# Supplementary material for: The Effects of an Extemporaneous Speech Dual-task on Older Adult Gait Control
Source: Research Square preprint supplement (doi:10.21203/rs.3.rs-7674245/v1), 2025-11-18
Supplement: Supplementary file 169 [file Over5ground01.xlsx]

## Sheet: Sheet1
Trajectories
		05:LFHD			05:RFHD			05:LBHD			05:RBHD			05:C7			05:T10			05:CLAV			05:STRN			05:RBAK			05:LSHO			05:LUPA			05:LELB			05:LFRM			05:LWRA			05:LWRB			05:LFIN
Frame	Sub Frame	X	Y	Z	X	Y	Z	X	Y	Z	X	Y	Z	X	Y	Z	X	Y	Z	X	Y	Z	X	Y	Z	X	Y	Z	X	Y	Z	X	Y	Z	X	Y	Z	X	Y	Z	X	Y	Z	X	Y	Z	X	Y	Z
		mm	mm	mm	mm	mm	mm	mm	mm	mm	mm	mm	mm	mm	mm	mm	mm	mm	mm	mm	mm	mm	mm	mm	mm	mm	mm	mm	mm	mm	mm	mm	mm	mm	mm	mm	mm	mm	mm	mm	mm	mm	mm	mm	mm	mm	mm	mm	mm
397	0	152.438	2696.32	1612.56	38.9269	2683.13	1608.05	140.425	2869.85	1623.72	20.252	2863.78	1621.83	86.9049	2913	1479.24	87.588	2988.94	1242.26	87.4178	2759.68	1405.94	99.2857	2698.24	1222.88	-32.5518	3005.28	1290.87	260.374	2880.87	1453.44	355.802	2910.82	1224.59	367.883	2912.76	1127.5	381.558	2818.99	956.218	329.503	2797.37	885.303	401.136	2828.03	880.268	384.647	2774.69	799.265
398	0	152.598	2685.76	1613.61	39.3152	2672.1	1609.65	138.434	2858.42	1624.79	19.3639	2852.66	1623.67	85.2329	2902.21	1480.78	85.9326	2978.22	1243.88	86.2723	2749.09	1407.45	98.5151	2687.65	1224.35	-34.4675	2994.14	1292.53	258.608	2871.23	1455.02	354.422	2901.99	1226.62	367.035	2904.88	1129.78	381.993	2812.92	957.711	331.859	2790.38	887.554	401.524	2823.17	881.755	386.355	2769.86	800.333
399	0	152.955	2675.68	1614.37	39.7103	2661.05	1611.17	138.365	2848.81	1626.05	18.5991	2841.34	1625.54	83.5187	2891.56	1482	84.1472	2967.41	1244.81	85.2048	2738.3	1408.94	97.94	2676.96	1225.95	-36.4054	2982.71	1293.73	257.246	2861.15	1456.62	352.62	2892.9	1228.22	366.374	2896.98	1131.92	382.533	2807.12	959.14	331.111	2785.34	888.154	402.454	2817.98	883.139	387.204	2765.68	801.026
400	0	153.58	2665.43	1614.97	40.4406	2649.98	1612.25	136.512	2837.55	1626.7	18.0127	2830.06	1626.88	82.0966	2880.84	1482.92	82.8544	2956.66	1245.86	84.2828	2727.79	1410.08	97.047	2666.55	1227.05	-38.0741	2971.54	1294.63	255.92	2851.23	1458.01	352.157	2884.69	1230.17	365.686	2889.05	1133.84	383.08	2801.06	960.433	332.302	2779.4	889.169	402.967	2812.86	884.47	388.256	2761.08	801.803
401	0	154.161	2655.03	1615.11	41.1836	2638.72	1613.14	136.054	2827.38	1627.26	17.5371	2818.8	1628.07	80.8621	2870.16	1483.72	81.5679	2945.82	1246.67	83.3734	2717.08	1410.94	96.451	2656.12	1227.95	-39.4371	2960.58	1295.75	254.652	2841.1	1458.95	351.39	2876.15	1231.86	365.291	2881.11	1135.63	383.498	2794.95	961.45	333.247	2773.78	889.904	403.489	2807.77	885.499	388.88	2756.46	802.264
402	0	154.86	2644.77	1615.14	41.7836	2627.54	1613.84	135.762	2816.97	1628.01	17.1527	2807.51	1629.28	79.585	2859.6	1484.35	80.4423	2935.22	1247.14	82.4487	2706.58	1411.71	95.7872	2645.89	1228.69	-40.7793	2949.77	1296.05	253.154	2831.04	1459.77	350.653	2867.49	1233.32	364.987	2873.13	1137.35	383.785	2788.71	962.425	334.087	2768.21	890.557	404.062	2802.22	886.381	389.511	2751.53	802.974
403	0	155.536	2634.23	1615.05	42.5701	2616.3	1614.16	135.364	2806.41	1628.19	16.8437	2796.07	1630.09	78.6122	2848.86	1484.9	79.3197	2924.49	1247.73	81.5383	2695.82	1412.31	95.1193	2635.33	1229.29	-42.1773	2938.55	1296.82	252	2820.55	1460.62	350	2858.87	1234.84	364.762	2865.02	1138.97	384.16	2782.44	963.419	334.919	2761.91	891.374	404.197	2796.81	887.066	389.898	2746.42	803.457
404	0	156.194	2623.82	1614.52	43.4641	2605.04	1614.28	134.878	2795.62	1628.28	16.3964	2784.69	1630.93	77.7228	2838.14	1485.25	78.3549	2913.96	1248.23	80.8837	2685.26	1412.47	94.4756	2624.95	1229.47	-43.3411	2927.69	1297.03	250.946	2810.31	1461.28	349.439	2850.19	1236.1	364.657	2856.68	1140.37	384.447	2775.77	963.998	335.572	2756	891.827	404.658	2791.31	887.68	389.956	2741.11	803.622
405	0	156.928	2613.2	1613.95	44.1296	2593.85	1614.15	134.605	2784.96	1628.37	16.0374	2773.24	1631.55	76.8642	2827.32	1485.41	77.5991	2903.36	1248.24	80.1201	2674.48	1412.61	93.8472	2614.31	1229.55	-44.1877	2917.05	1297.51	249.891	2799.34	1461.54	349.099	2840.93	1236.82	364.616	2848.41	1141.42	384.642	2769.24	964.373	335.45	2750.58	891.436	405.018	2785.29	888.032	389.739	2735.56	803.824
406	0	157.428	2602.27	1613.5	45.2483	2582.66	1613.54	134.454	2773.79	1628.31	16.0744	2761.89	1631.89	76.158	2816.4	1485.44	77.0487	2892.86	1248.67	79.5742	2663.72	1412.36	93.5226	2603.9	1229.34	-45.1544	2906.19	1297.73	249.282	2788.91	1461.88	348.803	2831.91	1237.91	364.301	2839.6	1142.37	384.852	2762.48	964.67	336.046	2744.55	891.677	405.375	2779.45	888.263	389.922	2729.97	803.617
407	0	158.14	2591.62	1612.65	45.9688	2571.55	1613.26	134.389	2762.86	1627.99	16.3135	2750.53	1631.93	75.8363	2805.58	1485.33	76.8621	2882.22	1248.49	79.0717	2652.88	1412.09	93.045	2593.31	1228.72	-45.4744	2895.63	1297.69	248.641	2778.23	1461.96	348.597	2822.79	1238.64	364.668	2831.24	1143.21	385.165	2755.51	964.751	336.866	2738.53	891.525	405.655	2772.93	888.317	389.287	2724.54	803.083
408	0	158.927	2580.91	1611.8	46.5367	2560.25	1612.85	134.384	2752.09	1627.49	16.3147	2739.08	1631.95	75.4673	2794.52	1485.13	76.4967	2871.62	1248.35	78.7247	2642.06	1411.48	92.7701	2582.88	1228.17	-45.8002	2884.85	1297.7	248.148	2767.12	1461.74	348.355	2813.29	1238.87	364.728	2822.53	1143.62	385.55	2748.42	964.499	337.132	2732.25	891.109	405.981	2766.79	888.109	388.804	2718.98	802.27
409	0	159.511	2570.05	1610.96	47.1594	2548.85	1612.33	134.364	2740.79	1626.95	16.2661	2727.61	1631.76	75.2643	2783.47	1484.76	76.4341	2860.94	1248.21	78.391	2630.91	1411.04	92.4108	2572.17	1227.49	-46.0486	2874.23	1297.51	247.694	2755.92	1461.45	348.247	2803.77	1239.13	364.617	2813.62	1143.84	385.638	2741.29	964.217	337.252	2725.62	890.606	406.053	2760.37	887.784	388.383	2713.01	801.545
410	0	160.172	2558.97	1610.02	47.9157	2537.65	1611.78	134.471	2729.71	1626.14	16.6465	2716.3	1631.17	75.2505	2772.33	1484.38	76.3201	2850.11	1247.85	78.3727	2619.98	1410.22	92.1117	2561.55	1226.69	-46.0309	2863.53	1297.26	247.61	2745.03	1460.88	348.259	2794.32	1239.08	364.698	2804.76	1143.91	385.802	2733.87	963.659	337.566	2718.72	890.308	406.195	2753.59	887.191	388.072	2707.06	800.98
411	0	160.895	2548.06	1608.87	49.0468	2526.35	1610.88	134.706	2718.56	1625.13	17.0606	2704.97	1630.57	75.3184	2761.16	1483.73	76.627	2839.48	1247.22	78.2784	2608.85	1409.34	92.0569	2550.83	1225.57	-45.6972	2853.05	1296.83	247.408	2733.82	1459.98	348.342	2784.67	1238.85	364.739	2795.93	1143.56	386.067	2726.5	962.859	337.22	2711.51	889.349	406.083	2746.95	886.235	387.619	2701.07	799.306
412	0	161.538	2537.05	1607.78	49.4299	2515.03	1610.27	134.914	2707.4	1623.93	17.2863	2693.63	1629.74	75.6506	2749.91	1483	76.9545	2828.34	1246.62	78.2248	2597.72	1408.34	92.057	2539.92	1224.37	-45.3086	2842.33	1296.25	247.35	2722.41	1459.09	348.327	2775.11	1238.45	364.592	2786.92	1143.15	386.115	2719.01	961.9	337.384	2704.79	888.293	406.027	2740.21	885.305	387.105	2694.97	798.006
413	0	162.433	2525.82	1606.83	50.2998	2503.56	1609.36	135.562	2696.42	1622.83	17.8626	2682.27	1628.83	76.1902	2738.44	1482.16	77.4916	2817.35	1246.11	78.4681	2586.43	1407.22	92.1409	2529.1	1223.28	-44.6966	2831.74	1295.81	247.812	2710.97	1458.44	348.488	2764.95	1238.24	364.697	2777.74	1142.91	386.374	2711.23	961.201	337.752	2697.28	887.532	405.826	2732.87	884.629	386.885	2688.37	796.992
414	0	163.159	2514.8	1605.8	50.7469	2492.25	1608.69	136.1	2684.95	1621.53	18.4522	2670.97	1627.73	76.7991	2726.98	1481.21	78.1236	2806.26	1245.32	78.6487	2575.09	1406.06	92.0856	2518.16	1222.02	-43.9453	2820.78	1295.14	248.271	2699.27	1457.62	348.76	2755.11	1237.9	364.763	2768.58	1142.53	386.292	2703.27	960.21	331.625	2692.18	881.864	405.855	2725.52	883.86	386.745	2681.49	795.855
415	0	164.115	2503.47	1604.45	51.7351	2480.88	1607.66	136.807	2673.69	1620.07	19.1803	2659.62	1626.64	77.6094	2715.62	1480.18	79.2015	2795.12	1244.37	78.9227	2563.78	1404.65	92.2685	2506.92	1220.43	-42.8246	2809.95	1294.37	248.781	2687.32	1456.37	348.968	2745.01	1237.03	364.759	2759.13	1141.8	386.564	2695.12	959.185	338.321	2681.19	885.555	405.658	2717.87	882.692	386.544	2674.55	794.38
416	0	164.999	2492.22	1603.11	52.8198	2469.6	1606.47	137.694	2662.3	1618.49	20.2484	2648.2	1625.26	78.5892	2704.06	1478.91	80.2142	2783.69	1243.27	79.5805	2552.28	1403.15	92.4926	2495.74	1218.78	-41.7649	2798.96	1293.43	249.503	2675.12	1455.12	349.299	2734.85	1236.07	364.855	2749.62	1140.95	386.731	2686.74	957.84	337.864	2673.31	884.076	405.486	2710.17	881.405	386.301	2667.24	792.762
417	0	166.095	2480.76	1601.69	53.7801	2458.17	1605.31	138.842	2650.9	1616.82	21.3133	2636.92	1623.82	79.802	2692.48	1477.55	81.6778	2772.52	1242.11	80.1466	2540.85	1401.67	92.7203	2484.41	1217.29	-40.4096	2788.05	1292.3	250.621	2662.93	1453.8	349.638	2724.69	1235.2	365.138	2740.17	1140.14	386.746	2678.07	956.402	337.944	2664.73	882.811	405.397	2702.1	880.125	386.17	2659.61	791.288
418	0	167.2	2469.34	1600.27	54.9961	2446.92	1604.03	140.142	2639.48	1615.08	22.7251	2625.66	1622.26	81.2328	2680.91	1476.1	83.3209	2761	1240.85	80.8714	2529.27	1399.93	93.1148	2472.83	1215.67	-38.876	2776.99	1291.16	251.909	2650.64	1452.34	350.265	2714.23	1234.15	365.59	2730.33	1139.07	387.113	2669.15	955.081	337.636	2657.01	880.739	405.271	2693.64	878.738	386.145	2651.58	789.717
419	0	168.509	2457.67	1598.67	56.5724	2435.5	1602.67	141.6	2628.03	1613.21	24.0172	2614.35	1620.58	82.8593	2669.37	1474.53	85.2387	2749.72	1239.47	81.678	2517.62	1398.3	93.4872	2461.19	1213.88	-37.1702	2766.12	1289.85	253.203	2638.41	1450.58	351.044	2703.58	1232.78	366.142	2720.33	1137.71	387.469	2660.12	953.348	337.211	2649.1	878.396	405.082	2685.09	877.06	385.869	2643.2	787.735
420	0	169.902	2446.3	1596.88	58.152	2424.63	1600.98	143.48	2616.71	1611.27	25.8634	2603.2	1618.68	84.5396	2657.67	1472.85	87.1406	2738.16	1237.8	82.8301	2506.07	1396.58	93.9652	2449.47	1212.23	-35.3682	2755.01	1288.47	254.752	2626.25	1448.75	351.93	2692.91	1231.2	366.986	2710.13	1136.26	387.795	2650.74	951.389	338.093	2638.21	877.631	405.19	2676.17	875.147	385.712	2634.54	785.815
421	0	171.505	2434.8	1595.26	59.3652	2413.08	1599.63	145.245	2605.07	1609.25	27.7276	2591.99	1616.95	86.708	2646.34	1471.02	89.313	2726.93	1236.06	83.7543	2494.46	1394.86	94.3751	2437.78	1210.25	-33.3422	2744.15	1286.83	256.413	2613.86	1446.73	353.05	2681.94	1229.48	367.79	2699.58	1134.46	387.977	2641.22	949.154	338.6	2628.57	876.02	405.105	2666.77	872.948	385.477	2625.58	783.608
422	0	173.223	2423.19	1593.34	61.0197	2401.69	1598.08	147.56	2593.85	1607.31	29.9463	2580.85	1615.26	88.4602	2634.6	1469.22	91.4594	2715.48	1234.11	85.2192	2482.94	1393.04	94.9832	2426.13	1208.51	-31.1501	2733.15	1285.26	258.186	2601.64	1444.4	354.455	2670.68	1227.38	368.864	2688.63	1132.31	388.415	2631.24	946.648	337.777	2620.65	872.673	405.217	2657.35	870.463	385.12	2616.39	780.855
423	0	175.107	2411.7	1591.57	62.8478	2390.66	1596.5	149.774	2582.25	1605.42	32.432	2569.65	1613.49	90.7242	2623.04	1467.46	93.677	2704.15	1232.4	86.5633	2471.33	1391.34	95.6971	2414.35	1206.8	-28.7899	2722.01	1283.8	260.129	2589.57	1442.18	355.837	2659.05	1225.19	370.199	2677.4	1130.25	388.988	2620.81	944.222	338.302	2609.74	870.797	405.553	2647.27	867.982	384.975	2606.7	778.322
424	0	177.04	2400.08	1590.04	64.7163	2379.2	1595.21	152.436	2570.8	1603.63	34.9329	2558.49	1611.87	93.411	2611.54	1465.67	95.8651	2692.43	1230.56	88.1767	2459.86	1389.74	96.5283	2402.98	1204.95	-26.3183	2710.77	1282.33	262.342	2577.49	1440.1	357.68	2647.19	1223.15	371.791	2665.83	1128.19	389.72	2610.15	941.835	338.957	2598.76	868.998	406.174	2636.84	865.663	384.986	2596.72	775.902
425	0	179.191	2388.31	1588.58	66.6066	2367.88	1593.8	155.174	2559.12	1601.75	37.4486	2547.36	1610.31	95.8278	2599.79	1463.99	98.0805	2680.81	1228.91	90.1433	2448.18	1388.1	97.6551	2391.29	1203.28	-23.6838	2699.64	1280.91	264.863	2565.33	1438.04	359.684	2635.24	1221.05	373.593	2654.06	1126.11	390.55	2598.96	939.39	339.677	2587.99	866.858	406.774	2625.92	863.27	385.073	2586.3	773.313
426	0	181.554	2376.66	1586.98	68.8208	2356.72	1592.35	158.112	2547.61	1599.87	40.3457	2536.19	1608.4	98.8484	2588.3	1462.24	100.118	2668.69	1227.15	92.2615	2436.51	1386.32	98.8803	2379.13	1201.74	-21.3124	2688.33	1279.63	267.322	2553.01	1435.69	361.638	2623.14	1218.58	375.288	2642.09	1123.67	391.422	2587.34	936.766	340.13	2577.2	863.933	407.454	2614.58	860.555	385.101	2575.51	770.46
427	0	183.837	2364.98	1585.49	71.5701	2345.54	1590.65	161.273	2536.22	1598.01	43.4815	2525.29	1606.65	101.708	2576.75	1460.53	102.27	2656.72	1225.32	94.3584	2424.81	1384.68	100.313	2367.31	1200.09	-18.7432	2677.06	1278.36	270.172	2540.87	1433.46	363.733	2610.84	1216.05	377.057	2629.94	1121.03	392.65	2575.42	934.005	340.194	2566.01	860.789	408.389	2602.94	857.768	385.214	2564.44	767.537
428	0	186.482	2353.36	1584.08	73.8418	2334.52	1589.39	164.589	2524.62	1596.13	46.6968	2514.44	1604.81	104.908	2565.21	1458.63	104.728	2644.69	1223.26	96.5616	2413.16	1383.16	101.844	2355.35	1198.65	-16.0395	2665.65	1277.05	272.842	2529.03	1430.75	366.131	2598.42	1213.3	379.114	2617.7	1118.26	393.932	2563.16	931.117	340.401	2554.5	857.505	409.507	2590.84	854.855	385.627	2552.91	764.622
429	0	189.158	2341.65	1582.65	76.3231	2323.35	1588.19	168.231	2513.2	1594.33	50.2988	2503.49	1603.04	108.343	2553.81	1456.71	107.06	2632.31	1221.13	99.2333	2401.36	1381.79	103.397	2343.31	1197.26	-13.1052	2654.23	1275.54	275.839	2517.01	1427.97	368.585	2586.18	1210.31	381.208	2605.27	1115.21	395.402	2550.7	928.071	340.754	2542.8	854.027	410.814	2578.42	851.762	386.154	2541.03	761.362
430	0	192.114	2330.02	1581.5	79.1076	2312.41	1587.08	172.124	2501.83	1592.72	54.1082	2492.63	1601.49	111.723	2542.34	1454.96	109.646	2620.14	1219.06	101.91	2389.63	1380.6	104.939	2331.07	1196.33	-10.2064	2642.72	1274.06	278.911	2504.94	1425.34	370.879	2573.59	1207.27	383.401	2592.79	1112.05	397.014	2538	924.992	341.337	2530.36	850.618	412.078	2565.85	848.612	386.937	2528.67	758.324
431	0	194.986	2318.36	1580.48	81.8178	2301.22	1586.21	175.839	2490.04	1591.34	57.912	2481.69	1600.27	115.032	2530.87	1453.51	112.279	2608.05	1217.13	104.231	2377.66	1379.76	106.607	2318.95	1195.57	-7.2996	2631.15	1272.65	281.783	2493.13	1422.72	373.459	2560.86	1204.42	385.541	2579.86	1109.05	398.544	2525.04	921.938	341.943	2517.71	847.142	413.468	2552.79	845.472	387.932	2515.79	755.304
432	0	198.048	2306.64	1579.7	84.9316	2290.15	1585.46	179.739	2478.54	1590.13	61.8054	2470.87	1599.27	118.254	2519.41	1452.14	114.618	2595.65	1215.29	106.868	2365.85	1379	108.325	2306.48	1195.07	-4.46488	2619.25	1271.38	284.82	2481.46	1420.35	375.867	2548.24	1201.38	387.72	2566.88	1105.97	399.676	2512.29	918.909	342.371	2505.59	843.52	415.017	2539.49	842.403	389.094	2502.68	752.321
433	0	201.125	2295.16	1578.8	88.0225	2279.29	1584.93	183.804	2467.17	1589.16	65.8034	2459.97	1598.54	121.54	2508.01	1451	116.935	2583.72	1213.79	109.43	2354.03	1378.63	110.297	2293.88	1194.87	-1.82005	2607.19	1270.37	287.841	2470	1418	378.36	2535.26	1198.5	389.748	2553.35	1102.9	401.255	2498.87	915.94	343.231	2492.39	839.976	416.66	2525.81	839.384	390.596	2489.08	749.322
434	0	204.232	2283.54	1578.44	90.8007	2268.17	1584.73	187.797	2455.71	1588.51	69.6338	2449.06	1597.95	124.719	2496.61	1450.13	119.082	2571.65	1212.61	112.105	2342.26	1378.48	112.284	2281.38	1194.83	0.636888	2595.02	1269.51	290.745	2458.58	1416.2	380.606	2522.25	1195.8	391.761	2539.7	1100.06	403.112	2484.92	913.356	344.107	2478.91	837.182	418.487	2511.94	836.754	391.668	2475.11	747.026
435	0	207.356	2272.01	1578.38	93.9193	2257.28	1584.74	191.75	2444.21	1588.09	73.5706	2438.27	1597.86	127.781	2485.31	1449.45	121.145	2559.32	1211.74	115.026	2330.6	1378.62	114.519	2268.71	1195.36	3.00607	2582.75	1268.81	293.861	2447.39	1414.74	382.892	2508.9	1193.54	393.782	2525.72	1097.61	405.155	2470.79	911.18	345.685	2464.39	834.254	420.511	2497.52	834.564	394.202	2460.57	744.763
436	0	210.398	2260.66	1578.45	96.8045	2246.25	1585.25	195.872	2432.94	1588.07	77.4379	2427.45	1598.09	130.831	2474.01	1449.25	123.145	2547.28	1211.2	117.981	2318.88	1379.12	117.055	2256.15	1196.07	5.26233	2570.44	1268.62	296.705	2436.27	1413.6	384.994	2495.74	1191.35	395.638	2511.64	1095.37	407.049	2456.48	909.307	346.879	2450.4	831.834	422.629	2483	832.557	395.982	2445.91	742.946
437	0	213.471	2249.35	1578.77	99.9525	2235.43	1585.96	199.756	2421.66	1588.18	81.3621	2416.71	1598.69	133.676	2462.75	1449.26	124.861	2534.89	1210.83	120.784	2307.24	1379.87	119.609	2243.58	1197.13	7.34107	2558.35	1268.73	299.455	2425.38	1412.62	386.848	2482.37	1189.28	397.24	2497.45	1093.19	409.027	2441.89	907.547	356.096	2433.48	835.644	424.728	2468.21	830.706	398.746	2430.66	741.069
438	0	216.491	2238.1	1579.49	103.109	2224.61	1586.93	203.442	2410.56	1588.69	85.1335	2405.92	1599.29	136.454	2451.58	1449.55	126.741	2522.9	1210.75	123.392	2295.83	1381	122.163	2230.8	1198.73	9.22721	2546.31	1269.06	302.038	2414.45	1411.97	388.702	2469.03	1187.59	398.83	2483.28	1091.5	411.019	2426.91	906.317	351.428	2420.53	829.266	426.871	2453.15	829.352	401.229	2415.17	739.803
439	0	219.514	2227.02	1580.35	105.844	2213.73	1588.18	207.261	2399.51	1589.15	88.7011	2395.32	1600.3	138.978	2440.45	1450.16	128.569	2511.01	1211.1	125.981	2284.35	1382.33	124.638	2218.82	1200.1	10.8429	2534.26	1269.96	304.595	2403.43	1411.82	390.371	2455.55	1186.47	400.225	2468.92	1090.29	413.077	2411.79	905.603	363.117	2401.32	835.312	429.174	2437.7	828.587	403.983	2399.2	739.246
440	0	222.455	2215.99	1581.41	109.03	2203.36	1589.62	210.681	2388.56	1589.91	92.1135	2384.76	1601.37	141.357	2429.28	1450.88	130.182	2499.14	1211.64	128.382	2272.93	1383.85	126.911	2206.87	1201.93	12.4257	2522.45	1271.03	306.973	2392.28	1412.03	392.204	2441.99	1185.76	401.693	2454.59	1089.52	415.283	2396.38	905.447	362.96	2386.9	833.166	431.461	2421.85	828.303	406.804	2382.86	739.053
441	0	225.204	2205.1	1582.71	111.584	2192.59	1591.39	213.759	2377.7	1590.8	95.4074	2374.27	1602.59	143.607	2418.22	1452.08	131.858	2487.65	1212.73	130.377	2261.83	1385.33	128.671	2195.17	1203.63	13.9813	2510.86	1272.53	309.2	2380.94	1412.73	393.737	2428.55	1185.55	403.194	2440.44	1089.39	417.213	2380.75	905.806	365.589	2370.54	833.691	433.737	2405.68	828.659	409.307	2366.12	739.762
442	0	227.794	2194.36	1584.12	114.293	2182	1593.32	217.087	2367.07	1591.77	98.5466	2363.76	1604.01	145.809	2407.14	1453.33	133.661	2476.56	1214.01	132.272	2250.72	1387	130.287	2183.9	1205.42	15.4951	2499.46	1274.1	311.149	2369.48	1413.63	395.461	2414.92	1185.81	404.664	2426.23	1089.61	419.367	2364.96	906.787	367.828	2354.05	834.497	436.025	2389.32	829.589	412.477	2349.02	740.677
443	0	230.382	2183.68	1585.59	116.84	2171.61	1595.21	219.417	2356.45	1592.41	101.285	2353.4	1605.38	147.704	2395.94	1454.79	135.459	2465.7	1215.57	133.856	2239.65	1388.67	131.493	2172.68	1207.17	17.1218	2488.29	1275.93	313.088	2357.91	1414.81	396.991	2401.58	1186.38	406.192	2411.83	1090.19	421.569	2349.06	908.035	370.1	2337.29	835.792	438.155	2372.84	830.629	415.265	2331.44	742.044
444	0	232.696	2173.22	1586.99	119.156	2161.01	1597.45	222.07	2345.88	1593.46	103.82	2342.91	1607.06	149.313	2384.97	1456.53	137.393	2455.43	1217.54	134.905	2228.74	1390.26	132.431	2161.99	1208.61	18.729	2477.48	1277.92	314.747	2346.23	1416.3	398.593	2387.98	1187.23	407.848	2397.56	1091.13	423.723	2332.81	909.697	372.376	2320.35	837.294	440.038	2355.79	832.003	417.833	2313.62	743.897
445	0	234.658	2162.69	1588.57	121.404	2150.62	1599.5	224.459	2335.43	1594.64	106.06	2332.49	1608.63	151.005	2374.1	1458.36	139.568	2445.31	1219.86	136.08	2217.84	1391.95	132.883	2151.71	1209.98	20.4645	2466.9	1280.08	316.255	2334.45	1418.14	400.215	2374.5	1188.57	409.557	2383.21	1092.43	425.547	2316.61	911.745	373.676	2303.68	838.904	442.363	2338.6	834.121	420.34	2295.3	746.301
446	0	236.697	2152.1	1590.43	123.162	2140.17	1601.95	226.334	2324.93	1595.86	107.937	2322.19	1610.57	152.303	2363.19	1460.45	141.998	2435.47	1222.24	136.976	2207.24	1393.65	133.45	2141.6	1211.48	22.2111	2456.53	1282.1	317.619	2322.69	1420.32	401.993	2360.76	1190.41	411.514	2368.58	1094.24	427.6	2299.94	914.264	376.369	2285.9	842.113	444.413	2321.23	836.43	422.471	2276.76	749.426
447	0	238.075	2141.75	1592.17	124.876	2129.82	1604.18	227.555	2314.49	1597.19	109.718	2311.78	1612.47	153.687	2352.44	1462.62	144.3	2425.54	1224.73	137.676	2196.73	1395.4	134.071	2131.68	1213.11	23.9221	2446.34	1284.32	318.91	2311.03	1422.7	403.842	2347.2	1192.43	413.461	2353.95	1096.23	429.36	2283.21	917.023	378.04	2268.65	844.809	446.59	2303.48	839.136	424.71	2258.01	752.621
448	0	239.51	2131.31	1594.04	126.068	2119.26	1606.46	229.001	2303.92	1598.81	111.072	2301.43	1614.59	154.229	2341.64	1465.06	146.394	2415.67	1227.41	138.502	2186.22	1397.31	134.396	2121.89	1214.58	25.7124	2436.41	1286.53	320.018	2299.58	1425.1	405.5	2333.31	1194.54	415.383	2339.28	1098.37	430.877	2266.48	919.913	379.727	2250.46	848.022	448.427	2285.64	841.917	427.069	2238.58	756.298
449	0	240.389	2120.8	1596.06	127.267	2109.17	1608.76	230.18	2293.4	1600.72	112.367	2291.13	1616.65	155.701	2331.3	1467.38	148.435	2405.78	1229.9	139.095	2175.99	1399.31	135.005	2111.92	1216.41	27.4882	2426.46	1288.74	321.233	2288.15	1428.05	407.35	2319.6	1197	417.338	2324.75	1100.8	432.426	2249.55	923.286	382.509	2232.35	852.466	450.404	2267.44	845.17	428.074	2219.72	759.789
450	0	241.157	2110.27	1598.29	128.374	2099.17	1610.93	231.519	2283.02	1602.96	113.588	2280.9	1618.92	156.91	2320.84	1469.71	150.463	2396.03	1232.36	139.849	2165.74	1401.5	135.752	2101.96	1218.55	29.3177	2416.82	1290.95	322.558	2276.9	1430.9	409.228	2305.81	1199.64	419.426	2310.13	1103.5	434.056	2232.37	926.806	383.006	2215.34	855.397	452.207	2249.23	848.56	430.167	2200.29	763.92
451	0	241.572	2099.74	1600.6	128.704	2088.89	1613.17	232.45	2272.45	1605.39	114.351	2270.61	1621.29	158.094	2310.61	1472.17	152.485	2386.09	1234.88	140.635	2155.62	1403.77	136.439	2092.21	1220.56	31.3424	2407.04	1293	323.627	2265.98	1433.86	411.274	2291.91	1202.38	421.496	2295.45	1106.15	435.661	2215.08	930.603	384.405	2197.7	859.171	454.043	2230.74	852.231	431.168	2180.78	768.338
452	0	241.779	2089.11	1603.18	128.813	2078.65	1615.36	233.208	2261.83	1608.04	114.995	2260.32	1623.75	159.376	2300.2	1474.66	154.313	2376.18	1237.38	141.508	2145.56	1406.18	137.321	2082.35	1222.98	33.2956	2397.4	1295.22	324.61	2255.19	1436.78	413.114	2278.27	1205.34	423.504	2281.12	1109.06	437.006	2197.99	934.671	385.654	2180.07	863.405	455.771	2212.29	856.22	433.004	2161.12	772.98
453	0	241.795	2078.39	1605.91	128.509	2068.29	1617.58	233.847	2251.33	1610.89	115.559	2250.15	1625.92	160.543	2289.98	1477.06	155.99	2365.99	1239.72	142.43	2135.59	1408.51	138.311	2072.43	1225.34	35.0798	2387.93	1297.43	325.612	2244.55	1439.85	414.922	2264.61	1208.32	425.386	2266.91	1112.19	438.295	2180.89	938.868	386.084	2162.95	867.31	457.388	2193.83	860.465	434.509	2141.44	778.098
454	0	241.688	2067.77	1608.55	128.268	2058.03	1619.6	234.043	2240.58	1613.69	116.037	2239.93	1627.99	161.704	2279.8	1479.35	157.539	2356.01	1242.03	143.513	2125.51	1410.87	139.202	2062.65	1227.73	36.8651	2378.17	1299.72	327.182	2233.66	1443.07	416.813	2251.39	1211.31	427.438	2252.65	1115.16	439.751	2163.82	943.151	386.179	2145.11	871.27	458.891	2175.2	864.632	435.649	2121.85	783.211
455	0	241.259	2057.01	1611.09	127.864	2047.91	1621.41	234.914	2229.89	1616.47	116.416	2229.84	1629.9	163.087	2269.62	1481.47	159.214	2345.7	1244.15	144.418	2115.54	1412.95	140.269	2052.85	1229.58	38.762	2368.52	1301.93	328.359	2223.01	1445.65	418.642	2238.18	1213.84	429.362	2238.91	1117.74	441.056	2146.8	947.196	389.057	2126.95	876.909	460.156	2156.84	868.487	436.62	2102.12	787.979
456	0	240.845	2046.32	1613.45	127.197	2037.79	1623.07	235.319	2219.27	1619.07	116.796	2219.78	1631.69	164.414	2259.45	1483.55	160.779	2335.49	1246.19	145.556	2105.42	1414.89	141.305	2042.92	1231.65	40.7312	2359.01	1304	329.623	2212.32	1448.22	420.377	2225.34	1216.52	431.279	2225.19	1120.19	442.129	2129.98	951.089	389.192	2109.7	880.689	461.47	2138.35	872.499	437.192	2082.44	792.925
457	0	240.48	2035.47	1615.92	126.554	2027.64	1624.43	235.805	2208.57	1621.52	117.251	2209.62	1633.13	165.893	2249.09	1485.43	162.515	2325.13	1248.23	146.54	2095.38	1416.66	142.205	2033.08	1233.58	42.5681	2349.36	1305.89	330.892	2201.67	1450.6	422.279	2212.71	1219.07	433.463	2211.69	1122.78	443.499	2113.4	955.269	389.644	2091.83	884.807	462.618	2120.21	876.527	437.974	2062.94	797.899
458	0	239.907	2024.65	1618.08	126.093	2017.48	1625.65	236.351	2197.85	1623.76	117.379	2199.47	1634.46	167.316	2238.8	1487.08	164.213	2314.98	1250.22	147.607	2085.15	1418.15	143.229	2023.18	1235.03	44.3124	2339.75	1307.73	332.165	2190.8	1452.67	424.128	2200.28	1221.17	435.444	2198.24	1124.85	444.786	2096.78	959.037	391.483	2074.22	889.796	463.679	2102.04	880.202	438.559	2043.37	802.804
459	0	239.254	2013.88	1619.89	125.438	2007.3	1626.56	236.808	2186.98	1625.68	117.722	2189.29	1635.59	168.73	2228.49	1488.63	165.821	2304.75	1251.97	148.618	2074.98	1419.43	144.022	2013.36	1236.24	45.8717	2330.03	1309.45	333.32	2179.91	1454.33	425.852	2188.02	1223.09	437.409	2184.96	1126.76	445.896	2080.28	962.445	392.351	2056.64	893.868	464.375	2084.05	883.557	439.504	2023.8	807.564
460	0	238.948	2002.94	1621.57	124.904	1997.24	1627.43	237.142	2176.12	1627.3	118.206	2179.24	1636.37	169.976	2218.16	1489.8	167.238	2294.67	1253.31	149.528	2064.78	1420.46	144.717	2003.59	1237.17	47.5455	2320.36	1310.99	334.563	2169.09	1455.77	427.641	2175.98	1224.73	439.494	2171.59	1128.44	446.984	2063.97	965.738	392.948	2038.59	897.821	465.171	2066.24	886.803	439.887	2004.51	812.187
461	0	238.534	1992.02	1622.78	124.339	1986.85	1628.04	237.579	2165.17	1628.5	118.737	2168.81	1636.75	171.211	2207.79	1490.66	168.8	2284.72	1254.24	150.647	2054.49	1421.15	145.598	1993.74	1237.86	49.0715	2310.72	1312.24	335.664	2158.32	1456.81	429.318	2164.03	1225.87	441.406	2158.54	1129.53	447.929	2047.83	968.594	393.733	2021.92	901.644	466.166	2048.44	889.821	440.335	1985.22	816.667
462	0	238.302	1981.15	1623.72	123.983	1976.43	1628.26	238.357	2154.47	1629.54	119.149	2158.61	1637.04	172.654	2197.31	1491.55	170.119	2275.1	1255.22	151.535	2044.3	1421.63	146.304	1984.04	1238.15	50.4614	2300.79	1313.13	336.821	2147.65	1457.32	431.062	2152.2	1226.82	443.427	2145.3	1130.38	449.002	2031.85	971.258	394.328	2004.72	904.987	466.326	2031.14	892.114	440.361	1966.11	820.808
463	0	238.032	1970.16	1624.41	123.778	1966.07	1628.35	238.864	2143.63	1630.07	119.84	2147.97	1636.91	173.692	2186.86	1491.95	171.062	2265.6	1256.09	152.629	2034.01	1421.86	147.056	1974.22	1238.28	51.3598	2290.67	1313.8	337.904	2136.95	1457.84	432.643	2140.29	1227.43	445.257	2132.28	1131.12	449.9	2015.83	973.714	394.856	1987.76	908.432	466.892	2013.46	894.561	440.698	1947.22	825.022
464	0	237.84	1959.17	1624.86	123.489	1955.45	1628.25	239.23	2132.37	1630.63	120.157	2137.45	1636.77	174.765	2176.42	1492.39	171.429	2256.05	1256.66	153.483	2023.78	1421.93	147.652	1964.43	1238.22	52.4267	2280.52	1314.55	339.132	2126.23	1458.17	434.213	2128.38	1228.02	447.112	2119.09	1131.68	450.727	2000.19	975.928	395.222	1970.96	911.539	467.172	1996.77	896.727	440.047	1928.74	828.765
465	0	237.859	1948.12	1624.95	123.552	1944.77	1627.88	239.77	2121.33	1630.7	120.584	2126.93	1636.46	175.753	2165.73	1492.47	171.629	2246.38	1257.12	154.477	2013.38	1421.68	148.513	1954.6	1237.79	53.364	2270.63	1315.02	340.004	2115.72	1458.05	435.57	2116.4	1228.08	448.632	2106.11	1131.83	451.361	1984.55	977.918	394.924	1953.96	914.254	467.689	1979.53	898.642	440.549	1910.34	832.45
466	0	237.831	1937.14	1624.67	123.367	1934.16	1627.12	240.359	2110.48	1630.49	121.143	2116.33	1635.92	176.452	2155.21	1492.25	171.58	2236.29	1257.32	155.286	2003.05	1421.14	149.341	1944.75	1236.99	53.8468	2260.35	1315.47	340.722	2105.48	1457.49	436.807	2104.4	1227.94	450.169	2092.98	1131.69	452.075	1969.16	979.625	395.907	1937.93	916.863	467.848	1962.79	900.358	439.988	1892.22	835.65
467	0	237.882	1925.97	1624.22	123.414	1923.32	1626.08	240.88	2099.32	1630.23	121.616	2105.58	1635.17	177.158	2144.6	1492.02	171.701	2226.31	1257.29	156.221	1992.48	1420.5	150.091	1934.81	1236.04	54.0426	2250.05	1315.59	341.478	2094.97	1457.02	437.961	2092.28	1227.73	451.568	2079.58	1131.64	452.502	1953.72	981.215	396.019	1921.72	919.124	467.699	1946.54	901.876	439.961	1874.49	838.873
468	0	237.896	1914.87	1623.65	123.268	1912.53	1625.02	241.34	2087.95	1629.84	122.204	2094.73	1634.33	177.743	2133.91	1491.59	171.884	2215.79	1257.14	157.065	1982	1419.62	150.843	1924.55	1235.15	54.3369	2239.57	1315.69	342.205	2084.68	1456.3	439.041	2080.29	1227.44	452.828	2066.88	1131.25	452.842	1938.6	982.596	396.206	1905.79	921.393	468.514	1930.19	903.602	439.468	1857.1	841.763
469	0	238.094	1903.77	1622.69	123.355	1901.59	1623.67	241.832	2076.86	1629.03	122.571	2083.89	1633.24	178.258	2123.14	1490.88	171.882	2205.35	1256.73	157.914	1971.39	1418.56	151.644	1914.52	1233.94	54.1847	2228.88	1315.6	342.684	2074.52	1455.21	439.824	2068.43	1226.61	453.735	2053.97	1130.54	453.135	1923.76	983.673	396.288	1890.12	923.158	468.261	1913.67	904.654	439.394	1839.84	844.36
470	0	238.166	1892.69	1621.53	123.316	1890.79	1622.27	242.381	2066.09	1628.06	123.043	2073.06	1631.9	178.447	2112.41	1490.02	171.534	2194.75	1255.96	158.569	1960.7	1417.26	152.412	1904.34	1232.49	53.9536	2218.27	1315.2	343.029	2064.27	1453.97	440.439	2056.56	1225.7	454.653	2041.24	1129.8	453.205	1909	984.562	396.137	1874.7	924.743	467.883	1898.25	905.558	438.636	1823.12	846.778
471	0	238.23	1881.63	1620.32	123.461	1879.9	1620.68	242.751	2054.85	1626.99	123.61	2062.25	1630.39	178.512	2101.41	1489.02	171.2	2184.18	1254.98	159.123	1950.06	1415.81	153.129	1894.13	1230.91	53.3544	2207.32	1314.59	343.699	2054.09	1452.67	440.844	2044.83	1224.61	455.29	2028.87	1128.77	453.214	1894.72	985.198	395.582	1859.49	926.095	468.319	1882.29	906.727	438.199	1806.83	848.947
472	0	238.27	1870.47	1618.96	123.525	1869.02	1619.01	243.067	2043.53	1625.7	123.888	2051.37	1628.69	178.541	2090.61	1487.87	170.725	2173.81	1253.93	159.974	1939.35	1414.2	153.806	1883.66	1229.32	52.7942	2196.36	1313.9	343.919	2043.89	1450.95	441.137	2033.26	1223.35	455.622	2016.66	1127.47	453.142	1880.47	985.674	395.149	1844.52	927.223	467.977	1867.18	907.309	437.922	1790.92	850.758
473	0	238.24	1859.45	1617.38	123.426	1858.02	1617.2	243.471	2032.51	1624.18	124.118	2040.37	1627	178.257	2079.73	1486.58	170.106	2163.46	1252.85	160.418	1928.52	1412.54	154.674	1873.08	1227.41	51.9914	2185.24	1312.93	343.097	2034.18	1448.78	440.934	2021.36	1221.76	455.894	2004.49	1126.13	452.905	1866.61	985.959	395.233	1830.38	928.073	467.778	1852.16	907.871	437.126	1775.13	852.46
474	0	238.196	1848.46	1615.89	123.316	1847.15	1615.35	243.471	2021.68	1622.47	124.18	2029.56	1625.2	177.996	2068.74	1485.15	169.15	2152.95	1251.55	161.073	1917.74	1410.78	155.165	1862.37	1225.6	51.0383	2174.07	1311.95	343.103	2024.1	1447.12	440.875	2010.02	1220.34	456.039	1992.51	1124.85	452.522	1853	986.167	394.78	1816.16	928.692	466.995	1837.74	908.116	436.516	1760.04	853.875
475	0	237.983	1837.49	1614.5	123.06	1836.23	1613.69	243.436	2010.51	1620.99	124.167	2018.77	1623.1	177.81	2057.84	1483.7	168.197	2142.18	1250.08	161.49	1906.88	1408.95	155.636	1851.39	1223.9	49.969	2162.51	1310.89	342.968	2013.84	1445.45	440.736	1998.89	1218.88	456.081	1980.91	1123.47	452.055	1839.73	986.256	394.32	1802.38	929.297	466.898	1823.3	908.605	435.699	1745.04	855.02
476	0	237.721	1826.42	1613.02	122.686	1825.38	1611.82	243.27	1999.45	1619.29	123.931	2007.94	1621.42	177.303	2046.85	1482.1	167.277	2131.63	1248.78	161.763	1895.81	1407.11	156.196	1840.37	1221.93	48.7418	2150.94	1309.58	342.769	2003.74	1443.53	440.378	1987.96	1217.04	455.833	1969.29	1121.75	451.646	1826.8	985.998	393.733	1788.96	929.296	465.399	1809.91	908.097	435.135	1730.82	855.909
477	0	237.096	1815.59	1611.37	122.039	1814.46	1610.02	242.803	1988.52	1617.43	123.552	1997.01	1619.35	176.569	2035.8	1480.44	166.525	2121.04	1247.24	162.069	1885.18	1404.98	156.582	1829.24	1220.04	47.6673	2139.71	1308.09	342.358	1993.32	1441.55	439.715	1977.15	1215.13	455.501	1957.95	1119.87	451.028	1814.28	985.408	393.137	1776.04	929.202	465.279	1796.33	908.024	434.499	1716.94	856.49
478	0	236.463	1804.63	1609.98	121.346	1803.69	1608.48	242.393	1977.71	1615.81	123.102	1986.32	1617.33	176.126	2024.71	1478.82	165.54	2110.39	1245.69	162.056	1874.14	1403.26	156.851	1817.81	1218.19	46.5372	2128.01	1306.45	342.022	1983.06	1439.66	439.222	1966.49	1213.26	455.217	1947.05	1118.1	450.324	1802.14	984.732	392.365	1763.34	928.847	464.52	1783.34	907.574	434.083	1703.71	856.726
479	0	235.608	1793.79	1608.78	120.555	1792.86	1606.89	241.509	1966.73	1614.2	122.323	1975.59	1615.58	175.496	2013.64	1477.21	164.576	2099.32	1243.97	162.103	1862.94	1401.52	156.855	1806.25	1216.37	45.6243	2116.53	1304.97	341.537	1972.46	1437.86	438.524	1956.17	1211.42	454.588	1936.37	1116.18	449.805	1790.26	983.945	391.647	1751.23	928.409	463.688	1771.06	906.809	433.21	1690.87	856.93
480	0	234.667	1782.93	1607.73	119.341	1782.03	1605.54	240.725	1955.83	1612.63	121.691	1964.43	1613.44	174.702	2002.36	1475.58	163.889	2088.49	1242.53	161.601	1851.82	1399.74	156.844	1794.82	1214.72	44.6595	2105.08	1303.45	341.117	1961.58	1436.19	437.548	1945.85	1209.36	454.046	1925.8	1114.32	448.942	1779.02	982.803	390.604	1739.28	927.683	462.857	1759.21	905.928	432.308	1678.64	856.783
481	0	233.387	1771.95	1606.78	118.226	1771.13	1604.32	239.591	1944.99	1611.22	120.432	1953.87	1611.65	173.987	1991.01	1474.11	163.092	2077.4	1241.16	161.12	1840.53	1398.16	156.615	1783.32	1212.84	43.9677	2093.66	1301.95	340.557	1950.54	1434.69	436.629	1935.82	1207.58	453.241	1915.64	1112.59	448.181	1767.98	981.599	389.823	1727.87	926.878	462.591	1747.66	905.282	431.735	1666.91	856.396
482	0	231.859	1761.15	1605.98	116.771	1760.41	1603.09	238.143	1934.03	1609.68	118.942	1943.06	1609.72	173.16	1979.61	1472.86	162.447	2066.1	1239.75	160.455	1829.17	1396.66	156.189	1772	1211.21	43.4456	2082.37	1300.27	339.818	1939.27	1433.34	435.771	1925.82	1205.9	452.38	1905.61	1110.86	447.437	1757.59	980.429	388.92	1716.98	925.89	460.609	1737.11	903.406	430.833	1655.82	855.849
483	0	230.242	1750.15	1605.21	115.082	1749.72	1601.93	236.726	1923.16	1608.2	117.395	1932.33	1607.71	172.461	1968.32	1471.39	162.38	2055.13	1238.47	159.42	1817.42	1395.13	155.79	1760.57	1209.66	43.0215	2071.04	1298.58	339.267	1927.66	1432.08	434.595	1915.94	1204.19	451.472	1895.98	1109.13	446.645	1747.48	978.77	387.678	1706.41	924.666	459.671	1727.03	901.837	430.375	1645.47	854.726
484	0	228.314	1739.22	1604.48	113.266	1738.73	1600.86	235.222	1912.25	1606.84	116.031	1921.49	1605.88	171.608	1956.91	1469.93	162.518	2043.89	1237.2	158.749	1806.22	1393.66	155.216	1749.02	1208.15	42.7694	2059.61	1296.81	338.601	1915.93	1430.96	433.482	1906.1	1202.65	450.329	1886.24	1107.49	445.892	1737.82	977.112	387.443	1696.69	923.3	458.75	1717.43	900.093	429.551	1635.54	853.39
485	0	226.331	1728.21	1604.11	111.159	1727.95	1599.77	233.457	1901.19	1605.69	114.146	1910.74	1604.12	170.708	1945.57	1468.66	162.556	2032.19	1235.84	157.87	1794.64	1392.59	154.803	1737.59	1207.14	42.6531	2048.4	1294.83	337.91	1904.16	1430.26	432.536	1896.13	1201.66	449.616	1876.87	1106.44	445.098	1728.67	975.42	386.409	1686.99	921.928	457.394	1708.38	898.163	428.89	1626.3	851.908
486	0	223.847	1717.01	1603.55	108.889	1717.3	1598.67	231.594	1890.32	1604.58	112.385	1900.1	1602.42	169.801	1934.5	1467.39	162.75	2020.83	1234.32	156.868	1783.33	1391.63	154.577	1726.08	1206.25	42.3585	2037.07	1292.66	337.212	1892.42	1429.67	430.716	1885.82	1200.28	448.671	1867.46	1105.51	444.383	1719.85	973.69	385.9	1678.06	920.396	456.651	1699.72	896.35	428.222	1617.65	850.119
487	0	221.496	1705.99	1602.87	106.464	1706.57	1597.6	229.486	1879.21	1603.53	110.481	1889.39	1600.76	168.779	1923.52	1465.96	162.489	2008.86	1232.5	156.087	1772.07	1390.58	154.177	1714.36	1205.43	42.1186	2025.65	1290.44	336.2	1881.03	1428.93	430.491	1875.77	1199.85	447.468	1858.23	1104.28	443.407	1711.03	971.676	384.734	1669.15	918.585	455.416	1691.58	894.115	427.453	1609.47	847.79
488	0	219.037	1695.09	1602.33	104.213	1696.14	1596.43	227.554	1868.46	1602.69	108.511	1878.73	1599.21	167.615	1912.62	1464.45	162.396	1997.08	1230.83	154.811	1760.65	1389.71	153.954	1702.44	1204.95	41.5522	2014.01	1287.9	335.198	1869.89	1428.32	429.541	1865.51	1199.16	446.611	1848.91	1103.52	442.6	1702.6	969.664	384.148	1660.96	916.557	454.299	1684.29	891.88	426.973	1602.06	845.294
489	0	216.441	1684.13	1601.96	101.806	1685.36	1595.39	225.413	1857.62	1602.11	106.395	1868.12	1598.15	166.283	1901.86	1463.31	161.604	1984.93	1229.04	154.281	1749.8	1389.17	154.014	1690.29	1204.82	40.909	2002.45	1285.65	334.176	1858.78	1428.09	428.905	1855.13	1198.89	445.37	1839.33	1102.84	441.677	1694.49	967.686	382.625	1652.79	914.405	453.413	1676.98	889.853	426.105	1594.95	842.414
490	0	214.013	1673.31	1601.77	99.3263	1674.75	1594.82	223.236	1846.71	1601.86	104.19	1857.44	1597.4	164.985	1890.89	1462.34	160.732	1973.01	1227.24	152.973	1738.21	1388.94	153.63	1677.62	1204.89	40.15	1990.81	1283.26	332.827	1847.58	1427.8	428.174	1844.94	1198.58	444.297	1829.93	1102.29	440.912	1686.56	965.752	382.252	1645.34	912.263	452.347	1669.88	887.652	425.329	1588.37	839.354
491	0	211.451	1662.47	1601.77	97.0491	1664.13	1594.37	221.011	1836.05	1601.9	102.031	1846.87	1597.03	163.501	1880.06	1461.6	159.27	1960.75	1226.05	151.875	1726.91	1388.93	153.376	1664.87	1205.21	39.307	1978.9	1281.38	331.607	1836.91	1427.78	427.484	1834.6	1198.66	443.177	1820.73	1102.1	439.764	1678.64	963.83	381.07	1637.87	909.866	451.636	1663.16	885.9	424.795	1582.27	836.184
492	0	209.178	1651.7	1602.14	94.6555	1653.48	1594.34	218.527	1825.22	1602.18	99.4533	1836.11	1596.95	161.926	1869.02	1461.09	157.753	1948.2	1225.31	150.763	1715.57	1389.32	153.029	1652.14	1205.86	38.4497	1967.18	1279.78	330.473	1826.22	1428.17	426.627	1824.56	1198.95	441.901	1811.56	1102.23	438.707	1670.99	962.187	380.374	1631.21	907.573	450.995	1656.69	884.321	424.194	1576.72	832.965
493	0	206.731	1641.06	1602.59	92.3116	1642.8	1594.58	216.227	1814.79	1602.55	97.201	1825.47	1596.94	160.241	1857.96	1460.86	156.58	1936.19	1224.64	149.4	1704.19	1389.72	152.688	1639.54	1206.7	37.4786	1955.5	1278.45	328.859	1815.57	1428.53	425.493	1814.45	1199.3	440.521	1802.25	1102.46	437.662	1663.97	960.488	379.417	1624.69	905.187	449.932	1650.29	882.572	423.775	1571.6	829.572
494	0	204.641	1630.53	1603.27	90.1723	1632.07	1595.12	213.703	1804.2	1602.85	94.7723	1814.76	1597.29	158.699	1846.89	1460.79	155.729	1924.05	1224.2	148.261	1692.89	1390.29	152.142	1627.26	1207.46	36.5711	1943.74	1277.47	327.376	1804.68	1429.08	424.357	1804.54	1200.01	438.806	1792.97	1102.74	436.513	1656.79	958.963	378.43	1618.44	902.735	449.593	1644.22	881.258	423.651	1567.05	826.297
495	0	202.328	1619.81	1604.05	88.145	1621.28	1595.93	211.307	1793.49	1603.44	92.5961	1804.03	1597.64	156.819	1835.81	1461	154.772	1911.49	1224.27	146.766	1681.43	1391.05	151.471	1615.3	1208.39	35.7336	1931.89	1276.86	325.691	1793.87	1429.98	422.928	1794.73	1200.94	437.2	1783.9	1103.57	435.565	1650.09	957.813	377.422	1612.73	900.17	448.886	1638.83	880.006	423.672	1562.99	823.354
496	0	200.339	1609.3	1605.27	86.1475	1610.63	1596.99	209.234	1783.23	1604.33	90.3502	1793.31	1598.22	155.305	1824.72	1461.51	153.913	1899.53	1224.53	145.666	1670.22	1392.05	150.693	1603.39	1209.47	34.5635	1920.08	1276.69	324.431	1782.85	1431.41	421.75	1785.02	1202.4	435.457	1774.77	1104.65	434.39	1643.48	956.797	376.741	1607.51	897.994	448.849	1633.85	879.488	423.53	1559.35	820.243
497	0	198.602	1598.88	1606.6	84.2636	1599.98	1598.29	206.93	1772.7	1605.16	88.0811	1782.65	1599.07	153.558	1813.57	1462.32	153.085	1887.6	1224.91	144.307	1658.92	1393.02	149.792	1591.67	1210.67	33.4908	1908.46	1276.64	322.763	1771.95	1432.77	420.257	1775.25	1203.84	433.92	1766.03	1106.06	433.348	1637.21	955.987	375.912	1602.47	895.865	448.644	1628.83	878.754	423.831	1556.24	817.421
498	0	196.971	1588.36	1607.89	82.6651	1589.19	1599.56	204.529	1761.94	1605.82	85.9889	1771.87	1599.95	151.866	1802.56	1463.09	151.988	1875.81	1225.71	143.245	1647.75	1394.14	149.095	1580.03	1211.91	32.1759	1896.68	1276.95	321.249	1760.76	1434.27	418.295	1765.52	1205.05	432.12	1757.26	1107.42	432.397	1631.15	955.323	375.4	1597.94	893.653	448.607	1624.19	878.318	424.296	1553.47	814.554
499	0	195.27	1577.82	1609.33	81.2053	1578.49	1600.96	202.819	1751.78	1607.03	83.8074	1761.1	1600.97	150.318	1791.55	1464.13	150.654	1864.45	1226.62	142.133	1636.63	1395.34	148.457	1568.64	1213.13	30.9037	1885.14	1277.46	319.764	1749.91	1435.92	416.583	1755.97	1206.53	430.333	1748.68	1109.06	431.595	1625.4	954.78	374.762	1593.94	891.417	448.774	1619.9	878.256	424.991	1550.94	812.068
500	0	193.808	1567.28	1610.69	79.7991	1567.69	1602.37	200.829	1741.2	1608.03	82.0299	1750.44	1602.02	148.816	1780.46	1465.12	149.519	1852.84	1227.46	141.244	1625.65	1396.48	147.78	1557.28	1214.34	29.5076	1873.37	1277.86	318.396	1739.04	1437.58	414.998	1746.57	1208.02	428.483	1740.34	1110.62	430.897	1620.01	954.338	374.789	1590.02	889.911	448.628	1615.99	877.762	425.428	1548.82	809.56
501	0	192.677	1556.87	1612.03	78.4582	1556.96	1603.68	199.035	1730.56	1608.91	80.3216	1739.59	1602.84	147.554	1769.54	1466	148.31	1841.37	1228.16	140.448	1614.42	1397.62	147.468	1546.17	1215.45	28.2102	1861.55	1278.37	317.234	1728.39	1439.1	413.469	1737.33	1209.33	426.202	1731.71	1111.75	430.197	1614.7	953.735	374.607	1586.06	888.259	448.738	1612.38	877.375	426.188	1546.96	807.241
502	0	191.706	1546.38	1613.45	77.4225	1545.95	1604.94	197.54	1720	1609.99	78.9616	1728.79	1603.91	146.174	1758.39	1467.18	147.201	1830.21	1229.39	139.846	1603.42	1398.76	147.414	1535.05	1216.52	26.9351	1849.92	1279.18	316.115	1717.73	1440.7	411.843	1728.04	1210.61	424.833	1723.74	1113.49	429.969	1609.58	953.365	375.024	1582.66	886.833	448.527	1608.61	876.956	426.902	1545.18	804.834
503	0	190.715	1535.66	1614.89	76.4207	1535.19	1606.4	196.144	1709.21	1611.09	77.6633	1717.96	1604.95	144.952	1747.24	1468.26	145.838	1819.11	1230.72	139.556	1592.34	1399.9	147.601	1523.82	1217.62	25.5307	1838.31	1280.1	315.164	1707.27	1442.38	410.745	1719.19	1212.16	422.993	1715.55	1114.78	429.628	1604.58	953.075	374.283	1578.56	885.298	448.887	1605.13	876.985	428.035	1543.7	803.006
504	0	189.903	1524.94	1616.24	75.6917	1524.16	1607.7	195.04	1698.5	1612.28	76.4276	1707	1606.01	143.743	1736.14	1469.65	144.365	1808.5	1232.02	138.918	1581.03	1401.07	147.892	1512.88	1218.59	23.7982	1826.67	1281.31	313.947	1696.62	1443.61	409.648	1710.51	1213.52	421.356	1707.65	1116.03	429.59	1599.81	952.836	374.999	1575.21	884.216	449.311	1601.86	876.816	428.83	1542.4	800.837
505	0	189.447	1514.01	1617.6	75.2511	1513.23	1609.04	194.086	1687.61	1613.32	75.6859	1695.94	1607.14	142.62	1724.94	1470.95	143.04	1798.16	1233.55	138.821	1569.93	1402.17	148.34	1502.16	1219.43	22.1778	1815.16	1282.7	313.125	1686.53	1445	408.646	1701.99	1214.81	420.397	1700.27	1117.62	429.753	1595.17	952.563	375.687	1571.64	883.203	449.781	1598.84	876.583	430.056	1541.12	798.93
506	0	189.098	1503.19	1618.87	74.9675	1502.01	1610.2	193.348	1676.8	1614.47	74.8059	1684.92	1608.36	141.66	1713.86	1472.29	141.595	1787.52	1234.98	138.799	1558.93	1403.15	148.958	1491.45	1220.35	20.3312	1803.64	1284.16	312.364	1676.26	1446.36	407.733	1693.61	1216.12	418.971	1692.3	1118.9	430.026	1590.5	952.324	376.33	1567.84	882.306	450.281	1595.84	876.529	431.184	1539.88	797.313
507	0	188.946	1492.16	1620.15	74.7032	1490.89	1611.61	192.746	1665.78	1615.73	74.3137	1673.49	1609.6	140.869	1702.64	1473.76	140.243	1776.83	1236.44	138.693	1547.89	1404.28	149.463	1480.87	1221.29	18.6772	1792.18	1285.96	311.777	1666.29	1447.82	407.015	1685.47	1217.67	418.221	1684.81	1120.53	430.419	1586.1	952.391	376.318	1564.12	881.411	450.382	1592.75	876.36	432.47	1538.81	795.915
508	0	189.111	1481.31	1621.4	74.8188	1479.65	1612.84	192.322	1654.8	1617.03	73.818	1662.4	1610.9	139.883	1691.55	1475.16	139.018	1766.18	1237.99	139.03	1536.94	1405.27	149.965	1470.28	1222.28	17.1147	1780.63	1287.66	311.165	1656.33	1449.16	405.842	1677.11	1218.79	417.095	1677.37	1121.83	431.119	1582.11	952.59	377.804	1560.56	881.026	451.205	1590.29	876.687	433.748	1537.47	794.736
509	0	189.298	1470.15	1622.54	75.186	1468.25	1614.03	192.095	1643.69	1618.24	73.6054	1651.01	1612.32	139.252	1680.47	1476.65	137.786	1755.58	1239.33	138.993	1525.99	1406.37	150.64	1459.59	1223.22	15.4513	1769.17	1289.4	310.647	1646.36	1450.45	404.981	1669.09	1219.95	416.13	1670.18	1123.18	431.521	1577.63	952.603	379.958	1557.24	881.053	451.693	1587.41	876.756	435.03	1536.14	793.727
510	0	189.704	1459.11	1623.5	75.3889	1456.82	1615.25	191.976	1632.61	1619.49	73.3379	1639.52	1613.75	138.532	1669.6	1477.9	136.894	1745.09	1240.76	139.363	1515.09	1407.53	150.893	1449	1224.26	14.1661	1757.84	1291.08	310.185	1636.5	1451.7	404.082	1661.08	1221.1	415.101	1662.88	1124.41	432.053	1573.55	952.838	381.345	1552.67	881.35	452.172	1584.57	877.027	436.559	1534.78	793.164
511	0	190.435	1448.12	1624.39	75.8839	1445.37	1616.57	191.89	1621.57	1620.59	73.4779	1628.22	1615.13	137.829	1658.51	1479.15	136.09	1734.42	1241.91	139.25	1504.25	1408.69	151.257	1438.49	1225.5	12.7927	1746.38	1292.69	309.568	1626.57	1452.71	403.534	1653.48	1222.44	414.239	1656.14	1125.74	432.661	1569.47	953.233	383.187	1548.54	882.093	452.405	1581.59	877.113	437.878	1533.1	792.811
512	0	191.141	1436.91	1625.13	76.7432	1433.88	1617.54	192.057	1610.42	1621.62	73.5404	1616.75	1616.59	137.254	1647.56	1480.29	135.029	1723.47	1243.01	139.382	1493.41	1409.82	151.462	1427.77	1226.59	11.6692	1734.93	1294.01	309.353	1616.61	1453.99	403.074	1645.76	1223.78	413.745	1649.19	1127.28	433.155	1565.09	953.625	384.966	1544.53	882.881	453.421	1578.95	877.902	440.052	1531.28	792.98
513	0	192.034	1425.84	1625.83	77.5295	1422.26	1618.53	192.312	1599.23	1622.69	73.4883	1605.07	1618.13	136.775	1636.64	1481.48	134.249	1712.42	1244.4	139.446	1482.6	1410.88	151.745	1417.4	1227.56	10.4945	1723.5	1295.59	308.775	1606.32	1455.14	402.64	1638.13	1225.36	412.98	1642.3	1128.83	433.748	1560.76	954.278	384.638	1540.85	881.937	453.624	1575.71	878.546	440.283	1529.38	792.568
514	0	192.908	1414.72	1626.31	78.4614	1410.8	1619.36	192.626	1588.29	1623.66	73.8603	1593.55	1619.41	136.428	1625.75	1482.47	133.523	1701.52	1245.25	139.428	1471.7	1411.96	151.875	1406.74	1228.57	9.68651	1712.09	1296.74	308.528	1596.07	1456.37	401.956	1630.44	1226.64	412.468	1635.51	1130.43	434.294	1555.99	955.003	386.92	1536.7	883.588	454.332	1572.84	879.55	441.251	1527.14	792.784
515	0	193.9	1403.6	1626.54	79.4089	1399.25	1620.13	192.774	1577.03	1624.29	74.1438	1582.13	1620.54	136.145	1614.78	1483.23	133.072	1690.56	1246.01	139.527	1460.78	1412.76	152.031	1396.19	1229.38	8.959	1700.72	1297.58	308.234	1585.7	1457.2	401.594	1622.82	1227.98	412.092	1628.75	1131.88	434.605	1551.87	955.484	386.189	1532.8	882.85	454.73	1569.57	880.167	442.002	1524.6	792.918
516	0	194.832	1392.56	1626.55	80.4009	1387.68	1620.57	193.253	1565.92	1624.74	74.3395	1570.45	1621.55	135.954	1603.7	1483.74	132.596	1679.77	1246.63	139.558	1449.77	1413.42	152.166	1385.4	1229.92	8.46462	1689.4	1298.41	308.132	1575.17	1457.91	400.763	1615.02	1228.76	411.657	1621.89	1132.97	434.871	1547.23	955.767	386.553	1528.76	882.792	454.854	1566.09	880.593	443.576	1521.57	793.408
517	0	195.959	1381.37	1626.62	81.5582	1376.27	1621.08	193.69	1554.73	1625.18	74.7271	1558.9	1622.49	135.911	1592.64	1484.36	132.459	1668.95	1247.38	139.531	1438.76	1413.91	152.244	1374.42	1230.36	8.04527	1678.03	1298.97	308.001	1564.37	1458.53	400.55	1607.24	1229.9	411.675	1614.87	1134.28	435.164	1542.49	956.115	387.761	1524.64	883.393	454.876	1562.31	881.013	444.193	1518.77	793.665
518	0	196.817	1370.08	1626.49	82.4541	1364.61	1621.51	194.197	1543.57	1625.36	75.2708	1547.33	1623.01	135.955	1581.31	1484.63	132.474	1658.05	1247.78	139.54	1427.51	1414.3	152.331	1363.39	1230.73	7.92492	1666.73	1299.5	308.088	1553.36	1458.98	400.303	1599.3	1230.86	411.554	1607.74	1135.37	435.534	1537.68	956.398	385.009	1520.34	881.532	454.882	1558.44	881.3	444.053	1515.45	793.484
519	0	197.768	1359.01	1626.16	83.4518	1353.04	1621.7	194.895	1532.32	1625.26	75.8164	1535.67	1623.3	136.116	1570.05	1484.6	132.812	1647.48	1248.02	139.749	1416.36	1414.33	152.306	1352.29	1230.72	7.91379	1655.63	1299.79	307.983	1542.15	1459.07	400.215	1591.2	1231.63	411.734	1600.67	1136.28	435.782	1532.55	956.444	388.156	1515.5	883.557	455.15	1554.52	881.649	443.42	1512.24	793.029
520	0	198.89	1347.66	1625.78	84.5473	1341.44	1621.72	195.399	1521.1	1624.91	76.2579	1523.99	1623.52	136.425	1558.68	1484.64	133.106	1636.79	1248.34	139.695	1404.92	1414.12	152.331	1341.26	1230.36	8.12098	1644.59	1299.95	308.154	1530.64	1458.96	400.352	1582.75	1232.29	411.613	1593.03	1136.87	436.057	1527.31	956.349	387.877	1510.81	883.009	455.07	1550.25	881.599	444.033	1508.4	792.935
521	0	199.893	1336.31	1625.23	85.6177	1329.83	1621.66	196.087	1509.66	1624.22	76.7867	1512.31	1623.33	136.823	1547.13	1484.45	133.389	1625.82	1248.36	139.755	1393.42	1413.7	152.197	1330.05	1229.73	8.46012	1633.57	1300.01	308.333	1518.94	1458.66	400.585	1574.15	1232.87	411.737	1585.16	1137.33	436.371	1521.73	956.202	388.029	1505.55	882.842	454.473	1545.3	881.178	442.977	1504.67	792.185
522	0	201.079	1324.9	1624.56	86.781	1318.13	1621.47	196.938	1498.31	1623.46	77.4967	1500.67	1622.88	137.272	1535.4	1484.04	134.045	1615.22	1248.11	139.885	1381.92	1413.04	152.15	1319.03	1228.84	9.03483	1622.63	1299.88	308.641	1507.04	1458.15	400.604	1564.84	1233.01	411.988	1577.2	1137.72	436.077	1515.94	955.491	387.91	1500.31	882.295	454.459	1540.47	880.943	443.304	1500.34	791.789
523	0	202.309	1313.46	1623.68	87.973	1306.41	1621.02	197.732	1486.77	1622.28	78.3867	1489	1622.25	137.714	1523.56	1483.55	134.926	1604.23	1248	140.119	1370.29	1412	152.156	1307.93	1227.66	9.70918	1611.62	1299.68	309.213	1494.94	1457.59	401.263	1555.52	1233.28	412.325	1568.87	1138	436.267	1509.78	954.94	389.614	1494.56	883.052	454.711	1535.61	880.666	442.673	1495.9	790.766
524	0	203.571	1301.92	1622.63	89.2487	1294.53	1620.44	198.595	1475.19	1620.98	79.2972	1477.09	1621.45	138.374	1511.55	1482.86	135.693	1593.37	1247.69	140.202	1358.36	1410.88	152.131	1296.79	1226.27	10.4549	1600.62	1299.38	309.764	1482.68	1456.83	401.415	1545.5	1233.07	412.645	1560.23	1138.02	436.474	1503.26	954.365	388.794	1489.08	881.364	454.414	1529.99	880.094	441.363	1491.37	789.57
525	0	204.885	1290.28	1621.44	90.4888	1282.64	1619.75	199.507	1463.55	1619.55	80.2369	1465.12	1620.38	139.088	1499.61	1481.97	136.782	1582.41	1247.19	140.462	1346.49	1409.58	151.972	1285.47	1224.7	11.6507	1589.65	1298.84	310.095	1470.13	1455.82	402.098	1535.5	1233.19	412.851	1551.1	1138.02	436.328	1496.29	953.54	389.116	1482.76	881.123	454.281	1524.14	879.54	441.596	1486.37	788.978
526	0	206.182	1278.5	1620.06	91.8904	1270.71	1618.85	200.658	1451.87	1617.95	81.2498	1453.11	1619.21	139.886	1487.44	1480.93	138.038	1571.49	1246.53	140.648	1334.57	1408.08	151.999	1274.19	1222.97	12.7902	1578.51	1298.22	310.877	1457.58	1454.82	402.679	1524.95	1232.95	413.212	1541.68	1137.94	436.701	1489.33	952.882	389.272	1476.33	880.278	454.517	1518.12	879.059	440.995	1481.14	787.79
527	0	207.597	1266.65	1618.52	93.3362	1258.7	1617.7	201.916	1440.11	1616.08	82.2963	1441.09	1617.95	140.85	1475.16	1479.8	139.405	1560.39	1245.74	140.992	1322.38	1406.41	151.961	1262.67	1220.95	14.1395	1567.45	1297.4	311.958	1444.87	1453.79	403.149	1514.08	1232.44	413.648	1531.83	1137.57	436.806	1481.76	951.876	388.397	1469.74	878.396	453.985	1511.22	877.9	440.235	1475.44	786.284
528	0	209.126	1254.8	1616.89	94.837	1246.61	1616.45	202.947	1428.14	1614.08	83.4677	1428.95	1616.36	141.833	1462.74	1478.42	141.054	1548.96	1244.83	141.329	1310.16	1404.6	152.234	1251.18	1218.95	15.6294	1556.2	1296.37	312.655	1431.8	1452.27	403.8	1502.82	1231.76	414.365	1522	1137.16	437.191	1473.83	950.946	388.355	1462.54	877.198	454.269	1504.4	877.16	439.218	1469.62	784.722
529	0	210.746	1242.9	1615.18	96.3495	1234.52	1615.15	204.27	1416.24	1612.1	84.8041	1416.94	1614.69	143.109	1450.44	1476.82	143.082	1537.67	1243.75	141.877	1297.92	1402.76	152.414	1239.52	1216.94	17.477	1544.99	1295.11	313.608	1418.61	1450.65	404.84	1491.62	1231.12	415.055	1511.41	1136.48	437.578	1465.59	949.743	386.191	1455.01	874.498	454.528	1497.06	876.182	438.716	1463.51	783.24
530	0	212.299	1230.85	1613.2	98.1529	1222.3	1613.74	205.796	1404.25	1609.85	86.2729	1404.77	1612.83	144.621	1438.18	1475.15	145.102	1525.9	1242.39	142.767	1285.66	1400.81	152.752	1227.77	1214.73	19.4676	1533.75	1293.78	315.064	1405.41	1449	405.594	1480	1229.89	415.695	1500.63	1135.41	437.803	1456.79	948.142	388.88	1447.11	874.723	454.549	1489.19	874.771	438.955	1456.66	781.737
531	0	214.152	1218.89	1611.21	99.8653	1210.15	1612.18	206.948	1392.22	1607.68	87.8011	1392.56	1610.97	146.297	1425.8	1473.46	147.261	1513.89	1240.95	143.501	1273.27	1398.7	153.203	1215.89	1212.54	21.6469	1522.48	1292.33	316.385	1392.04	1447.2	406.894	1468.3	1228.81	416.603	1489.66	1134.3	438.252	1447.65	946.602	388.984	1438.72	873.082	454.938	1480.91	873.461	437.184	1449.48	779.232
532	0	215.924	1206.73	1609.25	101.71	1197.92	1610.51	208.729	1380.28	1605.39	89.5082	1380.29	1609.07	148.13	1413.46	1471.65	149.46	1501.69	1239.34	144.133	1260.64	1396.69	153.689	1203.79	1210.42	23.8779	1511.31	1290.72	318.059	1378.79	1445.33	408.242	1456.38	1227.51	417.907	1478.29	1133.19	438.832	1437.95	944.876	389.52	1429.79	871.718	454.915	1471.87	871.679	437.498	1442.11	777.835
533	0	217.931	1194.67	1607.25	103.679	1185.72	1608.85	210.842	1368.01	1603.06	91.4298	1368.13	1607.08	150.112	1401.13	1469.67	151.799	1489.32	1237.54	145.524	1248.35	1394.7	154.297	1191.71	1208.31	26.3667	1500.02	1288.99	319.631	1365.44	1443.16	409.413	1443.86	1225.72	418.945	1466.35	1131.42	439.567	1427.98	943.007	389.016	1421.94	868.585	455.913	1462.95	870.137	436.607	1433.83	775.343
534	0	220.083	1182.52	1605.23	105.819	1173.49	1607.3	212.821	1355.93	1600.87	93.4042	1355.94	1605.36	152.2	1388.74	1467.84	154.185	1476.78	1235.7	146.753	1235.92	1392.64	154.952	1179.57	1206.15	28.9319	1488.5	1287.38	321.598	1352.03	1441.11	411.056	1431.36	1224.04	420.362	1454.18	1129.7	440.561	1417.5	941.088	388.466	1411.39	866.223	456.823	1453.28	868.315	436.901	1425.08	773.334
535	0	222.28	1170.29	1603.4	108.005	1161.28	1605.74	215.018	1343.69	1598.92	95.6004	1343.64	1603.63	154.394	1376.35	1466.09	156.609	1464.08	1233.96	147.886	1223.54	1390.78	155.605	1167.37	1204.16	31.6135	1476.85	1285.74	323.538	1338.82	1439.19	412.962	1418.54	1222.43	422.677	1442.09	1128.57	441.423	1406.21	939.206	389.832	1401.93	864.649	457.407	1442.06	866.551	436.905	1415.77	771.411
536	0	224.582	1158.11	1601.65	110.454	1149.24	1604.25	217.344	1331.42	1597.07	98.0032	1331.51	1601.95	156.901	1364	1464.41	159.066	1451.34	1232.18	149.699	1211.26	1388.97	156.537	1155.01	1202.41	34.4322	1465.15	1284.11	325.601	1325.5	1437.2	415.142	1405.62	1220.82	424.03	1429.04	1126.55	442.666	1394.52	937.406	390.435	1390.35	862.83	458.884	1430.92	864.99	437.492	1406.15	769.548
537	0	227.097	1145.8	1600	112.856	1137.09	1602.77	219.979	1319.24	1595.18	100.491	1319.43	1600.37	159.546	1351.62	1462.66	161.595	1438.58	1230.42	151.061	1198.75	1387.19	157.539	1142.57	1200.63	37.319	1453.39	1282.57	328.036	1312.35	1435.26	417.288	1392.45	1218.81	426.487	1416.28	1124.8	444.217	1382.47	935.373	391.391	1379.35	860.815	459.963	1418.83	862.734	436.487	1395.47	766.665
538	0	229.697	1133.69	1598.4	115.51	1124.91	1601.45	222.707	1307.03	1593.16	103.317	1307.28	1598.75	162.214	1339.2	1460.89	164.118	1425.74	1228.57	153.294	1186.42	1385.63	158.842	1129.94	1198.94	40.136	1441.51	1281.02	330.362	1299.21	1433.04	419.101	1378.87	1216.36	428.464	1403.05	1122.56	445.463	1369.62	932.976	392.288	1367.13	858.21	461.341	1406.35	860.337	437.029	1384.36	764.32
539	0	232.398	1121.37	1596.82	118.231	1112.88	1600.22	225.245	1294.95	1591.28	106.288	1295.21	1597.13	165.106	1326.81	1459.17	166.675	1412.79	1226.69	154.986	1173.83	1384.04	160.023	1117.24	1197.47	43.027	1429.44	1279.45	332.863	1286.34	1430.91	421.667	1365.7	1214.35	430.69	1389.83	1120.38	447.18	1356.66	930.772	394.174	1355.65	856.329	462.984	1393.24	858	437.852	1372.4	762.023
540	0	235.392	1109.24	1595.55	121.097	1100.89	1599.18	228.745	1282.64	1589.36	109.378	1283.27	1595.41	168.08	1314.37	1457.42	169.35	1399.82	1224.78	157.118	1161.35	1382.68	161.391	1104.39	1196.2	46.0309	1417.34	1277.96	335.645	1273.37	1428.85	424.094	1352.15	1212.01	433.093	1376.34	1118.14	449.062	1343.06	928.532	395.861	1342.63	854.278	464.791	1379.57	855.596	438.991	1359.81	759.865
541	0	238.507	1097.05	1594.29	123.988	1088.87	1598.18	232.182	1270.44	1587.67	112.984	1271.36	1593.85	171.3	1301.96	1455.79	172.092	1386.78	1222.8	159.513	1148.9	1381.39	163.015	1091.5	1195.13	49.0568	1405.05	1276.53	338.476	1260.29	1426.76	426.83	1338.63	1209.74	435.691	1362.62	1115.77	450.791	1328.99	926.004	397.442	1329.47	851.947	467.091	1365.61	853.322	440	1346.47	757.18
542	0	241.453	1084.86	1593.15	127.233	1077.07	1597.26	235.678	1258.31	1586.14	116.384	1259.46	1592.37	174.778	1289.8	1454.19	174.86	1373.69	1220.93	162.041	1136.42	1380.33	164.629	1078.55	1194.24	52.2745	1392.76	1275.28	341.486	1247.45	1424.63	429.526	1325.16	1207.5	438.262	1348.81	1113.28	453.169	1314.79	923.795	399.226	1315.33	849.659	469.702	1351.75	851.042	441.506	1332.23	754.815
543	0	244.698	1072.6	1592.42	130.279	1065.16	1596.7	239.477	1246.07	1584.71	120.288	1247.67	1591.15	178.283	1277.6	1452.74	177.808	1360.53	1219.11	164.62	1123.88	1379.59	166.168	1065.41	1193.6	55.5788	1380.43	1274.01	344.556	1234.65	1422.7	432.212	1311.36	1205.15	440.994	1334.69	1110.91	455.667	1300.23	921.68	401.393	1300.85	847.451	471.445	1335.94	848.375	443.322	1317.38	752.39
544	0	247.941	1060.37	1591.99	133.785	1053.42	1596.38	243.395	1233.88	1583.93	124.197	1235.93	1590.34	181.638	1265.28	1451.63	181.004	1347.31	1217.51	167.298	1111.28	1378.99	167.918	1052.13	1193.31	59.0618	1368.12	1272.99	347.638	1221.79	1420.77	435.193	1297.48	1202.89	443.661	1320.25	1108.41	457.825	1285	919.175	403.659	1285.4	845.154	474.143	1320.8	845.987	445.516	1301.86	750.04
545	0	251.506	1048.24	1591.87	137.143	1041.68	1596.41	247.591	1221.6	1583.05	128.279	1224.18	1589.82	185.196	1253.07	1450.83	184.313	1334.31	1216.36	169.921	1098.71	1378.71	169.825	1038.82	1193.21	62.465	1355.56	1271.92	350.861	1209.15	1419.03	438.312	1283.51	1200.76	446.84	1305.88	1106.14	460.489	1269.54	916.939	406.444	1269.83	842.998	476.582	1304.84	843.446	447.734	1285.46	747.539
546	0	254.894	1036.11	1591.96	140.563	1030.07	1596.69	251.609	1209.43	1582.44	132.431	1212.51	1589.61	188.572	1240.8	1450.17	187.568	1321.26	1215.45	172.674	1086.12	1378.79	171.639	1025.33	1193.53	65.7851	1342.93	1271.03	353.837	1196.62	1417.48	441.267	1269.45	1198.72	449.874	1291.06	1103.95	463.184	1253.73	914.933	409.12	1253.94	841.064	479.253	1288.57	841.262	450.327	1268.48	745.473
547	0	258.294	1024.04	1592.38	143.887	1018.41	1597.5	255.844	1197.44	1582.27	136.694	1201.05	1589.54	191.806	1228.6	1449.75	190.13	1308.07	1214.57	175.318	1073.64	1379.22	173.754	1011.91	1194.27	69.0263	1330.11	1270.56	356.808	1184.1	1416.31	443.854	1254.74	1196.74	452.65	1275.81	1101.96	466.194	1237.67	913.398	410.8	1237.22	838.872	482.403	1272.03	839.505	453.491	1250.73	743.907
548	0	261.88	1012.22	1593.23	147.413	1006.96	1598.47	260.007	1185.29	1582.23	140.76	1189.52	1589.73	194.977	1216.23	1449.73	192.638	1295.18	1214.13	178.292	1061.07	1379.91	176.119	998.56	1195.1	71.9362	1317.44	1270.42	359.963	1171.98	1415.51	446.58	1240.08	1194.95	455.339	1260.43	1099.99	469.061	1221.08	911.824	414.311	1220.12	837.516	484.941	1254.69	837.394	456.375	1232.2	742.24
549	0	265.378	1000.27	1594.29	150.937	995.581	1599.95	264.111	1173.39	1582.29	145.041	1178.22	1590.19	198.177	1204.06	1450.11	195.093	1282.56	1214.4	181.098	1048.53	1380.93	178.637	985.501	1196.07	74.7027	1304.63	1270.9	362.853	1159.84	1414.99	449.137	1225.27	1193.35	457.996	1244.9	1098.39	471.929	1204.07	910.557	417.865	1202.83	836.616	488.169	1237.24	836.121	459.973	1213.11	741.325
550	0	268.62	988.433	1595.54	154.231	984.242	1601.63	268.225	1161.5	1582.64	149.143	1166.81	1590.81	201.119	1192.1	1450.76	197.114	1269.93	1214.66	184.003	1036.23	1381.95	181.302	972.663	1197.33	76.9498	1291.88	1271.71	365.736	1147.8	1414.97	451.904	1210.5	1192.5	460.334	1229.17	1097.02	474.611	1186.53	909.738	419.952	1184.74	835.233	491.076	1219.03	835.04	463.577	1193.51	740.727
551	0	272.003	976.793	1597.02	157.554	973.124	1603.6	272.006	1149.87	1583.12	153.322	1155.56	1591.43	203.747	1180.03	1451.55	198.412	1257.12	1215.17	186.771	1024.1	1383.24	183.966	960.149	1198.78	78.7033	1279.16	1272.95	368.39	1135.88	1415.28	454.526	1195.6	1191.82	462.668	1213.35	1096.04	477.751	1168.85	909.637	421.427	1168.03	832.744	494.331	1200.24	834.63	467.579	1173.13	740.754
552	0	275.093	965.254	1598.58	160.715	962.091	1605.49	275.912	1138.22	1583.58	157.125	1144.61	1592.38	206.237	1168.03	1452.87	200.085	1244.84	1216.55	189.52	1012.01	1384.62	186.578	947.862	1200.34	80.0355	1266.58	1274.66	370.846	1124.03	1415.72	456.771	1180.73	1191.41	465.513	1197.92	1096.03	480.886	1150.7	909.995	427.492	1146.96	835.614	497.602	1181.04	834.642	471.481	1152.28	741.121
553	0	278.18	953.776	1600.21	163.633	951.105	1607.42	279.787	1126.54	1584.09	160.935	1133.54	1593.33	208.776	1156.49	1454	201.543	1232.84	1217.75	191.967	1000.19	1386.03	188.88	935.879	1201.88	81.387	1254.16	1276.55	373.299	1112.24	1416.76	459.149	1166.05	1191.61	467.961	1182.42	1096.21	483.751	1132.17	910.804	428.1	1128.93	833.289	501.075	1161.5	835.381	475.643	1130.9	742.2
554	0	280.982	942.481	1601.79	166.556	940.402	1609.4	283.271	1115.03	1584.68	164.48	1122.6	1594.29	210.968	1144.98	1455.25	203.151	1221.32	1219.19	194.132	988.566	1387.62	190.737	924.185	1203.52	82.6184	1242.12	1278.35	375.516	1100.47	1417.74	461.611	1151.6	1192.06	470.586	1167.34	1096.64	486.926	1113.68	912.102	435.161	1106.88	838.215	504.329	1141.54	836.214	479.694	1109	743.682
555	0	283.657	931.349	1603.27	169.205	929.759	1611.37	286.609	1103.64	1585.17	168.051	1112.02	1595.37	213.097	1133.59	1456.5	204.949	1210.02	1220.69	196.1	977.249	1388.88	192.353	912.8	1205.02	84.0772	1230.52	1280.07	377.456	1088.68	1418.61	463.638	1137.26	1192.28	472.552	1152.02	1096.68	489.888	1094.88	913.262	438.313	1086.55	839.339	507.585	1121.34	837.143	483.443	1086.63	745.166
556	0	286.146	920.201	1604.66	171.563	919.191	1613.51	289.9	1092.44	1585.81	171.341	1101.53	1596.53	215.237	1122.6	1457.89	207.014	1199.01	1222.48	197.786	966.013	1390.21	193.431	901.727	1206.32	85.803	1219.25	1281.71	379.587	1076.92	1419.92	466.311	1123.02	1193.41	475.196	1136.91	1097.27	493.07	1076.13	914.899	439.551	1066.03	839.076	510.733	1100.84	838.393	487.23	1063.87	747.142
557	0	288.352	909.13	1606.3	173.683	908.766	1615.56	292.819	1081.17	1586.66	174.322	1090.93	1597.95	217.076	1111.37	1459.42	209.581	1188.32	1224.5	199.116	955.026	1391.81	194.228	891.039	1207.68	87.5218	1208.19	1283.39	381.297	1065.08	1421.34	468.178	1109.15	1194.21	477.677	1121.9	1098.16	495.984	1057.21	916.936	444.965	1043.97	843.744	513.617	1080.12	840.077	491.253	1040.96	750.154
558	0	290.284	898.195	1607.85	175.606	898.529	1617.89	295.672	1070.32	1587.77	177.15	1080.51	1599.55	218.69	1100.51	1461.2	212.076	1177.72	1226.66	200.292	944.132	1393.38	194.998	880.573	1209.19	89.351	1197.43	1284.99	382.646	1053.34	1422.77	471.361	1095.46	1196.28	479.867	1106.56	1099.05	499.153	1037.94	919.413	448.752	1021.74	847.49	516.698	1059.58	842.104	494.798	1017.58	753.444
559	0	291.982	887.358	1609.59	177.271	888.252	1620.3	298.025	1059.25	1588.8	179.839	1070.35	1601.31	220.184	1089.63	1463.1	214.423	1167.36	1228.72	201.374	933.45	1395.23	195.647	870.157	1210.69	91.5484	1186.93	1286.55	384.14	1041.97	1424.58	472.218	1081.45	1196.83	482.187	1091.28	1100.08	501.68	1019.15	921.734	449.797	1001.08	849.008	519.18	1038.7	844.017	498.435	994.157	757.058
560	0	293.355	876.578	1611.54	178.772	878.171	1622.75	300.295	1048.42	1590.2	182.268	1060.19	1603.22	221.913	1079.16	1465.14	216.629	1156.94	1230.79	202.411	923.076	1397.03	196.394	859.815	1212.4	93.5302	1176.67	1288.36	385.372	1030.61	1426.47	475.019	1067.73	1199.12	484.776	1076.23	1101.82	504.329	1000.29	924.558	452.489	980.599	852.221	521.633	1018.04	846.376	501.831	970.622	761.254
561	0	294.351	865.818	1613.89	179.815	868.164	1625.52	302.164	1037.48	1591.76	184.241	1050	1605.39	223.023	1068.51	1467.24	218.558	1146.47	1232.75	203.21	912.635	1399.29	197.236	849.44	1214.65	95.7056	1166.41	1290.17	386.618	1019.54	1428.83	475.923	1053.93	1200.41	486.649	1060.81	1103.46	506.567	981.24	927.763	454.784	959.921	855.791	524.31	997.632	849.483	505.359	946.892	766.14
562	0	295.219	855.167	1616.4	180.524	858.128	1628.44	303.856	1026.74	1593.81	186.297	1040.04	1607.64	224.494	1058.23	1469.6	220.369	1136.13	1234.67	204.328	902.401	1401.62	198.238	839.023	1217.07	97.8992	1156.48	1292.17	387.669	1008.68	1431.3	478.048	1040.12	1202.81	489.292	1045.57	1105.94	509.259	962.598	931.662	459.262	939.743	861.237	526.446	976.907	852.73	508.525	923.77	771.198
563	0	295.788	844.68	1619.21	181.235	848.47	1631.38	305.569	1015.91	1596.13	188.033	1030.19	1610.11	225.836	1047.88	1472.07	221.841	1125.48	1236.8	205.48	892.157	1404.3	199.485	828.698	1219.82	99.9602	1146.57	1294.24	388.811	997.687	1434.27	479.67	1026.23	1205.25	491.111	1030.05	1108.29	511.392	943.679	935.832	459.835	919.217	864.666	529.031	956.745	856.965	511.043	900.563	776.907
564	0	296.042	834.142	1622.35	181.311	838.662	1634.36	306.847	1005.33	1598.79	189.246	1020.2	1612.79	227.014	1037.69	1474.66	223.25	1114.97	1239.03	206.577	882.205	1406.79	200.747	818.358	1222.6	101.722	1136.51	1296.49	389.907	987.15	1437.51	481.536	1012.48	1208.21	493.584	1015.04	1111.61	513.457	924.862	940.467	462.96	899.088	870.167	531.058	936.36	861.36	513.973	877.473	783.164
565	0	295.935	823.65	1625.55	181.241	829.022	1637.44	307.973	994.614	1601.43	190.633	1010.45	1614.94	228.357	1027.61	1477.16	224.55	1104.3	1241	207.759	872.174	1409.68	202.334	808.233	1225.52	103.663	1126.55	1298.67	391.262	976.844	1440.77	483.582	998.88	1211.22	495.567	999.731	1114.65	515.288	906.249	945.276	465.682	878.618	876.163	533.122	916.013	866.059	516.127	854.743	789.514
566	0	296.042	813.28	1628.74	181.064	819.542	1640.24	308.954	984.091	1603.98	191.852	1000.78	1617.26	229.69	1017.57	1479.62	225.94	1093.84	1243.11	209.027	862.172	1412.2	203.851	797.962	1228.32	105.331	1116.36	1300.76	392.655	966.747	1443.85	485.153	985.163	1213.99	497.069	984.601	1117.31	517.091	887.638	950.101	466.628	858.883	880.821	534.94	895.865	870.739	518.61	832.375	796.132
567	0	295.421	802.972	1631.94	180.72	809.998	1642.82	309.879	973.536	1606.6	192.775	991.121	1619.27	230.911	1007.39	1481.85	227.324	1083.14	1245.16	210.34	852.252	1414.68	205.385	787.717	1230.88	106.996	1106.24	1302.75	393.713	956.51	1446.57	486.583	971.634	1216.58	499.057	969.836	1120.17	518.632	869.043	955.035	468.426	838.604	886.57	536.426	875.459	875.424	520.649	810.079	802.652
568	0	294.663	792.717	1635.15	180.301	800.706	1645.2	310.765	963.295	1609.19	193.775	981.527	1621.19	232.379	997.269	1483.85	228.933	1072.67	1247.05	211.644	842.228	1417.15	206.838	777.353	1233.54	108.48	1096.04	1304.61	395.017	946.352	1449.25	489.145	958.416	1220	500.956	955.456	1122.87	520.264	850.735	960.096	469.853	818.546	892.435	537.845	855.223	880.262	522.226	788.103	809.215
569	0	294.264	782.392	1637.95	179.709	791.228	1647.41	311.382	952.819	1611.61	194.781	972.064	1622.73	233.735	987.417	1485.7	230.415	1061.97	1248.89	212.81	832.055	1419.37	208.224	767.069	1235.87	110.203	1085.71	1306.07	396.743	936.838	1451.84	489.892	945.309	1221.72	502.853	940.999	1125.41	521.563	832.323	964.969	470.653	798.262	898.134	539.106	835.166	885.177	523.495	766.292	815.683
570	0	293.845	772.29	1640.61	179.366	781.843	1649.19	312.079	942.487	1614	195.567	962.36	1624.37	234.875	977.158	1487.41	232.04	1051.49	1250.9	214.203	821.998	1421.46	209.617	756.687	1238.03	111.822	1075.48	1307.69	398.039	926.306	1454.1	491.954	932.699	1224.03	504.745	926.773	1127.78	522.853	814.235	969.717	471.762	778.739	903.859	540.046	814.886	889.828	524.245	744.62	822.066
571	0	293.416	762.306	1642.97	179.004	772.398	1650.86	312.599	932.226	1616.08	196.21	952.739	1625.65	236.19	966.992	1489.1	233.53	1040.86	1252.32	215.505	811.785	1423.11	210.88	746.35	1239.76	113.071	1065.03	1309.12	399.338	916.127	1456.19	493.464	920.037	1225.98	506.579	912.642	1129.85	523.916	796.129	974.355	472.607	759.254	909.59	541.117	795.1	894.616	524.681	723.228	828.385
572	0	293.254	752.148	1645.15	178.683	762.852	1652.11	313.217	921.95	1617.92	196.825	943.379	1626.81	237.633	956.936	1490.35	235.067	1030.47	1253.61	216.871	801.602	1424.63	212.101	736.052	1241.37	114.555	1054.74	1310.13	400.403	905.595	1457.75	495.049	907.453	1227.99	508.676	898.624	1131.96	524.933	778.444	978.763	473.332	740.198	915.156	541.903	775.43	899.286	524.819	702.014	834.651
573	0	293.11	742.065	1646.79	178.657	753.33	1653.23	314.04	911.831	1619.66	197.472	933.491	1627.75	238.551	946.428	1491.48	236.711	1020.16	1254.93	218.162	791.368	1425.83	213.389	725.735	1242.63	115.879	1044.22	1311.23	401.825	895.359	1459.28	496.788	895.123	1229.52	510.569	884.651	1133.52	525.908	760.847	983.029	473.741	721.418	920.521	542.14	755.537	903.377	524.689	681.086	840.669
574	0	293.046	731.969	1648.24	178.55	743.446	1654.14	314.435	901.51	1620.77	198.088	923.524	1628.35	240.021	936.167	1492.29	237.796	1009.96	1255.94	219.345	781.014	1426.65	214.608	715.375	1243.47	117.192	1033.81	1311.91	402.939	884.908	1460.33	498.538	882.805	1230.83	512.628	870.862	1135.02	526.733	743.457	986.943	473.824	703.065	925.555	542.86	736.32	907.732	524.274	660.481	846.654
575	0	293.058	721.813	1649.42	178.709	733.511	1654.67	315.106	891.382	1621.87	198.668	913.565	1628.68	240.825	925.664	1492.88	238.54	999.924	1256.72	220.434	770.582	1427.27	215.651	704.963	1244.01	118.269	1023.13	1312.57	403.977	874.386	1461.19	500.048	870.437	1231.94	514.552	857.093	1136.34	527.376	726.383	990.716	473.926	685.11	930.262	543.255	717.464	911.847	523.632	640.124	852.457
576	0	293.364	711.594	1650.23	179.214	723.621	1654.82	315.501	880.962	1622.23	199.106	903.38	1628.65	241.901	915.15	1493.22	238.73	989.616	1256.91	221.548	760.067	1427.54	216.893	694.599	1244.21	119.348	1012.69	1312.7	404.923	864.015	1461.58	502.007	858.352	1232.86	516.178	843.296	1137.01	527.701	709.388	994.05	474.284	667.647	935.044	543.131	698.655	915.319	522.935	620.259	857.919
577	0	293.729	701.3	1650.64	179.536	713.303	1654.96	315.93	870.793	1622.15	199.786	893.205	1628.16	242.623	904.382	1493.13	238.896	979.298	1257.03	222.573	749.425	1427.41	218.023	684.16	1243.98	120.107	1001.95	1312.85	405.463	853.405	1461.2	502.886	845.899	1232.77	517.937	829.675	1137.42	528.098	692.883	996.992	474.194	650.266	939.396	542.897	680.257	918.28	521.848	600.515	862.932
578	0	294.357	691.064	1650.74	180.055	702.896	1654.62	316.516	860.491	1621.79	200.123	882.518	1627.48	243.507	893.614	1492.78	238.875	968.588	1257.02	223.607	738.798	1426.97	219.224	673.758	1243.46	120.91	991.337	1312.83	406.4	842.982	1460.94	504.379	833.741	1232.9	519.794	816.245	1137.73	528.333	676.508	999.698	473.244	632.895	943.106	542.888	662.333	921.363	521.03	581.596	868.15
579	0	294.941	680.579	1650.7	180.623	692.424	1654.3	316.888	849.818	1621.21	200.767	872.033	1626.33	244.059	882.582	1492.43	238.987	957.718	1256.88	224.49	727.936	1426.31	220.19	663.316	1242.54	121.313	980.482	1312.65	406.986	832.359	1460.5	505.771	821.529	1233.04	521.259	802.746	1137.88	528.363	660.315	1002.3	473.548	616.432	947.016	542.5	644.465	924.19	519.922	563.011	872.814
580	0	295.662	670.054	1650.38	181.31	681.629	1653.48	317.614	839.412	1620.59	200.95	861.209	1625.17	244.634	871.554	1491.91	239.047	946.56	1256.52	225.39	716.951	1425.35	221.261	652.913	1241.34	121.66	969.557	1312.48	407.746	821.718	1459.95	507.169	809.278	1232.96	523.086	789.471	1138.09	528.286	644.372	1004.87	472.867	599.964	950.268	542.204	627.042	927.008	518.803	544.75	877.104
581	0	296.4	659.529	1649.68	182.111	670.823	1652.48	317.95	828.6	1619.39	201.519	850.332	1623.72	245.003	860.238	1491.1	239.035	935.367	1255.97	226.257	705.86	1423.92	222.172	642.489	1239.75	121.827	958.668	1312.18	408.363	811.034	1459.03	508.117	796.793	1232.47	524.574	776.102	1137.93	528.093	628.721	1006.88	472.347	584.015	953.237	541.891	609.999	929.475	517.513	526.959	881.105
582	0	297.176	648.784	1648.81	182.882	659.818	1651.17	318.443	817.861	1618.01	201.652	839.23	1621.94	245.155	848.839	1490.18	238.934	924.141	1255.16	227.056	694.677	1422.35	223.129	631.856	1237.91	121.558	947.576	1311.68	408.919	800.435	1457.85	510.133	784.629	1232.46	525.7	762.889	1137.32	527.746	613.34	1008.59	471.064	568.2	955.566	541.156	593.149	931.49	516.189	509.591	884.77
583	0	298.037	637.953	1647.75	183.486	648.713	1649.79	318.683	806.965	1616.27	201.887	828	1619.89	245.51	837.41	1488.94	238.943	913.194	1254.16	227.798	683.29	1420.58	223.975	621.358	1235.81	121.372	936.196	1310.93	408.897	789.399	1456.04	509.75	772.308	1230.71	526.996	749.967	1136.52	527.341	598.367	1009.87	470.11	552.719	957.683	540.532	576.87	933.147	514.514	492.582	887.904
584	0	298.687	626.967	1646.32	184.161	637.385	1648.19	319.072	795.998	1614.31	202.386	816.777	1617.56	245.65	825.867	1487.44	238.641	902.155	1252.88	228.455	671.94	1418.46	224.743	610.597	1233.5	121.057	924.825	1309.94	409.371	778.624	1454.25	510.702	760.267	1229.47	527.828	737.017	1135.13	526.857	583.648	1010.83	469.011	537.89	959.362	539.64	560.812	934.228	513.185	476.11	890.601
585	0	299.364	615.893	1644.82	185.018	626.027	1646.27	319.26	784.946	1612.21	202.372	805.329	1615.16	245.635	814.11	1485.89	238.023	891.15	1251.57	229.209	660.344	1416.28	225.447	599.676	1231.11	120.695	913.359	1309.04	409.604	767.574	1452.25	511.161	748.154	1227.84	528.94	724.521	1133.89	526.095	569.208	1011.49	468.661	523.401	960.935	539.047	545.292	935.299	511.534	460.099	893.005
586	0	299.653	604.68	1643.22	185.263	614.504	1644.49	319.122	773.643	1609.95	202.448	793.821	1612.65	245.649	802.408	1484.27	237.461	880.284	1250.04	229.716	648.737	1414.01	226.139	588.757	1228.5	120.284	901.876	1307.95	409.883	756.523	1450.1	511.522	736.246	1226.05	529.56	711.994	1132.21	525.444	555.132	1011.75	467.521	509.478	961.73	538.015	529.956	935.889	509.743	444.595	894.89
587	0	299.436	593.295	1641.21	185.612	603.051	1642.4	319.271	762.438	1607.77	202.69	782.349	1610.01	245.752	790.692	1482.29	236.744	869.427	1248.51	230.173	637.142	1411.68	226.641	577.576	1226.03	119.721	890.388	1306.65	409.948	745.462	1447.57	511.627	724.25	1223.88	530.133	699.591	1130.26	524.408	541.356	1011.59	466.027	495.435	962.111	536.803	515.31	935.913	508.275	429.581	896.258
588	0	300.111	582.134	1639.5	185.828	591.3	1640.31	319.086	751.1	1605.58	202.291	770.595	1607.65	245.771	779.099	1480.45	235.965	858.466	1246.96	230.639	625.481	1409.25	227.118	566.361	1223.45	119.073	878.69	1305.29	410.535	734.528	1445.36	511.649	712.51	1221.57	530.359	687.384	1127.91	523.602	527.987	1010.98	465.138	482.225	962.193	535.657	500.962	935.574	506.441	415.07	897.032
589	0	300.481	570.732	1637.82	186.053	579.624	1638.05	318.831	739.481	1603.6	201.92	758.818	1605.25	245.582	767.322	1478.58	235.238	847.461	1245.18	230.889	613.705	1406.75	227.34	554.998	1220.86	118.293	867.103	1303.9	410.592	723.197	1442.96	511.598	700.824	1219.33	530.622	675.436	1125.82	522.725	515.038	1010.13	463.871	469.202	961.65	534.501	487.052	935.028	504.793	401.029	897.388
590	0	300.283	559.199	1635.92	185.829	567.99	1636	318.603	728.149	1601.8	201.365	747.137	1603.22	245.419	755.591	1476.71	234.928	836.327	1243.49	231.049	601.945	1404.65	227.458	543.48	1218.61	117.583	855.392	1302.57	410.506	711.722	1440.47	511.585	689.502	1217.06	530.996	663.635	1123.79	522.02	502.393	1008.85	462.145	456.361	960.742	533.536	473.892	934.277	503.143	387.639	897.5
591	0	300.061	547.735	1634.21	185.489	556.259	1633.94	318.033	716.623	1599.95	200.99	735.442	1601.03	244.947	743.798	1475.01	234.566	824.958	1241.82	230.847	590.257	1402.46	227.437	531.782	1216.47	116.941	843.592	1300.82	410.49	700.307	1438.07	511.363	678.171	1214.6	530.794	651.909	1121.28	521.108	490.129	1007.31	461.365	444.342	959.529	532.558	461.098	933.047	501.626	374.887	896.851
592	0	299.521	536.187	1632.47	184.924	544.508	1631.96	317.484	704.998	1598.5	200.244	723.987	1599.1	244.85	732.128	1473.05	234.215	813.447	1239.88	230.607	578.532	1400.5	227.255	520.197	1214.29	116.238	831.808	1298.9	410.13	688.667	1435.65	510.918	666.993	1212.12	530.624	640.62	1118.98	519.83	478.311	1005.3	460.142	432.613	957.876	531.33	449.072	931.132	499.928	362.641	895.717
593	0	298.069	524.446	1630.76	184.189	532.82	1629.96	316.429	693.51	1596.93	199.81	712.362	1597.09	244.313	720.347	1471.33	234.077	801.961	1238.07	230.269	566.825	1398.65	226.627	508.494	1212.49	115.746	819.998	1297.35	409.898	676.811	1433.62	510.242	655.86	1209.85	530.156	629.352	1116.73	518.766	466.874	1003.22	458.933	421.317	955.911	530.158	437.631	929.126	498.42	351.029	894.11
594	0	297.121	512.942	1629.45	183.161	521.121	1628.23	315.358	681.982	1595.56	198.673	700.705	1595.41	244.18	708.654	1469.69	233.936	790.362	1236.46	229.674	555.058	1396.99	225.995	496.677	1210.75	115.413	808.246	1295.54	409.442	664.971	1431.67	509.331	644.819	1207.53	529.494	618.325	1114.48	517.986	455.946	1000.82	457.712	410.519	953.555	528.868	426.768	926.631	497.241	340.104	892.028
595	0	296.484	501.695	1628.18	182.153	509.522	1626.55	314.224	670.524	1594.1	197.004	688.87	1593.69	243.553	696.884	1467.87	233.857	778.477	1234.73	228.977	543.347	1395.33	225.294	484.805	1209.06	115.153	796.796	1293.37	408.983	652.847	1429.81	508.424	633.844	1205.34	528.642	607.425	1112.17	516.916	445.527	998.112	456.629	400.242	950.876	527.67	416.444	923.629	495.911	329.862	889.289
596	0	294.545	489.928	1626.87	180.598	497.897	1625.03	312.863	659.084	1592.84	195.939	677.464	1592.09	243.251	685.256	1466.27	233.865	766.579	1232.98	228.026	531.601	1393.99	224.58	472.795	1207.74	115.443	785.196	1291.57	408.416	640.711	1428.32	507.469	622.85	1203.44	527.732	596.71	1110.21	515.47	435.36	995.105	455.431	390.207	947.948	526.289	406.741	920.397	494.948	320.195	886.063
597	0	293.418	478.645	1626.11	179.005	486.374	1623.76	311.335	647.648	1591.95	193.927	665.687	1590.67	242.588	673.547	1464.93	234.065	754.711	1231.5	227.082	519.957	1392.8	223.78	460.963	1206.6	115.423	773.503	1289.68	407.986	628.386	1427.36	506.231	611.665	1201.84	526.777	586.134	1108.73	514.4	425.645	992.098	454.259	380.931	944.659	525.044	397.79	917.126	493.76	311.229	882.601
598	0	291.039	467.036	1625.02	177.166	474.948	1622.38	309.575	636.135	1591.07	192.515	654.39	1589.33	241.761	661.91	1463.57	234.175	742.86	1229.93	226.063	508.262	1391.84	222.948	448.874	1205.77	115.519	761.97	1287.48	407.246	616.187	1426.4	505.36	600.527	1200.8	525.809	575.703	1107.42	513.749	416.302	989.018	453.266	372.039	941.224	523.995	389.249	913.748	492.905	302.986	878.432
599	0	289.172	455.655	1624.23	175.351	463.648	1621.27	307.54	624.7	1589.99	190.568	642.95	1588.16	241.514	650.832	1462.3	234.351	730.495	1228.52	225.216	496.748	1390.91	222.395	436.807	1205.1	115.758	750.39	1285.32	406.584	604.107	1425.66	504.297	589.362	1199.61	524.347	565.051	1105.97	512.56	407.364	985.594	452.206	363.497	937.26	522.881	381.323	909.868	491.872	295.272	873.724
600	0	287.302	444.394	1623.52	173.369	452.339	1620.09	305.532	613.369	1589.15	188.643	631.649	1586.96	240.797	639.754	1461.01	234.053	718.064	1226.64	224.175	485.193	1390.1	221.898	424.485	1204.69	115.707	738.694	1282.76	405.75	592.325	1425.01	503.117	578.036	1198.65	522.795	554.529	1104.67	511.563	398.665	982.103	451.367	355.38	933.3	521.732	373.949	905.839	491.141	288.304	868.694
601	0	285.238	433.139	1622.77	171.128	441.007	1619.06	303.475	602.28	1588.61	186.549	620.362	1585.99	239.533	628.642	1459.6	233.62	705.352	1224.53	223.195	473.78	1389.66	221.601	412.179	1204.63	115.353	726.692	1280.27	404.742	580.892	1424.59	502.129	566.771	1198.04	521.604	544.299	1103.97	510.529	390.354	978.738	450.362	347.747	929.164	520.986	366.953	902.154	490.34	281.928	863.353
602	0	283.364	422.087	1622.02	169.11	429.866	1618.38	301.424	591.34	1588.34	184.242	609.231	1585.5	238.284	617.717	1458.43	233.002	692.712	1222.84	222.55	462.304	1389.47	221.349	399.916	1204.75	114.793	714.609	1277.63	403.46	569.685	1424.16	501.064	555.309	1197.63	519.821	533.724	1103.16	509.514	382.211	975.338	448.697	340.049	924.562	520.216	360.262	898.438	489.609	276.003	857.693
603	0	281.44	411.18	1621.68	167.119	418.746	1617.79	299.121	580.549	1588.25	181.952	598.074	1585.28	236.841	606.743	1457.52	232.08	679.763	1221.17	221.404	450.739	1389.38	221.035	386.717	1205.28	114.283	702.451	1275.28	402.258	558.772	1424.14	499.95	543.969	1197.42	518.265	523.506	1102.68	508.334	374.31	972.079	448.354	333.398	920.375	519.616	353.911	894.918	488.715	270.626	851.97
604	0	279.495	400.401	1621.52	165.098	407.538	1617.52	296.726	569.889	1588.3	179.509	587.038	1585.25	235.227	595.744	1456.67	230.736	667.017	1219.63	220.164	439.121	1389.61	220.598	373.644	1206.1	113.58	690.093	1272.8	400.831	547.949	1424.24	498.694	532.86	1197.26	516.322	513.243	1102.33	507.052	366.722	968.993	447.513	327.007	915.899	519.004	347.702	891.465	488.166	265.933	845.763
605	0	277.651	389.636	1621.61	163.195	396.403	1617.56	294.146	559.264	1588.6	177.099	576.009	1585.48	233.353	584.53	1456.07	229.282	654.357	1218.58	218.89	427.604	1390.11	220.375	360.27	1207.12	112.877	677.755	1270.84	399.439	537.273	1424.45	497.29	521.954	1197.32	514.287	503.268	1102.03	506.191	359.463	966.03	446.157	320.672	911.266	518.752	341.967	888.515	488.018	261.802	839.954
606	0	275.919	379.003	1621.83	161.514	385.264	1617.91	291.576	548.651	1588.95	174.391	564.807	1585.98	231.5	573.253	1455.78	227.587	641.981	1218.05	217.544	416.025	1390.65	219.779	347.216	1208.11	112.094	665.467	1269.36	397.919	526.361	1424.94	496.025	511.413	1197.66	512.288	493.556	1102.03	505.711	352.685	963.525	446.156	315.364	907.019	518.431	336.38	885.716	487.816	258.243	833.951
607	0	274.877	368.684	1622.44	159.819	374.081	1618.46	289.097	538.144	1589.39	171.463	553.744	1586.54	229.558	561.887	1455.8	225.981	629.79	1217.92	216.231	404.48	1391.36	219.379	334.338	1209.13	111.022	653.102	1268.17	396.31	515.365	1425.68	494.407	501.044	1198.23	509.98	483.972	1102.33	504.383	345.952	961.093	445.74	310.517	902.543	518.662	331.25	883.593	488.063	255.069	828.331
608	0	273.312	358.044	1623.06	158.255	362.982	1619.25	286.625	527.721	1589.9	168.918	542.605	1587.08	227.735	550.5	1455.97	224.783	617.523	1218.01	214.859	392.948	1392.14	218.635	321.822	1210.28	109.949	640.659	1267.21	394.819	504.26	1426.8	493.371	490.659	1199.46	507.986	474.79	1102.9	503.096	339.281	958.913	445.232	305.745	898.638	518.715	326.342	881.586	488.507	252.52	823.03
609	0	271.713	347.535	1623.69	156.717	351.878	1620.12	284.271	517.223	1590.12	166.528	531.4	1587.47	226.044	539.052	1456.18	224.01	605.296	1217.92	213.59	381.379	1392.85	217.904	309.574	1211.19	108.877	628.166	1266.47	393.395	493.113	1427.83	490.896	480.661	1199.75	505.88	465.773	1103.45	502.702	333.419	956.856	444.916	301.351	894.932	518.896	322.212	879.673	489.205	250.497	818.018
610	0	270.218	337.046	1624.23	155.156	340.711	1620.91	281.749	506.592	1590.23	164.044	520.398	1587.8	224.429	527.594	1456.49	223.384	592.93	1218.08	212.551	369.836	1393.39	217.294	297.476	1211.86	107.633	616.05	1266.12	391.889	481.878	1428.87	489.134	470.925	1200.45	503.699	456.969	1103.89	501.884	327.775	954.895	445.394	297.784	891.378	519.105	318.239	877.704	490.022	248.774	813.232
611	0	268.697	326.413	1624.99	153.741	329.656	1621.74	279.794	496.121	1590.47	161.947	509.234	1588.08	222.876	516.171	1456.89	222.912	581.037	1218.55	211.546	358.344	1393.97	216.782	285.654	1212.52	106.561	604.107	1266.13	390.656	470.709	1430.11	487.247	461.297	1201.23	501.584	448.417	1104.74	501.359	322.53	953.252	445.527	294.186	888.195	519.367	314.771	875.967	491.218	247.572	808.892
612	0	267.296	315.624	1626.1	152.318	318.656	1622.55	277.921	485.513	1590.78	159.902	498.06	1588.29	221.46	504.772	1457.5	221.912	569.341	1219.02	210.808	347.02	1394.58	216.284	274.155	1213.17	105.436	592.225	1266.38	389.511	459.547	1431.52	485.482	452.002	1201.98	499.711	440.005	1105.61	501.044	317.564	951.836	445.55	290.838	885.295	520.001	311.701	874.699	492.49	246.574	804.935
613	0	266.085	304.864	1626.99	150.944	307.671	1623.4	276.223	474.617	1591.28	158.155	486.887	1588.64	220.316	493.397	1458.26	220.795	558.011	1219.83	210.166	335.67	1395.12	216.189	263.146	1213.52	104.367	580.605	1266.69	388.577	448.57	1432.75	484.056	442.977	1202.84	497.983	432.034	1106.43	501.031	312.916	950.473	446.316	288.352	882.304	521.097	308.702	873.861	493.883	245.927	801.275
614	0	264.887	293.952	1627.92	149.763	296.512	1624.18	274.406	463.472	1591.87	156.629	475.628	1589.17	219.162	482.16	1459.29	219.87	547.117	1220.62	209.687	324.307	1395.77	216.21	251.751	1214.13	103.23	569.098	1267.3	387.529	437.703	1434.04	482.768	434.1	1203.67	496.392	424.25	1107.4	501.296	308.569	949.5	447.036	285.409	880.058	521.441	306.394	872.315	495.566	245.406	798.054
615	0	263.838	282.942	1629.19	148.723	285.352	1625.07	273.438	452.683	1593.04	155.433	464.454	1589.95	217.832	470.69	1460.47	219.033	536.175	1221.78	209.452	312.989	1396.61	216.632	240.959	1214.71	102.098	557.691	1268.42	386.825	427.013	1435.52	481.786	425.562	1204.91	494.876	416.585	1108.53	501.28	304.515	948.648	449.161	281.575	879.231	522.128	304.168	871.501	496.966	244.956	795.16
616	0	262.913	271.842	1630.41	147.805	274.168	1626.25	272.427	441.588	1594.32	154.359	453.194	1590.99	216.809	459.523	1461.86	218.024	525.297	1223.18	209.42	301.755	1397.67	217.089	229.967	1215.66	100.737	546.344	1269.9	386.236	416.614	1436.98	481.561	417.084	1206.5	493.71	409.31	1109.78	501.818	300.677	947.724	449.466	280.069	877.278	523.196	302.402	870.924	499.099	245.025	792.765
617	0	262.234	260.68	1631.55	147.189	262.913	1627.41	271.265	430.129	1595.55	153.335	441.877	1592.28	215.866	448.307	1463.38	217.156	514.777	1224.62	209.268	290.723	1398.68	217.604	219.268	1216.79	99.3749	535.019	1271.66	385.657	406.338	1438.4	480.514	409.09	1207.3	492.523	402.089	1110.89	502.511	296.95	947.107	450.544	277.348	875.927	524.049	300.439	870.248	500.385	244.934	790.507
618	0	261.778	249.353	1632.91	146.491	251.431	1628.6	270.872	419.272	1597.35	152.56	430.56	1594.06	215.076	437.425	1464.97	215.856	503.868	1226.3	209.193	279.81	1400.02	218.139	209.066	1217.98	98.0146	523.887	1273.28	385.239	396.358	1439.96	479.817	400.989	1208.64	491.748	394.983	1112.45	503.18	293.427	946.805	451.763	274.651	875.159	524.823	298.656	869.901	502.09	244.685	788.812
619	0	261.579	238.025	1634.33	146.228	239.922	1629.88	270.282	408.044	1599.19	152.153	419.244	1595.79	214.589	426.597	1466.79	214.786	493.135	1227.91	209.185	269.043	1401.69	218.611	198.671	1219.37	96.7518	512.804	1275.44	384.84	386.473	1441.76	479.495	393.169	1210.37	490.825	388.22	1113.93	504.109	290.189	946.896	452.891	272.208	874.827	525.716	297.168	869.976	503.779	244.62	787.662
620	0	261.505	226.519	1635.82	146.264	228.415	1631.53	269.849	396.871	1601.21	151.725	407.882	1598.09	213.569	415.537	1468.57	213.766	482.669	1229.68	209.068	258.224	1403.41	219.105	188.419	1220.92	95.5407	501.781	1277.42	384.363	376.642	1443.34	479.034	385.33	1212.05	490.516	381.585	1115.8	504.968	287.039	947.249	454.247	269.464	874.688	526.64	295.631	870.134	505.37	244.408	786.743
621	0	261.614	215.217	1637.05	146.25	216.903	1633.06	269.74	385.571	1603.3	151.511	396.486	1600.49	213.038	404.855	1470.5	212.611	472.077	1231.5	209.023	247.575	1405.08	219.355	177.904	1222.7	94.157	490.587	1279.47	383.81	366.785	1444.88	479.182	377.632	1214.21	489.959	375.223	1117.25	505.963	283.793	947.548	456.574	265.35	875.187	527.503	293.992	870.53	507.726	244.198	786.663
622	0	262.001	203.724	1638.41	146.604	205.193	1634.62	269.575	374.194	1605.53	151.456	385.066	1603	212.45	394.192	1472.42	211.645	461.591	1233.32	208.972	236.876	1407.06	219.56	167.391	1224.59	92.9159	479.411	1281.68	383.36	356.996	1446.75	478.394	370.339	1215.78	489.742	368.83	1119.5	506.835	280.55	948.274	456.867	263.422	875.772	528.326	292.347	871.308	509.296	243.518	786.919
623	0	262.38	192.31	1639.53	147.003	193.563	1636.31	269.776	363.017	1607.65	151.334	373.49	1605.62	211.633	383.392	1474.24	210.769	451.061	1235.23	208.835	226.203	1408.97	219.477	156.971	1226.4	91.8429	468.308	1283.74	382.999	347.173	1448.58	477.969	362.994	1217.73	489.29	362.672	1121.43	507.628	277.349	949.317	458.139	260.526	876.4	529.18	290.401	872.222	510.212	243.113	786.887
624	0	263.093	180.899	1640.45	147.786	181.818	1637.85	269.693	351.627	1609.48	151.566	361.904	1608.25	211.157	372.775	1475.96	210.15	440.678	1236.73	208.764	215.692	1410.65	219.546	146.471	1228.26	90.6796	457.155	1285.65	382.536	337.27	1450.4	477.619	355.841	1219.66	489.25	356.726	1123.71	508.329	273.978	950.409	459.221	257.741	877.034	530.003	288.495	873.483	511.316	242.092	787.203
625	0	264.007	169.471	1641.36	148.628	170.147	1639.29	269.876	340.461	1611.29	151.575	350.374	1610.62	210.596	362.15	1477.58	209.43	429.834	1238.42	208.569	205.024	1412.43	219.48	136.069	1230.05	89.5158	445.868	1287.45	382.095	327.263	1452.22	477.423	349.002	1221.87	489.199	351.006	1126.09	509.053	270.477	951.555	457.985	255.503	876.231	530.743	286.275	874.925	512.347	241.01	787.889
626	0	264.729	158.173	1642.11	149.471	158.357	1640.65	270.018	329.014	1612.82	151.606	338.697	1612.76	209.976	351.29	1479.12	209.191	419.266	1239.74	208.331	194.483	1413.98	219.308	125.617	1231.62	88.4041	434.667	1289.07	381.563	317.158	1453.9	477.226	342.199	1224.06	488.935	345.233	1128.24	510.005	266.807	953.051	458.874	252.475	877.295	531.164	283.969	876.239	513.164	239.591	788.757
627	0	265.662	146.79	1642.45	150.432	146.654	1641.69	270.485	317.833	1614.02	152.068	327.094	1614.71	209.681	340.577	1480.26	208.842	408.292	1241.03	207.984	183.927	1415.21	219.173	115.261	1232.81	87.6781	423.632	1290.52	381.125	306.835	1455.22	476.831	335.369	1225.75	489.058	339.623	1130.23	510.355	263.728	954.11	461.607	248.932	880.008	531.573	281.428	877.397	513.734	237.789	789.4
628	0	266.491	135.591	1642.52	151.691	134.754	1642.45	270.633	306.513	1614.95	152.208	315.298	1616.33	209.233	329.73	1481.23	208.717	397.41	1241.93	207.814	173.112	1416.21	218.934	104.583	1233.81	86.8985	412.488	1291.61	380.597	296.37	1456.25	476.477	328.636	1227.45	488.841	333.826	1132.01	510.788	260.12	954.944	462.029	245.88	880.628	531.833	278.892	878.363	513.955	235.893	789.891
629	0	267.602	124.044	1642.63	152.588	123.084	1643.21	270.86	295.126	1615.62	152.592	303.617	1617.69	208.879	318.811	1482.02	208.805	386.592	1242.94	207.585	162.375	1417.05	218.851	93.8886	1234.78	86.3752	401.547	1292.67	380.351	285.729	1457.35	476.215	321.923	1229.16	488.862	327.979	1133.85	511.09	256.403	955.847	462.45	242.606	881.494	532.04	276.227	879.479	514.273	233.68	790.684
630	0	268.526	112.58	1642.51	153.535	111.09	1643.69	271.439	283.733	1616.17	152.857	291.764	1618.61	208.694	307.75	1482.59	208.746	375.54	1243.5	207.248	151.47	1417.65	218.624	83.1788	1235.36	85.9828	390.616	1293.44	380.208	274.957	1458.32	475.743	314.769	1230.68	488.834	322.008	1135.48	512.067	252.972	956.863	462.941	239.002	882.416	532.096	273.402	880.279	514.469	231.325	791.31
631	0	269.505	101.02	1642.17	154.72	99.1984	1643.77	271.677	272.162	1616.26	153.257	279.966	1619.23	208.534	296.575	1483.01	208.948	364.68	1243.83	207.141	140.443	1417.86	218.343	72.4176	1235.56	85.8603	379.779	1293.88	379.888	263.905	1458.61	475.37	307.54	1231.81	488.519	315.723	1136.59	512.112	248.746	957.137	463.126	235.29	882.744	532.042	270.352	880.792	514.62	228.713	791.583
632	0	270.643	89.3463	1641.78	155.494	87.2392	1643.63	272.016	260.792	1616.11	153.529	267.949	1619.57	208.552	285.371	1483.16	209.032	353.701	1244.31	207.023	129.379	1417.81	218.176	61.7711	1235.53	85.7667	368.973	1294.36	379.76	252.78	1458.85	475.057	300.029	1232.83	488.482	309.314	1137.79	512.328	244.57	957.357	463.203	231.453	882.84	532.048	267.289	881.163	514.624	226.006	791.583
633	0	271.407	77.8162	1640.99	156.588	75.203	1643.23	272.402	249.029	1615.9	154.026	256.077	1619.62	208.553	273.866	1483.13	209.24	342.703	1244.38	206.878	118.249	1417.54	217.81	51.0469	1235.19	86.018	358.343	1294.61	379.677	241.417	1458.93	474.908	292.257	1233.83	488.326	302.633	1138.72	512.643	240.147	957.542	463.092	227.613	882.47	531.947	263.884	881.537	514.797	223.034	791.721
634	0	272.502	65.9963	1640.01	157.733	63.0931	1642.64	272.87	237.408	1615.24	154.342	244.001	1619.32	208.783	262.317	1482.84	209.536	331.686	1244.19	206.682	106.908	1416.92	217.632	40.283	1234.29	86.2832	347.539	1294.67	379.693	229.786	1458.67	474.566	283.955	1234.28	488.122	295.508	1139.34	512.981	235.408	957.545	463.304	223.067	882.346	531.505	260.018	881.384	514.477	219.841	791.287
635	0	273.429	54.322	1638.82	158.792	51.1027	1641.75	273.251	225.745	1614.32	154.814	231.987	1618.82	208.899	250.682	1482.47	209.742	320.443	1244.05	206.791	95.4996	1415.9	217.396	29.3555	1233.17	86.6315	336.783	1294.58	379.753	217.992	1458.12	474.483	275.416	1234.65	487.985	288.148	1139.83	513.067	230.4	957.131	463.593	218.248	881.926	531.373	255.961	881.302	514.683	216.508	790.786
636	0	274.52	42.5472	1637.68	159.744	39.0322	1640.8	273.797	214.122	1613.39	155.121	219.793	1617.96	209.276	238.831	1481.76	210.173	309.394	1243.71	206.726	83.9581	1414.78	217.084	18.6147	1231.76	87.1498	325.976	1294.35	379.906	206.047	1457.45	474.53	266.463	1234.97	487.883	280.378	1140.19	513.349	224.996	956.883	463.827	213.205	881.473	531.314	251.905	881.18	514.674	212.933	790.191
637	0	275.621	30.7298	1636.32	160.785	26.8324	1639.67	274.304	202.369	1612.07	155.554	207.702	1616.9	209.492	226.91	1480.9	210.686	298.308	1243.09	206.926	72.2291	1413.45	217.013	7.81917	1230.22	87.8411	315.168	1293.93	380.217	193.972	1456.65	474.545	257.132	1235	487.632	272.117	1140.22	513.336	219.306	956.273	464.061	207.884	880.807	531.077	247.364	880.805	514.909	209.044	789.522
638	0	276.519	18.9706	1634.59	161.915	14.5955	1638.35	274.794	190.518	1610.43	156.05	195.439	1615.66	210.049	214.874	1479.85	211.154	287.041	1242.24	206.945	60.4949	1411.77	217.029	-3.22093	1228.11	88.6143	304.206	1293.34	380.594	181.654	1455.4	474.479	247.249	1234.54	487.574	263.522	1139.96	513.561	213.128	955.338	464.251	202.19	879.738	530.863	242.561	879.957	514.795	204.979	788.224
639	0	277.725	7.10754	1633.11	163.004	2.37926	1636.97	275.289	178.676	1608.7	156.692	183.349	1614.19	210.555	202.913	1478.77	211.896	275.78	1241.32	207.245	48.5995	1410.03	217.02	-14.1074	1226.19	89.5193	293.181	1292.61	380.871	169.203	1453.89	474.51	237.113	1233.91	487.274	254.406	1139.33	513.505	206.596	954.212	464.511	196.216	878.552	530.467	236.996	879.002	514.731	200.545	786.975
640	0	278.797	-4.79829	1631.37	164.142	-9.67077	1635.61	276.015	166.787	1606.87	157.253	171.049	1612.49	211.231	190.648	1477.42	213.193	264.658	1240.19	207.441	36.686	1408.2	217.06	-25.4639	1224.17	90.6551	282.127	1291.59	381.544	156.558	1452.54	474.619	226.678	1233.08	487.278	244.771	1138.8	513.399	199.532	952.933	464.37	189.997	877.148	530.156	231.148	878.013	514.071	195.785	785.637
641	0	279.98	-16.8274	1629.72	165.088	-21.828	1634.06	276.829	154.819	1604.94	158.123	158.852	1610.7	212.226	178.453	1475.94	214.747	253.614	1239.1	207.815	24.6223	1406.37	216.853	-37.0488	1221.96	91.9184	271.008	1290.49	382.305	143.886	1451.01	474.972	215.771	1232.31	487.357	234.817	1138.08	513.582	192.058	951.812	464.157	183.071	875.606	530.229	224.845	877.174	513.966	190.649	784.011
642	0	280.933	-28.7418	1627.92	166.418	-33.9952	1632.48	277.549	142.758	1602.78	158.92	146.64	1608.79	213.152	166.374	1474.65	216.414	242.504	1237.96	208.334	12.5017	1404.36	217.076	-48.8616	1219.92	93.3724	259.883	1289.36	383.174	130.985	1449.48	475.295	204.589	1231.21	487.57	224.455	1137.18	513.589	183.983	950.378	464.95	175.951	874.913	530.053	217.721	876.137	513.636	184.948	782.413
643	0	281.935	-40.772	1626.18	167.501	-46.1765	1630.85	278.686	130.704	1600.83	159.796	134.394	1606.89	214.376	154.092	1473.03	218.272	231.139	1236.91	208.786	0.467995	1402.32	217.187	-60.6231	1217.74	94.8752	248.686	1288.13	384.156	118.075	1447.83	475.858	193.12	1230.13	487.765	213.653	1136.15	513.706	175.436	949.108	464.907	168.462	873.372	529.998	210.173	875.103	513.302	178.851	780.785
644	0	283.257	-52.9897	1624.58	168.637	-58.361	1629.02	280.116	118.728	1598.92	161.058	122.3	1604.83	215.774	141.83	1471.27	220.11	219.472	1235.47	209.229	-11.4949	1400.53	217.628	-72.5066	1215.57	96.5114	237.477	1286.65	385.237	105.236	1445.96	476.536	181.259	1228.66	488.214	202.504	1134.85	513.716	166.359	947.417	463.744	160.404	870.456	529.945	201.911	873.613	512.9	172.238	778.89
645	0	284.405	-65.1984	1622.73	169.762	-70.3915	1627.49	281.285	106.352	1596.72	162.494	110.167	1602.76	217.341	129.701	1469.58	221.836	207.751	1233.95	210.177	-23.6418	1398.55	218.241	-84.3739	1213.61	98.3821	226.106	1285.1	386.584	92.3275	1444.01	477.357	169.137	1226.91	488.727	190.981	1133.21	513.874	156.715	945.443	464.58	151.826	869.637	530.194	193.167	872.169	512.221	165.019	776.668
646	0	285.586	-77.5339	1621.15	170.895	-82.261	1625.84	282.936	94.0335	1594.93	164.122	98.1449	1601.04	218.768	117.75	1468.06	223.726	195.772	1232.48	211.218	-35.7866	1396.74	218.763	-96.3185	1211.62	100.267	214.657	1283.63	388.168	79.4494	1442.19	478.281	156.869	1225.06	489.489	179.164	1131.61	514.204	146.52	943.587	464.609	142.851	867.724	530.445	183.614	870.525	511.814	157.219	774.62
647	0	286.92	-89.9022	1620.03	171.79	-94.1943	1624.22	284.848	81.6924	1593.27	165.843	86.2642	1599.05	220.617	105.564	1466.38	225.505	183.728	1230.88	212.354	-47.895	1395.06	219.621	-108.431	1209.97	102.346	203.184	1282.15	389.797	66.7243	1440.44	479.574	144.293	1223.39	490.491	166.984	1129.98	514.624	135.781	941.815	464.721	133.209	866.034	530.937	173.396	868.934	511.272	148.839	772.83
648	0	287.887	-102.24	1618.37	172.953	-106.078	1622.78	286.863	69.3663	1591.61	167.981	74.4085	1597.24	222.66	93.2329	1464.51	227.288	171.608	1229.24	213.696	-59.9427	1393.55	220.664	-120.609	1208.42	104.376	191.518	1280.67	391.661	54.0753	1438.73	480.78	131.63	1221.41	491.445	154.678	1128.08	515.11	124.491	939.915	464.027	122.814	863.005	531.416	162.316	867.161	510.804	139.717	770.696
649	0	289.084	-114.714	1617.08	174.2	-117.811	1621.19	289.086	56.6735	1589.91	170.265	62.6587	1595.63	224.814	81.081	1462.99	229.124	159.607	1227.67	215.307	-72.1514	1391.95	221.768	-132.763	1206.7	106.418	179.717	1279.24	393.503	41.4795	1436.74	482.45	118.906	1219.47	492.662	142.196	1126.02	515.798	112.425	937.746	465.582	111.916	862.256	532.301	150.479	865.289	510.369	129.836	768.227
650	0	290.302	-127.185	1615.9	175.376	-129.42	1619.68	291.606	44.1398	1588.28	173.022	51.0047	1593.69	227.092	68.9837	1461.47	230.813	147.124	1226.08	217.117	-84.371	1390.41	223.067	-145.107	1205.25	108.527	167.719	1277.9	395.47	28.9928	1434.73	484.09	106.087	1217.36	494.059	129.715	1123.97	516.534	100.032	935.57	466.089	100.303	860.176	533.33	138.25	863.236	510.257	119.303	765.904
651	0	291.479	-139.774	1614.73	176.456	-140.737	1618.44	294.609	31.4879	1586.77	175.857	39.4329	1591.73	229.416	56.8643	1459.78	232.299	134.49	1224.49	219.062	-96.671	1389.04	224.352	-157.55	1203.95	110.615	155.712	1276.64	397.723	16.5781	1432.85	485.933	93.4294	1215.37	495.742	116.807	1121.95	517.595	87.0867	933.425	466.933	87.8841	858.264	534.607	125.284	861.26	510.302	107.937	763.54
652	0	292.723	-152.398	1613.76	177.673	-152.182	1617.09	297.711	18.6612	1585.22	179.175	27.9418	1589.91	232.032	44.5694	1458.17	234.154	121.71	1222.86	221.089	-108.961	1387.68	225.668	-170.134	1202.66	112.699	143.628	1275.48	399.968	4.11952	1430.78	487.851	80.6776	1213.19	497.842	104.077	1119.95	518.836	73.7487	931.177	467.889	74.9343	856.23	535.767	111.609	858.842	510.681	95.7489	761.264
653	0	293.983	-165.063	1613.01	178.989	-163.5	1615.76	301.152	5.90461	1583.66	182.656	16.5437	1588.08	234.697	32.435	1456.64	236.034	109.071	1221.22	223.267	-121.23	1386.37	227.134	-182.817	1201.51	114.816	131.415	1274.43	402.486	-8.32947	1428.73	489.98	68.0982	1211.02	499.918	91.0112	1117.75	520.222	60.0708	928.87	469	61.2384	853.918	537.266	97.5231	856.45	511.354	82.7926	758.832
654	0	295.283	-177.743	1612	180.171	-174.497	1614.54	304.455	-7.28413	1582.02	186.516	5.27235	1586.2	237.515	20.4057	1455.13	237.934	96.2672	1219.46	225.55	-133.554	1385.17	228.412	-195.533	1200.33	116.976	119.126	1273.34	405.043	-20.7526	1426.65	492.029	55.246	1208.66	501.818	78.1704	1115.16	521.753	46.1185	926.5	470.311	47.1498	851.777	538.73	83.0969	853.918	512.161	69.0612	756.41
655	0	296.342	-190.432	1611.21	181.415	-185.569	1613.29	308.455	-20.1022	1580.8	190.527	-5.91977	1584.45	240.473	8.45092	1453.61	240.06	83.6329	1217.63	227.857	-145.759	1384.09	229.771	-208.31	1199.59	119.242	106.825	1272.2	407.859	-33.2516	1424.52	494.336	42.3668	1206.49	504.159	65.0957	1112.74	523.545	31.9222	924.227	471.905	32.5582	849.621	540.465	68.4982	851.446	513.274	54.4874	754.005
656	0	297.551	-203.156	1610.33	182.777	-196.411	1612.22	312.395	-33.3387	1579.4	194.906	-16.984	1582.95	243.628	-3.40013	1452.16	242.549	70.9387	1215.78	230.242	-158.015	1383.16	231.14	-221.162	1198.99	121.833	94.5931	1271.09	410.673	-45.6509	1422.32	496.924	29.5119	1204.12	506.617	51.6303	1110.11	525.545	17.3125	921.66	473.6	17.639	847.273	541.941	53.2929	848.524	514.6	39.0254	751.271
657	0	298.664	-215.873	1609.75	184.072	-206.985	1611.35	316.719	-46.4055	1578.68	199.383	-27.9478	1581.91	247.022	-15.1352	1450.91	245.253	58.3691	1214.01	232.72	-170.189	1382.57	232.378	-234.119	1198.66	124.751	82.5871	1269.88	413.622	-58.1231	1420.13	499.338	16.1057	1201.61	509.291	37.9474	1107.66	527.437	2.36628	919.205	475.197	2.34283	844.858	543.794	37.9778	845.846	516.209	22.8472	748.754
658	0	299.861	-228.546	1609.55	185.484	-217.606	1610.85	321.072	-59.5877	1578.35	204.154	-38.9306	1581.21	250.499	-26.801	1449.75	248.202	45.9246	1212.42	234.994	-182.314	1382.4	233.31	-247.252	1198.81	128.008	70.4886	1268.73	416.394	-70.649	1417.96	502.165	2.71722	1199.45	512.031	23.7929	1105.19	529.643	-12.7426	917.001	477.194	-13.3386	842.759	545.482	22.1825	843.066	517.974	6.05661	746.497
659	0	301.034	-241.187	1609.52	186.68	-227.961	1610.82	325.383	-72.7576	1578.17	208.919	-49.7387	1581.04	253.694	-38.5428	1448.62	251.537	33.176	1211.13	237.327	-194.324	1382.62	234.44	-260.408	1199.35	131.356	58.5177	1267.63	419.782	-83.0363	1416.55	505.003	-11.1214	1197.22	514.72	9.30351	1102.69	531.74	-28.297	914.666	479.148	-29.4124	840.77	547.562	6.26444	840.551	520.051	-11.5626	744.331
660	0	302.102	-253.768	1609.68	188.173	-238.453	1610.95	329.789	-85.8854	1578.32	213.852	-60.6152	1581.23	257.289	-50.4543	1448.2	254.76	20.5424	1210.14	239.63	-206.373	1382.97	235.623	-273.658	1200.1	134.914	46.3623	1266.87	422.649	-95.6605	1414.75	507.659	-25.4531	1194.8	517.508	-5.69913	1100.28	533.908	-44.1573	912.273	481.306	-45.7514	838.688	549.745	-10.1257	838.243	522.109	-29.7616	742.01
661	0	303.112	-266.268	1610.22	189.524	-248.592	1611.48	334.11	-99.0154	1578.66	218.707	-71.4309	1581.59	260.37	-62.2849	1447.9	257.79	8.05275	1209.86	241.945	-218.475	1383.67	237.087	-286.727	1200.99	138.374	34.2969	1266.55	425.541	-108.145	1413.58	510.429	-40.1284	1192.89	520.122	-21.1431	1098.13	536.026	-60.3958	910.246	483.168	-62.5721	836.634	551.665	-26.8116	835.76	524.455	-48.7457	740.364
662	0	304.24	-278.679	1611.3	191.017	-258.776	1612.62	338.413	-112.014	1579.5	223.609	-82.233	1582.38	263.576	-74.2198	1448.32	260.564	-4.52603	1209.95	244.201	-230.48	1384.87	238.704	-299.521	1202.32	141.625	22.2989	1266.8	428.336	-120.61	1412.95	513.277	-55.2686	1191.55	522.529	-36.9469	1096.36	538.353	-77.114	909.012	485.5	-79.9286	835.583	553.775	-44.0527	834.054	527.04	-68.3197	739.375
663	0	305.286	-290.878	1612.72	192.323	-268.767	1614.13	342.628	-124.963	1580.42	228.398	-93.0549	1583.16	266.435	-86.1002	1449.2	262.737	-16.7785	1210.61	246.459	-242.499	1386.24	240.449	-312.153	1203.7	144.233	10.0382	1267.75	430.954	-132.943	1412.81	515.749	-70.6924	1190.44	524.955	-53.0398	1095.17	540.6	-94.5025	908.195	487.868	-97.7164	834.828	556.401	-61.8154	833.18	529.782	-88.2919	738.745
664	0	306.196	-302.921	1614.28	193.949	-278.892	1615.79	346.627	-137.804	1581.47	232.866	-103.903	1584.29	268.931	-98.0119	1450.43	264.462	-28.9669	1211.82	248.593	-254.354	1387.71	242.353	-324.538	1205.19	146.176	-2.01874	1269.38	433.349	-145.174	1413.07	518.547	-86.1979	1190.26	527.127	-69.2741	1094.38	542.683	-112.345	907.875	490.132	-116.091	834.445	558.66	-80.3872	832.54	532.763	-109.015	738.799
665	0	307.254	-314.87	1616.01	195.1	-288.94	1617.66	350.344	-150.524	1582.6	237.211	-114.784	1585.3	271.171	-109.784	1451.84	265.708	-40.8921	1213.41	250.633	-266.123	1389.44	244.396	-336.552	1207.13	147.358	-13.9189	1271.45	435.559	-157.262	1413.98	520.355	-101.586	1189.83	529.304	-85.3511	1094.35	545.096	-130.627	908.418	492.586	-135.033	834.865	561.23	-99.6548	832.647	535.695	-130.112	739.497
666	0	308.334	-326.539	1617.74	196.645	-298.943	1619.53	353.854	-163.045	1583.7	241.191	-125.54	1586.45	273.109	-121.353	1453.45	266.358	-52.7774	1215.1	252.584	-277.674	1391.1	246.35	-348.215	1208.92	147.967	-25.9376	1273.8	437.623	-169.214	1415.12	522.532	-116.873	1190.14	531.301	-101.314	1094.56	547.087	-149.386	909.176	494.872	-154.868	835.505	563.692	-119.682	833.244	538.871	-151.809	740.733
667	0	309.334	-338.193	1619.26	198.156	-308.933	1621.31	356.974	-175.366	1584.46	245.029	-136.347	1587.47	274.931	-132.773	1454.89	266.9	-64.4243	1216.78	254.381	-289.071	1392.66	248.153	-359.506	1210.6	148.435	-37.6904	1276.05	439.484	-180.99	1416.32	524.223	-132.081	1190.46	533.179	-117.066	1094.87	549.421	-168.558	910.444	497.361	-175.152	836.66	566.291	-140.103	834.018	541.721	-173.919	742.004
668	0	310.254	-349.621	1620.89	199.5	-318.912	1623.2	359.966	-187.501	1585.47	248.387	-147.057	1588.67	276.715	-143.996	1456.46	267.336	-75.8287	1218.39	256.04	-300.328	1394.29	249.918	-370.746	1212.48	149.025	-49.2897	1278.11	441.053	-192.692	1417.62	526.073	-146.902	1191.18	534.979	-132.619	1095.46	551.506	-187.901	911.914	499.87	-195.98	838.198	568.733	-161.145	835.303	544.615	-196.383	743.856
669	0	311.156	-360.935	1622.51	200.644	-329.007	1625.03	362.649	-199.402	1586.54	251.534	-157.671	1589.79	278.265	-155.142	1457.9	268.016	-87.0164	1219.88	257.225	-311.401	1395.88	251.02	-381.632	1214.14	149.826	-60.4065	1280.07	442.549	-204.361	1419.23	527.955	-161.373	1192.31	536.995	-147.938	1096.56	553.952	-207.466	914.456	502.289	-217.039	840.609	571.383	-182.217	837.196	547.529	-219.211	746.503
670	0	311.892	-372.096	1624	201.709	-338.965	1626.98	365.16	-210.968	1587.73	254.262	-168.444	1591.2	279.738	-166.075	1459.63	269.507	-97.7438	1222.02	258.241	-322.269	1397.54	251.563	-392.335	1215.62	150.894	-71.3792	1281.94	444.064	-216.02	1421.09	530.128	-175.696	1193.94	538.987	-163.206	1097.61	556.052	-226.896	916.537	504.53	-238.354	843.035	573.615	-203.677	839.104	550.199	-242.481	749.278
671	0	312.682	-383.167	1625.62	202.738	-349.251	1628.67	367.095	-222.685	1588.96	256.719	-179.033	1592.71	281.053	-176.973	1461.4	271.708	-107.984	1224.14	259.187	-333.025	1399.01	252.123	-402.856	1216.92	152.325	-82.0294	1283.73	445.063	-227.664	1422.69	531.877	-189.777	1195.29	540.984	-178.476	1098.78	558.339	-246.721	919.233	506.749	-259.731	845.709	575.79	-225.309	841.179	552.813	-265.981	752.436
672	0	313.162	-394.235	1627.04	203.423	-359.284	1630.71	368.779	-234.078	1590.08	258.764	-189.544	1594.33	282.159	-187.74	1463.17	274.29	-117.913	1226.19	259.758	-343.559	1400.5	252.474	-413.087	1218.3	153.928	-92.4292	1285.21	446.116	-239.143	1424.58	532.992	-203.524	1196.36	542.836	-193.685	1099.94	560.244	-266.157	921.679	509.025	-281.335	849.141	577.985	-246.717	843.688	555.269	-289.709	756.046
673	0	313.531	-405.134	1628.64	203.98	-369.478	1632.48	370.363	-245.527	1592.05	260.581	-200.039	1596.05	283.198	-198.391	1465.14	276.841	-127.635	1228.33	260.373	-354.101	1402.22	252.789	-423.156	1219.76	155.672	-102.654	1286.78	446.951	-250.548	1426.65	534.606	-217.17	1198.21	544.941	-208.883	1101.67	562.285	-285.662	924.707	511.054	-302.692	852.924	579.943	-268.344	846.587	557.546	-313.528	760.233
674	0	313.682	-415.975	1630.4	204.555	-379.662	1634.49	371.472	-256.616	1593.61	261.961	-210.48	1598.02	284.052	-208.968	1467.05	279.039	-137.51	1230.61	261.048	-364.521	1404.01	253.136	-433.258	1221.26	157.53	-112.696	1288.26	447.877	-261.718	1428.96	536.084	-230.808	1200.14	546.758	-224.214	1103.38	564.236	-305.142	928.181	512.871	-323.756	856.615	581.828	-289.848	849.722	559.776	-337.659	764.948
675	0	313.654	-426.777	1632.14	204.722	-389.782	1636.33	372.354	-267.715	1595.63	263.108	-221.07	1600.04	284.913	-219.446	1469.27	281.013	-147.384	1232.67	261.505	-374.863	1405.83	253.585	-443.473	1222.98	159.389	-122.642	1289.82	448.584	-272.7	1431.4	537.908	-244.439	1202.6	548.587	-239.397	1105.39	565.924	-324.388	931.905	514.441	-344.714	860.779	583.625	-311.059	853.239	561.823	-361.592	770.027
676	0	313.472	-437.545	1634.2	204.714	-399.932	1638.38	373.051	-278.699	1597.82	264.06	-231.52	1602.19	285.73	-229.833	1471.25	282.749	-157.291	1234.41	262.031	-385.068	1407.9	254.274	-453.624	1225.14	161.227	-132.392	1291.4	449.484	-283.568	1434.24	538.867	-257.881	1204.74	550.346	-254.47	1107.91	567.553	-343.653	935.874	516.03	-365.495	865.594	585.26	-331.996	857.152	563.792	-385.318	775.899
677	0	313.112	-448.243	1636.2	204.51	-410.233	1640.18	373.612	-289.667	1600.24	264.834	-241.845	1604.34	286.462	-240.105	1473.32	284.141	-167.294	1236.07	262.497	-394.925	1409.94	255.044	-463.86	1227.15	162.936	-142.105	1292.91	450.156	-294.241	1436.96	540.553	-271.41	1207.62	551.812	-269.466	1110.28	569.12	-362.393	940.182	517.722	-386.203	870.663	586.717	-352.652	861.229	565.913	-409.035	781.964
678	0	312.466	-458.827	1638.32	204.091	-420.393	1641.98	373.86	-300.629	1602.63	265.505	-252.384	1606.61	287.405	-250.284	1475.49	285.566	-176.91	1237.9	263.248	-405.06	1412.11	256.21	-473.839	1229.4	164.638	-151.832	1294.64	450.88	-304.881	1439.77	541.525	-284.82	1209.94	553.282	-284.417	1112.9	570.412	-381.105	944.764	519.28	-406.821	875.885	587.983	-373.182	865.612	567.727	-432.495	788.558
679	0	311.751	-469.517	1640.43	203.448	-430.571	1643.69	373.924	-311.472	1605.27	265.681	-262.675	1608.8	288.098	-260.364	1477.62	286.913	-186.698	1240.05	263.855	-414.89	1414.2	257.339	-483.756	1231.49	166.251	-161.49	1296.36	451.772	-315.317	1443	543.099	-298.301	1213.2	554.73	-299.088	1115.9	571.868	-399.566	950.045	520.135	-427.275	880.986	589.094	-393.29	870.452	569.568	-455.51	795.747
680	0	310.958	-480.159	1642.47	202.865	-440.752	1645.25	373.987	-322.24	1608.01	265.915	-272.985	1611	288.979	-270.384	1479.73	288.168	-196.723	1242.19	264.632	-424.73	1416.34	258.608	-493.69	1233.8	167.747	-171.175	1298.11	452.589	-325.681	1446.24	544.224	-311.439	1216.02	556.15	-313.421	1119.05	573.185	-417.66	955.09	521.646	-447.449	887.354	590.395	-413.145	875.727	571.356	-478.068	803.072
681	0	310.129	-490.775	1644.37	202.003	-450.864	1646.52	373.935	-333.057	1610.5	266.015	-283.421	1612.94	289.77	-280.332	1481.75	289.617	-206.884	1244.29	265.633	-434.72	1418.3	259.741	-503.591	1235.79	169.195	-180.854	1299.9	453.378	-336.039	1449.12	545.411	-324.539	1218.83	557.4	-327.602	1121.95	574.495	-435.775	960.564	522.972	-467.658	893.813	591.062	-433.086	880.739	572.898	-500.384	810.455
682	0	309.02	-501.382	1645.97	201.175	-461.026	1647.53	373.758	-343.889	1612.96	266.137	-293.776	1614.86	290.586	-290.33	1483.53	291.014	-217.205	1246.11	266.417	-444.46	1419.96	260.998	-513.627	1237.53	170.577	-190.607	1301.43	454.097	-346.363	1451.78	546.721	-337.461	1221.52	558.715	-341.553	1124.62	575.384	-453.584	965.535	524.01	-487.671	900.17	591.866	-452.71	885.942	574.349	-522.404	817.748
683	0	307.97	-512.005	1647.36	200.298	-471.251	1648.27	373.619	-354.651	1615.23	266.164	-304.163	1616.44	291.472	-300.237	1485.15	292.367	-227.645	1247.76	267.322	-454.358	1421.51	262.121	-523.611	1239.29	171.779	-200.404	1302.8	455.165	-356.697	1454.47	548.102	-350.272	1224.16	560.309	-355.094	1127.35	576.4	-471.258	970.729	525.043	-507.596	906.622	592.321	-472.303	890.951	575.077	-544.205	824.795
684	0	307.039	-522.594	1648.67	199.536	-481.539	1648.74	373.496	-365.491	1617.39	266.186	-314.634	1617.89	292.438	-310.15	1486.52	293.786	-238.13	1249.12	268.223	-464.113	1422.95	263.187	-533.558	1240.77	173.011	-210.275	1303.83	456.019	-366.945	1456.69	549.662	-362.708	1226.67	561.649	-368.72	1129.49	577.362	-488.782	975.752	525.835	-527.17	913.101	592.497	-491.743	895.736	575.673	-565.606	831.859
685	0	306.123	-533.335	1649.66	198.698	-491.808	1649.04	373.388	-376.293	1619.34	266.207	-325.016	1619.16	293.404	-320.121	1487.61	295.382	-248.67	1250.26	269.221	-473.919	1424.06	264.218	-543.453	1241.9	174.364	-220.11	1304.86	456.91	-377.223	1458.54	550.758	-374.997	1228.3	563.279	-382.108	1131.62	578.13	-506.098	980.471	526.336	-546.455	919.244	592.881	-510.986	900.56	575.88	-586.631	838.754
686	0	305.413	-543.993	1650.47	197.996	-502.098	1649.11	373.189	-387.093	1621.09	266.21	-335.512	1620.22	294.391	-330.088	1488.72	296.893	-259.104	1251.31	270.035	-483.818	1424.97	265.024	-553.32	1242.83	175.653	-230.003	1305.56	457.694	-387.481	1460.02	552.56	-387.122	1230.31	564.871	-395.469	1133.28	578.85	-523.208	984.943	526.911	-565.057	925.74	592.846	-530.381	905.321	575.924	-607.535	845.692
687	0	304.533	-554.729	1651.09	197.373	-512.573	1649.04	373.045	-397.911	1622.66	266.281	-346.162	1621.12	295.251	-340.16	1489.52	298.047	-269.287	1252.31	271.055	-493.767	1425.78	265.931	-563.203	1243.67	176.772	-239.891	1306.26	458.751	-397.588	1461.51	553.784	-399.06	1231.53	566.811	-408.44	1134.99	579.402	-540.123	989.327	527.146	-583.565	931.766	592.96	-549.216	909.698	575.453	-627.931	852.252
688	0	303.965	-565.574	1651.38	196.792	-523.174	1648.73	372.923	-408.852	1623.83	266.218	-356.776	1621.78	296.15	-350.233	1489.92	298.559	-279.311	1252.75	271.934	-503.726	1426.16	266.758	-573.016	1244.09	177.858	-249.844	1306.74	459.578	-407.832	1462.31	555.487	-411.014	1232.81	568.269	-421.999	1135.9	579.937	-556.996	993.219	526.894	-601.978	936.867	593.014	-567.845	913.878	574.851	-648.172	858.621
689	0	303.443	-576.372	1651.34	196.494	-533.897	1648.16	372.835	-419.771	1624.59	266.359	-367.552	1622.11	297.021	-360.476	1490.27	298.781	-289.553	1252.92	272.814	-513.836	1426.25	267.699	-582.995	1244.13	178.935	-259.903	1307.07	460.322	-418.033	1462.5	556.639	-422.841	1233.09	569.9	-435.271	1136.6	580.248	-573.616	996.646	526.506	-619.667	941.761	592.68	-586.39	917.614	573.923	-668.048	864.546
690	0	303.035	-587.313	1651.02	196.05	-544.534	1647.45	372.856	-430.668	1625.13	266.345	-378.255	1622.18	297.664	-370.802	1490.32	298.972	-300.004	1253.06	273.589	-524.023	1426.17	268.413	-592.955	1243.94	179.608	-269.95	1307.23	460.781	-428.131	1462.28	558.336	-434.702	1233.87	571.688	-448.471	1137.12	580.393	-589.902	1000.07	526.161	-636.989	946.742	592.367	-604.643	921.408	572.696	-687.552	870.448
691	0	302.708	-598.297	1650.6	195.92	-555.364	1646.52	372.843	-441.67	1625.37	266.535	-389.139	1621.98	298.328	-381.237	1490.24	299.378	-310.655	1253.14	274.385	-534.278	1425.88	269.28	-602.866	1243.63	180.2	-280.148	1307.3	461.643	-438.255	1462.27	559.785	-446.604	1234.13	573.497	-461.649	1137.5	580.61	-606.119	1003.19	525.687	-653.845	951.367	592.234	-622.4	925.133	571.382	-706.539	876.107
692	0	302.597	-609.317	1649.89	195.825	-566.307	1645.37	372.925	-452.671	1625.28	266.564	-400.038	1621.5	298.854	-391.751	1490	299.746	-321.272	1253.04	275.331	-544.646	1425.19	270.114	-612.867	1242.66	180.571	-290.43	1307.36	462.198	-448.409	1461.67	560.857	-458.257	1233.71	575.115	-474.752	1137.54	580.401	-622.081	1005.92	525.137	-670.556	955.368	591.501	-640.189	927.935	569.917	-725.176	881.297
693	0	302.417	-620.362	1648.87	195.748	-577.122	1644.04	373.152	-463.774	1624.91	266.822	-411.084	1620.69	299.275	-402.341	1489.49	299.787	-331.788	1252.61	276.029	-555.164	1424.14	270.975	-622.871	1241.48	180.636	-300.775	1307.33	462.698	-458.557	1460.72	561.98	-470.018	1233.22	576.836	-487.877	1137.36	580.181	-638.12	1008.55	524.259	-686.74	959.091	590.701	-657.726	930.721	568.252	-743.436	886.15
694	0	302.355	-631.483	1647.64	195.764	-588.23	1642.42	373.337	-474.91	1624.21	267.107	-422.089	1619.7	299.654	-413.002	1488.8	299.6	-342.146	1252.01	276.693	-565.676	1422.95	271.855	-632.886	1240.12	180.447	-311.215	1307.1	463.131	-468.65	1459.5	563.093	-481.713	1232.64	578.357	-500.812	1136.98	579.878	-653.336	1010.83	523.322	-702.428	962.399	590.212	-674.672	933.559	566.581	-761.22	890.924
695	0	302.498	-642.623	1646.26	195.703	-599.333	1640.76	373.577	-486.141	1623.17	267.453	-433.178	1618.47	299.965	-423.801	1487.83	299.169	-352.34	1251.25	277.546	-576.394	1421.51	272.679	-642.968	1238.42	180.087	-321.817	1306.73	463.75	-478.782	1458.24	564.386	-493.444	1231.9	579.882	-513.737	1136.41	579.442	-668.598	1012.73	522.309	-717.709	965.175	589.362	-691.332	935.704	564.738	-778.416	894.937
696	0	302.48	-653.883	1644.57	195.813	-610.339	1638.78	373.927	-497.402	1622.04	267.863	-444.322	1617.04	300.087	-434.58	1486.92	298.407	-362.349	1250.4	278.139	-587.207	1419.83	273.351	-653.209	1236.42	179.579	-332.512	1306.21	464	-488.934	1456.45	565.008	-505.225	1230.59	581.164	-526.511	1135.45	578.908	-683.441	1014.24	521.184	-732.593	967.55	588.589	-707.811	937.631	562.867	-795.145	898.504
697	0	302.641	-665.055	1642.91	195.958	-621.52	1636.9	374.224	-508.679	1620.76	268.127	-455.545	1615.47	300.213	-445.592	1485.66	297.583	-372.367	1249.49	278.736	-598.044	1418.03	274.077	-663.525	1234.56	178.924	-343.345	1305.69	464.196	-499.17	1454.55	565.657	-516.784	1229.23	582.267	-539.297	1134.38	578.155	-698.005	1015.52	519.92	-747.097	969.404	587.671	-723.624	939.29	561.052	-811.432	901.889
698	0	302.778	-676.355	1641	196.242	-632.746	1634.82	374.471	-519.946	1619.3	268.418	-466.764	1613.8	300.141	-456.516	1484.38	296.559	-382.435	1248.37	279.256	-609.017	1416.2	274.509	-673.923	1232.45	178.122	-354.252	1304.85	464.594	-509.389	1452.65	566.219	-528.435	1227.82	583.443	-551.779	1133.24	577.384	-712.22	1016.45	518.687	-761.186	971.006	586.853	-738.997	940.754	559.126	-827.101	904.661
699	0	303.09	-687.718	1638.92	196.624	-644.101	1632.62	374.693	-531.183	1617.52	268.773	-478.134	1611.97	300.091	-467.686	1482.73	295.664	-392.588	1247.16	279.769	-620.065	1414.13	274.976	-684.504	1230.21	177.2	-365.327	1303.78	464.479	-519.598	1450.08	566.415	-540.02	1225.74	584.013	-564.253	1131.5	576.47	-726.126	1016.8	517.369	-774.937	971.992	585.951	-754.044	941.514	557.239	-842.253	906.786
700	0	303.325	-699.096	1636.85	196.886	-655.461	1630.34	374.856	-542.479	1615.57	268.859	-489.359	1610.06	300.065	-478.815	1481.12	294.581	-402.805	1245.77	280.017	-631.131	1411.92	275.193	-695.133	1227.96	176.243	-376.554	1302.75	464.511	-529.954	1447.64	566.437	-551.594	1223.57	584.869	-576.371	1129.79	575.596	-739.709	1016.8	516.209	-788.315	972.5	584.828	-768.706	941.868	555.371	-857.036	908.354
701	0	303.486	-710.373	1634.7	196.91	-666.894	1628.19	374.897	-553.701	1613.75	268.866	-500.705	1608.19	299.666	-489.855	1479.41	293.399	-413.23	1244.2	280.261	-642.3	1409.82	275.345	-705.902	1225.88	175.166	-387.881	1301.66	464.473	-540.355	1445.41	566.409	-562.955	1221.61	584.804	-588.673	1127.99	574.699	-752.922	1016.73	514.954	-801.335	972.577	583.802	-782.883	941.976	553.49	-871.239	909.502
702	0	303.601	-721.544	1632.57	196.916	-678.206	1626.03	374.949	-564.846	1612.08	268.74	-511.965	1606.38	299.316	-500.981	1477.81	292.428	-423.688	1242.76	280.327	-653.457	1407.87	275.43	-716.818	1223.78	174.074	-399.176	1300.4	464.386	-550.753	1443.25	566.071	-574.279	1219.55	584.832	-600.526	1126.11	573.382	-765.761	1016.25	513.757	-813.998	972.382	583.034	-796.281	942.09	551.711	-884.844	910.126
703	0	303.728	-732.806	1630.57	196.772	-689.764	1624.08	375.068	-575.777	1610.22	268.473	-523.255	1604.62	298.842	-512.119	1476.06	291.337	-434.232	1241.2	280.197	-664.671	1405.8	275.176	-727.757	1221.68	172.846	-410.534	1299.05	463.798	-561.279	1440.65	566.214	-585.575	1217.83	584.476	-612.192	1123.98	572.53	-778.247	1015.36	512.575	-826.313	971.494	582.089	-809.452	941.488	550.175	-897.851	910.156
704	0	303.617	-744.171	1628.6	196.82	-701.161	1622.14	374.512	-587.159	1608.49	268.057	-534.473	1602.98	298.288	-523.368	1474.36	290.335	-444.976	1239.49	279.922	-675.886	1403.93	274.879	-738.957	1219.74	171.669	-421.951	1297.74	463.378	-571.833	1438.35	565.27	-596.609	1215.31	584.099	-623.685	1121.95	571.529	-790.221	1014.01	511.397	-838.147	970.313	581.178	-821.901	940.505	548.708	-910.304	909.423
705	0	303.428	-755.37	1626.86	196.458	-712.628	1620.44	374.142	-598.27	1607.07	267.559	-545.717	1601.51	297.578	-534.503	1472.88	289.36	-455.746	1237.98	279.384	-687.159	1402.14	274.484	-750.19	1218.1	170.521	-433.405	1296.41	462.957	-582.704	1436.4	564.019	-607.488	1212.9	583.555	-634.952	1119.98	570.43	-801.81	1012.3	510.325	-849.643	968.745	580.346	-833.84	939.143	547.525	-922.217	908.348
706	0	303.118	-766.544	1625.36	196.114	-724.049	1619.02	373.346	-609.382	1605.52	266.794	-556.939	1600.16	296.897	-545.95	1471.21	288.417	-466.67	1236.51	278.749	-698.452	1400.54	273.8	-761.463	1216.33	169.543	-444.763	1295.01	462.426	-593.776	1434.52	563.038	-618.311	1210.78	582.482	-646.028	1117.83	569.511	-813.052	1010.46	509.353	-860.792	966.696	579.4	-845.091	937.211	546.557	-933.462	906.742
707	0	302.559	-777.557	1623.94	195.353	-735.379	1617.71	372.486	-620.401	1604.08	265.809	-568.13	1598.91	296.115	-557.246	1469.92	287.621	-477.79	1234.94	277.909	-709.816	1399.05	272.929	-772.818	1214.78	168.729	-456.169	1293.61	461.463	-605.022	1432.51	561.657	-629.058	1208.58	581.419	-656.934	1115.86	568.541	-823.817	1008.25	508.538	-871.432	964.268	578.53	-855.837	934.909	545.829	-944.177	904.484
708	0	301.777	-788.713	1622.8	194.512	-746.681	1616.69	371.381	-631.461	1602.63	264.728	-579.368	1597.67	295.314	-568.814	1468.47	286.861	-488.998	1233.6	276.796	-721.25	1397.74	271.965	-784.215	1213.55	168.082	-467.49	1292.36	460.604	-616.555	1431.09	560.211	-639.653	1206.73	580.048	-667.616	1113.98	567.675	-834.084	1005.84	507.614	-881.715	961.616	577.727	-865.788	932.293	545.19	-954.071	901.726
709	0	300.93	-799.709	1621.96	193.465	-757.953	1615.9	370.205	-642.383	1601.65	263.292	-590.542	1596.47	294.305	-580.229	1467.31	286.355	-500.367	1232.51	275.585	-732.701	1396.67	270.732	-795.708	1212.36	167.57	-478.838	1290.94	459.751	-628.288	1430.08	558.705	-650.313	1205.12	578.658	-678.068	1112.44	566.734	-844.105	1003.25	506.77	-891.599	958.669	576.923	-875.2	929.527	544.684	-963.451	898.438
710	0	299.679	-810.628	1621.06	192.292	-769.197	1615.03	368.749	-653.312	1600.47	261.674	-601.714	1595.41	293.253	-591.816	1466.19	285.988	-511.793	1231.6	274.306	-744.159	1395.6	269.547	-807.409	1211.26	167.163	-490.159	1289.57	458.676	-640.168	1429.06	556.927	-660.935	1203.55	576.955	-688.508	1110.84	565.889	-853.649	1000.34	506.195	-901.053	955.249	576.17	-884.054	926.408	544.381	-972.256	894.586
711	0	298.552	-821.662	1620.4	190.904	-780.493	1614.21	367.014	-664.17	1599.51	259.913	-612.816	1594.47	292.344	-603.158	1465.3	285.599	-523.479	1230.58	273.021	-755.706	1394.65	268.497	-819.081	1210.44	166.885	-501.582	1288.06	457.585	-652.239	1428.22	555.576	-671.882	1202.66	575.226	-698.822	1109.49	565.084	-862.817	997.209	505.615	-910.015	951.629	575.453	-892.269	922.83	544.287	-980.348	890.16
712	0	297.006	-832.439	1619.66	189.392	-791.811	1613.5	365.079	-675.083	1598.62	257.915	-623.888	1593.53	291.365	-614.512	1464.31	285.251	-535.44	1229.45	271.649	-767.138	1393.98	267.311	-830.843	1209.85	166.512	-513.038	1286.42	456.485	-664.288	1427.7	553.476	-682.571	1201.33	573.339	-709.01	1108.25	564.233	-871.595	993.877	505.062	-918.439	947.654	574.805	-899.909	919.139	544.251	-987.761	885.489
713	0	295.674	-843.412	1619.17	187.787	-803.05	1612.88	362.922	-685.588	1597.84	255.532	-634.941	1592.74	290.199	-625.712	1463.33	284.842	-547.578	1228.17	270.412	-778.609	1393.46	266.289	-842.642	1209.55	166.04	-524.598	1284.52	455.243	-676.214	1427.35	551.892	-693.708	1200.59	571.455	-719.06	1107.32	563.441	-879.981	990.506	504.435	-926.611	943.477	574.38	-907.006	915.401	544.326	-994.633	880.243
714	0	294.109	-854.219	1618.4	186.101	-814.432	1612.08	360.88	-696.092	1597.63	252.87	-645.99	1592.11	288.825	-636.781	1462.28	284.101	-560.035	1226.75	269.029	-789.921	1393.04	265.351	-854.645	1209.47	165.401	-536.294	1282.63	453.96	-687.984	1426.97	550.314	-704.806	1200.17	569.559	-729.093	1106.43	562.83	-888.184	986.968	504.089	-934.293	939.078	573.98	-913.701	911.482	544.542	-1000.87	874.783
715	0	292.612	-865.078	1617.65	184.342	-825.967	1611.11	358.108	-706.519	1597.14	250.246	-656.932	1591.7	287.338	-647.653	1461.3	283.024	-572.693	1225.36	267.697	-801.184	1392.78	264.496	-866.837	1209.59	164.478	-548.023	1280.53	452.44	-699.359	1426.73	548.588	-716.124	1199.54	567.578	-739.17	1105.69	562.327	-895.647	983.562	503.644	-941.539	934.499	573.635	-920.04	907.418	544.782	-1006.61	868.814
716	0	291.261	-875.717	1616.89	182.637	-837.548	1610.22	355.525	-716.572	1597.24	247.194	-667.964	1591.51	285.562	-658.345	1460.39	281.627	-585.398	1223.76	266.33	-812.34	1392.67	263.806	-879.191	1209.94	163.268	-559.951	1278.25	450.842	-710.357	1426.56	547.57	-727.394	1199.83	565.667	-749.147	1105.29	561.627	-903.13	980.156	503.397	-948.376	929.698	573.388	-925.827	903.556	545.071	-1011.6	862.862
717	0	290.015	-886.397	1616.01	181.086	-849.155	1609.22	352.598	-726.511	1597.21	243.817	-678.831	1591.63	283.679	-669.029	1459.26	279.912	-598.291	1221.99	264.907	-823.46	1392.68	263.089	-891.641	1210.55	161.829	-572.028	1276.03	449.187	-720.898	1426.34	546.155	-738.725	1199.47	563.651	-759.185	1104.74	561.075	-910.543	976.576	503.02	-954.834	924.831	573.273	-931.432	899.594	545.397	-1016.18	856.417
718	0	288.814	-897.118	1615.34	179.669	-861.004	1608.35	349.708	-736.307	1597.71	240.308	-689.883	1592.05	281.361	-679.65	1458.34	277.954	-611.078	1220.46	263.465	-834.594	1392.9	262.359	-904.368	1211.34	160.129	-584.34	1273.67	447.327	-731.026	1426.23	544.773	-749.686	1199.56	561.584	-769.205	1104.48	560.564	-917.557	973.367	503.41	-960.385	920.145	573.321	-936.775	895.846	545.843	-1020.23	850.029
719	0	287.81	-907.574	1614.85	178.276	-872.916	1607.72	346.679	-745.854	1598.72	236.669	-700.966	1592.88	279.103	-690.268	1457.75	275.779	-623.778	1219	261.827	-845.652	1393.46	261.431	-917.196	1212.43	158.464	-596.651	1271.7	445.31	-740.822	1426.34	543.297	-760.228	1199.72	559.518	-779.015	1104.49	559.976	-924.332	970.321	503.328	-965.941	915.31	574.052	-941.834	892.957	546.445	-1023.76	843.85
720	0	286.991	-918.219	1614.66	176.82	-884.992	1607.34	343.462	-755.52	1599.86	232.809	-712.155	1593.86	276.594	-700.86	1457.34	273.581	-636.17	1217.89	260.145	-856.781	1394.19	260.607	-930.082	1213.66	156.516	-609.039	1269.8	443.35	-750.603	1426.77	541.836	-770.414	1200.22	557.291	-788.738	1104.71	559.518	-930.797	967.67	503.394	-971.016	910.794	574.54	-946.554	890.066	547.059	-1026.76	837.58
721	0	286.034	-928.694	1614.3	175.458	-897.333	1607.16	340.122	-765.078	1600.75	228.871	-723.302	1594.95	274.022	-711.562	1457.07	271.404	-648.207	1217.22	258.532	-868.016	1394.85	259.623	-942.836	1214.71	154.693	-621.519	1268.3	441.282	-760.353	1427.02	539.947	-780.343	1200.34	555.059	-798.28	1104.82	559.115	-937.077	964.942	503.49	-975.769	905.951	574.84	-951.076	887.031	548.01	-1029.32	831.599
722	0	285.463	-939.273	1614.42	174.475	-909.524	1607.16	336.928	-774.56	1601.81	224.748	-734.619	1596	271.482	-722.401	1456.93	269.295	-659.889	1216.89	256.808	-879.218	1395.57	258.668	-955.236	1215.8	152.777	-633.823	1267.03	439.07	-770.226	1427.45	538.339	-790.001	1201.03	552.673	-807.535	1104.98	558.486	-942.848	962.483	503.728	-979.983	901.383	575.602	-955.218	884.508	549.077	-1031.29	825.88
723	0	284.786	-949.888	1614.77	173.385	-921.768	1607.48	333.888	-783.989	1602.97	220.972	-746.146	1597.06	268.931	-733.344	1457.09	267.352	-671.318	1216.78	255.132	-890.444	1396.46	257.732	-967.349	1216.87	150.775	-646.127	1266.24	436.974	-780.05	1428.41	535.989	-799.486	1201.54	550.331	-816.455	1105.6	558.018	-948.34	960.348	504.041	-983.648	897.42	576.334	-958.741	882.428	550.639	-1032.37	820.813
724	0	284.152	-960.343	1615.38	172.383	-934.072	1608	330.408	-794.073	1603.62	217.191	-757.664	1597.98	266.492	-744.274	1457.53	265.576	-682.618	1216.89	253.616	-901.649	1397.18	256.849	-979.206	1217.8	148.764	-658.193	1265.76	434.979	-790.144	1429.49	533.606	-808.578	1202.11	548.19	-825.012	1106.43	557.646	-953.323	958.748	504.359	-987.017	893.798	577.11	-961.957	880.824	551.775	-1033.23	816.032
725	0	283.513	-971.049	1615.81	171.437	-946.333	1608.52	327.537	-803.865	1604.52	213.504	-769.223	1598.72	264.271	-755.342	1458.2	263.792	-693.882	1217.2	252.314	-912.851	1397.81	256.113	-990.769	1218.52	146.782	-670.057	1265.78	433.04	-800.458	1430.57	531.44	-817.492	1203.05	545.81	-833.244	1107.15	557.333	-958.005	957.305	504.762	-989.822	890.535	577.716	-964.625	879.216	553.25	-1033.76	811.77
726	0	283.005	-981.681	1616.46	170.425	-958.516	1609.04	324.652	-813.879	1605.11	210.129	-780.752	1599.35	262.093	-766.616	1458.37	262.295	-705.123	1217.76	251.037	-924.021	1398.4	255.6	-1001.94	1219.1	144.822	-681.788	1265.85	431.297	-810.85	1431.97	528.961	-826.031	1203.5	543.597	-840.988	1108.16	557.171	-962.207	955.98	505.376	-992.35	887.923	578.436	-966.909	878.105	554.725	-1034	808.049
727	0	282.555	-992.268	1617.04	169.593	-970.652	1609.58	321.935	-823.95	1605.82	207.003	-792.475	1599.81	260.248	-777.62	1459.4	261.006	-716.184	1218.58	250.044	-935.112	1398.89	255.363	-1012.72	1219.57	143.042	-693.134	1266.28	429.786	-821.322	1433.53	526.866	-834.294	1204.57	541.506	-848.372	1109.3	556.573	-966.038	954.879	505.752	-994.495	885.451	578.706	-968.781	877.08	556.215	-1033.81	804.891
728	0	282.109	-1003.09	1617.61	168.818	-982.68	1609.87	319.423	-834.196	1606.39	204.295	-803.959	1600.31	258.549	-788.687	1460.34	259.838	-727.186	1219.57	249.415	-946.389	1399.32	255.378	-1023.37	1219.85	141.251	-704.43	1267.04	428.431	-831.849	1434.93	524.824	-842.455	1205.36	539.495	-855.45	1110.36	556.362	-969.573	953.987	505.886	-996.638	883.341	578.872	-970.425	876.119	557.504	-1033.61	801.734
729	0	281.782	-1013.9	1618.22	168.46	-994.741	1610.27	317.154	-844.666	1607.25	201.794	-815.639	1600.99	256.92	-799.682	1461.31	258.558	-738.024	1220.37	248.849	-957.431	1399.75	255.39	-1033.89	1220.19	139.523	-715.529	1267.95	427.117	-842.213	1436.26	523.402	-850.314	1206.48	537.713	-862.232	1111.44	555.97	-972.816	953.071	506.34	-998.428	881.422	579.312	-971.95	875.543	558.507	-1033.12	799.078
730	0	281.605	-1024.7	1619.02	168.055	-1006.7	1610.81	315.147	-855.061	1608.33	199.206	-827.206	1601.83	255.383	-810.678	1462.38	257.084	-748.771	1221.35	248.221	-968.405	1400.51	255.544	-1044.35	1220.83	137.646	-726.434	1269	426.128	-852.536	1437.94	521.827	-857.899	1207.37	536.002	-868.661	1112.65	555.904	-976.01	952.359	504.622	-1001.88	879.591	579.394	-973.151	875.063	559.448	-1032.57	796.732
731	0	281.396	-1035.5	1619.75	167.829	-1018.64	1611.42	313.29	-865.518	1609.62	197.264	-838.901	1602.92	253.962	-821.529	1463.77	255.641	-759.309	1222.59	247.835	-979.204	1401.4	255.714	-1054.8	1221.67	136.083	-737.349	1270.33	425.104	-862.466	1439.31	520.779	-865.263	1208.5	534.641	-874.915	1113.87	555.81	-979.097	951.869	506.692	-1001.6	878.612	579.388	-974.17	874.543	560.234	-1031.84	794.785
732	0	281.458	-1046.47	1620.5	167.732	-1030.71	1612.05	311.647	-876.11	1611.18	195.378	-850.556	1604.31	252.779	-832.338	1465.09	254.268	-769.791	1224.01	247.469	-989.692	1402.25	255.908	-1065.14	1222.5	134.551	-748.271	1271.75	424.241	-872.327	1440.65	519.832	-872.403	1209.58	533.529	-881.095	1115.07	555.741	-981.59	951.415	504.504	-1005.31	877.448	578.929	-975.435	873.639	560.457	-1031.37	792.627
733	0	281.655	-1057.33	1621.32	167.785	-1042.68	1612.79	310.106	-886.662	1612.71	193.673	-862.264	1605.95	251.612	-843.067	1466.29	252.843	-780.206	1225.27	247.178	-1000.28	1403.42	256.138	-1075.39	1223.65	133.004	-759.197	1273.27	423.542	-882.042	1442.16	519.615	-879.602	1211.32	532.584	-887.206	1116.34	555.579	-984.131	950.951	504.41	-1007.34	876.387	578.791	-976.286	873.336	560.725	-1030.78	791.179
734	0	282.066	-1068.26	1622.27	168.126	-1054.56	1613.66	308.937	-897.292	1614.53	192.088	-873.894	1607.69	250.754	-853.599	1467.94	251.636	-790.543	1226.89	247.073	-1010.99	1404.88	256.337	-1085.69	1224.94	131.648	-770.028	1274.9	422.733	-891.47	1443.49	519.064	-886.641	1212.74	531.833	-893.228	1117.62	555.377	-986.708	950.786	510.332	-1010.53	879.098	578.429	-977.17	873.006	560.586	-1030.23	789.828
735	0	282.51	-1079.16	1623.23	168.382	-1066.44	1614.57	308.077	-907.791	1616.5	190.944	-885.493	1609.54	249.898	-864.127	1469.48	250.393	-800.828	1228.35	246.822	-1021.47	1406.25	256.471	-1095.89	1226.24	130.314	-780.936	1276.62	422.053	-900.982	1444.88	518.317	-893.839	1213.93	531.273	-899.074	1119.07	555.062	-989.213	950.797	507.437	-1010.13	877.192	577.786	-978.368	872.751	560.467	-1030.07	788.946
736	0	283.102	-1090.07	1624.12	169.051	-1078.24	1615.74	307.145	-918.453	1618.22	189.88	-897.117	1611.52	249.11	-874.629	1470.97	249.143	-811.104	1229.81	246.56	-1032	1407.67	256.504	-1106.12	1227.6	128.992	-791.832	1278.36	421.285	-910.528	1446.2	517.805	-900.946	1215.4	530.707	-904.804	1120.46	554.912	-991.842	950.861	506.003	-1008.94	875.772	577.334	-979.598	872.908	559.643	-1029.48	788.048
737	0	283.963	-1100.89	1625.22	169.567	-1090.07	1617.01	306.294	-929.212	1619.85	188.99	-908.766	1613.38	248.326	-885.215	1472.44	248.081	-821.361	1231.46	246.282	-1042.5	1409.19	256.345	-1116.37	1229.11	127.751	-802.832	1280.09	420.657	-920.016	1447.71	517.297	-907.885	1217.15	530.217	-910.318	1122.07	554.535	-994.417	950.995	505.906	-1010.89	876.016	576.923	-980.749	873.213	558.917	-1029.45	787.593
738	0	284.883	-1111.7	1626.32	170.52	-1101.73	1618.25	305.876	-939.761	1621.52	188.337	-920.284	1615.17	247.68	-895.7	1473.98	246.862	-831.711	1232.71	246.053	-1052.93	1410.63	256.239	-1126.63	1230.55	126.589	-813.785	1281.7	420.182	-929.764	1449.18	516.96	-914.679	1218.77	529.661	-915.627	1123.5	554.03	-997.087	951.335	505.929	-1013.36	876.532	576	-982.366	873.426	557.984	-1029.58	787.232
739	0	285.916	-1122.54	1627.09	171.487	-1113.49	1619.37	305.515	-950.482	1622.53	187.808	-931.84	1616.78	247.065	-906.339	1475.18	245.909	-842.126	1234.11	245.918	-1063.39	1411.74	256.063	-1136.84	1231.63	125.601	-824.686	1283.35	419.569	-939.662	1450.21	516.346	-921.425	1220.13	529.032	-920.864	1124.8	553.437	-999.995	951.498	504.44	-1013.27	875.694	575.298	-984.104	873.75	556.864	-1030.09	786.76
740	0	287.035	-1133.34	1627.73	172.365	-1125.13	1620.5	305.356	-961.014	1623.58	187.493	-943.297	1618.2	246.663	-916.991	1476.32	244.943	-852.629	1235.3	245.817	-1073.87	1412.74	255.789	-1147.01	1232.61	124.528	-835.669	1284.82	419.074	-949.748	1451.22	516.123	-928.133	1221.82	528.36	-926.046	1126.12	552.745	-1003	951.757	503.814	-1015.73	875.892	574.651	-985.786	874.27	555.807	-1030.83	786.532
741	0	288.288	-1144.14	1628.55	173.576	-1136.62	1621.53	305.2	-971.665	1624.61	187.233	-954.829	1619.5	246.328	-927.675	1477.43	244.002	-863.272	1236.33	245.461	-1084.35	1413.69	255.417	-1157.17	1233.52	123.724	-846.516	1286.19	418.641	-960.062	1452.28	515.204	-934.626	1222.91	527.651	-931.093	1127.5	552.059	-1005.84	952.212	502.709	-1018.61	876.352	573.417	-987.806	874.751	554.724	-1031.69	786.599
742	0	289.4	-1154.84	1628.97	174.607	-1148.19	1622.47	305.195	-982.365	1625.44	187.21	-966.331	1620.62	246.03	-938.509	1478.31	243.45	-873.89	1237.39	245.122	-1095.05	1414.44	255.093	-1167.44	1234.11	122.982	-857.408	1287.48	418.331	-970.547	1453.18	514.597	-941.146	1224.16	526.99	-936.243	1128.8	551.44	-1008.94	952.558	502.2	-1020.54	876.839	572.426	-989.651	875.222	553.625	-1032.89	786.563
743	0	290.587	-1165.74	1629.19	175.748	-1159.8	1623.15	305.218	-993.074	1625.77	187.104	-977.779	1621.45	245.861	-949.374	1478.95	243.143	-884.63	1238.33	244.905	-1105.92	1414.83	254.657	-1177.83	1234.4	122.429	-868.265	1288.49	418.075	-981.248	1453.59	514.027	-947.906	1225.17	526.136	-941.664	1129.75	550.609	-1012.25	952.406	501.316	-1023.55	876.682	570.97	-992.168	875.102	552.261	-1034.38	786.105
744	0	291.805	-1176.61	1629.36	177.042	-1171.32	1623.6	305.455	-1003.84	1625.95	187.124	-989.326	1622.01	245.738	-960.401	1479.38	242.977	-895.321	1238.95	244.776	-1116.87	1415.04	254.222	-1188.35	1234.56	121.987	-878.909	1289.31	417.872	-992.216	1453.86	513.394	-954.58	1225.72	525.262	-947.25	1130.43	549.879	-1015.56	952.241	499.931	-1026.89	876.465	569.847	-994.36	875.14	551.062	-1036.04	785.704
745	0	292.994	-1187.61	1629.3	177.986	-1182.9	1623.98	305.53	-1014.73	1625.98	187.283	-1001.11	1622.29	245.697	-971.587	1479.72	243.095	-906.044	1239.3	244.504	-1127.89	1415.07	253.903	-1198.9	1234.51	121.796	-889.664	1289.88	417.732	-1003.17	1453.98	512.318	-961.71	1226.45	524.45	-953.19	1131.24	549.22	-1019.15	952.039	499.634	-1030.3	876.613	568.55	-996.886	874.995	549.946	-1037.99	785.331
746	0	294.248	-1198.63	1629	179.27	-1194.41	1624.1	305.911	-1025.64	1625.68	187.514	-1012.47	1622.45	245.733	-982.889	1479.82	243.196	-916.886	1239.49	244.403	-1138.91	1414.81	253.432	-1209.44	1233.95	121.668	-900.371	1290.41	417.636	-1014.52	1453.82	511.616	-969.099	1226.93	523.554	-959.475	1131.71	548.37	-1022.87	951.547	498.565	-1033.42	876.064	567.302	-999.521	874.817	548.812	-1040.11	784.719
747	0	295.393	-1209.89	1628.64	180.296	-1206.16	1623.87	306.254	-1036.69	1625.24	187.912	-1024.09	1622.43	245.92	-994.136	1479.96	243.466	-927.213	1239.74	244.187	-1150.09	1414.34	253.07	-1220.1	1233.32	121.501	-911.146	1290.78	417.544	-1025.82	1453.45	510.711	-976.844	1227.04	522.595	-966.196	1132	547.618	-1027.06	950.968	497.588	-1038.07	875.485	566.005	-1002.28	874.272	547.568	-1042.49	783.962
748	0	296.429	-1221.03	1627.96	181.326	-1217.85	1623.73	306.416	-1048.01	1624.58	188.174	-1035.81	1622.14	246.084	-1005.59	1479.76	243.947	-937.836	1239.96	244.044	-1161.23	1413.7	252.801	-1230.69	1232.4	121.699	-921.717	1290.95	417.693	-1037.21	1453.28	509.948	-984.986	1227.22	521.754	-973.295	1132.32	546.899	-1031.39	950.492	497.079	-1041.93	875.257	564.499	-1005.54	873.898	546.618	-1045.08	783.334
749	0	297.493	-1232.47	1627.08	182.324	-1229.6	1623.06	306.764	-1059.4	1623.73	188.446	-1047.54	1621.78	246.165	-1017.21	1479.33	244.184	-948.676	1239.81	243.958	-1172.46	1412.88	252.466	-1241.36	1231.3	121.915	-932.359	1291.06	417.799	-1048.78	1452.79	509.446	-993.615	1227.39	520.878	-981.002	1132.39	546.157	-1036.31	949.806	496.008	-1046.13	874.406	563.191	-1009.29	873.315	545.488	-1047.89	782.386
750	0	298.435	-1243.79	1625.81	183.398	-1241.47	1622.27	307.395	-1070.88	1622.77	188.944	-1059.45	1621.12	246.332	-1028.84	1478.76	244.632	-959.577	1239.53	243.914	-1183.89	1411.69	252.315	-1252.14	1229.85	122.249	-943.102	1290.86	417.821	-1060.49	1451.8	508.702	-1002.76	1226.93	520.014	-989.135	1132.12	545.348	-1041.73	948.798	495.368	-1051.88	873.411	562.143	-1013.32	872.645	544.434	-1051.14	781.062
751	0	299.426	-1255.3	1624.43	184.611	-1253.42	1621.26	308.147	-1082.33	1621.84	189.514	-1071.35	1620.31	246.761	-1040.45	1478.31	245.269	-969.923	1239.11	244.019	-1195.37	1410.43	252.127	-1263.07	1228.23	122.776	-953.798	1290.63	418.049	-1072.26	1450.99	508.629	-1012.31	1226.74	519.222	-997.696	1131.88	544.66	-1047.54	947.938	497.666	-1061.45	873.709	560.957	-1017.91	871.989	543.412	-1054.62	779.856
752	0	300.626	-1267.15	1623.12	185.348	-1265.43	1620.21	308.724	-1094.03	1620.67	190.179	-1083.37	1619.4	247.218	-1052.27	1477.43	245.676	-980.687	1238.52	243.977	-1206.91	1409.14	252.128	-1273.89	1226.7	123.463	-964.593	1290.18	418.724	-1084.25	1450.43	508.248	-1022.15	1226.3	518.527	-1006.64	1131.56	544.123	-1054.05	947.139	493.742	-1062.56	871.231	559.909	-1023.25	871.297	542.475	-1058.49	778.756
753	0	301.689	-1278.87	1621.43	186.653	-1277.31	1619.08	309.501	-1105.76	1619.1	190.858	-1095.41	1618.38	247.725	-1064.09	1476.54	246.556	-991.435	1237.82	244.188	-1218.57	1407.62	252.106	-1284.99	1224.99	124.308	-975.499	1289.61	418.863	-1096.23	1449.05	507.811	-1032.49	1225.41	517.914	-1015.96	1130.97	543.332	-1060.89	945.955	493.585	-1070	870.466	559.158	-1029.24	870.414	541.898	-1063.03	777.479
754	0	302.61	-1290.41	1619.48	187.736	-1289.48	1617.59	310.361	-1117.54	1617.68	191.616	-1107.37	1617.43	248.285	-1076.14	1475.35	247.466	-1002.32	1237.02	244.428	-1230.39	1405.9	252.246	-1296.17	1222.93	125.322	-986.272	1288.8	419.213	-1108.47	1447.6	507.61	-1043.13	1224.41	517.631	-1025.51	1130.3	542.638	-1068.39	944.724	493.233	-1076.57	869.249	558.486	-1035.57	869.654	540.786	-1068.06	775.841
755	0	303.809	-1302.32	1617.81	188.918	-1301.48	1616.17	311.132	-1129.54	1615.98	192.686	-1119.5	1615.96	249.102	-1088.15	1474.01	248.537	-1013.22	1236.13	244.716	-1242.21	1404.14	252.291	-1307.45	1220.98	126.303	-997.26	1287.99	419.916	-1120.92	1446.36	508.049	-1054	1223.92	517.586	-1035.53	1129.72	542.177	-1076.33	943.591	492.382	-1083.77	867.968	557.83	-1042.9	868.821	539.623	-1073.47	774.421
756	0	304.996	-1314.22	1615.92	190.07	-1313.52	1614.57	312.248	-1141.44	1614.04	193.677	-1131.53	1614.46	250.1	-1100.31	1472.61	249.923	-1024.45	1235.11	245.134	-1254.16	1402.33	252.373	-1318.92	1218.93	127.815	-1008.19	1286.96	420.692	-1133.57	1444.91	508.15	-1065.14	1222.77	517.207	-1045.97	1128.67	541.573	-1084.85	942.163	491.58	-1090.62	866.337	557.405	-1050.62	867.805	538.567	-1079.54	772.845
757	0	306.197	-1326.34	1613.88	191.332	-1325.64	1613.07	313.505	-1153.42	1612.09	194.883	-1143.59	1612.84	251.114	-1112.43	1471.27	251.453	-1035.83	1233.9	245.56	-1266.13	1400.37	252.586	-1330.48	1216.77	129.118	-1019.33	1285.78	421.668	-1146.36	1443.3	508.415	-1076.48	1221.28	517.34	-1056.43	1127.41	541.295	-1093.89	940.711	490.979	-1098.98	864.759	556.884	-1059.1	866.624	537.53	-1086.24	771.133
758	0	307.596	-1338.49	1612.04	192.734	-1337.66	1611.48	314.741	-1165.62	1609.94	196.192	-1155.63	1611.32	252.411	-1124.58	1469.75	253.156	-1047.52	1232.7	246.148	-1278.17	1398.49	252.967	-1342	1214.7	130.883	-1030.32	1284.63	422.599	-1159.19	1441.43	509.025	-1088.14	1219.93	517.667	-1067.48	1126.19	540.937	-1103.41	939.062	490.799	-1107.58	863.602	556.527	-1067.99	865.268	536.401	-1093.62	769.403
759	0	308.966	-1350.47	1610.18	193.89	-1349.73	1609.93	316.431	-1177.64	1608.28	197.718	-1167.72	1609.68	253.701	-1136.76	1468.3	254.763	-1059.44	1231.41	246.684	-1290.28	1396.66	253.277	-1353.81	1212.8	132.33	-1041.53	1283.37	423.802	-1172.06	1439.85	509.866	-1099.88	1218.71	518.222	-1078.62	1124.86	540.86	-1113.5	937.591	490.149	-1116.37	862.26	556.47	-1077.41	863.986	535.523	-1101.54	767.823
760	0	310.435	-1362.6	1608.23	195.418	-1361.74	1608.43	317.917	-1189.86	1606.39	199.334	-1179.71	1608.05	255.062	-1149.05	1466.61	256.434	-1071.4	1230.04	247.504	-1302.38	1394.76	253.531	-1365.2	1210.66	134.146	-1052.82	1282.16	425.009	-1184.97	1438.06	510.903	-1111.87	1217.25	519.235	-1090.15	1123.69	540.907	-1124.05	935.866	489.812	-1126.28	860.498	556.392	-1087.69	862.43	534.671	-1110.3	766.076
761	0	311.943	-1374.85	1606.2	197.166	-1373.9	1606.8	319.641	-1202.1	1604.18	200.923	-1191.83	1606.66	256.661	-1161.2	1465.02	257.793	-1083.66	1228.53	248.377	-1314.49	1392.79	253.962	-1377.03	1208.55	135.869	-1064.27	1280.82	426.4	-1197.91	1436.03	512.071	-1124.23	1215.56	520.388	-1102.02	1121.96	541.143	-1135.19	933.798	489.637	-1136.15	858.382	556.666	-1098.6	860.56	533.94	-1119.87	763.977
762	0	313.691	-1387.03	1604.23	198.777	-1385.92	1605.36	321.441	-1214.3	1602.37	202.966	-1203.87	1605.08	258.291	-1173.48	1463.42	259.33	-1095.7	1227.13	249.4	-1326.69	1391.04	254.462	-1388.88	1206.57	137.659	-1075.83	1279.53	427.741	-1210.69	1434.05	513.336	-1136.53	1213.77	521.283	-1114.17	1120.08	541.578	-1146.78	931.968	490.084	-1147.32	857.137	557.609	-1109.94	859.132	533.432	-1129.88	762.045
763	0	315.577	-1399.24	1602.67	200.617	-1397.97	1603.9	323.51	-1226.52	1600.59	204.939	-1215.94	1603.47	260.053	-1185.85	1461.76	260.672	-1108.07	1225.67	250.569	-1338.87	1389.31	255.081	-1401.02	1204.72	139.45	-1087.59	1278.2	429.174	-1223.24	1431.99	514.959	-1148.96	1212.15	522.902	-1126.21	1118.52	542.291	-1158.75	930.101	490.044	-1158.66	855.393	557.941	-1121.95	857.119	533.292	-1140.68	760.276
764	0	317.381	-1411.42	1600.93	202.303	-1410.05	1602.52	325.494	-1238.78	1598.45	207.083	-1228.1	1601.83	261.843	-1198.25	1460.15	262.045	-1120.19	1224.07	251.831	-1351.03	1387.5	255.852	-1412.52	1202.92	141.276	-1099.46	1277	430.73	-1235.96	1430.07	516.631	-1161.58	1210.48	524.342	-1138.91	1116.56	543.316	-1171.34	928.201	491.156	-1170.67	853.845	558.933	-1134.51	855.268	533.487	-1152.33	758.356
765	0	319.354	-1423.79	1599.17	204.359	-1422.2	1601.02	327.865	-1251	1596.7	209.464	-1240.13	1600.23	263.798	-1210.66	1458.61	263.699	-1132.25	1222.7	253.213	-1363.45	1385.77	256.728	-1425.04	1200.98	143.011	-1111.34	1275.87	432.341	-1248.74	1428	518.261	-1174.25	1208.61	526.064	-1151.45	1114.66	544.651	-1184.36	926.676	492.085	-1183.45	851.915	560.315	-1147.67	853.275	533.752	-1164.67	756.247
766	0	321.331	-1436.04	1597.57	206.466	-1434.31	1599.6	330.322	-1263.32	1594.95	211.767	-1252.35	1598.48	265.911	-1222.98	1457.04	265.285	-1144.46	1221.11	254.684	-1375.7	1384.03	257.633	-1436.97	1199.2	144.849	-1123.32	1274.83	434.288	-1261.43	1426.11	519.916	-1186.87	1206.62	527.959	-1164.15	1112.71	545.884	-1197.63	924.434	493.411	-1196.55	850.103	561.716	-1161.15	851.21	534.531	-1177.75	754.25
767	0	323.556	-1448.42	1595.96	208.573	-1446.44	1598.16	332.6	-1275.71	1592.97	214.26	-1264.52	1596.65	268.134	-1235.4	1455.48	267.36	-1156.73	1219.45	256.377	-1388.02	1382.36	261.833	-1451.79	1199.11	146.72	-1135.4	1273.77	436.15	-1274.03	1423.96	521.82	-1199.7	1204.58	529.917	-1177.04	1110.72	547.421	-1211.23	922.329	495.103	-1210.61	848.203	563.154	-1175.14	848.947	535.716	-1191.63	752.152
768	0	325.634	-1460.79	1594.15	210.831	-1458.62	1596.57	335.25	-1288.12	1591.19	216.777	-1276.66	1595.05	270.458	-1247.65	1453.75	269.301	-1168.97	1217.85	258.124	-1400.37	1380.73	259.84	-1462.04	1196.02	148.786	-1147.36	1272.63	438.315	-1286.82	1422	523.884	-1212.63	1202.62	532.283	-1189.93	1108.59	549.169	-1225.27	920.205	496.236	-1224.34	845.576	564.762	-1189.53	846.553	537.185	-1206.22	749.972
769	0	327.958	-1473.23	1592.75	213.083	-1470.86	1595.17	337.738	-1300.67	1589.53	219.415	-1288.9	1593.67	273.008	-1259.84	1452.29	271.727	-1181.18	1216.26	259.898	-1412.66	1379.32	260.692	-1474.17	1194.71	151.079	-1159.35	1271.53	440.478	-1299.56	1419.86	525.862	-1225.65	1200.46	534.586	-1203.19	1106.57	551.156	-1239.5	918.221	498.486	-1239.64	844.132	566.686	-1204.3	844.469	538.832	-1221.54	747.865
770	0	330.47	-1485.68	1591.47	215.446	-1483.02	1594.01	340.521	-1313.14	1588.42	222.232	-1301.1	1592.33	275.485	-1271.97	1450.93	274.067	-1193.44	1214.69	261.659	-1425.01	1378.29	261.563	-1486.44	1193.74	153.427	-1171.27	1270.49	442.827	-1312.29	1418.15	528.242	-1238.81	1198.61	536.824	-1216.67	1104.47	553.129	-1253.93	916.298	500.547	-1254.64	842.385	568.624	-1219.23	842.204	540.875	-1237.46	746.061
771	0	332.823	-1498.21	1590.14	217.828	-1495.33	1592.82	343.359	-1325.64	1587.25	225.07	-1313.43	1591.48	278.171	-1284.11	1449.65	276.669	-1205.68	1213.28	263.389	-1437.33	1377.33	262.27	-1498.66	1192.85	156.014	-1183.08	1269.36	445.051	-1325.04	1416.04	530.566	-1252.3	1196.59	539.403	-1230.42	1102.35	555.276	-1268.91	914.124	502.61	-1270	840.327	570.639	-1234.66	839.847	543.068	-1254.27	744.017
772	0	335.224	-1510.81	1589.03	220.385	-1507.7	1591.89	346.016	-1338.29	1586.46	227.891	-1325.69	1591.04	280.766	-1296.02	1448.7	279.369	-1217.9	1212	265.141	-1449.64	1376.75	263.211	-1510.91	1192.37	158.762	-1194.95	1268.37	447.142	-1337.72	1414.08	532.844	-1266.11	1194.4	541.841	-1244.72	1100.08	557.629	-1284.24	911.952	504.822	-1286.09	838.358	572.771	-1250.56	837.519	545.475	-1271.65	741.999
773	0	337.701	-1523.18	1588.1	222.884	-1520	1591.13	348.831	-1350.74	1586.08	230.604	-1338.02	1590.99	283.194	-1308.1	1448.02	281.943	-1230.29	1211.2	266.744	-1461.8	1376.51	264.032	-1523.74	1192.31	161.544	-1206.9	1267.57	449.503	-1350.3	1412.89	535.337	-1280.06	1192.79	544.158	-1259.4	1098.04	560.06	-1300.03	910.298	507.151	-1302.29	836.788	574.944	-1266.8	835.543	548.126	-1289.52	740.602
774	0	340.374	-1535.53	1587.55	225.409	-1532.2	1590.94	351.711	-1363.07	1586.2	233.353	-1350.32	1591.2	285.637	-1320.14	1447.46	284.553	-1242.59	1210.65	268.503	-1473.94	1376.76	265.366	-1536.05	1192.73	164.339	-1218.8	1267.05	451.75	-1362.8	1412.11	537.753	-1294.47	1191.49	546.576	-1274.28	1096.53	562.529	-1315.82	909.097	509.229	-1318.55	835.405	577.393	-1283.36	833.951	551.062	-1308	739.575
[truncated: 69 more columns]

## Sheet: Sheet2
Devices
		025370 - Force			025370 - Moment			025370 - CoP			027571 - Force			027571 - Moment			027571 - CoP			037720 - Force			037720 - Moment			037720 - CoP
Frame	Sub Frame	Fx	Fy	Fz	Mx	My	Mz	Cx	Cy	Cz	Fx	Fy	Fz	Mx	My	Mz	Cx	Cy	Cz	Fx	Fy	Fz	Mx	My	Mz	Cx	Cy	Cz
		N	N	N	N.mm	N.mm	N.mm	mm	mm	mm	N	N	N	N.mm	N.mm	N.mm	mm	mm	mm	N	N	N	N.mm	N.mm	N.mm	mm	mm	mm
397	0	0.762068	1.19554	10.8017	1219.21	-37.3445	-206.911	200	300	0	0	0	0	0	0	0	200	903	0	0	0	0	0	0	0	603	903	0
397	1	2.59312	1.04295	10.1913	303.682	-281.485	21.9711	200	300	0	0	0	0	0	0	0	200	903	0	0	0	0	0	0	0	603	903	0
397	2	0	0	0	0	0	0	200	300	0	0	0	0	0	0	0	200	903	0	0	0	0	0	0	0	603	903	0
397	3	-0.611223	1.6533	11.7172	486.787	-647.696	-298.464	200	300	0	0	0	0	0	0	0	200	903	0	0	0	0	0	0	0	603	903	0
397	4	0	0	0	0	0	0	200	300	0	0	0	0	0	0	0	200	903	0	0	0	0	0	0	0	603	903	0
397	5	0.60948	2.41624	11.7172	669.893	-159.415	-115.358	200	300	0	0	0	0	0	0	0	200	903	0	0	0	0	0	0	0	603	903	0
397	6	0.151716	1.34812	11.1068	669.893	-220.45	-206.911	200	300	0	0	0	0	0	0	0	200	903	0	0	0	0	0	0	0	603	903	0
397	7	0	0	0	0	0	0	200	300	0	0	0	0	0	0	0	200	903	0	0	0	0	0	0	0	603	903	0
397	8	1.06724	1.04295	10.8017	303.682	-342.52	-115.358	200	300	0	0	0	0	0	0	0	200	903	0	0	0	0	0	0	0	603	903	0
397	9	0	0	0	0	0	0	200	300	0	0	0	0	0	0	0	200	903	0	0	0	0	0	0	0	603	903	0
398	0	0.151716	1.95848	11.412	303.682	-220.45	-206.911	200	300	0	0	0	0	0	0	0	200	903	0	0	0	0	0	0	0	603	903	0
398	1	-0.000871718	2.41624	10.1913	-62.5292	84.7258	-206.911	200	300	0	0	0	0	0	0	0	200	903	0	0	0	0	0	0	0	603	903	0
398	2	2.44053	2.26365	10.4965	578.34	-98.3797	-344.24	200	300	0	0	0	0	0	0	0	200	903	0	0	0	0	0	0	0	603	903	0
398	3	-0.15346	1.50071	10.4965	1219.21	-98.3797	-206.911	200	300	0	0	0	0	0	0	0	200	903	0	0	0	0	0	0	0	603	903	0
398	4	0.456892	0.585184	10.8017	486.787	-525.626	250.853	200	300	0	0	0	0	0	0	0	200	903	0	0	0	0	0	0	0	603	903	0
398	5	0.60948	1.50071	10.4965	120.576	-647.696	-298.464	200	300	0	0	0	0	0	0	0	200	903	0	0	0	0	0	0	0	603	903	0
398	6	0	0	0	0	0	0	200	300	0	0	0	0	0	0	0	200	903	0	0	0	0	0	0	0	603	903	0
398	7	0	0	0	0	0	0	200	300	0	0	0	0	0	0	0	200	903	0	0	0	0	0	0	0	603	903	0
398	8	0	0	0	0	0	0	200	300	0	0	0	0	0	0	0	200	903	0	0	0	0	0	0	0	603	903	0
398	9	0	0	0	0	0	0	200	300	0	0	0	0	0	0	0	200	903	0	0	0	0	0	0	0	603	903	0
399	0	-0.611223	1.34812	10.8017	852.998	-281.485	-69.5817	200	300	0	0	0	0	0	0	0	200	903	0	0	0	0	0	0	0	603	903	0
399	1	0.456892	1.19554	10.4965	1127.66	-220.45	-298.464	200	300	0	0	0	0	0	0	0	200	903	0	0	0	0	0	0	0	603	903	0
399	2	0.914656	0.432597	10.4965	1036.1	-37.3445	-298.464	200	300	0	0	0	0	0	0	0	200	903	0	0	0	0	0	0	0	603	903	0
399	3	0.456892	1.34812	10.1913	486.787	23.6906	-252.687	200	300	0	0	0	0	0	0	0	200	903	0	0	0	0	0	0	0	603	903	0
399	4	0	0	0	0	0	0	200	300	0	0	0	0	0	0	0	200	903	0	0	0	0	0	0	0	603	903	0
399	5	0.304304	1.95848	10.1913	29.0235	-220.45	113.524	200	300	0	0	0	0	0	0	0	200	903	0	0	0	0	0	0	0	603	903	0
399	6	0	0	0	0	0	0	200	300	0	0	0	0	0	0	0	200	903	0	0	0	0	0	0	0	603	903	0
399	7	-0.306047	2.26365	11.412	852.998	-220.45	-69.5817	200	300	0	0	0	0	0	0	0	200	903	0	0	0	0	0	0	0	603	903	0
399	8	0.304304	1.6533	11.412	852.998	-159.415	-298.464	200	300	0	0	0	0	0	0	0	200	903	0	0	0	0	0	0	0	603	903	0
399	9	0.914656	1.04295	12.0224	852.998	-159.415	-344.24	200	300	0	0	0	0	0	0	0	200	903	0	0	0	0	0	0	0	603	903	0
400	0	1.52501	1.19554	10.4965	578.34	-281.485	113.524	200	300	0	0	0	0	0	0	0	200	903	0	0	0	0	0	0	0	603	903	0
400	1	1.6776	1.19554	10.8017	303.682	-220.45	-69.5817	200	300	0	0	0	0	0	0	0	200	903	0	0	0	0	0	0	0	603	903	0
400	2	0	0	0	0	0	0	200	300	0	0	0	0	0	0	0	200	903	0	0	0	0	0	0	0	603	903	0
400	3	0.914656	1.95848	12.3275	761.445	-281.485	-252.687	200	300	0	0	0	0	0	0	0	200	903	0	0	0	0	0	0	0	603	903	0
400	4	0.151716	1.80589	10.8017	1768.53	-464.591	-23.8053	200	300	0	0	0	0	0	0	0	200	903	0	0	0	0	0	0	0	603	903	0
400	5	0.762068	2.11106	12.0224	669.893	84.7258	-252.687	200	300	0	0	0	0	0	0	0	200	903	0	0	0	0	0	0	0	603	903	0
400	6	0.914656	1.34812	11.1068	578.34	23.6906	-115.358	200	300	0	0	0	0	0	0	0	200	903	0	0	0	0	0	0	0	603	903	0
400	7	0	0	0	0	0	0	200	300	0	0	0	0	0	0	0	200	903	0	0	0	0	0	0	0	603	903	0
400	8	0.151716	1.04295	11.412	212.129	-37.3445	-115.358	200	300	0	0	0	0	0	0	0	200	903	0	0	0	0	0	0	0	603	903	0
400	9	0	0	0	0	0	0	200	300	0	0	0	0	0	0	0	200	903	0	0	0	0	0	0	0	603	903	0
401	0	-0.611223	1.95848	11.1068	395.235	-647.696	-161.134	200	300	0	0	0	0	0	0	0	200	903	0	0	0	0	0	0	0	603	903	0
401	1	-0.000871718	2.56883	10.4965	486.787	145.761	-298.464	200	300	0	0	0	0	0	0	0	200	903	0	0	0	0	0	0	0	603	903	0
401	2	1.37242	2.11106	12.3275	852.998	84.7258	-206.911	200	300	0	0	0	0	0	0	0	200	903	0	0	0	0	0	0	0	603	903	0
401	3	1.98277	1.19554	10.4965	1219.21	-403.556	-298.464	200	300	0	0	0	0	0	0	0	200	903	0	0	0	0	0	0	0	603	903	0
401	4	0	0	0	0	0	0	200	300	0	0	0	0	0	0	0	200	903	0	0	0	0	0	0	0	603	903	0
401	5	-0.000871718	0.89036	10.4965	212.129	23.6906	-115.358	200	300	0	0	0	0	0	0	0	200	903	0	0	0	0	0	0	0	603	903	0
401	6	0	0	0	0	0	0	200	300	0	0	0	0	0	0	0	200	903	0	0	0	0	0	0	0	603	903	0
401	7	0.304304	2.26365	11.1068	303.682	-37.3445	-161.134	200	300	0	0	0	0	0	0	0	200	903	0	0	0	0	0	0	0	603	903	0
401	8	0.914656	1.04295	11.7172	120.576	-159.415	-69.5817	200	300	0	0	0	0	0	0	0	200	903	0	0	0	0	0	0	0	603	903	0
401	9	1.06724	1.50071	10.1913	486.787	-403.556	-69.5817	200	300	0	0	0	0	0	0	0	200	903	0	0	0	0	0	0	0	603	903	0
402	0	0	0	0	0	0	0	200	300	0	0	0	0	0	0	0	200	903	0	0	0	0	0	0	0	603	903	0
402	1	0	0	0	0	0	0	200	300	0	0	0	0	0	0	0	200	903	0	0	0	0	0	0	0	603	903	0
402	2	0	0	0	0	0	0	200	300	0	0	0	0	0	0	0	200	903	0	0	0	0	0	0	0	603	903	0
402	3	-0.458635	1.34812	12.6327	303.682	-281.485	-298.464	200	300	0	0	0	0	0	0	0	200	903	0	0	0	0	0	0	0	603	903	0
402	4	-0.000871718	0.89036	11.412	29.0235	-37.3445	-115.358	200	300	0	0	0	0	0	0	0	200	903	0	0	0	0	0	0	0	603	903	0
402	5	1.98277	1.6533	10.1913	29.0235	-464.591	-161.134	200	300	0	0	0	0	0	0	0	200	903	0	0	0	0	0	0	0	603	903	0
402	6	0.762068	1.04295	10.4965	120.576	-98.3797	-206.911	200	300	0	0	0	0	0	0	0	200	903	0	0	0	0	0	0	0	603	903	0
402	7	0	0	0	0	0	0	200	300	0	0	0	0	0	0	0	200	903	0	0	0	0	0	0	0	603	903	0
402	8	0	0	0	0	0	0	200	300	0	0	0	0	0	0	0	200	903	0	0	0	0	0	0	0	603	903	0
402	9	-0.000871718	1.19554	10.1913	1036.1	-98.3797	-435.793	200	300	0	0	0	0	0	0	0	200	903	0	0	0	0	0	0	0	603	903	0
403	0	2.28795	1.34812	9.88614	578.34	84.7258	-298.464	200	300	0	0	0	0	0	0	0	200	903	0	0	0	0	0	0	0	603	903	0
403	1	0.304304	0.737772	10.8017	1219.21	-159.415	113.524	200	300	0	0	0	0	0	0	0	200	903	0	0	0	0	0	0	0	603	903	0
403	2	1.21983	1.04295	10.1913	303.682	-159.415	-69.5817	200	300	0	0	0	0	0	0	0	200	903	0	0	0	0	0	0	0	603	903	0
403	3	1.37242	2.26365	10.1913	1219.21	-159.415	-161.134	200	300	0	0	0	0	0	0	0	200	903	0	0	0	0	0	0	0	603	903	0
403	4	0	0	0	0	0	0	200	300	0	0	0	0	0	0	0	200	903	0	0	0	0	0	0	0	603	903	0
403	5	0.304304	1.80589	12.3275	29.0235	-281.485	205.077	200	300	0	0	0	0	0	0	0	200	903	0	0	0	0	0	0	0	603	903	0
403	6	-0.000871718	2.11106	9.88614	852.998	-525.626	113.524	200	300	0	0	0	0	0	0	0	200	903	0	0	0	0	0	0	0	603	903	0
403	7	1.37242	1.6533	9.88614	761.445	-403.556	-69.5817	200	300	0	0	0	0	0	0	0	200	903	0	0	0	0	0	0	0	603	903	0
403	8	-0.15346	1.34812	10.4965	395.235	-403.556	-161.134	200	300	0	0	0	0	0	0	0	200	903	0	0	0	0	0	0	0	603	903	0
403	9	0.456892	1.34812	10.8017	578.34	-220.45	-344.24	200	300	0	0	0	0	0	0	0	200	903	0	0	0	0	0	0	0	603	903	0
404	0	0.60948	0.737772	10.8017	578.34	-403.556	-298.464	200	300	0	0	0	0	0	0	0	200	903	0	0	0	0	0	0	0	603	903	0
404	1	0.914656	1.95848	9.88614	486.787	-159.415	-344.24	200	300	0	0	0	0	0	0	0	200	903	0	0	0	0	0	0	0	603	903	0
404	2	1.6776	2.56883	14.4638	486.787	206.796	-23.8053	200	300	0	0	0	0	0	0	0	200	903	0	0	0	0	0	0	0	603	903	0
404	3	0	0	0	0	0	0	200	300	0	0	0	0	0	0	0	200	903	0	0	0	0	0	0	0	603	903	0
404	4	1.52501	1.04295	11.412	1036.1	-708.731	-161.134	200	300	0	0	0	0	0	0	0	200	903	0	0	0	0	0	0	0	603	903	0
404	5	-0.763811	1.34812	10.8017	669.893	23.6906	-115.358	200	300	0	0	0	0	0	0	0	200	903	0	0	0	0	0	0	0	603	903	0
404	6	0.914656	1.50071	12.0224	669.893	-159.415	-252.687	200	300	0	0	0	0	0	0	0	200	903	0	0	0	0	0	0	0	603	903	0
404	7	1.21983	1.50071	11.412	395.235	-281.485	-298.464	200	300	0	0	0	0	0	0	0	200	903	0	0	0	0	0	0	0	603	903	0
404	8	1.52501	1.95848	10.8017	303.682	-37.3445	-206.911	200	300	0	0	0	0	0	0	0	200	903	0	0	0	0	0	0	0	603	903	0
404	9	0	0	0	0	0	0	200	300	0	0	0	0	0	0	0	200	903	0	0	0	0	0	0	0	603	903	0
405	0	0	0	0	0	0	0	200	300	0	0	0	0	0	0	0	200	903	0	0	0	0	0	0	0	603	903	0
405	1	0	0	0	0	0	0	200	300	0	0	0	0	0	0	0	200	903	0	0	0	0	0	0	0	603	903	0
405	2	-0.15346	1.80589	10.4965	944.551	23.6906	-115.358	200	300	0	0	0	0	0	0	0	200	903	0	0	0	0	0	0	0	603	903	0
405	3	-0.306047	0.280009	11.412	486.787	-342.52	-252.687	200	300	0	0	0	0	0	0	0	200	903	0	0	0	0	0	0	0	603	903	0
405	4	0.762068	1.19554	11.412	-62.5292	-220.45	-206.911	200	300	0	0	0	0	0	0	0	200	903	0	0	0	0	0	0	0	603	903	0
405	5	1.06724	2.11106	11.1068	944.551	84.7258	-161.134	200	300	0	0	0	0	0	0	0	200	903	0	0	0	0	0	0	0	603	903	0
405	6	0	0	0	0	0	0	200	300	0	0	0	0	0	0	0	200	903	0	0	0	0	0	0	0	603	903	0
405	7	0	0	0	0	0	0	200	300	0	0	0	0	0	0	0	200	903	0	0	0	0	0	0	0	603	903	0
405	8	0	0	0	0	0	0	200	300	0	0	0	0	0	0	0	200	903	0	0	0	0	0	0	0	603	903	0
405	9	-0.15346	1.50071	10.1913	669.893	-403.556	-527.345	200	300	0	0	0	0	0	0	0	200	903	0	0	0	0	0	0	0	603	903	0
406	0	-0.15346	-0.0251671	10.4965	578.34	-342.52	-161.134	200	300	0	0	0	0	0	0	0	200	903	0	0	0	0	0	0	0	603	903	0
406	1	0.151716	0.737772	12.6327	486.787	-403.556	-23.8053	200	300	0	0	0	0	0	0	0	200	903	0	0	0	0	0	0	0	603	903	0
406	2	0.762068	2.26365	10.4965	1127.66	-342.52	-161.134	200	300	0	0	0	0	0	0	0	200	903	0	0	0	0	0	0	0	603	903	0
406	3	1.6776	1.95848	10.1913	578.34	-403.556	-206.911	200	300	0	0	0	0	0	0	0	200	903	0	0	0	0	0	0	0	603	903	0
406	4	0.60948	2.11106	10.8017	669.893	-220.45	-206.911	200	300	0	0	0	0	0	0	0	200	903	0	0	0	0	0	0	0	603	903	0
406	5	2.44053	1.6533	12.9379	578.34	-281.485	-298.464	200	300	0	0	0	0	0	0	0	200	903	0	0	0	0	0	0	0	603	903	0
406	6	0.60948	0.89036	10.4965	852.998	-98.3797	-206.911	200	300	0	0	0	0	0	0	0	200	903	0	0	0	0	0	0	0	603	903	0
406	7	1.21983	1.50071	10.4965	578.34	84.7258	250.853	200	300	0	0	0	0	0	0	0	200	903	0	0	0	0	0	0	0	603	903	0
406	8	0	0	0	0	0	0	200	300	0	0	0	0	0	0	0	200	903	0	0	0	0	0	0	0	603	903	0
406	9	0.151716	1.50071	11.1068	303.682	-342.52	-481.569	200	300	0	0	0	0	0	0	0	200	903	0	0	0	0	0	0	0	603	903	0
407	0	0.60948	0.585184	11.412	669.893	-220.45	-298.464	200	300	0	0	0	0	0	0	0	200	903	0	0	0	0	0	0	0	603	903	0
407	1	1.06724	2.26365	10.8017	852.998	23.6906	-344.24	200	300	0	0	0	0	0	0	0	200	903	0	0	0	0	0	0	0	603	903	0
407	2	0	0	0	0	0	0	200	300	0	0	0	0	0	0	0	200	903	0	0	0	0	0	0	0	603	903	0
407	3	0	0	0	0	0	0	200	300	0	0	0	0	0	0	0	200	903	0	0	0	0	0	0	0	603	903	0
407	4	-0.15346	1.50071	9.88614	303.682	-281.485	-115.358	200	300	0	0	0	0	0	0	0	200	903	0	0	0	0	0	0	0	603	903	0
407	5	-0.306047	1.04295	10.8017	578.34	-281.485	-206.911	200	300	0	0	0	0	0	0	0	200	903	0	0	0	0	0	0	0	603	903	0
407	6	-0.306047	1.80589	13.5482	578.34	-220.45	-344.24	200	300	0	0	0	0	0	0	0	200	903	0	0	0	0	0	0	0	603	903	0
407	7	1.37242	2.26365	10.8017	212.129	23.6906	-115.358	200	300	0	0	0	0	0	0	0	200	903	0	0	0	0	0	0	0	603	903	0
407	8	1.52501	1.80589	10.8017	944.551	-342.52	-206.911	200	300	0	0	0	0	0	0	0	200	903	0	0	0	0	0	0	0	603	903	0
407	9	0	0	0	0	0	0	200	300	0	0	0	0	0	0	0	200	903	0	0	0	0	0	0	0	603	903	0
408	0	0.60948	-0.177755	11.1068	578.34	-464.591	-161.134	200	300	0	0	0	0	0	0	0	200	903	0	0	0	0	0	0	0	603	903	0
408	1	0	0	0	0	0	0	200	300	0	0	0	0	0	0	0	200	903	0	0	0	0	0	0	0	603	903	0
408	2	0.762068	2.41624	10.4965	1493.87	23.6906	-298.464	200	300	0	0	0	0	0	0	0	200	903	0	0	0	0	0	0	0	603	903	0
408	3	0.151716	1.95848	11.412	486.787	84.7258	-481.569	200	300	0	0	0	0	0	0	0	200	903	0	0	0	0	0	0	0	603	903	0
408	4	0.60948	1.95848	12.0224	303.682	23.6906	-23.8053	200	300	0	0	0	0	0	0	0	200	903	0	0	0	0	0	0	0	603	903	0
408	5	1.21983	1.50071	10.8017	395.235	-647.696	-69.5817	200	300	0	0	0	0	0	0	0	200	903	0	0	0	0	0	0	0	603	903	0
408	6	0	0	0	0	0	0	200	300	0	0	0	0	0	0	0	200	903	0	0	0	0	0	0	0	603	903	0
408	7	0	0	0	0	0	0	200	300	0	0	0	0	0	0	0	200	903	0	0	0	0	0	0	0	603	903	0
408	8	0	0	0	0	0	0	200	300	0	0	0	0	0	0	0	200	903	0	0	0	0	0	0	0	603	903	0
408	9	0.151716	1.6533	10.1913	1676.97	-159.415	-69.5817	200	300	0	0	0	0	0	0	0	200	903	0	0	0	0	0	0	0	603	903	0
409	0	0.304304	1.6533	11.7172	578.34	-159.415	-69.5817	200	300	0	0	0	0	0	0	0	200	903	0	0	0	0	0	0	0	603	903	0
409	1	-0.000871718	1.6533	11.412	669.893	-891.837	21.9711	200	300	0	0	0	0	0	0	0	200	903	0	0	0	0	0	0	0	603	903	0
409	2	0.914656	1.34812	10.1913	944.551	-37.3445	-206.911	200	300	0	0	0	0	0	0	0	200	903	0	0	0	0	0	0	0	603	903	0
409	3	1.98277	0.89036	9.88614	1036.1	-159.415	-298.464	200	300	0	0	0	0	0	0	0	200	903	0	0	0	0	0	0	0	603	903	0
409	4	0.914656	-0.0251671	10.1913	944.551	-403.556	-161.134	200	300	0	0	0	0	0	0	0	200	903	0	0	0	0	0	0	0	603	903	0
409	5	0	0	0	0	0	0	200	300	0	0	0	0	0	0	0	200	903	0	0	0	0	0	0	0	603	903	0
409	6	0.304304	1.95848	9.88614	1127.66	-281.485	-23.8053	200	300	0	0	0	0	0	0	0	200	903	0	0	0	0	0	0	0	603	903	0
409	7	0.151716	2.11106	9.88614	395.235	-464.591	-23.8053	200	300	0	0	0	0	0	0	0	200	903	0	0	0	0	0	0	0	603	903	0
409	8	-0.000871718	2.11106	13.2431	669.893	-342.52	113.524	200	300	0	0	0	0	0	0	0	200	903	0	0	0	0	0	0	0	603	903	0
409	9	0.60948	1.95848	11.1068	761.445	23.6906	-435.793	200	300	0	0	0	0	0	0	0	200	903	0	0	0	0	0	0	0	603	903	0
410	0	2.8983	1.50071	10.4965	944.551	-159.415	-435.793	200	300	0	0	0	0	0	0	0	200	903	0	0	0	0	0	0	0	603	903	0
410	1	0	0	0	0	0	0	200	300	0	0	0	0	0	0	0	200	903	0	0	0	0	0	0	0	603	903	0
410	2	0.762068	1.34812	10.1913	303.682	389.902	-252.687	200	300	0	0	0	0	0	0	0	200	903	0	0	0	0	0	0	0	603	903	0
410	3	0.456892	1.6533	9.88614	852.998	23.6906	-69.5817	200	300	0	0	0	0	0	0	0	200	903	0	0	0	0	0	0	0	603	903	0
410	4	0.151716	1.50071	11.7172	29.0235	-708.731	-252.687	200	300	0	0	0	0	0	0	0	200	903	0	0	0	0	0	0	0	603	903	0
410	5	-0.458635	1.80589	13.2431	761.445	-37.3445	67.7474	200	300	0	0	0	0	0	0	0	200	903	0	0	0	0	0	0	0	603	903	0
410	6	1.21983	1.80589	10.8017	1036.1	-98.3797	-252.687	200	300	0	0	0	0	0	0	0	200	903	0	0	0	0	0	0	0	603	903	0
410	7	2.8983	1.19554	9.88614	1127.66	-37.3445	-206.911	200	300	0	0	0	0	0	0	0	200	903	0	0	0	0	0	0	0	603	903	0
410	8	1.37242	-0.330343	10.4965	578.34	23.6906	67.7474	200	300	0	0	0	0	0	0	0	200	903	0	0	0	0	0	0	0	603	903	0
410	9	0	0	0	0	0	0	200	300	0	0	0	0	0	0	0	200	903	0	0	0	0	0	0	0	603	903	0
411	0	0	0	0	0	0	0	200	300	0	0	0	0	0	0	0	200	903	0	0	0	0	0	0	0	603	903	0
411	1	-0.611223	1.80589	10.8017	486.787	-220.45	-206.911	200	300	0	0	0	0	0	0	0	200	903	0	0	0	0	0	0	0	603	903	0
411	2	-0.000871718	2.11106	11.1068	1127.66	328.866	-115.358	200	300	0	0	0	0	0	0	0	200	903	0	0	0	0	0	0	0	603	903	0
411	3	1.06724	2.56883	11.412	852.998	-220.45	-390.016	200	300	0	0	0	0	0	0	0	200	903	0	0	0	0	0	0	0	603	903	0
411	4	0	0	0	0	0	0	200	300	0	0	0	0	0	0	0	200	903	0	0	0	0	0	0	0	603	903	0
411	5	0	0	0	0	0	0	200	300	0	0	0	0	0	0	0	200	903	0	0	0	0	0	0	0	603	903	0
411	6	0	0	0	0	0	0	200	300	0	0	0	0	0	0	0	200	903	0	0	0	0	0	0	0	603	903	0
411	7	0	0	0	0	0	0	200	300	0	0	0	0	0	0	0	200	903	0	0	0	0	0	0	0	603	903	0
411	8	1.21983	2.72141	11.1068	303.682	-220.45	-390.016	200	300	0	0	0	0	0	0	0	200	903	0	0	0	0	0	0	0	603	903	0
411	9	-0.000871718	2.11106	12.3275	761.445	-281.485	-115.358	200	300	0	0	0	0	0	0	0	200	903	0	0	0	0	0	0	0	603	903	0
412	0	0.914656	2.41624	10.8017	578.34	-220.45	-344.24	200	300	0	0	0	0	0	0	0	200	903	0	0	0	0	0	0	0	603	903	0
412	1	1.37242	1.19554	10.8017	1036.1	84.7258	-69.5817	200	300	0	0	0	0	0	0	0	200	903	0	0	0	0	0	0	0	603	903	0
412	2	0	0	0	0	0	0	200	300	0	0	0	0	0	0	0	200	903	0	0	0	0	0	0	0	603	903	0
412	3	0	0	0	0	0	0	200	300	0	0	0	0	0	0	0	200	903	0	0	0	0	0	0	0	603	903	0
412	4	0	0	0	0	0	0	200	300	0	0	0	0	0	0	0	200	903	0	0	0	0	0	0	0	603	903	0
412	5	0.151716	2.26365	9.88614	303.682	145.761	-69.5817	200	300	0	0	0	0	0	0	0	200	903	0	0	0	0	0	0	0	603	903	0
412	6	0.456892	0.432597	11.1068	395.235	-647.696	250.853	200	300	0	0	0	0	0	0	0	200	903	0	0	0	0	0	0	0	603	903	0
412	7	0	0	0	0	0	0	200	300	0	0	0	0	0	0	0	200	903	0	0	0	0	0	0	0	603	903	0
412	8	0.762068	0.89036	10.8017	852.998	-159.415	-298.464	200	300	0	0	0	0	0	0	0	200	903	0	0	0	0	0	0	0	603	903	0
412	9	-0.15346	1.19554	10.4965	578.34	-281.485	-206.911	200	300	0	0	0	0	0	0	0	200	903	0	0	0	0	0	0	0	603	903	0
413	0	0	0	0	0	0	0	200	300	0	0	0	0	0	0	0	200	903	0	0	0	0	0	0	0	603	903	0
413	1	0	0	0	0	0	0	200	300	0	0	0	0	0	0	0	200	903	0	0	0	0	0	0	0	603	903	0
413	2	0.456892	2.26365	9.88614	669.893	-220.45	-252.687	200	300	0	0	0	0	0	0	0	200	903	0	0	0	0	0	0	0	603	903	0
413	3	0	0	0	0	0	0	200	300	0	0	0	0	0	0	0	200	903	0	0	0	0	0	0	0	603	903	0
413	4	-0.611223	2.11106	10.1913	578.34	-342.52	-206.911	200	300	0	0	0	0	0	0	0	200	903	0	0	0	0	0	0	0	603	903	0
413	5	-0.306047	2.26365	13.2431	1127.66	-342.52	-344.24	200	300	0	0	0	0	0	0	0	200	903	0	0	0	0	0	0	0	603	903	0
413	6	1.21983	1.80589	12.0224	1127.66	-281.485	-161.134	200	300	0	0	0	0	0	0	0	200	903	0	0	0	0	0	0	0	603	903	0
413	7	2.44053	1.19554	10.4965	1310.76	84.7258	-115.358	200	300	0	0	0	0	0	0	0	200	903	0	0	0	0	0	0	0	603	903	0
413	8	0	0	0	0	0	0	200	300	0	0	0	0	0	0	0	200	903	0	0	0	0	0	0	0	603	903	0
413	9	0.456892	1.50071	12.3275	578.34	-464.591	-206.911	200	300	0	0	0	0	0	0	0	200	903	0	0	0	0	0	0	0	603	903	0
414	0	0	0	0	0	0	0	200	300	0	0	0	0	0	0	0	200	903	0	0	0	0	0	0	0	603	903	0
414	1	1.06724	1.95848	10.8017	944.551	-403.556	-344.24	200	300	0	0	0	0	0	0	0	200	903	0	0	0	0	0	0	0	603	903	0
414	2	-0.15346	-0.177755	10.4965	1219.21	206.796	-252.687	200	300	0	0	0	0	0	0	0	200	903	0	0	0	0	0	0	0	603	903	0
414	3	0.60948	1.80589	10.8017	669.893	-159.415	-390.016	200	300	0	0	0	0	0	0	0	200	903	0	0	0	0	0	0	0	603	903	0
414	4	1.37242	1.6533	11.412	29.0235	84.7258	-161.134	200	300	0	0	0	0	0	0	0	200	903	0	0	0	0	0	0	0	603	903	0
414	5	0.762068	0.89036	10.8017	29.0235	-220.45	159.3	200	300	0	0	0	0	0	0	0	200	903	0	0	0	0	0	0	0	603	903	0
414	6	0.762068	2.11106	10.1913	944.551	206.796	-252.687	200	300	0	0	0	0	0	0	0	200	903	0	0	0	0	0	0	0	603	903	0
414	7	0	0	0	0	0	0	200	300	0	0	0	0	0	0	0	200	903	0	0	0	0	0	0	0	603	903	0
414	8	1.37242	1.95848	10.8017	944.551	-403.556	-298.464	200	300	0	0	0	0	0	0	0	200	903	0	0	0	0	0	0	0	603	903	0
414	9	-0.000871718	1.19554	13.2431	303.682	84.7258	-390.016	200	300	0	0	0	0	0	0	0	200	903	0	0	0	0	0	0	0	603	903	0
415	0	0.304304	0.737772	12.6327	578.34	-220.45	-206.911	200	300	0	0	0	0	0	0	0	200	903	0	0	0	0	0	0	0	603	903	0
415	1	0.60948	0.737772	11.1068	578.34	-220.45	67.7474	200	300	0	0	0	0	0	0	0	200	903	0	0	0	0	0	0	0	603	903	0
415	2	0	0	0	0	0	0	200	300	0	0	0	0	0	0	0	200	903	0	0	0	0	0	0	0	603	903	0
415	3	0	0	0	0	0	0	200	300	0	0	0	0	0	0	0	200	903	0	0	0	0	0	0	0	603	903	0
415	4	0	0	0	0	0	0	200	300	0	0	0	0	0	0	0	200	903	0	0	0	0	0	0	0	603	903	0
415	5	-0.458635	2.11106	10.8017	486.787	-159.415	-344.24	200	300	0	0	0	0	0	0	0	200	903	0	0	0	0	0	0	0	603	903	0
415	6	-0.000871718	1.34812	11.412	1402.31	84.7258	-161.134	200	300	0	0	0	0	0	0	0	200	903	0	0	0	0	0	0	0	603	903	0
415	7	-0.15346	0.89036	13.5482	669.893	-342.52	159.3	200	300	0	0	0	0	0	0	0	200	903	0	0	0	0	0	0	0	603	903	0
415	8	0.914656	1.34812	11.1068	303.682	-98.3797	21.9711	200	300	0	0	0	0	0	0	0	200	903	0	0	0	0	0	0	0	603	903	0
415	9	0	0	0	0	0	0	200	300	0	0	0	0	0	0	0	200	903	0	0	0	0	0	0	0	603	903	0
416	0	0.914656	1.95848	10.1913	395.235	-769.766	-344.24	200	300	0	0	0	0	0	0	0	200	903	0	0	0	0	0	0	0	603	903	0
416	1	0	0	0	0	0	0	200	300	0	0	0	0	0	0	0	200	903	0	0	0	0	0	0	0	603	903	0
416	2	0	0	0	0	0	0	200	300	0	0	0	0	0	0	0	200	903	0	0	0	0	0	0	0	603	903	0
416	3	-0.000871718	1.50071	11.412	852.998	-525.626	-161.134	200	300	0	0	0	0	0	0	0	200	903	0	0	0	0	0	0	0	603	903	0
416	4	-0.000871718	-0.330343	11.1068	1036.1	-281.485	-69.5817	200	300	0	0	0	0	0	0	0	200	903	0	0	0	0	0	0	0	603	903	0
416	5	0.60948	1.04295	10.8017	486.787	23.6906	-298.464	200	300	0	0	0	0	0	0	0	200	903	0	0	0	0	0	0	0	603	903	0
416	6	2.59312	2.41624	9.58096	761.445	84.7258	-298.464	200	300	0	0	0	0	0	0	0	200	903	0	0	0	0	0	0	0	603	903	0
416	7	1.37242	1.80589	10.1913	486.787	84.7258	205.077	200	300	0	0	0	0	0	0	0	200	903	0	0	0	0	0	0	0	603	903	0
416	8	0	0	0	0	0	0	200	300	0	0	0	0	0	0	0	200	903	0	0	0	0	0	0	0	603	903	0
416	9	-0.000871718	1.80589	10.1913	761.445	-220.45	-298.464	200	300	0	0	0	0	0	0	0	200	903	0	0	0	0	0	0	0	603	903	0
417	0	0.151716	1.34812	11.1068	944.551	-342.52	-161.134	200	300	0	0	0	0	0	0	0	200	903	0	0	0	0	0	0	0	603	903	0
417	1	-0.15346	1.6533	11.412	852.998	23.6906	-206.911	200	300	0	0	0	0	0	0	0	200	903	0	0	0	0	0	0	0	603	903	0
417	2	0.304304	1.95848	11.1068	486.787	-37.3445	-161.134	200	300	0	0	0	0	0	0	0	200	903	0	0	0	0	0	0	0	603	903	0
417	3	0.762068	1.95848	11.7172	395.235	23.6906	-298.464	200	300	0	0	0	0	0	0	0	200	903	0	0	0	0	0	0	0	603	903	0
417	4	0	0	0	0	0	0	200	300	0	0	0	0	0	0	0	200	903	0	0	0	0	0	0	0	603	903	0
417	5	1.06724	0.89036	11.7172	120.576	-281.485	-161.134	200	300	0	0	0	0	0	0	0	200	903	0	0	0	0	0	0	0	603	903	0
417	6	0	0	0	0	0	0	200	300	0	0	0	0	0	0	0	200	903	0	0	0	0	0	0	0	603	903	0
417	7	0	0	0	0	0	0	200	300	0	0	0	0	0	0	0	200	903	0	0	0	0	0	0	0	603	903	0
417	8	0.456892	1.19554	10.1913	852.998	-342.52	-390.016	200	300	0	0	0	0	0	0	0	200	903	0	0	0	0	0	0	0	603	903	0
417	9	0.304304	1.04295	12.9379	669.893	-220.45	-344.24	200	300	0	0	0	0	0	0	0	200	903	0	0	0	0	0	0	0	603	903	0
418	0	0.456892	1.95848	10.4965	303.682	84.7258	-23.8053	200	300	0	0	0	0	0	0	0	200	903	0	0	0	0	0	0	0	603	903	0
418	1	0	0	0	0	0	0	200	300	0	0	0	0	0	0	0	200	903	0	0	0	0	0	0	0	603	903	0
418	2	0	0	0	0	0	0	200	300	0	0	0	0	0	0	0	200	903	0	0	0	0	0	0	0	603	903	0
418	3	0	0	0	0	0	0	200	300	0	0	0	0	0	0	0	200	903	0	0	0	0	0	0	0	603	903	0
418	4	0	0	0	0	0	0	200	300	0	0	0	0	0	0	0	200	903	0	0	0	0	0	0	0	603	903	0
418	5	0.304304	0.280009	11.412	578.34	-220.45	67.7474	200	300	0	0	0	0	0	0	0	200	903	0	0	0	0	0	0	0	603	903	0
418	6	-0.306047	1.19554	13.2431	120.576	-159.415	250.853	200	300	0	0	0	0	0	0	0	200	903	0	0	0	0	0	0	0	603	903	0
418	7	0	0	0	0	0	0	200	300	0	0	0	0	0	0	0	200	903	0	0	0	0	0	0	0	603	903	0
418	8	0	0	0	0	0	0	200	300	0	0	0	0	0	0	0	200	903	0	0	0	0	0	0	0	603	903	0
418	9	0	0	0	0	0	0	200	300	0	0	0	0	0	0	0	200	903	0	0	0	0	0	0	0	603	903	0
419	0	0	0	0	0	0	0	200	300	0	0	0	0	0	0	0	200	903	0	0	0	0	0	0	0	603	903	0
419	1	0	0	0	0	0	0	200	300	0	0	0	0	0	0	0	200	903	0	0	0	0	0	0	0	603	903	0
419	2	0.762068	1.50071	12.6327	578.34	-220.45	-252.687	200	300	0	0	0	0	0	0	0	200	903	0	0	0	0	0	0	0	603	903	0
419	3	0.304304	1.19554	11.412	-62.5292	206.796	21.9711	200	300	0	0	0	0	0	0	0	200	903	0	0	0	0	0	0	0	603	903	0
419	4	1.06724	0.89036	10.1913	29.0235	-342.52	-115.358	200	300	0	0	0	0	0	0	0	200	903	0	0	0	0	0	0	0	603	903	0
419	5	1.21983	1.95848	10.8017	578.34	-281.485	-161.134	200	300	0	0	0	0	0	0	0	200	903	0	0	0	0	0	0	0	603	903	0
419	6	1.06724	2.11106	9.88614	1036.1	84.7258	-206.911	200	300	0	0	0	0	0	0	0	200	903	0	0	0	0	0	0	0	603	903	0
419	7	0.914656	1.95848	9.88614	761.445	-159.415	-206.911	200	300	0	0	0	0	0	0	0	200	903	0	0	0	0	0	0	0	603	903	0
419	8	0.914656	1.34812	10.1913	669.893	-159.415	-252.687	200	300	0	0	0	0	0	0	0	200	903	0	0	0	0	0	0	0	603	903	0
419	9	0.151716	1.19554	12.0224	-62.5292	145.761	-298.464	200	300	0	0	0	0	0	0	0	200	903	0	0	0	0	0	0	0	603	903	0
420	0	0.304304	1.95848	10.8017	303.682	-403.556	21.9711	200	300	0	0	0	0	0	0	0	200	903	0	0	0	0	0	0	0	603	903	0
420	1	0	0	0	0	0	0	200	300	0	0	0	0	0	0	0	200	903	0	0	0	0	0	0	0	603	903	0
420	2	0.914656	2.41624	10.8017	1219.21	-220.45	-69.5817	200	300	0	0	0	0	0	0	0	200	903	0	0	0	0	0	0	0	603	903	0
420	3	0	0	0	0	0	0	200	300	0	0	0	0	0	0	0	200	903	0	0	0	0	0	0	0	603	903	0
420	4	0.60948	1.80589	12.9379	212.129	-159.415	-252.687	200	300	0	0	0	0	0	0	0	200	903	0	0	0	0	0	0	0	603	903	0
420	5	0.151716	1.19554	10.1913	486.787	-37.3445	-161.134	200	300	0	0	0	0	0	0	0	200	903	0	0	0	0	0	0	0	603	903	0
420	6	0	0	0	0	0	0	200	300	0	0	0	0	0	0	0	200	903	0	0	0	0	0	0	0	603	903	0
420	7	-0.306047	2.11106	9.88614	486.787	-220.45	-206.911	200	300	0	0	0	0	0	0	0	200	903	0	0	0	0	0	0	0	603	903	0
420	8	0.151716	1.04295	11.1068	303.682	267.831	-298.464	200	300	0	0	0	0	0	0	0	200	903	0	0	0	0	0	0	0	603	903	0
420	9	0.456892	2.11106	12.3275	1127.66	-342.52	-481.569	200	300	0	0	0	0	0	0	0	200	903	0	0	0	0	0	0	0	603	903	0
421	0	0	0	0	0	0	0	200	300	0	0	0	0	0	0	0	200	903	0	0	0	0	0	0	0	603	903	0
421	1	0	0	0	0	0	0	200	300	0	0	0	0	0	0	0	200	903	0	0	0	0	0	0	0	603	903	0
421	2	0	0	0	0	0	0	200	300	0	0	0	0	0	0	0	200	903	0	0	0	0	0	0	0	603	903	0
421	3	-0.000871718	1.6533	9.88614	303.682	-403.556	-161.134	200	300	0	0	0	0	0	0	0	200	903	0	0	0	0	0	0	0	603	903	0
421	4	0.151716	1.6533	11.412	395.235	-98.3797	-206.911	200	300	0	0	0	0	0	0	0	200	903	0	0	0	0	0	0	0	603	903	0
421	5	-0.306047	1.6533	11.7172	395.235	-159.415	-298.464	200	300	0	0	0	0	0	0	0	200	903	0	0	0	0	0	0	0	603	903	0
421	6	1.37242	2.72141	10.8017	578.34	-159.415	-252.687	200	300	0	0	0	0	0	0	0	200	903	0	0	0	0	0	0	0	603	903	0
421	7	1.52501	1.50071	11.1068	669.893	-37.3445	-69.5817	200	300	0	0	0	0	0	0	0	200	903	0	0	0	0	0	0	0	603	903	0
421	8	0	0	0	0	0	0	200	300	0	0	0	0	0	0	0	200	903	0	0	0	0	0	0	0	603	903	0
421	9	0.456892	0.89036	10.1913	212.129	-525.626	-161.134	200	300	0	0	0	0	0	0	0	200	903	0	0	0	0	0	0	0	603	903	0
422	0	-0.306047	1.80589	9.88614	852.998	-220.45	-298.464	200	300	0	0	0	0	0	0	0	200	903	0	0	0	0	0	0	0	603	903	0
422	1	1.37242	0.89036	9.88614	578.34	145.761	21.9711	200	300	0	0	0	0	0	0	0	200	903	0	0	0	0	0	0	0	603	903	0
422	2	0.456892	1.95848	10.8017	852.998	-464.591	-161.134	200	300	0	0	0	0	0	0	0	200	903	0	0	0	0	0	0	0	603	903	0
422	3	0.914656	1.19554	10.1913	212.129	84.7258	-206.911	200	300	0	0	0	0	0	0	0	200	903	0	0	0	0	0	0	0	603	903	0
422	4	0.456892	0.585184	10.8017	578.34	-37.3445	-69.5817	200	300	0	0	0	0	0	0	0	200	903	0	0	0	0	0	0	0	603	903	0
422	5	0	0	0	0	0	0	200	300	0	0	0	0	0	0	0	200	903	0	0	0	0	0	0	0	603	903	0
422	6	0.60948	1.6533	10.4965	669.893	-281.485	67.7474	200	300	0	0	0	0	0	0	0	200	903	0	0	0	0	0	0	0	603	903	0
422	7	0.151716	2.41624	9.88614	852.998	-37.3445	-298.464	200	300	0	0	0	0	0	0	0	200	903	0	0	0	0	0	0	0	603	903	0
422	8	0.456892	1.6533	10.1913	669.893	-464.591	-298.464	200	300	0	0	0	0	0	0	0	200	903	0	0	0	0	0	0	0	603	903	0
422	9	-0.306047	1.80589	11.412	395.235	23.6906	67.7474	200	300	0	0	0	0	0	0	0	200	903	0	0	0	0	0	0	0	603	903	0
423	0	0.304304	1.50071	13.5482	852.998	-37.3445	-23.8053	200	300	0	0	0	0	0	0	0	200	903	0	0	0	0	0	0	0	603	903	0
423	1	0.914656	1.19554	10.8017	1219.21	-159.415	-69.5817	200	300	0	0	0	0	0	0	0	200	903	0	0	0	0	0	0	0	603	903	0
423	2	0.60948	2.11106	13.2431	1127.66	-159.415	-298.464	200	300	0	0	0	0	0	0	0	200	903	0	0	0	0	0	0	0	603	903	0
423	3	0	0	0	0	0	0	200	300	0	0	0	0	0	0	0	200	903	0	0	0	0	0	0	0	603	903	0
423	4	0.914656	1.6533	12.6327	-62.5292	-281.485	-69.5817	200	300	0	0	0	0	0	0	0	200	903	0	0	0	0	0	0	0	603	903	0
423	5	0	0	0	0	0	0	200	300	0	0	0	0	0	0	0	200	903	0	0	0	0	0	0	0	603	903	0
423	6	1.52501	0.89036	10.1913	120.576	-98.3797	-69.5817	200	300	0	0	0	0	0	0	0	200	903	0	0	0	0	0	0	0	603	903	0
423	7	-0.000871718	1.6533	10.4965	852.998	84.7258	-252.687	200	300	0	0	0	0	0	0	0	200	903	0	0	0	0	0	0	0	603	903	0
423	8	-0.000871718	1.50071	12.6327	761.445	-281.485	-481.569	200	300	0	0	0	0	0	0	0	200	903	0	0	0	0	0	0	0	603	903	0
423	9	0.762068	1.34812	12.3275	578.34	23.6906	-390.016	200	300	0	0	0	0	0	0	0	200	903	0	0	0	0	0	0	0	603	903	0
424	0	0	0	0	0	0	0	200	300	0	0	0	0	0	0	0	200	903	0	0	0	0	0	0	0	603	903	0
424	1	0	0	0	0	0	0	200	300	0	0	0	0	0	0	0	200	903	0	0	0	0	0	0	0	603	903	0
424	2	0.151716	1.95848	11.1068	944.551	23.6906	-69.5817	200	300	0	0	0	0	0	0	0	200	903	0	0	0	0	0	0	0	603	903	0
424	3	-0.306047	1.95848	9.88614	578.34	23.6906	-252.687	200	300	0	0	0	0	0	0	0	200	903	0	0	0	0	0	0	0	603	903	0
424	4	1.37242	1.80589	10.8017	761.445	-586.661	-527.345	200	300	0	0	0	0	0	0	0	200	903	0	0	0	0	0	0	0	603	903	0
424	5	0.151716	0.280009	11.7172	1036.1	23.6906	-115.358	200	300	0	0	0	0	0	0	0	200	903	0	0	0	0	0	0	0	603	903	0
424	6	0.456892	2.41624	11.412	761.445	-37.3445	-161.134	200	300	0	0	0	0	0	0	0	200	903	0	0	0	0	0	0	0	603	903	0
424	7	1.37242	1.19554	10.4965	303.682	-403.556	-23.8053	200	300	0	0	0	0	0	0	0	200	903	0	0	0	0	0	0	0	603	903	0
424	8	0	0	0	0	0	0	200	300	0	0	0	0	0	0	0	200	903	0	0	0	0	0	0	0	603	903	0
424	9	0	0	0	0	0	0	200	300	0	0	0	0	0	0	0	200	903	0	0	0	0	0	0	0	603	903	0
425	0	0	0	0	0	0	0	200	300	0	0	0	0	0	0	0	200	903	0	0	0	0	0	0	0	603	903	0
425	1	0.762068	2.11106	11.412	578.34	-98.3797	-252.687	200	300	0	0	0	0	0	0	0	200	903	0	0	0	0	0	0	0	603	903	0
425	2	-0.000871718	1.34812	10.8017	852.998	-98.3797	-69.5817	200	300	0	0	0	0	0	0	0	200	903	0	0	0	0	0	0	0	603	903	0
425	3	0.914656	1.19554	11.1068	486.787	-159.415	-161.134	200	300	0	0	0	0	0	0	0	200	903	0	0	0	0	0	0	0	603	903	0
425	4	0.914656	0.737772	11.412	303.682	-220.45	-206.911	200	300	0	0	0	0	0	0	0	200	903	0	0	0	0	0	0	0	603	903	0
425	5	0.456892	1.19554	10.1913	303.682	-98.3797	-298.464	200	300	0	0	0	0	0	0	0	200	903	0	0	0	0	0	0	0	603	903	0
425	6	0	0	0	0	0	0	200	300	0	0	0	0	0	0	0	200	903	0	0	0	0	0	0	0	603	903	0
425	7	0	0	0	0	0	0	200	300	0	0	0	0	0	0	0	200	903	0	0	0	0	0	0	0	603	903	0
425	8	1.37242	2.26365	12.9379	669.893	-220.45	-298.464	200	300	0	0	0	0	0	0	0	200	903	0	0	0	0	0	0	0	603	903	0
425	9	-0.306047	1.19554	11.1068	761.445	-37.3445	21.9711	200	300	0	0	0	0	0	0	0	200	903	0	0	0	0	0	0	0	603	903	0
426	0	0.60948	1.04295	11.1068	578.34	-647.696	21.9711	200	300	0	0	0	0	0	0	0	200	903	0	0	0	0	0	0	0	603	903	0
426	1	1.06724	1.95848	10.1913	669.893	23.6906	-298.464	200	300	0	0	0	0	0	0	0	200	903	0	0	0	0	0	0	0	603	903	0
426	2	0	0	0	0	0	0	200	300	0	0	0	0	0	0	0	200	903	0	0	0	0	0	0	0	603	903	0
426	3	-0.306047	2.26365	10.8017	120.576	-159.415	-298.464	200	300	0	0	0	0	0	0	0	200	903	0	0	0	0	0	0	0	603	903	0
426	4	0	0	0	0	0	0	200	300	0	0	0	0	0	0	0	200	903	0	0	0	0	0	0	0	603	903	0
426	5	-0.15346	2.11106	11.1068	486.787	23.6906	-161.134	200	300	0	0	0	0	0	0	0	200	903	0	0	0	0	0	0	0	603	903	0
426	6	-0.306047	1.34812	12.6327	761.445	-220.45	67.7474	200	300	0	0	0	0	0	0	0	200	903	0	0	0	0	0	0	0	603	903	0
426	7	0.456892	1.6533	10.1913	669.893	-159.415	-161.134	200	300	0	0	0	0	0	0	0	200	903	0	0	0	0	0	0	0	603	903	0
426	8	0.304304	1.80589	10.4965	578.34	-159.415	-252.687	200	300	0	0	0	0	0	0	0	200	903	0	0	0	0	0	0	0	603	903	0
426	9	0	0	0	0	0	0	200	300	0	0	0	0	0	0	0	200	903	0	0	0	0	0	0	0	603	903	0
427	0	0	0	0	0	0	0	200	300	0	0	0	0	0	0	0	200	903	0	0	0	0	0	0	0	603	903	0
427	1	0	0	0	0	0	0	200	300	0	0	0	0	0	0	0	200	903	0	0	0	0	0	0	0	603	903	0
427	2	-0.306047	1.80589	11.1068	486.787	23.6906	-161.134	200	300	0	0	0	0	0	0	0	200	903	0	0	0	0	0	0	0	603	903	0
427	3	2.13536	1.04295	10.4965	578.34	-403.556	-161.134	200	300	0	0	0	0	0	0	0	200	903	0	0	0	0	0	0	0	603	903	0
427	4	0.456892	1.50071	10.4965	761.445	-220.45	-298.464	200	300	0	0	0	0	0	0	0	200	903	0	0	0	0	0	0	0	603	903	0
427	5	0	0	0	0	0	0	200	300	0	0	0	0	0	0	0	200	903	0	0	0	0	0	0	0	603	903	0
427	6	0	0	0	0	0	0	200	300	0	0	0	0	0	0	0	200	903	0	0	0	0	0	0	0	603	903	0
427	7	0.456892	1.50071	9.88614	578.34	-342.52	-252.687	200	300	0	0	0	0	0	0	0	200	903	0	0	0	0	0	0	0	603	903	0
427	8	0	0	0	0	0	0	200	300	0	0	0	0	0	0	0	200	903	0	0	0	0	0	0	0	603	903	0
427	9	-0.306047	1.6533	10.8017	669.893	-525.626	-161.134	200	300	0	0	0	0	0	0	0	200	903	0	0	0	0	0	0	0	603	903	0
428	0	1.21983	1.34812	11.7172	944.551	-281.485	-115.358	200	300	0	0	0	0	0	0	0	200	903	0	0	0	0	0	0	0	603	903	0
428	1	0.60948	1.80589	10.8017	1036.1	-525.626	-115.358	200	300	0	0	0	0	0	0	0	200	903	0	0	0	0	0	0	0	603	903	0
428	2	1.21983	1.50071	10.8017	669.893	-403.556	-206.911	200	300	0	0	0	0	0	0	0	200	903	0	0	0	0	0	0	0	603	903	0
428	3	1.37242	1.34812	10.1913	29.0235	-281.485	-344.24	200	300	0	0	0	0	0	0	0	200	903	0	0	0	0	0	0	0	603	903	0
428	4	-0.000871718	1.95848	9.88614	395.235	267.831	67.7474	200	300	0	0	0	0	0	0	0	200	903	0	0	0	0	0	0	0	603	903	0
428	5	0	0	0	0	0	0	200	300	0	0	0	0	0	0	0	200	903	0	0	0	0	0	0	0	603	903	0
428	6	-0.306047	1.80589	10.1913	486.787	-525.626	-206.911	200	300	0	0	0	0	0	0	0	200	903	0	0	0	0	0	0	0	603	903	0
428	7	-0.458635	1.50071	13.2431	486.787	-37.3445	-344.24	200	300	0	0	0	0	0	0	0	200	903	0	0	0	0	0	0	0	603	903	0
428	8	0.456892	1.19554	11.1068	761.445	23.6906	-161.134	200	300	0	0	0	0	0	0	0	200	903	0	0	0	0	0	0	0	603	903	0
428	9	1.52501	1.6533	9.88614	395.235	-464.591	-344.24	200	300	0	0	0	0	0	0	0	200	903	0	0	0	0	0	0	0	603	903	0
429	0	1.6776	0.737772	9.88614	395.235	145.761	-161.134	200	300	0	0	0	0	0	0	0	200	903	0	0	0	0	0	0	0	603	903	0
429	1	0	0	0	0	0	0	200	300	0	0	0	0	0	0	0	200	903	0	0	0	0	0	0	0	603	903	0
429	2	0	0	0	0	0	0	200	300	0	0	0	0	0	0	0	200	903	0	0	0	0	0	0	0	603	903	0
429	3	-0.458635	2.41624	10.8017	578.34	-159.415	-298.464	200	300	0	0	0	0	0	0	0	200	903	0	0	0	0	0	0	0	603	903	0
429	4	0.304304	1.19554	13.5482	1676.97	23.6906	-298.464	200	300	0	0	0	0	0	0	0	200	903	0	0	0	0	0	0	0	603	903	0
429	5	1.06724	1.6533	11.7172	852.998	-220.45	-161.134	200	300	0	0	0	0	0	0	0	200	903	0	0	0	0	0	0	0	603	903	0
429	6	1.37242	1.04295	9.88614	120.576	-281.485	-115.358	200	300	0	0	0	0	0	0	0	200	903	0	0	0	0	0	0	0	603	903	0
429	7	0	0	0	0	0	0	200	300	0	0	0	0	0	0	0	200	903	0	0	0	0	0	0	0	603	903	0
429	8	0	0	0	0	0	0	200	300	0	0	0	0	0	0	0	200	903	0	0	0	0	0	0	0	603	903	0
429	9	0	0	0	0	0	0	200	300	0	0	0	0	0	0	0	200	903	0	0	0	0	0	0	0	603	903	0
430	0	-0.15346	1.95848	11.1068	1219.21	206.796	-252.687	200	300	0	0	0	0	0	0	0	200	903	0	0	0	0	0	0	0	603	903	0
430	1	-0.000871718	1.50071	14.4638	761.445	-220.45	-298.464	200	300	0	0	0	0	0	0	0	200	903	0	0	0	0	0	0	0	603	903	0
430	2	0.762068	1.6533	11.412	395.235	-98.3797	-252.687	200	300	0	0	0	0	0	0	0	200	903	0	0	0	0	0	0	0	603	903	0
430	3	0	0	0	0	0	0	200	300	0	0	0	0	0	0	0	200	903	0	0	0	0	0	0	0	603	903	0
430	4	0	0	0	0	0	0	200	300	0	0	0	0	0	0	0	200	903	0	0	0	0	0	0	0	603	903	0
430	5	2.74571	1.80589	10.4965	395.235	-525.626	-252.687	200	300	0	0	0	0	0	0	0	200	903	0	0	0	0	0	0	0	603	903	0
430	6	0	0	0	0	0	0	200	300	0	0	0	0	0	0	0	200	903	0	0	0	0	0	0	0	603	903	0
430	7	0.914656	1.80589	12.0224	669.893	-98.3797	-298.464	200	300	0	0	0	0	0	0	0	200	903	0	0	0	0	0	0	0	603	903	0
430	8	-0.458635	1.19554	11.412	852.998	-464.591	-115.358	200	300	0	0	0	0	0	0	0	200	903	0	0	0	0	0	0	0	603	903	0
430	9	1.21983	0.737772	11.412	578.34	23.6906	-23.8053	200	300	0	0	0	0	0	0	0	200	903	0	0	0	0	0	0	0	603	903	0
431	0	1.21983	0.89036	11.1068	944.551	84.7258	-298.464	200	300	0	0	0	0	0	0	0	200	903	0	0	0	0	0	0	0	603	903	0
431	1	0	0	0	0	0	0	200	300	0	0	0	0	0	0	0	200	903	0	0	0	0	0	0	0	603	903	0
431	2	0	0	0	0	0	0	200	300	0	0	0	0	0	0	0	200	903	0	0	0	0	0	0	0	603	903	0
431	3	0	0	0	0	0	0	200	300	0	0	0	0	0	0	0	200	903	0	0	0	0	0	0	0	603	903	0
431	4	0.456892	3.02659	9.58096	761.445	-464.591	-115.358	200	300	0	0	0	0	0	0	0	200	903	0	0	0	0	0	0	0	603	903	0
431	5	0.456892	1.34812	10.1913	944.551	-159.415	67.7474	200	300	0	0	0	0	0	0	0	200	903	0	0	0	0	0	0	0	603	903	0
431	6	-0.15346	1.04295	13.5482	395.235	-159.415	-206.911	200	300	0	0	0	0	0	0	0	200	903	0	0	0	0	0	0	0	603	903	0
431	7	0.151716	1.34812	10.8017	761.445	-342.52	-435.793	200	300	0	0	0	0	0	0	0	200	903	0	0	0	0	0	0	0	603	903	0
431	8	0.60948	1.19554	10.8017	578.34	23.6906	21.9711	200	300	0	0	0	0	0	0	0	200	903	0	0	0	0	0	0	0	603	903	0
431	9	0	0	0	0	0	0	200	300	0	0	0	0	0	0	0	200	903	0	0	0	0	0	0	0	603	903	0
432	0	0.60948	0.432597	11.1068	395.235	-159.415	-161.134	200	300	0	0	0	0	0	0	0	200	903	0	0	0	0	0	0	0	603	903	0
432	1	0	0	0	0	0	0	200	300	0	0	0	0	0	0	0	200	903	0	0	0	0	0	0	0	603	903	0
432	2	-0.458635	1.04295	11.1068	486.787	84.7258	-69.5817	200	300	0	0	0	0	0	0	0	200	903	0	0	0	0	0	0	0	603	903	0
432	3	-0.458635	1.34812	12.6327	669.893	-37.3445	-115.358	200	300	0	0	0	0	0	0	0	200	903	0	0	0	0	0	0	0	603	903	0
432	4	0.60948	1.50071	11.412	1585.42	-281.485	-161.134	200	300	0	0	0	0	0	0	0	200	903	0	0	0	0	0	0	0	603	903	0
432	5	1.37242	1.50071	9.88614	486.787	-220.45	67.7474	200	300	0	0	0	0	0	0	0	200	903	0	0	0	0	0	0	0	603	903	0
432	6	1.37242	2.26365	9.88614	120.576	84.7258	-161.134	200	300	0	0	0	0	0	0	0	200	903	0	0	0	0	0	0	0	603	903	0
432	7	0.456892	1.80589	9.88614	303.682	-464.591	-252.687	200	300	0	0	0	0	0	0	0	200	903	0	0	0	0	0	0	0	603	903	0
432	8	0	0	0	0	0	0	200	300	0	0	0	0	0	0	0	200	903	0	0	0	0	0	0	0	603	903	0
432	9	-0.15346	1.04295	10.4965	944.551	-98.3797	-161.134	200	300	0	0	0	0	0	0	0	200	903	0	0	0	0	0	0	0	603	903	0
433	0	0.60948	0.585184	12.0224	852.998	-220.45	-298.464	200	300	0	0	0	0	0	0	0	200	903	0	0	0	0	0	0	0	603	903	0
433	1	0.914656	0.89036	12.0224	578.34	-37.3445	-252.687	200	300	0	0	0	0	0	0	0	200	903	0	0	0	0	0	0	0	603	903	0
433	2	1.37242	1.95848	9.88614	-62.5292	84.7258	-206.911	200	300	0	0	0	0	0	0	0	200	903	0	0	0	0	0	0	0	603	903	0
433	3	0	0	0	0	0	0	200	300	0	0	0	0	0	0	0	200	903	0	0	0	0	0	0	0	603	903	0
433	4	0	0	0	0	0	0	200	300	0	0	0	0	0	0	0	200	903	0	0	0	0	0	0	0	603	903	0
433	5	0	0	0	0	0	0	200	300	0	0	0	0	0	0	0	200	903	0	0	0	0	0	0	0	603	903	0
433	6	-0.611223	1.34812	10.8017	669.893	-220.45	-435.793	200	300	0	0	0	0	0	0	0	200	903	0	0	0	0	0	0	0	603	903	0
433	7	-0.458635	1.50071	13.8534	578.34	-220.45	-435.793	200	300	0	0	0	0	0	0	0	200	903	0	0	0	0	0	0	0	603	903	0
433	8	1.06724	0.585184	11.412	212.129	-220.45	-161.134	200	300	0	0	0	0	0	0	0	200	903	0	0	0	0	0	0	0	603	903	0
433	9	2.44053	1.50071	9.88614	395.235	-220.45	-69.5817	200	300	0	0	0	0	0	0	0	200	903	0	0	0	0	0	0	0	603	903	0
434	0	0	0	0	0	0	0	200	300	0	0	0	0	0	0	0	200	903	0	0	0	0	0	0	0	603	903	0
434	1	0	0	0	0	0	0	200	300	0	0	0	0	0	0	0	200	903	0	0	0	0	0	0	0	603	903	0
434	2	0	0	0	0	0	0	200	300	0	0	0	0	0	0	0	200	903	0	0	0	0	0	0	0	603	903	0
434	3	-0.763811	0.585184	11.7172	761.445	-342.52	-252.687	200	300	0	0	0	0	0	0	0	200	903	0	0	0	0	0	0	0	603	903	0
434	4	-0.000871718	2.26365	13.8534	395.235	145.761	-161.134	200	300	0	0	0	0	0	0	0	200	903	0	0	0	0	0	0	0	603	903	0
434	5	1.21983	1.95848	11.1068	669.893	23.6906	-69.5817	200	300	0	0	0	0	0	0	0	200	903	0	0	0	0	0	0	0	603	903	0
434	6	2.44053	1.6533	9.88614	120.576	-586.661	-161.134	200	300	0	0	0	0	0	0	0	200	903	0	0	0	0	0	0	0	603	903	0
434	7	0	0	0	0	0	0	200	300	0	0	0	0	0	0	0	200	903	0	0	0	0	0	0	0	603	903	0
434	8	0.456892	-0.330343	11.1068	852.998	-37.3445	-23.8053	200	300	0	0	0	0	0	0	0	200	903	0	0	0	0	0	0	0	603	903	0
434	9	0	0	0	0	0	0	200	300	0	0	0	0	0	0	0	200	903	0	0	0	0	0	0	0	603	903	0
435	0	1.6776	1.50071	12.0224	1493.87	84.7258	-390.016	200	300	0	0	0	0	0	0	0	200	903	0	0	0	0	0	0	0	603	903	0
435	1	-0.306047	1.95848	11.7172	120.576	84.7258	-206.911	200	300	0	0	0	0	0	0	0	200	903	0	0	0	0	0	0	0	603	903	0
435	2	0.762068	1.6533	11.412	120.576	-342.52	-69.5817	200	300	0	0	0	0	0	0	0	200	903	0	0	0	0	0	0	0	603	903	0
435	3	0.914656	2.11106	10.8017	395.235	-98.3797	67.7474	200	300	0	0	0	0	0	0	0	200	903	0	0	0	0	0	0	0	603	903	0
435	4	0	0	0	0	0	0	200	300	0	0	0	0	0	0	0	200	903	0	0	0	0	0	0	0	603	903	0
435	5	0.914656	1.6533	9.88614	578.34	-281.485	-206.911	200	300	0	0	0	0	0	0	0	200	903	0	0	0	0	0	0	0	603	903	0
435	6	0.456892	1.19554	10.8017	669.893	206.796	-252.687	200	300	0	0	0	0	0	0	0	200	903	0	0	0	0	0	0	0	603	903	0
435	7	0.456892	0.737772	10.4965	-62.5292	84.7258	-298.464	200	300	0	0	0	0	0	0	0	200	903	0	0	0	0	0	0	0	603	903	0
435	8	0.60948	1.50071	11.7172	212.129	-647.696	-115.358	200	300	0	0	0	0	0	0	0	200	903	0	0	0	0	0	0	0	603	903	0
435	9	0.151716	2.11106	10.8017	578.34	-220.45	-23.8053	200	300	0	0	0	0	0	0	0	200	903	0	0	0	0	0	0	0	603	903	0
436	0	0.151716	2.41624	11.7172	852.998	-37.3445	250.853	200	300	0	0	0	0	0	0	0	200	903	0	0	0	0	0	0	0	603	903	0
436	1	0.762068	2.11106	12.0224	761.445	-220.45	-252.687	200	300	0	0	0	0	0	0	0	200	903	0	0	0	0	0	0	0	603	903	0
436	2	0.304304	1.04295	11.1068	212.129	-159.415	-252.687	200	300	0	0	0	0	0	0	0	200	903	0	0	0	0	0	0	0	603	903	0
436	3	0	0	0	0	0	0	200	300	0	0	0	0	0	0	0	200	903	0	0	0	0	0	0	0	603	903	0
436	4	0	0	0	0	0	0	200	300	0	0	0	0	0	0	0	200	903	0	0	0	0	0	0	0	603	903	0
436	5	0	0	0	0	0	0	200	300	0	0	0	0	0	0	0	200	903	0	0	0	0	0	0	0	603	903	0
436	6	-0.15346	1.95848	10.1913	395.235	-342.52	-115.358	200	300	0	0	0	0	0	0	0	200	903	0	0	0	0	0	0	0	603	903	0
436	7	-0.458635	2.11106	13.5482	578.34	-403.556	-527.345	200	300	0	0	0	0	0	0	0	200	903	0	0	0	0	0	0	0	603	903	0
436	8	0.914656	1.50071	11.412	578.34	-98.3797	-664.674	200	300	0	0	0	0	0	0	0	200	903	0	0	0	0	0	0	0	603	903	0
436	9	2.8983	0.432597	12.0224	395.235	84.7258	-69.5817	200	300	0	0	0	0	0	0	0	200	903	0	0	0	0	0	0	0	603	903	0
437	0	0	0	0	0	0	0	200	300	0	0	0	0	0	0	0	200	903	0	0	0	0	0	0	0	603	903	0
437	1	0	0	0	0	0	0	200	300	0	0	0	0	0	0	0	200	903	0	0	0	0	0	0	0	603	903	0
437	2	0	0	0	0	0	0	200	300	0	0	0	0	0	0	0	200	903	0	0	0	0	0	0	0	603	903	0
437	3	-0.000871718	1.6533	11.412	669.893	-342.52	-206.911	200	300	0	0	0	0	0	0	0	200	903	0	0	0	0	0	0	0	603	903	0
437	4	-0.000871718	1.6533	12.0224	395.235	-220.45	-206.911	200	300	0	0	0	0	0	0	0	200	903	0	0	0	0	0	0	0	603	903	0
437	5	1.06724	1.80589	10.1913	120.576	23.6906	250.853	200	300	0	0	0	0	0	0	0	200	903	0	0	0	0	0	0	0	603	903	0
437	6	2.59312	1.80589	10.4965	395.235	-342.52	21.9711	200	300	0	0	0	0	0	0	0	200	903	0	0	0	0	0	0	0	603	903	0
437	7	0	0	0	0	0	0	200	300	0	0	0	0	0	0	0	200	903	0	0	0	0	0	0	0	603	903	0
437	8	0	0	0	0	0	0	200	300	0	0	0	0	0	0	0	200	903	0	0	0	0	0	0	0	603	903	0
437	9	0	0	0	0	0	0	200	300	0	0	0	0	0	0	0	200	903	0	0	0	0	0	0	0	603	903	0
438	0	0.151716	1.04295	11.1068	212.129	-220.45	-115.358	200	300	0	0	0	0	0	0	0	200	903	0	0	0	0	0	0	0	603	903	0
438	1	-0.15346	1.80589	11.1068	669.893	-37.3445	-206.911	200	300	0	0	0	0	0	0	0	200	903	0	0	0	0	0	0	0	603	903	0
438	2	0.914656	0.737772	11.7172	212.129	145.761	67.7474	200	300	0	0	0	0	0	0	0	200	903	0	0	0	0	0	0	0	603	903	0
438	3	1.06724	1.50071	10.8017	486.787	-281.485	-23.8053	200	300	0	0	0	0	0	0	0	200	903	0	0	0	0	0	0	0	603	903	0
438	4	1.06724	1.80589	9.88614	1036.1	23.6906	-161.134	200	300	0	0	0	0	0	0	0	200	903	0	0	0	0	0	0	0	603	903	0
438	5	1.06724	1.50071	11.412	578.34	84.7258	-298.464	200	300	0	0	0	0	0	0	0	200	903	0	0	0	0	0	0	0	603	903	0
438	6	0	0	0	0	0	0	200	300	0	0	0	0	0	0	0	200	903	0	0	0	0	0	0	0	603	903	0
438	7	1.98277	0.737772	11.1068	29.0235	23.6906	21.9711	200	300	0	0	0	0	0	0	0	200	903	0	0	0	0	0	0	0	603	903	0
438	8	-1.06899	1.80589	10.4965	669.893	-281.485	-161.134	200	300	0	0	0	0	0	0	0	200	903	0	0	0	0	0	0	0	603	903	0
438	9	0.60948	1.95848	10.1913	303.682	-281.485	-161.134	200	300	0	0	0	0	0	0	0	200	903	0	0	0	0	0	0	0	603	903	0
439	0	0.60948	1.95848	11.412	1402.31	84.7258	-161.134	200	300	0	0	0	0	0	0	0	200	903	0	0	0	0	0	0	0	603	903	0
439	1	0	0	0	0	0	0	200	300	0	0	0	0	0	0	0	200	903	0	0	0	0	0	0	0	603	903	0
439	2	1.06724	0.89036	10.1913	486.787	-220.45	-298.464	200	300	0	0	0	0	0	0	0	200	903	0	0	0	0	0	0	0	603	903	0
439	3	0	0	0	0	0	0	200	300	0	0	0	0	0	0	0	200	903	0	0	0	0	0	0	0	603	903	0
439	4	0	0	0	0	0	0	200	300	0	0	0	0	0	0	0	200	903	0	0	0	0	0	0	0	603	903	0
439	5	-0.15346	1.80589	9.88614	944.551	-342.52	-69.5817	200	300	0	0	0	0	0	0	0	200	903	0	0	0	0	0	0	0	603	903	0
439	6	-0.306047	2.11106	11.1068	669.893	-37.3445	-206.911	200	300	0	0	0	0	0	0	0	200	903	0	0	0	0	0	0	0	603	903	0
439	7	0.914656	2.26365	11.7172	669.893	-37.3445	-390.016	200	300	0	0	0	0	0	0	0	200	903	0	0	0	0	0	0	0	603	903	0
439	8	1.06724	1.95848	11.1068	395.235	-220.45	-298.464	200	300	0	0	0	0	0	0	0	200	903	0	0	0	0	0	0	0	603	903	0
439	9	0	0	0	0	0	0	200	300	0	0	0	0	0	0	0	200	903	0	0	0	0	0	0	0	603	903	0
440	0	1.52501	0.127421	11.412	669.893	-98.3797	-23.8053	200	300	0	0	0	0	0	0	0	200	903	0	0	0	0	0	0	0	603	903	0
440	1	0	0	0	0	0	0	200	300	0	0	0	0	0	0	0	200	903	0	0	0	0	0	0	0	603	903	0
440	2	1.83018	2.41624	11.1068	1036.1	-220.45	67.7474	200	300	0	0	0	0	0	0	0	200	903	0	0	0	0	0	0	0	603	903	0
440	3	-0.458635	2.41624	11.7172	395.235	-281.485	-115.358	200	300	0	0	0	0	0	0	0	200	903	0	0	0	0	0	0	0	603	903	0
440	4	0.456892	2.26365	10.8017	761.445	-281.485	-161.134	200	300	0	0	0	0	0	0	0	200	903	0	0	0	0	0	0	0	603	903	0
440	5	1.37242	2.72141	9.58096	669.893	-37.3445	-115.358	200	300	0	0	0	0	0	0	0	200	903	0	0	0	0	0	0	0	603	903	0
440	6	0.914656	1.04295	10.8017	669.893	-220.45	-344.24	200	300	0	0	0	0	0	0	0	200	903	0	0	0	0	0	0	0	603	903	0
440	7	0	0	0	0	0	0	200	300	0	0	0	0	0	0	0	200	903	0	0	0	0	0	0	0	603	903	0
440	8	0	0	0	0	0	0	200	300	0	0	0	0	0	0	0	200	903	0	0	0	0	0	0	0	603	903	0
440	9	0	0	0	0	0	0	200	300	0	0	0	0	0	0	0	200	903	0	0	0	0	0	0	0	603	903	0
441	0	0.60948	0.585184	10.8017	395.235	-281.485	-161.134	200	300	0	0	0	0	0	0	0	200	903	0	0	0	0	0	0	0	603	903	0
441	1	-0.000871718	2.11106	10.8017	578.34	23.6906	-115.358	200	300	0	0	0	0	0	0	0	200	903	0	0	0	0	0	0	0	603	903	0
441	2	0.762068	0.89036	10.4965	486.787	-98.3797	-206.911	200	300	0	0	0	0	0	0	0	200	903	0	0	0	0	0	0	0	603	903	0
441	3	0.456892	1.04295	11.1068	669.893	-281.485	-115.358	200	300	0	0	0	0	0	0	0	200	903	0	0	0	0	0	0	0	603	903	0
441	4	0	0	0	0	0	0	200	300	0	0	0	0	0	0	0	200	903	0	0	0	0	0	0	0	603	903	0
441	5	1.21983	1.95848	10.1913	212.129	84.7258	-252.687	200	300	0	0	0	0	0	0	0	200	903	0	0	0	0	0	0	0	603	903	0
441	6	0.456892	2.11106	10.1913	212.129	-159.415	-206.911	200	300	0	0	0	0	0	0	0	200	903	0	0	0	0	0	0	0	603	903	0
441	7	-0.611223	1.04295	10.8017	303.682	-37.3445	-69.5817	200	300	0	0	0	0	0	0	0	200	903	0	0	0	0	0	0	0	603	903	0
441	8	-0.916399	2.26365	9.88614	578.34	-220.45	-23.8053	200	300	0	0	0	0	0	0	0	200	903	0	0	0	0	0	0	0	603	903	0
441	9	-0.15346	1.19554	11.7172	1036.1	-464.591	-161.134	200	300	0	0	0	0	0	0	0	200	903	0	0	0	0	0	0	0	603	903	0
442	0	0.60948	1.80589	10.8017	944.551	-159.415	-344.24	200	300	0	0	0	0	0	0	0	200	903	0	0	0	0	0	0	0	603	903	0
442	1	2.59312	1.95848	10.8017	212.129	-159.415	250.853	200	300	0	0	0	0	0	0	0	200	903	0	0	0	0	0	0	0	603	903	0
442	2	0	0	0	0	0	0	200	300	0	0	0	0	0	0	0	200	903	0	0	0	0	0	0	0	603	903	0
442	3	0	0	0	0	0	0	200	300	0	0	0	0	0	0	0	200	903	0	0	0	0	0	0	0	603	903	0
442	4	0	0	0	0	0	0	200	300	0	0	0	0	0	0	0	200	903	0	0	0	0	0	0	0	603	903	0
442	5	-0.458635	1.50071	9.88614	852.998	-37.3445	-115.358	200	300	0	0	0	0	0	0	0	200	903	0	0	0	0	0	0	0	603	903	0
442	6	-0.763811	0.89036	11.1068	1402.31	-159.415	-344.24	200	300	0	0	0	0	0	0	0	200	903	0	0	0	0	0	0	0	603	903	0
442	7	0.60948	1.34812	11.7172	1036.1	23.6906	-435.793	200	300	0	0	0	0	0	0	0	200	903	0	0	0	0	0	0	0	603	903	0
442	8	1.06724	1.34812	10.4965	29.0235	23.6906	-298.464	200	300	0	0	0	0	0	0	0	200	903	0	0	0	0	0	0	0	603	903	0
442	9	0	0	0	0	0	0	200	300	0	0	0	0	0	0	0	200	903	0	0	0	0	0	0	0	603	903	0
443	0	0	0	0	0	0	0	200	300	0	0	0	0	0	0	0	200	903	0	0	0	0	0	0	0	603	903	0
443	1	0	0	0	0	0	0	200	300	0	0	0	0	0	0	0	200	903	0	0	0	0	0	0	0	603	903	0
443	2	0	0	0	0	0	0	200	300	0	0	0	0	0	0	0	200	903	0	0	0	0	0	0	0	603	903	0
443	3	-0.611223	1.34812	11.412	1036.1	23.6906	-252.687	200	300	0	0	0	0	0	0	0	200	903	0	0	0	0	0	0	0	603	903	0
443	4	-0.000871718	2.11106	11.412	852.998	206.796	-298.464	200	300	0	0	0	0	0	0	0	200	903	0	0	0	0	0	0	0	603	903	0
443	5	1.37242	1.50071	10.1913	578.34	-525.626	-69.5817	200	300	0	0	0	0	0	0	0	200	903	0	0	0	0	0	0	0	603	903	0
443	6	0.914656	1.19554	10.8017	578.34	-159.415	-298.464	200	300	0	0	0	0	0	0	0	200	903	0	0	0	0	0	0	0	603	903	0
443	7	0	0	0	0	0	0	200	300	0	0	0	0	0	0	0	200	903	0	0	0	0	0	0	0	603	903	0
443	8	0.762068	2.11106	11.7172	1036.1	-403.556	-161.134	200	300	0	0	0	0	0	0	0	200	903	0	0	0	0	0	0	0	603	903	0
443	9	-0.458635	1.95848	9.88614	852.998	-220.45	-298.464	200	300	0	0	0	0	0	0	0	200	903	0	0	0	0	0	0	0	603	903	0
444	0	0.914656	1.19554	10.8017	303.682	-37.3445	-390.016	200	300	0	0	0	0	0	0	0	200	903	0	0	0	0	0	0	0	603	903	0
444	1	-0.306047	1.95848	11.1068	669.893	-159.415	-23.8053	200	300	0	0	0	0	0	0	0	200	903	0	0	0	0	0	0	0	603	903	0
444	2	0.60948	1.34812	11.7172	669.893	-281.485	-115.358	200	300	0	0	0	0	0	0	0	200	903	0	0	0	0	0	0	0	603	903	0
444	3	0.456892	1.19554	10.8017	578.34	-342.52	-298.464	200	300	0	0	0	0	0	0	0	200	903	0	0	0	0	0	0	0	603	903	0
444	4	0	0	0	0	0	0	200	300	0	0	0	0	0	0	0	200	903	0	0	0	0	0	0	0	603	903	0
444	5	0	0	0	0	0	0	200	300	0	0	0	0	0	0	0	200	903	0	0	0	0	0	0	0	603	903	0
444	6	0.151716	1.95848	9.88614	669.893	-98.3797	-206.911	200	300	0	0	0	0	0	0	0	200	903	0	0	0	0	0	0	0	603	903	0
444	7	0	0	0	0	0	0	200	300	0	0	0	0	0	0	0	200	903	0	0	0	0	0	0	0	603	903	0
444	8	-0.611223	0.89036	10.8017	669.893	-464.591	205.077	200	300	0	0	0	0	0	0	0	200	903	0	0	0	0	0	0	0	603	903	0
444	9	-0.916399	2.11106	12.0224	852.998	-37.3445	205.077	200	300	0	0	0	0	0	0	0	200	903	0	0	0	0	0	0	0	603	903	0
445	0	0.456892	1.80589	10.1913	852.998	-342.52	-298.464	200	300	0	0	0	0	0	0	0	200	903	0	0	0	0	0	0	0	603	903	0
445	1	1.6776	1.04295	11.1068	761.445	-281.485	-252.687	200	300	0	0	0	0	0	0	0	200	903	0	0	0	0	0	0	0	603	903	0
445	2	0	0	0	0	0	0	200	300	0	0	0	0	0	0	0	200	903	0	0	0	0	0	0	0	603	903	0
445	3	0	0	0	0	0	0	200	300	0	0	0	0	0	0	0	200	903	0	0	0	0	0	0	0	603	903	0
445	4	0	0	0	0	0	0	200	300	0	0	0	0	0	0	0	200	903	0	0	0	0	0	0	0	603	903	0
445	5	-0.15346	1.95848	10.8017	212.129	-159.415	-69.5817	200	300	0	0	0	0	0	0	0	200	903	0	0	0	0	0	0	0	603	903	0
445	6	-0.15346	2.41624	13.2431	303.682	-159.415	-69.5817	200	300	0	0	0	0	0	0	0	200	903	0	0	0	0	0	0	0	603	903	0
445	7	0.60948	2.11106	11.412	669.893	-525.626	-298.464	200	300	0	0	0	0	0	0	0	200	903	0	0	0	0	0	0	0	603	903	0
445	8	2.13536	1.19554	9.88614	1310.76	145.761	-252.687	200	300	0	0	0	0	0	0	0	200	903	0	0	0	0	0	0	0	603	903	0
445	9	0	0	0	0	0	0	200	300	0	0	0	0	0	0	0	200	903	0	0	0	0	0	0	0	603	903	0
446	0	0	0	0	0	0	0	200	300	0	0	0	0	0	0	0	200	903	0	0	0	0	0	0	0	603	903	0
446	1	0	0	0	0	0	0	200	300	0	0	0	0	0	0	0	200	903	0	0	0	0	0	0	0	603	903	0
446	2	-0.15346	2.11106	10.4965	578.34	-220.45	-298.464	200	300	0	0	0	0	0	0	0	200	903	0	0	0	0	0	0	0	603	903	0
446	3	0.304304	1.80589	12.0224	669.893	-281.485	159.3	200	300	0	0	0	0	0	0	0	200	903	0	0	0	0	0	0	0	603	903	0
446	4	1.06724	2.26365	11.1068	761.445	-281.485	-206.911	200	300	0	0	0	0	0	0	0	200	903	0	0	0	0	0	0	0	603	903	0
446	5	1.37242	1.80589	10.1913	486.787	-98.3797	-252.687	200	300	0	0	0	0	0	0	0	200	903	0	0	0	0	0	0	0	603	903	0
446	6	1.06724	1.04295	10.8017	486.787	-220.45	-115.358	200	300	0	0	0	0	0	0	0	200	903	0	0	0	0	0	0	0	603	903	0
446	7	0	0	0	0	0	0	200	300	0	0	0	0	0	0	0	200	903	0	0	0	0	0	0	0	603	903	0
446	8	1.52501	1.04295	10.1913	578.34	23.6906	-298.464	200	300	0	0	0	0	0	0	0	200	903	0	0	0	0	0	0	0	603	903	0
446	9	-0.306047	1.6533	10.4965	852.998	-37.3445	-298.464	200	300	0	0	0	0	0	0	0	200	903	0	0	0	0	0	0	0	603	903	0
447	0	0.914656	2.56883	11.1068	578.34	-342.52	-23.8053	200	300	0	0	0	0	0	0	0	200	903	0	0	0	0	0	0	0	603	903	0
447	1	0.60948	1.80589	10.4965	-337.188	-220.45	-252.687	200	300	0	0	0	0	0	0	0	200	903	0	0	0	0	0	0	0	603	903	0
447	2	1.06724	1.80589	9.88614	578.34	-37.3445	-206.911	200	300	0	0	0	0	0	0	0	200	903	0	0	0	0	0	0	0	603	903	0
447	3	0	0	0	0	0	0	200	300	0	0	0	0	0	0	0	200	903	0	0	0	0	0	0	0	603	903	0
447	4	0	0	0	0	0	0	200	300	0	0	0	0	0	0	0	200	903	0	0	0	0	0	0	0	603	903	0
447	5	-0.306047	1.19554	11.7172	303.682	-220.45	-435.793	200	300	0	0	0	0	0	0	0	200	903	0	0	0	0	0	0	0	603	903	0
447	6	0.456892	1.95848	11.1068	486.787	-159.415	-69.5817	200	300	0	0	0	0	0	0	0	200	903	0	0	0	0	0	0	0	603	903	0
447	7	1.21983	-0.635519	11.1068	120.576	-159.415	-206.911	200	300	0	0	0	0	0	0	0	200	903	0	0	0	0	0	0	0	603	903	0
447	8	0	0	0	0	0	0	200	300	0	0	0	0	0	0	0	200	903	0	0	0	0	0	0	0	603	903	0
447	9	0.762068	1.34812	10.8017	669.893	-37.3445	-161.134	200	300	0	0	0	0	0	0	0	200	903	0	0	0	0	0	0	0	603	903	0
448	0	0	0	0	0	0	0	200	300	0	0	0	0	0	0	0	200	903	0	0	0	0	0	0	0	603	903	0
448	1	0.456892	1.50071	11.1068	486.787	-37.3445	-344.24	200	300	0	0	0	0	0	0	0	200	903	0	0	0	0	0	0	0	603	903	0
448	2	-0.611223	1.80589	11.7172	212.129	-159.415	-344.24	200	300	0	0	0	0	0	0	0	200	903	0	0	0	0	0	0	0	603	903	0
448	3	0.456892	1.95848	11.412	212.129	-159.415	67.7474	200	300	0	0	0	0	0	0	0	200	903	0	0	0	0	0	0	0	603	903	0
448	4	0	0	0	0	0	0	200	300	0	0	0	0	0	0	0	200	903	0	0	0	0	0	0	0	603	903	0
448	5	0	0	0	0	0	0	200	300	0	0	0	0	0	0	0	200	903	0	0	0	0	0	0	0	603	903	0
448	6	0	0	0	0	0	0	200	300	0	0	0	0	0	0	0	200	903	0	0	0	0	0	0	0	603	903	0
448	7	-0.458635	0.89036	10.4965	852.998	-281.485	-252.687	200	300	0	0	0	0	0	0	0	200	903	0	0	0	0	0	0	0	603	903	0
448	8	-0.306047	1.6533	11.1068	29.0235	23.6906	-298.464	200	300	0	0	0	0	0	0	0	200	903	0	0	0	0	0	0	0	603	903	0
448	9	0.60948	2.26365	12.0224	944.551	-403.556	-252.687	200	300	0	0	0	0	0	0	0	200	903	0	0	0	0	0	0	0	603	903	0
449	0	0.762068	1.95848	10.8017	120.576	-220.45	21.9711	200	300	0	0	0	0	0	0	0	200	903	0	0	0	0	0	0	0	603	903	0
449	1	0	0	0	0	0	0	200	300	0	0	0	0	0	0	0	200	903	0	0	0	0	0	0	0	603	903	0
449	2	0	0	0	0	0	0	200	300	0	0	0	0	0	0	0	200	903	0	0	0	0	0	0	0	603	903	0
449	3	-0.306047	1.80589	10.1913	852.998	-220.45	-69.5817	200	300	0	0	0	0	0	0	0	200	903	0	0	0	0	0	0	0	603	903	0
449	4	0.914656	1.50071	11.7172	303.682	23.6906	-161.134	200	300	0	0	0	0	0	0	0	200	903	0	0	0	0	0	0	0	603	903	0
449	5	0.304304	1.6533	10.8017	578.34	23.6906	-252.687	200	300	0	0	0	0	0	0	0	200	903	0	0	0	0	0	0	0	603	903	0
449	6	0.60948	1.6533	10.1913	212.129	-342.52	-206.911	200	300	0	0	0	0	0	0	0	200	903	0	0	0	0	0	0	0	603	903	0
449	7	0	0	0	0	0	0	200	300	0	0	0	0	0	0	0	200	903	0	0	0	0	0	0	0	603	903	0
449	8	0.762068	1.34812	9.88614	578.34	23.6906	-115.358	200	300	0	0	0	0	0	0	0	200	903	0	0	0	0	0	0	0	603	903	0
449	9	-0.15346	1.50071	10.4965	1585.42	-37.3445	113.524	200	300	0	0	0	0	0	0	0	200	903	0	0	0	0	0	0	0	603	903	0
450	0	-0.15346	1.50071	10.4965	944.551	-281.485	67.7474	200	300	0	0	0	0	0	0	0	200	903	0	0	0	0	0	0	0	603	903	0
450	1	-0.611223	1.6533	11.412	120.576	145.761	-206.911	200	300	0	0	0	0	0	0	0	200	903	0	0	0	0	0	0	0	603	903	0
450	2	0.60948	1.95848	10.8017	395.235	84.7258	-115.358	200	300	0	0	0	0	0	0	0	200	903	0	0	0	0	0	0	0	603	903	0
450	3	0	0	0	0	0	0	200	300	0	0	0	0	0	0	0	200	903	0	0	0	0	0	0	0	603	903	0
450	4	0	0	0	0	0	0	200	300	0	0	0	0	0	0	0	200	903	0	0	0	0	0	0	0	603	903	0
450	5	0.762068	2.26365	11.1068	852.998	-98.3797	-206.911	200	300	0	0	0	0	0	0	0	200	903	0	0	0	0	0	0	0	603	903	0
450	6	-0.15346	1.34812	10.8017	761.445	-159.415	-344.24	200	300	0	0	0	0	0	0	0	200	903	0	0	0	0	0	0	0	603	903	0
450	7	-0.15346	-0.0251671	10.4965	578.34	-281.485	-206.911	200	300	0	0	0	0	0	0	0	200	903	0	0	0	0	0	0	0	603	903	0
450	8	-0.000871718	1.34812	12.9379	395.235	-37.3445	388.182	200	300	0	0	0	0	0	0	0	200	903	0	0	0	0	0	0	0	603	903	0
450	9	0.60948	1.95848	11.1068	669.893	-98.3797	-252.687	200	300	0	0	0	0	0	0	0	200	903	0	0	0	0	0	0	0	603	903	0
451	0	0	0	0	0	0	0	200	300	0	0	0	0	0	0	0	200	903	0	0	0	0	0	0	0	603	903	0
451	1	0	0	0	0	0	0	200	300	0	0	0	0	0	0	0	200	903	0	0	0	0	0	0	0	603	903	0
451	2	-0.458635	2.11106	10.8017	761.445	84.7258	-206.911	200	300	0	0	0	0	0	0	0	200	903	0	0	0	0	0	0	0	603	903	0
451	3	1.6776	1.80589	10.8017	852.998	-220.45	67.7474	200	300	0	0	0	0	0	0	0	200	903	0	0	0	0	0	0	0	603	903	0
451	4	0	0	0	0	0	0	200	300	0	0	0	0	0	0	0	200	903	0	0	0	0	0	0	0	603	903	0
451	5	0.762068	0.737772	11.412	120.576	-159.415	-252.687	200	300	0	0	0	0	0	0	0	200	903	0	0	0	0	0	0	0	603	903	0
451	6	-0.000871718	1.95848	10.4965	761.445	-464.591	-344.24	200	300	0	0	0	0	0	0	0	200	903	0	0	0	0	0	0	0	603	903	0
451	7	0	0	0	0	0	0	200	300	0	0	0	0	0	0	0	200	903	0	0	0	0	0	0	0	603	903	0
451	8	0	0	0	0	0	0	200	300	0	0	0	0	0	0	0	200	903	0	0	0	0	0	0	0	603	903	0
451	9	0	0	0	0	0	0	200	300	0	0	0	0	0	0	0	200	903	0	0	0	0	0	0	0	603	903	0
452	0	-0.458635	1.19554	10.1913	578.34	-220.45	-298.464	200	300	0	0	0	0	0	0	0	200	903	0	0	0	0	0	0	0	603	903	0
452	1	-0.458635	0.585184	13.5482	1219.21	-281.485	-115.358	200	300	0	0	0	0	0	0	0	200	903	0	0	0	0	0	0	0	603	903	0
452	2	0.151716	1.80589	11.1068	303.682	-342.52	113.524	200	300	0	0	0	0	0	0	0	200	903	0	0	0	0	0	0	0	603	903	0
452	3	0	0	0	0	0	0	200	300	0	0	0	0	0	0	0	200	903	0	0	0	0	0	0	0	603	903	0
452	4	0.762068	2.26365	9.88614	669.893	-159.415	-252.687	200	300	0	0	0	0	0	0	0	200	903	0	0	0	0	0	0	0	603	903	0
452	5	0.456892	1.95848	10.8017	669.893	-159.415	-206.911	200	300	0	0	0	0	0	0	0	200	903	0	0	0	0	0	0	0	603	903	0
452	6	2.13536	1.19554	10.4965	852.998	-159.415	-252.687	200	300	0	0	0	0	0	0	0	200	903	0	0	0	0	0	0	0	603	903	0
452	7	0	0	0	0	0	0	200	300	0	0	0	0	0	0	0	200	903	0	0	0	0	0	0	0	603	903	0
452	8	0.914656	0.737772	10.8017	486.787	-220.45	-252.687	200	300	0	0	0	0	0	0	0	200	903	0	0	0	0	0	0	0	603	903	0
452	9	0	0	0	0	0	0	200	300	0	0	0	0	0	0	0	200	903	0	0	0	0	0	0	0	603	903	0
453	0	0	0	0	0	0	0	200	300	0	0	0	0	0	0	0	200	903	0	0	0	0	0	0	0	603	903	0
453	1	-0.15346	2.26365	10.4965	578.34	-403.556	205.077	200	300	0	0	0	0	0	0	0	200	903	0	0	0	0	0	0	0	603	903	0
453	2	0	0	0	0	0	0	200	300	0	0	0	0	0	0	0	200	903	0	0	0	0	0	0	0	603	903	0
453	3	0.60948	1.80589	10.1913	669.893	-464.591	-69.5817	200	300	0	0	0	0	0	0	0	200	903	0	0	0	0	0	0	0	603	903	0
453	4	0.762068	1.50071	10.8017	669.893	-159.415	-161.134	200	300	0	0	0	0	0	0	0	200	903	0	0	0	0	0	0	0	603	903	0
453	5	0.60948	2.11106	10.8017	-62.5292	-281.485	-527.345	200	300	0	0	0	0	0	0	0	200	903	0	0	0	0	0	0	0	603	903	0
453	6	0	0	0	0	0	0	200	300	0	0	0	0	0	0	0	200	903	0	0	0	0	0	0	0	603	903	0
453	7	0	0	0	0	0	0	200	300	0	0	0	0	0	0	0	200	903	0	0	0	0	0	0	0	603	903	0
453	8	0.456892	2.26365	10.8017	761.445	145.761	-435.793	200	300	0	0	0	0	0	0	0	200	903	0	0	0	0	0	0	0	603	903	0
453	9	-0.15346	1.34812	10.4965	852.998	-98.3797	-161.134	200	300	0	0	0	0	0	0	0	200	903	0	0	0	0	0	0	0	603	903	0
454	0	0.60948	1.19554	10.1913	395.235	-464.591	296.629	200	300	0	0	0	0	0	0	0	200	903	0	0	0	0	0	0	0	603	903	0
454	1	0.456892	0.737772	10.8017	120.576	-220.45	-344.24	200	300	0	0	0	0	0	0	0	200	903	0	0	0	0	0	0	0	603	903	0
454	2	0.60948	1.80589	9.88614	486.787	-98.3797	-161.134	200	300	0	0	0	0	0	0	0	200	903	0	0	0	0	0	0	0	603	903	0
454	3	2.28795	2.56883	12.0224	29.0235	-525.626	-161.134	200	300	0	0	0	0	0	0	0	200	903	0	0	0	0	0	0	0	603	903	0
454	4	0	0	0	0	0	0	200	300	0	0	0	0	0	0	0	200	903	0	0	0	0	0	0	0	603	903	0
454	5	-0.15346	1.95848	10.8017	486.787	-159.415	-252.687	200	300	0	0	0	0	0	0	0	200	903	0	0	0	0	0	0	0	603	903	0
454	6	-0.611223	-0.177755	13.5482	761.445	-281.485	-115.358	200	300	0	0	0	0	0	0	0	200	903	0	0	0	0	0	0	0	603	903	0
454	7	1.06724	1.34812	10.4965	852.998	-281.485	-161.134	200	300	0	0	0	0	0	0	0	200	903	0	0	0	0	0	0	0	603	903	0
454	8	0	0	0	0	0	0	200	300	0	0	0	0	0	0	0	200	903	0	0	0	0	0	0	0	603	903	0
454	9	0	0	0	0	0	0	200	300	0	0	0	0	0	0	0	200	903	0	0	0	0	0	0	0	603	903	0
455	0	0	0	0	0	0	0	200	300	0	0	0	0	0	0	0	200	903	0	0	0	0	0	0	0	603	903	0
455	1	1.06724	1.34812	12.3275	120.576	23.6906	21.9711	200	300	0	0	0	0	0	0	0	200	903	0	0	0	0	0	0	0	603	903	0
455	2	-0.458635	2.11106	10.4965	1127.66	84.7258	205.077	200	300	0	0	0	0	0	0	0	200	903	0	0	0	0	0	0	0	603	903	0
455	3	0.456892	2.11106	9.88614	761.445	-403.556	-161.134	200	300	0	0	0	0	0	0	0	200	903	0	0	0	0	0	0	0	603	903	0
455	4	0.914656	1.50071	10.8017	761.445	-342.52	-298.464	200	300	0	0	0	0	0	0	0	200	903	0	0	0	0	0	0	0	603	903	0
455	5	0.762068	1.19554	10.4965	852.998	-159.415	-481.569	200	300	0	0	0	0	0	0	0	200	903	0	0	0	0	0	0	0	603	903	0
455	6	0	0	0	0	0	0	200	300	0	0	0	0	0	0	0	200	903	0	0	0	0	0	0	0	603	903	0
455	7	0	0	0	0	0	0	200	300	0	0	0	0	0	0	0	200	903	0	0	0	0	0	0	0	603	903	0
455	8	-0.000871718	1.95848	10.8017	303.682	-159.415	-206.911	200	300	0	0	0	0	0	0	0	200	903	0	0	0	0	0	0	0	603	903	0
455	9	-0.763811	0.432597	12.9379	578.34	-281.485	-69.5817	200	300	0	0	0	0	0	0	0	200	903	0	0	0	0	0	0	0	603	903	0
456	0	0.456892	2.11106	10.8017	578.34	-342.52	-298.464	200	300	0	0	0	0	0	0	0	200	903	0	0	0	0	0	0	0	603	903	0
456	1	0.762068	1.50071	10.1913	1036.1	-98.3797	-252.687	200	300	0	0	0	0	0	0	0	200	903	0	0	0	0	0	0	0	603	903	0
456	2	0.762068	1.6533	12.6327	395.235	145.761	-161.134	200	300	0	0	0	0	0	0	0	200	903	0	0	0	0	0	0	0	603	903	0
456	3	0	0	0	0	0	0	200	300	0	0	0	0	0	0	0	200	903	0	0	0	0	0	0	0	603	903	0
456	4	0.304304	1.34812	10.8017	120.576	-37.3445	250.853	200	300	0	0	0	0	0	0	0	200	903	0	0	0	0	0	0	0	603	903	0
456	5	0	0	0	0	0	0	200	300	0	0	0	0	0	0	0	200	903	0	0	0	0	0	0	0	603	903	0
456	6	0.456892	0.585184	10.4965	486.787	-342.52	-435.793	200	300	0	0	0	0	0	0	0	200	903	0	0	0	0	0	0	0	603	903	0
456	7	0	0	0	0	0	0	200	300	0	0	0	0	0	0	0	200	903	0	0	0	0	0	0	0	603	903	0
456	8	0	0	0	0	0	0	200	300	0	0	0	0	0	0	0	200	903	0	0	0	0	0	0	0	603	903	0
456	9	0	0	0	0	0	0	200	300	0	0	0	0	0	0	0	200	903	0	0	0	0	0	0	0	603	903	0
457	0	-0.15346	0.585184	12.3275	-154.082	-403.556	-206.911	200	300	0	0	0	0	0	0	0	200	903	0	0	0	0	0	0	0	603	903	0
457	1	-0.611223	1.34812	10.8017	303.682	-342.52	-252.687	200	300	0	0	0	0	0	0	0	200	903	0	0	0	0	0	0	0	603	903	0
457	2	0.60948	1.80589	10.8017	669.893	-464.591	-69.5817	200	300	0	0	0	0	0	0	0	200	903	0	0	0	0	0	0	0	603	903	0
457	3	0.60948	0.280009	10.8017	395.235	-159.415	21.9711	200	300	0	0	0	0	0	0	0	200	903	0	0	0	0	0	0	0	603	903	0
457	4	1.37242	1.95848	9.88614	486.787	84.7258	159.3	200	300	0	0	0	0	0	0	0	200	903	0	0	0	0	0	0	0	603	903	0
457	5	1.37242	0.737772	12.9379	578.34	-159.415	-69.5817	200	300	0	0	0	0	0	0	0	200	903	0	0	0	0	0	0	0	603	903	0
457	6	0.151716	1.04295	10.1913	578.34	-769.766	-69.5817	200	300	0	0	0	0	0	0	0	200	903	0	0	0	0	0	0	0	603	903	0
457	7	0	0	0	0	0	0	200	300	0	0	0	0	0	0	0	200	903	0	0	0	0	0	0	0	603	903	0
457	8	-0.15346	2.11106	10.8017	669.893	-98.3797	-206.911	200	300	0	0	0	0	0	0	0	200	903	0	0	0	0	0	0	0	603	903	0
457	9	0.304304	2.56883	11.1068	303.682	-281.485	-252.687	200	300	0	0	0	0	0	0	0	200	903	0	0	0	0	0	0	0	603	903	0
458	0	0.762068	0.89036	12.0224	120.576	84.7258	-390.016	200	300	0	0	0	0	0	0	0	200	903	0	0	0	0	0	0	0	603	903	0
458	1	1.06724	2.26365	10.1913	761.445	267.831	-252.687	200	300	0	0	0	0	0	0	0	200	903	0	0	0	0	0	0	0	603	903	0
458	2	0.60948	0.737772	11.1068	669.893	-281.485	250.853	200	300	0	0	0	0	0	0	0	200	903	0	0	0	0	0	0	0	603	903	0
458	3	0	0	0	0	0	0	200	300	0	0	0	0	0	0	0	200	903	0	0	0	0	0	0	0	603	903	0
458	4	1.37242	1.04295	11.412	669.893	-220.45	-527.345	200	300	0	0	0	0	0	0	0	200	903	0	0	0	0	0	0	0	603	903	0
458	5	-0.916399	1.19554	12.0224	578.34	-281.485	-206.911	200	300	0	0	0	0	0	0	0	200	903	0	0	0	0	0	0	0	603	903	0
458	6	0.60948	2.26365	10.8017	669.893	-37.3445	-252.687	200	300	0	0	0	0	0	0	0	200	903	0	0	0	0	0	0	0	603	903	0
458	7	1.21983	1.95848	11.7172	578.34	-37.3445	-161.134	200	300	0	0	0	0	0	0	0	200	903	0	0	0	0	0	0	0	603	903	0
458	8	0	0	0	0	0	0	200	300	0	0	0	0	0	0	0	200	903	0	0	0	0	0	0	0	603	903	0
458	9	1.6776	1.19554	11.7172	578.34	-1074.94	296.629	200	300	0	0	0	0	0	0	0	200	903	0	0	0	0	0	0	0	603	903	0
459	0	0	0	0	0	0	0	200	300	0	0	0	0	0	0	0	200	903	0	0	0	0	0	0	0	603	903	0
459	1	1.37242	-0.330343	10.8017	944.551	-281.485	-206.911	200	300	0	0	0	0	0	0	0	200	903	0	0	0	0	0	0	0	603	903	0
459	2	-0.000871718	1.34812	11.412	303.682	-342.52	-206.911	200	300	0	0	0	0	0	0	0	200	903	0	0	0	0	0	0	0	603	903	0
459	3	1.06724	1.80589	11.412	852.998	-37.3445	-206.911	200	300	0	0	0	0	0	0	0	200	903	0	0	0	0	0	0	0	603	903	0
459	4	1.21983	1.80589	11.412	303.682	-220.45	-206.911	200	300	0	0	0	0	0	0	0	200	903	0	0	0	0	0	0	0	603	903	0
459	5	0	0	0	0	0	0	200	300	0	0	0	0	0	0	0	200	903	0	0	0	0	0	0	0	603	903	0
459	6	1.83018	2.11106	10.8017	1036.1	-281.485	-161.134	200	300	0	0	0	0	0	0	0	200	903	0	0	0	0	0	0	0	603	903	0
459	7	-0.458635	1.6533	10.4965	761.445	145.761	-298.464	200	300	0	0	0	0	0	0	0	200	903	0	0	0	0	0	0	0	603	903	0
459	8	1.21983	1.19554	11.1068	578.34	-159.415	-481.569	200	300	0	0	0	0	0	0	0	200	903	0	0	0	0	0	0	0	603	903	0
459	9	-0.000871718	1.19554	11.1068	-62.5292	-37.3445	-115.358	200	300	0	0	0	0	0	0	0	200	903	0	0	0	0	0	0	0	603	903	0
460	0	0.762068	1.6533	11.7172	29.0235	-98.3797	-69.5817	200	300	0	0	0	0	0	0	0	200	903	0	0	0	0	0	0	0	603	903	0
460	1	0.151716	2.26365	9.88614	303.682	-220.45	-298.464	200	300	0	0	0	0	0	0	0	200	903	0	0	0	0	0	0	0	603	903	0
460	2	0	0	0	0	0	0	200	300	0	0	0	0	0	0	0	200	903	0	0	0	0	0	0	0	603	903	0
460	3	0.60948	1.95848	11.412	578.34	-220.45	-23.8053	200	300	0	0	0	0	0	0	0	200	903	0	0	0	0	0	0	0	603	903	0
460	4	-0.15346	1.34812	10.4965	761.445	-403.556	-298.464	200	300	0	0	0	0	0	0	0	200	903	0	0	0	0	0	0	0	603	903	0
460	5	1.98277	1.19554	10.4965	395.235	-220.45	67.7474	200	300	0	0	0	0	0	0	0	200	903	0	0	0	0	0	0	0	603	903	0
460	6	0.151716	-0.940694	10.4965	578.34	23.6906	113.524	200	300	0	0	0	0	0	0	0	200	903	0	0	0	0	0	0	0	603	903	0
460	7	0.60948	1.34812	10.8017	578.34	-403.556	-298.464	200	300	0	0	0	0	0	0	0	200	903	0	0	0	0	0	0	0	603	903	0
460	8	0	0	0	0	0	0	200	300	0	0	0	0	0	0	0	200	903	0	0	0	0	0	0	0	603	903	0
460	9	0	0	0	0	0	0	200	300	0	0	0	0	0	0	0	200	903	0	0	0	0	0	0	0	603	903	0
461	0	-0.000871718	1.04295	11.412	395.235	-159.415	-206.911	200	300	0	0	0	0	0	0	0	200	903	0	0	0	0	0	0	0	603	903	0
461	1	-0.15346	1.80589	10.1913	852.998	84.7258	-23.8053	200	300	0	0	0	0	0	0	0	200	903	0	0	0	0	0	0	0	603	903	0
461	2	-0.000871718	1.80589	10.1913	669.893	84.7258	205.077	200	300	0	0	0	0	0	0	0	200	903	0	0	0	0	0	0	0	603	903	0
461	3	-0.15346	1.04295	11.7172	395.235	-281.485	-115.358	200	300	0	0	0	0	0	0	0	200	903	0	0	0	0	0	0	0	603	903	0
461	4	0.151716	-0.788107	12.0224	669.893	-37.3445	-344.24	200	300	0	0	0	0	0	0	0	200	903	0	0	0	0	0	0	0	603	903	0
461	5	-0.15346	1.04295	12.6327	395.235	-37.3445	-344.24	200	300	0	0	0	0	0	0	0	200	903	0	0	0	0	0	0	0	603	903	0
461	6	0.60948	2.874	10.1913	578.34	23.6906	-390.016	200	300	0	0	0	0	0	0	0	200	903	0	0	0	0	0	0	0	603	903	0
461	7	1.06724	2.26365	11.7172	212.129	23.6906	-298.464	200	300	0	0	0	0	0	0	0	200	903	0	0	0	0	0	0	0	603	903	0
461	8	0	0	0	0	0	0	200	300	0	0	0	0	0	0	0	200	903	0	0	0	0	0	0	0	603	903	0
461	9	0.762068	1.50071	10.4965	486.787	-281.485	-161.134	200	300	0	0	0	0	0	0	0	200	903	0	0	0	0	0	0	0	603	903	0
462	0	-0.611223	1.34812	10.4965	944.551	-159.415	21.9711	200	300	0	0	0	0	0	0	0	200	903	0	0	0	0	0	0	0	603	903	0
462	1	0.456892	-0.940694	11.1068	1127.66	-769.766	-115.358	200	300	0	0	0	0	0	0	0	200	903	0	0	0	0	0	0	0	603	903	0
462	2	0.60948	1.50071	10.8017	303.682	-98.3797	-161.134	200	300	0	0	0	0	0	0	0	200	903	0	0	0	0	0	0	0	603	903	0
462	3	0.914656	1.95848	10.1913	395.235	-281.485	-115.358	200	300	0	0	0	0	0	0	0	200	903	0	0	0	0	0	0	0	603	903	0
462	4	1.21983	1.95848	13.2431	395.235	-159.415	-161.134	200	300	0	0	0	0	0	0	0	200	903	0	0	0	0	0	0	0	603	903	0
462	5	0	0	0	0	0	0	200	300	0	0	0	0	0	0	0	200	903	0	0	0	0	0	0	0	603	903	0
462	6	2.28795	2.11106	9.58096	669.893	-98.3797	-69.5817	200	300	0	0	0	0	0	0	0	200	903	0	0	0	0	0	0	0	603	903	0
462	7	-0.611223	2.41624	11.412	1585.42	-37.3445	-206.911	200	300	0	0	0	0	0	0	0	200	903	0	0	0	0	0	0	0	603	903	0
462	8	1.06724	1.34812	10.8017	761.445	23.6906	-435.793	200	300	0	0	0	0	0	0	0	200	903	0	0	0	0	0	0	0	603	903	0
462	9	0.60948	1.34812	11.412	29.0235	-159.415	-252.687	200	300	0	0	0	0	0	0	0	200	903	0	0	0	0	0	0	0	603	903	0
463	0	0.762068	1.6533	9.88614	212.129	-159.415	-161.134	200	300	0	0	0	0	0	0	0	200	903	0	0	0	0	0	0	0	603	903	0
463	1	0.762068	1.6533	11.1068	303.682	23.6906	-69.5817	200	300	0	0	0	0	0	0	0	200	903	0	0	0	0	0	0	0	603	903	0
463	2	0	0	0	0	0	0	200	300	0	0	0	0	0	0	0	200	903	0	0	0	0	0	0	0	603	903	0
463	3	1.98277	2.11106	10.1913	669.893	-342.52	21.9711	200	300	0	0	0	0	0	0	0	200	903	0	0	0	0	0	0	0	603	903	0
463	4	-0.611223	1.6533	11.412	944.551	-159.415	-252.687	200	300	0	0	0	0	0	0	0	200	903	0	0	0	0	0	0	0	603	903	0
463	5	0.60948	1.50071	10.4965	578.34	145.761	-252.687	200	300	0	0	0	0	0	0	0	200	903	0	0	0	0	0	0	0	603	903	0
463	6	1.37242	1.50071	9.88614	578.34	-220.45	21.9711	200	300	0	0	0	0	0	0	0	200	903	0	0	0	0	0	0	0	603	903	0
463	7	0	0	0	0	0	0	200	300	0	0	0	0	0	0	0	200	903	0	0	0	0	0	0	0	603	903	0
463	8	0	0	0	0	0	0	200	300	0	0	0	0	0	0	0	200	903	0	0	0	0	0	0	0	603	903	0
463	9	0	0	0	0	0	0	200	300	0	0	0	0	0	0	0	200	903	0	0	0	0	0	0	0	603	903	0
464	0	-0.000871718	1.95848	11.1068	1219.21	145.761	205.077	200	300	0	0	0	0	0	0	0	200	903	0	0	0	0	0	0	0	603	903	0
464	1	0.304304	2.26365	12.6327	852.998	145.761	-206.911	200	300	0	0	0	0	0	0	0	200	903	0	0	0	0	0	0	0	603	903	0
464	2	1.06724	1.19554	10.4965	1219.21	-281.485	-115.358	200	300	0	0	0	0	0	0	0	200	903	0	0	0	0	0	0	0	603	903	0
464	3	0	0	0	0	0	0	200	300	0	0	0	0	0	0	0	200	903	0	0	0	0	0	0	0	603	903	0
464	4	0	0	0	0	0	0	200	300	0	0	0	0	0	0	0	200	903	0	0	0	0	0	0	0	603	903	0
464	5	0.304304	1.19554	10.8017	303.682	-342.52	-252.687	200	300	0	0	0	0	0	0	0	200	903	0	0	0	0	0	0	0	603	903	0
464	6	0	0	0	0	0	0	200	300	0	0	0	0	0	0	0	200	903	0	0	0	0	0	0	0	603	903	0
464	7	0.60948	2.26365	11.1068	212.129	206.796	113.524	200	300	0	0	0	0	0	0	0	200	903	0	0	0	0	0	0	0	603	903	0
464	8	-0.458635	2.11106	10.8017	-62.5292	-98.3797	-206.911	200	300	0	0	0	0	0	0	0	200	903	0	0	0	0	0	0	0	603	903	0
464	9	0.456892	1.50071	11.7172	669.893	-159.415	113.524	200	300	0	0	0	0	0	0	0	200	903	0	0	0	0	0	0	0	603	903	0
465	0	0.60948	1.50071	10.4965	944.551	23.6906	-298.464	200	300	0	0	0	0	0	0	0	200	903	0	0	0	0	0	0	0	603	903	0
465	1	0.304304	1.04295	10.4965	1127.66	-220.45	-23.8053	200	300	0	0	0	0	0	0	0	200	903	0	0	0	0	0	0	0	603	903	0
465	2	1.98277	1.50071	12.6327	852.998	-525.626	-344.24	200	300	0	0	0	0	0	0	0	200	903	0	0	0	0	0	0	0	603	903	0
465	3	0.151716	1.50071	10.8017	212.129	84.7258	-206.911	200	300	0	0	0	0	0	0	0	200	903	0	0	0	0	0	0	0	603	903	0
465	4	1.6776	2.11106	11.412	303.682	-37.3445	-206.911	200	300	0	0	0	0	0	0	0	200	903	0	0	0	0	0	0	0	603	903	0
465	5	-0.458635	0.127421	11.1068	395.235	-281.485	-23.8053	200	300	0	0	0	0	0	0	0	200	903	0	0	0	0	0	0	0	603	903	0
465	6	1.06724	1.80589	11.1068	669.893	23.6906	-69.5817	200	300	0	0	0	0	0	0	0	200	903	0	0	0	0	0	0	0	603	903	0
465	7	0	0	0	0	0	0	200	300	0	0	0	0	0	0	0	200	903	0	0	0	0	0	0	0	603	903	0
465	8	0.456892	1.6533	10.1913	852.998	-830.802	-344.24	200	300	0	0	0	0	0	0	0	200	903	0	0	0	0	0	0	0	603	903	0
465	9	0.60948	-0.0251671	10.4965	578.34	84.7258	-161.134	200	300	0	0	0	0	0	0	0	200	903	0	0	0	0	0	0	0	603	903	0
466	0	0.456892	1.6533	9.88614	486.787	206.796	-206.911	200	300	0	0	0	0	0	0	0	200	903	0	0	0	0	0	0	0	603	903	0
466	1	-0.611223	2.41624	10.1913	303.682	-98.3797	-23.8053	200	300	0	0	0	0	0	0	0	200	903	0	0	0	0	0	0	0	603	903	0
466	2	-0.000871718	2.26365	10.8017	486.787	-220.45	-344.24	200	300	0	0	0	0	0	0	0	200	903	0	0	0	0	0	0	0	603	903	0
466	3	0.456892	0.127421	10.1913	212.129	-220.45	-390.016	200	300	0	0	0	0	0	0	0	200	903	0	0	0	0	0	0	0	603	903	0
466	4	0.762068	1.95848	10.4965	761.445	-37.3445	-435.793	200	300	0	0	0	0	0	0	0	200	903	0	0	0	0	0	0	0	603	903	0
466	5	0	0	0	0	0	0	200	300	0	0	0	0	0	0	0	200	903	0	0	0	0	0	0	0	603	903	0
466	6	-0.611223	1.19554	12.0224	761.445	145.761	-161.134	200	300	0	0	0	0	0	0	0	200	903	0	0	0	0	0	0	0	603	903	0
466	7	0	0	0	0	0	0	200	300	0	0	0	0	0	0	0	200	903	0	0	0	0	0	0	0	603	903	0
466	8	2.28795	1.19554	10.1913	212.129	-403.556	-344.24	200	300	0	0	0	0	0	0	0	200	903	0	0	0	0	0	0	0	603	903	0
466	9	-0.15346	1.50071	9.88614	1127.66	-220.45	-298.464	200	300	0	0	0	0	0	0	0	200	903	0	0	0	0	0	0	0	603	903	0
467	0	-0.000871718	1.95848	12.0224	578.34	-159.415	-69.5817	200	300	0	0	0	0	0	0	0	200	903	0	0	0	0	0	0	0	603	903	0
467	1	0.914656	2.11106	11.1068	669.893	267.831	21.9711	200	300	0	0	0	0	0	0	0	200	903	0	0	0	0	0	0	0	603	903	0
467	2	0	0	0	0	0	0	200	300	0	0	0	0	0	0	0	200	903	0	0	0	0	0	0	0	603	903	0
467	3	0	0	0	0	0	0	200	300	0	0	0	0	0	0	0	200	903	0	0	0	0	0	0	0	603	903	0
467	4	1.83018	1.34812	11.412	578.34	-342.52	-161.134	200	300	0	0	0	0	0	0	0	200	903	0	0	0	0	0	0	0	603	903	0
467	5	-0.306047	0.280009	10.4965	1036.1	23.6906	-252.687	200	300	0	0	0	0	0	0	0	200	903	0	0	0	0	0	0	0	603	903	0
467	6	0.151716	1.80589	12.0224	303.682	-98.3797	-298.464	200	300	0	0	0	0	0	0	0	200	903	0	0	0	0	0	0	0	603	903	0
467	7	-0.306047	3.17918	11.1068	761.445	23.6906	-435.793	200	300	0	0	0	0	0	0	0	200	903	0	0	0	0	0	0	0	603	903	0
467	8	0.151716	2.26365	11.412	120.576	-37.3445	21.9711	200	300	0	0	0	0	0	0	0	200	903	0	0	0	0	0	0	0	603	903	0
467	9	2.13536	0.432597	10.1913	212.129	-37.3445	-344.24	200	300	0	0	0	0	0	0	0	200	903	0	0	0	0	0	0	0	603	903	0
468	0	0	0	0	0	0	0	200	300	0	0	0	0	0	0	0	200	903	0	0	0	0	0	0	0	603	903	0
468	1	0	0	0	0	0	0	200	300	0	0	0	0	0	0	0	200	903	0	0	0	0	0	0	0	603	903	0
468	2	0	0	0	0	0	0	200	300	0	0	0	0	0	0	0	200	903	0	0	0	0	0	0	0	603	903	0
468	3	0.151716	-0.330343	11.7172	578.34	-37.3445	-435.793	200	300	0	0	0	0	0	0	0	200	903	0	0	0	0	0	0	0	603	903	0
468	4	0.304304	1.6533	10.1913	-62.5292	-403.556	-69.5817	200	300	0	0	0	0	0	0	0	200	903	0	0	0	0	0	0	0	603	903	0
468	5	1.06724	1.50071	10.8017	395.235	-220.45	159.3	200	300	0	0	0	0	0	0	0	200	903	0	0	0	0	0	0	0	603	903	0
468	6	0	0	0	0	0	0	200	300	0	0	0	0	0	0	0	200	903	0	0	0	0	0	0	0	603	903	0
468	7	0	0	0	0	0	0	200	300	0	0	0	0	0	0	0	200	903	0	0	0	0	0	0	0	603	903	0
468	8	0	0	0	0	0	0	200	300	0	0	0	0	0	0	0	200	903	0	0	0	0	0	0	0	603	903	0
468	9	-0.306047	1.50071	10.8017	761.445	-98.3797	113.524	200	300	0	0	0	0	0	0	0	200	903	0	0	0	0	0	0	0	603	903	0
469	0	-0.15346	1.50071	10.8017	944.551	-37.3445	-161.134	200	300	0	0	0	0	0	0	0	200	903	0	0	0	0	0	0	0	603	903	0
469	1	0	0	0	0	0	0	200	300	0	0	0	0	0	0	0	200	903	0	0	0	0	0	0	0	603	903	0
469	2	0.914656	0.89036	10.1913	486.787	-464.591	-206.911	200	300	0	0	0	0	0	0	0	200	903	0	0	0	0	0	0	0	603	903	0
469	3	0.151716	1.80589	12.6327	761.445	-525.626	-344.24	200	300	0	0	0	0	0	0	0	200	903	0	0	0	0	0	0	0	603	903	0
469	4	0	0	0	0	0	0	200	300	0	0	0	0	0	0	0	200	903	0	0	0	0	0	0	0	603	903	0
469	5	0.304304	2.56883	12.3275	669.893	511.972	-252.687	200	300	0	0	0	0	0	0	0	200	903	0	0	0	0	0	0	0	603	903	0
469	6	0	0	0	0	0	0	200	300	0	0	0	0	0	0	0	200	903	0	0	0	0	0	0	0	603	903	0
469	7	0.762068	1.50071	10.1913	852.998	-403.556	-161.134	200	300	0	0	0	0	0	0	0	200	903	0	0	0	0	0	0	0	603	903	0
469	8	0.304304	1.04295	11.412	486.787	-37.3445	-161.134	200	300	0	0	0	0	0	0	0	200	903	0	0	0	0	0	0	0	603	903	0
469	9	0.304304	1.04295	11.7172	395.235	-220.45	-298.464	200	300	0	0	0	0	0	0	0	200	903	0	0	0	0	0	0	0	603	903	0
470	0	0.762068	1.04295	10.8017	486.787	-98.3797	-206.911	200	300	0	0	0	0	0	0	0	200	903	0	0	0	0	0	0	0	603	903	0
470	1	0	0	0	0	0	0	200	300	0	0	0	0	0	0	0	200	903	0	0	0	0	0	0	0	603	903	0
470	2	1.06724	1.95848	10.4965	486.787	-586.661	-390.016	200	300	0	0	0	0	0	0	0	200	903	0	0	0	0	0	0	0	603	903	0
470	3	0	0	0	0	0	0	200	300	0	0	0	0	0	0	0	200	903	0	0	0	0	0	0	0	603	903	0
470	4	0	0	0	0	0	0	200	300	0	0	0	0	0	0	0	200	903	0	0	0	0	0	0	0	603	903	0
470	5	-0.306047	0.89036	10.1913	1127.66	-708.731	296.629	200	300	0	0	0	0	0	0	0	200	903	0	0	0	0	0	0	0	603	903	0
470	6	-0.306047	1.34812	12.3275	852.998	-342.52	-344.24	200	300	0	0	0	0	0	0	0	200	903	0	0	0	0	0	0	0	603	903	0
470	7	0.914656	1.6533	11.412	944.551	-159.415	-252.687	200	300	0	0	0	0	0	0	0	200	903	0	0	0	0	0	0	0	603	903	0
470	8	1.06724	1.34812	10.1913	303.682	-98.3797	-206.911	200	300	0	0	0	0	0	0	0	200	903	0	0	0	0	0	0	0	603	903	0
470	9	1.06724	2.26365	10.4965	944.551	84.7258	21.9711	200	300	0	0	0	0	0	0	0	200	903	0	0	0	0	0	0	0	603	903	0
471	0	0	0	0	0	0	0	200	300	0	0	0	0	0	0	0	200	903	0	0	0	0	0	0	0	603	903	0
471	1	0	0	0	0	0	0	200	300	0	0	0	0	0	0	0	200	903	0	0	0	0	0	0	0	603	903	0
471	2	-0.611223	2.41624	10.4965	761.445	-159.415	-435.793	200	300	0	0	0	0	0	0	0	200	903	0	0	0	0	0	0	0	603	903	0
471	3	-0.611223	1.6533	13.2431	1310.76	-98.3797	-344.24	200	300	0	0	0	0	0	0	0	200	903	0	0	0	0	0	0	0	603	903	0
471	4	0.914656	1.80589	11.412	852.998	-525.626	-115.358	200	300	0	0	0	0	0	0	0	200	903	0	0	0	0	0	0	0	603	903	0
471	5	2.28795	1.6533	9.88614	1127.66	84.7258	-298.464	200	300	0	0	0	0	0	0	0	200	903	0	0	0	0	0	0	0	603	903	0
471	6	0	0	0	0	0	0	200	300	0	0	0	0	0	0	0	200	903	0	0	0	0	0	0	0	603	903	0
471	7	-0.000871718	1.80589	10.1913	212.129	-281.485	67.7474	200	300	0	0	0	0	0	0	0	200	903	0	0	0	0	0	0	0	603	903	0
471	8	0	0	0	0	0	0	200	300	0	0	0	0	0	0	0	200	903	0	0	0	0	0	0	0	603	903	0
471	9	0.304304	2.41624	11.7172	852.998	-37.3445	-115.358	200	300	0	0	0	0	0	0	0	200	903	0	0	0	0	0	0	0	603	903	0
472	0	-0.306047	2.11106	10.4965	852.998	-37.3445	-115.358	200	300	0	0	0	0	0	0	0	200	903	0	0	0	0	0	0	0	603	903	0
472	1	1.06724	0.89036	12.0224	1036.1	84.7258	-206.911	200	300	0	0	0	0	0	0	0	200	903	0	0	0	0	0	0	0	603	903	0
472	2	2.59312	1.19554	10.1913	395.235	-98.3797	21.9711	200	300	0	0	0	0	0	0	0	200	903	0	0	0	0	0	0	0	603	903	0
472	3	0	0	0	0	0	0	200	300	0	0	0	0	0	0	0	200	903	0	0	0	0	0	0	0	603	903	0
472	4	0	0	0	0	0	0	200	300	0	0	0	0	0	0	0	200	903	0	0	0	0	0	0	0	603	903	0
472	5	0	0	0	0	0	0	200	300	0	0	0	0	0	0	0	200	903	0	0	0	0	0	0	0	603	903	0
472	6	-0.458635	1.6533	10.4965	212.129	-220.45	-344.24	200	300	0	0	0	0	0	0	0	200	903	0	0	0	0	0	0	0	603	903	0
472	7	-0.306047	1.34812	12.3275	120.576	23.6906	113.524	200	300	0	0	0	0	0	0	0	200	903	0	0	0	0	0	0	0	603	903	0
472	8	1.06724	2.11106	11.7172	669.893	84.7258	-161.134	200	300	0	0	0	0	0	0	0	200	903	0	0	0	0	0	0	0	603	903	0
472	9	2.44053	1.6533	10.1913	578.34	-98.3797	-206.911	200	300	0	0	0	0	0	0	0	200	903	0	0	0	0	0	0	0	603	903	0
473	0	0	0	0	0	0	0	200	300	0	0	0	0	0	0	0	200	903	0	0	0	0	0	0	0	603	903	0
473	1	0	0	0	0	0	0	200	300	0	0	0	0	0	0	0	200	903	0	0	0	0	0	0	0	603	903	0
473	2	-0.15346	1.6533	10.4965	303.682	-586.661	-435.793	200	300	0	0	0	0	0	0	0	200	903	0	0	0	0	0	0	0	603	903	0
473	3	-0.306047	2.11106	11.412	761.445	267.831	-344.24	200	300	0	0	0	0	0	0	0	200	903	0	0	0	0	0	0	0	603	903	0
473	4	0.151716	1.95848	13.8534	395.235	206.796	113.524	200	300	0	0	0	0	0	0	0	200	903	0	0	0	0	0	0	0	603	903	0
473	5	0.762068	1.80589	10.8017	486.787	-525.626	-252.687	200	300	0	0	0	0	0	0	0	200	903	0	0	0	0	0	0	0	603	903	0
473	6	1.6776	1.50071	9.88614	852.998	-281.485	-252.687	200	300	0	0	0	0	0	0	0	200	903	0	0	0	0	0	0	0	603	903	0
473	7	0	0	0	0	0	0	200	300	0	0	0	0	0	0	0	200	903	0	0	0	0	0	0	0	603	903	0
473	8	-0.15346	1.34812	10.8017	761.445	-403.556	-298.464	200	300	0	0	0	0	0	0	0	200	903	0	0	0	0	0	0	0	603	903	0
473	9	0	0	0	0	0	0	200	300	0	0	0	0	0	0	0	200	903	0	0	0	0	0	0	0	603	903	0
474	0	0.151716	1.50071	10.1913	-62.5292	-220.45	-161.134	200	300	0	0	0	0	0	0	0	200	903	0	0	0	0	0	0	0	603	903	0
474	1	0.304304	1.95848	11.7172	120.576	-281.485	113.524	200	300	0	0	0	0	0	0	0	200	903	0	0	0	0	0	0	0	603	903	0
474	2	0.151716	2.26365	11.1068	303.682	-464.591	-298.464	200	300	0	0	0	0	0	0	0	200	903	0	0	0	0	0	0	0	603	903	0
474	3	0	0	0	0	0	0	200	300	0	0	0	0	0	0	0	200	903	0	0	0	0	0	0	0	603	903	0
474	4	0	0	0	0	0	0	200	300	0	0	0	0	0	0	0	200	903	0	0	0	0	0	0	0	603	903	0
474	5	-0.000871718	2.11106	10.8017	578.34	-37.3445	-344.24	200	300	0	0	0	0	0	0	0	200	903	0	0	0	0	0	0	0	603	903	0
474	6	0	0	0	0	0	0	200	300	0	0	0	0	0	0	0	200	903	0	0	0	0	0	0	0	603	903	0
474	7	-0.611223	0.89036	10.8017	395.235	-342.52	-115.358	200	300	0	0	0	0	0	0	0	200	903	0	0	0	0	0	0	0	603	903	0
474	8	-0.611223	1.6533	12.6327	761.445	-281.485	-206.911	200	300	0	0	0	0	0	0	0	200	903	0	0	0	0	0	0	0	603	903	0
474	9	0.456892	0.89036	10.8017	669.893	-98.3797	-206.911	200	300	0	0	0	0	0	0	0	200	903	0	0	0	0	0	0	0	603	903	0
475	0	2.13536	2.26365	9.88614	578.34	-281.485	-298.464	200	300	0	0	0	0	0	0	0	200	903	0	0	0	0	0	0	0	603	903	0
475	1	0.914656	2.874	10.4965	303.682	-159.415	-298.464	200	300	0	0	0	0	0	0	0	200	903	0	0	0	0	0	0	0	603	903	0
475	2	0.60948	2.26365	10.4965	212.129	84.7258	-161.134	200	300	0	0	0	0	0	0	0	200	903	0	0	0	0	0	0	0	603	903	0
475	3	-0.306047	1.80589	10.1913	852.998	-342.52	205.077	200	300	0	0	0	0	0	0	0	200	903	0	0	0	0	0	0	0	603	903	0
475	4	-0.458635	1.04295	10.8017	944.551	-159.415	-69.5817	200	300	0	0	0	0	0	0	0	200	903	0	0	0	0	0	0	0	603	903	0
475	5	-0.458635	1.95848	13.2431	1036.1	84.7258	-161.134	200	300	0	0	0	0	0	0	0	200	903	0	0	0	0	0	0	0	603	903	0
475	6	0.456892	0.280009	11.1068	944.551	-220.45	-435.793	200	300	0	0	0	0	0	0	0	200	903	0	0	0	0	0	0	0	603	903	0
475	7	2.59312	1.50071	11.412	120.576	-342.52	-298.464	200	300	0	0	0	0	0	0	0	200	903	0	0	0	0	0	0	0	603	903	0
475	8	1.06724	2.72141	9.58096	578.34	23.6906	67.7474	200	300	0	0	0	0	0	0	0	200	903	0	0	0	0	0	0	0	603	903	0
475	9	0	0	0	0	0	0	200	300	0	0	0	0	0	0	0	200	903	0	0	0	0	0	0	0	603	903	0
476	0	0	0	0	0	0	0	200	300	0	0	0	0	0	0	0	200	903	0	0	0	0	0	0	0	603	903	0
476	1	-0.763811	2.26365	11.412	761.445	-98.3797	-344.24	200	300	0	0	0	0	0	0	0	200	903	0	0	0	0	0	0	0	603	903	0
476	2	-0.763811	1.6533	12.6327	852.998	-342.52	-252.687	200	300	0	0	0	0	0	0	0	200	903	0	0	0	0	0	0	0	603	903	0
476	3	0.762068	1.80589	10.8017	761.445	23.6906	-390.016	200	300	0	0	0	0	0	0	0	200	903	0	0	0	0	0	0	0	603	903	0
476	4	2.28795	1.34812	10.4965	578.34	206.796	-206.911	200	300	0	0	0	0	0	0	0	200	903	0	0	0	0	0	0	0	603	903	0
476	5	0	0	0	0	0	0	200	300	0	0	0	0	0	0	0	200	903	0	0	0	0	0	0	0	603	903	0
476	6	0.151716	0.737772	10.1913	212.129	-342.52	21.9711	200	300	0	0	0	0	0	0	0	200	903	0	0	0	0	0	0	0	603	903	0
476	7	-0.15346	2.11106	9.88614	120.576	-403.556	-252.687	200	300	0	0	0	0	0	0	0	200	903	0	0	0	0	0	0	0	603	903	0
476	8	0.914656	2.11106	11.1068	669.893	-281.485	-252.687	200	300	0	0	0	0	0	0	0	200	903	0	0	0	0	0	0	0	603	903	0
476	9	0.151716	2.26365	11.7172	761.445	-37.3445	-298.464	200	300	0	0	0	0	0	0	0	200	903	0	0	0	0	0	0	0	603	903	0
477	0	0.762068	1.80589	11.1068	395.235	-98.3797	-206.911	200	300	0	0	0	0	0	0	0	200	903	0	0	0	0	0	0	0	603	903	0
477	1	1.06724	1.19554	11.412	578.34	-159.415	-344.24	200	300	0	0	0	0	0	0	0	200	903	0	0	0	0	0	0	0	603	903	0
477	2	0	0	0	0	0	0	200	300	0	0	0	0	0	0	0	200	903	0	0	0	0	0	0	0	603	903	0
477	3	0.60948	1.50071	9.88614	120.576	-37.3445	-161.134	200	300	0	0	0	0	0	0	0	200	903	0	0	0	0	0	0	0	603	903	0
477	4	0	0	0	0	0	0	200	300	0	0	0	0	0	0	0	200	903	0	0	0	0	0	0	0	603	903	0
477	5	-0.763811	2.26365	9.88614	761.445	-98.3797	-252.687	200	300	0	0	0	0	0	0	0	200	903	0	0	0	0	0	0	0	603	903	0
477	6	1.06724	1.34812	11.1068	-62.5292	23.6906	-206.911	200	300	0	0	0	0	0	0	0	200	903	0	0	0	0	0	0	0	603	903	0
477	7	-0.15346	0.432597	10.4965	395.235	-37.3445	-115.358	200	300	0	0	0	0	0	0	0	200	903	0	0	0	0	0	0	0	603	903	0
477	8	0.914656	1.80589	9.88614	578.34	-342.52	-69.5817	200	300	0	0	0	0	0	0	0	200	903	0	0	0	0	0	0	0	603	903	0
477	9	0.456892	2.11106	10.1913	669.893	-281.485	-252.687	200	300	0	0	0	0	0	0	0	200	903	0	0	0	0	0	0	0	603	903	0
478	0	-0.000871718	1.6533	10.1913	1402.31	-98.3797	-390.016	200	300	0	0	0	0	0	0	0	200	903	0	0	0	0	0	0	0	603	903	0
478	1	0.762068	1.19554	10.4965	944.551	-159.415	-435.793	200	300	0	0	0	0	0	0	0	200	903	0	0	0	0	0	0	0	603	903	0
478	2	0	0	0	0	0	0	200	300	0	0	0	0	0	0	0	200	903	0	0	0	0	0	0	0	603	903	0
478	3	0	0	0	0	0	0	200	300	0	0	0	0	0	0	0	200	903	0	0	0	0	0	0	0	603	903	0
478	4	-0.15346	2.11106	11.1068	944.551	23.6906	-206.911	200	300	0	0	0	0	0	0	0	200	903	0	0	0	0	0	0	0	603	903	0
478	5	-0.306047	1.80589	13.8534	212.129	-403.556	-252.687	200	300	0	0	0	0	0	0	0	200	903	0	0	0	0	0	0	0	603	903	0
478	6	0.456892	1.80589	10.4965	761.445	-98.3797	-252.687	200	300	0	0	0	0	0	0	0	200	903	0	0	0	0	0	0	0	603	903	0
478	7	2.44053	2.11106	11.1068	761.445	-281.485	-298.464	200	300	0	0	0	0	0	0	0	200	903	0	0	0	0	0	0	0	603	903	0
478	8	1.06724	1.95848	10.1913	1310.76	-342.52	-252.687	200	300	0	0	0	0	0	0	0	200	903	0	0	0	0	0	0	0	603	903	0
478	9	1.06724	1.19554	10.8017	669.893	-37.3445	250.853	200	300	0	0	0	0	0	0	0	200	903	0	0	0	0	0	0	0	603	903	0
479	0	0	0	0	0	0	0	200	300	0	0	0	0	0	0	0	200	903	0	0	0	0	0	0	0	603	903	0
479	1	0.304304	0.737772	11.412	395.235	-220.45	-298.464	200	300	0	0	0	0	0	0	0	200	903	0	0	0	0	0	0	0	603	903	0
479	2	0.151716	1.6533	11.412	1036.1	23.6906	-206.911	200	300	0	0	0	0	0	0	0	200	903	0	0	0	0	0	0	0	603	903	0
479	3	0.60948	2.56883	11.412	486.787	145.761	-390.016	200	300	0	0	0	0	0	0	0	200	903	0	0	0	0	0	0	0	603	903	0
479	4	1.06724	2.56883	11.1068	395.235	-342.52	-344.24	200	300	0	0	0	0	0	0	0	200	903	0	0	0	0	0	0	0	603	903	0
479	5	0	0	0	0	0	0	200	300	0	0	0	0	0	0	0	200	903	0	0	0	0	0	0	0	603	903	0
479	6	1.21983	1.04295	12.3275	669.893	-220.45	205.077	200	300	0	0	0	0	0	0	0	200	903	0	0	0	0	0	0	0	603	903	0
479	7	0	0	0	0	0	0	200	300	0	0	0	0	0	0	0	200	903	0	0	0	0	0	0	0	603	903	0
479	8	0	0	0	0	0	0	200	300	0	0	0	0	0	0	0	200	903	0	0	0	0	0	0	0	603	903	0
479	9	-0.000871718	1.19554	11.1068	486.787	23.6906	-298.464	200	300	0	0	0	0	0	0	0	200	903	0	0	0	0	0	0	0	603	903	0
480	0	0.304304	1.95848	13.8534	303.682	-342.52	-298.464	200	300	0	0	0	0	0	0	0	200	903	0	0	0	0	0	0	0	603	903	0
480	1	0.914656	2.11106	11.7172	303.682	23.6906	-206.911	200	300	0	0	0	0	0	0	0	200	903	0	0	0	0	0	0	0	603	903	0
480	2	2.8983	0.280009	11.412	303.682	23.6906	-115.358	200	300	0	0	0	0	0	0	0	200	903	0	0	0	0	0	0	0	603	903	0
480	3	0	0	0	0	0	0	200	300	0	0	0	0	0	0	0	200	903	0	0	0	0	0	0	0	603	903	0
480	4	0	0	0	0	0	0	200	300	0	0	0	0	0	0	0	200	903	0	0	0	0	0	0	0	603	903	0
480	5	0.151716	0.89036	10.1913	1310.76	-342.52	-206.911	200	300	0	0	0	0	0	0	0	200	903	0	0	0	0	0	0	0	603	903	0
480	6	-0.000871718	1.04295	11.7172	944.551	-220.45	-206.911	200	300	0	0	0	0	0	0	0	200	903	0	0	0	0	0	0	0	603	903	0
480	7	0.60948	0.585184	11.1068	669.893	-98.3797	-161.134	200	300	0	0	0	0	0	0	0	200	903	0	0	0	0	0	0	0	603	903	0
480	8	1.37242	1.50071	9.88614	303.682	-525.626	-23.8053	200	300	0	0	0	0	0	0	0	200	903	0	0	0	0	0	0	0	603	903	0
480	9	0.762068	1.6533	10.4965	303.682	-281.485	-298.464	200	300	0	0	0	0	0	0	0	200	903	0	0	0	0	0	0	0	603	903	0
481	0	0	0	0	0	0	0	200	300	0	0	0	0	0	0	0	200	903	0	0	0	0	0	0	0	603	903	0
481	1	0.914656	1.34812	10.8017	669.893	-159.415	21.9711	200	300	0	0	0	0	0	0	0	200	903	0	0	0	0	0	0	0	603	903	0
481	2	0	0	0	0	0	0	200	300	0	0	0	0	0	0	0	200	903	0	0	0	0	0	0	0	603	903	0
481	3	1.83018	1.95848	11.7172	669.893	-220.45	-206.911	200	300	0	0	0	0	0	0	0	200	903	0	0	0	0	0	0	0	603	903	0
481	4	0.456892	1.50071	10.1913	761.445	23.6906	-252.687	200	300	0	0	0	0	0	0	0	200	903	0	0	0	0	0	0	0	603	903	0
481	5	1.52501	0.737772	11.1068	669.893	-281.485	-206.911	200	300	0	0	0	0	0	0	0	200	903	0	0	0	0	0	0	0	603	903	0
481	6	0.914656	-0.330343	10.8017	669.893	-281.485	-298.464	200	300	0	0	0	0	0	0	0	200	903	0	0	0	0	0	0	0	603	903	0
481	7	0	0	0	0	0	0	200	300	0	0	0	0	0	0	0	200	903	0	0	0	0	0	0	0	603	903	0
481	8	0	0	0	0	0	0	200	300	0	0	0	0	0	0	0	200	903	0	0	0	0	0	0	0	603	903	0
481	9	0.60948	1.95848	9.88614	395.235	-342.52	-206.911	200	300	0	0	0	0	0	0	0	200	903	0	0	0	0	0	0	0	603	903	0
482	0	1.83018	1.6533	12.3275	303.682	-281.485	-23.8053	200	300	0	0	0	0	0	0	0	200	903	0	0	0	0	0	0	0	603	903	0
482	1	-0.458635	1.6533	10.8017	852.998	-98.3797	113.524	200	300	0	0	0	0	0	0	0	200	903	0	0	0	0	0	0	0	603	903	0
482	2	0.60948	2.11106	11.7172	944.551	-98.3797	-206.911	200	300	0	0	0	0	0	0	0	200	903	0	0	0	0	0	0	0	603	903	0
482	3	0.914656	1.50071	10.8017	1219.21	-220.45	-161.134	200	300	0	0	0	0	0	0	0	200	903	0	0	0	0	0	0	0	603	903	0
482	4	0.151716	1.34812	10.1913	1036.1	23.6906	-69.5817	200	300	0	0	0	0	0	0	0	200	903	0	0	0	0	0	0	0	603	903	0
482	5	0.762068	1.6533	10.1913	395.235	84.7258	-252.687	200	300	0	0	0	0	0	0	0	200	903	0	0	0	0	0	0	0	603	903	0
482	6	0	0	0	0	0	0	200	300	0	0	0	0	0	0	0	200	903	0	0	0	0	0	0	0	603	903	0
482	7	0	0	0	0	0	0	200	300	0	0	0	0	0	0	0	200	903	0	0	0	0	0	0	0	603	903	0
482	8	-0.15346	2.11106	9.88614	212.129	-586.661	-206.911	200	300	0	0	0	0	0	0	0	200	903	0	0	0	0	0	0	0	603	903	0
482	9	0.304304	0.89036	11.412	212.129	-220.45	-435.793	200	300	0	0	0	0	0	0	0	200	903	0	0	0	0	0	0	0	603	903	0
483	0	0.914656	1.95848	12.0224	944.551	-342.52	-344.24	200	300	0	0	0	0	0	0	0	200	903	0	0	0	0	0	0	0	603	903	0
483	1	0	0	0	0	0	0	200	300	0	0	0	0	0	0	0	200	903	0	0	0	0	0	0	0	603	903	0
483	2	0	0	0	0	0	0	200	300	0	0	0	0	0	0	0	200	903	0	0	0	0	0	0	0	603	903	0
483	3	0	0	0	0	0	0	200	300	0	0	0	0	0	0	0	200	903	0	0	0	0	0	0	0	603	903	0
483	4	2.28795	1.50071	10.4965	486.787	-220.45	205.077	200	300	0	0	0	0	0	0	0	200	903	0	0	0	0	0	0	0	603	903	0
483	5	-0.611223	1.95848	11.7172	303.682	-37.3445	-435.793	200	300	0	0	0	0	0	0	0	200	903	0	0	0	0	0	0	0	603	903	0
483	6	0.151716	2.11106	11.7172	1036.1	-281.485	-344.24	200	300	0	0	0	0	0	0	0	200	903	0	0	0	0	0	0	0	603	903	0
483	7	0.914656	2.11106	10.8017	212.129	-98.3797	-115.358	200	300	0	0	0	0	0	0	0	200	903	0	0	0	0	0	0	0	603	903	0
483	8	0	0	0	0	0	0	200	300	0	0	0	0	0	0	0	200	903	0	0	0	0	0	0	0	603	903	0
483	9	0.151716	1.95848	10.1913	578.34	-342.52	-206.911	200	300	0	0	0	0	0	0	0	200	903	0	0	0	0	0	0	0	603	903	0
484	0	0	0	0	0	0	0	200	300	0	0	0	0	0	0	0	200	903	0	0	0	0	0	0	0	603	903	0
484	1	-0.763811	0.585184	10.4965	761.445	-98.3797	-161.134	200	300	0	0	0	0	0	0	0	200	903	0	0	0	0	0	0	0	603	903	0
484	2	-0.458635	1.34812	12.6327	852.998	145.761	-344.24	200	300	0	0	0	0	0	0	0	200	903	0	0	0	0	0	0	0	603	903	0
484	3	0.762068	1.50071	12.9379	486.787	-159.415	-206.911	200	300	0	0	0	0	0	0	0	200	903	0	0	0	0	0	0	0	603	903	0
484	4	1.06724	1.34812	9.88614	29.0235	23.6906	-206.911	200	300	0	0	0	0	0	0	0	200	903	0	0	0	0	0	0	0	603	903	0
484	5	0.914656	1.95848	9.88614	852.998	-37.3445	-161.134	200	300	0	0	0	0	0	0	0	200	903	0	0	0	0	0	0	0	603	903	0
484	6	0	0	0	0	0	0	200	300	0	0	0	0	0	0	0	200	903	0	0	0	0	0	0	0	603	903	0
484	7	0	0	0	0	0	0	200	300	0	0	0	0	0	0	0	200	903	0	0	0	0	0	0	0	603	903	0
484	8	-0.15346	1.95848	10.4965	669.893	-37.3445	-252.687	200	300	0	0	0	0	0	0	0	200	903	0	0	0	0	0	0	0	603	903	0
484	9	0.762068	1.19554	12.0224	1310.76	-98.3797	-481.569	200	300	0	0	0	0	0	0	0	200	903	0	0	0	0	0	0	0	603	903	0
485	0	0.914656	1.04295	10.8017	578.34	-220.45	-298.464	200	300	0	0	0	0	0	0	0	200	903	0	0	0	0	0	0	0	603	903	0
485	1	0	0	0	0	0	0	200	300	0	0	0	0	0	0	0	200	903	0	0	0	0	0	0	0	603	903	0
485	2	0	0	0	0	0	0	200	300	0	0	0	0	0	0	0	200	903	0	0	0	0	0	0	0	603	903	0
485	3	0	0	0	0	0	0	200	300	0	0	0	0	0	0	0	200	903	0	0	0	0	0	0	0	603	903	0
485	4	-0.458635	1.95848	9.88614	212.129	-220.45	-252.687	200	300	0	0	0	0	0	0	0	200	903	0	0	0	0	0	0	0	603	903	0
485	5	-0.611223	2.56883	11.1068	395.235	-37.3445	-206.911	200	300	0	0	0	0	0	0	0	200	903	0	0	0	0	0	0	0	603	903	0
485	6	-0.458635	2.11106	11.7172	212.129	-525.626	-115.358	200	300	0	0	0	0	0	0	0	200	903	0	0	0	0	0	0	0	603	903	0
485	7	0.762068	1.50071	10.8017	852.998	84.7258	-69.5817	200	300	0	0	0	0	0	0	0	200	903	0	0	0	0	0	0	0	603	903	0
485	8	1.37242	2.11106	10.1913	761.445	-98.3797	-161.134	200	300	0	0	0	0	0	0	0	200	903	0	0	0	0	0	0	0	603	903	0
485	9	0	0	0	0	0	0	200	300	0	0	0	0	0	0	0	200	903	0	0	0	0	0	0	0	603	903	0
486	0	0.762068	1.6533	12.0224	1127.66	-342.52	-252.687	200	300	0	0	0	0	0	0	0	200	903	0	0	0	0	0	0	0	603	903	0
486	1	0	0	0	0	0	0	200	300	0	0	0	0	0	0	0	200	903	0	0	0	0	0	0	0	603	903	0
486	2	2.74571	1.80589	11.7172	486.787	-37.3445	-115.358	200	300	0	0	0	0	0	0	0	200	903	0	0	0	0	0	0	0	603	903	0
486	3	-0.000871718	2.11106	11.412	578.34	-37.3445	113.524	200	300	0	0	0	0	0	0	0	200	903	0	0	0	0	0	0	0	603	903	0
486	4	0.456892	1.80589	10.8017	212.129	-403.556	-69.5817	200	300	0	0	0	0	0	0	0	200	903	0	0	0	0	0	0	0	603	903	0
486	5	0.60948	1.34812	10.1913	486.787	-342.52	-206.911	200	300	0	0	0	0	0	0	0	200	903	0	0	0	0	0	0	0	603	903	0
486	6	0	0	0	0	0	0	200	300	0	0	0	0	0	0	0	200	903	0	0	0	0	0	0	0	603	903	0
486	7	0	0	0	0	0	0	200	300	0	0	0	0	0	0	0	200	903	0	0	0	0	0	0	0	603	903	0
486	8	0.762068	1.34812	9.88614	669.893	-98.3797	-161.134	200	300	0	0	0	0	0	0	0	200	903	0	0	0	0	0	0	0	603	903	0
486	9	0.151716	0.280009	10.8017	852.998	-220.45	-69.5817	200	300	0	0	0	0	0	0	0	200	903	0	0	0	0	0	0	0	603	903	0
487	0	-0.306047	0.585184	11.1068	486.787	-98.3797	250.853	200	300	0	0	0	0	0	0	0	200	903	0	0	0	0	0	0	0	603	903	0
487	1	-0.306047	0.737772	10.4965	486.787	-37.3445	-252.687	200	300	0	0	0	0	0	0	0	200	903	0	0	0	0	0	0	0	603	903	0
487	2	0.914656	2.72141	11.1068	395.235	-98.3797	-115.358	200	300	0	0	0	0	0	0	0	200	903	0	0	0	0	0	0	0	603	903	0
487	3	0.914656	2.11106	12.9379	486.787	-220.45	-252.687	200	300	0	0	0	0	0	0	0	200	903	0	0	0	0	0	0	0	603	903	0
487	4	0.914656	1.6533	10.4965	303.682	-281.485	-298.464	200	300	0	0	0	0	0	0	0	200	903	0	0	0	0	0	0	0	603	903	0
487	5	0.60948	2.11106	9.88614	761.445	-220.45	-390.016	200	300	0	0	0	0	0	0	0	200	903	0	0	0	0	0	0	0	603	903	0
487	6	0	0	0	0	0	0	200	300	0	0	0	0	0	0	0	200	903	0	0	0	0	0	0	0	603	903	0
487	7	0.304304	1.19554	10.8017	852.998	-37.3445	-206.911	200	300	0	0	0	0	0	0	0	200	903	0	0	0	0	0	0	0	603	903	0
487	8	-0.306047	1.19554	12.9379	578.34	-159.415	-435.793	200	300	0	0	0	0	0	0	0	200	903	0	0	0	0	0	0	0	603	903	0
487	9	0.456892	0.89036	11.1068	395.235	-586.661	-344.24	200	300	0	0	0	0	0	0	0	200	903	0	0	0	0	0	0	0	603	903	0
488	0	0	0	0	0	0	0	200	300	0	0	0	0	0	0	0	200	903	0	0	0	0	0	0	0	603	903	0
488	1	1.37242	1.80589	9.88614	486.787	-37.3445	-206.911	200	300	0	0	0	0	0	0	0	200	903	0	0	0	0	0	0	0	603	903	0
488	2	-0.000871718	0.280009	10.8017	212.129	-159.415	-161.134	200	300	0	0	0	0	0	0	0	200	903	0	0	0	0	0	0	0	603	903	0
488	3	0	0	0	0	0	0	200	300	0	0	0	0	0	0	0	200	903	0	0	0	0	0	0	0	603	903	0
488	4	-0.15346	1.6533	11.412	1036.1	-37.3445	-115.358	200	300	0	0	0	0	0	0	0	200	903	0	0	0	0	0	0	0	603	903	0
488	5	0.151716	1.34812	10.4965	1402.31	-342.52	-115.358	200	300	0	0	0	0	0	0	0	200	903	0	0	0	0	0	0	0	603	903	0
488	6	1.06724	2.11106	11.412	1036.1	-220.45	-161.134	200	300	0	0	0	0	0	0	0	200	903	0	0	0	0	0	0	0	603	903	0
488	7	0	0	0	0	0	0	200	300	0	0	0	0	0	0	0	200	903	0	0	0	0	0	0	0	603	903	0
488	8	0.762068	1.04295	10.4965	303.682	-220.45	-69.5817	200	300	0	0	0	0	0	0	0	200	903	0	0	0	0	0	0	0	603	903	0
488	9	-0.458635	1.80589	10.1913	1127.66	-525.626	-298.464	200	300	0	0	0	0	0	0	0	200	903	0	0	0	0	0	0	0	603	903	0
489	0	0	0	0	0	0	0	200	300	0	0	0	0	0	0	0	200	903	0	0	0	0	0	0	0	603	903	0
489	1	-0.000871718	2.11106	10.8017	578.34	206.796	-298.464	200	300	0	0	0	0	0	0	0	200	903	0	0	0	0	0	0	0	603	903	0
489	2	-0.306047	2.56883	11.7172	1127.66	-586.661	-390.016	200	300	0	0	0	0	0	0	0	200	903	0	0	0	0	0	0	0	603	903	0
489	3	1.21983	1.6533	10.1913	486.787	-98.3797	-298.464	200	300	0	0	0	0	0	0	0	200	903	0	0	0	0	0	0	0	603	903	0
489	4	0.914656	1.04295	11.412	303.682	-98.3797	-252.687	200	300	0	0	0	0	0	0	0	200	903	0	0	0	0	0	0	0	603	903	0
489	5	0	0	0	0	0	0	200	300	0	0	0	0	0	0	0	200	903	0	0	0	0	0	0	0	603	903	0
489	6	2.13536	1.19554	11.412	761.445	84.7258	-115.358	200	300	0	0	0	0	0	0	0	200	903	0	0	0	0	0	0	0	603	903	0
489	7	0	0	0	0	0	0	200	300	0	0	0	0	0	0	0	200	903	0	0	0	0	0	0	0	603	903	0
489	8	1.6776	1.19554	11.412	29.0235	-220.45	-23.8053	200	300	0	0	0	0	0	0	0	200	903	0	0	0	0	0	0	0	603	903	0
489	9	0.304304	1.80589	11.412	303.682	-220.45	-206.911	200	300	0	0	0	0	0	0	0	200	903	0	0	0	0	0	0	0	603	903	0
490	0	1.21983	1.95848	10.8017	486.787	-98.3797	-115.358	200	300	0	0	0	0	0	0	0	200	903	0	0	0	0	0	0	0	603	903	0
490	1	0.60948	1.19554	10.4965	395.235	-281.485	-206.911	200	300	0	0	0	0	0	0	0	200	903	0	0	0	0	0	0	0	603	903	0
490	2	1.06724	2.41624	10.1913	944.551	-342.52	-161.134	200	300	0	0	0	0	0	0	0	200	903	0	0	0	0	0	0	0	603	903	0
490	3	0.762068	1.6533	12.3275	486.787	-281.485	-206.911	200	300	0	0	0	0	0	0	0	200	903	0	0	0	0	0	0	0	603	903	0
490	4	-0.15346	1.04295	10.1913	303.682	-37.3445	205.077	200	300	0	0	0	0	0	0	0	200	903	0	0	0	0	0	0	0	603	903	0
490	5	1.52501	1.50071	11.412	944.551	-98.3797	-115.358	200	300	0	0	0	0	0	0	0	200	903	0	0	0	0	0	0	0	603	903	0
490	6	0.456892	1.04295	10.8017	944.551	23.6906	-23.8053	200	300	0	0	0	0	0	0	0	200	903	0	0	0	0	0	0	0	603	903	0
490	7	0.762068	0.89036	10.8017	303.682	-342.52	-206.911	200	300	0	0	0	0	0	0	0	200	903	0	0	0	0	0	0	0	603	903	0
490	8	0.762068	1.80589	10.8017	578.34	-525.626	-435.793	200	300	0	0	0	0	0	0	0	200	903	0	0	0	0	0	0	0	603	903	0
490	9	0	0	0	0	0	0	200	300	0	0	0	0	0	0	0	200	903	0	0	0	0	0	0	0	603	903	0
491	0	1.21983	1.34812	12.0224	212.129	267.831	-161.134	200	300	0	0	0	0	0	0	0	200	903	0	0	0	0	0	0	0	603	903	0
491	1	0	0	0	0	0	0	200	300	0	0	0	0	0	0	0	200	903	0	0	0	0	0	0	0	603	903	0
491	2	1.06724	1.6533	10.1913	486.787	-159.415	-252.687	200	300	0	0	0	0	0	0	0	200	903	0	0	0	0	0	0	0	603	903	0
491	3	-0.15346	1.19554	11.1068	944.551	-98.3797	-161.134	200	300	0	0	0	0	0	0	0	200	903	0	0	0	0	0	0	0	603	903	0
491	4	0.304304	0.585184	11.412	669.893	-220.45	-206.911	200	300	0	0	0	0	0	0	0	200	903	0	0	0	0	0	0	0	603	903	0
491	5	0.60948	-0.482931	11.1068	944.551	-98.3797	-161.134	200	300	0	0	0	0	0	0	0	200	903	0	0	0	0	0	0	0	603	903	0
491	6	1.37242	1.34812	10.1913	120.576	-464.591	-298.464	200	300	0	0	0	0	0	0	0	200	903	0	0	0	0	0	0	0	603	903	0
491	7	1.6776	1.50071	11.412	212.129	-281.485	21.9711	200	300	0	0	0	0	0	0	0	200	903	0	0	0	0	0	0	0	603	903	0
491	8	0.151716	1.95848	9.88614	852.998	-464.591	67.7474	200	300	0	0	0	0	0	0	0	200	903	0	0	0	0	0	0	0	603	903	0
491	9	1.21983	1.80589	9.88614	486.787	-464.591	-115.358	200	300	0	0	0	0	0	0	0	200	903	0	0	0	0	0	0	0	603	903	0
492	0	-0.000871718	1.95848	11.412	852.998	-159.415	-161.134	200	300	0	0	0	0	0	0	0	200	903	0	0	0	0	0	0	0	603	903	0
492	1	0.762068	2.26365	10.4965	1036.1	-586.661	-252.687	200	300	0	0	0	0	0	0	0	200	903	0	0	0	0	0	0	0	603	903	0
492	2	1.21983	1.19554	11.1068	944.551	-98.3797	-435.793	200	300	0	0	0	0	0	0	0	200	903	0	0	0	0	0	0	0	603	903	0
492	3	0	0	0	0	0	0	200	300	0	0	0	0	0	0	0	200	903	0	0	0	0	0	0	0	603	903	0
492	4	0.914656	0.737772	12.9379	212.129	-281.485	67.7474	200	300	0	0	0	0	0	0	0	200	903	0	0	0	0	0	0	0	603	903	0
492	5	0	0	0	0	0	0	200	300	0	0	0	0	0	0	0	200	903	0	0	0	0	0	0	0	603	903	0
492	6	1.21983	1.95848	10.8017	212.129	-220.45	-161.134	200	300	0	0	0	0	0	0	0	200	903	0	0	0	0	0	0	0	603	903	0
492	7	0.151716	1.6533	11.412	486.787	-220.45	-298.464	200	300	0	0	0	0	0	0	0	200	903	0	0	0	0	0	0	0	603	903	0
492	8	0.60948	1.95848	12.0224	852.998	-37.3445	-390.016	200	300	0	0	0	0	0	0	0	200	903	0	0	0	0	0	0	0	603	903	0
492	9	0.762068	1.34812	10.8017	761.445	-37.3445	-206.911	200	300	0	0	0	0	0	0	0	200	903	0	0	0	0	0	0	0	603	903	0
493	0	0	0	0	0	0	0	200	300	0	0	0	0	0	0	0	200	903	0	0	0	0	0	0	0	603	903	0
493	1	1.21983	0.432597	12.3275	761.445	-220.45	-23.8053	200	300	0	0	0	0	0	0	0	200	903	0	0	0	0	0	0	0	603	903	0
493	2	0	0	0	0	0	0	200	300	0	0	0	0	0	0	0	200	903	0	0	0	0	0	0	0	603	903	0
493	3	1.21983	1.34812	11.1068	-62.5292	84.7258	-161.134	200	300	0	0	0	0	0	0	0	200	903	0	0	0	0	0	0	0	603	903	0
493	4	-0.000871718	1.34812	11.412	395.235	-220.45	-206.911	200	300	0	0	0	0	0	0	0	200	903	0	0	0	0	0	0	0	603	903	0
493	5	2.13536	1.34812	11.412	303.682	23.6906	-206.911	200	300	0	0	0	0	0	0	0	200	903	0	0	0	0	0	0	0	603	903	0
493	6	1.21983	1.95848	10.8017	486.787	-159.415	-23.8053	200	300	0	0	0	0	0	0	0	200	903	0	0	0	0	0	0	0	603	903	0
493	7	1.98277	1.19554	11.1068	395.235	-37.3445	113.524	200	300	0	0	0	0	0	0	0	200	903	0	0	0	0	0	0	0	603	903	0
493	8	0	0	0	0	0	0	200	300	0	0	0	0	0	0	0	200	903	0	0	0	0	0	0	0	603	903	0
493	9	0.60948	0.89036	12.3275	944.551	23.6906	-298.464	200	300	0	0	0	0	0	0	0	200	903	0	0	0	0	0	0	0	603	903	0
494	0	0	0	0	0	0	0	200	300	0	0	0	0	0	0	0	200	903	0	0	0	0	0	0	0	603	903	0
494	1	1.98277	1.6533	10.4965	578.34	-98.3797	-298.464	200	300	0	0	0	0	0	0	0	200	903	0	0	0	0	0	0	0	603	903	0
494	2	-0.000871718	1.80589	10.8017	578.34	23.6906	-298.464	200	300	0	0	0	0	0	0	0	200	903	0	0	0	0	0	0	0	603	903	0
494	3	1.6776	1.80589	10.4965	29.0235	-220.45	-206.911	200	300	0	0	0	0	0	0	0	200	903	0	0	0	0	0	0	0	603	903	0
494	4	0.456892	1.95848	11.412	395.235	-159.415	-252.687	200	300	0	0	0	0	0	0	0	200	903	0	0	0	0	0	0	0	603	903	0
494	5	0	0	0	0	0	0	200	300	0	0	0	0	0	0	0	200	903	0	0	0	0	0	0	0	603	903	0
494	6	1.21983	1.6533	9.88614	578.34	-37.3445	-252.687	200	300	0	0	0	0	0	0	0	200	903	0	0	0	0	0	0	0	603	903	0
494	7	0	0	0	0	0	0	200	300	0	0	0	0	0	0	0	200	903	0	0	0	0	0	0	0	603	903	0
494	8	0	0	0	0	0	0	200	300	0	0	0	0	0	0	0	200	903	0	0	0	0	0	0	0	603	903	0
494	9	0.151716	1.50071	10.1913	944.551	-98.3797	67.7474	200	300	0	0	0	0	0	0	0	200	903	0	0	0	0	0	0	0	603	903	0
495	0	0.151716	2.11106	10.1913	395.235	84.7258	-161.134	200	300	0	0	0	0	0	0	0	200	903	0	0	0	0	0	0	0	603	903	0
495	1	0.456892	2.26365	10.8017	852.998	-37.3445	250.853	200	300	0	0	0	0	0	0	0	200	903	0	0	0	0	0	0	0	603	903	0
495	2	0.60948	1.95848	10.8017	761.445	23.6906	-252.687	200	300	0	0	0	0	0	0	0	200	903	0	0	0	0	0	0	0	603	903	0
495	3	0.456892	1.34812	10.1913	669.893	-708.731	-390.016	200	300	0	0	0	0	0	0	0	200	903	0	0	0	0	0	0	0	603	903	0
495	4	0	0	0	0	0	0	200	300	0	0	0	0	0	0	0	200	903	0	0	0	0	0	0	0	603	903	0
495	5	0	0	0	0	0	0	200	300	0	0	0	0	0	0	0	200	903	0	0	0	0	0	0	0	603	903	0
495	6	0	0	0	0	0	0	200	300	0	0	0	0	0	0	0	200	903	0	0	0	0	0	0	0	603	903	0
495	7	-0.15346	1.95848	11.412	578.34	-281.485	-573.122	200	300	0	0	0	0	0	0	0	200	903	0	0	0	0	0	0	0	603	903	0
495	8	-0.15346	1.6533	11.7172	395.235	-159.415	-298.464	200	300	0	0	0	0	0	0	0	200	903	0	0	0	0	0	0	0	603	903	0
495	9	0.60948	0.89036	11.1068	486.787	206.796	-344.24	200	300	0	0	0	0	0	0	0	200	903	0	0	0	0	0	0	0	603	903	0
496	0	0	0	0	0	0	0	200	300	0	0	0	0	0	0	0	200	903	0	0	0	0	0	0	0	603	903	0
496	1	0	0	0	0	0	0	200	300	0	0	0	0	0	0	0	200	903	0	0	0	0	0	0	0	603	903	0
496	2	0.762068	1.34812	11.7172	852.998	-220.45	21.9711	200	300	0	0	0	0	0	0	0	200	903	0	0	0	0	0	0	0	603	903	0
496	3	0	0	0	0	0	0	200	300	0	0	0	0	0	0	0	200	903	0	0	0	0	0	0	0	603	903	0
496	4	-0.000871718	1.6533	11.412	578.34	-159.415	-206.911	200	300	0	0	0	0	0	0	0	200	903	0	0	0	0	0	0	0	603	903	0
496	5	0.151716	1.6533	11.412	120.576	-220.45	-161.134	200	300	0	0	0	0	0	0	0	200	903	0	0	0	0	0	0	0	603	903	0
496	6	1.37242	1.80589	10.1913	-62.5292	-159.415	205.077	200	300	0	0	0	0	0	0	0	200	903	0	0	0	0	0	0	0	603	903	0
496	7	1.52501	1.50071	9.88614	120.576	-342.52	-161.134	200	300	0	0	0	0	0	0	0	200	903	0	0	0	0	0	0	0	603	903	0
496	8	0	0	0	0	0	0	200	300	0	0	0	0	0	0	0	200	903	0	0	0	0	0	0	0	603	903	0
496	9	0.151716	2.41624	11.7172	486.787	84.7258	-161.134	200	300	0	0	0	0	0	0	0	200	903	0	0	0	0	0	0	0	603	903	0
497	0	0	0	0	0	0	0	200	300	0	0	0	0	0	0	0	200	903	0	0	0	0	0	0	0	603	903	0
497	1	0.456892	1.95848	10.8017	669.893	-37.3445	-206.911	200	300	0	0	0	0	0	0	0	200	903	0	0	0	0	0	0	0	603	903	0
497	2	-0.306047	1.50071	11.1068	29.0235	-159.415	-206.911	200	300	0	0	0	0	0	0	0	200	903	0	0	0	0	0	0	0	603	903	0
497	3	0.914656	-0.0251671	10.4965	29.0235	-464.591	-161.134	200	300	0	0	0	0	0	0	0	200	903	0	0	0	0	0	0	0	603	903	0
497	4	1.06724	1.95848	11.1068	29.0235	-342.52	-115.358	200	300	0	0	0	0	0	0	0	200	903	0	0	0	0	0	0	0	603	903	0
497	5	0	0	0	0	0	0	200	300	0	0	0	0	0	0	0	200	903	0	0	0	0	0	0	0	603	903	0
497	6	-0.15346	2.26365	11.1068	578.34	-98.3797	-344.24	200	300	0	0	0	0	0	0	0	200	903	0	0	0	0	0	0	0	603	903	0
497	7	0.456892	1.50071	11.1068	303.682	-159.415	-527.345	200	300	0	0	0	0	0	0	0	200	903	0	0	0	0	0	0	0	603	903	0
497	8	-0.000871718	1.50071	11.1068	212.129	-37.3445	-206.911	200	300	0	0	0	0	0	0	0	200	903	0	0	0	0	0	0	0	603	903	0
497	9	-0.000871718	1.04295	10.1913	395.235	-281.485	21.9711	200	300	0	0	0	0	0	0	0	200	903	0	0	0	0	0	0	0	603	903	0
498	0	0.456892	1.04295	10.4965	486.787	-403.556	205.077	200	300	0	0	0	0	0	0	0	200	903	0	0	0	0	0	0	0	603	903	0
498	1	0.60948	2.41624	10.4965	1036.1	-220.45	-69.5817	200	300	0	0	0	0	0	0	0	200	903	0	0	0	0	0	0	0	603	903	0
498	2	0.762068	2.11106	10.1913	303.682	-159.415	-252.687	200	300	0	0	0	0	0	0	0	200	903	0	0	0	0	0	0	0	603	903	0
498	3	0.762068	1.80589	11.1068	669.893	-159.415	-252.687	200	300	0	0	0	0	0	0	0	200	903	0	0	0	0	0	0	0	603	903	0
498	4	0.151716	1.50071	10.1913	578.34	-220.45	-115.358	200	300	0	0	0	0	0	0	0	200	903	0	0	0	0	0	0	0	603	903	0
498	5	0.456892	1.6533	11.1068	761.445	-220.45	-69.5817	200	300	0	0	0	0	0	0	0	200	903	0	0	0	0	0	0	0	603	903	0
498	6	0.151716	0.280009	10.8017	486.787	-464.591	205.077	200	300	0	0	0	0	0	0	0	200	903	0	0	0	0	0	0	0	603	903	0
498	7	-0.611223	1.19554	12.6327	120.576	-464.591	-481.569	200	300	0	0	0	0	0	0	0	200	903	0	0	0	0	0	0	0	603	903	0
498	8	0.60948	2.11106	10.4965	1036.1	-403.556	-252.687	200	300	0	0	0	0	0	0	0	200	903	0	0	0	0	0	0	0	603	903	0
498	9	2.74571	2.11106	10.1913	120.576	-159.415	-115.358	200	300	0	0	0	0	0	0	0	200	903	0	0	0	0	0	0	0	603	903	0
499	0	0	0	0	0	0	0	200	300	0	0	0	0	0	0	0	200	903	0	0	0	0	0	0	0	603	903	0
499	1	0	0	0	0	0	0	200	300	0	0	0	0	0	0	0	200	903	0	0	0	0	0	0	0	603	903	0
499	2	0	0	0	0	0	0	200	300	0	0	0	0	0	0	0	200	903	0	0	0	0	0	0	0	603	903	0
499	3	-0.306047	0.737772	11.1068	578.34	-220.45	-298.464	200	300	0	0	0	0	0	0	0	200	903	0	0	0	0	0	0	0	603	903	0
499	4	-0.15346	1.34812	13.2431	669.893	-159.415	-298.464	200	300	0	0	0	0	0	0	0	200	903	0	0	0	0	0	0	0	603	903	0
499	5	1.06724	1.34812	10.8017	212.129	-342.52	-252.687	200	300	0	0	0	0	0	0	0	200	903	0	0	0	0	0	0	0	603	903	0
499	6	2.44053	1.80589	10.1913	486.787	23.6906	-344.24	200	300	0	0	0	0	0	0	0	200	903	0	0	0	0	0	0	0	603	903	0
499	7	0.762068	1.19554	10.1913	212.129	23.6906	-206.911	200	300	0	0	0	0	0	0	0	200	903	0	0	0	0	0	0	0	603	903	0
499	8	0	0	0	0	0	0	200	300	0	0	0	0	0	0	0	200	903	0	0	0	0	0	0	0	603	903	0
499	9	0	0	0	0	0	0	200	300	0	0	0	0	0	0	0	200	903	0	0	0	0	0	0	0	603	903	0
500	0	-0.306047	1.95848	10.4965	1219.21	-37.3445	-252.687	200	300	0	0	0	0	0	0	0	200	903	0	0	0	0	0	0	0	603	903	0
500	1	0.304304	0.89036	13.2431	852.998	-830.802	-206.911	200	300	0	0	0	0	0	0	0	200	903	0	0	0	0	0	0	0	603	903	0
500	2	0.914656	1.6533	11.7172	-154.082	-37.3445	-161.134	200	300	0	0	0	0	0	0	0	200	903	0	0	0	0	0	0	0	603	903	0
500	3	1.6776	1.04295	10.1913	486.787	328.866	-298.464	200	300	0	0	0	0	0	0	0	200	903	0	0	0	0	0	0	0	603	903	0
500	4	0	0	0	0	0	0	200	300	0	0	0	0	0	0	0	200	903	0	0	0	0	0	0	0	603	903	0
500	5	0	0	0	0	0	0	200	300	0	0	0	0	0	0	0	200	903	0	0	0	0	0	0	0	603	903	0
500	6	0	0	0	0	0	0	200	300	0	0	0	0	0	0	0	200	903	0	0	0	0	0	0	0	603	903	0
500	7	0.151716	1.34812	11.1068	944.551	-403.556	-298.464	200	300	0	0	0	0	0	0	0	200	903	0	0	0	0	0	0	0	603	903	0
500	8	0.151716	1.6533	11.7172	761.445	-586.661	-206.911	200	300	0	0	0	0	0	0	0	200	903	0	0	0	0	0	0	0	603	903	0
500	9	1.37242	0.89036	11.1068	944.551	267.831	-298.464	200	300	0	0	0	0	0	0	0	200	903	0	0	0	0	0	0	0	603	903	0
501	0	0	0	0	0	0	0	200	300	0	0	0	0	0	0	0	200	903	0	0	0	0	0	0	0	603	903	0
501	1	0	0	0	0	0	0	200	300	0	0	0	0	0	0	0	200	903	0	0	0	0	0	0	0	603	903	0
501	2	0	0	0	0	0	0	200	300	0	0	0	0	0	0	0	200	903	0	0	0	0	0	0	0	603	903	0
501	3	0	0	0	0	0	0	200	300	0	0	0	0	0	0	0	200	903	0	0	0	0	0	0	0	603	903	0
501	4	0.151716	2.72141	11.412	852.998	-37.3445	-252.687	200	300	0	0	0	0	0	0	0	200	903	0	0	0	0	0	0	0	603	903	0
501	5	0.456892	1.80589	12.6327	944.551	145.761	159.3	200	300	0	0	0	0	0	0	0	200	903	0	0	0	0	0	0	0	603	903	0
501	6	0.914656	0.89036	11.1068	761.445	23.6906	-206.911	200	300	0	0	0	0	0	0	0	200	903	0	0	0	0	0	0	0	603	903	0
501	7	0	0	0	0	0	0	200	300	0	0	0	0	0	0	0	200	903	0	0	0	0	0	0	0	603	903	0
501	8	0	0	0	0	0	0	200	300	0	0	0	0	0	0	0	200	903	0	0	0	0	0	0	0	603	903	0
501	9	0	0	0	0	0	0	200	300	0	0	0	0	0	0	0	200	903	0	0	0	0	0	0	0	603	903	0
502	0	0	0	0	0	0	0	200	300	0	0	0	0	0	0	0	200	903	0	0	0	0	0	0	0	603	903	0
502	1	-0.000871718	-0.635519	11.412	120.576	-159.415	-206.911	200	300	0	0	0	0	0	0	0	200	903	0	0	0	0	0	0	0	603	903	0
502	2	-0.000871718	1.80589	13.2431	761.445	23.6906	-69.5817	200	300	0	0	0	0	0	0	0	200	903	0	0	0	0	0	0	0	603	903	0
502	3	1.21983	2.11106	9.88614	761.445	-281.485	-252.687	200	300	0	0	0	0	0	0	0	200	903	0	0	0	0	0	0	0	603	903	0
502	4	0	0	0	0	0	0	200	300	0	0	0	0	0	0	0	200	903	0	0	0	0	0	0	0	603	903	0
502	5	0	0	0	0	0	0	200	300	0	0	0	0	0	0	0	200	903	0	0	0	0	0	0	0	603	903	0
502	6	-0.15346	1.04295	10.1913	395.235	-98.3797	-298.464	200	300	0	0	0	0	0	0	0	200	903	0	0	0	0	0	0	0	603	903	0
502	7	0	0	0	0	0	0	200	300	0	0	0	0	0	0	0	200	903	0	0	0	0	0	0	0	603	903	0
502	8	2.74571	1.6533	10.8017	212.129	23.6906	-206.911	200	300	0	0	0	0	0	0	0	200	903	0	0	0	0	0	0	0	603	903	0
502	9	-0.15346	1.50071	10.1913	212.129	-98.3797	21.9711	200	300	0	0	0	0	0	0	0	200	903	0	0	0	0	0	0	0	603	903	0
503	0	0.762068	1.50071	10.4965	578.34	-281.485	-252.687	200	300	0	0	0	0	0	0	0	200	903	0	0	0	0	0	0	0	603	903	0
503	1	0.60948	0.432597	11.1068	1310.76	-159.415	-252.687	200	300	0	0	0	0	0	0	0	200	903	0	0	0	0	0	0	0	603	903	0
503	2	0.762068	0.89036	10.1913	1127.66	-37.3445	-161.134	200	300	0	0	0	0	0	0	0	200	903	0	0	0	0	0	0	0	603	903	0
503	3	0.914656	1.34812	12.0224	852.998	-159.415	-115.358	200	300	0	0	0	0	0	0	0	200	903	0	0	0	0	0	0	0	603	903	0
503	4	0	0	0	0	0	0	200	300	0	0	0	0	0	0	0	200	903	0	0	0	0	0	0	0	603	903	0
503	5	0	0	0	0	0	0	200	300	0	0	0	0	0	0	0	200	903	0	0	0	0	0	0	0	603	903	0
503	6	-0.611223	1.6533	11.412	395.235	-403.556	21.9711	200	300	0	0	0	0	0	0	0	200	903	0	0	0	0	0	0	0	603	903	0
503	7	0.304304	1.6533	9.88614	578.34	-98.3797	-115.358	200	300	0	0	0	0	0	0	0	200	903	0	0	0	0	0	0	0	603	903	0
503	8	0.60948	2.26365	10.4965	1127.66	145.761	-23.8053	200	300	0	0	0	0	0	0	0	200	903	0	0	0	0	0	0	0	603	903	0
503	9	0.762068	1.04295	10.1913	1036.1	-159.415	-206.911	200	300	0	0	0	0	0	0	0	200	903	0	0	0	0	0	0	0	603	903	0
504	0	0.60948	0.89036	10.8017	578.34	-403.556	113.524	200	300	0	0	0	0	0	0	0	200	903	0	0	0	0	0	0	0	603	903	0
504	1	0	0	0	0	0	0	200	300	0	0	0	0	0	0	0	200	903	0	0	0	0	0	0	0	603	903	0
504	2	0	0	0	0	0	0	200	300	0	0	0	0	0	0	0	200	903	0	0	0	0	0	0	0	603	903	0
504	3	-0.000871718	-1.09328	10.1913	395.235	-403.556	-161.134	200	300	0	0	0	0	0	0	0	200	903	0	0	0	0	0	0	0	603	903	0
504	4	-0.611223	1.80589	12.6327	212.129	-159.415	-435.793	200	300	0	0	0	0	0	0	0	200	903	0	0	0	0	0	0	0	603	903	0
504	5	0.60948	2.26365	11.412	395.235	-98.3797	-344.24	200	300	0	0	0	0	0	0	0	200	903	0	0	0	0	0	0	0	603	903	0
504	6	0	0	0	0	0	0	200	300	0	0	0	0	0	0	0	200	903	0	0	0	0	0	0	0	603	903	0
504	7	1.52501	1.04295	10.4965	1402.31	-525.626	159.3	200	300	0	0	0	0	0	0	0	200	903	0	0	0	0	0	0	0	603	903	0
504	8	0.762068	0.89036	10.4965	761.445	-98.3797	-298.464	200	300	0	0	0	0	0	0	0	200	903	0	0	0	0	0	0	0	603	903	0
504	9	0	0	0	0	0	0	200	300	0	0	0	0	0	0	0	200	903	0	0	0	0	0	0	0	603	903	0
505	0	0.914656	1.50071	10.8017	212.129	-159.415	-23.8053	200	300	0	0	0	0	0	0	0	200	903	0	0	0	0	0	0	0	603	903	0
505	1	-0.15346	1.6533	11.7172	761.445	-342.52	-252.687	200	300	0	0	0	0	0	0	0	200	903	0	0	0	0	0	0	0	603	903	0
505	2	1.21983	2.11106	10.1913	486.787	-159.415	-69.5817	200	300	0	0	0	0	0	0	0	200	903	0	0	0	0	0	0	0	603	903	0
505	3	1.21983	1.95848	10.8017	669.893	-159.415	21.9711	200	300	0	0	0	0	0	0	0	200	903	0	0	0	0	0	0	0	603	903	0
505	4	1.06724	1.34812	9.88614	761.445	-403.556	-298.464	200	300	0	0	0	0	0	0	0	200	903	0	0	0	0	0	0	0	603	903	0
505	5	0	0	0	0	0	0	200	300	0	0	0	0	0	0	0	200	903	0	0	0	0	0	0	0	603	903	0
505	6	0	0	0	0	0	0	200	300	0	0	0	0	0	0	0	200	903	0	0	0	0	0	0	0	603	903	0
505	7	0	0	0	0	0	0	200	300	0	0	0	0	0	0	0	200	903	0	0	0	0	0	0	0	603	903	0
505	8	0.151716	1.80589	10.1913	486.787	84.7258	-527.345	200	300	0	0	0	0	0	0	0	200	903	0	0	0	0	0	0	0	603	903	0
505	9	-0.15346	2.72141	13.5482	669.893	-37.3445	-161.134	200	300	0	0	0	0	0	0	0	200	903	0	0	0	0	0	0	0	603	903	0
506	0	1.06724	2.11106	11.1068	29.0235	-281.485	-252.687	200	300	0	0	0	0	0	0	0	200	903	0	0	0	0	0	0	0	603	903	0
506	1	0	0	0	0	0	0	200	300	0	0	0	0	0	0	0	200	903	0	0	0	0	0	0	0	603	903	0
506	2	0	0	0	0	0	0	200	300	0	0	0	0	0	0	0	200	903	0	0	0	0	0	0	0	603	903	0
506	3	0	0	0	0	0	0	200	300	0	0	0	0	0	0	0	200	903	0	0	0	0	0	0	0	603	903	0
506	4	-0.15346	1.50071	9.88614	578.34	-281.485	-252.687	200	300	0	0	0	0	0	0	0	200	903	0	0	0	0	0	0	0	603	903	0
506	5	0.60948	1.19554	10.4965	578.34	-586.661	-161.134	200	300	0	0	0	0	0	0	0	200	903	0	0	0	0	0	0	0	603	903	0
506	6	0.304304	0.432597	11.1068	212.129	-281.485	205.077	200	300	0	0	0	0	0	0	0	200	903	0	0	0	0	0	0	0	603	903	0
506	7	1.37242	0.280009	11.1068	395.235	-281.485	-161.134	200	300	0	0	0	0	0	0	0	200	903	0	0	0	0	0	0	0	603	903	0
506	8	0.914656	1.50071	10.4965	395.235	-281.485	-252.687	200	300	0	0	0	0	0	0	0	200	903	0	0	0	0	0	0	0	603	903	0
506	9	0	0	0	0	0	0	200	300	0	0	0	0	0	0	0	200	903	0	0	0	0	0	0	0	603	903	0
507	0	0.60948	1.6533	11.1068	944.551	-281.485	-298.464	200	300	0	0	0	0	0	0	0	200	903	0	0	0	0	0	0	0	603	903	0
507	1	0.151716	2.56883	10.1913	395.235	23.6906	-206.911	200	300	0	0	0	0	0	0	0	200	903	0	0	0	0	0	0	0	603	903	0
507	2	-0.15346	1.34812	11.1068	669.893	84.7258	21.9711	200	300	0	0	0	0	0	0	0	200	903	0	0	0	0	0	0	0	603	903	0
507	3	0.304304	-0.330343	11.1068	395.235	-769.766	-115.358	200	300	0	0	0	0	0	0	0	200	903	0	0	0	0	0	0	0	603	903	0
507	4	-0.000871718	1.04295	10.4965	29.0235	-403.556	-252.687	200	300	0	0	0	0	0	0	0	200	903	0	0	0	0	0	0	0	603	903	0
507	5	0.304304	1.6533	10.4965	669.893	-159.415	-344.24	200	300	0	0	0	0	0	0	0	200	903	0	0	0	0	0	0	0	603	903	0
507	6	0	0	0	0	0	0	200	300	0	0	0	0	0	0	0	200	903	0	0	0	0	0	0	0	603	903	0
507	7	0.914656	2.26365	9.88614	486.787	267.831	-390.016	200	300	0	0	0	0	0	0	0	200	903	0	0	0	0	0	0	0	603	903	0
507	8	0	0	0	0	0	0	200	300	0	0	0	0	0	0	0	200	903	0	0	0	0	0	0	0	603	903	0
507	9	0	0	0	0	0	0	200	300	0	0	0	0	0	0	0	200	903	0	0	0	0	0	0	0	603	903	0
508	0	-0.306047	1.04295	11.1068	761.445	-159.415	-206.911	200	300	0	0	0	0	0	0	0	200	903	0	0	0	0	0	0	0	603	903	0
508	1	0.60948	1.50071	11.412	761.445	-281.485	-69.5817	200	300	0	0	0	0	0	0	0	200	903	0	0	0	0	0	0	0	603	903	0
508	2	1.37242	1.80589	10.8017	303.682	-342.52	-161.134	200	300	0	0	0	0	0	0	0	200	903	0	0	0	0	0	0	0	603	903	0
508	3	1.83018	2.41624	10.4965	944.551	-403.556	-298.464	200	300	0	0	0	0	0	0	0	200	903	0	0	0	0	0	0	0	603	903	0
508	4	0	0	0	0	0	0	200	300	0	0	0	0	0	0	0	200	903	0	0	0	0	0	0	0	603	903	0
508	5	0	0	0	0	0	0	200	300	0	0	0	0	0	0	0	200	903	0	0	0	0	0	0	0	603	903	0
508	6	0	0	0	0	0	0	200	300	0	0	0	0	0	0	0	200	903	0	0	0	0	0	0	0	603	903	0
508	7	-0.15346	1.6533	11.412	1585.42	-281.485	-161.134	200	300	0	0	0	0	0	0	0	200	903	0	0	0	0	0	0	0	603	903	0
508	8	-1.06899	1.19554	12.9379	669.893	-98.3797	-344.24	200	300	0	0	0	0	0	0	0	200	903	0	0	0	0	0	0	0	603	903	0
508	9	0.304304	1.19554	11.412	-62.5292	-159.415	159.3	200	300	0	0	0	0	0	0	0	200	903	0	0	0	0	0	0	0	603	903	0
509	0	2.13536	1.19554	11.1068	395.235	84.7258	-23.8053	200	300	0	0	0	0	0	0	0	200	903	0	0	0	0	0	0	0	603	903	0
509	1	0	0	0	0	0	0	200	300	0	0	0	0	0	0	0	200	903	0	0	0	0	0	0	0	603	903	0
509	2	0	0	0	0	0	0	200	300	0	0	0	0	0	0	0	200	903	0	0	0	0	0	0	0	603	903	0
509	3	0	0	0	0	0	0	200	300	0	0	0	0	0	0	0	200	903	0	0	0	0	0	0	0	603	903	0
509	4	-0.611223	1.6533	11.412	852.998	-586.661	-390.016	200	300	0	0	0	0	0	0	0	200	903	0	0	0	0	0	0	0	603	903	0
509	5	0.151716	1.19554	12.9379	1402.31	-37.3445	-298.464	200	300	0	0	0	0	0	0	0	200	903	0	0	0	0	0	0	0	603	903	0
509	6	1.21983	1.6533	11.412	852.998	23.6906	21.9711	200	300	0	0	0	0	0	0	0	200	903	0	0	0	0	0	0	0	603	903	0
509	7	0	0	0	0	0	0	200	300	0	0	0	0	0	0	0	200	903	0	0	0	0	0	0	0	603	903	0
509	8	0	0	0	0	0	0	200	300	0	0	0	0	0	0	0	200	903	0	0	0	0	0	0	0	603	903	0
509	9	0.151716	2.11106	10.4965	669.893	-281.485	-252.687	200	300	0	0	0	0	0	0	0	200	903	0	0	0	0	0	0	0	603	903	0
510	0	-0.611223	2.26365	9.88614	669.893	-37.3445	-206.911	200	300	0	0	0	0	0	0	0	200	903	0	0	0	0	0	0	0	603	903	0
510	1	0.151716	2.11106	11.412	-62.5292	-281.485	-298.464	200	300	0	0	0	0	0	0	0	200	903	0	0	0	0	0	0	0	603	903	0
510	2	0.151716	1.80589	10.8017	761.445	-98.3797	-206.911	200	300	0	0	0	0	0	0	0	200	903	0	0	0	0	0	0	0	603	903	0
510	3	1.21983	1.04295	11.412	944.551	-159.415	-115.358	200	300	0	0	0	0	0	0	0	200	903	0	0	0	0	0	0	0	603	903	0
510	4	0.762068	0.89036	10.8017	486.787	-281.485	-115.358	200	300	0	0	0	0	0	0	0	200	903	0	0	0	0	0	0	0	603	903	0
510	5	1.06724	1.34812	9.88614	944.551	-586.661	-161.134	200	300	0	0	0	0	0	0	0	200	903	0	0	0	0	0	0	0	603	903	0
510	6	0.60948	1.34812	10.8017	669.893	-37.3445	-23.8053	200	300	0	0	0	0	0	0	0	200	903	0	0	0	0	0	0	0	603	903	0
510	7	-0.611223	2.26365	9.88614	669.893	-159.415	-618.898	200	300	0	0	0	0	0	0	0	200	903	0	0	0	0	0	0	0	603	903	0
510	8	2.28795	1.80589	9.58096	29.0235	-342.52	-252.687	200	300	0	0	0	0	0	0	0	200	903	0	0	0	0	0	0	0	603	903	0
510	9	0.151716	2.26365	10.4965	212.129	-98.3797	-161.134	200	300	0	0	0	0	0	0	0	200	903	0	0	0	0	0	0	0	603	903	0
511	0	0	0	0	0	0	0	200	300	0	0	0	0	0	0	0	200	903	0	0	0	0	0	0	0	603	903	0
511	1	0.914656	0.280009	10.8017	578.34	-342.52	-252.687	200	300	0	0	0	0	0	0	0	200	903	0	0	0	0	0	0	0	603	903	0
511	2	0	0	0	0	0	0	200	300	0	0	0	0	0	0	0	200	903	0	0	0	0	0	0	0	603	903	0
511	3	0	0	0	0	0	0	200	300	0	0	0	0	0	0	0	200	903	0	0	0	0	0	0	0	603	903	0
511	4	0	0	0	0	0	0	200	300	0	0	0	0	0	0	0	200	903	0	0	0	0	0	0	0	603	903	0
511	5	1.52501	1.19554	11.7172	395.235	-37.3445	-298.464	200	300	0	0	0	0	0	0	0	200	903	0	0	0	0	0	0	0	603	903	0
511	6	-0.458635	1.80589	10.1913	395.235	-342.52	-252.687	200	300	0	0	0	0	0	0	0	200	903	0	0	0	0	0	0	0	603	903	0
511	7	1.06724	0.737772	11.1068	303.682	-525.626	-206.911	200	300	0	0	0	0	0	0	0	200	903	0	0	0	0	0	0	0	603	903	0
511	8	0	0	0	0	0	0	200	300	0	0	0	0	0	0	0	200	903	0	0	0	0	0	0	0	603	903	0
511	9	0	0	0	0	0	0	200	300	0	0	0	0	0	0	0	200	903	0	0	0	0	0	0	0	603	903	0
512	0	0.914656	1.95848	11.412	944.551	23.6906	67.7474	200	300	0	0	0	0	0	0	0	200	903	0	0	0	0	0	0	0	603	903	0
512	1	0	0	0	0	0	0	200	300	0	0	0	0	0	0	0	200	903	0	0	0	0	0	0	0	603	903	0
512	2	1.06724	1.34812	10.8017	29.0235	-37.3445	-390.016	200	300	0	0	0	0	0	0	0	200	903	0	0	0	0	0	0	0	603	903	0
512	3	-0.611223	1.34812	10.8017	669.893	-159.415	21.9711	200	300	0	0	0	0	0	0	0	200	903	0	0	0	0	0	0	0	603	903	0
512	4	0.762068	1.80589	10.8017	578.34	-281.485	-206.911	200	300	0	0	0	0	0	0	0	200	903	0	0	0	0	0	0	0	603	903	0
512	5	1.06724	1.80589	10.8017	1036.1	-159.415	-298.464	200	300	0	0	0	0	0	0	0	200	903	0	0	0	0	0	0	0	603	903	0
512	6	0	0	0	0	0	0	200	300	0	0	0	0	0	0	0	200	903	0	0	0	0	0	0	0	603	903	0
512	7	0.914656	0.280009	10.1913	578.34	-159.415	342.406	200	300	0	0	0	0	0	0	0	200	903	0	0	0	0	0	0	0	603	903	0
512	8	0	0	0	0	0	0	200	300	0	0	0	0	0	0	0	200	903	0	0	0	0	0	0	0	603	903	0
512	9	0	0	0	0	0	0	200	300	0	0	0	0	0	0	0	200	903	0	0	0	0	0	0	0	603	903	0
513	0	0.304304	1.34812	10.4965	395.235	-403.556	-115.358	200	300	0	0	0	0	0	0	0	200	903	0	0	0	0	0	0	0	603	903	0
513	1	-0.611223	1.50071	10.8017	395.235	-159.415	-252.687	200	300	0	0	0	0	0	0	0	200	903	0	0	0	0	0	0	0	603	903	0
513	2	0.304304	1.95848	10.8017	212.129	84.7258	-115.358	200	300	0	0	0	0	0	0	0	200	903	0	0	0	0	0	0	0	603	903	0
513	3	0.762068	2.11106	10.8017	669.893	-159.415	-161.134	200	300	0	0	0	0	0	0	0	200	903	0	0	0	0	0	0	0	603	903	0
513	4	1.37242	2.11106	10.1913	761.445	-98.3797	-161.134	200	300	0	0	0	0	0	0	0	200	903	0	0	0	0	0	0	0	603	903	0
513	5	0.914656	1.95848	12.3275	578.34	-342.52	-206.911	200	300	0	0	0	0	0	0	0	200	903	0	0	0	0	0	0	0	603	903	0
513	6	0	0	0	0	0	0	200	300	0	0	0	0	0	0	0	200	903	0	0	0	0	0	0	0	603	903	0
513	7	0.914656	1.04295	11.1068	761.445	-342.52	-69.5817	200	300	0	0	0	0	0	0	0	200	903	0	0	0	0	0	0	0	603	903	0
513	8	-0.306047	0.89036	10.8017	1219.21	23.6906	-161.134	200	300	0	0	0	0	0	0	0	200	903	0	0	0	0	0	0	0	603	903	0
513	9	0.60948	0.89036	11.7172	578.34	23.6906	-298.464	200	300	0	0	0	0	0	0	0	200	903	0	0	0	0	0	0	0	603	903	0
514	0	1.37242	1.34812	11.7172	395.235	-220.45	-206.911	200	300	0	0	0	0	0	0	0	200	903	0	0	0	0	0	0	0	603	903	0
514	1	0	0	0	0	0	0	200	300	0	0	0	0	0	0	0	200	903	0	0	0	0	0	0	0	603	903	0
514	2	0	0	0	0	0	0	200	300	0	0	0	0	0	0	0	200	903	0	0	0	0	0	0	0	603	903	0
514	3	0	0	0	0	0	0	200	300	0	0	0	0	0	0	0	200	903	0	0	0	0	0	0	0	603	903	0
514	4	0	0	0	0	0	0	200	300	0	0	0	0	0	0	0	200	903	0	0	0	0	0	0	0	603	903	0
514	5	-0.611223	1.6533	11.7172	852.998	23.6906	-390.016	200	300	0	0	0	0	0	0	0	200	903	0	0	0	0	0	0	0	603	903	0
514	6	-0.306047	1.34812	12.9379	303.682	-220.45	-206.911	200	300	0	0	0	0	0	0	0	200	903	0	0	0	0	0	0	0	603	903	0
514	7	1.06724	0.89036	11.412	395.235	-98.3797	-115.358	200	300	0	0	0	0	0	0	0	200	903	0	0	0	0	0	0	0	603	903	0
514	8	0	0	0	0	0	0	200	300	0	0	0	0	0	0	0	200	903	0	0	0	0	0	0	0	603	903	0
514	9	0	0	0	0	0	0	200	300	0	0	0	0	0	0	0	200	903	0	0	0	0	0	0	0	603	903	0
515	0	-0.000871718	2.26365	10.1913	303.682	-342.52	-344.24	200	300	0	0	0	0	0	0	0	200	903	0	0	0	0	0	0	0	603	903	0
515	1	-0.15346	1.95848	9.88614	578.34	-98.3797	-252.687	200	300	0	0	0	0	0	0	0	200	903	0	0	0	0	0	0	0	603	903	0
515	2	-0.000871718	1.95848	10.8017	212.129	-159.415	-344.24	200	300	0	0	0	0	0	0	0	200	903	0	0	0	0	0	0	0	603	903	0
515	3	0.151716	1.04295	10.4965	578.34	-37.3445	-298.464	200	300	0	0	0	0	0	0	0	200	903	0	0	0	0	0	0	0	603	903	0
515	4	0.914656	1.19554	11.1068	944.551	84.7258	67.7474	200	300	0	0	0	0	0	0	0	200	903	0	0	0	0	0	0	0	603	903	0
515	5	0.456892	1.19554	12.3275	669.893	-342.52	113.524	200	300	0	0	0	0	0	0	0	200	903	0	0	0	0	0	0	0	603	903	0
515	6	0.762068	1.34812	9.88614	212.129	-464.591	-69.5817	200	300	0	0	0	0	0	0	0	200	903	0	0	0	0	0	0	0	603	903	0
515	7	-0.15346	2.41624	12.0224	852.998	-159.415	-252.687	200	300	0	0	0	0	0	0	0	200	903	0	0	0	0	0	0	0	603	903	0
515	8	0.304304	2.26365	10.1913	486.787	23.6906	-161.134	200	300	0	0	0	0	0	0	0	200	903	0	0	0	0	0	0	0	603	903	0
515	9	1.83018	0.89036	10.8017	395.235	-281.485	-206.911	200	300	0	0	0	0	0	0	0	200	903	0	0	0	0	0	0	0	603	903	0
516	0	-0.15346	2.11106	11.412	852.998	-403.556	-161.134	200	300	0	0	0	0	0	0	0	200	903	0	0	0	0	0	0	0	603	903	0
516	1	0.304304	1.80589	10.4965	852.998	-586.661	205.077	200	300	0	0	0	0	0	0	0	200	903	0	0	0	0	0	0	0	603	903	0
516	2	1.06724	1.04295	10.4965	1127.66	-220.45	-298.464	200	300	0	0	0	0	0	0	0	200	903	0	0	0	0	0	0	0	603	903	0
516	3	0	0	0	0	0	0	200	300	0	0	0	0	0	0	0	200	903	0	0	0	0	0	0	0	603	903	0
516	4	0.762068	1.50071	11.7172	578.34	23.6906	-161.134	200	300	0	0	0	0	0	0	0	200	903	0	0	0	0	0	0	0	603	903	0
516	5	0	0	0	0	0	0	200	300	0	0	0	0	0	0	0	200	903	0	0	0	0	0	0	0	603	903	0
516	6	1.52501	1.6533	10.8017	395.235	-159.415	-252.687	200	300	0	0	0	0	0	0	0	200	903	0	0	0	0	0	0	0	603	903	0
516	7	-0.611223	1.04295	10.4965	578.34	-220.45	-206.911	200	300	0	0	0	0	0	0	0	200	903	0	0	0	0	0	0	0	603	903	0
516	8	-0.000871718	2.11106	12.3275	852.998	-586.661	159.3	200	300	0	0	0	0	0	0	0	200	903	0	0	0	0	0	0	0	603	903	0
516	9	0.914656	1.19554	10.8017	944.551	-159.415	-115.358	200	300	0	0	0	0	0	0	0	200	903	0	0	0	0	0	0	0	603	903	0
517	0	1.98277	1.19554	10.8017	852.998	-159.415	-435.793	200	300	0	0	0	0	0	0	0	200	903	0	0	0	0	0	0	0	603	903	0
517	1	0	0	0	0	0	0	200	300	0	0	0	0	0	0	0	200	903	0	0	0	0	0	0	0	603	903	0
517	2	0	0	0	0	0	0	200	300	0	0	0	0	0	0	0	200	903	0	0	0	0	0	0	0	603	903	0
517	3	0	0	0	0	0	0	200	300	0	0	0	0	0	0	0	200	903	0	0	0	0	0	0	0	603	903	0
517	4	-0.306047	1.95848	11.1068	395.235	-403.556	-298.464	200	300	0	0	0	0	0	0	0	200	903	0	0	0	0	0	0	0	603	903	0
517	5	-0.458635	1.95848	10.8017	395.235	-98.3797	21.9711	200	300	0	0	0	0	0	0	0	200	903	0	0	0	0	0	0	0	603	903	0
517	6	0.914656	2.11106	11.412	761.445	-37.3445	-252.687	200	300	0	0	0	0	0	0	0	200	903	0	0	0	0	0	0	0	603	903	0
517	7	0.60948	1.80589	10.8017	669.893	-98.3797	-115.358	200	300	0	0	0	0	0	0	0	200	903	0	0	0	0	0	0	0	603	903	0
517	8	0	0	0	0	0	0	200	300	0	0	0	0	0	0	0	200	903	0	0	0	0	0	0	0	603	903	0
517	9	0	0	0	0	0	0	200	300	0	0	0	0	0	0	0	200	903	0	0	0	0	0	0	0	603	903	0
518	0	0	0	0	0	0	0	200	300	0	0	0	0	0	0	0	200	903	0	0	0	0	0	0	0	603	903	0
518	1	0	0	0	0	0	0	200	300	0	0	0	0	0	0	0	200	903	0	0	0	0	0	0	0	603	903	0
518	2	-0.306047	1.95848	10.4965	578.34	145.761	205.077	200	300	0	0	0	0	0	0	0	200	903	0	0	0	0	0	0	0	603	903	0
518	3	-0.000871718	1.04295	11.7172	395.235	-159.415	-344.24	200	300	0	0	0	0	0	0	0	200	903	0	0	0	0	0	0	0	603	903	0
518	4	0.60948	1.80589	10.4965	669.893	84.7258	-298.464	200	300	0	0	0	0	0	0	0	200	903	0	0	0	0	0	0	0	603	903	0
518	5	0.60948	0.585184	11.1068	395.235	-37.3445	-161.134	200	300	0	0	0	0	0	0	0	200	903	0	0	0	0	0	0	0	603	903	0
518	6	0	0	0	0	0	0	200	300	0	0	0	0	0	0	0	200	903	0	0	0	0	0	0	0	603	903	0
518	7	0.914656	1.34812	11.1068	761.445	-342.52	-298.464	200	300	0	0	0	0	0	0	0	200	903	0	0	0	0	0	0	0	603	903	0
518	8	0	0	0	0	0	0	200	300	0	0	0	0	0	0	0	200	903	0	0	0	0	0	0	0	603	903	0
518	9	-0.611223	1.80589	13.2431	1036.1	-98.3797	-69.5817	200	300	0	0	0	0	0	0	0	200	903	0	0	0	0	0	0	0	603	903	0
519	0	-0.000871718	1.95848	10.4965	212.129	23.6906	-252.687	200	300	0	0	0	0	0	0	0	200	903	0	0	0	0	0	0	0	603	903	0
519	1	1.06724	1.34812	12.3275	1493.87	-37.3445	-161.134	200	300	0	0	0	0	0	0	0	200	903	0	0	0	0	0	0	0	603	903	0
519	2	1.21983	1.6533	10.1913	852.998	-342.52	-206.911	200	300	0	0	0	0	0	0	0	200	903	0	0	0	0	0	0	0	603	903	0
519	3	0	0	0	0	0	0	200	300	0	0	0	0	0	0	0	200	903	0	0	0	0	0	0	0	603	903	0
519	4	0	0	0	0	0	0	200	300	0	0	0	0	0	0	0	200	903	0	0	0	0	0	0	0	603	903	0
519	5	0.304304	1.19554	10.4965	303.682	-342.52	-252.687	200	300	0	0	0	0	0	0	0	200	903	0	0	0	0	0	0	0	603	903	0
519	6	0	0	0	0	0	0	200	300	0	0	0	0	0	0	0	200	903	0	0	0	0	0	0	0	603	903	0
519	7	0.60948	2.11106	10.1913	212.129	-159.415	-23.8053	200	300	0	0	0	0	0	0	0	200	903	0	0	0	0	0	0	0	603	903	0
519	8	0.762068	0.89036	12.0224	212.129	-220.45	-252.687	200	300	0	0	0	0	0	0	0	200	903	0	0	0	0	0	0	0	603	903	0
519	9	0.304304	2.11106	10.8017	578.34	-159.415	-435.793	200	300	0	0	0	0	0	0	0	200	903	0	0	0	0	0	0	0	603	903	0
520	0	0	0	0	0	0	0	200	300	0	0	0	0	0	0	0	200	903	0	0	0	0	0	0	0	603	903	0
520	1	0.60948	2.26365	10.1913	761.445	-220.45	-115.358	200	300	0	0	0	0	0	0	0	200	903	0	0	0	0	0	0	0	603	903	0
520	2	0	0	0	0	0	0	200	300	0	0	0	0	0	0	0	200	903	0	0	0	0	0	0	0	603	903	0
520	3	-0.458635	1.19554	11.412	-154.082	84.7258	159.3	200	300	0	0	0	0	0	0	0	200	903	0	0	0	0	0	0	0	603	903	0
520	4	-0.000871718	1.50071	11.412	395.235	-525.626	388.182	200	300	0	0	0	0	0	0	0	200	903	0	0	0	0	0	0	0	603	903	0
520	5	0.456892	0.432597	11.1068	303.682	-98.3797	-206.911	200	300	0	0	0	0	0	0	0	200	903	0	0	0	0	0	0	0	603	903	0
520	6	0.914656	1.50071	10.4965	1036.1	-37.3445	-161.134	200	300	0	0	0	0	0	0	0	200	903	0	0	0	0	0	0	0	603	903	0
520	7	0	0	0	0	0	0	200	300	0	0	0	0	0	0	0	200	903	0	0	0	0	0	0	0	603	903	0
520	8	0	0	0	0	0	0	200	300	0	0	0	0	0	0	0	200	903	0	0	0	0	0	0	0	603	903	0
520	9	0	0	0	0	0	0	200	300	0	0	0	0	0	0	0	200	903	0	0	0	0	0	0	0	603	903	0
521	0	1.6776	-0.177755	10.4965	669.893	-464.591	21.9711	200	300	0	0	0	0	0	0	0	200	903	0	0	0	0	0	0	0	603	903	0
521	1	0	0	0	0	0	0	200	300	0	0	0	0	0	0	0	200	903	0	0	0	0	0	0	0	603	903	0
521	2	0.762068	2.72141	11.1068	852.998	-342.52	-252.687	200	300	0	0	0	0	0	0	0	200	903	0	0	0	0	0	0	0	603	903	0
521	3	0.762068	1.6533	11.412	944.551	-525.626	-206.911	200	300	0	0	0	0	0	0	0	200	903	0	0	0	0	0	0	0	603	903	0
521	4	0.914656	0.737772	11.1068	944.551	-98.3797	-298.464	200	300	0	0	0	0	0	0	0	200	903	0	0	0	0	0	0	0	603	903	0
521	5	1.52501	1.6533	12.0224	944.551	-98.3797	67.7474	200	300	0	0	0	0	0	0	0	200	903	0	0	0	0	0	0	0	603	903	0
521	6	0	0	0	0	0	0	200	300	0	0	0	0	0	0	0	200	903	0	0	0	0	0	0	0	603	903	0
521	7	1.83018	1.19554	11.1068	578.34	-159.415	-69.5817	200	300	0	0	0	0	0	0	0	200	903	0	0	0	0	0	0	0	603	903	0
521	8	-0.763811	2.26365	11.1068	303.682	-281.485	-298.464	200	300	0	0	0	0	0	0	0	200	903	0	0	0	0	0	0	0	603	903	0
521	9	0.60948	1.6533	11.1068	486.787	-281.485	-206.911	200	300	0	0	0	0	0	0	0	200	903	0	0	0	0	0	0	0	603	903	0
522	0	0.60948	2.41624	11.412	944.551	23.6906	-23.8053	200	300	0	0	0	0	0	0	0	200	903	0	0	0	0	0	0	0	603	903	0
522	1	0	0	0	0	0	0	200	300	0	0	0	0	0	0	0	200	903	0	0	0	0	0	0	0	603	903	0
522	2	0.304304	1.34812	11.1068	303.682	-342.52	-252.687	200	300	0	0	0	0	0	0	0	200	903	0	0	0	0	0	0	0	603	903	0
522	3	0	0	0	0	0	0	200	300	0	0	0	0	0	0	0	200	903	0	0	0	0	0	0	0	603	903	0
522	4	-0.15346	1.34812	10.4965	120.576	-159.415	-115.358	200	300	0	0	0	0	0	0	0	200	903	0	0	0	0	0	0	0	603	903	0
522	5	0.151716	1.95848	12.6327	852.998	-342.52	-115.358	200	300	0	0	0	0	0	0	0	200	903	0	0	0	0	0	0	0	603	903	0
522	6	0.762068	2.11106	10.4965	303.682	-281.485	-298.464	200	300	0	0	0	0	0	0	0	200	903	0	0	0	0	0	0	0	603	903	0
522	7	0	0	0	0	0	0	200	300	0	0	0	0	0	0	0	200	903	0	0	0	0	0	0	0	603	903	0
522	8	0	0	0	0	0	0	200	300	0	0	0	0	0	0	0	200	903	0	0	0	0	0	0	0	603	903	0
522	9	0	0	0	0	0	0	200	300	0	0	0	0	0	0	0	200	903	0	0	0	0	0	0	0	603	903	0
523	0	0.762068	1.50071	10.1913	944.551	-159.415	-161.134	200	300	0	0	0	0	0	0	0	200	903	0	0	0	0	0	0	0	603	903	0
523	1	-0.000871718	0.89036	10.8017	578.34	-159.415	-206.911	200	300	0	0	0	0	0	0	0	200	903	0	0	0	0	0	0	0	603	903	0
523	2	0.456892	1.50071	11.7172	395.235	-220.45	-344.24	200	300	0	0	0	0	0	0	0	200	903	0	0	0	0	0	0	0	603	903	0
523	3	2.74571	0.737772	10.8017	578.34	-159.415	-206.911	200	300	0	0	0	0	0	0	0	200	903	0	0	0	0	0	0	0	603	903	0
523	4	0	0	0	0	0	0	200	300	0	0	0	0	0	0	0	200	903	0	0	0	0	0	0	0	603	903	0
523	5	0	0	0	0	0	0	200	300	0	0	0	0	0	0	0	200	903	0	0	0	0	0	0	0	603	903	0
523	6	0	0	0	0	0	0	200	300	0	0	0	0	0	0	0	200	903	0	0	0	0	0	0	0	603	903	0
523	7	0	0	0	0	0	0	200	300	0	0	0	0	0	0	0	200	903	0	0	0	0	0	0	0	603	903	0
523	8	0	0	0	0	0	0	200	300	0	0	0	0	0	0	0	200	903	0	0	0	0	0	0	0	603	903	0
523	9	0.914656	2.11106	11.412	578.34	145.761	-69.5817	200	300	0	0	0	0	0	0	0	200	903	0	0	0	0	0	0	0	603	903	0
524	0	0	0	0	0	0	0	200	300	0	0	0	0	0	0	0	200	903	0	0	0	0	0	0	0	603	903	0
524	1	0	0	0	0	0	0	200	300	0	0	0	0	0	0	0	200	903	0	0	0	0	0	0	0	603	903	0
524	2	-0.000871718	0.280009	10.1913	486.787	-98.3797	-161.134	200	300	0	0	0	0	0	0	0	200	903	0	0	0	0	0	0	0	603	903	0
524	3	0	0	0	0	0	0	200	300	0	0	0	0	0	0	0	200	903	0	0	0	0	0	0	0	603	903	0
524	4	0.151716	1.34812	10.8017	1310.76	-403.556	-298.464	200	300	0	0	0	0	0	0	0	200	903	0	0	0	0	0	0	0	603	903	0
524	5	0.304304	1.6533	13.5482	120.576	-220.45	-390.016	200	300	0	0	0	0	0	0	0	200	903	0	0	0	0	0	0	0	603	903	0
524	6	1.21983	1.34812	12.0224	395.235	-159.415	-344.24	200	300	0	0	0	0	0	0	0	200	903	0	0	0	0	0	0	0	603	903	0
524	7	0	0	0	0	0	0	200	300	0	0	0	0	0	0	0	200	903	0	0	0	0	0	0	0	603	903	0
524	8	0	0	0	0	0	0	200	300	0	0	0	0	0	0	0	200	903	0	0	0	0	0	0	0	603	903	0
524	9	0	0	0	0	0	0	200	300	0	0	0	0	0	0	0	200	903	0	0	0	0	0	0	0	603	903	0
525	0	-0.916399	1.34812	11.1068	1585.42	-464.591	-206.911	200	300	0	0	0	0	0	0	0	200	903	0	0	0	0	0	0	0	603	903	0
525	1	-0.15346	0.89036	10.4965	669.893	-342.52	-252.687	200	300	0	0	0	0	0	0	0	200	903	0	0	0	0	0	0	0	603	903	0
525	2	1.06724	0.89036	12.6327	303.682	-403.556	-252.687	200	300	0	0	0	0	0	0	0	200	903	0	0	0	0	0	0	0	603	903	0
525	3	1.21983	1.95848	11.412	578.34	-159.415	-344.24	200	300	0	0	0	0	0	0	0	200	903	0	0	0	0	0	0	0	603	903	0
525	4	0	0	0	0	0	0	200	300	0	0	0	0	0	0	0	200	903	0	0	0	0	0	0	0	603	903	0
525	5	0	0	0	0	0	0	200	300	0	0	0	0	0	0	0	200	903	0	0	0	0	0	0	0	603	903	0
525	6	0	0	0	0	0	0	200	300	0	0	0	0	0	0	0	200	903	0	0	0	0	0	0	0	603	903	0
525	7	1.83018	0.737772	10.4965	852.998	-281.485	-252.687	200	300	0	0	0	0	0	0	0	200	903	0	0	0	0	0	0	0	603	903	0
525	8	-0.306047	0.585184	10.8017	1036.1	-37.3445	-344.24	200	300	0	0	0	0	0	0	0	200	903	0	0	0	0	0	0	0	603	903	0
525	9	0.60948	1.19554	11.7172	578.34	-281.485	-344.24	200	300	0	0	0	0	0	0	0	200	903	0	0	0	0	0	0	0	603	903	0
526	0	0.914656	2.11106	11.1068	395.235	-281.485	-69.5817	200	300	0	0	0	0	0	0	0	200	903	0	0	0	0	0	0	0	603	903	0
526	1	0	0	0	0	0	0	200	300	0	0	0	0	0	0	0	200	903	0	0	0	0	0	0	0	603	903	0
526	2	1.6776	1.50071	11.7172	761.445	-220.45	-298.464	200	300	0	0	0	0	0	0	0	200	903	0	0	0	0	0	0	0	603	903	0
526	3	0	0	0	0	0	0	200	300	0	0	0	0	0	0	0	200	903	0	0	0	0	0	0	0	603	903	0
526	4	0.151716	1.04295	11.412	852.998	84.7258	21.9711	200	300	0	0	0	0	0	0	0	200	903	0	0	0	0	0	0	0	603	903	0
526	5	-0.15346	1.04295	12.0224	212.129	-220.45	-344.24	200	300	0	0	0	0	0	0	0	200	903	0	0	0	0	0	0	0	603	903	0
526	6	1.06724	1.04295	10.4965	303.682	-281.485	-206.911	200	300	0	0	0	0	0	0	0	200	903	0	0	0	0	0	0	0	603	903	0
526	7	2.59312	1.50071	9.58096	669.893	-98.3797	-23.8053	200	300	0	0	0	0	0	0	0	200	903	0	0	0	0	0	0	0	603	903	0
526	8	0	0	0	0	0	0	200	300	0	0	0	0	0	0	0	200	903	0	0	0	0	0	0	0	603	903	0
526	9	0	0	0	0	0	0	200	300	0	0	0	0	0	0	0	200	903	0	0	0	0	0	0	0	603	903	0
527	0	-0.306047	1.19554	10.1913	1219.21	-159.415	-206.911	200	300	0	0	0	0	0	0	0	200	903	0	0	0	0	0	0	0	603	903	0
527	1	-0.000871718	1.19554	12.0224	761.445	23.6906	-115.358	200	300	0	0	0	0	0	0	0	200	903	0	0	0	0	0	0	0	603	903	0
527	2	0.914656	1.04295	10.8017	578.34	-37.3445	-206.911	200	300	0	0	0	0	0	0	0	200	903	0	0	0	0	0	0	0	603	903	0
527	3	1.37242	1.50071	10.4965	578.34	-37.3445	-115.358	200	300	0	0	0	0	0	0	0	200	903	0	0	0	0	0	0	0	603	903	0
527	4	0	0	0	0	0	0	200	300	0	0	0	0	0	0	0	200	903	0	0	0	0	0	0	0	603	903	0
527	5	0.151716	1.6533	11.1068	486.787	-220.45	-390.016	200	300	0	0	0	0	0	0	0	200	903	0	0	0	0	0	0	0	603	903	0
527	6	-0.458635	1.19554	10.8017	669.893	-281.485	-390.016	200	300	0	0	0	0	0	0	0	200	903	0	0	0	0	0	0	0	603	903	0
527	7	-0.458635	1.34812	10.8017	486.787	145.761	-206.911	200	300	0	0	0	0	0	0	0	200	903	0	0	0	0	0	0	0	603	903	0
527	8	-0.000871718	1.80589	13.5482	120.576	-98.3797	-298.464	200	300	0	0	0	0	0	0	0	200	903	0	0	0	0	0	0	0	603	903	0
527	9	0.762068	2.41624	11.412	120.576	-220.45	-23.8053	200	300	0	0	0	0	0	0	0	200	903	0	0	0	0	0	0	0	603	903	0
528	0	0.60948	1.50071	10.4965	120.576	-159.415	-69.5817	200	300	0	0	0	0	0	0	0	200	903	0	0	0	0	0	0	0	603	903	0
528	1	0	0	0	0	0	0	200	300	0	0	0	0	0	0	0	200	903	0	0	0	0	0	0	0	603	903	0
528	2	0	0	0	0	0	0	200	300	0	0	0	0	0	0	0	200	903	0	0	0	0	0	0	0	603	903	0
528	3	0.60948	1.50071	10.8017	212.129	-98.3797	-298.464	200	300	0	0	0	0	0	0	0	200	903	0	0	0	0	0	0	0	603	903	0
528	4	0.151716	2.26365	11.1068	578.34	-220.45	-115.358	200	300	0	0	0	0	0	0	0	200	903	0	0	0	0	0	0	0	603	903	0
528	5	0.914656	1.95848	11.1068	29.0235	-342.52	21.9711	200	300	0	0	0	0	0	0	0	200	903	0	0	0	0	0	0	0	603	903	0
528	6	1.83018	1.6533	10.1913	761.445	-159.415	-161.134	200	300	0	0	0	0	0	0	0	200	903	0	0	0	0	0	0	0	603	903	0
528	7	0	0	0	0	0	0	200	300	0	0	0	0	0	0	0	200	903	0	0	0	0	0	0	0	603	903	0
528	8	0	0	0	0	0	0	200	300	0	0	0	0	0	0	0	200	903	0	0	0	0	0	0	0	603	903	0
528	9	1.21983	1.34812	10.4965	486.787	84.7258	-344.24	200	300	0	0	0	0	0	0	0	200	903	0	0	0	0	0	0	0	603	903	0
529	0	-0.306047	2.56883	11.7172	303.682	-37.3445	-298.464	200	300	0	0	0	0	0	0	0	200	903	0	0	0	0	0	0	0	603	903	0
529	1	1.06724	2.26365	11.1068	852.998	-342.52	-161.134	200	300	0	0	0	0	0	0	0	200	903	0	0	0	0	0	0	0	603	903	0
529	2	1.06724	2.72141	9.58096	852.998	-464.591	21.9711	200	300	0	0	0	0	0	0	0	200	903	0	0	0	0	0	0	0	603	903	0
529	3	0	0	0	0	0	0	200	300	0	0	0	0	0	0	0	200	903	0	0	0	0	0	0	0	603	903	0
529	4	1.6776	1.04295	12.0224	29.0235	-281.485	-298.464	200	300	0	0	0	0	0	0	0	200	903	0	0	0	0	0	0	0	603	903	0
529	5	0	0	0	0	0	0	200	300	0	0	0	0	0	0	0	200	903	0	0	0	0	0	0	0	603	903	0
529	6	1.37242	2.72141	10.1913	486.787	145.761	-344.24	200	300	0	0	0	0	0	0	0	200	903	0	0	0	0	0	0	0	603	903	0
529	7	-0.15346	2.72141	12.0224	669.893	-37.3445	-344.24	200	300	0	0	0	0	0	0	0	200	903	0	0	0	0	0	0	0	603	903	0
529	8	0.762068	1.04295	10.8017	1036.1	-220.45	-206.911	200	300	0	0	0	0	0	0	0	200	903	0	0	0	0	0	0	0	603	903	0
529	9	0.60948	0.432597	10.8017	578.34	23.6906	-115.358	200	300	0	0	0	0	0	0	0	200	903	0	0	0	0	0	0	0	603	903	0
530	0	0	0	0	0	0	0	200	300	0	0	0	0	0	0	0	200	903	0	0	0	0	0	0	0	603	903	0
530	1	0.304304	2.11106	9.88614	1127.66	-220.45	-344.24	200	300	0	0	0	0	0	0	0	200	903	0	0	0	0	0	0	0	603	903	0
530	2	0	0	0	0	0	0	200	300	0	0	0	0	0	0	0	200	903	0	0	0	0	0	0	0	603	903	0
530	3	0.151716	2.11106	11.7172	852.998	-37.3445	433.958	200	300	0	0	0	0	0	0	0	200	903	0	0	0	0	0	0	0	603	903	0
530	4	-0.000871718	1.50071	12.0224	578.34	-159.415	-206.911	200	300	0	0	0	0	0	0	0	200	903	0	0	0	0	0	0	0	603	903	0
530	5	1.06724	0.585184	10.8017	486.787	-37.3445	67.7474	200	300	0	0	0	0	0	0	0	200	903	0	0	0	0	0	0	0	603	903	0
530	6	0	0	0	0	0	0	200	300	0	0	0	0	0	0	0	200	903	0	0	0	0	0	0	0	603	903	0
530	7	0.762068	2.26365	13.2431	761.445	-586.661	-69.5817	200	300	0	0	0	0	0	0	0	200	903	0	0	0	0	0	0	0	603	903	0
530	8	0	0	0	0	0	0	200	300	0	0	0	0	0	0	0	200	903	0	0	0	0	0	0	0	603	903	0
530	9	-0.15346	0.280009	11.412	761.445	-98.3797	-252.687	200	300	0	0	0	0	0	0	0	200	903	0	0	0	0	0	0	0	603	903	0
531	0	0.151716	1.19554	13.5482	761.445	84.7258	-298.464	200	300	0	0	0	0	0	0	0	200	903	0	0	0	0	0	0	0	603	903	0
531	1	0.914656	1.34812	10.4965	120.576	145.761	-69.5817	200	300	0	0	0	0	0	0	0	200	903	0	0	0	0	0	0	0	603	903	0
531	2	2.28795	1.6533	11.1068	669.893	-403.556	-69.5817	200	300	0	0	0	0	0	0	0	200	903	0	0	0	0	0	0	0	603	903	0
531	3	0	0	0	0	0	0	200	300	0	0	0	0	0	0	0	200	903	0	0	0	0	0	0	0	603	903	0
531	4	0	0	0	0	0	0	200	300	0	0	0	0	0	0	0	200	903	0	0	0	0	0	0	0	603	903	0
531	5	-0.458635	1.50071	9.88614	1768.53	84.7258	-618.898	200	300	0	0	0	0	0	0	0	200	903	0	0	0	0	0	0	0	603	903	0
531	6	0.151716	-0.177755	11.412	944.551	-37.3445	205.077	200	300	0	0	0	0	0	0	0	200	903	0	0	0	0	0	0	0	603	903	0
531	7	0.151716	1.50071	10.8017	395.235	-159.415	-390.016	200	300	0	0	0	0	0	0	0	200	903	0	0	0	0	0	0	0	603	903	0
531	8	0.762068	1.50071	11.412	212.129	-159.415	-115.358	200	300	0	0	0	0	0	0	0	200	903	0	0	0	0	0	0	0	603	903	0
531	9	0	0	0	0	0	0	200	300	0	0	0	0	0	0	0	200	903	0	0	0	0	0	0	0	603	903	0
532	0	0.456892	2.41624	13.8534	944.551	-403.556	-161.134	200	300	0	0	0	0	0	0	0	200	903	0	0	0	0	0	0	0	603	903	0
532	1	0.151716	1.95848	10.4965	852.998	84.7258	-252.687	200	300	0	0	0	0	0	0	0	200	903	0	0	0	0	0	0	0	603	903	0
532	2	1.21983	1.04295	12.0224	1951.63	23.6906	-252.687	200	300	0	0	0	0	0	0	0	200	903	0	0	0	0	0	0	0	603	903	0
532	3	-0.306047	0.89036	12.0224	303.682	-220.45	-69.5817	200	300	0	0	0	0	0	0	0	200	903	0	0	0	0	0	0	0	603	903	0
532	4	0.151716	1.19554	11.1068	486.787	-98.3797	-23.8053	200	300	0	0	0	0	0	0	0	200	903	0	0	0	0	0	0	0	603	903	0
532	5	2.44053	1.80589	10.4965	1219.21	-281.485	67.7474	200	300	0	0	0	0	0	0	0	200	903	0	0	0	0	0	0	0	603	903	0
532	6	0.762068	3.17918	10.1913	1310.76	-281.485	-206.911	200	300	0	0	0	0	0	0	0	200	903	0	0	0	0	0	0	0	603	903	0
532	7	0.151716	1.34812	11.1068	669.893	-220.45	-344.24	200	300	0	0	0	0	0	0	0	200	903	0	0	0	0	0	0	0	603	903	0
532	8	-0.000871718	1.80589	9.88614	395.235	-159.415	-344.24	200	300	0	0	0	0	0	0	0	200	903	0	0	0	0	0	0	0	603	903	0
532	9	0.456892	1.04295	11.412	303.682	-98.3797	-252.687	200	300	0	0	0	0	0	0	0	200	903	0	0	0	0	0	0	0	603	903	0
533	0	-0.15346	1.95848	10.1913	303.682	-525.626	-69.5817	200	300	0	0	0	0	0	0	0	200	903	0	0	0	0	0	0	0	603	903	0
533	1	1.06724	1.6533	9.88614	1402.31	-403.556	-298.464	200	300	0	0	0	0	0	0	0	200	903	0	0	0	0	0	0	0	603	903	0
533	2	0.456892	1.95848	11.1068	761.445	-403.556	67.7474	200	300	0	0	0	0	0	0	0	200	903	0	0	0	0	0	0	0	603	903	0
533	3	0.304304	1.50071	10.1913	578.34	-281.485	-390.016	200	300	0	0	0	0	0	0	0	200	903	0	0	0	0	0	0	0	603	903	0
533	4	2.13536	0.737772	12.0224	-62.5292	-98.3797	-206.911	200	300	0	0	0	0	0	0	0	200	903	0	0	0	0	0	0	0	603	903	0
533	5	0.456892	1.04295	10.4965	303.682	23.6906	21.9711	200	300	0	0	0	0	0	0	0	200	903	0	0	0	0	0	0	0	603	903	0
533	6	0.304304	2.41624	11.1068	-62.5292	-37.3445	-252.687	200	300	0	0	0	0	0	0	0	200	903	0	0	0	0	0	0	0	603	903	0
533	7	-0.000871718	1.50071	11.1068	761.445	-525.626	21.9711	200	300	0	0	0	0	0	0	0	200	903	0	0	0	0	0	0	0	603	903	0
533	8	0.762068	1.50071	10.8017	852.998	-464.591	159.3	200	300	0	0	0	0	0	0	0	200	903	0	0	0	0	0	0	0	603	903	0
533	9	0.762068	1.50071	11.412	1127.66	-281.485	205.077	200	300	0	0	0	0	0	0	0	200	903	0	0	0	0	0	0	0	603	903	0
534	0	0.914656	1.80589	10.1913	669.893	-281.485	-298.464	200	300	0	0	0	0	0	0	0	200	903	0	0	0	0	0	0	0	603	903	0
534	1	1.37242	1.95848	11.412	303.682	-281.485	-161.134	200	300	0	0	0	0	0	0	0	200	903	0	0	0	0	0	0	0	603	903	0
534	2	-0.000871718	2.41624	9.88614	29.0235	-464.591	-252.687	200	300	0	0	0	0	0	0	0	200	903	0	0	0	0	0	0	0	603	903	0
534	3	-0.15346	1.19554	11.7172	578.34	-464.591	-115.358	200	300	0	0	0	0	0	0	0	200	903	0	0	0	0	0	0	0	603	903	0
534	4	0.151716	1.95848	9.88614	1036.1	-403.556	-115.358	200	300	0	0	0	0	0	0	0	200	903	0	0	0	0	0	0	0	603	903	0
534	5	1.83018	1.80589	10.4965	1127.66	-220.45	-206.911	200	300	0	0	0	0	0	0	0	200	903	0	0	0	0	0	0	0	603	903	0
534	6	0.762068	-0.330343	11.7172	852.998	-281.485	-344.24	200	300	0	0	0	0	0	0	0	200	903	0	0	0	0	0	0	0	603	903	0
534	7	0.914656	1.19554	11.7172	120.576	-281.485	-206.911	200	300	0	0	0	0	0	0	0	200	903	0	0	0	0	0	0	0	603	903	0
534	8	1.21983	1.6533	10.4965	395.235	145.761	-161.134	200	300	0	0	0	0	0	0	0	200	903	0	0	0	0	0	0	0	603	903	0
534	9	0	0	0	0	0	0	200	300	0	0	0	0	0	0	0	200	903	0	0	0	0	0	0	0	603	903	0
535	0	0	0	0	0	0	0	200	300	0	0	0	0	0	0	0	200	903	0	0	0	0	0	0	0	603	903	0
535	1	0	0	0	0	0	0	200	300	0	0	0	0	0	0	0	200	903	0	0	0	0	0	0	0	603	903	0
535	2	-0.763811	1.50071	10.8017	1127.66	-220.45	-161.134	200	300	0	0	0	0	0	0	0	200	903	0	0	0	0	0	0	0	603	903	0
535	3	-0.15346	2.11106	12.3275	486.787	-37.3445	-69.5817	200	300	0	0	0	0	0	0	0	200	903	0	0	0	0	0	0	0	603	903	0
535	4	1.21983	1.95848	10.8017	395.235	84.7258	-69.5817	200	300	0	0	0	0	0	0	0	200	903	0	0	0	0	0	0	0	603	903	0
535	5	2.28795	2.26365	10.4965	120.576	23.6906	-69.5817	200	300	0	0	0	0	0	0	0	200	903	0	0	0	0	0	0	0	603	903	0
535	6	0	0	0	0	0	0	200	300	0	0	0	0	0	0	0	200	903	0	0	0	0	0	0	0	603	903	0
535	7	0.456892	1.34812	10.1913	669.893	-281.485	-298.464	200	300	0	0	0	0	0	0	0	200	903	0	0	0	0	0	0	0	603	903	0
535	8	-0.458635	-0.788107	11.1068	944.551	-281.485	-161.134	200	300	0	0	0	0	0	0	0	200	903	0	0	0	0	0	0	0	603	903	0
535	9	0.762068	1.50071	11.1068	395.235	-281.485	-298.464	200	300	0	0	0	0	0	0	0	200	903	0	0	0	0	0	0	0	603	903	0
536	0	0.60948	1.80589	12.0224	212.129	-342.52	-298.464	200	300	0	0	0	0	0	0	0	200	903	0	0	0	0	0	0	0	603	903	0
536	1	0.914656	0.89036	11.7172	212.129	23.6906	-252.687	200	300	0	0	0	0	0	0	0	200	903	0	0	0	0	0	0	0	603	903	0
536	2	0.762068	1.50071	11.1068	761.445	-159.415	296.629	200	300	0	0	0	0	0	0	0	200	903	0	0	0	0	0	0	0	603	903	0
536	3	0	0	0	0	0	0	200	300	0	0	0	0	0	0	0	200	903	0	0	0	0	0	0	0	603	903	0
536	4	0.60948	1.95848	11.412	669.893	-220.45	-435.793	200	300	0	0	0	0	0	0	0	200	903	0	0	0	0	0	0	0	603	903	0
536	5	0	0	0	0	0	0	200	300	0	0	0	0	0	0	0	200	903	0	0	0	0	0	0	0	603	903	0
536	6	1.21983	1.6533	11.412	395.235	-281.485	-115.358	200	300	0	0	0	0	0	0	0	200	903	0	0	0	0	0	0	0	603	903	0
536	7	-0.15346	2.11106	11.412	120.576	84.7258	-206.911	200	300	0	0	0	0	0	0	0	200	903	0	0	0	0	0	0	0	603	903	0
536	8	0.304304	1.50071	9.88614	852.998	-159.415	-23.8053	200	300	0	0	0	0	0	0	0	200	903	0	0	0	0	0	0	0	603	903	0
536	9	0.914656	0.585184	11.1068	761.445	-220.45	250.853	200	300	0	0	0	0	0	0	0	200	903	0	0	0	0	0	0	0	603	903	0
537	0	0	0	0	0	0	0	200	300	0	0	0	0	0	0	0	200	903	0	0	0	0	0	0	0	603	903	0
537	1	0.151716	1.6533	9.88614	669.893	-220.45	-252.687	200	300	0	0	0	0	0	0	0	200	903	0	0	0	0	0	0	0	603	903	0
537	2	0	0	0	0	0	0	200	300	0	0	0	0	0	0	0	200	903	0	0	0	0	0	0	0	603	903	0
537	3	0	0	0	0	0	0	200	300	0	0	0	0	0	0	0	200	903	0	0	0	0	0	0	0	603	903	0
537	4	0.304304	0.89036	11.1068	1127.66	-37.3445	-298.464	200	300	0	0	0	0	0	0	0	200	903	0	0	0	0	0	0	0	603	903	0
537	5	0.762068	0.89036	11.412	669.893	-403.556	-115.358	200	300	0	0	0	0	0	0	0	200	903	0	0	0	0	0	0	0	603	903	0
537	6	0.60948	1.19554	10.8017	303.682	-37.3445	-69.5817	200	300	0	0	0	0	0	0	0	200	903	0	0	0	0	0	0	0	603	903	0
537	7	0	0	0	0	0	0	200	300	0	0	0	0	0	0	0	200	903	0	0	0	0	0	0	0	603	903	0
537	8	0	0	0	0	0	0	200	300	0	0	0	0	0	0	0	200	903	0	0	0	0	0	0	0	603	903	0
537	9	0.304304	1.19554	10.1913	761.445	-281.485	-206.911	200	300	0	0	0	0	0	0	0	200	903	0	0	0	0	0	0	0	603	903	0
538	0	1.37242	0.89036	11.1068	761.445	-98.3797	-252.687	200	300	0	0	0	0	0	0	0	200	903	0	0	0	0	0	0	0	603	903	0
538	1	0.151716	-0.940694	10.4965	486.787	-98.3797	-23.8053	200	300	0	0	0	0	0	0	0	200	903	0	0	0	0	0	0	0	603	903	0
538	2	1.06724	1.34812	10.4965	486.787	-220.45	-161.134	200	300	0	0	0	0	0	0	0	200	903	0	0	0	0	0	0	0	603	903	0
538	3	0.60948	2.41624	10.4965	669.893	-37.3445	-161.134	200	300	0	0	0	0	0	0	0	200	903	0	0	0	0	0	0	0	603	903	0
538	4	0	0	0	0	0	0	200	300	0	0	0	0	0	0	0	200	903	0	0	0	0	0	0	0	603	903	0
538	5	0	0	0	0	0	0	200	300	0	0	0	0	0	0	0	200	903	0	0	0	0	0	0	0	603	903	0
538	6	0.151716	1.19554	10.8017	944.551	328.866	205.077	200	300	0	0	0	0	0	0	0	200	903	0	0	0	0	0	0	0	603	903	0
538	7	1.37242	1.50071	11.1068	761.445	-98.3797	525.511	200	300	0	0	0	0	0	0	0	200	903	0	0	0	0	0	0	0	603	903	0
538	8	-0.15346	0.737772	11.412	395.235	-647.696	-206.911	200	300	0	0	0	0	0	0	0	200	903	0	0	0	0	0	0	0	603	903	0
538	9	-0.458635	1.34812	10.8017	486.787	-220.45	-344.24	200	300	0	0	0	0	0	0	0	200	903	0	0	0	0	0	0	0	603	903	0
539	0	0.151716	1.50071	10.8017	1127.66	-159.415	-23.8053	200	300	0	0	0	0	0	0	0	200	903	0	0	0	0	0	0	0	603	903	0
539	1	0.60948	1.80589	9.88614	761.445	-159.415	-206.911	200	300	0	0	0	0	0	0	0	200	903	0	0	0	0	0	0	0	603	903	0
539	2	1.52501	1.6533	11.1068	944.551	-37.3445	-206.911	200	300	0	0	0	0	0	0	0	200	903	0	0	0	0	0	0	0	603	903	0
539	3	0	0	0	0	0	0	200	300	0	0	0	0	0	0	0	200	903	0	0	0	0	0	0	0	603	903	0
539	4	1.6776	1.04295	11.412	29.0235	-464.591	-206.911	200	300	0	0	0	0	0	0	0	200	903	0	0	0	0	0	0	0	603	903	0
539	5	-0.763811	2.11106	11.1068	486.787	-342.52	-161.134	200	300	0	0	0	0	0	0	0	200	903	0	0	0	0	0	0	0	603	903	0
539	6	-0.15346	2.11106	10.4965	1402.31	-98.3797	-23.8053	200	300	0	0	0	0	0	0	0	200	903	0	0	0	0	0	0	0	603	903	0
539	7	0.762068	1.34812	10.8017	761.445	-220.45	-298.464	200	300	0	0	0	0	0	0	0	200	903	0	0	0	0	0	0	0	603	903	0
539	8	1.06724	1.04295	10.8017	761.445	-342.52	-344.24	200	300	0	0	0	0	0	0	0	200	903	0	0	0	0	0	0	0	603	903	0
539	9	0.914656	1.19554	10.1913	-62.5292	-220.45	-252.687	200	300	0	0	0	0	0	0	0	200	903	0	0	0	0	0	0	0	603	903	0
540	0	-0.000871718	1.19554	10.1913	761.445	-464.591	21.9711	200	300	0	0	0	0	0	0	0	200	903	0	0	0	0	0	0	0	603	903	0
540	1	-0.458635	1.04295	12.0224	944.551	-220.45	-298.464	200	300	0	0	0	0	0	0	0	200	903	0	0	0	0	0	0	0	603	903	0
540	2	-0.15346	2.56883	11.412	1219.21	-98.3797	-252.687	200	300	0	0	0	0	0	0	0	200	903	0	0	0	0	0	0	0	603	903	0
540	3	-0.611223	1.34812	11.1068	1585.42	23.6906	-298.464	200	300	0	0	0	0	0	0	0	200	903	0	0	0	0	0	0	0	603	903	0
540	4	0.60948	-0.482931	11.412	578.34	-403.556	-161.134	200	300	0	0	0	0	0	0	0	200	903	0	0	0	0	0	0	0	603	903	0
540	5	1.37242	1.6533	9.88614	303.682	23.6906	-252.687	200	300	0	0	0	0	0	0	0	200	903	0	0	0	0	0	0	0	603	903	0
540	6	0	0	0	0	0	0	200	300	0	0	0	0	0	0	0	200	903	0	0	0	0	0	0	0	603	903	0
540	7	0	0	0	0	0	0	200	300	0	0	0	0	0	0	0	200	903	0	0	0	0	0	0	0	603	903	0
540	8	0	0	0	0	0	0	200	300	0	0	0	0	0	0	0	200	903	0	0	0	0	0	0	0	603	903	0
540	9	-0.611223	1.50071	11.1068	852.998	-464.591	-435.793	200	300	0	0	0	0	0	0	0	200	903	0	0	0	0	0	0	0	603	903	0
541	0	-0.916399	-0.330343	13.8534	486.787	-37.3445	159.3	200	300	0	0	0	0	0	0	0	200	903	0	0	0	0	0	0	0	603	903	0
541	1	1.37242	1.04295	12.0224	395.235	84.7258	-252.687	200	300	0	3.20145	-5.91965	-26.255	-2096.65	2237.26	-267.195	285.213	982.857	0	0	0	0	0	0	0	603	903	0
541	2	0	0	0	0	0	0	200	300	0	7.32132	1.25199	-29.3067	-2462.86	2298.29	99.0157	278.422	987.038	0	0	0	0	0	0	0	603	903	0
541	3	0	0	0	0	0	0	200	300	0	2.74368	6.1348	-28.086	-2645.97	2908.64	373.674	303.562	997.21	0	0	0	0	0	0	0	603	903	0
541	4	-0.306047	0.585184	10.1913	669.893	-98.3797	-23.8053	200	300	0	-0.613251	8.42362	-32.0533	-3103.73	3274.85	831.438	302.169	999.83	0	0	0	0	0	0	0	603	903	0
541	5	-0.458635	1.04295	10.8017	1036.1	-281.485	-252.687	200	300	0	2.74368	11.628	-42.4293	-2279.76	3457.96	1243.43	281.499	956.731	0	0	0	0	0	0	0	603	903	0
541	6	0.151716	1.6533	11.7172	303.682	-98.3797	-298.464	200	300	0	1.98074	15.7478	-52.8053	-3195.29	4373.49	1060.32	282.823	963.511	0	0	0	0	0	0	0	603	903	0
541	7	0.456892	1.80589	11.1068	486.787	-281.485	67.7474	200	300	0	-0.613251	17.8841	-57.0777	-3103.73	4739.7	1151.87	283.039	957.377	0	0	0	0	0	0	0	603	903	0
541	8	0.762068	1.6533	10.4965	212.129	-159.415	-298.464	200	300	0	2.59109	19.7151	-63.1812	-4477.02	5350.05	1746.97	284.678	973.86	0	0	0	0	0	0	0	603	903	0
541	9	0.151716	1.95848	11.412	761.445	-281.485	-298.464	200	300	0	3.96439	21.6988	-73.5572	-4293.92	6387.65	1746.97	286.839	961.375	0	0	0	0	0	0	0	603	903	0
542	0	0	0	0	0	0	0	200	300	0	3.50662	23.2246	-85.4591	-4660.13	6692.82	1838.52	278.316	957.531	0	0	0	0	0	0	0	603	903	0
542	1	0.762068	2.874	12.0224	1219.21	-37.3445	-252.687	200	300	0	4.42215	23.0721	-91.8678	-5117.89	6753.86	1975.85	273.517	958.709	0	0	0	0	0	0	0	603	903	0
542	2	0.151716	1.50071	9.88614	395.235	-159.415	-298.464	200	300	0	2.74368	22.1565	-100.413	-5667.21	7852.49	1655.41	278.202	959.439	0	0	0	0	0	0	0	603	903	0
542	3	0.914656	2.26365	11.1068	303.682	-464.591	-252.687	200	300	0	1.52298	24.7505	-109.568	-5484.1	8584.91	2021.62	278.352	953.052	0	0	0	0	0	0	0	603	903	0
542	4	-0.15346	1.34812	10.4965	212.129	23.6906	-69.5817	200	300	0	0.607452	24.9031	-119.334	-6124.97	8706.98	1975.85	272.963	954.327	0	0	0	0	0	0	0	603	903	0
542	5	0	0	0	0	0	0	200	300	0	-1.52878	21.5462	-127.879	-6674.29	9744.58	1792.74	276.202	955.193	0	0	0	0	0	0	0	603	903	0
542	6	0.456892	1.04295	10.1913	852.998	-586.661	-115.358	200	300	0	-1.68137	22.1565	-135.813	-7589.82	10416	1792.74	276.693	958.884	0	0	0	0	0	0	0	603	903	0
542	7	0	0	0	0	0	0	200	300	0	-0.155487	23.9876	-145.579	-7040.5	10293.9	1975.85	270.71	951.362	0	0	0	0	0	0	0	603	903	0
542	8	1.06724	2.26365	10.4965	395.235	145.761	-298.464	200	300	0	-2.13913	21.0884	-154.429	-7589.82	11148.4	1563.86	272.191	952.148	0	0	0	0	0	0	0	603	903	0
542	9	0.304304	2.41624	10.8017	212.129	23.6906	-23.8053	200	300	0	-2.90207	20.1729	-160.837	-7956.03	11941.8	1563.86	274.248	952.466	0	0	0	0	0	0	0	603	903	0
543	0	0.456892	1.34812	13.2431	120.576	23.6906	-161.134	200	300	0	-1.98654	19.1048	-167.246	-8505.35	11880.8	1746.97	271.038	953.855	0	0	0	0	0	0	0	603	903	0
543	1	0.304304	1.6533	9.88614	944.551	-342.52	-206.911	200	300	0	-3.66501	17.5789	-177.012	-8780	12491.2	1151.87	270.567	952.601	0	0	0	0	0	0	0	603	903	0
543	2	0.60948	1.95848	12.3275	1402.31	-525.626	-161.134	200	300	0	-3.8176	12.6961	-183.421	-8688.45	13040.5	1060.32	271.096	950.369	0	0	0	0	0	0	0	603	903	0
543	3	0.762068	1.50071	11.7172	852.998	-220.45	-390.016	200	300	0	-4.27536	11.628	-191.355	-9237.77	13528.8	1289.2	270.7	951.276	0	0	0	0	0	0	0	603	903	0
543	4	0	0	0	0	0	0	200	300	0	-6.86935	10.4073	-198.374	-9237.77	13345.7	831.438	267.275	949.567	0	0	0	0	0	0	0	603	903	0
543	5	0.762068	1.80589	9.88614	578.34	-98.3797	-206.911	200	300	0	-7.78488	6.43997	-208.14	-9237.77	14627.4	511.003	270.277	947.383	0	0	0	0	0	0	0	603	903	0
543	6	0	0	0	0	0	0	200	300	0	-7.78488	3.08304	-215.769	-9237.77	14871.5	465.227	268.923	945.813	0	0	0	0	0	0	0	603	903	0
543	7	0	0	0	0	0	0	200	300	0	-9.92111	-0.426481	-225.535	-10061.7	15176.7	-129.866	267.292	947.613	0	0	0	0	0	0	0	603	903	0
543	8	-0.916399	1.6533	10.4965	944.551	-281.485	-298.464	200	300	0	-9.92111	-3.02048	-231.943	-9970.19	15665	-38.3134	267.538	945.985	0	0	0	0	0	0	0	603	903	0
543	9	-0.000871718	1.34812	10.8017	944.551	-220.45	-344.24	200	300	0	-10.8366	-7.14035	-239.878	-9878.64	16336.4	-541.854	268.103	944.182	0	0	0	0	0	0	0	603	903	0
544	0	0.914656	1.95848	11.412	944.551	84.7258	-161.134	200	300	0	-11.9048	-11.1076	-247.202	-10244.8	16519.5	-1091.17	266.826	944.443	0	0	0	0	0	0	0	603	903	0
544	1	0	0	0	0	0	0	200	300	0	-12.0573	-13.0913	-256.052	-10336.4	16641.6	-1274.28	264.993	943.368	0	0	0	0	0	0	0	603	903	0
544	2	0.60948	1.04295	12.0224	29.0235	-98.3797	113.524	200	300	0	-10.9892	-16.143	-261.24	-10153.3	17129.8	-1274.28	265.571	941.866	0	0	0	0	0	0	0	603	903	0
544	3	0	0	0	0	0	0	200	300	0	-12.8203	-21.9414	-268.87	-10244.8	17679.2	-1869.37	265.754	941.103	0	0	0	0	0	0	0	603	903	0
544	4	2.13536	1.6533	10.1913	212.129	145.761	-206.911	200	300	0	-12.9729	-24.2302	-274.973	-10244.8	17923.3	-1915.14	265.182	940.258	0	0	0	0	0	0	0	603	903	0
544	5	-0.458635	1.19554	10.8017	395.235	-342.52	-161.134	200	300	0	-14.8039	-26.3664	-281.077	-10794.2	18106.4	-1960.92	264.418	941.403	0	0	0	0	0	0	0	603	903	0
544	6	0.762068	1.95848	10.4965	852.998	-220.45	-344.24	200	300	0	-12.9729	-30.0285	-289.011	-10611.1	18899.9	-2372.91	265.395	939.715	0	0	0	0	0	0	0	603	903	0
544	7	0.762068	1.50071	11.1068	852.998	-159.415	-344.24	200	300	0	-15.4143	-32.4699	-292.979	-10336.4	19327.1	-2464.46	265.968	938.28	0	0	0	0	0	0	0	603	903	0
544	8	0	0	0	0	0	0	200	300	0	-16.3298	-35.8269	-302.439	-10244.8	19510.2	-2739.12	264.51	936.874	0	0	0	0	0	0	0	603	903	0
544	9	2.59312	0.737772	12.6327	395.235	-37.3445	-161.134	200	300	0	-16.4824	-39.3364	-309.763	-10702.6	20486.8	-2922.23	266.137	937.551	0	0	0	0	0	0	0	603	903	0
545	0	0	0	0	0	0	0	200	300	0	-17.5505	-41.32	-315.867	-11435	20853	-3288.44	266.018	939.202	0	0	0	0	0	0	0	603	903	0
545	1	0.762068	1.6533	10.4965	303.682	-342.52	-161.134	200	300	0	-18.9238	-44.3718	-326.853	-10611.1	20914	-3288.44	263.986	935.464	0	0	0	0	0	0	0	603	903	0
545	2	-0.458635	1.50071	10.8017	1036.1	-37.3445	-344.24	200	300	0	-18.0083	-46.8132	-336.619	-10244.8	21585.4	-3654.65	264.124	933.435	0	0	0	0	0	0	0	603	903	0
545	3	0.762068	1.04295	11.412	761.445	-342.52	-23.8053	200	300	0	-16.4824	-50.3227	-346.079	-10336.4	22012.7	-3929.31	263.606	932.867	0	0	0	0	0	0	0	603	903	0
545	4	1.21983	1.50071	11.7172	1036.1	-98.3797	-206.911	200	300	0	-18.3134	-51.8486	-353.403	-10153.3	22989.2	-4249.74	265.051	931.73	0	0	0	0	0	0	0	603	903	0
545	5	0	0	0	0	0	0	200	300	0	-19.6867	-54.29	-360.728	-10519.5	22684	-4615.95	262.884	932.162	0	0	0	0	0	0	0	603	903	0
545	6	0	0	0	0	0	0	200	300	0	-16.3298	-56.1211	-372.019	-10244.8	24148.9	-4753.28	264.913	930.539	0	0	0	0	0	0	0	603	903	0
545	7	0	0	0	0	0	0	200	300	0	-15.7195	-57.9521	-381.48	-10428	24942.3	-4570.18	265.383	930.336	0	0	0	0	0	0	0	603	903	0
545	8	0	0	0	0	0	0	200	300	0	-17.3979	-59.478	-388.804	-10244.8	25125.4	-5119.49	264.622	929.35	0	0	0	0	0	0	0	603	903	0
545	9	-0.306047	2.11106	10.8017	1036.1	267.831	-69.5817	200	300	0	-16.4824	-61.6142	-401.316	-10153.3	25491.7	-4936.39	263.52	928.3	0	0	0	0	0	0	0	603	903	0
546	0	-0.306047	1.6533	13.8534	852.998	-159.415	-298.464	200	300	0	-15.2617	-63.5979	-409.861	-10153.3	26651.3	-5394.15	265.025	927.773	0	0	0	0	0	0	0	603	903	0
546	1	0.60948	1.04295	11.412	578.34	-281.485	-161.134	200	300	0	-14.4987	-64.5134	-419.016	-10153.3	27383.7	-5531.48	265.352	927.231	0	0	0	0	0	0	0	603	903	0
546	2	2.8983	0.737772	10.1913	395.235	23.6906	-206.911	200	300	0	-14.041	-66.9548	-428.477	-9970.19	27872	-5485.7	265.049	926.269	0	0	0	0	0	0	0	603	903	0
546	3	0	0	0	0	0	0	200	300	0	-13.4306	-68.1755	-440.073	-10336.4	28726.5	-5577.26	265.277	926.488	0	0	0	0	0	0	0	603	903	0
546	4	0	0	0	0	0	0	200	300	0	-11.447	-69.854	-450.144	-9970.19	29336.9	-5943.47	265.172	925.149	0	0	0	0	0	0	0	603	903	0
546	5	0	0	0	0	0	0	200	300	0	-10.6841	-71.5324	-459.299	-8963.11	29642	-5897.69	264.538	922.515	0	0	0	0	0	0	0	603	903	0
546	6	0.151716	1.6533	12.0224	1036.1	-98.3797	-252.687	200	300	0	-12.0573	-74.4316	-469.065	-9329.32	30801.7	-6126.57	265.666	922.889	0	0	0	0	0	0	0	603	903	0
546	7	-0.458635	0.585184	11.1068	669.893	-281.485	-161.134	200	300	0	-10.9892	-75.042	-477.305	-8871.56	31412.1	-6538.56	265.811	921.587	0	0	0	0	0	0	0	603	903	0
546	8	1.37242	0.280009	11.1068	669.893	-98.3797	-69.5817	200	300	0	-7.47971	-76.5678	-488.291	-8963.11	31839.3	-6630.11	265.206	921.356	0	0	0	0	0	0	0	603	903	0
546	9	1.21983	-0.940694	10.8017	669.893	-37.3445	-344.24	200	300	0	-7.17453	-79.3144	-496.531	-9146.21	32693.8	-6355.45	265.844	921.42	0	0	0	0	0	0	0	603	903	0
547	0	0.456892	0.89036	10.4965	578.34	-403.556	-206.911	200	300	0	-7.02194	-80.6877	-505.076	-8963.11	33609.3	-6675.89	266.543	920.746	0	0	0	0	0	0	0	603	903	0
547	1	0	0	0	0	0	0	200	300	0	-7.02194	-83.5869	-513.621	-8413.79	34036.6	-6904.77	266.268	919.381	0	0	0	0	0	0	0	603	903	0
547	2	0.304304	1.34812	10.4965	578.34	-98.3797	-206.911	200	300	0	-6.56418	-84.655	-521.86	-8047.58	33853.5	-6630.11	264.871	918.421	0	0	0	0	0	0	0	603	903	0
547	3	0	0	0	0	0	0	200	300	0	-4.88571	-87.4016	-530.711	-8413.79	35318.3	-6950.55	266.549	918.854	0	0	0	0	0	0	0	603	903	0
547	4	0	0	0	0	0	0	200	300	0	-4.12277	-89.2326	-532.542	-7772.92	35806.6	-7133.65	267.237	917.596	0	0	0	0	0	0	0	603	903	0
547	5	0.304304	0.280009	11.412	578.34	-98.3797	-206.911	200	300	0	-4.12277	-92.5896	-548.106	-7223.6	36355.9	-6858.99	266.33	916.179	0	0	0	0	0	0	0	603	903	0
547	6	0.151716	0.127421	11.412	944.551	-647.696	-252.687	200	300	0	-3.51242	-95.1836	-553.294	-7223.6	36478	-7179.43	265.929	916.056	0	0	0	0	0	0	0	603	903	0
547	7	0.60948	0.737772	10.8017	303.682	-281.485	-23.8053	200	300	0	-0.918427	-96.862	-562.144	-6765.84	37515.6	-7454.09	266.737	915.036	0	0	0	0	0	0	0	603	903	0
547	8	1.21983	1.95848	10.1913	578.34	267.831	-115.358	200	300	0	-1.37619	-98.2353	-569.468	-6216.52	37393.5	-7545.64	265.664	913.916	0	0	0	0	0	0	0	603	903	0
547	9	1.06724	1.6533	9.88614	303.682	-159.415	-344.24	200	300	0	-1.37619	-100.219	-576.792	-6399.63	38064.9	-7454.09	265.994	914.095	0	0	0	0	0	0	0	603	903	0
548	0	0	0	0	0	0	0	200	300	0	-1.68137	-104.034	-582.59	-5758.76	38858.3	-8049.18	266.699	912.885	0	0	0	0	0	0	0	603	903	0
548	1	0	0	0	0	0	0	200	300	0	-1.68137	-106.628	-588.999	-4934.79	39529.7	-8003.4	267.113	911.378	0	0	0	0	0	0	0	603	903	0
548	2	0.456892	0.737772	10.1913	578.34	-342.52	-206.911	200	300	0	-0.155487	-108.306	-594.187	-5301	39468.7	-7911.85	266.425	911.922	0	0	0	0	0	0	0	603	903	0
548	3	0.304304	-0.788107	10.1913	761.445	-281.485	-206.911	200	300	0	1.06522	-109.374	-602.427	-5117.89	39651.8	-8369.61	265.82	911.495	0	0	0	0	0	0	0	603	903	0
548	4	0.762068	0.432597	10.4965	395.235	-37.3445	-298.464	200	300	0	-0.155487	-111.51	-607.31	-4751.68	40079.1	-8461.17	265.994	910.824	0	0	0	0	0	0	0	603	903	0
548	5	0.60948	1.50071	11.412	852.998	-403.556	-344.24	200	300	0	-0.460663	-114.257	-613.413	-4293.92	40445.3	-8644.27	265.935	910	0	0	0	0	0	0	0	603	903	0
548	6	1.37242	1.04295	10.1913	120.576	-159.415	-23.8053	200	300	0	1.06522	-115.173	-617.991	-3927.71	41055.6	-8781.6	266.434	909.356	0	0	0	0	0	0	0	603	903	0
548	7	1.37242	0.432597	10.1913	944.551	23.6906	-206.911	200	300	0	2.13333	-116.088	-621.043	-3653.05	41788	-8873.15	267.287	908.882	0	0	0	0	0	0	0	603	903	0
548	8	0	0	0	0	0	0	200	300	0	1.37039	-117.614	-628.062	-3836.15	42093.2	-8827.38	267.021	909.108	0	0	0	0	0	0	0	603	903	0
548	9	-0.306047	0.585184	10.4965	1036.1	-342.52	-69.5817	200	300	0	1.98074	-119.75	-632.029	-3286.84	42032.2	-8827.38	266.504	908.201	0	0	0	0	0	0	0	603	903	0
549	0	1.6776	-1.24587	10.8017	761.445	-98.3797	-252.687	200	300	0	2.43851	-122.344	-638.132	-2737.52	42520.5	-9010.48	266.633	907.29	0	0	0	0	0	0	0	603	903	0
549	1	-0.000871718	-0.0251671	11.412	395.235	-220.45	-206.911	200	300	0	3.8118	-122.955	-642.1	-2096.65	42642.5	-9193.59	266.411	906.265	0	0	0	0	0	0	0	603	903	0
549	2	0.914656	1.04295	10.4965	669.893	-403.556	-115.358	200	300	0	2.28592	-122.649	-646.372	-2554.42	42947.7	-9376.69	266.444	906.952	0	0	0	0	0	0	0	603	903	0
549	3	1.21983	0.432597	10.4965	303.682	-98.3797	-115.358	200	300	0	3.96439	-123.717	-649.729	-1821.99	43313.9	-9697.13	266.665	905.804	0	0	0	0	0	0	0	603	903	0
549	4	0	0	0	0	0	0	200	300	0	3.50662	-124.786	-654.917	-1455.78	44046.3	-9697.13	267.255	905.223	0	0	0	0	0	0	0	603	903	0
549	5	0.151716	0.585184	10.8017	395.235	-464.591	-298.464	200	300	0	4.11697	-127.38	-658.274	-1181.12	44168.4	-9468.25	267.097	904.794	0	0	0	0	0	0	0	603	903	0
549	6	0	0	0	0	0	0	200	300	0	3.50662	-127.685	-661.936	-723.36	44046.3	-10017.6	266.542	904.093	0	0	0	0	0	0	0	603	903	0
549	7	-0.611223	0.585184	10.4965	303.682	23.6906	-252.687	200	300	0	2.59109	-127.99	-665.293	-265.597	44046.3	-10154.9	266.206	903.399	0	0	0	0	0	0	0	603	903	0
549	8	0.456892	0.89036	11.1068	303.682	-37.3445	-206.911	200	300	0	3.04886	-128.143	-666.209	192.167	44107.4	-10200.7	266.207	902.712	0	0	0	0	0	0	0	603	903	0
549	9	1.21983	0.89036	11.1068	29.0235	-220.45	-206.911	200	300	0	3.8118	-129.363	-671.702	283.72	44839.8	-10246.4	266.756	902.578	0	0	0	0	0	0	0	603	903	0
550	0	1.21983	-0.330343	11.1068	29.0235	-159.415	-161.134	200	300	0	3.50662	-132.262	-674.448	466.825	45328.1	-10383.8	267.208	902.308	0	0	0	0	0	0	0	603	903	0
550	1	2.59312	1.34812	10.1913	578.34	-281.485	-252.687	200	300	0	2.59109	-133.483	-678.11	466.825	45633.2	-10017.6	267.295	902.312	0	0	0	0	0	0	0	603	903	0
550	2	0	0	0	0	0	0	200	300	0	5.0325	-133.483	-680.552	466.825	45511.2	-10521.1	266.874	902.314	0	0	0	0	0	0	0	603	903	0
550	3	0	0	0	0	0	0	200	300	0	3.8118	-133.331	-682.383	1382.35	45145	-10887.3	266.158	900.974	0	0	0	0	0	0	0	603	903	0
550	4	0.456892	0.585184	11.1068	303.682	-159.415	-435.793	200	300	0	7.32132	-135.162	-685.74	2114.77	45999.5	-10704.2	267.08	899.916	0	0	0	0	0	0	0	603	903	0
550	5	-0.15346	-0.0251671	11.1068	395.235	-281.485	-206.911	200	300	0	5.18509	-136.993	-688.486	1840.12	46487.7	-10933.1	267.522	900.327	0	0	0	0	0	0	0	603	903	0
550	6	-0.000871718	0.432597	10.8017	578.34	-281.485	-23.8053	200	300	0	6.71097	-138.061	-689.402	2297.88	46304.6	-11070.4	267.166	899.667	0	0	0	0	0	0	0	603	903	0
550	7	1.37242	0.585184	11.412	852.998	-37.3445	-252.687	200	300	0	6.2532	-137.45	-692.148	2297.88	46487.7	-11162	267.164	899.68	0	0	0	0	0	0	0	603	903	0
550	8	1.6776	1.50071	9.88614	1402.31	-159.415	-206.911	200	300	0	8.8472	-137.145	-691.538	2664.09	46609.8	-11390.9	267.4	899.148	0	0	0	0	0	0	0	603	903	0
550	9	0	0	0	0	0	0	200	300	0	7.62649	-139.129	-698.557	2938.75	47220.2	-11390.9	267.597	898.793	0	0	0	0	0	0	0	603	903	0
551	0	1.06724	0.280009	11.7172	852.998	-98.3797	-298.464	200	300	0	7.47391	-140.502	-700.999	3579.62	46915	-11299.3	266.926	897.894	0	0	0	0	0	0	0	603	903	0
551	1	0.151716	0.432597	10.4965	486.787	-586.661	-161.134	200	300	0	8.38943	-141.265	-702.219	3671.17	47769.5	-11116.2	268.026	897.772	0	0	0	0	0	0	0	603	903	0
551	2	1.52501	1.19554	10.1913	486.787	23.6906	-69.5817	200	300	0	10.2205	-140.044	-700.693	4037.38	47952.6	-11207.7	268.436	897.238	0	0	0	0	0	0	0	603	903	0
551	3	0.151716	0.737772	11.7172	303.682	-98.3797	-161.134	200	300	0	10.8308	-141.113	-707.407	4037.38	47708.4	-11390.9	267.441	897.293	0	0	0	0	0	0	0	603	903	0
551	4	-0.000871718	-1.09328	10.4965	486.787	-403.556	-481.569	200	300	0	11.7464	-141.723	-711.069	4128.94	47952.6	-10841.5	267.437	897.193	0	0	0	0	0	0	0	603	903	0
551	5	0.456892	0.89036	10.8017	944.551	-159.415	-344.24	200	300	0	12.3567	-143.249	-713.816	4769.81	48440.9	-11207.7	267.862	896.318	0	0	0	0	0	0	0	603	903	0
551	6	0	0	0	0	0	0	200	300	0	14.3404	-142.486	-716.868	5502.23	49051.2	-11162	268.424	895.325	0	0	0	0	0	0	0	603	903	0
551	7	0	0	0	0	0	0	200	300	0	15.5611	-144.775	-719.614	5227.57	48562.9	-11390.9	267.485	895.736	0	0	0	0	0	0	0	603	903	0
551	8	0	0	0	0	0	0	200	300	0	15.5611	-144.012	-722.056	5410.67	49722.6	-11253.5	268.863	895.507	0	0	0	0	0	0	0	603	903	0
551	9	-0.000871718	-0.0251671	10.8017	29.0235	-220.45	-115.358	200	300	0	17.2395	-145.232	-726.939	6326.2	50088.8	-11253.5	268.904	894.298	0	0	0	0	0	0	0	603	903	0
552	0	-0.306047	1.04295	11.412	303.682	-403.556	-344.24	200	300	0	19.6809	-146.148	-727.854	6692.41	49844.7	-10750	268.482	893.805	0	0	0	0	0	0	0	603	903	0
552	1	-0.306047	-1.24587	14.1586	303.682	-98.3797	-298.464	200	300	0	23.343	-147.521	-734.568	6600.86	50088.8	-11345.1	268.188	894.014	0	0	0	0	0	0	0	603	903	0
552	2	0.914656	1.34812	11.412	761.445	84.7258	-298.464	200	300	0	21.8172	-147.369	-737.62	6875.52	50882.3	-11574	268.982	893.679	0	0	0	0	0	0	0	603	903	0
552	3	1.98277	-0.0251671	10.8017	1310.76	-220.45	-69.5817	200	300	0	22.4275	-147.063	-742.503	7882.6	51431.6	-11299.3	269.268	892.384	0	0	0	0	0	0	0	603	903	0
552	4	0.914656	0.127421	12.0224	852.998	-98.3797	-69.5817	200	300	0	24.106	-148.132	-746.165	7974.15	51736.8	-10933.1	269.337	892.313	0	0	0	0	0	0	0	603	903	0
552	5	0	0	0	0	0	0	200	300	0	26.3948	-149.2	-751.047	8065.7	52103	-11070.4	269.374	892.261	0	0	0	0	0	0	0	603	903	0
552	6	-0.306047	0.737772	12.3275	395.235	-281.485	-161.134	200	300	0	27.4629	-150.115	-757.761	7974.15	52530.2	-10750	269.323	892.477	0	0	0	0	0	0	0	603	903	0
552	7	-0.000871718	1.6533	11.7172	1127.66	-37.3445	-161.134	200	300	0	28.3784	-150.42	-760.508	9072.78	52286.1	-10887.3	268.752	891.07	0	0	0	0	0	0	0	603	903	0
552	8	-0.458635	1.34812	10.4965	578.34	-98.3797	-161.134	200	300	0	28.8362	-151.794	-765.086	9164.33	52530.2	-11070.4	268.659	891.022	0	0	0	0	0	0	0	603	903	0
552	9	1.37242	1.04295	12.3275	578.34	-220.45	-344.24	200	300	0	31.5828	-151.031	-770.273	10171.4	54117.1	-11024.6	270.257	889.795	0	0	0	0	0	0	0	603	903	0
553	0	1.37242	1.19554	10.1913	761.445	-37.3445	-161.134	200	300	0	31.4302	-151.031	-775.767	10171.4	54666.5	-11162	270.468	889.889	0	0	0	0	0	0	0	603	903	0
553	1	0.914656	0.585184	12.9379	852.998	23.6906	-161.134	200	300	0	32.6509	-152.404	-780.344	10537.6	54666.5	-11070.4	270.054	889.496	0	0	0	0	0	0	0	603	903	0
553	2	0	0	0	0	0	0	200	300	0	33.719	-151.794	-787.058	10446.1	55093.7	-10612.7	270	889.728	0	0	0	0	0	0	0	603	903	0
553	3	-0.15346	1.04295	11.7172	303.682	-159.415	-573.122	200	300	0	35.8553	-153.625	-791.941	11361.6	56009.2	-10566.9	270.724	888.654	0	0	0	0	0	0	0	603	903	0
553	4	-0.611223	0.89036	11.1068	578.34	-98.3797	-481.569	200	300	0	37.076	-153.32	-798.35	12368.7	56497.5	-10795.8	270.768	887.507	0	0	0	0	0	0	0	603	903	0
553	5	0.60948	1.34812	11.1068	395.235	23.6906	-344.24	200	300	0	39.67	-153.472	-804.758	12918	56497.5	-10795.8	270.204	886.948	0	0	0	0	0	0	0	603	903	0
553	6	1.98277	0.89036	10.1913	578.34	-281.485	-161.134	200	300	0	39.5174	-154.388	-808.42	12826.4	57413	-10658.4	271.019	887.134	0	0	0	0	0	0	0	603	903	0
553	7	0	0	0	0	0	0	200	300	0	38.907	-153.93	-814.524	12734.9	57779.2	-10475.3	270.936	887.365	0	0	0	0	0	0	0	603	903	0
553	8	0.456892	-0.0251671	11.7172	1036.1	-525.626	-161.134	200	300	0	39.67	-156.371	-816.965	13558.9	58023.4	-10154.9	271.023	886.403	0	0	0	0	0	0	0	603	903	0
553	9	0	0	0	0	0	0	200	300	0	40.8907	-155.456	-822.459	13558.9	58267.5	-10338	270.846	886.514	0	0	0	0	0	0	0	603	903	0
554	0	0.456892	0.280009	11.412	29.0235	145.761	67.7474	200	300	0	41.3484	-155.303	-827.647	14565.9	58145.5	-10658.4	270.254	885.401	0	0	0	0	0	0	0	603	903	0
554	1	0.304304	0.89036	10.4965	303.682	-281.485	-344.24	200	300	0	39.2122	-155.608	-829.172	14657.5	58572.7	-10704.2	270.64	885.323	0	0	0	0	0	0	0	603	903	0
554	2	1.52501	1.50071	10.4965	578.34	-342.52	-390.016	200	300	0	39.2122	-155.761	-834.971	14840.6	59183.1	-10841.5	270.88	885.226	0	0	0	0	0	0	0	603	903	0
554	3	2.59312	-0.330343	10.1913	120.576	-159.415	-252.687	200	300	0	39.3648	-156.219	-837.107	15939.2	60220.7	-10750	271.939	883.959	0	0	0	0	0	0	0	603	903	0
554	4	0	0	0	0	0	0	200	300	0	41.6536	-154.845	-841.379	15664.6	60403.8	-10475.3	271.791	884.382	0	0	0	0	0	0	0	603	903	0
554	5	0	0	0	0	0	0	200	300	0	39.5174	-154.235	-846.873	15389.9	60037.5	-10887.3	270.893	884.827	0	0	0	0	0	0	0	603	903	0
554	6	0	0	0	0	0	0	200	300	0	38.1441	-153.777	-849.314	15664.6	60098.6	-10704.2	270.761	884.556	0	0	0	0	0	0	0	603	903	0
554	7	-0.15346	0.737772	11.1068	395.235	-220.45	-206.911	200	300	0	37.5337	-153.93	-852.976	16305.4	60342.7	-10658.4	270.744	883.884	0	0	0	0	0	0	0	603	903	0
554	8	0.151716	0.585184	11.7172	-62.5292	-281.485	-390.016	200	300	0	37.9915	-152.709	-855.418	16671.7	60708.9	-10612.7	270.97	883.511	0	0	0	0	0	0	0	603	903	0
554	9	1.06724	1.50071	10.4965	212.129	145.761	-298.464	200	300	0	37.076	-152.099	-856.943	16580.1	60831	-10383.8	270.986	883.652	0	0	0	0	0	0	0	603	903	0
555	0	1.06724	1.34812	12.6327	120.576	-159.415	-161.134	200	300	0	35.8553	-151.183	-860.606	16946.3	61685.5	-10566.9	271.677	883.309	0	0	0	0	0	0	0	603	903	0
555	1	0	0	0	0	0	0	200	300	0	37.2285	-150.573	-864.573	16854.8	61685.5	-10521.1	271.348	883.505	0	0	0	0	0	0	0	603	903	0
555	2	1.21983	1.50071	12.0224	944.551	23.6906	-527.345	200	300	0	36.1604	-149.963	-868.235	17770.3	61380.3	-10429.5	270.696	882.533	0	0	0	0	0	0	0	603	903	0
555	3	-0.611223	1.19554	10.1913	852.998	-220.45	-481.569	200	300	0	35.5501	-149.047	-868.54	17678.7	61868.6	-10475.3	271.233	882.646	0	0	0	0	0	0	0	603	903	0
555	4	1.83018	0.585184	10.8017	761.445	145.761	-390.016	200	300	0	34.7871	-149.2	-871.897	18228.1	61441.4	-10658.4	270.469	882.094	0	0	0	0	0	0	0	603	903	0
555	5	0.304304	0.585184	11.412	395.235	23.6906	-298.464	200	300	0	35.8553	-147.674	-874.949	17953.4	62112.7	-10338	270.99	882.481	0	0	0	0	0	0	0	603	903	0
555	6	1.21983	0.432597	10.8017	303.682	-342.52	-252.687	200	300	0	34.482	-147.063	-878.306	18045	62601	-10521.1	271.275	882.455	0	0	0	0	0	0	0	603	903	0
555	7	0.762068	1.19554	11.1068	486.787	-281.485	-298.464	200	300	0	35.8553	-147.674	-880.747	18685.8	63333.4	-10566.9	271.909	881.784	0	0	0	0	0	0	0	603	903	0
555	8	0.151716	-0.482931	10.4965	578.34	-220.45	-481.569	200	300	0	36.1604	-145.232	-884.714	18868.9	63150.3	-10063.3	271.379	881.672	0	0	0	0	0	0	0	603	903	0
555	9	0.456892	1.34812	10.4965	944.551	-281.485	-161.134	200	300	0	36.1604	-146.606	-885.325	18960.5	63394.5	-10154.9	271.606	881.584	0	0	0	0	0	0	0	603	903	0
556	0	0	0	0	0	0	0	200	300	0	36.1604	-145.538	-888.682	19326.7	63577.6	-10292.2	271.541	881.252	0	0	0	0	0	0	0	603	903	0
556	1	0	0	0	0	0	0	200	300	0	37.076	-144.469	-890.208	20150.7	63882.8	-10292.2	271.762	880.364	0	0	0	0	0	0	0	603	903	0
556	2	0.304304	0.280009	11.7172	486.787	-159.415	-390.016	200	300	0	39.8225	-144.927	-894.175	20333.8	63882.8	-10109.1	271.443	880.26	0	0	0	0	0	0	0	603	903	0
556	3	-0.458635	1.50071	13.5482	395.235	-98.3797	-344.24	200	300	0	38.7544	-147.063	-896.006	20242.2	64310	-9834.46	271.774	880.408	0	0	0	0	0	0	0	603	903	0
556	4	0.60948	1.6533	10.8017	486.787	-98.3797	-23.8053	200	300	0	38.4492	-145.843	-897.532	20700	64371	-10063.3	271.72	879.937	0	0	0	0	0	0	0	603	903	0
556	5	0	0	0	0	0	0	200	300	0	38.907	-143.249	-895.701	20883.1	63821.7	-9788.68	271.253	879.685	0	0	0	0	0	0	0	603	903	0
556	6	0.914656	2.11106	9.88614	852.998	-37.3445	-618.898	200	300	0	39.67	-144.164	-900.889	21249.3	64676.2	-9880.23	271.792	879.413	0	0	0	0	0	0	0	603	903	0
556	7	0.914656	1.04295	10.1913	1127.66	-159.415	-252.687	200	300	0	39.8225	-143.401	-903.025	21524	65164.5	-9193.59	272.163	879.165	0	0	0	0	0	0	0	603	903	0
556	8	0	0	0	0	0	0	200	300	0	39.9751	-144.012	-904.856	21798.6	65164.5	-9697.13	272.016	878.909	0	0	0	0	0	0	0	603	903	0
556	9	0	0	0	0	0	0	200	300	0	41.6536	-142.181	-901.194	21340.9	65103.5	-9422.47	272.241	879.319	0	0	0	0	0	0	0	603	903	0
557	0	-0.15346	1.19554	10.1913	761.445	-220.45	-252.687	200	300	0	40.4329	-142.181	-905.772	21707.1	65530.7	-9605.57	272.348	879.035	0	0	0	0	0	0	0	603	903	0
557	1	0.304304	1.50071	12.0224	395.235	-220.45	-206.911	200	300	0	41.0432	-140.35	-907.297	21981.7	65347.6	-9514.02	272.024	878.772	0	0	0	0	0	0	0	603	903	0
557	2	1.06724	1.95848	11.7172	486.787	-159.415	-527.345	200	300	0	41.0432	-140.044	-909.739	22531	65164.5	-9422.47	271.63	878.234	0	0	0	0	0	0	0	603	903	0
557	3	0	0	0	0	0	0	200	300	0	39.5174	-138.366	-910.654	22531	65652.8	-9376.69	272.094	878.258	0	0	0	0	0	0	0	603	903	0
557	4	0	0	0	0	0	0	200	300	0	40.4329	-138.671	-910.349	22439.5	65713.8	-9422.47	272.185	878.351	0	0	0	0	0	0	0	603	903	0
557	5	0.914656	0.737772	11.412	852.998	-220.45	-206.911	200	300	0	40.4329	-138.213	-909.128	22439.5	65591.8	-8781.6	272.148	878.318	0	0	0	0	0	0	0	603	903	0
557	6	0	0	0	0	0	0	200	300	0	41.1958	-137.45	-909.128	22439.5	65958	-9056.26	272.551	878.318	0	0	0	0	0	0	0	603	903	0
557	7	0.762068	0.737772	11.412	486.787	-220.45	-390.016	200	300	0	39.9751	-135.925	-911.265	22805.7	66141.1	-9147.81	272.582	877.974	0	0	0	0	0	0	0	603	903	0
557	8	-0.15346	1.80589	12.3275	212.129	23.6906	-344.24	200	300	0	39.67	-135.467	-912.18	23446.6	65835.9	-9010.48	272.174	877.296	0	0	0	0	0	0	0	603	903	0
557	9	1.6776	0.585184	10.8017	395.235	145.761	-161.134	200	300	0	38.4492	-135.314	-910.654	23263.5	65713.8	-9330.92	272.161	877.454	0	0	0	0	0	0	0	603	903	0
558	0	1.21983	1.6533	10.4965	852.998	-159.415	67.7474	200	300	0	39.67	-134.551	-909.434	23721.2	65652.8	-9330.92	272.191	876.917	0	0	0	0	0	0	0	603	903	0
558	1	1.98277	0.737772	9.88614	395.235	-342.52	-206.911	200	300	0	39.5174	-132.415	-908.518	23355	66080	-8873.15	272.734	877.293	0	0	0	0	0	0	0	603	903	0
558	2	0	0	0	0	0	0	200	300	0	38.7544	-132.72	-909.739	23446.6	65897	-8918.93	272.435	877.227	0	0	0	0	0	0	0	603	903	0
558	3	-0.458635	0.737772	11.7172	852.998	-220.45	-390.016	200	300	0	38.1441	-130.889	-911.875	23721.2	65713.8	-9147.81	272.065	876.986	0	0	0	0	0	0	0	603	903	0
558	4	-0.458635	1.50071	9.88614	303.682	267.831	-435.793	200	300	0	36.9234	-130.737	-910.349	24087.4	65897	-9147.81	272.386	876.54	0	0	0	0	0	0	0	603	903	0
558	5	1.6776	1.95848	11.7172	395.235	-342.52	-206.911	200	300	0	37.8389	-128.905	-911.265	24087.4	65958	-9102.03	272.381	876.567	0	0	0	0	0	0	0	603	903	0
558	6	0.151716	1.6533	9.88614	-62.5292	-281.485	-252.687	200	300	0	37.5337	-129.363	-909.128	23812.8	65774.9	-8918.93	272.349	876.807	0	0	0	0	0	0	0	603	903	0
558	7	0.60948	0.89036	10.1913	578.34	-281.485	-298.464	200	300	0	36.4656	-128.295	-908.518	23995.9	65774.9	-8827.38	272.398	876.588	0	0	0	0	0	0	0	603	903	0
558	8	0.456892	0.737772	10.8017	852.998	23.6906	-344.24	200	300	0	36.7708	-126.922	-909.739	23904.3	66019	-8232.28	272.569	876.724	0	0	0	0	0	0	0	603	903	0
558	9	0	0	0	0	0	0	200	300	0	37.3811	-126.464	-907.908	24179	65958	-8690.05	272.648	876.369	0	0	0	0	0	0	0	603	903	0
559	0	0.762068	0.89036	10.8017	486.787	23.6906	-390.016	200	300	0	36.9234	-125.549	-909.128	24179	65347.6	-8781.6	271.879	876.404	0	0	0	0	0	0	0	603	903	0
559	1	0.762068	1.80589	10.1913	578.34	-159.415	-390.016	200	300	0	36.4656	-124.633	-907.297	24545.2	65103.5	-8598.49	271.755	875.947	0	0	0	0	0	0	0	603	903	0
559	2	-0.15346	1.34812	10.1913	303.682	-403.556	-252.687	200	300	0	37.076	-123.107	-907.603	24087.4	66263.2	-8644.27	273.009	876.46	0	0	0	0	0	0	0	603	903	0
559	3	0.456892	1.19554	11.1068	120.576	-98.3797	-69.5817	200	300	0	36.6182	-122.649	-905.466	24819.9	65774.9	-8415.39	272.642	875.589	0	0	0	0	0	0	0	603	903	0
559	4	0.151716	1.19554	10.4965	669.893	23.6906	-344.24	200	300	0	37.076	-121.276	-906.687	24728.3	65652.8	-8369.61	272.41	875.727	0	0	0	0	0	0	0	603	903	0
559	5	0.914656	1.19554	10.4965	578.34	-220.45	-435.793	200	300	0	37.8389	-120.971	-906.077	24270.5	65774.9	-8278.06	272.593	876.214	0	0	0	0	0	0	0	603	903	0
559	6	0.60948	0.432597	11.412	578.34	-220.45	21.9711	200	300	0	36.4656	-119.445	-903.33	24453.6	65835.9	-7637.19	272.881	875.93	0	0	0	0	0	0	0	603	903	0
559	7	0	0	0	0	0	0	200	300	0	37.2285	-118.377	-900.889	24911.4	65591.8	-8094.96	272.808	875.348	0	0	0	0	0	0	0	603	903	0
559	8	0.914656	1.19554	10.1913	578.34	-159.415	-390.016	200	300	0	36.7708	-117.309	-899.973	25186.1	65713.8	-7911.85	273.018	875.015	0	0	0	0	0	0	0	603	903	0
559	9	0	0	0	0	0	0	200	300	0	38.2967	-116.546	-899.973	25094.5	65652.8	-7637.19	272.95	875.116	0	0	0	0	0	0	0	603	903	0
560	0	0	0	0	0	0	0	200	300	0	37.8389	-116.698	-899.363	24728.3	65164.5	-7682.97	272.456	875.505	0	0	0	0	0	0	0	603	903	0
560	1	-0.763811	2.11106	10.1913	852.998	-281.485	-664.674	200	300	0	37.5337	-115.478	-896.006	24362.1	65103.5	-7408.31	272.66	875.81	0	0	0	0	0	0	0	603	903	0
560	2	-0.306047	-0.0251671	10.8017	1127.66	-281.485	-206.911	200	300	0	36.7708	-115.63	-894.785	25094.5	65469.7	-7637.19	273.168	874.955	0	0	0	0	0	0	0	603	903	0
560	3	0.914656	1.19554	11.1068	669.893	23.6906	-435.793	200	300	0	36.7708	-112.579	-892.954	25735.4	65164.5	-7454.09	272.976	874.18	0	0	0	0	0	0	0	603	903	0
560	4	1.37242	-0.330343	11.7172	578.34	23.6906	-298.464	200	300	0	38.4492	-111.205	-891.428	25186.1	64737.3	-7270.98	272.622	874.746	0	0	0	0	0	0	0	603	903	0
560	5	0	0	0	0	0	0	200	300	0	36.7708	-111.51	-889.902	24636.8	64981.4	-7270.98	273.021	875.315	0	0	0	0	0	0	0	603	903	0
560	6	1.37242	1.34812	10.1913	578.34	-281.485	-161.134	200	300	0	37.2285	-109.679	-888.987	25186.1	64615.2	-7133.65	272.684	874.669	0	0	0	0	0	0	0	603	903	0
560	7	0.151716	1.6533	9.88614	212.129	-159.415	-252.687	200	300	0	35.8553	-110.595	-886.24	25277.6	64432.1	-6996.32	272.703	874.478	0	0	0	0	0	0	0	603	903	0
560	8	-0.15346	1.6533	10.4965	578.34	-220.45	-23.8053	200	300	0	36.4656	-108.611	-882.883	25186.1	64432.1	-7179.43	272.979	874.473	0	0	0	0	0	0	0	603	903	0
560	9	0.60948	1.95848	11.1068	852.998	-37.3445	-618.898	200	300	0	35.8553	-106.933	-878.916	24911.4	64615.2	-7454.09	273.517	874.657	0	0	0	0	0	0	0	603	903	0
561	0	0.456892	1.6533	11.1068	1036.1	84.7258	-206.911	200	300	0	35.0923	-106.628	-875.254	25003	64371	-7179.43	273.546	874.434	0	0	0	0	0	0	0	603	903	0
561	1	1.06724	1.04295	12.0224	486.787	-281.485	-390.016	200	300	0	35.3975	-106.322	-875.864	25186.1	64310	-6904.77	273.425	874.244	0	0	0	0	0	0	0	603	903	0
561	2	0.914656	0.432597	11.412	120.576	-98.3797	-206.911	200	300	0	35.5501	-105.407	-872.507	25186.1	63943.8	-6721.66	273.287	874.134	0	0	0	0	0	0	0	603	903	0
561	3	0	0	0	0	0	0	200	300	0	35.7027	-103.423	-870.982	24819.9	64126.9	-6950.55	273.626	874.504	0	0	0	0	0	0	0	603	903	0
561	4	0.60948	2.41624	11.412	761.445	-525.626	-298.464	200	300	0	35.0923	-103.271	-869.761	24911.4	63699.7	-6675.89	273.238	874.358	0	0	0	0	0	0	0	603	903	0
561	5	-0.458635	0.432597	10.1913	486.787	-98.3797	-481.569	200	300	0	34.9397	-101.745	-866.709	24728.3	63577.6	-6584.34	273.355	874.469	0	0	0	0	0	0	0	603	903	0
561	6	-0.458635	1.95848	12.3275	578.34	23.6906	-481.569	200	300	0	35.5501	-101.44	-863.962	26101.6	63333.4	-6492.78	273.306	872.789	0	0	0	0	0	0	0	603	903	0
561	7	-0.000871718	1.19554	11.1068	1036.1	-403.556	-161.134	200	300	0	34.6346	-100.524	-860.3	25186.1	62845.2	-6401.23	273.05	873.724	0	0	0	0	0	0	0	603	903	0
561	8	-0.000871718	1.04295	12.0224	303.682	-37.3445	-206.911	200	300	0	34.6346	-99.7612	-856.638	25003	63028.3	-6263.9	273.576	873.813	0	0	0	0	0	0	0	603	903	0
561	9	0	0	0	0	0	0	200	300	0	37.5337	-99.1508	-855.723	25094.5	63150.3	-6126.57	273.798	873.674	0	0	0	0	0	0	0	603	903	0
562	0	2.28795	1.34812	10.4965	578.34	-342.52	-298.464	200	300	0	36.4656	-97.3198	-854.197	25186.1	63089.3	-5989.24	273.858	873.515	0	0	0	0	0	0	0	603	903	0
562	1	0.60948	2.11106	10.8017	852.998	-586.661	-390.016	200	300	0	35.8553	-97.1672	-851.45	25186.1	63150.3	-5668.81	274.168	873.42	0	0	0	0	0	0	0	603	903	0
562	2	0.762068	1.95848	12.6327	395.235	84.7258	-115.358	200	300	0	35.5501	-95.4887	-847.483	25186.1	62784.1	-5989.24	274.083	873.281	0	0	0	0	0	0	0	603	903	0
562	3	0	0	0	0	0	0	200	300	0	34.9397	-95.6413	-845.042	24819.9	62540	-5897.69	274.008	873.629	0	0	0	0	0	0	0	603	903	0
562	4	0.304304	1.95848	10.1913	669.893	-98.3797	-206.911	200	300	0	34.9397	-93.8103	-842.295	24636.8	62234.8	-5851.91	273.887	873.75	0	0	0	0	0	0	0	603	903	0
562	5	0.60948	1.19554	11.412	486.787	-464.591	-206.911	200	300	0	36.6182	-92.8947	-840.464	24453.6	62417.9	-5989.24	274.266	873.905	0	0	0	0	0	0	0	603	903	0
562	6	-0.306047	1.04295	10.8017	944.551	-220.45	-206.911	200	300	0	36.313	-92.8947	-838.938	24911.4	61990.7	-5668.81	273.892	873.306	0	0	0	0	0	0	0	603	903	0
562	7	1.21983	1.50071	11.412	1036.1	-403.556	-252.687	200	300	0	35.5501	-89.6904	-834.971	25003	62051.7	-5577.26	274.316	873.055	0	0	0	0	0	0	0	603	903	0
562	8	1.6776	1.04295	11.412	303.682	23.6906	-252.687	200	300	0	37.076	-91.0637	-831.309	24636.8	61929.6	-5851.91	274.497	873.364	0	0	0	0	0	0	0	603	903	0
562	9	1.21983	1.6533	9.88614	303.682	-37.3445	-252.687	200	300	0	35.0923	-89.2326	-827.036	24819.9	61502.4	-5485.7	274.365	872.989	0	0	0	0	0	0	0	603	903	0
563	0	0	0	0	0	0	0	200	300	0	35.8553	-88.4697	-825.51	24819.9	61563.4	-5485.7	274.576	872.934	0	0	0	0	0	0	0	603	903	0
563	1	0	0	0	0	0	0	200	300	0	36.313	-88.4697	-820.933	24911.4	61929.6	-5485.7	275.438	872.655	0	0	0	0	0	0	0	603	903	0
563	2	0	0	0	0	0	0	200	300	0	35.5501	-87.5542	-819.712	24362.1	61075.1	-5394.15	274.508	873.28	0	0	0	0	0	0	0	603	903	0
563	3	2.28795	2.41624	10.1913	669.893	-342.52	-390.016	200	300	0	37.2285	-86.4861	-815.745	24545.2	61014.1	-4799.06	274.796	872.911	0	0	0	0	0	0	0	603	903	0
563	4	0.151716	1.50071	11.1068	1585.42	-98.3797	-390.016	200	300	0	35.2449	-84.655	-813.608	24911.4	61441.4	-5073.72	275.517	872.382	0	0	0	0	0	0	0	603	903	0
563	5	1.37242	1.80589	10.8017	486.787	-98.3797	-252.687	200	300	0	36.0078	-83.4343	-809.031	25094.5	61014.1	-5073.72	275.416	871.982	0	0	0	0	0	0	0	603	903	0
563	6	1.06724	0.89036	12.0224	120.576	-159.415	-298.464	200	300	0	35.2449	-83.2817	-807.505	24087.4	60647.9	-4982.16	275.105	873.171	0	0	0	0	0	0	0	603	903	0
563	7	2.13536	1.34812	9.88614	303.682	23.6906	-206.911	200	300	0	34.6346	-82.9765	-804.758	24453.6	60403.8	-4661.73	275.058	872.614	0	0	0	0	0	0	0	603	903	0
563	8	0	0	0	0	0	0	200	300	0	35.0923	-81.1455	-804.148	24453.6	60525.8	-4753.28	275.267	872.591	0	0	0	0	0	0	0	603	903	0
563	9	0.60948	2.26365	11.1068	395.235	-342.52	-527.345	200	300	0	36.313	-80.3825	-798.35	24270.5	59915.5	-4753.28	275.049	872.599	0	0	0	0	0	0	0	603	903	0
564	0	-0.611223	2.26365	9.88614	578.34	-220.45	-390.016	200	300	0	37.9915	-78.3989	-795.603	24819.9	60159.6	-4707.5	275.615	871.804	0	0	0	0	0	0	0	603	903	0
564	1	0.151716	1.95848	9.88614	852.998	145.761	-390.016	200	300	0	34.7871	-77.7885	-792.551	24545.2	60220.7	-4799.06	275.983	872.03	0	0	0	0	0	0	0	603	903	0
564	2	0.60948	0.89036	10.8017	1585.42	-220.45	-206.911	200	300	0	34.7871	-75.8049	-788.584	24453.6	59976.5	-4799.06	276.056	871.99	0	0	0	0	0	0	0	603	903	0
564	3	0.456892	1.34812	12.9379	852.998	-159.415	-344.24	200	300	0	35.5501	-77.0256	-785.227	24270.5	59183.1	-4203.96	275.371	872.091	0	0	0	0	0	0	0	603	903	0
564	4	0.914656	1.19554	11.1068	1127.66	-830.802	-344.24	200	300	0	36.0078	-76.4153	-783.091	24179	59732.4	-4295.52	276.278	872.124	0	0	0	0	0	0	0	603	903	0
564	5	0.304304	1.50071	11.412	578.34	-342.52	-115.358	200	300	0	36.1604	-73.3635	-777.598	24728.3	59732.4	-4158.19	276.817	871.199	0	0	0	0	0	0	0	603	903	0
564	6	0.762068	2.26365	10.8017	395.235	-220.45	-481.569	200	300	0	35.0923	-73.3635	-776.987	24087.4	58877.9	-4341.29	275.777	871.999	0	0	0	0	0	0	0	603	903	0
564	7	2.28795	2.11106	12.0224	486.787	23.6906	-390.016	200	300	0	36.6182	-71.5324	-773.936	24087.4	58816.8	-4387.07	275.997	871.877	0	0	0	0	0	0	0	603	903	0
564	8	0	0	0	0	0	0	200	300	0	35.3975	-71.685	-770.579	24453.6	58999.9	-4249.74	276.566	871.266	0	0	0	0	0	0	0	603	903	0
564	9	0.914656	1.34812	10.8017	578.34	-342.52	-206.911	200	300	0	37.076	-70.6169	-767.527	24179	59061	-4112.41	276.95	871.498	0	0	0	0	0	0	0	603	903	0
565	0	-0.763811	0.89036	10.4965	761.445	-281.485	-115.358	200	300	0	36.7708	-71.3799	-766.306	23995.9	58389.6	-3791.98	276.196	871.686	0	0	0	0	0	0	0	603	903	0
565	1	0.151716	0.737772	11.412	669.893	145.761	-298.464	200	300	0	35.5501	-68.3281	-763.254	23904.3	58633.7	-3700.42	276.821	871.681	0	0	0	0	0	0	0	603	903	0
565	2	0.60948	1.6533	10.8017	486.787	23.6906	-298.464	200	300	0	35.2449	-67.5652	-759.898	24270.5	58511.7	-3837.75	276.999	871.061	0	0	0	0	0	0	0	603	903	0
565	3	0.762068	1.80589	10.1913	303.682	84.7258	-298.464	200	300	0	35.8553	-67.1074	-757.151	24270.5	58023.4	-3883.53	276.634	870.945	0	0	0	0	0	0	0	603	903	0
565	4	0	0	0	0	0	0	200	300	0	36.1604	-64.9712	-752.878	23812.8	57901.3	-3700.42	276.907	871.371	0	0	0	0	0	0	0	603	903	0
565	5	0	0	0	0	0	0	200	300	0	34.9397	-65.1237	-750.132	24087.4	58328.6	-3608.87	277.758	870.889	0	0	0	0	0	0	0	603	903	0
565	6	0	0	0	0	0	0	200	300	0	35.3975	-64.2082	-748.301	24087.4	58206.5	-3471.54	277.785	870.81	0	0	0	0	0	0	0	603	903	0
565	7	0.151716	3.17918	10.8017	1036.1	-281.485	-252.687	200	300	0	36.4656	-63.1401	-746.47	24270.5	57046.8	-3425.77	276.422	870.486	0	0	0	0	0	0	0	603	903	0
565	8	0.304304	1.50071	13.5482	761.445	-159.415	-344.24	200	300	0	36.4656	-61.4616	-744.334	24453.6	57474.1	-3059.55	277.216	870.147	0	0	0	0	0	0	0	603	903	0
565	9	1.37242	1.6533	12.3275	852.998	-342.52	-298.464	200	300	0	35.5501	-61.4616	-741.282	24453.6	57596.1	-3425.77	277.698	870.012	0	0	0	0	0	0	0	603	903	0
566	0	2.59312	1.6533	10.1913	212.129	-98.3797	21.9711	200	300	0	34.9397	-60.6987	-736.399	24270.5	57291	-3379.99	277.799	870.042	0	0	0	0	0	0	0	603	903	0
566	1	0	0	0	0	0	0	200	300	0	37.5337	-60.0883	-733.042	24362.1	57291	-3196.88	278.155	869.766	0	0	0	0	0	0	0	603	903	0
566	2	1.37242	1.95848	11.1068	395.235	-159.415	-390.016	200	300	0	38.1441	-58.2573	-730.906	23812.8	56741.6	-3013.78	277.632	870.42	0	0	0	0	0	0	0	603	903	0
566	3	0.304304	2.56883	9.88614	1127.66	-159.415	-298.464	200	300	0	36.7708	-57.3418	-728.77	23446.6	56863.7	-2968	278.027	870.827	0	0	0	0	0	0	0	603	903	0
566	4	1.06724	1.80589	11.7172	944.551	-342.52	-435.793	200	300	0	35.8553	-57.7995	-725.107	23995.9	56680.6	-3013.78	278.169	869.907	0	0	0	0	0	0	0	603	903	0
566	5	0.304304	1.6533	12.0224	669.893	-98.3797	-206.911	200	300	0	36.0078	-55.9685	-724.497	24545.2	56924.8	-2739.12	278.571	869.121	0	0	0	0	0	0	0	603	903	0
566	6	2.28795	1.95848	12.0224	1036.1	-281.485	-252.687	200	300	0	36.4656	-55.5107	-720.835	24179	56741.6	-2922.23	278.717	869.457	0	0	0	0	0	0	0	603	903	0
566	7	0.914656	1.95848	10.4965	29.0235	-98.3797	-252.687	200	300	0	36.4656	-53.8322	-715.952	23904.3	56375.4	-2922.23	278.742	869.612	0	0	0	0	0	0	0	603	903	0
566	8	2.13536	1.34812	9.88614	669.893	-342.52	-344.24	200	300	0	35.7027	-53.6797	-714.426	23812.8	56314.4	-2601.79	278.825	869.669	0	0	0	0	0	0	0	603	903	0
566	9	0	0	0	0	0	0	200	300	0	36.313	-52.3064	-712.9	23995.9	56253.4	-2418.69	278.908	869.34	0	0	0	0	0	0	0	603	903	0
567	0	1.98277	1.95848	12.3275	669.893	23.6906	-161.134	200	300	0	36.9234	-51.8486	-707.712	23812.8	55826.1	-2601.79	278.883	869.353	0	0	0	0	0	0	0	603	903	0
567	1	-0.000871718	2.72141	9.88614	578.34	145.761	-344.24	200	300	0	36.6182	-51.2382	-707.407	24453.6	55582	-2510.24	278.571	868.432	0	0	0	0	0	0	0	603	903	0
567	2	2.28795	1.50071	10.8017	1219.21	-37.3445	-252.687	200	300	0	38.6018	-50.0175	-703.135	23904.3	55948.2	-2510.24	279.57	869.003	0	0	0	0	0	0	0	603	903	0
567	3	-0.000871718	1.34812	10.8017	486.787	-37.3445	-344.24	200	300	0	38.1441	-49.102	-696.421	23904.3	55826.1	-2281.36	280.161	868.676	0	0	0	0	0	0	0	603	903	0
567	4	1.52501	1.19554	10.4965	-154.082	-525.626	-206.911	200	300	0	36.4656	-47.7287	-696.726	24362.1	55582	-2281.36	279.776	868.033	0	0	0	0	0	0	0	603	903	0
567	5	0.914656	1.04295	11.1068	395.235	-525.626	-252.687	200	300	0	37.076	-47.5761	-696.421	24179	55582	-2052.47	279.811	868.281	0	0	0	0	0	0	0	603	903	0
567	6	0	0	0	0	0	0	200	300	0	37.6863	-47.1184	-691.843	23538.1	55215.8	-2006.7	279.81	868.978	0	0	0	0	0	0	0	603	903	0
567	7	0	0	0	0	0	0	200	300	0	36.7708	-45.5925	-690.623	24087.4	54666.5	-2281.36	279.155	868.122	0	0	0	0	0	0	0	603	903	0
567	8	0.304304	2.26365	10.4965	852.998	-159.415	-527.345	200	300	0	36.4656	-44.5244	-686.35	24453.6	54849.6	-1869.37	279.915	867.372	0	0	0	0	0	0	0	603	903	0
567	9	0	0	0	0	0	0	200	300	0	36.9234	-43.914	-684.214	24545.2	54727.5	-1594.71	279.986	867.126	0	0	0	0	0	0	0	603	903	0
568	0	-0.000871718	1.34812	11.1068	761.445	-220.45	-69.5817	200	300	0	36.4656	-42.6933	-680.552	24087.4	54544.4	-1640.49	280.147	867.606	0	0	0	0	0	0	0	603	903	0
568	1	-0.000871718	0.280009	10.1913	852.998	-220.45	-115.358	200	300	0	36.1604	-41.7778	-679.636	23629.7	54361.3	-1777.82	279.986	868.232	0	0	0	0	0	0	0	603	903	0
568	2	0.914656	1.95848	11.1068	578.34	-220.45	-206.911	200	300	0	37.076	-41.7778	-674.143	24453.6	54422.3	-1274.28	280.728	866.726	0	0	0	0	0	0	0	603	903	0
568	3	2.59312	1.80589	12.0224	395.235	-464.591	-527.345	200	300	0	37.3811	-40.7097	-674.753	23904.3	54361.3	-1182.72	280.565	867.573	0	0	0	0	0	0	0	603	903	0
568	4	1.52501	2.26365	10.4965	578.34	-281.485	-435.793	200	300	0	36.9234	-39.3364	-671.091	24362.1	54056.1	-1503.16	280.55	866.698	0	0	0	0	0	0	0	603	903	0
568	5	1.37242	1.34812	10.4965	486.787	84.7258	-206.911	200	300	0	35.2449	-37.5053	-664.683	24453.6	54300.2	-1503.16	281.693	866.21	0	0	0	0	0	0	0	603	903	0
568	6	0	0	0	0	0	0	200	300	0	37.6863	-37.6579	-664.072	24270.5	53873	-1365.83	281.125	866.452	0	0	0	0	0	0	0	603	903	0
568	7	0.60948	1.34812	10.8017	1310.76	-281.485	-161.134	200	300	0	36.1604	-36.2846	-664.072	24453.6	53445.8	-1320.05	280.482	866.176	0	0	0	0	0	0	0	603	903	0
568	8	-0.611223	1.34812	13.2431	669.893	-220.45	-618.898	200	300	0	36.9234	-36.7424	-656.748	24728.3	53506.8	-770.735	281.472	865.347	0	0	0	0	0	0	0	603	903	0
568	9	0.914656	1.50071	11.412	1127.66	-37.3445	-206.911	200	300	0	36.313	-35.5217	-659.19	24362.1	53262.6	-1182.72	280.8	866.042	0	0	0	0	0	0	0	603	903	0
569	0	2.44053	1.50071	10.8017	578.34	23.6906	-298.464	200	300	0	35.8553	-34.7588	-656.138	24545.2	52957.5	-1182.72	280.711	865.591	0	0	0	0	0	0	0	603	903	0
569	1	1.52501	2.72141	10.1913	578.34	-98.3797	-435.793	200	300	0	35.5501	-33.8432	-653.086	24911.4	52774.4	-1045.39	280.808	864.856	0	0	0	0	0	0	0	603	903	0
569	2	0	0	0	0	0	0	200	300	0	35.5501	-32.3173	-650.034	24819.9	53262.6	-1045.39	281.938	864.818	0	0	0	0	0	0	0	603	903	0
569	3	0.304304	1.50071	9.88614	761.445	-403.556	21.9711	200	300	0	35.0923	-32.0122	-649.119	24545.2	53140.6	-1136.95	281.866	865.187	0	0	0	0	0	0	0	603	903	0
569	4	-0.306047	0.585184	11.1068	852.998	-37.3445	-435.793	200	300	0	35.0923	-31.2492	-643.32	24545.2	52652.3	-724.959	281.845	864.846	0	0	0	0	0	0	0	603	903	0
569	5	0.151716	1.50071	13.5482	1219.21	-159.415	-344.24	200	300	0	35.0923	-30.4863	-645.457	24911.4	52652.3	-770.735	281.574	864.405	0	0	0	0	0	0	0	603	903	0
569	6	1.37242	1.04295	11.1068	761.445	-281.485	-344.24	200	300	0	35.5501	-29.113	-643.015	25094.5	52591.3	-816.512	281.789	863.974	0	0	0	0	0	0	0	603	903	0
569	7	1.83018	1.50071	10.8017	578.34	-98.3797	-252.687	200	300	0	35.5501	-28.3501	-637.522	25552.3	52041.9	-724.959	281.632	862.919	0	0	0	0	0	0	0	603	903	0
569	8	0	0	0	0	0	0	200	300	0	34.3294	-28.1975	-638.743	25369.2	52347.1	-770.735	281.953	863.283	0	0	0	0	0	0	0	603	903	0
569	9	0.914656	1.6533	10.1913	303.682	-281.485	-115.358	200	300	0	34.3294	-26.8242	-636.607	25552.3	52103	-679.183	281.845	862.862	0	0	0	0	0	0	0	603	903	0
570	0	0	0	0	0	0	0	200	300	0	34.6346	-26.8242	-635.386	25186.1	51797.8	-450.301	281.522	863.361	0	0	0	0	0	0	0	603	903	0
570	1	-0.000871718	2.41624	11.412	1127.66	-342.52	-435.793	200	300	0	35.8553	-26.6716	-632.639	25643.8	51736.8	-312.972	281.779	862.465	0	0	0	0	0	0	0	603	903	0
570	2	-0.306047	1.95848	11.412	944.551	-159.415	-390.016	200	300	0	34.7871	-25.2983	-630.808	25552.3	52103	-267.195	282.597	862.493	0	0	0	0	0	0	0	603	903	0
570	3	0.60948	1.50071	11.7172	761.445	-281.485	21.9711	200	300	0	34.3294	-24.2302	-627.756	26010	51797.8	-221.419	282.513	861.567	0	0	0	0	0	0	0	603	903	0
570	4	3.20347	1.6533	10.8017	486.787	-159.415	-298.464	200	300	0	33.5664	-24.3828	-627.451	25826.9	51675.7	-84.0898	282.358	861.838	0	0	0	0	0	0	0	603	903	0
570	5	0	0	0	0	0	0	200	300	0	34.1768	-23.6198	-624.094	26834	51553.7	-312.972	282.606	860.003	0	0	0	0	0	0	0	603	903	0
570	6	0	0	0	0	0	0	200	300	0	34.0242	-23.0095	-624.399	26010	51065.4	-221.419	281.783	861.344	0	0	0	0	0	0	0	603	903	0
570	7	0	0	0	0	0	0	200	300	0	34.7871	-22.8569	-621.653	26101.6	51248.5	7.46297	282.439	861.013	0	0	0	0	0	0	0	603	903	0
570	8	-0.15346	2.11106	10.4965	852.998	-37.3445	-206.911	200	300	0	36.0078	-22.7043	-621.348	26193.2	51187.4	7.46297	282.381	860.845	0	0	0	0	0	0	0	603	903	0
570	9	-0.000871718	1.95848	10.4965	1219.21	-98.3797	-344.24	200	300	0	33.1087	-21.331	-620.127	27200.2	51248.5	-129.866	282.642	859.138	0	0	0	0	0	0	0	603	903	0
571	0	0.914656	1.95848	11.1068	852.998	23.6906	-390.016	200	300	0	33.719	-21.4836	-617.38	27017.1	51309.5	-129.866	283.108	859.239	0	0	0	0	0	0	0	603	903	0
571	1	1.37242	-0.177755	11.1068	578.34	145.761	-206.911	200	300	0	33.5664	-19.9577	-615.549	26834	51065.4	53.2393	282.959	859.406	0	0	0	0	0	0	0	603	903	0
571	2	0	0	0	0	0	0	200	300	0	32.6509	-19.9577	-614.939	27108.7	51370.6	327.898	283.538	858.917	0	0	0	0	0	0	0	603	903	0
571	3	0.60948	2.26365	13.5482	395.235	-281.485	-298.464	200	300	0	32.3457	-20.2629	-617.075	27474.9	51187.4	236.345	282.952	858.476	0	0	0	0	0	0	0	603	903	0
571	4	0	0	0	0	0	0	200	300	0	33.719	-19.0422	-611.582	27200.2	50638.1	144.792	282.799	858.525	0	0	0	0	0	0	0	603	903	0
571	5	1.83018	2.41624	11.7172	120.576	-159.415	-390.016	200	300	0	33.5664	-17.9741	-611.277	27932.7	50638.1	99.0157	282.84	857.305	0	0	0	0	0	0	0	603	903	0
571	6	-0.000871718	2.41624	12.0224	852.998	-98.3797	-573.122	200	300	0	32.0406	-17.6689	-609.446	28207.3	50943.3	99.0157	283.59	856.716	0	0	0	0	0	0	0	603	903	0
571	7	1.21983	1.34812	11.1068	761.445	84.7258	-344.24	200	300	0	31.888	-17.5163	-608.225	28482	51187.4	190.568	284.159	856.172	0	0	0	0	0	0	0	603	903	0
571	8	1.06724	0.737772	10.1913	395.235	-220.45	-206.911	200	300	0	32.4983	-17.6689	-606.089	29031.3	50760.2	99.0157	283.75	855.101	0	0	0	0	0	0	0	603	903	0
571	9	0	0	0	0	0	0	200	300	0	33.1087	-17.5163	-604.258	28665.1	51187.4	327.898	284.711	855.562	0	0	0	0	0	0	0	603	903	0
572	0	1.21983	2.41624	9.88614	852.998	23.6906	-481.569	200	300	0	32.6509	-16.6008	-603.648	28482	50882.3	602.556	284.291	855.817	0	0	0	0	0	0	0	603	903	0
572	1	-0.306047	2.26365	10.1913	395.235	-159.415	-206.911	200	300	0	33.719	-16.2956	-599.985	28756.6	50333	419.45	283.89	855.071	0	0	0	0	0	0	0	603	903	0
572	2	1.06724	2.41624	12.9379	120.576	-98.3797	-344.24	200	300	0	32.0406	-16.7534	-602.427	29855.3	50455	465.227	283.753	853.442	0	0	0	0	0	0	0	603	903	0
572	3	0.151716	2.11106	11.1068	761.445	-98.3797	-161.134	200	300	0	32.9561	-16.4482	-600.291	29855.3	50760.2	373.674	284.559	853.265	0	0	0	0	0	0	0	603	903	0
572	4	0.60948	1.6533	10.4965	1036.1	-159.415	-161.134	200	300	0	31.888	-15.9904	-597.544	29672.2	50210.9	511.003	284.029	853.343	0	0	0	0	0	0	0	603	903	0
572	5	0.151716	1.80589	10.4965	669.893	-281.485	-252.687	200	300	0	31.7354	-14.6172	-592.966	29672.2	50455	694.108	285.089	852.96	0	0	0	0	0	0	0	603	903	0
572	6	0.60948	1.50071	10.8017	212.129	-342.52	-527.345	200	300	0	31.888	-15.8379	-595.713	30679.2	50638.1	877.214	285.004	851.5	0	0	0	0	0	0	0	603	903	0
572	7	0	0	0	0	0	0	200	300	0	32.1931	-14.4646	-595.713	31320.1	50577.1	694.108	284.902	850.424	0	0	0	0	0	0	0	603	903	0
572	8	-0.15346	2.41624	10.1913	486.787	-98.3797	-344.24	200	300	0	33.719	-14.4646	-594.187	31411.7	50027.8	739.885	284.195	850.135	0	0	0	0	0	0	0	603	903	0
572	9	0	0	0	0	0	0	200	300	0	32.0406	-15.3801	-593.272	30862.3	50394	877.214	284.943	850.979	0	0	0	0	0	0	0	603	903	0
573	0	0.304304	2.11106	10.4965	578.34	-159.415	-298.464	200	300	0	30.8199	-14.4646	-591.44	30953.9	50638.1	922.99	285.618	850.664	0	0	0	0	0	0	0	603	903	0
573	1	0.151716	1.19554	10.1913	852.998	-342.52	-206.911	200	300	0	31.2776	-14.312	-589.915	31777.9	50271.9	785.661	285.219	849.131	0	0	0	0	0	0	0	603	903	0
573	2	0.60948	1.50071	11.412	761.445	-342.52	-481.569	200	300	0	32.1931	-13.8542	-591.44	32144.1	50271.9	922.99	284.999	848.651	0	0	0	0	0	0	0	603	903	0
573	3	0.914656	1.50071	11.412	669.893	-98.3797	-206.911	200	300	0	32.4983	-14.1594	-589.915	32876.5	50271.9	785.661	285.219	847.269	0	0	0	0	0	0	0	603	903	0
573	4	1.52501	1.50071	10.1913	395.235	206.796	21.9711	200	300	0	30.9724	-14.0068	-587.168	32510.3	50516.1	877.214	286.033	847.632	0	0	0	0	0	0	0	603	903	0
573	5	1.37242	2.41624	11.412	303.682	-464.591	-390.016	200	300	0	32.9561	-12.7861	-585.032	32601.8	50088.8	1014.54	285.617	847.273	0	0	0	0	0	0	0	603	903	0
573	6	-0.15346	1.50071	9.88614	486.787	-159.415	-206.911	200	300	0	32.4983	-13.3965	-585.032	33151.1	50638.1	1151.87	286.556	846.335	0	0	0	0	0	0	0	603	903	0
573	7	1.6776	1.50071	10.1913	486.787	-342.52	-161.134	200	300	0	31.7354	-12.1757	-583.506	32693.4	50577.1	1380.75	286.678	846.971	0	0	0	0	0	0	0	603	903	0
573	8	0.304304	1.19554	10.8017	1493.87	-342.52	-161.134	200	300	0	32.0406	-12.1757	-585.032	32968	49966.7	1014.54	285.409	846.648	0	0	0	0	0	0	0	603	903	0
573	9	-0.000871718	2.11106	12.0224	1310.76	-220.45	-435.793	200	300	0	32.0406	-12.4809	-584.421	33242.7	49844.7	1289.2	285.289	846.119	0	0	0	0	0	0	0	603	903	0
574	0	0.762068	1.80589	10.4965	303.682	-220.45	-344.24	200	300	0	31.4302	-12.3283	-581.98	33059.6	50088.8	1243.43	286.066	846.195	0	0	0	0	0	0	0	603	903	0
574	1	1.52501	2.56883	9.88614	212.129	-220.45	-390.016	200	300	0	32.3457	-12.6335	-580.149	34890.7	50027.8	1289.2	286.233	842.859	0	0	0	0	0	0	0	603	903	0
574	2	1.06724	2.41624	10.1913	395.235	-159.415	-344.24	200	300	0	31.5828	-12.0232	-580.454	34341.3	50333	1334.98	286.713	843.837	0	0	0	0	0	0	0	603	903	0
574	3	0	0	0	0	0	0	200	300	0	32.8035	-11.8706	-580.454	34158.2	50516.1	1243.43	287.029	844.153	0	0	0	0	0	0	0	603	903	0
574	4	0	0	0	0	0	0	200	300	0	33.8716	-11.1076	-580.759	34616	50455	1289.2	286.878	843.395	0	0	0	0	0	0	0	603	903	0
574	5	-0.306047	1.6533	10.8017	852.998	-342.52	-573.122	200	300	0	32.3457	-10.6499	-580.759	35256.9	50027.8	1701.19	286.142	842.292	0	0	0	0	0	0	0	603	903	0
574	6	-0.306047	0.432597	14.1586	578.34	-342.52	-527.345	200	300	0	33.1087	-10.3447	-578.013	35897.7	50271.9	1472.31	286.974	840.895	0	0	0	0	0	0	0	603	903	0
574	7	0.762068	1.34812	10.1913	212.129	-159.415	-252.687	200	300	0	31.7354	-10.4973	-577.097	35623.1	50760.2	1289.2	287.958	841.272	0	0	0	0	0	0	0	603	903	0
574	8	0	0	0	0	0	0	200	300	0	31.7354	-9.73434	-577.097	35531.5	50516.1	1334.98	287.535	841.431	0	0	0	0	0	0	0	603	903	0
574	9	0	0	0	0	0	0	200	300	0	31.5828	-9.42917	-576.792	35897.7	50088.8	1380.75	286.84	840.763	0	0	0	0	0	0	0	603	903	0
575	0	0.456892	1.95848	11.7172	212.129	-647.696	-252.687	200	300	0	32.1931	-10.4973	-574.045	35989.3	51187.4	1701.19	289.17	840.306	0	0	0	0	0	0	0	603	903	0
575	1	0	0	0	0	0	0	200	300	0	32.8035	-9.58175	-578.623	36263.9	50882.3	1884.29	287.937	840.327	0	0	0	0	0	0	0	603	903	0
575	2	1.52501	1.34812	11.7172	1127.66	-281.485	-481.569	200	300	0	32.3457	-9.12399	-576.487	36172.4	50333	1975.85	287.31	840.254	0	0	0	0	0	0	0	603	903	0
575	3	-0.15346	-0.0251671	10.4965	944.551	-220.45	-298.464	200	300	0	31.888	-7.90329	-574.045	36538.6	50455	1609.64	287.894	839.349	0	0	0	0	0	0	0	603	903	0
575	4	1.37242	1.50071	10.4965	212.129	-220.45	-69.5817	200	300	0	33.5664	-8.05588	-575.266	37454.1	51004.3	1838.52	288.662	837.893	0	0	0	0	0	0	0	603	903	0
575	5	1.21983	2.41624	10.4965	852.998	-220.45	-23.8053	200	300	0	32.6509	-7.44552	-576.182	37545.7	51309.5	1930.07	289.051	837.837	0	0	0	0	0	0	0	603	903	0
575	6	0.304304	1.95848	9.88614	303.682	-281.485	-252.687	200	300	0	32.9561	-8.05588	-576.487	37637.2	50638.1	1792.74	287.839	837.713	0	0	0	0	0	0	0	603	903	0
575	7	1.06724	1.95848	10.4965	486.787	-403.556	-298.464	200	300	0	32.1931	-7.44552	-576.792	38003.5	51187.4	1838.52	288.745	837.112	0	0	0	0	0	0	0	603	903	0
575	8	0	0	0	0	0	0	200	300	0	32.6509	-6.68258	-575.877	38369.7	51004.3	2158.95	288.568	836.372	0	0	0	0	0	0	0	603	903	0
575	9	1.6776	1.80589	12.0224	944.551	-37.3445	-435.793	200	300	0	33.2613	-6.07223	-575.571	38461.2	50821.2	1746.97	288.297	836.177	0	0	0	0	0	0	0	603	903	0
576	0	0.456892	1.04295	10.8017	578.34	-281.485	-69.5817	200	300	0	33.2613	-5.91965	-576.487	38827.4	50943.3	2067.4	288.369	835.648	0	0	0	0	0	0	0	603	903	0
576	1	1.6776	1.50071	11.7172	395.235	23.6906	-573.122	200	300	0	32.4983	-5.76706	-577.402	39285.2	51614.7	2021.62	289.391	834.962	0	0	0	0	0	0	0	603	903	0
576	2	1.52501	2.11106	10.8017	669.893	84.7258	-206.911	200	300	0	34.3294	-5.76706	-577.402	38827.4	51614.7	2113.18	289.391	835.755	0	0	0	0	0	0	0	603	903	0
576	3	1.37242	2.26365	9.88614	486.787	-708.731	-252.687	200	300	0	33.719	-6.07223	-578.623	39468.3	50577.1	2387.83	287.409	834.789	0	0	0	0	0	0	0	603	903	0
576	4	0.762068	2.56883	9.88614	852.998	23.6906	-435.793	200	300	0	33.5664	-4.69894	-576.792	40017.6	51736.8	2570.94	289.697	833.62	0	0	0	0	0	0	0	603	903	0
576	5	-0.15346	2.41624	11.1068	944.551	23.6906	-481.569	200	300	0	33.4138	-4.39377	-578.318	40292.3	51614.7	2616.72	289.25	833.329	0	0	0	0	0	0	0	603	903	0
576	6	0	0	0	0	0	0	200	300	0	32.0406	-3.936	-577.097	40475.4	51675.7	2433.61	289.544	832.864	0	0	0	0	0	0	0	603	903	0
576	7	0.762068	1.34812	11.412	120.576	206.796	-23.8053	200	300	0	32.9561	-3.78341	-578.623	41116.2	51675.7	2342.06	289.308	831.941	0	0	0	0	0	0	0	603	903	0
576	8	0.151716	1.80589	12.9379	29.0235	-37.3445	-435.793	200	300	0	33.8716	-3.17306	-578.928	40750	52164	2570.94	290.104	832.611	0	0	0	0	0	0	0	603	903	0
576	9	1.21983	1.6533	11.1068	395.235	-464.591	-298.464	200	300	0	33.719	-3.02048	-579.233	41574	52286.1	2891.37	290.268	831.226	0	0	0	0	0	0	0	603	903	0
577	0	2.44053	1.95848	10.1913	395.235	-220.45	-390.016	200	300	0	33.4138	-2.41012	-579.844	41299.4	51431.6	2799.82	288.699	831.775	0	0	0	0	0	0	0	603	903	0
577	1	1.06724	2.26365	11.1068	1036.1	-98.3797	-298.464	200	300	0	33.5664	-1.95236	-580.759	41757.1	52164	2616.72	289.82	831.099	0	0	0	0	0	0	0	603	903	0
577	2	0.762068	1.80589	9.88614	1310.76	-37.3445	-252.687	200	300	0	32.4983	-1.34201	-581.37	42489.5	52408.2	2387.83	290.146	829.915	0	0	0	0	0	0	0	603	903	0
577	3	0	0	0	0	0	0	200	300	0	33.719	-0.884245	-581.98	42947.3	52103	2708.27	289.527	829.205	0	0	0	0	0	0	0	603	903	0
577	4	0.456892	1.50071	10.8017	29.0235	-342.52	21.9711	200	300	0	33.719	-1.79977	-583.506	43405.1	52225	2799.82	289.502	828.613	0	0	0	0	0	0	0	603	903	0
577	5	0.151716	1.50071	12.0224	578.34	-586.661	21.9711	200	300	0	33.2613	-1.64718	-583.201	43038.8	52896.4	2891.37	290.7	829.202	0	0	0	0	0	0	0	603	903	0
577	6	1.37242	1.80589	10.1913	395.235	-342.52	-161.134	200	300	0	36.0078	-1.34201	-582.285	43405.1	52896.4	2891.37	290.843	828.457	0	0	0	0	0	0	0	603	903	0
577	7	0	0	0	0	0	0	200	300	0	33.5664	-0.579069	-585.032	43862.8	51614.7	3120.26	288.225	828.025	0	0	0	0	0	0	0	603	903	0
577	8	0.914656	2.26365	9.88614	1036.1	-37.3445	-390.016	200	300	0	33.2613	0.0312825	-586.558	44320.6	52957.5	3074.48	290.285	827.44	0	0	0	0	0	0	0	603	903	0
577	9	2.74571	1.80589	12.3275	1036.1	-464.591	-206.911	200	300	0	33.2613	0.336458	-583.201	45785.4	53140.6	3120.26	291.119	824.493	0	0	0	0	0	0	0	603	903	0
578	0	0.762068	1.50071	9.88614	852.998	389.902	21.9711	200	300	0	32.8035	0.0312825	-587.778	44961.5	52896.4	3303.36	289.994	826.506	0	0	0	0	0	0	0	603	903	0
578	1	0.60948	1.95848	10.1913	303.682	23.6906	-115.358	200	300	0	32.4983	-0.273893	-588.084	44869.9	52896.4	3486.47	289.947	826.702	0	0	0	0	0	0	0	603	903	0
578	2	0.304304	1.19554	12.6327	395.235	-342.52	-344.24	200	300	0	33.719	0.489046	-587.473	45327.7	53384.7	3440.69	290.872	825.843	0	0	0	0	0	0	0	603	903	0
578	3	0.762068	2.26365	10.8017	212.129	-159.415	-710.451	200	300	0	35.7027	1.55716	-591.135	45693.9	53140.6	3349.14	289.896	825.702	0	0	0	0	0	0	0	603	903	0
578	4	2.13536	1.04295	9.88614	303.682	23.6906	-161.134	200	300	0	33.5664	1.40457	-593.272	45785.4	52957.5	3349.14	289.263	825.826	0	0	0	0	0	0	0	603	903	0
578	5	0	0	0	0	0	0	200	300	0	32.4983	1.55716	-591.44	46609.4	53873	3761.12	291.088	824.193	0	0	0	0	0	0	0	603	903	0
578	6	0	0	0	0	0	0	200	300	0	32.4983	0.794222	-593.577	46884.1	53995.1	3257.58	290.966	824.014	0	0	0	0	0	0	0	603	903	0
578	7	-0.306047	1.6533	12.3275	852.998	-403.556	-298.464	200	300	0	33.5664	1.55716	-594.797	47067.2	53812	3211.81	290.471	823.869	0	0	0	0	0	0	0	603	903	0
578	8	0.304304	1.04295	11.1068	578.34	-342.52	-206.911	200	300	0	33.719	2.16751	-597.239	47616.5	54056.1	3532.24	290.51	823.272	0	0	0	0	0	0	0	603	903	0
578	9	0.456892	1.19554	10.4965	303.682	-220.45	-435.793	200	300	0	32.8035	1.86234	-598.46	48074.3	54056.1	3578.02	290.325	822.67	0	0	0	0	0	0	0	603	903	0
579	0	1.06724	2.26365	12.3275	1310.76	84.7258	-344.24	200	300	0	35.2449	2.01493	-601.206	48074.3	54178.2	3440.69	290.116	823.037	0	0	0	0	0	0	0	603	903	0
579	1	0	0	0	0	0	0	200	300	0	32.1931	2.47269	-600.901	48440.5	54178.2	3257.58	290.162	822.387	0	0	0	0	0	0	0	603	903	0
579	2	1.83018	2.26365	12.6327	395.235	-159.415	21.9711	200	300	0	33.4138	2.77786	-602.427	48623.6	54605.4	3578.02	290.642	822.287	0	0	0	0	0	0	0	603	903	0
579	3	0.304304	2.11106	9.88614	578.34	-159.415	-69.5817	200	300	0	33.1087	2.47269	-602.427	48989.8	55093.7	3532.24	291.453	821.679	0	0	0	0	0	0	0	603	903	0
579	4	-0.15346	1.50071	10.8017	486.787	-159.415	-161.134	200	300	0	32.3457	2.62528	-603.953	48806.7	54849.6	3715.35	290.818	822.188	0	0	0	0	0	0	0	603	903	0
579	5	-0.15346	1.50071	11.1068	1036.1	-159.415	-252.687	200	300	0	32.0406	2.47269	-604.563	49447.5	54849.6	3806.9	290.726	821.209	0	0	0	0	0	0	0	603	903	0
579	6	0.914656	0.432597	10.8017	852.998	145.761	-390.016	200	300	0	34.0242	3.69339	-607.92	50180	54788.5	3990.01	290.125	820.456	0	0	0	0	0	0	0	603	903	0
579	7	1.37242	1.80589	10.1913	395.235	-98.3797	-390.016	200	300	0	33.2613	3.08304	-608.53	50729.3	55032.7	3944.23	290.435	819.636	0	0	0	0	0	0	0	603	903	0
579	8	1.06724	2.41624	9.88614	120.576	-281.485	-298.464	200	300	0	33.1087	2.16751	-609.141	51003.9	55093.7	3852.68	290.445	819.269	0	0	0	0	0	0	0	603	903	0
579	9	0.304304	2.41624	10.1913	212.129	206.796	-161.134	200	300	0	32.1931	3.08304	-609.751	51095.5	55765.1	3852.68	291.456	819.203	0	0	0	0	0	0	0	603	903	0
580	0	1.98277	2.11106	11.1068	212.129	84.7258	-206.911	200	300	0	32.6509	3.23563	-611.887	51644.8	55826.1	3944.23	291.236	818.598	0	0	0	0	0	0	0	603	903	0
580	1	0.60948	1.95848	11.1068	852.998	-281.485	-344.24	200	300	0	32.4983	3.84598	-613.718	52468.8	54971.6	4081.56	289.571	817.507	0	0	0	0	0	0	0	603	903	0
580	2	0.914656	1.50071	10.1913	1310.76	-37.3445	-298.464	200	300	0	34.7871	3.84598	-616.16	52651.9	55948.2	4768.21	290.801	817.548	0	0	0	0	0	0	0	603	903	0
580	3	1.21983	1.50071	11.412	669.893	-98.3797	-481.569	200	300	0	33.4138	3.84598	-617.991	52926.5	56009.2	4081.56	290.631	817.357	0	0	0	0	0	0	0	603	903	0
580	4	1.6776	1.80589	9.88614	120.576	-281.485	-481.569	200	300	0	32.1931	3.69339	-618.906	53475.9	56131.3	3852.68	290.694	816.596	0	0	0	0	0	0	0	603	903	0
580	5	1.6776	1.04295	11.412	486.787	145.761	-206.911	200	300	0	32.6509	3.5408	-618.296	54208.3	56375.4	3898.45	291.179	815.326	0	0	0	0	0	0	0	603	903	0
580	6	0.60948	2.11106	9.88614	395.235	84.7258	-344.24	200	300	0	33.8716	4.15116	-621.043	53933.6	56680.6	3990.01	291.267	816.156	0	0	0	0	0	0	0	603	903	0
580	7	1.83018	1.80589	11.412	395.235	-464.591	-161.134	200	300	0	34.0242	4.15116	-623.484	55306.9	56802.7	4264.67	291.105	814.294	0	0	0	0	0	0	0	603	903	0
580	8	0.151716	2.41624	11.7172	1127.66	-98.3797	-298.464	200	300	0	33.719	3.84598	-624.705	55123.8	56558.5	4356.22	290.536	814.76	0	0	0	0	0	0	0	603	903	0
580	9	1.52501	1.50071	11.7172	669.893	-464.591	-298.464	200	300	0	35.0923	3.38822	-627.451	55581.6	56924.8	4218.89	290.724	814.417	0	0	0	0	0	0	0	603	903	0
581	0	3.05089	1.50071	10.1913	761.445	-98.3797	-252.687	200	300	0	32.9561	3.99857	-627.756	55947.8	57229.9	4035.78	291.166	813.877	0	0	0	0	0	0	0	603	903	0
581	1	0	0	0	0	0	0	200	300	0	34.3294	4.15116	-628.062	56771.8	56985.8	4173.11	290.733	812.608	0	0	0	0	0	0	0	603	903	0
581	2	0	0	0	0	0	0	200	300	0	34.482	3.23563	-629.282	56314	57352	4401.99	291.139	813.511	0	0	0	0	0	0	0	603	903	0
581	3	0	0	0	0	0	0	200	300	0	34.482	4.15116	-633.86	56863.3	57718.2	4493.55	291.058	813.29	0	0	0	0	0	0	0	603	903	0
581	4	-0.15346	1.6533	11.1068	1493.87	-403.556	-298.464	200	300	0	34.0242	4.15116	-635.691	57595.7	57535.1	4493.55	290.508	812.397	0	0	0	0	0	0	0	603	903	0
581	5	0.456892	2.56883	12.0224	669.893	206.796	-252.687	200	300	0	35.3975	3.5408	-636.607	57870.4	57474.1	4676.65	290.282	812.096	0	0	0	0	0	0	0	603	903	0
581	6	1.52501	1.6533	10.4965	761.445	23.6906	-481.569	200	300	0	35.2449	3.69339	-638.132	58419.7	58267.5	4905.53	291.309	811.452	0	0	0	0	0	0	0	603	903	0
581	7	0	0	0	0	0	0	200	300	0	34.482	4.15116	-639.658	58511.3	58389.6	4676.65	291.282	811.527	0	0	0	0	0	0	0	603	903	0
581	8	1.52501	0.89036	9.88614	-62.5292	84.7258	-344.24	200	300	0	35.5501	3.38822	-642.71	59243.7	58511.7	4585.1	291.039	810.822	0	0	0	0	0	0	0	603	903	0
581	9	0	0	0	0	0	0	200	300	0	34.6346	3.23563	-640.574	59609.9	58511.7	4951.31	291.343	809.943	0	0	0	0	0	0	0	603	903	0
582	0	1.37242	1.95848	11.412	669.893	-464.591	-298.464	200	300	0	35.3975	2.62528	-647.288	59884.5	58694.8	4676.65	290.678	810.484	0	0	0	0	0	0	0	603	903	0
582	1	0.304304	2.56883	10.4965	944.551	23.6906	-115.358	200	300	0	35.5501	3.5408	-647.288	59976.1	58023.4	4722.43	289.641	810.342	0	0	0	0	0	0	0	603	903	0
582	2	1.06724	1.50071	12.3275	944.551	145.761	21.9711	200	300	0	34.9397	3.38822	-649.424	60891.6	58511.7	4630.88	290.098	809.237	0	0	0	0	0	0	0	603	903	0
582	3	1.6776	1.19554	10.4965	486.787	-98.3797	-298.464	200	300	0	36.7708	2.3201	-651.56	61441	59244.1	5042.86	290.927	808.702	0	0	0	0	0	0	0	603	903	0
582	4	1.6776	0.737772	9.88614	1127.66	206.796	-161.134	200	300	0	33.8716	3.38822	-653.086	62356.5	59305.1	4630.88	290.808	807.52	0	0	0	0	0	0	0	603	903	0
582	5	2.44053	1.50071	12.6327	578.34	23.6906	-390.016	200	300	0	36.1604	3.38822	-654.917	62264.9	58633.7	4951.31	289.529	807.927	0	0	0	0	0	0	0	603	903	0
582	6	0	0	0	0	0	0	200	300	0	36.0078	3.23563	-653.696	62173.4	59549.3	5088.64	291.096	807.89	0	0	0	0	0	0	0	603	903	0
582	7	1.98277	1.19554	10.8017	395.235	-159.415	-390.016	200	300	0	34.9397	3.69339	-658.274	62631.1	59854.4	4997.09	290.926	807.856	0	0	0	0	0	0	0	603	903	0
582	8	0.60948	2.41624	12.0224	852.998	-159.415	-298.464	200	300	0	34.7871	3.84598	-659.8	63912.9	59488.2	5088.64	290.161	806.133	0	0	0	0	0	0	0	603	903	0
582	9	1.21983	1.6533	11.412	761.445	-98.3797	-390.016	200	300	0	35.5501	3.5408	-661.326	63912.9	59793.4	5088.64	290.414	806.357	0	0	0	0	0	0	0	603	903	0
583	0	1.52501	1.19554	10.4965	761.445	84.7258	-23.8053	200	300	0	35.8553	4.30374	-663.462	64828.4	60220.7	5088.64	290.767	805.288	0	0	0	0	0	0	0	603	903	0
583	1	1.83018	0.737772	9.88614	29.0235	-98.3797	-23.8053	200	300	0	35.3975	3.69339	-667.429	64462.2	60525.8	5454.85	290.685	806.417	0	0	0	0	0	0	0	603	903	0
583	2	0	0	0	0	0	0	200	300	0	35.5501	2.77786	-666.209	65469.3	60464.8	5683.73	290.76	804.729	0	0	0	0	0	0	0	603	903	0
583	3	0	0	0	0	0	0	200	300	0	34.9397	3.5408	-670.481	66018.6	60708.9	5454.85	290.545	804.536	0	0	0	0	0	0	0	603	903	0
583	4	0	0	0	0	0	0	200	300	0	35.2449	4.15116	-671.397	67025.7	60647.9	5546.4	290.331	803.17	0	0	0	0	0	0	0	603	903	0
583	5	0.456892	2.72141	11.1068	669.893	-37.3445	-69.5817	200	300	0	35.3975	4.30374	-675.669	66384.8	60770	5409.07	289.94	804.75	0	0	0	0	0	0	0	603	903	0
583	6	-0.000871718	1.34812	14.1586	669.893	-37.3445	-298.464	200	300	0	34.482	3.84598	-676.89	66934.1	61014.1	5454.85	290.139	804.115	0	0	0	0	0	0	0	603	903	0
583	7	1.06724	0.127421	11.412	395.235	-159.415	-344.24	200	300	0	35.7027	3.84598	-679.941	67666.5	61319.3	5637.96	290.183	803.482	0	0	0	0	0	0	0	603	903	0
583	8	2.28795	1.6533	10.8017	212.129	-220.45	-344.24	200	300	0	34.7871	3.84598	-681.467	68399	61624.5	5821.06	290.429	802.63	0	0	0	0	0	0	0	603	903	0
583	9	1.06724	2.41624	10.4965	1127.66	-37.3445	-252.687	200	300	0	35.3975	4.30374	-682.993	68490.5	60953.1	5683.73	289.244	802.72	0	0	0	0	0	0	0	603	903	0
584	0	-0.15346	1.95848	13.5482	578.34	-281.485	-206.911	200	300	0	35.3975	5.06668	-684.519	69039.9	61746.5	5637.96	290.204	802.141	0	0	0	0	0	0	0	603	903	0
584	1	0.60948	2.26365	10.4965	669.893	23.6906	-252.687	200	300	0	34.482	4.91409	-687.266	69314.5	62173.8	6004.17	290.465	802.145	0	0	0	0	0	0	0	603	903	0
584	2	1.6776	1.34812	11.1068	395.235	23.6906	250.853	200	300	0	34.0242	4.91409	-691.538	70230	62112.7	5866.84	289.818	801.444	0	0	0	0	0	0	0	603	903	0
584	3	0.304304	1.19554	11.1068	578.34	-281.485	-161.134	200	300	0	34.7871	5.06668	-692.148	70870.9	62234.8	5866.84	289.915	800.607	0	0	0	0	0	0	0	603	903	0
584	4	1.21983	1.34812	10.8017	578.34	-220.45	-390.016	200	300	0	36.7708	5.52445	-694.895	70962.4	62723.1	6095.72	290.263	800.88	0	0	0	0	0	0	0	603	903	0
584	5	1.06724	1.6533	10.8017	578.34	-464.591	-390.016	200	300	0	36.313	5.82962	-696.726	71054	62723.1	6324.6	290.025	801.017	0	0	0	0	0	0	0	603	903	0
584	6	0.914656	1.95848	9.88614	212.129	-281.485	-344.24	200	300	0	34.3294	6.43997	-700.388	71694.9	62723.1	6370.38	289.555	800.636	0	0	0	0	0	0	0	603	903	0
584	7	1.06724	2.41624	12.9379	486.787	84.7258	-298.464	200	300	0	34.482	6.59256	-700.083	72976.6	62906.2	6370.38	289.855	798.76	0	0	0	0	0	0	0	603	903	0
584	8	0.762068	2.11106	9.88614	944.551	-98.3797	-206.911	200	300	0	34.7871	6.89774	-704.966	73251.2	63333.4	6278.83	289.839	799.093	0	0	0	0	0	0	0	603	903	0
584	9	0	0	0	0	0	0	200	300	0	34.7871	6.89774	-705.271	73709	63089.3	6278.83	289.454	798.488	0	0	0	0	0	0	0	603	903	0
585	0	0.304304	0.737772	10.8017	395.235	-98.3797	67.7474	200	300	0	33.719	6.74515	-710.154	73251.2	63394.5	6645.04	289.269	799.852	0	0	0	0	0	0	0	603	903	0
585	1	0.456892	1.6533	10.1913	486.787	-220.45	-481.569	200	300	0	34.3294	6.89774	-711.985	73983.7	63943.8	6690.81	289.811	799.088	0	0	0	0	0	0	0	603	903	0
585	2	1.06724	1.95848	10.4965	944.551	-159.415	-435.793	200	300	0	34.7871	8.42362	-715.037	75357	63821.7	6645.04	289.257	797.611	0	0	0	0	0	0	0	603	903	0
585	3	0	0	0	0	0	0	200	300	0	34.482	7.96585	-716.257	75997.9	63638.6	6782.37	288.849	796.896	0	0	0	0	0	0	0	603	903	0
585	4	1.37242	2.26365	11.7172	944.551	-37.3445	-344.24	200	300	0	34.0242	9.03397	-718.394	75540.1	64371	6690.81	289.604	797.849	0	0	0	0	0	0	0	603	903	0
585	5	0	0	0	0	0	0	200	300	0	34.7871	9.03397	-722.056	76089.4	64004.8	7331.68	288.643	797.621	0	0	0	0	0	0	0	603	903	0
585	6	1.6776	0.737772	11.7172	578.34	-403.556	-252.687	200	300	0	32.9561	8.11844	-727.244	77279.6	64554.2	7057.02	288.766	796.736	0	0	0	0	0	0	0	603	903	0
585	7	-0.15346	1.50071	10.4965	212.129	-220.45	-298.464	200	300	0	33.5664	9.49173	-727.549	77371.1	64493.1	7102.8	288.644	796.655	0	0	0	0	0	0	0	603	903	0
585	8	0	0	0	0	0	0	200	300	0	34.1768	11.1702	-729.685	77737.4	65103.5	7194.35	289.221	796.465	0	0	0	0	0	0	0	603	903	0
585	9	1.06724	1.95848	11.412	395.235	-98.3797	-206.911	200	300	0	33.2613	11.9331	-733.652	78378.2	65103.5	6690.81	288.739	796.167	0	0	0	0	0	0	0	603	903	0
586	0	1.06724	-0.177755	11.1068	578.34	-98.3797	-481.569	200	300	0	33.2613	11.3228	-733.958	78836	65164.5	7285.91	288.785	795.588	0	0	0	0	0	0	0	603	903	0
586	1	1.21983	1.80589	11.7172	669.893	-98.3797	-206.911	200	300	0	32.8035	12.0857	-737.315	79843	65652.8	7240.13	289.043	794.711	0	0	0	0	0	0	0	603	903	0
586	2	0	0	0	0	0	0	200	300	0	33.5664	12.3909	-737.925	79934.6	65774.9	7377.46	289.135	794.676	0	0	0	0	0	0	0	603	903	0
586	3	1.52501	1.04295	10.4965	944.551	-159.415	-390.016	200	300	0	34.1768	13.1538	-740.061	79843	66019	7469.01	289.208	795.113	0	0	0	0	0	0	0	603	903	0
586	4	0.151716	1.50071	11.7172	669.893	-281.485	-298.464	200	300	0	33.719	12.8487	-744.334	80300.8	65591.8	7697.89	288.121	795.117	0	0	0	0	0	0	0	603	903	0
586	5	0.304304	1.34812	11.1068	303.682	-403.556	-390.016	200	300	0	33.2613	14.222	-748.911	81582.5	66507.3	7972.55	288.805	794.065	0	0	0	0	0	0	0	603	903	0
586	6	1.21983	2.41624	11.412	303.682	-98.3797	-390.016	200	300	0	34.0242	14.3745	-750.742	81948.8	66507.3	8155.66	288.589	793.843	0	0	0	0	0	0	0	603	903	0
586	7	1.21983	0.737772	10.4965	303.682	-37.3445	-344.24	200	300	0	33.8716	14.222	-753.794	82681.2	66507.3	7606.34	288.23	793.313	0	0	0	0	0	0	0	603	903	0
586	8	1.6776	2.56883	9.58096	669.893	-98.3797	113.524	200	300	0	32.8035	15.5952	-753.794	83047.4	66629.4	7697.89	288.392	792.828	0	0	0	0	0	0	0	603	903	0
586	9	0.304304	2.26365	10.4965	578.34	23.6906	-298.464	200	300	0	33.2613	16.6634	-756.846	83047.4	67300.7	8201.44	288.923	793.272	0	0	0	0	0	0	0	603	903	0
587	0	0	0	0	0	0	0	200	300	0	34.3294	16.6634	-761.729	83871.4	67544.9	8430.32	288.673	792.893	0	0	0	0	0	0	0	603	903	0
587	1	0.456892	1.34812	11.1068	944.551	-586.661	-252.687	200	300	0	34.3294	17.7315	-762.949	84603.8	67483.9	8567.65	288.451	792.11	0	0	0	0	0	0	0	603	903	0
587	2	0.304304	1.80589	11.1068	669.893	84.7258	-344.24	200	300	0	33.8716	17.7315	-764.78	84878.4	67239.7	8384.54	287.92	792.016	0	0	0	0	0	0	0	603	903	0
587	3	1.52501	2.11106	10.4965	578.34	-98.3797	-618.898	200	300	0	33.1087	18.7996	-766.001	84603.8	67666.9	8338.76	288.338	792.551	0	0	0	0	0	0	0	603	903	0
587	4	1.21983	1.95848	11.1068	-245.635	-281.485	-390.016	200	300	0	32.6509	19.7151	-766.001	85794	68094.2	8430.32	288.896	790.998	0	0	0	0	0	0	0	603	903	0
587	5	1.98277	1.04295	10.4965	212.129	-159.415	-161.134	200	300	0	34.0242	18.3418	-772.41	86618	68216.3	8109.88	288.316	790.86	0	0	0	0	0	0	0	603	903	0
587	6	0	0	0	0	0	0	200	300	0	34.3294	20.3255	-775.156	86801.1	68765.6	8613.42	288.712	791.021	0	0	0	0	0	0	0	603	903	0
587	7	0	0	0	0	0	0	200	300	0	34.1768	20.4781	-776.987	87258.8	68643.5	8842.3	288.346	790.696	0	0	0	0	0	0	0	603	903	0
587	8	0.456892	1.80589	10.1913	578.34	-98.3797	-435.793	200	300	0	33.719	20.3255	-779.429	87899.7	68399.4	8933.86	287.756	790.226	0	0	0	0	0	0	0	603	903	0
587	9	-0.15346	1.50071	12.3275	761.445	-464.591	-435.793	200	300	0	33.719	21.8514	-782.786	88540.6	68765.6	9071.19	287.847	789.89	0	0	0	0	0	0	0	603	903	0
588	0	0.304304	1.34812	12.6327	120.576	-220.45	-298.464	200	300	0	36.0078	22.9195	-784.006	89456.1	69131.8	9162.74	288.178	788.899	0	0	0	0	0	0	0	603	903	0
588	1	1.52501	1.95848	11.1068	761.445	-98.3797	-161.134	200	300	0	34.7871	23.5298	-786.448	89547.7	68765.6	9300.07	287.438	789.137	0	0	0	0	0	0	0	603	903	0
588	2	2.59312	2.26365	9.58096	120.576	-98.3797	-206.911	200	300	0	33.8716	24.2928	-789.194	89364.5	69559.1	9483.17	288.139	789.765	0	0	0	0	0	0	0	603	903	0
588	3	0.456892	2.11106	10.1913	395.235	-464.591	-206.911	200	300	0	33.4138	23.6824	-791.636	90005.4	69803.2	9620.5	288.176	789.305	0	0	0	0	0	0	0	603	903	0
588	4	0.60948	2.41624	10.4965	1036.1	-98.3797	-161.134	200	300	0	33.4138	24.9031	-793.467	91195.6	70230.4	9757.83	288.511	788.067	0	0	0	0	0	0	0	603	903	0
588	5	0.456892	1.6533	11.1068	1402.31	23.6906	159.3	200	300	0	34.9397	25.666	-793.162	90280.1	69864.2	9757.83	288.083	789.177	0	0	0	0	0	0	0	603	903	0
588	6	1.06724	1.50071	11.412	1036.1	84.7258	-344.24	200	300	0	34.482	26.1238	-798.044	92019.6	70108.4	9528.95	287.85	787.694	0	0	0	0	0	0	0	603	903	0
588	7	1.21983	1.6533	9.88614	578.34	-586.661	-161.134	200	300	0	33.719	27.0393	-799.876	92294.2	70657.7	9345.84	288.336	787.614	0	0	0	0	0	0	0	603	903	0
588	8	1.6776	0.585184	10.8017	-154.082	84.7258	-390.016	200	300	0	35.5501	26.7342	-802.622	92660.4	70962.8	9803.61	288.414	787.553	0	0	0	0	0	0	0	603	903	0
588	9	0.762068	1.6533	10.8017	120.576	-220.45	-390.016	200	300	0	35.5501	25.9712	-805.674	93759.1	70230.4	10078.3	287.17	786.627	0	0	0	0	0	0	0	603	903	0
589	0	0	0	0	0	0	0	200	300	0	34.3294	28.1075	-806.284	93667.5	71146	9940.94	288.239	786.828	0	0	0	0	0	0	0	603	903	0
589	1	1.37242	2.56883	13.8534	1036.1	-159.415	-161.134	200	300	0	34.7871	29.1756	-808.42	94033.7	71084.9	10215.6	287.931	786.682	0	0	0	0	0	0	0	603	903	0
589	2	0.762068	3.17918	10.4965	852.998	84.7258	-435.793	200	300	0	34.482	29.9385	-812.083	94491.5	71146	10215.6	287.609	786.643	0	0	0	0	0	0	0	603	903	0
589	3	2.74571	1.50071	10.8017	486.787	-159.415	-298.464	200	300	0	34.0242	30.2437	-812.693	95498.6	71329.1	10215.6	287.769	785.491	0	0	0	0	0	0	0	603	903	0
589	4	0.60948	1.6533	10.4965	395.235	-220.45	-252.687	200	300	0	34.6346	30.3963	-815.44	96139.5	71878.4	10307.1	288.147	785.101	0	0	0	0	0	0	0	603	903	0
589	5	1.21983	1.80589	10.8017	212.129	-98.3797	-298.464	200	300	0	36.6182	30.854	-816.05	96505.7	72000.5	10719.1	288.23	784.74	0	0	0	0	0	0	0	603	903	0
589	6	1.21983	2.11106	10.4965	1036.1	-220.45	-23.8053	200	300	0	35.2449	31.9222	-817.271	96414.1	71817.3	10261.4	287.875	785.029	0	0	0	0	0	0	0	603	903	0
589	7	1.37242	2.41624	9.88614	120.576	-159.415	-527.345	200	300	0	34.9397	34.0584	-819.102	97238.1	72244.6	10764.9	288.2	784.287	0	0	0	0	0	0	0	603	903	0
589	8	1.06724	2.11106	10.4965	669.893	-98.3797	-298.464	200	300	0	34.1768	33.9058	-823.374	98245.2	72549.8	10993.8	288.113	783.68	0	0	0	0	0	0	0	603	903	0
589	9	0.304304	1.50071	10.1913	761.445	84.7258	-298.464	200	300	0	34.482	34.5161	-825.815	99069.1	72244.6	10993.8	287.483	783.035	0	0	0	0	0	0	0	603	903	0
590	0	0	0	0	0	0	0	200	300	0	34.3294	34.5161	-824.9	98702.9	72488.8	10948	287.876	783.346	0	0	0	0	0	0	0	603	903	0
590	1	0.456892	1.19554	10.4965	761.445	-159.415	-435.793	200	300	0	34.3294	34.8213	-826.121	98245.2	73221.2	11268.5	288.633	784.077	0	0	0	0	0	0	0	603	903	0
590	2	0.456892	1.6533	13.8534	395.235	-342.52	-481.569	200	300	0	34.482	36.042	-827.341	98977.6	73404.2	11222.7	288.723	783.367	0	0	0	0	0	0	0	603	903	0
590	3	1.06724	2.56883	11.7172	669.893	-98.3797	-390.016	200	300	0	35.0923	36.042	-830.088	100717	73160.1	11405.8	288.135	781.667	0	0	0	0	0	0	0	603	903	0
590	4	2.8983	2.11106	11.7172	578.34	-403.556	-481.569	200	300	0	35.5501	37.7205	-832.529	100992	73099.1	11680.4	287.804	781.693	0	0	0	0	0	0	0	603	903	0
590	5	1.83018	2.26365	9.88614	852.998	84.7258	-435.793	200	300	0	35.3975	38.0257	-832.529	101266	73648.4	11176.9	288.463	781.363	0	0	0	0	0	0	0	603	903	0
590	6	2.28795	2.11106	10.8017	669.893	-98.3797	-115.358	200	300	0	34.9397	38.0257	-831.309	101633	73831.5	11268.5	288.814	780.744	0	0	0	0	0	0	0	603	903	0
590	7	0.914656	1.19554	10.4965	761.445	-37.3445	-115.358	200	300	0	35.5501	38.9412	-835.276	102457	73587.4	11405.8	288.099	780.338	0	0	0	0	0	0	0	603	903	0
590	8	0.456892	1.95848	10.8017	669.893	-281.485	-344.24	200	300	0	36.313	40.1619	-836.191	103097	74258.7	11863.5	288.806	779.706	0	0	0	0	0	0	0	603	903	0
590	9	0.304304	1.50071	11.1068	669.893	84.7258	-344.24	200	300	0	37.8389	41.8404	-838.938	103281	74197.7	11680.4	288.442	779.891	0	0	0	0	0	0	0	603	903	0
591	0	1.37242	2.11106	11.7172	486.787	84.7258	-344.24	200	300	0	36.4656	42.1455	-839.548	103464	73709.5	11588.9	287.797	779.763	0	0	0	0	0	0	0	603	903	0
591	1	1.83018	2.26365	13.2431	212.129	-159.415	-756.227	200	300	0	35.7027	41.993	-840.769	103921	74075.7	11817.8	288.105	779.397	0	0	0	0	0	0	0	603	903	0
591	2	0	0	0	0	0	0	200	300	0	35.5501	42.6033	-840.159	104196	74625	12092.4	288.822	778.98	0	0	0	0	0	0	0	603	903	0
591	3	1.37242	1.80589	12.0224	486.787	-98.3797	-161.134	200	300	0	35.8553	43.3662	-841.379	105203	74625	12184	288.694	777.963	0	0	0	0	0	0	0	603	903	0
591	4	-0.000871718	1.6533	9.88614	1219.21	-98.3797	-390.016	200	300	0	38.2967	44.5869	-844.431	105295	74563.9	12550.2	288.301	778.307	0	0	0	0	0	0	0	603	903	0
591	5	0	0	0	0	0	0	200	300	0	36.313	45.5025	-846.262	105295	74869.1	12412.9	288.47	778.577	0	0	0	0	0	0	0	603	903	0
591	6	0.456892	1.50071	11.1068	303.682	145.761	-481.569	200	300	0	36.0078	46.2654	-845.957	105936	74808.1	12184	288.43	777.774	0	0	0	0	0	0	0	603	903	0
591	7	1.21983	1.6533	13.5482	303.682	-37.3445	-161.134	200	300	0	35.7027	45.8077	-847.178	107309	74808.1	12458.6	288.303	776.334	0	0	0	0	0	0	0	603	903	0
591	8	1.83018	2.26365	11.1068	303.682	-342.52	-618.898	200	300	0	36.4656	46.7232	-846.873	107034	75296.4	12687.5	288.911	776.612	0	0	0	0	0	0	0	603	903	0
591	9	2.59312	0.585184	9.88614	578.34	84.7258	-252.687	200	300	0	36.7708	47.6387	-847.483	108041	74991.2	12641.7	288.487	775.515	0	0	0	0	0	0	0	603	903	0
592	0	0	0	0	0	0	0	200	300	0	36.313	48.5542	-849.314	107584	75052.2	12596	288.368	776.329	0	0	0	0	0	0	0	603	903	0
592	1	0.304304	1.50071	10.1913	944.551	-525.626	-344.24	200	300	0	37.076	49.3172	-850.23	108133	75235.3	12870.6	288.488	775.819	0	0	0	0	0	0	0	603	903	0
592	2	0.762068	1.34812	10.1913	669.893	23.6906	-481.569	200	300	0	36.1604	49.7749	-851.755	108865	75845.7	13008	289.046	775.187	0	0	0	0	0	0	0	603	903	0
592	3	0.456892	1.6533	12.3275	303.682	-37.3445	-298.464	200	300	0	37.9915	49.9275	-852.671	109872	75601.5	12870.6	288.664	774.143	0	0	0	0	0	0	0	603	903	0
592	4	0.60948	2.72141	10.4965	303.682	-159.415	-252.687	200	300	0	37.8389	50.3853	-851.45	109689	75662.6	12779.1	288.863	774.174	0	0	0	0	0	0	0	603	903	0
592	5	1.37242	2.26365	10.1913	-62.5292	-98.3797	-206.911	200	300	0	37.076	51.1482	-850.84	110055	75662.6	13008	288.927	773.651	0	0	0	0	0	0	0	603	903	0
592	6	1.6776	1.95848	11.1068	395.235	-37.3445	-390.016	200	300	0	37.5337	53.437	-852.061	110696	76089.8	13191.1	289.301	773.084	0	0	0	0	0	0	0	603	903	0
592	7	0	0	0	0	0	0	200	300	0	38.7544	53.437	-853.281	110788	75723.6	13603	288.744	773.163	0	0	0	0	0	0	0	603	903	0
592	8	0	0	0	0	0	0	200	300	0	38.4492	54.2	-854.197	111978	75784.6	13511.5	288.72	771.908	0	0	0	0	0	0	0	603	903	0
592	9	0	0	0	0	0	0	200	300	0	37.8389	54.6577	-853.586	111887	76089.8	13465.7	289.141	771.922	0	0	0	0	0	0	0	603	903	0
593	0	0.762068	2.11106	10.1913	303.682	-159.415	-710.451	200	300	0	39.0596	54.9629	-852.976	112344	76272.9	13694.6	289.42	771.292	0	0	0	0	0	0	0	603	903	0
593	1	0.762068	1.6533	11.412	-62.5292	-159.415	-206.911	200	300	0	37.9915	56.4888	-852.061	113443	76150.9	13877.7	289.373	769.861	0	0	0	0	0	0	0	603	903	0
593	2	0.60948	2.11106	12.3275	-154.082	23.6906	-344.24	200	300	0	38.6018	57.4043	-852.976	113168	76272.9	13557.3	289.42	770.325	0	0	0	0	0	0	0	603	903	0
593	3	0.762068	2.26365	10.4965	395.235	84.7258	-390.016	200	300	0	38.7544	58.0147	-854.502	113901	76150.9	13969.3	289.117	769.705	0	0	0	0	0	0	0	603	903	0
593	4	1.06724	2.26365	10.8017	852.998	-98.3797	-344.24	200	300	0	38.2967	58.1673	-854.197	113809	75845.7	14015	288.792	769.765	0	0	0	0	0	0	0	603	903	0
593	5	1.83018	2.26365	9.88614	578.34	-37.3445	-481.569	200	300	0	40.4329	59.0828	-850.535	114358	75784.6	14106.6	289.102	768.545	0	0	0	0	0	0	0	603	903	0
593	6	1.83018	1.19554	9.88614	761.445	23.6906	-664.674	200	300	0	39.0596	60.6087	-853.586	115366	76578.1	14015	289.713	767.846	0	0	0	0	0	0	0	603	903	0
593	7	0.60948	1.19554	10.1913	303.682	-464.591	-390.016	200	300	0	38.7544	61.5242	-852.976	115732	76761.2	14106.6	289.992	767.32	0	0	0	0	0	0	0	603	903	0
593	8	0	0	0	0	0	0	200	300	0	39.67	62.4397	-853.892	114999	76333.9	14381.2	289.395	768.323	0	0	0	0	0	0	0	603	903	0
593	9	0.60948	2.26365	11.412	578.34	145.761	-115.358	200	300	0	38.907	62.2871	-851.145	115823	76456	14610.1	289.827	766.921	0	0	0	0	0	0	0	603	903	0
594	0	0.914656	2.41624	13.8534	486.787	-403.556	-298.464	200	300	0	39.0596	63.2027	-853.892	115915	76211.9	14839	289.252	767.251	0	0	0	0	0	0	0	603	903	0
594	1	1.6776	1.6533	12.0224	852.998	-159.415	-344.24	200	300	0	39.5174	63.5078	-852.061	116922	76395	14427	289.659	765.778	0	0	0	0	0	0	0	603	903	0
594	2	1.98277	1.34812	11.7172	1676.97	23.6906	-618.898	200	300	0	41.501	65.6441	-852.976	117288	76272.9	14884.8	289.42	765.495	0	0	0	0	0	0	0	603	903	0
594	3	1.6776	2.41624	10.1913	669.893	23.6906	-390.016	200	300	0	40.1277	64.7285	-852.671	116830	76700.1	14884.8	289.953	765.983	0	0	0	0	0	0	0	603	903	0
594	4	0	0	0	0	0	0	200	300	0	39.3648	66.8648	-849.619	117471	76578.1	14976.3	290.132	764.737	0	0	0	0	0	0	0	603	903	0
594	5	0	0	0	0	0	0	200	300	0	40.1277	66.8648	-850.84	117837	76517.1	14884.8	289.931	764.505	0	0	0	0	0	0	0	603	903	0
594	6	0.456892	2.26365	9.88614	303.682	-525.626	-344.24	200	300	0	41.3484	67.3225	-849.619	118295	76944.3	15159.4	290.563	763.767	0	0	0	0	0	0	0	603	903	0
594	7	0.60948	2.26365	11.412	578.34	-159.415	-115.358	200	300	0	41.0432	68.6958	-848.704	117746	76761.2	14655.9	290.445	764.264	0	0	0	0	0	0	0	603	903	0
594	8	0.914656	2.26365	11.1068	944.551	267.831	-527.345	200	300	0	40.7381	70.0691	-847.483	118936	76150.9	15159.4	289.855	762.66	0	0	0	0	0	0	0	603	903	0
594	9	1.98277	1.6533	11.1068	761.445	145.761	-481.569	200	300	0	40.7381	71.1372	-847.178	119211	76456	15159.4	290.248	762.285	0	0	0	0	0	0	0	603	903	0
595	0	1.52501	0.280009	11.412	578.34	-220.45	-344.24	200	300	0	41.0432	70.9846	-844.126	120035	76456	15159.4	290.574	760.8	0	0	0	0	0	0	0	603	903	0
595	1	1.37242	0.89036	10.8017	29.0235	-37.3445	-298.464	200	300	0	41.0432	71.595	-845.652	120309	76333.9	15663	290.266	760.732	0	0	0	0	0	0	0	603	903	0
595	2	0	0	0	0	0	0	200	300	0	40.8907	72.3579	-845.042	119485	75967.7	15617.2	289.898	761.604	0	0	0	0	0	0	0	603	903	0
595	3	0	0	0	0	0	0	200	300	0	40.7381	73.7312	-843.516	120035	76395	15708.8	290.567	760.697	0	0	0	0	0	0	0	603	903	0
595	4	0.456892	2.26365	9.88614	669.893	84.7258	-435.793	200	300	0	43.3321	73.7312	-842.905	120309	76272.9	15617.2	290.488	760.268	0	0	0	0	0	0	0	603	903	0
595	5	0.762068	1.50071	12.3275	1036.1	23.6906	-298.464	200	300	0	40.8907	75.4097	-843.821	121225	76150.9	15800.3	290.245	759.338	0	0	0	0	0	0	0	603	903	0
595	6	0.60948	1.19554	11.412	761.445	-403.556	-481.569	200	300	0	40.7381	75.7149	-840.769	121683	76517.1	15800.3	291.008	758.272	0	0	0	0	0	0	0	603	903	0
595	7	1.52501	1.04295	11.7172	1127.66	84.7258	-252.687	200	300	0	40.8907	74.4942	-840.769	122232	76150.9	15708.8	290.573	757.619	0	0	0	0	0	0	0	603	903	0
595	8	1.83018	1.04295	11.7172	212.129	-98.3797	-390.016	200	300	0	40.1277	77.5459	-837.412	121500	75662.6	15708.8	290.353	757.911	0	0	0	0	0	0	0	603	903	0
595	9	2.13536	2.11106	9.88614	1493.87	-403.556	-481.569	200	300	0	41.9588	78.7666	-835.276	121683	75723.6	15891.9	290.657	757.32	0	0	0	0	0	0	0	603	903	0
596	0	1.37242	2.26365	10.4965	303.682	-281.485	-252.687	200	300	0	39.2122	80.1399	-835.581	122598	75906.7	16075	290.843	756.278	0	0	0	0	0	0	0	603	903	0
596	1	0.456892	2.41624	11.7172	1036.1	-220.45	-435.793	200	300	0	39.8225	79.6822	-834.666	122781	75784.6	16029.2	290.796	755.898	0	0	0	0	0	0	0	603	903	0
596	2	0.762068	2.11106	10.8017	669.893	-403.556	-390.016	200	300	0	39.5174	80.5977	-831.614	122598	75296.4	15937.6	290.542	755.578	0	0	0	0	0	0	0	603	903	0
596	3	1.98277	1.19554	10.1913	486.787	-220.45	-344.24	200	300	0	38.2967	82.4287	-828.562	122690	75479.4	15983.4	291.097	754.925	0	0	0	0	0	0	0	603	903	0
596	4	0.762068	-0.0251671	10.8017	486.787	-98.3797	-481.569	200	300	0	38.2967	83.0391	-828.257	122507	75479.4	16349.6	291.131	755.091	0	0	0	0	0	0	0	603	903	0
596	5	1.06724	1.04295	10.4965	120.576	-342.52	-481.569	200	300	0	39.3648	83.4969	-826.121	123697	75052.2	16624.3	290.849	753.268	0	0	0	0	0	0	0	603	903	0
[truncated: 1,784 more rows]
