# Supplementary material for: The Effects of an Extemporaneous Speech Dual-task on Older Adult Gait Control
Source: Research Square preprint supplement (doi:10.21203/rs.3.rs-7674245/v1), 2025-11-18
Supplement: Supplementary file 171 [file Over5ground7.xlsx]

## Sheet: Sheet1
Trajectories
		05:LFHD			05:RFHD			05:LBHD			05:RBHD			05:C7			05:T10			05:CLAV			05:STRN			05:RBAK			05:LSHO			05:LUPA			05:LELB			05:LFRM			05:LWRA			05:LWRB			05:LFIN
Frame	Sub Frame	X	Y	Z	X	Y	Z	X	Y	Z	X	Y	Z	X	Y	Z	X	Y	Z	X	Y	Z	X	Y	Z	X	Y	Z	X	Y	Z	X	Y	Z	X	Y	Z	X	Y	Z	X	Y	Z	X	Y	Z	X	Y	Z
		mm	mm	mm	mm	mm	mm	mm	mm	mm	mm	mm	mm	mm	mm	mm	mm	mm	mm	mm	mm	mm	mm	mm	mm	mm	mm	mm	mm	mm	mm	mm	mm	mm	mm	mm	mm	mm	mm	mm	mm	mm	mm	mm	mm	mm	mm	mm	mm
302	0	317.309	3005.38	1618.45	203.542	3006.75	1625.01	328.154	3176.3	1632.04				262.922	3229.28	1493.07				233.376	3078.09	1423.66	220.665	3020.2	1240.29	144.768	3340.43	1318.5	424.421	3171.47	1457.43	515.107	3174.29	1225.18	525.295	3169.44	1128.75	529.434	3064.01	965.837	474.116	3041.01	897.052	547.093	3066.53	886.774	520.296	3005.77	811.881
303	0	316.958	2995.1	1619.15	202.93	2996.14	1625.11	328.151	3165.82	1632.55				263.483	3218.87	1493.34				234.462	3067.69	1423.7	221.53	3009.69	1240.26	145.336	3330.05	1318.67	425.008	3160.68	1457.67	516.023	3162.47	1225.49	526.478	3156.34	1129.15	529.528	3047.38	968.326	473.364	3022.87	900.695	544.745	3046.4	888.45	519.512	2985.58	815.787
304	0	316.883	2983.78	1619.58	202.764	2985.84	1625.01	328.303	3155.59	1632.6				263.866	3208.03	1493.16				234.975	3057.04	1423.34	222.953	2999.84	1239.45	145.844	3319.4	1318.53	425.133	3150.31	1457.22	517.059	3150.67	1225.79	527.984	3143.5	1129.48	529.449	3030.91	970.559	472.944	3004.43	904.172	545.811	3029.75	891.305	517.386	2965.68	819.803
305	0	316.926	2972.92	1619.67	202.716	2975.18	1624.47	328.205	3144.89	1632.29				264.17	3197.28	1492.72				235.655	3046.23	1422.54	223.438	2988.92	1238.99	146.078	3308.69	1318.17	424.814	3139.49	1456.55	518.19	3138.95	1225.66	528.998	3130.23	1129.1	529.331	3014.56	972.515	471.495	2987.44	906.926	545.653	3011.49	893.556	515.622	2945.53	823.358
306	0	317.007	2962.15	1619.35	202.706	2964.49	1623.63	327.279	3133.63	1631.23				264.19	3186.2	1491.94				236.511	3035.31	1421.25	224.32	2978.3	1237.7	146.113	3297.89	1317.73	426.034	3129.85	1456.4	519.037	3127.27	1225.36	530.237	3117.38	1128.66	528.98	2998.25	974.211	471.202	2969.93	909.507	544.012	2992.18	894.759	513.974	2926.21	827.008
307	0	316.816	2951.48	1618.82	202.517	2953.46	1622.61	327.15	3122.89	1630.24				264.215	3175.21	1491.06				236.704	3024.19	1420.05	225.334	2967.92	1235.92	145.945	3286.84	1317.09	425.758	3119.39	1454.97	519.809	3115.59	1224.59	531.378	3104.65	1128.15	528.592	2982.23	975.778	470.429	2952.65	912.443	543.252	2974.66	896.446	512.084	2906.77	830.536
308	0	316.792	2940.93	1617.95	202.707	2942.62	1621.25	326.701	3112.06	1628.85				263.962	3163.89	1489.8				237.277	3013.18	1418.3	226.139	2957.61	1234.03	145.591	3275.93	1316.34	426.136	3108.96	1453.51	520.5	3103.93	1223.54	532.315	3091.8	1127.09	528.024	2966.31	977.098	469.114	2936.01	914.803	541.981	2956.83	897.846	510.415	2887.62	833.855
309	0	316.69	2929.76	1616.71	202.164	2931.23	1619.63	327.333	3101.94	1627.5				263.868	3152.72	1488.52				237.835	3001.87	1416.14	227.393	2946.98	1231.61	145.06	3264.78	1315.47	426.531	3098.67	1452.09	520.853	3092.12	1222.29	533.094	3078.96	1125.77	527.247	2950.3	978.067	467.874	2919.31	916.633	540.726	2939.52	899.012	508.809	2868.86	837.056
310	0	316.728	2918.4	1615.11	202.453	2920.22	1617.63	326.482	3090.39	1625.56				263.555	3141.24	1487.01				238.428	2990.51	1413.75	228.331	2936.32	1229.02	144.16	3253.3	1314.53	426.472	3088.22	1450.36	521.591	3080.15	1221.04	533.83	3066.2	1124.63	526.296	2934.53	979.02	466.757	2903.06	918.577	539.511	2922.22	900.351	507.171	2850.33	840.055
311	0	316.547	2906.97	1613.97	202.317	2908.77	1615.58	326.215	3079.18	1623.8				263.181	3129.63	1485.44				238.865	2979.03	1411.37	228.801	2925.6	1226.5	143.302	3241.87	1313.52	426.253	3077.42	1448.36	521.753	3068.39	1219.37	534.427	3053.47	1123.18	525.224	2919.02	979.906	465.5	2886.74	920.487	538.31	2905.07	901.418	504.717	2832.29	843.079
312	0	316.438	2895.68	1612.34	202.196	2897.26	1613.55	325.777	3067.93	1621.85				262.709	3117.98	1483.68				239.384	2967.49	1408.52	229.702	2914.92	1223.54	142.282	3230.43	1312.38	425.898	3067.15	1446.1	521.952	3056.74	1217.59	534.898	3041.14	1121.52	524.185	2903.96	980.453	463.992	2871.13	921.699	536.858	2888.7	902.447	502.736	2814.35	845.783
313	0	316.128	2884.98	1610.28	201.988	2885.66	1611.12	325.632	3056.74	1619.51	207.435	3067.08	1623.68	262.137	3106.22	1481.7				239.804	2956.04	1405.88	230.225	2903.88	1220.45	141.249	3218.81	1311	425.622	3056.57	1443.49	521.272	3044.72	1214.83	535.112	3028.7	1119.03	523.015	2888.93	980.538	463.332	2856.5	922.716	535.153	2872.27	902.687	500.67	2796.96	848.203
314	0	316.027	2872.85	1608.09	201.494	2873.92	1608.77	325.424	3045.53	1617.16	207.002	3055.46	1620.7	261.576	3094.33	1479.75				239.88	2944.32	1403.18	230.528	2892.77	1217.51	139.95	3207.01	1309.6	425.532	3045.93	1440.69	520.786	3033.18	1212.44	535.122	3016.46	1116.72	521.719	2874.46	980.524	460.148	2840.05	923.853	533.65	2856.32	903.012	498.537	2779.95	850.475
315	0	315.642	2861.3	1606.04	201.21	2862.17	1606.17	324.688	3033.49	1614.55	206.609	3043.82	1617.77	260.992	3082.5	1477.53				240.03	2932.53	1400.4	230.836	2881.67	1214.61	138.882	3195.14	1307.9	425.308	3035.38	1438.09	520.469	3021.86	1209.75	535.085	3004.42	1114.27	520.459	2860.09	980.298	459.332	2825.32	924.117	532.234	2840.61	903.197	496.471	2763.44	852.502
316	0	315.293	2849.61	1604.11	200.528	2850.08	1603.83	324.255	3021.8	1612.25	206.098	3032.09	1615.19	260.296	3070.7	1475.35				240.108	2920.71	1397.78	231.166	2870.5	1211.54	137.621	3183.11	1306.37	424.905	3024.41	1435.4	520.372	3011.34	1207.49	534.915	2992.4	1111.91	519.158	2846.18	979.914	457.462	2810.86	924.506	530.126	2825.73	902.869	494.745	2747.4	854.087
317	0	314.551	2837.58	1601.95	200.127	2838.4	1601.14	323.768	3010.12	1610.42	205.277	3020.09	1612.63	259.473	3058.91	1473.51				240.053	2908.89	1395.28	231.038	2859.02	1209.18	136.118	3171.03	1305.06	423.938	3013.77	1432.72	518.778	2999.57	1204.74	534.308	2980.43	1109.61	517.72	2832.49	979.416	455.965	2796.78	924.84	529.123	2810.45	903.066	492.616	2731.81	855.567
318	0	313.523	2825.18	1600.12	199.393	2826.53	1598.92	322.761	2997.96	1608.46	204.109	3008.26	1610.55	258.576	3047.08	1471.48				239.622	2897.03	1393.01	230.756	2847.39	1206.85	134.564	3158.81	1303.4	423.366	3002.63	1430.51	518.552	2989.04	1202.73	533.743	2968.6	1107.46	516.235	2819.07	978.801	454.133	2783.28	924.583	527.133	2796.35	902.646	490.613	2716.61	856.965
319	0	312.714	2813.83	1598.28	198.261	2814.52	1596.77	321.884	2986.01	1606.52	203.225	2996.17	1608.39	257.653	3035.22	1469.52				239.126	2885.1	1390.78	230.536	2835.75	1204.59	133.047	3146.69	1301.66	422.758	2991.56	1428.16	516.836	2977.51	1199.87	532.695	2956.87	1105.03	514.874	2806.14	977.841	452.404	2769.85	924.369	525.842	2782.47	902.173	488.829	2702.44	857.786
320	0	311.612	2801.47	1596.5	197.497	2802.76	1594.53	320.97	2974.04	1604.86	202.226	2984.22	1606.47	256.712	3023.35	1467.77				238.765	2873.33	1388.8	229.912	2823.87	1202.59	131.573	3134.48	1300.07	421.797	2980.35	1426.06	516.098	2967.05	1197.79	531.768	2945.46	1102.75	513.427	2793.57	976.624	450.805	2756.7	923.472	523.927	2769.41	901.063	487.274	2688.62	858.072
321	0	310.124	2789.26	1595.03	195.523	2790.62	1592.95	319.932	2962.23	1603.69	201.114	2972.4	1604.66	255.651	3011.53	1466.21				237.614	2861.24	1387.03	229.072	2811.8	1200.9	130.294	3122.25	1298.57	420.736	2968.73	1423.9	514.49	2955.84	1195.42	530.322	2933.87	1100.72	511.995	2781.36	975.45	449.503	2743.9	922.935	521.479	2756.71	899.705	485.62	2675.19	858.318
322	0	308.611	2777.33	1593.9	193.803	2778.75	1591.59	318.545	2950.08	1602.24	199.972	2960.48	1602.89	254.596	2999.47	1464.53				236.681	2849.23	1385.48	227.971	2799.72	1199.36	129.116	3110.03	1297.01	419.985	2956.9	1422.52	512.811	2944.65	1193.56	529.064	2922.81	1098.83	510.534	2769.53	974.289	448.575	2732.28	922.176	520.849	2744.72	899.019	484.146	2662.72	857.958
323	0	307.013	2765.28	1592.62	192.482	2767.11	1589.93	317.134	2938.21	1600.88	198.296	2948.92	1601.26	253.368	2987.4	1462.86	243.347	3081.09	1233.07	235.438	2837	1383.96	226.834	2787.43	1197.59	128.096	3097.85	1295.21	418.48	2944.84	1420.52	511.518	2934.2	1191.81	527.472	2911.75	1096.71	509.07	2758.22	972.535	446.3	2719.93	921.046	519.178	2733.05	897.022	482.801	2650.65	857.198
324	0	305.091	2753.32	1591.52	190.515	2755.3	1588.87	315.345	2926.19	1599.01	196.76	2937.11	1599.67	252.205	2975.31	1461.4	242.755	3069.33	1231.61	233.988	2824.8	1382.51	225.564	2775.01	1196.24	127.185	3085.69	1293.36	417.34	2932.43	1419.04	509.638	2922.9	1189.43	525.677	2900.8	1094.56	507.699	2747.24	970.717	444.489	2707.8	920.356	517.067	2722.43	895.145	481.644	2639.14	855.93
325	0	302.877	2741.32	1590.8	187.536	2743.17	1588.16	313.414	2914.12	1597.83	194.949	2925.5	1597.87	250.935	2962.97	1460.12	241.74	3056.71	1230.15	232.259	2812.45	1381.4	224.085	2762.82	1194.83	126.46	3073.43	1291.62	416.087	2919.65	1418.06	507.962	2911.89	1188.33	524.009	2890.21	1093.03	506.221	2736.45	968.879	442.663	2696.57	918.766	515.669	2711.4	893.376	480.303	2628.14	854.592
326	0	300.656	2729.27	1590.42	185.883	2731.61	1587.21	311.419	2902.13	1596.86	192.966	2913.75	1596.67	249.747	2950.5	1458.85	241.071	3043.98	1228.82	230.558	2800.08	1380.46	222.539	2749.97	1194	125.886	3061.12	1289.96	414.8	2906.61	1417.05	506.28	2900.65	1187.29	522.239	2879.38	1091.56	504.979	2725.99	967.046	442.727	2686.55	917.237	514.206	2701.54	891.227	479.442	2617.85	852.899
327	0	298.092	2717.16	1590.1	183.001	2719.72	1586.71	309.276	2890.09	1595.85	190.706	2901.93	1595.49	248.258	2938.12	1457.81	240.495	3030.96	1227.6	229.037	2787.69	1379.52	221.143	2737.23	1193.18	125.26	3048.74	1288.24	413.204	2893.59	1416.15	504.039	2888.48	1185.91	520.365	2868.68	1090.34	503.66	2715.92	965.011	441.551	2675.85	915.837	512.933	2692.09	889.276	478.247	2607.93	850.32
328	0	295.441	2704.99	1590.01	181.242	2708.2	1586.05	307.038	2878.26	1595.15	188.565	2890.07	1594.37	246.682	2925.71	1456.78	239.984	3017.68	1226.53	227.099	2775.19	1378.98	219.709	2724.34	1192.68	124.344	3036.33	1286.48	411.652	2880.63	1415.7	502.493	2877.12	1185.57	518.468	2858.21	1089.5	502.452	2705.96	963.056	440.593	2666.19	913.024	511.327	2682.9	887.098	477.534	2599.06	847.804
329	0	292.729	2692.96	1590.08	178.171	2696.5	1585.87	304.781	2866.47	1594.7	186.048	2878.46	1593.59	244.89	2913.44	1455.95	239.34	3004.53	1225.43	225.385	2762.71	1378.5	218.387	2711.49	1192.47	123.297	3023.73	1284.56	409.966	2867.37	1415.65	500.866	2865.2	1185.23	516.461	2847.43	1088.85	501.024	2696.35	960.954	439.27	2656.05	911.7	510.587	2673.57	885.033	476.599	2590.23	844.86
330	0	290.046	2681.12	1590.3	175.61	2684.83	1585.9	302.099	2854.54	1594.26	183.547	2866.72	1592.9	242.928	2901.13	1455.08	237.719	2991.08	1224.64	223.424	2750.24	1378.38	217.08	2698.18	1192.48	122.028	3011.01	1282.8	407.977	2854.75	1415.25	499.06	2853.15	1184.88	514.513	2836.74	1088.34	499.786	2686.99	958.916	437.766	2646.73	909.148	508.34	2665.38	882.581	475.882	2582.2	841.589
331	0	287.336	2669.26	1590.67	172.495	2672.8	1586.26	299.593	2842.85	1594.02	180.934	2854.96	1592.52	240.916	2889.01	1454.66	236.166	2978.61	1223.36	221.48	2737.75	1378.59	215.812	2684.71	1192.9	120.541	2998.17	1281.17	406.321	2842.25	1415.56	497.351	2840.95	1184.78	512.513	2826.04	1088.07	498.493	2677.88	956.793	437.05	2637.99	906.544	507.655	2657.25	880.297	475.357	2574.62	838.077
332	0	284.632	2657.34	1591.41	170.32	2661.19	1586.61	296.75	2831.06	1594.33	178.227	2843.36	1592.53	238.779	2876.66	1454.39	234.317	2965.42	1222.63	219.375	2725.13	1379.1	214.159	2670.84	1193.72	119.184	2985.35	1279.61	404.364	2829.98	1415.94	495.45	2828.68	1185.09	510.504	2815.3	1088.42	497.241	2668.96	954.812	435.428	2629.41	904.029	506.608	2649.62	878.098	474.975	2567.29	834.493
333	0	281.911	2645.66	1592.47	167.597	2649.38	1587.43	293.888	2819.32	1594.9	175.319	2831.55	1592.79	236.628	2864.4	1454.17	232.637	2952.43	1222.34	217.397	2712.61	1379.97	212.745	2657.11	1194.94	117.717	2972.55	1278.52	402.435	2817.75	1416.86	493.836	2816.83	1186	508.319	2804.21	1089.02	496.06	2660.29	953.115	434.626	2621.7	901.105	506.005	2642.21	876.216	474.699	2560.87	830.719
334	0	279.258	2633.92	1593.49	164.921	2637.55	1588.51	290.978	2807.73	1595.62	172.326	2819.73	1593.46	234.467	2852.27	1454.46	230.701	2939.18	1222.41	215.406	2700.12	1380.94	211.503	2643.36	1196.07	116.196	2959.76	1277.78	400.218	2805.51	1417.8	492.175	2804.89	1187.26	506.205	2793.23	1089.94	494.891	2651.79	951.601	434.319	2613.86	898.88	505.27	2635.32	874.374	474.577	2555.17	826.719
335	0	276.508	2622.22	1595.05	163.027	2625.71	1589.47	287.927	2796.25	1596.54	169.428	2807.87	1594.2	231.85	2839.9	1455.31	228.68	2925.93	1222.93	213.149	2687.57	1382.03	209.881	2629.99	1197.38	114.532	2946.86	1277.5	398.119	2793.13	1419.36	490.034	2792.87	1188.57	503.982	2782.33	1091.27	493.766	2643.51	950.223	432.696	2606.75	895.537	504.799	2628.56	872.922	474.697	2549.54	823.036
336	0	273.863	2610.55	1596.67	159.901	2613.9	1591.04	285.112	2785.11	1597.77	166.401	2796.01	1595.15	229.465	2827.62	1456.04	226.828	2912.83	1223.7	211.226	2675.23	1383.31	208.126	2616.72	1198.87	112.823	2933.82	1277.24	395.38	2780.46	1420.86	488.379	2781.26	1190.53	501.698	2771.39	1092.89	492.725	2635.33	949.171	433.05	2600.38	892.598	504.476	2621.68	871.755	474.916	2544.55	819.279
337	0	271.391	2599.26	1598.28	157.349	2602.14	1592.66	281.878	2773.44	1598.78	163.18	2784.2	1596.09	227.45	2815.58	1457.01	224.956	2899.51	1224.25	209.316	2662.84	1384.49	206.857	2603.76	1200.24	111.025	2920.93	1277.25	393.634	2768.28	1422.88	486.24	2769.76	1192.29	499.401	2760.27	1094.59	491.892	2627.47	948.203	432.699	2593.86	889.875	504.749	2615.74	870.698	475.73	2539.89	815.594
338	0	268.908	2587.83	1600	154.969	2590.37	1594.29	278.972	2762.05	1600	160.111	2772.46	1597.04	224.813	2803.18	1458.03	223.482	2886.62	1225.24	207.52	2650.49	1385.79	205.51	2590.98	1201.49	109.349	2908.07	1277.57	391.426	2756.28	1424.85	484.137	2758.22	1194.28	497.213	2749.47	1096.57	491.103	2619.9	947.53	432.51	2587.71	887.884	505.089	2609.91	869.952	476.491	2535.9	812.091
339	0	266.45	2576.29	1602.12	152.473	2578.6	1595.91	276.001	2750.58	1601.37	156.969	2760.78	1598.08	222.609	2791.09	1459.29	221.867	2873.77	1226.2	205.859	2638.28	1387.35	204.264	2578.28	1203.1	107.339	2895.28	1277.92	389.53	2744.27	1427.16	482.177	2746.7	1196.34	494.847	2738.74	1098.75	490.385	2612.47	947.081	432.555	2582.41	885.135	505.2	2604.23	869.609	477.11	2532.26	808.847
340	0	264.086	2564.97	1603.96	150.078	2566.83	1597.76	273.219	2739.28	1602.63	154.357	2749	1599.08	220.393	2779.04	1460.45	220.339	2861.06	1227.18	204.443	2626.13	1388.85	203.376	2565.81	1204.72	105.424	2882.53	1278.42	387.404	2732.17	1429.27	480.149	2735.35	1198.41	492.655	2728.12	1100.72	489.899	2605.28	946.75	432.561	2576.37	883.765	506.006	2598.64	869.496	478.222	2529	805.738
341	0	262.076	2553.58	1605.82	148.091	2555.3	1599.36	270.464	2728.04	1603.94	151.597	2737.38	1600.24	218.721	2767.29	1461.84	218.884	2848.93	1228.43	203.258	2614.03	1390.32	202.751	2553.55	1206.23	103.603	2869.89	1278.95	385.682	2720.66	1431.45	478.004	2724.23	1200.23	490.466	2717.8	1102.71	489.535	2598.29	946.516	433.355	2571.22	881.544	506.282	2593.64	869.056	479.457	2526.21	802.609
342	0	259.705	2542.8	1607.41	145.781	2543.54	1600.86	268.011	2716.78	1605.25	149.27	2725.78	1601.33	216.388	2755.28	1463.22	217.225	2836.96	1229.71	202.052	2602.05	1391.59	202.268	2541.28	1207.62	101.796	2857.41	1279.86	383.969	2709.39	1433.44	476.08	2713.38	1202.05	488.329	2707.59	1104.74	489.095	2591.61	946.379	433.102	2565.91	880.101	506.819	2588.68	868.984	480.724	2523.62	799.794
343	0	257.758	2531.36	1609.49	143.922	2531.76	1602.55	265.606	2705.09	1606.93	146.937	2714.04	1602.55	214.423	2743.44	1464.86	215.415	2825.02	1231.23	201.03	2590.12	1393.09	202.286	2529.56	1209.12	99.7435	2845	1280.97	382.371	2698.04	1435.83	474.508	2702.5	1204.23	486.285	2697.72	1106.99	488.937	2585.02	946.692	433.19	2560.47	879.538	507.856	2583.56	869.673	482.035	2521.26	797.468
344	0	256.057	2519.45	1611.66	142.23	2520.29	1604.26	263.479	2693.6	1608.82	144.872	2702.36	1604.04	212.691	2731.7	1466.66	213.604	2813.14	1233.13	200.2	2578.27	1394.72	202.685	2518.17	1210.75	97.6031	2832.8	1282.62	380.85	2686.78	1438.29	473.327	2692.13	1206.58	484.504	2687.85	1109.36	488.946	2578.45	947.289	434.259	2555.73	878.693	508.27	2579.16	870.183	483.602	2518.92	795.581
345	0	254.493	2507.98	1613.56	140.529	2508.62	1605.88	261.578	2681.97	1610.55	142.653	2690.65	1605.6	211.037	2720.01	1468.49	211.979	2801.58	1234.96	199.725	2566.57	1396.23	202.995	2506.49	1212.14	95.4287	2821.08	1284.69	379.584	2675.72	1440.43	472.088	2682.02	1208.74	482.791	2678.23	1111.42	489.128	2572.25	947.747	435.42	2551.35	877.827	508.987	2574.6	870.692	485.141	2516.85	793.762
346	0	253.037	2496.58	1615.3	139.261	2496.94	1607.27	259.779	2670.44	1612.24	141.158	2678.98	1607.05	209.858	2708.57	1470.33	210.349	2790.14	1236.7	199.187	2555.01	1397.78	203.051	2495.06	1213.71	93.4743	2809.05	1286.41	378.519	2665.26	1442.54	470.884	2672.08	1210.57	481.173	2669.02	1113.47	489.337	2566.15	948.355	435.724	2546.2	877.766	509.9	2570.15	871.394	486.651	2514.87	792.276
347	0	251.875	2485.1	1617.02	138.143	2485.22	1608.91	258.44	2659.01	1614.15	139.748	2667.34	1608.57	208.453	2697.16	1472.13	208.681	2778.51	1238.34	198.507	2543.46	1399.42	203.311	2483.84	1215.33	91.5001	2796.98	1288.18	377.302	2654.82	1444.72	469.772	2662.4	1212.69	479.817	2659.86	1115.69	489.716	2559.85	949.259	436.856	2541.27	877.63	510.668	2565.67	872.435	487.958	2512.76	791.195
348	0	251.151	2473.68	1618.75	137.284	2473.58	1610.65	257.436	2647.74	1616.09	138.541	2655.64	1610.63	207.115	2685.71	1473.91	207.315	2767.11	1240.06	198.115	2532.05	1401.1	203.544	2472.34	1217.16	89.5767	2785.01	1289.93	376.349	2644.08	1446.76	468.923	2653.06	1214.71	478.733	2650.95	1117.86	490.175	2553.98	950.197	437.799	2536.54	877.965	511.26	2561.37	873.507	489.644	2510.45	790.593
349	0	250.485	2462.06	1620.39	136.64	2462	1612.04	256.377	2636.09	1618.07	137.515	2643.96	1612.51	205.858	2674.5	1475.71	205.879	2755.49	1241.79	197.824	2520.72	1402.89	203.63	2461.39	1218.76	87.8304	2773.16	1291.71	375.466	2633.85	1448.78	467.996	2643.77	1216.73	477.844	2642.38	1120.02	490.563	2548.33	951.161	439.131	2531.86	878.076	512.599	2556.58	874.947	491.028	2508.12	790.121
350	0	250.076	2450.6	1621.96	136.383	2450.15	1613.51	255.48	2624.47	1620.08	136.689	2632.32	1614.59	204.708	2663.38	1477.45	204.414	2743.84	1243.38	197.45	2509.33	1404.69	203.487	2449.98	1220.69	86.2685	2761.28	1293.47	374.318	2623.52	1450.79	467.181	2634.88	1218.68	477.002	2634.08	1122.15	490.957	2542.65	952.287	439.419	2526.98	878.561	513.293	2552.26	876.22	492.423	2505.49	790.071
351	0	249.945	2439.28	1623.31	136.2	2438.51	1615.33	254.885	2612.97	1621.87	135.878	2620.58	1616.68	203.619	2651.96	1479.07	203.252	2732.68	1244.89	197.077	2498.1	1406.44	203.484	2438.71	1222.48	84.7526	2749.26	1295.04	373.567	2613.18	1452.54	466.344	2626.3	1220.53	476.288	2626.11	1124.07	491.499	2536.95	953.377	440.726	2522.66	878.823	513.907	2547.74	877.41	493.563	2502.73	790.186
352	0	250.066	2427.75	1624.45	136.204	2426.74	1616.86	254.548	2601.67	1623.31	135.579	2608.8	1618.59	202.273	2640.7	1480.35	201.907	2721.07	1246.07	196.487	2486.99	1408.16	203.262	2427.7	1224.06	83.3554	2737.3	1296.4	372.479	2602.93	1453.95	465.453	2617.73	1221.74	475.7	2618.41	1125.81	492.112	2531.28	954.385	441.383	2516.95	879.774	514.657	2543.24	878.512	494.944	2499.5	790.548
353	0	250.415	2416.69	1625.2	136.676	2415.01	1618.18	254.075	2590.18	1624.34	135.482	2597.11	1620.4	201.132	2629.46	1481.57	200.739	2709.33	1247.14	196.216	2475.74	1409.53	202.946	2416.03	1225.67	82.0412	2725.33	1297.56	371.486	2592.32	1455.34	464.852	2609.69	1223.64	475.274	2610.97	1127.45	492.392	2525.81	955.178	442.472	2512.65	880.12	515.337	2538.56	879.601	496.268	2495.68	791.13
354	0	250.721	2405.52	1625.92	137.029	2403.25	1619.72	254.011	2578.88	1625.52	135.135	2585.4	1621.88	200.272	2618.13	1482.71	199.936	2697.85	1248.17	195.538	2464.24	1410.83	202.595	2404.57	1227.2	80.6683	2713.29	1298.62	370.412	2581.99	1456.24	464.513	2601.59	1225.22	475.054	2603.62	1129.14	492.825	2520.21	956.106	443.135	2506.5	881.354	515.861	2533.68	880.577	496.811	2492.15	791.473
355	0	251.501	2394.06	1626.61	137.454	2391.42	1620.95	253.858	2567.42	1626.22	135.087	2573.65	1623.46	199.422	2606.84	1483.61	199.043	2686.17	1248.97	195.103	2452.83	1412.04	202.218	2393.2	1228.32	79.4563	2701.34	1299.66	369.617	2571.21	1457.41	463.8	2593.58	1226.52	474.949	2596.44	1130.72	493.28	2514.6	956.942	443.657	2501.43	882.142	516.316	2528.9	881.509	497.582	2488.08	792.01
356	0	252.117	2382.78	1626.94	138.328	2379.66	1622.05	254.108	2556.34	1626.84	134.917	2561.79	1624.86	198.819	2595.24	1484.29	198.28	2674.42	1249.62	194.583	2441.26	1412.93	202.011	2381.69	1229.15	78.2927	2689.33	1300.4	369.107	2560.12	1458.36	463.427	2585.72	1227.76	474.822	2589.17	1132.12	493.709	2509.03	957.485	445.269	2496.14	882.372	516.523	2524.33	882.152	498.022	2483.76	792.363
357	0	252.958	2371.25	1627.19	138.996	2367.8	1622.89	254.161	2544.81	1627.05	135.025	2549.82	1625.53	198.493	2583.86	1484.62	197.552	2662.77	1250.09	194.045	2429.78	1413.46	201.453	2370.1	1229.77	77.3825	2677.44	1301.1	368.586	2548.83	1458.97	462.979	2577.86	1228.81	474.827	2582.03	1133.19	493.9	2503.55	957.83	445.616	2490.27	883.052	516.646	2519.46	882.542	498.423	2478.98	792.671
358	0	253.604	2359.83	1627.27	139.71	2355.82	1623.59	254.387	2533.26	1627.04	135.329	2538.02	1626.26	198.042	2572.16	1484.96	197.057	2650.94	1250.51	193.631	2418.05	1413.79	200.964	2358.59	1230.01	76.5002	2665.49	1301.41	368.008	2537.38	1459.17	462.637	2569.83	1229.56	474.823	2574.97	1134.04	494.294	2497.9	957.888	445.585	2484.51	883.426	516.392	2514.71	882.628	498.843	2473.89	793.023
359	0	254.691	2348.18	1627	140.78	2344.06	1623.96	254.743	2521.81	1626.57	135.633	2526.09	1626.57	197.389	2560.15	1484.82	196.708	2638.91	1250.24	193.014	2406.26	1413.81	200.525	2346.82	1229.92	75.8281	2653.62	1301.63	367.599	2525.92	1459.03	462.432	2561.87	1229.99	474.887	2567.77	1134.54	494.651	2492.18	957.662	445.888	2478.57	883.478	516.471	2509.77	882.391	499.27	2468.79	792.959
360	0	255.423	2336.67	1626.47	141.549	2331.87	1624.16	255.24	2510.17	1625.87	135.857	2514.07	1626.48	196.731	2548.25	1484.38	196.621	2627.29	1250.11	192.811	2394.44	1413.4	200.02	2335.1	1229.43	75.5216	2641.88	1301.62	367.212	2514.1	1458.55	462.088	2553.6	1230.19	474.88	2560.55	1134.84	494.836	2486.66	957.154	446.15	2472.78	883.081	516.36	2504.87	881.904	498.826	2463.75	792.348
361	0	256.304	2324.78	1626.03	142.322	2319.78	1624.16	255.409	2498.3	1625.21	136.086	2501.85	1626.17	196.651	2536.19	1484.1	196.412	2615.37	1249.87	192.34	2382.44	1412.86	199.346	2323.31	1228.8	75.0051	2630.04	1301.63	366.813	2502.19	1457.95	461.876	2545.1	1230.51	474.814	2553.1	1135.11	495.093	2480.76	956.73	446.337	2466.8	882.704	516.175	2499.79	881.437	498.833	2458.23	792.063
362	0	257.152	2312.92	1625.22	143.182	2307.6	1623.91	255.896	2486.3	1624.07	136.428	2489.61	1625.55	196.984	2523.97	1483.56	196.18	2603.18	1249.35	191.852	2370.21	1412.03	198.588	2311.7	1227.79	74.7885	2618.25	1301.43	366.776	2489.89	1457.27	461.645	2536.4	1230.39	474.667	2545.37	1135.06	495.227	2474.66	955.89	446.502	2460.55	881.997	515.967	2494.43	880.64	499.909	2452.19	791.891
363	0	257.981	2300.98	1624.07	144.29	2295.31	1623.2	256.281	2474.36	1622.5	136.936	2477.31	1624.66	196.753	2511.4	1482.69	196.085	2591.16	1248.48	191.694	2357.9	1410.78	198.16	2299.86	1226.31	74.7951	2606.49	1301.07	366.633	2477.48	1455.82	461.243	2527.43	1229.84	474.507	2537.51	1134.43	495.453	2468.54	954.579	446.474	2454.47	880.746	515.567	2489.25	879.298	498.852	2446.98	790.343
364	0	258.97	2288.83	1622.72	145.107	2282.83	1622.58	256.601	2462.19	1620.86	137.386	2464.89	1623.65	197.417	2498.91	1481.89	196.152	2578.96	1247.53	191.389	2345.52	1409.34	197.664	2288.68	1224.31	74.9549	2594.73	1300.46	366.527	2464.79	1454.22	461.128	2517.89	1229.12	474.299	2529.29	1133.82	495.568	2462.12	953.245	446.463	2448.12	879.444	515.183	2483.8	877.906	499.554	2441.06	789.222
365	0	259.842	2276.6	1621.33	146.006	2270.31	1621.7	257.163	2449.95	1619.15	138.008	2452.34	1622.37	197.279	2485.95	1480.76	196.164	2566.79	1246.65	191.235	2332.94	1407.74	197.077	2276.77	1222.39	75.3166	2582.77	1299.85	366.81	2451.89	1452.99	461.009	2508.25	1228.36	474.11	2520.62	1133.23	495.568	2455.5	951.866	446.409	2441.46	878.203	514.757	2478.03	876.576	498.996	2435.33	787.978
366	0	260.753	2264.12	1619.78	146.876	2257.61	1620.6	257.773	2437.68	1617.23	138.437	2439.67	1620.98	197.675	2472.9	1479.47	196.233	2554.41	1245.71	191.187	2320.2	1405.92	196.814	2264.85	1220.35	75.791	2570.73	1299.11	367.085	2438.77	1451.46	460.828	2497.79	1227.74	473.805	2511.59	1132.57	495.606	2448.6	950.468	446.688	2434.19	876.982	514.325	2472.06	875.185	499.247	2429.42	786.378
367	0	261.804	2251.69	1618.03	148.025	2244.92	1619.27	258.338	2425.06	1615.19	138.992	2426.91	1619.37	198.493	2460.05	1478.17	196.479	2541.86	1244.65	191.154	2307.35	1404.05	196.403	2252.81	1218.06	76.5738	2558.8	1298.37	367.066	2425.58	1449.7	460.707	2486.98	1226.86	473.425	2502.23	1131.62	495.555	2441.32	948.955	446.515	2427.05	875.117	513.836	2465.82	873.76	499.135	2423.36	784.768
368	0	263.005	2239.03	1616.26	149.043	2232	1617.94	259.005	2412.35	1613.15	139.576	2413.85	1617.56	198.763	2446.96	1476.53	197.133	2529.58	1243.62	191.264	2294.4	1401.85	196.207	2240.65	1215.63	77.353	2546.53	1297.4	367.704	2411.97	1448.18	460.584	2476.04	1225.82	473.046	2492.5	1130.78	495.636	2433.66	947.421	445.429	2421.82	872.383	513.356	2459.07	872.298	498.984	2417.16	782.956
369	0	263.878	2226.31	1614.27	150.135	2218.88	1616.51	259.572	2399.65	1610.94	140.376	2400.93	1615.88	199.389	2433.57	1474.98	198.206	2517.09	1242.42	191.372	2281.27	1399.75	196.098	2228.26	1213.19	78.2787	2534.27	1296.35	367.814	2398.44	1446.03	460.421	2464.69	1224.7	472.768	2482.3	1129.89	495.49	2425.55	945.762	446.583	2411.58	871.771	512.872	2452.11	870.793	498.752	2410.77	781.162
370	0	265.189	2213.46	1612.28	151.389	2205.94	1614.9	260.457	2386.79	1608.45	141.174	2387.82	1613.89	199.837	2420.12	1473.35	199.624	2504.55	1241.04	191.693	2268	1397.5	196.035	2215.73	1210.7	79.446	2521.93	1295.1	368.804	2384.34	1444.27	460.481	2452.96	1223.38	472.522	2471.84	1128.6	495.541	2416.96	944.09	446.445	2403.67	869.702	512.453	2444.6	869.133	498.64	2404.03	779.032
371	0	266.484	2200.61	1610.24	152.648	2192.76	1613.29	261.43	2373.83	1606.03	142.197	2374.6	1611.6	201.647	2406.36	1471.68	201.106	2491.74	1239.65	192.054	2254.83	1395.26	196.168	2203.03	1208.23	80.915	2509.62	1293.82	369.531	2370.3	1442.28	460.67	2441.02	1222.06	472.367	2460.89	1127.35	495.492	2408.03	942.105	446.539	2395.25	867.805	512.266	2436.58	867.644	498.437	2397.06	777.047
372	0	267.785	2187.47	1608.38	154.038	2179.58	1611.67	262.666	2360.91	1603.73	143.273	2361.42	1609.53	202.797	2392.86	1470.01	202.822	2478.81	1238.23	192.528	2241.4	1393.14	196.338	2190.2	1205.86	82.499	2497.21	1292.42	370.768	2356	1440.56	460.808	2428.83	1220.75	472.329	2449.46	1126.32	495.816	2398.49	940.503	446.624	2386.2	866.233	512.094	2428.07	866.211	498.156	2389.77	775.146
373	0	269.23	2174.4	1606.19	155.286	2166.21	1610.13	263.67	2347.62	1601	144.518	2348.12	1607.42	204.285	2379.23	1468.1	204.719	2465.69	1236.52	193.181	2227.87	1390.77	196.434	2177.24	1203.63	84.2278	2484.69	1290.91	371.788	2341.71	1438.48	461.216	2416.31	1219.12	472.481	2437.67	1124.82	495.714	2388.71	938.549	446.651	2377.27	864.213	512.031	2419.19	864.472	497.794	2382.09	772.755
374	0	270.88	2161.21	1604.11	157.074	2152.98	1608.2	265.088	2334.53	1598.54	145.958	2334.72	1605.27	205.736	2365.8	1466.23	206.489	2452.66	1234.93	194.055	2214.49	1388.56	196.783	2164.3	1201.18	86.0212	2472.03	1289.42	372.934	2327.44	1436.39	461.777	2403.25	1217.41	472.708	2425.33	1123.25	495.715	2378.59	936.444	446.735	2367.82	862.075	512.025	2409.79	862.615	497.472	2374.07	770.33
375	0	272.56	2147.94	1602.12	158.792	2139.43	1606.41	267.042	2321.33	1596.63	147.316	2321.39	1603.26	207.273	2352.12	1464.48	208.253	2439.55	1233.46	194.835	2201.03	1386.52	197.285	2151.15	1199.13	87.6742	2459.13	1288.1	373.988	2313.09	1434.29	462.504	2390.18	1215.77	473.303	2412.59	1121.72	495.872	2367.93	934.515	440.341	2359.75	854.946	512.116	2399.8	860.95	497.128	2365.56	768.064
376	0	274.397	2134.53	1600.18	160.343	2126	1604.81	268.44	2308.07	1594.2	149.074	2307.92	1601.55	209.001	2338.76	1462.61	210.04	2426.26	1231.85	195.784	2187.43	1384.52	197.826	2137.98	1197.01	89.616	2446.26	1286.59	375.735	2298.72	1432.55	463.72	2376.52	1214.12	474.04	2399.62	1120.12	496.364	2356.56	932.594	446.927	2347.84	858.069	512.592	2389.07	859.297	496.943	2356.62	765.788
377	0	276.363	2121.16	1598.24	162.369	2112.56	1603.14	270.412	2294.56	1592.23	150.956	2294.49	1599.92	211.026	2325.02	1460.76	211.848	2412.98	1230.25	197.001	2173.92	1382.59	198.561	2124.8	1195.13	91.6623	2433.38	1285.22	377.405	2284.6	1430.57	465.079	2362.66	1212.3	475.127	2386.07	1118.42	497.206	2344.68	930.661	441.114	2338.82	851.171	513.291	2377.83	857.474	496.917	2347.18	763.412
378	0	278.342	2107.71	1596.31	164.453	2099.2	1601.4	272.226	2281.13	1590.2	152.858	2281.04	1598.01	212.902	2311.47	1459.02	213.581	2399.76	1228.76	198.503	2160.49	1380.71	199.238	2111.51	1193.11	93.6154	2420.27	1283.82	379.204	2270.36	1428.57	466.593	2348.7	1210.38	476.34	2372.46	1116.54	497.83	2332.31	928.519	448.276	2325.68	854.14	514.183	2366.06	855.677	496.951	2337.15	760.982
379	0	280.43	2094.26	1594.57	166.494	2085.78	1599.8	274.489	2267.52	1588.28	155.146	2267.71	1596.05	215.15	2297.75	1457.26	215.516	2386.35	1227.18	199.901	2146.85	1378.98	200.076	2097.99	1191.22	95.6101	2407.09	1282.41	381.134	2256.12	1426.54	468.192	2334.51	1208.33	477.678	2358.57	1114.58	498.815	2319.41	926.412	448.877	2313.94	851.99	515.169	2353.74	853.669	496.264	2326.93	758.45
380	0	282.79	2080.81	1593.04	168.931	2072.4	1598.21	276.661	2253.82	1586.44	157.493	2254.32	1594.12	217.381	2284.28	1455.63	217.453	2372.95	1225.59	201.543	2133.3	1377.37	201.122	2084.46	1189.76	97.6845	2393.98	1281.16	382.783	2242.23	1424.18	470.048	2320.14	1206.1	479.194	2344.34	1112.36	499.756	2306.27	924.027	449.928	2301.58	849.901	516.37	2340.75	851.512	496.363	2315.87	755.958
381	0	285.174	2067.38	1591.44	171.406	2059.2	1596.66	279.206	2240.41	1584.48	160.15	2241.07	1592.58	219.937	2270.83	1453.99	219.501	2359.24	1223.86	203.34	2119.75	1375.86	202.436	2070.9	1188.24	100.03	2380.76	1279.94	384.998	2228.39	1421.94	472.042	2305.8	1203.54	481.013	2330.06	1109.88	501.084	2292.52	921.495	450.937	2287.78	847.387	517.898	2327.31	849.025	496.513	2304.38	753.013
382	0	287.627	2053.83	1590.14	173.952	2045.87	1595.39	282.166	2226.95	1583.17	162.792	2227.71	1591.21	222.564	2257.6	1452.58	221.56	2345.41	1222.17	205.31	2106.19	1374.55	203.548	2057.05	1187.08	102.283	2367.49	1278.78	387.549	2214.49	1420.04	474.221	2291.2	1201.3	482.904	2315.63	1107.44	502.598	2278.41	919.091	452.314	2274.47	845.158	519.583	2313.22	846.673	497.545	2292	750.435
383	0	290.029	2040.3	1589.22	176.242	2032.62	1594.47	285.07	2213.72	1582.29	165.708	2214.33	1590.23	224.999	2244.26	1451.56	223.542	2331.54	1220.73	207.235	2092.63	1373.88	204.772	2043.2	1186.49	104.501	2354.28	1277.89	389.986	2200.7	1418.32	476.356	2276.68	1199.25	484.948	2300.86	1105.41	504.284	2263.87	917.121	454.252	2260.4	843.592	521.45	2298.86	844.707	497.73	2279.21	748.184
384	0	292.645	2026.78	1588.52	178.812	2019.32	1593.82	287.895	2199.91	1581.67	168.893	2201.09	1589.69	227.263	2231.39	1450.51	225.637	2317.69	1219.29	209.263	2079.11	1373.41	206.079	2028.99	1186.29	106.902	2340.76	1276.95	392.548	2187.11	1416.75	478.639	2261.94	1197.16	487.116	2285.86	1103.25	505.962	2248.99	914.986	456.778	2245.02	841.775	523.342	2283.94	842.548	498.757	2265.56	745.871
385	0	295.345	2013.22	1588.04	181.456	2006.06	1593.39	291.063	2186.31	1581.49	171.84	2188.06	1589.6	230.378	2217.97	1449.88	227.795	2304.16	1218.18	211.488	2065.68	1373.31	207.494	2015	1186.4	109.299	2327.28	1276.5	394.858	2173.81	1415.1	480.845	2247.23	1195.02	489.245	2270.63	1101.07	507.839	2233.8	912.906	458.929	2230.63	840.372	525.116	2268.59	840.221	500.026	2251.15	743.567
386	0	297.927	1999.78	1587.92	184.164	1993.03	1593.19	294.05	2172.99	1581.75	174.902	2174.97	1590	232.308	2205.12	1449.48	229.985	2290.55	1217.71	213.562	2052.26	1373.77	208.885	2000.76	1187	111.545	2313.92	1275.92	397.22	2160.56	1413.97	482.933	2232.38	1193.29	491.334	2255.06	1099.17	509.79	2218.27	911.172	461.143	2215.38	838.884	527.327	2253.09	838.451	501.484	2236.02	741.652
387	0	300.681	1986.46	1588.14	186.754	1979.86	1593.57	297.513	2159.76	1582.21	178.134	2162	1590.76	235.141	2191.81	1449.63	231.809	2276.86	1217.26	215.733	2039.06	1374.49	210.508	1986.63	1188.19	113.926	2300.27	1275.8	399.574	2147.58	1413.17	485.047	2217.28	1191.8	493.396	2239.37	1097.52	511.677	2202.3	909.732	461.667	2200.3	836.162	529.381	2236.98	836.88	503.433	2220.02	740.134
388	0	303.364	1973.26	1588.65	189.523	1967.02	1594.13	300.572	2146.28	1583.1	181.375	2149.17	1591.57	237.422	2179.17	1449.89	233.555	2263.32	1217.38	217.975	2025.83	1375.69	212.207	1972.26	1189.73	115.986	2286.79	1276.15	402.02	2134.66	1412.88	487.05	2202.14	1190.6	495.361	2223.51	1096.26	513.862	2186.05	908.721	463.888	2184.12	835.058	531.7	2220.66	835.728	505.514	2203.28	738.919
389	0	306.003	1960.17	1589.6	192.22	1954.12	1595.18	303.773	2133.33	1584.25	184.381	2136.34	1592.93	239.47	2166.26	1450.7	234.616	2249.72	1217.91	220.192	2012.75	1377.18	213.757	1958.08	1191.2	117.623	2273.22	1276.86	404.184	2122.03	1413.07	488.934	2186.91	1189.83	497.107	2207.45	1095.33	515.723	2169.54	908.178	466.298	2167.04	835.145	533.8	2203.83	835.024	507.782	2185.7	738.288
390	0	308.573	1947.2	1590.71	194.701	1941.45	1596.56	306.558	2120.19	1585.41	187.507	2123.74	1594.31	241.603	2153.47	1451.85	235.625	2236.21	1218.58	222.277	1999.85	1378.91	215.828	1944.84	1193.1	118.777	2259.6	1277.88	406.364	2109.5	1413.51	490.64	2171.75	1189.47	498.804	2191.33	1094.84	517.719	2152.4	908.006	468.067	2150.25	834.336	535.957	2186.41	834.701	510.416	2167.24	738.249
391	0	311.37	1934.48	1592.08	197.32	1928.77	1598.11	309.589	2107.59	1586.8	190.275	2111.03	1595.96	243.619	2140.9	1453.01	236.572	2222.84	1219.5	224.536	1987.15	1380.77	217.942	1931.51	1195.19	119.625	2246.19	1279.35	407.798	2097.3	1413.99	492.262	2156.66	1189.18	500.469	2175.37	1094.52	519.726	2135.14	908.266	470.717	2132.01	835.129	538.222	2168.48	834.677	513.183	2148.18	738.401
392	0	313.901	1921.88	1593.38	200.022	1916.47	1599.75	312.31	2094.8	1588.2	193.254	2098.76	1597.69	245.408	2128.46	1454.49	237.242	2209.57	1220.65	226.543	1974.48	1382.63	219.874	1918.46	1197.29	120.297	2232.89	1281.12	409.704	2085.11	1415.01	493.799	2141.7	1189.33	501.947	2159.66	1094.64	521.631	2117.41	908.828	472.433	2113.99	834.867	540.063	2149.96	834.89	515.993	2128.24	738.882
393	0	316.216	1909.43	1595.15	202.431	1904.07	1601.66	314.975	2082.57	1589.91	195.687	2086.05	1599.43	247.191	2116.16	1456.1	238.011	2196.71	1222.2	228.061	1961.91	1384.71	221.586	1905.54	1199.65	120.875	2219.77	1283.16	411.177	2072.85	1416.3	495.377	2126.81	1190.06	503.525	2143.96	1095.32	523.616	2099.34	910.077	475.266	2094.9	836.813	542.569	2131.11	836.084	518.742	2107.5	740.193
394	0	318.438	1897.15	1596.89	204.568	1891.77	1603.72	317.162	2070.04	1591.68	198.026	2074.06	1601.54	248.864	2103.9	1457.86	238.717	2184.05	1223.99	229.648	1949.68	1386.86	223.011	1892.81	1201.99	121.503	2206.85	1285.37	412.852	2060.42	1418.21	496.902	2112.12	1191.13	505.133	2128.2	1096.3	525.69	2080.97	911.865	477.176	2075.5	838.064	544.755	2111.67	837.443	521.592	2086.2	741.989
395	0	320.456	1885.05	1598.6	206.696	1879.71	1605.81	319.249	2058.02	1593.13	199.953	2061.92	1603.53	250.419	2091.79	1459.62	240.038	2172.29	1225.89	230.922	1937.53	1388.94	223.993	1880.25	1204.31	122.326	2194.31	1287.46	414.148	2047.94	1419.74	498.371	2097.59	1192.12	506.759	2112.59	1097.24	527.781	2062.2	913.588	478.91	2055.94	839.366	546.814	2091.85	838.764	524.338	2064.44	743.777
396	0	322.206	1873.06	1600.26	208.619	1867.78	1607.83	320.945	2045.9	1594.62	201.896	2049.95	1605.33	251.774	2079.86	1461.54	241.535	2160.67	1228.06	232.075	1925.61	1390.95	224.694	1868.12	1206.24	123.11	2181.96	1289.53	415.257	2035.57	1421.37	499.737	2083.17	1193.33	508.401	2096.92	1098.28	529.255	2043.67	915.23	480.576	2036.16	840.891	548.589	2071.69	840.089	526.585	2042.18	745.736
397	0	323.759	1861.06	1602.18	209.929	1855.8	1610.03	322.495	2033.95	1596.38	203.407	2038.16	1607.51	252.882	2067.95	1463.66	243.316	2149.42	1230.34	232.79	1913.7	1393.14	225.181	1856.22	1208.39	124.143	2170.15	1291.69	416.315	2023.17	1423.4	501.114	2068.58	1194.89	510.04	2081.11	1099.64	530.799	2024.56	917.31	482.622	2015.76	843.923	550.271	2051.24	841.887	528.797	2019.36	748.547
398	0	325.121	1849.19	1604.17	211.23	1844.18	1612.28	324.016	2022.26	1598.2	204.913	2026.38	1609.71	254.032	2056.38	1465.88	245.237	2138.28	1232.71	233.326	1902.09	1395.29	225.4	1844.52	1210.43	125.319	2158.33	1293.73	417.325	2010.86	1425.44	502.296	2053.63	1196.45	511.787	2065.14	1101.13	532.343	2005.58	919.647	483.713	1995.56	846.065	551.735	2030.57	843.766	530.893	1996.17	751.604
399	0	326.274	1837.49	1606.2	212.523	1832.53	1614.64	325.328	2010.28	1600.31	206.594	2014.88	1611.96	255.105	2044.8	1468.36	247.226	2127.09	1235.31	234.265	1890.75	1397.46	225.678	1833.01	1212.56	126.942	2147.09	1295.75	418.391	1998.55	1427.79	503.673	2039.13	1198.23	513.52	2049.1	1102.82	533.726	1986.4	922.273	484.617	1975.36	848.505	553.178	2009.93	845.981	533.327	1972.44	755.258
400	0	326.926	1825.73	1608.37	213.109	1820.94	1616.92	326.543	1998.44	1602.71	207.504	2003.4	1614.43	255.911	2033.17	1470.78	249.036	2115.97	1237.9	234.503	1879.29	1399.84	225.922	1821.66	1214.88	128.367	2135.79	1297.82	419.391	1986.25	1430.45	504.967	2024.47	1200.41	515.241	2033.02	1104.82	534.866	1967.03	925.159	485.838	1954.89	851.738	554.484	1989.06	848.608	534.327	1949.13	758.926
401	0	327.514	1813.91	1611	213.284	1809.45	1619.34	327.461	1986.93	1605.27	208.587	1991.77	1616.89	256.797	2021.8	1473.31	250.564	2104.5	1240.34	235.015	1867.87	1402.43	226.094	1810.25	1217.34	129.706	2124.29	1299.81	419.84	1974.35	1433.06	506.383	2009.72	1202.95	516.76	2017.16	1107.09	536.012	1947.73	928.59	487.067	1934.24	855.657	555.734	1968.07	851.683	535.518	1925.42	763.33
402	0	327.669	1802.18	1613.5	213.657	1798.02	1621.75	328.231	1974.98	1607.92	209.426	1980.53	1619.5	257.659	2010.32	1475.76	251.727	2092.84	1242.51	235.433	1856.58	1405.15	226.686	1798.87	1220.04	131.352	2113.54	1302.03	421.029	1962.27	1436.06	507.655	1994.83	1205.39	518.308	2001.09	1109.57	536.806	1928.3	932.064	487.925	1913.46	859.703	556.614	1946.95	854.885	536.695	1901.62	768.089
403	0	327.827	1790.45	1616.22	213.441	1786.71	1624.15	329.034	1963.31	1610.62	210.073	1969.35	1621.98	258.389	1998.96	1478.25	252.821	2081.16	1244.57	235.997	1845.26	1407.86	227	1787.35	1222.65	133.057	2102.64	1304.14	421.509	1950.62	1438.88	508.925	1979.96	1207.93	519.836	1985.08	1112.04	537.913	1908.88	935.909	488.74	1892.77	863.881	557.45	1925.91	858.219	537.6	1877.69	773.106
404	0	327.656	1778.7	1618.89	213.333	1775.42	1626.54	329.796	1951.7	1613.48	210.596	1958.13	1624.46	259.35	1987.7	1480.71	253.874	2069.49	1246.55	236.128	1833.87	1410.47	227.675	1775.8	1225.63	134.575	2091.6	1306.27	422.367	1938.8	1441.89	510.358	1965.16	1210.87	521.321	1969.15	1114.82	538.647	1889.49	939.869	488.026	1872.84	867.01	558.25	1904.75	862.018	538.346	1853.83	778.627
405	0	327.234	1766.99	1621.8	212.845	1764.48	1628.99	330.217	1939.84	1616.32	211.098	1946.91	1626.82	260.144	1976.54	1483.04	254.634	2057.65	1248.34	236.784	1822.69	1413.19	228.204	1764.23	1228.37	136.083	2080.4	1308.17	423.248	1927.01	1444.94	511.614	1950.41	1213.62	522.804	1953.28	1117.56	539.292	1870.01	944.096	488.008	1852.14	871.389	558.992	1883.52	866.018	538.968	1830.16	784.285
406	0	326.697	1755.3	1624.46	212.244	1753.21	1631.21	330.784	1928.09	1618.86	211.839	1935.97	1628.9	260.983	1965.37	1485.05	255.559	2045.84	1250.05	237.381	1811.6	1415.62	229.049	1752.93	1231.17	137.49	2069.24	1309.83	423.653	1915.55	1447.46	512.94	1935.89	1216.28	524.251	1937.69	1120.11	539.966	1850.52	948.356	488.6	1831.1	876.325	559.406	1862.48	869.952	539.354	1806.62	789.882
407	0	325.999	1743.57	1626.93	211.517	1742.27	1633.12	331.284	1916.74	1621.23	212.244	1924.92	1630.59	261.797	1954.18	1487.12	256.605	2034.32	1251.81	237.977	1800.41	1417.87	229.767	1741.3	1233.39	138.821	2058.07	1311.43	424.89	1903.68	1450.2	514.279	1921.43	1218.83	525.551	1922.25	1122.51	540.339	1831.07	952.403	488.678	1810.01	881.179	559.642	1841.35	873.819	540.165	1782.65	795.666
408	0	325.337	1731.76	1629.43	210.491	1731.39	1634.7	331.694	1904.71	1623.59	212.68	1913.91	1632.04	262.697	1942.94	1488.81	257.621	2022.59	1253.73	238.75	1789.32	1419.94	230.665	1729.96	1235.67	139.989	2046.77	1312.94	425.534	1892.19	1452.59	515.509	1907.07	1221.22	526.994	1906.92	1124.82	540.716	1811.74	956.573	487.92	1788.67	885.791	559.668	1820.02	877.701	539.709	1759.54	801.208
409	0	324.353	1719.85	1631.55	209.662	1720.43	1636.27	332.153	1892.9	1625.41	213.053	1903.03	1633.28	263.583	1931.65	1490.13	258.824	2010.92	1255.24	239.729	1778.21	1421.69	231.312	1718.44	1237.53	141.237	2035.4	1314.21	426.352	1880.57	1454.52	516.724	1893.11	1223.14	528.495	1891.79	1126.79	540.679	1792.17	960.353	488.858	1767.81	891.118	559.708	1798.87	881.518	538.959	1736.5	806.645
410	0	323.509	1707.99	1633.52	208.399	1709.51	1637.33	332.762	1881.45	1627.09	213.737	1892.03	1634.09	264.558	1920.5	1491.42	259.88	1999.12	1256.42	240.472	1766.85	1423.02	232.192	1706.96	1239.07	142.263	2024.06	1315.26	427.237	1868.95	1456.23	518.062	1879.02	1224.98	529.934	1876.66	1128.51	541.373	1773.13	964.379	487.786	1746.49	895.616	559.481	1777.57	885.222	538.228	1713.42	812.011
411	0	322.594	1696.15	1635.29	207.403	1698.65	1638.25	333.15	1869.48	1628.61	214.188	1881.18	1634.75	265.341	1909.31	1492.39	261.097	1987.49	1257.27	240.903	1755.3	1424.17	233.172	1695.46	1240.39	143.017	2012.71	1316.14	427.852	1857.06	1457.73	519.321	1865.28	1226.55	531.426	1861.58	1130.08	541.618	1754.06	968.219	488.502	1725.93	900.772	559.194	1756.32	888.979	537.327	1690.47	817.348
412	0	321.683	1684.37	1636.65	206.46	1687.68	1638.75	333.619	1857.31	1629.96	214.833	1870.22	1634.96	266.067	1897.96	1493.03	262.361	1976.1	1258.08	241.985	1744.15	1425.07	233.729	1683.97	1241.34	143.853	2001.3	1316.69	428.652	1845.55	1458.79	520.631	1851.8	1227.76	532.937	1846.65	1131.22	541.715	1734.97	971.656	487.736	1705.13	905.342	558.758	1735.33	892.434	536.522	1667.71	822.691
413	0	320.796	1672.48	1637.6	205.402	1676.86	1638.96	334.104	1845.43	1630.53	215.289	1859.25	1634.88	266.816	1886.53	1493.2	263.266	1964.83	1258.25	242.67	1732.72	1425.57	234.771	1672.76	1241.82	144.386	1989.69	1316.83	429.498	1834.12	1459.22	521.979	1838.28	1228.39	534.459	1831.59	1131.86	541.775	1716.14	974.761	487.2	1684.74	909.675	557.889	1714.33	895.243	534.673	1645.24	827.462
414	0	319.948	1660.51	1638.11	204.67	1665.65	1638.81	334.54	1833.46	1630.71	215.883	1848.04	1634.49	267.534	1875.1	1493.25	264.062	1953.23	1258.37	243.591	1721.22	1425.64	235.873	1661.35	1241.94	145.224	1978.25	1316.88	429.651	1823.03	1459	523.125	1824.9	1228.58	535.749	1816.58	1132.08	541.406	1697	977.351	486.51	1664.8	913.8	556.87	1693.36	897.745	533.202	1622.88	832.271
415	0	319.217	1648.63	1638.53	203.692	1654.58	1638.53	334.965	1821.34	1630.78	216.401	1836.75	1633.66	268.246	1863.67	1492.99	263.995	1942.51	1258.25	244.502	1709.71	1425.52	236.326	1649.52	1241.66	145.666	1966.71	1316.72	430.798	1811.62	1459.21	524.247	1811.52	1228.67	536.775	1801.51	1131.94	541.222	1678.53	979.981	485.588	1645.05	917.686	556.247	1672.88	900.658	531.181	1600.76	836.881
416	0	318.423	1636.56	1638.72	202.945	1643.3	1638	335.429	1809.29	1630.49	216.833	1825.49	1632.7	268.78	1852.08	1492.58	263.74	1931.24	1257.73	245.438	1698.24	1425.21	237.074	1638.01	1241.22	145.881	1955	1316.31	431.437	1800.26	1458.71	525.424	1798.17	1228.52	538.397	1786.95	1132.05	540.969	1660.12	982.559	484.573	1625.39	921.481	555.165	1652.41	903.176	529.614	1578.97	841.552
417	0	317.802	1624.59	1638.47	202.252	1632.06	1637.28	335.78	1797.2	1629.82	217.456	1814.12	1631.47	269.094	1840.32	1491.87	263.354	1919.56	1257.07	246.045	1686.56	1424.38	238.007	1626.61	1240.39	146.162	1943.36	1315.66	431.932	1789.05	1457.78	526.402	1784.87	1227.88	539.673	1772.05	1131.56	540.435	1641.45	984.732	483.42	1606.14	924.893	553.991	1632.13	905.415	527.479	1557.31	845.856
418	0	317.178	1612.5	1637.82	201.84	1620.5	1636.11	335.98	1785.02	1628.9	217.922	1802.5	1629.89	269.341	1828.53	1490.9	263.004	1907.67	1256.38	246.637	1674.8	1423.23	239.015	1615.19	1239.16	146.189	1931.52	1315.08	432.2	1777.79	1456.56	527.386	1771.29	1227.06	540.527	1756.94	1130.72	539.813	1623.48	986.807	482.242	1587.17	928.026	552.721	1611.88	907.537	525.471	1536.12	850.077
419	0	316.469	1600.38	1637.14	201.238	1608.99	1634.81	336.198	1772.8	1627.83	217.911	1790.81	1628.29	269.544	1816.62	1489.76	262.639	1895.8	1255.41	247.534	1663.31	1421.87	239.668	1603.48	1237.71	145.992	1919.49	1314.38	432.613	1766.32	1455.27	528.094	1757.93	1226.07	541.751	1742.03	1130.02	538.84	1605.49	988.468	480.651	1568.43	930.908	551.508	1591.98	909.705	523.175	1515.22	854.081
420	0	315.615	1588.14	1636.21	200.771	1597.41	1633.27	336.364	1760.58	1626.4	218.187	1779.11	1626.33	269.57	1804.45	1488.37	262.145	1883.67	1254.3	248.054	1651.29	1420.27	240.315	1591.68	1235.88	145.845	1907.45	1313.44	432.833	1754.86	1453.31	528.709	1744.48	1224.68	542.507	1727.27	1128.72	537.994	1587.65	990.05	479.552	1550.29	933.646	550.972	1573.27	912.089	520.432	1494.64	857.952
421	0	315.55	1576.04	1634.99	200.367	1585.38	1631.68	336.476	1748.31	1624.73	218.449	1767.2	1624.23	269.599	1792.25	1486.85	261.638	1871.74	1253.1	248.272	1638.67	1418.45	240.958	1579.85	1233.78	145.632	1895.27	1312.44	432.987	1743.43	1451.43	529.051	1731.25	1223.02	543.298	1712.77	1127.29	537.01	1570.25	991.466	477.055	1531.9	935.894	549.638	1552.89	913.883	518.568	1474.42	861.687
422	0	314.815	1563.57	1633.53	199.91	1573.39	1629.63	336.4	1735.96	1622.92	218.371	1755.17	1621.74	269.427	1779.67	1485.19	261.095	1859.84	1251.67	248.765	1626.55	1416.27	241.261	1567.8	1231.66	144.966	1882.96	1311.35	433.013	1731.74	1449.22	529.302	1717.77	1221.22	543.477	1697.88	1125.5	535.84	1553.01	992.609	475.993	1514.41	937.95	548.017	1534.13	915.43	515.531	1454.64	864.978
423	0	313.961	1551.33	1632	199.46	1561.41	1627.84	336.121	1723.25	1620.76	218.315	1743.14	1619.06	269.379	1767.12	1483.41	260.527	1848.2	1250.04	248.994	1614.21	1413.98	241.453	1555.65	1229.23	144.474	1870.63	1310.16	432.618	1720.02	1446.61	529.573	1704.56	1219.28	543.702	1683.3	1123.55	534.59	1536.01	993.592	474.246	1497.06	939.878	546.671	1515.18	916.941	513.446	1435.27	868.312
424	0	313.924	1539.02	1630.28	198.825	1549.23	1625.72	336.04	1710.89	1618.41	218.104	1730.76	1616.47	269.052	1754.34	1481.33	259.408	1835.97	1248.08	249.423	1601.72	1411.6	241.572	1543.55	1226.69	143.822	1858.05	1308.9	432.545	1707.77	1443.91	529.386	1691.39	1216.84	543.79	1669.21	1121.3	533.273	1519.44	994.24	472.441	1480.09	941.353	544.84	1497.19	917.858	510.899	1416.52	871.194
425	0	313.302	1526.52	1628.43	198.509	1536.92	1623.52	335.722	1698.42	1615.87	218.082	1718.56	1613.62	268.657	1741.42	1479.34	258.646	1823.74	1246.27	249.679	1589.32	1408.99	241.322	1531.27	1223.9	143.103	1845.32	1307.48	431.921	1695.72	1441	528.993	1678.36	1214.26	544.249	1655.54	1119.17	531.544	1503.07	994.679	471.19	1463.74	942.593	543.612	1479.23	918.899	508.677	1398.07	873.903
426	0	312.085	1513.88	1626.46	197.849	1524.44	1621.19	335.457	1685.84	1613.46	217.629	1705.97	1610.63	268.393	1728.66	1477.23	257.687	1811.44	1244.4	249.152	1576.15	1406.34	240.902	1518.74	1221.2	142.542	1832.6	1306.25	431.573	1683.19	1438.28	528.342	1665.31	1211.55	544.117	1641.75	1116.83	530.642	1487.3	994.957	469.085	1447.25	943.518	542.545	1461.7	920.089	506.422	1380.25	876.177
427	0	311.319	1501.18	1624.52	197.044	1511.89	1618.95	335.038	1673.15	1610.93	217.383	1693.55	1607.7	267.726	1715.53	1474.93	256.54	1799.08	1242.28	249.005	1563.3	1403.86	240.374	1506.21	1218.57	141.725	1819.72	1304.78	431.048	1670.46	1435.55	528.18	1652.6	1209.28	543.981	1628.29	1114.46	529.039	1471.74	994.785	467.406	1431.5	944.176	540.309	1444.96	920.216	504.264	1362.95	878.235
428	0	310.864	1488.5	1622.44	196.247	1499.38	1616.65	334.307	1660.37	1608.2	216.786	1680.91	1604.74	267.174	1702.58	1472.8	255.519	1786.56	1240.43	248.57	1550.22	1401.22	239.844	1493.57	1215.93	140.903	1806.79	1303.19	430.463	1657.75	1432.81	527.166	1639.72	1206.42	543.503	1614.71	1111.94	527.703	1456.66	994.351	465.7	1416.04	944.343	538.96	1428.54	920.384	502.25	1346.18	879.84
429	0	309.301	1475.68	1620.41	195.319	1486.81	1614.45	333.604	1647.58	1605.7	215.888	1668.33	1602	266.316	1689.53	1470.43	254.15	1773.83	1238.38	248.123	1537.36	1398.7	238.966	1480.62	1213.24	139.698	1793.76	1301.57	429.629	1644.79	1430.16	526.293	1627.08	1203.9	542.911	1601.46	1109.45	526.346	1442	993.772	464.019	1401.01	944.351	537.18	1412.75	920.132	500.293	1329.88	881.036
430	0	308.688	1463.02	1618.56	194.153	1474.06	1612.31	332.625	1634.63	1603.3	215.122	1655.6	1599.33	265.466	1676.47	1468.34	252.966	1761.16	1236.24	247.155	1524.11	1396.33	237.845	1467.55	1210.83	138.581	1780.52	1299.89	428.876	1631.76	1427.64	524.856	1614.18	1201.13	542.366	1588.49	1107.12	524.335	1427.65	992.688	461.725	1386.11	943.942	535.695	1397.62	919.58	498.621	1314.25	882.029
431	0	307.508	1450.28	1616.59	192.969	1461.46	1610.29	331.429	1621.75	1600.75	214.154	1642.83	1596.72	264.556	1663.26	1465.92	251.982	1748.46	1234.22	246.289	1511.05	1394	236.907	1454.39	1208.51	137.663	1767.49	1297.99	427.745	1618.48	1424.88	523.267	1601.29	1198.22	541.151	1575.42	1104.3	522.994	1413.71	991.371	460.608	1372.02	943.162	534.021	1383.07	918.487	497	1299.31	882.185
432	0	305.566	1437.43	1614.75	191.707	1448.7	1608.39	330.098	1608.81	1598.42	212.869	1630.02	1594.32	263.694	1650.17	1463.8	250.837	1735.43	1231.99	244.995	1497.74	1391.78	235.477	1441.22	1206.2	136.821	1754.49	1296.02	427.118	1604.84	1422.74	521.841	1588.57	1195.63	540.113	1562.77	1101.72	521.901	1400.27	989.753	459.557	1358.41	942.244	532.302	1369.16	916.944	495.592	1284.92	881.889
433	0	304.275	1424.63	1613.21	189.898	1435.97	1606.63	328.509	1595.93	1596.42	211.29	1617.36	1592.11	262.514	1636.82	1461.73	249.665	1722.47	1230.05	243.456	1484.45	1389.85	233.869	1427.77	1204.25	136.092	1741.46	1294.14	425.454	1591.04	1420.5	520.751	1575.96	1193.69	538.876	1550.29	1099.48	520.668	1387.4	988.077	457.71	1344.79	940.882	530.568	1355.68	915.345	494.089	1271.21	881.357
434	0	302.327	1411.81	1611.82	187.87	1423.27	1605.01	326.783	1582.95	1594.43	209.763	1604.5	1589.84	261.43	1623.49	1459.8	248.908	1709.44	1228.19	241.82	1471.11	1388.04	232.015	1414.21	1202.33	135.358	1728.33	1292.15	424.689	1577.06	1418.91	519.184	1563.05	1191.61	537.35	1538.02	1097.1	519.104	1374.65	986.059	456.325	1331.65	939.512	529.582	1342.92	913.831	492.8	1258.01	880.253
435	0	300.391	1399.06	1610.45	186.053	1410.5	1603.52	324.856	1570	1592.3	207.983	1591.68	1587.57	260.256	1610.12	1457.8	248.112	1696.07	1226.18	239.977	1457.53	1386.3	230.119	1400.6	1200.52	134.837	1715.34	1290.05	423.16	1562.85	1417.01	517.209	1550.03	1189.19	535.666	1525.85	1094.73	517.953	1362.49	983.784	455.109	1319.1	937.549	526.966	1331.07	910.762	491.633	1245.43	878.505
436	0	298.01	1386.15	1609.23	183.754	1397.81	1602.1	322.532	1556.92	1590.26	205.721	1578.82	1585.59	258.943	1596.69	1456.08	247.638	1682.71	1224.39	238.041	1444.04	1384.7	228.279	1386.85	1198.87	134.367	1702.02	1287.89	421.611	1548.17	1415.35	515.761	1537.14	1187.38	534.198	1513.96	1092.78	516.783	1350.56	981.187	453.884	1306.94	935.312	525.651	1319.47	908.124	490.708	1233.6	876.153
437	0	295.478	1373.27	1608.4	181.098	1385.04	1601.13	320.378	1543.9	1588.76	203.708	1565.99	1583.71	257.979	1583.41	1454.55	247.449	1669.32	1223.04	235.982	1430.43	1383.52	226.502	1373.05	1197.71	134.1	1688.97	1285.72	420.115	1533.66	1414.23	513.872	1523.98	1185.95	532.379	1501.76	1091.15	515.43	1339.03	978.524	452.761	1295.21	932.986	523.723	1308.37	905.048	489.745	1222.31	873.463
438	0	292.503	1360.42	1607.66	178.55	1372.41	1600.14	318.021	1530.83	1587.41	201.328	1553.19	1582.15	256.593	1570.21	1453.08	247.586	1655.28	1221.65	234.01	1416.98	1382.43	224.779	1359.11	1196.78	133.658	1675.63	1283.31	418.653	1519.24	1413.57	512.579	1511.05	1185.18	530.463	1489.7	1089.75	514.01	1327.99	975.852	451.692	1283.78	930.306	521.891	1298.18	901.724	488.953	1211.62	870.343
439	0	289.743	1347.65	1606.96	175.799	1359.86	1599.24	315.457	1517.9	1586.11	198.872	1540.59	1580.66	254.525	1556.47	1451.73	247.624	1641.03	1220.18	231.902	1403.31	1381.68	223.117	1344.99	1196.15	133.066	1662.18	1281.02	417.105	1505.15	1413.03	510.606	1497.74	1184.21	528.431	1477.71	1088.69	513.107	1317.05	972.958	450.523	1272.87	927.199	520.856	1288.17	898.572	488.227	1201.57	866.72
440	0	287.01	1334.86	1606.41	172.884	1347.25	1598.46	312.691	1505	1585.03	196.461	1527.75	1579.3	252.825	1543.71	1450.53	247.327	1626.48	1218.26	229.918	1389.99	1381.14	221.725	1330.82	1195.96	131.995	1648.65	1278.33	414.893	1491.42	1412.27	508.701	1484.55	1183.65	526.689	1465.78	1088.1	511.77	1306.57	969.948	449.591	1262.4	924.079	519.98	1278.99	895.288	487.618	1192.27	862.476
441	0	284.139	1322.13	1606.09	169.825	1334.66	1598.08	309.868	1492.21	1584.31	193.543	1515.17	1578.53	250.902	1530.71	1449.31	246.417	1611.69	1216.05	227.778	1376.48	1380.88	220.476	1316.29	1196.16	130.894	1634.85	1275.94	413.108	1477.88	1412.45	506.847	1471.37	1183.42	524.498	1453.78	1087.59	510.432	1296.26	966.905	448.51	1252.27	920.641	518.945	1270.5	891.952	487.104	1183.48	857.977
442	0	280.951	1309.54	1606.28	166.978	1322	1598.09	306.874	1479.48	1583.98	190.593	1502.5	1578.15	248.43	1517.63	1448.38	244.821	1596.75	1214.31	225.546	1362.95	1381.03	219.404	1301.62	1196.66	129.5	1620.84	1273.46	411.028	1464.73	1412.68	504.954	1458.11	1183.53	521.859	1441.57	1087.25	509.229	1286.34	964.05	447.676	1242.74	916.988	517.976	1261.98	888.443	486.743	1175.31	853.123
443	0	278.357	1296.93	1606.69	164.177	1309.59	1598.5	304.112	1466.95	1584.21	187.713	1489.83	1578.23	246.176	1504.54	1447.77	242.71	1582.44	1213.37	223.484	1349.47	1381.55	218.119	1286.54	1197.39	128.152	1606.74	1271.43	408.54	1451.76	1412.97	503.108	1445.21	1184.05	519.39	1429.26	1087.5	507.938	1276.54	961.176	446.99	1233.58	913.154	517.108	1253.82	885.257	486.557	1167.84	847.998
444	0	275.374	1284.39	1607.72	161.294	1296.89	1599.49	301.168	1454.37	1584.77	184.814	1477.08	1578.63	243.696	1491.38	1447.78	240.403	1568.48	1213.21	221.309	1335.93	1382.32	216.888	1271.47	1198.57	126.647	1592.48	1269.87	406.605	1438.74	1414.38	501.324	1432.54	1185.16	517.173	1417.5	1088.37	506.641	1267.21	958.716	445.302	1224.6	909.312	516.351	1246.37	882.348	486.498	1161.12	842.85
445	0	272.126	1271.85	1609.08	158.462	1284.35	1600.82	298.008	1441.84	1585.34	181.856	1464.54	1579.25	241.108	1477.91	1448.38	238.194	1554.67	1213.81	219.087	1322.16	1383.46	215.599	1256.6	1199.85	124.802	1578.34	1268.84	404.313	1425.64	1415.77	499.093	1419.73	1186.38	514.334	1405.5	1089.34	505.501	1258.1	956.503	445.104	1216.68	905.696	515.907	1238.84	879.865	486.434	1154.86	837.837
446	0	269.74	1259.52	1610.49	155.767	1271.87	1602.38	295.766	1429.94	1586.4	178.815	1452.05	1580	238.43	1464.48	1449.14	235.999	1541.02	1214.66	217.392	1308.52	1384.74	214.461	1242.27	1201.11	123.019	1564.3	1268.48	402.043	1412.41	1417.43	496.99	1407.27	1187.88	511.078	1393.18	1090.38	504.479	1249.45	954.467	444.65	1208.99	901.959	515.052	1232.13	877.059	486.714	1149.46	832.427
447	0	266.994	1247.21	1612.2	152.962	1259.31	1604.21	292.442	1417.15	1587.01	176.082	1439.46	1580.98	235.95	1451.14	1450.35	234.2	1527.35	1215.79	215.298	1295	1385.98	213.134	1228.29	1202.34	120.917	1550.36	1268.77	399.759	1398.96	1419.49	494.403	1394.65	1189.62	508.367	1381.51	1092.16	503.411	1241.23	952.701	443.527	1201.28	898.435	514.969	1225.77	875.236	487.022	1144.69	827.436
448	0	263.981	1234.83	1614.04	150.308	1246.96	1606.07	289.663	1404.8	1587.99	173.212	1426.91	1581.97	233.5	1437.87	1451.81	233.117	1513.57	1216.82	213.414	1281.57	1387.44	211.959	1214.75	1203.8	118.944	1536.71	1269.21	397.762	1385.48	1421.94	491.98	1382.12	1191.72	506.004	1370.33	1094.47	502.577	1233.51	951.491	443.584	1195.22	895.093	514.966	1219.96	873.691	487.44	1140.61	822.596
449	0	261.8	1222.63	1615.73	147.822	1234.66	1607.97	287.411	1392.8	1589.09	170.612	1414.48	1582.99	231.369	1424.89	1453.25	232.495	1499.44	1217.95	211.886	1268.31	1388.88	211.004	1201.66	1205.16	116.875	1523.1	1270.33	395.802	1372.29	1424.39	489.572	1369.81	1193.88	503.208	1358.68	1096.52	501.403	1225.98	950.333	443.185	1189.12	892.097	514.847	1214.6	872.183	488.037	1137.23	817.94
450	0	259.331	1210.39	1617.53	145.206	1222.24	1609.63	284.807	1380.35	1590.36	167.885	1402.01	1584.24	229.196	1411.95	1454.9	231.401	1485.51	1219.23	210.246	1255.35	1390.25	210.184	1188.88	1206.53	114.432	1509.9	1271.42	394.1	1359.32	1427.14	487.441	1357.62	1196.21	500.416	1347.48	1098.69	500.479	1218.77	949.357	442.447	1183.35	889.199	514.653	1209.58	871.059	488.735	1134.42	813.631
451	0	256.902	1198.12	1619.41	142.755	1209.93	1611.39	282.183	1367.81	1591.87	165.725	1389.61	1585.49	227.087	1399.15	1456.69	229.859	1472.38	1221.18	209.11	1242.72	1391.79	209.455	1176.24	1208.02	112.146	1496.67	1273.05	391.814	1346.64	1429.43	485.352	1345.45	1198.46	497.845	1336.3	1101.17	499.652	1211.72	948.981	442.543	1178.59	886.743	514.23	1204.92	870.153	489.386	1132	809.604
452	0	254.712	1185.74	1621.25	140.557	1197.72	1613.07	280.162	1355.69	1593.74	163.421	1377.45	1587.18	225.03	1386.69	1458.53	227.736	1459.98	1223.25	207.933	1230.04	1393.63	208.969	1163.55	1209.68	109.817	1483.76	1274.55	390.624	1334.28	1432.39	483.111	1332.98	1200.51	495.424	1325.19	1103.54	498.861	1204.99	948.735	442.129	1173.44	884.748	514.618	1200.51	869.929	489.986	1129.95	805.904
453	0	252.615	1173.46	1623.01	138.527	1185.33	1614.77	278.013	1343.49	1595.52	161.377	1364.96	1589.06	223.265	1374.24	1460.53	225.299	1447.61	1225.08	206.913	1217.36	1395.5	208.665	1151.05	1211.41	107.763	1470.78	1276.38	389.012	1322.31	1434.76	481.545	1321.18	1202.77	493.357	1314.72	1105.94	498.126	1198.32	948.448	442.213	1168.89	882.882	514.539	1195.94	869.546	490.89	1128.3	802.47
454	0	250.424	1161.18	1624.91	136.893	1173.12	1616.4	276.024	1331.08	1597.71	159.467	1352.81	1591.14	221.627	1361.98	1462.57	223.27	1435.52	1227.02	205.934	1205	1397.43	208.352	1138.55	1213.39	105.704	1458.19	1278.37	387.669	1310.56	1437.14	480.663	1310.12	1205.49	491.225	1304.19	1108.14	497.543	1191.85	948.44	442.169	1164.4	881.451	514.825	1191.6	869.669	491.208	1126.63	799.139
455	0	249.152	1148.81	1626.79	135.294	1160.87	1618.2	274.452	1319.12	1600.2	157.913	1340.57	1593.38	220.066	1350.01	1464.72	221.943	1423.31	1229.21	205.181	1192.94	1399.55	208.026	1126.21	1215.67	103.608	1445.61	1280.4	386.426	1299.01	1439.67	480.351	1298.74	1208.57	489.406	1293.84	1110.57	496.996	1185.44	948.835	441.619	1159.69	880.326	515.327	1187.28	870.392	491.616	1125.32	796.341
456	0	247.866	1136.61	1628.7	133.898	1148.47	1620.03	272.69	1306.72	1602.7	156.257	1328.2	1595.89	218.61	1337.74	1466.91	220.693	1411.05	1231.43	204.513	1181.04	1401.72	207.794	1114.03	1217.96	101.512	1432.98	1282.47	385.361	1287.78	1442.15	479.16	1287.89	1210.75	487.769	1283.76	1112.91	496.653	1179.08	949.312	442.352	1155.57	879.852	515.578	1182.81	871.07	492.222	1124.04	794.105
457	0	246.747	1124.36	1630.61	132.809	1136.01	1621.78	271.618	1294.86	1605.23	154.949	1316.13	1598.4	217.393	1325.86	1469.16	218.871	1398.92	1233.27	203.835	1169.16	1403.93	207.468	1102.01	1220.17	99.4198	1420.52	1284.75	383.959	1276.74	1444.02	478.275	1277.51	1212.98	486.169	1273.97	1114.96	496.438	1172.97	949.832	442.347	1151.04	879.367	515.866	1178.26	871.872	492.832	1122.93	792.031
458	0	245.676	1112.17	1632.55	132.123	1123.8	1623.79	270.288	1282.57	1607.66	153.873	1303.71	1600.88	216.031	1314.03	1471.25	216.935	1386.71	1235.1	202.936	1157.11	1406.24	207.067	1090.15	1222.45	97.5044	1408.18	1286.99	382.654	1265.66	1445.97	476.703	1267.64	1214.61	484.609	1264.53	1116.93	496.101	1166.87	950.486	442.016	1146.33	879.056	516.07	1173.54	872.785	493.262	1121.63	790.356
459	0	245.566	1100.12	1634.38	131.472	1111.35	1625.87	269.579	1270.65	1610.15	152.923	1291.63	1603.42	214.702	1302.13	1473.34	215.198	1374.59	1237.21	202.242	1145.28	1408.52	206.495	1078.27	1224.82	95.6108	1395.72	1289.19	381.549	1254.76	1448.01	475.372	1257.91	1216.45	483.463	1255.64	1119.09	496.022	1160.92	951.313	442.937	1142.37	879.13	516.47	1168.96	873.897	493.965	1120.34	789.349
460	0	245.225	1088.05	1636.23	131.18	1099.11	1627.96	268.537	1258.55	1612.13	151.894	1279.24	1606.07	213.631	1290.47	1475.43	213.523	1362.56	1239.16	201.582	1133.47	1410.88	205.969	1066.45	1227.11	93.6166	1383.37	1291.28	380.582	1243.77	1449.92	473.956	1248.56	1218.02	482.431	1247.15	1121.04	496.053	1155.18	952.196	443.301	1138.26	878.994	517.049	1164.54	875.095	494.526	1118.61	788.586
461	0	245.652	1076.04	1638	131.104	1086.57	1630.01	267.987	1246.63	1614.29	151.129	1267.16	1608.55	212.609	1278.59	1477.46	211.812	1350.36	1240.94	200.635	1121.72	1412.88	205.232	1054.6	1229.26	91.793	1370.93	1293.4	379.567	1232.89	1451.82	474.264	1239.67	1220.75	481.366	1238.95	1123.03	495.828	1149.39	953.074	443.161	1133.54	879.165	517.46	1160.02	876.427	495.312	1116.84	788.31
462	0	245.841	1064.12	1639.5	131.133	1074.21	1632.17	267.327	1234.76	1616.14	150.491	1254.63	1610.84	211.315	1266.72	1479.27	210.256	1338.44	1242.77	200.007	1110.08	1414.97	204.478	1042.87	1231.38	89.8583	1358.47	1295.46	378.619	1221.77	1453.65	472.001	1230.99	1221.76	480.282	1230.98	1124.93	495.639	1143.67	954.031	444.359	1128.97	879.925	518.328	1156.01	878.114	495.745	1114.48	788.344
463	0	246.04	1052.11	1640.81	131.343	1061.76	1634.01	266.589	1222.81	1617.45	149.545	1242.53	1612.79	210.318	1254.85	1480.96	208.896	1326.44	1244.22	199.547	1098.56	1416.66	203.77	1031.06	1233.32	88.0218	1346.06	1297.28	377.647	1210.8	1455.26	470.329	1222.27	1222.9	479.261	1223.22	1126.58	495.642	1138.36	954.844	445.067	1124.01	880.846	518.205	1151.48	878.943	496.454	1112.01	788.474
464	0	246.469	1040.21	1641.81	131.631	1049.18	1635.78	266.169	1210.93	1618.69	149.13	1230.16	1614.69	209.05	1243.01	1482.13	207.403	1314.47	1245.39	198.772	1086.81	1418.19	202.976	1019.25	1234.86	86.3205	1333.62	1298.82	376.562	1199.38	1456.45	470.057	1214.11	1224.88	478.781	1216.06	1128.35	495.573	1133.03	955.46	444.11	1119.34	880.342	518.157	1147.16	879.774	497.439	1108.94	788.982
465	0	246.967	1028.36	1642.8	132.197	1036.87	1637.23	265.681	1199.16	1619.66	148.553	1217.71	1616.29	207.843	1231.02	1483.42	206.236	1302.4	1246.68	197.827	1074.91	1419.51	202.146	1007.37	1236.22	84.6249	1321.22	1300.39	375.597	1188.08	1457.67	469.348	1206.01	1226.44	477.875	1208.53	1129.78	495.787	1127.29	956.394	445.03	1115.47	880.992	518.024	1142.79	880.619	497.23	1105.9	789.014
466	0	247.336	1016.66	1643.49	132.543	1024.33	1638.54	265.369	1187.38	1620.47	148.05	1205.37	1617.59	206.831	1219.01	1484.4	205.02	1290.38	1247.55	197.055	1063	1420.71	201.242	995.365	1237.43	83.2278	1308.84	1301.58	374.817	1176.42	1458.87	467.923	1198.12	1227.33	477.376	1201.27	1131.39	495.51	1122.32	956.79	445.543	1109.54	882.335	517.936	1138.53	881.463	497.248	1102.16	789.396
467	0	247.851	1004.55	1644.03	133.093	1011.78	1639.67	264.856	1175.48	1620.91	147.525	1192.88	1618.64	206.047	1206.95	1485.11	203.979	1278.47	1248.44	196.201	1050.82	1421.69	200.333	983.366	1238.28	81.884	1296.5	1302.68	373.866	1164.69	1459.51	467.358	1190.37	1228.59	476.916	1194.05	1132.66	495.516	1117.11	957.115	443.705	1105.43	880.727	517.643	1134.24	881.935	497.572	1098.14	789.837
468	0	248.261	992.639	1644.18	133.525	999.273	1640.42	264.317	1163.46	1620.97	147.031	1180.43	1619.26	205.088	1194.63	1485.62	203.142	1266.64	1249.13	195.374	1038.81	1422	199.34	971.226	1238.7	80.665	1284.33	1303.27	372.977	1152.66	1459.95	465.912	1182.07	1229.07	476.386	1186.74	1133.56	495.5	1111.92	957.149	445.805	1099.63	882.852	517.329	1130.01	882.105	497.629	1093.82	789.931
469	0	248.693	980.652	1644.13	133.93	986.595	1640.89	263.837	1151.4	1620.76	146.572	1167.85	1619.59	204.38	1182.34	1485.75	202.177	1254.89	1249.34	194.478	1026.37	1422.33	198.477	959.156	1238.86	79.6607	1271.92	1303.74	372.353	1140.6	1460.18	465.213	1173.89	1229.96	475.737	1179.39	1134.27	495.247	1106.59	956.979	445.212	1095.69	882.072	516.542	1125.52	881.828	497.473	1089.21	789.993
470	0	249	968.375	1643.91	134.137	973.9	1641.19	263.455	1139.32	1620.33	145.898	1155.07	1619.63	203.655	1169.9	1485.78	201.706	1243.39	1249.63	193.789	1014.24	1422.12	197.501	947.067	1238.73	78.859	1259.89	1304.04	371.398	1128.31	1460.07	464.153	1165.44	1230.41	475.057	1171.7	1134.75	495.091	1101.16	956.813	445.592	1088.97	882.775	516.16	1121.1	881.761	497.161	1084.31	789.914
471	0	249.465	956.118	1643.4	134.38	961.109	1641.2	263.03	1127.15	1619.46	145.66	1142.5	1619.19	202.784	1157.27	1485.44	201.519	1231.97	1249.69	192.787	1001.7	1421.6	196.491	934.905	1238.08	78.1984	1247.55	1303.95	370.663	1115.81	1459.68	463.879	1156.51	1231.19	474.565	1163.93	1135.13	494.954	1095.61	956.306	442.971	1084.14	880.106	515.176	1116.38	880.991	496.827	1079.26	789.585
472	0	249.856	943.737	1642.67	134.735	948.294	1640.94	262.546	1114.8	1618.4	145.038	1129.64	1618.75	202.474	1144.6	1484.98	201.324	1220.38	1249.46	192.143	989.126	1421	195.562	922.713	1237.15	77.7937	1235.39	1303.64	370.139	1103.07	1459.26	463.746	1147.5	1231.66	474.107	1156.03	1135.55	494.738	1089.98	955.7	443.949	1078.88	880.518	514.552	1111.68	880.373	496.589	1074.01	789.252
473	0	250.064	931.33	1641.8	135.134	935.518	1640.46	262.104	1102.22	1617.31	144.436	1116.7	1617.99	201.912	1131.64	1484.42	201.149	1208.84	1249.21	191.24	976.264	1420.1	194.578	910.468	1236	77.5415	1223.39	1303.39	369.384	1089.96	1458.57	461.261	1137.55	1230.75	473.52	1147.7	1135.79	494.365	1083.9	955.322	442.231	1072.61	878.881	514.026	1106.86	880.065	496.517	1068.68	789.132
474	0	250.236	918.721	1640.72	135.367	922.519	1639.86	261.733	1089.61	1615.97	144.101	1103.77	1616.94	201.423	1118.65	1483.73	201.266	1197.32	1248.84	190.41	963.489	1418.65	193.68	898.156	1234.46	77.56	1211.12	1302.96	368.944	1076.75	1457.9	461.603	1127.86	1231.32	472.977	1138.98	1136	493.804	1077.47	954.284	442.152	1066.29	878.354	512.835	1101.5	879.201	495.68	1063.01	788.299
475	0	250.661	906.017	1639.38	135.662	909.359	1638.97	261.305	1077.01	1614.22	143.542	1090.58	1615.74	201.26	1105.59	1482.9	201.786	1185.63	1248.34	189.648	950.509	1417.17	192.908	885.756	1232.66	77.6343	1198.99	1302.21	368.45	1063.4	1456.88	461.052	1117.35	1231.18	472.36	1129.95	1135.85	493.275	1070.87	953.343	441.295	1060.04	876.93	512.08	1096.22	878.438	495.316	1057.35	787.688
476	0	250.967	893.177	1637.8	135.964	896.132	1637.84	260.918	1064.24	1612.47	143.321	1077.49	1614.28	200.763	1092.15	1481.78	202.549	1173.82	1247.73	189.119	937.551	1415.23	192.253	873.337	1230.63	77.8496	1186.76	1301.33	368.217	1049.82	1455.79	460.821	1106.59	1231.06	471.959	1120.77	1135.73	492.713	1063.85	952.364	443.674	1050.19	879.495	511.084	1090.35	877.487	494.65	1051.42	786.71
477	0	251.189	880.362	1636.27	136.177	882.882	1636.67	260.597	1051.39	1610.51	142.977	1064.16	1612.77	200.697	1078.88	1480.59	203.324	1161.65	1247.06	188.548	924.241	1413.52	191.764	860.859	1228.67	78.1988	1174.45	1300.29	367.756	1035.98	1454.52	460.109	1095.28	1230.63	471.054	1110.68	1135.4	492.17	1056.35	951.542	443.181	1043.04	878.879	509.678	1083.69	876.374	494.345	1045.68	785.973
478	0	251.618	867.324	1634.53	136.668	869.615	1635.24	260.395	1038.25	1608.6	142.792	1050.83	1611.02	200.72	1065.42	1479.28	204.103	1149.11	1246.38	188.195	910.952	1411.55	191.259	848.182	1226.48	78.7572	1161.93	1299.23	367.465	1021.97	1453.21	459.873	1083.67	1230.38	470.657	1100.64	1135.34	491.54	1048.51	950.713	442.914	1036.3	877.599	509.101	1077.09	875.98	493.673	1039.3	785.132
479	0	252.124	854.37	1632.74	137.184	856.286	1633.77	260.513	1025.32	1606.5	142.614	1037.47	1609.37	200.6	1051.81	1477.85	204.962	1136.46	1245.51	187.797	897.559	1409.58	190.958	835.524	1224.15	79.3871	1149.58	1298.07	367.484	1007.91	1451.97	459.985	1072.02	1230.21	470.367	1090.27	1135.14	491.191	1040.3	949.909	442.28	1028.45	876.418	508.443	1070.1	875.184	493.178	1032.38	784.128
480	0	252.58	841.204	1630.86	137.84	842.891	1632.17	260.47	1012.17	1604.25	142.508	1023.91	1607.37	200.881	1038.32	1476.29	205.892	1123.48	1244.38	187.381	883.998	1407.36	190.559	822.543	1221.89	80.249	1137.1	1296.76	367.547	993.806	1450.59	459.65	1059.98	1229.71	469.766	1079.4	1134.67	490.509	1031.34	948.809	449.446	1018.57	880.329	507.407	1061.93	874.289	491.399	1025.53	782.68
481	0	253.319	828.067	1628.81	138.44	829.513	1630.61	260.456	998.948	1601.64	142.814	1010.54	1605.3	201.076	1024.58	1474.7	206.774	1110.41	1242.95	187.43	870.578	1405.4	190.425	809.589	1219.58	81.0561	1124.53	1295.26	367.538	979.329	1448.97	459.617	1047.73	1228.94	469.66	1068.29	1134.23	490.068	1021.97	947.735	439.795	1013.77	872.952	506.332	1053.19	873.149	490.816	1018.08	781.418
482	0	254.17	814.937	1626.68	139.195	815.893	1628.94	260.912	985.778	1599.35	143.035	997.026	1603.24	201.738	1011.09	1472.87	207.684	1097.01	1241.41	187.408	857.01	1403.2	190.353	796.456	1217.33	82.0555	1111.83	1293.82	367.821	964.963	1447.4	459.635	1035.26	1228.11	469.658	1056.94	1133.56	489.815	1012.2	946.574	439.737	1004.91	871.972	505.98	1044.39	872.265	488.758	1010.47	779.561
483	0	255.043	801.596	1624.63	140.034	802.392	1627.18	261.373	972.463	1597	143.402	983.388	1601.3	202.255	997.33	1471.1	208.546	1083.39	1239.79	187.441	843.267	1401.2	190.189	783.295	1215.2	83.1067	1099.02	1292.37	368.187	950.738	1445.87	460.177	1022.84	1227.51	469.886	1045.01	1132.88	489.761	1001.95	945.565	435.983	997.081	867.801	505.859	1034.84	871.463	488.287	1002.21	778.363
484	0	256.099	788.236	1622.62	141.178	788.903	1625.43	262.201	959.286	1594.96	144.061	969.896	1599.5	203.253	984.058	1469.36	209.261	1069.34	1238.01	187.539	829.826	1399.16	190.145	769.969	1213.1	84.1335	1086.07	1290.84	368.656	936.418	1444.37	460.43	1009.91	1226.57	470.118	1032.6	1132.13	489.525	991.026	944.345	439.041	985.234	870.064	505.031	1024.15	870.115	486.859	993.613	776.784
485	0	257.292	774.996	1620.53	142.386	775.431	1623.75	262.989	945.916	1592.51	144.99	956.409	1597.5	204.017	970.302	1467.38	210.218	1055.3	1236.13	187.923	816.124	1397.24	190.128	756.545	1211.1	85.3244	1072.94	1289.14	369.402	922.312	1442.63	461.023	996.928	1225.37	470.549	1020	1130.86	489.583	979.74	942.91	437.763	975.21	867.656	505.497	1013.6	868.932	484.626	984.462	774.486
486	0	258.793	761.534	1618.27	143.817	761.956	1621.84	264.194	932.532	1590.28	146.174	942.908	1595.55	205.177	956.674	1465.31	211.144	1041.21	1234.23	188.351	802.525	1395.04	190.347	743.075	1208.86	86.586	1059.79	1287.35	370.271	908.184	1440.63	461.655	983.761	1223.74	471.277	1007.2	1129.38	489.494	967.679	940.93	437.774	963.871	866.271	505.458	1002.11	867.139	483.342	974.98	772.168
487	0	260.199	748.075	1616.34	145.211	748.42	1620.02	265.504	919.149	1588.04	147.473	929.407	1593.56	206.564	942.998	1463.49	212.185	1027.18	1232.41	189.365	788.94	1393.2	190.462	729.562	1206.82	87.8213	1046.51	1285.66	371.331	894.125	1438.69	462.711	970.44	1222.29	472.151	994.046	1127.85	490.023	955.578	939.262	436.456	952.739	863.976	505.8	989.894	865.531	482.13	964.787	770.103
488	0	261.856	734.738	1614.46	146.904	735.008	1618.41	267.107	905.615	1585.97	149.002	915.869	1591.5	208.052	929.241	1461.63	213.464	1013.35	1230.6	190.325	775.083	1391.23	190.707	715.765	1204.93	89.27	1033.31	1284.07	372.528	879.898	1436.6	463.563	956.693	1220.44	473.243	980.548	1126.19	490.368	942.63	937.418	436.757	940.744	862.12	506.09	977.204	863.565	481.209	954.025	767.964
489	0	263.717	721.22	1612.7	148.804	721.616	1616.68	268.98	892.128	1583.83	150.939	902.294	1589.62	209.907	915.578	1459.64	214.762	999.7	1228.63	191.51	761.293	1389.48	191.128	702.167	1202.87	90.9857	1019.92	1282.65	374.028	865.838	1434.35	464.587	942.797	1218.19	474.514	966.862	1124.12	491.251	929.439	935.328	437.107	928.168	859.936	506.863	964.167	861.4	480.744	942.956	765.571
490	0	265.709	707.654	1611.05	150.773	708.21	1615.06	271.085	878.57	1581.8	153.011	888.877	1587.47	211.862	901.712	1457.76	216.159	985.973	1226.73	192.78	747.474	1387.62	191.659	688.317	1201.12	92.6598	1006.4	1281.19	375.629	851.683	1431.96	466.038	928.865	1215.84	475.807	952.911	1121.72	491.755	915.683	932.69	438.523	915.12	858.226	507.899	950.855	859.021	480.141	931.045	762.877
491	0	267.798	694.082	1609.54	152.85	694.829	1613.47	273.33	864.862	1579.83	155.377	875.432	1585.42	214.028	887.953	1455.89	217.557	972.188	1224.73	194.333	733.58	1385.93	192.012	674.078	1199.55	94.4365	992.951	1279.96	377.467	837.347	1429.41	467.533	914.739	1213.4	477.5	938.91	1119.35	492.792	901.795	930.214	439.162	901.75	855.833	508.945	936.82	856.665	479.72	918.422	760.147
492	0	270.027	680.485	1608.17	155.066	681.328	1612	276.036	851.208	1578.15	157.981	862.047	1583.6	216.652	874.201	1454.19	219.168	958.174	1222.85	195.792	719.652	1384.54	192.486	660.042	1198.35	96.4453	979.412	1278.72	379.641	823.204	1426.79	469.259	900.283	1210.76	479.005	924.363	1116.63	493.735	887.321	927.448	440.085	887.682	853.353	509.72	922.352	853.715	480.053	905.402	757.455
493	0	272.352	666.857	1606.89	157.371	667.87	1610.67	278.828	837.52	1576.6	160.67	848.613	1581.97	219.441	860.52	1452.45	221.017	943.938	1220.93	197.508	705.828	1383.2	192.791	645.856	1197.2	98.7474	966.114	1277.69	382.01	808.888	1424.13	471.205	885.734	1207.92	480.981	909.812	1113.81	494.991	872.792	924.563	441.14	873.37	850.465	511.198	908.235	850.921	480.477	891.707	754.309
494	0	274.841	653.187	1605.99	159.925	654.603	1609.52	281.542	823.664	1575.36	163.482	835.168	1580.63	222.297	846.843	1450.75	222.93	929.561	1218.88	199.248	691.979	1382.21	192.959	631.581	1196.41	101.194	952.717	1276.64	384.557	794.678	1421.52	473.181	870.992	1205.08	483.173	895.061	1111.06	496.278	857.957	921.664	441.836	858.621	847.455	512.21	893.145	847.803	481.344	877.359	751.52
495	0	277.355	639.484	1605.49	162.491	641.292	1608.97	284.631	809.835	1574.63	166.698	821.68	1579.71	225.211	833.25	1449.45	225.199	914.739	1217.16	200.829	678.032	1381.6	193.018	617.504	1196.08	103.772	939.11	1275.77	386.8	780.366	1419	475.168	855.713	1202.25	484.96	879.556	1108.19	497.548	842.585	918.723	442.839	843.555	844.683	513.897	878.055	845.116	482.329	862.084	748.73
496	0	280.042	625.816	1605.18	165.018	627.865	1608.8	287.994	796.183	1574.27	169.966	808.376	1579.27	228.213	819.725	1448.54	227.204	899.94	1215.8	202.681	664.109	1381.41	193.106	602.942	1196.12	106.275	925.483	1275.06	389.067	766.071	1416.58	476.888	840.171	1199.2	486.692	863.643	1105.05	499.28	827	916.11	444.503	828.116	842.019	514.902	862.277	841.855	483.606	846.34	745.832
497	0	282.827	612.212	1605.11	167.848	614.541	1608.79	290.916	782.499	1573.9	173.101	795.04	1579.08	230.73	805.969	1447.97	228.712	885.435	1214.89	204.428	650.466	1381.28	193.311	588.097	1196.3	108.68	911.682	1274.74	391.234	751.944	1414.32	478.609	824.357	1196.28	488.239	847.17	1101.97	500.307	810.952	912.86	445.867	812.363	839.188	515.958	846.091	838.662	484.943	829.689	742.885
498	0	285.659	598.653	1605.47	170.65	601.323	1609.31	293.81	768.804	1573.96	176.079	781.554	1579.53	233.21	792.201	1447.87	230.057	870.872	1214.3	205.953	636.712	1381.81	193.555	573.716	1196.98	110.723	897.858	1274.81	393.329	737.862	1412.72	480.328	808.167	1193.81	489.472	830.159	1099.16	501.593	794.473	910.398	446.736	796.176	836.409	517.535	829.658	836.23	486.61	812.455	740.514
499	0	288.385	585.141	1606.45	173.188	587.936	1610.33	297.067	755.342	1574.76	179.111	768.286	1580.29	235.621	778.701	1448.26	231.049	856.661	1214.35	207.6	623.06	1382.79	194.19	559.537	1198	112.508	883.852	1275.38	395.461	724.141	1411.76	482.485	791.528	1192.22	490.661	812.74	1096.83	503.056	777.488	908.426	448.175	779.602	834.238	519.105	812.575	834.174	488.734	794.545	738.6
500	0	291.295	571.747	1607.37	176.215	574.703	1611.79	299.928	741.812	1575.62	182.077	755.134	1581.53	237.663	765.209	1449.14	231.459	842.376	1215	209.411	609.47	1384.07	195.092	545.59	1199.17	113.79	869.988	1276.53	397.086	710.585	1411.13	483.221	774.981	1189.94	491.792	795.129	1094.97	504.278	759.842	906.884	449.956	762.332	832.697	520.95	794.907	832.686	490.942	775.886	737.062
501	0	293.811	558.432	1608.87	178.899	561.458	1613.33	302.654	728.612	1576.81	184.678	741.861	1582.98	239.141	751.801	1450.47	231.441	828.476	1215.57	210.79	596.171	1385.43	196.005	531.639	1200.72	114.384	856.347	1278.39	399.342	697.255	1411.55	484.169	758.105	1188.66	492.477	777.437	1093.54	505.635	741.739	906.014	451.531	744.398	831.496	522.642	776.539	831.691	493.222	756.547	736.081
502	0	296.412	545.499	1610.25	181.358	548.314	1615.53	304.938	715.43	1578.02	187.029	728.618	1584.76	240.489	738.665	1451.93	231.242	814.755	1216.92	212.191	583.06	1387.37	196.872	518.241	1202.7	114.644	842.902	1280.48	400.32	684.254	1411.74	484.824	741.269	1187.68	492.922	759.79	1092.59	506.734	723.034	905.7	453.427	725.965	830.954	524.436	757.478	831.318	495.859	736.462	736.007
503	0	298.727	532.57	1612.05	184.135	535.57	1617.33	307.077	702.422	1579.36	189.299	715.717	1586.7	241.753	725.662	1453.52	231.13	801.405	1218.61	213.593	570.161	1389.3	197.999	505.117	1204.82	114.669	829.552	1282.71	401.902	671.486	1412.61	486.315	724.547	1187.78	493.157	742.297	1091.89	507.879	704.006	905.832	454.772	706.566	830.71	526.198	737.568	831.275	498.123	715.609	735.872
504	0	300.872	519.677	1613.51	186.074	522.662	1619.6	309.238	689.764	1580.92	191.361	703.036	1588.78	242.834	713.092	1455.21	231.519	788.698	1220.56	214.274	557.775	1391.38	198.918	492.557	1207.02	114.697	816.29	1284.79	402.941	658.68	1413.74	486.53	707.913	1187.55	493.515	725.107	1091.84	508.889	684.322	906.63	455.524	686.473	830.65	527.794	716.976	831.74	500.693	694.035	736.495
505	0	302.709	507.127	1615.47	187.882	509.926	1621.94	311.005	677.144	1582.74	193.04	690.521	1590.94	243.877	700.708	1457.22	232.73	776.413	1223.27	215.012	545.287	1393.58	199.374	480.049	1209.35	114.781	803.384	1287.11	403.96	645.836	1415.48	486.175	691.8	1187.62	494.192	708.375	1092.76	509.836	664.468	907.856	456.751	665.679	831.574	529.239	695.58	833.013	503.063	671.823	738.037
506	0	304.357	494.681	1617.27	189.425	497.589	1624.19	312.383	664.524	1584.77	194.45	677.942	1593.38	244.661	688.223	1459.39	234.229	764.417	1226.24	215.519	532.988	1395.78	199.437	467.757	1211.57	115.147	790.858	1289.49	404.184	632.917	1417.2	487.956	675.983	1189.75	494.426	691.474	1093.85	510.963	644.319	909.937	460.684	643.824	835.403	530.862	674.261	834.947	505.329	649.034	739.998
507	0	305.446	482.344	1619.27	190.683	485.192	1626.61	313.713	652.415	1586.8	195.626	665.663	1595.8	245.451	676.112	1461.65	235.771	752.648	1229.19	215.771	521.011	1398.06	199.283	455.82	1213.76	115.786	778.614	1291.74	404.899	619.9	1419.38	487.885	660.266	1190.76	495.064	675.051	1095.14	511.951	624.062	912.025	461.068	622.28	836.879	531.914	652.356	836.724	507.144	625.607	742.058
508	0	306.275	470.011	1621.12	191.446	473.171	1628.91	314.615	640.22	1588.74	196.624	653.838	1598.37	245.879	664.018	1463.94	237.382	741.149	1232.04	215.87	509.149	1400.13	199.081	444.064	1215.85	116.711	766.568	1293.88	405.277	607.422	1421.42	487.744	645.348	1191.79	495.48	658.555	1096.38	512.43	603.468	914.122	461.899	600.349	839.059	532.702	630.078	838.738	508.784	601.693	744.555
509	0	306.755	457.985	1623.45	192.086	461.299	1631.28	315.401	628.031	1591.11	197.471	641.887	1601.06	246.303	652.011	1466.43	238.565	729.558	1234.59	215.874	497.333	1402.58	198.919	432.538	1217.98	117.819	754.936	1295.91	405.948	594.82	1424.31	488.965	630.257	1194.47	496.156	642.122	1098.19	513.44	583.108	917.175	460.523	579.056	840.153	533.332	607.764	841.263	510.404	577.384	748.035
510	0	306.951	445.958	1625.66	192.084	449.45	1633.91	316	616.019	1593.68	198.052	630.073	1603.56	246.758	640.414	1468.91	239.966	718.143	1236.75	215.892	485.72	1404.88	198.826	421.044	1220.46	118.863	743.301	1297.92	406.108	582.352	1427.06	488.536	615.459	1196.16	497.05	625.728	1100.42	514.136	562.399	920.432	461.089	556.695	843.594	534.071	585.507	844.199	511.571	552.569	752.017
511	0	306.724	433.92	1628.3	191.836	437.865	1636.3	316.398	603.974	1596.12	198.738	618.534	1606.07	247.172	628.628	1471.49	240.854	706.407	1238.46	215.903	474.18	1407.42	198.862	409.598	1222.75	120.269	732.134	1299.81	405.94	570.088	1429.59	489.891	600.757	1199.2	497.795	609.181	1102.53	514.643	542.035	923.825	461.518	534.489	847.365	534.451	563.053	847.254	512.308	527.434	756.185
512	0	306.195	421.94	1630.83	191.381	426.543	1638.83	316.535	592.196	1598.85	198.967	607.141	1608.66	247.247	617.03	1474.01	241.709	694.624	1240.19	215.751	462.695	1409.89	199	398.046	1225.44	121.489	720.862	1301.52	406.386	557.908	1433.09	489.928	586.18	1201.45	498.843	592.927	1105.19	515.036	521.447	927.659	461.9	512.322	851.803	534.975	540.71	850.945	512.968	502.161	761.198
513	0	305.314	410.143	1633.63	190.42	415.144	1641.17	316.645	580.126	1601.61	199.055	595.709	1611.21	247.611	605.643	1476.51	242.543	683.025	1241.96	215.771	451.356	1412.59	199.145	386.578	1228.04	122.797	709.809	1303.37	406.749	545.875	1436.53	490.795	571.633	1204.53	499.979	576.686	1108.12	515.648	501.019	932.09	462.226	489.937	856.659	535.035	518.091	854.656	513.408	476.374	766.668
514	0	304.272	398.369	1636.43	189.427	403.962	1643.63	316.425	568.167	1604.46	199.094	584.47	1613.76	247.9	594.264	1479.01	243.108	671.26	1243.89	215.752	440.082	1414.99	199.723	375.151	1230.69	123.954	698.709	1305.22	406.823	533.95	1439.7	492.09	556.781	1207.95	500.915	560.235	1110.97	516.171	480.512	936.792	464.518	467.093	863.632	535.344	495.767	858.785	513.453	450.957	772.41
515	0	302.998	386.589	1639.16	188.499	392.97	1645.66	316.404	556.218	1607.48	199.07	573.322	1615.99	247.985	582.895	1481.55	243.9	659.852	1245.84	215.923	428.817	1417.48	200.298	363.588	1233.05	125.423	687.812	1306.82	407.132	522.212	1442.96	492.361	542.1	1210.53	502.222	544.079	1114.11	516.362	460.173	941.148	464.793	444.643	868.441	535.594	473.469	863.165	513.257	425.36	778.479
516	0	301.571	374.811	1641.97	187.067	381.911	1647.92	316.173	544.45	1610.38	198.889	562.08	1618.22	248.397	571.668	1483.9	244.935	648.258	1247.71	216.149	417.676	1419.8	201.107	352.229	1235.6	126.536	676.729	1308.52	407.329	510.601	1446.15	493.364	527.388	1213.7	503.544	528.008	1117.27	516.698	439.867	946.013	464.075	422.947	873.607	535.689	451.356	867.672	512.86	399.884	784.826
517	0	299.93	363.089	1644.59	185.484	370.995	1649.74	315.896	532.682	1613.12	198.756	551.061	1620.21	248.623	560.38	1485.94	245.717	636.791	1249.65	216.551	406.464	1422.21	201.821	341.024	1237.91	127.911	665.755	1310.05	407.774	499.011	1449.29	494.47	512.668	1216.8	504.709	511.983	1120.17	516.921	419.737	951.011	464.181	400.705	879.641	535.433	429.075	872.149	512.247	374.565	791.576
518	0	298.458	351.469	1647.14	183.826	360.028	1651.5	315.492	520.876	1615.5	198.659	540.013	1621.88	248.801	549.222	1487.83	246.891	625.472	1251.77	217.031	395.164	1423.99	202.798	329.7	1240.14	129.045	654.574	1311.42	407.688	487.713	1451.81	495.676	498.084	1219.72	506.1	496.184	1122.98	517.001	399.71	955.721	463.694	378.652	884.994	534.877	406.916	876.42	511.876	349.368	798.588
519	0	296.791	339.814	1649.24	182.275	349.161	1652.85	315.095	509.095	1617.9	198.311	528.888	1623.51	249.371	538.241	1489.65	247.571	613.946	1253.58	217.474	383.971	1425.79	203.742	318.207	1241.98	130.035	643.379	1312.62	408.067	476.27	1454.47	496.645	483.533	1222.33	507.371	480.536	1125.59	516.911	379.412	960.399	463.311	356.464	890.918	534.355	384.925	880.835	510.945	324.423	805.413
520	0	295.216	328.202	1651.27	180.761	338.335	1653.98	314.992	497.341	1620.17	198.176	517.856	1624.71	249.557	526.917	1491.14	248.508	602.508	1254.95	217.736	372.812	1427.33	204.411	306.889	1243.6	131.018	632.162	1313.83	408.283	464.914	1456.68	497.975	469.249	1224.92	508.653	464.839	1127.98	516.712	359.663	965.068	462.826	334.448	896.916	533.62	362.911	885.232	509.918	299.561	812.462
521	0	293.811	316.588	1652.91	179.232	327.289	1654.81	314.62	485.766	1621.89	197.957	506.753	1625.66	249.591	515.633	1492.27	249.025	590.626	1256.15	218.095	361.621	1428.61	205.208	295.574	1245	131.756	620.956	1314.53	408.552	453.588	1458.49	499.689	454.93	1227.57	510.183	449.545	1130.27	516.619	339.813	969.709	462.254	312.461	903.044	532.784	340.851	889.529	508.849	275.188	819.414
522	0	292.38	305.025	1654.15	177.987	316.31	1655.4	314.116	473.925	1623.38	197.764	495.61	1626.54	249.745	504.236	1493.26	249.97	579.112	1257.15	218.631	350.302	1429.47	206.007	284.21	1245.97	132.433	609.488	1315.27	408.642	442.264	1459.99	500.817	440.901	1229.39	511.497	434.09	1132.07	516.467	320.083	974.072	462.303	291.271	908.742	531.925	319.007	894.003	507.449	250.96	826.202
523	0	291.128	293.33	1655.33	176.707	305.171	1655.85	313.883	462.143	1624.81	197.346	484.353	1627.08	249.89	492.93	1494.13	250.548	567.423	1258.29	219.003	338.907	1430.2	206.53	272.997	1246.69	132.874	598.227	1315.96	408.798	431.007	1461.3	501.405	427.167	1230.7	512.776	418.8	1133.84	516.174	300.69	978.53	461.295	269.605	914.695	531.169	297.376	898.66	505.983	226.947	833.177
524	0	290.153	281.723	1656.19	175.685	293.931	1656.04	313.45	450.535	1625.67	196.842	472.93	1627.35	249.798	481.478	1494.66	251.052	556.249	1259.01	219.178	327.555	1430.62	207.135	261.828	1247.04	133.055	586.632	1316.17	408.836	419.741	1462.09	502.877	413.274	1232.34	513.915	403.443	1135.09	515.726	281.118	982.728	460.393	248.4	920.487	529.963	275.617	902.807	504.197	203.28	839.86
525	0	289.292	270.066	1656.61	175.117	282.691	1655.98	313.057	438.984	1625.97	196.544	461.506	1627.24	250.021	470.151	1494.9	250.868	544.909	1259.05	219.51	316.079	1430.66	207.938	250.667	1246.9	133.251	575.41	1316.25	408.971	408.6	1462.41	503.193	399.685	1232.67	514.946	388.289	1135.82	515.303	261.872	986.587	458.354	226.973	925.688	528.666	254.076	906.674	502.206	180.006	846.278
526	0	288.414	258.377	1656.75	174.55	271.246	1655.67	312.4	427.142	1625.97	196.205	449.95	1626.78	249.881	458.523	1494.76	250.333	533.586	1258.9	219.965	304.497	1430.36	208.359	239.323	1246.51	133.237	563.777	1316.12	408.93	397.509	1462.26	504.404	385.996	1233.47	515.912	373.217	1136.3	515.029	243.038	990.294	457.707	206.736	931.097	527.238	232.734	910.351	499.994	157.066	852.598
527	0	287.658	246.755	1656.8	173.714	259.676	1655.25	312.065	415.426	1625.95	195.641	438.229	1626.19	249.609	446.88	1494.57	249.536	522.405	1258.77	220.042	293	1429.98	208.869	228.059	1245.91	132.863	552.059	1316.06	408.891	386.411	1462.02	505.113	372.472	1233.96	516.935	358.217	1136.71	513.848	223.895	994.044	456.156	186.679	936.137	526.03	211.622	914.422	497.591	134.336	859.01
528	0	287.091	235.003	1656.49	172.924	247.872	1654.56	311.514	403.702	1625.46	195.294	426.542	1625.26	249.325	435.173	1494.13	248.406	510.702	1258.47	220.232	281.258	1429.32	209.427	216.622	1245.27	132.655	540.602	1315.77	408.706	375.293	1461.38	505.146	359.135	1233.56	517.76	343.227	1136.92	513.142	205.265	997.394	454.821	166.795	941.159	524.695	190.614	918.318	495.39	112.219	865.299
529	0	286.68	223.102	1655.78	172.504	235.844	1653.5	311.2	391.818	1624.7	194.871	414.601	1624.13	249.012	423.319	1493.45	247.025	498.907	1257.99	220.795	269.551	1428.31	209.785	205.429	1243.97	132.079	528.766	1315.22	408.517	364.193	1460.35	505.477	345.888	1233.16	518.542	328.384	1136.71	512.217	186.752	1000.6	453.196	147.4	945.813	523.329	169.99	921.981	493.161	90.3879	871.399
530	0	286.149	211.207	1654.91	172.215	224.117	1652.28	310.978	379.981	1623.82	194.291	402.503	1622.73	248.208	411.185	1492.53	245.723	487.056	1257.3	220.831	257.769	1426.8	210.333	193.923	1242.48	131.08	516.832	1314.53	408.263	353.145	1459.1	505.447	332.606	1232.34	519.192	313.723	1136.38	511.103	168.47	1003.58	451.525	128.347	950.047	521.871	149.567	925.674	490.695	69.0434	877.191
531	0	285.831	199.18	1653.78	171.743	211.943	1650.7	310.215	367.892	1622.4	193.893	390.493	1621.1	247.645	399.326	1491.41	244.553	475.334	1256.38	220.831	245.675	1425.29	210.654	182.447	1240.63	129.919	504.8	1313.84	407.938	342.115	1457.63	505.454	319.495	1231.45	519.7	299.15	1135.87	509.801	150.623	1006.52	449.842	109.965	954.011	520.347	129.458	929.21	488.235	47.9365	882.882
532	0	285.412	187.173	1652.32	171.342	199.811	1649.05	309.922	355.781	1620.98	193.478	378.345	1619.4	246.971	387.23	1490.06	243.263	463.966	1255.24	221.105	233.857	1423.45	211.053	170.87	1238.78	128.498	492.677	1312.94	407.58	331.041	1455.98	505.916	306.35	1230.71	520.096	284.666	1135.1	508.77	132.974	1009.32	448.169	91.5558	958.005	518.831	109.832	932.535	485.777	27.6262	888.376
533	0	285.066	174.933	1650.85	171.1	187.657	1647.14	309.803	343.66	1619.41	193.035	366.037	1617.34	246.307	375.033	1488.54	241.803	452.105	1253.92	221.292	221.654	1421.46	211.432	159.243	1236.42	127.03	480.221	1311.87	407.152	319.943	1454.01	505.137	293.713	1228.82	520.286	270.287	1133.97	507.43	115.645	1011.7	446.324	73.7509	961.354	517.368	90.6557	935.758	483.284	7.7516	893.445
534	0	284.577	162.71	1649.11	170.461	175.299	1645.21	309.082	331.321	1617.51	192.628	353.753	1615.22	245.586	362.951	1486.89	240.074	440.025	1252.32	220.97	209.514	1419.33	211.641	147.689	1234.14	125.457	467.737	1310.67	406.728	308.809	1451.96	504.874	281.052	1227.39	520.344	256.101	1132.77	505.931	98.7772	1013.9	444.545	56.4483	964.648	515.813	71.9692	938.768	480.891	-11.6204	898.306
535	0	284.126	150.339	1647.35	170.031	162.963	1642.96	308.938	319.054	1615.7	192.361	341.379	1612.83	244.741	350.544	1484.96	238.534	428.006	1250.5	221.084	197.183	1417.01	211.935	135.707	1231.82	123.883	455.105	1309.23	405.951	297.505	1449.55	504.187	268.383	1225.41	520.43	242.214	1131.33	504.107	82.2777	1015.77	442.629	39.5935	967.398	514.158	53.6897	941.277	478.582	-30.3193	902.986
536	0	283.547	138.058	1645.21	169.501	150.665	1640.77	308.405	306.558	1613.32	191.811	328.974	1610.38	243.923	338.281	1482.84	236.936	415.928	1248.66	220.871	184.74	1414.53	212.065	123.994	1229.06	122.225	442.295	1307.57	405.373	286.05	1447.07	503.606	255.998	1223.31	520.294	228.508	1129.55	502.59	66.2052	1017.3	440.8	23.061	969.806	512.46	35.9045	943.438	476.296	-48.6117	907.046
537	0	282.994	125.526	1643.13	168.97	138.109	1638.16	307.852	294.195	1610.97	191.339	316.462	1607.73	242.982	325.775	1480.76	235.192	403.644	1246.47	220.809	172.171	1411.88	212.029	111.933	1226.23	120.713	429.566	1305.89	404.604	274.549	1444.41	502.812	243.778	1221.02	520.489	215.414	1127.93	501.014	50.4448	1018.59	439.085	7.05054	971.736	510.945	18.7197	945.487	474.043	-66.3886	910.806
538	0	282.039	113.119	1640.81	168.036	125.807	1635.77	307.221	281.553	1608.57	190.7	304.086	1605.01	241.911	313.338	1478.44	233.875	391.724	1244.63	220.464	159.609	1409.21	211.939	99.7945	1223.5	119.136	416.676	1304.02	403.954	262.972	1441.92	501.907	231.64	1218.64	520.255	202.193	1126.11	499.635	35.1309	1019.67	437.387	-8.57308	973.369	509.449	1.87845	947.35	471.903	-83.4484	914.29
539	0	281.345	100.577	1638.63	167.279	113.25	1633.37	306.512	269.002	1606.08	190.095	291.601	1602.33	240.644	300.621	1476.04	231.893	378.727	1242.15	219.944	147.129	1406.66	211.595	87.6171	1220.81	117.361	403.582	1301.95	402.876	251.203	1439.23	500.826	219.644	1216.06	519.697	189.215	1124.02	498.105	20.3395	1020.37	435.763	-23.6368	974.729	507.935	-14.3336	948.841	469.848	-99.9266	917.315
540	0	280.199	88.1154	1636.24	166.164	100.853	1630.74	305.611	256.493	1603.54	189.109	279.031	1599.68	239.447	288.012	1473.63	230.18	366.18	1239.99	219.42	134.386	1403.99	211.319	74.8948	1218.2	115.629	390.433	1299.92	401.859	239.269	1436.53	499.802	207.788	1213.47	518.894	176.109	1121.6	496.685	5.89612	1020.55	434.221	-38.3642	975.515	506.428	-29.9639	949.909	467.921	-115.904	919.713
541	0	279.019	75.4986	1633.97	165.281	88.3292	1628.28	304.709	243.881	1601.08	188.087	266.416	1596.87	238.217	275.44	1471.25	228.492	353.545	1237.57	218.559	121.721	1401.45	210.669	62.2315	1215.61	113.793	377.133	1297.61	400.815	227.257	1433.9	498.554	195.869	1210.78	518.058	163.601	1119.24	495.284	-8.12737	1020.49	432.65	-52.6265	975.984	505.592	-45.1306	950.892	466.05	-131.3	921.683
542	0	277.599	63.0243	1631.98	163.643	75.9347	1626.14	303.505	231.194	1598.66	186.928	253.887	1594.28	236.865	262.708	1468.86	226.943	340.769	1235.2	217.503	108.907	1398.93	210.008	49.481	1213.08	112.101	364.026	1295.27	399.546	214.986	1431.33	497.357	184.17	1208.19	517.25	151.312	1116.86	494.011	-21.6843	1020.12	431.137	-66.4371	976.209	503.773	-59.4299	950.823	464.471	-146.019	923.161
543	0	276.165	50.415	1629.87	162.344	63.3659	1623.81	302.156	218.53	1596.27	185.667	241.362	1591.78	235.506	249.828	1466.38	225.398	328.009	1232.89	216.478	95.9593	1396.5	209.178	36.4872	1210.55	110.711	350.989	1292.85	398.322	202.466	1428.83	495.849	172.445	1205.27	516.295	139.174	1114.31	492.637	-34.7266	1019.19	429.761	-79.9295	975.967	502.325	-73.3095	950.332	462.894	-160.181	924.091
544	0	274.577	37.9998	1627.93	160.594	50.9866	1621.74	300.304	205.852	1593.69	184.144	228.726	1589.04	234.098	236.992	1463.98	224.094	315.682	1230.66	215.067	83.0298	1394.2	207.926	23.6341	1208.07	109.341	337.921	1290.31	396.797	189.728	1426.33	494.476	160.779	1202.7	515.218	127.351	1111.82	491.543	-47.4583	1018.09	428.33	-92.9608	975.247	500.806	-86.4805	949.439	461.452	-173.6	924.205
545	0	272.611	25.4356	1626.26	158.656	38.3419	1619.81	298.641	193.384	1591.48	182.291	216.21	1586.53	232.604	224.117	1461.77	222.658	302.571	1228.28	213.361	69.9768	1392.05	206.439	10.3581	1205.99	108.136	324.959	1287.94	395.256	176.644	1424.29	492.863	149.099	1200.36	514.09	115.738	1109.55	490.159	-59.5618	1016.65	427.117	-105.581	974.374	499.569	-99.0057	948.37	460.257	-186.568	924.052
546	0	270.572	12.9892	1624.55	156.503	25.99	1618.05	296.733	180.747	1589.23	180.321	203.568	1584.15	230.855	210.904	1459.57	221.795	289.824	1226.21	211.485	56.9179	1389.97	204.866	-2.78555	1203.95	107.121	312.12	1285.47	393.764	163.244	1422.42	491.229	137.24	1198.07	512.743	104.445	1107.13	489.019	-71.3727	1014.73	425.714	-117.89	973.291	498.293	-111.043	946.689	459.209	-198.754	923.257
547	0	268.376	0.533367	1622.98	154.464	13.5439	1616.44	294.456	168.133	1586.87	178.164	190.983	1581.74	229.313	197.823	1457.53	220.871	276.868	1223.93	209.723	43.6882	1387.87	203.169	-15.9267	1201.8	106.292	299.217	1282.99	392.01	149.487	1420.51	489.721	125.546	1195.94	511.167	93.2627	1104.48	488.013	-82.6636	1012.48	424.813	-129.67	971.421	496.812	-122.396	944.14	458.549	-210.411	921.681
548	0	265.86	-11.9836	1621.48	152.092	1.03956	1614.78	292.045	155.533	1584.83	175.704	178.393	1579.5	227.668	184.757	1455.7	220.302	263.702	1222.26	207.634	30.54	1386.08	201.392	-29.3449	1199.96	105.376	286.27	1280.38	390.241	135.774	1419.01	488.009	113.458	1194.26	509.68	82.2955	1102.43	487.144	-93.4906	1009.88	423.873	-140.716	969.268	495.556	-132.987	941.32	457.914	-221.399	919.438
549	0	263.265	-24.347	1620.38	149.199	-11.3149	1613.54	289.501	142.927	1583.05	173.14	165.841	1577.58	225.778	171.752	1454.07	219.766	250.32	1220.47	205.719	17.3866	1384.63	199.564	-42.4967	1198.56	104.507	273.29	1277.75	388.42	122.077	1417.94	486.582	101.402	1193.11	507.994	71.4147	1100.8	486.151	-103.906	1007.17	423.052	-151.211	966.662	494.511	-143.009	938.435	457.378	-231.677	916.675
550	0	260.453	-36.6927	1619.22	146.601	-23.6967	1612.22	287.219	130.716	1581.82	170.472	153.295	1575.72	223.795	159.092	1452.44	218.919	236.786	1218.6	203.595	4.4584	1383.46	198.115	-55.9247	1197.7	103.417	260.161	1275.1	386.473	108.706	1417.11	484.908	89.1357	1192.2	506.091	60.6142	1099.37	485.185	-113.888	1004.22	422.313	-161.508	963.795	493.609	-152.378	935.169	457.097	-241.289	913.347
551	0	257.625	-49.0917	1618.29	143.76	-36.1483	1611.11	284.095	118.122	1580.3	167.633	140.833	1574.31	221.441	146.426	1450.79	217.755	222.814	1216.6	201.695	-8.53589	1382.45	196.722	-69.6497	1196.99	102.101	246.799	1272.28	384.495	95.746	1416.46	483.111	76.7856	1191.32	504.217	49.7484	1098.25	484.548	-123.643	1000.91	421.576	-171.353	960.311	492.418	-161.166	931.036	456.953	-250.423	909.285
552	0	254.731	-61.4042	1617.59	140.543	-48.4856	1610.3	280.985	105.801	1579.23	164.574	128.489	1573.09	219.083	134.071	1449.29	215.912	209.099	1214.5	199.479	-21.2219	1381.9	195.48	-83.6271	1196.92	100.507	233.365	1269.35	382.105	83.2956	1415.93	481.381	64.46	1190.98	502.17	38.8644	1097.38	483.623	-133.143	997.485	421.017	-180.537	956.227	491.559	-169.429	926.963	456.859	-258.804	904.569
553	0	251.745	-73.6292	1617.18	137.715	-60.6768	1609.91	278.093	93.7109	1578.86	161.428	116.122	1572.55	216.312	121.581	1448.1	213.552	195.221	1212.57	197.379	-34.2226	1381.66	194.383	-97.8738	1197.4	98.8128	219.792	1266.52	379.769	71.2673	1415.82	479.495	52.3527	1190.75	499.894	28.0458	1096.77	482.604	-142.291	993.979	420.194	-189.643	952.265	490.611	-177.142	922.583	456.853	-266.535	899.226
554	0	248.731	-85.7646	1617.17	134.864	-73.0579	1609.91	274.568	81.3942	1578.44	158.118	103.807	1572.47	213.368	109.128	1447.22	211.123	181.52	1211.19	195.198	-46.8689	1381.89	193.4	-112.409	1198.18	96.9403	206.043	1264.01	377.138	59.4327	1415.84	477.738	40.2511	1190.99	497.474	17.1489	1096.56	481.672	-151.029	990.521	419.65	-198.214	947.829	490.009	-184.375	918.286	457.088	-273.706	893.54
555	0	245.853	-97.7795	1617.37	131.901	-85.4171	1610.19	271.18	69.3566	1578.48	154.744	91.518	1572.59	210.551	96.786	1446.75	208.855	168.171	1210.66	193.097	-59.6316	1382.41	192.397	-127.047	1199.17	95.0382	192.199	1261.96	374.74	47.8792	1416.51	475.548	28.6626	1191.32	495.006	6.26992	1096.77	480.613	-159.593	987.042	419.132	-206.091	942.982	489.391	-191.179	914.124	457.224	-280.007	887.089
556	0	243.013	-109.679	1617.98	128.754	-97.6116	1610.92	267.68	57.5634	1578.76	151.152	79.3009	1572.96	207.547	84.3271	1446.63	206.2	154.988	1210.31	190.863	-72.362	1383.28	191.542	-141.402	1200.46	93.0689	178.262	1260.27	372.289	36.2022	1417.76	473.399	17.2903	1192.29	492.293	-4.34636	1097.44	479.48	-167.751	983.882	418.502	-213.62	938.345	489.372	-197.498	910.716	457.817	-285.763	880.637
557	0	240.141	-121.49	1618.82	125.798	-109.666	1611.97	264.192	45.7461	1579.11	147.559	67.1775	1573.5	204.601	71.8061	1446.9	203.414	141.82	1210.5	188.678	-85.1486	1384.17	190.678	-155.367	1201.71	91.0019	164.447	1259.05	369.762	24.4624	1419.06	471.029	6.19633	1193.36	489.389	-14.9827	1098.28	478.541	-175.6	980.963	418.095	-220.642	933.655	489.099	-203.493	907.24	457.974	-290.946	874.117
558	0	237.283	-133.148	1619.73	122.919	-121.894	1613.05	260.801	34.1743	1579.61	144.069	55.0325	1574.15	201.635	59.276	1447.33	200.889	128.683	1210.96	186.662	-97.9091	1385.09	189.749	-168.976	1202.76	88.857	150.806	1258.37	367.217	12.5946	1420.63	468.499	-4.65701	1194.57	486.258	-25.3204	1099.15	477.494	-183.047	978.072	417.577	-227.196	928.907	488.996	-209.001	903.854	458.579	-295.362	867.179
559	0	234.334	-144.756	1620.79	120.153	-133.961	1614.21	257.657	22.7922	1580.33	140.581	42.935	1574.91	198.642	46.7456	1448.18	198.726	115.552	1211.66	184.701	-110.508	1386.05	188.965	-182.258	1203.95	86.7981	137.184	1258.14	364.77	0.641063	1422.51	465.825	-15.3998	1196.05	483.17	-35.5086	1100.41	476.37	-190.224	975.517	417.185	-233.153	924.14	489.036	-214.082	901.011	459.021	-298.987	860.53
560	0	231.666	-156.4	1622.06	117.387	-145.771	1615.61	254.346	11.258	1581.14	137.243	30.919	1575.64	195.892	34.2073	1449.06	196.981	102.362	1212.3	182.993	-123.146	1387.26	188.09	-195.313	1205.25	84.37	123.802	1258.28	362.439	-11.2272	1424.54	463.543	-26.2089	1198.13	480.111	-45.5593	1101.9	475.221	-197.13	973.269	416.633	-238.611	919.563	489.069	-218.853	898.459	459.677	-301.989	853.891
561	0	229.068	-167.882	1623.33	114.476	-157.645	1616.92	251.161	-0.370644	1581.88	134.009	18.9618	1576.45	193.263	21.8159	1450.11	195.472	89.1736	1213.34	181.364	-135.643	1388.32	187.303	-207.926	1206.47	81.8251	110.51	1258.89	360.42	-23.1781	1426.69	460.293	-36.7027	1199.21	477.115	-55.4373	1103.42	474.179	-203.562	971.194	416.168	-243.617	915.228	489.335	-223.261	896.293	460.414	-304.268	847.315
562	0	226.512	-179.574	1624.71	112.077	-169.577	1618.21	247.863	-12.2603	1582.77	130.997	7.02814	1577.26	190.863	9.44398	1451.24	193.842	76.2418	1214.43	179.945	-148.119	1389.47	186.596	-220.524	1207.66	79.7338	97.7009	1259.66	358.142	-34.9744	1428.6	457.42	-47.1916	1200.56	473.96	-65.13	1104.74	473.159	-209.828	969.248	416.083	-247.969	910.831	489.169	-227.546	894.026	461.181	-306.13	840.955
563	0	224.19	-191.107	1626.43	109.478	-181.561	1619.51	244.968	-23.9565	1583.97	128.087	-4.91441	1578.27	188.345	-2.90472	1452.68	191.855	63.7156	1215.71	178.484	-160.452	1390.78	185.986	-232.877	1208.97	77.2277	84.7604	1260.77	356.218	-46.6496	1430.74	454.891	-57.5182	1202.1	470.857	-74.4599	1106.14	472.342	-216.045	967.517	415.673	-252.025	906.827	489.444	-231.32	892.228	461.945	-307.365	834.944
564	0	221.978	-202.546	1628.08	107.382	-193.292	1621.05	242.288	-35.5795	1585.3	125.579	-16.8075	1579.46	186.13	-15.2091	1454.11	189.841	51.5855	1216.98	177.271	-172.756	1392.19	185.333	-245.034	1210.24	74.9707	72.1198	1262.1	354.268	-58.2566	1432.59	452.282	-67.9151	1203.38	467.85	-83.7884	1107.44	471.499	-221.336	965.894	415.441	-255.717	902.889	489.571	-234.859	890.456	462.938	-308.134	829.026
565	0	219.995	-214.143	1629.8	105.305	-205.194	1622.7	240.121	-47.1898	1586.82	123.302	-28.753	1580.89	184.121	-27.3352	1455.88	187.837	39.7739	1218.57	176.135	-184.952	1393.67	184.91	-257.292	1211.63	72.5982	59.5129	1263.72	352.654	-69.7014	1434.64	449.926	-78.1923	1204.62	464.884	-93.0069	1108.73	470.549	-226.636	963.911	415.883	-259.346	899.554	489.565	-238.1	888.588	463.775	-308.442	823.335
566	0	218.242	-225.865	1631.77	103.734	-217.215	1624.45	237.961	-58.8682	1588.66	121.176	-40.718	1582.36	182.149	-39.4491	1457.78	185.608	27.967	1220.48	175.059	-197.026	1395.42	184.466	-269.32	1213.37	70.0982	47.0134	1265.56	351.096	-81.0609	1436.78	448.292	-88.4259	1206.58	462.006	-102.011	1110.19	469.917	-231.679	962.441	415.753	-261.895	896.294	489.766	-240.782	887.084	464.825	-308.349	818.316
567	0	216.787	-237.403	1633.89	101.969	-229.105	1626.37	236.178	-70.6041	1590.78	119.374	-52.6693	1584.33	180.401	-51.4116	1459.85	183.621	16.3198	1222.61	173.869	-208.986	1397.34	183.963	-281.06	1215.33	67.6895	34.7459	1267.72	349.498	-92.2016	1439	446.222	-98.2309	1208.17	459.352	-110.911	1112.02	469.11	-236.403	961.191	415.709	-264.707	893.5	490.413	-243.206	886.321	466.004	-307.891	813.817
568	0	215.42	-249.144	1635.7	101.25	-241.223	1628.36	234.675	-82.1915	1592.83	117.623	-64.588	1586.4	178.668	-63.311	1461.87	181.793	4.66007	1224.8	173.008	-220.807	1399.22	183.552	-292.654	1217.13	65.3155	22.4995	1270	348.095	-103.32	1441.27	444.374	-108.298	1209.82	456.744	-120.179	1113.96	468.592	-240.735	960.303	415.76	-267.291	890.971	490.1	-245.136	884.859	467.112	-307.084	809.499
569	0	214.603	-260.788	1637.56	99.9954	-253.229	1630.18	233.3	-93.9664	1594.77	116.278	-76.6151	1588.44	177.082	-75.0756	1464.03	180.024	-6.95903	1226.85	171.97	-232.567	1400.99	182.96	-304.012	1218.78	62.8452	10.2996	1272.29	346.698	-114.326	1443.35	443.183	-118.369	1211.99	454.431	-129.126	1115.72	467.77	-244.931	959.238	415.668	-269.645	888.463	489.876	-246.893	883.652	468.195	-306.118	805.779
570	0	213.919	-272.67	1639.47	99.3886	-265.384	1632.27	232.103	-105.698	1596.85	114.948	-88.7328	1590.53	175.57	-86.8395	1466.04	178.247	-18.729	1228.98	171.021	-244.247	1402.98	182.208	-315.212	1220.6	60.587	-1.70682	1274.51	345.374	-125.341	1445.42	441.053	-128.294	1213.58	452.191	-137.941	1117.58	467.318	-248.852	958.371	415.816	-271.994	886.747	489.706	-248.358	882.802	469.566	-304.959	803.04
571	0	213.399	-284.507	1641.26	98.8416	-277.618	1634.29	231.069	-117.457	1598.81	113.955	-100.702	1592.8	174.134	-98.527	1468.12	176.907	-30.3619	1230.94	170.016	-255.871	1405	181.569	-326.517	1222.66	58.3693	-13.7177	1276.85	344.19	-136.54	1447.59	439.474	-138.258	1215.48	450.36	-146.891	1119.61	466.801	-252.823	957.886	415.793	-274.066	885.107	489.744	-249.771	882.321	470.778	-303.792	800.28
572	0	213.213	-296.425	1643.04	98.5165	-289.733	1636.42	230.241	-129.247	1600.8	113.123	-112.859	1595.07	172.536	-110.293	1470.04	175.527	-42.0708	1232.81	169.024	-267.544	1406.91	180.687	-337.757	1224.65	56.3508	-25.7151	1279.17	342.682	-147.625	1449.29	438.08	-148.106	1217.34	448.56	-155.525	1121.47	466.453	-256.708	957.57	416.099	-276.454	884.07	489.572	-251.339	881.889	471.436	-302.864	798.025
573	0	213.01	-308.263	1644.55	98.3845	-302.028	1638.28	229.488	-140.953	1602.57	112.243	-124.986	1597.37	171.291	-121.933	1472.08	173.961	-53.7702	1234.62	167.871	-279.098	1408.79	179.569	-349.208	1226.45	54.3344	-37.6456	1281.36	341.475	-158.907	1451.15	436.554	-157.776	1219.06	446.824	-163.759	1123.19	465.915	-260.513	957.426	416.319	-278.836	883.23	489.524	-252.934	881.809	471.855	-301.986	796.039
574	0	213.028	-320.173	1645.93	98.2941	-314.403	1640.14	228.627	-152.844	1604.26	111.459	-137.206	1599.37	169.827	-133.712	1473.72	172.651	-65.3919	1236.43	166.704	-290.639	1410.52	178.238	-360.577	1228.24	52.3263	-49.4845	1283.42	340.267	-170.372	1452.99	435.334	-167.179	1220.82	445.283	-171.822	1125	465.47	-264.382	957.319	417.02	-281.938	883.591	489.304	-254.834	881.872	472.487	-301.436	794.501
575	0	213.181	-332.125	1647.14	98.5303	-326.725	1641.69	228.076	-164.457	1605.65	110.676	-149.384	1601.33	168.742	-145.366	1475.33	171.335	-77.3297	1237.78	165.499	-302.295	1412	176.967	-371.892	1229.78	50.4784	-61.4422	1285.31	339.138	-181.924	1454.41	434.357	-176.658	1222.51	443.809	-179.73	1126.52	465.165	-268.391	957.444	417.227	-284.778	883.012	489.155	-256.986	881.89	472.879	-300.769	793.398
576	0	213.245	-344.048	1647.86	98.6419	-339.138	1643	227.479	-176.297	1606.73	109.983	-161.64	1602.8	167.524	-157.225	1476.53	170.247	-89.1478	1239.18	164.274	-313.938	1413.19	175.537	-383.352	1230.95	48.8393	-73.3213	1286.89	337.856	-193.669	1455.4	433.261	-185.6	1223.66	442.452	-187.463	1127.73	464.75	-272.616	957.045	417.244	-287.977	882.297	488.616	-259.314	881.577	473.149	-300.866	792.048
577	0	213.352	-355.968	1648.61	98.4949	-351.563	1644.19	226.702	-188.221	1607.52	109.059	-173.974	1604.15	166.54	-169.018	1477.6	169.215	-101.136	1240.17	163.183	-325.687	1414.18	173.984	-394.722	1231.98	47.2442	-85.1701	1288.21	336.733	-205.513	1456.32	431.699	-194.292	1224.43	441.369	-194.974	1129.07	464.461	-276.613	957.206	416.884	-291.099	881.806	488.134	-262.096	881.632	472.742	-301.276	790.882
578	0	213.508	-367.963	1649.26	98.6144	-363.876	1645.16	226.202	-200.036	1608.3	108.425	-186.276	1605.18	165.479	-181.051	1478.46	168.353	-113.079	1241.27	161.939	-337.448	1414.97	172.452	-406.208	1232.79	45.9117	-96.8592	1289.4	335.841	-217.606	1457.38	430.627	-203.026	1225.57	440.34	-202.487	1130.21	464.125	-280.994	957.26	417.016	-294.661	881.829	488.018	-264.653	881.957	472.336	-302.196	790.148
579	0	213.559	-380.101	1649.42	98.4843	-376.391	1645.72	225.495	-212.084	1608.56	107.78	-198.715	1605.85	164.655	-193.034	1478.93	167.614	-125.165	1241.71	160.862	-349.441	1415.37	170.922	-417.797	1233.19	44.7903	-108.721	1290.3	334.962	-229.831	1457.76	429.428	-211.759	1226.14	439.244	-210.071	1130.85	463.885	-285.656	957.072	416.677	-298.474	881.235	487.283	-267.92	881.517	471.71	-303.577	789.08
580	0	213.595	-392.275	1649.31	98.5021	-388.967	1645.99	224.966	-224.041	1608.52	106.911	-211.173	1606.18	163.709	-205.247	1479.15	166.77	-137.301	1242.04	159.592	-361.533	1415.36	169.297	-429.602	1233.12	43.7705	-120.347	1290.89	333.851	-242.163	1457.61	428.511	-220.569	1226.71	438.258	-217.734	1131.23	463.236	-290.331	956.058	416.039	-302.323	880.214	486.392	-271.593	880.93	470.69	-305.43	787.702
581	0	213.57	-404.466	1649.14	98.5559	-401.587	1646.19	224.173	-236.321	1608.2	106.169	-223.695	1606.27	163.018	-217.623	1479.33	166.089	-149.474	1242.26	158.424	-373.694	1415.2	167.588	-441.45	1232.76	42.9134	-132.04	1291.28	332.986	-254.724	1457.52	427.097	-229.397	1226.61	437.484	-225.449	1131.55	462.953	-295.074	955.443	415.23	-306.288	879.097	485.66	-275.337	880.327	469.73	-307.701	786.517
582	0	213.552	-416.738	1648.78	98.4707	-414.206	1646.18	223.59	-248.529	1607.74	105.452	-236.376	1606.02	162.161	-230.14	1479.13	165.412	-161.786	1242.11	157.212	-385.966	1414.81	165.982	-453.435	1232.3	42.0065	-143.668	1291.59	332.051	-267.4	1457.2	426.33	-238.41	1227.09	436.707	-233.226	1131.78	462.203	-300.529	954.63	414.63	-310.8	878.343	484.988	-279.354	879.764	468.786	-310.46	785.589
583	0	213.373	-429.104	1647.97	98.2763	-426.958	1645.8	222.892	-260.881	1606.86	104.76	-249.148	1605.5	161.43	-242.886	1478.7	164.631	-174.09	1241.84	156.048	-398.415	1414	164.249	-465.435	1231.15	41.6122	-155.626	1291.58	331.125	-280.258	1456.45	425.031	-247.595	1226.55	435.866	-241.211	1131.73	461.702	-306.025	953.59	414.156	-315.723	877.243	484.133	-283.665	878.769	467.701	-313.723	784.267
584	0	213.354	-441.541	1647.14	98.3564	-439.738	1645.35	222.073	-273.397	1605.61	103.987	-262.081	1604.64	160.715	-255.663	1478.01	163.739	-186.582	1241.27	154.857	-411.046	1412.98	162.591	-477.485	1229.77	40.9074	-167.367	1291.52	330.162	-293.295	1455.44	424.298	-257.105	1226.53	434.963	-249.367	1131.47	461.05	-311.648	952.441	413.343	-321.046	876.014	483.266	-288.22	877.833	466.638	-317.332	783.03
585	0	213.425	-454.073	1645.99	98.0713	-452.62	1644.69	221.4	-286.003	1604.16	103.272	-275.019	1603.52	160.034	-268.722	1477.19	162.878	-198.971	1240.66	153.665	-423.894	1411.65	161.003	-489.593	1228.25	40.2972	-179.161	1291.15	329.309	-306.462	1454.34	423.17	-266.74	1225.88	434.249	-257.726	1131.15	460.378	-317.597	951.287	412.064	-326.293	874.133	482.346	-293.046	876.849	465.719	-321.529	781.907
586	0	213.302	-466.762	1644.56	98.0817	-465.622	1643.78	220.683	-298.738	1602.51	102.623	-288.106	1602.28	159.439	-281.871	1476.24	162.115	-211.411	1239.93	152.648	-436.845	1410.12	159.447	-501.652	1226.26	40.0932	-191.339	1290.71	328.375	-319.819	1452.84	422.227	-276.687	1225.22	433.302	-266.308	1130.46	459.649	-323.85	949.812	411.395	-332.197	872.709	481.389	-298.295	875.645	464.561	-326.11	780.445
587	0	212.666	-479.824	1642.72	98.0625	-478.723	1642.58	220.167	-311.569	1600.59	101.774	-301.244	1601.03	158.759	-295.179	1475.14	161.651	-223.744	1239.15	151.542	-449.974	1408.29	158.066	-513.968	1224	39.6942	-203.353	1290.19	327.478	-333.287	1451.11	421.445	-286.857	1224.51	432.328	-275.14	1129.66	458.948	-330.396	948.291	410.939	-338.571	871.233	480.143	-303.936	874.234	463.493	-331.321	778.949
588	0	212.431	-492.749	1641.31	97.8347	-491.908	1641.46	219.494	-324.545	1598.65	101.041	-314.415	1599.47	158.236	-308.506	1473.8	161.692	-235.873	1238.21	150.481	-463.261	1406.42	156.662	-526.275	1221.67	39.6707	-215.729	1289.35	326.686	-346.889	1449.54	420.511	-297.273	1223.75	431.402	-284.216	1128.96	458.217	-337.244	946.904	410.138	-345.08	870.038	478.995	-309.754	872.902	462.352	-336.905	777.573
589	0	212.538	-505.73	1639.74	97.778	-505.065	1640.4	219.013	-337.488	1596.68	100.604	-327.71	1597.72	157.667	-322.128	1472.37	161.88	-247.804	1237.14	149.46	-476.582	1404.6	155.208	-538.669	1219.38	39.5085	-227.837	1288.62	326.031	-360.642	1447.93	419.711	-307.864	1223.06	430.48	-293.482	1128.26	457.61	-344.392	945.685	409.221	-351.987	868.513	477.947	-315.987	871.732	461.383	-342.919	776.428
590	0	212.872	-518.776	1637.81	98.4169	-518.42	1638.99	218.472	-350.761	1594.43	100.082	-341.089	1595.96	157.358	-335.788	1470.99	162.085	-259.912	1236.14	148.508	-490.109	1402.51	153.935	-551.327	1216.93	39.5372	-240.323	1287.68	325.343	-374.594	1446.23	418.772	-318.721	1222.12	429.472	-303.231	1127.43	456.813	-351.928	944.169	408.135	-359.238	866.615	476.891	-322.692	870.532	460.329	-349.395	775.051
591	0	212.659	-531.919	1636.06	98.1979	-531.824	1637.55	218.199	-363.971	1592.08	99.7155	-354.716	1594.1	157.079	-349.555	1469.39	162.402	-272.13	1235.12	147.63	-503.784	1400.35	152.78	-564.172	1214.33	39.7097	-252.935	1286.62	324.706	-388.757	1444.39	417.746	-329.853	1221.14	428.545	-313.108	1126.6	456.055	-359.936	942.834	407.472	-367.093	865.27	475.668	-329.735	869.113	459.274	-356.367	773.723
592	0	212.771	-545.163	1634.19	98.488	-545.171	1636.09	217.85	-377.394	1589.67	99.4715	-368.227	1592.05	156.547	-363.527	1467.6	162.644	-284.774	1233.77	146.827	-517.486	1398.19	151.661	-577.079	1211.84	40.0113	-265.642	1285.54	324.179	-403.059	1442.62	416.91	-341.2	1220.39	427.686	-323.467	1125.92	455.231	-368.305	941.433	407.016	-375.331	864.367	474.542	-337.174	868.08	458.25	-363.749	772.519
593	0	212.961	-558.486	1632.13	98.7217	-558.621	1634.56	217.733	-390.822	1587.08	99.2298	-381.781	1589.93	156.585	-377.252	1465.84	162.778	-298.014	1232.28	146.12	-531.216	1396.04	150.592	-590.239	1209.45	40.1978	-278.506	1284.16	323.635	-417.476	1440.57	416.055	-352.709	1219.38	426.86	-333.973	1124.99	454.531	-377.052	940.132	406.569	-383.962	863.483	473.344	-345.19	866.761	457.175	-371.609	771.226
594	0	213.392	-571.939	1630.05	98.9578	-572.292	1632.82	217.547	-404.407	1584.42	99.1446	-395.367	1587.7	156.45	-391.151	1463.91	163.082	-311.285	1230.78	145.543	-545.092	1393.81	149.741	-603.578	1207.04	40.6131	-291.443	1282.72	323.46	-431.945	1438.84	415.222	-364.526	1218.24	426.223	-344.687	1124.2	453.892	-386.332	938.742	405.862	-393.081	862.175	472.175	-353.778	865.503	456.1	-379.892	769.89
595	0	213.778	-585.436	1628.06	99.2676	-585.883	1631.22	217.478	-417.999	1582.02	99.2296	-409.215	1585.71	156.574	-405.063	1462.05	163.387	-324.971	1229.33	145.027	-558.913	1391.66	148.881	-616.983	1204.79	40.8437	-304.567	1281.26	323.165	-446.477	1437.01	414.979	-376.741	1217.79	425.6	-355.876	1123.37	453.251	-396.099	937.675	404.713	-402.808	860.479	471.337	-362.733	864.638	455.128	-388.618	768.765
596	0	214.166	-598.979	1626.09	99.6146	-599.556	1629.5	217.662	-431.643	1579.85	99.3415	-422.94	1583.75	156.671	-418.961	1460.35	163.685	-338.769	1227.73	144.426	-572.714	1389.82	148.204	-630.427	1202.73	41.2291	-317.808	1279.66	323.108	-460.937	1435.42	414.262	-389.048	1216.59	425.1	-367.582	1122.48	452.616	-406.449	936.513	404.097	-412.93	859.374	470.465	-372.258	863.677	454.049	-397.939	767.508
597	0	214.714	-612.681	1624.01	100.304	-613.299	1627.89	217.933	-445.336	1577.66	99.6291	-436.701	1581.83	157.024	-432.717	1458.38	163.806	-352.719	1226.03	144.246	-586.625	1387.88	147.729	-644.074	1200.63	41.611	-331.177	1278.13	323.089	-475.317	1433.49	414.022	-401.722	1215.39	424.806	-379.614	1121.47	452.182	-417.255	935.029	402.224	-424.205	856.455	469.534	-382.715	862.203	452.94	-407.761	765.938
598	0	215.285	-626.256	1621.93	101.094	-627.147	1626.26	218.295	-459.007	1575.5	99.9201	-450.578	1580.17	157.105	-446.763	1456.63	164.005	-366.626	1224.34	143.708	-600.487	1386.02	147.228	-657.863	1198.7	41.914	-344.702	1276.56	323.21	-489.609	1431.64	414.095	-414.776	1214.32	424.399	-392.16	1120.17	451.662	-428.721	933.525	402.499	-434.993	855.901	468.808	-393.691	860.78	451.799	-418.121	764.247
599	0	216.353	-640.063	1620.25	101.55	-641.037	1624.55	218.684	-472.75	1573.59	100.548	-464.478	1578.47	157.574	-460.708	1454.92	164.234	-380.51	1222.72	143.731	-614.349	1384.38	146.881	-671.72	1196.97	42.5097	-358.677	1274.87	323.267	-503.777	1429.8	413.847	-427.866	1212.89	424.344	-404.712	1119	451.353	-440.687	932.13	402.058	-446.861	854.627	468.211	-405.223	859.373	450.716	-429.052	762.723
600	0	217.171	-653.719	1618.37	102.542	-654.854	1623.09	219.283	-486.519	1571.83	100.966	-478.332	1576.81	157.954	-474.545	1453.1	164.397	-394.328	1221.09	143.8	-628.208	1382.72	146.6	-685.648	1195.23	42.6745	-372.281	1273.46	323.601	-517.8	1428.12	414.013	-441.244	1211.56	424.553	-417.642	1117.77	451.103	-453.126	930.712	401.686	-459.354	853.415	467.764	-417.565	857.835	449.783	-440.558	761.178
601	0	218.082	-667.568	1616.23	103.698	-668.75	1621.44	219.974	-500.251	1569.74	101.873	-492.275	1575.05	158.42	-488.698	1451.29	164.562	-408.22	1219.29	144.17	-641.922	1380.95	146.603	-699.702	1193.52	43.1332	-386.389	1271.81	324.068	-531.816	1426.18	414.348	-454.827	1209.96	424.661	-431.124	1116.21	451.054	-466.146	928.981	401.631	-472.01	851.924	467.66	-430.447	856.185	448.818	-452.689	759.226
602	0	219.356	-681.227	1614.77	104.742	-682.659	1619.78	220.957	-514.046	1567.96	102.819	-506.267	1573.22	159.326	-502.484	1449.64	164.684	-422.234	1217.53	144.715	-655.897	1379.23	146.575	-713.777	1191.89	43.2995	-400.129	1270.49	324.488	-545.734	1424.16	414.624	-468.443	1208.13	425.125	-444.508	1114.38	450.96	-479.675	927.052	401.52	-485.545	850.186	467.739	-443.778	854.371	447.961	-465.385	757.127
603	0	220.622	-695.12	1613.12	105.959	-696.58	1618.13	221.899	-527.872	1566.25	103.631	-520.184	1571.6	160.043	-516.229	1447.82	164.833	-436.257	1215.8	145.264	-669.852	1377.73	146.59	-727.93	1190.44	43.5337	-414.162	1269.21	325.243	-559.568	1422.13	415.352	-482.298	1206.55	425.533	-458.399	1112.5	451.062	-493.589	925.067	400.464	-499.956	847.234	467.808	-457.681	852.123	447.157	-478.798	755.048
604	0	221.791	-708.931	1611.53	107.835	-710.507	1616.7	223.021	-541.655	1564.67	105.018	-534.19	1570.12	161.005	-530.092	1446.19	165.061	-450.485	1213.79	146.114	-683.892	1376.37	146.739	-742.288	1189.12	43.9828	-428.42	1267.81	325.974	-573.365	1419.86	415.975	-496.188	1204.47	426.067	-472.174	1110.33	451.237	-507.967	922.896	402.083	-513.305	845.824	467.916	-472.363	849.833	446.726	-492.79	752.809
605	0	223.313	-722.596	1610.24	108.963	-724.499	1615.23	224.278	-555.494	1563.36	106.185	-548.082	1568.7	162.058	-543.991	1444.94	165.419	-464.799	1212.03	146.969	-698.002	1375.24	146.951	-756.77	1188.15	44.3133	-442.327	1266.78	326.992	-587.113	1417.88	416.491	-509.982	1202.15	426.869	-486.101	1108.04	451.484	-522.671	920.597	401.273	-528.949	842.827	468.265	-487.26	847.517	446.362	-507.401	750.35
606	0	224.982	-736.532	1609.22	110.186	-738.433	1614.14	225.694	-569.222	1562.56	107.545	-561.925	1567.7	163.271	-557.589	1443.79	165.726	-479.067	1210.36	147.785	-711.996	1374.47	147.006	-771.306	1187.56	44.7602	-456.436	1265.69	327.862	-600.684	1415.83	417.021	-524.064	1199.89	427.626	-500.476	1105.81	451.988	-537.641	918.581	402.38	-543.721	841.849	468.654	-502.621	845.298	446.153	-522.626	748.203
607	0	226.493	-750.31	1608.5	111.909	-752.346	1613.41	227.154	-582.997	1561.96	109.108	-575.814	1567.16	164.516	-571.261	1442.67	166.25	-493.263	1209.01	148.459	-725.893	1374.02	147.043	-786.027	1187.42	45.3625	-470.636	1264.72	328.839	-614.189	1413.77	417.77	-538.298	1197.74	428.252	-515.196	1103.64	452.364	-553.035	916.297	402.492	-559.781	839.245	469.074	-518.139	842.88	446.186	-538.561	745.931
608	0	228.078	-764.055	1607.95	113.668	-766.249	1612.9	228.641	-596.749	1561.73	110.557	-589.586	1566.99	165.703	-584.92	1441.89	166.801	-507.426	1207.92	149.438	-739.786	1373.86	147.116	-800.614	1187.56	46.0087	-484.713	1263.97	329.918	-627.802	1412.05	418.371	-552.734	1195.38	429.176	-530.077	1101.22	452.805	-568.633	914.045	402.333	-575.861	836.626	469.465	-534.209	840.363	446.446	-554.991	743.643
609	0	229.919	-777.906	1607.61	115.527	-780.097	1612.65	230.107	-610.382	1561.64	112.02	-603.335	1567.17	166.748	-598.458	1441.44	167.264	-521.424	1207.19	150.342	-753.567	1374.07	147.267	-815.412	1187.91	46.5992	-499.013	1263.46	331.043	-641.249	1410.63	419.27	-567.543	1193.43	429.7	-545.594	1098.88	453.082	-584.722	911.732	403.51	-591.268	834.906	469.771	-550.577	838.053	446.904	-572.196	741.558
610	0	231.464	-791.442	1607.63	117.062	-793.835	1612.75	231.689	-623.905	1562.17	113.456	-617.054	1567.63	167.783	-611.986	1441.32	167.494	-535.416	1206.81	151.169	-767.343	1374.69	147.57	-829.967	1188.78	46.8721	-513.244	1263.34	331.877	-654.535	1409.6	419.669	-582.594	1191.71	430.088	-561.426	1096.96	453.589	-601.025	910.175	403.768	-607.765	833.515	470.143	-567.224	836.164	447.519	-589.949	740.08
611	0	233.104	-805.051	1608.02	118.783	-807.328	1613.31	233.212	-637.44	1562.99	114.937	-630.446	1568.52	168.572	-625.168	1441.7	167.497	-549.25	1206.8	152.036	-780.903	1375.73	148.029	-844.376	1189.96	47.0967	-527.614	1263.44	332.91	-667.729	1409.13	420.075	-597.903	1190.29	430.412	-577.424	1095.42	453.902	-617.644	908.918	403.975	-624.965	831.976	470.575	-584.224	834.773	448.328	-608.282	739.031
612	0	234.442	-818.378	1608.45	120.272	-820.89	1614.05	234.666	-650.836	1564.01	116.484	-643.915	1569.61	169.394	-638.355	1442.12	167.103	-563.027	1207.22	153.006	-794.491	1376.86	148.694	-858.491	1191.3	46.925	-541.577	1264.32	333.561	-680.773	1408.83	420.246	-613.465	1189.03	430.664	-593.653	1094.15	454.472	-634.836	908.154	404.846	-642.664	831.655	471.088	-601.821	833.719	449.215	-627.217	738.284
613	0	236.188	-831.75	1609.51	121.673	-834.336	1614.85	235.933	-663.929	1565.02	117.878	-657.163	1570.81	170.049	-651.397	1443.12	166.422	-576.689	1207.87	153.864	-807.795	1378.16	149.421	-872.355	1192.81	46.236	-555.69	1265.52	334.209	-693.685	1409.07	420.866	-628.968	1188.66	430.73	-609.758	1093.35	454.767	-652.313	907.72	407.003	-661.019	832.895	471.536	-619.703	833.136	450.167	-646.742	737.988
614	0	237.885	-844.633	1610.69	123.018	-847.565	1615.77	237.267	-677.047	1566.54	118.899	-670.189	1572.37	170.352	-664.174	1444.21	165.426	-590.295	1208.59	154.497	-821.009	1379.63	150.045	-885.953	1194.48	45.4669	-569.611	1266.91	334.877	-706.527	1409.75	420.725	-644.399	1187.96	430.766	-625.613	1092.95	455.274	-670.162	907.906	406.403	-678.961	831.858	472.029	-638.312	833.147	451.218	-666.8	738.276
615	0	239.183	-857.667	1611.55	124.248	-860.678	1616.87	238.39	-689.925	1567.82	119.979	-683.24	1573.88	170.615	-677.115	1445.24	164.731	-603.567	1209.68	155.236	-834.196	1381.22	150.53	-899.332	1196.16	44.797	-583.509	1268.38	335.197	-719.368	1410.37	420.786	-659.652	1187.8	430.533	-641.817	1092.74	455.514	-688.392	908.328	407.243	-698.133	832.453	472.589	-657.439	833.287	452.51	-687.441	738.823
616	0	240.211	-870.467	1612.73	125.443	-873.637	1618.17	239.187	-702.797	1569.12	120.784	-696.087	1575.36	170.921	-689.813	1446.5	164.121	-616.567	1211.04	155.337	-846.921	1382.73	150.589	-912.454	1197.83	43.9174	-596.744	1270.1	335.388	-732.185	1411.27	420.739	-674.777	1187.9	430.573	-657.431	1092.75	455.82	-706.763	908.976	405.437	-719.026	830.825	473.023	-676.986	833.747	453.494	-708.515	739.63
617	0	241.088	-883.139	1614.04	126.35	-886.446	1619.63	239.752	-715.357	1570.71	121.402	-708.967	1577.05	171.124	-702.635	1447.98	163.794	-629.263	1212.62	155.272	-859.669	1384.51	150.285	-925.325	1199.67	43.2689	-609.852	1271.8	335.654	-745.119	1412.59	420.724	-689.709	1188.52	430.326	-673.072	1093.18	456.165	-725.5	910.252	407.431	-738.089	834.158	473.405	-696.822	834.513	454.555	-730.067	741.16
618	0	241.913	-895.75	1615.36	127.052	-899.224	1621.32	240.138	-727.942	1572.15	121.784	-721.635	1578.81	171.228	-714.786	1449.68	164.142	-641.658	1214.56	155.01	-872.169	1386.36	149.555	-937.874	1201.41	42.9558	-622.51	1273.49	335.766	-758.133	1414.02	420.479	-704.485	1189.17	430.336	-688.594	1093.82	456.443	-744.322	911.658	409.385	-758.678	836.906	473.717	-717.015	835.681	455.419	-752.076	743.109
619	0	242.357	-908.119	1616.68	127.607	-911.867	1622.99	240.54	-740.341	1573.73	122.16	-734.285	1580.77	171.325	-727.548	1451.25	164.906	-653.741	1216.74	154.714	-884.739	1388.07	148.809	-950.156	1202.97	42.9848	-634.924	1275.34	335.681	-771.245	1415.44	420.368	-719.275	1190.05	430.32	-704.138	1094.43	456.58	-763.355	913.035	406.244	-779.822	836.107	473.813	-737.552	836.706	455.956	-774.563	745.033
620	0	242.588	-920.484	1618.16	128.092	-924.309	1624.91	240.534	-752.743	1575.48	122.282	-746.687	1582.83	171.173	-739.961	1453.23	165.674	-665.606	1219.22	154.132	-897.092	1389.82	147.979	-962.185	1204.53	43.2841	-647.127	1277.05	335.542	-784.352	1417.22	420.284	-733.95	1191.26	430.258	-719.977	1095.37	456.685	-782.43	914.969	407.84	-799.241	839.522	473.833	-758.122	838.283	456.464	-797.445	747.686
621	0	242.739	-932.788	1620.32	128.075	-936.706	1627.02	240.424	-764.965	1577.56	122.25	-759.031	1585.11	171.042	-752.26	1455.86	166.463	-677.444	1221.83	153.499	-909.285	1391.94	147.151	-974.093	1206.39	43.4868	-658.906	1279.12	335.054	-797.285	1419.33	420.224	-748.665	1193.06	430.284	-735.785	1096.9	456.709	-801.601	917.432	405.857	-820.94	840.733	473.618	-778.957	840.264	456.741	-820.552	751.077
622	0	242.858	-945.162	1622.56	128.045	-948.944	1629.45	240.242	-777.083	1579.93	122.059	-771.198	1587.72	170.923	-764.531	1458.24	167.085	-689.116	1224.49	152.848	-921.401	1394.34	146.411	-986.004	1208.51	43.8991	-670.604	1281.3	334.896	-810.079	1422.08	420.12	-763.406	1195.03	430.556	-751.723	1098.76	456.657	-820.839	920.347	407.93	-840.721	846.615	473.191	-800.091	842.71	456.93	-843.874	755.024
623	0	242.469	-957.319	1624.74	127.867	-961.128	1631.81	239.923	-789.282	1582.59	121.673	-783.384	1590.39	170.502	-776.481	1461.07	167.448	-700.733	1226.92	152.192	-933.382	1396.72	145.811	-998.028	1210.79	44.3461	-682.154	1283.5	334.453	-822.706	1424.89	420.056	-778.289	1197.18	430.676	-767.738	1100.92	456.399	-840.242	923.512	407.404	-861.412	850.184	473.043	-820.852	845.659	456.749	-867.396	759.218
624	0	241.668	-969.348	1627.23	127.352	-973.123	1634.52	239.304	-801.349	1585.17	121.122	-795.482	1593.06	170.091	-788.447	1463.8	167.387	-712.391	1229.03	151.446	-945.278	1399.38	145.356	-1009.94	1213.48	44.4652	-693.653	1285.72	334.111	-835.159	1428.21	420.21	-793.231	1199.92	430.853	-784.074	1103.41	456.03	-859.657	927.093	406.754	-881.961	854.387	472.312	-842.068	848.869	456.373	-891.014	764.168
625	0	241.059	-981.466	1630.15	126.581	-985.131	1637.07	238.809	-813.414	1588.2	120.605	-807.417	1595.88	169.687	-800.572	1466.48	167.14	-724.028	1231.33	150.83	-957.019	1402.22	145.029	-1021.7	1216.39	44.902	-705.233	1288	333.68	-847.464	1431.59	420.648	-808.232	1203.03	431.049	-800.226	1106.06	455.543	-879.177	931.022	406.03	-902.661	858.911	471.79	-863.076	852.496	455.916	-914.716	769.428
626	0	240.228	-993.601	1633.13	125.624	-997.06	1639.85	238.198	-825.408	1591.13	119.978	-819.245	1598.69	169.299	-812.285	1469.41	166.827	-735.661	1233.59	150.466	-968.678	1405.11	144.951	-1033.54	1219.34	45.155	-716.552	1290.49	333.178	-859.623	1434.86	420.598	-823.274	1205.61	431.501	-816.321	1108.94	454.85	-898.746	935.04	405.279	-923.43	863.586	471.289	-884.233	856.279	455.268	-938.376	775.001
627	0	238.954	-1005.49	1635.86	124.451	-1009	1642.43	237.524	-837.31	1594.18	119.213	-831.123	1601.37	168.912	-824.194	1472.1	166.577	-747.344	1236.17	150.026	-980.255	1407.89	144.959	-1045.27	1222.3	45.2995	-728.161	1292.78	333.027	-871.653	1438.55	420.927	-838.315	1208.76	431.666	-832.503	1111.93	454.228	-918.443	939.518	404.338	-944.178	868.662	470.302	-905.601	860.241	454.307	-961.977	780.897
628	0	237.784	-1017.46	1639.18	123.176	-1020.76	1645.13	236.571	-849.253	1597.38	118.422	-842.894	1604.13	168.436	-835.726	1475.11	166.453	-759.134	1239.01	149.692	-991.83	1410.94	145.024	-1057.01	1225.47	45.5204	-739.751	1295.21	332.81	-883.58	1442.24	421.449	-853.34	1212.29	431.91	-848.631	1115.15	453.534	-938.102	944.292	403.832	-965.416	874.788	469.617	-926.877	865.069	453.188	-985.537	787.187
629	0	236.604	-1029.51	1641.89	121.929	-1032.48	1647.48	235.792	-861.279	1600.44	117.559	-854.705	1606.74	168.136	-847.339	1477.71	166.576	-771.052	1241.79	149.479	-1003.32	1413.62	145.132	-1068.81	1228.33	45.7112	-751.264	1297.48	332.854	-895.475	1445.95	421.588	-868.334	1215.08	432.51	-864.374	1118.22	452.548	-957.822	948.926	402.355	-986.133	880.299	468.56	-948.486	869.298	451.776	-1009.32	793.193
630	0	235.322	-1041.51	1644.56	120.57	-1044.28	1649.64	234.96	-873.231	1603.1	116.713	-866.458	1609.02	167.803	-859.085	1480.09	166.662	-782.971	1244.31	149.367	-1014.84	1416.17	145.433	-1080.57	1231.04	45.8006	-762.847	1299.69	332.414	-907.195	1448.92	421.882	-883.064	1218.06	432.813	-880.311	1120.99	451.68	-977.668	953.69	401.111	-1007.1	885.715	467.491	-970.008	873.79	450.219	-1032.66	799.34
631	0	234.007	-1053.48	1647.16	119.242	-1055.98	1651.47	234.25	-885.147	1606.07	115.815	-878.176	1611.18	167.576	-870.736	1482.43	166.705	-794.97	1246.7	149.161	-1026.38	1418.45	145.561	-1092.34	1233.51	45.7393	-774.461	1301.99	332.041	-918.905	1451.85	422.416	-897.631	1220.93	433.265	-896.029	1123.73	450.58	-997.448	958.305	399.518	-1028.18	890.927	466.529	-991.607	878.77	448.348	-1056.19	805.542
632	0	232.772	-1065.34	1649.29	118.062	-1067.65	1653.16	233.568	-896.907	1608.55	115.231	-889.838	1613.06	167.309	-882.539	1484.35	166.784	-807.026	1248.78	149.114	-1037.94	1420.66	145.676	-1103.99	1235.74	45.7404	-786.197	1303.83	331.973	-930.623	1454.54	422.641	-911.954	1223.39	433.681	-911.573	1126.29	449.591	-1017.18	963.15	397.709	-1048.73	896.583	465.325	-1013.28	883.418	446.23	-1079.37	811.718
633	0	231.774	-1077.41	1651.43	117	-1079.43	1654.67	232.92	-908.837	1610.82	114.599	-901.495	1614.68	167.125	-894.02	1486.19	166.817	-819.008	1250.28	149.109	-1049.42	1422.48	145.786	-1115.7	1237.74	45.6592	-798.055	1305.5	331.72	-942.295	1456.8	423.035	-926.241	1225.61	434.329	-927.017	1128.48	448.692	-1036.89	967.766	396.138	-1069.58	902.137	464.011	-1034.93	887.864	443.969	-1102.62	817.823
634	0	230.72	-1089.39	1653.07	115.883	-1091.24	1655.79	232.238	-920.69	1612.54	113.913	-913.264	1616.04	166.885	-905.688	1487.62	167.047	-830.921	1251.89	148.944	-1061.07	1424	145.798	-1127.36	1239.33	45.5314	-809.899	1306.79	331.353	-953.821	1458.41	423.322	-940.256	1227.29	434.787	-942.29	1130.11	447.541	-1056.36	971.89	394.469	-1090.02	907.528	462.594	-1056.63	892.294	441.207	-1125.69	823.676
635	0	229.766	-1101.22	1654.33	114.886	-1103.04	1656.7	231.414	-932.716	1614.06	113.343	-925.077	1616.94	166.646	-917.58	1488.74	166.958	-842.657	1253.18	148.931	-1072.66	1425.21	145.814	-1138.91	1240.59	45.2513	-821.734	1308.13	331.301	-965.527	1460.21	423.778	-954.157	1229.07	435.507	-957.486	1131.82	446.244	-1075.74	975.894	392.537	-1110.42	912.836	460.965	-1078.23	896.381	438.572	-1148.53	829.623
636	0	229.006	-1113.28	1655.38	113.983	-1114.95	1657.25	231.062	-944.575	1615.16	112.749	-936.931	1617.53	166.428	-929.375	1489.53	166.769	-854.219	1254.24	148.899	-1084.4	1426.07	145.716	-1150.54	1241.47	44.9103	-833.716	1309.08	331.121	-977.232	1461.16	424.186	-967.918	1230.09	435.885	-972.961	1132.74	445.094	-1094.92	979.67	390.536	-1130.76	917.732	459.383	-1099.63	900.285	435.751	-1171.22	835.232
637	0	228.345	-1125.34	1655.93	113.352	-1126.95	1657.5	230.599	-956.669	1615.71	112.277	-948.895	1617.82	166.198	-941.219	1490.04	165.83	-865.83	1254.68	148.984	-1096.3	1426.54	145.717	-1162.2	1241.82	44.6712	-845.742	1309.61	330.645	-988.876	1461.42	424.767	-981.84	1230.99	436.511	-988.13	1133.37	443.844	-1114.13	983.16	388.776	-1150.88	922.318	457.712	-1120.96	903.775	432.721	-1193.81	840.574
638	0	227.601	-1137.4	1656.19	112.738	-1139.01	1657.46	230.084	-968.735	1616.02	111.825	-960.993	1617.81	165.951	-953.383	1490.31	164.674	-877.539	1255.13	148.85	-1108.22	1426.67	145.656	-1173.92	1241.8	44.0386	-857.689	1310.21	330.338	-1000.6	1461.64	424.648	-995.548	1231.05	436.737	-1003.57	1133.78	442.381	-1133.04	986.073	386.784	-1170.66	926.711	455.768	-1142.04	907.034	429.675	-1216.16	845.743
639	0	227.034	-1149.43	1656.43	112.174	-1151.07	1657.38	229.571	-980.927	1616.01	111.378	-973.122	1617.42	165.581	-965.639	1490.24	163.301	-889.525	1255.38	148.605	-1120.18	1426.47	145.502	-1185.61	1241.58	43.3449	-869.96	1310.59	330.001	-1012.37	1461.53	424.975	-1009.17	1231.29	437.211	-1018.7	1133.98	441.08	-1151.84	989.147	384.628	-1190.22	931.039	453.864	-1162.67	910.367	426.906	-1238.12	851.107
640	0	226.493	-1161.58	1655.96	111.628	-1163.25	1656.82	229.17	-993.176	1615.47	110.965	-985.301	1616.72	164.898	-977.761	1489.95	161.767	-901.698	1255.24	148.496	-1132.32	1425.89	145.415	-1197.31	1240.86	42.3129	-882.052	1310.85	329.516	-1024.08	1460.89	424.963	-1022.93	1230.88	437.55	-1033.86	1133.76	439.517	-1170.31	991.752	382.803	-1209.41	935.375	452.141	-1183.39	913.361	424.001	-1259.89	856.003
641	0	226.101	-1173.99	1655.19	111.135	-1175.58	1655.85	228.67	-1005.54	1614.43	110.614	-997.644	1615.71	164.367	-990.149	1489.28	160.243	-914.008	1254.82	148.458	-1144.67	1424.82	145.283	-1209.26	1239.62	41.2286	-894.549	1310.7	329.052	-1035.99	1459.87	424.892	-1036.7	1229.96	437.721	-1049.01	1133	437.922	-1188.78	993.948	380.682	-1228.73	938.675	449.652	-1203.69	915.47	421	-1281.3	860.456
642	0	225.703	-1186.29	1654.2	110.795	-1188.04	1654.72	228.299	-1017.92	1613.19	110.101	-1010.12	1614.21	163.705	-1002.72	1488.29	158.816	-926.404	1254.14	148.401	-1157.1	1423.54	145.204	-1221.14	1238.12	39.984	-907.097	1310.32	328.53	-1047.9	1458.48	424.759	-1050.55	1228.89	437.901	-1064.07	1132.09	436.374	-1206.98	996.046	378.473	-1247.55	941.821	447.663	-1223.58	917.973	418.122	-1302.48	864.956
643	0	225.092	-1198.5	1652.88	110.356	-1200.45	1653.49	228.218	-1030.22	1611.96	109.636	-1022.66	1612.55	163.04	-1015.37	1487.2	157.453	-938.813	1253.14	148.06	-1169.51	1421.91	144.955	-1233.08	1236.34	38.525	-919.702	1309.64	327.912	-1059.67	1456.81	424.693	-1064.29	1227.81	437.809	-1079.07	1130.83	434.675	-1224.79	997.769	376.229	-1266.05	944.795	445.824	-1243.19	920.392	415.278	-1323.27	869.241
644	0	224.716	-1211.13	1651.4	109.742	-1213.02	1651.73	227.594	-1042.98	1610.06	109.272	-1035.29	1610.56	162.083	-1027.99	1485.73	155.91	-951.165	1251.83	147.951	-1182.1	1419.94	144.733	-1245.11	1234.28	37.0206	-932.539	1308.96	327.315	-1071.73	1454.84	423.905	-1078	1225.75	437.59	-1094.02	1129.19	432.901	-1242.51	999.148	374.05	-1284.36	947.259	443.871	-1262.54	922.305	412.308	-1343.76	872.974
645	0	224.233	-1223.84	1649.8	109.306	-1225.74	1649.88	227.287	-1055.57	1608.26	108.805	-1047.93	1608.53	161.167	-1040.72	1484.09	154.449	-963.113	1250.76	147.709	-1194.92	1417.81	144.486	-1257.27	1231.98	35.095	-945.441	1308.14	326.555	-1083.69	1452.62	423.239	-1091.71	1223.83	437.283	-1108.82	1127.46	431.106	-1260.03	1000.23	371.811	-1302.57	949.122	441.642	-1281.96	923.792	409.574	-1363.71	876.515
646	0	223.506	-1236.34	1647.92	108.501	-1238.37	1647.86	226.593	-1068.37	1606.07	108.291	-1060.7	1606.11	160.108	-1053.38	1482.5	152.724	-975.462	1249.24	147.269	-1207.68	1415.56	143.971	-1269.68	1229.63	33.2184	-958.378	1307.18	325.671	-1095.73	1450.21	422.388	-1105.38	1221.76	436.848	-1123.48	1125.69	429.224	-1277.18	1001.37	369.518	-1320.25	951.053	439.65	-1300.69	925.388	406.789	-1383.23	879.873
647	0	223.097	-1249.4	1645.83	107.939	-1251.13	1645.61	226.064	-1081.12	1603.81	107.569	-1073.46	1603.57	159.097	-1066.71	1480.12	150.727	-987.94	1247.2	146.899	-1220.66	1413.13	143.58	-1282.47	1227.11	31.2968	-971.571	1305.88	324.825	-1107.81	1447.6	421.443	-1118.95	1219.29	436.17	-1138.15	1123.45	427.282	-1294.03	1001.88	367.303	-1337.61	952.513	437.437	-1319.1	926.38	404.099	-1402.26	882.794
648	0	221.723	-1261.7	1643.31	107.187	-1263.94	1643.13	225.289	-1094.09	1601.05	106.792	-1086.35	1600.88	158.025	-1079.6	1478.03	148.888	-1000.36	1245.27	146.275	-1233.51	1410.45	143.207	-1295.26	1224.39	29.2802	-984.729	1304.34	323.702	-1120	1444.59	420.657	-1132.57	1216.82	435.456	-1152.64	1120.97	425.296	-1310.56	1002.01	365.019	-1354.56	953.476	435.24	-1336.99	926.899	401.566	-1420.95	885.306
649	0	220.811	-1274.64	1640.9	106.108	-1276.91	1640.59	224.273	-1107.04	1598.46	105.851	-1099.41	1598.17	156.632	-1092.51	1475.68	146.667	-1012.98	1243.04	145.652	-1246.48	1407.85	142.46	-1307.96	1221.83	27.241	-997.65	1302.64	322.705	-1132.21	1441.84	419.41	-1145.93	1214.3	434.504	-1166.95	1118.49	423.21	-1326.73	1001.91	362.781	-1371.16	954.278	433.131	-1354.56	927.567	399	-1439.03	887.612
650	0	219.808	-1287.56	1638.88	105.004	-1289.76	1638.07	223.156	-1120	1596	104.697	-1112.3	1595.43	155.18	-1105.28	1473.33	144.47	-1025.64	1240.86	144.672	-1259.36	1405.38	141.711	-1320.49	1219.36	25.1593	-1010.97	1300.78	321.32	-1144.34	1438.91	417.652	-1159.17	1211.35	433.309	-1181.02	1116.02	421.167	-1342.44	1001.85	360.414	-1387.25	954.878	430.866	-1371.45	927.814	396.396	-1456.62	889.532
651	0	218.353	-1300.33	1636.34	103.688	-1302.61	1635.57	221.915	-1132.93	1593.37	103.423	-1125.28	1592.79	153.894	-1118.13	1470.88	142.183	-1038.16	1238.26	143.607	-1272.25	1402.8	140.91	-1333.42	1216.89	22.9463	-1024.18	1298.79	320.076	-1156.72	1436.04	416.065	-1172.3	1208.5	432.097	-1195.08	1113.38	419.172	-1357.93	1001.25	358.087	-1403.05	954.914	428.679	-1387.98	927.747	394.016	-1473.56	891.053
652	0	216.955	-1313.36	1633.76	102.099	-1315.73	1632.9	220.468	-1145.93	1591.06	101.991	-1138.31	1590.1	152.209	-1130.98	1468.36	140.321	-1050.66	1236.1	142.543	-1285.32	1400.22	139.827	-1345.96	1214.33	21.0798	-1037.41	1296.68	318.629	-1169.15	1433.15	414.366	-1185.43	1205.76	430.645	-1208.95	1110.75	417.109	-1373.11	1000.33	355.893	-1418.45	954.569	426.589	-1404.01	927.27	391.623	-1490.07	891.997
653	0	215.068	-1326.24	1631.52	100.399	-1328.62	1630.42	218.665	-1158.91	1588.59	100.316	-1151.12	1587.71	150.555	-1143.92	1466.04	138.2	-1063.34	1233.56	140.977	-1298.2	1397.85	138.578	-1359.4	1212.04	18.8768	-1050.71	1294.48	316.967	-1181.78	1430.37	412.559	-1198.36	1203.14	428.996	-1222.48	1108.15	414.897	-1387.69	999.281	353.659	-1433.39	954.066	424.288	-1419.39	926.603	389.379	-1505.84	892.752
654	0	213.248	-1339.2	1629.57	98.6043	-1341.56	1628.11	216.836	-1171.86	1586.49	98.4747	-1164.09	1585.24	148.837	-1156.89	1463.71	136.317	-1076.11	1231.35	139.398	-1311.21	1395.65	136.936	-1372.57	1209.83	17.1586	-1063.8	1292.11	315.454	-1194.59	1428.04	410.536	-1211.25	1200.43	427.258	-1235.83	1105.69	412.858	-1402.01	998.129	351.546	-1447.85	953.306	422.14	-1434.28	925.739	387.261	-1521.1	892.976
655	0	210.999	-1352.14	1627.38	96.4789	-1354.52	1625.79	214.864	-1184.85	1584.34	96.5009	-1176.96	1582.9	147.132	-1169.83	1461.47	134.551	-1089.01	1228.99	137.734	-1324.36	1393.43	135.21	-1385.88	1207.6	15.7294	-1076.96	1289.83	313.876	-1207.8	1425.74	408.309	-1223.95	1197.73	425.384	-1248.89	1103.18	410.835	-1415.72	996.584	349.423	-1461.94	952.115	420.181	-1448.61	924.591	385.269	-1535.65	892.815
656	0	208.58	-1365.06	1625.51	94.0002	-1367.43	1623.61	212.42	-1197.72	1582.22	94.0443	-1190.04	1580.79	145.455	-1182.9	1459.26	133.399	-1101.86	1227.12	135.613	-1337.34	1391.43	133.06	-1398.84	1205.62	14.1963	-1090.01	1287.33	311.975	-1221.24	1423.65	406.423	-1236.65	1195.67	423.387	-1261.6	1100.86	409.002	-1429.05	995.025	347.469	-1475.57	950.834	418.001	-1462.17	923.114	383.388	-1549.63	892.174
657	0	205.959	-1377.95	1623.87	91.3809	-1380.23	1621.78	210.296	-1210.63	1580.69	91.6182	-1202.85	1578.44	143.588	-1195.84	1457.19	132.19	-1114.73	1224.89	133.441	-1350.44	1389.66	130.859	-1411.93	1203.87	13.0284	-1102.94	1284.9	310.441	-1234.88	1422.11	404.004	-1249.22	1193.53	421.303	-1273.92	1098.78	406.925	-1441.76	993.277	345.458	-1488.57	949.423	415.947	-1475.05	921.531	381.577	-1562.79	891.19
658	0	203.101	-1390.81	1622.16	88.426	-1392.95	1619.85	207.646	-1223.54	1578.81	89.0038	-1215.61	1576.33	141.954	-1208.95	1455.14	131.269	-1127.62	1222.86	131.246	-1363.55	1387.89	129.15	-1426.19	1202.43	12.0834	-1115.88	1282.17	308.459	-1248.7	1420.32	401.806	-1261.87	1191.64	419.204	-1286.16	1096.75	405.153	-1454.21	991.265	343.674	-1501.3	947.716	414.163	-1487.5	919.514	380.02	-1575.42	889.657
659	0	199.994	-1403.73	1620.64	85.6312	-1405.71	1618.13	204.823	-1236.67	1576.97	86.2739	-1228.49	1574.41	139.891	-1221.83	1453.2	130.597	-1140.93	1220.74	128.976	-1376.62	1386.34	126.954	-1439.48	1200.94	10.9326	-1128.81	1279.41	306.319	-1262.5	1418.65	399.638	-1274.74	1189.9	416.966	-1298.32	1094.62	403.351	-1466.31	989.008	341.904	-1513.53	945.538	412.055	-1499.32	916.992	378.578	-1587.47	887.624
660	0	196.844	-1416.59	1619.56	82.281	-1418.47	1616.73	201.865	-1249.52	1575.38	83.5008	-1241.24	1572.75	137.782	-1234.96	1451.34	129.788	-1154.68	1218.57	126.702	-1389.87	1385.21	125.243	-1453.65	1200.15	9.68916	-1142.05	1276.6	304.363	-1276.21	1417.65	397.622	-1287.59	1188.83	414.832	-1310.33	1093.29	401.477	-1477.81	986.631	340.067	-1525.2	943.381	410.261	-1510.45	914.571	377.177	-1598.75	885.154
661	0	193.622	-1429.38	1618.85	78.9099	-1431.02	1615.8	199.005	-1262.31	1574.55	80.5391	-1253.84	1571.5	135.5	-1247.82	1449.97	129.037	-1168.74	1216.73	124.283	-1402.95	1384.6	123.567	-1467.63	1199.81	8.42128	-1155.2	1273.95	302.151	-1289.65	1417.1	395.495	-1300.46	1187.96	412.932	-1322.15	1092.66	399.813	-1489.01	984.327	338.402	-1536.38	941.043	408.541	-1521.01	912.06	375.966	-1609.32	882.414
662	0	190.174	-1442.08	1618.44	75.679	-1443.51	1615.46	196.074	-1275.11	1573.99	77.4016	-1266.48	1570.84	133.233	-1260.76	1448.96	128.205	-1182.93	1215.2	121.849	-1416.15	1384.11	121.876	-1481.74	1199.59	7.05754	-1168.47	1271.53	300.148	-1303.13	1417.06	393.779	-1313.4	1187.82	410.5	-1334.06	1091.79	398.055	-1499.74	982.047	336.822	-1547.18	938.359	406.819	-1530.95	909.481	374.871	-1619.26	879.205
663	0	186.736	-1454.73	1618.43	72.224	-1456.09	1615.22	192.711	-1287.88	1573.61	74.2126	-1279.1	1570.41	130.664	-1273.65	1448.33	126.928	-1197.09	1214.23	119.526	-1429.43	1384.18	120.295	-1495.94	1199.93	5.7348	-1181.81	1269.61	297.742	-1316.34	1417.21	391.589	-1326.23	1187.71	408.265	-1345.94	1091.72	396.3	-1510.24	979.671	335.097	-1557.36	935.4	405.5	-1540.52	907.054	373.882	-1628.52	875.623
664	0	183.412	-1467.33	1618.87	68.7995	-1468.59	1615.6	189.396	-1300.48	1573.78	71.018	-1291.61	1570.52	128.263	-1286.5	1448.26	125.324	-1210.87	1213.99	116.999	-1442.41	1384.51	118.511	-1509.82	1200.53	4.1134	-1195.08	1268.17	295.67	-1329.58	1418	389.783	-1339.03	1188.42	405.736	-1357.86	1092.19	394.588	-1520.24	977.565	333.563	-1567.01	932.355	403.664	-1549.21	904.262	373.104	-1637.05	871.784
665	0	180.148	-1479.76	1619.63	65.6162	-1481.03	1616.24	186.401	-1312.93	1574.47	67.5362	-1304.08	1570.9	125.98	-1299.18	1448.52	123.409	-1224.26	1214.14	114.725	-1455.39	1385.34	116.684	-1523.57	1201.52	2.51194	-1208.38	1267.23	293.358	-1342.54	1419.18	387.833	-1351.54	1189.5	403.37	-1369.62	1092.95	392.923	-1529.99	975.547	332.161	-1575.86	929.541	402.312	-1557.13	901.926	372.561	-1644.79	867.86
666	0	176.755	-1492.19	1620.49	62.2164	-1493.48	1617.09	182.967	-1325.44	1575.02	64.3575	-1316.48	1571.67	123.432	-1311.84	1449.23	121.355	-1237.41	1214.64	112.582	-1468.48	1386.45	114.989	-1537.42	1202.79	1.22531	-1221.45	1266.79	291.157	-1355.58	1420.72	386.014	-1364.2	1191.09	401.216	-1381.45	1094.53	391.235	-1539.28	973.615	330.792	-1584.47	926.293	401.027	-1565	899.406	372.111	-1651.5	863.528
667	0	173.422	-1504.37	1622.01	58.8926	-1505.7	1618.44	179.596	-1337.71	1576.42	61.0313	-1328.88	1572.83	121.078	-1324.43	1450.16	119.333	-1250.97	1215.16	110.158	-1481.11	1387.93	113.343	-1550.98	1204.49	-0.378801	-1234.47	1266.73	288.753	-1368.33	1422.74	384.019	-1376.43	1193.23	398.586	-1393.02	1095.98	389.667	-1548.21	972.078	329.48	-1592.29	923.208	400.039	-1572.27	897.3	371.722	-1657.89	859.242
668	0	170.214	-1516.57	1623.71	55.671	-1517.86	1620.06	176.441	-1349.84	1578.21	57.8757	-1341.19	1574.3	118.657	-1336.82	1451.5	117.585	-1264.68	1216.04	107.933	-1493.75	1389.68	111.549	-1564.07	1206.46	-1.93759	-1247.46	1267.37	286.589	-1381.03	1425.24	381.899	-1388.65	1195.55	396.191	-1404.51	1098.33	388.205	-1556.78	970.879	328.765	-1600.13	920.582	399.162	-1579.08	895.48	371.434	-1663.5	854.817
669	0	167.19	-1528.7	1625.6	52.5682	-1530.12	1621.81	173.289	-1362.03	1580.04	54.8481	-1353.42	1576.07	116.313	-1349.36	1453	116.218	-1278.47	1217.41	106.004	-1506.27	1391.67	110.004	-1577.12	1208.64	-3.64622	-1260.25	1268.24	284.441	-1393.6	1427.74	379.778	-1400.78	1197.93	393.688	-1415.84	1100.51	387.117	-1565.14	969.867	328.01	-1607.19	917.674	398.619	-1585.66	893.738	371.307	-1668.53	850.336
670	0	164.283	-1540.88	1627.41	49.9007	-1542.32	1623.68	170.433	-1373.99	1582.05	51.5728	-1365.53	1578.05	113.803	-1361.75	1454.79	115.009	-1292.2	1219.05	104.054	-1518.69	1393.71	108.438	-1590.09	1210.86	-5.50745	-1273.16	1269.37	281.925	-1405.98	1429.82	377.465	-1412.84	1200.18	391.299	-1427.28	1103.02	385.812	-1573.2	968.663	327.186	-1613.68	914.447	398.513	-1591.59	892.762	371.481	-1673.01	845.663
671	0	161.534	-1552.81	1629.7	47.0482	-1554.39	1625.78	167.371	-1385.94	1584.4	48.91	-1377.5	1580.32	111.619	-1373.92	1456.82	113.116	-1305.33	1220.76	102.13	-1530.8	1396.08	106.899	-1602.74	1213.43	-7.3404	-1286.07	1270.83	280.033	-1418.2	1432.83	375.636	-1424.79	1203.18	388.97	-1438.2	1105.57	384.851	-1580.84	968.183	326.581	-1619.99	912.027	398.385	-1597.25	891.976	371.579	-1676.71	841.208
672	0	158.887	-1564.71	1632.05	44.4973	-1566.4	1627.95	164.805	-1397.75	1586.93	46.3239	-1389.52	1582.69	109.551	-1386.02	1459.01	111.112	-1317.89	1222.77	100.402	-1542.99	1398.61	105.555	-1615.46	1216.14	-9.24718	-1298.69	1272.46	277.964	-1430.13	1435.81	373.332	-1436.46	1205.75	386.561	-1449.14	1108.55	383.827	-1588.25	967.713	326.236	-1625.57	909.655	398.511	-1602.69	891.561	372.133	-1679.98	837.085
673	0	156.554	-1576.63	1634.41	42.0747	-1578.25	1630.09	162.439	-1409.71	1589.29	44.0075	-1401.59	1584.91	107.581	-1398.13	1461.27	108.974	-1330.25	1225.11	98.9409	-1555.22	1400.99	104.335	-1627.68	1218.6	-11.37	-1311.46	1274.44	276.16	-1442.02	1438.78	371.29	-1447.95	1208.35	384.231	-1459.55	1111	383.126	-1595.36	967.439	326.023	-1630.68	907.314	398.652	-1607.83	891.155	372.898	-1682.73	832.893
674	0	154.371	-1588.63	1636.73	39.7774	-1590.23	1632.37	160.174	-1421.62	1591.71	41.63	-1413.41	1587.06	105.558	-1410.1	1463.54	106.987	-1342.48	1227.52	97.5036	-1567.43	1403.33	103.405	-1639.96	1220.93	-13.4044	-1324.18	1276.42	274.333	-1453.82	1441.28	369.498	-1459.32	1210.8	381.861	-1469.93	1113.59	382.599	-1602.29	967.146	325.957	-1636.12	905.396	398.849	-1612.72	890.753	373.599	-1685.03	828.864
675	0	152.378	-1600.46	1639.22	37.9942	-1602.12	1634.65	158.4	-1433.44	1594.14	39.785	-1425.32	1589.27	103.683	-1422.46	1465.78	104.719	-1354.55	1229.84	96.0825	-1579.35	1405.75	102.793	-1652.04	1223.37	-15.5585	-1336.71	1278.6	272.655	-1465.39	1444	367.816	-1470.25	1213.44	379.564	-1480.08	1115.93	382.133	-1608.8	966.844	326.315	-1641.33	903.796	399.281	-1617.44	890.655	374.642	-1686.91	825.199
676	0	150.593	-1612.4	1641.63	36.2725	-1614	1636.87	156.933	-1445.44	1596.6	38.2597	-1437.22	1591.38	101.914	-1434.17	1468.28	102.814	-1366.54	1232.42	95.0544	-1591.51	1408.11	102.164	-1663.84	1225.63	-17.8201	-1349.25	1281.01	271.113	-1476.82	1446.5	366.141	-1480.96	1215.79	377.33	-1489.93	1118.29	381.826	-1615.31	966.915	327.244	-1646.24	902.138	399.678	-1621.76	890.449	375.948	-1688.53	821.682
677	0	149.05	-1624.43	1643.87	34.6983	-1625.95	1639.17	155.395	-1457.36	1598.68	36.9053	-1449.1	1593.8	100.446	-1446.47	1470.51	100.848	-1378.61	1234.68	94.108	-1603.65	1410.24	101.629	-1675.66	1227.7	-20.1497	-1361.81	1283.5	269.612	-1488.15	1448.6	364.336	-1491.12	1217.76	375.202	-1499.57	1120.44	381.793	-1621.27	966.683	327.706	-1650.92	900.566	400.135	-1625.98	890.277	377.397	-1689.92	818.508
678	0	147.672	-1636.29	1646.11	33.4203	-1637.75	1641.33	154.098	-1469.44	1600.93	35.7177	-1461.13	1595.88	98.682	-1458.38	1472.7	98.7768	-1390.56	1236.98	93.0635	-1615.48	1412.41	101.135	-1687.33	1229.84	-22.5661	-1374.3	1285.86	268.293	-1499.26	1451.11	362.855	-1501.12	1220.07	373.296	-1508.84	1122.58	381.721	-1627.03	966.805	328.285	-1655.31	899.514	400.795	-1629.75	890.467	378.971	-1691.01	815.936
[truncated: 69 more columns]

## Sheet: Sheet2
Devices
		025370 - Force			025370 - Moment			025370 - CoP			027571 - Force			027571 - Moment			027571 - CoP			037720 - Force			037720 - Moment			037720 - CoP
Frame	Sub Frame	Fx	Fy	Fz	Mx	My	Mz	Cx	Cy	Cz	Fx	Fy	Fz	Mx	My	Mz	Cx	Cy	Cz	Fx	Fy	Fz	Mx	My	Mz	Cx	Cy	Cz
		N	N	N	N.mm	N.mm	N.mm	mm	mm	mm	N	N	N	N.mm	N.mm	N.mm	mm	mm	mm	N	N	N	N.mm	N.mm	N.mm	mm	mm	mm
302	0	0	0	0	0	0	0	200	300	0	0	0	0	0	0	0	200	903	0	0	0	0	0	0	0	603	903	0
302	1	0	0	0	0	0	0	200	300	0	0	0	0	0	0	0	200	903	0	0	0	0	0	0	0	603	903	0
302	2	0	0	0	0	0	0	200	300	0	0	0	0	0	0	0	200	903	0	0	0	0	0	0	0	603	903	0
302	3	0	0	0	0	0	0	200	300	0	0	0	0	0	0	0	200	903	0	0	0	0	0	0	0	603	903	0
302	4	0	0	0	0	0	0	200	300	0	0	0	0	0	0	0	200	903	0	0	0	0	0	0	0	603	903	0
302	5	0	0	0	0	0	0	200	300	0	0	0	0	0	0	0	200	903	0	0	0	0	0	0	0	603	903	0
302	6	0	0	0	0	0	0	200	300	0	0	0	0	0	0	0	200	903	0	0	0	0	0	0	0	603	903	0
302	7	0	0	0	0	0	0	200	300	0	0	0	0	0	0	0	200	903	0	0	0	0	0	0	0	603	903	0
302	8	0	0	0	0	0	0	200	300	0	0	0	0	0	0	0	200	903	0	0	0	0	0	0	0	603	903	0
302	9	0	0	0	0	0	0	200	300	0	0	0	0	0	0	0	200	903	0	0	0	0	0	0	0	603	903	0
303	0	0	0	0	0	0	0	200	300	0	0	0	0	0	0	0	200	903	0	0	0	0	0	0	0	603	903	0
303	1	0	0	0	0	0	0	200	300	0	0	0	0	0	0	0	200	903	0	0	0	0	0	0	0	603	903	0
303	2	0	0	0	0	0	0	200	300	0	0	0	0	0	0	0	200	903	0	0	0	0	0	0	0	603	903	0
303	3	0	0	0	0	0	0	200	300	0	0	0	0	0	0	0	200	903	0	0	0	0	0	0	0	603	903	0
303	4	0	0	0	0	0	0	200	300	0	0	0	0	0	0	0	200	903	0	0	0	0	0	0	0	603	903	0
303	5	0	0	0	0	0	0	200	300	0	0	0	0	0	0	0	200	903	0	0	0	0	0	0	0	603	903	0
303	6	0	0	0	0	0	0	200	300	0	0	0	0	0	0	0	200	903	0	0	0	0	0	0	0	603	903	0
303	7	0	0	0	0	0	0	200	300	0	0	0	0	0	0	0	200	903	0	0	0	0	0	0	0	603	903	0
303	8	0	0	0	0	0	0	200	300	0	0	0	0	0	0	0	200	903	0	0	0	0	0	0	0	603	903	0
303	9	0	0	0	0	0	0	200	300	0	0	0	0	0	0	0	200	903	0	0	0	0	0	0	0	603	903	0
304	0	0	0	0	0	0	0	200	300	0	0	0	0	0	0	0	200	903	0	0	0	0	0	0	0	603	903	0
304	1	0	0	0	0	0	0	200	300	0	0	0	0	0	0	0	200	903	0	0	0	0	0	0	0	603	903	0
304	2	0	0	0	0	0	0	200	300	0	0	0	0	0	0	0	200	903	0	0	0	0	0	0	0	603	903	0
304	3	0	0	0	0	0	0	200	300	0	0	0	0	0	0	0	200	903	0	0	0	0	0	0	0	603	903	0
304	4	0	0	0	0	0	0	200	300	0	0	0	0	0	0	0	200	903	0	0	0	0	0	0	0	603	903	0
304	5	0	0	0	0	0	0	200	300	0	0	0	0	0	0	0	200	903	0	0	0	0	0	0	0	603	903	0
304	6	0	0	0	0	0	0	200	300	0	0	0	0	0	0	0	200	903	0	0	0	0	0	0	0	603	903	0
304	7	0	0	0	0	0	0	200	300	0	0	0	0	0	0	0	200	903	0	0	0	0	0	0	0	603	903	0
304	8	0	0	0	0	0	0	200	300	0	0	0	0	0	0	0	200	903	0	0	0	0	0	0	0	603	903	0
304	9	0	0	0	0	0	0	200	300	0	0	0	0	0	0	0	200	903	0	0	0	0	0	0	0	603	903	0
305	0	0	0	0	0	0	0	200	300	0	0	0	0	0	0	0	200	903	0	0	0	0	0	0	0	603	903	0
305	1	0	0	0	0	0	0	200	300	0	0	0	0	0	0	0	200	903	0	0	0	0	0	0	0	603	903	0
305	2	0	0	0	0	0	0	200	300	0	0	0	0	0	0	0	200	903	0	0	0	0	0	0	0	603	903	0
305	3	0	0	0	0	0	0	200	300	0	0	0	0	0	0	0	200	903	0	0	0	0	0	0	0	603	903	0
305	4	0	0	0	0	0	0	200	300	0	0	0	0	0	0	0	200	903	0	0	0	0	0	0	0	603	903	0
305	5	0	0	0	0	0	0	200	300	0	0	0	0	0	0	0	200	903	0	0	0	0	0	0	0	603	903	0
305	6	0	0	0	0	0	0	200	300	0	0	0	0	0	0	0	200	903	0	0	0	0	0	0	0	603	903	0
305	7	0	0	0	0	0	0	200	300	0	0	0	0	0	0	0	200	903	0	0	0	0	0	0	0	603	903	0
305	8	0	0	0	0	0	0	200	300	0	0	0	0	0	0	0	200	903	0	0	0	0	0	0	0	603	903	0
305	9	0	0	0	0	0	0	200	300	0	0	0	0	0	0	0	200	903	0	0	0	0	0	0	0	603	903	0
306	0	0	0	0	0	0	0	200	300	0	0	0	0	0	0	0	200	903	0	0	0	0	0	0	0	603	903	0
306	1	0	0	0	0	0	0	200	300	0	0	0	0	0	0	0	200	903	0	0	0	0	0	0	0	603	903	0
306	2	0	0	0	0	0	0	200	300	0	0	0	0	0	0	0	200	903	0	0	0	0	0	0	0	603	903	0
306	3	0	0	0	0	0	0	200	300	0	0	0	0	0	0	0	200	903	0	0	0	0	0	0	0	603	903	0
306	4	0	0	0	0	0	0	200	300	0	0	0	0	0	0	0	200	903	0	0	0	0	0	0	0	603	903	0
306	5	0	0	0	0	0	0	200	300	0	0	0	0	0	0	0	200	903	0	0	0	0	0	0	0	603	903	0
306	6	0	0	0	0	0	0	200	300	0	0	0	0	0	0	0	200	903	0	0	0	0	0	0	0	603	903	0
306	7	0	0	0	0	0	0	200	300	0	0	0	0	0	0	0	200	903	0	0	0	0	0	0	0	603	903	0
306	8	0	0	0	0	0	0	200	300	0	0	0	0	0	0	0	200	903	0	0	0	0	0	0	0	603	903	0
306	9	0	0	0	0	0	0	200	300	0	0	0	0	0	0	0	200	903	0	0	0	0	0	0	0	603	903	0
307	0	0	0	0	0	0	0	200	300	0	0	0	0	0	0	0	200	903	0	0	0	0	0	0	0	603	903	0
307	1	0	0	0	0	0	0	200	300	0	0	0	0	0	0	0	200	903	0	0	0	0	0	0	0	603	903	0
307	2	0	0	0	0	0	0	200	300	0	0	0	0	0	0	0	200	903	0	0	0	0	0	0	0	603	903	0
307	3	0	0	0	0	0	0	200	300	0	0	0	0	0	0	0	200	903	0	0	0	0	0	0	0	603	903	0
307	4	0	0	0	0	0	0	200	300	0	0	0	0	0	0	0	200	903	0	0	0	0	0	0	0	603	903	0
307	5	0	0	0	0	0	0	200	300	0	0	0	0	0	0	0	200	903	0	0	0	0	0	0	0	603	903	0
307	6	0	0	0	0	0	0	200	300	0	0	0	0	0	0	0	200	903	0	0	0	0	0	0	0	603	903	0
307	7	0	0	0	0	0	0	200	300	0	0	0	0	0	0	0	200	903	0	0	0	0	0	0	0	603	903	0
307	8	0	0	0	0	0	0	200	300	0	0	0	0	0	0	0	200	903	0	0	0	0	0	0	0	603	903	0
307	9	0	0	0	0	0	0	200	300	0	0	0	0	0	0	0	200	903	0	0	0	0	0	0	0	603	903	0
308	0	0	0	0	0	0	0	200	300	0	0	0	0	0	0	0	200	903	0	0	0	0	0	0	0	603	903	0
308	1	0	0	0	0	0	0	200	300	0	0	0	0	0	0	0	200	903	0	0	0	0	0	0	0	603	903	0
308	2	0	0	0	0	0	0	200	300	0	0	0	0	0	0	0	200	903	0	0	0	0	0	0	0	603	903	0
308	3	0	0	0	0	0	0	200	300	0	0	0	0	0	0	0	200	903	0	0	0	0	0	0	0	603	903	0
308	4	0	0	0	0	0	0	200	300	0	0	0	0	0	0	0	200	903	0	0	0	0	0	0	0	603	903	0
308	5	0	0	0	0	0	0	200	300	0	0	0	0	0	0	0	200	903	0	0	0	0	0	0	0	603	903	0
308	6	0	0	0	0	0	0	200	300	0	0	0	0	0	0	0	200	903	0	0	0	0	0	0	0	603	903	0
308	7	0	0	0	0	0	0	200	300	0	0	0	0	0	0	0	200	903	0	0	0	0	0	0	0	603	903	0
308	8	0	0	0	0	0	0	200	300	0	0	0	0	0	0	0	200	903	0	0	0	0	0	0	0	603	903	0
308	9	0	0	0	0	0	0	200	300	0	0	0	0	0	0	0	200	903	0	0	0	0	0	0	0	603	903	0
309	0	0	0	0	0	0	0	200	300	0	0	0	0	0	0	0	200	903	0	0	0	0	0	0	0	603	903	0
309	1	0	0	0	0	0	0	200	300	0	0	0	0	0	0	0	200	903	0	0	0	0	0	0	0	603	903	0
309	2	0	0	0	0	0	0	200	300	0	0	0	0	0	0	0	200	903	0	0	0	0	0	0	0	603	903	0
309	3	0	0	0	0	0	0	200	300	0	0	0	0	0	0	0	200	903	0	0	0	0	0	0	0	603	903	0
309	4	0	0	0	0	0	0	200	300	0	0	0	0	0	0	0	200	903	0	0	0	0	0	0	0	603	903	0
309	5	0	0	0	0	0	0	200	300	0	0	0	0	0	0	0	200	903	0	0	0	0	0	0	0	603	903	0
309	6	0	0	0	0	0	0	200	300	0	0	0	0	0	0	0	200	903	0	0	0	0	0	0	0	603	903	0
309	7	0	0	0	0	0	0	200	300	0	0	0	0	0	0	0	200	903	0	0	0	0	0	0	0	603	903	0
309	8	0	0	0	0	0	0	200	300	0	0	0	0	0	0	0	200	903	0	0	0	0	0	0	0	603	903	0
309	9	0	0	0	0	0	0	200	300	0	0	0	0	0	0	0	200	903	0	0	0	0	0	0	0	603	903	0
310	0	0	0	0	0	0	0	200	300	0	0	0	0	0	0	0	200	903	0	0	0	0	0	0	0	603	903	0
310	1	0	0	0	0	0	0	200	300	0	0	0	0	0	0	0	200	903	0	0	0	0	0	0	0	603	903	0
310	2	0	0	0	0	0	0	200	300	0	0	0	0	0	0	0	200	903	0	0	0	0	0	0	0	603	903	0
310	3	0	0	0	0	0	0	200	300	0	0	0	0	0	0	0	200	903	0	0	0	0	0	0	0	603	903	0
310	4	0	0	0	0	0	0	200	300	0	0	0	0	0	0	0	200	903	0	0	0	0	0	0	0	603	903	0
310	5	0	0	0	0	0	0	200	300	0	0	0	0	0	0	0	200	903	0	0	0	0	0	0	0	603	903	0
310	6	0	0	0	0	0	0	200	300	0	0	0	0	0	0	0	200	903	0	0	0	0	0	0	0	603	903	0
310	7	0	0	0	0	0	0	200	300	0	0	0	0	0	0	0	200	903	0	0	0	0	0	0	0	603	903	0
310	8	0	0	0	0	0	0	200	300	0	0	0	0	0	0	0	200	903	0	0	0	0	0	0	0	603	903	0
310	9	0	0	0	0	0	0	200	300	0	0	0	0	0	0	0	200	903	0	0	0	0	0	0	0	603	903	0
311	0	0	0	0	0	0	0	200	300	0	0	0	0	0	0	0	200	903	0	0	0	0	0	0	0	603	903	0
311	1	0	0	0	0	0	0	200	300	0	0	0	0	0	0	0	200	903	0	0	0	0	0	0	0	603	903	0
311	2	0	0	0	0	0	0	200	300	0	0	0	0	0	0	0	200	903	0	0	0	0	0	0	0	603	903	0
311	3	0	0	0	0	0	0	200	300	0	0	0	0	0	0	0	200	903	0	0	0	0	0	0	0	603	903	0
311	4	0	0	0	0	0	0	200	300	0	0	0	0	0	0	0	200	903	0	0	0	0	0	0	0	603	903	0
311	5	0	0	0	0	0	0	200	300	0	0	0	0	0	0	0	200	903	0	0	0	0	0	0	0	603	903	0
311	6	0	0	0	0	0	0	200	300	0	0	0	0	0	0	0	200	903	0	0	0	0	0	0	0	603	903	0
311	7	0	0	0	0	0	0	200	300	0	0	0	0	0	0	0	200	903	0	0	0	0	0	0	0	603	903	0
311	8	0	0	0	0	0	0	200	300	0	0	0	0	0	0	0	200	903	0	0	0	0	0	0	0	603	903	0
311	9	0	0	0	0	0	0	200	300	0	0	0	0	0	0	0	200	903	0	0	0	0	0	0	0	603	903	0
312	0	0	0	0	0	0	0	200	300	0	0	0	0	0	0	0	200	903	0	0	0	0	0	0	0	603	903	0
312	1	0	0	0	0	0	0	200	300	0	0	0	0	0	0	0	200	903	0	0	0	0	0	0	0	603	903	0
312	2	0	0	0	0	0	0	200	300	0	0	0	0	0	0	0	200	903	0	0	0	0	0	0	0	603	903	0
312	3	0	0	0	0	0	0	200	300	0	0	0	0	0	0	0	200	903	0	0	0	0	0	0	0	603	903	0
312	4	0	0	0	0	0	0	200	300	0	0	0	0	0	0	0	200	903	0	0	0	0	0	0	0	603	903	0
312	5	0	0	0	0	0	0	200	300	0	0	0	0	0	0	0	200	903	0	0	0	0	0	0	0	603	903	0
312	6	0	0	0	0	0	0	200	300	0	0	0	0	0	0	0	200	903	0	0	0	0	0	0	0	603	903	0
312	7	0	0	0	0	0	0	200	300	0	0	0	0	0	0	0	200	903	0	0	0	0	0	0	0	603	903	0
312	8	0	0	0	0	0	0	200	300	0	0	0	0	0	0	0	200	903	0	0	0	0	0	0	0	603	903	0
312	9	0	0	0	0	0	0	200	300	0	0	0	0	0	0	0	200	903	0	0	0	0	0	0	0	603	903	0
313	0	0	0	0	0	0	0	200	300	0	0	0	0	0	0	0	200	903	0	0	0	0	0	0	0	603	903	0
313	1	0	0	0	0	0	0	200	300	0	0	0	0	0	0	0	200	903	0	0	0	0	0	0	0	603	903	0
313	2	0	0	0	0	0	0	200	300	0	0	0	0	0	0	0	200	903	0	0	0	0	0	0	0	603	903	0
313	3	0	0	0	0	0	0	200	300	0	0	0	0	0	0	0	200	903	0	0	0	0	0	0	0	603	903	0
313	4	0	0	0	0	0	0	200	300	0	0	0	0	0	0	0	200	903	0	0	0	0	0	0	0	603	903	0
313	5	0	0	0	0	0	0	200	300	0	0	0	0	0	0	0	200	903	0	0	0	0	0	0	0	603	903	0
313	6	0	0	0	0	0	0	200	300	0	0	0	0	0	0	0	200	903	0	0	0	0	0	0	0	603	903	0
313	7	0	0	0	0	0	0	200	300	0	0	0	0	0	0	0	200	903	0	0	0	0	0	0	0	603	903	0
313	8	0	0	0	0	0	0	200	300	0	0	0	0	0	0	0	200	903	0	0	0	0	0	0	0	603	903	0
313	9	0	0	0	0	0	0	200	300	0	0	0	0	0	0	0	200	903	0	0	0	0	0	0	0	603	903	0
314	0	0	0	0	0	0	0	200	300	0	0	0	0	0	0	0	200	903	0	0	0	0	0	0	0	603	903	0
314	1	0	0	0	0	0	0	200	300	0	0	0	0	0	0	0	200	903	0	0	0	0	0	0	0	603	903	0
314	2	0	0	0	0	0	0	200	300	0	0	0	0	0	0	0	200	903	0	0	0	0	0	0	0	603	903	0
314	3	0	0	0	0	0	0	200	300	0	0	0	0	0	0	0	200	903	0	0	0	0	0	0	0	603	903	0
314	4	0	0	0	0	0	0	200	300	0	0	0	0	0	0	0	200	903	0	0	0	0	0	0	0	603	903	0
314	5	0	0	0	0	0	0	200	300	0	0	0	0	0	0	0	200	903	0	0	0	0	0	0	0	603	903	0
314	6	0	0	0	0	0	0	200	300	0	0	0	0	0	0	0	200	903	0	0	0	0	0	0	0	603	903	0
314	7	0	0	0	0	0	0	200	300	0	0	0	0	0	0	0	200	903	0	0	0	0	0	0	0	603	903	0
314	8	0	0	0	0	0	0	200	300	0	0	0	0	0	0	0	200	903	0	0	0	0	0	0	0	603	903	0
314	9	0	0	0	0	0	0	200	300	0	0	0	0	0	0	0	200	903	0	0	0	0	0	0	0	603	903	0
315	0	0	0	0	0	0	0	200	300	0	0	0	0	0	0	0	200	903	0	0	0	0	0	0	0	603	903	0
315	1	0	0	0	0	0	0	200	300	0	0	0	0	0	0	0	200	903	0	0	0	0	0	0	0	603	903	0
315	2	0	0	0	0	0	0	200	300	0	0	0	0	0	0	0	200	903	0	0	0	0	0	0	0	603	903	0
315	3	0	0	0	0	0	0	200	300	0	0	0	0	0	0	0	200	903	0	0	0	0	0	0	0	603	903	0
315	4	0	0	0	0	0	0	200	300	0	0	0	0	0	0	0	200	903	0	0	0	0	0	0	0	603	903	0
315	5	0	0	0	0	0	0	200	300	0	0	0	0	0	0	0	200	903	0	0	0	0	0	0	0	603	903	0
315	6	0	0	0	0	0	0	200	300	0	0	0	0	0	0	0	200	903	0	0	0	0	0	0	0	603	903	0
315	7	0	0	0	0	0	0	200	300	0	0	0	0	0	0	0	200	903	0	0	0	0	0	0	0	603	903	0
315	8	0	0	0	0	0	0	200	300	0	0	0	0	0	0	0	200	903	0	0	0	0	0	0	0	603	903	0
315	9	0	0	0	0	0	0	200	300	0	0	0	0	0	0	0	200	903	0	0	0	0	0	0	0	603	903	0
316	0	0	0	0	0	0	0	200	300	0	0	0	0	0	0	0	200	903	0	0	0	0	0	0	0	603	903	0
316	1	0	0	0	0	0	0	200	300	0	0	0	0	0	0	0	200	903	0	0	0	0	0	0	0	603	903	0
316	2	0	0	0	0	0	0	200	300	0	0	0	0	0	0	0	200	903	0	0	0	0	0	0	0	603	903	0
316	3	0	0	0	0	0	0	200	300	0	0	0	0	0	0	0	200	903	0	0	0	0	0	0	0	603	903	0
316	4	0	0	0	0	0	0	200	300	0	0	0	0	0	0	0	200	903	0	0	0	0	0	0	0	603	903	0
316	5	0	0	0	0	0	0	200	300	0	0	0	0	0	0	0	200	903	0	0	0	0	0	0	0	603	903	0
316	6	0	0	0	0	0	0	200	300	0	0	0	0	0	0	0	200	903	0	0	0	0	0	0	0	603	903	0
316	7	0	0	0	0	0	0	200	300	0	0	0	0	0	0	0	200	903	0	0	0	0	0	0	0	603	903	0
316	8	0	0	0	0	0	0	200	300	0	0	0	0	0	0	0	200	903	0	0	0	0	0	0	0	603	903	0
316	9	0	0	0	0	0	0	200	300	0	0	0	0	0	0	0	200	903	0	0	0	0	0	0	0	603	903	0
317	0	0	0	0	0	0	0	200	300	0	0	0	0	0	0	0	200	903	0	0	0	0	0	0	0	603	903	0
317	1	0	0	0	0	0	0	200	300	0	0	0	0	0	0	0	200	903	0	0	0	0	0	0	0	603	903	0
317	2	0	0	0	0	0	0	200	300	0	0	0	0	0	0	0	200	903	0	0	0	0	0	0	0	603	903	0
317	3	0	0	0	0	0	0	200	300	0	0	0	0	0	0	0	200	903	0	0	0	0	0	0	0	603	903	0
317	4	0	0	0	0	0	0	200	300	0	0	0	0	0	0	0	200	903	0	0	0	0	0	0	0	603	903	0
317	5	0	0	0	0	0	0	200	300	0	0	0	0	0	0	0	200	903	0	0	0	0	0	0	0	603	903	0
317	6	0	0	0	0	0	0	200	300	0	0	0	0	0	0	0	200	903	0	0	0	0	0	0	0	603	903	0
317	7	0	0	0	0	0	0	200	300	0	0	0	0	0	0	0	200	903	0	0	0	0	0	0	0	603	903	0
317	8	0	0	0	0	0	0	200	300	0	0	0	0	0	0	0	200	903	0	0	0	0	0	0	0	603	903	0
317	9	0	0	0	0	0	0	200	300	0	0	0	0	0	0	0	200	903	0	0	0	0	0	0	0	603	903	0
318	0	0	0	0	0	0	0	200	300	0	0	0	0	0	0	0	200	903	0	0	0	0	0	0	0	603	903	0
318	1	0	0	0	0	0	0	200	300	0	0	0	0	0	0	0	200	903	0	0	0	0	0	0	0	603	903	0
318	2	0	0	0	0	0	0	200	300	0	0	0	0	0	0	0	200	903	0	0	0	0	0	0	0	603	903	0
318	3	0	0	0	0	0	0	200	300	0	0	0	0	0	0	0	200	903	0	0	0	0	0	0	0	603	903	0
318	4	0	0	0	0	0	0	200	300	0	0	0	0	0	0	0	200	903	0	0	0	0	0	0	0	603	903	0
318	5	0	0	0	0	0	0	200	300	0	0	0	0	0	0	0	200	903	0	0	0	0	0	0	0	603	903	0
318	6	0	0	0	0	0	0	200	300	0	0	0	0	0	0	0	200	903	0	0	0	0	0	0	0	603	903	0
318	7	0	0	0	0	0	0	200	300	0	0	0	0	0	0	0	200	903	0	0	0	0	0	0	0	603	903	0
318	8	0	0	0	0	0	0	200	300	0	0	0	0	0	0	0	200	903	0	0	0	0	0	0	0	603	903	0
318	9	0	0	0	0	0	0	200	300	0	0	0	0	0	0	0	200	903	0	0	0	0	0	0	0	603	903	0
319	0	0	0	0	0	0	0	200	300	0	0	0	0	0	0	0	200	903	0	0	0	0	0	0	0	603	903	0
319	1	0	0	0	0	0	0	200	300	0	0	0	0	0	0	0	200	903	0	0	0	0	0	0	0	603	903	0
319	2	0	0	0	0	0	0	200	300	0	0	0	0	0	0	0	200	903	0	0	0	0	0	0	0	603	903	0
319	3	0	0	0	0	0	0	200	300	0	0	0	0	0	0	0	200	903	0	0	0	0	0	0	0	603	903	0
319	4	0	0	0	0	0	0	200	300	0	0	0	0	0	0	0	200	903	0	0	0	0	0	0	0	603	903	0
319	5	0	0	0	0	0	0	200	300	0	0	0	0	0	0	0	200	903	0	0	0	0	0	0	0	603	903	0
319	6	0	0	0	0	0	0	200	300	0	0	0	0	0	0	0	200	903	0	0	0	0	0	0	0	603	903	0
319	7	0	0	0	0	0	0	200	300	0	0	0	0	0	0	0	200	903	0	0	0	0	0	0	0	603	903	0
319	8	0	0	0	0	0	0	200	300	0	0	0	0	0	0	0	200	903	0	0	0	0	0	0	0	603	903	0
319	9	0	0	0	0	0	0	200	300	0	0	0	0	0	0	0	200	903	0	0	0	0	0	0	0	603	903	0
320	0	0	0	0	0	0	0	200	300	0	0	0	0	0	0	0	200	903	0	0	0	0	0	0	0	603	903	0
320	1	0	0	0	0	0	0	200	300	0	0	0	0	0	0	0	200	903	0	0	0	0	0	0	0	603	903	0
320	2	0	0	0	0	0	0	200	300	0	0	0	0	0	0	0	200	903	0	0	0	0	0	0	0	603	903	0
320	3	0	0	0	0	0	0	200	300	0	0	0	0	0	0	0	200	903	0	0	0	0	0	0	0	603	903	0
320	4	0	0	0	0	0	0	200	300	0	0	0	0	0	0	0	200	903	0	0	0	0	0	0	0	603	903	0
320	5	0	0	0	0	0	0	200	300	0	0	0	0	0	0	0	200	903	0	0	0	0	0	0	0	603	903	0
320	6	0	0	0	0	0	0	200	300	0	0	0	0	0	0	0	200	903	0	0	0	0	0	0	0	603	903	0
320	7	0	0	0	0	0	0	200	300	0	0	0	0	0	0	0	200	903	0	0	0	0	0	0	0	603	903	0
320	8	0	0	0	0	0	0	200	300	0	0	0	0	0	0	0	200	903	0	0	0	0	0	0	0	603	903	0
320	9	0	0	0	0	0	0	200	300	0	0	0	0	0	0	0	200	903	0	0	0	0	0	0	0	603	903	0
321	0	0	0	0	0	0	0	200	300	0	0	0	0	0	0	0	200	903	0	0	0	0	0	0	0	603	903	0
321	1	0	0	0	0	0	0	200	300	0	0	0	0	0	0	0	200	903	0	0	0	0	0	0	0	603	903	0
321	2	0	0	0	0	0	0	200	300	0	0	0	0	0	0	0	200	903	0	0	0	0	0	0	0	603	903	0
321	3	0	0	0	0	0	0	200	300	0	0	0	0	0	0	0	200	903	0	0	0	0	0	0	0	603	903	0
321	4	0	0	0	0	0	0	200	300	0	0	0	0	0	0	0	200	903	0	0	0	0	0	0	0	603	903	0
321	5	0	0	0	0	0	0	200	300	0	0	0	0	0	0	0	200	903	0	0	0	0	0	0	0	603	903	0
321	6	0	0	0	0	0	0	200	300	0	0	0	0	0	0	0	200	903	0	0	0	0	0	0	0	603	903	0
321	7	0	0	0	0	0	0	200	300	0	0	0	0	0	0	0	200	903	0	0	0	0	0	0	0	603	903	0
321	8	0	0	0	0	0	0	200	300	0	0	0	0	0	0	0	200	903	0	0	0	0	0	0	0	603	903	0
321	9	0	0	0	0	0	0	200	300	0	0	0	0	0	0	0	200	903	0	0	0	0	0	0	0	603	903	0
322	0	0	0	0	0	0	0	200	300	0	0	0	0	0	0	0	200	903	0	0	0	0	0	0	0	603	903	0
322	1	0	0	0	0	0	0	200	300	0	0	0	0	0	0	0	200	903	0	0	0	0	0	0	0	603	903	0
322	2	0	0	0	0	0	0	200	300	0	0	0	0	0	0	0	200	903	0	0	0	0	0	0	0	603	903	0
322	3	0	0	0	0	0	0	200	300	0	0	0	0	0	0	0	200	903	0	0	0	0	0	0	0	603	903	0
322	4	0	0	0	0	0	0	200	300	0	0	0	0	0	0	0	200	903	0	0	0	0	0	0	0	603	903	0
322	5	0	0	0	0	0	0	200	300	0	0	0	0	0	0	0	200	903	0	0	0	0	0	0	0	603	903	0
322	6	0	0	0	0	0	0	200	300	0	0	0	0	0	0	0	200	903	0	0	0	0	0	0	0	603	903	0
322	7	0	0	0	0	0	0	200	300	0	0	0	0	0	0	0	200	903	0	0	0	0	0	0	0	603	903	0
322	8	0	0	0	0	0	0	200	300	0	0	0	0	0	0	0	200	903	0	0	0	0	0	0	0	603	903	0
322	9	0	0	0	0	0	0	200	300	0	0	0	0	0	0	0	200	903	0	0	0	0	0	0	0	603	903	0
323	0	0	0	0	0	0	0	200	300	0	0	0	0	0	0	0	200	903	0	0	0	0	0	0	0	603	903	0
323	1	0	0	0	0	0	0	200	300	0	0	0	0	0	0	0	200	903	0	0	0	0	0	0	0	603	903	0
323	2	0	0	0	0	0	0	200	300	0	0	0	0	0	0	0	200	903	0	0	0	0	0	0	0	603	903	0
323	3	0	0	0	0	0	0	200	300	0	0	0	0	0	0	0	200	903	0	0	0	0	0	0	0	603	903	0
323	4	0	0	0	0	0	0	200	300	0	0	0	0	0	0	0	200	903	0	0	0	0	0	0	0	603	903	0
323	5	0	0	0	0	0	0	200	300	0	0	0	0	0	0	0	200	903	0	0	0	0	0	0	0	603	903	0
323	6	0	0	0	0	0	0	200	300	0	0	0	0	0	0	0	200	903	0	0	0	0	0	0	0	603	903	0
323	7	0	0	0	0	0	0	200	300	0	0	0	0	0	0	0	200	903	0	0	0	0	0	0	0	603	903	0
323	8	0	0	0	0	0	0	200	300	0	0	0	0	0	0	0	200	903	0	0	0	0	0	0	0	603	903	0
323	9	0	0	0	0	0	0	200	300	0	0	0	0	0	0	0	200	903	0	0	0	0	0	0	0	603	903	0
324	0	0	0	0	0	0	0	200	300	0	0	0	0	0	0	0	200	903	0	0	0	0	0	0	0	603	903	0
324	1	0	0	0	0	0	0	200	300	0	0	0	0	0	0	0	200	903	0	0	0	0	0	0	0	603	903	0
324	2	0	0	0	0	0	0	200	300	0	0	0	0	0	0	0	200	903	0	0	0	0	0	0	0	603	903	0
324	3	0	0	0	0	0	0	200	300	0	0	0	0	0	0	0	200	903	0	0	0	0	0	0	0	603	903	0
324	4	0	0	0	0	0	0	200	300	0	0	0	0	0	0	0	200	903	0	0	0	0	0	0	0	603	903	0
324	5	0	0	0	0	0	0	200	300	0	0	0	0	0	0	0	200	903	0	0	0	0	0	0	0	603	903	0
324	6	0	0	0	0	0	0	200	300	0	0	0	0	0	0	0	200	903	0	0	0	0	0	0	0	603	903	0
324	7	0	0	0	0	0	0	200	300	0	0	0	0	0	0	0	200	903	0	0	0	0	0	0	0	603	903	0
324	8	0	0	0	0	0	0	200	300	0	0	0	0	0	0	0	200	903	0	0	0	0	0	0	0	603	903	0
324	9	0	0	0	0	0	0	200	300	0	0	0	0	0	0	0	200	903	0	0	0	0	0	0	0	603	903	0
325	0	0	0	0	0	0	0	200	300	0	0	0	0	0	0	0	200	903	0	0	0	0	0	0	0	603	903	0
325	1	0	0	0	0	0	0	200	300	0	0	0	0	0	0	0	200	903	0	0	0	0	0	0	0	603	903	0
325	2	0	0	0	0	0	0	200	300	0	0	0	0	0	0	0	200	903	0	0	0	0	0	0	0	603	903	0
325	3	0	0	0	0	0	0	200	300	0	0	0	0	0	0	0	200	903	0	0	0	0	0	0	0	603	903	0
325	4	0	0	0	0	0	0	200	300	0	0	0	0	0	0	0	200	903	0	0	0	0	0	0	0	603	903	0
325	5	0	0	0	0	0	0	200	300	0	0	0	0	0	0	0	200	903	0	0	0	0	0	0	0	603	903	0
325	6	0	0	0	0	0	0	200	300	0	0	0	0	0	0	0	200	903	0	0	0	0	0	0	0	603	903	0
325	7	0	0	0	0	0	0	200	300	0	0	0	0	0	0	0	200	903	0	0	0	0	0	0	0	603	903	0
325	8	0	0	0	0	0	0	200	300	0	0	0	0	0	0	0	200	903	0	0	0	0	0	0	0	603	903	0
325	9	0	0	0	0	0	0	200	300	0	0	0	0	0	0	0	200	903	0	0	0	0	0	0	0	603	903	0
326	0	0	0	0	0	0	0	200	300	0	0	0	0	0	0	0	200	903	0	0	0	0	0	0	0	603	903	0
326	1	0	0	0	0	0	0	200	300	0	0	0	0	0	0	0	200	903	0	0	0	0	0	0	0	603	903	0
326	2	0	0	0	0	0	0	200	300	0	0	0	0	0	0	0	200	903	0	0	0	0	0	0	0	603	903	0
326	3	0	0	0	0	0	0	200	300	0	0	0	0	0	0	0	200	903	0	0	0	0	0	0	0	603	903	0
326	4	0	0	0	0	0	0	200	300	0	0	0	0	0	0	0	200	903	0	0	0	0	0	0	0	603	903	0
326	5	0	0	0	0	0	0	200	300	0	0	0	0	0	0	0	200	903	0	0	0	0	0	0	0	603	903	0
326	6	0	0	0	0	0	0	200	300	0	0	0	0	0	0	0	200	903	0	0	0	0	0	0	0	603	903	0
326	7	0	0	0	0	0	0	200	300	0	0	0	0	0	0	0	200	903	0	0	0	0	0	0	0	603	903	0
326	8	0	0	0	0	0	0	200	300	0	0	0	0	0	0	0	200	903	0	0	0	0	0	0	0	603	903	0
326	9	0	0	0	0	0	0	200	300	0	0	0	0	0	0	0	200	903	0	0	0	0	0	0	0	603	903	0
327	0	0	0	0	0	0	0	200	300	0	0	0	0	0	0	0	200	903	0	0	0	0	0	0	0	603	903	0
327	1	0	0	0	0	0	0	200	300	0	0	0	0	0	0	0	200	903	0	0	0	0	0	0	0	603	903	0
327	2	0	0	0	0	0	0	200	300	0	0	0	0	0	0	0	200	903	0	0	0	0	0	0	0	603	903	0
327	3	0	0	0	0	0	0	200	300	0	0	0	0	0	0	0	200	903	0	0	0	0	0	0	0	603	903	0
327	4	0	0	0	0	0	0	200	300	0	0	0	0	0	0	0	200	903	0	0	0	0	0	0	0	603	903	0
327	5	0	0	0	0	0	0	200	300	0	0	0	0	0	0	0	200	903	0	0	0	0	0	0	0	603	903	0
327	6	0	0	0	0	0	0	200	300	0	0	0	0	0	0	0	200	903	0	0	0	0	0	0	0	603	903	0
327	7	0	0	0	0	0	0	200	300	0	0	0	0	0	0	0	200	903	0	0	0	0	0	0	0	603	903	0
327	8	0	0	0	0	0	0	200	300	0	0	0	0	0	0	0	200	903	0	0	0	0	0	0	0	603	903	0
327	9	0	0	0	0	0	0	200	300	0	0	0	0	0	0	0	200	903	0	0	0	0	0	0	0	603	903	0
328	0	0	0	0	0	0	0	200	300	0	0	0	0	0	0	0	200	903	0	0	0	0	0	0	0	603	903	0
328	1	0	0	0	0	0	0	200	300	0	0	0	0	0	0	0	200	903	0	0	0	0	0	0	0	603	903	0
328	2	0	0	0	0	0	0	200	300	0	0	0	0	0	0	0	200	903	0	0	0	0	0	0	0	603	903	0
328	3	0	0	0	0	0	0	200	300	0	0	0	0	0	0	0	200	903	0	0	0	0	0	0	0	603	903	0
328	4	0	0	0	0	0	0	200	300	0	0	0	0	0	0	0	200	903	0	0	0	0	0	0	0	603	903	0
328	5	0	0	0	0	0	0	200	300	0	0	0	0	0	0	0	200	903	0	0	0	0	0	0	0	603	903	0
328	6	0	0	0	0	0	0	200	300	0	0	0	0	0	0	0	200	903	0	0	0	0	0	0	0	603	903	0
328	7	0	0	0	0	0	0	200	300	0	0	0	0	0	0	0	200	903	0	0	0	0	0	0	0	603	903	0
328	8	0	0	0	0	0	0	200	300	0	0	0	0	0	0	0	200	903	0	0	0	0	0	0	0	603	903	0
328	9	0	0	0	0	0	0	200	300	0	0	0	0	0	0	0	200	903	0	0	0	0	0	0	0	603	903	0
329	0	0	0	0	0	0	0	200	300	0	0	0	0	0	0	0	200	903	0	0	0	0	0	0	0	603	903	0
329	1	0	0	0	0	0	0	200	300	0	0	0	0	0	0	0	200	903	0	0	0	0	0	0	0	603	903	0
329	2	0	0	0	0	0	0	200	300	0	0	0	0	0	0	0	200	903	0	0	0	0	0	0	0	603	903	0
329	3	0	0	0	0	0	0	200	300	0	0	0	0	0	0	0	200	903	0	0	0	0	0	0	0	603	903	0
329	4	0	0	0	0	0	0	200	300	0	0	0	0	0	0	0	200	903	0	0	0	0	0	0	0	603	903	0
329	5	0	0	0	0	0	0	200	300	0	0	0	0	0	0	0	200	903	0	0	0	0	0	0	0	603	903	0
329	6	0	0	0	0	0	0	200	300	0	0	0	0	0	0	0	200	903	0	0	0	0	0	0	0	603	903	0
329	7	0	0	0	0	0	0	200	300	0	0	0	0	0	0	0	200	903	0	0	0	0	0	0	0	603	903	0
329	8	0	0	0	0	0	0	200	300	0	0	0	0	0	0	0	200	903	0	0	0	0	0	0	0	603	903	0
329	9	0	0	0	0	0	0	200	300	0	0	0	0	0	0	0	200	903	0	0	0	0	0	0	0	603	903	0
330	0	0	0	0	0	0	0	200	300	0	0	0	0	0	0	0	200	903	0	0	0	0	0	0	0	603	903	0
330	1	0	0	0	0	0	0	200	300	0	0	0	0	0	0	0	200	903	0	0	0	0	0	0	0	603	903	0
330	2	0	0	0	0	0	0	200	300	0	0	0	0	0	0	0	200	903	0	0	0	0	0	0	0	603	903	0
330	3	0	0	0	0	0	0	200	300	0	0	0	0	0	0	0	200	903	0	0	0	0	0	0	0	603	903	0
330	4	0	0	0	0	0	0	200	300	0	0	0	0	0	0	0	200	903	0	0	0	0	0	0	0	603	903	0
330	5	0	0	0	0	0	0	200	300	0	0	0	0	0	0	0	200	903	0	0	0	0	0	0	0	603	903	0
330	6	0	0	0	0	0	0	200	300	0	0	0	0	0	0	0	200	903	0	0	0	0	0	0	0	603	903	0
330	7	0	0	0	0	0	0	200	300	0	0	0	0	0	0	0	200	903	0	0	0	0	0	0	0	603	903	0
330	8	0	0	0	0	0	0	200	300	0	0	0	0	0	0	0	200	903	0	0	0	0	0	0	0	603	903	0
330	9	0	0	0	0	0	0	200	300	0	0	0	0	0	0	0	200	903	0	0	0	0	0	0	0	603	903	0
331	0	0	0	0	0	0	0	200	300	0	0	0	0	0	0	0	200	903	0	0	0	0	0	0	0	603	903	0
331	1	0	0	0	0	0	0	200	300	0	0	0	0	0	0	0	200	903	0	0	0	0	0	0	0	603	903	0
331	2	0	0	0	0	0	0	200	300	0	0	0	0	0	0	0	200	903	0	0	0	0	0	0	0	603	903	0
331	3	0	0	0	0	0	0	200	300	0	0	0	0	0	0	0	200	903	0	0	0	0	0	0	0	603	903	0
331	4	0	0	0	0	0	0	200	300	0	0	0	0	0	0	0	200	903	0	0	0	0	0	0	0	603	903	0
331	5	0	0	0	0	0	0	200	300	0	0	0	0	0	0	0	200	903	0	0	0	0	0	0	0	603	903	0
331	6	0	0	0	0	0	0	200	300	0	0	0	0	0	0	0	200	903	0	0	0	0	0	0	0	603	903	0
331	7	0	0	0	0	0	0	200	300	0	0	0	0	0	0	0	200	903	0	0	0	0	0	0	0	603	903	0
331	8	0	0	0	0	0	0	200	300	0	0	0	0	0	0	0	200	903	0	0	0	0	0	0	0	603	903	0
331	9	0	0	0	0	0	0	200	300	0	0	0	0	0	0	0	200	903	0	0	0	0	0	0	0	603	903	0
332	0	0	0	0	0	0	0	200	300	0	0	0	0	0	0	0	200	903	0	0	0	0	0	0	0	603	903	0
332	1	0	0	0	0	0	0	200	300	0	0	0	0	0	0	0	200	903	0	0	0	0	0	0	0	603	903	0
332	2	0	0	0	0	0	0	200	300	0	0	0	0	0	0	0	200	903	0	0	0	0	0	0	0	603	903	0
332	3	0	0	0	0	0	0	200	300	0	0	0	0	0	0	0	200	903	0	0	0	0	0	0	0	603	903	0
332	4	0	0	0	0	0	0	200	300	0	0	0	0	0	0	0	200	903	0	0	0	0	0	0	0	603	903	0
332	5	0	0	0	0	0	0	200	300	0	0	0	0	0	0	0	200	903	0	0	0	0	0	0	0	603	903	0
332	6	0	0	0	0	0	0	200	300	0	0	0	0	0	0	0	200	903	0	0	0	0	0	0	0	603	903	0
332	7	0	0	0	0	0	0	200	300	0	0	0	0	0	0	0	200	903	0	0	0	0	0	0	0	603	903	0
332	8	0	0	0	0	0	0	200	300	0	0	0	0	0	0	0	200	903	0	0	0	0	0	0	0	603	903	0
332	9	0	0	0	0	0	0	200	300	0	0	0	0	0	0	0	200	903	0	0	0	0	0	0	0	603	903	0
333	0	0	0	0	0	0	0	200	300	0	0	0	0	0	0	0	200	903	0	0	0	0	0	0	0	603	903	0
333	1	0	0	0	0	0	0	200	300	0	0	0	0	0	0	0	200	903	0	0	0	0	0	0	0	603	903	0
333	2	0	0	0	0	0	0	200	300	0	0	0	0	0	0	0	200	903	0	0	0	0	0	0	0	603	903	0
333	3	0	0	0	0	0	0	200	300	0	0	0	0	0	0	0	200	903	0	0	0	0	0	0	0	603	903	0
333	4	0	0	0	0	0	0	200	300	0	0	0	0	0	0	0	200	903	0	0	0	0	0	0	0	603	903	0
333	5	0	0	0	0	0	0	200	300	0	0	0	0	0	0	0	200	903	0	0	0	0	0	0	0	603	903	0
333	6	0	0	0	0	0	0	200	300	0	0	0	0	0	0	0	200	903	0	0	0	0	0	0	0	603	903	0
333	7	0	0	0	0	0	0	200	300	0	0	0	0	0	0	0	200	903	0	0	0	0	0	0	0	603	903	0
333	8	0	0	0	0	0	0	200	300	0	0	0	0	0	0	0	200	903	0	0	0	0	0	0	0	603	903	0
333	9	0	0	0	0	0	0	200	300	0	0	0	0	0	0	0	200	903	0	0	0	0	0	0	0	603	903	0
334	0	0	0	0	0	0	0	200	300	0	0	0	0	0	0	0	200	903	0	0	0	0	0	0	0	603	903	0
334	1	0	0	0	0	0	0	200	300	0	0	0	0	0	0	0	200	903	0	0	0	0	0	0	0	603	903	0
334	2	0	0	0	0	0	0	200	300	0	0	0	0	0	0	0	200	903	0	0	0	0	0	0	0	603	903	0
334	3	0	0	0	0	0	0	200	300	0	0	0	0	0	0	0	200	903	0	0	0	0	0	0	0	603	903	0
334	4	0	0	0	0	0	0	200	300	0	0	0	0	0	0	0	200	903	0	0	0	0	0	0	0	603	903	0
334	5	0	0	0	0	0	0	200	300	0	0	0	0	0	0	0	200	903	0	0	0	0	0	0	0	603	903	0
334	6	0	0	0	0	0	0	200	300	0	0	0	0	0	0	0	200	903	0	0	0	0	0	0	0	603	903	0
334	7	0	0	0	0	0	0	200	300	0	0	0	0	0	0	0	200	903	0	0	0	0	0	0	0	603	903	0
334	8	0	0	0	0	0	0	200	300	0	0	0	0	0	0	0	200	903	0	0	0	0	0	0	0	603	903	0
334	9	0	0	0	0	0	0	200	300	0	0	0	0	0	0	0	200	903	0	0	0	0	0	0	0	603	903	0
335	0	0	0	0	0	0	0	200	300	0	0	0	0	0	0	0	200	903	0	0	0	0	0	0	0	603	903	0
335	1	0	0	0	0	0	0	200	300	0	0	0	0	0	0	0	200	903	0	0	0	0	0	0	0	603	903	0
335	2	0	0	0	0	0	0	200	300	0	0	0	0	0	0	0	200	903	0	0	0	0	0	0	0	603	903	0
335	3	0	0	0	0	0	0	200	300	0	0	0	0	0	0	0	200	903	0	0	0	0	0	0	0	603	903	0
335	4	0	0	0	0	0	0	200	300	0	0	0	0	0	0	0	200	903	0	0	0	0	0	0	0	603	903	0
335	5	0	0	0	0	0	0	200	300	0	0	0	0	0	0	0	200	903	0	0	0	0	0	0	0	603	903	0
335	6	0	0	0	0	0	0	200	300	0	0	0	0	0	0	0	200	903	0	0	0	0	0	0	0	603	903	0
335	7	0	0	0	0	0	0	200	300	0	0	0	0	0	0	0	200	903	0	0	0	0	0	0	0	603	903	0
335	8	0	0	0	0	0	0	200	300	0	0	0	0	0	0	0	200	903	0	0	0	0	0	0	0	603	903	0
335	9	0	0	0	0	0	0	200	300	0	0	0	0	0	0	0	200	903	0	0	0	0	0	0	0	603	903	0
336	0	0	0	0	0	0	0	200	300	0	0	0	0	0	0	0	200	903	0	0	0	0	0	0	0	603	903	0
336	1	0	0	0	0	0	0	200	300	0	0	0	0	0	0	0	200	903	0	0	0	0	0	0	0	603	903	0
336	2	0	0	0	0	0	0	200	300	0	0	0	0	0	0	0	200	903	0	0	0	0	0	0	0	603	903	0
336	3	0	0	0	0	0	0	200	300	0	0	0	0	0	0	0	200	903	0	0	0	0	0	0	0	603	903	0
336	4	0	0	0	0	0	0	200	300	0	0	0	0	0	0	0	200	903	0	0	0	0	0	0	0	603	903	0
336	5	0	0	0	0	0	0	200	300	0	0	0	0	0	0	0	200	903	0	0	0	0	0	0	0	603	903	0
336	6	0	0	0	0	0	0	200	300	0	0	0	0	0	0	0	200	903	0	0	0	0	0	0	0	603	903	0
336	7	0	0	0	0	0	0	200	300	0	0	0	0	0	0	0	200	903	0	0	0	0	0	0	0	603	903	0
336	8	0	0	0	0	0	0	200	300	0	0	0	0	0	0	0	200	903	0	0	0	0	0	0	0	603	903	0
336	9	0	0	0	0	0	0	200	300	0	0	0	0	0	0	0	200	903	0	0	0	0	0	0	0	603	903	0
337	0	0	0	0	0	0	0	200	300	0	0	0	0	0	0	0	200	903	0	0	0	0	0	0	0	603	903	0
337	1	0	0	0	0	0	0	200	300	0	0	0	0	0	0	0	200	903	0	0	0	0	0	0	0	603	903	0
337	2	0	0	0	0	0	0	200	300	0	0	0	0	0	0	0	200	903	0	0	0	0	0	0	0	603	903	0
337	3	0	0	0	0	0	0	200	300	0	0	0	0	0	0	0	200	903	0	0	0	0	0	0	0	603	903	0
337	4	0	0	0	0	0	0	200	300	0	0	0	0	0	0	0	200	903	0	0	0	0	0	0	0	603	903	0
337	5	0	0	0	0	0	0	200	300	0	0	0	0	0	0	0	200	903	0	0	0	0	0	0	0	603	903	0
337	6	0	0	0	0	0	0	200	300	0	0	0	0	0	0	0	200	903	0	0	0	0	0	0	0	603	903	0
337	7	0	0	0	0	0	0	200	300	0	0	0	0	0	0	0	200	903	0	0	0	0	0	0	0	603	903	0
337	8	0	0	0	0	0	0	200	300	0	0	0	0	0	0	0	200	903	0	0	0	0	0	0	0	603	903	0
337	9	0	0	0	0	0	0	200	300	0	0	0	0	0	0	0	200	903	0	0	0	0	0	0	0	603	903	0
338	0	0	0	0	0	0	0	200	300	0	0	0	0	0	0	0	200	903	0	0	0	0	0	0	0	603	903	0
338	1	0	0	0	0	0	0	200	300	0	0	0	0	0	0	0	200	903	0	0	0	0	0	0	0	603	903	0
338	2	0	0	0	0	0	0	200	300	0	0	0	0	0	0	0	200	903	0	0	0	0	0	0	0	603	903	0
338	3	0	0	0	0	0	0	200	300	0	0	0	0	0	0	0	200	903	0	0	0	0	0	0	0	603	903	0
338	4	0	0	0	0	0	0	200	300	0	0	0	0	0	0	0	200	903	0	0	0	0	0	0	0	603	903	0
338	5	0	0	0	0	0	0	200	300	0	0	0	0	0	0	0	200	903	0	0	0	0	0	0	0	603	903	0
338	6	0	0	0	0	0	0	200	300	0	0	0	0	0	0	0	200	903	0	0	0	0	0	0	0	603	903	0
338	7	0	0	0	0	0	0	200	300	0	0	0	0	0	0	0	200	903	0	0	0	0	0	0	0	603	903	0
338	8	0	0	0	0	0	0	200	300	0	0	0	0	0	0	0	200	903	0	0	0	0	0	0	0	603	903	0
338	9	0	0	0	0	0	0	200	300	0	0	0	0	0	0	0	200	903	0	0	0	0	0	0	0	603	903	0
339	0	0	0	0	0	0	0	200	300	0	0	0	0	0	0	0	200	903	0	0	0	0	0	0	0	603	903	0
339	1	0	0	0	0	0	0	200	300	0	0	0	0	0	0	0	200	903	0	0	0	0	0	0	0	603	903	0
339	2	0	0	0	0	0	0	200	300	0	0	0	0	0	0	0	200	903	0	0	0	0	0	0	0	603	903	0
339	3	0	0	0	0	0	0	200	300	0	0	0	0	0	0	0	200	903	0	0	0	0	0	0	0	603	903	0
339	4	0	0	0	0	0	0	200	300	0	0	0	0	0	0	0	200	903	0	0	0	0	0	0	0	603	903	0
339	5	0	0	0	0	0	0	200	300	0	0	0	0	0	0	0	200	903	0	0	0	0	0	0	0	603	903	0
339	6	0	0	0	0	0	0	200	300	0	0	0	0	0	0	0	200	903	0	0	0	0	0	0	0	603	903	0
339	7	0	0	0	0	0	0	200	300	0	0	0	0	0	0	0	200	903	0	0	0	0	0	0	0	603	903	0
339	8	0	0	0	0	0	0	200	300	0	0	0	0	0	0	0	200	903	0	0	0	0	0	0	0	603	903	0
339	9	0	0	0	0	0	0	200	300	0	0	0	0	0	0	0	200	903	0	0	0	0	0	0	0	603	903	0
340	0	0	0	0	0	0	0	200	300	0	0	0	0	0	0	0	200	903	0	0	0	0	0	0	0	603	903	0
340	1	0	0	0	0	0	0	200	300	0	0	0	0	0	0	0	200	903	0	0	0	0	0	0	0	603	903	0
340	2	0	0	0	0	0	0	200	300	0	0	0	0	0	0	0	200	903	0	0	0	0	0	0	0	603	903	0
340	3	0	0	0	0	0	0	200	300	0	0	0	0	0	0	0	200	903	0	0	0	0	0	0	0	603	903	0
340	4	0	0	0	0	0	0	200	300	0	0	0	0	0	0	0	200	903	0	0	0	0	0	0	0	603	903	0
340	5	0	0	0	0	0	0	200	300	0	0	0	0	0	0	0	200	903	0	0	0	0	0	0	0	603	903	0
340	6	0	0	0	0	0	0	200	300	0	0	0	0	0	0	0	200	903	0	0	0	0	0	0	0	603	903	0
340	7	0	0	0	0	0	0	200	300	0	0	0	0	0	0	0	200	903	0	0	0	0	0	0	0	603	903	0
340	8	0	0	0	0	0	0	200	300	0	0	0	0	0	0	0	200	903	0	0	0	0	0	0	0	603	903	0
340	9	0	0	0	0	0	0	200	300	0	0	0	0	0	0	0	200	903	0	0	0	0	0	0	0	603	903	0
341	0	0	0	0	0	0	0	200	300	0	0	0	0	0	0	0	200	903	0	0	0	0	0	0	0	603	903	0
341	1	0	0	0	0	0	0	200	300	0	0	0	0	0	0	0	200	903	0	0	0	0	0	0	0	603	903	0
341	2	0	0	0	0	0	0	200	300	0	0	0	0	0	0	0	200	903	0	0	0	0	0	0	0	603	903	0
341	3	0	0	0	0	0	0	200	300	0	0	0	0	0	0	0	200	903	0	0	0	0	0	0	0	603	903	0
341	4	0	0	0	0	0	0	200	300	0	0	0	0	0	0	0	200	903	0	0	0	0	0	0	0	603	903	0
341	5	0	0	0	0	0	0	200	300	0	0	0	0	0	0	0	200	903	0	0	0	0	0	0	0	603	903	0
341	6	0	0	0	0	0	0	200	300	0	0	0	0	0	0	0	200	903	0	0	0	0	0	0	0	603	903	0
341	7	0	0	0	0	0	0	200	300	0	0	0	0	0	0	0	200	903	0	0	0	0	0	0	0	603	903	0
341	8	0	0	0	0	0	0	200	300	0	0	0	0	0	0	0	200	903	0	0	0	0	0	0	0	603	903	0
341	9	0	0	0	0	0	0	200	300	0	0	0	0	0	0	0	200	903	0	0	0	0	0	0	0	603	903	0
342	0	0	0	0	0	0	0	200	300	0	0	0	0	0	0	0	200	903	0	0	0	0	0	0	0	603	903	0
342	1	0	0	0	0	0	0	200	300	0	0	0	0	0	0	0	200	903	0	0	0	0	0	0	0	603	903	0
342	2	0	0	0	0	0	0	200	300	0	0	0	0	0	0	0	200	903	0	0	0	0	0	0	0	603	903	0
342	3	0	0	0	0	0	0	200	300	0	0	0	0	0	0	0	200	903	0	0	0	0	0	0	0	603	903	0
342	4	0	0	0	0	0	0	200	300	0	0	0	0	0	0	0	200	903	0	0	0	0	0	0	0	603	903	0
342	5	0	0	0	0	0	0	200	300	0	0	0	0	0	0	0	200	903	0	0	0	0	0	0	0	603	903	0
342	6	0	0	0	0	0	0	200	300	0	0	0	0	0	0	0	200	903	0	0	0	0	0	0	0	603	903	0
342	7	0	0	0	0	0	0	200	300	0	0	0	0	0	0	0	200	903	0	0	0	0	0	0	0	603	903	0
342	8	0	0	0	0	0	0	200	300	0	0	0	0	0	0	0	200	903	0	0	0	0	0	0	0	603	903	0
342	9	0	0	0	0	0	0	200	300	0	0	0	0	0	0	0	200	903	0	0	0	0	0	0	0	603	903	0
343	0	0	0	0	0	0	0	200	300	0	0	0	0	0	0	0	200	903	0	0	0	0	0	0	0	603	903	0
343	1	0	0	0	0	0	0	200	300	0	0	0	0	0	0	0	200	903	0	0	0	0	0	0	0	603	903	0
343	2	0	0	0	0	0	0	200	300	0	0	0	0	0	0	0	200	903	0	0	0	0	0	0	0	603	903	0
343	3	0	0	0	0	0	0	200	300	0	0	0	0	0	0	0	200	903	0	0	0	0	0	0	0	603	903	0
343	4	0	0	0	0	0	0	200	300	0	0	0	0	0	0	0	200	903	0	0	0	0	0	0	0	603	903	0
343	5	0	0	0	0	0	0	200	300	0	0	0	0	0	0	0	200	903	0	0	0	0	0	0	0	603	903	0
343	6	0	0	0	0	0	0	200	300	0	0	0	0	0	0	0	200	903	0	0	0	0	0	0	0	603	903	0
343	7	0	0	0	0	0	0	200	300	0	0	0	0	0	0	0	200	903	0	0	0	0	0	0	0	603	903	0
343	8	0	0	0	0	0	0	200	300	0	0	0	0	0	0	0	200	903	0	0	0	0	0	0	0	603	903	0
343	9	0	0	0	0	0	0	200	300	0	0	0	0	0	0	0	200	903	0	0	0	0	0	0	0	603	903	0
344	0	0	0	0	0	0	0	200	300	0	0	0	0	0	0	0	200	903	0	0	0	0	0	0	0	603	903	0
344	1	0	0	0	0	0	0	200	300	0	0	0	0	0	0	0	200	903	0	0	0	0	0	0	0	603	903	0
344	2	0	0	0	0	0	0	200	300	0	0	0	0	0	0	0	200	903	0	0	0	0	0	0	0	603	903	0
344	3	0	0	0	0	0	0	200	300	0	0	0	0	0	0	0	200	903	0	0	0	0	0	0	0	603	903	0
344	4	0	0	0	0	0	0	200	300	0	0	0	0	0	0	0	200	903	0	0	0	0	0	0	0	603	903	0
344	5	0	0	0	0	0	0	200	300	0	0	0	0	0	0	0	200	903	0	0	0	0	0	0	0	603	903	0
344	6	0	0	0	0	0	0	200	300	0	0	0	0	0	0	0	200	903	0	0	0	0	0	0	0	603	903	0
344	7	0	0	0	0	0	0	200	300	0	0	0	0	0	0	0	200	903	0	0	0	0	0	0	0	603	903	0
344	8	0	0	0	0	0	0	200	300	0	0	0	0	0	0	0	200	903	0	0	0	0	0	0	0	603	903	0
344	9	0	0	0	0	0	0	200	300	0	0	0	0	0	0	0	200	903	0	0	0	0	0	0	0	603	903	0
345	0	0	0	0	0	0	0	200	300	0	0	0	0	0	0	0	200	903	0	0	0	0	0	0	0	603	903	0
345	1	0	0	0	0	0	0	200	300	0	0	0	0	0	0	0	200	903	0	0	0	0	0	0	0	603	903	0
345	2	0	0	0	0	0	0	200	300	0	0	0	0	0	0	0	200	903	0	0	0	0	0	0	0	603	903	0
345	3	0	0	0	0	0	0	200	300	0	0	0	0	0	0	0	200	903	0	0	0	0	0	0	0	603	903	0
345	4	0	0	0	0	0	0	200	300	0	0	0	0	0	0	0	200	903	0	0	0	0	0	0	0	603	903	0
345	5	0	0	0	0	0	0	200	300	0	0	0	0	0	0	0	200	903	0	0	0	0	0	0	0	603	903	0
345	6	0	0	0	0	0	0	200	300	0	0	0	0	0	0	0	200	903	0	0	0	0	0	0	0	603	903	0
345	7	0	0	0	0	0	0	200	300	0	0	0	0	0	0	0	200	903	0	0	0	0	0	0	0	603	903	0
345	8	0	0	0	0	0	0	200	300	0	0	0	0	0	0	0	200	903	0	0	0	0	0	0	0	603	903	0
345	9	0	0	0	0	0	0	200	300	0	0	0	0	0	0	0	200	903	0	0	0	0	0	0	0	603	903	0
346	0	0	0	0	0	0	0	200	300	0	0	0	0	0	0	0	200	903	0	0	0	0	0	0	0	603	903	0
346	1	0	0	0	0	0	0	200	300	0	0	0	0	0	0	0	200	903	0	0	0	0	0	0	0	603	903	0
346	2	0	0	0	0	0	0	200	300	0	0	0	0	0	0	0	200	903	0	0	0	0	0	0	0	603	903	0
346	3	0	0	0	0	0	0	200	300	0	0	0	0	0	0	0	200	903	0	0	0	0	0	0	0	603	903	0
346	4	0	0	0	0	0	0	200	300	0	0	0	0	0	0	0	200	903	0	0	0	0	0	0	0	603	903	0
346	5	0	0	0	0	0	0	200	300	0	0	0	0	0	0	0	200	903	0	0	0	0	0	0	0	603	903	0
346	6	0	0	0	0	0	0	200	300	0	0	0	0	0	0	0	200	903	0	0	0	0	0	0	0	603	903	0
346	7	0	0	0	0	0	0	200	300	0	0	0	0	0	0	0	200	903	0	0	0	0	0	0	0	603	903	0
346	8	0	0	0	0	0	0	200	300	0	0	0	0	0	0	0	200	903	0	0	0	0	0	0	0	603	903	0
346	9	0	0	0	0	0	0	200	300	0	0	0	0	0	0	0	200	903	0	0	0	0	0	0	0	603	903	0
347	0	0	0	0	0	0	0	200	300	0	0	0	0	0	0	0	200	903	0	0	0	0	0	0	0	603	903	0
347	1	0	0	0	0	0	0	200	300	0	0	0	0	0	0	0	200	903	0	0	0	0	0	0	0	603	903	0
347	2	0	0	0	0	0	0	200	300	0	0	0	0	0	0	0	200	903	0	0	0	0	0	0	0	603	903	0
347	3	0	0	0	0	0	0	200	300	0	0	0	0	0	0	0	200	903	0	0	0	0	0	0	0	603	903	0
347	4	0	0	0	0	0	0	200	300	0	0	0	0	0	0	0	200	903	0	0	0	0	0	0	0	603	903	0
347	5	0	0	0	0	0	0	200	300	0	0	0	0	0	0	0	200	903	0	0	0	0	0	0	0	603	903	0
347	6	0	0	0	0	0	0	200	300	0	0	0	0	0	0	0	200	903	0	0	0	0	0	0	0	603	903	0
347	7	0	0	0	0	0	0	200	300	0	0	0	0	0	0	0	200	903	0	0	0	0	0	0	0	603	903	0
347	8	0	0	0	0	0	0	200	300	0	0	0	0	0	0	0	200	903	0	0	0	0	0	0	0	603	903	0
347	9	0	0	0	0	0	0	200	300	0	0	0	0	0	0	0	200	903	0	0	0	0	0	0	0	603	903	0
348	0	0	0	0	0	0	0	200	300	0	0	0	0	0	0	0	200	903	0	0	0	0	0	0	0	603	903	0
348	1	0	0	0	0	0	0	200	300	0	0	0	0	0	0	0	200	903	0	0	0	0	0	0	0	603	903	0
348	2	0	0	0	0	0	0	200	300	0	0	0	0	0	0	0	200	903	0	0	0	0	0	0	0	603	903	0
348	3	0	0	0	0	0	0	200	300	0	0	0	0	0	0	0	200	903	0	0	0	0	0	0	0	603	903	0
348	4	0	0	0	0	0	0	200	300	0	0	0	0	0	0	0	200	903	0	0	0	0	0	0	0	603	903	0
348	5	0	0	0	0	0	0	200	300	0	0	0	0	0	0	0	200	903	0	0	0	0	0	0	0	603	903	0
348	6	0	0	0	0	0	0	200	300	0	0	0	0	0	0	0	200	903	0	0	0	0	0	0	0	603	903	0
348	7	0	0	0	0	0	0	200	300	0	0	0	0	0	0	0	200	903	0	0	0	0	0	0	0	603	903	0
348	8	0	0	0	0	0	0	200	300	0	0	0	0	0	0	0	200	903	0	0	0	0	0	0	0	603	903	0
348	9	0	0	0	0	0	0	200	300	0	0	0	0	0	0	0	200	903	0	0	0	0	0	0	0	603	903	0
349	0	0	0	0	0	0	0	200	300	0	0	0	0	0	0	0	200	903	0	0	0	0	0	0	0	603	903	0
349	1	0	0	0	0	0	0	200	300	0	0	0	0	0	0	0	200	903	0	0	0	0	0	0	0	603	903	0
349	2	0	0	0	0	0	0	200	300	0	0	0	0	0	0	0	200	903	0	0	0	0	0	0	0	603	903	0
349	3	0	0	0	0	0	0	200	300	0	0	0	0	0	0	0	200	903	0	0	0	0	0	0	0	603	903	0
349	4	0	0	0	0	0	0	200	300	0	0	0	0	0	0	0	200	903	0	0	0	0	0	0	0	603	903	0
349	5	0	0	0	0	0	0	200	300	0	0	0	0	0	0	0	200	903	0	0	0	0	0	0	0	603	903	0
349	6	0	0	0	0	0	0	200	300	0	0	0	0	0	0	0	200	903	0	0	0	0	0	0	0	603	903	0
349	7	0	0	0	0	0	0	200	300	0	0	0	0	0	0	0	200	903	0	0	0	0	0	0	0	603	903	0
349	8	0	0	0	0	0	0	200	300	0	0	0	0	0	0	0	200	903	0	0	0	0	0	0	0	603	903	0
349	9	0	0	0	0	0	0	200	300	0	0	0	0	0	0	0	200	903	0	0	0	0	0	0	0	603	903	0
350	0	0	0	0	0	0	0	200	300	0	0	0	0	0	0	0	200	903	0	0	0	0	0	0	0	603	903	0
350	1	0	0	0	0	0	0	200	300	0	0	0	0	0	0	0	200	903	0	0	0	0	0	0	0	603	903	0
350	2	0	0	0	0	0	0	200	300	0	0	0	0	0	0	0	200	903	0	0	0	0	0	0	0	603	903	0
350	3	0	0	0	0	0	0	200	300	0	0	0	0	0	0	0	200	903	0	0	0	0	0	0	0	603	903	0
350	4	0	0	0	0	0	0	200	300	0	0	0	0	0	0	0	200	903	0	0	0	0	0	0	0	603	903	0
350	5	0	0	0	0	0	0	200	300	0	0	0	0	0	0	0	200	903	0	0	0	0	0	0	0	603	903	0
350	6	0	0	0	0	0	0	200	300	0	0	0	0	0	0	0	200	903	0	0	0	0	0	0	0	603	903	0
350	7	0	0	0	0	0	0	200	300	0	0	0	0	0	0	0	200	903	0	0	0	0	0	0	0	603	903	0
350	8	0	0	0	0	0	0	200	300	0	0	0	0	0	0	0	200	903	0	0	0	0	0	0	0	603	903	0
350	9	0	0	0	0	0	0	200	300	0	0	0	0	0	0	0	200	903	0	0	0	0	0	0	0	603	903	0
351	0	0	0	0	0	0	0	200	300	0	0	0	0	0	0	0	200	903	0	0	0	0	0	0	0	603	903	0
351	1	0	0	0	0	0	0	200	300	0	0	0	0	0	0	0	200	903	0	0	0	0	0	0	0	603	903	0
351	2	0	0	0	0	0	0	200	300	0	0	0	0	0	0	0	200	903	0	0	0	0	0	0	0	603	903	0
351	3	0	0	0	0	0	0	200	300	0	0	0	0	0	0	0	200	903	0	0	0	0	0	0	0	603	903	0
351	4	0	0	0	0	0	0	200	300	0	0	0	0	0	0	0	200	903	0	0	0	0	0	0	0	603	903	0
351	5	0	0	0	0	0	0	200	300	0	0	0	0	0	0	0	200	903	0	0	0	0	0	0	0	603	903	0
351	6	0	0	0	0	0	0	200	300	0	0	0	0	0	0	0	200	903	0	0	0	0	0	0	0	603	903	0
351	7	0	0	0	0	0	0	200	300	0	0	0	0	0	0	0	200	903	0	0	0	0	0	0	0	603	903	0
351	8	0	0	0	0	0	0	200	300	0	0	0	0	0	0	0	200	903	0	0	0	0	0	0	0	603	903	0
351	9	0	0	0	0	0	0	200	300	0	0	0	0	0	0	0	200	903	0	0	0	0	0	0	0	603	903	0
352	0	0	0	0	0	0	0	200	300	0	0	0	0	0	0	0	200	903	0	0	0	0	0	0	0	603	903	0
352	1	0	0	0	0	0	0	200	300	0	0	0	0	0	0	0	200	903	0	0	0	0	0	0	0	603	903	0
352	2	0	0	0	0	0	0	200	300	0	0	0	0	0	0	0	200	903	0	0	0	0	0	0	0	603	903	0
352	3	0	0	0	0	0	0	200	300	0	0	0	0	0	0	0	200	903	0	0	0	0	0	0	0	603	903	0
352	4	0	0	0	0	0	0	200	300	0	0	0	0	0	0	0	200	903	0	0	0	0	0	0	0	603	903	0
352	5	0	0	0	0	0	0	200	300	0	0	0	0	0	0	0	200	903	0	0	0	0	0	0	0	603	903	0
352	6	0	0	0	0	0	0	200	300	0	0	0	0	0	0	0	200	903	0	0	0	0	0	0	0	603	903	0
352	7	0	0	0	0	0	0	200	300	0	0	0	0	0	0	0	200	903	0	0	0	0	0	0	0	603	903	0
352	8	0	0	0	0	0	0	200	300	0	0	0	0	0	0	0	200	903	0	0	0	0	0	0	0	603	903	0
352	9	0	0	0	0	0	0	200	300	0	0	0	0	0	0	0	200	903	0	0	0	0	0	0	0	603	903	0
353	0	0	0	0	0	0	0	200	300	0	0	0	0	0	0	0	200	903	0	0	0	0	0	0	0	603	903	0
353	1	0	0	0	0	0	0	200	300	0	0	0	0	0	0	0	200	903	0	0	0	0	0	0	0	603	903	0
353	2	0	0	0	0	0	0	200	300	0	0	0	0	0	0	0	200	903	0	0	0	0	0	0	0	603	903	0
353	3	0	0	0	0	0	0	200	300	0	0	0	0	0	0	0	200	903	0	0	0	0	0	0	0	603	903	0
353	4	0	0	0	0	0	0	200	300	0	0	0	0	0	0	0	200	903	0	0	0	0	0	0	0	603	903	0
353	5	0	0	0	0	0	0	200	300	0	0	0	0	0	0	0	200	903	0	0	0	0	0	0	0	603	903	0
353	6	0	0	0	0	0	0	200	300	0	0	0	0	0	0	0	200	903	0	0	0	0	0	0	0	603	903	0
353	7	0	0	0	0	0	0	200	300	0	0	0	0	0	0	0	200	903	0	0	0	0	0	0	0	603	903	0
353	8	0	0	0	0	0	0	200	300	0	0	0	0	0	0	0	200	903	0	0	0	0	0	0	0	603	903	0
353	9	0	0	0	0	0	0	200	300	0	0	0	0	0	0	0	200	903	0	0	0	0	0	0	0	603	903	0
354	0	0	0	0	0	0	0	200	300	0	0	0	0	0	0	0	200	903	0	0	0	0	0	0	0	603	903	0
354	1	0	0	0	0	0	0	200	300	0	0	0	0	0	0	0	200	903	0	0	0	0	0	0	0	603	903	0
354	2	0	0	0	0	0	0	200	300	0	0	0	0	0	0	0	200	903	0	0	0	0	0	0	0	603	903	0
354	3	0	0	0	0	0	0	200	300	0	0	0	0	0	0	0	200	903	0	0	0	0	0	0	0	603	903	0
354	4	0	0	0	0	0	0	200	300	0	0	0	0	0	0	0	200	903	0	0	0	0	0	0	0	603	903	0
354	5	0	0	0	0	0	0	200	300	0	0	0	0	0	0	0	200	903	0	0	0	0	0	0	0	603	903	0
354	6	0	0	0	0	0	0	200	300	0	0	0	0	0	0	0	200	903	0	0	0	0	0	0	0	603	903	0
354	7	0	0	0	0	0	0	200	300	0	0	0	0	0	0	0	200	903	0	0	0	0	0	0	0	603	903	0
354	8	0	0	0	0	0	0	200	300	0	0	0	0	0	0	0	200	903	0	0	0	0	0	0	0	603	903	0
354	9	0	0	0	0	0	0	200	300	0	0	0	0	0	0	0	200	903	0	0	0	0	0	0	0	603	903	0
355	0	0	0	0	0	0	0	200	300	0	0	0	0	0	0	0	200	903	0	0	0	0	0	0	0	603	903	0
355	1	0	0	0	0	0	0	200	300	0	0	0	0	0	0	0	200	903	0	0	0	0	0	0	0	603	903	0
355	2	0	0	0	0	0	0	200	300	0	0	0	0	0	0	0	200	903	0	0	0	0	0	0	0	603	903	0
355	3	0	0	0	0	0	0	200	300	0	0	0	0	0	0	0	200	903	0	0	0	0	0	0	0	603	903	0
355	4	0	0	0	0	0	0	200	300	0	0	0	0	0	0	0	200	903	0	0	0	0	0	0	0	603	903	0
355	5	0	0	0	0	0	0	200	300	0	0	0	0	0	0	0	200	903	0	0	0	0	0	0	0	603	903	0
355	6	0	0	0	0	0	0	200	300	0	0	0	0	0	0	0	200	903	0	0	0	0	0	0	0	603	903	0
355	7	0	0	0	0	0	0	200	300	0	0	0	0	0	0	0	200	903	0	0	0	0	0	0	0	603	903	0
355	8	0	0	0	0	0	0	200	300	0	0	0	0	0	0	0	200	903	0	0	0	0	0	0	0	603	903	0
355	9	0	0	0	0	0	0	200	300	0	0	0	0	0	0	0	200	903	0	0	0	0	0	0	0	603	903	0
356	0	0	0	0	0	0	0	200	300	0	0	0	0	0	0	0	200	903	0	0	0	0	0	0	0	603	903	0
356	1	0	0	0	0	0	0	200	300	0	0	0	0	0	0	0	200	903	0	0	0	0	0	0	0	603	903	0
356	2	0	0	0	0	0	0	200	300	0	0	0	0	0	0	0	200	903	0	0	0	0	0	0	0	603	903	0
356	3	0	0	0	0	0	0	200	300	0	0	0	0	0	0	0	200	903	0	0	0	0	0	0	0	603	903	0
356	4	0	0	0	0	0	0	200	300	0	0	0	0	0	0	0	200	903	0	0	0	0	0	0	0	603	903	0
356	5	0	0	0	0	0	0	200	300	0	0	0	0	0	0	0	200	903	0	0	0	0	0	0	0	603	903	0
356	6	0	0	0	0	0	0	200	300	0	0	0	0	0	0	0	200	903	0	0	0	0	0	0	0	603	903	0
356	7	0	0	0	0	0	0	200	300	0	0	0	0	0	0	0	200	903	0	0	0	0	0	0	0	603	903	0
356	8	0	0	0	0	0	0	200	300	0	0	0	0	0	0	0	200	903	0	0	0	0	0	0	0	603	903	0
356	9	0	0	0	0	0	0	200	300	0	0	0	0	0	0	0	200	903	0	0	0	0	0	0	0	603	903	0
357	0	0	0	0	0	0	0	200	300	0	0	0	0	0	0	0	200	903	0	0	0	0	0	0	0	603	903	0
357	1	0	0	0	0	0	0	200	300	0	0	0	0	0	0	0	200	903	0	0	0	0	0	0	0	603	903	0
357	2	0	0	0	0	0	0	200	300	0	0	0	0	0	0	0	200	903	0	0	0	0	0	0	0	603	903	0
357	3	0	0	0	0	0	0	200	300	0	0	0	0	0	0	0	200	903	0	0	0	0	0	0	0	603	903	0
357	4	0	0	0	0	0	0	200	300	0	0	0	0	0	0	0	200	903	0	0	0	0	0	0	0	603	903	0
357	5	0	0	0	0	0	0	200	300	0	0	0	0	0	0	0	200	903	0	0	0	0	0	0	0	603	903	0
357	6	0	0	0	0	0	0	200	300	0	0	0	0	0	0	0	200	903	0	0	0	0	0	0	0	603	903	0
357	7	0	0	0	0	0	0	200	300	0	0	0	0	0	0	0	200	903	0	0	0	0	0	0	0	603	903	0
357	8	0	0	0	0	0	0	200	300	0	0	0	0	0	0	0	200	903	0	0	0	0	0	0	0	603	903	0
357	9	0	0	0	0	0	0	200	300	0	0	0	0	0	0	0	200	903	0	0	0	0	0	0	0	603	903	0
358	0	0	0	0	0	0	0	200	300	0	0	0	0	0	0	0	200	903	0	0	0	0	0	0	0	603	903	0
358	1	0	0	0	0	0	0	200	300	0	0	0	0	0	0	0	200	903	0	0	0	0	0	0	0	603	903	0
358	2	0	0	0	0	0	0	200	300	0	0	0	0	0	0	0	200	903	0	0	0	0	0	0	0	603	903	0
358	3	0	0	0	0	0	0	200	300	0	0	0	0	0	0	0	200	903	0	0	0	0	0	0	0	603	903	0
358	4	0	0	0	0	0	0	200	300	0	0	0	0	0	0	0	200	903	0	0	0	0	0	0	0	603	903	0
358	5	0	0	0	0	0	0	200	300	0	0	0	0	0	0	0	200	903	0	0	0	0	0	0	0	603	903	0
358	6	0	0	0	0	0	0	200	300	0	0	0	0	0	0	0	200	903	0	0	0	0	0	0	0	603	903	0
358	7	0	0	0	0	0	0	200	300	0	0	0	0	0	0	0	200	903	0	0	0	0	0	0	0	603	903	0
358	8	0	0	0	0	0	0	200	300	0	0	0	0	0	0	0	200	903	0	0	0	0	0	0	0	603	903	0
358	9	0	0	0	0	0	0	200	300	0	0	0	0	0	0	0	200	903	0	0	0	0	0	0	0	603	903	0
359	0	0	0	0	0	0	0	200	300	0	0	0	0	0	0	0	200	903	0	0	0	0	0	0	0	603	903	0
359	1	0	0	0	0	0	0	200	300	0	0	0	0	0	0	0	200	903	0	0	0	0	0	0	0	603	903	0
359	2	0	0	0	0	0	0	200	300	0	0	0	0	0	0	0	200	903	0	0	0	0	0	0	0	603	903	0
359	3	0	0	0	0	0	0	200	300	0	0	0	0	0	0	0	200	903	0	0	0	0	0	0	0	603	903	0
359	4	0	0	0	0	0	0	200	300	0	0	0	0	0	0	0	200	903	0	0	0	0	0	0	0	603	903	0
359	5	0	0	0	0	0	0	200	300	0	0	0	0	0	0	0	200	903	0	0	0	0	0	0	0	603	903	0
359	6	0	0	0	0	0	0	200	300	0	0	0	0	0	0	0	200	903	0	0	0	0	0	0	0	603	903	0
359	7	0	0	0	0	0	0	200	300	0	0	0	0	0	0	0	200	903	0	0	0	0	0	0	0	603	903	0
359	8	0	0	0	0	0	0	200	300	0	0	0	0	0	0	0	200	903	0	0	0	0	0	0	0	603	903	0
359	9	0	0	0	0	0	0	200	300	0	0	0	0	0	0	0	200	903	0	0	0	0	0	0	0	603	903	0
360	0	0	0	0	0	0	0	200	300	0	0	0	0	0	0	0	200	903	0	0	0	0	0	0	0	603	903	0
360	1	0	0	0	0	0	0	200	300	0	0	0	0	0	0	0	200	903	0	0	0	0	0	0	0	603	903	0
360	2	0	0	0	0	0	0	200	300	0	0	0	0	0	0	0	200	903	0	0	0	0	0	0	0	603	903	0
360	3	0	0	0	0	0	0	200	300	0	0	0	0	0	0	0	200	903	0	0	0	0	0	0	0	603	903	0
360	4	0	0	0	0	0	0	200	300	0	0	0	0	0	0	0	200	903	0	0	0	0	0	0	0	603	903	0
360	5	0	0	0	0	0	0	200	300	0	0	0	0	0	0	0	200	903	0	0	0	0	0	0	0	603	903	0
360	6	0	0	0	0	0	0	200	300	0	0	0	0	0	0	0	200	903	0	0	0	0	0	0	0	603	903	0
360	7	0	0	0	0	0	0	200	300	0	0	0	0	0	0	0	200	903	0	0	0	0	0	0	0	603	903	0
360	8	0	0	0	0	0	0	200	300	0	0	0	0	0	0	0	200	903	0	0	0	0	0	0	0	603	903	0
360	9	0	0	0	0	0	0	200	300	0	0	0	0	0	0	0	200	903	0	0	0	0	0	0	0	603	903	0
361	0	0	0	0	0	0	0	200	300	0	0	0	0	0	0	0	200	903	0	0	0	0	0	0	0	603	903	0
361	1	0	0	0	0	0	0	200	300	0	0	0	0	0	0	0	200	903	0	0	0	0	0	0	0	603	903	0
361	2	0	0	0	0	0	0	200	300	0	0	0	0	0	0	0	200	903	0	0	0	0	0	0	0	603	903	0
361	3	0	0	0	0	0	0	200	300	0	0	0	0	0	0	0	200	903	0	0	0	0	0	0	0	603	903	0
361	4	0	0	0	0	0	0	200	300	0	0	0	0	0	0	0	200	903	0	0	0	0	0	0	0	603	903	0
361	5	0	0	0	0	0	0	200	300	0	0	0	0	0	0	0	200	903	0	0	0	0	0	0	0	603	903	0
361	6	0	0	0	0	0	0	200	300	0	0	0	0	0	0	0	200	903	0	0	0	0	0	0	0	603	903	0
361	7	0	0	0	0	0	0	200	300	0	0	0	0	0	0	0	200	903	0	0	0	0	0	0	0	603	903	0
361	8	0	0	0	0	0	0	200	300	0	0	0	0	0	0	0	200	903	0	0	0	0	0	0	0	603	903	0
361	9	0	0	0	0	0	0	200	300	0	0	0	0	0	0	0	200	903	0	0	0	0	0	0	0	603	903	0
362	0	0	0	0	0	0	0	200	300	0	0	0	0	0	0	0	200	903	0	0	0	0	0	0	0	603	903	0
362	1	0	0	0	0	0	0	200	300	0	0	0	0	0	0	0	200	903	0	0	0	0	0	0	0	603	903	0
362	2	0	0	0	0	0	0	200	300	0	0	0	0	0	0	0	200	903	0	0	0	0	0	0	0	603	903	0
362	3	0	0	0	0	0	0	200	300	0	0	0	0	0	0	0	200	903	0	0	0	0	0	0	0	603	903	0
362	4	0	0	0	0	0	0	200	300	0	0	0	0	0	0	0	200	903	0	0	0	0	0	0	0	603	903	0
362	5	0	0	0	0	0	0	200	300	0	0	0	0	0	0	0	200	903	0	0	0	0	0	0	0	603	903	0
362	6	0	0	0	0	0	0	200	300	0	0	0	0	0	0	0	200	903	0	0	0	0	0	0	0	603	903	0
362	7	0	0	0	0	0	0	200	300	0	0	0	0	0	0	0	200	903	0	0	0	0	0	0	0	603	903	0
362	8	0	0	0	0	0	0	200	300	0	0	0	0	0	0	0	200	903	0	0	0	0	0	0	0	603	903	0
362	9	0	0	0	0	0	0	200	300	0	0	0	0	0	0	0	200	903	0	0	0	0	0	0	0	603	903	0
363	0	0	0	0	0	0	0	200	300	0	0	0	0	0	0	0	200	903	0	0	0	0	0	0	0	603	903	0
363	1	0	0	0	0	0	0	200	300	0	0	0	0	0	0	0	200	903	0	0	0	0	0	0	0	603	903	0
363	2	0	0	0	0	0	0	200	300	0	0	0	0	0	0	0	200	903	0	0	0	0	0	0	0	603	903	0
363	3	0	0	0	0	0	0	200	300	0	0	0	0	0	0	0	200	903	0	0	0	0	0	0	0	603	903	0
363	4	0	0	0	0	0	0	200	300	0	0	0	0	0	0	0	200	903	0	0	0	0	0	0	0	603	903	0
363	5	0	0	0	0	0	0	200	300	0	0	0	0	0	0	0	200	903	0	0	0	0	0	0	0	603	903	0
363	6	0	0	0	0	0	0	200	300	0	0	0	0	0	0	0	200	903	0	0	0	0	0	0	0	603	903	0
363	7	0	0	0	0	0	0	200	300	0	0	0	0	0	0	0	200	903	0	0	0	0	0	0	0	603	903	0
363	8	0	0	0	0	0	0	200	300	0	0	0	0	0	0	0	200	903	0	0	0	0	0	0	0	603	903	0
363	9	0	0	0	0	0	0	200	300	0	0	0	0	0	0	0	200	903	0	0	0	0	0	0	0	603	903	0
364	0	0	0	0	0	0	0	200	300	0	0	0	0	0	0	0	200	903	0	0	0	0	0	0	0	603	903	0
364	1	0	0	0	0	0	0	200	300	0	0	0	0	0	0	0	200	903	0	0	0	0	0	0	0	603	903	0
364	2	0	0	0	0	0	0	200	300	0	0	0	0	0	0	0	200	903	0	0	0	0	0	0	0	603	903	0
364	3	0	0	0	0	0	0	200	300	0	0	0	0	0	0	0	200	903	0	0	0	0	0	0	0	603	903	0
364	4	0	0	0	0	0	0	200	300	0	0	0	0	0	0	0	200	903	0	0	0	0	0	0	0	603	903	0
364	5	0	0	0	0	0	0	200	300	0	0	0	0	0	0	0	200	903	0	0	0	0	0	0	0	603	903	0
364	6	0	0	0	0	0	0	200	300	0	0	0	0	0	0	0	200	903	0	0	0	0	0	0	0	603	903	0
364	7	0	0	0	0	0	0	200	300	0	0	0	0	0	0	0	200	903	0	0	0	0	0	0	0	603	903	0
364	8	0	0	0	0	0	0	200	300	0	0	0	0	0	0	0	200	903	0	0	0	0	0	0	0	603	903	0
364	9	0	0	0	0	0	0	200	300	0	0	0	0	0	0	0	200	903	0	0	0	0	0	0	0	603	903	0
365	0	0	0	0	0	0	0	200	300	0	0	0	0	0	0	0	200	903	0	0	0	0	0	0	0	603	903	0
365	1	0	0	0	0	0	0	200	300	0	0	0	0	0	0	0	200	903	0	0	0	0	0	0	0	603	903	0
365	2	0	0	0	0	0	0	200	300	0	0	0	0	0	0	0	200	903	0	0	0	0	0	0	0	603	903	0
365	3	0	0	0	0	0	0	200	300	0	0	0	0	0	0	0	200	903	0	0	0	0	0	0	0	603	903	0
365	4	0	0	0	0	0	0	200	300	0	0	0	0	0	0	0	200	903	0	0	0	0	0	0	0	603	903	0
365	5	0	0	0	0	0	0	200	300	0	0	0	0	0	0	0	200	903	0	0	0	0	0	0	0	603	903	0
365	6	0	0	0	0	0	0	200	300	0	0	0	0	0	0	0	200	903	0	0	0	0	0	0	0	603	903	0
365	7	0	0	0	0	0	0	200	300	0	0	0	0	0	0	0	200	903	0	0	0	0	0	0	0	603	903	0
365	8	0	0	0	0	0	0	200	300	0	0	0	0	0	0	0	200	903	0	0	0	0	0	0	0	603	903	0
365	9	0	0	0	0	0	0	200	300	0	0	0	0	0	0	0	200	903	0	0	0	0	0	0	0	603	903	0
366	0	0	0	0	0	0	0	200	300	0	0	0	0	0	0	0	200	903	0	0	0	0	0	0	0	603	903	0
366	1	0	0	0	0	0	0	200	300	0	0	0	0	0	0	0	200	903	0	0	0	0	0	0	0	603	903	0
366	2	0	0	0	0	0	0	200	300	0	0	0	0	0	0	0	200	903	0	0	0	0	0	0	0	603	903	0
366	3	0	0	0	0	0	0	200	300	0	0	0	0	0	0	0	200	903	0	0	0	0	0	0	0	603	903	0
366	4	0	0	0	0	0	0	200	300	0	0	0	0	0	0	0	200	903	0	0	0	0	0	0	0	603	903	0
366	5	0	0	0	0	0	0	200	300	0	0	0	0	0	0	0	200	903	0	0	0	0	0	0	0	603	903	0
366	6	0	0	0	0	0	0	200	300	0	0	0	0	0	0	0	200	903	0	0	0	0	0	0	0	603	903	0
366	7	0	0	0	0	0	0	200	300	0	0	0	0	0	0	0	200	903	0	0	0	0	0	0	0	603	903	0
366	8	0	0	0	0	0	0	200	300	0	0	0	0	0	0	0	200	903	0	0	0	0	0	0	0	603	903	0
366	9	0	0	0	0	0	0	200	300	0	0	0	0	0	0	0	200	903	0	0	0	0	0	0	0	603	903	0
367	0	0	0	0	0	0	0	200	300	0	0	0	0	0	0	0	200	903	0	0	0	0	0	0	0	603	903	0
367	1	0	0	0	0	0	0	200	300	0	0	0	0	0	0	0	200	903	0	0	0	0	0	0	0	603	903	0
367	2	0	0	0	0	0	0	200	300	0	0	0	0	0	0	0	200	903	0	0	0	0	0	0	0	603	903	0
367	3	0	0	0	0	0	0	200	300	0	0	0	0	0	0	0	200	903	0	0	0	0	0	0	0	603	903	0
367	4	0	0	0	0	0	0	200	300	0	0	0	0	0	0	0	200	903	0	0	0	0	0	0	0	603	903	0
367	5	0	0	0	0	0	0	200	300	0	0	0	0	0	0	0	200	903	0	0	0	0	0	0	0	603	903	0
367	6	0	0	0	0	0	0	200	300	0	0	0	0	0	0	0	200	903	0	0	0	0	0	0	0	603	903	0
367	7	0	0	0	0	0	0	200	300	0	0	0	0	0	0	0	200	903	0	0	0	0	0	0	0	603	903	0
367	8	0	0	0	0	0	0	200	300	0	0	0	0	0	0	0	200	903	0	0	0	0	0	0	0	603	903	0
367	9	0	0	0	0	0	0	200	300	0	0	0	0	0	0	0	200	903	0	0	0	0	0	0	0	603	903	0
368	0	0	0	0	0	0	0	200	300	0	0	0	0	0	0	0	200	903	0	0	0	0	0	0	0	603	903	0
368	1	0	0	0	0	0	0	200	300	0	0	0	0	0	0	0	200	903	0	0	0	0	0	0	0	603	903	0
368	2	0	0	0	0	0	0	200	300	0	0	0	0	0	0	0	200	903	0	0	0	0	0	0	0	603	903	0
368	3	0	0	0	0	0	0	200	300	0	0	0	0	0	0	0	200	903	0	0	0	0	0	0	0	603	903	0
368	4	0	0	0	0	0	0	200	300	0	0	0	0	0	0	0	200	903	0	0	0	0	0	0	0	603	903	0
368	5	0	0	0	0	0	0	200	300	0	0	0	0	0	0	0	200	903	0	0	0	0	0	0	0	603	903	0
368	6	0	0	0	0	0	0	200	300	0	0	0	0	0	0	0	200	903	0	0	0	0	0	0	0	603	903	0
368	7	0	0	0	0	0	0	200	300	0	0	0	0	0	0	0	200	903	0	0	0	0	0	0	0	603	903	0
368	8	0	0	0	0	0	0	200	300	0	0	0	0	0	0	0	200	903	0	0	0	0	0	0	0	603	903	0
368	9	0	0	0	0	0	0	200	300	0	0	0	0	0	0	0	200	903	0	0	0	0	0	0	0	603	903	0
369	0	0	0	0	0	0	0	200	300	0	0	0	0	0	0	0	200	903	0	0	0	0	0	0	0	603	903	0
369	1	0	0	0	0	0	0	200	300	0	0	0	0	0	0	0	200	903	0	0	0	0	0	0	0	603	903	0
369	2	0	0	0	0	0	0	200	300	0	0	0	0	0	0	0	200	903	0	0	0	0	0	0	0	603	903	0
369	3	0	0	0	0	0	0	200	300	0	0	0	0	0	0	0	200	903	0	0	0	0	0	0	0	603	903	0
369	4	0	0	0	0	0	0	200	300	0	0	0	0	0	0	0	200	903	0	0	0	0	0	0	0	603	903	0
369	5	0	0	0	0	0	0	200	300	0	0	0	0	0	0	0	200	903	0	0	0	0	0	0	0	603	903	0
369	6	0	0	0	0	0	0	200	300	0	0	0	0	0	0	0	200	903	0	0	0	0	0	0	0	603	903	0
369	7	0	0	0	0	0	0	200	300	0	0	0	0	0	0	0	200	903	0	0	0	0	0	0	0	603	903	0
369	8	0	0	0	0	0	0	200	300	0	0	0	0	0	0	0	200	903	0	0	0	0	0	0	0	603	903	0
369	9	0	0	0	0	0	0	200	300	0	0	0	0	0	0	0	200	903	0	0	0	0	0	0	0	603	903	0
370	0	0	0	0	0	0	0	200	300	0	0	0	0	0	0	0	200	903	0	0	0	0	0	0	0	603	903	0
370	1	0	0	0	0	0	0	200	300	0	0	0	0	0	0	0	200	903	0	0	0	0	0	0	0	603	903	0
370	2	0	0	0	0	0	0	200	300	0	0	0	0	0	0	0	200	903	0	0	0	0	0	0	0	603	903	0
370	3	0	0	0	0	0	0	200	300	0	0	0	0	0	0	0	200	903	0	0	0	0	0	0	0	603	903	0
370	4	0	0	0	0	0	0	200	300	0	0	0	0	0	0	0	200	903	0	0	0	0	0	0	0	603	903	0
370	5	0	0	0	0	0	0	200	300	0	0	0	0	0	0	0	200	903	0	0	0	0	0	0	0	603	903	0
370	6	0	0	0	0	0	0	200	300	0	0	0	0	0	0	0	200	903	0	0	0	0	0	0	0	603	903	0
370	7	0	0	0	0	0	0	200	300	0	0	0	0	0	0	0	200	903	0	0	0	0	0	0	0	603	903	0
370	8	0	0	0	0	0	0	200	300	0	0	0	0	0	0	0	200	903	0	0	0	0	0	0	0	603	903	0
370	9	0	0	0	0	0	0	200	300	0	0	0	0	0	0	0	200	903	0	0	0	0	0	0	0	603	903	0
371	0	0	0	0	0	0	0	200	300	0	0	0	0	0	0	0	200	903	0	0	0	0	0	0	0	603	903	0
371	1	0	0	0	0	0	0	200	300	0	0	0	0	0	0	0	200	903	0	0	0	0	0	0	0	603	903	0
371	2	0	0	0	0	0	0	200	300	0	0	0	0	0	0	0	200	903	0	0	0	0	0	0	0	603	903	0
371	3	0	0	0	0	0	0	200	300	0	0	0	0	0	0	0	200	903	0	0	0	0	0	0	0	603	903	0
371	4	0	0	0	0	0	0	200	300	0	0	0	0	0	0	0	200	903	0	0	0	0	0	0	0	603	903	0
371	5	0	0	0	0	0	0	200	300	0	0	0	0	0	0	0	200	903	0	0	0	0	0	0	0	603	903	0
371	6	0	0	0	0	0	0	200	300	0	0	0	0	0	0	0	200	903	0	0	0	0	0	0	0	603	903	0
371	7	0	0	0	0	0	0	200	300	0	0	0	0	0	0	0	200	903	0	0	0	0	0	0	0	603	903	0
371	8	0	0	0	0	0	0	200	300	0	0	0	0	0	0	0	200	903	0	0	0	0	0	0	0	603	903	0
371	9	0	0	0	0	0	0	200	300	0	0	0	0	0	0	0	200	903	0	0	0	0	0	0	0	603	903	0
372	0	-0.15346	2.11106	11.7172	761.445	-525.626	-115.358	200	300	0	0	0	0	0	0	0	200	903	0	0	0	0	0	0	0	603	903	0
372	1	0.914656	2.874	10.4965	1036.1	-403.556	-69.5817	200	300	0	0	0	0	0	0	0	200	903	0	0	0	0	0	0	0	603	903	0
372	2	0	0	0	0	0	0	200	300	0	0	0	0	0	0	0	200	903	0	0	0	0	0	0	0	603	903	0
372	3	0	0	0	0	0	0	200	300	0	0	0	0	0	0	0	200	903	0	0	0	0	0	0	0	603	903	0
372	4	0	0	0	0	0	0	200	300	0	0	0	0	0	0	0	200	903	0	0	0	0	0	0	0	603	903	0
372	5	0.60948	2.11106	11.1068	395.235	-98.3797	67.7474	200	300	0	0	0	0	0	0	0	200	903	0	0	0	0	0	0	0	603	903	0
372	6	-0.000871718	1.80589	12.0224	212.129	-37.3445	-161.134	200	300	0	0	0	0	0	0	0	200	903	0	0	0	0	0	0	0	603	903	0
372	7	0.456892	1.19554	11.412	761.445	-281.485	67.7474	200	300	0	0	0	0	0	0	0	200	903	0	0	0	0	0	0	0	603	903	0
372	8	0.456892	2.41624	10.4965	852.998	-464.591	-298.464	200	300	0	0	0	0	0	0	0	200	903	0	0	0	0	0	0	0	603	903	0
372	9	1.21983	1.50071	10.4965	486.787	-159.415	-298.464	200	300	0	0	0	0	0	0	0	200	903	0	0	0	0	0	0	0	603	903	0
373	0	0.914656	1.80589	10.1913	578.34	-342.52	-69.5817	200	300	0	0	0	0	0	0	0	200	903	0	0	0	0	0	0	0	603	903	0
373	1	0	0	0	0	0	0	200	300	0	0	0	0	0	0	0	200	903	0	0	0	0	0	0	0	603	903	0
373	2	0	0	0	0	0	0	200	300	0	0	0	0	0	0	0	200	903	0	0	0	0	0	0	0	603	903	0
373	3	-0.458635	2.56883	11.1068	852.998	-525.626	250.853	200	300	0	0	0	0	0	0	0	200	903	0	0	0	0	0	0	0	603	903	0
373	4	-0.458635	1.6533	11.1068	395.235	-159.415	-298.464	200	300	0	0	0	0	0	0	0	200	903	0	0	0	0	0	0	0	603	903	0
373	5	0.762068	2.11106	11.412	852.998	-342.52	-115.358	200	300	0	0	0	0	0	0	0	200	903	0	0	0	0	0	0	0	603	903	0
373	6	1.52501	2.26365	12.0224	578.34	-220.45	-344.24	200	300	0	0	0	0	0	0	0	200	903	0	0	0	0	0	0	0	603	903	0
373	7	0	0	0	0	0	0	200	300	0	0	0	0	0	0	0	200	903	0	0	0	0	0	0	0	603	903	0
373	8	-0.306047	1.19554	11.412	761.445	-98.3797	-23.8053	200	300	0	0	0	0	0	0	0	200	903	0	0	0	0	0	0	0	603	903	0
373	9	0	0	0	0	0	0	200	300	0	0	0	0	0	0	0	200	903	0	0	0	0	0	0	0	603	903	0
374	0	1.06724	1.19554	10.4965	578.34	-403.556	-115.358	200	300	0	0	0	0	0	0	0	200	903	0	0	0	0	0	0	0	603	903	0
374	1	-0.458635	2.26365	10.8017	303.682	267.831	-298.464	200	300	0	0	0	0	0	0	0	200	903	0	0	0	0	0	0	0	603	903	0
374	2	1.21983	1.6533	11.7172	761.445	84.7258	-252.687	200	300	0	0	0	0	0	0	0	200	903	0	0	0	0	0	0	0	603	903	0
374	3	0.914656	2.11106	11.1068	212.129	-281.485	-161.134	200	300	0	0	0	0	0	0	0	200	903	0	0	0	0	0	0	0	603	903	0
374	4	0	0	0	0	0	0	200	300	0	0	0	0	0	0	0	200	903	0	0	0	0	0	0	0	603	903	0
374	5	1.37242	1.04295	12.9379	212.129	23.6906	-69.5817	200	300	0	0	0	0	0	0	0	200	903	0	0	0	0	0	0	0	603	903	0
374	6	0	0	0	0	0	0	200	300	0	0	0	0	0	0	0	200	903	0	0	0	0	0	0	0	603	903	0
374	7	0.914656	1.80589	11.412	120.576	23.6906	-161.134	200	300	0	0	0	0	0	0	0	200	903	0	0	0	0	0	0	0	603	903	0
374	8	-0.306047	2.26365	11.7172	120.576	-159.415	-115.358	200	300	0	0	0	0	0	0	0	200	903	0	0	0	0	0	0	0	603	903	0
374	9	0.914656	1.6533	10.4965	120.576	-37.3445	-252.687	200	300	0	0	0	0	0	0	0	200	903	0	0	0	0	0	0	0	603	903	0
375	0	1.52501	2.26365	11.1068	852.998	23.6906	113.524	200	300	0	0	0	0	0	0	0	200	903	0	0	0	0	0	0	0	603	903	0
375	1	0	0	0	0	0	0	200	300	0	0	0	0	0	0	0	200	903	0	0	0	0	0	0	0	603	903	0
375	2	0.762068	1.50071	11.1068	852.998	-464.591	-344.24	200	300	0	0	0	0	0	0	0	200	903	0	0	0	0	0	0	0	603	903	0
375	3	0	0	0	0	0	0	200	300	0	0	0	0	0	0	0	200	903	0	0	0	0	0	0	0	603	903	0
375	4	-0.15346	1.95848	11.412	852.998	23.6906	-252.687	200	300	0	0	0	0	0	0	0	200	903	0	0	0	0	0	0	0	603	903	0
375	5	0.304304	3.33177	10.8017	852.998	-98.3797	-252.687	200	300	0	0	0	0	0	0	0	200	903	0	0	0	0	0	0	0	603	903	0
375	6	0.762068	2.874	11.7172	212.129	23.6906	-161.134	200	300	0	0	0	0	0	0	0	200	903	0	0	0	0	0	0	0	603	903	0
375	7	0.456892	2.26365	11.1068	120.576	-98.3797	-23.8053	200	300	0	0	0	0	0	0	0	200	903	0	0	0	0	0	0	0	603	903	0
375	8	0.456892	2.11106	11.7172	944.551	-403.556	-69.5817	200	300	0	0	0	0	0	0	0	200	903	0	0	0	0	0	0	0	603	903	0
375	9	0	0	0	0	0	0	200	300	0	0	0	0	0	0	0	200	903	0	0	0	0	0	0	0	603	903	0
376	0	0.304304	2.26365	10.4965	1219.21	-464.591	-161.134	200	300	0	0	0	0	0	0	0	200	903	0	0	0	0	0	0	0	603	903	0
376	1	0	0	0	0	0	0	200	300	0	0	0	0	0	0	0	200	903	0	0	0	0	0	0	0	603	903	0
376	2	-0.611223	1.6533	11.1068	-62.5292	-37.3445	-161.134	200	300	0	0	0	0	0	0	0	200	903	0	0	0	0	0	0	0	603	903	0
376	3	0.151716	2.56883	10.4965	1493.87	145.761	-23.8053	200	300	0	0	0	0	0	0	0	200	903	0	0	0	0	0	0	0	603	903	0
376	4	1.06724	2.11106	10.4965	212.129	-37.3445	-23.8053	200	300	0	0	0	0	0	0	0	200	903	0	0	0	0	0	0	0	603	903	0
376	5	0.914656	1.95848	10.8017	761.445	-708.731	-252.687	200	300	0	0	0	0	0	0	0	200	903	0	0	0	0	0	0	0	603	903	0
376	6	0.762068	2.56883	10.1913	669.893	-159.415	-390.016	200	300	0	0	0	0	0	0	0	200	903	0	0	0	0	0	0	0	603	903	0
376	7	-0.000871718	1.50071	12.6327	1036.1	-98.3797	113.524	200	300	0	0	0	0	0	0	0	200	903	0	0	0	0	0	0	0	603	903	0
376	8	0	0	0	0	0	0	200	300	0	0	0	0	0	0	0	200	903	0	0	0	0	0	0	0	603	903	0
376	9	2.28795	1.50071	10.1913	303.682	-220.45	-344.24	200	300	0	0	0	0	0	0	0	200	903	0	0	0	0	0	0	0	603	903	0
377	0	-0.15346	0.89036	10.8017	395.235	145.761	-252.687	200	300	0	0	0	0	0	0	0	200	903	0	0	0	0	0	0	0	603	903	0
377	1	1.06724	2.11106	11.7172	-62.5292	-342.52	-23.8053	200	300	0	0	0	0	0	0	0	200	903	0	0	0	0	0	0	0	603	903	0
377	2	1.37242	1.80589	10.4965	120.576	-220.45	-390.016	200	300	0	0	0	0	0	0	0	200	903	0	0	0	0	0	0	0	603	903	0
377	3	0	0	0	0	0	0	200	300	0	0	0	0	0	0	0	200	903	0	0	0	0	0	0	0	603	903	0
377	4	0	0	0	0	0	0	200	300	0	0	0	0	0	0	0	200	903	0	0	0	0	0	0	0	603	903	0
377	5	0.151716	1.6533	9.88614	761.445	-220.45	-252.687	200	300	0	0	0	0	0	0	0	200	903	0	0	0	0	0	0	0	603	903	0
377	6	-0.000871718	1.34812	11.1068	120.576	84.7258	-206.911	200	300	0	0	0	0	0	0	0	200	903	0	0	0	0	0	0	0	603	903	0
377	7	1.37242	0.89036	10.8017	303.682	84.7258	21.9711	200	300	0	0	0	0	0	0	0	200	903	0	0	0	0	0	0	0	603	903	0
377	8	0.914656	1.95848	9.88614	669.893	-220.45	-206.911	200	300	0	0	0	0	0	0	0	200	903	0	0	0	0	0	0	0	603	903	0
377	9	0	0	0	0	0	0	200	300	0	0	0	0	0	0	0	200	903	0	0	0	0	0	0	0	603	903	0
378	0	0.762068	3.02659	9.58096	761.445	-98.3797	-298.464	200	300	0	0	0	0	0	0	0	200	903	0	0	0	0	0	0	0	603	903	0
378	1	0.60948	1.80589	10.4965	1585.42	-342.52	113.524	200	300	0	0	0	0	0	0	0	200	903	0	0	0	0	0	0	0	603	903	0
378	2	2.44053	1.95848	11.412	852.998	-98.3797	-23.8053	200	300	0	0	0	0	0	0	0	200	903	0	0	0	0	0	0	0	603	903	0
378	3	0.304304	1.50071	10.4965	29.0235	-220.45	-115.358	200	300	0	0	0	0	0	0	0	200	903	0	0	0	0	0	0	0	603	903	0
378	4	1.52501	1.95848	11.1068	212.129	-342.52	-23.8053	200	300	0	0	0	0	0	0	0	200	903	0	0	0	0	0	0	0	603	903	0
378	5	2.44053	1.6533	9.88614	303.682	-464.591	-69.5817	200	300	0	0	0	0	0	0	0	200	903	0	0	0	0	0	0	0	603	903	0
378	6	0	0	0	0	0	0	200	300	0	0	0	0	0	0	0	200	903	0	0	0	0	0	0	0	603	903	0
378	7	0	0	0	0	0	0	200	300	0	0	0	0	0	0	0	200	903	0	0	0	0	0	0	0	603	903	0
378	8	-0.15346	2.11106	9.88614	944.551	-342.52	-206.911	200	300	0	0	0	0	0	0	0	200	903	0	0	0	0	0	0	0	603	903	0
378	9	0.456892	2.26365	11.7172	669.893	-98.3797	-69.5817	200	300	0	0	0	0	0	0	0	200	903	0	0	0	0	0	0	0	603	903	0
379	0	0.762068	1.50071	11.1068	761.445	-37.3445	-23.8053	200	300	0	0	0	0	0	0	0	200	903	0	0	0	0	0	0	0	603	903	0
379	1	1.21983	1.6533	10.4965	120.576	-159.415	-252.687	200	300	0	0	0	0	0	0	0	200	903	0	0	0	0	0	0	0	603	903	0
379	2	0	0	0	0	0	0	200	300	0	0	0	0	0	0	0	200	903	0	0	0	0	0	0	0	603	903	0
379	3	0.914656	2.26365	12.9379	303.682	-464.591	-344.24	200	300	0	0	0	0	0	0	0	200	903	0	0	0	0	0	0	0	603	903	0
379	4	-0.458635	2.56883	9.88614	852.998	-159.415	-252.687	200	300	0	0	0	0	0	0	0	200	903	0	0	0	0	0	0	0	603	903	0
379	5	1.6776	0.737772	12.0224	578.34	267.831	-69.5817	200	300	0	0	0	0	0	0	0	200	903	0	0	0	0	0	0	0	603	903	0
379	6	0.60948	2.11106	10.4965	852.998	84.7258	-252.687	200	300	0	0	0	0	0	0	0	200	903	0	0	0	0	0	0	0	603	903	0
379	7	0.762068	1.95848	10.4965	852.998	-159.415	-69.5817	200	300	0	0	0	0	0	0	0	200	903	0	0	0	0	0	0	0	603	903	0
379	8	0.914656	1.04295	11.1068	395.235	-98.3797	-161.134	200	300	0	0	0	0	0	0	0	200	903	0	0	0	0	0	0	0	603	903	0
379	9	0.60948	2.56883	9.88614	1127.66	-281.485	-115.358	200	300	0	0	0	0	0	0	0	200	903	0	0	0	0	0	0	0	603	903	0
380	0	0	0	0	0	0	0	200	300	0	0	0	0	0	0	0	200	903	0	0	0	0	0	0	0	603	903	0
380	1	0	0	0	0	0	0	200	300	0	0	0	0	0	0	0	200	903	0	0	0	0	0	0	0	603	903	0
380	2	0	0	0	0	0	0	200	300	0	0	0	0	0	0	0	200	903	0	0	0	0	0	0	0	603	903	0
380	3	-0.000871718	1.80589	10.8017	578.34	-159.415	-344.24	200	300	0	0	0	0	0	0	0	200	903	0	0	0	0	0	0	0	603	903	0
380	4	0.304304	1.19554	13.5482	486.787	-281.485	-69.5817	200	300	0	0	0	0	0	0	0	200	903	0	0	0	0	0	0	0	603	903	0
380	5	0.456892	2.11106	11.1068	578.34	-159.415	-344.24	200	300	0	0	0	0	0	0	0	200	903	0	0	0	0	0	0	0	603	903	0
380	6	2.13536	2.41624	10.4965	669.893	-98.3797	-206.911	200	300	0	0	0	0	0	0	0	200	903	0	0	0	0	0	0	0	603	903	0
380	7	0.762068	1.04295	10.1913	303.682	-342.52	-206.911	200	300	0	0	0	0	0	0	0	200	903	0	0	0	0	0	0	0	603	903	0
380	8	1.06724	2.56883	11.412	669.893	84.7258	-298.464	200	300	0	0	0	0	0	0	0	200	903	0	0	0	0	0	0	0	603	903	0
380	9	-0.000871718	1.80589	10.1913	1127.66	23.6906	-206.911	200	300	0	0	0	0	0	0	0	200	903	0	0	0	0	0	0	0	603	903	0
381	0	1.52501	1.6533	10.4965	395.235	-647.696	21.9711	200	300	0	0	0	0	0	0	0	200	903	0	0	0	0	0	0	0	603	903	0
381	1	-0.458635	1.34812	10.8017	486.787	23.6906	-23.8053	200	300	0	0	0	0	0	0	0	200	903	0	0	0	0	0	0	0	603	903	0
381	2	0.60948	1.80589	10.4965	120.576	-342.52	-435.793	200	300	0	0	0	0	0	0	0	200	903	0	0	0	0	0	0	0	603	903	0
381	3	0.60948	2.26365	11.1068	761.445	-464.591	-161.134	200	300	0	0	0	0	0	0	0	200	903	0	0	0	0	0	0	0	603	903	0
381	4	0	0	0	0	0	0	200	300	0	0	0	0	0	0	0	200	903	0	0	0	0	0	0	0	603	903	0
381	5	0.914656	2.41624	9.88614	852.998	-37.3445	-527.345	200	300	0	0	0	0	0	0	0	200	903	0	0	0	0	0	0	0	603	903	0
381	6	0	0	0	0	0	0	200	300	0	0	0	0	0	0	0	200	903	0	0	0	0	0	0	0	603	903	0
381	7	0.304304	1.34812	10.8017	578.34	-159.415	-206.911	200	300	0	0	0	0	0	0	0	200	903	0	0	0	0	0	0	0	603	903	0
381	8	0	0	0	0	0	0	200	300	0	0	0	0	0	0	0	200	903	0	0	0	0	0	0	0	603	903	0
381	9	-0.000871718	1.34812	10.4965	303.682	-464.591	-161.134	200	300	0	0	0	0	0	0	0	200	903	0	0	0	0	0	0	0	603	903	0
382	0	0.60948	2.72141	10.8017	944.551	-342.52	-298.464	200	300	0	0	0	0	0	0	0	200	903	0	0	0	0	0	0	0	603	903	0
382	1	2.28795	1.80589	10.1913	212.129	-281.485	-435.793	200	300	0	0	0	0	0	0	0	200	903	0	0	0	0	0	0	0	603	903	0
382	2	0	0	0	0	0	0	200	300	0	0	0	0	0	0	0	200	903	0	0	0	0	0	0	0	603	903	0
382	3	0	0	0	0	0	0	200	300	0	0	0	0	0	0	0	200	903	0	0	0	0	0	0	0	603	903	0
382	4	0	0	0	0	0	0	200	300	0	0	0	0	0	0	0	200	903	0	0	0	0	0	0	0	603	903	0
382	5	-0.306047	1.95848	11.1068	669.893	-281.485	-298.464	200	300	0	0	0	0	0	0	0	200	903	0	0	0	0	0	0	0	603	903	0
382	6	-0.458635	1.19554	12.3275	395.235	-342.52	-298.464	200	300	0	0	0	0	0	0	0	200	903	0	0	0	0	0	0	0	603	903	0
382	7	0.914656	1.95848	11.1068	761.445	23.6906	-69.5817	200	300	0	0	0	0	0	0	0	200	903	0	0	0	0	0	0	0	603	903	0
382	8	2.8983	2.26365	9.88614	486.787	-37.3445	-206.911	200	300	0	0	0	0	0	0	0	200	903	0	0	0	0	0	0	0	603	903	0
382	9	1.37242	0.737772	10.4965	303.682	-525.626	-344.24	200	300	0	0	0	0	0	0	0	200	903	0	0	0	0	0	0	0	603	903	0
383	0	1.6776	1.95848	11.7172	303.682	-37.3445	-206.911	200	300	0	0	0	0	0	0	0	200	903	0	0	0	0	0	0	0	603	903	0
383	1	0	0	0	0	0	0	200	300	0	0	0	0	0	0	0	200	903	0	0	0	0	0	0	0	603	903	0
383	2	0.914656	1.6533	9.88614	669.893	-464.591	-69.5817	200	300	0	0	0	0	0	0	0	200	903	0	0	0	0	0	0	0	603	903	0
383	3	-0.611223	1.6533	12.0224	761.445	-98.3797	-344.24	200	300	0	0	0	0	0	0	0	200	903	0	0	0	0	0	0	0	603	903	0
383	4	0.914656	1.80589	12.0224	395.235	23.6906	-390.016	200	300	0	0	0	0	0	0	0	200	903	0	0	0	0	0	0	0	603	903	0
383	5	0.914656	2.11106	12.0224	29.0235	-37.3445	-206.911	200	300	0	0	0	0	0	0	0	200	903	0	0	0	0	0	0	0	603	903	0
383	6	0.914656	0.432597	10.1913	212.129	23.6906	-115.358	200	300	0	0	0	0	0	0	0	200	903	0	0	0	0	0	0	0	603	903	0
383	7	1.21983	2.56883	10.4965	669.893	-37.3445	21.9711	200	300	0	0	0	0	0	0	0	200	903	0	0	0	0	0	0	0	603	903	0
383	8	0	0	0	0	0	0	200	300	0	0	0	0	0	0	0	200	903	0	0	0	0	0	0	0	603	903	0
383	9	0.304304	1.50071	10.1913	303.682	-281.485	-298.464	200	300	0	0	0	0	0	0	0	200	903	0	0	0	0	0	0	0	603	903	0
384	0	-0.306047	1.6533	11.1068	944.551	-98.3797	-435.793	200	300	0	0	0	0	0	0	0	200	903	0	0	0	0	0	0	0	603	903	0
384	1	0.60948	1.80589	11.1068	395.235	145.761	-298.464	200	300	0	0	0	0	0	0	0	200	903	0	0	0	0	0	0	0	603	903	0
384	2	2.59312	1.50071	10.4965	486.787	-281.485	-161.134	200	300	0	0	0	0	0	0	0	200	903	0	0	0	0	0	0	0	603	903	0
384	3	0	0	0	0	0	0	200	300	0	0	0	0	0	0	0	200	903	0	0	0	0	0	0	0	603	903	0
384	4	0.914656	1.34812	11.412	212.129	23.6906	-161.134	200	300	0	0	0	0	0	0	0	200	903	0	0	0	0	0	0	0	603	903	0
384	5	0	0	0	0	0	0	200	300	0	0	0	0	0	0	0	200	903	0	0	0	0	0	0	0	603	903	0
384	6	1.52501	2.26365	11.412	1219.21	-98.3797	-252.687	200	300	0	0	0	0	0	0	0	200	903	0	0	0	0	0	0	0	603	903	0
384	7	-0.15346	1.95848	10.8017	944.551	84.7258	-252.687	200	300	0	0	0	0	0	0	0	200	903	0	0	0	0	0	0	0	603	903	0
384	8	0.60948	1.34812	12.0224	852.998	-464.591	-206.911	200	300	0	0	0	0	0	0	0	200	903	0	0	0	0	0	0	0	603	903	0
384	9	1.06724	1.34812	11.1068	-154.082	-159.415	-252.687	200	300	0	0	0	0	0	0	0	200	903	0	0	0	0	0	0	0	603	903	0
385	0	0	0	0	0	0	0	200	300	0	0	0	0	0	0	0	200	903	0	0	0	0	0	0	0	603	903	0
385	1	0	0	0	0	0	0	200	300	0	0	0	0	0	0	0	200	903	0	0	0	0	0	0	0	603	903	0
385	2	0	0	0	0	0	0	200	300	0	0	0	0	0	0	0	200	903	0	0	0	0	0	0	0	603	903	0
385	3	-0.306047	1.6533	9.88614	395.235	-220.45	-252.687	200	300	0	0	0	0	0	0	0	200	903	0	0	0	0	0	0	0	603	903	0
385	4	-0.000871718	3.17918	12.6327	761.445	-159.415	-23.8053	200	300	0	0	0	0	0	0	0	200	903	0	0	0	0	0	0	0	603	903	0
385	5	-0.000871718	1.6533	11.412	944.551	145.761	-252.687	200	300	0	0	0	0	0	0	0	200	903	0	0	0	0	0	0	0	603	903	0
385	6	1.21983	0.432597	10.1913	486.787	-98.3797	-161.134	200	300	0	0	0	0	0	0	0	200	903	0	0	0	0	0	0	0	603	903	0
385	7	0.60948	1.6533	11.1068	120.576	-98.3797	21.9711	200	300	0	0	0	0	0	0	0	200	903	0	0	0	0	0	0	0	603	903	0
385	8	0	0	0	0	0	0	200	300	0	0	0	0	0	0	0	200	903	0	0	0	0	0	0	0	603	903	0
385	9	0.762068	1.95848	11.412	303.682	-220.45	-161.134	200	300	0	0	0	0	0	0	0	200	903	0	0	0	0	0	0	0	603	903	0
386	0	0	0	0	0	0	0	200	300	0	0	0	0	0	0	0	200	903	0	0	0	0	0	0	0	603	903	0
386	1	1.37242	2.72141	12.9379	1036.1	-403.556	-115.358	200	300	0	0	0	0	0	0	0	200	903	0	0	0	0	0	0	0	603	903	0
386	2	-0.15346	1.6533	11.7172	852.998	145.761	-298.464	200	300	0	0	0	0	0	0	0	200	903	0	0	0	0	0	0	0	603	903	0
386	3	0.60948	1.34812	11.412	669.893	-37.3445	-252.687	200	300	0	0	0	0	0	0	0	200	903	0	0	0	0	0	0	0	603	903	0
386	4	0.914656	1.6533	10.1913	669.893	-403.556	-115.358	200	300	0	0	0	0	0	0	0	200	903	0	0	0	0	0	0	0	603	903	0
386	5	0	0	0	0	0	0	200	300	0	0	0	0	0	0	0	200	903	0	0	0	0	0	0	0	603	903	0
386	6	1.06724	2.41624	12.0224	29.0235	84.7258	-481.569	200	300	0	0	0	0	0	0	0	200	903	0	0	0	0	0	0	0	603	903	0
386	7	-0.611223	0.585184	10.1913	578.34	-281.485	-390.016	200	300	0	0	0	0	0	0	0	200	903	0	0	0	0	0	0	0	603	903	0
386	8	1.06724	2.41624	10.4965	761.445	-281.485	-206.911	200	300	0	0	0	0	0	0	0	200	903	0	0	0	0	0	0	0	603	903	0
386	9	0.456892	1.19554	11.1068	761.445	-98.3797	-23.8053	200	300	0	0	0	0	0	0	0	200	903	0	0	0	0	0	0	0	603	903	0
387	0	0.762068	1.19554	10.4965	1036.1	-159.415	-206.911	200	300	0	0	0	0	0	0	0	200	903	0	0	0	0	0	0	0	603	903	0
387	1	0.60948	1.6533	11.412	578.34	-769.766	-206.911	200	300	0	0	0	0	0	0	0	200	903	0	0	0	0	0	0	0	603	903	0
387	2	0	0	0	0	0	0	200	300	0	0	0	0	0	0	0	200	903	0	0	0	0	0	0	0	603	903	0
387	3	0.60948	1.95848	11.1068	578.34	-281.485	21.9711	200	300	0	0	0	0	0	0	0	200	903	0	0	0	0	0	0	0	603	903	0
387	4	0	0	0	0	0	0	200	300	0	0	0	0	0	0	0	200	903	0	0	0	0	0	0	0	603	903	0
387	5	1.83018	1.80589	11.412	303.682	-98.3797	21.9711	200	300	0	0	0	0	0	0	0	200	903	0	0	0	0	0	0	0	603	903	0
387	6	0.304304	1.80589	11.7172	761.445	-403.556	-206.911	200	300	0	0	0	0	0	0	0	200	903	0	0	0	0	0	0	0	603	903	0
387	7	-0.306047	1.19554	12.0224	486.787	-342.52	-161.134	200	300	0	0	0	0	0	0	0	200	903	0	0	0	0	0	0	0	603	903	0
387	8	1.21983	1.19554	10.1913	761.445	-220.45	-344.24	200	300	0	0	0	0	0	0	0	200	903	0	0	0	0	0	0	0	603	903	0
387	9	2.28795	1.6533	10.4965	1127.66	-342.52	-252.687	200	300	0	0	0	0	0	0	0	200	903	0	0	0	0	0	0	0	603	903	0
388	0	0.914656	1.6533	10.1913	212.129	-98.3797	-206.911	200	300	0	0	0	0	0	0	0	200	903	0	0	0	0	0	0	0	603	903	0
388	1	-0.15346	1.95848	11.1068	212.129	-98.3797	-298.464	200	300	0	0	0	0	0	0	0	200	903	0	0	0	0	0	0	0	603	903	0
388	2	0	0	0	0	0	0	200	300	0	0	0	0	0	0	0	200	903	0	0	0	0	0	0	0	603	903	0
388	3	-0.15346	2.26365	9.88614	395.235	-37.3445	205.077	200	300	0	0	0	0	0	0	0	200	903	0	0	0	0	0	0	0	603	903	0
388	4	-0.15346	2.56883	10.4965	669.893	-159.415	-206.911	200	300	0	0	0	0	0	0	0	200	903	0	0	0	0	0	0	0	603	903	0
388	5	0.304304	1.95848	11.412	761.445	-37.3445	-435.793	200	300	0	0	0	0	0	0	0	200	903	0	0	0	0	0	0	0	603	903	0
388	6	0.914656	1.6533	10.1913	852.998	-159.415	-115.358	200	300	0	0	0	0	0	0	0	200	903	0	0	0	0	0	0	0	603	903	0
388	7	0.762068	1.6533	10.1913	395.235	-220.45	-206.911	200	300	0	0	0	0	0	0	0	200	903	0	0	0	0	0	0	0	603	903	0
388	8	0	0	0	0	0	0	200	300	0	0	0	0	0	0	0	200	903	0	0	0	0	0	0	0	603	903	0
388	9	0	0	0	0	0	0	200	300	0	0	0	0	0	0	0	200	903	0	0	0	0	0	0	0	603	903	0
389	0	0.456892	1.80589	10.4965	578.34	-342.52	21.9711	200	300	0	0	0	0	0	0	0	200	903	0	0	0	0	0	0	0	603	903	0
389	1	-0.458635	2.26365	10.4965	578.34	-37.3445	-206.911	200	300	0	0	0	0	0	0	0	200	903	0	0	0	0	0	0	0	603	903	0
389	2	0.151716	1.6533	11.412	761.445	-159.415	159.3	200	300	0	0	0	0	0	0	0	200	903	0	0	0	0	0	0	0	603	903	0
389	3	0.914656	1.95848	10.4965	944.551	-159.415	250.853	200	300	0	0	0	0	0	0	0	200	903	0	0	0	0	0	0	0	603	903	0
389	4	1.06724	1.50071	10.1913	395.235	-464.591	-298.464	200	300	0	0	0	0	0	0	0	200	903	0	0	0	0	0	0	0	603	903	0
389	5	0	0	0	0	0	0	200	300	0	0	0	0	0	0	0	200	903	0	0	0	0	0	0	0	603	903	0
389	6	0	0	0	0	0	0	200	300	0	0	0	0	0	0	0	200	903	0	0	0	0	0	0	0	603	903	0
389	7	-0.763811	0.432597	11.1068	303.682	-159.415	-115.358	200	300	0	0	0	0	0	0	0	200	903	0	0	0	0	0	0	0	603	903	0
389	8	-0.15346	2.72141	10.4965	1036.1	-403.556	-161.134	200	300	0	0	0	0	0	0	0	200	903	0	0	0	0	0	0	0	603	903	0
389	9	-0.000871718	-0.0251671	13.8534	944.551	-403.556	-298.464	200	300	0	0	0	0	0	0	0	200	903	0	0	0	0	0	0	0	603	903	0
390	0	0.762068	1.95848	12.3275	852.998	-281.485	-161.134	200	300	0	0	0	0	0	0	0	200	903	0	0	0	0	0	0	0	603	903	0
390	1	3.20347	-0.0251671	11.412	761.445	206.796	-161.134	200	300	0	0	0	0	0	0	0	200	903	0	0	0	0	0	0	0	603	903	0
390	2	0	0	0	0	0	0	200	300	0	0	0	0	0	0	0	200	903	0	0	0	0	0	0	0	603	903	0
390	3	-0.611223	2.11106	12.0224	212.129	-647.696	-115.358	200	300	0	0	0	0	0	0	0	200	903	0	0	0	0	0	0	0	603	903	0
390	4	0	0	0	0	0	0	200	300	0	0	0	0	0	0	0	200	903	0	0	0	0	0	0	0	603	903	0
390	5	0.304304	2.11106	11.7172	395.235	-220.45	113.524	200	300	0	0	0	0	0	0	0	200	903	0	0	0	0	0	0	0	603	903	0
390	6	-0.306047	2.41624	11.1068	761.445	84.7258	21.9711	200	300	0	0	0	0	0	0	0	200	903	0	0	0	0	0	0	0	603	903	0
390	7	0.151716	1.6533	12.3275	1219.21	-159.415	-206.911	200	300	0	0	0	0	0	0	0	200	903	0	0	0	0	0	0	0	603	903	0
390	8	0.60948	1.6533	10.1913	486.787	84.7258	-206.911	200	300	0	0	0	0	0	0	0	200	903	0	0	0	0	0	0	0	603	903	0
390	9	1.37242	1.34812	9.88614	395.235	-159.415	-69.5817	200	300	0	0	0	0	0	0	0	200	903	0	0	0	0	0	0	0	603	903	0
391	0	0	0	0	0	0	0	200	300	0	0	0	0	0	0	0	200	903	0	0	0	0	0	0	0	603	903	0
391	1	0	0	0	0	0	0	200	300	0	0	0	0	0	0	0	200	903	0	0	0	0	0	0	0	603	903	0
391	2	0	0	0	0	0	0	200	300	0	0	0	0	0	0	0	200	903	0	0	0	0	0	0	0	603	903	0
391	3	0.762068	2.26365	11.7172	852.998	-464.591	-252.687	200	300	0	0	0	0	0	0	0	200	903	0	0	0	0	0	0	0	603	903	0
391	4	0.151716	2.26365	11.412	212.129	-98.3797	21.9711	200	300	0	0	0	0	0	0	0	200	903	0	0	0	0	0	0	0	603	903	0
391	5	1.52501	1.6533	11.412	852.998	23.6906	-206.911	200	300	0	0	0	0	0	0	0	200	903	0	0	0	0	0	0	0	603	903	0
391	6	0.914656	1.80589	10.4965	669.893	-281.485	-206.911	200	300	0	0	0	0	0	0	0	200	903	0	0	0	0	0	0	0	603	903	0
391	7	0	0	0	0	0	0	200	300	0	0	0	0	0	0	0	200	903	0	0	0	0	0	0	0	603	903	0
391	8	0	0	0	0	0	0	200	300	0	0	0	0	0	0	0	200	903	0	0	0	0	0	0	0	603	903	0
391	9	-0.458635	2.72141	10.4965	761.445	-342.52	-115.358	200	300	0	0	0	0	0	0	0	200	903	0	0	0	0	0	0	0	603	903	0
392	0	0.304304	1.19554	10.1913	212.129	84.7258	-206.911	200	300	0	0	0	0	0	0	0	200	903	0	0	0	0	0	0	0	603	903	0
392	1	0.304304	2.41624	11.412	669.893	84.7258	-115.358	200	300	0	0	0	0	0	0	0	200	903	0	0	0	0	0	0	0	603	903	0
392	2	0.304304	1.6533	13.8534	486.787	-342.52	-252.687	200	300	0	0	0	0	0	0	0	200	903	0	0	0	0	0	0	0	603	903	0
392	3	0.60948	1.34812	10.4965	486.787	-525.626	-69.5817	200	300	0	0	0	0	0	0	0	200	903	0	0	0	0	0	0	0	603	903	0
392	4	2.74571	-0.177755	9.88614	395.235	-37.3445	-298.464	200	300	0	0	0	0	0	0	0	200	903	0	0	0	0	0	0	0	603	903	0
392	5	0	0	0	0	0	0	200	300	0	0	0	0	0	0	0	200	903	0	0	0	0	0	0	0	603	903	0
392	6	-0.458635	2.26365	11.1068	578.34	-342.52	-298.464	200	300	0	0	0	0	0	0	0	200	903	0	0	0	0	0	0	0	603	903	0
392	7	-0.000871718	2.41624	10.8017	303.682	-98.3797	-252.687	200	300	0	0	0	0	0	0	0	200	903	0	0	0	0	0	0	0	603	903	0
392	8	0.151716	2.874	11.1068	395.235	206.796	-206.911	200	300	0	0	0	0	0	0	0	200	903	0	0	0	0	0	0	0	603	903	0
392	9	-0.000871718	2.41624	10.1913	669.893	-220.45	21.9711	200	300	0	0	0	0	0	0	0	200	903	0	0	0	0	0	0	0	603	903	0
393	0	0.762068	1.50071	12.0224	486.787	-98.3797	-23.8053	200	300	0	0	0	0	0	0	0	200	903	0	0	0	0	0	0	0	603	903	0
393	1	0.456892	1.50071	10.8017	669.893	-342.52	-435.793	200	300	0	0	0	0	0	0	0	200	903	0	0	0	0	0	0	0	603	903	0
393	2	0	0	0	0	0	0	200	300	0	0	0	0	0	0	0	200	903	0	0	0	0	0	0	0	603	903	0
393	3	1.21983	1.50071	10.8017	486.787	145.761	-115.358	200	300	0	0	0	0	0	0	0	200	903	0	0	0	0	0	0	0	603	903	0
393	4	0	0	0	0	0	0	200	300	0	0	0	0	0	0	0	200	903	0	0	0	0	0	0	0	603	903	0
393	5	2.28795	1.6533	10.8017	-154.082	-342.52	-206.911	200	300	0	0	0	0	0	0	0	200	903	0	0	0	0	0	0	0	603	903	0
393	6	0.304304	1.50071	11.7172	395.235	23.6906	-206.911	200	300	0	0	0	0	0	0	0	200	903	0	0	0	0	0	0	0	603	903	0
393	7	-0.000871718	1.95848	10.4965	303.682	-98.3797	-206.911	200	300	0	0	0	0	0	0	0	200	903	0	0	0	0	0	0	0	603	903	0
393	8	0.60948	1.6533	10.8017	1036.1	-281.485	-390.016	200	300	0	0	0	0	0	0	0	200	903	0	0	0	0	0	0	0	603	903	0
393	9	0.762068	2.11106	10.4965	669.893	-159.415	-298.464	200	300	0	0	0	0	0	0	0	200	903	0	0	0	0	0	0	0	603	903	0
394	0	1.06724	1.6533	11.7172	120.576	-159.415	-390.016	200	300	0	0	0	0	0	0	0	200	903	0	0	0	0	0	0	0	603	903	0
394	1	-0.000871718	2.26365	9.88614	669.893	-37.3445	205.077	200	300	0	0	0	0	0	0	0	200	903	0	0	0	0	0	0	0	603	903	0
394	2	0	0	0	0	0	0	200	300	0	0	0	0	0	0	0	200	903	0	0	0	0	0	0	0	603	903	0
394	3	0.151716	2.11106	10.1913	852.998	-220.45	-252.687	200	300	0	0	0	0	0	0	0	200	903	0	0	0	0	0	0	0	603	903	0
394	4	-0.458635	1.95848	13.8534	944.551	-586.661	-206.911	200	300	0	0	0	0	0	0	0	200	903	0	0	0	0	0	0	0	603	903	0
394	5	1.06724	1.50071	11.412	669.893	-220.45	-298.464	200	300	0	0	0	0	0	0	0	200	903	0	0	0	0	0	0	0	603	903	0
394	6	1.98277	0.89036	11.412	578.34	-37.3445	-298.464	200	300	0	0	0	0	0	0	0	200	903	0	0	0	0	0	0	0	603	903	0
394	7	0	0	0	0	0	0	200	300	0	0	0	0	0	0	0	200	903	0	0	0	0	0	0	0	603	903	0
394	8	0	0	0	0	0	0	200	300	0	0	0	0	0	0	0	200	903	0	0	0	0	0	0	0	603	903	0
394	9	0	0	0	0	0	0	200	300	0	0	0	0	0	0	0	200	903	0	0	0	0	0	0	0	603	903	0
395	0	-0.611223	2.26365	9.88614	761.445	-403.556	-23.8053	200	300	0	0	0	0	0	0	0	200	903	0	0	0	0	0	0	0	603	903	0
395	1	-0.458635	1.34812	13.5482	1219.21	-281.485	-115.358	200	300	0	0	0	0	0	0	0	200	903	0	0	0	0	0	0	0	603	903	0
395	2	0.914656	2.11106	11.1068	669.893	-98.3797	21.9711	200	300	0	0	0	0	0	0	0	200	903	0	0	0	0	0	0	0	603	903	0
395	3	0	0	0	0	0	0	200	300	0	0	0	0	0	0	0	200	903	0	0	0	0	0	0	0	603	903	0
395	4	0	0	0	0	0	0	200	300	0	0	0	0	0	0	0	200	903	0	0	0	0	0	0	0	603	903	0
395	5	0	0	0	0	0	0	200	300	0	0	0	0	0	0	0	200	903	0	0	0	0	0	0	0	603	903	0
395	6	-0.15346	2.26365	9.88614	578.34	-342.52	-69.5817	200	300	0	0	0	0	0	0	0	200	903	0	0	0	0	0	0	0	603	903	0
395	7	0.304304	1.34812	10.4965	761.445	-281.485	-161.134	200	300	0	0	0	0	0	0	0	200	903	0	0	0	0	0	0	0	603	903	0
395	8	-0.000871718	1.50071	11.1068	395.235	-464.591	-481.569	200	300	0	0	0	0	0	0	0	200	903	0	0	0	0	0	0	0	603	903	0
395	9	0.914656	1.95848	12.0224	852.998	-220.45	-390.016	200	300	0	0	0	0	0	0	0	200	903	0	0	0	0	0	0	0	603	903	0
396	0	0.60948	1.6533	12.6327	303.682	-37.3445	-252.687	200	300	0	0	0	0	0	0	0	200	903	0	0	0	0	0	0	0	603	903	0
396	1	0	0	0	0	0	0	200	300	0	0	0	0	0	0	0	200	903	0	0	0	0	0	0	0	603	903	0
396	2	0.762068	1.6533	11.1068	1036.1	-220.45	67.7474	200	300	0	0	0	0	0	0	0	200	903	0	0	0	0	0	0	0	603	903	0
396	3	0	0	0	0	0	0	200	300	0	0	0	0	0	0	0	200	903	0	0	0	0	0	0	0	603	903	0
396	4	0.914656	1.50071	11.412	669.893	23.6906	-390.016	200	300	0	0	0	0	0	0	0	200	903	0	0	0	0	0	0	0	603	903	0
396	5	-0.306047	2.56883	12.0224	120.576	-159.415	-252.687	200	300	0	0	0	0	0	0	0	200	903	0	0	0	0	0	0	0	603	903	0
396	6	1.06724	3.02659	12.0224	395.235	-98.3797	-206.911	200	300	0	0	0	0	0	0	0	200	903	0	0	0	0	0	0	0	603	903	0
396	7	1.37242	1.80589	11.1068	578.34	-403.556	-161.134	200	300	0	0	0	0	0	0	0	200	903	0	0	0	0	0	0	0	603	903	0
396	8	0	0	0	0	0	0	200	300	0	0	0	0	0	0	0	200	903	0	0	0	0	0	0	0	603	903	0
396	9	0	0	0	0	0	0	200	300	0	0	0	0	0	0	0	200	903	0	0	0	0	0	0	0	603	903	0
397	0	0.304304	2.11106	9.88614	486.787	-464.591	479.735	200	300	0	0	0	0	0	0	0	200	903	0	0	0	0	0	0	0	603	903	0
397	1	-0.306047	2.41624	9.88614	1493.87	-98.3797	-298.464	200	300	0	0	0	0	0	0	0	200	903	0	0	0	0	0	0	0	603	903	0
397	2	1.83018	1.6533	12.0224	1036.1	23.6906	-298.464	200	300	0	0	0	0	0	0	0	200	903	0	0	0	0	0	0	0	603	903	0
397	3	-0.15346	1.50071	10.8017	-62.5292	-159.415	-161.134	200	300	0	0	0	0	0	0	0	200	903	0	0	0	0	0	0	0	603	903	0
397	4	1.06724	2.26365	10.4965	395.235	-159.415	-23.8053	200	300	0	0	0	0	0	0	0	200	903	0	0	0	0	0	0	0	603	903	0
397	5	0	0	0	0	0	0	200	300	0	0	0	0	0	0	0	200	903	0	0	0	0	0	0	0	603	903	0
397	6	0	0	0	0	0	0	200	300	0	0	0	0	0	0	0	200	903	0	0	0	0	0	0	0	603	903	0
397	7	0.151716	1.50071	9.88614	669.893	-98.3797	-161.134	200	300	0	0	0	0	0	0	0	200	903	0	0	0	0	0	0	0	603	903	0
397	8	-0.000871718	1.6533	10.8017	212.129	-37.3445	-298.464	200	300	0	0	0	0	0	0	0	200	903	0	0	0	0	0	0	0	603	903	0
397	9	-0.458635	2.26365	10.4965	761.445	23.6906	21.9711	200	300	0	0	0	0	0	0	0	200	903	0	0	0	0	0	0	0	603	903	0
398	0	2.13536	1.80589	10.8017	212.129	-281.485	21.9711	200	300	0	0	0	0	0	0	0	200	903	0	0	0	0	0	0	0	603	903	0
398	1	0.456892	2.26365	10.1913	669.893	-98.3797	-23.8053	200	300	0	0	0	0	0	0	0	200	903	0	0	0	0	0	0	0	603	903	0
398	2	0.60948	1.19554	11.1068	1127.66	-220.45	-252.687	200	300	0	0	0	0	0	0	0	200	903	0	0	0	0	0	0	0	603	903	0
398	3	0.914656	-0.0251671	10.8017	303.682	-464.591	-298.464	200	300	0	0	0	0	0	0	0	200	903	0	0	0	0	0	0	0	603	903	0
398	4	2.74571	1.50071	10.4965	578.34	-220.45	-161.134	200	300	0	0	0	0	0	0	0	200	903	0	0	0	0	0	0	0	603	903	0
398	5	0	0	0	0	0	0	200	300	0	0	0	0	0	0	0	200	903	0	0	0	0	0	0	0	603	903	0
398	6	0.762068	2.874	12.3275	852.998	-281.485	67.7474	200	300	0	0	0	0	0	0	0	200	903	0	0	0	0	0	0	0	603	903	0
398	7	0	0	0	0	0	0	200	300	0	0	0	0	0	0	0	200	903	0	0	0	0	0	0	0	603	903	0
398	8	1.06724	1.19554	9.88614	761.445	-525.626	-69.5817	200	300	0	0	0	0	0	0	0	200	903	0	0	0	0	0	0	0	603	903	0
398	9	-0.458635	1.34812	10.8017	669.893	-342.52	-252.687	200	300	0	0	0	0	0	0	0	200	903	0	0	0	0	0	0	0	603	903	0
399	0	0.151716	2.56883	12.3275	120.576	-98.3797	-206.911	200	300	0	0	0	0	0	0	0	200	903	0	0	0	0	0	0	0	603	903	0
399	1	0.60948	2.26365	11.412	669.893	-220.45	-252.687	200	300	0	0	0	0	0	0	0	200	903	0	0	0	0	0	0	0	603	903	0
399	2	0.914656	1.6533	11.1068	395.235	-159.415	-161.134	200	300	0	0	0	0	0	0	0	200	903	0	0	0	0	0	0	0	603	903	0
399	3	0	0	0	0	0	0	200	300	0	0	0	0	0	0	0	200	903	0	0	0	0	0	0	0	603	903	0
399	4	0	0	0	0	0	0	200	300	0	0	0	0	0	0	0	200	903	0	0	0	0	0	0	0	603	903	0
399	5	0	0	0	0	0	0	200	300	0	0	0	0	0	0	0	200	903	0	0	0	0	0	0	0	603	903	0
399	6	0.762068	1.04295	10.8017	486.787	-342.52	-527.345	200	300	0	0	0	0	0	0	0	200	903	0	0	0	0	0	0	0	603	903	0
399	7	-0.763811	2.56883	11.1068	1036.1	-37.3445	-115.358	200	300	0	0	0	0	0	0	0	200	903	0	0	0	0	0	0	0	603	903	0
399	8	1.06724	1.6533	10.8017	669.893	84.7258	-252.687	200	300	0	0	0	0	0	0	0	200	903	0	0	0	0	0	0	0	603	903	0
399	9	1.37242	1.80589	11.1068	395.235	-220.45	-161.134	200	300	0	0	0	0	0	0	0	200	903	0	0	0	0	0	0	0	603	903	0
400	0	0	0	0	0	0	0	200	300	0	0	0	0	0	0	0	200	903	0	0	0	0	0	0	0	603	903	0
400	1	0	0	0	0	0	0	200	300	0	0	0	0	0	0	0	200	903	0	0	0	0	0	0	0	603	903	0
400	2	0	0	0	0	0	0	200	300	0	0	0	0	0	0	0	200	903	0	0	0	0	0	0	0	603	903	0
400	3	0	0	0	0	0	0	200	300	0	0	0	0	0	0	0	200	903	0	0	0	0	0	0	0	603	903	0
400	4	0.456892	2.11106	11.1068	303.682	267.831	-161.134	200	300	0	0	0	0	0	0	0	200	903	0	0	0	0	0	0	0	603	903	0
400	5	-0.000871718	2.11106	11.412	1402.32	-220.45	-161.134	200	300	0	0	0	0	0	0	0	200	903	0	0	0	0	0	0	0	603	903	0
400	6	1.06724	0.89036	10.1913	120.576	-281.485	159.3	200	300	0	0	0	0	0	0	0	200	903	0	0	0	0	0	0	0	603	903	0
400	7	1.21983	1.95848	12.0224	852.998	206.796	67.7474	200	300	0	0	0	0	0	0	0	200	903	0	0	0	0	0	0	0	603	903	0
400	8	0	0	0	0	0	0	200	300	0	0	0	0	0	0	0	200	903	0	0	0	0	0	0	0	603	903	0
400	9	0	0	0	0	0	0	200	300	0	0	0	0	0	0	0	200	903	0	0	0	0	0	0	0	603	903	0
401	0	0	0	0	0	0	0	200	300	0	0	0	0	0	0	0	200	903	0	0	0	0	0	0	0	603	903	0
401	1	0	0	0	0	0	0	200	300	0	0	0	0	0	0	0	200	903	0	0	0	0	0	0	0	603	903	0
401	2	0.456892	2.56883	11.1068	669.893	-98.3797	-161.134	200	300	0	0	0	0	0	0	0	200	903	0	0	0	0	0	0	0	603	903	0
401	3	-0.15346	1.50071	11.412	761.445	23.6906	67.7474	200	300	0	0	0	0	0	0	0	200	903	0	0	0	0	0	0	0	603	903	0
401	4	0.914656	1.6533	9.88614	-62.5292	-220.45	-69.5817	200	300	0	0	0	0	0	0	0	200	903	0	0	0	0	0	0	0	603	903	0
401	5	1.98277	2.26365	9.58096	852.998	-647.696	-344.24	200	300	0	0	0	0	0	0	0	200	903	0	0	0	0	0	0	0	603	903	0
401	6	0	0	0	0	0	0	200	300	0	0	0	0	0	0	0	200	903	0	0	0	0	0	0	0	603	903	0
401	7	1.52501	2.72141	13.8534	944.551	206.796	-161.134	200	300	0	0	0	0	0	0	0	200	903	0	0	0	0	0	0	0	603	903	0
401	8	-0.000871718	1.95848	10.4965	852.998	-647.696	-298.464	200	300	0	0	0	0	0	0	0	200	903	0	0	0	0	0	0	0	603	903	0
401	9	1.06724	1.34812	10.1913	120.576	-98.3797	67.7474	200	300	0	0	0	0	0	0	0	200	903	0	0	0	0	0	0	0	603	903	0
402	0	0.151716	1.6533	11.7172	395.235	84.7258	-252.687	200	300	0	0	0	0	0	0	0	200	903	0	0	0	0	0	0	0	603	903	0
402	1	0.60948	0.585184	10.4965	120.576	-403.556	-298.464	200	300	0	0	0	0	0	0	0	200	903	0	0	0	0	0	0	0	603	903	0
402	2	1.06724	2.26365	10.8017	669.893	-281.485	-161.134	200	300	0	0	0	0	0	0	0	200	903	0	0	0	0	0	0	0	603	903	0
402	3	0.762068	2.11106	10.1913	852.998	-159.415	-298.464	200	300	0	0	0	0	0	0	0	200	903	0	0	0	0	0	0	0	603	903	0
402	4	0.914656	1.6533	11.7172	212.129	-159.415	-298.464	200	300	0	0	0	0	0	0	0	200	903	0	0	0	0	0	0	0	603	903	0
402	5	-0.15346	2.26365	10.1913	761.445	-98.3797	-206.911	200	300	0	0	0	0	0	0	0	200	903	0	0	0	0	0	0	0	603	903	0
402	6	0	0	0	0	0	0	200	300	0	0	0	0	0	0	0	200	903	0	0	0	0	0	0	0	603	903	0
402	7	0.914656	2.26365	9.88614	395.235	-220.45	-161.134	200	300	0	0	0	0	0	0	0	200	903	0	0	0	0	0	0	0	603	903	0
402	8	-0.306047	1.95848	11.7172	761.445	-647.696	-252.687	200	300	0	0	0	0	0	0	0	200	903	0	0	0	0	0	0	0	603	903	0
402	9	1.06724	1.6533	11.1068	578.34	84.7258	-344.24	200	300	0	0	0	0	0	0	0	200	903	0	0	0	0	0	0	0	603	903	0
403	0	0.914656	1.95848	12.0224	1036.1	23.6906	-252.687	200	300	0	0	0	0	0	0	0	200	903	0	0	0	0	0	0	0	603	903	0
403	1	2.13536	1.50071	11.1068	303.682	-220.45	-115.358	200	300	0	0	0	0	0	0	0	200	903	0	0	0	0	0	0	0	603	903	0
403	2	0	0	0	0	0	0	200	300	0	0	0	0	0	0	0	200	903	0	0	0	0	0	0	0	603	903	0
403	3	0.304304	1.34812	10.8017	395.235	-98.3797	-23.8053	200	300	0	0	0	0	0	0	0	200	903	0	0	0	0	0	0	0	603	903	0
403	4	-0.458635	1.50071	10.1913	395.235	-281.485	296.629	200	300	0	0	0	0	0	0	0	200	903	0	0	0	0	0	0	0	603	903	0
403	5	0	0	0	0	0	0	200	300	0	0	0	0	0	0	0	200	903	0	0	0	0	0	0	0	603	903	0
403	6	-0.458635	1.34812	10.8017	852.998	267.831	-298.464	200	300	0	0	0	0	0	0	0	200	903	0	0	0	0	0	0	0	603	903	0
403	7	1.06724	2.26365	11.412	1127.66	-159.415	-252.687	200	300	0	0	0	0	0	0	0	200	903	0	0	0	0	0	0	0	603	903	0
403	8	0.762068	2.41624	10.4965	120.576	-159.415	-252.687	200	300	0	0	0	0	0	0	0	200	903	0	0	0	0	0	0	0	603	903	0
403	9	1.06724	1.80589	9.88614	29.0235	-37.3445	-23.8053	200	300	0	0	0	0	0	0	0	200	903	0	0	0	0	0	0	0	603	903	0
404	0	0	0	0	0	0	0	200	300	0	0	0	0	0	0	0	200	903	0	0	0	0	0	0	0	603	903	0
404	1	0	0	0	0	0	0	200	300	0	0	0	0	0	0	0	200	903	0	0	0	0	0	0	0	603	903	0
404	2	-0.458635	2.72141	10.1913	852.998	23.6906	-23.8053	200	300	0	0	0	0	0	0	0	200	903	0	0	0	0	0	0	0	603	903	0
404	3	-0.916399	1.6533	11.7172	852.998	-98.3797	-206.911	200	300	0	0	0	0	0	0	0	200	903	0	0	0	0	0	0	0	603	903	0
404	4	-0.000871718	1.34812	10.8017	212.129	-98.3797	-206.911	200	300	0	0	0	0	0	0	0	200	903	0	0	0	0	0	0	0	603	903	0
404	5	1.37242	1.95848	10.8017	852.998	-342.52	-23.8053	200	300	0	0	0	0	0	0	0	200	903	0	0	0	0	0	0	0	603	903	0
404	6	0.914656	-0.177755	11.7172	120.576	-342.52	-206.911	200	300	0	0	0	0	0	0	0	200	903	0	0	0	0	0	0	0	603	903	0
404	7	0	0	0	0	0	0	200	300	0	0	0	0	0	0	0	200	903	0	0	0	0	0	0	0	603	903	0
404	8	0.914656	1.34812	11.7172	761.445	-220.45	-252.687	200	300	0	0	0	0	0	0	0	200	903	0	0	0	0	0	0	0	603	903	0
404	9	-0.000871718	1.6533	9.88614	395.235	-403.556	-69.5817	200	300	0	0	0	0	0	0	0	200	903	0	0	0	0	0	0	0	603	903	0
405	0	1.37242	3.17918	10.1913	944.551	-220.45	-206.911	200	300	0	0	0	0	0	0	0	200	903	0	0	0	0	0	0	0	603	903	0
405	1	0.304304	0.737772	11.7172	395.235	-220.45	-298.464	200	300	0	0	0	0	0	0	0	200	903	0	0	0	0	0	0	0	603	903	0
405	2	0.151716	1.95848	15.0741	578.34	-37.3445	-206.911	200	300	0	0	0	0	0	0	0	200	903	0	0	0	0	0	0	0	603	903	0
405	3	0.60948	1.19554	10.8017	669.893	-525.626	-69.5817	200	300	0	0	0	0	0	0	0	200	903	0	0	0	0	0	0	0	603	903	0
405	4	0	0	0	0	0	0	200	300	0	0	0	0	0	0	0	200	903	0	0	0	0	0	0	0	603	903	0
405	5	1.06724	2.72141	9.88614	1036.1	-98.3797	-115.358	200	300	0	0	0	0	0	0	0	200	903	0	0	0	0	0	0	0	603	903	0
405	6	0.304304	2.56883	10.1913	486.787	-37.3445	113.524	200	300	0	0	0	0	0	0	0	200	903	0	0	0	0	0	0	0	603	903	0
405	7	-0.15346	0.280009	10.8017	761.445	-220.45	-206.911	200	300	0	0	0	0	0	0	0	200	903	0	0	0	0	0	0	0	603	903	0
405	8	0.60948	2.26365	11.1068	669.893	23.6906	-23.8053	200	300	0	0	0	0	0	0	0	200	903	0	0	0	0	0	0	0	603	903	0
405	9	0	0	0	0	0	0	200	300	0	0	0	0	0	0	0	200	903	0	0	0	0	0	0	0	603	903	0
406	0	0.60948	2.26365	10.4965	-62.5292	-281.485	-206.911	200	300	0	0	0	0	0	0	0	200	903	0	0	0	0	0	0	0	603	903	0
406	1	0.762068	2.11106	10.8017	669.893	-464.591	-69.5817	200	300	0	0	0	0	0	0	0	200	903	0	0	0	0	0	0	0	603	903	0
406	2	1.06724	1.95848	9.88614	1310.76	-281.485	-252.687	200	300	0	0	0	0	0	0	0	200	903	0	0	0	0	0	0	0	603	903	0
406	3	0.914656	1.04295	11.412	669.893	-37.3445	-252.687	200	300	0	0	0	0	0	0	0	200	903	0	0	0	0	0	0	0	603	903	0
406	4	0.456892	1.6533	9.88614	303.682	-281.485	-115.358	200	300	0	0	0	0	0	0	0	200	903	0	0	0	0	0	0	0	603	903	0
406	5	1.52501	2.11106	10.8017	29.0235	23.6906	-298.464	200	300	0	0	0	0	0	0	0	200	903	0	0	0	0	0	0	0	603	903	0
406	6	-0.000871718	1.50071	11.7172	578.34	-281.485	-161.134	200	300	0	0	0	0	0	0	0	200	903	0	0	0	0	0	0	0	603	903	0
406	7	1.21983	1.19554	11.1068	852.998	-281.485	-435.793	200	300	0	0	0	0	0	0	0	200	903	0	0	0	0	0	0	0	603	903	0
406	8	0.60948	1.95848	11.412	944.551	-98.3797	-252.687	200	300	0	0	0	0	0	0	0	200	903	0	0	0	0	0	0	0	603	903	0
406	9	0	0	0	0	0	0	200	300	0	0	0	0	0	0	0	200	903	0	0	0	0	0	0	0	603	903	0
407	0	1.21983	2.11106	11.1068	303.682	-281.485	21.9711	200	300	0	0	0	0	0	0	0	200	903	0	0	0	0	0	0	0	603	903	0
407	1	0	0	0	0	0	0	200	300	0	0	0	0	0	0	0	200	903	0	0	0	0	0	0	0	603	903	0
407	2	0	0	0	0	0	0	200	300	0	0	0	0	0	0	0	200	903	0	0	0	0	0	0	0	603	903	0
407	3	-0.306047	1.50071	10.4965	395.235	-403.556	-161.134	200	300	0	0	0	0	0	0	0	200	903	0	0	0	0	0	0	0	603	903	0
407	4	-0.306047	1.50071	9.88614	486.787	-403.556	-298.464	200	300	0	0	0	0	0	0	0	200	903	0	0	0	0	0	0	0	603	903	0
407	5	0.456892	2.26365	12.0224	761.445	-220.45	-390.016	200	300	0	0	0	0	0	0	0	200	903	0	0	0	0	0	0	0	603	903	0
407	6	0.914656	0.89036	14.1586	29.0235	206.796	-206.911	200	300	0	0	0	0	0	0	0	200	903	0	0	0	0	0	0	0	603	903	0
407	7	1.21983	1.95848	10.1913	852.998	-220.45	-161.134	200	300	0	0	0	0	0	0	0	200	903	0	0	0	0	0	0	0	603	903	0
407	8	0.456892	1.80589	9.88614	669.893	23.6906	-161.134	200	300	0	0	0	0	0	0	0	200	903	0	0	0	0	0	0	0	603	903	0
407	9	0.762068	1.50071	9.88614	-245.635	-281.485	-252.687	200	300	0	0	0	0	0	0	0	200	903	0	0	0	0	0	0	0	603	903	0
408	0	-0.458635	2.26365	9.88614	669.893	-586.661	-69.5817	200	300	0	0	0	0	0	0	0	200	903	0	0	0	0	0	0	0	603	903	0
408	1	-0.458635	1.19554	11.1068	395.235	-159.415	388.182	200	300	0	0	0	0	0	0	0	200	903	0	0	0	0	0	0	0	603	903	0
408	2	0.762068	3.02659	11.1068	944.551	206.796	-298.464	200	300	0	0	0	0	0	0	0	200	903	0	0	0	0	0	0	0	603	903	0
408	3	0.762068	1.50071	11.7172	761.445	-281.485	-206.911	200	300	0	0	0	0	0	0	0	200	903	0	0	0	0	0	0	0	603	903	0
408	4	1.21983	1.50071	10.8017	120.576	-159.415	-206.911	200	300	0	0	0	0	0	0	0	200	903	0	0	0	0	0	0	0	603	903	0
408	5	0	0	0	0	0	0	200	300	0	0	0	0	0	0	0	200	903	0	0	0	0	0	0	0	603	903	0
408	6	2.28795	2.26365	11.1068	303.682	23.6906	-23.8053	200	300	0	0	0	0	0	0	0	200	903	0	0	0	0	0	0	0	603	903	0
408	7	0	0	0	0	0	0	200	300	0	0	0	0	0	0	0	200	903	0	0	0	0	0	0	0	603	903	0
408	8	0.762068	2.26365	10.4965	578.34	-37.3445	-390.016	200	300	0	0	0	0	0	0	0	200	903	0	0	0	0	0	0	0	603	903	0
408	9	-0.306047	2.11106	11.7172	578.34	-37.3445	-390.016	200	300	0	0	0	0	0	0	0	200	903	0	0	0	0	0	0	0	603	903	0
409	0	2.28795	2.11106	10.8017	212.129	-220.45	-161.134	200	300	0	0	0	0	0	0	0	200	903	0	0	0	0	0	0	0	603	903	0
409	1	1.37242	2.11106	11.1068	212.129	-159.415	-23.8053	200	300	0	0	0	0	0	0	0	200	903	0	0	0	0	0	0	0	603	903	0
409	2	2.44053	1.34812	10.4965	669.893	-37.3445	-390.016	200	300	0	0	0	0	0	0	0	200	903	0	0	0	0	0	0	0	603	903	0
409	3	0	0	0	0	0	0	200	300	0	0	0	0	0	0	0	200	903	0	0	0	0	0	0	0	603	903	0
409	4	-0.458635	1.19554	10.4965	303.682	-220.45	159.3	200	300	0	0	0	0	0	0	0	200	903	0	0	0	0	0	0	0	603	903	0
409	5	-0.000871718	2.72141	9.88614	303.682	-159.415	-69.5817	200	300	0	0	0	0	0	0	0	200	903	0	0	0	0	0	0	0	603	903	0
409	6	2.28795	2.56883	10.4965	944.551	-37.3445	-161.134	200	300	0	0	0	0	0	0	0	200	903	0	0	0	0	0	0	0	603	903	0
409	7	0.151716	1.34812	11.1068	486.787	-342.52	67.7474	200	300	0	0	0	0	0	0	0	200	903	0	0	0	0	0	0	0	603	903	0
409	8	0.60948	0.280009	12.9379	578.34	-220.45	21.9711	200	300	0	0	0	0	0	0	0	200	903	0	0	0	0	0	0	0	603	903	0
409	9	0.456892	1.80589	9.88614	212.129	-220.45	-298.464	200	300	0	0	0	0	0	0	0	200	903	0	0	0	0	0	0	0	603	903	0
410	0	0	0	0	0	0	0	200	300	0	0	0	0	0	0	0	200	903	0	0	0	0	0	0	0	603	903	0
410	1	0	0	0	0	0	0	200	300	0	0	0	0	0	0	0	200	903	0	0	0	0	0	0	0	603	903	0
410	2	-0.306047	1.80589	10.1913	1402.32	23.6906	-298.464	200	300	0	0	0	0	0	0	0	200	903	0	0	0	0	0	0	0	603	903	0
410	3	-0.611223	0.89036	10.4965	578.34	23.6906	-344.24	200	300	0	0	0	0	0	0	0	200	903	0	0	0	0	0	0	0	603	903	0
410	4	1.83018	2.11106	12.3275	120.576	23.6906	-298.464	200	300	0	0	0	0	0	0	0	200	903	0	0	0	0	0	0	0	603	903	0
410	5	-0.000871718	2.56883	9.88614	395.235	-281.485	250.853	200	300	0	0	0	0	0	0	0	200	903	0	0	0	0	0	0	0	603	903	0
410	6	0.60948	2.26365	9.88614	212.129	-220.45	21.9711	200	300	0	0	0	0	0	0	0	200	903	0	0	0	0	0	0	0	603	903	0
410	7	0.456892	2.56883	10.4965	212.129	-403.556	-344.24	200	300	0	0	0	0	0	0	0	200	903	0	0	0	0	0	0	0	603	903	0
410	8	0.456892	1.6533	9.88614	852.998	-281.485	-252.687	200	300	0	0	0	0	0	0	0	200	903	0	0	0	0	0	0	0	603	903	0
410	9	0	0	0	0	0	0	200	300	0	0	0	0	0	0	0	200	903	0	0	0	0	0	0	0	603	903	0
411	0	0.304304	2.56883	9.88614	944.551	267.831	-206.911	200	300	0	0	0	0	0	0	0	200	903	0	0	0	0	0	0	0	603	903	0
411	1	0	0	0	0	0	0	200	300	0	0	0	0	0	0	0	200	903	0	0	0	0	0	0	0	603	903	0
411	2	-0.306047	2.26365	11.1068	303.682	-342.52	-252.687	200	300	0	0	0	0	0	0	0	200	903	0	0	0	0	0	0	0	603	903	0
411	3	0.151716	1.80589	12.0224	1036.1	-159.415	-161.134	200	300	0	0	0	0	0	0	0	200	903	0	0	0	0	0	0	0	603	903	0
411	4	0.762068	1.95848	10.8017	1036.1	-342.52	-206.911	200	300	0	0	0	0	0	0	0	200	903	0	0	0	0	0	0	0	603	903	0
411	5	0	0	0	0	0	0	200	300	0	0	0	0	0	0	0	200	903	0	0	0	0	0	0	0	603	903	0
411	6	0.762068	2.41624	10.1913	120.576	206.796	-390.016	200	300	0	0	0	0	0	0	0	200	903	0	0	0	0	0	0	0	603	903	0
411	7	0.151716	2.11106	10.4965	761.445	-159.415	-206.911	200	300	0	0	0	0	0	0	0	200	903	0	0	0	0	0	0	0	603	903	0
411	8	0	0	0	0	0	0	200	300	0	0	0	0	0	0	0	200	903	0	0	0	0	0	0	0	603	903	0
411	9	-0.000871718	0.585184	10.4965	761.445	206.796	-252.687	200	300	0	0	0	0	0	0	0	200	903	0	0	0	0	0	0	0	603	903	0
412	0	-0.458635	1.80589	10.8017	303.682	-159.415	-252.687	200	300	0	0	0	0	0	0	0	200	903	0	0	0	0	0	0	0	603	903	0
412	1	0.60948	2.72141	11.1068	120.576	-159.415	-344.24	200	300	0	0	0	0	0	0	0	200	903	0	0	0	0	0	0	0	603	903	0
412	2	0.762068	2.41624	12.0224	395.235	84.7258	-298.464	200	300	0	0	0	0	0	0	0	200	903	0	0	0	0	0	0	0	603	903	0
412	3	0	0	0	0	0	0	200	300	0	0	0	0	0	0	0	200	903	0	0	0	0	0	0	0	603	903	0
412	4	0.914656	2.11106	11.1068	578.34	-464.591	21.9711	200	300	0	0	0	0	0	0	0	200	903	0	0	0	0	0	0	0	603	903	0
412	5	0	0	0	0	0	0	200	300	0	0	0	0	0	0	0	200	903	0	0	0	0	0	0	0	603	903	0
412	6	1.21983	1.80589	10.1913	303.682	-37.3445	-206.911	200	300	0	0	0	0	0	0	0	200	903	0	0	0	0	0	0	0	603	903	0
412	7	0	0	0	0	0	0	200	300	0	0	0	0	0	0	0	200	903	0	0	0	0	0	0	0	603	903	0
412	8	-0.15346	3.02659	11.1068	944.551	-159.415	-390.016	200	300	0	0	0	0	0	0	0	200	903	0	0	0	0	0	0	0	603	903	0
412	9	0.762068	1.95848	11.1068	1127.66	-464.591	-344.24	200	300	0	0	0	0	0	0	0	200	903	0	0	0	0	0	0	0	603	903	0
413	0	0	0	0	0	0	0	200	300	0	0	0	0	0	0	0	200	903	0	0	0	0	0	0	0	603	903	0
413	1	0.914656	1.95848	10.4965	761.445	-220.45	-23.8053	200	300	0	0	0	0	0	0	0	200	903	0	0	0	0	0	0	0	603	903	0
413	2	0	0	0	0	0	0	200	300	0	0	0	0	0	0	0	200	903	0	0	0	0	0	0	0	603	903	0
413	3	0	0	0	0	0	0	200	300	0	0	0	0	0	0	0	200	903	0	0	0	0	0	0	0	603	903	0
413	4	-0.000871718	1.95848	10.8017	1219.21	-342.52	205.077	200	300	0	0	0	0	0	0	0	200	903	0	0	0	0	0	0	0	603	903	0
413	5	-0.611223	-0.177755	11.1068	852.998	23.6906	-344.24	200	300	0	0	0	0	0	0	0	200	903	0	0	0	0	0	0	0	603	903	0
413	6	0	0	0	0	0	0	200	300	0	0	0	0	0	0	0	200	903	0	0	0	0	0	0	0	603	903	0
413	7	1.37242	2.874	12.0224	303.682	-98.3797	-69.5817	200	300	0	0	0	0	0	0	0	200	903	0	0	0	0	0	0	0	603	903	0
413	8	0.762068	2.874	10.1913	395.235	84.7258	-115.358	200	300	0	0	0	0	0	0	0	200	903	0	0	0	0	0	0	0	603	903	0
413	9	1.06724	1.95848	9.88614	578.34	-464.591	-206.911	200	300	0	0	0	0	0	0	0	200	903	0	0	0	0	0	0	0	603	903	0
414	0	0	0	0	0	0	0	200	300	0	0	0	0	0	0	0	200	903	0	0	0	0	0	0	0	603	903	0
414	1	-0.15346	1.50071	10.1913	1127.66	-220.45	-252.687	200	300	0	0	0	0	0	0	0	200	903	0	0	0	0	0	0	0	603	903	0
414	2	-0.15346	2.11106	11.1068	669.893	389.902	-252.687	200	300	0	0	0	0	0	0	0	200	903	0	0	0	0	0	0	0	603	903	0
414	3	0.60948	2.11106	12.0224	120.576	23.6906	-161.134	200	300	0	0	0	0	0	0	0	200	903	0	0	0	0	0	0	0	603	903	0
414	4	0.60948	2.11106	10.4965	669.893	-159.415	-69.5817	200	300	0	0	0	0	0	0	0	200	903	0	0	0	0	0	0	0	603	903	0
414	5	0	0	0	0	0	0	200	300	0	0	0	0	0	0	0	200	903	0	0	0	0	0	0	0	603	903	0
414	6	0	0	0	0	0	0	200	300	0	0	0	0	0	0	0	200	903	0	0	0	0	0	0	0	603	903	0
414	7	0.456892	2.11106	11.7172	944.551	-220.45	-344.24	200	300	0	0	0	0	0	0	0	200	903	0	0	0	0	0	0	0	603	903	0
414	8	-0.15346	2.41624	9.88614	578.34	145.761	21.9711	200	300	0	0	0	0	0	0	0	200	903	0	0	0	0	0	0	0	603	903	0
414	9	1.52501	2.11106	11.1068	486.787	84.7258	67.7474	200	300	0	0	0	0	0	0	0	200	903	0	0	0	0	0	0	0	603	903	0
415	0	0.304304	1.04295	11.1068	944.551	84.7258	-344.24	200	300	0	0	0	0	0	0	0	200	903	0	0	0	0	0	0	0	603	903	0
415	1	0.762068	1.50071	10.1913	761.445	-37.3445	-69.5817	200	300	0	0	0	0	0	0	0	200	903	0	0	0	0	0	0	0	603	903	0
415	2	0.914656	1.34812	10.4965	303.682	-281.485	-206.911	200	300	0	0	0	0	0	0	0	200	903	0	0	0	0	0	0	0	603	903	0
415	3	0	0	0	0	0	0	200	300	0	0	0	0	0	0	0	200	903	0	0	0	0	0	0	0	603	903	0
415	4	0.762068	1.95848	12.9379	395.235	-769.766	-298.464	200	300	0	0	0	0	0	0	0	200	903	0	0	0	0	0	0	0	603	903	0
415	5	-0.15346	2.56883	9.88614	669.893	23.6906	-115.358	200	300	0	0	0	0	0	0	0	200	903	0	0	0	0	0	0	0	603	903	0
415	6	2.59312	1.95848	10.1913	761.445	-37.3445	250.853	200	300	0	0	0	0	0	0	0	200	903	0	0	0	0	0	0	0	603	903	0
415	7	-0.000871718	1.80589	11.7172	29.0235	-281.485	-252.687	200	300	0	0	0	0	0	0	0	200	903	0	0	0	0	0	0	0	603	903	0
415	8	1.06724	2.11106	10.4965	395.235	-403.556	-23.8053	200	300	0	0	0	0	0	0	0	200	903	0	0	0	0	0	0	0	603	903	0
415	9	0.456892	0.89036	11.7172	120.576	-281.485	-161.134	200	300	0	0	0	0	0	0	0	200	903	0	0	0	0	0	0	0	603	903	0
416	0	0.914656	1.6533	10.8017	852.998	-403.556	-298.464	200	300	0	0	0	0	0	0	0	200	903	0	0	0	0	0	0	0	603	903	0
416	1	1.37242	1.50071	12.9379	761.445	23.6906	-298.464	200	300	0	0	0	0	0	0	0	200	903	0	0	0	0	0	0	0	603	903	0
416	2	0.60948	1.50071	10.4965	303.682	23.6906	-252.687	200	300	0	0	0	0	0	0	0	200	903	0	0	0	0	0	0	0	603	903	0
416	3	1.37242	1.80589	11.7172	486.787	-37.3445	-69.5817	200	300	0	0	0	0	0	0	0	200	903	0	0	0	0	0	0	0	603	903	0
416	4	0.304304	1.19554	10.8017	303.682	23.6906	342.406	200	300	0	0	0	0	0	0	0	200	903	0	0	0	0	0	0	0	603	903	0
416	5	0.914656	1.95848	9.88614	944.551	23.6906	-298.464	200	300	0	0	0	0	0	0	0	200	903	0	0	0	0	0	0	0	603	903	0
416	6	0.914656	2.11106	11.7172	1768.53	-403.556	296.629	200	300	0	0	0	0	0	0	0	200	903	0	0	0	0	0	0	0	603	903	0
416	7	0.151716	0.127421	11.1068	761.445	-464.591	-344.24	200	300	0	0	0	0	0	0	0	200	903	0	0	0	0	0	0	0	603	903	0
416	8	0.60948	1.80589	11.7172	29.0235	84.7258	-298.464	200	300	0	0	0	0	0	0	0	200	903	0	0	0	0	0	0	0	603	903	0
416	9	0.151716	2.41624	10.4965	120.576	-98.3797	-69.5817	200	300	0	0	0	0	0	0	0	200	903	0	0	0	0	0	0	0	603	903	0
417	0	1.52501	2.11106	10.8017	944.551	-159.415	-69.5817	200	300	0	0	0	0	0	0	0	200	903	0	0	0	0	0	0	0	603	903	0
417	1	-0.306047	1.50071	10.8017	669.893	-464.591	-161.134	200	300	0	0	0	0	0	0	0	200	903	0	0	0	0	0	0	0	603	903	0
417	2	0.456892	1.95848	10.4965	852.998	-403.556	-527.345	200	300	0	0	0	0	0	0	0	200	903	0	0	0	0	0	0	0	603	903	0
417	3	0.60948	1.34812	10.8017	761.445	-281.485	-69.5817	200	300	0	0	0	0	0	0	0	200	903	0	0	0	0	0	0	0	603	903	0
417	4	0	0	0	0	0	0	200	300	0	0	0	0	0	0	0	200	903	0	0	0	0	0	0	0	603	903	0
417	5	1.83018	2.41624	12.9379	486.787	-464.591	-344.24	200	300	0	0	0	0	0	0	0	200	903	0	0	0	0	0	0	0	603	903	0
417	6	0	0	0	0	0	0	200	300	0	0	0	0	0	0	0	200	903	0	0	0	0	0	0	0	603	903	0
417	7	0.762068	0.89036	11.1068	303.682	-281.485	-69.5817	200	300	0	0	0	0	0	0	0	200	903	0	0	0	0	0	0	0	603	903	0
417	8	-0.000871718	1.95848	10.8017	303.682	-281.485	-206.911	200	300	0	0	0	0	0	0	0	200	903	0	0	0	0	0	0	0	603	903	0
417	9	0.914656	2.26365	10.8017	852.998	-891.837	-298.464	200	300	0	0	0	0	0	0	0	200	903	0	0	0	0	0	0	0	603	903	0
418	0	0.762068	0.585184	11.412	395.235	-342.52	-206.911	200	300	0	0	0	0	0	0	0	200	903	0	0	0	0	0	0	0	603	903	0
418	1	1.06724	2.72141	10.4965	669.893	-342.52	-344.24	200	300	0	0	0	0	0	0	0	200	903	0	0	0	0	0	0	0	603	903	0
418	2	-0.15346	1.80589	11.7172	578.34	-159.415	-206.911	200	300	0	0	0	0	0	0	0	200	903	0	0	0	0	0	0	0	603	903	0
418	3	0	0	0	0	0	0	200	300	0	0	0	0	0	0	0	200	903	0	0	0	0	0	0	0	603	903	0
418	4	0.151716	1.80589	10.1913	852.998	-98.3797	-69.5817	200	300	0	0	0	0	0	0	0	200	903	0	0	0	0	0	0	0	603	903	0
418	5	-0.458635	2.26365	10.1913	669.893	-586.661	67.7474	200	300	0	0	0	0	0	0	0	200	903	0	0	0	0	0	0	0	603	903	0
418	6	0.456892	2.56883	10.4965	761.445	-98.3797	-115.358	200	300	0	0	0	0	0	0	0	200	903	0	0	0	0	0	0	0	603	903	0
418	7	0.456892	1.80589	12.0224	669.893	-708.731	-115.358	200	300	0	0	0	0	0	0	0	200	903	0	0	0	0	0	0	0	603	903	0
418	8	0	0	0	0	0	0	200	300	0	0	0	0	0	0	0	200	903	0	0	0	0	0	0	0	603	903	0
418	9	1.21983	2.41624	12.6327	761.445	-98.3797	-23.8053	200	300	0	0	0	0	0	0	0	200	903	0	0	0	0	0	0	0	603	903	0
419	0	0	0	0	0	0	0	200	300	0	0	0	0	0	0	0	200	903	0	0	0	0	0	0	0	603	903	0
419	1	-0.000871718	2.11106	9.88614	669.893	-403.556	-252.687	200	300	0	0	0	0	0	0	0	200	903	0	0	0	0	0	0	0	603	903	0
419	2	-0.000871718	1.34812	10.1913	1036.1	-342.52	21.9711	200	300	0	0	0	0	0	0	0	200	903	0	0	0	0	0	0	0	603	903	0
419	3	0.914656	2.41624	11.1068	761.445	23.6906	-344.24	200	300	0	0	0	0	0	0	0	200	903	0	0	0	0	0	0	0	603	903	0
419	4	1.06724	3.02659	11.412	578.34	-281.485	-344.24	200	300	0	0	0	0	0	0	0	200	903	0	0	0	0	0	0	0	603	903	0
419	5	0	0	0	0	0	0	200	300	0	0	0	0	0	0	0	200	903	0	0	0	0	0	0	0	603	903	0
419	6	-0.000871718	1.80589	11.7172	669.893	-220.45	-206.911	200	300	0	0	0	0	0	0	0	200	903	0	0	0	0	0	0	0	603	903	0
419	7	0	0	0	0	0	0	200	300	0	0	0	0	0	0	0	200	903	0	0	0	0	0	0	0	603	903	0
419	8	1.52501	1.6533	11.1068	395.235	-98.3797	-161.134	200	300	0	0	0	0	0	0	0	200	903	0	0	0	0	0	0	0	603	903	0
419	9	-0.306047	2.11106	10.4965	1219.21	-464.591	-298.464	200	300	0	0	0	0	0	0	0	200	903	0	0	0	0	0	0	0	603	903	0
420	0	0.762068	1.04295	12.3275	303.682	-159.415	-344.24	200	300	0	0	0	0	0	0	0	200	903	0	0	0	0	0	0	0	603	903	0
420	1	1.21983	2.56883	11.1068	303.682	145.761	-115.358	200	300	0	0	0	0	0	0	0	200	903	0	0	0	0	0	0	0	603	903	0
420	2	0	0	0	0	0	0	200	300	0	0	0	0	0	0	0	200	903	0	0	0	0	0	0	0	603	903	0
420	3	0	0	0	0	0	0	200	300	0	0	0	0	0	0	0	200	903	0	0	0	0	0	0	0	603	903	0
420	4	0	0	0	0	0	0	200	300	0	0	0	0	0	0	0	200	903	0	0	0	0	0	0	0	603	903	0
420	5	0.151716	1.6533	9.88614	303.682	-220.45	-298.464	200	300	0	0	0	0	0	0	0	200	903	0	0	0	0	0	0	0	603	903	0
420	6	-0.306047	2.874	11.1068	1219.21	-220.45	67.7474	200	300	0	0	0	0	0	0	0	200	903	0	0	0	0	0	0	0	603	903	0
420	7	0.304304	2.11106	12.3275	852.998	-98.3797	-252.687	200	300	0	0	0	0	0	0	0	200	903	0	0	0	0	0	0	0	603	903	0
420	8	1.37242	1.50071	10.8017	120.576	-342.52	-115.358	200	300	0	0	0	0	0	0	0	200	903	0	0	0	0	0	0	0	603	903	0
420	9	1.06724	1.95848	10.4965	852.998	-464.591	-252.687	200	300	0	0	0	0	0	0	0	200	903	0	0	0	0	0	0	0	603	903	0
421	0	0.762068	1.34812	12.0224	395.235	-342.52	250.853	200	300	0	0	0	0	0	0	0	200	903	0	0	0	0	0	0	0	603	903	0
421	1	0	0	0	0	0	0	200	300	0	0	0	0	0	0	0	200	903	0	0	0	0	0	0	0	603	903	0
421	2	1.37242	2.41624	9.88614	1036.1	-464.591	-390.016	200	300	0	0	0	0	0	0	0	200	903	0	0	0	0	0	0	0	603	903	0
421	3	-0.306047	1.6533	11.412	669.893	-342.52	-298.464	200	300	0	0	0	0	0	0	0	200	903	0	0	0	0	0	0	0	603	903	0
421	4	0.762068	2.56883	12.3275	669.893	-281.485	-252.687	200	300	0	0	0	0	0	0	0	200	903	0	0	0	0	0	0	0	603	903	0
421	5	1.06724	2.72141	10.8017	212.129	-525.626	-161.134	200	300	0	0	0	0	0	0	0	200	903	0	0	0	0	0	0	0	603	903	0
421	6	0	0	0	0	0	0	200	300	0	0	0	0	0	0	0	200	903	0	0	0	0	0	0	0	603	903	0
421	7	0	0	0	0	0	0	200	300	0	0	0	0	0	0	0	200	903	0	0	0	0	0	0	0	603	903	0
421	8	0	0	0	0	0	0	200	300	0	0	0	0	0	0	0	200	903	0	0	0	0	0	0	0	603	903	0
421	9	-0.458635	2.11106	10.4965	578.34	-342.52	-206.911	200	300	0	0	0	0	0	0	0	200	903	0	0	0	0	0	0	0	603	903	0
422	0	-0.611223	2.874	11.1068	852.998	-281.485	-298.464	200	300	0	0	0	0	0	0	0	200	903	0	0	0	0	0	0	0	603	903	0
422	1	-0.458635	2.11106	12.0224	944.551	145.761	-161.134	200	300	0	0	0	0	0	0	0	200	903	0	0	0	0	0	0	0	603	903	0
422	2	1.06724	1.34812	10.8017	395.235	-98.3797	-298.464	200	300	0	0	0	0	0	0	0	200	903	0	0	0	0	0	0	0	603	903	0
422	3	1.21983	1.19554	11.412	-154.082	-464.591	113.524	200	300	0	0	0	0	0	0	0	200	903	0	0	0	0	0	0	0	603	903	0
422	4	0	0	0	0	0	0	200	300	0	0	0	0	0	0	0	200	903	0	0	0	0	0	0	0	603	903	0
422	5	-0.15346	2.26365	10.4965	578.34	-281.485	-115.358	200	300	0	0	0	0	0	0	0	200	903	0	0	0	0	0	0	0	603	903	0
422	6	0	0	0	0	0	0	200	300	0	0	0	0	0	0	0	200	903	0	0	0	0	0	0	0	603	903	0
422	7	-0.000871718	2.11106	12.0224	761.445	-159.415	-344.24	200	300	0	0	0	0	0	0	0	200	903	0	0	0	0	0	0	0	603	903	0
422	8	-0.15346	1.80589	10.8017	212.129	-464.591	-115.358	200	300	0	0	0	0	0	0	0	200	903	0	0	0	0	0	0	0	603	903	0
422	9	1.06724	1.80589	11.7172	303.682	-342.52	-69.5817	200	300	0	0	0	0	0	0	0	200	903	0	0	0	0	0	0	0	603	903	0
423	0	0.762068	2.56883	11.1068	852.998	-37.3445	-206.911	200	300	0	0	0	0	0	0	0	200	903	0	0	0	0	0	0	0	603	903	0
423	1	0.914656	2.41624	10.4965	1585.42	-281.485	-252.687	200	300	0	0	0	0	0	0	0	200	903	0	0	0	0	0	0	0	603	903	0
423	2	0.304304	1.19554	10.8017	669.893	-37.3445	-115.358	200	300	0	0	0	0	0	0	0	200	903	0	0	0	0	0	0	0	603	903	0
423	3	0	0	0	0	0	0	200	300	0	0	0	0	0	0	0	200	903	0	0	0	0	0	0	0	603	903	0
423	4	1.6776	2.41624	10.4965	578.34	-98.3797	-23.8053	200	300	0	0	0	0	0	0	0	200	903	0	0	0	0	0	0	0	603	903	0
423	5	0.304304	2.41624	10.8017	578.34	23.6906	67.7474	200	300	0	0	0	0	0	0	0	200	903	0	0	0	0	0	0	0	603	903	0
423	6	1.06724	1.95848	11.1068	1310.76	-281.485	-23.8053	200	300	0	0	0	0	0	0	0	200	903	0	0	0	0	0	0	0	603	903	0
423	7	0.304304	2.11106	11.1068	486.787	-464.591	-252.687	200	300	0	0	0	0	0	0	0	200	903	0	0	0	0	0	0	0	603	903	0
423	8	0	0	0	0	0	0	200	300	0	0	0	0	0	0	0	200	903	0	0	0	0	0	0	0	603	903	0
423	9	0.914656	3.02659	11.1068	578.34	389.902	-206.911	200	300	0	0	0	0	0	0	0	200	903	0	0	0	0	0	0	0	603	903	0
424	0	-0.15346	2.56883	10.1913	852.998	-37.3445	-390.016	200	300	0	0	0	0	0	0	0	200	903	0	0	0	0	0	0	0	603	903	0
424	1	1.21983	2.41624	10.1913	303.682	-220.45	-344.24	200	300	0	0	0	0	0	0	0	200	903	0	0	0	0	0	0	0	603	903	0
424	2	-0.000871718	1.50071	12.3275	303.682	-98.3797	-69.5817	200	300	0	0	0	0	0	0	0	200	903	0	0	0	0	0	0	0	603	903	0
424	3	0.304304	2.41624	11.7172	944.551	-220.45	113.524	200	300	0	0	0	0	0	0	0	200	903	0	0	0	0	0	0	0	603	903	0
424	4	0.762068	1.6533	10.8017	578.34	-403.556	-115.358	200	300	0	0	0	0	0	0	0	200	903	0	0	0	0	0	0	0	603	903	0
424	5	0	0	0	0	0	0	200	300	0	0	0	0	0	0	0	200	903	0	0	0	0	0	0	0	603	903	0
424	6	0.914656	1.50071	10.8017	852.998	-37.3445	-298.464	200	300	0	0	0	0	0	0	0	200	903	0	0	0	0	0	0	0	603	903	0
424	7	0.304304	1.6533	9.88614	120.576	84.7258	-161.134	200	300	0	0	0	0	0	0	0	200	903	0	0	0	0	0	0	0	603	903	0
424	8	1.98277	1.95848	11.7172	-62.5292	145.761	-298.464	200	300	0	0	0	0	0	0	0	200	903	0	0	0	0	0	0	0	603	903	0
424	9	0.304304	2.26365	10.8017	486.787	-159.415	-206.911	200	300	0	0	0	0	0	0	0	200	903	0	0	0	0	0	0	0	603	903	0
425	0	-0.000871718	0.585184	11.7172	1127.66	-464.591	-115.358	200	300	0	0	0	0	0	0	0	200	903	0	0	0	0	0	0	0	603	903	0
425	1	0.60948	1.19554	11.1068	852.998	-464.591	-252.687	200	300	0	0	0	0	0	0	0	200	903	0	0	0	0	0	0	0	603	903	0
425	2	0.304304	1.50071	9.88614	669.893	-220.45	-206.911	200	300	0	0	0	0	0	0	0	200	903	0	0	0	0	0	0	0	603	903	0
425	3	0	0	0	0	0	0	200	300	0	0	0	0	0	0	0	200	903	0	0	0	0	0	0	0	603	903	0
425	4	0.60948	2.41624	9.88614	486.787	-281.485	-23.8053	200	300	0	0	0	0	0	0	0	200	903	0	0	0	0	0	0	0	603	903	0
425	5	-0.000871718	1.19554	11.412	486.787	-464.591	-252.687	200	300	0	0	0	0	0	0	0	200	903	0	0	0	0	0	0	0	603	903	0
425	6	-0.458635	1.19554	10.4965	303.682	-342.52	-161.134	200	300	0	0	0	0	0	0	0	200	903	0	0	0	0	0	0	0	603	903	0
425	7	0.914656	1.95848	10.4965	1310.76	23.6906	67.7474	200	300	0	0	0	0	0	0	0	200	903	0	0	0	0	0	0	0	603	903	0
425	8	0.914656	0.585184	10.8017	669.893	-98.3797	-298.464	200	300	0	0	0	0	0	0	0	200	903	0	0	0	0	0	0	0	603	903	0
425	9	1.06724	2.11106	10.4965	669.893	-98.3797	-252.687	200	300	0	0	0	0	0	0	0	200	903	0	0	0	0	0	0	0	603	903	0
426	0	0.762068	1.34812	10.1913	486.787	84.7258	-69.5817	200	300	0	0	0	0	0	0	0	200	903	0	0	0	0	0	0	0	603	903	0
426	1	0	0	0	0	0	0	200	300	0	0	0	0	0	0	0	200	903	0	0	0	0	0	0	0	603	903	0
426	2	0	0	0	0	0	0	200	300	0	0	0	0	0	0	0	200	903	0	0	0	0	0	0	0	603	903	0
426	3	0.151716	2.41624	9.88614	395.235	-281.485	-69.5817	200	300	0	0	0	0	0	0	0	200	903	0	0	0	0	0	0	0	603	903	0
426	4	-0.458635	0.585184	12.0224	761.445	-342.52	-298.464	200	300	0	0	0	0	0	0	0	200	903	0	0	0	0	0	0	0	603	903	0
426	5	0.60948	1.34812	10.8017	852.998	-403.556	-161.134	200	300	0	0	0	0	0	0	0	200	903	0	0	0	0	0	0	0	603	903	0
426	6	0.914656	2.41624	11.1068	486.787	-220.45	-344.24	200	300	0	0	0	0	0	0	0	200	903	0	0	0	0	0	0	0	603	903	0
426	7	0	0	0	0	0	0	200	300	0	0	0	0	0	0	0	200	903	0	0	0	0	0	0	0	603	903	0
426	8	0	0	0	0	0	0	200	300	0	0	0	0	0	0	0	200	903	0	0	0	0	0	0	0	603	903	0
426	9	-0.306047	1.04295	10.4965	212.129	-281.485	-206.911	200	300	0	0	0	0	0	0	0	200	903	0	0	0	0	0	0	0	603	903	0
427	0	-0.916399	1.50071	11.412	578.34	-159.415	-252.687	200	300	0	0	0	0	0	0	0	200	903	0	0	0	0	0	0	0	603	903	0
427	1	-0.306047	2.56883	12.3275	944.551	-281.485	-161.134	200	300	0	0	0	0	0	0	0	200	903	0	0	0	0	0	0	0	603	903	0
427	2	-0.000871718	1.50071	13.2431	303.682	-37.3445	-115.358	200	300	0	0	0	0	0	0	0	200	903	0	0	0	0	0	0	0	603	903	0
427	3	0.762068	2.874	10.8017	852.998	-98.3797	-252.687	200	300	0	0	0	0	0	0	0	200	903	0	0	0	0	0	0	0	603	903	0
427	4	2.13536	1.50071	10.8017	578.34	-159.415	-23.8053	200	300	0	0	0	0	0	0	0	200	903	0	0	0	0	0	0	0	603	903	0
427	5	0.762068	1.50071	9.88614	303.682	-220.45	113.524	200	300	0	0	0	0	0	0	0	200	903	0	0	0	0	0	0	0	603	903	0
427	6	1.21983	2.11106	12.6327	1127.66	-98.3797	-298.464	200	300	0	0	0	0	0	0	0	200	903	0	0	0	0	0	0	0	603	903	0
427	7	0.151716	2.874	9.88614	761.445	-342.52	-206.911	200	300	0	0	0	0	0	0	0	200	903	0	0	0	0	0	0	0	603	903	0
427	8	0.914656	2.11106	12.0224	486.787	-342.52	-298.464	200	300	0	0	0	0	0	0	0	200	903	0	0	0	0	0	0	0	603	903	0
427	9	-0.15346	1.80589	12.0224	303.682	23.6906	-390.016	200	300	0	0	0	0	0	0	0	200	903	0	0	0	0	0	0	0	603	903	0
428	0	0.456892	1.34812	10.4965	486.787	-159.415	-298.464	200	300	0	0	0	0	0	0	0	200	903	0	0	0	0	0	0	0	603	903	0
428	1	0.914656	2.56883	10.1913	303.682	-98.3797	21.9711	200	300	0	0	0	0	0	0	0	200	903	0	0	0	0	0	0	0	603	903	0
428	2	1.37242	1.80589	9.88614	761.445	-37.3445	-115.358	200	300	0	0	0	0	0	0	0	200	903	0	0	0	0	0	0	0	603	903	0
428	3	0	0	0	0	0	0	200	300	0	0	0	0	0	0	0	200	903	0	0	0	0	0	0	0	603	903	0
428	4	0	0	0	0	0	0	200	300	0	0	0	0	0	0	0	200	903	0	0	0	0	0	0	0	603	903	0
428	5	-0.15346	2.11106	10.1913	212.129	84.7258	-481.569	200	300	0	0	0	0	0	0	0	200	903	0	0	0	0	0	0	0	603	903	0
428	6	0.456892	2.72141	10.8017	578.34	23.6906	-161.134	200	300	0	0	0	0	0	0	0	200	903	0	0	0	0	0	0	0	603	903	0
428	7	-0.000871718	2.41624	9.88614	395.235	-464.591	-161.134	200	300	0	0	0	0	0	0	0	200	903	0	0	0	0	0	0	0	603	903	0
428	8	0.60948	0.737772	10.8017	486.787	-98.3797	-69.5817	200	300	0	0	0	0	0	0	0	200	903	0	0	0	0	0	0	0	603	903	0
428	9	0.60948	1.80589	10.1913	303.682	-159.415	-298.464	200	300	0	0	0	0	0	0	0	200	903	0	0	0	0	0	0	0	603	903	0
429	0	0	0	0	0	0	0	200	300	0	0	0	0	0	0	0	200	903	0	0	0	0	0	0	0	603	903	0
429	1	0.914656	1.34812	9.88614	212.129	206.796	67.7474	200	300	0	0	0	0	0	0	0	200	903	0	0	0	0	0	0	0	603	903	0
429	2	0.304304	2.41624	10.1913	852.998	23.6906	-298.464	200	300	0	0	0	0	0	0	0	200	903	0	0	0	0	0	0	0	603	903	0
429	3	1.98277	1.04295	10.8017	669.893	-37.3445	-206.911	200	300	0	0	0	0	0	0	0	200	903	0	0	0	0	0	0	0	603	903	0
429	4	0.151716	1.19554	11.1068	303.682	-220.45	-69.5817	200	300	0	0	0	0	0	0	0	200	903	0	0	0	0	0	0	0	603	903	0
429	5	-0.15346	2.41624	12.0224	303.682	-159.415	-69.5817	200	300	0	0	0	0	0	0	0	200	903	0	0	0	0	0	0	0	603	903	0
429	6	0.304304	2.41624	10.1913	1036.1	-1197.01	-435.793	200	300	0	0	0	0	0	0	0	200	903	0	0	0	0	0	0	0	603	903	0
429	7	1.21983	1.50071	10.4965	1493.87	-220.45	-298.464	200	300	0	0	0	0	0	0	0	200	903	0	0	0	0	0	0	0	603	903	0
429	8	1.06724	1.04295	11.1068	395.235	-37.3445	-115.358	200	300	0	0	0	0	0	0	0	200	903	0	0	0	0	0	0	0	603	903	0
429	9	0	0	0	0	0	0	200	300	0	0	0	0	0	0	0	200	903	0	0	0	0	0	0	0	603	903	0
430	0	0	0	0	0	0	0	200	300	0	0	0	0	0	0	0	200	903	0	0	0	0	0	0	0	603	903	0
430	1	1.06724	1.6533	11.412	212.129	84.7258	67.7474	200	300	0	0	0	0	0	0	0	200	903	0	0	0	0	0	0	0	603	903	0
430	2	-0.916399	1.50071	10.8017	486.787	-159.415	-206.911	200	300	0	0	0	0	0	0	0	200	903	0	0	0	0	0	0	0	603	903	0
430	3	1.6776	1.50071	9.88614	761.445	-220.45	-206.911	200	300	0	0	0	0	0	0	0	200	903	0	0	0	0	0	0	0	603	903	0
430	4	0.914656	2.874	10.4965	1402.32	23.6906	-435.793	200	300	0	0	0	0	0	0	0	200	903	0	0	0	0	0	0	0	603	903	0
430	5	0	0	0	0	0	0	200	300	0	0	0	0	0	0	0	200	903	0	0	0	0	0	0	0	603	903	0
430	6	1.06724	1.6533	9.88614	578.34	-708.731	113.524	200	300	0	0	0	0	0	0	0	200	903	0	0	0	0	0	0	0	603	903	0
430	7	0	0	0	0	0	0	200	300	0	0	0	0	0	0	0	200	903	0	0	0	0	0	0	0	603	903	0
430	8	0	0	0	0	0	0	200	300	0	0	0	0	0	0	0	200	903	0	0	0	0	0	0	0	603	903	0
430	9	-0.306047	2.41624	10.4965	578.34	-159.415	-115.358	200	300	0	0	0	0	0	0	0	200	903	0	0	0	0	0	0	0	603	903	0
431	0	0.151716	2.56883	13.2431	852.998	-403.556	-298.464	200	300	0	0	0	0	0	0	0	200	903	0	0	0	0	0	0	0	603	903	0
431	1	0.762068	2.26365	11.1068	1127.66	23.6906	21.9711	200	300	0	0	0	0	0	0	0	200	903	0	0	0	0	0	0	0	603	903	0
431	2	0	0	0	0	0	0	200	300	0	0	0	0	0	0	0	200	903	0	0	0	0	0	0	0	603	903	0
431	3	1.52501	1.50071	10.1913	303.682	-220.45	-69.5817	200	300	0	0	0	0	0	0	0	200	903	0	0	0	0	0	0	0	603	903	0
431	4	0.456892	2.11106	9.88614	29.0235	145.761	-298.464	200	300	0	0	0	0	0	0	0	200	903	0	0	0	0	0	0	0	603	903	0
431	5	-0.000871718	2.11106	9.88614	669.893	-281.485	-115.358	200	300	0	0	0	0	0	0	0	200	903	0	0	0	0	0	0	0	603	903	0
431	6	0.762068	0.89036	10.4965	1493.87	-281.485	-298.464	200	300	0	0	0	0	0	0	0	200	903	0	0	0	0	0	0	0	603	903	0
431	7	-0.458635	1.50071	11.412	1219.21	-342.52	113.524	200	300	0	0	0	0	0	0	0	200	903	0	0	0	0	0	0	0	603	903	0
431	8	0.914656	1.34812	11.1068	578.34	-220.45	-161.134	200	300	0	0	0	0	0	0	0	200	903	0	0	0	0	0	0	0	603	903	0
431	9	1.21983	2.41624	10.8017	120.576	-281.485	-115.358	200	300	0	0	0	0	0	0	0	200	903	0	0	0	0	0	0	0	603	903	0
432	0	1.98277	2.11106	9.88614	578.34	-98.3797	-115.358	200	300	0	0	0	0	0	0	0	200	903	0	0	0	0	0	0	0	603	903	0
432	1	0	0	0	0	0	0	200	300	0	0	0	0	0	0	0	200	903	0	0	0	0	0	0	0	603	903	0
432	2	0	0	0	0	0	0	200	300	0	0	0	0	0	0	0	200	903	0	0	0	0	0	0	0	603	903	0
432	3	1.06724	2.874	11.7172	1219.21	-159.415	-69.5817	200	300	0	0	0	0	0	0	0	200	903	0	0	0	0	0	0	0	603	903	0
432	4	-0.458635	0.280009	11.1068	486.787	23.6906	-161.134	200	300	0	0	0	0	0	0	0	200	903	0	0	0	0	0	0	0	603	903	0
432	5	0.60948	2.26365	12.0224	486.787	-37.3445	-252.687	200	300	0	0	0	0	0	0	0	200	903	0	0	0	0	0	0	0	603	903	0
432	6	1.21983	1.80589	11.1068	578.34	-37.3445	-115.358	200	300	0	0	0	0	0	0	0	200	903	0	0	0	0	0	0	0	603	903	0
432	7	0	0	0	0	0	0	200	300	0	0	0	0	0	0	0	200	903	0	0	0	0	0	0	0	603	903	0
432	8	0.762068	1.95848	9.88614	-154.082	-159.415	-206.911	200	300	0	0	0	0	0	0	0	200	903	0	0	0	0	0	0	0	603	903	0
432	9	0	0	0	0	0	0	200	300	0	0	0	0	0	0	0	200	903	0	0	0	0	0	0	0	603	903	0
433	0	0	0	0	0	0	0	200	300	0	0	0	0	0	0	0	200	903	0	0	0	0	0	0	0	603	903	0
433	1	-0.000871718	1.6533	11.1068	578.34	23.6906	67.7474	200	300	0	0	0	0	0	0	0	200	903	0	0	0	0	0	0	0	603	903	0
433	2	0.151716	1.50071	12.3275	486.787	23.6906	-252.687	200	300	0	0	0	0	0	0	0	200	903	0	0	0	0	0	0	0	603	903	0
433	3	0.762068	2.26365	10.8017	120.576	-525.626	-252.687	200	300	0	0	0	0	0	0	0	200	903	0	0	0	0	0	0	0	603	903	0
433	4	2.28795	2.41624	10.4965	1219.21	-98.3797	-161.134	200	300	0	0	0	0	0	0	0	200	903	0	0	0	0	0	0	0	603	903	0
433	5	0	0	0	0	0	0	200	300	0	0	0	0	0	0	0	200	903	0	0	0	0	0	0	0	603	903	0
433	6	0	0	0	0	0	0	200	300	0	0	0	0	0	0	0	200	903	0	0	0	0	0	0	0	603	903	0
433	7	-0.15346	1.95848	9.88614	395.235	206.796	-115.358	200	300	0	0	0	0	0	0	0	200	903	0	0	0	0	0	0	0	603	903	0
433	8	0.60948	2.41624	12.9379	303.682	23.6906	-298.464	200	300	0	0	0	0	0	0	0	200	903	0	0	0	0	0	0	0	603	903	0
433	9	-0.15346	1.95848	11.7172	395.235	-220.45	-252.687	200	300	0	0	0	0	0	0	0	200	903	0	0	0	0	0	0	0	603	903	0
434	0	0.762068	1.50071	10.4965	1219.21	-220.45	342.406	200	300	0	0	0	0	0	0	0	200	903	0	0	0	0	0	0	0	603	903	0
434	1	0.762068	1.19554	10.8017	944.551	-98.3797	-298.464	200	300	0	0	0	0	0	0	0	200	903	0	0	0	0	0	0	0	603	903	0
434	2	0	0	0	0	0	0	200	300	0	0	0	0	0	0	0	200	903	0	0	0	0	0	0	0	603	903	0
434	3	0.151716	0.585184	11.1068	852.998	-159.415	-206.911	200	300	0	0	0	0	0	0	0	200	903	0	0	0	0	0	0	0	603	903	0
434	4	-0.000871718	2.26365	10.4965	669.893	-159.415	-298.464	200	300	0	0	0	0	0	0	0	200	903	0	0	0	0	0	0	0	603	903	0
434	5	1.37242	1.6533	12.0224	944.551	-281.485	-23.8053	200	300	0	0	0	0	0	0	0	200	903	0	0	0	0	0	0	0	603	903	0
434	6	-0.000871718	1.6533	10.1913	29.0235	-159.415	-23.8053	200	300	0	0	0	0	0	0	0	200	903	0	0	0	0	0	0	0	603	903	0
434	7	1.37242	1.95848	10.8017	578.34	-37.3445	-69.5817	200	300	0	0	0	0	0	0	0	200	903	0	0	0	0	0	0	0	603	903	0
434	8	0.456892	0.89036	11.412	120.576	-342.52	-435.793	200	300	0	0	0	0	0	0	0	200	903	0	0	0	0	0	0	0	603	903	0
434	9	0	0	0	0	0	0	200	300	0	0	0	0	0	0	0	200	903	0	0	0	0	0	0	0	603	903	0
435	0	0.456892	2.26365	10.1913	852.998	145.761	67.7474	200	300	0	0	0	0	0	0	0	200	903	0	0	0	0	0	0	0	603	903	0
435	1	0.456892	1.50071	9.88614	120.576	84.7258	-344.24	200	300	0	0	0	0	0	0	0	200	903	0	0	0	0	0	0	0	603	903	0
435	2	0	0	0	0	0	0	200	300	0	0	0	0	0	0	0	200	903	0	0	0	0	0	0	0	603	903	0
435	3	-0.000871718	0.89036	10.8017	29.0235	-342.52	-206.911	200	300	0	0	0	0	0	0	0	200	903	0	0	0	0	0	0	0	603	903	0
435	4	-0.763811	2.56883	12.9379	761.445	-220.45	-252.687	200	300	0	0	0	0	0	0	0	200	903	0	0	0	0	0	0	0	603	903	0
435	5	0.60948	1.50071	11.412	944.551	-220.45	-252.687	200	300	0	0	0	0	0	0	0	200	903	0	0	0	0	0	0	0	603	903	0
435	6	1.37242	1.6533	10.1913	212.129	-220.45	-390.016	200	300	0	0	0	0	0	0	0	200	903	0	0	0	0	0	0	0	603	903	0
435	7	1.21983	2.26365	10.8017	944.551	-37.3445	67.7474	200	300	0	0	0	0	0	0	0	200	903	0	0	0	0	0	0	0	603	903	0
435	8	0	0	0	0	0	0	200	300	0	0	0	0	0	0	0	200	903	0	0	0	0	0	0	0	603	903	0
435	9	0	0	0	0	0	0	200	300	0	0	0	0	0	0	0	200	903	0	0	0	0	0	0	0	603	903	0
436	0	0.60948	1.34812	10.1913	852.998	-98.3797	-115.358	200	300	0	0	0	0	0	0	0	200	903	0	0	0	0	0	0	0	603	903	0
436	1	-0.000871718	1.50071	11.412	578.34	-37.3445	-161.134	200	300	0	0	0	0	0	0	0	200	903	0	0	0	0	0	0	0	603	903	0
436	2	0.456892	2.11106	10.8017	1127.66	-159.415	-481.569	200	300	0	0	0	0	0	0	0	200	903	0	0	0	0	0	0	0	603	903	0
436	3	0.60948	1.19554	12.0224	486.787	23.6906	-252.687	200	300	0	0	0	0	0	0	0	200	903	0	0	0	0	0	0	0	603	903	0
436	4	0	0	0	0	0	0	200	300	0	0	0	0	0	0	0	200	903	0	0	0	0	0	0	0	603	903	0
436	5	0.914656	1.95848	10.4965	578.34	-220.45	-252.687	200	300	0	0	0	0	0	0	0	200	903	0	0	0	0	0	0	0	603	903	0
436	6	0	0	0	0	0	0	200	300	0	0	0	0	0	0	0	200	903	0	0	0	0	0	0	0	603	903	0
436	7	0.456892	1.95848	11.7172	944.551	-952.872	-69.5817	200	300	0	0	0	0	0	0	0	200	903	0	0	0	0	0	0	0	603	903	0
436	8	-0.306047	0.89036	11.1068	395.235	-464.591	-252.687	200	300	0	0	0	0	0	0	0	200	903	0	0	0	0	0	0	0	603	903	0
436	9	-0.000871718	2.72141	11.1068	852.998	-159.415	-344.24	200	300	0	0	0	0	0	0	0	200	903	0	0	0	0	0	0	0	603	903	0
437	0	0.762068	1.95848	11.1068	852.998	23.6906	-481.569	200	300	0	0	0	0	0	0	0	200	903	0	0	0	0	0	0	0	603	903	0
437	1	0	0	0	0	0	0	200	300	0	0	0	0	0	0	0	200	903	0	0	0	0	0	0	0	603	903	0
437	2	0	0	0	0	0	0	200	300	0	0	0	0	0	0	0	200	903	0	0	0	0	0	0	0	603	903	0
437	3	0	0	0	0	0	0	200	300	0	0	0	0	0	0	0	200	903	0	0	0	0	0	0	0	603	903	0
437	4	0	0	0	0	0	0	200	300	0	0	0	0	0	0	0	200	903	0	0	0	0	0	0	0	603	903	0
437	5	-0.611223	1.6533	10.8017	761.445	-342.52	-115.358	200	300	0	0	0	0	0	0	0	200	903	0	0	0	0	0	0	0	603	903	0
437	6	-0.15346	1.34812	11.412	486.787	-342.52	-435.793	200	300	0	0	0	0	0	0	0	200	903	0	0	0	0	0	0	0	603	903	0
437	7	0.914656	2.11106	10.8017	120.576	84.7258	-252.687	200	300	0	0	0	0	0	0	0	200	903	0	0	0	0	0	0	0	603	903	0
437	8	1.37242	2.41624	11.412	212.129	-37.3445	21.9711	200	300	0	0	0	0	0	0	0	200	903	0	0	0	0	0	0	0	603	903	0
437	9	0	0	0	0	0	0	200	300	0	0	0	0	0	0	0	200	903	0	0	0	0	0	0	0	603	903	0
438	0	0.60948	1.19554	12.9379	578.34	-586.661	-252.687	200	300	0	0	0	0	0	0	0	200	903	0	0	0	0	0	0	0	603	903	0
438	1	-0.306047	1.34812	10.1913	578.34	-342.52	-344.24	200	300	0	0	0	0	0	0	0	200	903	0	0	0	0	0	0	0	603	903	0
438	2	-0.306047	2.56883	11.412	486.787	-220.45	342.406	200	300	0	0	0	0	0	0	0	200	903	0	0	0	0	0	0	0	603	903	0
438	3	-0.000871718	2.41624	10.8017	761.445	145.761	113.524	200	300	0	0	0	0	0	0	0	200	903	0	0	0	0	0	0	0	603	903	0
438	4	1.21983	1.34812	10.8017	1036.1	-37.3445	-298.464	200	300	0	0	0	0	0	0	0	200	903	0	0	0	0	0	0	0	603	903	0
438	5	1.06724	-0.0251671	11.1068	486.787	-769.766	-161.134	200	300	0	0	0	0	0	0	0	200	903	0	0	0	0	0	0	0	603	903	0
438	6	0	0	0	0	0	0	200	300	0	0	0	0	0	0	0	200	903	0	0	0	0	0	0	0	603	903	0
438	7	1.21983	1.95848	10.4965	486.787	-37.3445	-206.911	200	300	0	0	0	0	0	0	0	200	903	0	0	0	0	0	0	0	603	903	0
438	8	-0.000871718	2.874	9.58096	1127.66	-220.45	-298.464	200	300	0	0	0	0	0	0	0	200	903	0	0	0	0	0	0	0	603	903	0
438	9	0.914656	1.80589	11.412	1402.32	-281.485	-298.464	200	300	0	0	0	0	0	0	0	200	903	0	0	0	0	0	0	0	603	903	0
439	0	-0.458635	2.26365	11.412	944.551	-37.3445	-206.911	200	300	0	0	0	0	0	0	0	200	903	0	0	0	0	0	0	0	603	903	0
439	1	0.914656	1.6533	10.4965	212.129	-220.45	113.524	200	300	0	0	0	0	0	0	0	200	903	0	0	0	0	0	0	0	603	903	0
439	2	1.06724	1.19554	10.8017	303.682	84.7258	342.406	200	300	0	0	0	0	0	0	0	200	903	0	0	0	0	0	0	0	603	903	0
439	3	0	0	0	0	0	0	200	300	0	0	0	0	0	0	0	200	903	0	0	0	0	0	0	0	603	903	0
439	4	0.60948	1.6533	12.6327	486.787	-98.3797	-481.569	200	300	0	0	0	0	0	0	0	200	903	0	0	0	0	0	0	0	603	903	0
439	5	-0.306047	1.19554	10.1913	212.129	-220.45	-390.016	200	300	0	0	0	0	0	0	0	200	903	0	0	0	0	0	0	0	603	903	0
439	6	0.60948	2.26365	11.7172	578.34	-37.3445	-206.911	200	300	0	0	0	0	0	0	0	200	903	0	0	0	0	0	0	0	603	903	0
439	7	0.456892	1.19554	11.1068	486.787	84.7258	-344.24	200	300	0	0	0	0	0	0	0	200	903	0	0	0	0	0	0	0	603	903	0
439	8	0.456892	2.11106	12.0224	578.34	-647.696	21.9711	200	300	0	0	0	0	0	0	0	200	903	0	0	0	0	0	0	0	603	903	0
439	9	0.304304	1.04295	11.7172	761.445	-403.556	-252.687	200	300	0	0	0	0	0	0	0	200	903	0	0	0	0	0	0	0	603	903	0
440	0	0.456892	1.19554	10.1913	303.682	-281.485	-252.687	200	300	0	1.37039	-1.03683	-21.6773	-7589.82	284.131	-129.866	213.107	1253.13	0	0	0	0	0	0	0	603	903	0
440	1	1.06724	3.02659	10.8017	944.551	-281.485	-344.24	200	300	0	6.86356	-2.41012	-37.5465	-11618.1	345.166	-1640.49	209.193	1212.43	0	0	0	0	0	0	0	603	903	0
440	2	0	0	0	0	0	0	200	300	0	11.136	-2.7153	-47.9224	-15646.5	284.131	-2830.67	205.929	1229.5	0	0	0	0	0	0	0	603	903	0
440	3	0	0	0	0	0	0	200	300	0	12.3567	-5.30929	-58.6036	-19125.5	345.166	-3791.98	205.89	1229.35	0	0	0	0	0	0	0	603	903	0
440	4	-0.000871718	1.19554	10.4965	578.34	-342.52	-206.911	200	300	0	13.8826	-7.14035	-69.8951	-21872	589.306	-4249.74	208.431	1215.93	0	0	0	0	0	0	0	603	903	0
440	5	-0.611223	1.80589	10.4965	303.682	-159.415	-23.8053	200	300	0	19.5284	-6.53	-82.4073	-25351	833.447	-4753.28	210.114	1210.63	0	0	0	0	0	0	0	603	903	0
440	6	0	0	0	0	0	0	200	300	0	23.343	-6.53	-93.0885	-28921.6	406.201	-5348.37	204.364	1213.69	0	0	0	0	0	0	0	603	903	0
440	7	0.914656	2.26365	10.1913	944.551	-281.485	-252.687	200	300	0	22.2749	-8.9714	-101.939	-32309.1	223.095	-5668.81	202.189	1219.95	0	0	0	0	0	0	0	603	903	0
440	8	0.456892	2.41624	10.4965	852.998	-98.3797	-298.464	200	300	0	23.6482	-9.42917	-110.789	-34781	345.166	-6401.23	203.116	1216.94	0	0	0	0	0	0	0	603	903	0
440	9	0.151716	1.80589	9.88614	578.34	-98.3797	-344.24	200	300	0	26.2422	-12.6335	-117.503	-36428.9	284.131	-6584.34	202.418	1213.03	0	0	0	0	0	0	0	603	903	0
441	0	0	0	0	0	0	0	200	300	0	27.0052	-15.5327	-130.32	-39175.5	467.236	-7225.21	203.585	1203.61	0	0	0	0	0	0	0	603	903	0
441	1	-0.15346	2.56883	10.1913	29.0235	-464.591	21.9711	200	300	0	27.9207	-18.5844	-139.17	-43661.6	162.06	-7179.43	201.164	1216.73	0	0	0	0	0	0	0	603	903	0
441	2	0.304304	1.80589	12.6327	486.787	-403.556	-206.911	200	300	0	28.0733	-22.094	-149.851	-46408.2	528.271	-7499.86	203.525	1212.7	0	0	0	0	0	0	0	603	903	0
441	3	0	0	0	0	0	0	200	300	0	31.2776	-24.5354	-160.837	-49521	589.306	-7637.19	203.664	1210.89	0	0	0	0	0	0	0	603	903	0
441	4	0	0	0	0	0	0	200	300	0	33.1087	-26.6716	-172.129	-52084.4	406.201	-8506.94	202.36	1205.59	0	0	0	0	0	0	0	603	903	0
441	5	0	0	0	0	0	0	200	300	0	34.6346	-29.5708	-181.895	-54831	345.166	-8644.27	201.898	1204.44	0	0	0	0	0	0	0	603	903	0
441	6	1.06724	2.874	13.2431	486.787	23.6906	-115.358	200	300	0	36.7708	-32.0122	-193.186	-59134	772.412	-9422.47	203.998	1209.1	0	0	0	0	0	0	0	603	903	0
441	7	0	0	0	0	0	0	200	300	0	39.2122	-32.9277	-205.393	-61972.2	345.166	-10200.7	201.681	1204.72	0	0	0	0	0	0	0	603	903	0
441	8	1.06724	1.95848	12.0224	486.787	-281.485	-206.911	200	300	0	42.2639	-34.9113	-216.99	-64261	772.412	-10566.9	203.56	1199.15	0	0	0	0	0	0	0	603	903	0
441	9	-0.458635	1.34812	10.1913	395.235	-159.415	-252.687	200	300	0	44.5528	-37.5053	-227.061	-68380.8	650.341	-10978.9	202.864	1204.16	0	0	0	0	0	0	0	603	903	0
442	0	0.914656	1.95848	10.1913	395.235	-464.591	-206.911	200	300	0	49.283	-39.9467	-238.047	-71585.2	650.341	-11802.8	202.732	1203.72	0	0	0	0	0	0	0	603	903	0
442	1	0.762068	2.56883	10.8017	669.893	-37.3445	-298.464	200	300	0	49.1304	-41.9304	-248.728	-74698	345.166	-12718.4	201.388	1203.32	0	0	0	0	0	0	0	603	903	0
442	2	1.6776	0.737772	10.4965	212.129	-98.3797	-161.134	200	300	0	51.114	-45.5925	-262.156	-77627.7	711.377	-12993	202.714	1199.11	0	0	0	0	0	0	0	603	903	0
442	3	0	0	0	0	0	0	200	300	0	52.6399	-48.4917	-271.006	-80557.4	589.306	-13221.9	202.175	1200.25	0	0	0	0	0	0	0	603	903	0
442	4	0	0	0	0	0	0	200	300	0	53.8606	-51.696	-282.908	-83578.6	650.341	-13542.3	202.299	1198.43	0	0	0	0	0	0	0	603	903	0
442	5	0	0	0	0	0	0	200	300	0	55.9969	-52.9167	-293.284	-86416.8	833.447	-13908.6	202.842	1197.65	0	0	0	0	0	0	0	603	903	0
442	6	-0.000871718	1.80589	10.8017	669.893	-464.591	-206.911	200	300	0	58.1331	-54.7478	-304.575	-90353.5	772.412	-14274.8	202.536	1199.65	0	0	0	0	0	0	0	603	903	0
442	7	-0.458635	2.56883	11.1068	303.682	-37.3445	-206.911	200	300	0	58.7434	-54.5952	-315.867	-93557.8	223.095	-14869.9	200.706	1199.19	0	0	0	0	0	0	0	603	903	0
442	8	0.914656	2.874	11.412	761.445	-159.415	-161.134	200	300	0	59.0486	-56.1211	-328.684	-96304.5	589.306	-14778.3	201.793	1196	0	0	0	0	0	0	0	603	903	0
442	9	1.37242	1.34812	11.1068	852.998	-281.485	67.7474	200	300	0	61.6426	-57.4944	-339.365	-99966.6	406.201	-15419.2	201.197	1197.57	0	0	0	0	0	0	0	603	903	0
443	0	0	0	0	0	0	0	200	300	0	61.6426	-59.9358	-350.352	-102988	467.236	-15693.8	201.334	1196.96	0	0	0	0	0	0	0	603	903	0
443	1	1.21983	2.41624	11.1068	29.0235	-281.485	-115.358	200	300	0	61.3374	-61.6142	-361.033	-106558	345.166	-15556.5	200.956	1198.15	0	0	0	0	0	0	0	603	903	0
443	2	0	0	0	0	0	0	200	300	0	61.0323	-64.666	-372.019	-109030	223.095	-15144.5	200.6	1196.08	0	0	0	0	0	0	0	603	903	0
443	3	-0.458635	2.41624	11.412	761.445	-220.45	-206.911	200	300	0	61.0323	-66.1919	-383.311	-110953	39.9899	-15053	200.104	1192.46	0	0	0	0	0	0	0	603	903	0
443	4	-0.15346	1.80589	11.1068	1310.76	23.6906	-252.687	200	300	0	60.2693	-67.7177	-393.687	-114523	-509.327	-14412.1	198.706	1193.9	0	0	0	0	0	0	0	603	903	0
443	5	0.304304	1.80589	13.2431	852.998	-159.415	-298.464	200	300	0	58.896	-69.5488	-405.588	-117819	-21.0453	-14183.2	199.948	1193.49	0	0	0	0	0	0	0	603	903	0
443	6	0.762068	1.6533	11.412	29.0235	145.761	-161.134	200	300	0	56.9124	-72.6006	-416.27	-120566	-692.432	-13771.2	198.337	1192.63	0	0	0	0	0	0	0	603	903	0
443	7	0.60948	2.11106	11.7172	29.0235	-281.485	-161.134	200	300	0	55.3865	-74.5842	-426.035	-122855	-204.151	-13633.9	199.521	1191.37	0	0	0	0	0	0	0	603	903	0
443	8	0.456892	1.95848	10.1913	-245.635	-281.485	-206.911	200	300	0	54.471	-74.4316	-436.411	-125876	-509.327	-12993	198.833	1191.43	0	0	0	0	0	0	0	603	903	0
443	9	1.98277	3.48435	11.7172	761.445	-220.45	-252.687	200	300	0	53.5555	-75.3471	-443.735	-129080	-875.538	-12809.9	198.027	1193.89	0	0	0	0	0	0	0	603	903	0
444	0	0	0	0	0	0	0	200	300	0	50.5037	-75.8049	-454.111	-130728	-1607.96	-12397.9	196.459	1190.88	0	0	0	0	0	0	0	603	903	0
444	1	0.456892	1.34812	12.0224	486.787	-708.731	-252.687	200	300	0	48.3675	-77.7885	-465.403	-133933	-1180.71	-11940.2	197.463	1190.78	0	0	0	0	0	0	0	603	903	0
444	2	0.304304	2.26365	11.7172	669.893	206.796	-115.358	200	300	0	47.1468	-79.7722	-472.727	-135581	-1241.75	-11757.1	197.373	1189.81	0	0	0	0	0	0	0	603	903	0
444	3	0.151716	2.874	12.0224	486.787	267.831	21.9711	200	300	0	46.3838	-80.9929	-479.746	-137778	-1913.14	-11116.2	196.012	1190.19	0	0	0	0	0	0	0	603	903	0
444	4	0.914656	2.26365	10.8017	761.445	-403.556	-161.134	200	300	0	43.6372	-82.5188	-487.986	-140799	-1546.92	-10475.3	196.83	1191.53	0	0	0	0	0	0	0	603	903	0
444	5	0	0	0	0	0	0	200	300	0	41.1958	-82.6714	-493.784	-142630	-1974.17	-9926.01	196.002	1191.85	0	0	0	0	0	0	0	603	903	0
444	6	0	0	0	0	0	0	200	300	0	39.9751	-83.1291	-502.94	-143729	-2218.31	-9514.02	195.589	1188.78	0	0	0	0	0	0	0	603	903	0
444	7	-0.15346	2.72141	11.1068	761.445	-342.52	-298.464	200	300	0	38.907	-84.5024	-510.874	-144553	-2523.49	-9010.48	195.06	1185.95	0	0	0	0	0	0	0	603	903	0
444	8	-0.000871718	0.737772	10.4965	669.893	84.7258	-161.134	200	300	0	37.5337	-85.2654	-516.062	-147025	-2889.7	-9193.59	194.4	1187.9	0	0	0	0	0	0	0	603	903	0
444	9	1.98277	2.26365	10.8017	578.34	-37.3445	-161.134	200	300	0	35.2449	-84.655	-522.776	-149313	-2950.73	-8415.39	194.356	1188.62	0	0	0	0	0	0	0	603	903	0
445	0	-0.15346	1.80589	12.6327	578.34	-98.3797	-435.793	200	300	0	34.3294	-86.6386	-527.659	-150961	-2767.63	-8278.06	194.755	1189.1	0	0	0	0	0	0	0	603	903	0
445	1	1.06724	1.95848	10.8017	212.129	-342.52	-298.464	200	300	0	34.482	-86.7912	-534.373	-151877	-2828.66	-8094.96	194.707	1187.22	0	0	0	0	0	0	0	603	903	0
445	2	0.60948	1.80589	9.88614	852.998	-281.485	-161.134	200	300	0	35.7027	-86.4861	-540.171	-153433	-3255.91	-7957.63	193.972	1187.05	0	0	0	0	0	0	0	603	903	0
445	3	0	0	0	0	0	0	200	300	0	33.4138	-88.3171	-547.19	-155356	-3683.16	-7499.86	193.269	1186.92	0	0	0	0	0	0	0	603	903	0
445	4	1.37242	2.56883	9.88614	852.998	389.902	-390.016	200	300	0	32.0406	-89.6904	-552.073	-156455	-3316.94	-7545.64	193.992	1186.39	0	0	0	0	0	0	0	603	903	0
445	5	0.151716	1.80589	10.1913	669.893	84.7258	-69.5817	200	300	0	30.3621	-90.7585	-555.125	-157279	-3439.02	-6996.32	193.805	1186.32	0	0	0	0	0	0	0	603	903	0
445	6	0	0	0	0	0	0	200	300	0	30.9724	-93.0473	-561.533	-158469	-3744.19	-6675.89	193.332	1185.21	0	0	0	0	0	0	0	603	903	0
445	7	0.456892	2.26365	10.4965	852.998	-647.696	67.7474	200	300	0	30.2095	-93.0473	-565.806	-160025	-3927.3	-6492.78	193.059	1185.83	0	0	0	0	0	0	0	603	903	0
445	8	-0.15346	2.11106	10.1913	212.129	23.6906	-206.911	200	300	0	29.4466	-94.268	-570.689	-161398	-3683.16	-6309.68	193.546	1185.81	0	0	0	0	0	0	0	603	903	0
445	9	0.456892	2.72141	11.412	669.893	-464.591	-390.016	200	300	0	28.2259	-94.4206	-575.571	-160575	-4476.61	-5897.69	192.222	1181.98	0	0	0	0	0	0	0	603	903	0
446	0	0.762068	1.34812	11.412	852.998	-281.485	-344.24	200	300	0	28.3784	-97.7776	-581.675	-162314	-4232.47	-5485.7	192.724	1182.05	0	0	0	0	0	0	0	603	903	0
446	1	0	0	0	0	0	0	200	300	0	27.1577	-98.2353	-584.727	-164328	-4232.47	-5668.81	192.762	1184.03	0	0	0	0	0	0	0	603	903	0
446	2	1.52501	0.89036	10.1913	212.129	-159.415	-161.134	200	300	0	25.3267	-100.524	-589.304	-166068	-4476.61	-5348.37	192.404	1184.8	0	0	0	0	0	0	0	603	903	0
446	3	0	0	0	0	0	0	200	300	0	24.106	-100.677	-595.408	-167349	-5086.96	-5027.94	191.456	1184.07	0	0	0	0	0	0	0	603	903	0
446	4	0	0	0	0	0	0	200	300	0	24.106	-102.203	-599.375	-167807	-4476.61	-4432.85	192.531	1182.97	0	0	0	0	0	0	0	603	903	0
446	5	-0.611223	1.34812	10.8017	1127.66	-403.556	-481.569	200	300	0	24.106	-103.881	-606.089	-168723	-5270.07	-3929.31	191.305	1181.38	0	0	0	0	0	0	0	603	903	0
446	6	-0.15346	0.280009	14.1586	852.998	-403.556	159.3	200	300	0	21.0542	-106.017	-610.667	-170187	-5636.28	-3563.09	190.77	1181.69	0	0	0	0	0	0	0	603	903	0
446	7	1.21983	1.34812	12.3275	395.235	-220.45	-390.016	200	300	0	19.6809	-107.391	-615.244	-171744	-5697.32	-3334.21	190.74	1182.15	0	0	0	0	0	0	0	603	903	0
446	8	2.59312	2.26365	11.412	-62.5292	-159.415	-252.687	200	300	0	16.6292	-107.238	-615.549	-171927	-5880.42	-2556.01	190.447	1182.31	0	0	0	0	0	0	0	603	903	0
446	9	0	0	0	0	0	0	200	300	0	15.8662	-110.29	-623.484	-173117	-6246.63	-2281.36	189.981	1180.66	0	0	0	0	0	0	0	603	903	0
447	0	-0.15346	1.19554	10.1913	1036.1	-281.485	-298.464	200	300	0	14.3404	-111.663	-629.893	-174216	-6307.67	-1640.49	189.986	1179.58	0	0	0	0	0	0	0	603	903	0
447	1	0	0	0	0	0	0	200	300	0	11.136	-112.731	-635.081	-175772	-6856.98	-816.512	189.203	1179.77	0	0	0	0	0	0	0	603	903	0
447	2	1.6776	1.95848	11.1068	486.787	23.6906	-252.687	200	300	0	11.5938	-113.799	-639.963	-176779	-7345.27	-633.406	188.522	1179.23	0	0	0	0	0	0	0	603	903	0
447	3	0.151716	2.72141	10.8017	486.787	-37.3445	-252.687	200	300	0	7.32132	-114.104	-643.626	-177329	-7223.2	-38.3134	188.777	1178.52	0	0	0	0	0	0	0	603	903	0
447	4	1.06724	2.56883	11.1068	-62.5292	-220.45	-390.016	200	300	0	6.10062	-114.562	-647.593	-177237	-7406.3	602.556	188.563	1176.69	0	0	0	0	0	0	0	603	903	0
447	5	1.06724	0.280009	10.8017	852.998	-281.485	-206.911	200	300	0	2.74368	-114.867	-653.391	-179434	-7467.34	1060.32	188.571	1177.62	0	0	0	0	0	0	0	603	903	0
447	6	0	0	0	0	0	0	200	300	0	0.302276	-116.698	-658.274	-180716	-8016.65	1838.52	187.822	1177.53	0	0	0	0	0	0	0	603	903	0
447	7	0.60948	1.50071	10.8017	120.576	-525.626	-344.24	200	300	0	-2.29172	-117.919	-662.852	-182456	-8077.69	2570.94	187.814	1178.26	0	0	0	0	0	0	0	603	903	0
447	8	0	0	0	0	0	0	200	300	0	-4.73312	-118.072	-668.65	-182822	-8627.01	3074.48	187.098	1176.42	0	0	0	0	0	0	0	603	903	0
447	9	1.06724	1.04295	11.7172	120.576	-220.45	-481.569	200	300	0	-7.02194	-117.156	-672.007	-183554	-9176.32	3623.8	186.345	1176.14	0	0	0	0	0	0	0	603	903	0
448	0	0.151716	2.26365	12.3275	944.551	-342.52	-252.687	200	300	0	-10.6841	-118.377	-679.941	-185111	-9664.61	4310.44	185.786	1175.24	0	0	0	0	0	0	0	603	903	0
448	1	1.83018	1.19554	11.412	852.998	-98.3797	-298.464	200	300	0	-11.9048	-119.598	-687.266	-186667	-9481.5	4951.31	186.204	1174.61	0	0	0	0	0	0	0	603	903	0
448	2	0.762068	1.34812	13.5482	212.129	84.7258	-298.464	200	300	0	-17.3979	-120.818	-690.317	-188681	-9908.75	5866.84	185.646	1176.33	0	0	0	0	0	0	0	603	903	0
448	3	0	0	0	0	0	0	200	300	0	-20.9074	-121.429	-698.252	-189047	-10091.9	6873.92	185.547	1173.74	0	0	0	0	0	0	0	603	903	0
448	4	1.21983	0.585184	11.7172	212.129	145.761	-435.793	200	300	0	-22.8911	-122.955	-702.524	-189963	-10336	7514.79	185.287	1173.4	0	0	0	0	0	0	0	603	903	0
448	5	0	0	0	0	0	0	200	300	0	-25.1799	-123.412	-708.323	-191519	-11068.4	7926.78	184.374	1173.38	0	0	0	0	0	0	0	603	903	0
448	6	0.762068	1.80589	9.88614	852.998	-98.3797	-344.24	200	300	0	-28.842	-122.497	-711.68	-192252	-11495.7	8201.44	183.847	1173.14	0	0	0	0	0	0	0	603	903	0
448	7	0.914656	1.34812	11.412	303.682	-281.485	-161.134	200	300	0	-28.5368	-124.786	-719.309	-193259	-11556.7	9116.96	183.934	1171.67	0	0	0	0	0	0	0	603	903	0
448	8	0.456892	2.11106	10.4965	669.893	-37.3445	-298.464	200	300	0	-32.3515	-126.922	-723.276	-193991	-11556.7	9483.17	184.022	1171.21	0	0	0	0	0	0	0	603	903	0
448	9	0.456892	0.432597	10.8017	486.787	-281.485	-115.358	200	300	0	-33.7248	-127.837	-729.075	-194724	-11922.9	9986.71	183.647	1170.08	0	0	0	0	0	0	0	603	903	0
449	0	0.762068	1.95848	10.8017	944.551	-464.591	388.182	200	300	0	-34.3352	-128.6	-731.821	-196738	-12228.1	10352.9	183.291	1171.83	0	0	0	0	0	0	0	603	903	0
449	1	0	0	0	0	0	0	200	300	0	-35.7085	-128.6	-735.789	-197104	-12350.2	10810.7	183.215	1170.88	0	0	0	0	0	0	0	603	903	0
449	2	0	0	0	0	0	0	200	300	0	-35.2507	-127.837	-741.892	-198203	-12899.5	10856.5	182.613	1170.16	0	0	0	0	0	0	0	603	903	0
449	3	0.151716	1.95848	10.4965	852.998	-220.45	-344.24	200	300	0	-37.3869	-128.753	-745.859	-198294	-13143.6	10993.8	182.378	1168.86	0	0	0	0	0	0	0	603	903	0
449	4	-0.15346	-0.0251671	13.2431	212.129	23.6906	-69.5817	200	300	0	-37.3869	-130.584	-750.437	-199393	-12655.3	10764.9	183.136	1168.7	0	0	0	0	0	0	0	603	903	0
449	5	0.304304	2.11106	10.1913	1036.1	23.6906	21.9711	200	300	0	-37.6921	-130.431	-753.184	-200858	-13265.7	11405.8	182.387	1169.68	0	0	0	0	0	0	0	603	903	0
449	6	1.98277	1.19554	9.88614	669.893	-342.52	-298.464	200	300	0	-39.0654	-129.974	-757.151	-202231	-13326.7	11039.6	182.399	1170.09	0	0	0	0	0	0	0	603	903	0
449	7	0.60948	1.6533	10.1913	669.893	-159.415	-161.134	200	300	0	-38.9128	-128.905	-762.949	-203238	-13265.7	11680.4	182.613	1169.38	0	0	0	0	0	0	0	603	903	0
449	8	0.304304	1.95848	10.4965	212.129	145.761	-69.5817	200	300	0	-37.9973	-128.905	-768.748	-203513	-13998.1	11451.6	181.791	1167.73	0	0	0	0	0	0	0	603	903	0
449	9	0	0	0	0	0	0	200	300	0	-37.6921	-128.295	-773.02	-203879	-13692.9	11314.2	182.286	1166.74	0	0	0	0	0	0	0	603	903	0
450	0	0.762068	2.41624	10.1913	761.445	-159.415	-298.464	200	300	0	-37.5395	-125.091	-776.682	-205527	-13754	11222.7	182.291	1167.62	0	0	0	0	0	0	0	603	903	0
450	1	0	0	0	0	0	0	200	300	0	-38.1499	-127.99	-780.039	-207083	-13692.9	11497.3	182.446	1168.48	0	0	0	0	0	0	0	603	903	0
450	2	-0.458635	-0.635519	10.4965	303.682	-403.556	-161.134	200	300	0	-37.8447	-127.38	-786.143	-207358	-13998.1	11176.9	182.194	1166.77	0	0	0	0	0	0	0	603	903	0
450	3	-0.458635	1.6533	12.3275	578.34	-220.45	-344.24	200	300	0	-35.8611	-126.311	-793.772	-207999	-13937.1	11131.1	182.442	1165.04	0	0	0	0	0	0	0	603	903	0
450	4	1.06724	2.874	11.1068	852.998	-37.3445	-298.464	200	300	0	-35.2507	-126.159	-796.824	-209647	-14181.2	11085.3	182.203	1166.1	0	0	0	0	0	0	0	603	903	0
450	5	2.44053	2.72141	11.1068	1310.76	-98.3797	-344.24	200	300	0	-35.7085	-126.311	-802.012	-211295	-14425.3	10627.6	182.014	1166.46	0	0	0	0	0	0	0	603	903	0
450	6	1.21983	2.874	11.1068	578.34	-281.485	67.7474	200	300	0	-33.4196	-125.549	-804.758	-212302	-14364.3	10627.6	182.151	1166.81	0	0	0	0	0	0	0	603	903	0
450	7	-0.000871718	1.50071	11.412	578.34	-220.45	-69.5817	200	300	0	-34.9455	-124.175	-811.472	-212576	-14120.2	10490.3	182.599	1164.96	0	0	0	0	0	0	0	603	903	0
450	8	0	0	0	0	0	0	200	300	0	-33.5722	-124.023	-813.608	-213950	-14425.3	10581.8	182.27	1165.96	0	0	0	0	0	0	0	603	903	0
450	9	0	0	0	0	0	0	200	300	0	-32.9619	-123.87	-820.933	-215231	-14425.3	10444.5	182.428	1165.18	0	0	0	0	0	0	0	603	903	0
451	0	-0.611223	0.280009	10.8017	486.787	-220.45	-344.24	200	300	0	-32.8093	-124.328	-824.9	-216513	-14730.5	10215.6	182.143	1165.47	0	0	0	0	0	0	0	603	903	0
451	1	0.304304	2.72141	12.3275	852.998	-342.52	-252.687	200	300	0	-32.8093	-122.955	-828.867	-217429	-14730.5	9940.94	182.228	1165.32	0	0	0	0	0	0	0	603	903	0
451	2	1.37242	1.95848	12.6327	578.34	23.6906	-390.016	200	300	0	-32.3515	-123.717	-831.919	-217429	-14913.6	9528.95	182.073	1164.36	0	0	0	0	0	0	0	603	903	0
451	3	3.05089	1.6533	10.4965	1219.21	23.6906	-206.911	200	300	0	-31.2834	-121.429	-837.107	-218985	-14669.5	9162.74	182.476	1164.6	0	0	0	0	0	0	0	603	903	0
451	4	0	0	0	0	0	0	200	300	0	-30.6731	-121.276	-841.074	-219809	-14913.6	9162.74	182.268	1164.34	0	0	0	0	0	0	0	603	903	0
451	5	2.44053	2.56883	12.9379	212.129	-220.45	-298.464	200	300	0	-30.0627	-121.276	-845.042	-221182	-14669.5	9254.29	182.641	1164.74	0	0	0	0	0	0	0	603	903	0
451	6	0	0	0	0	0	0	200	300	0	-30.0627	-120.971	-849.924	-221732	-14669.5	9437.4	182.74	1163.88	0	0	0	0	0	0	0	603	903	0
451	7	1.37242	1.95848	10.1913	944.551	-281.485	-161.134	200	300	0	-29.9101	-119.445	-852.671	-222098	-14669.5	8659.2	182.796	1163.47	0	0	0	0	0	0	0	603	903	0
451	8	-0.000871718	2.41624	9.88614	578.34	206.796	-298.464	200	300	0	-28.5368	-117.614	-850.535	-222464	-15157.8	8659.2	182.179	1164.56	0	0	0	0	0	0	0	603	903	0
451	9	0.60948	2.26365	13.5482	486.787	84.7258	-573.122	200	300	0	-27.1635	-117.461	-858.164	-222281	-14974.7	8476.09	182.55	1162.02	0	0	0	0	0	0	0	603	903	0
452	0	1.21983	2.56883	11.1068	29.0235	-159.415	-161.134	200	300	0	-28.2317	-116.241	-862.131	-223929	-14486.4	8155.66	183.197	1162.74	0	0	0	0	0	0	0	603	903	0
452	1	3.05089	2.26365	10.4965	29.0235	-98.3797	-69.5817	200	300	0	-28.3842	-116.393	-861.826	-225028	-14913.6	7926.78	182.695	1164.11	0	0	0	0	0	0	0	603	903	0
452	2	0.304304	2.26365	10.1913	669.893	-159.415	-115.358	200	300	0	-27.1635	-115.63	-867.93	-225211	-15035.7	7697.9	182.676	1162.48	0	0	0	0	0	0	0	603	903	0
452	3	0.762068	1.95848	12.0224	1036.1	-342.52	-206.911	200	300	0	-23.8066	-115.02	-868.845	-225943	-14913.6	7606.34	182.835	1163.05	0	0	0	0	0	0	0	603	903	0
452	4	0	0	0	0	0	0	200	300	0	-23.3488	-112.121	-868.54	-226401	-14913.6	7285.91	182.829	1163.67	0	0	0	0	0	0	0	603	903	0
452	5	2.44053	2.26365	12.3275	944.551	23.6906	-481.569	200	300	0	-24.1118	-112.426	-871.897	-226767	-15218.8	6965.47	182.545	1163.08	0	0	0	0	0	0	0	603	903	0
452	6	-0.458635	0.89036	11.1068	120.576	-464.591	-344.24	200	300	0	-23.0437	-110.748	-874.949	-227408	-14425.3	7148.58	183.513	1162.91	0	0	0	0	0	0	0	603	903	0
452	7	0.914656	1.80589	10.1913	578.34	-159.415	-69.5817	200	300	0	-21.6704	-110.748	-875.864	-226584	-14608.5	6690.81	183.321	1161.7	0	0	0	0	0	0	0	603	903	0
452	8	0	0	0	0	0	0	200	300	0	-19.8393	-110.29	-877.085	-227133	-15035.7	6507.71	182.857	1161.96	0	0	0	0	0	0	0	603	903	0
452	9	0.762068	1.34812	10.4965	761.445	84.7258	-252.687	200	300	0	-18.466	-109.069	-877.085	-227957	-14852.6	6370.38	183.066	1162.9	0	0	0	0	0	0	0	603	903	0
453	0	0	0	0	0	0	0	200	300	0	-19.3816	-106.933	-877.695	-227957	-14669.5	6507.71	183.286	1162.72	0	0	0	0	0	0	0	603	903	0
453	1	1.6776	2.874	10.4965	578.34	84.7258	-161.134	200	300	0	-18.7712	-106.17	-880.137	-227225	-14730.5	6004.17	183.263	1161.17	0	0	0	0	0	0	0	603	903	0
453	2	0.304304	2.72141	9.88614	852.998	84.7258	-69.5817	200	300	0	-17.0927	-104.949	-879.832	-227591	-14852.6	5500.63	183.119	1161.68	0	0	0	0	0	0	0	603	903	0
453	3	1.6776	2.11106	10.8017	761.445	-525.626	-69.5817	200	300	0	-15.5669	-104.797	-880.137	-226492	-14425.3	5271.75	183.61	1160.34	0	0	0	0	0	0	0	603	903	0
453	4	0.304304	1.6533	11.412	1127.66	-37.3445	-252.687	200	300	0	-16.0246	-102.813	-882.883	-227957	-14425.3	5088.64	183.661	1161.2	0	0	0	0	0	0	0	603	903	0
453	5	-0.000871718	0.89036	10.4965	303.682	-220.45	-206.911	200	300	0	-12.8203	-102.966	-879.832	-227774	-14486.4	5317.52	183.535	1161.88	0	0	0	0	0	0	0	603	903	0
453	6	0	0	0	0	0	0	200	300	0	-13.8884	-100.829	-882.273	-227591	-14364.3	4905.53	183.719	1160.96	0	0	0	0	0	0	0	603	903	0
453	7	0.304304	3.33177	9.88614	944.551	206.796	-23.8053	200	300	0	-12.6677	-98.5405	-881.663	-227225	-14669.5	4905.53	183.362	1160.72	0	0	0	0	0	0	0	603	903	0
453	8	0.456892	2.41624	10.4965	761.445	-220.45	-161.134	200	300	0	-11.447	-98.5405	-882.578	-227408	-15096.7	4676.65	182.895	1160.66	0	0	0	0	0	0	0	603	903	0
453	9	0.60948	1.95848	9.88614	486.787	-37.3445	-23.8053	200	300	0	-12.8203	-98.3879	-882.578	-227133	-14364.3	4401.99	183.725	1160.35	0	0	0	0	0	0	0	603	903	0
454	0	0.151716	2.26365	9.88614	-245.635	-98.3797	-115.358	200	300	0	-12.3625	-96.0991	-880.747	-226676	-14425.3	4356.22	183.621	1160.37	0	0	0	0	0	0	0	603	903	0
454	1	1.06724	2.874	10.4965	852.998	23.6906	-23.8053	200	300	0	-10.5315	-96.862	-881.357	-226309	-14669.5	4264.67	183.356	1159.77	0	0	0	0	0	0	0	603	903	0
454	2	-0.306047	1.95848	9.88614	486.787	-403.556	-298.464	200	300	0	-9.61594	-94.7258	-880.747	-226492	-14730.5	4127.34	183.275	1160.16	0	0	0	0	0	0	0	603	903	0
454	3	1.52501	2.72141	10.1913	669.893	-98.3797	-435.793	200	300	0	-8.24265	-93.6577	-880.137	-226126	-14730.5	4081.56	183.263	1159.92	0	0	0	0	0	0	0	603	903	0
454	4	0.60948	2.26365	11.412	852.998	-342.52	-252.687	200	300	0	-9.76852	-93.3525	-880.442	-225760	-14730.5	4035.78	183.269	1159.42	0	0	0	0	0	0	0	603	903	0
454	5	2.74571	2.41624	10.8017	29.0235	-98.3797	-206.911	200	300	0	-10.8366	-92.5896	-875.559	-224753	-14547.4	3990.01	183.385	1159.7	0	0	0	0	0	0	0	603	903	0
454	6	1.83018	2.72141	10.1913	944.551	-159.415	21.9711	200	300	0	-9.31076	-91.674	-877.39	-224387	-14669.5	3852.68	183.281	1158.74	0	0	0	0	0	0	0	603	903	0
454	7	0.304304	1.6533	11.1068	486.787	23.6906	-344.24	200	300	0	-8.853	-91.3689	-874.949	-224020	-14486.4	3761.12	183.443	1159.04	0	0	0	0	0	0	0	603	903	0
454	8	0	0	0	0	0	0	200	300	0	-9.31076	-89.843	-872.813	-223654	-14120.2	3761.12	183.822	1159.25	0	0	0	0	0	0	0	603	903	0
454	9	1.21983	2.26365	10.4965	486.787	-464.591	-252.687	200	300	0	-8.853	-88.9275	-874.949	-223563	-14242.2	3806.9	183.722	1158.52	0	0	0	0	0	0	0	603	903	0
455	0	-0.000871718	2.11106	10.8017	761.445	-159.415	-390.016	200	300	0	-7.78488	-88.9275	-873.728	-222739	-14791.6	3944.23	183.071	1157.93	0	0	0	0	0	0	0	603	903	0
455	1	1.6776	2.874	10.4965	852.998	23.6906	-252.687	200	300	0	-5.95383	-87.249	-872.507	-222190	-14791.6	3440.69	183.047	1157.66	0	0	0	0	0	0	0	603	903	0
455	2	1.52501	1.19554	11.412	486.787	-586.661	159.3	200	300	0	-7.47971	-87.7068	-870.371	-221640	-14608.5	3532.24	183.216	1157.65	0	0	0	0	0	0	0	603	903	0
455	3	1.52501	2.874	9.58096	395.235	-281.485	-161.134	200	300	0	-8.70041	-86.9438	-870.066	-221366	-13998.1	3486.47	183.911	1157.42	0	0	0	0	0	0	0	603	903	0
455	4	0	0	0	0	0	0	200	300	0	-8.70041	-87.0964	-867.319	-220175	-14730.5	3578.02	183.016	1156.86	0	0	0	0	0	0	0	603	903	0
455	5	0	0	0	0	0	0	200	300	0	-7.02194	-84.9602	-866.709	-220175	-14425.3	3806.9	183.356	1157.04	0	0	0	0	0	0	0	603	903	0
455	6	0	0	0	0	0	0	200	300	0	-6.86935	-84.8076	-866.404	-219626	-14669.5	4493.55	183.069	1156.49	0	0	0	0	0	0	0	603	903	0
455	7	1.06724	2.874	11.1068	578.34	-403.556	-252.687	200	300	0	-8.39523	-82.8239	-865.183	-218619	-14913.6	3852.68	182.762	1155.69	0	0	0	0	0	0	0	603	903	0
455	8	0.456892	2.72141	11.1068	669.893	-342.52	-252.687	200	300	0	-8.24265	-84.0446	-864.268	-218070	-14669.5	4035.78	183.027	1155.32	0	0	0	0	0	0	0	603	903	0
455	9	1.06724	2.11106	11.7172	1127.66	-159.415	-206.911	200	300	0	-6.86935	-83.4343	-863.352	-217520	-14364.3	4035.78	183.362	1154.95	0	0	0	0	0	0	0	603	903	0
456	0	0.914656	1.34812	11.1068	669.893	-37.3445	205.077	200	300	0	-6.10642	-84.5024	-862.131	-216971	-14913.6	3944.23	182.701	1154.67	0	0	0	0	0	0	0	603	903	0
456	1	1.83018	1.95848	9.88614	395.235	-464.591	-161.134	200	300	0	-5.80124	-82.5188	-859.69	-216879	-15035.7	3852.68	182.51	1155.28	0	0	0	0	0	0	0	603	903	0
456	2	0	0	0	0	0	0	200	300	0	-6.71677	-82.061	-861.521	-215872	-14791.6	3898.45	182.831	1153.57	0	0	0	0	0	0	0	603	903	0
456	3	-0.458635	3.17918	11.412	1219.21	23.6906	-298.464	200	300	0	-7.32712	-82.061	-857.554	-214774	-14791.6	3990.01	182.751	1153.45	0	0	0	0	0	0	0	603	903	0
456	4	0	0	0	0	0	0	200	300	0	-7.02194	-82.061	-857.249	-213675	-15157.8	3990.01	182.318	1152.26	0	0	0	0	0	0	0	603	903	0
456	5	1.98277	2.11106	10.4965	852.998	-220.45	-161.134	200	300	0	-6.86935	-81.6032	-852.671	-213767	-14913.6	3898.45	182.51	1153.7	0	0	0	0	0	0	0	603	903	0
456	6	-0.000871718	1.95848	11.1068	303.682	-37.3445	-252.687	200	300	0	-7.93747	-80.8403	-850.535	-211844	-14608.5	3761.12	182.824	1152.07	0	0	0	0	0	0	0	603	903	0
456	7	0.304304	2.41624	10.4965	29.0235	206.796	-252.687	200	300	0	-7.78488	-80.8403	-849.619	-211569	-14913.6	4264.67	182.447	1152.02	0	0	0	0	0	0	0	603	903	0
456	8	0.762068	3.02659	10.1913	1402.32	-281.485	-298.464	200	300	0	-7.17453	-80.0774	-849.009	-210837	-14791.6	4447.77	182.578	1151.33	0	0	0	0	0	0	0	603	903	0
456	9	0.60948	2.56883	11.412	1036.1	-98.3797	433.958	200	300	0	-7.78488	-79.3144	-846.567	-209830	-14852.6	4356.22	182.456	1150.86	0	0	0	0	0	0	0	603	903	0
457	0	0	0	0	0	0	0	200	300	0	-9.15817	-77.0256	-843.516	-209189	-15524	3990.01	181.596	1151	0	0	0	0	0	0	0	603	903	0
457	1	1.06724	1.95848	10.1913	578.34	-403.556	-390.016	200	300	0	-6.86935	-77.1782	-839.243	-207999	-14913.6	4401.99	182.23	1150.84	0	0	0	0	0	0	0	603	903	0
457	2	0.304304	2.72141	9.88614	120.576	23.6906	-69.5817	200	300	0	-9.92111	-75.4997	-836.191	-206534	-14547.4	4356.22	182.603	1149.99	0	0	0	0	0	0	0	603	903	0
457	3	0	0	0	0	0	0	200	300	0	-9.76852	-74.4316	-834.055	-205435	-15218.8	4539.32	181.753	1149.31	0	0	0	0	0	0	0	603	903	0
457	4	1.6776	1.04295	9.88614	852.998	-98.3797	-252.687	200	300	0	-10.2263	-73.5161	-831.309	-204978	-15279.8	4813.98	181.62	1149.57	0	0	0	0	0	0	0	603	903	0
457	5	-0.15346	2.11106	10.4965	1219.21	-159.415	-206.911	200	300	0	-10.9892	-72.9057	-828.867	-204245	-14913.6	4951.31	182.007	1149.41	0	0	0	0	0	0	0	603	903	0
457	6	2.28795	2.41624	10.4965	395.235	-159.415	67.7474	200	300	0	-10.3789	-71.3799	-825.815	-202872	-15524	5225.97	181.202	1148.66	0	0	0	0	0	0	0	603	903	0
457	7	0.60948	3.02659	11.1068	852.998	-159.415	-344.24	200	300	0	-12.9729	-70.0066	-821.238	-201132	-15707.1	5225.97	180.874	1147.91	0	0	0	0	0	0	0	603	903	0
457	8	2.44053	2.56883	11.1068	303.682	-98.3797	-161.134	200	300	0	-12.3625	-69.5488	-819.102	-200217	-15279.8	5409.07	181.346	1147.43	0	0	0	0	0	0	0	603	903	0
457	9	0.914656	2.874	9.58096	669.893	-159.415	-23.8053	200	300	0	-12.8203	-68.7859	-816.355	-199576	-15768.1	5454.85	180.685	1147.47	0	0	0	0	0	0	0	603	903	0
458	0	0.914656	1.80589	11.1068	212.129	-342.52	-161.134	200	300	0	-14.3462	-69.091	-814.524	-198935	-15890.2	5958.39	180.491	1147.23	0	0	0	0	0	0	0	603	903	0
458	1	0	0	0	0	0	0	200	300	0	-14.3462	-69.3962	-811.472	-196646	-15462.9	6187.27	180.945	1145.33	0	0	0	0	0	0	0	603	903	0
458	2	0.304304	2.26365	10.4965	578.34	-403.556	-252.687	200	300	0	-14.1936	-69.5488	-807.2	-194907	-15585	6049.94	180.692	1144.46	0	0	0	0	0	0	0	603	903	0
458	3	0.304304	3.33177	11.1068	486.787	23.6906	-252.687	200	300	0	-14.9565	-67.8703	-802.927	-194174	-16561.6	6187.27	179.374	1144.83	0	0	0	0	0	0	0	603	903	0
458	4	0.762068	3.33177	12.3275	578.34	-37.3445	-252.687	200	300	0	-16.635	-68.1755	-799.57	-193442	-15890.2	6233.05	180.127	1144.93	0	0	0	0	0	0	0	603	903	0
458	5	1.06724	2.874	10.8017	395.235	23.6906	-298.464	200	300	0	-14.3462	-68.0229	-797.129	-192343	-15768.1	6324.6	180.219	1144.3	0	0	0	0	0	0	0	603	903	0
458	6	0	0	0	0	0	0	200	300	0	-18.466	-68.7859	-793.772	-190878	-16439.5	6553.48	179.289	1143.47	0	0	0	0	0	0	0	603	903	0
458	7	0	0	0	0	0	0	200	300	0	-17.5505	-69.2436	-787.669	-189597	-16073.3	6965.47	179.594	1143.71	0	0	0	0	0	0	0	603	903	0
458	8	0	0	0	0	0	0	200	300	0	-17.0927	-68.4807	-783.701	-189047	-16073.3	6873.92	179.491	1144.22	0	0	0	0	0	0	0	603	903	0
458	9	-0.000871718	3.33177	10.1913	29.0235	145.761	-252.687	200	300	0	-19.3816	-68.3281	-781.87	-186759	-16500.5	7148.58	178.896	1141.86	0	0	0	0	0	0	0	603	903	0
459	0	0.304304	3.17918	11.412	486.787	-159.415	-298.464	200	300	0	-20.1445	-67.1074	-779.734	-185843	-16195.4	7377.46	179.23	1141.34	0	0	0	0	0	0	0	603	903	0
459	1	-0.15346	2.41624	11.1068	669.893	-159.415	-206.911	200	300	0	-20.4497	-67.7177	-776.987	-184744	-15890.2	7469.01	179.549	1140.77	0	0	0	0	0	0	0	603	903	0
459	2	1.06724	1.80589	10.4965	669.893	-37.3445	-161.134	200	300	0	-18.7712	-68.4807	-771.799	-183646	-16256.4	7926.78	178.937	1140.94	0	0	0	0	0	0	0	603	903	0
459	3	0.762068	1.95848	10.4965	578.34	-220.45	-206.911	200	300	0	-21.6704	-67.1074	-767.527	-183096	-16683.6	7743.67	178.263	1141.55	0	0	0	0	0	0	0	603	903	0
459	4	0	0	0	0	0	0	200	300	0	-22.5859	-66.3445	-764.17	-181998	-16744.7	7972.55	178.088	1141.16	0	0	0	0	0	0	0	603	903	0
459	5	0	0	0	0	0	0	200	300	0	-23.0437	-65.4289	-762.339	-179892	-16561.6	8247.21	178.275	1138.97	0	0	0	0	0	0	0	603	903	0
459	6	0.304304	2.874	10.1913	669.893	-769.766	-115.358	200	300	0	-22.5859	-65.8867	-759.287	-178519	-16927.8	8018.33	177.706	1138.11	0	0	0	0	0	0	0	603	903	0
459	7	-0.15346	2.41624	9.88614	303.682	-98.3797	-206.911	200	300	0	-23.9592	-65.5815	-755.32	-177420	-16683.6	8201.44	177.912	1137.89	0	0	0	0	0	0	0	603	903	0
459	8	1.37242	2.72141	9.88614	944.551	-159.415	-23.8053	200	300	0	-25.1799	-65.2763	-750.132	-176962	-16744.7	8476.09	177.678	1138.91	0	0	0	0	0	0	0	603	903	0
459	9	0.304304	1.80589	11.1068	29.0235	-281.485	159.3	200	300	0	-24.1118	-64.8186	-747.08	-176230	-16927.8	8384.54	177.341	1138.89	0	0	0	0	0	0	0	603	903	0
460	0	0.151716	2.41624	10.8017	578.34	-586.661	-206.911	200	300	0	-25.6377	-63.903	-744.334	-174399	-17049.9	8796.53	177.094	1137.3	0	0	0	0	0	0	0	603	903	0
460	1	0.762068	0.89036	10.4965	395.235	-37.3445	-298.464	200	300	0	-25.6377	-63.4453	-742.503	-173575	-16866.7	8933.86	177.284	1136.77	0	0	0	0	0	0	0	603	903	0
460	2	2.13536	2.56883	10.4965	578.34	389.902	-344.24	200	300	0	-26.248	-62.8349	-733.958	-172476	-17049.9	9483.17	176.77	1137.99	0	0	0	0	0	0	0	603	903	0
460	3	1.37242	2.56883	9.58096	578.34	-98.3797	-252.687	200	300	0	-27.6213	-63.4453	-736.399	-170828	-17171.9	8979.63	176.681	1134.98	0	0	0	0	0	0	0	603	903	0
460	4	0.762068	1.95848	12.6327	212.129	-159.415	159.3	200	300	0	-26.4006	-62.072	-731.516	-170828	-16866.7	9025.41	176.943	1136.53	0	0	0	0	0	0	0	603	903	0
460	5	0	0	0	0	0	0	200	300	0	-28.0791	-61.4616	-728.464	-169180	-16744.7	9025.41	177.014	1135.24	0	0	0	0	0	0	0	603	903	0
460	6	-0.15346	2.11106	11.412	303.682	-159.415	-481.569	200	300	0	-27.3161	-61.0039	-726.328	-168448	-17294	9391.62	176.19	1134.92	0	0	0	0	0	0	0	603	903	0
460	7	-0.000871718	2.56883	11.1068	1036.1	-464.591	-206.911	200	300	0	-27.1635	-59.6306	-723.582	-168082	-17355	9208.52	176.015	1135.29	0	0	0	0	0	0	0	603	903	0
460	8	0.456892	2.26365	12.0224	852.998	84.7258	-298.464	200	300	0	-28.3842	-59.1728	-719.614	-165610	-17233	9208.52	176.053	1133.14	0	0	0	0	0	0	0	603	903	0
460	9	1.06724	2.41624	12.6327	669.893	23.6906	-390.016	200	300	0	-28.5368	-58.4099	-717.783	-165793	-17416.1	8933.86	175.736	1133.98	0	0	0	0	0	0	0	603	903	0
461	0	1.21983	2.26365	11.1068	486.787	-281.485	-252.687	200	300	0	-27.9265	-57.7995	-713.511	-164420	-16988.8	8933.86	176.19	1133.44	0	0	0	0	0	0	0	603	903	0
461	1	0	0	0	0	0	0	200	300	0	-26.4006	-56.7314	-711.375	-163596	-16988.8	8750.75	176.118	1132.97	0	0	0	0	0	0	0	603	903	0
461	2	0	0	0	0	0	0	200	300	0	-26.8584	-55.6633	-707.102	-163779	-16927.8	9116.96	176.06	1134.62	0	0	0	0	0	0	0	603	903	0
461	3	0	0	0	0	0	0	200	300	0	-27.9265	-54.7478	-706.797	-162680	-17294	9208.52	175.532	1133.17	0	0	0	0	0	0	0	603	903	0
461	4	-0.306047	1.80589	10.4965	852.998	-159.415	-344.24	200	300	0	-29.1472	-54.4426	-704.661	-161032	-17110.9	9116.96	175.718	1131.52	0	0	0	0	0	0	0	603	903	0
461	5	1.6776	2.56883	11.7172	212.129	-220.45	-115.358	200	300	0	-27.6213	-54.29	-704.356	-160025	-17233	9071.19	175.534	1130.19	0	0	0	0	0	0	0	603	903	0
461	6	0.456892	2.72141	11.412	395.235	-220.45	-161.134	200	300	0	-28.0791	-52.6115	-697.336	-159659	-17294	9116.96	175.2	1131.96	0	0	0	0	0	0	0	603	903	0
461	7	0.914656	3.17918	11.7172	29.0235	23.6906	67.7474	200	300	0	-28.3842	-51.696	-693.98	-158011	-17171.9	8979.63	175.256	1130.69	0	0	0	0	0	0	0	603	903	0
461	8	1.21983	1.95848	10.4965	486.787	23.6906	67.7474	200	300	0	-28.3842	-51.2382	-692.759	-158194	-17049.9	9116.96	175.388	1131.35	0	0	0	0	0	0	0	603	903	0
461	9	1.6776	2.11106	10.4965	578.34	-281.485	-298.464	200	300	0	-27.011	-49.5598	-691.538	-156729	-17599.2	9162.74	174.551	1129.64	0	0	0	0	0	0	0	603	903	0
462	0	0.60948	1.95848	9.88614	395.235	-342.52	-481.569	200	300	0	-25.1799	-50.3227	-688.486	-156088	-17171.9	9300.07	175.058	1129.71	0	0	0	0	0	0	0	603	903	0
462	1	0.151716	3.02659	12.0224	669.893	145.761	-252.687	200	300	0	-27.1635	-48.9494	-684.824	-155539	-17477.1	8933.86	174.479	1130.12	0	0	0	0	0	0	0	603	903	0
462	2	0.151716	2.56883	9.88614	578.34	84.7258	-252.687	200	300	0	-27.3161	-49.102	-681.773	-154990	-17599.2	8704.98	174.186	1130.33	0	0	0	0	0	0	0	603	903	0
462	3	1.52501	3.33177	10.8017	669.893	-220.45	-252.687	200	300	0	-28.0791	-47.4235	-678.721	-153616	-17355	8842.31	174.43	1129.33	0	0	0	0	0	0	0	603	903	0
462	4	-0.000871718	1.6533	10.8017	486.787	-220.45	-69.5817	200	300	0	-27.011	-46.9658	-678.416	-153250	-17355	8567.65	174.418	1128.89	0	0	0	0	0	0	0	603	903	0
462	5	0.762068	2.26365	9.88614	669.893	-586.661	-206.911	200	300	0	-26.248	-46.3554	-676.279	-152518	-17294	8796.53	174.428	1128.52	0	0	0	0	0	0	0	603	903	0
462	6	0.762068	1.95848	11.1068	486.787	-769.766	-298.464	200	300	0	-27.3161	-45.1347	-673.228	-152060	-17477.1	8521.87	174.04	1128.87	0	0	0	0	0	0	0	603	903	0
462	7	0.456892	2.874	9.88614	212.129	-37.3445	-344.24	200	300	0	-27.3161	-44.3718	-670.481	-150595	-17416.1	8476.09	174.025	1127.61	0	0	0	0	0	0	0	603	903	0
462	8	1.98277	2.72141	10.1913	852.998	-159.415	-23.8053	200	300	0	-26.248	-43.4563	-668.955	-149863	-17660.2	8659.2	173.6	1127.03	0	0	0	0	0	0	0	603	903	0
462	9	0	0	0	0	0	0	200	300	0	-26.248	-42.6933	-667.429	-149497	-16988.8	8247.21	174.546	1126.99	0	0	0	0	0	0	0	603	903	0
463	0	0	0	0	0	0	0	200	300	0	-26.7058	-42.6933	-664.072	-147391	-17049.9	8430.32	174.325	1124.95	0	0	0	0	0	0	0	603	903	0
463	1	0.914656	2.11106	11.1068	303.682	-220.45	-252.687	200	300	0	-26.5532	-41.7778	-662.852	-148581	-16988.8	8384.54	174.37	1127.15	0	0	0	0	0	0	0	603	903	0
463	2	-0.15346	2.56883	10.8017	395.235	-98.3797	-206.911	200	300	0	-25.1799	-41.0149	-659.19	-147666	-17416.1	8338.77	173.58	1127.01	0	0	0	0	0	0	0	603	903	0
463	3	-0.611223	2.41624	13.2431	669.893	-342.52	-390.016	200	300	0	-25.3325	-39.1838	-654.002	-146475	-17110.9	8247.21	173.837	1126.97	0	0	0	0	0	0	0	603	903	0
463	4	0.456892	2.11106	12.0224	761.445	-464.591	-298.464	200	300	0	-25.3325	-39.6416	-656.748	-146292	-17110.9	8338.77	173.946	1125.75	0	0	0	0	0	0	0	603	903	0
463	5	1.06724	3.17918	11.1068	669.893	84.7258	205.077	200	300	0	-25.1799	-38.5735	-654.307	-145651	-17660.2	7697.9	173.009	1125.6	0	0	0	0	0	0	0	603	903	0
463	6	0	0	0	0	0	0	200	300	0	-26.248	-38.2683	-652.476	-144644	-16866.7	7560.57	174.15	1124.69	0	0	0	0	0	0	0	603	903	0
463	7	0	0	0	0	0	0	200	300	0	-24.5695	-38.726	-650.645	-143912	-17110.9	7789.45	173.702	1124.18	0	0	0	0	0	0	0	603	903	0
463	8	0	0	0	0	0	0	200	300	0	-24.417	-37.8105	-646.372	-143546	-17171.9	7606.34	173.433	1125.08	0	0	0	0	0	0	0	603	903	0
463	9	0	0	0	0	0	0	200	300	0	-26.0954	-36.5898	-644.541	-142264	-17355	7606.34	173.074	1123.72	0	0	0	0	0	0	0	603	903	0
464	0	-0.000871718	2.72141	10.8017	852.998	-159.415	67.7474	200	300	0	-25.4851	-34.6062	-643.626	-141715	-17416.1	7560.57	172.941	1123.18	0	0	0	0	0	0	0	603	903	0
464	1	-0.15346	0.585184	11.1068	944.551	-98.3797	-206.911	200	300	0	-24.1118	-35.0639	-640.574	-141440	-17416.1	7606.34	172.812	1123.8	0	0	0	0	0	0	0	603	903	0
464	2	0.762068	2.56883	10.1913	-245.635	-159.415	-206.911	200	300	0	-24.7221	-34.6062	-639.963	-140433	-17477.1	7377.46	172.69	1122.44	0	0	0	0	0	0	0	603	903	0
464	3	1.06724	2.56883	10.8017	120.576	-281.485	-252.687	200	300	0	-25.3325	-34.301	-637.217	-140433	-16927.8	7331.68	173.435	1123.38	0	0	0	0	0	0	0	603	903	0
464	4	1.83018	3.33177	9.27579	761.445	-403.556	-252.687	200	300	0	-25.3325	-33.5381	-633.555	-139792	-16927.8	7560.57	173.281	1123.65	0	0	0	0	0	0	0	603	903	0
464	5	0.762068	2.41624	9.88614	669.893	-281.485	388.182	200	300	0	-24.5695	-33.0803	-632.029	-139060	-17538.1	7285.91	172.251	1123.02	0	0	0	0	0	0	0	603	903	0
464	6	0.914656	1.6533	11.7172	578.34	-342.52	205.077	200	300	0	-23.654	-31.5544	-632.334	-138419	-16866.7	7285.91	173.326	1121.9	0	0	0	0	0	0	0	603	903	0
464	7	-0.000871718	2.26365	10.8017	395.235	-342.52	-481.569	200	300	0	-23.9592	-31.707	-631.724	-137961	-16988.8	6919.7	173.107	1121.39	0	0	0	0	0	0	0	603	903	0
464	8	0	0	0	0	0	0	200	300	0	-25.0273	-31.707	-628.367	-137228	-17110.9	6736.59	172.769	1121.39	0	0	0	0	0	0	0	603	903	0
464	9	0.151716	2.56883	10.8017	486.787	-98.3797	21.9711	200	300	0	-24.8747	-30.9441	-625.925	-136038	-17171.9	6690.81	172.566	1120.34	0	0	0	0	0	0	0	603	903	0
465	0	-0.000871718	2.26365	10.1913	761.445	-220.45	-435.793	200	300	0	-23.1963	-30.1811	-623.484	-135947	-16927.8	6736.59	172.85	1121.04	0	0	0	0	0	0	0	603	903	0
465	1	0.762068	2.26365	11.412	852.998	23.6906	-298.464	200	300	0	-23.3488	-29.5708	-622.568	-135489	-16805.7	6828.14	173.006	1120.63	0	0	0	0	0	0	0	603	903	0
465	2	0.762068	1.95848	9.88614	212.129	-98.3797	67.7474	200	300	0	-23.5014	-28.9604	-622.568	-135214	-17049.9	6507.71	172.614	1120.19	0	0	0	0	0	0	0	603	903	0
465	3	0.914656	2.56883	10.4965	395.235	-159.415	-252.687	200	300	0	-21.2126	-28.9604	-620.737	-134116	-17049.9	6461.93	172.533	1119.06	0	0	0	0	0	0	0	603	903	0
465	4	1.06724	2.72141	9.58096	486.787	267.831	-161.134	200	300	0	-23.1963	-28.1975	-617.686	-133750	-17049.9	6187.27	172.397	1119.53	0	0	0	0	0	0	0	603	903	0
465	5	0	0	0	0	0	0	200	300	0	-22.2807	-27.2819	-612.803	-133017	-17294	6095.72	171.779	1120.06	0	0	0	0	0	0	0	603	903	0
465	6	0.304304	1.80589	10.1913	486.787	-281.485	-161.134	200	300	0	-22.4333	-26.519	-614.939	-133292	-16683.6	6049.94	172.869	1119.76	0	0	0	0	0	0	0	603	903	0
465	7	-0.611223	1.6533	11.1068	212.129	-464.591	-161.134	200	300	0	-22.4333	-26.3664	-613.108	-131186	-16500.5	6324.6	173.087	1116.97	0	0	0	0	0	0	0	603	903	0
465	8	0	0	0	0	0	0	200	300	0	-21.06	-26.2138	-613.108	-132102	-17110.9	6095.72	172.092	1118.46	0	0	0	0	0	0	0	603	903	0
465	9	0.762068	2.874	11.1068	395.235	-220.45	-252.687	200	300	0	-22.2807	-25.9087	-610.056	-131003	-17660.2	5912.61	171.052	1117.74	0	0	0	0	0	0	0	603	903	0
466	0	1.06724	2.874	11.412	669.893	-342.52	-252.687	200	300	0	-20.4497	-25.2983	-608.836	-130087	-16866.7	6049.94	172.297	1116.67	0	0	0	0	0	0	0	603	903	0
466	1	0.914656	2.56883	9.88614	395.235	-37.3445	-206.911	200	300	0	-20.9074	-24.8405	-605.479	-129172	-17355	5866.84	171.337	1116.34	0	0	0	0	0	0	0	603	903	0
466	2	1.37242	1.6533	10.8017	120.576	145.761	-206.911	200	300	0	-22.4333	-24.8405	-605.784	-129904	-17110.9	5546.4	171.754	1117.44	0	0	0	0	0	0	0	603	903	0
466	3	0	0	0	0	0	0	200	300	0	-21.3652	-24.2302	-604.563	-129446	-16988.8	5454.85	171.899	1117.12	0	0	0	0	0	0	0	603	903	0
466	4	0	0	0	0	0	0	200	300	0	-21.5178	-23.925	-604.258	-128714	-17355	5363.3	171.279	1116.01	0	0	0	0	0	0	0	603	903	0
466	5	0.304304	2.72141	10.8017	852.998	206.796	-390.016	200	300	0	-19.9919	-22.7043	-602.122	-127158	-17477.1	5500.63	170.974	1114.18	0	0	0	0	0	0	0	603	903	0
466	6	-0.15346	2.11106	12.3275	578.34	-525.626	-161.134	200	300	0	-19.6867	-22.7043	-598.765	-127615	-16866.7	5317.52	171.831	1116.13	0	0	0	0	0	0	0	603	903	0
466	7	0.914656	2.11106	11.1068	212.129	23.6906	-344.24	200	300	0	-21.3652	-22.094	-599.375	-127341	-17110.9	5134.42	171.452	1115.46	0	0	0	0	0	0	0	603	903	0
466	8	1.6776	3.02659	12.0224	395.235	328.867	-161.134	200	300	0	-18.6186	-21.1784	-598.765	-126883	-17355	5042.86	171.015	1114.91	0	0	0	0	0	0	0	603	903	0
466	9	0	0	0	0	0	0	200	300	0	-19.3816	-21.7888	-597.544	-126792	-17416.1	5088.64	170.854	1115.19	0	0	0	0	0	0	0	603	903	0
467	0	0.914656	1.95848	11.1068	669.893	-159.415	-252.687	200	300	0	-19.3816	-21.1784	-596.323	-126151	-16866.7	5088.64	171.715	1114.55	0	0	0	0	0	0	0	603	903	0
467	1	0	0	0	0	0	0	200	300	0	-18.9238	-21.1784	-595.408	-126059	-17233	4905.53	171.057	1114.72	0	0	0	0	0	0	0	603	903	0
467	2	0	0	0	0	0	0	200	300	0	-19.229	-19.3474	-595.408	-125693	-17294	4768.21	170.954	1114.1	0	0	0	0	0	0	0	603	903	0
467	3	0.151716	3.63694	11.1068	944.551	-159.415	-161.134	200	300	0	-19.3816	-19.0422	-596.018	-124960	-16927.8	4401.99	171.599	1112.66	0	0	0	0	0	0	0	603	903	0
467	4	0.456892	1.80589	11.7172	395.235	-342.52	-161.134	200	300	0	-18.0083	-19.1948	-592.966	-124136	-16927.8	4585.1	171.452	1112.35	0	0	0	0	0	0	0	603	903	0
467	5	1.21983	2.72141	10.8017	669.893	-342.52	-115.358	200	300	0	-15.7195	-18.2793	-592.661	-124136	-16683.6	4310.44	171.85	1112.46	0	0	0	0	0	0	0	603	903	0
467	6	0.60948	1.80589	10.8017	852.998	-525.626	21.9711	200	300	0	-17.3979	-18.4319	-590.22	-124228	-16866.7	4264.67	171.423	1113.48	0	0	0	0	0	0	0	603	903	0
467	7	0	0	0	0	0	0	200	300	0	-18.1609	-17.2111	-588.084	-123953	-17294	4081.56	170.593	1113.78	0	0	0	0	0	0	0	603	903	0
467	8	0.914656	3.17918	10.1913	852.998	-37.3445	-161.134	200	300	0	-16.9402	-17.3637	-589.609	-122488	-17233	4127.34	170.772	1110.75	0	0	0	0	0	0	0	603	903	0
467	9	0	0	0	0	0	0	200	300	0	-16.1772	-16.2956	-590.525	-122672	-16988.8	3761.12	171.231	1110.73	0	0	0	0	0	0	0	603	903	0
468	0	-0.15346	3.33177	10.8017	578.34	-98.3797	-206.911	200	300	0	-15.7195	-17.0586	-589.609	-122031	-17294	3806.9	170.669	1109.97	0	0	0	0	0	0	0	603	903	0
468	1	1.6776	2.26365	11.412	852.998	23.6906	21.9711	200	300	0	-15.7195	-16.6008	-588.694	-122580	-17355	3669.57	170.519	1111.22	0	0	0	0	0	0	0	603	903	0
468	2	0.304304	2.11106	10.1913	303.682	-220.45	-69.5817	200	300	0	-16.9402	-15.8379	-586.863	-122763	-16927.8	3486.47	171.155	1112.19	0	0	0	0	0	0	0	603	903	0
468	3	1.52501	3.02659	9.58096	1585.42	-220.45	205.077	200	300	0	-15.5669	-15.5327	-587.473	-121390	-17171.9	3532.24	170.77	1109.63	0	0	0	0	0	0	0	603	903	0
468	4	0.456892	1.6533	10.4965	395.235	-98.3797	-527.345	200	300	0	-14.041	-14.4646	-589.304	-121481	-17538.1	3669.57	170.239	1109.14	0	0	0	0	0	0	0	603	903	0
468	5	1.98277	3.02659	10.8017	669.893	-342.52	-252.687	200	300	0	-14.041	-14.1594	-587.168	-121481	-17049.9	3120.26	170.963	1109.89	0	0	0	0	0	0	0	603	903	0
468	6	0	0	0	0	0	0	200	300	0	-13.7358	-13.3965	-587.473	-121024	-17233	3349.14	170.666	1109.01	0	0	0	0	0	0	0	603	903	0
468	7	1.37242	2.26365	12.0224	486.787	145.761	-115.358	200	300	0	-14.9565	-13.549	-587.778	-121207	-17416.1	3120.26	170.37	1109.21	0	0	0	0	0	0	0	603	903	0
468	8	0	0	0	0	0	0	200	300	0	-14.6513	-13.2439	-583.506	-120932	-17355	3211.81	170.257	1110.25	0	0	0	0	0	0	0	603	903	0
468	9	1.37242	1.34812	12.0224	212.129	-342.52	662.841	200	300	0	-13.4306	-13.2439	-586.863	-119284	-17477.1	2937.15	170.219	1106.26	0	0	0	0	0	0	0	603	903	0
469	0	-0.306047	2.72141	11.7172	578.34	145.761	21.9711	200	300	0	-12.5151	-12.4809	-589.609	-120383	-17477.1	3028.7	170.358	1107.17	0	0	0	0	0	0	0	603	903	0
469	1	0.60948	2.41624	12.3275	1036.1	23.6906	-206.911	200	300	0	-13.278	-12.0232	-588.694	-120932	-17477.1	2662.49	170.312	1108.42	0	0	0	0	0	0	0	603	903	0
469	2	0.60948	2.56883	10.1913	395.235	-220.45	-344.24	200	300	0	-13.4306	-11.8706	-588.084	-120200	-17721.2	2479.39	169.866	1107.39	0	0	0	0	0	0	0	603	903	0
469	3	1.98277	3.02659	10.1913	212.129	-159.415	67.7474	200	300	0	-13.5832	-10.8025	-586.863	-120017	-17599.2	2570.94	170.011	1107.51	0	0	0	0	0	0	0	603	903	0
469	4	0	0	0	0	0	0	200	300	0	-12.5151	-10.3447	-588.389	-119650	-17049.9	2387.83	171.023	1106.35	0	0	0	0	0	0	0	603	903	0
469	5	1.06724	2.72141	11.1068	578.34	-281.485	-69.5817	200	300	0	-10.6841	-9.73434	-588.389	-119284	-17355	2342.06	170.504	1105.73	0	0	0	0	0	0	0	603	903	0
469	6	0	0	0	0	0	0	200	300	0	-11.7522	-10.1921	-589.609	-119925	-18026.4	2204.73	169.427	1106.4	0	0	0	0	0	0	0	603	903	0
469	7	1.83018	2.26365	11.412	395.235	-37.3445	-161.134	200	300	0	-12.2099	-9.73434	-589.304	-119834	-17416.1	2708.27	170.446	1106.35	0	0	0	0	0	0	0	603	903	0
469	8	-0.306047	3.17918	11.412	486.787	-403.556	-115.358	200	300	0	-12.5151	-8.9714	-588.999	-119742	-17660.2	2479.39	170.017	1106.3	0	0	0	0	0	0	0	603	903	0
469	9	1.37242	1.50071	11.1068	120.576	-159.415	67.7474	200	300	0	-11.5996	-10.0395	-590.83	-118277	-18087.5	2799.82	169.386	1103.19	0	0	0	0	0	0	0	603	903	0
470	0	1.06724	3.17918	11.7172	852.998	-281.485	-115.358	200	300	0	-10.8366	-8.66623	-590.525	-118735	-17599.2	2342.06	170.197	1104.07	0	0	0	0	0	0	0	603	903	0
470	1	0	0	0	0	0	0	200	300	0	-12.2099	-8.81882	-590.22	-119193	-17782.3	2113.18	169.872	1104.95	0	0	0	0	0	0	0	603	903	0
470	2	0	0	0	0	0	0	200	300	0	-12.3625	-8.66623	-590.525	-119193	-18148.5	2296.28	169.267	1104.84	0	0	0	0	0	0	0	603	903	0
470	3	0.304304	3.02659	10.8017	303.682	23.6906	-161.134	200	300	0	-11.7522	-9.27658	-592.966	-118277	-18331.6	2433.61	169.085	1102.47	0	0	0	0	0	0	0	603	903	0
470	4	0	0	0	0	0	0	200	300	0	-11.447	-7.90329	-593.272	-118186	-17904.3	2113.18	169.821	1102.21	0	0	0	0	0	0	0	603	903	0
470	5	1.06724	3.17918	12.3275	761.445	23.6906	-298.464	200	300	0	-9.15817	-7.14035	-593.882	-118094	-18636.8	2113.18	168.619	1101.85	0	0	0	0	0	0	0	603	903	0
470	6	-0.000871718	2.56883	10.8017	761.445	-98.3797	113.524	200	300	0	-11.447	-7.44552	-593.577	-118643	-18453.7	2158.95	168.911	1102.88	0	0	0	0	0	0	0	603	903	0
470	7	-0.458635	2.11106	13.5482	-245.635	-37.3445	-161.134	200	300	0	-12.8203	-6.83517	-595.103	-118369	-18514.7	2342.06	168.888	1101.9	0	0	0	0	0	0	0	603	903	0
470	8	1.37242	0.89036	10.8017	212.129	-159.415	-115.358	200	300	0	-13.1255	-6.98776	-596.018	-117728	-18575.7	2113.18	168.834	1100.52	0	0	0	0	0	0	0	603	903	0
470	9	1.06724	2.72141	11.1068	120.576	-281.485	-69.5817	200	300	0	-11.447	-7.14035	-596.018	-116904	-18880.9	2479.39	168.322	1099.14	0	0	0	0	0	0	0	603	903	0
471	0	0	0	0	0	0	0	200	300	0	-11.9048	-7.44552	-596.628	-118002	-18575.7	2433.61	168.866	1100.78	0	0	0	0	0	0	0	603	903	0
471	1	0.762068	2.26365	9.88614	1219.21	-220.45	-206.911	200	300	0	-13.1255	-5.61447	-596.323	-118094	-18697.8	2204.73	168.645	1101.04	0	0	0	0	0	0	0	603	903	0
471	2	0.151716	0.89036	10.4965	1036.1	-37.3445	-344.24	200	300	0	-13.278	-5.76706	-600.901	-118094	-19003	2387.83	168.376	1099.53	0	0	0	0	0	0	0	603	903	0
471	3	0	0	0	0	0	0	200	300	0	-14.4987	-5.61447	-599.68	-117911	-18575.7	2342.06	169.024	1099.62	0	0	0	0	0	0	0	603	903	0
471	4	0.60948	2.874	11.412	212.129	-98.3797	67.7474	200	300	0	-12.9729	-5.46188	-600.596	-116721	-19064	2250.5	168.258	1097.34	0	0	0	0	0	0	0	603	903	0
471	5	-0.15346	2.56883	10.4965	852.998	-98.3797	-206.911	200	300	0	-12.3625	-5.00412	-601.206	-118186	-19674.4	2387.83	167.275	1099.58	0	0	0	0	0	0	0	603	903	0
471	6	0.151716	2.11106	10.8017	1036.1	-220.45	-161.134	200	300	0	-13.278	-6.07223	-601.511	-118460	-18758.8	2387.83	168.814	1099.94	0	0	0	0	0	0	0	603	903	0
471	7	0.60948	1.34812	10.8017	761.445	23.6906	-298.464	200	300	0	-14.4987	-4.39377	-603.953	-118643	-19369.2	2387.83	167.929	1099.44	0	0	0	0	0	0	0	603	903	0
471	8	2.74571	2.72141	10.8017	486.787	-98.3797	-69.5817	200	300	0	-13.8884	-5.15671	-606.394	-118460	-19857.5	2616.72	167.253	1098.35	0	0	0	0	0	0	0	603	903	0
471	9	1.21983	3.63694	9.58096	120.576	267.831	-115.358	200	300	0	-13.5832	-4.39377	-606.394	-117911	-19735.4	2204.73	167.455	1097.45	0	0	0	0	0	0	0	603	903	0
472	0	1.37242	2.72141	10.8017	578.34	145.761	21.9711	200	300	0	-12.8203	-5.15671	-607.615	-118002	-19613.3	2158.95	167.721	1097.21	0	0	0	0	0	0	0	603	903	0
472	1	0	0	0	0	0	0	200	300	0	-13.4306	-3.32565	-608.225	-118460	-19979.5	2387.83	167.151	1097.76	0	0	0	0	0	0	0	603	903	0
472	2	0	0	0	0	0	0	200	300	0	-14.1936	-3.47824	-610.056	-117270	-20040.6	2799.82	167.15	1095.23	0	0	0	0	0	0	0	603	903	0
472	3	-0.306047	2.11106	11.1068	578.34	-342.52	-344.24	200	300	0	-12.5151	-3.63083	-610.972	-118643	-20162.6	2525.16	166.999	1097.19	0	0	0	0	0	0	0	603	903	0
472	4	-0.306047	2.874	10.1913	486.787	-37.3445	-298.464	200	300	0	-14.8039	-3.02048	-614.329	-118094	-20223.7	2570.94	167.08	1095.23	0	0	0	0	0	0	0	603	903	0
472	5	0.914656	3.02659	11.1068	1585.42	-159.415	-252.687	200	300	0	-13.8884	-2.56271	-615.549	-118277	-20650.9	2479.39	166.451	1095.15	0	0	0	0	0	0	0	603	903	0
472	6	0.60948	2.41624	10.4965	852.998	206.796	-206.911	200	300	0	-14.3462	-2.56271	-614.939	-118186	-20406.8	2570.94	166.815	1095.19	0	0	0	0	0	0	0	603	903	0
472	7	0	0	0	0	0	0	200	300	0	-14.6513	-1.79977	-615.244	-118643	-20467.8	2525.16	166.732	1095.84	0	0	0	0	0	0	0	603	903	0
472	8	0	0	0	0	0	0	200	300	0	-15.1091	-2.25754	-621.653	-119010	-20895.1	2616.72	166.388	1094.44	0	0	0	0	0	0	0	603	903	0
472	9	-0.000871718	2.874	9.88614	395.235	84.7258	-69.5817	200	300	0	-15.2617	-1.4946	-622.263	-119101	-20956.1	2433.61	166.323	1094.4	0	0	0	0	0	0	0	603	903	0
473	0	-0.000871718	2.72141	9.88614	486.787	23.6906	-161.134	200	300	0	-15.1091	-0.579069	-624.705	-118735	-21322.3	2570.94	165.868	1093.07	0	0	0	0	0	0	0	603	903	0
473	1	0.304304	2.11106	12.0224	761.445	-281.485	-252.687	200	300	0	-14.8039	-1.34201	-626.841	-118552	-21566.5	2479.39	165.595	1092.13	0	0	0	0	0	0	0	603	903	0
473	2	-0.000871718	2.56883	10.4965	486.787	23.6906	-115.358	200	300	0	-15.4143	-0.426481	-627.146	-118277	-20773	2387.83	166.877	1091.6	0	0	0	0	0	0	0	603	903	0
473	3	1.21983	1.80589	10.4965	395.235	-159.415	113.524	200	300	0	-16.4824	-0.426481	-628.062	-119559	-21566.5	2296.28	165.662	1093.36	0	0	0	0	0	0	0	603	903	0
473	4	0.914656	2.72141	10.8017	395.235	-220.45	-69.5817	200	300	0	-14.3462	-0.121305	-629.893	-119834	-21688.5	2479.39	165.568	1093.24	0	0	0	0	0	0	0	603	903	0
473	5	0.762068	2.874	9.58096	852.998	-403.556	-161.134	200	300	0	-15.2617	0.641634	-631.419	-119834	-22482	2433.61	164.395	1092.78	0	0	0	0	0	0	0	603	903	0
473	6	0.914656	2.72141	10.4965	669.893	84.7258	-344.24	200	300	0	-14.6513	0.489046	-634.775	-118369	-21749.6	2479.39	165.737	1089.47	0	0	0	0	0	0	0	603	903	0
473	7	0.151716	2.41624	11.7172	761.445	23.6906	67.7474	200	300	0	-14.6513	0.641634	-635.996	-119834	-22237.8	2479.39	165.035	1091.42	0	0	0	0	0	0	0	603	903	0
473	8	0	0	0	0	0	0	200	300	0	-14.6513	1.86234	-638.438	-120200	-22359.9	2250.5	164.977	1091.27	0	0	0	0	0	0	0	603	903	0
473	9	2.44053	2.874	9.27579	-154.082	-159.415	250.853	200	300	0	-16.3298	2.3201	-635.081	-120291	-22298.9	2387.83	164.888	1092.41	0	0	0	0	0	0	0	603	903	0
474	0	-0.15346	2.72141	10.8017	-245.635	-98.3797	-161.134	200	300	0	-15.7195	2.3201	-642.1	-120291	-22604.1	2479.39	164.797	1090.34	0	0	0	0	0	0	0	603	903	0
474	1	1.21983	2.72141	9.88614	578.34	-403.556	-390.016	200	300	0	-14.3462	2.16751	-643.931	-120474	-22665.1	2479.39	164.802	1090.09	0	0	0	0	0	0	0	603	903	0
474	2	0.456892	1.95848	10.8017	669.893	-37.3445	-206.911	200	300	0	-14.3462	2.93045	-645.762	-120566	-22543	2479.39	165.091	1089.7	0	0	0	0	0	0	0	603	903	0
474	3	2.44053	2.26365	10.1913	486.787	206.796	342.406	200	300	0	-14.8039	4.45633	-643.32	-120657	-23397.5	2387.83	163.63	1090.55	0	0	0	0	0	0	0	603	903	0
474	4	0.762068	2.874	10.8017	852.998	-220.45	-298.464	200	300	0	-15.5669	4.76151	-648.508	-120566	-23275.4	2067.4	164.109	1088.91	0	0	0	0	0	0	0	603	903	0
474	5	0.456892	1.04295	13.2431	-62.5292	-281.485	-161.134	200	300	0	-13.8884	4.30374	-652.476	-121115	-23153.4	2296.28	164.515	1088.62	0	0	0	0	0	0	0	603	903	0
474	6	0	0	0	0	0	0	200	300	0	-16.0246	5.06668	-654.002	-120657	-23092.3	2158.95	164.691	1087.49	0	0	0	0	0	0	0	603	903	0
474	7	1.37242	2.11106	10.4965	578.34	-281.485	-252.687	200	300	0	-14.9565	4.91409	-656.138	-120657	-23702.7	2296.28	163.875	1086.89	0	0	0	0	0	0	0	603	903	0
474	8	-0.15346	2.41624	10.8017	1402.32	-159.415	-115.358	200	300	0	-14.4987	6.1348	-657.664	-122214	-23641.7	2342.06	164.052	1088.83	0	0	0	0	0	0	0	603	903	0
474	9	-0.000871718	1.80589	13.8534	486.787	-159.415	-206.911	200	300	0	-14.4987	6.89774	-661.326	-122122	-24007.9	1930.07	163.697	1087.66	0	0	0	0	0	0	0	603	903	0
475	0	1.06724	2.41624	12.0224	303.682	-342.52	-161.134	200	300	0	-15.7195	6.74515	-661.631	-122214	-24129.9	2113.18	163.53	1087.72	0	0	0	0	0	0	0	603	903	0
475	1	2.59312	2.56883	10.8017	578.34	-220.45	-69.5817	200	300	0	-16.4824	7.50809	-664.988	-122488	-24557.2	1975.85	163.071	1087.2	0	0	0	0	0	0	0	603	903	0
475	2	0	0	0	0	0	0	200	300	0	-15.5669	7.66068	-667.124	-122580	-24129.9	1838.52	163.83	1086.74	0	0	0	0	0	0	0	603	903	0
475	3	2.28795	2.11106	10.8017	852.998	23.6906	342.406	200	300	0	-15.7195	8.27103	-668.345	-123038	-24618.2	2113.18	163.165	1087.09	0	0	0	0	0	0	0	603	903	0
475	4	0	0	0	0	0	0	200	300	0	-15.1091	8.27103	-671.397	-123679	-24679.2	2570.94	163.242	1087.21	0	0	0	0	0	0	0	603	903	0
475	5	2.13536	3.17918	11.1068	578.34	-98.3797	-252.687	200	300	0	-16.635	9.64432	-673.838	-122214	-24557.2	2296.28	163.556	1084.37	0	0	0	0	0	0	0	603	903	0
475	6	-0.000871718	3.02659	12.0224	761.445	-98.3797	-115.358	200	300	0	-16.9402	9.9495	-677.5	-123496	-25411.7	2204.73	162.492	1085.28	0	0	0	0	0	0	0	603	903	0
475	7	0.762068	2.41624	11.1068	944.551	-342.52	-115.358	200	300	0	-17.2453	10.1021	-677.805	-123770	-25045.5	2113.18	163.049	1085.6	0	0	0	0	0	0	0	603	903	0
475	8	1.37242	2.26365	10.1913	212.129	-220.45	113.524	200	300	0	-15.872	9.64432	-679.941	-123587	-24862.4	1884.29	163.435	1084.76	0	0	0	0	0	0	0	603	903	0
475	9	0.762068	3.02659	9.58096	120.576	-37.3445	296.629	200	300	0	-15.4143	10.5598	-682.383	-123404	-25045.5	2113.18	163.297	1083.84	0	0	0	0	0	0	0	603	903	0
476	0	0	0	0	0	0	0	200	300	0	-17.0927	11.4754	-685.435	-124411	-25777.9	2250.5	162.392	1084.51	0	0	0	0	0	0	0	603	903	0
476	1	0	0	0	0	0	0	200	300	0	-15.5669	10.865	-687.571	-124686	-26083.1	2250.5	162.065	1084.34	0	0	0	0	0	0	0	603	903	0
476	2	0.151716	3.48435	9.58096	761.445	206.796	-252.687	200	300	0	-17.2453	12.3909	-690.012	-124320	-26205.1	1884.29	162.022	1083.17	0	0	0	0	0	0	0	603	903	0
476	3	1.37242	2.874	11.7172	212.129	-159.415	-298.464	200	300	0	-16.1772	12.8487	-692.148	-124777	-26205.1	1975.85	162.139	1083.28	0	0	0	0	0	0	0	603	903	0
476	4	-0.15346	2.56883	11.412	-62.5292	-37.3445	-298.464	200	300	0	-17.3979	13.1538	-693.369	-125144	-26388.2	2158.95	161.942	1083.49	0	0	0	0	0	0	0	603	903	0
476	5	0	0	0	0	0	0	200	300	0	-18.0083	13.9168	-692.454	-124777	-26510.3	2067.4	161.715	1083.2	0	0	0	0	0	0	0	603	903	0
476	6	0.762068	2.874	10.1913	395.235	-220.45	-23.8053	200	300	0	-18.0083	13.7642	-697.642	-125693	-26693.4	2113.18	161.738	1083.17	0	0	0	0	0	0	0	603	903	0
476	7	0	0	0	0	0	0	200	300	0	-16.1772	14.8323	-700.999	-125510	-26754.4	2158.95	161.834	1082.04	0	0	0	0	0	0	0	603	903	0
476	8	0	0	0	0	0	0	200	300	0	-17.5505	15.5952	-704.05	-125601	-27120.7	2342.06	161.479	1081.4	0	0	0	0	0	0	0	603	903	0
476	9	0.914656	1.95848	11.7172	120.576	-37.3445	-390.016	200	300	0	-16.9402	14.5271	-705.881	-126242	-26754.4	2158.95	162.098	1081.84	0	0	0	0	0	0	0	603	903	0
477	0	0	0	0	0	0	0	200	300	0	-18.466	15.9004	-706.797	-126059	-26998.6	2113.18	161.801	1081.35	0	0	0	0	0	0	0	603	903	0
477	1	1.6776	1.34812	9.88614	303.682	206.796	159.3	200	300	0	-17.2453	16.5108	-708.933	-126425	-27120.7	2067.4	161.744	1081.33	0	0	0	0	0	0	0	603	903	0
477	2	0.762068	2.72141	9.88614	578.34	-98.3797	-206.911	200	300	0	-19.229	17.4263	-711.985	-126608	-27364.8	2067.4	161.565	1080.82	0	0	0	0	0	0	0	603	903	0
477	3	0.456892	2.26365	11.412	852.998	-830.802	67.7474	200	300	0	-17.3979	16.6634	-712.595	-126517	-27486.9	2204.73	161.427	1080.54	0	0	0	0	0	0	0	603	903	0
477	4	0.914656	2.56883	11.1068	578.34	23.6906	159.3	200	300	0	-17.7031	17.4263	-716.257	-126700	-27608.9	2113.18	161.454	1079.89	0	0	0	0	0	0	0	603	903	0
477	5	2.13536	1.95848	11.7172	669.893	-159.415	-206.911	200	300	0	-18.7712	17.7315	-717.783	-126792	-27792	2158.95	161.281	1079.64	0	0	0	0	0	0	0	603	903	0
477	6	1.52501	3.63694	10.1913	303.682	-98.3797	-252.687	200	300	0	-17.5505	18.4944	-719.309	-127158	-28585.5	1884.29	160.26	1079.78	0	0	0	0	0	0	0	603	903	0
477	7	1.98277	3.02659	10.8017	761.445	84.7258	21.9711	200	300	0	-19.0764	17.8841	-718.088	-126700	-28402.4	1975.85	160.447	1079.44	0	0	0	0	0	0	0	603	903	0
477	8	0.151716	1.95848	9.88614	1310.76	-403.556	21.9711	200	300	0	-18.1609	20.4781	-723.887	-127158	-28097.2	1884.29	161.186	1078.66	0	0	0	0	0	0	0	603	903	0
477	9	-0.15346	2.41624	11.412	761.445	-220.45	-252.687	200	300	0	-18.7712	19.4099	-725.718	-126883	-28402.4	2158.95	160.863	1077.84	0	0	0	0	0	0	0	603	903	0
478	0	-0.306047	2.26365	10.8017	486.787	-159.415	-252.687	200	300	0	-18.9238	20.0203	-726.633	-127432	-28707.6	2067.4	160.492	1078.37	0	0	0	0	0	0	0	603	903	0
478	1	-0.306047	3.17918	13.2431	1768.53	389.902	113.524	200	300	0	-17.2453	21.241	-727.549	-127524	-28951.7	1975.85	160.207	1078.28	0	0	0	0	0	0	0	603	903	0
478	2	0.151716	1.95848	11.412	578.34	-281.485	-298.464	200	300	0	-19.6867	21.241	-729.685	-126883	-29256.9	2113.18	159.905	1076.89	0	0	0	0	0	0	0	603	903	0
478	3	0.60948	3.02659	11.1068	303.682	23.6906	-206.911	200	300	0	-18.7712	22.0039	-731.821	-126608	-29134.8	2021.62	160.189	1076	0	0	0	0	0	0	0	603	903	0
478	4	0	0	0	0	0	0	200	300	0	-17.5505	22.3091	-731.516	-127249	-28829.6	2250.5	160.589	1076.95	0	0	0	0	0	0	0	603	903	0
478	5	0	0	0	0	0	0	200	300	0	-19.9919	22.4617	-734.568	-127707	-29562.1	2433.61	159.756	1076.85	0	0	0	0	0	0	0	603	903	0
478	6	0	0	0	0	0	0	200	300	0	-20.2971	22.9195	-736.704	-128165	-29562.1	2342.06	159.873	1076.97	0	0	0	0	0	0	0	603	903	0
478	7	0	0	0	0	0	0	200	300	0	-20.4497	24.7505	-737.315	-128256	-29745.2	2204.73	159.657	1076.95	0	0	0	0	0	0	0	603	903	0
478	8	-0.763811	2.874	10.4965	852.998	-342.52	-161.134	200	300	0	-20.2971	23.6824	-740.366	-127524	-29684.1	2342.06	159.906	1075.24	0	0	0	0	0	0	0	603	903	0
478	9	-0.306047	3.33177	13.5482	852.998	-37.3445	21.9711	200	300	0	-18.6186	25.666	-740.977	-127341	-29623.1	2021.62	160.022	1074.86	0	0	0	0	0	0	0	603	903	0
479	0	1.37242	2.26365	10.8017	852.998	-403.556	-206.911	200	300	0	-19.8393	25.666	-741.892	-127707	-29928.3	1838.52	159.66	1075.14	0	0	0	0	0	0	0	603	903	0
479	1	0	0	0	0	0	0	200	300	0	-21.5178	26.7342	-743.418	-127982	-30050.3	2067.4	159.578	1075.15	0	0	0	0	0	0	0	603	903	0
479	2	0	0	0	0	0	0	200	300	0	-21.6704	26.8868	-744.944	-127524	-30416.6	2342.06	159.169	1074.19	0	0	0	0	0	0	0	603	903	0
479	3	0.762068	0.89036	10.8017	395.235	-37.3445	-344.24	200	300	0	-20.1445	27.6497	-747.996	-127341	-30477.6	2021.62	159.254	1073.24	0	0	0	0	0	0	0	603	903	0
479	4	-0.15346	3.33177	10.1913	1219.21	-281.485	-298.464	200	300	0	-20.1445	28.8704	-750.132	-127524	-30538.6	2067.4	159.289	1073	0	0	0	0	0	0	0	603	903	0
479	5	1.98277	2.72141	10.1913	1127.66	-37.3445	205.077	200	300	0	-22.1281	30.7014	-750.132	-127799	-30965.9	1838.52	158.719	1073.37	0	0	0	0	0	0	0	603	903	0
479	6	0.914656	2.11106	10.8017	761.445	-37.3445	21.9711	200	300	0	-20.1445	30.0911	-752.878	-127524	-31271	1746.97	158.465	1072.38	0	0	0	0	0	0	0	603	903	0
479	7	1.06724	1.80589	10.1913	212.129	-220.45	-252.687	200	300	0	-21.6704	30.3963	-752.878	-127341	-30660.7	2021.62	159.275	1072.14	0	0	0	0	0	0	0	603	903	0
479	8	0.456892	2.72141	10.4965	486.787	-342.52	-23.8053	200	300	0	-21.5178	31.9222	-754.099	-127341	-31149	2250.5	158.694	1071.86	0	0	0	0	0	0	0	603	903	0
479	9	2.8983	3.33177	9.27579	852.998	23.6906	21.9711	200	300	0	-21.3652	30.7014	-756.235	-127707	-31515.2	2113.18	158.326	1071.87	0	0	0	0	0	0	0	603	903	0
480	0	0.60948	2.874	9.88614	1402.32	-159.415	-161.134	200	300	0	-22.1281	33.1429	-758.066	-127890	-31515.2	2342.06	158.427	1071.71	0	0	0	0	0	0	0	603	903	0
480	1	0.456892	2.11106	11.7172	1036.1	-342.52	-206.911	200	300	0	-23.0437	33.1429	-759.287	-127524	-31393.1	1975.85	158.654	1070.95	0	0	0	0	0	0	0	603	903	0
480	2	-0.306047	2.41624	10.4965	120.576	-98.3797	-69.5817	200	300	0	-22.1281	33.7532	-759.287	-126883	-31942.4	1975.85	157.931	1070.11	0	0	0	0	0	0	0	603	903	0
480	3	1.52501	2.56883	12.0224	669.893	-98.3797	-115.358	200	300	0	-22.5859	34.0584	-760.813	-126975	-31515.2	1792.74	158.577	1069.89	0	0	0	0	0	0	0	603	903	0
480	4	-0.611223	1.50071	10.4965	761.445	-220.45	67.7474	200	300	0	-22.4333	35.8894	-762.644	-127341	-31759.3	1838.52	158.356	1069.97	0	0	0	0	0	0	0	603	903	0
480	5	0.151716	2.874	12.6327	944.551	-342.52	-23.8053	200	300	0	-22.7385	36.4998	-763.865	-126700	-31942.4	1792.74	158.183	1068.87	0	0	0	0	0	0	0	603	903	0
480	6	0.60948	2.41624	11.7172	1036.1	-281.485	-481.569	200	300	0	-23.0437	37.4153	-766.001	-127432	-32125.5	1975.85	158.061	1069.36	0	0	0	0	0	0	0	603	903	0
480	7	1.6776	1.80589	11.1068	944.551	-98.3797	-206.911	200	300	0	-22.8911	35.5843	-768.748	-126517	-32247.6	1975.85	158.052	1067.58	0	0	0	0	0	0	0	603	903	0
480	8	0.762068	2.56883	9.88614	395.235	84.7258	-252.687	200	300	0	-23.3488	38.1783	-767.527	-126059	-32735.9	1838.52	157.349	1067.24	0	0	0	0	0	0	0	603	903	0
480	9	0.914656	3.63694	11.412	212.129	23.6906	250.853	200	300	0	-22.5859	39.8567	-767.222	-126883	-32369.7	1701.19	157.809	1068.38	0	0	0	0	0	0	0	603	903	0
481	0	0	0	0	0	0	0	200	300	0	-24.2644	40.1619	-769.358	-126059	-32369.7	1655.41	157.926	1066.85	0	0	0	0	0	0	0	603	903	0
481	1	1.37242	2.56883	12.0224	1036.1	-403.556	-69.5817	200	300	0	-24.417	39.7041	-768.748	-126700	-32980.1	1975.85	157.099	1067.81	0	0	0	0	0	0	0	603	903	0
481	2	-0.306047	2.26365	11.412	944.551	-159.415	-206.911	200	300	0	-22.4333	41.23	-773.325	-126059	-33224.2	2113.18	157.037	1066.01	0	0	0	0	0	0	0	603	903	0
481	3	-0.458635	2.41624	12.3275	486.787	-220.45	-206.911	200	300	0	-22.1281	41.6878	-771.799	-126059	-32858	1975.85	157.427	1066.33	0	0	0	0	0	0	0	603	903	0
481	4	0.60948	3.48435	11.1068	395.235	-37.3445	-206.911	200	300	0	-23.654	43.5188	-772.105	-126242	-33224.2	1975.85	156.969	1066.5	0	0	0	0	0	0	0	603	903	0
481	5	2.59312	2.56883	10.4965	486.787	84.7258	-161.134	200	300	0	-24.7221	42.7559	-773.63	-125876	-33468.3	1609.64	156.739	1065.71	0	0	0	0	0	0	0	603	903	0
481	6	0.762068	3.02659	10.1913	578.34	-220.45	21.9711	200	300	0	-24.7221	44.2818	-774.851	-125693	-33407.3	1655.41	156.886	1065.22	0	0	0	0	0	0	0	603	903	0
481	7	-0.458635	2.26365	11.1068	761.445	-403.556	159.3	200	300	0	-23.9592	43.3662	-774.851	-125052	-33407.3	1701.19	156.886	1064.39	0	0	0	0	0	0	0	603	903	0
481	8	0	0	0	0	0	0	200	300	0	-23.0437	42.9085	-775.461	-125052	-33651.4	1838.52	156.605	1064.26	0	0	0	0	0	0	0	603	903	0
481	9	1.06724	1.50071	9.88614	1127.66	-342.52	-69.5817	200	300	0	-22.8911	44.8921	-775.767	-125144	-33834.5	1655.41	156.386	1064.32	0	0	0	0	0	0	0	603	903	0
482	0	-0.763811	3.33177	12.0224	486.787	-281.485	-115.358	200	300	0	-25.0273	46.5706	-776.682	-124136	-33529.4	1472.31	156.83	1062.83	0	0	0	0	0	0	0	603	903	0
482	1	-0.306047	3.63694	13.8534	486.787	-98.3797	-298.464	200	300	0	-25.4851	46.7232	-777.293	-124045	-34017.6	1518.08	156.236	1062.59	0	0	0	0	0	0	0	603	903	0
482	2	0.456892	2.41624	10.8017	1402.32	84.7258	-23.8053	200	300	0	-24.5695	47.1809	-778.208	-123953	-33529.4	1655.41	156.915	1062.28	0	0	0	0	0	0	0	603	903	0
482	3	0.762068	1.19554	11.412	852.998	-281.485	113.524	200	300	0	-24.7221	46.7232	-778.513	-123496	-33895.6	1197.65	156.461	1061.63	0	0	0	0	0	0	0	603	903	0
482	4	0	0	0	0	0	0	200	300	0	-24.1118	47.9439	-776.987	-123770	-33712.5	1380.75	156.611	1062.3	0	0	0	0	0	0	0	603	903	0
482	5	0.60948	3.63694	9.88614	486.787	-281.485	-206.911	200	300	0	-24.7221	48.4016	-777.293	-123129	-34261.8	1701.19	155.922	1061.41	0	0	0	0	0	0	0	603	903	0
482	6	0	0	0	0	0	0	200	300	0	-25.7903	49.012	-778.818	-122580	-34017.6	1426.53	156.321	1060.39	0	0	0	0	0	0	0	603	903	0
482	7	0	0	0	0	0	0	200	300	0	-25.1799	49.7749	-780.344	-122305	-34505.9	1426.53	155.781	1059.73	0	0	0	0	0	0	0	603	903	0
482	8	0.60948	0.585184	10.4965	761.445	206.796	-161.134	200	300	0	-24.1118	51.7586	-778.818	-121848	-33956.6	1426.53	156.4	1059.45	0	0	0	0	0	0	0	603	903	0
482	9	-0.611223	3.02659	10.4965	120.576	-403.556	-23.8053	200	300	0	-24.5695	50.3853	-779.734	-122580	-34139.7	1380.75	156.216	1060.21	0	0	0	0	0	0	0	603	903	0
483	0	0.456892	2.874	11.7172	29.0235	-586.661	-206.911	200	300	0	-25.6377	50.0801	-778.818	-121207	-34567	1334.98	155.616	1058.63	0	0	0	0	0	0	0	603	903	0
483	1	0.60948	3.48435	11.7172	486.787	-159.415	-115.358	200	300	0	-24.2644	51.4534	-780.955	-121481	-34628	1746.97	155.659	1058.56	0	0	0	0	0	0	0	603	903	0
483	2	1.83018	3.78953	9.58096	1127.66	-525.626	-23.8053	200	300	0	-26.0954	50.3853	-779.124	-120932	-34933.2	1609.64	155.164	1058.22	0	0	0	0	0	0	0	603	903	0
483	3	0	0	0	0	0	0	200	300	0	-25.1799	53.2845	-781.87	-119650	-34994.2	1151.87	155.243	1056.03	0	0	0	0	0	0	0	603	903	0
483	4	-0.458635	2.26365	13.8534	120.576	-98.3797	-115.358	200	300	0	-25.0273	52.9793	-780.955	-120291	-34994.2	1243.43	155.19	1057.03	0	0	0	0	0	0	0	603	903	0
483	5	-0.306047	3.17918	10.8017	1036.1	23.6906	-298.464	200	300	0	-25.6377	51.606	-782.786	-120200	-34322.8	1197.65	156.153	1056.55	0	0	0	0	0	0	0	603	903	0
483	6	0	0	0	0	0	0	200	300	0	-27.6213	53.7422	-780.344	-120108	-34444.9	694.108	155.859	1056.92	0	0	0	0	0	0	0	603	903	0
483	7	-0.15346	2.72141	11.1068	944.551	-220.45	-344.24	200	300	0	-26.5532	54.8103	-780.955	-119193	-34750.1	1151.87	155.503	1055.62	0	0	0	0	0	0	0	603	903	0
483	8	-0.458635	2.56883	13.5482	1036.1	23.6906	-344.24	200	300	0	-24.7221	55.4207	-782.175	-119101	-34811.1	1151.87	155.495	1055.27	0	0	0	0	0	0	0	603	903	0
483	9	0.151716	2.72141	11.412	395.235	-464.591	-161.134	200	300	0	-22.7385	56.4888	-781.87	-118369	-34811.1	922.99	155.477	1054.39	0	0	0	0	0	0	0	603	903	0
484	0	0.914656	3.33177	13.8534	395.235	-159.415	-206.911	200	300	0	-25.6377	56.031	-781.87	-118277	-35299.4	922.99	154.853	1054.27	0	0	0	0	0	0	0	603	903	0
484	1	0	0	0	0	0	0	200	300	0	-26.7058	56.6414	-780.344	-117911	-34750.1	968.767	155.468	1054.1	0	0	0	0	0	0	0	603	903	0
484	2	0.914656	3.17918	11.412	578.34	-159.415	205.077	200	300	0	-26.248	57.4043	-780.039	-118002	-34872.1	556.779	155.294	1054.28	0	0	0	0	0	0	0	603	903	0
484	3	-0.15346	2.11106	9.88614	486.787	-586.661	-69.5817	200	300	0	-24.7221	57.7095	-781.26	-117545	-35299.4	968.767	154.817	1053.46	0	0	0	0	0	0	0	603	903	0
484	4	1.37242	2.56883	10.1913	212.129	-586.661	-344.24	200	300	0	-25.1799	59.388	-782.175	-116812	-35787.7	1060.32	154.246	1052.34	0	0	0	0	0	0	0	603	903	0
484	5	-0.763811	2.11106	10.4965	486.787	-342.52	-298.464	200	300	0	-24.417	59.6931	-783.396	-116904	-35116.3	602.556	155.174	1052.23	0	0	0	0	0	0	0	603	903	0
484	6	0.304304	3.17918	13.2431	578.34	-159.415	67.7474	200	300	0	-27.011	58.7776	-782.481	-115988	-35543.5	831.438	154.576	1051.23	0	0	0	0	0	0	0	603	903	0
484	7	0.914656	3.33177	11.412	761.445	84.7258	-115.358	200	300	0	-25.3325	61.219	-781.565	-115988	-35604.6	556.779	154.445	1051.41	0	0	0	0	0	0	0	603	903	0
484	8	2.13536	2.41624	9.88614	1127.66	-403.556	-390.016	200	300	0	-26.4006	62.5923	-780.649	-115805	-35177.3	465.227	154.938	1051.34	0	0	0	0	0	0	0	603	903	0
484	9	0	0	0	0	0	0	200	300	0	-25.4851	63.0501	-782.175	-114981	-35543.5	556.779	154.558	1050	0	0	0	0	0	0	0	603	903	0
485	0	1.21983	2.874	12.0224	303.682	-159.415	-161.134	200	300	0	-25.7903	61.8294	-779.124	-114798	-35604.6	785.661	154.302	1050.34	0	0	0	0	0	0	0	603	903	0
485	1	-0.15346	3.48435	10.1913	578.34	-281.485	250.853	200	300	0	-24.7221	63.9656	-783.091	-115439	-35055.2	327.898	155.235	1050.41	0	0	0	0	0	0	0	603	903	0
485	2	0.914656	3.94212	11.412	852.998	-403.556	-23.8053	200	300	0	-27.1635	65.0337	-782.786	-114707	-35421.5	-38.3134	154.749	1049.54	0	0	0	0	0	0	0	603	903	0
485	3	-0.000871718	2.41624	12.0224	1402.32	-281.485	-161.134	200	300	0	-26.5532	67.17	-781.565	-113883	-35787.7	190.569	154.21	1048.71	0	0	0	0	0	0	0	603	903	0
485	4	1.06724	0.737772	11.1068	486.787	-220.45	-206.911	200	300	0	-25.3325	67.6277	-784.006	-113516	-35116.3	144.792	155.209	1047.79	0	0	0	0	0	0	0	603	903	0
485	5	1.37242	1.95848	11.412	303.682	-586.661	-23.8053	200	300	0	-25.4851	67.7803	-783.701	-113242	-35299.4	-129.866	154.958	1047.5	0	0	0	0	0	0	0	603	903	0
485	6	0	0	0	0	0	0	200	300	0	-25.4851	68.5432	-784.006	-113791	-35543.5	99.0157	154.664	1048.14	0	0	0	0	0	0	0	603	903	0
485	7	0.456892	3.94212	9.88614	1036.1	-342.52	-161.134	200	300	0	-26.248	69.001	-782.481	-113699	-35482.5	7.46297	154.654	1048.31	0	0	0	0	0	0	0	603	903	0
485	8	-0.458635	2.72141	9.88614	1493.87	-281.485	-252.687	200	300	0	-27.011	71.2898	-783.091	-112052	-35604.6	-129.866	154.533	1046.09	0	0	0	0	0	0	0	603	903	0
485	9	-0.458635	2.72141	10.1913	1127.66	-525.626	-206.911	200	300	0	-26.0954	70.3743	-781.565	-112052	-36092.8	144.792	153.82	1046.37	0	0	0	0	0	0	0	603	903	0
486	0	1.06724	2.56883	11.7172	303.682	206.796	-115.358	200	300	0	-25.9428	72.9683	-785.227	-112509	-35726.6	-267.195	154.502	1046.28	0	0	0	0	0	0	0	603	903	0
486	1	-0.000871718	3.17918	10.1913	212.129	23.6906	-69.5817	200	300	0	-26.248	72.8157	-784.312	-112235	-35726.6	-633.406	154.448	1046.1	0	0	0	0	0	0	0	603	903	0
486	2	0.914656	3.33177	10.8017	669.893	-342.52	-161.134	200	300	0	-27.011	73.4261	-784.617	-112143	-36214.9	-404.524	153.844	1045.93	0	0	0	0	0	0	0	603	903	0
486	3	-0.15346	2.72141	10.4965	486.787	-403.556	205.077	200	300	0	-26.4006	75.1045	-784.312	-111502	-36337	-221.419	153.67	1045.17	0	0	0	0	0	0	0	603	903	0
486	4	1.98277	2.41624	9.88614	1310.76	-159.415	-115.358	200	300	0	-25.6377	74.6468	-785.532	-110678	-35726.6	-496.077	154.519	1043.9	0	0	0	0	0	0	0	603	903	0
486	5	0.456892	3.63694	10.8017	578.34	23.6906	-390.016	200	300	0	-25.7903	77.3933	-786.448	-110861	-36520.1	-496.077	153.563	1043.96	0	0	0	0	0	0	0	603	903	0
486	6	1.83018	3.63694	13.2431	303.682	-281.485	-115.358	200	300	0	-25.3325	78.1563	-786.143	-111044	-36275.9	-770.735	153.856	1044.25	0	0	0	0	0	0	0	603	903	0
486	7	0	0	0	0	0	0	200	300	0	-25.9428	78.4615	-784.922	-110587	-35787.7	-587.63	154.406	1043.89	0	0	0	0	0	0	0	603	903	0
486	8	0	0	0	0	0	0	200	300	0	-26.7058	80.5977	-782.481	-110587	-36153.9	-862.288	153.796	1044.33	0	0	0	0	0	0	0	603	903	0
486	9	-0.763811	1.6533	10.4965	669.893	-159.415	-69.5817	200	300	0	-25.3325	80.1399	-787.058	-110220	-36275.9	-862.288	153.909	1043.04	0	0	0	0	0	0	0	603	903	0
487	0	-0.15346	2.72141	11.1068	395.235	-281.485	296.629	200	300	0	-25.3325	82.5813	-787.974	-110220	-36275.9	-908.065	153.963	1042.88	0	0	0	0	0	0	0	603	903	0
487	1	0.456892	4.24729	11.1068	212.129	84.7258	-298.464	200	300	0	-26.4006	83.3443	-788.584	-109030	-36642.2	-816.512	153.534	1041.26	0	0	0	0	0	0	0	603	903	0
487	2	0.304304	3.48435	11.412	669.893	-220.45	-206.911	200	300	0	-26.0954	83.9546	-787.669	-109580	-36337	-1182.72	153.868	1042.12	0	0	0	0	0	0	0	603	903	0
487	3	0.762068	2.874	9.88614	1219.21	-464.591	-206.911	200	300	0	-25.1799	85.6331	-785.532	-108756	-35604.6	-1274.28	154.675	1041.45	0	0	0	0	0	0	0	603	903	0
487	4	0	0	0	0	0	0	200	300	0	-25.3325	87.0064	-786.143	-108756	-35909.7	-1320.05	154.322	1041.34	0	0	0	0	0	0	0	603	903	0
487	5	0	0	0	0	0	0	200	300	0	-25.3325	87.6167	-787.974	-109396	-36275.9	-1503.16	153.963	1041.83	0	0	0	0	0	0	0	603	903	0
487	6	-0.306047	3.02659	10.1913	120.576	-525.626	-23.8053	200	300	0	-26.5532	87.4641	-787.363	-108298	-35787.7	-1457.38	154.547	1040.55	0	0	0	0	0	0	0	603	903	0
487	7	-0.306047	4.09471	11.412	761.445	-98.3797	67.7474	200	300	0	-26.0954	88.6848	-788.584	-108389	-35909.7	-1320.05	154.463	1040.45	0	0	0	0	0	0	0	603	903	0
487	8	-0.15346	3.17918	12.0224	1127.66	-37.3445	-115.358	200	300	0	-24.5695	90.2107	-787.058	-107108	-36398	-1320.05	153.754	1039.09	0	0	0	0	0	0	0	603	903	0
487	9	0.914656	2.72141	11.412	761.445	23.6906	67.7474	200	300	0	-23.9592	91.8892	-786.143	-107016	-36459.1	-1915.14	153.623	1039.13	0	0	0	0	0	0	0	603	903	0
488	0	1.37242	2.72141	10.1913	120.576	145.761	-69.5817	200	300	0	-25.0273	92.6521	-786.753	-107382	-35970.8	-1548.93	154.279	1039.49	0	0	0	0	0	0	0	603	903	0
488	1	0	0	0	0	0	0	200	300	0	-26.248	93.1099	-786.143	-107108	-36214.9	-1777.82	153.933	1039.24	0	0	0	0	0	0	0	603	903	0
488	2	-0.000871718	3.17918	9.58096	761.445	-891.837	67.7474	200	300	0	-25.6377	92.9573	-786.143	-106375	-36153.9	-1686.26	154.011	1038.31	0	0	0	0	0	0	0	603	903	0
488	3	0	0	0	0	0	0	200	300	0	-23.1963	93.8728	-785.227	-106009	-35726.6	-2098.25	154.502	1038	0	0	0	0	0	0	0	603	903	0
488	4	-0.763811	1.80589	9.88614	852.998	23.6906	67.7474	200	300	0	-23.8066	95.0935	-780.039	-106009	-36398	-1640.49	153.338	1038.9	0	0	0	0	0	0	0	603	903	0
488	5	-0.458635	2.72141	11.1068	120.576	-403.556	-161.134	200	300	0	-24.7221	96.4668	-783.091	-105643	-36275.9	-2189.8	153.676	1037.91	0	0	0	0	0	0	0	603	903	0
488	6	-0.458635	3.33177	11.1068	-245.635	84.7258	-344.24	200	300	0	-26.248	97.3824	-782.786	-105094	-35665.6	-2189.8	154.438	1037.26	0	0	0	0	0	0	0	603	903	0
488	7	0.304304	3.48435	11.1068	852.998	328.867	-115.358	200	300	0	-26.4006	96.9246	-784.006	-104910	-35482.5	-2144.03	154.742	1036.81	0	0	0	0	0	0	0	603	903	0
488	8	0.456892	2.56883	10.1913	578.34	-159.415	-69.5817	200	300	0	-24.5695	99.0608	-782.175	-103537	-36031.8	-2464.46	153.934	1035.37	0	0	0	0	0	0	0	603	903	0
488	9	0	0	0	0	0	0	200	300	0	-24.7221	99.2134	-781.26	-104361	-35665.6	-2281.36	154.349	1036.58	0	0	0	0	0	0	0	603	903	0
489	0	0.304304	3.63694	9.58096	669.893	84.7258	205.077	200	300	0	-25.0273	101.502	-781.26	-103903	-35970.8	-2556.01	153.958	1035.99	0	0	0	0	0	0	0	603	903	0
489	1	0.151716	3.48435	11.412	303.682	-98.3797	-298.464	200	300	0	-25.0273	100.282	-780.955	-103537	-36459.1	-2601.79	153.315	1035.58	0	0	0	0	0	0	0	603	903	0
489	2	-0.458635	3.48435	9.58096	669.893	-37.3445	-69.5817	200	300	0	-25.9428	102.57	-781.26	-102530	-36337	-2556.01	153.489	1034.24	0	0	0	0	0	0	0	603	903	0
489	3	0.456892	2.72141	10.4965	578.34	389.902	-23.8053	200	300	0	-24.417	103.181	-779.734	-102713	-35665.6	-2739.12	154.259	1034.73	0	0	0	0	0	0	0	603	903	0
489	4	-0.306047	2.874	10.1913	578.34	-464.591	159.3	200	300	0	-24.7221	103.944	-777.903	-103262	-35909.7	-2784.9	153.838	1035.74	0	0	0	0	0	0	0	603	903	0
489	5	-0.611223	2.41624	11.412	212.129	-464.591	21.9711	200	300	0	-25.0273	104.249	-777.598	-101248	-35848.7	-2739.12	153.898	1033.21	0	0	0	0	0	0	0	603	903	0
489	6	0.914656	3.33177	10.8017	395.235	-159.415	-390.016	200	300	0	-25.0273	105.775	-777.903	-102072	-35604.6	-2693.34	154.23	1034.21	0	0	0	0	0	0	0	603	903	0
489	7	0.456892	3.33177	11.1068	1127.66	23.6906	-115.358	200	300	0	-24.2644	106.538	-777.903	-101523	-35665.6	-2693.34	154.152	1033.51	0	0	0	0	0	0	0	603	903	0
489	8	0.914656	3.02659	10.1913	1219.21	-281.485	67.7474	200	300	0	-21.823	108.064	-776.377	-101340	-35787.7	-2922.23	153.904	1033.53	0	0	0	0	0	0	0	603	903	0
489	9	1.21983	2.41624	10.4965	761.445	-98.3797	-115.358	200	300	0	-23.8066	107.911	-775.156	-101248	-35482.5	-3151.11	154.225	1033.62	0	0	0	0	0	0	0	603	903	0
490	0	0	0	0	0	0	0	200	300	0	-25.3325	108.674	-773.325	-101431	-35238.4	-3151.11	154.433	1034.16	0	0	0	0	0	0	0	603	903	0
490	1	0	0	0	0	0	0	200	300	0	-25.0273	108.521	-773.02	-99966.6	-35482.5	-2968	154.099	1032.32	0	0	0	0	0	0	0	603	903	0
490	2	0.151716	2.874	10.8017	944.551	84.7258	67.7474	200	300	0	-24.1118	110.505	-773.02	-99417.2	-35909.7	-3242.66	153.546	1031.61	0	0	0	0	0	0	0	603	903	0
490	3	-0.306047	3.48435	11.412	1493.87	-37.3445	-206.911	200	300	0	-23.654	111.268	-774.241	-99875	-35482.5	-3288.44	154.171	1032	0	0	0	0	0	0	0	603	903	0
490	4	0.151716	2.56883	11.1068	944.551	-342.52	67.7474	200	300	0	-24.2644	112.336	-772.715	-99600.4	-35665.6	-3471.54	153.844	1031.9	0	0	0	0	0	0	0	603	903	0
490	5	0.60948	2.874	12.0224	29.0235	-220.45	-115.358	200	300	0	-21.6704	112.336	-771.494	-99051	-35604.6	-3746.2	153.85	1031.39	0	0	0	0	0	0	0	603	903	0
490	6	2.13536	3.33177	10.4965	395.235	206.796	67.7474	200	300	0	-24.8747	113.404	-770.273	-98867.9	-35116.3	-3654.65	154.411	1031.35	0	0	0	0	0	0	0	603	903	0
490	7	0	0	0	0	0	0	200	300	0	-23.8066	112.641	-767.222	-98776.4	-35116.3	-3837.75	154.229	1031.75	0	0	0	0	0	0	0	603	903	0
490	8	2.28795	2.56883	11.7172	669.893	-403.556	-69.5817	200	300	0	-23.5014	116.151	-767.832	-98410.2	-35543.5	-3837.75	153.709	1031.17	0	0	0	0	0	0	0	603	903	0
490	9	0	0	0	0	0	0	200	300	0	-23.654	116.456	-768.137	-98227	-35055.2	-3608.87	154.363	1030.88	0	0	0	0	0	0	0	603	903	0
491	0	1.06724	2.874	10.1913	303.682	84.7258	-115.358	200	300	0	-24.1118	116.608	-763.865	-97677.7	-34933.2	-3746.2	154.268	1030.87	0	0	0	0	0	0	0	603	903	0
491	1	-0.458635	3.48435	11.7172	303.682	-159.415	-69.5817	200	300	0	-25.0273	118.134	-765.696	-96579.1	-35299.4	-4203.97	153.899	1029.13	0	0	0	0	0	0	0	603	903	0
491	2	1.6776	3.63694	11.7172	1310.76	23.6906	-161.134	200	300	0	-22.8911	119.355	-762.034	-95663.6	-35116.3	-4295.52	153.918	1028.54	0	0	0	0	0	0	0	603	903	0
491	3	0.60948	2.72141	10.8017	1310.76	-98.3797	250.853	200	300	0	-23.1963	120.423	-761.729	-96670.7	-34628	-4203.97	154.54	1029.91	0	0	0	0	0	0	0	603	903	0
491	4	0	0	0	0	0	0	200	300	0	-23.3488	119.66	-760.203	-96304.5	-34567	-4295.52	154.529	1029.68	0	0	0	0	0	0	0	603	903	0
491	5	0	0	0	0	0	0	200	300	0	-21.06	121.033	-761.118	-96121.3	-34505.9	-4020.86	154.664	1029.29	0	0	0	0	0	0	0	603	903	0
491	6	5.64488	1.50071	-19.1056	-4823.27	1976.82	-1488.65	303.468	552.454	0	-23.0437	121.949	-759.287	-95297.4	-34567	-4387.07	154.474	1028.51	0	0	0	0	0	0	0	603	903	0
491	7	8.39146	9.28269	-25.8194	-5830.35	2159.92	-1213.99	283.655	525.813	0	-21.823	120.881	-756.541	-95022.7	-34628	-4661.73	154.229	1028.6	0	0	0	0	0	0	0	603	903	0
491	8	7.9337	12.487	-25.5143	-7112.09	2587.17	-847.78	301.401	578.75	0	-21.3652	124.085	-755.93	-94839.6	-34689	-4570.18	154.111	1028.46	0	0	0	0	0	0	0	603	903	0
491	9	5.18712	14.7759	-24.2935	-8576.93	2770.27	-435.793	314.033	653.054	0	-22.8911	124.696	-753.794	-94473.4	-34322.8	-4478.62	154.467	1028.33	0	0	0	0	0	0	0	603	903	0
492	0	2.28795	18.8957	-37.4161	-9492.46	3075.45	754.393	282.196	553.7	0	-22.8911	125.306	-751.963	-93557.8	-33773.5	-4844.83	155.086	1027.42	0	0	0	0	0	0	0	603	903	0
492	1	3.66124	19.3535	-45.961	-11415.1	3685.8	479.735	280.194	548.364	0	-21.9756	126.984	-752.878	-93374.8	-34383.9	-4890.61	154.33	1027.02	0	0	0	0	0	0	0	603	903	0
492	2	5.95006	24.0837	-55.1163	-12147.5	4418.22	21.9711	280.162	520.397	0	-20.2971	126.221	-749.827	-93191.6	-34505.9	-4799.06	153.981	1027.28	0	0	0	0	0	0	0	603	903	0
492	3	6.25523	24.3889	-59.6939	-14619.4	5455.82	525.511	291.397	544.906	0	-22.4333	127.137	-747.385	-93008.6	-33895.6	-4982.16	154.648	1027.45	0	0	0	0	0	0	0	603	903	0
492	4	6.86558	26.6777	-73.4268	-17549.1	5394.79	250.853	273.472	539.001	0	-20.7549	127.595	-743.418	-92184.5	-34261.8	-4799.06	153.913	1027	0	0	0	0	0	0	0	603	903	0
492	5	9.1544	28.6614	-84.4132	-18190	6615.49	-23.8053	278.37	515.487	0	-21.06	129.426	-742.808	-91726.8	-33895.6	-5211.05	154.368	1026.49	0	0	0	0	0	0	0	603	903	0
492	6	5.49229	27.4407	-92.9581	-21577.4	6493.42	433.958	269.853	532.12	0	-20.9074	128.968	-741.892	-91360.6	-33468.3	-5394.15	154.888	1026.15	0	0	0	0	0	0	0	603	903	0
492	7	6.86558	28.5088	-101.808	-22676.1	6737.56	800.17	266.179	522.733	0	-20.9074	128.815	-741.282	-91543.7	-33468.3	-5256.82	154.851	1026.49	0	0	0	0	0	0	0	603	903	0
492	8	5.49229	28.3562	-110.963	-25056.4	8080.33	388.182	272.82	525.808	0	-21.9756	129.121	-738.84	-90719.7	-33895.6	-5165.27	154.123	1025.79	0	0	0	0	0	0	0	603	903	0
492	9	5.18712	28.9665	-124.391	-26979	7958.26	1029.05	263.978	516.889	0	-21.6704	129.426	-735.483	-88797.1	-33529.4	-5531.48	154.412	1023.73	0	0	0	0	0	0	0	603	903	0
493	0	1.21983	28.9665	-134.767	-29634.1	8324.48	1807.25	261.769	519.891	0	-21.2126	130.647	-733.347	-88797.1	-33224.2	-5851.91	154.695	1024.08	0	0	0	0	0	0	0	603	903	0
493	1	-0.611223	26.9829	-143.922	-31373.6	9117.93	1624.14	263.353	517.989	0	-21.2126	130.647	-726.633	-88888.6	-33346.3	-5531.48	154.109	1025.33	0	0	0	0	0	0	0	603	903	0
493	2	-1.67934	27.5932	-155.519	-32197.6	9301.04	1669.92	259.806	507.033	0	-21.3652	132.172	-727.854	-89163.3	-33285.2	-5577.26	154.269	1025.5	0	0	0	0	0	0	0	603	903	0
493	3	0.151716	24.2363	-163.759	-35218.8	9301.04	2265.01	256.797	515.065	0	-20.2971	131.562	-725.413	-88156.2	-32064.5	-5577.26	155.798	1024.53	0	0	0	0	0	0	0	603	903	0
493	4	-2.90004	22.5578	-173.219	-37141.4	9850.36	2081.91	256.866	514.418	0	-20.7549	132.783	-722.666	-87515.4	-32980.1	-5439.93	154.363	1024.1	0	0	0	0	0	0	0	603	903	0
493	5	-2.1371	21.9475	-182.375	-39064	10399.7	1944.58	257.024	514.197	0	-20.4497	132.783	-719.919	-85959	-32858	-5623.03	154.359	1022.4	0	0	0	0	0	0	0	603	903	0
493	6	-3.51039	21.7949	-190.309	-40620.4	10888	2127.68	257.212	513.444	0	-20.4497	134.461	-717.173	-86416.8	-32430.7	-6126.57	154.78	1023.5	0	0	0	0	0	0	0	603	903	0
493	7	-1.52675	17.9802	-198.854	-41810.6	11071.1	2081.91	255.674	510.258	0	-19.5341	135.835	-713.816	-85959	-32247.6	-6035.02	154.824	1023.42	0	0	0	0	0	0	0	603	903	0
493	8	-3.35781	13.0974	-209.535	-44923.4	11742.4	1669.92	256.04	514.395	0	-20.6023	134.766	-708.628	-85775.9	-32003.5	-5989.24	154.837	1024.05	0	0	0	0	0	0	0	603	903	0
493	9	-4.7311	11.2663	-218.996	-45655.8	11864.5	2036.13	254.177	508.478	0	-20.6023	134.003	-707.407	-84677.2	-31759.3	-6035.02	155.105	1022.7	0	0	0	0	0	0	0	603	903	0
494	0	-6.86733	8.21458	-230.287	-47853.1	12169.7	2265.01	252.846	507.797	0	-18.7712	136.445	-704.05	-83761.7	-31820.4	-6080.8	154.804	1021.97	0	0	0	0	0	0	0	603	903	0
494	1	-9.15615	5.468	-238.222	-48951.7	12902.1	2173.46	254.16	505.488	0	-18.9238	137.818	-700.388	-83395.5	-31576.2	-6218.13	154.916	1022.07	0	0	0	0	0	0	0	603	903	0
494	2	-12.6657	0.432597	-246.156	-50508.1	13085.2	1944.58	253.158	505.187	0	-18.1609	137.971	-695.811	-82846.2	-31271	-6401.23	155.058	1022.06	0	0	0	0	0	0	0	603	903	0
494	3	-12.6657	-4.14504	-254.091	-53437.8	13207.3	2493.89	251.979	510.31	0	-20.1445	138.581	-692.454	-82022.2	-31210	-6401.23	154.928	1021.45	0	0	0	0	0	0	0	603	903	0
494	4	-10.682	-7.65456	-261.72	-53712.5	13756.6	2036.13	252.562	505.228	0	-20.1445	138.123	-688.486	-82388.4	-31332.1	-6401.23	154.491	1022.67	0	0	0	0	0	0	0	603	903	0
494	5	-10.2243	-13.6055	-272.401	-55543.5	14061.8	1669.92	251.622	503.903	0	-17.8557	138.276	-685.129	-80465.8	-30782.8	-6309.68	155.07	1020.45	0	0	0	0	0	0	0	603	903	0
494	6	-14.4967	-16.6572	-280.336	-56184.4	13756.6	2036.13	249.072	500.418	0	-18.0083	139.039	-680.247	-80282.7	-30721.7	-6080.8	154.837	1021.02	0	0	0	0	0	0	0	603	903	0
494	7	-16.1752	-19.5564	-287.66	-57832.3	14122.8	1853.03	249.095	501.044	0	-17.8557	141.175	-676.279	-79916.5	-30904.8	-6538.56	154.302	1021.17	0	0	0	0	0	0	0	603	903	0
494	8	-18.0062	-23.3711	-294.679	-59388.7	14550.1	1349.49	249.376	501.537	0	-18.7712	141.175	-673.838	-78909.4	-30843.8	-6447.01	154.227	1020.1	0	0	0	0	0	0	0	603	903	0
494	9	-15.1071	-28.2539	-300.783	-59754.9	14916.3	1669.92	249.592	498.665	0	-18.466	141.022	-668.345	-77353	-29745.2	-6492.78	155.494	1018.74	0	0	0	0	0	0	0	603	903	0
495	0	-17.0907	-35.273	-308.717	-62226.8	15160.4	1990.35	249.108	501.566	0	-17.3979	141.175	-663.157	-76895.3	-29989.3	-6538.56	154.778	1018.95	0	0	0	0	0	0	0	603	903	0
495	1	-18.3114	-36.4937	-316.042	-62684.6	15343.5	1303.71	248.549	498.343	0	-14.6513	141.175	-658.274	-76895.3	-29928.3	-6721.67	154.535	1019.81	0	0	0	0	0	0	0	603	903	0
495	2	-19.9899	-40.6135	-324.892	-64241	15221.4	1395.26	246.851	497.731	0	-16.1772	140.87	-652.17	-76071.3	-29195.8	-6218.13	155.233	1019.64	0	0	0	0	0	0	0	603	903	0
495	3	-21.058	-45.4964	-334.657	-65888.9	15953.9	1395.26	247.672	496.885	0	-16.1772	142.854	-650.339	-75796.6	-29317.9	-6584.34	154.919	1019.55	0	0	0	0	0	0	0	603	903	0
495	4	-22.2787	-48.8533	-344.423	-67445.4	16381.1	1441.04	247.561	495.821	0	-16.4824	143.006	-646.982	-74148.6	-29256.9	-6675.89	154.779	1017.61	0	0	0	0	0	0	0	603	903	0
495	5	-23.9572	-51.2947	-355.104	-69642.6	17113.5	1166.38	248.193	496.119	0	-15.5669	142.243	-639.658	-72592.3	-29012.7	-6950.55	154.643	1016.49	0	0	0	0	0	0	0	603	903	0
495	6	-24.1098	-55.5672	-364.565	-70741.3	17174.6	1349.49	247.11	494.043	0	-14.6513	142.091	-635.386	-72592.3	-28890.7	-6904.77	154.531	1017.25	0	0	0	0	0	0	0	603	903	0
495	7	-25.9408	-59.8396	-373.109	-72206.1	17540.8	1395.26	247.012	493.525	0	-15.4143	141.175	-629.587	-72317.6	-28524.5	-6538.56	154.693	1017.87	0	0	0	0	0	0	0	603	903	0
495	8	-27.4667	-64.1121	-382.57	-74220.2	17723.9	983.275	246.329	494.004	0	-14.041	141.48	-625.315	-71676.7	-27853.1	-6721.67	155.458	1017.63	0	0	0	0	0	0	0	603	903	0
495	9	-25.483	-65.9431	-395.998	-76326	18517.4	1029.05	246.761	492.744	0	-14.1936	141.022	-620.127	-70761.2	-27853.1	-6767.44	155.085	1017.11	0	0	0	0	0	0	0	603	903	0
496	0	-24.5675	-67.7742	-407.289	-77790.8	19188.7	571.288	247.113	490.997	0	-12.3625	141.938	-616.77	-69754.1	-28341.4	-6813.22	154.049	1016.1	0	0	0	0	0	0	0	603	903	0
496	1	-26.3986	-70.6734	-418.581	-79164.1	19616	388.182	246.863	489.125	0	-12.5151	141.175	-610.056	-68197.8	-27731	-6767.44	154.544	1014.79	0	0	0	0	0	0	0	603	903	0
496	2	-27.4667	-72.657	-429.567	-81361.4	19921.2	113.524	246.375	489.403	0	-12.5151	141.022	-604.258	-68197.8	-26998.6	-6996.32	155.319	1015.86	0	0	0	0	0	0	0	603	903	0
496	3	-27.1615	-75.5562	-440.553	-83284	20287.4	113.524	246.05	489.044	0	-11.5996	141.175	-600.291	-67740	-27120.7	-7087.88	154.821	1015.85	0	0	0	0	0	0	0	603	903	0
496	4	-28.2296	-76.4717	-450.929	-85572.8	21080.8	21.9711	246.75	489.77	0	-11.7522	140.412	-594.492	-66732.9	-26571.3	-7179.43	155.304	1015.25	0	0	0	0	0	0	0	603	903	0
496	5	-27.9245	-77.5398	-463.441	-87678.5	21141.9	-206.911	245.619	489.19	0	-9.92111	140.717	-590.22	-65725.8	-26388.2	-6996.32	155.291	1014.36	0	0	0	0	0	0	0	603	903	0
496	6	-26.3986	-78.9131	-475.038	-88685.6	22057.4	-481.569	246.433	486.692	0	-8.70041	139.802	-583.201	-65268	-25961	-7179.43	155.485	1014.91	0	0	0	0	0	0	0	603	903	0
496	7	-27.0089	-81.5071	-484.804	-90058.9	22606.7	-802.004	246.631	485.764	0	-8.853	139.497	-578.623	-64535.6	-25655.8	-7179.43	155.661	1014.53	0	0	0	0	0	0	0	603	903	0
496	8	-27.1615	-82.7278	-500.368	-92897	23156	-481.569	246.278	485.657	0	-10.0737	139.039	-571.909	-63162.3	-25289.6	-7316.76	155.78	1013.44	0	0	0	0	0	0	0	603	903	0
496	9	-25.6356	-83.7959	-510.133	-93904.1	24132.6	-985.109	247.306	484.078	0	-8.853	138.886	-566.111	-63070.8	-25533.7	-7362.53	154.896	1014.41	0	0	0	0	0	0	0	603	903	0
497	0	-26.7038	-85.627	-524.172	-96467.6	24620.9	-1259.77	246.971	484.038	0	-8.09006	136.445	-559.397	-62155.3	-25167.5	-7408.31	155.01	1014.11	0	0	0	0	0	0	0	603	903	0
497	1	-26.3986	-87.1529	-533.327	-96742.3	24437.8	-1213.99	245.821	481.394	0	-6.259	137.971	-554.819	-60965.1	-24496.1	-7042.1	155.848	1012.88	0	0	0	0	0	0	0	603	903	0
497	2	-26.7038	-89.8994	-543.092	-98939.5	25109.2	-1442.87	246.234	482.178	0	-5.64865	136.597	-548.716	-61056.6	-24557.2	-7087.88	155.246	1014.27	0	0	0	0	0	0	0	603	903	0
497	3	-25.7882	-90.6624	-552.248	-100679	26146.7	-1763.31	247.346	482.308	0	-5.19089	135.835	-541.392	-59500.2	-24313	-7362.53	155.092	1012.9	0	0	0	0	0	0	0	603	903	0
497	4	-24.2623	-92.0357	-563.539	-101686	26207.8	-1854.86	246.506	480.442	0	-4.27536	134.919	-534.067	-58493.2	-23885.8	-7362.53	155.276	1012.52	0	0	0	0	0	0	0	603	903	0
497	5	-22.1261	-94.7822	-574.22	-102968	26818.1	-1671.76	246.704	479.318	0	-5.0383	135.682	-527.964	-57303	-23580.6	-7591.42	155.337	1011.54	0	0	0	0	0	0	0	603	903	0
497	6	-23.4994	-97.9866	-583.986	-104066	27428.5	-1763.31	246.968	478.2	0	-2.59689	134.461	-522.471	-56479	-23092.3	-7362.53	155.802	1011.1	0	0	0	0	0	0	0	603	903	0
497	7	-26.246	-101.038	-594.362	-105440	27245.4	-2404.18	245.84	477.4	0	0.302276	132.478	-515.452	-55655	-22359.9	-7270.98	156.621	1010.97	0	0	0	0	0	0	0	603	903	0
497	8	-25.9408	-103.48	-602.602	-106813	28038.8	-2495.73	246.53	477.253	0	-1.37619	131.562	-509.348	-55288.8	-22359.9	-7316.76	156.101	1011.55	0	0	0	0	0	0	0	603	903	0
497	9	-24.8727	-105.921	-608.705	-107912	28405	-2724.61	246.665	477.281	0	-1.98654	130.952	-501.414	-53640.9	-22115.8	-7499.86	155.893	1009.98	0	0	0	0	0	0	0	603	903	0
498	0	-25.0253	-108.057	-615.419	-108095	28710.2	-2953.49	246.652	475.644	0	0.76004	130.952	-491.953	-53274.7	-21749.6	-7545.64	155.789	1011.29	0	0	0	0	0	0	0	603	903	0
498	1	-24.5675	-112.025	-623.659	-109102	29137.5	-3182.38	246.72	474.938	0	-0.613251	130.341	-486.765	-52176	-21261.3	-7545.64	156.321	1010.19	0	0	0	0	0	0	0	603	903	0
498	2	-24.5675	-115.687	-630.068	-110292	29564.7	-2770.39	246.923	475.048	0	0.607452	128.815	-482.188	-50894.3	-21261.3	-7454.09	155.907	1008.55	0	0	0	0	0	0	0	603	903	0
498	3	-24.8727	-119.196	-639.223	-111299	29625.8	-3228.15	246.347	474.116	0	1.98074	126.527	-473.337	-49978.8	-20834	-7362.53	155.985	1008.59	0	0	0	0	0	0	0	603	903	0
498	4	-24.4149	-122.095	-640.749	-112123	29747.8	-3411.26	246.427	474.988	0	3.50662	125.916	-467.539	-49795.6	-20223.7	-7362.53	156.744	1009.51	0	0	0	0	0	0	0	603	903	0
498	5	-25.0253	-123.469	-650.514	-112215	30419.2	-3640.14	246.762	472.501	0	2.74368	125.001	-459.299	-48605.4	-20712	-7682.97	154.905	1008.83	0	0	0	0	0	0	0	603	903	0
498	6	-24.1098	-127.131	-654.176	-112489	30602.3	-3777.47	246.78	471.956	0	3.8118	124.39	-448.923	-46774.4	-19979.5	-7637.19	155.495	1007.19	0	0	0	0	0	0	0	603	903	0
498	7	-25.0253	-129.42	-661.806	-113771	30907.5	-4097.9	246.702	471.91	0	5.18509	123.017	-444.346	-45858.9	-19064	-7728.75	157.096	1006.21	0	0	0	0	0	0	0	603	903	0
498	8	-24.1098	-131.556	-662.721	-114046	31090.6	-3960.57	246.914	472.087	0	4.87991	122.407	-437.327	-45401.1	-19247.1	-7728.75	155.989	1006.82	0	0	0	0	0	0	0	603	903	0
498	9	-23.3468	-132.777	-670.351	-114870	31334.7	-4006.35	246.744	471.358	0	6.55838	119.66	-427.561	-45309.5	-18697.8	-7591.42	156.269	1008.97	0	0	0	0	0	0	0	603	903	0
499	0	-22.1261	-134.608	-676.149	-113954	31212.7	-4464.12	246.162	468.534	0	6.2532	118.439	-421.152	-43295.4	-18087.5	-7316.76	157.052	1005.8	0	0	0	0	0	0	0	603	903	0
499	1	-23.8046	-136.744	-680.727	-114778	31884.1	-4555.67	246.838	468.611	0	6.40579	116.914	-412.913	-43112.3	-18026.4	-7362.53	156.343	1007.41	0	0	0	0	0	0	0	603	903	0
499	2	-22.2787	-138.422	-681.642	-115877	32006.1	-4647.22	246.954	469.997	0	6.55838	115.998	-406.809	-41281.2	-17904.3	-6858.99	155.988	1004.48	0	0	0	0	0	0	0	603	903	0
499	3	-25.0253	-138.88	-688.966	-116426	31762	-4693	246.101	468.987	0	8.54202	114.167	-398.264	-40457.3	-17049.9	-7362.53	157.19	1004.58	0	0	0	0	0	0	0	603	903	0
499	4	-23.9572	-140.406	-694.154	-116334	32433.4	-4738.77	246.724	467.592	0	9.15237	113.862	-389.109	-40274.2	-16744.7	-7454.09	156.967	1006.5	0	0	0	0	0	0	0	603	903	0
499	5	-25.6356	-142.39	-697.511	-116792	32677.5	-5104.98	246.849	467.441	0	8.99979	111.268	-380.869	-38626.2	-16378.5	-7362.53	156.997	1004.42	0	0	0	0	0	0	0	603	903	0
499	6	-25.9408	-143.61	-698.122	-117799	32738.5	-4967.66	246.895	468.738	0	11.5938	109.132	-373.85	-38076.9	-16073.3	-7316.76	157.006	1004.85	0	0	0	0	0	0	0	603	903	0
499	7	-24.1098	-143.916	-706.056	-116701	33226.8	-5516.97	247.06	465.285	0	10.5257	107.758	-363.169	-36795.2	-15462.9	-7408.31	157.422	1004.32	0	0	0	0	0	0	0	603	903	0
499	8	-21.9735	-143.916	-711.549	-117891	33654.1	-5562.75	247.297	465.682	0	11.136	107.301	-355.845	-35421.8	-15707.1	-7179.43	155.86	1002.54	0	0	0	0	0	0	0	603	903	0
499	9	-24.1098	-144.831	-716.127	-117799	33409.9	-5562.75	246.654	464.495	0	11.7464	104.554	-346.995	-34964.1	-15035.7	-7270.98	156.669	1003.76	0	0	0	0	0	0	0	603	903	0
500	0	-23.9572	-147.578	-713.38	-118440	33715.1	-5700.08	247.261	466.027	0	10.9834	103.181	-339.06	-34140.1	-14303.3	-7133.65	157.815	1003.69	0	0	0	0	0	0	0	603	903	0
500	1	-25.483	-148.798	-722.536	-119630	33959.2	-5700.08	247	465.57	0	11.4412	101.197	-332.346	-33133.1	-14303.3	-6721.67	156.963	1002.69	0	0	0	0	0	0	0	603	903	0
500	2	-23.3468	-148.951	-723.451	-119173	33532	-5974.74	246.35	464.728	0	11.5938	98.4505	-324.107	-31759.7	-13937.1	-6767.44	156.999	1000.99	0	0	0	0	0	0	0	603	903	0
500	3	-25.1779	-149.714	-728.029	-118806	34142.3	-6157.84	246.897	463.189	0	12.9671	96.9246	-313.731	-31576.6	-13570.9	-6767.44	156.744	1003.65	0	0	0	0	0	0	0	603	903	0
500	4	-23.0416	-150.477	-730.776	-117891	34569.6	-6478.28	247.305	461.323	0	12.6619	96.4668	-305.491	-30020.2	-13570.9	-6858.99	155.577	1001.27	0	0	0	0	0	0	0	603	903	0
500	5	-23.9572	-152.003	-731.691	-119264	34630.6	-6707.16	247.33	462.998	0	12.6619	91.8892	-297.251	-28921.6	-12777.4	-6492.78	157.015	1000.3	0	0	0	0	0	0	0	603	903	0
500	6	-22.7365	-153.529	-739.931	-120180	34630.6	-6524.05	246.803	462.42	0	12.0515	90.0581	-289.011	-28097.6	-12106	-6492.78	158.112	1000.22	0	0	0	0	0	0	0	603	903	0
500	7	-23.8046	-153.376	-739.32	-120363	34813.7	-6112.06	247.089	462.802	0	11.4412	87.0064	-279.551	-26907.4	-12533.3	-6218.13	155.166	999.252	0	0	0	0	0	0	0	603	903	0
500	8	-23.652	-154.292	-739.626	-119447	34996.8	-7073.37	247.317	461.497	0	11.7464	84.565	-271.006	-25259.5	-11556.7	-5943.47	157.356	996.206	0	0	0	0	0	0	0	603	903	0
500	9	-25.1779	-154.902	-745.119	-118532	34813.7	-6981.82	246.722	459.078	0	12.9671	80.9029	-262.461	-24984.8	-11190.5	-5531.48	157.363	998.195	0	0	0	0	0	0	0	603	903	0
501	0	-24.8727	-155.97	-740.846	-119630	35241	-7256.47	247.569	461.478	0	11.136	80.5977	-254.832	-24069.3	-10824.3	-5714.59	157.524	997.452	0	0	0	0	0	0	0	603	903	0
501	1	-23.8046	-157.038	-745.424	-120638	35485.1	-7302.25	247.604	461.837	0	11.2886	79.0718	-246.592	-22879.1	-10946.3	-5211.05	155.609	995.781	0	0	0	0	0	0	0	603	903	0
501	2	-23.1942	-157.038	-744.814	-120729	35424.1	-7210.7	247.561	462.093	0	10.6783	75.8675	-235.911	-21963.6	-10030.8	-5119.49	157.48	996.101	0	0	0	0	0	0	0	603	903	0
501	3	-22.1261	-157.343	-751.222	-120271	35790.3	-7256.47	247.643	460.101	0	12.0515	74.189	-229.197	-20315.6	-9847.71	-4982.16	157.034	991.638	0	0	0	0	0	0	0	603	903	0
501	4	-20.4476	-158.106	-755.19	-120088	35973.4	-7622.68	247.635	459.017	0	12.6619	72.5105	-220.347	-20407.2	-9786.68	-5073.72	155.585	995.614	0	0	0	0	0	0	0	603	903	0
501	5	-22.1261	-158.717	-757.631	-120546	35729.3	-7943.12	247.159	459.109	0	12.3567	70.8321	-212.412	-19949.4	-9908.75	-4570.18	153.351	996.919	0	0	0	0	0	0	0	603	903	0
[truncated: 1,774 more rows]
