# Supplementary material for: The Effects of an Extemporaneous Speech Dual-task on Older Adult Gait Control
Source: Research Square preprint supplement (doi:10.21203/rs.3.rs-7674245/v1), 2025-11-18
Supplement: Supplementary file 173 [file Over7ground03.xlsx]

## Sheet: Sheet1
Trajectories
		07:LFHD			07:RFHD			07:LBHD			07:RBHD			07:C7			07:T10			07:CLAV			07:STRN			07:RBAK			07:LSHO			07:LUPA			07:LELB			07:LFRM			07:LWRA			07:LWRB			07:LFIN
Frame	Sub Frame	X	Y	Z	X	Y	Z	X	Y	Z	X	Y	Z	X	Y	Z	X	Y	Z	X	Y	Z	X	Y	Z	X	Y	Z	X	Y	Z	X	Y	Z	X	Y	Z	X	Y	Z	X	Y	Z	X	Y	Z	X	Y	Z
		mm	mm	mm	mm	mm	mm	mm	mm	mm	mm	mm	mm	mm	mm	mm	mm	mm	mm	mm	mm	mm	mm	mm	mm	mm	mm	mm	mm	mm	mm	mm	mm	mm	mm	mm	mm	mm	mm	mm	mm	mm	mm	mm	mm	mm	mm	mm	mm
465	0	186.211	2500.13	1596.07	88.0345	2488.97	1601.59	193.05	2654.89	1607.69	63.0939	2657.86	1608.54	107.892	2704.97	1482.71	98.3304	2785.48	1233.48	117.9	2591.45	1390.51	114.063	2531.4	1236.35	13.5762	2785.05	1297.48	282.6	2699.71	1422.37	319.416	2750.66	1242.02	315.829	2806.58	1104.47	359.451	2793.47	934.996	338.98	2780.61	851.199	358.516	2842.43	867.03	369.632	2825.14	777.77
466	0	186.172	2485.63	1597.37	87.7576	2474.56	1602.78	193.289	2640.66	1609.53	63.2621	2643.48	1610.49	107.981	2691.08	1484.6	98.6092	2771.76	1235.53	117.361	2577.37	1392.08	113.149	2517.87	1237.92	13.706	2771.29	1299.32	282.464	2684.95	1424.21	321.002	2734.65	1243.72	318.76	2788.81	1105.04	363.738	2770.95	936.064	343.918	2756.02	852.27	363.56	2817.99	866.844	376.564	2797.43	778.376
467	0	186.054	2471.4	1598.46	87.3841	2460.4	1604.03	192.837	2625.86	1611.5	63.2165	2629.41	1612.71	107.98	2677.37	1486.48	98.7757	2757.93	1237.42	117.106	2563.62	1394.03	112.48	2504.51	1239.6	14.1141	2757.89	1301.12	282.548	2670.83	1426.09	322.341	2718.18	1245.09	321.297	2770.78	1105.74	368.02	2748.23	937.365	349.078	2730.98	853.75	368.725	2793.36	866.855	383.566	2769.29	779.664
468	0	185.462	2456.93	1599.7	87.9347	2446.91	1605.02	193.286	2611.89	1613.4	63.2732	2615.33	1614.71	107.814	2663.62	1488.3	99.0854	2744.07	1239	116.343	2550.01	1395.98	111.263	2490.98	1241.72	14.5611	2744.64	1302.77	282.251	2656.46	1428.06	323.561	2701.76	1246.56	324.595	2752.93	1106.24	372.144	2725.16	938.852	353.954	2705.67	855.799	373.783	2768.37	866.95	390.647	2740.5	781.318
469	0	185.581	2443.37	1600.55	87.5715	2432.94	1606.26	193.302	2597.96	1615.18	63.3061	2601.45	1616.93	107.692	2650.28	1489.95	99.6087	2730.56	1240.38	116.236	2536.4	1397.69	110.107	2477.43	1243.73	14.7336	2731.25	1304.17	282.114	2642.75	1429.57	324.83	2685.52	1247.85	327.552	2735.29	1106.76	376.492	2702.25	940.335	359.33	2679.8	857.882	378.983	2743.17	867.13	397.707	2711.53	783.233
470	0	184.94	2429.13	1601.7	86.7471	2418.5	1607.65	193.156	2583.73	1617.02	63.0665	2587.51	1618.67	107.5	2636.82	1491.75	100.069	2717.15	1241.86	116.002	2522.97	1399.58	109.543	2463.32	1245.31	15.2393	2717.96	1305.64	282.011	2629.14	1431.41	326.038	2669.39	1249.36	330.301	2716.91	1107.34	380.618	2678.91	942.222	364.563	2654.13	860.192	383.774	2717.53	867.618	404.464	2682.11	785.981
471	0	184.732	2415.39	1602.93	86.6497	2405.08	1608.72	192.947	2569.81	1619.06	63.0929	2573.67	1621.01	107.144	2623.33	1493.37	100.409	2703.59	1243.46	115.436	2509.6	1401.37	109.296	2449.27	1247.89	15.7906	2704.76	1307.18	281.666	2615.59	1433.41	327.112	2653.33	1251.11	333.1	2698.79	1108.03	384.808	2655.49	944.552	370.127	2627.67	863.766	388.651	2691.67	868.578	411.436	2652.56	789.394
472	0	184.328	2401.09	1604.16	85.7148	2390.89	1610.25	192.84	2555.66	1621.04	62.8266	2559.83	1622.8	106.939	2609.98	1495.16	100.799	2690.08	1245.02	114.851	2496.24	1403.26	108.427	2435.78	1249.82	16.0109	2691.37	1308.59	281.346	2601.97	1435.55	328.276	2637.46	1253.06	335.781	2680.67	1109.03	388.659	2631.77	947.282	374.713	2601.29	867.25	393.713	2666.18	870.145	417.834	2622.49	793.606
473	0	183.773	2387.46	1605.59	85.8652	2377.78	1611.23	192.718	2541.97	1623.02	62.6183	2546.17	1624.98	106.819	2596.6	1497.09	101.217	2676.81	1246.61	114.96	2482.89	1405.14	108.122	2422.55	1252.03	16.309	2677.94	1309.98	281.029	2588.63	1437.84	329.247	2621.6	1255.14	338.429	2662.35	1110.18	392.39	2608.15	950.206	379.269	2574.81	871.035	398.042	2639.69	871.984	424.1	2592.62	798.281
474	0	183.357	2373.53	1606.72	85.3705	2364.05	1612.37	192.348	2527.72	1624.85	62.6021	2532.38	1626.99	106.605	2583.17	1498.87	101.543	2663.53	1248.07	114.825	2469.46	1406.85	108.5	2408.72	1253.66	16.7882	2664.81	1311.42	281.053	2575.28	1439.94	330.389	2606.08	1257.42	341.065	2644.41	1111.38	396.031	2584.3	953.682	383.701	2548.32	875.356	402.431	2612.99	874.418	430.027	2562.49	803.528
475	0	182.869	2359.85	1607.88	84.529	2349.9	1613.26	192.263	2514.21	1626.51	62.2989	2518.81	1628.3	106.443	2569.72	1500.33	101.879	2650.23	1249.54	114.559	2456.2	1408	108.802	2395.47	1255.27	17.1839	2651.66	1312.59	280.692	2561.82	1441.99	331.571	2590.55	1259.21	343.871	2626.9	1112.76	399.467	2560.52	957.284	387.928	2521.46	880.456	406.6	2586.26	876.994	435.518	2532.51	809.425
476	0	182.525	2346.02	1608.89	84.433	2336.8	1613.87	192.024	2500.31	1628.13	62.0457	2505.1	1629.65	106.335	2556.43	1501.54	102.25	2636.85	1250.79	114.845	2443.2	1409.3	109.162	2382.94	1256.66	17.4077	2638.28	1313.68	280.859	2548.44	1443.92	332.568	2575.05	1261.19	345.342	2607.9	1113.72	402.813	2536.83	961.018	391.819	2494.86	886.024	410.405	2559.5	880.062	440.814	2502.7	815.721
477	0	182.186	2332.34	1609.6	83.9937	2322.71	1614.69	191.912	2486.7	1629.15	61.8636	2491.58	1630.59	106.196	2543.17	1502.71	102.536	2623.37	1251.75	115.113	2429.77	1410.49	109.993	2369.82	1257.54	17.8379	2624.95	1314.64	280.793	2535.31	1445.47	333.754	2559.77	1262.85	347.786	2590.61	1114.67	406.027	2513.22	964.996	396.289	2468.18	892.101	414.349	2532.85	883.347	445.765	2473	822.281
478	0	182.044	2319.04	1610.44	84.1454	2309.56	1614.96	191.748	2473.03	1630.13	61.852	2477.96	1631.24	106.238	2529.65	1503.3	102.933	2610.01	1252.6	115.259	2416.41	1411.26	110.712	2356.65	1258.49	18.1371	2611.57	1315.13	281.028	2521.72	1446.86	334.991	2544.63	1264.26	350.176	2572.99	1115.52	409.174	2489.74	969.084	399.712	2441.71	898.054	418.156	2506.09	886.716	450.307	2443.49	829.1
479	0	181.725	2305.06	1610.81	83.5387	2295.75	1615.42	191.581	2459.23	1630.99	61.5501	2464.4	1631.5	106.327	2516.23	1503.98	103.341	2596.73	1253.14	115.637	2403.14	1411.73	111.336	2343.2	1258.96	18.5286	2598.43	1315.42	281.156	2508.34	1448.18	336.13	2529.36	1265.55	352.521	2555.9	1116.24	412.187	2466.46	973.432	403.254	2415.64	904.394	421.724	2479.18	890.424	454.472	2414.28	836.062
480	0	181.643	2291.77	1611.07	83.6196	2282.42	1615.43	191.534	2445.67	1631.61	61.646	2450.98	1631.99	106.32	2502.91	1504.24	103.735	2583.25	1253.57	115.92	2389.65	1412.28	112.195	2329.81	1259.43	18.8447	2585.09	1315.81	281.203	2494.66	1449.22	337.539	2514.36	1266.59	354.823	2538.53	1116.83	414.893	2443.11	977.721	406.224	2389.42	911.068	424.676	2452.15	894.397	458.132	2385.01	843.33
481	0	181.32	2277.71	1611.27	83.4011	2268.76	1615.33	191.627	2431.86	1631.76	61.5359	2437.19	1631.73	106.578	2489.25	1504.52	104.113	2569.67	1253.81	116.005	2375.94	1412.38	112.942	2316.26	1259.66	19.2674	2571.52	1315.78	281.348	2481.05	1449.74	338.827	2499.09	1267.36	357.282	2521.46	1117.14	417.644	2419.95	981.993	409.314	2364.02	917.921	428.559	2426.19	898.617	461.363	2356.29	850.504
482	0	181.436	2263.92	1611.19	83.2823	2255.06	1614.76	191.53	2418.08	1632.07	61.4382	2423.57	1631.44	106.835	2475.55	1504.35	104.528	2556.22	1253.86	116.747	2362.57	1412.09	114.071	2302.75	1259.66	19.8324	2558	1315.62	281.725	2467.68	1450.21	340.071	2483.79	1267.92	359.665	2504.18	1117.39	420.431	2397.23	986.379	411.997	2338.47	924.481	431.781	2399.86	902.884	464.57	2327.98	857.9
483	0	181.105	2250.04	1611.16	83.1514	2241.42	1614.32	191.714	2404.13	1631.94	61.5892	2409.98	1631.28	106.995	2461.94	1504.29	104.945	2542.6	1253.77	117.278	2348.94	1411.68	114.188	2289.48	1258.61	20.2606	2544.56	1315.27	282.398	2454.13	1450.58	341.51	2468.61	1268.21	362.162	2486.87	1117.43	422.898	2374.61	990.834	414.64	2313.54	931.015	434.497	2373.41	907.304	467.577	2299.97	865.457
484	0	181.148	2236.14	1610.76	82.8984	2227.62	1613.69	191.709	2390.29	1631.83	61.6524	2396.12	1630.6	107.481	2448.02	1503.99	105.523	2529.14	1253.49	117.732	2335.27	1411.04	114.836	2276.05	1257.86	21.0819	2530.81	1315.09	282.721	2440.41	1450.61	342.864	2453.35	1268.3	364.682	2469.55	1117.25	425.189	2351.99	994.857	416.888	2289.16	937.486	437.752	2348.13	911.691	469.85	2272.32	872.897
485	0	181.057	2222.18	1610.35	82.9944	2213.89	1612.98	191.787	2376.13	1631.12	61.714	2382.35	1629.63	107.743	2434.16	1503.37	105.781	2515.66	1253.02	118.119	2321.58	1410.38	115.38	2262.64	1257.09	21.8208	2516.99	1314.34	282.873	2426.74	1450.24	344.08	2438.12	1268.22	367.289	2452.25	1116.89	427.347	2329.8	998.762	418.707	2264.91	943.536	440.296	2322.56	916.042	471.956	2245.1	880.236
486	0	181.085	2207.98	1609.54	82.5906	2199.7	1612.02	192.001	2362.27	1630.29	61.9705	2368.5	1628.33	107.695	2420.29	1502.05	106.24	2502.05	1252.13	119.081	2307.33	1409.29	116.313	2249.04	1256.36	22.3286	2503.35	1313.43	283.056	2412.71	1449.59	345.318	2422.97	1267.67	369.654	2434.76	1116.23	429.399	2308.09	1002.42	420.28	2241.21	949.624	442.825	2297.78	920.037	473.588	2218.61	887.227
487	0	181.008	2194.26	1608.59	83.014	2186.08	1610.95	192.123	2348.33	1628.9	61.9816	2354.85	1626.98	108.489	2406.28	1500.85	106.641	2488.32	1250.8	119.371	2293.8	1407.67	116.332	2235.69	1254.58	22.7034	2489.25	1312.03	283.666	2399.03	1448.55	346.674	2407.85	1266.66	372.321	2417.59	1115.15	431.129	2286.52	1005.72	421.877	2218.09	955.209	444.969	2273.37	923.799	475.105	2192.51	893.939
488	0	181.16	2180.3	1607.44	82.9255	2172.29	1610.07	192.278	2334.23	1627.28	62.4358	2341.04	1625.39	108.756	2392.17	1499.25	106.919	2474.79	1249.4	119.621	2279.37	1406.37	116.506	2221.92	1252.61	23.2552	2475.27	1310.25	284.018	2385.25	1447.26	347.654	2392.75	1265.8	374.537	2400	1113.92	432.874	2265.35	1008.89	423.243	2195.43	960.631	447.041	2249.56	927.315	476.439	2167.32	900.476
489	0	181.282	2166.22	1606.22	82.5281	2157.9	1608.84	192.58	2320.46	1625.65	62.6805	2327.15	1623.57	109.142	2378.1	1497.84	107.281	2460.98	1247.82	120.096	2265.43	1404.82	117.2	2207.92	1251.36	23.5178	2460.89	1308.65	284.263	2371.26	1445.71	348.847	2377.34	1264.39	376.972	2382.82	1112.73	434.13	2244.22	1011.62	424.332	2172.82	965.914	448.58	2225.88	930.892	477.206	2142.45	906.788
490	0	181.352	2152.05	1605.07	82.8721	2143.9	1607.74	192.93	2306.2	1624.07	63.0227	2313.19	1621.82	109.151	2363.76	1496.28	107.408	2447.04	1246.3	120.402	2250.76	1403.33	117.738	2193.98	1249.09	23.9563	2446.62	1307.05	284.431	2357.03	1444.22	349.916	2361.98	1263.17	379.11	2365.16	1111.55	435.202	2223.35	1014.52	424.951	2151.12	970.621	449.915	2202.54	934.311	477.921	2118.36	912.814
491	0	181.338	2137.71	1603.91	82.9431	2129.77	1606.5	193.282	2292.22	1622.5	63.2521	2299.22	1620.25	109.694	2349.54	1494.52	107.533	2432.84	1244.72	120.815	2236.51	1401.57	118.348	2179.62	1247.47	24.0892	2431.88	1305.34	284.874	2342.68	1442.82	350.793	2346.42	1262.05	380.771	2347.44	1110.08	436.171	2203	1017.13	425.371	2129.67	975.266	450.59	2179.16	937.391	478.425	2094.74	918.698
492	0	181.62	2123.5	1602.76	83.2116	2115.89	1605.16	193.331	2277.81	1620.8	63.4151	2285	1618.57	110.13	2335	1492.96	107.616	2418.52	1243.13	121.333	2222.01	1399.74	118.913	2164.96	1245.81	24.481	2417.38	1303.56	285.348	2328.51	1441.26	351.794	2330.76	1260.51	382.607	2329.93	1108.72	436.955	2182.81	1019.43	426.336	2108.41	979.716	451.463	2156.97	940.275	478.555	2071.53	924.125
493	0	181.404	2108.98	1601.74	83.425	2101.78	1604.05	193.485	2263.33	1619.28	63.6191	2270.94	1616.68	109.99	2320.23	1491.29	107.611	2403.84	1241.52	121.794	2207.39	1397.92	119.426	2150.36	1243.56	24.7027	2402.5	1301.73	285.079	2313.57	1439.2	352.603	2314.96	1259.11	384.43	2312.75	1107.5	437.401	2162.94	1021.4	426.011	2088.34	982.779	452.404	2135.45	943.177	478.376	2049.06	929.064
494	0	181.597	2094.86	1600.49	83.1534	2087.46	1602.79	193.749	2249.27	1617.55	63.7756	2256.68	1614.99	110.273	2305.53	1489.46	107.848	2389.5	1239.8	121.915	2192.79	1396.05	120.146	2135.71	1241.85	24.8748	2387.63	1299.97	285.807	2299.41	1437.71	353.328	2299.1	1257.79	385.764	2295.19	1106.24	437.704	2143.45	1023.34	425.537	2068.35	985.715	452.951	2114.29	945.658	478.185	2027.59	933.581
495	0	181.6	2080.35	1599.46	83.2923	2073.23	1601.87	193.977	2234.84	1615.66	64.1564	2242.52	1613.21	110.575	2291.09	1487.77	107.815	2374.54	1238.04	122.242	2177.91	1394.58	121.222	2120.64	1240.61	24.8683	2372.66	1297.86	285.875	2284.58	1436.19	353.843	2283.33	1256.53	386.933	2278.05	1104.9	437.769	2124.62	1024.67	425.317	2048.99	988.492	453.216	2093.9	947.678	477.815	2006.66	937.591
496	0	181.731	2066.02	1598.29	83.0963	2058.73	1600.56	194.185	2220.57	1613.74	64.3491	2228.24	1611.27	110.703	2276.4	1486.12	107.777	2359.92	1236.27	122.488	2163.18	1392.99	121.156	2105.54	1238.84	24.8926	2357.79	1296.01	286.096	2270.02	1434.67	354.238	2267.39	1255	387.699	2260.8	1103.42	437.408	2105.59	1025.48	424.491	2029.62	990.795	453.218	2074.15	949.23	477.096	1986.51	940.719
497	0	181.869	2051.78	1597.12	83.1803	2044.38	1599.42	194.212	2206.3	1612	64.476	2213.92	1609.5	110.115	2261.87	1484.01	107.716	2344.83	1234.52	122.504	2148.25	1391.36	121.639	2090.4	1237.5	24.6401	2342.54	1294.12	286.166	2255.3	1433.04	354.717	2251.4	1253.49	388.417	2244.18	1101.96	437.117	2087.61	1026.31	423.808	2011.43	992.587	452.93	2055.07	950.397	476.475	1967.05	943.399
498	0	181.866	2037.21	1595.97	82.9952	2029.85	1598.37	194.414	2191.8	1610.42	64.4437	2199.65	1608.01	110.181	2247.02	1482.68	107.443	2329.36	1232.81	122.706	2133.15	1390.25	121.866	2075.16	1236.38	24.7286	2327.42	1292.31	286.075	2240.46	1431.69	354.837	2235.28	1252.34	388.741	2227.53	1100.81	436.345	2069.52	1026.64	421.932	1992.75	993.745	452.315	2036.26	951.255	475.453	1948.19	945.632
499	0	181.924	2022.84	1595.15	83.0187	2015.43	1597.55	194.315	2177.4	1609.18	64.5812	2185.14	1606.59	110.275	2232.34	1481.43	107.199	2313.77	1231.23	122.673	2118.07	1389.16	121.993	2059.84	1235.35	24.6486	2312.18	1290.79	286.119	2225.68	1430.53	354.903	2219.24	1251.26	388.886	2210.97	1099.74	435.909	2052.35	1027.11	421.323	1975.34	994.864	451.69	2018.26	952.032	474.474	1929.92	947.245
500	0	181.481	2007.8	1594.31	83.1287	2001	1596.63	194.338	2162.96	1607.96	64.5856	2170.71	1605.35	109.907	2217.49	1479.96	106.896	2298.16	1229.8	122.625	2102.92	1387.84	122.125	2044.45	1234.37	24.4536	2296.86	1289.29	285.869	2210.65	1429.33	354.919	2203.36	1250.19	389.079	2194.9	1098.74	435.015	2035.15	1027.09	420.521	1958.29	995.683	450.846	2000.6	952.344	473.275	1912.29	948.323
501	0	181.915	1993.88	1593.54	83.0776	1986.43	1595.97	194.33	2148.36	1606.77	64.4311	2156.14	1604.11	109.691	2202.51	1478.66	106.563	2282.31	1228.16	122.189	2087.6	1386.62	121.916	2028.91	1233.38	24.1535	2281.26	1287.79	285.626	2195.66	1427.96	354.716	2187.52	1249.09	388.854	2178.83	1097.79	434.027	2018.48	1026.72	418.772	1941.65	995.297	449.909	1983.61	952.412	471.781	1894.99	948.826
502	0	181.586	1978.99	1592.74	82.7647	1971.53	1595.38	194.298	2134.23	1605.51	64.4861	2141.68	1603.04	109.431	2187.67	1477.38	106.032	2266.35	1226.32	121.753	2072.37	1385.8	121.695	2013.26	1232.9	23.5506	2265.62	1286.17	285.165	2180.57	1426.58	354.427	2171.94	1247.86	388.272	2162.94	1096.48	433.076	2002.41	1026.13	417.184	1925.32	994.964	448.855	1967.21	951.893	470.39	1878.64	948.533
503	0	181.463	1964.48	1592.07	82.9054	1957.03	1594.78	194.163	2119.64	1604.2	64.4258	2127.14	1602.08	109.365	2172.85	1476.11	105.293	2250.32	1224.71	121.341	2057.08	1384.9	120.959	1997.27	1232.28	22.8884	2250.03	1284.76	284.761	2165.45	1425.31	353.817	2156.24	1246.6	388.116	2147.94	1095.33	431.997	1986.67	1025.3	415.574	1909.61	993.948	447.706	1951.47	951.066	468.563	1862.45	947.763
504	0	181.558	1950.13	1591.48	82.7539	1942.33	1594.35	193.741	2105.15	1603.13	64.2413	2112.59	1601.05	108.528	2157.7	1474.9	104.537	2234.27	1223.14	120.893	2041.65	1384.01	120.243	1981.39	1231.61	22.0358	2234.18	1283.24	284.168	2150.21	1423.82	353.244	2140.86	1245.28	387.142	2132.59	1093.85	430.501	1971.19	1023.51	414.139	1894.48	992.674	446.514	1936.16	949.709	466.831	1847.06	946.29
505	0	181.394	1935.31	1591.23	82.9041	1927.65	1594.35	193.685	2090.94	1602.13	63.9647	2097.87	1600.52	108.16	2143.05	1473.91	103.817	2218.01	1221.46	119.87	2026.28	1383.49	119.068	1965.18	1231.36	21.2524	2218.3	1281.69	283.821	2135.33	1422.38	352.472	2125.7	1243.92	386.314	2117.75	1092.4	429.387	1956.51	1022.21	412.469	1879.7	990.747	445.239	1921.34	947.999	465.128	1832.28	944.423
506	0	181.676	1921.07	1591.17	82.9774	1912.78	1595	193.359	2076.17	1601.63	63.6088	2082.99	1600.37	107.361	2127.95	1473.29	103.31	2201.79	1219.99	119.041	2011.01	1383.27	117.646	1948.69	1231.4	20.3336	2202.45	1280.64	283.003	2120.17	1421.2	351.508	2110.83	1242.63	385.307	2103.4	1091.02	427.917	1942.04	1020.04	411.04	1865.36	988.98	443.769	1907.35	945.723	463.027	1818.13	941.7
507	0	181.689	1906.23	1591.39	83.2423	1897.92	1595.54	193.142	2061.93	1601.49	63.3683	2068.13	1600.71	106.738	2113	1473.03	102.901	2185.56	1219.12	118.343	1995.51	1383.78	116.405	1932.29	1232.1	19.4486	2186.49	1279.94	282.395	2105.49	1420.56	350.347	2096.47	1242.09	383.522	2088.47	1089.8	426.564	1928.57	1017.86	409.307	1852.07	985.968	442.219	1894.18	943.317	461.091	1804.85	938.532
508	0	181.69	1891.54	1591.93	83.378	1882.92	1596.48	192.831	2047.11	1601.81	63.0082	2053.09	1601.16	106.475	2097.7	1473.23	102.413	2169.28	1218.82	117.52	1980.24	1384.47	114.972	1915.67	1233.32	18.9031	2170.46	1279.79	281.629	2090.44	1420.44	348.772	2081.84	1241.4	381.875	2074.47	1089.37	424.563	1914.96	1015.52	407.15	1838.96	982.892	440.4	1881.52	940.765	459.14	1792.32	935.201
509	0	181.728	1876.81	1592.8	83.7387	1868.4	1597.41	192.453	2032.54	1602.21	62.7265	2038.05	1602.18	105.707	2082.39	1473.81	102.376	2153.22	1218.92	116.862	1964.8	1385.33	113.874	1899.55	1234.47	18.7125	2154.45	1279.93	281.079	2075.35	1420.61	347.284	2067.85	1241.31	380.167	2060.94	1089.23	422.887	1902.44	1013.36	404.836	1826.67	979.214	438.663	1869.93	938.198	456.921	1780.6	931.326
510	0	181.828	1862.01	1594	83.8765	1853.41	1598.83	192.246	2017.93	1602.92	62.3674	2022.97	1603.19	105.196	2067.2	1474.77	102.684	2137.71	1219.45	116.191	1949.4	1386.36	113.2	1883.48	1235.88	18.4472	2138.6	1280.33	280.438	2060.08	1421.22	345.902	2054.16	1241.65	378.237	2047.74	1089.56	420.747	1889.98	1011.13	403.148	1815.31	975.719	436.903	1859.12	935.555	454.706	1769.78	927.245
511	0	181.908	1847.18	1595.12	83.87	1838.13	1600.07	191.761	2002.81	1603.81	61.9654	2007.83	1604.42	104.899	2052.01	1475.65	103.021	2122.59	1220.53	116.062	1934.4	1387.21	112.637	1867.59	1237.23	18.5896	2123.06	1281.37	280.052	2044.99	1422.18	344.827	2040.69	1242.26	375.736	2034.6	1089.99	418.557	1878.42	1008.94	400.839	1804.49	971.84	434.026	1848.73	932.403	452.541	1759.91	922.468
512	0	181.865	1832.39	1596.3	83.8466	1823.21	1601.15	191.627	1988.32	1604.81	61.8081	1992.99	1605.04	104.537	2036.78	1476.81	103.202	2107.65	1221.79	115.853	1919.17	1388.08	112.391	1851.84	1238.45	18.6595	2107.6	1282.45	279.726	2029.88	1423.71	343.173	2026.84	1242.97	374.038	2022.9	1091.09	416.209	1867.71	1006.42	398.178	1794.22	967.935	431.482	1839.59	929.264	450.08	1751	917.594
513	0	181.856	1817.67	1597.66	83.9679	1808.39	1602.6	191.163	1973.21	1605.6	61.8375	1978.06	1605.91	104.362	2022.07	1477.81	103.225	2093.03	1223.09	116.025	1904.27	1389.23	112.742	1836.66	1239.68	18.346	2092.45	1283.53	279.497	2014.91	1425.1	342.045	2013.62	1243.65	371.115	2010.42	1091.41	413.702	1857.43	1003.79	395.747	1784.99	963.81	429.193	1831.52	926.012	447.449	1743.01	912.078
514	0	181.955	1802.93	1598.85	83.9893	1793.62	1603.57	191.114	1958.52	1606.58	61.6201	1963.4	1606.52	104.175	2007.24	1478.76	103.27	2078.58	1224.36	116.734	1889.54	1390.39	113.411	1821.71	1240.68	18.4036	2077.43	1284.47	279.476	2000.66	1426.31	340.91	2000.24	1244.28	368.683	1998.75	1092.1	411.181	1847.64	1000.57	393.212	1776.25	959.394	425.942	1823.64	922.127	444.679	1735.62	906.193
515	0	182.064	1788.25	1600.23	83.9608	1778.88	1604.66	191.114	1943.93	1608.03	61.7306	1948.67	1607.48	104.314	1992.73	1480.2	103.011	2064.03	1225.96	117.185	1875.01	1391.58	114.519	1807.2	1241.49	18.0398	2062.77	1285.83	279.551	1986.7	1427.79	340.181	1987.18	1245.28	366.111	1987.46	1092.93	408.801	1838.68	997.809	390.675	1768	955.005	423.07	1816.48	918.636	441.802	1729.32	900.183
516	0	182.156	1773.56	1601.8	84.1414	1764.2	1605.72	191.26	1928.96	1609.98	61.7529	1934.03	1608.85	104.351	1978.27	1481.74	102.79	2049.47	1227.63	117.945	1860.81	1392.85	116.087	1793	1242.59	17.8795	2047.89	1287.49	279.666	1972.97	1429.52	338.24	1973.35	1246.42	363.545	1976.15	1094.12	406.056	1829.99	994.918	387.994	1760.41	950.457	419.765	1809.91	915.105	438.91	1723.34	894.059
517	0	182.288	1758.86	1603.54	84.1998	1749.66	1607.03	191.289	1914.37	1612.02	61.8975	1919.38	1610.58	104.197	1963.86	1483.45	102.547	2035.24	1229.54	118.716	1846.77	1394.35	117.988	1779.08	1243.95	17.3242	2033.39	1289.27	279.754	1959.5	1431.37	337.823	1960.85	1247.9	361.35	1965.64	1095.64	403.502	1822.02	992.098	385.136	1753.61	945.519	416.564	1804.12	911.55	435.576	1718.07	888.14
518	0	182.534	1744.39	1604.94	84.5069	1735.15	1608.09	191.631	1899.74	1614.27	62.2285	1904.8	1612.53	104.345	1949.6	1485.38	102.152	2021.01	1231.5	119.707	1832.75	1396.15	119.915	1765.72	1245.52	17.1445	2018.87	1291.23	279.785	1946.31	1433.06	336.927	1948.62	1249.37	358.963	1954.74	1096.95	400.882	1814.44	989.152	382.175	1747.21	940.825	413.334	1799.25	908.16	432.196	1713.79	881.657
519	0	182.762	1729.73	1606.62	84.8314	1720.71	1609.35	192.423	1885.64	1616.97	62.3583	1890.19	1614.59	104.456	1935.55	1487.35	101.573	2006.72	1233.29	120.066	1818.4	1397.84	121.886	1752.36	1246.94	16.6634	2004.2	1292.96	280.002	1933.55	1434.7	336.19	1936.74	1250.95	356.652	1944.34	1098.24	398.091	1807.19	986.21	379.115	1741.49	935.815	409.877	1794.54	904.727	428.647	1710.06	875.11
520	0	183.113	1715.46	1608.29	85.3039	1706.51	1610.74	192.313	1870.89	1619.2	62.7569	1875.77	1616.8	104.535	1921.28	1489.47	101.116	1992.89	1235.18	121.012	1804.59	1399.85	123.831	1739.35	1248.99	16.548	1990.02	1294.91	280.331	1920.72	1436.43	335.084	1925.08	1252.36	354.344	1934.11	1099.78	395.377	1800.78	983.297	376.069	1736.53	930.924	406.224	1790.53	901.273	425.041	1707.36	869.002
521	0	183.26	1700.64	1610	85.6261	1692.08	1612.47	192.725	1856.38	1621.73	63.2059	1861.44	1619.22	104.861	1907.25	1491.55	100.568	1979	1237.11	121.74	1790.7	1402.14	125.727	1726.24	1251.13	15.9326	1975.37	1296.66	280.455	1907.83	1438.54	334.453	1913.96	1254.17	352.599	1924.7	1101.49	392.648	1794.7	980.489	372.883	1732.02	926.546	402.702	1787.38	898.102	421.016	1705.15	862.51
522	0	183.655	1686.43	1611.78	86.1207	1677.72	1613.92	193.172	1842.3	1624.1	63.5873	1847.18	1621.24	105.127	1893.42	1493.66	99.9495	1965	1238.99	122.821	1776.97	1404.44	127.256	1712.96	1253.48	15.8248	1961.14	1298.44	280.568	1895.28	1440.2	333.474	1903.14	1255.67	350.622	1914.85	1103.16	389.918	1789.26	977.872	369.825	1728.26	921.925	399.093	1784.36	895.018	417.012	1703.56	856.24
523	0	184.247	1672.27	1613.33	86.7156	1663.57	1615.35	193.715	1828.01	1626.45	64.0651	1832.9	1623.55	105.493	1879.38	1495.74	99.2148	1950.96	1240.75	123.368	1763.29	1406.48	128.62	1699.24	1255.66	15.3485	1946.91	1300.37	280.433	1882.55	1442.11	332.79	1892.53	1257.21	348.55	1905.36	1104.8	387.19	1784.15	975.186	366.532	1724.81	917.732	395.373	1781.98	891.993	412.852	1702.8	850.054
524	0	184.811	1658.25	1614.98	87.2792	1649.54	1617.09	194.498	1814.3	1628.79	64.4685	1818.83	1625.68	105.691	1865.5	1497.59	98.5333	1937.06	1242.59	124.12	1749.31	1408.71	129.785	1685.58	1257.97	14.6776	1932.31	1302.1	280.602	1869.63	1443.77	331.86	1881.62	1258.76	346.609	1896.09	1106.59	384.339	1779.37	972.645	362.954	1721.85	913.179	391.933	1780.22	889.531	408.601	1702.49	844.253
525	0	185.353	1644.36	1616.54	87.6847	1635.47	1618.77	194.737	1799.73	1630.87	65.2667	1804.74	1628.07	105.981	1851.5	1499.63	98.0621	1923.43	1244.63	124.611	1735.41	1410.84	130.646	1671.56	1260.39	14.8606	1918.08	1304.45	280.555	1856.52	1445.38	331.053	1870.69	1260.35	344.441	1886.85	1108.5	381.584	1774.89	970.809	359.971	1719.49	909.236	388.48	1778.33	887.432	404.609	1702.55	838.797
526	0	185.812	1630.07	1618.29	88.2532	1621.49	1620.18	195.36	1785.69	1632.97	65.7586	1790.67	1630.1	106.282	1837.45	1501.62	97.7143	1909.62	1246.75	124.845	1721.66	1412.59	131.222	1657.36	1262.3	14.456	1903.78	1306.77	280.564	1843.18	1446.85	330.182	1859.25	1262.01	342.377	1877.65	1110.34	378.834	1770.38	969.139	356.925	1717.23	905.534	385.431	1776.93	885.889	400.446	1702.84	833.833
527	0	186.191	1616.11	1619.73	88.7569	1607.59	1621.5	196.003	1771.62	1634.75	66.2434	1776.64	1631.95	106.569	1823.37	1503.34	97.3088	1895.3	1248.4	125.51	1707.73	1414.35	131.607	1643.37	1264.03	14.016	1889.15	1308.63	280.721	1829.66	1448.18	329.293	1847.99	1263.08	340.18	1868.6	1111.93	376.123	1766.15	967.541	354.136	1715.41	901.793	382.092	1775.33	884.349	396.33	1703.92	828.532
528	0	186.808	1602.08	1621	89.225	1593.56	1622.97	196.569	1757.63	1636.12	66.6554	1762.66	1633.39	106.826	1809.36	1504.67	97.0184	1880.97	1249.76	125.764	1693.64	1415.71	131.61	1629.53	1265.4	14.1838	1874.89	1310.3	280.568	1816.27	1448.9	328.468	1836.42	1263.83	337.84	1859.71	1113.23	373.545	1762.43	965.795	351.218	1713.62	898.443	379.095	1774.19	882.757	392.325	1705.1	823.876
529	0	187.358	1588.03	1621.91	89.974	1579.65	1624.01	197.13	1743.84	1636.88	67.3679	1748.74	1634.52	106.968	1795.27	1505.6	96.7593	1866.76	1250.62	126.01	1679.7	1416.9	131.514	1615.53	1266.31	13.8267	1860.65	1311.61	280.747	1802.65	1449.67	327.348	1824.81	1264.23	335.222	1850.86	1114.28	370.807	1758.78	964.003	348.636	1712.22	895.136	376.098	1773.2	881.276	388.511	1706.66	819.064
530	0	187.874	1574.27	1622.5	90.4487	1565.81	1624.9	197.603	1729.82	1637.34	68.0451	1734.91	1635.24	107.273	1781.26	1506.18	96.7511	1852.41	1251.3	126.131	1665.6	1417.46	131.332	1601.62	1266.88	13.1098	1846.27	1312.34	280.612	1788.98	1449.86	326.069	1813.11	1264.28	332.426	1842	1115.07	368.118	1755.01	962.084	345.85	1710.5	892.052	373.148	1772.54	879.886	384.773	1708.54	814.809
531	0	188.352	1560.28	1623.01	90.8826	1551.81	1625.52	198.292	1716.15	1637.48	68.3257	1721.03	1635.21	107.459	1767.06	1506.49	96.7796	1838.3	1251.76	126.357	1651.5	1417.83	131.336	1587.72	1267.17	13.1908	1831.98	1313.16	280.663	1775.33	1449.83	324.774	1801.52	1264.22	329.59	1833.1	1115.75	365.417	1751.38	960.289	343.055	1709.28	888.915	369.826	1771.47	878.501	381.123	1710.51	810.698
532	0	188.911	1546.36	1623.28	91.3531	1537.81	1626.18	198.555	1702.07	1637.3	68.9168	1707.06	1635.43	107.857	1752.91	1506.47	96.7504	1824.09	1252.08	126.647	1637.33	1417.95	131.278	1573.65	1267.15	13.1043	1817.92	1313.51	280.678	1761.52	1449.62	323.497	1789.87	1264.02	326.703	1824.24	1116.35	362.43	1747.98	958.287	340.9	1707.48	885.923	366.441	1770.33	877.326	377.489	1712.25	806.677
533	0	189.424	1532.45	1623.22	92.1499	1523.66	1626.32	198.776	1687.71	1636.61	69.3229	1693.11	1635.08	107.958	1738.65	1506.23	96.6012	1809.42	1251.66	126.614	1622.9	1417.7	131.33	1559.44	1266.83	13.1212	1803.56	1313.72	280.756	1747.64	1449.2	322.26	1778.44	1263.59	323.702	1815.25	1116.77	359.751	1744.28	956.471	337.101	1706.34	881.846	363.44	1769.49	876.403	373.723	1714.16	802.747
534	0	189.956	1518.37	1623.1	92.6383	1509.58	1626.36	199.347	1674.1	1636.12	69.7098	1679.05	1634.45	107.984	1724.12	1505.76	96.6558	1795.1	1251.5	127.084	1608.73	1417.05	131.423	1545.03	1266.18	12.8029	1789.11	1313.44	280.846	1733.55	1448.57	320.936	1767.16	1263.2	320.794	1806.09	1117.25	356.828	1740.46	954.759	334.444	1704.9	879.107	359.946	1768.4	875.676	370.507	1716.13	799.845
535	0	190.439	1504.16	1622.88	93.2396	1495.55	1626.29	199.672	1659.71	1635.07	69.9574	1664.91	1633.77	108.204	1709.69	1504.92	97.0662	1780.97	1251.12	126.991	1594.21	1416.18	131.509	1530.89	1264.92	12.5693	1774.67	1312.9	280.889	1719.33	1447.65	319.72	1755.84	1262.87	317.893	1796.64	1117.7	354.027	1736.75	953.376	331.699	1703.21	876.706	356.489	1767.14	875.201	367.29	1717.8	797.465
536	0	191.079	1490.18	1622.22	93.8364	1481.34	1625.82	200.222	1645.85	1633.69	70.2564	1650.7	1632.62	108.301	1695.06	1503.78	97.2817	1766.48	1250.04	127.318	1579.74	1415.11	131.508	1516.68	1263.65	12.4199	1760.53	1311.87	281.011	1705.11	1446.39	318.46	1744.58	1262.13	315.192	1787.15	1117.75	351.286	1732.76	951.809	328.311	1701.7	874.172	352.785	1765.53	874.57	364.001	1719.24	794.996
537	0	191.688	1475.97	1621.32	94.469	1467.09	1625.12	200.419	1631.62	1631.99	70.8988	1636.39	1631.23	108.505	1680.42	1502.48	97.6914	1752.23	1248.73	127.348	1565.08	1413.43	131.557	1502.5	1261.94	12.8336	1746.22	1310.83	281.066	1690.72	1444.86	317.147	1733.7	1261.29	312.549	1777.45	1117.62	348.478	1728.54	950.167	325.432	1699.53	871.535	349.176	1763.61	873.965	360.873	1720.55	792.818
538	0	192.265	1461.95	1620.23	95.2108	1452.84	1624.05	200.94	1617.6	1629.91	71.3285	1622.16	1629.11	108.968	1665.76	1500.74	98.2718	1737.97	1247.06	127.535	1550.59	1411.71	131.666	1488.46	1259.96	12.7978	1731.88	1309.2	281.394	1676.32	1443.18	315.836	1722.22	1260.28	310.29	1767.73	1117.45	345.985	1724.16	948.55	322.928	1697.25	869.397	345.577	1761.23	873.411	357.57	1721.19	791.002
539	0	192.873	1447.76	1618.72	95.61	1438.51	1622.78	201.242	1603.57	1627.74	71.6485	1607.71	1626.84	109.148	1650.99	1498.73	98.6901	1723.55	1245.23	127.982	1535.83	1409.64	131.711	1474.49	1257.43	13.0445	1717.63	1307.68	281.658	1661.85	1441.4	314.677	1710.86	1259.15	308.048	1757.96	1117.07	343.624	1719.44	947.217	320.666	1694.23	867.59	342.237	1758.54	873.045	354.305	1721.5	789.682
540	0	193.656	1433.47	1617.15	96.3985	1424.1	1621.35	201.577	1589.25	1625.32	72.0185	1593.46	1624.68	109.614	1636.3	1496.63	98.5592	1708.95	1242.82	128.296	1521.06	1407.5	131.725	1460.47	1254.86	13.1384	1703.15	1305.71	282.081	1646.92	1439.25	313.574	1699.14	1257.84	305.702	1747.81	1116.71	341.536	1714.3	945.97	318.172	1690.71	865.746	339.159	1755.09	872.748	351.113	1720.97	788.139
541	0	194.162	1419.32	1615.38	96.9312	1409.6	1619.74	201.902	1575.2	1622.74	72.1036	1579.08	1621.94	110.293	1621.32	1494.03	99.3043	1694.4	1240.74	128.746	1506.25	1405.05	131.857	1446.12	1252.12	13.4956	1688.6	1303.65	282.519	1632.27	1436.83	312.717	1687.24	1256.33	303.829	1737.68	1116.14	339.654	1708.61	944.714	316.426	1686.6	864.162	336.307	1751.06	872.466	348.214	1719.72	786.812
542	0	194.804	1404.88	1613.54	97.6278	1395.18	1617.92	202.257	1560.73	1620.2	72.8511	1564.29	1618.97	110.623	1606.48	1491.81	99.9059	1679.99	1238.64	129.317	1491.67	1402.28	132.003	1431.57	1249.34	14.1209	1674.36	1301.63	283.099	1617.39	1434.59	312.052	1674.88	1254.83	302.346	1727.22	1115.48	337.897	1702.6	943.638	314.784	1681.9	862.542	334.235	1746.61	872.508	345.476	1717.67	785.568
543	0	195.541	1390.49	1611.62	98.2301	1380.53	1616.01	202.594	1546.44	1617.48	73.2471	1549.86	1616.44	111.088	1591.53	1489.47	100.676	1665.34	1236.46	129.732	1476.7	1399.73	132.287	1416.93	1246.62	14.6633	1659.82	1299.51	283.6	1602.49	1432.17	311.719	1662.26	1253.38	300.921	1716.54	1114.92	336.431	1695.79	942.607	313.674	1676.52	861.24	332.146	1741.09	872.418	342.899	1714.9	784.609
544	0	196.201	1375.96	1609.68	99.2182	1366.01	1614.09	203.288	1531.9	1614.91	73.9799	1535.23	1614	112.05	1576.64	1487.21	101.432	1650.66	1234.16	130.239	1461.92	1397.22	132.561	1402.27	1243.78	15.2194	1645.37	1297.39	284.418	1587.52	1429.82	311.683	1649.31	1251.79	300.187	1705.47	1114.29	335.603	1688.44	941.715	312.747	1670.27	859.836	330.351	1734.83	872.275	340.661	1711.24	783.696
545	0	197.169	1361.46	1607.59	99.9799	1351.28	1611.7	203.936	1517.85	1612.48	74.5814	1520.57	1611.44	112.677	1561.64	1484.83	102.225	1635.88	1231.98	130.82	1446.98	1394.46	132.917	1387.49	1240.85	15.8613	1630.98	1295.38	285.106	1572.52	1427.48	311.809	1636.1	1250.29	299.606	1693.85	1113.7	334.851	1680.14	940.919	312.093	1663.57	858.641	329.18	1728.09	872.3	338.826	1706.72	783.124
546	0	197.82	1346.8	1605.52	100.767	1336.64	1609.78	204.51	1502.98	1610.04	75.1395	1505.73	1608.94	113.449	1546.82	1482.66	103.148	1621.1	1229.8	131.477	1432.19	1392.06	133.123	1372.78	1238.34	16.824	1616.21	1293.2	285.855	1557.56	1425.22	312.212	1622.34	1248.79	299.176	1681.52	1112.89	334.496	1671.27	940.108	311.859	1656.01	857.339	328.37	1720.52	872.223	337.183	1701.33	782.507
547	0	198.744	1332.38	1603.51	101.537	1321.92	1607.83	205.251	1488.62	1607.59	75.8121	1491.14	1606.96	114.378	1532.13	1480.34	104.161	1606.26	1227.66	132.074	1417.2	1389.77	133.787	1357.98	1235.89	17.7147	1601.6	1291.04	286.546	1542.54	1423.04	312.812	1608.69	1247.15	299.229	1669.08	1112.01	334.616	1662.1	939.072	311.988	1647.81	856.184	327.85	1712.29	872.214	335.659	1695	781.862
548	0	199.464	1317.53	1601.53	102.427	1307.17	1605.72	205.905	1473.94	1605.31	76.5829	1476.27	1604.66	115.072	1517.08	1478.26	105.365	1591.44	1225.6	132.83	1402.29	1387.42	134.375	1343.25	1233.92	18.7927	1586.67	1288.81	287.443	1527.64	1421.16	313.617	1594.69	1245.65	299.768	1656.2	1111.1	335.009	1651.92	938.291	312.526	1638.86	855.225	327.702	1703.1	872.092	334.725	1687.67	781.182
549	0	200.306	1302.83	1599.58	103.098	1292.4	1603.97	206.622	1459.29	1603.29	77.3981	1461.6	1602.61	116.05	1502.43	1476.14	106.634	1576.25	1223.41	133.729	1387.37	1385.66	135.125	1328.28	1231.84	19.9068	1571.82	1286.62	288.447	1512.56	1419.14	314.559	1580.53	1244.2	300.506	1642.8	1110.15	335.71	1641.11	937.56	313.536	1628.96	854.616	328.014	1693.23	872.118	334.015	1679.22	780.654
550	0	201.188	1288.27	1597.93	104.111	1277.69	1602.39	207.607	1444.48	1601.6	78.1713	1446.81	1600.66	117.228	1487.66	1474.14	107.872	1561.12	1221.16	134.581	1372.4	1383.77	135.987	1313.08	1230.41	21.3422	1556.63	1284.37	289.467	1497.7	1417.47	315.574	1566.14	1242.83	301.187	1628.96	1109.04	336.575	1629.6	936.597	314.517	1618.25	853.687	328.648	1682.42	871.84	333.795	1669.95	780.071
551	0	202.049	1273.4	1596.43	104.946	1262.92	1600.59	208.324	1429.9	1599.75	79.1394	1432.08	1599	118.298	1472.8	1472.27	109.429	1545.55	1218.87	135.851	1357.34	1382.31	137.297	1297.69	1229.13	22.8959	1541.54	1282.1	290.51	1482.73	1415.97	316.782	1551.4	1241.43	302.573	1615.03	1108.14	337.967	1617.3	935.803	315.783	1606.66	852.638	329.836	1670.81	871.553	334.065	1659.62	779.383
552	0	202.931	1258.65	1595.05	105.661	1248.16	1599.31	209.475	1415.05	1598.41	80.0909	1417.36	1597.57	119.388	1457.7	1470.68	110.963	1529.91	1216.79	137.047	1342.34	1380.87	138.748	1282.09	1228.1	24.4534	1526.04	1279.89	291.659	1467.85	1414.46	318.158	1536.79	1240.16	303.96	1600.53	1107.14	339.764	1604.49	935.117	317.614	1594.23	851.729	331.418	1658.42	871.269	334.924	1648.33	778.737
553	0	203.671	1243.78	1594	106.38	1233.52	1598.08	210.44	1400.45	1597.5	81.0779	1402.75	1596.04	120.538	1442.78	1469.14	112.389	1514.2	1214.95	138.392	1327.09	1379.84	140.253	1266.24	1227.19	25.9272	1510.31	1277.85	292.994	1453.05	1413.37	319.602	1521.69	1239.07	305.28	1585.44	1106.28	341.732	1590.78	934.537	319.947	1580.94	851.094	333.454	1645.14	871.011	336.222	1635.78	778.266
554	0	204.525	1228.92	1593.23	107.314	1218.75	1597.26	211.582	1385.39	1596.63	82.025	1388.15	1594.92	121.77	1427.86	1467.85	113.856	1498.27	1213.17	139.78	1311.86	1378.78	142.319	1250.14	1226.92	27.2849	1494.52	1276.07	294.117	1438.03	1412.24	321.212	1506.42	1238.18	306.855	1570.09	1105.33	343.823	1576.16	933.667	322.502	1566.82	850.134	335.609	1630.84	870.672	338.191	1622.24	777.853
555	0	205.335	1213.81	1593.21	108.072	1204.07	1596.84	212.619	1370.61	1596.25	83.2394	1373.32	1594.44	123.165	1412.89	1467.09	115.165	1482.06	1211.42	141.289	1296.62	1378.15	144.309	1234.07	1226.55	28.6304	1478.38	1274.28	295.465	1422.98	1411.51	322.979	1490.77	1237.44	308.679	1554.5	1104.33	346.629	1561.14	933.376	325.268	1551.68	849.184	337.998	1615.68	869.996	340.725	1607.7	777.183
556	0	206.289	1198.74	1593.58	109.037	1189.11	1596.82	213.64	1355.34	1596.35	84.2102	1358.49	1594.23	124.401	1397.89	1466.74	116.369	1465.73	1210.08	142.892	1281.4	1378.24	146.485	1217.84	1226.43	30.0052	1462.09	1272.78	296.802	1407.94	1411.04	324.718	1475.19	1236.67	310.844	1538.43	1103.52	348.886	1544.98	932.328	327.858	1535.72	848.057	340.647	1599.67	869.33	343.583	1591.87	776.564
557	0	207.068	1183.8	1594.31	109.804	1174.3	1597.34	214.781	1340.38	1596.87	85.4162	1343.6	1594.29	125.769	1382.65	1466.67	117.451	1449.8	1209.33	144.328	1266.12	1378.72	148.594	1201.58	1227.18	31.2379	1445.88	1271.78	298.191	1393.04	1410.99	326.393	1459.15	1236.06	312.916	1521.85	1102.72	351.847	1528.56	931.9	331.414	1518.84	847.958	343.605	1582.92	868.637	346.975	1575.09	775.934
558	0	207.996	1168.96	1595.3	110.657	1159.42	1598.37	215.581	1325.44	1597.37	86.473	1328.86	1594.84	126.936	1367.54	1466.97	118.491	1433.95	1209.13	146.104	1250.83	1379.43	150.694	1185.6	1228.34	32.1673	1429.84	1271.47	299.411	1378.12	1411.24	328.083	1442.93	1235.61	315.318	1505.11	1102.08	354.874	1511.35	931.529	335.076	1501.1	847.819	346.595	1565.21	867.836	350.737	1557.11	775.304
559	0	208.924	1154.06	1596.42	111.67	1144.62	1599.57	216.703	1310.49	1598.27	87.4013	1314.03	1595.08	128.135	1352.23	1467.56	119.386	1418.1	1209.34	147.575	1235.61	1380.53	152.711	1169.53	1229.81	33.2345	1413.63	1271.33	300.445	1363.12	1411.8	329.72	1426.46	1235.5	317.54	1487.75	1101.67	358.172	1493.26	931.354	338.587	1482.46	847.753	350.14	1546.83	867.399	355.19	1538	774.96
560	0	209.818	1139.2	1597.97	112.52	1129.77	1600.71	217.595	1295.63	1599.28	88.5201	1299.15	1596.02	129.168	1337.06	1468.48	120.126	1402.62	1210	148.529	1220.17	1381.59	154.365	1153.59	1231.13	33.8838	1397.81	1272.19	301.241	1348.02	1412.66	331.412	1409.73	1235.97	319.918	1470.19	1101.74	361.279	1473.96	931.433	342.039	1462.81	847.681	353.765	1527.21	867.097	360.081	1517.66	774.938
561	0	210.691	1124.35	1599.71	113.492	1114.88	1602.5	218.7	1280.85	1600.49	89.353	1284.31	1596.87	130.119	1321.71	1469.64	120.347	1386.82	1211.32	149.63	1204.98	1382.97	156.084	1137.91	1232.52	34.578	1382.47	1273.91	302.162	1332.79	1413.99	332.966	1392.93	1236.94	322.305	1452.38	1102.19	364.407	1453.89	931.88	346.183	1442.37	848.494	357.578	1506.63	867.232	365.409	1496.18	775.257
562	0	211.583	1109.55	1601.44	114.171	1100.12	1604.09	219.354	1265.99	1601.68	90.1508	1269.46	1598.12	130.856	1306.62	1470.98	120.301	1371.39	1212.96	150.697	1189.82	1384.24	157.516	1122.43	1234.24	34.9264	1367.16	1275.63	303.053	1317.36	1415.68	334.6	1376.06	1238.09	324.775	1434.43	1102.75	368.245	1433.7	932.852	350.317	1421.03	849.186	361.828	1485.51	867.176	371.042	1473.65	775.696
563	0	212.442	1094.85	1603.14	115.224	1085.32	1605.82	220.196	1251.3	1602.59	90.8263	1254.8	1599.52	131.622	1291.5	1472.43	120.615	1355.93	1214.73	151.068	1174.53	1385.4	158.357	1107.54	1235.25	35.4561	1352.03	1277.25	303.829	1301.98	1417.1	336.262	1359.17	1239.26	327.347	1416.37	1103.19	372.296	1413.09	933.562	354.684	1399.01	849.937	366.359	1463.69	867.086	376.888	1450.02	776.061
564	0	213.246	1080.24	1604.77	115.854	1070.66	1607.75	220.294	1235.93	1604.04	91.5488	1239.89	1600.62	132.387	1276.57	1473.97	121.111	1340.94	1216.67	151.486	1159.54	1386.59	159.102	1092.74	1236.52	36.0018	1337.56	1279.18	304.615	1286.41	1418.54	337.776	1342.17	1240.35	330.075	1398.4	1103.64	376.307	1391.53	934.347	358.703	1376.38	850.388	371.051	1441.36	866.889	382.984	1425.51	776.338
565	0	213.84	1065.62	1606.5	116.642	1055.92	1609.52	221.104	1221.74	1605.21	92.1002	1225.26	1602.72	132.953	1261.9	1475.65	121.788	1326.19	1218.68	152.028	1145.13	1388.25	159.122	1078.38	1237.58	36.6267	1323.26	1281.22	305.405	1270.88	1420.18	339.418	1325.21	1241.59	332.794	1380.04	1104.15	380.173	1369.76	934.968	363.389	1353.2	851.518	375.815	1418.36	866.733	389.345	1400.36	776.938
566	0	214.385	1051.02	1608.08	117.143	1041.3	1611.49	221.66	1207.1	1606.62	92.5491	1210.62	1604.16	133.705	1247.27	1477.43	122.646	1311.7	1220.79	151.932	1130.32	1389.88	158.658	1064.19	1238.41	37.4732	1309.23	1283.16	306.272	1255.43	1421.99	341.026	1308.16	1242.75	335.636	1361.86	1104.44	384.055	1347.7	935.662	367.4	1329.32	852.181	380.697	1394.99	866.395	395.562	1374.27	777.48
567	0	214.739	1036.4	1609.86	117.762	1026.74	1613.04	221.967	1192.71	1608.16	93.0459	1196.01	1605.89	134.252	1232.93	1479.1	123.619	1297.5	1222.78	152.04	1115.85	1391.53	157.836	1049.97	1239.95	38.3546	1295.22	1284.82	306.875	1240.11	1423.42	342.752	1291.04	1243.83	338.5	1343.49	1104.69	388.128	1325.3	936.524	372.093	1305.26	853.636	385.751	1371.21	866.331	402.13	1347.73	778.263
568	0	215.102	1022.02	1611.42	118.091	1012.34	1614.99	222.328	1178.21	1609.89	93.1301	1181.57	1607.65	134.755	1218.55	1480.88	124.694	1283.54	1224.62	152.336	1101.8	1393.18	157.02	1035.61	1241.6	39.5797	1281.53	1286.54	307.709	1225.07	1425.29	344.758	1274.37	1244.95	341.588	1325.08	1105.16	392.294	1302.57	937.63	376.786	1280.65	855.106	390.548	1346.63	866.134	408.746	1320.49	779.37
569	0	215.539	1007.56	1612.83	118.281	997.953	1616.55	222.672	1163.76	1611.82	93.6583	1167.17	1609.88	135.215	1204.36	1482.73	125.868	1269.29	1226.54	152.398	1087.7	1394.97	155.927	1021.39	1243.47	40.8263	1268.02	1288.24	308.26	1210.13	1427.16	346.401	1257.15	1246.26	344.813	1306.67	1105.69	396.483	1279.64	938.89	381.465	1255.73	856.894	395.672	1321.99	866.368	415.561	1292.59	781.018
570	0	215.67	993.217	1614.63	118.638	983.595	1618.41	222.984	1149.49	1613.82	94.1131	1153.01	1612.34	135.609	1190.26	1484.73	127.179	1255.47	1228.55	152.268	1073.65	1396.95	154.899	1007.37	1245.21	41.8708	1254.5	1290.06	308.709	1195.24	1429.27	348.065	1239.75	1247.92	347.873	1288.12	1106.34	400.598	1256.32	940.45	386.316	1230.6	858.848	400.642	1296.74	866.841	422.005	1264.24	783.057
571	0	215.891	978.879	1616.18	118.6	969.338	1620.09	223.149	1135.18	1615.96	94.2186	1138.67	1614.43	135.9	1176.32	1486.89	128.377	1241.49	1230.76	152.182	1059.56	1399.1	154.231	993.475	1247.07	43.0492	1241.55	1292.36	309.097	1180.54	1431.49	349.745	1222.82	1249.63	350.855	1269.21	1107.08	404.663	1232.68	942.374	391.314	1204.81	861.28	405.727	1271.28	867.773	428.523	1235.5	785.683
572	0	215.862	964.573	1618.1	118.807	955.005	1621.73	223.727	1121.42	1618.15	94.2189	1124.41	1616.77	136.064	1162.16	1488.98	129.735	1227.89	1232.76	152.131	1045.72	1401.21	153.529	979.731	1249.2	44.1159	1228.21	1294.45	309.423	1166.18	1433.71	351.455	1205.96	1251.63	353.792	1250.49	1108.07	408.727	1209.19	944.616	395.802	1178.98	864.248	410.835	1245.66	869.032	434.888	1206.51	789.002
573	0	216.142	950.495	1619.63	118.875	940.998	1623.69	223.916	1107.1	1620.45	94.6139	1110.3	1619.18	136.529	1148.32	1491.26	130.802	1214.17	1234.76	152.226	1031.93	1403.2	153.185	965.485	1251.78	45.118	1214.53	1296.14	309.741	1151.93	1436.14	353.252	1189.33	1253.67	356.791	1231.86	1109.22	412.81	1185.35	947.414	400.365	1152.99	867.778	415.422	1219.67	870.23	441.248	1177.38	792.809
574	0	216.169	936.348	1621.32	118.898	926.838	1625.17	223.794	1092.46	1622.67	94.6822	1096.34	1621.2	136.609	1134.44	1493.23	131.866	1200.73	1236.65	152.401	1018.07	1405.22	153.119	951.905	1253.94	46.229	1201.41	1298.23	309.905	1137.64	1438.41	354.723	1172.81	1255.81	359.716	1213.4	1110.48	416.801	1161.6	950.333	405.541	1127.29	871.827	420.271	1193.48	872.262	447.396	1148.01	797.215
575	0	216.183	922.237	1623.01	119.019	912.823	1626.86	223.9	1078.44	1624.68	94.776	1082.17	1623.14	137.051	1120.52	1495.18	132.813	1187.45	1238.64	152.491	1004.2	1407.18	153.177	938.143	1256.05	46.823	1188.24	1300.23	310.411	1123.43	1440.87	356.287	1156.55	1258.06	362.623	1195.18	1111.89	420.665	1137.71	953.779	409.49	1100.37	876.303	425.026	1167.19	874.711	453.217	1118.45	802.249
576	0	216.303	908.271	1624.45	118.825	898.783	1628.47	223.976	1064.55	1626.39	94.9925	1068.31	1624.95	137.415	1106.74	1496.84	133.564	1174.05	1240.48	152.731	990.494	1409.16	153.633	924.68	1257.83	47.6845	1174.96	1302.22	310.618	1109.16	1442.94	357.997	1140.25	1260.26	365.551	1177.27	1113.39	424.418	1114.06	957.435	413.944	1074.17	881.507	429.711	1140.75	877.52	459.23	1089.08	808.03
577	0	216.285	894.263	1626.07	119.045	884.904	1629.68	224.081	1050.35	1628.17	95.3547	1054.45	1626.86	137.877	1092.78	1498.49	134.311	1160.73	1242.04	153.161	976.711	1410.58	154.192	910.885	1259.53	48.5957	1161.22	1303.81	311.255	1094.81	1444.93	359.659	1124.39	1262.29	368.427	1159.46	1114.84	428.368	1090.52	961.469	418.348	1048	887.049	434.279	1114.2	880.577	464.805	1059.67	813.801
578	0	216.374	880.294	1627.41	119.013	871.01	1631.09	224.369	1036.51	1629.5	95.2861	1040.49	1628.04	138.458	1078.92	1499.9	134.938	1147.55	1243.44	153.704	962.893	1412	154.817	897.173	1260.9	49.452	1147.86	1305.34	311.772	1080.64	1446.85	361.207	1108.5	1264.06	371.435	1141.8	1116.05	432.042	1066.87	965.35	422.869	1021.67	892.913	439.007	1087.63	883.907	470.332	1030.35	820.081
579	0	216.463	866.227	1628.54	119.019	857.178	1631.99	224.474	1022.32	1630.88	95.6386	1026.79	1629.07	138.822	1064.93	1501.04	135.51	1134.82	1245.36	154.118	949.054	1412.89	155.517	883.39	1261.94	50.1707	1134.45	1307.03	312.337	1066.03	1448.6	362.905	1092.66	1265.92	374.249	1124.34	1117.21	435.802	1043.43	969.678	427.317	995.967	898.723	443.49	1061	887.533	475.423	1000.98	826.604
580	0	216.618	852.328	1629.66	119.126	843.273	1632.86	224.859	1008.47	1631.83	95.2018	1012.73	1629.35	139.67	1051.02	1502.02	136.185	1121.47	1246.95	154.433	935.432	1413.82	156.086	869.854	1262.65	51.138	1120.9	1308.12	313.013	1051.78	1450.1	364.635	1076.69	1267.5	377.035	1106.77	1118.28	439.578	1019.98	974.292	431.129	970.003	904.994	447.89	1034.62	891.468	480.19	971.923	833.405
581	0	216.746	838.264	1630.54	119.111	829.515	1633.32	224.996	994.172	1632.37	95.7456	999.19	1630.03	140.207	1037.04	1502.61	136.666	1107.75	1247.84	154.877	921.605	1414.39	156.773	856.07	1263.21	52.0507	1107.19	1308.9	313.842	1037.34	1451.16	366.457	1061.11	1268.59	379.86	1089.31	1118.89	442.836	997.062	978.098	434.795	944.431	910.937	452.642	1008.76	895.246	484.737	943.079	840.142
582	0	216.883	824.274	1631.02	119.479	815.523	1633.9	225.431	980.314	1632.57	96.5398	985.032	1629.79	140.997	1023.06	1502.88	137.185	1093.73	1248.46	155.509	907.628	1414.55	157.191	842.869	1262.91	52.9937	1093.6	1309.26	314.375	1023.04	1451.49	368.117	1045.29	1269.22	382.799	1072.08	1119.11	446.377	974.095	982.313	438.417	918.967	916.925	457.031	983.156	898.985	489.121	914.481	846.88
583	0	217.123	810.238	1631.31	119.475	801.612	1633.93	225.749	966.153	1632.56	97.0858	971.278	1629.47	141.638	1008.85	1502.91	138.503	1080.27	1248.7	156.092	893.668	1414.46	157.722	829.068	1262.79	53.9025	1080.11	1309.73	314.946	1008.54	1451.75	369.935	1029.63	1269.57	385.831	1054.79	1119.17	449.446	951.472	985.874	441.892	893.977	923.034	460.771	956.684	902.845	493.091	886.319	853.839
584	0	217.47	796.205	1631.35	119.834	787.641	1633.88	226.348	952.218	1632.18	97.5775	957.243	1628.7	142.364	994.811	1502.72	139.123	1066.16	1248.68	156.764	879.542	1414.04	158.138	815.571	1262.22	54.8619	1066.28	1309.53	315.766	994.353	1452.04	371.716	1014.13	1269.91	389.05	1037.74	1119.12	452.644	929.02	989.705	445.1	869.179	929.265	464.513	930.86	906.776	496.841	858.627	860.987
585	0	217.76	782.026	1631.33	120.041	773.702	1633.59	226.826	937.879	1631.52	98.0385	943.37	1627.78	142.988	980.468	1502.12	140.434	1052.33	1248.4	157.528	865.515	1413.33	158.741	801.949	1261.34	55.7918	1052.31	1309.29	316.399	979.832	1451.9	373.225	998.569	1269.96	392.184	1020.62	1118.86	456.063	906.883	994.161	448.049	844.861	935.482	468.242	905.527	910.808	500.312	831.2	868.016
586	0	218.128	767.708	1630.87	120.485	759.512	1633	227.394	923.609	1630.56	98.8789	929.326	1626.87	143.765	966.006	1501.4	141.299	1038.32	1247.84	158.23	851.18	1412.38	159.254	788.384	1259.92	56.7382	1038.53	1308.93	317.123	965.563	1451.41	375.236	982.669	1269.72	395.122	1003.35	1118.3	458.836	884.689	997.831	450.956	821.043	941.468	471.689	880.561	914.666	503.579	804.391	875.05
587	0	218.572	753.474	1630.26	120.88	745.502	1632.29	228.179	909.465	1629.28	99.3278	915.071	1625.47	144.37	951.649	1500.45	141.909	1024.38	1247	158.961	836.869	1411.12	159.867	774.987	1258.39	57.509	1024.31	1308.2	317.833	951.049	1450.76	376.917	967.178	1269.1	398.184	986.241	1117.52	461.417	863.114	1000.84	453.611	797.448	946.983	474.238	855.333	918.15	506.427	778.042	881.994
588	0	219.094	739.208	1629.47	121.231	731.335	1631.62	228.658	895.028	1627.86	100.018	900.99	1623.73	145.155	937.084	1499.43	142.599	1010.59	1246.07	159.475	822.494	1409.73	160.462	760.888	1256.93	58.3029	1010.2	1307.19	318.357	936.436	1449.82	378.651	951.734	1268.33	401.328	969.261	1116.67	464.18	841.866	1004.55	455.999	774.47	952.436	477.835	831.626	922.185	509.107	752.269	888.972
589	0	219.57	724.746	1628.51	121.682	716.929	1630.59	229.372	880.703	1626.31	100.607	886.653	1622.17	145.82	922.403	1497.87	143.104	996.83	1244.93	160.235	807.992	1408.26	161.297	747.352	1254.68	59.0394	995.895	1306.1	319.122	921.844	1448.25	380.179	936.077	1267.41	404.105	951.846	1115.56	466.278	820.703	1007.33	458.048	751.871	957.804	480.648	807.764	925.677	511.746	727.385	895.23
590	0	220.067	710.364	1627.39	122.413	702.607	1629.38	229.902	866.221	1624.47	101.167	872.455	1620.17	146.351	907.694	1496.4	143.629	982.785	1243.46	160.969	793.35	1406.37	162.016	733.123	1252.67	59.704	981.453	1304.75	319.733	907.034	1446.86	381.785	920.603	1266.1	407.037	934.761	1114.31	468.74	800.007	1010.36	459.805	729.628	962.794	483.204	784.399	928.924	513.647	702.387	901.84
591	0	220.716	695.97	1626.09	122.762	688.219	1628.27	230.622	851.717	1622.54	101.808	858.008	1618.11	147	892.804	1494.9	144.058	968.634	1241.93	161.52	778.82	1404.63	162.944	718.86	1250.67	60.3045	966.831	1303.17	320.482	892.614	1445.52	383.263	905.063	1264.74	409.871	917.75	1112.8	470.796	779.662	1012.93	461.594	707.963	967.468	485.081	761.155	931.771	515.739	678.476	907.799
592	0	221.257	681.382	1624.75	123.169	673.71	1627.15	231.162	837.152	1620.51	102.439	843.308	1616.57	147.668	877.933	1493.02	144.208	954.085	1240.42	162.103	763.984	1402.69	163.555	703.984	1248.59	60.8222	952.02	1301.48	320.958	877.668	1443.73	384.625	889.601	1263.16	412.363	900.47	1111.31	472.637	759.453	1015.29	463.043	686.818	971.646	487.626	739.211	934.864	517.3	655.121	913.456
593	0	221.656	666.748	1623.4	123.824	659.06	1625.79	231.568	822.378	1618.29	102.985	828.911	1614.24	148.119	862.929	1491.34	144.687	939.802	1238.87	162.681	749.051	1400.71	164.453	689.619	1246.56	61.2935	937.19	1299.82	321.621	862.857	1442.14	385.86	873.924	1261.78	414.638	883.162	1109.9	473.888	739.619	1016.8	464.14	665.91	975.574	489.001	716.794	937.443	518.785	632.432	919.009
594	0	222.146	651.979	1622.21	124.346	644.405	1624.51	232.169	807.809	1616.43	103.132	813.991	1612.13	148.635	847.888	1489.63	144.773	925.142	1237.36	163.311	734.077	1398.88	165.434	675.405	1244.13	61.6129	922.07	1298.27	322.206	847.768	1440.5	386.534	858.295	1260.3	416.964	866.16	1108.53	475.237	720.09	1018.83	465.075	645.687	978.967	491.175	695.89	940.279	520.039	610.348	924.262
595	0	222.561	637.278	1620.89	124.729	629.59	1623.14	232.276	792.903	1614.32	103.773	799.366	1610.17	148.895	832.732	1488.01	145.104	910.536	1235.79	163.799	719.156	1396.89	165.911	659.912	1242.58	61.9062	907.075	1296.69	322.606	832.966	1438.93	387.979	842.383	1258.99	418.692	848.996	1107.09	476.572	701.014	1021.01	466.528	626.24	982.195	492.087	674.727	942.405	520.96	589.051	928.6
596	0	223.132	622.427	1619.61	125.149	614.843	1621.9	232.86	778.114	1612.51	103.855	784.346	1608.11	149.301	817.584	1486.42	145.203	895.737	1234.11	164.367	703.995	1395.2	166.591	644.816	1240.55	62.2562	891.885	1295.17	322.896	817.788	1437.38	388.798	826.522	1257.64	420.351	831.887	1105.69	477.586	682.298	1022.32	466.904	606.707	984.807	493.819	654.875	944.693	521.9	568.373	932.694
597	0	223.497	607.474	1618.36	125.533	599.846	1620.76	232.965	762.997	1610.49	104.279	769.443	1606.07	149.501	802.412	1484.57	145.363	881.039	1232.79	164.65	688.971	1393.21	167.492	630.38	1238.53	62.3903	876.671	1293.45	323.302	802.765	1435.9	389.49	810.509	1256.29	421.657	815.09	1104.34	478.307	663.887	1023.5	467.343	587.725	987.086	494.171	634.831	945.976	522.562	548.484	936.274
598	0	223.889	592.633	1617.14	125.802	584.883	1619.4	233.329	748.403	1608.68	104.461	754.06	1604.06	149.475	787.157	1483.24	145.315	866.082	1231.37	165.012	673.724	1391.74	167.991	614.922	1236.84	62.4886	861.296	1291.82	323.507	787.505	1434.66	389.608	794.54	1255.03	422.755	798.504	1103.11	478.875	646.002	1024.14	467.487	569.446	988.999	495.24	616.123	947.383	522.958	529.184	939.085
599	0	224.141	577.797	1615.77	126.129	569.889	1618.23	233.254	733.233	1606.78	104.596	739.191	1602.35	149.61	772.112	1481.76	145.2	850.897	1230.21	165.218	658.513	1390.06	168.489	599.827	1235.3	62.5839	845.993	1290.43	323.573	772.565	1433.15	390.372	778.514	1253.83	423.517	781.856	1101.93	478.861	628.348	1024.22	467.577	551.425	990.381	495.555	597.695	948.28	523.136	510.61	941.323
600	0	224.348	562.883	1614.52	126.504	554.783	1617.08	233.373	718.57	1605.06	104.677	724.057	1600.77	149.413	756.874	1480.31	144.876	835.584	1228.77	165.501	643.202	1388.91	168.666	584.087	1234.08	62.2544	830.492	1288.9	323.263	757.315	1431.77	390.571	762.487	1252.61	423.999	765.425	1100.87	479.167	611.145	1024.8	467.504	534.03	991.259	495.054	579.391	948.456	523.193	492.665	942.938
601	0	224.614	547.941	1613.32	126.915	539.627	1615.83	233.124	703.406	1603.77	104.515	708.673	1599.38	149.094	741.676	1478.9	144.354	819.845	1227.55	165.616	627.777	1387.61	169.11	568.601	1233.15	61.7966	814.667	1287.75	323.103	742.406	1430.71	390.686	746.616	1251.71	424.487	749.446	1099.98	479.068	594.339	1024.89	467.28	517.003	991.908	495.669	562.457	949.179	522.933	475.178	944.107
602	0	224.935	533.092	1612.34	127.119	524.39	1614.77	233.191	688.735	1602.64	104.49	693.594	1598.28	148.746	726.605	1477.58	143.766	803.853	1226.39	165.448	612.427	1386.39	169.252	553.237	1232.12	61.0936	798.816	1286.46	322.725	727.239	1429.92	390.693	730.801	1250.99	424.722	733.568	1099.31	478.904	577.938	1025.06	466.842	500.565	992.211	495.395	545.77	949.339	522.689	458.393	944.757
603	0	225.111	518.135	1611.33	127.371	509.318	1613.84	232.889	673.606	1601.66	104.292	678.256	1597.19	148.175	711.346	1476.43	142.872	787.679	1225.07	165.305	597.006	1385.75	169.375	537.619	1231.51	60.348	782.891	1285.2	322.41	712.305	1428.95	390.568	715.063	1250.25	424.779	718.021	1098.78	478.699	562.057	1024.89	466.358	484.61	992.212	495.069	529.559	949.304	522.15	442.291	944.933
604	0	225.534	503.253	1610.32	127.698	494.193	1612.9	232.793	658.9	1600.49	103.983	663.102	1596.36	147.779	696.077	1475.25	141.941	771.294	1223.52	165.096	581.467	1384.98	169.522	522.271	1230.72	59.5933	766.864	1283.77	321.76	697.099	1427.71	390.052	699.583	1249.13	424.303	702.575	1097.69	478.193	546.392	1024.29	465.755	469.214	991.25	494.774	513.963	948.85	521.352	426.307	944.32
605	0	225.619	488.292	1609.35	127.896	478.944	1612.3	232.249	643.845	1599.49	103.713	647.985	1595.56	147.064	680.87	1474.07	141.014	754.934	1221.88	164.346	565.843	1384.13	169.098	506.186	1230.17	58.576	750.774	1282.36	321.203	681.914	1426.48	389.605	684.297	1248.06	424.15	687.705	1096.78	477.32	531.398	1023.18	464.834	454.047	990.295	494.14	498.896	947.858	520.286	411.01	943.129
606	0	225.769	473.371	1609	128.168	463.704	1612.08	232.134	629.021	1599.01	103.142	632.489	1595.15	146.271	665.54	1473.49	140.088	738.618	1220.49	163.696	550.139	1383.99	168.478	490.138	1229.95	57.4548	734.613	1281.27	320.53	666.805	1425.37	388.929	669.25	1247.1	423.293	672.826	1095.75	476.544	516.698	1021.93	463.848	439.358	988.831	493.366	484.41	946.507	519.145	396.712	941.14
607	0	225.974	458.36	1609.01	128.334	448.391	1612.48	231.628	613.912	1598.71	102.839	617.171	1595.34	145.529	650.147	1473.27	139.287	722.215	1219.54	162.891	534.432	1384.26	167.574	473.463	1230.4	56.4485	718.305	1280.49	319.69	651.525	1424.26	387.842	654.356	1246.14	422.441	658.383	1094.96	475.477	502.421	1020.27	462.74	425.43	987.004	492.459	470.441	944.951	517.908	382.712	938.799
608	0	226.095	443.462	1609.12	128.543	433.025	1613	231.09	599.063	1598.5	102.583	601.714	1595.63	144.802	634.678	1473.11	138.691	705.721	1218.77	162.01	518.609	1384.81	166.648	457.227	1230.86	55.6564	702.019	1279.89	318.978	636.487	1423.53	386.572	639.716	1245.44	421.014	643.926	1093.93	474.426	488.712	1018.59	461.665	411.765	984.701	490.816	456.864	942.513	516.606	369.44	936.021
609	0	226.25	428.442	1609.7	128.702	417.749	1614	230.6	584.045	1598.64	101.949	586.174	1596.27	143.98	619.112	1473.41	138.207	689.274	1218.5	161.301	502.889	1385.51	165.648	440.899	1231.69	55.0111	685.684	1279.86	318.087	621.229	1423.51	385.396	625.358	1245.22	419.445	629.819	1093.56	472.683	475.294	1016.05	460.19	398.888	981.947	489.84	444.656	940.443	515.109	357.023	932.888
610	0	226.252	413.38	1610.78	128.802	402.298	1615.35	230.085	568.951	1599.16	101.372	570.495	1596.94	143.218	603.388	1474.21	137.96	673.085	1218.94	160.6	487.186	1386.44	164.593	424.549	1232.94	54.4124	669.463	1280.36	317.389	606.042	1424.01	384.051	611.355	1245.49	417.478	615.946	1093.6	471.098	462.648	1014.45	458.426	386.544	979.064	488.212	432.854	938.225	513.228	345.367	929.385
611	0	226.172	398.248	1612.22	128.906	386.983	1616.96	229.634	553.939	1599.93	100.79	555.106	1597.93	142.545	587.785	1475.27	138.096	657.129	1219.47	159.9	471.506	1387.53	163.585	407.895	1234.43	54.0332	653.361	1281.09	316.642	590.722	1424.83	382.544	597.561	1245.88	415.22	602.341	1094.03	469.282	450.344	1012.73	456.488	374.892	975.882	486.166	421.813	935.927	511.231	334.46	925.515
612	0	226.046	383.2	1613.7	128.825	371.574	1618.39	229.096	538.728	1600.78	100.53	539.589	1599.04	142.123	572.077	1476.38	138.558	641.427	1220.75	159.592	455.819	1388.72	162.642	391.209	1236.05	53.8602	637.365	1282.3	316.1	575.121	1425.87	380.761	583.364	1246.67	412.857	589.283	1094.79	466.891	438.384	1010.84	454.21	363.696	972.597	484	411.596	933.571	509.092	324.426	921.457
613	0	225.975	368.105	1615.4	128.809	356.374	1620.07	228.651	523.68	1601.7	99.8187	524.015	1599.72	141.81	556.497	1477.56	138.956	625.919	1222.58	159.353	440.277	1389.91	162.363	375.308	1237.4	53.5982	621.512	1283.72	315.794	559.689	1427.54	379.645	570.358	1247.99	410.287	576.453	1095.75	464.62	427.309	1009.06	451.914	353.305	969.116	481.538	401.854	931.26	506.666	315.222	917.126
614	0	225.948	353.035	1617.28	128.679	341.108	1621.67	228.398	508.422	1602.85	99.7292	508.812	1600.06	141.361	540.9	1479.05	139.154	611.112	1224.11	159.406	425.003	1391.34	162.168	359.249	1238.83	53.3932	605.972	1285.25	315.671	544.316	1429.12	378.039	556.386	1248.65	407.52	564.037	1096.79	462.249	416.793	1007.1	449.292	343.615	965.521	478.675	392.984	928.523	503.885	306.659	912.58
615	0	225.91	337.98	1618.91	128.602	325.937	1623.19	228.082	493.437	1603.95	99.2519	493.454	1601.12	141.247	525.654	1480.27	138.917	596.376	1225.84	159.549	409.814	1392.52	162.756	344.642	1239.56	53.5513	590.854	1286.97	315.603	529.203	1430.73	377.213	542.803	1249.92	404.724	552.003	1097.89	459.298	406.435	1004.9	446.293	334.313	961.607	475.489	384.696	925.659	500.964	298.898	907.506
616	0	225.691	322.898	1620.9	128.483	310.772	1624.8	227.84	478.311	1605.39	99.3447	478.211	1601.99	141.029	510.361	1481.9	138.603	581.996	1227.94	159.883	394.793	1393.78	163.276	328.798	1241.08	53.2346	575.647	1288.84	315.424	514.42	1432.45	375.62	528.894	1251.01	401.877	540.28	1099.02	456.362	396.768	1002.52	443.265	325.711	957.685	472.31	376.927	922.785	497.849	291.801	902.389
617	0	225.703	307.89	1622.78	128.407	295.69	1626.53	227.754	463.273	1607.12	99.108	463.035	1603.39	140.945	495.384	1483.72	138.453	567.76	1230.34	160.442	380.1	1395.16	164.562	314.437	1242.3	53.0734	560.75	1290.79	315.335	500.134	1434.19	373.979	515.383	1252.14	399.013	528.595	1100.41	453.351	387.491	1000.12	440.089	317.41	953.653	468.784	369.575	919.845	494.401	285.252	896.908
618	0	225.634	292.922	1624.64	128.31	280.676	1627.98	227.586	448.254	1608.95	99.1301	448.101	1604.55	140.865	480.346	1485.49	137.867	553.084	1232.38	161.14	365.454	1396.94	166.1	300.725	1243.3	52.755	545.869	1292.89	315.374	486.071	1435.98	373.528	502.213	1253.85	396.078	517.238	1101.76	450.363	378.671	997.855	436.823	309.697	949.649	465.334	362.921	916.997	490.807	279.275	891.468
619	0	225.669	277.901	1626.61	128.383	265.67	1629.59	227.544	433.417	1610.76	98.966	432.919	1606.25	140.961	465.681	1487.41	137.625	538.512	1234.36	161.897	351.013	1398.56	167.762	286.744	1244.67	52.4039	531.017	1294.9	315.507	472.208	1437.97	372.39	489.261	1255.34	393.093	505.92	1103.21	447.218	370.217	995.492	433.426	302.479	945.394	461.66	356.528	914.203	486.863	273.751	885.982
620	0	225.672	263.145	1628.44	128.378	250.73	1631.21	227.632	418.417	1613.14	99.2717	418.198	1608.02	141.039	450.882	1489.5	137.024	523.571	1236.27	162.373	336.555	1400.17	169.23	272.667	1246.51	52.0186	516.259	1297.02	315.596	458.336	1439.88	371.173	476.61	1257.05	390.217	494.809	1104.83	444.093	362.178	993.416	429.917	295.814	941.132	458.095	350.674	911.763	482.799	268.783	880.465
621	0	225.774	248.089	1630.52	128.386	235.952	1632.9	227.778	403.585	1615.45	99.4279	403.46	1610.02	141.05	436.219	1491.53	137.027	509.249	1238.73	163.074	322.267	1402.36	170.71	259.785	1248.13	51.7532	501.625	1299.25	315.861	444.618	1441.92	370.157	464.345	1258.81	387.292	483.799	1106.43	440.926	354.442	991.149	426.262	289.794	937.553	454.308	345.274	909.097	478.473	264.43	874.807
622	0	225.851	233.517	1632.15	128.55	221.087	1634.54	227.971	388.852	1617.47	99.386	388.593	1612.14	141.255	421.855	1493.56	136.704	495.244	1241.07	163.385	308.06	1404.13	171.924	246.62	1249.73	51.3077	487.021	1301.25	315.928	431.064	1443.65	368.932	452.558	1260.41	384.667	473.107	1108.12	437.652	346.961	988.687	422.676	284.043	933.322	450.405	340.314	906.523	474.158	260.692	869.286
623	0	225.965	218.553	1633.93	128.729	206.376	1636.07	228.362	374.021	1619.8	99.7205	374.151	1613.85	141.542	407.457	1495.65	135.773	480.958	1243.01	164.075	293.826	1406.25	173.171	233.235	1251.66	51.0268	472.521	1303.24	315.984	417.505	1445.27	367.515	440.858	1261.96	381.92	462.385	1109.56	434.039	340.174	985.714	419.152	278.598	929.206	446.392	335.723	903.772	469.528	257.363	863.645
624	0	226.123	203.974	1635.44	128.89	191.738	1637.83	228.565	359.384	1621.63	100.087	359.554	1615.74	141.809	393.101	1497.59	135.184	467.004	1244.75	164.386	279.736	1408.23	174.041	219.363	1253.84	50.7016	458.037	1305.35	316.104	403.87	1446.95	366.117	429.168	1263.35	379.257	451.628	1111.13	430.895	333.548	983.391	415.537	273.73	925.367	442.341	331.563	901.124	464.959	254.72	857.926
625	0	226.329	189.418	1636.73	129.083	177.124	1639.1	228.893	344.774	1623.38	100.435	345.102	1617.66	141.986	378.749	1499.35	134.512	452.729	1246.67	164.839	265.587	1410.09	174.796	205.688	1255.72	50.3005	443.839	1307.28	316.035	390.344	1448.31	364.963	417.416	1264.84	376.828	440.899	1112.92	428.167	327.269	981.391	412.181	269.091	921.53	438.457	327.719	898.765	460.477	252.361	852.622
626	0	226.615	174.534	1637.63	129.372	162.651	1640.48	229.43	330.174	1624.94	101.062	330.688	1619.29	142.18	364.555	1500.92	133.826	438.662	1248.4	165.162	251.446	1412.05	175.225	191.495	1257.66	50.1498	429.481	1309.26	316.077	376.624	1449.8	364.12	405.758	1266.13	374.328	430.433	1114.43	425.09	320.885	979.56	408.81	264.364	917.851	434.855	324.377	896.679	455.93	250.407	847.337
627	0	226.913	160.159	1639.03	129.629	148.212	1641.58	230.011	315.603	1626.46	101.479	316.232	1620.69	142.434	350.426	1502.6	133.25	424.48	1249.91	165.334	237.407	1413.58	175.198	177.259	1259.64	49.651	415.021	1311.24	316.04	362.862	1450.72	362.774	393.467	1267.25	371.978	419.903	1116.17	422.071	314.873	977.813	405.327	260.339	914.049	430.953	320.447	894.728	451.374	248.877	842.278
628	0	227.174	145.727	1639.86	129.982	133.886	1642.59	230.661	301.132	1627.64	102.161	301.893	1622.29	142.59	336.279	1503.93	133.178	410.602	1251.93	165.365	223.302	1414.79	175.143	163.075	1260.89	49.1956	400.717	1312.99	316.004	349.026	1451.89	361.841	381.195	1268.49	369.467	409.525	1117.41	419.07	308.914	975.996	402.186	256.532	910.721	427.516	317.18	893.174	446.802	247.409	837.211
629	0	227.608	131.105	1640.83	130.325	119.565	1643.52	231.392	286.622	1628.78	102.674	287.571	1623.4	142.737	322.1	1505.06	132.987	396.571	1253.33	165.447	209.165	1416.02	174.892	149.062	1262.04	48.8775	386.64	1314.39	315.907	335.104	1452.52	360.856	368.84	1269.15	367.085	399.123	1118.77	416.158	302.945	974.116	399.369	252.527	907.276	424.034	313.896	891.541	442.085	246.638	832.312
630	0	227.858	116.669	1641.28	130.693	105.251	1644.1	232.222	272.189	1629.44	103.272	273.352	1624.34	143.045	307.765	1505.87	132.705	382.386	1254.56	165.475	194.928	1416.93	174.471	134.819	1262.81	48.6322	372.326	1315.75	315.968	321.161	1452.83	359.851	356.362	1269.55	364.607	388.676	1119.85	413.054	297.226	971.795	396.252	249.01	904.146	420.611	310.805	889.941	438.081	245.977	827.494
631	0	228.225	102.274	1641.4	130.916	90.9604	1644.5	232.744	257.787	1629.55	103.771	259.11	1624.76	143.268	293.515	1506.37	132.31	367.893	1254.85	165.516	180.798	1417.38	174.022	120.863	1263.26	48.264	358.004	1316.58	315.925	307.164	1452.89	358.755	343.994	1269.54	362.053	378.244	1120.46	410.413	291.667	969.847	393.664	245.133	900.58	417.183	307.659	888.289	433.842	245.176	823.09
632	0	228.702	87.9582	1641.33	131.168	76.6815	1644.77	233.374	243.445	1629.31	104.361	244.844	1624.94	143.467	279.162	1506.71	132.152	353.506	1255.51	165.616	166.579	1417.45	173.561	106.949	1263.29	47.9617	343.88	1317.11	315.986	293.113	1452.63	357.542	331.424	1269.24	359.464	367.733	1120.82	407.666	286.279	967.821	391.007	241.411	896.818	413.579	304.499	886.507	429.564	244.598	818.238
633	0	229.09	73.5622	1641.1	131.527	62.4318	1644.81	233.899	228.982	1628.82	104.944	230.684	1624.73	143.683	264.701	1506.37	132.081	339.413	1255.49	165.491	152.145	1417.39	173.061	92.6152	1263.08	47.762	329.667	1317.34	315.822	279.041	1452.01	356.44	318.946	1268.72	356.871	357.136	1120.88	404.934	280.696	965.561	388.082	237.386	893.63	410.197	301.413	884.936	425.628	244.185	814.132
634	0	229.335	59.1719	1640.39	131.886	48.132	1644.65	234.47	214.571	1628.05	105.411	216.324	1624.39	143.742	250.371	1506.03	132.121	325.042	1255.1	165.515	137.839	1416.99	172.645	78.7169	1262.46	47.4739	315.594	1317.35	315.841	264.688	1451.16	355.133	306.49	1268.08	354.312	346.391	1120.92	402.213	275.14	963.406	385.218	233.619	890.23	406.531	298.039	883.224	421.694	243.502	810.314
635	0	229.789	44.9109	1639.63	132.28	33.7954	1644.17	234.574	200.08	1626.77	105.928	201.934	1623.33	143.885	235.873	1505.36	132.222	310.728	1254.6	165.591	123.302	1416.37	172.48	64.2625	1261.71	47.2856	301.376	1316.88	315.884	250.292	1450.21	354.165	294.14	1267.34	352.015	335.544	1120.92	399.552	269.422	961.26	382.348	229.896	886.792	403.214	294.661	881.975	418.182	242.872	806.908
636	0	230.294	30.4715	1638.94	132.735	19.4296	1643.48	235.266	185.682	1625.48	106.403	187.417	1622.28	144.116	221.345	1504.59	132.243	296.349	1254.07	165.543	108.764	1415.38	172.141	49.772	1260.7	47.1789	287.054	1316.45	316.029	235.961	1449.15	353.056	281.668	1266.55	349.873	324.501	1121.01	396.97	263.533	959.327	379.567	225.661	883.788	399.707	291.042	880.763	414.773	242.017	803.908
637	0	230.674	16.0154	1637.91	133.26	4.99855	1642.56	235.676	171.137	1624.06	106.852	173.076	1621.12	144.306	206.759	1503.37	132.173	281.991	1253.2	165.629	94.1306	1414.25	171.976	35.2812	1259.44	46.9723	272.684	1315.82	316.109	221.467	1447.87	352.074	269.095	1265.78	347.838	313.35	1120.96	394.515	257.283	957.569	376.29	221.782	881.122	396.413	287.044	879.877	411.369	240.585	801.241
638	0	231.195	1.53715	1636.68	133.808	-9.56577	1641.37	236.219	156.69	1622.47	107.242	158.522	1619.76	144.531	191.997	1501.94	132.322	267.491	1252.2	165.72	79.3742	1412.72	171.836	20.9065	1257.59	46.8329	258.279	1314.64	316.254	206.776	1446.43	351.297	256.832	1264.64	345.906	302.047	1120.43	392.172	250.83	955.777	373.57	217.215	878.281	393.158	282.72	878.605	408.107	238.873	798.636
639	0	231.552	-13.0698	1635.17	134.169	-24.0822	1639.97	236.112	142.02	1620.17	107.563	143.868	1617.62	144.833	177.141	1500.45	132.498	253.096	1250.87	165.8	64.5494	1411.01	171.58	6.53931	1255.85	46.8783	243.852	1313.46	316.409	192.028	1444.71	350.389	244.158	1263.54	344.201	290.544	1120.15	389.942	244.057	953.895	371.331	212.528	875.817	390.28	278.148	877.709	404.629	236.974	796.528
640	0	232.048	-27.4836	1633.55	134.698	-38.6326	1638.59	237.043	127.637	1618.21	108.002	129.223	1615.7	145.154	162.271	1498.69	132.947	238.753	1249.38	165.992	49.7228	1409.06	171.426	-7.54261	1253.66	46.9294	229.429	1312.04	316.578	177.172	1442.75	349.461	231.262	1261.96	342.57	279.033	1119.59	387.851	236.957	951.929	369.47	207.286	873.249	387.481	272.972	876.699	401.693	234.403	794.225
641	0	232.533	-41.9268	1631.55	135.226	-53.2402	1636.95	237.229	113.041	1615.6	108.238	114.471	1613.13	145.561	147.367	1496.73	133.1	224.2	1247.24	166.213	34.6733	1407.08	171.231	-21.839	1251.31	46.9931	215.039	1310.32	316.897	162.228	1440.65	348.691	218.185	1260.29	341.138	267.21	1118.66	386.157	229.631	950.316	367.115	201.577	870.663	385.004	267.26	875.652	398.961	231.143	792.034
642	0	233.208	-56.5879	1629.71	135.743	-67.9943	1635.09	237.553	98.4567	1613.08	108.937	99.6336	1610.99	145.852	132.368	1494.64	133.228	209.63	1245.03	166.483	19.821	1404.73	171.234	-36.1618	1248.66	47.1703	200.455	1308.38	317.204	147.18	1438.49	348.256	204.914	1258.81	339.854	255.27	1117.67	384.007	222.075	948.452	365.237	195.377	868.481	382.676	261.143	874.735	396.394	227.361	789.998
643	0	233.75	-71.2594	1627.89	136.388	-82.6727	1633.34	237.982	83.7312	1610.59	109.226	84.7485	1608.22	146.367	117.218	1492.44	133.801	195.104	1243.43	166.692	4.66267	1402.39	171.158	-50.8009	1246.05	47.592	185.922	1306.86	317.586	132.158	1436.26	347.942	191.433	1257.08	339.058	243.183	1117.03	382.845	213.844	946.976	364.078	188.981	867.672	381.081	254.342	874.301	394.189	222.926	788.236
644	0	234.28	-85.8268	1625.83	136.908	-97.4774	1631.27	238.474	69.0001	1608.01	109.54	69.9557	1605.8	146.97	102.089	1490.54	134.281	180.658	1241.4	167.131	-10.496	1400.14	171.188	-65.4155	1243.53	47.8654	171.317	1305.11	318.091	116.898	1434.18	347.744	177.7	1255.4	338.293	230.772	1116.01	381.91	205.025	945.558	363.454	181.566	865.263	379.651	246.994	873.61	392.263	217.629	786.721
645	0	234.929	-100.736	1623.59	137.523	-112.404	1629.33	238.905	54.1627	1605.53	109.992	54.8065	1603.34	147.254	86.9939	1488.34	134.784	166.076	1239.53	167.35	-25.5577	1397.62	171.257	-80.3789	1240.82	48.1651	156.709	1303.2	318.499	101.563	1431.73	347.73	163.751	1253.56	337.774	218.052	1114.87	381.338	195.758	944.235	363.524	173.849	864.011	378.494	239.095	873.091	390.678	211.807	785.439
646	0	235.448	-115.672	1622.08	138.202	-127.41	1627.3	239.322	39.2583	1602.99	110.27	39.8752	1600.64	147.85	71.8185	1486.31	135.36	151.215	1237.8	167.642	-40.8084	1395.12	171.339	-95.5999	1238.45	48.7112	142.03	1301.62	319.127	86.1842	1429.76	347.983	149.45	1252.14	337.567	205.03	1114.02	381.073	186.042	943.044	363.489	165.305	862.529	377.83	230.635	872.764	389.412	205.279	784.281
647	0	236.05	-130.513	1620.05	138.776	-142.424	1625.41	239.885	24.2517	1600.99	110.792	24.743	1598.61	148.412	56.6208	1484.41	136.056	136.443	1236.45	168.221	-56.1671	1393.04	171.579	-110.7	1235.9	49.2013	127.318	1299.89	319.754	70.8357	1427.8	348.355	135.129	1250.66	337.815	191.714	1113.22	381.135	175.783	942.121	364.358	156.594	862.038	377.335	221.431	872.519	388.56	197.914	783.441
648	0	236.824	-145.632	1618.28	139.427	-157.481	1623.71	240.245	9.06276	1598.67	111.528	9.55666	1596.38	148.977	41.5247	1482.54	136.904	121.617	1234.97	168.422	-71.2307	1391.08	171.816	-125.709	1233.85	49.9878	112.536	1298.36	320.443	55.4075	1425.86	348.814	120.583	1249.06	338.059	178.092	1112.18	381.385	164.821	941.089	364.195	146.542	860.14	377.2	211.564	872.068	387.957	189.734	782.599
649	0	237.335	-160.709	1616.33	139.997	-172.631	1621.99	240.892	-6.08271	1596.77	112.032	-5.69141	1594.39	149.764	26.3606	1480.68	137.925	106.552	1233.35	168.992	-86.6838	1389.1	172.052	-140.926	1232.08	50.9454	97.4897	1296.51	321.24	39.8833	1424.2	349.608	105.823	1247.5	338.536	163.97	1111.04	381.908	153.285	940.022	365.327	136.246	859.307	377.358	201.078	871.571	387.73	180.733	781.616
650	0	237.968	-175.92	1614.86	140.596	-187.803	1620.52	241.298	-21.337	1594.69	112.64	-20.8004	1592.57	150.662	11.1399	1479.07	139.046	91.4599	1231.61	169.672	-102.016	1387.53	172.222	-156.124	1230.48	51.9845	82.3707	1294.68	321.911	24.3106	1422.5	350.498	90.9323	1246.14	339.435	149.546	1110.03	382.712	141.264	938.93	366.311	125.202	858.18	377.845	189.844	871.31	387.856	170.941	780.763
651	0	238.573	-191.07	1613.36	141.2	-202.973	1619.16	241.975	-36.6111	1593.21	113.317	-36.1309	1590.83	151.514	-3.89471	1477.53	140.312	76.2357	1229.95	170.251	-117.497	1386.02	172.625	-171.466	1229.14	53.0888	67.0666	1292.99	322.709	8.74073	1420.97	351.54	75.8179	1244.77	340.482	134.905	1109.18	383.616	128.595	937.917	367.439	113.263	857.283	378.632	177.8	871.044	388.268	160.097	779.766
652	0	239.174	-206.534	1611.92	141.736	-218.269	1617.66	242.76	-51.9683	1591.84	114.067	-51.3199	1589.55	152.641	-19.1426	1476.23	141.5	60.8323	1228.38	170.998	-132.923	1384.93	173.326	-186.92	1228.09	54.2086	51.5708	1291.44	323.71	-6.83173	1419.71	352.69	60.4528	1243.55	341.7	119.835	1108.35	385.219	115.365	937.225	369.003	100.594	856.444	379.745	165.123	870.519	389.266	148.565	779.146
653	0	239.795	-221.756	1610.97	142.282	-233.631	1616.61	243.498	-67.2968	1590.67	114.977	-66.6751	1588.46	153.326	-34.3386	1474.81	142.79	45.3351	1226.85	172.083	-148.514	1383.92	174.284	-202.961	1227.34	55.4092	35.9603	1289.99	324.799	-22.2855	1418.78	353.928	44.8128	1242.55	342.988	104.506	1107.36	386.891	101.377	936.616	370.857	87.1841	855.739	381.227	151.618	870.31	390.792	135.934	778.822
654	0	240.425	-237.305	1610.02	142.861	-248.816	1615.67	244.378	-82.5721	1589.94	115.794	-81.6334	1587.59	154.568	-49.6032	1474	144.226	29.5578	1225.68	173.01	-163.945	1383.18	175.438	-219.078	1226.85	56.7297	20.2266	1288.75	326.019	-37.8089	1418.12	355.461	29.0253	1241.92	344.606	88.843	1106.76	388.932	86.888	936.394	372.641	72.9282	854.852	383.078	137.431	870.319	392.85	122.477	778.711
655	0	240.804	-252.455	1609.24	143.326	-263.971	1614.64	245.264	-97.9437	1589.4	116.541	-96.9739	1587.05	155.577	-64.6613	1472.91	145.745	13.4774	1224.56	174.173	-179.494	1382.77	176.89	-235.248	1226.76	57.8925	4.59587	1287.27	327.197	-53.4546	1417.56	356.995	13.0226	1241.45	346.419	72.9494	1106.37	390.96	71.5363	936.11	375.43	58.1373	854.66	385.28	122.426	870.185	395.139	107.933	778.628
656	0	241.473	-268.017	1608.6	143.727	-279.115	1613.8	246.241	-113.277	1589.01	117.356	-111.896	1586.39	156.901	-79.8498	1471.87	147.301	-2.81198	1223.51	175.459	-195.078	1382.3	178.6	-251.713	1226.77	59.722	-11.317	1286.08	328.629	-69.133	1416.87	358.838	-3.10256	1240.97	348.458	56.7746	1105.94	393.422	55.7382	935.833	378.021	42.562	853.95	387.83	106.688	870.078	397.9	92.499	778.46
657	0	241.925	-283.311	1608.52	144.118	-294.372	1613.42	247.05	-128.785	1589.08	118.358	-127.024	1586.23	158.226	-94.8784	1471.21	148.795	-19.4238	1222.15	176.676	-210.8	1382.21	180.231	-268.384	1227.05	61.5227	-27.1047	1284.57	330.179	-84.9295	1416.39	360.708	-19.4743	1240.46	350.569	40.25	1105.15	396.652	39.5814	935.612	381.453	26.0883	853.182	390.71	90.2452	869.577	401.173	76.2621	777.969
658	0	242.375	-298.908	1609	144.66	-309.597	1613.86	247.986	-144.357	1589.76	119.321	-142.155	1586.47	159.923	-110.174	1471.14	150.128	-36.2435	1220.63	177.908	-226.562	1382.72	181.812	-284.992	1227.64	63.252	-42.9537	1283.47	331.651	-100.805	1416.05	362.662	-36.1682	1239.92	352.958	23.234	1104.44	399.463	22.5215	935.179	384.24	8.8434	852.823	393.602	73.1305	868.977	404.65	59.1061	777.595
659	0	242.971	-314.183	1609.4	144.963	-324.711	1614.29	248.851	-159.929	1590.36	120.468	-157.193	1586.61	161.204	-125.586	1471.21	151.243	-53.1327	1219.41	179.092	-242.235	1383.33	183.263	-301.59	1228.55	64.6035	-58.767	1282.75	333.112	-116.889	1415.93	364.711	-53.1744	1239.52	355.766	5.84438	1104.23	402.599	4.886	934.878	388.062	-9.00159	852.836	396.934	55.3056	868.595	408.564	40.9904	777.243
660	0	243.62	-329.588	1610.34	145.504	-339.762	1614.99	249.924	-175.203	1591.03	121.444	-172.215	1587.06	162.651	-141.187	1471.72	152.511	-69.4007	1219.5	180.282	-258.094	1384.16	184.501	-318.148	1229.64	65.9446	-74.6904	1282.52	334.612	-132.986	1416.34	367.023	-70.4804	1239.59	358.277	-11.9083	1103.81	405.971	-13.4854	934.822	391.774	-27.8123	852.546	400.597	36.6771	868.411	412.867	21.884	776.985
661	0	244.104	-345.051	1611.68	146.065	-354.957	1615.94	250.992	-190.563	1591.87	122.594	-187.284	1587.6	163.709	-156.797	1472.18	153.254	-85.4649	1219.91	181.209	-273.907	1385.06	185.358	-334.561	1230.86	67.104	-90.4141	1282.92	335.824	-149.251	1416.9	369.154	-87.917	1239.79	360.946	-29.8969	1103.84	409.558	-32.4248	935.145	395.855	-47.2923	853.113	404.354	17.3013	868.16	417.603	1.92861	777.284
662	0	244.788	-360.281	1613.16	146.623	-370.123	1617.42	252.043	-206.017	1592.76	123.512	-202.501	1588.11	164.769	-172.478	1473.11	153.767	-101.113	1221.09	181.98	-289.568	1386	185.866	-350.76	1232.01	67.7256	-106.048	1284.04	336.912	-165.515	1417.57	371.191	-105.652	1240.24	364.069	-48.1671	1104.29	413.629	-52.2368	935.491	400.262	-67.3995	853.594	408.694	-2.74049	868.464	422.552	-19.0168	777.601
663	0	245.458	-375.775	1614.74	147.353	-385.292	1618.96	252.892	-221.47	1593.25	124.498	-217.891	1588.66	165.919	-188.247	1474.25	154.319	-116.77	1222.49	182.623	-305.214	1386.97	186.23	-366.88	1233.07	68.3347	-121.506	1285.48	337.878	-181.888	1418.53	373.221	-123.385	1240.88	366.775	-66.5923	1104.4	417.112	-72.6821	935.815	404.615	-88.3292	854.178	413.095	-23.594	868.382	427.923	-40.8766	777.943
664	0	246.403	-390.84	1616.27	148.204	-400.504	1620.51	253.696	-237.069	1593.96	125.3	-233.126	1589.53	166.445	-203.986	1475.55	154.673	-132.13	1224.11	183.227	-320.857	1387.87	186.534	-382.64	1233.94	68.7312	-136.834	1287.11	338.672	-198.125	1419.58	374.888	-141.348	1241.47	369.742	-85.1696	1105.03	421.327	-93.507	936.575	409.197	-109.978	855.221	418.018	-45.0835	868.708	433.582	-63.6488	778.646
665	0	247.317	-406.142	1617.8	148.994	-415.727	1622.06	254.571	-252.3	1594.73	126.174	-248.559	1590.48	167.212	-219.6	1476.93	155.143	-147.11	1226.25	183.536	-336.287	1388.77	186.657	-397.891	1234.81	68.9472	-151.746	1288.97	339.593	-214.229	1421.03	376.495	-159.154	1242.59	372.707	-103.552	1105.23	425.694	-114.528	937.57	413.737	-132.323	855.526	422.872	-67.1994	868.716	439.536	-87.0107	779.345
666	0	247.944	-421.341	1619.17	149.749	-430.954	1623.83	255.296	-267.583	1595.54	126.857	-263.813	1591.46	167.525	-235.054	1478.2	155.354	-161.867	1227.69	183.757	-351.735	1389.8	186.41	-413.017	1235.52	69.3091	-166.86	1291	340.154	-230.417	1422.14	378.066	-176.844	1243.34	375.494	-122.139	1105.62	429.609	-136.339	938.382	418.54	-155.046	857.058	428.12	-89.8112	868.918	445.476	-111.445	780.082
667	0	248.682	-436.474	1620.24	150.629	-446.161	1625.39	255.875	-282.704	1596.07	127.563	-279.21	1592.5	168.152	-250.497	1479.66	155.543	-176.795	1229.27	183.793	-366.891	1390.85	185.987	-427.75	1236.15	69.7475	-181.695	1292.94	340.536	-246.45	1423.15	379.575	-194.236	1244.31	378.174	-140.712	1105.56	433.814	-158.311	939.058	423.173	-178.341	858.208	433.194	-112.936	868.798	451.495	-136.531	780.737
668	0	249.727	-451.719	1621.34	151.347	-461.47	1626.85	256.425	-297.899	1596.94	127.954	-294.53	1593.72	168.626	-265.548	1481.36	155.957	-191.584	1231.33	183.821	-382.093	1391.98	185.155	-442.126	1237.11	70.0948	-196.078	1294.62	340.87	-262.246	1424.27	380.973	-211.491	1245.12	380.916	-159.298	1105.72	437.965	-180.508	940.059	427.541	-202.481	858.595	437.898	-136.643	868.533	458.24	-162.204	781.786
669	0	250.047	-466.778	1622.64	152.016	-476.652	1628.53	256.762	-313.163	1598.14	128.421	-309.747	1595.26	169.031	-280.606	1482.91	156.174	-206.285	1233.01	183.781	-396.987	1393.21	184.318	-456.498	1238.04	70.5214	-210.482	1296.32	341.328	-277.894	1425.72	382.446	-228.623	1246.51	383.887	-177.774	1106.48	441.826	-203.127	941.204	431.294	-226.768	859.78	443.007	-160.659	868.849	464.2	-188.716	783.15
670	0	250.778	-481.864	1623.74	152.563	-491.888	1629.89	256.897	-328.39	1599.43	128.792	-324.926	1597.03	169.071	-295.488	1484.29	156.622	-220.715	1235.01	183.666	-411.752	1394.62	183.347	-470.985	1239.48	70.7745	-224.664	1298.35	341.612	-293.356	1427.24	383.659	-245.643	1247.77	386.384	-196.398	1106.64	446.084	-225.804	942.852	435.775	-251.084	861.394	448.262	-184.962	869.649	470.562	-215.716	785.152
671	0	251.395	-496.975	1625.08	153.097	-507.079	1631.28	257.388	-343.366	1601	128.991	-340.131	1598.94	169.144	-310.17	1486.03	157.061	-234.88	1236.85	183.51	-426.389	1396.02	182.664	-485.423	1240.88	71.0959	-238.804	1300.21	342.063	-308.458	1429.2	384.984	-262.513	1249.14	389.25	-214.732	1107.55	449.719	-248.914	944.467	440.172	-275.687	863.846	453.243	-209.661	870.424	476.7	-243.25	787.529
672	0	251.478	-512.126	1626.29	153.418	-522.335	1632.92	257.614	-358.272	1602.69	129.276	-355.158	1601.11	169.152	-324.794	1488.13	157.537	-249.033	1238.85	183.292	-440.779	1397.71	181.874	-500.129	1242.49	71.5492	-252.553	1302.42	342.09	-323.477	1431	386.288	-279.277	1250.78	391.983	-233.19	1108.25	453.45	-271.898	946.331	444.249	-300.953	866.214	458.026	-234.56	871.579	482.864	-270.923	790.351
673	0	252.157	-527.136	1627.53	153.66	-537.404	1634.38	257.756	-373.157	1604.37	129.376	-370.183	1603.04	169.027	-339.404	1489.95	158.012	-263.116	1240.61	183.04	-455.266	1399.45	181.188	-514.524	1244.39	71.9102	-266.609	1304.35	341.896	-338.554	1432.76	387.326	-296.016	1252.54	394.583	-251.54	1109.15	457.188	-294.918	948.774	447.32	-326.659	868.411	462.57	-259.684	872.796	488.817	-299.088	793.875
674	0	251.912	-542.122	1628.91	153.771	-552.477	1635.78	257.803	-388.169	1606.58	129.452	-385.037	1605.42	169.029	-353.796	1492.06	158.546	-276.929	1242.95	182.859	-469.633	1401.45	180.7	-528.908	1246.2	72.1086	-280.4	1306.35	342	-353.137	1435.15	388.439	-312.551	1254.41	397.184	-269.793	1110.48	460.228	-318.244	951.189	451.021	-352.165	871.744	466.775	-285.059	874.519	494.421	-327.473	797.786
675	0	252.019	-557.285	1630.04	153.759	-567.698	1637.1	257.679	-403.153	1608.35	129.419	-400.104	1607.48	168.931	-368.387	1494.07	158.846	-290.886	1244.94	182.666	-483.974	1403.41	180.379	-543.156	1248.21	72.6075	-294.128	1308.57	341.997	-367.794	1437.46	389.581	-328.959	1256.7	399.704	-288.009	1111.92	463.663	-341.399	954.28	454.592	-377.59	875.379	470.868	-310.399	876.733	499.805	-356.067	802.28
676	0	251.982	-572.024	1631.36	153.715	-582.75	1638.39	257.675	-417.999	1610.65	129.358	-414.824	1609.7	168.877	-382.834	1495.92	158.975	-304.82	1247.01	182.608	-498.224	1405.13	180.278	-557.116	1250.18	72.743	-308.285	1310.59	342.025	-382.535	1439.84	390.661	-345.314	1258.96	402.01	-306.057	1113.39	466.717	-364.467	957.654	457.899	-402.773	880.108	474.837	-335.887	879.513	505.586	-384.603	807.932
677	0	251.773	-587.086	1632.71	153.621	-597.672	1639.75	257.584	-432.76	1612.45	129.324	-429.682	1611.73	168.729	-397.194	1497.89	159.44	-318.656	1249.43	182.524	-512.415	1406.92	180.186	-570.677	1251.95	73.1528	-321.877	1312.95	341.945	-397.193	1442.12	391.694	-361.604	1261.21	404.368	-323.85	1115.15	469.545	-387.608	961.494	461.611	-427.687	885.378	478.318	-361.373	882.061	510.475	-413.018	813.77
678	0	251.894	-601.786	1633.78	153.247	-612.516	1640.67	257.507	-447.459	1614.39	129.292	-444.387	1613.4	168.679	-411.5	1499.54	159.734	-332.674	1251.42	182.458	-526.7	1408.52	180.243	-584.423	1253.4	73.5082	-335.946	1314.74	341.817	-411.954	1444.3	392.743	-377.796	1263.28	406.684	-341.454	1117.04	472.191	-410.771	965.29	464.59	-452.852	890.772	482.203	-387.045	885.842	515.08	-441.62	820.137
679	0	251.428	-616.706	1634.84	152.989	-627.39	1641.62	257.18	-462.325	1615.76	128.736	-458.884	1615.43	168.634	-426.092	1500.95	159.887	-346.668	1253.23	182.49	-540.908	1409.92	180.33	-598.376	1254.63	73.6476	-350.078	1316.49	341.869	-426.801	1446.42	393.849	-393.944	1265.71	408.745	-358.851	1118.57	474.682	-433.747	969.391	467.674	-478.28	896.018	485.542	-412.693	889.2	519.203	-470.138	826.534
680	0	250.876	-631.364	1635.74	152.682	-641.989	1642.35	256.925	-477.035	1617.09	128.702	-473.708	1616.32	168.615	-440.478	1502.28	160.431	-360.622	1255.25	182.462	-555.15	1411.11	180.561	-612.174	1255.79	74.1108	-363.543	1318.19	342.083	-441.522	1448.42	395.03	-409.895	1267.59	410.768	-376.121	1119.97	477.3	-456.358	973.791	470.403	-503.242	901.864	489.029	-438.163	893.174	523.105	-498.281	833.267
681	0	250.661	-646.313	1636.5	152.173	-656.758	1642.83	256.973	-491.671	1618.26	128.613	-488.109	1617.12	168.69	-454.821	1503.4	160.877	-374.641	1256.56	182.447	-569.359	1412.06	180.666	-626.054	1256.62	74.3312	-377.616	1319.37	342.181	-456.45	1449.97	396.118	-425.873	1269.16	413.07	-393.177	1121.5	479.838	-478.971	978.084	473.462	-528.081	908.198	492.026	-463.71	896.392	526.77	-526.401	839.91
682	0	250.502	-660.786	1636.92	152.03	-671.407	1643.24	256.864	-506.371	1618.84	128.672	-502.665	1617.49	168.676	-469.462	1504.05	161.354	-388.581	1257.71	182.561	-583.645	1412.62	180.918	-640.36	1257.25	74.9707	-391.572	1320.15	342.276	-471.389	1451.38	397.357	-441.882	1270.8	415.54	-409.741	1122.71	482.238	-501.394	982.301	476.024	-552.815	914.447	494.959	-489.16	900.198	530.019	-554.321	846.789
683	0	250.081	-675.629	1637.12	151.775	-685.487	1643.21	256.551	-521.334	1619.28	128.229	-517.302	1617.91	168.739	-483.828	1504.43	161.878	-402.632	1258.5	182.716	-598.061	1412.91	181.117	-654.469	1257.5	75.4441	-405.464	1320.93	342.643	-486.403	1452.52	398.573	-457.666	1271.93	417.744	-426.517	1123.49	484.429	-523.482	986.465	478.453	-577.413	920.621	497.853	-514.457	903.914	533.085	-581.797	853.764
684	0	249.251	-690.401	1637.47	151.155	-700.473	1643.18	256.742	-535.759	1619.33	128.395	-531.802	1617.7	168.967	-498.43	1504.66	162.397	-416.587	1258.74	182.721	-612.42	1412.91	181.325	-668.753	1257.54	76.1168	-419.093	1321.24	342.692	-501.35	1453.18	399.857	-473.47	1272.9	419.898	-443.331	1124.23	486.703	-545.472	990.682	480.67	-601.575	926.743	500.595	-539.573	907.891	535.689	-609.084	860.849
685	0	248.861	-705.323	1637.04	150.996	-714.807	1642.62	256.463	-550.569	1618.96	128.174	-546.365	1617.74	169.012	-512.954	1504.59	163.047	-430.698	1259.08	182.732	-626.768	1412.48	181.389	-682.926	1256.97	76.4172	-433.405	1321.1	342.849	-516.394	1453.6	401.058	-489.167	1273.39	422.298	-459.953	1124.48	488.738	-567.288	994.578	482.749	-625.554	932.849	503.141	-564.508	911.731	537.932	-636.093	867.533
686	0	248.515	-719.939	1636.49	150.317	-729.508	1642.06	256.34	-565.482	1618.44	128.304	-560.879	1616.49	169.303	-527.5	1504.21	163.656	-444.599	1259.18	182.895	-641.154	1411.86	181.58	-697.027	1256.23	77.1515	-447.379	1320.54	343.05	-531.353	1453.56	402.343	-504.806	1273.64	424.918	-476.6	1124.75	490.819	-588.891	998.31	484.579	-649.256	938.663	505.611	-589.172	915.532	539.99	-662.685	874.144
687	0	248.275	-734.652	1635.98	150.294	-743.767	1641.25	256.608	-580.069	1617.64	128.076	-575.435	1615.77	169.24	-542.203	1503.35	164.274	-458.604	1258.73	183.115	-655.711	1410.83	181.768	-711.11	1255.08	77.5906	-461.316	1320.25	343.281	-546.323	1453.52	403.607	-520.57	1274	427.327	-493.308	1124.83	492.613	-610.305	1002.04	486.336	-672.578	944.644	507.865	-613.525	919.502	541.703	-688.914	880.925
688	0	248.08	-749.536	1634.73	149.841	-758.365	1639.94	256.325	-595.031	1616.44	127.967	-590.298	1614.11	169.469	-556.876	1502.42	164.878	-472.478	1258.24	183.219	-670.152	1409.71	181.848	-725.208	1253.85	78.1754	-475.595	1319.2	343.554	-561.265	1453.12	404.774	-536.313	1273.9	429.822	-509.837	1124.32	494.682	-631.356	1005.69	487.914	-695.507	950.286	509.958	-637.391	923.169	543.475	-714.568	887.773
689	0	247.932	-764.213	1633.66	149.88	-773.065	1638.71	256.65	-609.765	1615.21	128.143	-604.834	1612.73	169.38	-571.569	1501.15	165.432	-486.659	1257.14	183.369	-684.859	1408.22	181.943	-739.372	1252.18	78.5975	-489.716	1317.9	343.652	-576.257	1452.19	405.952	-551.87	1272.92	432.2	-526.702	1123.62	496.257	-652.183	1008.84	489.161	-717.899	955.61	511.914	-661.011	926.585	544.68	-739.826	894.099
690	0	247.708	-779.091	1632.05	149.971	-787.49	1637.06	256.284	-624.822	1613.19	128.028	-619.699	1610.83	169.764	-586.37	1499.79	165.59	-501.059	1255.23	183.505	-699.595	1406.68	181.995	-753.238	1250.3	79.0138	-504.141	1316.5	343.842	-591.314	1450.91	407.164	-567.51	1272.15	434.723	-543.291	1122.7	497.658	-672.892	1011.54	490.237	-740.219	960.43	513.316	-684.461	929.59	545.693	-764.464	899.84
691	0	247.629	-794.03	1631.09	149.957	-802.381	1635.38	256.246	-639.707	1611.47	128.184	-634.618	1608.89	169.797	-601.289	1498.07	166.038	-515.424	1253.69	183.572	-714.323	1404.81	182.173	-767.417	1247.96	79.4609	-518.537	1314.89	344.037	-606.282	1449.57	408.25	-583.181	1271	436.963	-560.059	1121.59	498.87	-693.152	1013.97	490.91	-762.09	965.198	514.695	-707.494	932.553	546.309	-788.686	905.246
692	0	247.335	-808.92	1629.3	149.67	-817.196	1633.92	256.18	-654.707	1609.59	128.018	-649.316	1607.16	169.929	-616.239	1496.6	166.357	-529.517	1252.2	183.726	-729.135	1402.85	182.252	-781.551	1245.81	79.8246	-533.115	1313.2	344.158	-621.444	1448.06	409.147	-598.916	1269.55	439.109	-576.853	1120.3	499.917	-713.3	1016.21	491.648	-783.382	969.607	516.014	-729.669	935.321	546.866	-812.342	910.802
693	0	247.24	-823.769	1627.6	149.613	-831.975	1632.25	255.888	-669.753	1607.49	128.052	-664.203	1605.01	169.971	-631.384	1494.65	166.412	-543.986	1250.43	183.782	-744.095	1400.92	182.543	-795.931	1243.65	80.2241	-547.636	1311.43	344.289	-636.595	1446.51	410.183	-614.625	1268.31	441.143	-593.668	1118.81	500.868	-733.139	1018.32	491.891	-804.182	973.408	516.788	-752.012	937.909	547.247	-835.383	915.757
694	0	247.213	-838.675	1625.79	149.454	-846.861	1630.74	256.1	-684.494	1605.58	127.793	-679.395	1602.81	169.866	-646.479	1492.71	166.734	-558.261	1248.81	183.836	-759.233	1398.87	182.88	-810.556	1241.52	80.4448	-562.555	1309.59	344.421	-651.881	1444.78	410.767	-630.46	1266.69	443.132	-610.524	1117.51	501.525	-752.766	1020.13	492.188	-824.778	976.96	517.741	-773.603	940.372	547.191	-858.04	920.42
695	0	246.797	-853.784	1623.99	149.051	-861.806	1628.83	255.658	-699.715	1603.7	127.661	-694.28	1601.04	169.996	-661.54	1491.02	166.657	-573.055	1247.08	183.921	-774.443	1396.86	182.951	-825.743	1239.48	80.716	-577.452	1307.6	344.442	-667.225	1443.12	411.825	-646.244	1265.39	444.804	-627.475	1115.94	502.121	-772.053	1021.61	492.212	-844.935	980.108	518.329	-794.763	942.365	547.113	-879.953	924.677
696	0	246.655	-868.667	1622.71	149.095	-876.756	1627.1	255.808	-714.438	1601.79	127.326	-709.118	1599.02	169.843	-676.801	1489.12	166.985	-587.759	1245.59	183.858	-789.748	1394.77	183.158	-840.935	1237.48	80.7085	-592.469	1305.56	344.57	-682.506	1441.3	412.305	-662.216	1263.77	446.132	-644.551	1114.23	502.392	-791.217	1022.87	491.781	-864.968	982.544	518.616	-815.459	943.933	546.846	-901.225	928.306
697	0	246.256	-883.553	1620.9	148.529	-891.894	1625.4	255.215	-729.766	1599.41	126.993	-724.249	1596.8	169.871	-691.95	1487.03	166.811	-602.879	1243.49	183.136	-805.153	1393	183.227	-856.685	1235.46	80.7759	-607.642	1303.59	344.487	-698.04	1439.37	412.624	-678.157	1262.15	447.404	-661.471	1112.58	502.315	-809.966	1023.49	491.327	-884.386	984.756	518.709	-835.707	945.454	546.174	-922.122	931.273
698	0	245.84	-898.771	1619.02	148.268	-906.851	1623.68	255.273	-744.494	1597.65	126.755	-739.387	1594.57	169.561	-707.141	1485.12	166.779	-618.298	1241.28	183.302	-820.537	1391.07	183.257	-872.389	1233.51	80.8291	-622.889	1301.52	344.463	-713.544	1437.52	413.084	-694.335	1260.27	448.392	-678.324	1110.71	502.283	-828.541	1023.78	490.73	-903.375	986.294	518.558	-855.508	946.117	545.446	-942.335	933.483
699	0	245.539	-913.803	1617.82	147.677	-921.963	1622.15	254.786	-759.778	1595.92	126.335	-754.483	1592.73	169.401	-722.337	1483.32	166.645	-634.057	1239.02	183.11	-836.004	1389.29	183.268	-888.048	1232.13	80.6353	-638.353	1299.24	344.348	-729.016	1435.66	413.217	-710.729	1258.37	449.101	-695.237	1109.02	501.976	-846.6	1023.83	490.085	-922.004	987.365	518.134	-874.783	946.56	544.775	-961.908	935.77
700	0	245.056	-928.894	1616.17	147.227	-936.867	1620.79	254.186	-774.868	1593.84	125.941	-769.452	1590.91	169.128	-737.615	1481.42	166.628	-649.71	1237.19	182.835	-851.423	1387.73	183.155	-903.799	1230.73	80.4902	-653.85	1297.16	344.033	-744.533	1434.16	413.306	-727.119	1256.95	449.343	-712.25	1107.17	501.456	-864.49	1023.7	489.023	-940.102	987.821	517.514	-893.587	946.596	543.829	-980.813	937.19
701	0	244.582	-943.883	1614.74	146.598	-952.117	1619.15	253.705	-790.111	1592.2	125.438	-784.822	1588.85	168.533	-752.915	1479.54	166.251	-665.6	1235.01	182.54	-867.085	1386.21	182.9	-919.749	1229.28	80.1232	-669.533	1295.34	343.665	-759.925	1432.61	413.552	-743.491	1255.54	449.649	-729.018	1105.99	500.787	-882.174	1023.22	487.963	-957.997	988.338	516.636	-911.815	946.411	542.657	-999.342	937.556
702	0	244.008	-958.994	1613.54	146.23	-967.214	1617.77	253.304	-805.209	1591.08	125.049	-799.786	1587.65	168.086	-768.128	1478.05	165.678	-681.727	1233.15	182.07	-882.772	1384.87	182.563	-935.886	1228.06	79.5349	-685.402	1293.21	342.998	-775.263	1431	413.367	-759.728	1254.14	449.821	-745.622	1104.85	499.958	-899.498	1022.59	486.739	-975.253	987.645	515.757	-929.441	945.888	541.323	-1017.22	937.873
703	0	243.392	-974.319	1612.2	145.509	-982.243	1616.54	253.028	-820.094	1589.9	124.47	-814.856	1586.15	167.318	-783.449	1476.34	165.112	-697.861	1231.37	181.495	-898.439	1383.73	182.147	-951.938	1227.16	78.8052	-701.378	1291.32	342.29	-790.742	1429.61	412.685	-776.315	1252.74	449.446	-762.185	1103.23	498.851	-916.558	1021.5	485.347	-992.051	986.695	514.712	-946.775	944.806	539.82	-1034.52	937.284
704	0	242.957	-989.313	1611.18	145.195	-997.361	1614.97	252.111	-835.363	1588.38	123.724	-829.868	1585.06	166.61	-798.834	1474.65	163.96	-714.444	1228.99	180.544	-914.364	1382.63	181.575	-968.427	1226.23	77.9694	-717.53	1289.36	341.63	-806.217	1428.13	412.211	-792.629	1251.42	448.758	-778.686	1101.68	497.653	-933.253	1020.16	483.994	-1008.58	985.319	513.434	-963.565	943.708	538.175	-1051.41	935.957
705	0	242.307	-1004.25	1609.8	144.678	-1012.34	1614.14	251.98	-850.036	1587.48	123.185	-844.887	1583.69	165.768	-814.195	1472.94	163.003	-730.943	1227.18	180.156	-930.142	1381.45	180.954	-984.856	1225.51	76.9195	-733.814	1287.36	340.799	-821.66	1426.57	411.324	-808.898	1250	448.056	-795.053	1100.42	496.394	-949.568	1018.72	482.639	-1024.52	983.68	512.203	-979.784	942.242	536.619	-1067.7	934.218
706	0	241.89	-1019.18	1608.76	144.14	-1027.49	1613.15	250.694	-865.509	1585.65	122.602	-860.38	1582.45	164.745	-829.52	1471.54	161.857	-747.687	1225.36	178.89	-946.13	1380.75	180.048	-1001.49	1225.08	75.6435	-750.256	1285.48	339.787	-837.172	1425.07	410.569	-824.748	1248.47	447.282	-811.031	1099.1	495.136	-965.57	1016.91	480.943	-1040.45	981.375	511.022	-995.247	940.366	534.902	-1083.58	932.102
707	0	241.562	-1034.21	1608.36	143.69	-1042.43	1613.45	250.138	-880.469	1584.85	122.045	-875.54	1582.1	163.706	-845.018	1470.5	160.342	-764.52	1223.09	178.223	-962.082	1380.06	178.88	-1018.66	1224.58	74.3172	-766.752	1283.77	338.809	-852.557	1423.47	409.37	-840.753	1246.89	446.318	-826.805	1097.7	493.602	-981.223	1014.71	479.187	-1055.85	978.778	509.186	-1010.83	937.847	532.981	-1098.68	929.123
708	0	241.05	-1049.41	1608.26	143.215	-1057.8	1613.59	249.33	-895.621	1584.55	121.237	-890.913	1582.23	162.761	-860.599	1470.2	159.28	-781.382	1221.68	177.08	-978.096	1379.95	177.666	-1035.84	1224.65	73.0155	-783.296	1282.55	337.865	-868.02	1422.17	407.86	-856.589	1245.51	444.575	-842.698	1096.01	491.858	-996.438	1012.02	477.514	-1070.62	975.85	508.043	-1025.1	935.07	530.954	-1113.43	925.451
709	0	240.735	-1064.62	1608.61	142.957	-1073.2	1614.37	248.385	-910.883	1584.54	120.336	-906.262	1582.86	161.679	-876.295	1469.94	158.298	-798.013	1221.01	175.962	-994.148	1380.39	176.362	-1052.95	1225.13	71.9223	-799.881	1282.06	336.677	-883.538	1421.48	406.403	-872.028	1244.84	442.695	-858.345	1094.86	490.108	-1011.19	1009.44	475.559	-1085.03	972.462	505.703	-1039.49	932.202	528.814	-1127.34	921.579
710	0	240.446	-1079.83	1609.69	142.648	-1088.56	1615.52	248.222	-925.668	1585.42	119.464	-921.649	1584.09	160.516	-892.037	1470.37	157.804	-814.715	1221.22	174.902	-1010.18	1381.19	175.053	-1069.75	1226.45	71.0115	-816.389	1282.14	335.73	-898.892	1421.58	404.744	-887.2	1244.77	440.55	-873.766	1094.41	488.128	-1025.54	1006.91	473.281	-1098.82	968.655	503.597	-1052.68	929.147	526.541	-1140.24	917.446
711	0	240.098	-1094.98	1610.65	142.432	-1104	1617.03	247.085	-941.127	1586.24	118.623	-937.434	1584.94	159.592	-907.818	1471.45	157.783	-830.495	1222.15	173.608	-1026.12	1382.54	173.712	-1086.7	1227.97	70.4753	-832.721	1282.78	334.758	-914.527	1422.02	402.599	-902.247	1244.78	438.057	-888.966	1094.66	485.839	-1039.17	1004.3	471.164	-1111.82	965.043	501.316	-1064.92	926.558	523.943	-1152.4	912.897
712	0	239.758	-1110.28	1612.18	142.26	-1119.65	1618.62	246.5	-956.247	1587.25	117.516	-952.982	1586.4	158.956	-923.622	1472.84	157.514	-846.345	1223.15	173.043	-1042.06	1383.75	172.454	-1103.26	1229.55	70.1378	-849.011	1283.95	333.931	-930.267	1423.12	400.427	-917.093	1245.34	435.295	-903.815	1095.04	483.004	-1052.33	1001.7	468.529	-1124.13	960.92	498.538	-1076.42	923.447	521.119	-1163.71	908
713	0	239.495	-1125.45	1613.88	141.893	-1134.96	1620.45	245.83	-971.416	1588.49	117.14	-968.518	1587.42	158.311	-939.235	1474.04	157.748	-861.816	1225.05	172.365	-1057.72	1385.3	171.374	-1119.42	1231.3	69.9331	-865.186	1285.12	333.301	-946.079	1424.6	398.38	-931.858	1246.15	432.221	-918.234	1095.93	480.129	-1064.82	999.242	465.68	-1135.79	956.946	495.344	-1087.09	920.25	518.08	-1174.06	902.7
714	0	239.124	-1140.6	1615.68	141.427	-1150.23	1622.02	245.195	-986.784	1590.08	116.443	-983.966	1588.94	157.832	-954.742	1475.74	157.641	-877.094	1226.78	171.901	-1073.23	1386.78	170.521	-1135.31	1232.83	69.723	-881.083	1286.86	333.086	-961.778	1426.39	396.736	-946.619	1247.38	428.896	-932.164	1096.68	477.129	-1076.8	997.076	462.687	-1146.49	952.914	491.818	-1096.99	917.252	515.43	-1182.55	897.608
715	0	238.754	-1155.85	1617.54	141.177	-1165.45	1623.47	244.958	-1001.82	1591.58	116.036	-999.185	1590.36	157.487	-969.992	1477.32	157.435	-892.209	1228.9	171.717	-1088.53	1388.35	170.04	-1150.64	1234.3	69.5992	-896.43	1288.73	332.687	-977.203	1428.17	395.362	-961.31	1248.38	425.673	-945.855	1097.97	473.785	-1088.14	994.643	459.765	-1156.03	949.643	489.098	-1105.61	915.247	511.915	-1191.25	892.213
716	0	238.481	-1170.97	1619.43	140.942	-1180.92	1625	244.761	-1017.18	1593.94	115.886	-1014.61	1591.3	157.256	-985.033	1479.22	157.228	-907.308	1230.7	171.755	-1103.62	1390	170.032	-1165.85	1235.72	69.3141	-911.466	1290.77	332.505	-992.059	1430.02	393.945	-976.036	1249.54	422.532	-958.977	1099.49	470.474	-1098.94	992.264	456.224	-1165.69	945.651	485.363	-1114.43	911.956	508.501	-1198.82	887.086
717	0	238.352	-1186.05	1621.57	140.749	-1196.02	1626.65	244.897	-1032.09	1596.29	115.938	-1029.75	1593.39	157.016	-999.834	1481.09	156.722	-922.22	1232.94	171.987	-1118.33	1391.88	170.592	-1180.46	1237.42	68.9889	-926.457	1292.93	332.238	-1006.52	1431.93	392.944	-990.024	1250.9	419.245	-971.676	1100.63	467.099	-1109.07	989.953	452.463	-1174.7	941.27	481.114	-1122.61	908.702	504.626	-1206.01	881.674
718	0	238.113	-1201.11	1623.33	140.545	-1211.07	1628.12	244.297	-1047.11	1598.2	115.942	-1044.85	1594.92	156.725	-1014.45	1483.01	156.383	-937.048	1235.06	172.328	-1132.84	1393.8	171.443	-1195.06	1239.32	68.5993	-941.472	1294.89	332.051	-1020.3	1433.76	391.323	-1004.05	1252.17	415.837	-984.243	1101.91	463.647	-1118.74	987.513	449.297	-1183.04	937.414	476.483	-1130.44	905.519	500.626	-1212.38	876.425
719	0	237.955	-1216.16	1625.02	140.488	-1226.2	1629.53	244.268	-1062.04	1600.6	115.631	-1059.51	1597.35	156.618	-1028.79	1484.93	155.782	-951.864	1236.89	172.763	-1147.15	1395.87	172.703	-1209	1241.32	68.0896	-956.261	1297.04	331.92	-1033.83	1435.66	389.936	-1017.3	1253.34	412.899	-996.179	1103.44	460.039	-1128	985.108	444.491	-1191.58	932.391	472.19	-1137.36	902.811	496.076	-1218.61	870.575
720	0	237.981	-1230.95	1626.87	140.45	-1241.1	1631.01	243.726	-1076.92	1602.88	115.285	-1074.09	1600.45	156.674	-1043.01	1487.03	155.087	-966.596	1238.64	173.195	-1161.58	1397.88	173.871	-1223.05	1243.22	67.1792	-970.978	1298.49	331.84	-1047.01	1437.44	388.458	-1030.45	1254.83	409.519	-1008.13	1104.4	456.435	-1136.78	982.679	440.693	-1198.82	928.471	468.001	-1144	900.29	491.402	-1224.01	865.023
721	0	238.159	-1245.77	1628.61	140.57	-1255.76	1632.47	244.387	-1091.25	1606.06	115.794	-1088.86	1602.47	156.295	-1057.19	1488.89	154.003	-981.239	1240.02	173.719	-1175.69	1400.13	175.076	-1237.09	1245.47	66.5614	-986.056	1300.47	331.72	-1059.96	1439.14	387.321	-1042.42	1256.34	406.447	-1019.52	1105.58	452.925	-1144.81	980.551	436.562	-1205.52	924.534	463.9	-1149.94	897.946	486.705	-1228.78	860.095
722	0	238.267	-1260.54	1630.39	140.601	-1270.57	1634.31	244.685	-1105.76	1608.94	115.94	-1103.3	1605.23	156.256	-1071.24	1490.93	152.993	-996.132	1241.76	174.25	-1189.61	1402.54	176.496	-1250.58	1248.24	65.6344	-1001.01	1302.22	331.673	-1072.8	1440.91	385.88	-1054.23	1257.81	403.389	-1030.62	1106.86	449.452	-1152.46	978.468	432.725	-1211.75	921.429	459.538	-1155.51	895.568	481.814	-1233.15	854.938
723	0	238.304	-1275.32	1631.96	140.788	-1285.4	1635.79	244.382	-1120.57	1611.26	116.003	-1118.06	1608.07	155.943	-1085.27	1492.9	151.94	-1010.62	1243.06	174.479	-1203.54	1404.77	177.585	-1264.9	1250.62	64.7402	-1015.75	1303.9	331.421	-1085.65	1442.46	384.221	-1065.62	1259.07	400.507	-1041.29	1108.48	445.91	-1159.75	976.417	428.682	-1217.56	917.463	455.28	-1160.51	893.292	476.752	-1236.86	849.874
724	0	238.451	-1289.95	1633.54	140.891	-1300.05	1637.26	244.492	-1135.15	1613.5	116.457	-1132.38	1610.51	156.135	-1099.41	1495.03	150.625	-1025.46	1244.71	174.97	-1217.61	1407.14	178.544	-1279.23	1253.16	63.92	-1030.62	1305.9	331.28	-1098.4	1443.96	382.744	-1076.77	1260.34	397.567	-1052.06	1109.81	442.553	-1166.57	974.457	424.708	-1222.8	914.041	451.171	-1165.13	891.438	471.707	-1240.34	844.807
725	0	238.54	-1304.56	1635.05	140.953	-1314.23	1638.66	245.253	-1149.34	1616.53	116.753	-1146.7	1612.73	156.047	-1113.39	1496.87	149.649	-1039.79	1246.21	175.132	-1231.65	1409.43	179.334	-1293.4	1255.79	63.0956	-1045.54	1307.6	330.927	-1111.4	1445.23	380.683	-1087.79	1261.25	394.616	-1062.51	1111.16	438.867	-1173	972.677	420.925	-1227.66	911.124	446.723	-1169.62	889.48	466.474	-1243.19	840.207
726	0	238.64	-1319.14	1636.48	140.887	-1328.91	1639.8	245.307	-1164	1618.44	116.867	-1161.01	1614.96	155.461	-1127.42	1498.37	148.674	-1054.61	1248.19	175.166	-1245.57	1411.31	179.828	-1307.78	1258.03	62.4401	-1060.51	1309.67	330.521	-1124.48	1446.35	379.22	-1098.84	1262.53	391.944	-1072.71	1112.8	435.503	-1179.21	970.975	417.252	-1232.28	908.037	442.701	-1173.46	887.776	461.354	-1245.61	835.331
727	0	238.604	-1333.77	1637.49	141.124	-1343.35	1640.94	245.498	-1178.51	1620.22	117.148	-1175.11	1617.13	155.547	-1141.49	1500.06	147.753	-1068.99	1249.55	175.244	-1259.58	1413.18	180.176	-1321.9	1260.17	61.4859	-1075.28	1311.29	330.239	-1137.69	1447.61	377.725	-1109.97	1263.62	388.924	-1082.86	1113.78	432.137	-1185.32	969.368	413.672	-1236.7	904.888	438.701	-1177.07	886.169	456.433	-1247.75	831.086
728	0	238.802	-1348.22	1638.6	141.086	-1357.97	1641.96	245.507	-1193.22	1621.74	117.686	-1189.62	1618.77	155.25	-1155.66	1501.41	146.877	-1083.66	1251.18	175.238	-1273.81	1414.81	180.183	-1335.94	1261.85	60.8169	-1089.86	1312.98	329.914	-1150.96	1448.49	376.061	-1121.39	1264.53	386.05	-1092.79	1115.27	429.033	-1190.87	968.015	410.366	-1240.69	902.203	434.932	-1180.42	885.122	451.565	-1249.2	826.487
729	0	238.81	-1362.74	1639.5	141.03	-1372.03	1643	246.57	-1207.34	1623.97	117.837	-1203.86	1620.33	155.012	-1169.8	1502.54	146.048	-1098.1	1252.22	175.133	-1287.89	1416.21	179.889	-1349.9	1263.23	60.1221	-1104.7	1314.4	329.404	-1164.36	1449.17	374.643	-1132.98	1265.2	382.831	-1102.67	1116.2	425.697	-1196.43	966.653	406.966	-1245.04	898.784	430.972	-1183.58	883.833	447.127	-1250.46	822.903
730	0	238.793	-1377.37	1640.03	141.098	-1386.56	1643.38	245.933	-1222.34	1624.37	117.949	-1218.19	1621.54	154.919	-1184.06	1503.44	145.358	-1112.68	1253.35	174.976	-1302.21	1417.2	179.328	-1364.31	1264.17	59.5602	-1119.29	1315.6	328.856	-1178.06	1449.42	372.999	-1144.67	1265.54	379.745	-1112.48	1117.49	422.394	-1201.87	965.029	403.839	-1249.43	896.163	426.959	-1186.59	882.497	442.736	-1251.41	818.747
731	0	238.825	-1391.95	1640.24	141.332	-1401.34	1643.85	246.85	-1236.62	1625.99	118.209	-1232.39	1622.78	155.235	-1198.36	1504.46	144.887	-1127.06	1254.22	174.85	-1316.35	1417.88	178.944	-1378.34	1264.57	58.9664	-1133.78	1316.53	328.516	-1191.83	1449.53	371.439	-1156.72	1265.66	376.595	-1122.38	1118.32	419.28	-1207.02	963.298	398.845	-1257.3	895.127	422.939	-1189.8	880.888	438.39	-1252.25	815.091
732	0	238.93	-1406.54	1640.29	141.579	-1416.18	1644.01	247.234	-1251.03	1626.39	117.929	-1246.56	1623.71	154.711	-1212.84	1504.76	144.315	-1141.43	1254.61	174.73	-1330.68	1418.24	178.33	-1393.34	1264.9	58.4078	-1148.24	1317.09	328.11	-1205.7	1449.43	369.188	-1169.08	1265.51	372.907	-1132.52	1118.79	416.19	-1212.06	961.809	397.737	-1256.28	890.253	418.923	-1192.16	880.032	434.36	-1252.68	811.657
733	0	239.011	-1421.09	1640.26	141.409	-1430.21	1644.27	247.346	-1265.61	1626.57	118.383	-1261.33	1623.49	154.69	-1227.28	1504.95	143.629	-1155.85	1254.43	174.498	-1345.2	1418.39	178.413	-1406.88	1265.08	57.9956	-1162.68	1317.33	327.812	-1219.59	1449.37	367.659	-1181.12	1265.54	369.445	-1142.73	1119.23	413.029	-1216.95	960.335	394.945	-1260.21	887.993	414.826	-1194.81	878.922	430.575	-1252.81	808.51
734	0	239.175	-1435.73	1639.78	141.517	-1444.81	1644.09	247.422	-1280.1	1625.82	118.244	-1275.62	1623.8	154.325	-1241.87	1504.8	143.01	-1170.24	1253.99	174.279	-1359.88	1418.15	177.979	-1421.92	1264.97	57.7875	-1177.24	1317.56	327.382	-1233.7	1448.94	365.552	-1193.37	1264.77	366.063	-1153.11	1119.57	409.977	-1221.83	958.584	392.142	-1263.74	885.365	410.57	-1197.52	877.663	426.979	-1252.96	805.422
735	0	239.188	-1450.38	1639.01	139.364	-1458.03	1645.44	247.234	-1294.75	1624.85	118.234	-1290.39	1623.49	154.196	-1256.6	1504.16	142.813	-1184.58	1253.64	174.202	-1374	1417.44	177.709	-1436.73	1264.4	57.332	-1191.88	1317.13	327.002	-1247.9	1448.12	363.845	-1205.52	1264.48	362.826	-1163.68	1119.95	407.053	-1226.64	956.866	389.139	-1267.86	883.038	406.385	-1200.08	876.787	423.467	-1253	802.545
736	0	239.419	-1464.95	1638.21	141.917	-1474.36	1642.89	247.149	-1309.41	1623.66	118.402	-1304.99	1622.55	153.907	-1271.09	1503.7	142.582	-1199.06	1253.12	173.847	-1388.92	1416.65	177.383	-1451.43	1263.52	57.0161	-1206.41	1316.53	326.606	-1262.21	1447.22	362.285	-1217.63	1263.83	359.496	-1174.42	1119.89	404.092	-1231.67	955.413	390.04	-1268.89	882.44	402.457	-1202.77	876.284	420.504	-1252.87	799.926
737	0	239.335	-1479.75	1637.04	141.125	-1488.13	1642.79	247.493	-1323.89	1623.19	118.354	-1319.76	1621.79	153.567	-1286.07	1502.51	142.524	-1213.75	1252.34	173.719	-1403.3	1415.43	177.056	-1465.75	1262.25	56.617	-1221.07	1315.48	326.164	-1276.57	1445.97	360.49	-1229.81	1263.04	356.434	-1185.42	1120.07	401.139	-1237.06	953.901	386.516	-1272.29	880.316	398.274	-1205.71	875.718	415.811	-1252.84	797.187
738	0	239.32	-1494.64	1635.21	141.495	-1503.23	1641.42	246.994	-1338.84	1621.45	118.02	-1334.36	1620.91	153.376	-1300.94	1501.26	142.563	-1228.27	1251.31	173.579	-1418.03	1414.03	176.625	-1480.39	1260.54	56.5389	-1235.67	1314.57	325.971	-1290.99	1444.53	358.962	-1242.25	1262.23	353.425	-1196.72	1119.76	398.45	-1242.42	952.474	383.986	-1275.83	877.933	394.23	-1208.92	875.348	412.959	-1253.34	795.439
739	0	239.649	-1509.15	1634.19	141.836	-1517.96	1640.26	247.734	-1353.02	1620.9	118.062	-1349.37	1619.41	153.369	-1315.8	1500.32	142.435	-1243.08	1249.72	173.905	-1432.21	1412.23	176.456	-1494.54	1258.73	56.2367	-1250.35	1313.12	325.799	-1305.65	1443.31	357.343	-1254.73	1261.31	350.761	-1208.16	1119.56	395.8	-1247.71	951.102	381.409	-1279.61	875.606	390.233	-1212.53	874.562	410.028	-1253.64	793.807
740	0	239.825	-1523.84	1632.69	141.919	-1532.81	1638.76	247.466	-1367.81	1618.93	117.736	-1364.27	1617.7	153.279	-1330.79	1498.66	142.334	-1257.79	1247.86	173.765	-1447.19	1410.52	176.447	-1508.14	1256.7	56.0385	-1265.06	1311.6	325.704	-1320.37	1441.85	355.846	-1267.61	1259.95	348.449	-1219.96	1119.4	392.23	-1253.72	949.78	382.945	-1281.46	874.891	386.567	-1216.51	874.351	406.798	-1254.64	792.164
741	0	239.973	-1538.54	1631.11	140.055	-1546.78	1638.31	247.543	-1382.42	1617.49	117.558	-1379.36	1615.95	153.156	-1346	1496.8	142.503	-1272.35	1246.13	173.681	-1462.18	1408.61	176.159	-1522.51	1254.68	55.9643	-1279.86	1309.81	325.464	-1335.19	1440.13	354.726	-1280.55	1259	346.248	-1231.83	1118.67	389.589	-1260.28	948.229	376.306	-1288.23	870.462	383.154	-1221.04	874.084	403.96	-1256.16	790.71
742	0	240.073	-1553.33	1629.41	140.562	-1561.85	1636.48	246.83	-1397.59	1614.74	117.578	-1394.34	1613.87	153.198	-1361.17	1495.1	142.665	-1287.02	1244.41	173.708	-1477.12	1406.54	176.041	-1537.29	1252.25	56.0687	-1294.53	1308.09	325.386	-1350.14	1438.21	353.954	-1293.83	1257.46	344.316	-1243.94	1117.98	388.057	-1267.19	947.269	374.19	-1293.18	869.405	380.535	-1226.06	874.277	401.314	-1258.37	789.708
743	0	240.308	-1568.15	1627.64	140.84	-1577.02	1634.74	247.21	-1412.03	1613.31	117.295	-1409.26	1611.8	153.303	-1376.34	1493.24	142.978	-1301.83	1242.64	173.687	-1492.13	1404.23	176.025	-1552.01	1250.01	56.3525	-1309.27	1306.45	325.382	-1365.33	1436.11	353.431	-1307.28	1256.24	342.982	-1256.26	1117.48	385.811	-1274.6	946.182	371.912	-1298.51	866.6	378.218	-1231.63	874.502	398.415	-1261.17	788.453
744	0	240.57	-1583	1625.76	140.856	-1591.84	1632.98	246.602	-1427.05	1610.61	117.273	-1424.44	1609.32	153.414	-1391.49	1491.25	143.426	-1316.58	1241.08	173.733	-1507.14	1402.02	175.577	-1568.09	1247.54	56.6032	-1323.97	1304.61	325.443	-1380.3	1434.55	353.213	-1320.99	1255.12	341.683	-1268.79	1116.65	384.583	-1282.6	945.483	369.143	-1303.96	864.995	376.148	-1238.04	874.678	395.985	-1264.59	787.674
745	0	240.745	-1597.9	1623.73	143.887	-1608.91	1629.05	246.571	-1441.86	1608.35	117.185	-1439.61	1607.27	153.577	-1406.51	1489.08	144.362	-1331.47	1239.69	173.859	-1522.27	1399.62	175.695	-1582.89	1245.32	56.8996	-1338.69	1302.52	325.717	-1395.45	1432.82	352.936	-1335.06	1253.36	341.184	-1281.57	1116.17	383.616	-1291.3	944.661	368.198	-1311.06	863.957	374.786	-1245.01	875.01	393.843	-1268.76	787.056
746	0	241.138	-1612.74	1621.56	141.225	-1621.91	1628.94	246.344	-1456.78	1606.04	117.198	-1454.74	1604.73	153.825	-1421.63	1486.88	144.759	-1346.36	1237.41	174.028	-1537.44	1397.23	175.767	-1598.04	1242.92	57.5649	-1353.42	1300.67	326.062	-1410.88	1430.64	353.013	-1349.32	1251.83	340.813	-1294.6	1115.84	383.055	-1300.48	943.913	367.249	-1318.51	862.793	373.946	-1252.53	875.484	392.308	-1273.65	786.697
747	0	241.42	-1627.58	1619.6	144.587	-1639.05	1624.8	245.719	-1471.72	1603.08	116.81	-1469.84	1602.61	154.183	-1436.66	1484.74	145.518	-1361.44	1235.42	174.177	-1552.62	1395.01	175.601	-1613.31	1240.79	58.0388	-1368.27	1298.41	326.652	-1426.31	1428.9	353.428	-1363.7	1250.37	340.676	-1307.75	1114.74	382.517	-1310.42	943.023	366.076	-1326.09	861.393	373.492	-1260.87	875.962	390.411	-1279.29	786.044
748	0	241.751	-1642.54	1617.55	145.069	-1654.12	1622.63	246.587	-1486.15	1602.25	116.782	-1484.96	1600.5	154.546	-1451.7	1482.46	146.417	-1376.67	1233.39	174.389	-1567.74	1392.95	175.623	-1628.72	1238.8	58.6731	-1383.12	1296.14	327.059	-1441.73	1426.98	354.078	-1378.1	1248.74	340.969	-1321.25	1113.76	382.623	-1320.75	942.32	367.122	-1335.45	860.27	373.437	-1269.9	876.105	388.41	-1286.38	784.949
749	0	242.012	-1657.37	1615.07	145.348	-1669.33	1620.4	246.7	-1501	1600.4	117.004	-1500.22	1598.53	155.128	-1466.68	1480.36	147.316	-1392.1	1231.13	174.732	-1582.78	1390.93	175.656	-1644.31	1236.99	59.5906	-1398.06	1294.08	327.702	-1457.21	1425.06	354.828	-1392.78	1247.2	341.666	-1335.02	1112.65	383.174	-1331.88	941.386	365.677	-1344.23	859.4	373.971	-1279.65	876.314	387.648	-1293.79	784.529
750	0	242.554	-1672.41	1613.44	146.053	-1684.4	1618.84	246.807	-1515.92	1598.56	116.838	-1515.15	1596.7	155.832	-1481.71	1478.29	148.517	-1407.63	1228.81	175.081	-1598.08	1388.96	175.633	-1660.08	1235.23	60.5702	-1413.34	1291.55	328.393	-1472.76	1423.05	355.7	-1407.76	1245.65	342.664	-1349.01	1111.84	383.861	-1343.34	940.752	366.61	-1354.8	858.719	374.866	-1290.14	876.822	387.046	-1302.19	784.339
751	0	243.038	-1687.3	1611.75	146.405	-1699.55	1616.76	246.948	-1530.81	1596.97	116.984	-1530.29	1594.93	156.452	-1496.72	1476.35	149.834	-1423.37	1226.79	175.554	-1613.37	1387.34	175.97	-1675.98	1233.86	61.7129	-1428.66	1289.28	329.143	-1488.32	1421.33	356.753	-1422.76	1244.51	343.903	-1363.26	1111.12	385.026	-1355.49	940.043	367.487	-1365.66	858.062	376.289	-1301.12	877.278	386.742	-1311.42	784.123
752	0	243.605	-1702.26	1610.05	147.026	-1714.57	1614.81	246.736	-1546.01	1594.97	117.354	-1545.7	1593.22	157.219	-1511.66	1474.45	150.993	-1439.16	1224.39	176.028	-1628.69	1385.7	176.083	-1692.01	1232.51	62.986	-1443.86	1287.08	329.984	-1504.02	1419.83	357.902	-1438.03	1243.14	345.29	-1377.72	1110.14	386.568	-1368.15	939.321	368.916	-1377.23	857.275	377.971	-1313.11	877.236	387.039	-1321.7	783.698
753	0	244.024	-1717.35	1608.34	147.418	-1729.76	1613.46	247.496	-1560.58	1594.2	117.427	-1560.63	1591.63	158.106	-1526.77	1472.59	152.475	-1455.21	1222.34	176.662	-1643.95	1384.16	176.502	-1708.15	1231.32	64.4356	-1459.39	1284.75	330.861	-1519.74	1418.15	359.277	-1453.39	1242.03	346.877	-1392.49	1109.26	388.575	-1381.4	938.809	370.579	-1389.32	856.531	380.276	-1325.63	877.333	387.907	-1332.88	783.227
754	0	244.629	-1732.2	1606.78	147.868	-1744.91	1611.85	247.777	-1575.51	1592.78	117.8	-1575.82	1590.28	159.01	-1541.75	1470.64	153.997	-1471.33	1220.18	177.333	-1659.44	1382.7	177.32	-1724.12	1230.18	65.7822	-1475.04	1282.39	331.757	-1535.4	1416.69	360.479	-1469.09	1240.47	348.776	-1407.54	1108.49	390.899	-1395.22	938.217	373.588	-1403.01	855.888	382.641	-1339.04	877.096	389.492	-1345.1	782.951
755	0	245.056	-1747.18	1605.48	148.307	-1760.05	1610.13	247.824	-1590.63	1591.4	117.992	-1590.87	1588.93	159.884	-1556.69	1469.06	155.296	-1487.67	1217.84	178.133	-1674.85	1381.66	178.352	-1740.31	1229.52	67.2311	-1490.79	1280.05	332.816	-1551.13	1415.27	362.34	-1484.63	1239.75	350.683	-1422.91	1107.52	393.532	-1409.52	937.851	375.94	-1416.51	855.061	385.368	-1353.07	876.823	391.472	-1358.07	782.495
756	0	245.647	-1762.12	1604.57	148.993	-1775.17	1609.38	248.307	-1605.49	1591.03	118.248	-1606.15	1588.05	160.915	-1571.78	1467.96	156.746	-1504.18	1215.72	178.86	-1690.27	1380.94	179.204	-1757.03	1229.13	68.6502	-1506.46	1277.98	333.88	-1566.89	1414.12	364.142	-1500.47	1238.96	352.746	-1438.73	1106.38	396.607	-1424.5	937.521	379.127	-1431.31	854.378	388.441	-1367.93	876.499	393.916	-1372.27	782.045
757	0	246.182	-1777.54	1604.6	149.573	-1790.48	1609.1	248.807	-1620.6	1591.13	118.82	-1621.38	1588.04	161.945	-1586.99	1467.33	158.184	-1520.84	1214.28	179.608	-1705.93	1380.69	182.761	-1769.18	1228	69.9953	-1522.44	1276.02	334.951	-1582.66	1413.42	365.658	-1516.98	1237.81	355.245	-1455	1105.69	399.724	-1440.32	936.822	383.298	-1447.4	853.8	391.749	-1383.6	875.99	397.204	-1387.18	781.922
758	0	246.746	-1792.67	1605.13	150.068	-1805.77	1609.31	249.083	-1635.93	1591.3	119.289	-1636.75	1588.19	162.807	-1602.24	1467.22	159.348	-1537.54	1213.23	180.523	-1721.25	1381.02	183.629	-1785.72	1228.56	71.1965	-1538.27	1274.65	335.899	-1598.3	1412.83	367.614	-1533.61	1237.19	357.78	-1471.76	1105.05	403.163	-1456.75	936.802	387.104	-1464.02	853.563	395.361	-1400.07	875.916	401.204	-1403.48	781.538
759	0	247.243	-1807.62	1605.6	150.487	-1820.98	1609.9	249.457	-1651.07	1592.15	119.648	-1652.02	1588.7	163.665	-1617.58	1467.51	160.145	-1554.07	1212.49	181.142	-1736.8	1381.67	184.5	-1802.16	1229.49	72.1628	-1554.09	1274.1	336.721	-1613.91	1412.94	369.492	-1550.33	1237.18	360.251	-1488.96	1104.73	406.427	-1474.16	936.563	390.709	-1481.14	853.408	399.046	-1417.61	875.922	405.326	-1421.12	781.371
760	0	247.717	-1823.66	1606.77	151.036	-1836.32	1610.61	249.822	-1666.42	1593.1	120.005	-1667.27	1589.34	164.368	-1633.05	1468	160.617	-1570.15	1212.49	181.824	-1752.27	1382.59	185.342	-1818.48	1230.57	73.0161	-1569.61	1274.35	337.61	-1629.48	1413.82	370.799	-1567.64	1236.52	362.864	-1506.57	1104.56	410.13	-1492.55	936.704	395.493	-1500.03	853.737	403.056	-1435.99	875.998	410.307	-1439.79	781.525
761	0	248.171	-1838.38	1607.97	151.496	-1851.69	1611.75	250.201	-1681.62	1594.19	120.612	-1682.82	1590.33	164.881	-1648.44	1468.64	161.289	-1585.65	1213.87	182.367	-1767.69	1383.58	185.997	-1834.75	1231.93	73.4841	-1585.15	1275.29	338.194	-1645.19	1414.68	372.992	-1584.56	1237.85	365.377	-1524.52	1104.81	413.933	-1511.67	937.042	400.381	-1519.3	853.936	407.352	-1455.38	876.234	415.472	-1459.77	781.589
762	0	248.664	-1853.26	1609.13	151.866	-1866.91	1613.17	250.212	-1696.96	1595.12	120.77	-1698.22	1591.48	165.413	-1663.89	1470.04	161.036	-1600.85	1214.56	182.813	-1783.01	1384.92	186.704	-1850.36	1233.63	73.6695	-1600.66	1276.51	338.559	-1660.84	1415.96	373.857	-1601.87	1237.93	367.801	-1542.48	1105.09	418.052	-1531.32	938.151	404.649	-1540.03	854.862	412.018	-1475.73	876.257	421.228	-1481.12	781.937
763	0	248.894	-1868.74	1610.76	152.27	-1882.15	1614.55	250.618	-1711.97	1596.66	120.868	-1713.43	1592.72	165.697	-1679.31	1471.39	160.83	-1615.92	1215.85	182.961	-1798.45	1386.27	187.076	-1865.96	1234.8	73.8255	-1615.82	1278.2	338.921	-1676.52	1417.59	375.141	-1619.19	1238.9	370.746	-1560.58	1105.98	421.875	-1551.92	938.752	408.842	-1561.03	855.403	416.785	-1496.9	876.321	427.765	-1503.32	782.65
764	0	249.244	-1883.71	1612	152.623	-1897.45	1616.12	250.665	-1727.16	1598.07	121.063	-1728.77	1594.31	165.991	-1694.6	1472.87	160.654	-1630.94	1217.74	182.812	-1813.83	1387.39	187.211	-1881.21	1235.7	73.8847	-1630.75	1280.16	339.262	-1692.27	1419.15	376.291	-1636.36	1240.08	373.327	-1578.99	1106.66	426.225	-1572.93	939.882	414.114	-1583.51	856.445	421.886	-1518.85	876.563	434.124	-1527.16	782.914
765	0	249.65	-1898.8	1613.29	152.91	-1912.74	1617.79	250.606	-1742.21	1599.42	121.019	-1744.03	1595.96	166.121	-1709.67	1474.66	160.46	-1645.92	1219.57	182.79	-1828.65	1388.9	187.074	-1895.74	1236.97	73.8939	-1645.53	1282.18	339.344	-1708.08	1420.67	377.745	-1653.05	1241.95	375.943	-1597.5	1107.02	430.682	-1594.55	940.757	419.198	-1606.3	857.256	427.193	-1541.51	876.505	441.009	-1551.64	783.235
766	0	249.564	-1913.83	1614.88	153.064	-1927.8	1619.41	250.577	-1757.13	1601.14	120.974	-1759.34	1597.81	166.086	-1724.72	1476.41	160.573	-1660.55	1222.25	182.394	-1843.66	1390.41	186.506	-1909.96	1238.14	73.6922	-1660.14	1284.35	339.527	-1723.8	1422.54	379.752	-1669.88	1244.58	378.816	-1616.2	1107.82	434.519	-1616.8	941.504	423.782	-1629.96	858.439	432.405	-1564.87	876.427	447.997	-1577.14	783.911
767	0	249.599	-1928.9	1616.35	153.215	-1942.88	1620.96	250.096	-1772.17	1602.52	120.606	-1774.42	1599.71	166.094	-1739.58	1478.32	160.559	-1675.26	1224.62	181.938	-1858.44	1392.03	185.717	-1923.94	1239.71	73.6841	-1674.53	1286.7	339.432	-1739.42	1423.97	380.564	-1687.46	1245.77	381.526	-1634.89	1108.07	438.583	-1639.46	942.441	428.724	-1654.04	859.557	437.581	-1589.07	875.854	455.422	-1603.58	785.099
768	0	249.715	-1943.77	1617.69	153.239	-1957.94	1622.49	250.034	-1787.12	1604.52	120.421	-1789.56	1601.65	166.098	-1754.18	1480.26	160.576	-1689.82	1226.65	181.476	-1873	1393.63	184.64	-1938.07	1241.36	73.8223	-1688.81	1288.63	339.54	-1754.87	1426.09	381.837	-1704.68	1247.05	384.785	-1653.68	1109.6	442.981	-1662.72	943.341	433.714	-1678.71	860.997	443.228	-1613.57	875.941	462.628	-1630.94	785.707
769	0	249.656	-1958.59	1619.12	153.195	-1972.83	1624.05	249.592	-1802.04	1606.2	120.164	-1804.29	1604.2	165.922	-1768.64	1482.11	160.699	-1704.3	1228.64	180.954	-1887.29	1395.47	183.364	-1952.38	1243.1	74.0473	-1702.87	1290.57	339.458	-1770.18	1427.85	383.055	-1722	1247.97	387.497	-1672.71	1109.77	447.102	-1686.05	944.772	438.511	-1703.93	862.667	448.628	-1638.6	875.974	469.733	-1658.85	786.859
770	0	249.691	-1973.28	1620.49	152.977	-1987.57	1625.49	249.258	-1816.86	1608.22	119.794	-1819.1	1606.48	165.653	-1782.98	1484.11	161.009	-1718.46	1230.83	180.2	-1901.63	1397.39	182.103	-1966.86	1244.78	74.1694	-1716.77	1292.61	339.199	-1785.2	1429.73	384.402	-1739.49	1249.82	390.535	-1691.85	1110.67	451.911	-1709.88	946.387	442.762	-1729.12	864.294	454.007	-1663.97	876.122	476.833	-1687.78	788.33
771	0	249.128	-1988.24	1621.81	152.767	-2002.37	1626.79	248.897	-1831.61	1610.4	119.576	-1833.88	1608.96	165.295	-1797.34	1486.04	161.488	-1732.53	1233.09	179.434	-1915.97	1399.2	180.834	-1981.4	1246.55	74.5452	-1730.58	1294.71	338.965	-1799.96	1431.88	385.173	-1757.11	1250.52	393.462	-1711.13	1111.41	455.951	-1733.84	947.839	447.854	-1755.32	866.572	459.56	-1689.7	876.844	483.699	-1717.09	790.14
772	0	248.818	-2002.99	1623.11	152.457	-2017.19	1628.22	248.77	-1845.99	1613.29	119.21	-1848.52	1611.61	164.872	-1811.54	1488.05	161.731	-1746.53	1234.88	178.672	-1930.4	1400.91	179.761	-1995.68	1248.4	74.8254	-1744.28	1296.85	338.597	-1814.55	1434.01	386.614	-1774.47	1252.63	396.064	-1730.52	1111.8	459.997	-1758.3	949.71	452.654	-1781.92	868.073	464.723	-1715.89	877.452	491.743	-1746.49	793.293
773	0	248.522	-2017.4	1624.49	152.033	-2031.74	1629.62	248.291	-1860.57	1615.67	118.823	-1862.94	1614.11	164.532	-1825.52	1490.28	161.873	-1760.39	1236.91	178	-1944.44	1403.01	178.75	-2009.77	1250.63	74.8537	-1758.02	1298.38	338.246	-1828.83	1436.45	388.317	-1791.26	1255.02	399.488	-1749.54	1113.78	463.639	-1782.68	951.971	456.643	-1808.4	870.998	469.722	-1742.46	878.573	498.51	-1776.36	796.616
774	0	248.013	-2032.03	1625.9	151.64	-2046.17	1630.81	248.465	-1874.41	1618.73	117.915	-1877.3	1616.43	163.959	-1839.58	1492.1	161.842	-1774.21	1238.62	177.455	-1958.41	1405.1	178.028	-2023.35	1253.05	74.9068	-1771.71	1300.35	337.61	-1843.09	1438.45	388.463	-1808.58	1256.12	402.043	-1768.82	1114.54	467.735	-1807.27	954.936	461.493	-1835.28	874.36	474.378	-1769.34	879.941	505.189	-1806.78	800.499
775	0	247.512	-2046.56	1627.2	151.24	-2060.7	1631.97	247.864	-1888.79	1621.01	117.531	-1891.86	1618.91	163.647	-1853.45	1494.21	161.983	-1788.03	1240.65	177.062	-1972.03	1407.13	177.514	-2036.86	1254.93	74.9553	-1785.45	1302.31	337.182	-1857.26	1440.98	389.988	-1824.9	1258.91	404.531	-1788.12	1115.77	471.326	-1832.03	957.862	465.543	-1862.81	877.956	479.257	-1796.48	881.905	511.194	-1837.49	804.93
776	0	247.075	-2060.94	1628.25	150.785	-2075.12	1633.07	247.514	-1903.03	1623.3	117.017	-1906.22	1621.02	163.23	-1867.46	1495.87	161.895	-1801.86	1242.51	175.796	-1987.59	1408.75	175.964	-2051.17	1256.44	74.9487	-1799.12	1304.05	336.737	-1871.41	1442.87	390.54	-1841.99	1260.2	407.241	-1807.28	1117.39	474.82	-1856.88	960.89	469.247	-1890.06	881.976	483.718	-1823.76	883.448	517.445	-1868.06	809.269
777	0	246.344	-2075.4	1629.29	150.164	-2089.52	1633.9	247.067	-1917.34	1625.1	116.371	-1920.49	1622.84	162.822	-1881.41	1497.47	161.793	-1815.41	1244.07	175.353	-2001.4	1410.32	176.04	-2064.81	1257.93	75.0751	-1812.78	1305.84	336.547	-1885.54	1445.14	393.088	-1857.4	1264.2	409.557	-1826.27	1118	478.213	-1881.72	964.016	473.419	-1917.9	886.889	488.192	-1851.36	885.813	523.104	-1898.92	814.563
778	0	245.727	-2089.8	1630.07	149.711	-2103.74	1634.45	246.53	-1931.66	1627	115.829	-1934.8	1624.56	162.433	-1895.44	1498.79	161.745	-1829.18	1245.64	174.812	-2015.43	1411.69	175.935	-2078.62	1259.26	75.0089	-1826.39	1307.24	336.249	-1899.83	1446.72	392.278	-1875.09	1263.6	412.144	-1845.19	1119.63	481.414	-1906.66	967.61	477.121	-1945.59	891.603	492.56	-1879.09	888.665	528.193	-1930.24	820.326
779	0	245.276	-2104.09	1630.79	149.212	-2118.04	1634.96	245.99	-1945.98	1628.38	115.355	-1949.05	1625.93	162.178	-1909.44	1499.97	161.505	-1842.88	1246.94	174.325	-2029.41	1412.85	175.71	-2092.39	1260.38	75.0302	-1839.99	1308.53	336.047	-1913.97	1448.68	394.523	-1890.73	1267.51	414.503	-1864.01	1120.3	484.591	-1931.53	971.188	480.675	-1973.13	896.568	496.721	-1906.82	891.542	533.2	-1960.9	825.795
780	0	244.778	-2118.39	1631.31	148.587	-2132.39	1635.43	245.366	-1960.38	1629.59	114.929	-1963.35	1626.79	161.957	-1923.36	1500.86	161.535	-1856.45	1248.09	174.238	-2043.26	1413.74	176.236	-2105.97	1261.21	74.9819	-1853.62	1309.53	335.8	-1928.25	1450	395.183	-1907.26	1268.25	416.914	-1882.67	1121.14	487.785	-1956.21	975.049	484.064	-2000.59	901.793	500.635	-1934.63	894.589	537.62	-1991.7	832.016
781	0	244.084	-2132.7	1631.84	148.106	-2146.44	1635.54	243.38	-1975.45	1629.34	114.216	-1977.5	1627.47	161.851	-1937.33	1501.64	161.558	-1870	1249.21	174.03	-2057.15	1414.48	176.426	-2119.55	1261.88	75.0265	-1867.11	1310.42	335.298	-1942.53	1450.94	395.527	-1924.02	1268.55	419.294	-1901.34	1122.1	491.115	-1980.52	978.618	486.866	-2028.03	907.168	504.219	-1962.62	897.733	541.553	-2022.36	838.262
782	0	243.861	-2147.34	1631.92	147.547	-2160.6	1635.46	244.253	-1988.93	1630.88	113.824	-1991.84	1627.76	161.561	-1951.56	1502.01	161.725	-1883.63	1249.95	173.75	-2071.27	1414.78	176.741	-2133.24	1262.05	75.2055	-1880.75	1311.01	335.382	-1956.87	1451.61	397.023	-1939.92	1270.33	421.849	-1919.95	1122.84	493.526	-2005.47	982.603	489.91	-2055.35	912.986	507.763	-1990.32	900.846	545.054	-2053.3	845.018
[truncated: 69 more columns]

## Sheet: Sheet2
Devices
		025370 - Force			025370 - Moment			025370 - CoP			027571 - Force			027571 - Moment			027571 - CoP			037720 - Force			037720 - Moment			037720 - CoP
Frame	Sub Frame	Fx	Fy	Fz	Mx	My	Mz	Cx	Cy	Cz	Fx	Fy	Fz	Mx	My	Mz	Cx	Cy	Cz	Fx	Fy	Fz	Mx	My	Mz	Cx	Cy	Cz
		N	N	N	N.mm	N.mm	N.mm	mm	mm	mm	N	N	N	N.mm	N.mm	N.mm	mm	mm	mm	N	N	N	N.mm	N.mm	N.mm	mm	mm	mm
465	0	0	0	0	0	0	0	200	300	0	0	0	0	0	0	0	200	903	0	0	0	0	0	0	0	603	903	0
465	1	0	0	0	0	0	0	200	300	0	0	0	0	0	0	0	200	903	0	0	0	0	0	0	0	603	903	0
465	2	0	0	0	0	0	0	200	300	0	0	0	0	0	0	0	200	903	0	0	0	0	0	0	0	603	903	0
465	3	0	0	0	0	0	0	200	300	0	0	0	0	0	0	0	200	903	0	0	0	0	0	0	0	603	903	0
465	4	0	0	0	0	0	0	200	300	0	0	0	0	0	0	0	200	903	0	0	0	0	0	0	0	603	903	0
465	5	0	0	0	0	0	0	200	300	0	0	0	0	0	0	0	200	903	0	0	0	0	0	0	0	603	903	0
465	6	0	0	0	0	0	0	200	300	0	0	0	0	0	0	0	200	903	0	0	0	0	0	0	0	603	903	0
465	7	0	0	0	0	0	0	200	300	0	0	0	0	0	0	0	200	903	0	0	0	0	0	0	0	603	903	0
465	8	0	0	0	0	0	0	200	300	0	0	0	0	0	0	0	200	903	0	0	0	0	0	0	0	603	903	0
465	9	0	0	0	0	0	0	200	300	0	0	0	0	0	0	0	200	903	0	0	0	0	0	0	0	603	903	0
466	0	0	0	0	0	0	0	200	300	0	0	0	0	0	0	0	200	903	0	0	0	0	0	0	0	603	903	0
466	1	0	0	0	0	0	0	200	300	0	0	0	0	0	0	0	200	903	0	0	0	0	0	0	0	603	903	0
466	2	0	0	0	0	0	0	200	300	0	0	0	0	0	0	0	200	903	0	0	0	0	0	0	0	603	903	0
466	3	0	0	0	0	0	0	200	300	0	0	0	0	0	0	0	200	903	0	0	0	0	0	0	0	603	903	0
466	4	0	0	0	0	0	0	200	300	0	0	0	0	0	0	0	200	903	0	0	0	0	0	0	0	603	903	0
466	5	0	0	0	0	0	0	200	300	0	0	0	0	0	0	0	200	903	0	0	0	0	0	0	0	603	903	0
466	6	0	0	0	0	0	0	200	300	0	0	0	0	0	0	0	200	903	0	0	0	0	0	0	0	603	903	0
466	7	0	0	0	0	0	0	200	300	0	0	0	0	0	0	0	200	903	0	0	0	0	0	0	0	603	903	0
466	8	0	0	0	0	0	0	200	300	0	0	0	0	0	0	0	200	903	0	0	0	0	0	0	0	603	903	0
466	9	0	0	0	0	0	0	200	300	0	0	0	0	0	0	0	200	903	0	0	0	0	0	0	0	603	903	0
467	0	0	0	0	0	0	0	200	300	0	0	0	0	0	0	0	200	903	0	0	0	0	0	0	0	603	903	0
467	1	0	0	0	0	0	0	200	300	0	0	0	0	0	0	0	200	903	0	0	0	0	0	0	0	603	903	0
467	2	0	0	0	0	0	0	200	300	0	0	0	0	0	0	0	200	903	0	0	0	0	0	0	0	603	903	0
467	3	0	0	0	0	0	0	200	300	0	0	0	0	0	0	0	200	903	0	0	0	0	0	0	0	603	903	0
467	4	0	0	0	0	0	0	200	300	0	0	0	0	0	0	0	200	903	0	0	0	0	0	0	0	603	903	0
467	5	0	0	0	0	0	0	200	300	0	0	0	0	0	0	0	200	903	0	0	0	0	0	0	0	603	903	0
467	6	0	0	0	0	0	0	200	300	0	0	0	0	0	0	0	200	903	0	0	0	0	0	0	0	603	903	0
467	7	0	0	0	0	0	0	200	300	0	0	0	0	0	0	0	200	903	0	0	0	0	0	0	0	603	903	0
467	8	0	0	0	0	0	0	200	300	0	0	0	0	0	0	0	200	903	0	0	0	0	0	0	0	603	903	0
467	9	0	0	0	0	0	0	200	300	0	0	0	0	0	0	0	200	903	0	0	0	0	0	0	0	603	903	0
468	0	0	0	0	0	0	0	200	300	0	0	0	0	0	0	0	200	903	0	0	0	0	0	0	0	603	903	0
468	1	0	0	0	0	0	0	200	300	0	0	0	0	0	0	0	200	903	0	0	0	0	0	0	0	603	903	0
468	2	0	0	0	0	0	0	200	300	0	0	0	0	0	0	0	200	903	0	0	0	0	0	0	0	603	903	0
468	3	0	0	0	0	0	0	200	300	0	0	0	0	0	0	0	200	903	0	0	0	0	0	0	0	603	903	0
468	4	0	0	0	0	0	0	200	300	0	0	0	0	0	0	0	200	903	0	0	0	0	0	0	0	603	903	0
468	5	0	0	0	0	0	0	200	300	0	0	0	0	0	0	0	200	903	0	0	0	0	0	0	0	603	903	0
468	6	0	0	0	0	0	0	200	300	0	0	0	0	0	0	0	200	903	0	0	0	0	0	0	0	603	903	0
468	7	0	0	0	0	0	0	200	300	0	0	0	0	0	0	0	200	903	0	0	0	0	0	0	0	603	903	0
468	8	0	0	0	0	0	0	200	300	0	0	0	0	0	0	0	200	903	0	0	0	0	0	0	0	603	903	0
468	9	0	0	0	0	0	0	200	300	0	0	0	0	0	0	0	200	903	0	0	0	0	0	0	0	603	903	0
469	0	0	0	0	0	0	0	200	300	0	0	0	0	0	0	0	200	903	0	0	0	0	0	0	0	603	903	0
469	1	0	0	0	0	0	0	200	300	0	0	0	0	0	0	0	200	903	0	0	0	0	0	0	0	603	903	0
469	2	0	0	0	0	0	0	200	300	0	0	0	0	0	0	0	200	903	0	0	0	0	0	0	0	603	903	0
469	3	0	0	0	0	0	0	200	300	0	0	0	0	0	0	0	200	903	0	0	0	0	0	0	0	603	903	0
469	4	0	0	0	0	0	0	200	300	0	0	0	0	0	0	0	200	903	0	0	0	0	0	0	0	603	903	0
469	5	0	0	0	0	0	0	200	300	0	0	0	0	0	0	0	200	903	0	0	0	0	0	0	0	603	903	0
469	6	0	0	0	0	0	0	200	300	0	0	0	0	0	0	0	200	903	0	0	0	0	0	0	0	603	903	0
469	7	0	0	0	0	0	0	200	300	0	0	0	0	0	0	0	200	903	0	0	0	0	0	0	0	603	903	0
469	8	0	0	0	0	0	0	200	300	0	0	0	0	0	0	0	200	903	0	0	0	0	0	0	0	603	903	0
469	9	0	0	0	0	0	0	200	300	0	0	0	0	0	0	0	200	903	0	0	0	0	0	0	0	603	903	0
470	0	0	0	0	0	0	0	200	300	0	0	0	0	0	0	0	200	903	0	0	0	0	0	0	0	603	903	0
470	1	0	0	0	0	0	0	200	300	0	0	0	0	0	0	0	200	903	0	0	0	0	0	0	0	603	903	0
470	2	0	0	0	0	0	0	200	300	0	0	0	0	0	0	0	200	903	0	0	0	0	0	0	0	603	903	0
470	3	0	0	0	0	0	0	200	300	0	0	0	0	0	0	0	200	903	0	0	0	0	0	0	0	603	903	0
470	4	0	0	0	0	0	0	200	300	0	0	0	0	0	0	0	200	903	0	0	0	0	0	0	0	603	903	0
470	5	0	0	0	0	0	0	200	300	0	0	0	0	0	0	0	200	903	0	0	0	0	0	0	0	603	903	0
470	6	0	0	0	0	0	0	200	300	0	0	0	0	0	0	0	200	903	0	0	0	0	0	0	0	603	903	0
470	7	0	0	0	0	0	0	200	300	0	0	0	0	0	0	0	200	903	0	0	0	0	0	0	0	603	903	0
470	8	0	0	0	0	0	0	200	300	0	0	0	0	0	0	0	200	903	0	0	0	0	0	0	0	603	903	0
470	9	0	0	0	0	0	0	200	300	0	0	0	0	0	0	0	200	903	0	0	0	0	0	0	0	603	903	0
471	0	0	0	0	0	0	0	200	300	0	0	0	0	0	0	0	200	903	0	0	0	0	0	0	0	603	903	0
471	1	0	0	0	0	0	0	200	300	0	0	0	0	0	0	0	200	903	0	0	0	0	0	0	0	603	903	0
471	2	0	0	0	0	0	0	200	300	0	0	0	0	0	0	0	200	903	0	0	0	0	0	0	0	603	903	0
471	3	0	0	0	0	0	0	200	300	0	0	0	0	0	0	0	200	903	0	0	0	0	0	0	0	603	903	0
471	4	0	0	0	0	0	0	200	300	0	0	0	0	0	0	0	200	903	0	0	0	0	0	0	0	603	903	0
471	5	0	0	0	0	0	0	200	300	0	0	0	0	0	0	0	200	903	0	0	0	0	0	0	0	603	903	0
471	6	0	0	0	0	0	0	200	300	0	0	0	0	0	0	0	200	903	0	0	0	0	0	0	0	603	903	0
471	7	0	0	0	0	0	0	200	300	0	0	0	0	0	0	0	200	903	0	0	0	0	0	0	0	603	903	0
471	8	0	0	0	0	0	0	200	300	0	0	0	0	0	0	0	200	903	0	0	0	0	0	0	0	603	903	0
471	9	0	0	0	0	0	0	200	300	0	0	0	0	0	0	0	200	903	0	0	0	0	0	0	0	603	903	0
472	0	0	0	0	0	0	0	200	300	0	0	0	0	0	0	0	200	903	0	0	0	0	0	0	0	603	903	0
472	1	0	0	0	0	0	0	200	300	0	0	0	0	0	0	0	200	903	0	0	0	0	0	0	0	603	903	0
472	2	0	0	0	0	0	0	200	300	0	0	0	0	0	0	0	200	903	0	0	0	0	0	0	0	603	903	0
472	3	0	0	0	0	0	0	200	300	0	0	0	0	0	0	0	200	903	0	0	0	0	0	0	0	603	903	0
472	4	0	0	0	0	0	0	200	300	0	0	0	0	0	0	0	200	903	0	0	0	0	0	0	0	603	903	0
472	5	0	0	0	0	0	0	200	300	0	0	0	0	0	0	0	200	903	0	0	0	0	0	0	0	603	903	0
472	6	0	0	0	0	0	0	200	300	0	0	0	0	0	0	0	200	903	0	0	0	0	0	0	0	603	903	0
472	7	0	0	0	0	0	0	200	300	0	0	0	0	0	0	0	200	903	0	0	0	0	0	0	0	603	903	0
472	8	0	0	0	0	0	0	200	300	0	0	0	0	0	0	0	200	903	0	0	0	0	0	0	0	603	903	0
472	9	0	0	0	0	0	0	200	300	0	0	0	0	0	0	0	200	903	0	0	0	0	0	0	0	603	903	0
473	0	0	0	0	0	0	0	200	300	0	0	0	0	0	0	0	200	903	0	0	0	0	0	0	0	603	903	0
473	1	0	0	0	0	0	0	200	300	0	0	0	0	0	0	0	200	903	0	0	0	0	0	0	0	603	903	0
473	2	0	0	0	0	0	0	200	300	0	0	0	0	0	0	0	200	903	0	0	0	0	0	0	0	603	903	0
473	3	0	0	0	0	0	0	200	300	0	0	0	0	0	0	0	200	903	0	0	0	0	0	0	0	603	903	0
473	4	0	0	0	0	0	0	200	300	0	0	0	0	0	0	0	200	903	0	0	0	0	0	0	0	603	903	0
473	5	0	0	0	0	0	0	200	300	0	0	0	0	0	0	0	200	903	0	0	0	0	0	0	0	603	903	0
473	6	0	0	0	0	0	0	200	300	0	0	0	0	0	0	0	200	903	0	0	0	0	0	0	0	603	903	0
473	7	0	0	0	0	0	0	200	300	0	0	0	0	0	0	0	200	903	0	0	0	0	0	0	0	603	903	0
473	8	0	0	0	0	0	0	200	300	0	0	0	0	0	0	0	200	903	0	0	0	0	0	0	0	603	903	0
473	9	0	0	0	0	0	0	200	300	0	0	0	0	0	0	0	200	903	0	0	0	0	0	0	0	603	903	0
474	0	0	0	0	0	0	0	200	300	0	0	0	0	0	0	0	200	903	0	0	0	0	0	0	0	603	903	0
474	1	0	0	0	0	0	0	200	300	0	0	0	0	0	0	0	200	903	0	0	0	0	0	0	0	603	903	0
474	2	0	0	0	0	0	0	200	300	0	0	0	0	0	0	0	200	903	0	0	0	0	0	0	0	603	903	0
474	3	0	0	0	0	0	0	200	300	0	0	0	0	0	0	0	200	903	0	0	0	0	0	0	0	603	903	0
474	4	0	0	0	0	0	0	200	300	0	0	0	0	0	0	0	200	903	0	0	0	0	0	0	0	603	903	0
474	5	0	0	0	0	0	0	200	300	0	0	0	0	0	0	0	200	903	0	0	0	0	0	0	0	603	903	0
474	6	0	0	0	0	0	0	200	300	0	0	0	0	0	0	0	200	903	0	0	0	0	0	0	0	603	903	0
474	7	0	0	0	0	0	0	200	300	0	0	0	0	0	0	0	200	903	0	0	0	0	0	0	0	603	903	0
474	8	0	0	0	0	0	0	200	300	0	0	0	0	0	0	0	200	903	0	0	0	0	0	0	0	603	903	0
474	9	0	0	0	0	0	0	200	300	0	0	0	0	0	0	0	200	903	0	0	0	0	0	0	0	603	903	0
475	0	0	0	0	0	0	0	200	300	0	0	0	0	0	0	0	200	903	0	0	0	0	0	0	0	603	903	0
475	1	0	0	0	0	0	0	200	300	0	0	0	0	0	0	0	200	903	0	0	0	0	0	0	0	603	903	0
475	2	0	0	0	0	0	0	200	300	0	0	0	0	0	0	0	200	903	0	0	0	0	0	0	0	603	903	0
475	3	0	0	0	0	0	0	200	300	0	0	0	0	0	0	0	200	903	0	0	0	0	0	0	0	603	903	0
475	4	0	0	0	0	0	0	200	300	0	0	0	0	0	0	0	200	903	0	0	0	0	0	0	0	603	903	0
475	5	0	0	0	0	0	0	200	300	0	0	0	0	0	0	0	200	903	0	0	0	0	0	0	0	603	903	0
475	6	0	0	0	0	0	0	200	300	0	0	0	0	0	0	0	200	903	0	0	0	0	0	0	0	603	903	0
475	7	0	0	0	0	0	0	200	300	0	0	0	0	0	0	0	200	903	0	0	0	0	0	0	0	603	903	0
475	8	0	0	0	0	0	0	200	300	0	0	0	0	0	0	0	200	903	0	0	0	0	0	0	0	603	903	0
475	9	0	0	0	0	0	0	200	300	0	0	0	0	0	0	0	200	903	0	0	0	0	0	0	0	603	903	0
476	0	0	0	0	0	0	0	200	300	0	0	0	0	0	0	0	200	903	0	0	0	0	0	0	0	603	903	0
476	1	0	0	0	0	0	0	200	300	0	0	0	0	0	0	0	200	903	0	0	0	0	0	0	0	603	903	0
476	2	0	0	0	0	0	0	200	300	0	0	0	0	0	0	0	200	903	0	0	0	0	0	0	0	603	903	0
476	3	0	0	0	0	0	0	200	300	0	0	0	0	0	0	0	200	903	0	0	0	0	0	0	0	603	903	0
476	4	0	0	0	0	0	0	200	300	0	0	0	0	0	0	0	200	903	0	0	0	0	0	0	0	603	903	0
476	5	0	0	0	0	0	0	200	300	0	0	0	0	0	0	0	200	903	0	0	0	0	0	0	0	603	903	0
476	6	0	0	0	0	0	0	200	300	0	0	0	0	0	0	0	200	903	0	0	0	0	0	0	0	603	903	0
476	7	0	0	0	0	0	0	200	300	0	0	0	0	0	0	0	200	903	0	0	0	0	0	0	0	603	903	0
476	8	0	0	0	0	0	0	200	300	0	0	0	0	0	0	0	200	903	0	0	0	0	0	0	0	603	903	0
476	9	0	0	0	0	0	0	200	300	0	0	0	0	0	0	0	200	903	0	0	0	0	0	0	0	603	903	0
477	0	0	0	0	0	0	0	200	300	0	0	0	0	0	0	0	200	903	0	0	0	0	0	0	0	603	903	0
477	1	0	0	0	0	0	0	200	300	0	0	0	0	0	0	0	200	903	0	0	0	0	0	0	0	603	903	0
477	2	0	0	0	0	0	0	200	300	0	0	0	0	0	0	0	200	903	0	0	0	0	0	0	0	603	903	0
477	3	0	0	0	0	0	0	200	300	0	0	0	0	0	0	0	200	903	0	0	0	0	0	0	0	603	903	0
477	4	0	0	0	0	0	0	200	300	0	0	0	0	0	0	0	200	903	0	0	0	0	0	0	0	603	903	0
477	5	0	0	0	0	0	0	200	300	0	0	0	0	0	0	0	200	903	0	0	0	0	0	0	0	603	903	0
477	6	0	0	0	0	0	0	200	300	0	0	0	0	0	0	0	200	903	0	0	0	0	0	0	0	603	903	0
477	7	0	0	0	0	0	0	200	300	0	0	0	0	0	0	0	200	903	0	0	0	0	0	0	0	603	903	0
477	8	0	0	0	0	0	0	200	300	0	0	0	0	0	0	0	200	903	0	0	0	0	0	0	0	603	903	0
477	9	0	0	0	0	0	0	200	300	0	0	0	0	0	0	0	200	903	0	0	0	0	0	0	0	603	903	0
478	0	0	0	0	0	0	0	200	300	0	0	0	0	0	0	0	200	903	0	0	0	0	0	0	0	603	903	0
478	1	0	0	0	0	0	0	200	300	0	0	0	0	0	0	0	200	903	0	0	0	0	0	0	0	603	903	0
478	2	0	0	0	0	0	0	200	300	0	0	0	0	0	0	0	200	903	0	0	0	0	0	0	0	603	903	0
478	3	0	0	0	0	0	0	200	300	0	0	0	0	0	0	0	200	903	0	0	0	0	0	0	0	603	903	0
478	4	0	0	0	0	0	0	200	300	0	0	0	0	0	0	0	200	903	0	0	0	0	0	0	0	603	903	0
478	5	0	0	0	0	0	0	200	300	0	0	0	0	0	0	0	200	903	0	0	0	0	0	0	0	603	903	0
478	6	0	0	0	0	0	0	200	300	0	0	0	0	0	0	0	200	903	0	0	0	0	0	0	0	603	903	0
478	7	0	0	0	0	0	0	200	300	0	0	0	0	0	0	0	200	903	0	0	0	0	0	0	0	603	903	0
478	8	0	0	0	0	0	0	200	300	0	0	0	0	0	0	0	200	903	0	0	0	0	0	0	0	603	903	0
478	9	0	0	0	0	0	0	200	300	0	0	0	0	0	0	0	200	903	0	0	0	0	0	0	0	603	903	0
479	0	0	0	0	0	0	0	200	300	0	0	0	0	0	0	0	200	903	0	0	0	0	0	0	0	603	903	0
479	1	0	0	0	0	0	0	200	300	0	0	0	0	0	0	0	200	903	0	0	0	0	0	0	0	603	903	0
479	2	0	0	0	0	0	0	200	300	0	0	0	0	0	0	0	200	903	0	0	0	0	0	0	0	603	903	0
479	3	0	0	0	0	0	0	200	300	0	0	0	0	0	0	0	200	903	0	0	0	0	0	0	0	603	903	0
479	4	0	0	0	0	0	0	200	300	0	0	0	0	0	0	0	200	903	0	0	0	0	0	0	0	603	903	0
479	5	0	0	0	0	0	0	200	300	0	0	0	0	0	0	0	200	903	0	0	0	0	0	0	0	603	903	0
479	6	0	0	0	0	0	0	200	300	0	0	0	0	0	0	0	200	903	0	0	0	0	0	0	0	603	903	0
479	7	0	0	0	0	0	0	200	300	0	0	0	0	0	0	0	200	903	0	0	0	0	0	0	0	603	903	0
479	8	0	0	0	0	0	0	200	300	0	0	0	0	0	0	0	200	903	0	0	0	0	0	0	0	603	903	0
479	9	0	0	0	0	0	0	200	300	0	0	0	0	0	0	0	200	903	0	0	0	0	0	0	0	603	903	0
480	0	0	0	0	0	0	0	200	300	0	0	0	0	0	0	0	200	903	0	0	0	0	0	0	0	603	903	0
480	1	0	0	0	0	0	0	200	300	0	0	0	0	0	0	0	200	903	0	0	0	0	0	0	0	603	903	0
480	2	0	0	0	0	0	0	200	300	0	0	0	0	0	0	0	200	903	0	0	0	0	0	0	0	603	903	0
480	3	0	0	0	0	0	0	200	300	0	0	0	0	0	0	0	200	903	0	0	0	0	0	0	0	603	903	0
480	4	0	0	0	0	0	0	200	300	0	0	0	0	0	0	0	200	903	0	0	0	0	0	0	0	603	903	0
480	5	0	0	0	0	0	0	200	300	0	0	0	0	0	0	0	200	903	0	0	0	0	0	0	0	603	903	0
480	6	0	0	0	0	0	0	200	300	0	0	0	0	0	0	0	200	903	0	0	0	0	0	0	0	603	903	0
480	7	0	0	0	0	0	0	200	300	0	0	0	0	0	0	0	200	903	0	0	0	0	0	0	0	603	903	0
480	8	0	0	0	0	0	0	200	300	0	0	0	0	0	0	0	200	903	0	0	0	0	0	0	0	603	903	0
480	9	0	0	0	0	0	0	200	300	0	0	0	0	0	0	0	200	903	0	0	0	0	0	0	0	603	903	0
481	0	0	0	0	0	0	0	200	300	0	0	0	0	0	0	0	200	903	0	0	0	0	0	0	0	603	903	0
481	1	0	0	0	0	0	0	200	300	0	0	0	0	0	0	0	200	903	0	0	0	0	0	0	0	603	903	0
481	2	0	0	0	0	0	0	200	300	0	0	0	0	0	0	0	200	903	0	0	0	0	0	0	0	603	903	0
481	3	0	0	0	0	0	0	200	300	0	0	0	0	0	0	0	200	903	0	0	0	0	0	0	0	603	903	0
481	4	0	0	0	0	0	0	200	300	0	0	0	0	0	0	0	200	903	0	0	0	0	0	0	0	603	903	0
481	5	0	0	0	0	0	0	200	300	0	0	0	0	0	0	0	200	903	0	0	0	0	0	0	0	603	903	0
481	6	0	0	0	0	0	0	200	300	0	0	0	0	0	0	0	200	903	0	0	0	0	0	0	0	603	903	0
481	7	0	0	0	0	0	0	200	300	0	0	0	0	0	0	0	200	903	0	0	0	0	0	0	0	603	903	0
481	8	0	0	0	0	0	0	200	300	0	0	0	0	0	0	0	200	903	0	0	0	0	0	0	0	603	903	0
481	9	0	0	0	0	0	0	200	300	0	0	0	0	0	0	0	200	903	0	0	0	0	0	0	0	603	903	0
482	0	0	0	0	0	0	0	200	300	0	0	0	0	0	0	0	200	903	0	0	0	0	0	0	0	603	903	0
482	1	0	0	0	0	0	0	200	300	0	0	0	0	0	0	0	200	903	0	0	0	0	0	0	0	603	903	0
482	2	0	0	0	0	0	0	200	300	0	0	0	0	0	0	0	200	903	0	0	0	0	0	0	0	603	903	0
482	3	0	0	0	0	0	0	200	300	0	0	0	0	0	0	0	200	903	0	0	0	0	0	0	0	603	903	0
482	4	0	0	0	0	0	0	200	300	0	0	0	0	0	0	0	200	903	0	0	0	0	0	0	0	603	903	0
482	5	0	0	0	0	0	0	200	300	0	0	0	0	0	0	0	200	903	0	0	0	0	0	0	0	603	903	0
482	6	0	0	0	0	0	0	200	300	0	0	0	0	0	0	0	200	903	0	0	0	0	0	0	0	603	903	0
482	7	0	0	0	0	0	0	200	300	0	0	0	0	0	0	0	200	903	0	0	0	0	0	0	0	603	903	0
482	8	0	0	0	0	0	0	200	300	0	0	0	0	0	0	0	200	903	0	0	0	0	0	0	0	603	903	0
482	9	0	0	0	0	0	0	200	300	0	0	0	0	0	0	0	200	903	0	0	0	0	0	0	0	603	903	0
483	0	0	0	0	0	0	0	200	300	0	0	0	0	0	0	0	200	903	0	0	0	0	0	0	0	603	903	0
483	1	0	0	0	0	0	0	200	300	0	0	0	0	0	0	0	200	903	0	0	0	0	0	0	0	603	903	0
483	2	0	0	0	0	0	0	200	300	0	0	0	0	0	0	0	200	903	0	0	0	0	0	0	0	603	903	0
483	3	0	0	0	0	0	0	200	300	0	0	0	0	0	0	0	200	903	0	0	0	0	0	0	0	603	903	0
483	4	0	0	0	0	0	0	200	300	0	0	0	0	0	0	0	200	903	0	0	0	0	0	0	0	603	903	0
483	5	0	0	0	0	0	0	200	300	0	0	0	0	0	0	0	200	903	0	0	0	0	0	0	0	603	903	0
483	6	0	0	0	0	0	0	200	300	0	0	0	0	0	0	0	200	903	0	0	0	0	0	0	0	603	903	0
483	7	0	0	0	0	0	0	200	300	0	0	0	0	0	0	0	200	903	0	0	0	0	0	0	0	603	903	0
483	8	0	0	0	0	0	0	200	300	0	0	0	0	0	0	0	200	903	0	0	0	0	0	0	0	603	903	0
483	9	0	0	0	0	0	0	200	300	0	0	0	0	0	0	0	200	903	0	0	0	0	0	0	0	603	903	0
484	0	0	0	0	0	0	0	200	300	0	0	0	0	0	0	0	200	903	0	0	0	0	0	0	0	603	903	0
484	1	0	0	0	0	0	0	200	300	0	0	0	0	0	0	0	200	903	0	0	0	0	0	0	0	603	903	0
484	2	0	0	0	0	0	0	200	300	0	0	0	0	0	0	0	200	903	0	0	0	0	0	0	0	603	903	0
484	3	0	0	0	0	0	0	200	300	0	0	0	0	0	0	0	200	903	0	0	0	0	0	0	0	603	903	0
484	4	0	0	0	0	0	0	200	300	0	0	0	0	0	0	0	200	903	0	0	0	0	0	0	0	603	903	0
484	5	0	0	0	0	0	0	200	300	0	0	0	0	0	0	0	200	903	0	0	0	0	0	0	0	603	903	0
484	6	0	0	0	0	0	0	200	300	0	0	0	0	0	0	0	200	903	0	0	0	0	0	0	0	603	903	0
484	7	0	0	0	0	0	0	200	300	0	0	0	0	0	0	0	200	903	0	0	0	0	0	0	0	603	903	0
484	8	0	0	0	0	0	0	200	300	0	0	0	0	0	0	0	200	903	0	0	0	0	0	0	0	603	903	0
484	9	0	0	0	0	0	0	200	300	0	0	0	0	0	0	0	200	903	0	0	0	0	0	0	0	603	903	0
485	0	0	0	0	0	0	0	200	300	0	0	0	0	0	0	0	200	903	0	0	0	0	0	0	0	603	903	0
485	1	0	0	0	0	0	0	200	300	0	0	0	0	0	0	0	200	903	0	0	0	0	0	0	0	603	903	0
485	2	0	0	0	0	0	0	200	300	0	0	0	0	0	0	0	200	903	0	0	0	0	0	0	0	603	903	0
485	3	0	0	0	0	0	0	200	300	0	0	0	0	0	0	0	200	903	0	0	0	0	0	0	0	603	903	0
485	4	0	0	0	0	0	0	200	300	0	0	0	0	0	0	0	200	903	0	0	0	0	0	0	0	603	903	0
485	5	0	0	0	0	0	0	200	300	0	0	0	0	0	0	0	200	903	0	0	0	0	0	0	0	603	903	0
485	6	0	0	0	0	0	0	200	300	0	0	0	0	0	0	0	200	903	0	0	0	0	0	0	0	603	903	0
485	7	0	0	0	0	0	0	200	300	0	0	0	0	0	0	0	200	903	0	0	0	0	0	0	0	603	903	0
485	8	0	0	0	0	0	0	200	300	0	0	0	0	0	0	0	200	903	0	0	0	0	0	0	0	603	903	0
485	9	0	0	0	0	0	0	200	300	0	0	0	0	0	0	0	200	903	0	0	0	0	0	0	0	603	903	0
486	0	0	0	0	0	0	0	200	300	0	0	0	0	0	0	0	200	903	0	0	0	0	0	0	0	603	903	0
486	1	0	0	0	0	0	0	200	300	0	0	0	0	0	0	0	200	903	0	0	0	0	0	0	0	603	903	0
486	2	0	0	0	0	0	0	200	300	0	0	0	0	0	0	0	200	903	0	0	0	0	0	0	0	603	903	0
486	3	0	0	0	0	0	0	200	300	0	0	0	0	0	0	0	200	903	0	0	0	0	0	0	0	603	903	0
486	4	0	0	0	0	0	0	200	300	0	0	0	0	0	0	0	200	903	0	0	0	0	0	0	0	603	903	0
486	5	0	0	0	0	0	0	200	300	0	0	0	0	0	0	0	200	903	0	0	0	0	0	0	0	603	903	0
486	6	0	0	0	0	0	0	200	300	0	0	0	0	0	0	0	200	903	0	0	0	0	0	0	0	603	903	0
486	7	0	0	0	0	0	0	200	300	0	0	0	0	0	0	0	200	903	0	0	0	0	0	0	0	603	903	0
486	8	0	0	0	0	0	0	200	300	0	0	0	0	0	0	0	200	903	0	0	0	0	0	0	0	603	903	0
486	9	0	0	0	0	0	0	200	300	0	0	0	0	0	0	0	200	903	0	0	0	0	0	0	0	603	903	0
487	0	0	0	0	0	0	0	200	300	0	0	0	0	0	0	0	200	903	0	0	0	0	0	0	0	603	903	0
487	1	0	0	0	0	0	0	200	300	0	0	0	0	0	0	0	200	903	0	0	0	0	0	0	0	603	903	0
487	2	0	0	0	0	0	0	200	300	0	0	0	0	0	0	0	200	903	0	0	0	0	0	0	0	603	903	0
487	3	0	0	0	0	0	0	200	300	0	0	0	0	0	0	0	200	903	0	0	0	0	0	0	0	603	903	0
487	4	0	0	0	0	0	0	200	300	0	0	0	0	0	0	0	200	903	0	0	0	0	0	0	0	603	903	0
487	5	0	0	0	0	0	0	200	300	0	0	0	0	0	0	0	200	903	0	0	0	0	0	0	0	603	903	0
487	6	0	0	0	0	0	0	200	300	0	0	0	0	0	0	0	200	903	0	0	0	0	0	0	0	603	903	0
487	7	0	0	0	0	0	0	200	300	0	0	0	0	0	0	0	200	903	0	0	0	0	0	0	0	603	903	0
487	8	0	0	0	0	0	0	200	300	0	0	0	0	0	0	0	200	903	0	0	0	0	0	0	0	603	903	0
487	9	0	0	0	0	0	0	200	300	0	0	0	0	0	0	0	200	903	0	0	0	0	0	0	0	603	903	0
488	0	0	0	0	0	0	0	200	300	0	0	0	0	0	0	0	200	903	0	0	0	0	0	0	0	603	903	0
488	1	0	0	0	0	0	0	200	300	0	0	0	0	0	0	0	200	903	0	0	0	0	0	0	0	603	903	0
488	2	0	0	0	0	0	0	200	300	0	0	0	0	0	0	0	200	903	0	0	0	0	0	0	0	603	903	0
488	3	0	0	0	0	0	0	200	300	0	0	0	0	0	0	0	200	903	0	0	0	0	0	0	0	603	903	0
488	4	0	0	0	0	0	0	200	300	0	0	0	0	0	0	0	200	903	0	0	0	0	0	0	0	603	903	0
488	5	0	0	0	0	0	0	200	300	0	0	0	0	0	0	0	200	903	0	0	0	0	0	0	0	603	903	0
488	6	0	0	0	0	0	0	200	300	0	0	0	0	0	0	0	200	903	0	0	0	0	0	0	0	603	903	0
488	7	0	0	0	0	0	0	200	300	0	0	0	0	0	0	0	200	903	0	0	0	0	0	0	0	603	903	0
488	8	0	0	0	0	0	0	200	300	0	0	0	0	0	0	0	200	903	0	0	0	0	0	0	0	603	903	0
488	9	0	0	0	0	0	0	200	300	0	0	0	0	0	0	0	200	903	0	0	0	0	0	0	0	603	903	0
489	0	0	0	0	0	0	0	200	300	0	0	0	0	0	0	0	200	903	0	0	0	0	0	0	0	603	903	0
489	1	0	0	0	0	0	0	200	300	0	0	0	0	0	0	0	200	903	0	0	0	0	0	0	0	603	903	0
489	2	0	0	0	0	0	0	200	300	0	0	0	0	0	0	0	200	903	0	0	0	0	0	0	0	603	903	0
489	3	0	0	0	0	0	0	200	300	0	0	0	0	0	0	0	200	903	0	0	0	0	0	0	0	603	903	0
489	4	0	0	0	0	0	0	200	300	0	0	0	0	0	0	0	200	903	0	0	0	0	0	0	0	603	903	0
489	5	0	0	0	0	0	0	200	300	0	0	0	0	0	0	0	200	903	0	0	0	0	0	0	0	603	903	0
489	6	0	0	0	0	0	0	200	300	0	0	0	0	0	0	0	200	903	0	0	0	0	0	0	0	603	903	0
489	7	0	0	0	0	0	0	200	300	0	0	0	0	0	0	0	200	903	0	0	0	0	0	0	0	603	903	0
489	8	0	0	0	0	0	0	200	300	0	0	0	0	0	0	0	200	903	0	0	0	0	0	0	0	603	903	0
489	9	0	0	0	0	0	0	200	300	0	0	0	0	0	0	0	200	903	0	0	0	0	0	0	0	603	903	0
490	0	0	0	0	0	0	0	200	300	0	0	0	0	0	0	0	200	903	0	0	0	0	0	0	0	603	903	0
490	1	0	0	0	0	0	0	200	300	0	0	0	0	0	0	0	200	903	0	0	0	0	0	0	0	603	903	0
490	2	0	0	0	0	0	0	200	300	0	0	0	0	0	0	0	200	903	0	0	0	0	0	0	0	603	903	0
490	3	0	0	0	0	0	0	200	300	0	0	0	0	0	0	0	200	903	0	0	0	0	0	0	0	603	903	0
490	4	0	0	0	0	0	0	200	300	0	0	0	0	0	0	0	200	903	0	0	0	0	0	0	0	603	903	0
490	5	0	0	0	0	0	0	200	300	0	0	0	0	0	0	0	200	903	0	0	0	0	0	0	0	603	903	0
490	6	0	0	0	0	0	0	200	300	0	0	0	0	0	0	0	200	903	0	0	0	0	0	0	0	603	903	0
490	7	0	0	0	0	0	0	200	300	0	0	0	0	0	0	0	200	903	0	0	0	0	0	0	0	603	903	0
490	8	0	0	0	0	0	0	200	300	0	0	0	0	0	0	0	200	903	0	0	0	0	0	0	0	603	903	0
490	9	0	0	0	0	0	0	200	300	0	0	0	0	0	0	0	200	903	0	0	0	0	0	0	0	603	903	0
491	0	0	0	0	0	0	0	200	300	0	0	0	0	0	0	0	200	903	0	0	0	0	0	0	0	603	903	0
491	1	0	0	0	0	0	0	200	300	0	0	0	0	0	0	0	200	903	0	0	0	0	0	0	0	603	903	0
491	2	0	0	0	0	0	0	200	300	0	0	0	0	0	0	0	200	903	0	0	0	0	0	0	0	603	903	0
491	3	0	0	0	0	0	0	200	300	0	0	0	0	0	0	0	200	903	0	0	0	0	0	0	0	603	903	0
491	4	0	0	0	0	0	0	200	300	0	0	0	0	0	0	0	200	903	0	0	0	0	0	0	0	603	903	0
491	5	0	0	0	0	0	0	200	300	0	0	0	0	0	0	0	200	903	0	0	0	0	0	0	0	603	903	0
491	6	0	0	0	0	0	0	200	300	0	0	0	0	0	0	0	200	903	0	0	0	0	0	0	0	603	903	0
491	7	0	0	0	0	0	0	200	300	0	0	0	0	0	0	0	200	903	0	0	0	0	0	0	0	603	903	0
491	8	0	0	0	0	0	0	200	300	0	0	0	0	0	0	0	200	903	0	0	0	0	0	0	0	603	903	0
491	9	0	0	0	0	0	0	200	300	0	0	0	0	0	0	0	200	903	0	0	0	0	0	0	0	603	903	0
492	0	0	0	0	0	0	0	200	300	0	0	0	0	0	0	0	200	903	0	0	0	0	0	0	0	603	903	0
492	1	0	0	0	0	0	0	200	300	0	0	0	0	0	0	0	200	903	0	0	0	0	0	0	0	603	903	0
492	2	0	0	0	0	0	0	200	300	0	0	0	0	0	0	0	200	903	0	0	0	0	0	0	0	603	903	0
492	3	0	0	0	0	0	0	200	300	0	0	0	0	0	0	0	200	903	0	0	0	0	0	0	0	603	903	0
492	4	0	0	0	0	0	0	200	300	0	0	0	0	0	0	0	200	903	0	0	0	0	0	0	0	603	903	0
492	5	0	0	0	0	0	0	200	300	0	0	0	0	0	0	0	200	903	0	0	0	0	0	0	0	603	903	0
492	6	0	0	0	0	0	0	200	300	0	0	0	0	0	0	0	200	903	0	0	0	0	0	0	0	603	903	0
492	7	0	0	0	0	0	0	200	300	0	0	0	0	0	0	0	200	903	0	0	0	0	0	0	0	603	903	0
492	8	0	0	0	0	0	0	200	300	0	0	0	0	0	0	0	200	903	0	0	0	0	0	0	0	603	903	0
492	9	0	0	0	0	0	0	200	300	0	0	0	0	0	0	0	200	903	0	0	0	0	0	0	0	603	903	0
493	0	0	0	0	0	0	0	200	300	0	0	0	0	0	0	0	200	903	0	0	0	0	0	0	0	603	903	0
493	1	0	0	0	0	0	0	200	300	0	0	0	0	0	0	0	200	903	0	0	0	0	0	0	0	603	903	0
493	2	0	0	0	0	0	0	200	300	0	0	0	0	0	0	0	200	903	0	0	0	0	0	0	0	603	903	0
493	3	0	0	0	0	0	0	200	300	0	0	0	0	0	0	0	200	903	0	0	0	0	0	0	0	603	903	0
493	4	0	0	0	0	0	0	200	300	0	0	0	0	0	0	0	200	903	0	0	0	0	0	0	0	603	903	0
493	5	0	0	0	0	0	0	200	300	0	0	0	0	0	0	0	200	903	0	0	0	0	0	0	0	603	903	0
493	6	0	0	0	0	0	0	200	300	0	0	0	0	0	0	0	200	903	0	0	0	0	0	0	0	603	903	0
493	7	0	0	0	0	0	0	200	300	0	0	0	0	0	0	0	200	903	0	0	0	0	0	0	0	603	903	0
493	8	0	0	0	0	0	0	200	300	0	0	0	0	0	0	0	200	903	0	0	0	0	0	0	0	603	903	0
493	9	0	0	0	0	0	0	200	300	0	0	0	0	0	0	0	200	903	0	0	0	0	0	0	0	603	903	0
494	0	0	0	0	0	0	0	200	300	0	0	0	0	0	0	0	200	903	0	0	0	0	0	0	0	603	903	0
494	1	0	0	0	0	0	0	200	300	0	0	0	0	0	0	0	200	903	0	0	0	0	0	0	0	603	903	0
494	2	0	0	0	0	0	0	200	300	0	0	0	0	0	0	0	200	903	0	0	0	0	0	0	0	603	903	0
494	3	0	0	0	0	0	0	200	300	0	0	0	0	0	0	0	200	903	0	0	0	0	0	0	0	603	903	0
494	4	0	0	0	0	0	0	200	300	0	0	0	0	0	0	0	200	903	0	0	0	0	0	0	0	603	903	0
494	5	0	0	0	0	0	0	200	300	0	0	0	0	0	0	0	200	903	0	0	0	0	0	0	0	603	903	0
494	6	0	0	0	0	0	0	200	300	0	0	0	0	0	0	0	200	903	0	0	0	0	0	0	0	603	903	0
494	7	0	0	0	0	0	0	200	300	0	0	0	0	0	0	0	200	903	0	0	0	0	0	0	0	603	903	0
494	8	0	0	0	0	0	0	200	300	0	0	0	0	0	0	0	200	903	0	0	0	0	0	0	0	603	903	0
494	9	0	0	0	0	0	0	200	300	0	0	0	0	0	0	0	200	903	0	0	0	0	0	0	0	603	903	0
495	0	0	0	0	0	0	0	200	300	0	0	0	0	0	0	0	200	903	0	0	0	0	0	0	0	603	903	0
495	1	0	0	0	0	0	0	200	300	0	0	0	0	0	0	0	200	903	0	0	0	0	0	0	0	603	903	0
495	2	0	0	0	0	0	0	200	300	0	0	0	0	0	0	0	200	903	0	0	0	0	0	0	0	603	903	0
495	3	0	0	0	0	0	0	200	300	0	0	0	0	0	0	0	200	903	0	0	0	0	0	0	0	603	903	0
495	4	0	0	0	0	0	0	200	300	0	0	0	0	0	0	0	200	903	0	0	0	0	0	0	0	603	903	0
495	5	0	0	0	0	0	0	200	300	0	0	0	0	0	0	0	200	903	0	0	0	0	0	0	0	603	903	0
495	6	0	0	0	0	0	0	200	300	0	0	0	0	0	0	0	200	903	0	0	0	0	0	0	0	603	903	0
495	7	0	0	0	0	0	0	200	300	0	0	0	0	0	0	0	200	903	0	0	0	0	0	0	0	603	903	0
495	8	0	0	0	0	0	0	200	300	0	0	0	0	0	0	0	200	903	0	0	0	0	0	0	0	603	903	0
495	9	0	0	0	0	0	0	200	300	0	0	0	0	0	0	0	200	903	0	0	0	0	0	0	0	603	903	0
496	0	0	0	0	0	0	0	200	300	0	0	0	0	0	0	0	200	903	0	0	0	0	0	0	0	603	903	0
496	1	0	0	0	0	0	0	200	300	0	0	0	0	0	0	0	200	903	0	0	0	0	0	0	0	603	903	0
496	2	0	0	0	0	0	0	200	300	0	0	0	0	0	0	0	200	903	0	0	0	0	0	0	0	603	903	0
496	3	0	0	0	0	0	0	200	300	0	0	0	0	0	0	0	200	903	0	0	0	0	0	0	0	603	903	0
496	4	0	0	0	0	0	0	200	300	0	0	0	0	0	0	0	200	903	0	0	0	0	0	0	0	603	903	0
496	5	0	0	0	0	0	0	200	300	0	0	0	0	0	0	0	200	903	0	0	0	0	0	0	0	603	903	0
496	6	0	0	0	0	0	0	200	300	0	0	0	0	0	0	0	200	903	0	0	0	0	0	0	0	603	903	0
496	7	0	0	0	0	0	0	200	300	0	0	0	0	0	0	0	200	903	0	0	0	0	0	0	0	603	903	0
496	8	0	0	0	0	0	0	200	300	0	0	0	0	0	0	0	200	903	0	0	0	0	0	0	0	603	903	0
496	9	0	0	0	0	0	0	200	300	0	0	0	0	0	0	0	200	903	0	0	0	0	0	0	0	603	903	0
497	0	0	0	0	0	0	0	200	300	0	0	0	0	0	0	0	200	903	0	0	0	0	0	0	0	603	903	0
497	1	0	0	0	0	0	0	200	300	0	0	0	0	0	0	0	200	903	0	0	0	0	0	0	0	603	903	0
497	2	0	0	0	0	0	0	200	300	0	0	0	0	0	0	0	200	903	0	0	0	0	0	0	0	603	903	0
497	3	0	0	0	0	0	0	200	300	0	0	0	0	0	0	0	200	903	0	0	0	0	0	0	0	603	903	0
497	4	0	0	0	0	0	0	200	300	0	0	0	0	0	0	0	200	903	0	0	0	0	0	0	0	603	903	0
497	5	0	0	0	0	0	0	200	300	0	0	0	0	0	0	0	200	903	0	0	0	0	0	0	0	603	903	0
497	6	0	0	0	0	0	0	200	300	0	0	0	0	0	0	0	200	903	0	0	0	0	0	0	0	603	903	0
497	7	0	0	0	0	0	0	200	300	0	0	0	0	0	0	0	200	903	0	0	0	0	0	0	0	603	903	0
497	8	0	0	0	0	0	0	200	300	0	0	0	0	0	0	0	200	903	0	0	0	0	0	0	0	603	903	0
497	9	0	0	0	0	0	0	200	300	0	0	0	0	0	0	0	200	903	0	0	0	0	0	0	0	603	903	0
498	0	0	0	0	0	0	0	200	300	0	0	0	0	0	0	0	200	903	0	0	0	0	0	0	0	603	903	0
498	1	0	0	0	0	0	0	200	300	0	0	0	0	0	0	0	200	903	0	0	0	0	0	0	0	603	903	0
498	2	0	0	0	0	0	0	200	300	0	0	0	0	0	0	0	200	903	0	0	0	0	0	0	0	603	903	0
498	3	0	0	0	0	0	0	200	300	0	0	0	0	0	0	0	200	903	0	0	0	0	0	0	0	603	903	0
498	4	0	0	0	0	0	0	200	300	0	0	0	0	0	0	0	200	903	0	0	0	0	0	0	0	603	903	0
498	5	0	0	0	0	0	0	200	300	0	0	0	0	0	0	0	200	903	0	0	0	0	0	0	0	603	903	0
498	6	0	0	0	0	0	0	200	300	0	0	0	0	0	0	0	200	903	0	0	0	0	0	0	0	603	903	0
498	7	0	0	0	0	0	0	200	300	0	0	0	0	0	0	0	200	903	0	0	0	0	0	0	0	603	903	0
498	8	0	0	0	0	0	0	200	300	0	0	0	0	0	0	0	200	903	0	0	0	0	0	0	0	603	903	0
498	9	0	0	0	0	0	0	200	300	0	0	0	0	0	0	0	200	903	0	0	0	0	0	0	0	603	903	0
499	0	0	0	0	0	0	0	200	300	0	0	0	0	0	0	0	200	903	0	0	0	0	0	0	0	603	903	0
499	1	0	0	0	0	0	0	200	300	0	0	0	0	0	0	0	200	903	0	0	0	0	0	0	0	603	903	0
499	2	0	0	0	0	0	0	200	300	0	0	0	0	0	0	0	200	903	0	0	0	0	0	0	0	603	903	0
499	3	0	0	0	0	0	0	200	300	0	0	0	0	0	0	0	200	903	0	0	0	0	0	0	0	603	903	0
499	4	0	0	0	0	0	0	200	300	0	0	0	0	0	0	0	200	903	0	0	0	0	0	0	0	603	903	0
499	5	0	0	0	0	0	0	200	300	0	0	0	0	0	0	0	200	903	0	0	0	0	0	0	0	603	903	0
499	6	0	0	0	0	0	0	200	300	0	0	0	0	0	0	0	200	903	0	0	0	0	0	0	0	603	903	0
499	7	0	0	0	0	0	0	200	300	0	0	0	0	0	0	0	200	903	0	0	0	0	0	0	0	603	903	0
499	8	0	0	0	0	0	0	200	300	0	0	0	0	0	0	0	200	903	0	0	0	0	0	0	0	603	903	0
499	9	0	0	0	0	0	0	200	300	0	0	0	0	0	0	0	200	903	0	0	0	0	0	0	0	603	903	0
500	0	0	0	0	0	0	0	200	300	0	0	0	0	0	0	0	200	903	0	0	0	0	0	0	0	603	903	0
500	1	0	0	0	0	0	0	200	300	0	0	0	0	0	0	0	200	903	0	0	0	0	0	0	0	603	903	0
500	2	0	0	0	0	0	0	200	300	0	0	0	0	0	0	0	200	903	0	0	0	0	0	0	0	603	903	0
500	3	0	0	0	0	0	0	200	300	0	0	0	0	0	0	0	200	903	0	0	0	0	0	0	0	603	903	0
500	4	0	0	0	0	0	0	200	300	0	0	0	0	0	0	0	200	903	0	0	0	0	0	0	0	603	903	0
500	5	0	0	0	0	0	0	200	300	0	0	0	0	0	0	0	200	903	0	0	0	0	0	0	0	603	903	0
500	6	0	0	0	0	0	0	200	300	0	0	0	0	0	0	0	200	903	0	0	0	0	0	0	0	603	903	0
500	7	0	0	0	0	0	0	200	300	0	0	0	0	0	0	0	200	903	0	0	0	0	0	0	0	603	903	0
500	8	0	0	0	0	0	0	200	300	0	0	0	0	0	0	0	200	903	0	0	0	0	0	0	0	603	903	0
500	9	0	0	0	0	0	0	200	300	0	0	0	0	0	0	0	200	903	0	0	0	0	0	0	0	603	903	0
501	0	0	0	0	0	0	0	200	300	0	0	0	0	0	0	0	200	903	0	0	0	0	0	0	0	603	903	0
501	1	0	0	0	0	0	0	200	300	0	0	0	0	0	0	0	200	903	0	0	0	0	0	0	0	603	903	0
501	2	0	0	0	0	0	0	200	300	0	0	0	0	0	0	0	200	903	0	0	0	0	0	0	0	603	903	0
501	3	0	0	0	0	0	0	200	300	0	0	0	0	0	0	0	200	903	0	0	0	0	0	0	0	603	903	0
501	4	0	0	0	0	0	0	200	300	0	0	0	0	0	0	0	200	903	0	0	0	0	0	0	0	603	903	0
501	5	0	0	0	0	0	0	200	300	0	0	0	0	0	0	0	200	903	0	0	0	0	0	0	0	603	903	0
501	6	0	0	0	0	0	0	200	300	0	0	0	0	0	0	0	200	903	0	0	0	0	0	0	0	603	903	0
501	7	0	0	0	0	0	0	200	300	0	0	0	0	0	0	0	200	903	0	0	0	0	0	0	0	603	903	0
501	8	0	0	0	0	0	0	200	300	0	0	0	0	0	0	0	200	903	0	0	0	0	0	0	0	603	903	0
501	9	0	0	0	0	0	0	200	300	0	0	0	0	0	0	0	200	903	0	0	0	0	0	0	0	603	903	0
502	0	0	0	0	0	0	0	200	300	0	0	0	0	0	0	0	200	903	0	0	0	0	0	0	0	603	903	0
502	1	0	0	0	0	0	0	200	300	0	0	0	0	0	0	0	200	903	0	0	0	0	0	0	0	603	903	0
502	2	0	0	0	0	0	0	200	300	0	0	0	0	0	0	0	200	903	0	0	0	0	0	0	0	603	903	0
502	3	0	0	0	0	0	0	200	300	0	0	0	0	0	0	0	200	903	0	0	0	0	0	0	0	603	903	0
502	4	0	0	0	0	0	0	200	300	0	0	0	0	0	0	0	200	903	0	0	0	0	0	0	0	603	903	0
502	5	0	0	0	0	0	0	200	300	0	0	0	0	0	0	0	200	903	0	0	0	0	0	0	0	603	903	0
502	6	0	0	0	0	0	0	200	300	0	0	0	0	0	0	0	200	903	0	0	0	0	0	0	0	603	903	0
502	7	0	0	0	0	0	0	200	300	0	0	0	0	0	0	0	200	903	0	0	0	0	0	0	0	603	903	0
502	8	0	0	0	0	0	0	200	300	0	0	0	0	0	0	0	200	903	0	0	0	0	0	0	0	603	903	0
502	9	0	0	0	0	0	0	200	300	0	0	0	0	0	0	0	200	903	0	0	0	0	0	0	0	603	903	0
503	0	0	0	0	0	0	0	200	300	0	0	0	0	0	0	0	200	903	0	0	0	0	0	0	0	603	903	0
503	1	0	0	0	0	0	0	200	300	0	0	0	0	0	0	0	200	903	0	0	0	0	0	0	0	603	903	0
503	2	0	0	0	0	0	0	200	300	0	0	0	0	0	0	0	200	903	0	0	0	0	0	0	0	603	903	0
503	3	0	0	0	0	0	0	200	300	0	0	0	0	0	0	0	200	903	0	0	0	0	0	0	0	603	903	0
503	4	0	0	0	0	0	0	200	300	0	0	0	0	0	0	0	200	903	0	0	0	0	0	0	0	603	903	0
503	5	0	0	0	0	0	0	200	300	0	0	0	0	0	0	0	200	903	0	0	0	0	0	0	0	603	903	0
503	6	0	0	0	0	0	0	200	300	0	0	0	0	0	0	0	200	903	0	0	0	0	0	0	0	603	903	0
503	7	0	0	0	0	0	0	200	300	0	0	0	0	0	0	0	200	903	0	0	0	0	0	0	0	603	903	0
503	8	0	0	0	0	0	0	200	300	0	0	0	0	0	0	0	200	903	0	0	0	0	0	0	0	603	903	0
503	9	0	0	0	0	0	0	200	300	0	0	0	0	0	0	0	200	903	0	0	0	0	0	0	0	603	903	0
504	0	0	0	0	0	0	0	200	300	0	0	0	0	0	0	0	200	903	0	0	0	0	0	0	0	603	903	0
504	1	0	0	0	0	0	0	200	300	0	0	0	0	0	0	0	200	903	0	0	0	0	0	0	0	603	903	0
504	2	0	0	0	0	0	0	200	300	0	0	0	0	0	0	0	200	903	0	0	0	0	0	0	0	603	903	0
504	3	0	0	0	0	0	0	200	300	0	0	0	0	0	0	0	200	903	0	0	0	0	0	0	0	603	903	0
504	4	0	0	0	0	0	0	200	300	0	0	0	0	0	0	0	200	903	0	0	0	0	0	0	0	603	903	0
504	5	0	0	0	0	0	0	200	300	0	0	0	0	0	0	0	200	903	0	0	0	0	0	0	0	603	903	0
504	6	0	0	0	0	0	0	200	300	0	0	0	0	0	0	0	200	903	0	0	0	0	0	0	0	603	903	0
504	7	0	0	0	0	0	0	200	300	0	0	0	0	0	0	0	200	903	0	0	0	0	0	0	0	603	903	0
504	8	0	0	0	0	0	0	200	300	0	0	0	0	0	0	0	200	903	0	0	0	0	0	0	0	603	903	0
504	9	0	0	0	0	0	0	200	300	0	0	0	0	0	0	0	200	903	0	0	0	0	0	0	0	603	903	0
505	0	0	0	0	0	0	0	200	300	0	0	0	0	0	0	0	200	903	0	0	0	0	0	0	0	603	903	0
505	1	0	0	0	0	0	0	200	300	0	0	0	0	0	0	0	200	903	0	0	0	0	0	0	0	603	903	0
505	2	0	0	0	0	0	0	200	300	0	0	0	0	0	0	0	200	903	0	0	0	0	0	0	0	603	903	0
505	3	0	0	0	0	0	0	200	300	0	0	0	0	0	0	0	200	903	0	0	0	0	0	0	0	603	903	0
505	4	0	0	0	0	0	0	200	300	0	0	0	0	0	0	0	200	903	0	0	0	0	0	0	0	603	903	0
505	5	0	0	0	0	0	0	200	300	0	0	0	0	0	0	0	200	903	0	0	0	0	0	0	0	603	903	0
505	6	0	0	0	0	0	0	200	300	0	0	0	0	0	0	0	200	903	0	0	0	0	0	0	0	603	903	0
505	7	0	0	0	0	0	0	200	300	0	0	0	0	0	0	0	200	903	0	0	0	0	0	0	0	603	903	0
505	8	0	0	0	0	0	0	200	300	0	0	0	0	0	0	0	200	903	0	0	0	0	0	0	0	603	903	0
505	9	0	0	0	0	0	0	200	300	0	0	0	0	0	0	0	200	903	0	0	0	0	0	0	0	603	903	0
506	0	0	0	0	0	0	0	200	300	0	0	0	0	0	0	0	200	903	0	0	0	0	0	0	0	603	903	0
506	1	0	0	0	0	0	0	200	300	0	0	0	0	0	0	0	200	903	0	0	0	0	0	0	0	603	903	0
506	2	0	0	0	0	0	0	200	300	0	0	0	0	0	0	0	200	903	0	0	0	0	0	0	0	603	903	0
506	3	0	0	0	0	0	0	200	300	0	0	0	0	0	0	0	200	903	0	0	0	0	0	0	0	603	903	0
506	4	0	0	0	0	0	0	200	300	0	0	0	0	0	0	0	200	903	0	0	0	0	0	0	0	603	903	0
506	5	0	0	0	0	0	0	200	300	0	0	0	0	0	0	0	200	903	0	0	0	0	0	0	0	603	903	0
506	6	0	0	0	0	0	0	200	300	0	0	0	0	0	0	0	200	903	0	0	0	0	0	0	0	603	903	0
506	7	0	0	0	0	0	0	200	300	0	0	0	0	0	0	0	200	903	0	0	0	0	0	0	0	603	903	0
506	8	0	0	0	0	0	0	200	300	0	0	0	0	0	0	0	200	903	0	0	0	0	0	0	0	603	903	0
506	9	0	0	0	0	0	0	200	300	0	0	0	0	0	0	0	200	903	0	0	0	0	0	0	0	603	903	0
507	0	0	0	0	0	0	0	200	300	0	0	0	0	0	0	0	200	903	0	0	0	0	0	0	0	603	903	0
507	1	0	0	0	0	0	0	200	300	0	0	0	0	0	0	0	200	903	0	0	0	0	0	0	0	603	903	0
507	2	0	0	0	0	0	0	200	300	0	0	0	0	0	0	0	200	903	0	0	0	0	0	0	0	603	903	0
507	3	0	0	0	0	0	0	200	300	0	0	0	0	0	0	0	200	903	0	0	0	0	0	0	0	603	903	0
507	4	0	0	0	0	0	0	200	300	0	0	0	0	0	0	0	200	903	0	0	0	0	0	0	0	603	903	0
507	5	0	0	0	0	0	0	200	300	0	0	0	0	0	0	0	200	903	0	0	0	0	0	0	0	603	903	0
507	6	0	0	0	0	0	0	200	300	0	0	0	0	0	0	0	200	903	0	0	0	0	0	0	0	603	903	0
507	7	0	0	0	0	0	0	200	300	0	0	0	0	0	0	0	200	903	0	0	0	0	0	0	0	603	903	0
507	8	0	0	0	0	0	0	200	300	0	0	0	0	0	0	0	200	903	0	0	0	0	0	0	0	603	903	0
507	9	0	0	0	0	0	0	200	300	0	0	0	0	0	0	0	200	903	0	0	0	0	0	0	0	603	903	0
508	0	0	0	0	0	0	0	200	300	0	0	0	0	0	0	0	200	903	0	0	0	0	0	0	0	603	903	0
508	1	0	0	0	0	0	0	200	300	0	0	0	0	0	0	0	200	903	0	0	0	0	0	0	0	603	903	0
508	2	0	0	0	0	0	0	200	300	0	0	0	0	0	0	0	200	903	0	0	0	0	0	0	0	603	903	0
508	3	0	0	0	0	0	0	200	300	0	0	0	0	0	0	0	200	903	0	0	0	0	0	0	0	603	903	0
508	4	0	0	0	0	0	0	200	300	0	0	0	0	0	0	0	200	903	0	0	0	0	0	0	0	603	903	0
508	5	0	0	0	0	0	0	200	300	0	0	0	0	0	0	0	200	903	0	0	0	0	0	0	0	603	903	0
508	6	0	0	0	0	0	0	200	300	0	0	0	0	0	0	0	200	903	0	0	0	0	0	0	0	603	903	0
508	7	0	0	0	0	0	0	200	300	0	0	0	0	0	0	0	200	903	0	0	0	0	0	0	0	603	903	0
508	8	0	0	0	0	0	0	200	300	0	0	0	0	0	0	0	200	903	0	0	0	0	0	0	0	603	903	0
508	9	0	0	0	0	0	0	200	300	0	0	0	0	0	0	0	200	903	0	0	0	0	0	0	0	603	903	0
509	0	0	0	0	0	0	0	200	300	0	0	0	0	0	0	0	200	903	0	0	0	0	0	0	0	603	903	0
509	1	0	0	0	0	0	0	200	300	0	0	0	0	0	0	0	200	903	0	0	0	0	0	0	0	603	903	0
509	2	0	0	0	0	0	0	200	300	0	0	0	0	0	0	0	200	903	0	0	0	0	0	0	0	603	903	0
509	3	0	0	0	0	0	0	200	300	0	0	0	0	0	0	0	200	903	0	0	0	0	0	0	0	603	903	0
509	4	0	0	0	0	0	0	200	300	0	0	0	0	0	0	0	200	903	0	0	0	0	0	0	0	603	903	0
509	5	0	0	0	0	0	0	200	300	0	0	0	0	0	0	0	200	903	0	0	0	0	0	0	0	603	903	0
509	6	0	0	0	0	0	0	200	300	0	0	0	0	0	0	0	200	903	0	0	0	0	0	0	0	603	903	0
509	7	0	0	0	0	0	0	200	300	0	0	0	0	0	0	0	200	903	0	0	0	0	0	0	0	603	903	0
509	8	0	0	0	0	0	0	200	300	0	0	0	0	0	0	0	200	903	0	0	0	0	0	0	0	603	903	0
509	9	0	0	0	0	0	0	200	300	0	0	0	0	0	0	0	200	903	0	0	0	0	0	0	0	603	903	0
510	0	0	0	0	0	0	0	200	300	0	0	0	0	0	0	0	200	903	0	0	0	0	0	0	0	603	903	0
510	1	0	0	0	0	0	0	200	300	0	0	0	0	0	0	0	200	903	0	0	0	0	0	0	0	603	903	0
510	2	0	0	0	0	0	0	200	300	0	0	0	0	0	0	0	200	903	0	0	0	0	0	0	0	603	903	0
510	3	0	0	0	0	0	0	200	300	0	0	0	0	0	0	0	200	903	0	0	0	0	0	0	0	603	903	0
510	4	0	0	0	0	0	0	200	300	0	0	0	0	0	0	0	200	903	0	0	0	0	0	0	0	603	903	0
510	5	0	0	0	0	0	0	200	300	0	0	0	0	0	0	0	200	903	0	0	0	0	0	0	0	603	903	0
510	6	0	0	0	0	0	0	200	300	0	0	0	0	0	0	0	200	903	0	0	0	0	0	0	0	603	903	0
510	7	0	0	0	0	0	0	200	300	0	0	0	0	0	0	0	200	903	0	0	0	0	0	0	0	603	903	0
510	8	0	0	0	0	0	0	200	300	0	0	0	0	0	0	0	200	903	0	0	0	0	0	0	0	603	903	0
510	9	0	0	0	0	0	0	200	300	0	0	0	0	0	0	0	200	903	0	0	0	0	0	0	0	603	903	0
511	0	0	0	0	0	0	0	200	300	0	0	0	0	0	0	0	200	903	0	0	0	0	0	0	0	603	903	0
511	1	0	0	0	0	0	0	200	300	0	0	0	0	0	0	0	200	903	0	0	0	0	0	0	0	603	903	0
511	2	0	0	0	0	0	0	200	300	0	0	0	0	0	0	0	200	903	0	0	0	0	0	0	0	603	903	0
511	3	0	0	0	0	0	0	200	300	0	0	0	0	0	0	0	200	903	0	0	0	0	0	0	0	603	903	0
511	4	0	0	0	0	0	0	200	300	0	0	0	0	0	0	0	200	903	0	0	0	0	0	0	0	603	903	0
511	5	0	0	0	0	0	0	200	300	0	0	0	0	0	0	0	200	903	0	0	0	0	0	0	0	603	903	0
511	6	0	0	0	0	0	0	200	300	0	0	0	0	0	0	0	200	903	0	0	0	0	0	0	0	603	903	0
511	7	0	0	0	0	0	0	200	300	0	0	0	0	0	0	0	200	903	0	0	0	0	0	0	0	603	903	0
511	8	0	0	0	0	0	0	200	300	0	0	0	0	0	0	0	200	903	0	0	0	0	0	0	0	603	903	0
511	9	0	0	0	0	0	0	200	300	0	0	0	0	0	0	0	200	903	0	0	0	0	0	0	0	603	903	0
512	0	0	0	0	0	0	0	200	300	0	0	0	0	0	0	0	200	903	0	0	0	0	0	0	0	603	903	0
512	1	0	0	0	0	0	0	200	300	0	0	0	0	0	0	0	200	903	0	0	0	0	0	0	0	603	903	0
512	2	0	0	0	0	0	0	200	300	0	0	0	0	0	0	0	200	903	0	0	0	0	0	0	0	603	903	0
512	3	0	0	0	0	0	0	200	300	0	0	0	0	0	0	0	200	903	0	0	0	0	0	0	0	603	903	0
512	4	0	0	0	0	0	0	200	300	0	0	0	0	0	0	0	200	903	0	0	0	0	0	0	0	603	903	0
512	5	0	0	0	0	0	0	200	300	0	0	0	0	0	0	0	200	903	0	0	0	0	0	0	0	603	903	0
512	6	0	0	0	0	0	0	200	300	0	0	0	0	0	0	0	200	903	0	0	0	0	0	0	0	603	903	0
512	7	0	0	0	0	0	0	200	300	0	0	0	0	0	0	0	200	903	0	0	0	0	0	0	0	603	903	0
512	8	0	0	0	0	0	0	200	300	0	0	0	0	0	0	0	200	903	0	0	0	0	0	0	0	603	903	0
512	9	0	0	0	0	0	0	200	300	0	0	0	0	0	0	0	200	903	0	0	0	0	0	0	0	603	903	0
513	0	0	0	0	0	0	0	200	300	0	0	0	0	0	0	0	200	903	0	0	0	0	0	0	0	603	903	0
513	1	0	0	0	0	0	0	200	300	0	0	0	0	0	0	0	200	903	0	0	0	0	0	0	0	603	903	0
513	2	0	0	0	0	0	0	200	300	0	0	0	0	0	0	0	200	903	0	0	0	0	0	0	0	603	903	0
513	3	0	0	0	0	0	0	200	300	0	0	0	0	0	0	0	200	903	0	0	0	0	0	0	0	603	903	0
513	4	0	0	0	0	0	0	200	300	0	0	0	0	0	0	0	200	903	0	0	0	0	0	0	0	603	903	0
513	5	0	0	0	0	0	0	200	300	0	0	0	0	0	0	0	200	903	0	0	0	0	0	0	0	603	903	0
513	6	0	0	0	0	0	0	200	300	0	0	0	0	0	0	0	200	903	0	0	0	0	0	0	0	603	903	0
513	7	0	0	0	0	0	0	200	300	0	0	0	0	0	0	0	200	903	0	0	0	0	0	0	0	603	903	0
513	8	0	0	0	0	0	0	200	300	0	0	0	0	0	0	0	200	903	0	0	0	0	0	0	0	603	903	0
513	9	0	0	0	0	0	0	200	300	0	0	0	0	0	0	0	200	903	0	0	0	0	0	0	0	603	903	0
514	0	0	0	0	0	0	0	200	300	0	0	0	0	0	0	0	200	903	0	0	0	0	0	0	0	603	903	0
514	1	0	0	0	0	0	0	200	300	0	0	0	0	0	0	0	200	903	0	0	0	0	0	0	0	603	903	0
514	2	0	0	0	0	0	0	200	300	0	0	0	0	0	0	0	200	903	0	0	0	0	0	0	0	603	903	0
514	3	0	0	0	0	0	0	200	300	0	0	0	0	0	0	0	200	903	0	0	0	0	0	0	0	603	903	0
514	4	0	0	0	0	0	0	200	300	0	0	0	0	0	0	0	200	903	0	0	0	0	0	0	0	603	903	0
514	5	0	0	0	0	0	0	200	300	0	0	0	0	0	0	0	200	903	0	0	0	0	0	0	0	603	903	0
514	6	0	0	0	0	0	0	200	300	0	0	0	0	0	0	0	200	903	0	0	0	0	0	0	0	603	903	0
514	7	0	0	0	0	0	0	200	300	0	0	0	0	0	0	0	200	903	0	0	0	0	0	0	0	603	903	0
514	8	0	0	0	0	0	0	200	300	0	0	0	0	0	0	0	200	903	0	0	0	0	0	0	0	603	903	0
514	9	0	0	0	0	0	0	200	300	0	0	0	0	0	0	0	200	903	0	0	0	0	0	0	0	603	903	0
515	0	0	0	0	0	0	0	200	300	0	0	0	0	0	0	0	200	903	0	0	0	0	0	0	0	603	903	0
515	1	0	0	0	0	0	0	200	300	0	0	0	0	0	0	0	200	903	0	0	0	0	0	0	0	603	903	0
515	2	0	0	0	0	0	0	200	300	0	0	0	0	0	0	0	200	903	0	0	0	0	0	0	0	603	903	0
515	3	0	0	0	0	0	0	200	300	0	0	0	0	0	0	0	200	903	0	0	0	0	0	0	0	603	903	0
515	4	0	0	0	0	0	0	200	300	0	0	0	0	0	0	0	200	903	0	0	0	0	0	0	0	603	903	0
515	5	0	0	0	0	0	0	200	300	0	0	0	0	0	0	0	200	903	0	0	0	0	0	0	0	603	903	0
515	6	0	0	0	0	0	0	200	300	0	0	0	0	0	0	0	200	903	0	0	0	0	0	0	0	603	903	0
515	7	0	0	0	0	0	0	200	300	0	0	0	0	0	0	0	200	903	0	0	0	0	0	0	0	603	903	0
515	8	0	0	0	0	0	0	200	300	0	0	0	0	0	0	0	200	903	0	0	0	0	0	0	0	603	903	0
515	9	0	0	0	0	0	0	200	300	0	0	0	0	0	0	0	200	903	0	0	0	0	0	0	0	603	903	0
516	0	0	0	0	0	0	0	200	300	0	0	0	0	0	0	0	200	903	0	0	0	0	0	0	0	603	903	0
516	1	0	0	0	0	0	0	200	300	0	0	0	0	0	0	0	200	903	0	0	0	0	0	0	0	603	903	0
516	2	0	0	0	0	0	0	200	300	0	0	0	0	0	0	0	200	903	0	0	0	0	0	0	0	603	903	0
516	3	0	0	0	0	0	0	200	300	0	0	0	0	0	0	0	200	903	0	0	0	0	0	0	0	603	903	0
516	4	0	0	0	0	0	0	200	300	0	0	0	0	0	0	0	200	903	0	0	0	0	0	0	0	603	903	0
516	5	0	0	0	0	0	0	200	300	0	0	0	0	0	0	0	200	903	0	0	0	0	0	0	0	603	903	0
516	6	0	0	0	0	0	0	200	300	0	0	0	0	0	0	0	200	903	0	0	0	0	0	0	0	603	903	0
516	7	0	0	0	0	0	0	200	300	0	0	0	0	0	0	0	200	903	0	0	0	0	0	0	0	603	903	0
516	8	0	0	0	0	0	0	200	300	0	0	0	0	0	0	0	200	903	0	0	0	0	0	0	0	603	903	0
516	9	0	0	0	0	0	0	200	300	0	0	0	0	0	0	0	200	903	0	0	0	0	0	0	0	603	903	0
517	0	0	0	0	0	0	0	200	300	0	0	0	0	0	0	0	200	903	0	0	0	0	0	0	0	603	903	0
517	1	0	0	0	0	0	0	200	300	0	0	0	0	0	0	0	200	903	0	0	0	0	0	0	0	603	903	0
517	2	0	0	0	0	0	0	200	300	0	0	0	0	0	0	0	200	903	0	0	0	0	0	0	0	603	903	0
517	3	0	0	0	0	0	0	200	300	0	0	0	0	0	0	0	200	903	0	0	0	0	0	0	0	603	903	0
517	4	0	0	0	0	0	0	200	300	0	0	0	0	0	0	0	200	903	0	0	0	0	0	0	0	603	903	0
517	5	0	0	0	0	0	0	200	300	0	0	0	0	0	0	0	200	903	0	0	0	0	0	0	0	603	903	0
517	6	0	0	0	0	0	0	200	300	0	0	0	0	0	0	0	200	903	0	0	0	0	0	0	0	603	903	0
517	7	0	0	0	0	0	0	200	300	0	0	0	0	0	0	0	200	903	0	0	0	0	0	0	0	603	903	0
517	8	0	0	0	0	0	0	200	300	0	0	0	0	0	0	0	200	903	0	0	0	0	0	0	0	603	903	0
517	9	0	0	0	0	0	0	200	300	0	0	0	0	0	0	0	200	903	0	0	0	0	0	0	0	603	903	0
518	0	0	0	0	0	0	0	200	300	0	0	0	0	0	0	0	200	903	0	0	0	0	0	0	0	603	903	0
518	1	0	0	0	0	0	0	200	300	0	0	0	0	0	0	0	200	903	0	0	0	0	0	0	0	603	903	0
518	2	0	0	0	0	0	0	200	300	0	0	0	0	0	0	0	200	903	0	0	0	0	0	0	0	603	903	0
518	3	0	0	0	0	0	0	200	300	0	0	0	0	0	0	0	200	903	0	0	0	0	0	0	0	603	903	0
518	4	0	0	0	0	0	0	200	300	0	0	0	0	0	0	0	200	903	0	0	0	0	0	0	0	603	903	0
518	5	0	0	0	0	0	0	200	300	0	0	0	0	0	0	0	200	903	0	0	0	0	0	0	0	603	903	0
518	6	0	0	0	0	0	0	200	300	0	0	0	0	0	0	0	200	903	0	0	0	0	0	0	0	603	903	0
518	7	0	0	0	0	0	0	200	300	0	0	0	0	0	0	0	200	903	0	0	0	0	0	0	0	603	903	0
518	8	0	0	0	0	0	0	200	300	0	0	0	0	0	0	0	200	903	0	0	0	0	0	0	0	603	903	0
518	9	0	0	0	0	0	0	200	300	0	0	0	0	0	0	0	200	903	0	0	0	0	0	0	0	603	903	0
519	0	0	0	0	0	0	0	200	300	0	0	0	0	0	0	0	200	903	0	0	0	0	0	0	0	603	903	0
519	1	0	0	0	0	0	0	200	300	0	0	0	0	0	0	0	200	903	0	0	0	0	0	0	0	603	903	0
519	2	0	0	0	0	0	0	200	300	0	0	0	0	0	0	0	200	903	0	0	0	0	0	0	0	603	903	0
519	3	0	0	0	0	0	0	200	300	0	0	0	0	0	0	0	200	903	0	0	0	0	0	0	0	603	903	0
519	4	0	0	0	0	0	0	200	300	0	0	0	0	0	0	0	200	903	0	0	0	0	0	0	0	603	903	0
519	5	0	0	0	0	0	0	200	300	0	0	0	0	0	0	0	200	903	0	0	0	0	0	0	0	603	903	0
519	6	0	0	0	0	0	0	200	300	0	0	0	0	0	0	0	200	903	0	0	0	0	0	0	0	603	903	0
519	7	0	0	0	0	0	0	200	300	0	0	0	0	0	0	0	200	903	0	0	0	0	0	0	0	603	903	0
519	8	0	0	0	0	0	0	200	300	0	0	0	0	0	0	0	200	903	0	0	0	0	0	0	0	603	903	0
519	9	0	0	0	0	0	0	200	300	0	0	0	0	0	0	0	200	903	0	0	0	0	0	0	0	603	903	0
520	0	0	0	0	0	0	0	200	300	0	0	0	0	0	0	0	200	903	0	0	0	0	0	0	0	603	903	0
520	1	0	0	0	0	0	0	200	300	0	0	0	0	0	0	0	200	903	0	0	0	0	0	0	0	603	903	0
520	2	0	0	0	0	0	0	200	300	0	0	0	0	0	0	0	200	903	0	0	0	0	0	0	0	603	903	0
520	3	0	0	0	0	0	0	200	300	0	0	0	0	0	0	0	200	903	0	0	0	0	0	0	0	603	903	0
520	4	0	0	0	0	0	0	200	300	0	0	0	0	0	0	0	200	903	0	0	0	0	0	0	0	603	903	0
520	5	0	0	0	0	0	0	200	300	0	0	0	0	0	0	0	200	903	0	0	0	0	0	0	0	603	903	0
520	6	0	0	0	0	0	0	200	300	0	0	0	0	0	0	0	200	903	0	0	0	0	0	0	0	603	903	0
520	7	0	0	0	0	0	0	200	300	0	0	0	0	0	0	0	200	903	0	0	0	0	0	0	0	603	903	0
520	8	0	0	0	0	0	0	200	300	0	0	0	0	0	0	0	200	903	0	0	0	0	0	0	0	603	903	0
520	9	0	0	0	0	0	0	200	300	0	0	0	0	0	0	0	200	903	0	0	0	0	0	0	0	603	903	0
521	0	0	0	0	0	0	0	200	300	0	0	0	0	0	0	0	200	903	0	0	0	0	0	0	0	603	903	0
521	1	0	0	0	0	0	0	200	300	0	0	0	0	0	0	0	200	903	0	0	0	0	0	0	0	603	903	0
521	2	0	0	0	0	0	0	200	300	0	0	0	0	0	0	0	200	903	0	0	0	0	0	0	0	603	903	0
521	3	0	0	0	0	0	0	200	300	0	0	0	0	0	0	0	200	903	0	0	0	0	0	0	0	603	903	0
521	4	0	0	0	0	0	0	200	300	0	0	0	0	0	0	0	200	903	0	0	0	0	0	0	0	603	903	0
521	5	0	0	0	0	0	0	200	300	0	0	0	0	0	0	0	200	903	0	0	0	0	0	0	0	603	903	0
521	6	0	0	0	0	0	0	200	300	0	0	0	0	0	0	0	200	903	0	0	0	0	0	0	0	603	903	0
521	7	0	0	0	0	0	0	200	300	0	0	0	0	0	0	0	200	903	0	0	0	0	0	0	0	603	903	0
521	8	0	0	0	0	0	0	200	300	0	0	0	0	0	0	0	200	903	0	0	0	0	0	0	0	603	903	0
521	9	0	0	0	0	0	0	200	300	0	0	0	0	0	0	0	200	903	0	0	0	0	0	0	0	603	903	0
522	0	0	0	0	0	0	0	200	300	0	0	0	0	0	0	0	200	903	0	0	0	0	0	0	0	603	903	0
522	1	0	0	0	0	0	0	200	300	0	0	0	0	0	0	0	200	903	0	0	0	0	0	0	0	603	903	0
522	2	0	0	0	0	0	0	200	300	0	0	0	0	0	0	0	200	903	0	0	0	0	0	0	0	603	903	0
522	3	0	0	0	0	0	0	200	300	0	0	0	0	0	0	0	200	903	0	0	0	0	0	0	0	603	903	0
522	4	0	0	0	0	0	0	200	300	0	0	0	0	0	0	0	200	903	0	0	0	0	0	0	0	603	903	0
522	5	0	0	0	0	0	0	200	300	0	0	0	0	0	0	0	200	903	0	0	0	0	0	0	0	603	903	0
522	6	0	0	0	0	0	0	200	300	0	0	0	0	0	0	0	200	903	0	0	0	0	0	0	0	603	903	0
522	7	0	0	0	0	0	0	200	300	0	0	0	0	0	0	0	200	903	0	0	0	0	0	0	0	603	903	0
522	8	0	0	0	0	0	0	200	300	0	0	0	0	0	0	0	200	903	0	0	0	0	0	0	0	603	903	0
522	9	0	0	0	0	0	0	200	300	0	0	0	0	0	0	0	200	903	0	0	0	0	0	0	0	603	903	0
523	0	0	0	0	0	0	0	200	300	0	0	0	0	0	0	0	200	903	0	0	0	0	0	0	0	603	903	0
523	1	0	0	0	0	0	0	200	300	0	0	0	0	0	0	0	200	903	0	0	0	0	0	0	0	603	903	0
523	2	0	0	0	0	0	0	200	300	0	0	0	0	0	0	0	200	903	0	0	0	0	0	0	0	603	903	0
523	3	0	0	0	0	0	0	200	300	0	0	0	0	0	0	0	200	903	0	0	0	0	0	0	0	603	903	0
523	4	0	0	0	0	0	0	200	300	0	0	0	0	0	0	0	200	903	0	0	0	0	0	0	0	603	903	0
523	5	0	0	0	0	0	0	200	300	0	0	0	0	0	0	0	200	903	0	0	0	0	0	0	0	603	903	0
523	6	0	0	0	0	0	0	200	300	0	0	0	0	0	0	0	200	903	0	0	0	0	0	0	0	603	903	0
523	7	0	0	0	0	0	0	200	300	0	0	0	0	0	0	0	200	903	0	0	0	0	0	0	0	603	903	0
523	8	0	0	0	0	0	0	200	300	0	0	0	0	0	0	0	200	903	0	0	0	0	0	0	0	603	903	0
523	9	0	0	0	0	0	0	200	300	0	0	0	0	0	0	0	200	903	0	0	0	0	0	0	0	603	903	0
524	0	0	0	0	0	0	0	200	300	0	0	0	0	0	0	0	200	903	0	0	0	0	0	0	0	603	903	0
524	1	0	0	0	0	0	0	200	300	0	0	0	0	0	0	0	200	903	0	0	0	0	0	0	0	603	903	0
524	2	0	0	0	0	0	0	200	300	0	0	0	0	0	0	0	200	903	0	0	0	0	0	0	0	603	903	0
524	3	0	0	0	0	0	0	200	300	0	0	0	0	0	0	0	200	903	0	0	0	0	0	0	0	603	903	0
524	4	0	0	0	0	0	0	200	300	0	0	0	0	0	0	0	200	903	0	0	0	0	0	0	0	603	903	0
524	5	0	0	0	0	0	0	200	300	0	0	0	0	0	0	0	200	903	0	0	0	0	0	0	0	603	903	0
524	6	0	0	0	0	0	0	200	300	0	0	0	0	0	0	0	200	903	0	0	0	0	0	0	0	603	903	0
524	7	0	0	0	0	0	0	200	300	0	0	0	0	0	0	0	200	903	0	0	0	0	0	0	0	603	903	0
524	8	0	0	0	0	0	0	200	300	0	0	0	0	0	0	0	200	903	0	0	0	0	0	0	0	603	903	0
524	9	0	0	0	0	0	0	200	300	0	0	0	0	0	0	0	200	903	0	0	0	0	0	0	0	603	903	0
525	0	0	0	0	0	0	0	200	300	0	0	0	0	0	0	0	200	903	0	0	0	0	0	0	0	603	903	0
525	1	0	0	0	0	0	0	200	300	0	0	0	0	0	0	0	200	903	0	0	0	0	0	0	0	603	903	0
525	2	0	0	0	0	0	0	200	300	0	0	0	0	0	0	0	200	903	0	0	0	0	0	0	0	603	903	0
525	3	0	0	0	0	0	0	200	300	0	0	0	0	0	0	0	200	903	0	0	0	0	0	0	0	603	903	0
525	4	0	0	0	0	0	0	200	300	0	0	0	0	0	0	0	200	903	0	0	0	0	0	0	0	603	903	0
525	5	0	0	0	0	0	0	200	300	0	0	0	0	0	0	0	200	903	0	0	0	0	0	0	0	603	903	0
525	6	0	0	0	0	0	0	200	300	0	0	0	0	0	0	0	200	903	0	0	0	0	0	0	0	603	903	0
525	7	0	0	0	0	0	0	200	300	0	0	0	0	0	0	0	200	903	0	0	0	0	0	0	0	603	903	0
525	8	0	0	0	0	0	0	200	300	0	0	0	0	0	0	0	200	903	0	0	0	0	0	0	0	603	903	0
525	9	0	0	0	0	0	0	200	300	0	0	0	0	0	0	0	200	903	0	0	0	0	0	0	0	603	903	0
526	0	0	0	0	0	0	0	200	300	0	0	0	0	0	0	0	200	903	0	0	0	0	0	0	0	603	903	0
526	1	0	0	0	0	0	0	200	300	0	0	0	0	0	0	0	200	903	0	0	0	0	0	0	0	603	903	0
526	2	0	0	0	0	0	0	200	300	0	0	0	0	0	0	0	200	903	0	0	0	0	0	0	0	603	903	0
526	3	0	0	0	0	0	0	200	300	0	0	0	0	0	0	0	200	903	0	0	0	0	0	0	0	603	903	0
526	4	0	0	0	0	0	0	200	300	0	0	0	0	0	0	0	200	903	0	0	0	0	0	0	0	603	903	0
526	5	0	0	0	0	0	0	200	300	0	0	0	0	0	0	0	200	903	0	0	0	0	0	0	0	603	903	0
526	6	0	0	0	0	0	0	200	300	0	0	0	0	0	0	0	200	903	0	0	0	0	0	0	0	603	903	0
526	7	0	0	0	0	0	0	200	300	0	0	0	0	0	0	0	200	903	0	0	0	0	0	0	0	603	903	0
526	8	0	0	0	0	0	0	200	300	0	0	0	0	0	0	0	200	903	0	0	0	0	0	0	0	603	903	0
526	9	0	0	0	0	0	0	200	300	0	0	0	0	0	0	0	200	903	0	0	0	0	0	0	0	603	903	0
527	0	0	0	0	0	0	0	200	300	0	0	0	0	0	0	0	200	903	0	0	0	0	0	0	0	603	903	0
527	1	0	0	0	0	0	0	200	300	0	0	0	0	0	0	0	200	903	0	0	0	0	0	0	0	603	903	0
527	2	0	0	0	0	0	0	200	300	0	0	0	0	0	0	0	200	903	0	0	0	0	0	0	0	603	903	0
527	3	0	0	0	0	0	0	200	300	0	0	0	0	0	0	0	200	903	0	0	0	0	0	0	0	603	903	0
527	4	0	0	0	0	0	0	200	300	0	0	0	0	0	0	0	200	903	0	0	0	0	0	0	0	603	903	0
527	5	0	0	0	0	0	0	200	300	0	0	0	0	0	0	0	200	903	0	0	0	0	0	0	0	603	903	0
527	6	0	0	0	0	0	0	200	300	0	0	0	0	0	0	0	200	903	0	0	0	0	0	0	0	603	903	0
527	7	0	0	0	0	0	0	200	300	0	0	0	0	0	0	0	200	903	0	0	0	0	0	0	0	603	903	0
527	8	0	0	0	0	0	0	200	300	0	0	0	0	0	0	0	200	903	0	0	0	0	0	0	0	603	903	0
527	9	0	0	0	0	0	0	200	300	0	0	0	0	0	0	0	200	903	0	0	0	0	0	0	0	603	903	0
528	0	0	0	0	0	0	0	200	300	0	0	0	0	0	0	0	200	903	0	0	0	0	0	0	0	603	903	0
528	1	0	0	0	0	0	0	200	300	0	0	0	0	0	0	0	200	903	0	0	0	0	0	0	0	603	903	0
528	2	0	0	0	0	0	0	200	300	0	0	0	0	0	0	0	200	903	0	0	0	0	0	0	0	603	903	0
528	3	0	0	0	0	0	0	200	300	0	0	0	0	0	0	0	200	903	0	0	0	0	0	0	0	603	903	0
528	4	0	0	0	0	0	0	200	300	0	0	0	0	0	0	0	200	903	0	0	0	0	0	0	0	603	903	0
528	5	0	0	0	0	0	0	200	300	0	0	0	0	0	0	0	200	903	0	0	0	0	0	0	0	603	903	0
528	6	0	0	0	0	0	0	200	300	0	0	0	0	0	0	0	200	903	0	0	0	0	0	0	0	603	903	0
528	7	0	0	0	0	0	0	200	300	0	0	0	0	0	0	0	200	903	0	0	0	0	0	0	0	603	903	0
528	8	0	0	0	0	0	0	200	300	0	0	0	0	0	0	0	200	903	0	0	0	0	0	0	0	603	903	0
528	9	0	0	0	0	0	0	200	300	0	0	0	0	0	0	0	200	903	0	0	0	0	0	0	0	603	903	0
529	0	0	0	0	0	0	0	200	300	0	0	0	0	0	0	0	200	903	0	0	0	0	0	0	0	603	903	0
529	1	0	0	0	0	0	0	200	300	0	0	0	0	0	0	0	200	903	0	0	0	0	0	0	0	603	903	0
529	2	0	0	0	0	0	0	200	300	0	0	0	0	0	0	0	200	903	0	0	0	0	0	0	0	603	903	0
529	3	0	0	0	0	0	0	200	300	0	0	0	0	0	0	0	200	903	0	0	0	0	0	0	0	603	903	0
529	4	0	0	0	0	0	0	200	300	0	0	0	0	0	0	0	200	903	0	0	0	0	0	0	0	603	903	0
529	5	0	0	0	0	0	0	200	300	0	0	0	0	0	0	0	200	903	0	0	0	0	0	0	0	603	903	0
529	6	0	0	0	0	0	0	200	300	0	0	0	0	0	0	0	200	903	0	0	0	0	0	0	0	603	903	0
529	7	0	0	0	0	0	0	200	300	0	0	0	0	0	0	0	200	903	0	0	0	0	0	0	0	603	903	0
529	8	0	0	0	0	0	0	200	300	0	0	0	0	0	0	0	200	903	0	0	0	0	0	0	0	603	903	0
529	9	0	0	0	0	0	0	200	300	0	0	0	0	0	0	0	200	903	0	0	0	0	0	0	0	603	903	0
530	0	0	0	0	0	0	0	200	300	0	0	0	0	0	0	0	200	903	0	0	0	0	0	0	0	603	903	0
530	1	0	0	0	0	0	0	200	300	0	0	0	0	0	0	0	200	903	0	0	0	0	0	0	0	603	903	0
530	2	0	0	0	0	0	0	200	300	0	0	0	0	0	0	0	200	903	0	0	0	0	0	0	0	603	903	0
530	3	0	0	0	0	0	0	200	300	0	0	0	0	0	0	0	200	903	0	0	0	0	0	0	0	603	903	0
530	4	0	0	0	0	0	0	200	300	0	0	0	0	0	0	0	200	903	0	0	0	0	0	0	0	603	903	0
530	5	0	0	0	0	0	0	200	300	0	0	0	0	0	0	0	200	903	0	0	0	0	0	0	0	603	903	0
530	6	0	0	0	0	0	0	200	300	0	0	0	0	0	0	0	200	903	0	0	0	0	0	0	0	603	903	0
530	7	0	0	0	0	0	0	200	300	0	0	0	0	0	0	0	200	903	0	0	0	0	0	0	0	603	903	0
530	8	0	0	0	0	0	0	200	300	0	0	0	0	0	0	0	200	903	0	0	0	0	0	0	0	603	903	0
530	9	0	0	0	0	0	0	200	300	0	0	0	0	0	0	0	200	903	0	0	0	0	0	0	0	603	903	0
531	0	0	0	0	0	0	0	200	300	0	0	0	0	0	0	0	200	903	0	0	0	0	0	0	0	603	903	0
531	1	0	0	0	0	0	0	200	300	0	0	0	0	0	0	0	200	903	0	0	0	0	0	0	0	603	903	0
531	2	0	0	0	0	0	0	200	300	0	0	0	0	0	0	0	200	903	0	0	0	0	0	0	0	603	903	0
531	3	0	0	0	0	0	0	200	300	0	0	0	0	0	0	0	200	903	0	0	0	0	0	0	0	603	903	0
531	4	0	0	0	0	0	0	200	300	0	0	0	0	0	0	0	200	903	0	0	0	0	0	0	0	603	903	0
531	5	0	0	0	0	0	0	200	300	0	0	0	0	0	0	0	200	903	0	0	0	0	0	0	0	603	903	0
531	6	0	0	0	0	0	0	200	300	0	0	0	0	0	0	0	200	903	0	0	0	0	0	0	0	603	903	0
531	7	0	0	0	0	0	0	200	300	0	0	0	0	0	0	0	200	903	0	0	0	0	0	0	0	603	903	0
531	8	0	0	0	0	0	0	200	300	0	0	0	0	0	0	0	200	903	0	0	0	0	0	0	0	603	903	0
531	9	0	0	0	0	0	0	200	300	0	0	0	0	0	0	0	200	903	0	0	0	0	0	0	0	603	903	0
532	0	0	0	0	0	0	0	200	300	0	0	0	0	0	0	0	200	903	0	0	0	0	0	0	0	603	903	0
532	1	0	0	0	0	0	0	200	300	0	0	0	0	0	0	0	200	903	0	0	0	0	0	0	0	603	903	0
532	2	0	0	0	0	0	0	200	300	0	0	0	0	0	0	0	200	903	0	0	0	0	0	0	0	603	903	0
532	3	0	0	0	0	0	0	200	300	0	0	0	0	0	0	0	200	903	0	0	0	0	0	0	0	603	903	0
532	4	0	0	0	0	0	0	200	300	0	0	0	0	0	0	0	200	903	0	0	0	0	0	0	0	603	903	0
532	5	0	0	0	0	0	0	200	300	0	0	0	0	0	0	0	200	903	0	0	0	0	0	0	0	603	903	0
532	6	0	0	0	0	0	0	200	300	0	0	0	0	0	0	0	200	903	0	0	0	0	0	0	0	603	903	0
532	7	0	0	0	0	0	0	200	300	0	0	0	0	0	0	0	200	903	0	0	0	0	0	0	0	603	903	0
532	8	0	0	0	0	0	0	200	300	0	0	0	0	0	0	0	200	903	0	0	0	0	0	0	0	603	903	0
532	9	0	0	0	0	0	0	200	300	0	0	0	0	0	0	0	200	903	0	0	0	0	0	0	0	603	903	0
533	0	0	0	0	0	0	0	200	300	0	0	0	0	0	0	0	200	903	0	0	0	0	0	0	0	603	903	0
533	1	0	0	0	0	0	0	200	300	0	0	0	0	0	0	0	200	903	0	0	0	0	0	0	0	603	903	0
533	2	0	0	0	0	0	0	200	300	0	0	0	0	0	0	0	200	903	0	0	0	0	0	0	0	603	903	0
533	3	0	0	0	0	0	0	200	300	0	0	0	0	0	0	0	200	903	0	0	0	0	0	0	0	603	903	0
533	4	0	0	0	0	0	0	200	300	0	0	0	0	0	0	0	200	903	0	0	0	0	0	0	0	603	903	0
533	5	0	0	0	0	0	0	200	300	0	0	0	0	0	0	0	200	903	0	0	0	0	0	0	0	603	903	0
533	6	0	0	0	0	0	0	200	300	0	0	0	0	0	0	0	200	903	0	0	0	0	0	0	0	603	903	0
533	7	0	0	0	0	0	0	200	300	0	0	0	0	0	0	0	200	903	0	0	0	0	0	0	0	603	903	0
533	8	0	0	0	0	0	0	200	300	0	0	0	0	0	0	0	200	903	0	0	0	0	0	0	0	603	903	0
533	9	0	0	0	0	0	0	200	300	0	0	0	0	0	0	0	200	903	0	0	0	0	0	0	0	603	903	0
534	0	0	0	0	0	0	0	200	300	0	0	0	0	0	0	0	200	903	0	0	0	0	0	0	0	603	903	0
534	1	0	0	0	0	0	0	200	300	0	0	0	0	0	0	0	200	903	0	0	0	0	0	0	0	603	903	0
534	2	0	0	0	0	0	0	200	300	0	0	0	0	0	0	0	200	903	0	0	0	0	0	0	0	603	903	0
534	3	0	0	0	0	0	0	200	300	0	0	0	0	0	0	0	200	903	0	0	0	0	0	0	0	603	903	0
534	4	0	0	0	0	0	0	200	300	0	0	0	0	0	0	0	200	903	0	0	0	0	0	0	0	603	903	0
534	5	0	0	0	0	0	0	200	300	0	0	0	0	0	0	0	200	903	0	0	0	0	0	0	0	603	903	0
534	6	0	0	0	0	0	0	200	300	0	0	0	0	0	0	0	200	903	0	0	0	0	0	0	0	603	903	0
534	7	0	0	0	0	0	0	200	300	0	0	0	0	0	0	0	200	903	0	0	0	0	0	0	0	603	903	0
534	8	0	0	0	0	0	0	200	300	0	0	0	0	0	0	0	200	903	0	0	0	0	0	0	0	603	903	0
534	9	0	0	0	0	0	0	200	300	0	0	0	0	0	0	0	200	903	0	0	0	0	0	0	0	603	903	0
535	0	0	0	0	0	0	0	200	300	0	0	0	0	0	0	0	200	903	0	0	0	0	0	0	0	603	903	0
535	1	0	0	0	0	0	0	200	300	0	0	0	0	0	0	0	200	903	0	0	0	0	0	0	0	603	903	0
535	2	0	0	0	0	0	0	200	300	0	0	0	0	0	0	0	200	903	0	0	0	0	0	0	0	603	903	0
535	3	0	0	0	0	0	0	200	300	0	0	0	0	0	0	0	200	903	0	0	0	0	0	0	0	603	903	0
535	4	0	0	0	0	0	0	200	300	0	0	0	0	0	0	0	200	903	0	0	0	0	0	0	0	603	903	0
535	5	0	0	0	0	0	0	200	300	0	0	0	0	0	0	0	200	903	0	0	0	0	0	0	0	603	903	0
535	6	0	0	0	0	0	0	200	300	0	0	0	0	0	0	0	200	903	0	0	0	0	0	0	0	603	903	0
535	7	0	0	0	0	0	0	200	300	0	0	0	0	0	0	0	200	903	0	0	0	0	0	0	0	603	903	0
535	8	0	0	0	0	0	0	200	300	0	0	0	0	0	0	0	200	903	0	0	0	0	0	0	0	603	903	0
535	9	0	0	0	0	0	0	200	300	0	0	0	0	0	0	0	200	903	0	0	0	0	0	0	0	603	903	0
536	0	0	0	0	0	0	0	200	300	0	0	0	0	0	0	0	200	903	0	0	0	0	0	0	0	603	903	0
536	1	0	0	0	0	0	0	200	300	0	0	0	0	0	0	0	200	903	0	0	0	0	0	0	0	603	903	0
536	2	0	0	0	0	0	0	200	300	0	0	0	0	0	0	0	200	903	0	0	0	0	0	0	0	603	903	0
536	3	0	0	0	0	0	0	200	300	0	0	0	0	0	0	0	200	903	0	0	0	0	0	0	0	603	903	0
536	4	0	0	0	0	0	0	200	300	0	0	0	0	0	0	0	200	903	0	0	0	0	0	0	0	603	903	0
536	5	0	0	0	0	0	0	200	300	0	0	0	0	0	0	0	200	903	0	0	0	0	0	0	0	603	903	0
536	6	0	0	0	0	0	0	200	300	0	0	0	0	0	0	0	200	903	0	0	0	0	0	0	0	603	903	0
536	7	0	0	0	0	0	0	200	300	0	0	0	0	0	0	0	200	903	0	0	0	0	0	0	0	603	903	0
536	8	0	0	0	0	0	0	200	300	0	0	0	0	0	0	0	200	903	0	0	0	0	0	0	0	603	903	0
536	9	0	0	0	0	0	0	200	300	0	0	0	0	0	0	0	200	903	0	0	0	0	0	0	0	603	903	0
537	0	0	0	0	0	0	0	200	300	0	0	0	0	0	0	0	200	903	0	0	0	0	0	0	0	603	903	0
537	1	0	0	0	0	0	0	200	300	0	0	0	0	0	0	0	200	903	0	0	0	0	0	0	0	603	903	0
537	2	0	0	0	0	0	0	200	300	0	0	0	0	0	0	0	200	903	0	0	0	0	0	0	0	603	903	0
537	3	0	0	0	0	0	0	200	300	0	0	0	0	0	0	0	200	903	0	0	0	0	0	0	0	603	903	0
537	4	0	0	0	0	0	0	200	300	0	0	0	0	0	0	0	200	903	0	0	0	0	0	0	0	603	903	0
537	5	0	0	0	0	0	0	200	300	0	0	0	0	0	0	0	200	903	0	0	0	0	0	0	0	603	903	0
537	6	0	0	0	0	0	0	200	300	0	0	0	0	0	0	0	200	903	0	0	0	0	0	0	0	603	903	0
537	7	0	0	0	0	0	0	200	300	0	0	0	0	0	0	0	200	903	0	0	0	0	0	0	0	603	903	0
537	8	0	0	0	0	0	0	200	300	0	0	0	0	0	0	0	200	903	0	0	0	0	0	0	0	603	903	0
537	9	0	0	0	0	0	0	200	300	0	0	0	0	0	0	0	200	903	0	0	0	0	0	0	0	603	903	0
538	0	0	0	0	0	0	0	200	300	0	0	0	0	0	0	0	200	903	0	0	0	0	0	0	0	603	903	0
538	1	0	0	0	0	0	0	200	300	0	0	0	0	0	0	0	200	903	0	0	0	0	0	0	0	603	903	0
538	2	0	0	0	0	0	0	200	300	0	0	0	0	0	0	0	200	903	0	0	0	0	0	0	0	603	903	0
538	3	0	0	0	0	0	0	200	300	0	0	0	0	0	0	0	200	903	0	0	0	0	0	0	0	603	903	0
538	4	0	0	0	0	0	0	200	300	0	0	0	0	0	0	0	200	903	0	0	0	0	0	0	0	603	903	0
538	5	0	0	0	0	0	0	200	300	0	0	0	0	0	0	0	200	903	0	0	0	0	0	0	0	603	903	0
538	6	0	0	0	0	0	0	200	300	0	0	0	0	0	0	0	200	903	0	0	0	0	0	0	0	603	903	0
538	7	0	0	0	0	0	0	200	300	0	0	0	0	0	0	0	200	903	0	0	0	0	0	0	0	603	903	0
538	8	0	0	0	0	0	0	200	300	0	0	0	0	0	0	0	200	903	0	0	0	0	0	0	0	603	903	0
538	9	0	0	0	0	0	0	200	300	0	0	0	0	0	0	0	200	903	0	0	0	0	0	0	0	603	903	0
539	0	0	0	0	0	0	0	200	300	0	0	0	0	0	0	0	200	903	0	0	0	0	0	0	0	603	903	0
539	1	0	0	0	0	0	0	200	300	0	0	0	0	0	0	0	200	903	0	0	0	0	0	0	0	603	903	0
539	2	0	0	0	0	0	0	200	300	0	0	0	0	0	0	0	200	903	0	0	0	0	0	0	0	603	903	0
539	3	0	0	0	0	0	0	200	300	0	0	0	0	0	0	0	200	903	0	0	0	0	0	0	0	603	903	0
539	4	0	0	0	0	0	0	200	300	0	0	0	0	0	0	0	200	903	0	0	0	0	0	0	0	603	903	0
539	5	0	0	0	0	0	0	200	300	0	0	0	0	0	0	0	200	903	0	0	0	0	0	0	0	603	903	0
539	6	0	0	0	0	0	0	200	300	0	0	0	0	0	0	0	200	903	0	0	0	0	0	0	0	603	903	0
539	7	0	0	0	0	0	0	200	300	0	0	0	0	0	0	0	200	903	0	0	0	0	0	0	0	603	903	0
539	8	0	0	0	0	0	0	200	300	0	0	0	0	0	0	0	200	903	0	0	0	0	0	0	0	603	903	0
539	9	0	0	0	0	0	0	200	300	0	0	0	0	0	0	0	200	903	0	0	0	0	0	0	0	603	903	0
540	0	0	0	0	0	0	0	200	300	0	0	0	0	0	0	0	200	903	0	0	0	0	0	0	0	603	903	0
540	1	0	0	0	0	0	0	200	300	0	0	0	0	0	0	0	200	903	0	0	0	0	0	0	0	603	903	0
540	2	0	0	0	0	0	0	200	300	0	0	0	0	0	0	0	200	903	0	0	0	0	0	0	0	603	903	0
540	3	0	0	0	0	0	0	200	300	0	0	0	0	0	0	0	200	903	0	0	0	0	0	0	0	603	903	0
540	4	0	0	0	0	0	0	200	300	0	0	0	0	0	0	0	200	903	0	0	0	0	0	0	0	603	903	0
540	5	0	0	0	0	0	0	200	300	0	0	0	0	0	0	0	200	903	0	0	0	0	0	0	0	603	903	0
540	6	0	0	0	0	0	0	200	300	0	0	0	0	0	0	0	200	903	0	0	0	0	0	0	0	603	903	0
540	7	0	0	0	0	0	0	200	300	0	0	0	0	0	0	0	200	903	0	0	0	0	0	0	0	603	903	0
540	8	0	0	0	0	0	0	200	300	0	0	0	0	0	0	0	200	903	0	0	0	0	0	0	0	603	903	0
540	9	0	0	0	0	0	0	200	300	0	0	0	0	0	0	0	200	903	0	0	0	0	0	0	0	603	903	0
541	0	0	0	0	0	0	0	200	300	0	0	0	0	0	0	0	200	903	0	0	0	0	0	0	0	603	903	0
541	1	0	0	0	0	0	0	200	300	0	0	0	0	0	0	0	200	903	0	0	0	0	0	0	0	603	903	0
541	2	0	0	0	0	0	0	200	300	0	0	0	0	0	0	0	200	903	0	0	0	0	0	0	0	603	903	0
541	3	0	0	0	0	0	0	200	300	0	0	0	0	0	0	0	200	903	0	0	0	0	0	0	0	603	903	0
541	4	0	0	0	0	0	0	200	300	0	0	0	0	0	0	0	200	903	0	0	0	0	0	0	0	603	903	0
541	5	0	0	0	0	0	0	200	300	0	0	0	0	0	0	0	200	903	0	0	0	0	0	0	0	603	903	0
541	6	0	0	0	0	0	0	200	300	0	0	0	0	0	0	0	200	903	0	0	0	0	0	0	0	603	903	0
541	7	0	0	0	0	0	0	200	300	0	0	0	0	0	0	0	200	903	0	0	0	0	0	0	0	603	903	0
541	8	0	0	0	0	0	0	200	300	0	0	0	0	0	0	0	200	903	0	0	0	0	0	0	0	603	903	0
541	9	0	0	0	0	0	0	200	300	0	0	0	0	0	0	0	200	903	0	0	0	0	0	0	0	603	903	0
542	0	0	0	0	0	0	0	200	300	0	0	0	0	0	0	0	200	903	0	0	0	0	0	0	0	603	903	0
542	1	0	0	0	0	0	0	200	300	0	0	0	0	0	0	0	200	903	0	0	0	0	0	0	0	603	903	0
542	2	0	0	0	0	0	0	200	300	0	0	0	0	0	0	0	200	903	0	0	0	0	0	0	0	603	903	0
542	3	0	0	0	0	0	0	200	300	0	0	0	0	0	0	0	200	903	0	0	0	0	0	0	0	603	903	0
542	4	0	0	0	0	0	0	200	300	0	0	0	0	0	0	0	200	903	0	0	0	0	0	0	0	603	903	0
542	5	0	0	0	0	0	0	200	300	0	0	0	0	0	0	0	200	903	0	0	0	0	0	0	0	603	903	0
542	6	0	0	0	0	0	0	200	300	0	0	0	0	0	0	0	200	903	0	0	0	0	0	0	0	603	903	0
542	7	0	0	0	0	0	0	200	300	0	0	0	0	0	0	0	200	903	0	0	0	0	0	0	0	603	903	0
542	8	0	0	0	0	0	0	200	300	0	0	0	0	0	0	0	200	903	0	0	0	0	0	0	0	603	903	0
542	9	0	0	0	0	0	0	200	300	0	0	0	0	0	0	0	200	903	0	0	0	0	0	0	0	603	903	0
543	0	0	0	0	0	0	0	200	300	0	0	0	0	0	0	0	200	903	0	0	0	0	0	0	0	603	903	0
543	1	0	0	0	0	0	0	200	300	0	0	0	0	0	0	0	200	903	0	0	0	0	0	0	0	603	903	0
543	2	0	0	0	0	0	0	200	300	0	0	0	0	0	0	0	200	903	0	0	0	0	0	0	0	603	903	0
543	3	0	0	0	0	0	0	200	300	0	0	0	0	0	0	0	200	903	0	0	0	0	0	0	0	603	903	0
543	4	0	0	0	0	0	0	200	300	0	0	0	0	0	0	0	200	903	0	0	0	0	0	0	0	603	903	0
543	5	0	0	0	0	0	0	200	300	0	0	0	0	0	0	0	200	903	0	0	0	0	0	0	0	603	903	0
543	6	0	0	0	0	0	0	200	300	0	0	0	0	0	0	0	200	903	0	0	0	0	0	0	0	603	903	0
543	7	0	0	0	0	0	0	200	300	0	0	0	0	0	0	0	200	903	0	0	0	0	0	0	0	603	903	0
543	8	0	0	0	0	0	0	200	300	0	0	0	0	0	0	0	200	903	0	0	0	0	0	0	0	603	903	0
543	9	0	0	0	0	0	0	200	300	0	0	0	0	0	0	0	200	903	0	0	0	0	0	0	0	603	903	0
544	0	0	0	0	0	0	0	200	300	0	0	0	0	0	0	0	200	903	0	0	0	0	0	0	0	603	903	0
544	1	0	0	0	0	0	0	200	300	0	0	0	0	0	0	0	200	903	0	0	0	0	0	0	0	603	903	0
544	2	0	0	0	0	0	0	200	300	0	0	0	0	0	0	0	200	903	0	0	0	0	0	0	0	603	903	0
544	3	0	0	0	0	0	0	200	300	0	0	0	0	0	0	0	200	903	0	0	0	0	0	0	0	603	903	0
544	4	0	0	0	0	0	0	200	300	0	0	0	0	0	0	0	200	903	0	0	0	0	0	0	0	603	903	0
544	5	0	0	0	0	0	0	200	300	0	0	0	0	0	0	0	200	903	0	0	0	0	0	0	0	603	903	0
544	6	0	0	0	0	0	0	200	300	0	0	0	0	0	0	0	200	903	0	0	0	0	0	0	0	603	903	0
544	7	0	0	0	0	0	0	200	300	0	0	0	0	0	0	0	200	903	0	0	0	0	0	0	0	603	903	0
544	8	0	0	0	0	0	0	200	300	0	0	0	0	0	0	0	200	903	0	0	0	0	0	0	0	603	903	0
544	9	0	0	0	0	0	0	200	300	0	0	0	0	0	0	0	200	903	0	0	0	0	0	0	0	603	903	0
545	0	0	0	0	0	0	0	200	300	0	0	0	0	0	0	0	200	903	0	0	0	0	0	0	0	603	903	0
545	1	0	0	0	0	0	0	200	300	0	0	0	0	0	0	0	200	903	0	0	0	0	0	0	0	603	903	0
545	2	0	0	0	0	0	0	200	300	0	0	0	0	0	0	0	200	903	0	0	0	0	0	0	0	603	903	0
545	3	0	0	0	0	0	0	200	300	0	0	0	0	0	0	0	200	903	0	0	0	0	0	0	0	603	903	0
545	4	0	0	0	0	0	0	200	300	0	0	0	0	0	0	0	200	903	0	0	0	0	0	0	0	603	903	0
545	5	0	0	0	0	0	0	200	300	0	0	0	0	0	0	0	200	903	0	0	0	0	0	0	0	603	903	0
545	6	0	0	0	0	0	0	200	300	0	0	0	0	0	0	0	200	903	0	0	0	0	0	0	0	603	903	0
545	7	0	0	0	0	0	0	200	300	0	0	0	0	0	0	0	200	903	0	0	0	0	0	0	0	603	903	0
545	8	0	0	0	0	0	0	200	300	0	0	0	0	0	0	0	200	903	0	0	0	0	0	0	0	603	903	0
545	9	0	0	0	0	0	0	200	300	0	0	0	0	0	0	0	200	903	0	0	0	0	0	0	0	603	903	0
546	0	0	0	0	0	0	0	200	300	0	0	0	0	0	0	0	200	903	0	0	0	0	0	0	0	603	903	0
546	1	0	0	0	0	0	0	200	300	0	0	0	0	0	0	0	200	903	0	0	0	0	0	0	0	603	903	0
546	2	0	0	0	0	0	0	200	300	0	0	0	0	0	0	0	200	903	0	0	0	0	0	0	0	603	903	0
546	3	0	0	0	0	0	0	200	300	0	0	0	0	0	0	0	200	903	0	0	0	0	0	0	0	603	903	0
546	4	0	0	0	0	0	0	200	300	0	0	0	0	0	0	0	200	903	0	0	0	0	0	0	0	603	903	0
546	5	0	0	0	0	0	0	200	300	0	0	0	0	0	0	0	200	903	0	0	0	0	0	0	0	603	903	0
546	6	0	0	0	0	0	0	200	300	0	0	0	0	0	0	0	200	903	0	0	0	0	0	0	0	603	903	0
546	7	0	0	0	0	0	0	200	300	0	0	0	0	0	0	0	200	903	0	0	0	0	0	0	0	603	903	0
546	8	0	0	0	0	0	0	200	300	0	0	0	0	0	0	0	200	903	0	0	0	0	0	0	0	603	903	0
546	9	0	0	0	0	0	0	200	300	0	0	0	0	0	0	0	200	903	0	0	0	0	0	0	0	603	903	0
547	0	0	0	0	0	0	0	200	300	0	0	0	0	0	0	0	200	903	0	0	0	0	0	0	0	603	903	0
547	1	0	0	0	0	0	0	200	300	0	0	0	0	0	0	0	200	903	0	0	0	0	0	0	0	603	903	0
547	2	0	0	0	0	0	0	200	300	0	0	0	0	0	0	0	200	903	0	0	0	0	0	0	0	603	903	0
547	3	0	0	0	0	0	0	200	300	0	0	0	0	0	0	0	200	903	0	0	0	0	0	0	0	603	903	0
547	4	0	0	0	0	0	0	200	300	0	0	0	0	0	0	0	200	903	0	0	0	0	0	0	0	603	903	0
547	5	0	0	0	0	0	0	200	300	0	0	0	0	0	0	0	200	903	0	0	0	0	0	0	0	603	903	0
547	6	0	0	0	0	0	0	200	300	0	0	0	0	0	0	0	200	903	0	0	0	0	0	0	0	603	903	0
547	7	0	0	0	0	0	0	200	300	0	0	0	0	0	0	0	200	903	0	0	0	0	0	0	0	603	903	0
547	8	0	0	0	0	0	0	200	300	0	0	0	0	0	0	0	200	903	0	0	0	0	0	0	0	603	903	0
547	9	0	0	0	0	0	0	200	300	0	0	0	0	0	0	0	200	903	0	0	0	0	0	0	0	603	903	0
548	0	0	0	0	0	0	0	200	300	0	0	0	0	0	0	0	200	903	0	0	0	0	0	0	0	603	903	0
548	1	0	0	0	0	0	0	200	300	0	0	0	0	0	0	0	200	903	0	0	0	0	0	0	0	603	903	0
548	2	0	0	0	0	0	0	200	300	0	0	0	0	0	0	0	200	903	0	0	0	0	0	0	0	603	903	0
548	3	0	0	0	0	0	0	200	300	0	0	0	0	0	0	0	200	903	0	0	0	0	0	0	0	603	903	0
548	4	0	0	0	0	0	0	200	300	0	0	0	0	0	0	0	200	903	0	0	0	0	0	0	0	603	903	0
548	5	0	0	0	0	0	0	200	300	0	0	0	0	0	0	0	200	903	0	0	0	0	0	0	0	603	903	0
548	6	0	0	0	0	0	0	200	300	0	0	0	0	0	0	0	200	903	0	0	0	0	0	0	0	603	903	0
548	7	0	0	0	0	0	0	200	300	0	0	0	0	0	0	0	200	903	0	0	0	0	0	0	0	603	903	0
548	8	0	0	0	0	0	0	200	300	0	0	0	0	0	0	0	200	903	0	0	0	0	0	0	0	603	903	0
548	9	0	0	0	0	0	0	200	300	0	0	0	0	0	0	0	200	903	0	0	0	0	0	0	0	603	903	0
549	0	0	0	0	0	0	0	200	300	0	0	0	0	0	0	0	200	903	0	0	0	0	0	0	0	603	903	0
549	1	0	0	0	0	0	0	200	300	0	0	0	0	0	0	0	200	903	0	0	0	0	0	0	0	603	903	0
549	2	0	0	0	0	0	0	200	300	0	0	0	0	0	0	0	200	903	0	0	0	0	0	0	0	603	903	0
549	3	0	0	0	0	0	0	200	300	0	0	0	0	0	0	0	200	903	0	0	0	0	0	0	0	603	903	0
549	4	0	0	0	0	0	0	200	300	0	0	0	0	0	0	0	200	903	0	0	0	0	0	0	0	603	903	0
549	5	0	0	0	0	0	0	200	300	0	0	0	0	0	0	0	200	903	0	0	0	0	0	0	0	603	903	0
549	6	0	0	0	0	0	0	200	300	0	0	0	0	0	0	0	200	903	0	0	0	0	0	0	0	603	903	0
549	7	0	0	0	0	0	0	200	300	0	0	0	0	0	0	0	200	903	0	0	0	0	0	0	0	603	903	0
549	8	0	0	0	0	0	0	200	300	0	0	0	0	0	0	0	200	903	0	0	0	0	0	0	0	603	903	0
549	9	0	0	0	0	0	0	200	300	0	0	0	0	0	0	0	200	903	0	0	0	0	0	0	0	603	903	0
550	0	0	0	0	0	0	0	200	300	0	0	0	0	0	0	0	200	903	0	0	0	0	0	0	0	603	903	0
550	1	0	0	0	0	0	0	200	300	0	0	0	0	0	0	0	200	903	0	0	0	0	0	0	0	603	903	0
550	2	0	0	0	0	0	0	200	300	0	0	0	0	0	0	0	200	903	0	0	0	0	0	0	0	603	903	0
550	3	0	0	0	0	0	0	200	300	0	0	0	0	0	0	0	200	903	0	0	0	0	0	0	0	603	903	0
550	4	0	0	0	0	0	0	200	300	0	0	0	0	0	0	0	200	903	0	0	0	0	0	0	0	603	903	0
550	5	0	0	0	0	0	0	200	300	0	0	0	0	0	0	0	200	903	0	0	0	0	0	0	0	603	903	0
550	6	0	0	0	0	0	0	200	300	0	0	0	0	0	0	0	200	903	0	0	0	0	0	0	0	603	903	0
550	7	0	0	0	0	0	0	200	300	0	0	0	0	0	0	0	200	903	0	0	0	0	0	0	0	603	903	0
550	8	0	0	0	0	0	0	200	300	0	0	0	0	0	0	0	200	903	0	0	0	0	0	0	0	603	903	0
550	9	0	0	0	0	0	0	200	300	0	0	0	0	0	0	0	200	903	0	0	0	0	0	0	0	603	903	0
551	0	0	0	0	0	0	0	200	300	0	0	0	0	0	0	0	200	903	0	0	0	0	0	0	0	603	903	0
551	1	0	0	0	0	0	0	200	300	0	0	0	0	0	0	0	200	903	0	0	0	0	0	0	0	603	903	0
551	2	0	0	0	0	0	0	200	300	0	0	0	0	0	0	0	200	903	0	0	0	0	0	0	0	603	903	0
551	3	0	0	0	0	0	0	200	300	0	0	0	0	0	0	0	200	903	0	0	0	0	0	0	0	603	903	0
551	4	0	0	0	0	0	0	200	300	0	0	0	0	0	0	0	200	903	0	0	0	0	0	0	0	603	903	0
551	5	0	0	0	0	0	0	200	300	0	0	0	0	0	0	0	200	903	0	0	0	0	0	0	0	603	903	0
551	6	0	0	0	0	0	0	200	300	0	0	0	0	0	0	0	200	903	0	0	0	0	0	0	0	603	903	0
551	7	0	0	0	0	0	0	200	300	0	0	0	0	0	0	0	200	903	0	0	0	0	0	0	0	603	903	0
551	8	0	0	0	0	0	0	200	300	0	0	0	0	0	0	0	200	903	0	0	0	0	0	0	0	603	903	0
551	9	0	0	0	0	0	0	200	300	0	0	0	0	0	0	0	200	903	0	0	0	0	0	0	0	603	903	0
552	0	0	0	0	0	0	0	200	300	0	0	0	0	0	0	0	200	903	0	0	0	0	0	0	0	603	903	0
552	1	0	0	0	0	0	0	200	300	0	0	0	0	0	0	0	200	903	0	0	0	0	0	0	0	603	903	0
552	2	0	0	0	0	0	0	200	300	0	0	0	0	0	0	0	200	903	0	0	0	0	0	0	0	603	903	0
552	3	0	0	0	0	0	0	200	300	0	0	0	0	0	0	0	200	903	0	0	0	0	0	0	0	603	903	0
552	4	0	0	0	0	0	0	200	300	0	0	0	0	0	0	0	200	903	0	0	0	0	0	0	0	603	903	0
552	5	0	0	0	0	0	0	200	300	0	0	0	0	0	0	0	200	903	0	0	0	0	0	0	0	603	903	0
552	6	0	0	0	0	0	0	200	300	0	0	0	0	0	0	0	200	903	0	0	0	0	0	0	0	603	903	0
552	7	0	0	0	0	0	0	200	300	0	0	0	0	0	0	0	200	903	0	0	0	0	0	0	0	603	903	0
552	8	0	0	0	0	0	0	200	300	0	0	0	0	0	0	0	200	903	0	0	0	0	0	0	0	603	903	0
552	9	0	0	0	0	0	0	200	300	0	2.26257	-15.7831	-39.7894	-9284.73	834.231	-2148.93	220.966	1136.35	0	0	0	0	0	0	0	603	903	0
553	0	0	0	0	0	0	0	200	300	0	12.1808	-26.6168	-46.1981	-8094.54	1078.37	-2698.24	223.342	1078.21	0	0	0	0	0	0	0	603	903	0
553	1	0	0	0	0	0	0	200	300	0	17.2162	-13.4943	-31.5496	-5531.07	-203.367	-3156.01	193.554	1078.31	0	0	0	0	0	0	0	603	903	0
553	2	0	0	0	0	0	0	200	300	0	1.49963	-2.35535	-20.2581	-5805.73	162.844	-2057.37	208.038	1189.59	0	0	0	0	0	0	0	603	903	0
553	3	0	0	0	0	0	0	200	300	0	-3.53577	-6.32263	-31.5496	-8094.54	1017.34	-1279.18	232.246	1159.57	0	0	0	0	0	0	0	603	903	0
553	4	0	0	0	0	0	0	200	300	0	9.28162	-0.67688	-50.4705	-9010.07	40.7741	-1004.52	200.808	1081.52	0	0	0	0	0	0	0	603	903	0
553	5	0	0	0	0	0	0	200	300	0	7.29797	9.54651	-62.3724	-12580.6	468.02	-1920.04	207.504	1104.7	0	0	0	0	0	0	0	603	903	0
553	6	0	0	0	0	0	0	200	300	0	4.3988	12.7509	-68.7811	-15785	956.302	-2744.02	213.904	1132.5	0	0	0	0	0	0	0	603	903	0
553	7	0	0	0	0	0	0	200	300	0	15.9955	12.2931	-81.9036	-18348.4	712.161	-2835.57	208.695	1127.03	0	0	0	0	0	0	0	603	903	0
553	8	0	0	0	0	0	0	200	300	0	16.4532	15.9552	-102.656	-21095	651.126	-2927.13	206.343	1108.49	0	0	0	0	0	0	0	603	903	0
553	9	0	0	0	0	0	0	200	300	0	5.7721	18.0914	-109.369	-23017.6	1383.55	-2744.02	212.65	1113.46	0	0	0	0	0	0	0	603	903	0
554	0	0	0	0	0	0	0	200	300	0	11.5704	10.7672	-120.051	-25214.9	529.055	-1920.04	204.407	1113.04	0	0	0	0	0	0	0	603	903	0
554	1	0	0	0	0	0	0	200	300	0	11.723	5.73181	-133.478	-28877	651.126	-2332.03	204.878	1119.34	0	0	0	0	0	0	0	603	903	0
554	2	0	0	0	0	0	0	200	300	0	6.22986	13.6664	-149.347	-30891.2	529.055	-1782.72	203.542	1109.84	0	0	0	0	0	0	0	603	903	0
554	3	0	0	0	0	0	0	200	300	0	5.16174	14.7345	-160.334	-33088.5	284.915	-1370.73	201.777	1109.37	0	0	0	0	0	0	0	603	903	0
554	4	0	0	0	0	0	0	200	300	0	3.02551	8.02063	-169.794	-35926.6	468.02	-1004.52	202.756	1114.59	0	0	0	0	0	0	0	603	903	0
554	5	0	0	0	0	0	0	200	300	0	2.10999	12.9034	-185.358	-38032.3	223.88	-500.977	201.208	1108.18	0	0	0	0	0	0	0	603	903	0
554	6	0	0	0	0	0	0	200	300	0	-0.178833	17.0233	-196.345	-40412.7	-569.578	2.56305	197.099	1108.83	0	0	0	0	0	0	0	603	903	0
554	7	0	0	0	0	0	0	200	300	0	-3.68835	6.49475	-204.889	-42884.6	-203.367	139.892	199.007	1112.31	0	0	0	0	0	0	0	603	903	0
554	8	0	0	0	0	0	0	200	300	0	-7.04529	3.13782	-212.214	-43433.9	-630.613	1375.85	197.028	1107.67	0	0	0	0	0	0	0	603	903	0
554	9	0	0	0	0	0	0	200	300	0	-4.75647	8.93616	-222.59	-44990.3	-1240.96	1284.3	194.425	1105.12	0	0	0	0	0	0	0	603	903	0
555	0	0	0	0	0	0	0	200	300	0	-9.48669	-0.0665281	-229.609	-46912.9	-1363.03	1330.08	194.064	1107.32	0	0	0	0	0	0	0	603	903	0
555	1	0	0	0	0	0	0	200	300	0	-11.0126	-7.39075	-234.186	-48011.5	-1424.07	2154.05	193.919	1108.01	0	0	0	0	0	0	0	603	903	0
555	2	0	0	0	0	0	0	200	300	0	-11.6229	-5.55969	-239.069	-48377.7	-1912.35	2291.38	192.001	1105.36	0	0	0	0	0	0	0	603	903	0
555	3	0	0	0	0	0	0	200	300	0	-13.6066	-8.61145	-244.867	-49476.4	-1607.18	2199.83	193.437	1105.05	0	0	0	0	0	0	0	603	903	0
555	4	0	0	0	0	0	0	200	300	0	-12.8436	-16.8512	-250.666	-50391.9	-2095.46	3115.36	191.64	1104.03	0	0	0	0	0	0	0	603	903	0
555	5	0	0	0	0	0	0	200	300	0	-14.8273	-19.2926	-254.023	-50391.9	-2217.53	3206.91	191.27	1101.38	0	0	0	0	0	0	0	603	903	0
555	6	0	0	0	0	0	0	200	300	0	-18.9471	-18.6823	-257.38	-51765.2	-1729.25	2840.7	193.281	1104.12	0	0	0	0	0	0	0	603	903	0
555	7	0	0	0	0	0	0	200	300	0	-14.2169	-24.0228	-261.957	-52314.5	-2461.67	4213.99	190.603	1102.71	0	0	0	0	0	0	0	603	903	0
555	8	0	0	0	0	0	0	200	300	0	-15.4376	-31.1945	-265.925	-52863.8	-2644.77	3939.33	190.054	1101.79	0	0	0	0	0	0	0	603	903	0
555	9	0	0	0	0	0	0	200	300	0	-20.9308	-31.9574	-270.807	-53870.9	-2339.6	3618.9	191.361	1101.93	0	0	0	0	0	0	0	603	903	0
556	0	0	0	0	0	0	0	200	300	0	-21.3885	-32.5677	-274.164	-54603.3	-2156.49	4122.44	192.134	1102.16	0	0	0	0	0	0	0	603	903	0
556	1	0	0	0	0	0	0	200	300	0	-19.8627	-39.5868	-279.352	-55061.1	-2766.84	3985.11	190.096	1100.1	0	0	0	0	0	0	0	603	903	0
556	2	0	0	0	0	0	0	200	300	0	-23.9825	-41.8756	-286.371	-56342.8	-2461.67	4076.66	191.404	1099.75	0	0	0	0	0	0	0	603	903	0
556	3	0	0	0	0	0	0	200	300	0	-26.1188	-39.5868	-297.663	-58357	-2766.84	4992.19	190.705	1099.05	0	0	0	0	0	0	0	603	903	0
556	4	0	0	0	0	0	0	200	300	0	-25.0507	-46.4532	-303.461	-59730.3	-3316.16	4488.65	189.072	1099.83	0	0	0	0	0	0	0	603	903	0
556	5	0	0	0	0	0	0	200	300	0	-22.4567	-53.1671	-314.753	-61012	-3377.19	3847.78	189.27	1096.84	0	0	0	0	0	0	0	603	903	0
556	6	0	0	0	0	0	0	200	300	0	-23.6774	-51.4886	-321.161	-62110.7	-3194.09	4397.09	190.055	1096.39	0	0	0	0	0	0	0	603	903	0
556	7	0	0	0	0	0	0	200	300	0	-26.8817	-53.6249	-332.148	-63392.4	-3010.98	4030.88	190.935	1093.86	0	0	0	0	0	0	0	603	903	0
556	8	0	0	0	0	0	0	200	300	0	-23.2196	-60.0336	-344.355	-65589.7	-3194.09	3756.23	190.724	1093.47	0	0	0	0	0	0	0	603	903	0
556	9	0	0	0	0	0	0	200	300	0	-23.6774	-59.5758	-350.763	-67054.5	-3743.41	4076.66	189.328	1094.17	0	0	0	0	0	0	0	603	903	0
557	0	0	0	0	0	0	0	200	300	0	-27.3395	-60.0336	-364.802	-68519.4	-3377.19	3985.11	190.742	1090.83	0	0	0	0	0	0	0	603	903	0
557	1	0	0	0	0	0	0	200	300	0	-25.3558	-64.306	-373.041	-69618	-3743.41	3481.57	189.965	1089.62	0	0	0	0	0	0	0	603	903	0
557	2	0	0	0	0	0	0	200	300	0	-23.5248	-68.4259	-383.417	-71174.4	-4048.58	3939.33	189.441	1088.63	0	0	0	0	0	0	0	603	903	0
557	3	0	0	0	0	0	0	200	300	0	-26.424	-66.7474	-395.624	-72913.9	-3987.55	4213.99	189.921	1087.3	0	0	0	0	0	0	0	603	903	0
557	4	0	0	0	0	0	0	200	300	0	-28.1024	-68.7311	-403.559	-74378.7	-3987.55	3527.34	190.119	1087.31	0	0	0	0	0	0	0	603	903	0
557	5	0	0	0	0	0	0	200	300	0	-27.0343	-74.9872	-413.63	-75660.5	-4475.83	4259.77	189.179	1085.92	0	0	0	0	0	0	0	603	903	0
557	6	0	0	0	0	0	0	200	300	0	-27.1869	-75.4449	-422.175	-77125.3	-4414.79	4259.77	189.543	1085.69	0	0	0	0	0	0	0	603	903	0
557	7	0	0	0	0	0	0	200	300	0	-27.9498	-73.6139	-428.888	-78773.3	-4414.79	3847.78	189.706	1086.67	0	0	0	0	0	0	0	603	903	0
557	8	0	0	0	0	0	0	200	300	0	-27.9498	-78.4967	-438.044	-78956.4	-4414.79	4305.54	189.922	1083.25	0	0	0	0	0	0	0	603	903	0
557	9	0	0	0	0	0	0	200	300	0	-29.7809	-83.0743	-444.452	-80604.3	-4719.97	4122.44	189.38	1084.36	0	0	0	0	0	0	0	603	903	0
558	0	0	0	0	0	0	0	200	300	0	-27.7972	-80.7855	-453.608	-81153.6	-4842.04	3939.33	189.326	1081.91	0	0	0	0	0	0	0	603	903	0
558	1	0	0	0	0	0	0	200	300	0	-26.7291	-82.3114	-459.711	-82343.8	-4719.97	4168.21	189.733	1082.12	0	0	0	0	0	0	0	603	903	0
558	2	0	0	0	0	0	0	200	300	0	-28.7128	-86.7365	-466.73	-83534	-4536.86	4351.32	190.279	1081.98	0	0	0	0	0	0	0	603	903	0
558	3	0	0	0	0	0	0	200	300	0	-28.255	-84.7528	-474.055	-84174.9	-4842.04	3756.23	189.786	1080.56	0	0	0	0	0	0	0	603	903	0
558	4	0	0	0	0	0	0	200	300	0	-27.9498	-84.295	-478.022	-84907.3	-4964.11	3802	189.615	1080.62	0	0	0	0	0	0	0	603	903	0
558	5	0	0	0	0	0	0	200	300	0	-27.0343	-86.7365	-481.684	-85273.5	-4414.79	3802	190.835	1080.03	0	0	0	0	0	0	0	603	903	0
558	6	0	0	0	0	0	0	200	300	0	-24.8981	-89.1779	-485.956	-85822.8	-4597.9	3206.91	190.538	1079.61	0	0	0	0	0	0	0	603	903	0
558	7	0	0	0	0	0	0	200	300	0	-25.9662	-86.5839	-489.924	-86646.8	-4842.04	3435.79	190.117	1079.86	0	0	0	0	0	0	0	603	903	0
558	8	0	0	0	0	0	0	200	300	0	-25.3558	-89.0253	-496.332	-87104.6	-4658.93	3435.79	190.613	1078.5	0	0	0	0	0	0	0	603	903	0
558	9	0	0	0	0	0	0	200	300	0	-23.6774	-90.0934	-497.858	-87104.6	-4658.93	2978.03	190.642	1077.96	0	0	0	0	0	0	0	603	903	0
559	0	0	0	0	0	0	0	200	300	0	-21.0834	-88.5675	-501.215	-87013	-4475.83	2978.03	191.07	1076.6	0	0	0	0	0	0	0	603	903	0
559	1	0	0	0	0	0	0	200	300	0	-21.0834	-88.4149	-504.267	-87379.2	-4781	2978.03	190.519	1076.28	0	0	0	0	0	0	0	603	903	0
559	2	0	0	0	0	0	0	200	300	0	-18.7946	-89.7882	-502.131	-87745.4	-4536.86	2611.82	190.965	1077.75	0	0	0	0	0	0	0	603	903	0
559	3	0	0	0	0	0	0	200	300	0	-18.7946	-90.246	-507.929	-88203.2	-4536.86	2382.93	191.068	1076.65	0	0	0	0	0	0	0	603	903	0
559	4	0	0	0	0	0	0	200	300	0	-16.8109	-89.483	-511.286	-87379.2	-4658.93	2611.82	190.888	1073.9	0	0	0	0	0	0	0	603	903	0
559	5	0	0	0	0	0	0	200	300	0	-13.6066	-91.6193	-511.896	-87928.5	-4903.07	2291.38	190.422	1074.77	0	0	0	0	0	0	0	603	903	0
559	6	0	0	0	0	0	0	200	300	0	-12.3859	-92.077	-514.338	-88477.8	-4597.9	2199.83	191.061	1075.02	0	0	0	0	0	0	0	603	903	0
559	7	0	0	0	0	0	0	200	300	0	-13.454	-90.8563	-514.033	-88020.1	-4231.69	2199.83	191.768	1074.23	0	0	0	0	0	0	0	603	903	0
559	8	0	0	0	0	0	0	200	300	0	-10.86	-90.8563	-515.864	-88386.3	-5086.18	1925.17	190.14	1074.34	0	0	0	0	0	0	0	603	903	0
559	9	0	0	0	0	0	0	200	300	0	-7.80823	-93.1451	-517.695	-88844.1	-4414.79	1787.84	191.472	1074.61	0	0	0	0	0	0	0	603	903	0
560	0	0	0	0	0	0	0	200	300	0	-6.12976	-92.9926	-517.389	-88020.1	-4353.76	1925.17	191.585	1073.12	0	0	0	0	0	0	0	603	903	0
560	1	0	0	0	0	0	0	200	300	0	-6.12976	-93.1451	-518.915	-88386.3	-4475.83	1375.85	191.375	1073.33	0	0	0	0	0	0	0	603	903	0
560	2	0	0	0	0	0	0	200	300	0	-4.75647	-94.8236	-520.441	-88203.2	-4353.76	1284.3	191.635	1072.48	0	0	0	0	0	0	0	603	903	0
560	3	0	0	0	0	0	0	200	300	0	-3.078	-95.1288	-521.662	-87562.3	-4109.62	1330.08	192.122	1070.85	0	0	0	0	0	0	0	603	903	0
560	4	0	0	0	0	0	0	200	300	0	-2.00989	-92.9926	-521.052	-87928.5	-4292.72	826.538	191.761	1071.75	0	0	0	0	0	0	0	603	903	0
560	5	0	0	0	0	0	0	200	300	0	-0.636596	-94.8236	-523.798	-87837	-4292.72	918.091	191.805	1070.69	0	0	0	0	0	0	0	603	903	0
560	6	0	0	0	0	0	0	200	300	0	-0.484008	-96.9598	-523.493	-87470.8	-4048.58	689.209	192.266	1070.09	0	0	0	0	0	0	0	603	903	0
560	7	0	0	0	0	0	0	200	300	0	0.278931	-96.1969	-525.019	-88386.3	-3743.41	414.55	192.87	1071.35	0	0	0	0	0	0	0	603	903	0
560	8	0	0	0	0	0	0	200	300	0	1.65222	-95.434	-523.798	-87928.5	-3865.48	2.56305	192.62	1070.87	0	0	0	0	0	0	0	603	903	0
560	9	0	0	0	0	0	0	200	300	0	5.7721	-96.5021	-528.376	-87562.3	-3621.34	94.1158	193.146	1068.72	0	0	0	0	0	0	0	603	903	0
561	0	0	0	0	0	0	0	200	300	0	4.09363	-96.6547	-529.596	-88111.6	-3987.55	-180.542	192.471	1069.38	0	0	0	0	0	0	0	603	903	0
561	1	0	0	0	0	0	0	200	300	0	3.1781	-96.5021	-531.733	-88294.8	-3621.34	-88.9897	193.19	1069.05	0	0	0	0	0	0	0	603	903	0
561	2	0	0	0	0	0	0	200	300	0	4.70398	-97.265	-531.733	-87562.3	-3682.37	-134.766	193.075	1067.67	0	0	0	0	0	0	0	603	903	0
561	3	0	0	0	0	0	0	200	300	0	7.29797	-97.4176	-533.564	-87287.7	-3865.48	-638.306	192.755	1066.59	0	0	0	0	0	0	0	603	903	0
561	4	0	0	0	0	0	0	200	300	0	6.53503	-95.2814	-538.141	-87470.8	-3377.19	-729.859	193.724	1065.54	0	0	0	0	0	0	0	603	903	0
561	5	0	0	0	0	0	0	200	300	0	6.07727	-94.0607	-545.16	-87470.8	-3133.05	-638.306	194.253	1063.45	0	0	0	0	0	0	0	603	903	0
561	6	0	0	0	0	0	0	200	300	0	7.14539	-95.5865	-554.011	-89576.5	-3316.16	-1187.62	194.014	1064.69	0	0	0	0	0	0	0	603	903	0
561	7	0	0	0	0	0	0	200	300	0	14.0118	-98.6383	-557.673	-88569.4	-3194.09	-1599.61	194.272	1061.82	0	0	0	0	0	0	0	603	903	0
561	8	0	0	0	0	0	0	200	300	0	17.2162	-101.843	-555.842	-88844.1	-3194.09	-1828.49	194.254	1062.84	0	0	0	0	0	0	0	603	903	0
561	9	0	0	0	0	0	0	200	300	0	18.5895	-102.453	-559.809	-89759.6	-3133.05	-1874.27	194.403	1063.34	0	0	0	0	0	0	0	603	903	0
562	0	0	0	0	0	0	0	200	300	0	19.3524	-102.453	-566.828	-89942.7	-2949.95	-2332.03	194.796	1061.68	0	0	0	0	0	0	0	603	903	0
562	1	0	0	0	0	0	0	200	300	0	21.1835	-106.878	-570.795	-89851.1	-3316.16	-2377.81	194.19	1060.41	0	0	0	0	0	0	0	603	903	0
562	2	0	0	0	0	0	0	200	300	0	19.3524	-112.371	-572.626	-90492	-3010.98	-2286.26	194.742	1061.03	0	0	0	0	0	0	0	603	903	0
562	3	0	0	0	0	0	0	200	300	0	16.7584	-110.998	-575.373	-90949.8	-3010.98	-2194.7	194.767	1061.07	0	0	0	0	0	0	0	603	903	0
562	4	0	0	0	0	0	0	200	300	0	16.911	-112.829	-579.645	-90217.3	-2888.91	-2377.81	195.016	1058.64	0	0	0	0	0	0	0	603	903	0
562	5	0	0	0	0	0	0	200	300	0	17.0636	-115.27	-584.833	-91590.7	-3010.98	-2332.03	194.852	1059.61	0	0	0	0	0	0	0	603	903	0
562	6	0	0	0	0	0	0	200	300	0	13.4015	-116.186	-585.749	-90949.8	-3072.02	-2286.26	194.755	1058.27	0	0	0	0	0	0	0	603	903	0
562	7	0	0	0	0	0	0	200	300	0	12.3334	-111.608	-588.495	-91499.1	-3194.09	-2332.03	194.572	1058.48	0	0	0	0	0	0	0	603	903	0
562	8	0	0	0	0	0	0	200	300	0	13.2489	-112.829	-593.073	-91407.6	-3682.37	-2103.15	193.791	1057.13	0	0	0	0	0	0	0	603	903	0
562	9	0	0	0	0	0	0	200	300	0	12.1808	-111.913	-596.125	-91865.3	-3743.41	-2148.93	193.72	1057.1	0	0	0	0	0	0	0	603	903	0
563	0	0	0	0	0	0	0	200	300	0	8.51868	-110.54	-597.956	-91956.9	-3499.26	-2286.26	194.148	1056.79	0	0	0	0	0	0	0	603	903	0
563	1	0	0	0	0	0	0	200	300	0	8.2135	-108.862	-601.313	-91590.7	-4109.62	-2469.36	193.166	1055.32	0	0	0	0	0	0	0	603	903	0
563	2	0	0	0	0	0	0	200	300	0	13.0963	-110.388	-605.28	-91224.4	-3865.48	-2103.15	193.614	1053.71	0	0	0	0	0	0	0	603	903	0
563	3	0	0	0	0	0	0	200	300	0	12.1808	-110.845	-605.585	-91956.9	-3560.3	-2423.59	194.121	1054.85	0	0	0	0	0	0	0	603	903	0
563	4	0	0	0	0	0	0	200	300	0	9.4342	-110.235	-608.027	-92780.8	-3499.26	-2652.47	194.245	1055.59	0	0	0	0	0	0	0	603	903	0
563	5	0	0	0	0	0	0	200	300	0	14.9274	-108.099	-609.553	-92231.5	-3743.41	-2332.03	193.859	1054.31	0	0	0	0	0	0	0	603	903	0
563	6	0	0	0	0	0	0	200	300	0	16.7584	-108.404	-612.604	-92689.3	-3438.23	-2698.24	194.388	1054.3	0	0	0	0	0	0	0	603	903	0
563	7	0	0	0	0	0	0	200	300	0	16.4532	-108.557	-613.52	-91682.2	-3316.16	-2789.8	194.595	1052.44	0	0	0	0	0	0	0	603	903	0
563	8	0	0	0	0	0	0	200	300	0	18.2843	-107.794	-617.792	-92872.4	-3377.19	-2652.47	194.533	1053.33	0	0	0	0	0	0	0	603	903	0
563	9	0	0	0	0	0	0	200	300	0	21.0309	-107.183	-618.708	-93421.7	-3621.34	-2927.13	194.147	1053.99	0	0	0	0	0	0	0	603	903	0
564	0	0	0	0	0	0	0	200	300	0	25.4559	-106.725	-621.149	-93238.6	-3499.26	-3156.01	194.366	1053.11	0	0	0	0	0	0	0	603	903	0
564	1	0	0	0	0	0	0	200	300	0	23.4723	-105.352	-624.201	-92964	-3072.02	-3110.23	195.078	1051.93	0	0	0	0	0	0	0	603	903	0
564	2	0	0	0	0	0	0	200	300	0	25.6085	-105.352	-624.201	-93055.5	-3133.05	-3567.99	194.981	1052.08	0	0	0	0	0	0	0	603	903	0
564	3	0	0	0	0	0	0	200	300	0	28.0499	-106.878	-627.253	-92689.3	-3377.19	-3613.77	194.616	1050.77	0	0	0	0	0	0	0	603	903	0
564	4	0	0	0	0	0	0	200	300	0	28.3551	-105.505	-627.863	-93421.7	-3316.16	-3613.77	194.718	1051.79	0	0	0	0	0	0	0	603	903	0
564	5	0	0	0	0	0	0	200	300	0	28.9655	-105.2	-625.727	-93238.6	-3010.98	-3934.21	195.188	1052.01	0	0	0	0	0	0	0	603	903	0
564	6	0	0	0	0	0	0	200	300	0	27.5922	-106.115	-629.694	-92689.3	-3194.09	-3888.43	194.928	1050.2	0	0	0	0	0	0	0	603	903	0
564	7	0	0	0	0	0	0	200	300	0	30.0336	-104.437	-633.661	-92140	-3255.12	-4117.31	194.863	1048.41	0	0	0	0	0	0	0	603	903	0
564	8	0	0	0	0	0	0	200	300	0	28.8129	-104.284	-633.661	-93238.6	-3316.16	-4346.19	194.767	1050.14	0	0	0	0	0	0	0	603	903	0
564	9	0	0	0	0	0	0	200	300	0	26.0663	-105.352	-633.356	-93238.6	-3010.98	-4071.53	195.246	1050.21	0	0	0	0	0	0	0	603	903	0
565	0	0	0	0	0	0	0	200	300	0	28.8129	-103.979	-633.967	-93421.7	-3010.98	-4254.64	195.251	1050.36	0	0	0	0	0	0	0	603	903	0
565	1	0	0	0	0	0	0	200	300	0	26.8292	-102.148	-636.713	-92506.2	-3438.23	-4437.74	194.6	1048.29	0	0	0	0	0	0	0	603	903	0
565	2	0	0	0	0	0	0	200	300	0	26.524	-101.385	-637.324	-92872.4	-3316.16	-4163.09	194.797	1048.72	0	0	0	0	0	0	0	603	903	0
565	3	0	0	0	0	0	0	200	300	0	26.2189	-102.453	-637.629	-93055.5	-3194.09	-4300.42	194.991	1048.94	0	0	0	0	0	0	0	603	903	0
565	4	0	0	0	0	0	0	200	300	0	25.6085	-100.012	-638.239	-93238.6	-3377.19	-4346.19	194.709	1049.09	0	0	0	0	0	0	0	603	903	0
565	5	0	0	0	0	0	0	200	300	0	27.7448	-98.4857	-637.934	-92689.3	-3438.23	-4208.86	194.61	1048.3	0	0	0	0	0	0	0	603	903	0
565	6	0	0	0	0	0	0	200	300	0	25.7611	-99.0961	-639.46	-92414.6	-3560.3	-4117.31	194.432	1047.52	0	0	0	0	0	0	0	603	903	0
565	7	0	0	0	0	0	0	200	300	0	25.6085	-97.7228	-640.986	-92597.7	-3438.23	-4529.3	194.636	1047.46	0	0	0	0	0	0	0	603	903	0
565	8	0	0	0	0	0	0	200	300	0	27.1344	-97.265	-641.901	-92689.3	-3133.05	-3796.88	195.119	1047.4	0	0	0	0	0	0	0	603	903	0
565	9	0	0	0	0	0	0	200	300	0	27.4396	-96.0443	-641.596	-92414.6	-3560.3	-4208.86	194.451	1047.04	0	0	0	0	0	0	0	603	903	0
566	0	0	0	0	0	0	0	200	300	0	26.6766	-98.028	-641.596	-92597.7	-3743.41	-4300.42	194.165	1047.32	0	0	0	0	0	0	0	603	903	0
566	1	0	0	0	0	0	0	200	300	0	29.2706	-94.8236	-642.817	-91865.3	-3010.98	-4437.74	195.316	1045.91	0	0	0	0	0	0	0	603	903	0
566	2	0	0	0	0	0	0	200	300	0	29.2706	-93.1451	-643.732	-92048.4	-3377.19	-4620.85	194.754	1045.99	0	0	0	0	0	0	0	603	903	0
566	3	0	0	0	0	0	0	200	300	0	29.2706	-93.7555	-643.732	-92872.4	-3255.12	-4529.3	194.943	1047.27	0	0	0	0	0	0	0	603	903	0
566	4	0	0	0	0	0	0	200	300	0	28.3551	-92.3822	-642.206	-91865.3	-3560.3	-4758.18	194.456	1046.05	0	0	0	0	0	0	0	603	903	0
566	5	0	0	0	0	0	0	200	300	0	29.881	-92.3822	-643.122	-92323.1	-3255.12	-4712.4	194.939	1046.55	0	0	0	0	0	0	0	603	903	0
566	6	0	0	0	0	0	0	200	300	0	31.5594	-90.7037	-643.427	-91682.2	-3010.98	-5032.84	195.32	1045.49	0	0	0	0	0	0	0	603	903	0
566	7	0	0	0	0	0	0	200	300	0	33.0853	-90.246	-644.648	-91682.2	-3560.3	-4758.18	194.477	1045.22	0	0	0	0	0	0	0	603	903	0
566	8	0	0	0	0	0	0	200	300	0	31.2543	-89.1779	-641.596	-92323.1	-3499.26	-4758.18	194.546	1046.9	0	0	0	0	0	0	0	603	903	0
566	9	0	0	0	0	0	0	200	300	0	30.4913	-89.6356	-646.174	-91773.8	-3255.12	-4895.51	194.962	1045.03	0	0	0	0	0	0	0	603	903	0
567	0	0	0	0	0	0	0	200	300	0	31.712	-87.1942	-644.343	-90766.7	-3255.12	-5307.5	194.948	1043.87	0	0	0	0	0	0	0	603	903	0
567	1	0	0	0	0	0	0	200	300	0	32.1698	-85.9735	-644.343	-91407.6	-3255.12	-5170.17	194.948	1044.86	0	0	0	0	0	0	0	603	903	0
567	2	0	0	0	0	0	0	200	300	0	32.7802	-85.3632	-645.258	-90675.1	-2949.95	-5215.94	195.428	1043.53	0	0	0	0	0	0	0	603	903	0
567	3	0	0	0	0	0	0	200	300	0	32.1698	-84.4476	-646.784	-91041.3	-2888.91	-5490.6	195.533	1043.76	0	0	0	0	0	0	0	603	903	0
567	4	0	0	0	0	0	0	200	300	0	31.5594	-83.9899	-645.258	-91224.4	-3438.23	-5353.27	194.672	1044.38	0	0	0	0	0	0	0	603	903	0
567	5	0	0	0	0	0	0	200	300	0	31.712	-83.3795	-645.868	-90125.8	-3255.12	-5170.17	194.96	1042.54	0	0	0	0	0	0	0	603	903	0
567	6	0	0	0	0	0	0	200	300	0	32.6276	-82.6166	-643.122	-89759.6	-2949.95	-5353.27	195.413	1042.57	0	0	0	0	0	0	0	603	903	0
567	7	0	0	0	0	0	0	200	300	0	32.3224	-80.7855	-645.563	-89301.8	-3010.98	-5399.05	195.336	1041.33	0	0	0	0	0	0	0	603	903	0
567	8	0	0	0	0	0	0	200	300	0	33.5431	-80.1752	-646.479	-90125.8	-3255.12	-5078.62	194.965	1042.41	0	0	0	0	0	0	0	603	903	0
567	9	0	0	0	0	0	0	200	300	0	32.0172	-79.87	-648.31	-89942.7	-3255.12	-5307.5	194.979	1041.73	0	0	0	0	0	0	0	603	903	0
568	0	0	0	0	0	0	0	200	300	0	31.1017	-80.4803	-646.784	-89118.7	-2766.84	-5444.83	195.722	1040.79	0	0	0	0	0	0	0	603	903	0
568	1	0	0	0	0	0	0	200	300	0	33.0853	-79.2596	-645.258	-88386.3	-2888.91	-5307.5	195.523	1039.98	0	0	0	0	0	0	0	603	903	0
568	2	0	0	0	0	0	0	200	300	0	32.7802	-77.276	-645.868	-88844.1	-3255.12	-5307.5	194.96	1040.56	0	0	0	0	0	0	0	603	903	0
568	3	0	0	0	0	0	0	200	300	0	31.5594	-76.9708	-647.7	-88752.5	-3377.19	-5536.38	194.786	1040.03	0	0	0	0	0	0	0	603	903	0
568	4	0	0	0	0	0	0	200	300	0	31.2543	-75.7501	-647.7	-88844.1	-3010.98	-5307.5	195.351	1040.17	0	0	0	0	0	0	0	603	903	0
568	5	0	0	0	0	0	0	200	300	0	31.5594	-75.1398	-647.394	-88477.8	-3133.05	-5307.5	195.161	1039.67	0	0	0	0	0	0	0	603	903	0
568	6	0	0	0	0	0	0	200	300	0	32.3224	-75.1398	-646.784	-88661	-3316.16	-5215.94	194.873	1040.08	0	0	0	0	0	0	0	603	903	0
568	7	0	0	0	0	0	0	200	300	0	32.475	-73.7665	-645.868	-88294.8	-3316.16	-5124.39	194.866	1039.71	0	0	0	0	0	0	0	603	903	0
568	8	0	0	0	0	0	0	200	300	0	32.7802	-73.6139	-645.563	-88294.8	-2827.88	-5124.39	195.62	1039.77	0	0	0	0	0	0	0	603	903	0
568	9	0	0	0	0	0	0	200	300	0	30.0336	-72.088	-645.868	-86738.4	-2949.95	-5032.84	195.433	1037.3	0	0	0	0	0	0	0	603	903	0
569	0	0	0	0	0	0	0	200	300	0	31.2543	-72.6984	-645.868	-87653.9	-3255.12	-5124.39	194.96	1038.71	0	0	0	0	0	0	0	603	903	0
569	1	0	0	0	0	0	0	200	300	0	30.7965	-71.3251	-644.648	-86646.8	-3133.05	-5032.84	195.14	1037.41	0	0	0	0	0	0	0	603	903	0
569	2	0	0	0	0	0	0	200	300	0	30.9491	-70.5621	-644.037	-86646.8	-3133.05	-4895.51	195.135	1037.54	0	0	0	0	0	0	0	603	903	0
569	3	0	0	0	0	0	0	200	300	0	30.3387	-68.5785	-643.122	-87196.1	-2827.88	-5032.84	195.603	1038.58	0	0	0	0	0	0	0	603	903	0
569	4	0	0	0	0	0	0	200	300	0	28.8129	-67.9681	-642.817	-85822.8	-3499.26	-4803.96	194.556	1036.51	0	0	0	0	0	0	0	603	903	0
569	5	0	0	0	0	0	0	200	300	0	29.5758	-68.2733	-642.206	-86097.5	-2888.91	-5124.39	195.502	1037.07	0	0	0	0	0	0	0	603	903	0
569	6	0	0	0	0	0	0	200	300	0	30.0336	-66.2897	-640.986	-85639.7	-2705.81	-4895.51	195.779	1036.61	0	0	0	0	0	0	0	603	903	0
569	7	0	0	0	0	0	0	200	300	0	29.7284	-66.9	-640.375	-85181.9	-3255.12	-4803.96	194.917	1036.02	0	0	0	0	0	0	0	603	903	0
569	8	0	0	0	0	0	0	200	300	0	28.8129	-65.069	-638.849	-85273.5	-3010.98	-4346.19	195.287	1036.48	0	0	0	0	0	0	0	603	903	0
569	9	0	0	0	0	0	0	200	300	0	28.0499	-64.1534	-639.155	-84907.3	-2705.81	-4712.4	195.767	1035.84	0	0	0	0	0	0	0	603	903	0
570	0	0	0	0	0	0	0	200	300	0	27.8973	-63.3905	-637.934	-83808.7	-2766.84	-4666.63	195.663	1034.38	0	0	0	0	0	0	0	603	903	0
570	1	0	0	0	0	0	0	200	300	0	27.8973	-62.9327	-638.544	-83076.3	-2888.91	-4575.07	195.476	1033.1	0	0	0	0	0	0	0	603	903	0
570	2	0	0	0	0	0	0	200	300	0	29.4232	-62.3224	-635.492	-83076.3	-3133.05	-4437.74	195.07	1033.73	0	0	0	0	0	0	0	603	903	0
570	3	0	0	0	0	0	0	200	300	0	27.4396	-61.5594	-633.967	-83259.3	-2766.84	-4575.07	195.636	1034.33	0	0	0	0	0	0	0	603	903	0
570	4	0	0	0	0	0	0	200	300	0	26.6766	-61.2543	-633.661	-82618.5	-2888.91	-4529.3	195.441	1033.38	0	0	0	0	0	0	0	603	903	0
570	5	0	0	0	0	0	0	200	300	0	26.8292	-60.9491	-631.22	-82526.9	-2888.91	-4483.52	195.423	1033.74	0	0	0	0	0	0	0	603	903	0
570	6	0	0	0	0	0	0	200	300	0	27.1344	-60.1862	-629.999	-81153.6	-3194.09	-4346.19	194.93	1031.82	0	0	0	0	0	0	0	603	903	0
570	7	0	0	0	0	0	0	200	300	0	28.0499	-60.4913	-628.168	-80787.4	-2583.74	-4391.97	195.887	1031.61	0	0	0	0	0	0	0	603	903	0
570	8	0	0	0	0	0	0	200	300	0	27.4396	-59.7284	-627.253	-81153.6	-2644.77	-3934.21	195.784	1032.38	0	0	0	0	0	0	0	603	903	0
570	9	0	0	0	0	0	0	200	300	0	25.9137	-58.5077	-627.253	-80787.4	-2888.91	-4071.53	195.394	1031.8	0	0	0	0	0	0	0	603	903	0
571	0	0	0	0	0	0	0	200	300	0	25.4559	-58.6603	-624.811	-79505.7	-3010.98	-4071.53	195.181	1030.25	0	0	0	0	0	0	0	603	903	0
571	1	0	0	0	0	0	0	200	300	0	26.3715	-59.2706	-622.98	-78040.9	-2888.91	-4117.31	195.363	1028.27	0	0	0	0	0	0	0	603	903	0
571	2	0	0	0	0	0	0	200	300	0	26.0663	-58.2025	-620.234	-78407.1	-3316.16	-3888.43	194.653	1029.42	0	0	0	0	0	0	0	603	903	0
571	3	0	0	0	0	0	0	200	300	0	25.3033	-57.8973	-618.097	-78407.1	-2400.63	-3384.89	196.116	1029.85	0	0	0	0	0	0	0	603	903	0
571	4	0	0	0	0	0	0	200	300	0	27.4396	-56.2189	-616.572	-78132.4	-2339.6	-3796.88	196.205	1029.72	0	0	0	0	0	0	0	603	903	0
571	5	0	0	0	0	0	0	200	300	0	24.693	-56.8292	-615.961	-76942.2	-2644.77	-3796.88	195.706	1027.91	0	0	0	0	0	0	0	603	903	0
571	6	0	0	0	0	0	0	200	300	0	25.4559	-56.0663	-613.215	-76484.5	-2766.84	-3613.77	195.488	1027.73	0	0	0	0	0	0	0	603	903	0
571	7	0	0	0	0	0	0	200	300	0	26.0663	-55.9137	-611.689	-76118.2	-2705.81	-3430.67	195.577	1027.44	0	0	0	0	0	0	0	603	903	0
571	8	0	0	0	0	0	0	200	300	0	24.3878	-54.693	-608.942	-76026.7	-2278.56	-3751.1	196.258	1027.85	0	0	0	0	0	0	0	603	903	0
571	9	0	0	0	0	0	0	200	300	0	26.2189	-54.5404	-606.196	-75294.2	-2217.53	-3705.32	196.342	1027.21	0	0	0	0	0	0	0	603	903	0
572	0	0	0	0	0	0	0	200	300	0	24.9982	-52.4042	-602.839	-74104.1	-2583.74	-3934.21	195.714	1025.93	0	0	0	0	0	0	0	603	903	0
572	1	0	0	0	0	0	0	200	300	0	25.4559	-52.7094	-603.754	-73188.6	-2400.63	-3751.1	196.024	1024.22	0	0	0	0	0	0	0	603	903	0
572	2	0	0	0	0	0	0	200	300	0	25.7611	-51.4886	-601.618	-73097	-2217.53	-3659.55	196.314	1024.5	0	0	0	0	0	0	0	603	903	0
572	3	0	0	0	0	0	0	200	300	0	25.4559	-50.5731	-593.378	-73371.6	-2095.46	-3659.55	196.469	1026.65	0	0	0	0	0	0	0	603	903	0
572	4	0	0	0	0	0	0	200	300	0	23.9301	-49.505	-595.82	-72273	-2278.56	-3384.89	196.176	1024.3	0	0	0	0	0	0	0	603	903	0
572	5	0	0	0	0	0	0	200	300	0	24.5404	-48.8947	-594.904	-71998.4	-2522.7	-3476.44	195.759	1024.03	0	0	0	0	0	0	0	603	903	0
572	6	0	0	0	0	0	0	200	300	0	24.9982	-47.0636	-591.852	-71540.6	-2217.53	-3613.77	196.253	1023.88	0	0	0	0	0	0	0	603	903	0
572	7	0	0	0	0	0	0	200	300	0	25.6085	-47.3688	-590.937	-70808.2	-1973.39	-3751.1	196.661	1022.82	0	0	0	0	0	0	0	603	903	0
572	8	0	0	0	0	0	0	200	300	0	25.7611	-46.7584	-588.801	-70899.7	-2217.53	-3522.22	196.234	1023.41	0	0	0	0	0	0	0	603	903	0
572	9	0	0	0	0	0	0	200	300	0	24.9982	-46.3007	-584.528	-70625.1	-2400.63	-3430.67	195.893	1023.82	0	0	0	0	0	0	0	603	903	0
573	0	0	0	0	0	0	0	200	300	0	24.0826	-44.1644	-581.476	-68977.1	-1851.32	-3384.89	196.816	1021.62	0	0	0	0	0	0	0	603	903	0
573	1	0	0	0	0	0	0	200	300	0	26.3715	-44.7748	-581.782	-68153.2	-1851.32	-3247.56	196.818	1020.15	0	0	0	0	0	0	0	603	903	0
573	2	0	0	0	0	0	0	200	300	0	25.6085	-44.0118	-580.866	-68427.8	-2217.53	-3201.78	196.182	1020.8	0	0	0	0	0	0	0	603	903	0
573	3	0	0	0	0	0	0	200	300	0	24.9982	-43.4015	-579.645	-68336.2	-2034.42	-2972.9	196.49	1020.89	0	0	0	0	0	0	0	603	903	0
573	4	0	0	0	0	0	0	200	300	0	23.7775	-42.7911	-575.678	-67878.5	-1546.14	-3156.01	197.314	1020.91	0	0	0	0	0	0	0	603	903	0
573	5	0	0	0	0	0	0	200	300	0	23.6249	-43.0963	-574.763	-67054.5	-1607.18	-3430.67	197.204	1019.66	0	0	0	0	0	0	0	603	903	0
573	6	0	0	0	0	0	0	200	300	0	25.1508	-41.723	-571.406	-65131.9	-1790.28	-3476.44	196.867	1016.99	0	0	0	0	0	0	0	603	903	0
573	7	0	0	0	0	0	0	200	300	0	25.6085	-40.8075	-570.49	-66230.6	-2156.49	-3293.34	196.22	1019.09	0	0	0	0	0	0	0	603	903	0
573	8	0	0	0	0	0	0	200	300	0	24.0826	-40.8075	-568.659	-65681.2	-1240.96	-3613.77	197.818	1018.5	0	0	0	0	0	0	0	603	903	0
573	9	0	0	0	0	0	0	200	300	0	24.8456	-40.5023	-565.912	-65131.9	-1790.28	-3384.89	196.836	1018.09	0	0	0	0	0	0	0	603	903	0
574	0	0	0	0	0	0	0	200	300	0	24.0826	-40.8075	-564.081	-64124.8	-1790.28	-3339.11	196.826	1016.68	0	0	0	0	0	0	0	603	903	0
574	1	0	0	0	0	0	0	200	300	0	24.8456	-38.5187	-561.64	-63941.7	-1424.07	-3476.44	197.464	1016.85	0	0	0	0	0	0	0	603	903	0
574	2	0	0	0	0	0	0	200	300	0	24.5404	-38.3661	-561.64	-63575.5	-1118.89	-3384.89	198.008	1016.2	0	0	0	0	0	0	0	603	903	0
574	3	0	0	0	0	0	0	200	300	0	25.7611	-37.6031	-558.588	-63117.8	-1607.18	-3247.56	197.123	1016	0	0	0	0	0	0	0	603	903	0
574	4	0	0	0	0	0	0	200	300	0	23.7775	-36.8402	-555.842	-62568.4	-1302	-3796.88	197.658	1015.57	0	0	0	0	0	0	0	603	903	0
574	5	0	0	0	0	0	0	200	300	0	24.9982	-36.6876	-554.316	-61286.7	-1057.86	-3430.67	198.092	1013.56	0	0	0	0	0	0	0	603	903	0
574	6	0	0	0	0	0	0	200	300	0	24.2352	-35.4669	-551.264	-61195.1	-1302	-3522.22	197.638	1014.01	0	0	0	0	0	0	0	603	903	0
574	7	0	0	0	0	0	0	200	300	0	25.4559	-34.8566	-550.043	-60462.7	-1607.18	-3293.34	197.078	1012.92	0	0	0	0	0	0	0	603	903	0
574	8	0	0	0	0	0	0	200	300	0	25.7611	-35.7721	-546.076	-60188.1	-1485.1	-3384.89	197.28	1013.22	0	0	0	0	0	0	0	603	903	0
574	9	0	0	0	0	0	0	200	300	0	24.8456	-34.2462	-545.771	-59364.1	-1179.93	-3659.55	197.838	1011.77	0	0	0	0	0	0	0	603	903	0
575	0	0	0	0	0	0	0	200	300	0	25.1508	-34.704	-541.804	-59547.2	-1302	-3247.56	197.597	1012.91	0	0	0	0	0	0	0	603	903	0
575	1	0	0	0	0	0	0	200	300	0	26.3715	-32.8729	-538.752	-58448.6	-1118.89	-3522.22	197.923	1011.49	0	0	0	0	0	0	0	603	903	0
575	2	0	0	0	0	0	0	200	300	0	28.9655	-33.1781	-536.921	-58265.5	-1118.89	-3293.34	197.916	1011.52	0	0	0	0	0	0	0	603	903	0
575	3	0	0	0	0	0	0	200	300	0	26.9818	-32.5677	-535.395	-57807.7	-752.683	-3293.34	198.594	1010.97	0	0	0	0	0	0	0	603	903	0
575	4	0	0	0	0	0	0	200	300	0	26.2189	-32.4152	-533.259	-57533	-874.753	-2927.13	198.36	1010.89	0	0	0	0	0	0	0	603	903	0
575	5	0	0	0	0	0	0	200	300	0	25.9137	-32.2626	-528.986	-56526	-874.753	-3430.67	198.346	1009.86	0	0	0	0	0	0	0	603	903	0
575	6	0	0	0	0	0	0	200	300	0	27.4396	-33.1781	-528.071	-55885.1	-569.578	-3247.56	198.921	1008.83	0	0	0	0	0	0	0	603	903	0
575	7	0	0	0	0	0	0	200	300	0	27.5922	-31.1945	-524.103	-55427.3	-203.367	-3384.89	199.612	1008.76	0	0	0	0	0	0	0	603	903	0
575	8	0	0	0	0	0	0	200	300	0	26.2189	-30.5841	-522.883	-55427.3	-630.613	-3339.11	198.794	1009	0	0	0	0	0	0	0	603	903	0
575	9	0	0	0	0	0	0	200	300	0	28.0499	-31.0419	-519.831	-54603.3	-325.437	-3201.78	199.374	1008.04	0	0	0	0	0	0	0	603	903	0
576	0	0	0	0	0	0	0	200	300	0	26.9818	-30.1263	-516.169	-53413.2	-813.718	-3384.89	198.424	1006.48	0	0	0	0	0	0	0	603	903	0
576	1	0	0	0	0	0	0	200	300	0	27.287	-29.8212	-513.117	-52131.4	-569.578	-3613.77	198.89	1004.6	0	0	0	0	0	0	0	603	903	0
576	2	0	0	0	0	0	0	200	300	0	27.4396	-29.2108	-508.539	-52314.5	-447.507	-3430.67	199.12	1005.87	0	0	0	0	0	0	0	603	903	0
576	3	0	0	0	0	0	0	200	300	0	25.7611	-29.0582	-507.929	-52314.5	-203.367	-3384.89	199.6	1006	0	0	0	0	0	0	0	603	903	0
576	4	0	0	0	0	0	0	200	300	0	27.287	-29.6686	-502.741	-51399	-20.2611	-3293.34	199.96	1005.24	0	0	0	0	0	0	0	603	903	0
576	5	0	0	0	0	0	0	200	300	0	25.6085	-29.516	-503.962	-50758.1	40.7741	-3339.11	200.081	1003.72	0	0	0	0	0	0	0	603	903	0
576	6	0	0	0	0	0	0	200	300	0	27.4396	-27.8375	-499.689	-49659.5	-325.437	-3201.78	199.349	1002.38	0	0	0	0	0	0	0	603	903	0
576	7	0	0	0	0	0	0	200	300	0	26.3715	-27.6849	-497.858	-49751.1	-81.2963	-3613.77	199.837	1002.93	0	0	0	0	0	0	0	603	903	0
576	8	0	0	0	0	0	0	200	300	0	26.2189	-27.2272	-496.638	-49293.3	101.809	-3201.78	200.205	1002.25	0	0	0	0	0	0	0	603	903	0
576	9	0	0	0	0	0	0	200	300	0	27.7448	-27.0746	-491.45	-49018.6	-203.367	-3201.78	199.586	1002.74	0	0	0	0	0	0	0	603	903	0
577	0	0	0	0	0	0	0	200	300	0	25.6085	-26.6168	-491.144	-47828.4	-264.402	-3156.01	199.462	1000.38	0	0	0	0	0	0	0	603	903	0
577	1	0	0	0	0	0	0	200	300	0	26.9818	-26.6168	-486.262	-47096	-20.2611	-3201.78	199.958	999.853	0	0	0	0	0	0	0	603	903	0
577	2	0	0	0	0	0	0	200	300	0	26.6766	-25.5487	-484.736	-46912.9	-203.367	-3110.23	199.58	999.78	0	0	0	0	0	0	0	603	903	0
577	3	0	0	0	0	0	0	200	300	0	28.2025	-25.5487	-483.21	-47187.6	-203.367	-2881.35	199.579	1000.65	0	0	0	0	0	0	0	603	903	0
577	4	0	0	0	0	0	0	200	300	0	25.6085	-24.9384	-480.463	-46546.7	162.844	-2835.57	200.339	999.879	0	0	0	0	0	0	0	603	903	0
577	5	0	0	0	0	0	0	200	300	0	26.2189	-24.7858	-478.327	-45356.5	101.809	-2927.13	200.213	997.823	0	0	0	0	0	0	0	603	903	0
577	6	0	0	0	0	0	0	200	300	0	26.0663	-24.4806	-475.58	-44074.8	-81.2963	-2927.13	199.829	995.676	0	0	0	0	0	0	0	603	903	0
577	7	0	0	0	0	0	0	200	300	0	26.524	-24.1754	-473.444	-44532.5	101.809	-2698.24	200.215	997.061	0	0	0	0	0	0	0	603	903	0
577	8	0	0	0	0	0	0	200	300	0	25.3033	-24.0228	-470.087	-44624.1	-20.2611	-2652.47	199.957	997.927	0	0	0	0	0	0	0	603	903	0
577	9	0	0	0	0	0	0	200	300	0	25.4559	-24.4806	-470.698	-43983.2	-203.367	-2835.57	199.568	996.443	0	0	0	0	0	0	0	603	903	0
578	0	0	0	0	0	0	0	200	300	0	24.9982	-23.1073	-467.646	-43067.7	162.844	-2744.02	200.348	995.095	0	0	0	0	0	0	0	603	903	0
578	1	0	0	0	0	0	0	200	300	0	26.2189	-22.6495	-465.204	-42793	223.88	-2835.57	200.481	994.988	0	0	0	0	0	0	0	603	903	0
578	2	0	0	0	0	0	0	200	300	0	25.1508	-22.4969	-463.373	-42426.8	284.915	-2835.57	200.615	994.561	0	0	0	0	0	0	0	603	903	0
578	3	0	0	0	0	0	0	200	300	0	24.693	-22.6495	-462.153	-41602.8	-20.2611	-2881.35	199.956	993.02	0	0	0	0	0	0	0	603	903	0
578	4	0	0	0	0	0	0	200	300	0	24.2352	-21.734	-458.796	-41602.8	40.7741	-3064.45	200.089	993.678	0	0	0	0	0	0	0	603	903	0
578	5	0	0	0	0	0	0	200	300	0	24.3878	-21.734	-457.88	-40962	284.915	-2744.02	200.622	992.46	0	0	0	0	0	0	0	603	903	0
578	6	0	0	0	0	0	0	200	300	0	24.8456	-20.9711	-455.134	-40412.7	40.7741	-2332.03	200.09	991.793	0	0	0	0	0	0	0	603	903	0
578	7	0	0	0	0	0	0	200	300	0	24.9982	-21.8866	-452.997	-40412.7	-203.367	-2560.91	199.551	992.212	0	0	0	0	0	0	0	603	903	0
578	8	0	0	0	0	0	0	200	300	0	22.8619	-20.5133	-452.692	-39222.5	-386.472	-2789.8	199.146	989.643	0	0	0	0	0	0	0	603	903	0
578	9	0	0	0	0	0	0	200	300	0	23.7775	-20.2081	-451.471	-39130.9	-325.437	-2515.14	199.279	989.674	0	0	0	0	0	0	0	603	903	0
579	0	0	0	0	0	0	0	200	300	0	24.3878	-20.6659	-446.589	-37940.7	-569.578	-2560.91	198.725	987.957	0	0	0	0	0	0	0	603	903	0
579	1	0	0	0	0	0	0	200	300	0	24.5404	-19.2926	-449.03	-38123.8	-20.2611	-2377.81	199.955	987.903	0	0	0	0	0	0	0	603	903	0
579	2	0	0	0	0	0	0	200	300	0	22.5568	-19.4452	-446.284	-37574.5	-20.2611	-2377.81	199.955	987.194	0	0	0	0	0	0	0	603	903	0
579	3	0	0	0	0	0	0	200	300	0	25.3033	-19.2926	-442.316	-37940.7	-264.402	-2194.7	199.402	988.777	0	0	0	0	0	0	0	603	903	0
579	4	0	0	0	0	0	0	200	300	0	23.6249	-19.4452	-443.537	-37208.3	-325.437	-2286.26	199.266	986.89	0	0	0	0	0	0	0	603	903	0
579	5	0	0	0	0	0	0	200	300	0	23.9301	-18.3771	-443.537	-36933.7	-325.437	-2103.15	199.266	986.271	0	0	0	0	0	0	0	603	903	0
579	6	0	0	0	0	0	0	200	300	0	23.7775	-18.8348	-440.79	-36750.6	40.7741	-2286.26	200.093	986.374	0	0	0	0	0	0	0	603	903	0
579	7	0	0	0	0	0	0	200	300	0	22.2516	-18.5297	-439.57	-36567.5	101.809	-1782.72	200.232	986.189	0	0	0	0	0	0	0	603	903	0
579	8	0	0	0	0	0	0	200	300	0	22.5568	-17.6141	-436.823	-35651.9	-142.331	-2057.37	199.674	984.616	0	0	0	0	0	0	0	603	903	0
579	9	0	0	0	0	0	0	200	300	0	22.5568	-17.1564	-435.602	-35560.4	-142.331	-2148.93	199.673	984.635	0	0	0	0	0	0	0	603	903	0
580	0	0	0	0	0	0	0	200	300	0	23.7775	-17.9193	-434.687	-35102.6	162.844	-2240.48	200.375	983.754	0	0	0	0	0	0	0	603	903	0
580	1	0	0	0	0	0	0	200	300	0	22.7094	-16.2408	-434.687	-35377.3	40.7741	-2103.15	200.094	984.386	0	0	0	0	0	0	0	603	903	0
580	2	0	0	0	0	0	0	200	300	0	21.9464	-16.6986	-433.161	-34827.9	-264.402	-2286.26	199.39	983.404	0	0	0	0	0	0	0	603	903	0
580	3	0	0	0	0	0	0	200	300	0	21.9464	-16.2408	-430.72	-33820.9	-142.331	-2011.6	199.67	981.522	0	0	0	0	0	0	0	603	903	0
580	4	0	0	0	0	0	0	200	300	0	21.9464	-15.7831	-429.804	-33180	-325.437	-2011.6	199.243	980.198	0	0	0	0	0	0	0	603	903	0
580	5	0	0	0	0	0	0	200	300	0	21.4886	-15.0201	-428.888	-33363.1	-81.2963	-2148.93	199.81	980.79	0	0	0	0	0	0	0	603	903	0
580	6	0	0	0	0	0	0	200	300	0	21.9464	-15.0201	-429.499	-33454.7	-264.402	-2057.37	199.384	980.892	0	0	0	0	0	0	0	603	903	0
580	7	0	0	0	0	0	0	200	300	0	20.4205	-14.2572	-428.278	-33271.6	-508.542	-1965.82	198.813	980.687	0	0	0	0	0	0	0	603	903	0
580	8	0	0	0	0	0	0	200	300	0	20.2679	-14.8676	-428.278	-32447.6	-203.367	-2103.15	199.525	978.763	0	0	0	0	0	0	0	603	903	0
580	9	0	0	0	0	0	0	200	300	0	21.1835	-14.2572	-425.532	-31806.7	-386.472	-1965.82	199.092	977.746	0	0	0	0	0	0	0	603	903	0
581	0	0	0	0	0	0	0	200	300	0	21.9464	-14.5624	-425.532	-31898.3	-752.683	-1920.04	198.231	977.961	0	0	0	0	0	0	0	603	903	0
581	1	0	0	0	0	0	0	200	300	0	20.2679	-13.3417	-425.226	-31623.6	-264.402	-1691.16	199.378	977.369	0	0	0	0	0	0	0	603	903	0
581	2	0	0	0	0	0	0	200	300	0	19.505	-12.8839	-424.921	-31440.5	-203.367	-1599.61	199.521	976.991	0	0	0	0	0	0	0	603	903	0
581	3	0	0	0	0	0	0	200	300	0	19.9628	-12.5787	-423.701	-30708.1	-691.648	-1691.16	198.368	975.476	0	0	0	0	0	0	0	603	903	0
581	4	0	0	0	0	0	0	200	300	0	20.8783	-13.4943	-422.48	-30341.9	-569.578	-1599.61	198.652	974.819	0	0	0	0	0	0	0	603	903	0
581	5	0	0	0	0	0	0	200	300	0	20.7257	-11.8158	-421.564	-30341.9	-81.2963	-1553.83	199.807	974.974	0	0	0	0	0	0	0	603	903	0
581	6	0	0	0	0	0	0	200	300	0	20.4205	-12.121	-419.428	-30708.1	-325.437	-1416.5	199.224	976.214	0	0	0	0	0	0	0	603	903	0
581	7	0	0	0	0	0	0	200	300	0	19.3524	-11.8158	-422.175	-29701	-630.613	-1324.95	198.506	973.352	0	0	0	0	0	0	0	603	903	0
581	8	0	0	0	0	0	0	200	300	0	19.1998	-11.2054	-421.564	-29151.7	-569.578	-1233.4	198.649	972.151	0	0	0	0	0	0	0	603	903	0
581	9	0	0	0	0	0	0	200	300	0	20.1154	-11.6632	-420.344	-28144.6	-264.402	-1233.4	199.371	969.956	0	0	0	0	0	0	0	603	903	0
582	0	0	0	0	0	0	0	200	300	0	19.9628	-12.2736	-418.207	-28602.4	-142.331	-1324.95	199.66	971.393	0	0	0	0	0	0	0	603	903	0
582	1	0	0	0	0	0	0	200	300	0	18.7421	-10.9003	-417.902	-28693.9	-447.507	-1370.73	198.929	971.662	0	0	0	0	0	0	0	603	903	0
582	2	0	0	0	0	0	0	200	300	0	20.2679	-11.2054	-418.207	-29060.1	-630.613	-1462.28	198.492	972.487	0	0	0	0	0	0	0	603	903	0
582	3	0	0	0	0	0	0	200	300	0	18.5895	-10.2899	-417.597	-28053	-630.613	-1645.39	198.49	970.177	0	0	0	0	0	0	0	603	903	0
582	4	0	0	0	0	0	0	200	300	0	19.9628	-10.1373	-417.292	-27869.9	-203.367	-1233.4	199.513	969.788	0	0	0	0	0	0	0	603	903	0
582	5	0	0	0	0	0	0	200	300	0	19.505	-10.2899	-415.766	-27595.3	-1179.93	-1508.06	197.162	969.372	0	0	0	0	0	0	0	603	903	0
582	6	0	0	0	0	0	0	200	300	0	18.5895	-10.7477	-414.545	-27412.2	-264.402	-1187.62	199.362	969.126	0	0	0	0	0	0	0	603	903	0
582	7	0	0	0	0	0	0	200	300	0	21.1835	-10.1373	-414.85	-27229.1	-508.542	-1187.62	198.774	968.636	0	0	0	0	0	0	0	603	903	0
582	8	0	0	0	0	0	0	200	300	0	18.7421	-9.2218	-416.071	-26679.7	-874.753	-1416.5	197.898	967.123	0	0	0	0	0	0	0	603	903	0
582	9	0	0	0	0	0	0	200	300	0	18.7421	-9.2218	-416.071	-25672.7	-752.683	-1096.07	198.191	964.703	0	0	0	0	0	0	0	603	903	0
583	0	0	0	0	0	0	0	200	300	0	19.505	-9.98474	-416.071	-26222	-508.542	-1187.62	198.778	966.023	0	0	0	0	0	0	0	603	903	0
583	1	0	0	0	0	0	0	200	300	0	18.2843	-9.2218	-414.545	-26313.5	-569.578	-1416.5	198.626	966.476	0	0	0	0	0	0	0	603	903	0
583	2	0	0	0	0	0	0	200	300	0	20.4205	-8.30627	-416.376	-25581.1	-813.718	-1096.07	198.046	964.438	0	0	0	0	0	0	0	603	903	0
583	3	0	0	0	0	0	0	200	300	0	18.2843	-8.0011	-415.156	-25123.4	-1057.86	-1004.52	197.452	963.516	0	0	0	0	0	0	0	603	903	0
583	4	0	0	0	0	0	0	200	300	0	19.6576	-9.52698	-414.24	-24757.1	-1118.89	-1096.07	197.299	962.765	0	0	0	0	0	0	0	603	903	0
583	5	0	0	0	0	0	0	200	300	0	19.3524	-8.61145	-414.545	-24940.2	-935.789	-1004.52	197.743	963.163	0	0	0	0	0	0	0	603	903	0
583	6	0	0	0	0	0	0	200	300	0	18.5895	-8.0011	-415.156	-25031.8	-1057.86	-1096.07	197.452	963.295	0	0	0	0	0	0	0	603	903	0
583	7	0	0	0	0	0	0	200	300	0	20.8783	-8.15369	-414.24	-24848.7	-1179.93	-958.741	197.152	962.986	0	0	0	0	0	0	0	603	903	0
583	8	0	0	0	0	0	0	200	300	0	18.1317	-8.0011	-415.156	-24024.7	-752.683	-867.188	198.187	960.869	0	0	0	0	0	0	0	603	903	0
583	9	0	0	0	0	0	0	200	300	0	19.8102	-7.54333	-416.071	-23658.5	-1240.96	-958.741	197.017	959.862	0	0	0	0	0	0	0	603	903	0
584	0	0	0	0	0	0	0	200	300	0	19.0472	-7.39075	-416.987	-23567	-935.789	-1141.85	197.756	959.517	0	0	0	0	0	0	0	603	903	0
584	1	0	0	0	0	0	0	200	300	0	21.4886	-8.0011	-415.461	-23658.5	-935.789	-912.964	197.748	959.945	0	0	0	0	0	0	0	603	903	0
584	2	0	0	0	0	0	0	200	300	0	18.2843	-6.93298	-416.071	-23475.4	-996.824	-912.964	197.604	959.422	0	0	0	0	0	0	0	603	903	0
584	3	0	0	0	0	0	0	200	300	0	17.674	-6.93298	-416.987	-22743	-1302	-638.306	196.878	957.541	0	0	0	0	0	0	0	603	903	0
584	4	0	0	0	0	0	0	200	300	0	18.7421	-7.39075	-418.207	-23017.6	-1179.93	-821.412	197.179	958.039	0	0	0	0	0	0	0	603	903	0
584	5	0	0	0	0	0	0	200	300	0	19.0472	-6.62781	-417.597	-23292.3	-1179.93	-867.188	197.174	958.777	0	0	0	0	0	0	0	603	903	0
584	6	0	0	0	0	0	0	200	300	0	17.3688	-6.7804	-418.513	-22651.4	-1363.03	-958.741	196.743	957.124	0	0	0	0	0	0	0	603	903	0
584	7	0	0	0	0	0	0	200	300	0	20.5731	-6.47522	-418.818	-22559.9	-1302	-867.188	196.891	956.866	0	0	0	0	0	0	0	603	903	0
584	8	0	0	0	0	0	0	200	300	0	17.3688	-8.45886	-417.597	-21919	-1607.18	-867.188	196.151	955.488	0	0	0	0	0	0	0	603	903	0
584	9	0	0	0	0	0	0	200	300	0	18.2843	-5.71228	-419.428	-21827.5	-1240.96	-775.635	197.041	955.041	0	0	0	0	0	0	0	603	903	0
585	0	0	0	0	0	0	0	200	300	0	18.5895	-5.71228	-420.649	-21735.9	-1424.07	-684.083	196.615	954.672	0	0	0	0	0	0	0	603	903	0
585	1	0	0	0	0	0	0	200	300	0	17.2162	-5.4071	-418.513	-21278.1	-1912.35	-455.201	195.431	953.842	0	0	0	0	0	0	0	603	903	0
585	2	0	0	0	0	0	0	200	300	0	18.7421	-6.17004	-422.48	-21278.1	-1607.18	-317.872	196.196	953.365	0	0	0	0	0	0	0	603	903	0
585	3	0	0	0	0	0	0	200	300	0	16.7584	-4.49158	-422.48	-20820.4	-1607.18	-592.53	196.196	952.281	0	0	0	0	0	0	0	603	903	0
585	4	0	0	0	0	0	0	200	300	0	17.8265	-4.03381	-422.48	-20911.9	-2095.46	-684.083	195.04	952.498	0	0	0	0	0	0	0	603	903	0
585	5	0	0	0	0	0	0	200	300	0	16.911	-5.86487	-424.921	-20728.8	-1973.39	-455.201	195.356	951.783	0	0	0	0	0	0	0	603	903	0
585	6	0	0	0	0	0	0	200	300	0	16.911	-3.57605	-425.532	-21003.5	-1973.39	-180.542	195.363	952.358	0	0	0	0	0	0	0	603	903	0
585	7	0	0	0	0	0	0	200	300	0	16.911	-4.33899	-427.057	-20728.8	-2156.49	-455.201	194.95	951.539	0	0	0	0	0	0	0	603	903	0
585	8	0	0	0	0	0	0	200	300	0	16.1481	-6.01746	-429.804	-20179.5	-2400.63	-546.754	194.415	949.951	0	0	0	0	0	0	0	603	903	0
585	9	0	0	0	0	0	0	200	300	0	17.2162	-4.03381	-427.668	-19447.1	-2583.74	-317.872	193.959	948.472	0	0	0	0	0	0	0	603	903	0
586	0	0	0	0	0	0	0	200	300	0	16.7584	-3.42346	-430.109	-20454.2	-1912.35	-134.766	195.554	950.556	0	0	0	0	0	0	0	603	903	0
586	1	0	0	0	0	0	0	200	300	0	16.6058	-4.03381	-431.025	-20271.1	-2156.49	-180.542	194.997	950.03	0	0	0	0	0	0	0	603	903	0
586	2	0	0	0	0	0	0	200	300	0	15.8429	-3.72864	-431.635	-20271.1	-2461.67	-272.095	194.297	949.964	0	0	0	0	0	0	0	603	903	0
586	3	0	0	0	0	0	0	200	300	0	15.9955	-3.57605	-433.161	-19996.4	-2339.6	-500.977	194.599	949.164	0	0	0	0	0	0	0	603	903	0
586	4	0	0	0	0	0	0	200	300	0	16.4532	-3.57605	-433.466	-19355.5	-2034.42	-180.542	195.307	947.653	0	0	0	0	0	0	0	603	903	0
586	5	0	0	0	0	0	0	200	300	0	17.0636	-1.89758	-435.602	-19447.1	-2400.63	-180.542	194.489	947.644	0	0	0	0	0	0	0	603	903	0
586	6	0	0	0	0	0	0	200	300	0	16.7584	-2.20276	-436.213	-19538.6	-2644.77	-317.872	193.937	947.792	0	0	0	0	0	0	0	603	903	0
586	7	0	0	0	0	0	0	200	300	0	14.7748	-1.89758	-438.349	-19172.4	-2644.77	139.892	193.967	946.738	0	0	0	0	0	0	0	603	903	0
586	8	0	0	0	0	0	0	200	300	0	14.7748	-1.43982	-440.79	-19355.5	-2522.7	94.1158	194.277	946.911	0	0	0	0	0	0	0	603	903	0
586	9	0	0	0	0	0	0	200	300	0	15.08	-1.59241	-442.621	-18714.7	-2644.77	-180.542	194.025	945.281	0	0	0	0	0	0	0	603	903	0
587	0	0	0	0	0	0	0	200	300	0	15.3851	-0.829468	-443.537	-18989.3	-2522.7	-134.766	194.312	945.813	0	0	0	0	0	0	0	603	903	0
587	1	0	0	0	0	0	0	200	300	0	15.6903	-1.59241	-445.673	-18989.3	-2949.95	-363.648	193.381	945.608	0	0	0	0	0	0	0	603	903	0
587	2	0	0	0	0	0	0	200	300	0	14.0118	-0.524292	-446.589	-18989.3	-2583.74	-363.648	194.215	945.521	0	0	0	0	0	0	0	603	903	0
587	3	0	0	0	0	0	0	200	300	0	14.0118	1.15418	-449.335	-18623.1	-2644.77	-226.319	194.114	944.446	0	0	0	0	0	0	0	603	903	0
587	4	0	0	0	0	0	0	200	300	0	14.7748	1.00159	-451.166	-18623.1	-3316.16	-180.542	192.65	944.278	0	0	0	0	0	0	0	603	903	0
587	5	0	0	0	0	0	0	200	300	0	14.317	0.543823	-452.692	-18165.3	-2888.91	-226.319	193.618	943.127	0	0	0	0	0	0	0	603	903	0
587	6	0	0	0	0	0	0	200	300	0	13.4015	1.45935	-454.523	-18531.6	-2888.91	-43.2133	193.644	943.771	0	0	0	0	0	0	0	603	903	0
587	7	0	0	0	0	0	0	200	300	0	17.0636	1.91711	-455.744	-18623.1	-3499.26	-88.9897	192.322	943.863	0	0	0	0	0	0	0	603	903	0
587	8	0	0	0	0	0	0	200	300	0	13.5541	1.76453	-459.406	-17982.2	-3377.19	-180.542	192.649	942.142	0	0	0	0	0	0	0	603	903	0
587	9	0	0	0	0	0	0	200	300	0	13.7067	2.68005	-461.237	-18165.3	-3072.02	-43.2133	193.34	942.384	0	0	0	0	0	0	0	603	903	0
588	0	0	0	0	0	0	0	200	300	0	14.1644	3.13782	-460.627	-18806.2	-3560.3	2.56305	192.271	943.828	0	0	0	0	0	0	0	603	903	0
588	1	0	0	0	0	0	0	200	300	0	12.7911	2.52747	-465.204	-17982.2	-3804.44	-88.9897	191.822	941.654	0	0	0	0	0	0	0	603	903	0
588	2	0	0	0	0	0	0	200	300	0	13.4015	2.68005	-464.899	-18348.4	-3621.34	277.221	192.211	942.468	0	0	0	0	0	0	0	603	903	0
588	3	0	0	0	0	0	0	200	300	0	13.0963	4.81628	-462.153	-18165.3	-3377.19	185.669	192.692	942.306	0	0	0	0	0	0	0	603	903	0
588	4	0	0	0	0	0	0	200	300	0	15.2325	4.20593	-469.782	-17982.2	-3621.34	368.774	192.291	941.278	0	0	0	0	0	0	0	603	903	0
588	5	0	0	0	0	0	0	200	300	0	12.1808	5.12146	-472.834	-17982.2	-3743.41	460.327	192.083	941.031	0	0	0	0	0	0	0	603	903	0
588	6	0	0	0	0	0	0	200	300	0	12.1808	5.27405	-472.834	-18348.4	-3682.37	185.669	192.212	941.805	0	0	0	0	0	0	0	603	903	0
588	7	0	0	0	0	0	0	200	300	0	10.8075	4.6637	-475.886	-17982.2	-3743.41	94.1158	192.134	940.787	0	0	0	0	0	0	0	603	903	0
588	8	0	0	0	0	0	0	200	300	0	12.9437	5.73181	-476.191	-16792.1	-3499.26	185.669	192.652	938.263	0	0	0	0	0	0	0	603	903	0
588	9	0	0	0	0	0	0	200	300	0	11.8756	6.49475	-478.327	-17707.6	-4292.72	231.445	191.026	940.02	0	0	0	0	0	0	0	603	903	0
589	0	0	0	0	0	0	0	200	300	0	12.1808	5.42664	-482.905	-17524.5	-3621.34	139.892	192.501	939.29	0	0	0	0	0	0	0	603	903	0
589	1	0	0	0	0	0	0	200	300	0	10.6549	7.56287	-482.599	-17341.4	-3682.37	2.56305	192.37	938.933	0	0	0	0	0	0	0	603	903	0
589	2	0	0	0	0	0	0	200	300	0	10.5023	7.41028	-485.346	-17341.4	-4292.72	139.892	191.155	938.73	0	0	0	0	0	0	0	603	903	0
589	3	0	0	0	0	0	0	200	300	0	10.6549	7.41028	-486.872	-16608.9	-4048.58	551.879	191.685	937.114	0	0	0	0	0	0	0	603	903	0
589	4	0	0	0	0	0	0	200	300	0	12.6385	7.86804	-489.618	-17066.7	-4231.69	185.669	191.357	937.857	0	0	0	0	0	0	0	603	903	0
589	5	0	0	0	0	0	0	200	300	0	10.8075	9.08875	-490.839	-17616	-4292.72	185.669	191.254	938.89	0	0	0	0	0	0	0	603	903	0
589	6	0	0	0	0	0	0	200	300	0	9.58679	9.85168	-495.112	-17066.7	-4536.86	506.103	190.837	937.471	0	0	0	0	0	0	0	603	903	0
589	7	0	0	0	0	0	0	200	300	0	9.89197	9.54651	-495.112	-17158.3	-4414.79	185.669	191.083	937.655	0	0	0	0	0	0	0	603	903	0
589	8	0	0	0	0	0	0	200	300	0	10.8075	9.6991	-498.774	-16975.2	-4597.9	597.656	190.782	937.034	0	0	0	0	0	0	0	603	903	0
589	9	0	0	0	0	0	0	200	300	0	10.0446	10.1569	-501.215	-16517.4	-4292.72	506.103	191.435	935.955	0	0	0	0	0	0	0	603	903	0
590	0	0	0	0	0	0	0	200	300	0	10.6549	11.6827	-502.436	-17341.4	-5086.18	689.209	189.877	937.515	0	0	0	0	0	0	0	603	903	0
590	1	0	0	0	0	0	0	200	300	0	9.28162	11.3776	-505.182	-17432.9	-4903.07	734.985	190.294	937.508	0	0	0	0	0	0	0	603	903	0
590	2	0	0	0	0	0	0	200	300	0	8.2135	13.056	-509.455	-17249.8	-4597.9	734.985	190.975	936.859	0	0	0	0	0	0	0	603	903	0
590	3	0	0	0	0	0	0	200	300	0	9.12903	14.1241	-510.676	-17249.8	-4964.11	643.432	190.279	936.779	0	0	0	0	0	0	0	603	903	0
590	4	0	0	0	0	0	0	200	300	0	8.51868	12.9034	-515.253	-17707.6	-5086.18	643.432	190.129	937.367	0	0	0	0	0	0	0	603	903	0
590	5	0	0	0	0	0	0	200	300	0	9.28162	14.7345	-515.864	-17432.9	-4536.86	643.432	191.205	936.794	0	0	0	0	0	0	0	603	903	0
590	6	0	0	0	0	0	0	200	300	0	7.45056	15.8026	-519.831	-17524.5	-5086.18	643.432	190.216	936.712	0	0	0	0	0	0	0	603	903	0
590	7	0	0	0	0	0	0	200	300	0	6.68762	16.2604	-522.272	-17432.9	-5269.28	597.656	189.911	936.379	0	0	0	0	0	0	0	603	903	0
590	8	0	0	0	0	0	0	200	300	0	8.06091	17.7863	-523.798	-16975.2	-5147.21	643.432	190.173	935.408	0	0	0	0	0	0	0	603	903	0
590	9	0	0	0	0	0	0	200	300	0	7.45056	18.0914	-525.934	-17341.4	-5147.21	460.327	190.213	935.973	0	0	0	0	0	0	0	603	903	0
591	0	0	0	0	0	0	0	200	300	0	7.75574	18.8544	-527.765	-17249.8	-5269.28	643.432	190.016	935.685	0	0	0	0	0	0	0	603	903	0
591	1	0	0	0	0	0	0	200	300	0	7.29797	20.2277	-528.071	-17616	-5330.32	643.432	189.906	936.359	0	0	0	0	0	0	0	603	903	0
591	2	0	0	0	0	0	0	200	300	0	9.28162	20.838	-532.343	-17432.9	-5391.35	506.103	189.872	935.748	0	0	0	0	0	0	0	603	903	0
591	3	0	0	0	0	0	0	200	300	0	6.22986	21.1432	-536.31	-17432.9	-5574.46	506.103	189.606	935.505	0	0	0	0	0	0	0	603	903	0
591	4	0	0	0	0	0	0	200	300	0	7.75574	21.9061	-537.836	-16242.7	-5818.6	826.538	189.181	933.2	0	0	0	0	0	0	0	603	903	0
591	5	0	0	0	0	0	0	200	300	0	8.51868	20.838	-542.109	-17524.5	-5757.57	734.985	189.379	935.327	0	0	0	0	0	0	0	603	903	0
591	6	0	0	0	0	0	0	200	300	0	7.29797	23.2794	-541.498	-17341.4	-5513.43	780.761	189.818	935.025	0	0	0	0	0	0	0	603	903	0
591	7	0	0	0	0	0	0	200	300	0	6.38245	24.0424	-544.55	-17616	-5757.57	1146.97	189.427	935.35	0	0	0	0	0	0	0	603	903	0
591	8	0	0	0	0	0	0	200	300	0	6.07727	25.4156	-548.212	-17707.6	-6123.78	551.879	188.83	935.301	0	0	0	0	0	0	0	603	903	0
591	9	0	0	0	0	0	0	200	300	0	7.45056	25.1105	-549.738	-17158.3	-5818.6	643.432	189.416	934.212	0	0	0	0	0	0	0	603	903	0
592	0	0	0	0	0	0	0	200	300	0	7.14539	26.026	-552.18	-17249.8	-5818.6	780.761	189.462	934.24	0	0	0	0	0	0	0	603	903	0
592	1	0	0	0	0	0	0	200	300	0	7.75574	26.4838	-553.095	-17799.1	-6306.88	734.985	188.597	935.181	0	0	0	0	0	0	0	603	903	0
592	2	0	0	0	0	0	0	200	300	0	6.53503	28.7726	-554.926	-17249.8	-6123.78	643.432	188.965	934.085	0	0	0	0	0	0	0	603	903	0
592	3	0	0	0	0	0	0	200	300	0	7.29797	28.9252	-557.978	-17616	-6123.78	1055.42	189.025	934.571	0	0	0	0	0	0	0	603	903	0
592	4	0	0	0	0	0	0	200	300	0	6.68762	30.1459	-561.945	-17249.8	-6062.74	780.761	189.211	933.697	0	0	0	0	0	0	0	603	903	0
592	5	0	0	0	0	0	0	200	300	0	7.14539	29.3829	-560.724	-16975.2	-6184.81	918.091	188.97	933.274	0	0	0	0	0	0	0	603	903	0
592	6	0	0	0	0	0	0	200	300	0	8.51868	29.9933	-564.997	-17432.9	-6245.85	780.761	188.945	933.855	0	0	0	0	0	0	0	603	903	0
592	7	0	0	0	0	0	0	200	300	0	7.75574	31.6718	-566.828	-17982.2	-6245.85	734.985	188.981	934.724	0	0	0	0	0	0	0	603	903	0
592	8	0	0	0	0	0	0	200	300	0	6.53503	32.2821	-568.659	-17158.3	-6184.81	734.985	189.124	933.173	0	0	0	0	0	0	0	603	903	0
592	9	0	0	0	0	0	0	200	300	0	8.36609	32.4347	-568.049	-17982.2	-6489.99	780.761	188.575	934.656	0	0	0	0	0	0	0	603	903	0
593	0	0	0	0	0	0	0	200	300	0	7.14539	34.2657	-572.931	-17158.3	-6428.95	780.761	188.779	932.948	0	0	0	0	0	0	0	603	903	0
593	1	0	0	0	0	0	0	200	300	0	7.90833	35.0287	-574.763	-16792.1	-5818.6	918.091	189.877	932.216	0	0	0	0	0	0	0	603	903	0
593	2	0	0	0	0	0	0	200	300	0	9.12903	34.8761	-575.068	-17066.7	-6551.02	689.209	188.608	932.678	0	0	0	0	0	0	0	603	903	0
593	3	0	0	0	0	0	0	200	300	0	8.2135	36.2494	-578.425	-17524.5	-6673.09	689.209	188.463	933.297	0	0	0	0	0	0	0	603	903	0
593	4	0	0	0	0	0	0	200	300	0	7.14539	37.4701	-582.087	-17341.4	-6306.88	734.985	189.165	932.792	0	0	0	0	0	0	0	603	903	0
593	5	0	0	0	0	0	0	200	300	0	7.60315	38.6908	-583.613	-16975.2	-6367.92	551.879	189.089	932.086	0	0	0	0	0	0	0	603	903	0
593	6	0	0	0	0	0	0	200	300	0	8.2135	38.3856	-584.833	-16700.5	-6734.13	368.774	188.485	931.556	0	0	0	0	0	0	0	603	903	0
593	7	0	0	0	0	0	0	200	300	0	8.67126	39.3011	-589.411	-16975.2	-6795.17	551.879	188.471	931.8	0	0	0	0	0	0	0	603	903	0
593	8	0	0	0	0	0	0	200	300	0	8.67126	40.2167	-589.411	-17066.7	-7222.41	597.656	187.746	931.956	0	0	0	0	0	0	0	603	903	0
593	9	0	0	0	0	0	0	200	300	0	7.29797	41.4374	-592.158	-17158.3	-6795.17	368.774	188.525	931.976	0	0	0	0	0	0	0	603	903	0
594	0	0	0	0	0	0	0	200	300	0	8.67126	40.0641	-593.378	-16792.1	-7344.48	551.879	187.623	931.299	0	0	0	0	0	0	0	603	903	0
594	1	0	0	0	0	0	0	200	300	0	9.89197	43.2684	-596.735	-16334.3	-7039.31	368.774	188.204	930.373	0	0	0	0	0	0	0	603	903	0
594	2	0	0	0	0	0	0	200	300	0	11.8756	43.2684	-598.566	-17249.8	-6978.27	551.879	188.342	931.819	0	0	0	0	0	0	0	603	903	0
594	3	0	0	0	0	0	0	200	300	0	9.73938	43.8788	-599.482	-17158.3	-7161.38	551.879	188.054	931.622	0	0	0	0	0	0	0	603	903	0
594	4	0	0	0	0	0	0	200	300	0	9.4342	44.9469	-600.397	-16975.2	-7405.52	551.879	187.666	931.273	0	0	0	0	0	0	0	603	903	0
594	5	0	0	0	0	0	0	200	300	0	8.97644	46.3202	-603.144	-17066.7	-7039.31	506.103	188.329	931.296	0	0	0	0	0	0	0	603	903	0
594	6	0	0	0	0	0	0	200	300	0	8.82385	47.0831	-606.196	-16792.1	-6917.24	597.656	188.589	930.701	0	0	0	0	0	0	0	603	903	0
594	7	0	0	0	0	0	0	200	300	0	10.1971	46.9305	-607.416	-16975.2	-7405.52	460.327	187.808	930.947	0	0	0	0	0	0	0	603	903	0
594	8	0	0	0	0	0	0	200	300	0	10.6549	46.1676	-606.806	-17158.3	-7466.55	643.432	187.695	931.276	0	0	0	0	0	0	0	603	903	0
594	9	0	0	0	0	0	0	200	300	0	10.0446	48.4564	-608.942	-16700.5	-7161.38	506.103	188.24	930.425	0	0	0	0	0	0	0	603	903	0
595	0	0	0	0	0	0	0	200	300	0	9.73938	50.5927	-610.468	-16883.6	-7161.38	231.445	188.269	930.657	0	0	0	0	0	0	0	603	903	0
595	1	0	0	0	0	0	0	200	300	0	10.5023	51.5082	-612.909	-16608.9	-7649.66	368.774	187.519	930.099	0	0	0	0	0	0	0	603	903	0
595	2	0	0	0	0	0	0	200	300	0	10.8075	52.1185	-616.572	-16792.1	-7283.45	185.669	188.187	930.235	0	0	0	0	0	0	0	603	903	0
595	3	0	0	0	0	0	0	200	300	0	11.4178	51.0504	-614.741	-16883.6	-7222.41	139.892	188.251	930.465	0	0	0	0	0	0	0	603	903	0
595	4	0	0	0	0	0	0	200	300	0	10.3497	53.797	-616.877	-16334.3	-7771.73	460.327	187.402	929.479	0	0	0	0	0	0	0	603	903	0
595	5	0	0	0	0	0	0	200	300	0	11.1127	55.9332	-617.792	-16334.3	-7771.73	322.998	187.42	929.44	0	0	0	0	0	0	0	603	903	0
595	6	0	0	0	0	0	0	200	300	0	10.8075	56.2384	-621.454	-16151.2	-7527.59	231.445	187.887	928.989	0	0	0	0	0	0	0	603	903	0
595	7	0	0	0	0	0	0	200	300	0	11.1127	56.8488	-620.844	-15235.7	-7649.66	185.669	187.679	927.54	0	0	0	0	0	0	0	603	903	0
595	8	0	0	0	0	0	0	200	300	0	11.5704	57.1539	-625.117	-15235.7	-7771.73	139.892	187.568	927.372	0	0	0	0	0	0	0	603	903	0
595	9	0	0	0	0	0	0	200	300	0	10.8075	58.3746	-623.285	-16242.7	-8015.87	277.221	187.139	929.06	0	0	0	0	0	0	0	603	903	0
596	0	0	0	0	0	0	0	200	300	0	13.8593	59.7479	-624.506	-16151.2	-7588.62	414.55	187.849	928.862	0	0	0	0	0	0	0	603	903	0
596	1	0	0	0	0	0	0	200	300	0	10.8075	61.4264	-625.727	-15601.9	-7710.69	368.774	187.677	927.934	0	0	0	0	0	0	0	603	903	0
596	2	0	0	0	0	0	0	200	300	0	12.3334	60.9686	-628.473	-15876.5	-8137.94	597.656	187.051	928.262	0	0	0	0	0	0	0	603	903	0
596	3	0	0	0	0	0	0	200	300	0	11.4178	61.579	-630.915	-15876.5	-7893.8	643.432	187.488	928.164	0	0	0	0	0	0	0	603	903	0
596	4	0	0	0	0	0	0	200	300	0	11.1127	62.6471	-629.694	-15876.5	-8076.9	643.432	187.173	928.213	0	0	0	0	0	0	0	603	903	0
596	5	0	0	0	0	0	0	200	300	0	11.4178	63.8678	-629.694	-15968.1	-8198.97	368.774	186.979	928.359	0	0	0	0	0	0	0	603	903	0
596	6	0	0	0	0	0	0	200	300	0	10.1971	61.8842	-633.051	-15785	-8321.04	506.103	186.856	927.935	0	0	0	0	0	0	0	603	903	0
596	7	0	0	0	0	0	0	200	300	0	11.1127	65.8514	-633.356	-14961	-8076.9	689.209	187.247	926.622	0	0	0	0	0	0	0	603	903	0
596	8	0	0	0	0	0	0	200	300	0	11.1127	66.6144	-634.882	-15876.5	-8382.08	322.998	186.797	928.007	0	0	0	0	0	0	0	603	903	0
596	9	0	0	0	0	0	0	200	300	0	12.1808	66.9196	-633.967	-15601.9	-8382.08	414.55	186.778	927.61	0	0	0	0	0	0	0	603	903	0
597	0	0	0	0	0	0	0	200	300	0	10.3497	68.2928	-632.136	-15601.9	-8443.11	322.998	186.644	927.681	0	0	0	0	0	0	0	603	903	0
597	1	0	0	0	0	0	0	200	300	0	9.89197	69.8187	-635.187	-14961	-8321.04	231.445	186.9	926.554	0	0	0	0	0	0	0	603	903	0
597	2	0	0	0	0	0	0	200	300	0	10.5023	70.7343	-638.544	-14320.1	-8321.04	460.327	186.969	925.426	0	0	0	0	0	0	0	603	903	0
597	3	0	0	0	0	0	0	200	300	0	12.9437	70.4291	-637.934	-14777.9	-8687.25	322.998	186.382	926.165	0	0	0	0	0	0	0	603	903	0
597	4	0	0	0	0	0	0	200	300	0	10.1971	71.4972	-637.629	-15418.8	-8992.43	460.327	185.897	927.181	0	0	0	0	0	0	0	603	903	0
597	5	0	0	0	0	0	0	200	300	0	8.51868	73.786	-635.492	-14503.2	-8137.94	551.879	187.194	925.822	0	0	0	0	0	0	0	603	903	0
597	6	0	0	0	0	0	0	200	300	0	8.97644	74.2438	-639.155	-14320.1	-8870.36	460.327	186.122	925.405	0	0	0	0	0	0	0	603	903	0
597	7	0	0	0	0	0	0	200	300	0	9.89197	74.8541	-641.291	-13862.4	-8809.32	414.55	186.263	924.616	0	0	0	0	0	0	0	603	903	0
597	8	0	0	0	0	0	0	200	300	0	9.58679	74.8541	-641.596	-14686.3	-8626.22	460.327	186.555	925.89	0	0	0	0	0	0	0	603	903	0
597	9	0	0	0	0	0	0	200	300	0	8.97644	76.38	-639.765	-14411.7	-8687.25	643.432	186.421	925.527	0	0	0	0	0	0	0	603	903	0
598	0	0	0	0	0	0	0	200	300	0	9.89197	77.6007	-636.713	-14503.2	-9541.75	689.209	185.014	925.778	0	0	0	0	0	0	0	603	903	0
598	1	0	0	0	0	0	0	200	300	0	8.2135	78.974	-642.206	-14137	-8931.39	414.55	186.093	925.013	0	0	0	0	0	0	0	603	903	0
598	2	0	0	0	0	0	0	200	300	0	9.4342	79.5844	-641.596	-13404.6	-8870.36	872.314	186.175	923.893	0	0	0	0	0	0	0	603	903	0
598	3	0	0	0	0	0	0	200	300	0	8.97644	79.4318	-640.986	-13587.7	-8748.29	689.209	186.352	924.198	0	0	0	0	0	0	0	603	903	0
598	4	0	0	0	0	0	0	200	300	0	8.2135	79.1266	-642.206	-14228.6	-9053.46	918.091	185.903	925.156	0	0	0	0	0	0	0	603	903	0
598	5	0	0	0	0	0	0	200	300	0	9.58679	81.2628	-638.849	-13862.4	-8809.32	918.091	186.211	924.699	0	0	0	0	0	0	0	603	903	0
598	6	0	0	0	0	0	0	200	300	0	6.9928	83.8568	-638.849	-13862.4	-8870.36	918.091	186.115	924.699	0	0	0	0	0	0	0	603	903	0
598	7	0	0	0	0	0	0	200	300	0	7.14539	84.0094	-640.07	-13038.4	-9053.46	689.209	185.856	923.37	0	0	0	0	0	0	0	603	903	0
598	8	0	0	0	0	0	0	200	300	0	8.36609	84.0094	-636.103	-13679.3	-9419.67	506.103	185.192	924.505	0	0	0	0	0	0	0	603	903	0
598	9	0	0	0	0	0	0	200	300	0	6.68762	85.3827	-639.46	-12855.3	-9480.71	551.879	185.174	923.103	0	0	0	0	0	0	0	603	903	0
599	0	0	0	0	0	0	0	200	300	0	8.36609	86.1456	-638.239	-13404.6	-9114.5	1009.64	185.719	924.003	0	0	0	0	0	0	0	603	903	0
599	1	0	0	0	0	0	0	200	300	0	5.61951	87.6715	-637.018	-12672.2	-9419.67	734.985	185.213	922.893	0	0	0	0	0	0	0	603	903	0
599	2	0	0	0	0	0	0	200	300	0	6.53503	89.1974	-637.324	-11848.2	-9602.78	689.209	184.933	921.591	0	0	0	0	0	0	0	603	903	0
599	3	0	0	0	0	0	0	200	300	0	6.07727	89.0448	-633.661	-12489.1	-9053.46	918.091	185.712	922.709	0	0	0	0	0	0	0	603	903	0
599	4	0	0	0	0	0	0	200	300	0	4.70398	90.2655	-637.629	-12214.4	-9358.64	734.985	185.323	922.156	0	0	0	0	0	0	0	603	903	0
599	5	0	0	0	0	0	0	200	300	0	6.68762	90.5707	-635.492	-12397.5	-9663.82	643.432	184.793	922.509	0	0	0	0	0	0	0	603	903	0
599	6	0	0	0	0	0	0	200	300	0	4.70398	92.2491	-634.577	-12122.9	-9419.67	689.209	185.156	922.104	0	0	0	0	0	0	0	603	903	0
599	7	0	0	0	0	0	0	200	300	0	5.46692	93.6224	-634.577	-12672.2	-9358.64	689.209	185.252	922.97	0	0	0	0	0	0	0	603	903	0
599	8	0	0	0	0	0	0	200	300	0	5.00916	92.8595	-634.272	-12122.9	-10335.2	734.985	183.705	922.113	0	0	0	0	0	0	0	603	903	0
599	9	0	0	0	0	0	0	200	300	0	3.33069	94.3854	-632.136	-11939.8	-9724.85	826.538	184.616	921.888	0	0	0	0	0	0	0	603	903	0
600	0	0	0	0	0	0	0	200	300	0	5.7721	96.369	-627.558	-12122.9	-9846.92	872.314	184.309	922.318	0	0	0	0	0	0	0	603	903	0
600	1	0	0	0	0	0	0	200	300	0	2.72034	95.7587	-631.22	-11665.1	-9602.78	872.314	184.787	921.48	0	0	0	0	0	0	0	603	903	0
600	2	0	0	0	0	0	0	200	300	0	3.48328	97.4371	-631.83	-11482	-10152.1	918.091	183.932	921.173	0	0	0	0	0	0	0	603	903	0
600	3	0	0	0	0	0	0	200	300	0	3.1781	97.2845	-629.389	-11390.4	-9907.96	826.538	184.258	921.098	0	0	0	0	0	0	0	603	903	0
600	4	0	0	0	0	0	0	200	300	0	1.49963	98.0475	-626.948	-11390.4	-9541.75	872.314	184.781	921.168	0	0	0	0	0	0	0	603	903	0
600	5	0	0	0	0	0	0	200	300	0	1.49963	99.5734	-626.642	-11115.8	-9907.96	689.209	184.189	920.739	0	0	0	0	0	0	0	603	903	0
600	6	0	0	0	0	0	0	200	300	0	2.41516	99.2682	-624.811	-10932.7	-10091.1	780.761	183.849	920.498	0	0	0	0	0	0	0	603	903	0
600	7	0	0	0	0	0	0	200	300	0	3.33069	101.252	-624.201	-11024.2	-9724.85	780.761	184.42	920.661	0	0	0	0	0	0	0	603	903	0
600	8	0	0	0	0	0	0	200	300	0	1.49963	101.404	-623.591	-10932.7	-9663.82	872.314	184.503	920.532	0	0	0	0	0	0	0	603	903	0
600	9	0	0	0	0	0	0	200	300	0	-0.484008	102.167	-620.234	-11024.2	-10213.1	826.538	183.533	920.774	0	0	0	0	0	0	0	603	903	0
601	0	0	0	0	0	0	0	200	300	0	0.126343	103.998	-619.623	-10474.9	-10274.2	963.867	183.419	919.905	0	0	0	0	0	0	0	603	903	0
601	1	0	0	0	0	0	0	200	300	0	0.736695	103.998	-620.234	-10108.7	-9846.92	780.761	184.124	919.298	0	0	0	0	0	0	0	603	903	0
601	2	0	0	0	0	0	0	200	300	0	2.41516	104.914	-618.097	-10291.8	-10091.1	597.656	183.674	919.651	0	0	0	0	0	0	0	603	903	0
601	3	0	0	0	0	0	0	200	300	0	0.584107	104.761	-616.877	-10200.3	-10213.1	551.879	183.444	919.535	0	0	0	0	0	0	0	603	903	0
601	4	0	0	0	0	0	0	200	300	0	-0.941772	105.982	-615.656	-9925.6	-10091.1	963.867	183.609	919.122	0	0	0	0	0	0	0	603	903	0
601	5	0	0	0	0	0	0	200	300	0	-1.09436	107.355	-612.604	-9742.49	-10030	460.327	183.627	918.903	0	0	0	0	0	0	0	603	903	0
601	6	0	0	0	0	0	0	200	300	0	-0.0262447	106.745	-611.689	-9559.39	-10335.2	551.879	183.104	918.628	0	0	0	0	0	0	0	603	903	0
601	7	0	0	0	0	0	0	200	300	0	-0.636596	108.881	-610.468	-10200.3	-10396.2	460.327	182.97	919.709	0	0	0	0	0	0	0	603	903	0
601	8	0	0	0	0	0	0	200	300	0	-2.00989	108.729	-608.332	-9376.28	-10274.2	734.985	183.111	918.413	0	0	0	0	0	0	0	603	903	0
601	9	0	0	0	0	0	0	200	300	0	-0.636596	109.339	-606.196	-10200.3	-10579.3	597.656	182.548	919.827	0	0	0	0	0	0	0	603	903	0
602	0	0	0	0	0	0	0	200	300	0	-1.39954	110.712	-604.67	-9101.62	-10091.1	734.985	183.311	918.052	0	0	0	0	0	0	0	603	903	0
602	1	0	0	0	0	0	0	200	300	0	-1.39954	109.797	-601.923	-9376.28	-10152.1	551.879	183.134	918.577	0	0	0	0	0	0	0	603	903	0
602	2	0	0	0	0	0	0	200	300	0	-2.62024	112.543	-601.618	-9284.73	-9968.99	231.445	183.43	918.433	0	0	0	0	0	0	0	603	903	0
602	3	0	0	0	0	0	0	200	300	0	-3.68835	111.933	-598.871	-8277.65	-10030	460.327	183.252	916.822	0	0	0	0	0	0	0	603	903	0
602	4	0	0	0	0	0	0	200	300	0	-2.77283	113.154	-596.43	-8918.52	-10213.1	185.669	182.876	917.953	0	0	0	0	0	0	0	603	903	0
602	5	0	0	0	0	0	0	200	300	0	-1.24695	114.069	-593.073	-8369.2	-10091.1	414.55	182.985	917.112	0	0	0	0	0	0	0	603	903	0
602	6	0	0	0	0	0	0	200	300	0	-3.99353	113.611	-591.242	-8460.75	-9968.99	185.669	183.139	917.31	0	0	0	0	0	0	0	603	903	0
602	7	0	0	0	0	0	0	200	300	0	-3.23059	115.9	-590.021	-8826.97	-10274.2	231.445	182.587	917.96	0	0	0	0	0	0	0	603	903	0
602	8	0	0	0	0	0	0	200	300	0	-4.60388	115.9	-587.58	-8094.54	-10396.2	185.669	182.307	916.776	0	0	0	0	0	0	0	603	903	0
602	9	0	0	0	0	0	0	200	300	0	-4.90906	116.205	-583.307	-8277.65	-9785.89	322.998	183.223	917.191	0	0	0	0	0	0	0	603	903	0
603	0	0	0	0	0	0	0	200	300	0	-4.29871	116.663	-581.782	-8369.2	-10030	277.221	182.76	917.385	0	0	0	0	0	0	0	603	903	0
603	1	0	0	0	0	0	0	200	300	0	-4.29871	117.579	-579.645	-7545.23	-10213.1	185.669	182.38	916.017	0	0	0	0	0	0	0	603	903	0
603	2	0	0	0	0	0	0	200	300	0	-3.84094	119.105	-578.119	-7270.57	-10091.1	2.56305	182.545	915.576	0	0	0	0	0	0	0	603	903	0
603	3	0	0	0	0	0	0	200	300	0	-5.51941	119.105	-572.016	-7362.12	-9785.89	94.1158	182.892	915.871	0	0	0	0	0	0	0	603	903	0
603	4	0	0	0	0	0	0	200	300	0	-5.82458	119.105	-572.321	-7453.68	-10091.1	-43.2133	182.368	916.024	0	0	0	0	0	0	0	603	903	0
603	5	0	0	0	0	0	0	200	300	0	-5.06165	119.562	-568.659	-7636.78	-10091.1	-180.542	182.255	916.429	0	0	0	0	0	0	0	603	903	0
603	6	0	0	0	0	0	0	200	300	0	-4.90906	122.004	-566.218	-7453.68	-9907.96	-317.872	182.502	916.164	0	0	0	0	0	0	0	603	903	0
603	7	-2.01187	0.567363	-10.9266	-913.699	-581.797	296.449	146.754	383.622	0	-5.06165	120.325	-562.555	-7819.89	-9602.78	-226.319	182.93	916.901	0	0	0	0	0	0	0	603	903	0
603	8	-7.81021	-4.62063	-36.5613	-2470.1	-2168.71	891.542	140.683	367.56	0	-5.82458	122.156	-562.25	-7270.57	-9968.99	-88.9897	182.27	915.931	0	0	0	0	0	0	0	603	903	0
603	9	-20.1698	-13.013	-61.2806	-3202.52	-3755.63	2264.83	138.714	352.26	0	-5.36682	121.393	-557.978	-7453.68	-10274.2	-638.306	181.587	916.358	0	0	0	0	0	0	0	603	903	0
604	0	-32.3769	-7.5198	-59.7547	-3202.52	-3999.77	1623.96	133.064	353.594	0	-7.35046	121.546	-554.011	-6812.81	-9480.71	-775.635	182.887	915.297	0	0	0	0	0	0	0	603	903	0
604	1	-23.5268	7.43382	-38.6976	-3385.62	-3328.38	-298.644	113.99	387.489	0	-5.21423	122.767	-553.4	-6995.91	-9602.78	-409.424	182.648	915.642	0	0	0	0	0	0	0	603	903	0
604	2	2.2606	12.0115	-35.6458	-4118.05	-3023.2	-573.302	115.188	415.527	0	-5.97717	124.293	-547.602	-6263.49	-9785.89	-546.754	182.13	914.438	0	0	0	0	0	0	0	603	903	0
604	3	9.43223	7.73899	-60.6702	-3568.73	-2962.17	-344.421	151.176	358.822	0	-5.97717	124.75	-546.076	-7270.57	-9541.75	-363.648	182.527	916.314	0	0	0	0	0	0	0	603	903	0
604	4	-3.07998	9.87522	-89.3568	-4209.6	-4304.94	-939.513	151.823	347.11	0	-6.8927	123.987	-541.804	-6812.81	-9114.5	-546.754	183.178	915.574	0	0	0	0	0	0	0	603	903	0
604	5	-16.5077	21.9297	-103.7	-6681.52	-6258.07	-893.737	139.652	364.431	0	-8.1134	124.14	-539.667	-6721.25	-8992.43	-867.188	183.337	915.455	0	0	0	0	0	0	0	603	903	0
604	6	-27.494	31.6953	-102.784	-9245	-8272.23	-115.539	119.519	389.945	0	-7.50305	126.429	-537.531	-5805.73	-9480.71	-1050.29	182.363	913.801	0	0	0	0	0	0	0	603	903	0
604	7	-29.9354	28.7961	-118.043	-8695.68	-8760.51	-207.091	125.786	373.665	0	-5.21423	125.361	-532.343	-6355.04	-8870.36	-1279.18	183.337	914.938	0	0	0	0	0	0	0	603	903	0
604	8	-13.9137	17.9624	-140.321	-7871.71	-7844.98	-1031.07	144.093	356.098	0	-6.58752	126.124	-528.376	-6263.49	-9175.53	-958.741	182.634	914.854	0	0	0	0	0	0	0	603	903	0
604	9	1.80283	15.8262	-152.223	-8329.47	-7600.84	-573.302	150.068	354.719	0	-8.26599	125.361	-526.24	-6538.15	-9053.46	-1004.52	182.796	915.424	0	0	0	0	0	0	0	603	903	0
605	0	-2.62222	19.3357	-154.97	-9611.21	-8699.48	-664.855	143.863	362.02	0	-8.26599	126.429	-522.577	-5714.17	-8992.43	-1279.18	182.792	913.935	0	0	0	0	0	0	0	603	903	0
605	1	-15.287	19.3357	-159.852	-11808.5	-10042.2	-1443.05	137.178	373.871	0	-7.96081	127.039	-516.474	-5805.73	-8870.36	-1141.85	182.825	914.241	0	0	0	0	0	0	0	603	903	0
605	2	-18.4914	18.5727	-179.384	-12540.9	-11079.8	-1305.72	138.234	369.911	0	-8.26599	127.497	-512.201	-5622.62	-8748.29	-1233.4	182.92	913.977	0	0	0	0	0	0	0	603	903	0
605	3	-11.7775	21.0141	-190.675	-12449.3	-10652.6	-802.184	144.132	365.291	0	-7.96081	127.65	-509.455	-5256.41	-9053.46	-912.964	182.229	913.318	0	0	0	0	0	0	0	603	903	0
605	4	0.276953	17.352	-197.084	-12174.7	-10286.4	-1580.38	147.807	361.774	0	-8.1134	127.039	-506.098	-5622.62	-8870.36	-958.741	182.473	914.11	0	0	0	0	0	0	0	603	903	0
605	5	6.68564	12.4692	-201.661	-11991.6	-10652.6	-1717.71	147.176	359.464	0	-8.26599	124.598	-498.163	-5714.17	-8565.18	-1004.52	182.806	914.471	0	0	0	0	0	0	0	603	903	0
605	6	-2.92739	12.4692	-211.732	-13090.2	-11018.8	-893.737	147.959	361.824	0	-9.18152	126.887	-492.975	-5164.86	-8260.01	-1553.83	183.245	913.477	0	0	0	0	0	0	0	603	903	0
605	7	-11.6249	13.2322	-222.108	-13548	-12056.4	-1214.17	145.718	360.997	0	-8.1134	128.565	-489.008	-5622.62	-8565.18	-1553.83	182.485	914.498	0	0	0	0	0	0	0	603	903	0
605	8	-7.81021	5.60276	-223.634	-14097.3	-12239.5	-1671.94	145.27	363.037	0	-8.41858	127.802	-487.177	-5073.31	-8198.97	-1645.39	183.17	913.414	0	0	0	0	0	0	0	603	903	0
605	9	1.19248	-1.72146	-222.413	-14280.4	-11507.1	-664.855	148.263	364.207	0	-8.41858	125.971	-481.379	-5073.31	-8076.9	-1553.83	183.221	913.539	0	0	0	0	0	0	0	603	903	0
606	0	8.82187	-4.01027	-234.926	-13731.1	-10835.7	-619.079	153.876	358.449	0	-8.57117	125.208	-473.749	-5073.31	-7893.8	-1599.61	183.338	913.709	0	0	0	0	0	0	0	603	903	0
606	1	8.21152	-5.84133	-245.302	-14280.4	-11446.1	-1488.83	153.339	358.216	0	-8.87634	126.429	-468.561	-4707.09	-7649.66	-1553.83	183.674	913.046	0	0	0	0	0	0	0	603	903	0
606	2	3.32871	-9.65603	-249.269	-15562.1	-12605.7	-710.631	149.429	362.431	0	-7.65564	125.666	-463.068	-3883.12	-7588.62	-1920.04	183.612	911.386	0	0	0	0	0	0	0	603	903	0
606	3	5.15977	-12.7078	-250.795	-14646.6	-12666.8	-573.302	149.494	358.401	0	-8.87634	125.056	-457.88	-4249.33	-7771.73	-1874.27	183.027	912.281	0	0	0	0	0	0	0	603	903	0
606	4	10.1952	-17.438	-256.288	-14372	-12117.4	-802.184	152.719	356.077	0	-10.2496	125.056	-448.42	-4981.75	-7039.31	-1553.83	184.302	914.11	0	0	0	0	0	0	0	603	903	0
606	5	19.503	-24.6096	-267.274	-14097.3	-11812.3	-847.961	155.805	352.745	0	-7.96081	123.377	-445.673	-4615.54	-7161.38	-1874.27	183.931	913.356	0	0	0	0	0	0	0	603	903	0
606	6	19.8082	-29.4925	-275.514	-14646.6	-11690.2	21.7904	157.57	353.161	0	-8.72375	122.004	-438.349	-3974.67	-7344.48	-2011.6	183.245	912.067	0	0	0	0	0	0	0	603	903	0
606	7	17.5194	-31.9339	-278.261	-15379	-12666.8	-664.855	154.479	355.268	0	-9.48669	122.767	-433.161	-3883.12	-6551.02	-2011.6	184.876	911.965	0	0	0	0	0	0	0	603	903	0
606	8	18.4349	-33.002	-284.364	-16386.1	-13094	-710.631	153.953	357.624	0	-8.41858	121.851	-425.532	-3425.36	-6795.17	-2103.15	184.031	911.05	0	0	0	0	0	0	0	603	903	0
606	9	20.5711	-38.0374	-293.825	-16203	-12727.8	159.12	156.682	355.145	0	-7.80823	120.02	-418.513	-3700.01	-6795.17	-2332.03	183.764	911.841	0	0	0	0	0	0	0	603	903	0
607	0	26.0643	-42.615	-301.454	-15562.1	-12666.8	-344.421	157.981	351.624	0	-10.097	118.494	-412.714	-2876.04	-5818.6	-1965.82	185.902	909.969	0	0	0	0	0	0	0	603	903	0
607	1	31.8626	-43.8357	-308.473	-15928.4	-13094	-710.631	157.552	351.636	0	-9.63928	117.884	-407.221	-2967.59	-6001.71	-2057.37	185.262	910.287	0	0	0	0	0	0	0	603	903	0
607	2	29.5738	-44.4461	-315.797	-16569.2	-13643.3	296.449	156.797	352.468	0	-8.72375	117.121	-400.202	-2509.83	-5940.67	-2332.03	185.156	909.271	0	0	0	0	0	0	0	603	903	0
607	3	26.3695	-45.8194	-325.563	-16752.3	-14558.9	433.778	155.281	351.457	0	-6.8927	115.9	-392.878	-2418.28	-5818.6	-2011.6	185.19	909.155	0	0	0	0	0	0	0	603	903	0
607	4	25.454	-49.3289	-336.244	-16843.9	-14558.9	-344.421	156.702	350.094	0	-8.41858	114.222	-385.859	-2784.49	-5208.25	-2011.6	186.502	910.216	0	0	0	0	0	0	0	603	903	0
607	5	31.2523	-50.8548	-351.503	-16660.8	-14864	616.883	157.713	347.399	0	-9.79187	110.712	-379.755	-2601.38	-5513.43	-2332.03	185.482	909.85	0	0	0	0	0	0	0	603	903	0
607	6	36.2877	-54.0591	-363.099	-16752.3	-15291.3	891.542	157.887	346.137	0	-9.48669	110.56	-370.905	-2876.04	-5330.32	-2240.48	185.629	910.754	0	0	0	0	0	0	0	603	903	0
607	7	35.6773	-58.0264	-375.917	-17118.5	-15657.5	616.883	158.349	345.538	0	-7.50305	109.949	-362.971	-2235.17	-5208.25	-2148.93	185.651	909.158	0	0	0	0	0	0	0	603	903	0
607	8	32.3204	-58.7893	-383.851	-17484.7	-16389.9	754.213	157.301	345.551	0	-8.57117	107.661	-355.951	-1960.51	-4658.93	-2057.37	186.911	908.508	0	0	0	0	0	0	0	603	903	0
607	9	33.6937	-57.1109	-400.331	-17576.3	-17427.5	1257.75	156.467	343.904	0	-9.18152	105.372	-349.848	-2143.62	-4414.79	-2194.7	187.381	909.127	0	0	0	0	0	0	0	603	903	0
608	0	37.2032	-59.3997	-411.622	-17759.4	-17854.8	1120.42	156.623	343.145	0	-10.2496	101.099	-340.082	-1868.96	-4536.86	-2194.7	186.66	908.496	0	0	0	0	0	0	0	603	903	0
608	1	41.0179	-64.2825	-424.745	-17576.3	-17549.6	1257.75	158.682	341.381	0	-10.2496	101.862	-332.453	-1594.3	-4475.83	-2057.37	186.537	907.796	0	0	0	0	0	0	0	603	903	0
608	2	42.849	-65.6558	-435.731	-17301.6	-18404.1	1852.85	157.763	339.707	0	-9.94446	100.336	-325.434	-1136.54	-3743.41	-2148.93	188.497	906.492	0	0	0	0	0	0	0	603	903	0
608	3	42.5438	-67.1817	-447.023	-17667.8	-19136.5	1852.85	157.191	339.523	0	-10.4022	98.963	-318.11	-1319.64	-3865.48	-1965.82	187.849	907.148	0	0	0	0	0	0	0	603	903	0
608	4	40.5602	-68.8601	-455.263	-17851	-19685.8	1852.85	156.759	339.21	0	-9.79187	96.0638	-308.649	-1319.64	-3804.44	-2148.93	187.674	907.276	0	0	0	0	0	0	0	603	903	0
608	5	42.5438	-72.8274	-463.807	-18125.6	-19807.9	2447.94	157.293	339.08	0	-12.0807	93.9276	-301.63	-37.9035	-3621.34	-2057.37	187.994	903.126	0	0	0	0	0	0	0	603	903	0
608	6	47.7318	-75.2688	-475.404	-18766.5	-19929.9	2539.49	158.078	339.475	0	-11.4703	92.4017	-292.475	-861.878	-3255.12	-2011.6	188.87	905.947	0	0	0	0	0	0	0	603	903	0
608	7	48.7999	-76.7947	-481.202	-18217.2	-20540.3	2493.72	157.315	337.858	0	-10.86	91.7914	-284.54	-404.114	-3072.02	-2103.15	189.204	904.42	0	0	0	0	0	0	0	603	903	0
608	8	47.8844	-78.9309	-493.104	-16935.4	-21150.7	2722.6	157.107	334.345	0	-9.33411	88.7396	-276.911	-312.562	-2766.84	-2011.6	190.008	904.129	0	0	0	0	0	0	0	603	903	0
608	9	48.037	-82.1353	-498.292	-17942.5	-21211.7	3455.02	157.431	336.008	0	-11.3177	85.0775	-268.366	-312.562	-3255.12	-1965.82	187.871	904.165	0	0	0	0	0	0	0	603	903	0
609	0	48.7999	-82.4405	-504.701	-18400.3	-21516.9	3134.58	157.367	336.458	0	-12.5385	81.2628	-261.957	53.6492	-2888.91	-1920.04	188.972	902.795	0	0	0	0	0	0	0	603	903	0
609	1	49.5628	-84.2715	-511.72	-17576.3	-21944.1	3363.47	157.117	334.347	0	-12.0807	79.2792	-252.192	694.518	-2522.7	-1736.94	189.997	900.246	0	0	0	0	0	0	0	603	903	0
609	2	50.9361	-88.2388	-519.96	-16843.9	-22127.2	3958.56	157.444	332.395	0	-11.1652	77.4481	-246.088	419.86	-2766.84	-1828.49	188.757	901.294	0	0	0	0	0	0	0	603	903	0
609	3	50.1732	-90.8328	-526.063	-17027	-22188.2	3775.45	157.822	332.367	0	-11.9281	74.549	-239.374	1060.73	-2583.74	-1645.39	189.206	898.569	0	0	0	0	0	0	0	603	903	0
609	4	49.4103	-90.6802	-527.894	-16843.9	-22676.5	3867.01	157.043	331.908	0	-12.2333	71.3446	-228.693	694.518	-2278.56	-1462.28	190.037	899.963	0	0	0	0	0	0	0	603	903	0
609	5	47.1214	-91.9009	-533.693	-17759.4	-23164.8	4507.87	156.595	333.276	0	-10.2496	70.5817	-222.895	786.071	-2034.42	-2057.37	190.873	899.473	0	0	0	0	0	0	0	603	903	0
609	6	47.274	-94.0371	-537.66	-16752.3	-23470	4050.11	156.348	331.158	0	-12.2333	67.3773	-215.571	877.624	-2156.49	-1782.72	189.996	898.929	0	0	0	0	0	0	0	603	903	0
609	7	47.5792	-93.8845	-543.458	-16203	-23531	3821.23	156.701	329.815	0	-10.7074	66.1566	-207.941	877.624	-1790.28	-1553.83	191.39	898.78	0	0	0	0	0	0	0	603	903	0
609	8	46.8163	-93.8845	-544.069	-16477.7	-23409	4599.43	156.974	330.286	0	-10.097	62.1893	-201.838	1060.73	-1668.21	-1645.39	191.735	897.745	0	0	0	0	0	0	0	603	903	0
609	9	44.0697	-95.8682	-549.867	-16477.7	-24629.7	4416.32	155.208	329.967	0	-11.6229	60.3583	-197.26	1243.83	-1485.1	-1828.49	192.471	896.694	0	0	0	0	0	0	0	603	903	0
610	0	41.1705	-94.4949	-549.867	-15745.2	-24568.6	4004.33	155.319	328.635	0	-11.0126	55.3229	-190.546	1243.83	-1424.07	-1324.95	192.526	896.472	0	0	0	0	0	0	0	603	903	0
610	1	41.6283	-94.3423	-553.834	-15379	-24385.5	4278.99	155.97	327.768	0	-11.4703	50.5927	-182.612	1335.39	-1179.93	-1508.06	193.539	895.687	0	0	0	0	0	0	0	603	903	0
610	2	40.4076	-95.563	-554.139	-15104.4	-24446.5	4599.43	155.884	327.257	0	-10.2496	47.9987	-173.151	1243.83	-1240.96	-1324.95	192.833	895.817	0	0	0	0	0	0	0	603	903	0
610	3	37.8136	-96.1734	-557.802	-14921.3	-25240	4233.22	154.751	326.75	0	-10.097	44.9469	-168.879	2067.81	-1057.86	-1141.85	193.736	890.756	0	0	0	0	0	0	0	603	903	0
610	4	35.067	-95.1052	-559.938	-14829.7	-25301	4416.32	154.815	326.485	0	-10.7074	44.3365	-164.606	1060.73	-1302	-1416.5	192.09	896.556	0	0	0	0	0	0	0	603	903	0
610	5	31.7101	-94.8001	-558.717	-15195.9	-25545.2	5057.19	154.279	327.198	0	-9.63928	42.6581	-157.282	1701.6	-1057.86	-1370.73	193.274	892.181	0	0	0	0	0	0	0	603	903	0
610	6	29.4212	-94.8001	-560.548	-15012.8	-25545.2	4462.1	154.428	326.782	0	-10.86	41.8951	-150.568	1701.6	-874.753	-1187.62	194.19	891.699	0	0	0	0	0	0	0	603	903	0
610	7	29.2687	-94.3423	-560.548	-14738.2	-25850.4	4690.98	153.884	326.292	0	-9.33411	39.9115	-143.854	1610.05	-1057.86	-1416.5	192.646	891.808	0	0	0	0	0	0	0	603	903	0
610	8	27.8954	-94.3423	-561.769	-14463.5	-25850.4	4370.55	153.984	325.746	0	-9.18152	36.8597	-139.277	2067.81	-1179.93	-1370.73	191.528	888.153	0	0	0	0	0	0	0	603	903	0
610	9	24.3858	-93.5794	-562.99	-14921.3	-26033.5	4278.99	153.759	326.504	0	-10.5548	34.7235	-135.004	2250.91	-630.613	-1004.52	195.329	886.327	0	0	0	0	0	0	0	603	903	0
611	0	21.3341	-94.6475	-560.548	-13731.1	-26033.5	4278.99	153.557	324.496	0	-8.41858	30.9088	-128.596	1976.26	-752.683	-1462.28	194.147	887.632	0	0	0	0	0	0	0	603	903	0
611	1	19.3504	-95.1052	-560.243	-13273.3	-26643.8	4416.32	152.442	323.692	0	-9.48669	26.4838	-124.323	2250.91	-752.683	-1324.95	193.946	884.895	0	0	0	0	0	0	0	603	903	0
611	2	19.1979	-94.8001	-560.548	-12907.1	-26521.7	4416.32	152.686	323.026	0	-8.26599	24.0424	-118.83	2067.81	-1302	-1324.95	189.043	885.599	0	0	0	0	0	0	0	603	903	0
611	3	17.2142	-95.1052	-561.769	-12174.7	-26216.6	4370.55	153.332	321.672	0	-8.57117	22.3639	-114.557	1976.26	-508.542	-1416.5	195.561	885.749	0	0	0	0	0	0	0	603	903	0
611	4	14.1625	-95.7156	-561.769	-12449.3	-26826.9	4645.21	152.246	322.161	0	-7.35046	20.0751	-112.116	2342.47	-325.437	-1141.85	197.097	882.107	0	0	0	0	0	0	0	603	903	0
611	5	12.1788	-96.326	-559.633	-12357.8	-27132.1	4507.87	151.518	322.082	0	-8.1134	19.7699	-106.318	2159.36	-447.507	-1279.18	195.791	882.69	0	0	0	0	0	0	0	603	903	0
611	6	10.1952	-95.8682	-560.853	-12724	-27193.1	4828.31	151.515	322.687	0	-7.19788	20.0751	-102.35	2250.91	-630.613	-1141.85	193.839	881.008	0	0	0	0	0	0	0	603	903	0
611	7	8.97446	-96.0208	-560.243	-12449.3	-27132.1	4874.09	151.571	322.221	0	-6.74011	18.5492	-96.5521	2159.36	-20.2611	-1141.85	199.79	880.635	0	0	0	0	0	0	0	603	903	0
611	8	8.36411	-95.563	-561.769	-11808.5	-27071.1	4507.87	151.811	321.02	0	-4.60388	20.6854	-92.5848	2067.81	-203.367	-912.964	197.803	880.666	0	0	0	0	0	0	0	603	903	0
611	9	5.46494	-96.1734	-561.464	-11991.6	-27620.4	5057.19	150.806	321.358	0	-5.82458	20.838	-88.3123	1426.94	-386.472	-958.741	195.624	886.842	0	0	0	0	0	0	0	603	903	0
612	0	4.09165	-96.4785	-558.717	-12083.1	-27803.5	4645.21	150.237	321.627	0	-6.28235	19.6173	-86.7864	1610.05	-203.367	-912.964	197.657	884.448	0	0	0	0	0	0	0	603	903	0
612	1	2.2606	-95.8682	-556.581	-11076.1	-27620.4	5057.19	150.375	319.9	0	-6.12976	16.7181	-80.3777	1701.6	-264.402	-821.412	196.711	881.83	0	0	0	0	0	0	0	603	903	0
612	2	2.71836	-96.7837	-561.159	-11076.1	-27620.4	5011.42	150.78	319.738	0	-4.75647	15.0397	-77.9363	2067.81	-203.367	-684.083	197.391	876.468	0	0	0	0	0	0	0	603	903	0
612	3	1.34507	-97.6992	-562.99	-10709.8	-28291.8	5102.97	149.747	319.023	0	-5.21423	14.7345	-74.2742	1884.7	101.809	-1141.85	201.371	877.625	0	0	0	0	0	0	0	603	903	0
612	4	0.582129	-97.5467	-563.295	-11259.2	-28352.8	5331.85	149.666	319.988	0	-4.75647	13.3612	-71.2225	969.177	162.844	-1004.52	202.286	889.392	0	0	0	0	0	0	0	603	903	0
612	5	0.124365	-98.3096	-563.295	-10526.7	-27986.6	5240.3	150.316	318.688	0	-5.21423	9.54651	-67.8655	1335.39	101.809	-1096.07	201.5	883.323	0	0	0	0	0	0	0	603	903	0
612	6	-1.85928	-97.8518	-561.769	-11350.7	-28169.7	5286.07	149.855	320.205	0	-3.99353	8.93616	-66.3397	1518.49	-20.2611	-912.964	199.695	880.11	0	0	0	0	0	0	0	603	903	0
612	7	-0.638574	-97.2415	-566.652	-10709.8	-28902.1	5331.85	148.995	318.9	0	-2.77283	7.86804	-63.8983	1518.49	-20.2611	-1004.52	199.683	879.236	0	0	0	0	0	0	0	603	903	0
612	8	1.19248	-96.7837	-576.722	-8787.24	-29695.6	5926.94	148.51	315.237	0	-3.078	6.34216	-58.4051	1243.83	284.915	-1004.52	204.878	881.703	0	0	0	0	0	0	0	603	903	0
612	9	-2.7748	-97.8518	-582.826	-9336.55	-29756.6	5652.29	148.944	316.019	0	-4.75647	5.8844	-57.7947	1426.94	651.126	-1004.52	211.266	878.31	0	0	0	0	0	0	0	603	903	0
613	0	-7.81021	-100.751	-582.826	-9245	-29817.6	6064.27	148.84	315.862	0	-4.75647	6.34216	-55.6585	1610.05	40.7741	-958.741	200.733	874.073	0	0	0	0	0	0	0	603	903	0
613	1	-10.4042	-102.124	-577.638	-9061.9	-30061.8	5881.17	147.957	315.688	0	-3.23059	5.73181	-54.4378	1335.39	-81.2963	-1279.18	198.507	878.47	0	0	0	0	0	0	0	603	903	0
613	2	-7.96279	-101.819	-582.826	-8512.58	-30244.9	5606.51	148.107	314.606	0	-2.16248	2.98523	-48.6395	1610.05	-81.2963	-684.083	198.329	869.898	0	0	0	0	0	0	0	603	903	0
613	3	-9.33608	-101.972	-591.676	-7780.16	-30305.9	6064.27	148.78	313.149	0	-2.62024	5.27405	-48.3343	786.071	-81.2963	-1233.4	198.318	886.737	0	0	0	0	0	0	0	603	903	0
613	4	-12.3878	-107.312	-594.728	-7688.6	-30794.2	6522.04	148.221	312.928	0	-4.45129	3.90076	-43.7566	1243.83	-508.542	-1050.29	188.378	874.574	0	0	0	0	0	0	0	603	903	0
613	5	-10.099	-110.517	-594.117	-7505.5	-31343.5	6338.93	147.244	312.633	0	-3.68835	3.90076	-42.8411	1152.28	223.88	-1004.52	205.226	876.103	0	0	0	0	0	0	0	603	903	0
613	6	-9.64126	-107.465	-596.864	-7047.73	-30916.3	6750.92	148.202	311.808	0	-2.00989	4.35852	-42.2308	969.177	-264.402	-958.741	193.739	880.051	0	0	0	0	0	0	0	603	903	0
613	7	-6.89468	-110.059	-601.442	-7139.29	-31221.5	7208.68	148.089	311.87	0	-3.078	4.35852	-38.2635	694.518	-264.402	-1004.52	193.09	884.849	0	0	0	0	0	0	0	603	903	0
613	8	-4.75845	-114.026	-605.714	-6864.63	-31770.8	7071.35	147.548	311.333	0	-1.70471	1.91711	-38.5687	602.966	-203.367	-684.083	194.727	887.366	0	0	0	0	0	0	0	603	903	0
613	9	-5.3688	-111.585	-607.24	-6223.76	-31709.7	7208.68	147.781	310.249	0	-1.70471	1.91711	-35.2117	328.307	284.915	-729.859	208.091	893.676	0	0	0	0	0	0	0	603	903	0
614	0	-5.52139	-107.312	-609.071	-6681.52	-31892.8	7346.01	147.637	310.97	0	-2.16248	2.52747	-33.6858	1152.28	345.95	-638.306	210.27	868.793	0	0	0	0	0	0	0	603	903	0
614	1	-6.43691	-109.296	-609.071	-6498.42	-31831.8	7071.35	147.737	310.669	0	-0.484008	1.76453	-33.0755	786.071	223.88	-455.201	206.769	879.234	0	0	0	0	0	0	0	603	903	0
614	2	-5.3688	-110.517	-613.649	-5949.1	-31953.9	7117.13	147.928	309.695	0	1.34705	0.848999	-29.4134	511.413	-203.367	-729.859	193.086	885.613	0	0	0	0	0	0	0	603	903	0
614	3	-3.84292	-106.549	-616.701	-4850.47	-32014.9	7162.91	148.087	307.865	0	-0.636596	0.696411	-29.4134	419.86	162.844	-821.412	205.536	888.726	0	0	0	0	0	0	0	603	903	0
614	4	-3.53774	-104.871	-619.142	-5491.34	-32198	7117.13	147.996	308.869	0	-1.09436	1.15418	-25.4461	419.86	284.915	-684.083	211.197	886.5	0	0	0	0	0	0	0	603	903	0
614	5	-4.45327	-106.397	-620.057	-4942.02	-32503.2	7025.58	147.58	307.97	0	-0.941772	0.696411	-23.9202	328.307	40.7741	-821.412	201.705	889.275	0	0	0	0	0	0	0	603	903	0
614	6	-6.89468	-106.092	-620.973	-5399.78	-32869.4	7254.46	147.068	308.696	0	-1.09436	-1.13464	-21.784	145.202	-81.2963	-1004.52	196.268	896.335	0	0	0	0	0	0	0	603	903	0
614	7	-3.53774	-102.887	-624.94	-5491.34	-32808.4	6979.8	147.502	308.787	0	-0.636596	0.696411	-22.3943	145.202	345.95	-821.412	215.448	896.516	0	0	0	0	0	0	0	603	903	0
614	8	-3.07998	-102.735	-629.518	-5125.13	-32869.4	6979.8	147.786	308.141	0	0.278931	-0.0665281	-20.2581	145.202	284.915	-821.412	214.064	895.832	0	0	0	0	0	0	0	603	903	0
614	9	-5.97915	-104.413	-632.264	-4118.05	-32625.3	7437.56	148.399	306.513	0	0	0	0	0	0	0	200	903	0	0	0	0	0	0	0	603	903	0
615	0	-3.69033	-103.345	-633.485	-4209.6	-33601.8	7208.68	146.957	306.645	0	0	0	0	0	0	0	200	903	0	0	0	0	0	0	0	603	903	0
615	1	-3.69033	-103.498	-633.485	-3385.62	-33235.6	7117.13	147.535	305.344	0	0	0	0	0	0	0	200	903	0	0	0	0	0	0	0	603	903	0
615	2	-4.45327	-104.566	-635.927	-3294.07	-33174.6	7346.01	147.833	305.18	0	0	0	0	0	0	0	200	903	0	0	0	0	0	0	0	603	903	0
615	3	-2.46963	-106.549	-638.368	-2927.86	-33357.7	7483.34	147.745	304.586	0	0	0	0	0	0	0	200	903	0	0	0	0	0	0	0	603	903	0
615	4	-3.84292	-106.244	-640.504	-2927.86	-33907	7346.01	147.062	304.571	0	0	0	0	0	0	0	200	903	0	0	0	0	0	0	0	603	903	0
615	5	-7.19985	-104.413	-640.199	-3294.07	-33784.9	7117.13	147.227	305.145	0	0	0	0	0	0	0	200	903	0	0	0	0	0	0	0	603	903	0
615	6	-7.04727	-104.871	-639.894	-2927.86	-33601.8	7254.46	147.488	304.576	0	0	0	0	0	0	0	200	903	0	0	0	0	0	0	0	603	903	0
615	7	-8.11538	-104.413	-640.199	-3019.41	-33479.7	7437.56	147.704	304.716	0	0	0	0	0	0	0	200	903	0	0	0	0	0	0	0	603	903	0
615	8	-8.72573	-102.124	-642.64	-2561.65	-34334.2	7162.91	146.573	303.986	0	0	0	0	0	0	0	200	903	0	0	0	0	0	0	0	603	903	0
615	9	-9.94644	-100.904	-646.303	-2378.54	-34456.3	6934.02	146.687	303.68	0	0	0	0	0	0	0	200	903	0	0	0	0	0	0	0	603	903	0
616	0	-11.7775	-101.514	-645.997	-1463.02	-34212.2	7025.58	147.04	302.265	0	0	0	0	0	0	0	200	903	0	0	0	0	0	0	0	603	903	0
616	1	-12.5404	-99.9881	-645.997	-1005.25	-34212.2	6750.92	147.04	301.556	0	0	0	0	0	0	0	200	903	0	0	0	0	0	0	0	603	903	0
616	2	-12.9982	-97.6992	-647.523	-730.594	-34639.4	6796.69	146.505	301.128	0	0	0	0	0	0	0	200	903	0	0	0	0	0	0	0	603	903	0
616	3	-11.6249	-99.0725	-647.218	-1096.8	-34822.5	7025.58	146.197	301.695	0	0	0	0	0	0	0	200	903	0	0	0	0	0	0	0	603	903	0
616	4	-12.2353	-98.3096	-649.354	-1279.91	-34822.5	6842.47	146.374	301.971	0	0	0	0	0	0	0	200	903	0	0	0	0	0	0	0	603	903	0
616	5	-13.3034	-96.4785	-649.354	-1096.8	-35066.7	6934.02	145.998	301.689	0	0	0	0	0	0	0	200	903	0	0	0	0	0	0	0	603	903	0
616	6	-13.6085	-95.563	-649.965	-1188.36	-34944.6	7071.35	146.236	301.828	0	0	0	0	0	0	0	200	903	0	0	0	0	0	0	0	603	903	0
616	7	-13.9137	-96.326	-646.608	-1188.36	-35127.7	7117.13	145.674	301.838	0	0	0	0	0	0	0	200	903	0	0	0	0	0	0	0	603	903	0
616	8	-12.9982	-94.4949	-646.608	-364.383	-34761.5	7162.91	146.24	300.564	0	0	0	0	0	0	0	200	903	0	0	0	0	0	0	0	603	903	0
616	9	-11.9301	-94.3423	-646.913	-89.7247	-35066.7	7208.68	145.794	300.139	0	0	0	0	0	0	0	200	903	0	0	0	0	0	0	0	603	903	0
617	0	-12.3878	-93.8845	-648.439	-89.7247	-35127.7	7071.35	145.827	300.138	0	0	0	0	0	0	0	200	903	0	0	0	0	0	0	0	603	903	0
617	1	-13.9137	-93.732	-648.439	551.144	-34578.4	6979.8	146.674	299.15	0	0	0	0	0	0	0	200	903	0	0	0	0	0	0	0	603	903	0
617	2	-11.7775	-94.1897	-647.523	184.934	-34578.4	6934.02	146.599	299.714	0	0	0	0	0	0	0	200	903	0	0	0	0	0	0	0	603	903	0
617	3	-13.1508	-90.8328	-646.913	1.82809	-35005.6	6979.8	145.888	299.997	0	0	0	0	0	0	0	200	903	0	0	0	0	0	0	0	603	903	0
617	4	-13.456	-90.9854	-647.218	459.592	-35188.7	6750.92	145.631	299.29	0	0	0	0	0	0	0	200	903	0	0	0	0	0	0	0	603	903	0
617	5	-13.3034	-90.5276	-648.134	825.803	-34883.6	6659.37	146.178	298.726	0	0	0	0	0	0	0	200	903	0	0	0	0	0	0	0	603	903	0
617	6	-12.2353	-89.0017	-644.777	917.356	-34944.6	6842.47	145.804	298.577	0	0	0	0	0	0	0	200	903	0	0	0	0	0	0	0	603	903	0
617	7	-13.9137	-87.6284	-647.828	1192.01	-35127.7	6842.47	145.776	298.16	0	0	0	0	0	0	0	200	903	0	0	0	0	0	0	0	603	903	0
617	8	-14.5241	-88.6966	-647.523	1466.67	-35127.7	6934.02	145.751	297.735	0	0	0	0	0	0	0	200	903	0	0	0	0	0	0	0	603	903	0
617	9	-13.9137	-88.544	-646.608	2199.09	-34761.5	6842.47	146.24	296.599	0	0	0	0	0	0	0	200	903	0	0	0	0	0	0	0	603	903	0
618	0	-13.1508	-86.1026	-646.913	2290.65	-34761.5	6613.59	146.266	296.459	0	0	0	0	0	0	0	200	903	0	0	0	0	0	0	0	603	903	0
618	1	-13.3034	-88.0862	-648.439	2199.09	-35127.7	6567.81	145.827	296.609	0	0	0	0	0	0	0	200	903	0	0	0	0	0	0	0	603	903	0
618	2	-13.3034	-86.5603	-647.828	1558.22	-35493.9	6705.14	145.211	297.595	0	0	0	0	0	0	0	200	903	0	0	0	0	0	0	0	603	903	0
618	3	-12.693	-85.0344	-646.913	2382.2	-35432.9	6705.14	145.228	296.318	0	0	0	0	0	0	0	200	903	0	0	0	0	0	0	0	603	903	0
618	4	-14.0663	-84.2715	-645.692	2199.09	-35005.6	6430.48	145.786	296.594	0	0	0	0	0	0	0	200	903	0	0	0	0	0	0	0	603	903	0
618	5	-12.9982	-86.4077	-645.387	2473.75	-35432.9	6522.04	145.098	296.167	0	0	0	0	0	0	0	200	903	0	0	0	0	0	0	0	603	903	0
618	6	-13.3034	-83.8137	-646.913	3297.73	-35310.8	6659.37	145.416	294.902	0	0	0	0	0	0	0	200	903	0	0	0	0	0	0	0	603	903	0
618	7	-13.3034	-83.5086	-642.946	3206.17	-35738	6293.15	144.415	295.013	0	0	0	0	0	0	0	200	903	0	0	0	0	0	0	0	603	903	0
618	8	-13.7611	-82.4405	-646.303	3206.17	-35066.7	6384.71	145.743	295.039	0	0	0	0	0	0	0	200	903	0	0	0	0	0	0	0	603	903	0
618	9	-14.5241	-82.1353	-644.471	3480.83	-35005.6	6567.81	145.683	294.599	0	0	0	0	0	0	0	200	903	0	0	0	0	0	0	0	603	903	0
619	0	-14.5241	-81.2197	-642.335	3206.17	-35310.8	6247.38	145.027	295.009	0	0	0	0	0	0	0	200	903	0	0	0	0	0	0	0	603	903	0
619	1	-12.693	-80.6094	-641.725	3389.28	-35249.8	6338.93	145.07	294.719	0	0	0	0	0	0	0	200	903	0	0	0	0	0	0	0	603	903	0
619	2	-12.5404	-79.2361	-642.335	3663.94	-34578.4	6293.15	146.168	294.296	0	0	0	0	0	0	0	200	903	0	0	0	0	0	0	0	603	903	0
619	3	-13.9137	-79.999	-642.64	3480.83	-34761.5	6110.05	145.908	294.584	0	0	0	0	0	0	0	200	903	0	0	0	0	0	0	0	603	903	0
619	4	-13.1508	-78.0154	-641.115	4121.7	-35066.7	6110.05	145.304	293.571	0	0	0	0	0	0	0	200	903	0	0	0	0	0	0	0	603	903	0
619	5	-14.2189	-76.1843	-638.368	4671.02	-35066.7	6247.38	145.068	292.683	0	0	0	0	0	0	0	200	903	0	0	0	0	0	0	0	603	903	0
619	6	-13.9137	-76.4895	-637.147	4671.02	-34578.4	5972.72	145.729	292.669	0	0	0	0	0	0	0	200	903	0	0	0	0	0	0	0	603	903	0
619	7	-12.0827	-75.2688	-636.537	4579.46	-34700.4	6064.27	145.486	292.806	0	0	0	0	0	0	0	200	903	0	0	0	0	0	0	0	603	903	0
619	8	-12.3878	-74.9636	-637.758	5128.78	-34517.3	5789.61	145.877	291.958	0	0	0	0	0	0	0	200	903	0	0	0	0	0	0	0	603	903	0
619	9	-12.0827	-73.4378	-632.264	4762.57	-34761.5	6018.5	145.021	292.467	0	0	0	0	0	0	0	200	903	0	0	0	0	0	0	0	603	903	0
620	0	-13.7611	-72.3697	-634.401	5220.33	-34761.5	5743.84	145.206	291.771	0	0	0	0	0	0	0	200	903	0	0	0	0	0	0	0	603	903	0
620	1	-14.2189	-72.2171	-631.044	5128.78	-34456.3	5606.51	145.398	291.873	0	0	0	0	0	0	0	200	903	0	0	0	0	0	0	0	603	903	0
620	2	-13.7611	-70.9964	-626.771	4854.12	-34517.3	5560.73	144.928	292.255	0	0	0	0	0	0	0	200	903	0	0	0	0	0	0	0	603	903	0
620	3	-13.1508	-69.7757	-628.602	5678.1	-34700.4	5698.06	144.797	290.967	0	0	0	0	0	0	0	200	903	0	0	0	0	0	0	0	603	903	0
620	4	-13.1508	-68.8601	-629.213	5678.1	-34822.5	5377.63	144.657	290.976	0	0	0	0	0	0	0	200	903	0	0	0	0	0	0	0	603	903	0
620	5	-13.3034	-68.555	-627.382	6044.31	-34517.3	5331.85	144.982	290.366	0	0	0	0	0	0	0	200	903	0	0	0	0	0	0	0	603	903	0
620	6	-14.0663	-67.6394	-627.076	5769.65	-34578.4	5102.97	144.858	290.799	0	0	0	0	0	0	0	200	903	0	0	0	0	0	0	0	603	903	0
620	7	-12.5404	-67.0291	-623.109	5586.54	-34700.4	5286.07	144.311	291.034	0	0	0	0	0	0	0	200	903	0	0	0	0	0	0	0	603	903	0
620	8	-14.0663	-66.4187	-622.804	4854.12	-34700.4	5194.52	144.284	292.206	0	0	0	0	0	0	0	200	903	0	0	0	0	0	0	0	603	903	0
620	9	-13.1508	-64.7403	-622.194	5952.76	-34395.3	5102.97	144.719	290.433	0	0	0	0	0	0	0	200	903	0	0	0	0	0	0	0	603	903	0
621	0	-12.2353	-63.5196	-622.499	5586.54	-34151.1	5011.42	145.139	291.026	0	0	0	0	0	0	0	200	903	0	0	0	0	0	0	0	603	903	0
621	1	-12.5404	-62.9092	-619.752	5769.65	-34395.3	5148.75	144.502	290.69	0	0	0	0	0	0	0	200	903	0	0	0	0	0	0	0	603	903	0
621	2	-13.1508	-61.3833	-619.447	6227.41	-33968	4919.86	145.164	289.947	0	0	0	0	0	0	0	200	903	0	0	0	0	0	0	0	603	903	0
621	3	-12.9982	-60.6204	-615.175	6135.86	-34212.2	4828.31	144.386	290.026	0	0	0	0	0	0	0	200	903	0	0	0	0	0	0	0	603	903	0
621	4	-13.7611	-60.1626	-611.513	6318.97	-33784.9	4553.65	144.752	289.667	0	0	0	0	0	0	0	200	903	0	0	0	0	0	0	0	603	903	0
621	5	-12.3878	-58.6367	-611.513	6135.86	-33662.9	4782.53	144.951	289.966	0	0	0	0	0	0	0	200	903	0	0	0	0	0	0	0	603	903	0
621	6	-12.3878	-58.0264	-612.428	6502.07	-33907	4462.1	144.635	289.383	0	0	0	0	0	0	0	200	903	0	0	0	0	0	0	0	603	903	0
621	7	-11.6249	-56.6531	-609.376	5952.76	-33846	4187.44	144.458	290.231	0	0	0	0	0	0	0	200	903	0	0	0	0	0	0	0	603	903	0
621	8	-12.9982	-55.8902	-609.681	6227.41	-33296.6	4370.55	145.387	289.786	0	0	0	0	0	0	0	200	903	0	0	0	0	0	0	0	603	903	0
621	9	-13.456	-54.822	-605.714	6227.41	-33357.7	4187.44	144.928	289.719	0	0	0	0	0	0	0	200	903	0	0	0	0	0	0	0	603	903	0
622	0	-12.3878	-55.1272	-603.273	6318.97	-33662.9	4141.66	144.2	289.526	0	0	0	0	0	0	0	200	903	0	0	0	0	0	0	0	603	903	0
622	1	-11.7775	-52.8384	-602.357	7234.5	-33235.6	4370.55	144.824	287.99	0	0	0	0	0	0	0	200	903	0	0	0	0	0	0	0	603	903	0
622	2	-11.7775	-52.8384	-601.137	7142.94	-32991.5	4141.66	145.118	288.118	0	0	0	0	0	0	0	200	903	0	0	0	0	0	0	0	603	903	0
622	3	-12.5404	-52.0755	-598.39	7966.92	-32930.4	4095.89	144.968	286.686	0	0	0	0	0	0	0	200	903	0	0	0	0	0	0	0	603	903	0
622	4	-12.8456	-51.4651	-598.085	7509.15	-33174.6	3821.23	144.532	287.445	0	0	0	0	0	0	0	200	903	0	0	0	0	0	0	0	603	903	0
622	5	-12.8456	-51.3125	-592.592	7234.5	-32930.4	4324.77	144.43	287.792	0	0	0	0	0	0	0	200	903	0	0	0	0	0	0	0	603	903	0
622	6	-11.0146	-50.8548	-590.761	7051.39	-32686.3	3729.68	144.671	288.064	0	0	0	0	0	0	0	200	903	0	0	0	0	0	0	0	603	903	0
622	7	-11.0146	-50.0918	-588.319	7326.05	-32137	4050.11	145.375	287.547	0	0	0	0	0	0	0	200	903	0	0	0	0	0	0	0	603	903	0
622	8	-11.0146	-48.4133	-587.709	7417.6	-32686.3	3729.68	144.384	287.379	0	0	0	0	0	0	0	200	903	0	0	0	0	0	0	0	603	903	0
622	9	-11.3197	-47.6504	-585.267	7142.94	-32625.3	3592.35	144.256	287.795	0	0	0	0	0	0	0	200	903	0	0	0	0	0	0	0	603	903	0
623	0	-12.0827	-47.803	-581.3	7783.81	-32075.9	3592.35	144.82	286.61	0	0	0	0	0	0	0	200	903	0	0	0	0	0	0	0	603	903	0
623	1	-12.0827	-45.9719	-578.554	8058.47	-31709.7	3455.02	145.191	286.071	0	0	0	0	0	0	0	200	903	0	0	0	0	0	0	0	603	903	0
623	2	-10.7094	-45.3616	-577.028	8333.13	-31892.8	3500.8	144.729	285.559	0	0	0	0	0	0	0	200	903	0	0	0	0	0	0	0	603	903	0
623	3	-9.64126	-45.5142	-576.112	8974	-32014.9	3271.91	144.429	284.423	0	0	0	0	0	0	0	200	903	0	0	0	0	0	0	0	603	903	0
623	4	-10.2516	-44.7512	-570.009	8058.47	-32014.9	3180.36	143.834	285.863	0	0	0	0	0	0	0	200	903	0	0	0	0	0	0	0	603	903	0
623	5	-10.862	-44.2935	-570.314	8424.68	-31404.6	3134.58	144.935	285.228	0	0	0	0	0	0	0	200	903	0	0	0	0	0	0	0	603	903	0
623	6	-11.4723	-42.9202	-567.567	8882.44	-30977.3	3134.58	145.421	284.35	0	0	0	0	0	0	0	200	903	0	0	0	0	0	0	0	603	903	0
623	7	-11.1671	-42.7676	-561.464	8150.02	-31160.4	3409.24	144.501	285.484	0	0	0	0	0	0	0	200	903	0	0	0	0	0	0	0	603	903	0
623	8	-10.099	-41.0891	-561.769	8699.34	-31587.7	3134.58	143.771	284.514	0	0	0	0	0	0	0	200	903	0	0	0	0	0	0	0	603	903	0
623	9	-10.4042	-41.0891	-562.379	8241.57	-31160.4	2722.6	144.592	285.345	0	0	0	0	0	0	0	200	903	0	0	0	0	0	0	0	603	903	0
624	0	-11.0146	-39.8684	-561.159	8424.68	-30977.3	2905.7	144.798	284.987	0	0	0	0	0	0	0	200	903	0	0	0	0	0	0	0	603	903	0
624	1	-11.0146	-40.4788	-558.717	8699.34	-30794.2	2676.82	144.884	284.43	0	0	0	0	0	0	0	200	903	0	0	0	0	0	0	0	603	903	0
624	2	-11.4723	-38.19	-554.139	9889.52	-30977.3	2631.04	144.098	282.153	0	0	0	0	0	0	0	200	903	0	0	0	0	0	0	0	603	903	0
624	3	-11.1671	-37.8848	-552.308	9706.42	-30794.2	2539.49	144.245	282.426	0	0	0	0	0	0	0	200	903	0	0	0	0	0	0	0	603	903	0
624	4	-10.5568	-37.7322	-550.172	10164.2	-30367	2585.27	144.805	281.525	0	0	0	0	0	0	0	200	903	0	0	0	0	0	0	0	603	903	0
624	5	-10.5568	-37.427	-549.562	9706.42	-30305.9	2539.49	144.854	282.338	0	0	0	0	0	0	0	200	903	0	0	0	0	0	0	0	603	903	0
624	6	-11.9301	-36.8167	-547.731	9889.52	-30916.3	2173.28	143.556	281.945	0	0	0	0	0	0	0	200	903	0	0	0	0	0	0	0	603	903	0
624	7	-9.94644	-37.427	-544.679	10164.2	-30611.1	2356.39	143.8	281.339	0	0	0	0	0	0	0	200	903	0	0	0	0	0	0	0	603	903	0
624	8	-12.2353	-35.9011	-542.848	9248.65	-30183.9	2585.27	144.397	282.963	0	0	0	0	0	0	0	200	903	0	0	0	0	0	0	0	603	903	0
624	9	-10.7094	-35.4434	-539.491	9614.87	-30244.9	2356.39	143.938	282.178	0	0	0	0	0	0	0	200	903	0	0	0	0	0	0	0	603	903	0
625	0	-10.862	-33.9175	-539.491	10530.4	-29817.6	2264.83	144.73	280.481	0	0	0	0	0	0	0	200	903	0	0	0	0	0	0	0	603	903	0
625	1	-11.0146	-33.4597	-533.693	9981.08	-30367	2173.28	143.1	281.298	0	0	0	0	0	0	0	200	903	0	0	0	0	0	0	0	603	903	0
625	2	-11.6249	-34.2227	-535.219	10347.3	-30061.8	2081.73	143.833	280.667	0	0	0	0	0	0	0	200	903	0	0	0	0	0	0	0	603	903	0
625	3	-11.4723	-31.9339	-532.472	10805.1	-29451.4	2447.94	144.689	279.708	0	0	0	0	0	0	0	200	903	0	0	0	0	0	0	0	603	903	0
625	4	-9.94644	-31.6287	-529.115	10896.6	-29268.3	1990.17	144.684	279.406	0	0	0	0	0	0	0	200	903	0	0	0	0	0	0	0	603	903	0
625	5	-8.42056	-31.7813	-528.2	11354.4	-29512.5	2035.95	144.126	278.504	0	0	0	0	0	0	0	200	903	0	0	0	0	0	0	0	603	903	0
625	6	-9.94644	-31.0183	-526.979	11537.5	-29268.3	2081.73	144.46	278.106	0	0	0	0	0	0	0	200	903	0	0	0	0	0	0	0	603	903	0
625	7	-11.3197	-31.9339	-524.843	11262.8	-29024.2	1898.62	144.699	278.541	0	0	0	0	0	0	0	200	903	0	0	0	0	0	0	0	603	903	0
625	8	-10.862	-30.2554	-519.96	10896.6	-28902.1	1807.07	144.415	279.043	0	0	0	0	0	0	0	200	903	0	0	0	0	0	0	0	603	903	0
625	9	-10.2516	-29.0347	-517.213	11262.8	-28719	1807.07	144.474	278.224	0	0	0	0	0	0	0	200	903	0	0	0	0	0	0	0	603	903	0
626	0	-8.87832	-27.6614	-515.992	10988.2	-29207.3	1532.41	143.396	278.705	0	0	0	0	0	0	0	200	903	0	0	0	0	0	0	0	603	903	0
626	1	-10.099	-27.3562	-516.298	11629	-28963.2	1578.19	143.902	277.476	0	0	0	0	0	0	0	200	903	0	0	0	0	0	0	0	603	903	0
626	2	-10.5568	-26.2881	-514.467	13002.3	-28291.8	1669.74	145.008	274.727	0	0	0	0	0	0	0	200	903	0	0	0	0	0	0	0	603	903	0
626	3	-11.6249	-25.6778	-511.11	12544.6	-28352.8	1532.41	144.527	275.456	0	0	0	0	0	0	0	200	903	0	0	0	0	0	0	0	603	903	0
626	4	-10.5568	-26.5933	-508.668	13185.4	-28535.9	1349.31	143.901	274.079	0	0	0	0	0	0	0	200	903	0	0	0	0	0	0	0	603	903	0
626	5	-9.94644	-26.1355	-507.753	13002.3	-28291.8	1303.53	144.28	274.392	0	0	0	0	0	0	0	200	903	0	0	0	0	0	0	0	603	903	0
626	6	-9.48867	-25.8303	-507.448	13185.4	-28169.7	1211.98	144.488	274.016	0	0	0	0	0	0	0	200	903	0	0	0	0	0	0	0	603	903	0
626	7	-10.862	-24.7622	-504.701	12910.8	-27986.6	1395.08	144.548	274.419	0	0	0	0	0	0	0	200	903	0	0	0	0	0	0	0	603	903	0
626	8	-9.48867	-24.7622	-502.26	13093.9	-28169.7	1349.31	143.914	273.93	0	0	0	0	0	0	0	200	903	0	0	0	0	0	0	0	603	903	0
626	9	-11.3197	-23.5415	-500.123	13002.3	-27925.6	1120.42	144.163	274.002	0	0	0	0	0	0	0	200	903	0	0	0	0	0	0	0	603	903	0
627	0	-9.64126	-22.4734	-498.597	13002.3	-27986.6	1120.42	143.869	273.922	0	0	0	0	0	0	0	200	903	0	0	0	0	0	0	0	603	903	0
627	1	-9.33608	-22.1682	-497.987	13551.6	-27742.4	1028.87	144.291	272.787	0	0	0	0	0	0	0	200	903	0	0	0	0	0	0	0	603	903	0
627	2	-9.33608	-22.0156	-491.884	13643.2	-27620.4	1074.65	143.848	272.263	0	0	0	0	0	0	0	200	903	0	0	0	0	0	0	0	603	903	0
627	3	-10.2516	-21.4053	-494.63	14192.5	-27681.4	845.765	144.036	271.307	0	0	0	0	0	0	0	200	903	0	0	0	0	0	0	0	603	903	0
627	4	-9.64126	-22.1682	-490.358	14650.3	-27681.4	891.542	143.549	270.123	0	0	0	0	0	0	0	200	903	0	0	0	0	0	0	0	603	903	0
627	5	-9.48867	-21.8631	-487.611	14284.1	-27193.1	983.094	144.232	270.706	0	0	0	0	0	0	0	200	903	0	0	0	0	0	0	0	603	903	0
627	6	-7.65762	-22.7786	-489.747	14467.2	-27010	891.542	144.849	270.46	0	0	0	0	0	0	0	200	903	0	0	0	0	0	0	0	603	903	0
627	7	-9.48867	-20.3372	-487.001	14192.5	-27193.1	754.213	144.162	270.857	0	0	0	0	0	0	0	200	903	0	0	0	0	0	0	0	603	903	0
627	8	-10.4042	-20.1846	-485.17	13826.3	-27132.1	708.436	144.077	271.502	0	0	0	0	0	0	0	200	903	0	0	0	0	0	0	0	603	903	0
627	9	-8.57314	-18.6587	-482.728	14650.3	-26704.8	799.989	144.679	269.651	0	0	0	0	0	0	0	200	903	0	0	0	0	0	0	0	603	903	0
628	0	-9.79385	-18.5061	-478.761	14833.4	-26643.8	1074.65	144.348	269.017	0	0	0	0	0	0	0	200	903	0	0	0	0	0	0	0	603	903	0
628	1	-8.57314	-17.2854	-476.625	15108	-26765.9	250.672	143.843	268.302	0	0	0	0	0	0	0	200	903	0	0	0	0	0	0	0	603	903	0
628	2	-9.03091	-17.1328	-475.709	15748.9	-26338.6	571.107	144.633	266.894	0	0	0	0	0	0	0	200	903	0	0	0	0	0	0	0	603	903	0
628	3	-9.33608	-17.5906	-471.437	15840.5	-26765.9	433.778	143.225	266.4	0	0	0	0	0	0	0	200	903	0	0	0	0	0	0	0	603	903	0
628	4	-10.4042	-17.438	-474.183	16572.9	-26643.8	662.66	143.811	265.05	0	0	0	0	0	0	0	200	903	0	0	0	0	0	0	0	603	903	0
628	5	-9.94644	-16.6751	-472.352	16389.8	-26094.5	571.107	144.756	265.302	0	0	0	0	0	0	0	200	903	0	0	0	0	0	0	0	603	903	0
628	6	-9.48867	-16.5225	-470.521	16206.7	-26643.8	571.107	143.374	265.556	0	0	0	0	0	0	0	200	903	0	0	0	0	0	0	0	603	903	0
628	7	-9.48867	-16.3699	-468.69	16023.6	-26155.5	67.5668	144.194	265.812	0	0	0	0	0	0	0	200	903	0	0	0	0	0	0	0	603	903	0
628	8	-8.57314	-15.607	-468.69	16572.9	-26094.5	708.436	144.325	264.64	0	0	0	0	0	0	0	200	903	0	0	0	0	0	0	0	603	903	0
628	9	-9.94644	-14.5388	-467.164	16847.5	-25972.4	67.5668	144.404	263.937	0	0	0	0	0	0	0	200	903	0	0	0	0	0	0	0	603	903	0
629	0	-9.33608	-14.5388	-462.282	17305.3	-26399.7	250.672	142.893	262.565	0	0	0	0	0	0	0	200	903	0	0	0	0	0	0	0	603	903	0
629	1	-10.5568	-15.3018	-461.366	17213.7	-25850.4	342.225	143.97	262.69	0	0	0	0	0	0	0	200	903	0	0	0	0	0	0	0	603	903	0
629	2	-9.79385	-13.4707	-461.061	17671.5	-25972.4	479.554	143.668	261.672	0	0	0	0	0	0	0	200	903	0	0	0	0	0	0	0	603	903	0
629	3	-9.03091	-13.1655	-461.976	17946.2	-25850.4	433.778	144.044	261.154	0	0	0	0	0	0	0	200	903	0	0	0	0	0	0	0	603	903	0
629	4	-10.2516	-13.6233	-457.704	18129.3	-25789.3	250.672	143.655	260.391	0	0	0	0	0	0	0	200	903	0	0	0	0	0	0	0	603	903	0
629	5	-10.099	-13.9285	-458.619	18220.8	-25850.4	67.5668	143.634	260.27	0	0	0	0	0	0	0	200	903	0	0	0	0	0	0	0	603	903	0
629	6	-10.2516	-12.5552	-455.568	18312.4	-25606.2	159.12	143.793	259.803	0	0	0	0	0	0	0	200	903	0	0	0	0	0	0	0	603	903	0
629	7	-8.57314	-12.8604	-454.042	18495.5	-25362.1	-298.644	144.142	259.265	0	0	0	0	0	0	0	200	903	0	0	0	0	0	0	0	603	903	0
629	8	-9.33608	-13.7759	-453.126	18403.9	-25728.3	-161.315	143.221	259.385	0	0	0	0	0	0	0	200	903	0	0	0	0	0	0	0	603	903	0
629	9	-8.72573	-11.3345	-453.431	18312.4	-25667.3	-161.315	143.393	259.614	0	0	0	0	0	0	0	200	903	0	0	0	0	0	0	0	603	903	0
630	0	-9.79385	-10.8767	-452.516	19502.6	-25240	-161.315	144.223	256.902	0	0	0	0	0	0	0	200	903	0	0	0	0	0	0	0	603	903	0
630	1	-8.72573	-10.8767	-449.769	19227.9	-25056.9	-69.7623	144.289	257.249	0	0	0	0	0	0	0	200	903	0	0	0	0	0	0	0	603	903	0
630	2	-9.64126	-11.1819	-445.497	20051.9	-25117.9	-252.868	143.618	254.99	0	0	0	0	0	0	0	200	903	0	0	0	0	0	0	0	603	903	0
630	3	-8.72573	-11.1819	-448.549	20326.5	-25362.1	-207.091	143.457	254.684	0	0	0	0	0	0	0	200	903	0	0	0	0	0	0	0	603	903	0
630	4	-8.87832	-12.25	-449.159	21150.5	-25301	-252.868	143.67	252.911	0	0	0	0	0	0	0	200	903	0	0	0	0	0	0	0	603	903	0
630	5	-9.1835	-11.4871	-448.243	21150.5	-24873.8	-252.868	144.508	252.815	0	0	0	0	0	0	0	200	903	0	0	0	0	0	0	0	603	903	0
630	6	-9.94644	-12.8604	-446.412	20784.3	-24934.8	-207.091	144.144	253.441	0	0	0	0	0	0	0	200	903	0	0	0	0	0	0	0	603	903	0
630	7	-9.79385	-11.0293	-444.276	20875.9	-25301	-344.421	143.051	253.012	0	0	0	0	0	0	0	200	903	0	0	0	0	0	0	0	603	903	0
630	8	-8.26797	-11.1819	-443.666	21699.8	-25117.9	-161.315	143.385	251.09	0	0	0	0	0	0	0	200	903	0	0	0	0	0	0	0	603	903	0
630	9	-6.43691	-10.5716	-445.192	22249.1	-25179	21.7904	143.442	250.023	0	0	0	0	0	0	0	200	903	0	0	0	0	0	0	0	603	903	0
631	0	-8.57314	-9.65603	-443.971	21699.8	-24995.9	-207.091	143.699	251.123	0	0	0	0	0	0	0	200	903	0	0	0	0	0	0	0	603	903	0
631	1	-9.33608	-11.7923	-443.666	22340.7	-25056.9	-23.9859	143.523	249.645	0	0	0	0	0	0	0	200	903	0	0	0	0	0	0	0	603	903	0
631	2	-9.1835	-9.80861	-439.699	22981.6	-24995.9	-481.75	143.152	247.733	0	0	0	0	0	0	0	200	903	0	0	0	0	0	0	0	603	903	0
631	3	-9.1835	-10.2664	-440.919	23164.7	-25301	-298.644	142.618	247.463	0	0	0	0	0	0	0	200	903	0	0	0	0	0	0	0	603	903	0
631	4	-7.96279	-10.1138	-439.699	23347.8	-25117.9	-481.75	142.875	246.9	0	0	0	0	0	0	0	200	903	0	0	0	0	0	0	0	603	903	0
631	5	-8.11538	-9.19826	-441.53	23439.3	-24934.8	-207.091	143.526	246.913	0	0	0	0	0	0	0	200	903	0	0	0	0	0	0	0	603	903	0
631	6	-8.26797	-9.9612	-439.699	23164.7	-25117.9	-527.526	142.875	247.317	0	0	0	0	0	0	0	200	903	0	0	0	0	0	0	0	603	903	0
631	7	-7.81021	-9.19826	-437.867	23714	-25240	-390.197	142.357	245.842	0	0	0	0	0	0	0	200	903	0	0	0	0	0	0	0	603	903	0
631	8	-8.57314	-7.82497	-434.816	24446.4	-24873.8	-435.973	142.795	243.778	0	0	0	0	0	0	0	200	903	0	0	0	0	0	0	0	603	903	0
631	9	-7.35244	-7.82497	-437.257	23988.6	-25056.9	-710.631	142.695	245.138	0	0	0	0	0	0	0	200	903	0	0	0	0	0	0	0	603	903	0
632	0	-6.89468	-9.80861	-439.699	25178.8	-25056.9	-802.184	143.013	242.736	0	0	0	0	0	0	0	200	903	0	0	0	0	0	0	0	603	903	0
632	1	-7.96279	-7.82497	-439.393	25270.4	-24812.8	-573.302	143.53	242.488	0	0	0	0	0	0	0	200	903	0	0	0	0	0	0	0	603	903	0
632	2	-6.28433	-6.90944	-437.257	25636.6	-24568.6	-710.631	143.812	241.37	0	0	0	0	0	0	0	200	903	0	0	0	0	0	0	0	603	903	0
632	3	-7.19985	-7.21462	-436.342	26277.5	-24873.8	-619.079	142.995	239.778	0	0	0	0	0	0	0	200	903	0	0	0	0	0	0	0	603	903	0
632	4	-6.43691	-7.06203	-436.036	26460.6	-24934.8	-390.197	142.815	239.316	0	0	0	0	0	0	0	200	903	0	0	0	0	0	0	0	603	903	0
632	5	-7.04727	-7.21462	-437.562	26552.1	-25179	-939.513	142.456	239.318	0	0	0	0	0	0	0	200	903	0	0	0	0	0	0	0	603	903	0
632	6	-6.13174	-6.1465	-434.205	26735.2	-24690.7	-710.631	143.136	238.427	0	0	0	0	0	0	0	200	903	0	0	0	0	0	0	0	603	903	0
632	7	-6.5895	-5.99392	-437.867	27193	-24812.8	-802.184	143.333	237.897	0	0	0	0	0	0	0	200	903	0	0	0	0	0	0	0	603	903	0
632	8	-6.89468	-5.53615	-436.647	27101.4	-25117.9	-1076.84	142.475	237.933	0	0	0	0	0	0	0	200	903	0	0	0	0	0	0	0	603	903	0
632	9	-4.91104	-6.1465	-436.342	27376.1	-25179	-893.737	142.295	237.26	0	0	0	0	0	0	0	200	903	0	0	0	0	0	0	0	603	903	0
633	0	-4.75845	-5.84133	-438.173	28108.5	-24812.8	-710.631	143.372	235.851	0	0	0	0	0	0	0	200	903	0	0	0	0	0	0	0	603	903	0
633	1	-4.91104	-5.07839	-438.783	28474.7	-24995.9	-985.29	143.034	235.105	0	0	0	0	0	0	0	200	903	0	0	0	0	0	0	0	603	903	0
633	2	-5.3688	-5.68874	-439.088	28749.4	-25117.9	-1122.62	142.795	234.525	0	0	0	0	0	0	0	200	903	0	0	0	0	0	0	0	603	903	0
633	3	-6.13174	-5.53615	-437.562	28932.5	-25423.1	-893.737	141.898	233.878	0	0	0	0	0	0	0	200	903	0	0	0	0	0	0	0	603	903	0
633	4	-4.45327	-5.53615	-438.478	29024	-24873.8	-893.737	143.272	233.807	0	0	0	0	0	0	0	200	903	0	0	0	0	0	0	0	603	903	0
633	5	-2.31704	-5.23098	-440.309	29115.6	-25117.9	-893.737	142.954	233.875	0	0	0	0	0	0	0	200	903	0	0	0	0	0	0	0	603	903	0
633	6	-3.84292	-5.68874	-439.699	29298.7	-25056.9	-893.737	143.013	233.366	0	0	0	0	0	0	0	200	903	0	0	0	0	0	0	0	603	903	0
633	7	-4.75845	-4.01027	-440.614	29481.8	-25362.1	-893.737	142.439	233.089	0	0	0	0	0	0	0	200	903	0	0	0	0	0	0	0	603	903	0
633	8	-3.07998	-4.31545	-438.783	30122.7	-25240	-847.961	142.477	231.35	0	0	0	0	0	0	0	200	903	0	0	0	0	0	0	0	603	903	0
633	9	-4.1481	-4.01027	-434.816	30031.1	-25117.9	-939.513	142.233	230.934	0	0	0	0	0	0	0	200	903	0	0	0	0	0	0	0	603	903	0
634	0	-2.62222	-3.39992	-439.088	31129.8	-25179	-847.961	142.656	229.104	0	0	0	0	0	0	0	200	903	0	0	0	0	0	0	0	603	903	0
634	1	-3.38516	-3.24733	-441.53	31862.2	-25423.1	-1168.4	142.42	227.837	0	0	0	0	0	0	0	200	903	0	0	0	0	0	0	0	603	903	0
634	2	-3.84292	-4.16286	-442.445	31679.1	-25423.1	-1259.95	142.54	228.4	0	0	0	0	0	0	0	200	903	0	0	0	0	0	0	0	603	903	0
634	3	-3.23257	-3.55251	-439.699	32319.9	-25301	-1214.17	142.458	226.495	0	0	0	0	0	0	0	200	903	0	0	0	0	0	0	0	603	903	0
634	4	-2.7748	-5.23098	-442.445	32503.1	-24568.6	-1305.72	144.471	226.538	0	0	0	0	0	0	0	200	903	0	0	0	0	0	0	0	603	903	0
634	5	-2.92739	-3.55251	-441.53	32136.8	-25606.2	-1443.05	142.006	227.215	0	0	0	0	0	0	0	200	903	0	0	0	0	0	0	0	603	903	0
634	6	-2.46963	-2.63698	-443.055	32777.7	-25179	-1351.5	143.17	226.019	0	0	0	0	0	0	0	200	903	0	0	0	0	0	0	0	603	903	0
634	7	-3.23257	-2.63698	-443.361	33235.5	-25301	-1305.72	142.934	225.037	0	0	0	0	0	0	0	200	903	0	0	0	0	0	0	0	603	903	0
634	8	-2.92739	-1.72146	-444.276	33418.6	-25484.1	-1671.94	142.639	224.78	0	0	0	0	0	0	0	200	903	0	0	0	0	0	0	0	603	903	0
634	9	-2.62222	-2.94216	-443.666	33967.9	-25484.1	-1443.05	142.56	223.438	0	0	0	0	0	0	0	200	903	0	0	0	0	0	0	0	603	903	0
635	0	-2.16445	-2.17922	-444.581	34791.9	-25789.3	-1397.28	141.992	221.742	0	0	0	0	0	0	0	200	903	0	0	0	0	0	0	0	603	903	0
635	1	-2.16445	-1.41628	-446.107	34975	-25728.3	-1443.05	142.327	221.6	0	0	0	0	0	0	0	200	903	0	0	0	0	0	0	0	603	903	0
635	2	-2.31704	-2.02663	-446.412	35432.7	-25240	-985.29	143.46	220.628	0	0	0	0	0	0	0	200	903	0	0	0	0	0	0	0	603	903	0
635	3	-2.62222	-1.87404	-444.276	35341.2	-25362.1	-1443.05	142.914	220.452	0	0	0	0	0	0	0	200	903	0	0	0	0	0	0	0	603	903	0
635	4	-2.01187	-2.17922	-444.581	36622.9	-25850.4	-1259.95	141.855	217.624	0	0	0	0	0	0	0	200	903	0	0	0	0	0	0	0	603	903	0
635	5	-0.0282228	-1.72146	-446.718	35890.5	-25606.2	-1626.16	142.679	219.657	0	0	0	0	0	0	0	200	903	0	0	0	0	0	0	0	603	903	0
635	6	-1.5541	-1.87404	-447.328	36714.5	-25667.3	-1351.5	142.621	217.925	0	0	0	0	0	0	0	200	903	0	0	0	0	0	0	0	603	903	0
635	7	-2.62222	-1.41628	-448.243	36073.6	-25789.3	-1443.05	142.466	219.522	0	0	0	0	0	0	0	200	903	0	0	0	0	0	0	0	603	903	0
635	8	-2.31704	-0.195577	-447.633	36806	-25911.4	-1397.28	142.115	217.776	0	0	0	0	0	0	0	200	903	0	0	0	0	0	0	0	603	903	0
635	9	-1.24893	-1.72146	-446.718	37538.5	-25667.3	-1717.71	142.543	215.968	0	0	0	0	0	0	0	200	903	0	0	0	0	0	0	0	603	903	0
636	0	0.276953	-0.348165	-449.464	38270.9	-25484.1	-1534.61	143.301	214.852	0	0	0	0	0	0	0	200	903	0	0	0	0	0	0	0	603	903	0
636	1	-1.40151	-0.0429889	-447.938	38728.6	-25423.1	-1671.94	143.244	213.54	0	0	0	0	0	0	0	200	903	0	0	0	0	0	0	0	603	903	0
636	2	-2.46963	-0.958516	-449.769	39461.1	-26033.5	-1488.83	142.118	212.264	0	0	0	0	0	0	0	200	903	0	0	0	0	0	0	0	603	903	0
636	3	-2.46963	-0.348165	-449.159	39277.9	-25789.3	-1992.37	142.583	212.552	0	0	0	0	0	0	0	200	903	0	0	0	0	0	0	0	603	903	0
636	4	-0.94375	-0.805928	-449.769	39827.3	-26216.6	-1671.94	141.711	211.45	0	0	0	0	0	0	0	200	903	0	0	0	0	0	0	0	603	903	0
636	5	-0.180811	-0.195577	-450.685	39644.2	-25484.1	-1855.04	143.455	212.036	0	0	0	0	0	0	0	200	903	0	0	0	0	0	0	0	603	903	0
636	6	-1.5541	-0.0429889	-449.464	40285	-26155.5	-1992.37	141.807	210.371	0	0	0	0	0	0	0	200	903	0	0	0	0	0	0	0	603	903	0
636	7	-3.38516	-0.805928	-453.126	40925.9	-26033.5	-2083.92	142.547	209.681	0	0	0	0	0	0	0	200	903	0	0	0	0	0	0	0	603	903	0
636	8	-3.99551	1.17771	-451.906	40651.3	-26033.5	-1946.59	142.392	210.045	0	0	0	0	0	0	0	200	903	0	0	0	0	0	0	0	603	903	0
636	9	-2.62222	1.63548	-453.126	41017.5	-25850.4	-2221.25	142.951	209.479	0	0	0	0	0	0	0	200	903	0	0	0	0	0	0	0	603	903	0
637	0	-2.31704	0.872538	-456.483	41933	-26033.5	-2038.15	142.97	208.139	0	0	0	0	0	0	0	200	903	0	0	0	0	0	0	0	603	903	0
637	1	-3.07998	1.48289	-453.126	42482.3	-26460.7	-2129.7	141.604	206.246	0	0	0	0	0	0	0	200	903	0	0	0	0	0	0	0	603	903	0
637	2	-4.60586	1.02513	-457.704	43031.6	-26643.8	-2083.92	141.788	205.984	0	0	0	0	0	0	0	200	903	0	0	0	0	0	0	0	603	903	0
637	3	-4.1481	1.3303	-456.483	43214.7	-26277.6	-2038.15	142.435	205.331	0	0	0	0	0	0	0	200	903	0	0	0	0	0	0	0	603	903	0
637	4	-4.60586	1.02513	-458.009	43214.7	-26460.7	-2038.15	142.227	205.647	0	0	0	0	0	0	0	200	903	0	0	0	0	0	0	0	603	903	0
637	5	-3.69033	1.94065	-459.23	43214.7	-26582.8	-2129.7	142.114	205.897	0	0	0	0	0	0	0	200	903	0	0	0	0	0	0	0	603	903	0
637	6	-4.75845	1.78807	-460.451	43855.6	-26460.7	-2083.92	142.533	204.755	0	0	0	0	0	0	0	200	903	0	0	0	0	0	0	0	603	903	0
637	7	-3.69033	2.85618	-460.451	44313.4	-26888	-2129.7	141.605	203.761	0	0	0	0	0	0	0	200	903	0	0	0	0	0	0	0	603	903	0
637	8	-5.67397	2.85618	-461.061	44679.6	-26582.8	-2358.58	142.344	203.094	0	0	0	0	0	0	0	200	903	0	0	0	0	0	0	0	603	903	0
637	9	-4.30068	1.48289	-461.976	45045.8	-26643.8	-2404.36	142.326	202.493	0	0	0	0	0	0	0	200	903	0	0	0	0	0	0	0	603	903	0
638	0	-4.91104	3.46653	-465.028	45778.2	-27193.1	-2267.03	141.524	201.558	0	0	0	0	0	0	0	200	903	0	0	0	0	0	0	0	603	903	0
638	1	-5.67397	3.61912	-465.944	46510.6	-27132.1	-1763.49	141.77	200.18	0	0	0	0	0	0	0	200	903	0	0	0	0	0	0	0	603	903	0
638	2	-4.91104	3.61912	-465.028	47151.5	-26888	-2404.36	142.18	198.605	0	0	0	0	0	0	0	200	903	0	0	0	0	0	0	0	603	903	0
638	3	-7.19985	3.46653	-465.028	47151.5	-27010	-2221.25	141.917	198.605	0	0	0	0	0	0	0	200	903	0	0	0	0	0	0	0	603	903	0
638	4	-6.28433	3.00877	-468.385	47609.3	-27315.2	-2404.36	141.682	198.354	0	0	0	0	0	0	0	200	903	0	0	0	0	0	0	0	603	903	0
638	5	-6.43691	4.22947	-470.216	47334.6	-27254.2	-2312.8	142.039	199.334	0	0	0	0	0	0	0	200	903	0	0	0	0	0	0	0	603	903	0
638	6	-7.81021	3.61912	-471.437	47609.3	-27315.2	-2633.24	142.06	199.012	0	0	0	0	0	0	0	200	903	0	0	0	0	0	0	0	603	903	0
638	7	-8.57314	6.06053	-469.911	48250.1	-27437.3	-2816.34	141.612	197.321	0	0	0	0	0	0	0	200	903	0	0	0	0	0	0	0	603	903	0
638	8	-8.11538	5.90794	-473.878	48616.3	-27986.6	-2679.02	140.941	197.408	0	0	0	0	0	0	0	200	903	0	0	0	0	0	0	0	603	903	0
638	9	-8.42056	4.83982	-474.489	48982.5	-28169.7	-2404.36	140.631	196.768	0	0	0	0	0	0	0	200	903	0	0	0	0	0	0	0	603	903	0
639	0	-7.65762	7.12864	-478.151	50264.3	-28047.6	-2999.45	141.341	194.878	0	0	0	0	0	0	0	200	903	0	0	0	0	0	0	0	603	903	0
639	1	-5.97915	6.97605	-477.846	50630.5	-27803.5	-2541.69	141.815	194.044	0	0	0	0	0	0	0	200	903	0	0	0	0	0	0	0	603	903	0
639	2	-9.64126	6.67088	-481.508	50813.6	-28108.7	-2221.25	141.624	194.47	0	0	0	0	0	0	0	200	903	0	0	0	0	0	0	0	603	903	0
639	3	-10.099	6.51829	-481.202	50813.6	-27986.6	-2404.36	141.84	194.403	0	0	0	0	0	0	0	200	903	0	0	0	0	0	0	0	603	903	0
639	4	-9.48867	7.89158	-482.423	50538.9	-28474.9	-2862.12	140.975	195.239	0	0	0	0	0	0	0	200	903	0	0	0	0	0	0	0	603	903	0
639	5	-9.03091	7.73899	-485.78	50813.6	-28230.7	-2999.45	141.886	195.398	0	0	0	0	0	0	0	200	903	0	0	0	0	0	0	0	603	903	0
639	6	-9.64126	8.9597	-488.221	51912.2	-28352.8	-2862.12	141.926	193.671	0	0	0	0	0	0	0	200	903	0	0	0	0	0	0	0	603	903	0
639	7	-10.5568	9.26487	-485.17	52095.3	-28780	-2587.46	140.68	192.625	0	0	0	0	0	0	0	200	903	0	0	0	0	0	0	0	603	903	0
639	8	-10.2516	8.04417	-488.527	52278.4	-28963.2	-2862.12	140.713	192.988	0	0	0	0	0	0	0	200	903	0	0	0	0	0	0	0	603	903	0
639	9	-9.33608	10.4856	-491.273	53102.4	-29024.2	-2770.57	140.92	191.909	0	0	0	0	0	0	0	200	903	0	0	0	0	0	0	0	603	903	0
640	0	-9.1835	10.1804	-494.935	53834.8	-28658	-3274.11	142.098	191.229	0	0	0	0	0	0	0	200	903	0	0	0	0	0	0	0	603	903	0
640	1	-9.79385	10.4856	-496.156	53468.6	-28719	-2953.67	142.117	192.234	0	0	0	0	0	0	0	200	903	0	0	0	0	0	0	0	603	903	0
640	2	-10.2516	12.164	-493.409	54384.2	-29207.3	-3274.11	140.805	189.779	0	0	0	0	0	0	0	200	903	0	0	0	0	0	0	0	603	903	0
640	3	-10.7094	11.7063	-498.597	55116.6	-29146.3	-3457.21	141.544	189.457	0	0	0	0	0	0	0	200	903	0	0	0	0	0	0	0	603	903	0
640	4	-10.099	12.6218	-500.123	54658.8	-28963.2	-3640.32	142.088	190.709	0	0	0	0	0	0	0	200	903	0	0	0	0	0	0	0	603	903	0
640	5	-10.2516	13.8425	-502.87	54658.8	-29146.3	-3502.99	142.04	191.306	0	0	0	0	0	0	0	200	903	0	0	0	0	0	0	0	603	903	0
640	6	-11.3197	14.3003	-504.396	55574.3	-29573.5	-3502.99	141.368	189.82	0	0	0	0	0	0	0	200	903	0	0	0	0	0	0	0	603	903	0
640	7	-9.48867	13.9951	-505.617	55757.4	-29451.4	-3594.54	141.751	189.724	0	0	0	0	0	0	0	200	903	0	0	0	0	0	0	0	603	903	0
640	8	-11.3197	14.9106	-504.701	56764.5	-29268.3	-3777.65	142.009	187.528	0	0	0	0	0	0	0	200	903	0	0	0	0	0	0	0	603	903	0
640	9	-10.4042	15.2158	-511.415	57313.9	-29634.5	-3640.32	142.054	187.931	0	0	0	0	0	0	0	200	903	0	0	0	0	0	0	0	603	903	0
641	0	-10.099	13.8425	-515.687	57588.5	-30122.8	-3823.43	141.587	188.327	0	0	0	0	0	0	0	200	903	0	0	0	0	0	0	0	603	903	0
641	1	-9.94644	15.9787	-519.349	57771.6	-30122.8	-3960.75	141.999	188.762	0	0	0	0	0	0	0	200	903	0	0	0	0	0	0	0	603	903	0
641	2	-9.64126	16.8943	-518.739	58229.4	-30000.7	-4189.64	142.166	187.748	0	0	0	0	0	0	0	200	903	0	0	0	0	0	0	0	603	903	0
641	3	-8.57314	17.8098	-521.18	58229.4	-30122.8	-3823.43	142.203	188.274	0	0	0	0	0	0	0	200	903	0	0	0	0	0	0	0	603	903	0
641	4	-8.87832	18.8779	-525.453	58504	-30061.8	-3960.75	142.789	188.66	0	0	0	0	0	0	0	200	903	0	0	0	0	0	0	0	603	903	0
641	5	-7.96279	19.4883	-527.894	58778.7	-30794.2	-3914.98	141.666	188.654	0	0	0	0	0	0	0	200	903	0	0	0	0	0	0	0	603	903	0
641	6	-8.11538	20.709	-531.251	58870.2	-30489	-4235.41	142.609	189.186	0	0	0	0	0	0	0	200	903	0	0	0	0	0	0	0	603	903	0
641	7	-8.26797	19.4883	-531.862	59144.9	-30428	-3914.98	142.79	188.796	0	0	0	0	0	0	0	200	903	0	0	0	0	0	0	0	603	903	0
641	8	-7.65762	21.7771	-533.693	60426.6	-30428	-4143.86	142.986	186.776	0	0	0	0	0	0	0	200	903	0	0	0	0	0	0	0	603	903	0
641	9	-5.82656	22.54	-541.322	60609.8	-30794.2	-4418.52	143.113	188.034	0	0	0	0	0	0	0	200	903	0	0	0	0	0	0	0	603	903	0
642	0	-5.67397	22.6926	-541.322	60426.6	-30794.2	-4601.62	143.113	188.372	0	0	0	0	0	0	0	200	903	0	0	0	0	0	0	0	603	903	0
642	1	-7.65762	23.7607	-544.374	61342.2	-30916.3	-4372.74	143.208	187.316	0	0	0	0	0	0	0	200	903	0	0	0	0	0	0	0	603	903	0
642	2	-7.19985	22.6926	-544.069	61708.4	-30794.2	-4464.29	143.4	186.58	0	0	0	0	0	0	0	200	903	0	0	0	0	0	0	0	603	903	0
642	3	-5.67397	25.4392	-546.815	61708.4	-31587.7	-4510.07	142.233	187.149	0	0	0	0	0	0	0	200	903	0	0	0	0	0	0	0	603	903	0
642	4	-5.97915	26.2021	-550.783	61708.4	-31404.6	-4784.73	142.982	187.962	0	0	0	0	0	0	0	200	903	0	0	0	0	0	0	0	603	903	0
642	5	-6.89468	27.1177	-553.834	62532.3	-31831.8	-4372.74	142.525	187.092	0	0	0	0	0	0	0	200	903	0	0	0	0	0	0	0	603	903	0
642	6	-5.21621	28.4909	-553.529	62898.6	-31221.5	-4738.95	143.596	186.368	0	0	0	0	0	0	0	200	903	0	0	0	0	0	0	0	603	903	0
642	7	-6.43691	29.1013	-555.36	62990.1	-31404.6	-4647.4	143.452	186.578	0	0	0	0	0	0	0	200	903	0	0	0	0	0	0	0	603	903	0
642	8	-5.3688	29.8642	-559.633	63356.3	-31770.8	-5288.27	143.229	186.789	0	0	0	0	0	0	0	200	903	0	0	0	0	0	0	0	603	903	0
642	9	-4.91104	30.6272	-564.21	64455	-31953.9	-4510.07	143.365	185.761	0	0	0	0	0	0	0	200	903	0	0	0	0	0	0	0	603	903	0
643	0	-5.82656	28.6435	-566.041	65004.3	-31526.6	-5334.04	144.303	185.16	0	0	0	0	0	0	0	200	903	0	0	0	0	0	0	0	603	903	0
643	1	-5.3688	31.6953	-568.178	65645.1	-31892.8	-5150.94	143.868	184.464	0	0	0	0	0	0	0	200	903	0	0	0	0	0	0	0	603	903	0
643	2	-4.91104	32.6108	-569.703	65462	-32137	-4967.83	143.59	185.095	0	0	0	0	0	0	0	200	903	0	0	0	0	0	0	0	603	903	0
643	3	-5.3688	32.4582	-573.976	65919.8	-32381.1	-5105.16	143.585	185.152	0	0	0	0	0	0	0	200	903	0	0	0	0	0	0	0	603	903	0
643	4	-5.06362	32.916	-576.112	65462	-32075.9	-5334.04	144.323	186.373	0	0	0	0	0	0	0	200	903	0	0	0	0	0	0	0	603	903	0
643	5	-4.91104	34.5945	-578.248	66194.5	-32442.2	-5288.27	143.896	185.526	0	0	0	0	0	0	0	200	903	0	0	0	0	0	0	0	603	903	0
643	6	-4.60586	35.2048	-578.859	66286	-32747.3	-4922.06	143.428	185.488	0	0	0	0	0	0	0	200	903	0	0	0	0	0	0	0	603	903	0
643	7	-3.53774	36.5781	-581.3	66743.8	-32686.3	-5013.61	143.77	185.182	0	0	0	0	0	0	0	200	903	0	0	0	0	0	0	0	603	903	0
643	8	-3.53774	35.0522	-586.183	67201.6	-32503.2	-5288.27	144.551	185.357	0	0	0	0	0	0	0	200	903	0	0	0	0	0	0	0	603	903	0
643	9	-4.60586	37.7988	-586.793	68208.6	-32564.2	-5654.48	144.505	183.76	0	0	0	0	0	0	0	200	903	0	0	0	0	0	0	0	603	903	0
644	0	-2.62222	38.7143	-587.709	68574.8	-33113.5	-5242.49	143.657	183.318	0	0	0	0	0	0	0	200	903	0	0	0	0	0	0	0	603	903	0
644	1	-3.84292	39.3247	-591.066	69307.2	-33052.5	-5700.26	144.08	182.742	0	0	0	0	0	0	0	200	903	0	0	0	0	0	0	0	603	903	0
644	2	-3.53774	40.0876	-592.592	69581.9	-33357.7	-5746.03	143.709	182.58	0	0	0	0	0	0	0	200	903	0	0	0	0	0	0	0	603	903	0
644	3	-3.69033	41.3083	-597.169	69581.9	-33357.7	-6158.02	144.14	183.48	0	0	0	0	0	0	0	200	903	0	0	0	0	0	0	0	603	903	0
644	4	-4.60586	41.9187	-599.916	69124.2	-32991.5	-6066.47	145.007	184.777	0	0	0	0	0	0	0	200	903	0	0	0	0	0	0	0	603	903	0
644	5	-3.07998	42.8342	-597.169	69765	-33723.9	-6020.69	143.527	183.174	0	0	0	0	0	0	0	200	903	0	0	0	0	0	0	0	603	903	0
644	6	-4.1481	43.9023	-601.137	70772.1	-33601.8	-6020.69	144.103	182.27	0	0	0	0	0	0	0	200	903	0	0	0	0	0	0	0	603	903	0
644	7	-3.23257	44.8179	-603.273	70772.1	-33601.8	-6386.9	144.301	182.686	0	0	0	0	0	0	0	200	903	0	0	0	0	0	0	0	603	903	0
644	8	-3.38516	44.5127	-607.545	71046.8	-33723.9	-5608.7	144.492	183.059	0	0	0	0	0	0	0	200	903	0	0	0	0	0	0	0	603	903	0
644	9	-4.45327	46.8015	-610.597	71779.2	-33846	-6386.9	144.569	182.444	0	0	0	0	0	0	0	200	903	0	0	0	0	0	0	0	603	903	0
645	0	-2.92739	47.2593	-610.292	71962.3	-34090.1	-6020.69	144.141	182.085	0	0	0	0	0	0	0	200	903	0	0	0	0	0	0	0	603	903	0
645	1	-4.45327	47.4118	-612.123	71687.6	-34090.1	-6524.23	144.308	182.887	0	0	0	0	0	0	0	200	903	0	0	0	0	0	0	0	603	903	0
645	2	-3.07998	48.3274	-614.869	72786.3	-34090.1	-6524.23	144.557	181.623	0	0	0	0	0	0	0	200	903	0	0	0	0	0	0	0	603	903	0
645	3	-3.84292	49.2429	-618.226	73060.9	-34517.3	-6524.23	144.167	181.822	0	0	0	0	0	0	0	200	903	0	0	0	0	0	0	0	603	903	0
645	4	-4.60586	47.717	-619.447	73152.5	-34944.6	-6432.68	143.587	181.907	0	0	0	0	0	0	0	200	903	0	0	0	0	0	0	0	603	903	0
645	5	-2.92739	49.8533	-619.752	73976.4	-34273.2	-6386.9	144.699	180.635	0	0	0	0	0	0	0	200	903	0	0	0	0	0	0	0	603	903	0
645	6	-2.7748	50.7688	-622.194	73427.1	-34456.3	-6615.78	144.621	181.987	0	0	0	0	0	0	0	200	903	0	0	0	0	0	0	0	603	903	0
645	7	-3.84292	52.1421	-623.414	73610.2	-34700.4	-6798.89	144.338	181.924	0	0	0	0	0	0	0	200	903	0	0	0	0	0	0	0	603	903	0
645	8	-4.1481	53.2102	-628.297	74525.8	-34883.6	-6203.8	144.479	181.385	0	0	0	0	0	0	0	200	903	0	0	0	0	0	0	0	603	903	0
645	9	-4.60586	53.9731	-629.213	74434.2	-35005.6	-5929.14	144.366	181.703	0	0	0	0	0	0	0	200	903	0	0	0	0	0	0	0	603	903	0
646	0	-4.60586	54.8887	-628.602	74434.2	-35371.8	-6753.11	143.729	181.588	0	0	0	0	0	0	0	200	903	0	0	0	0	0	0	0	603	903	0
646	1	-3.23257	55.0412	-629.518	74892	-34761.5	-6112.24	144.781	181.033	0	0	0	0	0	0	0	200	903	0	0	0	0	0	0	0	603	903	0
646	2	-4.1481	55.8042	-631.654	75990.6	-34944.6	-6844.67	144.678	179.696	0	0	0	0	0	0	0	200	903	0	0	0	0	0	0	0	603	903	0
646	3	-3.69033	56.8723	-635.316	76173.7	-34944.6	-6661.56	144.997	180.101	0	0	0	0	0	0	0	200	903	0	0	0	0	0	0	0	603	903	0
646	4	-5.3688	57.3301	-637.147	76906.1	-35310.8	-6798.89	144.58	179.296	0	0	0	0	0	0	0	200	903	0	0	0	0	0	0	0	603	903	0
646	5	-5.52139	58.3982	-635.621	76906.1	-35127.7	-6936.22	144.735	179.006	0	0	0	0	0	0	0	200	903	0	0	0	0	0	0	0	603	903	0
646	6	-4.75845	58.8559	-637.147	77180.8	-35310.8	-7073.55	144.58	178.865	0	0	0	0	0	0	0	200	903	0	0	0	0	0	0	0	603	903	0
646	7	-3.38516	59.6189	-640.504	76173.7	-35127.7	-6936.22	145.156	181.072	0	0	0	0	0	0	0	200	903	0	0	0	0	0	0	0	603	903	0
646	8	-5.06362	60.0766	-641.725	77180.8	-35982.2	-7119.32	143.929	179.729	0	0	0	0	0	0	0	200	903	0	0	0	0	0	0	0	603	903	0
646	9	-5.3688	60.3818	-643.556	77363.9	-35738	-7210.88	144.468	179.787	0	0	0	0	0	0	0	200	903	0	0	0	0	0	0	0	603	903	0
647	0	-6.43691	62.518	-642.03	78004.8	-35310.8	-7119.32	145.001	178.503	0	0	0	0	0	0	0	200	903	0	0	0	0	0	0	0	603	903	0
647	1	-4.75845	63.5862	-643.861	77913.2	-35371.8	-7165.1	145.063	178.991	0	0	0	0	0	0	0	200	903	0	0	0	0	0	0	0	603	903	0
647	2	-2.7748	64.5017	-647.523	78462.5	-36043.2	-7165.1	144.337	178.827	0	0	0	0	0	0	0	200	903	0	0	0	0	0	0	0	603	903	0
647	3	-5.06362	64.9594	-646.303	79103.4	-35982.2	-7302.43	144.326	177.606	0	0	0	0	0	0	0	200	903	0	0	0	0	0	0	0	603	903	0
647	4	-6.13174	65.7224	-649.659	79103.4	-35860.1	-7348.21	144.802	178.239	0	0	0	0	0	0	0	200	903	0	0	0	0	0	0	0	603	903	0
647	5	-6.5895	65.5698	-648.134	80018.9	-35799.1	-7165.1	144.766	176.539	0	0	0	0	0	0	0	200	903	0	0	0	0	0	0	0	603	903	0
647	6	-5.67397	66.6379	-650.575	78828.7	-36165.3	-7210.88	144.41	178.832	0	0	0	0	0	0	0	200	903	0	0	0	0	0	0	0	603	903	0
647	7	-5.06362	67.2483	-652.711	79652.7	-36226.3	-7348.21	144.499	177.966	0	0	0	0	0	0	0	200	903	0	0	0	0	0	0	0	603	903	0
647	8	-5.67397	68.469	-653.627	80110.5	-35738	-7485.54	145.323	177.437	0	0	0	0	0	0	0	200	903	0	0	0	0	0	0	0	603	903	0
647	9	-4.45327	68.6216	-653.932	80293.6	-35921.2	-7119.32	145.069	177.214	0	0	0	0	0	0	0	200	903	0	0	0	0	0	0	0	603	903	0
648	0	-6.13174	69.2319	-653.322	79744.3	-36470.5	-7531.31	144.177	177.94	0	0	0	0	0	0	0	200	903	0	0	0	0	0	0	0	603	903	0
648	1	-5.21621	70.7578	-656.068	80018.9	-36287.4	-7439.76	144.69	178.033	0	0	0	0	0	0	0	200	903	0	0	0	0	0	0	0	603	903	0
648	2	-4.91104	71.3681	-656.068	80476.7	-35860.1	-7485.54	145.341	177.335	0	0	0	0	0	0	0	200	903	0	0	0	0	0	0	0	603	903	0
648	3	-5.82656	73.0466	-658.204	80476.7	-35982.2	-7165.1	145.333	177.733	0	0	0	0	0	0	0	200	903	0	0	0	0	0	0	0	603	903	0
648	4	-4.1481	73.9621	-656.068	80202	-36409.4	-7485.54	144.504	177.754	0	0	0	0	0	0	0	200	903	0	0	0	0	0	0	0	603	903	0
648	5	-5.97915	74.2673	-655.763	80934.4	-36104.3	-7439.76	144.943	176.58	0	0	0	0	0	0	0	200	903	0	0	0	0	0	0	0	603	903	0
648	6	-5.3688	73.9621	-656.373	80934.4	-36226.3	-7805.97	144.808	176.695	0	0	0	0	0	0	0	200	903	0	0	0	0	0	0	0	603	903	0
648	7	-4.60586	75.488	-660.341	81941.6	-36043.2	-7485.54	145.417	175.91	0	0	0	0	0	0	0	200	903	0	0	0	0	0	0	0	603	903	0
648	8	-5.82656	76.0984	-658.51	82307.8	-36409.4	-7577.09	144.709	175.009	0	0	0	0	0	0	0	200	903	0	0	0	0	0	0	0	603	903	0
648	9	-5.67397	77.7768	-658.204	82307.8	-36348.4	-8034.85	144.776	174.951	0	0	0	0	0	0	0	200	903	0	0	0	0	0	0	0	603	903	0
649	0	-4.1481	77.7768	-658.204	82582.4	-35982.2	-7714.42	145.333	174.534	0	0	0	0	0	0	0	200	903	0	0	0	0	0	0	0	603	903	0
649	1	-3.38516	78.082	-662.782	82490.8	-35982.2	-7805.97	145.71	175.539	0	0	0	0	0	0	0	200	903	0	0	0	0	0	0	0	603	903	0
649	2	-4.75845	78.9975	-660.951	82674	-36287.4	-7760.19	145.098	174.917	0	0	0	0	0	0	0	200	903	0	0	0	0	0	0	0	603	903	0
649	3	-4.30068	79.3027	-661.256	83131.7	-36348.4	-7622.86	145.031	174.282	0	0	0	0	0	0	0	200	903	0	0	0	0	0	0	0	603	903	0
649	4	-5.21621	80.2182	-658.51	82307.8	-35799.1	-7851.75	145.636	175.009	0	0	0	0	0	0	0	200	903	0	0	0	0	0	0	0	603	903	0
649	5	-4.1481	80.3708	-660.035	82399.3	-36104.3	-7714.42	145.3	175.159	0	0	0	0	0	0	0	200	903	0	0	0	0	0	0	0	603	903	0
649	6	-2.92739	82.0493	-658.815	82857.1	-36287.4	-7485.54	144.92	174.233	0	0	0	0	0	0	0	200	903	0	0	0	0	0	0	0	603	903	0
649	7	-3.53774	83.1174	-660.951	82582.4	-36470.5	-7531.31	144.821	175.055	0	0	0	0	0	0	0	200	903	0	0	0	0	0	0	0	603	903	0
649	8	-3.84292	83.5752	-660.646	82582.4	-35860.1	-7851.75	145.72	174.997	0	0	0	0	0	0	0	200	903	0	0	0	0	0	0	0	603	903	0
649	9	-1.70669	84.4907	-659.425	83040.2	-35493.9	-7256.65	146.174	174.072	0	0	0	0	0	0	0	200	903	0	0	0	0	0	0	0	603	903	0
650	0	-3.53774	84.6433	-655.458	83497.9	-35860.1	-7668.64	145.29	172.611	0	0	0	0	0	0	0	200	903	0	0	0	0	0	0	0	603	903	0
650	1	-1.85928	86.3218	-658.204	83406.4	-35860.1	-7393.98	145.518	173.282	0	0	0	0	0	0	0	200	903	0	0	0	0	0	0	0	603	903	0
650	2	-1.24893	85.5588	-659.12	83497.9	-35799.1	-7805.97	145.687	173.319	0	0	0	0	0	0	0	200	903	0	0	0	0	0	0	0	603	903	0
650	3	-2.16445	86.4743	-658.204	83589.5	-35799.1	-8034.85	145.611	173.004	0	0	0	0	0	0	0	200	903	0	0	0	0	0	0	0	603	903	0
650	4	-0.94375	87.5425	-654.847	82490.8	-35616	-7851.75	145.612	174.03	0	0	0	0	0	0	0	200	903	0	0	0	0	0	0	0	603	903	0
650	5	-1.40151	88.1528	-655.458	82857.1	-35738	-7622.86	145.476	173.589	0	0	0	0	0	0	0	200	903	0	0	0	0	0	0	0	603	903	0
650	6	-0.638574	89.0683	-654.542	82857.1	-35616	-7714.42	145.586	173.412	0	0	0	0	0	0	0	200	903	0	0	0	0	0	0	0	603	903	0
650	7	-0.638574	90.4416	-655.153	83040.2	-35493.9	-7668.64	145.823	173.251	0	0	0	0	0	0	0	200	903	0	0	0	0	0	0	0	603	903	0
650	8	-1.24893	91.052	-654.542	83131.7	-35066.7	-7851.75	146.426	172.993	0	0	0	0	0	0	0	200	903	0	0	0	0	0	0	0	603	903	0
650	9	0.124365	91.5097	-652.101	82857.1	-35554.9	-7531.31	145.476	172.938	0	0	0	0	0	0	0	200	903	0	0	0	0	0	0	0	603	903	0
651	0	-1.40151	92.5779	-650.27	83497.9	-35432.9	-7760.19	145.511	171.595	0	0	0	0	0	0	0	200	903	0	0	0	0	0	0	0	603	903	0
651	1	-0.0282228	92.4253	-650.27	84047.3	-35066.7	-7531.31	146.074	170.75	0	0	0	0	0	0	0	200	903	0	0	0	0	0	0	0	603	903	0
651	2	-0.180811	93.3408	-649.659	83589.5	-34944.6	-7805.97	146.211	171.333	0	0	0	0	0	0	0	200	903	0	0	0	0	0	0	0	603	903	0
651	3	0.124365	92.5779	-648.744	83864.1	-35738	-7577.09	144.912	170.728	0	0	0	0	0	0	0	200	903	0	0	0	0	0	0	0	603	903	0
651	4	-0.485986	94.7141	-649.049	83223.3	-34944.6	-7622.86	146.16	171.777	0	0	0	0	0	0	0	200	903	0	0	0	0	0	0	0	603	903	0
651	5	-1.24893	95.6296	-645.997	82582.4	-34883.6	-7851.75	146	172.163	0	0	0	0	0	0	0	200	903	0	0	0	0	0	0	0	603	903	0
651	6	0.734717	96.6977	-643.251	83131.7	-34517.3	-7668.64	146.339	170.763	0	0	0	0	0	0	0	200	903	0	0	0	0	0	0	0	603	903	0
651	7	0.887305	97.7658	-644.166	82490.8	-34944.6	-7348.21	145.752	171.942	0	0	0	0	0	0	0	200	903	0	0	0	0	0	0	0	603	903	0
651	8	1.03989	97.9184	-636.537	82399.3	-34822.5	-6844.67	145.294	170.551	0	0	0	0	0	0	0	200	903	0	0	0	0	0	0	0	603	903	0
651	9	0.124365	98.9865	-641.725	82857.1	-34273.2	-7210.88	146.592	170.884	0	0	0	0	0	0	0	200	903	0	0	0	0	0	0	0	603	903	0
652	0	0.734717	99.1391	-637.758	82948.6	-34273.2	-7073.55	146.26	169.937	0	0	0	0	0	0	0	200	903	0	0	0	0	0	0	0	603	903	0
652	1	1.19248	98.9865	-635.011	82582.4	-34639.4	-7439.76	145.451	169.951	0	0	0	0	0	0	0	200	903	0	0	0	0	0	0	0	603	903	0
652	2	3.63389	99.1391	-634.401	82399.3	-34456.3	-7119.32	145.687	170.115	0	0	0	0	0	0	0	200	903	0	0	0	0	0	0	0	603	903	0
652	3	1.80283	100.818	-630.433	82307.8	-34029.1	-7256.65	146.023	169.443	0	0	0	0	0	0	0	200	903	0	0	0	0	0	0	0	603	903	0
652	4	0.734717	101.733	-630.433	81209.1	-33968	-7439.76	146.12	171.185	0	0	0	0	0	0	0	200	903	0	0	0	0	0	0	0	603	903	0
652	5	0.887305	102.343	-627.687	81850	-34151.1	-7531.31	145.592	169.601	0	0	0	0	0	0	0	200	903	0	0	0	0	0	0	0	603	903	0
652	6	1.80283	102.801	-626.771	80842.9	-33846	-7302.43	146	171.017	0	0	0	0	0	0	0	200	903	0	0	0	0	0	0	0	603	903	0
652	7	1.95542	101.886	-622.499	80659.8	-33723.9	-7393.98	145.825	170.426	0	0	0	0	0	0	0	200	903	0	0	0	0	0	0	0	603	903	0
652	8	2.71836	104.175	-621.583	81026	-33052.5	-7531.31	146.825	169.646	0	0	0	0	0	0	0	200	903	0	0	0	0	0	0	0	603	903	0
652	9	1.19248	104.632	-619.447	81117.6	-33357.7	-7348.21	146.149	169.048	0	0	0	0	0	0	0	200	903	0	0	0	0	0	0	0	603	903	0
653	0	2.71836	104.632	-613.344	80293.6	-32991.5	-7302.43	146.21	169.089	0	0	0	0	0	0	0	200	903	0	0	0	0	0	0	0	603	903	0
653	1	1.65024	105.7	-612.733	80659.8	-33479.7	-7256.65	145.36	168.361	0	0	0	0	0	0	0	200	903	0	0	0	0	0	0	0	603	903	0
653	2	2.71836	104.022	-611.818	80110.5	-32869.4	-7256.65	146.276	169.061	0	0	0	0	0	0	0	200	903	0	0	0	0	0	0	0	603	903	0
653	3	2.71836	106.158	-609.681	79194.9	-32991.5	-7256.65	145.887	170.104	0	0	0	0	0	0	0	200	903	0	0	0	0	0	0	0	603	903	0
653	4	2.87095	107.379	-607.85	79103.4	-33052.5	-7165.1	145.624	169.864	0	0	0	0	0	0	0	200	903	0	0	0	0	0	0	0	603	903	0
653	5	2.2606	108.447	-603.578	78828.7	-32686.3	-7073.55	145.846	169.398	0	0	0	0	0	0	0	200	903	0	0	0	0	0	0	0	603	903	0
653	6	2.56577	108.6	-598.695	78187.9	-32503.2	-7210.88	145.71	169.403	0	0	0	0	0	0	0	200	903	0	0	0	0	0	0	0	603	903	0
653	7	3.63389	106.463	-596.559	77913.2	-32259	-6570.01	145.925	169.396	0	0	0	0	0	0	0	200	903	0	0	0	0	0	0	0	603	903	0
653	8	4.09165	109.21	-594.728	78737.2	-32381.1	-6890.44	145.553	167.608	0	0	0	0	0	0	0	200	903	0	0	0	0	0	0	0	603	903	0
653	9	3.78647	109.363	-591.676	77547	-32259	-6982	145.479	168.937	0	0	0	0	0	0	0	200	903	0	0	0	0	0	0	0	603	903	0
654	0	3.78647	109.668	-590.15	76539.9	-31465.6	-6570.01	146.682	170.304	0	0	0	0	0	0	0	200	903	0	0	0	0	0	0	0	603	903	0
654	1	3.4813	110.431	-583.131	77180.8	-31526.6	-6753.11	145.936	167.644	0	0	0	0	0	0	0	200	903	0	0	0	0	0	0	0	603	903	0
654	2	4.24424	109.973	-580.079	76448.4	-31709.7	-6936.22	145.336	168.21	0	0	0	0	0	0	0	200	903	0	0	0	0	0	0	0	603	903	0
654	3	5.15977	111.194	-578.859	75899	-31465.6	-6798.89	145.642	168.882	0	0	0	0	0	0	0	200	903	0	0	0	0	0	0	0	603	903	0
654	4	5.9227	111.499	-573.671	75258.2	-30977.3	-6707.34	146.002	168.813	0	0	0	0	0	0	0	200	903	0	0	0	0	0	0	0	603	903	0
654	5	4.24424	112.719	-571.229	75349.8	-31038.3	-6890.44	145.664	168.092	0	0	0	0	0	0	0	200	903	0	0	0	0	0	0	0	603	903	0
654	6	4.85459	112.872	-566.041	74434.2	-30916.3	-6386.9	145.382	168.5	0	0	0	0	0	0	0	200	903	0	0	0	0	0	0	0	603	903	0
654	7	5.31235	111.499	-562.379	73793.4	-30733.2	-6661.56	145.352	168.784	0	0	0	0	0	0	0	200	903	0	0	0	0	0	0	0	603	903	0
654	8	5.61753	113.482	-559.938	74159.6	-30611.1	-6570.01	145.331	167.558	0	0	0	0	0	0	0	200	903	0	0	0	0	0	0	0	603	903	0
654	9	5.9227	113.635	-551.698	74159.6	-29817.6	-6615.78	145.953	165.579	0	0	0	0	0	0	0	200	903	0	0	0	0	0	0	0	603	903	0
655	0	4.54941	113.177	-549.867	72786.3	-29878.7	-6615.78	145.662	167.629	0	0	0	0	0	0	0	200	903	0	0	0	0	0	0	0	603	903	0
655	1	4.24424	114.245	-543.458	72694.7	-30367	-6661.56	144.123	166.237	0	0	0	0	0	0	0	200	903	0	0	0	0	0	0	0	603	903	0
655	2	6.07529	113.33	-540.407	72236.9	-30122.8	-6341.13	144.259	166.329	0	0	0	0	0	0	0	200	903	0	0	0	0	0	0	0	603	903	0
655	3	6.07529	113.94	-538.27	70863.7	-29512.5	-6158.02	145.172	168.349	0	0	0	0	0	0	0	200	903	0	0	0	0	0	0	0	603	903	0
655	4	7.60117	114.551	-533.998	70772.1	-29390.4	-6432.68	144.962	167.467	0	0	0	0	0	0	0	200	903	0	0	0	0	0	0	0	603	903	0
655	5	6.38047	115.161	-530.336	70131.2	-29451.4	-6478.46	144.466	167.761	0	0	0	0	0	0	0	200	903	0	0	0	0	0	0	0	603	903	0
655	6	5.61753	113.025	-524.232	69215.7	-29268.3	-6066.47	144.169	167.967	0	0	0	0	0	0	0	200	903	0	0	0	0	0	0	0	603	903	0
655	7	7.14341	114.551	-518.434	69124.2	-28780	-6203.8	144.487	166.667	0	0	0	0	0	0	0	200	903	0	0	0	0	0	0	0	603	903	0
655	8	7.44858	115.466	-515.382	68483.3	-28474.9	-6066.47	144.75	167.121	0	0	0	0	0	0	0	200	903	0	0	0	0	0	0	0	603	903	0
655	9	7.296	114.398	-510.499	68117.1	-28108.7	-6203.8	144.939	166.568	0	0	0	0	0	0	0	200	903	0	0	0	0	0	0	0	603	903	0
656	0	7.296	114.245	-505.617	67110	-28169.7	-6066.47	144.286	167.271	0	0	0	0	0	0	0	200	903	0	0	0	0	0	0	0	603	903	0
656	1	7.60117	113.94	-497.987	66469.1	-27498.3	-5929.14	144.781	166.524	0	0	0	0	0	0	0	200	903	0	0	0	0	0	0	0	603	903	0
656	2	8.36411	113.788	-492.189	65004.3	-27376.2	-6066.47	144.379	167.928	0	0	0	0	0	0	0	200	903	0	0	0	0	0	0	0	603	903	0
656	3	8.97446	113.635	-487.001	64546.5	-27559.3	-6066.47	143.41	167.461	0	0	0	0	0	0	0	200	903	0	0	0	0	0	0	0	603	903	0
656	4	7.90635	114.245	-482.728	64180.3	-26888	-5562.93	144.3	167.047	0	0	0	0	0	0	0	200	903	0	0	0	0	0	0	0	603	903	0
656	5	8.97446	113.94	-474.794	63081.7	-26338.6	-5654.48	144.526	167.139	0	0	0	0	0	0	0	200	903	0	0	0	0	0	0	0	603	903	0
656	6	7.60117	113.177	-468.385	62532.3	-26155.5	-5746.03	144.158	166.494	0	0	0	0	0	0	0	200	903	0	0	0	0	0	0	0	603	903	0
656	7	8.05894	112.719	-462.892	62532.3	-26216.6	-5974.92	143.364	164.909	0	0	0	0	0	0	0	200	903	0	0	0	0	0	0	0	603	903	0
656	8	8.36411	113.025	-457.399	61616.8	-25789.3	-5562.93	143.617	165.289	0	0	0	0	0	0	0	200	903	0	0	0	0	0	0	0	603	903	0
656	9	8.5167	111.041	-447.938	60152	-25240	-4967.83	143.653	165.714	0	0	0	0	0	0	0	200	903	0	0	0	0	0	0	0	603	903	0
657	0	7.75376	110.736	-444.581	60335.1	-24995.9	-5242.49	143.777	164.288	0	0	0	0	0	0	0	200	903	0	0	0	0	0	0	0	603	903	0
657	1	8.21152	108.142	-436.036	59144.9	-24873.8	-5150.94	142.955	164.358	0	0	0	0	0	0	0	200	903	0	0	0	0	0	0	0	603	903	0
657	2	8.36411	108.905	-429.933	57771.6	-24690.7	-5379.82	142.571	165.626	0	0	0	0	0	0	0	200	903	0	0	0	0	0	0	0	603	903	0
657	3	10.1952	107.837	-423.219	56673	-23897.2	-4876.28	143.535	166.091	0	0	0	0	0	0	0	200	903	0	0	0	0	0	0	0	603	903	0
657	4	7.14341	107.989	-415.284	56032.1	-24019.3	-5379.82	142.162	165.075	0	0	0	0	0	0	0	200	903	0	0	0	0	0	0	0	603	903	0
657	5	7.14341	106.921	-407.655	54841.9	-23653.1	-5013.61	141.978	165.47	0	0	0	0	0	0	0	200	903	0	0	0	0	0	0	0	603	903	0
657	6	7.296	104.327	-398.5	53743.3	-23103.8	-4922.06	142.023	165.136	0	0	0	0	0	0	0	200	903	0	0	0	0	0	0	0	603	903	0
657	7	7.60117	104.175	-390.26	53010.9	-22920.7	-4738.95	141.268	164.165	0	0	0	0	0	0	0	200	903	0	0	0	0	0	0	0	603	903	0
657	8	7.75376	102.649	-379.884	52553.1	-22615.5	-4693.18	140.467	161.66	0	0	0	0	0	0	0	200	903	0	0	0	0	0	0	0	603	903	0
657	9	7.90635	101.123	-374.086	51454.5	-21944.1	-4464.29	141.339	162.453	0	0	0	0	0	0	0	200	903	0	0	0	0	0	0	0	603	903	0
658	0	7.296	99.7495	-367.372	50172.7	-21577.9	-4464.29	141.264	163.428	0	0	0	0	0	0	0	200	903	0	0	0	0	0	0	0	603	903	0
658	1	7.60117	97.7658	-358.217	49257.2	-20967.5	-4235.41	141.467	162.493	0	0	0	0	0	0	0	200	903	0	0	0	0	0	0	0	603	903	0
658	2	8.82187	95.7822	-348.756	47700.8	-20784.4	-4235.41	140.404	163.226	0	0	0	0	0	0	0	200	903	0	0	0	0	0	0	0	603	903	0
658	3	10.1952	94.5615	-342.347	46510.6	-20540.3	-4189.64	140.002	164.142	0	0	0	0	0	0	0	200	903	0	0	0	0	0	0	0	603	903	0
658	4	7.75376	93.7986	-333.803	45869.7	-19563.7	-4143.86	141.391	162.584	0	0	0	0	0	0	0	200	903	0	0	0	0	0	0	0	603	903	0
658	5	6.83823	91.052	-324.647	44771.1	-19502.7	-4006.53	139.927	162.093	0	0	0	0	0	0	0	200	903	0	0	0	0	0	0	0	603	903	0
658	6	7.296	89.2209	-314.882	44313.4	-19380.6	-3640.32	138.451	159.27	0	0	0	0	0	0	0	200	903	0	0	0	0	0	0	0	603	903	0
658	7	7.90635	86.9321	-306.642	43580.9	-18648.2	-3777.65	139.186	157.877	0	0	0	0	0	0	0	200	903	0	0	0	0	0	0	0	603	903	0
658	8	7.296	84.0329	-299.623	41749.9	-18282	-3777.65	138.983	160.659	0	0	0	0	0	0	0	200	903	0	0	0	0	0	0	0	603	903	0
658	9	6.68564	82.2019	-291.993	41475.2	-17610.6	-3548.77	139.688	157.958	0	0	0	0	0	0	0	200	903	0	0	0	0	0	0	0	603	903	0
659	0	6.07529	78.3872	-284.669	40925.9	-17610.6	-3182.56	138.137	156.234	0	0	0	0	0	0	0	200	903	0	0	0	0	0	0	0	603	903	0
659	1	6.53306	77.0139	-275.209	39277.9	-16756.1	-3228.33	139.115	157.279	0	0	0	0	0	0	0	200	903	0	0	0	0	0	0	0	603	903	0
659	2	8.36411	72.2837	-268.495	38087.8	-16512	-3136.78	138.502	158.143	0	0	0	0	0	0	0	200	903	0	0	0	0	0	0	0	603	903	0
659	3	8.66929	71.5207	-260.866	37538.5	-16450.9	-2358.58	136.937	156.1	0	0	0	0	0	0	0	200	903	0	0	0	0	0	0	0	603	903	0
659	4	7.90635	68.9267	-253.541	36348.3	-15779.6	-2724.79	137.763	156.638	0	0	0	0	0	0	0	200	903	0	0	0	0	0	0	0	603	903	0
659	5	7.14341	66.0276	-245.302	35524.3	-15413.3	-2587.46	137.166	155.181	0	0	0	0	0	0	0	200	903	0	0	0	0	0	0	0	603	903	0
659	6	6.83823	64.0439	-236.146	35066.5	-14925.1	-2221.25	136.797	151.505	0	0	0	0	0	0	0	200	903	0	0	0	0	0	0	0	603	903	0
659	7	6.38047	59.1611	-230.348	34059.5	-15108.2	-2175.48	134.412	152.139	0	0	0	0	0	0	0	200	903	0	0	0	0	0	0	0	603	903	0
659	8	7.75376	56.2619	-221.803	33327	-14436.8	-1946.59	134.912	149.745	0	0	0	0	0	0	0	200	903	0	0	0	0	0	0	0	603	903	0
659	9	8.5167	53.8205	-217.225	32411.5	-13826.4	-1946.59	136.35	150.793	0	0	0	0	0	0	0	200	903	0	0	0	0	0	0	0	603	903	0
660	0	8.66929	51.074	-207.155	30672	-13338.1	-1809.26	135.613	151.937	0	0	0	0	0	0	0	200	903	0	0	0	0	0	0	0	603	903	0
660	1	6.83823	48.0222	-204.103	30397.3	-13277.1	-1534.61	134.949	151.069	0	0	0	0	0	0	0	200	903	0	0	0	0	0	0	0	603	903	0
660	2	7.44858	47.1067	-195.863	29939.6	-12788.8	-1351.5	134.705	147.14	0	0	0	0	0	0	0	200	903	0	0	0	0	0	0	0	603	903	0
660	3	7.296	44.0549	-190.065	28657.8	-12178.5	-1443.05	135.925	149.221	0	0	0	0	0	0	0	200	903	0	0	0	0	0	0	0	603	903	0
660	4	9.58481	41.9187	-183.046	28200.1	-11690.2	-619.079	136.135	145.94	0	0	0	0	0	0	0	200	903	0	0	0	0	0	0	0	603	903	0
660	5	8.82187	38.2566	-176.637	27559.2	-11629.2	-985.29	134.163	143.978	0	0	0	0	0	0	0	200	903	0	0	0	0	0	0	0	603	903	0
660	6	8.05894	35.2048	-171.144	26826.8	-11201.9	-710.631	134.547	143.25	0	0	0	0	0	0	0	200	903	0	0	0	0	0	0	0	603	903	0
660	7	8.05894	33.5263	-165.651	26002.8	-10530.5	-619.079	136.429	143.026	0	0	0	0	0	0	0	200	903	0	0	0	0	0	0	0	603	903	0
660	8	7.75376	30.322	-158.021	25453.5	-10225.4	-710.631	135.291	138.924	0	0	0	0	0	0	0	200	903	0	0	0	0	0	0	0	603	903	0
660	9	9.27964	27.5754	-152.528	24721.1	-9981.21	-390.197	134.561	137.925	0	0	0	0	0	0	0	200	903	0	0	0	0	0	0	0	603	903	0
661	0	12.3314	27.1177	-151.307	23805.5	-9981.21	-161.315	134.034	142.668	0	0	0	0	0	0	0	200	903	0	0	0	0	0	0	0	603	903	0
661	1	10.1952	25.4392	-146.119	23256.2	-9492.93	-23.9859	135.033	140.841	0	0	0	0	0	0	0	200	903	0	0	0	0	0	0	0	603	903	0
661	2	8.5167	22.8452	-140.931	22615.4	-9187.76	67.5668	134.807	139.529	0	0	0	0	0	0	0	200	903	0	0	0	0	0	0	0	603	903	0
661	3	8.66929	20.2512	-134.218	22249.1	-8760.51	67.5668	134.729	134.231	0	0	0	0	0	0	0	200	903	0	0	0	0	0	0	0	603	903	0
661	4	8.21152	21.1667	-129.64	21608.3	-8760.51	67.5668	132.424	133.321	0	0	0	0	0	0	0	200	903	0	0	0	0	0	0	0	603	903	0
661	5	8.97446	20.0986	-128.724	21333.6	-8882.58	388.001	130.995	134.269	0	0	0	0	0	0	0	200	903	0	0	0	0	0	0	0	603	903	0
661	6	9.7374	18.8779	-125.978	20692.8	-8089.12	113.343	135.789	135.743	0	0	0	0	0	0	0	200	903	0	0	0	0	0	0	0	603	903	0
661	7	7.90635	18.5727	-122.621	20051.9	-7906.02	-115.539	135.525	136.473	0	0	0	0	0	0	0	200	903	0	0	0	0	0	0	0	603	903	0
661	8	8.82187	17.6572	-116.517	19319.5	-8028.09	-69.7623	131.1	134.193	0	0	0	0	0	0	0	200	903	0	0	0	0	0	0	0	603	903	0
661	9	7.44858	17.5046	-113.466	18678.6	-7600.84	21.7904	133.012	135.381	0	0	0	0	0	0	0	200	903	0	0	0	0	0	0	0	603	903	0
662	0	8.82187	15.521	-110.414	18220.8	-7539.81	296.449	131.713	134.977	0	0	0	0	0	0	0	200	903	0	0	0	0	0	0	0	603	903	0
662	1	7.75376	13.2322	-108.583	17580	-7234.63	21.7904	133.372	138.096	0	0	0	0	0	0	0	200	903	0	0	0	0	0	0	0	603	903	0
662	2	7.14341	11.0959	-105.531	17030.6	-7112.56	342.225	132.602	138.62	0	0	0	0	0	0	0	200	903	0	0	0	0	0	0	0	603	903	0
662	3	6.83823	11.2485	-103.09	16481.3	-6807.38	433.778	133.966	140.126	0	0	0	0	0	0	0	200	903	0	0	0	0	0	0	0	603	903	0
662	4	5.61753	11.0959	-98.2068	15657.3	-6624.28	204.896	132.548	140.568	0	0	0	0	0	0	0	200	903	0	0	0	0	0	0	0	603	903	0
662	5	7.296	9.41746	-94.2396	15840.5	-6258.07	67.5668	133.594	131.913	0	0	0	0	0	0	0	200	903	0	0	0	0	0	0	0	603	903	0
662	6	8.82187	9.11228	-92.4085	14741.8	-6380.14	479.554	130.957	140.471	0	0	0	0	0	0	0	200	903	0	0	0	0	0	0	0	603	903	0
662	7	7.60117	8.34935	-89.3568	15016.5	-6013.93	250.672	132.698	131.949	0	0	0	0	0	0	0	200	903	0	0	0	0	0	0	0	603	903	0
662	8	5.61753	6.21311	-85.9998	14467.2	-5525.65	479.554	135.748	131.777	0	0	0	0	0	0	0	200	903	0	0	0	0	0	0	0	603	903	0
662	9	5.77012	7.89158	-80.5067	13917.8	-5098.4	388.001	136.671	127.122	0	0	0	0	0	0	0	200	903	0	0	0	0	0	0	0	603	903	0
663	0	5.46494	8.04417	-78.3704	13185.4	-4854.26	-161.315	138.06	131.755	0	0	0	0	0	0	0	200	903	0	0	0	0	0	0	0	603	903	0
663	1	6.68564	7.73899	-72.8773	12727.7	-5159.43	67.5668	129.204	125.355	0	0	0	0	0	0	0	200	903	0	0	0	0	0	0	0	603	903	0
663	2	6.22788	7.58641	-70.741	11995.2	-4732.19	159.12	133.105	130.434	0	0	0	0	0	0	0	200	903	0	0	0	0	0	0	0	603	903	0
663	3	5.77012	8.04417	-67.3841	10805.1	-4427.01	388.001	134.302	139.65	0	0	0	0	0	0	0	200	903	0	0	0	0	0	0	0	603	903	0
663	4	7.44858	7.58641	-63.4168	10713.5	-4182.87	113.343	134.042	131.062	0	0	0	0	0	0	0	200	903	0	0	0	0	0	0	0	603	903	0
663	5	5.15977	8.34935	-57.3133	10438.8	-4060.8	21.7904	129.147	117.864	0	0	0	0	0	0	0	200	903	0	0	0	0	0	0	0	603	903	0
663	6	5.77012	8.80711	-56.7029	9614.87	-3999.77	296.449	129.461	130.434	0	0	0	0	0	0	0	200	903	0	0	0	0	0	0	0	603	903	0
663	7	5.9227	8.19676	-55.1771	8974	-3572.52	-23.9859	135.254	137.36	0	0	0	0	0	0	0	200	903	0	0	0	0	0	0	0	603	903	0
663	8	4.39683	8.04417	-52.1253	8424.68	-3633.56	-161.315	130.292	138.376	0	0	0	0	0	0	0	200	903	0	0	0	0	0	0	0	603	903	0
663	9	6.07529	7.43382	-49.0735	8150.02	-3633.56	204.896	125.957	133.922	0	0	0	0	0	0	0	200	903	0	0	0	0	0	0	0	603	903	0
664	0	4.39683	7.12864	-45.1063	7783.81	-3084.24	204.896	131.623	127.434	0	0	0	0	0	0	0	200	903	0	0	0	0	0	0	0	603	903	0
664	1	5.15977	6.3657	-42.97	7966.92	-2901.13	113.343	132.485	114.594	0	0	0	0	0	0	0	200	903	0	0	0	0	0	0	0	603	903	0
664	2	5.46494	6.21311	-43.2752	7051.39	-2534.92	67.5668	141.423	137.057	0	0	0	0	0	0	0	200	903	0	0	0	0	0	0	0	603	903	0
664	3	5.00718	4.83982	-39.3079	6776.73	-2779.06	250.672	129.3	127.599	0	0	0	0	0	0	0	200	903	0	0	0	0	0	0	0	603	903	0
664	4	3.4813	4.83982	-37.782	5678.1	-2534.92	-161.315	132.907	149.714	0	0	0	0	0	0	0	200	903	0	0	0	0	0	0	0	603	903	0
664	5	3.93906	4.53465	-35.0355	5586.54	-2046.64	342.225	141.584	140.546	0	0	0	0	0	0	0	200	903	0	0	0	0	0	0	0	603	903	0
[truncated: 1,184 more rows]
