# Supplementary material for: The Effects of an Extemporaneous Speech Dual-task on Older Adult Gait Control
Source: Research Square preprint supplement (doi:10.21203/rs.3.rs-7674245/v1), 2025-11-18
Supplement: Supplementary file 175 [file Over7ground05.xlsx]

## Sheet: Sheet1
Trajectories
		07:LFHD			07:RFHD			07:LBHD			07:RBHD			07:C7			07:T10			07:CLAV			07:STRN			07:RBAK			07:LSHO			07:LUPA			07:LELB			07:LFRM			07:LWRA			07:LWRB			07:LFIN
Frame	Sub Frame	X	Y	Z	X	Y	Z	X	Y	Z	X	Y	Z	X	Y	Z	X	Y	Z	X	Y	Z	X	Y	Z	X	Y	Z	X	Y	Z	X	Y	Z	X	Y	Z	X	Y	Z	X	Y	Z	X	Y	Z	X	Y	Z
		mm	mm	mm	mm	mm	mm	mm	mm	mm	mm	mm	mm	mm	mm	mm	mm	mm	mm	mm	mm	mm	mm	mm	mm	mm	mm	mm	mm	mm	mm	mm	mm	mm	mm	mm	mm	mm	mm	mm	mm	mm	mm	mm	mm	mm	mm	mm	mm
398	0	302.383	2473.83	1599.87	202.185	2469.78	1599.26	318.913	2628.2	1602.71	189.332	2640.06	1595.69	231.267	2678.03	1474.51	223.873	2761.01	1223.56	250.387	2569.11	1380.09	254.869	2512.5	1224.84	138.498	2754.14	1286.24	406.009	2688.38	1420.69	437.44	2747.84	1242.1	425.815	2807.37	1106.34	460.593	2802.92	934.693	435.142	2793.01	851.563	455.608	2854.5	868.73	461.678	2839.97	777.764
399	0	302.13	2458.39	1601.06	202.423	2454.35	1600.83	318.744	2612.78	1604.11	189.447	2624.62	1597.47	231.492	2662.94	1476.32	223.978	2746.04	1225.64	249.661	2554.03	1381.74	254.888	2497.25	1226.25	138.685	2739.53	1288.55	406.376	2672.24	1422.77	438.544	2729.98	1243.59	428.086	2788.48	1107.29	463.489	2780.57	935.66	438.247	2769.49	852.635	459.332	2831.18	868.656	465.994	2814.84	778.202
400	0	301.586	2442.92	1602.38	202.349	2438.95	1601.92	318.409	2597.35	1605.57	188.996	2609.31	1598.82	231.561	2647.81	1478.12	224.178	2731.06	1227.99	249.552	2539.21	1383.18	254.461	2482.28	1227.71	138.811	2725	1290.7	406.644	2656.01	1424.62	439.882	2712.06	1244.97	430.252	2769.61	1107.89	466.791	2758.14	936.375	441.662	2745.61	853.47	463.287	2807.37	868.569	470.431	2788.92	778.482
401	0	301.31	2427.77	1603.56	201.49	2423.74	1603.62	318.198	2582.19	1607.11	188.702	2594.23	1600.8	231.708	2633.08	1479.84	224.775	2716.42	1230.27	248.926	2524.3	1384.67	253.813	2467.3	1229.29	139.454	2711.25	1292.53	406.907	2639.81	1426.48	441.348	2694.5	1246.37	433.402	2750.9	1108.54	469.943	2735.19	937.181	445.957	2722.15	854.302	467.44	2783.03	868.429	475.112	2762.27	778.856
402	0	300.5	2412.35	1604.65	201.171	2408.76	1604.81	317.899	2567.07	1608.75	188.205	2579.07	1602.34	231.898	2618.46	1481.58	225.514	2701.78	1232.45	248.418	2509.62	1386.4	252.566	2452.73	1230.62	140.155	2697.19	1294.32	407.254	2623.64	1428.63	442.696	2676.37	1247.74	436.243	2731.96	1109.18	473.202	2711.92	938.047	449.796	2696.39	856.022	471.622	2758.1	868.36	479.924	2734.97	779.499
403	0	299.719	2397.1	1605.95	200.337	2393.79	1605.88	317.452	2551.93	1610.66	187.814	2564.15	1604.16	231.832	2603.9	1483.32	226.379	2687.43	1234.46	247.931	2495.21	1388.12	251.194	2437.97	1232.37	141.019	2683.35	1295.96	407.264	2607.45	1430.41	444.248	2658.31	1249.07	439.097	2712.77	1109.7	476.601	2688.37	939.075	453.658	2671.23	857.696	475.898	2733	868.308	484.783	2707.27	780.337
404	0	299.051	2382.3	1607.1	199.39	2378.81	1607.08	316.928	2536.85	1612.57	187.615	2549.46	1606.46	231.849	2589.59	1485.14	227.538	2673.01	1236.22	247.052	2480.65	1389.81	249.336	2423.87	1233.89	141.967	2669.72	1297.48	407.535	2591.91	1432.29	445.808	2640.31	1250.29	442.115	2693.56	1110.1	480.128	2664.58	940.115	457.563	2645.7	859.057	480.418	2707.49	868.322	489.941	2678.63	781.18
405	0	298.138	2367.53	1608.05	199.192	2364.74	1607.93	316.237	2521.68	1614.58	186.967	2534.69	1607.96	231.765	2575.34	1486.88	228.671	2658.83	1237.9	246.623	2466.64	1391.33	248.23	2409.83	1236.1	143.117	2656.31	1299.04	407.727	2576.57	1434.21	447.429	2622.52	1251.53	445.792	2674.84	1110.69	483.467	2640.49	941.271	461.426	2619.89	860.548	484.988	2681.68	868.392	495.152	2649.91	782.366
406	0	297.083	2352.2	1609.42	198.084	2350.01	1608.82	315.806	2506.75	1616.54	186.308	2520.04	1610.01	231.462	2561.17	1488.57	229.641	2644.7	1239.7	245.427	2452	1393.5	246.141	2395.9	1237.98	144.086	2642.76	1300.5	406.782	2560.84	1435.66	448.889	2604.47	1253	448.589	2655.09	1111.14	487.025	2616.31	942.881	465.322	2593.84	862.644	489.533	2655.69	868.805	500.242	2620.51	784.275
407	0	296.065	2337.38	1610.73	197.232	2335.28	1610.26	314.533	2491.24	1618.48	185.932	2505.52	1612.04	231.336	2547	1490.44	230.642	2630.8	1241.41	244.777	2438.05	1395.14	244.424	2381.42	1239.8	144.981	2629.25	1302.07	407.066	2546.01	1437.93	450.293	2586.64	1254.52	450.916	2634.38	1111.62	490.565	2592.01	944.712	468.781	2567.62	864.23	494.365	2629.78	869.596	505.682	2591.12	786.556
408	0	295.258	2322.69	1612.03	196.511	2320.96	1611.54	314.483	2476.84	1620.46	185.282	2490.97	1613.9	231.178	2532.86	1492.38	231.489	2616.82	1243.13	243.945	2423.83	1396.97	242.99	2367.89	1241.75	145.778	2615.8	1303.81	406.819	2531	1439.69	451.738	2569.07	1256.23	454.184	2614.81	1112.43	494.138	2567.41	946.573	472.606	2541.02	866.799	498.941	2603.27	870.789	510.987	2561.17	789.383
409	0	294.368	2308.04	1613.09	194.828	2305.94	1612.31	313.859	2462.23	1622.32	184.683	2476.37	1615.66	230.919	2518.86	1494.09	232.08	2603.07	1244.8	243.352	2410.03	1398.5	242.065	2353.74	1243.63	146.179	2602.27	1305.33	406.263	2516.05	1441.65	452.836	2551.34	1257.89	457.083	2595.03	1113.28	497.558	2542.83	948.97	476.266	2514.43	869.52	503.321	2576.56	872.098	516.57	2531.24	792.858
410	0	293.398	2293.25	1614.34	194.713	2291.99	1613.55	313.124	2447.56	1624	183.998	2462.04	1617.15	230.515	2504.79	1495.72	232.398	2589.15	1246.46	242.69	2395.91	1400.28	241.174	2339.41	1245.52	146.518	2588.76	1306.87	405.967	2501.13	1443.74	454.1	2534.27	1259.63	459.905	2575.25	1114.12	500.804	2518.14	951.495	480.302	2487.9	872.935	507.441	2549.57	873.656	521.737	2501.31	796.546
411	0	292.502	2278.85	1615.24	193.514	2277.54	1614.39	312.459	2432.87	1625.58	183.332	2447.65	1618.69	230.227	2490.88	1497.14	232.485	2575.42	1248.02	241.841	2381.98	1401.9	240.482	2325.08	1247.44	146.849	2575.44	1308.57	405.634	2486.53	1445.58	454.955	2516.82	1261.45	462.695	2555.73	1115.09	504.164	2493.45	954.308	483.548	2461.06	876.682	511.697	2522.76	875.751	526.902	2471.45	800.949
412	0	291.798	2264.59	1616.01	192.77	2263.22	1615.43	311.747	2418.55	1626.9	182.815	2433.37	1620.41	229.938	2476.97	1498.53	232.642	2561.68	1249.34	241.685	2368.17	1403.38	240.261	2311.03	1248.95	146.885	2561.79	1309.94	405.389	2472.17	1447.38	456.061	2499.95	1263.07	465.405	2536.46	1116.01	507.311	2468.86	957.46	487.243	2434.46	880.623	515.309	2495.48	877.73	531.845	2441.35	805.685
413	0	290.989	2250.04	1616.81	191.726	2248.53	1616.17	311.129	2404.16	1628.19	182.154	2418.99	1621.36	229.707	2463.02	1499.61	232.613	2547.95	1250.64	240.868	2354.14	1404.68	240.064	2296.9	1250.3	146.773	2548.02	1311.13	405.326	2457.58	1448.9	457.012	2482.81	1264.77	467.993	2517.24	1117.08	510.419	2444.37	960.712	491.032	2407.58	884.94	519.659	2468.59	880.636	536.914	2411.35	811.175
414	0	290.267	2236.27	1617.15	191.325	2234.72	1616.57	310.46	2389.48	1629.32	181.485	2404.7	1622.23	229.428	2448.98	1500.82	232.666	2534.4	1251.77	240.473	2340.21	1405.81	240.28	2282.86	1251.42	146.81	2534.53	1312.27	405.262	2443.1	1450.67	458.019	2466	1266.35	470.527	2498.29	1118.21	513.36	2419.94	964.386	494.302	2380.77	889.604	523.136	2441.19	883.325	541.602	2381.65	817.176
415	0	289.549	2221.67	1617.84	189.925	2220.06	1616.96	310.001	2375.29	1630.11	180.942	2390.51	1623.07	229.33	2435	1501.74	232.714	2520.58	1252.64	239.764	2326.13	1406.52	239.987	2269.06	1252.35	147.086	2520.99	1313.12	405.031	2428.64	1451.86	459.021	2449.35	1267.65	472.861	2479.47	1119.01	516.671	2395.89	967.765	498.142	2354.2	894.819	527.035	2414.25	886.359	546.159	2352.1	822.833
416	0	288.624	2207.05	1618.27	189.613	2206.16	1617.01	309.523	2361.07	1630.78	180.409	2376.26	1623.58	228.998	2420.99	1502.28	232.514	2506.88	1253.48	239.328	2312.24	1407.24	239.185	2255.27	1253.02	147.027	2507.15	1313.65	404.629	2413.73	1452.95	459.935	2432.64	1268.83	475.016	2460.71	1119.72	519.42	2371.87	971.536	501.615	2327.77	900.117	530.789	2387.43	889.693	550.389	2322.61	829.03
417	0	287.844	2192.7	1618.41	188.934	2191.86	1617.04	308.908	2346.43	1631.26	179.983	2361.99	1623.97	228.483	2406.91	1502.66	232.367	2492.99	1254.17	239.127	2298.09	1407.55	239.468	2241.38	1253.77	147.156	2493.53	1314.38	404.363	2399.12	1453.95	460.762	2416.12	1269.92	477.188	2442.12	1120.42	522.138	2347.96	975.411	504.635	2301.56	905.393	534.495	2360.96	893.464	554.256	2293.47	835.437
418	0	287.108	2178.15	1618.44	187.797	2177.7	1616.97	308.305	2331.79	1631.57	179.45	2347.87	1624.04	228.619	2392.59	1502.95	232.31	2479.08	1254.64	238.634	2284.04	1407.79	238.936	2227.6	1253.76	147.153	2479.57	1314.42	404.226	2384.65	1454.52	461.681	2399.66	1270.65	479.368	2423.75	1120.72	524.958	2324.4	979.186	507.914	2275.48	910.557	537.335	2333.98	896.739	558.221	2264.69	841.866
419	0	286.464	2163.88	1618.09	187.283	2163.43	1616.67	307.928	2317.64	1631.32	178.941	2333.6	1623.57	228.264	2378.48	1502.74	232.247	2465.03	1254.71	238.236	2269.95	1407.51	238.001	2213.97	1253.09	147.285	2465.83	1314.26	403.892	2369.97	1454.71	462.659	2383.31	1271.11	481.516	2405.55	1120.83	527.585	2301.12	982.76	510.602	2249.71	915.972	540.916	2308.1	900.352	561.912	2236.3	848.306
420	0	285.739	2149.52	1617.69	186.65	2149.1	1615.95	307.564	2303.15	1630.84	178.688	2319.35	1623.17	227.889	2364.32	1502.4	232.061	2450.73	1254.39	237.924	2255.67	1407.17	237.411	2199.91	1252.72	147.261	2451.82	1313.92	403.664	2355.24	1454.64	463.468	2367.03	1271.21	483.485	2387.34	1120.62	530.102	2278.02	986.307	513.887	2224.21	921.322	543.673	2281.92	903.728	565.181	2208.2	854.875
421	0	284.592	2134.65	1616.96	185.733	2134.79	1615.28	306.971	2288.39	1630.21	178.259	2305.08	1622.29	227.714	2349.92	1501.65	231.919	2436.41	1253.88	237.623	2241.29	1406.59	237.045	2186.08	1252.03	147.274	2437.7	1313.33	403.307	2340.62	1454.26	464.125	2350.96	1271.25	485.554	2369.26	1120.34	532.469	2255.26	989.653	516.098	2199.13	926.863	546.295	2256.18	907.118	568.042	2180.59	861.394
422	0	284.166	2120.59	1616.1	184.801	2120.39	1614.68	306.472	2273.98	1629.38	177.724	2290.73	1621.24	227.394	2335.45	1500.88	231.648	2422.02	1253.08	236.915	2226.77	1405.8	236.181	2171.83	1251.14	147.204	2423.6	1312.52	402.793	2325.83	1453.44	464.742	2334.89	1270.85	487.529	2351.25	1119.78	534.717	2232.85	993.024	518.358	2174.33	932.299	548.608	2230.96	910.46	570.674	2153.61	867.804
423	0	283.874	2105.69	1615.17	184.477	2105.94	1613.65	306.121	2259.53	1628.17	177.419	2276.35	1620.31	227	2320.94	1499.79	231.338	2407.4	1252.02	237.268	2212.41	1404.6	235.763	2157.48	1250.27	146.902	2409.13	1311.39	402.468	2311.31	1452.63	465.367	2318.77	1270.26	489.48	2333.32	1118.98	536.636	2210.65	996	520.889	2150.3	937.329	551.006	2206.08	913.658	573.39	2127.01	874.293
424	0	283.074	2091.17	1613.93	183.974	2091.4	1612.54	305.711	2244.83	1626.9	176.562	2261.9	1618.9	226.574	2306.31	1498.72	230.987	2392.84	1251.12	236.262	2197.63	1403.4	235.211	2143.11	1249.02	146.825	2394.84	1310.3	401.901	2296.33	1451.4	465.91	2302.78	1269.63	491.347	2315.36	1118.24	538.66	2188.84	999.07	522.893	2126.33	942.638	552.907	2181.39	917.063	575.488	2100.97	880.672
425	0	281.765	2076.72	1612.67	183.308	2076.88	1611.26	305.137	2229.91	1625.78	176.375	2247.22	1617.96	226.038	2291.59	1497.57	230.368	2377.99	1250.11	235.511	2182.57	1402.36	234.138	2128.22	1247.37	146.279	2380	1309.16	401.404	2281.28	1450.52	466.366	2286.75	1268.97	492.976	2297.33	1117.55	540.13	2167.21	1002.08	524.424	2102.88	947.943	554.464	2157.07	920.424	577.597	2075.57	887.143
426	0	281.594	2061.59	1611.7	182.576	2062.27	1610.18	304.602	2215.23	1624.29	175.874	2232.65	1616.58	225.513	2276.72	1496.03	229.822	2363.24	1248.83	234.899	2167.83	1400.66	234.1	2113.56	1245.89	145.935	2365.31	1307.59	401.004	2266.34	1449.15	466.832	2270.88	1267.99	494.605	2279.49	1116.57	541.607	2146.04	1005.08	526.049	2080.15	952.8	556.047	2133.38	923.406	579.122	2050.68	893.179
427	0	281.086	2046.85	1610.05	181.685	2047.64	1608.76	304.029	2200.61	1622.47	175.258	2217.82	1614.85	224.785	2261.86	1494.42	229.106	2348.22	1247.31	234.458	2152.98	1398.92	233.074	2098.72	1244.12	145.4	2350.3	1305.91	400.354	2251.31	1447.51	467.014	2254.94	1266.83	496.027	2261.77	1115.31	542.923	2125.35	1007.35	527.504	2057.95	957.211	556.793	2109.46	926.117	580.206	2026.31	898.866
428	0	279.89	2032.46	1607.92	181.001	2032.64	1607.17	303.421	2185.77	1620.67	174.376	2203.13	1613.22	224.138	2246.95	1493.03	228.274	2333.4	1245.82	233.432	2137.64	1397.59	232.446	2083.54	1242.68	144.477	2335.12	1304.1	399.623	2236.29	1445.99	467.153	2238.97	1265.69	497.509	2244.34	1114.23	543.706	2104.54	1010	528.334	2035.95	961.743	557.558	2086.43	929.091	581.105	2002.53	904.598
429	0	279.484	2017.49	1606.57	180.199	2017.82	1605.6	302.513	2170.71	1618.81	173.819	2188.24	1611.57	223.087	2231.98	1491.02	227.371	2318.25	1244.02	232.76	2122.47	1395.91	231.834	2068.43	1240.6	143.885	2319.96	1302.29	398.635	2221.07	1444.41	467.206	2222.95	1264.42	498.273	2226.62	1113.05	544.029	2083.96	1012.03	529.319	2014.7	966.066	558.475	2064.38	931.867	581.664	1979.33	909.721
430	0	278.657	2002.6	1604.84	179.371	2002.9	1603.98	301.792	2156.02	1616.8	172.946	2173.32	1609.5	222.23	2216.9	1489.01	226.335	2302.96	1242.01	231.87	2107.28	1393.95	231.194	2053.05	1238.8	142.823	2304.64	1300.08	397.807	2205.89	1442.55	467.017	2206.85	1263.11	499.441	2209.67	1111.83	544.393	2064.11	1014.05	529.475	1993.96	969.785	559.83	2043.52	934.599	582.141	1956.95	914.99
431	0	277.89	1987.77	1602.94	178.595	1987.82	1601.95	300.83	2141.26	1614.67	172.124	2158.34	1607.42	221.3	2202.06	1487.03	225.398	2287.85	1239.86	231.107	2091.93	1392.19	230.48	2037.33	1237.15	141.632	2289.24	1297.7	396.976	2190.78	1440.57	466.826	2190.85	1261.56	500.013	2192.61	1110.46	544.914	2044.97	1015.98	529.959	1973.96	973.467	559.521	2021.71	936.724	582.483	1935.35	919.491
432	0	276.95	1972.87	1601.05	177.601	1972.74	1600.2	299.843	2126.31	1612.53	171.1	2143.35	1605.44	220.438	2186.89	1484.85	224.279	2272.31	1237.63	230.1	2076.43	1390.32	229.978	2021.63	1235.27	140.272	2273.61	1295.37	395.937	2175.35	1438.92	466.478	2174.87	1260.16	500.716	2175.98	1109.26	545.118	2026.4	1017.55	529.979	1954.14	976.509	559.7	2001.13	938.947	582.343	1914.28	923.83
433	0	275.962	1957.89	1599.41	176.491	1957.65	1598.29	298.66	2111.22	1610.71	169.851	2128.24	1603.42	218.932	2171.73	1483.01	222.964	2256.48	1235.64	228.974	2060.99	1388.82	229.146	2005.65	1233.8	138.719	2257.76	1293.17	394.601	2160.08	1437.14	465.821	2158.78	1258.91	501.041	2159.51	1108.16	544.81	2007.64	1019.23	528.994	1934.7	979.849	559.717	1981.37	941.143	582.176	1893.98	928.055
434	0	274.275	1942.7	1597.55	175.47	1942.33	1596.69	297.504	2096.29	1608.92	168.524	2113.27	1601.79	217.287	2156.55	1481.09	221.513	2240.49	1233.59	228.034	2045.53	1387.06	228.433	1989.83	1232.12	137.16	2241.88	1291.12	393.129	2144.73	1435.63	465.015	2142.75	1257.77	501.057	2143.22	1107.22	544.307	1989.66	1020.71	528.252	1916.14	982.416	559.505	1961.98	943.201	581.329	1874.26	931.567
435	0	273.939	1928.07	1595.76	174.615	1927.27	1595.07	296.269	2081.58	1607.01	167.314	2097.88	1600.03	215.638	2141.34	1479.11	220.055	2224.45	1231.44	226.594	2029.83	1385.15	227.613	1973.73	1231.05	135.248	2225.91	1288.83	391.491	2129.54	1434.04	463.963	2126.77	1256.65	500.487	2126.99	1105.96	543.611	1972.16	1021.97	527.302	1898	984.689	559.532	1943.94	945.329	580.724	1855.35	935.167
436	0	272.7	1913.15	1593.9	173.487	1912.1	1593.16	294.918	2066.68	1605.12	165.885	2082.66	1598.18	214.036	2126.02	1476.98	218.178	2208.15	1229.26	225.246	2014	1383.71	226.811	1957.68	1229.37	133.374	2209.88	1286.69	389.587	2114.3	1432.29	462.897	2111.18	1255.5	500.428	2111.76	1105.23	542.765	1955.35	1023.01	526.525	1880.88	986.956	558.357	1925.43	946.662	579.73	1837.16	938.05
437	0	272.036	1897.98	1592.34	172.491	1896.74	1591.58	293.419	2051.67	1603.3	164.486	2067.38	1596.53	212.069	2110.59	1475.22	216.04	2191.61	1226.97	223.465	1998.07	1381.94	224.855	1940.98	1227.99	131.09	2193.61	1284.22	387.795	2099	1430.67	461.642	2095.66	1254.2	499.795	2096.65	1104.15	541.742	1939.09	1023.9	525.171	1864.2	988.712	557.537	1908.22	948.1	578.266	1819.53	940.48
438	0	270.962	1883.19	1590.85	171.591	1881.41	1590.17	291.876	2037.04	1601.31	162.86	2052.18	1594.81	209.853	2095.32	1472.94	213.799	2175.2	1224.54	221.723	1982.27	1380.42	223.526	1924.53	1226.83	128.736	2177.28	1282.01	385.708	2083.79	1428.64	460.159	2080.5	1252.81	497.488	2080.5	1102.25	540.388	1923.21	1024.49	523.501	1848.04	990.239	556.502	1891.63	949.061	577.009	1802.89	942.561
439	0	269.938	1868.06	1589.57	170.494	1865.94	1589.01	290.184	2022.05	1599.62	160.948	2036.71	1593.13	207.795	2079.8	1471.34	211.526	2158.77	1222.31	219.618	1966.23	1379.26	221.877	1907.97	1225.56	126.241	2160.84	1279.9	383.534	2068.38	1426.78	458.404	2065.58	1251.41	496.793	2066.59	1101.3	539.021	1908.21	1024.92	521.703	1832.64	991.04	555.289	1875.73	949.777	575.234	1786.82	944.05
440	0	268.062	1852.5	1588.3	169.422	1850.45	1588.49	288.442	2007.05	1598.12	159.194	2021.09	1592.01	205.666	2064.29	1469.93	209.304	2142.21	1220.19	217.602	1950.15	1377.81	220.226	1891.41	1224.94	123.609	2144.28	1278.07	381.582	2053.34	1425.29	456.582	2050.95	1249.92	495.383	2052.58	1099.99	537.239	1893.25	1024.7	519.952	1817.77	991.337	553.821	1860.44	950.04	573.257	1771.13	945.138
441	0	267.644	1837.57	1588.06	168.431	1834.71	1588.42	286.673	1992.16	1597.11	157.471	2005.29	1591.53	203.286	2048.5	1469.12	207.263	2125.65	1218.41	215.388	1934.03	1377.49	218.225	1874.52	1224.48	121.025	2127.79	1276.61	379.482	2038.06	1423.66	454.57	2036.82	1248.6	493.828	2039.21	1098.7	535.444	1879.44	1024.12	517.621	1803.44	991.466	552.155	1845.99	950.086	571.523	1756.82	945.719
442	0	266.498	1822.22	1587.86	167.404	1818.84	1588.58	284.778	1976.88	1596.64	155.712	1989.37	1591.48	201.017	2032.67	1468.74	205.392	2109.17	1217.49	213.331	1917.78	1377.63	215.795	1857.46	1224.35	118.637	2111.36	1275.73	377.376	2022.74	1422.78	452.216	2022.93	1247.78	491.647	2025.62	1097.81	533.401	1866.1	1023.81	515.537	1790.14	991.164	550.125	1832.29	949.652	569.253	1743.18	946.006
443	0	265.423	1806.7	1588.37	166.518	1802.9	1589.42	282.99	1961.59	1596.63	153.666	1973.41	1591.85	198.921	2016.73	1468.72	203.91	2092.7	1217.18	211.592	1901.74	1377.79	213.528	1840.4	1224.97	116.674	2094.74	1275.41	375.431	2007.48	1422.49	448.54	2008.11	1246.94	489.392	2012.78	1097.5	530.994	1853.06	1023.3	513.287	1777.19	990.577	547.973	1819.39	949.212	567.129	1730.29	945.888
444	0	264.152	1791.08	1589.21	165.462	1786.88	1590.27	280.871	1946.25	1596.91	151.458	1957.38	1592.37	196.946	2000.68	1469.35	202.79	2076.64	1217.6	209.629	1885.56	1378.24	211.242	1823.56	1225.93	115.042	2078.11	1275.65	373.217	1991.7	1422.79	445.746	1995.24	1247.32	486.733	2000.19	1097.67	528.357	1840.81	1022.25	510.635	1765.1	989.575	545.841	1807.68	948.607	564.425	1718.34	944.911
445	0	262.972	1775.68	1590.16	164.435	1770.94	1591.68	278.999	1930.81	1597.37	149.501	1941.33	1593.2	195.188	1984.41	1470.1	201.681	2060.57	1218.41	207.702	1869.31	1379.12	209.008	1806.79	1227.18	113.621	2061.64	1276.34	371.309	1975.95	1423.34	443.124	1981.93	1247.64	483.676	1988	1098.08	525.529	1829.27	1021.83	507.821	1753.71	988.437	542.925	1796.59	947.477	561.912	1707.32	943.661
446	0	261.851	1759.98	1591.27	163.333	1755.02	1592.78	277.015	1914.95	1598.18	147.839	1925.31	1594.02	193.348	1968.56	1471.14	200.797	2044.99	1219.72	206.179	1853.37	1380.11	207.163	1790.3	1228.65	112.393	2045.29	1277.29	369.782	1960.11	1424.52	440.541	1968.87	1248.38	480.241	1976.11	1098.84	522.506	1818.4	1020.81	504.574	1742.84	986.281	539.232	1786.07	945.82	559.188	1697.2	941.458
447	0	260.688	1744.15	1592.66	162.18	1738.93	1594.05	275.383	1899.38	1599.36	146.298	1909.3	1594.68	191.651	1952.61	1472.43	199.793	2029.8	1221.37	204.369	1837.22	1381.15	205.651	1774.35	1229.61	111.027	2029.34	1278.59	367.986	1944.12	1425.99	437.723	1955.54	1249.53	476.633	1964.65	1099.86	519.019	1807.63	1019.8	501.591	1732.93	984.484	536.272	1776.97	944.366	556.211	1688.01	939.109
448	0	259.181	1728.03	1594.5	161.196	1723.13	1595.31	273.945	1883.83	1600.79	144.908	1893.32	1595.62	190.222	1936.88	1474.01	198.625	2014.52	1223.39	203.439	1821.61	1382.61	204.696	1758.66	1230.89	109.803	2013.53	1280.32	366.466	1928.98	1427.78	435.677	1942.19	1250.74	473.055	1953.48	1101.14	515.643	1797.52	1018.59	498.324	1723.48	982.16	532.625	1768.19	942.603	553.092	1679.46	936.094
449	0	258.12	1712.46	1596.06	160.199	1707.28	1596.47	272.474	1868.09	1602.19	143.6	1877.43	1596.68	188.82	1921.26	1475.69	197.373	1999.77	1225.69	202.895	1806.41	1384.09	204.194	1743.44	1232.01	108.436	1997.89	1282.4	364.974	1913.81	1429.72	433.37	1928.99	1251.98	469.772	1943.04	1102.73	511.946	1787.88	1017.1	494.7	1714.54	979.332	528.45	1759.96	940.271	549.738	1671.72	932.513
450	0	257.203	1696.71	1597.48	159.122	1691.55	1597.79	271.208	1852.42	1604.04	142.353	1861.77	1597.95	187.461	1905.92	1477.53	195.859	1984.75	1227.95	202.362	1791.28	1385.86	204.054	1728.35	1233.33	106.6	1982.43	1284.64	363.657	1899.34	1431.75	431.167	1915.96	1253.49	465.902	1932.09	1104.31	508.407	1778.89	1015.32	491.064	1706.11	976.08	524.41	1752.41	937.792	546.197	1664.45	928.287
451	0	256.253	1681.31	1599.15	158.379	1675.93	1598.89	269.995	1836.93	1605.98	141.176	1846	1599.52	186.212	1890.67	1479.47	194.403	1970.06	1230.3	201.766	1776.22	1387.39	205.105	1713.51	1235.18	104.886	1967.02	1286.78	362.401	1885.35	1433.77	428.719	1903.16	1255.2	462.73	1921.96	1106.35	504.802	1770.16	1013.4	487.475	1698.06	972.774	520.097	1745.48	935.179	542.267	1658	923.453
452	0	255.486	1665.9	1600.65	157.516	1660.36	1600.31	269.006	1821.74	1608.2	140.072	1830.4	1601.48	184.944	1875.59	1481.63	192.808	1955.27	1232.47	201.253	1761.36	1389.43	205.711	1699.25	1236.8	103.251	1951.92	1288.98	361.284	1871.57	1435.72	426.718	1890.38	1256.81	458.601	1911.07	1107.78	501.032	1761.89	1011.11	483.713	1690.54	969.143	515.941	1739.29	932.303	538.129	1651.89	918.348
453	0	254.863	1650.5	1602.33	157.142	1644.73	1601.6	267.841	1806.12	1610.51	139.316	1814.69	1603.91	183.919	1860.64	1483.91	191.245	1940.77	1234.89	201.197	1746.64	1391.49	206.857	1685.21	1238.8	101.773	1936.65	1291.41	360.352	1858.08	1437.91	424.674	1878.07	1258.78	455.264	1900.76	1109.86	497.343	1754.01	1009.11	479.796	1683.69	965.024	511.571	1733.32	929.513	534.098	1646.74	912.951
454	0	254.296	1635.21	1604.02	156.476	1629.29	1602.91	266.963	1790.9	1613.35	138.118	1799.24	1606.4	182.908	1845.8	1486.39	189.655	1926.41	1237.34	200.851	1731.98	1393.61	207.91	1671.27	1240.71	100.06	1921.49	1293.98	359.192	1844.34	1440.37	422.564	1865.81	1260.94	451.15	1889.77	1111.56	493.508	1746.1	1006.93	475.896	1677.16	960.918	507.174	1727.71	926.76	529.46	1641.67	907.223
455	0	253.778	1620.11	1605.71	156.118	1613.88	1604.57	266.739	1776.3	1616.49	137.084	1783.67	1609.01	182.041	1830.9	1489.07	187.961	1911.81	1239.96	200.719	1717.4	1396.05	208.833	1657.55	1243.02	98.6004	1906.57	1296.47	358.306	1830.94	1442.84	420.448	1854.01	1263.17	447.494	1879.24	1113.63	489.734	1738.75	1004.34	471.848	1671.09	956.702	502.855	1722.77	923.948	525.13	1637.59	901.364
456	0	253.359	1604.92	1607.67	155.703	1598.61	1606.14	265.54	1760.78	1618.88	136.248	1768.35	1611.67	181.201	1816.17	1491.67	186.499	1897.59	1242.51	200.574	1703.02	1398.44	209.699	1643.73	1245.53	96.9022	1891.59	1298.92	357.488	1817.54	1445.32	418.309	1842.43	1265.34	443.74	1868.72	1115.64	485.748	1731.77	1002.08	467.662	1665.61	952.238	498.411	1718.38	920.924	520.162	1633.99	895.006
457	0	252.995	1590.13	1609.23	155.361	1583.41	1607.61	264.839	1745.9	1621.41	135.501	1753.09	1614.09	180.604	1801.4	1493.99	184.945	1883.35	1245.04	200.41	1688.73	1401.09	210.307	1629.89	1248.3	95.417	1877.02	1301.46	356.727	1804.34	1447.69	416.283	1830.96	1267.57	440.093	1857.96	1117.66	481.824	1724.96	999.565	463.446	1660.55	947.595	493.837	1714.14	917.942	515.232	1630.97	888.494
458	0	252.551	1575.11	1610.98	155.165	1568.28	1609.38	264.156	1731.11	1623.72	134.814	1737.94	1616.23	179.643	1787.04	1496.4	183.449	1869.15	1247.44	200.081	1674.35	1403.52	210.659	1615.92	1250.48	94.0431	1862.06	1303.84	355.898	1791.01	1449.96	413.93	1819.62	1269.75	436.59	1847.34	1119.76	477.934	1718.45	997.115	459.138	1655.85	942.936	489.739	1710.74	914.992	509.877	1628.47	881.496
459	0	252.511	1560.52	1612.66	154.945	1553.35	1611.01	263.181	1715.81	1626.21	134.259	1723.01	1618.52	178.829	1772.66	1498.8	182.193	1855.02	1249.89	199.927	1660.21	1405.99	210.902	1601.92	1253.21	92.8794	1847.83	1306.3	355.263	1777.58	1452.21	412.229	1808	1271.84	433.113	1836.7	1121.92	474.201	1712.36	994.814	454.422	1651.58	938.057	485.479	1707.37	912.499	504.814	1626.68	875.204
460	0	252.248	1545.75	1614.39	154.756	1538.55	1612.67	262.597	1701.13	1628.38	133.582	1708.03	1620.58	178.414	1758.2	1501.14	181.167	1840.85	1252.17	199.482	1645.86	1408.26	210.875	1588.05	1255.52	91.6303	1833.13	1308.69	354.606	1763.95	1454.21	410.412	1796.29	1273.79	429.863	1825.98	1124.04	470.283	1706.03	992.731	450.041	1647.62	933.772	481.552	1704.28	910.34	499.327	1624.97	868.843
461	0	252.11	1531.07	1615.86	154.675	1523.58	1614.21	262.057	1686.32	1630.38	133.132	1693.22	1622.6	177.795	1743.49	1503.1	180.066	1826.63	1254.48	199.183	1631.55	1410.47	210.591	1574.11	1257.66	90.8059	1818.77	1311.1	353.677	1750.06	1455.99	408.344	1784.21	1275.45	426.473	1815.41	1126.01	466.476	1700.01	990.836	445.706	1643.87	929.685	477.405	1700.86	908.469	493.77	1623.79	862.441
462	0	251.769	1516.44	1617.57	154.565	1508.83	1615.46	261.73	1671.9	1632.21	132.814	1678.56	1624.2	177.384	1728.9	1505.18	179.076	1812.48	1256.66	198.797	1617.38	1412.27	210.016	1560.29	1259.43	90.0254	1804.37	1313.36	353.166	1736.1	1457.65	406.701	1772.02	1277.07	423.078	1804.95	1127.94	462.758	1694	989.148	441.456	1640.49	925.955	473.327	1697.67	906.701	488.089	1622.95	856.532
463	0	251.497	1501.98	1618.82	154.259	1494.29	1616.81	261.493	1657.27	1633.71	132.397	1663.78	1625.83	177.163	1714.6	1506.73	178.234	1798.07	1258.47	198.388	1603.16	1413.79	209.553	1546.44	1261.18	89.1247	1789.94	1315.34	352.595	1721.97	1459.1	405.102	1759.6	1278.34	419.608	1794.31	1129.67	458.96	1688.12	987.489	437.193	1637.1	922.159	470.038	1694.7	905.512	482.721	1622.33	850.872
464	0	251.602	1487.52	1619.81	154.216	1479.77	1617.88	261.143	1642.76	1634.8	131.991	1649.22	1627.06	176.654	1699.93	1508.05	177.656	1783.94	1259.97	198.036	1588.9	1414.93	208.517	1532.54	1262.13	88.5623	1775.62	1317.01	352.245	1707.74	1459.95	403.585	1746.81	1279.25	416.201	1783.87	1131	455.236	1682.26	986.007	432.809	1633.85	918.476	466.53	1691.64	904.302	477.281	1622.03	845.521
465	0	251.406	1473.14	1620.71	154.056	1465.25	1618.55	260.812	1628.29	1635.5	131.756	1634.74	1627.69	176.198	1685.49	1508.91	177.067	1769.83	1261.08	197.57	1574.5	1415.9	207.685	1518.38	1262.89	88.1473	1761.39	1318.25	351.892	1693.39	1460.65	401.891	1733.99	1279.75	412.839	1773.48	1132.19	451.478	1676.3	984.084	428.632	1630.61	914.93	462.689	1688.48	902.778	471.927	1621.81	840.435
466	0	251.225	1458.83	1621.03	154.046	1450.8	1619.06	260.687	1614.13	1635.59	131.375	1620.34	1627.83	175.994	1670.9	1509.49	176.514	1755.74	1261.72	197.186	1560.15	1416.54	206.803	1504.05	1263.22	87.764	1747.23	1319.18	351.469	1679.01	1460.94	400.359	1721.33	1280.03	409.405	1763.01	1133.09	447.599	1670.54	982.066	424.398	1627.48	911.463	458.796	1685.47	901.231	466.627	1621.71	835.608
467	0	251.231	1444.56	1621.07	153.943	1436.49	1619.54	260.441	1599.84	1635.28	131.191	1606.09	1627.55	175.922	1656.77	1509.48	176.039	1741.61	1261.93	196.86	1545.85	1416.52	206.021	1489.61	1263.26	87.2034	1732.93	1319.48	351.188	1664.64	1460.75	398.725	1708.64	1279.83	406.088	1752.42	1133.72	443.677	1664.91	979.684	420.181	1624.25	908.009	454.749	1682.39	899.49	461.376	1621.67	830.845
468	0	251.288	1430.34	1620.61	153.877	1422.03	1619.34	260.258	1585.59	1634.51	131.042	1591.73	1626.98	175.451	1642.1	1509.26	175.568	1727.36	1261.68	195.936	1531.18	1416.08	205.25	1475.04	1263.02	86.6955	1718.43	1319.37	350.792	1650.19	1460.13	396.932	1696.17	1279.37	402.724	1741.77	1133.85	439.725	1659.32	976.805	415.388	1620.84	903.428	450.961	1679.73	897.732	456.144	1621.34	825.929
469	0	251.194	1416.03	1620.1	153.902	1407.62	1618.79	260.073	1571.38	1633.58	130.952	1577.24	1626.12	175.107	1627.6	1508.54	175.006	1713.2	1261.31	195.52	1516.75	1415.46	204.544	1460.5	1262.16	86.1191	1704.08	1319.1	350.519	1635.75	1459.26	395.682	1683.8	1278.79	399.543	1731.03	1133.95	435.939	1653.73	974.48	411.416	1617.49	899.941	446.361	1676.32	895.805	451.176	1620.9	821.544
470	0	251.254	1401.7	1619.41	153.98	1393.26	1618.23	259.819	1557.09	1632.38	130.931	1562.63	1624.79	174.682	1613.12	1507.55	174.515	1698.87	1260.53	195.699	1502.47	1414.46	204.12	1446.34	1261.08	85.6609	1689.46	1318.5	350.209	1621.11	1458.1	394.049	1671.22	1277.96	396.395	1720.14	1133.85	432.432	1648.01	972.035	407.649	1614.05	896.584	442.156	1673.13	894.013	446.674	1620.53	817.802
471	0	251.518	1387.42	1617.97	154.058	1378.88	1617.2	260.115	1543.21	1630.61	130.763	1548.21	1623.53	174.56	1598.47	1506.19	173.968	1684.53	1259.41	195.186	1487.69	1413.12	203.397	1431.87	1259.46	85.2531	1675.2	1317.39	350.011	1606.57	1456.65	392.434	1658.89	1276.8	393.46	1709.06	1133.31	429.04	1642.26	969.382	403.509	1610.69	893.335	437.786	1669.8	892.111	442.274	1619.83	814.097
472	0	251.593	1373.16	1616.69	154.261	1364.45	1615.86	260.218	1529.19	1628.66	130.751	1533.81	1621.67	174.334	1583.82	1504.47	173.496	1670.26	1257.91	194.512	1472.94	1411.23	202.636	1417.67	1257.63	84.6255	1661.45	1316.05	349.61	1592	1454.57	390.798	1646.55	1275.32	390.422	1697.84	1132.44	425.72	1636.41	966.644	399.992	1606.91	889.786	433.563	1666.39	890.035	438.09	1618.86	810.419
473	0	251.793	1358.77	1614.93	154.465	1349.93	1614.38	260.172	1514.59	1626.27	131.087	1519.34	1619.74	174.173	1569.05	1502.62	173.167	1655.8	1256.19	194.251	1458.25	1409.36	201.981	1403.55	1255.15	84.5902	1646.45	1314.3	349.503	1577.44	1452.26	389.222	1634.02	1273.55	387.715	1686.46	1131.43	422.648	1630.38	963.93	396.707	1602.72	886.313	429.43	1662.66	888.097	434.125	1617.45	806.945
474	0	252.11	1344.36	1612.88	154.74	1335.31	1612.46	259.978	1500.13	1623.75	131.007	1504.8	1617.24	174.216	1554.38	1500.59	172.811	1641.51	1254.23	194.165	1443.54	1407.27	201.358	1389.39	1252.83	83.8764	1632.23	1312.63	349.301	1562.81	1449.81	387.703	1621.54	1271.64	385.041	1675.12	1130.13	419.712	1624.06	961.239	393.829	1598.17	882.983	425.435	1658.56	886.084	430.407	1615.83	803.888
475	0	252.352	1329.97	1610.76	155.057	1320.8	1610.47	260.276	1486.03	1620.77	131.374	1490.14	1614.77	174.063	1539.75	1497.96	172.487	1627.23	1251.85	193.735	1428.69	1404.51	200.791	1375.02	1250.02	83.4541	1617.74	1310.47	349.127	1548.2	1447.06	386.243	1608.76	1269.28	382.58	1663.48	1128.42	417.068	1617.43	958.424	391.003	1593.17	879.428	421.607	1653.96	884.027	426.557	1613.65	800.726
476	0	252.88	1315.69	1608.15	155.601	1306.23	1608.25	260.398	1471.67	1617.71	131.395	1475.6	1611.6	174.238	1524.96	1495.34	172.288	1612.81	1249.33	193.466	1413.74	1401.79	200.21	1360.41	1247.02	83.1599	1603.38	1308.01	348.983	1533.54	1443.96	384.886	1595.74	1266.59	380.331	1651.51	1126.58	414.754	1610.55	955.405	388.752	1587.81	876.092	418.109	1649.13	881.878	423.375	1611.11	797.407
477	0	253.334	1301.31	1605.44	156.117	1291.68	1605.67	260.739	1457.46	1614.47	131.493	1460.93	1608.41	174.286	1510.23	1492.53	172.154	1598.5	1246.54	193.783	1398.97	1398.99	199.775	1345.67	1244.16	82.891	1589.04	1305.51	348.971	1518.76	1440.83	383.877	1582.6	1263.8	378.042	1639.32	1124.48	412.658	1603.27	952.702	386.985	1582.41	872.915	414.908	1643.77	879.859	420.413	1607.98	794.321
478	0	253.879	1286.7	1602.7	156.562	1276.88	1603.24	261.058	1443.07	1611.08	131.985	1446.29	1605.8	174.517	1495.57	1489.81	172.01	1584.11	1243.67	193.538	1384.13	1395.93	199.317	1330.72	1241	82.7826	1574.56	1302.86	349.187	1504.22	1437.66	382.91	1569.04	1260.91	376.235	1626.96	1122.34	410.427	1595.57	949.92	385.334	1575.85	869.686	411.923	1637.69	877.884	417.721	1603.99	791.533
479	0	254.482	1272.22	1599.87	157.253	1262.19	1600.46	261.486	1428.43	1607.91	132.267	1431.51	1602.55	174.679	1480.83	1486.83	172.065	1569.53	1240.82	193.41	1369.12	1392.76	198.926	1315.75	1237.77	82.68	1560.12	1300.25	349.23	1489.43	1434.43	382.333	1555.54	1258.04	374.634	1614.17	1120.09	408.926	1587.24	947.34	383.873	1568.72	866.427	409.363	1631.2	876.162	415.263	1599.64	788.811
480	0	255.193	1257.58	1596.99	157.98	1247.42	1597.75	261.77	1413.77	1604.64	132.829	1416.51	1599.73	175.129	1466.23	1483.96	172.092	1554.92	1238.11	193.442	1354.15	1389.82	198.557	1300.6	1234.77	82.636	1545.66	1297.69	349.516	1474.61	1431.32	381.756	1541.52	1255.19	373.228	1601.01	1117.79	407.504	1578.3	944.816	382.652	1561.2	863.491	407.003	1623.92	874.604	413.243	1594.51	786.393
481	0	255.976	1242.87	1594.08	158.767	1232.58	1595.11	262.238	1399.12	1601.45	133.259	1401.73	1596.73	175.44	1451.54	1481.27	172.424	1540.15	1235.12	193.658	1339.1	1386.81	198.481	1285.69	1231.72	82.8354	1531.09	1295	349.961	1459.88	1428.1	381.536	1527.28	1252.06	371.936	1587.46	1115.32	406.439	1568.79	942.156	381.721	1552.97	860.368	404.798	1615.68	872.692	411.405	1588.59	783.848
482	0	256.816	1228.17	1591.17	159.657	1217.61	1592.33	263.023	1384.49	1598.38	133.771	1386.79	1594.15	176.012	1436.75	1478.47	172.824	1525.23	1232.21	194.127	1324.44	1383.92	198.227	1270.94	1228.82	83.2699	1516.43	1292.2	350.41	1445.04	1424.94	381.565	1513.03	1249.08	371.429	1573.83	1112.86	405.443	1558.62	939.483	380.897	1544.13	857.501	403.141	1606.91	870.894	409.758	1581.82	781.414
483	0	257.691	1213.38	1588.31	160.577	1202.55	1589.83	263.704	1369.84	1595.47	134.44	1371.83	1591.29	176.617	1422.11	1475.69	173.372	1510.26	1229.35	194.437	1309.34	1381.53	198.083	1255.99	1226.14	83.8239	1501.89	1289.52	350.848	1429.91	1422.1	381.566	1498.23	1246.32	370.774	1559.44	1110.42	404.986	1547.84	937.123	380.373	1534.43	854.962	401.868	1597.43	869.342	408.427	1574.12	779.204
484	0	258.529	1198.48	1585.56	161.631	1187.59	1587.09	264.307	1355	1592.69	135.182	1356.84	1589.03	177.37	1407.39	1473.07	174.09	1495.1	1226.42	194.669	1294.13	1378.87	198.219	1241.02	1223.91	84.6948	1486.95	1286.7	351.394	1414.92	1419.04	381.924	1483.54	1243.47	370.849	1545.14	1108.07	404.768	1536.52	934.766	380.344	1524.21	852.506	401.061	1587.06	867.801	407.52	1565.46	777.177
485	0	259.511	1183.61	1582.81	162.384	1172.67	1584.9	265.362	1340.12	1590.32	136.036	1341.77	1586.63	178.198	1392.53	1470.68	175.06	1479.76	1223.63	195.315	1279.08	1376.82	198.13	1225.74	1221.81	85.6574	1472.18	1284.05	352.184	1399.91	1416.52	382.443	1468.57	1240.85	371.032	1530.48	1105.74	404.804	1524.39	932.453	380.379	1513.02	850.284	400.772	1575.84	866.309	407.035	1556.1	775.212
486	0	260.398	1168.61	1580.29	163.376	1157.58	1582.67	265.792	1324.58	1588.1	136.999	1326.74	1584.99	178.983	1377.56	1468.43	176.035	1464.38	1220.94	196.139	1264.02	1374.72	198.605	1210.25	1219.99	86.7511	1457.01	1281.51	352.903	1384.87	1413.98	382.954	1453.47	1238.28	371.383	1515.38	1103.55	405.329	1511.6	930.409	380.839	1501.17	848.055	401.028	1563.78	864.951	406.889	1545.49	773.427
487	0	261.48	1153.54	1578.35	164.315	1142.41	1580.6	267.099	1309.6	1586.36	137.956	1311.49	1583.41	179.851	1362.51	1466.58	176.956	1448.66	1218.62	196.54	1248.42	1373.13	199.273	1194.32	1218.5	87.8384	1441.73	1279.31	353.902	1369.81	1411.97	383.889	1437.9	1236.14	372.37	1500.14	1101.7	406.12	1497.92	928.585	382.055	1488.38	846.437	401.971	1551	863.976	407.371	1533.91	771.971
488	0	262.415	1138.08	1576.89	165.386	1127.25	1579.28	268.255	1294.27	1585.31	138.87	1296.27	1582.26	180.74	1347.3	1465.25	177.846	1432.65	1216.83	197.959	1233.23	1371.7	200.141	1178.23	1217.34	88.7441	1426.11	1277.38	354.894	1354.57	1410.58	384.92	1422.33	1234.61	373.235	1484.3	1100.13	407.378	1483.43	927.443	383.076	1474.53	844.784	403.087	1537.08	863.058	408.221	1521.19	770.949
489	0	263.401	1122.68	1575.92	166.32	1111.95	1578.36	269.077	1278.92	1584.87	140.219	1280.75	1581.92	181.626	1332.14	1464.36	178.709	1416.74	1215.34	198.854	1217.63	1370.77	201.295	1162.01	1216.55	89.5685	1410.39	1275.88	355.787	1339.35	1409.41	386.015	1406.34	1233.24	374.357	1468.07	1098.69	408.592	1468.24	926.269	384.763	1460.17	843.263	404.874	1522.38	862.144	409.592	1507.44	770.082
490	0	264.448	1107.15	1575.22	167.372	1096.41	1577.89	270.449	1263.25	1584.47	141.128	1265.38	1581.89	182.521	1316.75	1463.98	179.424	1400.63	1214.19	199.75	1202.23	1370.58	202.677	1145.7	1216.55	90.4159	1394.52	1274.49	356.651	1324.14	1408.53	387.105	1390.31	1231.97	375.652	1451.62	1097.27	410.385	1452.37	925.052	386.508	1444.64	841.788	406.519	1506.67	861.175	411.353	1492.84	768.905
491	0	265.423	1091.42	1575.24	168.345	1080.74	1577.95	271.601	1247.53	1584.97	142.201	1249.74	1582.48	183.26	1301.36	1464.18	179.984	1384.54	1213.6	201.068	1186.65	1370.8	204.189	1129.22	1217.07	91.1453	1378.51	1273.85	357.278	1309.22	1408.05	388.197	1373.99	1231.05	377.086	1434.81	1096.27	412.423	1435.94	924.304	388.643	1428.21	841.293	408.669	1490.21	860.669	413.448	1476.71	768.332
492	0	266.514	1075.72	1575.99	169.352	1064.94	1578.55	272.612	1231.9	1585.82	143.357	1234.05	1583.44	184.007	1285.76	1464.93	180.28	1368.52	1213.9	202.094	1171.02	1371.93	205.887	1112.96	1218.44	91.572	1362.36	1273.94	358.064	1294.39	1408.79	389.305	1357.49	1230.98	378.61	1417.55	1096	414.524	1418.54	924.253	391.062	1410.96	841.397	411.132	1472.9	860.708	416.197	1459.78	768.296
493	0	267.619	1060.05	1577.06	170.632	1049.21	1579.8	273.709	1216.12	1587.41	144.459	1218.22	1585.07	184.543	1270.19	1466.3	180.397	1352.74	1214.75	203.26	1155.56	1373.41	207.729	1096.58	1220.26	91.8255	1346.13	1274.84	358.702	1279.61	1410.06	390.399	1340.92	1231.53	380.258	1400.33	1096.25	417.091	1400.61	924.861	393.911	1392.7	842.003	413.84	1454.6	861.288	419.397	1441.41	768.839
494	0	268.795	1044.54	1578.11	171.869	1033.56	1581.23	274.344	1200.35	1589.01	145.355	1202.49	1586.57	185.169	1254.63	1467.72	180.337	1336.92	1216.01	204.39	1140.18	1375.34	209.657	1080.72	1222.21	92.1394	1329.86	1275.97	359.282	1264.87	1411.84	391.474	1324.29	1232.68	381.714	1382.73	1097.03	419.787	1381.96	925.854	396.798	1373.43	843.003	416.789	1435.37	861.886	422.93	1421.82	769.639
495	0	269.773	1029.06	1579.56	172.807	1017.98	1582.31	275.414	1185.06	1590.49	146.26	1186.94	1588.56	185.579	1239.17	1469.31	180.174	1321.23	1217.61	205.589	1124.85	1377	211.612	1064.27	1224.79	92.1706	1313.52	1277.5	359.845	1250.15	1414.01	392.527	1307.89	1234.17	383.34	1365.3	1098.21	422.464	1362.4	927.201	400.245	1353.34	844.089	419.823	1415.32	862.614	426.924	1401.15	770.737
496	0	270.679	1013.72	1581.01	173.791	1002.52	1583.99	276.186	1169.63	1592.52	147.038	1171.4	1590.56	186.167	1223.78	1471.22	179.796	1305.18	1219.44	206.51	1109.45	1379.13	213.407	1048.6	1227.3	92.2086	1297.04	1279.41	360.304	1235.27	1416.33	393.661	1291.48	1236.14	385.121	1348.02	1099.67	425.583	1342.81	928.965	403.874	1332.6	845.852	423.529	1394.83	863.833	431.112	1379.23	771.924
497	0	271.571	998.462	1582.79	174.712	987.131	1585.69	276.897	1154.32	1594.68	147.72	1155.92	1592.56	186.738	1208.53	1473.21	179.487	1289.34	1221.39	207.406	1094.38	1381.3	215.242	1033.7	1229.13	92.3289	1281.62	1281.59	360.83	1220.26	1418.46	394.668	1275.22	1238.17	387.006	1330.81	1101.19	428.813	1322.78	930.669	407.229	1311	847.301	427.119	1373.53	864.763	435.775	1356.63	773.303
498	0	272.431	983.429	1584.67	175.739	971.75	1587.45	277.518	1139.12	1596.72	148.141	1140.61	1594.69	187.346	1193.35	1475.29	179.505	1273.69	1223.46	208.08	1079.21	1383.37	216.508	1018.55	1231.17	92.3045	1265.78	1283.85	361.44	1204.92	1420.49	395.982	1259.07	1240.25	389.054	1313.66	1102.5	432.221	1302.53	932.388	411.355	1289.02	849.053	431	1351.86	865.364	440.669	1333.05	774.523
499	0	273.182	968.252	1586.46	176.354	956.712	1589.34	278.203	1124.2	1598.76	148.803	1125.4	1596.96	188.222	1178.34	1477.45	179.648	1258.48	1225.67	208.331	1064.11	1385.34	216.92	1003.49	1233.23	92.5206	1250.76	1286.25	362.066	1189.52	1422.41	397.151	1242.83	1242.18	391.319	1296.54	1103.69	435.635	1281.72	933.873	415.579	1266.47	850.773	434.921	1329.85	865.81	445.677	1308.68	775.68
500	0	273.908	953.419	1588.28	177.085	941.749	1591.47	278.512	1109.34	1600.74	149.416	1110.33	1599.25	188.893	1163.53	1479.53	180.004	1243.49	1228.07	208.618	1049.22	1387.34	217.304	989.263	1234.9	92.9382	1236.17	1288.71	362.857	1173.96	1424.3	398.703	1226.76	1244.08	393.711	1279.36	1104.84	439.558	1260.86	935.51	419.847	1243.43	852.624	439.001	1307.28	866.384	451.039	1283.69	776.997
501	0	274.405	938.605	1590.24	177.444	926.792	1593.51	279.095	1094.34	1602.94	149.941	1095.52	1601.49	189.686	1148.8	1481.8	180.631	1228.63	1230.5	208.9	1034.42	1389.6	216.758	974.793	1236.82	93.4548	1221.66	1291.1	363.614	1158.42	1426.37	400.072	1210.25	1245.81	396.221	1262.1	1105.94	443.1	1239.51	937.19	424.339	1220.17	854.642	443.21	1284.52	866.944	456.428	1257.97	778.525
502	0	274.786	923.705	1592.17	177.98	912.043	1595.37	279.65	1079.34	1605.14	150.479	1080.84	1603.8	190.28	1134.13	1483.99	181.807	1214.32	1233.01	209.272	1019.73	1391.78	215.44	959.871	1238.88	94.2362	1207.51	1293.46	364.386	1142.94	1428.3	401.728	1193.63	1247.5	398.84	1244.63	1106.98	446.828	1218.13	938.931	429.079	1196.56	856.813	447.554	1261.52	867.459	462.125	1231.9	780.33
503	0	275.175	908.92	1594.05	178.394	897.399	1597.61	280.209	1064.73	1607.24	150.99	1066.17	1606.25	191.004	1119.55	1486.13	183.004	1199.58	1235.27	209.461	1005.2	1393.8	214.363	945.366	1240.77	95.3439	1193.81	1295.61	365.038	1127.65	1430.15	403.378	1176.86	1249.08	401.588	1226.95	1107.91	450.648	1196.39	940.65	433.878	1172.69	859.208	451.722	1237.87	868.015	468.206	1205.11	782.267
504	0	275.594	894.288	1596.01	178.635	882.797	1599.71	280.794	1050.07	1609.29	151.535	1051.53	1608.65	191.501	1105.26	1488.4	183.971	1184.68	1237.22	209.413	990.756	1395.88	213.357	930.991	1242.64	96.4361	1179.66	1297.82	365.652	1112.44	1432.17	404.958	1160.07	1250.57	404.403	1209.25	1108.76	454.558	1174.47	942.571	438.304	1148.36	861.545	455.954	1213.94	868.72	474.141	1178.25	784.706
505	0	275.93	879.745	1597.97	179.152	868.337	1601.86	281.306	1035.17	1611.58	152.253	1037.14	1611.09	192.057	1090.73	1490.46	185.281	1170.6	1239.26	209.373	976.284	1398.02	212.155	916.44	1244.87	97.6546	1165.84	1299.94	366.166	1097.23	1434.18	406.663	1143.19	1252.34	407.38	1191.24	1109.74	458.451	1152.31	944.576	443.32	1123.74	864.132	460.075	1189.81	869.473	480.142	1150.96	787.411
506	0	276.212	865.01	1599.85	179.321	853.901	1603.76	281.941	1020.72	1613.78	153.076	1022.4	1613.1	192.569	1076.41	1492.78	186.239	1156.31	1241.38	209.415	961.775	1399.99	211.077	901.648	1246.93	98.8829	1151.96	1301.96	366.546	1082.11	1436.38	408.32	1126.4	1254.18	410.352	1173.01	1110.8	462.194	1129.69	946.722	447.685	1098.98	867.047	464.029	1165.16	870.386	485.963	1123.03	790.721
507	0	276.434	850.472	1601.64	179.566	839.504	1606	282.603	1006.14	1615.99	153.366	1008.16	1615.84	193.028	1062.12	1494.85	187.349	1142.34	1243.37	209.322	947.522	1402.24	210.221	887.11	1249.27	99.9336	1138.19	1304.13	367.122	1067.28	1438.71	410.024	1109.6	1256.16	413.379	1154.64	1111.98	465.759	1106.78	949.253	452.57	1074.37	870.416	468.211	1140.23	871.922	491.831	1095.24	794.493
508	0	276.758	836.075	1603.34	179.65	825.209	1607.7	282.989	991.489	1617.91	154.022	994.118	1618.42	193.536	1047.7	1497.11	188.465	1128.35	1245.53	209.303	933.253	1404.23	209.654	872.94	1251.46	100.845	1124.45	1306.11	367.499	1052.4	1440.81	411.605	1092.94	1258.07	416.245	1136.07	1113.14	469.35	1083.74	951.757	456.246	1048.55	874.055	472.309	1115.03	873.606	497.61	1067.27	798.508
509	0	277.017	821.679	1604.94	180.164	810.935	1609.49	283.858	977.305	1619.88	154.355	979.69	1620.56	194.025	1033.68	1498.92	189.26	1114.73	1247.67	209.322	919.078	1406.3	209.452	858.767	1253.61	101.617	1110.62	1308.24	367.924	1037.56	1442.86	413.062	1076.15	1259.87	418.799	1117.32	1114.18	472.939	1060.46	954.533	460.286	1023.22	877.571	476.639	1089.61	875.706	503.374	1039.06	803.033
510	0	277.347	807.285	1606.34	180.243	796.724	1611.16	284.104	962.552	1621.8	155.099	965.595	1622.77	194.6	1019.31	1500.78	189.682	1100.38	1249.66	209.158	905.03	1408.32	209.477	844.648	1255.57	102.36	1096.71	1310.29	368.582	1022.87	1444.9	414.821	1059.37	1261.86	421.786	1098.76	1115.45	476.418	1036.99	957.77	464.361	997.711	881.935	480.892	1063.91	877.974	508.881	1010.92	808.039
511	0	277.666	792.988	1607.73	180.657	782.519	1612.64	284.863	948.462	1623.5	155.595	951.273	1624.58	195.26	1005.25	1502.45	190.584	1086.42	1251.4	209.597	891.008	1409.91	209.686	830.569	1257.43	103.136	1083.09	1312.25	369.104	1008.03	1446.94	416.53	1042.68	1263.62	424.733	1080.35	1116.67	480.211	1013.47	961.408	468.344	972.288	886.637	485.219	1038.1	880.554	514.226	982.436	813.285
512	0	277.944	778.678	1608.84	180.749	768.386	1613.87	285.315	933.806	1625	156.214	937.582	1626.57	195.808	991.026	1503.82	191.209	1072.21	1252.67	209.844	876.965	1411.41	210.059	816.406	1258.95	103.889	1069.39	1313.82	369.789	993.31	1448.68	418.22	1025.96	1265.09	427.478	1061.79	1117.52	483.603	989.865	964.595	472.514	946.806	891.024	489.632	1012.12	883.158	519.559	954.224	818.607
513	0	278.14	764.402	1609.63	180.979	754.342	1614.73	285.967	919.67	1626.12	156.531	923.314	1627.71	196.674	977.014	1505.02	191.932	1058.14	1253.99	210.182	862.788	1412.68	210.4	802.351	1259.96	104.685	1055.57	1315.11	370.37	978.671	1449.76	419.916	1009.15	1266.35	430.356	1043.36	1118.17	486.862	966.176	967.544	475.677	920.993	895.594	493.877	985.958	885.758	524.175	925.75	823.62
514	0	278.409	750.139	1610.23	181.192	740.264	1615.29	286.389	905.176	1627.36	157.276	909.36	1628.71	197.106	962.812	1505.8	192.649	1043.95	1255.09	210.693	848.786	1413.55	210.678	788.108	1260.96	105.483	1041.75	1316.14	371.055	963.875	1451.01	421.592	992.427	1267.34	433.123	1024.88	1118.77	490.163	942.736	970.663	479.143	895.391	900.081	498.263	960.022	888.487	528.675	897.331	828.893
515	0	278.47	735.662	1611.13	181.396	726.078	1615.74	287.244	891.047	1628.19	157.766	895.286	1629.88	198.13	948.718	1506.56	193.4	1029.78	1255.75	211.15	834.628	1414.11	210.987	774.1	1261.65	106.416	1027.98	1317.07	371.766	949.274	1451.8	423.406	975.749	1268.2	435.985	1006.41	1119.11	493.667	919.122	974.146	482.48	869.888	904.582	502.896	934.724	891.44	533.052	869.134	834.288
516	0	278.927	721.322	1611.19	181.686	712.034	1615.98	287.886	876.48	1628.92	158.597	881.295	1630.17	198.808	934.356	1507.02	194.336	1015.65	1256.35	211.79	820.459	1414.6	211.271	760.099	1262	107.356	1014.16	1317.52	372.52	934.519	1452.48	424.873	959.192	1268.75	438.824	987.879	1119.18	496.984	895.771	977.23	485.866	844.57	909.033	506.703	907.979	894.21	537.154	841.076	839.518
517	0	279.302	706.896	1611.26	182.087	697.901	1615.9	288.736	862.008	1629.21	159.231	867.268	1630.96	199.643	920.17	1507.05	194.896	1001.54	1256.67	212.383	806.151	1414.61	211.48	746.17	1262.07	108.299	1000.13	1317.92	373.27	919.872	1452.7	426.645	942.503	1269.23	441.835	969.284	1119.05	500.136	872.32	980.219	488.851	819.235	913.386	511.021	882.614	897.07	540.963	813.235	844.848
518	0	279.584	692.53	1611.18	182.351	683.649	1615.71	289.277	847.65	1629.37	159.768	853.003	1630.73	200.452	905.806	1506.98	195.881	987.492	1256.58	212.999	791.908	1414.45	211.822	732.577	1261.61	109.254	986.038	1317.96	373.998	905.251	1452.83	428.698	925.953	1269.28	444.722	950.78	1118.65	503.259	849.419	983.096	491.875	794.198	917.68	514.845	856.799	899.922	544.594	785.49	850.118
519	0	280.083	678.126	1610.93	182.569	669.566	1615.33	289.332	833.023	1629.18	160.662	838.951	1630.35	201.1	891.41	1506.58	196.527	973.067	1256.42	213.588	777.518	1414.06	211.892	718.035	1261.32	110.208	971.92	1317.52	374.521	890.547	1452.49	430.395	909.433	1269.13	447.583	932.207	1118.11	506.16	826.365	985.789	494.775	769.403	922.056	518.425	831.271	902.553	547.861	758.234	855.13
520	0	280.536	663.787	1610.26	183.093	655.287	1614.76	290.272	818.858	1628.48	161.313	824.499	1629.96	201.896	877.01	1505.85	197.198	958.669	1255.7	214.182	762.938	1413.32	212.298	703.895	1260.37	111.014	957.51	1316.81	375.359	875.918	1451.73	432.06	893.022	1268.51	450.533	913.636	1117.25	508.971	803.61	988.057	497.555	745.045	926.092	521.788	805.749	904.99	550.961	731.258	860.049
521	0	281.059	649.288	1609.48	183.621	640.857	1613.98	291.191	804.281	1627.4	161.888	810.234	1628.57	202.576	862.362	1504.77	197.777	944.373	1254.63	214.9	748.307	1412.15	212.528	689.165	1259.44	111.912	943.191	1315.68	375.874	861.133	1450.61	433.654	876.714	1267.58	453.326	895.163	1115.98	511.798	781.142	990.317	500.204	720.853	930.469	525.024	780.734	907.188	553.918	704.765	864.914
522	0	281.56	634.738	1608.78	184.078	626.4	1613.41	291.729	789.613	1626.21	162.883	796.018	1627.25	203.18	847.832	1503.48	198.137	929.76	1253.38	215.269	733.676	1410.96	213.015	675.082	1257.93	112.538	928.482	1314.59	376.645	846.445	1449.58	435.19	860.375	1266.64	456.03	876.67	1114.81	514.411	758.928	992.514	502.801	697.079	934.361	528.058	756.054	909.42	556.754	678.646	869.673
523	0	281.975	620.006	1608.17	184.569	611.938	1612.48	292.45	775.222	1624.8	163.45	781.627	1625.8	203.701	833.024	1502.35	198.589	915.398	1252	215.936	718.963	1409.71	213.924	661.162	1256.19	113.213	913.87	1313.2	377.212	831.642	1448.3	436.637	843.948	1265.58	458.737	858.339	1113.5	517.149	737.07	994.927	505.166	673.568	938.121	530.874	731.633	911.637	559.347	653.022	874.353
524	0	282.626	605.487	1606.84	185.14	597.391	1611.45	292.916	760.484	1623.38	164.071	767.068	1624.46	204.367	818.217	1500.89	198.724	900.645	1250.54	216.424	704.05	1408.14	214.376	646.088	1254.67	113.613	898.769	1311.94	377.798	816.798	1446.86	437.966	827.503	1264.44	461.262	840.064	1112.12	519.021	715.092	996.561	507.41	650.523	941.78	533.564	707.823	913.948	561.437	627.726	878.943
525	0	283.194	590.733	1605.58	185.689	582.655	1610.14	293.509	745.761	1621.92	164.683	752.453	1622.82	204.676	803.341	1499.24	198.846	885.937	1249.07	217.027	689.043	1406.53	215.086	631.261	1252.79	114.029	883.733	1310.42	378.225	801.979	1445.41	439.068	811.151	1263.3	463.607	821.876	1110.94	520.773	693.592	997.947	509.145	627.844	945.326	536.019	684.225	916.412	563.426	603.15	883.563
526	0	283.682	576.056	1604.37	186.183	567.898	1609.1	294.133	731.142	1620.21	164.91	737.658	1621.13	205.009	788.364	1497.63	198.777	870.919	1247.32	217.592	673.886	1404.86	216.128	617.306	1250.58	114.224	868.307	1308.77	378.495	786.799	1443.81	440.248	794.802	1262.06	465.707	803.793	1109.67	522.776	672.578	1000.43	510.988	605.665	948.56	538.211	661.068	918.749	565.25	579.031	887.984
527	0	284.335	561.2	1602.99	186.81	553.039	1607.85	294.378	716.108	1618.42	165.742	722.904	1619.57	205.363	773.164	1495.99	198.787	855.696	1245.75	218.043	658.671	1402.96	217.062	602.464	1248.66	114.386	852.755	1306.82	378.975	771.798	1442.18	441.426	778.457	1260.78	467.701	785.916	1108.29	524.467	652.014	1002.21	512.489	583.85	951.785	540.074	638.474	920.906	566.83	555.561	892.312
528	0	284.92	546.381	1601.58	187.32	538.149	1606.36	294.972	701.486	1616.49	165.957	707.92	1617.73	205.701	757.965	1493.94	198.772	840.526	1243.92	218.6	643.272	1401.27	218.115	587.479	1246.57	114.494	837.094	1304.95	379.202	756.561	1440.57	442.198	762.141	1259.34	469.427	768.225	1106.9	525.929	631.727	1003.79	513.67	562.677	954.935	541.828	616.419	923.031	568.207	532.666	896.623
529	0	285.403	531.392	1600.18	187.814	523.08	1605	295.244	686.646	1614.55	166.249	693.028	1615.82	205.765	742.6	1491.89	198.77	825.005	1241.79	218.911	627.824	1399.32	218.586	570.981	1245.43	114.894	821.415	1303.17	379.588	741.458	1438.79	443.167	745.795	1257.83	471.148	750.988	1105.46	527.103	611.937	1005.34	514.722	542.002	957.844	543.245	594.756	924.882	569.415	510.417	900.485
530	0	285.783	516.347	1598.66	188.218	508.028	1603.74	295.351	671.633	1612.53	166.547	677.729	1613.95	206.023	727.295	1490.02	198.74	809.638	1239.56	219.313	612.334	1397.62	219.616	556.314	1243.05	114.784	805.5	1300.86	379.651	726.03	1436.74	443.727	729.808	1256.02	472.507	733.966	1103.85	528.101	592.653	1006.45	515.55	521.761	960.564	544.327	573.836	926.303	570.269	488.91	904.117
531	0	285.868	501.202	1597.33	188.507	492.87	1602.17	295.632	656.727	1610.34	166.689	662.806	1611.73	206.113	711.754	1488.16	198.663	794.248	1237.62	219.582	596.792	1395.73	219.942	539.324	1241.72	114.627	789.581	1298.67	379.959	710.688	1434.89	444.282	713.558	1254.31	473.587	717.125	1102.11	528.83	573.865	1007.28	516.114	502.11	963.03	545.252	553.323	927.773	570.952	467.976	907.334
532	0	286.358	486.037	1595.7	188.885	477.447	1600.84	295.706	641.376	1608.57	167.021	647.413	1609.84	206.073	696.222	1486.14	198.254	778.227	1236.03	220.009	581.052	1394.09	220.782	524.206	1239.46	114.595	773.566	1296.95	380.043	695.032	1433.25	444.227	697.666	1252.75	474.674	700.672	1100.59	529.473	555.431	1008.4	516.458	483.033	965.104	546.084	533.549	929.185	571.452	447.55	910.552
533	0	286.714	470.729	1594.39	189.206	462.218	1599.63	295.99	626.257	1606.91	167.013	632.098	1607.94	206.094	680.729	1484.41	197.897	762.042	1234.49	220.228	565.314	1392.23	221.267	508.149	1237.96	114.357	757.438	1295.03	380.116	679.677	1431.82	445.067	681.57	1251.66	475.501	684.26	1099.51	529.799	537.485	1009.31	516.643	464.45	967.004	546.072	513.657	930.568	571.697	427.901	913.603
534	0	286.886	455.552	1593.03	189.372	446.769	1598.01	296.012	610.818	1605.21	167.031	616.554	1606.45	205.757	665.054	1482.68	197.579	745.75	1232.63	220.558	549.453	1390.68	221.4	491.882	1236.5	114.103	741.344	1293.24	379.95	664.067	1430.15	445.326	665.586	1250.41	476.342	668.465	1098.45	530.11	520.088	1010.19	516.729	446.562	968.844	546.958	495.471	932.156	571.77	408.945	916.27
535	0	287.217	439.956	1591.74	189.586	431.351	1596.68	296.141	595.598	1603.53	167.156	601.22	1604.54	205.617	649.419	1480.9	197.133	729.206	1230.7	220.44	533.47	1388.97	221.74	475.849	1234.91	113.665	725.103	1291.42	379.787	648.385	1428.53	445.47	649.874	1248.8	476.75	652.875	1097.02	530.088	502.949	1010.77	516.57	429.221	970.11	547.184	477.57	932.84	571.717	390.63	918.464
536	0	287.403	424.646	1590.32	189.847	415.806	1595.34	295.857	580.149	1601.9	166.998	585.594	1603.13	205.496	633.718	1479.21	196.864	712.598	1228.87	220.426	517.502	1387.57	221.634	459.147	1234.01	113.128	708.775	1289.74	379.649	632.743	1426.68	445.118	634.266	1247.35	477.042	637.615	1095.73	529.886	486.429	1010.93	516.136	412.36	971.203	547.166	460.13	933.632	571.454	372.925	920.354
537	0	287.367	409.427	1588.89	189.94	400.248	1594.16	295.87	564.881	1600.39	167.063	570.089	1601.55	205.228	617.755	1477.56	196.112	696.076	1226.84	220.263	501.455	1386.15	221.467	443.176	1232.64	112.49	692.375	1287.83	379.124	616.879	1424.62	445.234	618.756	1245.7	476.714	622.56	1094.24	529.658	470.599	1010.9	515.713	396.071	972.002	546.558	443.043	933.681	570.952	355.837	921.612
538	0	287.554	393.888	1587.46	190.094	384.695	1593.03	295.895	549.401	1598.78	166.801	554.382	1600.16	205.136	602.117	1475.99	195.247	679.351	1224.84	219.84	485.507	1385	221	427.062	1231.5	111.831	676.099	1286.02	379.069	601.052	1422.92	444.769	603.318	1243.87	476.647	607.858	1092.75	529.194	455.035	1010.72	515.274	380.36	972.22	546.736	427.318	933.49	570.444	339.299	922.358
539	0	287.87	378.387	1586.33	190.325	368.939	1592.09	295.477	533.839	1597.3	166.946	538.68	1598.85	204.694	586.312	1474.53	194.516	662.562	1222.95	219.456	469.232	1383.82	220.279	410.259	1230.77	111.157	659.665	1284.33	378.644	585.044	1421.03	444.247	588.183	1242.2	476.158	593.188	1091.19	528.633	440.062	1009.77	514.928	365.082	971.761	546.206	411.808	932.747	569.963	323.857	922.278
540	0	288.123	362.775	1585.64	190.626	353.033	1591.73	295.448	518.138	1596.27	166.815	522.72	1598.4	204.062	570.545	1473.66	194.019	645.523	1221.31	218.802	453.124	1383.17	219.105	393.308	1230.2	110.416	642.907	1283.07	378.064	569.222	1419.59	443.448	573.167	1240.74	475.105	578.35	1089.67	528.108	425.539	1008.67	514.329	350.534	970.625	545.67	397.136	931.537	569.409	308.909	921.859
541	0	288.307	347.048	1585.5	191.014	337.153	1591.8	295.52	502.545	1596.16	166.771	506.671	1598.71	203.544	554.722	1473.24	193.746	628.284	1220.04	218.195	437.082	1383.25	217.8	376.206	1230.46	109.79	626.12	1282.14	377.497	553.666	1418.68	442.197	558.358	1239.73	474.297	563.7	1088.88	527.145	411.504	1006.8	513.542	336.557	968.813	544.801	383.271	929.778	568.809	295.048	920.616
542	0	288.416	331.536	1585.27	191.232	321.224	1592.31	295.204	486.842	1596.1	166.556	490.775	1599.49	202.998	538.739	1473.18	193.7	611.04	1219.29	217.537	420.891	1383.56	216.776	359.415	1231.14	109.258	609.383	1281.67	376.722	537.872	1418.05	441.093	544.133	1239.1	472.887	549.159	1088.15	525.985	397.883	1004.69	512.764	323.217	966.335	543.582	370.263	927.514	568.076	282.115	918.777
543	0	288.583	315.856	1585.46	191.526	305.234	1592.96	295.234	471.309	1596.52	166.371	474.59	1600.11	202.374	522.452	1473.52	193.735	593.897	1219.05	216.979	404.607	1384.1	215.612	341.984	1232.17	109.002	592.585	1281.49	375.942	522.075	1417.93	439.453	529.425	1238.88	471.177	534.702	1087.97	524.425	384.934	1002.22	511.485	310.666	963.258	541.965	358.107	924.825	567.152	270.283	916.213
544	0	288.891	300.038	1586.28	191.853	289.092	1594.05	295.14	455.476	1597.19	166.041	458.363	1601.3	202.052	506.169	1474.17	194.135	577.189	1219.13	216.526	388.408	1384.98	214.793	325.139	1233.23	109.133	575.868	1281.96	375.575	506.17	1418.6	438.512	514.727	1239.23	469.181	520.772	1088.1	522.596	372.494	999.729	509.707	298.977	959.544	539.665	346.711	921.75	566.068	259.482	913.383
545	0	289.227	284.289	1587.49	192.076	273.101	1595.47	295.041	439.609	1598.03	166.221	442.286	1602.27	201.792	489.916	1475.1	194.657	561.215	1219.95	216.116	372.26	1385.92	213.938	308.079	1234.76	109.353	559.493	1282.54	375.234	489.971	1419.63	436.582	499.755	1239.65	466.998	507.065	1088.82	520.426	360.632	997.241	507.515	287.928	955.692	537.597	336.792	918.619	564.459	249.81	909.647
546	0	289.24	268.533	1588.64	192.258	257.016	1596.76	294.59	423.776	1598.63	166.079	426.32	1603.11	201.704	473.848	1476	194.974	545.783	1221.08	216.134	356.199	1386.93	213.64	291.569	1235.94	109.541	543.172	1283.7	375.218	473.876	1420.81	436.418	484.638	1240.73	464.673	493.777	1089.63	517.747	349.396	994.111	505.076	277.552	951.613	534.846	327.266	915.465	562.425	240.865	905.595
547	0	289.208	252.566	1590.09	192.268	241.159	1597.94	295.205	407.996	1599.84	165.966	410.409	1603.9	201.743	457.582	1477.41	194.892	530.321	1222.51	216.283	340.272	1387.88	213.758	275.442	1236.86	109.61	527.053	1284.84	375.206	457.668	1422.19	435.505	469.212	1241.6	462.275	480.885	1090.63	515.205	338.648	991.914	502.03	267.868	947.462	531.803	318.456	912.35	559.73	232.504	900.707
548	0	289.2	236.774	1591.5	192.348	225.317	1599.25	295.352	392.261	1600.94	166.212	394.602	1604.78	201.956	441.715	1478.79	195.133	515.13	1224.43	216.57	324.541	1388.82	214.132	259.612	1237.57	109.955	511.459	1286.59	375.437	441.814	1423.89	434.792	454.046	1242.65	459.991	468.247	1091.89	512.402	328.278	989.501	498.992	258.72	942.896	528.551	310.329	909.317	556.761	224.935	895.478
549	0	289.438	220.855	1592.97	192.353	209.493	1600.57	295.039	376.131	1602.39	166.211	378.722	1605.95	201.927	426.009	1480.14	195.475	499.861	1226.69	217.152	309.036	1390	214.926	244.329	1238.38	109.891	495.752	1288.61	375.605	426.311	1425.37	433.658	438.919	1243.75	457.691	455.799	1093.29	509.431	318.402	987.084	495.623	250.302	938.399	525.185	302.664	906.322	553.36	218.096	889.86
550	0	289.634	205.029	1594.6	192.53	193.803	1601.81	295.372	360.504	1604.06	166.499	363.011	1607.28	202.119	410.622	1481.67	195.5	484.605	1228.57	217.849	293.725	1391.24	216.223	229.504	1239.08	110.063	480.435	1290.49	375.94	411.362	1427.14	432.988	424.673	1245.01	455.406	443.394	1094.68	506.53	308.994	984.552	492.115	242.192	933.817	521.635	295.526	903.253	549.727	211.703	883.561
551	0	289.719	189.367	1596.01	192.592	178.094	1602.91	295.865	344.881	1606.19	166.615	347.381	1608.88	202.216	395.147	1483.47	195.636	469.647	1230.57	218.573	278.636	1392.48	217.701	214.557	1240.26	110.029	464.989	1292.23	376.162	396.605	1428.85	432.203	410.845	1246.41	453.281	431.298	1096.33	503.155	299.72	981.925	488.397	234.691	928.926	517.98	288.863	900.238	545.502	205.965	876.974
552	0	289.867	173.819	1597.64	192.713	162.651	1604.28	296.096	329.176	1608.07	166.939	331.709	1611.02	202.665	380.028	1485.3	195.501	454.506	1232.38	219.368	263.729	1394.21	219.4	200.332	1241.59	110.166	449.847	1294.21	376.423	382.171	1430.62	431.614	397.481	1247.93	451.059	419.311	1097.61	499.967	290.987	979.232	484.408	227.826	924.409	514.193	282.818	897.167	540.945	200.837	869.99
553	0	289.996	158.495	1598.83	192.794	147.273	1605.63	296.594	313.718	1610.61	167.265	316.387	1612.77	202.919	364.936	1487.27	195.604	439.824	1234.49	220.066	248.962	1396.03	220.943	186.634	1243.02	110.048	434.625	1296.19	376.753	367.864	1432.43	430.864	384.612	1249.21	449.06	407.309	1099.36	496.483	282.557	976.477	480.17	221.552	919.526	510.183	277.203	894.063	535.855	196.434	863.01
554	0	290.189	143.201	1600.46	192.927	131.935	1606.71	296.866	298.327	1612.88	167.499	300.989	1615.19	203.29	349.908	1489.4	195.534	425.177	1236.44	220.783	234.249	1397.64	222.391	173.088	1244.38	110.164	419.742	1298.01	376.986	353.909	1434.04	430.371	371.988	1251.01	446.848	395.524	1100.84	492.73	274.807	973.245	475.907	215.602	914.614	505.995	272.059	891.159	530.488	192.658	855.815
555	0	290.354	127.994	1601.96	193.23	116.694	1608.18	297.05	283.08	1615.2	167.873	285.803	1617.43	203.555	335.068	1491.35	195.059	410.211	1238.35	221.579	219.729	1399.68	223.876	159.355	1246.25	109.801	404.517	1299.74	377.453	339.916	1436.04	429.849	359.693	1252.89	444.864	383.928	1102.77	489.263	267.38	970.727	471.305	210.558	909.907	501.757	267.432	888.432	524.629	189.572	848.954
556	0	290.584	112.821	1603.78	193.371	101.648	1609.71	297.484	267.958	1617.79	168.249	270.752	1619.75	203.954	320.45	1493.52	194.988	395.659	1240.43	222.255	205.312	1401.66	225.393	145.793	1248.29	109.849	389.712	1301.82	377.721	326.183	1438	429.151	347.724	1254.85	442.873	372.531	1104.53	485.946	260.442	968.473	466.922	206.017	905.743	497.599	263.515	885.981	518.618	187.282	842.318
557	0	291.011	97.7878	1605.24	193.705	86.6992	1611.16	297.876	252.853	1620.16	168.573	255.832	1621.94	204.222	305.717	1495.52	194.854	381.361	1242.47	223.044	190.795	1403.76	226.579	131.497	1250.38	110.038	374.921	1303.91	378.062	312.424	1439.81	428.214	335.551	1256.38	440.923	361.286	1106.49	482.363	253.926	966.102	462.173	201.844	901.471	493.308	260.072	883.492	512.275	185.396	835.857
558	0	290.882	82.7739	1607.11	193.818	71.8954	1612.6	298.232	238	1622.15	169.019	241.054	1624.18	204.407	291.17	1497.44	194.218	366.768	1244.27	223.56	176.424	1405.7	227.598	116.66	1252.69	109.676	359.997	1305.54	378.099	298.714	1441.42	427.535	323.724	1258.21	438.812	350.269	1108.06	478.89	247.998	963.901	457.173	198.663	897.582	488.594	256.471	881.341	505.878	184.215	829.761
559	0	291.198	68.176	1608.41	193.912	57.2453	1614.01	298.562	223.046	1624.29	169.27	226.407	1625.95	204.614	276.696	1499.08	193.788	352.363	1245.7	223.888	162.184	1407.29	228.3	101.923	1254.8	109.757	345.211	1307.5	378.26	284.901	1442.92	426.771	311.639	1259.66	436.718	339.344	1109.93	475.453	242.287	962.108	452.741	195.251	893.986	484.408	254.047	879.611	499.193	183.46	824.115
560	0	291.352	53.4233	1609.82	194.098	42.7216	1615.5	298.971	208.398	1626.07	169.681	211.887	1627.7	204.912	262.237	1500.7	193.688	337.978	1247.6	224.419	147.713	1409.24	228.738	87.0381	1256.88	109.9	330.561	1309.47	378.433	270.985	1444.33	425.971	299.354	1260.99	434.434	328.452	1111.58	472.04	236.89	960.571	448.309	192.11	891.043	479.959	251.112	878.241	492.599	183.464	818.436
561	0	291.53	38.8813	1611.12	194.142	28.2463	1616.72	299.276	193.639	1627.62	170.233	197.412	1629.23	205.359	247.789	1502.22	193.528	323.281	1249.13	224.798	133.482	1410.72	229.11	72.5601	1258.6	109.832	315.764	1311.26	378.594	256.989	1445.43	425.183	286.893	1262.02	432.17	317.653	1113.19	468.555	231.746	958.803	444.469	189.658	888.025	475.755	248.436	877.126	486.309	183.397	813.927
562	0	291.84	24.4013	1612.54	194.344	13.8288	1618.03	299.662	179.087	1628.86	170.66	182.948	1630.5	205.72	233.276	1503.5	193.433	308.667	1250.46	225.068	119.316	1411.73	229.204	58.2371	1259.9	109.703	301.047	1312.78	378.754	242.965	1446.23	423.791	274.18	1262.47	429.503	306.977	1114.53	464.815	226.453	957.169	440.704	186.332	885.688	471.674	245.979	876.237	480.587	184.203	809.445
563	0	291.935	9.97453	1613.49	194.416	-0.510121	1619.24	300.231	164.532	1630.27	171.075	168.812	1631.92	206.388	218.851	1504.67	193.376	293.833	1251.59	225.353	104.948	1412.83	229.058	44.3054	1260.94	109.763	286.412	1314.08	379.048	228.779	1447.17	423.129	261.728	1263.44	426.717	296.428	1115.71	461.231	221.197	956.039	437.085	183.472	883.084	467.538	243.348	875.878	474.484	184.437	805.301
564	0	291.991	-4.62971	1614.56	194.391	-14.8262	1620.11	300.45	149.972	1630.98	171.382	154.581	1632.74	206.648	204.414	1505.4	193.748	279.109	1252.5	225.5	90.6446	1413.53	228.894	30.1754	1261.64	109.985	271.874	1315.02	379.249	214.436	1447.59	421.931	249.059	1263.69	423.743	285.841	1116.83	457.69	215.852	954.986	433.081	180.168	881.01	463.189	240.615	875.478	469.048	185.159	801.898
565	0	292.096	-19.0613	1615.22	194.45	-29.1077	1620.88	300.888	135.491	1631.39	171.866	140.283	1633.04	206.805	189.891	1505.83	193.991	264.319	1252.99	225.777	76.1255	1413.99	228.749	15.9842	1261.94	110.246	257.357	1315.87	379.359	199.975	1447.57	420.529	236.424	1263.77	420.648	275.294	1117.77	453.999	210.58	953.774	429.135	176.764	878.85	458.864	237.897	875.193	463.768	185.742	798.859
566	0	292.285	-33.4259	1615.44	194.668	-43.4105	1621.47	301.189	121.059	1631.55	172.285	126.046	1633.48	207.478	175.36	1506.15	194.52	249.67	1253.43	225.977	61.5534	1414.14	228.649	1.44181	1261.95	110.234	242.921	1316.37	379.522	185.566	1447.5	419.178	223.983	1263.73	417.353	264.683	1118.34	450.398	205.14	952.758	425.86	173.477	876.746	454.51	234.992	875.226	458.828	186.28	796.372
567	0	292.596	-47.8655	1615.95	194.852	-57.7814	1621.86	301.579	106.716	1631.45	172.605	111.892	1633.47	207.418	160.73	1506.01	194.916	235.023	1253.65	226.143	47.0241	1414.21	228.487	-13.1235	1261.99	110.279	228.434	1316.59	379.841	171.034	1447.41	417.822	211.699	1263.59	414.168	253.81	1119.02	446.904	199.722	951.879	421.552	170.334	875.629	449.983	231.975	875.401	454.257	186.44	794.59
568	0	293.066	-62.4118	1616.16	195.204	-72.1594	1622.04	301.988	92.2934	1631.09	173.097	97.6252	1633.13	207.727	146.057	1505.87	195.328	220.447	1253.66	226.353	32.539	1413.97	228.483	-27.9044	1261.65	110.414	213.88	1316.55	380.243	156.433	1447.07	416.554	199.197	1263.61	411.103	242.752	1119.59	443.204	193.812	951.299	417.624	166.598	873.861	445.207	228.729	875.309	449.841	186.467	793.276
569	0	293.274	-76.9251	1615.82	195.538	-86.6061	1621.99	302.45	77.8243	1630.37	173.544	83.2359	1632.42	208.377	131.291	1505.35	195.341	205.866	1252.84	226.643	17.7032	1413.19	228.664	-42.6746	1261.03	110.531	199.336	1316.09	380.376	141.673	1446.28	414.94	186.608	1262.74	408.165	231.499	1119.72	439.528	187.87	950.303	413.983	162.728	872.272	440.437	225.045	875.324	445.169	185.868	791.837
570	0	293.569	-91.3938	1615.38	195.762	-101.057	1621.72	302.836	63.5468	1629.23	173.834	68.8526	1631.27	208.403	116.426	1504.15	195.677	191.142	1251.9	226.662	3.08765	1412.19	228.507	-57.5184	1259.87	110.751	184.768	1315.31	380.569	127.018	1445.2	414.034	174.035	1262.14	405.539	219.912	1119.76	435.791	181.99	949.219	410.429	158.212	870.723	435.921	221.071	875.322	440.921	184.759	790.399
571	0	293.924	-105.823	1614.73	196.099	-115.527	1621.24	303.146	49.1431	1627.56	174.249	54.3938	1629.76	209.077	101.495	1502.86	196.147	176.497	1250.71	226.636	-11.6529	1411.24	228.416	-72.1051	1258.74	110.973	170.225	1314.2	381.019	112.375	1444.04	412.621	161.266	1260.74	403.217	208.111	1119.46	432.616	175.473	947.842	406.627	154.293	868.866	431.597	216.745	875.289	436.942	182.995	789.089
572	0	294.475	-120.357	1613.7	196.589	-130.22	1620.4	303.529	34.6458	1625.82	174.684	39.7555	1628.22	209.116	86.588	1501.46	196.663	161.883	1249.59	227.135	-26.5959	1409.53	228.356	-86.512	1256.91	111.551	155.457	1313.17	381.367	97.3458	1442.54	412.171	148.302	1259.94	400.981	196.066	1118.88	429.776	168.389	946.693	403.819	148.239	867.41	427.583	211.607	875.286	433.154	180.342	788.077
573	0	295.122	-135.143	1612.86	197.185	-144.896	1619.44	303.93	20.0256	1624.34	175.124	25.0602	1626.49	209.452	71.6599	1499.88	197.181	147.189	1248.26	227.565	-41.6461	1407.98	228.446	-100.943	1255.07	111.864	140.82	1311.79	381.724	82.2512	1440.8	411.446	134.881	1258.79	399.237	183.796	1118.71	427.457	160.877	945.812	401.319	143.533	866.58	424.245	205.939	875.554	429.703	177.12	787.336
574	0	295.583	-149.772	1611.84	197.645	-159.558	1618.31	304.293	5.30407	1622.44	175.398	10.5008	1624.7	209.97	56.5172	1498.45	197.852	132.551	1246.88	227.809	-56.5866	1406.08	228.439	-115.455	1253.07	112.157	126.234	1310.42	382.184	67.1485	1439.09	411.031	121.359	1257.55	397.746	171.48	1118.24	425.333	152.795	945.032	399.047	137.036	864.87	421.284	199.479	875.791	426.616	173.033	787.058
575	0	296.073	-164.333	1610.41	198.09	-174.336	1617.05	304.8	-9.41726	1620.54	175.964	-4.17605	1622.46	210.501	41.3628	1496.38	198.35	117.782	1244.97	228.204	-71.7164	1404.1	228.647	-129.921	1250.75	112.665	111.529	1308.71	382.725	51.991	1437.17	410.652	107.526	1255.95	396.425	158.781	1117.37	423.713	144.153	944.116	396.834	129.629	863.318	418.907	192.254	875.764	423.643	168.139	786.085
576	0	296.702	-179.258	1608.92	198.701	-189.101	1615.49	305.38	-23.9833	1618.2	176.519	-18.9022	1620.32	211.054	26.2241	1494.39	199.052	103.263	1243.08	228.721	-86.9188	1401.87	228.763	-144.823	1248.11	113.31	96.5717	1306.84	383.326	36.7282	1434.99	410.317	93.5188	1254.05	395.43	145.818	1116.4	422.357	134.746	942.807	395.865	121.682	862.378	417.114	184.181	875.722	421.076	162.324	785.17
577	0	297.215	-193.986	1607.18	199.361	-203.88	1613.68	305.99	-38.6955	1615.91	177.05	-33.7098	1617.8	211.669	11.0702	1492.06	199.728	88.7804	1241	229.196	-101.947	1399.48	229.179	-159.777	1245.66	113.766	81.6717	1304.89	383.877	21.4808	1432.72	410.463	79.2775	1252.25	394.669	132.691	1115.11	421.491	124.715	941.588	394.796	112.582	860.785	415.745	175.328	875.471	418.873	155.733	784.247
578	0	297.657	-208.655	1605.34	199.873	-218.633	1612.09	306.414	-53.5559	1613.3	177.638	-48.3454	1615.39	212.74	-4.07984	1489.73	200.702	74.1287	1238.98	229.855	-117.301	1397.13	229.638	-175.225	1243.32	114.325	66.6396	1302.65	384.807	5.97954	1430.57	411.006	65.2335	1250.44	394.568	119.25	1114.12	420.961	113.928	940.242	394.223	103.162	859.509	414.922	165.723	875.28	417	148.085	783.198
579	0	298.65	-223.548	1603.63	200.426	-233.404	1610.22	307.083	-68.3941	1611.14	178.475	-63.0914	1612.91	213.688	-19.0719	1487.69	201.649	59.2372	1236.53	230.529	-132.498	1394.91	230.174	-190.379	1241.01	115.248	51.6345	1300.35	385.654	-9.34764	1428.04	411.466	50.8128	1248.27	394.62	105.663	1112.46	420.827	102.617	938.721	393.815	92.566	857.838	414.48	155.295	874.633	415.541	139.538	781.879
580	0	299.066	-238.253	1601.51	201.144	-248.137	1608.36	307.795	-83.178	1608.6	179.2	-77.8218	1610.77	214.7	-34.1943	1485.05	202.549	43.958	1234.1	231.315	-147.71	1392.42	230.877	-205.924	1238.46	116.234	36.5479	1298.14	386.655	-24.8949	1425.71	412.227	36.0673	1246.17	394.903	91.4828	1110.59	420.967	90.5558	937.068	393.65	81.0202	855.766	414.232	143.873	873.576	414.563	129.808	780.613
581	0	299.655	-253.259	1600.04	201.675	-262.903	1606.68	308.798	-97.9179	1606.74	179.977	-92.4551	1608.63	215.482	-49.2002	1482.83	203.876	28.5444	1231.92	232.014	-163.149	1390.29	231.207	-221.221	1236.38	117.686	21.4124	1295.77	387.887	-40.5501	1423.45	413.141	20.969	1244.34	395.451	77.0671	1108.98	421.38	77.8203	935.461	394.295	69.4816	854.697	414.657	131.636	872.889	414.121	119.135	779.496
582	0	300.576	-268.151	1598.51	202.254	-277.597	1605.05	309.515	-112.953	1604.67	180.977	-107.195	1606.57	216.719	-64.2772	1480.75	205.416	13.0147	1229.93	232.933	-178.463	1388.42	231.98	-236.613	1234.49	119.259	6.38095	1293.51	389.243	-56.2066	1421.41	414.317	5.68982	1242.52	396.584	62.4304	1107.54	422.399	64.265	934.174	395.592	56.5804	853.26	415.42	118.748	871.7	414.235	107.289	778.383
583	0	300.8	-283.008	1596.97	202.861	-292.299	1603.51	310.508	-128.003	1602.93	181.725	-121.756	1605.25	218.365	-79.4071	1478.59	207.171	-2.54921	1227.55	233.913	-193.771	1386.43	232.529	-252.008	1232.82	120.733	-8.91037	1291.22	390.623	-72.0163	1419.36	415.915	-9.64919	1240.65	398.079	47.4554	1106.15	423.742	50.1869	932.683	396.645	42.6366	851.518	416.5	104.864	870.479	414.83	94.4956	777.211
584	0	301.775	-298.111	1595.79	203.449	-307.001	1602.2	311.831	-142.946	1601.39	183.218	-136.338	1602.72	219.945	-94.5545	1476.61	208.94	-18.4304	1225.04	235.158	-209.362	1384.71	233.313	-267.713	1230.98	122.529	-24.2067	1288.94	392.226	-87.8519	1417.49	417.57	-25.4436	1238.78	399.513	32.0059	1104.39	425.384	35.4392	931.078	398.809	28.1684	850.156	418.239	90.2884	869.234	416.028	80.4593	775.581
585	0	301.829	-312.999	1594.74	204.13	-321.574	1601.01	312.952	-157.856	1599.37	184.506	-150.855	1600.82	221.553	-109.685	1474.62	210.928	-34.3423	1222.77	236.328	-224.715	1382.95	234.288	-283.456	1229.73	124.762	-39.658	1286.57	393.857	-103.74	1415.57	419.355	-41.3212	1236.9	401.307	16.3012	1102.76	427.352	19.952	929.385	400.948	12.9495	848.481	420.058	75.0995	867.333	417.89	65.5323	773.945
586	0	302.683	-328.081	1593.86	204.719	-336.187	1599.78	314.103	-173.123	1597.91	185.894	-165.3	1598.83	223.287	-124.93	1472.71	212.82	-50.2131	1220.32	237.722	-240.257	1381.51	235.22	-299.566	1228.3	126.564	-55.1596	1284.12	395.593	-119.715	1413.78	420.961	-57.9091	1234.98	403.165	0.14413	1100.83	429.528	3.78232	927.56	403.105	-3.13957	846.762	422.505	58.805	865.655	420.101	49.6323	772.014
587	0	303.17	-343.169	1592.86	205.245	-350.756	1598.77	315.647	-187.978	1596.41	187.096	-179.722	1597.32	224.844	-139.953	1470.57	214.924	-66.0225	1217.9	239.083	-255.752	1379.91	236.475	-316.007	1227.32	128.435	-70.9303	1281.61	397.261	-135.636	1411.8	423.07	-74.2249	1233.12	405.557	-16.2699	1099.02	432.092	-12.9878	925.521	405.822	-20.1863	844.516	425.185	41.9039	863.595	422.933	32.592	770.007
588	0	303.631	-357.978	1591.84	205.754	-365.113	1597.76	316.858	-203.015	1594.67	188.441	-194.029	1595.5	226.897	-155.121	1468.94	216.875	-81.9669	1215.52	240.599	-271.262	1378.58	238.051	-332.52	1226.11	130.847	-86.5838	1279.6	399.083	-151.669	1410.14	425.478	-90.6931	1231.59	408.073	-33.0111	1096.96	434.9	-30.3604	923.664	409.485	-37.5885	843.589	428.212	24.1723	861.568	426.257	14.4699	767.863
589	0	304.409	-372.831	1591.27	206.381	-379.462	1596.98	318.288	-217.957	1593.58	190.017	-208.498	1593.82	228.708	-170.015	1467.17	219.075	-98.0897	1213.64	242.169	-286.814	1377.31	239.833	-349.021	1225.46	132.956	-102.083	1277.46	401.154	-167.57	1408.6	427.905	-107.292	1229.8	410.957	-49.9844	1095.14	438.114	-48.468	921.669	412.26	-56.2316	840.973	431.59	5.91563	859.175	430.07	-4.58064	765.804
590	0	305.193	-387.957	1591.4	207.086	-393.998	1596.84	319.784	-232.846	1592.77	191.505	-222.676	1592.83	230.758	-184.933	1466.07	220.935	-114.636	1211.2	243.711	-302.277	1376.75	241.52	-365.695	1225.15	134.983	-117.969	1275.36	403.21	-183.586	1407.22	430.351	-124.475	1228.15	414.011	-67.4624	1093.19	441.598	-67.1612	919.946	415.841	-75.6515	838.734	435.244	-13.2202	856.961	434.479	-24.5987	763.596
591	0	305.809	-402.883	1591.76	207.721	-408.425	1597.24	321.26	-248.287	1593.1	193.09	-237.358	1592.65	232.866	-200.004	1465.43	222.796	-131.351	1209.46	245.207	-317.538	1376.62	243.079	-382.151	1225.24	137.309	-133.708	1273.64	405.21	-199.574	1406.22	432.791	-141.834	1226.68	417.126	-85.3592	1091.36	445.321	-86.4468	918.31	420.164	-95.5479	837.164	439.279	-33.0309	854.742	439.265	-45.4951	761.684
592	0	306.373	-418.015	1592.54	208.474	-422.504	1597.54	323.013	-263.291	1593.57	194.57	-251.687	1592.76	234.723	-215.077	1465.22	224.6	-148.083	1208.28	246.663	-332.773	1377.01	244.436	-398.455	1225.7	139.173	-149.439	1272.38	406.913	-215.49	1405.37	435.427	-159.568	1225.56	420.522	-103.737	1089.83	449.259	-106.479	916.845	424.52	-116.138	835.875	443.682	-53.7115	852.837	444.479	-67.5227	759.952
593	0	307.107	-432.751	1593.29	209.161	-436.913	1598.03	324.472	-278.322	1593.95	196.115	-266.006	1592.77	236.469	-230.205	1465.08	226.177	-164.752	1207.51	247.765	-348.173	1377.41	245.475	-414.479	1226.6	140.862	-164.594	1271.71	408.577	-231.267	1404.92	437.549	-177.821	1224.51	423.734	-122.357	1088.3	453.279	-127.128	915.5	428.337	-137.61	833.946	448.215	-75.0426	850.761	450.166	-90.2917	758.249
594	0	307.768	-447.881	1594.32	210.071	-450.828	1598.91	325.655	-293.398	1594.09	197.724	-280.292	1592.94	237.852	-245.157	1465.26	227.501	-181.229	1207.11	248.384	-363.339	1378.13	246.066	-430.301	1227.61	142.368	-179.507	1271.87	409.791	-247.127	1404.5	439.726	-196.041	1223.69	426.965	-141.271	1087.11	457.573	-148.453	914.344	434.208	-160.02	834.043	453.098	-97.1766	849.157	456.01	-114.177	756.666
595	0	308.397	-462.605	1595.48	210.84	-465.263	1600.26	327.196	-307.981	1594.33	199.219	-294.644	1593.62	239.119	-260.181	1465.83	228.146	-197.549	1207.22	249.472	-378.507	1378.68	246.465	-446.1	1228.55	143.385	-194.245	1272.45	411.061	-262.941	1404.72	441.709	-214.156	1223.35	430.05	-160.46	1085.96	461.987	-170.297	913.676	439.205	-183.196	833.795	458.296	-120.08	847.63	462.47	-138.898	755.682
596	0	309.505	-477.342	1596.65	211.466	-479.982	1601.64	328.358	-323.072	1595.01	200.355	-309.123	1594.27	240.085	-275.04	1466.61	228.882	-213.351	1208.34	249.963	-393.403	1379.5	246.715	-461.642	1229.51	144.013	-209.029	1273.53	412.092	-278.69	1405.35	443.542	-232.217	1223.38	433.445	-179.697	1085.48	466.534	-192.841	913.515	443.711	-206.49	833.892	463.582	-143.688	846.591	469.096	-164.608	755.043
597	0	309.968	-491.843	1597.82	212.481	-494.209	1603.02	329.521	-337.657	1595.6	201.504	-323.432	1595.13	240.871	-290.017	1467.5	229.374	-228.339	1209.86	250.269	-408.234	1380.38	246.634	-476.76	1230.63	145.08	-223.59	1274.94	412.883	-294.224	1406.36	445.423	-250.196	1224.05	436.516	-199.036	1084.85	471.179	-215.732	913.738	449.139	-230.995	833.585	468.929	-167.856	845.464	476.03	-191.097	755.064
598	0	310.838	-506.624	1598.77	212.906	-508.769	1604.62	330.233	-352.343	1596.04	202.323	-338.075	1596.28	241.313	-304.306	1468.71	229.559	-242.699	1211.43	250.392	-422.699	1381.3	246.255	-491.665	1231.57	146.019	-238.027	1276.86	413.402	-309.789	1407.33	447.053	-268.044	1224.76	440.228	-218.107	1085.28	475.871	-239.119	914.131	454.108	-256.132	833.7	474.497	-192.606	844.709	483.032	-218.502	755.422
599	0	311.286	-520.928	1599.8	213.657	-523.27	1605.99	330.976	-366.899	1596.9	203.032	-352.415	1597.84	241.694	-318.784	1469.97	230.032	-256.57	1213.55	250.107	-436.96	1382.43	245.737	-506.284	1232.44	146.255	-252.333	1278.29	413.841	-325.121	1408.65	448.593	-285.735	1225.49	443.257	-237.352	1084.98	480.96	-262.817	915.116	459.553	-281.31	834.848	480.229	-217.93	844.39	490.164	-246.337	756.256
600	0	311.922	-535.48	1600.68	214.443	-537.49	1607.57	331.699	-381.08	1597.63	203.483	-366.791	1599.18	241.981	-333.013	1471.29	230.28	-270.468	1215.07	249.963	-451.204	1383.66	244.993	-520.459	1233.48	146.73	-265.885	1280.22	414.122	-340.315	1409.97	450.234	-303.064	1226.87	446.626	-256.484	1085.5	485.303	-286.86	916.039	464.716	-307.01	836.824	485.564	-243.737	844.058	497.106	-275.053	757.485
601	0	312.404	-549.659	1601.78	214.633	-551.949	1608.86	331.912	-395.594	1598.8	204.011	-381.312	1600.86	242.326	-347.04	1473	230.81	-284.42	1216.98	250.154	-465.283	1384.88	244.041	-534.264	1235.04	147.288	-279.34	1281.8	414.454	-355.22	1411.74	451.7	-320.247	1228.06	449.544	-275.454	1085.55	489.901	-310.932	917.484	470.802	-332.965	839.392	491.108	-269.916	844.117	504.21	-304.039	759.089
602	0	312.755	-563.939	1602.81	215.176	-566.078	1610.14	332.38	-409.647	1600.12	204.333	-395.311	1602.74	242.312	-360.936	1474.46	231.209	-298.636	1218.43	250.024	-479.094	1386.31	243.354	-547.869	1236.35	147.607	-293.004	1283.18	414.575	-369.732	1413.32	453.184	-337.04	1229.35	452.679	-294.339	1086.06	494.322	-335.11	919.109	476.555	-358.875	841.341	496.604	-296.323	844.525	511.588	-333.803	761.518
603	0	312.889	-578.188	1603.74	215.209	-580.441	1611.41	332.409	-423.956	1601.76	204.476	-409.539	1604.73	242.243	-374.777	1475.89	231.758	-312.61	1220.14	249.49	-492.844	1388.06	242.739	-561.39	1237.89	148.425	-307.273	1284.33	414.635	-383.981	1415.08	454.66	-353.598	1231.03	455.659	-313.179	1086.47	498.744	-359.216	921.053	477.53	-385.483	840.372	502.048	-322.879	845.6	518.421	-363.699	764.407
604	0	312.7	-592.188	1604.78	215.177	-594.412	1612.63	332.302	-438.291	1603.74	204.584	-423.676	1606.73	242.183	-388.575	1477.76	232.433	-326.507	1221.78	249.226	-506.493	1389.71	242.229	-574.766	1239.6	148.747	-320.244	1286.21	414.655	-397.942	1417.08	455.918	-369.969	1232.55	458.77	-331.817	1087.54	502.986	-383.523	923.502	483.7	-413.374	844.551	507.259	-349.756	847.049	525.006	-393.887	768.138
605	0	312.38	-606.343	1606.17	215.103	-608.451	1613.61	332.492	-452.028	1605.8	204.399	-437.747	1609.24	242.139	-402.249	1479.72	233.209	-340.23	1223.58	249.061	-520.115	1391.32	241.86	-588.134	1241.4	149.276	-333.824	1287.45	414.549	-411.626	1419.09	457.349	-386.065	1234.59	461.636	-350.446	1088.38	506.962	-407.824	926.418	488.823	-440.869	848.437	512.1	-376.57	848.539	531.288	-424.251	772.395
606	0	312.113	-620.521	1607.62	214.64	-622.371	1615.14	331.958	-466.273	1607.75	204.182	-451.778	1611.13	241.858	-415.903	1481.22	233.908	-353.597	1225.31	249.023	-533.584	1393.3	241.763	-601.497	1243.09	149.926	-347.609	1288.87	414.407	-425.229	1421.15	458.654	-401.947	1236.4	464.515	-369.015	1089.36	510.857	-432.061	929.533	493.754	-467.984	852.549	517.04	-403.411	850.938	537.531	-454.511	777.422
607	0	311.883	-634.353	1609.26	214.379	-636.366	1616.39	331.729	-480.349	1610.12	203.955	-465.572	1613.25	241.976	-429.602	1483.33	234.798	-366.411	1227.29	249.106	-547.198	1395.19	241.926	-615.025	1245.24	150.731	-360.704	1290.9	414.615	-438.504	1423.64	460.067	-417.603	1238.73	467.373	-387.491	1090.79	514.7	-456.069	933.266	497.913	-493.391	857.236	521.514	-430.328	853.779	543.617	-484.869	783.436
608	0	311.464	-648.116	1610.68	213.717	-650.336	1617.82	331.509	-493.993	1612.16	203.495	-479.442	1614.94	242.035	-443.188	1485.27	235.362	-380.175	1228.71	249.191	-560.676	1397.11	242.204	-628.516	1247.42	151.493	-373.837	1292.72	414.685	-452.04	1426.14	461.3	-433.132	1240.89	470.396	-405.834	1092.48	518.398	-479.916	937.449	505.318	-519.565	867.073	525.723	-457.16	856.952	549.281	-514.839	790.104
609	0	310.947	-662.047	1612.22	213.281	-663.985	1619.05	331.027	-508.046	1614.4	203.175	-493.342	1616.88	242.014	-456.841	1486.87	236.343	-392.939	1230.37	249.357	-574.251	1398.83	242.558	-642.13	1249.19	152.116	-387.355	1294.17	414.861	-465.567	1428.34	462.569	-448.561	1243.15	473.164	-424.15	1094.15	521.78	-503.721	941.721	506.748	-546.753	869.607	529.372	-483.997	860.181	554.737	-544.547	797.405
610	0	310.322	-675.958	1613.71	212.583	-677.796	1620.31	330.787	-521.739	1616.77	202.799	-507.03	1618.49	242.126	-470.445	1488.4	237.186	-406.208	1232.15	249.521	-587.853	1400.56	243.005	-655.7	1250.81	152.629	-400.663	1295.6	414.7	-479.336	1430.23	463.819	-463.965	1245.22	475.776	-442.319	1095.39	525.184	-527.722	946.517	510.666	-572.48	875.935	533.205	-510.527	863.877	559.639	-574.257	804.836
611	0	309.784	-689.781	1615.5	212.09	-691.634	1621.35	330.276	-535.689	1618.4	202.197	-520.828	1619.82	242.287	-484.134	1490.07	237.601	-420.011	1232.99	249.563	-601.399	1402.07	243.494	-669.239	1252.52	152.699	-413.725	1296.47	414.976	-493.235	1432.37	465.683	-479.348	1247.96	478.214	-460.339	1097.03	528.251	-551.045	951.09	514.325	-598.86	882.57	536.849	-537.103	868.343	564.184	-603.372	812.513
612	0	309.139	-703.486	1617.04	211.389	-705.441	1622.42	329.733	-549.603	1620.15	201.931	-534.433	1621.08	242.448	-497.797	1491.32	238.459	-433.155	1234.47	249.663	-615.179	1403.43	243.927	-682.736	1253.8	153.319	-427.102	1297.75	415.186	-507.334	1434.02	466.794	-494.741	1249.38	480.882	-478.289	1098.7	531.129	-574.229	955.83	517.405	-624.771	889.256	540.191	-563.501	872.773	568.472	-632.09	820.351
613	0	308.581	-717.352	1618.33	211.023	-718.958	1623.58	329.401	-563.336	1621.53	201.462	-548.202	1621.99	242.671	-511.686	1492.49	238.808	-446.642	1235.47	249.827	-628.838	1404.65	244.286	-696.186	1255	154.048	-440.355	1298.99	415.487	-521.526	1435.95	467.974	-510.492	1251.17	483.279	-496.127	1100.14	534.062	-597.424	961.153	520.286	-650.44	896.344	543.281	-589.846	877.325	572.466	-660.505	828.815
614	0	308.341	-731.186	1619.61	210.444	-732.788	1624.67	329.018	-577.226	1622.81	201.216	-561.905	1623.04	242.961	-525.569	1493.49	239.411	-460.368	1236.71	249.961	-642.574	1405.73	244.497	-709.609	1255.9	154.869	-453.886	1300.3	415.758	-535.915	1437.31	469.274	-526.514	1252.99	485.77	-513.917	1101.67	536.97	-619.907	966.233	523.81	-675.548	903.413	546.359	-615.679	882.35	576.013	-688.431	837.347
615	0	307.928	-745.003	1620.79	209.985	-746.601	1625.58	328.895	-590.966	1623.94	200.959	-575.797	1623.59	243.04	-539.544	1494.29	240.169	-474.261	1237.58	249.966	-656.538	1406.47	244.489	-723.277	1256.64	155.426	-467.541	1300.88	416.084	-550.492	1438.92	470.858	-542.003	1254.45	488.31	-531.444	1103.1	539.351	-642.561	971.208	526.414	-700.736	910.601	549.237	-641.262	887.444	579.196	-716.054	845.683
616	0	307.386	-758.898	1621.61	209.453	-760.495	1626.25	328.351	-605.031	1624.46	200.617	-589.474	1623.93	243.259	-553.588	1494.85	240.827	-488.533	1238.17	249.964	-670.551	1407.03	244.414	-737.175	1257	156.295	-481.25	1301.41	416.09	-565.067	1439.68	471.654	-558.673	1255.83	490.408	-549.186	1103.8	541.683	-664.889	975.989	528.827	-725.3	917.505	552.012	-666.367	892.44	582.025	-743.026	853.703
617	0	307.063	-773	1622.47	209.112	-774.321	1626.72	328.304	-618.853	1624.91	200.304	-603.347	1624.07	243.473	-567.784	1495.35	241.562	-502.633	1238.92	249.916	-684.597	1407.34	244.217	-751.037	1257.31	157.099	-495.046	1301.91	416.152	-579.905	1440.28	472.841	-574.901	1256.74	492.612	-567.008	1104.58	543.88	-687.154	980.719	531.002	-749.503	924.708	554.028	-691.782	897.249	584.543	-769.827	862.006
618	0	306.803	-786.92	1622.99	208.884	-788.169	1627.32	327.737	-633.092	1624.75	200.256	-617.352	1624.11	243.501	-581.923	1495.44	242.239	-516.689	1239.37	249.974	-698.78	1407.43	244.12	-765.2	1257.42	157.801	-508.953	1302.01	416.526	-594.649	1441.31	474.077	-591.195	1257.65	494.904	-584.767	1105.44	545.905	-709.021	985.359	533.122	-773.69	932.073	556.205	-716.487	902.133	586.761	-795.892	869.978
619	0	306.542	-800.972	1623.25	208.494	-802.296	1627.45	327.794	-646.891	1624.75	199.939	-631.418	1623.79	243.629	-596.422	1495.49	243.027	-530.656	1239.79	249.82	-713.029	1407.38	243.861	-779.409	1257.38	158.565	-522.846	1302.09	416.612	-609.385	1441.68	475.086	-607.571	1258.14	497.351	-602.413	1106.45	547.781	-730.658	990.025	534.929	-796.981	938.486	557.729	-741.199	906.787	588.631	-821.527	877.645
620	0	306.211	-815.19	1623.46	208.372	-816.22	1627.42	327.766	-661.319	1624.8	199.878	-645.394	1623.41	243.589	-610.698	1495.11	243.77	-544.957	1239.65	249.818	-727.273	1406.94	243.605	-793.684	1256.84	159.16	-536.999	1301.68	416.702	-624.311	1441.89	476.5	-624.008	1258.76	499.235	-620.295	1106.42	549.473	-752.163	994.088	536.489	-820.021	944.764	559.358	-765.409	911.305	590.037	-846.786	884.825
621	0	305.987	-829.341	1623.26	207.783	-830.491	1627.48	327.562	-675.348	1624.19	199.668	-659.754	1622.5	243.578	-625.299	1494.62	244.189	-559.001	1238.78	249.839	-741.729	1406.45	243.539	-808.026	1256.26	159.764	-551.211	1301.15	416.785	-639.071	1441.7	477.474	-640.347	1258.82	501.217	-638.014	1106.71	550.865	-773.358	997.956	537.8	-842.692	950.831	561.001	-789.163	915.627	591.154	-871.69	891.52
622	0	305.748	-843.636	1622.98	207.659	-844.76	1626.95	327.101	-689.826	1623.1	199.52	-673.776	1621.69	243.578	-639.709	1493.85	244.891	-573.233	1238.67	249.637	-756.283	1405.59	243.275	-822.198	1255.37	160.178	-565.509	1300.52	416.674	-653.996	1441.43	478.407	-656.721	1258.82	502.856	-656.025	1106.47	552.18	-794.413	1001.75	538.781	-864.928	956.632	562.405	-812.442	919.966	592.163	-895.719	898.402
623	0	305.587	-858.013	1622.39	207.504	-858.948	1626.28	326.993	-704.05	1622.06	199.236	-688.188	1620.62	243.447	-654.44	1492.78	244.888	-587.6	1237.48	249.599	-770.868	1404.62	243.147	-836.63	1254.22	160.617	-579.835	1299.63	416.669	-668.762	1440.81	479.054	-672.999	1258.46	504.728	-673.64	1106.31	553.156	-815.14	1005.06	539.557	-886.88	961.992	563.443	-835.509	923.97	592.784	-919.458	904.731
624	0	305.235	-872.357	1621.53	207.284	-873.35	1625.46	326.481	-718.718	1620.91	199.134	-702.312	1619.26	243.457	-669.037	1491.76	244.958	-601.929	1236.18	249.648	-785.633	1403.3	243.142	-850.828	1252.89	160.725	-594.541	1298.25	416.597	-683.626	1439.94	479.771	-689.268	1258.02	506.561	-691.3	1106.26	553.975	-835.534	1008.07	540.107	-908.283	966.779	564.401	-857.958	927.483	593.289	-942.784	910.653
625	0	305.279	-886.816	1620.75	207.108	-887.883	1624.28	326.747	-732.819	1620.09	199.015	-716.931	1618.03	243.211	-683.99	1490.32	245.003	-616.469	1235.05	249.677	-800.359	1402.02	243.251	-865.305	1251.23	160.58	-610.278	1296.38	416.593	-698.478	1439.11	480.385	-705.359	1257.26	507.928	-708.923	1105.47	554.834	-855.748	1011.07	540.336	-929.198	971.25	565.33	-880.134	931.087	593.446	-965.504	915.985
626	0	304.853	-901.19	1619.49	206.987	-902.152	1623.13	326.379	-747.416	1618.51	198.795	-731.323	1616.15	243.01	-698.748	1488.85	245.065	-630.061	1233.68	249.531	-815.14	1400.57	243.301	-880.004	1249.58	160.52	-625.274	1294.85	416.317	-713.272	1437.75	480.918	-721.635	1256.59	509.142	-726.476	1104.78	555.275	-875.591	1013.65	540.317	-949.735	975.328	565.982	-901.795	933.948	593.415	-987.832	921.369
627	0	304.741	-915.822	1618.57	206.52	-916.788	1621.59	326.012	-761.938	1616.8	198.392	-745.99	1614.52	242.608	-713.692	1487.05	244.618	-645.204	1231.92	249.392	-830.177	1398.85	243.545	-894.882	1247.76	160.277	-640.229	1293.11	416.065	-728.041	1436.41	481.199	-737.674	1255.34	510.211	-743.957	1103.86	555.384	-895.23	1015.7	540.097	-969.864	978.95	566.491	-922.927	936.77	593.005	-1009.52	925.658
628	0	304.286	-930.478	1616.74	206.539	-931.303	1620.32	325.531	-776.484	1614.75	197.923	-760.562	1612.61	242.25	-728.597	1485.14	244.042	-659.695	1229.92	249.336	-845.12	1397.07	243.813	-909.791	1245.82	159.778	-655.513	1291.04	415.67	-742.846	1434.61	481.534	-753.81	1254.14	511.162	-761.206	1102.66	555.379	-914.528	1017.26	539.634	-989.757	981.812	566.835	-943.646	939.279	592.507	-1030.76	929.674
629	0	304.042	-944.936	1615.43	206.198	-946.246	1618.63	325.085	-791.06	1612.9	197.425	-775.254	1610.83	241.734	-743.628	1483.32	243.403	-674.493	1228.04	249.679	-859.893	1394.99	244.278	-925.059	1243.73	159.267	-670.908	1289.27	415.339	-757.582	1432.91	481.518	-769.572	1252.63	512.109	-778.259	1101.51	555.184	-933.47	1018.73	539.116	-1008.91	984.373	566.904	-963.804	941.345	591.767	-1051.44	933.115
630	0	303.766	-959.613	1614.13	205.952	-961.034	1617.11	324.638	-805.717	1611.29	197.11	-790.187	1608.4	241.312	-758.682	1481.55	242.766	-689.392	1226.58	249.027	-875.275	1393.31	244.685	-940.637	1241.82	158.524	-686.191	1287.18	415.042	-772.363	1431.41	481.722	-785.422	1251.36	512.541	-795.146	1100.29	554.975	-951.885	1020.04	538.318	-1027.72	986.33	566.798	-983.525	942.886	590.94	-1071.39	936.847
631	0	303.568	-974.412	1612.9	205.626	-975.665	1615.74	323.898	-820.423	1609.21	196.554	-805.193	1606.56	240.778	-773.745	1479.49	241.691	-704.589	1224.34	249.285	-890.349	1391.23	245.049	-955.971	1239.94	157.585	-701.681	1285.09	414.596	-787.181	1429.47	481.626	-801.036	1249.82	513.694	-811.73	1099.5	554.523	-969.929	1020.57	537.511	-1046.12	987.915	566.398	-1002.82	943.952	589.784	-1090.83	938.99
632	0	303.284	-989.151	1611.34	205.304	-990.701	1614.12	323.106	-835.137	1607.19	195.938	-819.925	1604.56	240.092	-788.929	1477.67	240.581	-719.911	1222.32	249.06	-905.606	1389.45	245.316	-971.67	1238.13	156.666	-717.285	1283	414.048	-801.981	1427.39	481.003	-816.603	1247.78	512.786	-828.487	1096.87	553.754	-987.662	1020.83	536.337	-1063.96	989.184	565.684	-1021.39	944.641	588.778	-1109.63	940.919
633	0	302.861	-1003.87	1609.79	205.036	-1005.63	1612.66	322.597	-849.916	1605.25	195.145	-835.043	1602.74	239.495	-804.126	1475.88	239.354	-735.508	1220.44	248.615	-921.087	1387.55	245.337	-987.328	1236.46	155.523	-733.106	1280.73	413.34	-816.724	1425.48	480.464	-831.903	1245.98	512.485	-844.873	1094.99	552.873	-1004.83	1020.7	534.993	-1081.42	989.556	564.957	-1039.44	944.774	587.203	-1127.83	941.999
634	0	302.582	-1018.8	1608.35	204.556	-1020.75	1611.09	322.178	-864.56	1603.82	194.626	-850.159	1600.64	238.578	-819.395	1473.91	238.081	-751.131	1218.6	248.086	-936.368	1385.93	245.308	-1002.67	1234.8	154.471	-748.602	1278.84	412.568	-831.478	1423.47	479.731	-847.252	1244.36	512.212	-860.785	1093.56	551.81	-1021.53	1020.08	533.597	-1098.16	989.803	563.878	-1056.71	944.768	585.767	-1145.33	942.883
635	0	302.163	-1033.7	1606.78	204.301	-1035.86	1609.4	321.018	-879.446	1601.69	193.704	-865.365	1599.01	237.666	-834.592	1472.2	236.888	-766.887	1216.72	247.589	-951.932	1384.17	245.112	-1018.68	1233.3	153.13	-764.55	1276.64	411.632	-846.276	1421.64	479.02	-862.33	1242.62	511.962	-876.095	1092.36	550.572	-1037.9	1019.45	532.001	-1114.55	989.348	562.845	-1073.47	944.546	584.323	-1162.16	943.498
636	0	301.839	-1048.37	1605.17	204.013	-1051.01	1608	320.63	-894.09	1600.47	192.941	-880.345	1597.45	236.665	-849.881	1470.2	235.512	-782.939	1214.83	247.04	-967.413	1382.61	245.023	-1033.99	1231.77	151.781	-780.517	1274.95	410.744	-861.042	1419.72	478.059	-877.212	1240.99	510.974	-891.513	1090.44	549.29	-1053.75	1018.72	530.439	-1130.21	988.643	561.846	-1089.53	944.05	582.501	-1178.45	943.018
637	0	301.536	-1063.13	1603.98	203.529	-1066	1606.8	319.695	-908.997	1598.8	191.959	-895.562	1595.6	235.556	-865.188	1468.54	233.961	-799.041	1212.9	246.192	-982.942	1381.25	244.75	-1049.41	1230.4	150.409	-796.405	1273.36	409.544	-875.938	1417.91	476.933	-891.987	1239.29	510.153	-906.128	1088.81	547.659	-1068.9	1017.72	528.637	-1145.45	987.687	560.673	-1104.94	943.244	580.608	-1193.9	942.563
638	0	301.079	-1078.22	1602.84	203.333	-1081.28	1605.52	319.035	-923.739	1597.33	191.079	-910.876	1594.69	234.49	-880.449	1467.12	232.229	-815.375	1210.83	245.262	-998.513	1379.98	243.981	-1065.43	1229.39	148.773	-812.265	1271.61	408.674	-890.893	1416.26	475.863	-906.629	1237.64	508.957	-920.713	1087.12	546.282	-1083.62	1016.31	526.868	-1159.91	986.182	559.305	-1119.78	941.984	578.818	-1208.8	941.419
639	0	300.946	-1093.24	1602.01	202.741	-1096.58	1604.93	318.264	-938.614	1596.6	190.223	-926.261	1593.47	233.226	-895.746	1465.7	230.739	-831.734	1209.33	244.128	-1014.19	1378.97	242.842	-1081.66	1228.46	147.164	-828.252	1269.9	407.36	-905.93	1414.37	474.44	-921.257	1235.86	507.94	-934.557	1085.46	544.665	-1097.86	1014.36	525.112	-1173.93	983.947	557.791	-1133.99	939.877	576.7	-1223.06	939.36
640	0	300.432	-1108.45	1601.46	202.549	-1112.14	1604.78	317.04	-953.807	1595.37	189.296	-941.854	1593.06	232.058	-911.205	1465.29	229.207	-848.305	1207.96	243.027	-1029.95	1378.5	241.65	-1097.88	1227.99	145.528	-844.347	1268.83	406.314	-920.838	1412.99	472.896	-935.329	1234.21	506.083	-948.594	1083.48	542.934	-1111.51	1012.17	523.002	-1187.53	982.103	556.365	-1147.41	937.914	574.54	-1236.66	936.71
641	0	300.155	-1123.63	1601.45	202.254	-1127.69	1605.14	315.699	-968.948	1594.72	188.302	-957.484	1593.13	230.673	-926.728	1464.96	227.619	-864.693	1206.67	241.874	-1045.54	1378.63	240.301	-1114.13	1228.26	143.951	-860.464	1268.2	404.972	-935.738	1412.05	471.126	-949.6	1233.18	504.121	-962.09	1082.19	541	-1124.51	1009.9	521.096	-1200.34	978.997	554.307	-1160.09	935.052	572.578	-1249.27	934.138
642	0	299.918	-1138.76	1601.88	202.014	-1143.32	1605.53	315.054	-983.981	1595.39	187.349	-973.122	1593.97	229.476	-942.311	1465.32	226.496	-881.043	1206.33	240.684	-1061.19	1379.16	238.834	-1130.33	1228.99	142.62	-876.586	1267.96	403.57	-950.718	1411.58	469.366	-963.414	1232.51	501.747	-975.429	1081.08	539.013	-1136.96	1007.49	518.95	-1212.47	975.879	552.336	-1171.86	932.481	570.507	-1261.1	930.505
643	0	299.511	-1154.02	1602.72	201.637	-1159.06	1606.74	313.907	-999.417	1596.09	186.299	-988.815	1594.85	227.856	-958.092	1465.71	225.88	-896.975	1206.53	239.434	-1076.62	1380.15	237.385	-1146.39	1230.18	141.633	-892.712	1268.46	402.263	-965.745	1411.75	466.645	-977.066	1232.11	499.086	-988.283	1080.56	536.794	-1148.9	1004.99	517	-1223.91	972.667	550.259	-1182.65	930.284	568.287	-1272.03	926.516
644	0	299.131	-1169.31	1603.81	201.351	-1174.79	1608.17	313.408	-1014.42	1597.59	185.125	-1004.7	1596.3	227.114	-973.971	1467.01	225.271	-912.726	1207.29	238.442	-1092.58	1381.3	236.091	-1162.29	1231.65	140.772	-908.667	1269.33	401.146	-981.025	1412.77	464.424	-990.185	1232.33	496.178	-1000.66	1080.55	534.457	-1159.97	1002.51	514.77	-1234.63	968.956	547.66	-1192.67	926.73	566.126	-1281.77	922.4
645	0	298.592	-1184.75	1605.02	200.749	-1190.49	1609.52	311.831	-1029.94	1598.06	184.229	-1020.41	1597.57	226.141	-989.814	1468.31	224.736	-928.419	1208.27	237.521	-1108.36	1382.54	235.163	-1177.62	1232.97	139.962	-924.237	1270.82	399.972	-996.634	1413.97	462.118	-1003.76	1232.92	492.856	-1012.86	1080.95	531.704	-1170.54	1000.16	512.263	-1244.54	965.191	544.922	-1201.75	923.673	563.707	-1290.58	917.738
646	0	298.011	-1200.23	1606.26	200.339	-1206.15	1610.71	311.09	-1045.17	1599.21	183.196	-1036.3	1598.59	225.194	-1005.62	1469.62	224.565	-943.488	1210.34	236.753	-1123.96	1383.8	234.044	-1193.99	1234.24	139.183	-939.827	1272.68	399.387	-1012.33	1415.77	460.056	-1017.07	1234.04	489.938	-1024.33	1082.38	528.829	-1180.62	997.724	509.74	-1253.98	961.217	542.13	-1209.85	920.618	561.215	-1298.49	912.471
647	0	297.52	-1215.66	1607.83	199.667	-1221.85	1612.21	310.063	-1060.78	1600.25	182.307	-1052.16	1599.3	224.058	-1021.38	1470.85	223.891	-958.212	1212.06	236.277	-1139.59	1384.89	233.431	-1209.66	1235.28	138.746	-955.199	1274.93	398.758	-1027.98	1417.54	458.158	-1030.66	1235	486.408	-1035.83	1083.17	526.021	-1189.95	995.251	506.909	-1262.65	956.693	538.794	-1217.39	917.152	558.876	-1305.65	907.249
648	0	297.056	-1231.21	1609.5	199.161	-1237.52	1613.42	309.275	-1076.31	1601.69	181.428	-1067.8	1600.48	223.321	-1037.06	1472.56	223.704	-972.352	1215.08	236.046	-1154.98	1386.13	233.175	-1224.8	1236.3	138.24	-970.41	1277.21	398.269	-1043.37	1419.74	456.586	-1044.14	1236.43	482.956	-1047.01	1084.24	523.114	-1198.64	992.625	504.741	-1269.94	952.635	535.653	-1224.03	913.902	556.313	-1311.77	901.575
649	0	296.531	-1246.8	1611.29	198.616	-1253.27	1614.73	308.859	-1091.61	1603.77	180.681	-1083.61	1601.79	223.019	-1052.44	1474.73	223.013	-986.543	1217.48	235.805	-1170.18	1387.48	233.26	-1239.87	1237.19	137.736	-985.598	1279.49	397.74	-1058.39	1421.72	455.026	-1057.75	1238.09	479.534	-1057.93	1085.36	520.332	-1206.79	989.745	501.854	-1277.49	947.856	531.724	-1230.22	909.855	553.52	-1317.1	895.467
650	0	295.984	-1262.47	1612.97	198.297	-1269.14	1615.78	307.553	-1107.52	1604.83	179.741	-1099.13	1603.41	222.296	-1067.82	1476.6	222.238	-1000.75	1219.79	235.807	-1185.29	1388.82	233.793	-1254.67	1238.06	137.263	-1000.87	1282.36	397.081	-1073.16	1423.89	453.496	-1070.96	1239.57	475.998	-1068.92	1086.79	517.07	-1214.84	986.627	498.898	-1284.3	943.026	527.815	-1235.74	905.992	550.396	-1321.79	888.837
651	0	295.543	-1278.16	1614.35	197.928	-1285.01	1616.94	307.491	-1122.8	1608.11	179.325	-1114.74	1604.89	221.759	-1082.92	1478.68	221.389	-1015.29	1222.56	236.009	-1199.96	1390.39	234.703	-1269.19	1239.14	136.511	-1015.89	1284.71	396.599	-1087.37	1426.14	452.219	-1084.02	1241.23	473.039	-1079.48	1089.03	513.918	-1222.14	983.381	496.069	-1290.29	938.464	524.041	-1240.6	902.347	546.659	-1325.83	881.045
652	0	295.256	-1293.68	1615.82	197.628	-1300.57	1618.21	306.586	-1138.43	1609.77	178.754	-1130.55	1606.99	221.141	-1097.93	1480.79	220.838	-1029.53	1225.35	236.13	-1214.63	1392.13	235.909	-1282.81	1240.77	135.716	-1030.67	1287.36	396.146	-1101.37	1428.29	450.515	-1097.08	1243.07	469.76	-1090.15	1090.69	510.827	-1229.17	980.598	492.782	-1296.26	933.056	520.3	-1244.66	898.856	543.323	-1329.12	874.312
653	0	295.061	-1309.07	1617.24	197.373	-1316.16	1619.24	306.555	-1153.62	1613.23	178.2	-1146.13	1609.08	220.787	-1112.83	1483	219.677	-1044.19	1227.24	236.251	-1229.1	1394.04	237.034	-1296.65	1242.24	134.963	-1045.39	1289.59	395.809	-1115.13	1430.64	449.157	-1109.45	1245.15	466.638	-1100.71	1092.42	507.721	-1235.68	977.531	489.36	-1301.38	928.09	515.955	-1248.63	895.075	539.642	-1331.73	867.733
654	0	295.005	-1324.48	1618.47	197.316	-1331.72	1620.37	305.88	-1169.04	1614.88	177.829	-1161.66	1611.43	220.473	-1127.61	1485.28	219.101	-1058.55	1230.26	236.557	-1243.39	1395.9	238.235	-1310.15	1243.86	134.113	-1060.11	1291.96	395.607	-1128.87	1432.59	447.795	-1121.82	1247.01	463.635	-1111.24	1094.39	504.383	-1241.82	974.418	486.196	-1305.76	923.069	511.895	-1251.96	891.576	535.564	-1333.68	860.573
655	0	294.882	-1339.73	1619.84	197.167	-1347.45	1621.33	306.099	-1183.99	1618.32	177.513	-1177.12	1613.62	220.267	-1142.35	1487.16	218.206	-1073.07	1232.73	236.823	-1257.74	1397.8	239.378	-1323.36	1245.5	133.432	-1074.65	1294.03	395.389	-1142.4	1434.82	446.537	-1133.32	1248.78	460.725	-1121.78	1095.97	501.177	-1247.87	971.592	482.486	-1309.83	917.927	507.742	-1254.91	888.233	531.498	-1335.2	853.814
656	0	294.815	-1355	1621.11	197.222	-1362.76	1622.31	305.399	-1199.42	1620.29	177.201	-1192.67	1616.11	219.829	-1157.05	1489.43	217.048	-1087.33	1234.58	236.9	-1271.97	1399.87	240.414	-1336.52	1247.31	132.667	-1089.04	1296.33	395.281	-1155.85	1436.69	444.763	-1145.3	1250.1	458.017	-1132.13	1098.01	497.801	-1253.53	968.897	478.64	-1313.7	912.892	503.906	-1257.05	885.425	526.727	-1336.14	846.913
657	0	294.749	-1370.17	1622.42	197.194	-1378.14	1623.35	305.479	-1214.58	1623.32	176.843	-1207.79	1618.25	219.775	-1171.67	1491.76	216.285	-1101.19	1237.19	236.993	-1286.16	1401.91	241.003	-1350.59	1249.07	132.156	-1103.31	1298.78	394.997	-1169.53	1438.75	443.874	-1156.33	1252.29	455.899	-1142.13	1100.78	494.33	-1258.88	966.336	474.952	-1316.94	908.282	499.602	-1259.74	882.609	521.743	-1336.66	840.384
658	0	294.777	-1385.43	1623.48	197.28	-1393.46	1624.34	306.053	-1229.41	1626.34	176.306	-1222.56	1621.23	219.975	-1186.23	1493.87	215.453	-1115.35	1239.34	237.216	-1300.16	1403.69	241.3	-1365.54	1250.62	131.244	-1117.76	1300.71	394.748	-1183.24	1440.68	442.855	-1167.84	1254.15	453.699	-1152.31	1102.98	490.947	-1264.05	964.228	470.685	-1319.8	903.918	495.704	-1261.99	880.402	516.929	-1337.03	834.483
659	0	294.903	-1400.5	1624.55	197.209	-1408.48	1625.57	305.692	-1244.73	1627.76	177.093	-1237.96	1622.08	219.898	-1200.76	1495.92	214.996	-1128.72	1241.84	237.204	-1314.41	1405.56	242.196	-1377.93	1252.91	130.609	-1131.96	1303.17	394.573	-1196.87	1442.45	441.339	-1179.78	1255.86	451.412	-1162.34	1104.87	487.87	-1269.06	962.667	466.864	-1322.1	900.229	492.521	-1263.77	879.085	511.909	-1336.81	829.061
660	0	294.876	-1415.55	1625.5	197.23	-1423.34	1626.43	305.688	-1259.88	1629.37	176.434	-1252.38	1624.64	219.495	-1215.25	1497.63	214.03	-1142.28	1243.73	237.111	-1328.47	1407.12	242.08	-1392.48	1254.43	130.156	-1146.2	1305.25	394.195	-1210.85	1443.97	440.457	-1191.52	1257.14	449.61	-1171.77	1107.42	484.589	-1273.94	961.227	462.822	-1324.44	896.869	489.298	-1265.63	877.953	506.534	-1336.5	823.723
661	0	294.782	-1430.6	1626.16	197.16	-1438.3	1627.12	305.973	-1274.81	1630.96	176.634	-1267.42	1626.16	219.255	-1229.5	1499.54	213.34	-1155.93	1245.56	236.949	-1342.73	1408.47	241.798	-1406.75	1255.78	129.507	-1160.23	1307.46	394.033	-1224.8	1445.28	438.99	-1203.91	1258.57	447.408	-1181.42	1109.4	481.28	-1279.1	959.845	458.8	-1326.61	893.292	486.176	-1267.8	877.063	501.039	-1336.16	818.942
662	0	294.819	-1445.63	1626.54	197.161	-1453.08	1627.75	306.285	-1289.72	1632.12	176.746	-1282.24	1627.56	219.465	-1244.01	1500.88	212.67	-1169.54	1247.07	236.796	-1357.06	1409.47	241.348	-1420.74	1256.64	128.976	-1174.31	1309.24	393.76	-1238.93	1446.32	438.011	-1216.3	1259.46	445.049	-1190.99	1110.84	477.948	-1284.22	958.711	454.554	-1329.44	890.325	483.65	-1269.71	876.832	495.552	-1335.72	814.132
663	0	294.749	-1460.53	1626.88	197.216	-1467.92	1628.2	306.607	-1304.59	1633	177.299	-1297.07	1628.54	219.103	-1258.36	1502.04	212.321	-1183.19	1248.65	236.609	-1371.09	1410.38	240.657	-1434.92	1257.33	128.341	-1188.43	1310.86	393.371	-1253.15	1446.96	436.98	-1228.53	1260.54	442.669	-1200.32	1112.39	474.672	-1289.19	957.73	450.24	-1331.5	886.726	480.809	-1272.19	876.422	490.06	-1335.11	810.141
664	0	294.727	-1475.39	1627.16	197.194	-1482.44	1628.68	306.687	-1319.58	1633.48	177.581	-1311.72	1629.37	218.837	-1272.87	1502.99	212.007	-1197.13	1250.05	236.356	-1385.22	1411.1	239.998	-1448.9	1257.88	127.794	-1202.27	1312.21	393.228	-1267.41	1447.6	435.856	-1240.84	1261.07	440.335	-1209.73	1113.69	471.274	-1294.29	956.642	446.312	-1334.11	884.504	477.936	-1274.71	875.959	484.775	-1334.54	806.35
665	0	294.852	-1490.17	1627.31	197.531	-1497.83	1628.7	307.363	-1334.19	1634.29	177.761	-1326.47	1629.97	218.791	-1287.42	1503.54	211.489	-1211.28	1250.7	236.149	-1399.47	1411.38	239.153	-1463.04	1257.95	127.467	-1216.38	1313.54	393.385	-1281.83	1448.03	434.552	-1253.14	1261.32	438.005	-1219.16	1114.89	468.019	-1299.41	955.485	442.135	-1336.53	882.304	474.713	-1277.46	875.327	479.624	-1334.05	802.944
666	0	294.889	-1504.93	1627.14	197.39	-1512.25	1628.94	307.657	-1348.9	1634.14	178.309	-1341.11	1629.96	219.11	-1302	1503.77	211.248	-1225.28	1251.39	236.594	-1412.56	1410.97	238.316	-1476.96	1257.84	126.933	-1230.32	1314.36	393.086	-1296.15	1447.93	433.536	-1265.15	1261.37	435.966	-1228.55	1116.1	464.771	-1304.38	954.303	438.217	-1339.08	880.119	471.601	-1280.04	875.116	474.888	-1333.64	800.007
667	0	294.914	-1519.73	1626.53	197.557	-1527.11	1628.57	307.62	-1363.76	1633.6	178.545	-1355.8	1629.85	218.667	-1316.39	1504.09	210.878	-1239.42	1252.04	236.159	-1426.95	1410.75	237.416	-1490.88	1257.34	126.432	-1244.21	1314.9	392.897	-1310.58	1447.82	432.315	-1276.88	1261.58	433.616	-1238.14	1116.99	461.305	-1309.39	953.016	434.93	-1341.44	878.186	468.332	-1282.83	874.941	469.926	-1333.27	797.143
668	0	294.925	-1534.48	1626.05	197.567	-1541.84	1627.93	307.752	-1378.59	1632.75	178.253	-1370.31	1629.69	218.922	-1330.93	1503.84	210.63	-1253.47	1252.39	235.749	-1441.33	1410.34	236.575	-1504.66	1256.36	126.086	-1258.18	1315.11	392.582	-1325.07	1447.21	431.299	-1288.66	1261.5	431.033	-1248	1117.29	458.063	-1314.85	951.666	430.752	-1343.74	876.055	464.882	-1285.74	874.44	465.245	-1333.38	794.508
669	0	295.004	-1549.29	1624.95	197.779	-1556.59	1627.12	308.356	-1393.12	1632.37	178.707	-1385.04	1628.88	218.434	-1345.44	1503.34	210.421	-1267.34	1252.36	235.483	-1455.6	1409.53	235.759	-1519.07	1255.52	125.806	-1272.12	1315.14	392.38	-1339.6	1446.4	430.003	-1300.37	1261.07	428.953	-1257.91	1117.79	455.086	-1320.12	950.164	426.918	-1346.55	874.312	461.267	-1288.96	873.688	460.47	-1333.71	792.253
670	0	295.206	-1563.98	1623.5	197.903	-1571.24	1626.52	308.294	-1407.85	1630.73	179.262	-1400.04	1627.73	218.438	-1360.07	1502.61	210.133	-1281.13	1251.9	235.272	-1469.91	1408.49	235.496	-1531.65	1253.95	125.581	-1286.04	1314.84	392.359	-1354.02	1445.55	429.033	-1312.02	1260.61	426.752	-1268.06	1117.98	452.349	-1325.33	948.887	422.788	-1348.79	872.622	458.496	-1291.77	873.874	456.047	-1334.18	790.146
671	0	295.578	-1578.51	1622.65	198.099	-1585.69	1625.45	308.395	-1422.58	1629.39	179.518	-1414.71	1626.68	218.364	-1374.55	1501.7	209.847	-1294.95	1251.31	234.988	-1484.28	1407.4	234.749	-1545.59	1252.67	125.401	-1300.05	1314.49	392.292	-1368.48	1444.4	427.745	-1323.81	1259.76	424.53	-1278.41	1117.99	448.569	-1330.78	947.225	421.24	-1353.62	871.365	454.645	-1295.88	873.072	452.71	-1335.2	788.498
672	0	295.699	-1593.2	1621.14	198.332	-1600.4	1624.09	308.641	-1437.25	1627.84	179.776	-1429.3	1625.36	218.399	-1389.1	1500.44	209.693	-1309	1250.54	234.797	-1498.67	1406.01	234.103	-1559.66	1251.18	125.087	-1314.21	1313.67	392.217	-1382.91	1442.96	426.684	-1335.67	1259	422.541	-1288.88	1117.94	447.041	-1336.85	946.33	418.992	-1358.08	870.097	451.49	-1299.86	872.645	449.125	-1336.87	786.889
673	0	295.877	-1607.93	1619.29	198.577	-1615.26	1622.45	308.732	-1451.96	1625.93	179.835	-1443.87	1623.88	218.503	-1403.78	1498.91	209.603	-1322.95	1249.6	234.633	-1513.08	1404.27	233.453	-1573.63	1249.27	124.851	-1328.24	1312.66	392.274	-1397.35	1441.29	425.063	-1348.12	1257.09	420.492	-1299.71	1117.28	444.009	-1343.1	944.424	416.555	-1363.18	868.293	448.298	-1304.38	871.963	445.837	-1339.13	785.18
674	0	296.249	-1622.55	1617.46	199.02	-1629.76	1620.71	309.324	-1466.4	1624.45	180.228	-1458.65	1622.27	218.579	-1418.35	1497.44	209.695	-1337.01	1248.58	234.433	-1527.66	1402.37	232.78	-1587.7	1247.34	124.762	-1342.22	1311.5	392.262	-1411.8	1439.51	424.41	-1360.18	1256.3	418.606	-1310.68	1116.71	442.127	-1350.02	942.868	414.342	-1368.51	866.462	445.668	-1309.3	871.734	442.813	-1341.95	783.479
675	0	296.495	-1637.13	1615.62	199.278	-1644.47	1618.76	309.32	-1481.22	1622.11	180.493	-1473.32	1620.42	218.526	-1433	1495.49	209.743	-1351.05	1247.06	234.385	-1542.1	1400.65	232.571	-1601.87	1245.34	124.599	-1356.3	1310.11	392.232	-1426.24	1437.78	423.525	-1372.85	1254.91	417.071	-1321.93	1116.84	440.492	-1357.09	941.664	409.137	-1371.66	868.088	442.961	-1314.84	871.127	440.497	-1345.4	782.296
676	0	296.916	-1651.86	1613.4	199.712	-1659.18	1616.84	309.775	-1495.73	1620.12	180.86	-1488.07	1618.01	218.654	-1447.55	1493.73	209.73	-1365.18	1245.27	234.454	-1556.6	1398.63	232.485	-1616.08	1243.05	124.471	-1370.53	1308.35	391.798	-1440.49	1435.88	422.504	-1385.72	1253.2	415.226	-1333.51	1115.56	439.038	-1364.61	940.519	409.515	-1379.64	864.641	440.806	-1320.94	870.535	438.407	-1349.67	780.932
677	0	297.427	-1666.38	1611.21	200.078	-1673.86	1615.24	310.314	-1510.27	1618.3	181.164	-1502.73	1616.32	218.791	-1462.13	1491.72	209.926	-1379.26	1243.63	234.605	-1571.12	1396.45	234.741	-1625.94	1240.04	124.41	-1384.85	1306.64	391.746	-1454.84	1433.94	421.964	-1398.68	1251.65	413.767	-1345.38	1114.64	437.835	-1372.82	939.249	410.611	-1388.34	861.515	438.745	-1327.87	869.988	436.754	-1354.49	780.039
678	0	297.841	-1681.07	1608.86	200.318	-1688.53	1612.98	310.364	-1525	1615.52	181.438	-1517.17	1614.22	218.98	-1476.79	1489.65	210.029	-1393.33	1241.52	234.682	-1585.7	1394.25	234.659	-1640.28	1237.59	124.437	-1399.1	1305.02	391.841	-1469.28	1431.79	421.647	-1411.77	1250.08	412.424	-1357.46	1113.33	436.942	-1381.61	937.834	410.493	-1396.1	859.929	437.04	-1335.35	869.533	435.339	-1360.31	778.713
679	0	298.116	-1695.77	1606.47	200.816	-1703.05	1610.45	311.096	-1539.44	1613.39	182.002	-1531.95	1611.84	219.157	-1491.39	1487.46	210.145	-1407.67	1239.46	234.734	-1600.34	1392.01	234.54	-1654.81	1235.2	124.42	-1413.46	1303.02	391.977	-1483.78	1429.37	420.786	-1425.36	1247.59	411.359	-1369.89	1112.15	436.201	-1390.98	936.203	409.96	-1403.66	858.047	435.619	-1343.56	868.613	433.965	-1366.97	777.215
680	0	298.483	-1710.59	1604.09	201.414	-1717.7	1608.16	311.653	-1554.01	1611.12	181.955	-1546.06	1610.17	219.383	-1506	1485.09	210.48	-1421.98	1237.48	234.863	-1615	1389.68	234.569	-1669.28	1232.7	124.532	-1427.9	1301.06	392.18	-1498.34	1426.83	420.439	-1439.08	1245.22	410.438	-1382.59	1111.15	435.731	-1401.04	934.462	409.371	-1413.86	856.08	434.441	-1352.58	867.577	433.079	-1374.53	775.747
681	0	298.972	-1725.32	1601.89	201.859	-1732.42	1606.3	312.147	-1568.67	1608.79	182.614	-1560.71	1608.24	219.795	-1520.47	1483.05	211.023	-1436.38	1235.5	235.32	-1629.61	1387.45	235.03	-1683.8	1230.44	124.841	-1442.36	1299.07	392.404	-1512.87	1424.45	420.561	-1452.6	1243.4	410.049	-1395.64	1109.54	435.49	-1411.56	932.902	409.472	-1423.79	854.373	433.763	-1362.26	866.539	432.66	-1382.9	774.546
682	0	299.397	-1739.64	1599.54	202.232	-1746.99	1604.36	312.398	-1583.48	1606.51	183.147	-1575.43	1605.91	220.193	-1534.93	1481	211.317	-1450.92	1233.28	235.69	-1644.3	1385.51	235.37	-1698.3	1228.55	125.114	-1456.87	1297.06	392.864	-1527.42	1422.39	420.76	-1466.35	1242.06	409.897	-1408.9	1107.45	435.655	-1422.56	931.601	409.458	-1434.32	852.658	433.337	-1372.67	865.856	432.605	-1392.19	774.059
683	0	299.96	-1754.6	1597.81	202.666	-1761.57	1602.39	312.957	-1598.17	1604.69	183.654	-1590.15	1604.11	220.774	-1549.41	1479.13	212.015	-1465.64	1231.36	236.058	-1659.09	1383.8	235.794	-1712.97	1226.72	125.579	-1471.47	1295.12	393.414	-1542.05	1420.61	420.991	-1480.45	1240.22	409.757	-1422.58	1105.9	435.896	-1434.49	930.091	409.829	-1445.57	851.049	433.008	-1383.79	864.699	432.648	-1402.61	772.344
684	0	300.326	-1769.31	1595.9	203.151	-1776.27	1600.46	313.64	-1612.89	1603.12	184.172	-1604.56	1602.73	221.463	-1563.91	1477.24	212.913	-1480.54	1229.57	236.56	-1673.9	1382.1	236.235	-1727.82	1225.02	126.454	-1486.13	1293.27	394.067	-1556.74	1418.85	421.266	-1494.87	1238.14	410.153	-1436.63	1104.53	436.345	-1447	928.755	410.599	-1457.68	849.549	433.391	-1395.82	863.916	433.143	-1413.95	771.263
685	0	300.733	-1784.12	1594.24	203.466	-1790.94	1598.83	314.205	-1627.64	1601.48	184.6	-1619.04	1601.04	222.272	-1578.41	1475.49	213.982	-1495.52	1227.55	237.194	-1688.62	1380.66	236.61	-1742.83	1223.76	127.429	-1500.76	1291.22	394.819	-1571.55	1417.12	421.938	-1509.43	1236.7	410.674	-1451	1103.06	436.885	-1460.18	927.183	411.433	-1470.5	848.265	433.875	-1408.68	862.962	434.044	-1426.19	770.172
686	0	301.076	-1798.84	1592.77	203.816	-1805.35	1597.35	314.84	-1642.44	1600.13	185.408	-1633.47	1599.72	223.171	-1592.96	1474.05	215.043	-1510.59	1225.64	237.746	-1703.71	1379.3	237.233	-1757.82	1222.58	128.556	-1515.52	1289.45	395.786	-1586.5	1415.86	422.769	-1524.36	1235.36	411.365	-1465.67	1101.74	437.773	-1474.18	926.025	412.297	-1484.03	847.006	434.738	-1422.2	862.143	435.158	-1439.6	769.181
687	0	301.359	-1813.69	1591.49	204.192	-1819.89	1595.88	315.358	-1657.35	1598.74	186.101	-1647.95	1598.54	224.124	-1607.49	1472.61	216.479	-1525.76	1223.9	238.663	-1718.58	1378.27	237.907	-1773.36	1221.61	129.752	-1530.33	1287.72	396.702	-1601.5	1414.71	423.753	-1539.53	1234.23	412.375	-1480.7	1100.66	439.146	-1488.74	925.042	413.65	-1498.43	845.923	435.979	-1436.56	861.31	436.67	-1453.86	768.123
688	0	301.719	-1828.23	1589.98	204.423	-1834.3	1594.68	316.253	-1672.05	1597.93	186.982	-1662.46	1597.51	225.149	-1621.94	1471.4	217.854	-1540.92	1222.3	239.651	-1733.21	1377.39	238.864	-1788.75	1221.21	131.364	-1545.24	1286.14	397.848	-1616.54	1413.65	425.023	-1554.64	1232.82	413.711	-1496	1099.74	440.551	-1504	923.946	415.502	-1513.65	844.942	437.554	-1451.77	860.328	438.523	-1469.05	767.325
689	0	301.94	-1843.14	1589.53	204.513	-1848.75	1593.6	317.054	-1686.81	1597.43	187.591	-1676.7	1596.67	226.261	-1636.31	1470.32	219.543	-1556.07	1220.98	240.69	-1747.98	1376.79	239.819	-1804.45	1220.81	132.873	-1560.16	1284.55	399.164	-1631.67	1412.92	426.753	-1570.19	1232.37	415.279	-1511.63	1098.83	442.592	-1519.68	923.37	417.366	-1529.63	843.927	439.49	-1467.66	859.217	440.642	-1484.97	766.133
690	0	302.098	-1858.04	1589.31	204.743	-1863.14	1593.29	317.755	-1701.75	1597.42	188.336	-1691.15	1596.36	227.317	-1650.72	1469.77	221.103	-1571.35	1219.82	241.519	-1763.07	1376.65	240.905	-1820.3	1220.68	134.511	-1575.11	1283.26	400.302	-1646.75	1412.27	429.78	-1584.96	1233.47	416.901	-1527.61	1097.63	444.526	-1536.4	922.309	419.4	-1546.25	843.077	441.444	-1484.24	858.039	443.083	-1502.06	765.266
691	0	302.28	-1872.93	1589.41	204.998	-1877.7	1593.24	318.729	-1716.56	1598.16	189.201	-1705.61	1596.71	228.371	-1665.34	1469.6	222.52	-1586.71	1218.72	242.458	-1777.92	1377.09	242.222	-1835.95	1220.98	136.02	-1590.11	1282.38	401.39	-1661.89	1411.84	430.124	-1602.12	1231.33	418.804	-1544.09	1096.81	446.715	-1553.4	921.799	421.963	-1563.71	842.447	444.03	-1501.66	857.304	445.866	-1519.91	764.697
692	0	302.61	-1887.83	1590.03	205.282	-1892.29	1593.69	319.498	-1731.54	1598.85	190.065	-1720.08	1597.45	229.452	-1679.95	1469.99	223.725	-1602.19	1218.17	243.397	-1793.09	1377.57	243.473	-1851.61	1221.66	137.208	-1605.38	1281.79	402.453	-1677.06	1412.11	431.733	-1618.5	1230.72	420.928	-1561	1096.67	449.32	-1571.17	921.528	424.8	-1581.96	842.2	446.806	-1519.72	856.93	449.133	-1538.57	764.325
693	0	302.949	-1902.61	1591.27	205.522	-1906.7	1594.64	320.068	-1746.6	1599.8	190.849	-1734.59	1598.18	230.366	-1694.61	1470.81	224.491	-1617.47	1218.45	244.4	-1808	1378.73	244.796	-1867.02	1223.74	138.121	-1620.49	1281.94	403.751	-1691.93	1413.25	433.309	-1635.18	1231.34	423.037	-1578.27	1096.67	452.164	-1589.41	921.803	427.77	-1600.9	842.242	449.601	-1538.51	856.317	452.636	-1558.38	764.175
694	0	303.185	-1917.57	1592.72	205.758	-1921.27	1595.8	320.926	-1761.54	1601.07	191.553	-1749.09	1599.25	231.173	-1709.37	1471.89	225.025	-1632.72	1219.24	245.232	-1822.76	1380.14	246.084	-1882.32	1225.44	138.746	-1635.41	1282.57	404.483	-1706.94	1414.16	434.989	-1651.93	1231.61	425.16	-1595.59	1097.25	455.029	-1608.46	922.152	431	-1620.58	842.764	453.018	-1558.14	856.525	456.356	-1579.01	764.41
695	0	303.653	-1932.17	1593.7	206.208	-1935.88	1597.09	321.642	-1776.51	1602.59	192.321	-1763.63	1600.43	231.844	-1724.13	1473.17	225.371	-1647.99	1220.82	245.939	-1837.64	1381.47	247.134	-1897.51	1227.06	139.225	-1650.25	1283.97	405.329	-1721.88	1415.42	436.471	-1668.95	1232.86	427.497	-1613.2	1097.09	457.964	-1628.37	922.675	434.601	-1641.07	843.657	456.473	-1578.53	856.804	460.137	-1600.71	764.837
696	0	303.852	-1947.21	1595.43	206.509	-1950.51	1598.45	322.284	-1791.23	1603.97	193.1	-1778.15	1601.96	232.392	-1738.81	1474.62	225.023	-1663.18	1221.88	246.409	-1852.42	1382.92	247.688	-1912.75	1228.77	139.451	-1665.08	1285.66	405.784	-1736.8	1416.95	437.461	-1685.9	1233.57	429.698	-1630.86	1097.9	461.34	-1648.45	923.965	438.446	-1662.16	844.746	460.251	-1599.47	857.316	464.818	-1622.99	765.661
697	0	304.311	-1961.83	1596.87	206.93	-1965.01	1599.92	322.786	-1805.82	1605.37	193.45	-1792.79	1603.08	232.723	-1753.47	1476.05	224.919	-1678.01	1223.48	246.837	-1866.76	1384.75	248.546	-1927.58	1230.63	139.529	-1679.51	1287.52	406.162	-1751.6	1418.71	438.54	-1702.94	1235.12	432.024	-1648.51	1098.75	464.583	-1669.07	925.163	442.209	-1683.81	845.983	464.161	-1621.06	857.681	469.368	-1646	766.369
698	0	304.576	-1976.38	1598.27	207.389	-1979.54	1601.45	323.188	-1820.47	1606.61	193.815	-1807.29	1604.81	233.04	-1768.01	1477.71	224.909	-1692.62	1225.9	247.04	-1881.21	1386.37	248.987	-1942.08	1232.42	139.383	-1693.88	1289.59	406.588	-1766.55	1420.85	439.924	-1719.46	1236.42	434.103	-1666.06	1099.58	468.012	-1690.06	926.293	446.262	-1706.01	847.53	468.392	-1643.15	858.22	474.412	-1669.85	767.522
699	0	305.151	-1990.97	1599.53	207.774	-1994.13	1603.03	323.585	-1834.86	1608.06	194.109	-1821.8	1606.49	233.192	-1782.35	1479.61	224.501	-1706.83	1227.66	247.165	-1895.46	1387.87	249.341	-1956.33	1234.07	139.408	-1708.07	1291.89	406.925	-1781.29	1422.73	440.87	-1735.95	1237.92	436.576	-1683.76	1100.68	471.769	-1711.04	928.225	450.48	-1728.67	849.221	472.728	-1665.69	858.915	479.3	-1694.23	769.035
700	0	305.518	-2005.29	1600.74	208.09	-2008.58	1604.55	323.783	-1849.28	1609.37	194.241	-1836.28	1608.15	233.396	-1796.54	1481.29	224.48	-1720.65	1230.02	247.094	-1909.55	1389.41	249.404	-1970.19	1235.62	139.169	-1722.04	1293.94	406.808	-1796.16	1424.04	441.406	-1752.42	1239.12	438.891	-1701.24	1101.59	475.139	-1732.47	929.551	455.2	-1750.84	851.223	476.909	-1688.63	859.494	484.632	-1719.39	770.554
701	0	305.541	-2019.84	1601.91	208.366	-2022.84	1605.81	323.779	-1863.64	1610.65	194.31	-1850.76	1609.97	233.395	-1810.7	1482.95	224.577	-1734.28	1232.79	246.546	-1924.02	1390.87	248.905	-1984.13	1236.34	139.215	-1735.79	1296.33	407.058	-1810.79	1426.17	442.432	-1768.6	1240.79	441.304	-1718.63	1102.38	478.809	-1753.95	931.36	458.985	-1775.02	853.253	481.162	-1711.85	859.96	490.062	-1745.09	772.221
[truncated: 69 more columns]

## Sheet: Sheet2
Devices
		025370 - Force			025370 - Moment			025370 - CoP			027571 - Force			027571 - Moment			027571 - CoP			037720 - Force			037720 - Moment			037720 - CoP
Frame	Sub Frame	Fx	Fy	Fz	Mx	My	Mz	Cx	Cy	Cz	Fx	Fy	Fz	Mx	My	Mz	Cx	Cy	Cz	Fx	Fy	Fz	Mx	My	Mz	Cx	Cy	Cz
		N	N	N	N.mm	N.mm	N.mm	mm	mm	mm	N	N	N	N.mm	N.mm	N.mm	mm	mm	mm	N	N	N	N.mm	N.mm	N.mm	mm	mm	mm
398	0	0	0	0	0	0	0	200	300	0	0	0	0	0	0	0	200	903	0	0	0	0	0	0	0	603	903	0
398	1	0	0	0	0	0	0	200	300	0	0	0	0	0	0	0	200	903	0	0	0	0	0	0	0	603	903	0
398	2	0	0	0	0	0	0	200	300	0	0	0	0	0	0	0	200	903	0	0	0	0	0	0	0	603	903	0
398	3	0	0	0	0	0	0	200	300	0	0	0	0	0	0	0	200	903	0	0	0	0	0	0	0	603	903	0
398	4	0	0	0	0	0	0	200	300	0	0	0	0	0	0	0	200	903	0	0	0	0	0	0	0	603	903	0
398	5	0	0	0	0	0	0	200	300	0	0	0	0	0	0	0	200	903	0	0	0	0	0	0	0	603	903	0
398	6	0	0	0	0	0	0	200	300	0	0	0	0	0	0	0	200	903	0	0	0	0	0	0	0	603	903	0
398	7	0	0	0	0	0	0	200	300	0	0	0	0	0	0	0	200	903	0	0	0	0	0	0	0	603	903	0
398	8	0	0	0	0	0	0	200	300	0	0	0	0	0	0	0	200	903	0	0	0	0	0	0	0	603	903	0
398	9	0	0	0	0	0	0	200	300	0	0	0	0	0	0	0	200	903	0	0	0	0	0	0	0	603	903	0
399	0	0	0	0	0	0	0	200	300	0	0	0	0	0	0	0	200	903	0	0	0	0	0	0	0	603	903	0
399	1	0	0	0	0	0	0	200	300	0	0	0	0	0	0	0	200	903	0	0	0	0	0	0	0	603	903	0
399	2	0	0	0	0	0	0	200	300	0	0	0	0	0	0	0	200	903	0	0	0	0	0	0	0	603	903	0
399	3	0	0	0	0	0	0	200	300	0	0	0	0	0	0	0	200	903	0	0	0	0	0	0	0	603	903	0
399	4	0	0	0	0	0	0	200	300	0	0	0	0	0	0	0	200	903	0	0	0	0	0	0	0	603	903	0
399	5	0	0	0	0	0	0	200	300	0	0	0	0	0	0	0	200	903	0	0	0	0	0	0	0	603	903	0
399	6	0	0	0	0	0	0	200	300	0	0	0	0	0	0	0	200	903	0	0	0	0	0	0	0	603	903	0
399	7	0	0	0	0	0	0	200	300	0	0	0	0	0	0	0	200	903	0	0	0	0	0	0	0	603	903	0
399	8	0	0	0	0	0	0	200	300	0	0	0	0	0	0	0	200	903	0	0	0	0	0	0	0	603	903	0
399	9	0	0	0	0	0	0	200	300	0	0	0	0	0	0	0	200	903	0	0	0	0	0	0	0	603	903	0
400	0	0	0	0	0	0	0	200	300	0	0	0	0	0	0	0	200	903	0	0	0	0	0	0	0	603	903	0
400	1	0	0	0	0	0	0	200	300	0	0	0	0	0	0	0	200	903	0	0	0	0	0	0	0	603	903	0
400	2	0	0	0	0	0	0	200	300	0	0	0	0	0	0	0	200	903	0	0	0	0	0	0	0	603	903	0
400	3	0	0	0	0	0	0	200	300	0	0	0	0	0	0	0	200	903	0	0	0	0	0	0	0	603	903	0
400	4	0	0	0	0	0	0	200	300	0	0	0	0	0	0	0	200	903	0	0	0	0	0	0	0	603	903	0
400	5	0	0	0	0	0	0	200	300	0	0	0	0	0	0	0	200	903	0	0	0	0	0	0	0	603	903	0
400	6	0	0	0	0	0	0	200	300	0	0	0	0	0	0	0	200	903	0	0	0	0	0	0	0	603	903	0
400	7	0	0	0	0	0	0	200	300	0	0	0	0	0	0	0	200	903	0	0	0	0	0	0	0	603	903	0
400	8	0	0	0	0	0	0	200	300	0	0	0	0	0	0	0	200	903	0	0	0	0	0	0	0	603	903	0
400	9	0	0	0	0	0	0	200	300	0	0	0	0	0	0	0	200	903	0	0	0	0	0	0	0	603	903	0
401	0	0	0	0	0	0	0	200	300	0	0	0	0	0	0	0	200	903	0	0	0	0	0	0	0	603	903	0
401	1	0	0	0	0	0	0	200	300	0	0	0	0	0	0	0	200	903	0	0	0	0	0	0	0	603	903	0
401	2	0	0	0	0	0	0	200	300	0	0	0	0	0	0	0	200	903	0	0	0	0	0	0	0	603	903	0
401	3	0	0	0	0	0	0	200	300	0	0	0	0	0	0	0	200	903	0	0	0	0	0	0	0	603	903	0
401	4	0	0	0	0	0	0	200	300	0	0	0	0	0	0	0	200	903	0	0	0	0	0	0	0	603	903	0
401	5	0	0	0	0	0	0	200	300	0	0	0	0	0	0	0	200	903	0	0	0	0	0	0	0	603	903	0
401	6	0	0	0	0	0	0	200	300	0	0	0	0	0	0	0	200	903	0	0	0	0	0	0	0	603	903	0
401	7	0	0	0	0	0	0	200	300	0	0	0	0	0	0	0	200	903	0	0	0	0	0	0	0	603	903	0
401	8	0	0	0	0	0	0	200	300	0	0	0	0	0	0	0	200	903	0	0	0	0	0	0	0	603	903	0
401	9	0	0	0	0	0	0	200	300	0	0	0	0	0	0	0	200	903	0	0	0	0	0	0	0	603	903	0
402	0	0	0	0	0	0	0	200	300	0	0	0	0	0	0	0	200	903	0	0	0	0	0	0	0	603	903	0
402	1	0	0	0	0	0	0	200	300	0	0	0	0	0	0	0	200	903	0	0	0	0	0	0	0	603	903	0
402	2	0	0	0	0	0	0	200	300	0	0	0	0	0	0	0	200	903	0	0	0	0	0	0	0	603	903	0
402	3	0	0	0	0	0	0	200	300	0	0	0	0	0	0	0	200	903	0	0	0	0	0	0	0	603	903	0
402	4	0	0	0	0	0	0	200	300	0	0	0	0	0	0	0	200	903	0	0	0	0	0	0	0	603	903	0
402	5	0	0	0	0	0	0	200	300	0	0	0	0	0	0	0	200	903	0	0	0	0	0	0	0	603	903	0
402	6	0	0	0	0	0	0	200	300	0	0	0	0	0	0	0	200	903	0	0	0	0	0	0	0	603	903	0
402	7	0	0	0	0	0	0	200	300	0	0	0	0	0	0	0	200	903	0	0	0	0	0	0	0	603	903	0
402	8	0	0	0	0	0	0	200	300	0	0	0	0	0	0	0	200	903	0	0	0	0	0	0	0	603	903	0
402	9	0	0	0	0	0	0	200	300	0	0	0	0	0	0	0	200	903	0	0	0	0	0	0	0	603	903	0
403	0	0	0	0	0	0	0	200	300	0	0	0	0	0	0	0	200	903	0	0	0	0	0	0	0	603	903	0
403	1	0	0	0	0	0	0	200	300	0	0	0	0	0	0	0	200	903	0	0	0	0	0	0	0	603	903	0
403	2	0	0	0	0	0	0	200	300	0	0	0	0	0	0	0	200	903	0	0	0	0	0	0	0	603	903	0
403	3	0	0	0	0	0	0	200	300	0	0	0	0	0	0	0	200	903	0	0	0	0	0	0	0	603	903	0
403	4	0	0	0	0	0	0	200	300	0	0	0	0	0	0	0	200	903	0	0	0	0	0	0	0	603	903	0
403	5	0	0	0	0	0	0	200	300	0	0	0	0	0	0	0	200	903	0	0	0	0	0	0	0	603	903	0
403	6	0	0	0	0	0	0	200	300	0	0	0	0	0	0	0	200	903	0	0	0	0	0	0	0	603	903	0
403	7	0	0	0	0	0	0	200	300	0	0	0	0	0	0	0	200	903	0	0	0	0	0	0	0	603	903	0
403	8	0	0	0	0	0	0	200	300	0	0	0	0	0	0	0	200	903	0	0	0	0	0	0	0	603	903	0
403	9	0	0	0	0	0	0	200	300	0	0	0	0	0	0	0	200	903	0	0	0	0	0	0	0	603	903	0
404	0	0	0	0	0	0	0	200	300	0	0	0	0	0	0	0	200	903	0	0	0	0	0	0	0	603	903	0
404	1	0	0	0	0	0	0	200	300	0	0	0	0	0	0	0	200	903	0	0	0	0	0	0	0	603	903	0
404	2	0	0	0	0	0	0	200	300	0	0	0	0	0	0	0	200	903	0	0	0	0	0	0	0	603	903	0
404	3	0	0	0	0	0	0	200	300	0	0	0	0	0	0	0	200	903	0	0	0	0	0	0	0	603	903	0
404	4	0	0	0	0	0	0	200	300	0	0	0	0	0	0	0	200	903	0	0	0	0	0	0	0	603	903	0
404	5	0	0	0	0	0	0	200	300	0	0	0	0	0	0	0	200	903	0	0	0	0	0	0	0	603	903	0
404	6	0	0	0	0	0	0	200	300	0	0	0	0	0	0	0	200	903	0	0	0	0	0	0	0	603	903	0
404	7	0	0	0	0	0	0	200	300	0	0	0	0	0	0	0	200	903	0	0	0	0	0	0	0	603	903	0
404	8	0	0	0	0	0	0	200	300	0	0	0	0	0	0	0	200	903	0	0	0	0	0	0	0	603	903	0
404	9	0	0	0	0	0	0	200	300	0	0	0	0	0	0	0	200	903	0	0	0	0	0	0	0	603	903	0
405	0	0	0	0	0	0	0	200	300	0	0	0	0	0	0	0	200	903	0	0	0	0	0	0	0	603	903	0
405	1	0	0	0	0	0	0	200	300	0	0	0	0	0	0	0	200	903	0	0	0	0	0	0	0	603	903	0
405	2	0	0	0	0	0	0	200	300	0	0	0	0	0	0	0	200	903	0	0	0	0	0	0	0	603	903	0
405	3	0	0	0	0	0	0	200	300	0	0	0	0	0	0	0	200	903	0	0	0	0	0	0	0	603	903	0
405	4	0	0	0	0	0	0	200	300	0	0	0	0	0	0	0	200	903	0	0	0	0	0	0	0	603	903	0
405	5	0	0	0	0	0	0	200	300	0	0	0	0	0	0	0	200	903	0	0	0	0	0	0	0	603	903	0
405	6	0	0	0	0	0	0	200	300	0	0	0	0	0	0	0	200	903	0	0	0	0	0	0	0	603	903	0
405	7	0	0	0	0	0	0	200	300	0	0	0	0	0	0	0	200	903	0	0	0	0	0	0	0	603	903	0
405	8	0	0	0	0	0	0	200	300	0	0	0	0	0	0	0	200	903	0	0	0	0	0	0	0	603	903	0
405	9	0	0	0	0	0	0	200	300	0	0	0	0	0	0	0	200	903	0	0	0	0	0	0	0	603	903	0
406	0	0	0	0	0	0	0	200	300	0	0	0	0	0	0	0	200	903	0	0	0	0	0	0	0	603	903	0
406	1	0	0	0	0	0	0	200	300	0	0	0	0	0	0	0	200	903	0	0	0	0	0	0	0	603	903	0
406	2	0	0	0	0	0	0	200	300	0	0	0	0	0	0	0	200	903	0	0	0	0	0	0	0	603	903	0
406	3	0	0	0	0	0	0	200	300	0	0	0	0	0	0	0	200	903	0	0	0	0	0	0	0	603	903	0
406	4	0	0	0	0	0	0	200	300	0	0	0	0	0	0	0	200	903	0	0	0	0	0	0	0	603	903	0
406	5	0	0	0	0	0	0	200	300	0	0	0	0	0	0	0	200	903	0	0	0	0	0	0	0	603	903	0
406	6	0	0	0	0	0	0	200	300	0	0	0	0	0	0	0	200	903	0	0	0	0	0	0	0	603	903	0
406	7	0	0	0	0	0	0	200	300	0	0	0	0	0	0	0	200	903	0	0	0	0	0	0	0	603	903	0
406	8	0	0	0	0	0	0	200	300	0	0	0	0	0	0	0	200	903	0	0	0	0	0	0	0	603	903	0
406	9	0	0	0	0	0	0	200	300	0	0	0	0	0	0	0	200	903	0	0	0	0	0	0	0	603	903	0
407	0	0	0	0	0	0	0	200	300	0	0	0	0	0	0	0	200	903	0	0	0	0	0	0	0	603	903	0
407	1	0	0	0	0	0	0	200	300	0	0	0	0	0	0	0	200	903	0	0	0	0	0	0	0	603	903	0
407	2	0	0	0	0	0	0	200	300	0	0	0	0	0	0	0	200	903	0	0	0	0	0	0	0	603	903	0
407	3	0	0	0	0	0	0	200	300	0	0	0	0	0	0	0	200	903	0	0	0	0	0	0	0	603	903	0
407	4	0	0	0	0	0	0	200	300	0	0	0	0	0	0	0	200	903	0	0	0	0	0	0	0	603	903	0
407	5	0	0	0	0	0	0	200	300	0	0	0	0	0	0	0	200	903	0	0	0	0	0	0	0	603	903	0
407	6	0	0	0	0	0	0	200	300	0	0	0	0	0	0	0	200	903	0	0	0	0	0	0	0	603	903	0
407	7	0	0	0	0	0	0	200	300	0	0	0	0	0	0	0	200	903	0	0	0	0	0	0	0	603	903	0
407	8	0	0	0	0	0	0	200	300	0	0	0	0	0	0	0	200	903	0	0	0	0	0	0	0	603	903	0
407	9	0	0	0	0	0	0	200	300	0	0	0	0	0	0	0	200	903	0	0	0	0	0	0	0	603	903	0
408	0	0	0	0	0	0	0	200	300	0	0	0	0	0	0	0	200	903	0	0	0	0	0	0	0	603	903	0
408	1	0	0	0	0	0	0	200	300	0	0	0	0	0	0	0	200	903	0	0	0	0	0	0	0	603	903	0
408	2	0	0	0	0	0	0	200	300	0	0	0	0	0	0	0	200	903	0	0	0	0	0	0	0	603	903	0
408	3	0	0	0	0	0	0	200	300	0	0	0	0	0	0	0	200	903	0	0	0	0	0	0	0	603	903	0
408	4	0	0	0	0	0	0	200	300	0	0	0	0	0	0	0	200	903	0	0	0	0	0	0	0	603	903	0
408	5	0	0	0	0	0	0	200	300	0	0	0	0	0	0	0	200	903	0	0	0	0	0	0	0	603	903	0
408	6	0	0	0	0	0	0	200	300	0	0	0	0	0	0	0	200	903	0	0	0	0	0	0	0	603	903	0
408	7	0	0	0	0	0	0	200	300	0	0	0	0	0	0	0	200	903	0	0	0	0	0	0	0	603	903	0
408	8	0	0	0	0	0	0	200	300	0	0	0	0	0	0	0	200	903	0	0	0	0	0	0	0	603	903	0
408	9	0	0	0	0	0	0	200	300	0	0	0	0	0	0	0	200	903	0	0	0	0	0	0	0	603	903	0
409	0	0	0	0	0	0	0	200	300	0	0	0	0	0	0	0	200	903	0	0	0	0	0	0	0	603	903	0
409	1	0	0	0	0	0	0	200	300	0	0	0	0	0	0	0	200	903	0	0	0	0	0	0	0	603	903	0
409	2	0	0	0	0	0	0	200	300	0	0	0	0	0	0	0	200	903	0	0	0	0	0	0	0	603	903	0
409	3	0	0	0	0	0	0	200	300	0	0	0	0	0	0	0	200	903	0	0	0	0	0	0	0	603	903	0
409	4	0	0	0	0	0	0	200	300	0	0	0	0	0	0	0	200	903	0	0	0	0	0	0	0	603	903	0
409	5	0	0	0	0	0	0	200	300	0	0	0	0	0	0	0	200	903	0	0	0	0	0	0	0	603	903	0
409	6	0	0	0	0	0	0	200	300	0	0	0	0	0	0	0	200	903	0	0	0	0	0	0	0	603	903	0
409	7	0	0	0	0	0	0	200	300	0	0	0	0	0	0	0	200	903	0	0	0	0	0	0	0	603	903	0
409	8	0	0	0	0	0	0	200	300	0	0	0	0	0	0	0	200	903	0	0	0	0	0	0	0	603	903	0
409	9	0	0	0	0	0	0	200	300	0	0	0	0	0	0	0	200	903	0	0	0	0	0	0	0	603	903	0
410	0	0	0	0	0	0	0	200	300	0	0	0	0	0	0	0	200	903	0	0	0	0	0	0	0	603	903	0
410	1	0	0	0	0	0	0	200	300	0	0	0	0	0	0	0	200	903	0	0	0	0	0	0	0	603	903	0
410	2	0	0	0	0	0	0	200	300	0	0	0	0	0	0	0	200	903	0	0	0	0	0	0	0	603	903	0
410	3	0	0	0	0	0	0	200	300	0	0	0	0	0	0	0	200	903	0	0	0	0	0	0	0	603	903	0
410	4	0	0	0	0	0	0	200	300	0	0	0	0	0	0	0	200	903	0	0	0	0	0	0	0	603	903	0
410	5	0	0	0	0	0	0	200	300	0	0	0	0	0	0	0	200	903	0	0	0	0	0	0	0	603	903	0
410	6	0	0	0	0	0	0	200	300	0	0	0	0	0	0	0	200	903	0	0	0	0	0	0	0	603	903	0
410	7	0	0	0	0	0	0	200	300	0	0	0	0	0	0	0	200	903	0	0	0	0	0	0	0	603	903	0
410	8	0	0	0	0	0	0	200	300	0	0	0	0	0	0	0	200	903	0	0	0	0	0	0	0	603	903	0
410	9	0	0	0	0	0	0	200	300	0	0	0	0	0	0	0	200	903	0	0	0	0	0	0	0	603	903	0
411	0	0	0	0	0	0	0	200	300	0	0	0	0	0	0	0	200	903	0	0	0	0	0	0	0	603	903	0
411	1	0	0	0	0	0	0	200	300	0	0	0	0	0	0	0	200	903	0	0	0	0	0	0	0	603	903	0
411	2	0	0	0	0	0	0	200	300	0	0	0	0	0	0	0	200	903	0	0	0	0	0	0	0	603	903	0
411	3	0	0	0	0	0	0	200	300	0	0	0	0	0	0	0	200	903	0	0	0	0	0	0	0	603	903	0
411	4	0	0	0	0	0	0	200	300	0	0	0	0	0	0	0	200	903	0	0	0	0	0	0	0	603	903	0
411	5	0	0	0	0	0	0	200	300	0	0	0	0	0	0	0	200	903	0	0	0	0	0	0	0	603	903	0
411	6	0	0	0	0	0	0	200	300	0	0	0	0	0	0	0	200	903	0	0	0	0	0	0	0	603	903	0
411	7	0	0	0	0	0	0	200	300	0	0	0	0	0	0	0	200	903	0	0	0	0	0	0	0	603	903	0
411	8	0	0	0	0	0	0	200	300	0	0	0	0	0	0	0	200	903	0	0	0	0	0	0	0	603	903	0
411	9	0	0	0	0	0	0	200	300	0	0	0	0	0	0	0	200	903	0	0	0	0	0	0	0	603	903	0
412	0	0	0	0	0	0	0	200	300	0	0	0	0	0	0	0	200	903	0	0	0	0	0	0	0	603	903	0
412	1	0	0	0	0	0	0	200	300	0	0	0	0	0	0	0	200	903	0	0	0	0	0	0	0	603	903	0
412	2	0	0	0	0	0	0	200	300	0	0	0	0	0	0	0	200	903	0	0	0	0	0	0	0	603	903	0
412	3	0	0	0	0	0	0	200	300	0	0	0	0	0	0	0	200	903	0	0	0	0	0	0	0	603	903	0
412	4	0	0	0	0	0	0	200	300	0	0	0	0	0	0	0	200	903	0	0	0	0	0	0	0	603	903	0
412	5	0	0	0	0	0	0	200	300	0	0	0	0	0	0	0	200	903	0	0	0	0	0	0	0	603	903	0
412	6	0	0	0	0	0	0	200	300	0	0	0	0	0	0	0	200	903	0	0	0	0	0	0	0	603	903	0
412	7	0	0	0	0	0	0	200	300	0	0	0	0	0	0	0	200	903	0	0	0	0	0	0	0	603	903	0
412	8	0	0	0	0	0	0	200	300	0	0	0	0	0	0	0	200	903	0	0	0	0	0	0	0	603	903	0
412	9	0	0	0	0	0	0	200	300	0	0	0	0	0	0	0	200	903	0	0	0	0	0	0	0	603	903	0
413	0	0	0	0	0	0	0	200	300	0	0	0	0	0	0	0	200	903	0	0	0	0	0	0	0	603	903	0
413	1	0	0	0	0	0	0	200	300	0	0	0	0	0	0	0	200	903	0	0	0	0	0	0	0	603	903	0
413	2	0	0	0	0	0	0	200	300	0	0	0	0	0	0	0	200	903	0	0	0	0	0	0	0	603	903	0
413	3	0	0	0	0	0	0	200	300	0	0	0	0	0	0	0	200	903	0	0	0	0	0	0	0	603	903	0
413	4	0	0	0	0	0	0	200	300	0	0	0	0	0	0	0	200	903	0	0	0	0	0	0	0	603	903	0
413	5	0	0	0	0	0	0	200	300	0	0	0	0	0	0	0	200	903	0	0	0	0	0	0	0	603	903	0
413	6	0	0	0	0	0	0	200	300	0	0	0	0	0	0	0	200	903	0	0	0	0	0	0	0	603	903	0
413	7	0	0	0	0	0	0	200	300	0	0	0	0	0	0	0	200	903	0	0	0	0	0	0	0	603	903	0
413	8	0	0	0	0	0	0	200	300	0	0	0	0	0	0	0	200	903	0	0	0	0	0	0	0	603	903	0
413	9	0	0	0	0	0	0	200	300	0	0	0	0	0	0	0	200	903	0	0	0	0	0	0	0	603	903	0
414	0	0	0	0	0	0	0	200	300	0	0	0	0	0	0	0	200	903	0	0	0	0	0	0	0	603	903	0
414	1	0	0	0	0	0	0	200	300	0	0	0	0	0	0	0	200	903	0	0	0	0	0	0	0	603	903	0
414	2	0	0	0	0	0	0	200	300	0	0	0	0	0	0	0	200	903	0	0	0	0	0	0	0	603	903	0
414	3	0	0	0	0	0	0	200	300	0	0	0	0	0	0	0	200	903	0	0	0	0	0	0	0	603	903	0
414	4	0	0	0	0	0	0	200	300	0	0	0	0	0	0	0	200	903	0	0	0	0	0	0	0	603	903	0
414	5	0	0	0	0	0	0	200	300	0	0	0	0	0	0	0	200	903	0	0	0	0	0	0	0	603	903	0
414	6	0	0	0	0	0	0	200	300	0	0	0	0	0	0	0	200	903	0	0	0	0	0	0	0	603	903	0
414	7	0	0	0	0	0	0	200	300	0	0	0	0	0	0	0	200	903	0	0	0	0	0	0	0	603	903	0
414	8	0	0	0	0	0	0	200	300	0	0	0	0	0	0	0	200	903	0	0	0	0	0	0	0	603	903	0
414	9	0	0	0	0	0	0	200	300	0	0	0	0	0	0	0	200	903	0	0	0	0	0	0	0	603	903	0
415	0	0	0	0	0	0	0	200	300	0	0	0	0	0	0	0	200	903	0	0	0	0	0	0	0	603	903	0
415	1	0	0	0	0	0	0	200	300	0	0	0	0	0	0	0	200	903	0	0	0	0	0	0	0	603	903	0
415	2	0	0	0	0	0	0	200	300	0	0	0	0	0	0	0	200	903	0	0	0	0	0	0	0	603	903	0
415	3	0	0	0	0	0	0	200	300	0	0	0	0	0	0	0	200	903	0	0	0	0	0	0	0	603	903	0
415	4	0	0	0	0	0	0	200	300	0	0	0	0	0	0	0	200	903	0	0	0	0	0	0	0	603	903	0
415	5	0	0	0	0	0	0	200	300	0	0	0	0	0	0	0	200	903	0	0	0	0	0	0	0	603	903	0
415	6	0	0	0	0	0	0	200	300	0	0	0	0	0	0	0	200	903	0	0	0	0	0	0	0	603	903	0
415	7	0	0	0	0	0	0	200	300	0	0	0	0	0	0	0	200	903	0	0	0	0	0	0	0	603	903	0
415	8	0	0	0	0	0	0	200	300	0	0	0	0	0	0	0	200	903	0	0	0	0	0	0	0	603	903	0
415	9	0	0	0	0	0	0	200	300	0	0	0	0	0	0	0	200	903	0	0	0	0	0	0	0	603	903	0
416	0	0	0	0	0	0	0	200	300	0	0	0	0	0	0	0	200	903	0	0	0	0	0	0	0	603	903	0
416	1	0	0	0	0	0	0	200	300	0	0	0	0	0	0	0	200	903	0	0	0	0	0	0	0	603	903	0
416	2	0	0	0	0	0	0	200	300	0	0	0	0	0	0	0	200	903	0	0	0	0	0	0	0	603	903	0
416	3	0	0	0	0	0	0	200	300	0	0	0	0	0	0	0	200	903	0	0	0	0	0	0	0	603	903	0
416	4	0	0	0	0	0	0	200	300	0	0	0	0	0	0	0	200	903	0	0	0	0	0	0	0	603	903	0
416	5	0	0	0	0	0	0	200	300	0	0	0	0	0	0	0	200	903	0	0	0	0	0	0	0	603	903	0
416	6	0	0	0	0	0	0	200	300	0	0	0	0	0	0	0	200	903	0	0	0	0	0	0	0	603	903	0
416	7	0	0	0	0	0	0	200	300	0	0	0	0	0	0	0	200	903	0	0	0	0	0	0	0	603	903	0
416	8	0	0	0	0	0	0	200	300	0	0	0	0	0	0	0	200	903	0	0	0	0	0	0	0	603	903	0
416	9	0	0	0	0	0	0	200	300	0	0	0	0	0	0	0	200	903	0	0	0	0	0	0	0	603	903	0
417	0	0	0	0	0	0	0	200	300	0	0	0	0	0	0	0	200	903	0	0	0	0	0	0	0	603	903	0
417	1	0	0	0	0	0	0	200	300	0	0	0	0	0	0	0	200	903	0	0	0	0	0	0	0	603	903	0
417	2	0	0	0	0	0	0	200	300	0	0	0	0	0	0	0	200	903	0	0	0	0	0	0	0	603	903	0
417	3	0	0	0	0	0	0	200	300	0	0	0	0	0	0	0	200	903	0	0	0	0	0	0	0	603	903	0
417	4	0	0	0	0	0	0	200	300	0	0	0	0	0	0	0	200	903	0	0	0	0	0	0	0	603	903	0
417	5	0	0	0	0	0	0	200	300	0	0	0	0	0	0	0	200	903	0	0	0	0	0	0	0	603	903	0
417	6	0	0	0	0	0	0	200	300	0	0	0	0	0	0	0	200	903	0	0	0	0	0	0	0	603	903	0
417	7	0	0	0	0	0	0	200	300	0	0	0	0	0	0	0	200	903	0	0	0	0	0	0	0	603	903	0
417	8	0	0	0	0	0	0	200	300	0	0	0	0	0	0	0	200	903	0	0	0	0	0	0	0	603	903	0
417	9	0	0	0	0	0	0	200	300	0	0	0	0	0	0	0	200	903	0	0	0	0	0	0	0	603	903	0
418	0	0	0	0	0	0	0	200	300	0	0	0	0	0	0	0	200	903	0	0	0	0	0	0	0	603	903	0
418	1	0	0	0	0	0	0	200	300	0	0	0	0	0	0	0	200	903	0	0	0	0	0	0	0	603	903	0
418	2	0	0	0	0	0	0	200	300	0	0	0	0	0	0	0	200	903	0	0	0	0	0	0	0	603	903	0
418	3	0	0	0	0	0	0	200	300	0	0	0	0	0	0	0	200	903	0	0	0	0	0	0	0	603	903	0
418	4	0	0	0	0	0	0	200	300	0	0	0	0	0	0	0	200	903	0	0	0	0	0	0	0	603	903	0
418	5	0	0	0	0	0	0	200	300	0	0	0	0	0	0	0	200	903	0	0	0	0	0	0	0	603	903	0
418	6	0	0	0	0	0	0	200	300	0	0	0	0	0	0	0	200	903	0	0	0	0	0	0	0	603	903	0
418	7	0	0	0	0	0	0	200	300	0	0	0	0	0	0	0	200	903	0	0	0	0	0	0	0	603	903	0
418	8	0	0	0	0	0	0	200	300	0	0	0	0	0	0	0	200	903	0	0	0	0	0	0	0	603	903	0
418	9	0	0	0	0	0	0	200	300	0	0	0	0	0	0	0	200	903	0	0	0	0	0	0	0	603	903	0
419	0	0	0	0	0	0	0	200	300	0	0	0	0	0	0	0	200	903	0	0	0	0	0	0	0	603	903	0
419	1	0	0	0	0	0	0	200	300	0	0	0	0	0	0	0	200	903	0	0	0	0	0	0	0	603	903	0
419	2	0	0	0	0	0	0	200	300	0	0	0	0	0	0	0	200	903	0	0	0	0	0	0	0	603	903	0
419	3	0	0	0	0	0	0	200	300	0	0	0	0	0	0	0	200	903	0	0	0	0	0	0	0	603	903	0
419	4	0	0	0	0	0	0	200	300	0	0	0	0	0	0	0	200	903	0	0	0	0	0	0	0	603	903	0
419	5	0	0	0	0	0	0	200	300	0	0	0	0	0	0	0	200	903	0	0	0	0	0	0	0	603	903	0
419	6	0	0	0	0	0	0	200	300	0	0	0	0	0	0	0	200	903	0	0	0	0	0	0	0	603	903	0
419	7	0	0	0	0	0	0	200	300	0	0	0	0	0	0	0	200	903	0	0	0	0	0	0	0	603	903	0
419	8	0	0	0	0	0	0	200	300	0	0	0	0	0	0	0	200	903	0	0	0	0	0	0	0	603	903	0
419	9	0	0	0	0	0	0	200	300	0	0	0	0	0	0	0	200	903	0	0	0	0	0	0	0	603	903	0
420	0	0	0	0	0	0	0	200	300	0	0	0	0	0	0	0	200	903	0	0	0	0	0	0	0	603	903	0
420	1	0	0	0	0	0	0	200	300	0	0	0	0	0	0	0	200	903	0	0	0	0	0	0	0	603	903	0
420	2	0	0	0	0	0	0	200	300	0	0	0	0	0	0	0	200	903	0	0	0	0	0	0	0	603	903	0
420	3	0	0	0	0	0	0	200	300	0	0	0	0	0	0	0	200	903	0	0	0	0	0	0	0	603	903	0
420	4	0	0	0	0	0	0	200	300	0	0	0	0	0	0	0	200	903	0	0	0	0	0	0	0	603	903	0
420	5	0	0	0	0	0	0	200	300	0	0	0	0	0	0	0	200	903	0	0	0	0	0	0	0	603	903	0
420	6	0	0	0	0	0	0	200	300	0	0	0	0	0	0	0	200	903	0	0	0	0	0	0	0	603	903	0
420	7	0	0	0	0	0	0	200	300	0	0	0	0	0	0	0	200	903	0	0	0	0	0	0	0	603	903	0
420	8	0	0	0	0	0	0	200	300	0	0	0	0	0	0	0	200	903	0	0	0	0	0	0	0	603	903	0
420	9	0	0	0	0	0	0	200	300	0	0	0	0	0	0	0	200	903	0	0	0	0	0	0	0	603	903	0
421	0	0	0	0	0	0	0	200	300	0	0	0	0	0	0	0	200	903	0	0	0	0	0	0	0	603	903	0
421	1	0	0	0	0	0	0	200	300	0	0	0	0	0	0	0	200	903	0	0	0	0	0	0	0	603	903	0
421	2	0	0	0	0	0	0	200	300	0	0	0	0	0	0	0	200	903	0	0	0	0	0	0	0	603	903	0
421	3	0	0	0	0	0	0	200	300	0	0	0	0	0	0	0	200	903	0	0	0	0	0	0	0	603	903	0
421	4	0	0	0	0	0	0	200	300	0	0	0	0	0	0	0	200	903	0	0	0	0	0	0	0	603	903	0
421	5	0	0	0	0	0	0	200	300	0	0	0	0	0	0	0	200	903	0	0	0	0	0	0	0	603	903	0
421	6	0	0	0	0	0	0	200	300	0	0	0	0	0	0	0	200	903	0	0	0	0	0	0	0	603	903	0
421	7	0	0	0	0	0	0	200	300	0	0	0	0	0	0	0	200	903	0	0	0	0	0	0	0	603	903	0
421	8	0	0	0	0	0	0	200	300	0	0	0	0	0	0	0	200	903	0	0	0	0	0	0	0	603	903	0
421	9	0	0	0	0	0	0	200	300	0	0	0	0	0	0	0	200	903	0	0	0	0	0	0	0	603	903	0
422	0	0	0	0	0	0	0	200	300	0	0	0	0	0	0	0	200	903	0	0	0	0	0	0	0	603	903	0
422	1	0	0	0	0	0	0	200	300	0	0	0	0	0	0	0	200	903	0	0	0	0	0	0	0	603	903	0
422	2	0	0	0	0	0	0	200	300	0	0	0	0	0	0	0	200	903	0	0	0	0	0	0	0	603	903	0
422	3	0	0	0	0	0	0	200	300	0	0	0	0	0	0	0	200	903	0	0	0	0	0	0	0	603	903	0
422	4	0	0	0	0	0	0	200	300	0	0	0	0	0	0	0	200	903	0	0	0	0	0	0	0	603	903	0
422	5	0	0	0	0	0	0	200	300	0	0	0	0	0	0	0	200	903	0	0	0	0	0	0	0	603	903	0
422	6	0	0	0	0	0	0	200	300	0	0	0	0	0	0	0	200	903	0	0	0	0	0	0	0	603	903	0
422	7	0	0	0	0	0	0	200	300	0	0	0	0	0	0	0	200	903	0	0	0	0	0	0	0	603	903	0
422	8	0	0	0	0	0	0	200	300	0	0	0	0	0	0	0	200	903	0	0	0	0	0	0	0	603	903	0
422	9	0	0	0	0	0	0	200	300	0	0	0	0	0	0	0	200	903	0	0	0	0	0	0	0	603	903	0
423	0	0	0	0	0	0	0	200	300	0	0	0	0	0	0	0	200	903	0	0	0	0	0	0	0	603	903	0
423	1	0	0	0	0	0	0	200	300	0	0	0	0	0	0	0	200	903	0	0	0	0	0	0	0	603	903	0
423	2	0	0	0	0	0	0	200	300	0	0	0	0	0	0	0	200	903	0	0	0	0	0	0	0	603	903	0
423	3	0	0	0	0	0	0	200	300	0	0	0	0	0	0	0	200	903	0	0	0	0	0	0	0	603	903	0
423	4	0	0	0	0	0	0	200	300	0	0	0	0	0	0	0	200	903	0	0	0	0	0	0	0	603	903	0
423	5	0	0	0	0	0	0	200	300	0	0	0	0	0	0	0	200	903	0	0	0	0	0	0	0	603	903	0
423	6	0	0	0	0	0	0	200	300	0	0	0	0	0	0	0	200	903	0	0	0	0	0	0	0	603	903	0
423	7	0	0	0	0	0	0	200	300	0	0	0	0	0	0	0	200	903	0	0	0	0	0	0	0	603	903	0
423	8	0	0	0	0	0	0	200	300	0	0	0	0	0	0	0	200	903	0	0	0	0	0	0	0	603	903	0
423	9	0	0	0	0	0	0	200	300	0	0	0	0	0	0	0	200	903	0	0	0	0	0	0	0	603	903	0
424	0	0	0	0	0	0	0	200	300	0	0	0	0	0	0	0	200	903	0	0	0	0	0	0	0	603	903	0
424	1	0	0	0	0	0	0	200	300	0	0	0	0	0	0	0	200	903	0	0	0	0	0	0	0	603	903	0
424	2	0	0	0	0	0	0	200	300	0	0	0	0	0	0	0	200	903	0	0	0	0	0	0	0	603	903	0
424	3	0	0	0	0	0	0	200	300	0	0	0	0	0	0	0	200	903	0	0	0	0	0	0	0	603	903	0
424	4	0	0	0	0	0	0	200	300	0	0	0	0	0	0	0	200	903	0	0	0	0	0	0	0	603	903	0
424	5	0	0	0	0	0	0	200	300	0	0	0	0	0	0	0	200	903	0	0	0	0	0	0	0	603	903	0
424	6	0	0	0	0	0	0	200	300	0	0	0	0	0	0	0	200	903	0	0	0	0	0	0	0	603	903	0
424	7	0	0	0	0	0	0	200	300	0	0	0	0	0	0	0	200	903	0	0	0	0	0	0	0	603	903	0
424	8	0	0	0	0	0	0	200	300	0	0	0	0	0	0	0	200	903	0	0	0	0	0	0	0	603	903	0
424	9	0	0	0	0	0	0	200	300	0	0	0	0	0	0	0	200	903	0	0	0	0	0	0	0	603	903	0
425	0	0	0	0	0	0	0	200	300	0	0	0	0	0	0	0	200	903	0	0	0	0	0	0	0	603	903	0
425	1	0	0	0	0	0	0	200	300	0	0	0	0	0	0	0	200	903	0	0	0	0	0	0	0	603	903	0
425	2	0	0	0	0	0	0	200	300	0	0	0	0	0	0	0	200	903	0	0	0	0	0	0	0	603	903	0
425	3	0	0	0	0	0	0	200	300	0	0	0	0	0	0	0	200	903	0	0	0	0	0	0	0	603	903	0
425	4	0	0	0	0	0	0	200	300	0	0	0	0	0	0	0	200	903	0	0	0	0	0	0	0	603	903	0
425	5	0	0	0	0	0	0	200	300	0	0	0	0	0	0	0	200	903	0	0	0	0	0	0	0	603	903	0
425	6	0	0	0	0	0	0	200	300	0	0	0	0	0	0	0	200	903	0	0	0	0	0	0	0	603	903	0
425	7	0	0	0	0	0	0	200	300	0	0	0	0	0	0	0	200	903	0	0	0	0	0	0	0	603	903	0
425	8	0	0	0	0	0	0	200	300	0	0	0	0	0	0	0	200	903	0	0	0	0	0	0	0	603	903	0
425	9	0	0	0	0	0	0	200	300	0	0	0	0	0	0	0	200	903	0	0	0	0	0	0	0	603	903	0
426	0	0	0	0	0	0	0	200	300	0	0	0	0	0	0	0	200	903	0	0	0	0	0	0	0	603	903	0
426	1	0	0	0	0	0	0	200	300	0	0	0	0	0	0	0	200	903	0	0	0	0	0	0	0	603	903	0
426	2	0	0	0	0	0	0	200	300	0	0	0	0	0	0	0	200	903	0	0	0	0	0	0	0	603	903	0
426	3	0	0	0	0	0	0	200	300	0	0	0	0	0	0	0	200	903	0	0	0	0	0	0	0	603	903	0
426	4	0	0	0	0	0	0	200	300	0	0	0	0	0	0	0	200	903	0	0	0	0	0	0	0	603	903	0
426	5	0	0	0	0	0	0	200	300	0	0	0	0	0	0	0	200	903	0	0	0	0	0	0	0	603	903	0
426	6	0	0	0	0	0	0	200	300	0	0	0	0	0	0	0	200	903	0	0	0	0	0	0	0	603	903	0
426	7	0	0	0	0	0	0	200	300	0	0	0	0	0	0	0	200	903	0	0	0	0	0	0	0	603	903	0
426	8	0	0	0	0	0	0	200	300	0	0	0	0	0	0	0	200	903	0	0	0	0	0	0	0	603	903	0
426	9	0	0	0	0	0	0	200	300	0	0	0	0	0	0	0	200	903	0	0	0	0	0	0	0	603	903	0
427	0	0	0	0	0	0	0	200	300	0	0	0	0	0	0	0	200	903	0	0	0	0	0	0	0	603	903	0
427	1	0	0	0	0	0	0	200	300	0	0	0	0	0	0	0	200	903	0	0	0	0	0	0	0	603	903	0
427	2	0	0	0	0	0	0	200	300	0	0	0	0	0	0	0	200	903	0	0	0	0	0	0	0	603	903	0
427	3	0	0	0	0	0	0	200	300	0	0	0	0	0	0	0	200	903	0	0	0	0	0	0	0	603	903	0
427	4	0	0	0	0	0	0	200	300	0	0	0	0	0	0	0	200	903	0	0	0	0	0	0	0	603	903	0
427	5	0	0	0	0	0	0	200	300	0	0	0	0	0	0	0	200	903	0	0	0	0	0	0	0	603	903	0
427	6	0	0	0	0	0	0	200	300	0	0	0	0	0	0	0	200	903	0	0	0	0	0	0	0	603	903	0
427	7	0	0	0	0	0	0	200	300	0	0	0	0	0	0	0	200	903	0	0	0	0	0	0	0	603	903	0
427	8	0	0	0	0	0	0	200	300	0	0	0	0	0	0	0	200	903	0	0	0	0	0	0	0	603	903	0
427	9	0	0	0	0	0	0	200	300	0	0	0	0	0	0	0	200	903	0	0	0	0	0	0	0	603	903	0
428	0	0	0	0	0	0	0	200	300	0	0	0	0	0	0	0	200	903	0	0	0	0	0	0	0	603	903	0
428	1	0	0	0	0	0	0	200	300	0	0	0	0	0	0	0	200	903	0	0	0	0	0	0	0	603	903	0
428	2	0	0	0	0	0	0	200	300	0	0	0	0	0	0	0	200	903	0	0	0	0	0	0	0	603	903	0
428	3	0	0	0	0	0	0	200	300	0	0	0	0	0	0	0	200	903	0	0	0	0	0	0	0	603	903	0
428	4	0	0	0	0	0	0	200	300	0	0	0	0	0	0	0	200	903	0	0	0	0	0	0	0	603	903	0
428	5	0	0	0	0	0	0	200	300	0	0	0	0	0	0	0	200	903	0	0	0	0	0	0	0	603	903	0
428	6	0	0	0	0	0	0	200	300	0	0	0	0	0	0	0	200	903	0	0	0	0	0	0	0	603	903	0
428	7	0	0	0	0	0	0	200	300	0	0	0	0	0	0	0	200	903	0	0	0	0	0	0	0	603	903	0
428	8	0	0	0	0	0	0	200	300	0	0	0	0	0	0	0	200	903	0	0	0	0	0	0	0	603	903	0
428	9	0	0	0	0	0	0	200	300	0	0	0	0	0	0	0	200	903	0	0	0	0	0	0	0	603	903	0
429	0	0	0	0	0	0	0	200	300	0	0	0	0	0	0	0	200	903	0	0	0	0	0	0	0	603	903	0
429	1	0	0	0	0	0	0	200	300	0	0	0	0	0	0	0	200	903	0	0	0	0	0	0	0	603	903	0
429	2	0	0	0	0	0	0	200	300	0	0	0	0	0	0	0	200	903	0	0	0	0	0	0	0	603	903	0
429	3	0	0	0	0	0	0	200	300	0	0	0	0	0	0	0	200	903	0	0	0	0	0	0	0	603	903	0
429	4	0	0	0	0	0	0	200	300	0	0	0	0	0	0	0	200	903	0	0	0	0	0	0	0	603	903	0
429	5	0	0	0	0	0	0	200	300	0	0	0	0	0	0	0	200	903	0	0	0	0	0	0	0	603	903	0
429	6	0	0	0	0	0	0	200	300	0	0	0	0	0	0	0	200	903	0	0	0	0	0	0	0	603	903	0
429	7	0	0	0	0	0	0	200	300	0	0	0	0	0	0	0	200	903	0	0	0	0	0	0	0	603	903	0
429	8	0	0	0	0	0	0	200	300	0	0	0	0	0	0	0	200	903	0	0	0	0	0	0	0	603	903	0
429	9	0	0	0	0	0	0	200	300	0	0	0	0	0	0	0	200	903	0	0	0	0	0	0	0	603	903	0
430	0	0	0	0	0	0	0	200	300	0	0	0	0	0	0	0	200	903	0	0	0	0	0	0	0	603	903	0
430	1	0	0	0	0	0	0	200	300	0	0	0	0	0	0	0	200	903	0	0	0	0	0	0	0	603	903	0
430	2	0	0	0	0	0	0	200	300	0	0	0	0	0	0	0	200	903	0	0	0	0	0	0	0	603	903	0
430	3	0	0	0	0	0	0	200	300	0	0	0	0	0	0	0	200	903	0	0	0	0	0	0	0	603	903	0
430	4	0	0	0	0	0	0	200	300	0	0	0	0	0	0	0	200	903	0	0	0	0	0	0	0	603	903	0
430	5	0	0	0	0	0	0	200	300	0	0	0	0	0	0	0	200	903	0	0	0	0	0	0	0	603	903	0
430	6	0	0	0	0	0	0	200	300	0	0	0	0	0	0	0	200	903	0	0	0	0	0	0	0	603	903	0
430	7	0	0	0	0	0	0	200	300	0	0	0	0	0	0	0	200	903	0	0	0	0	0	0	0	603	903	0
430	8	0	0	0	0	0	0	200	300	0	0	0	0	0	0	0	200	903	0	0	0	0	0	0	0	603	903	0
430	9	0	0	0	0	0	0	200	300	0	0	0	0	0	0	0	200	903	0	0	0	0	0	0	0	603	903	0
431	0	0	0	0	0	0	0	200	300	0	0	0	0	0	0	0	200	903	0	0	0	0	0	0	0	603	903	0
431	1	0	0	0	0	0	0	200	300	0	0	0	0	0	0	0	200	903	0	0	0	0	0	0	0	603	903	0
431	2	0	0	0	0	0	0	200	300	0	0	0	0	0	0	0	200	903	0	0	0	0	0	0	0	603	903	0
431	3	0	0	0	0	0	0	200	300	0	0	0	0	0	0	0	200	903	0	0	0	0	0	0	0	603	903	0
431	4	0	0	0	0	0	0	200	300	0	0	0	0	0	0	0	200	903	0	0	0	0	0	0	0	603	903	0
431	5	0	0	0	0	0	0	200	300	0	0	0	0	0	0	0	200	903	0	0	0	0	0	0	0	603	903	0
431	6	0	0	0	0	0	0	200	300	0	0	0	0	0	0	0	200	903	0	0	0	0	0	0	0	603	903	0
431	7	0	0	0	0	0	0	200	300	0	0	0	0	0	0	0	200	903	0	0	0	0	0	0	0	603	903	0
431	8	0	0	0	0	0	0	200	300	0	0	0	0	0	0	0	200	903	0	0	0	0	0	0	0	603	903	0
431	9	0	0	0	0	0	0	200	300	0	0	0	0	0	0	0	200	903	0	0	0	0	0	0	0	603	903	0
432	0	0	0	0	0	0	0	200	300	0	0	0	0	0	0	0	200	903	0	0	0	0	0	0	0	603	903	0
432	1	0	0	0	0	0	0	200	300	0	0	0	0	0	0	0	200	903	0	0	0	0	0	0	0	603	903	0
432	2	0	0	0	0	0	0	200	300	0	0	0	0	0	0	0	200	903	0	0	0	0	0	0	0	603	903	0
432	3	0	0	0	0	0	0	200	300	0	0	0	0	0	0	0	200	903	0	0	0	0	0	0	0	603	903	0
432	4	0	0	0	0	0	0	200	300	0	0	0	0	0	0	0	200	903	0	0	0	0	0	0	0	603	903	0
432	5	0	0	0	0	0	0	200	300	0	0	0	0	0	0	0	200	903	0	0	0	0	0	0	0	603	903	0
432	6	0	0	0	0	0	0	200	300	0	0	0	0	0	0	0	200	903	0	0	0	0	0	0	0	603	903	0
432	7	0	0	0	0	0	0	200	300	0	0	0	0	0	0	0	200	903	0	0	0	0	0	0	0	603	903	0
432	8	0	0	0	0	0	0	200	300	0	0	0	0	0	0	0	200	903	0	0	0	0	0	0	0	603	903	0
432	9	0	0	0	0	0	0	200	300	0	0	0	0	0	0	0	200	903	0	0	0	0	0	0	0	603	903	0
433	0	0	0	0	0	0	0	200	300	0	0	0	0	0	0	0	200	903	0	0	0	0	0	0	0	603	903	0
433	1	0	0	0	0	0	0	200	300	0	0	0	0	0	0	0	200	903	0	0	0	0	0	0	0	603	903	0
433	2	0	0	0	0	0	0	200	300	0	0	0	0	0	0	0	200	903	0	0	0	0	0	0	0	603	903	0
433	3	0	0	0	0	0	0	200	300	0	0	0	0	0	0	0	200	903	0	0	0	0	0	0	0	603	903	0
433	4	0	0	0	0	0	0	200	300	0	0	0	0	0	0	0	200	903	0	0	0	0	0	0	0	603	903	0
433	5	0	0	0	0	0	0	200	300	0	0	0	0	0	0	0	200	903	0	0	0	0	0	0	0	603	903	0
433	6	0	0	0	0	0	0	200	300	0	0	0	0	0	0	0	200	903	0	0	0	0	0	0	0	603	903	0
433	7	0	0	0	0	0	0	200	300	0	0	0	0	0	0	0	200	903	0	0	0	0	0	0	0	603	903	0
433	8	0	0	0	0	0	0	200	300	0	0	0	0	0	0	0	200	903	0	0	0	0	0	0	0	603	903	0
433	9	0	0	0	0	0	0	200	300	0	0	0	0	0	0	0	200	903	0	0	0	0	0	0	0	603	903	0
434	0	0	0	0	0	0	0	200	300	0	0	0	0	0	0	0	200	903	0	0	0	0	0	0	0	603	903	0
434	1	0	0	0	0	0	0	200	300	0	0	0	0	0	0	0	200	903	0	0	0	0	0	0	0	603	903	0
434	2	0	0	0	0	0	0	200	300	0	0	0	0	0	0	0	200	903	0	0	0	0	0	0	0	603	903	0
434	3	0	0	0	0	0	0	200	300	0	0	0	0	0	0	0	200	903	0	0	0	0	0	0	0	603	903	0
434	4	0	0	0	0	0	0	200	300	0	0	0	0	0	0	0	200	903	0	0	0	0	0	0	0	603	903	0
434	5	0	0	0	0	0	0	200	300	0	0	0	0	0	0	0	200	903	0	0	0	0	0	0	0	603	903	0
434	6	0	0	0	0	0	0	200	300	0	0	0	0	0	0	0	200	903	0	0	0	0	0	0	0	603	903	0
434	7	0	0	0	0	0	0	200	300	0	0	0	0	0	0	0	200	903	0	0	0	0	0	0	0	603	903	0
434	8	0	0	0	0	0	0	200	300	0	0	0	0	0	0	0	200	903	0	0	0	0	0	0	0	603	903	0
434	9	0	0	0	0	0	0	200	300	0	0	0	0	0	0	0	200	903	0	0	0	0	0	0	0	603	903	0
435	0	0	0	0	0	0	0	200	300	0	0	0	0	0	0	0	200	903	0	0	0	0	0	0	0	603	903	0
435	1	0	0	0	0	0	0	200	300	0	0	0	0	0	0	0	200	903	0	0	0	0	0	0	0	603	903	0
435	2	0	0	0	0	0	0	200	300	0	0	0	0	0	0	0	200	903	0	0	0	0	0	0	0	603	903	0
435	3	0	0	0	0	0	0	200	300	0	0	0	0	0	0	0	200	903	0	0	0	0	0	0	0	603	903	0
435	4	0	0	0	0	0	0	200	300	0	0	0	0	0	0	0	200	903	0	0	0	0	0	0	0	603	903	0
435	5	0	0	0	0	0	0	200	300	0	0	0	0	0	0	0	200	903	0	0	0	0	0	0	0	603	903	0
435	6	0	0	0	0	0	0	200	300	0	0	0	0	0	0	0	200	903	0	0	0	0	0	0	0	603	903	0
435	7	0	0	0	0	0	0	200	300	0	0	0	0	0	0	0	200	903	0	0	0	0	0	0	0	603	903	0
435	8	0	0	0	0	0	0	200	300	0	0	0	0	0	0	0	200	903	0	0	0	0	0	0	0	603	903	0
435	9	0	0	0	0	0	0	200	300	0	0	0	0	0	0	0	200	903	0	0	0	0	0	0	0	603	903	0
436	0	0	0	0	0	0	0	200	300	0	0	0	0	0	0	0	200	903	0	0	0	0	0	0	0	603	903	0
436	1	0	0	0	0	0	0	200	300	0	0	0	0	0	0	0	200	903	0	0	0	0	0	0	0	603	903	0
436	2	0	0	0	0	0	0	200	300	0	0	0	0	0	0	0	200	903	0	0	0	0	0	0	0	603	903	0
436	3	0	0	0	0	0	0	200	300	0	0	0	0	0	0	0	200	903	0	0	0	0	0	0	0	603	903	0
436	4	0	0	0	0	0	0	200	300	0	0	0	0	0	0	0	200	903	0	0	0	0	0	0	0	603	903	0
436	5	0	0	0	0	0	0	200	300	0	0	0	0	0	0	0	200	903	0	0	0	0	0	0	0	603	903	0
436	6	0	0	0	0	0	0	200	300	0	0	0	0	0	0	0	200	903	0	0	0	0	0	0	0	603	903	0
436	7	0	0	0	0	0	0	200	300	0	0	0	0	0	0	0	200	903	0	0	0	0	0	0	0	603	903	0
436	8	0	0	0	0	0	0	200	300	0	0	0	0	0	0	0	200	903	0	0	0	0	0	0	0	603	903	0
436	9	0	0	0	0	0	0	200	300	0	0	0	0	0	0	0	200	903	0	0	0	0	0	0	0	603	903	0
437	0	0	0	0	0	0	0	200	300	0	0	0	0	0	0	0	200	903	0	0	0	0	0	0	0	603	903	0
437	1	0	0	0	0	0	0	200	300	0	0	0	0	0	0	0	200	903	0	0	0	0	0	0	0	603	903	0
437	2	0	0	0	0	0	0	200	300	0	0	0	0	0	0	0	200	903	0	0	0	0	0	0	0	603	903	0
437	3	0	0	0	0	0	0	200	300	0	0	0	0	0	0	0	200	903	0	0	0	0	0	0	0	603	903	0
437	4	0	0	0	0	0	0	200	300	0	0	0	0	0	0	0	200	903	0	0	0	0	0	0	0	603	903	0
437	5	0	0	0	0	0	0	200	300	0	0	0	0	0	0	0	200	903	0	0	0	0	0	0	0	603	903	0
437	6	0	0	0	0	0	0	200	300	0	0	0	0	0	0	0	200	903	0	0	0	0	0	0	0	603	903	0
437	7	0	0	0	0	0	0	200	300	0	0	0	0	0	0	0	200	903	0	0	0	0	0	0	0	603	903	0
437	8	0	0	0	0	0	0	200	300	0	0	0	0	0	0	0	200	903	0	0	0	0	0	0	0	603	903	0
437	9	0	0	0	0	0	0	200	300	0	0	0	0	0	0	0	200	903	0	0	0	0	0	0	0	603	903	0
438	0	0	0	0	0	0	0	200	300	0	0	0	0	0	0	0	200	903	0	0	0	0	0	0	0	603	903	0
438	1	0	0	0	0	0	0	200	300	0	0	0	0	0	0	0	200	903	0	0	0	0	0	0	0	603	903	0
438	2	0	0	0	0	0	0	200	300	0	0	0	0	0	0	0	200	903	0	0	0	0	0	0	0	603	903	0
438	3	0	0	0	0	0	0	200	300	0	0	0	0	0	0	0	200	903	0	0	0	0	0	0	0	603	903	0
438	4	0	0	0	0	0	0	200	300	0	0	0	0	0	0	0	200	903	0	0	0	0	0	0	0	603	903	0
438	5	0	0	0	0	0	0	200	300	0	0	0	0	0	0	0	200	903	0	0	0	0	0	0	0	603	903	0
438	6	0	0	0	0	0	0	200	300	0	0	0	0	0	0	0	200	903	0	0	0	0	0	0	0	603	903	0
438	7	0	0	0	0	0	0	200	300	0	0	0	0	0	0	0	200	903	0	0	0	0	0	0	0	603	903	0
438	8	0	0	0	0	0	0	200	300	0	0	0	0	0	0	0	200	903	0	0	0	0	0	0	0	603	903	0
438	9	0	0	0	0	0	0	200	300	0	0	0	0	0	0	0	200	903	0	0	0	0	0	0	0	603	903	0
439	0	0	0	0	0	0	0	200	300	0	0	0	0	0	0	0	200	903	0	0	0	0	0	0	0	603	903	0
439	1	0	0	0	0	0	0	200	300	0	0	0	0	0	0	0	200	903	0	0	0	0	0	0	0	603	903	0
439	2	0	0	0	0	0	0	200	300	0	0	0	0	0	0	0	200	903	0	0	0	0	0	0	0	603	903	0
439	3	0	0	0	0	0	0	200	300	0	0	0	0	0	0	0	200	903	0	0	0	0	0	0	0	603	903	0
439	4	0	0	0	0	0	0	200	300	0	0	0	0	0	0	0	200	903	0	0	0	0	0	0	0	603	903	0
439	5	0	0	0	0	0	0	200	300	0	0	0	0	0	0	0	200	903	0	0	0	0	0	0	0	603	903	0
439	6	0	0	0	0	0	0	200	300	0	0	0	0	0	0	0	200	903	0	0	0	0	0	0	0	603	903	0
439	7	0	0	0	0	0	0	200	300	0	0	0	0	0	0	0	200	903	0	0	0	0	0	0	0	603	903	0
439	8	0	0	0	0	0	0	200	300	0	0	0	0	0	0	0	200	903	0	0	0	0	0	0	0	603	903	0
439	9	0	0	0	0	0	0	200	300	0	0	0	0	0	0	0	200	903	0	0	0	0	0	0	0	603	903	0
440	0	0	0	0	0	0	0	200	300	0	0	0	0	0	0	0	200	903	0	0	0	0	0	0	0	603	903	0
440	1	0	0	0	0	0	0	200	300	0	0	0	0	0	0	0	200	903	0	0	0	0	0	0	0	603	903	0
440	2	0	0	0	0	0	0	200	300	0	0	0	0	0	0	0	200	903	0	0	0	0	0	0	0	603	903	0
440	3	0	0	0	0	0	0	200	300	0	0	0	0	0	0	0	200	903	0	0	0	0	0	0	0	603	903	0
440	4	0	0	0	0	0	0	200	300	0	0	0	0	0	0	0	200	903	0	0	0	0	0	0	0	603	903	0
440	5	0	0	0	0	0	0	200	300	0	0	0	0	0	0	0	200	903	0	0	0	0	0	0	0	603	903	0
440	6	0	0	0	0	0	0	200	300	0	0	0	0	0	0	0	200	903	0	0	0	0	0	0	0	603	903	0
440	7	0	0	0	0	0	0	200	300	0	0	0	0	0	0	0	200	903	0	0	0	0	0	0	0	603	903	0
440	8	0	0	0	0	0	0	200	300	0	0	0	0	0	0	0	200	903	0	0	0	0	0	0	0	603	903	0
440	9	0	0	0	0	0	0	200	300	0	0	0	0	0	0	0	200	903	0	0	0	0	0	0	0	603	903	0
441	0	0	0	0	0	0	0	200	300	0	0	0	0	0	0	0	200	903	0	0	0	0	0	0	0	603	903	0
441	1	0	0	0	0	0	0	200	300	0	0	0	0	0	0	0	200	903	0	0	0	0	0	0	0	603	903	0
441	2	0	0	0	0	0	0	200	300	0	0	0	0	0	0	0	200	903	0	0	0	0	0	0	0	603	903	0
441	3	0	0	0	0	0	0	200	300	0	0	0	0	0	0	0	200	903	0	0	0	0	0	0	0	603	903	0
441	4	0	0	0	0	0	0	200	300	0	0	0	0	0	0	0	200	903	0	0	0	0	0	0	0	603	903	0
441	5	0	0	0	0	0	0	200	300	0	0	0	0	0	0	0	200	903	0	0	0	0	0	0	0	603	903	0
441	6	0	0	0	0	0	0	200	300	0	0	0	0	0	0	0	200	903	0	0	0	0	0	0	0	603	903	0
441	7	0	0	0	0	0	0	200	300	0	0	0	0	0	0	0	200	903	0	0	0	0	0	0	0	603	903	0
441	8	0	0	0	0	0	0	200	300	0	0	0	0	0	0	0	200	903	0	0	0	0	0	0	0	603	903	0
441	9	0	0	0	0	0	0	200	300	0	0	0	0	0	0	0	200	903	0	0	0	0	0	0	0	603	903	0
442	0	0	0	0	0	0	0	200	300	0	0	0	0	0	0	0	200	903	0	0	0	0	0	0	0	603	903	0
442	1	0	0	0	0	0	0	200	300	0	0	0	0	0	0	0	200	903	0	0	0	0	0	0	0	603	903	0
442	2	0	0	0	0	0	0	200	300	0	0	0	0	0	0	0	200	903	0	0	0	0	0	0	0	603	903	0
442	3	0	0	0	0	0	0	200	300	0	0	0	0	0	0	0	200	903	0	0	0	0	0	0	0	603	903	0
442	4	0	0	0	0	0	0	200	300	0	0	0	0	0	0	0	200	903	0	0	0	0	0	0	0	603	903	0
442	5	0	0	0	0	0	0	200	300	0	0	0	0	0	0	0	200	903	0	0	0	0	0	0	0	603	903	0
442	6	0	0	0	0	0	0	200	300	0	0	0	0	0	0	0	200	903	0	0	0	0	0	0	0	603	903	0
442	7	0	0	0	0	0	0	200	300	0	0	0	0	0	0	0	200	903	0	0	0	0	0	0	0	603	903	0
442	8	0	0	0	0	0	0	200	300	0	0	0	0	0	0	0	200	903	0	0	0	0	0	0	0	603	903	0
442	9	0	0	0	0	0	0	200	300	0	0	0	0	0	0	0	200	903	0	0	0	0	0	0	0	603	903	0
443	0	0	0	0	0	0	0	200	300	0	0	0	0	0	0	0	200	903	0	0	0	0	0	0	0	603	903	0
443	1	0	0	0	0	0	0	200	300	0	0	0	0	0	0	0	200	903	0	0	0	0	0	0	0	603	903	0
443	2	0	0	0	0	0	0	200	300	0	0	0	0	0	0	0	200	903	0	0	0	0	0	0	0	603	903	0
443	3	0	0	0	0	0	0	200	300	0	0	0	0	0	0	0	200	903	0	0	0	0	0	0	0	603	903	0
443	4	0	0	0	0	0	0	200	300	0	0	0	0	0	0	0	200	903	0	0	0	0	0	0	0	603	903	0
443	5	0	0	0	0	0	0	200	300	0	0	0	0	0	0	0	200	903	0	0	0	0	0	0	0	603	903	0
443	6	0	0	0	0	0	0	200	300	0	0	0	0	0	0	0	200	903	0	0	0	0	0	0	0	603	903	0
443	7	0	0	0	0	0	0	200	300	0	0	0	0	0	0	0	200	903	0	0	0	0	0	0	0	603	903	0
443	8	0	0	0	0	0	0	200	300	0	0	0	0	0	0	0	200	903	0	0	0	0	0	0	0	603	903	0
443	9	0	0	0	0	0	0	200	300	0	0	0	0	0	0	0	200	903	0	0	0	0	0	0	0	603	903	0
444	0	0	0	0	0	0	0	200	300	0	0	0	0	0	0	0	200	903	0	0	0	0	0	0	0	603	903	0
444	1	0	0	0	0	0	0	200	300	0	0	0	0	0	0	0	200	903	0	0	0	0	0	0	0	603	903	0
444	2	0	0	0	0	0	0	200	300	0	0	0	0	0	0	0	200	903	0	0	0	0	0	0	0	603	903	0
444	3	0	0	0	0	0	0	200	300	0	0	0	0	0	0	0	200	903	0	0	0	0	0	0	0	603	903	0
444	4	0	0	0	0	0	0	200	300	0	0	0	0	0	0	0	200	903	0	0	0	0	0	0	0	603	903	0
444	5	0	0	0	0	0	0	200	300	0	0	0	0	0	0	0	200	903	0	0	0	0	0	0	0	603	903	0
444	6	0	0	0	0	0	0	200	300	0	0	0	0	0	0	0	200	903	0	0	0	0	0	0	0	603	903	0
444	7	0	0	0	0	0	0	200	300	0	0	0	0	0	0	0	200	903	0	0	0	0	0	0	0	603	903	0
444	8	0	0	0	0	0	0	200	300	0	0	0	0	0	0	0	200	903	0	0	0	0	0	0	0	603	903	0
444	9	0	0	0	0	0	0	200	300	0	0	0	0	0	0	0	200	903	0	0	0	0	0	0	0	603	903	0
445	0	0	0	0	0	0	0	200	300	0	0	0	0	0	0	0	200	903	0	0	0	0	0	0	0	603	903	0
445	1	0	0	0	0	0	0	200	300	0	0	0	0	0	0	0	200	903	0	0	0	0	0	0	0	603	903	0
445	2	0	0	0	0	0	0	200	300	0	0	0	0	0	0	0	200	903	0	0	0	0	0	0	0	603	903	0
445	3	0	0	0	0	0	0	200	300	0	0	0	0	0	0	0	200	903	0	0	0	0	0	0	0	603	903	0
445	4	0	0	0	0	0	0	200	300	0	0	0	0	0	0	0	200	903	0	0	0	0	0	0	0	603	903	0
445	5	0	0	0	0	0	0	200	300	0	0	0	0	0	0	0	200	903	0	0	0	0	0	0	0	603	903	0
445	6	0	0	0	0	0	0	200	300	0	0	0	0	0	0	0	200	903	0	0	0	0	0	0	0	603	903	0
445	7	0	0	0	0	0	0	200	300	0	0	0	0	0	0	0	200	903	0	0	0	0	0	0	0	603	903	0
445	8	0	0	0	0	0	0	200	300	0	0	0	0	0	0	0	200	903	0	0	0	0	0	0	0	603	903	0
445	9	0	0	0	0	0	0	200	300	0	0	0	0	0	0	0	200	903	0	0	0	0	0	0	0	603	903	0
446	0	0	0	0	0	0	0	200	300	0	0	0	0	0	0	0	200	903	0	0	0	0	0	0	0	603	903	0
446	1	0	0	0	0	0	0	200	300	0	0	0	0	0	0	0	200	903	0	0	0	0	0	0	0	603	903	0
446	2	0	0	0	0	0	0	200	300	0	0	0	0	0	0	0	200	903	0	0	0	0	0	0	0	603	903	0
446	3	0	0	0	0	0	0	200	300	0	0	0	0	0	0	0	200	903	0	0	0	0	0	0	0	603	903	0
446	4	0	0	0	0	0	0	200	300	0	0	0	0	0	0	0	200	903	0	0	0	0	0	0	0	603	903	0
446	5	0	0	0	0	0	0	200	300	0	0	0	0	0	0	0	200	903	0	0	0	0	0	0	0	603	903	0
446	6	0	0	0	0	0	0	200	300	0	0	0	0	0	0	0	200	903	0	0	0	0	0	0	0	603	903	0
446	7	0	0	0	0	0	0	200	300	0	0	0	0	0	0	0	200	903	0	0	0	0	0	0	0	603	903	0
446	8	0	0	0	0	0	0	200	300	0	0	0	0	0	0	0	200	903	0	0	0	0	0	0	0	603	903	0
446	9	0	0	0	0	0	0	200	300	0	0	0	0	0	0	0	200	903	0	0	0	0	0	0	0	603	903	0
447	0	0	0	0	0	0	0	200	300	0	0	0	0	0	0	0	200	903	0	0	0	0	0	0	0	603	903	0
447	1	0	0	0	0	0	0	200	300	0	0	0	0	0	0	0	200	903	0	0	0	0	0	0	0	603	903	0
447	2	0	0	0	0	0	0	200	300	0	0	0	0	0	0	0	200	903	0	0	0	0	0	0	0	603	903	0
447	3	0	0	0	0	0	0	200	300	0	0	0	0	0	0	0	200	903	0	0	0	0	0	0	0	603	903	0
447	4	0	0	0	0	0	0	200	300	0	0	0	0	0	0	0	200	903	0	0	0	0	0	0	0	603	903	0
447	5	0	0	0	0	0	0	200	300	0	0	0	0	0	0	0	200	903	0	0	0	0	0	0	0	603	903	0
447	6	0	0	0	0	0	0	200	300	0	0	0	0	0	0	0	200	903	0	0	0	0	0	0	0	603	903	0
447	7	0	0	0	0	0	0	200	300	0	0	0	0	0	0	0	200	903	0	0	0	0	0	0	0	603	903	0
447	8	0	0	0	0	0	0	200	300	0	0	0	0	0	0	0	200	903	0	0	0	0	0	0	0	603	903	0
447	9	0	0	0	0	0	0	200	300	0	0	0	0	0	0	0	200	903	0	0	0	0	0	0	0	603	903	0
448	0	0	0	0	0	0	0	200	300	0	0	0	0	0	0	0	200	903	0	0	0	0	0	0	0	603	903	0
448	1	0	0	0	0	0	0	200	300	0	0	0	0	0	0	0	200	903	0	0	0	0	0	0	0	603	903	0
448	2	0	0	0	0	0	0	200	300	0	0	0	0	0	0	0	200	903	0	0	0	0	0	0	0	603	903	0
448	3	0	0	0	0	0	0	200	300	0	0	0	0	0	0	0	200	903	0	0	0	0	0	0	0	603	903	0
448	4	0	0	0	0	0	0	200	300	0	0	0	0	0	0	0	200	903	0	0	0	0	0	0	0	603	903	0
448	5	0	0	0	0	0	0	200	300	0	0	0	0	0	0	0	200	903	0	0	0	0	0	0	0	603	903	0
448	6	0	0	0	0	0	0	200	300	0	0	0	0	0	0	0	200	903	0	0	0	0	0	0	0	603	903	0
448	7	0	0	0	0	0	0	200	300	0	0	0	0	0	0	0	200	903	0	0	0	0	0	0	0	603	903	0
448	8	0	0	0	0	0	0	200	300	0	0	0	0	0	0	0	200	903	0	0	0	0	0	0	0	603	903	0
448	9	0	0	0	0	0	0	200	300	0	0	0	0	0	0	0	200	903	0	0	0	0	0	0	0	603	903	0
449	0	0	0	0	0	0	0	200	300	0	0	0	0	0	0	0	200	903	0	0	0	0	0	0	0	603	903	0
449	1	0	0	0	0	0	0	200	300	0	0	0	0	0	0	0	200	903	0	0	0	0	0	0	0	603	903	0
449	2	0	0	0	0	0	0	200	300	0	0	0	0	0	0	0	200	903	0	0	0	0	0	0	0	603	903	0
449	3	0	0	0	0	0	0	200	300	0	0	0	0	0	0	0	200	903	0	0	0	0	0	0	0	603	903	0
449	4	0	0	0	0	0	0	200	300	0	0	0	0	0	0	0	200	903	0	0	0	0	0	0	0	603	903	0
449	5	0	0	0	0	0	0	200	300	0	0	0	0	0	0	0	200	903	0	0	0	0	0	0	0	603	903	0
449	6	0	0	0	0	0	0	200	300	0	0	0	0	0	0	0	200	903	0	0	0	0	0	0	0	603	903	0
449	7	0	0	0	0	0	0	200	300	0	0	0	0	0	0	0	200	903	0	0	0	0	0	0	0	603	903	0
449	8	0	0	0	0	0	0	200	300	0	0	0	0	0	0	0	200	903	0	0	0	0	0	0	0	603	903	0
449	9	0	0	0	0	0	0	200	300	0	0	0	0	0	0	0	200	903	0	0	0	0	0	0	0	603	903	0
450	0	0	0	0	0	0	0	200	300	0	0	0	0	0	0	0	200	903	0	0	0	0	0	0	0	603	903	0
450	1	0	0	0	0	0	0	200	300	0	0	0	0	0	0	0	200	903	0	0	0	0	0	0	0	603	903	0
450	2	0	0	0	0	0	0	200	300	0	0	0	0	0	0	0	200	903	0	0	0	0	0	0	0	603	903	0
450	3	0	0	0	0	0	0	200	300	0	0	0	0	0	0	0	200	903	0	0	0	0	0	0	0	603	903	0
450	4	0	0	0	0	0	0	200	300	0	0	0	0	0	0	0	200	903	0	0	0	0	0	0	0	603	903	0
450	5	0	0	0	0	0	0	200	300	0	0	0	0	0	0	0	200	903	0	0	0	0	0	0	0	603	903	0
450	6	0	0	0	0	0	0	200	300	0	0	0	0	0	0	0	200	903	0	0	0	0	0	0	0	603	903	0
450	7	0	0	0	0	0	0	200	300	0	0	0	0	0	0	0	200	903	0	0	0	0	0	0	0	603	903	0
450	8	0	0	0	0	0	0	200	300	0	0	0	0	0	0	0	200	903	0	0	0	0	0	0	0	603	903	0
450	9	0	0	0	0	0	0	200	300	0	0	0	0	0	0	0	200	903	0	0	0	0	0	0	0	603	903	0
451	0	0	0	0	0	0	0	200	300	0	0	0	0	0	0	0	200	903	0	0	0	0	0	0	0	603	903	0
451	1	0	0	0	0	0	0	200	300	0	0	0	0	0	0	0	200	903	0	0	0	0	0	0	0	603	903	0
451	2	0	0	0	0	0	0	200	300	0	0	0	0	0	0	0	200	903	0	0	0	0	0	0	0	603	903	0
451	3	0	0	0	0	0	0	200	300	0	0	0	0	0	0	0	200	903	0	0	0	0	0	0	0	603	903	0
451	4	0	0	0	0	0	0	200	300	0	0	0	0	0	0	0	200	903	0	0	0	0	0	0	0	603	903	0
451	5	0	0	0	0	0	0	200	300	0	0	0	0	0	0	0	200	903	0	0	0	0	0	0	0	603	903	0
451	6	0	0	0	0	0	0	200	300	0	0	0	0	0	0	0	200	903	0	0	0	0	0	0	0	603	903	0
451	7	0	0	0	0	0	0	200	300	0	0	0	0	0	0	0	200	903	0	0	0	0	0	0	0	603	903	0
451	8	0	0	0	0	0	0	200	300	0	0	0	0	0	0	0	200	903	0	0	0	0	0	0	0	603	903	0
451	9	0	0	0	0	0	0	200	300	0	0	0	0	0	0	0	200	903	0	0	0	0	0	0	0	603	903	0
452	0	0	0	0	0	0	0	200	300	0	0	0	0	0	0	0	200	903	0	0	0	0	0	0	0	603	903	0
452	1	0	0	0	0	0	0	200	300	0	0	0	0	0	0	0	200	903	0	0	0	0	0	0	0	603	903	0
452	2	0	0	0	0	0	0	200	300	0	0	0	0	0	0	0	200	903	0	0	0	0	0	0	0	603	903	0
452	3	0	0	0	0	0	0	200	300	0	0	0	0	0	0	0	200	903	0	0	0	0	0	0	0	603	903	0
452	4	0	0	0	0	0	0	200	300	0	0	0	0	0	0	0	200	903	0	0	0	0	0	0	0	603	903	0
452	5	0	0	0	0	0	0	200	300	0	0	0	0	0	0	0	200	903	0	0	0	0	0	0	0	603	903	0
452	6	0	0	0	0	0	0	200	300	0	0	0	0	0	0	0	200	903	0	0	0	0	0	0	0	603	903	0
452	7	0	0	0	0	0	0	200	300	0	0	0	0	0	0	0	200	903	0	0	0	0	0	0	0	603	903	0
452	8	0	0	0	0	0	0	200	300	0	0	0	0	0	0	0	200	903	0	0	0	0	0	0	0	603	903	0
452	9	0	0	0	0	0	0	200	300	0	0	0	0	0	0	0	200	903	0	0	0	0	0	0	0	603	903	0
453	0	0	0	0	0	0	0	200	300	0	0	0	0	0	0	0	200	903	0	0	0	0	0	0	0	603	903	0
453	1	0	0	0	0	0	0	200	300	0	0	0	0	0	0	0	200	903	0	0	0	0	0	0	0	603	903	0
453	2	0	0	0	0	0	0	200	300	0	0	0	0	0	0	0	200	903	0	0	0	0	0	0	0	603	903	0
453	3	0	0	0	0	0	0	200	300	0	0	0	0	0	0	0	200	903	0	0	0	0	0	0	0	603	903	0
453	4	0	0	0	0	0	0	200	300	0	0	0	0	0	0	0	200	903	0	0	0	0	0	0	0	603	903	0
453	5	0	0	0	0	0	0	200	300	0	0	0	0	0	0	0	200	903	0	0	0	0	0	0	0	603	903	0
453	6	0	0	0	0	0	0	200	300	0	0	0	0	0	0	0	200	903	0	0	0	0	0	0	0	603	903	0
453	7	0	0	0	0	0	0	200	300	0	0	0	0	0	0	0	200	903	0	0	0	0	0	0	0	603	903	0
453	8	0	0	0	0	0	0	200	300	0	0	0	0	0	0	0	200	903	0	0	0	0	0	0	0	603	903	0
453	9	0	0	0	0	0	0	200	300	0	0	0	0	0	0	0	200	903	0	0	0	0	0	0	0	603	903	0
454	0	0	0	0	0	0	0	200	300	0	0	0	0	0	0	0	200	903	0	0	0	0	0	0	0	603	903	0
454	1	0	0	0	0	0	0	200	300	0	0	0	0	0	0	0	200	903	0	0	0	0	0	0	0	603	903	0
454	2	0	0	0	0	0	0	200	300	0	0	0	0	0	0	0	200	903	0	0	0	0	0	0	0	603	903	0
454	3	0	0	0	0	0	0	200	300	0	0	0	0	0	0	0	200	903	0	0	0	0	0	0	0	603	903	0
454	4	0	0	0	0	0	0	200	300	0	0	0	0	0	0	0	200	903	0	0	0	0	0	0	0	603	903	0
454	5	0	0	0	0	0	0	200	300	0	0	0	0	0	0	0	200	903	0	0	0	0	0	0	0	603	903	0
454	6	0	0	0	0	0	0	200	300	0	0	0	0	0	0	0	200	903	0	0	0	0	0	0	0	603	903	0
454	7	0	0	0	0	0	0	200	300	0	0	0	0	0	0	0	200	903	0	0	0	0	0	0	0	603	903	0
454	8	0	0	0	0	0	0	200	300	0	0	0	0	0	0	0	200	903	0	0	0	0	0	0	0	603	903	0
454	9	0	0	0	0	0	0	200	300	0	0	0	0	0	0	0	200	903	0	0	0	0	0	0	0	603	903	0
455	0	0	0	0	0	0	0	200	300	0	0	0	0	0	0	0	200	903	0	0	0	0	0	0	0	603	903	0
455	1	0	0	0	0	0	0	200	300	0	0	0	0	0	0	0	200	903	0	0	0	0	0	0	0	603	903	0
455	2	0	0	0	0	0	0	200	300	0	0	0	0	0	0	0	200	903	0	0	0	0	0	0	0	603	903	0
455	3	0	0	0	0	0	0	200	300	0	0	0	0	0	0	0	200	903	0	0	0	0	0	0	0	603	903	0
455	4	0	0	0	0	0	0	200	300	0	0	0	0	0	0	0	200	903	0	0	0	0	0	0	0	603	903	0
455	5	0	0	0	0	0	0	200	300	0	0	0	0	0	0	0	200	903	0	0	0	0	0	0	0	603	903	0
455	6	0	0	0	0	0	0	200	300	0	0	0	0	0	0	0	200	903	0	0	0	0	0	0	0	603	903	0
455	7	0	0	0	0	0	0	200	300	0	0	0	0	0	0	0	200	903	0	0	0	0	0	0	0	603	903	0
455	8	0	0	0	0	0	0	200	300	0	0	0	0	0	0	0	200	903	0	0	0	0	0	0	0	603	903	0
455	9	0	0	0	0	0	0	200	300	0	0	0	0	0	0	0	200	903	0	0	0	0	0	0	0	603	903	0
456	0	0	0	0	0	0	0	200	300	0	0	0	0	0	0	0	200	903	0	0	0	0	0	0	0	603	903	0
456	1	0	0	0	0	0	0	200	300	0	0	0	0	0	0	0	200	903	0	0	0	0	0	0	0	603	903	0
456	2	0	0	0	0	0	0	200	300	0	0	0	0	0	0	0	200	903	0	0	0	0	0	0	0	603	903	0
456	3	0	0	0	0	0	0	200	300	0	0	0	0	0	0	0	200	903	0	0	0	0	0	0	0	603	903	0
456	4	0	0	0	0	0	0	200	300	0	0	0	0	0	0	0	200	903	0	0	0	0	0	0	0	603	903	0
456	5	0	0	0	0	0	0	200	300	0	0	0	0	0	0	0	200	903	0	0	0	0	0	0	0	603	903	0
456	6	0	0	0	0	0	0	200	300	0	0	0	0	0	0	0	200	903	0	0	0	0	0	0	0	603	903	0
456	7	0	0	0	0	0	0	200	300	0	0	0	0	0	0	0	200	903	0	0	0	0	0	0	0	603	903	0
456	8	0	0	0	0	0	0	200	300	0	0	0	0	0	0	0	200	903	0	0	0	0	0	0	0	603	903	0
456	9	0	0	0	0	0	0	200	300	0	0	0	0	0	0	0	200	903	0	0	0	0	0	0	0	603	903	0
457	0	0	0	0	0	0	0	200	300	0	0	0	0	0	0	0	200	903	0	0	0	0	0	0	0	603	903	0
457	1	0	0	0	0	0	0	200	300	0	0	0	0	0	0	0	200	903	0	0	0	0	0	0	0	603	903	0
457	2	0	0	0	0	0	0	200	300	0	0	0	0	0	0	0	200	903	0	0	0	0	0	0	0	603	903	0
457	3	0	0	0	0	0	0	200	300	0	0	0	0	0	0	0	200	903	0	0	0	0	0	0	0	603	903	0
457	4	0	0	0	0	0	0	200	300	0	0	0	0	0	0	0	200	903	0	0	0	0	0	0	0	603	903	0
457	5	0	0	0	0	0	0	200	300	0	0	0	0	0	0	0	200	903	0	0	0	0	0	0	0	603	903	0
457	6	0	0	0	0	0	0	200	300	0	0	0	0	0	0	0	200	903	0	0	0	0	0	0	0	603	903	0
457	7	0	0	0	0	0	0	200	300	0	0	0	0	0	0	0	200	903	0	0	0	0	0	0	0	603	903	0
457	8	0	0	0	0	0	0	200	300	0	0	0	0	0	0	0	200	903	0	0	0	0	0	0	0	603	903	0
457	9	0	0	0	0	0	0	200	300	0	0	0	0	0	0	0	200	903	0	0	0	0	0	0	0	603	903	0
458	0	0	0	0	0	0	0	200	300	0	0	0	0	0	0	0	200	903	0	0	0	0	0	0	0	603	903	0
458	1	0	0	0	0	0	0	200	300	0	0	0	0	0	0	0	200	903	0	0	0	0	0	0	0	603	903	0
458	2	0	0	0	0	0	0	200	300	0	0	0	0	0	0	0	200	903	0	0	0	0	0	0	0	603	903	0
458	3	0	0	0	0	0	0	200	300	0	0	0	0	0	0	0	200	903	0	0	0	0	0	0	0	603	903	0
458	4	0	0	0	0	0	0	200	300	0	0	0	0	0	0	0	200	903	0	0	0	0	0	0	0	603	903	0
458	5	0	0	0	0	0	0	200	300	0	0	0	0	0	0	0	200	903	0	0	0	0	0	0	0	603	903	0
458	6	0	0	0	0	0	0	200	300	0	0	0	0	0	0	0	200	903	0	0	0	0	0	0	0	603	903	0
458	7	0	0	0	0	0	0	200	300	0	0	0	0	0	0	0	200	903	0	0	0	0	0	0	0	603	903	0
458	8	0	0	0	0	0	0	200	300	0	0	0	0	0	0	0	200	903	0	0	0	0	0	0	0	603	903	0
458	9	0	0	0	0	0	0	200	300	0	0	0	0	0	0	0	200	903	0	0	0	0	0	0	0	603	903	0
459	0	0	0	0	0	0	0	200	300	0	0	0	0	0	0	0	200	903	0	0	0	0	0	0	0	603	903	0
459	1	0	0	0	0	0	0	200	300	0	0	0	0	0	0	0	200	903	0	0	0	0	0	0	0	603	903	0
459	2	0	0	0	0	0	0	200	300	0	0	0	0	0	0	0	200	903	0	0	0	0	0	0	0	603	903	0
459	3	0	0	0	0	0	0	200	300	0	0	0	0	0	0	0	200	903	0	0	0	0	0	0	0	603	903	0
459	4	0	0	0	0	0	0	200	300	0	0	0	0	0	0	0	200	903	0	0	0	0	0	0	0	603	903	0
459	5	0	0	0	0	0	0	200	300	0	0	0	0	0	0	0	200	903	0	0	0	0	0	0	0	603	903	0
459	6	0	0	0	0	0	0	200	300	0	0	0	0	0	0	0	200	903	0	0	0	0	0	0	0	603	903	0
459	7	0	0	0	0	0	0	200	300	0	0	0	0	0	0	0	200	903	0	0	0	0	0	0	0	603	903	0
459	8	0	0	0	0	0	0	200	300	0	0	0	0	0	0	0	200	903	0	0	0	0	0	0	0	603	903	0
459	9	0	0	0	0	0	0	200	300	0	0	0	0	0	0	0	200	903	0	0	0	0	0	0	0	603	903	0
460	0	0	0	0	0	0	0	200	300	0	0	0	0	0	0	0	200	903	0	0	0	0	0	0	0	603	903	0
460	1	0	0	0	0	0	0	200	300	0	0	0	0	0	0	0	200	903	0	0	0	0	0	0	0	603	903	0
460	2	0	0	0	0	0	0	200	300	0	0	0	0	0	0	0	200	903	0	0	0	0	0	0	0	603	903	0
460	3	0	0	0	0	0	0	200	300	0	0	0	0	0	0	0	200	903	0	0	0	0	0	0	0	603	903	0
460	4	0	0	0	0	0	0	200	300	0	0	0	0	0	0	0	200	903	0	0	0	0	0	0	0	603	903	0
460	5	0	0	0	0	0	0	200	300	0	0	0	0	0	0	0	200	903	0	0	0	0	0	0	0	603	903	0
460	6	0	0	0	0	0	0	200	300	0	0	0	0	0	0	0	200	903	0	0	0	0	0	0	0	603	903	0
460	7	0	0	0	0	0	0	200	300	0	0	0	0	0	0	0	200	903	0	0	0	0	0	0	0	603	903	0
460	8	0	0	0	0	0	0	200	300	0	0	0	0	0	0	0	200	903	0	0	0	0	0	0	0	603	903	0
460	9	0	0	0	0	0	0	200	300	0	0	0	0	0	0	0	200	903	0	0	0	0	0	0	0	603	903	0
461	0	0	0	0	0	0	0	200	300	0	0	0	0	0	0	0	200	903	0	0	0	0	0	0	0	603	903	0
461	1	0	0	0	0	0	0	200	300	0	0	0	0	0	0	0	200	903	0	0	0	0	0	0	0	603	903	0
461	2	0	0	0	0	0	0	200	300	0	0	0	0	0	0	0	200	903	0	0	0	0	0	0	0	603	903	0
461	3	0	0	0	0	0	0	200	300	0	0	0	0	0	0	0	200	903	0	0	0	0	0	0	0	603	903	0
461	4	0	0	0	0	0	0	200	300	0	0	0	0	0	0	0	200	903	0	0	0	0	0	0	0	603	903	0
461	5	0	0	0	0	0	0	200	300	0	0	0	0	0	0	0	200	903	0	0	0	0	0	0	0	603	903	0
461	6	0	0	0	0	0	0	200	300	0	0	0	0	0	0	0	200	903	0	0	0	0	0	0	0	603	903	0
461	7	0	0	0	0	0	0	200	300	0	0	0	0	0	0	0	200	903	0	0	0	0	0	0	0	603	903	0
461	8	0	0	0	0	0	0	200	300	0	0	0	0	0	0	0	200	903	0	0	0	0	0	0	0	603	903	0
461	9	0	0	0	0	0	0	200	300	0	0	0	0	0	0	0	200	903	0	0	0	0	0	0	0	603	903	0
462	0	0	0	0	0	0	0	200	300	0	0	0	0	0	0	0	200	903	0	0	0	0	0	0	0	603	903	0
462	1	0	0	0	0	0	0	200	300	0	0	0	0	0	0	0	200	903	0	0	0	0	0	0	0	603	903	0
462	2	0	0	0	0	0	0	200	300	0	0	0	0	0	0	0	200	903	0	0	0	0	0	0	0	603	903	0
462	3	0	0	0	0	0	0	200	300	0	0	0	0	0	0	0	200	903	0	0	0	0	0	0	0	603	903	0
462	4	0	0	0	0	0	0	200	300	0	0	0	0	0	0	0	200	903	0	0	0	0	0	0	0	603	903	0
462	5	0	0	0	0	0	0	200	300	0	0	0	0	0	0	0	200	903	0	0	0	0	0	0	0	603	903	0
462	6	0	0	0	0	0	0	200	300	0	0	0	0	0	0	0	200	903	0	0	0	0	0	0	0	603	903	0
462	7	0	0	0	0	0	0	200	300	0	0	0	0	0	0	0	200	903	0	0	0	0	0	0	0	603	903	0
462	8	0	0	0	0	0	0	200	300	0	0	0	0	0	0	0	200	903	0	0	0	0	0	0	0	603	903	0
462	9	0	0	0	0	0	0	200	300	0	0	0	0	0	0	0	200	903	0	0	0	0	0	0	0	603	903	0
463	0	0	0	0	0	0	0	200	300	0	0	0	0	0	0	0	200	903	0	0	0	0	0	0	0	603	903	0
463	1	0	0	0	0	0	0	200	300	0	0	0	0	0	0	0	200	903	0	0	0	0	0	0	0	603	903	0
463	2	0	0	0	0	0	0	200	300	0	0	0	0	0	0	0	200	903	0	0	0	0	0	0	0	603	903	0
463	3	0	0	0	0	0	0	200	300	0	0	0	0	0	0	0	200	903	0	0	0	0	0	0	0	603	903	0
463	4	0	0	0	0	0	0	200	300	0	0	0	0	0	0	0	200	903	0	0	0	0	0	0	0	603	903	0
463	5	0	0	0	0	0	0	200	300	0	0	0	0	0	0	0	200	903	0	0	0	0	0	0	0	603	903	0
463	6	0	0	0	0	0	0	200	300	0	0	0	0	0	0	0	200	903	0	0	0	0	0	0	0	603	903	0
463	7	0	0	0	0	0	0	200	300	0	0	0	0	0	0	0	200	903	0	0	0	0	0	0	0	603	903	0
463	8	0	0	0	0	0	0	200	300	0	0	0	0	0	0	0	200	903	0	0	0	0	0	0	0	603	903	0
463	9	0	0	0	0	0	0	200	300	0	0	0	0	0	0	0	200	903	0	0	0	0	0	0	0	603	903	0
464	0	0	0	0	0	0	0	200	300	0	0	0	0	0	0	0	200	903	0	0	0	0	0	0	0	603	903	0
464	1	0	0	0	0	0	0	200	300	0	0	0	0	0	0	0	200	903	0	0	0	0	0	0	0	603	903	0
464	2	0	0	0	0	0	0	200	300	0	0	0	0	0	0	0	200	903	0	0	0	0	0	0	0	603	903	0
464	3	0	0	0	0	0	0	200	300	0	0	0	0	0	0	0	200	903	0	0	0	0	0	0	0	603	903	0
464	4	0	0	0	0	0	0	200	300	0	0	0	0	0	0	0	200	903	0	0	0	0	0	0	0	603	903	0
464	5	0	0	0	0	0	0	200	300	0	0	0	0	0	0	0	200	903	0	0	0	0	0	0	0	603	903	0
464	6	0	0	0	0	0	0	200	300	0	0	0	0	0	0	0	200	903	0	0	0	0	0	0	0	603	903	0
464	7	0	0	0	0	0	0	200	300	0	0	0	0	0	0	0	200	903	0	0	0	0	0	0	0	603	903	0
464	8	0	0	0	0	0	0	200	300	0	0	0	0	0	0	0	200	903	0	0	0	0	0	0	0	603	903	0
464	9	0	0	0	0	0	0	200	300	0	0	0	0	0	0	0	200	903	0	0	0	0	0	0	0	603	903	0
465	0	0	0	0	0	0	0	200	300	0	0	0	0	0	0	0	200	903	0	0	0	0	0	0	0	603	903	0
465	1	0	0	0	0	0	0	200	300	0	0	0	0	0	0	0	200	903	0	0	0	0	0	0	0	603	903	0
465	2	0	0	0	0	0	0	200	300	0	0	0	0	0	0	0	200	903	0	0	0	0	0	0	0	603	903	0
465	3	0	0	0	0	0	0	200	300	0	0	0	0	0	0	0	200	903	0	0	0	0	0	0	0	603	903	0
465	4	0	0	0	0	0	0	200	300	0	0	0	0	0	0	0	200	903	0	0	0	0	0	0	0	603	903	0
465	5	0	0	0	0	0	0	200	300	0	0	0	0	0	0	0	200	903	0	0	0	0	0	0	0	603	903	0
465	6	0	0	0	0	0	0	200	300	0	0	0	0	0	0	0	200	903	0	0	0	0	0	0	0	603	903	0
465	7	0	0	0	0	0	0	200	300	0	0	0	0	0	0	0	200	903	0	0	0	0	0	0	0	603	903	0
465	8	0	0	0	0	0	0	200	300	0	0	0	0	0	0	0	200	903	0	0	0	0	0	0	0	603	903	0
465	9	0	0	0	0	0	0	200	300	0	0	0	0	0	0	0	200	903	0	0	0	0	0	0	0	603	903	0
466	0	0	0	0	0	0	0	200	300	0	0	0	0	0	0	0	200	903	0	0	0	0	0	0	0	603	903	0
466	1	0	0	0	0	0	0	200	300	0	0	0	0	0	0	0	200	903	0	0	0	0	0	0	0	603	903	0
466	2	0	0	0	0	0	0	200	300	0	0	0	0	0	0	0	200	903	0	0	0	0	0	0	0	603	903	0
466	3	0	0	0	0	0	0	200	300	0	0	0	0	0	0	0	200	903	0	0	0	0	0	0	0	603	903	0
466	4	0	0	0	0	0	0	200	300	0	0	0	0	0	0	0	200	903	0	0	0	0	0	0	0	603	903	0
466	5	0	0	0	0	0	0	200	300	0	0	0	0	0	0	0	200	903	0	0	0	0	0	0	0	603	903	0
466	6	0	0	0	0	0	0	200	300	0	0	0	0	0	0	0	200	903	0	0	0	0	0	0	0	603	903	0
466	7	0	0	0	0	0	0	200	300	0	0	0	0	0	0	0	200	903	0	0	0	0	0	0	0	603	903	0
466	8	0	0	0	0	0	0	200	300	0	0	0	0	0	0	0	200	903	0	0	0	0	0	0	0	603	903	0
466	9	0	0	0	0	0	0	200	300	0	0	0	0	0	0	0	200	903	0	0	0	0	0	0	0	603	903	0
467	0	0	0	0	0	0	0	200	300	0	0	0	0	0	0	0	200	903	0	0	0	0	0	0	0	603	903	0
467	1	0	0	0	0	0	0	200	300	0	0	0	0	0	0	0	200	903	0	0	0	0	0	0	0	603	903	0
467	2	0	0	0	0	0	0	200	300	0	0	0	0	0	0	0	200	903	0	0	0	0	0	0	0	603	903	0
467	3	0	0	0	0	0	0	200	300	0	0	0	0	0	0	0	200	903	0	0	0	0	0	0	0	603	903	0
467	4	0	0	0	0	0	0	200	300	0	0	0	0	0	0	0	200	903	0	0	0	0	0	0	0	603	903	0
467	5	0	0	0	0	0	0	200	300	0	0	0	0	0	0	0	200	903	0	0	0	0	0	0	0	603	903	0
467	6	0	0	0	0	0	0	200	300	0	0	0	0	0	0	0	200	903	0	0	0	0	0	0	0	603	903	0
467	7	0	0	0	0	0	0	200	300	0	0	0	0	0	0	0	200	903	0	0	0	0	0	0	0	603	903	0
467	8	0	0	0	0	0	0	200	300	0	0	0	0	0	0	0	200	903	0	0	0	0	0	0	0	603	903	0
467	9	0	0	0	0	0	0	200	300	0	0	0	0	0	0	0	200	903	0	0	0	0	0	0	0	603	903	0
468	0	0	0	0	0	0	0	200	300	0	0	0	0	0	0	0	200	903	0	0	0	0	0	0	0	603	903	0
468	1	0	0	0	0	0	0	200	300	0	0	0	0	0	0	0	200	903	0	0	0	0	0	0	0	603	903	0
468	2	0	0	0	0	0	0	200	300	0	0	0	0	0	0	0	200	903	0	0	0	0	0	0	0	603	903	0
468	3	0	0	0	0	0	0	200	300	0	0	0	0	0	0	0	200	903	0	0	0	0	0	0	0	603	903	0
468	4	0	0	0	0	0	0	200	300	0	0	0	0	0	0	0	200	903	0	0	0	0	0	0	0	603	903	0
468	5	0	0	0	0	0	0	200	300	0	0	0	0	0	0	0	200	903	0	0	0	0	0	0	0	603	903	0
468	6	0	0	0	0	0	0	200	300	0	0	0	0	0	0	0	200	903	0	0	0	0	0	0	0	603	903	0
468	7	0	0	0	0	0	0	200	300	0	0	0	0	0	0	0	200	903	0	0	0	0	0	0	0	603	903	0
468	8	0	0	0	0	0	0	200	300	0	0	0	0	0	0	0	200	903	0	0	0	0	0	0	0	603	903	0
468	9	0	0	0	0	0	0	200	300	0	0	0	0	0	0	0	200	903	0	0	0	0	0	0	0	603	903	0
469	0	0	0	0	0	0	0	200	300	0	0	0	0	0	0	0	200	903	0	0	0	0	0	0	0	603	903	0
469	1	0	0	0	0	0	0	200	300	0	0	0	0	0	0	0	200	903	0	0	0	0	0	0	0	603	903	0
469	2	0	0	0	0	0	0	200	300	0	0	0	0	0	0	0	200	903	0	0	0	0	0	0	0	603	903	0
469	3	0	0	0	0	0	0	200	300	0	0	0	0	0	0	0	200	903	0	0	0	0	0	0	0	603	903	0
469	4	0	0	0	0	0	0	200	300	0	0	0	0	0	0	0	200	903	0	0	0	0	0	0	0	603	903	0
469	5	0	0	0	0	0	0	200	300	0	0	0	0	0	0	0	200	903	0	0	0	0	0	0	0	603	903	0
469	6	0	0	0	0	0	0	200	300	0	0	0	0	0	0	0	200	903	0	0	0	0	0	0	0	603	903	0
469	7	0	0	0	0	0	0	200	300	0	0	0	0	0	0	0	200	903	0	0	0	0	0	0	0	603	903	0
469	8	0	0	0	0	0	0	200	300	0	0	0	0	0	0	0	200	903	0	0	0	0	0	0	0	603	903	0
469	9	0	0	0	0	0	0	200	300	0	0	0	0	0	0	0	200	903	0	0	0	0	0	0	0	603	903	0
470	0	0	0	0	0	0	0	200	300	0	0	0	0	0	0	0	200	903	0	0	0	0	0	0	0	603	903	0
470	1	0	0	0	0	0	0	200	300	0	0	0	0	0	0	0	200	903	0	0	0	0	0	0	0	603	903	0
470	2	0	0	0	0	0	0	200	300	0	0	0	0	0	0	0	200	903	0	0	0	0	0	0	0	603	903	0
470	3	0	0	0	0	0	0	200	300	0	0	0	0	0	0	0	200	903	0	0	0	0	0	0	0	603	903	0
470	4	0	0	0	0	0	0	200	300	0	0	0	0	0	0	0	200	903	0	0	0	0	0	0	0	603	903	0
470	5	0	0	0	0	0	0	200	300	0	0	0	0	0	0	0	200	903	0	0	0	0	0	0	0	603	903	0
470	6	0	0	0	0	0	0	200	300	0	0	0	0	0	0	0	200	903	0	0	0	0	0	0	0	603	903	0
470	7	0	0	0	0	0	0	200	300	0	0	0	0	0	0	0	200	903	0	0	0	0	0	0	0	603	903	0
470	8	0	0	0	0	0	0	200	300	0	0	0	0	0	0	0	200	903	0	0	0	0	0	0	0	603	903	0
470	9	0	0	0	0	0	0	200	300	0	0	0	0	0	0	0	200	903	0	0	0	0	0	0	0	603	903	0
471	0	0	0	0	0	0	0	200	300	0	0	0	0	0	0	0	200	903	0	0	0	0	0	0	0	603	903	0
471	1	0	0	0	0	0	0	200	300	0	0	0	0	0	0	0	200	903	0	0	0	0	0	0	0	603	903	0
471	2	0	0	0	0	0	0	200	300	0	0	0	0	0	0	0	200	903	0	0	0	0	0	0	0	603	903	0
471	3	0	0	0	0	0	0	200	300	0	0	0	0	0	0	0	200	903	0	0	0	0	0	0	0	603	903	0
471	4	0	0	0	0	0	0	200	300	0	0	0	0	0	0	0	200	903	0	0	0	0	0	0	0	603	903	0
471	5	0	0	0	0	0	0	200	300	0	0	0	0	0	0	0	200	903	0	0	0	0	0	0	0	603	903	0
471	6	0	0	0	0	0	0	200	300	0	0	0	0	0	0	0	200	903	0	0	0	0	0	0	0	603	903	0
471	7	0	0	0	0	0	0	200	300	0	0	0	0	0	0	0	200	903	0	0	0	0	0	0	0	603	903	0
471	8	0	0	0	0	0	0	200	300	0	0	0	0	0	0	0	200	903	0	0	0	0	0	0	0	603	903	0
471	9	0	0	0	0	0	0	200	300	0	0	0	0	0	0	0	200	903	0	0	0	0	0	0	0	603	903	0
472	0	0	0	0	0	0	0	200	300	0	0	0	0	0	0	0	200	903	0	0	0	0	0	0	0	603	903	0
472	1	0	0	0	0	0	0	200	300	0	0	0	0	0	0	0	200	903	0	0	0	0	0	0	0	603	903	0
472	2	0	0	0	0	0	0	200	300	0	0	0	0	0	0	0	200	903	0	0	0	0	0	0	0	603	903	0
472	3	0	0	0	0	0	0	200	300	0	0	0	0	0	0	0	200	903	0	0	0	0	0	0	0	603	903	0
472	4	0	0	0	0	0	0	200	300	0	0	0	0	0	0	0	200	903	0	0	0	0	0	0	0	603	903	0
472	5	0	0	0	0	0	0	200	300	0	0	0	0	0	0	0	200	903	0	0	0	0	0	0	0	603	903	0
472	6	0	0	0	0	0	0	200	300	0	0	0	0	0	0	0	200	903	0	0	0	0	0	0	0	603	903	0
472	7	0	0	0	0	0	0	200	300	0	0	0	0	0	0	0	200	903	0	0	0	0	0	0	0	603	903	0
472	8	0	0	0	0	0	0	200	300	0	0	0	0	0	0	0	200	903	0	0	0	0	0	0	0	603	903	0
472	9	0	0	0	0	0	0	200	300	0	0	0	0	0	0	0	200	903	0	0	0	0	0	0	0	603	903	0
473	0	0	0	0	0	0	0	200	300	0	0	0	0	0	0	0	200	903	0	0	0	0	0	0	0	603	903	0
473	1	0	0	0	0	0	0	200	300	0	0	0	0	0	0	0	200	903	0	0	0	0	0	0	0	603	903	0
473	2	0	0	0	0	0	0	200	300	0	0	0	0	0	0	0	200	903	0	0	0	0	0	0	0	603	903	0
473	3	0	0	0	0	0	0	200	300	0	0	0	0	0	0	0	200	903	0	0	0	0	0	0	0	603	903	0
473	4	0	0	0	0	0	0	200	300	0	0	0	0	0	0	0	200	903	0	0	0	0	0	0	0	603	903	0
473	5	0	0	0	0	0	0	200	300	0	0	0	0	0	0	0	200	903	0	0	0	0	0	0	0	603	903	0
473	6	0	0	0	0	0	0	200	300	0	0	0	0	0	0	0	200	903	0	0	0	0	0	0	0	603	903	0
473	7	0	0	0	0	0	0	200	300	0	0	0	0	0	0	0	200	903	0	0	0	0	0	0	0	603	903	0
473	8	0	0	0	0	0	0	200	300	0	0	0	0	0	0	0	200	903	0	0	0	0	0	0	0	603	903	0
473	9	0	0	0	0	0	0	200	300	0	0	0	0	0	0	0	200	903	0	0	0	0	0	0	0	603	903	0
474	0	0	0	0	0	0	0	200	300	0	0	0	0	0	0	0	200	903	0	0	0	0	0	0	0	603	903	0
474	1	0	0	0	0	0	0	200	300	0	0	0	0	0	0	0	200	903	0	0	0	0	0	0	0	603	903	0
474	2	0	0	0	0	0	0	200	300	0	0	0	0	0	0	0	200	903	0	0	0	0	0	0	0	603	903	0
474	3	0	0	0	0	0	0	200	300	0	0	0	0	0	0	0	200	903	0	0	0	0	0	0	0	603	903	0
474	4	0	0	0	0	0	0	200	300	0	0	0	0	0	0	0	200	903	0	0	0	0	0	0	0	603	903	0
474	5	0	0	0	0	0	0	200	300	0	0	0	0	0	0	0	200	903	0	0	0	0	0	0	0	603	903	0
474	6	0	0	0	0	0	0	200	300	0	0	0	0	0	0	0	200	903	0	0	0	0	0	0	0	603	903	0
474	7	0	0	0	0	0	0	200	300	0	0	0	0	0	0	0	200	903	0	0	0	0	0	0	0	603	903	0
474	8	0	0	0	0	0	0	200	300	0	0	0	0	0	0	0	200	903	0	0	0	0	0	0	0	603	903	0
474	9	0	0	0	0	0	0	200	300	0	0	0	0	0	0	0	200	903	0	0	0	0	0	0	0	603	903	0
475	0	0	0	0	0	0	0	200	300	0	0	0	0	0	0	0	200	903	0	0	0	0	0	0	0	603	903	0
475	1	0	0	0	0	0	0	200	300	0	0	0	0	0	0	0	200	903	0	0	0	0	0	0	0	603	903	0
475	2	0	0	0	0	0	0	200	300	0	0	0	0	0	0	0	200	903	0	0	0	0	0	0	0	603	903	0
475	3	0	0	0	0	0	0	200	300	0	0	0	0	0	0	0	200	903	0	0	0	0	0	0	0	603	903	0
475	4	0	0	0	0	0	0	200	300	0	0	0	0	0	0	0	200	903	0	0	0	0	0	0	0	603	903	0
475	5	0	0	0	0	0	0	200	300	0	0	0	0	0	0	0	200	903	0	0	0	0	0	0	0	603	903	0
475	6	0	0	0	0	0	0	200	300	0	0	0	0	0	0	0	200	903	0	0	0	0	0	0	0	603	903	0
475	7	0	0	0	0	0	0	200	300	0	0	0	0	0	0	0	200	903	0	0	0	0	0	0	0	603	903	0
475	8	0	0	0	0	0	0	200	300	0	0	0	0	0	0	0	200	903	0	0	0	0	0	0	0	603	903	0
475	9	0	0	0	0	0	0	200	300	0	0	0	0	0	0	0	200	903	0	0	0	0	0	0	0	603	903	0
476	0	0	0	0	0	0	0	200	300	0	0	0	0	0	0	0	200	903	0	0	0	0	0	0	0	603	903	0
476	1	0	0	0	0	0	0	200	300	0	0	0	0	0	0	0	200	903	0	0	0	0	0	0	0	603	903	0
476	2	0	0	0	0	0	0	200	300	0	0	0	0	0	0	0	200	903	0	0	0	0	0	0	0	603	903	0
476	3	0	0	0	0	0	0	200	300	0	0	0	0	0	0	0	200	903	0	0	0	0	0	0	0	603	903	0
476	4	0	0	0	0	0	0	200	300	0	0	0	0	0	0	0	200	903	0	0	0	0	0	0	0	603	903	0
476	5	0	0	0	0	0	0	200	300	0	0	0	0	0	0	0	200	903	0	0	0	0	0	0	0	603	903	0
476	6	0	0	0	0	0	0	200	300	0	0	0	0	0	0	0	200	903	0	0	0	0	0	0	0	603	903	0
476	7	0	0	0	0	0	0	200	300	0	0	0	0	0	0	0	200	903	0	0	0	0	0	0	0	603	903	0
476	8	0	0	0	0	0	0	200	300	0	0	0	0	0	0	0	200	903	0	0	0	0	0	0	0	603	903	0
476	9	0	0	0	0	0	0	200	300	0	0	0	0	0	0	0	200	903	0	0	0	0	0	0	0	603	903	0
477	0	0	0	0	0	0	0	200	300	0	0	0	0	0	0	0	200	903	0	0	0	0	0	0	0	603	903	0
477	1	0	0	0	0	0	0	200	300	0	0	0	0	0	0	0	200	903	0	0	0	0	0	0	0	603	903	0
477	2	0	0	0	0	0	0	200	300	0	0	0	0	0	0	0	200	903	0	0	0	0	0	0	0	603	903	0
477	3	0	0	0	0	0	0	200	300	0	0	0	0	0	0	0	200	903	0	0	0	0	0	0	0	603	903	0
477	4	0	0	0	0	0	0	200	300	0	0	0	0	0	0	0	200	903	0	0	0	0	0	0	0	603	903	0
477	5	0	0	0	0	0	0	200	300	0	0	0	0	0	0	0	200	903	0	0	0	0	0	0	0	603	903	0
477	6	0	0	0	0	0	0	200	300	0	0	0	0	0	0	0	200	903	0	0	0	0	0	0	0	603	903	0
477	7	0	0	0	0	0	0	200	300	0	0	0	0	0	0	0	200	903	0	0	0	0	0	0	0	603	903	0
477	8	0	0	0	0	0	0	200	300	0	0	0	0	0	0	0	200	903	0	0	0	0	0	0	0	603	903	0
477	9	0	0	0	0	0	0	200	300	0	0	0	0	0	0	0	200	903	0	0	0	0	0	0	0	603	903	0
478	0	0	0	0	0	0	0	200	300	0	0	0	0	0	0	0	200	903	0	0	0	0	0	0	0	603	903	0
478	1	0	0	0	0	0	0	200	300	0	0	0	0	0	0	0	200	903	0	0	0	0	0	0	0	603	903	0
478	2	0	0	0	0	0	0	200	300	0	0	0	0	0	0	0	200	903	0	0	0	0	0	0	0	603	903	0
478	3	0	0	0	0	0	0	200	300	0	0	0	0	0	0	0	200	903	0	0	0	0	0	0	0	603	903	0
478	4	0	0	0	0	0	0	200	300	0	0	0	0	0	0	0	200	903	0	0	0	0	0	0	0	603	903	0
478	5	0	0	0	0	0	0	200	300	0	0	0	0	0	0	0	200	903	0	0	0	0	0	0	0	603	903	0
478	6	0	0	0	0	0	0	200	300	0	0	0	0	0	0	0	200	903	0	0	0	0	0	0	0	603	903	0
478	7	0	0	0	0	0	0	200	300	0	0	0	0	0	0	0	200	903	0	0	0	0	0	0	0	603	903	0
478	8	0	0	0	0	0	0	200	300	0	0	0	0	0	0	0	200	903	0	0	0	0	0	0	0	603	903	0
478	9	0	0	0	0	0	0	200	300	0	0	0	0	0	0	0	200	903	0	0	0	0	0	0	0	603	903	0
479	0	0	0	0	0	0	0	200	300	0	0	0	0	0	0	0	200	903	0	0	0	0	0	0	0	603	903	0
479	1	0	0	0	0	0	0	200	300	0	0	0	0	0	0	0	200	903	0	0	0	0	0	0	0	603	903	0
479	2	0	0	0	0	0	0	200	300	0	0	0	0	0	0	0	200	903	0	0	0	0	0	0	0	603	903	0
479	3	0	0	0	0	0	0	200	300	0	0	0	0	0	0	0	200	903	0	0	0	0	0	0	0	603	903	0
479	4	0	0	0	0	0	0	200	300	0	0	0	0	0	0	0	200	903	0	0	0	0	0	0	0	603	903	0
479	5	0	0	0	0	0	0	200	300	0	0	0	0	0	0	0	200	903	0	0	0	0	0	0	0	603	903	0
479	6	0	0	0	0	0	0	200	300	0	0	0	0	0	0	0	200	903	0	0	0	0	0	0	0	603	903	0
479	7	0	0	0	0	0	0	200	300	0	0	0	0	0	0	0	200	903	0	0	0	0	0	0	0	603	903	0
479	8	0	0	0	0	0	0	200	300	0	0	0	0	0	0	0	200	903	0	0	0	0	0	0	0	603	903	0
479	9	0	0	0	0	0	0	200	300	0	0	0	0	0	0	0	200	903	0	0	0	0	0	0	0	603	903	0
480	0	0	0	0	0	0	0	200	300	0	0	0	0	0	0	0	200	903	0	0	0	0	0	0	0	603	903	0
480	1	0	0	0	0	0	0	200	300	0	0	0	0	0	0	0	200	903	0	0	0	0	0	0	0	603	903	0
480	2	0	0	0	0	0	0	200	300	0	0	0	0	0	0	0	200	903	0	0	0	0	0	0	0	603	903	0
480	3	0	0	0	0	0	0	200	300	0	0	0	0	0	0	0	200	903	0	0	0	0	0	0	0	603	903	0
480	4	0	0	0	0	0	0	200	300	0	0	0	0	0	0	0	200	903	0	0	0	0	0	0	0	603	903	0
480	5	0	0	0	0	0	0	200	300	0	0	0	0	0	0	0	200	903	0	0	0	0	0	0	0	603	903	0
480	6	0	0	0	0	0	0	200	300	0	0	0	0	0	0	0	200	903	0	0	0	0	0	0	0	603	903	0
480	7	0	0	0	0	0	0	200	300	0	0	0	0	0	0	0	200	903	0	0	0	0	0	0	0	603	903	0
480	8	0	0	0	0	0	0	200	300	0	0	0	0	0	0	0	200	903	0	0	0	0	0	0	0	603	903	0
480	9	0	0	0	0	0	0	200	300	0	0	0	0	0	0	0	200	903	0	0	0	0	0	0	0	603	903	0
481	0	0	0	0	0	0	0	200	300	0	0	0	0	0	0	0	200	903	0	0	0	0	0	0	0	603	903	0
481	1	0	0	0	0	0	0	200	300	0	0	0	0	0	0	0	200	903	0	0	0	0	0	0	0	603	903	0
481	2	0	0	0	0	0	0	200	300	0	0	0	0	0	0	0	200	903	0	0	0	0	0	0	0	603	903	0
481	3	0	0	0	0	0	0	200	300	0	0	0	0	0	0	0	200	903	0	0	0	0	0	0	0	603	903	0
481	4	0	0	0	0	0	0	200	300	0	0	0	0	0	0	0	200	903	0	0	0	0	0	0	0	603	903	0
481	5	0	0	0	0	0	0	200	300	0	0	0	0	0	0	0	200	903	0	0	0	0	0	0	0	603	903	0
481	6	0	0	0	0	0	0	200	300	0	0	0	0	0	0	0	200	903	0	0	0	0	0	0	0	603	903	0
481	7	0	0	0	0	0	0	200	300	0	0	0	0	0	0	0	200	903	0	0	0	0	0	0	0	603	903	0
481	8	0	0	0	0	0	0	200	300	0	0	0	0	0	0	0	200	903	0	0	0	0	0	0	0	603	903	0
481	9	0	0	0	0	0	0	200	300	0	0	0	0	0	0	0	200	903	0	0	0	0	0	0	0	603	903	0
482	0	0	0	0	0	0	0	200	300	0	0	0	0	0	0	0	200	903	0	0	0	0	0	0	0	603	903	0
482	1	0	0	0	0	0	0	200	300	0	0	0	0	0	0	0	200	903	0	0	0	0	0	0	0	603	903	0
482	2	0	0	0	0	0	0	200	300	0	0	0	0	0	0	0	200	903	0	0	0	0	0	0	0	603	903	0
482	3	0	0	0	0	0	0	200	300	0	0	0	0	0	0	0	200	903	0	0	0	0	0	0	0	603	903	0
482	4	0	0	0	0	0	0	200	300	0	0	0	0	0	0	0	200	903	0	0	0	0	0	0	0	603	903	0
482	5	0	0	0	0	0	0	200	300	0	0	0	0	0	0	0	200	903	0	0	0	0	0	0	0	603	903	0
482	6	0	0	0	0	0	0	200	300	0	0	0	0	0	0	0	200	903	0	0	0	0	0	0	0	603	903	0
482	7	0	0	0	0	0	0	200	300	0	0	0	0	0	0	0	200	903	0	0	0	0	0	0	0	603	903	0
482	8	0	0	0	0	0	0	200	300	0	0	0	0	0	0	0	200	903	0	0	0	0	0	0	0	603	903	0
482	9	0	0	0	0	0	0	200	300	0	0	0	0	0	0	0	200	903	0	0	0	0	0	0	0	603	903	0
483	0	0	0	0	0	0	0	200	300	0	0	0	0	0	0	0	200	903	0	0	0	0	0	0	0	603	903	0
483	1	0	0	0	0	0	0	200	300	0	0	0	0	0	0	0	200	903	0	0	0	0	0	0	0	603	903	0
483	2	0	0	0	0	0	0	200	300	0	0	0	0	0	0	0	200	903	0	0	0	0	0	0	0	603	903	0
483	3	0	0	0	0	0	0	200	300	0	0	0	0	0	0	0	200	903	0	0	0	0	0	0	0	603	903	0
483	4	0	0	0	0	0	0	200	300	0	0	0	0	0	0	0	200	903	0	0	0	0	0	0	0	603	903	0
483	5	0	0	0	0	0	0	200	300	0	0	0	0	0	0	0	200	903	0	0	0	0	0	0	0	603	903	0
483	6	0	0	0	0	0	0	200	300	0	0	0	0	0	0	0	200	903	0	0	0	0	0	0	0	603	903	0
483	7	0	0	0	0	0	0	200	300	0	0	0	0	0	0	0	200	903	0	0	0	0	0	0	0	603	903	0
483	8	0	0	0	0	0	0	200	300	0	0	0	0	0	0	0	200	903	0	0	0	0	0	0	0	603	903	0
483	9	0	0	0	0	0	0	200	300	0	0	0	0	0	0	0	200	903	0	0	0	0	0	0	0	603	903	0
484	0	0	0	0	0	0	0	200	300	0	0	0	0	0	0	0	200	903	0	0	0	0	0	0	0	603	903	0
484	1	0	0	0	0	0	0	200	300	0	0	0	0	0	0	0	200	903	0	0	0	0	0	0	0	603	903	0
484	2	0	0	0	0	0	0	200	300	0	0	0	0	0	0	0	200	903	0	0	0	0	0	0	0	603	903	0
484	3	0	0	0	0	0	0	200	300	0	0	0	0	0	0	0	200	903	0	0	0	0	0	0	0	603	903	0
484	4	0	0	0	0	0	0	200	300	0	0	0	0	0	0	0	200	903	0	0	0	0	0	0	0	603	903	0
484	5	0	0	0	0	0	0	200	300	0	0	0	0	0	0	0	200	903	0	0	0	0	0	0	0	603	903	0
484	6	0	0	0	0	0	0	200	300	0	0	0	0	0	0	0	200	903	0	0	0	0	0	0	0	603	903	0
484	7	0	0	0	0	0	0	200	300	0	0	0	0	0	0	0	200	903	0	0	0	0	0	0	0	603	903	0
484	8	0	0	0	0	0	0	200	300	0	0	0	0	0	0	0	200	903	0	0	0	0	0	0	0	603	903	0
484	9	0	0	0	0	0	0	200	300	0	0	0	0	0	0	0	200	903	0	0	0	0	0	0	0	603	903	0
485	0	0	0	0	0	0	0	200	300	0	0	0	0	0	0	0	200	903	0	0	0	0	0	0	0	603	903	0
485	1	0	0	0	0	0	0	200	300	0	0	0	0	0	0	0	200	903	0	0	0	0	0	0	0	603	903	0
485	2	0	0	0	0	0	0	200	300	0	0	0	0	0	0	0	200	903	0	0	0	0	0	0	0	603	903	0
485	3	0	0	0	0	0	0	200	300	0	0	0	0	0	0	0	200	903	0	0	0	0	0	0	0	603	903	0
485	4	0	0	0	0	0	0	200	300	0	0	0	0	0	0	0	200	903	0	0	0	0	0	0	0	603	903	0
485	5	0	0	0	0	0	0	200	300	0	0	0	0	0	0	0	200	903	0	0	0	0	0	0	0	603	903	0
485	6	0	0	0	0	0	0	200	300	0	0	0	0	0	0	0	200	903	0	0	0	0	0	0	0	603	903	0
485	7	0	0	0	0	0	0	200	300	0	0	0	0	0	0	0	200	903	0	0	0	0	0	0	0	603	903	0
485	8	0	0	0	0	0	0	200	300	0	0	0	0	0	0	0	200	903	0	0	0	0	0	0	0	603	903	0
485	9	0	0	0	0	0	0	200	300	0	0	0	0	0	0	0	200	903	0	0	0	0	0	0	0	603	903	0
486	0	0	0	0	0	0	0	200	300	0	0	0	0	0	0	0	200	903	0	0	0	0	0	0	0	603	903	0
486	1	0	0	0	0	0	0	200	300	0	-2.62024	-14.715	-21.784	-3425.36	1566.65	-1050.29	271.918	1060.24	0	0	0	0	0	0	0	603	903	0
486	2	0	0	0	0	0	0	200	300	0	-2.77283	-18.8348	-26.6668	-4157.78	1139.41	-1279.18	242.728	1058.92	0	0	0	0	0	0	0	603	903	0
486	3	0	0	0	0	0	0	200	300	0	-0.789184	-11.2054	-19.3426	-3059.14	773.196	-821.412	239.974	1061.16	0	0	0	0	0	0	0	603	903	0
486	4	0	0	0	0	0	0	200	300	0	0	0	0	0	0	0	200	903	0	0	0	0	0	0	0	603	903	0
486	5	0	0	0	0	0	0	200	300	0	-0.941772	-13.952	-17.2064	-3242.25	1505.62	-821.412	287.504	1091.43	0	0	0	0	0	0	0	603	903	0
486	6	0	0	0	0	0	0	200	300	0	-0.0262447	-17.0038	-23.9202	-3608.46	895.266	-1187.62	237.427	1053.85	0	0	0	0	0	0	0	603	903	0
486	7	0	0	0	0	0	0	200	300	0	-0.789184	-16.3934	-27.2772	-4340.88	1993.9	-1599.61	273.098	1062.14	0	0	0	0	0	0	0	603	903	0
486	8	0	0	0	0	0	0	200	300	0	-1.24695	-19.7504	-26.0565	-5073.31	2054.94	-1828.49	278.865	1097.7	0	0	0	0	0	0	0	603	903	0
486	9	0	0	0	0	0	0	200	300	0	3.78845	-24.1754	-30.9393	-4981.75	1932.86	-2194.7	262.473	1064.02	0	0	0	0	0	0	0	603	903	0
487	0	0	0	0	0	0	0	200	300	0	3.02551	-25.3961	-37.0428	-5439.52	2482.18	-2469.36	267.008	1049.84	0	0	0	0	0	0	0	603	903	0
487	1	0	0	0	0	0	0	200	300	0	1.65222	-26.6168	-41.9256	-6629.7	2787.36	-3064.45	266.483	1061.13	0	0	0	0	0	0	0	603	903	0
487	2	0	0	0	0	0	0	200	300	0	6.53503	-31.9574	-45.5877	-6812.81	3092.53	-3430.67	267.837	1052.44	0	0	0	0	0	0	0	603	903	0
487	3	0	0	0	0	0	0	200	300	0	8.06091	-35.9247	-50.4705	-7728.33	3519.78	-3979.98	269.739	1056.13	0	0	0	0	0	0	0	603	903	0
487	4	0	0	0	0	0	0	200	300	0	7.14539	-38.2135	-57.4896	-9010.07	3397.71	-4483.52	259.101	1059.73	0	0	0	0	0	0	0	603	903	0
487	5	0	0	0	0	0	0	200	300	0	8.51868	-41.2653	-64.5086	-9467.83	4069.1	-4300.42	263.078	1049.77	0	0	0	0	0	0	0	603	903	0
487	6	0	0	0	0	0	0	200	300	0	8.2135	-44.4696	-70.9173	-11024.2	4252.2	-4758.18	259.96	1058.45	0	0	0	0	0	0	0	603	903	0
487	7	0	0	0	0	0	0	200	300	0	7.75574	-40.1971	-79.157	-11848.2	4923.59	-4025.76	262.2	1052.68	0	0	0	0	0	0	0	603	903	0
487	8	0	0	0	0	0	0	200	300	0	5.31433	-35.7721	-94.1106	-13038.4	5106.69	-3476.44	254.263	1041.54	0	0	0	0	0	0	0	603	903	0
487	9	0	0	0	0	0	0	200	300	0	3.33069	-33.7885	-104.487	-15418.8	6388.43	-3476.44	261.141	1050.57	0	0	0	0	0	0	0	603	903	0
488	0	0	0	0	0	0	0	200	300	0	5.00916	-29.9738	-115.168	-17616	6327.4	-2927.13	254.941	1055.96	0	0	0	0	0	0	0	603	903	0
488	1	0	0	0	0	0	0	200	300	0	4.55139	-24.6332	-127.985	-19080.9	6876.71	-2515.14	253.731	1052.09	0	0	0	0	0	0	0	603	903	0
488	2	0	0	0	0	0	0	200	300	0	2.26257	-24.6332	-141.718	-20911.9	7792.24	-2057.37	254.984	1050.56	0	0	0	0	0	0	0	603	903	0
488	3	0	0	0	0	0	0	200	300	0	-0.484008	-23.8702	-153.01	-23200.7	8219.49	-1462.28	253.719	1054.63	0	0	0	0	0	0	0	603	903	0
488	4	0	0	0	0	0	0	200	300	0	-0.636596	-18.2245	-163.386	-24848.7	8341.56	-775.635	251.054	1055.09	0	0	0	0	0	0	0	603	903	0
488	5	0	0	0	0	0	0	200	300	0	-6.58752	-13.952	-176.813	-26313.5	8951.91	-317.872	250.629	1051.82	0	0	0	0	0	0	0	603	903	0
488	6	0	0	0	0	0	0	200	300	0	-8.41858	-13.6469	-189.02	-28236.1	9318.12	597.656	249.297	1052.38	0	0	0	0	0	0	0	603	903	0
488	7	0	0	0	0	0	0	200	300	0	-9.33411	-10.7477	-202.448	-29975.6	9806.4	963.867	248.439	1051.07	0	0	0	0	0	0	0	603	903	0
488	8	0	0	0	0	0	0	200	300	0	-14.0643	-5.25452	-214.045	-31074.3	9989.51	1238.52	246.67	1048.18	0	0	0	0	0	0	0	603	903	0
488	9	0	0	0	0	0	0	200	300	0	-15.285	-5.55969	-223.2	-32630.7	10233.6	1513.18	245.85	1049.19	0	0	0	0	0	0	0	603	903	0
489	0	0	0	0	0	0	0	200	300	0	-15.5902	-5.71228	-233.271	-34004	10416.8	2154.05	244.655	1048.77	0	0	0	0	0	0	0	603	903	0
489	1	0	0	0	0	0	0	200	300	0	-17.1161	-2.35535	-243.036	-35468.8	11820.6	2016.72	248.637	1048.94	0	0	0	0	0	0	0	603	903	0
489	2	0	0	0	0	0	0	200	300	0	-18.4894	-0.829468	-252.802	-35468.8	11088.1	2154.05	243.861	1043.3	0	0	0	0	0	0	0	603	903	0
489	3	0	0	0	0	0	0	200	300	0	-18.7946	-5.10193	-261.042	-37757.6	12064.7	2199.83	246.218	1047.64	0	0	0	0	0	0	0	603	903	0
489	4	0	0	0	0	0	0	200	300	0	-20.1678	-9.06921	-266.535	-37483	12125.7	2428.71	245.494	1043.63	0	0	0	0	0	0	0	603	903	0
489	5	0	0	0	0	0	0	200	300	0	-18.0316	-8.91663	-274.47	-38490.1	11881.6	2245.6	243.289	1043.23	0	0	0	0	0	0	0	603	903	0
489	6	0	0	0	0	0	0	200	300	0	-19.8627	-13.1891	-278.742	-39405.6	12064.7	2245.6	243.283	1044.37	0	0	0	0	0	0	0	603	903	0
489	7	0	0	0	0	0	0	200	300	0	-22.7618	-18.9874	-288.508	-40778.9	12980.2	2199.83	244.991	1044.34	0	0	0	0	0	0	0	603	903	0
489	8	0	0	0	0	0	0	200	300	0	-24.7455	-19.5978	-300.104	-41053.5	13224.4	2016.72	244.066	1039.8	0	0	0	0	0	0	0	603	903	0
489	9	0	0	0	0	0	0	200	300	0	-23.5248	-25.7013	-308.954	-42060.6	13346.4	1879.39	243.199	1039.14	0	0	0	0	0	0	0	603	903	0
490	0	0	0	0	0	0	0	200	300	0	-22.3041	-36.9928	-315.058	-42426.8	13834.7	1650.51	243.912	1037.66	0	0	0	0	0	0	0	603	903	0
490	1	0	0	0	0	0	0	200	300	0	-24.8981	-41.2653	-320.856	-43708.6	14384	1330.08	244.83	1039.22	0	0	0	0	0	0	0	603	903	0
490	2	0	0	0	0	0	0	200	300	0	-25.8136	-42.1808	-330.622	-44257.9	14506.1	1192.75	243.875	1036.86	0	0	0	0	0	0	0	603	903	0
490	3	0	0	0	0	0	0	200	300	0	-26.2714	-49.8102	-337.946	-44441	14628.2	1009.64	243.286	1034.5	0	0	0	0	0	0	0	603	903	0
490	4	0	0	0	0	0	0	200	300	0	-27.3395	-56.0663	-343.134	-45173.4	14689.2	963.867	242.809	1034.65	0	0	0	0	0	0	0	603	903	0
490	5	0	0	0	0	0	0	200	300	0	-30.6964	-57.7448	-351.374	-45997.4	15177.5	963.867	243.195	1033.91	0	0	0	0	0	0	0	603	903	0
490	6	0	0	0	0	0	0	200	300	0	-33.7482	-63.5431	-360.224	-45173.4	15543.7	734.985	243.15	1028.4	0	0	0	0	0	0	0	603	903	0
490	7	0	0	0	0	0	0	200	300	0	-31.9171	-71.3251	-367.548	-47462.2	15177.5	734.985	241.294	1032.13	0	0	0	0	0	0	0	603	903	0
490	8	0	0	0	0	0	0	200	300	0	-35.8844	-72.851	-372.736	-47370.7	15482.7	826.538	241.538	1030.09	0	0	0	0	0	0	0	603	903	0
490	9	0	0	0	0	0	0	200	300	0	-36.4948	-73.0035	-377.314	-48194.6	16032	414.55	242.49	1030.73	0	0	0	0	0	0	0	603	903	0
491	0	0	0	0	0	0	0	200	300	0	-36.3422	-77.4286	-387.69	-48652.4	16276.1	551.879	241.982	1028.49	0	0	0	0	0	0	0	603	903	0
491	1	0	0	0	0	0	0	200	300	0	-37.7155	-79.5648	-397.455	-49384.8	16032	368.774	240.337	1027.25	0	0	0	0	0	0	0	603	903	0
491	2	0	0	0	0	0	0	200	300	0	-40.3094	-77.276	-402.643	-49934.2	16886.5	368.774	241.939	1027.02	0	0	0	0	0	0	0	603	903	0
491	3	0	0	0	0	0	0	200	300	0	-38.4784	-79.2596	-410.273	-50117.3	16886.5	414.55	241.159	1025.16	0	0	0	0	0	0	0	603	903	0
491	4	0	0	0	0	0	0	200	300	0	-39.2413	-83.0743	-414.545	-50391.9	16642.3	643.432	240.146	1024.56	0	0	0	0	0	0	0	603	903	0
491	5	0	0	0	0	0	0	200	300	0	-41.225	-80.7855	-422.175	-51032.8	17069.6	139.892	240.433	1023.88	0	0	0	0	0	0	0	603	903	0
491	6	0	0	0	0	0	0	200	300	0	-43.819	-77.4286	-427.363	-51673.7	17435.8	185.669	240.799	1023.91	0	0	0	0	0	0	0	603	903	0
491	7	0	0	0	0	0	0	200	300	0	-42.9034	-79.7174	-431.025	-51948.3	18107.2	277.221	242.01	1023.52	0	0	0	0	0	0	0	603	903	0
491	8	0	0	0	0	0	0	200	300	0	-41.5302	-78.6493	-436.518	-50758.1	17679.9	48.3394	240.502	1019.28	0	0	0	0	0	0	0	603	903	0
491	9	0	0	0	0	0	0	200	300	0	-42.1405	-76.9708	-440.79	-52131.4	17985.1	-180.542	240.802	1021.27	0	0	0	0	0	0	0	603	903	0
492	0	0	0	0	0	0	0	200	300	0	-42.4457	-76.8182	-443.842	-52589.2	18351.3	-409.424	241.347	1021.49	0	0	0	0	0	0	0	603	903	0
492	1	0	0	0	0	0	0	200	300	0	-37.7155	-78.1915	-442.316	-52497.6	18778.6	-546.754	242.455	1021.69	0	0	0	0	0	0	0	603	903	0
492	2	0	0	0	0	0	0	200	300	0	-40.9198	-75.4449	-446.894	-52497.6	18351.3	-546.754	241.064	1020.47	0	0	0	0	0	0	0	603	903	0
492	3	0	0	0	0	0	0	200	300	0	-39.6991	-74.8346	-449.335	-52039.9	18717.5	-1004.52	241.656	1018.82	0	0	0	0	0	0	0	603	903	0
492	4	0	0	0	0	0	0	200	300	0	-37.7155	-77.1234	-452.692	-51948.3	19144.8	-1187.62	242.291	1017.75	0	0	0	0	0	0	0	603	903	0
492	5	0	0	0	0	0	0	200	300	0	-37.868	-77.7338	-452.387	-52497.6	19144.8	-1187.62	242.319	1019.05	0	0	0	0	0	0	0	603	903	0
492	6	0	0	0	0	0	0	200	300	0	-37.4103	-75.7501	-453.608	-51856.8	19205.8	-1370.73	242.34	1017.32	0	0	0	0	0	0	0	603	903	0
492	7	0	0	0	0	0	0	200	300	0	-36.4948	-76.8182	-452.997	-51124.3	19694.1	-1508.06	243.475	1015.86	0	0	0	0	0	0	0	603	903	0
492	8	0	0	0	0	0	0	200	300	0	-32.5275	-76.9708	-453.303	-51215.9	19205.8	-1782.72	242.369	1015.98	0	0	0	0	0	0	0	603	903	0
492	9	0	0	0	0	0	0	200	300	0	-32.9852	-76.3605	-455.134	-51673.7	19572	-1874.27	243.003	1016.54	0	0	0	0	0	0	0	603	903	0
493	0	0	0	0	0	0	0	200	300	0	-32.9852	-77.276	-453.913	-50483.5	18656.5	-2057.37	241.102	1014.22	0	0	0	0	0	0	0	603	903	0
493	1	0	0	0	0	0	0	200	300	0	-31.1542	-78.6493	-449.64	-50391.9	19572	-1920.04	243.528	1015.07	0	0	0	0	0	0	0	603	903	0
493	2	0	0	0	0	0	0	200	300	0	-28.255	-78.9545	-449.946	-50575	19022.7	-1782.72	242.278	1015.4	0	0	0	0	0	0	0	603	903	0
493	3	0	0	0	0	0	0	200	300	0	-28.1024	-77.5812	-449.03	-49751.1	19022.7	-2240.48	242.364	1013.8	0	0	0	0	0	0	0	603	903	0
493	4	0	0	0	0	0	0	200	300	0	-26.2714	-78.8019	-449.335	-50025.7	18900.6	-2057.37	242.064	1014.33	0	0	0	0	0	0	0	603	903	0
493	5	0	0	0	0	0	0	200	300	0	-24.8981	-80.9381	-445.063	-49751.1	19266.9	-2286.26	243.29	1014.78	0	0	0	0	0	0	0	603	903	0
493	6	0	0	0	0	0	0	200	300	0	-25.0507	-79.2596	-446.284	-48835.5	19450	-2286.26	243.582	1012.43	0	0	0	0	0	0	0	603	903	0
493	7	0	0	0	0	0	0	200	300	0	-22.4567	-79.87	-443.842	-48652.4	19388.9	-2377.81	243.684	1012.62	0	0	0	0	0	0	0	603	903	0
493	8	0	0	0	0	0	0	200	300	0	-20.6256	-80.6329	-443.232	-49110.2	19205.8	-2744.02	243.331	1013.8	0	0	0	0	0	0	0	603	903	0
493	9	0	0	0	0	0	0	200	300	0	-19.7101	-79.4122	-440.485	-48469.3	19572	-3201.78	244.433	1013.04	0	0	0	0	0	0	0	603	903	0
494	0	0	0	0	0	0	0	200	300	0	-18.4894	-79.5648	-444.147	-47553.8	19694.1	-3156.01	244.341	1010.07	0	0	0	0	0	0	0	603	903	0
494	1	0	0	0	0	0	0	200	300	0	-15.7428	-82.0062	-441.706	-46546.7	19450	-3384.89	244.034	1008.38	0	0	0	0	0	0	0	603	903	0
494	2	0	0	0	0	0	0	200	300	0	-13.6066	-81.701	-441.096	-47736.9	19572	-3201.78	244.371	1011.22	0	0	0	0	0	0	0	603	903	0
494	3	0	0	0	0	0	0	200	300	0	-13.7592	-78.4967	-438.654	-47096	19755.1	-3522.22	245.036	1010.36	0	0	0	0	0	0	0	603	903	0
494	4	0	0	0	0	0	0	200	300	0	-12.0807	-77.7338	-452.692	-47279.1	21097.9	-3613.77	246.605	1007.44	0	0	0	0	0	0	0	603	903	0
494	5	0	0	0	0	0	0	200	300	0	-4.45129	-77.7338	-462.458	-46546.7	21647.2	-3842.65	246.809	1003.65	0	0	0	0	0	0	0	603	903	0
494	6	0	0	0	0	0	0	200	300	0	4.3988	-82.7692	-463.679	-45905.8	21281	-4208.86	245.896	1002	0	0	0	0	0	0	0	603	903	0
494	7	0	0	0	0	0	0	200	300	0	3.48328	-89.6356	-459.101	-46455.2	21586.2	-4575.07	247.018	1004.19	0	0	0	0	0	0	0	603	903	0
494	8	0	0	0	0	0	0	200	300	0	1.9574	-88.8727	-460.627	-46180.5	21586.2	-4254.64	246.863	1003.26	0	0	0	0	0	0	0	603	903	0
494	9	0	0	0	0	0	0	200	300	0	10.9601	-87.652	-470.392	-45997.4	21830.3	-5124.39	246.409	1000.79	0	0	0	0	0	0	0	603	903	0
495	0	0	0	0	0	0	0	200	300	0	10.6549	-92.6874	-477.411	-45722.7	21952.4	-5032.84	245.982	998.772	0	0	0	0	0	0	0	603	903	0
495	1	0	0	0	0	0	0	200	300	0	3.33069	-98.028	-480.158	-46088.9	22684.8	-5261.72	247.245	998.987	0	0	0	0	0	0	0	603	903	0
495	2	0	0	0	0	0	0	200	300	0	-0.178833	-99.7064	-481.074	-46180.5	22440.7	-5673.71	246.647	998.995	0	0	0	0	0	0	0	603	903	0
495	3	0	0	0	0	0	0	200	300	0	3.94104	-103.216	-485.041	-45997.4	22501.7	-6223.02	246.391	997.832	0	0	0	0	0	0	0	603	903	0
495	4	0	0	0	0	0	0	200	300	0	3.94104	-107.336	-488.703	-45997.4	22806.9	-5582.16	246.668	997.121	0	0	0	0	0	0	0	603	903	0
495	5	0	0	0	0	0	0	200	300	0	-0.636596	-106.268	-488.703	-45997.4	22867.9	-6223.02	246.793	997.121	0	0	0	0	0	0	0	603	903	0
495	6	0	0	0	0	0	0	200	300	0	-2.92541	-107.488	-492.365	-46180.5	22501.7	-6314.58	245.701	996.793	0	0	0	0	0	0	0	603	903	0
495	7	0	0	0	0	0	0	200	300	0	-1.39954	-109.472	-496.332	-46455.2	22745.9	-5994.14	245.828	996.597	0	0	0	0	0	0	0	603	903	0
495	8	0	0	0	0	0	0	200	300	0	-2.16248	-107.641	-500.3	-45905.8	23051	-6177.25	246.074	994.757	0	0	0	0	0	0	0	603	903	0
495	9	0	0	0	0	0	0	200	300	0	-7.50305	-106.725	-499.994	-44990.3	22745.9	-6406.13	245.492	992.982	0	0	0	0	0	0	0	603	903	0
496	0	0	0	0	0	0	0	200	300	0	-5.06165	-106.878	-503.351	-45631.2	22623.8	-5765.26	244.946	993.655	0	0	0	0	0	0	0	603	903	0
496	1	0	0	0	0	0	0	200	300	0	-0.178833	-103.826	-508.845	-45997.4	23051	-5948.37	245.301	993.396	0	0	0	0	0	0	0	603	903	0
496	2	0	0	0	0	0	0	200	300	0	-2.31506	-100.469	-512.201	-45997.4	22623.8	-6223.02	244.17	992.803	0	0	0	0	0	0	0	603	903	0
496	3	0	0	0	0	0	0	200	300	0	-4.60388	-101.843	-514.033	-45265	23417.2	-5811.04	245.556	991.059	0	0	0	0	0	0	0	603	903	0
496	4	0	0	0	0	0	0	200	300	0	1.04187	-100.469	-518	-45722.7	22501.7	-5994.14	243.44	991.268	0	0	0	0	0	0	0	603	903	0
496	5	0	0	0	0	0	0	200	300	0	3.63586	-99.7064	-519.831	-46363.6	23600.3	-6177.25	245.4	992.19	0	0	0	0	0	0	0	603	903	0
496	6	0	0	0	0	0	0	200	300	0	1.19446	-98.3331	-523.188	-45265	23783.5	-5719.48	245.459	989.518	0	0	0	0	0	0	0	603	903	0
496	7	0	0	0	0	0	0	200	300	0	1.80481	-100.164	-525.934	-45997.4	23661.4	-6177.25	244.989	990.458	0	0	0	0	0	0	0	603	903	0
496	8	0	0	0	0	0	0	200	300	0	7.14539	-100.469	-531.428	-45722.7	23600.3	-6360.35	244.409	989.038	0	0	0	0	0	0	0	603	903	0
496	9	0	0	0	0	0	0	200	300	0	10.3497	-100.622	-534.784	-46088.9	24393.8	-5811.04	245.614	989.182	0	0	0	0	0	0	0	603	903	0
497	0	0	0	0	0	0	0	200	300	0	8.51868	-100.927	-535.7	-46638.3	24332.8	-6085.7	245.422	990.06	0	0	0	0	0	0	0	603	903	0
497	1	0	0	0	0	0	0	200	300	0	8.36609	-103.063	-538.447	-46455.2	24149.7	-6223.02	244.851	989.276	0	0	0	0	0	0	0	603	903	0
497	2	0	0	0	0	0	0	200	300	0	10.6549	-100.622	-544.855	-46638.3	24637.9	-5948.37	245.219	988.598	0	0	0	0	0	0	0	603	903	0
497	3	0	0	0	0	0	0	200	300	0	13.0963	-99.7064	-548.212	-46455.2	25309.3	-6406.13	246.167	987.739	0	0	0	0	0	0	0	603	903	0
497	4	0	0	0	0	0	0	200	300	0	14.1644	-101.232	-547.602	-46638.3	25126.2	-6818.12	245.884	988.168	0	0	0	0	0	0	0	603	903	0
497	5	0	0	0	0	0	0	200	300	0	12.6385	-100.927	-554.011	-46546.7	25309.3	-6406.13	245.684	987.018	0	0	0	0	0	0	0	603	903	0
497	6	0	0	0	0	0	0	200	300	0	13.4015	-99.5538	-557.673	-46638.3	25309.3	-6406.13	245.384	986.63	0	0	0	0	0	0	0	603	903	0
497	7	0	0	0	0	0	0	200	300	0	12.9437	-98.4857	-560.724	-46272	25309.3	-6909.67	245.137	985.522	0	0	0	0	0	0	0	603	903	0
497	8	0	0	0	0	0	0	200	300	0	13.0963	-98.9435	-563.166	-46272	25370.4	-6680.79	245.05	985.164	0	0	0	0	0	0	0	603	903	0
497	9	0	0	0	0	0	0	200	300	0	14.9274	-98.4857	-565.912	-46363.6	25431.4	-6772.34	244.939	984.927	0	0	0	0	0	0	0	603	903	0
498	0	0	0	0	0	0	0	200	300	0	13.8593	-98.028	-569.269	-47370.7	25797.6	-7047	245.317	986.213	0	0	0	0	0	0	0	603	903	0
498	1	0	0	0	0	0	0	200	300	0	12.1808	-98.9435	-570.49	-47004.5	26041.8	-6589.24	245.648	985.393	0	0	0	0	0	0	0	603	903	0
498	2	0	0	0	0	0	0	200	300	0	12.3334	-97.265	-570.795	-46638.3	25675.5	-6635.01	244.982	984.708	0	0	0	0	0	0	0	603	903	0
498	3	0	0	0	0	0	0	200	300	0	13.4015	-96.5021	-575.678	-45814.3	25553.5	-7184.33	244.389	982.583	0	0	0	0	0	0	0	603	903	0
498	4	0	0	0	0	0	0	200	300	0	14.9274	-95.8917	-579.951	-47004.5	26285.9	-6726.56	245.324	984.049	0	0	0	0	0	0	0	603	903	0
498	5	0	0	0	0	0	0	200	300	0	13.5541	-96.1969	-581.782	-47279.1	26163.8	-6818.12	244.972	984.266	0	0	0	0	0	0	0	603	903	0
498	6	0	0	0	0	0	0	200	300	0	16.1481	-93.4503	-583.307	-47462.2	25492.4	-6818.12	243.703	984.367	0	0	0	0	0	0	0	603	903	0
498	7	0	0	0	0	0	0	200	300	0	15.08	-94.2133	-584.833	-47004.5	26102.8	-6406.13	244.633	983.372	0	0	0	0	0	0	0	603	903	0
498	8	0	0	0	0	0	0	200	300	0	17.0636	-92.84	-586.359	-47279.1	25736.6	-6268.8	243.892	983.632	0	0	0	0	0	0	0	603	903	0
498	9	0	0	0	0	0	0	200	300	0	17.2162	-91.6193	-588.19	-47920	25492.4	-6726.56	243.34	984.47	0	0	0	0	0	0	0	603	903	0
499	0	0	0	0	0	0	0	200	300	0	15.8429	-89.7882	-592.158	-47004.5	26224.9	-6177.25	244.287	982.378	0	0	0	0	0	0	0	603	903	0
499	1	0	0	0	0	0	0	200	300	0	18.5895	-91.3141	-593.378	-47828.4	26774.2	-6268.8	245.122	983.604	0	0	0	0	0	0	0	603	903	0
499	2	0	0	0	0	0	0	200	300	0	18.2843	-90.5511	-592.463	-47645.3	26469	-6635.01	244.676	983.419	0	0	0	0	0	0	0	603	903	0
499	3	0	0	0	0	0	0	200	300	0	18.8947	-88.2623	-593.378	-47370.7	26408	-6039.92	244.504	982.832	0	0	0	0	0	0	0	603	903	0
499	4	0	0	0	0	0	0	200	300	0	19.505	-87.652	-597.346	-46821.4	26774.2	-6314.58	244.822	981.382	0	0	0	0	0	0	0	603	903	0
499	5	0	0	0	0	0	0	200	300	0	19.1998	-87.9572	-597.651	-47828.4	26835.2	-6543.46	244.901	983.027	0	0	0	0	0	0	0	603	903	0
499	6	0	0	0	0	0	0	200	300	0	21.4886	-87.1942	-599.787	-47736.9	26957.3	-6085.7	244.945	982.59	0	0	0	0	0	0	0	603	903	0
499	7	0	0	0	0	0	0	200	300	0	19.1998	-84.4476	-600.702	-47279.1	26591.1	-6085.7	244.267	981.706	0	0	0	0	0	0	0	603	903	0
499	8	0	0	0	0	0	0	200	300	0	20.8783	-85.2106	-602.228	-47553.8	26591.1	-6268.8	244.154	981.963	0	0	0	0	0	0	0	603	903	0
499	9	0	0	0	0	0	0	200	300	0	20.2679	-83.8373	-604.67	-47920	26163.8	-6085.7	243.27	982.25	0	0	0	0	0	0	0	603	903	0
500	0	0	0	0	0	0	0	200	300	0	19.1998	-82.0062	-607.111	-48103.1	27079.4	-5307.5	244.604	982.233	0	0	0	0	0	0	0	603	903	0
500	1	0	0	0	0	0	0	200	300	0	21.9464	-81.2433	-607.111	-48286.2	26285.9	-6406.13	243.297	982.534	0	0	0	0	0	0	0	603	903	0
500	2	0	0	0	0	0	0	200	300	0	19.8102	-81.3959	-610.468	-48194.6	26652.1	-5811.04	243.658	981.947	0	0	0	0	0	0	0	603	903	0
500	3	0	0	0	0	0	0	200	300	0	20.5731	-80.0226	-608.637	-47920	26530	-5856.81	243.589	981.733	0	0	0	0	0	0	0	603	903	0
500	4	0	0	0	0	0	0	200	300	0	21.1835	-77.5812	-607.721	-48560.9	26163.8	-5719.48	243.052	982.906	0	0	0	0	0	0	0	603	903	0
500	5	0	0	0	0	0	0	200	300	0	19.9628	-78.0389	-610.773	-48469.3	26408	-5582.16	243.237	982.357	0	0	0	0	0	0	0	603	903	0
500	6	0	0	0	0	0	0	200	300	0	20.4205	-77.1234	-613.52	-47462.2	26896.2	-5353.27	243.839	980.361	0	0	0	0	0	0	0	603	903	0
500	7	0	0	0	0	0	0	200	300	0	21.4886	-75.7501	-613.825	-47279.1	26835.2	-5719.48	243.718	980.024	0	0	0	0	0	0	0	603	903	0
500	8	0	0	0	0	0	0	200	300	0	21.0309	-74.8346	-615.351	-48377.7	26530	-5170.17	243.114	981.618	0	0	0	0	0	0	0	603	903	0
500	9	0	0	0	0	0	0	200	300	0	20.5731	-74.8346	-614.13	-48927.1	26591.1	-5170.17	243.299	982.669	0	0	0	0	0	0	0	603	903	0
501	0	0	0	0	0	0	0	200	300	0	20.5731	-73.6139	-615.046	-48927.1	26774.2	-5353.27	243.532	982.55	0	0	0	0	0	0	0	603	903	0
501	1	0	0	0	0	0	0	200	300	0	20.7257	-71.3251	-615.351	-48011.5	26835.2	-4987.06	243.61	981.023	0	0	0	0	0	0	0	603	903	0
501	2	0	0	0	0	0	0	200	300	0	21.7938	-71.4777	-618.403	-48469.3	26774.2	-4987.06	243.296	981.378	0	0	0	0	0	0	0	603	903	0
501	3	0	0	0	0	0	0	200	300	0	20.8783	-70.5621	-618.708	-49018.6	26530	-5078.62	242.88	982.227	0	0	0	0	0	0	0	603	903	0
501	4	0	0	0	0	0	0	200	300	0	20.8783	-69.6466	-618.708	-48835.5	26896.2	-5032.84	243.472	981.932	0	0	0	0	0	0	0	603	903	0
501	5	0	0	0	0	0	0	200	300	0	21.9464	-68.1207	-615.046	-48286.2	26896.2	-4712.4	243.73	981.508	0	0	0	0	0	0	0	603	903	0
501	6	0	0	0	0	0	0	200	300	0	23.6249	-67.0526	-619.013	-48469.3	26285.9	-4849.73	242.464	981.301	0	0	0	0	0	0	0	603	903	0
501	7	0	0	0	0	0	0	200	300	0	22.099	-65.9845	-622.37	-48469.3	26591.1	-4254.64	242.726	980.879	0	0	0	0	0	0	0	603	903	0
501	8	0	0	0	0	0	0	200	300	0	23.1671	-64.7638	-622.675	-48744	26835.2	-4529.3	243.097	981.282	0	0	0	0	0	0	0	603	903	0
501	9	0	0	0	0	0	0	200	300	0	21.6412	-63.0853	-622.675	-48377.7	26591.1	-4803.96	242.705	980.693	0	0	0	0	0	0	0	603	903	0
502	0	0	0	0	0	0	0	200	300	0	22.7094	-62.7802	-621.149	-48194.6	25675.5	-4391.97	241.336	980.59	0	0	0	0	0	0	0	603	903	0
502	1	0	0	0	0	0	0	200	300	0	22.4042	-61.4069	-623.896	-48560.9	26285.9	-4254.64	242.132	980.835	0	0	0	0	0	0	0	603	903	0
502	2	0	0	0	0	0	0	200	300	0	21.7938	-60.6439	-622.98	-49018.6	26224.9	-4666.63	242.096	981.684	0	0	0	0	0	0	0	603	903	0
502	3	0	0	0	0	0	0	200	300	0	21.9464	-59.7284	-623.896	-48469.3	26346.9	-3979.98	242.23	980.688	0	0	0	0	0	0	0	603	903	0
502	4	0	0	0	0	0	0	200	300	0	23.0145	-58.8129	-623.591	-47462.2	26408	-3934.21	242.348	979.111	0	0	0	0	0	0	0	603	903	0
502	5	0	0	0	0	0	0	200	300	0	21.9464	-58.0499	-623.591	-48744	26530	-4346.19	242.544	981.167	0	0	0	0	0	0	0	603	903	0
502	6	0	0	0	0	0	0	200	300	0	21.9464	-57.287	-623.896	-48286.2	26591.1	-3979.98	242.621	980.395	0	0	0	0	0	0	0	603	903	0
502	7	0	0	0	0	0	0	200	300	0	21.1835	-55.1508	-623.591	-48377.7	26285.9	-3751.1	242.152	980.579	0	0	0	0	0	0	0	603	903	0
502	8	0	0	0	0	0	0	200	300	0	22.2516	-53.9301	-623.285	-48103.1	26224.9	-4071.53	242.075	980.177	0	0	0	0	0	0	0	603	903	0
502	9	0	0	0	0	0	0	200	300	0	23.1671	-53.3197	-625.117	-47553.8	26408	-3339.11	242.245	979.072	0	0	0	0	0	0	0	603	903	0
503	0	0	0	0	0	0	0	200	300	0	20.7257	-52.4042	-624.201	-47920	26652.1	-3567.99	242.698	979.77	0	0	0	0	0	0	0	603	903	0
503	1	0	0	0	0	0	0	200	300	0	22.7094	-51.7938	-623.591	-47736.9	26102.8	-3796.88	241.859	979.552	0	0	0	0	0	0	0	603	903	0
503	2	0	0	0	0	0	0	200	300	0	21.6412	-50.4205	-621.76	-47279.1	26102.8	-3613.77	241.982	979.041	0	0	0	0	0	0	0	603	903	0
503	3	0	0	0	0	0	0	200	300	0	21.9464	-50.4205	-623.285	-46638.3	26469	-3339.11	242.467	977.827	0	0	0	0	0	0	0	603	903	0
503	4	0	0	0	0	0	0	200	300	0	20.8783	-48.4369	-623.896	-47096	26163.8	-3430.67	241.936	978.487	0	0	0	0	0	0	0	603	903	0
503	5	0	0	0	0	0	0	200	300	0	19.6576	-47.9791	-624.506	-46912.9	25797.6	-3201.78	241.309	978.12	0	0	0	0	0	0	0	603	903	0
503	6	0	0	0	0	0	0	200	300	0	20.1154	-47.2162	-623.896	-46272	25797.6	-3110.23	241.349	977.166	0	0	0	0	0	0	0	603	903	0
503	7	0	0	0	0	0	0	200	300	0	20.5731	-46.4532	-622.675	-46272	25980.7	-3156.01	241.724	977.312	0	0	0	0	0	0	0	603	903	0
503	8	0	0	0	0	0	0	200	300	0	20.2679	-45.2325	-623.285	-46363.6	25919.7	-2881.35	241.586	977.386	0	0	0	0	0	0	0	603	903	0
503	9	0	0	0	0	0	0	200	300	0	18.8947	-45.08	-622.98	-45997.4	25492.4	-2606.69	240.92	976.834	0	0	0	0	0	0	0	603	903	0
504	0	0	0	0	0	0	0	200	300	0	19.6576	-43.8593	-622.37	-45905.8	25431.4	-2652.47	240.862	976.76	0	0	0	0	0	0	0	603	903	0
504	1	0	0	0	0	0	0	200	300	0	19.505	-43.8593	-622.065	-45173.4	25736.6	-2423.59	241.373	975.619	0	0	0	0	0	0	0	603	903	0
504	2	0	0	0	0	0	0	200	300	0	19.8102	-43.7067	-618.708	-45265	25614.5	-2148.93	241.4	976.161	0	0	0	0	0	0	0	603	903	0
504	3	0	0	0	0	0	0	200	300	0	18.2843	-42.7911	-619.013	-45356.5	25004.2	-2423.59	240.394	976.272	0	0	0	0	0	0	0	603	903	0
504	4	0	0	0	0	0	0	200	300	0	18.1317	-42.3334	-617.487	-45081.8	25248.3	-2011.6	240.889	976.009	0	0	0	0	0	0	0	603	903	0
504	5	0	0	0	0	0	0	200	300	0	18.7421	-41.5704	-617.182	-44257.9	25309.3	-2286.26	241.008	974.71	0	0	0	0	0	0	0	603	903	0
504	6	0	0	0	0	0	0	200	300	0	19.9628	-40.9601	-613.52	-44257.9	25004.2	-2377.81	240.755	975.138	0	0	0	0	0	0	0	603	903	0
504	7	0	0	0	0	0	0	200	300	0	17.674	-41.5704	-615.351	-43891.7	24882.1	-2194.7	240.436	974.328	0	0	0	0	0	0	0	603	903	0
504	8	0	0	0	0	0	0	200	300	0	18.8947	-40.0446	-612.909	-43983.2	25553.5	-2103.15	241.692	974.761	0	0	0	0	0	0	0	603	903	0
504	9	0	0	0	0	0	0	200	300	0	16.7584	-39.4342	-611.078	-42793	25065.2	-2148.93	241.018	973.029	0	0	0	0	0	0	0	603	903	0
505	0	0	0	0	0	0	0	200	300	0	19.3524	-39.2816	-610.468	-42426.8	24576.9	-2057.37	240.259	972.499	0	0	0	0	0	0	0	603	903	0
505	1	0	0	0	0	0	0	200	300	0	17.0636	-38.5187	-609.247	-42335.3	24454.8	-1965.82	240.139	972.488	0	0	0	0	0	0	0	603	903	0
505	2	0	0	0	0	0	0	200	300	0	18.5895	-38.5187	-606.806	-42152.2	24760	-2148.93	240.804	972.466	0	0	0	0	0	0	0	603	903	0
505	3	0	0	0	0	0	0	200	300	0	17.5214	-38.0609	-603.754	-41236.6	24515.9	-1965.82	240.606	971.3	0	0	0	0	0	0	0	603	903	0
505	4	0	0	0	0	0	0	200	300	0	19.8102	-37.7557	-603.754	-40687.3	24149.7	-1645.39	239.999	970.391	0	0	0	0	0	0	0	603	903	0
505	5	0	0	0	0	0	0	200	300	0	16.7584	-36.535	-601.923	-41328.2	23783.5	-2103.15	239.512	971.66	0	0	0	0	0	0	0	603	903	0
505	6	0	0	0	0	0	0	200	300	0	18.1317	-36.535	-601.008	-40595.8	23539.3	-1828.49	239.166	970.546	0	0	0	0	0	0	0	603	903	0
505	7	0	0	0	0	0	0	200	300	0	16.6058	-36.535	-599.787	-39405.6	23905.5	-1782.72	239.857	968.699	0	0	0	0	0	0	0	603	903	0
505	8	0	0	0	0	0	0	200	300	0	17.674	-36.535	-597.956	-39314	23417.2	-1736.94	239.162	968.747	0	0	0	0	0	0	0	603	903	0
505	9	0	0	0	0	0	0	200	300	0	17.2162	-36.535	-594.599	-39314	24149.7	-1782.72	240.615	969.119	0	0	0	0	0	0	0	603	903	0
506	0	0	0	0	0	0	0	200	300	0	16.7584	-37.4506	-589.106	-39039.4	23905.5	-1645.39	240.579	969.269	0	0	0	0	0	0	0	603	903	0
506	1	0	0	0	0	0	0	200	300	0	16.7584	-35.1617	-590.937	-38398.5	23478.3	-1828.49	239.731	967.979	0	0	0	0	0	0	0	603	903	0
506	2	0	0	0	0	0	0	200	300	0	17.8265	-34.5514	-591.547	-37849.2	23478.3	-1416.5	239.69	966.983	0	0	0	0	0	0	0	603	903	0
506	3	0	0	0	0	0	0	200	300	0	19.0472	-34.704	-585.444	-37116.8	23722.4	-1416.5	240.52	966.399	0	0	0	0	0	0	0	603	903	0
506	4	0	0	0	0	0	0	200	300	0	18.5895	-34.704	-587.275	-37574.5	23539.3	-1736.94	240.082	966.981	0	0	0	0	0	0	0	603	903	0
506	5	0	0	0	0	0	0	200	300	0	17.9791	-33.0255	-583.613	-36933.7	23173.1	-1782.72	239.706	966.285	0	0	0	0	0	0	0	603	903	0
506	6	0	0	0	0	0	0	200	300	0	17.3688	-31.6522	-582.697	-36201.2	23234.1	-1462.28	239.873	965.127	0	0	0	0	0	0	0	603	903	0
506	7	0	0	0	0	0	0	200	300	0	18.2843	-33.0255	-579.035	-35743.5	23173.1	-1645.39	240.02	964.729	0	0	0	0	0	0	0	603	903	0
506	8	0	0	0	0	0	0	200	300	0	16.6058	-31.4996	-579.645	-35560.4	23295.2	-1828.49	240.189	964.349	0	0	0	0	0	0	0	603	903	0
506	9	0	0	0	0	0	0	200	300	0	17.8265	-31.1945	-575.983	-34827.9	22623.8	-1233.4	239.279	963.467	0	0	0	0	0	0	0	603	903	0
507	0	0	0	0	0	0	0	200	300	0	18.4369	-30.5841	-575.068	-34461.7	22684.8	-1553.83	239.447	962.926	0	0	0	0	0	0	0	603	903	0
507	1	0	0	0	0	0	0	200	300	0	17.9791	-30.2789	-572.626	-33637.8	22990	-1416.5	240.148	961.743	0	0	0	0	0	0	0	603	903	0
507	2	0	0	0	0	0	0	200	300	0	17.5214	-28.9056	-571.711	-33729.3	22806.9	-1553.83	239.892	961.997	0	0	0	0	0	0	0	603	903	0
507	3	0	0	0	0	0	0	200	300	0	17.3688	-28.7531	-568.049	-33637.8	22196.5	-1508.06	239.075	962.216	0	0	0	0	0	0	0	603	903	0
507	4	0	0	0	0	0	0	200	300	0	15.8429	-28.7531	-568.354	-32722.2	22196.5	-1370.73	239.054	960.574	0	0	0	0	0	0	0	603	903	0
507	5	0	0	0	0	0	0	200	300	0	16.4532	-28.6005	-565.912	-32539.1	22623.8	-1187.62	239.978	960.499	0	0	0	0	0	0	0	603	903	0
507	6	0	0	0	0	0	0	200	300	0	16.7584	-29.0582	-564.387	-32447.6	22013.4	-1416.5	239.004	960.492	0	0	0	0	0	0	0	603	903	0
507	7	0	0	0	0	0	0	200	300	0	15.3851	-27.5323	-560.419	-31806.7	21891.4	-1553.83	239.062	959.755	0	0	0	0	0	0	0	603	903	0
507	8	0	0	0	0	0	0	200	300	0	15.9955	-27.0746	-558.893	-30982.7	22135.5	-1050.29	239.606	958.436	0	0	0	0	0	0	0	603	903	0
507	9	0	0	0	0	0	0	200	300	0	16.4532	-26.922	-557.978	-30433.4	21952.4	-1187.62	239.343	957.542	0	0	0	0	0	0	0	603	903	0
508	0	0	0	0	0	0	0	200	300	0	16.1481	-26.0065	-558.283	-30433.4	21647.2	-1279.18	238.775	957.513	0	0	0	0	0	0	0	603	903	0
508	1	0	0	0	0	0	0	200	300	0	14.9274	-26.7694	-554.926	-29975.6	21525.2	-1141.85	238.789	957.017	0	0	0	0	0	0	0	603	903	0
508	2	0	0	0	0	0	0	200	300	0	14.1644	-25.8539	-550.959	-29701	21647.2	-1233.4	239.29	956.908	0	0	0	0	0	0	0	603	903	0
508	3	0	0	0	0	0	0	200	300	0	15.08	-24.9384	-549.433	-28968.6	21708.3	-1508.06	239.51	955.725	0	0	0	0	0	0	0	603	903	0
508	4	0	0	0	0	0	0	200	300	0	15.2325	-24.328	-548.517	-28236.1	21158.9	-1233.4	238.575	954.477	0	0	0	0	0	0	0	603	903	0
508	5	0	0	0	0	0	0	200	300	0	14.1644	-24.4806	-545.771	-27595.3	20792.7	-1462.28	238.098	953.562	0	0	0	0	0	0	0	603	903	0
508	6	0	0	0	0	0	0	200	300	0	14.1644	-24.1754	-543.635	-27961.5	21220	-1553.83	239.034	954.434	0	0	0	0	0	0	0	603	903	0
508	7	0	0	0	0	0	0	200	300	0	14.9274	-24.328	-541.804	-26954.4	21158.9	-1279.18	239.053	952.749	0	0	0	0	0	0	0	603	903	0
508	8	0	0	0	0	0	0	200	300	0	15.6903	-23.2599	-539.972	-26588.2	20792.7	-1279.18	238.507	952.24	0	0	0	0	0	0	0	603	903	0
508	9	0	0	0	0	0	0	200	300	0	15.08	-22.6495	-538.447	-26313.5	20609.6	-1279.18	238.276	951.869	0	0	0	0	0	0	0	603	903	0
509	0	0	0	0	0	0	0	200	300	0	14.0118	-22.0392	-536.005	-26130.4	20792.7	-1096.07	238.792	951.75	0	0	0	0	0	0	0	603	903	0
509	1	0	0	0	0	0	0	200	300	0	14.1644	-21.5814	-534.479	-25398	20365.5	-1508.06	238.103	950.519	0	0	0	0	0	0	0	603	903	0
509	2	0	0	0	0	0	0	200	300	0	15.3851	-21.734	-534.174	-24940.2	19694.1	-1416.5	236.868	949.689	0	0	0	0	0	0	0	603	903	0
509	3	0	0	0	0	0	0	200	300	0	15.2325	-21.734	-530.817	-24665.6	20914.8	-1187.62	239.401	949.467	0	0	0	0	0	0	0	603	903	0
509	4	0	0	0	0	0	0	200	300	0	14.7748	-22.1918	-528.681	-23933.2	20548.6	-1233.4	238.868	948.27	0	0	0	0	0	0	0	603	903	0
509	5	0	0	0	0	0	0	200	300	0	14.4696	-20.3607	-526.85	-24024.7	20243.4	-1279.18	238.423	948.601	0	0	0	0	0	0	0	603	903	0
509	6	0	0	0	0	0	0	200	300	0	18.2843	-20.5133	-525.629	-23200.7	19938.2	-1233.4	237.932	947.139	0	0	0	0	0	0	0	603	903	0
509	7	0	0	0	0	0	0	200	300	0	17.2162	-20.6659	-523.188	-22926.1	20426.5	-1324.95	239.042	946.82	0	0	0	0	0	0	0	603	903	0
509	8	0	0	0	0	0	0	200	300	0	16.4532	-20.8185	-522.577	-22559.9	20121.3	-1279.18	238.504	946.17	0	0	0	0	0	0	0	603	903	0
509	9	0	0	0	0	0	0	200	300	0	15.6903	-20.0555	-517.695	-22010.6	19694.1	-1324.95	238.042	945.517	0	0	0	0	0	0	0	603	903	0
510	0	0	0	0	0	0	0	200	300	0	15.08	-19.2926	-513.117	-21644.3	19755.1	-1416.5	238.5	945.182	0	0	0	0	0	0	0	603	903	0
510	1	0	0	0	0	0	0	200	300	0	15.2325	-19.4452	-514.033	-20911.9	19999.3	-1645.39	238.907	943.682	0	0	0	0	0	0	0	603	903	0
510	2	0	0	0	0	0	0	200	300	0	15.9955	-18.9874	-513.422	-20911.9	20304.5	-1508.06	239.547	943.731	0	0	0	0	0	0	0	603	903	0
510	3	0	0	0	0	0	0	200	300	0	15.2325	-18.9874	-507.319	-20179.5	19327.9	-1645.39	238.098	942.777	0	0	0	0	0	0	0	603	903	0
510	4	0	0	0	0	0	0	200	300	0	14.317	-19.7504	-508.845	-19264	19511	-1645.39	238.344	940.858	0	0	0	0	0	0	0	603	903	0
510	5	0	0	0	0	0	0	200	300	0	15.8429	-19.2926	-504.572	-18073.8	19450	-1416.5	238.547	938.82	0	0	0	0	0	0	0	603	903	0
510	6	0	0	0	0	0	0	200	300	0	16.3007	-18.5297	-503.046	-19080.9	19327.9	-1462.28	238.422	940.931	0	0	0	0	0	0	0	603	903	0
510	7	0	0	0	0	0	0	200	300	0	15.5377	-19.14	-500.3	-17982.2	18778.6	-1599.61	237.535	938.943	0	0	0	0	0	0	0	603	903	0
510	8	0	0	0	0	0	0	200	300	0	14.317	-18.9874	-499.384	-17890.7	19022.7	-1508.06	238.092	938.826	0	0	0	0	0	0	0	603	903	0
510	9	0	0	0	0	0	0	200	300	0	14.1644	-18.8348	-497.248	-17158.3	18412.4	-1599.61	237.029	937.506	0	0	0	0	0	0	0	603	903	0
511	0	0	0	0	0	0	0	200	300	0	14.9274	-19.2926	-493.891	-17158.3	18839.6	-1553.83	238.145	937.741	0	0	0	0	0	0	0	603	903	0
511	1	0	0	0	0	0	0	200	300	0	17.3688	-18.9874	-490.839	-16151.2	18534.4	-1279.18	237.761	935.905	0	0	0	0	0	0	0	603	903	0
511	2	0	0	0	0	0	0	200	300	0	14.7748	-18.8348	-488.093	-16517.4	18717.5	-1599.61	238.348	936.841	0	0	0	0	0	0	0	603	903	0
511	3	0	0	0	0	0	0	200	300	0	14.6222	-18.3771	-485.651	-15876.5	18595.5	-1508.06	238.29	935.691	0	0	0	0	0	0	0	603	903	0
511	4	0	0	0	0	0	0	200	300	0	13.7067	-18.6823	-486.262	-14961	18473.4	-1324.95	237.991	933.767	0	0	0	0	0	0	0	603	903	0
511	5	0	0	0	0	0	0	200	300	0	14.7748	-18.8348	-482.599	-14594.8	18229.2	-1508.06	237.773	933.242	0	0	0	0	0	0	0	603	903	0
511	6	0	0	0	0	0	0	200	300	0	13.8593	-19.4452	-479.853	-14045.5	18473.4	-1599.61	238.498	932.27	0	0	0	0	0	0	0	603	903	0
511	7	0	0	0	0	0	0	200	300	0	12.486	-17.4615	-477.106	-13313	18473.4	-1416.5	238.72	930.904	0	0	0	0	0	0	0	603	903	0
511	8	0	0	0	0	0	0	200	300	0	14.0118	-17.4615	-474.97	-13496.2	17985.1	-1416.5	237.866	931.415	0	0	0	0	0	0	0	603	903	0
511	9	0	0	0	0	0	0	200	300	0	12.1808	-17.309	-472.834	-12763.7	17863	-1416.5	237.779	929.994	0	0	0	0	0	0	0	603	903	0
512	0	0	0	0	0	0	0	200	300	0	13.0963	-16.6986	-471.918	-12122.9	18595.5	-1462.28	239.404	928.689	0	0	0	0	0	0	0	603	903	0
512	1	0	0	0	0	0	0	200	300	0	13.7067	-16.546	-467.951	-12122.9	18168.2	-1187.62	238.825	928.906	0	0	0	0	0	0	0	603	903	0
512	2	0	0	0	0	0	0	200	300	0	11.8756	-16.0883	-467.951	-11115.8	17802	-1599.61	238.042	926.754	0	0	0	0	0	0	0	603	903	0
512	3	0	0	0	0	0	0	200	300	0	11.5704	-15.9357	-466.12	-11298.9	17679.9	-1279.18	237.93	927.24	0	0	0	0	0	0	0	603	903	0
512	4	0	0	0	0	0	0	200	300	0	12.486	-16.2408	-460.627	-10474.9	17802	-1462.28	238.647	925.741	0	0	0	0	0	0	0	603	903	0
512	5	0	0	0	0	0	0	200	300	0	14.9274	-15.1727	-461.542	-10200.3	17435.8	-1553.83	237.777	925.1	0	0	0	0	0	0	0	603	903	0
512	6	0	0	0	0	0	0	200	300	0	12.7911	-15.0201	-461.847	-10200.3	17435.8	-1324.95	237.752	925.086	0	0	0	0	0	0	0	603	903	0
512	7	0	0	0	0	0	0	200	300	0	11.723	-14.2572	-456.965	-10017.2	17008.5	-1599.61	237.221	924.921	0	0	0	0	0	0	0	603	903	0
512	8	0	0	0	0	0	0	200	300	0	11.8756	-14.715	-458.185	-9193.18	17435.8	-1645.39	238.054	923.064	0	0	0	0	0	0	0	603	903	0
512	9	0	0	0	0	0	0	200	300	0	12.3334	-14.715	-455.134	-8826.97	17496.8	-1416.5	238.443	922.394	0	0	0	0	0	0	0	603	903	0
513	0	0	0	0	0	0	0	200	300	0	12.486	-14.8676	-451.471	-8094.54	17191.7	-1553.83	238.079	920.929	0	0	0	0	0	0	0	603	903	0
513	1	0	0	0	0	0	0	200	300	0	11.1127	-14.1046	-452.692	-7362.12	17130.6	-1736.94	237.842	919.263	0	0	0	0	0	0	0	603	903	0
513	2	0	0	0	0	0	0	200	300	0	11.723	-14.5624	-452.997	-7911.44	17313.7	-1645.39	238.22	920.465	0	0	0	0	0	0	0	603	903	0
513	3	0	0	0	0	0	0	200	300	0	10.8075	-13.7994	-449.64	-7453.68	17008.5	-1416.5	237.827	919.577	0	0	0	0	0	0	0	603	903	0
513	4	0	0	0	0	0	0	200	300	0	11.5704	-14.715	-448.725	-6812.81	16337.2	-1553.83	236.408	918.183	0	0	0	0	0	0	0	603	903	0
513	5	0	0	0	0	0	0	200	300	0	11.1127	-14.4098	-447.199	-6629.7	17252.7	-1691.16	238.579	917.825	0	0	0	0	0	0	0	603	903	0
513	6	0	0	0	0	0	0	200	300	0	10.8075	-14.715	-444.452	-6446.6	17130.6	-1645.39	238.543	917.505	0	0	0	0	0	0	0	603	903	0
513	7	0	0	0	0	0	0	200	300	0	10.3497	-13.4943	-444.147	-5714.17	16703.4	-1828.49	237.608	915.866	0	0	0	0	0	0	0	603	903	0
513	8	0	0	0	0	0	0	200	300	0	10.9601	-14.1046	-444.147	-4523.99	16764.4	-1508.06	237.745	913.186	0	0	0	0	0	0	0	603	903	0
513	9	0	0	0	0	0	0	200	300	0	11.4178	-13.3417	-442.011	-5073.31	16764.4	-1828.49	237.928	914.478	0	0	0	0	0	0	0	603	903	0
514	0	0	0	0	0	0	0	200	300	0	10.3497	-13.952	-441.706	-4432.43	16764.4	-1736.94	237.954	913.035	0	0	0	0	0	0	0	603	903	0
514	1	0	0	0	0	0	0	200	300	0	10.9601	-13.952	-439.875	-4432.43	16398.2	-1553.83	237.279	913.077	0	0	0	0	0	0	0	603	903	0
514	2	0	0	0	0	0	0	200	300	0	10.9601	-13.7994	-436.518	-4249.33	16459.2	-1645.39	237.706	912.735	0	0	0	0	0	0	0	603	903	0
514	3	0	0	0	0	0	0	200	300	0	11.1127	-13.4943	-438.044	-3883.12	16642.3	-1645.39	237.992	911.865	0	0	0	0	0	0	0	603	903	0
514	4	0	0	0	0	0	0	200	300	0	10.3497	-13.4943	-437.128	-3333.8	16703.4	-1553.83	238.212	910.627	0	0	0	0	0	0	0	603	903	0
514	5	0	0	0	0	0	0	200	300	0	12.486	-13.3417	-436.823	-3791.57	15848.9	-1462.28	236.282	911.68	0	0	0	0	0	0	0	603	903	0
514	6	0	0	0	0	0	0	200	300	0	11.8756	-13.3417	-435.297	-3059.14	16581.3	-1874.27	238.092	910.028	0	0	0	0	0	0	0	603	903	0
514	7	0	0	0	0	0	0	200	300	0	11.2653	-13.0365	-433.771	-2326.72	16398.2	-1553.83	237.804	908.364	0	0	0	0	0	0	0	603	903	0
514	8	0	0	0	0	0	0	200	300	0	10.9601	-12.8839	-432.245	-2143.62	16093	-1691.16	237.231	907.959	0	0	0	0	0	0	0	603	903	0
514	9	0	0	0	0	0	0	200	300	0	10.5023	-13.7994	-431.025	-2143.62	16093	-1736.94	237.337	907.973	0	0	0	0	0	0	0	603	903	0
515	0	0	0	0	0	0	0	200	300	0	9.4342	-11.9684	-430.414	-1136.54	16642.3	-1691.16	238.666	905.641	0	0	0	0	0	0	0	603	903	0
515	1	0	0	0	0	0	0	200	300	0	10.9601	-12.4261	-429.499	-861.878	16520.3	-1874.27	238.464	905.007	0	0	0	0	0	0	0	603	903	0
515	2	0	0	0	0	0	0	200	300	0	11.2653	-13.1891	-428.888	-861.878	15971	-2011.6	237.238	905.01	0	0	0	0	0	0	0	603	903	0
515	3	0	0	0	0	0	0	200	300	0	9.89197	-13.0365	-427.057	-587.22	16093	-1782.72	237.684	904.375	0	0	0	0	0	0	0	603	903	0
515	4	0	0	0	0	0	0	200	300	0	8.97644	-11.8158	-425.532	53.6492	15543.7	-1874.27	236.528	902.874	0	0	0	0	0	0	0	603	903	0
515	5	0	0	0	0	0	0	200	300	0	10.8075	-12.4261	-424.921	419.86	15971	-1691.16	237.586	902.012	0	0	0	0	0	0	0	603	903	0
515	6	0	0	0	0	0	0	200	300	0	10.0446	-12.121	-425.837	1152.28	15971	-1736.94	237.505	900.294	0	0	0	0	0	0	0	603	903	0
515	7	0	0	0	0	0	0	200	300	0	9.12903	-11.6632	-423.701	1243.83	16154.1	-1920.04	238.126	900.064	0	0	0	0	0	0	0	603	903	0
515	8	0	0	0	0	0	0	200	300	0	8.82385	-10.9003	-422.48	1335.39	16032	-2057.37	237.947	899.839	0	0	0	0	0	0	0	603	903	0
515	9	0	0	0	0	0	0	200	300	0	9.89197	-11.8158	-422.48	1518.49	15848.9	-1736.94	237.514	899.406	0	0	0	0	0	0	0	603	903	0
516	0	0	0	0	0	0	0	200	300	0	12.0282	-11.0529	-421.564	2159.36	15665.8	-1828.49	237.161	897.878	0	0	0	0	0	0	0	603	903	0
516	1	0	0	0	0	0	0	200	300	0	11.5704	-10.9003	-422.175	2067.81	15909.9	-1874.27	237.686	898.102	0	0	0	0	0	0	0	603	903	0
516	2	0	0	0	0	0	0	200	300	0	11.5704	-11.0529	-421.259	2525.57	15971	-1782.72	237.912	897.005	0	0	0	0	0	0	0	603	903	0
516	3	0	0	0	0	0	0	200	300	0	11.8756	-11.2054	-420.344	3258	14994.4	-1645.39	235.672	895.249	0	0	0	0	0	0	0	603	903	0
516	4	0	0	0	0	0	0	200	300	0	11.2653	-11.6632	-419.733	3258	15971	-1645.39	238.05	895.238	0	0	0	0	0	0	0	603	903	0
516	5	0	0	0	0	0	0	200	300	0	10.5023	-11.0529	-419.733	3258	16276.1	-1599.61	238.777	895.238	0	0	0	0	0	0	0	603	903	0
516	6	0	0	0	0	0	0	200	300	0	10.6549	-11.0529	-418.207	3624.21	15848.9	-1599.61	237.897	894.334	0	0	0	0	0	0	0	603	903	0
516	7	0	0	0	0	0	0	200	300	0	8.67126	-10.5951	-416.987	3898.86	15909.9	-1782.72	238.155	893.65	0	0	0	0	0	0	0	603	903	0
516	8	0	0	0	0	0	0	200	300	0	8.97644	-9.98474	-416.987	4448.18	16154.1	-1782.72	238.74	892.333	0	0	0	0	0	0	0	603	903	0
516	9	0	0	0	0	0	0	200	300	0	8.2135	-10.1373	-417.597	4539.73	16154.1	-1553.83	238.683	892.129	0	0	0	0	0	0	0	603	903	0
517	0	0	0	0	0	0	0	200	300	0	9.4342	-10.4425	-416.071	4814.39	15726.8	-1920.04	237.798	891.429	0	0	0	0	0	0	0	603	903	0
517	1	0	0	0	0	0	0	200	300	0	7.90833	-10.1373	-416.376	5821.47	15848.9	-1782.72	238.064	889.019	0	0	0	0	0	0	0	603	903	0
517	2	0	0	0	0	0	0	200	300	0	7.60315	-9.37439	-416.071	5821.47	15726.8	-1782.72	237.798	889.009	0	0	0	0	0	0	0	603	903	0
517	3	0	0	0	0	0	0	200	300	0	8.67126	-9.06921	-414.85	5729.92	15726.8	-1828.49	237.91	889.188	0	0	0	0	0	0	0	603	903	0
517	4	0	0	0	0	0	0	200	300	0	6.84021	-8.76404	-415.766	6187.68	15665.8	-1645.39	237.679	888.117	0	0	0	0	0	0	0	603	903	0
517	5	0	0	0	0	0	0	200	300	0	7.29797	-9.37439	-414.545	6370.79	16154.1	-1736.94	238.968	887.632	0	0	0	0	0	0	0	603	903	0
517	6	0	0	0	0	0	0	200	300	0	8.2135	-8.15369	-416.071	6828.55	15787.8	-1920.04	237.945	886.588	0	0	0	0	0	0	0	603	903	0
517	7	0	0	0	0	0	0	200	300	0	8.06091	-8.30627	-414.85	6645.45	15604.7	-1782.72	237.615	886.981	0	0	0	0	0	0	0	603	903	0
517	8	0	0	0	0	0	0	200	300	0	7.60315	-9.52698	-414.85	6920.11	15787.8	-1645.39	238.057	886.319	0	0	0	0	0	0	0	603	903	0
517	9	0	0	0	0	0	0	200	300	0	7.90833	-7.84851	-415.766	7469.42	16154.1	-1645.39	238.854	885.035	0	0	0	0	0	0	0	603	903	0
518	0	0	0	0	0	0	0	200	300	0	8.51868	-6.7804	-417.597	7835.63	16215.1	-1782.72	238.83	884.236	0	0	0	0	0	0	0	603	903	0
518	1	0	0	0	0	0	0	200	300	0	9.28162	-6.47522	-416.681	7927.19	15482.7	-1416.5	237.157	883.975	0	0	0	0	0	0	0	603	903	0
518	2	0	0	0	0	0	0	200	300	0	8.06091	-6.62781	-417.597	8018.74	16337.2	-1599.61	239.122	883.798	0	0	0	0	0	0	0	603	903	0
518	3	0	0	0	0	0	0	200	300	0	8.51868	-6.7804	-417.292	8110.29	16398.2	-1370.73	239.297	883.564	0	0	0	0	0	0	0	603	903	0
518	4	0	0	0	0	0	0	200	300	0	7.75574	-6.01746	-416.376	8384.95	15971	-1645.39	238.357	882.862	0	0	0	0	0	0	0	603	903	0
518	5	0	0	0	0	0	0	200	300	0	8.51868	-6.01746	-417.902	8293.4	16032	-1599.61	238.363	883.155	0	0	0	0	0	0	0	603	903	0
518	6	0	0	0	0	0	0	200	300	0	8.36609	-5.86487	-419.123	8842.71	16459.2	-1645.39	239.271	881.902	0	0	0	0	0	0	0	603	903	0
518	7	0	0	0	0	0	0	200	300	0	7.45056	-4.94934	-420.649	8751.16	16764.4	-1645.39	239.854	882.196	0	0	0	0	0	0	0	603	903	0
518	8	0	0	0	0	0	0	200	300	0	7.45056	-5.55969	-420.038	9208.92	16215.1	-1782.72	238.604	881.076	0	0	0	0	0	0	0	603	903	0
518	9	0	0	0	0	0	0	200	300	0	8.2135	-5.71228	-419.428	8934.27	16337.2	-1691.16	238.951	881.699	0	0	0	0	0	0	0	603	903	0
519	0	0	0	0	0	0	0	200	300	0	8.2135	-5.25452	-420.344	9666.69	16520.3	-1508.06	239.302	880.003	0	0	0	0	0	0	0	603	903	0
519	1	0	0	0	0	0	0	200	300	0	6.9928	-4.03381	-422.175	9483.58	16520.3	-1736.94	239.131	880.536	0	0	0	0	0	0	0	603	903	0
519	2	0	0	0	0	0	0	200	300	0	6.38245	-4.1864	-421.259	10032.9	16032	-1508.06	238.057	879.184	0	0	0	0	0	0	0	603	903	0
519	3	0	0	0	0	0	0	200	300	0	8.06091	-3.88123	-425.226	9941.35	16520.3	-1462.28	238.851	879.621	0	0	0	0	0	0	0	603	903	0
519	4	0	0	0	0	0	0	200	300	0	7.14539	-2.9657	-425.837	10399.1	16154.1	-1645.39	237.935	878.58	0	0	0	0	0	0	0	603	903	0
519	5	0	0	0	0	0	0	200	300	0	6.68762	-4.33899	-426.752	10673.8	16459.2	-1370.73	238.569	877.988	0	0	0	0	0	0	0	603	903	0
519	6	0	0	0	0	0	0	200	300	0	6.68762	-2.9657	-426.752	10399.1	16459.2	-1279.18	238.569	878.632	0	0	0	0	0	0	0	603	903	0
519	7	0	0	0	0	0	0	200	300	0	7.75574	-2.20276	-424.616	10124.5	16703.4	-1324.95	239.338	879.156	0	0	0	0	0	0	0	603	903	0
519	8	0	0	0	0	0	0	200	300	0	7.14539	-1.59241	-427.973	10856.9	17069.6	-1187.62	239.885	877.632	0	0	0	0	0	0	0	603	903	0
519	9	0	0	0	0	0	0	200	300	0	7.45056	-1.59241	-431.33	10765.3	16581.3	-1050.29	238.442	878.042	0	0	0	0	0	0	0	603	903	0
520	0	0	0	0	0	0	0	200	300	0	6.07727	-1.13464	-434.076	10582.2	16703.4	-1324.95	238.48	878.621	0	0	0	0	0	0	0	603	903	0
520	1	0	0	0	0	0	0	200	300	0	5.61951	-2.05017	-434.687	11131.5	17191.7	-1096.07	239.55	877.392	0	0	0	0	0	0	0	603	903	0
520	2	0	0	0	0	0	0	200	300	0	6.07727	0.0860598	-435.602	11314.6	17191.7	-1096.07	239.466	877.025	0	0	0	0	0	0	0	603	903	0
520	3	0	0	0	0	0	0	200	300	0	6.38245	0.238648	-437.128	10765.3	16886.5	-1187.62	238.631	878.373	0	0	0	0	0	0	0	603	903	0
520	4	0	0	0	0	0	0	200	300	0	5.16174	0.848999	-439.57	11040	16947.5	-1279.18	238.555	877.885	0	0	0	0	0	0	0	603	903	0
520	5	0	0	0	0	0	0	200	300	0	4.55139	2.22229	-440.18	11589.3	17618.9	-1187.62	240.027	876.672	0	0	0	0	0	0	0	603	903	0
520	6	0	0	0	0	0	0	200	300	0	5.61951	2.52747	-442.316	11406.2	17313.7	-1187.62	239.143	877.213	0	0	0	0	0	0	0	603	903	0
520	7	0	0	0	0	0	0	200	300	0	5.46692	2.37488	-443.842	11131.5	17008.5	-1050.29	238.321	877.92	0	0	0	0	0	0	0	603	903	0
520	8	0	0	0	0	0	0	200	300	0	4.55139	2.52747	-445.368	11864	17130.6	-729.859	238.464	876.362	0	0	0	0	0	0	0	603	903	0
520	9	0	0	0	0	0	0	200	300	0	4.55139	3.59558	-446.894	11772.4	17313.7	-1141.85	238.742	876.657	0	0	0	0	0	0	0	603	903	0
521	0	0	0	0	0	0	0	200	300	0	5.16174	4.35852	-449.64	12138.6	16825.4	-867.188	237.42	876.004	0	0	0	0	0	0	0	603	903	0
521	1	0	0	0	0	0	0	200	300	0	5.46692	4.20593	-451.471	12047.1	16947.5	-867.188	237.538	876.316	0	0	0	0	0	0	0	603	903	0
521	2	0	0	0	0	0	0	200	300	0	3.63586	4.6637	-452.692	12230.2	17374.8	-775.635	238.381	875.983	0	0	0	0	0	0	0	603	903	0
521	3	0	0	0	0	0	0	200	300	0	3.63586	5.42664	-454.218	11864	17557.9	-500.977	238.655	876.881	0	0	0	0	0	0	0	603	903	0
521	4	0	0	0	0	0	0	200	300	0	5.00916	6.03699	-455.134	12413.3	17374.8	-546.754	238.175	875.726	0	0	0	0	0	0	0	603	903	0
521	5	0	0	0	0	0	0	200	300	0	4.70398	6.79993	-457.575	11955.5	17557.9	-455.201	238.372	876.872	0	0	0	0	0	0	0	603	903	0
521	6	0	0	0	0	0	0	200	300	0	3.1781	7.41028	-458.491	12504.8	17924.1	-500.977	239.094	875.726	0	0	0	0	0	0	0	603	903	0
521	7	0	0	0	0	0	0	200	300	0	3.78845	7.25769	-460.322	12504.8	18107.2	-409.424	239.336	875.835	0	0	0	0	0	0	0	603	903	0
521	8	0	0	0	0	0	0	200	300	0	3.94104	8.02063	-460.627	12779.5	17741	-455.201	238.515	875.256	0	0	0	0	0	0	0	603	903	0
521	9	0	0	0	0	0	0	200	300	0	3.94104	8.32581	-462.153	12779.5	17985.1	-500.977	238.916	875.348	0	0	0	0	0	0	0	603	903	0
522	0	0	0	0	0	0	0	200	300	0	2.41516	8.78357	-464.594	12504.8	18290.3	-455.201	239.368	876.084	0	0	0	0	0	0	0	603	903	0
522	1	0	0	0	0	0	0	200	300	0	2.41516	9.6991	-467.035	12321.7	18351.3	-317.872	239.293	876.617	0	0	0	0	0	0	0	603	903	0
522	2	0	0	0	0	0	0	200	300	0	3.63586	10.0043	-466.73	13328.8	18229.2	-180.542	239.057	874.442	0	0	0	0	0	0	0	603	903	0
522	3	0	0	0	0	0	0	200	300	0	4.70398	10.9198	-469.782	12871	18229.2	-363.648	238.804	875.602	0	0	0	0	0	0	0	603	903	0
522	4	0	0	0	0	0	0	200	300	0	3.33069	10.9198	-470.087	12962.6	18290.3	-226.319	238.908	875.425	0	0	0	0	0	0	0	603	903	0
522	5	0	0	0	0	0	0	200	300	0	4.09363	11.5302	-474.665	13145.7	18534.4	-317.872	239.047	875.305	0	0	0	0	0	0	0	603	903	0
522	6	0	0	0	0	0	0	200	300	0	2.41516	11.3776	-473.444	13786.6	17802	94.1158	237.601	873.88	0	0	0	0	0	0	0	603	903	0
522	7	0	0	0	0	0	0	200	300	0	3.33069	13.2086	-476.801	13328.8	18717.5	-43.2133	239.256	875.045	0	0	0	0	0	0	0	603	903	0
522	8	0	0	0	0	0	0	200	300	0	2.72034	12.5983	-479.548	13878.1	18534.4	185.669	238.65	874.06	0	0	0	0	0	0	0	603	903	0
522	9	0	0	0	0	0	0	200	300	0	1.9574	11.9879	-481.684	13878.1	18351.3	231.445	238.098	874.188	0	0	0	0	0	0	0	603	903	0
523	0	0	0	0	0	0	0	200	300	0	2.41516	13.6664	-481.684	13786.6	18290.3	-134.766	237.972	874.378	0	0	0	0	0	0	0	603	903	0
523	1	0	0	0	0	0	0	200	300	0	1.80481	14.5819	-483.21	14061.2	18778.6	139.892	238.862	873.9	0	0	0	0	0	0	0	603	903	0
523	2	0	0	0	0	0	0	200	300	0	2.72034	13.9716	-485.041	14061.2	18778.6	322.998	238.715	874.01	0	0	0	0	0	0	0	603	903	0
523	3	0	0	0	0	0	0	200	300	0	3.1781	15.8026	-488.093	13695	18473.4	231.445	237.848	874.942	0	0	0	0	0	0	0	603	903	0
523	4	0	0	0	0	0	0	200	300	0	1.49963	15.4974	-490.229	14152.8	18656.5	185.669	238.057	874.13	0	0	0	0	0	0	0	603	903	0
523	5	0	0	0	0	0	0	200	300	0	2.41516	15.8026	-488.398	14152.8	19022.7	460.327	238.949	874.022	0	0	0	0	0	0	0	603	903	0
523	6	0	0	0	0	0	0	200	300	0	3.1781	17.3285	-491.45	14793.6	18961.7	277.221	238.583	872.898	0	0	0	0	0	0	0	603	903	0
523	7	0	0	0	0	0	0	200	300	0	3.1781	17.6337	-492.975	14793.6	18961.7	368.774	238.464	872.991	0	0	0	0	0	0	0	603	903	0
523	8	0	0	0	0	0	0	200	300	0	2.10999	19.1595	-495.417	14702.1	19022.7	551.879	238.397	873.324	0	0	0	0	0	0	0	603	903	0
523	9	0	0	0	0	0	0	200	300	0	1.80481	19.007	-498.774	14519	19388.9	322.998	238.873	873.891	0	0	0	0	0	0	0	603	903	0
524	0	0	0	0	0	0	0	200	300	0	1.65222	18.8544	-499.994	15159.9	19327.9	506.103	238.656	872.68	0	0	0	0	0	0	0	603	903	0
524	1	0	0	0	0	0	0	200	300	0	3.33069	18.0914	-501.215	15617.6	19266.9	551.879	238.44	871.841	0	0	0	0	0	0	0	603	903	0
524	2	0	0	0	0	0	0	200	300	0	2.41516	20.0751	-502.741	15617.6	19022.7	643.432	237.838	871.935	0	0	0	0	0	0	0	603	903	0
524	3	0	0	0	0	0	0	200	300	0	1.80481	20.6854	-505.182	15617.6	19511	689.209	238.622	872.085	0	0	0	0	0	0	0	603	903	0
524	4	0	0	0	0	0	0	200	300	0	2.41516	19.4647	-507.624	15800.7	19327.9	872.314	238.075	871.873	0	0	0	0	0	0	0	603	903	0
524	5	0	0	0	0	0	0	200	300	0	3.1781	21.9061	-509.76	16166.9	18961.7	689.209	237.197	871.285	0	0	0	0	0	0	0	603	903	0
524	6	0	0	0	0	0	0	200	300	0	4.70398	21.7535	-511.286	16075.4	19511	689.209	238.161	871.559	0	0	0	0	0	0	0	603	903	0
524	7	0	0	0	0	0	0	200	300	0	3.1781	21.4484	-514.643	15800.7	19755.1	872.314	238.386	872.298	0	0	0	0	0	0	0	603	903	0
524	8	0	0	0	0	0	0	200	300	0	2.41516	23.2794	-514.643	15800.7	19083.7	780.761	237.082	872.298	0	0	0	0	0	0	0	603	903	0
524	9	0	0	0	0	0	0	200	300	0	2.26257	23.8898	-515.864	16166.9	19511	1055.42	237.822	871.661	0	0	0	0	0	0	0	603	903	0
525	0	0	0	0	0	0	0	200	300	0	3.33069	24.5001	-519.221	16075.4	19938.2	963.867	238.4	872.039	0	0	0	0	0	0	0	603	903	0
525	1	0	0	0	0	0	0	200	300	0	3.94104	25.1105	-520.441	15983.8	19877.2	963.867	238.193	872.288	0	0	0	0	0	0	0	603	903	0
525	2	0	0	0	0	0	0	200	300	0	2.10999	24.8053	-523.188	15983.8	19816.2	780.761	237.876	872.449	0	0	0	0	0	0	0	603	903	0
525	3	0	0	0	0	0	0	200	300	0	2.56775	23.8898	-525.324	16441.6	19999.3	1101.2	238.07	871.702	0	0	0	0	0	0	0	603	903	0
525	4	0	0	0	0	0	0	200	300	0	3.78845	26.1786	-524.103	16716.3	20121.3	1146.97	238.392	871.105	0	0	0	0	0	0	0	603	903	0
525	5	0	0	0	0	0	0	200	300	0	3.78845	27.3993	-526.85	16624.7	20182.4	872.314	238.308	871.445	0	0	0	0	0	0	0	603	903	0
525	6	0	0	0	0	0	0	200	300	0	1.80481	26.3312	-528.681	16533.1	20304.5	1055.42	238.406	871.728	0	0	0	0	0	0	0	603	903	0
525	7	0	0	0	0	0	0	200	300	0	2.72034	28.7726	-531.428	17265.6	20182.4	1146.97	237.978	870.511	0	0	0	0	0	0	0	603	903	0
525	8	0	0	0	0	0	0	200	300	0	3.78845	29.3829	-534.174	17723.3	20670.7	1146.97	238.697	869.821	0	0	0	0	0	0	0	603	903	0
525	9	0	0	0	0	0	0	200	300	0	4.24622	27.8571	-536.31	17906.4	20792.7	1284.3	238.77	869.612	0	0	0	0	0	0	0	603	903	0
526	0	0	0	0	0	0	0	200	300	0	3.33069	31.0614	-536.921	17540.2	20304.5	1238.52	237.816	870.332	0	0	0	0	0	0	0	603	903	0
526	1	0	0	0	0	0	0	200	300	0	2.72034	32.2821	-538.752	17448.7	20609.6	1146.97	238.254	870.613	0	0	0	0	0	0	0	603	903	0
526	2	0	0	0	0	0	0	200	300	0	4.55139	32.2821	-538.141	17631.8	20731.7	1650.51	238.525	870.236	0	0	0	0	0	0	0	603	903	0
526	3	0	0	0	0	0	0	200	300	0	5.00916	33.5028	-543.024	17906.4	20426.5	1742.07	237.616	870.025	0	0	0	0	0	0	0	603	903	0
526	4	0	0	0	0	0	0	200	300	0	4.09363	33.1976	-545.771	17814.9	20426.5	1513.18	237.427	870.358	0	0	0	0	0	0	0	603	903	0
526	5	0	0	0	0	0	0	200	300	0	3.78845	33.808	-546.076	18455.8	20914.8	1513.18	238.3	869.203	0	0	0	0	0	0	0	603	903	0
526	6	0	0	0	0	0	0	200	300	0	4.85657	34.1132	-547.602	18455.8	20548.6	1558.96	237.525	869.297	0	0	0	0	0	0	0	603	903	0
526	7	0	0	0	0	0	0	200	300	0	5.16174	35.7916	-550.043	18364.2	20609.6	1192.75	237.469	869.613	0	0	0	0	0	0	0	603	903	0
526	8	0	0	0	0	0	0	200	300	0	5.46692	35.3339	-550.654	18089.5	20853.8	1833.62	237.871	870.149	0	0	0	0	0	0	0	603	903	0
526	9	0	0	0	0	0	0	200	300	0	4.70398	37.0123	-554.011	18547.3	21647.2	1513.18	239.074	869.522	0	0	0	0	0	0	0	603	903	0
527	0	0	0	0	0	0	0	200	300	0	4.55139	37.3175	-556.757	18547.3	21036.9	1787.84	237.785	869.687	0	0	0	0	0	0	0	603	903	0
527	1	0	0	0	0	0	0	200	300	0	5.46692	37.6227	-557.673	18913.5	21097.9	1650.51	237.832	869.085	0	0	0	0	0	0	0	603	903	0
527	2	0	0	0	0	0	0	200	300	0	5.7721	39.1486	-559.809	18547.3	21403.1	1650.51	238.233	869.869	0	0	0	0	0	0	0	603	903	0
527	3	0	0	0	0	0	0	200	300	0	4.70398	38.5382	-557.062	19829	21342	1604.74	238.312	867.404	0	0	0	0	0	0	0	603	903	0
527	4	0	0	0	0	0	0	200	300	0	4.70398	41.2848	-562.555	19279.7	21220	1925.17	237.721	868.728	0	0	0	0	0	0	0	603	903	0
527	5	0	0	0	0	0	0	200	300	0	5.92468	42.0477	-565.302	19554.4	21036.9	2016.72	237.214	868.409	0	0	0	0	0	0	0	603	903	0
527	6	0	0	0	0	0	0	200	300	0	8.36609	43.8788	-565.302	19829	21403.1	1925.17	237.861	867.923	0	0	0	0	0	0	0	603	903	0
527	7	0	0	0	0	0	0	200	300	0	7.29797	42.8107	-568.659	20012.2	21708.3	2062.5	238.174	867.808	0	0	0	0	0	0	0	603	903	0
527	8	0	0	0	0	0	0	200	300	0	5.7721	44.6417	-570.185	19829	21403.1	2108.28	237.537	868.224	0	0	0	0	0	0	0	603	903	0
527	9	0	0	0	0	0	0	200	300	0	5.00916	45.0995	-572.016	20378.4	21708.3	1925.17	237.95	867.375	0	0	0	0	0	0	0	603	903	0
528	0	0	0	0	0	0	0	200	300	0	6.84021	46.6254	-574.457	20744.6	21525.2	2154.05	237.47	866.888	0	0	0	0	0	0	0	603	903	0
528	1	0	0	0	0	0	0	200	300	0	7.45056	45.7098	-575.068	20378.4	21403.1	2199.83	237.218	867.564	0	0	0	0	0	0	0	603	903	0
528	2	0	0	0	0	0	0	200	300	0	6.38245	48.7616	-577.509	20744.6	21097.9	2245.6	236.533	867.079	0	0	0	0	0	0	0	603	903	0
528	3	0	0	0	0	0	0	200	300	0	6.22986	48.1512	-580.256	20469.9	22013.4	2291.38	237.937	867.723	0	0	0	0	0	0	0	603	903	0
528	4	0	0	0	0	0	0	200	300	0	7.75574	49.9823	-582.087	20744.6	21708.3	2474.49	237.294	867.362	0	0	0	0	0	0	0	603	903	0
528	5	0	0	0	0	0	0	200	300	0	9.58679	50.5927	-582.087	21019.2	21464.1	2566.04	236.874	866.89	0	0	0	0	0	0	0	603	903	0
528	6	0	0	0	0	0	0	200	300	0	6.68762	51.5082	-585.444	21293.9	21891.4	2566.04	237.393	866.628	0	0	0	0	0	0	0	603	903	0
528	7	0	0	0	0	0	0	200	300	0	7.29797	53.3392	-585.444	20836.1	21952.4	2566.04	237.497	867.41	0	0	0	0	0	0	0	603	903	0
528	8	0	0	0	0	0	0	200	300	0	6.84021	54.1022	-588.801	21202.3	21769.3	2474.49	236.972	866.991	0	0	0	0	0	0	0	603	903	0
528	9	0	0	0	0	0	0	200	300	0	7.75574	55.3229	-590.021	21293.9	21891.4	2520.26	237.103	866.91	0	0	0	0	0	0	0	603	903	0
529	0	0	0	0	0	0	0	200	300	0	7.90833	55.6281	-592.158	21019.2	22196.5	2474.49	237.484	867.504	0	0	0	0	0	0	0	603	903	0
529	1	0	0	0	0	0	0	200	300	0	6.84021	54.4073	-592.463	21568.5	22135.5	2886.47	237.362	866.595	0	0	0	0	0	0	0	603	903	0
529	2	0	0	0	0	0	0	200	300	0	7.14539	57.4591	-593.378	21660.1	22135.5	2840.7	237.304	866.497	0	0	0	0	0	0	0	603	903	0
529	3	0	0	0	0	0	0	200	300	0	7.90833	59.4427	-592.158	22117.9	22135.5	2978.03	237.381	865.649	0	0	0	0	0	0	0	603	903	0
529	4	0	0	0	0	0	0	200	300	0	7.90833	60.9686	-597.04	21843.2	22379.6	2840.7	237.484	866.414	0	0	0	0	0	0	0	603	903	0
529	5	0	0	0	0	0	0	200	300	0	7.29797	61.7316	-599.482	22301	22501.7	3161.13	237.535	865.8	0	0	0	0	0	0	0	603	903	0
529	6	0	0	0	0	0	0	200	300	0	7.29797	63.2574	-601.313	21934.8	21952.4	3023.8	236.507	866.522	0	0	0	0	0	0	0	603	903	0
529	7	0	0	0	0	0	0	200	300	0	8.51868	62.9523	-601.923	22484.1	22684.8	2840.7	237.687	865.646	0	0	0	0	0	0	0	603	903	0
529	8	0	0	0	0	0	0	200	300	0	8.82385	62.1893	-605.28	22758.7	22623.8	3069.58	237.377	865.4	0	0	0	0	0	0	0	603	903	0
529	9	0	0	0	0	0	0	200	300	0	7.75574	65.0885	-603.144	22392.5	22318.6	3069.58	237.004	865.874	0	0	0	0	0	0	0	603	903	0
530	0	0	0	0	0	0	0	200	300	0	7.90833	66.767	-604.67	22850.3	22013.4	3069.58	236.406	865.21	0	0	0	0	0	0	0	603	903	0
530	1	0	0	0	0	0	0	200	300	0	8.36609	67.5299	-605.89	23033.4	22623.8	3161.13	237.34	864.984	0	0	0	0	0	0	0	603	903	0
530	2	0	0	0	0	0	0	200	300	0	8.51868	69.8187	-608.027	22850.3	22257.6	3069.58	236.606	865.419	0	0	0	0	0	0	0	603	903	0
530	3	0	0	0	0	0	0	200	300	0	8.2135	70.1239	-608.637	22575.6	22196.5	3481.57	236.469	865.908	0	0	0	0	0	0	0	603	903	0
530	4	0	0	0	0	0	0	200	300	0	7.60315	70.4291	-611.078	22758.7	22318.6	3527.34	236.523	865.757	0	0	0	0	0	0	0	603	903	0
530	5	0	0	0	0	0	0	200	300	0	9.12903	71.4972	-610.163	23216.5	22623.8	3435.79	237.078	864.95	0	0	0	0	0	0	0	603	903	0
530	6	0	0	0	0	0	0	200	300	0	10.3497	73.0231	-611.078	23491.2	22440.7	3618.9	236.723	864.558	0	0	0	0	0	0	0	603	903	0
530	7	0	0	0	0	0	0	200	300	0	8.82385	74.8541	-612.299	23491.2	22440.7	3618.9	236.65	864.635	0	0	0	0	0	0	0	603	903	0
530	8	0	0	0	0	0	0	200	300	0	8.51868	73.9386	-613.52	23491.2	22990	3710.45	237.472	864.711	0	0	0	0	0	0	0	603	903	0
530	9	0	0	0	0	0	0	200	300	0	7.14539	76.38	-613.825	23674.3	22806.9	3710.45	237.155	864.432	0	0	0	0	0	0	0	603	903	0
531	0	0	0	0	0	0	0	200	300	0	8.06091	76.8378	-614.13	23857.4	22501.7	3664.67	236.64	864.153	0	0	0	0	0	0	0	603	903	0
531	1	0	0	0	0	0	0	200	300	0	7.75574	79.1266	-614.741	23857.4	22379.6	3756.23	236.405	864.191	0	0	0	0	0	0	0	603	903	0
531	2	0	0	0	0	0	0	200	300	0	6.68762	80.1947	-615.656	23582.7	22501.7	3710.45	236.549	864.695	0	0	0	0	0	0	0	603	903	0
531	3	0	0	0	0	0	0	200	300	0	6.53503	80.9576	-614.741	23948.9	22806.9	3893.55	237.1	864.042	0	0	0	0	0	0	0	603	903	0
531	4	0	0	0	0	0	0	200	300	0	7.90833	82.4835	-617.182	24956	22196.5	4030.88	235.964	862.565	0	0	0	0	0	0	0	603	903	0
531	5	0	0	0	0	0	0	200	300	0	7.29797	83.7042	-618.097	24315.1	22562.8	3710.45	236.504	863.661	0	0	0	0	0	0	0	603	903	0
531	6	0	0	0	0	0	0	200	300	0	7.60315	84.3146	-619.929	24406.7	22806.9	4122.44	236.79	863.63	0	0	0	0	0	0	0	603	903	0
531	7	0	0	0	0	0	0	200	300	0	7.90833	84.7723	-617.792	24315.1	22562.8	4213.99	236.522	863.642	0	0	0	0	0	0	0	603	903	0
531	8	0	0	0	0	0	0	200	300	0	6.53503	84.162	-620.234	25139.1	21830.3	4305.54	235.197	862.468	0	0	0	0	0	0	0	603	903	0
531	9	0	0	0	0	0	0	200	300	0	6.84021	87.2137	-618.403	24864.4	22745.9	4442.87	236.782	862.792	0	0	0	0	0	0	0	603	903	0
532	0	0	0	0	0	0	0	200	300	0	6.53503	89.0448	-619.318	24498.2	22257.6	4763.31	235.939	863.443	0	0	0	0	0	0	0	603	903	0
532	1	0	0	0	0	0	0	200	300	0	4.3988	88.1293	-619.013	24406.7	22074.5	4442.87	235.661	863.572	0	0	0	0	0	0	0	603	903	0
532	2	0	0	0	0	0	0	200	300	0	4.24622	90.5707	-620.539	25230.7	22196.5	4809.08	235.77	862.341	0	0	0	0	0	0	0	603	903	0
532	3	0	0	0	0	0	0	200	300	0	4.85657	90.8759	-619.929	25322.2	22013.4	4763.31	235.51	862.153	0	0	0	0	0	0	0	603	903	0
532	4	0	0	0	0	0	0	200	300	0	4.24622	92.7069	-619.929	24956	22440.7	4488.65	236.199	862.744	0	0	0	0	0	0	0	603	903	0
532	5	0	0	0	0	0	0	200	300	0	2.56775	92.8595	-618.403	25230.7	21952.4	4534.42	235.499	862.2	0	0	0	0	0	0	0	603	903	0
532	6	0	0	0	0	0	0	200	300	0	4.55139	94.9957	-617.487	24956	22623.8	4580.2	236.638	862.585	0	0	0	0	0	0	0	603	903	0
532	7	0	0	0	0	0	0	200	300	0	2.41516	95.3009	-616.572	25780	22257.6	4763.31	236.099	861.188	0	0	0	0	0	0	0	603	903	0
532	8	0	0	0	0	0	0	200	300	0	3.48328	96.2164	-617.792	25413.8	21769.3	4809.08	235.237	861.864	0	0	0	0	0	0	0	603	903	0
532	9	0	0	0	0	0	0	200	300	0	0.889283	96.8268	-615.656	25230.7	21708.3	4763.31	235.26	862.018	0	0	0	0	0	0	0	603	903	0
533	0	0	0	0	0	0	0	200	300	0	0.431519	98.0475	-617.182	25871.5	22257.6	4900.63	236.063	861.081	0	0	0	0	0	0	0	603	903	0
533	1	0	0	0	0	0	0	200	300	0	-0.484008	98.2001	-615.351	26420.8	21952.4	4946.41	235.675	860.064	0	0	0	0	0	0	0	603	903	0
533	2	0	0	0	0	0	0	200	300	0	0.431519	100.031	-614.13	25963.1	21525.2	5037.96	235.05	860.724	0	0	0	0	0	0	0	603	903	0
533	3	0	0	0	0	0	0	200	300	0	-0.0262447	101.252	-613.215	26329.3	21464.1	5221.07	235.003	860.063	0	0	0	0	0	0	0	603	903	0
533	4	0	0	0	0	0	0	200	300	0	-1.39954	101.404	-615.046	25871.5	21464.1	5312.62	234.898	860.936	0	0	0	0	0	0	0	603	903	0
533	5	0	0	0	0	0	0	200	300	0	-1.39954	101.252	-614.741	25780	21525.2	5175.29	235.015	861.064	0	0	0	0	0	0	0	603	903	0
533	6	0	0	0	0	0	0	200	300	0	1.34705	102.167	-613.825	25963.1	21036.9	5175.29	234.272	860.703	0	0	0	0	0	0	0	603	903	0
533	7	0	0	0	0	0	0	200	300	0	-0.789184	102.625	-611.384	26420.8	21525.2	5221.07	235.207	859.785	0	0	0	0	0	0	0	603	903	0
533	8	0	0	0	0	0	0	200	300	0	-1.39954	103.693	-610.773	25871.5	21464.1	5358.4	235.143	860.641	0	0	0	0	0	0	0	603	903	0
533	9	0	0	0	0	0	0	200	300	0	-3.38318	103.541	-609.247	25963.1	20914.8	5404.18	234.329	860.385	0	0	0	0	0	0	0	603	903	0
534	0	0	0	0	0	0	0	200	300	0	-4.14612	105.372	-611.078	26329.3	20914.8	5312.62	234.226	859.913	0	0	0	0	0	0	0	603	903	0
534	1	0	0	0	0	0	0	200	300	0	-3.23059	105.219	-608.942	26054.6	21158.9	5312.62	234.747	860.213	0	0	0	0	0	0	0	603	903	0
534	2	0	0	0	0	0	0	200	300	0	-3.99353	106.287	-608.027	26054.6	20914.8	5221.07	234.398	860.149	0	0	0	0	0	0	0	603	903	0
534	3	0	0	0	0	0	0	200	300	0	-5.82458	107.355	-606.806	26512.4	20426.5	5037.96	233.662	859.308	0	0	0	0	0	0	0	603	903	0
534	4	0	0	0	0	0	0	200	300	0	-6.58752	108.423	-605.585	25780	21036.9	5404.18	234.738	860.43	0	0	0	0	0	0	0	603	903	0
534	5	0	0	0	0	0	0	200	300	0	-5.06165	108.729	-603.449	26512.4	20792.7	5175.29	234.456	859.065	0	0	0	0	0	0	0	603	903	0
534	6	0	0	0	0	0	0	200	300	0	-3.53577	110.102	-604.365	26420.8	20365.5	5266.85	233.697	859.283	0	0	0	0	0	0	0	603	903	0
534	7	0	0	0	0	0	0	200	300	0	-6.58752	110.407	-599.787	26420.8	20243.4	5266.85	233.751	858.95	0	0	0	0	0	0	0	603	903	0
534	8	0	0	0	0	0	0	200	300	0	-7.04529	110.865	-601.313	26603.9	20487.6	5221.07	234.071	858.757	0	0	0	0	0	0	0	603	903	0
534	9	0	0	0	0	0	0	200	300	0	-7.65564	111.78	-597.956	26878.6	20243.4	5129.52	233.854	858.049	0	0	0	0	0	0	0	603	903	0
535	0	0	0	0	0	0	0	200	300	0	-6.43494	112.086	-597.346	26695.5	19877.2	5358.4	233.276	858.31	0	0	0	0	0	0	0	603	903	0
535	1	0	0	0	0	0	0	200	300	0	-7.35046	113.611	-595.82	26420.8	19755.1	5129.52	233.156	858.656	0	0	0	0	0	0	0	603	903	0
535	2	0	0	0	0	0	0	200	300	0	-8.41858	114.069	-595.514	26329.3	19999.3	5358.4	233.583	858.787	0	0	0	0	0	0	0	603	903	0
535	3	0	0	0	0	0	0	200	300	0	-9.18152	115.595	-595.514	26695.5	19938.2	5404.18	233.481	858.172	0	0	0	0	0	0	0	603	903	0
535	4	0	0	0	0	0	0	200	300	0	-8.41858	114.832	-591.242	26603.9	19327.9	5495.73	232.69	858.003	0	0	0	0	0	0	0	603	903	0
535	5	0	0	0	0	0	0	200	300	0	-8.57117	114.832	-586.97	26237.7	19572	5404.18	233.344	858.3	0	0	0	0	0	0	0	603	903	0
535	6	0	0	0	0	0	0	200	300	0	-9.63928	116.205	-587.275	27061.7	19450	5541.5	233.119	856.92	0	0	0	0	0	0	0	603	903	0
535	7	0	0	0	0	0	0	200	300	0	-8.41858	118.189	-583.307	26146.2	19327.9	5358.4	233.135	858.176	0	0	0	0	0	0	0	603	903	0
535	8	0	0	0	0	0	0	200	300	0	-9.48669	118.189	-583.307	26329.3	18900.6	5541.5	232.403	857.862	0	0	0	0	0	0	0	603	903	0
535	9	0	0	0	0	0	0	200	300	0	-9.63928	118.494	-579.34	26603.9	19450	5266.85	233.573	857.079	0	0	0	0	0	0	0	603	903	0
536	0	0	0	0	0	0	0	200	300	0	-10.4022	118.342	-578.73	26237.7	19450	5083.74	233.608	857.663	0	0	0	0	0	0	0	603	903	0
536	1	0	0	0	0	0	0	200	300	0	-11.6229	119.105	-574.763	26146.2	19083.7	5083.74	233.203	857.51	0	0	0	0	0	0	0	603	903	0
536	2	0	0	0	0	0	0	200	300	0	-11.1652	120.783	-569.269	26054.6	18961.7	5175.29	233.309	857.232	0	0	0	0	0	0	0	603	903	0
536	3	0	0	0	0	0	0	200	300	0	-10.5548	121.241	-570.795	26787.1	19205.8	4900.63	233.647	856.071	0	0	0	0	0	0	0	603	903	0
536	4	0	0	0	0	0	0	200	300	0	-10.7074	121.546	-570.49	26329.3	19205.8	4900.63	233.665	856.848	0	0	0	0	0	0	0	603	903	0
536	5	0	0	0	0	0	0	200	300	0	-12.2333	121.546	-564.997	26420.8	18595.5	4992.19	232.913	856.237	0	0	0	0	0	0	0	603	903	0
536	6	0	0	0	0	0	0	200	300	0	-10.5548	121.699	-565.607	25963.1	18656.5	4854.86	232.985	857.097	0	0	0	0	0	0	0	603	903	0
536	7	0	0	0	0	0	0	200	300	0	-11.9281	122.309	-561.335	26512.4	18534.4	4900.63	233.019	855.769	0	0	0	0	0	0	0	603	903	0
536	8	0	0	0	0	0	0	200	300	0	-9.48669	123.377	-557.673	26054.6	18534.4	4854.86	233.235	856.28	0	0	0	0	0	0	0	603	903	0
536	9	0	0	0	0	0	0	200	300	0	-11.6229	123.987	-555.231	25780	17985.1	4854.86	232.392	856.569	0	0	0	0	0	0	0	603	903	0
537	0	0	0	0	0	0	0	200	300	0	-10.097	123.835	-553.705	25596.9	18168.2	4854.86	232.812	856.772	0	0	0	0	0	0	0	603	903	0
537	1	0	0	0	0	0	0	200	300	0	-12.2333	124.14	-550.043	25963.1	18290.3	4900.63	233.252	855.798	0	0	0	0	0	0	0	603	903	0
537	2	0	0	0	0	0	0	200	300	0	-10.4022	124.445	-546.381	25413.8	18351.3	4809.08	233.587	856.487	0	0	0	0	0	0	0	603	903	0
537	3	0	0	0	0	0	0	200	300	0	-11.3177	124.14	-543.329	25139.1	17924.1	4854.86	232.989	856.731	0	0	0	0	0	0	0	603	903	0
537	4	0	0	0	0	0	0	200	300	0	-11.4703	125.361	-539.362	25322.2	17679.9	4946.41	232.779	856.052	0	0	0	0	0	0	0	603	903	0
537	5	-0.638574	2.55101	-15.5042	551.144	-459.727	-390.197	170.348	264.452	0	-12.0807	123.377	-537.226	24864.4	17802	4717.53	233.137	856.717	0	0	0	0	0	0	0	603	903	0
537	6	-9.1835	5.90794	-49.3787	2107.54	-459.727	-664.855	190.69	257.319	0	-11.6229	125.208	-533.259	25413.8	17924.1	4717.53	233.612	855.343	0	0	0	0	0	0	0	603	903	0
537	7	-23.3742	10.1804	-83.5584	2107.54	-1009.04	-1031.07	187.924	274.778	0	-11.7755	125.513	-528.986	25230.7	17679.9	4442.87	233.422	855.304	0	0	0	0	0	0	0	603	903	0
537	8	-25.663	16.4365	-81.4222	1466.67	-1741.47	-573.302	178.612	281.987	0	-11.9281	125.513	-524.714	24772.9	17496.8	4259.77	233.345	855.788	0	0	0	0	0	0	0	603	903	0
537	9	-14.5241	25.5918	-60.6702	459.592	-1924.57	-619.079	168.278	292.425	0	-12.8436	125.818	-518.915	24956	17802	4442.87	234.306	854.907	0	0	0	0	0	0	0	603	903	0
538	0	-0.94375	31.6953	-59.4495	1283.57	-1131.11	-756.408	180.974	278.409	0	-12.8436	127.192	-517.695	24772.9	17679.9	4351.32	234.151	855.148	0	0	0	0	0	0	0	603	903	0
538	1	5.77012	26.0495	-95.1551	2656.86	-703.868	-710.631	192.603	272.079	0	-10.86	127.497	-512.507	25139.1	16581.3	4397.09	232.353	853.949	0	0	0	0	0	0	0	603	903	0
538	2	3.32871	21.1667	-126.283	3663.94	-1314.22	-207.091	189.593	270.986	0	-8.26599	125.666	-509.15	24589.8	17618.9	4259.77	234.605	854.704	0	0	0	0	0	0	0	603	903	0
538	3	-11.6249	29.4065	-135.743	3114.62	-2229.75	-847.961	183.574	277.055	0	-12.3859	123.377	-505.793	24315.1	17252.7	4259.77	234.11	854.927	0	0	0	0	0	0	0	603	903	0
538	4	-24.4423	38.8669	-140.626	2839.96	-2779.06	-2175.48	180.238	279.805	0	-12.8436	126.581	-502.436	24223.6	17069.6	3985.11	233.974	854.788	0	0	0	0	0	0	0	603	903	0
538	5	-20.7802	34.5945	-161.683	4213.25	-2840.1	-939.513	182.434	273.941	0	-12.691	128.26	-496.027	24589.8	16764.4	4076.66	233.797	853.427	0	0	0	0	0	0	0	603	903	0
538	6	-7.65762	24.8288	-189.76	4854.12	-2229.75	-802.184	188.25	274.42	0	-9.94446	125.971	-490.229	24223.6	16947.5	4122.44	234.571	853.587	0	0	0	0	0	0	0	603	903	0
538	7	1.03989	19.6408	-203.798	6135.86	-1619.4	-893.737	192.054	269.892	0	-10.5548	125.208	-485.956	24223.6	16520.3	4030.88	233.995	853.153	0	0	0	0	0	0	0	603	903	0
538	8	0.887305	21.9297	-206.239	6227.41	-1924.57	-1031.07	190.668	269.805	0	-12.3859	124.445	-484.43	23216.5	16337.2	4030.88	233.724	855.075	0	0	0	0	0	0	0	603	903	0
538	9	-5.3688	19.1831	-216.005	5037.23	-2962.17	-1122.62	186.287	276.68	0	-10.2496	124.75	-475.886	23216.5	16276.1	3939.33	234.202	854.214	0	0	0	0	0	0	0	603	903	0
539	0	-11.6249	18.7253	-235.841	5952.76	-2962.17	-985.29	187.44	274.759	0	-10.7074	124.598	-468.256	23124.9	16215.1	3802	234.629	853.615	0	0	0	0	0	0	0	603	903	0
539	1	-4.30068	15.2158	-255.678	6227.41	-2412.85	-1214.17	190.563	275.643	0	-11.3177	125.208	-464.899	23308.1	16215.1	3802	234.879	852.864	0	0	0	0	0	0	0	603	903	0
539	2	9.58481	11.5537	-260.56	6868.28	-1741.47	-573.302	193.316	273.64	0	-10.86	123.835	-462.153	22850.3	15971	3618.9	234.558	853.557	0	0	0	0	0	0	0	603	903	0
539	3	15.078	6.67088	-263.002	8241.57	-1009.04	-527.526	196.163	268.663	0	-11.0126	122.767	-452.387	22484.1	15787.8	3893.55	234.899	853.299	0	0	0	0	0	0	0	603	903	0
539	4	10.6529	-0.195577	-279.786	8333.13	-1192.15	-847.961	195.739	270.216	0	-10.7074	122.004	-447.809	22575.6	15726.8	3481.57	235.119	852.587	0	0	0	0	0	0	0	603	903	0
539	5	8.66929	-5.23098	-291.078	8058.47	-1619.4	-344.421	194.437	272.315	0	-10.5548	121.699	-440.18	23033.4	15665.8	3527.34	235.589	850.673	0	0	0	0	0	0	0	603	903	0
539	6	12.484	-8.28273	-294.13	8333.13	-1070.08	-69.7623	196.362	271.669	0	-9.63928	119.715	-436.518	22117.9	15177.5	3481.57	234.769	852.331	0	0	0	0	0	0	0	603	903	0
539	7	20.8763	-15.607	-298.707	9157.1	-32.4808	-252.868	199.891	269.344	0	-10.2496	119.868	-431.635	21843.2	15238.5	3252.69	235.304	852.394	0	0	0	0	0	0	0	603	903	0
539	8	28.2005	-23.8467	-308.168	9981.08	455.801	-115.539	201.479	267.612	0	-10.7074	120.173	-424.006	21568.5	15421.6	3252.69	236.371	852.131	0	0	0	0	0	0	0	603	903	0
539	9	30.0316	-28.7295	-319.154	10255.7	272.695	479.554	200.854	267.866	0	-10.86	117.884	-415.156	21477	14994.4	3344.24	236.118	851.268	0	0	0	0	0	0	0	603	903	0
540	0	26.3695	-31.0183	-323.427	10438.8	333.73	250.672	201.032	267.724	0	-9.79187	115.137	-411.188	21751.7	14567.1	3115.36	235.427	850.101	0	0	0	0	0	0	0	603	903	0
540	1	26.6747	-36.3589	-324.037	10438.8	699.941	342.225	202.16	267.785	0	-7.65564	115.29	-404.474	21385.4	14567.1	3161.13	236.015	850.128	0	0	0	0	0	0	0	603	903	0
540	2	33.3885	-41.5469	-331.361	11903.7	1066.15	708.436	203.217	264.076	0	-9.79187	115.443	-396.235	20744.6	14628.2	2794.92	236.918	850.646	0	0	0	0	0	0	0	603	903	0
540	3	38.4239	-47.3452	-340.516	12544.6	1493.4	845.765	204.386	263.16	0	-10.7074	113.154	-388.91	20561.5	14078.9	3115.36	236.201	850.131	0	0	0	0	0	0	0	603	903	0
540	4	41.1705	-52.5332	-347.535	12727.7	1371.33	891.542	203.946	263.377	0	-10.097	111.475	-383.112	20286.8	13773.7	3115.36	235.952	850.047	0	0	0	0	0	0	0	603	903	0
540	5	40.255	-54.3643	-353.029	13093.9	1676.5	1257.75	204.749	262.91	0	-9.02893	111.78	-376.093	19829	13590.6	2703.37	236.136	850.276	0	0	0	0	0	0	0	603	903	0
540	6	39.1869	-57.7212	-358.827	13551.6	1432.36	1532.41	203.992	262.234	0	-8.87634	107.661	-369.379	19462.8	13895.8	2382.93	237.619	850.309	0	0	0	0	0	0	0	603	903	0
540	7	40.255	-59.2471	-367.372	13917.8	1249.26	1395.08	203.401	262.115	0	-9.79187	105.524	-361.139	19645.9	13712.7	2703.37	237.971	848.6	0	0	0	0	0	0	0	603	903	0
540	8	46.0533	-61.8411	-375.001	15016.5	1188.22	1852.85	203.169	259.956	0	-9.94446	104.456	-353.51	19279.7	13346.4	2428.71	237.754	848.462	0	0	0	0	0	0	0	603	903	0
540	9	50.1732	-64.2825	-384.157	16115.1	1798.57	2356.39	204.682	258.051	0	-9.79187	103.693	-346.491	18638.9	13163.3	2382.93	237.99	849.207	0	0	0	0	0	0	0	603	903	0
541	0	49.7154	-65.5032	-398.5	16481.3	1676.5	2219.06	204.207	258.642	0	-9.18152	99.4208	-336.725	18913.5	12980.2	2428.71	238.548	846.831	0	0	0	0	0	0	0	603	903	0
541	1	49.7154	-67.792	-414.369	16939.1	1493.4	2585.27	203.604	259.121	0	-8.87634	100.031	-331.843	17814.9	12797.1	2611.82	238.564	849.315	0	0	0	0	0	0	0	603	903	0
541	2	49.7154	-69.0127	-428.102	18678.6	1005.12	3363.47	202.348	256.369	0	-10.2496	97.132	-323.603	18272.7	11698.5	2199.83	236.151	846.534	0	0	0	0	0	0	0	603	903	0
541	3	50.3258	-72.5222	-436.952	19502.6	1676.5	3088.81	203.837	255.367	0	-10.2496	95.1483	-314.448	17906.4	12308.8	2154.05	239.144	846.054	0	0	0	0	0	0	0	603	903	0
541	4	53.225	-74.5059	-452.821	20875.9	1615.47	3455.02	203.568	253.898	0	-8.87634	92.8595	-308.039	17357.1	11820.6	2108.28	238.374	846.653	0	0	0	0	0	0	0	603	903	0
541	5	54.2931	-75.2688	-470.521	21791.4	1737.54	4370.55	203.693	253.687	0	-8.72375	92.8595	-300.104	17082.5	11576.4	1787.84	238.575	846.078	0	0	0	0	0	0	0	603	903	0
541	6	52.3094	-77.0999	-481.508	22523.8	1066.15	3912.78	202.214	253.222	0	-9.94446	90.2655	-292.78	17082.5	11759.5	1879.39	240.165	844.654	0	0	0	0	0	0	0	603	903	0
541	7	51.6991	-79.2361	-496.766	23439.3	1493.4	3821.23	203.006	252.816	0	-8.26599	87.0612	-285.456	16716.3	11759.5	1879.39	241.196	844.44	0	0	0	0	0	0	0	603	903	0
541	8	54.2931	-81.3723	-505.922	24812.6	1371.33	4416.32	202.711	250.956	0	-10.5548	82.3309	-279.352	16441.6	11332.3	1467.41	240.566	844.144	0	0	0	0	0	0	0	603	903	0
541	9	57.1922	-83.9663	-518.434	25545	1432.36	4828.31	202.763	250.727	0	-9.63928	79.1266	-272.944	16533.1	10721.9	1513.18	239.283	842.427	0	0	0	0	0	0	0	603	903	0
542	0	57.0396	-88.544	-527.894	26735.2	1493.4	4874.09	202.829	249.355	0	-9.02893	78.5162	-262.568	15709.2	10599.9	1375.85	240.37	843.171	0	0	0	0	0	0	0	603	903	0
542	1	56.8871	-90.2224	-541.017	27559.2	1798.57	4828.31	203.324	249.06	0	-9.94446	75.7697	-255.549	15617.6	10355.7	1604.74	240.523	841.886	0	0	0	0	0	0	0	603	903	0
542	2	55.2086	-91.7483	-548.646	28749.4	1676.5	5331.85	203.056	247.599	0	-11.1652	71.4972	-248.53	15526.1	10355.7	1238.52	241.668	840.528	0	0	0	0	0	0	0	603	903	0
542	3	57.3448	-94.8001	-557.496	29390.3	1493.4	5194.52	202.679	247.282	0	-9.48669	71.6498	-242.426	14976.7	9562.26	1192.75	239.444	841.221	0	0	0	0	0	0	0	603	903	0
542	4	58.4129	-99.6829	-565.736	31038.2	1371.33	5835.39	202.424	245.137	0	-9.33411	67.0721	-234.492	14335.9	9684.33	1009.64	241.299	841.864	0	0	0	0	0	0	0	603	903	0
542	5	58.4129	-101.361	-571.229	31129.8	1737.54	5835.39	203.042	245.504	0	-11.1652	64.6307	-228.388	14061.2	9379.16	1238.52	241.067	841.433	0	0	0	0	0	0	0	603	903	0
542	6	58.7181	-102.582	-578.554	32136.8	1310.29	5743.84	202.265	244.453	0	-11.7755	63.2574	-218.012	14152.8	9012.95	963.867	241.342	838.083	0	0	0	0	0	0	0	603	903	0
542	7	57.4974	-104.413	-581.605	32319.9	1432.36	5240.3	202.463	244.43	0	-11.0126	60.9686	-214.655	13511.9	9012.95	826.538	241.988	840.053	0	0	0	0	0	0	0	603	903	0
542	8	55.056	-107.007	-590.761	32777.7	822.012	5835.39	201.391	244.516	0	-9.79187	56.8488	-207.331	12962.6	9318.12	734.985	244.943	840.479	0	0	0	0	0	0	0	603	903	0
542	9	54.7508	-106.397	-591.676	33876.4	883.047	5652.29	201.492	242.745	0	-10.4022	54.2548	-200.617	13054.1	8707.77	414.55	243.405	837.93	0	0	0	0	0	0	0	603	903	0
543	0	55.8189	-106.855	-597.169	34059.5	1249.26	5102.97	202.092	242.965	0	-11.3177	51.8134	-193.293	12596.4	8097.42	597.656	241.892	837.833	0	0	0	0	0	0	0	603	903	0
543	1	52.462	-108.838	-598.39	34700.3	1005.12	5240.3	201.68	242.011	0	-10.2496	48.3038	-186.884	12962.6	7914.31	460.327	242.349	833.638	0	0	0	0	0	0	0	603	903	0
543	2	47.8844	-109.449	-604.188	35158.1	516.836	5148.75	200.855	241.809	0	-7.80823	44.184	-180.17	12779.5	7975.35	185.669	244.266	832.07	0	0	0	0	0	0	0	603	903	0
543	3	46.2059	-108.838	-605.409	35982.1	577.871	4690.98	200.955	240.566	0	-9.33411	45.2521	-174.372	12047.1	7670.17	94.1158	243.987	833.912	0	0	0	0	0	0	0	603	903	0
543	4	44.3749	-107.617	-609.071	36165.2	394.765	4553.65	200.648	240.622	0	-11.6229	44.184	-166.437	12047.1	7303.96	322.998	243.884	830.618	0	0	0	0	0	0	0	603	903	0
543	5	42.5438	-107.77	-607.24	37446.9	333.73	4416.32	200.55	238.333	0	-10.2496	42.5055	-162.165	11955.5	6937.75	231.445	242.782	829.276	0	0	0	0	0	0	0	603	903	0
543	6	40.255	-109.296	-608.156	37446.9	89.5895	3683.9	200.147	238.425	0	-9.79187	40.3693	-158.503	11314.6	6937.75	-180.542	243.771	831.615	0	0	0	0	0	0	0	603	903	0
543	7	35.9825	-108.228	-610.902	37446.9	-764.903	3867.01	198.748	238.702	0	-10.097	37.6227	-152.094	11131.5	6571.54	94.1158	243.207	829.812	0	0	0	0	0	0	0	603	903	0
543	8	31.7101	-105.939	-614.259	36806	-276.621	3592.35	199.55	240.081	0	-11.0126	33.1976	-145.075	10856.9	6205.33	-180.542	242.773	828.164	0	0	0	0	0	0	0	603	903	0
543	9	29.5738	-107.312	-613.344	37721.6	-703.868	3180.36	198.852	238.498	0	-10.4022	30.7562	-140.803	10307.6	5961.19	2.56305	242.337	829.794	0	0	0	0	0	0	0	603	903	0
544	0	28.6583	-107.617	-609.376	38179.3	-703.868	3180.36	198.845	237.347	0	-7.19788	28.9252	-133.784	10032.9	5717.04	-88.9897	242.734	828.007	0	0	0	0	0	0	0	603	903	0
544	1	24.2333	-105.481	-610.292	37630	-886.973	2493.72	198.547	238.341	0	-8.1134	26.6364	-127.375	9849.79	5472.9	48.3394	242.967	825.671	0	0	0	0	0	0	0	603	903	0
544	2	21.3341	-105.939	-610.292	38454	-1314.22	2539.49	197.847	236.991	0	-8.72375	24.8053	-122.492	9300.48	4984.62	-272.095	240.693	827.073	0	0	0	0	0	0	0	603	903	0
544	3	18.1297	-107.16	-610.902	38545.5	-1192.15	2035.95	198.049	236.904	0	-9.63928	21.4484	-119.44	9300.48	5472.9	-226.319	245.821	825.133	0	0	0	0	0	0	0	603	903	0
544	4	15.3832	-105.939	-608.766	39277.9	-1558.36	2356.39	197.44	235.479	0	-9.48669	22.2113	-114.557	8934.27	5656.01	-363.648	249.373	825.011	0	0	0	0	0	0	0	603	903	0
544	5	13.2469	-105.023	-609.987	39644.2	-1741.47	1532.41	197.145	235.008	0	-7.65564	21.9061	-109.675	8293.4	4740.48	-317.872	243.223	827.382	0	0	0	0	0	0	0	603	903	0
544	6	9.7374	-106.855	-604.799	39735.7	-1924.57	1257.75	196.818	234.299	0	-7.04529	21.7535	-104.792	8384.95	4740.48	-43.2133	245.237	822.985	0	0	0	0	0	0	0	603	903	0
544	7	7.14341	-107.312	-600.831	39827.3	-1741.47	1120.42	197.102	233.713	0	-7.35046	20.6854	-100.214	7652.53	5167.73	-363.648	251.567	826.638	0	0	0	0	0	0	0	603	903	0
544	8	5.00718	-106.397	-603.273	39735.7	-1802.5	1349.31	197.012	234.133	0	-7.80823	22.0587	-95.6365	7377.87	4740.48	-317.872	249.568	825.855	0	0	0	0	0	0	0	603	903	0
544	9	3.4813	-106.092	-602.357	40010.4	-2107.68	845.765	196.501	233.577	0	-5.82458	20.6854	-89.8382	7377.87	4313.24	-272.095	248.011	820.876	0	0	0	0	0	0	0	603	903	0
545	0	2.10801	-107.007	-597.169	39369.5	-2168.71	388.001	196.368	234.073	0	-5.51941	19.007	-86.4813	6828.55	4130.13	-546.754	247.758	824.04	0	0	0	0	0	0	0	603	903	0
545	1	-0.333399	-107.16	-599.916	39827.3	-2290.78	525.331	196.181	233.612	0	-6.43494	19.007	-84.345	6462.34	4496.34	-455.201	253.309	826.382	0	0	0	0	0	0	0	603	903	0
545	2	-2.31704	-106.244	-596.559	40101.9	-2412.85	250.672	195.955	232.778	0	-6.12976	17.3285	-81.5984	6737	3824.95	-546.754	246.875	820.437	0	0	0	0	0	0	0	603	903	0
545	3	-3.23257	-106.549	-594.117	39918.8	-2779.06	342.225	195.322	232.81	0	-6.12976	13.6664	-78.8519	6004.58	3641.85	-546.754	246.186	826.85	0	0	0	0	0	0	0	603	903	0
545	4	-5.21621	-107.77	-594.423	40468.1	-2718.03	250.672	195.427	231.92	0	-5.21423	11.225	-74.8846	6279.24	3580.81	-867.188	247.818	819.148	0	0	0	0	0	0	0	603	903	0
545	5	-5.97915	-107.465	-595.338	39918.8	-2779.06	-207.091	195.332	232.948	0	-4.60388	11.225	-71.5276	5455.26	3702.88	-592.53	251.769	826.732	0	0	0	0	0	0	0	603	903	0
545	6	-8.26797	-106.092	-595.949	41017.5	-2840.1	296.449	195.234	231.173	0	-5.51941	8.47839	-68.4759	5821.47	3519.78	-775.635	251.402	817.985	0	0	0	0	0	0	0	603	903	0
545	7	-7.50503	-108.228	-591.981	41749.9	-2901.13	388.001	195.099	229.474	0	-4.45129	7.86804	-65.4241	4814.39	2787.36	-684.083	242.604	829.413	0	0	0	0	0	0	0	603	903	0
545	8	-10.4042	-109.143	-593.202	41841.4	-3206.31	67.5668	194.595	229.465	0	-2.92541	8.47839	-62.3724	5363.71	2787.36	-638.306	244.689	817.005	0	0	0	0	0	0	0	603	903	0
545	9	-10.4042	-107.77	-595.033	41658.3	-3145.27	-69.7623	194.714	229.99	0	-3.078	8.78357	-59.6258	4905.94	2909.43	-500.977	248.795	820.721	0	0	0	0	0	0	0	603	903	0
546	0	-9.64126	-107.007	-597.474	42024.5	-3206.31	754.213	194.634	229.663	0	-3.68835	6.64734	-58.4051	4448.18	2726.32	-500.977	246.68	826.839	0	0	0	0	0	0	0	603	903	0
546	1	-10.2516	-108.991	-592.592	41933	-3572.52	342.225	193.971	229.238	0	-4.60388	6.03699	-54.1326	4356.63	2360.11	-272.095	243.599	822.519	0	0	0	0	0	0	0	603	903	0
546	2	-11.6249	-108.838	-598.085	42116.1	-3633.56	525.331	193.925	229.582	0	-3.99353	7.41028	-49.555	4173.52	2665.29	-500.977	253.784	818.78	0	0	0	0	0	0	0	603	903	0
546	3	-11.9301	-107.923	-598.085	42757	-3328.38	754.213	194.435	228.51	0	-2.31506	7.56287	-46.8084	4081.97	2665.29	-546.754	256.94	815.794	0	0	0	0	0	0	0	603	903	0
546	4	-11.1671	-107.923	-598.39	42482.3	-3633.56	754.213	193.928	229.006	0	-2.46765	6.49475	-42.5359	3898.86	2177.01	-684.083	251.18	811.34	0	0	0	0	0	0	0	603	903	0
546	5	-10.862	-109.296	-600.831	42482.3	-3816.66	433.778	193.648	229.294	0	-3.53577	6.34216	-42.5359	3074.89	1932.86	-592.53	245.441	830.711	0	0	0	0	0	0	0	603	903	0
546	6	-10.5568	-108.075	-604.188	43855.6	-3572.52	1028.87	194.087	227.414	0	-1.24695	4.96887	-39.7894	3074.89	1993.9	-729.859	250.111	825.721	0	0	0	0	0	0	0	603	903	0
546	7	-11.7775	-108.686	-605.714	43489.4	-3389.42	1166.2	194.404	228.202	0	-3.38318	2.98523	-37.0428	3166.44	2054.94	-363.648	255.475	817.519	0	0	0	0	0	0	0	603	903	0
546	8	-9.48867	-108.075	-608.461	43947.2	-3633.56	1166.2	194.028	227.773	0	-0.789184	4.35852	-34.2962	2708.68	1505.62	-455.201	243.9	824.021	0	0	0	0	0	0	0	603	903	0
546	9	-11.1671	-108.075	-607.545	44588	-3877.7	1028.87	193.617	226.61	0	-1.09436	4.96887	-32.4651	2434.02	1505.62	-592.53	246.376	828.027	0	0	0	0	0	0	0	603	903	0
547	0	-9.79385	-108.075	-610.597	44496.5	-3816.66	1532.41	193.749	227.126	0	-2.16248	3.59558	-29.4134	2525.57	1932.86	-684.083	265.714	817.135	0	0	0	0	0	0	0	603	903	0
547	1	-9.48867	-107.77	-613.954	44954.2	-3694.59	1166.2	193.982	226.779	0	-1.8573	3.74817	-29.1082	2342.47	1505.62	-272.095	251.725	822.526	0	0	0	0	0	0	0	603	903	0
547	2	-10.4042	-107.312	-613.344	45137.3	-3755.63	1532.41	193.877	226.408	0	-0.484008	3.90076	-26.972	2067.81	1139.41	-592.53	242.244	826.335	0	0	0	0	0	0	0	603	903	0
547	3	-11.1671	-106.855	-617.921	45412	-3816.66	1944.4	193.823	226.508	0	0.126343	3.29041	-25.1409	2434.02	956.302	-317.872	238.038	806.185	0	0	0	0	0	0	0	603	903	0
547	4	-11.0146	-106.702	-619.752	45778.2	-3938.73	1807.07	193.645	226.135	0	-0.789184	2.98523	-21.784	1884.7	1261.48	-546.754	257.908	816.482	0	0	0	0	0	0	0	603	903	0
547	5	-9.33608	-105.329	-627.992	47059.9	-4060.8	1532.41	193.534	225.063	0	0	0	0	0	0	0	200	903	0	0	0	0	0	0	0	603	903	0
547	6	-9.79385	-105.176	-634.096	48250.1	-4549.08	1807.07	192.826	223.907	0	0	0	0	0	0	0	200	903	0	0	0	0	0	0	0	603	903	0
547	7	-12.5404	-107.617	-639.589	48250.1	-4304.94	1120.42	193.269	224.561	0	0	0	0	0	0	0	200	903	0	0	0	0	0	0	0	603	903	0
547	8	-16.3551	-107.77	-638.978	49623.4	-4854.26	754.213	192.403	222.339	0	0	0	0	0	0	0	200	903	0	0	0	0	0	0	0	603	903	0
547	9	-16.9655	-106.855	-637.147	49348.8	-4427.01	845.765	193.052	222.547	0	0	0	0	0	0	0	200	903	0	0	0	0	0	0	0	603	903	0
548	0	-18.9491	-106.244	-643.251	50630.5	-4793.22	754.213	192.548	221.29	0	0	0	0	0	0	0	200	903	0	0	0	0	0	0	0	603	903	0
548	1	-17.7284	-109.601	-648.439	50813.6	-4854.26	433.778	192.514	221.637	0	0	0	0	0	0	0	200	903	0	0	0	0	0	0	0	603	903	0
548	2	-18.0336	-111.737	-650.27	51179.8	-4854.26	571.107	192.535	221.295	0	0	0	0	0	0	0	200	903	0	0	0	0	0	0	0	603	903	0
548	3	-18.9491	-110.211	-651.796	52095.3	-4549.08	662.66	193.021	220.074	0	0	0	0	0	0	0	200	903	0	0	0	0	0	0	0	603	903	0
548	4	-17.2707	-110.517	-657.899	51454.5	-4610.12	1440.86	192.993	221.79	0	0	0	0	0	0	0	200	903	0	0	0	0	0	0	0	603	903	0
548	5	-16.5077	-113.721	-657.594	51912.2	-4610.12	937.318	192.989	221.057	0	0	0	0	0	0	0	200	903	0	0	0	0	0	0	0	603	903	0
548	6	-16.05	-111.585	-657.899	52095.3	-4549.08	1486.63	193.085	220.816	0	0	0	0	0	0	0	200	903	0	0	0	0	0	0	0	603	903	0
548	7	-13.456	-109.449	-659.12	52370	-4304.94	799.989	193.469	220.546	0	0	0	0	0	0	0	200	903	0	0	0	0	0	0	0	603	903	0
548	8	-15.1344	-108.38	-659.425	52827.8	-4671.15	891.542	192.916	219.888	0	0	0	0	0	0	0	200	903	0	0	0	0	0	0	0	603	903	0
548	9	-16.8129	-106.855	-664.613	53926.4	-4732.19	1211.98	192.88	218.86	0	0	0	0	0	0	0	200	903	0	0	0	0	0	0	0	603	903	0
549	0	-15.8974	-105.329	-664.918	54567.3	-4671.15	1028.87	192.975	217.934	0	0	0	0	0	0	0	200	903	0	0	0	0	0	0	0	603	903	0
549	1	-10.5568	-104.413	-666.139	54841.9	-4365.98	1440.86	193.446	217.672	0	0	0	0	0	0	0	200	903	0	0	0	0	0	0	0	603	903	0
549	2	-11.1671	-103.955	-666.444	55116.6	-4121.84	1715.52	193.815	217.298	0	0	0	0	0	0	0	200	903	0	0	0	0	0	0	0	603	903	0
549	3	-11.6249	-102.887	-669.191	55391.2	-4304.94	1669.74	193.567	217.227	0	0	0	0	0	0	0	200	903	0	0	0	0	0	0	0	603	903	0
549	4	-12.2353	-101.514	-669.801	55574.3	-4427.01	1623.96	193.391	217.029	0	0	0	0	0	0	0	200	903	0	0	0	0	0	0	0	603	903	0
549	5	-10.099	-100.751	-669.191	54933.5	-4304.94	1715.52	193.567	217.911	0	0	0	0	0	0	0	200	903	0	0	0	0	0	0	0	603	903	0
549	6	-12.0827	-101.056	-670.717	55299.7	-4121.84	1990.17	193.855	217.551	0	0	0	0	0	0	0	200	903	0	0	0	0	0	0	0	603	903	0
549	7	-10.2516	-100.598	-669.801	55482.8	-4488.05	1623.96	193.299	217.165	0	0	0	0	0	0	0	200	903	0	0	0	0	0	0	0	603	903	0
549	8	-10.4042	-98.9199	-671.632	55757.4	-4671.15	1944.4	193.045	216.982	0	0	0	0	0	0	0	200	903	0	0	0	0	0	0	0	603	903	0
549	9	-12.8456	-98.9199	-672.548	55849	-4243.91	1623.96	193.69	216.959	0	0	0	0	0	0	0	200	903	0	0	0	0	0	0	0	603	903	0
550	0	-14.3715	-99.2251	-671.632	56306.8	-4549.08	1349.31	193.227	216.164	0	0	0	0	0	0	0	200	903	0	0	0	0	0	0	0	603	903	0
550	1	-14.0663	-97.2415	-670.411	56673	-4793.22	1440.86	192.85	215.465	0	0	0	0	0	0	0	200	903	0	0	0	0	0	0	0	603	903	0
550	2	-15.1344	-95.4104	-666.444	56856.1	-4304.94	1257.75	193.54	214.687	0	0	0	0	0	0	0	200	903	0	0	0	0	0	0	0	603	903	0
550	3	-15.8974	-95.7156	-670.106	56306.8	-4365.98	983.094	193.485	215.973	0	0	0	0	0	0	0	200	903	0	0	0	0	0	0	0	603	903	0
550	4	-16.6603	-94.9527	-670.717	57130.7	-4549.08	891.542	193.218	214.821	0	0	0	0	0	0	0	200	903	0	0	0	0	0	0	0	603	903	0
550	5	-17.7284	-93.8845	-669.801	57130.7	-4793.22	1028.87	192.844	214.705	0	0	0	0	0	0	0	200	903	0	0	0	0	0	0	0	603	903	0
550	6	-18.9491	-92.8164	-670.411	57588.5	-4549.08	433.778	193.215	214.1	0	0	0	0	0	0	0	200	903	0	0	0	0	0	0	0	603	903	0
550	7	-18.6439	-92.5113	-667.665	57039.2	-4610.12	571.107	193.095	214.569	0	0	0	0	0	0	0	200	903	0	0	0	0	0	0	0	603	903	0
550	8	-19.1017	-91.5957	-667.97	56947.6	-4488.05	754.213	193.281	214.745	0	0	0	0	0	0	0	200	903	0	0	0	0	0	0	0	603	903	0
550	9	-18.9491	-89.7647	-671.632	57497	-4854.26	342.225	192.772	214.392	0	0	0	0	0	0	0	200	903	0	0	0	0	0	0	0	603	903	0
551	0	-20.0172	-88.6966	-669.801	57588.5	-4793.22	250.672	192.844	214.021	0	0	0	0	0	0	0	200	903	0	0	0	0	0	0	0	603	903	0
551	1	-21.3905	-87.6284	-668.886	57863.2	-4549.08	662.66	193.199	213.493	0	0	0	0	0	0	0	200	903	0	0	0	0	0	0	0	603	903	0
551	2	-20.3224	-87.781	-666.749	57771.6	-4488.05	479.554	193.269	213.353	0	0	0	0	0	0	0	200	903	0	0	0	0	0	0	0	603	903	0
551	3	-20.6276	-86.2551	-664.918	58504	-4610.12	204.896	193.067	212.013	0	0	0	0	0	0	0	200	903	0	0	0	0	0	0	0	603	903	0
551	4	-20.475	-85.4922	-666.444	58961.8	-4610.12	662.66	193.083	211.528	0	0	0	0	0	0	0	200	903	0	0	0	0	0	0	0	603	903	0
551	5	-20.475	-85.7974	-666.444	58137.8	-4732.19	525.331	192.899	212.764	0	0	0	0	0	0	0	200	903	0	0	0	0	0	0	0	603	903	0
551	6	-20.6276	-84.5767	-666.749	59144.9	-4976.33	433.778	192.536	211.294	0	0	0	0	0	0	0	200	903	0	0	0	0	0	0	0	603	903	0
551	7	-19.5595	-83.356	-664.308	59236.4	-5098.4	754.213	192.325	210.83	0	0	0	0	0	0	0	200	903	0	0	0	0	0	0	0	603	903	0
551	8	-21.2379	-83.356	-660.646	59053.3	-5098.4	616.883	192.283	210.613	0	0	0	0	0	0	0	200	903	0	0	0	0	0	0	0	603	903	0
551	9	-19.7121	-82.1353	-662.477	57954.7	-5037.36	433.778	192.396	212.518	0	0	0	0	0	0	0	200	903	0	0	0	0	0	0	0	603	903	0
552	0	-20.0172	-80.9146	-664.003	58320.9	-4488.05	891.542	193.241	212.168	0	0	0	0	0	0	0	200	903	0	0	0	0	0	0	0	603	903	0
552	1	-20.7802	-80.1516	-662.172	59236.4	-4854.26	983.094	192.669	210.542	0	0	0	0	0	0	0	200	903	0	0	0	0	0	0	0	603	903	0
552	2	-19.1017	-80.1516	-659.73	58870.2	-4671.15	433.778	192.92	210.766	0	0	0	0	0	0	0	200	903	0	0	0	0	0	0	0	603	903	0
552	3	-20.475	-78.7783	-658.51	58961.8	-4427.01	479.554	193.277	210.462	0	0	0	0	0	0	0	200	903	0	0	0	0	0	0	0	603	903	0
552	4	-19.7121	-77.2525	-658.204	59144.9	-4854.26	616.883	192.625	210.142	0	0	0	0	0	0	0	200	903	0	0	0	0	0	0	0	603	903	0
552	5	-19.1017	-77.2525	-659.425	59785.8	-4549.08	388.001	193.101	209.337	0	0	0	0	0	0	0	200	903	0	0	0	0	0	0	0	603	903	0
552	6	-20.3224	-76.0318	-658.51	59968.9	-4488.05	479.554	193.185	208.932	0	0	0	0	0	0	0	200	903	0	0	0	0	0	0	0	603	903	0
552	7	-20.9328	-75.7266	-653.932	59602.7	-4549.08	433.778	193.044	208.855	0	0	0	0	0	0	0	200	903	0	0	0	0	0	0	0	603	903	0
552	8	-20.7802	-74.9636	-654.847	60152	-4793.22	250.672	192.68	208.144	0	0	0	0	0	0	0	200	903	0	0	0	0	0	0	0	603	903	0
552	9	-19.8646	-74.8111	-653.322	60243.5	-4793.22	296.449	192.663	207.789	0	0	0	0	0	0	0	200	903	0	0	0	0	0	0	0	603	903	0
553	0	-19.4069	-73.5904	-654.237	61250.6	-5037.36	433.778	192.3	206.379	0	0	0	0	0	0	0	200	903	0	0	0	0	0	0	0	603	903	0
553	1	-19.5595	-72.3697	-649.659	59968.9	-5098.4	250.672	192.152	207.692	0	0	0	0	0	0	0	200	903	0	0	0	0	0	0	0	603	903	0
553	2	-20.475	-72.2171	-652.406	60426.6	-4793.22	-115.539	192.653	207.379	0	0	0	0	0	0	0	200	903	0	0	0	0	0	0	0	603	903	0
553	3	-20.9328	-70.5386	-649.659	59968.9	-5281.5	388.001	191.87	207.692	0	0	0	0	0	0	0	200	903	0	0	0	0	0	0	0	603	903	0
553	4	-19.5595	-69.6231	-648.439	60243.5	-4854.26	799.989	192.514	207.094	0	0	0	0	0	0	0	200	903	0	0	0	0	0	0	0	603	903	0
553	5	-19.2543	-69.6231	-646.913	60518.2	-4854.26	204.896	192.496	206.451	0	0	0	0	0	0	0	200	903	0	0	0	0	0	0	0	603	903	0
553	6	-19.7121	-67.9446	-646.608	60518.2	-4793.22	21.7904	192.587	206.407	0	0	0	0	0	0	0	200	903	0	0	0	0	0	0	0	603	903	0
553	7	-19.7121	-67.792	-645.692	60884.4	-4976.33	113.343	192.293	205.707	0	0	0	0	0	0	0	200	903	0	0	0	0	0	0	0	603	903	0
553	8	-17.7284	-66.4187	-643.251	61159.1	-4732.19	571.107	192.643	204.922	0	0	0	0	0	0	0	200	903	0	0	0	0	0	0	0	603	903	0
553	9	-20.0172	-66.1135	-639.589	60884.4	-4671.15	250.672	192.697	204.807	0	0	0	0	0	0	0	200	903	0	0	0	0	0	0	0	603	903	0
554	0	-18.3388	-65.198	-638.673	61250.6	-4671.15	113.343	192.686	204.097	0	0	0	0	0	0	0	200	903	0	0	0	0	0	0	0	603	903	0
554	1	-17.881	-66.2661	-638.978	61250.6	-4793.22	159.12	192.499	204.143	0	0	0	0	0	0	0	200	903	0	0	0	0	0	0	0	603	903	0
554	2	-18.7965	-63.367	-636.842	60884.4	-4915.29	113.343	192.282	204.396	0	0	0	0	0	0	0	200	903	0	0	0	0	0	0	0	603	903	0
554	3	-18.9491	-63.0618	-635.011	60792.9	-4610.12	296.449	192.74	204.265	0	0	0	0	0	0	0	200	903	0	0	0	0	0	0	0	603	903	0
554	4	-18.9491	-61.0781	-631.349	60792.9	-4549.08	21.7904	192.795	203.71	0	0	0	0	0	0	0	200	903	0	0	0	0	0	0	0	603	903	0
554	5	-18.4914	-61.0781	-628.908	60609.8	-4915.29	67.5668	192.184	203.627	0	0	0	0	0	0	0	200	903	0	0	0	0	0	0	0	603	903	0
554	6	-16.6603	-60.4678	-628.602	61159.1	-4610.12	113.343	192.666	202.706	0	0	0	0	0	0	0	200	903	0	0	0	0	0	0	0	603	903	0
554	7	-17.881	-59.3997	-626.771	61799.9	-4549.08	21.7904	192.742	201.4	0	0	0	0	0	0	0	200	903	0	0	0	0	0	0	0	603	903	0
554	8	-19.8646	-58.9419	-624.33	61983	-4915.29	-207.091	192.127	200.721	0	0	0	0	0	0	0	200	903	0	0	0	0	0	0	0	603	903	0
554	9	-19.2543	-57.2634	-620.363	61799.9	-4854.26	67.5668	192.175	200.381	0	0	0	0	0	0	0	200	903	0	0	0	0	0	0	0	603	903	0
555	0	-19.1017	-57.7212	-618.532	62074.6	-4915.29	-298.644	192.053	199.642	0	0	0	0	0	0	0	200	903	0	0	0	0	0	0	0	603	903	0
555	1	-18.1862	-57.416	-617.006	61708.4	-4854.26	-161.315	192.133	199.987	0	0	0	0	0	0	0	200	903	0	0	0	0	0	0	0	603	903	0
555	2	-18.4914	-56.1953	-617.311	61983	-4915.29	-161.315	192.038	199.592	0	0	0	0	0	0	0	200	903	0	0	0	0	0	0	0	603	903	0
555	3	-19.7121	-56.1953	-615.785	61891.5	-4915.29	-390.197	192.018	199.492	0	0	0	0	0	0	0	200	903	0	0	0	0	0	0	0	603	903	0
555	4	-18.1862	-55.585	-610.902	61708.4	-5342.54	-527.526	191.255	198.988	0	0	0	0	0	0	0	200	903	0	0	0	0	0	0	0	603	903	0
555	5	-20.0172	-54.0591	-609.071	61433.7	-4854.26	-390.197	192.03	199.135	0	0	0	0	0	0	0	200	903	0	0	0	0	0	0	0	603	903	0
555	6	-18.4914	-54.0591	-608.766	62074.6	-4732.19	-252.868	192.227	198.032	0	0	0	0	0	0	0	200	903	0	0	0	0	0	0	0	603	903	0
555	7	-18.0336	-53.2962	-607.85	61891.5	-5037.36	-527.526	191.713	198.18	0	0	0	0	0	0	0	200	903	0	0	0	0	0	0	0	603	903	0
555	8	-17.881	-52.5332	-605.409	62898.6	-4854.26	-527.526	191.982	196.106	0	0	0	0	0	0	0	200	903	0	0	0	0	0	0	0	603	903	0
555	9	-19.2543	-52.6858	-602.357	63173.2	-4854.26	-298.644	191.941	195.123	0	0	0	0	0	0	0	200	903	0	0	0	0	0	0	0	603	903	0
556	0	-19.2543	-52.5332	-598.695	62807	-4915.29	-573.302	191.79	195.093	0	0	0	0	0	0	0	200	903	0	0	0	0	0	0	0	603	903	0
556	1	-17.4232	-51.7703	-598.085	63264.8	-5220.47	-207.091	191.271	194.221	0	0	0	0	0	0	0	200	903	0	0	0	0	0	0	0	603	903	0
556	2	-17.4232	-51.0073	-597.78	63539.4	-5098.4	159.12	191.471	193.708	0	0	0	0	0	0	0	200	903	0	0	0	0	0	0	0	603	903	0
556	3	-18.4914	-50.7022	-594.423	63997.2	-5098.4	-481.75	191.423	192.337	0	0	0	0	0	0	0	200	903	0	0	0	0	0	0	0	603	903	0
556	4	-18.4914	-49.9392	-592.897	62807	-5037.36	-527.526	191.504	194.068	0	0	0	0	0	0	0	200	903	0	0	0	0	0	0	0	603	903	0
556	5	-18.7965	-49.9392	-588.014	62898.6	-5403.57	-344.421	190.81	193.032	0	0	0	0	0	0	0	200	903	0	0	0	0	0	0	0	603	903	0
556	6	-17.881	-48.5659	-585.573	63722.5	-4854.26	-390.197	191.71	191.179	0	0	0	0	0	0	0	200	903	0	0	0	0	0	0	0	603	903	0
556	7	-17.1181	-47.9556	-586.183	62990.1	-5037.36	-939.513	191.407	192.542	0	0	0	0	0	0	0	200	903	0	0	0	0	0	0	0	603	903	0
556	8	-17.2707	-47.3452	-581.3	63722.5	-5281.5	-115.539	190.914	190.379	0	0	0	0	0	0	0	200	903	0	0	0	0	0	0	0	603	903	0
556	9	-19.1017	-46.5823	-581.605	63631	-5098.4	-527.526	191.234	190.594	0	0	0	0	0	0	0	200	903	0	0	0	0	0	0	0	603	903	0
557	0	-18.7965	-46.5823	-579.164	64638.1	-5342.54	-573.302	190.775	188.394	0	0	0	0	0	0	0	200	903	0	0	0	0	0	0	0	603	903	0
557	1	-18.0336	-46.1245	-577.333	64729.6	-5159.43	-847.961	191.063	187.882	0	0	0	0	0	0	0	200	903	0	0	0	0	0	0	0	603	903	0
557	2	-16.9655	-46.8875	-578.859	64821.2	-5586.68	-435.973	190.349	188.019	0	0	0	0	0	0	0	200	903	0	0	0	0	0	0	0	603	903	0
557	3	-17.2707	-45.8194	-574.891	64729.6	-5403.57	-893.737	190.601	187.406	0	0	0	0	0	0	0	200	903	0	0	0	0	0	0	0	603	903	0
557	4	-18.0336	-45.6668	-571.534	64455	-5098.4	-985.29	191.079	187.225	0	0	0	0	0	0	0	200	903	0	0	0	0	0	0	0	603	903	0
557	5	-18.3388	-44.7512	-567.872	65278.9	-4915.29	-664.855	191.344	185.046	0	0	0	0	0	0	0	200	903	0	0	0	0	0	0	0	603	903	0
557	6	-17.4232	-44.2935	-566.346	64271.9	-5525.65	-847.961	190.243	186.515	0	0	0	0	0	0	0	200	903	0	0	0	0	0	0	0	603	903	0
557	7	-16.6603	-44.2935	-562.684	64821.2	-5220.47	-1397.28	190.722	184.8	0	0	0	0	0	0	0	200	903	0	0	0	0	0	0	0	603	903	0
557	8	-16.9655	-42.9202	-563.295	65004.3	-4976.33	-1168.4	191.166	184.6	0	0	0	0	0	0	0	200	903	0	0	0	0	0	0	0	603	903	0
557	9	-17.881	-42.0047	-560.243	64638.1	-5220.47	-939.513	190.682	184.625	0	0	0	0	0	0	0	200	903	0	0	0	0	0	0	0	603	903	0
558	0	-16.6603	-41.5469	-556.886	65370.5	-5220.47	-893.737	190.626	182.614	0	0	0	0	0	0	0	200	903	0	0	0	0	0	0	0	603	903	0
558	1	-17.5758	-41.5469	-554.139	65553.6	-5464.61	-939.513	190.139	181.702	0	0	0	0	0	0	0	200	903	0	0	0	0	0	0	0	603	903	0
558	2	-16.8129	-40.4788	-553.834	65919.8	-5525.65	-710.631	190.023	180.976	0	0	0	0	0	0	0	200	903	0	0	0	0	0	0	0	603	903	0
558	3	-17.2707	-39.8684	-552.308	66560.7	-5342.54	-1305.72	190.327	179.486	0	0	0	0	0	0	0	200	903	0	0	0	0	0	0	0	603	903	0
558	4	-17.4232	-40.4788	-549.257	67018.4	-5586.68	-893.737	189.829	177.983	0	0	0	0	0	0	0	200	903	0	0	0	0	0	0	0	603	903	0
558	5	-17.881	-40.3262	-548.951	66743.8	-5525.65	-1168.4	189.934	178.416	0	0	0	0	0	0	0	200	903	0	0	0	0	0	0	0	603	903	0
558	6	-17.1181	-39.4107	-545.9	66652.2	-5525.65	-1259.95	189.878	177.904	0	0	0	0	0	0	0	200	903	0	0	0	0	0	0	0	603	903	0
558	7	-16.3551	-38.9529	-543.763	66560.7	-5281.5	-1259.95	190.287	177.593	0	0	0	0	0	0	0	200	903	0	0	0	0	0	0	0	603	903	0
558	8	-15.8974	-38.6477	-543.458	66286	-5891.86	-756.408	189.159	178.029	0	0	0	0	0	0	0	200	903	0	0	0	0	0	0	0	603	903	0
558	9	-15.8974	-38.19	-541.322	66469.1	-5586.68	-1031.07	189.68	177.21	0	0	0	0	0	0	0	200	903	0	0	0	0	0	0	0	603	903	0
559	0	-17.4232	-38.6477	-540.407	66743.8	-5708.75	-1076.84	189.436	176.493	0	0	0	0	0	0	0	200	903	0	0	0	0	0	0	0	603	903	0
559	1	-17.1181	-36.6641	-537.965	66926.9	-5769.79	-1488.83	189.275	175.593	0	0	0	0	0	0	0	200	903	0	0	0	0	0	0	0	603	903	0
559	2	-15.7448	-36.0537	-536.134	66926.9	-5830.82	-527.526	189.124	175.168	0	0	0	0	0	0	0	200	903	0	0	0	0	0	0	0	603	903	0
559	3	-15.7448	-36.0537	-534.913	67201.6	-5952.89	-1259.95	188.871	174.369	0	0	0	0	0	0	0	200	903	0	0	0	0	0	0	0	603	903	0
559	4	-16.6603	-35.1382	-530.946	66835.4	-5586.68	-1031.07	189.478	174.12	0	0	0	0	0	0	0	200	903	0	0	0	0	0	0	0	603	903	0
559	5	-17.4232	-34.833	-532.472	68208.6	-5525.65	-1488.83	189.623	171.902	0	0	0	0	0	0	0	200	903	0	0	0	0	0	0	0	603	903	0
559	6	-17.5758	-34.5279	-528.505	67934	-5891.86	-985.29	188.852	171.46	0	0	0	0	0	0	0	200	903	0	0	0	0	0	0	0	603	903	0
559	7	-16.6603	-34.5279	-525.758	68758	-5952.89	-1397.28	188.678	169.221	0	0	0	0	0	0	0	200	903	0	0	0	0	0	0	0	603	903	0
559	8	-16.2025	-33.6123	-526.979	68574.8	-5525.65	-1214.17	189.514	169.872	0	0	0	0	0	0	0	200	903	0	0	0	0	0	0	0	603	903	0
559	9	-16.9655	-33.6123	-522.096	69124.2	-5891.86	-1488.83	188.715	167.603	0	0	0	0	0	0	0	200	903	0	0	0	0	0	0	0	603	903	0
560	0	-18.0336	-33.1546	-522.401	68758	-5952.89	-1626.16	188.605	168.381	0	0	0	0	0	0	0	200	903	0	0	0	0	0	0	0	603	903	0
560	1	-19.1017	-32.3916	-520.57	68666.4	-5952.89	-1626.16	188.565	168.094	0	0	0	0	0	0	0	200	903	0	0	0	0	0	0	0	603	903	0
560	2	-17.881	-31.9339	-520.265	68758	-5952.89	-1671.94	188.558	167.841	0	0	0	0	0	0	0	200	903	0	0	0	0	0	0	0	603	903	0
560	3	-18.7965	-30.7132	-518.434	69032.6	-6013.93	-1488.83	188.4	166.844	0	0	0	0	0	0	0	200	903	0	0	0	0	0	0	0	603	903	0
560	4	-16.5077	-30.5606	-516.298	68666.4	-6502.21	-1488.83	187.406	167.002	0	0	0	0	0	0	0	200	903	0	0	0	0	0	0	0	603	903	0
560	5	-19.5595	-29.9502	-515.077	68941	-6441.17	-1809.26	187.495	166.154	0	0	0	0	0	0	0	200	903	0	0	0	0	0	0	0	603	903	0
560	6	-19.2543	-30.7132	-512.025	69124.2	-6319.1	-1443.05	187.659	164.999	0	0	0	0	0	0	0	200	903	0	0	0	0	0	0	0	603	903	0
560	7	-18.3388	-29.9502	-509.584	69581.9	-6258.07	-1534.61	187.719	163.453	0	0	0	0	0	0	0	200	903	0	0	0	0	0	0	0	603	903	0
560	8	-18.1862	-29.7976	-509.279	69765	-6502.21	-1076.84	187.233	163.012	0	0	0	0	0	0	0	200	903	0	0	0	0	0	0	0	603	903	0
560	9	-18.6439	-29.4925	-505.922	69124.2	-6502.21	-1717.71	187.148	163.37	0	0	0	0	0	0	0	200	903	0	0	0	0	0	0	0	603	903	0
561	0	-18.7965	-29.0347	-504.701	69765	-6807.38	-1855.04	186.512	161.77	0	0	0	0	0	0	0	200	903	0	0	0	0	0	0	0	603	903	0
561	1	-19.5595	-29.0347	-502.26	70039.7	-6258.07	-1809.26	187.54	160.551	0	0	0	0	0	0	0	200	903	0	0	0	0	0	0	0	603	903	0
561	2	-19.1017	-28.7295	-499.513	69856.6	-6685.31	-1855.04	186.616	160.151	0	0	0	0	0	0	0	200	903	0	0	0	0	0	0	0	603	903	0
561	3	-18.6439	-28.4243	-498.903	69856.6	-6624.28	-1900.82	186.722	159.98	0	0	0	0	0	0	0	200	903	0	0	0	0	0	0	0	603	903	0
561	4	-20.1698	-28.4243	-497.682	69581.9	-6380.14	-2038.15	187.18	160.188	0	0	0	0	0	0	0	200	903	0	0	0	0	0	0	0	603	903	0
561	5	-18.4914	-27.5088	-495.851	70131.2	-6563.24	-2129.7	186.764	158.564	0	0	0	0	0	0	0	200	903	0	0	0	0	0	0	0	603	903	0
561	6	-20.0172	-26.8985	-490.358	70039.7	-6624.28	-2175.48	186.491	157.166	0	0	0	0	0	0	0	200	903	0	0	0	0	0	0	0	603	903	0
561	7	-18.9491	-26.8985	-490.053	70497.5	-6807.38	-1900.82	186.109	156.143	0	0	0	0	0	0	0	200	903	0	0	0	0	0	0	0	603	903	0
561	8	-18.4914	-27.2036	-488.832	70314.3	-6624.28	-2450.13	186.449	156.158	0	0	0	0	0	0	0	200	903	0	0	0	0	0	0	0	603	903	0
561	9	-20.0172	-26.2881	-488.527	71229.9	-6563.24	-2083.92	186.565	154.194	0	0	0	0	0	0	0	200	903	0	0	0	0	0	0	0	603	903	0
562	0	-18.6439	-26.4407	-483.949	70863.7	-6563.24	-2175.48	186.438	153.572	0	0	0	0	0	0	0	200	903	0	0	0	0	0	0	0	603	903	0
562	1	-20.475	-27.5088	-481.508	71046.8	-7234.63	-2175.48	184.975	152.449	0	0	0	0	0	0	0	200	903	0	0	0	0	0	0	0	603	903	0
562	2	-18.6439	-27.3562	-480.897	71413	-6502.21	-2312.8	186.479	151.501	0	0	0	0	0	0	0	200	903	0	0	0	0	0	0	0	603	903	0
562	3	-18.6439	-26.8985	-480.897	71413	-6624.28	-2312.8	186.225	151.501	0	0	0	0	0	0	0	200	903	0	0	0	0	0	0	0	603	903	0
562	4	-19.5595	-27.2036	-478.456	70589	-6868.42	-2129.7	185.645	152.465	0	0	0	0	0	0	0	200	903	0	0	0	0	0	0	0	603	903	0
562	5	-17.7284	-26.5933	-476.625	70772.1	-6929.45	-2267.03	185.461	151.514	0	0	0	0	0	0	0	200	903	0	0	0	0	0	0	0	603	903	0
562	6	-19.2543	-25.8303	-472.963	70863.7	-6685.31	-2221.25	185.865	150.171	0	0	0	0	0	0	0	200	903	0	0	0	0	0	0	0	603	903	0
562	7	-18.6439	-25.22	-471.132	70680.5	-6868.42	-2358.58	185.421	149.977	0	0	0	0	0	0	0	200	903	0	0	0	0	0	0	0	603	903	0
562	8	-17.7284	-24.6096	-470.521	70589	-6868.42	-2267.03	185.403	149.977	0	0	0	0	0	0	0	200	903	0	0	0	0	0	0	0	603	903	0
562	9	-19.1017	-24.1519	-469.911	71596.1	-6807.38	-2221.25	185.513	147.639	0	0	0	0	0	0	0	200	903	0	0	0	0	0	0	0	603	903	0
563	0	-18.0336	-24.3045	-465.638	71504.5	-6807.38	-2404.36	185.381	146.438	0	0	0	0	0	0	0	200	903	0	0	0	0	0	0	0	603	903	0
563	1	-19.1017	-24.6096	-464.723	71504.5	-6990.49	-2312.8	184.958	146.135	0	0	0	0	0	0	0	200	903	0	0	0	0	0	0	0	603	903	0
563	2	-18.4914	-23.8467	-463.807	72236.9	-6807.38	-2312.8	185.323	144.252	0	0	0	0	0	0	0	200	903	0	0	0	0	0	0	0	603	903	0
563	3	-18.7965	-25.3726	-463.197	72511.6	-6990.49	-2358.58	184.908	143.454	0	0	0	0	0	0	0	200	903	0	0	0	0	0	0	0	603	903	0
563	4	-18.6439	-23.6941	-461.976	71596.1	-6807.38	-2358.58	185.265	145.022	0	0	0	0	0	0	0	200	903	0	0	0	0	0	0	0	603	903	0
563	5	-19.2543	-23.2363	-460.756	71962.3	-6685.31	-2495.91	185.491	143.817	0	0	0	0	0	0	0	200	903	0	0	0	0	0	0	0	603	903	0
563	6	-19.5595	-22.1682	-458.009	71962.3	-7051.52	-2358.58	184.604	142.88	0	0	0	0	0	0	0	200	903	0	0	0	0	0	0	0	603	903	0
563	7	-18.1862	-22.1682	-456.788	72236.9	-7295.66	-2495.91	184.028	141.859	0	0	0	0	0	0	0	200	903	0	0	0	0	0	0	0	603	903	0
563	8	-18.7965	-22.1682	-456.788	72511.6	-7051.52	-2633.24	184.563	141.258	0	0	0	0	0	0	0	200	903	0	0	0	0	0	0	0	603	903	0
563	9	-19.8646	-22.1682	-456.788	72053.9	-7234.63	-2541.69	184.162	142.26	0	0	0	0	0	0	0	200	903	0	0	0	0	0	0	0	603	903	0
564	0	-17.4232	-21.8631	-452.821	72786.3	-7112.56	-2312.8	184.293	139.26	0	0	0	0	0	0	0	200	903	0	0	0	0	0	0	0	603	903	0
564	1	-19.1017	-22.1682	-453.431	73427.1	-7112.56	-2267.03	184.314	138.063	0	0	0	0	0	0	0	200	903	0	0	0	0	0	0	0	603	903	0
564	2	-18.3388	-22.1682	-451.6	73244	-6685.31	-2633.24	185.196	137.812	0	0	0	0	0	0	0	200	903	0	0	0	0	0	0	0	603	903	0
564	3	-18.3388	-22.3208	-453.126	73244	-6929.45	-2770.57	184.707	138.359	0	0	0	0	0	0	0	200	903	0	0	0	0	0	0	0	603	903	0
564	4	-20.0172	-21.2527	-450.99	72877.8	-6990.49	-2679.02	184.5	138.405	0	0	0	0	0	0	0	200	903	0	0	0	0	0	0	0	603	903	0
564	5	-18.0336	-21.4053	-448.243	72694.7	-6990.49	-2312.8	184.405	137.823	0	0	0	0	0	0	0	200	903	0	0	0	0	0	0	0	603	903	0
564	6	-19.7121	-19.8794	-444.581	73335.6	-6929.45	-2679.02	184.414	135.046	0	0	0	0	0	0	0	200	903	0	0	0	0	0	0	0	603	903	0
564	7	-18.3388	-19.5742	-446.107	73335.6	-6807.38	-2495.91	184.74	135.61	0	0	0	0	0	0	0	200	903	0	0	0	0	0	0	0	603	903	0
564	8	-18.6439	-20.4898	-446.107	73884.9	-6990.49	-2770.57	184.33	134.379	0	0	0	0	0	0	0	200	903	0	0	0	0	0	0	0	603	903	0
564	9	-20.0172	-19.5742	-445.802	73976.4	-6929.45	-2404.36	184.456	134.06	0	0	0	0	0	0	0	200	903	0	0	0	0	0	0	0	603	903	0
565	0	-18.3388	-18.6587	-443.971	75075.1	-6990.49	-2862.12	184.255	130.901	0	0	0	0	0	0	0	200	903	0	0	0	0	0	0	0	603	903	0
565	1	-19.7121	-20.032	-442.75	74342.6	-6929.45	-2587.46	184.349	132.089	0	0	0	0	0	0	0	200	903	0	0	0	0	0	0	0	603	903	0
565	2	-18.9491	-19.7268	-442.75	74800.4	-7417.73	-3045.23	183.246	131.055	0	0	0	0	0	0	0	200	903	0	0	0	0	0	0	0	603	903	0
565	3	-18.4914	-20.3372	-445.192	74892	-7295.66	-2862.12	183.612	131.776	0	0	0	0	0	0	0	200	903	0	0	0	0	0	0	0	603	903	0
565	4	-19.7121	-19.1165	-442.75	74434.2	-6868.42	-2953.67	184.487	131.882	0	0	0	0	0	0	0	200	903	0	0	0	0	0	0	0	603	903	0
565	5	-19.5595	-19.1165	-441.835	74525.8	-7112.56	-2679.02	183.902	131.327	0	0	0	0	0	0	0	200	903	0	0	0	0	0	0	0	603	903	0
565	6	-19.2543	-18.2009	-440.614	75166.6	-7112.56	-2907.9	183.858	129.405	0	0	0	0	0	0	0	200	903	0	0	0	0	0	0	0	603	903	0
565	7	-17.881	-17.8958	-439.088	75166.6	-7173.59	-2541.69	183.663	128.812	0	0	0	0	0	0	0	200	903	0	0	0	0	0	0	0	603	903	0
565	8	-17.881	-17.2854	-440.309	74892	-6868.42	-2862.12	184.401	129.91	0	0	0	0	0	0	0	200	903	0	0	0	0	0	0	0	603	903	0
565	9	-17.881	-17.5906	-440.919	75349.8	-6929.45	-2953.67	184.284	129.108	0	0	0	0	0	0	0	200	903	0	0	0	0	0	0	0	603	903	0
566	0	-18.4914	-16.5225	-439.393	76173.7	-6746.35	-2907.9	184.646	126.639	0	0	0	0	0	0	0	200	903	0	0	0	0	0	0	0	603	903	0
566	1	-19.5595	-16.3699	-437.257	76082.2	-6868.42	-2862.12	184.292	126.001	0	0	0	0	0	0	0	200	903	0	0	0	0	0	0	0	603	903	0
566	2	-17.1181	-17.1328	-436.036	75990.6	-6685.31	-3182.56	184.668	125.724	0	0	0	0	0	0	0	200	903	0	0	0	0	0	0	0	603	903	0
566	3	-15.7448	-16.6751	-436.647	76723	-6746.35	-3045.23	184.55	124.29	0	0	0	0	0	0	0	200	903	0	0	0	0	0	0	0	603	903	0
566	4	-17.2707	-16.5225	-436.952	77180.8	-7234.63	-3091	183.443	123.365	0	0	0	0	0	0	0	200	903	0	0	0	0	0	0	0	603	903	0
566	5	-17.5758	-15.607	-436.952	77455.5	-6868.42	-2999.45	184.281	122.737	0	0	0	0	0	0	0	200	903	0	0	0	0	0	0	0	603	903	0
566	6	-17.5758	-16.2173	-433.29	77089.3	-6929.45	-2770.57	184.007	122.084	0	0	0	0	0	0	0	200	903	0	0	0	0	0	0	0	603	903	0
566	7	-17.4232	-14.5388	-434.205	76814.6	-6929.45	-3136.78	184.041	123.092	0	0	0	0	0	0	0	200	903	0	0	0	0	0	0	0	603	903	0
566	8	-16.2025	-13.9285	-433.29	77455.5	-7112.56	-2999.45	183.585	121.239	0	0	0	0	0	0	0	200	903	0	0	0	0	0	0	0	603	903	0
566	9	-15.287	-14.0811	-435.426	77730.1	-7112.56	-2724.79	183.665	121.485	0	0	0	0	0	0	0	200	903	0	0	0	0	0	0	0	603	903	0
567	0	-16.5077	-14.844	-436.036	77547	-6563.24	-2953.67	184.948	122.155	0	0	0	0	0	0	0	200	903	0	0	0	0	0	0	0	603	903	0
567	1	-15.4396	-13.3181	-436.036	78371	-7112.56	-3045.23	183.688	120.265	0	0	0	0	0	0	0	200	903	0	0	0	0	0	0	0	603	903	0
567	2	-15.7448	-12.8604	-434.816	78737.2	-6929.45	-2816.34	184.063	118.918	0	0	0	0	0	0	0	200	903	0	0	0	0	0	0	0	603	903	0
567	3	-14.5241	-13.4707	-433.29	79194.9	-7112.56	-2862.12	183.585	117.224	0	0	0	0	0	0	0	200	903	0	0	0	0	0	0	0	603	903	0
567	4	-13.7611	-13.3181	-434.816	79194.9	-6868.42	-3045.23	184.204	117.866	0	0	0	0	0	0	0	200	903	0	0	0	0	0	0	0	603	903	0
567	5	-14.6767	-13.3181	-432.374	79835.8	-6502.21	-2999.45	184.962	115.355	0	0	0	0	0	0	0	200	903	0	0	0	0	0	0	0	603	903	0
567	6	-14.5241	-12.0974	-436.036	79103.4	-6746.35	-3045.23	184.528	118.585	0	0	0	0	0	0	0	200	903	0	0	0	0	0	0	0	603	903	0
567	7	-13.7611	-12.0974	-433.9	79378.1	-6685.31	-2907.9	184.593	117.059	0	0	0	0	0	0	0	200	903	0	0	0	0	0	0	0	603	903	0
567	8	-12.2353	-10.419	-432.374	80110.5	-6685.31	-3091	184.538	114.72	0	0	0	0	0	0	0	200	903	0	0	0	0	0	0	0	603	903	0
567	9	-10.862	-10.7241	-436.342	79744.3	-6380.14	-3365.66	185.378	117.243	0	0	0	0	0	0	0	200	903	0	0	0	0	0	0	0	603	903	0
568	0	-12.3878	-9.9612	-435.731	80476.7	-6563.24	-2907.9	184.937	115.307	0	0	0	0	0	0	0	200	903	0	0	0	0	0	0	0	603	903	0
568	1	-13.1508	-9.80861	-436.342	80659.8	-6319.1	-3182.56	185.518	115.145	0	0	0	0	0	0	0	200	903	0	0	0	0	0	0	0	603	903	0
568	2	-13.3034	-9.9612	-434.205	81575.3	-6685.31	-2907.9	184.603	112.127	0	0	0	0	0	0	0	200	903	0	0	0	0	0	0	0	603	903	0
568	3	-13.1508	-9.9612	-431.154	81941.6	-6074.96	-3274.11	185.91	109.948	0	0	0	0	0	0	0	200	903	0	0	0	0	0	0	0	603	903	0
568	4	-11.6249	-9.9612	-435.731	82033.1	-6624.28	-3274.11	184.797	111.735	0	0	0	0	0	0	0	200	903	0	0	0	0	0	0	0	603	903	0
568	5	-11.7775	-10.7241	-436.647	82307.8	-6685.31	-3502.99	184.689	111.5	0	0	0	0	0	0	0	200	903	0	0	0	0	0	0	0	603	903	0
568	6	-12.2353	-8.89309	-437.562	82399.3	-6807.38	-3136.78	184.442	111.686	0	0	0	0	0	0	0	200	903	0	0	0	0	0	0	0	603	903	0
568	7	-12.693	-8.89309	-433.9	82307.8	-6380.14	-3228.33	185.296	110.307	0	0	0	0	0	0	0	200	903	0	0	0	0	0	0	0	603	903	0
568	8	-12.693	-8.89309	-436.342	82582.4	-6868.42	-3365.66	184.259	110.739	0	0	0	0	0	0	0	200	903	0	0	0	0	0	0	0	603	903	0
568	9	-11.1671	-7.5198	-436.036	82857.1	-6685.31	-3411.44	184.668	109.977	0	0	0	0	0	0	0	200	903	0	0	0	0	0	0	0	603	903	0
569	0	-10.5568	-6.90944	-438.173	83131.7	-6807.38	-3182.56	184.464	110.276	0	0	0	0	0	0	0	200	903	0	0	0	0	0	0	0	603	903	0
569	1	-11.4723	-7.97756	-435.731	83497.9	-6197.03	-3548.77	185.778	108.373	0	0	0	0	0	0	0	200	903	0	0	0	0	0	0	0	603	903	0
569	2	-12.0827	-6.45168	-440.309	84230.3	-6197.03	-3640.32	185.926	108.702	0	0	0	0	0	0	0	200	903	0	0	0	0	0	0	0	603	903	0
569	3	-11.7775	-5.84133	-438.783	84871.2	-6258.07	-3411.44	185.738	106.576	0	0	0	0	0	0	0	200	903	0	0	0	0	0	0	0	603	903	0
569	4	-11.1671	-6.1465	-440.004	85054.3	-6441.17	-3228.33	185.361	106.696	0	0	0	0	0	0	0	200	903	0	0	0	0	0	0	0	603	903	0
569	5	-11.0146	-5.53615	-440.614	85145.9	-6136	-3365.66	186.074	106.756	0	0	0	0	0	0	0	200	903	0	0	0	0	0	0	0	603	903	0
569	6	-11.1671	-4.77321	-443.666	85603.7	-6136	-3548.77	186.17	107.054	0	0	0	0	0	0	0	200	903	0	0	0	0	0	0	0	603	903	0
569	7	-12.5404	-4.77321	-443.666	86244.5	-6502.21	-3640.32	185.344	105.609	0	0	0	0	0	0	0	200	903	0	0	0	0	0	0	0	603	903	0
569	8	-10.7094	-3.85769	-443.361	85695.2	-6502.21	-3731.87	185.334	106.714	0	0	0	0	0	0	0	200	903	0	0	0	0	0	0	0	603	903	0
569	9	-13.1508	-2.4844	-444.581	86427.6	-6319.1	-3457.21	185.786	105.598	0	0	0	0	0	0	0	200	903	0	0	0	0	0	0	0	603	903	0
570	0	-11.4723	-2.02663	-447.938	86427.6	-6319.1	-4098.08	185.893	107.055	0	0	0	0	0	0	0	200	903	0	0	0	0	0	0	0	603	903	0
570	1	-11.6249	-1.87404	-447.633	86977	-6380.14	-3777.65	185.747	105.696	0	0	0	0	0	0	0	200	903	0	0	0	0	0	0	0	603	903	0
570	2	-11.1671	-3.24733	-446.412	87251.6	-6258.07	-4052.31	185.981	104.549	0	0	0	0	0	0	0	200	903	0	0	0	0	0	0	0	603	903	0
570	3	-13.1508	-0.500753	-449.159	88167.1	-6197.03	-3914.98	186.203	103.706	0	0	0	0	0	0	0	200	903	0	0	0	0	0	0	0	603	903	0
570	4	-12.5404	-0.805928	-447.938	88350.2	-6258.07	-3869.2	186.029	102.763	0	0	0	0	0	0	0	200	903	0	0	0	0	0	0	0	603	903	0
570	5	-11.7775	-0.805928	-449.769	88991.1	-6502.21	-4235.41	185.543	102.141	0	0	0	0	0	0	0	200	903	0	0	0	0	0	0	0	603	903	0
570	6	-9.79385	-0.958516	-450.99	89174.2	-6380.14	-4189.64	185.853	102.27	0	0	0	0	0	0	0	200	903	0	0	0	0	0	0	0	603	903	0
570	7	-11.4723	-0.348165	-452.211	89265.8	-6258.07	-4143.86	186.161	102.601	0	0	0	0	0	0	0	200	903	0	0	0	0	0	0	0	603	903	0
570	8	-12.5404	-0.0429889	-453.737	89723.5	-5952.89	-4143.86	186.88	102.256	0	0	0	0	0	0	0	200	903	0	0	0	0	0	0	0	603	903	0
570	9	-12.5404	0.414775	-452.516	89265.8	-6136	-4235.41	186.44	102.735	0	0	0	0	0	0	0	200	903	0	0	0	0	0	0	0	603	903	0
571	0	-12.2353	0.719951	-453.126	89448.9	-6380.14	-4281.19	185.92	102.596	0	0	0	0	0	0	0	200	903	0	0	0	0	0	0	0	603	903	0
571	1	-9.03091	1.63548	-455.263	89815.1	-6502.21	-4235.41	185.718	102.718	0	0	0	0	0	0	0	200	903	0	0	0	0	0	0	0	603	903	0
571	2	-11.7775	1.78807	-455.873	90364.4	-6319.1	-4281.19	186.138	101.777	0	0	0	0	0	0	0	200	903	0	0	0	0	0	0	0	603	903	0
571	3	-13.7611	0.719951	-457.704	90822.1	-6319.1	-4555.85	186.194	101.57	0	0	0	0	0	0	0	200	903	0	0	0	0	0	0	0	603	903	0
571	4	-12.9982	2.55101	-456.788	91829.2	-6319.1	-4464.29	186.166	98.9677	0	0	0	0	0	0	0	200	903	0	0	0	0	0	0	0	603	903	0
571	5	-11.9301	2.85618	-458.009	92378.5	-6258.07	-4372.74	186.336	98.3041	0	0	0	0	0	0	0	200	903	0	0	0	0	0	0	0	603	903	0
571	6	-11.7775	2.55101	-459.535	91554.6	-6136	-4555.85	186.647	100.767	0	0	0	0	0	0	0	200	903	0	0	0	0	0	0	0	603	903	0
571	7	-11.4723	3.16136	-458.619	92836.3	-6258.07	-4647.4	186.355	97.5744	0	0	0	0	0	0	0	200	903	0	0	0	0	0	0	0	603	903	0
571	8	-12.0827	2.55101	-462.282	93477.2	-6319.1	-4418.52	186.331	97.7917	0	0	0	0	0	0	0	200	903	0	0	0	0	0	0	0	603	903	0
571	9	-12.693	3.46653	-462.587	92561.7	-6563.24	-4647.4	185.812	99.9042	0	0	0	0	0	0	0	200	903	0	0	0	0	0	0	0	603	903	0
572	0	-11.4723	4.68724	-463.197	93385.6	-6258.07	-4052.31	186.489	98.389	0	0	0	0	0	0	0	200	903	0	0	0	0	0	0	0	603	903	0
572	1	-9.1835	5.60276	-465.944	93202.5	-6197.03	-4281.19	186.7	99.9704	0	0	0	0	0	0	0	200	903	0	0	0	0	0	0	0	603	903	0
572	2	-10.862	5.90794	-468.995	94209.6	-5952.89	-4601.62	187.307	99.1247	0	0	0	0	0	0	0	200	903	0	0	0	0	0	0	0	603	903	0
572	3	-12.693	6.51829	-468.385	94301.2	-6074.96	-4601.62	187.03	98.6674	0	0	0	0	0	0	0	200	903	0	0	0	0	0	0	0	603	903	0
572	4	-12.0827	7.28123	-468.69	95491.4	-5769.79	-4235.41	187.69	96.2591	0	0	0	0	0	0	0	200	903	0	0	0	0	0	0	0	603	903	0
572	5	-11.3197	7.73899	-469.911	95582.9	-5952.89	-4876.28	187.332	96.5936	0	0	0	0	0	0	0	200	903	0	0	0	0	0	0	0	603	903	0
572	6	-10.5568	7.89158	-472.658	95766	-6013.93	-4647.4	187.276	97.3882	0	0	0	0	0	0	0	200	903	0	0	0	0	0	0	0	603	903	0
572	7	-11.0146	8.9597	-474.489	96498.4	-6197.03	-4922.06	186.94	96.6264	0	0	0	0	0	0	0	200	903	0	0	0	0	0	0	0	603	903	0
572	8	-12.0827	8.34935	-474.794	96956.2	-5830.82	-4601.62	187.719	95.793	0	0	0	0	0	0	0	200	903	0	0	0	0	0	0	0	603	903	0
572	9	-11.4723	9.72264	-476.625	96956.2	-6013.93	-4784.73	187.382	96.5775	0	0	0	0	0	0	0	200	903	0	0	0	0	0	0	0	603	903	0
573	0	-11.0146	10.9433	-477.235	97505.5	-5952.89	-4784.73	187.526	95.6867	0	0	0	0	0	0	0	200	903	0	0	0	0	0	0	0	603	903	0
573	1	-10.2516	10.6382	-480.592	97597.1	-6197.03	-4967.83	187.105	96.9233	0	0	0	0	0	0	0	200	903	0	0	0	0	0	0	0	603	903	0
573	2	-10.2516	12.927	-483.034	97871.7	-5891.86	-4876.28	187.802	97.3811	0	0	0	0	0	0	0	200	903	0	0	0	0	0	0	0	603	903	0
573	3	-11.1671	13.3847	-484.865	98421	-5830.82	-5105.16	187.974	97.0133	0	0	0	0	0	0	0	200	903	0	0	0	0	0	0	0	603	903	0
573	4	-9.33608	13.9951	-485.17	98421	-6319.1	-5105.16	186.975	97.141	0	0	0	0	0	0	0	200	903	0	0	0	0	0	0	0	603	903	0
573	5	-11.0146	14.758	-484.559	99794.3	-6136	-5288.27	187.337	94.0514	0	0	0	0	0	0	0	200	903	0	0	0	0	0	0	0	603	903	0
573	6	-10.4042	15.2158	-488.527	100069	-5647.72	-5059.39	188.439	95.1617	0	0	0	0	0	0	0	200	903	0	0	0	0	0	0	0	603	903	0
573	7	-9.94644	14.6054	-491.578	99611.2	-5891.86	-4967.83	188.014	97.3646	0	0	0	0	0	0	0	200	903	0	0	0	0	0	0	0	603	903	0
573	8	-10.2516	16.4365	-493.409	100435	-6197.03	-5288.27	187.44	96.4466	0	0	0	0	0	0	0	200	903	0	0	0	0	0	0	0	603	903	0
573	9	-10.862	17.352	-495.546	101442	-5891.86	-5059.39	188.11	95.2918	0	0	0	0	0	0	0	200	903	0	0	0	0	0	0	0	603	903	0
574	0	-11.0146	17.5046	-493.715	101900	-5952.89	-5150.94	187.943	93.6054	0	0	0	0	0	0	0	200	903	0	0	0	0	0	0	0	603	903	0
574	1	-10.7094	18.2676	-494.935	101076	-6136	-5242.49	187.602	95.7793	0	0	0	0	0	0	0	200	903	0	0	0	0	0	0	0	603	903	0
574	2	-8.87832	19.4883	-498.597	102083	-5952.89	-5517.15	188.061	95.2594	0	0	0	0	0	0	0	200	903	0	0	0	0	0	0	0	603	903	0
574	3	-10.5568	19.4883	-500.734	102083	-5403.57	-5471.37	189.209	96.1328	0	0	0	0	0	0	0	200	903	0	0	0	0	0	0	0	603	903	0
574	4	-11.4723	21.0141	-501.344	102907	-5647.72	-5334.04	188.735	94.7376	0	0	0	0	0	0	0	200	903	0	0	0	0	0	0	0	603	903	0
574	5	-11.0146	21.4719	-502.87	102999	-5891.86	-5334.04	188.284	95.1783	0	0	0	0	0	0	0	200	903	0	0	0	0	0	0	0	603	903	0
574	6	-8.87832	22.6926	-504.701	103640	-5708.75	-5517.15	188.689	94.6516	0	0	0	0	0	0	0	200	903	0	0	0	0	0	0	0	603	903	0
574	7	-9.79385	23.4555	-505.617	104464	-5525.65	-5654.48	189.071	93.3938	0	0	0	0	0	0	0	200	903	0	0	0	0	0	0	0	603	903	0
574	8	-11.0146	23.6081	-508.058	105288	-5647.72	-5471.37	188.884	92.7648	0	0	0	0	0	0	0	200	903	0	0	0	0	0	0	0	603	903	0
574	9	-11.9301	23.6081	-512.025	105379	-5830.82	-5517.15	188.612	94.1917	0	0	0	0	0	0	0	200	903	0	0	0	0	0	0	0	603	903	0
575	0	-10.7094	24.8288	-512.025	105654	-5891.86	-5654.48	188.493	93.6553	0	0	0	0	0	0	0	200	903	0	0	0	0	0	0	0	603	903	0
575	1	-11.7775	25.134	-512.941	106203	-5708.75	-5791.81	188.871	92.9527	0	0	0	0	0	0	0	200	903	0	0	0	0	0	0	0	603	903	0
575	2	-11.3197	25.897	-515.687	105837	-5342.54	-5654.48	189.64	94.7656	0	0	0	0	0	0	0	200	903	0	0	0	0	0	0	0	603	903	0
575	3	-10.2516	26.2021	-518.129	105928	-5647.72	-5746.03	189.1	95.5559	0	0	0	0	0	0	0	200	903	0	0	0	0	0	0	0	603	903	0
575	4	-11.6249	27.728	-519.349	106569	-5464.61	-5974.92	189.478	94.8025	0	0	0	0	0	0	0	200	903	0	0	0	0	0	0	0	603	903	0
575	5	-11.4723	28.4909	-521.791	107119	-5464.61	-5974.92	189.527	94.7098	0	0	0	0	0	0	0	200	903	0	0	0	0	0	0	0	603	903	0
575	6	-12.693	28.7961	-520.265	107576	-5647.72	-5700.26	189.145	93.2278	0	0	0	0	0	0	0	200	903	0	0	0	0	0	0	0	603	903	0
575	7	-11.1671	30.1694	-522.096	108217	-5647.72	-5791.81	189.183	92.7255	0	0	0	0	0	0	0	200	903	0	0	0	0	0	0	0	603	903	0
575	8	-10.862	31.3901	-526.368	109133	-5647.72	-5700.26	189.27	92.6686	0	0	0	0	0	0	0	200	903	0	0	0	0	0	0	0	603	903	0
575	9	-11.3197	32.0005	-523.012	109316	-5952.89	-6158.02	188.618	90.9877	0	0	0	0	0	0	0	200	903	0	0	0	0	0	0	0	603	903	0
576	0	-13.1508	32.1531	-529.725	109041	-5708.75	-5929.14	189.223	94.1553	0	0	0	0	0	0	0	200	903	0	0	0	0	0	0	0	603	903	0
576	1	-12.9982	32.916	-530.336	110781	-5281.5	-6386.9	190.041	91.1122	0	0	0	0	0	0	0	200	903	0	0	0	0	0	0	0	603	903	0
576	2	-11.7775	33.2212	-532.777	110964	-5403.57	-6386.9	189.858	91.7258	0	0	0	0	0	0	0	200	903	0	0	0	0	0	0	0	603	903	0
576	3	-12.693	34.4419	-533.388	111513	-5647.72	-6524.23	189.412	90.9342	0	0	0	0	0	0	0	200	903	0	0	0	0	0	0	0	603	903	0
576	4	-12.5404	35.0522	-537.355	111147	-5891.86	-6432.68	189.035	93.1592	0	0	0	0	0	0	0	200	903	0	0	0	0	0	0	0	603	903	0
576	5	-13.9137	35.9678	-538.27	111788	-5403.57	-6524.23	189.961	92.3205	0	0	0	0	0	0	0	200	903	0	0	0	0	0	0	0	603	903	0
576	6	-14.0663	37.4936	-539.491	111879	-5708.75	-6707.34	189.418	92.6207	0	0	0	0	0	0	0	200	903	0	0	0	0	0	0	0	603	903	0
576	7	-14.0663	38.8669	-540.407	112062	-5586.68	-6615.78	189.662	92.6332	0	0	0	0	0	0	0	200	903	0	0	0	0	0	0	0	603	903	0
576	8	-13.3034	38.104	-543.458	113069	-5403.57	-6341.13	190.057	91.9445	0	0	0	0	0	0	0	200	903	0	0	0	0	0	0	0	603	903	0
576	9	-12.5404	39.0195	-543.458	113527	-5220.47	-6753.11	190.394	91.1022	0	0	0	0	0	0	0	200	903	0	0	0	0	0	0	0	603	903	0
577	0	-12.693	40.698	-546.815	114717	-5464.61	-6570.01	190.007	90.2081	0	0	0	0	0	0	0	200	903	0	0	0	0	0	0	0	603	903	0
577	1	-14.3715	41.6135	-549.562	115175	-5586.68	-6844.67	189.834	90.4236	0	0	0	0	0	0	0	200	903	0	0	0	0	0	0	0	603	903	0
577	2	-13.7611	41.1557	-549.257	115175	-5403.57	-6936.22	190.162	90.3071	0	0	0	0	0	0	0	200	903	0	0	0	0	0	0	0	603	903	0
577	3	-14.6767	42.2239	-552.614	115816	-5647.72	-6890.44	189.78	90.4212	0	0	0	0	0	0	0	200	903	0	0	0	0	0	0	0	603	903	0
577	4	-13.6085	43.4446	-553.834	116548	-5525.65	-6936.22	190.023	89.5607	0	0	0	0	0	0	0	200	903	0	0	0	0	0	0	0	603	903	0
577	5	-13.9137	42.9868	-557.191	116915	-5464.61	-7256.65	190.193	90.1713	0	0	0	0	0	0	0	200	903	0	0	0	0	0	0	0	603	903	0
577	6	-14.5241	44.8179	-559.938	116732	-5342.54	-7027.77	190.459	91.5276	0	0	0	0	0	0	0	200	903	0	0	0	0	0	0	0	603	903	0
577	7	-15.5922	45.4282	-561.464	117647	-5464.61	-6936.22	190.267	90.4635	0	0	0	0	0	0	0	200	903	0	0	0	0	0	0	0	603	903	0
577	8	-15.5922	46.1911	-562.074	118654	-5769.79	-7302.43	189.735	88.8994	0	0	0	0	0	0	0	200	903	0	0	0	0	0	0	0	603	903	0
577	9	-16.05	47.8696	-561.464	118654	-5769.79	-7302.43	189.724	88.6699	0	0	0	0	0	0	0	200	903	0	0	0	0	0	0	0	603	903	0
578	0	-14.6767	48.48	-566.041	118929	-5464.61	-7119.32	190.346	89.8937	0	0	0	0	0	0	0	200	903	0	0	0	0	0	0	0	603	903	0
578	1	-15.1344	48.7851	-569.398	119295	-5647.72	-7256.65	190.081	90.4892	0	0	0	0	0	0	0	200	903	0	0	0	0	0	0	0	603	903	0
578	2	-14.8292	49.3955	-566.346	120302	-5586.68	-7348.21	190.136	87.5821	0	0	0	0	0	0	0	200	903	0	0	0	0	0	0	0	603	903	0
578	3	-15.7448	50.311	-573.976	121401	-5586.68	-7165.1	190.267	88.4915	0	0	0	0	0	0	0	200	903	0	0	0	0	0	0	0	603	903	0
578	4	-16.3551	50.1584	-573.366	121218	-5403.57	-7393.98	190.576	88.5857	0	0	0	0	0	0	0	200	903	0	0	0	0	0	0	0	603	903	0
578	5	-15.8974	51.5317	-575.197	121309	-5891.86	-7348.21	189.757	89.0996	0	0	0	0	0	0	0	200	903	0	0	0	0	0	0	0	603	903	0
578	6	-14.6767	52.1421	-578.248	122499	-5647.72	-7485.54	190.233	88.1543	0	0	0	0	0	0	0	200	903	0	0	0	0	0	0	0	603	903	0
578	7	-15.5922	53.5154	-580.995	122042	-5708.75	-7531.31	190.174	89.9437	0	0	0	0	0	0	0	200	903	0	0	0	0	0	0	0	603	903	0
578	8	-15.4396	54.2783	-582.826	122866	-5891.86	-7485.54	189.891	89.1899	0	0	0	0	0	0	0	200	903	0	0	0	0	0	0	0	603	903	0
578	9	-14.9818	55.6516	-582.521	124056	-5281.5	-7348.21	190.933	87.0363	0	0	0	0	0	0	0	200	903	0	0	0	0	0	0	0	603	903	0
579	0	-16.3551	56.4145	-584.352	123598	-5647.72	-7668.64	190.335	88.487	0	0	0	0	0	0	0	200	903	0	0	0	0	0	0	0	603	903	0
579	1	-15.8974	56.8723	-587.404	124147	-5525.65	-7622.86	190.593	88.6507	0	0	0	0	0	0	0	200	903	0	0	0	0	0	0	0	603	903	0
579	2	-15.1344	57.3301	-590.455	125246	-5342.54	-7348.21	190.952	87.8824	0	0	0	0	0	0	0	200	903	0	0	0	0	0	0	0	603	903	0
579	3	-15.8974	57.7878	-592.592	125612	-5342.54	-7393.98	190.984	88.0291	0	0	0	0	0	0	0	200	903	0	0	0	0	0	0	0	603	903	0
579	4	-16.6603	58.8559	-593.202	126162	-5647.72	-7714.42	190.479	87.3211	0	0	0	0	0	0	0	200	903	0	0	0	0	0	0	0	603	903	0
579	5	-14.3715	60.2292	-594.423	126802	-5586.68	-7714.42	190.602	86.6797	0	0	0	0	0	0	0	200	903	0	0	0	0	0	0	0	603	903	0
579	6	-17.1181	60.2292	-595.338	125795	-5220.47	-7760.19	191.231	88.6994	0	0	0	0	0	0	0	200	903	0	0	0	0	0	0	0	603	903	0
579	7	-15.1344	60.8396	-596.254	127169	-5769.79	-7531.31	190.323	86.7207	0	0	0	0	0	0	0	200	903	0	0	0	0	0	0	0	603	903	0
579	8	-12.693	61.7551	-599.305	127809	-5525.65	-7760.19	190.78	86.7374	0	0	0	0	0	0	0	200	903	0	0	0	0	0	0	0	603	903	0
579	9	-16.05	60.8396	-601.747	127901	-5769.79	-7760.19	190.412	87.4505	0	0	0	0	0	0	0	200	903	0	0	0	0	0	0	0	603	903	0
580	0	-16.5077	63.4336	-603.883	127993	-5220.47	-7577.09	191.355	88.0507	0	0	0	0	0	0	0	200	903	0	0	0	0	0	0	0	603	903	0
580	1	-13.6085	64.0439	-603.578	128542	-5159.43	-7027.77	191.452	87.0335	0	0	0	0	0	0	0	200	903	0	0	0	0	0	0	0	603	903	0
580	2	-16.05	65.112	-603.273	128817	-5403.57	-7577.09	191.043	86.4704	0	0	0	0	0	0	0	200	903	0	0	0	0	0	0	0	603	903	0
580	3	-15.1344	67.0957	-605.104	129000	-5403.57	-7393.98	191.07	86.8141	0	0	0	0	0	0	0	200	903	0	0	0	0	0	0	0	603	903	0
580	4	-12.3878	68.1638	-606.935	129457	-5098.4	-7302.43	191.6	86.703	0	0	0	0	0	0	0	200	903	0	0	0	0	0	0	0	603	903	0
580	5	-14.6767	68.1638	-609.071	129549	-4976.33	-7073.55	191.83	87.3007	0	0	0	0	0	0	0	200	903	0	0	0	0	0	0	0	603	903	0
580	6	-15.4396	67.8586	-607.545	130190	-5281.5	-7622.86	191.307	85.7117	0	0	0	0	0	0	0	200	903	0	0	0	0	0	0	0	603	903	0
580	7	-13.456	70.3	-608.461	130098	-5037.36	-7531.31	191.721	86.1846	0	0	0	0	0	0	0	200	903	0	0	0	0	0	0	0	603	903	0
580	8	-14.9818	70.1474	-609.681	131746	-4976.33	-7119.32	191.838	83.9097	0	0	0	0	0	0	0	200	903	0	0	0	0	0	0	0	603	903	0
580	9	-14.2189	71.5207	-611.207	131838	-5159.43	-7302.43	191.559	84.2994	0	0	0	0	0	0	0	200	903	0	0	0	0	0	0	0	603	903	0
581	0	-13.6085	73.1992	-613.954	132570	-4915.29	-7577.09	191.994	84.0714	0	0	0	0	0	0	0	200	903	0	0	0	0	0	0	0	603	903	0
581	1	-13.7611	72.5888	-613.954	131288	-5220.47	-7485.54	191.497	86.1591	0	0	0	0	0	0	0	200	903	0	0	0	0	0	0	0	603	903	0
581	2	-14.9818	72.894	-616.701	132753	-4854.26	-7714.42	192.129	84.7362	0	0	0	0	0	0	0	200	903	0	0	0	0	0	0	0	603	903	0
581	3	-14.3715	73.1992	-615.48	133303	-4793.22	-7485.54	192.212	83.4168	0	0	0	0	0	0	0	200	903	0	0	0	0	0	0	0	603	903	0
581	4	-13.9137	72.894	-613.954	133211	-5098.4	-7485.54	191.696	83.0275	0	0	0	0	0	0	0	200	903	0	0	0	0	0	0	0	603	903	0
581	5	-12.693	75.1828	-616.701	133211	-4915.29	-7531.31	192.03	83.9938	0	0	0	0	0	0	0	200	903	0	0	0	0	0	0	0	603	903	0
581	6	-13.1508	76.251	-618.837	133303	-4549.08	-7668.64	192.649	84.5916	0	0	0	0	0	0	0	200	903	0	0	0	0	0	0	0	603	903	0
581	7	-12.2353	76.7087	-617.311	133486	-4671.15	-7210.88	192.433	83.7626	0	0	0	0	0	0	0	200	903	0	0	0	0	0	0	0	603	903	0
581	8	-12.693	78.082	-620.363	133760	-5098.4	-7439.76	191.782	84.3836	0	0	0	0	0	0	0	200	903	0	0	0	0	0	0	0	603	903	0
581	9	-12.8456	80.0657	-619.752	133944	-4732.19	-7348.21	192.364	83.8757	0	0	0	0	0	0	0	200	903	0	0	0	0	0	0	0	603	903	0
582	0	-12.2353	80.5234	-617.921	134035	-4427.01	-7210.88	192.836	83.0872	0	0	0	0	0	0	0	200	903	0	0	0	0	0	0	0	603	903	0
582	1	-11.7775	80.9812	-619.447	133577	-4610.12	-7027.77	192.558	84.3605	0	0	0	0	0	0	0	200	903	0	0	0	0	0	0	0	603	903	0
582	2	-11.0146	82.0493	-621.278	135042	-4671.15	-7165.1	192.481	82.6382	0	0	0	0	0	0	0	200	903	0	0	0	0	0	0	0	603	903	0
582	3	-11.1671	84.0329	-622.194	135042	-4182.87	-7302.43	193.277	82.9581	0	0	0	0	0	0	0	200	903	0	0	0	0	0	0	0	603	903	0
582	4	-12.0827	82.9648	-622.194	135408	-4610.12	-6982	192.591	82.3694	0	0	0	0	0	0	0	200	903	0	0	0	0	0	0	0	603	903	0
582	5	-11.6249	82.9648	-620.973	135683	-4243.91	-7073.55	193.166	81.4994	0	0	0	0	0	0	0	200	903	0	0	0	0	0	0	0	603	903	0
582	6	-10.7094	84.4907	-620.668	135317	-4793.22	-6661.56	192.277	81.982	0	0	0	0	0	0	0	200	903	0	0	0	0	0	0	0	603	903	0
582	7	-10.099	85.1011	-622.499	135042	-4182.87	-7165.1	193.281	83.0645	0	0	0	0	0	0	0	200	903	0	0	0	0	0	0	0	603	903	0
582	8	-9.64126	86.7795	-623.72	135683	-4488.05	-6890.44	192.804	82.4615	0	0	0	0	0	0	0	200	903	0	0	0	0	0	0	0	603	903	0
582	9	-9.79385	85.7114	-618.532	136049	-4427.01	-7027.77	192.843	80.0449	0	0	0	0	0	0	0	200	903	0	0	0	0	0	0	0	603	903	0
583	0	-10.862	87.8476	-623.109	136324	-4549.08	-6753.11	192.699	81.2199	0	0	0	0	0	0	0	200	903	0	0	0	0	0	0	0	603	903	0
583	1	-9.03091	88.1528	-622.194	136507	-4243.91	-6753.11	193.179	80.6038	0	0	0	0	0	0	0	200	903	0	0	0	0	0	0	0	603	903	0
583	2	-9.94644	89.0683	-624.025	135866	-4182.87	-6707.34	193.297	82.2745	0	0	0	0	0	0	0	200	903	0	0	0	0	0	0	0	603	903	0
583	3	-8.72573	89.9839	-621.888	136324	-3877.7	-6844.67	193.765	80.7905	0	0	0	0	0	0	0	200	903	0	0	0	0	0	0	0	603	903	0
583	4	-7.04727	91.2046	-624.33	136507	-3999.77	-6570.01	193.594	81.3544	0	0	0	0	0	0	0	200	903	0	0	0	0	0	0	0	603	903	0
583	5	-7.50503	92.2727	-623.414	136324	-3694.59	-6570.01	194.074	81.327	0	0	0	0	0	0	0	200	903	0	0	0	0	0	0	0	603	903	0
583	6	-9.03091	91.9675	-623.72	135958	-3755.63	-6661.56	193.979	82.0212	0	0	0	0	0	0	0	200	903	0	0	0	0	0	0	0	603	903	0
583	7	-6.13174	94.2563	-620.668	136415	-4182.87	-6753.11	193.261	80.2119	0	0	0	0	0	0	0	200	903	0	0	0	0	0	0	0	603	903	0
583	8	-8.11538	95.0193	-621.583	136232	-3877.7	-6386.9	193.762	80.8302	0	0	0	0	0	0	0	200	903	0	0	0	0	0	0	0	603	903	0
583	9	-7.19985	95.9348	-621.278	137148	-3816.66	-6249.57	193.857	79.2489	0	0	0	0	0	0	0	200	903	0	0	0	0	0	0	0	603	903	0
584	0	-7.19985	96.5451	-621.278	136873	-4121.84	-6432.68	193.366	79.6909	0	0	0	0	0	0	0	200	903	0	0	0	0	0	0	0	603	903	0
584	1	-7.04727	96.8503	-621.888	136141	-3938.73	-6066.47	193.667	81.0849	0	0	0	0	0	0	0	200	903	0	0	0	0	0	0	0	603	903	0
584	2	-7.81021	97.4607	-622.804	136965	-3694.59	-6158.02	194.068	80.0838	0	0	0	0	0	0	0	200	903	0	0	0	0	0	0	0	603	903	0
584	3	-8.11538	97.6133	-618.837	136873	-3816.66	-6203.8	193.833	78.8218	0	0	0	0	0	0	0	200	903	0	0	0	0	0	0	0	603	903	0
584	4	-7.19985	99.4443	-615.175	136141	-3633.56	-5883.36	194.093	78.6957	0	0	0	0	0	0	0	200	903	0	0	0	0	0	0	0	603	903	0
584	5	-6.74209	100.055	-617.616	135775	-3755.63	-5929.14	193.919	80.1635	0	0	0	0	0	0	0	200	903	0	0	0	0	0	0	0	603	903	0
584	6	-5.82656	101.581	-617.311	135500	-3816.66	-5746.03	193.817	80.4998	0	0	0	0	0	0	0	200	903	0	0	0	0	0	0	0	603	903	0
584	7	-7.35244	101.886	-613.344	135500	-3816.66	-5929.14	193.777	79.08	0	0	0	0	0	0	0	200	903	0	0	0	0	0	0	0	603	903	0
584	8	-5.82656	102.343	-615.48	135775	-3633.56	-5654.48	194.096	79.4005	0	0	0	0	0	0	0	200	903	0	0	0	0	0	0	0	603	903	0
584	9	-6.13174	103.412	-612.733	135775	-3511.49	-5517.15	194.269	78.4117	0	0	0	0	0	0	0	200	903	0	0	0	0	0	0	0	603	903	0
585	0	-4.30068	104.327	-611.818	135225	-3511.49	-5334.04	194.261	78.9779	0	0	0	0	0	0	0	200	903	0	0	0	0	0	0	0	603	903	0
585	1	-3.07998	105.09	-612.123	135408	-3572.52	-5425.6	194.164	78.7889	0	0	0	0	0	0	0	200	903	0	0	0	0	0	0	0	603	903	0
585	2	-4.45327	104.937	-610.902	134493	-3816.66	-5471.37	193.752	79.8456	0	0	0	0	0	0	0	200	903	0	0	0	0	0	0	0	603	903	0
585	3	-5.06362	106.158	-609.987	134218	-3694.59	-5242.49	193.943	79.9654	0	0	0	0	0	0	0	200	903	0	0	0	0	0	0	0	603	903	0
585	4	-4.30068	107.074	-605.409	134218	-3328.38	-5196.72	194.502	78.3017	0	0	0	0	0	0	0	200	903	0	0	0	0	0	0	0	603	903	0
585	5	-5.3688	107.531	-604.493	134035	-3450.45	-5379.82	194.292	78.2688	0	0	0	0	0	0	0	200	903	0	0	0	0	0	0	0	603	903	0
585	6	-4.45327	107.684	-602.357	133852	-3389.42	-5288.27	194.373	77.7865	0	0	0	0	0	0	0	200	903	0	0	0	0	0	0	0	603	903	0
585	7	-4.91104	109.363	-602.968	134401	-3511.49	-4418.52	194.176	77.1003	0	0	0	0	0	0	0	200	903	0	0	0	0	0	0	0	603	903	0
585	8	-4.30068	109.21	-596.254	133577	-3450.45	-5334.04	194.213	75.9724	0	0	0	0	0	0	0	200	903	0	0	0	0	0	0	0	603	903	0
585	9	-4.30068	110.431	-598.39	132662	-3572.52	-5150.94	194.03	78.3021	0	0	0	0	0	0	0	200	903	0	0	0	0	0	0	0	603	903	0
586	0	-4.45327	111.499	-595.338	133211	-3572.52	-4738.95	193.999	76.243	0	0	0	0	0	0	0	200	903	0	0	0	0	0	0	0	603	903	0
586	1	-3.23257	111.651	-592.286	132021	-3389.42	-4601.62	194.277	77.0996	0	0	0	0	0	0	0	200	903	0	0	0	0	0	0	0	603	903	0
586	2	-0.94375	112.414	-593.202	130648	-3267.34	-4784.73	194.492	79.7586	0	0	0	0	0	0	0	200	903	0	0	0	0	0	0	0	603	903	0
586	3	-2.7748	113.635	-590.455	130739	-3206.31	-4647.4	194.57	78.5791	0	0	0	0	0	0	0	200	903	0	0	0	0	0	0	0	603	903	0
586	4	-4.1481	114.093	-587.098	129915	-3389.42	-4372.74	194.227	78.7165	0	0	0	0	0	0	0	200	903	0	0	0	0	0	0	0	603	903	0
586	5	-1.85928	114.856	-583.131	129640	-3572.52	-4464.29	193.874	77.6821	0	0	0	0	0	0	0	200	903	0	0	0	0	0	0	0	603	903	0
586	6	-3.23257	115.466	-580.385	129915	-3084.24	-4326.96	194.686	76.1567	0	0	0	0	0	0	0	200	903	0	0	0	0	0	0	0	603	903	0
586	7	-1.85928	115.008	-577.943	129274	-3389.42	-4326.96	194.135	76.3201	0	0	0	0	0	0	0	200	903	0	0	0	0	0	0	0	603	903	0
586	8	-1.5541	115.619	-575.807	128725	-3267.34	-4006.53	194.326	76.4442	0	0	0	0	0	0	0	200	903	0	0	0	0	0	0	0	603	903	0
586	9	-2.62222	115.313	-574.281	128267	-3511.49	-4052.31	193.885	76.6473	0	0	0	0	0	0	0	200	903	0	0	0	0	0	0	0	603	903	0
587	0	-3.38516	117.602	-570.924	127077	-3206.31	-4143.86	194.384	77.4187	0	0	0	0	0	0	0	200	903	0	0	0	0	0	0	0	603	903	0
587	1	-2.92739	118.365	-565.736	126619	-2962.17	-4052.31	194.764	76.1867	0	0	0	0	0	0	0	200	903	0	0	0	0	0	0	0	603	903	0
587	2	-1.70669	118.06	-563.295	125978	-3084.24	-3823.43	194.525	76.3544	0	0	0	0	0	0	0	200	903	0	0	0	0	0	0	0	603	903	0
587	3	-0.791162	119.739	-561.464	125154	-3206.31	-3869.2	194.289	77.0926	0	0	0	0	0	0	0	200	903	0	0	0	0	0	0	0	603	903	0
587	4	-1.40151	120.807	-558.412	124422	-3328.38	-4006.53	194.04	77.186	0	0	0	0	0	0	0	200	903	0	0	0	0	0	0	0	603	903	0
587	5	-2.31704	118.976	-554.445	123781	-3328.38	-3731.87	193.997	76.7475	0	0	0	0	0	0	0	200	903	0	0	0	0	0	0	0	603	903	0
587	6	-2.31704	121.264	-549.867	123598	-3084.24	-3594.54	194.391	75.2219	0	0	0	0	0	0	0	200	903	0	0	0	0	0	0	0	603	903	0
587	7	-2.46963	121.875	-544.374	122591	-3999.77	-3502.99	192.653	74.8037	0	0	0	0	0	0	0	200	903	0	0	0	0	0	0	0	603	903	0
587	8	-1.40151	121.875	-542.238	122316	-3389.42	-3365.66	193.749	74.4231	0	0	0	0	0	0	0	200	903	0	0	0	0	0	0	0	603	903	0
587	9	-1.5541	121.57	-539.796	120943	-3389.42	-3274.11	193.721	75.9469	0	0	0	0	0	0	0	200	903	0	0	0	0	0	0	0	603	903	0
588	0	-2.01187	122.18	-534.303	119844	-3511.49	-3228.33	193.428	75.6996	0	0	0	0	0	0	0	200	903	0	0	0	0	0	0	0	603	903	0
588	1	-1.40151	123.095	-528.81	119478	-3511.49	-3136.78	193.36	74.0622	0	0	0	0	0	0	0	200	903	0	0	0	0	0	0	0	603	903	0
588	2	-2.01187	123.401	-523.927	117464	-3389.42	-3228.33	193.531	75.8008	0	0	0	0	0	0	0	200	903	0	0	0	0	0	0	0	603	903	0
588	3	-0.180811	123.095	-521.486	116640	-3145.27	-2724.79	193.969	76.3313	0	0	0	0	0	0	0	200	903	0	0	0	0	0	0	0	603	903	0
588	4	1.34507	124.621	-521.791	115633	-3145.27	-2953.67	193.972	78.3921	0	0	0	0	0	0	0	200	903	0	0	0	0	0	0	0	603	903	0
588	5	-1.09634	125.079	-513.856	114534	-3267.34	-2633.24	193.642	77.1082	0	0	0	0	0	0	0	200	903	0	0	0	0	0	0	0	603	903	0
588	6	-1.70669	124.316	-507.448	113893	-3450.45	-2679.02	193.2	75.5563	0	0	0	0	0	0	0	200	903	0	0	0	0	0	0	0	603	903	0
588	7	0.887305	126.147	-501.039	113161	-3206.31	-2953.67	193.601	74.1473	0	0	0	0	0	0	0	200	903	0	0	0	0	0	0	0	603	903	0
588	8	-1.24893	126.605	-495.241	112978	-3267.34	-2450.13	193.403	71.8726	0	0	0	0	0	0	0	200	903	0	0	0	0	0	0	0	603	903	0
588	9	0.276953	125.689	-491.273	110872	-3450.45	-2541.69	192.977	74.3166	0	0	0	0	0	0	0	200	903	0	0	0	0	0	0	0	603	903	0
589	0	0.429541	125.232	-486.696	109957	-3633.56	-2541.69	192.534	74.075	0	0	0	0	0	0	0	200	903	0	0	0	0	0	0	0	603	903	0
589	1	-0.638574	124.774	-478.761	108492	-3389.42	-2450.13	192.92	73.3904	0	0	0	0	0	0	0	200	903	0	0	0	0	0	0	0	603	903	0
589	2	-1.40151	123.858	-477.235	107393	-3450.45	-2175.48	192.77	74.9679	0	0	0	0	0	0	0	200	903	0	0	0	0	0	0	0	603	903	0
589	3	0.582129	124.316	-469.606	105196	-3633.56	-1992.37	192.263	75.991	0	0	0	0	0	0	0	200	903	0	0	0	0	0	0	0	603	903	0
589	4	1.95542	124.774	-463.807	103914	-3267.34	-2083.92	192.955	75.954	0	0	0	0	0	0	0	200	903	0	0	0	0	0	0	0	603	903	0
589	5	3.02354	124.164	-457.399	102632	-3206.31	-2038.15	192.99	75.6171	0	0	0	0	0	0	0	200	903	0	0	0	0	0	0	0	603	903	0
589	6	1.49766	123.553	-452.211	101351	-3084.24	-1717.71	193.18	75.8772	0	0	0	0	0	0	0	200	903	0	0	0	0	0	0	0	603	903	0
589	7	1.34507	120.959	-444.581	99702.8	-3450.45	-1763.49	192.239	75.7379	0	0	0	0	0	0	0	200	903	0	0	0	0	0	0	0	603	903	0
589	8	1.65024	122.943	-436.036	98787.3	-3572.52	-1671.94	191.807	73.4427	0	0	0	0	0	0	0	200	903	0	0	0	0	0	0	0	603	903	0
589	9	2.10801	121.875	-426.271	97413.9	-3328.38	-1671.94	192.192	71.474	0	0	0	0	0	0	0	200	903	0	0	0	0	0	0	0	603	903	0
590	0	3.02354	119.586	-422.304	96040.6	-3389.42	-1351.5	191.974	72.5791	0	0	0	0	0	0	0	200	903	0	0	0	0	0	0	0	603	903	0
590	1	3.17612	120.044	-415.284	94026.5	-3511.49	-1443.05	191.544	73.5853	0	0	0	0	0	0	0	200	903	0	0	0	0	0	0	0	603	903	0
590	2	2.10801	118.365	-407.655	92195.5	-3999.77	-1305.72	190.188	73.8396	0	0	0	0	0	0	0	200	903	0	0	0	0	0	0	0	603	903	0
590	3	3.02354	117.145	-398.805	90913.7	-3206.31	-1076.84	191.96	72.0347	0	0	0	0	0	0	0	200	903	0	0	0	0	0	0	0	603	903	0
590	4	2.2606	115.466	-389.955	88350.2	-3755.63	-573.302	190.369	73.4348	0	0	0	0	0	0	0	200	903	0	0	0	0	0	0	0	603	903	0
590	5	3.78647	113.94	-381.41	86153	-3450.45	-939.513	190.953	74.1198	0	0	0	0	0	0	0	200	903	0	0	0	0	0	0	0	603	903	0
590	6	5.00718	112.872	-374.391	84688.1	-3572.52	-664.855	190.458	73.7977	0	0	0	0	0	0	0	200	903	0	0	0	0	0	0	0	603	903	0
590	7	3.63389	110.583	-365.541	82674	-3816.66	-802.184	189.559	73.8311	0	0	0	0	0	0	0	200	903	0	0	0	0	0	0	0	603	903	0
590	8	2.56577	106.006	-356.996	80842.9	-3755.63	-252.868	189.48	73.5466	0	0	0	0	0	0	0	200	903	0	0	0	0	0	0	0	603	903	0
590	9	4.24424	106.158	-348.451	79835.8	-3389.42	-619.079	190.273	70.8837	0	0	0	0	0	0	0	200	903	0	0	0	0	0	0	0	603	903	0
591	0	2.71836	104.022	-339.906	78004.8	-3694.59	-481.75	189.131	70.5108	0	0	0	0	0	0	0	200	903	0	0	0	0	0	0	0	603	903	0
591	1	3.63389	101.275	-327.394	76082.2	-3816.66	-619.079	188.342	67.6127	0	0	0	0	0	0	0	200	903	0	0	0	0	0	0	0	603	903	0
591	2	4.24424	98.3762	-324.037	74434.2	-3572.52	-69.7623	188.975	70.291	0	0	0	0	0	0	0	200	903	0	0	0	0	0	0	0	603	903	0
591	3	4.09165	97.0029	-313.051	72328.5	-3511.49	-115.539	188.783	68.9558	0	0	0	0	0	0	0	200	903	0	0	0	0	0	0	0	603	903	0
591	4	3.17612	94.2563	-304.811	70039.7	-3572.52	-207.091	188.28	70.2192	0	0	0	0	0	0	0	200	903	0	0	0	0	0	0	0	603	903	0
591	5	3.63389	90.7468	-293.214	68666.4	-3572.52	-207.091	187.816	65.8148	0	0	0	0	0	0	0	200	903	0	0	0	0	0	0	0	603	903	0
591	6	5.15977	88.1528	-286.195	67018.4	-3084.24	342.225	189.223	65.8296	0	0	0	0	0	0	0	200	903	0	0	0	0	0	0	0	603	903	0
591	7	6.53306	84.4907	-277.955	64271.9	-3206.31	204.896	188.465	68.7691	0	0	0	0	0	0	0	200	903	0	0	0	0	0	0	0	603	903	0
591	8	6.53306	82.3545	-270.936	62166.1	-3389.42	21.7904	187.49	70.5508	0	0	0	0	0	0	0	200	903	0	0	0	0	0	0	0	603	903	0
591	9	5.46494	78.9975	-262.086	60884.4	-3511.49	67.5668	186.602	67.6933	0	0	0	0	0	0	0	200	903	0	0	0	0	0	0	0	603	903	0
592	0	5.31235	76.4035	-251.1	58504	-3267.34	479.554	186.988	67.009	0	0	0	0	0	0	0	200	903	0	0	0	0	0	0	0	603	903	0
592	1	5.46494	73.0466	-239.808	57222.3	-3511.49	525.331	185.357	61.3833	0	0	0	0	0	0	0	200	903	0	0	0	0	0	0	0	603	903	0
592	2	6.22788	69.9949	-235.841	55299.7	-3389.42	433.778	185.628	65.5214	0	0	0	0	0	0	0	200	903	0	0	0	0	0	0	0	603	903	0
592	3	5.31235	67.8586	-229.738	54109.5	-3450.45	571.107	184.981	64.4726	0	0	0	0	0	0	0	200	903	0	0	0	0	0	0	0	603	903	0
592	4	6.07529	64.1965	-219.972	52370	-3084.24	891.542	185.979	61.9242	0	0	0	0	0	0	0	200	903	0	0	0	0	0	0	0	603	903	0
592	5	5.15977	59.6189	-214.479	50905.2	-2962.17	525.331	186.189	62.6565	0	0	0	0	0	0	0	200	903	0	0	0	0	0	0	0	603	903	0
592	6	5.46494	56.7197	-203.492	49348.8	-3328.38	662.66	183.644	57.4911	0	0	0	0	0	0	0	200	903	0	0	0	0	0	0	0	603	903	0
592	7	5.61753	51.9895	-198.61	47243.1	-3084.24	571.107	184.471	62.1312	0	0	0	0	0	0	0	200	903	0	0	0	0	0	0	0	603	903	0
592	8	8.5167	49.7007	-192.506	46144.4	-2718.03	799.989	185.881	60.2964	0	0	0	0	0	0	0	200	903	0	0	0	0	0	0	0	603	903	0
592	9	6.53306	43.7497	-184.877	44313.4	-2718.03	891.542	185.298	60.3087	0	0	0	0	0	0	0	200	903	0	0	0	0	0	0	0	603	903	0
593	0	6.07529	42.9868	-176.332	43031.6	-2962.17	937.318	183.201	55.9623	0	0	0	0	0	0	0	200	903	0	0	0	0	0	0	0	603	903	0
593	1	6.22788	39.1721	-169.618	41017.5	-2901.13	937.318	182.896	58.1774	0	0	0	0	0	0	0	200	903	0	0	0	0	0	0	0	603	903	0
593	2	5.77012	37.0359	-160.463	40193.5	-2656.99	983.094	183.442	49.5152	0	0	0	0	0	0	0	200	903	0	0	0	0	0	0	0	603	903	0
593	3	5.9227	34.2893	-154.664	38911.7	-2840.1	891.542	181.637	48.4117	0	0	0	0	0	0	0	200	903	0	0	0	0	0	0	0	603	903	0
593	4	5.9227	31.5427	-151.002	37813.1	-2840.1	708.436	181.192	49.5858	0	0	0	0	0	0	0	200	903	0	0	0	0	0	0	0	603	903	0
593	5	5.61753	27.4228	-146.73	36348.3	-3084.24	891.542	178.98	52.2776	0	0	0	0	0	0	0	200	903	0	0	0	0	0	0	0	603	903	0
593	6	5.77012	27.2702	-141.237	34791.9	-2595.96	571.107	181.62	53.6625	0	0	0	0	0	0	0	200	903	0	0	0	0	0	0	0	603	903	0
593	7	4.09165	25.4392	-135.743	33967.9	-2534.92	845.765	181.326	49.7641	0	0	0	0	0	0	0	200	903	0	0	0	0	0	0	0	603	903	0
593	8	4.702	25.897	-132.692	32960.8	-2534.92	845.765	180.896	51.5985	0	0	0	0	0	0	0	200	903	0	0	0	0	0	0	0	603	903	0
593	9	5.31235	22.6926	-129.335	32319.9	-2473.89	571.107	180.872	50.1063	0	0	0	0	0	0	0	200	903	0	0	0	0	0	0	0	603	903	0
594	0	4.85459	21.3193	-128.419	31953.7	-2229.75	754.213	182.637	51.1764	0	0	0	0	0	0	0	200	903	0	0	0	0	0	0	0	603	903	0
594	1	4.39683	20.4038	-122.926	31129.8	-2534.92	708.436	179.378	46.7603	0	0	0	0	0	0	0	200	903	0	0	0	0	0	0	0	603	903	0
594	2	3.63389	21.0141	-117.433	30214.2	-2595.96	-115.539	177.894	42.7107	0	0	0	0	0	0	0	200	903	0	0	0	0	0	0	0	603	903	0
594	3	3.17612	21.0141	-110.719	29024	-2779.06	799.989	174.9	37.8586	0	0	0	0	0	0	0	200	903	0	0	0	0	0	0	0	603	903	0
594	4	4.85459	19.0305	-108.278	27925.4	-2351.82	891.542	178.28	42.0944	0	0	0	0	0	0	0	200	903	0	0	0	0	0	0	0	603	903	0
594	5	4.09165	16.1313	-106.752	26277.5	-2107.68	662.66	180.256	53.8452	0	0	0	0	0	0	0	200	903	0	0	0	0	0	0	0	603	903	0
594	6	3.4813	14.1477	-104.31	26369	-2107.68	296.449	179.794	47.2061	0	0	0	0	0	0	0	200	903	0	0	0	0	0	0	0	603	903	0
594	7	3.17612	12.6218	-99.7327	25178.8	-2168.71	571.107	178.255	47.5369	0	0	0	0	0	0	0	200	903	0	0	0	0	0	0	0	603	903	0
594	8	2.56577	10.4856	-95.1551	24263.3	-2351.82	754.213	175.284	45.0131	0	0	0	0	0	0	0	200	903	0	0	0	0	0	0	0	603	903	0
594	9	2.56577	11.0959	-90.5775	23256.2	-1802.5	388.001	180.1	43.2448	0	0	0	0	0	0	0	200	903	0	0	0	0	0	0	0	603	903	0
595	0	4.702	10.1804	-89.3568	22432.2	-1924.57	571.107	178.462	48.9585	0	0	0	0	0	0	0	200	903	0	0	0	0	0	0	0	603	903	0
595	1	3.78647	8.50193	-85.9998	21516.7	-1985.61	525.331	176.911	49.805	0	0	0	0	0	0	0	200	903	0	0	0	0	0	0	0	603	903	0
595	2	2.56577	6.3657	-80.8118	20784.3	-2107.68	342.225	173.919	42.8062	0	0	0	0	0	0	0	200	903	0	0	0	0	0	0	0	603	903	0
595	3	3.02354	7.12864	-77.1497	19319.5	-1619.4	571.107	179.01	49.5849	0	0	0	0	0	0	0	200	903	0	0	0	0	0	0	0	603	903	0
595	4	2.87095	7.28123	-70.4359	18220.8	-1619.4	937.318	177.009	41.3132	0	0	0	0	0	0	0	200	903	0	0	0	0	0	0	0	603	903	0
595	5	3.63389	8.50193	-69.8255	17213.7	-1558.36	525.331	177.682	53.4748	0	0	0	0	0	0	0	200	903	0	0	0	0	0	0	0	603	903	0
595	6	4.09165	8.19676	-68.2996	16664.4	-1558.36	845.765	177.183	56.0099	0	0	0	0	0	0	0	200	903	0	0	0	0	0	0	0	603	903	0
595	7	4.24424	8.9597	-61.8909	15748.9	-948.008	708.436	184.683	45.5378	0	0	0	0	0	0	0	200	903	0	0	0	0	0	0	0	603	903	0
595	8	4.09165	10.333	-59.4495	14467.2	-1131.11	479.554	180.974	56.648	0	0	0	0	0	0	0	200	903	0	0	0	0	0	0	0	603	903	0
595	9	3.93906	9.41746	-54.5667	14009.4	-1131.11	204.896	179.271	43.2611	0	0	0	0	0	0	0	200	903	0	0	0	0	0	0	0	603	903	0
596	0	3.78647	7.12864	-52.4305	13368.5	-825.938	754.213	184.247	45.0237	0	0	0	0	0	0	0	200	903	0	0	0	0	0	0	0	603	903	0
596	1	3.93906	8.80711	-46.6321	12269.9	-948.008	754.213	179.671	36.879	0	0	0	0	0	0	0	200	903	0	0	0	0	0	0	0	603	903	0
596	2	4.702	8.34935	-48.158	11262.8	-886.973	433.778	181.582	66.128	0	0	0	0	0	0	0	200	903	0	0	0	0	0	0	0	603	903	0
596	3	3.63389	8.34935	-45.7166	11262.8	-703.868	571.107	184.604	53.6385	0	0	0	0	0	0	0	200	903	0	0	0	0	0	0	0	603	903	0
596	4	4.39683	7.28123	-41.7493	10347.3	-764.903	525.331	181.679	52.1568	0	0	0	0	0	0	0	200	903	0	0	0	0	0	0	0	603	903	0
596	5	2.41318	7.58641	-39.9183	10530.4	-764.903	342.225	180.838	36.2012	0	0	0	0	0	0	0	200	903	0	0	0	0	0	0	0	603	903	0
596	6	3.02354	6.21311	-38.3924	9706.42	-764.903	296.449	180.077	47.1786	0	0	0	0	0	0	0	200	903	0	0	0	0	0	0	0	603	903	0
596	7	3.02354	5.145	-38.0872	8699.34	-886.973	479.554	176.712	71.5943	0	0	0	0	0	0	0	200	903	0	0	0	0	0	0	0	603	903	0
596	8	2.87095	3.31394	-35.6458	8150.02	-825.938	388.001	176.829	71.361	0	0	0	0	0	0	0	200	903	0	0	0	0	0	0	0	603	903	0
596	9	1.95542	4.07688	-35.951	7417.6	-825.938	479.554	177.026	93.6746	0	0	0	0	0	0	0	200	903	0	0	0	0	0	0	0	603	903	0
597	0	3.93906	4.38206	-30.1526	6868.28	-459.727	159.12	184.753	72.2162	0	0	0	0	0	0	0	200	903	0	0	0	0	0	0	0	603	903	0
597	1	1.65024	5.145	-27.7112	5952.76	-703.868	250.672	174.6	85.1862	0	0	0	0	0	0	0	200	903	0	0	0	0	0	0	0	603	903	0
597	2	2.87095	4.68724	-25.2698	6044.31	-581.797	67.5668	176.977	60.8093	0	0	0	0	0	0	0	200	903	0	0	0	0	0	0	0	603	903	0
597	3	3.17612	4.68724	-23.4388	5586.54	-581.797	571.107	175.178	61.6538	0	0	0	0	0	0	0	200	903	0	0	0	0	0	0	0	603	903	0
597	4	3.02354	4.68724	-22.8284	5037.23	-459.727	708.436	179.862	79.3441	0	0	0	0	0	0	0	200	903	0	0	0	0	0	0	0	603	903	0
597	5	2.2606	4.38206	-21.6077	5494.99	-398.692	342.225	181.549	45.6932	0	0	0	0	0	0	0	200	903	0	0	0	0	0	0	0	603	903	0
[truncated: 1,044 more rows]
