# Supplementary material for: The Effects of an Extemporaneous Speech Dual-task on Older Adult Gait Control
Source: Research Square preprint supplement (doi:10.21203/rs.3.rs-7674245/v1), 2025-11-18
Supplement: Supplementary file 177 [file Over7ground06.xlsx]

## Sheet: Sheet1
Trajectories
		07:LFHD			07:RFHD			07:LBHD			07:RBHD			07:C7			07:T10			07:CLAV			07:STRN			07:RBAK			07:LSHO			07:LUPA			07:LELB			07:LFRM			07:LWRA			07:LWRB			07:LFIN
Frame	Sub Frame	X	Y	Z	X	Y	Z	X	Y	Z	X	Y	Z	X	Y	Z	X	Y	Z	X	Y	Z	X	Y	Z	X	Y	Z	X	Y	Z	X	Y	Z	X	Y	Z	X	Y	Z	X	Y	Z	X	Y	Z	X	Y	Z
		mm	mm	mm	mm	mm	mm	mm	mm	mm	mm	mm	mm	mm	mm	mm	mm	mm	mm	mm	mm	mm	mm	mm	mm	mm	mm	mm	mm	mm	mm	mm	mm	mm	mm	mm	mm	mm	mm	mm	mm	mm	mm	mm	mm	mm	mm	mm	mm
613	0	121.461	-1103.65	1636.56	219.694	-1098.8	1638.45	105.691	-1258.87	1628.31	234.503	-1268.98	1621.87	193.052	-1300.4	1498.61	203.299	-1368.49	1243.73	178.327	-1185.63	1410.68	174.42	-1120.68	1259.74	286.365	-1364.32	1305.88	20.2953	-1303.65	1444.58	-28.8308	-1322.81	1260.7	-41.5024	-1340.84	1108.85	-86.1312	-1224.19	977.368	-67.1756	-1165.25	918.127	-94.9062	-1223.06	894.874	-113.281	-1145.89	848.442
614	0	121.233	-1088.99	1637.75	219.462	-1084.09	1639.9	105.548	-1244.17	1629.51	234.484	-1254.21	1623.52	193.35	-1285.7	1500.19	204.232	-1353.94	1245.92	178.397	-1171.13	1412.28	174.909	-1106.29	1261.49	287.116	-1349.73	1308.1	21.0075	-1289.87	1445.68	-27.4649	-1310.57	1261.8	-38.6527	-1331.06	1109.96	-83.0521	-1218.36	975.465	-63.7637	-1161.24	914.734	-91.2722	-1219.88	892.793	-108.597	-1144.42	842.981
615	0	121.041	-1074.38	1638.78	219.325	-1069.4	1641.48	105.474	-1229.79	1630.35	234.244	-1239.67	1624.62	193.715	-1271.15	1501.38	204.81	-1340.18	1247.31	178.659	-1156.52	1413.69	175.451	-1091.98	1262.48	287.766	-1335.35	1309.81	21.4641	-1275.62	1446.61	-25.7601	-1298.57	1262.68	-35.8382	-1321.28	1111.22	-79.7276	-1213.01	973.461	-60.3677	-1157.44	911.344	-87.6496	-1217.03	890.73	-103.846	-1143.6	837.563
616	0	120.748	-1059.84	1639.91	219.238	-1054.75	1642.78	105.478	-1215.05	1631.09	234.182	-1225.01	1625.47	194.018	-1256.55	1502.55	205.372	-1326.05	1248.46	179.149	-1142.1	1414.84	176.429	-1077.73	1263.26	288.548	-1321.04	1311.34	21.9429	-1261.42	1447.55	-24.4678	-1286.26	1263.36	-32.8285	-1311.64	1112.33	-76.6503	-1207.59	971.594	-57.0271	-1153.95	907.624	-83.9489	-1214.15	888.986	-99.2991	-1142.96	832.649
617	0	120.526	-1045.25	1640.54	218.962	-1040.18	1643.58	105.328	-1200.47	1631.36	234.213	-1210.32	1626.19	194.308	-1241.82	1503.25	206.013	-1311.46	1249.74	179.617	-1127.8	1415.21	177.235	-1063.51	1263.55	289.245	-1306.55	1312.81	22.2765	-1246.88	1447.7	-22.9071	-1273.84	1263.6	-29.8904	-1301.96	1113.25	-73.3832	-1202.22	969.558	-53.7953	-1150.58	904.173	-80.416	-1211.29	887.202	-94.8181	-1142.46	827.702
618	0	120.371	-1030.77	1640.87	218.59	-1025.66	1644.01	105.293	-1185.93	1631.27	234.125	-1195.73	1626.49	194.643	-1227.03	1503.75	206.315	-1297.19	1250.39	180.075	-1113.12	1415.55	178.224	-1049.31	1263.76	289.778	-1292.19	1313.78	22.7305	-1232.27	1447.94	-21.302	-1261.22	1264.09	-26.9177	-1292.2	1114.12	-70.0661	-1197.01	967.523	-50.435	-1147.3	900.599	-76.6953	-1208.58	885.46	-90.4926	-1142.1	822.992
619	0	120.144	-1016.32	1641.05	218.371	-1011.07	1644.25	105.268	-1171.44	1630.79	234.078	-1181.07	1626.11	194.841	-1212.4	1503.83	206.719	-1282.85	1250.63	180.551	-1098.36	1415.59	179.341	-1034.99	1263.35	290.553	-1277.84	1314.37	22.9882	-1217.6	1447.76	-19.7864	-1248.86	1263.59	-23.8514	-1282.59	1114.68	-66.6738	-1192.02	964.926	-47.0672	-1143.93	897.254	-72.7582	-1206.22	883.448	-86.2269	-1141.85	818.644
620	0	119.834	-1001.86	1640.86	218.387	-996.438	1644.68	105.214	-1156.99	1629.98	234.103	-1166.37	1625.51	195.082	-1197.51	1503.54	207.154	-1268.22	1250.7	181.021	-1083.57	1415.07	180.197	-1020.6	1262.5	291.014	-1263.67	1314.7	23.3869	-1202.77	1447.16	-18.0922	-1236.4	1263.25	-20.859	-1272.87	1115.06	-63.347	-1186.92	962.866	-43.7166	-1140.89	893.838	-68.7828	-1203.64	881.619	-82.2877	-1141.49	814.567
621	0	119.692	-987.272	1640.5	217.981	-981.749	1644.33	105.15	-1142.46	1628.86	234.178	-1151.58	1624.74	195.224	-1182.59	1503.1	207.442	-1253.73	1250.71	181.282	-1068.98	1414.03	181.06	-1006.15	1261.46	291.305	-1249.29	1314.85	23.6938	-1187.6	1446.41	-16.6365	-1223.82	1262.67	-17.9289	-1262.92	1115.52	-60.0588	-1182.24	960.653	-40.5096	-1137.44	889.845	-64.7185	-1200.84	879.867	-78.1293	-1141.24	810.348
622	0	119.403	-972.691	1639.62	217.635	-967.198	1643.58	105.27	-1127.88	1627.39	234.203	-1136.86	1623.39	195.296	-1167.65	1502.34	207.455	-1239.47	1250.29	181.622	-1054.02	1412.94	181.754	-991.864	1260.05	291.649	-1234.98	1314.37	23.7775	-1172.64	1445.3	-15.204	-1211.58	1261.96	-14.918	-1252.94	1115.6	-56.9766	-1177.18	958.511	-37.6216	-1134.16	887.302	-60.6437	-1198.1	877.924	-74.4367	-1140.79	806.73
623	0	119.187	-958.196	1638.64	217.621	-952.432	1642.9	105.342	-1113.2	1625.63	234.208	-1121.99	1621.54	195.385	-1152.32	1500.98	207.784	-1224.93	1249.53	182.079	-1039.08	1411.45	182.52	-977.341	1258.16	291.986	-1220.52	1313.7	23.9575	-1157.56	1444.04	-13.7791	-1199.53	1261.03	-11.9969	-1242.96	1115.34	-53.7272	-1172.04	956.157	-34.7001	-1130.71	883.999	-56.6839	-1195.43	876.268	-70.7997	-1140.62	803.294
624	0	119.022	-943.594	1637.53	217.301	-937.777	1641.74	105.436	-1098.61	1623.62	234.27	-1107.09	1619.64	195.297	-1137.23	1499.6	207.877	-1210.54	1248.56	182.247	-1024.13	1409.7	183.104	-963.105	1255.91	292.167	-1205.84	1312.88	23.9903	-1142.33	1442.45	-12.2179	-1187.31	1260.01	-9.36356	-1232.64	1115.22	-50.8775	-1166.77	953.777	-31.7702	-1127.09	880.812	-52.9811	-1192.29	874.906	-67.1669	-1139.68	800.203
625	0	118.843	-928.819	1636.27	217.023	-922.959	1640.41	105.435	-1083.89	1621.44	234.357	-1092.16	1617.67	195.252	-1122.03	1498.22	207.838	-1196.28	1247.48	182.694	-1009.06	1407.93	183.851	-948.867	1253.69	292.199	-1191.47	1311.7	23.8767	-1127.02	1440.72	-11.1608	-1174.89	1258.86	-6.82832	-1222.11	1114.83	-47.7683	-1160.96	951.914	-29.0452	-1123.37	878.188	-49.1742	-1188.62	873.461	-63.8429	-1138.38	797.163
626	0	118.566	-914.144	1634.94	217.017	-908.123	1639.31	105.453	-1069.16	1619.09	234.29	-1077.32	1615.12	195.126	-1106.71	1496.51	207.591	-1182.06	1246.06	182.676	-993.999	1405.63	184.569	-934.735	1251.23	292.104	-1177.24	1310.42	23.8173	-1111.71	1438.64	-9.6871	-1162.42	1257.62	-4.28989	-1211.36	1114.29	-45.2592	-1155.14	949.505	-26.1351	-1119.13	875.001	-45.3362	-1184.86	871.579	-60.2418	-1136.98	794.246
627	0	118.431	-899.314	1633.29	216.8	-893.251	1637.55	105.319	-1054.31	1616.51	234.235	-1062.29	1612.48	194.932	-1091.33	1494.63	207.355	-1167.59	1244.42	182.921	-978.913	1403.45	185.033	-920.607	1248.29	292.073	-1162.78	1309.05	23.5536	-1096.38	1436.41	-8.54977	-1149.73	1256.58	-2.19479	-1200.56	1113.72	-42.8174	-1148.96	947.673	-24.0714	-1114.51	872.331	-41.9305	-1180.6	870.276	-57.0939	-1134.9	791.474
628	0	118.274	-884.587	1631.42	216.622	-878.435	1635.73	105.297	-1039.41	1614.1	234.23	-1047.17	1609.88	194.56	-1076.02	1492.83	206.924	-1153.29	1242.9	182.914	-963.855	1401.15	185.428	-906.371	1245.35	291.912	-1148.43	1307.46	23.383	-1080.86	1434.36	-7.36421	-1136.97	1254.67	-0.252818	-1189.37	1113.11	-40.4262	-1142.18	945.763	-21.4879	-1109.6	869.606	-39.0348	-1175.84	869.422	-54.0327	-1132.32	789.258
629	0	118.04	-869.648	1629.95	216.345	-863.547	1633.96	105.171	-1024.48	1611.47	234.008	-1032.19	1607.24	194.325	-1060.64	1490.82	206.407	-1139.12	1241.32	182.807	-948.669	1398.37	186.088	-892.056	1243.02	291.526	-1134.19	1305.93	23.0432	-1065.57	1432.07	-6.60637	-1123.76	1253.13	1.55144	-1177.82	1112.36	-38.3997	-1135.25	943.732	-19.5235	-1104.22	867.352	-36.4245	-1170.57	868.383	-51.1319	-1129.45	786.778
630	0	117.769	-854.695	1627.96	216.296	-848.572	1632.31	104.956	-1009.45	1608.92	233.78	-1017.23	1604.41	193.827	-1045.51	1488.76	206.064	-1124.69	1239.62	182.9	-933.583	1396.2	186.479	-877.432	1240.4	291.272	-1119.79	1304.29	22.8186	-1050.23	1429.91	-5.99888	-1110.34	1251.53	3.10773	-1165.9	1111.78	-36.7101	-1127.69	942.106	-14.8588	-1100.21	862.555	-33.6942	-1164.68	867.086	-48.5133	-1125.9	784.658
631	0	117.569	-839.831	1626.24	215.7	-833.86	1629.79	104.747	-994.402	1606.45	233.606	-1002.1	1601.68	193.26	-1030.18	1486.96	205.674	-1110.08	1238.06	182.85	-918.469	1393.8	186.506	-862.596	1237.76	291.035	-1105.14	1302.76	22.4823	-1034.9	1427.9	-5.52807	-1096.59	1250.18	4.02207	-1153.82	1111.48	-35.2806	-1119.62	940.68	-13.2736	-1093.69	860.29	-31.665	-1158.23	866.589	-45.8056	-1121.86	783.144
632	0	117.362	-824.797	1624.27	215.579	-818.778	1628.22	104.385	-979.281	1603.98	233.257	-986.956	1599.31	192.861	-1015	1484.9	205.203	-1095.51	1236.61	182.723	-903.406	1391.81	186.438	-847.678	1235.21	290.658	-1090.61	1301.14	22.0971	-1019.67	1425.81	-5.23286	-1082.63	1248.39	5.1596	-1141.13	1110.62	-34.2199	-1110.83	939.169	-12.6504	-1086.33	858.767	-29.8158	-1150.91	866.155	-43.7496	-1116.93	781.481
633	0	117.064	-809.766	1622.63	215.168	-803.873	1626.2	104.061	-964.185	1601.62	232.86	-971.933	1596.86	192.306	-1000.04	1482.87	204.425	-1081.24	1234.74	182.417	-888.284	1389.58	186.63	-832.56	1233.37	290.047	-1076.33	1299.32	21.7301	-1004.37	1423.87	-5.34695	-1068.39	1247	5.88733	-1128	1109.66	-33.4219	-1101.41	938.24	-14.1253	-1076.71	859.007	-28.3316	-1143.1	865.575	-41.919	-1111.46	779.948
634	0	116.744	-794.869	1620.61	214.904	-788.991	1624.65	103.649	-949.108	1599.63	232.299	-956.939	1594.52	191.64	-984.97	1480.98	204.032	-1066.14	1232.79	182.017	-873.306	1387.73	186.127	-817.571	1231.39	289.419	-1061.28	1297.57	21.0699	-989.216	1422.15	-5.52896	-1054.13	1245.55	6.13236	-1115.07	1108.96	-32.6969	-1091.68	937.138	-11.3326	-1069.85	855.301	-27.0371	-1134.32	865.112	-40.3336	-1104.85	778.965
635	0	116.331	-779.659	1619.25	214.442	-774.01	1622.76	103.244	-934.106	1597.76	231.997	-941.884	1592.97	190.988	-969.892	1479.31	203.234	-1051.15	1231.05	181.65	-858.082	1386.27	185.895	-802.241	1230.01	288.589	-1046.61	1295.71	20.4727	-973.951	1420.75	-5.96653	-1039.73	1244.29	6.30536	-1101.42	1108.39	-32.6965	-1081.04	936.303	-13.3354	-1058.79	856.3	-26.213	-1124.95	864.919	-39.0912	-1097.57	777.99
636	0	115.921	-764.61	1617.83	214.361	-758.872	1621.94	102.695	-918.892	1596.2	231.629	-926.96	1591.95	190.323	-955.141	1477.84	202.168	-1035.79	1229.47	180.891	-842.921	1384.91	185.164	-787.283	1228.81	287.837	-1031.42	1294.07	19.7052	-958.715	1419.38	-6.51436	-1024.96	1243.32	6.08064	-1087.46	1107.66	-32.7149	-1069.74	935.578	-11.5998	-1050.21	853.053	-25.8868	-1114.65	864.854	-38.3687	-1089.42	777.186
637	0	115.731	-749.5	1616.33	213.739	-744.04	1620.01	102.081	-903.756	1595.06	230.952	-912.017	1590.32	189.532	-940.15	1476.34	200.947	-1020.59	1227.79	180.31	-827.724	1383.69	184.733	-771.868	1227.86	286.72	-1016.4	1292.47	18.8985	-943.481	1418.16	-7.17186	-1010.16	1242.06	5.76479	-1073.19	1107.14	-33.1251	-1057.96	934.868	-14.1003	-1037.64	854.053	-26.0562	-1103.79	864.874	-37.9194	-1080.09	776.543
638	0	115.244	-734.324	1615.15	212.972	-729.491	1618.03	101.446	-888.643	1594.01	230.256	-897.216	1589.07	188.576	-925.085	1475.1	199.837	-1004.94	1226.26	179.48	-812.477	1382.64	183.878	-756.578	1226.69	285.446	-1001.4	1290.68	18.1559	-928.166	1416.91	-8.2181	-995.268	1241.28	4.99561	-1058.71	1106.95	-33.7954	-1045.69	934.365	-12.7345	-1027.65	851.411	-26.5167	-1092.13	864.796	-37.8729	-1069.97	776.102
639	0	115.015	-719.243	1614.07	212.618	-714.589	1616.64	100.679	-873.523	1593.33	229.7	-882.393	1588.51	187.673	-910.129	1473.8	198.597	-989.44	1224.74	178.846	-797.234	1381.86	183.171	-740.93	1226.41	284.35	-985.657	1289.05	17.2678	-912.833	1415.83	-9.33572	-979.992	1240.9	4.29011	-1043.81	1106.52	-35.1492	-1032.54	933.943	-16.3725	-1013.8	852.617	-27.22	-1079.41	864.849	-38.5492	-1058.73	775.78
640	0	114.634	-704.185	1612.94	212.37	-699.626	1615.52	99.9039	-858.421	1592.64	228.982	-867.62	1587.83	186.678	-895.21	1472.62	197.483	-973.591	1222.99	177.701	-781.898	1380.9	182.087	-724.912	1225.64	283.075	-970.065	1287.5	16.2884	-897.46	1415.03	-10.4262	-964.512	1240.1	2.92939	-1028.77	1106.01	-36.6545	-1018.84	933.547	-16.1856	-1001.78	850.094	-28.672	-1066.08	864.755	-39.516	-1046.45	775.37
641	0	114.414	-689.063	1611.89	211.985	-684.862	1614.24	99.2076	-843.433	1591.99	227.804	-852.821	1586.07	185.5	-880.219	1471.52	196.104	-957.784	1221.54	176.624	-766.478	1380.11	180.73	-708.628	1225.27	281.738	-954.375	1285.84	15.2708	-881.906	1414.01	-11.7304	-949.054	1239.35	1.71127	-1013.55	1105.38	-38.4311	-1004.46	933.086	-20.452	-986.144	851.906	-30.3265	-1052.06	864.392	-40.8962	-1033.18	774.927
642	0	113.951	-674.124	1611.12	211.829	-670.105	1613.4	98.4858	-828.486	1591.32	227.155	-838.088	1585.63	184.561	-865.44	1470.42	195.366	-941.377	1219.55	175.647	-751.126	1379.73	179.334	-692.516	1225.48	279.913	-939.347	1284.59	14.0655	-866.444	1413.29	-13.3648	-933.527	1238.77	0.05187	-997.972	1104.78	-40.781	-989.546	932.722	-20.4982	-973.035	848.915	-32.3831	-1037.32	864.346	-42.9352	-1019.02	774.488
643	0	113.754	-659.095	1610.66	211.456	-655.427	1612.74	97.7578	-813.408	1591.1	226.448	-823.439	1585.31	183.201	-850.542	1469.48	194.102	-925.104	1217.86	174.43	-735.733	1379.43	177.981	-675.879	1225.68	278.487	-923.413	1282.94	12.5986	-850.924	1412.76	-15.0351	-917.413	1238.33	-1.88903	-981.945	1104.26	-43.3527	-973.864	932.196	-25.7059	-955.768	850.745	-34.8626	-1021.79	863.842	-45.4254	-1003.8	773.98
644	0	113.307	-644.072	1610.5	211.289	-640.556	1612.65	96.9433	-798.368	1591.36	225.636	-808.785	1585.45	181.803	-835.741	1469.16	192.279	-909.153	1216.42	173.284	-720.174	1379.58	176.27	-659.176	1225.86	277.076	-907.257	1281.21	11.1696	-835.168	1412.29	-16.7066	-901.23	1237.31	-3.64385	-965.38	1103.65	-46.0684	-957.675	931.786	-29.0312	-939.354	849.875	-37.5858	-1005.45	863.235	-48.4511	-987.516	773.341
645	0	113.031	-629.109	1610.66	210.795	-625.894	1612.37	96.1006	-783.326	1591.97	224.708	-794.244	1585.73	180.526	-820.8	1468.69	191.218	-892.683	1215.09	172.13	-704.84	1379.83	174.758	-642.617	1226.33	275.526	-891.27	1279.73	9.84449	-819.561	1411.73	-18.7401	-884.725	1237.03	-6.13648	-948.693	1102.83	-49.098	-940.755	931.432	-32.4194	-922.476	849.493	-40.7058	-988.474	862.503	-51.9594	-970.436	772.956
646	0	112.618	-614.105	1610.95	210.73	-611.131	1612.7	95.2997	-768.259	1592.75	223.72	-779.524	1585.93	179.221	-805.991	1468.83	190.108	-876.331	1213.99	171.199	-689.441	1380.56	173.853	-626.207	1227.72	274.404	-875.319	1278.68	8.56905	-803.952	1411.81	-20.5824	-867.998	1236.48	-8.67014	-931.397	1102.53	-52.3846	-923.17	931.167	-36.1941	-904.475	849.337	-43.8164	-970.594	862.079	-55.8684	-952.582	772.258
647	0	112.422	-599.03	1611.89	210.1	-596.546	1612.76	94.2432	-753.159	1593.75	222.906	-764.894	1586.79	178.029	-790.939	1468.87	188.929	-860.378	1214.02	170.311	-674.152	1381.15	172.822	-610.104	1228.77	273.331	-859.815	1278.35	7.44365	-788.155	1411.73	-22.7291	-850.902	1236.25	-11.4543	-913.707	1102.05	-55.9145	-904.995	930.859	-40.3963	-885.649	849.172	-47.3703	-951.999	861.605	-60.5047	-933.324	772.258
648	0	112.042	-583.993	1612.72	209.822	-581.771	1613.34	93.29	-738.137	1594.68	221.931	-750.314	1587.56	176.855	-775.875	1469.34	188.005	-844.445	1214.24	169.521	-658.911	1381.96	172.259	-594.052	1229.88	272.145	-844.836	1278.58	6.37491	-772.477	1412.1	-24.5968	-833.638	1236.19	-14.0152	-895.733	1101.62	-59.4027	-886.111	930.74	-45.0404	-866.054	849.202	-51.5417	-932.797	861.168	-65.215	-913.346	772.031
649	0	111.608	-569.256	1613.39	209.241	-567.22	1613.93	92.4423	-723.089	1595.64	220.97	-735.598	1587.86	175.97	-760.972	1470.17	187.2	-828.957	1214.84	169.046	-643.861	1382.96	172.131	-578.301	1231.17	271.261	-829.914	1279.22	5.42642	-756.66	1412.48	-26.4778	-816.131	1236.44	-16.859	-877.69	1101.29	-63.2225	-866.558	930.789	-49.0786	-845.899	849.079	-55.8936	-912.643	860.97	-70.6615	-892.42	772.002
650	0	111.174	-554.293	1614.7	208.839	-552.354	1615.2	91.7012	-708.324	1596.48	220.236	-720.907	1589.14	175.164	-746.036	1471.11	186.557	-813.521	1215.9	168.622	-628.926	1384.1	171.895	-562.75	1232.43	270.667	-814.862	1280.55	4.50446	-740.982	1413.51	-28.1473	-798.641	1236.61	-19.5791	-859.249	1101.09	-67.3543	-846.377	931.036	-53.9989	-824.787	849.747	-60.2971	-891.638	860.446	-76.399	-870.408	772.458
651	0	110.476	-539.393	1615.65	208.26	-537.707	1616.76	91.0228	-693.391	1597.45	219.55	-706.083	1590.75	174.356	-731.259	1472.45	185.794	-798.628	1217.72	168.355	-614.128	1385.4	171.947	-547.564	1233.55	269.963	-800.552	1282.24	3.74898	-725.325	1414.61	-29.8567	-781.169	1236.93	-22.7812	-840.83	1100.91	-71.6034	-825.29	931.593	-59.1903	-802.776	850.279	-65.4376	-869.897	860.442	-82.6436	-847.274	772.696
652	0	110.093	-524.666	1616.89	207.991	-522.931	1618.71	90.3888	-678.438	1598.56	218.841	-691.284	1592	173.935	-716.738	1473.92	185.326	-784.025	1219.37	168.243	-599.576	1386.71	172.402	-532.612	1234.94	269.397	-786.323	1284.05	3.05398	-709.978	1415.85	-31.5077	-763.515	1237.67	-25.5968	-822.062	1100.93	-75.9857	-803.735	932.315	-63.8131	-780.068	850.606	-70.5445	-847.276	860.367	-88.8575	-823.391	773.182
653	0	109.488	-509.936	1617.71	207.316	-508.312	1619.77	89.8588	-663.768	1599.62	218.285	-676.703	1593.59	173.497	-702.314	1475.42	185.048	-769.24	1221.35	168.358	-585.266	1388.1	172.801	-518.292	1236.03	268.953	-772.301	1286.09	2.54658	-694.668	1417.28	-32.9104	-746.267	1238.68	-28.5094	-803.423	1101.06	-80.085	-781.722	932.919	-68.5531	-756.681	852.208	-75.7222	-824.037	860.513	-95.4109	-798.536	774.183
654	0	109.16	-495.326	1618.68	206.993	-493.724	1621.19	89.2735	-648.907	1600.92	217.894	-662.125	1595.4	173.026	-688.096	1477.04	184.778	-754.776	1223.5	168.492	-571.047	1389.5	173.775	-504.077	1237.56	268.359	-758.619	1288.16	2.28291	-679.611	1418.76	-34.4378	-729.106	1239.82	-31.371	-784.329	1101.18	-84.3733	-759.236	933.952	-71.8307	-733.918	852.05	-81.1655	-800.189	860.715	-101.891	-772.669	775.209
655	0	108.75	-480.671	1619.72	206.387	-479.263	1622.2	88.7753	-634.416	1602.13	217.412	-647.729	1597.39	172.627	-673.949	1478.64	184.151	-740.668	1225.51	168.683	-556.985	1390.87	174.7	-490.171	1239.24	267.785	-744.954	1289.89	1.87333	-664.561	1420.37	-35.9173	-712.064	1241.04	-34.0541	-765.341	1101.27	-88.6366	-736.155	934.959	-77.3064	-708.524	854.447	-86.4697	-775.59	860.94	-108.499	-745.853	776.751
656	0	108.514	-466.075	1620.42	206.351	-464.777	1623.68	88.5517	-619.972	1603.75	216.994	-633.567	1599.52	172.469	-660.126	1480.34	183.78	-726.752	1227.33	168.815	-543.236	1392.28	175.437	-476.515	1240.58	267.328	-731.503	1291.69	1.72007	-649.838	1422.11	-37.2697	-695.323	1242.33	-37.4203	-746.574	1101.8	-92.9888	-712.635	936.504	-81.7267	-683.599	856.137	-91.9162	-750.571	861.488	-115.16	-718.257	778.897
657	0	108.359	-451.808	1621.43	206.32	-450.498	1625.07	88.1862	-605.585	1605.47	216.587	-619.291	1601.84	172.369	-646.571	1482.12	183.296	-713.227	1229.28	169.159	-529.589	1394.03	176.447	-462.871	1242.48	266.982	-718.189	1293.41	1.58243	-635.352	1423.74	-38.7926	-678.607	1243.72	-40.1786	-727.63	1101.92	-96.9374	-689.155	938.077	-86.0737	-658.288	858.718	-97.394	-725.21	862.396	-121.648	-690.243	781.115
658	0	108.176	-437.294	1622.43	206.05	-436.278	1626.09	87.8255	-591.284	1607.49	216.385	-605.302	1604.2	172.16	-633.056	1484.07	182.649	-699.652	1231.05	169.557	-516.156	1396.18	177.174	-449.361	1244.34	266.327	-704.954	1295.18	1.36702	-621.184	1425.8	-40.3638	-662.079	1245.42	-43.3036	-708.641	1102.41	-101.081	-665.111	940.226	-90.434	-632.536	861.446	-103.328	-699.737	863.851	-128.165	-661.437	784.013
659	0	108.289	-423.047	1623.47	206.092	-422.2	1627.11	87.6621	-576.955	1609.6	216.063	-591.225	1606.38	172.005	-619.679	1485.95	181.959	-686.201	1233	169.787	-502.777	1398.11	177.894	-435.968	1246.43	265.686	-691.937	1296.98	1.12456	-607.251	1428.1	-41.8107	-645.481	1247.06	-46.5787	-689.94	1103.15	-105.052	-641.028	942.49	-94.491	-606.535	864.439	-108.492	-673.432	865.103	-134.591	-632.272	787.404
660	0	108.457	-408.897	1624.62	206.35	-408.075	1628.48	87.57	-563.038	1611.71	215.962	-577.423	1608.91	172.013	-606.359	1487.75	181.399	-672.569	1234.99	169.905	-489.492	1400	178.278	-422.801	1248.31	265.041	-679.056	1298.65	1.21344	-593.518	1430.22	-43.3072	-629.16	1248.92	-49.7772	-671.092	1104.23	-108.985	-616.826	945.265	-98.6393	-580.373	867.999	-113.949	-647.111	867.372	-140.679	-602.781	791.698
661	0	108.484	-394.731	1625.78	206.595	-394.139	1629.8	87.4914	-548.953	1613.97	215.815	-563.66	1611.62	171.884	-593.206	1489.8	180.739	-659.073	1236.78	169.947	-476.295	1402.03	178.807	-409.652	1250.93	264.294	-666.057	1300.56	1.03979	-579.861	1432.59	-44.8966	-612.856	1251.16	-52.7318	-652.36	1105.23	-112.743	-592.654	948.435	-102.408	-554.152	871.945	-119.222	-620.475	869.907	-146.569	-573.001	796.225
662	0	108.796	-380.823	1627.04	206.718	-380.36	1630.89	87.4503	-534.982	1616.26	215.794	-549.85	1613.93	171.748	-579.878	1491.77	179.797	-646.036	1238.61	170.071	-463.128	1404.12	179.004	-396.398	1253.11	263.57	-653.201	1302.45	0.868362	-566.176	1434.78	-46.573	-596.665	1253.32	-55.8352	-633.643	1106.38	-116.477	-568.366	952.095	-106.335	-527.854	876.499	-124.056	-593.725	872.814	-152.363	-543.063	801.673
663	0	109.103	-366.902	1628.34	207.277	-366.541	1632.45	87.3763	-521.097	1618.27	215.795	-536.241	1615.99	171.735	-566.705	1493.65	178.93	-633.127	1240.5	170.178	-449.924	1406.25	179.251	-383.248	1255.48	262.9	-640.527	1304.22	0.92599	-552.501	1437.12	-48.0929	-580.47	1255.27	-58.9064	-615.067	1107.75	-120.206	-544.094	956.176	-110.386	-501.338	881.763	-129.115	-567.024	876.161	-157.942	-513.142	807.835
664	0	109.318	-353.073	1629.51	207.435	-352.841	1633.34	87.6883	-507.35	1620.22	215.82	-522.561	1617.85	171.581	-553.403	1495.35	178.266	-620.021	1242	170.216	-436.779	1408	179.312	-370.131	1257.43	262.148	-627.742	1305.85	0.853991	-538.798	1439.2	-49.6115	-564.497	1257.65	-62.2703	-596.854	1109.59	-123.76	-519.944	960.254	-113.775	-475.277	887.328	-133.463	-540.37	879.751	-162.954	-483.32	814.521
665	0	109.482	-339.351	1630.27	207.597	-339.177	1634.17	87.7366	-493.682	1621.94	216.009	-508.975	1619.6	171.573	-540.1	1496.95	177.804	-606.633	1243.73	170.158	-423.657	1409.44	179.085	-356.881	1258.77	261.637	-614.873	1307.55	0.798878	-525.035	1441.43	-51.0655	-548.579	1259.71	-65.3524	-578.525	1111.06	-127.051	-496.062	964.602	-117.334	-449.096	893.32	-137.974	-513.52	883.883	-167.839	-453.563	821.365
666	0	109.846	-325.542	1631.51	207.884	-325.601	1635.05	87.8736	-479.769	1623.56	216.231	-495.423	1621.1	171.362	-526.723	1498.25	177.128	-594.158	1245.27	170.133	-410.39	1410.95	179.085	-343.58	1260.65	261.024	-601.914	1308.87	0.599923	-511.146	1443.2	-52.6862	-532.644	1261.71	-68.3279	-560.242	1112.53	-130.588	-472.189	969.601	-120.815	-422.911	899.908	-142.236	-486.844	887.99	-172.34	-424.033	828.541
667	0	110.065	-311.926	1632.17	208.175	-311.944	1635.65	87.9546	-466.113	1624.81	216.225	-481.918	1622.09	171.283	-513.319	1499.35	176.567	-581.095	1246.59	170.332	-397.136	1412.34	179.015	-330.385	1262.03	260.319	-589.04	1310.09	0.436972	-497.172	1444.77	-54.1635	-516.643	1263.45	-71.3101	-542.347	1113.93	-133.663	-448.719	974.265	-124.202	-397.01	906.549	-146.337	-460.195	892.562	-176.45	-394.716	836.169
668	0	110.251	-298.305	1632.75	208.578	-298.353	1636.36	88.2877	-452.604	1625.76	216.345	-468.288	1622.94	171.203	-499.829	1500.27	176.071	-567.935	1247.84	170.297	-383.798	1413.23	178.848	-317.091	1262.92	259.743	-575.993	1310.89	0.477364	-483.189	1446.31	-55.6928	-500.754	1265.21	-74.2307	-524.393	1115.21	-136.771	-425.301	979.405	-126.998	-371.538	913.086	-150.079	-433.859	897.08	-180.395	-365.821	843.669
669	0	111.074	-284.505	1633.67	208.761	-284.593	1636.69	88.3699	-438.923	1626.45	216.55	-454.585	1623.54	171.144	-486.316	1500.99	175.599	-554.54	1248.61	170.185	-370.328	1413.81	178.719	-303.778	1263.5	259.311	-562.678	1311.61	0.293612	-469.038	1447.55	-57.1708	-484.808	1266.44	-77.2795	-506.484	1116.4	-139.755	-402.254	984.082	-130.15	-345.996	919.839	-153.693	-407.469	901.984	-183.982	-337.133	851.782
670	0	111.056	-270.772	1633.76	209.087	-270.941	1636.85	88.4877	-425.02	1626.8	216.798	-440.972	1623.75	171.057	-472.632	1501.42	175.162	-540.997	1249.42	170.22	-356.697	1414.07	178.697	-290.33	1263.86	258.783	-549.322	1312.03	0.36269	-454.922	1448.52	-58.2147	-468.925	1267.95	-80.1464	-488.703	1117.18	-142.547	-379.279	988.772	-133.055	-320.696	926.823	-157.111	-381.467	906.694	-187.162	-308.867	859.54
671	0	111.473	-256.983	1634.05	209.41	-257.247	1636.94	88.591	-411.225	1626.9	216.817	-427.321	1623.72	171.072	-458.867	1501.46	174.597	-527.796	1249.72	170.184	-343.066	1414.14	178.635	-276.864	1264.07	258.402	-536.437	1311.9	0.153944	-440.795	1449.18	-59.8939	-453.018	1268.69	-83.0749	-470.951	1118.08	-145.189	-356.645	993.536	-135.761	-295.971	933.327	-159.99	-355.648	911.232	-190.165	-281.02	867.525
672	0	111.338	-243.161	1633.53	209.563	-243.496	1636.57	88.8558	-397.419	1626.75	217.055	-413.435	1623.17	171.081	-445.03	1501.27	173.646	-515	1249.97	170.177	-329.342	1414	178.432	-263.396	1263.64	257.021	-523.383	1312.16	0.17593	-426.699	1449.54	-61.3964	-437.088	1269.78	-85.8621	-453.239	1118.56	-147.719	-334.349	998.2	-137.981	-272	939.564	-162.845	-330.05	916.159	-192.821	-253.726	875.671
673	0	111.581	-229.311	1633.33	209.782	-229.593	1636.02	88.9424	-383.577	1626.04	217.049	-399.633	1622.37	171.14	-431.214	1500.89	173.217	-501.6	1249.72	170.111	-315.443	1413.4	178.424	-249.744	1263.15	256.434	-509.848	1311.7	0.017339	-412.443	1449.77	-62.8029	-421.273	1270.02	-88.7174	-435.564	1118.85	-150.234	-312.051	1002.89	-140.271	-247.58	946.846	-165.875	-304.939	921.068	-195.251	-226.719	883.489
674	0	111.976	-215.29	1632.81	210.016	-215.776	1635.3	89.0043	-369.513	1625.25	217.151	-385.658	1621.39	170.954	-417.139	1500.21	172.824	-487.783	1249.34	170.032	-301.487	1412.53	178.065	-235.998	1262.23	256.835	-495.779	1310.54	0.004795	-398.216	1449.59	-63.8982	-405.375	1270.3	-91.3722	-417.839	1119.1	-152.374	-290.164	1007.08	-142.239	-223.716	953.608	-168.307	-279.995	925.741	-197.33	-200.199	891.219
675	0	111.93	-201.359	1631.72	209.992	-201.84	1634.05	89.1272	-355.514	1624.25	217.155	-371.817	1620.11	171.127	-403.164	1499.21	172.576	-474.197	1248.52	169.939	-287.497	1411.41	177.702	-222.404	1260.82	256.434	-482.133	1309.58	0.10169	-383.917	1449.17	-65.2538	-389.603	1270.13	-93.8129	-400.426	1118.78	-154.316	-268.504	1011.25	-143.951	-200.223	960.109	-170.711	-255.474	930.414	-199.085	-174.242	898.944
676	0	112.327	-187.277	1630.97	210.379	-187.793	1633.16	89.1672	-341.555	1622.93	217.3	-357.694	1618.31	171.125	-389.094	1498.06	172.364	-460.657	1247.61	169.684	-273.326	1409.88	177.345	-208.628	1259.29	256.116	-468.216	1308.6	-0.196682	-369.771	1448.49	-66.4647	-373.941	1269.84	-96.4403	-382.903	1118.67	-156.044	-247.181	1015.16	-145.383	-177.488	966.056	-172.563	-231.474	934.926	-200.621	-148.887	906.541
677	0	112.182	-173.213	1629.35	210.292	-173.686	1631.51	89.2984	-327.303	1621.42	217.244	-343.551	1617.08	171.079	-374.82	1496.77	172.287	-446.602	1246.63	169.526	-259.147	1408.37	176.809	-194.821	1257.43	255.931	-454.091	1307.28	-0.272871	-355.561	1447.58	-67.5185	-358.179	1269.31	-98.7483	-365.447	1118.21	-157.574	-226.119	1019	-146.51	-154.981	972.132	-174.239	-207.567	939.12	-201.884	-123.921	913.809
678	0	112.275	-158.978	1628.02	210.41	-159.598	1630.08	89.1932	-313	1619.73	217.181	-329.376	1614.91	171.205	-360.517	1495.09	172.263	-432.626	1245.43	169.502	-244.789	1406.67	176.32	-180.957	1255.39	255.865	-440.004	1305.78	-0.229654	-341.224	1446.29	-68.5343	-342.511	1268.3	-101.469	-347.74	1118.25	-158.907	-205.32	1022.41	-147.392	-133.006	977.74	-176.016	-184.427	943.37	-202.789	-99.6152	920.695
679	0	112.375	-144.778	1626.35	210.376	-145.384	1628.17	89.217	-298.81	1618.07	217.172	-315.219	1613.09	171.244	-346.195	1493.61	172.217	-418.535	1244.22	169.432	-230.45	1404.75	175.615	-167.259	1253.21	255.895	-425.916	1304.11	-0.378727	-327.025	1444.93	-69.4948	-326.855	1267.39	-103.62	-330.414	1117.45	-159.946	-185.078	1025.54	-148.082	-111.549	982.856	-177.222	-161.6	947.18	-203.474	-76.0384	927.105
680	0	112.724	-130.444	1624.91	210.517	-131.046	1626.62	89.1428	-284.552	1616.11	217.221	-300.857	1611.26	171.385	-331.701	1491.68	172.511	-404.273	1242.81	169.131	-215.934	1402.79	175.09	-153.147	1250.96	256.095	-411.481	1302.07	-0.444898	-312.766	1443.37	-70.3509	-311.425	1266.14	-105.518	-313.167	1116.38	-160.767	-164.862	1028.45	-148.524	-90.4576	987.54	-178.52	-139.411	950.902	-203.999	-52.9017	933.53
681	0	112.318	-116.03	1622.76	210.671	-116.69	1624.9	89.3788	-270.181	1614.11	217.31	-286.478	1609.3	171.527	-317.275	1489.97	172.923	-389.878	1241.15	169.071	-201.339	1401.05	174.517	-139.082	1249.19	256.431	-396.757	1300.21	-0.47067	-298.285	1441.91	-71.2196	-295.734	1264.94	-107.168	-295.95	1115.22	-161.609	-145.236	1031.22	-148.773	-69.8644	992.135	-179.245	-117.355	954.197	-204.328	-30.3034	939.484
682	0	112.629	-101.601	1621.18	210.813	-102.219	1623.2	89.4224	-255.715	1611.8	217.266	-271.972	1607.22	171.673	-302.69	1487.88	173.329	-375.836	1239.45	168.818	-186.725	1398.98	173.94	-124.853	1247.05	256.775	-382.048	1298.22	-0.363607	-284.001	1440.02	-71.869	-280.381	1263.37	-108.745	-278.87	1113.99	-162.092	-125.786	1033.56	-149.012	-49.7555	995.982	-180.027	-96.2652	957.242	-204.305	-8.55883	944.926
683	0	112.781	-87.1059	1619.09	210.881	-87.7477	1621.05	89.5111	-241.165	1609.96	217.464	-257.598	1605	171.884	-288.21	1485.99	173.78	-361.804	1237.37	169.01	-171.995	1396.99	173.464	-110.335	1244.73	257.13	-367.519	1296.29	-0.326717	-269.754	1438.13	-71.7802	-265.06	1261.86	-109.706	-262.132	1112.01	-162.359	-106.839	1035.27	-148.789	-30.1584	999.474	-180.562	-75.5017	959.993	-204.077	12.531	950.01
684	0	112.475	-72.5982	1616.94	210.755	-73.193	1618.86	89.6205	-226.639	1607.85	217.536	-242.948	1603.01	172.082	-273.498	1483.78	174.295	-347.348	1235.29	168.941	-157.376	1395.12	172.958	-95.6686	1242.84	257.257	-352.772	1294.37	-0.18716	-255.269	1436.18	-72.3159	-249.567	1260.35	-110.917	-245.377	1110.51	-162.381	-88.2692	1036.9	-148.085	-11.0339	1002.31	-180.503	-55.2544	962.201	-203.718	33.1656	954.294
685	0	113.114	-57.9399	1615.1	210.991	-58.5246	1616.99	89.7381	-211.989	1605.97	217.831	-228.315	1601.02	172.428	-258.804	1481.9	174.773	-332.627	1233.27	168.892	-142.464	1392.98	172.555	-81.0308	1240.57	257.78	-337.766	1292.33	0.027167	-240.809	1434.18	-72.5805	-234.149	1258.62	-111.712	-228.712	1109.03	-162.149	-69.9411	1038.06	-147.402	7.64033	1004.77	-180.62	-35.5035	964.267	-202.93	53.0856	958.299
686	0	113.123	-43.315	1613.01	210.912	-43.8738	1614.81	89.8739	-197.397	1603.66	217.804	-213.637	1598.85	172.843	-244.111	1479.97	175.219	-317.851	1231.35	169.121	-127.566	1391.21	172.35	-66.1521	1238.28	258.134	-322.814	1290.56	0.246779	-226.267	1432.3	-72.5727	-218.792	1256.74	-112.276	-212.324	1107.63	-161.827	-52.2064	1039.09	-146.799	25.7669	1006.63	-180.608	-16.732	965.905	-202.197	72.2009	961.316
687	0	112.864	-28.7255	1611.05	211.211	-29.0432	1613.21	90.1617	-182.789	1601.77	218.087	-198.783	1597	173.292	-229.409	1478.02	175.912	-303.014	1229.47	168.888	-112.894	1389.17	172.435	-50.9765	1237.11	258.819	-307.932	1288.62	0.700015	-211.743	1430.41	-72.5094	-203.491	1255.36	-112.873	-196.118	1106.78	-161.314	-34.8709	1039.68	-145.621	43.2713	1008.58	-179.879	1.53608	966.792	-201.213	90.7406	964.175
688	0	113.292	-13.947	1609.42	211.241	-14.2048	1611.44	90.3675	-168.044	1599.89	218.444	-184.024	1595.17	173.844	-214.536	1476.18	176.85	-287.84	1227.54	169.355	-97.6205	1387.62	172.147	-35.9703	1234.91	259.682	-292.541	1286.57	1.0698	-197.085	1428.96	-72.2117	-188.279	1253.81	-113.018	-180.169	1105.24	-160.584	-18.1144	1040.07	-144.582	60.2902	1009.71	-179.456	19.274	967.826	-200.04	108.634	966.254
689	0	112.964	0.762235	1607.32	211.376	0.648814	1609.68	90.6785	-153.286	1598	218.701	-169.132	1593.24	174.452	-199.755	1474.6	177.885	-272.528	1225.72	169.275	-82.6068	1385.82	172.313	-20.7219	1233.25	260.615	-277.17	1284.56	1.67881	-182.528	1427.19	-71.8823	-172.963	1252.4	-112.951	-164.655	1103.86	-159.839	-1.64538	1039.92	-143.319	76.8134	1010.24	-178.669	36.4063	968.373	-198.869	125.822	967.643
690	0	113.431	15.5585	1605.98	211.388	15.6626	1608.1	91.0812	-138.642	1596.04	219.155	-154.135	1591.59	175.277	-184.78	1472.7	178.941	-257.15	1223.83	169.929	-67.1595	1384.36	172.345	-5.51595	1232.06	261.474	-261.794	1282.93	2.36685	-167.993	1425.46	-71.3892	-158.021	1250.87	-112.672	-149.439	1102.58	-158.932	14.0702	1039.94	-142.098	92.7261	1010.43	-177.383	52.8668	968.165	-197.344	142.308	968.663
691	0	113.358	30.3095	1604.36	211.536	30.5945	1606.86	91.497	-123.919	1594.37	219.467	-139.073	1589.67	176.086	-169.75	1470.89	180.015	-241.579	1222.17	170.306	-52.0744	1382.89	172.796	10.1056	1231.14	262.778	-246.364	1281.31	3.15906	-153.357	1423.98	-70.6596	-143.163	1249.51	-112.141	-134.656	1101.11	-157.798	29.6113	1039.16	-140.671	108.185	1010.27	-176.399	68.6387	967.826	-195.755	158.102	968.936
692	0	113.084	45.1539	1602.96	211.539	45.5925	1605.65	92.0569	-109.142	1592.58	220.169	-124.013	1588.4	177.059	-154.667	1469.52	181.382	-225.938	1220.39	170.803	-36.6818	1381.68	173.12	25.7961	1229.7	264.048	-230.784	1279.77	4.02018	-138.591	1422.5	-69.8764	-128.448	1247.92	-111.611	-120.127	1099.72	-156.461	44.4784	1038.56	-139.303	123.031	1009.42	-175.242	83.9959	967.509	-194.195	173.574	968.516
693	0	113.493	60.0205	1602.22	211.588	60.8063	1604.95	92.5402	-94.2583	1591.23	220.745	-108.675	1587.06	177.952	-139.49	1468.35	182.487	-210.241	1218.72	171.496	-21.207	1380.65	173.517	40.6634	1228.01	265.401	-215.071	1278.44	4.88912	-123.906	1420.98	-68.8685	-113.793	1246.59	-110.661	-105.918	1098.2	-155.209	58.9399	1037.17	-137.645	137.428	1008.58	-173.766	98.4672	966.074	-192.514	188.195	967.469
694	0	113.239	74.8541	1601.49	211.476	76.1147	1604.67	93.1783	-79.3251	1590.5	221.403	-93.2905	1586.66	179.031	-124.201	1467.79	183.571	-194.44	1217.51	172.367	-5.64701	1380.22	174.646	57.224	1227.96	266.594	-199.467	1277.65	5.84942	-109.084	1419.8	-67.6526	-99.6419	1245.22	-109.447	-92.091	1096.96	-153.792	72.7353	1035.66	-135.911	151.288	1006.9	-172.344	112.281	964.79	-190.607	201.974	965.663
695	0	113.212	89.8141	1601.45	211.333	91.5299	1604.99	93.9484	-64.4261	1589.92	222.296	-77.7449	1586.66	179.918	-108.76	1467.74	184.413	-178.806	1216.85	173.368	9.87822	1380.29	175.478	73.1712	1227.73	267.871	-183.813	1277.23	6.70658	-94.1567	1419.16	-66.3844	-85.5687	1244.53	-107.965	-78.4195	1096.04	-152.14	85.9901	1033.82	-134.391	164.408	1004.71	-170.69	125.229	962.689	-188.75	215.135	963.577
696	0	113.231	104.972	1601.83	211.29	107.111	1605.68	94.6388	-49.4274	1589.91	223.051	-62.1648	1586.99	180.992	-93.3557	1468.31	185.128	-163.274	1216.89	174.348	25.4286	1380.79	176.872	89.5669	1228.85	269.013	-168.148	1277.61	7.79415	-78.9996	1419.12	-64.925	-71.5309	1244.32	-105.792	-65.2042	1094.83	-150.203	98.953	1032.08	-132.635	176.961	1002.11	-168.833	137.571	960.487	-186.792	227.37	960.9
697	0	113.21	120.056	1602.64	211.437	122.687	1607.06	95.4896	-34.5501	1590.22	224.109	-46.4859	1587.76	181.972	-77.9355	1469.16	185.46	-147.957	1217.74	175.226	40.899	1381.81	177.616	104.961	1229.19	269.89	-152.441	1278.43	8.69514	-63.8095	1419.56	-63.1056	-57.9642	1244.39	-103.506	-52.2499	1094.75	-148.22	111.056	1029.84	-130.6	188.886	999.408	-166.838	148.879	958.244	-184.7	238.664	957.436
698	0	113.294	135.117	1604	211.693	138.203	1608.79	96.2596	-19.484	1591.37	225.06	-30.9115	1588.95	182.84	-62.5047	1470.4	185.75	-132.857	1218.93	176.231	56.2671	1383.05	179.529	121.61	1232.03	270.607	-136.915	1279.69	9.60042	-48.607	1420.61	-61.1972	-44.6082	1244.97	-101.21	-39.7717	1095.34	-146.064	122.586	1027.61	-128.323	199.82	996.447	-164.028	159.286	955.148	-182.385	248.981	953.447
699	0	113.4	150.173	1605.44	211.691	153.622	1610.17	96.9465	-4.37838	1592.46	225.718	-15.3351	1590.36	183.687	-47.1316	1471.82	185.938	-117.713	1220.66	176.992	71.5445	1384.67	180.525	137.192	1233.61	271.139	-121.362	1281.17	10.3446	-33.2759	1422.29	-59.4783	-31.0252	1246.05	-98.4281	-27.4864	1096.14	-143.357	133.709	1025.51	-126.261	210.221	993.028	-161.507	168.962	952.129	-180.333	258.43	948.999
700	0	113.756	165.261	1606.94	211.937	169.015	1611.72	97.6021	10.651	1593.78	226.587	0.187793	1591.59	184.418	-31.9593	1473.42	185.885	-102.765	1222.8	177.517	86.6005	1386.52	181.018	152.26	1234.65	271.387	-105.883	1283.04	10.9121	-18.0277	1424.14	-57.7822	-17.4178	1247.25	-95.5866	-15.5518	1097.24	-140.718	144.173	1023.31	-123.641	220.056	989.112	-158.72	177.744	949.146	-177.925	267.101	944.106
701	0	114.067	180.208	1608.58	212.017	184.176	1612.97	98.2236	25.6071	1595.27	227.099	15.3361	1592.65	184.994	-16.9349	1475.04	185.953	-88.0419	1224.65	177.934	101.542	1388.12	182.005	167.755	1237	271.691	-90.7295	1284.94	11.6032	-2.93327	1426.03	-56.1687	-3.9074	1248.61	-92.589	-3.96857	1098.24	-138.211	154.077	1021.06	-121.141	229.1	984.924	-155.372	185.871	945.808	-175.335	274.862	938.66
702	0	114.223	195.177	1610.27	212.346	199.358	1614.57	98.7596	40.4209	1596.86	227.62	30.4871	1594.08	185.647	-2.0537	1476.82	186.621	-73.0721	1226.55	177.86	116.388	1389.8	182.271	182.425	1238.49	272.435	-75.3263	1286.52	12.1029	11.7426	1428.32	-54.6166	9.5307	1250.05	-89.4798	7.28192	1099.67	-135.129	163.437	1018.43	-118.416	237.781	980.899	-152.233	193.283	942.178	-172.605	281.858	932.964
703	0	114.51	210.032	1612.25	212.643	214.291	1616.4	99.2164	55.2978	1598.84	228.043	45.4366	1595.59	186.074	12.6613	1478.81	186.908	-58.63	1228.96	177.951	131.05	1391.96	182.221	197.059	1240.39	272.972	-60.4396	1288.66	12.4442	26.0766	1430.53	-53.3954	22.9479	1251.66	-86.2005	18.3877	1100.9	-132.325	172.27	1015.72	-115.628	245.74	976.283	-149.055	200.163	938.973	-169.602	288.309	926.772
704	0	114.628	224.909	1614.31	212.788	229.067	1618.16	99.4329	70.0648	1601.08	228.26	60.3535	1597.5	186.549	27.3143	1480.91	187.58	-44.1541	1231.26	177.782	145.675	1393.96	181.119	210.583	1241.09	273.723	-45.6529	1290.81	12.7986	39.9195	1432.66	-51.8864	35.9618	1253.23	-83.0538	29.3192	1102.43	-129.31	180.973	1012.82	-112.461	253.291	971.675	-145.45	206.512	935.273	-166.373	294.131	920.435
705	0	114.713	239.388	1616.32	213.009	243.781	1619.92	99.7578	84.6594	1603.16	228.695	75.0195	1599.18	187.007	41.7597	1483.11	188.368	-29.9377	1233.61	177.439	160.071	1396	179.741	224.318	1242.55	274.119	-31.2783	1293.16	13.2784	53.3914	1434.89	-50.5515	48.5441	1255.1	-80.0322	39.8498	1103.99	-126.29	188.892	1010	-109.176	260.133	966.925	-142.065	212.069	931.541	-163.044	298.938	913.64
706	0	114.732	253.886	1618.37	212.958	258.449	1621.7	99.8332	99.1372	1605.76	228.783	89.7476	1601.32	187.346	56.0774	1485.19	189.073	-15.7889	1235.75	177.112	174.393	1398.13	178.488	238.281	1244.64	275.261	-16.2119	1295.03	13.5314	66.6421	1437.13	-49.1889	60.7418	1256.59	-76.5296	50.3554	1105.27	-123.138	196.44	1006.9	-105.884	266.431	961.581	-138.244	217.277	927.667	-159.176	303.371	906.68
707	0	114.677	268.195	1620.31	213.081	272.982	1623.72	100.089	113.405	1607.92	229.072	104.059	1603.53	187.608	70.4369	1487.3	189.901	-1.5872	1237.89	176.734	188.636	1400.36	176.895	252.131	1246.59	276.184	-1.68572	1297.49	13.5433	79.7383	1439.27	-47.7627	72.7211	1258.32	-73.5552	60.7521	1107.03	-119.773	203.802	1003.8	-102.342	272.244	956.103	-134.694	221.939	924.155	-155.08	307.273	899.746
708	0	114.695	282.483	1622.31	212.799	287.216	1625.34	100.241	127.616	1610.29	229.104	118.503	1605.67	187.942	84.5282	1489.73	190.867	12.5643	1240.17	176.128	202.684	1402.62	175.307	265.899	1248.9	277.175	12.8461	1299.82	13.8017	92.8655	1441.36	-46.363	84.1581	1260.09	-70.4805	70.8244	1108.4	-116.432	210.677	1000.78	-98.5994	277.579	951.37	-130.909	226.181	920.65	-151.005	310.481	892.526
709	0	114.479	296.574	1624.65	212.769	301.477	1627.36	100.31	141.724	1612.91	229.34	132.818	1607.74	187.901	98.5961	1491.95	191.429	25.9709	1242.77	175.47	216.666	1404.84	173.708	279.606	1251.1	278.067	27.2396	1302.02	13.753	105.686	1443.53	-44.9645	95.2344	1261.63	-67.1823	80.6561	1109.87	-112.927	216.787	997.908	-94.7455	281.963	945.936	-127.138	229.726	917.261	-146.515	312.954	885.677
710	0	114.359	310.611	1626.7	212.517	315.798	1629.42	100.363	155.651	1614.88	229.273	147.028	1609.96	187.953	112.748	1494.27	192.36	39.9066	1245.16	174.991	230.618	1407.43	172.421	293.326	1253.67	278.812	41.6052	1304.4	13.8317	118.656	1445.57	-44.0008	106.085	1263.58	-64.3725	90.504	1111.62	-109.617	222.861	995.114	-90.8371	286.146	940.945	-123.031	232.967	913.931	-141.962	314.913	878.811
711	0	114.055	324.676	1628.98	212.297	329.942	1631.53	100.306	169.72	1617.36	229.28	161.197	1612.2	188.05	126.804	1496.51	193.603	53.8028	1247.17	174.591	244.628	1409.68	171.208	306.836	1255.83	279.667	56.0613	1306.88	13.9176	131.755	1447.65	-42.5682	117.024	1265.63	-61.6235	100.222	1113.58	-106.041	228.52	992.285	-86.7644	289.882	936.243	-119.087	235.747	910.732	-136.985	316.371	872.401
712	0	113.828	338.592	1630.86	212.088	343.946	1633.58	100.326	183.465	1619.09	229.207	175.233	1613.89	187.983	140.774	1498.62	194.382	67.5912	1249.44	174.179	258.644	1412.02	170.307	320.298	1258.17	280.459	70.3335	1309.41	13.9004	144.799	1449.45	-41.4308	127.898	1267.19	-58.8835	109.744	1115.31	-102.779	233.617	989.853	-82.7833	292.927	931.179	-114.951	238	907.706	-132.048	317.151	865.61
713	0	113.507	352.464	1632.86	211.858	357.877	1635.45	100.217	197.399	1621.17	229.053	189.242	1615.69	187.938	154.694	1500.73	195.52	81.849	1251.55	173.779	272.402	1414.09	169.867	333.733	1260.41	281.36	84.3897	1311.61	13.9781	157.966	1451.18	-39.636	138.889	1268.87	-56.3725	118.996	1117.17	-99.0924	238.554	986.726	-78.4297	295.319	926.285	-110.932	240.097	904.976	-127.187	317.467	859.351
714	0	113.091	366.288	1634.54	211.446	371.803	1637.07	100.04	211.155	1622.49	229.02	203.283	1617.18	187.861	168.656	1502.36	196.392	95.6379	1253.74	173.561	286.245	1415.88	169.391	346.93	1261.89	281.793	98.6766	1313.87	14.1014	171.277	1452.77	-38.7162	150.148	1270.25	-53.6632	128.444	1118.93	-95.4694	243.453	984.418	-74.5792	297.818	921.74	-107.054	242.099	902.548	-122.122	317.455	853.259
715	0	112.809	380.037	1635.84	210.976	385.669	1638.4	99.7652	224.937	1624.2	228.659	216.919	1618.53	187.847	182.596	1504.08	196.981	109.414	1255.51	173.494	300.171	1417.61	169.296	360.336	1263.08	282.627	112.911	1315.66	14.3437	184.608	1453.89	-37.3392	161.596	1271.29	-51.0288	137.629	1120.43	-91.8811	247.982	982.022	-70.6525	300.118	917.834	-103.086	243.677	900.121	-116.927	317.019	847.393
716	0	112.497	393.771	1637.09	210.454	399.352	1639.48	99.4668	238.69	1624.96	228.479	230.892	1619.64	187.798	196.532	1505.23	197.774	123.044	1256.94	173.286	313.892	1418.81	169.479	373.88	1264.35	283.164	126.892	1317.51	14.5448	198.077	1454.71	-36.3252	173.12	1272.1	-48.5113	146.661	1121.78	-88.3909	252.204	979.782	-66.3969	302.302	913.232	-99.1223	245.181	897.95	-111.857	316.339	841.764
717	0	112.117	407.459	1638	210.22	413.14	1640.77	99.1347	252.359	1625.53	228.26	244.629	1620.4	187.806	210.417	1506.33	198.153	136.692	1258.37	173.185	327.712	1419.76	169.621	387.504	1265.19	283.67	140.881	1318.83	14.6376	211.6	1455.37	-35.1604	184.842	1272.53	-45.5773	155.557	1122.74	-84.9813	256.66	977.577	-62.7356	304.337	909.557	-95.2287	246.655	896.033	-106.793	315.383	836.336
718	0	111.611	421.158	1638.69	209.779	426.858	1641.68	98.8863	266.091	1625.91	228.005	258.448	1621.05	187.763	224.348	1507.18	198.65	150.563	1259.25	173.178	341.599	1420.64	169.965	401.349	1266	284.208	154.868	1320.24	14.7613	225.142	1455.79	-33.9381	196.686	1272.81	-42.8203	164.533	1123.56	-81.6399	260.639	975.379	-58.9386	306.348	905.989	-91.1463	248.05	894.156	-102.122	314.383	831.6
719	0	111.241	434.788	1638.95	209.395	440.681	1642.35	98.7563	279.722	1625.82	227.553	272.153	1621.63	187.663	238.286	1507.55	199.19	164.112	1259.76	173.348	355.502	1421.04	170.32	415.246	1266.25	284.638	168.918	1320.97	14.8937	238.765	1455.87	-32.3591	208.483	1272.74	-39.997	173.396	1124.35	-78.2234	264.377	973.33	-55.3251	308.284	902.588	-87.08	249.372	892.123	-97.2056	313.139	826.411
720	0	110.798	448.396	1639.02	208.956	454.365	1642.7	98.5159	293.322	1625.15	227.572	286.089	1621.29	187.727	252.167	1507.61	199.717	177.588	1260.15	173.447	369.408	1421.16	170.693	429.104	1266.22	285.003	182.796	1321.4	14.9145	252.52	1455.73	-31.3112	219.933	1272.49	-36.9474	182.225	1124.79	-74.7991	268.158	971.118	-51.8233	310.311	899.309	-82.8575	250.674	890.262	-92.4488	312.026	821.94
721	0	110.478	462.171	1639	208.484	468.053	1642.76	98.2551	307.046	1624.69	227.239	299.877	1621.22	187.726	266.006	1507.52	200.154	191.423	1260.26	173.512	383.472	1420.96	171.182	442.937	1266.05	285.378	196.582	1321.76	14.9393	266.393	1455.24	-29.9834	231.585	1272.15	-34.0445	191.217	1125.28	-71.4057	271.989	969.124	-48.4415	312.438	896.127	-78.7719	251.923	888.658	-88.2325	310.87	818.454
722	0	110.042	475.953	1638.64	208.08	481.882	1642.65	98.0113	320.9	1623.9	227.087	313.708	1620.79	187.676	280.155	1507.01	200.523	205.061	1259.97	173.692	397.527	1420.39	171.718	456.499	1265.32	285.934	210.48	1321.79	15.0904	280.267	1454.45	-28.5259	243.091	1271.67	-31.0411	200.242	1125.44	-68.0479	276.066	966.803	-45.299	314.287	893.579	-74.6214	253.538	886.94	-83.6544	309.605	814.48
723	0	109.656	489.675	1637.84	207.655	495.688	1642.25	97.8985	334.684	1622.66	227.017	327.722	1619.46	187.639	294.137	1506.44	200.925	218.609	1259.29	173.817	411.427	1419.54	172.442	469.975	1264.28	286.164	224.346	1321.33	15.1544	294.126	1453.35	-27.2619	254.35	1270.84	-28.0359	209.572	1125.4	-64.7438	280	964.603	-41.8839	316.619	890.496	-70.0639	255.336	885.21	-79.1564	308.749	810.932
724	0	109.289	503.406	1637	207.337	509.668	1641.61	97.7569	348.488	1621.02	226.736	341.557	1618.32	187.62	308.227	1505.69	201.185	232.294	1258.71	173.842	425.428	1418.42	172.682	483.327	1262.61	286.399	238.17	1320.68	15.3044	308.092	1452.02	-25.7919	265.598	1269.97	-25.1534	218.87	1125.46	-61.3586	284.249	962.407	-38.2438	319.127	887.684	-65.7612	257.138	883.981	-75.0884	307.977	807.674
725	0	108.938	517.303	1636.27	206.981	523.587	1640.83	97.6012	362.443	1619.75	226.699	355.657	1616.93	187.674	322.256	1504.57	201.466	245.985	1257.74	174.04	439.546	1417.23	173.548	496.514	1261.4	286.73	251.92	1320.01	15.3917	322.214	1450.77	-24.3403	276.903	1269.15	-22.2265	228.678	1125.13	-58.1857	288.822	960.358	-35.0843	321.896	884.693	-61.2833	259.692	882.618	-71.0989	307.873	805.044
726	0	108.685	531.159	1635.15	206.921	537.643	1640.32	97.3542	376.523	1617.97	226.582	369.735	1615.38	187.745	336.512	1503.16	201.714	259.676	1256.73	174.294	453.928	1415.96	174.205	509.968	1259.7	286.958	265.721	1319.13	15.2899	336.418	1449.29	-23.1662	288.267	1268.29	-19.482	238.63	1125.19	-55.248	293.623	958.755	-32.0583	325.032	882.104	-57.1985	262.315	881.548	-67.0508	308.113	802.386
727	0	108.552	545.04	1633.78	206.558	551.561	1639.13	97.272	390.493	1615.97	226.286	383.714	1613.52	187.552	350.71	1501.96	201.913	273.372	1255.47	174.464	468.1	1414.39	174.751	523.624	1258.04	287.005	279.706	1317.87	15.3011	350.385	1447.73	-22.0679	299.842	1267.23	-16.9686	248.835	1124.81	-52.0789	298.79	956.905	-29.8468	328.579	880.527	-53.092	265.259	880.48	-63.4106	308.729	800.071
728	0	108.297	559.07	1632.29	206.212	565.488	1637.96	97.3577	404.437	1613.91	226.094	398.048	1611.78	187.596	364.95	1500.51	202.016	287.272	1254.04	174.68	482.19	1412.76	175.442	537.331	1256.34	287.157	293.357	1316.69	15.3234	364.561	1445.97	-20.0955	311.509	1266.06	-14.2667	259.284	1124.3	-49.3608	304.262	955.378	-25.3711	331.596	877.789	-49.1896	268.777	879.509	-59.8476	309.778	798.096
729	0	107.992	573.093	1630.95	205.919	579.475	1636.49	97.003	418.597	1611.76	226.063	412.041	1609.71	187.656	379.318	1498.76	201.926	300.904	1252.61	174.501	496.579	1410.81	175.763	551.248	1254.14	287.297	307.301	1315.28	15.3888	378.977	1444.12	-18.7833	323.515	1264.72	-11.9055	269.953	1123.87	-46.9093	310.151	954.06	-22.9727	336.043	875.996	-45.5969	272.711	878.916	-56.5476	311.646	796.425
730	0	107.603	587.126	1629.26	205.657	593.6	1634.91	96.8414	432.694	1609.7	225.844	426.233	1607.51	187.537	393.599	1496.92	201.961	314.802	1250.87	174.868	511.112	1408.79	176.163	565.398	1251.93	287.145	321.284	1313.88	15.4856	393.365	1442.18	-17.7094	335.889	1263.42	-9.67046	280.893	1123.44	-44.4378	316.695	952.575	-21.084	341.305	874.344	-42.1493	277.488	878.546	-52.6256	313.966	794.791
731	0	107.389	601.273	1627.64	205.33	607.774	1633.02	96.7021	446.764	1607.55	225.743	440.411	1605.37	187.586	407.983	1495.07	201.828	328.743	1249.41	174.977	525.291	1406.79	176.775	579.541	1249.93	287.16	335.067	1312.58	15.2456	407.789	1439.97	-16.8055	348.578	1261.84	-7.54668	292.116	1122.83	-42.0871	323.612	951.067	-19.0055	346.745	872.737	-39.0646	282.768	877.98	-49.5602	316.867	793.18
732	0	107.153	615.304	1625.53	205.079	621.843	1631.41	96.6381	460.852	1605.07	225.584	454.82	1603.28	187.401	422.295	1493.17	201.665	342.724	1247.51	174.939	539.594	1404.85	176.877	593.616	1247.51	287.191	348.901	1310.78	15.3032	422.164	1438.23	-15.9391	361.497	1260.33	-5.62597	303.752	1122.14	-40.0167	331.111	949.885	-15.9117	352.267	870.323	-36.2004	288.705	877.46	-46.56	320.449	791.861
733	0	106.778	629.414	1623.84	204.613	636.003	1629.59	96.3505	475.078	1602.83	225.425	468.893	1601.15	187.281	436.527	1491.36	201.51	356.742	1245.57	175.067	554.183	1402.76	177.334	607.812	1245.44	286.917	362.984	1308.95	15.2006	436.565	1436.06	-15.4587	374.739	1258.72	-4.00176	315.647	1121.28	-38.2703	339.189	948.74	-13.6206	359.166	868.21	-33.6109	295.373	877.15	-44.0237	325.157	790.664
734	0	106.419	643.516	1621.91	204.432	650.384	1627.88	96.3433	489.145	1600.62	225.108	483.225	1598.92	187.274	450.714	1489.27	201.11	370.948	1243.69	174.563	568.44	1400.47	177.421	622.029	1243.26	286.763	377.141	1307.15	15.0116	451.007	1434.01	-14.8985	387.949	1257.03	-2.57751	328.009	1120.26	-36.2768	347.666	947.611	-12.467	366.811	866.658	-31.1404	302.64	876.683	-41.4583	330.243	789.429
735	0	106.013	657.758	1619.89	203.98	664.444	1626.12	95.9763	503.34	1598.62	224.888	497.51	1596.96	186.928	464.911	1487.39	200.677	385.107	1241.77	174.793	582.764	1398.95	177.273	636.256	1241.22	286.427	390.984	1305.39	14.7062	465.268	1432	-14.6056	401.417	1255.35	-1.56275	340.647	1119.14	-34.6702	357.059	946.163	-11.1684	374.929	865.361	-29.0944	310.622	876.207	-39.1632	336.311	788.147
736	0	105.646	671.815	1618.1	203.654	678.694	1624.67	95.6686	517.551	1596.72	224.651	511.793	1595.25	186.635	479.023	1485.66	200.191	399.528	1239.74	174.64	597.188	1397.21	177.639	650.764	1240.11	286.143	405.173	1303.43	14.3653	479.525	1430.27	-14.3632	414.977	1253.76	-0.722821	353.634	1118.12	-33.5859	366.879	944.949	-9.34497	383.39	863.783	-27.1343	319.43	875.62	-37.1115	343.333	787.067
737	0	105.441	686.064	1616.54	203.147	693.063	1622.83	95.3008	531.816	1595.04	224.34	526.076	1593.71	186.299	493.026	1483.7	199.618	414.072	1237.71	174.343	611.518	1395.63	177.427	665.313	1238.68	285.538	419.494	1301.64	13.9962	493.853	1428.62	-14.4529	428.829	1252.15	-0.300762	367.036	1116.88	-32.3733	377.621	943.688	-8.65777	393.223	862.384	-25.6237	328.977	875.084	-35.3159	351.232	786.27
738	0	105.105	700.48	1614.93	202.653	707.192	1621.17	95.0256	545.864	1593.49	224.091	540.232	1592.19	185.727	507.013	1482.18	198.872	428.677	1235.92	173.949	625.901	1394.28	177.036	680.094	1237.37	284.925	433.915	1299.61	13.4993	508.132	1426.83	-14.5255	442.857	1250.78	0.003068	380.859	1115.7	-31.9089	388.842	942.443	-7.2526	403.158	860.821	-24.5847	339.27	874.588	-33.9294	359.986	785.378
739	0	104.678	714.551	1613.41	202.356	721.407	1619.78	94.5796	560.054	1592.46	223.639	554.562	1590.8	185.028	521.041	1480.6	197.954	443.515	1233.88	173.467	640.343	1392.81	176.462	695.066	1236.22	284.001	448.304	1297.57	12.7961	522.49	1425.31	-14.8127	457.077	1249.48	-0.121527	395.074	1114.8	-31.4657	400.864	941.365	-6.56058	413.979	859.652	-23.8567	350.191	874.431	-32.5602	369.561	784.314
740	0	104.435	728.953	1611.9	202.119	735.671	1618.2	94.3503	574.513	1591.41	223.102	568.524	1589.86	184.194	535.089	1479.04	196.889	458.571	1232.03	172.8	654.796	1391.54	175.864	710.116	1235.37	282.877	462.823	1295.88	12.0568	536.882	1424.01	-15.367	471.595	1248.18	-0.518005	409.555	1113.7	-31.2483	413.541	940.406	-6.96409	426.169	858.51	-23.5129	362.147	873.964	-31.8198	380.487	783.71
741	0	103.985	743.223	1610.62	201.754	749.739	1616.85	93.4468	588.546	1590.51	222.633	582.604	1588.8	183.392	549.22	1477.58	195.678	473.788	1230.4	172.032	669.298	1390.64	175.199	725.394	1234.71	281.647	477.531	1293.91	11.3813	551.49	1422.88	-16.4056	486.356	1247.03	-1.15476	424.308	1112.81	-31.7144	426.938	939.403	-6.46262	438.428	857.421	-23.7454	374.942	873.447	-31.4134	392.243	782.904
742	0	103.863	757.464	1609.54	201.664	763.864	1615.51	93.5905	602.914	1589.86	221.91	596.406	1588.03	182.412	563.376	1476.18	194.251	489.05	1228.25	171.372	683.815	1389.81	174.166	740.615	1234.18	280.181	492.335	1291.87	10.4681	566.147	1421.61	-17.5262	501.415	1245.65	-1.97743	439.365	1111.61	-32.2966	440.955	938.15	-7.41675	452.164	856.369	-24.3138	388.436	872.675	-31.4808	404.853	782.002
743	0	103.502	771.744	1608.79	201.487	777.823	1614.71	92.6141	617.102	1589.15	221.297	610.305	1586.95	181.335	577.526	1474.79	192.672	504.508	1226.47	170.504	698.578	1389.14	173.402	756.12	1234.17	278.768	507.232	1290.13	9.22686	580.842	1420.5	-18.7005	516.75	1244.59	-3.04466	454.621	1110.27	-33.2741	455.62	937.276	-8.05499	466.342	855.443	-25.3265	402.803	871.976	-31.8885	418.444	780.903
744	0	103.127	785.878	1608.58	201.24	791.828	1614.33	91.252	630.942	1588.9	220.651	624.322	1586.69	180.181	591.637	1473.78	191.195	520.135	1225.21	169.547	713.091	1389.18	172.428	771.432	1234.28	277.219	522.014	1288.46	8.00233	595.798	1419.94	-20.1554	532.263	1243.55	-4.39662	470.332	1109.36	-34.6751	470.891	936.393	-8.81386	481.213	854.338	-26.7353	418.003	871.168	-32.5915	433.121	779.852
745	0	103.011	800.441	1608.83	201.1	806.112	1614.44	90.9674	645.464	1588.9	219.905	638.518	1586.67	178.848	605.671	1473.47	189.773	535.718	1223.82	168.732	727.957	1389.11	171.307	787.011	1234.2	275.759	536.945	1286.96	6.81066	610.78	1419.45	-21.8169	548.094	1242.82	-6.13981	486.471	1108.29	-36.2878	486.944	935.351	-10.9633	497.359	853.327	-28.6304	434.086	870.204	-33.798	448.777	778.667
746	0	102.596	814.763	1609.42	200.699	820.13	1614.54	89.9782	659.81	1589.6	219.088	652.476	1586.89	178.129	620.21	1473.32	188.276	551.134	1222.99	167.894	742.695	1389.29	170.108	802.421	1234.67	274.296	551.68	1286.06	5.49854	625.667	1419.1	-23.4324	564.275	1242.16	-8.07273	503.111	1107.14	-38.0179	503.649	934.403	-12.1355	513.719	852.459	-30.6348	450.656	869.287	-35.3773	465.266	777.904
747	0	102.415	829.271	1610.23	200.26	834.23	1615.02	89.2865	674.377	1590.6	218.33	666.42	1587.6	177.08	634.653	1473.65	187.029	566.441	1222.79	166.302	756.996	1389.48	169.279	817.966	1235.56	273.021	566.441	1285.79	4.30935	640.427	1419.28	-25.0902	580.362	1241.61	-10.039	520.056	1106.51	-40.2698	521.181	933.799	-14.4088	531.245	851.952	-33.1444	468.325	868.622	-37.5717	482.986	777.083
748	0	101.903	843.679	1611.23	200.033	848.588	1615.79	88.3599	688.787	1591.87	217.801	680.594	1588.54	175.851	648.887	1474.41	186.071	581.573	1223.19	165.853	771.724	1390.35	168.209	833.224	1236.85	272.086	581.271	1285.87	3.29763	655.273	1419.75	-26.68	596.97	1241.62	-12.3804	537.385	1106.19	-42.7808	539.474	933.584	-17.6879	550.139	851.64	-36.0684	486.777	868.201	-40.2069	501.669	776.735
749	0	101.782	858.315	1612.43	199.48	862.779	1616.68	87.8347	703.324	1592.89	217.01	694.81	1589.55	175.451	663.506	1475.21	185.5	596.55	1223.82	165.284	786.412	1391.4	167.357	848.576	1238.13	271.169	595.928	1286.56	2.59013	669.894	1420.6	-28.2394	613.562	1241.74	-14.3402	555.001	1105.96	-45.5326	558.346	933.53	-20.4065	569.3	851.584	-39.2007	506.065	867.865	-43.5996	521.479	776.398
750	0	101.491	872.6	1613.61	199.218	877.166	1617.67	87.2279	717.621	1594.24	216.537	709.084	1590.31	174.945	677.784	1476.26	185.051	611.057	1224.76	164.519	800.546	1392.49	166.396	863.572	1239.41	270.716	610.416	1287.62	2.03191	684.327	1421.76	-29.6338	630.05	1242.15	-16.4869	572.618	1106.13	-48.3634	577.834	933.63	-23.4744	589.338	851.625	-42.6106	526.061	867.617	-46.9367	542.143	776.174
751	0	101.234	887.047	1614.71	198.947	891.324	1618.78	86.8081	732.042	1595.35	216.159	723.344	1591.41	174.435	692.181	1477.27	184.781	625.499	1226.24	164.233	814.936	1393.71	165.739	878.421	1240.7	270.182	624.704	1288.82	1.59326	698.983	1422.95	-30.7752	646.62	1242.76	-18.9872	590.339	1106.22	-51.255	598.052	934.143	-26.191	609.747	852.143	-46.4967	546.989	867.577	-51.1593	564.163	776.152
752	0	100.842	901.001	1615.88	198.823	905.588	1620.25	86.5531	746.427	1596.18	215.917	737.558	1592.69	173.887	706.423	1478.39	184.389	639.927	1227.37	164.06	829.125	1394.87	165.128	892.674	1242.15	269.825	638.814	1290.29	1.15869	713.6	1424.4	-32.2145	663.288	1244.14	-21.1665	608.186	1106.4	-54.4695	618.692	934.55	-30.0331	631.641	852.787	-50.4104	568.414	867.275	-55.7097	587.024	776.411
753	0	100.769	915.517	1616.98	198.701	919.767	1621.58	86.4441	760.528	1597.27	215.781	751.693	1593.98	173.574	720.285	1479.79	184.149	653.953	1228.66	164.033	843.055	1396.31	164.948	906.843	1243.37	269.43	652.615	1291.77	0.693307	728.277	1425.99	-33.451	679.688	1244.59	-23.4745	625.954	1106.49	-58.0191	639.763	935.197	-33.1404	653.358	853.081	-54.464	590.602	866.831	-60.3431	610.842	776.548
754	0	100.573	929.562	1618.19	198.478	933.855	1622.88	86.3425	774.725	1598.72	215.743	765.869	1595.62	173.187	734.252	1481.08	183.708	667.76	1230.12	164.166	857.026	1397.68	164.875	920.613	1244.62	269.059	666.157	1293.18	0.325869	742.883	1427.35	-34.5332	696.268	1245.49	-26.0579	643.885	1106.77	-61.4064	660.978	935.855	-36.5627	676.046	853.828	-58.7106	613.187	866.464	-65.117	635.325	776.74
755	0	100.97	943.576	1619.53	198.503	948.08	1624.09	86.5247	788.885	1600.04	215.755	779.862	1597.4	172.955	748.007	1482.51	183.133	681.641	1231.99	164.135	870.82	1398.82	165.138	934.034	1245.74	268.453	679.63	1294.73	0.158229	757.451	1429.17	-35.8245	712.791	1246.92	-28.6895	661.819	1107.16	-64.5771	682.812	936.403	-40.8528	699.497	855.018	-62.9488	636.319	866.238	-70.1913	660.815	777.227
756	0	101.11	957.572	1620.6	198.607	962.16	1625.08	86.6578	802.949	1601.51	216.035	793.957	1598.89	173.001	761.788	1483.9	182.685	695.278	1233.54	164.297	884.403	1399.97	165.924	947.479	1246.83	268.032	692.81	1296.08	-0.107296	772.005	1430.52	-37.328	729.342	1247.85	-31.254	679.881	1107.41	-67.9269	704.705	937.27	-44.2757	722.866	855.991	-66.854	660.216	865.842	-75.5153	686.865	777.94
757	0	101.293	971.714	1621.47	198.735	976.241	1625.96	86.9617	816.826	1603.27	216.006	807.87	1600.54	172.939	775.251	1485.36	182.043	708.715	1234.92	164.78	898.134	1401.21	166.59	960.84	1247.91	267.413	706.029	1297.2	-0.125596	786.268	1431.95	-38.8787	746.016	1248.95	-33.9106	698.109	1107.71	-71.2982	727.141	938.09	-47.4459	746.681	857.273	-71.0467	684.233	865.704	-80.9384	713.661	779.09
758	0	101.141	985.456	1622.2	198.765	990.037	1626.94	87.1674	830.646	1605.03	216.339	821.581	1602.42	172.881	788.64	1486.91	181.33	722.234	1236.41	164.811	911.168	1402.25	167.688	974.397	1249.45	266.925	718.954	1298.67	-0.075209	800.379	1433.66	-40.0285	762.563	1250.08	-36.5723	716.48	1108.05	-74.4301	749.819	938.999	-51.6115	770.654	858.976	-75.3196	708.665	866.03	-86.401	741.013	780.1
759	0	101.554	999.423	1623.1	199.07	1004	1627.83	87.4373	844.456	1607.16	216.679	835.445	1604.41	173.153	801.921	1488.55	180.548	735.458	1237.75	165.353	924.5	1403.91	168.627	987.896	1250.86	266.088	731.952	1299.88	-0.057891	814.374	1435.41	-41.4387	779.067	1251.29	-39.2244	734.917	1108.44	-77.823	772.941	940.617	-55.5613	795.743	861.113	-79.6756	733.473	866.351	-91.8026	769.004	782.149
760	0	101.802	1013.13	1624.5	199.26	1017.81	1628.89	87.9316	858.168	1609.1	216.864	849.146	1606.35	173.231	815.322	1489.82	179.742	748.802	1239.32	165.903	937.922	1405.49	169.528	1001.35	1252.63	265.621	744.771	1301.26	0.120894	827.953	1437.28	-42.6937	795.445	1252.77	-41.8987	753.431	1108.7	-81.0871	796.069	941.966	-59.2329	820.834	862.621	-83.8649	758.562	866.939	-97.2014	797.267	784.522
761	0	101.898	1026.91	1625.62	199.589	1031.63	1630.1	88.4463	871.735	1611.1	217.461	862.808	1608.48	173.61	828.556	1491.62	179.334	761.959	1240.67	166.237	951.15	1407.07	170.593	1014.85	1254.63	265.14	757.681	1302.54	0.295533	841.493	1439.06	-43.5929	811.805	1254.38	-44.4975	772.1	1109.25	-84.266	819.42	944.067	-62.7304	846.195	865.041	-87.7702	784.122	867.805	-102.644	825.722	787.324
762	0	102.3	1040.4	1627.01	199.859	1045.28	1631.42	88.7635	885.341	1613.14	217.756	876.459	1610.67	173.835	841.678	1493.36	178.721	775.046	1242.38	166.426	963.983	1408.91	170.996	1027.93	1256.58	264.795	770.802	1303.9	0.580091	854.962	1441.27	-44.8527	828.114	1255.7	-47.1273	790.807	1110.04	-87.4349	843.029	946.402	-66.2586	871.54	868.094	-92.0375	809.443	868.994	-107.873	854.65	790.796
763	0	102.726	1054.08	1628.07	199.994	1058.93	1632.38	89.3121	898.871	1615.5	218.298	890.127	1612.98	174.185	854.908	1494.97	178.204	788.127	1244.09	166.777	977.046	1410.37	171.567	1041.12	1258.33	264.358	783.51	1305.49	0.899125	868.32	1443.27	-45.9714	844.318	1257.53	-49.71	809.533	1111.14	-90.544	866.669	948.847	-69.7453	897.18	870.999	-95.8626	835.548	870.831	-112.808	883.771	794.77
764	0	102.93	1067.46	1628.89	200.272	1072.65	1633.15	89.9266	912.209	1617.45	218.841	903.654	1614.79	174.649	868.048	1496.56	178.042	801.232	1245.53	166.858	989.898	1411.51	171.744	1054.18	1259.79	263.893	796.38	1307.11	0.999512	881.691	1445.14	-47.0221	860.233	1259.34	-52.2148	828.34	1111.76	-93.312	890.44	951.532	-72.9537	923.058	874.477	-99.7411	861.524	872.777	-117.595	912.921	798.97
765	0	103.342	1080.98	1629.79	200.631	1086.47	1633.88	90.4849	925.532	1619.25	219.495	917.27	1616.56	174.886	881.113	1497.86	177.796	814.383	1247.11	166.641	1002.74	1412.43	171.577	1067.15	1261.14	263.97	809.202	1308.39	1.42454	894.924	1446.89	-47.9422	876.146	1260.9	-54.5558	847.061	1113.05	-96.2661	914.193	954.65	-76.0184	948.898	878.302	-103.835	887.293	875.274	-121.943	941.773	803.44
766	0	103.38	1094.26	1630.56	200.75	1099.97	1634.49	91.0697	938.779	1621.13	219.922	930.925	1618.27	175.103	894.154	1499.25	177.836	827.447	1248.57	166.879	1015.8	1413.84	171.574	1080.25	1262.72	263.93	822.186	1309.81	1.64843	908.229	1448.74	-48.6918	892.044	1262.39	-56.8204	865.844	1114.34	-98.8069	938.114	957.953	-79.5661	975.381	882.338	-107.201	913.659	877.76	-126.154	971.153	808.368
767	0	103.68	1107.75	1631.27	200.926	1113.54	1634.98	91.5948	952.115	1622.74	220.502	944.438	1619.72	175.568	907.646	1500.53	177.889	840.707	1249.88	167.139	1029.05	1415.11	171.473	1093.52	1264	263.82	835.318	1310.95	1.82085	921.436	1450.16	-49.6292	907.832	1264.42	-59.0205	884.447	1115.1	-101.488	961.878	961.343	-82.0258	1001.18	886.656	-110.505	940.085	880.684	-130.163	1000.3	814.053
768	0	103.745	1121.04	1631.72	201.287	1127.28	1635.37	92.2494	965.338	1624.3	221.143	958.035	1621.06	175.787	920.678	1501.41	177.864	853.899	1250.9	167.256	1042.11	1416.1	171.159	1106.75	1264.88	263.938	848.21	1312.01	2.05253	934.734	1451.68	-50.5243	923.427	1265.7	-61.2184	902.856	1116.29	-104.175	985.578	965.066	-84.7417	1027.19	891.656	-113.777	966.493	883.891	-133.782	1029.26	819.713
769	0	103.948	1134.49	1632.07	201.324	1140.77	1635.75	92.7825	978.648	1625.45	221.614	971.779	1622.03	176.188	933.962	1502.21	178.029	866.89	1251.79	167.222	1055.08	1416.84	170.855	1119.86	1265.97	264.126	861.447	1312.61	2.22949	947.914	1453.07	-51.3885	939.079	1267.1	-63.2039	921.179	1117.38	-106.665	1009.28	968.906	-87.5305	1053.03	896.776	-116.88	992.846	887.147	-137.342	1057.88	825.737
770	0	104.438	1147.79	1632.85	201.626	1154.62	1635.82	93.1488	991.92	1626.52	222.189	985.36	1622.94	176.408	947.354	1502.84	178.079	880.107	1252.66	167.532	1068.43	1417.5	170.794	1133.24	1266.63	264.045	874.607	1313.46	2.66593	961.045	1454	-52.1494	954.942	1268.47	-65.3881	939.468	1117.91	-109.111	1032.77	972.878	-90.1338	1078.93	902.162	-119.796	1019.13	890.584	-140.428	1086.47	831.799
771	0	104.391	1161.26	1632.77	201.767	1168.19	1635.85	93.6014	1005.23	1627.58	222.715	998.981	1623.45	176.508	960.717	1503.32	178.108	893.425	1253.2	167.615	1081.71	1417.97	170.535	1146.37	1266.75	264.053	887.812	1313.84	2.63998	974.589	1455.03	-52.9834	970.675	1269.67	-67.2091	957.634	1118.72	-111.46	1056.1	976.945	-92.5079	1104.58	907.812	-122.567	1045.23	894.203	-143.192	1114.85	838.05
772	0	104.442	1174.67	1632.93	201.958	1182.03	1635.71	94.1569	1018.59	1627.8	223.143	1012.69	1623.66	176.878	974.213	1503.57	178.215	906.557	1253.22	167.571	1095.04	1417.98	170.477	1159.4	1267.04	264.088	900.761	1314.24	2.889	987.976	1455.45	-53.8746	986.18	1270.37	-69.0651	975.638	1119.14	-113.567	1079.13	980.673	-94.7596	1129.93	913.262	-125.152	1071.23	897.926	-145.736	1142.82	844.429
773	0	104.528	1188.24	1632.66	202.068	1195.82	1635.29	94.715	1031.99	1628.09	223.7	1026.52	1623.63	177.237	987.616	1503.68	178.253	919.57	1253.44	167.592	1108.53	1417.59	170.63	1172.65	1266.69	264.14	914.084	1314.18	3.11221	1001.51	1455.76	-54.6581	1001.57	1270.99	-71.096	993.511	1119.62	-115.403	1101.86	984.464	-96.7053	1155.09	918.841	-127.179	1096.89	901.362	-148.29	1170.44	850.945
774	0	104.65	1201.84	1632.25	202.034	1209.66	1634.66	95.1486	1045.65	1627.85	224.121	1040.45	1623.33	177.301	1001.21	1503.45	178.21	932.937	1253.34	167.668	1121.92	1417.41	170.548	1185.75	1265.96	264.038	927.728	1314.08	3.33602	1015.13	1455.86	-55.4344	1017.11	1271.44	-72.9362	1011.35	1119.53	-117.166	1124.45	988.314	-98.8818	1179.76	924.921	-129.129	1122.48	905.239	-149.98	1197.65	857.355
775	0	104.619	1215.35	1631.66	202.085	1223.6	1633.92	95.6083	1059.12	1627.61	224.724	1054.39	1622.75	177.624	1015.02	1503.06	178.158	946.396	1252.98	167.915	1135.65	1416.72	170.873	1199.05	1265.53	264.075	941.04	1313.71	3.55637	1028.79	1455.54	-56.0711	1032.71	1271.34	-74.6082	1029.13	1119.59	-118.816	1146.69	991.973	-100.475	1204.08	930.164	-130.928	1147.56	908.818	-151.553	1224.52	863.79
776	0	104.722	1229.05	1631.08	202.21	1237.49	1633.24	96.1306	1072.82	1626.92	225.148	1068.4	1622.06	177.805	1028.61	1502.32	178.261	959.658	1252.46	167.898	1149.3	1415.85	170.8	1212.45	1264.53	264.058	954.499	1313.04	3.81059	1042.56	1455.03	-56.6249	1048.03	1271.17	-76.3568	1046.72	1119.31	-120.243	1168.71	995.509	-101.933	1227.94	935.833	-132.431	1172.29	912.641	-153.109	1250.92	870.217
777	0	104.694	1242.8	1629.95	202.16	1251.43	1632.33	96.1697	1086.42	1626.11	225.46	1082.45	1621.32	178.125	1042.6	1501.48	178.316	973.143	1251.63	168.245	1163.12	1415.05	171.116	1226.13	1263.64	264.1	968.247	1312.18	4.05262	1056.51	1454.48	-57.2734	1063.46	1271.05	-78.12	1064.13	1118.85	-121.662	1190.31	998.825	-102.939	1251.45	941.501	-133.556	1196.81	916.195	-154.122	1276.95	876.857
778	0	104.638	1256.51	1629.04	202.226	1265.59	1631.38	96.9959	1100.21	1625.11	226.066	1096.57	1620.35	178.309	1056.51	1500.39	178.338	986.827	1250.83	168.654	1177.12	1413.83	171.278	1239.8	1262.27	264.151	982.106	1311.26	4.25856	1070.53	1453.78	-57.4582	1078.67	1270.64	-79.5735	1081.45	1118.5	-122.596	1211.59	1002.33	-103.816	1274.72	947.007	-134.562	1220.96	920.036	-154.757	1302.45	883.305
779	0	104.63	1270.39	1627.97	202.064	1279.74	1630.06	97.5378	1114.03	1623.96	226.522	1110.69	1619.16	178.745	1070.57	1499.35	178.471	1000.41	1249.71	168.874	1191.1	1412.61	171.621	1253.77	1261	264.419	996.104	1310.07	4.49733	1084.61	1452.92	-58.1243	1094.13	1269.97	-81.0983	1098.6	1117.66	-123.37	1232.56	1005.55	-104.497	1297.34	952.223	-135.331	1244.56	923.511	-155.251	1327.34	889.802
780	0	104.852	1284.31	1626.5	202.201	1293.85	1628.95	98.0576	1127.9	1622.56	227.052	1124.94	1617.89	179.071	1084.81	1497.93	178.734	1014.05	1248.56	169.096	1205.11	1411.26	171.873	1267.79	1259.63	264.568	1010.03	1308.64	4.79685	1098.9	1451.38	-58.5191	1109.39	1269.11	-82.2585	1115.52	1116.92	-124.179	1253.1	1008.73	-104.789	1319.24	957.455	-135.963	1267.59	926.91	-155.574	1351.57	895.946
781	0	104.813	1298.24	1624.89	202.132	1307.99	1627.46	98.5606	1141.8	1621.11	227.472	1139.28	1616.55	179.46	1099.08	1496.5	178.967	1028.05	1247.23	169.384	1219.37	1409.4	171.967	1281.79	1257.8	264.867	1024.45	1307.13	5.13061	1113.2	1450.11	-58.8462	1124.81	1267.92	-83.7064	1132.33	1116.06	-124.529	1273.28	1011.5	-104.893	1340.82	962.395	-136.385	1290.25	930.292	-155.593	1375.37	902.256
782	0	104.795	1312.17	1623.16	202.158	1322.32	1625.82	99.1457	1155.8	1619.4	228.048	1153.72	1614.71	179.749	1113.24	1494.89	179.723	1043.06	1245.13	169.859	1233.83	1407.64	172.257	1295.93	1255.9	265.458	1038.95	1305.17	5.503	1127.68	1448.81	-59.0292	1140.21	1267.03	-84.8003	1148.91	1115	-124.567	1293.25	1013.97	-104.763	1361.89	966.938	-136.578	1312.46	933.496	-155.177	1398.42	908.069
783	0	105.155	1326.29	1621.51	201.756	1336.48	1623.99	99.8361	1169.84	1617.76	228.8	1168.07	1613.33	180.189	1127.54	1493.06	179.983	1056.72	1243.57	170.343	1248.31	1405.92	172.564	1310.22	1253.87	265.786	1053.29	1303.42	5.91754	1142.11	1447.12	-59.0534	1155.54	1265.71	-85.4487	1165.59	1113.86	-124.518	1312.6	1016.32	-104.393	1382.42	971.339	-136.425	1334.13	936.422	-154.859	1420.93	913.631
784	0	105.257	1340.28	1619.87	201.951	1350.82	1622.43	100.433	1183.99	1615.81	229.377	1182.46	1611.58	180.728	1141.86	1491.37	180.657	1071.39	1241.56	170.828	1262.73	1404.25	173.267	1324.75	1252.38	266.182	1067.77	1301.49	6.26395	1156.45	1445.49	-58.8391	1170.85	1264.45	-86.1951	1182.06	1112.59	-124.51	1331.65	1018.86	-103.537	1402.24	975.248	-136.119	1355.31	939.356	-154.048	1442.72	919.264
785	0	105.779	1354.51	1618.18	202.405	1365.34	1621.05	101.152	1198.2	1614.03	230.059	1197.01	1610.02	181.342	1156.36	1489.72	181.203	1085.48	1239.95	171.626	1277.22	1402.83	173.688	1339.35	1250.86	266.922	1082.54	1299.54	6.66297	1171.02	1444.07	-59.0404	1186.28	1262.89	-86.8171	1198.21	1111.32	-124.129	1350.19	1021.05	-102.788	1421.58	979.085	-135.867	1375.83	942.359	-153.205	1463.92	924.333
786	0	105.897	1368.74	1616.48	202.523	1379.79	1619.41	101.969	1212.43	1612.5	230.775	1211.72	1608.37	181.945	1170.71	1488.08	181.68	1099.74	1238.12	172.294	1291.77	1401.29	174.246	1354.1	1249.25	267.545	1097.09	1297.57	7.21115	1185.61	1442.44	-58.8596	1201.62	1261.52	-87.1803	1214.19	1110.01	-123.479	1368.21	1022.96	-101.782	1440.64	982.838	-135.155	1395.91	944.572	-151.932	1484.45	929.017
787	0	106.439	1383.06	1615.25	202.955	1394.4	1617.67	102.812	1226.76	1610.66	231.654	1226.25	1606.63	182.687	1185.14	1486.42	182.47	1114.06	1236.5	172.872	1306.41	1399.55	174.85	1368.91	1247.35	268.296	1111.72	1295.62	7.83064	1200.37	1440.57	-58.5846	1216.77	1260.19	-87.3722	1230.03	1108.57	-122.728	1385.92	1024.31	-100.58	1459.06	985.671	-134.367	1415.11	946.558	-150.492	1504.34	933.151
788	0	107.072	1397.31	1613.21	203.402	1409.03	1616.21	103.662	1241.1	1608.98	232.556	1240.97	1605.11	183.306	1199.49	1484.74	183.521	1129.18	1234.51	173.581	1321.11	1397.82	175.575	1383.84	1246.28	269.073	1126.51	1293.71	8.52885	1215.02	1438.81	-58.0719	1231.91	1258.57	-87.311	1245.65	1106.96	-121.727	1403.36	1025.39	-99.0203	1476.83	988.079	-133.243	1434.02	948.61	-149.164	1523.38	936.961
789	0	107.4	1411.91	1611.48	203.692	1423.62	1614.41	104.722	1255.42	1607.59	233.623	1255.72	1603.78	184.213	1213.98	1483.09	184.056	1143.12	1233.45	174.593	1335.76	1396.54	176.219	1398.8	1244.89	269.912	1141.5	1292.11	9.45029	1229.81	1437.39	-57.4102	1247.2	1257.14	-87.1212	1261.19	1105.62	-120.419	1420.16	1026.56	-97.4809	1494.05	990.277	-131.966	1452.27	950.097	-147.192	1541.96	940.225
790	0	108.081	1426.31	1609.9	204.576	1438.36	1612.97	105.883	1269.8	1606.15	234.659	1270.44	1602.37	185.281	1228.5	1481.58	185.147	1157.88	1231.77	175.448	1350.59	1395.12	177.132	1413.87	1243.71	270.957	1156.53	1290.16	10.343	1244.41	1435.55	-56.6516	1262.26	1255.84	-86.7809	1276.37	1104.51	-119.146	1436.61	1027.39	-95.7117	1510.98	992.15	-130.451	1469.79	951.077	-145.442	1559.78	942.805
791	0	108.674	1440.49	1608.41	205.278	1453.19	1611.52	107.03	1284.19	1604.62	235.882	1285.23	1600.86	186.094	1242.94	1479.87	186.494	1174.29	1229.38	176.453	1365.43	1394.08	178.302	1429.2	1243.01	271.95	1171.53	1288.31	11.3641	1259.13	1434.11	-55.7941	1277.16	1254.57	-86.2397	1291.24	1103.17	-117.759	1452.5	1027.93	-93.8467	1527.15	993.494	-128.947	1486.84	952.334	-143.485	1576.85	945.006
792	0	109.415	1454.93	1606.96	205.657	1467.78	1609.93	108.269	1298.56	1603.49	236.9	1300.01	1599.76	187.314	1257.74	1478.34	187.427	1188.6	1228.23	177.452	1380.26	1392.83	179.157	1444.46	1241.9	273.162	1186.69	1286.62	12.3048	1273.82	1432.67	-54.821	1291.92	1252.95	-85.7703	1305.73	1101.97	-116.056	1468.23	1027.89	-91.9587	1542.91	994.475	-127.291	1503.13	952.805	-141.233	1593.3	946.731
793	0	110.155	1469.26	1605.54	206.548	1482.49	1608.72	109.505	1312.91	1602.28	238.183	1314.78	1598.8	188.412	1272.35	1476.97	188.791	1204.03	1226.58	178.799	1395.17	1391.86	180.4	1459.68	1241.18	274.461	1202.1	1284.94	13.4382	1288.7	1431.32	-53.7537	1306.52	1251.74	-84.9128	1320.16	1100.44	-114.42	1483.39	1028.13	-89.7824	1558.18	994.948	-125.59	1518.88	953.069	-138.849	1609.27	947.83
794	0	110.876	1483.64	1604.29	207.063	1497.26	1607.36	110.861	1327.32	1601.01	239.382	1329.61	1597.75	189.576	1287.05	1475.49	190.236	1219.85	1224.84	180.161	1410.29	1390.99	181.924	1475.28	1240.74	276.046	1217.51	1282.98	14.719	1303.58	1429.8	-52.5726	1321.13	1250.53	-83.969	1334.15	1098.9	-112.527	1498.22	1028.03	-87.7973	1572.86	994.963	-123.517	1534.3	953.003	-136.553	1624.54	948.5
795	0	111.597	1498.03	1603.29	207.924	1511.99	1606.66	112.248	1341.83	1600.06	240.769	1344.57	1596.84	190.956	1301.78	1474.26	192.061	1236.27	1222.93	181.448	1425.28	1390.26	183.421	1490.86	1239.99	277.403	1232.79	1281.63	15.9407	1318.5	1428.21	-51.374	1335.6	1248.94	-82.9706	1347.95	1097.93	-110.513	1512.61	1026.98	-85.394	1587.07	994.586	-121.536	1548.74	952.445	-134.055	1639.12	948.126
796	0	112.358	1512.67	1602.67	208.491	1526.93	1606.16	113.542	1356.32	1599.54	242.165	1359.57	1596.5	192.404	1316.58	1473.53	193.308	1251.2	1221.98	182.823	1440.39	1389.46	184.91	1506.56	1239.3	278.902	1248.42	1280.36	17.2383	1333.25	1427.14	-49.9058	1349.98	1247.97	-81.7735	1361.66	1096.69	-108.45	1526.27	1025.72	-82.9455	1600.83	993.747	-119.435	1562.75	951.386	-131.31	1653.28	947.324
797	0	113.211	1527.07	1602.6	209.164	1541.89	1606	114.893	1370.9	1599.41	243.51	1374.83	1596.39	193.935	1331.53	1473.02	194.658	1266.75	1221.18	184.364	1455.57	1389.36	186.747	1522.58	1239.26	280.428	1264.21	1279.27	18.8255	1347.85	1426.13	-48.2945	1364.25	1247.05	-80.2153	1375.09	1095.79	-106.123	1539.49	1024.04	-80.415	1613.93	992.207	-117.209	1576.06	949.993	-128.439	1666.71	945.867
798	0	113.418	1541.68	1602.41	209.797	1557.03	1606.18	116.426	1385.55	1599.26	244.915	1389.9	1596.63	195.402	1346.45	1473.08	195.981	1282.96	1220.37	185.712	1470.78	1389.46	188.227	1538.44	1239.79	282.074	1279.92	1278.27	20.5693	1362.39	1425.6	-46.5555	1378.07	1246.67	-78.4909	1388.2	1095.19	-103.988	1552.41	1022.45	-77.9574	1626.65	990.41	-114.868	1588.54	948.539	-125.681	1679.29	943.927
799	0	114.14	1556.02	1602.81	210.338	1571.97	1606.99	117.887	1400.22	1599.48	246.319	1405.11	1597.41	197.139	1361.58	1473.31	197.108	1298.61	1220.32	187.122	1485.79	1390.22	189.895	1554.37	1240.75	283.252	1295.53	1278.55	22.2068	1376.81	1425.47	-44.6865	1391.58	1246.53	-76.7666	1400.94	1095.08	-101.575	1564.74	1020.82	-75.4676	1638.54	988.215	-112.355	1600.27	946.421	-122.977	1690.99	941.622
800	0	114.808	1570.81	1603.68	210.946	1587.18	1608.02	119.385	1414.79	1600.23	247.723	1420.58	1598.13	198.804	1376.73	1473.92	198.159	1314.92	1220.06	188.269	1500.95	1390.9	191.302	1570.23	1241.86	284.728	1311.35	1278.69	23.8217	1391.27	1426.07	-42.7452	1404.93	1246.77	-74.5107	1413.47	1095.27	-99.0126	1576.54	1019.39	-72.9075	1649.81	985.913	-109.853	1611.3	944.409	-120.092	1701.85	938.64
801	0	115.4	1585.14	1604.78	211.6	1602.26	1609.16	120.897	1429.54	1600.98	249.183	1435.85	1599.19	200.29	1392	1474.72	198.96	1329.47	1221.21	189.678	1516.05	1392.06	192.332	1585.79	1243.17	285.927	1326.95	1279.19	25.2366	1405.86	1427	-40.9033	1417.98	1247.47	-72.1991	1425.52	1095.72	-96.5723	1587.68	1017.7	-70.1662	1660.37	983.351	-107.122	1621.46	942.18	-117.276	1711.8	935.145
802	0	116.008	1599.79	1605.93	212.226	1617.52	1610.33	122.398	1444.23	1601.86	250.63	1451.2	1600.16	201.695	1407.19	1475.58	199.997	1344.32	1222.21	190.735	1531.13	1393.03	193.49	1601.26	1244.47	287.097	1342.3	1280.14	26.5871	1420.59	1428.17	-38.9858	1430.77	1248.24	-69.5839	1437.1	1096.37	-93.8252	1598.38	1016.02	-67.4212	1670.31	980.301	-104.178	1630.68	939.931	-114.297	1720.99	931.299
803	0	116.473	1614.62	1607.27	212.604	1632.53	1611.55	123.693	1458.96	1602.94	251.943	1466.53	1601.1	203.046	1422.4	1476.87	201.057	1359.06	1223.68	191.446	1546.01	1393.81	194.374	1616.3	1245.42	288.351	1357.6	1281.62	27.7382	1435.36	1429.54	-37.0242	1443.46	1249.32	-67.0221	1448.44	1097.29	-91.0807	1608.31	1014.21	-64.6227	1679.65	977.172	-101.367	1639.23	937.387	-111.278	1729.3	927.105
804	0	117.196	1629.29	1608.68	212.984	1647.78	1612.66	124.895	1473.75	1604.07	253.162	1481.95	1601.96	204.317	1437.58	1478.36	202.083	1373.14	1225.53	192.162	1560.8	1394.75	194.846	1631.08	1246.36	289.667	1372.6	1283.19	28.8255	1449.89	1431.11	-35.3338	1456.14	1250.34	-64.2212	1459.34	1098.23	-88.2847	1617.75	1012.08	-61.5731	1688.5	973.732	-98.6136	1647.08	934.725	-108.309	1736.99	922.444
805	0	117.546	1644.07	1610.02	213.31	1663.17	1613.79	126.165	1488.52	1605.73	254.256	1497.44	1603.02	205.268	1452.5	1479.97	203.195	1387.3	1227.61	192.48	1575.48	1395.54	194.835	1645.41	1246.55	290.817	1387.4	1285.05	29.7158	1464.19	1432.74	-33.5299	1468.79	1251.35	-61.2054	1470.11	1099.52	-85.4146	1626.54	1009.79	-58.5777	1696.4	969.663	-95.4943	1654.3	931.754	-105.49	1743.79	917.298
806	0	117.983	1658.89	1611.61	213.603	1678.33	1614.93	127.05	1503.38	1607.31	255.139	1512.82	1604.09	206.194	1467.33	1481.57	204.367	1401.23	1229.7	192.707	1589.83	1396.36	194.213	1658.76	1246.42	291.977	1401.99	1287.04	30.5511	1478.13	1434.37	-31.7846	1481.12	1252.57	-58.2182	1480.37	1100.61	-82.6252	1634.97	1007.36	-55.7181	1703.83	965.642	-92.7641	1660.73	928.925	-102.352	1750	911.627
807	0	118.257	1673.61	1612.8	213.864	1693.54	1616.03	128.103	1518.19	1609.31	256.114	1528.27	1605.64	207.233	1482.02	1483.48	205.431	1415.17	1232.03	192.87	1604.01	1397.63	193.672	1672.25	1247.31	293.123	1416.6	1289.41	31.4954	1491.71	1436.3	-30.1654	1493.39	1253.9	-55.1128	1490.59	1101.8	-80.0552	1642.64	1004.83	-53.137	1710.63	961.259	-89.6468	1666.48	925.708	-99.0726	1755.54	906.051
808	0	118.589	1688.37	1614.43	214.099	1708.75	1617.15	128.933	1532.86	1611.53	256.926	1543.45	1607.26	208.03	1496.54	1485.35	206.651	1429.08	1234.36	192.791	1618.06	1398.88	192.881	1685.88	1248.45	294.285	1431.02	1291.59	32.2136	1504.91	1438.31	-28.3068	1505.33	1255.4	-51.9346	1500.52	1103.21	-77.0891	1650.27	1002.21	-50.4033	1716.98	957.081	-86.6346	1671.77	922.584	-96.0824	1760.1	900.121
809	0	118.723	1702.96	1615.82	214.465	1723.93	1618.09	129.462	1547.57	1613.52	257.694	1558.73	1608.96	208.799	1510.83	1487.23	207.714	1442.8	1236.38	192.931	1631.92	1400.4	191.938	1698.77	1249.36	295.387	1445.35	1293.54	32.6798	1517.93	1440.13	-26.7416	1516.83	1256.99	-48.6712	1510.2	1104.48	-74.4922	1657.04	999.504	-47.4896	1722.95	952.606	-83.4583	1676.46	919.223	-93.1046	1763.94	894.059
810	0	118.704	1717.52	1617.44	214.449	1738.89	1619.13	130.173	1562.11	1616.05	258.342	1573.74	1611.15	209.279	1524.98	1489.3	208.926	1456.33	1238.51	192.925	1645.59	1402.18	191.126	1712.22	1251.1	296.46	1459.46	1295.59	33.2986	1530.73	1442.03	-25.0437	1528.12	1258.28	-45.475	1519.69	1105.58	-71.6699	1663.3	996.84	-44.7326	1727.89	947.736	-80.3424	1680.4	915.635	-90.1836	1767.14	887.965
811	0	118.738	1732.08	1618.82	214.307	1753.94	1620.21	130.741	1576.74	1618.44	258.758	1588.81	1613.49	209.77	1538.99	1491.31	210.344	1470.09	1240.34	192.758	1659.3	1404.06	190.155	1724.6	1252.61	297.696	1473.6	1297.72	33.6942	1543.29	1443.86	-23.3982	1539.05	1259.95	-42.2737	1529.06	1106.86	-68.9346	1669.37	994.208	-42.1452	1732.51	943.136	-77.4483	1683.91	912.311	-87.0792	1769.61	881.353
812	0	118.574	1746.62	1619.84	214.104	1768.74	1621.14	131.203	1591.31	1621.1	259.225	1603.8	1615.83	210.221	1553.03	1493.62	211.548	1483.55	1242.43	192.59	1672.76	1405.96	189.369	1737.7	1254.38	298.913	1487.64	1299.82	34.0628	1555.83	1445.41	-22.1443	1549.7	1261.36	-39.2239	1538.32	1108.33	-66.3685	1675.01	991.253	-39.4439	1736.77	938.348	-74.4066	1686.79	908.825	-84.0872	1771.49	874.884
813	0	118.609	1760.93	1620.94	213.777	1783.56	1621.96	131.562	1605.86	1623.6	259.585	1618.82	1618.04	210.272	1566.79	1495.54	213.213	1497.37	1244.22	192.575	1686.27	1407.79	188.467	1750.8	1256.31	299.848	1501.44	1301.98	34.6742	1568.42	1446.86	-20.4449	1560.05	1262.45	-36.1369	1547.56	1109.57	-63.8136	1680.03	987.974	-36.916	1740.27	933.307	-71.3426	1688.96	905.455	-81.2005	1772.44	868.362
814	0	118.369	1775.34	1622.06	213.484	1798.27	1622.79	131.853	1620.28	1626.12	259.892	1633.57	1620.39	210.557	1580.54	1497.63	214.41	1510.71	1246.37	192.676	1699.75	1409.67	187.83	1763.92	1258.05	300.825	1514.98	1304.47	35.0802	1580.82	1448.35	-18.8792	1570.53	1263.69	-33.3807	1556.64	1111.29	-61.1028	1684.82	985.008	-34.5104	1743.32	928.207	-68.1386	1690.8	902.298	-78.2855	1772.94	861.979
815	0	118.125	1789.71	1623.07	213.229	1812.78	1623.57	132.055	1634.61	1628.38	260.074	1648.24	1622.58	211.082	1594.27	1499.69	215.607	1524.14	1248.49	192.855	1713.16	1411.65	188.118	1777.52	1260.25	301.854	1528.96	1306.86	35.8282	1593.56	1449.78	-17.0805	1580.86	1265.18	-30.5665	1565.8	1112.54	-58.0677	1688.85	982.225	-31.9016	1745.91	923.473	-65.292	1692.3	899.233	-75.2888	1772.72	855.677
816	0	117.874	1803.95	1623.94	212.907	1827.4	1624.39	132.248	1648.81	1630.2	260.086	1662.94	1624.46	211.193	1607.93	1501.54	216.916	1537.79	1250.14	192.96	1726.6	1413.41	188.096	1790.75	1262.23	302.768	1542.63	1308.96	36.3803	1606.28	1450.98	-14.9897	1591.31	1266.61	-27.7983	1574.81	1113.99	-55.8038	1692.71	979.444	-29.3376	1748.3	919.264	-62.1517	1693.31	896.36	-72.459	1772.07	849.845
817	0	117.673	1818.07	1624.65	212.596	1841.72	1625.18	132.218	1663.04	1631.96	260.103	1677.3	1626.42	211.532	1621.63	1503.26	218.124	1551.21	1252.03	193.322	1740.05	1415.08	188.64	1803.96	1264.06	303.887	1556.44	1310.89	36.5683	1619.03	1452.02	-13.8488	1602.16	1267.16	-24.9231	1583.65	1115.4	-53.2281	1696.56	976.734	-27.2279	1749.9	914.597	-59.0945	1694.06	893.618	-69.8752	1770.75	843.837
818	0	117.26	1832.1	1625.17	212.272	1856.07	1625.8	132.097	1677.05	1633.38	260.07	1691.82	1628.06	211.72	1635.21	1504.54	219.215	1564.87	1253.23	193.647	1753.33	1416.6	189.234	1817.09	1265.54	304.779	1570.26	1312.69	37.1216	1632.02	1452.78	-12.3233	1613.09	1268.13	-22.1277	1592.51	1116.49	-50.7717	1700.07	974.46	-24.7902	1751.12	909.952	-56.3999	1694.61	891.179	-67.0486	1769.27	838.444
819	0	116.807	1846.12	1625.59	211.91	1870.22	1626.29	132.286	1691.35	1634.4	260.132	1706.17	1629.56	212.146	1648.95	1505.77	220.371	1578.47	1254.48	194.239	1766.85	1417.75	189.945	1830.23	1266.67	305.764	1584	1314.3	37.7791	1645.1	1453.45	-10.6567	1624.38	1268.73	-19.0934	1601.34	1117.64	-48.4223	1703.52	972.262	-22.7125	1752.71	905.896	-53.6943	1695.19	888.928	-64.3131	1767.42	832.983
820	0	116.597	1860.14	1625.92	211.472	1884.5	1626.51	132.335	1705.37	1635.08	260.447	1721.01	1630.4	212.354	1662.7	1506.69	221.498	1591.89	1255.78	194.344	1779.98	1418.66	190.859	1843.53	1267.36	306.759	1597.7	1315.83	38.3753	1658.34	1453.76	-9.1413	1635.58	1268.69	-16.063	1609.93	1118.32	-45.9003	1706.87	969.736	-20.4501	1753.22	902.063	-51.294	1695.45	887.03	-61.6212	1765.15	827.723
821	0	116.151	1874.04	1625.37	211.105	1898.74	1626.48	132.345	1719.32	1635.58	260.524	1735.41	1631.23	212.502	1676.5	1507.31	222.661	1605.84	1256.27	195.017	1793.8	1419.08	191.852	1856.87	1267.92	307.239	1611.44	1316.69	38.8804	1671.54	1453.59	-7.3169	1647.07	1268.5	-13.0005	1618.54	1118.81	-43.4796	1710.02	967.47	-18.5163	1754.7	898.28	-48.6108	1695.85	884.963	-58.8212	1762.51	822.77
822	0	115.899	1888.02	1624.96	210.512	1912.8	1626.15	132.313	1733.33	1635.69	260.549	1749.78	1631.6	212.901	1690.48	1507.55	223.619	1619.27	1256.78	195.183	1807.19	1419.03	192.741	1870.39	1267.59	307.98	1625.12	1317.4	39.4085	1684.94	1453.18	-5.05543	1658.31	1268.01	-9.78522	1627.21	1119.12	-41.1417	1713.29	964.976	-16.3014	1755.75	894.167	-45.9734	1696.34	883.054	-56.2218	1760.05	817.823
823	0	115.585	1901.89	1623.9	210.064	1927.07	1625.55	132.452	1747.26	1635.57	260.631	1764.23	1631.51	213.049	1704.3	1507.57	224.494	1632.76	1257.07	195.886	1821.19	1418.6	193.466	1883.87	1266.85	308.985	1639.03	1317.79	39.9042	1698.44	1452.54	-3.3736	1669.71	1267.27	-6.37966	1635.86	1119.43	-38.4511	1716.57	962.63	-14.1387	1756.41	889.873	-43.2557	1696.71	881.668	-53.5853	1757.63	813.391
824	0	115.065	1915.68	1622.91	209.536	1941.24	1624.8	132.532	1761.04	1635.12	260.552	1778.42	1631.36	213.313	1718.18	1507.33	225.362	1646.51	1256.7	196.17	1834.58	1418.13	194.567	1897.63	1266.65	309.812	1652.64	1317.96	40.2867	1711.91	1451.66	-1.83559	1680.83	1266.86	-3.25623	1644.56	1119.37	-35.9409	1719.93	960.428	-11.9071	1757.57	886.426	-40.3103	1697.04	880.038	-51.0096	1754.99	809.091
825	0	114.646	1929.38	1622.02	209.063	1955.53	1624.24	132.894	1775.01	1634.39	260.953	1792.94	1631.18	213.485	1732.23	1506.68	225.984	1660.08	1256.12	196.722	1848.4	1417.6	195.22	1911.18	1265.73	310.425	1666.22	1317.84	40.7698	1725.5	1450.76	0.102335	1691.84	1265.77	-0.304724	1653.41	1119.59	-33.4082	1723.03	958.494	-9.76378	1759.4	883.629	-37.2361	1697.58	878.668	-48.446	1752.51	806.008
826	0	114.434	1943.02	1620.68	208.491	1969.74	1623.16	133.231	1788.9	1633.34	261.092	1807.48	1630.77	213.848	1746.21	1505.89	226.526	1673.81	1255.19	197.277	1862.19	1416.74	196.271	1925.14	1264.95	311.206	1679.92	1317.51	41.1714	1739.19	1449.55	1.25566	1702.81	1265.19	2.48716	1662.46	1119.67	-30.9325	1726.35	956.713	-7.26796	1760.04	880.726	-33.9349	1698.02	877.518	-45.9425	1750.28	802.85
827	0	113.85	1956.84	1619.15	207.696	1984.07	1621.5	133.64	1802.86	1631.93	261.295	1821.95	1629.74	214.03	1760.31	1504.75	227.05	1687.49	1254.11	197.657	1876.11	1415.27	197.198	1938.85	1263.57	311.729	1693.46	1316.84	41.5873	1753.06	1448.21	2.72557	1713.86	1264.09	5.22478	1671.59	1119.49	-28.2861	1730.03	954.728	-3.69717	1761.24	877.526	-30.6483	1699.12	876.482	-43.1419	1748.02	800.017
828	0	113.27	1970.65	1617.4	207.235	1998.47	1619.86	134.058	1816.79	1630.35	261.722	1836.86	1628.52	214.073	1774.39	1503.33	227.229	1701.16	1252.97	198.099	1890.03	1413.61	197.622	1952.11	1261.26	312.226	1707.27	1315.54	41.8502	1766.95	1446.56	4.46642	1724.93	1262.98	7.77591	1680.84	1119.24	-25.89	1733.71	952.669	0.063108	1762.81	874.861	-27.4576	1700.28	875.799	-40.2581	1746.37	797.192
829	0	112.709	1984.4	1615.18	206.39	2012.84	1617.99	134.643	1830.63	1629.17	261.993	1851.65	1626.98	214.558	1788.85	1501.83	227.48	1714.81	1251.65	198.565	1904.14	1412.01	198.381	1965.39	1259.18	312.485	1720.91	1314.53	42.2666	1781.24	1444.79	5.82536	1735.98	1261.84	10.1563	1690.31	1119.1	-23.4292	1737.86	951.049	2.79811	1764.92	872.214	-24.1307	1702.1	875.113	-37.8144	1745.32	795.309
830	0	112.267	1998.26	1613.36	205.712	2027.31	1615.96	135.04	1844.61	1627.55	262.427	1866.47	1625.48	214.882	1803.15	1500.12	227.76	1728.58	1250.4	199.039	1918.2	1410.06	199.208	1978.67	1256.92	312.882	1734.69	1313.34	42.4168	1795.43	1442.77	7.13409	1747.53	1260.91	12.266	1700.03	1118.83	-21.2741	1742.24	949.449	5.31699	1767.66	870.287	-21.0436	1704.42	874.582	-34.1416	1744.61	793.393
831	0	111.762	2012.16	1611.12	205.062	2041.81	1613.63	135.498	1858.79	1625.91	262.984	1881.58	1623.78	215.111	1817.32	1498.31	227.839	1742.29	1248.47	199.309	1932.36	1407.96	199.976	1992.05	1254.58	312.969	1748.38	1311.5	42.6552	1809.72	1440.84	8.17712	1758.83	1259.71	14.1488	1709.98	1118.45	-19.4921	1747.2	948.449	6.5902	1770.1	867.859	-18.1779	1707.25	874.176	-30.9794	1744.68	791.226
832	0	111.329	2025.83	1608.58	204.181	2056.53	1611.19	136.112	1873.01	1623.53	263.269	1896.54	1621.56	215.282	1831.73	1496.39	227.742	1756.14	1246.71	199.61	1946.6	1405.66	200.539	2005.81	1252.16	312.85	1762.17	1309.66	42.8842	1823.97	1438.68	9.21805	1770.7	1258.13	15.9631	1720.11	1117.82	-16.936	1752.52	947.021	8.60299	1773.62	866.151	-15.5695	1710.65	873.873	-27.8446	1744.91	788.343
833	0	110.652	2039.91	1606.22	203.305	2070.96	1608.66	136.653	1886.96	1621.72	263.411	1911.51	1619.55	215.252	1846	1494.33	227.805	1769.91	1244.75	199.867	1960.79	1403.41	201.101	2019.84	1249.55	312.859	1775.77	1308.17	42.8694	1838.19	1436.62	10.1831	1782.74	1256.88	17.4673	1730.45	1117.68	-15.1717	1758.38	945.757	10.2751	1777.97	864.672	-13.28	1714.83	873.813	-25.0824	1746.87	788.205
834	0	109.991	2053.95	1603.72	202.421	2085.56	1606.07	136.922	1900.93	1619.84	264.062	1926.74	1617.53	215.271	1860.5	1492.32	227.53	1783.82	1242.53	200.016	1975.15	1401.04	201.57	2033.88	1247.06	312.89	1789.57	1306.19	43.0284	1852.68	1434.62	10.6395	1795.22	1255.38	18.8219	1741.26	1116.97	-14.15	1764.83	945.359	11.7691	1782.73	863.242	-11.4659	1719.74	873.875	-22.0754	1748.94	786.54
835	0	109.28	2067.96	1601.3	201.485	2100.28	1603.48	137.05	1915.22	1617.35	263.985	1941.88	1615.28	215.156	1874.83	1490.16	227.288	1797.82	1240.49	200.252	1989.43	1398.76	201.763	2048.11	1244.65	312.691	1803.46	1304.02	42.8733	1867.26	1432.27	11.1568	1807.98	1253.6	19.4511	1752.42	1116.37	-12.7629	1772.05	943.621	12.2747	1788.45	862.405	-9.74382	1725.25	873.773	-19.9463	1752.27	786.071
836	0	108.353	2081.93	1598.46	200.513	2115.06	1600.83	137.668	1929.62	1615.45	264.982	1957.8	1613.3	215.048	1889.37	1488.09	226.821	1811.75	1238.41	200.17	2003.7	1396.38	202.054	2062.37	1242.24	312.485	1817.12	1302.28	42.5878	1881.65	1430.25	11.4334	1820.96	1252.48	20.2839	1763.89	1115.48	-12.0578	1779.62	942.776	12.9415	1794.86	861.722	-8.44265	1731.69	873.791	-17.6073	1756.17	784.902
837	0	107.594	2096.01	1595.98	199.466	2129.76	1598.06	137.639	1943.73	1613.58	264.859	1972.88	1611.21	214.781	1903.66	1486.06	226.189	1826.01	1236.16	200.302	2017.97	1394.13	202.304	2076.38	1239.86	312.026	1830.99	1300.26	42.3844	1896.36	1428.24	11.3584	1834.33	1250.96	20.6531	1775.91	1115.03	-11.3783	1788.4	941.876	13.3824	1801.95	860.046	-7.49526	1738.88	873.869	-15.5442	1761.12	784.181
838	0	106.703	2110.21	1593.35	198.292	2144.67	1595.24	138.087	1958.12	1611.82	265.014	1988.32	1609.23	214.234	1917.97	1484.16	225.568	1840.27	1234.49	200.113	2032.37	1391.82	202.324	2090.75	1237.63	311.337	1844.91	1298.17	41.9334	1911.24	1426.3	11.1509	1847.99	1249.49	20.7839	1788.33	1114.02	-11.4439	1797.38	941.083	13.5454	1810.02	859.475	-6.83636	1747.05	873.887	-13.837	1767.05	783.538
839	0	105.847	2124.11	1590.56	197.048	2159.53	1592.62	137.869	1972.58	1609.37	264.908	2003.64	1607.47	213.839	1932.19	1482.43	224.742	1854.53	1232.39	200.033	2046.74	1389.79	202.494	2104.97	1235.63	310.607	1858.87	1296.3	41.3069	1925.79	1424.35	10.4779	1861.93	1247.92	20.6253	1800.95	1113.62	-11.2344	1807.48	940.275	13.7024	1818.81	858.103	-6.55644	1755.89	873.945	-12.3699	1773.93	783.093
840	0	104.808	2138.39	1588.3	195.81	2174.28	1590.21	138.175	1986.99	1608.3	264.77	2019.02	1605.85	213.254	1946.75	1480.48	223.628	1868.88	1230.39	199.591	2061.14	1388.13	202.23	2119.39	1234.05	309.451	1872.93	1294.12	40.6837	1940.69	1422.71	9.98232	1875.97	1246.53	20.2522	1814.23	1112.63	-11.6483	1818.15	939.554	13.6176	1828.35	857.278	-6.4184	1765.68	873.688	-11.3668	1781.93	782.453
841	0	103.771	2152.55	1586.02	194.648	2188.99	1587.77	138.16	2001.61	1607.12	264.68	2034.4	1604.28	212.541	1961.04	1478.82	222.599	1883.47	1228.69	199.296	2075.48	1386.62	202.077	2133.72	1232.52	308.444	1887.17	1292.36	39.9008	1955.47	1421.23	9.15225	1890.28	1245.22	19.5563	1827.85	1111.76	-12.2223	1830.06	938.888	13.9321	1839.01	856.996	-6.83766	1776.58	873.436	-10.8739	1790.99	782.075
842	0	102.927	2166.9	1584.15	193.583	2203.82	1585.32	137.989	2016.19	1605.72	264.509	2049.96	1602.88	211.85	1975.62	1477.18	221.398	1898.2	1226.7	198.778	2089.93	1385.23	201.771	2148.43	1231.29	307.23	1901.47	1290.39	39.0399	1970.18	1419.74	7.93278	1904.86	1244.02	18.8707	1841.94	1110.9	-13.1437	1842.1	938.043	11.8887	1850.5	855.834	-7.5274	1788.14	873.249	-10.6507	1801.19	781.438
843	0	101.812	2181.16	1582.15	192.39	2218.7	1583.31	137.297	2030.75	1604.66	263.951	2064.98	1601.57	210.668	1990.01	1475.75	219.97	1912.92	1224.9	198.34	2104.51	1383.6	201.22	2163.19	1230.33	305.789	1916.07	1288.29	38.2355	1985.22	1418.28	6.82152	1919.77	1242.67	17.9072	1856.28	1109.88	-14.1415	1855.31	937.272	10.8529	1862.7	854.76	-8.56426	1800.6	872.985	-10.97	1812.37	780.851
844	0	100.864	2195.58	1580.65	191.14	2233.26	1581.42	137.399	2045.55	1604.22	263.417	2079.91	1600.44	209.681	2004.38	1474.56	218.726	1927.88	1223.34	197.204	2119.1	1382.52	200.542	2178.27	1229.52	304.484	1930.65	1286.84	37.0924	1999.9	1417.1	5.57132	1934.65	1241.51	16.708	1870.89	1108.95	-15.2292	1869.17	936.26	10.4987	1875.93	854.046	-10.0996	1814.03	872.401	-11.7803	1824.77	780.257
845	0	99.8466	2209.99	1579.29	190.162	2247.96	1579.81	136.309	2059.82	1602.9	262.85	2094.85	1599.16	208.865	2018.89	1473.44	217.476	1942.98	1221.52	196.237	2133.73	1381.45	199.654	2193.68	1228.65	303.771	1946.25	1284.8	36.0536	2014.89	1416.12	4.43309	1949.68	1240.43	15.265	1886	1107.73	-17.1718	1883.54	935.25	8.25967	1889.89	852.741	-11.9162	1828.34	871.611	-13.2815	1838.19	779.493
846	0	98.8514	2224.4	1578.2	189.006	2262.59	1578.6	136.371	2074.78	1602.51	262.277	2109.93	1598.3	207.415	2033.26	1472.06	216.535	1958.56	1219.83	195.541	2148.38	1380.34	198.536	2209.05	1228.03	302.275	1961.28	1282.89	34.8198	2029.79	1414.76	2.95711	1965.04	1239.08	13.525	1901.48	1106.56	-19.1536	1898.76	934.218	6.13887	1904.82	851.51	-13.9129	1843.31	870.681	-15.0694	1852.71	778.422
847	0	97.8149	2238.99	1577.87	187.892	2277.48	1577.89	135.348	2089.47	1602.1	261.709	2124.97	1598.06	206.472	2047.94	1471.56	215.254	1973.55	1218.72	194.304	2163.09	1380.41	197.307	2224.57	1228.06	301.085	1976.1	1281.65	33.3436	2044.35	1413.94	1.50505	1980.55	1237.96	12.0576	1917.33	1105.37	-21.3918	1914.46	933.404	4.36684	1920.73	850.444	-16.2746	1859.37	869.626	-17.35	1868.46	777.411
848	0	96.8333	2253.62	1577.94	186.942	2292.15	1577.89	135.031	2104.39	1602.74	260.32	2139.67	1598.2	205.487	2062.59	1471.53	214.258	1988.91	1217.88	193.208	2177.78	1380.75	195.926	2240.12	1228.31	300.08	1991.25	1280.47	32.441	2059.17	1413.82	-0.058979	1996.48	1237.27	10.1484	1933.72	1104.16	-23.1493	1931.4	932.266	2.3776	1937.62	849.836	-18.7283	1876.09	868.654	-20.018	1885.29	776.235
849	0	95.8088	2268.39	1578.24	185.884	2306.89	1577.82	134.631	2119.28	1603.8	259.739	2154.6	1598.7	204.495	2077.18	1471.86	213.394	2004.15	1217.66	192.115	2192.38	1381.08	194.665	2255.7	1229.14	298.933	2006.31	1279.81	31.3964	2073.74	1413.75	-1.47197	2012.45	1236.82	8.22275	1950.45	1103.34	-25.6981	1948.72	931.548	-0.732982	1955.19	848.594	-21.5268	1893.92	867.526	-23.3915	1903.62	775.43
850	0	94.8375	2283.12	1578.78	184.822	2321.65	1578.13	133.747	2134	1604.7	258.837	2169.47	1599.34	203.664	2091.88	1472.37	212.662	2019.24	1217.92	190.994	2206.99	1381.85	193.304	2271.14	1230.22	298.041	2021.3	1279.75	30.2702	2088.01	1414.09	-2.60557	2028.5	1236.07	6.24011	1967.66	1102.77	-28.5355	1966.97	931.237	-3.76584	1973.73	848.012	-24.5016	1912.56	866.723	-27.1696	1922.84	775.121
851	0	93.8483	2297.82	1579.33	183.898	2336.49	1578.9	132.94	2148.81	1605.94	257.837	2184.24	1600.27	203.179	2106.62	1473.51	212.343	2034.14	1218.43	190.212	2221.7	1382.64	192.002	2286.42	1231.47	297.71	2036.34	1280.57	29.6625	2102.5	1414.92	-4.3776	2044.99	1236.37	4.80488	1985.38	1102.13	-31.3142	1985.92	930.939	-6.65623	1993.35	847.902	-27.6026	1931.97	866.109	-31.2243	1943.25	774.39
852	0	92.9764	2312.44	1580.34	182.891	2350.98	1579.8	131.769	2163.42	1607.24	257.004	2199.17	1601.43	202.343	2121.25	1474.6	212.607	2049.19	1219.22	189.27	2236.14	1383.73	190.724	2301.53	1232.97	297.403	2051.37	1281.61	29.0718	2116.89	1416.03	-5.63764	2061.36	1236.64	2.74764	2003.07	1102.18	-34.2013	2005.73	931.187	-10.5388	2013.84	848.218	-30.9893	1952.39	865.623	-35.5813	1964.9	774.359
853	0	92.1553	2327.02	1581.27	182.116	2365.49	1580.74	130.914	2178	1608.47	256.208	2213.91	1602.52	201.83	2135.67	1475.93	212.517	2064.05	1220.51	188.529	2250.72	1384.96	189.682	2316.24	1234.42	296.803	2065.86	1282.74	28.4033	2131.13	1417.25	-6.98815	2077.69	1237.4	0.911113	2020.76	1102.11	-37.3088	2025.9	931.51	-13.1962	2035.16	848.328	-34.5845	1973.73	865.096	-39.7486	1987.58	773.549
854	0	91.5577	2341.28	1582.17	181.273	2380.1	1581.88	130.14	2192.59	1609.29	255.445	2228.28	1603.94	201.642	2150.36	1477.2	212.789	2078.89	1221.86	187.962	2265.28	1386.25	188.774	2330.68	1235.84	297.845	2081.04	1284.4	28.0764	2145.7	1418.58	-8.2221	2094.09	1238.14	-1.15051	2038.43	1101.99	-39.7825	2046.9	930.913	-16.7307	2057.2	848.567	-38.0676	1995.5	864.495	-44.4411	2011.3	773.391
855	0	90.6767	2355.68	1583.22	180.634	2394.61	1583.29	129.479	2206.98	1610.37	254.79	2242.4	1605.54	201.118	2164.78	1478.65	212.81	2093.13	1222.86	187.575	2279.5	1387.96	188.034	2345.08	1237.16	297.273	2095.14	1286.16	27.5935	2160.03	1419.89	-9.14254	2110.18	1239.22	-3.29469	2056.24	1102.44	-43.2452	2067.93	931.778	-20.1948	2080.02	848.963	-41.9171	2018.12	864.035	-50.1486	2036.14	773.841
856	0	90.1109	2370.1	1584.41	179.827	2408.9	1584.54	128.777	2221.45	1611.44	254.231	2257.14	1607.24	200.58	2179.09	1480.17	212.673	2107.37	1224.79	187.221	2293.73	1388.89	187.721	2359	1238.26	297.186	2109.22	1288.12	27.2061	2174.63	1421.3	-10.3268	2126.49	1240.32	-5.50404	2073.96	1102.68	-46.4351	2089.6	932.403	-24.1308	2103.26	849.511	-45.9969	2041.14	863.967	-55.0769	2061.92	774.057
857	0	89.6007	2384.36	1585.42	179.339	2423.25	1585.76	128.524	2235.86	1612.72	253.775	2271.66	1608.98	200.249	2193.25	1481.91	212.79	2121.43	1226.81	187.294	2307.81	1390.45	187.654	2372.95	1239.5	298.034	2123.5	1289.86	26.9199	2189.16	1422.83	-11.2904	2142.86	1241.53	-7.86954	2092.01	1102.71	-49.9582	2111.65	933.088	-27.5733	2127.63	850.704	-49.9975	2064.82	863.275	-60.1904	2088.14	774.575
858	0	89.2622	2398.66	1586.46	179.136	2437.49	1587.01	128.069	2249.9	1614.44	253.403	2285.59	1610.46	199.792	2207.36	1483.5	212.359	2135.46	1228.19	187.113	2321.77	1391.81	188.05	2386.57	1240.76	297.615	2137.29	1292.02	26.6223	2203.67	1424.26	-12.5384	2159.16	1242.29	-10.143	2110.07	1102.64	-52.8956	2134.22	933.879	-31.1409	2152.02	851.951	-53.7654	2088.75	863.047	-65.7087	2115.17	775.014
859	0	89.1565	2412.78	1587.4	178.959	2451.57	1588.1	127.693	2264.27	1615.92	252.961	2299.97	1612.23	199.583	2221.39	1484.83	212.28	2149.48	1230.51	187.151	2335.48	1392.98	188.756	2400.19	1241.97	297.265	2151	1293.6	26.2969	2218.04	1425.57	-13.5253	2175.47	1243.38	-11.972	2128.41	1102.9	-56.3893	2156.67	934.872	-35.2585	2176.68	853.044	-57.3861	2113.72	862.609	-70.9067	2142.89	776.068
860	0	89.2174	2427.13	1588.59	179.103	2465.8	1589.31	127.531	2278.5	1617.59	252.749	2314.09	1613.87	199.618	2235.33	1486.33	211.156	2163.19	1232.32	187.152	2349.31	1394.43	189.409	2413.95	1243.27	296.804	2164.4	1295.45	25.984	2232.26	1427	-14.6195	2191.74	1244.67	-14.6808	2146.61	1103.21	-59.1075	2179.94	935.845	-37.6992	2202.02	853.89	-61.2438	2138.56	862.635	-76.691	2171.21	777.683
861	0	89.1693	2441.33	1589.53	179.26	2479.7	1590.3	127.175	2292.76	1618.86	252.498	2327.79	1615.61	199.545	2249.05	1488.21	211.16	2177.03	1234.13	187.078	2362.95	1395.94	190.264	2427.48	1244.6	296.286	2177.84	1297.03	25.7541	2246.57	1428.51	-15.9884	2208.16	1245.53	-16.8835	2164.89	1103.14	-62.1702	2203.12	937.043	-41.2089	2227.5	855.706	-64.7911	2163.97	862.605	-81.8091	2199.78	779.362
862	0	89.6153	2455.47	1590.4	179.479	2493.79	1591.45	126.898	2307.04	1620.5	252.499	2342	1617.17	199.12	2262.72	1489.8	210.506	2190.5	1235.95	187.28	2376.43	1397.26	190.924	2441.05	1246.04	295.606	2191.11	1298.58	25.4281	2260.3	1429.74	-17.342	2224.55	1246.59	-19.2472	2183.2	1103.27	-65.5716	2226.42	938.701	-46.054	2253.5	858.043	-68.6648	2189.33	862.963	-86.9639	2228.66	781.694
863	0	89.8035	2469.79	1591.78	180.004	2507.61	1592.62	126.442	2321.14	1622.39	252.193	2355.4	1618.89	198.967	2276.47	1491.5	210.157	2203.84	1237.19	187.468	2390.01	1398.68	191.673	2454.74	1247.51	295.325	2204.53	1299.94	25.5832	2274.09	1431.51	-18.3961	2240.63	1247.68	-21.7954	2201.75	1103.53	-68.5238	2249.76	939.949	-49.734	2279.29	860.37	-72.5673	2215.2	863.578	-91.9462	2257.8	784.18
864	0	90.236	2484.07	1593.18	180.601	2521.54	1593.7	126.285	2335.5	1624.07	252.276	2369.6	1620.45	199.184	2290.12	1493.27	209.538	2217.11	1238.9	187.429	2403.34	1399.86	192.212	2467.95	1248.97	294.883	2217.68	1301.62	25.7604	2287.88	1433.42	-19.7092	2256.84	1249.3	-24.2346	2220.23	1103.86	-71.6394	2273.41	942.057	-53.4782	2305.23	863.173	-76.1488	2241.23	864.358	-96.8646	2287.34	787.63
865	0	90.7823	2498.37	1594.37	181.223	2535.25	1594.9	126.147	2349.64	1625.39	252.225	2382.79	1622.17	199.397	2303.89	1494.67	209.193	2230.27	1240.53	187.414	2416.82	1401.41	192.421	2481	1250.44	294.321	2230.8	1303.12	25.6641	2301.38	1435.27	-20.702	2272.85	1250.58	-26.2908	2238.74	1104.41	-74.484	2297.13	944.431	-56.8684	2331.49	866.419	-79.5526	2267.4	865.859	-101.522	2316.78	791.606
866	0	91.3378	2512.49	1595.56	182.039	2549.19	1596.26	125.955	2363.73	1626.97	252.167	2396.32	1623.67	199.035	2317.5	1496.33	208.219	2243.11	1241.52	187.274	2430.18	1402.96	192.383	2493.98	1252.03	293.815	2243.66	1304.9	25.5939	2314.62	1436.85	-21.5267	2288.74	1252.24	-28.9286	2257.04	1105.1	-77.329	2320.9	947.258	-59.9617	2357.78	870.644	-82.8735	2293.7	867.425	-105.854	2346.12	795.982
867	0	91.9192	2526.82	1596.64	183.022	2562.94	1597.24	125.705	2377.88	1628.48	252.055	2409.69	1625.06	199.235	2331.02	1497.86	208.9	2256.44	1243.26	187.269	2443.45	1404.29	192.099	2507.06	1253.31	293.677	2256.8	1306.42	25.7302	2328.1	1438.81	-23.2763	2304.59	1254.12	-31.0592	2275.21	1106.21	-80.0867	2344.78	950.566	-64.5117	2384.03	875.341	-85.7621	2320.53	869.701	-110.133	2375.77	801.106
868	0	92.7095	2541.12	1597.93	183.898	2576.78	1598.23	125.489	2392.05	1629.83	252.131	2423.36	1626.06	199.518	2344.67	1499.34	208.776	2269.24	1244.97	187.115	2457	1405.71	191.673	2520.09	1254.31	293.448	2269.98	1307.83	25.8282	2341.87	1440.88	-23.93	2320.18	1256.05	-33.2125	2293.29	1107.38	-82.6846	2368.52	954.027	-67.4335	2410.27	880.276	-89.1169	2347.06	872.587	-114.029	2405.27	806.669
869	0	93.3628	2555.34	1598.92	185.061	2590.43	1599.14	125.398	2406.26	1631.02	252.129	2436.36	1627.27	199.589	2358.29	1500.53	208.332	2282.13	1246.35	187.061	2470.32	1406.47	191.079	2533.11	1255.26	293.2	2283.01	1309.08	25.8951	2355.37	1442.46	-24.895	2335.74	1257.6	-35.7786	2311.02	1108.42	-85.2219	2392.15	957.959	-70.0623	2436.54	885.686	-92.0604	2373.67	875.457	-117.523	2434.6	812.885
870	0	94.2292	2569.65	1599.59	186.107	2604.29	1599.97	125.302	2420.23	1632.21	252.045	2449.81	1628.33	199.18	2371.94	1501.63	208.582	2295.06	1247.46	186.958	2483.72	1407.46	190.487	2546.34	1256.11	292.867	2295.92	1310.47	25.825	2368.84	1444.16	-26.3743	2351.36	1259.46	-38.0145	2328.57	1109.45	-88.0076	2415.62	962.182	-72.4486	2462.58	891.754	-95.1233	2400.28	879.476	-120.731	2463.69	819.206
871	0	95.1445	2584.11	1600.65	187.18	2617.95	1600.62	125.144	2434.61	1632.92	252.137	2463.02	1629.1	199.524	2385.6	1502.46	207.987	2307.89	1247.9	186.834	2497.23	1407.95	189.989	2559.44	1256.58	292.786	2309.09	1311.59	25.8201	2382.78	1445.71	-27.5136	2366.76	1261.2	-40.3541	2346	1110.74	-90.322	2438.8	966.586	-75.1388	2488.27	897.584	-98.2914	2426.74	883.781	-123.699	2492.63	825.88
872	0	95.8975	2598.36	1601.06	188.265	2631.7	1601.05	124.537	2448.64	1633.5	251.995	2476.48	1629.57	199.685	2399.23	1503.24	207.581	2320.9	1249.03	186.603	2510.57	1408.2	189.474	2572.44	1256.65	292.2	2322.11	1312.46	25.7946	2396.61	1446.77	-28.4902	2382.26	1262.64	-42.0377	2363.39	1111.72	-92.6345	2461.78	970.995	-77.1421	2513.45	903.622	-101.233	2453.07	887.849	-126.515	2521.31	833.047
873	0	96.6561	2612.79	1601.36	189.228	2645.47	1601.27	124.524	2462.88	1633.86	252.29	2489.95	1629.86	199.84	2413.01	1503.73	208.286	2334.06	1250.69	186.411	2524.04	1408.21	189.13	2585.4	1256.73	292.303	2335.37	1312.94	25.7646	2410.31	1447.78	-29.8985	2397.42	1263.64	-44.8478	2380.23	1112.78	-94.7311	2484.56	975.75	-79.1382	2539	910.24	-104.362	2478.76	892.254	-128.989	2550.03	840.51
874	0	97.5963	2627.07	1601.72	190.401	2658.98	1601.76	124.308	2476.87	1634.34	251.871	2502.78	1630.19	200.01	2426.6	1504.33	208.139	2347.32	1251.17	186.225	2537.46	1408.38	188.858	2598.33	1256.71	291.877	2348.56	1313.44	25.8536	2424.26	1448.77	-31.0032	2412.72	1265.08	-47.4217	2397.07	1113.83	-97.0371	2507.02	980.33	-80.9543	2563.53	917.005	-107.438	2504.38	897.083	-131.259	2577.79	847.951
875	0	98.1986	2641.45	1602.06	191.496	2672.86	1601.97	124.068	2491.33	1634.48	251.906	2516.27	1630.42	200.114	2440.52	1504.61	207.932	2360.42	1252.07	186.241	2550.93	1408.45	188.76	2611.01	1256.55	291.418	2361.68	1313.91	25.717	2438.01	1449.72	-32.1097	2427.71	1266.23	-49.5467	2413.72	1115.18	-99.0656	2529.2	985.547	-83.1501	2587.91	924.126	-110.211	2529.65	901.99	-133.132	2605.4	855.993
876	0	99.1015	2655.75	1601.99	192.455	2686.39	1601.94	123.832	2505.31	1634.37	251.851	2529.3	1630.28	199.709	2454.22	1504.35	207.9	2373.93	1252.38	186.187	2564.55	1408.2	188.706	2623.92	1256.04	291.5	2374.79	1314.18	25.9088	2452	1450.19	-33.2176	2442.94	1266.95	-50.815	2431.76	1114.85	-100.891	2551.06	990.178	-84.8502	2611.75	931.028	-113.016	2554.62	907.065	-135.101	2632.29	863.816
877	0	99.7039	2670.15	1601.75	193.438	2700.34	1601.74	123.68	2519.49	1633.9	251.291	2542.45	1629.99	199.948	2468.13	1504.01	207.826	2387.28	1252.33	186.356	2578.17	1407.85	188.756	2636.79	1255.51	291.159	2388.24	1313.87	25.7779	2465.72	1450.29	-34.5189	2457.71	1267.2	-57.077	2444.54	1116.17	-102.75	2572.57	994.811	-86.3762	2635.05	937.828	-115.422	2579.18	912.068	-136.584	2658.77	871.828
878	0	100.518	2684.46	1601.26	193.851	2713.73	1601.22	123.455	2533.67	1633.66	251.793	2556.32	1629.41	200.386	2481.95	1503.96	207.645	2400.54	1252.1	186.36	2591.76	1407.19	188.95	2649.79	1254.7	290.961	2401.75	1313.57	26.0627	2479.65	1450.25	-35.4975	2472.85	1267.69	-55.6344	2465.08	1115.37	-104.541	2593.67	999.427	-87.6329	2658	944.379	-117.471	2603.29	916.819	-138.093	2684.72	879.702
879	0	101.245	2698.81	1600.49	195.169	2727.76	1600.71	123.064	2547.82	1632.88	251.356	2569.45	1628.97	200.666	2495.88	1503.41	207.43	2414	1251.75	186.55	2605.62	1406.42	189.032	2663.24	1253.72	290.797	2415.13	1313.26	26.135	2493.5	1449.7	-36.6437	2487.81	1267.59	-58.1103	2481.88	1114.88	-106.209	2614.47	1003.46	-88.8856	2680.34	950.696	-119.401	2627.01	921.487	-139.335	2710.06	887.417
880	0	102.094	2713.17	1599.73	196.035	2741.48	1600.07	122.977	2562.07	1631.6	251.446	2583.03	1628.3	200.556	2509.81	1502.58	207.22	2427.31	1251.12	186.723	2619.32	1405.47	189.17	2676.69	1252.8	290.53	2428.8	1312.63	26.3753	2507.44	1449.21	-38.021	2502.67	1267.05	-61.9978	2497.05	1114.77	-107.456	2635.22	1007.69	-89.8736	2702.1	956.61	-121.44	2650.02	926.003	-140.307	2734.73	895.165
881	0	102.607	2727.46	1598.62	196.862	2755.35	1599.14	122.368	2576.23	1631.11	251.106	2596.28	1627.2	200.563	2523.77	1501.51	207.085	2440.76	1250.04	186.905	2633.27	1404.3	189.476	2690.36	1251.57	290.598	2442.69	1311.39	26.6045	2521.27	1448.12	-38.347	2517.35	1266.56	-63.7245	2513.89	1114.77	-108.86	2655.24	1011.48	-90.7759	2723.74	962.582	-122.471	2673.16	930.863	-141.243	2758.61	902.498
882	0	103.43	2741.77	1597.64	197.769	2769.24	1598.04	123.141	2590.35	1629.89	251.252	2610.1	1626.02	201.638	2537.68	1500.62	207.528	2454.94	1248.66	187.279	2647.13	1402.98	189.565	2704.17	1250.29	290.954	2456.79	1310.15	26.8263	2535.23	1447.27	-37.886	2532.1	1266.02	-65.626	2530.37	1114.25	-109.869	2674.73	1014.91	-91.4232	2744.65	968.109	-124.372	2695.1	935.289	-142.079	2781.95	909.682
883	0	104.133	2756.1	1596.55	198.715	2783.07	1597.31	122.744	2604.64	1628.52	251.612	2623.51	1625	201.602	2551.71	1499.45	208.081	2468.65	1247.71	187.476	2661.16	1401.91	189.691	2718.2	1248.98	291.047	2470.91	1308.69	27.2395	2549.08	1446.27	-39.4623	2547.05	1265.52	-67.4577	2546.74	1113.62	-110.944	2694.23	1018.56	-92.2059	2764.84	973.6	-125.714	2716.64	939.199	-142.954	2804.26	916.626
884	0	104.843	2770.31	1595.25	199.608	2797.03	1596.34	122.67	2618.8	1627.04	251.311	2636.89	1623.95	202.119	2565.66	1498.09	208.235	2482.4	1246.45	187.657	2675.07	1400.76	189.489	2732.08	1247.87	290.624	2484.63	1307.41	27.5423	2563.04	1445.37	-40.0419	2562.07	1264.98	-69.0504	2563.03	1112.98	-111.87	2713.22	1022.09	-92.9001	2784.56	978.693	-126.686	2737.64	942.867	-143.539	2826	923.237
885	0	105.69	2784.44	1594.12	200.527	2810.67	1595.12	122.908	2632.91	1625.88	251.553	2650.55	1622.68	202.35	2579.68	1496.61	208.774	2496.61	1244.85	188.046	2689.17	1399.42	189.601	2746.28	1246.45	291.205	2499.23	1305.64	27.9784	2576.85	1444.11	-40.2513	2576.77	1263.74	-70.4343	2579.14	1112.34	-112.45	2731.35	1024.89	-93.4489	2803.95	983.373	-127.809	2758.12	946.647	-144.099	2847.04	929.59
886	0	106.611	2798.77	1592.9	201.563	2824.79	1593.79	122.164	2646.59	1624.69	251.859	2664.18	1621.2	203.014	2593.74	1494.91	209.365	2510.86	1242.99	188.446	2703.26	1397.78	189.585	2760.33	1244.87	291.904	2513.98	1303.61	28.4405	2591.03	1442.77	-40.6486	2591.78	1263.01	-71.7087	2594.95	1111.56	-113.038	2749.62	1027.99	-93.6642	2822.73	987.733	-128.521	2777.99	950.166	-144.681	2867.4	935.129
887	0	107.401	2812.93	1591.31	202.527	2838.44	1592.63	122.794	2661	1622.27	252.111	2677.76	1619.89	203.506	2608.01	1493.21	209.746	2525.2	1241.26	188.76	2717.44	1396.22	189.5	2774.42	1243.32	292.432	2528.47	1301.69	29.0276	2604.82	1441.39	-40.4995	2606.99	1262.26	-72.4321	2610.73	1110.69	-113.636	2766.99	1030.2	-93.8333	2841.08	991.762	-128.845	2797.44	953.602	-145.038	2887.11	940.58
888	0	108.214	2827.14	1589.8	203.546	2852.47	1591.33	123.16	2675.14	1620.85	252.676	2691.26	1618.36	204.536	2621.89	1491.78	210.589	2539.25	1239.7	189.194	2731.62	1394.73	189.464	2788.84	1241.82	292.622	2542.82	1299.88	29.8549	2619	1440.03	-40.4977	2621.5	1260.87	-73.0568	2626.39	1109.84	-113.885	2784.17	1032.26	-94.1876	2858.89	995.33	-128.602	2816.02	955.889	-145.49	2906.05	945.361
889	0	109.299	2841.36	1588.74	204.082	2866.05	1590.03	123.358	2689.15	1618.82	253.049	2705.18	1616.68	205.148	2636.06	1490.08	211.353	2554.09	1237.69	189.551	2745.88	1393.19	189.335	2803.16	1240.25	293.488	2557.54	1297.84	30.4879	2632.84	1438.79	-40.1795	2636.57	1260.05	-73.5898	2641.5	1108.54	-113.984	2800.62	1033.72	-94.3391	2876.29	998.398	-129.399	2834.13	958.524	-145.819	2924.31	949.519
890	0	110.289	2855.51	1587.32	205.374	2880.04	1588.77	124.078	2703.23	1618.06	253.812	2718.79	1615.24	206.216	2650.22	1488.24	212.285	2568.6	1235.87	190.11	2760.12	1391.46	189.432	2818.06	1238.7	294.462	2572.49	1295.5	31.2678	2646.78	1437.28	-39.4177	2651.44	1258.85	-73.3064	2656.68	1107.79	-114.13	2817.29	1035.42	-94.3752	2893.1	1001.02	-129.688	2851.67	960.873	-145.914	2942.1	953.137
891	0	111.455	2869.58	1585.85	206.779	2893.95	1587.4	124.836	2717.16	1616.65	254.322	2732.62	1613.45	207.023	2664.25	1486.57	213.252	2583.61	1234.07	190.599	2774.45	1389.98	189.296	2832.64	1237.33	295.269	2587.16	1293.49	32.0154	2660.74	1435.74	-39.1131	2665.97	1257.93	-73.5068	2671.55	1106.85	-114.054	2832.98	1036.4	-94.3461	2909.46	1003.21	-129.697	2868.53	962.484	-146.224	2958.98	956.074
892	0	112.527	2883.82	1584.6	207.978	2907.8	1586.31	125.282	2731.29	1614.16	254.928	2745.74	1611.99	207.607	2678.53	1484.57	214.396	2598.45	1232.82	191.185	2788.74	1388.69	189.286	2847.79	1236.2	296.104	2601.82	1291.49	32.9275	2674.43	1434.42	-38.283	2680.24	1256.56	-72.692	2686.15	1105.65	-113.806	2848.34	1037.25	-94.2366	2925.09	1005.04	-129.531	2884.73	963.578	-146.218	2975.24	958.788
893	0	113.783	2897.72	1583.62	209.161	2921.69	1585.22	125.53	2745.12	1613.08	255.975	2759.76	1610.77	209.146	2692.55	1483.23	215.372	2613.57	1231.51	191.801	2803.19	1387.41	189.525	2863	1235.33	297.107	2616.76	1289.27	34.099	2688.4	1433.48	-37.6191	2694.26	1255.68	-72.4002	2700.44	1104.85	-113.635	2863.16	1037.76	-94.0013	2940.36	1006.45	-129.311	2900.36	964.785	-146.125	2991.01	960.817
894	0	115.044	2911.67	1582.63	210.454	2935.43	1584.35	127.172	2759.19	1611.7	256.532	2773.17	1609.17	210.172	2706.69	1481.59	217.291	2629.19	1229.47	192.623	2817.52	1386	189.761	2877.98	1234.3	298.233	2631.82	1287.28	34.9302	2702.05	1432.07	-36.6916	2708.04	1254.24	-71.1757	2714.47	1103.57	-112.924	2877.84	1038.29	-93.892	2954.96	1007.24	-128.473	2915.4	964.763	-146.086	3006	962.229
895	0	116.074	2925.75	1581.68	211.79	2949.4	1583.25	128.035	2773.08	1610.29	257.529	2786.93	1607.58	211.406	2720.89	1479.88	218.225	2644.87	1227.53	193.388	2832.09	1384.65	189.991	2892.85	1233.3	299.648	2646.95	1285	36.2475	2716.1	1430.66	-35.5177	2721.84	1252.81	-70.33	2728.12	1102.25	-112.63	2891.83	1037.85	-93.4546	2969.36	1007.47	-128.659	2929.88	965.22	-145.809	3020.55	962.818
896	0	117.182	2939.68	1580.65	212.687	2962.94	1582.49	128.049	2786.78	1608.55	258.553	2800.55	1606.27	212.822	2735.21	1477.96	219.517	2659.94	1225.89	194.284	2846.51	1383.42	190.566	2908.06	1232.33	300.457	2661.74	1283.23	37.2638	2730.11	1429.05	-34.6046	2735.44	1251.47	-69.4691	2741.33	1100.79	-111.787	2905.48	1037.23	-93.1031	2983.29	1007.06	-127.979	2943.75	964.746	-145.564	3034.22	963.018
897	0	118.217	2953.68	1580.08	213.994	2977.1	1582.11	129.738	2800.95	1607.44	259.484	2814.4	1605.38	213.435	2749.1	1477.04	220.299	2675.14	1224.04	195.235	2861.18	1382.52	191.368	2922.87	1231.59	301.552	2676.62	1281.48	38.0964	2744.14	1427.62	-33.1496	2749	1249.97	-68.1398	2754.4	1099.45	-111.028	2918.5	1036.29	-92.5538	2996.5	1006.57	-127.328	2957.11	963.858	-145.228	3047.6	962.463
898	0	119.403	2967.76	1579.95	215.291	2990.96	1582.03	130.168	2814.56	1607.15	260.184	2828.04	1604.63	214.572	2763.5	1475.77	222.191	2690.79	1222.1	196.355	2875.71	1382.05	192.494	2937.7	1231.23	302.97	2691.99	1279.92	39.3455	2758.31	1426.24	-31.5985	2762.29	1248.48	-66.5465	2767.35	1097.82	-110.076	2931.34	1035.04	-91.8639	3009.11	1005.3	-126.984	2969.77	962.496	-144.898	3060.2	961.172
899	0	120.289	2981.72	1579.97	216.001	3004.97	1582.17	131.368	2828.86	1606.39	261.452	2842.11	1604.5	215.86	2777.67	1475.69	222.612	2706.04	1220.81	197.422	2890.16	1382.08	193.703	2952.78	1231.24	304.236	2707.04	1278.65	40.3854	2772.35	1425.31	-30.0716	2775.53	1247.35	-64.6623	2779.92	1096.5	-109.112	2943.26	1033.07	-91.5992	3021.38	1003.22	-125.988	2981.83	960.73	-144.33	3072.22	959.403
900	0	121.405	2995.73	1580.55	216.975	3018.72	1582.85	132.506	2842.81	1606.65	262.153	2855.99	1604.84	216.461	2791.91	1475.18	223.148	2721.2	1220.1	198.466	2904.81	1382.42	195.093	2968.14	1231.97	305.144	2722.19	1277.98	41.4831	2786.44	1424.78	-28.7277	2788.23	1246.68	-62.6865	2792.29	1095.53	-108.025	2955.28	1031.32	-90.6971	3033.29	1001.01	-124.129	2993.13	958.383	-143.781	3083.27	957.094
901	0	122.383	3009.75	1581.3	218.168	3033.04	1583.5	132.9	2856.85	1606.82	262.491	2869.46	1605.46	217.849	2806.6	1475.38	223.899	2736.6	1219.3	199.627	2919.4	1383.01	196.475	2983.11	1233.07	306.087	2737.47	1277.59	42.677	2800.74	1424.39	-25.1869	2801.27	1245.64	-60.7746	2804.38	1094.78	-106.73	2966.53	1028.87	-89.857	3044.58	998.23	-123.171	3003.75	955.972	-143.138	3093.93	953.827
902	0	123.216	3023.83	1582.44	219.105	3047	1584.93	134.227	2870.77	1608	263.268	2883.4	1606.3	218.626	2820.73	1476.26	224.138	2751.87	1219.07	200.585	2934.08	1384.06	197.882	2999.02	1234.74	306.679	2752.55	1277.62	43.5481	2814.93	1424.51	-23.0576	2814.11	1245.56	-58.4638	2816.35	1094.57	-105.27	2977.58	1026.35	-89.0649	3055.27	994.842	-121.648	3013.74	952.874	-142.385	3103.68	950.028
903	0	123.948	3038.05	1583.71	219.916	3061.07	1586.12	134.518	2884.9	1608.42	264.607	2897.78	1607.17	219.315	2835.27	1476.69	224.565	2766.53	1219.39	201.45	2948.64	1385.24	199.211	3014.4	1235.98	306.834	2767.71	1277.88	44.3451	2829.24	1425.06	-21.2382	2826.8	1245.79	-55.6707	2828.13	1094.81	-103.63	2987.82	1023.37	-87.4823	3065.5	991.139	-119.52	3022.85	949.555	-141.486	3112.46	945.728
904	0	124.637	3052.27	1585.19	221.422	3075.67	1588.39	134.974	2898.99	1609.11	264.974	2911.52	1608.09	219.545	2849.61	1477.35	224.488	2781.02	1219.98	202.254	2963.21	1386.41	200.419	3030.24	1237.6	307.461	2782.76	1278.42	45.0426	2843.61	1425.99	-19.7487	2839.59	1246.01	-53.2291	2839.78	1095.43	-101.656	2997.83	1020.56	-86.2028	3075.03	987.21	-117.629	3031.33	945.882	-140.312	3120.27	940.618
905	0	125.341	3066.28	1586.73	221.565	3088.91	1589.36	135.872	2912.8	1610.45	265.426	2925.4	1609	220.377	2863.97	1478.38	224.746	2795.42	1220.98	202.905	2977.67	1387.46	201.284	3045.19	1239.11	308.061	2797.63	1279.31	45.7132	2858.2	1427.06	-17.7392	2852.44	1246.74	-50.1588	2851.35	1095.62	-99.2843	3007.32	1017.7	-84.2926	3083.99	982.622	-114.704	3038.98	942.224	-138.931	3127.62	935.061
906	0	126.216	3080.62	1588.52	222.87	3103.42	1591.56	135.96	2927.05	1611.17	265.962	2939.13	1609.89	220.61	2878.05	1479.69	224.998	2809.26	1222.27	203.284	2991.99	1388.71	201.801	3059.57	1240.38	308.299	2812.07	1280.84	46.0454	2872.51	1428.32	-16.2384	2865.15	1247.63	-46.3253	2862.91	1096.54	-97.1432	3016.43	1014.56	-82.5464	3092.1	977.844	-112.063	3046.27	937.821	-137.314	3134.33	929.162
907	0	126.727	3094.67	1590.49	223.014	3116.86	1592.96	136.642	2941.25	1612.41	266	2952.8	1610.85	221.057	2892.1	1480.93	225.14	2823.38	1223.7	203.387	3005.94	1390.07	202.146	3074.48	1241.62	308.868	2826.33	1282.5	46.3205	2886.51	1429.85	-15.0382	2878.08	1248.47	-43.8267	2873.5	1097.78	-94.8713	3025.09	1011.16	-80.5348	3100.18	972.623	-109.271	3052.82	933.792	-135.559	3140.11	922.745
908	0	127.293	3108.7	1592.08	224.02	3131.2	1594.9	136.041	2955.15	1614.19	266.589	2966.83	1612.12	221.551	2905.86	1482.87	225.726	2837.08	1225.73	203.462	3019.84	1391.42	202.138	3087.5	1242.89	308.985	2840.43	1284.18	46.5076	2900.35	1431.59	-13.7662	2891.06	1249.81	-40.9821	2884.43	1099.12	-92.491	3033.22	1007.39	-78.2399	3107.48	967.396	-106.527	3058.87	929.155	-133.298	3145.27	915.704
909	0	127.975	3122.88	1593.97	224.198	3144.57	1596.13	136.528	2969.37	1615.65	266.314	2980.25	1613.55	222.299	2920.29	1484.41	226.2	2851.32	1227.54	203.303	3033.41	1392.93	201.191	3100.84	1244.18	310.164	2854.67	1286.24	46.6693	2913.63	1433.1	-12.7708	2903.84	1251.05	-39.2965	2894.45	1101.36	-90.145	3040.93	1003.98	-75.8869	3114.28	961.763	-100.676	3064.29	924.576	-130.681	3149.92	908.435
910	0	128.074	3136.86	1595.94	225.935	3159.5	1598.75	135.923	2983.17	1617.25	266.408	2993.94	1615	221.796	2933.69	1485.87	227.003	2865.16	1229.72	203.102	3046.89	1394.51	200.766	3113.88	1245.24	310.529	2868.48	1288.09	47.0831	2926.85	1434.91	-11.7269	2916.48	1252.1	-35.4315	2905.88	1102.04	-87.0998	3048.78	1000.55	-73.2548	3120.53	955.826	-98.4456	3069.17	919.835	-127.706	3153.81	900.819
911	0	128.324	3150.66	1597.05	225.53	3172.37	1599.78	135.576	2996.74	1618.95	266.829	3008.07	1616.46	222.014	2946.27	1488.45	227.268	2879.1	1231.53	202.868	3060.48	1396.03	199.554	3126.93	1246.95	310.922	2882.18	1289.89	47.0767	2939.57	1436.67	-10.3266	2928.89	1253.54	-32.6162	2916.68	1103.31	-84.3295	3055.76	996.531	-70.6901	3125.86	950.017	-94.8835	3073.7	915.668	-124.47	3156.84	892.627
912	0	128.478	3164.58	1598.75	225.925	3186.17	1601.12	135.097	3010.88	1620.94	266.728	3021.78	1618.15	222.107	2959.91	1490.03	228.13	2893.04	1233.36	202.459	3073.59	1397.44	198.466	3139.68	1248.41	311.375	2896.07	1291.71	47.2609	2952.24	1438.35	-9.44586	2941.07	1254.81	-29.9829	2927.76	1104.3	-81.5607	3062.78	992.652	-67.5267	3131.2	943.688	-90.0145	3077.45	911.003	-120.816	3159.62	884.615
913	0	128.298	3178.23	1600.21	225.876	3199.54	1602.43	135.157	3024.25	1621.86	266.151	3035.09	1619.74	222.074	2973.19	1491.91	228.713	2906.81	1235.25	201.892	3086.68	1399.12	197.295	3152.51	1249.87	312.202	2909.7	1293.55	47.4267	2964.79	1439.96	-8.41516	2952.98	1256.08	-27.6983	2938.16	1106.13	-78.62	3069.5	988.955	-64.5116	3136.16	937.678	-85.8984	3081.04	906.47	-116.883	3161.92	876.542
914	0	128.595	3191.86	1601.73	226.221	3213.38	1604.22	134.557	3037.94	1623.72	265.959	3048.52	1621.54	221.82	2986.44	1493.6	229.024	2920.03	1236.91	201.395	3099.85	1400.82	196.222	3165.41	1251.56	312.484	2923.24	1295.01	47.0731	2977.34	1441.22	-7.36367	2964.7	1257.25	-25.3594	2949.05	1106.24	-75.5333	3075.76	985.206	-60.885	3140.45	931.417	-82.5968	3084.26	902.493	-112.595	3163.81	868.458
915	0	128.39	3205.5	1603.18	225.881	3226.37	1605.49	134.069	3051.63	1625.51	264.8	3061.27	1623.53	221.819	3000.4	1494.97	230.195	2933.52	1238.62	200.942	3112.81	1402.58	195.099	3178.39	1253.3	313.229	2936.86	1296.98	47.2627	2989.73	1442.58	-6.38686	2976.01	1258.3	-22.169	2959.94	1107.48	-72.3907	3081.71	981.745	-58.112	3144.21	925.766	-78.974	3086.99	898.541	-108.012	3164.86	860.563
916	0	128.231	3218.88	1604.58	225.901	3239.92	1606.94	133.385	3064.95	1627.31	264.815	3075.07	1625.39	222.34	3013.71	1496.99	230.868	2946.75	1240.52	200.608	3125.8	1404.22	194.174	3191.32	1255.09	313.387	2950.02	1298.78	47.254	3002.15	1443.86	-5.41991	2987.25	1259.56	-20.1451	2970.58	1108.52	-69.252	3087.36	978.291	-55.1763	3147.74	920.378	-75.2772	3089.42	894.815	-103.021	3165.76	852.969
917	0	127.753	3232.45	1605.93	226.362	3253.76	1609.13	133.045	3078.64	1628.84	263.991	3087.86	1626.89	221.616	3027.02	1498.22	231.841	2959.69	1241.99	201.907	3140.82	1406.44	193.298	3204.19	1256.8	313.917	2963.59	1300.38	47.2384	3014.72	1444.97	-4.22219	2998.42	1260.48	-18.1138	2981.15	1109.75	-65.9954	3092.81	975.031	-50.983	3150.25	914.432	-72.6687	3091.37	891.698	-97.7324	3166.14	845.523
918	0	127.352	3245.74	1607.41	225.372	3266.16	1609.88	132.136	3091.79	1630.11	263.104	3100.85	1628.42	222.243	3040.92	1499.54	232.875	2972.83	1243.25	199.944	3151.99	1407.1	192.761	3217	1258.4	314.54	2976.77	1301.96	47.3223	3027.31	1445.9	-3.26918	3009.82	1261.24	-15.811	2991.4	1110.99	-62.6783	3097.99	972.018	-48.3104	3153.58	909.932	-68.2124	3093.63	888.439	-92.606	3165.98	838.327
919	0	127.263	3258.91	1608.49	225.409	3279.71	1611.26	131.698	3105.04	1631.31	263.187	3114.41	1630	222.243	3055.46	1500.69	233.41	2985.9	1244.71	199.915	3165.22	1408.55	192.424	3229.73	1259.74	314.877	2990.34	1303.51	47.316	3040.01	1446.78	-2.36287	3021.34	1262.02	-14.0578	3001.71	1111.82	-59.2252	3102.98	969.304	-43.7875	3155.72	904.693	-65.4699	3095.48	886.207	-87.0774	3165.57	831.702
920	0	126.877	3272.17	1609.44	225.569	3293.23	1613.27	131.019	3118.48	1632.19	262.294	3127.15	1631.01	222.14	3068.67	1502.08	232.999	2998.19	1245.76	199.934	3178.07	1409.65	192.517	3242.49	1260.78	315.801	3003.63	1305.18	47.1949	3052.84	1447.3	-1.63549	3032.97	1262.57	-12.2257	3011.52	1112.76	-55.7042	3108.08	966.836	-38.6941	3157.74	899.898	-62.1888	3097.36	884.025	-80.9752	3165.14	825.425
921	0	126.34	3285.28	1610.38	224.869	3306.29	1614.12	130.456	3131.46	1632.54	261.595	3140.29	1632	221.833	3082.07	1503.04	234.521	3011.4	1246.49	199.607	3191.1	1410.42	192.843	3255.37	1261.55	318	3017.43	1306.59	47.1576	3065.78	1447.73	-1.1636	3044.38	1262.87	-9.30469	3021.51	1113.34	-52.0737	3113.01	964.292	-33.9562	3160.02	895.623	-58.377	3099.27	882.207	-75.243	3164.36	819.732
922	0	126.331	3298.63	1611.45	224.735	3319.13	1614.78	129.694	3144.39	1633	261.078	3153.15	1632.63	221.64	3095.21	1503.33	235.597	3024.41	1247.11	199.492	3203.97	1410.91	193.291	3268.16	1262.16	317.025	3030.49	1307.57	47.261	3078.83	1447.92	0.539162	3056.45	1262.66	-6.79365	3031.28	1113.72	-48.4258	3117.75	962.168	-28.1795	3161.64	891.057	-55.4474	3101.48	880.541	-69.343	3163.4	814.381
923	0	125.892	3311.65	1611.92	223.907	3332.02	1615.14	129.385	3157.56	1633.02	260.47	3166.01	1633.02	221.076	3108.69	1503.76	235.307	3037.46	1247.69	199.451	3217.24	1411.28	193.879	3281.2	1262.47	318.273	3044.43	1308.18	47.2293	3092.01	1447.81	1.31317	3068.26	1262.5	-4.3401	3040.96	1113.74	-44.6567	3122.65	959.995	-23.3598	3164.08	887.376	-51.1989	3103.49	878.961	-63.375	3162.5	809.423
924	0	125.317	3324.63	1612.23	223.459	3344.63	1615.66	128.918	3170.65	1633.04	259.875	3179.01	1633.38	220.945	3121.87	1503.98	235.994	3050.81	1247.88	199.472	3230.45	1411.33	194.418	3294.46	1262.23	318.7	3057.89	1308.97	47.2	3105.34	1447.55	2.50238	3080.28	1262.08	-1.53753	3050.36	1114.09	-40.8631	3127.45	957.885	-18.6197	3166.55	884.205	-47.0929	3105.58	877.699	-57.731	3161.6	805.094
925	0	125.259	3337.91	1612.37	224.368	3358.61	1617.32	128.03	3183.6	1632.55	259.692	3192.13	1632.94	221.101	3135.17	1503.85	235.783	3063.77	1248.15	199.902	3243.71	1411.27	195.077	3307.77	1262	319.309	3071.15	1309.41	47.2978	3118.7	1447.01	3.82005	3092.11	1261.55	0.882528	3059.95	1114.38	-36.921	3132.2	955.723	-12.7838	3168.4	880.618	-44.1151	3108.08	876.383	-52.1162	3160.83	801.057
926	0	125.445	3351.08	1612.19	224.379	3371.96	1617.54	127.79	3196.7	1632.17	259.292	3204.98	1632.91	220.829	3148.86	1503.57	236.253	3077.34	1248	199.778	3257.2	1410.87	195.462	3320.94	1261.45	319.521	3084.67	1309.36	47.2003	3132.06	1446.15	5.10688	3103.85	1260.91	3.42497	3069.3	1114.53	-32.8993	3136.96	953.647	-8.5697	3170.34	877.383	-38.6565	3110	875.077	-46.4897	3160.03	797.674
927	0	124.433	3364.05	1612.14	224.234	3385.04	1617.61	127.329	3209.9	1631.19	259.29	3217.86	1632.09	220.76	3162.24	1503.15	237.378	3091.54	1247.23	199.61	3270.56	1410.29	195.807	3334.09	1260.7	319.433	3098.06	1309.17	47.4124	3145.65	1445.52	6.41308	3115.36	1260.31	6.51004	3079.12	1114.47	-28.8903	3141.65	951.788	-5.87632	3172.69	874.908	-35.0961	3112.71	873.813	-41.1584	3159.44	794.601
928	0	125.041	3377.18	1611.74	224.094	3398.07	1617.77	127.565	3222.89	1629.71	258.793	3231.24	1631.45	220.333	3175.53	1502.16	236.873	3105.25	1246.31	199.596	3283.9	1409.54	196.282	3347.36	1260	319.889	3111.34	1309.02	47.3151	3158.98	1444.63	7.5598	3126.63	1259.53	9.20359	3088.39	1114.24	-24.8467	3146.41	949.939	-1.03867	3175.32	872.496	-30.1163	3115.19	872.842	-35.8619	3159.28	792.018
929	0	124.974	3390.48	1611.4	224.164	3411.47	1617.66	127.041	3236.03	1628.85	258.475	3244.13	1630.8	220.497	3189.48	1501.17	236.45	3119.06	1245.41	199.958	3297.7	1408.65	196.789	3360.88	1259.1	319.898	3124.86	1308.37	46.8366	3172.27	1443.81	8.84531	3137.74	1258.68	12.3795	3098.26	1114.06	-20.9714	3151.4	948.294	4.57832	3177.88	869.921	-25.2664	3118.01	871.865	-30.3184	3159.33	789.498
930	0	124.234	3403.58	1610.93	224.169	3424.84	1617.3	127.144	3249.55	1627.73	258.019	3257.21	1629.8	220.4	3202.93	1500.36	236.474	3132.64	1244.79	199.944	3311.13	1407.71	197.075	3374.05	1257.84	319.862	3138.09	1307.67	46.8226	3185.89	1442.65	10.2475	3149.15	1257.75	15.2837	3107.89	1113.92	-16.7569	3156.38	946.488	10.0228	3180.74	867.945	-20.5221	3120.99	871.211	-24.7916	3159.9	787.735
931	0	124.273	3417.07	1610.26	224.025	3438.01	1616.53	126.558	3262.65	1626.69	258.1	3270.83	1628.53	220.201	3216.35	1498.95	236.049	3146.13	1243.76	199.905	3324.49	1406.35	197.296	3387.07	1256.28	319.93	3151.5	1306.58	46.7145	3199.41	1441.26	11.3871	3160.35	1256.84	17.3014	3117.87	1114.06	-13.3756	3161.73	945.168	14.4364	3184.4	865.922	-15.7377	3124.28	870.703	-20.6013	3161.22	786.01
932	0	124.367	3430.38	1609.05	224.053	3451.52	1615.54	126.416	3275.79	1624.92	258.369	3284.12	1627.08	220.261	3230.5	1497.73	236.349	3160.22	1242.78	199.9	3338.35	1404.91	197.554	3400.16	1254.56	319.772	3165.3	1305.29	46.6499	3213.2	1439.84	12.4868	3171.46	1256.01	20.0186	3127.73	1113.61	-10.0356	3167.24	943.746	18.106	3188.38	864.347	-11.7767	3127.94	870.232	-15.436	3162.69	784.505
933	0	123.585	3441.99	1608.16	224.113	3465.06	1614.66	126.59	3289.33	1623.73	258.095	3297.64	1625.64	218.117	3240.11	1496.9	235.946	3173.67	1241.53	198.601	3349.82	1404.11	197.768	3413.3	1252.78	319.034	3178.64	1303.9	46.4073	3226.71	1438.41	14.0557	3182.65	1254.83	22.7168	3137.88	1113.29	-6.85365	3173.11	942.624	19.5922	3192.84	863.575	-7.82998	3132.39	869.714	-11.7326	3165.08	783.577
934	0	124.277	3457.28	1606.96	224.144	3478.54	1613.56	128.238	3306.56	1622.23	257.99	3311.24	1624.09	220.22	3257.62	1495.56	235.511	3187.1	1240.17	199.921	3365.25	1401.97	197.756	3426.29	1250.88	318.916	3192.07	1302.77	46.5145	3240.48	1436.94	15.2224	3194.29	1253.9	24.4707	3147.82	1113.23	-4.31961	3179.27	941.787	24.289	3197.72	861.912	-3.48921	3137.29	869.545	-6.22677	3167.67	782.359
935	0	123.959	3470.73	1605.96	224.093	3491.93	1612.37	126.254	3316.14	1620.4	257.973	3324.52	1622.24	217.741	3267.68	1493.68	234.986	3200.36	1238.39	198.287	3376.82	1400.66	197.62	3439.57	1249.11	318.694	3205.69	1301.27	46.1469	3254.05	1435.41	15.975	3205.95	1253.3	27.159	3158.38	1112.66	-1.64894	3185.96	940.9	24.9186	3203.49	861.122	0.291812	3142.59	869.419	-3.14238	3171.27	781.67
936	0	123.576	3484.15	1604.77	224.154	3505.56	1611.16	127.752	3331.97	1619.14	257.9	3337.97	1620.34	219.649	3285.54	1491.55	233.996	3213.54	1236.64	199.559	3392.5	1398.25	197.458	3453.2	1247.36	317.705	3218.67	1299.74	45.888	3267.9	1433.96	17.3068	3217.83	1251.84	28.9968	3168.87	1112.38	0.524415	3192.98	939.967	28.9957	3209.54	859.732	3.42259	3148.4	869.53	0.506381	3175.26	780.974
937	0	123.783	3497.55	1603.42	224.116	3519.2	1610.04	128.214	3347.38	1616.66	257.842	3351.67	1618.71	217.019	3295.23	1490.4	233.795	3226.97	1234.88	197.643	3403.99	1397.3	197.07	3466.87	1245.69	317.532	3232.27	1298.42	45.3612	3281.56	1432.59	17.1988	3229.55	1251.15	30.8557	3179.7	1112.06	2.3375	3200.41	939.35	30.9276	3216.27	858.954	6.90247	3154.87	869.307	3.61564	3180.12	780.478
938	0	123.586	3510.98	1602.12	224.101	3532.66	1608.82	125.81	3356.76	1615.56	257.702	3365.12	1616.98	216.242	3309.15	1488.26	232.853	3239.92	1232.95	197.035	3417.52	1395.35	196.593	3480.43	1243.94	316.859	3245.7	1296.91	44.8788	3295.37	1431.01	17.8789	3241.58	1250.07	31.9537	3190.49	1111.66	4.01732	3208.42	938.671	31.4281	3223.83	858.379	9.67523	3161.81	869.318	6.61513	3185.61	779.979
939	0	123.583	3524.67	1601.17	224.124	3546.28	1607.39	125.941	3370.13	1613.48	257.458	3378.57	1615.12	215.754	3322.44	1487.06	231.094	3252.58	1231.19	196.774	3430.87	1393.79	196.169	3494.21	1242.07	316.109	3259.01	1295.36	44.1706	3309.28	1429.53	18.1096	3254.02	1249.05	33.0185	3201.97	1111.2	4.87834	3217.07	938.281	31.838	3231.89	857.77	11.4537	3169.65	869.569	8.76096	3191.91	779.462
940	0	123.354	3538.26	1599.39	224.046	3559.89	1605.84	127.744	3388.26	1611.32	257.184	3392.19	1613.01	215.195	3336.27	1484.99	231.023	3266.26	1229.58	196.181	3444.56	1391.95	195.827	3507.97	1240.22	315.75	3272.6	1293.58	43.4952	3323.48	1427.79	17.8764	3266.75	1247.96	34.8565	3213.65	1110.07	5.82783	3226.2	937.532	33.5357	3240.65	856.36	14.0704	3178.29	868.979	10.6609	3198.78	778.58
941	0	121.939	3549.68	1598.34	221.943	3572.52	1604.19	124.852	3397.43	1610.23	256.847	3405.69	1610.7	214.307	3350.04	1483.14	229.665	3279.87	1227.81	195.574	3458.34	1390.13	195.428	3521.84	1238.25	314.197	3286.3	1291.57	42.5471	3337.7	1426.09	18.6476	3279.84	1246.44	34.7423	3225.33	1109.56	6.72641	3235.81	936.513	33.8857	3250.45	855.516	15.6225	3187.33	868.743	12.2295	3206.81	778.245
942	0	123.023	3565.61	1596.38	223.833	3587.1	1602.55	124.46	3411.11	1608.21	256.406	3419.15	1608.73	213.445	3363.42	1481.37	228.022	3293.52	1226.18	195.037	3471.92	1388.59	195.058	3535.64	1236.59	313.444	3300.1	1289.95	41.6038	3351.88	1424.33	17.6531	3292.94	1245.37	35.5779	3237.66	1108.7	7.18117	3245.91	935.642	33.7647	3260.35	854.767	16.6423	3196.95	868.474	13.8285	3215.31	777.531
943	0	122.737	3579.16	1594.88	223.751	3600.67	1600.86	126.148	3429.72	1606.26	255.889	3432.81	1606.96	212.308	3377.28	1479.48	226.699	3307.07	1224.32	194.342	3485.72	1386.92	194.74	3549.72	1235.04	311.672	3313.59	1287.64	40.4924	3366.28	1422.45	16.4498	3306.13	1244.19	35.0782	3250.32	1107.8	7.00361	3256.79	934.799	33.4188	3270.76	853.74	17.2038	3207.46	867.866	14.128	3224.67	776.988
944	0	122.066	3592.95	1593.88	223.677	3614.37	1599.54	125.364	3442.71	1605.03	255.071	3446.1	1605.23	211.142	3390.96	1477.68	225.102	3321.12	1222.27	193.47	3499.48	1385.31	194.116	3563.65	1233.51	310.785	3327.99	1285.66	39.3537	3380.63	1420.87	15.4917	3320	1242.83	34.116	3263.29	1106.97	6.36339	3268.24	933.938	33.6804	3281.6	852.095	16.8559	3218.26	867.351	14.5709	3235.09	775.908
945	0	122.059	3606.44	1592.54	223.596	3627.81	1598.25	122.269	3452.12	1603.81	254.426	3459.4	1603.61	210.36	3404.75	1475.63	223.639	3335.7	1220.12	192.871	3513.48	1383.85	193.602	3578.05	1232.3	309.387	3341.77	1283.59	38.0179	3394.83	1419.22	14.0997	3333.83	1241.41	33.5569	3276.62	1105.75	5.39457	3280.44	932.932	32.7083	3293.24	850.896	17.0322	3230.39	866.434	14.6559	3245.94	774.7
946	0	121.759	3620.33	1591.7	223.413	3641.21	1597.01	121.012	3465.87	1602.13	253.605	3472.76	1601.91	209.15	3418.53	1473.45	221.998	3349.77	1217.92	191.867	3527.28	1382.26	192.742	3592.23	1231.1	307.489	3356.02	1281.34	36.6206	3409.17	1417.53	13.13	3348.14	1239.65	32.5937	3290.15	1104.42	4.2267	3293.2	931.556	31.5017	3305.74	849.539	15.8749	3242.64	865.56	13.9313	3257.92	773.671
947	0	121.434	3633.97	1590.22	223.154	3654.54	1595.79	123.015	3484.77	1600.17	252.703	3486.1	1600.39	208.14	3432.37	1471.71	220.469	3364.64	1215.9	190.922	3541.55	1380.88	191.832	3607.22	1229.71	305.586	3370.04	1279.38	35.6866	3423.64	1415.89	11.7751	3362.59	1238.01	30.3868	3304.52	1103.27	2.40966	3306.58	930.295	29.2814	3318.8	848.154	13.7894	3255.6	864.648	12.744	3270.55	772.241
948	0	120.52	3647.28	1589.23	221.992	3667.27	1594.97	119.591	3493.44	1599.09	251.675	3499.25	1598.76	205.957	3445.39	1470.53	218.976	3378.89	1213.65	189.113	3555.05	1379.86	190.636	3621.82	1228.84	304.195	3384.37	1277.08	34.2798	3437.7	1414.11	9.65535	3376.84	1236.64	29.8065	3318.73	1100.97	0.711389	3320.5	928.764	27.1342	3332.64	846.566	12.6425	3269.62	862.719	10.5596	3283.99	771.047
949	0	120.41	3661.46	1588.26	222.699	3681.57	1593.92	118.048	3507.05	1598.08	250.728	3512.71	1597.27	204.937	3459.28	1468.98	217.174	3394.38	1211.3	187.907	3569.36	1378.73	189.216	3636.72	1227.91	302.727	3399.09	1274.82	32.8536	3451.88	1412.65	8.42114	3391.65	1234.81	27.8368	3333.78	1099.37	-1.33556	3335.24	927.025	25.8408	3347.63	844.649	9.68316	3283.99	861.582	8.31517	3298.14	769.233
950	0	119.879	3675.02	1587.99	222.386	3695.22	1593.42	117.269	3521.03	1597.54	249.529	3526.18	1596.59	206.523	3478.89	1467.65	216.311	3409.02	1209.93	188.177	3586.34	1377.15	187.673	3651.46	1227.36	301.354	3413.64	1273.32	31.5569	3465.98	1411.41	6.55279	3406.73	1233.07	25.3409	3349.16	1097.83	-3.7587	3350.54	925.346	22.6673	3362.29	843.03	9.03591	3301.93	859.092	5.4886	3313.25	767.835
[truncated: 69 more columns]

## Sheet: Sheet2
Devices
		025370 - Force			025370 - Moment			025370 - CoP			027571 - Force			027571 - Moment			027571 - CoP			037720 - Force			037720 - Moment			037720 - CoP
Frame	Sub Frame	Fx	Fy	Fz	Mx	My	Mz	Cx	Cy	Cz	Fx	Fy	Fz	Mx	My	Mz	Cx	Cy	Cz	Fx	Fy	Fz	Mx	My	Mz	Cx	Cy	Cz
		N	N	N	N.mm	N.mm	N.mm	mm	mm	mm	N	N	N	N.mm	N.mm	N.mm	mm	mm	mm	N	N	N	N.mm	N.mm	N.mm	mm	mm	mm
613	0	0	0	0	0	0	0	200	300	0	0	0	0	0	0	0	200	903	0	0	0	0	0	0	0	603	903	0
613	1	0	0	0	0	0	0	200	300	0	0	0	0	0	0	0	200	903	0	0	0	0	0	0	0	603	903	0
613	2	0	0	0	0	0	0	200	300	0	0	0	0	0	0	0	200	903	0	0	0	0	0	0	0	603	903	0
613	3	0	0	0	0	0	0	200	300	0	0	0	0	0	0	0	200	903	0	0	0	0	0	0	0	603	903	0
613	4	0	0	0	0	0	0	200	300	0	0	0	0	0	0	0	200	903	0	0	0	0	0	0	0	603	903	0
613	5	0	0	0	0	0	0	200	300	0	0	0	0	0	0	0	200	903	0	0	0	0	0	0	0	603	903	0
613	6	0	0	0	0	0	0	200	300	0	0	0	0	0	0	0	200	903	0	0	0	0	0	0	0	603	903	0
613	7	0	0	0	0	0	0	200	300	0	0	0	0	0	0	0	200	903	0	0	0	0	0	0	0	603	903	0
613	8	0	0	0	0	0	0	200	300	0	0	0	0	0	0	0	200	903	0	0	0	0	0	0	0	603	903	0
613	9	0	0	0	0	0	0	200	300	0	0	0	0	0	0	0	200	903	0	0	0	0	0	0	0	603	903	0
614	0	0	0	0	0	0	0	200	300	0	0	0	0	0	0	0	200	903	0	0	0	0	0	0	0	603	903	0
614	1	0	0	0	0	0	0	200	300	0	0	0	0	0	0	0	200	903	0	0	0	0	0	0	0	603	903	0
614	2	0	0	0	0	0	0	200	300	0	0	0	0	0	0	0	200	903	0	0	0	0	0	0	0	603	903	0
614	3	0	0	0	0	0	0	200	300	0	0	0	0	0	0	0	200	903	0	0	0	0	0	0	0	603	903	0
614	4	0	0	0	0	0	0	200	300	0	0	0	0	0	0	0	200	903	0	0	0	0	0	0	0	603	903	0
614	5	0	0	0	0	0	0	200	300	0	0	0	0	0	0	0	200	903	0	0	0	0	0	0	0	603	903	0
614	6	0	0	0	0	0	0	200	300	0	0	0	0	0	0	0	200	903	0	0	0	0	0	0	0	603	903	0
614	7	0	0	0	0	0	0	200	300	0	0	0	0	0	0	0	200	903	0	0	0	0	0	0	0	603	903	0
614	8	0	0	0	0	0	0	200	300	0	0	0	0	0	0	0	200	903	0	0	0	0	0	0	0	603	903	0
614	9	0	0	0	0	0	0	200	300	0	0	0	0	0	0	0	200	903	0	0	0	0	0	0	0	603	903	0
615	0	0	0	0	0	0	0	200	300	0	0	0	0	0	0	0	200	903	0	0	0	0	0	0	0	603	903	0
615	1	0	0	0	0	0	0	200	300	0	0	0	0	0	0	0	200	903	0	0	0	0	0	0	0	603	903	0
615	2	0	0	0	0	0	0	200	300	0	0	0	0	0	0	0	200	903	0	0	0	0	0	0	0	603	903	0
615	3	0	0	0	0	0	0	200	300	0	0	0	0	0	0	0	200	903	0	0	0	0	0	0	0	603	903	0
615	4	0	0	0	0	0	0	200	300	0	0	0	0	0	0	0	200	903	0	0	0	0	0	0	0	603	903	0
615	5	0	0	0	0	0	0	200	300	0	0	0	0	0	0	0	200	903	0	0	0	0	0	0	0	603	903	0
615	6	0	0	0	0	0	0	200	300	0	0	0	0	0	0	0	200	903	0	0	0	0	0	0	0	603	903	0
615	7	0	0	0	0	0	0	200	300	0	0	0	0	0	0	0	200	903	0	0	0	0	0	0	0	603	903	0
615	8	0	0	0	0	0	0	200	300	0	0	0	0	0	0	0	200	903	0	0	0	0	0	0	0	603	903	0
615	9	0	0	0	0	0	0	200	300	0	0	0	0	0	0	0	200	903	0	0	0	0	0	0	0	603	903	0
616	0	0	0	0	0	0	0	200	300	0	0	0	0	0	0	0	200	903	0	0	0	0	0	0	0	603	903	0
616	1	0	0	0	0	0	0	200	300	0	0	0	0	0	0	0	200	903	0	0	0	0	0	0	0	603	903	0
616	2	0	0	0	0	0	0	200	300	0	0	0	0	0	0	0	200	903	0	0	0	0	0	0	0	603	903	0
616	3	0	0	0	0	0	0	200	300	0	0	0	0	0	0	0	200	903	0	0	0	0	0	0	0	603	903	0
616	4	0	0	0	0	0	0	200	300	0	0	0	0	0	0	0	200	903	0	0	0	0	0	0	0	603	903	0
616	5	0	0	0	0	0	0	200	300	0	0	0	0	0	0	0	200	903	0	0	0	0	0	0	0	603	903	0
616	6	0	0	0	0	0	0	200	300	0	0	0	0	0	0	0	200	903	0	0	0	0	0	0	0	603	903	0
616	7	0	0	0	0	0	0	200	300	0	0	0	0	0	0	0	200	903	0	0	0	0	0	0	0	603	903	0
616	8	0	0	0	0	0	0	200	300	0	0	0	0	0	0	0	200	903	0	0	0	0	0	0	0	603	903	0
616	9	0	0	0	0	0	0	200	300	0	0	0	0	0	0	0	200	903	0	0	0	0	0	0	0	603	903	0
617	0	0	0	0	0	0	0	200	300	0	0	0	0	0	0	0	200	903	0	0	0	0	0	0	0	603	903	0
617	1	0	0	0	0	0	0	200	300	0	0	0	0	0	0	0	200	903	0	0	0	0	0	0	0	603	903	0
617	2	0	0	0	0	0	0	200	300	0	0	0	0	0	0	0	200	903	0	0	0	0	0	0	0	603	903	0
617	3	0	0	0	0	0	0	200	300	0	0	0	0	0	0	0	200	903	0	0	0	0	0	0	0	603	903	0
617	4	0	0	0	0	0	0	200	300	0	0	0	0	0	0	0	200	903	0	0	0	0	0	0	0	603	903	0
617	5	0	0	0	0	0	0	200	300	0	0	0	0	0	0	0	200	903	0	0	0	0	0	0	0	603	903	0
617	6	0	0	0	0	0	0	200	300	0	0	0	0	0	0	0	200	903	0	0	0	0	0	0	0	603	903	0
617	7	0	0	0	0	0	0	200	300	0	0	0	0	0	0	0	200	903	0	0	0	0	0	0	0	603	903	0
617	8	0	0	0	0	0	0	200	300	0	0	0	0	0	0	0	200	903	0	0	0	0	0	0	0	603	903	0
617	9	0	0	0	0	0	0	200	300	0	0	0	0	0	0	0	200	903	0	0	0	0	0	0	0	603	903	0
618	0	0	0	0	0	0	0	200	300	0	0	0	0	0	0	0	200	903	0	0	0	0	0	0	0	603	903	0
618	1	0	0	0	0	0	0	200	300	0	0	0	0	0	0	0	200	903	0	0	0	0	0	0	0	603	903	0
618	2	0	0	0	0	0	0	200	300	0	0	0	0	0	0	0	200	903	0	0	0	0	0	0	0	603	903	0
618	3	0	0	0	0	0	0	200	300	0	0	0	0	0	0	0	200	903	0	0	0	0	0	0	0	603	903	0
618	4	0	0	0	0	0	0	200	300	0	0	0	0	0	0	0	200	903	0	0	0	0	0	0	0	603	903	0
618	5	0	0	0	0	0	0	200	300	0	0	0	0	0	0	0	200	903	0	0	0	0	0	0	0	603	903	0
618	6	0	0	0	0	0	0	200	300	0	0	0	0	0	0	0	200	903	0	0	0	0	0	0	0	603	903	0
618	7	0	0	0	0	0	0	200	300	0	0	0	0	0	0	0	200	903	0	0	0	0	0	0	0	603	903	0
618	8	0	0	0	0	0	0	200	300	0	0	0	0	0	0	0	200	903	0	0	0	0	0	0	0	603	903	0
618	9	0	0	0	0	0	0	200	300	0	0	0	0	0	0	0	200	903	0	0	0	0	0	0	0	603	903	0
619	0	0	0	0	0	0	0	200	300	0	0	0	0	0	0	0	200	903	0	0	0	0	0	0	0	603	903	0
619	1	0	0	0	0	0	0	200	300	0	0	0	0	0	0	0	200	903	0	0	0	0	0	0	0	603	903	0
619	2	0	0	0	0	0	0	200	300	0	0	0	0	0	0	0	200	903	0	0	0	0	0	0	0	603	903	0
619	3	0	0	0	0	0	0	200	300	0	0	0	0	0	0	0	200	903	0	0	0	0	0	0	0	603	903	0
619	4	0	0	0	0	0	0	200	300	0	0	0	0	0	0	0	200	903	0	0	0	0	0	0	0	603	903	0
619	5	0	0	0	0	0	0	200	300	0	0	0	0	0	0	0	200	903	0	0	0	0	0	0	0	603	903	0
619	6	0	0	0	0	0	0	200	300	0	0	0	0	0	0	0	200	903	0	0	0	0	0	0	0	603	903	0
619	7	0	0	0	0	0	0	200	300	0	0	0	0	0	0	0	200	903	0	0	0	0	0	0	0	603	903	0
619	8	0	0	0	0	0	0	200	300	0	0	0	0	0	0	0	200	903	0	0	0	0	0	0	0	603	903	0
619	9	0	0	0	0	0	0	200	300	0	0	0	0	0	0	0	200	903	0	0	0	0	0	0	0	603	903	0
620	0	0	0	0	0	0	0	200	300	0	0	0	0	0	0	0	200	903	0	0	0	0	0	0	0	603	903	0
620	1	0	0	0	0	0	0	200	300	0	0	0	0	0	0	0	200	903	0	0	0	0	0	0	0	603	903	0
620	2	0	0	0	0	0	0	200	300	0	0	0	0	0	0	0	200	903	0	0	0	0	0	0	0	603	903	0
620	3	0	0	0	0	0	0	200	300	0	0	0	0	0	0	0	200	903	0	0	0	0	0	0	0	603	903	0
620	4	0	0	0	0	0	0	200	300	0	0	0	0	0	0	0	200	903	0	0	0	0	0	0	0	603	903	0
620	5	0	0	0	0	0	0	200	300	0	0	0	0	0	0	0	200	903	0	0	0	0	0	0	0	603	903	0
620	6	0	0	0	0	0	0	200	300	0	0	0	0	0	0	0	200	903	0	0	0	0	0	0	0	603	903	0
620	7	0	0	0	0	0	0	200	300	0	0	0	0	0	0	0	200	903	0	0	0	0	0	0	0	603	903	0
620	8	0	0	0	0	0	0	200	300	0	0	0	0	0	0	0	200	903	0	0	0	0	0	0	0	603	903	0
620	9	0	0	0	0	0	0	200	300	0	0	0	0	0	0	0	200	903	0	0	0	0	0	0	0	603	903	0
621	0	0	0	0	0	0	0	200	300	0	0	0	0	0	0	0	200	903	0	0	0	0	0	0	0	603	903	0
621	1	0	0	0	0	0	0	200	300	0	0	0	0	0	0	0	200	903	0	0	0	0	0	0	0	603	903	0
621	2	0	0	0	0	0	0	200	300	0	0	0	0	0	0	0	200	903	0	0	0	0	0	0	0	603	903	0
621	3	0	0	0	0	0	0	200	300	0	0	0	0	0	0	0	200	903	0	0	0	0	0	0	0	603	903	0
621	4	0	0	0	0	0	0	200	300	0	0	0	0	0	0	0	200	903	0	0	0	0	0	0	0	603	903	0
621	5	0	0	0	0	0	0	200	300	0	0	0	0	0	0	0	200	903	0	0	0	0	0	0	0	603	903	0
621	6	0	0	0	0	0	0	200	300	0	0	0	0	0	0	0	200	903	0	0	0	0	0	0	0	603	903	0
621	7	0	0	0	0	0	0	200	300	0	0	0	0	0	0	0	200	903	0	0	0	0	0	0	0	603	903	0
621	8	0	0	0	0	0	0	200	300	0	0	0	0	0	0	0	200	903	0	0	0	0	0	0	0	603	903	0
621	9	0	0	0	0	0	0	200	300	0	0	0	0	0	0	0	200	903	0	0	0	0	0	0	0	603	903	0
622	0	0	0	0	0	0	0	200	300	0	0	0	0	0	0	0	200	903	0	0	0	0	0	0	0	603	903	0
622	1	0	0	0	0	0	0	200	300	0	0	0	0	0	0	0	200	903	0	0	0	0	0	0	0	603	903	0
622	2	0	0	0	0	0	0	200	300	0	0	0	0	0	0	0	200	903	0	0	0	0	0	0	0	603	903	0
622	3	0	0	0	0	0	0	200	300	0	0	0	0	0	0	0	200	903	0	0	0	0	0	0	0	603	903	0
622	4	0	0	0	0	0	0	200	300	0	0	0	0	0	0	0	200	903	0	0	0	0	0	0	0	603	903	0
622	5	0	0	0	0	0	0	200	300	0	0	0	0	0	0	0	200	903	0	0	0	0	0	0	0	603	903	0
622	6	0	0	0	0	0	0	200	300	0	0	0	0	0	0	0	200	903	0	0	0	0	0	0	0	603	903	0
622	7	0	0	0	0	0	0	200	300	0	0	0	0	0	0	0	200	903	0	0	0	0	0	0	0	603	903	0
622	8	0	0	0	0	0	0	200	300	0	0	0	0	0	0	0	200	903	0	0	0	0	0	0	0	603	903	0
622	9	0	0	0	0	0	0	200	300	0	0	0	0	0	0	0	200	903	0	0	0	0	0	0	0	603	903	0
623	0	0	0	0	0	0	0	200	300	0	0	0	0	0	0	0	200	903	0	0	0	0	0	0	0	603	903	0
623	1	0	0	0	0	0	0	200	300	0	0	0	0	0	0	0	200	903	0	0	0	0	0	0	0	603	903	0
623	2	0	0	0	0	0	0	200	300	0	0	0	0	0	0	0	200	903	0	0	0	0	0	0	0	603	903	0
623	3	0	0	0	0	0	0	200	300	0	0	0	0	0	0	0	200	903	0	0	0	0	0	0	0	603	903	0
623	4	0	0	0	0	0	0	200	300	0	0	0	0	0	0	0	200	903	0	0	0	0	0	0	0	603	903	0
623	5	0	0	0	0	0	0	200	300	0	0	0	0	0	0	0	200	903	0	0	0	0	0	0	0	603	903	0
623	6	0	0	0	0	0	0	200	300	0	0	0	0	0	0	0	200	903	0	0	0	0	0	0	0	603	903	0
623	7	0	0	0	0	0	0	200	300	0	0	0	0	0	0	0	200	903	0	0	0	0	0	0	0	603	903	0
623	8	0	0	0	0	0	0	200	300	0	0	0	0	0	0	0	200	903	0	0	0	0	0	0	0	603	903	0
623	9	0	0	0	0	0	0	200	300	0	0	0	0	0	0	0	200	903	0	0	0	0	0	0	0	603	903	0
624	0	0	0	0	0	0	0	200	300	0	0	0	0	0	0	0	200	903	0	0	0	0	0	0	0	603	903	0
624	1	0	0	0	0	0	0	200	300	0	0	0	0	0	0	0	200	903	0	0	0	0	0	0	0	603	903	0
624	2	0	0	0	0	0	0	200	300	0	0	0	0	0	0	0	200	903	0	0	0	0	0	0	0	603	903	0
624	3	0	0	0	0	0	0	200	300	0	0	0	0	0	0	0	200	903	0	0	0	0	0	0	0	603	903	0
624	4	0	0	0	0	0	0	200	300	0	0	0	0	0	0	0	200	903	0	0	0	0	0	0	0	603	903	0
624	5	0	0	0	0	0	0	200	300	0	0	0	0	0	0	0	200	903	0	0	0	0	0	0	0	603	903	0
624	6	0	0	0	0	0	0	200	300	0	0	0	0	0	0	0	200	903	0	0	0	0	0	0	0	603	903	0
624	7	0	0	0	0	0	0	200	300	0	0	0	0	0	0	0	200	903	0	0	0	0	0	0	0	603	903	0
624	8	0	0	0	0	0	0	200	300	0	0	0	0	0	0	0	200	903	0	0	0	0	0	0	0	603	903	0
624	9	0	0	0	0	0	0	200	300	0	0	0	0	0	0	0	200	903	0	0	0	0	0	0	0	603	903	0
625	0	0	0	0	0	0	0	200	300	0	0	0	0	0	0	0	200	903	0	0	0	0	0	0	0	603	903	0
625	1	0	0	0	0	0	0	200	300	0	0	0	0	0	0	0	200	903	0	0	0	0	0	0	0	603	903	0
625	2	0	0	0	0	0	0	200	300	0	0	0	0	0	0	0	200	903	0	0	0	0	0	0	0	603	903	0
625	3	0	0	0	0	0	0	200	300	0	0	0	0	0	0	0	200	903	0	0	0	0	0	0	0	603	903	0
625	4	0	0	0	0	0	0	200	300	0	0	0	0	0	0	0	200	903	0	0	0	0	0	0	0	603	903	0
625	5	0	0	0	0	0	0	200	300	0	0	0	0	0	0	0	200	903	0	0	0	0	0	0	0	603	903	0
625	6	0	0	0	0	0	0	200	300	0	0	0	0	0	0	0	200	903	0	0	0	0	0	0	0	603	903	0
625	7	0	0	0	0	0	0	200	300	0	0	0	0	0	0	0	200	903	0	0	0	0	0	0	0	603	903	0
625	8	0	0	0	0	0	0	200	300	0	0	0	0	0	0	0	200	903	0	0	0	0	0	0	0	603	903	0
625	9	0	0	0	0	0	0	200	300	0	0	0	0	0	0	0	200	903	0	0	0	0	0	0	0	603	903	0
626	0	0	0	0	0	0	0	200	300	0	0	0	0	0	0	0	200	903	0	0	0	0	0	0	0	603	903	0
626	1	0	0	0	0	0	0	200	300	0	0	0	0	0	0	0	200	903	0	0	0	0	0	0	0	603	903	0
626	2	0	0	0	0	0	0	200	300	0	0	0	0	0	0	0	200	903	0	0	0	0	0	0	0	603	903	0
626	3	0	0	0	0	0	0	200	300	0	0	0	0	0	0	0	200	903	0	0	0	0	0	0	0	603	903	0
626	4	0	0	0	0	0	0	200	300	0	0	0	0	0	0	0	200	903	0	0	0	0	0	0	0	603	903	0
626	5	0	0	0	0	0	0	200	300	0	0	0	0	0	0	0	200	903	0	0	0	0	0	0	0	603	903	0
626	6	0	0	0	0	0	0	200	300	0	0	0	0	0	0	0	200	903	0	0	0	0	0	0	0	603	903	0
626	7	0	0	0	0	0	0	200	300	0	0	0	0	0	0	0	200	903	0	0	0	0	0	0	0	603	903	0
626	8	0	0	0	0	0	0	200	300	0	0	0	0	0	0	0	200	903	0	0	0	0	0	0	0	603	903	0
626	9	0	0	0	0	0	0	200	300	0	0	0	0	0	0	0	200	903	0	0	0	0	0	0	0	603	903	0
627	0	0	0	0	0	0	0	200	300	0	0	0	0	0	0	0	200	903	0	0	0	0	0	0	0	603	903	0
627	1	0	0	0	0	0	0	200	300	0	0	0	0	0	0	0	200	903	0	0	0	0	0	0	0	603	903	0
627	2	0	0	0	0	0	0	200	300	0	0	0	0	0	0	0	200	903	0	0	0	0	0	0	0	603	903	0
627	3	0	0	0	0	0	0	200	300	0	0	0	0	0	0	0	200	903	0	0	0	0	0	0	0	603	903	0
627	4	0	0	0	0	0	0	200	300	0	0	0	0	0	0	0	200	903	0	0	0	0	0	0	0	603	903	0
627	5	0	0	0	0	0	0	200	300	0	0	0	0	0	0	0	200	903	0	0	0	0	0	0	0	603	903	0
627	6	0	0	0	0	0	0	200	300	0	0	0	0	0	0	0	200	903	0	0	0	0	0	0	0	603	903	0
627	7	0	0	0	0	0	0	200	300	0	0	0	0	0	0	0	200	903	0	0	0	0	0	0	0	603	903	0
627	8	0	0	0	0	0	0	200	300	0	0	0	0	0	0	0	200	903	0	0	0	0	0	0	0	603	903	0
627	9	0	0	0	0	0	0	200	300	0	0	0	0	0	0	0	200	903	0	0	0	0	0	0	0	603	903	0
628	0	0	0	0	0	0	0	200	300	0	0	0	0	0	0	0	200	903	0	0	0	0	0	0	0	603	903	0
628	1	0	0	0	0	0	0	200	300	0	0	0	0	0	0	0	200	903	0	0	0	0	0	0	0	603	903	0
628	2	0	0	0	0	0	0	200	300	0	0	0	0	0	0	0	200	903	0	0	0	0	0	0	0	603	903	0
628	3	0	0	0	0	0	0	200	300	0	0	0	0	0	0	0	200	903	0	0	0	0	0	0	0	603	903	0
628	4	0	0	0	0	0	0	200	300	0	0	0	0	0	0	0	200	903	0	0	0	0	0	0	0	603	903	0
628	5	0	0	0	0	0	0	200	300	0	0	0	0	0	0	0	200	903	0	0	0	0	0	0	0	603	903	0
628	6	0	0	0	0	0	0	200	300	0	0	0	0	0	0	0	200	903	0	0	0	0	0	0	0	603	903	0
628	7	0	0	0	0	0	0	200	300	0	0	0	0	0	0	0	200	903	0	0	0	0	0	0	0	603	903	0
628	8	0	0	0	0	0	0	200	300	0	0	0	0	0	0	0	200	903	0	0	0	0	0	0	0	603	903	0
628	9	0	0	0	0	0	0	200	300	0	0	0	0	0	0	0	200	903	0	0	0	0	0	0	0	603	903	0
629	0	0	0	0	0	0	0	200	300	0	0	0	0	0	0	0	200	903	0	0	0	0	0	0	0	603	903	0
629	1	0	0	0	0	0	0	200	300	0	0	0	0	0	0	0	200	903	0	0	0	0	0	0	0	603	903	0
629	2	0	0	0	0	0	0	200	300	0	0	0	0	0	0	0	200	903	0	0	0	0	0	0	0	603	903	0
629	3	0	0	0	0	0	0	200	300	0	0	0	0	0	0	0	200	903	0	0	0	0	0	0	0	603	903	0
629	4	0	0	0	0	0	0	200	300	0	0	0	0	0	0	0	200	903	0	0	0	0	0	0	0	603	903	0
629	5	0	0	0	0	0	0	200	300	0	0	0	0	0	0	0	200	903	0	0	0	0	0	0	0	603	903	0
629	6	0	0	0	0	0	0	200	300	0	0	0	0	0	0	0	200	903	0	0	0	0	0	0	0	603	903	0
629	7	0	0	0	0	0	0	200	300	0	0	0	0	0	0	0	200	903	0	0	0	0	0	0	0	603	903	0
629	8	0	0	0	0	0	0	200	300	0	0	0	0	0	0	0	200	903	0	0	0	0	0	0	0	603	903	0
629	9	0	0	0	0	0	0	200	300	0	0	0	0	0	0	0	200	903	0	0	0	0	0	0	0	603	903	0
630	0	0	0	0	0	0	0	200	300	0	0	0	0	0	0	0	200	903	0	0	0	0	0	0	0	603	903	0
630	1	0	0	0	0	0	0	200	300	0	0	0	0	0	0	0	200	903	0	0	0	0	0	0	0	603	903	0
630	2	0	0	0	0	0	0	200	300	0	0	0	0	0	0	0	200	903	0	0	0	0	0	0	0	603	903	0
630	3	0	0	0	0	0	0	200	300	0	0	0	0	0	0	0	200	903	0	0	0	0	0	0	0	603	903	0
630	4	0	0	0	0	0	0	200	300	0	0	0	0	0	0	0	200	903	0	0	0	0	0	0	0	603	903	0
630	5	0	0	0	0	0	0	200	300	0	0	0	0	0	0	0	200	903	0	0	0	0	0	0	0	603	903	0
630	6	0	0	0	0	0	0	200	300	0	0	0	0	0	0	0	200	903	0	0	0	0	0	0	0	603	903	0
630	7	0	0	0	0	0	0	200	300	0	0	0	0	0	0	0	200	903	0	0	0	0	0	0	0	603	903	0
630	8	0	0	0	0	0	0	200	300	0	0	0	0	0	0	0	200	903	0	0	0	0	0	0	0	603	903	0
630	9	0	0	0	0	0	0	200	300	0	0	0	0	0	0	0	200	903	0	0	0	0	0	0	0	603	903	0
631	0	0	0	0	0	0	0	200	300	0	0	0	0	0	0	0	200	903	0	0	0	0	0	0	0	603	903	0
631	1	0	0	0	0	0	0	200	300	0	0	0	0	0	0	0	200	903	0	0	0	0	0	0	0	603	903	0
631	2	0	0	0	0	0	0	200	300	0	0	0	0	0	0	0	200	903	0	0	0	0	0	0	0	603	903	0
631	3	0	0	0	0	0	0	200	300	0	0	0	0	0	0	0	200	903	0	0	0	0	0	0	0	603	903	0
631	4	0	0	0	0	0	0	200	300	0	0	0	0	0	0	0	200	903	0	0	0	0	0	0	0	603	903	0
631	5	0	0	0	0	0	0	200	300	0	0	0	0	0	0	0	200	903	0	0	0	0	0	0	0	603	903	0
631	6	0	0	0	0	0	0	200	300	0	0	0	0	0	0	0	200	903	0	0	0	0	0	0	0	603	903	0
631	7	0	0	0	0	0	0	200	300	0	0	0	0	0	0	0	200	903	0	0	0	0	0	0	0	603	903	0
631	8	0	0	0	0	0	0	200	300	0	0	0	0	0	0	0	200	903	0	0	0	0	0	0	0	603	903	0
631	9	0	0	0	0	0	0	200	300	0	0	0	0	0	0	0	200	903	0	0	0	0	0	0	0	603	903	0
632	0	0	0	0	0	0	0	200	300	0	0	0	0	0	0	0	200	903	0	0	0	0	0	0	0	603	903	0
632	1	0	0	0	0	0	0	200	300	0	0	0	0	0	0	0	200	903	0	0	0	0	0	0	0	603	903	0
632	2	0	0	0	0	0	0	200	300	0	0	0	0	0	0	0	200	903	0	0	0	0	0	0	0	603	903	0
632	3	0	0	0	0	0	0	200	300	0	0	0	0	0	0	0	200	903	0	0	0	0	0	0	0	603	903	0
632	4	0	0	0	0	0	0	200	300	0	0	0	0	0	0	0	200	903	0	0	0	0	0	0	0	603	903	0
632	5	0	0	0	0	0	0	200	300	0	0	0	0	0	0	0	200	903	0	0	0	0	0	0	0	603	903	0
632	6	0	0	0	0	0	0	200	300	0	0	0	0	0	0	0	200	903	0	0	0	0	0	0	0	603	903	0
632	7	0	0	0	0	0	0	200	300	0	0	0	0	0	0	0	200	903	0	0	0	0	0	0	0	603	903	0
632	8	0	0	0	0	0	0	200	300	0	0	0	0	0	0	0	200	903	0	0	0	0	0	0	0	603	903	0
632	9	0	0	0	0	0	0	200	300	0	0	0	0	0	0	0	200	903	0	0	0	0	0	0	0	603	903	0
633	0	0	0	0	0	0	0	200	300	0	0	0	0	0	0	0	200	903	0	0	0	0	0	0	0	603	903	0
633	1	0	0	0	0	0	0	200	300	0	0	0	0	0	0	0	200	903	0	0	0	0	0	0	0	603	903	0
633	2	0	0	0	0	0	0	200	300	0	0	0	0	0	0	0	200	903	0	0	0	0	0	0	0	603	903	0
633	3	0	0	0	0	0	0	200	300	0	0	0	0	0	0	0	200	903	0	0	0	0	0	0	0	603	903	0
633	4	0	0	0	0	0	0	200	300	0	0	0	0	0	0	0	200	903	0	0	0	0	0	0	0	603	903	0
633	5	0	0	0	0	0	0	200	300	0	0	0	0	0	0	0	200	903	0	0	0	0	0	0	0	603	903	0
633	6	0	0	0	0	0	0	200	300	0	0	0	0	0	0	0	200	903	0	0	0	0	0	0	0	603	903	0
633	7	0	0	0	0	0	0	200	300	0	0	0	0	0	0	0	200	903	0	0	0	0	0	0	0	603	903	0
633	8	0	0	0	0	0	0	200	300	0	0	0	0	0	0	0	200	903	0	0	0	0	0	0	0	603	903	0
633	9	0	0	0	0	0	0	200	300	0	0	0	0	0	0	0	200	903	0	0	0	0	0	0	0	603	903	0
634	0	0	0	0	0	0	0	200	300	0	0	0	0	0	0	0	200	903	0	0	0	0	0	0	0	603	903	0
634	1	0	0	0	0	0	0	200	300	0	0	0	0	0	0	0	200	903	0	0	0	0	0	0	0	603	903	0
634	2	0	0	0	0	0	0	200	300	0	0	0	0	0	0	0	200	903	0	0	0	0	0	0	0	603	903	0
634	3	0	0	0	0	0	0	200	300	0	0	0	0	0	0	0	200	903	0	0	0	0	0	0	0	603	903	0
634	4	0	0	0	0	0	0	200	300	0	0	0	0	0	0	0	200	903	0	0	0	0	0	0	0	603	903	0
634	5	0	0	0	0	0	0	200	300	0	0	0	0	0	0	0	200	903	0	0	0	0	0	0	0	603	903	0
634	6	0	0	0	0	0	0	200	300	0	0	0	0	0	0	0	200	903	0	0	0	0	0	0	0	603	903	0
634	7	0	0	0	0	0	0	200	300	0	0	0	0	0	0	0	200	903	0	0	0	0	0	0	0	603	903	0
634	8	0	0	0	0	0	0	200	300	0	0	0	0	0	0	0	200	903	0	0	0	0	0	0	0	603	903	0
634	9	0	0	0	0	0	0	200	300	0	0	0	0	0	0	0	200	903	0	0	0	0	0	0	0	603	903	0
635	0	0	0	0	0	0	0	200	300	0	0	0	0	0	0	0	200	903	0	0	0	0	0	0	0	603	903	0
635	1	0	0	0	0	0	0	200	300	0	0	0	0	0	0	0	200	903	0	0	0	0	0	0	0	603	903	0
635	2	0	0	0	0	0	0	200	300	0	0	0	0	0	0	0	200	903	0	0	0	0	0	0	0	603	903	0
635	3	0	0	0	0	0	0	200	300	0	0	0	0	0	0	0	200	903	0	0	0	0	0	0	0	603	903	0
635	4	0	0	0	0	0	0	200	300	0	0	0	0	0	0	0	200	903	0	0	0	0	0	0	0	603	903	0
635	5	0	0	0	0	0	0	200	300	0	0	0	0	0	0	0	200	903	0	0	0	0	0	0	0	603	903	0
635	6	0	0	0	0	0	0	200	300	0	0	0	0	0	0	0	200	903	0	0	0	0	0	0	0	603	903	0
635	7	0	0	0	0	0	0	200	300	0	0	0	0	0	0	0	200	903	0	0	0	0	0	0	0	603	903	0
635	8	0	0	0	0	0	0	200	300	0	0	0	0	0	0	0	200	903	0	0	0	0	0	0	0	603	903	0
635	9	0	0	0	0	0	0	200	300	0	0	0	0	0	0	0	200	903	0	0	0	0	0	0	0	603	903	0
636	0	0	0	0	0	0	0	200	300	0	0	0	0	0	0	0	200	903	0	0	0	0	0	0	0	603	903	0
636	1	0	0	0	0	0	0	200	300	0	0	0	0	0	0	0	200	903	0	0	0	0	0	0	0	603	903	0
636	2	0	0	0	0	0	0	200	300	0	0	0	0	0	0	0	200	903	0	0	0	0	0	0	0	603	903	0
636	3	0	0	0	0	0	0	200	300	0	0	0	0	0	0	0	200	903	0	0	0	0	0	0	0	603	903	0
636	4	0	0	0	0	0	0	200	300	0	0	0	0	0	0	0	200	903	0	0	0	0	0	0	0	603	903	0
636	5	0	0	0	0	0	0	200	300	0	0	0	0	0	0	0	200	903	0	0	0	0	0	0	0	603	903	0
636	6	0	0	0	0	0	0	200	300	0	0	0	0	0	0	0	200	903	0	0	0	0	0	0	0	603	903	0
636	7	0	0	0	0	0	0	200	300	0	0	0	0	0	0	0	200	903	0	0	0	0	0	0	0	603	903	0
636	8	0	0	0	0	0	0	200	300	0	0	0	0	0	0	0	200	903	0	0	0	0	0	0	0	603	903	0
636	9	0	0	0	0	0	0	200	300	0	0	0	0	0	0	0	200	903	0	0	0	0	0	0	0	603	903	0
637	0	0	0	0	0	0	0	200	300	0	0	0	0	0	0	0	200	903	0	0	0	0	0	0	0	603	903	0
637	1	0	0	0	0	0	0	200	300	0	0	0	0	0	0	0	200	903	0	0	0	0	0	0	0	603	903	0
637	2	0	0	0	0	0	0	200	300	0	0	0	0	0	0	0	200	903	0	0	0	0	0	0	0	603	903	0
637	3	0	0	0	0	0	0	200	300	0	0	0	0	0	0	0	200	903	0	0	0	0	0	0	0	603	903	0
637	4	0	0	0	0	0	0	200	300	0	0	0	0	0	0	0	200	903	0	0	0	0	0	0	0	603	903	0
637	5	0	0	0	0	0	0	200	300	0	0	0	0	0	0	0	200	903	0	0	0	0	0	0	0	603	903	0
637	6	0	0	0	0	0	0	200	300	0	0	0	0	0	0	0	200	903	0	0	0	0	0	0	0	603	903	0
637	7	0	0	0	0	0	0	200	300	0	0	0	0	0	0	0	200	903	0	0	0	0	0	0	0	603	903	0
637	8	0	0	0	0	0	0	200	300	0	0	0	0	0	0	0	200	903	0	0	0	0	0	0	0	603	903	0
637	9	0	0	0	0	0	0	200	300	0	0	0	0	0	0	0	200	903	0	0	0	0	0	0	0	603	903	0
638	0	0	0	0	0	0	0	200	300	0	0	0	0	0	0	0	200	903	0	0	0	0	0	0	0	603	903	0
638	1	0	0	0	0	0	0	200	300	0	0	0	0	0	0	0	200	903	0	0	0	0	0	0	0	603	903	0
638	2	0	0	0	0	0	0	200	300	0	0	0	0	0	0	0	200	903	0	0	0	0	0	0	0	603	903	0
638	3	0	0	0	0	0	0	200	300	0	0	0	0	0	0	0	200	903	0	0	0	0	0	0	0	603	903	0
638	4	0	0	0	0	0	0	200	300	0	0	0	0	0	0	0	200	903	0	0	0	0	0	0	0	603	903	0
638	5	0	0	0	0	0	0	200	300	0	0	0	0	0	0	0	200	903	0	0	0	0	0	0	0	603	903	0
638	6	0	0	0	0	0	0	200	300	0	0	0	0	0	0	0	200	903	0	0	0	0	0	0	0	603	903	0
638	7	0	0	0	0	0	0	200	300	0	0	0	0	0	0	0	200	903	0	0	0	0	0	0	0	603	903	0
638	8	0	0	0	0	0	0	200	300	0	0	0	0	0	0	0	200	903	0	0	0	0	0	0	0	603	903	0
638	9	0	0	0	0	0	0	200	300	0	0	0	0	0	0	0	200	903	0	0	0	0	0	0	0	603	903	0
639	0	0	0	0	0	0	0	200	300	0	0	0	0	0	0	0	200	903	0	0	0	0	0	0	0	603	903	0
639	1	0	0	0	0	0	0	200	300	0	0	0	0	0	0	0	200	903	0	0	0	0	0	0	0	603	903	0
639	2	0	0	0	0	0	0	200	300	0	0	0	0	0	0	0	200	903	0	0	0	0	0	0	0	603	903	0
639	3	0	0	0	0	0	0	200	300	0	0	0	0	0	0	0	200	903	0	0	0	0	0	0	0	603	903	0
639	4	0	0	0	0	0	0	200	300	0	0	0	0	0	0	0	200	903	0	0	0	0	0	0	0	603	903	0
639	5	0	0	0	0	0	0	200	300	0	0	0	0	0	0	0	200	903	0	0	0	0	0	0	0	603	903	0
639	6	0	0	0	0	0	0	200	300	0	0	0	0	0	0	0	200	903	0	0	0	0	0	0	0	603	903	0
639	7	0	0	0	0	0	0	200	300	0	0	0	0	0	0	0	200	903	0	0	0	0	0	0	0	603	903	0
639	8	0	0	0	0	0	0	200	300	0	0	0	0	0	0	0	200	903	0	0	0	0	0	0	0	603	903	0
639	9	0	0	0	0	0	0	200	300	0	0	0	0	0	0	0	200	903	0	0	0	0	0	0	0	603	903	0
640	0	0	0	0	0	0	0	200	300	0	0	0	0	0	0	0	200	903	0	0	0	0	0	0	0	603	903	0
640	1	0	0	0	0	0	0	200	300	0	0	0	0	0	0	0	200	903	0	0	0	0	0	0	0	603	903	0
640	2	0	0	0	0	0	0	200	300	0	0	0	0	0	0	0	200	903	0	0	0	0	0	0	0	603	903	0
640	3	0	0	0	0	0	0	200	300	0	0	0	0	0	0	0	200	903	0	0	0	0	0	0	0	603	903	0
640	4	0	0	0	0	0	0	200	300	0	0	0	0	0	0	0	200	903	0	0	0	0	0	0	0	603	903	0
640	5	0	0	0	0	0	0	200	300	0	0	0	0	0	0	0	200	903	0	0	0	0	0	0	0	603	903	0
640	6	0	0	0	0	0	0	200	300	0	0	0	0	0	0	0	200	903	0	0	0	0	0	0	0	603	903	0
640	7	0	0	0	0	0	0	200	300	0	0	0	0	0	0	0	200	903	0	0	0	0	0	0	0	603	903	0
640	8	0	0	0	0	0	0	200	300	0	0	0	0	0	0	0	200	903	0	0	0	0	0	0	0	603	903	0
640	9	0	0	0	0	0	0	200	300	0	0	0	0	0	0	0	200	903	0	0	0	0	0	0	0	603	903	0
641	0	0	0	0	0	0	0	200	300	0	0	0	0	0	0	0	200	903	0	0	0	0	0	0	0	603	903	0
641	1	0	0	0	0	0	0	200	300	0	0	0	0	0	0	0	200	903	0	0	0	0	0	0	0	603	903	0
641	2	0	0	0	0	0	0	200	300	0	0	0	0	0	0	0	200	903	0	0	0	0	0	0	0	603	903	0
641	3	0	0	0	0	0	0	200	300	0	0	0	0	0	0	0	200	903	0	0	0	0	0	0	0	603	903	0
641	4	0	0	0	0	0	0	200	300	0	0	0	0	0	0	0	200	903	0	0	0	0	0	0	0	603	903	0
641	5	0	0	0	0	0	0	200	300	0	0	0	0	0	0	0	200	903	0	0	0	0	0	0	0	603	903	0
641	6	0	0	0	0	0	0	200	300	0	0	0	0	0	0	0	200	903	0	0	0	0	0	0	0	603	903	0
641	7	0	0	0	0	0	0	200	300	0	0	0	0	0	0	0	200	903	0	0	0	0	0	0	0	603	903	0
641	8	0	0	0	0	0	0	200	300	0	0	0	0	0	0	0	200	903	0	0	0	0	0	0	0	603	903	0
641	9	0	0	0	0	0	0	200	300	0	0	0	0	0	0	0	200	903	0	0	0	0	0	0	0	603	903	0
642	0	0	0	0	0	0	0	200	300	0	0	0	0	0	0	0	200	903	0	0	0	0	0	0	0	603	903	0
642	1	0	0	0	0	0	0	200	300	0	0	0	0	0	0	0	200	903	0	0	0	0	0	0	0	603	903	0
642	2	0	0	0	0	0	0	200	300	0	0	0	0	0	0	0	200	903	0	0	0	0	0	0	0	603	903	0
642	3	0	0	0	0	0	0	200	300	0	0	0	0	0	0	0	200	903	0	0	0	0	0	0	0	603	903	0
642	4	0	0	0	0	0	0	200	300	0	0	0	0	0	0	0	200	903	0	0	0	0	0	0	0	603	903	0
642	5	0	0	0	0	0	0	200	300	0	0	0	0	0	0	0	200	903	0	0	0	0	0	0	0	603	903	0
642	6	0	0	0	0	0	0	200	300	0	0	0	0	0	0	0	200	903	0	0	0	0	0	0	0	603	903	0
642	7	0	0	0	0	0	0	200	300	0	0	0	0	0	0	0	200	903	0	0	0	0	0	0	0	603	903	0
642	8	0	0	0	0	0	0	200	300	0	0	0	0	0	0	0	200	903	0	0	0	0	0	0	0	603	903	0
642	9	0	0	0	0	0	0	200	300	0	0	0	0	0	0	0	200	903	0	0	0	0	0	0	0	603	903	0
643	0	0	0	0	0	0	0	200	300	0	0	0	0	0	0	0	200	903	0	0	0	0	0	0	0	603	903	0
643	1	0	0	0	0	0	0	200	300	0	0	0	0	0	0	0	200	903	0	0	0	0	0	0	0	603	903	0
643	2	0	0	0	0	0	0	200	300	0	0	0	0	0	0	0	200	903	0	0	0	0	0	0	0	603	903	0
643	3	0	0	0	0	0	0	200	300	0	0	0	0	0	0	0	200	903	0	0	0	0	0	0	0	603	903	0
643	4	0	0	0	0	0	0	200	300	0	0	0	0	0	0	0	200	903	0	0	0	0	0	0	0	603	903	0
643	5	0	0	0	0	0	0	200	300	0	0	0	0	0	0	0	200	903	0	0	0	0	0	0	0	603	903	0
643	6	0	0	0	0	0	0	200	300	0	0	0	0	0	0	0	200	903	0	0	0	0	0	0	0	603	903	0
643	7	0	0	0	0	0	0	200	300	0	0	0	0	0	0	0	200	903	0	0	0	0	0	0	0	603	903	0
643	8	0	0	0	0	0	0	200	300	0	0	0	0	0	0	0	200	903	0	0	0	0	0	0	0	603	903	0
643	9	0	0	0	0	0	0	200	300	0	0	0	0	0	0	0	200	903	0	0	0	0	0	0	0	603	903	0
644	0	0	0	0	0	0	0	200	300	0	0	0	0	0	0	0	200	903	0	0	0	0	0	0	0	603	903	0
644	1	0	0	0	0	0	0	200	300	0	0	0	0	0	0	0	200	903	0	0	0	0	0	0	0	603	903	0
644	2	0	0	0	0	0	0	200	300	0	0	0	0	0	0	0	200	903	0	0	0	0	0	0	0	603	903	0
644	3	0	0	0	0	0	0	200	300	0	0	0	0	0	0	0	200	903	0	0	0	0	0	0	0	603	903	0
644	4	0	0	0	0	0	0	200	300	0	0	0	0	0	0	0	200	903	0	0	0	0	0	0	0	603	903	0
644	5	0	0	0	0	0	0	200	300	0	0	0	0	0	0	0	200	903	0	0	0	0	0	0	0	603	903	0
644	6	0	0	0	0	0	0	200	300	0	0	0	0	0	0	0	200	903	0	0	0	0	0	0	0	603	903	0
644	7	0	0	0	0	0	0	200	300	0	0	0	0	0	0	0	200	903	0	0	0	0	0	0	0	603	903	0
644	8	0	0	0	0	0	0	200	300	0	0	0	0	0	0	0	200	903	0	0	0	0	0	0	0	603	903	0
644	9	0	0	0	0	0	0	200	300	0	0	0	0	0	0	0	200	903	0	0	0	0	0	0	0	603	903	0
645	0	0	0	0	0	0	0	200	300	0	0	0	0	0	0	0	200	903	0	0	0	0	0	0	0	603	903	0
645	1	0	0	0	0	0	0	200	300	0	0	0	0	0	0	0	200	903	0	0	0	0	0	0	0	603	903	0
645	2	0	0	0	0	0	0	200	300	0	0	0	0	0	0	0	200	903	0	0	0	0	0	0	0	603	903	0
645	3	0	0	0	0	0	0	200	300	0	0	0	0	0	0	0	200	903	0	0	0	0	0	0	0	603	903	0
645	4	0	0	0	0	0	0	200	300	0	0	0	0	0	0	0	200	903	0	0	0	0	0	0	0	603	903	0
645	5	0	0	0	0	0	0	200	300	0	0	0	0	0	0	0	200	903	0	0	0	0	0	0	0	603	903	0
645	6	0	0	0	0	0	0	200	300	0	0	0	0	0	0	0	200	903	0	0	0	0	0	0	0	603	903	0
645	7	0	0	0	0	0	0	200	300	0	0	0	0	0	0	0	200	903	0	0	0	0	0	0	0	603	903	0
645	8	0	0	0	0	0	0	200	300	0	0	0	0	0	0	0	200	903	0	0	0	0	0	0	0	603	903	0
645	9	0	0	0	0	0	0	200	300	0	0	0	0	0	0	0	200	903	0	0	0	0	0	0	0	603	903	0
646	0	0	0	0	0	0	0	200	300	0	0	0	0	0	0	0	200	903	0	0	0	0	0	0	0	603	903	0
646	1	0	0	0	0	0	0	200	300	0	0	0	0	0	0	0	200	903	0	0	0	0	0	0	0	603	903	0
646	2	0	0	0	0	0	0	200	300	0	0	0	0	0	0	0	200	903	0	0	0	0	0	0	0	603	903	0
646	3	0	0	0	0	0	0	200	300	0	0	0	0	0	0	0	200	903	0	0	0	0	0	0	0	603	903	0
646	4	0	0	0	0	0	0	200	300	0	0	0	0	0	0	0	200	903	0	0	0	0	0	0	0	603	903	0
646	5	0	0	0	0	0	0	200	300	0	0	0	0	0	0	0	200	903	0	0	0	0	0	0	0	603	903	0
646	6	0	0	0	0	0	0	200	300	0	0	0	0	0	0	0	200	903	0	0	0	0	0	0	0	603	903	0
646	7	0	0	0	0	0	0	200	300	0	0	0	0	0	0	0	200	903	0	0	0	0	0	0	0	603	903	0
646	8	0	0	0	0	0	0	200	300	0	0	0	0	0	0	0	200	903	0	0	0	0	0	0	0	603	903	0
646	9	0	0	0	0	0	0	200	300	0	0	0	0	0	0	0	200	903	0	0	0	0	0	0	0	603	903	0
647	0	0	0	0	0	0	0	200	300	0	0	0	0	0	0	0	200	903	0	0	0	0	0	0	0	603	903	0
647	1	0	0	0	0	0	0	200	300	0	0	0	0	0	0	0	200	903	0	0	0	0	0	0	0	603	903	0
647	2	0	0	0	0	0	0	200	300	0	0	0	0	0	0	0	200	903	0	0	0	0	0	0	0	603	903	0
647	3	0	0	0	0	0	0	200	300	0	0	0	0	0	0	0	200	903	0	0	0	0	0	0	0	603	903	0
647	4	0	0	0	0	0	0	200	300	0	0	0	0	0	0	0	200	903	0	0	0	0	0	0	0	603	903	0
647	5	0	0	0	0	0	0	200	300	0	0	0	0	0	0	0	200	903	0	0	0	0	0	0	0	603	903	0
647	6	0	0	0	0	0	0	200	300	0	0	0	0	0	0	0	200	903	0	0	0	0	0	0	0	603	903	0
647	7	0	0	0	0	0	0	200	300	0	0	0	0	0	0	0	200	903	0	0	0	0	0	0	0	603	903	0
647	8	0	0	0	0	0	0	200	300	0	0	0	0	0	0	0	200	903	0	0	0	0	0	0	0	603	903	0
647	9	0	0	0	0	0	0	200	300	0	0	0	0	0	0	0	200	903	0	0	0	0	0	0	0	603	903	0
648	0	0	0	0	0	0	0	200	300	0	0	0	0	0	0	0	200	903	0	0	0	0	0	0	0	603	903	0
648	1	0	0	0	0	0	0	200	300	0	0	0	0	0	0	0	200	903	0	0	0	0	0	0	0	603	903	0
648	2	0	0	0	0	0	0	200	300	0	0	0	0	0	0	0	200	903	0	0	0	0	0	0	0	603	903	0
648	3	0	0	0	0	0	0	200	300	0	0	0	0	0	0	0	200	903	0	0	0	0	0	0	0	603	903	0
648	4	0	0	0	0	0	0	200	300	0	0	0	0	0	0	0	200	903	0	0	0	0	0	0	0	603	903	0
648	5	0	0	0	0	0	0	200	300	0	0	0	0	0	0	0	200	903	0	0	0	0	0	0	0	603	903	0
648	6	0	0	0	0	0	0	200	300	0	0	0	0	0	0	0	200	903	0	0	0	0	0	0	0	603	903	0
648	7	0	0	0	0	0	0	200	300	0	0	0	0	0	0	0	200	903	0	0	0	0	0	0	0	603	903	0
648	8	0	0	0	0	0	0	200	300	0	0	0	0	0	0	0	200	903	0	0	0	0	0	0	0	603	903	0
648	9	0	0	0	0	0	0	200	300	0	0	0	0	0	0	0	200	903	0	0	0	0	0	0	0	603	903	0
649	0	0	0	0	0	0	0	200	300	0	0	0	0	0	0	0	200	903	0	0	0	0	0	0	0	603	903	0
649	1	0	0	0	0	0	0	200	300	0	0	0	0	0	0	0	200	903	0	0	0	0	0	0	0	603	903	0
649	2	0	0	0	0	0	0	200	300	0	0	0	0	0	0	0	200	903	0	0	0	0	0	0	0	603	903	0
649	3	0	0	0	0	0	0	200	300	0	0	0	0	0	0	0	200	903	0	0	0	0	0	0	0	603	903	0
649	4	0	0	0	0	0	0	200	300	0	0	0	0	0	0	0	200	903	0	0	0	0	0	0	0	603	903	0
649	5	0	0	0	0	0	0	200	300	0	0	0	0	0	0	0	200	903	0	0	0	0	0	0	0	603	903	0
649	6	2.56577	10.4856	-3.90753	93.3808	-154.551	-1580.38	160.448	276.102	0	0	0	0	0	0	0	200	903	0	0	0	0	0	0	0	603	903	0
649	7	3.78647	12.7744	-5.43341	93.3808	-398.692	-2083.92	126.622	282.814	0	0	0	0	0	0	0	200	903	0	0	0	0	0	0	0	603	903	0
649	8	3.93906	13.3847	-6.95929	734.25	-581.797	-2038.15	116.4	194.494	0	0	0	0	0	0	0	200	903	0	0	0	0	0	0	0	603	903	0
649	9	3.32871	10.4856	-7.56964	368.039	-642.832	-1031.07	115.078	251.38	0	0	0	0	0	0	0	200	903	0	0	0	0	0	0	0	603	903	0
650	0	4.85459	7.89158	-4.51788	825.803	-337.657	-847.961	125.262	117.215	0	0	0	0	0	0	0	200	903	0	0	0	0	0	0	0	603	903	0
650	1	3.78647	9.26487	-5.12823	1008.91	-459.727	-1351.5	110.354	103.264	0	0	0	0	0	0	0	200	903	0	0	0	0	0	0	0	603	903	0
650	2	5.31235	12.4692	-5.12823	642.697	-459.727	-1397.28	110.354	174.675	0	0	0	0	0	0	0	200	903	0	0	0	0	0	0	0	603	903	0
650	3	4.09165	10.7908	-6.95929	368.039	-764.903	-893.737	90.0889	247.115	0	0	0	0	0	0	0	200	903	0	0	0	0	0	0	0	603	903	0
650	4	0	0	0	0	0	0	200	300	0	0	0	0	0	0	0	200	903	0	0	0	0	0	0	0	603	903	0
650	5	1.49766	7.89158	-7.56964	459.592	-642.832	-1122.62	115.078	239.285	0	0	0	0	0	0	0	200	903	0	0	0	0	0	0	0	603	903	0
650	6	1.95542	10.0278	-6.65411	551.144	-825.938	-1214.17	75.8756	217.172	0	0	0	0	0	0	0	200	903	0	0	0	0	0	0	0	603	903	0
650	7	3.4813	8.65452	-5.12823	459.592	-703.868	-1626.16	62.7466	210.38	0	0	0	0	0	0	0	200	903	0	0	0	0	0	0	0	603	903	0
650	8	3.02354	9.57005	-7.56964	917.356	-581.797	-2038.15	123.141	178.811	0	0	0	0	0	0	0	200	903	0	0	0	0	0	0	0	603	903	0
650	9	1.34507	10.7908	-9.70587	1008.91	-764.903	-1992.37	121.192	196.052	0	0	0	0	0	0	0	200	903	0	0	0	0	0	0	0	603	903	0
651	0	0.276953	10.9433	-9.09552	734.25	-1009.04	-2038.15	89.0615	219.273	0	0	0	0	0	0	0	200	903	0	0	0	0	0	0	0	603	903	0
651	1	2.41318	10.0278	-5.12823	1558.22	-1131.11	-2129.7	-20.5659	-3.85211	0	0	0	0	0	0	0	200	903	0	0	0	0	0	0	0	603	903	0
651	2	1.65024	10.1804	-7.26447	1375.12	-703.868	-2129.7	103.108	110.706	0	0	0	0	0	0	0	200	903	0	0	0	0	0	0	0	603	903	0
651	3	2.2606	11.7063	-6.65411	2107.54	-886.973	-2404.36	66.703	-16.7275	0	0	0	0	0	0	0	200	903	0	0	0	0	0	0	0	603	903	0
651	4	2.56577	12.927	-9.70587	1283.57	-1253.18	-2495.91	70.8839	167.754	0	0	0	0	0	0	0	200	903	0	0	0	0	0	0	0	603	903	0
651	5	1.03989	12.927	-9.4007	1375.12	-1253.18	-2450.13	66.6924	153.722	0	0	0	0	0	0	0	200	903	0	0	0	0	0	0	0	603	903	0
651	6	0.429541	12.164	-10.6214	1283.57	-1192.15	-2312.8	87.7597	179.153	0	0	0	0	0	0	0	200	903	0	0	0	0	0	0	0	603	903	0
651	7	2.56577	13.8425	-9.70587	1466.67	-1375.25	-2724.79	58.3069	148.888	0	0	0	0	0	0	0	200	903	0	0	0	0	0	0	0	603	903	0
651	8	1.65024	14.4529	-10.6214	1558.22	-1436.29	-2724.79	64.774	153.294	0	0	0	0	0	0	0	200	903	0	0	0	0	0	0	0	603	903	0
651	9	0.734717	13.3847	-10.3162	1924.44	-1497.32	-2679.02	54.8573	113.455	0	0	0	0	0	0	0	200	903	0	0	0	0	0	0	0	603	903	0
652	0	0.887305	14.4529	-10.9266	1741.33	-1314.22	-2679.02	79.7226	140.633	0	0	0	0	0	0	0	200	903	0	0	0	0	0	0	0	603	903	0
652	1	-0.0282228	13.3847	-10.6214	1924.44	-1131.11	-2953.67	93.5062	118.815	0	0	0	0	0	0	0	200	903	0	0	0	0	0	0	0	603	903	0
652	2	1.03989	14.3003	-11.8421	2015.99	-1375.25	-2679.02	83.8674	129.761	0	0	0	0	0	0	0	200	903	0	0	0	0	0	0	0	603	903	0
652	3	1.34507	13.0796	-9.09552	1649.78	-1497.32	-2953.67	35.3777	118.616	0	0	0	0	0	0	0	200	903	0	0	0	0	0	0	0	603	903	0
652	4	2.2606	13.3847	-10.011	1832.88	-1314.22	-2587.46	68.7231	116.914	0	0	0	0	0	0	0	200	903	0	0	0	0	0	0	0	603	903	0
652	5	1.80283	14.4529	-9.09552	2107.54	-1497.32	-2541.69	35.3777	68.288	0	0	0	0	0	0	0	200	903	0	0	0	0	0	0	0	603	903	0
652	6	1.03989	14.1477	-10.6214	1649.78	-1558.36	-2358.58	53.2811	144.674	0	0	0	0	0	0	0	200	903	0	0	0	0	0	0	0	603	903	0
652	7	0.887305	12.7744	-11.8421	2199.09	-1619.4	-2541.69	63.251	114.299	0	0	0	0	0	0	0	200	903	0	0	0	0	0	0	0	603	903	0
652	8	1.65024	14.1477	-10.6214	2473.75	-1375.25	-2541.69	70.5204	67.0973	0	0	0	0	0	0	0	200	903	0	0	0	0	0	0	0	603	903	0
652	9	0.887305	13.8425	-10.011	2565.3	-1253.18	-2724.79	74.8199	43.7526	0	0	0	0	0	0	0	200	903	0	0	0	0	0	0	0	603	903	0
653	0	0.124365	12.6218	-10.6214	2565.3	-1802.5	-2953.67	30.2953	58.4777	0	0	0	0	0	0	0	200	903	0	0	0	0	0	0	0	603	903	0
653	1	0.429541	12.7744	-11.8421	2199.09	-1558.36	-2679.02	68.4051	114.299	0	0	0	0	0	0	0	200	903	0	0	0	0	0	0	0	603	903	0
653	2	1.34507	12.0115	-9.09552	2290.65	-1558.36	-2770.57	28.6673	48.1566	0	0	0	0	0	0	0	200	903	0	0	0	0	0	0	0	603	903	0
653	3	0.429541	12.6218	-11.8421	1832.88	-1314.22	-2770.57	89.0214	145.223	0	0	0	0	0	0	0	200	903	0	0	0	0	0	0	0	603	903	0
653	4	0.429541	13.6899	-11.2318	1924.44	-1680.43	-3045.23	50.3857	128.661	0	0	0	0	0	0	0	200	903	0	0	0	0	0	0	0	603	903	0
653	5	1.34507	13.2322	-10.9266	2199.09	-1497.32	-2816.34	62.9648	98.739	0	0	0	0	0	0	0	200	903	0	0	0	0	0	0	0	603	903	0
653	6	2.41318	14.1477	-10.3162	1558.22	-1558.36	-2862.12	48.9408	148.954	0	0	0	0	0	0	0	200	903	0	0	0	0	0	0	0	603	903	0
653	7	1.49766	14.758	-11.2318	1649.78	-1375.25	-2953.67	77.5565	153.115	0	0	0	0	0	0	0	200	903	0	0	0	0	0	0	0	603	903	0
653	8	0.887305	13.5373	-12.4525	2839.96	-1497.32	-2770.57	79.7566	71.9355	0	0	0	0	0	0	0	200	903	0	0	0	0	0	0	0	603	903	0
653	9	1.34507	13.8425	-9.70587	2656.86	-1985.61	-2587.46	-4.57784	26.2629	0	0	0	0	0	0	0	200	903	0	0	0	0	0	0	0	603	903	0
654	0	-0.180811	13.3847	-9.4007	2382.2	-1741.47	-2907.9	14.7514	46.5933	0	0	0	0	0	0	0	200	903	0	0	0	0	0	0	0	603	903	0
654	1	0.887305	13.3847	-10.3162	2565.3	-1375.25	-2221.25	66.6901	51.333	0	0	0	0	0	0	0	200	903	0	0	0	0	0	0	0	603	903	0
654	2	0.734717	13.0796	-13.6732	2199.09	-1802.5	-2724.79	68.1723	139.167	0	0	0	0	0	0	0	200	903	0	0	0	0	0	0	0	603	903	0
654	3	0.276953	13.2322	-12.1473	1832.88	-1558.36	-2907.9	71.7112	149.112	0	0	0	0	0	0	0	200	903	0	0	0	0	0	0	0	603	903	0
654	4	0.582129	13.3847	-12.1473	1832.88	-1619.4	-2816.34	66.6866	149.112	0	0	0	0	0	0	0	200	903	0	0	0	0	0	0	0	603	903	0
654	5	-0.0282228	12.927	-10.6214	2015.99	-1497.32	-2633.24	59.0275	110.196	0	0	0	0	0	0	0	200	903	0	0	0	0	0	0	0	603	903	0
654	6	0.887305	11.2485	-9.4007	1741.33	-1680.43	-2770.57	21.2441	114.766	0	0	0	0	0	0	0	200	903	0	0	0	0	0	0	0	603	903	0
654	7	2.10801	12.927	-13.6732	2290.65	-1375.25	-2862.12	99.4194	132.471	0	0	0	0	0	0	0	200	903	0	0	0	0	0	0	0	603	903	0
654	8	0.887305	12.4692	-12.4525	2290.65	-1436.29	-2679.02	84.6581	116.049	0	0	0	0	0	0	0	200	903	0	0	0	0	0	0	0	603	903	0
654	9	0.124365	12.0115	-12.1473	2382.2	-1619.4	-2633.24	66.6866	103.89	0	0	0	0	0	0	0	200	903	0	0	0	0	0	0	0	603	903	0
655	0	1.65024	12.164	-9.09552	2839.96	-1497.32	-2724.79	35.3777	-12.2375	0	0	0	0	0	0	0	200	903	0	0	0	0	0	0	0	603	903	0
655	1	0.582129	10.4856	-10.3162	2199.09	-1192.15	-2724.79	84.4394	86.8315	0	0	0	0	0	0	0	200	903	0	0	0	0	0	0	0	603	903	0
655	2	0.887305	12.164	-9.4007	2015.99	-1558.36	-2862.12	34.2293	85.549	0	0	0	0	0	0	0	200	903	0	0	0	0	0	0	0	603	903	0
655	3	0.124365	11.8589	-12.1473	1832.88	-1497.32	-2770.57	76.7358	149.112	0	0	0	0	0	0	0	200	903	0	0	0	0	0	0	0	603	903	0
655	4	1.49766	13.2322	-7.87482	3114.62	-1436.29	-2724.79	17.6098	-95.5166	0	0	0	0	0	0	0	200	903	0	0	0	0	0	0	0	603	903	0
655	5	0.276953	12.6218	-11.5369	2015.99	-1375.25	-2907.9	80.7954	125.258	0	0	0	0	0	0	0	200	903	0	0	0	0	0	0	0	603	903	0
655	6	-0.638574	11.7063	-10.011	1741.33	-1558.36	-2679.02	44.336	126.059	0	0	0	0	0	0	0	200	903	0	0	0	0	0	0	0	603	903	0
655	7	0.429541	12.6218	-10.9266	1832.88	-1558.36	-2541.69	57.3789	132.255	0	0	0	0	0	0	0	200	903	0	0	0	0	0	0	0	603	903	0
655	8	0.124365	13.0796	-10.3162	1832.88	-1619.4	-2541.69	43.0244	122.33	0	0	0	0	0	0	0	200	903	0	0	0	0	0	0	0	603	903	0
655	9	1.19248	11.2485	-11.8421	1832.88	-1436.29	-2724.79	78.7133	145.223	0	0	0	0	0	0	0	200	903	0	0	0	0	0	0	0	603	903	0
656	0	0.124365	11.4011	-11.2318	1832.88	-1375.25	-2724.79	77.5565	136.812	0	0	0	0	0	0	0	200	903	0	0	0	0	0	0	0	603	903	0
656	1	0.887305	11.2485	-12.1473	2015.99	-1314.22	-2541.69	91.8095	134.038	0	0	0	0	0	0	0	200	903	0	0	0	0	0	0	0	603	903	0
656	2	-0.333399	11.2485	-9.4007	1375.12	-1253.18	-2404.36	66.6924	153.722	0	0	0	0	0	0	0	200	903	0	0	0	0	0	0	0	603	903	0
656	3	1.49766	11.5537	-9.4007	1649.78	-1314.22	-2770.57	60.1998	124.505	0	0	0	0	0	0	0	200	903	0	0	0	0	0	0	0	603	903	0
656	4	1.80283	11.7063	-10.011	2656.86	-1009.04	-2541.69	99.207	34.6074	0	0	0	0	0	0	0	200	903	0	0	0	0	0	0	0	603	903	0
656	5	1.19248	11.7063	-10.011	1649.78	-1436.29	-1992.37	56.5295	135.204	0	0	0	0	0	0	0	200	903	0	0	0	0	0	0	0	603	903	0
656	6	-0.791162	10.333	-10.3162	1741.33	-1436.29	-2175.48	60.7737	131.205	0	0	0	0	0	0	0	200	903	0	0	0	0	0	0	0	603	903	0
656	7	0.734717	11.8589	-9.4007	2473.75	-1009.04	-2267.03	92.6629	36.8544	0	0	0	0	0	0	0	200	903	0	0	0	0	0	0	0	603	903	0
656	8	-0.180811	11.5537	-7.26447	2107.54	-1131.11	-2541.69	44.295	9.88351	0	0	0	0	0	0	0	200	903	0	0	0	0	0	0	0	603	903	0
656	9	0.429541	11.7063	-9.09552	1741.33	-1619.4	-2770.57	21.9568	108.551	0	0	0	0	0	0	0	200	903	0	0	0	0	0	0	0	603	903	0
657	0	1.03989	10.9433	-11.5369	1741.33	-1436.29	-2358.58	75.505	149.065	0	0	0	0	0	0	0	200	903	0	0	0	0	0	0	0	603	903	0
657	1	0.429541	10.6382	-9.09552	2015.99	-764.903	-2221.25	115.903	78.3537	0	0	0	0	0	0	0	200	903	0	0	0	0	0	0	0	603	903	0
657	2	-0.180811	8.65452	-11.8421	1558.22	-1131.11	-2404.36	104.484	168.417	0	0	0	0	0	0	0	200	903	0	0	0	0	0	0	0	603	903	0
657	3	-0.638574	10.7908	-9.4007	1283.57	-1558.36	-2450.13	34.2293	163.46	0	0	0	0	0	0	0	200	903	0	0	0	0	0	0	0	603	903	0
657	4	1.65024	10.6382	-8.48517	1283.57	-1253.18	-2358.58	52.3089	148.728	0	0	0	0	0	0	0	200	903	0	0	0	0	0	0	0	603	903	0
657	5	2.71836	11.4011	-10.9266	1832.88	-1375.25	-1809.26	74.1367	132.255	0	0	0	0	0	0	0	200	903	0	0	0	0	0	0	0	603	903	0
657	6	1.80283	11.2485	-9.4007	1649.78	-1192.15	-2541.69	73.1851	124.505	0	0	0	0	0	0	0	200	903	0	0	0	0	0	0	0	603	903	0
657	7	0.276953	11.7063	-10.6214	1466.67	-1009.04	-2312.8	104.999	161.913	0	0	0	0	0	0	0	200	903	0	0	0	0	0	0	0	603	903	0
657	8	1.34507	11.4011	-9.09552	2107.54	-1680.43	-2450.13	15.2464	68.288	0	0	0	0	0	0	0	200	903	0	0	0	0	0	0	0	603	903	0
657	9	-0.638574	11.5537	-9.4007	1832.88	-1497.32	-2404.36	40.7219	105.027	0	0	0	0	0	0	0	200	903	0	0	0	0	0	0	0	603	903	0
658	0	1.19248	11.4011	-9.70587	2382.2	-1253.18	-2267.03	70.8839	54.561	0	0	0	0	0	0	0	200	903	0	0	0	0	0	0	0	603	903	0
658	1	-0.0282228	10.333	-10.011	1649.78	-1436.29	-2312.8	56.5295	135.204	0	0	0	0	0	0	0	200	903	0	0	0	0	0	0	0	603	903	0
658	2	0.429541	10.333	-11.2318	1832.88	-1192.15	-2587.46	93.859	136.812	0	0	0	0	0	0	0	200	903	0	0	0	0	0	0	0	603	903	0
658	3	-0.180811	10.4856	-10.9266	2015.99	-1253.18	-2175.48	85.3086	115.497	0	0	0	0	0	0	0	200	903	0	0	0	0	0	0	0	603	903	0
658	4	0.429541	10.0278	-9.4007	1008.91	-1558.36	-2221.25	34.2293	192.677	0	0	0	0	0	0	0	200	903	0	0	0	0	0	0	0	603	903	0
658	5	-0.0282228	9.57005	-9.09552	1466.67	-1436.29	-2358.58	42.0882	138.748	0	0	0	0	0	0	0	200	903	0	0	0	0	0	0	0	603	903	0
658	6	1.19248	10.0278	-8.48517	1558.22	-1009.04	-2267.03	81.0815	116.359	0	0	0	0	0	0	0	200	903	0	0	0	0	0	0	0	603	903	0
658	7	1.03989	9.72264	-10.6214	1375.12	-1070.08	-1946.59	99.2526	170.533	0	0	0	0	0	0	0	200	903	0	0	0	0	0	0	0	603	903	0
658	8	0.582129	9.87522	-7.56964	2382.2	-1314.22	-2083.92	26.3829	-14.7044	0	0	0	0	0	0	0	200	903	0	0	0	0	0	0	0	603	903	0
658	9	0.429541	9.72264	-10.011	1832.88	-1253.18	-2129.7	74.8199	116.914	0	0	0	0	0	0	0	200	903	0	0	0	0	0	0	0	603	903	0
659	0	-0.333399	9.72264	-7.56964	1924.44	-948.008	-2221.25	74.7618	45.7692	0	0	0	0	0	0	0	200	903	0	0	0	0	0	0	0	603	903	0
659	1	0.887305	9.41746	-7.56964	1375.12	-1009.04	-1809.26	66.6987	118.338	0	0	0	0	0	0	0	200	903	0	0	0	0	0	0	0	603	903	0
659	2	2.41318	9.41746	-7.26447	1741.33	-1314.22	-1763.49	19.0893	60.2948	0	0	0	0	0	0	0	200	903	0	0	0	0	0	0	0	603	903	0
659	3	0.582129	9.26487	-10.6214	1192.01	-1009.04	-1900.82	104.999	187.772	0	0	0	0	0	0	0	200	903	0	0	0	0	0	0	0	603	903	0
659	4	-0.333399	8.50193	-9.09552	1375.12	-1131.11	-1855.04	75.6406	148.814	0	0	0	0	0	0	0	200	903	0	0	0	0	0	0	0	603	903	0
659	5	2.10801	7.89158	-9.4007	1283.57	-886.973	-2450.13	105.648	163.46	0	0	0	0	0	0	0	200	903	0	0	0	0	0	0	0	603	903	0
659	6	-0.0282228	9.72264	-7.26447	1741.33	-1375.25	-1763.49	10.6874	60.2948	0	0	0	0	0	0	0	200	903	0	0	0	0	0	0	0	603	903	0
659	7	0.582129	9.26487	-7.56964	1375.12	-1009.04	-2221.25	66.6987	118.338	0	0	0	0	0	0	0	200	903	0	0	0	0	0	0	0	603	903	0
659	8	1.19248	9.41746	-10.011	1008.91	-1253.18	-1855.04	74.8199	199.221	0	0	0	0	0	0	0	200	903	0	0	0	0	0	0	0	603	903	0
659	9	1.03989	9.11228	-9.09552	1832.88	-1131.11	-2038.15	75.6406	98.4851	0	0	0	0	0	0	0	200	903	0	0	0	0	0	0	0	603	903	0
660	0	-0.485986	8.80711	-8.79034	1649.78	-1375.25	-1809.26	43.5494	112.319	0	0	0	0	0	0	0	200	903	0	0	0	0	0	0	0	603	903	0
660	1	1.03989	8.50193	-6.65411	1741.33	-1070.08	-1946.59	39.1854	38.3077	0	0	0	0	0	0	0	200	903	0	0	0	0	0	0	0	603	903	0
660	2	-0.180811	8.34935	-8.79034	1375.12	-1314.22	-1763.49	50.4928	143.565	0	0	0	0	0	0	0	200	903	0	0	0	0	0	0	0	603	903	0
660	3	0.582129	8.34935	-7.56964	1375.12	-642.832	-2129.7	115.078	118.338	0	0	0	0	0	0	0	200	903	0	0	0	0	0	0	0	603	903	0
660	4	1.34507	7.12864	-9.4007	1466.67	-1375.25	-1946.59	53.7072	143.983	0	0	0	0	0	0	0	200	903	0	0	0	0	0	0	0	603	903	0
660	5	1.03989	8.34935	-8.79034	1100.46	-886.973	-1763.49	99.0969	174.81	0	0	0	0	0	0	0	200	903	0	0	0	0	0	0	0	603	903	0
660	6	0.276953	8.34935	-9.4007	825.803	-459.727	-2038.15	151.097	212.155	0	0	0	0	0	0	0	200	903	0	0	0	0	0	0	0	603	903	0
660	7	-0.333399	8.04417	-6.34894	1192.01	-1070.08	-2358.58	31.4555	112.25	0	0	0	0	0	0	0	200	903	0	0	0	0	0	0	0	603	903	0
660	8	1.19248	8.9597	-7.87482	1192.01	-948.008	-1671.94	79.6152	148.63	0	0	0	0	0	0	0	200	903	0	0	0	0	0	0	0	603	903	0
660	9	0.887305	8.65452	-6.95929	1192.01	-948.008	-1626.16	63.778	128.716	0	0	0	0	0	0	0	200	903	0	0	0	0	0	0	0	603	903	0
661	0	-0.0282228	8.65452	-9.09552	1283.57	-886.973	-2129.7	102.482	158.879	0	0	0	0	0	0	0	200	903	0	0	0	0	0	0	0	603	903	0
661	1	-1.09634	8.9597	-8.48517	1741.33	-1192.15	-1900.82	59.502	94.7795	0	0	0	0	0	0	0	200	903	0	0	0	0	0	0	0	603	903	0
661	2	1.49766	8.65452	-7.56964	1375.12	-1131.11	-1809.26	50.5723	118.338	0	0	0	0	0	0	0	200	903	0	0	0	0	0	0	0	603	903	0
661	3	-0.94375	8.04417	-7.56964	1375.12	-1070.08	-1900.82	58.6355	118.338	0	0	0	0	0	0	0	200	903	0	0	0	0	0	0	0	603	903	0
661	4	0.734717	7.73899	-7.87482	1100.46	-1131.11	-1809.26	56.3632	160.256	0	0	0	0	0	0	0	200	903	0	0	0	0	0	0	0	603	903	0
661	5	-0.0282228	7.73899	-10.6214	1100.46	-1070.08	-1809.26	99.2526	196.392	0	0	0	0	0	0	0	200	903	0	0	0	0	0	0	0	603	903	0
661	6	0.734717	7.43382	-8.17999	642.697	-1009.04	-1809.26	76.645	221.431	0	0	0	0	0	0	0	200	903	0	0	0	0	0	0	0	603	903	0
661	7	-0.333399	7.12864	-8.48517	917.356	-764.903	-1717.71	109.854	191.887	0	0	0	0	0	0	0	200	903	0	0	0	0	0	0	0	603	903	0
661	8	0.429541	7.89158	-7.26447	1100.46	-459.727	-1900.82	136.716	148.514	0	0	0	0	0	0	0	200	903	0	0	0	0	0	0	0	603	903	0
661	9	0.734717	8.19676	-7.26447	734.25	-1009.04	-1992.37	61.0988	198.926	0	0	0	0	0	0	0	200	903	0	0	0	0	0	0	0	603	903	0
662	0	0	0	0	0	0	0	200	300	0	0	0	0	0	0	0	200	903	0	0	0	0	0	0	0	603	903	0
662	1	0.429541	8.04417	-9.09552	1100.46	-703.868	-1626.16	122.614	179.011	0	0	0	0	0	0	0	200	903	0	0	0	0	0	0	0	603	903	0
662	2	0.582129	8.04417	-7.56964	1375.12	-1009.04	-1580.38	66.6987	118.338	0	0	0	0	0	0	0	200	903	0	0	0	0	0	0	0	603	903	0
662	3	-0.791162	7.73899	-9.09552	1741.33	-1436.29	-1992.37	42.0882	108.551	0	0	0	0	0	0	0	200	903	0	0	0	0	0	0	0	603	903	0
662	4	0	0	0	0	0	0	200	300	0	0	0	0	0	0	0	200	903	0	0	0	0	0	0	0	603	903	0
662	5	0	0	0	0	0	0	200	300	0	0	0	0	0	0	0	200	903	0	0	0	0	0	0	0	603	903	0
662	6	0.734717	5.75535	-8.17999	1466.67	-886.973	-1855.04	91.568	120.7	0	0	0	0	0	0	0	200	903	0	0	0	0	0	0	0	603	903	0
662	7	0.429541	6.21311	-7.87482	642.697	-948.008	-1809.26	79.6152	218.386	0	0	0	0	0	0	0	200	903	0	0	0	0	0	0	0	603	903	0
662	8	-0.638574	6.3657	-8.48517	459.592	-1009.04	-1946.59	81.0815	245.836	0	0	0	0	0	0	0	200	903	0	0	0	0	0	0	0	603	903	0
662	9	0	0	0	0	0	0	200	300	0	0	0	0	0	0	0	200	903	0	0	0	0	0	0	0	603	903	0
663	0	0.429541	7.12864	-8.48517	642.697	-886.973	-1626.16	95.4678	224.256	0	0	0	0	0	0	0	200	903	0	0	0	0	0	0	0	603	903	0
663	1	0	0	0	0	0	0	200	300	0	0	0	0	0	0	0	200	903	0	0	0	0	0	0	0	603	903	0
663	2	1.03989	6.67088	-7.56964	368.039	-642.832	-1717.71	115.078	251.38	0	0	0	0	0	0	0	200	903	0	0	0	0	0	0	0	603	903	0
663	3	0	0	0	0	0	0	200	300	0	0	0	0	0	0	0	200	903	0	0	0	0	0	0	0	603	903	0
663	4	0	0	0	0	0	0	200	300	0	0	0	0	0	0	0	200	903	0	0	0	0	0	0	0	603	903	0
663	5	0	0	0	0	0	0	200	300	0	0	0	0	0	0	0	200	903	0	0	0	0	0	0	0	603	903	0
663	6	0	0	0	0	0	0	200	300	0	0	0	0	0	0	0	200	903	0	0	0	0	0	0	0	603	903	0
663	7	0	0	0	0	0	0	200	300	0	0	0	0	0	0	0	200	903	0	0	0	0	0	0	0	603	903	0
663	8	0	0	0	0	0	0	200	300	0	0	0	0	0	0	0	200	903	0	0	0	0	0	0	0	603	903	0
663	9	0	0	0	0	0	0	200	300	0	0	0	0	0	0	0	200	903	0	0	0	0	0	0	0	603	903	0
664	0	0	0	0	0	0	0	200	300	0	0	0	0	0	0	0	200	903	0	0	0	0	0	0	0	603	903	0
664	1	0	0	0	0	0	0	200	300	0	0	0	0	0	0	0	200	903	0	0	0	0	0	0	0	603	903	0
664	2	0	0	0	0	0	0	200	300	0	0	0	0	0	0	0	200	903	0	0	0	0	0	0	0	603	903	0
664	3	0	0	0	0	0	0	200	300	0	0	0	0	0	0	0	200	903	0	0	0	0	0	0	0	603	903	0
664	4	0	0	0	0	0	0	200	300	0	0	0	0	0	0	0	200	903	0	0	0	0	0	0	0	603	903	0
664	5	0	0	0	0	0	0	200	300	0	0	0	0	0	0	0	200	903	0	0	0	0	0	0	0	603	903	0
664	6	0	0	0	0	0	0	200	300	0	0	0	0	0	0	0	200	903	0	0	0	0	0	0	0	603	903	0
664	7	0	0	0	0	0	0	200	300	0	0	0	0	0	0	0	200	903	0	0	0	0	0	0	0	603	903	0
664	8	0	0	0	0	0	0	200	300	0	0	0	0	0	0	0	200	903	0	0	0	0	0	0	0	603	903	0
664	9	0	0	0	0	0	0	200	300	0	0	0	0	0	0	0	200	903	0	0	0	0	0	0	0	603	903	0
665	0	0	0	0	0	0	0	200	300	0	0	0	0	0	0	0	200	903	0	0	0	0	0	0	0	603	903	0
665	1	0	0	0	0	0	0	200	300	0	0	0	0	0	0	0	200	903	0	0	0	0	0	0	0	603	903	0
665	2	0	0	0	0	0	0	200	300	0	0	0	0	0	0	0	200	903	0	0	0	0	0	0	0	603	903	0
665	3	0	0	0	0	0	0	200	300	0	0	0	0	0	0	0	200	903	0	0	0	0	0	0	0	603	903	0
665	4	0	0	0	0	0	0	200	300	0	0	0	0	0	0	0	200	903	0	0	0	0	0	0	0	603	903	0
665	5	0	0	0	0	0	0	200	300	0	0	0	0	0	0	0	200	903	0	0	0	0	0	0	0	603	903	0
665	6	0	0	0	0	0	0	200	300	0	0	0	0	0	0	0	200	903	0	0	0	0	0	0	0	603	903	0
665	7	0	0	0	0	0	0	200	300	0	0	0	0	0	0	0	200	903	0	0	0	0	0	0	0	603	903	0
665	8	0	0	0	0	0	0	200	300	0	0	0	0	0	0	0	200	903	0	0	0	0	0	0	0	603	903	0
665	9	0	0	0	0	0	0	200	300	0	0	0	0	0	0	0	200	903	0	0	0	0	0	0	0	603	903	0
666	0	0	0	0	0	0	0	200	300	0	0	0	0	0	0	0	200	903	0	0	0	0	0	0	0	603	903	0
666	1	0	0	0	0	0	0	200	300	0	0	0	0	0	0	0	200	903	0	0	0	0	0	0	0	603	903	0
666	2	0	0	0	0	0	0	200	300	0	0	0	0	0	0	0	200	903	0	0	0	0	0	0	0	603	903	0
666	3	0	0	0	0	0	0	200	300	0	0	0	0	0	0	0	200	903	0	0	0	0	0	0	0	603	903	0
666	4	0	0	0	0	0	0	200	300	0	0	0	0	0	0	0	200	903	0	0	0	0	0	0	0	603	903	0
666	5	0	0	0	0	0	0	200	300	0	0	0	0	0	0	0	200	903	0	0	0	0	0	0	0	603	903	0
666	6	0	0	0	0	0	0	200	300	0	0	0	0	0	0	0	200	903	0	0	0	0	0	0	0	603	903	0
666	7	0	0	0	0	0	0	200	300	0	0	0	0	0	0	0	200	903	0	0	0	0	0	0	0	603	903	0
666	8	0	0	0	0	0	0	200	300	0	0	0	0	0	0	0	200	903	0	0	0	0	0	0	0	603	903	0
666	9	0	0	0	0	0	0	200	300	0	0	0	0	0	0	0	200	903	0	0	0	0	0	0	0	603	903	0
667	0	0	0	0	0	0	0	200	300	0	0	0	0	0	0	0	200	903	0	0	0	0	0	0	0	603	903	0
667	1	0	0	0	0	0	0	200	300	0	0	0	0	0	0	0	200	903	0	0	0	0	0	0	0	603	903	0
667	2	0	0	0	0	0	0	200	300	0	0	0	0	0	0	0	200	903	0	0	0	0	0	0	0	603	903	0
667	3	0	0	0	0	0	0	200	300	0	0	0	0	0	0	0	200	903	0	0	0	0	0	0	0	603	903	0
667	4	0	0	0	0	0	0	200	300	0	0	0	0	0	0	0	200	903	0	0	0	0	0	0	0	603	903	0
667	5	0	0	0	0	0	0	200	300	0	0	0	0	0	0	0	200	903	0	0	0	0	0	0	0	603	903	0
667	6	0	0	0	0	0	0	200	300	0	0	0	0	0	0	0	200	903	0	0	0	0	0	0	0	603	903	0
667	7	0	0	0	0	0	0	200	300	0	0	0	0	0	0	0	200	903	0	0	0	0	0	0	0	603	903	0
667	8	0	0	0	0	0	0	200	300	0	0	0	0	0	0	0	200	903	0	0	0	0	0	0	0	603	903	0
667	9	0	0	0	0	0	0	200	300	0	0	0	0	0	0	0	200	903	0	0	0	0	0	0	0	603	903	0
668	0	0	0	0	0	0	0	200	300	0	0	0	0	0	0	0	200	903	0	0	0	0	0	0	0	603	903	0
668	1	0	0	0	0	0	0	200	300	0	0	0	0	0	0	0	200	903	0	0	0	0	0	0	0	603	903	0
668	2	0	0	0	0	0	0	200	300	0	0	0	0	0	0	0	200	903	0	0	0	0	0	0	0	603	903	0
668	3	0	0	0	0	0	0	200	300	0	0	0	0	0	0	0	200	903	0	0	0	0	0	0	0	603	903	0
668	4	0	0	0	0	0	0	200	300	0	0	0	0	0	0	0	200	903	0	0	0	0	0	0	0	603	903	0
668	5	0	0	0	0	0	0	200	300	0	0	0	0	0	0	0	200	903	0	0	0	0	0	0	0	603	903	0
668	6	0	0	0	0	0	0	200	300	0	0	0	0	0	0	0	200	903	0	0	0	0	0	0	0	603	903	0
668	7	0	0	0	0	0	0	200	300	0	0	0	0	0	0	0	200	903	0	0	0	0	0	0	0	603	903	0
668	8	0	0	0	0	0	0	200	300	0	0	0	0	0	0	0	200	903	0	0	0	0	0	0	0	603	903	0
668	9	0	0	0	0	0	0	200	300	0	0	0	0	0	0	0	200	903	0	0	0	0	0	0	0	603	903	0
669	0	0	0	0	0	0	0	200	300	0	0	0	0	0	0	0	200	903	0	0	0	0	0	0	0	603	903	0
669	1	0	0	0	0	0	0	200	300	0	0	0	0	0	0	0	200	903	0	0	0	0	0	0	0	603	903	0
669	2	0	0	0	0	0	0	200	300	0	0	0	0	0	0	0	200	903	0	0	0	0	0	0	0	603	903	0
669	3	0	0	0	0	0	0	200	300	0	0	0	0	0	0	0	200	903	0	0	0	0	0	0	0	603	903	0
669	4	0	0	0	0	0	0	200	300	0	0	0	0	0	0	0	200	903	0	0	0	0	0	0	0	603	903	0
669	5	0	0	0	0	0	0	200	300	0	0	0	0	0	0	0	200	903	0	0	0	0	0	0	0	603	903	0
669	6	0	0	0	0	0	0	200	300	0	0	0	0	0	0	0	200	903	0	0	0	0	0	0	0	603	903	0
669	7	0	0	0	0	0	0	200	300	0	0	0	0	0	0	0	200	903	0	0	0	0	0	0	0	603	903	0
669	8	0	0	0	0	0	0	200	300	0	0	0	0	0	0	0	200	903	0	0	0	0	0	0	0	603	903	0
669	9	0	0	0	0	0	0	200	300	0	0	0	0	0	0	0	200	903	0	0	0	0	0	0	0	603	903	0
670	0	0	0	0	0	0	0	200	300	0	0	0	0	0	0	0	200	903	0	0	0	0	0	0	0	603	903	0
670	1	0	0	0	0	0	0	200	300	0	0	0	0	0	0	0	200	903	0	0	0	0	0	0	0	603	903	0
670	2	0	0	0	0	0	0	200	300	0	0	0	0	0	0	0	200	903	0	0	0	0	0	0	0	603	903	0
670	3	0	0	0	0	0	0	200	300	0	0	0	0	0	0	0	200	903	0	0	0	0	0	0	0	603	903	0
670	4	0	0	0	0	0	0	200	300	0	0	0	0	0	0	0	200	903	0	0	0	0	0	0	0	603	903	0
670	5	0	0	0	0	0	0	200	300	0	0	0	0	0	0	0	200	903	0	0	0	0	0	0	0	603	903	0
670	6	0	0	0	0	0	0	200	300	0	0	0	0	0	0	0	200	903	0	0	0	0	0	0	0	603	903	0
670	7	0	0	0	0	0	0	200	300	0	0	0	0	0	0	0	200	903	0	0	0	0	0	0	0	603	903	0
670	8	0	0	0	0	0	0	200	300	0	0	0	0	0	0	0	200	903	0	0	0	0	0	0	0	603	903	0
670	9	0	0	0	0	0	0	200	300	0	0	0	0	0	0	0	200	903	0	0	0	0	0	0	0	603	903	0
671	0	0	0	0	0	0	0	200	300	0	0	0	0	0	0	0	200	903	0	0	0	0	0	0	0	603	903	0
671	1	0	0	0	0	0	0	200	300	0	0	0	0	0	0	0	200	903	0	0	0	0	0	0	0	603	903	0
671	2	0	0	0	0	0	0	200	300	0	0	0	0	0	0	0	200	903	0	0	0	0	0	0	0	603	903	0
671	3	0	0	0	0	0	0	200	300	0	0	0	0	0	0	0	200	903	0	0	0	0	0	0	0	603	903	0
671	4	0	0	0	0	0	0	200	300	0	0	0	0	0	0	0	200	903	0	0	0	0	0	0	0	603	903	0
671	5	0	0	0	0	0	0	200	300	0	0	0	0	0	0	0	200	903	0	0	0	0	0	0	0	603	903	0
671	6	0	0	0	0	0	0	200	300	0	0	0	0	0	0	0	200	903	0	0	0	0	0	0	0	603	903	0
671	7	0	0	0	0	0	0	200	300	0	0	0	0	0	0	0	200	903	0	0	0	0	0	0	0	603	903	0
671	8	0	0	0	0	0	0	200	300	0	0	0	0	0	0	0	200	903	0	0	0	0	0	0	0	603	903	0
671	9	0	0	0	0	0	0	200	300	0	0	0	0	0	0	0	200	903	0	0	0	0	0	0	0	603	903	0
672	0	0	0	0	0	0	0	200	300	0	0	0	0	0	0	0	200	903	0	0	0	0	0	0	0	603	903	0
672	1	0	0	0	0	0	0	200	300	0	0	0	0	0	0	0	200	903	0	0	0	0	0	0	0	603	903	0
672	2	0	0	0	0	0	0	200	300	0	0	0	0	0	0	0	200	903	0	0	0	0	0	0	0	603	903	0
672	3	0	0	0	0	0	0	200	300	0	0	0	0	0	0	0	200	903	0	0	0	0	0	0	0	603	903	0
672	4	0	0	0	0	0	0	200	300	0	0	0	0	0	0	0	200	903	0	0	0	0	0	0	0	603	903	0
672	5	0	0	0	0	0	0	200	300	0	0	0	0	0	0	0	200	903	0	0	0	0	0	0	0	603	903	0
672	6	0	0	0	0	0	0	200	300	0	0	0	0	0	0	0	200	903	0	0	0	0	0	0	0	603	903	0
672	7	0	0	0	0	0	0	200	300	0	0	0	0	0	0	0	200	903	0	0	0	0	0	0	0	603	903	0
672	8	0	0	0	0	0	0	200	300	0	0	0	0	0	0	0	200	903	0	0	0	0	0	0	0	603	903	0
672	9	0	0	0	0	0	0	200	300	0	0	0	0	0	0	0	200	903	0	0	0	0	0	0	0	603	903	0
673	0	0	0	0	0	0	0	200	300	0	0	0	0	0	0	0	200	903	0	0	0	0	0	0	0	603	903	0
673	1	0	0	0	0	0	0	200	300	0	0	0	0	0	0	0	200	903	0	0	0	0	0	0	0	603	903	0
673	2	0	0	0	0	0	0	200	300	0	0	0	0	0	0	0	200	903	0	0	0	0	0	0	0	603	903	0
673	3	0	0	0	0	0	0	200	300	0	0	0	0	0	0	0	200	903	0	0	0	0	0	0	0	603	903	0
673	4	0	0	0	0	0	0	200	300	0	0	0	0	0	0	0	200	903	0	0	0	0	0	0	0	603	903	0
673	5	0	0	0	0	0	0	200	300	0	0	0	0	0	0	0	200	903	0	0	0	0	0	0	0	603	903	0
673	6	0	0	0	0	0	0	200	300	0	0	0	0	0	0	0	200	903	0	0	0	0	0	0	0	603	903	0
673	7	0	0	0	0	0	0	200	300	0	0	0	0	0	0	0	200	903	0	0	0	0	0	0	0	603	903	0
673	8	0	0	0	0	0	0	200	300	0	0	0	0	0	0	0	200	903	0	0	0	0	0	0	0	603	903	0
673	9	0	0	0	0	0	0	200	300	0	0	0	0	0	0	0	200	903	0	0	0	0	0	0	0	603	903	0
674	0	0	0	0	0	0	0	200	300	0	0	0	0	0	0	0	200	903	0	0	0	0	0	0	0	603	903	0
674	1	0	0	0	0	0	0	200	300	0	0	0	0	0	0	0	200	903	0	0	0	0	0	0	0	603	903	0
674	2	0	0	0	0	0	0	200	300	0	0	0	0	0	0	0	200	903	0	0	0	0	0	0	0	603	903	0
674	3	0	0	0	0	0	0	200	300	0	0	0	0	0	0	0	200	903	0	0	0	0	0	0	0	603	903	0
674	4	0	0	0	0	0	0	200	300	0	0	0	0	0	0	0	200	903	0	0	0	0	0	0	0	603	903	0
674	5	0	0	0	0	0	0	200	300	0	0	0	0	0	0	0	200	903	0	0	0	0	0	0	0	603	903	0
674	6	0	0	0	0	0	0	200	300	0	0	0	0	0	0	0	200	903	0	0	0	0	0	0	0	603	903	0
674	7	0	0	0	0	0	0	200	300	0	0	0	0	0	0	0	200	903	0	0	0	0	0	0	0	603	903	0
674	8	0	0	0	0	0	0	200	300	0	0	0	0	0	0	0	200	903	0	0	0	0	0	0	0	603	903	0
674	9	0	0	0	0	0	0	200	300	0	0	0	0	0	0	0	200	903	0	0	0	0	0	0	0	603	903	0
675	0	0	0	0	0	0	0	200	300	0	0	0	0	0	0	0	200	903	0	0	0	0	0	0	0	603	903	0
675	1	0	0	0	0	0	0	200	300	0	0	0	0	0	0	0	200	903	0	0	0	0	0	0	0	603	903	0
675	2	0	0	0	0	0	0	200	300	0	0	0	0	0	0	0	200	903	0	0	0	0	0	0	0	603	903	0
675	3	0	0	0	0	0	0	200	300	0	0	0	0	0	0	0	200	903	0	0	0	0	0	0	0	603	903	0
675	4	0	0	0	0	0	0	200	300	0	0	0	0	0	0	0	200	903	0	0	0	0	0	0	0	603	903	0
675	5	0	0	0	0	0	0	200	300	0	0	0	0	0	0	0	200	903	0	0	0	0	0	0	0	603	903	0
675	6	0	0	0	0	0	0	200	300	0	0	0	0	0	0	0	200	903	0	0	0	0	0	0	0	603	903	0
675	7	0	0	0	0	0	0	200	300	0	0	0	0	0	0	0	200	903	0	0	0	0	0	0	0	603	903	0
675	8	0	0	0	0	0	0	200	300	0	0	0	0	0	0	0	200	903	0	0	0	0	0	0	0	603	903	0
675	9	0	0	0	0	0	0	200	300	0	0	0	0	0	0	0	200	903	0	0	0	0	0	0	0	603	903	0
676	0	0	0	0	0	0	0	200	300	0	0	0	0	0	0	0	200	903	0	0	0	0	0	0	0	603	903	0
676	1	0	0	0	0	0	0	200	300	0	0	0	0	0	0	0	200	903	0	0	0	0	0	0	0	603	903	0
676	2	0	0	0	0	0	0	200	300	0	0	0	0	0	0	0	200	903	0	0	0	0	0	0	0	603	903	0
676	3	0	0	0	0	0	0	200	300	0	0	0	0	0	0	0	200	903	0	0	0	0	0	0	0	603	903	0
676	4	0	0	0	0	0	0	200	300	0	0	0	0	0	0	0	200	903	0	0	0	0	0	0	0	603	903	0
676	5	0	0	0	0	0	0	200	300	0	0	0	0	0	0	0	200	903	0	0	0	0	0	0	0	603	903	0
676	6	0	0	0	0	0	0	200	300	0	0	0	0	0	0	0	200	903	0	0	0	0	0	0	0	603	903	0
676	7	0	0	0	0	0	0	200	300	0	0	0	0	0	0	0	200	903	0	0	0	0	0	0	0	603	903	0
676	8	0	0	0	0	0	0	200	300	0	0	0	0	0	0	0	200	903	0	0	0	0	0	0	0	603	903	0
676	9	0	0	0	0	0	0	200	300	0	0	0	0	0	0	0	200	903	0	0	0	0	0	0	0	603	903	0
677	0	0	0	0	0	0	0	200	300	0	0	0	0	0	0	0	200	903	0	0	0	0	0	0	0	603	903	0
677	1	0	0	0	0	0	0	200	300	0	0	0	0	0	0	0	200	903	0	0	0	0	0	0	0	603	903	0
677	2	0	0	0	0	0	0	200	300	0	0	0	0	0	0	0	200	903	0	0	0	0	0	0	0	603	903	0
677	3	0	0	0	0	0	0	200	300	0	0	0	0	0	0	0	200	903	0	0	0	0	0	0	0	603	903	0
677	4	0	0	0	0	0	0	200	300	0	0	0	0	0	0	0	200	903	0	0	0	0	0	0	0	603	903	0
677	5	0	0	0	0	0	0	200	300	0	0	0	0	0	0	0	200	903	0	0	0	0	0	0	0	603	903	0
677	6	0	0	0	0	0	0	200	300	0	0	0	0	0	0	0	200	903	0	0	0	0	0	0	0	603	903	0
677	7	0	0	0	0	0	0	200	300	0	0	0	0	0	0	0	200	903	0	0	0	0	0	0	0	603	903	0
677	8	0	0	0	0	0	0	200	300	0	0	0	0	0	0	0	200	903	0	0	0	0	0	0	0	603	903	0
677	9	0	0	0	0	0	0	200	300	0	0	0	0	0	0	0	200	903	0	0	0	0	0	0	0	603	903	0
678	0	0	0	0	0	0	0	200	300	0	0	0	0	0	0	0	200	903	0	0	0	0	0	0	0	603	903	0
678	1	0	0	0	0	0	0	200	300	0	0	0	0	0	0	0	200	903	0	0	0	0	0	0	0	603	903	0
678	2	0	0	0	0	0	0	200	300	0	0	0	0	0	0	0	200	903	0	0	0	0	0	0	0	603	903	0
678	3	0	0	0	0	0	0	200	300	0	0	0	0	0	0	0	200	903	0	0	0	0	0	0	0	603	903	0
678	4	0	0	0	0	0	0	200	300	0	0	0	0	0	0	0	200	903	0	0	0	0	0	0	0	603	903	0
678	5	0	0	0	0	0	0	200	300	0	0	0	0	0	0	0	200	903	0	0	0	0	0	0	0	603	903	0
678	6	0	0	0	0	0	0	200	300	0	0	0	0	0	0	0	200	903	0	0	0	0	0	0	0	603	903	0
678	7	0	0	0	0	0	0	200	300	0	0	0	0	0	0	0	200	903	0	0	0	0	0	0	0	603	903	0
678	8	0	0	0	0	0	0	200	300	0	0	0	0	0	0	0	200	903	0	0	0	0	0	0	0	603	903	0
678	9	0	0	0	0	0	0	200	300	0	0	0	0	0	0	0	200	903	0	0	0	0	0	0	0	603	903	0
679	0	0	0	0	0	0	0	200	300	0	0	0	0	0	0	0	200	903	0	0	0	0	0	0	0	603	903	0
679	1	0	0	0	0	0	0	200	300	0	0	0	0	0	0	0	200	903	0	0	0	0	0	0	0	603	903	0
679	2	0	0	0	0	0	0	200	300	0	0	0	0	0	0	0	200	903	0	0	0	0	0	0	0	603	903	0
679	3	0	0	0	0	0	0	200	300	0	0	0	0	0	0	0	200	903	0	0	0	0	0	0	0	603	903	0
679	4	0	0	0	0	0	0	200	300	0	0	0	0	0	0	0	200	903	0	0	0	0	0	0	0	603	903	0
679	5	0	0	0	0	0	0	200	300	0	0	0	0	0	0	0	200	903	0	0	0	0	0	0	0	603	903	0
679	6	0	0	0	0	0	0	200	300	0	0	0	0	0	0	0	200	903	0	0	0	0	0	0	0	603	903	0
679	7	0	0	0	0	0	0	200	300	0	0	0	0	0	0	0	200	903	0	0	0	0	0	0	0	603	903	0
679	8	0	0	0	0	0	0	200	300	0	0	0	0	0	0	0	200	903	0	0	0	0	0	0	0	603	903	0
679	9	0	0	0	0	0	0	200	300	0	0	0	0	0	0	0	200	903	0	0	0	0	0	0	0	603	903	0
680	0	0	0	0	0	0	0	200	300	0	0	0	0	0	0	0	200	903	0	0	0	0	0	0	0	603	903	0
680	1	0	0	0	0	0	0	200	300	0	0	0	0	0	0	0	200	903	0	0	0	0	0	0	0	603	903	0
680	2	0	0	0	0	0	0	200	300	0	0	0	0	0	0	0	200	903	0	0	0	0	0	0	0	603	903	0
680	3	0	0	0	0	0	0	200	300	0	0	0	0	0	0	0	200	903	0	0	0	0	0	0	0	603	903	0
680	4	0	0	0	0	0	0	200	300	0	0	0	0	0	0	0	200	903	0	0	0	0	0	0	0	603	903	0
680	5	0	0	0	0	0	0	200	300	0	0	0	0	0	0	0	200	903	0	0	0	0	0	0	0	603	903	0
680	6	0	0	0	0	0	0	200	300	0	0	0	0	0	0	0	200	903	0	0	0	0	0	0	0	603	903	0
680	7	0	0	0	0	0	0	200	300	0	0	0	0	0	0	0	200	903	0	0	0	0	0	0	0	603	903	0
680	8	0	0	0	0	0	0	200	300	0	0	0	0	0	0	0	200	903	0	0	0	0	0	0	0	603	903	0
680	9	0	0	0	0	0	0	200	300	0	0	0	0	0	0	0	200	903	0	0	0	0	0	0	0	603	903	0
681	0	0	0	0	0	0	0	200	300	0	0	0	0	0	0	0	200	903	0	0	0	0	0	0	0	603	903	0
681	1	0	0	0	0	0	0	200	300	0	0	0	0	0	0	0	200	903	0	0	0	0	0	0	0	603	903	0
681	2	0	0	0	0	0	0	200	300	0	0	0	0	0	0	0	200	903	0	0	0	0	0	0	0	603	903	0
681	3	0	0	0	0	0	0	200	300	0	0	0	0	0	0	0	200	903	0	0	0	0	0	0	0	603	903	0
681	4	0	0	0	0	0	0	200	300	0	0	0	0	0	0	0	200	903	0	0	0	0	0	0	0	603	903	0
681	5	0	0	0	0	0	0	200	300	0	0	0	0	0	0	0	200	903	0	0	0	0	0	0	0	603	903	0
681	6	0	0	0	0	0	0	200	300	0	0	0	0	0	0	0	200	903	0	0	0	0	0	0	0	603	903	0
681	7	0	0	0	0	0	0	200	300	0	0	0	0	0	0	0	200	903	0	0	0	0	0	0	0	603	903	0
681	8	0	0	0	0	0	0	200	300	0	0	0	0	0	0	0	200	903	0	0	0	0	0	0	0	603	903	0
681	9	0	0	0	0	0	0	200	300	0	0	0	0	0	0	0	200	903	0	0	0	0	0	0	0	603	903	0
682	0	0	0	0	0	0	0	200	300	0	0	0	0	0	0	0	200	903	0	0	0	0	0	0	0	603	903	0
682	1	0	0	0	0	0	0	200	300	0	0	0	0	0	0	0	200	903	0	0	0	0	0	0	0	603	903	0
682	2	0	0	0	0	0	0	200	300	0	0	0	0	0	0	0	200	903	0	0	0	0	0	0	0	603	903	0
682	3	0	0	0	0	0	0	200	300	0	0	0	0	0	0	0	200	903	0	0	0	0	0	0	0	603	903	0
682	4	0	0	0	0	0	0	200	300	0	0	0	0	0	0	0	200	903	0	0	0	0	0	0	0	603	903	0
682	5	0	0	0	0	0	0	200	300	0	0	0	0	0	0	0	200	903	0	0	0	0	0	0	0	603	903	0
682	6	0	0	0	0	0	0	200	300	0	0	0	0	0	0	0	200	903	0	0	0	0	0	0	0	603	903	0
682	7	0	0	0	0	0	0	200	300	0	0	0	0	0	0	0	200	903	0	0	0	0	0	0	0	603	903	0
682	8	0	0	0	0	0	0	200	300	0	0	0	0	0	0	0	200	903	0	0	0	0	0	0	0	603	903	0
682	9	0	0	0	0	0	0	200	300	0	0	0	0	0	0	0	200	903	0	0	0	0	0	0	0	603	903	0
683	0	0	0	0	0	0	0	200	300	0	0	0	0	0	0	0	200	903	0	0	0	0	0	0	0	603	903	0
683	1	0	0	0	0	0	0	200	300	0	0	0	0	0	0	0	200	903	0	0	0	0	0	0	0	603	903	0
683	2	0	0	0	0	0	0	200	300	0	0	0	0	0	0	0	200	903	0	0	0	0	0	0	0	603	903	0
683	3	0	0	0	0	0	0	200	300	0	0	0	0	0	0	0	200	903	0	0	0	0	0	0	0	603	903	0
683	4	0	0	0	0	0	0	200	300	0	0	0	0	0	0	0	200	903	0	0	0	0	0	0	0	603	903	0
683	5	0	0	0	0	0	0	200	300	0	0	0	0	0	0	0	200	903	0	0	0	0	0	0	0	603	903	0
683	6	0	0	0	0	0	0	200	300	0	0	0	0	0	0	0	200	903	0	0	0	0	0	0	0	603	903	0
683	7	0	0	0	0	0	0	200	300	0	0	0	0	0	0	0	200	903	0	0	0	0	0	0	0	603	903	0
683	8	0	0	0	0	0	0	200	300	0	0	0	0	0	0	0	200	903	0	0	0	0	0	0	0	603	903	0
683	9	0	0	0	0	0	0	200	300	0	0	0	0	0	0	0	200	903	0	0	0	0	0	0	0	603	903	0
684	0	0	0	0	0	0	0	200	300	0	0	0	0	0	0	0	200	903	0	0	0	0	0	0	0	603	903	0
684	1	0	0	0	0	0	0	200	300	0	0	0	0	0	0	0	200	903	0	0	0	0	0	0	0	603	903	0
684	2	0	0	0	0	0	0	200	300	0	0	0	0	0	0	0	200	903	0	0	0	0	0	0	0	603	903	0
684	3	0	0	0	0	0	0	200	300	0	0	0	0	0	0	0	200	903	0	0	0	0	0	0	0	603	903	0
684	4	0	0	0	0	0	0	200	300	0	0	0	0	0	0	0	200	903	0	0	0	0	0	0	0	603	903	0
684	5	0	0	0	0	0	0	200	300	0	0	0	0	0	0	0	200	903	0	0	0	0	0	0	0	603	903	0
684	6	0	0	0	0	0	0	200	300	0	0	0	0	0	0	0	200	903	0	0	0	0	0	0	0	603	903	0
684	7	0	0	0	0	0	0	200	300	0	0	0	0	0	0	0	200	903	0	0	0	0	0	0	0	603	903	0
684	8	0	0	0	0	0	0	200	300	0	0	0	0	0	0	0	200	903	0	0	0	0	0	0	0	603	903	0
684	9	0	0	0	0	0	0	200	300	0	0	0	0	0	0	0	200	903	0	0	0	0	0	0	0	603	903	0
685	0	0	0	0	0	0	0	200	300	0	0	0	0	0	0	0	200	903	0	0	0	0	0	0	0	603	903	0
685	1	0	0	0	0	0	0	200	300	0	0	0	0	0	0	0	200	903	0	0	0	0	0	0	0	603	903	0
685	2	0	0	0	0	0	0	200	300	0	0	0	0	0	0	0	200	903	0	0	0	0	0	0	0	603	903	0
685	3	0	0	0	0	0	0	200	300	0	0	0	0	0	0	0	200	903	0	0	0	0	0	0	0	603	903	0
685	4	0	0	0	0	0	0	200	300	0	0	0	0	0	0	0	200	903	0	0	0	0	0	0	0	603	903	0
685	5	0	0	0	0	0	0	200	300	0	0	0	0	0	0	0	200	903	0	0	0	0	0	0	0	603	903	0
685	6	0	0	0	0	0	0	200	300	0	0	0	0	0	0	0	200	903	0	0	0	0	0	0	0	603	903	0
685	7	0	0	0	0	0	0	200	300	0	0	0	0	0	0	0	200	903	0	0	0	0	0	0	0	603	903	0
685	8	0	0	0	0	0	0	200	300	0	0	0	0	0	0	0	200	903	0	0	0	0	0	0	0	603	903	0
685	9	0	0	0	0	0	0	200	300	0	0	0	0	0	0	0	200	903	0	0	0	0	0	0	0	603	903	0
686	0	0	0	0	0	0	0	200	300	0	0	0	0	0	0	0	200	903	0	0	0	0	0	0	0	603	903	0
686	1	0	0	0	0	0	0	200	300	0	0	0	0	0	0	0	200	903	0	0	0	0	0	0	0	603	903	0
686	2	0	0	0	0	0	0	200	300	0	0	0	0	0	0	0	200	903	0	0	0	0	0	0	0	603	903	0
686	3	0	0	0	0	0	0	200	300	0	0	0	0	0	0	0	200	903	0	0	0	0	0	0	0	603	903	0
686	4	0	0	0	0	0	0	200	300	0	0	0	0	0	0	0	200	903	0	0	0	0	0	0	0	603	903	0
686	5	0	0	0	0	0	0	200	300	0	0	0	0	0	0	0	200	903	0	0	0	0	0	0	0	603	903	0
686	6	0	0	0	0	0	0	200	300	0	0	0	0	0	0	0	200	903	0	0	0	0	0	0	0	603	903	0
686	7	0	0	0	0	0	0	200	300	0	0	0	0	0	0	0	200	903	0	0	0	0	0	0	0	603	903	0
686	8	0	0	0	0	0	0	200	300	0	0	0	0	0	0	0	200	903	0	0	0	0	0	0	0	603	903	0
686	9	0	0	0	0	0	0	200	300	0	0	0	0	0	0	0	200	903	0	0	0	0	0	0	0	603	903	0
687	0	0	0	0	0	0	0	200	300	0	0	0	0	0	0	0	200	903	0	0	0	0	0	0	0	603	903	0
687	1	0	0	0	0	0	0	200	300	0	0	0	0	0	0	0	200	903	0	0	0	0	0	0	0	603	903	0
687	2	0	0	0	0	0	0	200	300	0	0	0	0	0	0	0	200	903	0	0	0	0	0	0	0	603	903	0
687	3	0	0	0	0	0	0	200	300	0	0	0	0	0	0	0	200	903	0	0	0	0	0	0	0	603	903	0
687	4	0	0	0	0	0	0	200	300	0	0	0	0	0	0	0	200	903	0	0	0	0	0	0	0	603	903	0
687	5	0	0	0	0	0	0	200	300	0	0	0	0	0	0	0	200	903	0	0	0	0	0	0	0	603	903	0
687	6	0	0	0	0	0	0	200	300	0	0	0	0	0	0	0	200	903	0	0	0	0	0	0	0	603	903	0
687	7	0	0	0	0	0	0	200	300	0	0	0	0	0	0	0	200	903	0	0	0	0	0	0	0	603	903	0
687	8	0	0	0	0	0	0	200	300	0	0	0	0	0	0	0	200	903	0	0	0	0	0	0	0	603	903	0
687	9	0	0	0	0	0	0	200	300	0	0	0	0	0	0	0	200	903	0	0	0	0	0	0	0	603	903	0
688	0	0	0	0	0	0	0	200	300	0	0	0	0	0	0	0	200	903	0	0	0	0	0	0	0	603	903	0
688	1	0	0	0	0	0	0	200	300	0	0	0	0	0	0	0	200	903	0	0	0	0	0	0	0	603	903	0
688	2	0	0	0	0	0	0	200	300	0	0	0	0	0	0	0	200	903	0	0	0	0	0	0	0	603	903	0
688	3	0	0	0	0	0	0	200	300	0	0	0	0	0	0	0	200	903	0	0	0	0	0	0	0	603	903	0
688	4	0	0	0	0	0	0	200	300	0	0	0	0	0	0	0	200	903	0	0	0	0	0	0	0	603	903	0
688	5	0	0	0	0	0	0	200	300	0	0	0	0	0	0	0	200	903	0	0	0	0	0	0	0	603	903	0
688	6	0	0	0	0	0	0	200	300	0	0	0	0	0	0	0	200	903	0	0	0	0	0	0	0	603	903	0
688	7	0	0	0	0	0	0	200	300	0	0	0	0	0	0	0	200	903	0	0	0	0	0	0	0	603	903	0
688	8	0	0	0	0	0	0	200	300	0	0	0	0	0	0	0	200	903	0	0	0	0	0	0	0	603	903	0
688	9	0	0	0	0	0	0	200	300	0	0	0	0	0	0	0	200	903	0	0	0	0	0	0	0	603	903	0
689	0	0	0	0	0	0	0	200	300	0	0	0	0	0	0	0	200	903	0	0	0	0	0	0	0	603	903	0
689	1	0	0	0	0	0	0	200	300	0	0	0	0	0	0	0	200	903	0	0	0	0	0	0	0	603	903	0
689	2	0	0	0	0	0	0	200	300	0	0	0	0	0	0	0	200	903	0	0	0	0	0	0	0	603	903	0
689	3	0	0	0	0	0	0	200	300	0	0	0	0	0	0	0	200	903	0	0	0	0	0	0	0	603	903	0
689	4	0	0	0	0	0	0	200	300	0	0	0	0	0	0	0	200	903	0	0	0	0	0	0	0	603	903	0
689	5	0	0	0	0	0	0	200	300	0	0	0	0	0	0	0	200	903	0	0	0	0	0	0	0	603	903	0
689	6	0	0	0	0	0	0	200	300	0	0	0	0	0	0	0	200	903	0	0	0	0	0	0	0	603	903	0
689	7	0	0	0	0	0	0	200	300	0	0	0	0	0	0	0	200	903	0	0	0	0	0	0	0	603	903	0
689	8	0	0	0	0	0	0	200	300	0	0	0	0	0	0	0	200	903	0	0	0	0	0	0	0	603	903	0
689	9	0	0	0	0	0	0	200	300	0	0	0	0	0	0	0	200	903	0	0	0	0	0	0	0	603	903	0
690	0	0	0	0	0	0	0	200	300	0	0	0	0	0	0	0	200	903	0	0	0	0	0	0	0	603	903	0
690	1	0	0	0	0	0	0	200	300	0	0	0	0	0	0	0	200	903	0	0	0	0	0	0	0	603	903	0
690	2	0	0	0	0	0	0	200	300	0	0	0	0	0	0	0	200	903	0	0	0	0	0	0	0	603	903	0
690	3	0	0	0	0	0	0	200	300	0	0	0	0	0	0	0	200	903	0	0	0	0	0	0	0	603	903	0
690	4	0	0	0	0	0	0	200	300	0	0	0	0	0	0	0	200	903	0	0	0	0	0	0	0	603	903	0
690	5	0	0	0	0	0	0	200	300	0	0	0	0	0	0	0	200	903	0	0	0	0	0	0	0	603	903	0
690	6	0	0	0	0	0	0	200	300	0	0	0	0	0	0	0	200	903	0	0	0	0	0	0	0	603	903	0
690	7	-2.62222	7.73899	-20.9974	2290.65	455.801	-435.973	221.708	190.908	0	0	0	0	0	0	0	200	903	0	0	0	0	0	0	0	603	903	0
690	8	-3.53774	15.6736	-36.8665	3572.38	822.012	159.12	222.297	203.099	0	0	0	0	0	0	0	200	903	0	0	0	0	0	0	0	603	903	0
690	9	1.19248	16.5891	-35.3406	2931.52	822.012	845.765	223.26	217.05	0	0	0	0	0	0	0	200	903	0	0	0	0	0	0	0	603	903	0
691	0	6.07529	9.72264	-25.575	1924.44	577.871	754.213	222.595	224.753	0	0	0	0	0	0	0	200	903	0	0	0	0	0	0	0	603	903	0
691	1	2.56577	10.4856	-21.9129	2839.96	516.836	525.331	223.586	170.398	0	0	0	0	0	0	0	200	903	0	0	0	0	0	0	0	603	903	0
691	2	3.4813	17.6572	-34.1199	3389.28	1066.15	1303.53	231.247	200.666	0	0	0	0	0	0	0	200	903	0	0	0	0	0	0	0	603	903	0
691	3	8.82187	18.2676	-49.3787	4579.46	1005.12	1074.65	220.355	207.258	0	0	0	0	0	0	0	200	903	0	0	0	0	0	0	0	603	903	0
691	4	7.44858	9.11228	-57.6185	6318.97	1676.5	1257.75	229.097	190.331	0	0	0	0	0	0	0	200	903	0	0	0	0	0	0	0	603	903	0
691	5	3.93906	2.70359	-62.5013	8241.57	1798.57	937.318	228.777	168.138	0	0	0	0	0	0	0	200	903	0	0	0	0	0	0	0	603	903	0
691	6	10.0426	2.39842	-72.2669	8790.89	1859.61	1028.87	225.733	178.355	0	0	0	0	0	0	0	200	903	0	0	0	0	0	0	0	603	903	0
691	7	11.5685	-2.02663	-91.493	10255.7	2408.93	1120.42	226.329	187.907	0	0	0	0	0	0	0	200	903	0	0	0	0	0	0	0	603	903	0
691	8	6.83823	-7.36721	-106.447	12086.8	2897.21	662.66	227.217	186.452	0	0	0	0	0	0	0	200	903	0	0	0	0	0	0	0	603	903	0
691	9	8.97446	-9.50344	-107.667	12544.6	2775.14	616.883	225.775	183.488	0	0	0	0	0	0	0	200	903	0	0	0	0	0	0	0	603	903	0
692	0	12.1788	-2.94216	-118.654	14558.7	2775.14	891.542	223.389	177.301	0	0	0	0	0	0	0	200	903	0	0	0	0	0	0	0	603	903	0
692	1	8.66929	-1.87404	-129.64	14924.9	3446.52	662.66	226.585	184.874	0	0	0	0	0	0	0	200	903	0	0	0	0	0	0	0	603	903	0
692	2	5.31235	-7.5198	-143.678	16298.2	3080.31	296.449	221.439	186.564	0	0	0	0	0	0	0	200	903	0	0	0	0	0	0	0	603	903	0
692	3	5.46494	-10.7241	-151.613	17030.6	2897.21	-115.539	219.109	187.67	0	0	0	0	0	0	0	200	903	0	0	0	0	0	0	0	603	903	0
692	4	2.56577	-7.97756	-162.599	18953.2	3202.38	-435.973	219.695	183.436	0	0	0	0	0	0	0	200	903	0	0	0	0	0	0	0	603	903	0
692	5	-1.70669	-10.5716	-173.28	20418.1	3446.52	-939.513	219.89	182.167	0	0	0	0	0	0	0	200	903	0	0	0	0	0	0	0	603	903	0
692	6	-3.23257	-16.9802	-187.929	22157.6	3385.49	-1076.84	218.015	182.096	0	0	0	0	0	0	0	200	903	0	0	0	0	0	0	0	603	903	0
692	7	-5.52139	-15.9121	-197.389	22981.6	3385.49	-1214.17	217.151	183.572	0	0	0	0	0	0	0	200	903	0	0	0	0	0	0	0	603	903	0
692	8	-6.89468	-13.4707	-208.375	24354.9	3324.45	-1671.94	215.954	183.12	0	0	0	0	0	0	0	200	903	0	0	0	0	0	0	0	603	903	0
692	9	-7.50503	-12.0974	-217.225	25178.8	3080.31	-2221.25	214.18	184.089	0	0	0	0	0	0	0	200	903	0	0	0	0	0	0	0	603	903	0
693	0	-13.6085	-12.7078	-232.179	26185.9	3141.35	-2358.58	213.53	187.217	0	0	0	0	0	0	0	200	903	0	0	0	0	0	0	0	603	903	0
693	1	-19.5595	-6.29909	-243.776	27559.2	2653.07	-2862.12	210.883	186.949	0	0	0	0	0	0	0	200	903	0	0	0	0	0	0	0	603	903	0
693	2	-20.3224	-1.26369	-249.574	28291.6	2408.93	-3319.89	209.652	186.64	0	0	0	0	0	0	0	200	903	0	0	0	0	0	0	0	603	903	0
693	3	-23.2216	1.48289	-259.95	29481.8	2653.07	-3228.33	210.206	186.587	0	0	0	0	0	0	0	200	903	0	0	0	0	0	0	0	603	903	0
693	4	-26.4259	5.145	-269.716	29939.6	2469.96	-3274.11	209.158	188.996	0	0	0	0	0	0	0	200	903	0	0	0	0	0	0	0	603	903	0
693	5	-26.7311	11.2485	-278.566	31312.9	1859.61	-3869.2	206.676	187.593	0	0	0	0	0	0	0	200	903	0	0	0	0	0	0	0	603	903	0
693	6	-27.6466	17.0469	-286.5	31587.5	1798.57	-3731.87	206.278	189.747	0	0	0	0	0	0	0	200	903	0	0	0	0	0	0	0	603	903	0
693	7	-33.445	20.2512	-292.299	32411.5	1981.68	-3869.2	206.78	189.115	0	0	0	0	0	0	0	200	903	0	0	0	0	0	0	0	603	903	0
693	8	-35.4286	23.9133	-297.181	32686.2	1981.68	-4372.74	206.668	190.013	0	0	0	0	0	0	0	200	903	0	0	0	0	0	0	0	603	903	0
693	9	-34.8183	30.6272	-302.369	33052.4	1371.33	-4326.96	204.535	190.689	0	0	0	0	0	0	0	200	903	0	0	0	0	0	0	0	603	903	0
694	0	-35.7338	34.8996	-310.609	33510.1	1615.47	-4235.41	205.201	192.115	0	0	0	0	0	0	0	200	903	0	0	0	0	0	0	0	603	903	0
694	1	-39.0907	40.0876	-317.933	33601.7	1493.4	-4372.74	204.697	194.312	0	0	0	0	0	0	0	200	903	0	0	0	0	0	0	0	603	903	0
694	2	-37.1071	44.3601	-319.154	34242.6	1310.29	-4647.4	204.106	192.708	0	0	0	0	0	0	0	200	903	0	0	0	0	0	0	0	603	903	0
694	3	-40.9218	51.2265	-330.446	35158.1	1249.26	-4418.52	203.781	193.604	0	0	0	0	0	0	0	200	903	0	0	0	0	0	0	0	603	903	0
694	4	-42.7528	53.9731	-336.244	35158.1	1371.33	-4418.52	204.078	195.439	0	0	0	0	0	0	0	200	903	0	0	0	0	0	0	0	603	903	0
694	5	-43.058	54.2783	-346.01	35982.1	1005.12	-4693.18	202.905	196.009	0	0	0	0	0	0	0	200	903	0	0	0	0	0	0	0	603	903	0
694	6	-43.8209	58.8559	-356.386	36897.6	1432.36	-4555.85	204.019	196.467	0	0	0	0	0	0	0	200	903	0	0	0	0	0	0	0	603	903	0
694	7	-45.9572	62.8232	-369.203	37904.7	883.047	-4555.85	202.392	197.334	0	0	0	0	0	0	0	200	903	0	0	0	0	0	0	0	603	903	0
694	8	-46.8727	64.3491	-379.579	37904.7	944.082	-4464.29	202.487	200.14	0	0	0	0	0	0	0	200	903	0	0	0	0	0	0	0	603	903	0
694	9	-47.0253	64.1965	-389.345	39461.1	1554.43	-4235.41	203.992	198.647	0	0	0	0	0	0	0	200	903	0	0	0	0	0	0	0	603	903	0
695	0	-48.3986	65.7224	-399.721	39644.2	1615.47	-4143.86	204.041	200.82	0	0	0	0	0	0	0	200	903	0	0	0	0	0	0	0	603	903	0
695	1	-46.2624	65.7224	-411.012	40559.7	1493.4	-4326.96	203.633	201.318	0	0	0	0	0	0	0	200	903	0	0	0	0	0	0	0	603	903	0
695	2	-46.5675	67.2483	-424.745	39918.8	1920.64	-4006.53	204.522	206.017	0	0	0	0	0	0	0	200	903	0	0	0	0	0	0	0	603	903	0
695	3	-49.7719	68.7741	-433.9	41292.1	2164.78	-4052.31	204.989	204.835	0	0	0	0	0	0	0	200	903	0	0	0	0	0	0	0	603	903	0
695	4	-50.6874	71.063	-444.581	41749.9	1920.64	-4052.31	204.32	206.092	0	0	0	0	0	0	0	200	903	0	0	0	0	0	0	0	603	903	0
695	5	-49.6193	73.0466	-450.685	42299.2	2103.75	-4052.31	204.668	206.145	0	0	0	0	0	0	0	200	903	0	0	0	0	0	0	0	603	903	0
695	6	-50.9926	73.657	-458.314	42665.4	2408.93	-3640.32	205.256	206.908	0	0	0	0	0	0	0	200	903	0	0	0	0	0	0	0	603	903	0
695	7	-50.84	75.6406	-467.775	42940.1	2408.93	-3731.87	205.15	208.204	0	0	0	0	0	0	0	200	903	0	0	0	0	0	0	0	603	903	0
695	8	-49.4667	78.5398	-476.93	43580.9	2164.78	-3869.2	204.539	208.622	0	0	0	0	0	0	0	200	903	0	0	0	0	0	0	0	603	903	0
695	9	-48.7038	81.2864	-482.728	44313.4	2347.89	-3411.44	204.864	208.202	0	0	0	0	0	0	0	200	903	0	0	0	0	0	0	0	603	903	0
696	0	-50.6874	81.2864	-490.358	43672.5	2592.03	-3274.11	205.286	210.938	0	0	0	0	0	0	0	200	903	0	0	0	0	0	0	0	603	903	0
696	1	-49.3141	82.9648	-494.63	44221.8	2775.14	-3319.89	205.611	210.596	0	0	0	0	0	0	0	200	903	0	0	0	0	0	0	0	603	903	0
696	2	-46.8727	86.1692	-499.513	44404.9	2653.07	-3182.56	205.311	211.104	0	0	0	0	0	0	0	200	903	0	0	0	0	0	0	0	603	903	0
696	3	-47.0253	88.3054	-505.617	43672.5	2958.24	-2816.34	205.851	213.625	0	0	0	0	0	0	0	200	903	0	0	0	0	0	0	0	603	903	0
696	4	-45.8046	89.0683	-511.72	44038.7	3263.42	-2724.79	206.377	213.94	0	0	0	0	0	0	0	200	903	0	0	0	0	0	0	0	603	903	0
696	5	-46.4149	92.4253	-515.687	44038.7	3263.42	-2679.02	206.328	214.602	0	0	0	0	0	0	0	200	903	0	0	0	0	0	0	0	603	903	0
696	6	-43.9735	94.1037	-518.434	44313.4	3446.52	-2541.69	206.648	214.525	0	0	0	0	0	0	0	200	903	0	0	0	0	0	0	0	603	903	0
696	7	-42.4477	93.3408	-519.349	44130.3	3385.49	-2679.02	206.519	215.028	0	0	0	0	0	0	0	200	903	0	0	0	0	0	0	0	603	903	0
696	8	-39.7011	94.7141	-521.791	44404.9	3690.66	-2495.91	207.073	214.899	0	0	0	0	0	0	0	200	903	0	0	0	0	0	0	0	603	903	0
696	9	-38.4804	96.3926	-524.232	44404.9	3934.81	-2312.8	207.506	215.295	0	0	0	0	0	0	0	200	903	0	0	0	0	0	0	0	603	903	0
697	0	-35.8864	95.6296	-528.2	44496.5	3568.59	-2312.8	206.756	215.758	0	0	0	0	0	0	0	200	903	0	0	0	0	0	0	0	603	903	0
697	1	-35.1234	95.1719	-529.725	44313.4	3751.7	-2267.03	207.082	216.347	0	0	0	0	0	0	0	200	903	0	0	0	0	0	0	0	603	903	0
697	2	-32.2243	95.9348	-530.031	44404.9	4239.98	-1763.49	208	216.222	0	0	0	0	0	0	0	200	903	0	0	0	0	0	0	0	603	903	0
697	3	-29.9354	95.1719	-531.251	43947.2	4545.16	-1671.94	208.556	217.276	0	0	0	0	0	0	0	200	903	0	0	0	0	0	0	0	603	903	0
697	4	-27.0363	95.3244	-531.862	43123.2	4178.94	-1809.26	207.857	218.92	0	0	0	0	0	0	0	200	903	0	0	0	0	0	0	0	603	903	0
697	5	-24.4423	94.2563	-533.082	42665.4	4423.09	-1534.61	208.297	219.965	0	0	0	0	0	0	0	200	903	0	0	0	0	0	0	0	603	903	0
697	6	-21.3905	94.8667	-530.336	42116.1	4972.4	-1168.4	209.376	220.586	0	0	0	0	0	0	0	200	903	0	0	0	0	0	0	0	603	903	0
697	7	-19.2543	94.8667	-532.472	42299.2	5094.47	-1305.72	209.568	220.561	0	0	0	0	0	0	0	200	903	0	0	0	0	0	0	0	603	903	0
697	8	-18.1862	92.2727	-530.031	42116.1	5033.44	-1305.72	209.497	220.54	0	0	0	0	0	0	0	200	903	0	0	0	0	0	0	0	603	903	0
697	9	-14.9818	93.4934	-527.894	42482.3	5277.58	-1031.07	209.997	219.525	0	0	0	0	0	0	0	200	903	0	0	0	0	0	0	0	603	903	0
698	0	-11.9301	94.1037	-527.589	41749.9	6010	-847.961	211.391	220.867	0	0	0	0	0	0	0	200	903	0	0	0	0	0	0	0	603	903	0
698	1	-9.03091	95.0193	-528.2	41749.9	5765.86	-1031.07	210.916	220.958	0	0	0	0	0	0	0	200	903	0	0	0	0	0	0	0	603	903	0
698	2	-7.04727	93.4934	-527.284	41017.5	5765.86	-664.855	210.935	222.21	0	0	0	0	0	0	0	200	903	0	0	0	0	0	0	0	603	903	0
698	3	-5.52139	93.1882	-524.843	41383.7	5826.89	-573.302	211.102	221.15	0	0	0	0	0	0	0	200	903	0	0	0	0	0	0	0	603	903	0
698	4	-4.30068	93.4934	-523.317	40925.9	5826.89	-207.091	211.135	221.795	0	0	0	0	0	0	0	200	903	0	0	0	0	0	0	0	603	903	0
698	5	-1.70669	95.0193	-521.18	40376.6	5948.96	-23.9859	211.414	222.529	0	0	0	0	0	0	0	200	903	0	0	0	0	0	0	0	603	903	0
698	6	0.582129	94.2563	-521.486	39918.8	5948.96	342.225	211.408	223.452	0	0	0	0	0	0	0	200	903	0	0	0	0	0	0	0	603	903	0
698	7	1.49766	95.1719	-523.012	39552.6	5948.96	159.12	211.374	224.375	0	0	0	0	0	0	0	200	903	0	0	0	0	0	0	0	603	903	0
698	8	2.56577	96.0874	-521.486	38820.2	6132.07	662.66	211.759	225.558	0	0	0	0	0	0	0	200	903	0	0	0	0	0	0	0	603	903	0
698	9	5.9227	95.477	-519.349	38820.2	6559.32	799.989	212.63	225.252	0	0	0	0	0	0	0	200	903	0	0	0	0	0	0	0	603	903	0
699	0	4.85459	94.4089	-518.739	38820.2	6681.39	662.66	212.88	225.164	0	0	0	0	0	0	0	200	903	0	0	0	0	0	0	0	603	903	0
699	1	6.83823	96.24	-519.349	39003.3	6681.39	983.094	212.865	224.9	0	0	0	0	0	0	0	200	903	0	0	0	0	0	0	0	603	903	0
699	2	9.58481	96.3926	-519.349	39003.3	6864.49	1120.42	213.217	224.9	0	0	0	0	0	0	0	200	903	0	0	0	0	0	0	0	603	903	0
699	3	8.66929	97.3081	-520.875	38728.6	6925.53	1074.65	213.296	225.647	0	0	0	0	0	0	0	200	903	0	0	0	0	0	0	0	603	903	0
699	4	8.05894	96.0874	-520.265	38820.2	6559.32	1028.87	212.608	225.384	0	0	0	0	0	0	0	200	903	0	0	0	0	0	0	0	603	903	0
699	5	10.8055	96.5451	-520.265	38911.7	7108.63	1349.31	213.663	225.208	0	0	0	0	0	0	0	200	903	0	0	0	0	0	0	0	603	903	0
699	6	9.27964	96.0874	-519.96	38820.2	7169.67	1486.63	213.789	225.34	0	0	0	0	0	0	0	200	903	0	0	0	0	0	0	0	603	903	0
699	7	9.88999	95.0193	-521.791	38545.5	7230.7	1532.41	213.857	226.128	0	0	0	0	0	0	0	200	903	0	0	0	0	0	0	0	603	903	0
699	8	10.9581	96.6977	-523.927	38362.4	6742.42	1715.52	212.869	226.779	0	0	0	0	0	0	0	200	903	0	0	0	0	0	0	0	603	903	0
699	9	10.9581	96.5451	-525.453	38270.9	7291.74	1761.29	213.877	227.166	0	0	0	0	0	0	0	200	903	0	0	0	0	0	0	0	603	903	0
700	0	9.27964	96.24	-526.979	37996.2	6742.42	1944.4	212.794	227.898	0	0	0	0	0	0	0	200	903	0	0	0	0	0	0	0	603	903	0
700	1	11.2633	97.1555	-527.589	37721.6	7352.77	1944.4	213.937	228.502	0	0	0	0	0	0	0	200	903	0	0	0	0	0	0	0	603	903	0
700	2	10.0426	97.6133	-528.505	37813.1	7230.7	2127.5	213.681	228.453	0	0	0	0	0	0	0	200	903	0	0	0	0	0	0	0	603	903	0
700	3	10.5003	96.0874	-529.725	37630	7657.95	2127.5	214.456	228.963	0	0	0	0	0	0	0	200	903	0	0	0	0	0	0	0	603	903	0
700	4	10.1952	97.9184	-536.744	38179.3	7780.02	2356.39	214.495	228.869	0	0	0	0	0	0	0	200	903	0	0	0	0	0	0	0	603	903	0
700	5	8.21152	97.1555	-543.153	37996.2	8756.58	2585.27	216.122	230.045	0	0	0	0	0	0	0	200	903	0	0	0	0	0	0	0	603	903	0
700	6	8.97446	95.6296	-552.308	37996.2	8573.48	2402.16	215.523	231.205	0	0	0	0	0	0	0	200	903	0	0	0	0	0	0	0	603	903	0
700	7	15.078	99.4443	-551.088	37996.2	8207.26	3043.03	214.893	231.052	0	0	0	0	0	0	0	200	903	0	0	0	0	0	0	0	603	903	0
700	8	16.7564	101.733	-549.867	37721.6	8878.65	2905.7	216.147	231.399	0	0	0	0	0	0	0	200	903	0	0	0	0	0	0	0	603	903	0
700	9	15.2306	100.818	-554.75	38820.2	8634.51	2539.49	215.565	230.022	0	0	0	0	0	0	0	200	903	0	0	0	0	0	0	0	603	903	0
701	0	17.2142	99.5969	-565.736	37630	8573.48	2997.26	215.155	233.485	0	0	0	0	0	0	0	200	903	0	0	0	0	0	0	0	603	903	0
701	1	19.1979	103.106	-568.483	37904.7	8695.55	3226.14	215.296	233.323	0	0	0	0	0	0	0	200	903	0	0	0	0	0	0	0	603	903	0
701	2	15.9935	107.226	-575.502	38728.6	9366.93	2768.37	216.276	232.705	0	0	0	0	0	0	0	200	903	0	0	0	0	0	0	0	603	903	0
701	3	15.2306	106.006	-577.638	37538.5	9122.79	3134.58	215.793	235.014	0	0	0	0	0	0	0	200	903	0	0	0	0	0	0	0	603	903	0
701	4	15.9935	108.447	-584.352	37721.6	9000.72	3546.57	215.403	235.447	0	0	0	0	0	0	0	200	903	0	0	0	0	0	0	0	603	903	0
701	5	12.0262	109.973	-587.709	37904.7	9183.83	3088.81	215.627	235.504	0	0	0	0	0	0	0	200	903	0	0	0	0	0	0	0	603	903	0
701	6	12.1788	109.82	-590.761	37813.1	9489	2951.48	216.062	235.993	0	0	0	0	0	0	0	200	903	0	0	0	0	0	0	0	603	903	0
701	7	13.0943	107.531	-594.728	38087.8	9244.86	3180.36	215.545	235.958	0	0	0	0	0	0	0	200	903	0	0	0	0	0	0	0	603	903	0
701	8	11.4159	108.142	-600.221	38637.1	9305.9	3317.69	215.504	235.629	0	0	0	0	0	0	0	200	903	0	0	0	0	0	0	0	603	903	0
701	9	11.2633	108.447	-602.052	37996.2	9305.9	2631.04	215.457	236.889	0	0	0	0	0	0	0	200	903	0	0	0	0	0	0	0	603	903	0
702	0	10.9581	106.921	-602.357	37721.6	9183.83	2997.26	215.246	237.377	0	0	0	0	0	0	0	200	903	0	0	0	0	0	0	0	603	903	0
702	1	9.43223	105.853	-603.578	38545.5	9489	3043.03	215.721	236.138	0	0	0	0	0	0	0	200	903	0	0	0	0	0	0	0	603	903	0
702	2	10.9581	106.311	-612.123	37996.2	9366.93	2814.15	215.302	237.927	0	0	0	0	0	0	0	200	903	0	0	0	0	0	0	0	603	903	0
702	3	10.8055	105.395	-613.954	37813.1	9244.86	3088.81	215.058	238.411	0	0	0	0	0	0	0	200	903	0	0	0	0	0	0	0	603	903	0
702	4	11.4159	105.548	-613.954	38179.3	9183.83	3226.14	214.959	237.814	0	0	0	0	0	0	0	200	903	0	0	0	0	0	0	0	603	903	0
702	5	8.36411	104.48	-615.785	37904.7	9550.04	2859.93	215.509	238.445	0	0	0	0	0	0	0	200	903	0	0	0	0	0	0	0	603	903	0
702	6	10.6529	104.175	-618.226	37446.9	9061.76	3134.58	214.658	239.429	0	0	0	0	0	0	0	200	903	0	0	0	0	0	0	0	603	903	0
702	7	12.0262	103.869	-622.499	37355.4	9305.9	3500.8	214.949	239.991	0	0	0	0	0	0	0	200	903	0	0	0	0	0	0	0	603	903	0
702	8	11.1107	102.496	-621.278	37996.2	9733.14	3226.14	215.666	238.842	0	0	0	0	0	0	0	200	903	0	0	0	0	0	0	0	603	903	0
702	9	11.721	101.123	-623.414	37630	9855.21	3180.36	215.808	239.639	0	0	0	0	0	0	0	200	903	0	0	0	0	0	0	0	603	903	0
703	0	10.9581	101.123	-624.635	37721.6	9427.97	3455.02	215.094	239.61	0	0	0	0	0	0	0	200	903	0	0	0	0	0	0	0	603	903	0
703	1	10.3478	100.97	-626.771	37904.7	9489	3271.91	215.14	239.524	0	0	0	0	0	0	0	200	903	0	0	0	0	0	0	0	603	903	0
703	2	12.9417	97.7658	-626.771	37263.8	9977.28	3180.36	215.919	240.546	0	0	0	0	0	0	0	200	903	0	0	0	0	0	0	0	603	903	0
703	3	13.2469	98.9865	-628.908	37263.8	9855.21	3363.47	215.67	240.748	0	0	0	0	0	0	0	200	903	0	0	0	0	0	0	0	603	903	0
703	4	13.3995	98.834	-631.654	37263.8	9672.11	3592.35	215.312	241.006	0	0	0	0	0	0	0	200	903	0	0	0	0	0	0	0	603	903	0
703	5	13.3995	98.071	-631.349	37355.4	9489	3363.47	215.03	240.832	0	0	0	0	0	0	0	200	903	0	0	0	0	0	0	0	603	903	0
703	6	12.9417	97.3081	-630.128	36806	9794.18	3455.02	215.543	241.59	0	0	0	0	0	0	0	200	903	0	0	0	0	0	0	0	603	903	0
703	7	14.7728	97.6133	-631.349	37172.2	9855.21	3500.8	215.61	241.123	0	0	0	0	0	0	0	200	903	0	0	0	0	0	0	0	603	903	0
703	8	15.3832	96.24	-632.57	36806	9794.18	3363.47	215.483	241.815	0	0	0	0	0	0	0	200	903	0	0	0	0	0	0	0	603	903	0
703	9	15.8409	94.8667	-635.011	36989.1	9550.04	3821.23	215.039	241.75	0	0	0	0	0	0	0	200	903	0	0	0	0	0	0	0	603	903	0
704	0	14.4676	95.477	-634.401	36714.5	10282.5	3683.9	216.208	242.127	0	0	0	0	0	0	0	200	903	0	0	0	0	0	0	0	603	903	0
704	1	15.3832	94.1037	-637.452	36989.1	10099.4	3546.57	215.843	241.973	0	0	0	0	0	0	0	200	903	0	0	0	0	0	0	0	603	903	0
704	2	15.3832	92.7304	-635.011	36989.1	9611.07	3729.68	215.135	241.75	0	0	0	0	0	0	0	200	903	0	0	0	0	0	0	0	603	903	0
704	3	16.1461	91.052	-635.316	36531.4	10221.4	3821.23	216.089	242.499	0	0	0	0	0	0	0	200	903	0	0	0	0	0	0	0	603	903	0
704	4	16.6039	91.052	-636.537	36348.3	10160.4	3500.8	215.962	242.897	0	0	0	0	0	0	0	200	903	0	0	0	0	0	0	0	603	903	0
704	5	15.9935	90.289	-638.673	36165.2	10221.4	3409.24	216.004	243.375	0	0	0	0	0	0	0	200	903	0	0	0	0	0	0	0	603	903	0
704	6	14.6202	90.289	-638.368	36531.4	9855.21	3729.68	215.438	242.774	0	0	0	0	0	0	0	200	903	0	0	0	0	0	0	0	603	903	0
704	7	15.078	89.2209	-640.199	36256.7	10160.4	3592.35	215.871	243.367	0	0	0	0	0	0	0	200	903	0	0	0	0	0	0	0	603	903	0
704	8	14.7728	88.1528	-638.673	36256.7	10099.4	3592.35	215.813	243.231	0	0	0	0	0	0	0	200	903	0	0	0	0	0	0	0	603	903	0
704	9	15.3832	86.4743	-639.284	35890.5	9977.28	3821.23	215.607	243.858	0	0	0	0	0	0	0	200	903	0	0	0	0	0	0	0	603	903	0
705	0	15.5357	87.0847	-640.504	36256.7	10099.4	3821.23	215.768	243.393	0	0	0	0	0	0	0	200	903	0	0	0	0	0	0	0	603	903	0
705	1	14.9254	85.5588	-641.42	36165.2	10343.5	3500.8	216.126	243.617	0	0	0	0	0	0	0	200	903	0	0	0	0	0	0	0	603	903	0
705	2	13.7047	85.4062	-641.725	36073.6	9794.18	4233.22	215.262	243.786	0	0	0	0	0	0	0	200	903	0	0	0	0	0	0	0	603	903	0
705	3	14.1625	83.7278	-642.335	35890.5	10099.4	3867.01	215.723	244.125	0	0	0	0	0	0	0	200	903	0	0	0	0	0	0	0	603	903	0
705	4	14.0099	82.5071	-642.335	35798.9	10282.5	3638.12	216.008	244.268	0	0	0	0	0	0	0	200	903	0	0	0	0	0	0	0	603	903	0
705	5	14.7728	79.9131	-640.809	35890.5	10221.4	3775.45	215.951	243.992	0	0	0	0	0	0	0	200	903	0	0	0	0	0	0	0	603	903	0
705	6	14.6202	80.8286	-640.504	34791.9	10038.3	4324.77	215.673	245.68	0	0	0	0	0	0	0	200	903	0	0	0	0	0	0	0	603	903	0
705	7	14.9254	80.5234	-642.335	34791.9	9855.21	3226.14	215.343	245.835	0	0	0	0	0	0	0	200	903	0	0	0	0	0	0	0	603	903	0
705	8	13.7047	79.4553	-642.03	35066.5	10465.6	3546.57	216.301	245.382	0	0	0	0	0	0	0	200	903	0	0	0	0	0	0	0	603	903	0
705	9	13.3995	79.1501	-642.03	34791.9	9855.21	3638.12	215.35	245.81	0	0	0	0	0	0	0	200	903	0	0	0	0	0	0	0	603	903	0
706	0	14.315	76.0984	-640.199	35158.1	9977.28	3546.57	215.585	245.083	0	0	0	0	0	0	0	200	903	0	0	0	0	0	0	0	603	903	0
706	1	14.4676	77.1665	-640.504	34975	10221.4	3638.12	215.958	245.395	0	0	0	0	0	0	0	200	903	0	0	0	0	0	0	0	603	903	0
706	2	14.315	76.4035	-639.894	34791.9	10282.5	3592.35	216.069	245.629	0	0	0	0	0	0	0	200	903	0	0	0	0	0	0	0	603	903	0
706	3	15.078	73.9621	-640.504	34791.9	9855.21	3592.35	215.387	245.68	0	0	0	0	0	0	0	200	903	0	0	0	0	0	0	0	603	903	0
706	4	14.0099	73.8095	-641.115	34975	10282.5	3409.24	216.038	245.447	0	0	0	0	0	0	0	200	903	0	0	0	0	0	0	0	603	903	0
706	5	14.315	72.5888	-639.284	34517.2	10282.5	3912.78	216.084	246.006	0	0	0	0	0	0	0	200	903	0	0	0	0	0	0	0	603	903	0
706	6	13.7047	69.9949	-638.368	34334.1	10343.5	3592.35	216.203	246.216	0	0	0	0	0	0	0	200	903	0	0	0	0	0	0	0	603	903	0
706	7	15.078	70.6052	-639.284	33693.2	10099.4	3546.57	215.798	247.295	0	0	0	0	0	0	0	200	903	0	0	0	0	0	0	0	603	903	0
706	8	14.9254	70.4526	-638.978	33510.1	10160.4	3500.8	215.901	247.557	0	0	0	0	0	0	0	200	903	0	0	0	0	0	0	0	603	903	0
706	9	15.5357	69.9949	-634.706	33327	10465.6	3500.8	216.489	247.492	0	0	0	0	0	0	0	200	903	0	0	0	0	0	0	0	603	903	0
707	0	13.7047	69.3845	-637.758	33235.5	10465.6	3409.24	216.41	247.887	0	0	0	0	0	0	0	200	903	0	0	0	0	0	0	0	603	903	0
707	1	13.2469	68.9267	-635.927	32686.2	10282.5	3455.02	216.169	248.601	0	0	0	0	0	0	0	200	903	0	0	0	0	0	0	0	603	903	0
707	2	14.4676	67.0957	-635.316	32503.1	10160.4	3592.35	215.993	248.84	0	0	0	0	0	0	0	200	903	0	0	0	0	0	0	0	603	903	0
707	3	14.1625	66.6379	-632.57	33235.5	10343.5	3180.36	216.352	247.46	0	0	0	0	0	0	0	200	903	0	0	0	0	0	0	0	603	903	0
707	4	13.8573	64.9594	-634.401	32960.8	10343.5	3455.02	216.304	248.044	0	0	0	0	0	0	0	200	903	0	0	0	0	0	0	0	603	903	0
707	5	13.8573	64.3491	-632.875	32594.6	10099.4	3455.02	215.958	248.498	0	0	0	0	0	0	0	200	903	0	0	0	0	0	0	0	603	903	0
707	6	13.0943	63.5862	-632.264	32319.9	9977.28	3271.91	215.78	248.882	0	0	0	0	0	0	0	200	903	0	0	0	0	0	0	0	603	903	0
707	7	13.2469	61.1448	-629.213	32045.3	10282.5	3317.69	216.342	249.071	0	0	0	0	0	0	0	200	903	0	0	0	0	0	0	0	603	903	0
707	8	14.315	62.0603	-627.076	31312.9	10221.4	3592.35	216.3	250.065	0	0	0	0	0	0	0	200	903	0	0	0	0	0	0	0	603	903	0
707	9	13.8573	61.2973	-625.856	31129.8	10282.5	3180.36	216.429	250.26	0	0	0	0	0	0	0	200	903	0	0	0	0	0	0	0	603	903	0
708	0	13.8573	61.4499	-627.382	30855.1	10221.4	2951.48	216.292	250.819	0	0	0	0	0	0	0	200	903	0	0	0	0	0	0	0	603	903	0
708	1	13.3995	60.8396	-624.94	30855.1	10587.6	3317.69	216.942	250.627	0	0	0	0	0	0	0	200	903	0	0	0	0	0	0	0	603	903	0
708	2	14.315	58.3982	-622.499	30305.8	10404.5	3500.8	216.714	251.316	0	0	0	0	0	0	0	200	903	0	0	0	0	0	0	0	603	903	0
708	3	12.484	59.3137	-620.057	31038.2	10282.5	3180.36	216.583	249.943	0	0	0	0	0	0	0	200	903	0	0	0	0	0	0	0	603	903	0
708	4	13.5521	58.5508	-619.447	30580.4	10404.5	3500.8	216.796	250.633	0	0	0	0	0	0	0	200	903	0	0	0	0	0	0	0	603	903	0
708	5	15.078	56.8723	-619.447	30672	10404.5	3317.69	216.796	250.485	0	0	0	0	0	0	0	200	903	0	0	0	0	0	0	0	603	903	0
708	6	13.3995	56.4145	-616.701	30397.3	10587.6	2951.48	217.168	250.71	0	0	0	0	0	0	0	200	903	0	0	0	0	0	0	0	603	903	0
708	7	12.9417	55.6516	-615.785	29848	10160.4	3180.36	216.5	251.529	0	0	0	0	0	0	0	200	903	0	0	0	0	0	0	0	603	903	0
708	8	12.484	55.0412	-611.207	29756.5	10404.5	3180.36	217.023	251.315	0	0	0	0	0	0	0	200	903	0	0	0	0	0	0	0	603	903	0
708	9	13.5521	53.8205	-610.902	28749.4	10343.5	3226.14	216.932	252.939	0	0	0	0	0	0	0	200	903	0	0	0	0	0	0	0	603	903	0
709	0	14.1625	53.0576	-609.987	28657.8	10587.6	3043.03	217.357	253.019	0	0	0	0	0	0	0	200	903	0	0	0	0	0	0	0	603	903	0
709	1	14.4676	52.4472	-609.071	28657.8	10221.4	3409.24	216.782	252.948	0	0	0	0	0	0	0	200	903	0	0	0	0	0	0	0	603	903	0
709	2	13.8573	52.1421	-605.409	27559.2	10404.5	2997.26	217.186	254.478	0	0	0	0	0	0	0	200	903	0	0	0	0	0	0	0	603	903	0
709	3	14.0099	51.3791	-606.019	27650.8	10587.6	3134.58	217.471	254.373	0	0	0	0	0	0	0	200	903	0	0	0	0	0	0	0	603	903	0
709	4	14.1625	50.7688	-602.052	27559.2	10587.6	3180.36	217.586	254.225	0	0	0	0	0	0	0	200	903	0	0	0	0	0	0	0	603	903	0
709	5	14.9254	49.3955	-599.305	27467.7	10465.6	3134.58	217.463	254.168	0	0	0	0	0	0	0	200	903	0	0	0	0	0	0	0	603	903	0
709	6	15.6883	48.9377	-597.474	27193	10282.5	2814.15	217.21	254.487	0	0	0	0	0	0	0	200	903	0	0	0	0	0	0	0	603	903	0
709	7	14.9254	47.8696	-597.78	27376.1	10709.7	2859.93	217.916	254.204	0	0	0	0	0	0	0	200	903	0	0	0	0	0	0	0	603	903	0
709	8	14.4676	47.717	-595.949	27193	10526.6	3271.91	217.664	254.37	0	0	0	0	0	0	0	200	903	0	0	0	0	0	0	0	603	903	0
709	9	14.315	47.1067	-591.066	26460.6	10404.5	2722.6	217.603	255.232	0	0	0	0	0	0	0	200	903	0	0	0	0	0	0	0	603	903	0
710	0	14.9254	44.9704	-591.371	26552.1	10282.5	3088.81	217.388	255.101	0	0	0	0	0	0	0	200	903	0	0	0	0	0	0	0	603	903	0
710	1	15.8409	45.4282	-588.014	26094.4	10587.6	3043.03	218.006	255.623	0	0	0	0	0	0	0	200	903	0	0	0	0	0	0	0	603	903	0
710	2	15.8409	44.5127	-587.098	24995.7	10648.7	2814.15	218.138	257.425	0	0	0	0	0	0	0	200	903	0	0	0	0	0	0	0	603	903	0
710	3	15.6883	44.3601	-585.878	24812.6	10526.6	3134.58	217.967	257.649	0	0	0	0	0	0	0	200	903	0	0	0	0	0	0	0	603	903	0
710	4	15.3832	43.9023	-583.436	24629.5	10465.6	2859.93	217.938	257.785	0	0	0	0	0	0	0	200	903	0	0	0	0	0	0	0	603	903	0
710	5	14.9254	44.0549	-578.554	24171.8	10709.7	2951.48	218.511	258.22	0	0	0	0	0	0	0	200	903	0	0	0	0	0	0	0	603	903	0
710	6	16.6039	43.4446	-576.417	23897.1	10770.7	3271.91	218.686	258.542	0	0	0	0	0	0	0	200	903	0	0	0	0	0	0	0	603	903	0
710	7	17.672	41.6135	-574.586	23897.1	10648.7	3134.58	218.533	258.41	0	0	0	0	0	0	0	200	903	0	0	0	0	0	0	0	603	903	0
710	8	16.6039	42.2239	-574.281	23439.3	10587.6	3043.03	218.436	259.185	0	0	0	0	0	0	0	200	903	0	0	0	0	0	0	0	603	903	0
710	9	15.5357	42.529	-571.84	23714	10953.8	2676.82	219.155	258.53	0	0	0	0	0	0	0	200	903	0	0	0	0	0	0	0	603	903	0
711	0	17.2142	42.0713	-568.178	23164.7	10953.8	2905.7	219.279	259.23	0	0	0	0	0	0	0	200	903	0	0	0	0	0	0	0	603	903	0
711	1	16.1461	40.5454	-565.431	23439.3	10343.5	2905.7	218.293	258.546	0	0	0	0	0	0	0	200	903	0	0	0	0	0	0	0	603	903	0
711	2	16.2987	40.5454	-562.684	22432.2	10587.6	2676.82	218.816	260.134	0	0	0	0	0	0	0	200	903	0	0	0	0	0	0	0	603	903	0
711	3	18.4349	37.4936	-562.684	22157.6	10709.7	2859.93	219.033	260.622	0	0	0	0	0	0	0	200	903	0	0	0	0	0	0	0	603	903	0
711	4	16.6039	39.4773	-559.633	21516.7	10831.8	2859.93	219.355	261.552	0	0	0	0	0	0	0	200	903	0	0	0	0	0	0	0	603	903	0
711	5	15.9935	38.2566	-558.412	20967.4	10465.6	2676.82	218.742	262.452	0	0	0	0	0	0	0	200	903	0	0	0	0	0	0	0	603	903	0
711	6	17.8246	38.8669	-552.308	21333.6	11014.9	2768.37	219.943	261.374	0	0	0	0	0	0	0	200	903	0	0	0	0	0	0	0	603	903	0
711	7	16.909	37.9514	-551.088	20418.1	10343.5	2905.7	218.769	262.949	0	0	0	0	0	0	0	200	903	0	0	0	0	0	0	0	603	903	0
711	8	17.5194	36.4255	-549.257	20143.4	10587.6	2631.04	219.276	263.326	0	0	0	0	0	0	0	200	903	0	0	0	0	0	0	0	603	903	0
711	9	19.8082	37.4936	-547.426	20235	10831.8	2722.6	219.787	263.036	0	0	0	0	0	0	0	200	903	0	0	0	0	0	0	0	603	903	0
712	0	17.9771	37.1885	-545.289	20418.1	10831.8	2676.82	219.864	262.555	0	0	0	0	0	0	0	200	903	0	0	0	0	0	0	0	603	903	0
712	1	16.7564	33.6789	-543.153	19502.6	10953.8	2722.6	220.167	264.094	0	0	0	0	0	0	0	200	903	0	0	0	0	0	0	0	603	903	0
712	2	18.1297	35.2048	-538.881	19685.7	10587.6	2585.27	219.647	263.469	0	0	0	0	0	0	0	200	903	0	0	0	0	0	0	0	603	903	0
712	3	16.7564	34.8996	-536.134	19136.4	10831.8	2631.04	220.204	264.307	0	0	0	0	0	0	0	200	903	0	0	0	0	0	0	0	603	903	0
712	4	17.672	33.3738	-534.913	18953.2	10892.8	2585.27	220.364	264.568	0	0	0	0	0	0	0	200	903	0	0	0	0	0	0	0	603	903	0
712	5	19.6556	32.7634	-533.082	18037.7	10526.6	2585.27	219.747	266.163	0	0	0	0	0	0	0	200	903	0	0	0	0	0	0	0	603	903	0
712	6	17.9771	32.916	-531.862	17946.2	10221.4	2631.04	219.218	266.258	0	0	0	0	0	0	0	200	903	0	0	0	0	0	0	0	603	903	0
712	7	17.0616	31.8479	-528.81	17671.5	10892.8	2539.49	220.599	266.582	0	0	0	0	0	0	0	200	903	0	0	0	0	0	0	0	603	903	0
712	8	18.5875	30.9324	-525.453	17122.2	10709.7	2631.04	220.382	267.414	0	0	0	0	0	0	0	200	903	0	0	0	0	0	0	0	603	903	0
712	9	17.2142	28.0332	-523.622	17030.6	10648.7	2631.04	220.337	267.475	0	0	0	0	0	0	0	200	903	0	0	0	0	0	0	0	603	903	0
713	0	18.4349	30.322	-520.875	16939.1	10770.7	2722.6	220.678	267.48	0	0	0	0	0	0	0	200	903	0	0	0	0	0	0	0	603	903	0
713	1	18.4349	29.4065	-519.044	16756	10892.8	2493.72	220.986	267.718	0	0	0	0	0	0	0	200	903	0	0	0	0	0	0	0	603	903	0
713	2	19.0453	28.7961	-516.908	16572.9	10953.8	2722.6	221.191	267.938	0	0	0	0	0	0	0	200	903	0	0	0	0	0	0	0	603	903	0
713	3	17.2142	28.3384	-514.772	17213.7	10770.7	2539.49	220.923	266.56	0	0	0	0	0	0	0	200	903	0	0	0	0	0	0	0	603	903	0
713	4	17.8246	27.2702	-511.72	15840.5	10526.6	2768.37	220.571	269.045	0	0	0	0	0	0	0	200	903	0	0	0	0	0	0	0	603	903	0
713	5	16.909	25.7444	-506.532	15748.9	10892.8	2356.39	221.505	268.908	0	0	0	0	0	0	0	200	903	0	0	0	0	0	0	0	603	903	0
713	6	18.1297	26.3547	-507.448	15382.7	11137	2356.39	221.947	269.686	0	0	0	0	0	0	0	200	903	0	0	0	0	0	0	0	603	903	0
713	7	17.8246	25.134	-506.227	15016.5	10526.6	2264.83	220.794	270.336	0	0	0	0	0	0	0	200	903	0	0	0	0	0	0	0	603	903	0
713	8	18.2823	25.897	-499.818	14741.8	10587.6	2173.28	221.183	270.506	0	0	0	0	0	0	0	200	903	0	0	0	0	0	0	0	603	903	0
713	9	17.2142	24.9814	-502.87	14009.4	10892.8	2447.94	221.661	272.141	0	0	0	0	0	0	0	200	903	0	0	0	0	0	0	0	603	903	0
714	0	17.0616	24.5237	-498.597	14192.5	10892.8	2173.28	221.847	271.535	0	0	0	0	0	0	0	200	903	0	0	0	0	0	0	0	603	903	0
714	1	17.9771	23.6081	-499.208	13368.5	10465.6	2219.06	220.964	273.221	0	0	0	0	0	0	0	200	903	0	0	0	0	0	0	0	603	903	0
714	2	18.1297	22.2348	-495.546	13917.8	10648.7	2402.16	221.489	271.914	0	0	0	0	0	0	0	200	903	0	0	0	0	0	0	0	603	903	0
714	3	18.5875	21.9297	-496.461	13643.2	10953.8	2402.16	222.064	272.519	0	0	0	0	0	0	0	200	903	0	0	0	0	0	0	0	603	903	0
714	4	17.672	21.3193	-494.935	13551.6	10770.7	1990.17	221.762	272.619	0	0	0	0	0	0	0	200	903	0	0	0	0	0	0	0	603	903	0
714	5	18.8927	20.2512	-488.221	13368.5	10404.5	2081.73	221.311	272.618	0	0	0	0	0	0	0	200	903	0	0	0	0	0	0	0	603	903	0
714	6	17.672	19.7934	-488.527	13277	10831.8	2173.28	222.172	272.822	0	0	0	0	0	0	0	200	903	0	0	0	0	0	0	0	603	903	0
714	7	19.0453	18.2676	-485.78	12453	11137	2035.95	222.926	274.365	0	0	0	0	0	0	0	200	903	0	0	0	0	0	0	0	603	903	0
714	8	19.503	18.4201	-486.085	11903.7	10953.8	1944.4	222.535	275.511	0	0	0	0	0	0	0	200	903	0	0	0	0	0	0	0	603	903	0
714	9	18.2823	17.9624	-483.949	11995.2	10831.8	1990.17	222.382	275.214	0	0	0	0	0	0	0	200	903	0	0	0	0	0	0	0	603	903	0
715	0	18.1297	18.115	-482.728	11812.1	10770.7	2035.95	222.312	275.53	0	0	0	0	0	0	0	200	903	0	0	0	0	0	0	0	603	903	0
715	1	18.8927	17.9624	-479.677	11445.9	10831.8	1807.07	222.581	276.138	0	0	0	0	0	0	0	200	903	0	0	0	0	0	0	0	603	903	0
715	2	19.6556	17.352	-477.235	10988.2	10831.8	1944.4	222.697	276.975	0	0	0	0	0	0	0	200	903	0	0	0	0	0	0	0	603	903	0
715	3	19.6556	16.5891	-477.235	10896.6	10587.6	1807.07	222.185	277.167	0	0	0	0	0	0	0	200	903	0	0	0	0	0	0	0	603	903	0
715	4	19.6556	15.9787	-473.268	10805.1	10587.6	2035.95	222.371	277.169	0	0	0	0	0	0	0	200	903	0	0	0	0	0	0	0	603	903	0
715	5	19.3504	16.5891	-473.573	10805.1	11075.9	1852.85	223.388	277.184	0	0	0	0	0	0	0	200	903	0	0	0	0	0	0	0	603	903	0
715	6	20.1134	15.2158	-469.911	10530.4	11075.9	1852.85	223.57	277.591	0	0	0	0	0	0	0	200	903	0	0	0	0	0	0	0	603	903	0
715	7	21.3341	14.758	-468.385	9614.87	10648.7	1761.29	222.735	279.472	0	0	0	0	0	0	0	200	903	0	0	0	0	0	0	0	603	903	0
715	8	21.0289	12.927	-466.249	9523.31	10160.4	1715.52	221.792	279.575	0	0	0	0	0	0	0	200	903	0	0	0	0	0	0	0	603	903	0
715	9	20.266	15.0632	-465.333	8790.89	10953.8	1761.29	223.54	281.108	0	0	0	0	0	0	0	200	903	0	0	0	0	0	0	0	603	903	0
716	0	19.9608	13.9951	-462.892	8607.79	10770.7	1578.19	223.268	281.404	0	0	0	0	0	0	0	200	903	0	0	0	0	0	0	0	603	903	0
716	1	19.503	14.758	-462.892	8699.34	10770.7	1395.08	223.268	281.207	0	0	0	0	0	0	0	200	903	0	0	0	0	0	0	0	603	903	0
716	2	20.1134	14.9106	-459.535	8882.44	10465.6	1623.96	222.774	280.671	0	0	0	0	0	0	0	200	903	0	0	0	0	0	0	0	603	903	0
716	3	21.0289	12.0115	-458.314	8058.47	10343.5	1532.41	222.569	282.417	0	0	0	0	0	0	0	200	903	0	0	0	0	0	0	0	603	903	0
716	4	20.266	13.6899	-454.957	7966.92	10831.8	1349.31	223.808	282.489	0	0	0	0	0	0	0	200	903	0	0	0	0	0	0	0	603	903	0
716	5	21.0289	12.7744	-456.483	7692.26	10770.7	1166.2	223.595	283.149	0	0	0	0	0	0	0	200	903	0	0	0	0	0	0	0	603	903	0
716	6	19.8082	12.6218	-454.957	8333.13	10648.7	1395.08	223.406	281.684	0	0	0	0	0	0	0	200	903	0	0	0	0	0	0	0	603	903	0
716	7	20.1134	12.164	-449.769	6959.84	10648.7	1257.75	223.676	284.526	0	0	0	0	0	0	0	200	903	0	0	0	0	0	0	0	603	903	0
716	8	20.1134	10.4856	-449.159	6593.63	10770.7	1257.75	223.98	285.32	0	0	0	0	0	0	0	200	903	0	0	0	0	0	0	0	603	903	0
716	9	21.6393	11.8589	-447.633	6135.86	10831.8	1211.98	224.198	286.293	0	0	0	0	0	0	0	200	903	0	0	0	0	0	0	0	603	903	0
717	0	21.6393	11.8589	-446.718	5769.65	10404.5	1166.2	223.291	287.084	0	0	0	0	0	0	0	200	903	0	0	0	0	0	0	0	603	903	0
717	1	21.0289	12.164	-446.412	6227.41	10282.5	1166.2	223.034	286.05	0	0	0	0	0	0	0	200	903	0	0	0	0	0	0	0	603	903	0
717	2	20.266	12.0115	-444.887	5678.1	10587.6	1028.87	223.799	287.237	0	0	0	0	0	0	0	200	903	0	0	0	0	0	0	0	603	903	0
717	3	20.1134	10.333	-440.919	5311.89	10526.6	1211.98	223.874	287.953	0	0	0	0	0	0	0	200	903	0	0	0	0	0	0	0	603	903	0
717	4	19.3504	11.0959	-438.173	5861.2	10404.5	479.554	223.745	286.624	0	0	0	0	0	0	0	200	903	0	0	0	0	0	0	0	603	903	0
717	5	19.8082	11.4011	-439.088	5403.44	10465.6	1074.65	223.835	287.694	0	0	0	0	0	0	0	200	903	0	0	0	0	0	0	0	603	903	0
717	6	20.1134	8.65452	-442.14	4762.57	10465.6	1028.87	223.67	289.228	0	0	0	0	0	0	0	200	903	0	0	0	0	0	0	0	603	903	0
717	7	18.1297	10.1804	-439.393	4487.91	10221.4	937.318	223.263	289.786	0	0	0	0	0	0	0	200	903	0	0	0	0	0	0	0	603	903	0
717	8	19.3504	9.72264	-438.478	4213.25	10099.4	891.542	223.033	290.391	0	0	0	0	0	0	0	200	903	0	0	0	0	0	0	0	603	903	0
717	9	18.8927	7.43382	-436.647	4030.15	10221.4	1166.2	223.409	290.77	0	0	0	0	0	0	0	200	903	0	0	0	0	0	0	0	603	903	0
718	0	19.3504	8.50193	-434.511	3389.28	10465.6	1074.65	224.086	292.2	0	0	0	0	0	0	0	200	903	0	0	0	0	0	0	0	603	903	0
718	1	20.266	8.50193	-432.68	3572.38	10770.7	845.765	224.893	291.744	0	0	0	0	0	0	0	200	903	0	0	0	0	0	0	0	603	903	0
718	2	20.266	8.9597	-435.731	3389.28	10465.6	616.883	224.018	292.222	0	0	0	0	0	0	0	200	903	0	0	0	0	0	0	0	603	903	0
718	3	19.0453	7.89158	-434.816	2656.86	9733.14	891.542	222.385	293.89	0	0	0	0	0	0	0	200	903	0	0	0	0	0	0	0	603	903	0
718	4	21.1815	7.58641	-433.595	2839.96	10282.5	525.331	223.714	293.45	0	0	0	0	0	0	0	200	903	0	0	0	0	0	0	0	603	903	0
718	5	18.5875	7.58641	-432.374	2748.41	10282.5	525.331	223.781	293.643	0	0	0	0	0	0	0	200	903	0	0	0	0	0	0	0	603	903	0
718	6	19.1979	7.43382	-431.459	2748.41	10221.4	433.778	223.69	293.63	0	0	0	0	0	0	0	200	903	0	0	0	0	0	0	0	603	903	0
718	7	18.8927	6.82347	-432.68	2839.96	10221.4	342.225	223.624	293.436	0	0	0	0	0	0	0	200	903	0	0	0	0	0	0	0	603	903	0
718	8	18.5875	6.3657	-431.459	2565.3	10038.3	342.225	223.266	294.054	0	0	0	0	0	0	0	200	903	0	0	0	0	0	0	0	603	903	0
718	9	18.4349	5.75535	-432.68	2107.54	10404.5	479.554	224.047	295.129	0	0	0	0	0	0	0	200	903	0	0	0	0	0	0	0	603	903	0
719	0	17.8246	4.83982	-430.848	2015.99	10282.5	296.449	223.866	295.321	0	0	0	0	0	0	0	200	903	0	0	0	0	0	0	0	603	903	0
719	1	18.4349	5.45018	-430.238	1100.46	10099.4	342.225	223.474	297.442	0	0	0	0	0	0	0	200	903	0	0	0	0	0	0	0	603	903	0
719	2	18.7401	4.68724	-430.848	825.803	10038.3	388.001	223.299	298.083	0	0	0	0	0	0	0	200	903	0	0	0	0	0	0	0	603	903	0
719	3	18.5875	4.99241	-431.459	551.144	10404.5	204.896	224.115	298.723	0	0	0	0	0	0	0	200	903	0	0	0	0	0	0	0	603	903	0
719	4	18.2823	4.68724	-432.374	368.039	10587.6	67.5668	224.487	299.149	0	0	0	0	0	0	0	200	903	0	0	0	0	0	0	0	603	903	0
719	5	18.2823	4.99241	-432.069	917.356	10282.5	525.331	223.798	297.877	0	0	0	0	0	0	0	200	903	0	0	0	0	0	0	0	603	903	0
719	6	18.1297	4.53465	-430.238	551.144	9916.25	250.672	223.048	298.719	0	0	0	0	0	0	0	200	903	0	0	0	0	0	0	0	603	903	0
719	7	19.0453	3.61912	-429.628	734.25	10343.5	67.5668	224.076	298.291	0	0	0	0	0	0	0	200	903	0	0	0	0	0	0	0	603	903	0
719	8	20.1134	4.07688	-432.68	276.486	10282.5	21.7904	223.765	299.361	0	0	0	0	0	0	0	200	903	0	0	0	0	0	0	0	603	903	0
719	9	18.4349	1.02513	-431.764	93.3808	9794.18	113.343	222.684	299.784	0	0	0	0	0	0	0	200	903	0	0	0	0	0	0	0	603	903	0
720	0	16.909	3.00877	-432.68	-730.594	9977.28	342.225	223.059	301.689	0	0	0	0	0	0	0	200	903	0	0	0	0	0	0	0	603	903	0
720	1	17.5194	2.85618	-430.238	-730.594	10099.4	113.343	223.474	301.698	0	0	0	0	0	0	0	200	903	0	0	0	0	0	0	0	603	903	0
720	2	17.672	3.46653	-428.712	-547.489	10282.5	-161.315	223.985	301.277	0	0	0	0	0	0	0	200	903	0	0	0	0	0	0	0	603	903	0
720	3	17.672	3.00877	-431.764	-1371.46	9733.14	-207.091	222.543	303.176	0	0	0	0	0	0	0	200	903	0	0	0	0	0	0	0	603	903	0
720	4	17.9771	1.94065	-432.374	-1920.78	9489	21.7904	221.946	304.442	0	0	0	0	0	0	0	200	903	0	0	0	0	0	0	0	603	903	0
720	5	16.909	3.16136	-434.511	-1554.57	10160.4	-115.539	223.384	303.578	0	0	0	0	0	0	0	200	903	0	0	0	0	0	0	0	603	903	0
720	6	17.2142	2.55101	-433.595	-1920.78	10221.4	-252.868	223.574	304.43	0	0	0	0	0	0	0	200	903	0	0	0	0	0	0	0	603	903	0
720	7	17.0616	2.39842	-432.68	-1829.23	9916.25	-207.091	222.918	304.228	0	0	0	0	0	0	0	200	903	0	0	0	0	0	0	0	603	903	0
720	8	18.1297	1.48289	-432.68	-1463.02	10099.4	-207.091	223.341	303.381	0	0	0	0	0	0	0	200	903	0	0	0	0	0	0	0	603	903	0
720	9	17.9771	1.63548	-434.205	-2286.99	10160.4	-344.421	223.4	305.267	0	0	0	0	0	0	0	200	903	0	0	0	0	0	0	0	603	903	0
721	0	17.672	-0.348165	-435.121	-2561.65	10221.4	-573.302	223.491	305.887	0	0	0	0	0	0	0	200	903	0	0	0	0	0	0	0	603	903	0
721	1	17.2142	1.02513	-435.731	-3019.41	9977.28	-252.868	222.898	306.93	0	0	0	0	0	0	0	200	903	0	0	0	0	0	0	0	603	903	0
721	2	16.4513	1.3303	-433.595	-3019.41	9733.14	-435.973	222.448	306.964	0	0	0	0	0	0	0	200	903	0	0	0	0	0	0	0	603	903	0
721	3	16.909	1.3303	-436.342	-3294.07	10160.4	-390.197	223.285	307.549	0	0	0	0	0	0	0	200	903	0	0	0	0	0	0	0	603	903	0
721	4	16.6039	1.17771	-435.426	-3385.62	10160.4	-573.302	223.334	307.775	0	0	0	0	0	0	0	200	903	0	0	0	0	0	0	0	603	903	0
721	5	17.2142	1.3303	-437.867	-3385.62	9794.18	-573.302	222.368	307.732	0	0	0	0	0	0	0	200	903	0	0	0	0	0	0	0	603	903	0
721	6	15.078	0.414775	-438.783	-3751.83	9550.04	-756.408	221.765	308.551	0	0	0	0	0	0	0	200	903	0	0	0	0	0	0	0	603	903	0
721	7	18.5875	-0.195577	-438.478	-4301.15	10038.3	-619.079	222.894	309.809	0	0	0	0	0	0	0	200	903	0	0	0	0	0	0	0	603	903	0
721	8	15.6883	-0.195577	-438.173	-4484.26	9977.28	-527.526	222.77	310.234	0	0	0	0	0	0	0	200	903	0	0	0	0	0	0	0	603	903	0
721	9	16.2987	-1.87404	-437.867	-4484.26	9977.28	-710.631	222.786	310.241	0	0	0	0	0	0	0	200	903	0	0	0	0	0	0	0	603	903	0
722	0	16.2987	-0.65334	-440.614	-5216.68	9855.21	-847.961	222.367	311.84	0	0	0	0	0	0	0	200	903	0	0	0	0	0	0	0	603	903	0
722	1	15.9935	-0.958516	-440.919	-5399.78	10282.5	-1168.4	223.321	312.247	0	0	0	0	0	0	0	200	903	0	0	0	0	0	0	0	603	903	0
722	2	15.5357	-0.805928	-441.835	-5216.68	10221.4	-985.29	223.134	311.807	0	0	0	0	0	0	0	200	903	0	0	0	0	0	0	0	603	903	0
722	3	14.7728	-0.500753	-439.699	-5674.44	9794.18	-1076.84	222.275	312.905	0	0	0	0	0	0	0	200	903	0	0	0	0	0	0	0	603	903	0
722	4	15.5357	-0.958516	-441.835	-5949.1	9733.14	-1076.84	222.029	313.465	0	0	0	0	0	0	0	200	903	0	0	0	0	0	0	0	603	903	0
722	5	16.7564	-1.26369	-443.361	-5857.55	10099.4	-1214.17	222.779	313.212	0	0	0	0	0	0	0	200	903	0	0	0	0	0	0	0	603	903	0
722	6	14.9254	-1.26369	-444.581	-6132.21	9977.28	-1076.84	222.442	313.793	0	0	0	0	0	0	0	200	903	0	0	0	0	0	0	0	603	903	0
722	7	14.315	-1.26369	-446.107	-6040.65	9611.07	-1168.4	221.544	313.541	0	0	0	0	0	0	0	200	903	0	0	0	0	0	0	0	603	903	0
722	8	14.1625	-2.33181	-446.107	-6589.97	9733.14	-939.513	221.818	314.772	0	0	0	0	0	0	0	200	903	0	0	0	0	0	0	0	603	903	0
722	9	14.7728	-2.94216	-445.802	-6956.18	9550.04	-1351.5	221.422	315.604	0	0	0	0	0	0	0	200	903	0	0	0	0	0	0	0	603	903	0
723	0	14.4676	-2.94216	-447.023	-7413.94	9550.04	-1305.72	221.364	316.585	0	0	0	0	0	0	0	200	903	0	0	0	0	0	0	0	603	903	0
723	1	14.315	-3.09475	-450.685	-8054.81	9977.28	-985.29	222.138	317.872	0	0	0	0	0	0	0	200	903	0	0	0	0	0	0	0	603	903	0
723	2	13.3995	-3.24733	-451.295	-8329.47	9977.28	-1305.72	222.108	318.457	0	0	0	0	0	0	0	200	903	0	0	0	0	0	0	0	603	903	0
723	3	14.4676	-3.55251	-449.769	-8787.24	9977.28	-1534.61	222.183	319.537	0	0	0	0	0	0	0	200	903	0	0	0	0	0	0	0	603	903	0
723	4	12.7892	-2.63698	-449.159	-8604.13	10221.4	-1626.16	222.757	319.156	0	0	0	0	0	0	0	200	903	0	0	0	0	0	0	0	603	903	0
723	5	13.8573	-2.63698	-452.211	-8970.34	10038.3	-1443.05	222.198	319.837	0	0	0	0	0	0	0	200	903	0	0	0	0	0	0	0	603	903	0
723	6	13.2469	-2.94216	-454.652	-9428.11	9855.21	-1763.49	221.676	320.737	0	0	0	0	0	0	0	200	903	0	0	0	0	0	0	0	603	903	0
723	7	13.5521	-4.31545	-454.347	-9428.11	9855.21	-1717.71	221.691	320.751	0	0	0	0	0	0	0	200	903	0	0	0	0	0	0	0	603	903	0
723	8	12.7892	-2.94216	-457.399	-9702.76	9916.25	-1580.38	221.68	321.213	0	0	0	0	0	0	0	200	903	0	0	0	0	0	0	0	603	903	0
723	9	12.0262	-3.85769	-457.399	-9794.32	10160.4	-1580.38	222.213	321.413	0	0	0	0	0	0	0	200	903	0	0	0	0	0	0	0	603	903	0
724	0	12.7892	-3.39992	-458.619	-9885.87	9550.04	-1900.82	220.823	321.556	0	0	0	0	0	0	0	200	903	0	0	0	0	0	0	0	603	903	0
724	1	14.6202	-4.31545	-462.282	-9611.21	9977.28	-1717.71	221.583	320.791	0	0	0	0	0	0	0	200	903	0	0	0	0	0	0	0	603	903	0
724	2	13.0943	-4.77321	-462.282	-10526.7	9977.28	-1809.26	221.583	322.771	0	0	0	0	0	0	0	200	903	0	0	0	0	0	0	0	603	903	0
724	3	12.6366	-5.07839	-464.418	-10893	9855.21	-1809.26	221.221	323.455	0	0	0	0	0	0	0	200	903	0	0	0	0	0	0	0	603	903	0
724	4	13.7047	-6.60427	-462.892	-10893	10038.3	-1809.26	221.686	323.532	0	0	0	0	0	0	0	200	903	0	0	0	0	0	0	0	603	903	0
724	5	12.0262	-5.53615	-464.113	-11533.8	10038.3	-2129.7	221.629	324.851	0	0	0	0	0	0	0	200	903	0	0	0	0	0	0	0	603	903	0
724	6	12.7892	-5.07839	-465.638	-12632.5	10099.4	-2038.15	221.689	327.129	0	0	0	0	0	0	0	200	903	0	0	0	0	0	0	0	603	903	0
724	7	12.3314	-5.68874	-468.08	-12449.3	10343.5	-2267.03	222.098	326.597	0	0	0	0	0	0	0	200	903	0	0	0	0	0	0	0	603	903	0
724	8	13.7047	-5.38356	-467.47	-12266.2	10160.4	-1763.49	221.735	326.24	0	0	0	0	0	0	0	200	903	0	0	0	0	0	0	0	603	903	0
724	9	11.2633	-5.53615	-470.216	-13090.2	10038.3	-2221.25	221.348	327.839	0	0	0	0	0	0	0	200	903	0	0	0	0	0	0	0	603	903	0
725	0	11.4159	-5.38356	-470.521	-13456.4	10465.6	-2038.15	222.243	328.599	0	0	0	0	0	0	0	200	903	0	0	0	0	0	0	0	603	903	0
725	1	12.0262	-5.07839	-471.132	-13456.4	10343.5	-2175.48	221.955	328.562	0	0	0	0	0	0	0	200	903	0	0	0	0	0	0	0	603	903	0
725	2	13.3995	-6.45168	-475.709	-13364.9	10099.4	-2038.15	221.23	328.095	0	0	0	0	0	0	0	200	903	0	0	0	0	0	0	0	603	903	0
725	3	12.3314	-5.68874	-475.404	-13364.9	9427.97	-2129.7	219.831	328.113	0	0	0	0	0	0	0	200	903	0	0	0	0	0	0	0	603	903	0
725	4	10.8055	-7.06203	-478.151	-13822.6	10343.5	-1855.04	221.632	328.909	0	0	0	0	0	0	0	200	903	0	0	0	0	0	0	0	603	903	0
725	5	12.1788	-7.06203	-478.456	-14372	10343.5	-2312.8	221.618	330.038	0	0	0	0	0	0	0	200	903	0	0	0	0	0	0	0	603	903	0
725	6	10.9581	-6.90944	-477.846	-14646.6	10343.5	-2083.92	221.646	330.651	0	0	0	0	0	0	0	200	903	0	0	0	0	0	0	0	603	903	0
725	7	11.721	-8.7405	-479.677	-15104.4	10099.4	-2175.48	221.055	331.489	0	0	0	0	0	0	0	200	903	0	0	0	0	0	0	0	603	903	0
725	8	12.1788	-7.06203	-483.339	-16019.9	10526.6	-2129.7	221.779	333.144	0	0	0	0	0	0	0	200	903	0	0	0	0	0	0	0	603	903	0
725	9	11.5685	-7.36721	-483.949	-16477.7	10648.7	-2450.13	222.004	334.048	0	0	0	0	0	0	0	200	903	0	0	0	0	0	0	0	603	903	0
726	0	11.1107	-7.21462	-484.559	-16477.7	10465.6	-2587.46	221.598	334.005	0	0	0	0	0	0	0	200	903	0	0	0	0	0	0	0	603	903	0
726	1	10.6529	-7.5198	-484.559	-16111.5	10404.5	-2541.69	221.472	333.25	0	0	0	0	0	0	0	200	903	0	0	0	0	0	0	0	603	903	0
726	2	10.6529	-7.21462	-483.644	-17118.5	10526.6	-2358.58	221.765	335.395	0	0	0	0	0	0	0	200	903	0	0	0	0	0	0	0	603	903	0
726	3	11.5685	-7.97756	-486.696	-17667.8	10831.8	-2404.36	222.256	336.302	0	0	0	0	0	0	0	200	903	0	0	0	0	0	0	0	603	903	0
726	4	11.721	-7.36721	-489.442	-17301.6	10648.7	-2862.12	221.757	335.35	0	0	0	0	0	0	0	200	903	0	0	0	0	0	0	0	603	903	0
726	5	10.8055	-7.67238	-490.053	-18034.1	10648.7	-2679.02	221.73	336.8	0	0	0	0	0	0	0	200	903	0	0	0	0	0	0	0	603	903	0
726	6	10.6529	-7.82497	-490.663	-18034.1	10404.5	-2267.03	221.205	336.754	0	0	0	0	0	0	0	200	903	0	0	0	0	0	0	0	603	903	0
726	7	10.8055	-8.28273	-493.104	-18308.7	10770.7	-2450.13	221.843	337.13	0	0	0	0	0	0	0	200	903	0	0	0	0	0	0	0	603	903	0
726	8	11.5685	-9.9612	-491.884	-18766.5	10587.6	-2221.25	221.525	338.152	0	0	0	0	0	0	0	200	903	0	0	0	0	0	0	0	603	903	0
726	9	11.5685	-8.89309	-495.241	-19956.7	10526.6	-2404.36	221.256	340.297	0	0	0	0	0	0	0	200	903	0	0	0	0	0	0	0	603	903	0
727	0	13.5521	-8.89309	-497.072	-19956.7	10770.7	-2587.46	221.668	340.148	0	0	0	0	0	0	0	200	903	0	0	0	0	0	0	0	603	903	0
727	1	11.2633	-8.43532	-497.987	-19773.6	11198	-2816.34	222.487	339.707	0	0	0	0	0	0	0	200	903	0	0	0	0	0	0	0	603	903	0
727	2	11.4159	-8.58791	-497.987	-21238.4	11259	-2404.36	222.609	342.648	0	0	0	0	0	0	0	200	903	0	0	0	0	0	0	0	603	903	0
727	3	11.8736	-9.80861	-497.682	-21330	10892.8	-2770.57	221.887	342.859	0	0	0	0	0	0	0	200	903	0	0	0	0	0	0	0	603	903	0
727	4	12.6366	-8.58791	-499.818	-20689.1	10892.8	-2404.36	221.794	341.393	0	0	0	0	0	0	0	200	903	0	0	0	0	0	0	0	603	903	0
727	5	12.3314	-8.58791	-501.954	-21421.5	11137	-2679.02	222.187	342.676	0	0	0	0	0	0	0	200	903	0	0	0	0	0	0	0	603	903	0
727	6	12.0262	-8.7405	-503.48	-21513.1	11442.1	-2633.24	222.726	342.729	0	0	0	0	0	0	0	200	903	0	0	0	0	0	0	0	603	903	0
727	7	13.7047	-9.80861	-503.48	-21787.7	11137	-2816.34	222.12	343.274	0	0	0	0	0	0	0	200	903	0	0	0	0	0	0	0	603	903	0
727	8	12.0262	-9.9612	-504.701	-22428.6	11259	-2770.57	222.308	344.439	0	0	0	0	0	0	0	200	903	0	0	0	0	0	0	0	603	903	0
727	9	13.7047	-11.4871	-505.922	-22428.6	11137	-2770.57	222.013	344.332	0	0	0	0	0	0	0	200	903	0	0	0	0	0	0	0	603	903	0
728	0	13.5521	-10.5716	-508.973	-23435.7	11747.3	-2999.45	223.08	346.045	0	0	0	0	0	0	0	200	903	0	0	0	0	0	0	0	603	903	0
728	1	13.2469	-10.7241	-507.753	-24076.5	11075.9	-2816.34	221.814	347.418	0	0	0	0	0	0	0	200	903	0	0	0	0	0	0	0	603	903	0
728	2	12.6366	-10.419	-512.025	-24625.9	10953.8	-2679.02	221.393	348.095	0	0	0	0	0	0	0	200	903	0	0	0	0	0	0	0	603	903	0
728	3	13.2469	-9.80861	-512.33	-24442.8	11564.2	-2633.24	222.572	347.709	0	0	0	0	0	0	0	200	903	0	0	0	0	0	0	0	603	903	0
728	4	12.7892	-10.1138	-510.805	-24809	11137	-2999.45	221.803	348.568	0	0	0	0	0	0	0	200	903	0	0	0	0	0	0	0	603	903	0
728	5	13.7047	-11.7923	-513.856	-25816	11991.4	-2999.45	223.336	350.24	0	0	0	0	0	0	0	200	903	0	0	0	0	0	0	0	603	903	0
728	6	14.0099	-10.5716	-517.518	-24442.8	11564.2	-2953.67	222.346	347.231	0	0	0	0	0	0	0	200	903	0	0	0	0	0	0	0	603	903	0
728	7	14.0099	-10.1138	-519.655	-25541.4	11747.3	-2770.57	222.606	349.151	0	0	0	0	0	0	0	200	903	0	0	0	0	0	0	0	603	903	0
728	8	13.0943	-11.3345	-517.518	-26090.7	11991.4	-2999.45	223.171	350.415	0	0	0	0	0	0	0	200	903	0	0	0	0	0	0	0	603	903	0
728	9	14.4676	-11.6397	-520.265	-25999.1	12052.5	-3136.78	223.166	349.973	0	0	0	0	0	0	0	200	903	0	0	0	0	0	0	0	603	903	0
729	0	15.5357	-12.7078	-521.486	-26548.5	11930.4	-2541.69	222.878	350.909	0	0	0	0	0	0	0	200	903	0	0	0	0	0	0	0	603	903	0
729	1	15.5357	-13.013	-525.453	-27372.4	11930.4	-2862.12	222.705	352.093	0	0	0	0	0	0	0	200	903	0	0	0	0	0	0	0	603	903	0
729	2	15.3832	-13.6233	-527.589	-27830.2	12052.5	-2953.67	222.844	352.75	0	0	0	0	0	0	0	200	903	0	0	0	0	0	0	0	603	903	0
729	3	15.078	-14.3863	-529.42	-27738.7	12296.6	-2862.12	223.227	352.394	0	0	0	0	0	0	0	200	903	0	0	0	0	0	0	0	603	903	0
729	4	14.1625	-13.6233	-528.505	-27555.5	11991.4	-2679.02	222.689	352.139	0	0	0	0	0	0	0	200	903	0	0	0	0	0	0	0	603	903	0
729	5	14.6202	-14.0811	-526.674	-29020.4	12296.6	-3091	223.348	355.101	0	0	0	0	0	0	0	200	903	0	0	0	0	0	0	0	603	903	0
729	6	15.8409	-15.7595	-531.862	-29111.9	12357.7	-2541.69	223.235	354.736	0	0	0	0	0	0	0	200	903	0	0	0	0	0	0	0	603	903	0
729	7	15.6883	-14.844	-534.913	-28837.3	12784.9	-2953.67	223.901	353.91	0	0	0	0	0	0	0	200	903	0	0	0	0	0	0	0	603	903	0
729	8	14.1625	-15.1492	-532.777	-29386.6	12357.7	-3091	223.195	355.157	0	0	0	0	0	0	0	200	903	0	0	0	0	0	0	0	603	903	0
729	9	15.078	-15.9121	-537.965	-29661.3	12601.8	-3136.78	223.425	355.136	0	0	0	0	0	0	0	200	903	0	0	0	0	0	0	0	603	903	0
730	0	14.6202	-16.3699	-538.576	-29935.9	12235.6	-3228.33	222.718	355.584	0	0	0	0	0	0	0	200	903	0	0	0	0	0	0	0	603	903	0
730	1	15.9935	-18.8113	-540.407	-30210.6	12418.7	-2999.45	222.98	355.903	0	0	0	0	0	0	0	200	903	0	0	0	0	0	0	0	603	903	0
730	2	15.8409	-17.438	-540.407	-30943	12968	-3182.56	223.997	357.259	0	0	0	0	0	0	0	200	903	0	0	0	0	0	0	0	603	903	0
730	3	15.6883	-17.8958	-544.984	-31492.3	12662.8	-3136.78	223.235	357.786	0	0	0	0	0	0	0	200	903	0	0	0	0	0	0	0	603	903	0
730	4	14.315	-17.5906	-546.51	-31675.4	12845.9	-3274.11	223.505	357.959	0	0	0	0	0	0	0	200	903	0	0	0	0	0	0	0	603	903	0
730	5	16.909	-17.8958	-547.731	-31858.5	12845.9	-3136.78	223.453	358.165	0	0	0	0	0	0	0	200	903	0	0	0	0	0	0	0	603	903	0
730	6	14.4676	-19.7268	-547.426	-32316.3	12968	-3045.23	223.689	359.033	0	0	0	0	0	0	0	200	903	0	0	0	0	0	0	0	603	903	0
730	7	14.7728	-19.4217	-551.393	-32041.6	12784.9	-3091	223.187	358.11	0	0	0	0	0	0	0	200	903	0	0	0	0	0	0	0	603	903	0
730	8	14.6202	-19.7268	-556.276	-32407.8	12907	-3365.66	223.202	358.259	0	0	0	0	0	0	0	200	903	0	0	0	0	0	0	0	603	903	0
730	9	14.0099	-20.9475	-559.633	-31950.1	13273.2	-3136.78	223.718	357.091	0	0	0	0	0	0	0	200	903	0	0	0	0	0	0	0	603	903	0
731	0	14.7728	-21.5579	-559.633	-32590.9	13395.3	-3319.89	223.936	358.236	0	0	0	0	0	0	0	200	903	0	0	0	0	0	0	0	603	903	0
731	1	12.6366	-25.5252	-561.769	-33414.9	13029	-3686.1	223.193	359.482	0	0	0	0	0	0	0	200	903	0	0	0	0	0	0	0	603	903	0
731	2	12.9417	-24.4571	-564.21	-34055.8	13151.1	-3777.65	223.309	360.36	0	0	0	0	0	0	0	200	903	0	0	0	0	0	0	0	603	903	0
731	3	13.5521	-24.9148	-568.483	-33964.2	13578.4	-3594.54	223.885	359.745	0	0	0	0	0	0	0	200	903	0	0	0	0	0	0	0	603	903	0
731	4	12.3314	-25.9829	-569.703	-33781.1	13334.2	-3777.65	223.406	359.296	0	0	0	0	0	0	0	200	903	0	0	0	0	0	0	0	603	903	0
731	5	11.5685	-26.4407	-574.586	-34513.6	13639.4	-4052.31	223.738	360.067	0	0	0	0	0	0	0	200	903	0	0	0	0	0	0	0	603	903	0
731	6	11.4159	-28.4243	-574.891	-34879.8	13334.2	-3548.77	223.194	360.672	0	0	0	0	0	0	0	200	903	0	0	0	0	0	0	0	603	903	0
731	7	12.0262	-27.9666	-577.638	-34513.6	13334.2	-3914.98	223.084	359.749	0	0	0	0	0	0	0	200	903	0	0	0	0	0	0	0	603	903	0
731	8	12.1788	-28.7295	-580.385	-34879.8	13456.3	-3869.2	223.185	360.098	0	0	0	0	0	0	0	200	903	0	0	0	0	0	0	0	603	903	0
731	9	11.5685	-29.9502	-584.047	-34696.7	13517.3	-3869.2	223.144	359.407	0	0	0	0	0	0	0	200	903	0	0	0	0	0	0	0	603	903	0
732	0	11.721	-31.4761	-587.709	-35429.1	13456.3	-3869.2	222.896	360.283	0	0	0	0	0	0	0	200	903	0	0	0	0	0	0	0	603	903	0
732	1	10.6529	-33.7649	-588.319	-35703.7	13395.3	-3914.98	222.769	360.688	0	0	0	0	0	0	0	200	903	0	0	0	0	0	0	0	603	903	0
732	2	11.1107	-32.3916	-588.014	-36527.7	14005.6	-4006.53	223.818	362.121	0	0	0	0	0	0	0	200	903	0	0	0	0	0	0	0	603	903	0
732	3	10.6529	-33.3071	-591.066	-36527.7	13822.5	-4098.08	223.386	361.8	0	0	0	0	0	0	0	200	903	0	0	0	0	0	0	0	603	903	0
732	4	13.0943	-33.6123	-595.338	-36802.4	13639.4	-4189.64	222.91	361.818	0	0	0	0	0	0	0	200	903	0	0	0	0	0	0	0	603	903	0
732	5	11.1107	-34.9856	-597.169	-36985.5	13761.5	-4052.31	223.044	361.935	0	0	0	0	0	0	0	200	903	0	0	0	0	0	0	0	603	903	0
732	6	9.58481	-37.2744	-599	-37260.1	14249.7	-4281.19	223.789	362.204	0	0	0	0	0	0	0	200	903	0	0	0	0	0	0	0	603	903	0
732	7	10.9581	-36.9693	-599.916	-37351.7	14066.6	-4326.96	223.448	362.262	0	0	0	0	0	0	0	200	903	0	0	0	0	0	0	0	603	903	0
732	8	9.7374	-37.427	-600.831	-37077	13334.2	-4510.07	222.193	361.71	0	0	0	0	0	0	0	200	903	0	0	0	0	0	0	0	603	903	0
732	9	10.5003	-40.4788	-603.883	-37351.7	13639.4	-4235.41	222.586	361.853	0	0	0	0	0	0	0	200	903	0	0	0	0	0	0	0	603	903	0
733	0	10.5003	-40.1736	-606.935	-37626.4	13700.4	-4281.19	222.573	361.994	0	0	0	0	0	0	0	200	903	0	0	0	0	0	0	0	603	903	0
733	1	12.1788	-41.2417	-606.935	-38084.1	14005.6	-4418.52	223.076	362.748	0	0	0	0	0	0	0	200	903	0	0	0	0	0	0	0	603	903	0
733	2	9.58481	-43.0728	-611.207	-37901	14188.7	-4555.85	223.214	362.01	0	0	0	0	0	0	0	200	903	0	0	0	0	0	0	0	603	903	0
733	3	8.97446	-42.9202	-610.292	-38633.4	14005.6	-4235.41	222.949	363.303	0	0	0	0	0	0	0	200	903	0	0	0	0	0	0	0	603	903	0
733	4	10.3478	-43.3779	-612.428	-39182.7	13883.5	-4418.52	222.67	363.979	0	0	0	0	0	0	0	200	903	0	0	0	0	0	0	0	603	903	0
733	5	10.9581	-43.9883	-616.395	-39549	14249.7	-4372.74	223.118	364.162	0	0	0	0	0	0	0	200	903	0	0	0	0	0	0	0	603	903	0
733	6	10.3478	-43.3779	-613.954	-38450.3	14677	-4555.85	223.906	362.627	0	0	0	0	0	0	0	200	903	0	0	0	0	0	0	0	603	903	0
733	7	9.43223	-45.6668	-618.226	-40006.7	14249.7	-4510.07	223.049	364.712	0	0	0	0	0	0	0	200	903	0	0	0	0	0	0	0	603	903	0
733	8	8.97446	-47.803	-618.532	-40098.3	14249.7	-4464.29	223.038	364.828	0	0	0	0	0	0	0	200	903	0	0	0	0	0	0	0	603	903	0
733	9	10.0426	-46.2771	-620.363	-39365.8	14921.1	-4738.95	224.052	363.456	0	0	0	0	0	0	0	200	903	0	0	0	0	0	0	0	603	903	0
734	0	11.2633	-47.6504	-624.33	-39640.5	14554.9	-5059.39	223.313	363.493	0	0	0	0	0	0	0	200	903	0	0	0	0	0	0	0	603	903	0
734	1	10.0426	-48.8711	-624.635	-39365.8	14249.7	-4418.52	222.813	363.022	0	0	0	0	0	0	0	200	903	0	0	0	0	0	0	0	603	903	0
734	2	9.58481	-50.0918	-625.551	-39732.1	14432.9	-4326.96	223.072	363.515	0	0	0	0	0	0	0	200	903	0	0	0	0	0	0	0	603	903	0
734	3	9.58481	-50.2444	-625.551	-40739.2	13883.5	-5196.72	222.194	365.125	0	0	0	0	0	0	0	200	903	0	0	0	0	0	0	0	603	903	0
734	4	9.58481	-51.4651	-627.076	-41288.5	14127.7	-4555.85	222.529	365.843	0	0	0	0	0	0	0	200	903	0	0	0	0	0	0	0	603	903	0
734	5	10.1952	-52.5332	-625.856	-41288.5	14677	-5013.61	223.451	365.971	0	0	0	0	0	0	0	200	903	0	0	0	0	0	0	0	603	903	0
734	6	10.6529	-52.3806	-631.959	-41654.7	14371.8	-4052.31	222.742	365.914	0	0	0	0	0	0	0	200	903	0	0	0	0	0	0	0	603	903	0
734	7	9.58481	-53.7539	-632.875	-41837.8	14493.9	-4830.5	222.902	366.108	0	0	0	0	0	0	0	200	903	0	0	0	0	0	0	0	603	903	0
734	8	10.5003	-53.9065	-631.654	-42020.9	14677	-4418.52	223.236	366.525	0	0	0	0	0	0	0	200	903	0	0	0	0	0	0	0	603	903	0
734	9	10.5003	-54.5169	-632.264	-41563.1	15043.2	-4601.62	223.793	365.737	0	0	0	0	0	0	0	200	903	0	0	0	0	0	0	0	603	903	0
735	0	12.7892	-56.9583	-634.096	-41654.7	14432.9	-4555.85	222.761	365.691	0	0	0	0	0	0	0	200	903	0	0	0	0	0	0	0	603	903	0
735	1	11.1107	-56.9583	-636.537	-41471.6	14677	-5105.16	223.058	365.152	0	0	0	0	0	0	0	200	903	0	0	0	0	0	0	0	603	903	0
735	2	10.3478	-58.4841	-637.758	-41837.8	15165.3	-4876.28	223.779	365.601	0	0	0	0	0	0	0	200	903	0	0	0	0	0	0	0	603	903	0
735	3	9.88999	-58.4841	-636.842	-42936.4	14982.2	-5013.61	223.526	367.421	0	0	0	0	0	0	0	200	903	0	0	0	0	0	0	0	603	903	0
735	4	11.4159	-59.7049	-637.452	-42753.3	14738	-4601.62	223.12	367.069	0	0	0	0	0	0	0	200	903	0	0	0	0	0	0	0	603	903	0
735	5	12.3314	-59.3997	-639.284	-42753.3	14432.9	-4738.95	222.577	366.877	0	0	0	0	0	0	0	200	903	0	0	0	0	0	0	0	603	903	0
735	6	11.8736	-59.7049	-639.894	-43302.6	14921.1	-4922.06	223.318	367.672	0	0	0	0	0	0	0	200	903	0	0	0	0	0	0	0	603	903	0
735	7	11.2633	-61.0781	-641.42	-43302.6	14127.7	-4693.18	222.026	367.511	0	0	0	0	0	0	0	200	903	0	0	0	0	0	0	0	603	903	0
735	8	11.4159	-61.2307	-641.115	-43394.2	15165.3	-4967.83	223.655	367.686	0	0	0	0	0	0	0	200	903	0	0	0	0	0	0	0	603	903	0
735	9	11.721	-62.604	-640.809	-43119.5	14860.1	-5013.61	223.19	367.289	0	0	0	0	0	0	0	200	903	0	0	0	0	0	0	0	603	903	0
736	0	12.1788	-63.0618	-638.978	-43394.2	14982.2	-5196.72	223.447	367.912	0	0	0	0	0	0	0	200	903	0	0	0	0	0	0	0	603	903	0
736	1	12.484	-64.7403	-643.556	-42478.6	15104.2	-5196.72	223.47	366.006	0	0	0	0	0	0	0	200	903	0	0	0	0	0	0	0	603	903	0
736	2	11.4159	-65.198	-642.335	-43577.3	15287.3	-4876.28	223.8	367.842	0	0	0	0	0	0	0	200	903	0	0	0	0	0	0	0	603	903	0
736	3	13.0943	-66.4187	-642.64	-43668.8	14860.1	-5196.72	223.124	367.952	0	0	0	0	0	0	0	200	903	0	0	0	0	0	0	0	603	903	0
736	4	11.4159	-66.7239	-642.335	-44401.3	15043.2	-5379.82	223.42	369.125	0	0	0	0	0	0	0	200	903	0	0	0	0	0	0	0	603	903	0
736	5	12.9417	-68.2498	-641.725	-44492.8	15287.3	-5334.04	223.822	369.333	0	0	0	0	0	0	0	200	903	0	0	0	0	0	0	0	603	903	0
736	6	12.3314	-67.9446	-643.251	-43851.9	15165.3	-5059.39	223.576	368.172	0	0	0	0	0	0	0	200	903	0	0	0	0	0	0	0	603	903	0
736	7	12.3314	-67.9446	-640.809	-44859	14860.1	-5334.04	223.19	370.004	0	0	0	0	0	0	0	200	903	0	0	0	0	0	0	0	603	903	0
736	8	11.721	-70.0808	-643.861	-45133.7	14677	-5379.82	222.795	370.099	0	0	0	0	0	0	0	200	903	0	0	0	0	0	0	0	603	903	0
736	9	11.2633	-69.6231	-641.725	-44584.4	15287.3	-5288.27	223.822	369.476	0	0	0	0	0	0	0	200	903	0	0	0	0	0	0	0	603	903	0
737	0	12.7892	-70.6912	-643.556	-44584.4	15226.3	-5105.16	223.66	369.278	0	0	0	0	0	0	0	200	903	0	0	0	0	0	0	0	603	903	0
737	1	11.8736	-72.0645	-642.335	-44035.1	15104.2	-5150.94	223.515	368.555	0	0	0	0	0	0	0	200	903	0	0	0	0	0	0	0	603	903	0
737	2	12.7892	-72.6748	-643.861	-44767.5	14982.2	-5242.49	223.269	369.53	0	0	0	0	0	0	0	200	903	0	0	0	0	0	0	0	603	903	0
737	3	11.2633	-72.98	-643.861	-44675.9	15104.2	-5242.49	223.459	369.388	0	0	0	0	0	0	0	200	903	0	0	0	0	0	0	0	603	903	0
737	4	12.6366	-73.7429	-641.115	-45866.1	14982.2	-5196.72	223.369	371.541	0	0	0	0	0	0	0	200	903	0	0	0	0	0	0	0	603	903	0
737	5	11.1107	-73.7429	-641.115	-45316.8	14982.2	-5059.39	223.369	370.684	0	0	0	0	0	0	0	200	903	0	0	0	0	0	0	0	603	903	0
737	6	11.721	-74.0481	-640.809	-44584.4	14921.1	-5242.49	223.285	369.575	0	0	0	0	0	0	0	200	903	0	0	0	0	0	0	0	603	903	0
737	7	11.5685	-75.1162	-642.64	-45774.5	15165.3	-5379.82	223.598	371.229	0	0	0	0	0	0	0	200	903	0	0	0	0	0	0	0	603	903	0
737	8	10.5003	-75.7266	-642.03	-45866.1	15165.3	-5059.39	223.621	371.439	0	0	0	0	0	0	0	200	903	0	0	0	0	0	0	0	603	903	0
737	9	10.8055	-76.3369	-642.335	-45225.2	14982.2	-5196.72	223.325	370.408	0	0	0	0	0	0	0	200	903	0	0	0	0	0	0	0	603	903	0
738	0	9.88999	-76.4895	-640.504	-45316.8	14616	-5425.6	222.819	370.752	0	0	0	0	0	0	0	200	903	0	0	0	0	0	0	0	603	903	0
738	1	11.5685	-78.168	-640.504	-45774.5	14493.9	-5654.48	222.629	371.466	0	0	0	0	0	0	0	200	903	0	0	0	0	0	0	0	603	903	0
738	2	12.9417	-78.7783	-638.978	-45683	15043.2	-5105.16	223.543	371.494	0	0	0	0	0	0	0	200	903	0	0	0	0	0	0	0	603	903	0
738	3	11.2633	-80.3042	-637.452	-46049.2	14921.1	-4693.18	223.407	372.239	0	0	0	0	0	0	0	200	903	0	0	0	0	0	0	0	603	903	0
738	4	10.3478	-79.3887	-639.894	-45866.1	14554.9	-5105.16	222.746	371.678	0	0	0	0	0	0	0	200	903	0	0	0	0	0	0	0	603	903	0
738	5	10.1952	-81.0672	-637.452	-46507	14554.9	-4784.73	222.833	372.958	0	0	0	0	0	0	0	200	903	0	0	0	0	0	0	0	603	903	0
738	6	10.5003	-81.6775	-635.316	-46690.1	14616	-4876.28	223.006	373.491	0	0	0	0	0	0	0	200	903	0	0	0	0	0	0	0	603	903	0
738	7	10.6529	-81.6775	-633.18	-45683	14799.1	-5196.72	223.373	372.148	0	0	0	0	0	0	0	200	903	0	0	0	0	0	0	0	603	903	0
738	8	10.8055	-81.9827	-635.927	-46781.6	14738	-5150.94	223.176	373.565	0	0	0	0	0	0	0	200	903	0	0	0	0	0	0	0	603	903	0
738	9	9.43223	-82.4405	-635.011	-46598.5	14005.6	-5288.27	222.056	373.382	0	0	0	0	0	0	0	200	903	0	0	0	0	0	0	0	603	903	0
739	0	10.1952	-83.5086	-632.264	-46049.2	14554.9	-5059.39	223.02	372.832	0	0	0	0	0	0	0	200	903	0	0	0	0	0	0	0	603	903	0
739	1	8.66929	-84.4241	-628.908	-45774.5	14127.7	-4922.06	222.464	372.784	0	0	0	0	0	0	0	200	903	0	0	0	0	0	0	0	603	903	0
739	2	9.7374	-85.7974	-631.044	-45957.6	14677	-5242.49	223.258	372.828	0	0	0	0	0	0	0	200	903	0	0	0	0	0	0	0	603	903	0
739	3	9.27964	-86.2551	-631.349	-46049.2	14249.7	-5379.82	222.57	372.938	0	0	0	0	0	0	0	200	903	0	0	0	0	0	0	0	603	903	0
739	4	8.82187	-87.1707	-630.433	-46873.2	14188.7	-4601.62	222.506	374.351	0	0	0	0	0	0	0	200	903	0	0	0	0	0	0	0	603	903	0
739	5	8.05894	-87.781	-630.433	-46873.2	14554.9	-4601.62	223.087	374.351	0	0	0	0	0	0	0	200	903	0	0	0	0	0	0	0	603	903	0
739	6	8.05894	-88.0862	-626.161	-46964.7	14432.9	-4372.74	223.05	375.004	0	0	0	0	0	0	0	200	903	0	0	0	0	0	0	0	603	903	0
739	7	8.82187	-89.1543	-625.245	-46873.2	14249.7	-4922.06	222.791	374.968	0	0	0	0	0	0	0	200	903	0	0	0	0	0	0	0	603	903	0
739	8	10.5003	-89.6121	-626.161	-46781.6	14249.7	-4784.73	222.757	374.712	0	0	0	0	0	0	0	200	903	0	0	0	0	0	0	0	603	903	0
739	9	8.66929	-89.7647	-623.414	-46140.8	14310.8	-4784.73	222.955	374.013	0	0	0	0	0	0	0	200	903	0	0	0	0	0	0	0	603	903	0
740	0	7.90635	-91.2906	-622.804	-45866.1	14554.9	-4967.83	223.37	373.645	0	0	0	0	0	0	0	200	903	0	0	0	0	0	0	0	603	903	0
740	1	7.75376	-91.138	-620.973	-46140.8	14432.9	-4876.28	223.242	374.304	0	0	0	0	0	0	0	200	903	0	0	0	0	0	0	0	603	903	0
740	2	7.14341	-92.8164	-615.785	-45866.1	14005.6	-4830.5	222.744	374.484	0	0	0	0	0	0	0	200	903	0	0	0	0	0	0	0	603	903	0
740	3	8.05894	-92.3587	-616.701	-46873.2	14066.6	-4876.28	222.81	376.006	0	0	0	0	0	0	0	200	903	0	0	0	0	0	0	0	603	903	0
740	4	8.05894	-92.969	-618.226	-46415.4	14371.8	-4830.5	223.247	375.078	0	0	0	0	0	0	0	200	903	0	0	0	0	0	0	0	603	903	0
740	5	6.83823	-93.5794	-615.785	-46049.2	14249.7	-4418.52	223.141	374.781	0	0	0	0	0	0	0	200	903	0	0	0	0	0	0	0	603	903	0
740	6	6.07529	-94.1897	-613.954	-46781.6	13578.4	-4693.18	222.116	376.197	0	0	0	0	0	0	0	200	903	0	0	0	0	0	0	0	603	903	0
740	7	6.53306	-95.7156	-611.513	-46781.6	13761.5	-4052.31	222.504	376.502	0	0	0	0	0	0	0	200	903	0	0	0	0	0	0	0	603	903	0
740	8	7.296	-95.563	-609.987	-45591.4	13944.6	-4647.4	222.86	374.742	0	0	0	0	0	0	0	200	903	0	0	0	0	0	0	0	603	903	0
740	9	7.14341	-95.7156	-608.156	-46049.2	14005.6	-4555.85	223.03	375.719	0	0	0	0	0	0	0	200	903	0	0	0	0	0	0	0	603	903	0
741	0	7.14341	-96.7837	-606.63	-46049.2	13700.4	-4647.4	222.585	375.91	0	0	0	0	0	0	0	200	903	0	0	0	0	0	0	0	603	903	0
741	1	6.68564	-97.3941	-604.493	-45683	13761.5	-4555.85	222.765	375.572	0	0	0	0	0	0	0	200	903	0	0	0	0	0	0	0	603	903	0
741	2	8.36411	-97.6992	-601.442	-45683	14066.6	-4693.18	223.388	375.956	0	0	0	0	0	0	0	200	903	0	0	0	0	0	0	0	603	903	0
741	3	6.38047	-98.3096	-598.39	-46323.9	13700.4	-4601.62	222.896	377.414	0	0	0	0	0	0	0	200	903	0	0	0	0	0	0	0	603	903	0
741	4	6.22788	-98.9199	-596.254	-45957.6	13700.4	-4601.62	222.978	377.077	0	0	0	0	0	0	0	200	903	0	0	0	0	0	0	0	603	903	0
741	5	5.9227	-98.9199	-595.033	-45316.8	13578.4	-4418.52	222.82	376.158	0	0	0	0	0	0	0	200	903	0	0	0	0	0	0	0	603	903	0
741	6	5.61753	-99.6829	-592.592	-46049.2	13334.2	-4876.28	222.502	377.708	0	0	0	0	0	0	0	200	903	0	0	0	0	0	0	0	603	903	0
741	7	5.00718	-100.904	-591.371	-45316.8	13456.3	-4510.07	222.754	376.63	0	0	0	0	0	0	0	200	903	0	0	0	0	0	0	0	603	903	0
741	8	4.702	-101.209	-587.098	-45042.1	13700.4	-4326.96	223.336	376.72	0	0	0	0	0	0	0	200	903	0	0	0	0	0	0	0	603	903	0
741	9	5.00718	-101.667	-584.352	-44859	12907	-4372.74	222.088	376.767	0	0	0	0	0	0	0	200	903	0	0	0	0	0	0	0	603	903	0
742	0	6.07529	-102.124	-582.826	-45133.7	13212.1	-4281.19	222.669	377.439	0	1.9574	15.9552	-32.7703	-37.9035	-2217.53	-1920.04	132.331	904.157	0	0	0	0	0	0	0	603	903	0
742	1	4.85459	-102.887	-573.976	-44492.8	13334.2	-4189.64	223.231	377.517	0	-5.672	33.5028	-48.9446	1060.73	-3072.02	-3293.34	137.235	881.328	0	0	0	0	0	0	0	603	903	0
742	2	4.24424	-103.345	-576.417	-45591.4	13151.1	-4052.31	222.815	379.095	0	-12.5385	18.0914	-33.0755	-37.9035	-1424.07	-1599.61	156.945	904.146	0	0	0	0	0	0	0	603	903	0
742	3	3.93906	-103.192	-574.891	-45499.9	13151.1	-4098.08	222.876	379.145	0	0	0	0	0	0	0	200	903	0	0	0	0	0	0	0	603	903	0
742	4	5.00718	-104.261	-571.534	-44675.9	12968	-4052.31	222.69	378.168	0	2.41516	19.6173	-15.9857	328.307	-1912.35	-2423.59	80.3708	882.462	0	0	0	0	0	0	0	603	903	0
742	5	6.68564	-104.718	-567.262	-44950.6	13090.1	-4143.86	223.076	379.241	0	-10.7074	25.1105	-46.5032	419.86	-2339.6	-2057.37	149.69	893.971	0	0	0	0	0	0	0	603	903	0
742	6	5.77012	-104.718	-564.515	-44767.5	13212.1	-4006.53	223.404	379.302	0	-8.87634	-3.42346	-55.0482	236.755	-3133.05	-134.766	143.085	898.699	0	0	0	0	0	0	0	603	903	0
742	7	4.09165	-105.023	-564.821	-44584.4	13090.1	-4052.31	223.176	378.935	0	-1.24695	-8.15369	-54.4378	511.413	-4781	-1141.85	112.175	893.606	0	0	0	0	0	0	0	603	903	0
742	8	2.41318	-106.702	-559.327	-43394.2	12662.8	-3548.77	222.639	377.583	0	-13.9117	5.27405	-71.2225	53.6492	-4719.97	-1004.52	133.729	902.247	0	0	0	0	0	0	0	603	903	0
742	9	3.17612	-106.549	-553.834	-43485.7	12845.9	-3960.75	223.195	378.518	0	-16.2006	-6.32263	-93.8055	1243.83	-6367.92	780.761	132.116	889.74	0	0	0	0	0	0	0	603	903	0
743	0	5.46494	-106.244	-548.341	-42844.9	12907	-3960.75	223.538	378.135	0	-7.35046	-21.8866	-103.571	1610.05	-7649.66	-363.648	126.141	887.455	0	0	0	0	0	0	0	603	903	0
743	1	4.54941	-107.617	-551.088	-42570.2	12662.8	-4006.53	222.978	377.248	0	-11.6229	-5.71228	-107.844	602.966	-7344.48	-180.542	131.897	897.409	0	0	0	0	0	0	0	603	903	0
743	2	1.49766	-109.296	-549.562	-42570.2	11930.4	-3594.54	221.709	377.462	0	-15.7428	6.49475	-123.408	1060.73	-8076.9	689.209	134.551	894.405	0	0	0	0	0	0	0	603	903	0
743	3	4.85459	-108.838	-541.627	-43211.1	12357.7	-3869.2	222.816	379.78	0	-6.28235	-15.1727	-143.244	2250.91	-9663.82	-226.319	132.536	887.286	0	0	0	0	0	0	0	603	903	0
743	4	2.87095	-108.686	-535.829	-43211.1	12479.7	-3594.54	223.29	380.643	0	-9.02893	-19.2926	-155.146	1884.7	-9785.89	-226.319	136.925	890.852	0	0	0	0	0	0	0	603	903	0
743	5	3.02354	-108.991	-534.303	-42478.6	12540.8	-3502.99	223.471	379.503	0	-14.3695	1.76453	-163.386	1426.94	-10396.2	1284.3	136.37	894.266	0	0	0	0	0	0	0	603	903	0
743	6	2.87095	-109.906	-533.998	-42936.4	12540.8	-3502.99	223.485	380.406	0	-4.29871	-8.0011	-174.677	2250.91	-11555.9	414.55	133.844	890.114	0	0	0	0	0	0	0	603	903	0
743	7	3.78647	-111.127	-524.537	-42295.5	12235.6	-3869.2	223.326	380.634	0	0.431519	-26.7694	-192.988	2617.13	-12227.3	277.221	136.642	889.439	0	0	0	0	0	0	0	603	903	0
743	8	1.65024	-109.601	-520.875	-42112.4	12296.6	-3411.44	223.608	380.849	0	-6.12976	-11.358	-202.143	2983.34	-12471.4	1787.84	138.304	888.241	0	0	0	0	0	0	0	603	903	0
743	9	1.80283	-110.059	-517.518	-40556	12296.6	-3365.66	223.761	378.366	0	-2.92541	-1.43982	-213.434	1884.7	-13020.8	734.985	138.994	894.17	0	0	0	0	0	0	0	603	903	0
744	0	2.2606	-111.585	-516.603	-40922.3	12357.7	-3548.77	223.921	379.214	0	7.45056	-18.2245	-219.843	2159.36	-13448	414.55	138.829	893.178	0	0	0	0	0	0	0	603	903	0
744	1	1.49766	-111.737	-506.837	-40464.5	11869.4	-3365.66	223.419	379.837	0	3.78845	-15.3253	-232.355	2525.57	-13997.3	2016.72	139.759	892.131	0	0	0	0	0	0	0	603	903	0
744	2	1.80283	-111.127	-504.396	-39915.2	11930.4	-3274.11	223.653	379.135	0	-1.09436	3.29041	-239.68	2708.68	-13997.3	597.656	141.6	891.699	0	0	0	0	0	0	0	603	903	0
744	3	1.03989	-110.669	-499.818	-39457.4	11991.4	-3182.56	223.992	378.944	0	5.46692	-0.829468	-244.562	1426.94	-13936.3	368.774	143.015	897.165	0	0	0	0	0	0	0	603	903	0
744	4	2.87095	-113.263	-496.461	-38725	11869.4	-3365.66	223.908	378.002	0	12.3334	-8.15369	-250.361	2067.81	-14485.6	1650.51	142.141	894.741	0	0	0	0	0	0	0	603	903	0
744	5	-0.791162	-113.263	-489.442	-39549	11564.2	-3045.23	223.627	380.804	0	4.24622	6.18958	-257.38	2067.81	-15279.1	185.669	140.636	894.966	0	0	0	0	0	0	0	603	903	0
744	6	1.65024	-111.585	-482.728	-39365.8	11625.2	-2816.34	224.082	381.549	0	2.26257	13.5138	-262.568	1610.05	-14729.7	-317.872	143.901	896.868	0	0	0	0	0	0	0	603	903	0
744	7	1.49766	-111.585	-479.677	-38267.2	11869.4	-2953.67	224.745	379.777	0	15.9955	4.20593	-263.483	1701.6	-15523.2	918.091	141.085	896.542	0	0	0	0	0	0	0	603	903	0
744	8	1.03989	-113.721	-473.268	-38358.8	11747.3	-3091	224.822	381.051	0	13.8593	13.3612	-270.197	1426.94	-15462.2	-226.319	142.775	897.719	0	0	0	0	0	0	0	603	903	0
744	9	-0.791162	-113.568	-468.69	-38175.7	11564.2	-2679.02	224.673	381.452	0	4.70398	26.3312	-276.606	1426.94	-15095.9	-1508.06	145.424	897.841	0	0	0	0	0	0	0	603	903	0
745	0	0.276953	-110.669	-459.23	-37168.6	11442.1	-2770.57	224.916	380.937	0	9.4342	19.9225	-281.183	1610.05	-15706.3	-180.542	144.142	897.274	0	0	0	0	0	0	0	603	903	0
745	1	1.19248	-111.737	-453.126	-36710.8	11503.2	-2999.45	225.386	381.017	0	17.9791	20.0751	-282.709	1243.83	-16072.5	-1096.07	143.148	898.6	0	0	0	0	0	0	0	603	903	0
745	2	0.276953	-112.805	-448.243	-35886.8	11259	-2587.46	225.118	380.061	0	14.6222	35.3339	-295.221	419.86	-16927	-1920.04	142.663	901.578	0	0	0	0	0	0	0	603	903	0
745	3	-0.485986	-111.89	-443.666	-35429.1	11137	-2175.48	225.102	379.855	0	10.5023	38.5382	-307.123	602.966	-17415.3	-958.741	143.296	901.037	0	0	0	0	0	0	0	603	903	0
745	4	-0.333399	-110.517	-436.036	-35062.9	10892.8	-2541.69	224.981	380.413	0	16.911	29.3829	-311.091	-312.562	-17537.4	-2011.6	143.626	904.005	0	0	0	0	0	0	0	603	903	0
745	5	-1.40151	-111.432	-426.271	-34788.2	11014.9	-2404.36	225.84	381.611	0	21.0309	42.5055	-319.636	-312.562	-18025.6	-2789.8	143.606	903.978	0	0	0	0	0	0	0	603	903	0
745	6	-2.31704	-110.822	-420.472	-34238.9	10770.7	-2129.7	225.616	381.43	0	18.4369	54.4073	-329.401	-861.878	-18636	-1828.49	143.425	905.617	0	0	0	0	0	0	0	603	903	0
745	7	-1.09634	-109.601	-414.369	-34330.5	10465.6	-2312.8	225.257	382.85	0	15.2325	45.7098	-342.524	-1228.09	-19185.3	-2789.8	143.988	906.585	0	0	0	0	0	0	0	603	903	0
745	8	-1.24893	-109.296	-407.96	-33598	10221.4	-2129.7	225.055	382.356	0	20.5731	44.9469	-351.069	-1502.75	-19185.3	-3659.55	145.352	907.281	0	0	0	0	0	0	0	603	903	0
745	9	-2.62222	-107.923	-400.941	-32957.2	10526.6	-1900.82	226.255	382.199	0	18.7421	62.3419	-360.834	-2143.62	-20406	-2698.24	143.448	908.941	0	0	0	0	0	0	0	603	903	0
746	0	-1.09634	-107.617	-393.312	-32407.8	10465.6	-1855.04	226.609	382.397	0	18.1317	61.2738	-370.295	-2326.72	-20528.1	-3796.88	144.563	909.284	0	0	0	0	0	0	0	603	903	0
746	1	-2.16445	-107.465	-384.462	-32316.3	10221.4	-1992.37	226.586	384.056	0	21.1835	51.6608	-385.859	-2784.49	-21138.4	-4391.97	145.217	910.216	0	0	0	0	0	0	0	603	903	0
746	2	-2.01187	-104.413	-376.527	-31034.5	10038.3	-1809.26	226.66	382.423	0	18.7421	63.2574	-392.573	-2692.93	-21931.9	-3430.67	144.133	909.86	0	0	0	0	0	0	0	603	903	0
746	3	-1.85928	-103.345	-371.339	-30210.6	10160.4	-1717.71	227.361	381.356	0	19.0472	73.1757	-401.117	-3883.12	-22237.1	-4254.64	144.562	912.681	0	0	0	0	0	0	0	603	903	0
746	4	-3.07998	-102.735	-364.32	-30119	10038.3	-1946.59	227.554	382.672	0	25.6085	66.6144	-411.188	-3059.14	-22481.2	-5261.72	145.326	910.44	0	0	0	0	0	0	0	603	903	0
746	5	-3.53774	-101.209	-356.08	-29478.2	9611.07	-1717.71	226.991	382.785	0	24.2352	67.0721	-420.649	-3883.12	-23274.7	-3888.43	144.67	912.231	0	0	0	0	0	0	0	603	903	0
746	6	-4.30068	-100.751	-346.315	-29111.9	9733.14	-1534.61	228.105	384.062	0	20.4205	76.0748	-431.33	-4707.09	-24068.1	-5170.17	144.2	913.913	0	0	0	0	0	0	0	603	903	0
746	7	-3.53774	-97.6992	-338.075	-28745.7	9550.04	-1397.28	228.248	385.028	0	25.6085	75.4645	-437.433	-5439.52	-24007.1	-5811.04	145.118	915.435	0	0	0	0	0	0	0	603	903	0
746	8	-3.23257	-96.1734	-334.108	-28562.6	8939.69	-1534.61	226.757	385.489	0	27.5922	70.7343	-445.673	-5439.52	-24312.3	-4391.97	145.448	915.205	0	0	0	0	0	0	0	603	903	0
746	9	-4.1481	-93.4268	-322.206	-26914.7	9244.86	-1305.72	228.692	383.533	0	24.5404	76.5326	-456.354	-5805.73	-25349.9	-5444.83	144.451	915.722	0	0	0	0	0	0	0	603	903	0
747	0	-6.13174	-91.7483	-317.323	-27372.4	8756.58	-1214.17	227.595	386.26	0	26.3715	81.8732	-463.373	-6355.04	-25716.1	-6223.02	144.502	916.715	0	0	0	0	0	0	0	603	903	0
747	1	-5.82656	-90.2224	-308.168	-26365.4	8512.44	-1168.4	227.623	385.555	0	30.3387	75.7697	-468.561	-6171.94	-25533	-5261.72	145.508	916.172	0	0	0	0	0	0	0	603	903	0
747	2	-4.75845	-88.3914	-301.149	-25816	8573.48	-1122.62	228.469	385.725	0	28.2025	76.2274	-474.055	-7453.68	-25899.2	-5811.04	145.367	918.723	0	0	0	0	0	0	0	603	903	0
747	3	-5.3688	-86.2551	-293.214	-24992.1	8756.58	-710.631	229.864	385.235	0	25.9137	84.0094	-479.853	-6446.6	-26631.6	-6955.45	144.5	916.435	0	0	0	0	0	0	0	603	903	0
747	4	-5.82656	-83.9663	-285.28	-24809	8512.44	-893.737	229.839	386.964	0	27.1344	80.8051	-488.703	-7636.78	-26753.7	-5948.37	145.256	918.627	0	0	0	0	0	0	0	603	903	0
747	5	-6.13174	-82.4405	-277.345	-24259.6	8024.16	-802.184	228.932	387.471	0	29.2706	78.6688	-491.45	-8277.65	-26692.6	-6223.02	145.686	919.843	0	0	0	0	0	0	0	603	903	0
747	6	-6.43691	-78.9309	-266.969	-23985	7841.05	-847.961	229.371	389.842	0	26.2189	84.4672	-497.553	-8002.99	-27303	-7367.43	145.125	919.085	0	0	0	0	0	0	0	603	903	0
747	7	-7.65762	-77.0999	-256.898	-23801.9	8268.3	-710.631	232.185	392.651	0	24.8456	84.6198	-500.605	-8643.86	-28096.4	-6314.58	143.875	920.267	0	0	0	0	0	0	0	603	903	0
747	8	-6.5895	-73.4378	-251.405	-23252.6	7108.63	-939.513	228.276	392.49	0	25.1508	79.2792	-504.267	-8918.52	-27791.3	-6451.91	144.888	920.686	0	0	0	0	0	0	0	603	903	0
747	9	-7.81021	-70.386	-246.217	-22520.1	7718.98	-710.631	231.35	391.465	0	27.4396	83.7042	-506.708	-9559.39	-28157.5	-7138.55	144.431	921.866	0	0	0	0	0	0	0	603	903	0
748	0	-7.81021	-67.9446	-237.672	-21238.4	7047.6	-481.75	229.653	389.36	0	22.099	87.2137	-512.507	-9834.05	-28523.7	-6314.58	144.345	922.188	0	0	0	0	0	0	0	603	903	0
748	1	-8.42056	-65.3506	-230.348	-20872.2	7352.77	-573.302	231.92	390.612	0	20.4205	81.2628	-512.507	-9925.6	-28523.7	-6360.35	144.345	922.367	0	0	0	0	0	0	0	603	903	0
748	2	-8.57314	-62.604	-220.277	-19773.6	6864.49	-390.197	231.163	389.767	0	25.6085	81.4154	-514.643	-10383.4	-28584.7	-7138.55	144.457	923.176	0	0	0	0	0	0	0	603	903	0
748	3	-7.50503	-59.8574	-214.174	-19590.5	6803.46	-298.644	231.766	391.47	0	20.5731	86.2982	-516.474	-10749.6	-28523.7	-6451.91	144.772	923.813	0	0	0	0	0	0	0	603	903	0
748	4	-6.13174	-57.416	-208.07	-19498.9	6681.39	-298.644	232.111	393.713	0	17.8265	85.5353	-517.695	-10749.6	-28767.8	-6268.8	144.431	923.764	0	0	0	0	0	0	0	603	903	0
748	5	-7.35244	-53.1436	-201.051	-19590.5	6254.14	-390.197	231.107	397.44	0	20.1154	80.9576	-517.389	-11573.5	-29256.1	-6955.45	143.454	925.369	0	0	0	0	0	0	0	603	903	0
748	6	-8.26797	-50.0918	-193.422	-19315.8	6193.1	-23.9859	232.019	399.864	0	17.2162	83.8568	-518.915	-11390.4	-28767.8	-6177.25	144.562	924.951	0	0	0	0	0	0	0	603	903	0
748	7	-7.96279	-47.0401	-183.351	-18217.2	6071.03	-207.091	233.112	399.357	0	13.2489	86.756	-519.831	-11573.5	-28828.9	-5994.14	144.542	925.264	0	0	0	0	0	0	0	603	903	0
748	8	-7.04727	-44.5987	-178.468	-18674.9	5826.89	-207.091	232.65	404.64	0	15.6903	82.6361	-518	-11207.3	-29500.2	-6635.01	143.05	924.636	0	0	0	0	0	0	0	603	903	0
748	9	-6.89468	-42.9202	-170.534	-17576.3	5521.72	-207.091	232.379	403.067	0	15.8429	80.1947	-519.221	-11939.8	-29622.3	-5902.59	142.948	925.996	0	0	0	0	0	0	0	603	903	0
749	0	-7.04727	-39.5633	-165.346	-16660.8	6132.07	-23.9859	237.086	400.763	0	9.73938	87.2137	-519.526	-12031.3	-29134	-5811.04	143.922	926.158	0	0	0	0	0	0	0	603	903	0
749	1	-8.42056	-36.8167	-158.937	-16386.1	5704.82	-69.7623	235.894	403.098	0	12.7911	86.756	-519.831	-12122.9	-29744.4	-6635.01	142.781	926.321	0	0	0	0	0	0	0	603	903	0
749	2	-7.35244	-35.1382	-154.97	-15379	5399.65	-161.315	234.843	399.239	0	8.82385	82.4835	-519.831	-12214.4	-29439.2	-5856.81	143.368	926.497	0	0	0	0	0	0	0	603	903	0
749	3	-8.26797	-33.7649	-147.645	-15287.5	4972.4	-23.9859	233.678	403.542	0	6.68762	85.0775	-518	-12580.6	-29256.1	-5673.71	143.521	927.287	0	0	0	0	0	0	0	603	903	0
749	4	-6.89468	-31.1709	-141.847	-15653.7	5277.58	-23.9859	237.206	410.356	0	6.22986	88.4344	-519.526	-13221.5	-29317.1	-6268.8	143.569	928.449	0	0	0	0	0	0	0	603	903	0
749	5	-6.5895	-27.9666	-138.795	-15195.9	4667.23	342.225	233.627	409.484	0	4.70398	84.7723	-515.558	-13129.9	-29561.3	-5444.83	142.662	928.467	0	0	0	0	0	0	0	603	903	0
749	6	-7.50503	-26.4407	-136.049	-15104.4	4667.23	67.5668	234.306	411.022	0	1.65222	84.7723	-516.169	-13313	-29744.4	-5490.6	142.375	928.792	0	0	0	0	0	0	0	603	903	0
749	7	-7.81021	-24.4571	-131.471	-15104.4	4545.16	159.12	234.572	414.888	0	1.19446	88.4344	-517.695	-12397.5	-29317.1	-6406.13	143.37	926.948	0	0	0	0	0	0	0	603	903	0
749	8	-7.96279	-22.4734	-126.893	-14921.3	4484.12	388.001	235.338	417.589	0	-0.0262447	85.0775	-515.864	-13129.9	-29195.1	-5765.26	143.405	928.452	0	0	0	0	0	0	0	603	903	0
749	9	-6.5895	-19.7268	-123.842	-14463.5	4239.98	937.318	234.237	416.79	0	-0.636596	84.0094	-513.117	-13679.3	-29866.5	-5444.83	141.794	929.659	0	0	0	0	0	0	0	603	903	0
750	0	-6.89468	-17.2854	-120.79	-13639.5	4789.3	571.107	239.65	412.92	0	-2.46765	87.5189	-513.422	-13862.4	-29988.5	-6177.25	141.591	930	0	0	0	0	0	0	0	603	903	0
750	1	-6.89468	-15.3018	-118.959	-13639.5	4545.16	433.778	238.208	414.658	0	-5.36682	88.8922	-514.643	-13587.7	-29866.5	-5536.38	141.967	929.402	0	0	0	0	0	0	0	603	903	0
750	2	-7.19985	-14.844	-115.297	-12632.5	4117.91	159.12	235.716	409.565	0	-3.078	85.2301	-510.981	-13953.9	-29683.4	-5261.72	141.909	930.308	0	0	0	0	0	0	0	603	903	0
750	3	-3.69033	-15.7595	-113.16	-12540.9	4178.94	250.672	236.929	410.824	0	-5.51941	85.5353	-514.033	-14594.8	-29927.5	-5994.14	141.779	931.393	0	0	0	0	0	0	0	603	903	0
750	4	-6.43691	-17.2854	-107.667	-12266.2	4117.91	479.554	238.247	413.927	0	-7.19788	87.9767	-519.221	-15327.2	-30354.7	-5215.94	141.538	932.52	0	0	0	0	0	0	0	603	903	0
750	5	-4.75845	-13.4707	-103.09	-12357.8	4178.94	342.225	240.537	419.874	0	-8.1134	86.1456	-525.934	-16334.3	-30965.1	-5078.62	141.124	934.058	0	0	0	0	0	0	0	603	903	0
750	6	-3.69033	-12.5552	-100.648	-12083.1	3568.59	250.672	235.456	420.053	0	-10.097	84.6198	-527.46	-16792.1	-31636.5	-5811.04	140.021	934.836	0	0	0	0	0	0	0	603	903	0
750	7	-6.13174	-10.8767	-97.2913	-11167.6	3568.59	296.449	236.679	414.785	0	-16.3531	93.775	-526.85	-17432.9	-31636.5	-5353.27	139.952	936.089	0	0	0	0	0	0	0	603	903	0
750	8	-6.13174	-10.5716	-96.0706	-11076.1	3263.42	433.778	233.969	415.291	0	-18.7946	93.6224	-524.409	-17524.5	-31209.2	-5032.84	140.487	936.418	0	0	0	0	0	0	0	603	903	0
750	9	-5.21621	-11.1819	-88.7464	-10709.8	3324.45	113.343	237.46	420.679	0	-16.9635	89.6552	-526.24	-17707.6	-31270.3	-5902.59	140.578	936.649	0	0	0	0	0	0	0	603	903	0
751	0	-3.69033	-9.9612	-84.4739	-9794.32	2592.03	296.449	230.684	415.945	0	-19.0997	94.8431	-535.395	-17524.5	-32185.8	-6039.92	139.884	935.732	0	0	0	0	0	0	0	603	903	0
751	1	-2.7748	-8.7405	-82.3377	-9061.9	3141.35	525.331	238.152	410.058	0	-21.0834	101.404	-536.616	-18348.4	-32307.9	-5948.37	139.793	937.193	0	0	0	0	0	0	0	603	903	0
751	2	-3.99551	-10.1138	-81.4222	-9153.45	2897.21	571.107	235.583	412.42	0	-16.8109	100.794	-538.752	-19264	-32185.8	-7138.55	140.259	938.757	0	0	0	0	0	0	0	603	903	0
751	3	-5.67397	-10.419	-76.8445	-8878.79	2653.07	388.001	234.525	415.542	0	-11.7755	100.641	-539.667	-19996.4	-32063.7	-6863.89	140.586	940.053	0	0	0	0	0	0	0	603	903	0
751	4	-5.21621	-9.04567	-70.1307	-8695.68	2592.03	433.778	236.96	423.993	0	-16.048	106.592	-545.16	-19080.9	-32735.1	-6909.67	139.953	938.001	0	0	0	0	0	0	0	603	903	0
751	5	-6.28433	-8.13015	-64.0272	-7963.26	2653.07	662.66	241.437	424.373	0	-13.6066	104.609	-545.466	-19996.4	-32979.2	-8054.08	139.539	939.659	0	0	0	0	0	0	0	603	903	0
751	6	-4.60586	-9.04567	-64.9427	-8237.92	2469.96	479.554	238.033	426.849	0	-9.63928	101.557	-548.212	-20911.9	-32918.2	-7550.54	139.954	941.146	0	0	0	0	0	0	0	603	903	0
751	7	-5.67397	-8.58791	-64.0272	-7871.71	2103.75	525.331	232.857	422.943	0	-9.33411	102.625	-556.757	-21278.1	-32613	-7413.21	141.423	941.218	0	0	0	0	0	0	0	603	903	0
751	8	-5.52139	-7.82497	-61.2806	-7230.84	2042.71	250.672	233.334	417.996	0	-8.72375	105.067	-558.588	-21827.5	-33162.4	-8328.74	140.632	942.076	0	0	0	0	0	0	0	603	903	0
751	9	-5.67397	-7.97756	-57.9236	-6956.18	2103.75	479.554	236.319	420.092	0	-5.82458	102.015	-560.419	-22651.4	-33040.3	-8191.41	141.044	943.419	0	0	0	0	0	0	0	603	903	0
752	0	-3.99551	-10.5716	-52.4305	-6773.08	1615.47	159.12	230.812	429.182	0	-5.97717	100.947	-561.945	-22743	-32552	-7596.32	142.073	943.472	0	0	0	0	0	0	0	603	903	0
752	1	-6.28433	-8.7405	-49.0735	-5857.55	1310.29	342.225	226.701	419.363	0	-7.50305	104.914	-565.302	-23109.2	-32857.2	-8786.5	141.877	943.879	0	0	0	0	0	0	0	603	903	0
752	2	-3.84292	-7.97756	-46.9373	-5857.55	1859.61	250.672	239.619	424.795	0	-8.1134	103.083	-567.743	-23383.8	-33345.5	-8466.06	141.267	944.187	0	0	0	0	0	0	0	603	903	0
752	3	-2.62222	-9.35085	-46.0218	-4850.47	1493.4	388.001	232.45	405.395	0	-7.19788	102.93	-569.88	-22834.5	-32796.1	-7779.42	142.451	943.069	0	0	0	0	0	0	0	603	903	0
752	4	-4.91104	-8.89309	-43.2752	-5216.68	944.082	388.001	221.816	420.547	0	-7.50305	104.609	-572.626	-23567	-32979.2	-8054.08	142.407	944.156	0	0	0	0	0	0	0	603	903	0
752	5	-4.91104	-9.80861	-42.97	-4942.02	1493.4	525.331	234.754	415.011	0	-11.0126	105.219	-574.457	-24299.4	-33894.8	-8054.08	140.997	945.3	0	0	0	0	0	0	0	603	903	0
752	6	-2.16445	-6.90944	-39.3079	-5125.13	1310.29	21.7904	233.334	430.384	0	-11.1652	102.473	-574.457	-24848.7	-33772.7	-7138.55	141.209	946.256	0	0	0	0	0	0	0	603	903	0
752	7	-4.91104	-6.1465	-35.951	-5125.13	1432.36	250.672	239.842	442.559	0	-11.7755	101.71	-578.73	-24574	-33772.7	-7550.54	141.643	945.462	0	0	0	0	0	0	0	603	903	0
752	8	-3.99551	-6.90944	-34.4251	-4667.36	1005.12	296.449	229.197	435.58	0	-14.6747	104.914	-583.613	-25214.9	-33772.7	-7321.66	142.132	946.205	0	0	0	0	0	0	0	603	903	0
752	9	-2.31704	-5.53615	-35.3406	-4850.47	1493.4	21.7904	242.257	437.249	0	-18.1842	101.557	-587.58	-25855.8	-34810.3	-6497.68	140.756	947.004	0	0	0	0	0	0	0	603	903	0
753	0	-3.53774	-5.38356	-33.5096	-4392.7	1005.12	-161.315	229.995	431.088	0	-18.9471	99.5734	-588.495	-26038.9	-35054.4	-7047	140.434	947.247	0	0	0	0	0	0	0	603	903	0
753	1	-4.30068	-5.53615	-31.3734	-3843.39	760.976	159.12	224.256	422.505	0	-20.1678	102.473	-588.495	-26313.5	-34322	-6726.56	141.678	947.713	0	0	0	0	0	0	0	603	903	0
753	2	-4.30068	-5.23098	-27.7112	-3110.97	944.082	159.12	234.069	412.264	0	-21.236	101.252	-592.768	-26679.7	-35115.5	-5811.04	140.76	948.009	0	0	0	0	0	0	0	603	903	0
753	3	-2.92739	-4.46804	-24.3543	-3110.97	1005.12	-207.091	241.271	427.738	0	-21.6937	99.2682	-597.346	-27229.1	-35359.6	-6772.34	140.805	948.583	0	0	0	0	0	0	0	603	903	0
753	4	-2.62222	-4.31545	-24.0491	-2744.75	455.801	67.5668	218.953	414.131	0	-23.067	98.8104	-598.566	-27412.2	-34810.3	-6955.45	141.844	948.796	0	0	0	0	0	0	0	603	903	0
753	5	-2.46963	-5.23098	-24.0491	-2561.65	577.871	388.001	224.029	406.517	0	-24.7455	100.336	-598.566	-27320.6	-35054.4	-6360.35	141.436	948.643	0	0	0	0	0	0	0	603	903	0
753	6	-4.45327	-5.38356	-21.6077	-2470.1	577.871	342.225	226.744	414.315	0	-22.3041	100.336	-600.702	-26771.3	-35664.8	-7092.78	140.628	947.567	0	0	0	0	0	0	0	603	903	0
753	7	-2.31704	-4.01027	-16.7249	-2012.33	516.836	113.343	230.902	420.319	0	-21.6937	98.8104	-602.839	-27686.8	-35237.5	-7138.55	141.547	948.927	0	0	0	0	0	0	0	603	903	0
753	8	-2.92739	-3.39992	-18.556	-2378.54	272.695	159.12	214.696	428.182	0	-23.3722	100.641	-605.585	-27869.9	-35359.6	-6131.47	141.611	949.022	0	0	0	0	0	0	0	603	903	0
753	9	-1.85928	-3.85769	-15.5042	-2286.99	822.012	113.343	253.019	447.508	0	-22.7618	99.5734	-605.89	-28602.4	-35298.6	-7230.1	141.741	950.207	0	0	0	0	0	0	0	603	903	0
754	0	-2.92739	-2.4844	-13.6732	-1554.57	516.836	67.5668	237.799	413.695	0	-19.5575	95.7587	-607.111	-28419.2	-35908.9	-7138.55	140.853	949.811	0	0	0	0	0	0	0	603	903	0
754	1	-2.7748	-1.26369	-12.1473	-1920.78	211.66	204.896	217.424	458.124	0	-20.473	96.8268	-607.416	-28785.5	-35481.7	-6635.01	141.586	950.39	0	0	0	0	0	0	0	603	903	0
754	2	-2.62222	-2.94216	-14.2835	-1646.12	272.695	-69.7623	219.092	415.246	0	-21.5411	98.6578	-610.163	-29334.8	-35359.6	-7001.22	142.049	951.077	0	0	0	0	0	0	0	603	903	0
754	3	-3.53774	-0.805928	-10.6214	-1096.8	28.5544	250.672	202.688	403.264	0	-17.4213	96.5216	-613.215	-29334.8	-35603.8	-7413.21	141.939	950.838	0	0	0	0	0	0	0	603	903	0
754	4	-1.85928	0.262187	-10.9266	-822.147	394.765	67.5668	236.129	375.243	0	-17.5739	95.1483	-612.909	-29426.3	-35847.9	-6543.46	141.512	951.011	0	0	0	0	0	0	0	603	903	0
754	5	0	0	0	0	0	0	200	300	0	-17.5739	96.0638	-614.13	-29975.6	-35420.7	-7275.88	142.324	951.81	0	0	0	0	0	0	0	603	903	0
754	6	0	0	0	0	0	0	200	300	0	-19.0997	95.4535	-614.741	-30341.9	-35298.6	-6818.12	142.58	952.357	0	0	0	0	0	0	0	603	903	0
754	7	-2.7748	1.02513	-10.3162	-913.699	211.66	204.896	220.517	388.569	0	-19.8627	94.2328	-615.351	-30341.9	-35603.8	-6635.01	142.141	952.308	0	0	0	0	0	0	0	603	903	0
754	8	0	0	0	0	0	0	200	300	0	-20.3204	92.4017	-615.656	-30433.4	-35786.9	-7184.33	141.872	952.432	0	0	0	0	0	0	0	603	903	0
754	9	0	0	0	0	0	0	200	300	0	-20.9308	95.1483	-617.487	-30067.2	-35359.6	-7275.88	142.736	951.693	0	0	0	0	0	0	0	603	903	0
755	0	0	0	0	0	0	0	200	300	0	-20.9308	92.5543	-619.318	-30708.1	-35237.5	-6451.91	143.103	952.584	0	0	0	0	0	0	0	603	903	0
755	1	0	0	0	0	0	0	200	300	0	-22.1515	91.6388	-618.097	-30341.9	-35542.7	-6635.01	142.497	952.089	0	0	0	0	0	0	0	603	903	0
755	2	0	0	0	0	0	0	200	300	0	-23.3722	91.0284	-617.487	-30891.2	-35542.7	-6955.45	142.44	953.027	0	0	0	0	0	0	0	603	903	0
755	3	0	0	0	0	0	0	200	300	0	-23.5248	91.4862	-619.623	-30433.4	-35786.9	-6131.47	142.244	952.116	0	0	0	0	0	0	0	603	903	0
755	4	0	0	0	0	0	0	200	300	0	-20.9308	89.9603	-621.454	-30799.6	-35664.8	-6543.46	142.611	952.561	0	0	0	0	0	0	0	603	903	0
755	5	0	0	0	0	0	0	200	300	0	-23.3722	89.0448	-622.37	-31074.3	-36397.2	-6589.24	141.518	952.929	0	0	0	0	0	0	0	603	903	0
755	6	0	0	0	0	0	0	200	300	0	-25.9662	88.2819	-620.234	-31806.7	-35664.8	-5627.93	142.498	954.282	0	0	0	0	0	0	0	603	903	0
755	7	0	0	0	0	0	0	200	300	0	-25.5084	86.4508	-621.76	-31165.8	-35908.9	-5902.59	142.246	953.125	0	0	0	0	0	0	0	603	903	0
755	8	0	0	0	0	0	0	200	300	0	-24.2877	86.4508	-622.675	-31440.5	-36214.1	-6085.7	141.841	953.493	0	0	0	0	0	0	0	603	903	0
755	9	0	0	0	0	0	0	200	300	0	-25.5084	86.2982	-624.811	-31989.8	-36214.1	-5307.5	142.04	954.199	0	0	0	0	0	0	0	603	903	0
756	0	0	0	0	0	0	0	200	300	0	-26.7291	84.3146	-624.811	-31165.8	-35725.8	-5719.48	142.821	952.88	0	0	0	0	0	0	0	603	903	0
756	1	0	0	0	0	0	0	200	300	0	-26.5765	82.4835	-623.591	-32081.4	-35664.8	-5673.71	142.807	954.446	0	0	0	0	0	0	0	603	903	0
756	2	0	0	0	0	0	0	200	300	0	-25.2032	82.7887	-623.591	-31898.3	-35908.9	-5490.6	142.416	954.153	0	0	0	0	0	0	0	603	903	0
756	3	0	0	0	0	0	0	200	300	0	-25.661	83.0939	-624.201	-31806.7	-35786.9	-5490.6	142.668	953.956	0	0	0	0	0	0	0	603	903	0
756	4	0	0	0	0	0	0	200	300	0	-26.2714	79.4318	-623.896	-32447.6	-35786.9	-5856.81	142.64	955.008	0	0	0	0	0	0	0	603	903	0
756	5	0	0	0	0	0	0	200	300	0	-25.0507	79.8895	-625.422	-32264.5	-35664.8	-5444.83	142.975	954.588	0	0	0	0	0	0	0	603	903	0
756	6	0	0	0	0	0	0	200	300	0	-25.8136	80.0421	-625.727	-31532	-35970	-5582.16	142.515	953.393	0	0	0	0	0	0	0	603	903	0
756	7	0	0	0	0	0	0	200	300	0	-23.3722	78.8214	-622.98	-32081.4	-35970	-5582.16	142.261	954.497	0	0	0	0	0	0	0	603	903	0
756	8	0	0	0	0	0	0	200	300	0	-26.7291	77.6007	-624.506	-32172.9	-35970	-5215.94	142.403	954.517	0	0	0	0	0	0	0	603	903	0
756	9	0	0	0	0	0	0	200	300	0	-25.2032	78.0585	-624.506	-32356	-35481.7	-5399.05	143.184	954.811	0	0	0	0	0	0	0	603	903	0
757	0	0	0	0	0	0	0	200	300	0	-25.3558	78.5162	-626.337	-32447.6	-35542.7	-5536.38	143.253	954.805	0	0	0	0	0	0	0	603	903	0
757	1	0	0	0	0	0	0	200	300	0	-23.9825	75.9222	-626.948	-32722.2	-35359.6	-4758.18	143.6	955.193	0	0	0	0	0	0	0	603	903	0
757	2	0	0	0	0	0	0	200	300	0	-25.9662	74.7015	-626.642	-32722.2	-35359.6	-4666.63	143.573	955.218	0	0	0	0	0	0	0	603	903	0
757	3	0	0	0	0	0	0	200	300	0	-27.0343	74.549	-625.422	-32722.2	-35908.9	-4849.73	142.584	955.32	0	0	0	0	0	0	0	603	903	0
757	4	0	0	0	0	0	0	200	300	0	-27.9498	73.3282	-625.422	-32722.2	-36092	-4620.85	142.292	955.32	0	0	0	0	0	0	0	603	903	0
757	5	0	0	0	0	0	0	200	300	0	-26.7291	72.8705	-626.032	-32722.2	-35359.6	-4758.18	143.518	955.269	0	0	0	0	0	0	0	603	903	0
757	6	0	0	0	0	0	0	200	300	0	-26.7291	72.5653	-626.337	-33271.6	-35115.5	-4803.96	143.935	956.121	0	0	0	0	0	0	0	603	903	0
757	7	0	0	0	0	0	0	200	300	0	-28.7128	71.4972	-622.98	-33088.5	-35725.8	-4437.74	142.653	956.113	0	0	0	0	0	0	0	603	903	0
757	8	0	0	0	0	0	0	200	300	0	-28.5602	69.361	-626.337	-32539.1	-35603.8	-4483.52	143.156	954.951	0	0	0	0	0	0	0	603	903	0
757	9	0	0	0	0	0	0	200	300	0	-26.424	69.2084	-625.727	-31989.8	-35420.7	-4254.64	143.393	954.124	0	0	0	0	0	0	0	603	903	0
758	0	0	0	0	0	0	0	200	300	0	-27.3395	69.6661	-626.032	-33088.5	-35359.6	-4254.64	143.518	955.854	0	0	0	0	0	0	0	603	903	0
758	1	0	0	0	0	0	0	200	300	0	-28.8654	67.3773	-625.422	-33180	-35970	-4163.09	142.487	956.052	0	0	0	0	0	0	0	603	903	0
758	2	0	0	0	0	0	0	200	300	0	-27.4921	66.4618	-626.642	-32813.8	-35725.8	-4346.19	142.989	955.364	0	0	0	0	0	0	0	603	903	0
758	3	0	0	0	0	0	0	200	300	0	-24.8981	65.6989	-625.422	-33088.5	-35420.7	-3796.88	143.365	955.906	0	0	0	0	0	0	0	603	903	0
758	4	0	0	0	0	0	0	200	300	0	-27.3395	64.0204	-624.811	-32996.9	-35359.6	-4025.76	143.408	955.811	0	0	0	0	0	0	0	603	903	0
758	5	0	0	0	0	0	0	200	300	0	-26.7291	63.5626	-622.37	-33637.8	-35481.7	-3934.21	142.989	957.048	0	0	0	0	0	0	0	603	903	0
758	6	0	0	0	0	0	0	200	300	0	-27.6447	61.7316	-624.506	-33363.1	-35298.6	-3476.44	143.478	956.423	0	0	0	0	0	0	0	603	903	0
758	7	0	0	0	0	0	0	200	300	0	-27.7972	62.4945	-625.422	-33546.2	-35420.7	-3842.65	143.365	956.638	0	0	0	0	0	0	0	603	903	0
758	8	0	0	0	0	0	0	200	300	0	-26.5765	60.0531	-625.117	-32630.7	-35237.5	-3796.88	143.63	955.199	0	0	0	0	0	0	0	603	903	0
758	9	0	0	0	0	0	0	200	300	0	-26.2714	59.4427	-623.285	-33912.4	-35359.6	-3064.45	143.269	957.409	0	0	0	0	0	0	0	603	903	0
759	0	0	0	0	0	0	0	200	300	0	-27.6447	58.6798	-622.675	-33637.8	-34688.2	-3476.44	144.292	957.021	0	0	0	0	0	0	0	603	903	0
759	1	0	0	0	0	0	0	200	300	0	-27.3395	58.3746	-622.37	-33271.6	-34749.3	-3018.68	144.166	956.46	0	0	0	0	0	0	0	603	903	0
759	2	0	0	0	0	0	0	200	300	0	-26.1188	57.1539	-622.675	-32447.6	-35176.5	-3201.78	143.507	955.11	0	0	0	0	0	0	0	603	903	0
759	3	0	0	0	0	0	0	200	300	0	-25.8136	55.4755	-622.37	-33820.9	-35054.4	-3064.45	143.676	957.342	0	0	0	0	0	0	0	603	903	0
759	4	0	0	0	0	0	0	200	300	0	-27.0343	53.3392	-623.591	-33546.2	-34749.3	-3110.23	144.276	956.795	0	0	0	0	0	0	0	603	903	0
759	5	0	0	0	0	0	0	200	300	0	-26.5765	54.1022	-620.844	-34004	-34444.1	-2972.9	144.521	957.771	0	0	0	0	0	0	0	603	903	0
759	6	0	0	0	0	0	0	200	300	0	-27.1869	54.2548	-620.234	-33912.4	-35176.5	-3110.23	143.285	957.677	0	0	0	0	0	0	0	603	903	0
759	7	0	0	0	0	0	0	200	300	0	-25.3558	53.1866	-620.844	-34095.5	-34993.4	-2972.9	143.636	957.918	0	0	0	0	0	0	0	603	903	0
759	8	0	0	0	0	0	0	200	300	0	-24.4403	51.8134	-615.656	-34461.7	-33894.8	-2560.91	144.945	958.976	0	0	0	0	0	0	0	603	903	0
759	9	0	0	0	0	0	0	200	300	0	-25.2032	50.5927	-617.792	-33637.8	-34627.2	-2560.91	143.95	957.448	0	0	0	0	0	0	0	603	903	0
760	0	0	0	0	0	0	0	200	300	0	-25.3558	50.1349	-616.877	-34644.8	-34627.2	-2835.57	143.867	959.162	0	0	0	0	0	0	0	603	903	0
760	1	0	0	0	0	0	0	200	300	0	-24.5929	50.5927	-615.961	-34187.1	-33711.7	-2606.69	145.27	958.502	0	0	0	0	0	0	0	603	903	0
760	2	0	0	0	0	0	0	200	300	0	-23.9825	49.9823	-616.266	-34461.7	-34016.8	-2515.14	144.802	958.92	0	0	0	0	0	0	0	603	903	0
760	3	0	0	0	0	0	0	200	300	0	-23.83	48.7616	-614.741	-34827.9	-33955.8	-2835.57	144.764	959.655	0	0	0	0	0	0	0	603	903	0
760	4	0	0	0	0	0	0	200	300	0	-25.0507	47.5409	-614.435	-34644.8	-34138.9	-2194.7	144.439	959.385	0	0	0	0	0	0	0	603	903	0
760	5	0	0	0	0	0	0	200	300	0	-24.4403	47.0831	-610.163	-35102.6	-33772.7	-2286.26	144.65	960.53	0	0	0	0	0	0	0	603	903	0
760	6	0	0	0	0	0	0	200	300	0	-22.3041	47.6935	-611.384	-34461.7	-33467.5	-2377.81	145.259	959.367	0	0	0	0	0	0	0	603	903	0
760	7	0	0	0	0	0	0	200	300	0	-22.9144	45.2521	-609.858	-34644.8	-33772.7	-2011.6	144.622	959.808	0	0	0	0	0	0	0	603	903	0
760	8	0	0	0	0	0	0	200	300	0	-22.4567	46.3202	-608.637	-35194.2	-33589.6	-1920.04	144.812	960.825	0	0	0	0	0	0	0	603	903	0
760	9	0	0	0	0	0	0	200	300	0	-23.3722	45.2521	-607.416	-35285.7	-33101.3	-2148.93	145.505	961.091	0	0	0	0	0	0	0	603	903	0
761	0	0	0	0	0	0	0	200	300	0	-22.4567	44.3365	-604.67	-34644.8	-33223.4	-1828.49	145.055	960.295	0	0	0	0	0	0	0	603	903	0
761	1	0	0	0	0	0	0	200	300	0	-21.3885	44.7943	-602.534	-35468.8	-33345.5	-1691.16	144.658	961.866	0	0	0	0	0	0	0	603	903	0
761	2	0	0	0	0	0	0	200	300	0	-19.2523	44.184	-601.313	-35468.8	-32796.1	-2011.6	145.459	961.986	0	0	0	0	0	0	0	603	903	0
761	3	0	0	0	0	0	0	200	300	0	-22.3041	43.5736	-600.397	-36018.1	-32613	-1553.83	145.681	962.991	0	0	0	0	0	0	0	603	903	0
761	4	0	0	0	0	0	0	200	300	0	-22.1515	42.0477	-598.566	-36018.1	-32796.1	-1599.61	145.209	963.174	0	0	0	0	0	0	0	603	903	0
761	5	0	0	0	0	0	0	200	300	0	-21.9989	42.5055	-596.735	-35743.5	-32918.2	-1599.61	144.836	962.898	0	0	0	0	0	0	0	603	903	0
761	6	0	0	0	0	0	0	200	300	0	-20.9308	40.827	-594.294	-35835	-32246.8	-1553.83	145.739	963.299	0	0	0	0	0	0	0	603	903	0
761	7	0	0	0	0	0	0	200	300	0	-20.7782	41.1322	-592.463	-36292.8	-32002.7	-1370.73	145.984	964.258	0	0	0	0	0	0	0	603	903	0
761	8	0	0	0	0	0	0	200	300	0	-21.5411	41.2848	-590.021	-36201.2	-32674.1	-1462.28	144.622	964.356	0	0	0	0	0	0	0	603	903	0
761	9	0	0	0	0	0	0	200	300	0	-20.0153	40.5219	-589.106	-36384.4	-31941.7	-1462.28	145.779	964.762	0	0	0	0	0	0	0	603	903	0
762	0	0	0	0	0	0	0	200	300	0	-22.3041	39.1486	-588.19	-35835	-31941.7	-1096.07	145.695	963.924	0	0	0	0	0	0	0	603	903	0
762	1	0	0	0	0	0	0	200	300	0	-20.473	39.7589	-585.749	-35926.6	-32063.7	-1279.18	145.26	964.334	0	0	0	0	0	0	0	603	903	0
762	2	0	0	0	0	0	0	200	300	0	-20.473	40.2167	-583.002	-36659	-31880.6	-1141.85	145.316	965.88	0	0	0	0	0	0	0	603	903	0
762	3	0	0	0	0	0	0	200	300	0	-21.6937	38.8434	-583.307	-36018.1	-31697.5	-1004.52	145.659	964.748	0	0	0	0	0	0	0	603	903	0
762	4	0	0	0	0	0	0	200	300	0	-21.3885	37.3175	-576.594	-37483	-31331.3	-1050.29	145.661	968.008	0	0	0	0	0	0	0	603	903	0
762	5	0	0	0	0	0	0	200	300	0	-20.0153	37.7753	-579.34	-37025.2	-31514.4	-1096.07	145.603	966.909	0	0	0	0	0	0	0	603	903	0
762	6	0	0	0	0	0	0	200	300	0	-19.8627	37.4701	-576.594	-37116.8	-31331.3	-958.741	145.661	967.373	0	0	0	0	0	0	0	603	903	0
762	7	0	0	0	0	0	0	200	300	0	-21.236	36.8597	-575.068	-37299.9	-30721	-867.188	146.579	967.862	0	0	0	0	0	0	0	603	903	0
762	8	0	0	0	0	0	0	200	300	0	-18.642	36.5546	-574.763	-37391.4	-30782	-912.964	146.444	968.055	0	0	0	0	0	0	0	603	903	0
762	9	0	0	0	0	0	0	200	300	0	-20.9308	35.0287	-571.1	-37025.2	-31331.3	-775.635	145.139	967.831	0	0	0	0	0	0	0	603	903	0
763	0	0	0	0	0	0	0	200	300	0	-19.8627	35.4865	-570.795	-37299.9	-30843	-775.635	145.965	968.347	0	0	0	0	0	0	0	603	903	0
763	1	0	0	0	0	0	0	200	300	0	-19.8627	34.7235	-567.133	-37574.5	-30476.8	-684.083	146.262	969.253	0	0	0	0	0	0	0	603	903	0
763	2	0	0	0	0	0	0	200	300	0	-19.8627	34.4183	-566.523	-37940.7	-30537.8	-592.53	146.096	969.971	0	0	0	0	0	0	0	603	903	0
763	3	0	0	0	0	0	0	200	300	0	-21.0834	34.1132	-562.555	-37391.4	-30782	-638.306	145.282	969.467	0	0	0	0	0	0	0	603	903	0
763	4	0	0	0	0	0	0	200	300	0	-19.7101	32.5873	-564.081	-37666.1	-30476.8	-638.306	145.971	969.774	0	0	0	0	0	0	0	603	903	0
763	5	0	0	0	0	0	0	200	300	0	-19.7101	33.1976	-561.945	-38673.2	-30232.7	-409.424	146.2	971.82	0	0	0	0	0	0	0	603	903	0
763	6	0	0	0	0	0	0	200	300	0	-20.7782	31.9769	-559.809	-39130.9	-30293.7	-409.424	145.886	972.901	0	0	0	0	0	0	0	603	903	0
763	7	0	0	0	0	0	0	200	300	0	-20.0153	32.4347	-558.893	-38673.2	-30110.6	-226.319	146.125	972.196	0	0	0	0	0	0	0	603	903	0
763	8	0	0	0	0	0	0	200	300	0	-19.0997	29.8407	-556.452	-38581.6	-30049.6	-226.319	145.998	972.335	0	0	0	0	0	0	0	603	903	0
763	9	0	0	0	0	0	0	200	300	0	-19.2523	31.6718	-555.842	-39130.9	-29805.4	-363.648	146.378	973.399	0	0	0	0	0	0	0	603	903	0
764	0	0	0	0	0	0	0	200	300	0	-20.9308	30.2985	-554.316	-38856.3	-29317.1	-88.9897	147.111	973.098	0	0	0	0	0	0	0	603	903	0
764	1	0	0	0	0	0	0	200	300	0	-19.8627	29.6881	-551.874	-39039.4	-29805.4	-226.319	145.992	973.74	0	0	0	0	0	0	0	603	903	0
764	2	0	0	0	0	0	0	200	300	0	-19.4049	30.2985	-549.128	-37940.7	-29683.4	-363.648	145.945	972.093	0	0	0	0	0	0	0	603	903	0
764	3	0	0	0	0	0	0	200	300	0	-19.4049	28.0096	-548.212	-39130.9	-29134	-134.766	146.856	974.379	0	0	0	0	0	0	0	603	903	0
764	4	0	0	0	0	0	0	200	300	0	-20.3204	29.5355	-546.992	-39405.6	-29561.3	2.56305	145.957	975.041	0	0	0	0	0	0	0	603	903	0
764	5	0	0	0	0	0	0	200	300	0	-18.7946	28.7726	-546.381	-39954.9	-29317.1	-180.542	146.343	976.126	0	0	0	0	0	0	0	603	903	0
764	6	0	0	0	0	0	0	200	300	0	-20.0153	28.1622	-543.94	-39314	-29012	-43.2133	146.663	975.277	0	0	0	0	0	0	0	603	903	0
764	7	0	0	0	0	0	0	200	300	0	-19.4049	28.7726	-541.498	-39405.6	-28767.8	-134.766	146.874	975.771	0	0	0	0	0	0	0	603	903	0
764	8	0	0	0	0	0	0	200	300	0	-18.3368	27.2467	-539.362	-39863.4	-29256.1	2.56305	145.758	976.908	0	0	0	0	0	0	0	603	903	0
764	9	0	0	0	0	0	0	200	300	0	-19.8627	27.2467	-538.752	-40778.9	-28950.9	94.1158	146.263	978.691	0	0	0	0	0	0	0	603	903	0
765	0	0	0	0	0	0	0	200	300	0	-20.0153	26.1786	-537.836	-40321.1	-28401.6	506.103	147.193	977.969	0	0	0	0	0	0	0	603	903	0
765	1	0	0	0	0	0	0	200	300	0	-18.7946	25.7208	-534.784	-40504.2	-28279.5	94.1158	147.12	978.739	0	0	0	0	0	0	0	603	903	0
765	2	0	0	0	0	0	0	200	300	0	-18.9471	26.026	-533.869	-41053.5	-28584.7	48.3394	146.457	979.898	0	0	0	0	0	0	0	603	903	0
765	3	0	0	0	0	0	0	200	300	0	-20.1678	25.2631	-528.376	-40229.6	-28462.7	185.669	146.132	979.138	0	0	0	0	0	0	0	603	903	0
765	4	0	0	0	0	0	0	200	300	0	-19.8627	25.4156	-532.953	-40962	-27974.4	231.445	147.511	979.859	0	0	0	0	0	0	0	603	903	0
765	5	0	0	0	0	0	0	200	300	0	-19.0997	24.3475	-529.291	-40870.4	-27913.3	2.56305	147.263	980.217	0	0	0	0	0	0	0	603	903	0
765	6	0	0	0	0	0	0	200	300	0	-17.5739	23.2794	-527.155	-40962	-27608.2	414.55	147.628	980.704	0	0	0	0	0	0	0	603	903	0
765	7	0	0	0	0	0	0	200	300	0	-19.8627	23.432	-525.019	-41328.2	-27974.4	414.55	146.717	981.718	0	0	0	0	0	0	0	603	903	0
765	8	0	0	0	0	0	0	200	300	0	-19.5575	23.432	-525.324	-41602.8	-27730.2	277.221	147.213	982.195	0	0	0	0	0	0	0	603	903	0
765	9	0	0	0	0	0	0	200	300	0	-21.0834	21.4484	-519.831	-40870.4	-28096.4	643.432	145.951	981.623	0	0	0	0	0	0	0	603	903	0
766	0	0	0	0	0	0	0	200	300	0	-19.2523	21.7535	-522.883	-41145.1	-27852.3	139.892	146.733	981.689	0	0	0	0	0	0	0	603	903	0
766	1	0	0	0	0	0	0	200	300	0	-19.2523	21.7535	-519.831	-42060.6	-27364	414.55	147.36	983.912	0	0	0	0	0	0	0	603	903	0
766	2	0	0	0	0	0	0	200	300	0	-20.7782	21.601	-518	-42060.6	-27364	597.656	147.174	984.198	0	0	0	0	0	0	0	603	903	0
766	3	0	0	0	0	0	0	200	300	0	-20.9308	21.1432	-518	-41785.9	-27547.1	597.656	146.82	983.668	0	0	0	0	0	0	0	603	903	0
766	4	0	0	0	0	0	0	200	300	0	-19.8627	20.0751	-515.558	-42152.2	-27486.1	734.985	146.687	984.76	0	0	0	0	0	0	0	603	903	0
766	5	0	0	0	0	0	0	200	300	0	-19.4049	19.7699	-515.253	-42793	-26753.7	689.209	148.077	986.052	0	0	0	0	0	0	0	603	903	0
766	6	0	0	0	0	0	0	200	300	0	-21.5411	19.4647	-511.286	-42426.8	-26692.6	1009.64	147.793	985.981	0	0	0	0	0	0	0	603	903	0
766	7	0	0	0	0	0	0	200	300	0	-21.5411	19.4647	-509.76	-42976.1	-27364	734.985	146.32	987.307	0	0	0	0	0	0	0	603	903	0
766	8	0	0	0	0	0	0	200	300	0	-20.1678	18.244	-506.708	-42884.6	-27486.1	689.209	145.756	987.634	0	0	0	0	0	0	0	603	903	0
766	9	0	0	0	0	0	0	200	300	0	-19.8627	19.7699	-508.845	-42884.6	-26143.3	918.091	148.622	987.278	0	0	0	0	0	0	0	603	903	0
767	0	0	0	0	0	0	0	200	300	0	-20.0153	18.3966	-506.098	-43342.4	-26814.7	1055.42	147.017	988.64	0	0	0	0	0	0	0	603	903	0
767	1	0	0	0	0	0	0	200	300	0	-21.236	18.5492	-503.046	-43891.7	-26814.7	872.314	146.695	990.252	0	0	0	0	0	0	0	603	903	0
767	2	0	0	0	0	0	0	200	300	0	-21.8463	18.244	-502.131	-43250.8	-26631.6	734.985	146.963	989.135	0	0	0	0	0	0	0	603	903	0
767	3	0	0	0	0	0	0	200	300	0	-20.3204	18.8544	-500.3	-42609.9	-26387.5	918.091	147.257	988.169	0	0	0	0	0	0	0	603	903	0
767	4	0	0	0	0	0	0	200	300	0	-20.1678	18.8544	-499.384	-44166.3	-26875.7	1238.52	146.182	991.442	0	0	0	0	0	0	0	603	903	0
767	5	0	0	0	0	0	0	200	300	0	-21.236	17.4811	-497.553	-44624.1	-26387.5	918.091	146.966	992.687	0	0	0	0	0	0	0	603	903	0
767	6	0	0	0	0	0	0	200	300	0	-21.5411	18.0914	-496.638	-44807.2	-25899.2	963.867	147.851	993.221	0	0	0	0	0	0	0	603	903	0
767	7	0	0	0	0	0	0	200	300	0	-21.9989	18.0914	-492.67	-44624.1	-25533	963.867	148.174	993.576	0	0	0	0	0	0	0	603	903	0
767	8	0	0	0	0	0	0	200	300	0	-20.3204	18.0914	-492.365	-43708.6	-26143.3	963.867	146.903	991.773	0	0	0	0	0	0	0	603	903	0
767	9	0	0	0	0	0	0	200	300	0	-20.1678	16.5656	-488.398	-44898.7	-25716.1	1055.42	147.346	994.931	0	0	0	0	0	0	0	603	903	0
768	0	0	0	0	0	0	0	200	300	0	-21.0834	18.244	-489.313	-45631.2	-24983.6	1009.64	148.941	996.255	0	0	0	0	0	0	0	603	903	0
768	1	0	0	0	0	0	0	200	300	0	-21.3885	18.244	-486.262	-45539.6	-25716.1	826.538	147.115	996.653	0	0	0	0	0	0	0	603	903	0
768	2	0	0	0	0	0	0	200	300	0	-20.1678	17.9388	-485.346	-45265	-25533	780.761	147.392	996.263	0	0	0	0	0	0	0	603	903	0
768	3	0	0	0	0	0	0	200	300	0	-20.1678	17.4811	-482.599	-44807.2	-24922.6	963.867	148.358	995.846	0	0	0	0	0	0	0	603	903	0
768	4	0	0	0	0	0	0	200	300	0	-21.0834	18.0914	-481.684	-46272	-24922.6	1055.42	148.259	999.063	0	0	0	0	0	0	0	603	903	0
768	5	0	0	0	0	0	0	200	300	0	-19.0997	18.7018	-479.548	-45997.4	-25655	1146.97	146.502	998.918	0	0	0	0	0	0	0	603	903	0
768	6	0	0	0	0	0	0	200	300	0	-20.1678	17.3285	-479.853	-45814.3	-25166.8	1284.3	147.553	998.476	0	0	0	0	0	0	0	603	903	0
768	7	0	0	0	0	0	0	200	300	0	-19.8627	17.0233	-478.327	-46638.3	-24922.6	1467.41	147.896	1000.5	0	0	0	0	0	0	0	603	903	0
768	8	0	0	0	0	0	0	200	300	0	-19.4049	16.7181	-475.886	-47004.5	-25227.8	1330.08	146.988	1001.77	0	0	0	0	0	0	0	603	903	0
768	9	0	0	0	0	0	0	200	300	0	-20.473	15.9552	-474.97	-47004.5	-24739.5	1421.63	147.914	1001.96	0	0	0	0	0	0	0	603	903	0
769	0	0	0	0	0	0	0	200	300	0	-19.7101	16.2604	-473.444	-47004.5	-24190.2	1284.3	148.906	1002.28	0	0	0	0	0	0	0	603	903	0
769	1	0	0	0	0	0	0	200	300	0	-18.642	16.413	-472.223	-47187.6	-24312.3	1238.52	148.515	1002.93	0	0	0	0	0	0	0	603	903	0
769	2	0	0	0	0	0	0	200	300	0	-18.4894	15.4974	-468.867	-47553.8	-24556.4	1192.75	147.626	1004.42	0	0	0	0	0	0	0	603	903	0
769	3	0	0	0	0	0	0	200	300	0	-19.7101	14.8871	-469.782	-47920	-24373.3	1146.97	148.118	1005	0	0	0	0	0	0	0	603	903	0
769	4	0	0	0	0	0	0	200	300	0	-18.3368	14.7345	-467.646	-47920	-23885	1101.2	148.925	1005.47	0	0	0	0	0	0	0	603	903	0
769	5	0	0	0	0	0	0	200	300	0	-20.0153	15.4974	-467.341	-47462.2	-23762.9	1101.2	149.153	1004.56	0	0	0	0	0	0	0	603	903	0
769	6	0	0	0	0	0	0	200	300	0	-17.7264	14.5819	-461.847	-47462.2	-24007.1	1238.52	148.019	1005.77	0	0	0	0	0	0	0	603	903	0
769	7	0	0	0	0	0	0	200	300	0	-18.642	14.8871	-466.73	-48469.3	-23885	1238.52	148.825	1006.85	0	0	0	0	0	0	0	603	903	0
769	8	0	0	0	0	0	0	200	300	0	-19.2523	14.4293	-464.594	-48194.6	-24007.1	1238.52	148.327	1006.73	0	0	0	0	0	0	0	603	903	0
769	9	0	0	0	0	0	0	200	300	0	-18.9471	13.6664	-463.679	-48377.7	-24129.2	1284.3	147.961	1007.33	0	0	0	0	0	0	0	603	903	0
770	0	0	0	0	0	0	0	200	300	0	-17.2687	12.5983	-460.627	-48560.9	-24373.3	1330.08	147.087	1008.42	0	0	0	0	0	0	0	603	903	0
770	1	0	0	0	0	0	0	200	300	0	-17.2687	13.3612	-460.932	-49201.7	-23579.8	1467.41	148.843	1009.74	0	0	0	0	0	0	0	603	903	0
770	2	0	0	0	0	0	0	200	300	0	-18.7946	13.3612	-461.847	-48927.1	-23518.8	1604.74	149.077	1008.94	0	0	0	0	0	0	0	603	903	0
770	3	0	0	0	0	0	0	200	300	0	-17.4213	12.2931	-460.932	-49751.1	-23640.9	1742.07	148.711	1010.94	0	0	0	0	0	0	0	603	903	0
770	4	0	0	0	0	0	0	200	300	0	-16.8109	12.4457	-458.796	-49384.8	-23640.9	1467.41	148.472	1010.64	0	0	0	0	0	0	0	603	903	0
770	5	0	0	0	0	0	0	200	300	0	-16.5057	11.225	-456.965	-49751.1	-23091.6	1375.85	149.468	1011.87	0	0	0	0	0	0	0	603	903	0
770	6	0	0	0	0	0	0	200	300	0	-16.8109	12.2931	-457.88	-50849.7	-23152.6	1558.96	149.435	1014.05	0	0	0	0	0	0	0	603	903	0
770	7	0	0	0	0	0	0	200	300	0	-17.5739	11.9879	-456.965	-50300.4	-23579.8	1330.08	148.399	1013.08	0	0	0	0	0	0	0	603	903	0
770	8	0	0	0	0	0	0	200	300	0	-17.7264	11.3776	-457.575	-50666.6	-23640.9	1513.18	148.334	1013.73	0	0	0	0	0	0	0	603	903	0
770	9	0	0	0	0	0	0	200	300	0	-16.3531	10.1569	-456.354	-50208.8	-22908.5	1558.96	149.801	1013.02	0	0	0	0	0	0	0	603	903	0
771	0	0	0	0	0	0	0	200	300	0	-15.285	10.9198	-455.439	-50758.1	-23396.7	1375.85	148.628	1014.45	0	0	0	0	0	0	0	603	903	0
771	1	0	0	0	0	0	0	200	300	0	-16.2006	10.7672	-455.439	-51215.9	-23396.7	1513.18	148.628	1015.45	0	0	0	0	0	0	0	603	903	0
771	2	0	0	0	0	0	0	200	300	0	-16.8109	11.225	-456.049	-50849.7	-22908.5	1421.63	149.768	1014.5	0	0	0	0	0	0	0	603	903	0
771	3	0	0	0	0	0	0	200	300	0	-16.6583	10.9198	-455.439	-51856.8	-23030.5	1330.08	149.432	1016.86	0	0	0	0	0	0	0	603	903	0
771	4	0	0	0	0	0	0	200	300	0	-16.5057	10.3094	-454.828	-52589.2	-23030.5	1787.84	149.364	1018.62	0	0	0	0	0	0	0	603	903	0
771	5	0	0	0	0	0	0	200	300	0	-16.048	9.6991	-453.913	-52223	-22908.5	1879.39	149.531	1018.05	0	0	0	0	0	0	0	603	903	0
771	6	0	0	0	0	0	0	200	300	0	-15.285	10.462	-452.997	-52772.3	-22542.2	1925.17	150.238	1019.5	0	0	0	0	0	0	0	603	903	0
771	7	0	0	0	0	0	0	200	300	0	-16.3531	9.08875	-452.997	-52406.1	-22542.2	1604.74	150.238	1018.69	0	0	0	0	0	0	0	603	903	0
771	8	0	0	0	0	0	0	200	300	0	-14.8273	9.54651	-452.692	-53138.5	-22969.5	1513.18	149.26	1020.38	0	0	0	0	0	0	0	603	903	0
771	9	0	0	0	0	0	0	200	300	0	-15.8954	9.24133	-452.692	-53321.6	-23030.5	1787.84	149.125	1020.79	0	0	0	0	0	0	0	603	903	0
772	0	0	0	0	0	0	0	200	300	0	-14.8273	8.93616	-450.556	-53230.1	-22725.3	1375.85	149.562	1021.14	0	0	0	0	0	0	0	603	903	0
772	1	0	0	0	0	0	0	200	300	0	-14.9799	9.39392	-450.251	-53779.4	-22054	1467.41	151.018	1022.44	0	0	0	0	0	0	0	603	903	0
772	2	0	0	0	0	0	0	200	300	0	-15.7428	7.86804	-450.861	-53779.4	-22603.3	1787.84	149.866	1022.28	0	0	0	0	0	0	0	603	903	0
772	3	0	0	0	0	0	0	200	300	0	-16.3531	9.54651	-451.166	-54420.2	-22298.1	1467.41	150.577	1023.62	0	0	0	0	0	0	0	603	903	0
772	4	0	0	0	0	0	0	200	300	0	-16.3531	8.17322	-452.082	-53779.4	-22542.2	1604.74	150.137	1021.96	0	0	0	0	0	0	0	603	903	0
772	5	0	0	0	0	0	0	200	300	0	-14.6747	8.47839	-450.251	-53504.7	-22542.2	1513.18	149.934	1021.83	0	0	0	0	0	0	0	603	903	0
772	6	0	0	0	0	0	0	200	300	0	-14.8273	9.39392	-447.504	-54969.6	-22908.5	2016.72	148.808	1025.84	0	0	0	0	0	0	0	603	903	0
772	7	0	0	0	0	0	0	200	300	0	-15.7428	6.95251	-450.556	-55335.8	-22176	1650.51	150.781	1025.82	0	0	0	0	0	0	0	603	903	0
772	8	0	0	0	0	0	0	200	300	0	-13.3014	8.47839	-451.471	-55702	-22176	1833.62	150.881	1026.38	0	0	0	0	0	0	0	603	903	0
772	9	0	0	0	0	0	0	200	300	0	-14.2169	7.56287	-450.861	-55610.4	-22298.1	1833.62	150.543	1026.34	0	0	0	0	0	0	0	603	903	0
773	0	0	0	0	0	0	0	200	300	0	-14.0643	7.56287	-449.946	-55976.6	-22359.1	1467.41	150.307	1027.41	0	0	0	0	0	0	0	603	903	0
773	1	0	0	0	0	0	0	200	300	0	-14.0643	6.64734	-450.556	-56526	-22115	1696.29	150.916	1028.46	0	0	0	0	0	0	0	603	903	0
773	2	0	0	0	0	0	0	200	300	0	-15.285	7.41028	-449.335	-56983.7	-22237.1	1787.84	150.511	1029.82	0	0	0	0	0	0	0	603	903	0
773	3	0	0	0	0	0	0	200	300	0	-14.8273	7.25769	-449.946	-56434.4	-22420.2	1742.07	150.171	1028.42	0	0	0	0	0	0	0	603	903	0
773	4	0	0	0	0	0	0	200	300	0	-14.0643	6.49475	-445.673	-56800.6	-21931.9	1742.07	150.789	1030.45	0	0	0	0	0	0	0	603	903	0
773	5	0	0	0	0	0	0	200	300	0	-13.454	6.03699	-449.64	-57075.3	-21931.9	1696.29	151.223	1029.94	0	0	0	0	0	0	0	603	903	0
773	6	0	0	0	0	0	0	200	300	0	-14.8273	6.03699	-449.335	-57624.6	-22420.2	1650.51	150.104	1031.24	0	0	0	0	0	0	0	603	903	0
773	7	0	0	0	0	0	0	200	300	0	-14.6747	6.03699	-447.809	-57258.4	-22420.2	1696.29	149.934	1030.86	0	0	0	0	0	0	0	603	903	0
773	8	0	0	0	0	0	0	200	300	0	-12.9962	6.18958	-449.335	-57349.9	-21748.8	1833.62	151.598	1030.63	0	0	0	0	0	0	0	603	903	0
773	9	0	0	0	0	0	0	200	300	0	-12.9962	6.34216	-450.556	-58723.2	-22420.2	1833.62	150.239	1033.33	0	0	0	0	0	0	0	603	903	0
774	0	0	0	0	0	0	0	200	300	0	-14.5221	4.96887	-450.556	-58540.1	-22054	1650.51	151.052	1032.93	0	0	0	0	0	0	0	603	903	0
774	1	0	0	0	0	0	0	200	300	0	-13.7592	4.35852	-451.777	-59364.1	-22176	1970.95	150.914	1034.4	0	0	0	0	0	0	0	603	903	0
774	2	0	0	0	0	0	0	200	300	0	-14.2169	4.81628	-449.335	-59181	-21748.8	1925.17	151.598	1034.71	0	0	0	0	0	0	0	603	903	0
774	3	0	0	0	0	0	0	200	300	0	-12.0807	5.42664	-449.946	-59730.3	-21931.9	1925.17	151.257	1035.75	0	0	0	0	0	0	0	603	903	0
774	4	0	0	0	0	0	0	200	300	0	-12.8436	4.96887	-452.082	-60188.1	-22176	1925.17	150.947	1036.14	0	0	0	0	0	0	0	603	903	0
774	5	0	0	0	0	0	0	200	300	0	-13.454	4.81628	-451.471	-61012	-21992.9	1787.84	151.286	1038.14	0	0	0	0	0	0	0	603	903	0
774	6	0	0	0	0	0	0	200	300	0	-13.454	3.13782	-451.166	-60188.1	-21748.8	1604.74	151.794	1036.41	0	0	0	0	0	0	0	603	903	0
774	7	0	0	0	0	0	0	200	300	0	-12.8436	4.20593	-451.777	-60554.3	-22054	1833.62	151.184	1037.04	0	0	0	0	0	0	0	603	903	0
774	8	0	0	0	0	0	0	200	300	0	-12.5385	4.6637	-449.64	-60645.8	-22115	1879.39	150.816	1037.88	0	0	0	0	0	0	0	603	903	0
774	9	0	0	0	0	0	0	200	300	0	-13.454	4.35852	-452.692	-61652.9	-21687.7	1558.96	152.092	1039.19	0	0	0	0	0	0	0	603	903	0
775	0	0	0	0	0	0	0	200	300	0	-12.3859	3.74817	-453.913	-62019.1	-21809.8	1879.39	151.952	1039.63	0	0	0	0	0	0	0	603	903	0
775	1	0	0	0	0	0	0	200	300	0	-12.3859	3.13782	-452.997	-61836	-22237.1	1833.62	150.911	1039.5	0	0	0	0	0	0	0	603	903	0
775	2	0	0	0	0	0	0	200	300	0	-12.2333	3.74817	-453.303	-62202.2	-22359.1	1970.95	150.675	1040.22	0	0	0	0	0	0	0	603	903	0
775	3	0	0	0	0	0	0	200	300	0	-12.2333	3.44299	-453.913	-63300.9	-21992.9	2154.05	151.548	1042.46	0	0	0	0	0	0	0	603	903	0
775	4	0	0	0	0	0	0	200	300	0	-13.1488	4.05334	-454.523	-63484	-21931.9	2062.5	151.748	1042.67	0	0	0	0	0	0	0	603	903	0
775	5	0	0	0	0	0	0	200	300	0	-12.9962	3.29041	-455.439	-63392.4	-22420.2	1970.95	150.772	1042.19	0	0	0	0	0	0	0	603	903	0
775	6	0	0	0	0	0	0	200	300	0	-11.4703	3.13782	-456.965	-63026.2	-21992.9	1879.39	151.872	1040.92	0	0	0	0	0	0	0	603	903	0
775	7	0	0	0	0	0	0	200	300	0	-12.3859	2.83264	-455.134	-64216.4	-21443.6	1879.39	152.885	1044.09	0	0	0	0	0	0	0	603	903	0
775	8	0	0	0	0	0	0	200	300	0	-13.3014	2.83264	-456.354	-65223.4	-22237.1	1833.62	151.272	1045.92	0	0	0	0	0	0	0	603	903	0
775	9	0	0	0	0	0	0	200	300	0	-11.1652	3.13782	-453.913	-65131.9	-22298.1	1879.39	150.876	1046.49	0	0	0	0	0	0	0	603	903	0
776	0	0	0	0	0	0	0	200	300	0	-13.454	2.37488	-458.796	-65315	-21870.9	2108.28	152.33	1045.36	0	0	0	0	0	0	0	603	903	0
776	1	0	0	0	0	0	0	200	300	0	-12.0807	2.0697	-459.101	-65772.8	-21992.9	2016.72	152.096	1046.26	0	0	0	0	0	0	0	603	903	0
776	2	0	0	0	0	0	0	200	300	0	-12.5385	2.0697	-460.322	-66688.3	-22298.1	2062.5	151.56	1047.87	0	0	0	0	0	0	0	603	903	0
776	3	0	0	0	0	0	0	200	300	0	-14.2169	1.76453	-460.627	-66596.8	-22420.2	2062.5	151.327	1047.58	0	0	0	0	0	0	0	603	903	0
776	4	0	0	0	0	0	0	200	300	0	-13.7592	1.76453	-460.322	-66596.8	-22115	1970.95	151.958	1047.67	0	0	0	0	0	0	0	603	903	0
776	5	0	0	0	0	0	0	200	300	0	-11.9281	1.76453	-463.679	-67146.1	-22847.4	2016.72	150.726	1047.81	0	0	0	0	0	0	0	603	903	0
776	6	0	0	0	0	0	0	200	300	0	-12.3859	1.15418	-464.594	-68977.1	-22664.3	2062.5	151.217	1051.47	0	0	0	0	0	0	0	603	903	0
776	7	0	0	0	0	0	0	200	300	0	-13.454	0.543823	-465.204	-68519.4	-22359.1	2199.83	151.937	1050.29	0	0	0	0	0	0	0	603	903	0
776	8	0	0	0	0	0	0	200	300	0	-13.1488	0.391236	-463.068	-68610.9	-22054	2108.28	152.374	1051.17	0	0	0	0	0	0	0	603	903	0
776	9	0	0	0	0	0	0	200	300	0	-12.5385	-0.829468	-467.035	-68885.6	-22664.3	2108.28	151.472	1050.5	0	0	0	0	0	0	0	603	903	0
777	0	0	0	0	0	0	0	200	300	0	-11.3177	-0.219116	-469.782	-68794	-22542.2	2291.38	152.016	1049.44	0	0	0	0	0	0	0	603	903	0
777	1	0	0	0	0	0	0	200	300	0	-13.1488	-0.67688	-470.698	-70258.9	-22237.1	2337.16	152.757	1052.27	0	0	0	0	0	0	0	603	903	0
777	2	0	0	0	0	0	0	200	300	0	-13.7592	-1.43982	-469.477	-70350.4	-22542.2	2062.5	151.984	1052.85	0	0	0	0	0	0	0	603	903	0
777	3	0	0	0	0	0	0	200	300	0	-13.3014	-0.67688	-468.561	-70625.1	-22786.4	2199.83	151.369	1053.73	0	0	0	0	0	0	0	603	903	0
777	4	0	0	0	0	0	0	200	300	0	-12.8436	-2.81311	-472.834	-69709.5	-22481.2	2245.6	152.454	1050.43	0	0	0	0	0	0	0	603	903	0
777	5	0	0	0	0	0	0	200	300	0	-13.1488	-1.43982	-474.055	-71449.1	-22481.2	2337.16	152.577	1053.72	0	0	0	0	0	0	0	603	903	0
777	6	0	0	0	0	0	0	200	300	0	-14.0643	-1.89758	-476.801	-71265.9	-22908.5	2291.38	151.954	1052.47	0	0	0	0	0	0	0	603	903	0
777	7	0	0	0	0	0	0	200	300	0	-11.4703	-2.05017	-478.022	-72547.7	-23091.6	2428.71	151.694	1054.77	0	0	0	0	0	0	0	603	903	0
777	8	0	0	0	0	0	0	200	300	0	-13.6066	-2.35535	-478.632	-72089.9	-23091.6	2199.83	151.755	1053.62	0	0	0	0	0	0	0	603	903	0
777	9	0	0	0	0	0	0	200	300	0	-12.5385	-2.81311	-479.853	-73097	-22786.4	2474.49	152.514	1055.33	0	0	0	0	0	0	0	603	903	0
778	0	0	0	0	0	0	0	200	300	0	-12.691	-3.27087	-483.21	-73737.9	-23396.7	2199.83	151.581	1055.6	0	0	0	0	0	0	0	603	903	0
778	1	0	0	0	0	0	0	200	300	0	-12.9962	-3.88123	-482.905	-74470.3	-23335.7	2428.71	151.676	1057.21	0	0	0	0	0	0	0	603	903	0
778	2	0	0	0	0	0	0	200	300	0	-13.9117	-4.33899	-484.125	-73921	-23335.7	2245.6	151.798	1055.69	0	0	0	0	0	0	0	603	903	0
778	3	0	0	0	0	0	0	200	300	0	-12.2333	-4.49158	-485.956	-74287.2	-23335.7	2382.93	151.98	1055.87	0	0	0	0	0	0	0	603	903	0
778	4	0	0	0	0	0	0	200	300	0	-12.8436	-5.4071	-486.262	-74836.5	-23457.8	2337.16	151.759	1056.9	0	0	0	0	0	0	0	603	903	0
778	5	0	0	0	0	0	0	200	300	0	-13.6066	-5.25452	-487.787	-75568.9	-23213.6	2291.38	152.41	1057.92	0	0	0	0	0	0	0	603	903	0
778	6	0	0	0	0	0	0	200	300	0	-14.3695	-5.25452	-489.924	-76392.9	-23396.7	2428.71	152.244	1058.93	0	0	0	0	0	0	0	603	903	0
778	7	0	0	0	0	0	0	200	300	0	-14.0643	-5.4071	-489.008	-75935.1	-23701.9	2291.38	151.531	1058.28	0	0	0	0	0	0	0	603	903	0
778	8	0	0	0	0	0	0	200	300	0	-12.5385	-5.55969	-488.703	-76484.5	-23946	2291.38	151.001	1059.51	0	0	0	0	0	0	0	603	903	0
778	9	0	0	0	0	0	0	200	300	0	-12.8436	-7.08557	-493.281	-77033.8	-23579.8	2520.26	152.198	1059.17	0	0	0	0	0	0	0	603	903	0
779	0	0	0	0	0	0	0	200	300	0	-14.0643	-6.32263	-497.553	-77033.8	-23579.8	2520.26	152.608	1057.83	0	0	0	0	0	0	0	603	903	0
779	1	0	0	0	0	0	0	200	300	0	-14.2169	-6.93298	-496.638	-78498.6	-24251.2	2428.71	151.169	1061.06	0	0	0	0	0	0	0	603	903	0
779	2	0	0	0	0	0	0	200	300	0	-14.0643	-7.08557	-497.858	-78132.4	-24190.2	2749.15	151.411	1059.94	0	0	0	0	0	0	0	603	903	0
779	3	0	0	0	0	0	0	200	300	0	-13.6066	-7.39075	-496.638	-78681.7	-23457.8	2794.92	152.767	1061.43	0	0	0	0	0	0	0	603	903	0
779	4	0	0	0	0	0	0	200	300	0	-12.2333	-9.2218	-501.52	-79780.4	-24190.2	2794.92	151.766	1062.08	0	0	0	0	0	0	0	603	903	0
779	5	0	0	0	0	0	0	200	300	0	-13.7592	-8.91663	-503.351	-79963.4	-24190.2	2611.82	151.942	1061.86	0	0	0	0	0	0	0	603	903	0
779	6	0	0	0	0	0	0	200	300	0	-14.0643	-9.83215	-504.572	-79963.4	-23885	2932.25	152.663	1061.48	0	0	0	0	0	0	0	603	903	0
779	7	0	0	0	0	0	0	200	300	0	-12.9962	-9.83215	-505.793	-80604.3	-24007.1	2794.92	152.536	1062.36	0	0	0	0	0	0	0	603	903	0
779	8	0	0	0	0	0	0	200	300	0	-13.7592	-11.0529	-506.708	-80695.9	-24434.3	2840.7	151.778	1062.26	0	0	0	0	0	0	0	603	903	0
779	9	0	0	0	0	0	0	200	300	0	-14.5221	-10.4425	-509.15	-81428.3	-24617.4	2794.92	151.65	1062.93	0	0	0	0	0	0	0	603	903	0
780	0	0	0	0	0	0	0	200	300	0	-13.7592	-10.9003	-510.37	-82069.2	-24251.2	2749.15	152.483	1063.8	0	0	0	0	0	0	0	603	903	0
780	1	0	0	0	0	0	0	200	300	0	-13.7592	-11.358	-512.812	-81977.6	-24434.3	2978.03	152.352	1062.86	0	0	0	0	0	0	0	603	903	0
780	2	0	0	0	0	0	0	200	300	0	-13.6066	-13.1891	-515.558	-82069.2	-24739.5	2978.03	152.014	1062.19	0	0	0	0	0	0	0	603	903	0
780	3	0	0	0	0	0	0	200	300	0	-12.2333	-13.1891	-517.695	-83259.3	-24800.5	2978.03	152.094	1063.83	0	0	0	0	0	0	0	603	903	0
780	4	0	0	0	0	0	0	200	300	0	-13.454	-12.7313	-517.695	-83625.5	-24922.6	2840.7	151.858	1064.53	0	0	0	0	0	0	0	603	903	0
780	5	0	0	0	0	0	0	200	300	0	-13.7592	-14.2572	-521.967	-83534	-24556.4	3023.8	152.954	1063.04	0	0	0	0	0	0	0	603	903	0
780	6	0	0	0	0	0	0	200	300	0	-12.3859	-15.0201	-524.409	-83991.8	-24861.6	3206.91	152.591	1063.16	0	0	0	0	0	0	0	603	903	0
780	7	0	0	0	0	0	0	200	300	0	-11.4703	-16.3934	-526.85	-85548.2	-25838.1	3344.24	150.957	1065.38	0	0	0	0	0	0	0	603	903	0
780	8	0	0	0	0	0	0	200	300	0	-13.1488	-17.4615	-527.46	-85181.9	-24800.5	3481.57	152.981	1064.49	0	0	0	0	0	0	0	603	903	0
780	9	0	0	0	0	0	0	200	300	0	-12.691	-18.5297	-531.122	-85273.5	-25349.9	3573.12	152.271	1063.55	0	0	0	0	0	0	0	603	903	0
781	0	0	0	0	0	0	0	200	300	0	-11.6229	-20.0555	-532.038	-85181.9	-25594	3390.01	151.894	1063.1	0	0	0	0	0	0	0	603	903	0
781	1	0	0	0	0	0	0	200	300	0	-11.9281	-20.5133	-536.005	-85731.3	-25471.9	3435.79	152.478	1062.94	0	0	0	0	0	0	0	603	903	0
781	2	0	0	0	0	0	0	200	300	0	-13.9117	-20.9711	-537.226	-87287.7	-25410.9	3481.57	152.7	1065.48	0	0	0	0	0	0	0	603	903	0
781	3	0	0	0	0	0	0	200	300	0	-11.4703	-21.4288	-537.531	-87013	-26143.3	3573.12	151.364	1064.88	0	0	0	0	0	0	0	603	903	0
781	4	0	0	0	0	0	0	200	300	0	-12.0807	-23.1073	-540.888	-87196.1	-26143.3	3847.78	151.666	1064.21	0	0	0	0	0	0	0	603	903	0
781	5	0	0	0	0	0	0	200	300	0	-12.8436	-22.8021	-543.024	-87562.3	-25471.9	3664.67	153.092	1064.25	0	0	0	0	0	0	0	603	903	0
781	6	0	0	0	0	0	0	200	300	0	-12.0807	-24.1754	-546.992	-88661	-25716.1	3710.45	152.986	1065.09	0	0	0	0	0	0	0	603	903	0
781	7	0	0	0	0	0	0	200	300	0	-13.3014	-24.328	-548.823	-88935.6	-26204.3	3664.67	152.254	1065.05	0	0	0	0	0	0	0	603	903	0
781	8	0	0	0	0	0	0	200	300	0	-12.8436	-26.4642	-550.654	-88569.4	-26631.6	3847.78	151.636	1063.84	0	0	0	0	0	0	0	603	903	0
781	9	0	0	0	0	0	0	200	300	0	-11.6229	-26.6168	-551.264	-88569.4	-26143.3	3939.33	152.576	1063.67	0	0	0	0	0	0	0	603	903	0
782	0	0	0	0	0	0	0	200	300	0	-11.4703	-26.7694	-554.316	-90766.7	-26692.6	3618.9	151.846	1066.75	0	0	0	0	0	0	0	603	903	0
782	1	0	0	0	0	0	0	200	300	0	-12.5385	-27.9901	-556.147	-89484.9	-26448.5	3939.33	152.443	1063.9	0	0	0	0	0	0	0	603	903	0
782	2	0	0	0	0	0	0	200	300	0	-12.2333	-29.3634	-555.842	-90308.9	-26326.4	4213.99	152.637	1065.47	0	0	0	0	0	0	0	603	903	0
782	3	0	0	0	0	0	0	200	300	0	-11.3177	-31.6522	-561.335	-90034.3	-26692.6	3939.33	152.448	1063.39	0	0	0	0	0	0	0	603	903	0
782	4	0	0	0	0	0	0	200	300	0	-11.6229	-31.0419	-560.419	-91865.3	-26875.7	4351.32	152.044	1066.92	0	0	0	0	0	0	0	603	903	0
782	5	0	0	0	0	0	0	200	300	0	-12.8436	-31.8048	-563.471	-90675.1	-26875.7	4351.32	152.303	1063.92	0	0	0	0	0	0	0	603	903	0
782	6	0	0	0	0	0	0	200	300	0	-12.9962	-31.4996	-563.776	-92414.6	-26753.7	4259.77	152.546	1066.92	0	0	0	0	0	0	0	603	903	0
782	7	0	0	0	0	0	0	200	300	0	-11.9281	-32.2626	-567.438	-92323.1	-26753.7	4442.87	152.852	1065.7	0	0	0	0	0	0	0	603	903	0
782	8	0	0	0	0	0	0	200	300	0	-10.5548	-34.5514	-569.88	-92231.5	-27364	4488.65	151.983	1064.84	0	0	0	0	0	0	0	603	903	0
782	9	0	0	0	0	0	0	200	300	0	-13.1488	-35.3143	-570.49	-93604.8	-27364	4763.31	152.034	1067.08	0	0	0	0	0	0	0	603	903	0
783	0	0	0	0	0	0	0	200	300	0	-13.7592	-36.3824	-571.1	-93879.5	-27486.1	4625.98	151.872	1067.38	0	0	0	0	0	0	0	603	903	0
783	1	0	0	0	0	0	0	200	300	0	-13.3014	-36.9928	-574.152	-93513.2	-27425.1	4946.41	152.234	1065.87	0	0	0	0	0	0	0	603	903	0
783	2	0	0	0	0	0	0	200	300	0	-12.2333	-37.4506	-576.899	-94062.6	-27730.2	4809.08	151.932	1066.05	0	0	0	0	0	0	0	603	903	0
783	3	0	0	0	0	0	0	200	300	0	-10.86	-39.2816	-574.457	-95252.8	-27364	4946.41	152.365	1068.81	0	0	0	0	0	0	0	603	903	0
783	4	0	0	0	0	0	0	200	300	0	-13.3014	-39.2816	-579.951	-94154.1	-27425.1	4900.63	152.711	1065.35	0	0	0	0	0	0	0	603	903	0
783	5	0	0	0	0	0	0	200	300	0	-13.1488	-40.3497	-581.171	-94886.6	-27241.9	5129.52	153.126	1066.27	0	0	0	0	0	0	0	603	903	0
783	6	0	0	0	0	0	0	200	300	0	-12.2333	-41.1127	-582.087	-95161.2	-27852.3	5221.07	152.151	1066.48	0	0	0	0	0	0	0	603	903	0
783	7	0	0	0	0	0	0	200	300	0	-12.8436	-42.7911	-584.833	-95527.4	-27547.1	4992.19	152.897	1066.34	0	0	0	0	0	0	0	603	903	0
783	8	0	0	0	0	0	0	200	300	0	-14.3695	-42.9437	-586.664	-96351.4	-27791.3	5083.74	152.628	1067.24	0	0	0	0	0	0	0	603	903	0
783	9	0	0	0	0	0	0	200	300	0	-14.6747	-45.08	-585.444	-97175.4	-28218.5	5312.62	151.8	1068.99	0	0	0	0	0	0	0	603	903	0
784	0	0	0	0	0	0	0	200	300	0	-14.5221	-45.8429	-589.106	-96168.3	-28157.5	5358.4	152.203	1066.24	0	0	0	0	0	0	0	603	903	0
784	1	0	0	0	0	0	0	200	300	0	-12.8436	-45.8429	-590.326	-96717.6	-27791.3	5221.07	152.922	1066.84	0	0	0	0	0	0	0	603	903	0
784	2	0	0	0	0	0	0	200	300	0	-12.9962	-45.6903	-591.242	-97816.2	-28035.4	5495.73	152.582	1068.44	0	0	0	0	0	0	0	603	903	0
784	3	0	0	0	0	0	0	200	300	0	-14.8273	-46.6058	-593.989	-98182.5	-28279.5	5312.62	152.39	1068.29	0	0	0	0	0	0	0	603	903	0
784	4	0	0	0	0	0	0	200	300	0	-14.3695	-48.1317	-594.904	-98090.9	-28584.7	5770.39	151.951	1067.89	0	0	0	0	0	0	0	603	903	0
784	5	0	0	0	0	0	0	200	300	0	-13.7592	-49.0472	-596.125	-98090.9	-28096.4	5816.16	152.868	1067.55	0	0	0	0	0	0	0	603	903	0
784	6	0	0	0	0	0	0	200	300	0	-13.454	-49.8102	-596.125	-98823.3	-28523.7	5953.49	152.151	1068.78	0	0	0	0	0	0	0	603	903	0
784	7	0	0	0	0	0	0	200	300	0	-15.285	-51.0309	-597.346	-99006.4	-28706.8	5861.94	151.943	1068.74	0	0	0	0	0	0	0	603	903	0
784	8	0	0	0	0	0	0	200	300	0	-13.7592	-50.5731	-597.956	-99189.5	-28584.7	6228.15	152.196	1068.88	0	0	0	0	0	0	0	603	903	0
784	9	0	0	0	0	0	0	200	300	0	-12.5385	-52.099	-599.482	-99281.1	-28401.6	6182.37	152.623	1068.61	0	0	0	0	0	0	0	603	903	0
785	0	0	0	0	0	0	0	200	300	0	-12.5385	-54.9982	-601.618	-99830.4	-28157.5	6273.93	153.197	1068.94	0	0	0	0	0	0	0	603	903	0
785	1	0	0	0	0	0	0	200	300	0	-15.7428	-54.9982	-601.008	-100197	-28462.7	6090.82	152.642	1069.71	0	0	0	0	0	0	0	603	903	0
785	2	0	0	0	0	0	0	200	300	0	-15.7428	-54.9982	-602.228	-100837	-28157.5	6319.7	153.245	1070.44	0	0	0	0	0	0	0	603	903	0
785	3	0	0	0	0	0	0	200	300	0	-16.8109	-56.8292	-602.839	-100014	-28401.6	6411.26	152.887	1068.9	0	0	0	0	0	0	0	603	903	0
785	4	0	0	0	0	0	0	200	300	0	-15.285	-56.9818	-604.975	-100197	-28523.7	6273.93	152.851	1068.62	0	0	0	0	0	0	0	603	903	0
785	5	0	0	0	0	0	0	200	300	0	-15.285	-58.0499	-607.416	-100288	-29317.1	6548.58	151.735	1068.11	0	0	0	0	0	0	0	603	903	0
785	6	0	0	0	0	0	0	200	300	0	-16.6583	-58.5077	-605.28	-101112	-28584.7	6548.58	152.774	1070.05	0	0	0	0	0	0	0	603	903	0
785	7	0	0	0	0	0	0	200	300	0	-15.4376	-59.7284	-604.975	-101387	-28706.8	6457.03	152.549	1070.59	0	0	0	0	0	0	0	603	903	0
785	8	0	0	0	0	0	0	200	300	0	-16.5057	-60.6439	-606.501	-101021	-29012	6777.47	152.165	1069.56	0	0	0	0	0	0	0	603	903	0
785	9	0	0	0	0	0	0	200	300	0	-15.8954	-61.1017	-608.637	-101478	-29378.2	6823.24	151.731	1069.73	0	0	0	0	0	0	0	603	903	0
786	0	0	0	0	0	0	0	200	300	0	-16.3531	-62.9327	-609.553	-101936	-28767.8	7052.12	152.805	1070.23	0	0	0	0	0	0	0	603	903	0
786	1	0	0	0	0	0	0	200	300	0	-16.8109	-63.5431	-607.721	-101478	-28950.9	7372.56	152.362	1069.98	0	0	0	0	0	0	0	603	903	0
786	2	0	0	0	0	0	0	200	300	0	-17.4213	-64.306	-606.806	-102119	-29378.2	7097.9	151.586	1071.29	0	0	0	0	0	0	0	603	903	0
786	3	0	0	0	0	0	0	200	300	0	-16.5057	-65.2216	-611.078	-102119	-29256.1	7372.56	152.124	1070.11	0	0	0	0	0	0	0	603	903	0
786	4	0	0	0	0	0	0	200	300	0	-15.4376	-65.5267	-612.299	-102394	-28706.8	7235.23	153.116	1070.23	0	0	0	0	0	0	0	603	903	0
786	5	0	0	0	0	0	0	200	300	0	-17.1161	-66.9	-611.689	-103218	-29012	7097.9	152.571	1071.74	0	0	0	0	0	0	0	603	903	0
786	6	0	0	0	0	0	0	200	300	0	-18.3368	-67.8156	-609.858	-103035	-29378.2	7189.45	151.828	1071.95	0	0	0	0	0	0	0	603	903	0
786	7	0	0	0	0	0	0	200	300	0	-18.3368	-68.7311	-611.689	-102760	-29134	7281.01	152.371	1070.99	0	0	0	0	0	0	0	603	903	0
786	8	0	0	0	0	0	0	200	300	0	-17.1161	-69.494	-611.078	-102669	-28706.8	7418.34	153.023	1071.01	0	0	0	0	0	0	0	603	903	0
786	9	0	0	0	0	0	0	200	300	0	-17.7264	-70.7147	-612.909	-103126	-29256.1	7464.11	152.267	1071.26	0	0	0	0	0	0	0	603	903	0
787	0	0	0	0	0	0	0	200	300	0	-18.642	-71.9354	-611.689	-102577	-29073	7555.67	152.471	1070.69	0	0	0	0	0	0	0	603	903	0
787	1	0	0	0	0	0	0	200	300	0	-18.3368	-72.5458	-611.994	-103493	-28828.9	7555.67	152.894	1072.11	0	0	0	0	0	0	0	603	903	0
787	2	0	0	0	0	0	0	200	300	0	-17.4213	-73.6139	-611.689	-103309	-29073	7692.99	152.471	1071.89	0	0	0	0	0	0	0	603	903	0
787	3	0	0	0	0	0	0	200	300	0	-17.2687	-74.5294	-611.689	-103584	-29012	7921.88	152.571	1072.34	0	0	0	0	0	0	0	603	903	0
787	4	0	0	0	0	0	0	200	300	0	-16.8109	-73.7665	-612.299	-103859	-29256.1	8150.76	152.219	1072.62	0	0	0	0	0	0	0	603	903	0
787	5	0	0	0	0	0	0	200	300	0	-18.4894	-76.0553	-614.13	-104225	-28828.9	8059.2	153.057	1072.71	0	0	0	0	0	0	0	603	903	0
787	6	0	0	0	0	0	0	200	300	0	-18.4894	-76.2079	-614.13	-103584	-28828.9	8379.64	153.057	1071.67	0	0	0	0	0	0	0	603	903	0
787	7	0	0	0	0	0	0	200	300	0	-16.8109	-78.1915	-611.384	-103584	-29012	8059.2	152.547	1072.43	0	0	0	0	0	0	0	603	903	0
787	8	0	0	0	0	0	0	200	300	0	-17.4213	-78.0389	-610.468	-104500	-29134	8059.2	152.276	1074.18	0	0	0	0	0	0	0	603	903	0
787	9	0	0	0	0	0	0	200	300	0	-18.7946	-79.1071	-612.299	-103767	-28645.8	8059.2	153.216	1072.47	0	0	0	0	0	0	0	603	903	0
788	0	0	0	0	0	0	0	200	300	0	-18.3368	-79.87	-609.247	-103950	-28523.7	8242.31	153.182	1073.62	0	0	0	0	0	0	0	603	903	0
788	1	0	0	0	0	0	0	200	300	0	-16.9635	-79.87	-611.078	-103950	-28950.9	8333.86	152.623	1073.11	0	0	0	0	0	0	0	603	903	0
788	2	0	0	0	0	0	0	200	300	0	-17.879	-82.0062	-610.468	-104316	-29134	8196.53	152.276	1073.88	0	0	0	0	0	0	0	603	903	0
788	3	0	0	0	0	0	0	200	300	0	-18.0316	-81.701	-609.858	-103401	-28584.7	8288.09	153.129	1072.55	0	0	0	0	0	0	0	603	903	0
788	4	0	0	0	0	0	0	200	300	0	-17.2687	-82.3114	-610.468	-103676	-28523.7	8333.86	153.276	1072.83	0	0	0	0	0	0	0	603	903	0
788	5	0	0	0	0	0	0	200	300	0	-16.8109	-82.464	-606.806	-102394	-29073	8333.86	152.088	1071.74	0	0	0	0	0	0	0	603	903	0
788	6	0	0	0	0	0	0	200	300	0	-16.6583	-84.4476	-610.468	-103859	-28889.9	8654.3	152.676	1073.13	0	0	0	0	0	0	0	603	903	0
788	7	0	0	0	0	0	0	200	300	0	-17.2687	-85.058	-607.721	-103950	-28401.6	8608.52	153.265	1074.05	0	0	0	0	0	0	0	603	903	0
788	8	0	0	0	0	0	0	200	300	0	-17.4213	-85.8209	-607.416	-104591	-28828.9	8745.85	152.539	1075.19	0	0	0	0	0	0	0	603	903	0
788	9	0	0	0	0	0	0	200	300	0	-16.5057	-86.7365	-608.637	-104133	-28706.8	8928.96	152.834	1074.09	0	0	0	0	0	0	0	603	903	0
789	0	0	0	0	0	0	0	200	300	0	-14.2169	-87.4994	-605.585	-104133	-28035.4	8791.63	153.705	1074.95	0	0	0	0	0	0	0	603	903	0
789	1	0	0	0	0	0	0	200	300	0	-15.4376	-88.4149	-604.975	-104683	-28096.4	8608.52	153.558	1076.04	0	0	0	0	0	0	0	603	903	0
789	2	0	0	0	0	0	0	200	300	0	-15.285	-89.6356	-604.67	-104225	-28340.6	8562.74	153.13	1075.37	0	0	0	0	0	0	0	603	903	0
789	3	0	0	0	0	0	0	200	300	0	-15.5902	-88.8727	-604.059	-104042	-28096.4	8608.52	153.487	1075.24	0	0	0	0	0	0	0	603	903	0
789	4	0	0	0	0	0	0	200	300	0	-15.7428	-87.9572	-600.092	-103767	-28462.7	8471.19	152.57	1075.92	0	0	0	0	0	0	0	603	903	0
789	5	0	0	0	0	0	0	200	300	0	-15.4376	-89.6356	-603.144	-104225	-27852.3	8654.3	153.821	1075.8	0	0	0	0	0	0	0	603	903	0
789	6	0	0	0	0	0	0	200	300	0	-16.2006	-91.6193	-601.618	-103767	-28096.4	8745.85	153.299	1075.48	0	0	0	0	0	0	0	603	903	0
789	7	0	0	0	0	0	0	200	300	0	-16.048	-92.077	-600.702	-103493	-27303	8425.42	154.548	1075.29	0	0	0	0	0	0	0	603	903	0
789	8	0	0	0	0	0	0	200	300	0	-14.5221	-91.9244	-599.177	-103401	-27791.3	8608.52	153.618	1075.57	0	0	0	0	0	0	0	603	903	0
789	9	0	0	0	0	0	0	200	300	0	-14.2169	-92.2296	-600.092	-103767	-27913.3	8700.07	153.485	1075.92	0	0	0	0	0	0	0	603	903	0
790	0	0	0	0	0	0	0	200	300	0	-14.6747	-92.2296	-599.482	-103035	-28340.6	8471.19	152.725	1074.87	0	0	0	0	0	0	0	603	903	0
790	1	0	0	0	0	0	0	200	300	0	-15.285	-95.434	-597.956	-103859	-27425.1	8700.07	154.135	1076.69	0	0	0	0	0	0	0	603	903	0
790	2	0	0	0	0	0	0	200	300	0	-14.2169	-95.5865	-596.43	-103309	-27180.9	8883.18	154.427	1076.21	0	0	0	0	0	0	0	603	903	0
790	3	0	0	0	0	0	0	200	300	0	-13.6066	-95.5865	-593.378	-103309	-27669.2	8379.64	153.37	1077.1	0	0	0	0	0	0	0	603	903	0
790	4	0	0	0	0	0	0	200	300	0	-13.7592	-95.5865	-592.768	-103493	-27119.9	8608.52	154.249	1077.59	0	0	0	0	0	0	0	603	903	0
790	5	0	0	0	0	0	0	200	300	0	-14.2169	-96.5021	-593.073	-102943	-26692.6	8745.85	154.993	1076.58	0	0	0	0	0	0	0	603	903	0
790	6	0	0	0	0	0	0	200	300	0	-13.6066	-97.7228	-591.242	-103493	-27486.1	8837.4	153.511	1078.04	0	0	0	0	0	0	0	603	903	0
790	7	0	0	0	0	0	0	200	300	0	-12.8436	-98.3331	-588.19	-102485	-27180.9	8700.07	153.789	1077.24	0	0	0	0	0	0	0	603	903	0
790	8	0	0	0	0	0	0	200	300	0	-12.8436	-97.7228	-587.275	-102669	-26875.7	8837.4	154.237	1077.82	0	0	0	0	0	0	0	603	903	0
790	9	0	0	0	0	0	0	200	300	0	-13.6066	-97.5702	-583.307	-102211	-26692.6	8516.97	154.239	1078.23	0	0	0	0	0	0	0	603	903	0
791	0	0	0	0	0	0	0	200	300	0	-13.3014	-98.3331	-586.054	-102669	-26997.8	8608.52	153.933	1078.19	0	0	0	0	0	0	0	603	903	0
791	1	0	0	0	0	0	0	200	300	0	-12.691	-99.4012	-584.833	-101661	-26875.7	8471.19	154.045	1076.83	0	0	0	0	0	0	0	603	903	0
791	2	0	0	0	0	0	0	200	300	0	-11.6229	-100.317	-581.782	-101845	-26326.4	8562.74	154.749	1078.06	0	0	0	0	0	0	0	603	903	0
791	3	0	0	0	0	0	0	200	300	0	-11.3177	-100.622	-579.645	-102302	-26631.6	8425.42	154.055	1079.49	0	0	0	0	0	0	0	603	903	0
791	4	0	0	0	0	0	0	200	300	0	-12.9962	-100.775	-578.73	-102119	-26631.6	8608.52	153.983	1079.45	0	0	0	0	0	0	0	603	903	0
791	5	0	0	0	0	0	0	200	300	0	-12.8436	-101.385	-579.34	-101478	-26692.6	8242.31	153.926	1078.16	0	0	0	0	0	0	0	603	903	0
791	6	0	0	0	0	0	0	200	300	0	-11.1652	-101.08	-576.899	-101570	-25533	8425.42	155.741	1079.06	0	0	0	0	0	0	0	603	903	0
791	7	0	0	0	0	0	0	200	300	0	-11.1652	-103.216	-575.983	-101661	-26204.3	8425.42	154.505	1079.5	0	0	0	0	0	0	0	603	903	0
791	8	0	0	0	0	0	0	200	300	0	-12.2333	-103.674	-572.016	-100471	-25960.2	8608.52	154.616	1078.64	0	0	0	0	0	0	0	603	903	0
791	9	0	0	0	0	0	0	200	300	0	-11.9281	-103.369	-568.964	-101204	-25716.1	8425.42	154.802	1080.87	0	0	0	0	0	0	0	603	903	0
792	0	0	0	0	0	0	0	200	300	0	-11.0126	-103.674	-567.743	-100105	-25410.9	8288.09	155.242	1079.32	0	0	0	0	0	0	0	603	903	0
792	1	0	0	0	0	0	0	200	300	0	-10.5548	-103.979	-568.049	-100288	-25533	8516.97	155.051	1079.55	0	0	0	0	0	0	0	603	903	0
792	2	0	0	0	0	0	0	200	300	0	-12.2333	-105.047	-565.607	-100197	-25533	8379.64	154.857	1080.15	0	0	0	0	0	0	0	603	903	0
792	3	0	0	0	0	0	0	200	300	0	-9.63928	-105.505	-562.25	-100014	-25471.9	8150.76	154.696	1080.88	0	0	0	0	0	0	0	603	903	0
792	4	0	0	0	0	0	0	200	300	0	-11.7755	-105.963	-560.724	-99281.1	-25288.8	8288.09	154.9	1080.06	0	0	0	0	0	0	0	603	903	0
792	5	0	0	0	0	0	0	200	300	0	-10.2496	-105.505	-558.893	-98823.3	-25349.9	8471.19	154.643	1079.82	0	0	0	0	0	0	0	603	903	0
792	6	0	0	0	0	0	0	200	300	0	-10.4022	-104.894	-556.147	-99372.6	-25349.9	8242.31	154.419	1081.68	0	0	0	0	0	0	0	603	903	0
792	7	0	0	0	0	0	0	200	300	0	-11.4703	-107.336	-556.147	-98731.8	-25166.8	8288.09	154.748	1080.53	0	0	0	0	0	0	0	603	903	0
792	8	0	0	0	0	0	0	200	300	0	-10.7074	-108.251	-554.316	-98548.7	-25044.7	8288.09	154.819	1080.78	0	0	0	0	0	0	0	603	903	0
792	9	0	0	0	0	0	0	200	300	0	-9.48669	-108.251	-551.264	-97541.6	-24861.6	8196.53	154.901	1079.94	0	0	0	0	0	0	0	603	903	0
793	0	0	0	0	0	0	0	200	300	0	-9.33411	-108.404	-547.602	-97358.5	-24312.3	8013.43	155.602	1080.79	0	0	0	0	0	0	0	603	903	0
793	1	0	0	0	0	0	0	200	300	0	-9.48669	-110.235	-544.855	-97816.2	-24068.1	7967.65	155.827	1082.53	0	0	0	0	0	0	0	603	903	0
793	2	0	0	0	0	0	0	200	300	0	-10.2496	-109.777	-543.94	-97266.9	-24495.4	7921.88	154.967	1081.82	0	0	0	0	0	0	0	603	903	0
793	3	0	0	0	0	0	0	200	300	0	-10.5548	-111.151	-539.362	-96442.9	-24190.2	7921.88	155.15	1081.81	0	0	0	0	0	0	0	603	903	0
793	4	0	0	0	0	0	0	200	300	0	-9.02893	-111.456	-536.31	-95069.7	-23762.9	7967.65	155.692	1080.27	0	0	0	0	0	0	0	603	903	0
793	5	0	0	0	0	0	0	200	300	0	-8.57117	-111.913	-534.479	-95985.2	-23701.9	7967.65	155.654	1082.59	0	0	0	0	0	0	0	603	903	0
793	6	0	0	0	0	0	0	200	300	0	-8.1134	-111.303	-532.953	-95527.4	-23824	7876.1	155.298	1082.24	0	0	0	0	0	0	0	603	903	0
793	7	0	0	0	0	0	0	200	300	0	-10.5548	-112.219	-531.122	-94795	-23640.9	7876.1	155.489	1081.48	0	0	0	0	0	0	0	603	903	0
793	8	0	0	0	0	0	0	200	300	0	-8.72375	-112.829	-529.596	-94428.8	-23396.7	7967.65	155.822	1081.3	0	0	0	0	0	0	0	603	903	0
793	9	0	0	0	0	0	0	200	300	0	-8.1134	-112.219	-525.324	-94428.8	-23640.9	7784.55	154.998	1082.75	0	0	0	0	0	0	0	603	903	0
794	0	0	0	0	0	0	0	200	300	0	-8.57117	-113.745	-521.967	-93971	-23030.5	7692.99	155.877	1083.03	0	0	0	0	0	0	0	603	903	0
794	1	0	0	0	0	0	0	200	300	0	-8.72375	-113.287	-518.305	-93604.8	-22420.2	7464.11	156.743	1083.6	0	0	0	0	0	0	0	603	903	0
794	2	0	0	0	0	0	0	200	300	0	-8.41858	-113.592	-516.474	-92780.8	-22664.3	7692.99	156.117	1082.64	0	0	0	0	0	0	0	603	903	0
794	3	0	0	0	0	0	0	200	300	0	-7.35046	-114.965	-510.676	-91499.1	-22908.5	7647.22	155.141	1082.17	0	0	0	0	0	0	0	603	903	0
794	4	0	0	0	0	0	0	200	300	0	-7.35046	-116.186	-510.065	-91682.2	-22664.3	7692.99	155.566	1082.75	0	0	0	0	0	0	0	603	903	0
794	5	0	0	0	0	0	0	200	300	0	-7.96081	-115.423	-505.488	-91499.1	-22176	7509.89	156.129	1084.01	0	0	0	0	0	0	0	603	903	0
794	6	0	0	0	0	0	0	200	300	0	-6.8927	-115.423	-501.52	-91041.3	-22176	7281.01	155.782	1084.53	0	0	0	0	0	0	0	603	903	0
794	7	0	0	0	0	0	0	200	300	0	-6.8927	-115.576	-499.994	-90217.3	-22420.2	7418.34	155.159	1083.44	0	0	0	0	0	0	0	603	903	0
794	8	0	0	0	0	0	0	200	300	0	-6.8927	-116.644	-493.586	-89576.5	-22237.1	7326.78	154.948	1084.48	0	0	0	0	0	0	0	603	903	0
794	9	0	0	0	0	0	0	200	300	0	-6.8927	-116.796	-492.06	-89301.8	-21748.8	7326.78	155.801	1084.49	0	0	0	0	0	0	0	603	903	0
795	0	0	0	0	0	0	0	200	300	0	-8.26599	-117.101	-486.872	-88386.3	-21565.7	7143.68	155.706	1084.54	0	0	0	0	0	0	0	603	903	0
795	1	0	0	0	0	0	0	200	300	0	-7.35046	-116.339	-482.905	-87470.8	-21626.7	7097.9	155.215	1084.13	0	0	0	0	0	0	0	603	903	0
795	2	0	0	0	0	0	0	200	300	0	-6.58752	-116.339	-480.463	-86097.5	-21138.4	6960.57	156.004	1082.2	0	0	0	0	0	0	0	603	903	0
795	3	0	0	0	0	0	0	200	300	0	-6.12976	-115.576	-475.275	-86555.2	-21077.4	7097.9	155.652	1085.12	0	0	0	0	0	0	0	603	903	0
795	4	0	0	0	0	0	0	200	300	0	-6.8927	-117.254	-471.308	-86097.5	-21138.4	7052.12	155.149	1085.68	0	0	0	0	0	0	0	603	903	0
795	5	0	0	0	0	0	0	200	300	0	-4.75647	-116.949	-465.204	-85365.1	-20894.3	6960.57	155.086	1086.5	0	0	0	0	0	0	0	603	903	0
795	6	0	0	0	0	0	0	200	300	0	-7.19788	-116.644	-458.185	-83534	-20100.8	6960.57	156.13	1085.31	0	0	0	0	0	0	0	603	903	0
795	7	0	0	0	0	0	0	200	300	0	-5.36682	-116.644	-456.354	-82984.7	-20222.9	7143.68	155.686	1084.84	0	0	0	0	0	0	0	603	903	0
795	8	0	0	0	0	0	0	200	300	0	-5.82458	-116.033	-451.471	-81977.6	-20283.9	6685.91	155.072	1084.58	0	0	0	0	0	0	0	603	903	0
795	9	0	0	0	0	0	0	200	300	0	-5.97717	-117.254	-446.589	-81611.4	-20222.9	6594.36	154.717	1085.74	0	0	0	0	0	0	0	603	903	0
796	0	0	0	0	0	0	0	200	300	0	-5.82458	-115.881	-440.79	-80604.3	-19063.2	6594.36	156.752	1085.86	0	0	0	0	0	0	0	603	903	0
796	1	0	0	0	0	0	0	200	300	0	-6.12976	-115.27	-434.992	-79414.1	-19551.5	6365.48	155.053	1085.56	0	0	0	0	0	0	0	603	903	0
796	2	0	0	0	0	0	0	200	300	0	-4.75647	-114.05	-430.414	-78498.6	-19490.5	6136.6	154.717	1085.38	0	0	0	0	0	0	0	603	903	0
796	3	0	0	0	0	0	0	200	300	0	-5.21423	-114.202	-425.532	-77766.2	-18758.1	6136.6	155.919	1085.75	0	0	0	0	0	0	0	603	903	0
796	4	0	0	0	0	0	0	200	300	0	-5.672	-114.202	-420.038	-77125.3	-18636	6045.04	155.633	1086.61	0	0	0	0	0	0	0	603	903	0
796	5	0	0	0	0	0	0	200	300	0	-3.84094	-111.303	-413.63	-76209.8	-18758.1	5770.39	154.65	1087.25	0	0	0	0	0	0	0	603	903	0
796	6	0	0	0	0	0	0	200	300	0	-5.06165	-112.219	-407.526	-75019.6	-18513.9	6045.04	154.57	1087.09	0	0	0	0	0	0	0	603	903	0
796	7	0	0	0	0	0	0	200	300	0	-3.84094	-110.845	-401.423	-73829.4	-18025.6	5587.28	155.096	1086.92	0	0	0	0	0	0	0	603	903	0
796	8	0	0	0	0	0	0	200	300	0	-3.68835	-110.388	-395.93	-73371.6	-17842.5	5541.5	154.935	1088.32	0	0	0	0	0	0	0	603	903	0
796	9	0	0	0	0	0	0	200	300	0	-5.06165	-109.014	-390.131	-71723.7	-18086.7	5587.28	153.64	1086.85	0	0	0	0	0	0	0	603	903	0
797	0	0	0	0	0	0	0	200	300	0	-3.84094	-109.319	-383.417	-71174.4	-17720.5	5587.28	153.783	1088.63	0	0	0	0	0	0	0	603	903	0
797	1	0	0	0	0	0	0	200	300	0	-2.77283	-107.794	-375.788	-69984.2	-17049.1	5221.07	154.631	1089.23	0	0	0	0	0	0	0	603	903	0
797	2	0	0	0	0	0	0	200	300	0	-0.636596	-105.505	-367.243	-68794	-17110.1	5358.4	153.409	1090.33	0	0	0	0	0	0	0	603	903	0
797	3	0	0	0	0	0	0	200	300	0	-3.23059	-105.047	-362.665	-68153.2	-16743.9	5083.74	153.831	1090.92	0	0	0	0	0	0	0	603	903	0
797	4	0	0	0	0	0	0	200	300	0	-3.23059	-104.742	-357.477	-67237.6	-16255.6	4854.86	154.527	1091.09	0	0	0	0	0	0	0	603	903	0
797	5	0	0	0	0	0	0	200	300	0	-3.53577	-103.674	-350.763	-65498.1	-16072.5	4717.53	154.178	1089.73	0	0	0	0	0	0	0	603	903	0
797	6	0	0	0	0	0	0	200	300	0	-2.16248	-101.69	-342.829	-63575.5	-15950.4	4717.53	153.474	1088.44	0	0	0	0	0	0	0	603	903	0
797	7	0	0	0	0	0	0	200	300	0	-1.8573	-101.232	-336.725	-62843.1	-15828.4	4580.2	152.993	1089.63	0	0	0	0	0	0	0	603	903	0
797	8	0	0	0	0	0	0	200	300	0	-2.77283	-98.6383	-329.096	-62385.3	-15218	4351.32	153.758	1092.57	0	0	0	0	0	0	0	603	903	0
797	9	0	0	0	0	0	0	200	300	0	-1.24695	-96.6547	-323.603	-61012	-15279.1	4168.21	152.785	1091.54	0	0	0	0	0	0	0	603	903	0
798	0	0	0	0	0	0	0	200	300	0	-1.8573	-95.1288	-315.668	-59638.7	-15034.9	4030.88	152.371	1091.93	0	0	0	0	0	0	0	603	903	0
798	1	0	0	0	0	0	0	200	300	0	-0.178833	-92.6874	-307.123	-58173.9	-14607.7	3939.33	152.437	1092.42	0	0	0	0	0	0	0	603	903	0
798	2	0	0	0	0	0	0	200	300	0	0.278931	-93.1451	-302.241	-57533	-13997.3	3664.67	153.688	1093.36	0	0	0	0	0	0	0	603	903	0
798	3	0	0	0	0	0	0	200	300	0	0.126343	-89.6356	-294.611	-56434.4	-14180.4	3802	151.867	1094.56	0	0	0	0	0	0	0	603	903	0
798	4	0	0	0	0	0	0	200	300	0	-0.33142	-88.1097	-287.897	-55061.1	-13631.1	3390.01	152.653	1094.25	0	0	0	0	0	0	0	603	903	0
798	5	0	0	0	0	0	0	200	300	0	1.04187	-87.1942	-279.352	-52680.7	-13203.9	3298.46	152.734	1091.58	0	0	0	0	0	0	0	603	903	0
798	6	0	0	0	0	0	0	200	300	0	1.34705	-85.2106	-272.944	-52131.4	-12471.4	3161.13	154.308	1094	0	0	0	0	0	0	0	603	903	0
798	7	0	0	0	0	0	0	200	300	0	0.584107	-82.6166	-264.399	-51856.8	-12532.5	2886.47	152.6	1099.13	0	0	0	0	0	0	0	603	903	0
798	8	0	0	0	0	0	0	200	300	0	2.26257	-80.1752	-257.685	-50391.9	-11983.2	2703.37	153.497	1098.56	0	0	0	0	0	0	0	603	903	0
798	9	0	0	0	0	0	0	200	300	0	1.19446	-78.0389	-253.107	-48652.4	-11372.8	2657.59	155.067	1095.22	0	0	0	0	0	0	0	603	903	0
799	0	0	0	0	0	0	0	200	300	0	3.33069	-76.0553	-245.173	-47279.1	-11922.1	2474.49	151.373	1095.84	0	0	0	0	0	0	0	603	903	0
799	1	0	0	0	0	0	0	200	300	0	1.9574	-74.2242	-237.543	-46638.3	-11311.8	2245.6	152.38	1099.34	0	0	0	0	0	0	0	603	903	0
799	2	0	0	0	0	0	0	200	300	0	1.9574	-71.6302	-229.304	-45356.5	-10945.6	2154.05	152.266	1100.8	0	0	0	0	0	0	0	603	903	0
799	3	0	0	0	0	0	0	200	300	0	2.56775	-69.9518	-222.59	-43983.2	-10396.2	2108.28	153.294	1100.6	0	0	0	0	0	0	0	603	903	0
799	4	0	0	0	0	0	0	200	300	0	3.1781	-66.7474	-216.791	-42243.7	-10579.3	2062.5	151.2	1097.86	0	0	0	0	0	0	0	603	903	0
799	5	0	0	0	0	0	0	200	300	0	2.72034	-64.4586	-210.077	-41694.4	-9907.96	2016.72	152.837	1101.47	0	0	0	0	0	0	0	603	903	0
799	6	0	0	0	0	0	0	200	300	0	5.31433	-62.7802	-203.058	-40962	-9724.85	1925.17	152.108	1104.73	0	0	0	0	0	0	0	603	903	0
799	7	0	0	0	0	0	0	200	300	0	4.3988	-60.6439	-197.26	-39680.2	-9724.85	1742.07	150.7	1104.16	0	0	0	0	0	0	0	603	903	0
799	8	0	0	0	0	0	0	200	300	0	2.26257	-59.118	-191.157	-38306.9	-9358.64	1879.39	151.042	1103.4	0	0	0	0	0	0	0	603	903	0
799	9	0	0	0	0	0	0	200	300	0	3.78845	-55.6085	-183.832	-37116.8	-8321.04	1467.41	154.736	1104.91	0	0	0	0	0	0	0	603	903	0
800	0	0	0	0	0	0	0	200	300	0	4.55139	-51.7938	-178.034	-36567.5	-8443.11	918.091	152.576	1108.4	0	0	0	0	0	0	0	603	903	0
800	1	0	0	0	0	0	0	200	300	0	3.78845	-47.9791	-172.236	-35102.6	-8565.18	963.867	150.271	1106.81	0	0	0	0	0	0	0	603	903	0
800	2	0	0	0	0	0	0	200	300	0	3.63586	-45.6903	-164.606	-34461.7	-7466.55	780.761	154.64	1112.36	0	0	0	0	0	0	0	603	903	0
800	3	0	0	0	0	0	0	200	300	0	4.70398	-43.2489	-156.061	-32630.7	-7466.55	551.879	152.156	1112.09	0	0	0	0	0	0	0	603	903	0
800	4	0	0	0	0	0	0	200	300	0	5.7721	-40.9601	-153.315	-31715.2	-7405.52	506.103	151.697	1109.86	0	0	0	0	0	0	0	603	903	0
800	5	0	0	0	0	0	0	200	300	0	4.55139	-38.5187	-147.211	-30525	-7100.34	734.985	151.768	1110.35	0	0	0	0	0	0	0	603	903	0
800	6	0	0	0	0	0	0	200	300	0	3.48328	-38.0609	-142.023	-30158.8	-6612.06	460.327	153.444	1115.35	0	0	0	0	0	0	0	603	903	0
800	7	0	0	0	0	0	0	200	300	0	3.02551	-36.9928	-136.53	-28236.1	-6551.02	414.55	152.018	1109.81	0	0	0	0	0	0	0	603	903	0
800	8	0	0	0	0	0	0	200	300	0	3.94104	-33.7885	-128.596	-27503.7	-6489.99	277.221	149.532	1116.88	0	0	0	0	0	0	0	603	903	0
800	9	0	0	0	0	0	0	200	300	0	4.3988	-31.8048	-127.375	-27046	-6184.81	185.669	151.444	1115.33	0	0	0	0	0	0	0	603	903	0
801	0	0	0	0	0	0	0	200	300	0	3.78845	-30.1263	-122.797	-25672.7	-6062.74	94.1158	150.628	1112.07	0	0	0	0	0	0	0	603	903	0
801	1	0	0	0	0	0	0	200	300	0	3.1781	-27.3798	-120.661	-25489.6	-5452.39	-88.9897	154.812	1114.25	0	0	0	0	0	0	0	603	903	0
801	2	0	0	0	0	0	0	200	300	0	4.3988	-25.0909	-114.252	-24574	-5940.67	-88.9897	148.004	1118.09	0	0	0	0	0	0	0	603	903	0
801	3	0	0	0	0	0	0	200	300	0	5.46692	-23.7177	-109.064	-23841.6	-5330.32	-272.095	151.127	1121.6	0	0	0	0	0	0	0	603	903	0
801	4	0	0	0	0	0	0	200	300	0	3.94104	-20.6659	-106.318	-23292.3	-4781	-500.977	155.031	1122.08	0	0	0	0	0	0	0	603	903	0
801	5	0	0	0	0	0	0	200	300	0	4.55139	-17.1564	-103.266	-22743	-5147.21	-546.754	150.156	1123.24	0	0	0	0	0	0	0	603	903	0
801	6	0	0	0	0	0	0	200	300	0	4.55139	-17.309	-98.9935	-21278.1	-5025.14	-455.201	149.238	1117.94	0	0	0	0	0	0	0	603	903	0
801	7	0	0	0	0	0	0	200	300	0	5.31433	-17.6141	-94.1106	-20362.6	-4414.79	-317.872	153.089	1119.37	0	0	0	0	0	0	0	603	903	0
801	8	0	0	0	0	0	0	200	300	0	1.19446	-17.0038	-88.6175	-19904.8	-4170.65	-180.542	152.936	1127.62	0	0	0	0	0	0	0	603	903	0
801	9	0	0	0	0	0	0	200	300	0	2.41516	-17.6141	-84.345	-18623.1	-4353.76	-88.9897	148.382	1123.8	0	0	0	0	0	0	0	603	903	0
802	0	0	0	0	0	0	0	200	300	0	0.126343	-17.7667	-80.6829	-17158.3	-4109.62	2.56305	149.065	1115.66	0	0	0	0	0	0	0	603	903	0
802	1	0	0	0	0	0	0	200	300	0	1.34705	-16.3934	-75.8001	-17066.7	-3865.48	231.445	149.004	1128.15	0	0	0	0	0	0	0	603	903	0
802	2	0	0	0	0	0	0	200	300	0	1.19446	-15.1727	-74.2742	-16608.9	-3804.44	-317.872	148.778	1126.62	0	0	0	0	0	0	0	603	903	0
802	3	0	0	0	0	0	0	200	300	0	1.34705	-15.6305	-70.6121	-15235.7	-3621.34	-88.9897	148.715	1118.77	0	0	0	0	0	0	0	603	903	0
802	4	0	0	0	0	0	0	200	300	0	0.431519	-13.952	-66.0345	-14137	-3438.23	-226.319	147.933	1117.09	0	0	0	0	0	0	0	603	903	0
802	5	0	0	0	0	0	0	200	300	0	1.49963	-11.8158	-63.5931	-13862.4	-3072.02	-317.872	151.693	1120.99	0	0	0	0	0	0	0	603	903	0
802	6	0	0	0	0	0	0	200	300	0	1.80481	-9.83215	-61.762	-13496.2	-3010.98	-226.319	151.249	1121.52	0	0	0	0	0	0	0	603	903	0
802	7	0	0	0	0	0	0	200	300	0	2.26257	-10.4425	-59.931	-13038.4	-3010.98	-409.424	149.759	1120.56	0	0	0	0	0	0	0	603	903	0
802	8	0	0	0	0	0	0	200	300	0	0.431519	-7.23816	-54.743	-12946.8	-3010.98	-729.859	144.998	1139.5	0	0	0	0	0	0	0	603	903	0
802	9	0	0	0	0	0	0	200	300	0	0.278931	-6.17004	-51.386	-12306	-2461.67	-638.306	152.095	1142.48	0	0	0	0	0	0	0	603	903	0
803	0	0	0	0	0	0	0	200	300	0	1.04187	-6.47522	-51.386	-11573.5	-2217.53	-409.424	156.846	1128.23	0	0	0	0	0	0	0	603	903	0
803	1	0	0	0	0	0	0	200	300	0	1.80481	-5.25452	-49.8602	-11573.5	-2400.63	-638.306	151.853	1135.12	0	0	0	0	0	0	0	603	903	0
803	2	0	0	0	0	0	0	200	300	0	0.126343	-5.25452	-46.8084	-10841.1	-2339.6	-729.859	150.018	1134.61	0	0	0	0	0	0	0	603	903	0
803	3	0	0	0	0	0	0	200	300	0	-0.33142	-6.47522	-44.0618	-10383.4	-1973.39	-546.754	155.213	1138.65	0	0	0	0	0	0	0	603	903	0
803	4	0	0	0	0	0	0	200	300	0	2.10999	-6.01746	-40.0945	-9101.62	-1790.28	-592.53	155.349	1130	0	0	0	0	0	0	0	603	903	0
803	5	0	0	0	0	0	0	200	300	0	1.04187	-4.64417	-39.7894	-9193.18	-2278.56	-409.424	142.734	1134.05	0	0	0	0	0	0	0	603	903	0
803	6	0	0	0	0	0	0	200	300	0	-0.484008	-4.94934	-39.179	-9193.18	-1424.07	-546.754	163.652	1137.65	0	0	0	0	0	0	0	603	903	0
803	7	0	0	0	0	0	0	200	300	0	1.19446	-4.1864	-37.6531	-8826.97	-1424.07	-592.53	162.179	1137.43	0	0	0	0	0	0	0	603	903	0
803	8	0	0	0	0	0	0	200	300	0	0.126343	-3.57605	-36.1273	-8186.1	-1790.28	-317.872	150.445	1129.59	0	0	0	0	0	0	0	603	903	0
803	9	0	0	0	0	0	0	200	300	0	-0.484008	-2.81311	-33.991	-7636.78	-1729.25	-455.201	149.126	1127.67	0	0	0	0	0	0	0	603	903	0
804	0	0	0	0	0	0	0	200	300	0	0.278931	-4.33899	-33.0755	-7636.78	-1179.93	-43.2133	164.326	1133.89	0	0	0	0	0	0	0	603	903	0
804	1	0	0	0	0	0	0	200	300	0	-0.789184	-2.9657	-29.1082	-7453.68	-1302	-455.201	155.27	1159.07	0	0	0	0	0	0	0	603	903	0
804	2	0	0	0	0	0	0	200	300	0	-1.24695	-2.66052	-30.0237	-6812.81	-1546.14	-88.9897	148.503	1129.91	0	0	0	0	0	0	0	603	903	0
804	3	0	0	0	0	0	0	200	300	0	-0.178833	-2.20276	-25.7513	-5347.96	-1240.96	-43.2133	151.81	1110.68	0	0	0	0	0	0	0	603	903	0
804	4	0	0	0	0	0	0	200	300	0	-0.484008	-2.9657	-26.3616	-5714.17	-874.753	-546.754	166.817	1119.76	0	0	0	0	0	0	0	603	903	0
804	5	0	0	0	0	0	0	200	300	0	-2.16248	-2.20276	-23.3099	-6080.39	-874.753	-363.648	162.473	1163.85	0	0	0	0	0	0	0	603	903	0
804	6	0	0	0	0	0	0	200	300	0	-0.636596	-0.982055	-21.1736	-5439.52	-691.648	-363.648	167.334	1159.9	0	0	0	0	0	0	0	603	903	0
804	7	0	0	0	0	0	0	200	300	0	-1.39954	-2.05017	-21.1736	-4981.75	-935.789	-272.095	155.804	1138.28	0	0	0	0	0	0	0	603	903	0
804	8	0	0	0	0	0	0	200	300	0	-0.636596	-0.982055	-20.5633	-4615.54	-508.542	-272.095	175.269	1127.46	0	0	0	0	0	0	0	603	903	0
804	9	0	0	0	0	0	0	200	300	0	-0.484008	-0.67688	-19.9529	-3333.8	-569.578	-272.095	171.454	1070.08	0	0	0	0	0	0	0	603	903	0
805	0	0	0	0	0	0	0	200	300	0	-1.39954	-1.43982	-19.6478	-4340.88	-935.789	-272.095	152.372	1123.94	0	0	0	0	0	0	0	603	903	0
805	1	0	0	0	0	0	0	200	300	0	0	0	0	0	0	0	200	903	0	0	0	0	0	0	0	603	903	0
805	2	0	0	0	0	0	0	200	300	0	0	0	0	0	0	0	200	903	0	0	0	0	0	0	0	603	903	0
805	3	0	0	0	0	0	0	200	300	0	0	0	0	0	0	0	200	903	0	0	0	0	0	0	0	603	903	0
805	4	0	0	0	0	0	0	200	300	0	0	0	0	0	0	0	200	903	0	0	0	0	0	0	0	603	903	0
805	5	0	0	0	0	0	0	200	300	0	0	0	0	0	0	0	200	903	0	0	0	0	0	0	0	603	903	0
805	6	0	0	0	0	0	0	200	300	0	0	0	0	0	0	0	200	903	0	0	0	0	0	0	0	603	903	0
805	7	0	0	0	0	0	0	200	300	0	0	0	0	0	0	0	200	903	0	0	0	0	0	0	0	603	903	0
805	8	0	0	0	0	0	0	200	300	0	0	0	0	0	0	0	200	903	0	0	0	0	0	0	0	603	903	0
805	9	0	0	0	0	0	0	200	300	0	0	0	0	0	0	0	200	903	0	0	0	0	0	0	0	603	903	0
806	0	0	0	0	0	0	0	200	300	0	0	0	0	0	0	0	200	903	0	0	0	0	0	0	0	603	903	0
806	1	0	0	0	0	0	0	200	300	0	0	0	0	0	0	0	200	903	0	0	0	0	0	0	0	603	903	0
806	2	0	0	0	0	0	0	200	300	0	0	0	0	0	0	0	200	903	0	0	0	0	0	0	0	603	903	0
806	3	0	0	0	0	0	0	200	300	0	0	0	0	0	0	0	200	903	0	0	0	0	0	0	0	603	903	0
806	4	0	0	0	0	0	0	200	300	0	0	0	0	0	0	0	200	903	0	0	0	0	0	0	0	603	903	0
806	5	0	0	0	0	0	0	200	300	0	0	0	0	0	0	0	200	903	0	0	0	0	0	0	0	603	903	0
806	6	0	0	0	0	0	0	200	300	0	0	0	0	0	0	0	200	903	0	0	0	0	0	0	0	603	903	0
806	7	0	0	0	0	0	0	200	300	0	0	0	0	0	0	0	200	903	0	0	0	0	0	0	0	603	903	0
806	8	0	0	0	0	0	0	200	300	0	0	0	0	0	0	0	200	903	0	0	0	0	0	0	0	603	903	0
806	9	0	0	0	0	0	0	200	300	0	0	0	0	0	0	0	200	903	0	0	0	0	0	0	0	603	903	0
807	0	0	0	0	0	0	0	200	300	0	0	0	0	0	0	0	200	903	0	0	0	0	0	0	0	603	903	0
807	1	0	0	0	0	0	0	200	300	0	0	0	0	0	0	0	200	903	0	0	0	0	0	0	0	603	903	0
807	2	0	0	0	0	0	0	200	300	0	0	0	0	0	0	0	200	903	0	0	0	0	0	0	0	603	903	0
807	3	0	0	0	0	0	0	200	300	0	0	0	0	0	0	0	200	903	0	0	0	0	0	0	0	603	903	0
807	4	0	0	0	0	0	0	200	300	0	0	0	0	0	0	0	200	903	0	0	0	0	0	0	0	603	903	0
807	5	0	0	0	0	0	0	200	300	0	0	0	0	0	0	0	200	903	0	0	0	0	0	0	0	603	903	0
807	6	0	0	0	0	0	0	200	300	0	0	0	0	0	0	0	200	903	0	0	0	0	0	0	0	603	903	0
807	7	0	0	0	0	0	0	200	300	0	0	0	0	0	0	0	200	903	0	0	0	0	0	0	0	603	903	0
807	8	0	0	0	0	0	0	200	300	0	0	0	0	0	0	0	200	903	0	0	0	0	0	0	0	603	903	0
807	9	0	0	0	0	0	0	200	300	0	0	0	0	0	0	0	200	903	0	0	0	0	0	0	0	603	903	0
808	0	0	0	0	0	0	0	200	300	0	0	0	0	0	0	0	200	903	0	0	0	0	0	0	0	603	903	0
808	1	0	0	0	0	0	0	200	300	0	0	0	0	0	0	0	200	903	0	0	0	0	0	0	0	603	903	0
808	2	0	0	0	0	0	0	200	300	0	0	0	0	0	0	0	200	903	0	0	0	0	0	0	0	603	903	0
808	3	0	0	0	0	0	0	200	300	0	0	0	0	0	0	0	200	903	0	0	0	0	0	0	0	603	903	0
808	4	0	0	0	0	0	0	200	300	0	0	0	0	0	0	0	200	903	0	0	0	0	0	0	0	603	903	0
808	5	0	0	0	0	0	0	200	300	0	0	0	0	0	0	0	200	903	0	0	0	0	0	0	0	603	903	0
808	6	0	0	0	0	0	0	200	300	0	0	0	0	0	0	0	200	903	0	0	0	0	0	0	0	603	903	0
808	7	0	0	0	0	0	0	200	300	0	0	0	0	0	0	0	200	903	0	0	0	0	0	0	0	603	903	0
808	8	0	0	0	0	0	0	200	300	0	0	0	0	0	0	0	200	903	0	0	0	0	0	0	0	603	903	0
808	9	0	0	0	0	0	0	200	300	0	0	0	0	0	0	0	200	903	0	0	0	0	0	0	0	603	903	0
809	0	0	0	0	0	0	0	200	300	0	0	0	0	0	0	0	200	903	0	0	0	0	0	0	0	603	903	0
809	1	0	0	0	0	0	0	200	300	0	0	0	0	0	0	0	200	903	0	0	0	0	0	0	0	603	903	0
809	2	0	0	0	0	0	0	200	300	0	0	0	0	0	0	0	200	903	0	0	0	0	0	0	0	603	903	0
809	3	0	0	0	0	0	0	200	300	0	0	0	0	0	0	0	200	903	0	0	0	0	0	0	0	603	903	0
809	4	0	0	0	0	0	0	200	300	0	0	0	0	0	0	0	200	903	0	0	0	0	0	0	0	603	903	0
809	5	0	0	0	0	0	0	200	300	0	0	0	0	0	0	0	200	903	0	0	0	0	0	0	0	603	903	0
809	6	0	0	0	0	0	0	200	300	0	0	0	0	0	0	0	200	903	0	0	0	0	0	0	0	603	903	0
809	7	0	0	0	0	0	0	200	300	0	0	0	0	0	0	0	200	903	0	0	0	0	0	0	0	603	903	0
809	8	0	0	0	0	0	0	200	300	0	0	0	0	0	0	0	200	903	0	0	0	0	0	0	0	603	903	0
809	9	0	0	0	0	0	0	200	300	0	0	0	0	0	0	0	200	903	0	0	0	0	0	0	0	603	903	0
810	0	0	0	0	0	0	0	200	300	0	0	0	0	0	0	0	200	903	0	0	0	0	0	0	0	603	903	0
810	1	0	0	0	0	0	0	200	300	0	0	0	0	0	0	0	200	903	0	0	0	0	0	0	0	603	903	0
810	2	0	0	0	0	0	0	200	300	0	0	0	0	0	0	0	200	903	0	0	0	0	0	0	0	603	903	0
810	3	0	0	0	0	0	0	200	300	0	0	0	0	0	0	0	200	903	0	0	0	0	0	0	0	603	903	0
810	4	0	0	0	0	0	0	200	300	0	0	0	0	0	0	0	200	903	0	0	0	0	0	0	0	603	903	0
810	5	0	0	0	0	0	0	200	300	0	0	0	0	0	0	0	200	903	0	0	0	0	0	0	0	603	903	0
810	6	0	0	0	0	0	0	200	300	0	0	0	0	0	0	0	200	903	0	0	0	0	0	0	0	603	903	0
810	7	0	0	0	0	0	0	200	300	0	0	0	0	0	0	0	200	903	0	0	0	0	0	0	0	603	903	0
810	8	0	0	0	0	0	0	200	300	0	0	0	0	0	0	0	200	903	0	0	0	0	0	0	0	603	903	0
810	9	0	0	0	0	0	0	200	300	0	0	0	0	0	0	0	200	903	0	0	0	0	0	0	0	603	903	0
811	0	0	0	0	0	0	0	200	300	0	0	0	0	0	0	0	200	903	0	0	0	0	0	0	0	603	903	0
811	1	0	0	0	0	0	0	200	300	0	0	0	0	0	0	0	200	903	0	0	0	0	0	0	0	603	903	0
811	2	0	0	0	0	0	0	200	300	0	0	0	0	0	0	0	200	903	0	0	0	0	0	0	0	603	903	0
811	3	0	0	0	0	0	0	200	300	0	0	0	0	0	0	0	200	903	0	0	0	0	0	0	0	603	903	0
811	4	0	0	0	0	0	0	200	300	0	0	0	0	0	0	0	200	903	0	0	0	0	0	0	0	603	903	0
811	5	0	0	0	0	0	0	200	300	0	0	0	0	0	0	0	200	903	0	0	0	0	0	0	0	603	903	0
811	6	0	0	0	0	0	0	200	300	0	0	0	0	0	0	0	200	903	0	0	0	0	0	0	0	603	903	0
811	7	0	0	0	0	0	0	200	300	0	0	0	0	0	0	0	200	903	0	0	0	0	0	0	0	603	903	0
811	8	0	0	0	0	0	0	200	300	0	0	0	0	0	0	0	200	903	0	0	0	0	0	0	0	603	903	0
811	9	0	0	0	0	0	0	200	300	0	0	0	0	0	0	0	200	903	0	0	0	0	0	0	0	603	903	0
812	0	0	0	0	0	0	0	200	300	0	0	0	0	0	0	0	200	903	0	0	0	0	0	0	0	603	903	0
812	1	0	0	0	0	0	0	200	300	0	0	0	0	0	0	0	200	903	0	0	0	0	0	0	0	603	903	0
812	2	0	0	0	0	0	0	200	300	0	0	0	0	0	0	0	200	903	0	0	0	0	0	0	0	603	903	0
812	3	0	0	0	0	0	0	200	300	0	0	0	0	0	0	0	200	903	0	0	0	0	0	0	0	603	903	0
812	4	0	0	0	0	0	0	200	300	0	0	0	0	0	0	0	200	903	0	0	0	0	0	0	0	603	903	0
812	5	0	0	0	0	0	0	200	300	0	0	0	0	0	0	0	200	903	0	0	0	0	0	0	0	603	903	0
[truncated: 1,384 more rows]
