# Supplementary material for: The Effects of an Extemporaneous Speech Dual-task on Older Adult Gait Control
Source: Research Square preprint supplement (doi:10.21203/rs.3.rs-7674245/v1), 2025-11-18
Supplement: Supplementary file 179 [file Over7ground07.xlsx]

## Sheet: Sheet1
Trajectories
		07:LFHD			07:RFHD			07:LBHD			07:RBHD			07:C7			07:T10			07:CLAV			07:STRN			07:RBAK			07:LSHO			07:LUPA			07:LELB			07:LFRM			07:LWRA			07:LWRB			07:LFIN
Frame	Sub Frame	X	Y	Z	X	Y	Z	X	Y	Z	X	Y	Z	X	Y	Z	X	Y	Z	X	Y	Z	X	Y	Z	X	Y	Z	X	Y	Z	X	Y	Z	X	Y	Z	X	Y	Z	X	Y	Z	X	Y	Z	X	Y	Z
		mm	mm	mm	mm	mm	mm	mm	mm	mm	mm	mm	mm	mm	mm	mm	mm	mm	mm	mm	mm	mm	mm	mm	mm	mm	mm	mm	mm	mm	mm	mm	mm	mm	mm	mm	mm	mm	mm	mm	mm	mm	mm	mm	mm	mm	mm	mm	mm
418	0	284.265	2462.7	1607.94	184.606	2457.58	1610.71	300.475	2616.26	1624.54	170.794	2627.58	1622.95	215.343	2676.61	1497.91	211.801	2758.1	1247.92	223.35	2565.32	1404.57	217.356	2507.39	1250.37	126.689	2759.85	1310.81	389.611	2669.93	1440.29	434.384	2707.41	1257.69	439.862	2753.42	1114.95	489.866	2711.29	950.843	473.242	2686.39	869.611	495.388	2748.6	875.924	513.64	2707.67	793.623
419	0	283.276	2447.34	1609.25	183.857	2442.79	1612.22	299.792	2601.13	1626.52	170.046	2612.53	1624.63	215.009	2661.91	1499.66	212.135	2743.74	1249.8	222.226	2550.58	1406.49	216.698	2492.73	1252.41	126.998	2745.78	1312.56	389.221	2654.71	1442.56	435.849	2689.83	1259.92	442.666	2733.73	1116.22	493.685	2686.28	953.68	477.71	2659.08	873.453	500.877	2721.81	877.925	519.444	2677.44	797.503
420	0	282.518	2432.17	1610.44	183.656	2428.27	1612.97	299.24	2586.1	1628.16	169.306	2597.57	1626.43	214.342	2647.08	1501.17	212.363	2729.13	1251.45	222.377	2536.32	1408.01	216.103	2478.29	1254.48	127.348	2731.37	1314.18	388.613	2639.38	1444.88	436.939	2672.27	1262.17	445.124	2713.92	1117.64	497.348	2661.12	956.878	481.375	2631.81	877.04	505.575	2694.29	880.142	525.199	2646.85	801.839
421	0	281.688	2417.32	1611.44	182.845	2413.31	1613.47	298.526	2571.15	1629.67	168.853	2582.62	1627.98	214.186	2632.45	1502.86	212.651	2714.76	1253.07	221.863	2521.56	1409.52	215.716	2463.74	1255.94	127.591	2717.25	1315.68	388.173	2624.03	1446.99	438.166	2654.77	1264.21	448.21	2694.71	1118.9	500.819	2635.99	960.138	485.619	2604.52	880.955	510.188	2666.75	882.577	530.865	2616.26	806.631
422	0	280.719	2402.36	1612.33	182.203	2398.49	1614.73	297.854	2556.05	1630.95	168.145	2567.82	1629.01	213.855	2617.65	1504.04	212.815	2700.22	1254.51	221.243	2506.83	1410.88	215.463	2449.38	1257.14	127.961	2702.82	1317.05	388.033	2608.71	1448.87	439.262	2637.38	1266.28	450.529	2674.55	1120.25	504.434	2611.04	963.576	489.459	2577.09	885.401	514.715	2639.03	885.325	536.276	2585.62	811.867
423	0	280.15	2387.27	1613.25	181.44	2383.61	1615.23	297.112	2540.78	1631.87	167.351	2552.8	1629.49	213.533	2602.84	1505.01	213.084	2685.62	1255.65	221.008	2492.32	1411.71	215.457	2435.01	1258.09	127.958	2688.52	1317.81	387.816	2593.41	1450.55	440.493	2620.1	1268.03	453.232	2655.35	1121.38	507.853	2586.1	967.059	493.31	2549.81	889.972	519.171	2611.34	888.066	541.886	2555.07	817.621
424	0	279.205	2372.28	1613.62	180.51	2368.68	1615.53	296.585	2525.89	1632.4	166.848	2537.96	1629.74	213.301	2588.01	1505.62	213.236	2671.13	1256.64	220.402	2477.36	1412.4	215.307	2420.54	1258.42	128.37	2674.14	1318.51	387.53	2577.9	1451.82	441.733	2602.92	1269.46	455.937	2636.28	1122.31	511.184	2561.29	970.631	497.633	2522.25	895.135	523.425	2583.73	890.916	546.829	2524.51	823.331
425	0	278.515	2357.26	1614.05	179.482	2353.81	1615.61	295.355	2510.44	1632.7	166.27	2523.23	1629.74	213.055	2573.11	1505.86	213.589	2656.62	1257.27	220.084	2462.59	1412.61	215.372	2405.87	1258.7	128.528	2659.79	1318.81	387.457	2562.35	1452.74	442.998	2585.78	1270.54	458.838	2617.55	1122.97	514.484	2536.67	974.211	501.031	2495.29	899.966	527.765	2556.34	893.848	551.683	2494.13	829.189
426	0	277.76	2342.38	1614.12	178.601	2338.51	1615.74	295.26	2495.93	1632.58	165.892	2508.43	1629.28	212.928	2558.26	1505.7	213.723	2642.08	1257.46	220.105	2447.99	1412.31	215.223	2391.18	1258.74	128.855	2645.23	1318.75	387.306	2546.85	1453.25	444.286	2568.81	1271.35	461.601	2598.87	1123.27	517.703	2512.36	977.649	504.616	2468.21	904.895	531.716	2528.92	896.811	556.1	2463.8	835.196
427	0	277.282	2327.78	1613.65	178.081	2323.75	1615.36	294.797	2481.1	1632.09	165.125	2493.5	1628.39	212.736	2543.36	1505.47	213.807	2627.68	1257.43	219.553	2432.73	1412.29	215.061	2376.29	1258.5	129.055	2630.85	1318.45	387.084	2531.33	1453.63	445.437	2551.69	1271.9	464.312	2580.27	1123.48	520.818	2487.98	981.083	507.836	2441.32	910.111	535.488	2501.66	899.779	560.283	2433.76	841.511
428	0	276.332	2312.32	1613.47	177.322	2308.81	1614.73	294.285	2466.04	1631.5	164.81	2478.67	1627.55	212.266	2528.34	1504.69	213.842	2613.01	1257.19	219.122	2417.72	1411.62	215.16	2361.24	1257.72	129.13	2616.15	1317.88	386.891	2515.77	1453.77	446.683	2534.72	1272.3	467.059	2561.59	1123.47	523.628	2463.78	984.452	511.044	2414.58	915.382	538.974	2474.36	902.798	564.147	2404.06	847.992
429	0	276.055	2297.28	1612.83	177.257	2294.13	1613.64	293.875	2450.8	1630.59	164.35	2463.59	1626.44	212.415	2513.32	1504.17	213.994	2598.32	1256.61	219.17	2402.7	1410.68	215.113	2346.5	1256.28	129.444	2601.46	1317.12	386.88	2500.31	1453.47	448.096	2517.79	1272.43	469.893	2543.01	1123.19	526.59	2439.95	987.822	513.857	2388.25	920.609	542.363	2447.31	905.987	567.752	2374.76	854.461
430	0	275.315	2282.04	1611.87	176.651	2279.09	1612.56	293.518	2435.52	1629.47	164.103	2448.69	1625.45	212.233	2498.16	1503.17	214.206	2583.65	1255.81	219.112	2387.86	1409.07	215.125	2331.66	1254.86	129.686	2586.77	1316.16	386.778	2484.76	1452.71	449.347	2500.91	1272.2	472.869	2524.44	1122.76	529.443	2416.36	991.214	517.051	2362.47	925.393	545.635	2420.7	909.041	571.226	2345.85	860.956
431	0	274.91	2266.74	1610.62	175.912	2263.84	1611.23	293.148	2420.39	1627.87	163.697	2433.58	1623.6	211.935	2482.92	1501.89	214.235	2568.8	1254.74	219.02	2372.62	1407.64	214.752	2316.78	1253.55	129.667	2571.83	1314.69	386.401	2469.09	1451.74	450.465	2484	1271.59	475.721	2505.93	1121.91	531.898	2392.97	994.078	519.41	2336.67	930.307	548.57	2394.32	911.968	574.226	2317.31	867.456
432	0	274.491	2251.35	1609.14	175.853	2248.76	1609.74	292.842	2405.24	1626.09	163.353	2418.49	1621.75	211.794	2467.81	1500.19	214.106	2553.75	1253.46	218.68	2357.17	1406.18	214.448	2302.01	1251.6	129.87	2556.92	1313.23	386.293	2453.76	1450.5	451.589	2467.33	1270.66	478.299	2487.26	1120.91	534.263	2369.84	996.69	521.69	2311.39	935.282	551.171	2368.13	914.732	576.767	2289.38	873.664
433	0	274.089	2236.06	1607.52	175.365	2233.49	1608.03	292.48	2389.84	1624.26	163.034	2403.19	1619.84	211.434	2452.37	1498.35	214.034	2538.92	1252.03	218.483	2341.82	1404.31	214.307	2287.34	1249.62	129.843	2541.83	1311.45	386.138	2438.35	1449	452.514	2450.55	1269.67	480.895	2468.85	1119.67	536.179	2346.82	999.425	523.822	2286.38	940.239	553.553	2342.41	917.506	579.221	2262.14	880.196
434	0	273.624	2221.1	1605.47	174.992	2218.1	1606.35	292.162	2374.55	1622	162.642	2388.04	1617.62	210.969	2437.08	1496.66	213.928	2523.62	1250.03	218.118	2326.28	1402.14	214.112	2272.42	1247.27	129.66	2526.61	1309.32	385.972	2422.85	1447.25	453.582	2434.09	1268.1	483.372	2450.41	1118.11	538.305	2324.52	1001.72	525.821	2261.96	944.833	555.67	2317.21	920.041	581.399	2235.36	886.064
435	0	273.631	2205.83	1603.34	174.515	2202.69	1604.45	291.988	2359.24	1619.71	162.453	2372.55	1615.36	210.801	2421.58	1494.5	213.796	2508.5	1247.89	218.044	2310.77	1400.02	213.985	2257.57	1244.94	129.579	2511.29	1307.22	385.84	2407.32	1445.18	454.444	2417.46	1266.58	485.664	2431.96	1116.53	540.094	2302.2	1004.07	527.623	2238.17	949.053	557.654	2292.26	922.474	583.356	2209.34	891.929
436	0	273.119	2190.27	1601.47	173.873	2186.78	1602.56	291.502	2343.6	1617.75	162.099	2357.01	1613.34	210.673	2406.05	1492.43	213.616	2493.28	1245.92	217.663	2295.05	1398.07	212.699	2241.46	1243.11	129.302	2495.72	1305.2	385.588	2391.68	1443.53	455.093	2400.75	1265.16	487.715	2413.47	1115.11	541.543	2280.31	1006.29	528.809	2214.64	953.356	559.337	2267.88	925.295	584.745	2183.71	897.793
437	0	272.822	2174.48	1599.5	173.699	2171.35	1600.51	291.164	2328.02	1615.72	161.868	2341.34	1611.04	210.295	2390.36	1490.38	213.241	2477.83	1244.07	217.066	2279.18	1396.14	212.739	2226.1	1241.08	129.057	2480.01	1303.2	385.72	2376.25	1441.84	455.734	2384.15	1263.78	489.48	2394.97	1113.74	542.71	2258.7	1008.5	529.882	2191.53	957.8	560.652	2243.84	928.004	586.116	2158.7	903.319
438	0	272.403	2158.86	1597.36	173.405	2155.99	1598.6	290.979	2312.49	1613.5	161.363	2325.82	1608.91	210.059	2374.69	1488.3	212.65	2462.32	1242.06	217.075	2263.44	1393.91	212.442	2210.15	1239.11	128.83	2464.24	1301.14	385.133	2360.25	1439.8	456.148	2367.26	1262.2	491.192	2376.81	1112.15	543.946	2237.44	1010.62	530.704	2169.13	961.492	561.975	2220.49	930.476	586.871	2134.53	908.497
439	0	271.995	2143.26	1595.37	172.621	2139.8	1596.37	290.547	2296.82	1611.35	160.902	2310.16	1607.09	209.568	2358.93	1486.24	212.086	2446.68	1240.12	216.629	2247.35	1391.87	212.224	2194.06	1237.1	128.243	2448.2	1299.05	384.686	2344.23	1438.17	456.453	2350.43	1260.63	492.475	2358.68	1110.74	544.607	2216.62	1012.63	531.655	2147.28	965.158	562.832	2197.53	932.966	587.542	2110.99	913.361
440	0	271.522	2127.35	1593.51	172.619	2124.3	1594.28	289.996	2280.91	1609.39	160.437	2294.2	1604.87	209.066	2343.08	1484.29	211.498	2430.84	1238.23	216.667	2231.41	1389.79	212.649	2177.9	1235.36	127.526	2432.12	1297.11	384.591	2328.48	1436.35	456.658	2333.48	1259.21	493.48	2340.57	1109.38	545.178	2196.26	1014.33	531.694	2125.72	968.385	563.593	2175.14	935.384	587.903	2088	918.002
441	0	271.075	2111.46	1591.73	172.104	2108.43	1592.43	289.568	2265.05	1607.56	159.801	2278.25	1602.86	208.582	2327.19	1482.8	210.777	2414.78	1236.27	215.977	2215.23	1387.89	213.3	2161.96	1232.76	126.634	2415.88	1295.09	384.083	2312.51	1434.61	456.667	2316.44	1257.86	494.217	2322.69	1108.12	545.492	2176.1	1016.11	531.713	2104.85	971.77	563.913	2153.42	937.728	587.945	2065.77	922.322
442	0	270.703	2095.55	1590.05	171.854	2092.43	1590.78	289.066	2249.25	1605.75	159.501	2262.35	1601.5	207.891	2311.26	1480.67	209.974	2398.16	1234.22	215.398	2198.9	1386.43	213.05	2145.21	1231.41	125.817	2399.63	1293.24	383.49	2296.36	1433.18	456.513	2299.51	1256.4	494.69	2305.1	1106.79	545.578	2156.68	1017.68	531.648	2084.64	974.188	563.484	2131.48	939.497	587.65	2044.23	925.931
443	0	270.168	2079.59	1588.2	171.353	2076.34	1588.97	288.361	2233.29	1604.01	158.9	2246.34	1599.51	207.278	2295.48	1478.86	209.103	2381.34	1232.15	215.06	2182.62	1384.87	213.15	2128.28	1230.47	124.723	2383.08	1291.18	382.709	2280.33	1431.46	456.125	2282.47	1254.88	494.874	2287.77	1105.33	545.111	2137.51	1018.27	531.262	2064.76	976.798	563.258	2111.07	940.86	587.288	2023.5	929.191
444	0	269.742	2063.82	1586.36	170.932	2060.25	1587.52	287.741	2217.54	1602.16	158.221	2230.27	1597.75	206.211	2279.3	1476.96	208.207	2364.43	1230.15	214.69	2166.32	1383.33	212.247	2111.71	1228.69	123.56	2366.51	1289.18	381.997	2264.65	1429.53	455.582	2265.71	1253.45	494.733	2270.66	1103.91	544.71	2119.03	1019.34	530.763	2045.74	978.777	562.711	2091.3	942.108	586.326	2003.24	931.837
445	0	269.417	2048.03	1584.81	170.601	2044.32	1586.06	286.987	2201.67	1600.58	157.458	2214.13	1596.19	205.324	2263.53	1475.44	207.044	2347.53	1228.25	213.635	2149.75	1382.3	211.574	2095.07	1227.9	122.32	2349.76	1287.27	381.018	2248.69	1428.33	454.764	2249.13	1252.39	494.369	2253.8	1102.56	543.659	2100.85	1019.74	529.887	2027.01	980.734	561.899	2072.14	943.114	585.606	1984.07	934.191
446	0	268.829	2032.01	1583.55	169.839	2027.88	1584.57	286.276	2185.85	1599.22	156.759	2197.99	1595	203.947	2247.14	1473.82	205.531	2330.5	1226.4	212.956	2133.26	1381.04	210.651	2078.25	1226.88	120.769	2332.67	1285.56	379.836	2232.68	1426.76	453.854	2232.26	1250.88	493.727	2237.19	1101.42	542.604	2083.14	1020.23	528.516	2008.98	982.091	560.886	2053.62	943.906	584.696	1965.65	936.148
447	0	268.292	2015.92	1582.48	169.588	2011.82	1583.7	285.589	2169.94	1597.97	155.968	2181.81	1593.86	203.124	2231.08	1472.5	203.92	2313.28	1224.67	211.776	2116.59	1380.19	209.612	2061.14	1225.99	119.422	2315.75	1284.01	378.696	2216.64	1424.98	452.884	2215.83	1249.65	493.25	2221.1	1100.33	541.326	2065.89	1020.46	527.221	1991.5	983.053	559.685	2035.57	944.546	582.463	1946.89	937.39
448	0	267.885	2000.11	1581.46	168.462	1995.31	1582.7	284.778	2154.07	1596.89	155.069	2165.6	1593.02	201.879	2214.8	1471.37	202.222	2296.1	1223.07	210.785	2099.99	1379.06	208.333	2043.84	1225.65	117.672	2298.68	1282.71	377.54	2200.63	1423.6	451.812	2199.67	1248.34	492.332	2205.15	1099.28	540.013	2049.27	1020.58	525.637	1974.62	983.538	558.396	2018.29	944.933	580.882	1929.52	938.573
449	0	267.419	1984	1581.04	168.118	1979.1	1582.47	283.963	2138.16	1596.05	154.28	2149.29	1592.5	200.843	2198.43	1470.54	200.583	2278.71	1221.61	210.22	2083.22	1378.78	206.706	2026.36	1225.41	115.939	2281.49	1281.35	376.25	2184.58	1422.25	450.454	2183.81	1247.04	491.204	2189.66	1097.95	537.74	2032.39	1020.04	523.098	1958.02	983.389	556.718	2001.59	944.836	578.81	1912.71	938.953
450	0	266.954	1967.95	1580.81	167.629	1962.59	1582.51	283.046	2122.04	1595.59	153.354	2132.82	1592.31	199.544	2182.11	1470.01	198.855	2261.15	1220.53	208.518	2066.48	1378.65	205.234	2008.5	1225.39	114.13	2264.27	1280.55	374.889	2168.53	1421.13	448.879	2168.15	1245.92	489.654	2174.34	1096.93	535.643	2016.59	1019.39	520.87	1942.27	983.176	554.658	1985.43	944.414	576.276	1896.43	938.77
451	0	266.432	1951.64	1581.08	167.35	1946.2	1582.78	282.135	2106.04	1595.49	152.355	2116.28	1592.35	198.255	2165.68	1470.03	197.494	2243.87	1219.95	207.032	2049.63	1378.82	203.97	1990.49	1226.04	112.215	2246.84	1280.01	373.468	2152.59	1420.23	446.964	2152.95	1245.25	487.839	2159.46	1096.12	533.397	2001.4	1018.59	518.816	1927.04	982.79	552.461	1970.46	943.694	573.732	1881.12	938.284
452	0	265.934	1935.54	1581.7	167.029	1929.52	1584.02	281.271	2089.94	1595.67	151.588	2099.77	1593.01	196.84	2149.3	1470.37	196.332	2226.72	1219.71	205.728	2032.89	1379.32	202.149	1972.72	1226.91	110.754	2229.59	1279.89	372.12	2136.55	1420.02	445.094	2138.2	1244.68	486.115	2145.37	1095.48	531.104	1987.04	1017.3	515.872	1912.59	981.458	549.992	1955.95	942.625	571.088	1866.73	937.059
453	0	266.098	1919.61	1582.44	166.71	1912.93	1585.19	280.552	2073.95	1595.92	150.564	2083.22	1593.72	195.48	2132.69	1470.97	195.33	2209.89	1220.03	204.694	2016.24	1380.13	200.536	1954.9	1228.17	109.305	2212.14	1280.2	371.008	2120.53	1420.14	443.054	2123.72	1244.42	483.74	2131.26	1095.3	528.375	1973.16	1016.28	513.272	1898.94	980.219	547.199	1942.46	941.267	568.069	1853.15	935.403
454	0	265.657	1903.25	1583.7	166.496	1896.37	1586.35	279.654	2057.7	1596.69	149.81	2066.54	1594.55	194.333	2116.07	1471.99	194.454	2193.32	1221.04	203.512	1999.48	1381.27	198.769	1936.92	1229.77	108.137	2195.01	1281.18	369.832	2104.43	1420.81	440.916	2109.51	1244.8	479.972	2116.37	1095.23	525.345	1959.74	1015.11	510.009	1885.74	978.39	543.957	1929.73	939.717	564.785	1840.35	933.081
455	0	265.02	1886.46	1585.18	166.129	1879.56	1588.11	278.889	2041.45	1597.73	149.157	2049.94	1595.83	193.378	2099.47	1473.25	193.681	2177.17	1222.68	202.786	1982.97	1382.63	197.827	1919.96	1231.19	107.055	2177.97	1282.5	368.972	2088.13	1422.16	438.666	2095.18	1245.45	477.016	2103.08	1095.93	522.139	1946.93	1013.93	506.594	1873.25	976.333	540.442	1917.81	938.094	561.388	1828.58	930.518
456	0	264.639	1870.3	1586.74	165.835	1863.18	1589.7	278.346	2025.26	1598.84	148.45	2033.31	1596.73	192.72	2082.93	1474.84	192.957	2161.21	1224.6	202.314	1966.64	1384.09	197.063	1903.42	1232.73	106.216	2161.23	1284.21	368.279	2071.82	1423.55	436.784	2081.17	1246.31	472.691	2089.19	1096.19	518.826	1934.83	1012.76	503.301	1861.65	974.449	537.369	1907.2	936.556	557.829	1817.72	927.19
457	0	264.471	1853.94	1588.22	165.611	1846.59	1590.96	277.88	2008.86	1600.15	148.005	2016.8	1597.83	191.933	2066.45	1476.5	191.964	2145.4	1226.7	202.111	1950.55	1385.36	196.784	1887.32	1233.94	105.197	2144.7	1286.27	367.461	2055.53	1424.75	434.776	2066.89	1247.29	469.38	2076.5	1097.17	515.214	1923.14	1011.19	499.383	1850.65	971.67	532.979	1896.68	934.25	554.038	1807.53	923.496
458	0	264.279	1837.44	1589.9	165.446	1830.03	1592.28	277.546	1992.46	1601.76	147.681	2000.35	1599.17	191.362	2050.23	1478.33	190.87	2129.73	1229.06	201.745	1934.51	1386.71	196.829	1871.57	1235.16	104.107	2128.32	1288.42	367.586	2040.08	1426.79	433.149	2052.75	1248.44	465.765	2064.01	1098.22	511.663	1912.18	1009.58	495.546	1840.15	968.706	529.318	1887.33	932.294	550.071	1798.14	919.471
459	0	263.902	1820.94	1591.58	165.367	1813.72	1593.8	277.352	1976.09	1603.72	147.415	1984.04	1600.71	190.893	2034.2	1480.42	189.865	2114.32	1231.44	201.947	1918.81	1388.38	197.304	1856.19	1236.35	103.124	2112.13	1290.92	366.604	2025.25	1428.8	431.357	2038.73	1249.78	462.324	2052.04	1099.63	507.918	1901.53	1007.77	491.915	1830.43	965.65	524.578	1877.9	929.679	545.836	1789.43	914.959
460	0	264.028	1804.61	1592.88	165.354	1797.64	1594.98	277.18	1959.73	1605.65	147.313	1967.82	1602.43	190.447	2018.49	1482.47	188.657	2098.93	1233.61	202.124	1903.26	1390.15	198.17	1840.98	1237.89	101.929	2096.1	1293.39	366.18	2010.62	1430.71	429.631	2024.87	1251.03	458.621	2040.13	1100.78	504.25	1891.71	1005.54	487.904	1821.07	962.268	520.219	1869.51	926.864	541.291	1781.51	910.053
461	0	263.905	1788.52	1594.29	165.308	1781.53	1596.05	277.046	1943.53	1607.53	147.174	1951.73	1604.36	190.092	2002.85	1484.5	187.396	2083.47	1235.77	202.346	1887.77	1391.98	199.498	1825.91	1239.64	100.588	2080.33	1295.63	365.705	1996.32	1432.49	427.792	2011.27	1252.14	456.152	2029.79	1102.4	500.281	1881.97	1003.1	484.081	1812.49	958.762	516.341	1862.34	924.323	536.777	1774.08	904.662
462	0	263.912	1772.44	1595.6	165.702	1765.6	1597.33	276.887	1927.25	1609.76	147.136	1935.48	1606.47	189.6	1987.38	1486.74	186.224	2068.4	1238.03	202.767	1872.54	1393.99	201.151	1811.25	1241.4	99.5303	2064.57	1297.85	365.374	1982.39	1434.35	425.086	1996.99	1253.27	452.151	2018.03	1103.5	496.574	1872.98	1000.82	479.559	1804.3	954.501	511.204	1854.79	921.103	531.727	1767.39	899.01
463	0	264.1	1756.41	1597.04	166.006	1749.76	1598.37	277.094	1911.34	1612.23	147.394	1919.52	1608.89	189.29	1972.15	1488.93	184.896	2053.13	1240.13	203.346	1857.62	1396.15	202.722	1796.69	1243.39	98.3233	2048.96	1300.23	365.169	1968.62	1436.3	423.423	1984.1	1254.89	448.334	2006.39	1104.79	492.633	1864.49	998.428	475.477	1796.65	950.908	506.505	1848.21	918.153	526.756	1761.42	893.062
464	0	264.469	1740.69	1598.27	166.157	1733.71	1599.69	277.121	1895.44	1614.47	147.486	1903.55	1611.14	189.118	1957.04	1491.18	183.605	2037.87	1242.12	203.911	1842.46	1398.42	204.355	1782.22	1246	96.8927	2033.34	1302.35	364.771	1954.87	1438.21	421.796	1971.64	1256.3	445.387	1995.97	1106.37	488.581	1856.23	995.771	471.139	1789.69	946.593	502.25	1842.53	915.263	521.481	1756.18	886.818
465	0	264.33	1724.46	1599.47	166.613	1718.17	1600.82	277.158	1879.55	1616.69	147.86	1887.63	1613.46	188.912	1942.15	1493.36	182.424	2023.05	1244.3	204.029	1827.31	1400.88	205.508	1767.65	1248.38	95.6092	2017.55	1304.5	364.442	1941.34	1440.06	420.119	1959.53	1257.81	441.707	1984.63	1107.72	484.58	1848.42	993.167	466.618	1783.22	942.331	497.253	1836.96	911.955	516.407	1751.97	880.719
466	0	264.775	1708.99	1600.5	166.983	1702.36	1601.81	277.479	1863.93	1618.89	148.051	1871.78	1615.78	188.593	1927.13	1495.51	180.955	2007.71	1246.39	204.285	1812.36	1403.01	206.381	1753.11	1250.89	94.7108	2002.26	1306.87	364.011	1927.58	1441.71	417.925	1947.63	1259.5	438.366	1973.86	1109.23	480.35	1840.82	990.536	461.992	1777.29	938.083	492.238	1831.79	908.815	510.233	1747.61	873.916
467	0	265.095	1693.51	1601.67	167.426	1686.75	1603	277.83	1848.38	1620.99	148.395	1856.08	1618.12	188.442	1912.15	1497.73	179.808	1992.89	1248.48	204.647	1797.52	1405.58	206.875	1738.3	1253.36	93.8093	1986.82	1309.08	363.572	1913.9	1443.48	416.385	1935.68	1261	434.547	1962.27	1110.68	476.394	1833.63	987.902	457.296	1771.84	933.388	487.263	1827.11	905.788	504.4	1744.18	867.542
468	0	265.658	1678.15	1602.75	167.881	1671.23	1604	278.013	1832.8	1623.05	148.537	1840.48	1620.19	188.088	1897.32	1499.91	178.452	1977.68	1250.42	204.908	1782.86	1407.69	207.645	1723.66	1255.69	92.7756	1971.22	1311.3	363.143	1900.07	1445.13	414.794	1923.97	1262.65	431.407	1951.49	1112.3	472.074	1826.8	985.295	452.608	1766.79	928.795	482.181	1823.02	902.827	498.697	1741.53	861.222
469	0	265.87	1662.65	1603.6	168.321	1655.88	1604.92	278.537	1817.33	1624.91	148.784	1824.89	1622.34	188.131	1882.27	1501.57	177.351	1962.88	1252.4	205.106	1768.11	1409.71	207.781	1708.9	1257.82	91.5281	1955.63	1313.34	362.667	1886.26	1446.71	412.999	1912.04	1264.09	428.267	1940.55	1113.85	467.95	1820.13	982.599	447.223	1761.88	923.538	477.238	1818.98	900.084	492.552	1739.25	854.678
470	0	266.371	1647.39	1604.39	168.691	1640.51	1605.59	278.561	1801.74	1626.5	148.941	1809.55	1624.07	187.723	1867.57	1503.33	176.299	1947.74	1254.01	205.218	1753.47	1411.39	207.811	1694.21	1259.4	90.7904	1940.19	1315.18	362.141	1872.36	1447.91	411.298	1899.99	1265.13	425.14	1929.45	1115.25	463.705	1813.74	979.759	442.426	1757.63	918.947	472.329	1815.61	897.23	486.607	1737.5	848.291
471	0	266.702	1632.31	1604.89	169.115	1625.22	1606.39	279.187	1786.79	1627.67	149.05	1794.09	1625.52	187.459	1852.69	1504.75	175.347	1932.87	1255.3	205.257	1738.8	1413.07	207.81	1679.42	1261.07	89.9895	1925.04	1316.73	361.764	1858.51	1449.03	409.519	1887.84	1265.99	422.013	1918.64	1116.28	459.572	1807.62	976.896	437.602	1753.77	914.044	467.319	1812.33	894.156	480.213	1736.33	841.696
472	0	267.027	1617.14	1605.11	169.365	1610.08	1606.6	278.802	1771.34	1628.29	149.409	1778.87	1626.58	187.415	1837.98	1505.65	174.42	1917.71	1256.21	205.208	1724	1414.2	207.451	1664.68	1262.33	88.8976	1909.38	1317.66	361.108	1844.17	1449.45	408.041	1875.23	1266.39	418.762	1907.44	1117.09	455.307	1801.7	973.822	432.87	1750.13	909.291	462.265	1809.44	891.058	474.122	1735.61	835.255
473	0	267.15	1601.91	1605.37	169.645	1594.86	1606.94	279.7	1756.62	1629.01	149.676	1763.54	1627.34	187.068	1823.08	1506.4	173.644	1902.76	1257.05	205.052	1709.09	1415.4	207.126	1649.81	1263.34	88.2233	1894.21	1318.67	360.663	1829.92	1449.78	406.251	1862.4	1266.48	415.55	1896.48	1117.69	451.018	1796.07	970.851	428.034	1746.9	904.59	457.412	1806.75	888.278	468.117	1735.37	828.941
474	0	267.502	1587.15	1605.2	170.057	1579.79	1607.18	279.3	1740.99	1629.03	149.662	1748.3	1627.49	187.011	1808.1	1507.02	172.976	1887.69	1257.47	204.895	1694.18	1415.83	206.908	1635	1263.77	87.6789	1879	1319.44	360.407	1815.6	1449.86	404.653	1849.32	1266.21	412.285	1885.45	1118.07	446.832	1790.47	967.646	423.465	1743.71	899.973	452.275	1803.97	885.38	462.171	1735.35	822.839
475	0	267.757	1571.92	1604.92	170.187	1564.54	1607.04	280.053	1726.72	1629.48	149.964	1733.16	1627.75	186.805	1793.23	1507.16	172.498	1872.87	1257.72	204.866	1679.21	1415.97	206.663	1619.89	1263.94	86.9876	1863.52	1319.83	360.129	1801.18	1449.56	403.156	1836.2	1265.86	408.804	1874.11	1118.24	442.789	1785.04	964.672	418.758	1740.83	895.242	447.593	1801.56	882.845	456.534	1735.78	817.151
476	0	267.985	1556.79	1604.65	170.479	1549.44	1606.83	279.404	1710.83	1628.92	149.939	1717.96	1627.76	186.498	1778.1	1506.97	171.82	1857.7	1257.61	204.776	1664.3	1415.94	206.444	1604.82	1263.83	86.2957	1848.38	1319.81	359.798	1786.5	1448.88	401.473	1822.68	1265.17	405.343	1862.78	1118.22	438.251	1779.65	961.307	414.216	1738.01	890.69	442.728	1799.27	880.284	450.812	1736.31	811.853
477	0	268.145	1541.89	1604.07	170.663	1534.35	1606.32	279.605	1695.79	1628.54	149.796	1702.99	1627.27	186.245	1762.69	1506.66	171.523	1842.77	1257.38	204.479	1648.97	1415.51	206.301	1589.48	1263.17	85.8467	1833.02	1319.73	359.578	1771.71	1448.06	399.602	1809.21	1264.13	401.565	1851.33	1118.14	433.96	1774.25	958.346	408.929	1735.17	885.24	437.852	1797.04	878.035	444.918	1736.82	806.277
478	0	268.368	1526.73	1603.23	170.942	1519.09	1605.73	279.717	1680.84	1627.6	150.129	1687.83	1626.87	186.048	1747.54	1505.99	171.136	1827.74	1256.75	204.289	1633.62	1414.82	205.897	1574.28	1262.31	85.4549	1818.03	1319.19	359.295	1756.76	1447	397.616	1795.92	1263.03	398.29	1839.75	1117.75	429.681	1768.8	955.128	404.425	1732.45	880.991	432.849	1794.61	876.005	439.496	1737.85	801.311
479	0	268.509	1511.66	1602.4	171.158	1503.97	1605.02	279.762	1665.75	1626.19	150.159	1672.48	1625.72	186.072	1732.47	1504.92	170.549	1812.34	1255.48	204.264	1618.44	1413.61	205.755	1559.18	1261.57	84.6981	1802.55	1318.19	359.22	1741.74	1445.76	396.151	1782.54	1261.76	394.749	1828.17	1117.39	425.521	1763.44	952.48	399.974	1729.85	876.959	428.084	1792.15	874.273	434.32	1738.76	797.062
480	0	268.723	1496.46	1601.29	171.431	1488.72	1604.15	279.944	1650.66	1625.02	150.378	1657.3	1624.36	186.005	1717.22	1503.73	170.303	1797.16	1254.4	204.131	1602.99	1412.56	205.599	1544.07	1260.03	84.3599	1787.66	1317.22	359.086	1726.51	1444.28	394.688	1769.27	1260.63	391.278	1816.24	1116.85	421.312	1757.77	950.026	394.798	1727.35	873.481	422.968	1789.34	872.688	429.135	1739.38	793.408
481	0	268.804	1481.22	1600.16	171.501	1473.39	1603.13	279.939	1635.44	1623.57	150.395	1642.18	1623.14	186.08	1701.91	1502.44	170.326	1782.08	1253.04	203.978	1587.57	1411.09	205.414	1529.21	1258.35	84.3079	1772.54	1316.01	359.193	1711.42	1442.64	392.995	1755.96	1259.24	387.635	1804.22	1116.34	417.264	1751.94	947.749	390.319	1724.36	870.164	418.599	1786.75	871.547	424.104	1739.91	790.24
482	0	269.14	1466.13	1598.86	171.767	1458.05	1602.06	280.348	1620.49	1621.74	150.426	1626.91	1621.35	186.222	1686.42	1500.86	170.447	1766.8	1251.41	204.194	1572.27	1409.38	205.089	1514.17	1256.39	84.1181	1757.23	1314.52	359.175	1696.13	1440.86	391.641	1742.62	1257.81	384.716	1792.38	1115.68	413.371	1746.1	945.568	386.002	1721.39	867.09	413.976	1783.63	870.617	418.958	1740.32	787.488
483	0	269.388	1450.83	1597.33	172.016	1442.69	1600.46	280.104	1605.1	1619.82	150.551	1611.51	1619.42	186.303	1671.05	1499.1	170.652	1751.43	1249.54	204.167	1556.57	1407.75	204.632	1499.36	1254.52	84.4091	1742.18	1312.94	359.184	1680.65	1438.94	390.128	1729.53	1256.18	381.733	1780.22	1114.94	409.729	1739.99	943.495	381.832	1717.82	864.598	409.54	1779.93	869.895	414.103	1740.32	784.979
484	0	269.689	1435.63	1595.57	172.358	1427.47	1598.88	280.451	1589.87	1617.71	150.862	1596.29	1617.62	186.521	1655.63	1497.22	171.154	1736.16	1247.74	204.142	1540.94	1405.87	204.586	1483.91	1252.7	84.6589	1726.98	1311.18	359.303	1665.02	1436.83	388.866	1716.21	1254.57	379.076	1768.02	1114.31	406.107	1733.55	942.021	378.134	1714.07	862.64	405.37	1775.88	869.438	409.404	1739.56	782.975
485	0	270.018	1420.29	1593.96	172.801	1411.97	1597.21	280.353	1574.6	1615.74	150.795	1580.87	1615.53	187	1640.07	1495.25	171.677	1720.9	1245.86	204.16	1525.11	1403.81	204.344	1468.45	1250.31	84.9493	1711.73	1309.31	359.731	1649.46	1434.83	387.812	1702.92	1253.06	376.752	1755.7	1113.64	403.095	1726.7	940.492	374.341	1709.61	860.653	401.578	1771.04	869.312	404.805	1738.16	781.335
486	0	270.404	1404.89	1592.24	173.084	1396.6	1595.66	280.617	1559.22	1613.55	151.175	1565.26	1613.41	187.428	1624.57	1493.32	172.188	1705.36	1243.87	204.226	1509.3	1401.73	204.401	1452.67	1248.28	85.4809	1696.41	1307.37	360.116	1633.58	1432.73	386.91	1689.47	1251.49	374.825	1743.22	1113	400.436	1719.37	939.243	370.933	1704.48	858.976	398.115	1765.58	869.369	400.438	1735.92	780.124
487	0	270.821	1389.53	1590.26	173.616	1381.21	1593.85	280.963	1543.96	1611.52	151.438	1550.09	1611.42	187.877	1608.84	1490.99	172.89	1689.74	1241.83	204.621	1493.51	1399.61	204.378	1436.65	1246.11	86.129	1681.22	1305.43	360.655	1617.71	1430.47	386.308	1675.58	1250.11	373.137	1730.45	1112.24	398.241	1711.5	938.245	368.303	1698.82	857.652	395.388	1759.65	869.683	396.408	1732.99	779.095
488	0	271.196	1374.28	1588.29	173.926	1365.75	1591.79	281.154	1528.45	1609.33	151.79	1534.77	1608.95	188.544	1593.3	1488.83	173.698	1674.12	1239.69	204.882	1477.76	1397.34	204.628	1420.68	1244.18	86.7672	1665.68	1303.27	361.15	1601.64	1428.1	385.991	1661.42	1248.37	371.945	1717.6	1111.5	396.296	1703.01	937.097	366.131	1692.31	856.545	392.935	1752.97	869.895	392.701	1729.42	778.325
489	0	271.721	1358.74	1586.36	174.575	1350.26	1589.83	281.799	1513.13	1607.01	152.584	1519.26	1606.71	189.306	1577.74	1486.55	174.737	1658.41	1237.3	205.411	1461.92	1395.05	204.566	1404.55	1241.76	87.7724	1650.05	1301.05	361.926	1585.64	1425.8	385.891	1646.95	1246.64	371.035	1704.38	1110.53	395.008	1694.15	936.093	364.384	1685.2	855.306	390.95	1745.64	869.996	389.384	1724.92	777.627
490	0	272.229	1343.25	1584.42	174.888	1334.9	1588.02	282.635	1498.24	1604.84	153.041	1503.93	1604.72	190.298	1562.15	1484.24	175.692	1642.28	1234.77	205.88	1445.94	1392.99	204.827	1388.59	1239.69	88.7935	1634.75	1298.69	362.72	1569.65	1423.21	386.321	1632.29	1244.68	370.44	1690.73	1109.49	394.307	1684.93	935.164	363.258	1677.24	854.17	389.452	1737.64	870.12	386.687	1719.73	776.953
491	0	272.746	1327.8	1582.49	175.619	1319.34	1586.02	282.707	1482.19	1602.71	153.899	1488.39	1602.37	191.097	1546.45	1482.07	177.015	1626.21	1232.35	206.676	1430.18	1390.87	205.019	1372.42	1237.76	90.1429	1619.11	1296.23	363.675	1553.47	1420.85	386.794	1617.11	1242.86	370.399	1676.84	1108.45	393.474	1674.57	934.082	362.629	1668.72	853.15	388.232	1728.7	870.293	384.655	1713.5	776.757
492	0	273.466	1312.33	1580.81	176.202	1303.91	1584.32	283.84	1466.82	1600.91	154.362	1473.13	1600.66	192.214	1530.74	1479.83	178.445	1609.9	1230.05	207.17	1414.07	1389.05	205.433	1356.28	1235.75	91.4726	1603.27	1293.94	364.869	1537.14	1419	387.589	1601.71	1241.19	370.711	1662.68	1107.49	393.654	1664.08	933.532	362.526	1659.23	852.819	387.596	1719.22	870.657	383.13	1706.06	776.554
493	0	274.047	1296.67	1579.21	176.722	1288.55	1582.9	285.325	1452.02	1599.18	155.519	1457.53	1598.57	193.405	1515.03	1477.72	179.947	1593.24	1227.59	208.239	1398.13	1387.22	205.862	1340.17	1234.27	92.9876	1587.26	1291.47	366.109	1520.78	1417.03	388.789	1586.12	1239.53	371.308	1648.12	1106.56	394.085	1652.61	932.777	363.085	1649.02	852.13	387.868	1708.84	871.043	382.556	1697.71	776.578
494	0	274.687	1281.23	1577.66	177.302	1273.13	1581.34	285.079	1435.54	1597.32	156.23	1442.35	1597.04	194.779	1499.23	1475.73	181.642	1576.59	1225.09	209.082	1381.94	1385.53	206.517	1323.55	1233.04	94.7111	1571.37	1289.05	367.295	1504.35	1414.84	389.956	1570.16	1237.83	371.792	1633.13	1105.48	394.957	1640.62	932.086	364.437	1637.87	851.419	388.188	1697.67	871.326	382.627	1688.28	776.462
495	0	275.136	1265.54	1576.46	177.788	1257.7	1579.98	286.609	1420.06	1595.87	157.346	1427	1595.37	196.143	1483.37	1473.68	183.443	1559.84	1222.81	210.229	1365.81	1384.06	207.262	1306.78	1231.66	96.5726	1555.13	1286.59	368.822	1487.94	1413	391.431	1554.19	1236.35	372.976	1617.85	1104.59	396.128	1627.69	931.627	365.4	1625.82	850.31	388.994	1685.57	871.438	383.202	1677.42	776.336
496	0	275.865	1249.92	1575.54	178.559	1242.34	1578.55	287.444	1404.31	1594.52	158.312	1411.74	1593.71	197.588	1467.46	1471.94	185.201	1542.92	1220.71	211.386	1349.46	1382.6	208.3	1289.83	1230.59	98.4219	1538.6	1284.39	370.269	1471.2	1411.44	393.013	1537.81	1235.2	373.765	1602.09	1103.66	397.634	1613.86	931.129	367.396	1612.63	849.91	390.203	1672.28	871.588	384.755	1665.52	776.395
497	0	276.629	1234.35	1574.62	179	1227.18	1577.64	288.664	1388.85	1593.21	159.368	1396.54	1592.07	199.227	1451.57	1470.4	187.203	1525.89	1218.55	212.698	1333.14	1381.27	209.665	1272.48	1229.79	100.374	1521.9	1281.95	371.963	1454.48	1409.85	394.781	1521.47	1233.99	375.618	1586.35	1102.82	400.357	1599.84	930.622	370.027	1598.66	849.052	391.834	1658.25	871.097	387.097	1652.45	776.146
498	0	277.302	1218.62	1573.94	179.665	1211.86	1576.93	289.813	1373.28	1592.01	160.516	1381.39	1590.77	200.884	1435.84	1468.81	189.183	1508.71	1216.17	214.141	1316.86	1380.11	211.176	1255.07	1228.97	102.469	1505.48	1279.57	373.661	1437.8	1408.27	396.6	1504.75	1232.57	377.581	1570.19	1101.75	402.648	1584.47	929.787	372.186	1583.5	847.892	394.149	1643.16	870.665	389.892	1638.07	775.541
499	0	277.996	1202.74	1574.32	180.263	1196.36	1576.91	290.981	1357.42	1591.48	161.804	1365.98	1589.97	202.489	1419.96	1467.72	191.14	1491.31	1214.12	215.419	1300.45	1379.59	212.92	1237.63	1228.5	104.465	1489.08	1277.45	375.496	1421.3	1407.08	398.653	1487.7	1231.48	379.778	1553.61	1100.68	405.022	1568.33	928.887	375.51	1567.64	847.076	396.951	1627.32	869.886	393.113	1622.28	774.712
500	0	278.628	1186.9	1574.76	180.962	1180.9	1577.31	292.228	1341.42	1591.65	163.064	1350.59	1589.55	204.144	1404.03	1467.2	192.846	1473.92	1212.66	216.892	1284.22	1379.76	214.478	1220.19	1228.67	106.085	1472.53	1275.9	377.242	1404.89	1406.43	400.777	1470.56	1230.47	382.479	1536.82	1099.95	408.056	1551.35	928.101	379.346	1550.52	846.522	400.168	1610.4	869.081	396.979	1605.12	773.886
501	0	279.264	1170.92	1575.93	181.656	1165.27	1578.14	293.244	1325.42	1592.11	164.46	1335.29	1589.83	205.557	1387.98	1467.09	194.236	1456.83	1211.79	218.179	1267.88	1380	215.942	1203.21	1229.39	107.492	1456.1	1275.24	378.763	1388.53	1406.38	403.003	1453.26	1229.99	385.148	1519.02	1099.32	412.105	1533.77	927.822	382.822	1532.43	845.739	403.911	1592.42	868.453	401.74	1586.9	773.45
502	0	280.125	1154.78	1577.37	182.369	1149.87	1579.42	294.81	1309.47	1592.91	166.019	1319.84	1590.48	206.944	1371.74	1467.54	195.344	1440.26	1212.04	219.515	1251.48	1380.43	217.345	1186.38	1230.45	108.702	1440.1	1275.52	380.017	1372.22	1406.43	405.147	1435.49	1229.82	388.065	1501.17	1098.84	416.137	1515.05	927.529	387.526	1513.37	845.35	408.169	1573.32	867.851	406.913	1567.16	772.839
503	0	280.903	1139.07	1579.01	183.163	1134.22	1580.84	296.133	1293.6	1593.82	167.072	1304.43	1591.28	208.141	1355.66	1468.57	195.933	1424.17	1212.88	220.696	1235.38	1381.48	218.531	1169.83	1231.54	109.613	1424.14	1276.47	381.341	1355.92	1407.32	407.149	1417.87	1230.11	390.97	1482.7	1098.87	419.817	1494.74	927.47	392.392	1492.89	845.154	413.069	1553.08	867.47	412.758	1546.07	772.497
504	0	281.847	1123.24	1580.74	183.918	1118.71	1582.9	297.276	1277.88	1594.9	168.367	1288.9	1592.07	209.181	1339.63	1469.47	196.271	1408.29	1214.11	221.543	1219.36	1382.59	219.529	1153.57	1232.61	110.4	1408.13	1277.93	382.113	1339.69	1408.16	409.124	1400.23	1230.88	394.05	1464.26	1099.06	424.365	1474.24	927.696	397.501	1471.42	845.17	418.375	1531.85	867.084	418.955	1523.85	772.251
505	0	282.699	1107.66	1582.43	184.741	1103.23	1584.68	298.366	1262.22	1595.8	169.705	1273.64	1593.62	210.112	1323.82	1470.63	196.665	1392.46	1215.59	222.243	1203.44	1383.7	220.51	1137.43	1234.05	111.017	1392.41	1279.57	382.902	1323.54	1409.6	410.839	1382.37	1231.8	397.172	1445.57	1099.29	429.199	1453.07	927.983	403.191	1449.27	845.488	423.802	1509.66	866.494	425.58	1500.33	771.851
506	0	282.901	1092.19	1584.06	185.613	1087.7	1586.64	299.276	1246.79	1596.79	170.357	1258.29	1595.1	210.814	1307.98	1472.28	197.116	1377.1	1217.22	223.055	1188.04	1385.1	221.131	1121.72	1235.23	111.671	1377.13	1281.51	383.446	1307.28	1410.99	412.432	1364.59	1232.79	400.231	1426.62	1099.48	433.708	1430.93	928.264	408.98	1426.19	845.839	429.587	1486.78	865.972	432.456	1475.58	771.577
507	0	284.176	1076.83	1585.74	186.289	1072.43	1588.74	300.07	1231.61	1597.88	171.068	1242.96	1596.4	211.272	1292.62	1473.89	197.632	1361.75	1219.12	223.059	1172.41	1386.61	221.598	1106.37	1236.47	112.32	1361.9	1283.55	384.117	1291.36	1412.56	414.194	1346.89	1234.08	403.599	1407.81	1099.98	439.186	1408.54	928.855	414.672	1402.28	846.167	435.686	1463.25	865.466	439.761	1450.08	771.477
508	0	284.758	1061.68	1587.23	187.216	1057.19	1590.93	300.805	1216.39	1599.03	171.814	1227.78	1598.53	212.016	1277.35	1475.57	198.275	1346.64	1221.1	223.513	1157.58	1387.99	221.459	1091.62	1237.6	112.987	1346.92	1285.45	384.697	1275.44	1414.24	415.98	1329.19	1235.33	407.206	1388.77	1100.48	444.145	1385.69	929.153	420.585	1377.64	846.693	441.768	1438.95	864.883	447.189	1423.44	771.359
509	0	285.154	1046.56	1588.94	187.812	1042.2	1592.72	301.616	1202.02	1600.59	172.355	1212.71	1600.34	212.409	1262.42	1477.36	198.838	1331.62	1223.25	223.581	1142.47	1389.68	221.077	1077.03	1239.11	113.38	1332.58	1287.55	385.327	1259.69	1416.22	417.868	1311.65	1236.67	410.695	1369.75	1100.78	449.302	1362.27	929.946	426.152	1352.33	846.954	447.851	1414.05	864.337	454.529	1395.63	771.355
510	0	286.038	1031.78	1590.22	188.373	1027.18	1594.58	302.256	1186.91	1602.15	173.039	1197.83	1602.56	212.883	1247.5	1479.19	199.553	1316.84	1225.46	223.525	1127.58	1391.36	220.402	1062.69	1240.62	114.311	1318.11	1289.42	385.873	1243.97	1418.25	419.813	1293.93	1238.25	414.241	1350.44	1101.36	454.55	1338.48	930.948	432.121	1326.68	847.954	454.429	1388.88	864.137	462.26	1367.17	771.865
511	0	285.928	1017.02	1591.86	188.618	1012.45	1596.37	302.358	1171.86	1603.96	173.458	1183.18	1604.46	213.335	1232.88	1481.2	200.442	1302.35	1227.39	223.524	1113.05	1393.15	219.679	1048.29	1242.38	115.067	1303.83	1291.31	386.345	1228.55	1420.22	421.865	1276.44	1239.73	418.037	1331.44	1101.93	459.832	1314.3	931.938	438.38	1300.22	849.217	460.342	1362.8	863.518	470.055	1338.03	772.61
512	0	286.708	1002.36	1593.43	189.089	997.919	1598.17	303.198	1157.54	1606.08	173.921	1168.56	1607.01	213.586	1218.53	1483.35	201.461	1287.85	1229.19	223.4	1098.51	1395.05	219.115	1034.41	1244.07	115.903	1289.69	1293.11	386.765	1213.56	1422.28	424.078	1258.86	1241.42	421.544	1312.19	1102.46	465.048	1289.84	933.213	444.219	1273.48	850.696	466.63	1336.25	863.481	478.116	1308.07	773.851
513	0	286.325	987.792	1595.11	189.098	983.441	1599.89	303.506	1142.97	1608.31	174.077	1154.11	1609.4	214.087	1204.28	1485.32	202.334	1273.35	1231.22	223.454	1084.33	1397.12	218.591	1019.78	1246.28	116.761	1275.56	1295.05	387.155	1198.75	1424.32	426.11	1241.42	1243.11	425.237	1293.12	1103.01	470.202	1265	934.888	450.16	1246.31	852.685	472.858	1309.27	863.643	485.73	1277.6	775.597
514	0	286.898	973.498	1596.73	189.169	969.146	1601.48	303.688	1128.48	1610.74	174.301	1139.75	1611.94	214.416	1189.98	1487.35	203.477	1259.3	1233.25	223.527	1070.26	1399.21	218.385	1005.12	1248.45	117.784	1261.76	1296.98	387.583	1184.06	1426.59	427.996	1224	1244.95	428.886	1273.85	1103.83	475.38	1240.16	936.807	456.369	1218.68	854.92	479.161	1282.1	864.245	493.319	1246.62	777.878
515	0	286.495	959.169	1598.8	189.139	955.106	1603.54	303.874	1113.95	1613.14	174.696	1125.79	1614.14	214.822	1175.83	1489.4	204.644	1244.96	1235.14	223.569	1056.01	1401.22	217.935	990.539	1251.04	118.994	1247.76	1298.77	387.966	1169.44	1428.86	429.977	1206.86	1246.85	432.557	1254.58	1104.67	480.398	1215.11	939.006	462.424	1191	857.731	485.391	1254.58	865.216	500.964	1215.55	780.768
516	0	286.82	945.18	1600.59	188.967	941.143	1605.19	303.568	1099.3	1615.67	174.845	1111.72	1616.23	215.183	1162	1491.31	205.688	1230.87	1236.77	223.722	1042.08	1403.24	218.058	976.276	1253.4	120.186	1233.82	1300.2	388.501	1155.1	1431.21	431.919	1190.08	1248.83	436.178	1235.45	1105.53	485.35	1189.92	941.522	468.169	1163.25	861.009	490.898	1226.59	866.089	508.308	1183.91	784.388
517	0	286.647	931.016	1602.51	189.095	927.216	1606.87	303.675	1085.27	1618.01	175.049	1097.81	1618.61	215.374	1147.89	1493	206.659	1216.79	1238.43	224.172	1028.08	1405.51	218.208	962.072	1255.74	121.275	1220.15	1301.8	388.851	1140.61	1433.43	433.769	1173.3	1250.9	439.821	1216.45	1106.57	490.08	1164.59	944.387	473.91	1135.32	864.944	496.685	1198.59	867.76	515.505	1152.33	788.503
518	0	286.484	917.091	1604.57	188.659	913.378	1608.77	304.475	1071.97	1620.44	175.279	1084.2	1620.29	216.102	1133.96	1495.03	207.489	1203.27	1240.31	224.539	1014.23	1407.29	218.484	948.238	1257.81	122.263	1206.27	1303.45	389.399	1126.38	1435.69	435.619	1156.72	1253.02	443.259	1197.26	1107.66	494.72	1139.34	947.684	478.742	1106.44	869.535	502.439	1170.44	870.04	522.477	1120.48	793.698
519	0	285.971	903.103	1606.63	188.558	899.828	1610.25	304.586	1057.85	1622.36	175.164	1070.41	1622.02	216.546	1119.89	1496.73	208.464	1189.3	1241.93	224.946	1000.29	1409.03	219.101	934.285	1259.86	123.21	1192.57	1304.87	389.955	1112.13	1437.76	437.608	1140.49	1255.12	446.88	1178.37	1108.85	499.413	1114.2	951.53	483.963	1078.35	874.599	507.832	1142.14	872.73	529.157	1089.12	799.104
520	0	286.311	889.345	1608.45	188.616	886.02	1611.94	304.668	1043.87	1624.13	175.711	1056.83	1623.67	217.231	1105.81	1498.12	209.183	1175.1	1243.6	225.584	986.417	1410.58	219.67	920.699	1261.16	124.179	1178.87	1306.25	390.508	1097.75	1439.63	439.481	1124.13	1257.13	450.332	1159.62	1110.02	503.853	1088.8	955.418	489.403	1050.16	880.174	513.177	1113.72	875.642	535.923	1058.02	805.21
521	0	286.246	875.42	1610.29	188.511	872.488	1613.35	304.948	1030.04	1625.94	175.735	1043.32	1624.7	217.864	1091.75	1499.5	210.143	1161.21	1245	226.101	972.46	1411.81	220.432	906.75	1262.52	125.006	1165.05	1307.69	391.21	1083.39	1441.54	441.411	1107.73	1258.99	453.799	1140.85	1111.13	508.185	1063.72	959.631	494.186	1022.38	885.803	518.411	1085.46	879.132	541.574	1026.01	811.802
522	0	286.303	861.598	1612.07	188.496	858.892	1614.8	305.065	1016.1	1627.52	176.109	1029.54	1625.78	218.351	1077.62	1500.65	210.765	1147.2	1246.11	226.547	958.361	1412.67	221.088	893.197	1262.8	126.015	1151.1	1308.72	391.995	1068.9	1443.42	443.385	1091.43	1260.84	457.12	1122.2	1112.35	512.61	1038.75	964.455	499.154	994.868	891.776	523.572	1057.26	883.021	547.28	994.683	818.826
523	0	285.946	847.794	1613.63	188.518	845.054	1615.97	305.359	1002.2	1628.66	176.471	1015.93	1626.4	218.959	1063.46	1501.37	211.532	1133.2	1247.18	227.2	944.372	1413.47	221.951	879.141	1263.89	126.922	1137.15	1309.72	392.71	1054.5	1444.7	445.356	1075.08	1262.41	460.44	1103.66	1113.29	516.657	1014.01	969.027	503.528	967.128	898.239	528.497	1029.06	887.036	552.498	963.52	826.006
524	0	286.121	833.803	1615.05	188.6	831.431	1616.93	305.558	988.428	1629.44	176.568	1002.12	1626.58	219.565	1049.21	1501.94	212.278	1119.21	1247.89	227.98	930.177	1413.81	222.69	864.813	1264.48	127.774	1123.15	1310.15	393.344	1039.82	1445.87	447.278	1058.63	1263.62	463.717	1085.24	1113.96	520.704	989.768	973.412	507.757	939.74	904.689	533.832	1001.99	891.316	557.393	932.854	833.407
525	0	286.247	819.825	1616.23	188.666	817.519	1617.75	305.812	974.562	1629.79	177.09	988.436	1626.62	220.341	1034.9	1502.09	213.032	1105.2	1248.48	228.615	915.969	1414.05	223.513	850.653	1264.44	128.779	1109.21	1310.65	394.118	1025.43	1446.59	448.873	1042.46	1264.62	467.031	1066.91	1114.42	524.354	965.26	978.052	511.776	912.776	911.456	537.754	973.461	895.573	562.002	902.501	840.899
526	0	286.673	805.947	1617.05	188.769	803.651	1618.42	306.213	960.628	1630.06	177.32	974.498	1626.48	220.921	1020.53	1502.36	213.942	1091.26	1248.92	229.391	901.617	1414.03	224.201	836.497	1264.42	129.666	1095.09	1310.67	394.788	1010.73	1447.43	450.936	1026.24	1265.46	470.419	1048.62	1114.84	527.996	941.212	982.648	515.597	886.161	918.193	542.074	946.179	900.069	566.255	872.545	848.807
527	0	286.974	791.812	1617.72	188.996	789.77	1618.8	306.436	946.291	1630.15	177.785	960.769	1625.97	221.642	1006.04	1502.36	214.599	1077.02	1249.42	230.059	887.234	1413.81	225.162	822.388	1264.01	130.624	1080.93	1310.96	395.589	996.247	1447.79	453.155	1009.91	1266.05	473.781	1030.29	1115.11	531.547	917.614	987.347	519.091	859.976	925.138	546.013	918.94	904.668	570.265	843.267	856.767
528	0	287.178	777.452	1618.19	189.112	775.631	1618.93	306.937	932.204	1629.85	178.609	946.675	1625.75	222.096	991.431	1502.12	215.423	1063.14	1249.43	230.808	872.861	1413.37	225.839	808.281	1263.34	131.528	1066.56	1311.01	396.136	981.504	1447.83	454.889	993.521	1266.38	477.077	1011.9	1115.18	534.619	893.95	991.789	522.353	834.219	932.181	549.876	892.288	909.265	573.725	814.384	864.736
529	0	287.426	763.238	1618.38	189.382	761.416	1618.88	307.523	917.955	1629.45	179.034	932.589	1624.7	222.849	976.935	1501.67	216.007	1048.95	1249.39	231.518	858.295	1412.72	226.604	794.337	1262.49	132.411	1052.26	1310.48	396.81	966.957	1447.76	456.804	977.41	1266.41	480.375	993.531	1115.11	537.758	870.765	996.246	525.352	808.827	938.813	553.237	865.828	913.765	577.103	785.97	872.759
530	0	287.594	748.817	1618.38	189.53	747.346	1618.8	307.793	903.73	1628.54	179.51	918.507	1623.69	223.327	962.144	1501.02	216.964	1035.22	1249.15	232.468	843.953	1411.87	227.31	780.326	1261.48	133.154	1037.78	1309.94	397.573	952.378	1447.37	458.607	961.288	1266.33	483.528	975.246	1114.78	540.643	847.955	1000.53	528.212	783.982	945.162	556.502	839.957	918.482	580.054	758.358	880.661
531	0	287.91	734.455	1618.18	189.791	732.964	1618.38	308.35	889.366	1627.86	179.816	904.007	1622.48	223.988	947.533	1500.42	217.607	1020.83	1248.49	232.989	829.139	1410.88	228.1	766.859	1259.69	133.937	1023.32	1309.43	398.204	937.604	1446.93	460.401	945.052	1266.2	486.613	956.872	1114.46	543.275	825.51	1004.56	530.812	759.644	951.473	559.507	814.434	923.083	582.765	731.338	888.618
532	0	288.172	719.916	1617.73	190.1	718.681	1617.78	308.657	874.588	1626.95	180.481	889.867	1621.49	224.571	932.616	1499.46	217.915	1006.68	1247.75	233.66	814.375	1409.69	228.914	752.698	1258.43	134.512	1008.66	1308.54	398.717	922.808	1446.2	461.948	928.849	1265.74	489.589	938.668	1114.04	545.74	803.34	1008.56	533.041	735.643	957.68	562.204	789.507	927.537	585.281	704.989	896.322
533	0	288.28	705.345	1617.11	190.329	704.219	1617.11	309.22	860.113	1625.8	180.975	875.227	1620.28	225.109	917.823	1498.33	218.324	992.371	1246.76	234.456	799.725	1408.62	229.798	738.765	1256.71	135.231	993.947	1307.49	399.472	908.023	1445.41	463.514	912.737	1265.19	492.358	920.487	1113.44	548.001	781.622	1012.42	535.139	712.343	963.976	564.452	764.994	931.687	587.315	679.275	903.932
534	0	288.337	690.744	1616.21	190.623	689.591	1616.27	309.588	845.361	1624.51	181.663	861.101	1618.7	225.702	903.015	1497.04	218.596	977.748	1245.52	235.222	784.982	1407.21	230.63	723.943	1255.4	135.869	978.97	1306.1	399.979	893.274	1444.23	464.885	896.484	1264.38	494.94	902.362	1112.67	549.947	760.192	1015.92	537.039	689.712	969.662	565.935	740.507	935.503	589.338	654.532	910.916
535	0	288.71	676.046	1615.22	191.044	675.023	1615.03	310.131	831.052	1622.87	181.973	846.479	1617.13	226.174	887.966	1495.81	219.035	963.167	1244.3	235.736	770.01	1405.83	231.457	709.369	1253.86	136.322	963.896	1304.55	400.355	878.261	1442.98	466.24	880.282	1263.47	497.334	884.275	1111.85	551.648	739.289	1019.1	538.524	667.54	975.112	568.566	717.649	939.773	590.977	630.191	917.936
536	0	289.315	661.384	1613.81	191.293	660.441	1613.93	310.36	815.974	1621.6	182.526	831.806	1615.75	226.68	872.977	1494.21	219.267	948.277	1243.12	236.494	754.959	1404.39	232.47	694.675	1252.11	136.805	948.79	1303.17	400.789	863.375	1441.75	467.436	864.031	1262.67	499.391	866.311	1111.2	553.109	718.575	1022.35	539.837	645.909	980.381	570.258	694.788	943.816	592.337	606.571	924.68
537	0	289.49	646.527	1612.66	191.593	645.647	1612.65	310.966	801.259	1620.22	183.037	817.002	1614.4	226.85	857.866	1492.67	219.668	933.322	1241.88	237.108	739.827	1402.79	233.453	679.572	1250.53	137.279	933.572	1301.67	401.298	848.281	1440.8	468.644	847.602	1261.99	501.409	848.709	1110.52	554.46	698.339	1025.6	540.951	624.633	985.32	571.766	672.501	947.67	593.505	583.772	931.061
538	0	290.117	631.763	1611.28	192.044	630.884	1611.43	311.451	786.446	1618.53	183.069	802.164	1612.52	227.243	842.902	1491.17	220.051	918.251	1240.37	237.497	724.804	1401.13	234.172	663.827	1249.16	137.749	918.044	1300.08	401.737	833.202	1439.65	469.576	831.171	1261.04	503.206	831.262	1109.63	555.592	678.623	1028.33	541.939	604.201	989.638	572.634	650.534	951.019	594.507	561.672	936.853
539	0	290.597	616.804	1609.8	192.387	615.921	1609.9	311.726	771.66	1616.6	183.752	787.34	1611.05	227.514	827.61	1489.51	220.47	902.877	1238.67	238.006	709.616	1399.58	235.019	648.676	1247.46	137.966	902.75	1298.23	402.022	818.065	1438.21	470.454	814.954	1259.89	504.789	814.014	1108.69	556.506	659.507	1030.83	542.416	584.15	993.795	574.179	629.81	954.411	595.087	540.219	942.224
540	0	290.378	601.763	1608.29	192.675	600.968	1608.36	311.964	756.643	1614.92	183.857	772.223	1609.08	227.715	812.56	1487.83	220.844	887.75	1236.89	238.396	694.472	1397.79	235.639	633.205	1245.68	138.072	887.552	1296.5	402.365	802.874	1437	471.125	798.632	1258.84	505.982	796.918	1107.62	557.127	640.544	1032.9	542.892	564.754	997.465	574.428	609.025	956.942	595.6	519.447	947.038
541	0	290.724	586.893	1606.85	192.946	585.978	1606.93	312.16	741.409	1613.29	184.149	757.286	1607.36	227.779	797.508	1486.04	221.042	872.288	1235.1	238.763	679.243	1396.31	236.122	617.768	1244.01	138.101	872.076	1294.55	402.42	787.726	1435.56	471.699	782.461	1257.68	507.023	780.189	1106.71	557.53	622.249	1034.79	543.016	545.84	1000.64	575.617	589.654	959.831	595.751	499.384	951.264
542	0	291.024	571.738	1605.33	193.155	570.923	1605.3	312.595	726.462	1611.65	184.581	742.318	1605.85	227.631	782.359	1484.37	220.858	856.438	1233.5	239.065	663.978	1394.6	237.063	603.086	1242.23	138.135	856.459	1292.81	402.587	772.72	1434.24	472.183	766.311	1256.47	507.925	763.645	1105.66	557.67	604.361	1035.82	543.188	527.583	1003.38	576.151	570.643	962.041	595.788	480.002	955.155
543	0	291.353	556.672	1603.7	193.525	555.877	1603.79	312.793	711.374	1609.85	184.637	727.123	1604.07	227.75	767.32	1482.65	220.877	840.765	1231.73	239.448	648.602	1393.12	237.663	587.661	1240.73	138.05	840.981	1290.92	402.494	757.663	1432.67	472.407	750.507	1255.26	508.579	747.563	1104.39	557.889	587.042	1037.24	542.994	509.687	1005.86	576.347	552.155	963.693	595.521	461.295	958.276
544	0	291.714	541.52	1602.31	193.756	540.666	1602.39	313.022	696.376	1608.27	184.887	712.024	1602.51	227.492	751.992	1480.84	220.632	825.115	1230.01	239.638	633.147	1391.55	237.836	571.378	1239.73	137.788	825.449	1289.1	402.479	742.691	1431.41	472.617	734.781	1254.07	509.119	731.612	1103.36	557.945	570.186	1038.13	542.724	492.508	1007.52	575.933	533.898	964.877	595.233	443.335	960.791
545	0	291.927	526.514	1600.88	193.966	525.57	1601.01	313.207	681.255	1606.82	184.858	696.693	1601.05	227.442	736.909	1479.37	220.05	809.133	1228.07	239.595	617.85	1390.06	238.284	556.223	1238.37	137.369	809.746	1287.29	402.219	727.696	1429.92	472.701	719.472	1252.89	509.434	716.075	1102.28	557.59	553.699	1038.83	542.218	475.709	1009.08	576.252	517.127	966.187	594.705	426.014	963.017
546	0	292.28	511.291	1599.42	194.262	510.368	1599.56	313.313	666.14	1605.31	185.227	681.662	1599.59	227.223	721.632	1477.68	219.486	792.985	1226.02	239.739	602.45	1388.93	238.29	540.296	1237.36	136.943	793.898	1285.68	401.948	712.884	1428.26	472.691	704.244	1251.46	509.688	700.953	1101.02	557.306	537.764	1038.93	541.542	459.546	1009.87	575.461	499.969	966.637	593.948	409.251	964.252
547	0	292.489	496.369	1597.79	194.586	495.144	1598.32	313.246	650.969	1603.63	184.991	666.319	1598.33	226.972	706.323	1476.13	218.832	776.798	1224.31	239.382	586.878	1387.56	238.357	524.934	1235.92	136.515	778.166	1283.97	401.545	697.783	1426.47	472.273	689.399	1249.89	509.756	686.083	1099.65	556.897	522.296	1038.86	540.762	443.925	1009.98	575.681	484.313	966.999	593.049	392.98	964.939
548	0	292.893	481.281	1596.44	194.915	480.017	1596.95	313.528	636.048	1602.3	185.231	651.205	1597.07	226.745	691.272	1474.62	218.046	760.5	1222.63	239.01	571.429	1386.42	237.707	508.638	1235.41	135.813	762.274	1282.09	401.32	682.767	1425.02	472.037	674.756	1248.35	509.696	671.559	1098.22	556.294	507.352	1038.27	539.793	429.264	1009.34	575.523	469.488	966.557	592.041	377.373	964.987
549	0	293.271	466.236	1595.52	195.315	464.747	1596.18	313.593	620.97	1601.23	185.171	635.826	1596.25	226.067	676.015	1473.5	217.212	744.035	1220.53	238.765	555.95	1385.55	237.283	492.688	1234.61	134.955	746.098	1280.46	400.834	667.813	1423.43	471.59	660.438	1246.85	509.282	657.307	1096.67	555.578	492.802	1037.4	539.113	414.686	1008.62	574.817	454.611	965.9	590.906	362.436	964.512
550	0	293.673	451.176	1594.98	195.649	449.438	1596.06	313.684	605.968	1600.64	185.221	620.613	1595.98	225.594	660.848	1472.83	216.571	727.465	1218.64	238.342	540.353	1385.12	236.504	475.776	1234.57	134.159	729.674	1279.01	400.396	653.208	1421.87	470.765	646.259	1245.27	508.784	643.391	1095.16	554.788	478.726	1035.98	538.064	400.712	1007.2	573.366	439.987	964.329	589.705	348.261	963.11
551	0	294.067	436.07	1594.65	196.133	434.088	1595.97	313.624	590.98	1600.3	185.099	605.206	1596	224.993	645.484	1472.3	216.147	710.98	1217.33	238.06	524.897	1385.23	235.836	458.843	1235.34	133.456	713.308	1278.05	399.551	638.533	1420.6	469.763	632.304	1244.11	507.735	629.577	1093.84	553.69	465.203	1034.23	537.026	387.176	1005.41	572.811	426.769	962.689	588.417	334.727	961.056
552	0	294.924	421.121	1594.67	196.633	418.794	1596.56	313.642	576.164	1600.29	185.379	589.903	1597.1	224.297	630.037	1472.26	215.876	694.582	1216.32	237.799	509.374	1385.63	235.758	443.293	1235.55	132.806	696.78	1277.4	398.984	624.042	1419.82	468.696	618.822	1243.22	506.383	616.251	1092.85	552.565	452.2	1032.15	535.837	374.315	1003.03	571.547	414.234	960.422	587.137	322.1	958.459
553	0	295.386	406.1	1595.29	197.055	403.31	1597.59	313.528	561.123	1600.51	185.12	574.498	1597.66	223.972	614.521	1472.66	215.807	678.417	1216.03	237.479	493.788	1386.3	235.213	426.729	1236.88	132.319	680.221	1277.13	398.32	609.313	1419.63	467.414	605.711	1242.62	504.961	603.328	1092.12	551.239	439.788	1029.99	534.556	362.206	1000.26	569.65	402.218	957.703	585.841	310.401	955.311
554	0	295.692	390.979	1596.32	197.689	387.935	1598.7	313.415	546.013	1601.11	184.83	558.901	1598.59	223.678	598.899	1473.2	215.721	662.421	1216.41	237.438	478.22	1387.28	235.072	410.375	1238.02	132.445	663.928	1277.56	397.817	594.521	1419.74	465.815	592.658	1242.38	502.525	590.305	1091.7	549.585	427.791	1027.6	533.272	350.662	997.048	568.247	391.504	954.969	584.504	299.602	951.313
555	0	296.045	375.892	1597.51	198.217	372.583	1600.08	313.42	530.956	1601.9	185.025	543.553	1599.4	223.34	583.169	1474.1	216.124	646.831	1217.23	237.553	462.676	1388.21	234.979	393.507	1239.68	132.46	647.661	1278.53	397.739	579.477	1420.58	464.39	579.493	1242.65	500.591	578.089	1092.19	547.877	416.651	1025.28	531.736	339.801	993.589	566.304	381.372	951.889	582.981	289.637	946.983
556	0	296.472	360.741	1598.89	198.473	357.273	1601.51	313.706	515.941	1602.82	184.905	528.081	1600.15	223.41	567.736	1474.89	216.748	631.587	1218.39	237.662	447.298	1389.17	235.401	378.11	1240.56	132.479	631.665	1279.48	397.685	564.232	1421.6	463.012	566.534	1242.99	497.908	566.2	1092.07	545.953	406.042	1022.62	530.089	329.635	989.774	563.977	372.271	948.339	581.302	280.586	941.753
557	0	297.234	345.724	1600.24	199.034	342.082	1602.88	313.629	500.788	1603.5	185.26	512.883	1600.74	223.41	552.195	1476.1	216.994	616.386	1219.6	238.04	432.068	1389.99	235.937	362.158	1241.67	132.506	615.912	1280.58	398.017	549.201	1422.86	462.369	553.822	1243.67	495.075	554.643	1092.41	543.858	395.981	1019.62	528.308	320.071	985.459	561.34	363.723	944.714	579.546	272.794	935.869
558	0	297.604	330.586	1601.68	199.438	326.838	1603.93	314.101	485.734	1604.7	185.334	497.646	1601.38	223.747	537.027	1477.22	217.149	601.433	1221.08	238.639	417.003	1390.89	236.852	347.319	1242.02	132.705	600.595	1282.14	398.239	534.176	1424.27	460.465	540.661	1244.16	492.028	543.25	1092.91	541.534	386.532	1016.33	526.311	311.119	980.533	558.523	355.918	940.45	577.646	265.513	929.641
559	0	298.063	315.533	1603.25	199.924	311.708	1605.3	314.401	470.636	1605.9	185.841	482.546	1602.41	223.759	521.824	1478.74	217.269	586.833	1222.9	239.394	402.172	1391.82	238.24	332.677	1242.75	132.502	585.183	1283.65	398.461	519.627	1425.71	459.978	527.603	1245.12	488.934	532.06	1093.52	539.066	377.388	1012.78	524.23	302.829	975.665	555.576	348.886	936.121	575.469	258.928	922.921
560	0	298.319	300.458	1604.93	200.458	296.63	1606.71	314.751	455.636	1607.4	186.089	467.467	1603.57	224.172	507.052	1480.07	216.87	571.965	1224.59	240.254	387.499	1392.96	239.874	318.448	1243.59	132.573	570.393	1285.16	398.803	505.714	1427.27	458.852	514.3	1245.98	485.809	521.123	1094.05	536.866	369.013	1009.27	521.98	295.184	970.128	552.31	342.57	931.308	573.141	253.097	915.907
561	0	299.17	285.593	1606.22	201.052	281.646	1607.89	315.395	440.869	1609.02	186.616	452.319	1605.03	224.4	492.189	1481.9	216.955	557.601	1226.47	241.236	373.125	1394.37	241.72	304.609	1244.64	132.467	555.388	1287.21	399.213	491.905	1428.93	457.918	501.397	1246.88	482.799	510.146	1094.94	534.214	360.947	1005.49	519.564	288.085	964.473	549.004	336.631	926.517	570.474	248.059	908.58
562	0	299.554	270.533	1607.75	201.713	266.666	1609.08	315.964	425.963	1611.08	187.233	437.403	1606.65	224.722	477.494	1483.51	217.029	543.113	1228.51	242.347	358.742	1395.79	243.59	290.757	1245.68	132.549	540.65	1289.07	399.508	478.337	1430.52	456.947	488.391	1248.06	479.773	499.291	1095.99	531.356	353.164	1001.31	516.884	281.333	958.265	544.417	330.806	920.95	567.612	243.686	900.805
563	0	300.496	255.862	1609	202.359	251.779	1610.26	316.283	411.085	1612.92	187.829	422.58	1609	225.207	463.057	1485.41	217.006	528.644	1230.56	243.343	344.487	1397.34	245.609	277.581	1246.82	132.435	526.007	1290.88	399.985	464.811	1432.22	455.804	475.541	1249.34	476.707	488.357	1097.1	528.502	345.867	997.337	513.98	275.358	952.136	541.522	326.726	916.78	564.369	240.102	892.773
564	0	301.352	241.062	1610.4	203.113	237.004	1611.7	317.092	396.434	1615.19	188.364	407.644	1610.95	225.729	448.735	1487.29	216.917	514.466	1232.12	244.338	330.388	1399.14	247.226	264.034	1248.58	132.402	511.462	1292.71	400.399	451.534	1433.76	455.008	463.266	1250.54	473.842	477.702	1098.1	525.158	338.865	992.466	510.864	270.006	945.632	537.467	322.727	911.632	560.902	237.257	884.582
565	0	302.274	226.423	1611.74	203.88	222.201	1612.88	317.823	381.884	1617.33	188.978	392.922	1612.91	226.439	434.401	1489.31	216.903	500.517	1233.95	245.335	316.384	1400.94	248.863	250.78	1250.21	132.527	497.091	1294.61	400.843	438.298	1435.3	454.104	451.211	1251.75	471.127	466.91	1099.28	522.166	332.308	988.421	507.469	265.043	938.913	533.309	319.225	906.578	557.029	235.176	876.176
566	0	303.009	212.002	1613.02	204.842	207.546	1614.24	318.552	367.478	1619.37	189.813	378.349	1615.34	226.887	420.195	1491.24	216.719	486.404	1235.97	246.325	302.314	1402.83	250.428	237.229	1252	132.681	482.74	1296.56	401.401	425.06	1436.99	453.177	439.488	1253.07	468.371	455.977	1100.58	519.196	326.215	984.311	503.873	260.816	932.475	528.959	316.22	901.713	552.844	233.688	867.828
567	0	304.063	197.481	1614.37	205.633	192.986	1615.63	319.328	352.93	1621.66	190.5	363.713	1617.5	227.428	405.953	1493.26	216.388	472.586	1237.79	247.198	288.435	1404.93	251.734	223.429	1254.15	132.604	468.271	1298.34	401.859	411.869	1438.62	451.626	427.793	1254.32	465.831	445.052	1101.98	515.163	320.285	979.799	500.14	256.973	926.152	524.498	313.769	897.213	548.46	232.927	859.526
568	0	304.906	183.07	1615.72	206.545	178.466	1616.85	320.006	338.485	1623.63	191.254	349.215	1619.51	227.957	391.871	1495.23	215.951	458.595	1239.22	247.793	274.591	1406.6	252.662	209.172	1256.28	132.64	454.074	1300.38	402.208	398.634	1440.18	451.141	416.329	1256.07	463.544	433.979	1103.58	511.73	314.699	975.861	496.026	253.68	919.689	520.062	311.664	892.997	543.493	232.673	851.363
569	0	305.707	168.966	1616.61	207.608	164.074	1618.28	320.791	324.174	1625.24	192.137	334.746	1621.44	228.513	377.761	1496.83	215.692	444.518	1241.16	248.537	260.631	1408.45	253.524	195.09	1258.39	132.802	439.815	1302.36	402.427	385.224	1441.41	450.076	404.521	1257.22	461.208	423.003	1104.81	507.977	309.337	971.624	491.801	250.703	913.031	515.423	309.789	888.971	538.297	233.027	843.258
570	0	306.677	154.857	1617.63	208.543	149.693	1619.41	321.666	309.86	1626.76	193.016	320.345	1623.12	229.1	363.641	1498.51	215.57	430.626	1242.68	249.373	246.74	1410.2	254.097	181.237	1260.19	132.931	425.51	1303.95	402.802	371.722	1442.8	448.776	392.353	1258.17	458.943	411.51	1106.61	504.376	304.06	968.59	487.058	248.003	906.883	511.211	308.643	885.341	532.775	233.716	835.799
571	0	307.835	140.58	1618.88	209.548	135.401	1620.79	322.888	295.735	1628.43	193.882	306.063	1624.71	229.125	349.688	1499.86	215.487	416.617	1244.05	249.87	232.822	1411.58	254.38	167.282	1261.71	132.817	411.07	1305.56	403.177	358.17	1444.27	448.474	379.984	1259.87	456.682	400.209	1108.21	500.669	298.832	965.772	482.554	245.917	901.35	506.743	307.028	882.616	526.992	234.835	828.731
572	0	308.844	126.53	1619.92	210.509	121.16	1621.9	323.765	281.63	1629.51	194.8	291.741	1626.02	229.585	335.611	1501.18	215.448	402.299	1245.78	250.52	218.798	1412.84	254.61	153.784	1262.91	132.883	396.63	1307.26	403.399	344.322	1445.39	447.746	367.031	1260.7	454.406	388.775	1109.76	496.964	293.846	963.035	478.032	243.93	896.304	502.209	305.26	880.332	520.782	235.883	821.913
573	0	309.865	112.569	1620.74	211.618	106.873	1622.83	324.695	267.504	1630.5	195.743	277.658	1627.6	230.379	321.435	1502.33	215.418	387.725	1246.75	251.137	204.819	1413.92	254.791	140.075	1263.78	133.061	382.28	1308.56	403.759	330.429	1446.26	446.679	353.662	1261.14	451.983	377.281	1110.94	493.007	288.65	960.447	472.926	241.788	891.757	497.954	303.581	878.203	514.402	237.585	815.411
574	0	311.025	98.4641	1621.36	212.581	92.7068	1623.74	325.607	253.386	1631.17	196.533	263.374	1628.18	230.453	307.171	1502.96	215.574	373.413	1247.78	251.567	190.691	1414.8	254.858	126.102	1264.47	133.293	367.918	1309.73	404.023	316.509	1446.8	445.977	340.067	1261.25	449.513	365.833	1111.88	489.011	283.086	957.992	467.781	239.636	887.306	493.858	301.646	876.457	508.179	239.18	809.657
575	0	311.892	84.447	1621.63	213.546	78.4814	1624.48	326.327	239.232	1631.44	197.47	249.162	1628.82	231.052	292.887	1503.71	216.508	359.318	1249.62	252.064	176.656	1415.36	255.058	112.022	1264.97	133.303	353.441	1310.57	404.436	302.421	1447.12	445.546	326.345	1261.56	446.922	354.401	1112.7	484.972	278.258	955.444	463.073	237.237	882.716	489.907	299.627	875.129	501.513	240.28	804.049
576	0	312.415	70.1971	1622.25	214.515	64.2767	1625	327.047	225.042	1631.51	198.334	234.969	1629.12	231.557	278.482	1504.08	216.428	344.932	1249.89	252.628	162.32	1415.64	255.393	98.0986	1264.99	133.418	338.843	1311.56	404.809	288.213	1447.14	444.332	312.535	1261.04	444.332	342.97	1113.19	480.764	272.472	953.372	457.867	235.153	879.069	485.685	297.059	873.951	495.188	241.656	799.337
577	0	313.68	56.0736	1622.49	215.617	49.9869	1625.47	327.917	210.886	1631.34	199.072	220.685	1629.02	232.075	263.962	1504.14	216.696	330.47	1250.32	253.135	148.037	1415.39	255.827	83.5184	1265.13	133.531	324.128	1311.92	405.18	274.06	1447.01	443.495	298.835	1260.47	441.659	331.371	1113.53	476.502	266.821	951.351	452.544	232.998	875.518	481.426	294.251	872.952	489.113	242.575	795.383
578	0	314.763	41.9223	1622.62	216.573	35.7279	1625.84	328.837	196.855	1630.89	199.932	206.306	1628.59	232.59	249.37	1503.9	217.114	315.921	1250.52	253.7	133.581	1414.94	256.221	68.9868	1264.97	133.621	309.557	1312.04	405.668	259.826	1446.52	442.539	285.545	1259.64	439.06	319.852	1113.51	472.367	260.881	949.299	449.909	230.92	873.753	477.48	291.51	872.319	482.946	243.426	791.854
579	0	315.328	27.7296	1622.56	217.518	21.4522	1626.04	329.689	182.72	1630.08	200.659	191.965	1628.06	233.169	234.723	1503.38	217.324	301.415	1250.29	254.161	119.055	1414.34	256.775	54.5069	1264.27	133.659	295.082	1311.81	406.123	245.451	1445.64	441.729	272.468	1258.89	436.659	308.258	1113.49	468.167	254.979	947.311	443.235	229.124	872.386	472.939	288.14	871.485	476.941	243.757	788.822
580	0	316.253	13.3448	1622.22	218.46	6.93957	1625.91	330.549	168.583	1629.06	201.392	177.557	1627.37	233.673	219.983	1502.59	217.473	286.792	1249.7	254.826	104.411	1413.59	257.118	39.9902	1263.27	133.86	280.416	1311.41	406.545	230.99	1444.55	440.981	259.664	1257.93	434.149	296.568	1113.12	463.819	248.563	945.385	437.583	226.017	869.516	468.397	284.503	870.9	470.713	243.654	786.358
581	0	317.072	-1.14135	1621.79	219.36	-7.60907	1625.53	331.268	154.083	1627.97	202.122	163.065	1626.17	234.294	205.041	1501.8	217.704	272.177	1248.93	255.401	89.557	1412.56	257.695	25.6532	1262.18	133.935	265.507	1310.95	406.963	216.304	1443.24	440.215	247.051	1257.06	432.017	285.046	1112.8	459.804	241.983	943.71	431.935	222.471	866.838	463.757	280.573	870.323	464.979	242.813	784.378
582	0	318.401	-15.5628	1621.32	220.287	-22.0915	1625.22	331.906	139.6	1626.39	202.791	148.515	1624.81	234.919	190.099	1500.75	217.84	257.459	1247.85	255.978	74.7179	1411.22	258.13	11.3956	1260.41	134.035	250.494	1310.45	407.661	201.584	1441.94	439.725	234.524	1256.07	429.851	273.365	1112.36	455.689	235.743	942.495	426.953	218.492	864.755	459.21	276.125	870.006	459.306	241.31	782.438
583	0	318.996	-30.1523	1620.6	221.181	-36.7277	1624.69	332.593	124.891	1624.78	203.542	133.981	1623.21	235.649	174.967	1499.37	218.275	242.821	1246.32	256.572	59.8329	1409.8	258.679	-2.80232	1258.5	134.939	236.147	1309.68	408.307	186.674	1440.48	438.553	221.809	1254.34	427.731	261.626	1111.49	452.162	228.848	940.669	422.577	214.017	862.802	454.815	271.135	869.497	453.818	239.291	780.577
584	0	319.838	-44.7089	1619.8	221.953	-51.4314	1623.88	333.482	110.53	1622.83	204.38	119.198	1621.14	236.578	159.806	1497.93	218.947	228.264	1245.11	257.207	44.8158	1408	259.061	-17.0998	1256.53	135.39	221.418	1308.56	409.128	171.658	1438.57	437.686	209.101	1252.79	425.716	249.933	1110.67	448.887	221.612	939.008	418.564	208.446	861.305	450.689	265.744	868.865	448.774	236.326	778.999
585	0	320.59	-59.5444	1618.7	222.871	-66.1606	1622.95	334.075	95.8774	1620.79	205.218	104.39	1619.33	237.748	144.604	1496.46	219.643	213.75	1243.82	257.974	29.6401	1406.35	259.366	-31.6769	1254.35	136.08	206.673	1307.17	409.829	156.443	1436.67	437.038	196.229	1251.36	423.96	238.307	1110.02	446.097	213.985	937.744	414.994	202.817	859.454	447.049	259.656	868.766	444.093	232.668	777.953
586	0	321.763	-74.2403	1617.55	223.716	-80.9896	1621.92	334.94	81.094	1618.82	205.879	89.5048	1617.18	238.378	129.312	1494.87	220.377	199.308	1242.16	258.185	14.7617	1404.47	259.692	-46.478	1252.27	136.943	191.99	1305.9	410.713	141.065	1434.96	436.526	183.134	1249.94	422.163	226.527	1109.14	443.559	205.845	936.586	412.914	195.998	859.2	443.413	252.933	868.522	439.719	228.144	776.953
587	0	322.165	-89.0032	1616.31	224.51	-95.907	1620.81	335.638	66.3301	1616.54	206.544	74.7222	1615.29	239.366	113.928	1493.07	221.491	184.691	1240.73	259.053	-0.539218	1402.35	259.899	-61.4184	1250.2	137.89	177.215	1304.43	411.67	125.601	1433	436.192	169.886	1248.56	420.642	214.625	1108.29	441.336	197.088	935.475	410.28	187.664	858.288	440.298	245.582	868.387	435.656	222.916	776.118
588	0	322.976	-103.964	1614.77	225.283	-110.753	1619.71	336.371	51.4358	1614.68	207.245	59.7691	1613.08	240.282	98.6527	1491.32	222.824	170.137	1239.05	259.804	-15.7792	1400.43	260.404	-76.6445	1247.78	139.005	162.513	1303.05	412.668	109.987	1431.04	436.253	156.44	1247.1	419.428	202.533	1107.54	439.456	188.087	934.48	408.149	179.256	857.234	437.151	237.542	868.007	432.067	216.569	775.298
589	0	323.736	-118.924	1613.8	225.908	-125.699	1618.53	336.879	36.4288	1612.47	207.96	44.7282	1611.28	241.717	83.3728	1489.92	224.579	155.591	1237.43	260.287	-30.7565	1398.37	260.747	-92.0786	1245.73	140.136	147.93	1301.56	413.774	94.3547	1429.31	436.78	143.018	1246.11	418.61	190.34	1107.05	437.835	178.373	933.65	406.457	170.158	856.269	434.588	228.849	867.841	428.922	209.276	774.839
590	0	324.376	-133.854	1612.68	226.575	-140.685	1617.36	337.553	21.2907	1610.85	208.704	29.7191	1609.64	242.74	68.0558	1488.31	226.151	140.797	1235.62	261.002	-46.0084	1396.79	261.034	-107.291	1243.91	141.544	133.31	1300.2	415.018	78.6382	1427.82	437.134	129.172	1245.03	417.943	177.751	1106.52	436.492	168.023	932.945	404.909	160.308	855.503	432.323	219.186	867.996	426.227	200.936	774.484
591	0	324.955	-149.008	1611.07	227.177	-155.656	1616.15	338.535	6.2672	1609.35	209.425	14.7671	1607.92	243.975	52.9305	1486.94	228.08	126.336	1234.62	261.72	-61.2633	1394.82	261.47	-122.44	1242.09	143.006	118.582	1298.59	416.226	62.7892	1426.1	437.849	115.105	1243.96	417.636	165.004	1105.86	435.524	157.15	932.198	403.767	149.651	854.786	430.252	208.936	867.54	423.875	191.572	774.175
592	0	325.615	-164.064	1609.9	227.767	-170.624	1614.89	339.164	-8.90674	1607.49	210.288	-0.138715	1606.16	245.449	37.6971	1485.24	229.917	111.676	1233.36	262.461	-76.4745	1393.36	261.781	-137.519	1240.43	144.673	104.009	1297.08	417.52	46.8215	1424.55	438.313	100.769	1242.65	417.652	151.972	1105.46	434.917	145.503	931.527	403.114	138.129	854.269	428.585	197.747	866.698	421.8	181.087	773.479
593	0	326.159	-179.109	1608.66	228.204	-185.58	1613.49	340.071	-23.9026	1605.94	211.158	-14.8502	1604.47	246.858	22.6508	1483.72	232.056	96.8943	1231.95	263.211	-91.8263	1391.73	262.293	-152.37	1238.97	146.53	89.4255	1295.57	418.932	30.8728	1423.1	439.504	86.3642	1241.72	417.857	138.433	1104.81	434.519	133.332	930.735	402.868	125.902	853.908	427.692	185.79	866.687	420.555	169.708	772.823
594	0	326.668	-194.254	1607.51	228.67	-200.437	1612.32	340.731	-38.9982	1604.27	211.956	-29.8643	1603	248.333	7.53852	1482.25	233.558	81.742	1229.13	264.11	-106.967	1390.49	262.888	-167.36	1237.52	148.665	74.7146	1293.7	420.467	14.9074	1421.9	440.64	71.548	1240.87	418.376	124.701	1104.45	434.615	120.442	929.992	402.92	113.042	853.481	427.324	173.18	866.249	419.749	157.383	772.362
595	0	327.056	-209.161	1606.3	229.065	-215.315	1611.14	341.569	-54.1875	1602.88	212.844	-44.6772	1601.44	249.679	-7.444	1480.7	236.006	66.3996	1228.38	265.148	-122.289	1389.02	263.57	-182.567	1236.34	150.847	60.1134	1292.29	421.98	-1.06964	1420.75	441.699	56.3745	1239.77	419.209	110.642	1103.9	435.251	106.69	929.493	403.572	99.3304	852.897	427.507	159.681	865.766	419.49	143.887	771.793
596	0	327.473	-224.398	1605.24	229.424	-230.029	1610.09	342.331	-69.4025	1601.59	213.595	-59.2733	1600.33	251.185	-22.3098	1479.5	238.556	51.216	1227.09	266.089	-137.396	1387.9	264.702	-198.045	1235.29	152.989	45.1757	1290.39	423.524	-16.9852	1419.8	443.738	41.2875	1239.48	420.416	96.0742	1103.41	436.335	92.3951	929.211	404.733	84.914	852.377	428.359	145.429	865.491	420.153	129.686	771.498
597	0	327.695	-239.181	1604	229.573	-244.759	1608.83	343.146	-84.5535	1600.74	214.539	-73.9327	1598.73	252.702	-37.2259	1477.96	240.774	35.7011	1225.43	267.184	-152.665	1386.8	265.764	-213.676	1234.46	155.135	30.3702	1288.79	425.127	-32.7997	1418.87	445.529	25.9074	1238.9	421.914	81.155	1102.86	437.875	77.4517	928.731	406.183	69.7297	851.748	429.509	130.336	864.95	421.371	114.621	770.936
598	0	327.937	-254.168	1603.18	229.674	-259.363	1608	343.908	-99.5207	1599.67	215.273	-88.5266	1597.85	254.151	-51.9384	1476.75	243.048	19.964	1223.75	268.252	-167.862	1385.66	267.205	-229.695	1233.91	157.437	15.3964	1286.85	426.829	-48.5168	1417.92	447.501	10.3162	1238.22	423.824	65.9777	1102.3	439.744	61.8381	928.073	408.042	53.9512	850.97	431.091	114.583	863.976	423.175	98.7254	770.241
599	0	328.09	-269.373	1603.26	229.893	-274.045	1607.48	344.779	-114.568	1599.15	216.002	-103.113	1597.09	255.894	-66.7337	1475.74	245.376	4.09457	1221.91	269.434	-183.107	1385.12	268.68	-245.796	1233.51	159.767	0.517383	1285.03	428.506	-64.3595	1417.01	449.367	-5.65786	1237.4	426.089	50.3909	1101.59	441.935	45.6893	927.104	410.667	37.3774	850.082	433.403	98.2535	862.855	425.436	81.9271	769.05
600	0	328.22	-284.362	1603.57	230.128	-288.788	1607.44	345.658	-129.724	1599.26	216.887	-117.759	1596.54	257.482	-81.6019	1475.21	247.447	-11.9141	1220.1	270.584	-198.192	1385.11	269.976	-261.824	1233.5	162.132	-14.7236	1283.26	430.192	-79.9925	1416.44	451.612	-21.9079	1236.65	428.466	34.1573	1100.64	444.661	28.9394	926.124	413.988	20.0928	848.845	436.453	81.2926	862.154	428.385	64.4158	768.006
601	0	328.362	-299.422	1604.31	229.978	-303.309	1607.75	346.322	-144.921	1599.51	217.989	-132.334	1596.36	258.932	-96.565	1474.86	249.558	-27.8819	1219.14	271.718	-213.332	1385.39	271.247	-277.579	1233.89	164.25	-29.6386	1281.99	431.694	-95.5908	1416.09	453.759	-38.29	1235.68	431.067	17.4583	1099.61	447.611	11.5743	925.171	416.826	2.50844	848.481	439.336	63.4699	860.585	432.097	46.094	766.927
602	0	328.44	-314.354	1604.92	229.921	-317.818	1608.24	347.034	-160.081	1599.91	218.946	-146.647	1596.31	260.347	-111.524	1474.96	251.277	-43.9184	1218.48	272.691	-228.475	1385.81	272.312	-293.198	1234.45	166.224	-44.6447	1281.35	433.128	-111.167	1415.96	455.846	-55.1557	1235.17	433.708	0.359124	1098.58	450.919	-6.50904	924.341	421.314	-16.0893	847.693	443.198	44.9825	859.601	436.321	26.8588	765.813
603	0	328.33	-329.372	1606.14	230.045	-332.297	1609.07	347.828	-175.176	1600.7	219.751	-160.987	1596.62	261.57	-126.492	1475.32	252.49	-59.7764	1217.87	273.594	-243.726	1386.34	273.019	-308.549	1235.24	167.857	-59.5396	1281.25	434.186	-126.81	1416.01	457.889	-72.1921	1235.03	436.866	-17.0754	1098.38	454.844	-25.3522	923.915	425.687	-35.3734	847.161	447.524	25.717	858.924	441.404	6.86745	765.227
604	0	328.335	-344.298	1607.44	229.985	-346.786	1610.07	348.773	-189.963	1601.81	220.604	-175.52	1597.1	262.473	-141.667	1475.8	253.66	-75.2171	1218.36	274.273	-258.867	1386.97	273.67	-324.049	1236.09	169.182	-74.2137	1281.64	435.232	-142.412	1416.82	459.846	-89.3242	1235.34	439.926	-34.9819	1098.49	459.08	-44.8052	924.049	429.828	-55.4066	847.065	452.294	5.73198	858.305	447.023	-13.9837	765.07
605	0	328.689	-358.977	1609.09	230.058	-361.105	1611.52	349.462	-204.807	1602.64	221.337	-189.798	1597.9	263.311	-156.613	1476.61	254.934	-90.1142	1219.58	274.698	-273.781	1387.83	274.023	-339.291	1237.02	170.314	-88.7837	1282.72	436.154	-158.044	1417.74	461.754	-106.651	1235.82	443.145	-52.9494	1098.33	463.454	-64.9081	924.411	434.19	-76.0584	846.447	457.68	-14.8778	858.139	453.264	-35.6169	765.11
606	0	328.675	-373.523	1610.49	230.106	-375.637	1613.03	349.823	-219.7	1603.18	221.857	-204.163	1598.64	263.834	-171.576	1477.48	255.538	-104.753	1220.54	275.136	-288.807	1388.54	274.284	-354.638	1237.84	171.28	-103.25	1284.02	436.779	-173.702	1418.67	463.423	-124.165	1236.44	446.348	-71.2218	1098.61	468.159	-85.5575	924.803	439.488	-97.4113	846.678	463.242	-36.3889	857.837	459.74	-58.2693	765.156
607	0	328.943	-388.111	1611.74	230.659	-389.587	1614.36	350.084	-234.343	1603.69	222.097	-218.716	1599.25	264.445	-186.61	1478.62	255.946	-119.118	1221.58	275.208	-303.54	1389.31	274.47	-369.523	1238.6	172.035	-117.509	1285.55	437.457	-189.46	1419.76	465.169	-141.685	1237.19	449.607	-89.4885	1098.4	473.016	-106.742	925.25	445.044	-119.35	847.145	469.155	-58.3786	857.557	466.793	-81.5553	765.372
608	0	329.013	-402.729	1613.59	230.596	-404.098	1616.29	350.36	-248.837	1604.32	222.222	-233.361	1599.58	264.793	-201.316	1479.58	256.405	-133.236	1223.12	275.283	-317.937	1390.17	274.138	-384.13	1239.35	172.877	-131.5	1286.96	437.983	-205.162	1420.99	466.715	-159.166	1237.83	453.063	-107.804	1098.61	477.961	-128.041	925.9	450.435	-141.537	847.599	475.289	-80.8775	857.36	473.851	-105.68	765.626
609	0	329.02	-417.051	1614.88	230.642	-418.355	1617.92	350.552	-263.268	1605.08	222.547	-247.788	1600.8	264.973	-215.958	1480.88	256.977	-147.422	1224.87	275.197	-332.356	1391.09	273.653	-398.395	1240.01	173.194	-145.664	1288.53	438.356	-220.818	1422.32	468.362	-176.699	1238.68	456.71	-126.259	1098.93	482.967	-149.864	926.462	456.027	-164.371	848.41	481.58	-103.822	857.296	481.171	-130.484	766.233
610	0	328.762	-431.496	1616.24	230.81	-432.804	1619.29	350.367	-277.805	1605.68	222.393	-262.231	1601.83	265.34	-230.442	1482.23	257.394	-161.388	1225.82	274.754	-346.888	1392.17	272.943	-412.365	1240.79	173.851	-159.637	1290.12	438.57	-236.39	1423.45	470.086	-194.199	1239.64	460.153	-144.796	1099.03	488.271	-171.925	927.504	461.228	-187.086	848.848	488.097	-127.182	857.453	488.734	-155.972	766.835
611	0	328.701	-446.091	1617.71	230.574	-447.214	1621.07	350.126	-292.445	1606.73	222.364	-276.727	1602.97	265.523	-244.952	1483.66	257.868	-175.779	1228.22	274.663	-361.188	1393.13	272.06	-426.313	1241.59	174.449	-173.429	1291.66	438.839	-251.855	1425.1	471.935	-211.646	1240.91	463.909	-163.217	1099.56	493.131	-194.406	928.529	467.228	-210.166	850.127	494.139	-151.307	856.981	496.347	-182.145	768.037
612	0	328.599	-460.392	1619.21	230.257	-461.414	1622.65	349.951	-306.835	1608.03	222.169	-291.085	1604.3	265.521	-259.35	1485.15	258.395	-189.988	1229.94	274.214	-375.436	1394.4	270.961	-440.017	1242.77	174.895	-187.024	1293.19	439.057	-267.137	1426.92	473.777	-228.877	1242.32	467.668	-181.676	1100.1	498.731	-216.972	930.244	471.151	-234.343	849.89	500.872	-175.582	857.96	504.188	-208.776	769.908
613	0	328.096	-474.61	1620.72	229.974	-475.695	1624.05	349.939	-321.048	1609.82	221.932	-305.358	1606.01	265.283	-273.652	1486.55	258.975	-204.168	1232.04	273.705	-389.625	1395.76	269.993	-453.652	1243.74	175.469	-200.491	1294.89	438.964	-282.288	1428.54	475.558	-246.091	1243.97	471.454	-200.077	1100.95	503.9	-239.975	932.061	476.706	-258.772	851.518	507.489	-200.083	859.096	511.824	-236.051	772.272
614	0	327.546	-489.065	1622.02	229.374	-490.105	1625.56	349.572	-335.487	1611.32	221.499	-319.639	1607.35	265.102	-287.916	1488.25	259.822	-218.321	1233.91	273.115	-403.803	1397.06	268.994	-467.304	1244.78	176.096	-213.924	1296.6	438.935	-297.321	1430.4	477.336	-263.091	1245.7	475.307	-218.51	1102.07	508.995	-262.921	934.125	484.075	-283.152	855.096	514.051	-224.858	860.286	519.548	-263.498	774.914
615	0	326.953	-503.538	1623.5	228.889	-504.466	1626.86	348.917	-349.944	1612.85	221.037	-333.812	1609.32	265.047	-302.121	1489.97	260.546	-232.314	1235.59	272.632	-417.88	1398.59	267.936	-480.889	1246.2	176.655	-227.22	1298.39	438.791	-312.169	1432.19	478.975	-279.941	1247.38	478.982	-236.927	1102.96	514.13	-285.775	936.473	489.987	-307.911	857.755	520.281	-249.86	861.614	527.423	-291.418	777.893
616	0	326.329	-517.811	1624.94	228.347	-518.461	1628.32	348.3	-364.332	1614.62	220.491	-348.113	1610.74	264.766	-316.299	1491.5	261.385	-245.98	1237.56	272.02	-431.924	1400.17	267.124	-494.475	1247.62	177.392	-240.41	1300.01	438.606	-326.911	1434.2	480.476	-296.548	1249.39	482.337	-255.481	1103.92	519.127	-308.78	939.124	496.524	-333.453	860.493	526.601	-274.691	863.612	534.9	-319.461	781.65
617	0	325.527	-532.064	1626.51	227.528	-532.714	1629.55	347.689	-378.517	1616.23	219.971	-362.098	1612.37	264.591	-330.394	1493.07	262.095	-259.487	1239.03	271.591	-446.002	1401.69	266.295	-508.259	1249.24	178.068	-253.661	1301.64	438.558	-341.685	1436.23	482.012	-313.065	1251.41	485.694	-273.863	1105.24	523.917	-331.708	942.005	501.596	-358.36	863.649	532.572	-299.804	865.889	542.245	-347.432	785.926
618	0	324.699	-546.232	1627.7	226.68	-546.913	1630.79	347.241	-392.658	1617.94	219.439	-376.282	1614.28	264.454	-344.415	1494.6	262.846	-272.837	1240.86	271.082	-459.995	1403.1	265.71	-522.065	1250.61	178.744	-266.901	1303.31	438.302	-356.439	1438.35	483.67	-329.536	1253.53	489.323	-292.137	1107.03	528.875	-354.775	945.622	507.288	-383.486	867.56	538.181	-324.954	868.138	549.473	-375.377	790.536
619	0	323.876	-560.492	1628.85	225.803	-560.896	1631.96	346.579	-406.905	1619.65	218.805	-390.381	1615.57	264.294	-358.414	1496.12	263.583	-286.195	1242.42	270.581	-473.938	1404.64	265.193	-535.878	1252.01	179.219	-280.099	1304.81	438.117	-371.289	1440.38	485.433	-345.531	1255.82	492.575	-310.454	1108.56	533.545	-377.556	949.133	512.834	-408.658	872.022	543.861	-350.133	871.464	556.497	-403.394	795.771
620	0	322.788	-574.766	1630.1	224.649	-574.957	1632.81	345.689	-421.253	1621.07	218.092	-404.257	1617.17	263.92	-372.413	1497.39	264.249	-299.351	1243.95	270.051	-487.86	1405.89	264.579	-549.584	1253.23	179.79	-293.246	1306.4	437.997	-386.041	1442.36	486.925	-361.724	1257.86	495.87	-328.571	1110.14	538.141	-400.463	953.053	518.144	-433.875	876.625	548.501	-375.467	873.825	563.403	-431.298	801.844
621	0	321.681	-588.943	1630.83	223.595	-588.986	1633.59	344.79	-435.47	1622.4	217.198	-418.293	1617.99	263.635	-386.363	1498.49	264.814	-312.671	1245.19	269.495	-501.739	1406.94	264.002	-563.227	1254.12	180.219	-306.43	1307.67	437.739	-400.943	1444.03	487.8	-377.949	1259.9	499.057	-346.71	1111.63	542.393	-423.339	956.802	523.268	-458.979	881.989	553.641	-400.596	877.191	569.708	-459.091	807.519
622	0	320.627	-603.039	1631.82	222.515	-603.053	1634.32	344.197	-449.491	1623.57	216.496	-432.31	1618.91	263.507	-400.375	1499.41	265.154	-326.021	1246.43	268.989	-515.728	1407.75	263.48	-576.773	1254.92	180.617	-319.848	1308.93	437.522	-415.813	1445.63	489.449	-394.338	1261.7	502.35	-364.703	1113.31	546.924	-446.283	961.071	528.5	-484.375	887.023	558.136	-425.757	880.418	575.696	-486.725	813.288
623	0	319.588	-617.206	1632.63	221.403	-616.983	1634.92	343.418	-463.753	1624.57	215.704	-446.281	1619.5	263.051	-414.498	1500.02	265.616	-339.693	1247.38	268.444	-529.63	1408.53	262.9	-590.241	1255.51	181.235	-333.147	1309.85	437.333	-430.684	1447.04	490.941	-410.607	1263.33	505.533	-382.777	1114.52	551.235	-468.535	965.043	533.208	-509.478	892.038	563.053	-450.548	883.778	581.469	-514.12	819.166
624	0	318.44	-631.417	1633.28	220.652	-630.698	1635.07	342.426	-478.003	1625.02	214.879	-460.259	1619.83	262.787	-428.629	1500.61	265.939	-353.493	1248.35	267.992	-543.647	1408.84	262.286	-603.821	1255.78	181.538	-346.622	1310.72	437.026	-445.634	1448.07	492.234	-426.916	1264.82	508.386	-400.842	1115.35	555.143	-490.964	968.684	538.029	-534.324	897.033	567.44	-475.509	887.019	586.824	-541.277	825.265
625	0	317.334	-645.611	1633.62	219.553	-644.793	1635.17	341.604	-492.316	1625.6	214.144	-474.134	1620.21	262.58	-442.771	1500.97	266.201	-367.454	1248.96	267.474	-557.601	1408.9	261.549	-617.43	1255.73	181.833	-360.006	1311.1	436.702	-460.548	1448.96	493.376	-443.307	1265.79	511.253	-418.857	1116.29	558.929	-513.26	972.266	542.108	-559.461	902.283	571.539	-500.352	890.196	591.792	-568.237	831.107
626	0	316.215	-659.768	1633.73	218.42	-658.831	1635.2	340.926	-506.36	1625.75	213.386	-488.265	1619.84	262.117	-456.989	1501.15	266.496	-381.393	1249.33	266.814	-571.588	1408.99	260.843	-631.173	1255.48	181.998	-373.739	1311.26	436.351	-475.4	1449.51	494.525	-459.796	1266.84	513.831	-436.983	1116.74	562.449	-535.484	975.952	546.055	-584.322	907.59	575.54	-524.922	893.574	596.521	-594.911	837.038
627	0	315.131	-673.972	1633.87	217.09	-672.833	1635.09	340.06	-520.726	1625.64	212.599	-502.388	1619.54	261.751	-471.251	1500.98	266.604	-395.32	1249.39	266.323	-585.862	1408.66	260.097	-645.061	1255.19	182.409	-387.375	1311.27	435.829	-490.266	1449.85	495.571	-476.274	1267.68	516.25	-455.019	1117.3	566.027	-557.273	979.458	550.858	-608.179	912.568	578.972	-549.592	896.615	600.88	-621.22	843.029
628	0	314.222	-688.237	1634.01	216.257	-686.892	1634.59	339.105	-535.137	1625.35	211.79	-516.381	1618.75	261.221	-485.734	1500.46	266.85	-409.293	1249.34	265.311	-599.907	1408.15	259.417	-658.946	1254.43	182.428	-401.144	1310.71	435.338	-505.319	1449.96	496.585	-492.778	1268.04	519.005	-472.654	1117.99	569.207	-579.056	982.771	554.396	-631.629	917.368	582.402	-574	900.003	604.867	-647.101	848.76
629	0	313.143	-702.431	1633.59	215.087	-701.285	1634.1	338.278	-549.358	1624.46	211.009	-530.592	1617.92	260.701	-500.207	1500.05	266.943	-423.289	1249.14	264.831	-614.291	1407.41	258.764	-672.951	1253.64	182.642	-415.048	1310.38	434.84	-520.303	1449.89	497.438	-509.176	1268.39	521.136	-490.525	1118.02	572.115	-600.712	985.944	557.967	-655.69	922.556	585.67	-597.872	903.238	608.702	-672.912	854.724
630	0	312.004	-716.663	1632.87	214.072	-715.169	1633.66	337.413	-563.718	1623.81	210.223	-544.955	1616.87	260.151	-514.652	1499.3	266.635	-437.26	1248.46	264.285	-628.666	1406.42	258.109	-686.97	1252.56	182.494	-429.271	1309.69	434.303	-535.146	1449.69	498.096	-525.591	1268.62	523.222	-508.429	1117.95	574.924	-622.092	989.372	560.843	-679.508	927.848	589.253	-621.022	906.68	612.061	-698.083	860.461
631	0	310.953	-731.107	1632.51	212.879	-729.569	1633.09	336.379	-578.279	1622.9	209.44	-558.994	1616	259.474	-529.373	1498.32	266.523	-450.99	1248.1	263.277	-643.142	1405.48	257.376	-701.191	1251.21	182.269	-443.347	1308.59	433.564	-550.072	1449.18	498.661	-541.833	1268.6	525.297	-526.144	1118.03	577.322	-643.415	992.583	563.914	-702.321	932.616	591.544	-645.087	909.819	615.029	-723.145	865.951
632	0	309.759	-745.462	1631.77	211.893	-743.802	1632.22	335.648	-592.498	1621.76	208.362	-573.46	1614.36	258.622	-544.063	1497.41	265.825	-464.956	1246.91	262.835	-657.688	1403.94	256.725	-715.359	1249.89	181.787	-457.822	1307.15	432.705	-565.077	1448.39	499.039	-558.081	1268.2	526.802	-544.035	1117.39	579.401	-664.478	995.151	566.247	-725.095	937.001	593.796	-668.265	912.522	617.65	-747.599	871.242
633	0	308.765	-759.904	1630.93	210.875	-758.193	1631.34	334.583	-607.171	1620.21	207.39	-588.04	1613.01	257.726	-558.934	1496.04	265.285	-479.123	1245.93	262.156	-672.36	1402.62	256.193	-729.579	1248.09	181.477	-472.137	1306.19	431.913	-579.974	1447.39	499.309	-574.148	1267.55	528.384	-561.78	1117.03	581.181	-685.378	997.784	568.394	-747.4	941.34	596.075	-691.16	915.357	620.119	-771.514	876.511
634	0	307.857	-774.349	1630.25	209.725	-772.773	1630.51	333.442	-621.722	1618.72	206.484	-602.418	1611.63	256.846	-573.693	1494.85	264.471	-493.48	1244.6	260.822	-687.042	1401.3	255.562	-744	1246.46	180.647	-486.422	1304.63	431.008	-594.691	1446.43	499.328	-590.24	1267.06	529.47	-579.531	1116.28	582.81	-705.791	1000.51	570.149	-769.329	945.575	597.418	-713.966	917.87	621.936	-795.214	881.16
635	0	306.713	-788.845	1629.08	208.834	-787.201	1629.29	332.387	-635.995	1616.95	205.292	-617.124	1609.39	255.711	-588.491	1493.23	263.502	-507.667	1243.29	260.329	-701.849	1399.55	254.873	-758.447	1244.84	179.789	-501.298	1303.07	429.994	-609.588	1445.36	499.306	-606.142	1266.58	530.616	-597.02	1115.68	584.153	-725.996	1002.91	571.524	-790.747	949.314	598.866	-736.176	920.495	623.675	-818.135	886.131
636	0	305.75	-803.396	1628	207.652	-801.896	1627.85	331.271	-650.541	1615.23	204.012	-631.762	1607.39	254.561	-603.578	1491.58	262.615	-522.481	1241.78	259.066	-716.842	1398.04	254.345	-773.167	1243.24	178.626	-516.311	1301.08	428.901	-624.457	1444.19	498.998	-622.191	1265.49	531.376	-614.404	1114.81	584.881	-746.014	1004.81	572.637	-811.679	953.321	600.178	-757.87	922.833	624.935	-840.734	890.568
637	0	304.588	-817.888	1626.5	206.553	-816.39	1626.74	329.941	-665.146	1613.45	202.878	-646.248	1605.88	253.378	-618.442	1490.02	261.252	-537.192	1239.64	258.459	-731.682	1396.17	253.626	-788.08	1241.41	177.334	-531.62	1298.98	427.59	-639.205	1442.52	498.52	-638.014	1264.47	531.735	-631.546	1113.68	585.137	-765.585	1006.22	573.211	-832.132	956.548	601.06	-779.233	924.993	625.843	-862.845	894.814
638	0	303.552	-832.514	1625.4	205.356	-830.96	1625.12	328.854	-679.466	1611.72	201.46	-661.213	1603.31	252.111	-633.477	1488.16	259.793	-552.029	1237.72	256.943	-746.783	1394.49	252.9	-803.395	1239.64	175.903	-547.324	1296.95	426.384	-653.841	1441.11	497.795	-653.872	1263.28	532.132	-648.5	1112.75	585.661	-784.839	1008.29	573.413	-852.394	959.407	601.629	-800.037	926.98	626.601	-884.307	898.961
639	0	302.336	-846.941	1623.84	204.23	-845.921	1623.59	327.263	-694.154	1609.73	200.084	-675.935	1601.66	250.492	-648.415	1486.06	258.25	-566.979	1236.02	256.162	-761.744	1392.47	252.295	-818.749	1237.79	174.193	-562.781	1294.93	425.088	-668.396	1439.81	497.002	-669.615	1262.17	531.901	-665.265	1111.53	585.497	-803.71	1009.53	573.455	-872.359	961.886	602.019	-820.455	928.872	626.793	-905.261	902.374
640	0	301.253	-861.616	1622.1	203.233	-860.559	1622.08	325.587	-708.944	1607.8	198.465	-690.937	1599.5	248.83	-663.607	1484	256.286	-582.19	1234.06	254.756	-776.921	1390.69	251.648	-834.287	1235.83	172.476	-578.323	1293.01	423.659	-683.086	1438.32	495.91	-685.341	1260.8	531.638	-681.86	1110.47	585.254	-822.253	1010.99	573.222	-891.615	964.252	602.153	-840.265	930.738	626.749	-925.73	905.848
641	0	300.265	-876.059	1620.71	201.948	-875.579	1620.39	324.326	-723.349	1605.84	196.939	-705.709	1597.74	247.041	-678.593	1482.34	254.423	-597.452	1232.38	253.841	-792.013	1388.78	250.912	-849.824	1234.05	170.413	-593.831	1291.01	421.93	-697.73	1436.68	494.727	-700.866	1259.58	531.116	-698.149	1109.36	584.637	-840.235	1012	572.623	-910.375	966.286	601.916	-859.515	932.261	626.39	-945.409	909.104
642	0	299.174	-890.657	1619.15	200.891	-890.453	1619.06	322.87	-737.701	1604.25	195.335	-720.841	1595.44	245.042	-693.732	1480.43	252.372	-612.873	1230.84	252.404	-807.26	1386.91	250.049	-865.352	1232.51	168.209	-609.459	1289.05	420.078	-712.273	1435.01	493.299	-716.155	1258.44	530.31	-713.893	1108.33	583.809	-857.763	1013.23	571.46	-928.458	968.349	601.394	-878.202	933.79	625.536	-964.669	912.01
643	0	298.008	-905.471	1617.34	199.87	-905.559	1617.12	320.805	-752.393	1602.12	193.526	-735.865	1593.7	242.954	-708.776	1478.46	249.713	-628.562	1228.69	250.673	-822.539	1385.14	249.144	-880.861	1230.73	165.764	-625.279	1287.1	418.019	-726.952	1433.3	491.637	-731.296	1256.99	529.344	-729.395	1107.02	582.598	-874.756	1013.97	570.241	-945.993	969.852	600.497	-896.365	934.968	624.303	-983.128	914.219
644	0	296.916	-919.899	1615.73	198.56	-920.633	1615.64	319.263	-766.957	1600.25	191.589	-751.052	1591.72	240.86	-723.859	1476.36	247.186	-644.322	1226.67	249.34	-837.829	1383.17	248.18	-896.58	1228.78	163.09	-641.184	1284.95	415.95	-741.362	1431.55	489.896	-746.306	1255.3	527.896	-744.532	1105.29	580.932	-891.479	1014.18	568.579	-962.954	971.183	599.35	-913.879	935.906	622.876	-1001.1	916.582
645	0	295.887	-934.606	1614.08	198.007	-935.632	1613.9	317.244	-781.371	1597.92	189.751	-766.13	1589.83	238.749	-739.068	1474.45	244.253	-660.296	1224.26	247.602	-853.23	1381.38	246.917	-912.155	1227.27	160.319	-657.05	1282.76	413.88	-755.832	1429.64	488.056	-760.895	1253.79	526.449	-759.232	1103.89	579.183	-907.393	1014.38	566.631	-979.278	972.476	597.948	-930.831	936.645	621.16	-1018.32	918.408
646	0	294.812	-949.142	1612.39	196.781	-950.691	1612.54	315.346	-795.989	1596.06	187.914	-781.361	1588.12	236.373	-754.183	1472.54	241.396	-676.473	1222.34	245.698	-868.573	1379.8	245.488	-928.04	1225.88	157.425	-673.026	1280.78	411.637	-770.352	1427.69	486.098	-775.139	1252.11	525.029	-773.188	1102.52	577.272	-922.727	1014.78	564.415	-995.082	973.084	596.196	-947.252	937.007	618.953	-1034.88	920.057
647	0	293.86	-963.866	1611.01	195.881	-965.83	1611.22	313.171	-810.617	1593.84	185.906	-796.711	1586.59	234.137	-769.329	1470.87	238.444	-692.64	1220.17	243.73	-884.039	1378.21	243.716	-943.766	1224.46	154.566	-688.903	1278.65	409.347	-785.101	1425.65	483.851	-789.165	1250.12	523.059	-787.049	1100.49	575.196	-937.717	1014.83	562	-1010.32	973.512	594.236	-962.997	937.086	616.511	-1050.96	921.183
648	0	292.808	-978.569	1609.54	194.764	-981.1	1610.46	311.668	-824.93	1592.83	183.821	-811.96	1585.43	231.728	-784.437	1469.54	235.532	-708.757	1218.26	241.589	-899.468	1377	241.58	-960.027	1223.33	151.752	-704.899	1276.96	407.145	-799.603	1423.94	481.659	-802.992	1248.29	521.362	-800.195	1098.99	572.593	-952.169	1013.99	559.225	-1024.94	973.8	591.985	-978.187	937.212	613.675	-1066.35	921.931
649	0	291.73	-993.333	1608.9	193.678	-996.606	1609.94	309.418	-839.8	1591.73	181.655	-827.541	1584.87	229.179	-799.616	1468.52	233.103	-724.686	1217.01	239.282	-914.793	1376.33	239.133	-975.901	1222.8	148.978	-720.957	1275.53	404.857	-814.08	1422.21	479.361	-816.341	1246.95	518.974	-813.476	1097.43	570.086	-965.902	1013.88	556.184	-1038.83	973.617	589.524	-992.496	937.091	610.415	-1081.14	922.196
650	0	290.52	-1008.16	1608.49	192.638	-1011.8	1609.67	306.744	-854.532	1590.72	179.344	-842.886	1584.85	226.627	-814.679	1468.17	230.55	-740.721	1215.41	237.024	-930.184	1376.17	236.61	-992.132	1222.81	146.097	-737.014	1274.32	402.369	-828.446	1420.8	476.184	-829.579	1245.51	516.668	-826.074	1096.35	566.775	-979.317	1012.85	552.822	-1052.3	972.912	586.634	-1006.18	936.413	607.086	-1094.91	922.233
651	0	289.466	-1022.89	1608.53	191.537	-1027.41	1609.99	304.642	-869.259	1590.93	177.089	-858.426	1585.36	224.057	-829.858	1467.88	228.404	-756.738	1214.54	234.835	-945.592	1376.49	234.076	-1008.16	1223.25	143.519	-753.024	1273.69	399.957	-842.797	1420.07	473.532	-842.222	1244.54	513.489	-838.787	1095.03	563.522	-992.045	1011.8	549.404	-1064.89	972.202	583.239	-1019.09	935.703	603.431	-1107.95	921.916
652	0	288.47	-1037.61	1608.93	190.43	-1042.91	1610.87	303.031	-883.569	1592.02	174.92	-874.052	1586.37	221.698	-844.928	1468.39	226.49	-772.589	1214.13	232.649	-960.854	1377.25	231.614	-1024.27	1224.47	141.233	-768.8	1273.67	397.547	-857.047	1419.8	470.278	-854.863	1244.27	510.51	-850.631	1094.58	560.202	-1004.07	1011.27	545.649	-1077.02	971.283	579.767	-1031.08	934.87	599.532	-1120.06	921.016
653	0	287.301	-1052.59	1609.62	189.414	-1058.35	1611.82	300.708	-898.289	1592.96	172.493	-889.484	1587.73	219.573	-860.178	1469.07	224.769	-788.149	1213.92	230.534	-976.117	1378.5	229.226	-1039.98	1226.11	139.008	-784.545	1274.11	395.301	-871.327	1420.17	467.293	-867.048	1244.29	506.8	-862.562	1094.55	556.098	-1015.51	1009.99	541.52	-1088.4	969.997	575.819	-1042.21	933.794	595.564	-1131.04	919.925
654	0	286.043	-1067.31	1610.53	188.09	-1073.73	1612.79	298.49	-912.944	1594.17	170.526	-904.919	1589.12	217.571	-875.201	1470.15	222.827	-803.714	1214.35	228.544	-991.394	1379.81	226.967	-1055.96	1227.77	137.16	-800.188	1274.89	393.246	-885.872	1420.87	463.631	-879.422	1244.19	502.928	-873.685	1094.73	551.983	-1026.29	1009.16	537.685	-1098.33	968.533	571.257	-1052.48	932.375	591.493	-1141.25	918.209
655	0	284.701	-1082.03	1611.65	186.946	-1088.97	1613.94	296.321	-927.781	1595.52	168.378	-920.432	1590.59	215.799	-890.339	1471.5	221.531	-818.614	1215.75	226.908	-1006.64	1381.13	224.98	-1071.64	1229.38	135.456	-815.566	1276.08	391.326	-900.738	1421.96	460.138	-891.768	1244.73	498.489	-884.844	1095.17	548.05	-1036.6	1008.36	533.433	-1108.04	967.08	566.491	-1062.04	930.64	586.922	-1150.66	916.048
656	0	283.482	-1096.96	1613.16	185.672	-1104.27	1615.25	294.161	-942.606	1596.92	166.28	-935.695	1592.08	214.164	-905.289	1473.06	220.594	-833.339	1217.68	225.444	-1021.57	1382.66	223.355	-1087.15	1230.74	133.77	-830.735	1277.9	389.806	-915.362	1423.64	457.148	-904.331	1245.64	494.401	-895.356	1096.12	543.333	-1046.31	1006.92	528.941	-1117.33	965.184	561.615	-1070.78	929.14	582.301	-1158.97	913.485
657	0	282.144	-1111.87	1614.61	184.257	-1119.42	1616.67	292.844	-957.105	1599.05	164.53	-950.882	1593.77	212.437	-920.194	1474.76	219.385	-847.711	1219.92	224.303	-1036.33	1384.25	222.151	-1102.31	1232.31	132.147	-845.521	1280	388.389	-929.914	1425.52	454.397	-916.736	1247.09	490.013	-905.795	1097.52	538.849	-1055.41	1005.86	524.249	-1126.07	963.146	556.485	-1078.84	927.342	577.396	-1166.91	910.476
658	0	280.847	-1126.73	1616.63	183.103	-1134.51	1618.06	291.241	-972.041	1601.49	163.062	-966.058	1595.42	211.048	-934.868	1476.93	217.874	-861.708	1222.25	223.201	-1050.5	1386.1	221.501	-1116.72	1233.76	130.622	-860.065	1282.55	386.921	-944.273	1427.57	451.842	-929.305	1248.58	485.17	-916.539	1098.47	534.232	-1064.15	1004.45	519.592	-1134.38	960.809	551.319	-1086.08	925.454	572.274	-1173.97	906.773
659	0	279.632	-1141.61	1618.7	181.854	-1149.87	1619.4	289.697	-986.943	1603.89	161.509	-981.156	1597.24	209.799	-949.549	1479.21	216.429	-875.679	1225.06	222.542	-1065.09	1387.96	221.467	-1130.19	1234.96	129.283	-874.456	1285.09	385.841	-958.204	1429.9	449.057	-941.838	1249.87	480.716	-926.39	1100.1	529.562	-1072.6	1002.61	514.68	-1142.13	957.969	545.671	-1093.16	923.253	566.827	-1180.83	902.418
660	0	278.483	-1156.62	1620.66	180.771	-1164.9	1620.97	288.613	-1001.58	1606.91	159.981	-996.146	1599.26	208.389	-963.867	1481.35	214.99	-889.591	1228.06	221.777	-1079.23	1390.05	221.481	-1143.89	1236.96	127.979	-888.758	1287.62	384.39	-971.914	1432.03	446.603	-954.214	1251.67	476.148	-936.589	1101.85	524.743	-1080.58	1000.94	510.125	-1148.73	955.822	540.399	-1099.38	921.571	561.373	-1186.39	897.946
661	0	277.264	-1171.34	1622.48	179.631	-1179.8	1622.29	287.091	-1016.37	1609.16	158.918	-1011.06	1601.45	207.365	-978.13	1483.7	213.104	-903.609	1230.29	221.093	-1093.14	1392.29	221.588	-1157.66	1238.91	126.387	-903.209	1290.18	383.459	-985.28	1434.38	444.258	-966.279	1253.67	471.817	-946.61	1103.55	519.843	-1088.42	998.946	505.332	-1155.44	952.825	535.034	-1105.41	919.301	555.662	-1191.61	893.099
662	0	276.252	-1186.11	1624.34	178.698	-1194.62	1623.82	285.57	-1031.11	1612.01	157.735	-1025.76	1604.07	206.269	-992.278	1486.09	211.532	-917.806	1232.61	220.525	-1107.1	1394.47	221.844	-1171.09	1240.85	125.333	-917.306	1292.73	382.495	-998.549	1436.62	441.818	-978.447	1255.28	467.129	-956.884	1104.83	514.957	-1095.91	996.743	500.043	-1161.99	949.147	529.196	-1111.3	916.337	549.567	-1196.56	887.42
663	0	275.488	-1200.8	1626.39	177.716	-1209.44	1625.52	284.049	-1045.87	1613.99	156.807	-1040.51	1606.5	205.496	-1006.39	1488.53	209.87	-932.198	1235.01	220.094	-1120.92	1396.83	222.122	-1184.48	1243.11	123.743	-931.55	1295.04	381.659	-1011.68	1438.66	439.314	-990.114	1256.78	462.809	-967.01	1106.7	510.26	-1103.21	994.627	495.203	-1167.82	945.527	523.293	-1116.5	913.159	543.733	-1200.8	881.96
664	0	274.633	-1215.5	1628.34	176.773	-1224.13	1627.15	283.222	-1060.53	1617.28	156.03	-1055.18	1608.91	204.427	-1020.36	1490.93	208.566	-946.126	1237.77	219.691	-1134.68	1399.31	222.441	-1197.25	1245.53	122.368	-945.455	1297.71	380.778	-1024.66	1440.7	437.257	-1001.46	1258.89	458.665	-977.071	1108.4	505.509	-1110.03	992.384	489.215	-1174	940.527	517.454	-1121.02	910.079	537.799	-1204.28	876.538
665	0	273.735	-1230.12	1629.93	176.02	-1238.76	1628.59	282.58	-1074.88	1620.6	154.994	-1069.68	1611.95	203.791	-1034.18	1493.43	207.02	-960.005	1240.4	218.921	-1148.15	1401.74	222.433	-1210.36	1248.02	120.924	-959.586	1299.98	380.018	-1037.51	1442.98	434.801	-1012.93	1260.53	454.81	-987.048	1110.54	500.736	-1116.73	989.891	484.274	-1179.14	936.567	511.704	-1125.31	907.205	531.227	-1207.52	869.961
666	0	272.897	-1244.59	1631.38	175.379	-1253.51	1629.63	281.575	-1089.48	1622.86	154.102	-1083.86	1614.87	202.911	-1048.03	1495.9	205.11	-973.763	1242.51	218.453	-1161.75	1404.09	222.363	-1223.92	1250.33	119.451	-973.711	1302.4	378.945	-1050.58	1444.76	432.37	-1024.14	1262.43	450.415	-997.81	1111.74	495.915	-1123.19	987.201	478.759	-1183.84	932.316	506.006	-1129.28	904.352	524.866	-1210.18	863.828
667	0	272.262	-1259.06	1632.78	174.784	-1267.97	1630.98	281.62	-1103.46	1626.45	153.418	-1098.53	1617.16	201.978	-1061.83	1497.67	203.441	-987.241	1244.91	217.787	-1175.27	1406.34	222.194	-1237.22	1252.71	118.064	-987.691	1304.71	377.979	-1063.49	1446.65	430.087	-1035.41	1264.14	447.003	-1008.07	1113.89	491.373	-1129.44	984.729	473.612	-1188.22	927.351	500.567	-1132.5	901.662	518.75	-1212.13	857.732
668	0	271.633	-1273.5	1633.89	174.062	-1282.32	1632.2	280.119	-1118.27	1627.63	152.811	-1112.7	1619.39	201.27	-1075.38	1500.08	201.527	-1000.77	1246.7	216.935	-1188.82	1408.45	221.826	-1250.76	1255	116.334	-1001.79	1306.83	376.992	-1076.42	1448.32	427.911	-1046.71	1265.69	443.472	-1018.56	1116.05	486.631	-1135.44	982.25	468.47	-1192.18	923.278	495.23	-1135.71	898.909	512.671	-1213.55	851.714
669	0	271.052	-1287.85	1634.8	173.378	-1296.48	1633.16	280.29	-1132.07	1630.52	152.007	-1126.75	1621.93	200.173	-1089.27	1501.53	200.167	-1014	1248.9	216.049	-1202.22	1410.35	221.178	-1264.23	1257.16	114.939	-1015.48	1308.74	375.851	-1089.49	1449.59	425.533	-1058.23	1266.83	439.574	-1029.48	1116.99	482.167	-1141.3	979.57	463.341	-1195.92	918.494	489.893	-1138.64	896.21	506.496	-1214.62	845.731
670	0	270.473	-1302.06	1635.29	172.857	-1310.9	1633.88	279.745	-1146.37	1632.19	151.438	-1141.31	1622.93	199.481	-1102.83	1503.27	198.421	-1027.39	1250.31	215.305	-1215.9	1411.71	220.162	-1278.14	1258.7	113.292	-1029.43	1310.69	374.73	-1102.69	1450.74	423.418	-1070.11	1268.03	436.263	-1040.15	1118.51	477.75	-1147.03	976.87	458.346	-1199.39	913.827	484.7	-1141.3	893.535	500.347	-1215.17	839.662
671	0	269.891	-1316.21	1635.82	172.283	-1325.14	1634.51	278.65	-1160.78	1632.63	150.931	-1155.39	1624.83	198.606	-1116.51	1504.54	196.571	-1040.7	1251.1	214.225	-1229.41	1413.04	219.037	-1291.47	1259.96	111.85	-1043.26	1312.31	373.506	-1116.01	1451.41	421.379	-1082.19	1268.61	433.121	-1050.89	1120.02	473.361	-1152.65	974.077	453.631	-1202.45	909.531	480.029	-1143.86	891.292	494.443	-1215.44	833.661
672	0	269.325	-1330.45	1636.12	171.572	-1339.13	1634.79	277.879	-1174.94	1632.94	150.16	-1169.43	1626.07	197.658	-1130.23	1505.45	195.382	-1053.84	1252.2	213.098	-1243.13	1413.9	217.729	-1304.71	1260.94	110.179	-1056.96	1313.48	372.398	-1129.32	1451.9	419.408	-1094.38	1269.25	429.592	-1061.75	1120.88	469.133	-1158.01	971.355	448.803	-1206.87	904.944	475.245	-1146.39	889.181	488.51	-1215.55	828.059
673	0	268.696	-1344.62	1635.94	171.195	-1353.37	1634.99	277.551	-1188.87	1633.27	149.359	-1183.53	1626.63	196.554	-1144.16	1505.6	193.968	-1067.17	1252.84	211.952	-1256.78	1414.41	215.89	-1319.88	1261.01	108.77	-1070.66	1314.17	371.356	-1142.84	1451.94	417.215	-1106.72	1268.55	425.711	-1072.85	1120.99	464.797	-1163.49	968.715	443.943	-1208.89	899.291	470.64	-1148.97	886.705	482.859	-1215.54	822.504
674	0	268.169	-1358.68	1635.54	170.675	-1367.56	1634.9	276.782	-1203.18	1633.3	148.928	-1197.63	1626.85	195.707	-1157.88	1505.84	192.782	-1081.1	1253.3	210.895	-1270.42	1414.71	215.083	-1331.53	1261.08	107.298	-1084.52	1314.97	370.217	-1156.54	1451.72	415.106	-1119.68	1268.3	422.369	-1083.59	1121.58	460.749	-1169	966.069	439.58	-1211.79	895.02	466.352	-1151.58	884.545	477.498	-1215.28	817.261
675	0	267.846	-1372.62	1635.17	170.079	-1381.67	1634.65	276.57	-1217.04	1633.59	148.234	-1211.54	1626.93	194.8	-1171.71	1506.21	191.752	-1094.71	1253.27	209.893	-1284.2	1414.54	213.134	-1346.87	1260.9	105.972	-1098.19	1315.24	369.32	-1170.2	1451.32	412.596	-1132.83	1267.52	418.759	-1094.48	1121.78	456.65	-1174.55	963.786	435.204	-1214.67	891.133	462.163	-1154.21	882.902	472.364	-1214.72	812.636
676	0	267.135	-1386.82	1634.21	169.552	-1395.62	1634.35	276.3	-1230.85	1633.55	147.727	-1225.79	1626.58	193.631	-1185.44	1505.88	190.688	-1108.52	1253.05	208.737	-1298.12	1414.08	211.749	-1360.44	1260.4	104.893	-1111.99	1315.29	368.319	-1183.95	1450.61	410.882	-1145.32	1267.15	414.409	-1105.6	1120.87	452.584	-1180.04	961.343	430.942	-1217.75	887.431	457.965	-1156.99	881.31	467.523	-1214.39	808.209
677	0	266.614	-1400.84	1633.29	169.041	-1409.71	1633.45	275.211	-1244.98	1631.55	147.145	-1239.8	1625.69	192.579	-1199.4	1504.89	189.779	-1122.18	1252.75	207.633	-1312.08	1413.11	210.223	-1374.73	1259.22	103.481	-1125.74	1314.57	367.224	-1197.88	1449.4	408.065	-1158.65	1265.21	411.403	-1116.16	1121.35	448.41	-1185.92	958.74	426.355	-1221.29	883.396	453.652	-1159.97	879.512	462.585	-1214.37	804.037
678	0	266.047	-1414.87	1631.97	168.826	-1424.08	1632.45	274.716	-1258.89	1630.19	146.54	-1254.18	1624.44	191.849	-1213.44	1503.98	188.998	-1135.73	1252.05	206.595	-1326.06	1412.05	208.944	-1388.56	1257.91	102.719	-1139.65	1313.84	366.42	-1211.86	1448.18	406.096	-1171.16	1264.3	408.035	-1127.09	1121.09	444.613	-1191.9	956.263	421.393	-1224.47	879.821	449.566	-1163.04	877.837	458.228	-1214.64	800.246
679	0	265.64	-1428.71	1630.81	168.055	-1437.72	1631.46	275.02	-1272.5	1630.31	145.555	-1267.81	1623.87	190.86	-1227.55	1502.85	188.071	-1149.37	1250.96	205.517	-1340.08	1410.86	207.731	-1402.07	1256.59	101.64	-1153.48	1312.85	365.452	-1226	1446.61	404.057	-1183.77	1262.66	404.296	-1138.32	1119.79	440.887	-1197.57	953.945	415.404	-1227.34	875.946	445.401	-1166.37	876.357	453.286	-1214.87	796.841
680	0	265.251	-1442.8	1629.35	167.617	-1451.99	1630.17	274.492	-1286.49	1628.7	145.135	-1282.08	1622.07	189.931	-1241.69	1501.39	187.269	-1163.11	1249.75	204.483	-1354.2	1409.22	206.386	-1416.21	1254.87	100.652	-1167.26	1311.77	364.612	-1240.03	1445.22	402.379	-1195.59	1261.51	401.363	-1149.23	1119.31	437.105	-1203.67	951.727	410.655	-1230.75	872.215	441.541	-1169.93	875.595	448.564	-1215.73	793.771
681	0	264.708	-1456.94	1627.57	167.124	-1466	1629.16	273.994	-1300.44	1626.92	144.32	-1295.89	1620.57	189.572	-1255.96	1499.71	186.253	-1176.91	1248.23	203.566	-1368.33	1407.49	205.22	-1429.51	1252.55	99.6922	-1181.09	1310.19	363.808	-1254.22	1443.26	400.376	-1208.12	1260.2	398.142	-1160.58	1118.11	433.597	-1209.91	949.416	408.559	-1234.87	871.104	437.466	-1174	874.366	444.48	-1217.09	791.104
682	0	264.267	-1471.08	1625.71	166.789	-1480.34	1627.35	273.057	-1314.65	1624.19	143.963	-1310.25	1618.74	188.444	-1270.19	1497.89	185.506	-1190.79	1246.73	202.548	-1382.63	1405.59	203.837	-1443.75	1250.57	98.9142	-1194.92	1308.72	362.903	-1268.64	1441.3	398.932	-1220	1258.58	395.509	-1171.74	1117.26	430.577	-1216.14	947.658	404.583	-1239.42	868.377	433.516	-1178.59	873.189	440.465	-1219.14	788.529
683	0	263.792	-1485.11	1623.98	166.227	-1494.37	1625.82	272.399	-1328.76	1621.99	143.3	-1324.28	1616.49	187.632	-1284.52	1496.03	184.708	-1204.64	1244.88	201.682	-1396.93	1403.47	202.983	-1457.57	1248.29	98.1291	-1208.96	1306.95	362.074	-1282.86	1439.31	396.991	-1232.4	1256.99	392.87	-1182.97	1116.29	426.541	-1223	945.428	401.405	-1244.29	866.205	430.019	-1183.36	872.558	436.466	-1221.81	786.511
684	0	263.37	-1499.16	1622.02	165.936	-1508.75	1623.65	271.639	-1342.97	1619.23	142.074	-1338.02	1614.84	187.411	-1298.94	1494.03	184.169	-1218.53	1242.91	200.754	-1411.29	1401.26	201.465	-1471.51	1245.88	97.4172	-1222.8	1305.18	361.435	-1297.24	1437.12	395.328	-1245.01	1255.26	390.773	-1194.34	1115.7	423.622	-1230.02	943.576	398.519	-1249.66	863.92	426.715	-1188.73	871.419	432.854	-1224.8	784.506
685	0	262.986	-1513.18	1620.13	165.733	-1523.4	1621.62	271.566	-1356.88	1617.47	141.587	-1352.3	1612.24	186.383	-1313.32	1491.78	183.907	-1232.54	1241.31	200.078	-1425.35	1398.96	201.408	-1485.25	1243.47	96.743	-1236.66	1303.43	360.768	-1311.69	1435.08	393.608	-1257.49	1253.47	388.613	-1206.05	1114.72	421.389	-1237.54	942.077	397.459	-1258.17	860.664	423.832	-1194.76	870.967	429.525	-1228.58	782.924
686	0	262.659	-1527.35	1618.04	165.384	-1537.54	1619.95	270.679	-1371.29	1614.21	141.169	-1366.61	1610.02	185.829	-1327.72	1489.54	183.582	-1246.72	1239.45	199.417	-1439.7	1396.67	200.808	-1499.29	1241.09	96.2223	-1250.65	1301.54	360.236	-1326.19	1432.82	392.557	-1270.33	1251.96	386.39	-1217.88	1113.17	419.644	-1245.58	940.648	394.011	-1262.54	860.291	421.022	-1201.27	870.134	426.512	-1232.96	781.146
687	0	262.365	-1541.6	1615.69	164.924	-1551.69	1617.63	270.25	-1385.41	1611.74	140.708	-1380.77	1607.43	185.427	-1342.03	1487.48	183.317	-1260.9	1237.59	198.581	-1454.33	1394.44	199.697	-1513.45	1238.81	95.598	-1264.65	1299.6	359.726	-1340.8	1430.7	391.503	-1283.21	1250.25	385.047	-1229.37	1112.63	418.051	-1253.95	939.191	396.22	-1273.84	856.88	419.04	-1208.35	869.773	423.71	-1238.07	779.5
688	0	261.845	-1556.01	1613.45	164.627	-1565.98	1615.61	270.459	-1399.34	1609.89	140.322	-1395.06	1605	185.051	-1356.37	1485.1	183.162	-1275.19	1235.8	197.923	-1468.82	1392.04	198.941	-1527.58	1236.37	95.3131	-1278.53	1297.68	359.305	-1355.53	1428.25	390.469	-1296.6	1248.09	383.471	-1241.54	1110.87	416.825	-1262.84	937.784	393.202	-1276.93	858.337	416.642	-1216.05	868.602	421.209	-1243.76	777.904
689	0	261.483	-1570.35	1611.11	164.251	-1580.33	1613.27	269.206	-1414.11	1606.21	140.124	-1409.4	1602.69	184.823	-1370.7	1482.89	183.018	-1289.52	1233.77	197.483	-1483.15	1389.63	198.428	-1541.72	1234	95.2096	-1292.55	1295.69	359.163	-1370.22	1426.06	390.08	-1310.15	1246.33	382.51	-1253.98	1110.11	415.766	-1272.21	936.206	391.731	-1286.5	856.54	415.105	-1224.39	868.088	419.444	-1250.3	776.478
690	0	261.055	-1584.77	1608.94	163.894	-1594.55	1611.45	269.712	-1427.94	1604.94	139.748	-1423.64	1600.11	184.621	-1384.94	1480.67	182.964	-1303.97	1231.85	196.949	-1497.65	1387.55	197.739	-1556.07	1231.92	95.118	-1306.74	1293.7	358.806	-1384.93	1423.74	389.675	-1323.95	1244.71	381.5	-1266.7	1108.72	414.816	-1282.05	934.943	391.569	-1295.6	854.792	413.609	-1233.38	867.509	417.992	-1257.57	775.411
691	0	260.749	-1598.98	1606.98	163.517	-1608.78	1609.32	269.433	-1442.29	1602.83	139.292	-1437.64	1598.12	184.448	-1399.2	1478.67	182.885	-1318.47	1229.77	196.524	-1512.27	1385.69	197.196	-1570.58	1230.04	95.1833	-1320.91	1291.76	358.766	-1399.67	1421.83	389.428	-1337.92	1243.04	380.717	-1279.85	1107.35	414.256	-1292.49	933.659	391.512	-1305.26	853.69	412.657	-1242.95	867.319	416.957	-1265.69	774.386
692	0	260.35	-1613.29	1604.59	163.244	-1623.08	1607.44	269.2	-1456.74	1600.87	139.128	-1452.02	1596.47	184.351	-1413.49	1476.66	183.233	-1333.15	1227.93	196.226	-1527.07	1383.81	196.921	-1585.19	1228.22	95.2143	-1335.3	1289.64	358.74	-1414.44	1419.91	389.444	-1352.01	1241.3	380.276	-1293.25	1106.25	414.251	-1303.61	932.611	391.116	-1315.93	851.831	411.629	-1253.26	866.461	416.156	-1274.92	773.251
693	0	260.021	-1627.81	1602.84	162.847	-1637.46	1605.83	269.165	-1471.16	1599.27	139.109	-1466.3	1595.04	184.489	-1427.78	1474.8	183.649	-1347.97	1225.91	196.084	-1541.6	1382.14	196.732	-1599.93	1226.66	95.5308	-1349.79	1287.63	358.862	-1429.16	1418.2	389.458	-1366.49	1239.64	380.027	-1307.04	1105.07	414.05	-1315.3	931.563	392.25	-1327.06	851.471	411.039	-1264.44	865.794	415.835	-1284.88	772.243
694	0	259.869	-1642.29	1601.6	162.503	-1651.62	1604.24	269.165	-1485.62	1597.92	139.308	-1480.69	1593.33	184.624	-1442.06	1473.24	184.087	-1362.89	1223.83	195.848	-1556.35	1380.99	196.382	-1614.94	1225.55	96.0785	-1364.36	1285.8	358.966	-1443.99	1416.73	389.624	-1381.16	1238.36	379.843	-1321.12	1103.84	414.376	-1327.62	930.633	392.124	-1338.99	849.32	410.842	-1276.15	865.17	416.241	-1295.72	771.861
695	0	259.379	-1656.83	1600.18	162.081	-1665.9	1602.7	269.063	-1500.15	1596.52	139.251	-1494.8	1591.59	184.786	-1456.45	1471.65	184.646	-1377.89	1222.01	195.919	-1570.69	1379.79	196.632	-1629.81	1224.44	96.5273	-1379.06	1283.8	359.151	-1458.81	1415.33	389.763	-1395.94	1236.95	379.949	-1335.59	1102.67	414.987	-1340.78	929.826	392.854	-1351.71	848.764	410.923	-1288.91	864.399	416.598	-1307.77	770.981
696	0	258.901	-1671.24	1598.57	161.726	-1680.22	1601.39	268.626	-1515.05	1594.85	139.421	-1508.87	1591.19	184.928	-1470.7	1470.12	185.182	-1393.15	1220.13	195.927	-1585.91	1378.75	196.686	-1645.15	1223.55	97.14	-1393.99	1282.07	359.461	-1473.7	1414.07	390.241	-1410.89	1235.7	380.198	-1350.45	1101.62	415.458	-1354.64	928.737	393.926	-1365.13	847.886	411.574	-1302.43	863.968	417.493	-1320.81	770.078
697	0	258.717	-1685.89	1597.97	161.377	-1694.46	1600.44	269.44	-1529.32	1594.85	139.781	-1523.23	1590.44	185.29	-1485.02	1469.02	185.628	-1408.55	1218.13	196.314	-1600.34	1378.11	197.228	-1660.48	1223.14	97.7786	-1408.87	1280.44	359.733	-1488.51	1412.99	390.442	-1426.09	1234.39	380.688	-1365.56	1100.67	416.125	-1369.25	927.698	395.127	-1379.4	847.096	412.565	-1316.67	863.333	419.013	-1334.59	769.6
698	0	258.354	-1700.37	1597.5	160.979	-1708.66	1600.02	269.643	-1543.94	1594.72	140.064	-1537.48	1590.06	185.624	-1499.37	1468.48	186.045	-1423.95	1216.73	196.478	-1615.31	1377.94	197.343	-1675.92	1223.17	98.3914	-1423.88	1279.17	359.984	-1503.06	1412.18	391.081	-1441.45	1233.67	381.52	-1381.03	1099.98	417.479	-1384.48	926.975	396.232	-1394.5	846.236	413.675	-1331.82	862.609	420.385	-1349.52	768.774
699	0	258.108	-1715.18	1597.93	160.7	-1723.02	1599.94	269.845	-1558.64	1594.87	140.136	-1551.7	1590.18	185.937	-1513.89	1468.34	186.524	-1439.44	1215.98	196.753	-1630.15	1378.2	197.726	-1691.34	1223.62	98.9036	-1439.1	1278.07	360.396	-1517.82	1411.86	391.586	-1457.04	1233.01	382.58	-1396.93	1099.42	418.651	-1400.36	926.299	398.034	-1410.27	845.757	415.175	-1347.66	861.98	422.398	-1365.42	768.399
700	0	257.865	-1729.91	1598.48	160.489	-1737.46	1600.36	270.082	-1573.34	1595.54	140.229	-1565.98	1590.66	186.175	-1528.4	1468.5	186.528	-1455.06	1215.25	197.065	-1645.12	1378.78	198.078	-1706.94	1224.42	99.1431	-1454.58	1277.5	360.695	-1532.54	1412.1	392.411	-1472.76	1232.94	383.542	-1413.37	1098.76	420.309	-1416.9	926.233	400.001	-1426.97	845.488	417.166	-1364.4	861.84	424.836	-1382.37	768.256
701	0	257.725	-1744.52	1599.51	160.256	-1751.89	1601.39	270.493	-1587.99	1596.78	140.718	-1580.37	1591.64	186.345	-1543.04	1469.06	186.409	-1470.42	1215.11	197.475	-1659.9	1379.75	198.661	-1722.24	1225.48	99.1534	-1469.85	1277.53	360.999	-1547.18	1412.77	393.522	-1488.61	1233.59	384.865	-1429.98	1098.77	422.243	-1434.17	926.59	401.737	-1444.6	845.263	419.129	-1381.83	861.618	427.464	-1400.19	768.424
702	0	257.545	-1759.19	1601	160.138	-1766.26	1602.81	270.702	-1602.71	1598.15	141.033	-1594.76	1592.79	186.458	-1557.74	1470.22	185.982	-1485.42	1215.45	197.728	-1674.73	1381.26	198.917	-1737.34	1226.9	98.9879	-1485.03	1278.22	361.088	-1561.83	1413.82	393.89	-1505	1233.64	385.984	-1447.01	1098.97	424.156	-1452.11	927.239	403.956	-1462.84	845.853	421.463	-1400.2	861.838	430.314	-1419.05	769.014
703	0	257.438	-1773.87	1602.56	160.198	-1780.71	1604.07	270.79	-1617.55	1599.38	141.343	-1609.2	1594.23	186.624	-1572.49	1471.51	185.422	-1500.39	1216.71	197.933	-1689.53	1382.83	198.982	-1752.21	1228.4	98.6559	-1500.25	1279.6	361.13	-1576.48	1415.19	394.533	-1521.54	1234.69	387.448	-1464.23	1099.52	426.1	-1470.95	927.757	406.125	-1482.14	846.605	424.115	-1419.45	862.574	433.161	-1438.94	769.421
704	0	257.522	-1788.41	1604.06	160.1	-1795.2	1605.55	271.227	-1632.06	1600.97	141.506	-1623.64	1595.44	186.622	-1587.13	1472.82	184.768	-1515.36	1218.51	198.899	-1703	1384	200.656	-1766.42	1229.83	98.3	-1515.33	1281.24	361.206	-1591.27	1416.81	395.328	-1537.9	1235.99	388.607	-1481.65	1100.1	428.525	-1490.32	928.773	409.195	-1502.13	847.855	426.985	-1439.43	863.044	436.624	-1459.91	770.11
705	0	257.575	-1802.9	1605.67	160.128	-1809.55	1607.41	271.134	-1646.72	1601.95	141.693	-1638.14	1596.83	186.629	-1601.81	1474.28	183.864	-1530.39	1220.13	198.808	-1717.76	1385.61	200.252	-1781.25	1231.48	97.7822	-1530.18	1282.84	361.186	-1605.99	1418.58	395.88	-1553.95	1236.67	390.399	-1498.94	1101.71	430.924	-1510.27	929.636	412.037	-1522.78	849.001	430.11	-1460	863.373	440.125	-1481.66	770.754
706	0	257.576	-1817.46	1607.21	160.077	-1824.03	1609.19	271.244	-1661.18	1603.48	141.765	-1652.49	1598.64	186.513	-1616.43	1475.91	183.185	-1545.4	1221.85	198.661	-1732.37	1387.2	199.966	-1795.99	1233.21	97.2278	-1544.71	1284.99	360.999	-1620.87	1419.98	396.476	-1570.47	1238.4	391.574	-1516.54	1101.79	433.359	-1530.55	930.595	415.021	-1543.99	850.229	433.374	-1481.1	863.674	443.447	-1504.27	771.483
707	0	257.527	-1832.02	1608.8	160.136	-1838.6	1610.91	271.302	-1675.61	1604.94	141.718	-1667	1600.19	186.381	-1630.95	1477.46	182.725	-1560	1223.94	198.387	-1746.96	1388.74	199.528	-1810.37	1234.76	96.6866	-1559.06	1286.96	360.878	-1635.8	1421.66	396.867	-1587.02	1239.51	393.273	-1533.5	1102.59	436.175	-1550.96	932.055	417.999	-1565.86	851.219	436.905	-1502.75	864.405	447.422	-1527.76	772.313
708	0	257.524	-1846.54	1610.25	160.148	-1853.04	1612.75	271.095	-1690.13	1606.24	141.547	-1681.49	1601.69	186.329	-1645.39	1479.38	182.314	-1574.29	1226.57	197.93	-1761.37	1390.35	198.695	-1824.39	1236.4	96.3365	-1573.26	1289.31	360.747	-1650.73	1423.13	397.451	-1603.25	1240.78	395.48	-1550.86	1104	439.13	-1571.63	933.255	421.621	-1588.19	852.911	440.371	-1524.92	864.675	451.471	-1551.56	773.499
709	0	257.388	-1860.84	1611.46	160.072	-1867.4	1614.42	270.827	-1704.52	1607.69	141.37	-1695.94	1603.62	186.182	-1659.64	1481.31	182.026	-1588.24	1229.07	197.461	-1775.65	1392.09	197.982	-1838.2	1238.05	96.0217	-1587.2	1291.57	360.717	-1665.7	1424.66	398.185	-1619.58	1242.8	397.07	-1568.48	1104.35	441.825	-1592.67	934.63	424.511	-1610.89	854.103	443.778	-1547.51	864.842	455.585	-1576.41	774.478
710	0	257.285	-1875.21	1612.82	159.874	-1881.76	1615.98	270.542	-1718.97	1608.92	141.093	-1710.37	1605.33	186.017	-1673.85	1482.99	181.724	-1602.33	1230.84	196.827	-1789.89	1393.66	197.014	-1852.22	1239.56	95.8328	-1600.95	1293.66	360.659	-1680.52	1426.43	399.406	-1635.5	1244.26	399.066	-1586.08	1104.98	444.572	-1614.19	935.86	428.009	-1633.95	855.992	447.053	-1570.42	864.928	459.777	-1601.62	776.06
711	0	257.003	-1889.6	1613.99	159.723	-1896.11	1617.34	270.614	-1733.2	1610.75	140.921	-1724.57	1607.22	185.982	-1687.94	1484.71	181.948	-1616.35	1232.83	195.234	-1806.21	1395.3	194.177	-1866.82	1241.02	95.9396	-1614.42	1295.6	360.436	-1695.45	1427.87	399.85	-1652.03	1245.06	401.198	-1603.83	1105.83	448.038	-1635.75	937.504	431.556	-1657.31	857.818	450.444	-1593.83	865.233	463.924	-1627.46	777.403
712	0	256.636	-1904.01	1615.19	159.478	-1910.35	1618.68	270.454	-1747.54	1612.4	140.657	-1738.76	1609.18	185.798	-1701.79	1486.42	182.259	-1630.28	1234.75	195.473	-1817.97	1396.88	195.197	-1879.94	1242.81	96.0468	-1627.7	1297.39	360.149	-1710.22	1429.63	400.518	-1668.71	1246.54	403.151	-1621.6	1106.15	450.911	-1657.67	938.996	435.661	-1680.17	860.282	453.991	-1617.64	865.6	468.167	-1653.85	779.199
713	0	256.268	-1918.41	1616.7	159.121	-1924.45	1619.93	270.179	-1761.79	1614.14	140.63	-1752.98	1610.88	185.507	-1715.58	1488.03	182.831	-1644.2	1236.84	193.703	-1834.14	1398.68	192.489	-1894.42	1244.42	96.4082	-1641.08	1299.3	359.914	-1724.76	1431.16	401.212	-1685.21	1247.7	405.024	-1639.38	1106.29	453.586	-1679.92	940.512	438.311	-1705.26	862.211	457.587	-1641.56	866.406	472.199	-1680.51	780.334
714	0	255.867	-1932.73	1617.7	158.624	-1938.57	1621.11	270.007	-1776.05	1616.01	140.101	-1766.88	1612.79	185.263	-1729.36	1489.91	183.29	-1658.01	1238.58	192.888	-1848.07	1400.43	191.577	-1908.18	1246.17	96.6869	-1654.36	1301.06	359.594	-1739.32	1432.78	401.697	-1701.46	1248.95	407.274	-1657.37	1107.22	456.275	-1702.29	942.279	441.373	-1729.57	864.606	461.203	-1665.87	867.402	477.504	-1707.29	783.768
715	0	255.328	-1946.92	1618.8	158.116	-1952.7	1622.4	269.519	-1790.38	1617.35	139.915	-1780.84	1615.1	184.995	-1743.02	1491.57	183.781	-1671.71	1240.26	192.236	-1861.73	1402.06	190.995	-1921.77	1247.79	97.2173	-1667.38	1302.71	359.36	-1753.67	1434.7	402.65	-1717.69	1250.46	409.585	-1675.41	1108.21	459.126	-1725.05	944.815	443.547	-1754.95	866.166	464.683	-1690.4	868.629	481.832	-1734.59	786.871
716	0	254.825	-1961.08	1619.95	157.584	-1966.6	1623.53	269.245	-1804.52	1619.23	139.585	-1794.76	1616.91	184.723	-1756.64	1493.38	184.153	-1685.16	1241.99	191.51	-1875.35	1403.95	190.252	-1935.23	1249.54	97.6226	-1680.38	1304.46	359.066	-1767.84	1436.74	402.884	-1734.57	1251.77	411.764	-1693.55	1109.02	461.782	-1747.69	946.923	446.416	-1779.44	869.039	468.009	-1715.12	869.633	485.854	-1762.01	790.106
717	0	254.266	-1975.23	1621.01	156.966	-1980.47	1624.51	268.935	-1818.55	1621.19	139.264	-1808.71	1618.87	184.22	-1770.38	1495.02	184.309	-1698.41	1243.78	190.731	-1889.11	1405.78	189.585	-1948.58	1251.05	97.8371	-1693.59	1305.96	358.591	-1782.07	1438.45	404.334	-1750.14	1253.84	413.809	-1711.54	1109.84	464.393	-1770.48	949.629	449.129	-1804.12	872.364	471.211	-1740.02	871.608	489.771	-1789.7	793.986
718	0	253.565	-1989.04	1621.58	156.366	-1994.47	1625.44	268.459	-1832.68	1622.82	138.838	-1822.55	1620.59	183.87	-1783.92	1496.43	184.33	-1711.57	1245.37	190.16	-1902.75	1407.24	189.058	-1961.76	1252.28	97.9471	-1706.6	1307.61	358.246	-1796.15	1440.34	405.187	-1766.44	1255.49	415.743	-1729.78	1110.44	466.739	-1793.54	952.374	451.807	-1828.92	875.932	474.545	-1765.21	873.964	493.571	-1817.45	798.197
719	0	252.753	-2003.6	1622.83	155.708	-2008.36	1626.44	268.229	-1846.66	1624.56	138.484	-1836.52	1622.21	183.491	-1797.54	1497.96	184.466	-1724.67	1247.13	189.667	-1916.33	1408.7	188.744	-1974.85	1253.52	98.0671	-1719.65	1309.34	357.938	-1810.31	1442.3	405.595	-1783.01	1257.05	418.087	-1747.97	1112.37	469.123	-1816.58	955.42	454.749	-1853.29	879.571	477.837	-1790.28	876.282	497.001	-1845.24	802.548
720	0	252.148	-2017.56	1623.7	155.015	-2022.08	1627.32	267.664	-1860.8	1625.8	138.025	-1850.32	1623.76	183.169	-1810.97	1499.38	184.256	-1737.7	1248.45	189.201	-1929.81	1410.2	188.289	-1987.97	1254.76	98.2087	-1732.76	1310.78	357.725	-1824.16	1444.2	406.835	-1798.81	1259.57	420.072	-1765.98	1113.18	471.47	-1839.4	958.759	456.46	-1878.48	883.679	480.53	-1815.6	878.257	500.466	-1872.7	807.199
721	0	251.191	-2031.67	1624.61	154.347	-2035.8	1627.99	267.134	-1874.83	1626.95	137.6	-1864.13	1624.86	182.869	-1824.66	1500.8	184.195	-1750.81	1250.1	188.977	-1943.27	1411.37	188.286	-2000.98	1255.75	98.0785	-1745.86	1312.01	357.342	-1838.19	1445.83	407.436	-1814.9	1260.59	422.262	-1783.83	1114.71	473.595	-1862.42	962.213	458.122	-1903.61	888.098	483.475	-1840.81	880.746	503.442	-1900.4	811.988
722	0	250.585	-2045.54	1625.18	153.674	-2049.64	1628.43	266.726	-1888.74	1628.29	137.144	-1877.79	1625.69	182.53	-1838.31	1501.72	184.172	-1763.92	1251.47	188.456	-1956.78	1412.26	187.832	-2014	1256.41	97.9765	-1758.87	1313.43	357.145	-1852.12	1447.51	408.475	-1830.99	1262.57	424.33	-1801.82	1115.61	475.957	-1885.11	965.334	460.29	-1928.29	892.535	486.62	-1866.28	884.167	506.179	-1928.25	817.411
723	0	250.087	-2059.29	1625.62	153.019	-2063.29	1628.9	266.213	-1902.82	1628.82	136.782	-1891.47	1626.68	182.321	-1851.88	1502.64	183.914	-1777.06	1252.34	188.296	-1970.32	1413.35	187.77	-2027.23	1257.21	98.0436	-1772.08	1314.65	356.915	-1866.08	1448.84	409.185	-1847.03	1263.95	426.599	-1819.6	1116.95	477.993	-1908.01	969.101	462.716	-1952.67	897.558	489.396	-1891.63	887.14	508.834	-1955.65	822.596
724	0	249.3	-2073.45	1626.27	152.286	-2076.94	1629.05	265.754	-1916.64	1629.71	136.162	-1905.19	1627.3	182.052	-1865.41	1503.4	183.902	-1790.26	1253.19	188.02	-1983.8	1413.99	187.657	-2040.37	1257.72	97.832	-1785.2	1315.43	356.703	-1880.07	1450.21	409.935	-1863.1	1265.34	428.693	-1837.35	1117.79	480.021	-1930.63	972.873	464.931	-1976.69	902.934	492.432	-1916.6	890.808	511.46	-1982.71	827.927
725	0	248.551	-2087.44	1626.71	151.635	-2090.65	1629.06	265.396	-1930.51	1630.46	135.639	-1918.75	1627.44	181.755	-1879	1503.85	183.68	-1803.58	1254.43	187.818	-1997.32	1414.34	187.626	-2053.44	1257.99	97.5313	-1798.36	1315.85	356.634	-1893.88	1451.22	411.326	-1878.43	1266.44	430.97	-1854.85	1118.58	482.001	-1953.17	976.597	466.58	-2000.94	907.449	494.907	-1941.62	893.701	513.429	-2009.94	833.72
726	0	247.982	-2101.26	1626.7	151.046	-2104.42	1628.94	265.042	-1944.58	1630.6	135.357	-1932.42	1627.37	181.543	-1892.61	1504.13	183.469	-1816.9	1255.1	187.673	-2010.93	1414.41	187.598	-2066.61	1257.98	97.3774	-1811.59	1316.17	356.484	-1907.74	1451.78	411.896	-1894.6	1267.59	433.087	-1872.48	1118.96	483.917	-1975.37	979.809	468.009	-2025.36	912.151	498.283	-1966.09	898.397	515.336	-2036.78	839.169
727	0	247.622	-2114.69	1626.45	150.424	-2118.1	1628.64	264.365	-1958.1	1630.58	135.037	-1946.22	1627.51	181.355	-1906.35	1504.27	183.271	-1830.28	1255.42	187.519	-2024.51	1414.3	187.539	-2079.84	1257.79	97.2335	-1824.99	1316.52	356.254	-1921.72	1452.4	412.815	-1910.28	1267.73	435.35	-1889.98	1119.73	485.659	-1997.01	983.071	469.565	-2049.02	916.931	500.301	-1990.85	901.176	517.357	-2062.89	844.343
728	0	247.082	-2128.4	1626.51	149.907	-2131.67	1628.17	263.81	-1972.08	1630.53	134.566	-1959.75	1626.92	180.993	-1920.01	1504.14	182.785	-1843.57	1255.32	187.291	-2038.15	1414.14	187.436	-2093.12	1257.43	96.9346	-1838.52	1316.38	356.047	-1935.39	1452.47	413.844	-1925.86	1268.58	437.489	-1907.33	1119.56	487.044	-2019.09	986.821	471.381	-2072.74	921.99	501.839	-2015.22	903.695	518.788	-2088.98	849.815
729	0	246.296	-2142.57	1626.02	149.45	-2145.29	1627.45	263.408	-1986.05	1630.18	134.372	-1973.49	1626.55	180.782	-1933.73	1503.79	182.603	-1856.79	1255.47	187.136	-2051.84	1413.7	187.403	-2106.24	1256.8	96.7336	-1851.88	1316.15	356.115	-1949.2	1452.21	413.527	-1941.42	1268.08	439.615	-1924.72	1119.63	488.603	-2040.69	989.95	472.036	-2095.35	926.749	504.398	-2039.11	907.801	520.217	-2115.04	855.722
730	0	245.963	-2156.16	1625	149.014	-2159.07	1626.74	263.258	-1999.78	1629.64	134.016	-1987.08	1625.59	180.463	-1947.52	1503.07	182.132	-1870.04	1255.07	186.895	-2065.74	1413.03	187.229	-2119.53	1255.85	96.5829	-1865.49	1315.67	355.806	-1962.94	1452.04	414.258	-1956.86	1267.57	441.669	-1942.18	1119.14	489.938	-2061.68	992.36	473.416	-2118.14	931.184	506.16	-2062.77	910.351	521.518	-2140.34	860.941
731	0	245.667	-2170.47	1624.65	148.598	-2172.72	1626.03	262.843	-2013.83	1628.75	133.753	-2000.76	1625.05	180.11	-1961.33	1502.41	181.546	-1883.19	1254.53	186.561	-2079.68	1412.43	186.887	-2132.8	1254.91	96.0886	-1879.24	1314.97	355.572	-1976.52	1451.64	415.198	-1972.22	1267.99	443.944	-1959.21	1119.93	491.518	-2082.8	995.894	476.408	-2141.96	937.362	506.404	-2087.36	911.904	522.782	-2165.09	866.452
732	0	244.972	-2184.34	1624.08	148.187	-2186.3	1625.1	262.762	-2027.56	1628.28	133.489	-2014.47	1624.16	179.838	-1975.11	1501.58	180.85	-1896.68	1253.64	186.314	-2093.67	1411.88	186.951	-2145.97	1254.78	95.6988	-1892.95	1314.28	355.097	-1990.1	1451.02	416.107	-1987.18	1268.7	445.534	-1976.34	1118.75	492.766	-2103.44	998.798	478.224	-2164.06	942.129	507.783	-2110.58	915.286	524.502	-2188.95	871.739
733	0	244.877	-2197.73	1622.69	147.943	-2200.1	1624.06	262.065	-2041.58	1626.99	133.255	-2028.43	1622.87	179.453	-1988.95	1500.64	180.169	-1910.23	1252.99	186.039	-2107.59	1410.73	186.944	-2159.76	1253.48	95.1824	-1907.03	1313.13	353.878	-2003.04	1450.6	416.461	-2002.13	1267.82	444.753	-1994.81	1115.44	493.803	-2123.55	1000.85	476.305	-2184.5	943.808	510.187	-2132.24	919.614	525.104	-2212.96	876.821
[truncated: 69 more columns]

## Sheet: Sheet2
Devices
		025370 - Force			025370 - Moment			025370 - CoP			027571 - Force			027571 - Moment			027571 - CoP			037720 - Force			037720 - Moment			037720 - CoP
Frame	Sub Frame	Fx	Fy	Fz	Mx	My	Mz	Cx	Cy	Cz	Fx	Fy	Fz	Mx	My	Mz	Cx	Cy	Cz	Fx	Fy	Fz	Mx	My	Mz	Cx	Cy	Cz
		N	N	N	N.mm	N.mm	N.mm	mm	mm	mm	N	N	N	N.mm	N.mm	N.mm	mm	mm	mm	N	N	N	N.mm	N.mm	N.mm	mm	mm	mm
418	0	0	0	0	0	0	0	200	300	0	0	0	0	0	0	0	200	903	0	0	0	0	0	0	0	603	903	0
418	1	0	0	0	0	0	0	200	300	0	0	0	0	0	0	0	200	903	0	0	0	0	0	0	0	603	903	0
418	2	0	0	0	0	0	0	200	300	0	0	0	0	0	0	0	200	903	0	0	0	0	0	0	0	603	903	0
418	3	0	0	0	0	0	0	200	300	0	0	0	0	0	0	0	200	903	0	0	0	0	0	0	0	603	903	0
418	4	0	0	0	0	0	0	200	300	0	0	0	0	0	0	0	200	903	0	0	0	0	0	0	0	603	903	0
418	5	0	0	0	0	0	0	200	300	0	0	0	0	0	0	0	200	903	0	0	0	0	0	0	0	603	903	0
418	6	0	0	0	0	0	0	200	300	0	0	0	0	0	0	0	200	903	0	0	0	0	0	0	0	603	903	0
418	7	0	0	0	0	0	0	200	300	0	0	0	0	0	0	0	200	903	0	0	0	0	0	0	0	603	903	0
418	8	0	0	0	0	0	0	200	300	0	0	0	0	0	0	0	200	903	0	0	0	0	0	0	0	603	903	0
418	9	0	0	0	0	0	0	200	300	0	0	0	0	0	0	0	200	903	0	0	0	0	0	0	0	603	903	0
419	0	0	0	0	0	0	0	200	300	0	0	0	0	0	0	0	200	903	0	0	0	0	0	0	0	603	903	0
419	1	0	0	0	0	0	0	200	300	0	0	0	0	0	0	0	200	903	0	0	0	0	0	0	0	603	903	0
419	2	0	0	0	0	0	0	200	300	0	0	0	0	0	0	0	200	903	0	0	0	0	0	0	0	603	903	0
419	3	0	0	0	0	0	0	200	300	0	0	0	0	0	0	0	200	903	0	0	0	0	0	0	0	603	903	0
419	4	0	0	0	0	0	0	200	300	0	0	0	0	0	0	0	200	903	0	0	0	0	0	0	0	603	903	0
419	5	0	0	0	0	0	0	200	300	0	0	0	0	0	0	0	200	903	0	0	0	0	0	0	0	603	903	0
419	6	0	0	0	0	0	0	200	300	0	0	0	0	0	0	0	200	903	0	0	0	0	0	0	0	603	903	0
419	7	0	0	0	0	0	0	200	300	0	0	0	0	0	0	0	200	903	0	0	0	0	0	0	0	603	903	0
419	8	0	0	0	0	0	0	200	300	0	0	0	0	0	0	0	200	903	0	0	0	0	0	0	0	603	903	0
419	9	0	0	0	0	0	0	200	300	0	0	0	0	0	0	0	200	903	0	0	0	0	0	0	0	603	903	0
420	0	0	0	0	0	0	0	200	300	0	0	0	0	0	0	0	200	903	0	0	0	0	0	0	0	603	903	0
420	1	0	0	0	0	0	0	200	300	0	0	0	0	0	0	0	200	903	0	0	0	0	0	0	0	603	903	0
420	2	0	0	0	0	0	0	200	300	0	0	0	0	0	0	0	200	903	0	0	0	0	0	0	0	603	903	0
420	3	0	0	0	0	0	0	200	300	0	0	0	0	0	0	0	200	903	0	0	0	0	0	0	0	603	903	0
420	4	0	0	0	0	0	0	200	300	0	0	0	0	0	0	0	200	903	0	0	0	0	0	0	0	603	903	0
420	5	0	0	0	0	0	0	200	300	0	0	0	0	0	0	0	200	903	0	0	0	0	0	0	0	603	903	0
420	6	0	0	0	0	0	0	200	300	0	0	0	0	0	0	0	200	903	0	0	0	0	0	0	0	603	903	0
420	7	0	0	0	0	0	0	200	300	0	0	0	0	0	0	0	200	903	0	0	0	0	0	0	0	603	903	0
420	8	0	0	0	0	0	0	200	300	0	0	0	0	0	0	0	200	903	0	0	0	0	0	0	0	603	903	0
420	9	0	0	0	0	0	0	200	300	0	0	0	0	0	0	0	200	903	0	0	0	0	0	0	0	603	903	0
421	0	0	0	0	0	0	0	200	300	0	0	0	0	0	0	0	200	903	0	0	0	0	0	0	0	603	903	0
421	1	0	0	0	0	0	0	200	300	0	0	0	0	0	0	0	200	903	0	0	0	0	0	0	0	603	903	0
421	2	0	0	0	0	0	0	200	300	0	0	0	0	0	0	0	200	903	0	0	0	0	0	0	0	603	903	0
421	3	0	0	0	0	0	0	200	300	0	0	0	0	0	0	0	200	903	0	0	0	0	0	0	0	603	903	0
421	4	0	0	0	0	0	0	200	300	0	0	0	0	0	0	0	200	903	0	0	0	0	0	0	0	603	903	0
421	5	0	0	0	0	0	0	200	300	0	0	0	0	0	0	0	200	903	0	0	0	0	0	0	0	603	903	0
421	6	0	0	0	0	0	0	200	300	0	0	0	0	0	0	0	200	903	0	0	0	0	0	0	0	603	903	0
421	7	0	0	0	0	0	0	200	300	0	0	0	0	0	0	0	200	903	0	0	0	0	0	0	0	603	903	0
421	8	0	0	0	0	0	0	200	300	0	0	0	0	0	0	0	200	903	0	0	0	0	0	0	0	603	903	0
421	9	0	0	0	0	0	0	200	300	0	0	0	0	0	0	0	200	903	0	0	0	0	0	0	0	603	903	0
422	0	0	0	0	0	0	0	200	300	0	0	0	0	0	0	0	200	903	0	0	0	0	0	0	0	603	903	0
422	1	0	0	0	0	0	0	200	300	0	0	0	0	0	0	0	200	903	0	0	0	0	0	0	0	603	903	0
422	2	0	0	0	0	0	0	200	300	0	0	0	0	0	0	0	200	903	0	0	0	0	0	0	0	603	903	0
422	3	0	0	0	0	0	0	200	300	0	0	0	0	0	0	0	200	903	0	0	0	0	0	0	0	603	903	0
422	4	0	0	0	0	0	0	200	300	0	0	0	0	0	0	0	200	903	0	0	0	0	0	0	0	603	903	0
422	5	0	0	0	0	0	0	200	300	0	0	0	0	0	0	0	200	903	0	0	0	0	0	0	0	603	903	0
422	6	0	0	0	0	0	0	200	300	0	0	0	0	0	0	0	200	903	0	0	0	0	0	0	0	603	903	0
422	7	0	0	0	0	0	0	200	300	0	0	0	0	0	0	0	200	903	0	0	0	0	0	0	0	603	903	0
422	8	0	0	0	0	0	0	200	300	0	0	0	0	0	0	0	200	903	0	0	0	0	0	0	0	603	903	0
422	9	0	0	0	0	0	0	200	300	0	0	0	0	0	0	0	200	903	0	0	0	0	0	0	0	603	903	0
423	0	0	0	0	0	0	0	200	300	0	0	0	0	0	0	0	200	903	0	0	0	0	0	0	0	603	903	0
423	1	0	0	0	0	0	0	200	300	0	0	0	0	0	0	0	200	903	0	0	0	0	0	0	0	603	903	0
423	2	0	0	0	0	0	0	200	300	0	0	0	0	0	0	0	200	903	0	0	0	0	0	0	0	603	903	0
423	3	0	0	0	0	0	0	200	300	0	0	0	0	0	0	0	200	903	0	0	0	0	0	0	0	603	903	0
423	4	0	0	0	0	0	0	200	300	0	0	0	0	0	0	0	200	903	0	0	0	0	0	0	0	603	903	0
423	5	0	0	0	0	0	0	200	300	0	0	0	0	0	0	0	200	903	0	0	0	0	0	0	0	603	903	0
423	6	0	0	0	0	0	0	200	300	0	0	0	0	0	0	0	200	903	0	0	0	0	0	0	0	603	903	0
423	7	0	0	0	0	0	0	200	300	0	0	0	0	0	0	0	200	903	0	0	0	0	0	0	0	603	903	0
423	8	0	0	0	0	0	0	200	300	0	0	0	0	0	0	0	200	903	0	0	0	0	0	0	0	603	903	0
423	9	0	0	0	0	0	0	200	300	0	0	0	0	0	0	0	200	903	0	0	0	0	0	0	0	603	903	0
424	0	0	0	0	0	0	0	200	300	0	0	0	0	0	0	0	200	903	0	0	0	0	0	0	0	603	903	0
424	1	0	0	0	0	0	0	200	300	0	0	0	0	0	0	0	200	903	0	0	0	0	0	0	0	603	903	0
424	2	0	0	0	0	0	0	200	300	0	0	0	0	0	0	0	200	903	0	0	0	0	0	0	0	603	903	0
424	3	0	0	0	0	0	0	200	300	0	0	0	0	0	0	0	200	903	0	0	0	0	0	0	0	603	903	0
424	4	0	0	0	0	0	0	200	300	0	0	0	0	0	0	0	200	903	0	0	0	0	0	0	0	603	903	0
424	5	0	0	0	0	0	0	200	300	0	0	0	0	0	0	0	200	903	0	0	0	0	0	0	0	603	903	0
424	6	0	0	0	0	0	0	200	300	0	0	0	0	0	0	0	200	903	0	0	0	0	0	0	0	603	903	0
424	7	0	0	0	0	0	0	200	300	0	0	0	0	0	0	0	200	903	0	0	0	0	0	0	0	603	903	0
424	8	0	0	0	0	0	0	200	300	0	0	0	0	0	0	0	200	903	0	0	0	0	0	0	0	603	903	0
424	9	0	0	0	0	0	0	200	300	0	0	0	0	0	0	0	200	903	0	0	0	0	0	0	0	603	903	0
425	0	0	0	0	0	0	0	200	300	0	0	0	0	0	0	0	200	903	0	0	0	0	0	0	0	603	903	0
425	1	0	0	0	0	0	0	200	300	0	0	0	0	0	0	0	200	903	0	0	0	0	0	0	0	603	903	0
425	2	0	0	0	0	0	0	200	300	0	0	0	0	0	0	0	200	903	0	0	0	0	0	0	0	603	903	0
425	3	0	0	0	0	0	0	200	300	0	0	0	0	0	0	0	200	903	0	0	0	0	0	0	0	603	903	0
425	4	0	0	0	0	0	0	200	300	0	0	0	0	0	0	0	200	903	0	0	0	0	0	0	0	603	903	0
425	5	0	0	0	0	0	0	200	300	0	0	0	0	0	0	0	200	903	0	0	0	0	0	0	0	603	903	0
425	6	0	0	0	0	0	0	200	300	0	0	0	0	0	0	0	200	903	0	0	0	0	0	0	0	603	903	0
425	7	0	0	0	0	0	0	200	300	0	0	0	0	0	0	0	200	903	0	0	0	0	0	0	0	603	903	0
425	8	0	0	0	0	0	0	200	300	0	0	0	0	0	0	0	200	903	0	0	0	0	0	0	0	603	903	0
425	9	0	0	0	0	0	0	200	300	0	0	0	0	0	0	0	200	903	0	0	0	0	0	0	0	603	903	0
426	0	0	0	0	0	0	0	200	300	0	0	0	0	0	0	0	200	903	0	0	0	0	0	0	0	603	903	0
426	1	0	0	0	0	0	0	200	300	0	0	0	0	0	0	0	200	903	0	0	0	0	0	0	0	603	903	0
426	2	0	0	0	0	0	0	200	300	0	0	0	0	0	0	0	200	903	0	0	0	0	0	0	0	603	903	0
426	3	0	0	0	0	0	0	200	300	0	0	0	0	0	0	0	200	903	0	0	0	0	0	0	0	603	903	0
426	4	0	0	0	0	0	0	200	300	0	0	0	0	0	0	0	200	903	0	0	0	0	0	0	0	603	903	0
426	5	0	0	0	0	0	0	200	300	0	0	0	0	0	0	0	200	903	0	0	0	0	0	0	0	603	903	0
426	6	0	0	0	0	0	0	200	300	0	0	0	0	0	0	0	200	903	0	0	0	0	0	0	0	603	903	0
426	7	0	0	0	0	0	0	200	300	0	0	0	0	0	0	0	200	903	0	0	0	0	0	0	0	603	903	0
426	8	0	0	0	0	0	0	200	300	0	0	0	0	0	0	0	200	903	0	0	0	0	0	0	0	603	903	0
426	9	0	0	0	0	0	0	200	300	0	0	0	0	0	0	0	200	903	0	0	0	0	0	0	0	603	903	0
427	0	0	0	0	0	0	0	200	300	0	0	0	0	0	0	0	200	903	0	0	0	0	0	0	0	603	903	0
427	1	0	0	0	0	0	0	200	300	0	0	0	0	0	0	0	200	903	0	0	0	0	0	0	0	603	903	0
427	2	0	0	0	0	0	0	200	300	0	0	0	0	0	0	0	200	903	0	0	0	0	0	0	0	603	903	0
427	3	0	0	0	0	0	0	200	300	0	0	0	0	0	0	0	200	903	0	0	0	0	0	0	0	603	903	0
427	4	0	0	0	0	0	0	200	300	0	0	0	0	0	0	0	200	903	0	0	0	0	0	0	0	603	903	0
427	5	0	0	0	0	0	0	200	300	0	0	0	0	0	0	0	200	903	0	0	0	0	0	0	0	603	903	0
427	6	0	0	0	0	0	0	200	300	0	0	0	0	0	0	0	200	903	0	0	0	0	0	0	0	603	903	0
427	7	0	0	0	0	0	0	200	300	0	0	0	0	0	0	0	200	903	0	0	0	0	0	0	0	603	903	0
427	8	0	0	0	0	0	0	200	300	0	0	0	0	0	0	0	200	903	0	0	0	0	0	0	0	603	903	0
427	9	0	0	0	0	0	0	200	300	0	0	0	0	0	0	0	200	903	0	0	0	0	0	0	0	603	903	0
428	0	0	0	0	0	0	0	200	300	0	0	0	0	0	0	0	200	903	0	0	0	0	0	0	0	603	903	0
428	1	0	0	0	0	0	0	200	300	0	0	0	0	0	0	0	200	903	0	0	0	0	0	0	0	603	903	0
428	2	0	0	0	0	0	0	200	300	0	0	0	0	0	0	0	200	903	0	0	0	0	0	0	0	603	903	0
428	3	0	0	0	0	0	0	200	300	0	0	0	0	0	0	0	200	903	0	0	0	0	0	0	0	603	903	0
428	4	0	0	0	0	0	0	200	300	0	0	0	0	0	0	0	200	903	0	0	0	0	0	0	0	603	903	0
428	5	0	0	0	0	0	0	200	300	0	0	0	0	0	0	0	200	903	0	0	0	0	0	0	0	603	903	0
428	6	0	0	0	0	0	0	200	300	0	0	0	0	0	0	0	200	903	0	0	0	0	0	0	0	603	903	0
428	7	0	0	0	0	0	0	200	300	0	0	0	0	0	0	0	200	903	0	0	0	0	0	0	0	603	903	0
428	8	0	0	0	0	0	0	200	300	0	0	0	0	0	0	0	200	903	0	0	0	0	0	0	0	603	903	0
428	9	0	0	0	0	0	0	200	300	0	0	0	0	0	0	0	200	903	0	0	0	0	0	0	0	603	903	0
429	0	0	0	0	0	0	0	200	300	0	0	0	0	0	0	0	200	903	0	0	0	0	0	0	0	603	903	0
429	1	0	0	0	0	0	0	200	300	0	0	0	0	0	0	0	200	903	0	0	0	0	0	0	0	603	903	0
429	2	0	0	0	0	0	0	200	300	0	0	0	0	0	0	0	200	903	0	0	0	0	0	0	0	603	903	0
429	3	0	0	0	0	0	0	200	300	0	0	0	0	0	0	0	200	903	0	0	0	0	0	0	0	603	903	0
429	4	0	0	0	0	0	0	200	300	0	0	0	0	0	0	0	200	903	0	0	0	0	0	0	0	603	903	0
429	5	0	0	0	0	0	0	200	300	0	0	0	0	0	0	0	200	903	0	0	0	0	0	0	0	603	903	0
429	6	0	0	0	0	0	0	200	300	0	0	0	0	0	0	0	200	903	0	0	0	0	0	0	0	603	903	0
429	7	0	0	0	0	0	0	200	300	0	0	0	0	0	0	0	200	903	0	0	0	0	0	0	0	603	903	0
429	8	0	0	0	0	0	0	200	300	0	0	0	0	0	0	0	200	903	0	0	0	0	0	0	0	603	903	0
429	9	0	0	0	0	0	0	200	300	0	0	0	0	0	0	0	200	903	0	0	0	0	0	0	0	603	903	0
430	0	0	0	0	0	0	0	200	300	0	0	0	0	0	0	0	200	903	0	0	0	0	0	0	0	603	903	0
430	1	0	0	0	0	0	0	200	300	0	0	0	0	0	0	0	200	903	0	0	0	0	0	0	0	603	903	0
430	2	0	0	0	0	0	0	200	300	0	0	0	0	0	0	0	200	903	0	0	0	0	0	0	0	603	903	0
430	3	0	0	0	0	0	0	200	300	0	0	0	0	0	0	0	200	903	0	0	0	0	0	0	0	603	903	0
430	4	0	0	0	0	0	0	200	300	0	0	0	0	0	0	0	200	903	0	0	0	0	0	0	0	603	903	0
430	5	0	0	0	0	0	0	200	300	0	0	0	0	0	0	0	200	903	0	0	0	0	0	0	0	603	903	0
430	6	0	0	0	0	0	0	200	300	0	0	0	0	0	0	0	200	903	0	0	0	0	0	0	0	603	903	0
430	7	0	0	0	0	0	0	200	300	0	0	0	0	0	0	0	200	903	0	0	0	0	0	0	0	603	903	0
430	8	0	0	0	0	0	0	200	300	0	0	0	0	0	0	0	200	903	0	0	0	0	0	0	0	603	903	0
430	9	0	0	0	0	0	0	200	300	0	0	0	0	0	0	0	200	903	0	0	0	0	0	0	0	603	903	0
431	0	0	0	0	0	0	0	200	300	0	0	0	0	0	0	0	200	903	0	0	0	0	0	0	0	603	903	0
431	1	0	0	0	0	0	0	200	300	0	0	0	0	0	0	0	200	903	0	0	0	0	0	0	0	603	903	0
431	2	0	0	0	0	0	0	200	300	0	0	0	0	0	0	0	200	903	0	0	0	0	0	0	0	603	903	0
431	3	0	0	0	0	0	0	200	300	0	0	0	0	0	0	0	200	903	0	0	0	0	0	0	0	603	903	0
431	4	0	0	0	0	0	0	200	300	0	0	0	0	0	0	0	200	903	0	0	0	0	0	0	0	603	903	0
431	5	0	0	0	0	0	0	200	300	0	0	0	0	0	0	0	200	903	0	0	0	0	0	0	0	603	903	0
431	6	0	0	0	0	0	0	200	300	0	0	0	0	0	0	0	200	903	0	0	0	0	0	0	0	603	903	0
431	7	0	0	0	0	0	0	200	300	0	0	0	0	0	0	0	200	903	0	0	0	0	0	0	0	603	903	0
431	8	0	0	0	0	0	0	200	300	0	0	0	0	0	0	0	200	903	0	0	0	0	0	0	0	603	903	0
431	9	0	0	0	0	0	0	200	300	0	0	0	0	0	0	0	200	903	0	0	0	0	0	0	0	603	903	0
432	0	0	0	0	0	0	0	200	300	0	0	0	0	0	0	0	200	903	0	0	0	0	0	0	0	603	903	0
432	1	0	0	0	0	0	0	200	300	0	0	0	0	0	0	0	200	903	0	0	0	0	0	0	0	603	903	0
432	2	0	0	0	0	0	0	200	300	0	0	0	0	0	0	0	200	903	0	0	0	0	0	0	0	603	903	0
432	3	0	0	0	0	0	0	200	300	0	0	0	0	0	0	0	200	903	0	0	0	0	0	0	0	603	903	0
432	4	0	0	0	0	0	0	200	300	0	0	0	0	0	0	0	200	903	0	0	0	0	0	0	0	603	903	0
432	5	0	0	0	0	0	0	200	300	0	0	0	0	0	0	0	200	903	0	0	0	0	0	0	0	603	903	0
432	6	0	0	0	0	0	0	200	300	0	0	0	0	0	0	0	200	903	0	0	0	0	0	0	0	603	903	0
432	7	0	0	0	0	0	0	200	300	0	0	0	0	0	0	0	200	903	0	0	0	0	0	0	0	603	903	0
432	8	0	0	0	0	0	0	200	300	0	0	0	0	0	0	0	200	903	0	0	0	0	0	0	0	603	903	0
432	9	0	0	0	0	0	0	200	300	0	0	0	0	0	0	0	200	903	0	0	0	0	0	0	0	603	903	0
433	0	0	0	0	0	0	0	200	300	0	0	0	0	0	0	0	200	903	0	0	0	0	0	0	0	603	903	0
433	1	0	0	0	0	0	0	200	300	0	0	0	0	0	0	0	200	903	0	0	0	0	0	0	0	603	903	0
433	2	0	0	0	0	0	0	200	300	0	0	0	0	0	0	0	200	903	0	0	0	0	0	0	0	603	903	0
433	3	0	0	0	0	0	0	200	300	0	0	0	0	0	0	0	200	903	0	0	0	0	0	0	0	603	903	0
433	4	0	0	0	0	0	0	200	300	0	0	0	0	0	0	0	200	903	0	0	0	0	0	0	0	603	903	0
433	5	0	0	0	0	0	0	200	300	0	0	0	0	0	0	0	200	903	0	0	0	0	0	0	0	603	903	0
433	6	0	0	0	0	0	0	200	300	0	0	0	0	0	0	0	200	903	0	0	0	0	0	0	0	603	903	0
433	7	0	0	0	0	0	0	200	300	0	0	0	0	0	0	0	200	903	0	0	0	0	0	0	0	603	903	0
433	8	0	0	0	0	0	0	200	300	0	0	0	0	0	0	0	200	903	0	0	0	0	0	0	0	603	903	0
433	9	0	0	0	0	0	0	200	300	0	0	0	0	0	0	0	200	903	0	0	0	0	0	0	0	603	903	0
434	0	0	0	0	0	0	0	200	300	0	0	0	0	0	0	0	200	903	0	0	0	0	0	0	0	603	903	0
434	1	0	0	0	0	0	0	200	300	0	0	0	0	0	0	0	200	903	0	0	0	0	0	0	0	603	903	0
434	2	0	0	0	0	0	0	200	300	0	0	0	0	0	0	0	200	903	0	0	0	0	0	0	0	603	903	0
434	3	0	0	0	0	0	0	200	300	0	0	0	0	0	0	0	200	903	0	0	0	0	0	0	0	603	903	0
434	4	0	0	0	0	0	0	200	300	0	0	0	0	0	0	0	200	903	0	0	0	0	0	0	0	603	903	0
434	5	0	0	0	0	0	0	200	300	0	0	0	0	0	0	0	200	903	0	0	0	0	0	0	0	603	903	0
434	6	0	0	0	0	0	0	200	300	0	0	0	0	0	0	0	200	903	0	0	0	0	0	0	0	603	903	0
434	7	0	0	0	0	0	0	200	300	0	0	0	0	0	0	0	200	903	0	0	0	0	0	0	0	603	903	0
434	8	0	0	0	0	0	0	200	300	0	0	0	0	0	0	0	200	903	0	0	0	0	0	0	0	603	903	0
434	9	0	0	0	0	0	0	200	300	0	0	0	0	0	0	0	200	903	0	0	0	0	0	0	0	603	903	0
435	0	0	0	0	0	0	0	200	300	0	0	0	0	0	0	0	200	903	0	0	0	0	0	0	0	603	903	0
435	1	0	0	0	0	0	0	200	300	0	0	0	0	0	0	0	200	903	0	0	0	0	0	0	0	603	903	0
435	2	0	0	0	0	0	0	200	300	0	0	0	0	0	0	0	200	903	0	0	0	0	0	0	0	603	903	0
435	3	0	0	0	0	0	0	200	300	0	0	0	0	0	0	0	200	903	0	0	0	0	0	0	0	603	903	0
435	4	0	0	0	0	0	0	200	300	0	0	0	0	0	0	0	200	903	0	0	0	0	0	0	0	603	903	0
435	5	0	0	0	0	0	0	200	300	0	0	0	0	0	0	0	200	903	0	0	0	0	0	0	0	603	903	0
435	6	0	0	0	0	0	0	200	300	0	0	0	0	0	0	0	200	903	0	0	0	0	0	0	0	603	903	0
435	7	0	0	0	0	0	0	200	300	0	0	0	0	0	0	0	200	903	0	0	0	0	0	0	0	603	903	0
435	8	0	0	0	0	0	0	200	300	0	0	0	0	0	0	0	200	903	0	0	0	0	0	0	0	603	903	0
435	9	0	0	0	0	0	0	200	300	0	0	0	0	0	0	0	200	903	0	0	0	0	0	0	0	603	903	0
436	0	0	0	0	0	0	0	200	300	0	0	0	0	0	0	0	200	903	0	0	0	0	0	0	0	603	903	0
436	1	0	0	0	0	0	0	200	300	0	0	0	0	0	0	0	200	903	0	0	0	0	0	0	0	603	903	0
436	2	0	0	0	0	0	0	200	300	0	0	0	0	0	0	0	200	903	0	0	0	0	0	0	0	603	903	0
436	3	0	0	0	0	0	0	200	300	0	0	0	0	0	0	0	200	903	0	0	0	0	0	0	0	603	903	0
436	4	0	0	0	0	0	0	200	300	0	0	0	0	0	0	0	200	903	0	0	0	0	0	0	0	603	903	0
436	5	0	0	0	0	0	0	200	300	0	0	0	0	0	0	0	200	903	0	0	0	0	0	0	0	603	903	0
436	6	0	0	0	0	0	0	200	300	0	0	0	0	0	0	0	200	903	0	0	0	0	0	0	0	603	903	0
436	7	0	0	0	0	0	0	200	300	0	0	0	0	0	0	0	200	903	0	0	0	0	0	0	0	603	903	0
436	8	0	0	0	0	0	0	200	300	0	0	0	0	0	0	0	200	903	0	0	0	0	0	0	0	603	903	0
436	9	0	0	0	0	0	0	200	300	0	0	0	0	0	0	0	200	903	0	0	0	0	0	0	0	603	903	0
437	0	0	0	0	0	0	0	200	300	0	0	0	0	0	0	0	200	903	0	0	0	0	0	0	0	603	903	0
437	1	0	0	0	0	0	0	200	300	0	0	0	0	0	0	0	200	903	0	0	0	0	0	0	0	603	903	0
437	2	0	0	0	0	0	0	200	300	0	0	0	0	0	0	0	200	903	0	0	0	0	0	0	0	603	903	0
437	3	0	0	0	0	0	0	200	300	0	0	0	0	0	0	0	200	903	0	0	0	0	0	0	0	603	903	0
437	4	0	0	0	0	0	0	200	300	0	0	0	0	0	0	0	200	903	0	0	0	0	0	0	0	603	903	0
437	5	0	0	0	0	0	0	200	300	0	0	0	0	0	0	0	200	903	0	0	0	0	0	0	0	603	903	0
437	6	0	0	0	0	0	0	200	300	0	0	0	0	0	0	0	200	903	0	0	0	0	0	0	0	603	903	0
437	7	0	0	0	0	0	0	200	300	0	0	0	0	0	0	0	200	903	0	0	0	0	0	0	0	603	903	0
437	8	0	0	0	0	0	0	200	300	0	0	0	0	0	0	0	200	903	0	0	0	0	0	0	0	603	903	0
437	9	0	0	0	0	0	0	200	300	0	0	0	0	0	0	0	200	903	0	0	0	0	0	0	0	603	903	0
438	0	0	0	0	0	0	0	200	300	0	0	0	0	0	0	0	200	903	0	0	0	0	0	0	0	603	903	0
438	1	0	0	0	0	0	0	200	300	0	0	0	0	0	0	0	200	903	0	0	0	0	0	0	0	603	903	0
438	2	0	0	0	0	0	0	200	300	0	0	0	0	0	0	0	200	903	0	0	0	0	0	0	0	603	903	0
438	3	0	0	0	0	0	0	200	300	0	0	0	0	0	0	0	200	903	0	0	0	0	0	0	0	603	903	0
438	4	0	0	0	0	0	0	200	300	0	0	0	0	0	0	0	200	903	0	0	0	0	0	0	0	603	903	0
438	5	0	0	0	0	0	0	200	300	0	0	0	0	0	0	0	200	903	0	0	0	0	0	0	0	603	903	0
438	6	0	0	0	0	0	0	200	300	0	0	0	0	0	0	0	200	903	0	0	0	0	0	0	0	603	903	0
438	7	0	0	0	0	0	0	200	300	0	0	0	0	0	0	0	200	903	0	0	0	0	0	0	0	603	903	0
438	8	0	0	0	0	0	0	200	300	0	0	0	0	0	0	0	200	903	0	0	0	0	0	0	0	603	903	0
438	9	0	0	0	0	0	0	200	300	0	0	0	0	0	0	0	200	903	0	0	0	0	0	0	0	603	903	0
439	0	0	0	0	0	0	0	200	300	0	0	0	0	0	0	0	200	903	0	0	0	0	0	0	0	603	903	0
439	1	0	0	0	0	0	0	200	300	0	0	0	0	0	0	0	200	903	0	0	0	0	0	0	0	603	903	0
439	2	0	0	0	0	0	0	200	300	0	0	0	0	0	0	0	200	903	0	0	0	0	0	0	0	603	903	0
439	3	0	0	0	0	0	0	200	300	0	0	0	0	0	0	0	200	903	0	0	0	0	0	0	0	603	903	0
439	4	0	0	0	0	0	0	200	300	0	0	0	0	0	0	0	200	903	0	0	0	0	0	0	0	603	903	0
439	5	0	0	0	0	0	0	200	300	0	0	0	0	0	0	0	200	903	0	0	0	0	0	0	0	603	903	0
439	6	0	0	0	0	0	0	200	300	0	0	0	0	0	0	0	200	903	0	0	0	0	0	0	0	603	903	0
439	7	0	0	0	0	0	0	200	300	0	0	0	0	0	0	0	200	903	0	0	0	0	0	0	0	603	903	0
439	8	0	0	0	0	0	0	200	300	0	0	0	0	0	0	0	200	903	0	0	0	0	0	0	0	603	903	0
439	9	0	0	0	0	0	0	200	300	0	0	0	0	0	0	0	200	903	0	0	0	0	0	0	0	603	903	0
440	0	0	0	0	0	0	0	200	300	0	0	0	0	0	0	0	200	903	0	0	0	0	0	0	0	603	903	0
440	1	0	0	0	0	0	0	200	300	0	0	0	0	0	0	0	200	903	0	0	0	0	0	0	0	603	903	0
440	2	0	0	0	0	0	0	200	300	0	0	0	0	0	0	0	200	903	0	0	0	0	0	0	0	603	903	0
440	3	0	0	0	0	0	0	200	300	0	0	0	0	0	0	0	200	903	0	0	0	0	0	0	0	603	903	0
440	4	0	0	0	0	0	0	200	300	0	0	0	0	0	0	0	200	903	0	0	0	0	0	0	0	603	903	0
440	5	0	0	0	0	0	0	200	300	0	0	0	0	0	0	0	200	903	0	0	0	0	0	0	0	603	903	0
440	6	0	0	0	0	0	0	200	300	0	0	0	0	0	0	0	200	903	0	0	0	0	0	0	0	603	903	0
440	7	0	0	0	0	0	0	200	300	0	0	0	0	0	0	0	200	903	0	0	0	0	0	0	0	603	903	0
440	8	0	0	0	0	0	0	200	300	0	0	0	0	0	0	0	200	903	0	0	0	0	0	0	0	603	903	0
440	9	0	0	0	0	0	0	200	300	0	0	0	0	0	0	0	200	903	0	0	0	0	0	0	0	603	903	0
441	0	0	0	0	0	0	0	200	300	0	0	0	0	0	0	0	200	903	0	0	0	0	0	0	0	603	903	0
441	1	0	0	0	0	0	0	200	300	0	0	0	0	0	0	0	200	903	0	0	0	0	0	0	0	603	903	0
441	2	0	0	0	0	0	0	200	300	0	0	0	0	0	0	0	200	903	0	0	0	0	0	0	0	603	903	0
441	3	0	0	0	0	0	0	200	300	0	0	0	0	0	0	0	200	903	0	0	0	0	0	0	0	603	903	0
441	4	0	0	0	0	0	0	200	300	0	0	0	0	0	0	0	200	903	0	0	0	0	0	0	0	603	903	0
441	5	0	0	0	0	0	0	200	300	0	0	0	0	0	0	0	200	903	0	0	0	0	0	0	0	603	903	0
441	6	0	0	0	0	0	0	200	300	0	0	0	0	0	0	0	200	903	0	0	0	0	0	0	0	603	903	0
441	7	0	0	0	0	0	0	200	300	0	0	0	0	0	0	0	200	903	0	0	0	0	0	0	0	603	903	0
441	8	0	0	0	0	0	0	200	300	0	0	0	0	0	0	0	200	903	0	0	0	0	0	0	0	603	903	0
441	9	0	0	0	0	0	0	200	300	0	0	0	0	0	0	0	200	903	0	0	0	0	0	0	0	603	903	0
442	0	0	0	0	0	0	0	200	300	0	0	0	0	0	0	0	200	903	0	0	0	0	0	0	0	603	903	0
442	1	0	0	0	0	0	0	200	300	0	0	0	0	0	0	0	200	903	0	0	0	0	0	0	0	603	903	0
442	2	0	0	0	0	0	0	200	300	0	0	0	0	0	0	0	200	903	0	0	0	0	0	0	0	603	903	0
442	3	0	0	0	0	0	0	200	300	0	0	0	0	0	0	0	200	903	0	0	0	0	0	0	0	603	903	0
442	4	0	0	0	0	0	0	200	300	0	0	0	0	0	0	0	200	903	0	0	0	0	0	0	0	603	903	0
442	5	0	0	0	0	0	0	200	300	0	0	0	0	0	0	0	200	903	0	0	0	0	0	0	0	603	903	0
442	6	0	0	0	0	0	0	200	300	0	0	0	0	0	0	0	200	903	0	0	0	0	0	0	0	603	903	0
442	7	0	0	0	0	0	0	200	300	0	0	0	0	0	0	0	200	903	0	0	0	0	0	0	0	603	903	0
442	8	0	0	0	0	0	0	200	300	0	0	0	0	0	0	0	200	903	0	0	0	0	0	0	0	603	903	0
442	9	0	0	0	0	0	0	200	300	0	0	0	0	0	0	0	200	903	0	0	0	0	0	0	0	603	903	0
443	0	0	0	0	0	0	0	200	300	0	0	0	0	0	0	0	200	903	0	0	0	0	0	0	0	603	903	0
443	1	0	0	0	0	0	0	200	300	0	0	0	0	0	0	0	200	903	0	0	0	0	0	0	0	603	903	0
443	2	0	0	0	0	0	0	200	300	0	0	0	0	0	0	0	200	903	0	0	0	0	0	0	0	603	903	0
443	3	0	0	0	0	0	0	200	300	0	0	0	0	0	0	0	200	903	0	0	0	0	0	0	0	603	903	0
443	4	0	0	0	0	0	0	200	300	0	0	0	0	0	0	0	200	903	0	0	0	0	0	0	0	603	903	0
443	5	0	0	0	0	0	0	200	300	0	0	0	0	0	0	0	200	903	0	0	0	0	0	0	0	603	903	0
443	6	0	0	0	0	0	0	200	300	0	0	0	0	0	0	0	200	903	0	0	0	0	0	0	0	603	903	0
443	7	0	0	0	0	0	0	200	300	0	0	0	0	0	0	0	200	903	0	0	0	0	0	0	0	603	903	0
443	8	0	0	0	0	0	0	200	300	0	0	0	0	0	0	0	200	903	0	0	0	0	0	0	0	603	903	0
443	9	0	0	0	0	0	0	200	300	0	0	0	0	0	0	0	200	903	0	0	0	0	0	0	0	603	903	0
444	0	0	0	0	0	0	0	200	300	0	0	0	0	0	0	0	200	903	0	0	0	0	0	0	0	603	903	0
444	1	0	0	0	0	0	0	200	300	0	0	0	0	0	0	0	200	903	0	0	0	0	0	0	0	603	903	0
444	2	0	0	0	0	0	0	200	300	0	0	0	0	0	0	0	200	903	0	0	0	0	0	0	0	603	903	0
444	3	0	0	0	0	0	0	200	300	0	0	0	0	0	0	0	200	903	0	0	0	0	0	0	0	603	903	0
444	4	0	0	0	0	0	0	200	300	0	0	0	0	0	0	0	200	903	0	0	0	0	0	0	0	603	903	0
444	5	0	0	0	0	0	0	200	300	0	0	0	0	0	0	0	200	903	0	0	0	0	0	0	0	603	903	0
444	6	0	0	0	0	0	0	200	300	0	0	0	0	0	0	0	200	903	0	0	0	0	0	0	0	603	903	0
444	7	0	0	0	0	0	0	200	300	0	0	0	0	0	0	0	200	903	0	0	0	0	0	0	0	603	903	0
444	8	0	0	0	0	0	0	200	300	0	0	0	0	0	0	0	200	903	0	0	0	0	0	0	0	603	903	0
444	9	0	0	0	0	0	0	200	300	0	0	0	0	0	0	0	200	903	0	0	0	0	0	0	0	603	903	0
445	0	0	0	0	0	0	0	200	300	0	0	0	0	0	0	0	200	903	0	0	0	0	0	0	0	603	903	0
445	1	0	0	0	0	0	0	200	300	0	0	0	0	0	0	0	200	903	0	0	0	0	0	0	0	603	903	0
445	2	0	0	0	0	0	0	200	300	0	0	0	0	0	0	0	200	903	0	0	0	0	0	0	0	603	903	0
445	3	0	0	0	0	0	0	200	300	0	0	0	0	0	0	0	200	903	0	0	0	0	0	0	0	603	903	0
445	4	0	0	0	0	0	0	200	300	0	0	0	0	0	0	0	200	903	0	0	0	0	0	0	0	603	903	0
445	5	0	0	0	0	0	0	200	300	0	0	0	0	0	0	0	200	903	0	0	0	0	0	0	0	603	903	0
445	6	0	0	0	0	0	0	200	300	0	0	0	0	0	0	0	200	903	0	0	0	0	0	0	0	603	903	0
445	7	0	0	0	0	0	0	200	300	0	0	0	0	0	0	0	200	903	0	0	0	0	0	0	0	603	903	0
445	8	0	0	0	0	0	0	200	300	0	0	0	0	0	0	0	200	903	0	0	0	0	0	0	0	603	903	0
445	9	0	0	0	0	0	0	200	300	0	0	0	0	0	0	0	200	903	0	0	0	0	0	0	0	603	903	0
446	0	0	0	0	0	0	0	200	300	0	0	0	0	0	0	0	200	903	0	0	0	0	0	0	0	603	903	0
446	1	0	0	0	0	0	0	200	300	0	0	0	0	0	0	0	200	903	0	0	0	0	0	0	0	603	903	0
446	2	0	0	0	0	0	0	200	300	0	0	0	0	0	0	0	200	903	0	0	0	0	0	0	0	603	903	0
446	3	0	0	0	0	0	0	200	300	0	0	0	0	0	0	0	200	903	0	0	0	0	0	0	0	603	903	0
446	4	0	0	0	0	0	0	200	300	0	0	0	0	0	0	0	200	903	0	0	0	0	0	0	0	603	903	0
446	5	0	0	0	0	0	0	200	300	0	0	0	0	0	0	0	200	903	0	0	0	0	0	0	0	603	903	0
446	6	0	0	0	0	0	0	200	300	0	0	0	0	0	0	0	200	903	0	0	0	0	0	0	0	603	903	0
446	7	0	0	0	0	0	0	200	300	0	0	0	0	0	0	0	200	903	0	0	0	0	0	0	0	603	903	0
446	8	0	0	0	0	0	0	200	300	0	0	0	0	0	0	0	200	903	0	0	0	0	0	0	0	603	903	0
446	9	0	0	0	0	0	0	200	300	0	0	0	0	0	0	0	200	903	0	0	0	0	0	0	0	603	903	0
447	0	0	0	0	0	0	0	200	300	0	0	0	0	0	0	0	200	903	0	0	0	0	0	0	0	603	903	0
447	1	0	0	0	0	0	0	200	300	0	0	0	0	0	0	0	200	903	0	0	0	0	0	0	0	603	903	0
447	2	0	0	0	0	0	0	200	300	0	0	0	0	0	0	0	200	903	0	0	0	0	0	0	0	603	903	0
447	3	0	0	0	0	0	0	200	300	0	0	0	0	0	0	0	200	903	0	0	0	0	0	0	0	603	903	0
447	4	0	0	0	0	0	0	200	300	0	0	0	0	0	0	0	200	903	0	0	0	0	0	0	0	603	903	0
447	5	0	0	0	0	0	0	200	300	0	0	0	0	0	0	0	200	903	0	0	0	0	0	0	0	603	903	0
447	6	0	0	0	0	0	0	200	300	0	0	0	0	0	0	0	200	903	0	0	0	0	0	0	0	603	903	0
447	7	0	0	0	0	0	0	200	300	0	0	0	0	0	0	0	200	903	0	0	0	0	0	0	0	603	903	0
447	8	0	0	0	0	0	0	200	300	0	0	0	0	0	0	0	200	903	0	0	0	0	0	0	0	603	903	0
447	9	0	0	0	0	0	0	200	300	0	0	0	0	0	0	0	200	903	0	0	0	0	0	0	0	603	903	0
448	0	0	0	0	0	0	0	200	300	0	0	0	0	0	0	0	200	903	0	0	0	0	0	0	0	603	903	0
448	1	0	0	0	0	0	0	200	300	0	0	0	0	0	0	0	200	903	0	0	0	0	0	0	0	603	903	0
448	2	0	0	0	0	0	0	200	300	0	0	0	0	0	0	0	200	903	0	0	0	0	0	0	0	603	903	0
448	3	0	0	0	0	0	0	200	300	0	0	0	0	0	0	0	200	903	0	0	0	0	0	0	0	603	903	0
448	4	0	0	0	0	0	0	200	300	0	0	0	0	0	0	0	200	903	0	0	0	0	0	0	0	603	903	0
448	5	0	0	0	0	0	0	200	300	0	0	0	0	0	0	0	200	903	0	0	0	0	0	0	0	603	903	0
448	6	0	0	0	0	0	0	200	300	0	0	0	0	0	0	0	200	903	0	0	0	0	0	0	0	603	903	0
448	7	0	0	0	0	0	0	200	300	0	0	0	0	0	0	0	200	903	0	0	0	0	0	0	0	603	903	0
448	8	0	0	0	0	0	0	200	300	0	0	0	0	0	0	0	200	903	0	0	0	0	0	0	0	603	903	0
448	9	0	0	0	0	0	0	200	300	0	0	0	0	0	0	0	200	903	0	0	0	0	0	0	0	603	903	0
449	0	0	0	0	0	0	0	200	300	0	0	0	0	0	0	0	200	903	0	0	0	0	0	0	0	603	903	0
449	1	0	0	0	0	0	0	200	300	0	0	0	0	0	0	0	200	903	0	0	0	0	0	0	0	603	903	0
449	2	0	0	0	0	0	0	200	300	0	0	0	0	0	0	0	200	903	0	0	0	0	0	0	0	603	903	0
449	3	0	0	0	0	0	0	200	300	0	0	0	0	0	0	0	200	903	0	0	0	0	0	0	0	603	903	0
449	4	0	0	0	0	0	0	200	300	0	0	0	0	0	0	0	200	903	0	0	0	0	0	0	0	603	903	0
449	5	0	0	0	0	0	0	200	300	0	0	0	0	0	0	0	200	903	0	0	0	0	0	0	0	603	903	0
449	6	0	0	0	0	0	0	200	300	0	0	0	0	0	0	0	200	903	0	0	0	0	0	0	0	603	903	0
449	7	0	0	0	0	0	0	200	300	0	0	0	0	0	0	0	200	903	0	0	0	0	0	0	0	603	903	0
449	8	0	0	0	0	0	0	200	300	0	0	0	0	0	0	0	200	903	0	0	0	0	0	0	0	603	903	0
449	9	0	0	0	0	0	0	200	300	0	0	0	0	0	0	0	200	903	0	0	0	0	0	0	0	603	903	0
450	0	0	0	0	0	0	0	200	300	0	0	0	0	0	0	0	200	903	0	0	0	0	0	0	0	603	903	0
450	1	0	0	0	0	0	0	200	300	0	0	0	0	0	0	0	200	903	0	0	0	0	0	0	0	603	903	0
450	2	0	0	0	0	0	0	200	300	0	0	0	0	0	0	0	200	903	0	0	0	0	0	0	0	603	903	0
450	3	0	0	0	0	0	0	200	300	0	0	0	0	0	0	0	200	903	0	0	0	0	0	0	0	603	903	0
450	4	0	0	0	0	0	0	200	300	0	0	0	0	0	0	0	200	903	0	0	0	0	0	0	0	603	903	0
450	5	0	0	0	0	0	0	200	300	0	0	0	0	0	0	0	200	903	0	0	0	0	0	0	0	603	903	0
450	6	0	0	0	0	0	0	200	300	0	0	0	0	0	0	0	200	903	0	0	0	0	0	0	0	603	903	0
450	7	0	0	0	0	0	0	200	300	0	0	0	0	0	0	0	200	903	0	0	0	0	0	0	0	603	903	0
450	8	0	0	0	0	0	0	200	300	0	0	0	0	0	0	0	200	903	0	0	0	0	0	0	0	603	903	0
450	9	0	0	0	0	0	0	200	300	0	0	0	0	0	0	0	200	903	0	0	0	0	0	0	0	603	903	0
451	0	0	0	0	0	0	0	200	300	0	0	0	0	0	0	0	200	903	0	0	0	0	0	0	0	603	903	0
451	1	0	0	0	0	0	0	200	300	0	0	0	0	0	0	0	200	903	0	0	0	0	0	0	0	603	903	0
451	2	0	0	0	0	0	0	200	300	0	0	0	0	0	0	0	200	903	0	0	0	0	0	0	0	603	903	0
451	3	0	0	0	0	0	0	200	300	0	0	0	0	0	0	0	200	903	0	0	0	0	0	0	0	603	903	0
451	4	0	0	0	0	0	0	200	300	0	0	0	0	0	0	0	200	903	0	0	0	0	0	0	0	603	903	0
451	5	0	0	0	0	0	0	200	300	0	0	0	0	0	0	0	200	903	0	0	0	0	0	0	0	603	903	0
451	6	0	0	0	0	0	0	200	300	0	0	0	0	0	0	0	200	903	0	0	0	0	0	0	0	603	903	0
451	7	0	0	0	0	0	0	200	300	0	0	0	0	0	0	0	200	903	0	0	0	0	0	0	0	603	903	0
451	8	0	0	0	0	0	0	200	300	0	0	0	0	0	0	0	200	903	0	0	0	0	0	0	0	603	903	0
451	9	0	0	0	0	0	0	200	300	0	0	0	0	0	0	0	200	903	0	0	0	0	0	0	0	603	903	0
452	0	0	0	0	0	0	0	200	300	0	0	0	0	0	0	0	200	903	0	0	0	0	0	0	0	603	903	0
452	1	0	0	0	0	0	0	200	300	0	0	0	0	0	0	0	200	903	0	0	0	0	0	0	0	603	903	0
452	2	0	0	0	0	0	0	200	300	0	0	0	0	0	0	0	200	903	0	0	0	0	0	0	0	603	903	0
452	3	0	0	0	0	0	0	200	300	0	0	0	0	0	0	0	200	903	0	0	0	0	0	0	0	603	903	0
452	4	0	0	0	0	0	0	200	300	0	0	0	0	0	0	0	200	903	0	0	0	0	0	0	0	603	903	0
452	5	0	0	0	0	0	0	200	300	0	0	0	0	0	0	0	200	903	0	0	0	0	0	0	0	603	903	0
452	6	0	0	0	0	0	0	200	300	0	0	0	0	0	0	0	200	903	0	0	0	0	0	0	0	603	903	0
452	7	0	0	0	0	0	0	200	300	0	0	0	0	0	0	0	200	903	0	0	0	0	0	0	0	603	903	0
452	8	0	0	0	0	0	0	200	300	0	0	0	0	0	0	0	200	903	0	0	0	0	0	0	0	603	903	0
452	9	0	0	0	0	0	0	200	300	0	0	0	0	0	0	0	200	903	0	0	0	0	0	0	0	603	903	0
453	0	0	0	0	0	0	0	200	300	0	0	0	0	0	0	0	200	903	0	0	0	0	0	0	0	603	903	0
453	1	0	0	0	0	0	0	200	300	0	0	0	0	0	0	0	200	903	0	0	0	0	0	0	0	603	903	0
453	2	0	0	0	0	0	0	200	300	0	0	0	0	0	0	0	200	903	0	0	0	0	0	0	0	603	903	0
453	3	0	0	0	0	0	0	200	300	0	0	0	0	0	0	0	200	903	0	0	0	0	0	0	0	603	903	0
453	4	0	0	0	0	0	0	200	300	0	0	0	0	0	0	0	200	903	0	0	0	0	0	0	0	603	903	0
453	5	0	0	0	0	0	0	200	300	0	0	0	0	0	0	0	200	903	0	0	0	0	0	0	0	603	903	0
453	6	0	0	0	0	0	0	200	300	0	0	0	0	0	0	0	200	903	0	0	0	0	0	0	0	603	903	0
453	7	0	0	0	0	0	0	200	300	0	0	0	0	0	0	0	200	903	0	0	0	0	0	0	0	603	903	0
453	8	0	0	0	0	0	0	200	300	0	0	0	0	0	0	0	200	903	0	0	0	0	0	0	0	603	903	0
453	9	0	0	0	0	0	0	200	300	0	0	0	0	0	0	0	200	903	0	0	0	0	0	0	0	603	903	0
454	0	0	0	0	0	0	0	200	300	0	0	0	0	0	0	0	200	903	0	0	0	0	0	0	0	603	903	0
454	1	0	0	0	0	0	0	200	300	0	0	0	0	0	0	0	200	903	0	0	0	0	0	0	0	603	903	0
454	2	0	0	0	0	0	0	200	300	0	0	0	0	0	0	0	200	903	0	0	0	0	0	0	0	603	903	0
454	3	0	0	0	0	0	0	200	300	0	0	0	0	0	0	0	200	903	0	0	0	0	0	0	0	603	903	0
454	4	0	0	0	0	0	0	200	300	0	0	0	0	0	0	0	200	903	0	0	0	0	0	0	0	603	903	0
454	5	0	0	0	0	0	0	200	300	0	0	0	0	0	0	0	200	903	0	0	0	0	0	0	0	603	903	0
454	6	0	0	0	0	0	0	200	300	0	0	0	0	0	0	0	200	903	0	0	0	0	0	0	0	603	903	0
454	7	0	0	0	0	0	0	200	300	0	0	0	0	0	0	0	200	903	0	0	0	0	0	0	0	603	903	0
454	8	0	0	0	0	0	0	200	300	0	0	0	0	0	0	0	200	903	0	0	0	0	0	0	0	603	903	0
454	9	0	0	0	0	0	0	200	300	0	0	0	0	0	0	0	200	903	0	0	0	0	0	0	0	603	903	0
455	0	0	0	0	0	0	0	200	300	0	0	0	0	0	0	0	200	903	0	0	0	0	0	0	0	603	903	0
455	1	0	0	0	0	0	0	200	300	0	0	0	0	0	0	0	200	903	0	0	0	0	0	0	0	603	903	0
455	2	0	0	0	0	0	0	200	300	0	0	0	0	0	0	0	200	903	0	0	0	0	0	0	0	603	903	0
455	3	0	0	0	0	0	0	200	300	0	0	0	0	0	0	0	200	903	0	0	0	0	0	0	0	603	903	0
455	4	0	0	0	0	0	0	200	300	0	0	0	0	0	0	0	200	903	0	0	0	0	0	0	0	603	903	0
455	5	0	0	0	0	0	0	200	300	0	0	0	0	0	0	0	200	903	0	0	0	0	0	0	0	603	903	0
455	6	0	0	0	0	0	0	200	300	0	0	0	0	0	0	0	200	903	0	0	0	0	0	0	0	603	903	0
455	7	0	0	0	0	0	0	200	300	0	0	0	0	0	0	0	200	903	0	0	0	0	0	0	0	603	903	0
455	8	0	0	0	0	0	0	200	300	0	0	0	0	0	0	0	200	903	0	0	0	0	0	0	0	603	903	0
455	9	0	0	0	0	0	0	200	300	0	0	0	0	0	0	0	200	903	0	0	0	0	0	0	0	603	903	0
456	0	0	0	0	0	0	0	200	300	0	0	0	0	0	0	0	200	903	0	0	0	0	0	0	0	603	903	0
456	1	0	0	0	0	0	0	200	300	0	0	0	0	0	0	0	200	903	0	0	0	0	0	0	0	603	903	0
456	2	0	0	0	0	0	0	200	300	0	0	0	0	0	0	0	200	903	0	0	0	0	0	0	0	603	903	0
456	3	0	0	0	0	0	0	200	300	0	0	0	0	0	0	0	200	903	0	0	0	0	0	0	0	603	903	0
456	4	0	0	0	0	0	0	200	300	0	0	0	0	0	0	0	200	903	0	0	0	0	0	0	0	603	903	0
456	5	0	0	0	0	0	0	200	300	0	0	0	0	0	0	0	200	903	0	0	0	0	0	0	0	603	903	0
456	6	0	0	0	0	0	0	200	300	0	0	0	0	0	0	0	200	903	0	0	0	0	0	0	0	603	903	0
456	7	0	0	0	0	0	0	200	300	0	0	0	0	0	0	0	200	903	0	0	0	0	0	0	0	603	903	0
456	8	0	0	0	0	0	0	200	300	0	0	0	0	0	0	0	200	903	0	0	0	0	0	0	0	603	903	0
456	9	0	0	0	0	0	0	200	300	0	0	0	0	0	0	0	200	903	0	0	0	0	0	0	0	603	903	0
457	0	0	0	0	0	0	0	200	300	0	0	0	0	0	0	0	200	903	0	0	0	0	0	0	0	603	903	0
457	1	0	0	0	0	0	0	200	300	0	0	0	0	0	0	0	200	903	0	0	0	0	0	0	0	603	903	0
457	2	0	0	0	0	0	0	200	300	0	0	0	0	0	0	0	200	903	0	0	0	0	0	0	0	603	903	0
457	3	0	0	0	0	0	0	200	300	0	0	0	0	0	0	0	200	903	0	0	0	0	0	0	0	603	903	0
457	4	0	0	0	0	0	0	200	300	0	0	0	0	0	0	0	200	903	0	0	0	0	0	0	0	603	903	0
457	5	0	0	0	0	0	0	200	300	0	0	0	0	0	0	0	200	903	0	0	0	0	0	0	0	603	903	0
457	6	0	0	0	0	0	0	200	300	0	0	0	0	0	0	0	200	903	0	0	0	0	0	0	0	603	903	0
457	7	0	0	0	0	0	0	200	300	0	0	0	0	0	0	0	200	903	0	0	0	0	0	0	0	603	903	0
457	8	0	0	0	0	0	0	200	300	0	0	0	0	0	0	0	200	903	0	0	0	0	0	0	0	603	903	0
457	9	0	0	0	0	0	0	200	300	0	0	0	0	0	0	0	200	903	0	0	0	0	0	0	0	603	903	0
458	0	0	0	0	0	0	0	200	300	0	0	0	0	0	0	0	200	903	0	0	0	0	0	0	0	603	903	0
458	1	0	0	0	0	0	0	200	300	0	0	0	0	0	0	0	200	903	0	0	0	0	0	0	0	603	903	0
458	2	0	0	0	0	0	0	200	300	0	0	0	0	0	0	0	200	903	0	0	0	0	0	0	0	603	903	0
458	3	0	0	0	0	0	0	200	300	0	0	0	0	0	0	0	200	903	0	0	0	0	0	0	0	603	903	0
458	4	0	0	0	0	0	0	200	300	0	0	0	0	0	0	0	200	903	0	0	0	0	0	0	0	603	903	0
458	5	0	0	0	0	0	0	200	300	0	0	0	0	0	0	0	200	903	0	0	0	0	0	0	0	603	903	0
458	6	0	0	0	0	0	0	200	300	0	0	0	0	0	0	0	200	903	0	0	0	0	0	0	0	603	903	0
458	7	0	0	0	0	0	0	200	300	0	0	0	0	0	0	0	200	903	0	0	0	0	0	0	0	603	903	0
458	8	0	0	0	0	0	0	200	300	0	0	0	0	0	0	0	200	903	0	0	0	0	0	0	0	603	903	0
458	9	0	0	0	0	0	0	200	300	0	0	0	0	0	0	0	200	903	0	0	0	0	0	0	0	603	903	0
459	0	0	0	0	0	0	0	200	300	0	0	0	0	0	0	0	200	903	0	0	0	0	0	0	0	603	903	0
459	1	0	0	0	0	0	0	200	300	0	0	0	0	0	0	0	200	903	0	0	0	0	0	0	0	603	903	0
459	2	0	0	0	0	0	0	200	300	0	0	0	0	0	0	0	200	903	0	0	0	0	0	0	0	603	903	0
459	3	0	0	0	0	0	0	200	300	0	0	0	0	0	0	0	200	903	0	0	0	0	0	0	0	603	903	0
459	4	0	0	0	0	0	0	200	300	0	0	0	0	0	0	0	200	903	0	0	0	0	0	0	0	603	903	0
459	5	0	0	0	0	0	0	200	300	0	0	0	0	0	0	0	200	903	0	0	0	0	0	0	0	603	903	0
459	6	0	0	0	0	0	0	200	300	0	0	0	0	0	0	0	200	903	0	0	0	0	0	0	0	603	903	0
459	7	0	0	0	0	0	0	200	300	0	0	0	0	0	0	0	200	903	0	0	0	0	0	0	0	603	903	0
459	8	0	0	0	0	0	0	200	300	0	0	0	0	0	0	0	200	903	0	0	0	0	0	0	0	603	903	0
459	9	0	0	0	0	0	0	200	300	0	0	0	0	0	0	0	200	903	0	0	0	0	0	0	0	603	903	0
460	0	0	0	0	0	0	0	200	300	0	0	0	0	0	0	0	200	903	0	0	0	0	0	0	0	603	903	0
460	1	0	0	0	0	0	0	200	300	0	0	0	0	0	0	0	200	903	0	0	0	0	0	0	0	603	903	0
460	2	0	0	0	0	0	0	200	300	0	0	0	0	0	0	0	200	903	0	0	0	0	0	0	0	603	903	0
460	3	0	0	0	0	0	0	200	300	0	0	0	0	0	0	0	200	903	0	0	0	0	0	0	0	603	903	0
460	4	0	0	0	0	0	0	200	300	0	0	0	0	0	0	0	200	903	0	0	0	0	0	0	0	603	903	0
460	5	0	0	0	0	0	0	200	300	0	0	0	0	0	0	0	200	903	0	0	0	0	0	0	0	603	903	0
460	6	0	0	0	0	0	0	200	300	0	0	0	0	0	0	0	200	903	0	0	0	0	0	0	0	603	903	0
460	7	0	0	0	0	0	0	200	300	0	0	0	0	0	0	0	200	903	0	0	0	0	0	0	0	603	903	0
460	8	0	0	0	0	0	0	200	300	0	0	0	0	0	0	0	200	903	0	0	0	0	0	0	0	603	903	0
460	9	0	0	0	0	0	0	200	300	0	0	0	0	0	0	0	200	903	0	0	0	0	0	0	0	603	903	0
461	0	0	0	0	0	0	0	200	300	0	0	0	0	0	0	0	200	903	0	0	0	0	0	0	0	603	903	0
461	1	0	0	0	0	0	0	200	300	0	0	0	0	0	0	0	200	903	0	0	0	0	0	0	0	603	903	0
461	2	0	0	0	0	0	0	200	300	0	0	0	0	0	0	0	200	903	0	0	0	0	0	0	0	603	903	0
461	3	0	0	0	0	0	0	200	300	0	0	0	0	0	0	0	200	903	0	0	0	0	0	0	0	603	903	0
461	4	0	0	0	0	0	0	200	300	0	0	0	0	0	0	0	200	903	0	0	0	0	0	0	0	603	903	0
461	5	0	0	0	0	0	0	200	300	0	0	0	0	0	0	0	200	903	0	0	0	0	0	0	0	603	903	0
461	6	0	0	0	0	0	0	200	300	0	0	0	0	0	0	0	200	903	0	0	0	0	0	0	0	603	903	0
461	7	0	0	0	0	0	0	200	300	0	0	0	0	0	0	0	200	903	0	0	0	0	0	0	0	603	903	0
461	8	0	0	0	0	0	0	200	300	0	0	0	0	0	0	0	200	903	0	0	0	0	0	0	0	603	903	0
461	9	0	0	0	0	0	0	200	300	0	0	0	0	0	0	0	200	903	0	0	0	0	0	0	0	603	903	0
462	0	0	0	0	0	0	0	200	300	0	0	0	0	0	0	0	200	903	0	0	0	0	0	0	0	603	903	0
462	1	0	0	0	0	0	0	200	300	0	0	0	0	0	0	0	200	903	0	0	0	0	0	0	0	603	903	0
462	2	0	0	0	0	0	0	200	300	0	0	0	0	0	0	0	200	903	0	0	0	0	0	0	0	603	903	0
462	3	0	0	0	0	0	0	200	300	0	0	0	0	0	0	0	200	903	0	0	0	0	0	0	0	603	903	0
462	4	0	0	0	0	0	0	200	300	0	0	0	0	0	0	0	200	903	0	0	0	0	0	0	0	603	903	0
462	5	0	0	0	0	0	0	200	300	0	0	0	0	0	0	0	200	903	0	0	0	0	0	0	0	603	903	0
462	6	0	0	0	0	0	0	200	300	0	0	0	0	0	0	0	200	903	0	0	0	0	0	0	0	603	903	0
462	7	0	0	0	0	0	0	200	300	0	0	0	0	0	0	0	200	903	0	0	0	0	0	0	0	603	903	0
462	8	0	0	0	0	0	0	200	300	0	0	0	0	0	0	0	200	903	0	0	0	0	0	0	0	603	903	0
462	9	0	0	0	0	0	0	200	300	0	0	0	0	0	0	0	200	903	0	0	0	0	0	0	0	603	903	0
463	0	0	0	0	0	0	0	200	300	0	0	0	0	0	0	0	200	903	0	0	0	0	0	0	0	603	903	0
463	1	0	0	0	0	0	0	200	300	0	0	0	0	0	0	0	200	903	0	0	0	0	0	0	0	603	903	0
463	2	0	0	0	0	0	0	200	300	0	0	0	0	0	0	0	200	903	0	0	0	0	0	0	0	603	903	0
463	3	0	0	0	0	0	0	200	300	0	0	0	0	0	0	0	200	903	0	0	0	0	0	0	0	603	903	0
463	4	0	0	0	0	0	0	200	300	0	0	0	0	0	0	0	200	903	0	0	0	0	0	0	0	603	903	0
463	5	0	0	0	0	0	0	200	300	0	0	0	0	0	0	0	200	903	0	0	0	0	0	0	0	603	903	0
463	6	0	0	0	0	0	0	200	300	0	0	0	0	0	0	0	200	903	0	0	0	0	0	0	0	603	903	0
463	7	0	0	0	0	0	0	200	300	0	0	0	0	0	0	0	200	903	0	0	0	0	0	0	0	603	903	0
463	8	0	0	0	0	0	0	200	300	0	0	0	0	0	0	0	200	903	0	0	0	0	0	0	0	603	903	0
463	9	0	0	0	0	0	0	200	300	0	0	0	0	0	0	0	200	903	0	0	0	0	0	0	0	603	903	0
464	0	0	0	0	0	0	0	200	300	0	0	0	0	0	0	0	200	903	0	0	0	0	0	0	0	603	903	0
464	1	0	0	0	0	0	0	200	300	0	0	0	0	0	0	0	200	903	0	0	0	0	0	0	0	603	903	0
464	2	0	0	0	0	0	0	200	300	0	0	0	0	0	0	0	200	903	0	0	0	0	0	0	0	603	903	0
464	3	0	0	0	0	0	0	200	300	0	0	0	0	0	0	0	200	903	0	0	0	0	0	0	0	603	903	0
464	4	0	0	0	0	0	0	200	300	0	0	0	0	0	0	0	200	903	0	0	0	0	0	0	0	603	903	0
464	5	0	0	0	0	0	0	200	300	0	0	0	0	0	0	0	200	903	0	0	0	0	0	0	0	603	903	0
464	6	0	0	0	0	0	0	200	300	0	0	0	0	0	0	0	200	903	0	0	0	0	0	0	0	603	903	0
464	7	0	0	0	0	0	0	200	300	0	0	0	0	0	0	0	200	903	0	0	0	0	0	0	0	603	903	0
464	8	0	0	0	0	0	0	200	300	0	0	0	0	0	0	0	200	903	0	0	0	0	0	0	0	603	903	0
464	9	0	0	0	0	0	0	200	300	0	0	0	0	0	0	0	200	903	0	0	0	0	0	0	0	603	903	0
465	0	0	0	0	0	0	0	200	300	0	0	0	0	0	0	0	200	903	0	0	0	0	0	0	0	603	903	0
465	1	0	0	0	0	0	0	200	300	0	0	0	0	0	0	0	200	903	0	0	0	0	0	0	0	603	903	0
465	2	0	0	0	0	0	0	200	300	0	0	0	0	0	0	0	200	903	0	0	0	0	0	0	0	603	903	0
465	3	0	0	0	0	0	0	200	300	0	0	0	0	0	0	0	200	903	0	0	0	0	0	0	0	603	903	0
465	4	0	0	0	0	0	0	200	300	0	0	0	0	0	0	0	200	903	0	0	0	0	0	0	0	603	903	0
465	5	0	0	0	0	0	0	200	300	0	0	0	0	0	0	0	200	903	0	0	0	0	0	0	0	603	903	0
465	6	0	0	0	0	0	0	200	300	0	0	0	0	0	0	0	200	903	0	0	0	0	0	0	0	603	903	0
465	7	0	0	0	0	0	0	200	300	0	0	0	0	0	0	0	200	903	0	0	0	0	0	0	0	603	903	0
465	8	0	0	0	0	0	0	200	300	0	0	0	0	0	0	0	200	903	0	0	0	0	0	0	0	603	903	0
465	9	0	0	0	0	0	0	200	300	0	0	0	0	0	0	0	200	903	0	0	0	0	0	0	0	603	903	0
466	0	0	0	0	0	0	0	200	300	0	0	0	0	0	0	0	200	903	0	0	0	0	0	0	0	603	903	0
466	1	0	0	0	0	0	0	200	300	0	0	0	0	0	0	0	200	903	0	0	0	0	0	0	0	603	903	0
466	2	0	0	0	0	0	0	200	300	0	0	0	0	0	0	0	200	903	0	0	0	0	0	0	0	603	903	0
466	3	0	0	0	0	0	0	200	300	0	0	0	0	0	0	0	200	903	0	0	0	0	0	0	0	603	903	0
466	4	0	0	0	0	0	0	200	300	0	0	0	0	0	0	0	200	903	0	0	0	0	0	0	0	603	903	0
466	5	0	0	0	0	0	0	200	300	0	0	0	0	0	0	0	200	903	0	0	0	0	0	0	0	603	903	0
466	6	0	0	0	0	0	0	200	300	0	0	0	0	0	0	0	200	903	0	0	0	0	0	0	0	603	903	0
466	7	0	0	0	0	0	0	200	300	0	0	0	0	0	0	0	200	903	0	0	0	0	0	0	0	603	903	0
466	8	0	0	0	0	0	0	200	300	0	0	0	0	0	0	0	200	903	0	0	0	0	0	0	0	603	903	0
466	9	0	0	0	0	0	0	200	300	0	0	0	0	0	0	0	200	903	0	0	0	0	0	0	0	603	903	0
467	0	0	0	0	0	0	0	200	300	0	0	0	0	0	0	0	200	903	0	0	0	0	0	0	0	603	903	0
467	1	0	0	0	0	0	0	200	300	0	0	0	0	0	0	0	200	903	0	0	0	0	0	0	0	603	903	0
467	2	0	0	0	0	0	0	200	300	0	0	0	0	0	0	0	200	903	0	0	0	0	0	0	0	603	903	0
467	3	0	0	0	0	0	0	200	300	0	0	0	0	0	0	0	200	903	0	0	0	0	0	0	0	603	903	0
467	4	0	0	0	0	0	0	200	300	0	0	0	0	0	0	0	200	903	0	0	0	0	0	0	0	603	903	0
467	5	0	0	0	0	0	0	200	300	0	0	0	0	0	0	0	200	903	0	0	0	0	0	0	0	603	903	0
467	6	0	0	0	0	0	0	200	300	0	0	0	0	0	0	0	200	903	0	0	0	0	0	0	0	603	903	0
467	7	0	0	0	0	0	0	200	300	0	0	0	0	0	0	0	200	903	0	0	0	0	0	0	0	603	903	0
467	8	0	0	0	0	0	0	200	300	0	0	0	0	0	0	0	200	903	0	0	0	0	0	0	0	603	903	0
467	9	0	0	0	0	0	0	200	300	0	0	0	0	0	0	0	200	903	0	0	0	0	0	0	0	603	903	0
468	0	0	0	0	0	0	0	200	300	0	0	0	0	0	0	0	200	903	0	0	0	0	0	0	0	603	903	0
468	1	0	0	0	0	0	0	200	300	0	0	0	0	0	0	0	200	903	0	0	0	0	0	0	0	603	903	0
468	2	0	0	0	0	0	0	200	300	0	0	0	0	0	0	0	200	903	0	0	0	0	0	0	0	603	903	0
468	3	0	0	0	0	0	0	200	300	0	0	0	0	0	0	0	200	903	0	0	0	0	0	0	0	603	903	0
468	4	0	0	0	0	0	0	200	300	0	0	0	0	0	0	0	200	903	0	0	0	0	0	0	0	603	903	0
468	5	0	0	0	0	0	0	200	300	0	0	0	0	0	0	0	200	903	0	0	0	0	0	0	0	603	903	0
468	6	0	0	0	0	0	0	200	300	0	0	0	0	0	0	0	200	903	0	0	0	0	0	0	0	603	903	0
468	7	0	0	0	0	0	0	200	300	0	0	0	0	0	0	0	200	903	0	0	0	0	0	0	0	603	903	0
468	8	0	0	0	0	0	0	200	300	0	0	0	0	0	0	0	200	903	0	0	0	0	0	0	0	603	903	0
468	9	0	0	0	0	0	0	200	300	0	0	0	0	0	0	0	200	903	0	0	0	0	0	0	0	603	903	0
469	0	0	0	0	0	0	0	200	300	0	0	0	0	0	0	0	200	903	0	0	0	0	0	0	0	603	903	0
469	1	0	0	0	0	0	0	200	300	0	0	0	0	0	0	0	200	903	0	0	0	0	0	0	0	603	903	0
469	2	0	0	0	0	0	0	200	300	0	0	0	0	0	0	0	200	903	0	0	0	0	0	0	0	603	903	0
469	3	0	0	0	0	0	0	200	300	0	0	0	0	0	0	0	200	903	0	0	0	0	0	0	0	603	903	0
469	4	0	0	0	0	0	0	200	300	0	0	0	0	0	0	0	200	903	0	0	0	0	0	0	0	603	903	0
469	5	0	0	0	0	0	0	200	300	0	0	0	0	0	0	0	200	903	0	0	0	0	0	0	0	603	903	0
469	6	0	0	0	0	0	0	200	300	0	0	0	0	0	0	0	200	903	0	0	0	0	0	0	0	603	903	0
469	7	0	0	0	0	0	0	200	300	0	0	0	0	0	0	0	200	903	0	0	0	0	0	0	0	603	903	0
469	8	0	0	0	0	0	0	200	300	0	0	0	0	0	0	0	200	903	0	0	0	0	0	0	0	603	903	0
469	9	0	0	0	0	0	0	200	300	0	0	0	0	0	0	0	200	903	0	0	0	0	0	0	0	603	903	0
470	0	0	0	0	0	0	0	200	300	0	0	0	0	0	0	0	200	903	0	0	0	0	0	0	0	603	903	0
470	1	0	0	0	0	0	0	200	300	0	0	0	0	0	0	0	200	903	0	0	0	0	0	0	0	603	903	0
470	2	0	0	0	0	0	0	200	300	0	0	0	0	0	0	0	200	903	0	0	0	0	0	0	0	603	903	0
470	3	0	0	0	0	0	0	200	300	0	0	0	0	0	0	0	200	903	0	0	0	0	0	0	0	603	903	0
470	4	0	0	0	0	0	0	200	300	0	0	0	0	0	0	0	200	903	0	0	0	0	0	0	0	603	903	0
470	5	0	0	0	0	0	0	200	300	0	0	0	0	0	0	0	200	903	0	0	0	0	0	0	0	603	903	0
470	6	0	0	0	0	0	0	200	300	0	0	0	0	0	0	0	200	903	0	0	0	0	0	0	0	603	903	0
470	7	0	0	0	0	0	0	200	300	0	0	0	0	0	0	0	200	903	0	0	0	0	0	0	0	603	903	0
470	8	0	0	0	0	0	0	200	300	0	0	0	0	0	0	0	200	903	0	0	0	0	0	0	0	603	903	0
470	9	0	0	0	0	0	0	200	300	0	0	0	0	0	0	0	200	903	0	0	0	0	0	0	0	603	903	0
471	0	0	0	0	0	0	0	200	300	0	0	0	0	0	0	0	200	903	0	0	0	0	0	0	0	603	903	0
471	1	0	0	0	0	0	0	200	300	0	0	0	0	0	0	0	200	903	0	0	0	0	0	0	0	603	903	0
471	2	0	0	0	0	0	0	200	300	0	0	0	0	0	0	0	200	903	0	0	0	0	0	0	0	603	903	0
471	3	0	0	0	0	0	0	200	300	0	0	0	0	0	0	0	200	903	0	0	0	0	0	0	0	603	903	0
471	4	0	0	0	0	0	0	200	300	0	0	0	0	0	0	0	200	903	0	0	0	0	0	0	0	603	903	0
471	5	0	0	0	0	0	0	200	300	0	0	0	0	0	0	0	200	903	0	0	0	0	0	0	0	603	903	0
471	6	0	0	0	0	0	0	200	300	0	0	0	0	0	0	0	200	903	0	0	0	0	0	0	0	603	903	0
471	7	0	0	0	0	0	0	200	300	0	0	0	0	0	0	0	200	903	0	0	0	0	0	0	0	603	903	0
471	8	0	0	0	0	0	0	200	300	0	0	0	0	0	0	0	200	903	0	0	0	0	0	0	0	603	903	0
471	9	0	0	0	0	0	0	200	300	0	0	0	0	0	0	0	200	903	0	0	0	0	0	0	0	603	903	0
472	0	0	0	0	0	0	0	200	300	0	0	0	0	0	0	0	200	903	0	0	0	0	0	0	0	603	903	0
472	1	0	0	0	0	0	0	200	300	0	0	0	0	0	0	0	200	903	0	0	0	0	0	0	0	603	903	0
472	2	0	0	0	0	0	0	200	300	0	0	0	0	0	0	0	200	903	0	0	0	0	0	0	0	603	903	0
472	3	0	0	0	0	0	0	200	300	0	0	0	0	0	0	0	200	903	0	0	0	0	0	0	0	603	903	0
472	4	0	0	0	0	0	0	200	300	0	0	0	0	0	0	0	200	903	0	0	0	0	0	0	0	603	903	0
472	5	0	0	0	0	0	0	200	300	0	0	0	0	0	0	0	200	903	0	0	0	0	0	0	0	603	903	0
472	6	0	0	0	0	0	0	200	300	0	0	0	0	0	0	0	200	903	0	0	0	0	0	0	0	603	903	0
472	7	0	0	0	0	0	0	200	300	0	0	0	0	0	0	0	200	903	0	0	0	0	0	0	0	603	903	0
472	8	0	0	0	0	0	0	200	300	0	0	0	0	0	0	0	200	903	0	0	0	0	0	0	0	603	903	0
472	9	0	0	0	0	0	0	200	300	0	0	0	0	0	0	0	200	903	0	0	0	0	0	0	0	603	903	0
473	0	0	0	0	0	0	0	200	300	0	0	0	0	0	0	0	200	903	0	0	0	0	0	0	0	603	903	0
473	1	0	0	0	0	0	0	200	300	0	0	0	0	0	0	0	200	903	0	0	0	0	0	0	0	603	903	0
473	2	0	0	0	0	0	0	200	300	0	0	0	0	0	0	0	200	903	0	0	0	0	0	0	0	603	903	0
473	3	0	0	0	0	0	0	200	300	0	0	0	0	0	0	0	200	903	0	0	0	0	0	0	0	603	903	0
473	4	0	0	0	0	0	0	200	300	0	0	0	0	0	0	0	200	903	0	0	0	0	0	0	0	603	903	0
473	5	0	0	0	0	0	0	200	300	0	0	0	0	0	0	0	200	903	0	0	0	0	0	0	0	603	903	0
473	6	0	0	0	0	0	0	200	300	0	0	0	0	0	0	0	200	903	0	0	0	0	0	0	0	603	903	0
473	7	0	0	0	0	0	0	200	300	0	0	0	0	0	0	0	200	903	0	0	0	0	0	0	0	603	903	0
473	8	0	0	0	0	0	0	200	300	0	0	0	0	0	0	0	200	903	0	0	0	0	0	0	0	603	903	0
473	9	0	0	0	0	0	0	200	300	0	0	0	0	0	0	0	200	903	0	0	0	0	0	0	0	603	903	0
474	0	0	0	0	0	0	0	200	300	0	0	0	0	0	0	0	200	903	0	0	0	0	0	0	0	603	903	0
474	1	0	0	0	0	0	0	200	300	0	0	0	0	0	0	0	200	903	0	0	0	0	0	0	0	603	903	0
474	2	0	0	0	0	0	0	200	300	0	0	0	0	0	0	0	200	903	0	0	0	0	0	0	0	603	903	0
474	3	0	0	0	0	0	0	200	300	0	0	0	0	0	0	0	200	903	0	0	0	0	0	0	0	603	903	0
474	4	0	0	0	0	0	0	200	300	0	0	0	0	0	0	0	200	903	0	0	0	0	0	0	0	603	903	0
474	5	0	0	0	0	0	0	200	300	0	0	0	0	0	0	0	200	903	0	0	0	0	0	0	0	603	903	0
474	6	0	0	0	0	0	0	200	300	0	0	0	0	0	0	0	200	903	0	0	0	0	0	0	0	603	903	0
474	7	0	0	0	0	0	0	200	300	0	0	0	0	0	0	0	200	903	0	0	0	0	0	0	0	603	903	0
474	8	0	0	0	0	0	0	200	300	0	0	0	0	0	0	0	200	903	0	0	0	0	0	0	0	603	903	0
474	9	0	0	0	0	0	0	200	300	0	0	0	0	0	0	0	200	903	0	0	0	0	0	0	0	603	903	0
475	0	0	0	0	0	0	0	200	300	0	0	0	0	0	0	0	200	903	0	0	0	0	0	0	0	603	903	0
475	1	0	0	0	0	0	0	200	300	0	0	0	0	0	0	0	200	903	0	0	0	0	0	0	0	603	903	0
475	2	0	0	0	0	0	0	200	300	0	0	0	0	0	0	0	200	903	0	0	0	0	0	0	0	603	903	0
475	3	0	0	0	0	0	0	200	300	0	0	0	0	0	0	0	200	903	0	0	0	0	0	0	0	603	903	0
475	4	0	0	0	0	0	0	200	300	0	0	0	0	0	0	0	200	903	0	0	0	0	0	0	0	603	903	0
475	5	0	0	0	0	0	0	200	300	0	0	0	0	0	0	0	200	903	0	0	0	0	0	0	0	603	903	0
475	6	0	0	0	0	0	0	200	300	0	0	0	0	0	0	0	200	903	0	0	0	0	0	0	0	603	903	0
475	7	0	0	0	0	0	0	200	300	0	0	0	0	0	0	0	200	903	0	0	0	0	0	0	0	603	903	0
475	8	0	0	0	0	0	0	200	300	0	0	0	0	0	0	0	200	903	0	0	0	0	0	0	0	603	903	0
475	9	0	0	0	0	0	0	200	300	0	0	0	0	0	0	0	200	903	0	0	0	0	0	0	0	603	903	0
476	0	0	0	0	0	0	0	200	300	0	0	0	0	0	0	0	200	903	0	0	0	0	0	0	0	603	903	0
476	1	0	0	0	0	0	0	200	300	0	0	0	0	0	0	0	200	903	0	0	0	0	0	0	0	603	903	0
476	2	0	0	0	0	0	0	200	300	0	0	0	0	0	0	0	200	903	0	0	0	0	0	0	0	603	903	0
476	3	0	0	0	0	0	0	200	300	0	0	0	0	0	0	0	200	903	0	0	0	0	0	0	0	603	903	0
476	4	0	0	0	0	0	0	200	300	0	0	0	0	0	0	0	200	903	0	0	0	0	0	0	0	603	903	0
476	5	0	0	0	0	0	0	200	300	0	0	0	0	0	0	0	200	903	0	0	0	0	0	0	0	603	903	0
476	6	0	0	0	0	0	0	200	300	0	0	0	0	0	0	0	200	903	0	0	0	0	0	0	0	603	903	0
476	7	0	0	0	0	0	0	200	300	0	0	0	0	0	0	0	200	903	0	0	0	0	0	0	0	603	903	0
476	8	0	0	0	0	0	0	200	300	0	0	0	0	0	0	0	200	903	0	0	0	0	0	0	0	603	903	0
476	9	0	0	0	0	0	0	200	300	0	0	0	0	0	0	0	200	903	0	0	0	0	0	0	0	603	903	0
477	0	0	0	0	0	0	0	200	300	0	0	0	0	0	0	0	200	903	0	0	0	0	0	0	0	603	903	0
477	1	0	0	0	0	0	0	200	300	0	0	0	0	0	0	0	200	903	0	0	0	0	0	0	0	603	903	0
477	2	0	0	0	0	0	0	200	300	0	0	0	0	0	0	0	200	903	0	0	0	0	0	0	0	603	903	0
477	3	0	0	0	0	0	0	200	300	0	0	0	0	0	0	0	200	903	0	0	0	0	0	0	0	603	903	0
477	4	0	0	0	0	0	0	200	300	0	0	0	0	0	0	0	200	903	0	0	0	0	0	0	0	603	903	0
477	5	0	0	0	0	0	0	200	300	0	0	0	0	0	0	0	200	903	0	0	0	0	0	0	0	603	903	0
477	6	0	0	0	0	0	0	200	300	0	0	0	0	0	0	0	200	903	0	0	0	0	0	0	0	603	903	0
477	7	0	0	0	0	0	0	200	300	0	0	0	0	0	0	0	200	903	0	0	0	0	0	0	0	603	903	0
477	8	0	0	0	0	0	0	200	300	0	0	0	0	0	0	0	200	903	0	0	0	0	0	0	0	603	903	0
477	9	0	0	0	0	0	0	200	300	0	0	0	0	0	0	0	200	903	0	0	0	0	0	0	0	603	903	0
478	0	0	0	0	0	0	0	200	300	0	0	0	0	0	0	0	200	903	0	0	0	0	0	0	0	603	903	0
478	1	0	0	0	0	0	0	200	300	0	0	0	0	0	0	0	200	903	0	0	0	0	0	0	0	603	903	0
478	2	0	0	0	0	0	0	200	300	0	0	0	0	0	0	0	200	903	0	0	0	0	0	0	0	603	903	0
478	3	0	0	0	0	0	0	200	300	0	0	0	0	0	0	0	200	903	0	0	0	0	0	0	0	603	903	0
478	4	0	0	0	0	0	0	200	300	0	0	0	0	0	0	0	200	903	0	0	0	0	0	0	0	603	903	0
478	5	0	0	0	0	0	0	200	300	0	0	0	0	0	0	0	200	903	0	0	0	0	0	0	0	603	903	0
478	6	0	0	0	0	0	0	200	300	0	0	0	0	0	0	0	200	903	0	0	0	0	0	0	0	603	903	0
478	7	0	0	0	0	0	0	200	300	0	0	0	0	0	0	0	200	903	0	0	0	0	0	0	0	603	903	0
478	8	0	0	0	0	0	0	200	300	0	0	0	0	0	0	0	200	903	0	0	0	0	0	0	0	603	903	0
478	9	0	0	0	0	0	0	200	300	0	0	0	0	0	0	0	200	903	0	0	0	0	0	0	0	603	903	0
479	0	0	0	0	0	0	0	200	300	0	0	0	0	0	0	0	200	903	0	0	0	0	0	0	0	603	903	0
479	1	0	0	0	0	0	0	200	300	0	0	0	0	0	0	0	200	903	0	0	0	0	0	0	0	603	903	0
479	2	0	0	0	0	0	0	200	300	0	0	0	0	0	0	0	200	903	0	0	0	0	0	0	0	603	903	0
479	3	0	0	0	0	0	0	200	300	0	0	0	0	0	0	0	200	903	0	0	0	0	0	0	0	603	903	0
479	4	0	0	0	0	0	0	200	300	0	0	0	0	0	0	0	200	903	0	0	0	0	0	0	0	603	903	0
479	5	0	0	0	0	0	0	200	300	0	0	0	0	0	0	0	200	903	0	0	0	0	0	0	0	603	903	0
479	6	0	0	0	0	0	0	200	300	0	0	0	0	0	0	0	200	903	0	0	0	0	0	0	0	603	903	0
479	7	0	0	0	0	0	0	200	300	0	0	0	0	0	0	0	200	903	0	0	0	0	0	0	0	603	903	0
479	8	0	0	0	0	0	0	200	300	0	0	0	0	0	0	0	200	903	0	0	0	0	0	0	0	603	903	0
479	9	0	0	0	0	0	0	200	300	0	0	0	0	0	0	0	200	903	0	0	0	0	0	0	0	603	903	0
480	0	0	0	0	0	0	0	200	300	0	0	0	0	0	0	0	200	903	0	0	0	0	0	0	0	603	903	0
480	1	0	0	0	0	0	0	200	300	0	0	0	0	0	0	0	200	903	0	0	0	0	0	0	0	603	903	0
480	2	0	0	0	0	0	0	200	300	0	0	0	0	0	0	0	200	903	0	0	0	0	0	0	0	603	903	0
480	3	0	0	0	0	0	0	200	300	0	0	0	0	0	0	0	200	903	0	0	0	0	0	0	0	603	903	0
480	4	0	0	0	0	0	0	200	300	0	0	0	0	0	0	0	200	903	0	0	0	0	0	0	0	603	903	0
480	5	0	0	0	0	0	0	200	300	0	0	0	0	0	0	0	200	903	0	0	0	0	0	0	0	603	903	0
480	6	0	0	0	0	0	0	200	300	0	0	0	0	0	0	0	200	903	0	0	0	0	0	0	0	603	903	0
480	7	0	0	0	0	0	0	200	300	0	0	0	0	0	0	0	200	903	0	0	0	0	0	0	0	603	903	0
480	8	0	0	0	0	0	0	200	300	0	0	0	0	0	0	0	200	903	0	0	0	0	0	0	0	603	903	0
480	9	0	0	0	0	0	0	200	300	0	0	0	0	0	0	0	200	903	0	0	0	0	0	0	0	603	903	0
481	0	0	0	0	0	0	0	200	300	0	0	0	0	0	0	0	200	903	0	0	0	0	0	0	0	603	903	0
481	1	0	0	0	0	0	0	200	300	0	0	0	0	0	0	0	200	903	0	0	0	0	0	0	0	603	903	0
481	2	0	0	0	0	0	0	200	300	0	0	0	0	0	0	0	200	903	0	0	0	0	0	0	0	603	903	0
481	3	0	0	0	0	0	0	200	300	0	0	0	0	0	0	0	200	903	0	0	0	0	0	0	0	603	903	0
481	4	0	0	0	0	0	0	200	300	0	0	0	0	0	0	0	200	903	0	0	0	0	0	0	0	603	903	0
481	5	0	0	0	0	0	0	200	300	0	0	0	0	0	0	0	200	903	0	0	0	0	0	0	0	603	903	0
481	6	0	0	0	0	0	0	200	300	0	0	0	0	0	0	0	200	903	0	0	0	0	0	0	0	603	903	0
481	7	0	0	0	0	0	0	200	300	0	0	0	0	0	0	0	200	903	0	0	0	0	0	0	0	603	903	0
481	8	0	0	0	0	0	0	200	300	0	0	0	0	0	0	0	200	903	0	0	0	0	0	0	0	603	903	0
481	9	0	0	0	0	0	0	200	300	0	0	0	0	0	0	0	200	903	0	0	0	0	0	0	0	603	903	0
482	0	0	0	0	0	0	0	200	300	0	0	0	0	0	0	0	200	903	0	0	0	0	0	0	0	603	903	0
482	1	0	0	0	0	0	0	200	300	0	0	0	0	0	0	0	200	903	0	0	0	0	0	0	0	603	903	0
482	2	0	0	0	0	0	0	200	300	0	0	0	0	0	0	0	200	903	0	0	0	0	0	0	0	603	903	0
482	3	0	0	0	0	0	0	200	300	0	0	0	0	0	0	0	200	903	0	0	0	0	0	0	0	603	903	0
482	4	0	0	0	0	0	0	200	300	0	0	0	0	0	0	0	200	903	0	0	0	0	0	0	0	603	903	0
482	5	0	0	0	0	0	0	200	300	0	0	0	0	0	0	0	200	903	0	0	0	0	0	0	0	603	903	0
482	6	0	0	0	0	0	0	200	300	0	0	0	0	0	0	0	200	903	0	0	0	0	0	0	0	603	903	0
482	7	0	0	0	0	0	0	200	300	0	0	0	0	0	0	0	200	903	0	0	0	0	0	0	0	603	903	0
482	8	0	0	0	0	0	0	200	300	0	0	0	0	0	0	0	200	903	0	0	0	0	0	0	0	603	903	0
482	9	0	0	0	0	0	0	200	300	0	0	0	0	0	0	0	200	903	0	0	0	0	0	0	0	603	903	0
483	0	0	0	0	0	0	0	200	300	0	0	0	0	0	0	0	200	903	0	0	0	0	0	0	0	603	903	0
483	1	0	0	0	0	0	0	200	300	0	0	0	0	0	0	0	200	903	0	0	0	0	0	0	0	603	903	0
483	2	0	0	0	0	0	0	200	300	0	0	0	0	0	0	0	200	903	0	0	0	0	0	0	0	603	903	0
483	3	0	0	0	0	0	0	200	300	0	0	0	0	0	0	0	200	903	0	0	0	0	0	0	0	603	903	0
483	4	0	0	0	0	0	0	200	300	0	0	0	0	0	0	0	200	903	0	0	0	0	0	0	0	603	903	0
483	5	0	0	0	0	0	0	200	300	0	0	0	0	0	0	0	200	903	0	0	0	0	0	0	0	603	903	0
483	6	0	0	0	0	0	0	200	300	0	0	0	0	0	0	0	200	903	0	0	0	0	0	0	0	603	903	0
483	7	0	0	0	0	0	0	200	300	0	0	0	0	0	0	0	200	903	0	0	0	0	0	0	0	603	903	0
483	8	0	0	0	0	0	0	200	300	0	0	0	0	0	0	0	200	903	0	0	0	0	0	0	0	603	903	0
483	9	0	0	0	0	0	0	200	300	0	0	0	0	0	0	0	200	903	0	0	0	0	0	0	0	603	903	0
484	0	0	0	0	0	0	0	200	300	0	0	0	0	0	0	0	200	903	0	0	0	0	0	0	0	603	903	0
484	1	0	0	0	0	0	0	200	300	0	0	0	0	0	0	0	200	903	0	0	0	0	0	0	0	603	903	0
484	2	0	0	0	0	0	0	200	300	0	0	0	0	0	0	0	200	903	0	0	0	0	0	0	0	603	903	0
484	3	0	0	0	0	0	0	200	300	0	0	0	0	0	0	0	200	903	0	0	0	0	0	0	0	603	903	0
484	4	0	0	0	0	0	0	200	300	0	0	0	0	0	0	0	200	903	0	0	0	0	0	0	0	603	903	0
484	5	0	0	0	0	0	0	200	300	0	0	0	0	0	0	0	200	903	0	0	0	0	0	0	0	603	903	0
484	6	0	0	0	0	0	0	200	300	0	0	0	0	0	0	0	200	903	0	0	0	0	0	0	0	603	903	0
484	7	0	0	0	0	0	0	200	300	0	0	0	0	0	0	0	200	903	0	0	0	0	0	0	0	603	903	0
484	8	0	0	0	0	0	0	200	300	0	0	0	0	0	0	0	200	903	0	0	0	0	0	0	0	603	903	0
484	9	0	0	0	0	0	0	200	300	0	0	0	0	0	0	0	200	903	0	0	0	0	0	0	0	603	903	0
485	0	0	0	0	0	0	0	200	300	0	0	0	0	0	0	0	200	903	0	0	0	0	0	0	0	603	903	0
485	1	0	0	0	0	0	0	200	300	0	0	0	0	0	0	0	200	903	0	0	0	0	0	0	0	603	903	0
485	2	0	0	0	0	0	0	200	300	0	0	0	0	0	0	0	200	903	0	0	0	0	0	0	0	603	903	0
485	3	0	0	0	0	0	0	200	300	0	0	0	0	0	0	0	200	903	0	0	0	0	0	0	0	603	903	0
485	4	0	0	0	0	0	0	200	300	0	0	0	0	0	0	0	200	903	0	0	0	0	0	0	0	603	903	0
485	5	0	0	0	0	0	0	200	300	0	0	0	0	0	0	0	200	903	0	0	0	0	0	0	0	603	903	0
485	6	0	0	0	0	0	0	200	300	0	0	0	0	0	0	0	200	903	0	0	0	0	0	0	0	603	903	0
485	7	0	0	0	0	0	0	200	300	0	0	0	0	0	0	0	200	903	0	0	0	0	0	0	0	603	903	0
485	8	0	0	0	0	0	0	200	300	0	0	0	0	0	0	0	200	903	0	0	0	0	0	0	0	603	903	0
485	9	0	0	0	0	0	0	200	300	0	0	0	0	0	0	0	200	903	0	0	0	0	0	0	0	603	903	0
486	0	0	0	0	0	0	0	200	300	0	0	0	0	0	0	0	200	903	0	0	0	0	0	0	0	603	903	0
486	1	0	0	0	0	0	0	200	300	0	0	0	0	0	0	0	200	903	0	0	0	0	0	0	0	603	903	0
486	2	0	0	0	0	0	0	200	300	0	0	0	0	0	0	0	200	903	0	0	0	0	0	0	0	603	903	0
486	3	0	0	0	0	0	0	200	300	0	0	0	0	0	0	0	200	903	0	0	0	0	0	0	0	603	903	0
486	4	0	0	0	0	0	0	200	300	0	0	0	0	0	0	0	200	903	0	0	0	0	0	0	0	603	903	0
486	5	0	0	0	0	0	0	200	300	0	0	0	0	0	0	0	200	903	0	0	0	0	0	0	0	603	903	0
486	6	0	0	0	0	0	0	200	300	0	0	0	0	0	0	0	200	903	0	0	0	0	0	0	0	603	903	0
486	7	0	0	0	0	0	0	200	300	0	0	0	0	0	0	0	200	903	0	0	0	0	0	0	0	603	903	0
486	8	0	0	0	0	0	0	200	300	0	0	0	0	0	0	0	200	903	0	0	0	0	0	0	0	603	903	0
486	9	0	0	0	0	0	0	200	300	0	0	0	0	0	0	0	200	903	0	0	0	0	0	0	0	603	903	0
487	0	0	0	0	0	0	0	200	300	0	0	0	0	0	0	0	200	903	0	0	0	0	0	0	0	603	903	0
487	1	0	0	0	0	0	0	200	300	0	0	0	0	0	0	0	200	903	0	0	0	0	0	0	0	603	903	0
487	2	0	0	0	0	0	0	200	300	0	0	0	0	0	0	0	200	903	0	0	0	0	0	0	0	603	903	0
487	3	0	0	0	0	0	0	200	300	0	0	0	0	0	0	0	200	903	0	0	0	0	0	0	0	603	903	0
487	4	0	0	0	0	0	0	200	300	0	0	0	0	0	0	0	200	903	0	0	0	0	0	0	0	603	903	0
487	5	0	0	0	0	0	0	200	300	0	0	0	0	0	0	0	200	903	0	0	0	0	0	0	0	603	903	0
487	6	0	0	0	0	0	0	200	300	0	0	0	0	0	0	0	200	903	0	0	0	0	0	0	0	603	903	0
487	7	0	0	0	0	0	0	200	300	0	0	0	0	0	0	0	200	903	0	0	0	0	0	0	0	603	903	0
487	8	0	0	0	0	0	0	200	300	0	0	0	0	0	0	0	200	903	0	0	0	0	0	0	0	603	903	0
487	9	0	0	0	0	0	0	200	300	0	0	0	0	0	0	0	200	903	0	0	0	0	0	0	0	603	903	0
488	0	0	0	0	0	0	0	200	300	0	0	0	0	0	0	0	200	903	0	0	0	0	0	0	0	603	903	0
488	1	0	0	0	0	0	0	200	300	0	0	0	0	0	0	0	200	903	0	0	0	0	0	0	0	603	903	0
488	2	0	0	0	0	0	0	200	300	0	0	0	0	0	0	0	200	903	0	0	0	0	0	0	0	603	903	0
488	3	0	0	0	0	0	0	200	300	0	0	0	0	0	0	0	200	903	0	0	0	0	0	0	0	603	903	0
488	4	0	0	0	0	0	0	200	300	0	0	0	0	0	0	0	200	903	0	0	0	0	0	0	0	603	903	0
488	5	0	0	0	0	0	0	200	300	0	0	0	0	0	0	0	200	903	0	0	0	0	0	0	0	603	903	0
488	6	0	0	0	0	0	0	200	300	0	0	0	0	0	0	0	200	903	0	0	0	0	0	0	0	603	903	0
488	7	0	0	0	0	0	0	200	300	0	0	0	0	0	0	0	200	903	0	0	0	0	0	0	0	603	903	0
488	8	0	0	0	0	0	0	200	300	0	0	0	0	0	0	0	200	903	0	0	0	0	0	0	0	603	903	0
488	9	0	0	0	0	0	0	200	300	0	0	0	0	0	0	0	200	903	0	0	0	0	0	0	0	603	903	0
489	0	0	0	0	0	0	0	200	300	0	0	0	0	0	0	0	200	903	0	0	0	0	0	0	0	603	903	0
489	1	0	0	0	0	0	0	200	300	0	0	0	0	0	0	0	200	903	0	0	0	0	0	0	0	603	903	0
489	2	0	0	0	0	0	0	200	300	0	0	0	0	0	0	0	200	903	0	0	0	0	0	0	0	603	903	0
489	3	0	0	0	0	0	0	200	300	0	0	0	0	0	0	0	200	903	0	0	0	0	0	0	0	603	903	0
489	4	0	0	0	0	0	0	200	300	0	0	0	0	0	0	0	200	903	0	0	0	0	0	0	0	603	903	0
489	5	0	0	0	0	0	0	200	300	0	0	0	0	0	0	0	200	903	0	0	0	0	0	0	0	603	903	0
489	6	0	0	0	0	0	0	200	300	0	0	0	0	0	0	0	200	903	0	0	0	0	0	0	0	603	903	0
489	7	0	0	0	0	0	0	200	300	0	0	0	0	0	0	0	200	903	0	0	0	0	0	0	0	603	903	0
489	8	0	0	0	0	0	0	200	300	0	0	0	0	0	0	0	200	903	0	0	0	0	0	0	0	603	903	0
489	9	0	0	0	0	0	0	200	300	0	0	0	0	0	0	0	200	903	0	0	0	0	0	0	0	603	903	0
490	0	0	0	0	0	0	0	200	300	0	0	0	0	0	0	0	200	903	0	0	0	0	0	0	0	603	903	0
490	1	0	0	0	0	0	0	200	300	0	0	0	0	0	0	0	200	903	0	0	0	0	0	0	0	603	903	0
490	2	0	0	0	0	0	0	200	300	0	0	0	0	0	0	0	200	903	0	0	0	0	0	0	0	603	903	0
490	3	0	0	0	0	0	0	200	300	0	0	0	0	0	0	0	200	903	0	0	0	0	0	0	0	603	903	0
490	4	0	0	0	0	0	0	200	300	0	0	0	0	0	0	0	200	903	0	0	0	0	0	0	0	603	903	0
490	5	0	0	0	0	0	0	200	300	0	0	0	0	0	0	0	200	903	0	0	0	0	0	0	0	603	903	0
490	6	0	0	0	0	0	0	200	300	0	0	0	0	0	0	0	200	903	0	0	0	0	0	0	0	603	903	0
490	7	0	0	0	0	0	0	200	300	0	0	0	0	0	0	0	200	903	0	0	0	0	0	0	0	603	903	0
490	8	0	0	0	0	0	0	200	300	0	0	0	0	0	0	0	200	903	0	0	0	0	0	0	0	603	903	0
490	9	0	0	0	0	0	0	200	300	0	0	0	0	0	0	0	200	903	0	0	0	0	0	0	0	603	903	0
491	0	0	0	0	0	0	0	200	300	0	0	0	0	0	0	0	200	903	0	0	0	0	0	0	0	603	903	0
491	1	0	0	0	0	0	0	200	300	0	0	0	0	0	0	0	200	903	0	0	0	0	0	0	0	603	903	0
491	2	0	0	0	0	0	0	200	300	0	0	0	0	0	0	0	200	903	0	0	0	0	0	0	0	603	903	0
491	3	0	0	0	0	0	0	200	300	0	0	0	0	0	0	0	200	903	0	0	0	0	0	0	0	603	903	0
491	4	0	0	0	0	0	0	200	300	0	0	0	0	0	0	0	200	903	0	0	0	0	0	0	0	603	903	0
491	5	0	0	0	0	0	0	200	300	0	0	0	0	0	0	0	200	903	0	0	0	0	0	0	0	603	903	0
491	6	0	0	0	0	0	0	200	300	0	0	0	0	0	0	0	200	903	0	0	0	0	0	0	0	603	903	0
491	7	0	0	0	0	0	0	200	300	0	0	0	0	0	0	0	200	903	0	0	0	0	0	0	0	603	903	0
491	8	0	0	0	0	0	0	200	300	0	0	0	0	0	0	0	200	903	0	0	0	0	0	0	0	603	903	0
491	9	0	0	0	0	0	0	200	300	0	0	0	0	0	0	0	200	903	0	0	0	0	0	0	0	603	903	0
492	0	0	0	0	0	0	0	200	300	0	0	0	0	0	0	0	200	903	0	0	0	0	0	0	0	603	903	0
492	1	0	0	0	0	0	0	200	300	0	0	0	0	0	0	0	200	903	0	0	0	0	0	0	0	603	903	0
492	2	0	0	0	0	0	0	200	300	0	0	0	0	0	0	0	200	903	0	0	0	0	0	0	0	603	903	0
492	3	0	0	0	0	0	0	200	300	0	0	0	0	0	0	0	200	903	0	0	0	0	0	0	0	603	903	0
492	4	0	0	0	0	0	0	200	300	0	0	0	0	0	0	0	200	903	0	0	0	0	0	0	0	603	903	0
492	5	0	0	0	0	0	0	200	300	0	0	0	0	0	0	0	200	903	0	0	0	0	0	0	0	603	903	0
492	6	0	0	0	0	0	0	200	300	0	0	0	0	0	0	0	200	903	0	0	0	0	0	0	0	603	903	0
492	7	0	0	0	0	0	0	200	300	0	0	0	0	0	0	0	200	903	0	0	0	0	0	0	0	603	903	0
492	8	0	0	0	0	0	0	200	300	0	0	0	0	0	0	0	200	903	0	0	0	0	0	0	0	603	903	0
492	9	0	0	0	0	0	0	200	300	0	0	0	0	0	0	0	200	903	0	0	0	0	0	0	0	603	903	0
493	0	0	0	0	0	0	0	200	300	0	0	0	0	0	0	0	200	903	0	0	0	0	0	0	0	603	903	0
493	1	0	0	0	0	0	0	200	300	0	0	0	0	0	0	0	200	903	0	0	0	0	0	0	0	603	903	0
493	2	0	0	0	0	0	0	200	300	0	0	0	0	0	0	0	200	903	0	0	0	0	0	0	0	603	903	0
493	3	0	0	0	0	0	0	200	300	0	0	0	0	0	0	0	200	903	0	0	0	0	0	0	0	603	903	0
493	4	0	0	0	0	0	0	200	300	0	0	0	0	0	0	0	200	903	0	0	0	0	0	0	0	603	903	0
493	5	0	0	0	0	0	0	200	300	0	0	0	0	0	0	0	200	903	0	0	0	0	0	0	0	603	903	0
493	6	0	0	0	0	0	0	200	300	0	0	0	0	0	0	0	200	903	0	0	0	0	0	0	0	603	903	0
493	7	0	0	0	0	0	0	200	300	0	0	0	0	0	0	0	200	903	0	0	0	0	0	0	0	603	903	0
493	8	0	0	0	0	0	0	200	300	0	0	0	0	0	0	0	200	903	0	0	0	0	0	0	0	603	903	0
493	9	0	0	0	0	0	0	200	300	0	0	0	0	0	0	0	200	903	0	0	0	0	0	0	0	603	903	0
494	0	0	0	0	0	0	0	200	300	0	0	0	0	0	0	0	200	903	0	0	0	0	0	0	0	603	903	0
494	1	0	0	0	0	0	0	200	300	0	0	0	0	0	0	0	200	903	0	0	0	0	0	0	0	603	903	0
494	2	0	0	0	0	0	0	200	300	0	0	0	0	0	0	0	200	903	0	0	0	0	0	0	0	603	903	0
494	3	0	0	0	0	0	0	200	300	0	0	0	0	0	0	0	200	903	0	0	0	0	0	0	0	603	903	0
494	4	0	0	0	0	0	0	200	300	0	0	0	0	0	0	0	200	903	0	0	0	0	0	0	0	603	903	0
494	5	0	0	0	0	0	0	200	300	0	0	0	0	0	0	0	200	903	0	0	0	0	0	0	0	603	903	0
494	6	0	0	0	0	0	0	200	300	0	0	0	0	0	0	0	200	903	0	0	0	0	0	0	0	603	903	0
494	7	0	0	0	0	0	0	200	300	0	0	0	0	0	0	0	200	903	0	0	0	0	0	0	0	603	903	0
494	8	0	0	0	0	0	0	200	300	0	0	0	0	0	0	0	200	903	0	0	0	0	0	0	0	603	903	0
494	9	0	0	0	0	0	0	200	300	0	0	0	0	0	0	0	200	903	0	0	0	0	0	0	0	603	903	0
495	0	0	0	0	0	0	0	200	300	0	0	0	0	0	0	0	200	903	0	0	0	0	0	0	0	603	903	0
495	1	0	0	0	0	0	0	200	300	0	0	0	0	0	0	0	200	903	0	0	0	0	0	0	0	603	903	0
495	2	0	0	0	0	0	0	200	300	0	0	0	0	0	0	0	200	903	0	0	0	0	0	0	0	603	903	0
495	3	0	0	0	0	0	0	200	300	0	0	0	0	0	0	0	200	903	0	0	0	0	0	0	0	603	903	0
495	4	0	0	0	0	0	0	200	300	0	0	0	0	0	0	0	200	903	0	0	0	0	0	0	0	603	903	0
495	5	0	0	0	0	0	0	200	300	0	0	0	0	0	0	0	200	903	0	0	0	0	0	0	0	603	903	0
495	6	0	0	0	0	0	0	200	300	0	0	0	0	0	0	0	200	903	0	0	0	0	0	0	0	603	903	0
495	7	0	0	0	0	0	0	200	300	0	0	0	0	0	0	0	200	903	0	0	0	0	0	0	0	603	903	0
495	8	0	0	0	0	0	0	200	300	0	0	0	0	0	0	0	200	903	0	0	0	0	0	0	0	603	903	0
495	9	0	0	0	0	0	0	200	300	0	0	0	0	0	0	0	200	903	0	0	0	0	0	0	0	603	903	0
496	0	0	0	0	0	0	0	200	300	0	0	0	0	0	0	0	200	903	0	0	0	0	0	0	0	603	903	0
496	1	0	0	0	0	0	0	200	300	0	0	0	0	0	0	0	200	903	0	0	0	0	0	0	0	603	903	0
496	2	0	0	0	0	0	0	200	300	0	1.9574	-15.3253	-32.16	-7819.89	1932.86	-2057.37	260.102	1146.16	0	0	0	0	0	0	0	603	903	0
496	3	0	0	0	0	0	0	200	300	0	9.12903	-33.0255	-48.9446	-11298.9	3458.74	-4620.85	270.666	1133.85	0	0	0	0	0	0	0	603	903	0
496	4	0	0	0	0	0	0	200	300	0	16.911	-23.2599	-40.7049	-7453.68	1932.86	-4025.76	247.485	1086.11	0	0	0	0	0	0	0	603	903	0
496	5	0	0	0	0	0	0	200	300	0	5.46692	-8.15369	-25.1409	-6446.6	1688.72	-2698.24	267.17	1159.42	0	0	0	0	0	0	0	603	903	0
496	6	0	0	0	0	0	0	200	300	0	-2.92541	-18.6823	-26.0565	-7911.44	1932.86	-3842.65	274.18	1206.63	0	0	0	0	0	0	0	603	903	0
496	7	0	0	0	0	0	0	200	300	0	16.3007	-22.8021	-45.2825	-9376.28	2421.15	-3430.67	253.468	1110.06	0	0	0	0	0	0	0	603	903	0
496	8	0	0	0	0	0	0	200	300	0	13.5541	-5.71228	-62.0672	-12214.4	3092.53	-1920.04	249.826	1099.79	0	0	0	0	0	0	0	603	903	0
496	9	0	0	0	0	0	0	200	300	0	-3.53577	-0.524292	-67.2552	-17432.9	4313.24	-3751.1	264.132	1162.21	0	0	0	0	0	0	0	603	903	0
497	0	0	0	0	0	0	0	200	300	0	12.7911	-3.42346	-86.1761	-19721.7	4191.17	-3705.32	248.635	1131.85	0	0	0	0	0	0	0	603	903	0
497	1	0	0	0	0	0	0	200	300	0	23.0145	0.848999	-112.116	-23750.1	5656.01	-2423.59	250.448	1114.83	0	0	0	0	0	0	0	603	903	0
497	2	0	0	0	0	0	0	200	300	0	7.90833	8.47839	-128.901	-28785.5	6876.71	-2972.9	253.349	1126.32	0	0	0	0	0	0	0	603	903	0
497	3	0	0	0	0	0	0	200	300	0	5.46692	1.91711	-137.14	-31532	6144.29	-3110.23	244.803	1132.93	0	0	0	0	0	0	0	603	903	0
497	4	0	0	0	0	0	0	200	300	0	10.3497	-9.67957	-153.315	-34370.2	6937.75	-1691.16	245.252	1127.18	0	0	0	0	0	0	0	603	903	0
497	5	0	0	0	0	0	0	200	300	0	6.9928	-3.11829	-173.762	-37940.7	8280.52	-2011.6	247.655	1121.35	0	0	0	0	0	0	0	603	903	0
497	6	0	0	0	0	0	0	200	300	0	3.02551	4.51111	-192.377	-42243.7	7975.35	-1416.5	241.457	1122.59	0	0	0	0	0	0	0	603	903	0
497	7	0	0	0	0	0	0	200	300	0	-3.68835	-8.30627	-203.669	-45997.4	8646.73	-88.9897	242.455	1128.84	0	0	0	0	0	0	0	603	903	0
497	8	0	0	0	0	0	0	200	300	0	-6.12976	-6.47522	-224.421	-50208.8	10172.6	506.103	245.328	1126.73	0	0	0	0	0	0	0	603	903	0
497	9	0	0	0	0	0	0	200	300	0	-4.75647	7.71545	-242.121	-52314.5	9684.33	1330.08	239.998	1119.07	0	0	0	0	0	0	0	603	903	0
498	0	0	0	0	0	0	0	200	300	0	-11.0126	-1.74499	-255.549	-55793.5	9928.47	2794.92	238.852	1121.33	0	0	0	0	0	0	0	603	903	0
498	1	0	0	0	0	0	0	200	300	0	-18.7946	-12.5787	-267.145	-59089.4	10233.6	2932.25	238.307	1124.19	0	0	0	0	0	0	0	603	903	0
498	2	0	0	0	0	0	0	200	300	0	-14.5221	-3.11829	-280.573	-61012	10294.7	3664.67	236.692	1120.46	0	0	0	0	0	0	0	603	903	0
498	3	0	0	0	0	0	0	200	300	0	-20.0153	-5.4071	-295.527	-63209.3	10721.9	4488.65	236.281	1116.89	0	0	0	0	0	0	0	603	903	0
498	4	0	0	0	0	0	0	200	300	0	-22.7618	-20.9711	-301.02	-65040.3	10599.9	4488.65	235.213	1119.07	0	0	0	0	0	0	0	603	903	0
498	5	0	0	0	0	0	0	200	300	0	-22.7618	-21.1237	-312.617	-66871.4	9867.44	4946.41	231.564	1116.91	0	0	0	0	0	0	0	603	903	0
498	6	0	0	0	0	0	0	200	300	0	-28.1024	-17.309	-321.161	-69343.3	10966.1	5129.52	234.145	1118.91	0	0	0	0	0	0	0	603	903	0
498	7	0	0	0	0	0	0	200	300	0	-26.5765	-27.9901	-328.486	-69984.2	11210.2	5861.94	234.127	1116.05	0	0	0	0	0	0	0	603	903	0
498	8	0	0	0	0	0	0	200	300	0	-26.1188	-36.8402	-333.674	-70991.3	10905	5495.73	232.682	1115.76	0	0	0	0	0	0	0	603	903	0
498	9	0	0	0	0	0	0	200	300	0	-34.6637	-36.2299	-342.829	-71998.4	11759.5	5495.73	234.301	1113.01	0	0	0	0	0	0	0	603	903	0
499	0	0	0	0	0	0	0	200	300	0	-33.9008	-39.5868	-352.595	-74561.8	11820.6	5633.06	233.525	1114.47	0	0	0	0	0	0	0	603	903	0
499	1	0	0	0	0	0	0	200	300	0	-28.5602	-51.6412	-360.529	-75935.1	11576.4	6228.15	232.11	1113.62	0	0	0	0	0	0	0	603	903	0
499	2	0	0	0	0	0	0	200	300	0	-42.9034	-56.9818	-369.074	-77400	11637.5	6502.81	231.531	1112.71	0	0	0	0	0	0	0	603	903	0
499	3	0	0	0	0	0	0	200	300	0	-44.8871	-56.3715	-381.891	-78956.4	12186.8	6365.48	231.912	1109.75	0	0	0	0	0	0	0	603	903	0
499	4	0	0	0	0	0	0	200	300	0	-37.2577	-65.9845	-393.793	-81153.6	12308.8	5999.27	231.257	1109.08	0	0	0	0	0	0	0	603	903	0
499	5	0	0	0	0	0	0	200	300	0	-39.3939	-73.3087	-405.39	-83717.1	13041.3	6045.04	232.17	1109.51	0	0	0	0	0	0	0	603	903	0
499	6	0	0	0	0	0	0	200	300	0	-46.2604	-72.851	-416.376	-85090.4	13102.3	6457.03	231.467	1107.36	0	0	0	0	0	0	0	603	903	0
499	7	0	0	0	0	0	0	200	300	0	-43.819	-78.9545	-429.804	-86829.9	13651.6	5587.28	231.762	1105.02	0	0	0	0	0	0	0	603	903	0
499	8	0	0	0	0	0	0	200	300	0	-39.2413	-87.9572	-442.927	-89942.7	13651.6	5633.06	230.821	1106.06	0	0	0	0	0	0	0	603	903	0
499	9	0	0	0	0	0	0	200	300	0	-43.2086	-86.1261	-454.523	-91865.3	14567.1	6045.04	232.049	1105.11	0	0	0	0	0	0	0	603	903	0
500	0	0	0	0	0	0	0	200	300	0	-48.3966	-86.7365	-464.594	-93787.9	15055.4	5678.83	232.406	1104.87	0	0	0	0	0	0	0	603	903	0
500	1	0	0	0	0	0	0	200	300	0	-46.8707	-97.7228	-479.853	-95344.3	15543.7	5633.06	232.393	1101.69	0	0	0	0	0	0	0	603	903	0
500	2	0	0	0	0	0	0	200	300	0	-41.8353	-99.5538	-491.45	-97083.8	15543.7	5724.61	231.628	1100.55	0	0	0	0	0	0	0	603	903	0
500	3	0	0	0	0	0	0	200	300	0	-45.8026	-96.9598	-500.91	-99006.4	16215.1	4946.41	232.371	1100.65	0	0	0	0	0	0	0	603	903	0
500	4	0	0	0	0	0	0	200	300	0	-49.7699	-102.453	-513.727	-100380	16459.2	5221.07	232.039	1098.4	0	0	0	0	0	0	0	603	903	0
500	5	0	0	0	0	0	0	200	300	0	-45.1923	-106.878	-523.798	-102577	15971	5358.4	230.491	1098.83	0	0	0	0	0	0	0	603	903	0
500	6	0	0	0	0	0	0	200	300	0	-45.9552	-104.894	-536.005	-102669	17496.8	5083.74	232.643	1094.54	0	0	0	0	0	0	0	603	903	0
500	7	0	0	0	0	0	0	200	300	0	-49.9225	-105.657	-543.94	-105324	17435.8	5312.62	232.055	1096.63	0	0	0	0	0	0	0	603	903	0
500	8	0	0	0	0	0	0	200	300	0	-49.3121	-111.913	-553.705	-106788	17435.8	5449.95	231.489	1095.86	0	0	0	0	0	0	0	603	903	0
500	9	0	0	0	0	0	0	200	300	0	-48.5492	-111.303	-561.64	-107612	17802	4809.08	231.696	1094.6	0	0	0	0	0	0	0	603	903	0
501	0	0	0	0	0	0	0	200	300	0	-50.5328	-108.251	-569.575	-108711	18290.3	4992.19	232.112	1093.86	0	0	0	0	0	0	0	603	903	0
501	1	0	0	0	0	0	0	200	300	0	-49.9225	-111.151	-575.983	-109352	18229.2	4900.63	231.649	1092.85	0	0	0	0	0	0	0	603	903	0
501	2	0	0	0	0	0	0	200	300	0	-48.7018	-115.728	-583.613	-111000	18290.3	4717.53	231.34	1093.19	0	0	0	0	0	0	0	603	903	0
501	3	0	0	0	0	0	0	200	300	0	-49.4647	-112.676	-589.106	-111458	18839.6	4488.65	231.98	1092.2	0	0	0	0	0	0	0	603	903	0
501	4	0	0	0	0	0	0	200	300	0	-48.244	-113.134	-591.852	-111366	18839.6	4442.87	231.832	1091.17	0	0	0	0	0	0	0	603	903	0
501	5	0	0	0	0	0	0	200	300	0	-46.5656	-118.017	-596.735	-112007	19022.7	3893.55	231.878	1090.7	0	0	0	0	0	0	0	603	903	0
501	6	0	0	0	0	0	0	200	300	0	-43.2086	-116.491	-600.397	-112190	19327.9	3847.78	232.192	1089.86	0	0	0	0	0	0	0	603	903	0
501	7	0	0	0	0	0	0	200	300	0	-45.65	-112.524	-604.059	-113655	19694.1	3527.34	232.603	1091.15	0	0	0	0	0	0	0	603	903	0
501	8	0	0	0	0	0	0	200	300	0	-41.8353	-118.017	-607.111	-113655	20121.3	2886.47	233.143	1090.21	0	0	0	0	0	0	0	603	903	0
501	9	0	0	0	0	0	0	200	300	0	-39.2413	-120.001	-608.942	-112922	19755.1	3115.36	232.442	1088.44	0	0	0	0	0	0	0	603	903	0
502	0	0	0	0	0	0	0	200	300	0	-40.462	-113.592	-610.468	-112922	20121.3	3115.36	232.961	1087.98	0	0	0	0	0	0	0	603	903	0
502	1	0	0	0	0	0	0	200	300	0	-39.6991	-115.576	-611.078	-113472	20182.4	2566.04	233.027	1088.69	0	0	0	0	0	0	0	603	903	0
502	2	0	0	0	0	0	0	200	300	0	-38.1732	-117.254	-611.384	-112922	20182.4	2566.04	233.011	1087.7	0	0	0	0	0	0	0	603	903	0
502	3	0	0	0	0	0	0	200	300	0	-37.1051	-115.728	-611.689	-112556	19999.3	2703.37	232.695	1087.01	0	0	0	0	0	0	0	603	903	0
502	4	0	0	0	0	0	0	200	300	0	-34.8163	-112.982	-613.52	-112373	20548.6	1925.17	233.493	1086.16	0	0	0	0	0	0	0	603	903	0
502	5	0	0	0	0	0	0	200	300	0	-31.0016	-115.118	-611.078	-112373	20365.5	1970.95	233.327	1086.89	0	0	0	0	0	0	0	603	903	0
502	6	0	0	0	0	0	0	200	300	0	-31.9171	-114.813	-610.773	-111183	20182.4	2016.72	233.044	1085.04	0	0	0	0	0	0	0	603	903	0
502	7	0	0	0	0	0	0	200	300	0	-30.2386	-112.219	-610.163	-111732	20365.5	1650.51	233.377	1086.12	0	0	0	0	0	0	0	603	903	0
502	8	0	0	0	0	0	0	200	300	0	-28.255	-113.897	-609.247	-110817	20426.5	1330.08	233.527	1084.89	0	0	0	0	0	0	0	603	903	0
502	9	0	0	0	0	0	0	200	300	0	-25.2032	-114.355	-608.027	-110267	20304.5	1558.96	233.394	1084.35	0	0	0	0	0	0	0	603	903	0
503	0	0	0	0	0	0	0	200	300	0	-24.8981	-111.456	-604.67	-110542	20548.6	597.656	233.983	1085.81	0	0	0	0	0	0	0	603	903	0
503	1	0	0	0	0	0	0	200	300	0	-23.83	-111.151	-608.942	-108619	20609.6	597.656	233.845	1081.37	0	0	0	0	0	0	0	603	903	0
503	2	0	0	0	0	0	0	200	300	0	-21.3885	-115.27	-607.111	-108894	21097.9	506.103	234.751	1082.36	0	0	0	0	0	0	0	603	903	0
503	3	0	0	0	0	0	0	200	300	0	-19.5575	-112.219	-605.585	-108986	20609.6	-363.648	234.033	1082.97	0	0	0	0	0	0	0	603	903	0
503	4	0	0	0	0	0	0	200	300	0	-20.3204	-112.829	-603.144	-108070	20670.7	-180.542	234.272	1082.18	0	0	0	0	0	0	0	603	903	0
503	5	0	0	0	0	0	0	200	300	0	-16.3531	-112.829	-602.534	-108253	20487.6	-226.319	234.002	1082.66	0	0	0	0	0	0	0	603	903	0
503	6	0	0	0	0	0	0	200	300	0	-16.048	-114.507	-601.618	-106972	20609.6	-729.859	234.257	1080.81	0	0	0	0	0	0	0	603	903	0
503	7	0	0	0	0	0	0	200	300	0	-16.048	-112.066	-600.092	-107155	20731.7	-1096.07	234.548	1081.56	0	0	0	0	0	0	0	603	903	0
503	8	0	0	0	0	0	0	200	300	0	-14.9799	-112.371	-598.566	-106148	21220	-1187.62	235.451	1080.34	0	0	0	0	0	0	0	603	903	0
503	9	0	0	0	0	0	0	200	300	0	-11.0126	-114.813	-599.482	-105873	21281	-1782.72	235.499	1079.61	0	0	0	0	0	0	0	603	903	0
504	0	0	0	0	0	0	0	200	300	0	-10.86	-113.745	-598.566	-106331	20792.7	-1599.61	234.738	1080.64	0	0	0	0	0	0	0	603	903	0
504	1	0	0	0	0	0	0	200	300	0	-13.7592	-112.219	-605.28	-106056	22074.5	-1874.27	236.47	1078.22	0	0	0	0	0	0	0	603	903	0
504	2	0	0	0	0	0	0	200	300	0	-9.18152	-110.54	-613.825	-106697	22806.9	-2286.26	237.155	1076.82	0	0	0	0	0	0	0	603	903	0
504	3	0	0	0	0	0	0	200	300	0	2.10999	-114.965	-615.351	-105507	22867.9	-3476.44	237.162	1074.46	0	0	0	0	0	0	0	603	903	0
504	4	0	0	0	0	0	0	200	300	0	2.10999	-117.712	-613.215	-105415	22562.8	-3522.22	236.794	1074.91	0	0	0	0	0	0	0	603	903	0
504	5	0	0	0	0	0	0	200	300	0	-0.484008	-117.407	-612.299	-105690	22990	-3842.65	237.547	1075.61	0	0	0	0	0	0	0	603	903	0
504	6	0	0	0	0	0	0	200	300	0	2.72034	-116.491	-620.234	-105598	22990	-4575.07	237.067	1073.26	0	0	0	0	0	0	0	603	903	0
504	7	0	0	0	0	0	0	200	300	0	4.55139	-123.815	-622.37	-105690	23600.3	-5078.62	237.92	1072.82	0	0	0	0	0	0	0	603	903	0
504	8	0	0	0	0	0	0	200	300	0	-0.0262447	-126.104	-625.422	-105324	23844.5	-4712.4	238.125	1071.4	0	0	0	0	0	0	0	603	903	0
504	9	0	0	0	0	0	0	200	300	0	-3.078	-124.426	-626.337	-105324	23478.3	-5307.5	237.485	1071.16	0	0	0	0	0	0	0	603	903	0
505	0	0	0	0	0	0	0	200	300	0	-1.8573	-130.224	-631.22	-105507	23478.3	-5399.05	237.195	1070.15	0	0	0	0	0	0	0	603	903	0
505	1	0	0	0	0	0	0	200	300	0	-5.21423	-133.886	-631.83	-105049	24027.6	-4620.85	238.029	1069.26	0	0	0	0	0	0	0	603	903	0
505	2	0	0	0	0	0	0	200	300	0	-9.02893	-128.698	-631.22	-105140	22929	-4483.52	236.325	1069.57	0	0	0	0	0	0	0	603	903	0
505	3	0	0	0	0	0	0	200	300	0	-10.097	-129.919	-631.525	-104500	23661.4	-4437.74	237.467	1068.47	0	0	0	0	0	0	0	603	903	0
505	4	0	0	0	0	0	0	200	300	0	-8.72375	-133.123	-633.661	-105140	23844.5	-4025.76	237.63	1068.93	0	0	0	0	0	0	0	603	903	0
505	5	0	0	0	0	0	0	200	300	0	-10.7074	-129.461	-632.441	-105324	22990	-4208.86	236.351	1069.54	0	0	0	0	0	0	0	603	903	0
505	6	0	0	0	0	0	0	200	300	0	-12.691	-125.341	-633.661	-105049	23173.1	-4071.53	236.57	1068.78	0	0	0	0	0	0	0	603	903	0
505	7	0	0	0	0	0	0	200	300	0	-8.87634	-127.783	-634.577	-104591	23844.5	-4025.76	237.575	1067.82	0	0	0	0	0	0	0	603	903	0
505	8	0	0	0	0	0	0	200	300	0	-3.53577	-126.714	-634.882	-104225	23905.5	-4483.52	237.653	1067.16	0	0	0	0	0	0	0	603	903	0
505	9	0	0	0	0	0	0	200	300	0	-6.58752	-120.764	-636.408	-104591	23844.5	-5032.84	237.467	1067.35	0	0	0	0	0	0	0	603	903	0
506	0	0	0	0	0	0	0	200	300	0	-4.14612	-120.001	-635.798	-104133	24149.7	-4803.96	237.983	1066.78	0	0	0	0	0	0	0	603	903	0
506	1	0	0	0	0	0	0	200	300	0	0.126343	-121.526	-640.986	-103676	24515.9	-4987.06	238.247	1064.74	0	0	0	0	0	0	0	603	903	0
506	2	0	0	0	0	0	0	200	300	0	1.04187	-118.475	-642.512	-103767	24760	-5490.6	238.536	1064.5	0	0	0	0	0	0	0	603	903	0
506	3	0	0	0	0	0	0	200	300	0	2.10999	-116.186	-643.732	-103859	24637.9	-5536.38	238.274	1064.34	0	0	0	0	0	0	0	603	903	0
506	4	0	0	0	0	0	0	200	300	0	4.55139	-120.611	-643.122	-103676	24637.9	-5948.37	238.31	1064.21	0	0	0	0	0	0	0	603	903	0
506	5	0	0	0	0	0	0	200	300	0	6.53503	-120.611	-646.174	-103401	24882.1	-6589.24	238.507	1063.02	0	0	0	0	0	0	0	603	903	0
506	6	0	0	0	0	0	0	200	300	0	6.53503	-117.864	-647.089	-102669	25126.2	-6314.58	238.83	1061.66	0	0	0	0	0	0	0	603	903	0
506	7	0	0	0	0	0	0	200	300	0	10.8075	-118.475	-649.225	-102852	25248.3	-6589.24	238.89	1061.42	0	0	0	0	0	0	0	603	903	0
506	8	0	0	0	0	0	0	200	300	0	10.6549	-119.848	-649.836	-103218	25370.4	-7138.55	239.041	1061.84	0	0	0	0	0	0	0	603	903	0
506	9	0	0	0	0	0	0	200	300	0	9.73938	-117.407	-651.972	-102852	25675.5	-6726.56	239.381	1060.75	0	0	0	0	0	0	0	603	903	0
507	0	0	0	0	0	0	0	200	300	0	8.67126	-117.559	-652.888	-103126	25248.3	-7001.22	238.672	1060.95	0	0	0	0	0	0	0	603	903	0
507	1	0	0	0	0	0	0	200	300	0	11.4178	-120.153	-651.667	-102577	25492.4	-7230.1	239.119	1060.41	0	0	0	0	0	0	0	603	903	0
507	2	0	0	0	0	0	0	200	300	0	12.0282	-120.306	-653.498	-101936	25980.7	-6955.45	239.756	1058.99	0	0	0	0	0	0	0	603	903	0
507	3	0	0	0	0	0	0	200	300	0	10.3497	-115.423	-653.498	-102302	26346.9	-7138.55	240.317	1059.55	0	0	0	0	0	0	0	603	903	0
507	4	0	0	0	0	0	0	200	300	0	8.51868	-116.033	-656.244	-102485	25736.6	-7413.21	239.218	1059.17	0	0	0	0	0	0	0	603	903	0
507	5	0	0	0	0	0	0	200	300	0	9.12903	-118.17	-653.193	-101387	25980.7	-6955.45	239.775	1058.22	0	0	0	0	0	0	0	603	903	0
507	6	0	0	0	0	0	0	200	300	0	8.97644	-115.27	-655.939	-100288	25858.7	-7321.66	239.422	1055.89	0	0	0	0	0	0	0	603	903	0
507	7	0	0	0	0	0	0	200	300	0	9.12903	-114.965	-655.024	-101204	25614.5	-7596.32	239.105	1057.5	0	0	0	0	0	0	0	603	903	0
507	8	0	0	0	0	0	0	200	300	0	8.67126	-115.576	-652.277	-101021	25858.7	-7367.43	239.644	1057.87	0	0	0	0	0	0	0	603	903	0
507	9	0	0	0	0	0	0	200	300	0	9.89197	-113.592	-655.329	-100746	26408	-7504.76	240.297	1056.73	0	0	0	0	0	0	0	603	903	0
508	0	0	0	0	0	0	0	200	300	0	8.82385	-111.456	-656.244	-100014	26346.9	-7550.54	240.148	1055.4	0	0	0	0	0	0	0	603	903	0
508	1	0	0	0	0	0	0	200	300	0	10.6549	-113.287	-652.888	-99922	25797.6	-7642.09	239.513	1056.05	0	0	0	0	0	0	0	603	903	0
508	2	0	0	0	0	0	0	200	300	0	11.5704	-112.829	-655.939	-99647.3	25980.7	-7550.54	239.608	1054.92	0	0	0	0	0	0	0	603	903	0
508	3	0	0	0	0	0	0	200	300	0	11.2653	-109.014	-653.498	-100105	26346.9	-7870.97	240.317	1056.18	0	0	0	0	0	0	0	603	903	0
508	4	0	0	0	0	0	0	200	300	0	14.4696	-108.557	-653.193	-99647.3	26102.8	-7733.64	239.962	1055.55	0	0	0	0	0	0	0	603	903	0
508	5	0	0	0	0	0	0	200	300	0	13.4015	-109.014	-653.498	-98823.3	26285.9	-7962.53	240.223	1054.22	0	0	0	0	0	0	0	603	903	0
508	6	0	0	0	0	0	0	200	300	0	15.9955	-106.42	-655.024	-98365.6	26224.9	-7870.97	240.037	1053.17	0	0	0	0	0	0	0	603	903	0
508	7	0	0	0	0	0	0	200	300	0	16.6058	-104.437	-654.108	-99006.4	26530	-7962.53	240.559	1054.36	0	0	0	0	0	0	0	603	903	0
508	8	0	0	0	0	0	0	200	300	0	16.1481	-106.268	-653.193	-97907.8	26530	-7825.2	240.616	1052.89	0	0	0	0	0	0	0	603	903	0
508	9	0	0	0	0	0	0	200	300	0	17.2162	-105.047	-650.751	-97816.2	26224.9	-8145.63	240.299	1053.31	0	0	0	0	0	0	0	603	903	0
509	0	0	0	0	0	0	0	200	300	0	18.5895	-103.369	-649.836	-97816.2	27018.3	-8145.63	241.577	1053.52	0	0	0	0	0	0	0	603	903	0
509	1	0	0	0	0	0	0	200	300	0	20.4205	-101.232	-649.836	-96992.3	27201.4	-8466.06	241.859	1052.26	0	0	0	0	0	0	0	603	903	0
509	2	0	0	0	0	0	0	200	300	0	18.8947	-100.775	-650.446	-97358.5	26896.2	-8557.62	241.35	1052.68	0	0	0	0	0	0	0	603	903	0
509	3	0	0	0	0	0	0	200	300	0	18.1317	-99.0961	-648.92	-96626.1	26713.1	-8282.96	241.166	1051.9	0	0	0	0	0	0	0	603	903	0
509	4	0	0	0	0	0	0	200	300	0	18.2843	-99.0961	-648.005	-95893.6	27201.4	-8328.74	241.977	1050.98	0	0	0	0	0	0	0	603	903	0
509	5	0	0	0	0	0	0	200	300	0	20.2679	-98.6383	-646.479	-95344.3	27018.3	-8649.17	241.793	1050.48	0	0	0	0	0	0	0	603	903	0
509	6	0	0	0	0	0	0	200	300	0	19.505	-97.5702	-646.479	-95893.6	26957.3	-8511.84	241.699	1051.33	0	0	0	0	0	0	0	603	903	0
509	7	0	0	0	0	0	0	200	300	0	18.1317	-95.2814	-642.206	-95161.2	26591.1	-8603.39	241.406	1051.18	0	0	0	0	0	0	0	603	903	0
509	8	0	0	0	0	0	0	200	300	0	19.9628	-95.1288	-645.258	-95710.5	27323.5	-8694.95	242.345	1051.33	0	0	0	0	0	0	0	603	903	0
509	9	0	0	0	0	0	0	200	300	0	21.3361	-94.2133	-646.784	-94428.8	26957.3	-8511.84	241.679	1049	0	0	0	0	0	0	0	603	903	0
510	0	0	0	0	0	0	0	200	300	0	22.099	-93.1451	-642.817	-94428.8	27018.3	-8099.85	242.031	1049.9	0	0	0	0	0	0	0	603	903	0
510	1	0	0	0	0	0	0	200	300	0	20.2679	-92.84	-644.648	-94337.2	27140.4	-8603.39	242.101	1049.34	0	0	0	0	0	0	0	603	903	0
510	2	0	0	0	0	0	0	200	300	0	20.1154	-92.84	-643.122	-94428.8	27201.4	-8466.06	242.296	1049.83	0	0	0	0	0	0	0	603	903	0
510	3	0	0	0	0	0	0	200	300	0	19.8102	-91.0089	-640.375	-93604.8	26591.1	-8649.17	241.524	1049.17	0	0	0	0	0	0	0	603	903	0
510	4	0	0	0	0	0	0	200	300	0	21.0309	-89.1779	-641.291	-92048.4	27384.5	-8557.62	242.702	1046.54	0	0	0	0	0	0	0	603	903	0
510	5	0	0	0	0	0	0	200	300	0	21.4886	-89.3304	-642.817	-93147	27750.7	-8328.74	243.171	1047.9	0	0	0	0	0	0	0	603	903	0
510	6	0	0	0	0	0	0	200	300	0	21.0309	-89.3304	-638.239	-92964	27567.6	-8374.51	243.193	1048.66	0	0	0	0	0	0	0	603	903	0
510	7	0	0	0	0	0	0	200	300	0	22.4042	-87.652	-641.901	-92323.1	27384.5	-8099.85	242.662	1046.83	0	0	0	0	0	0	0	603	903	0
510	8	0	0	0	0	0	0	200	300	0	21.6412	-86.5839	-639.765	-91499.1	27323.5	-8237.18	242.709	1046.02	0	0	0	0	0	0	0	603	903	0
510	9	0	0	0	0	0	0	200	300	0	24.0826	-84.7528	-635.798	-91132.9	27323.5	-8191.41	242.975	1046.34	0	0	0	0	0	0	0	603	903	0
511	0	0	0	0	0	0	0	200	300	0	21.9464	-84.7528	-638.239	-90858.2	27506.6	-8282.96	243.098	1045.36	0	0	0	0	0	0	0	603	903	0
511	1	0	0	0	0	0	0	200	300	0	22.5568	-82.9218	-638.849	-90583.6	27384.5	-8374.51	242.865	1044.79	0	0	0	0	0	0	0	603	903	0
511	2	0	0	0	0	0	0	200	300	0	21.4886	-82.7692	-637.324	-90034.3	27262.5	-8237.18	242.777	1044.27	0	0	0	0	0	0	0	603	903	0
511	3	0	0	0	0	0	0	200	300	0	23.9301	-83.2269	-637.324	-89851.1	26896.2	-8237.18	242.202	1043.98	0	0	0	0	0	0	0	603	903	0
511	4	0	0	0	0	0	0	200	300	0	22.7094	-80.1752	-637.629	-89942.7	26896.2	-8099.85	242.182	1044.06	0	0	0	0	0	0	0	603	903	0
511	5	0	0	0	0	0	0	200	300	0	23.1671	-80.7855	-634.577	-89576.5	27567.6	-7642.09	243.443	1044.16	0	0	0	0	0	0	0	603	903	0
511	6	0	0	0	0	0	0	200	300	0	22.7094	-80.1752	-630.305	-88569.4	27872.8	-8099.85	244.221	1043.52	0	0	0	0	0	0	0	603	903	0
511	7	0	0	0	0	0	0	200	300	0	23.1671	-79.2596	-631.83	-88294.8	27933.8	-7733.64	244.211	1042.74	0	0	0	0	0	0	0	603	903	0
511	8	0	0	0	0	0	0	200	300	0	19.9628	-77.8864	-632.136	-88203.2	27384.5	-7642.09	243.321	1042.53	0	0	0	0	0	0	0	603	903	0
511	9	0	0	0	0	0	0	200	300	0	22.099	-78.3441	-628.779	-87928.5	27201.4	-7733.64	243.261	1042.84	0	0	0	0	0	0	0	603	903	0
512	0	0	0	0	0	0	0	200	300	0	21.0309	-78.3441	-631.525	-86738.4	27750.7	-7458.99	243.942	1040.35	0	0	0	0	0	0	0	603	903	0
512	1	0	0	0	0	0	0	200	300	0	19.9628	-77.1234	-628.779	-86921.4	27872.8	-7184.33	244.328	1041.24	0	0	0	0	0	0	0	603	903	0
512	2	0	0	0	0	0	0	200	300	0	19.0472	-76.5131	-628.779	-86646.8	27689.7	-7504.76	244.037	1040.8	0	0	0	0	0	0	0	603	903	0
512	3	0	0	0	0	0	0	200	300	0	18.7421	-76.2079	-627.863	-85731.3	27933.8	-7321.66	244.49	1039.54	0	0	0	0	0	0	0	603	903	0
512	4	0	0	0	0	0	0	200	300	0	20.2679	-74.682	-626.642	-85181.9	27872.8	-7184.33	244.48	1038.93	0	0	0	0	0	0	0	603	903	0
512	5	0	0	0	0	0	0	200	300	0	22.099	-74.5294	-627.558	-84632.6	27384.5	-7275.88	243.637	1037.86	0	0	0	0	0	0	0	603	903	0
512	6	0	0	0	0	0	0	200	300	0	19.9628	-75.4449	-626.337	-84632.6	27384.5	-7184.33	243.722	1038.12	0	0	0	0	0	0	0	603	903	0
512	7	0	0	0	0	0	0	200	300	0	19.0472	-75.2924	-624.811	-84358	27872.8	-7138.55	244.61	1038.01	0	0	0	0	0	0	0	603	903	0
512	8	0	0	0	0	0	0	200	300	0	19.3524	-74.0717	-622.675	-83259.3	27811.8	-7047	244.665	1036.71	0	0	0	0	0	0	0	603	903	0
512	9	0	0	0	0	0	0	200	300	0	19.505	-73.3087	-622.065	-82710	27506.6	-6726.56	244.218	1035.96	0	0	0	0	0	0	0	603	903	0
513	0	0	0	0	0	0	0	200	300	0	19.9628	-73.6139	-620.234	-82801.6	27933.8	-6360.35	245.038	1036.5	0	0	0	0	0	0	0	603	903	0
513	1	0	0	0	0	0	0	200	300	0	18.5895	-72.2406	-619.318	-82435.4	27811.8	-6726.56	244.907	1036.11	0	0	0	0	0	0	0	603	903	0
513	2	0	0	0	0	0	0	200	300	0	17.9791	-72.3932	-617.792	-81153.6	27628.7	-6451.91	244.722	1034.36	0	0	0	0	0	0	0	603	903	0
513	3	0	0	0	0	0	0	200	300	0	18.7421	-72.5458	-616.266	-80604.3	27811.8	-6314.58	245.129	1033.79	0	0	0	0	0	0	0	603	903	0
513	4	0	0	0	0	0	0	200	300	0	19.1998	-71.4777	-612.909	-80879	27750.7	-6406.13	245.277	1034.96	0	0	0	0	0	0	0	603	903	0
513	5	0	0	0	0	0	0	200	300	0	17.5214	-68.7311	-608.332	-78956.4	27933.8	-6268.8	245.919	1032.79	0	0	0	0	0	0	0	603	903	0
513	6	0	0	0	0	0	0	200	300	0	17.3688	-69.1888	-609.858	-78590.1	27933.8	-6039.92	245.804	1031.87	0	0	0	0	0	0	0	603	903	0
513	7	0	0	0	0	0	0	200	300	0	19.0472	-68.4259	-608.027	-77583.1	27445.6	-6223.02	245.139	1030.6	0	0	0	0	0	0	0	603	903	0
513	8	0	0	0	0	0	0	200	300	0	18.1317	-67.663	-605.89	-77857.7	27689.7	-5994.14	245.701	1031.5	0	0	0	0	0	0	0	603	903	0
513	9	0	0	0	0	0	0	200	300	0	16.911	-67.3578	-605.585	-77216.9	27445.6	-5856.81	245.321	1030.51	0	0	0	0	0	0	0	603	903	0
514	0	0	0	0	0	0	0	200	300	0	18.7421	-66.9	-602.534	-76850.7	27506.6	-5994.14	245.652	1030.55	0	0	0	0	0	0	0	603	903	0
514	1	0	0	0	0	0	0	200	300	0	18.7421	-66.7474	-600.702	-75294.2	27811.8	-5856.81	246.299	1028.34	0	0	0	0	0	0	0	603	903	0
514	2	0	0	0	0	0	0	200	300	0	18.7421	-64.4586	-599.177	-75111.2	27872.8	-5582.16	246.519	1028.36	0	0	0	0	0	0	0	603	903	0
514	3	0	0	0	0	0	0	200	300	0	19.3524	-63.8483	-597.956	-74928	27201.4	-5811.04	245.491	1028.31	0	0	0	0	0	0	0	603	903	0
514	4	0	0	0	0	0	0	200	300	0	17.9791	-63.6957	-596.125	-74561.8	27384.5	-5582.16	245.938	1028.08	0	0	0	0	0	0	0	603	903	0
514	5	0	0	0	0	0	0	200	300	0	17.5214	-62.7802	-594.904	-73646.3	27018.3	-5490.6	245.416	1026.8	0	0	0	0	0	0	0	603	903	0
514	6	0	0	0	0	0	0	200	300	0	18.7421	-62.3224	-592.463	-73005.4	27323.5	-5673.71	246.119	1026.22	0	0	0	0	0	0	0	603	903	0
514	7	0	0	0	0	0	0	200	300	0	18.2843	-62.6276	-589.411	-73188.6	27750.7	-5444.83	247.082	1027.17	0	0	0	0	0	0	0	603	903	0
514	8	0	0	0	0	0	0	200	300	0	17.2162	-61.5594	-586.97	-72456.1	28055.9	-5399.05	247.798	1026.44	0	0	0	0	0	0	0	603	903	0
514	9	0	0	0	0	0	0	200	300	0	17.3688	-60.9491	-586.359	-71723.7	27750.7	-5536.38	247.327	1025.32	0	0	0	0	0	0	0	603	903	0
515	0	0	0	0	0	0	0	200	300	0	17.9791	-60.6439	-584.223	-70167.3	27201.4	-5582.16	246.56	1023.1	0	0	0	0	0	0	0	603	903	0
515	1	0	0	0	0	0	0	200	300	0	18.1317	-61.2543	-583.613	-70442	27567.6	-5261.72	247.236	1023.7	0	0	0	0	0	0	0	603	903	0
515	2	0	0	0	0	0	0	200	300	0	15.9955	-60.0336	-580.561	-69709.5	27811.8	-5215.94	247.905	1023.07	0	0	0	0	0	0	0	603	903	0
515	3	0	0	0	0	0	0	200	300	0	16.1481	-59.118	-579.34	-68977.1	27628.7	-5170.17	247.69	1022.06	0	0	0	0	0	0	0	603	903	0
515	4	0	0	0	0	0	0	200	300	0	17.0636	-59.118	-576.899	-67603.8	27384.5	-4987.06	247.469	1020.18	0	0	0	0	0	0	0	603	903	0
515	5	0	0	0	0	0	0	200	300	0	17.0636	-58.6603	-577.509	-68427.8	27506.6	-5124.39	247.63	1021.49	0	0	0	0	0	0	0	603	903	0
515	6	0	0	0	0	0	0	200	300	0	16.1481	-57.4396	-574.763	-67420.7	27567.6	-4987.06	247.964	1020.3	0	0	0	0	0	0	0	603	903	0
515	7	0	0	0	0	0	0	200	300	0	16.1481	-57.287	-573.847	-67786.9	27323.5	-4941.29	247.615	1021.13	0	0	0	0	0	0	0	603	903	0
515	8	0	0	0	0	0	0	200	300	0	17.3688	-56.6766	-572.016	-66322.1	27079.4	-4941.29	247.34	1018.94	0	0	0	0	0	0	0	603	903	0
515	9	0	0	0	0	0	0	200	300	0	17.9791	-56.3715	-570.795	-66139	27811.8	-4941.29	248.725	1018.87	0	0	0	0	0	0	0	603	903	0
516	0	0	0	0	0	0	0	200	300	0	18.1317	-55.3033	-568.659	-65955.9	27750.7	-4666.63	248.8	1018.99	0	0	0	0	0	0	0	603	903	0
516	1	0	0	0	0	0	0	200	300	0	17.8265	-54.5404	-568.049	-65772.8	27628.7	-4941.29	248.638	1018.79	0	0	0	0	0	0	0	603	903	0
516	2	0	0	0	0	0	0	200	300	0	17.8265	-54.2352	-566.523	-64857.2	27811.8	-5032.84	249.092	1017.48	0	0	0	0	0	0	0	603	903	0
516	3	0	0	0	0	0	0	200	300	0	18.8947	-53.9301	-564.692	-64491	27872.8	-5078.62	249.359	1017.21	0	0	0	0	0	0	0	603	903	0
516	4	0	0	0	0	0	0	200	300	0	18.4369	-53.3197	-562.25	-64307.9	27506.6	-5078.62	248.922	1017.38	0	0	0	0	0	0	0	603	903	0
516	5	0	0	0	0	0	0	200	300	0	18.5895	-53.0145	-561.64	-62934.6	27384.5	-5124.39	248.758	1015.06	0	0	0	0	0	0	0	603	903	0
516	6	0	0	0	0	0	0	200	300	0	18.4369	-51.0309	-560.419	-63392.4	27872.8	-5307.5	249.736	1016.12	0	0	0	0	0	0	0	603	903	0
516	7	0	0	0	0	0	0	200	300	0	19.505	-50.5731	-559.199	-61469.8	27994.9	-5307.5	250.063	1012.92	0	0	0	0	0	0	0	603	903	0
516	8	0	0	0	0	0	0	200	300	0	20.2679	-50.4205	-557.978	-62019.1	27323.5	-4895.51	248.969	1014.15	0	0	0	0	0	0	0	603	903	0
516	9	0	0	0	0	0	0	200	300	0	19.505	-50.7257	-556.757	-62019.1	27628.7	-5078.62	249.624	1014.39	0	0	0	0	0	0	0	603	903	0
517	0	0	0	0	0	0	0	200	300	0	20.7257	-49.6576	-554.926	-61378.2	27567.6	-4987.06	249.678	1013.61	0	0	0	0	0	0	0	603	903	0
517	1	0	0	0	0	0	0	200	300	0	21.0309	-49.3524	-552.18	-60462.7	27445.6	-4849.73	249.704	1012.5	0	0	0	0	0	0	0	603	903	0
517	2	0	0	0	0	0	0	200	300	0	23.1671	-49.0472	-550.959	-59913.4	27262.5	-4895.51	249.482	1011.74	0	0	0	0	0	0	0	603	903	0
517	3	0	0	0	0	0	0	200	300	0	20.8783	-49.3524	-550.043	-59913.4	27872.8	-5078.62	250.674	1011.92	0	0	0	0	0	0	0	603	903	0
517	4	0	0	0	0	0	0	200	300	0	22.8619	-48.1317	-549.128	-59547.2	27811.8	-5124.39	250.647	1011.44	0	0	0	0	0	0	0	603	903	0
517	5	0	0	0	0	0	0	200	300	0	21.7938	-48.2843	-548.212	-58540.1	27445.6	-5215.94	250.064	1009.78	0	0	0	0	0	0	0	603	903	0
517	6	0	0	0	0	0	0	200	300	0	21.7938	-49.505	-546.381	-57716.1	27750.7	-5170.17	250.79	1008.63	0	0	0	0	0	0	0	603	903	0
517	7	0	0	0	0	0	0	200	300	0	22.099	-47.8265	-542.719	-57716.1	27567.6	-5307.5	250.795	1009.35	0	0	0	0	0	0	0	603	903	0
517	8	0	0	0	0	0	0	200	300	0	21.7938	-46.911	-535.7	-57533	27323.5	-5215.94	251.005	1010.4	0	0	0	0	0	0	0	603	903	0
517	9	0	0	0	0	0	0	200	300	0	21.1835	-47.2162	-538.141	-55976.6	27384.5	-5124.39	250.887	1007.02	0	0	0	0	0	0	0	603	903	0
518	0	0	0	0	0	0	0	200	300	0	22.5568	-46.4532	-536.005	-55427.3	27933.8	-4849.73	252.115	1006.41	0	0	0	0	0	0	0	603	903	0
518	1	0	0	0	0	0	0	200	300	0	22.8619	-45.3851	-532.953	-55061.1	27567.6	-5307.5	251.726	1006.31	0	0	0	0	0	0	0	603	903	0
518	2	0	0	0	0	0	0	200	300	0	21.6412	-46.4532	-532.038	-54145.6	27079.4	-5261.72	250.897	1004.77	0	0	0	0	0	0	0	603	903	0
518	3	0	0	0	0	0	0	200	300	0	21.6412	-46.4532	-528.071	-53870.9	27140.4	-5261.72	251.395	1005.01	0	0	0	0	0	0	0	603	903	0
518	4	0	0	0	0	0	0	200	300	0	22.5568	-45.8429	-527.155	-53504.7	27506.6	-5032.84	252.179	1004.5	0	0	0	0	0	0	0	603	903	0
518	5	0	0	0	0	0	0	200	300	0	22.099	-45.2325	-524.409	-52589.2	27079.4	-5124.39	251.638	1003.28	0	0	0	0	0	0	0	603	903	0
518	6	0	0	0	0	0	0	200	300	0	24.0826	-44.6222	-523.798	-52497.6	26835.2	-4941.29	251.232	1003.22	0	0	0	0	0	0	0	603	903	0
518	7	0	0	0	0	0	0	200	300	0	24.8456	-43.5541	-521.967	-52131.4	26346.9	-4758.18	250.476	1002.88	0	0	0	0	0	0	0	603	903	0
518	8	0	0	0	0	0	0	200	300	0	21.4886	-44.317	-518.915	-50941.2	27384.5	-4941.29	252.773	1001.17	0	0	0	0	0	0	0	603	903	0
518	9	0	0	0	0	0	0	200	300	0	22.4042	-44.0118	-516.474	-50483.5	26774.2	-4803.96	251.84	1000.75	0	0	0	0	0	0	0	603	903	0
519	0	0	0	0	0	0	0	200	300	0	22.5568	-43.8593	-513.422	-50575	26896.2	-4712.4	252.386	1001.51	0	0	0	0	0	0	0	603	903	0
519	1	0	0	0	0	0	0	200	300	0	21.4886	-42.9437	-509.76	-50025.7	27079.4	-4803.96	253.122	1001.14	0	0	0	0	0	0	0	603	903	0
519	2	0	0	0	0	0	0	200	300	0	21.4886	-42.6385	-510.981	-48835.5	27262.5	-4849.73	253.353	998.572	0	0	0	0	0	0	0	603	903	0
519	3	0	0	0	0	0	0	200	300	0	23.3197	-42.3334	-509.455	-48560.9	26530	-4712.4	252.075	998.319	0	0	0	0	0	0	0	603	903	0
519	4	0	0	0	0	0	0	200	300	0	22.4042	-41.723	-507.319	-48469.3	26713.1	-4849.73	252.656	998.54	0	0	0	0	0	0	0	603	903	0
519	5	0	0	0	0	0	0	200	300	0	21.0309	-41.8756	-506.403	-47645.3	26530	-4803.96	252.389	997.086	0	0	0	0	0	0	0	603	903	0
519	6	0	0	0	0	0	0	200	300	0	21.3361	-41.5704	-502.436	-47004.5	26346.9	-4712.4	252.438	996.553	0	0	0	0	0	0	0	603	903	0
519	7	0	0	0	0	0	0	200	300	0	22.099	-41.5704	-502.131	-46088.9	26224.9	-4620.85	252.227	994.787	0	0	0	0	0	0	0	603	903	0
519	8	0	0	0	0	0	0	200	300	0	21.7938	-40.3497	-499.689	-45905.8	26652.1	-4620.85	253.337	994.869	0	0	0	0	0	0	0	603	903	0
519	9	0	0	0	0	0	0	200	300	0	21.3361	-40.5023	-501.215	-45631.2	26774.2	-4300.42	253.419	994.041	0	0	0	0	0	0	0	603	903	0
520	0	0	0	0	0	0	0	200	300	0	23.3197	-40.1971	-497.858	-45539.6	26102.8	-4849.73	252.43	994.471	0	0	0	0	0	0	0	603	903	0
520	1	0	0	0	0	0	0	200	300	0	21.7938	-40.8075	-497.553	-44807.2	26408	-4437.74	253.076	993.055	0	0	0	0	0	0	0	603	903	0
520	2	0	0	0	0	0	0	200	300	0	22.2516	-39.892	-495.722	-44441	26163.8	-4391.97	252.779	992.649	0	0	0	0	0	0	0	603	903	0
520	3	0	0	0	0	0	0	200	300	0	22.7094	-39.892	-492.67	-44624.1	26041.8	-4529.3	252.858	993.576	0	0	0	0	0	0	0	603	903	0
520	4	0	0	0	0	0	0	200	300	0	21.3361	-39.4342	-490.534	-43983.2	26102.8	-4391.97	253.213	992.664	0	0	0	0	0	0	0	603	903	0
520	5	0	0	0	0	0	0	200	300	0	21.4886	-38.5187	-490.229	-43067.7	26469	-4391.97	253.993	990.852	0	0	0	0	0	0	0	603	903	0
520	6	0	0	0	0	0	0	200	300	0	22.099	-39.2816	-488.703	-42701.5	26285.9	-4529.3	253.787	990.377	0	0	0	0	0	0	0	603	903	0
520	7	0	0	0	0	0	0	200	300	0	22.099	-39.2816	-486.872	-42335.3	25858.7	-4483.52	253.112	989.954	0	0	0	0	0	0	0	603	903	0
520	8	0	0	0	0	0	0	200	300	0	20.8783	-38.8239	-485.956	-41785.9	26041.8	-4254.64	253.589	988.987	0	0	0	0	0	0	0	603	903	0
520	9	0	0	0	0	0	0	200	300	0	22.2516	-38.3661	-482.599	-41602.8	25858.7	-4163.09	253.582	989.206	0	0	0	0	0	0	0	603	903	0
521	0	0	0	0	0	0	0	200	300	0	22.099	-37.4506	-481.379	-40687.3	25675.5	-4346.19	253.338	987.522	0	0	0	0	0	0	0	603	903	0
521	1	0	0	0	0	0	0	200	300	0	21.6412	-38.6713	-481.074	-40138	25858.7	-4208.86	253.752	986.434	0	0	0	0	0	0	0	603	903	0
521	2	0	0	0	0	0	0	200	300	0	21.3361	-37.4506	-480.768	-40412.7	25919.7	-4300.42	253.913	987.059	0	0	0	0	0	0	0	603	903	0
521	3	0	0	0	0	0	0	200	300	0	20.7257	-37.298	-478.022	-40138	26041.8	-4529.3	254.478	986.967	0	0	0	0	0	0	0	603	903	0
521	4	0	0	0	0	0	0	200	300	0	21.4886	-36.8402	-477.106	-39039.4	25675.5	-4025.76	253.815	984.825	0	0	0	0	0	0	0	603	903	0
521	5	0	0	0	0	0	0	200	300	0	21.4886	-36.6876	-474.36	-38856.3	25492.4	-4208.86	253.741	984.913	0	0	0	0	0	0	0	603	903	0
521	6	0	0	0	0	0	0	200	300	0	21.4886	-36.2299	-474.055	-38764.7	25797.6	-4117.31	254.419	984.773	0	0	0	0	0	0	0	603	903	0
521	7	0	0	0	0	0	0	200	300	0	20.2679	-35.7721	-472.529	-38398.5	25431.4	-4163.09	253.82	984.262	0	0	0	0	0	0	0	603	903	0
521	8	0	0	0	0	0	0	200	300	0	20.5731	-35.4669	-472.834	-37391.4	25431.4	-3842.65	253.785	982.079	0	0	0	0	0	0	0	603	903	0
521	9	0	0	0	0	0	0	200	300	0	21.0309	-35.4669	-471.918	-37666.1	25553.5	-3979.98	254.148	982.815	0	0	0	0	0	0	0	603	903	0
522	0	0	0	0	0	0	0	200	300	0	20.7257	-34.704	-469.172	-37574.5	25797.6	-3796.88	254.985	983.087	0	0	0	0	0	0	0	603	903	0
522	1	0	0	0	0	0	0	200	300	0	19.505	-34.8566	-468.256	-37025.2	25370.4	-3888.43	254.181	982.07	0	0	0	0	0	0	0	603	903	0
522	2	0	0	0	0	0	0	200	300	0	19.1998	-34.3988	-468.256	-36567.5	25553.5	-3934.21	254.572	981.093	0	0	0	0	0	0	0	603	903	0
522	3	0	0	0	0	0	0	200	300	0	19.1998	-34.5514	-467.035	-36018.1	25675.5	-3842.65	254.976	980.121	0	0	0	0	0	0	0	603	903	0
522	4	0	0	0	0	0	0	200	300	0	20.2679	-33.4833	-468.256	-36018.1	25797.6	-3888.43	255.093	979.92	0	0	0	0	0	0	0	603	903	0
522	5	0	0	0	0	0	0	200	300	0	20.1154	-33.0255	-466.12	-35651.9	25431.4	-3796.88	254.56	979.487	0	0	0	0	0	0	0	603	903	0
522	6	0	0	0	0	0	0	200	300	0	18.2843	-33.1781	-465.204	-35102.6	25126.2	-3796.88	254.011	978.456	0	0	0	0	0	0	0	603	903	0
522	7	0	0	0	0	0	0	200	300	0	19.6576	-32.8729	-463.679	-34370.2	25187.3	-3705.32	254.321	977.125	0	0	0	0	0	0	0	603	903	0
522	8	0	0	0	0	0	0	200	300	0	18.5895	-31.6522	-461.847	-35011	25187.3	-3659.55	254.536	978.807	0	0	0	0	0	0	0	603	903	0
522	9	0	0	0	0	0	0	200	300	0	19.6576	-32.2626	-461.542	-34461.7	24943.1	-3522.22	254.043	977.667	0	0	0	0	0	0	0	603	903	0
523	0	0	0	0	0	0	0	200	300	0	19.1998	-31.1945	-463.679	-33820.9	25431.4	-3476.44	254.847	975.94	0	0	0	0	0	0	0	603	903	0
523	1	0	0	0	0	0	0	200	300	0	19.6576	-30.8893	-461.542	-33546.2	25248.3	-3201.78	254.704	975.683	0	0	0	0	0	0	0	603	903	0
523	2	0	0	0	0	0	0	200	300	0	17.8265	-31.347	-460.932	-33637.8	25065.2	-3384.89	254.379	975.978	0	0	0	0	0	0	0	603	903	0
523	3	0	0	0	0	0	0	200	300	0	19.1998	-30.7367	-460.322	-33363.1	24760	-3110.23	253.789	975.478	0	0	0	0	0	0	0	603	903	0
523	4	0	0	0	0	0	0	200	300	0	18.1317	-29.6686	-459.711	-32630.7	25309.3	-3201.78	255.055	973.981	0	0	0	0	0	0	0	603	903	0
523	5	0	0	0	0	0	0	200	300	0	19.1998	-29.9738	-457.88	-32447.6	25004.2	-3247.56	254.609	973.865	0	0	0	0	0	0	0	603	903	0
523	6	0	0	0	0	0	0	200	300	0	15.8429	-29.6686	-458.796	-32264.5	24882.1	-3339.11	254.233	973.324	0	0	0	0	0	0	0	603	903	0
523	7	0	0	0	0	0	0	200	300	0	18.7421	-29.3634	-457.27	-32630.7	25248.3	-3156.01	255.215	974.36	0	0	0	0	0	0	0	603	903	0
523	8	0	0	0	0	0	0	200	300	0	17.5214	-29.0582	-455.744	-31623.6	25187.3	-3293.34	255.266	972.389	0	0	0	0	0	0	0	603	903	0
523	9	0	0	0	0	0	0	200	300	0	16.7584	-28.6005	-456.049	-31257.4	25004.2	-3110.23	254.828	971.54	0	0	0	0	0	0	0	603	903	0
524	0	0	0	0	0	0	0	200	300	0	16.4532	-28.1427	-454.828	-31165.8	25004.2	-3018.68	254.975	971.522	0	0	0	0	0	0	0	603	903	0
524	1	0	0	0	0	0	0	200	300	0	14.7748	-27.2272	-451.777	-31257.4	25248.3	-3018.68	255.887	972.188	0	0	0	0	0	0	0	603	903	0
524	2	0	0	0	0	0	0	200	300	0	14.4696	-27.5323	-453.913	-30250.3	24515.9	-2881.35	254.01	969.643	0	0	0	0	0	0	0	603	903	0
524	3	0	0	0	0	0	0	200	300	0	15.5377	-26.922	-453.913	-30067.2	24699	-3018.68	254.413	969.24	0	0	0	0	0	0	0	603	903	0
524	4	0	0	0	0	0	0	200	300	0	15.5377	-26.1591	-452.692	-30433.4	24821.1	-2881.35	254.83	970.228	0	0	0	0	0	0	0	603	903	0
524	5	0	0	0	0	0	0	200	300	0	14.0118	-26.1591	-451.471	-30067.2	24882.1	-2652.47	255.113	969.598	0	0	0	0	0	0	0	603	903	0
524	6	0	0	0	0	0	0	200	300	0	13.7067	-25.2435	-452.387	-29609.4	24332.8	-2744.02	253.788	968.452	0	0	0	0	0	0	0	603	903	0
524	7	0	0	0	0	0	0	200	300	0	15.2325	-25.2435	-451.777	-28877	24943.1	-2881.35	255.211	966.919	0	0	0	0	0	0	0	603	903	0
524	8	0	0	0	0	0	0	200	300	0	14.4696	-25.2435	-451.471	-29151.7	25004.2	-2881.35	255.384	967.57	0	0	0	0	0	0	0	603	903	0
524	9	0	0	0	0	0	0	200	300	0	14.6222	-25.2435	-451.777	-29334.8	24637.9	-2744.02	254.536	967.932	0	0	0	0	0	0	0	603	903	0
525	0	0	0	0	0	0	0	200	300	0	13.5541	-24.6332	-450.861	-29334.8	24515.9	-2972.9	254.376	968.064	0	0	0	0	0	0	0	603	903	0
525	1	0	0	0	0	0	0	200	300	0	12.486	-25.2435	-448.42	-28236.1	24210.7	-2881.35	253.991	965.968	0	0	0	0	0	0	0	603	903	0
525	2	0	0	0	0	0	0	200	300	0	14.0118	-23.8702	-449.335	-28510.8	24332.8	-2469.36	254.153	966.451	0	0	0	0	0	0	0	603	903	0
525	3	0	0	0	0	0	0	200	300	0	13.5541	-23.2599	-450.251	-27595.3	24393.8	-2560.91	254.178	964.289	0	0	0	0	0	0	0	603	903	0
525	4	0	0	0	0	0	0	200	300	0	12.0282	-22.6495	-449.335	-28236.1	24882.1	-2560.91	255.375	965.84	0	0	0	0	0	0	0	603	903	0
525	5	0	0	0	0	0	0	200	300	0	14.7748	-23.1073	-449.946	-27412.2	24760	-2469.36	255.029	963.923	0	0	0	0	0	0	0	603	903	0
525	6	0	0	0	0	0	0	200	300	0	12.1808	-22.8021	-449.64	-27137.5	24393.8	-2652.47	254.252	963.354	0	0	0	0	0	0	0	603	903	0
525	7	0	0	0	0	0	0	200	300	0	12.3334	-21.2762	-445.368	-26862.9	24271.7	-2606.69	254.498	963.316	0	0	0	0	0	0	0	603	903	0
525	8	0	0	0	0	0	0	200	300	0	13.4015	-22.0392	-448.115	-27046	24576.9	-2057.37	254.845	963.355	0	0	0	0	0	0	0	603	903	0
525	9	0	0	0	0	0	0	200	300	0	11.5704	-20.9711	-449.64	-27137.5	24210.7	-2423.59	253.845	963.354	0	0	0	0	0	0	0	603	903	0
526	0	0	0	0	0	0	0	200	300	0	11.8756	-20.8185	-449.03	-26313.5	24332.8	-2377.81	254.19	961.601	0	0	0	0	0	0	0	603	903	0
526	1	0	0	0	0	0	0	200	300	0	12.0282	-21.2762	-449.946	-26130.4	24637.9	-2515.14	254.758	961.075	0	0	0	0	0	0	0	603	903	0
526	2	0	0	0	0	0	0	200	300	0	12.486	-20.5133	-447.809	-26222	24637.9	-2057.37	255.019	961.556	0	0	0	0	0	0	0	603	903	0
526	3	0	0	0	0	0	0	200	300	0	10.8075	-19.7504	-447.809	-25764.2	24393.8	-2286.26	254.474	960.534	0	0	0	0	0	0	0	603	903	0
526	4	0	0	0	0	0	0	200	300	0	10.6549	-20.3607	-448.115	-25855.8	24699	-2332.03	255.118	960.699	0	0	0	0	0	0	0	603	903	0
526	5	0	0	0	0	0	0	200	300	0	13.7067	-18.8348	-448.725	-25764.2	24210.7	-1874.27	253.954	960.417	0	0	0	0	0	0	0	603	903	0
526	6	0	0	0	0	0	0	200	300	0	10.6549	-19.14	-448.42	-25672.7	24088.6	-2194.7	253.719	960.251	0	0	0	0	0	0	0	603	903	0
526	7	0	0	0	0	0	0	200	300	0	11.4178	-18.6823	-448.725	-25306.5	23966.6	-2286.26	253.41	959.396	0	0	0	0	0	0	0	603	903	0
526	8	0	0	0	0	0	0	200	300	0	10.5023	-17.9193	-447.809	-24665.6	24699	-2148.93	255.155	958.081	0	0	0	0	0	0	0	603	903	0
526	9	0	0	0	0	0	0	200	300	0	10.3497	-17.0038	-448.115	-25123.4	24454.8	-2148.93	254.573	959.065	0	0	0	0	0	0	0	603	903	0
527	0	0	0	0	0	0	0	200	300	0	9.73938	-16.6986	-449.946	-25031.8	24393.8	-2240.48	254.215	958.633	0	0	0	0	0	0	0	603	903	0
527	1	0	0	0	0	0	0	200	300	0	10.8075	-18.0719	-448.42	-24390.9	24210.7	-1828.49	253.991	957.393	0	0	0	0	0	0	0	603	903	0
527	2	0	0	0	0	0	0	200	300	0	10.8075	-15.9357	-450.251	-24848.7	24637.9	-2194.7	254.721	958.189	0	0	0	0	0	0	0	603	903	0
527	3	0	0	0	0	0	0	200	300	0	10.3497	-16.0883	-450.251	-24390.9	23844.5	-2103.15	252.958	957.172	0	0	0	0	0	0	0	603	903	0
527	4	0	0	0	0	0	0	200	300	0	10.0446	-15.6305	-450.861	-24299.4	24210.7	-1874.27	253.699	956.896	0	0	0	0	0	0	0	603	903	0
527	5	0	0	0	0	0	0	200	300	0	9.73938	-15.6305	-450.556	-24207.8	24332.8	-1874.27	254.006	956.729	0	0	0	0	0	0	0	603	903	0
527	6	0	0	0	0	0	0	200	300	0	10.0446	-14.5624	-452.692	-24116.3	24271.7	-1782.72	253.616	956.273	0	0	0	0	0	0	0	603	903	0
527	7	0	0	0	0	0	0	200	300	0	9.73938	-14.4098	-453.913	-24482.5	24027.6	-1782.72	252.934	956.937	0	0	0	0	0	0	0	603	903	0
527	8	0	0	0	0	0	0	200	300	0	8.51868	-15.1727	-456.659	-24116.3	24515.9	-1599.61	253.685	955.81	0	0	0	0	0	0	0	603	903	0
527	9	0	0	0	0	0	0	200	300	0	8.2135	-13.952	-454.523	-24482.5	24393.8	-1736.94	253.669	956.864	0	0	0	0	0	0	0	603	903	0
528	0	0	0	0	0	0	0	200	300	0	8.36609	-12.4261	-455.134	-23750.1	24454.8	-1691.16	253.731	955.183	0	0	0	0	0	0	0	603	903	0
528	1	0	0	0	0	0	0	200	300	0	10.1971	-11.6632	-456.659	-24024.7	24454.8	-1416.5	253.552	955.61	0	0	0	0	0	0	0	603	903	0
528	2	0	0	0	0	0	0	200	300	0	7.75574	-13.4943	-454.523	-24116.3	24454.8	-1553.83	253.803	956.058	0	0	0	0	0	0	0	603	903	0
528	3	0	0	0	0	0	0	200	300	0	8.2135	-11.358	-458.796	-24207.8	24210.7	-1416.5	252.77	955.764	0	0	0	0	0	0	0	603	903	0
528	4	0	0	0	0	0	0	200	300	0	6.38245	-10.5951	-458.491	-23383.8	24149.7	-1279.18	252.672	954.002	0	0	0	0	0	0	0	603	903	0
528	5	0	0	0	0	0	0	200	300	0	6.68762	-9.67957	-458.796	-23750.1	24454.8	-1279.18	253.302	954.766	0	0	0	0	0	0	0	603	903	0
528	6	0	0	0	0	0	0	200	300	0	6.22986	-9.83215	-459.406	-23658.5	24332.8	-1324.95	252.966	954.498	0	0	0	0	0	0	0	603	903	0
528	7	0	0	0	0	0	0	200	300	0	5.16174	-8.61145	-461.847	-24299.4	23844.5	-1050.29	251.629	955.613	0	0	0	0	0	0	0	603	903	0
528	8	0	0	0	0	0	0	200	300	0	4.85657	-7.84851	-462.458	-23841.6	24271.7	-1233.4	252.484	954.554	0	0	0	0	0	0	0	603	903	0
528	9	0	0	0	0	0	0	200	300	0	5.7721	-7.69592	-463.068	-24024.7	24393.8	-1004.52	252.679	954.882	0	0	0	0	0	0	0	603	903	0
529	0	0	0	0	0	0	0	200	300	0	5.7721	-9.2218	-464.594	-23567	24210.7	-775.635	252.112	953.726	0	0	0	0	0	0	0	603	903	0
529	1	0	0	0	0	0	0	200	300	0	5.46692	-6.62781	-464.899	-24482.5	24271.7	-729.859	252.209	955.662	0	0	0	0	0	0	0	603	903	0
529	2	0	0	0	0	0	0	200	300	0	3.94104	-5.86487	-467.341	-24299.4	24332.8	-821.412	252.066	954.995	0	0	0	0	0	0	0	603	903	0
529	3	0	0	0	0	0	0	200	300	0	3.94104	-6.17004	-467.951	-23750.1	24637.9	-729.859	252.651	953.753	0	0	0	0	0	0	0	603	903	0
529	4	0	0	0	0	0	0	200	300	0	4.55139	-5.55969	-467.951	-23750.1	24027.6	-455.201	251.346	953.753	0	0	0	0	0	0	0	603	903	0
529	5	0	0	0	0	0	0	200	300	0	3.94104	-4.49158	-468.561	-23292.3	24454.8	-684.083	252.191	952.71	0	0	0	0	0	0	0	603	903	0
529	6	0	0	0	0	0	0	200	300	0	2.26257	-3.72864	-469.172	-23292.3	24637.9	-409.424	252.514	952.646	0	0	0	0	0	0	0	603	903	0
529	7	0	0	0	0	0	0	200	300	0	2.10999	-2.9657	-470.087	-23933.2	23966.6	-592.53	250.983	953.912	0	0	0	0	0	0	0	603	903	0
529	8	0	0	0	0	0	0	200	300	0	3.33069	-2.05017	-470.698	-23658.5	23966.6	-500.977	250.917	953.263	0	0	0	0	0	0	0	603	903	0
529	9	0	0	0	0	0	0	200	300	0	2.87293	-2.35535	-473.139	-23200.7	24332.8	-592.53	251.428	952.036	0	0	0	0	0	0	0	603	903	0
530	0	0	0	0	0	0	0	200	300	0	1.80481	-1.43982	-474.055	-23200.7	24699	-500.977	252.102	951.941	0	0	0	0	0	0	0	603	903	0
530	1	0	0	0	0	0	0	200	300	0	1.65222	-2.05017	-471.308	-23841.6	23966.6	-272.095	250.851	953.586	0	0	0	0	0	0	0	603	903	0
530	2	0	0	0	0	0	0	200	300	0	2.41516	-0.524292	-475.58	-23475.4	24515.9	-226.319	251.549	952.362	0	0	0	0	0	0	0	603	903	0
530	3	0	0	0	0	0	0	200	300	0	1.80481	0.391236	-475.886	-23200.7	24454.8	-226.319	251.388	951.753	0	0	0	0	0	0	0	603	903	0
530	4	0	0	0	0	0	0	200	300	0	1.65222	0.0860598	-476.801	-23841.6	24149.7	-363.648	250.649	953.003	0	0	0	0	0	0	0	603	903	0
530	5	0	0	0	0	0	0	200	300	0	0.584107	-0.67688	-478.937	-23658.5	24271.7	-317.872	250.678	952.398	0	0	0	0	0	0	0	603	903	0
530	6	0	0	0	0	0	0	200	300	0	2.41516	1.00159	-477.717	-23567	24393.8	185.669	251.063	952.333	0	0	0	0	0	0	0	603	903	0
530	7	0	0	0	0	0	0	200	300	0	2.10999	1.76453	-478.937	-23292.3	24454.8	-43.2133	251.061	951.633	0	0	0	0	0	0	0	603	903	0
530	8	0	0	0	0	0	0	200	300	0	1.04187	1.91711	-481.684	-23292.3	23905.5	368.774	249.629	951.356	0	0	0	0	0	0	0	603	903	0
530	9	0	0	0	0	0	0	200	300	0	0.584107	3.59558	-479.853	-23750.1	24454.8	48.3394	250.963	952.495	0	0	0	0	0	0	0	603	903	0
531	0	0	0	0	0	0	0	200	300	0	1.19446	3.74817	-482.599	-23383.8	24271.7	2.56305	250.294	951.454	0	0	0	0	0	0	0	603	903	0
531	1	0	0	0	0	0	0	200	300	0	1.19446	4.20593	-482.294	-23292.3	24027.6	-43.2133	249.819	951.295	0	0	0	0	0	0	0	603	903	0
531	2	0	0	0	0	0	0	200	300	0	-0.33142	4.05334	-484.125	-23383.8	24271.7	-134.766	250.135	951.301	0	0	0	0	0	0	0	603	903	0
531	3	0	0	0	0	0	0	200	300	0	2.87293	5.73181	-484.43	-23567	23783.5	139.892	249.096	951.649	0	0	0	0	0	0	0	603	903	0
531	4	0	0	0	0	0	0	200	300	0	-0.484008	5.42664	-488.398	-23292.3	24027.6	-272.095	249.197	950.691	0	0	0	0	0	0	0	603	903	0
531	5	0	0	0	0	0	0	200	300	0	0.889283	5.73181	-489.313	-23475.4	24027.6	231.445	249.105	950.976	0	0	0	0	0	0	0	603	903	0
531	6	0	0	0	0	0	0	200	300	0	0.889283	6.18958	-487.787	-23567	24454.8	48.3394	250.134	951.314	0	0	0	0	0	0	0	603	903	0
531	7	0	0	0	0	0	0	200	300	0	-0.0262447	6.79993	-488.703	-23750.1	24393.8	322.998	249.915	951.598	0	0	0	0	0	0	0	603	903	0
531	8	0	0	0	0	0	0	200	300	0	-0.33142	7.1051	-492.365	-22926.1	23966.6	139.892	248.676	949.563	0	0	0	0	0	0	0	603	903	0
531	9	0	0	0	0	0	0	200	300	0	1.04187	8.02063	-493.586	-23017.6	24149.7	322.998	248.927	949.634	0	0	0	0	0	0	0	603	903	0
532	0	0	0	0	0	0	0	200	300	0	0.736695	7.71545	-494.196	-23475.4	24027.6	414.55	248.62	950.502	0	0	0	0	0	0	0	603	903	0
532	1	0	0	0	0	0	0	200	300	0	-0.33142	6.64734	-495.722	-23475.4	24027.6	368.774	248.47	950.356	0	0	0	0	0	0	0	603	903	0
532	2	0	0	0	0	0	0	200	300	0	-0.789184	9.24133	-496.332	-22743	24271.7	322.998	248.902	948.822	0	0	0	0	0	0	0	603	903	0
532	3	0	0	0	0	0	0	200	300	0	1.04187	9.6991	-497.248	-22834.5	24576.9	322.998	249.426	948.922	0	0	0	0	0	0	0	603	903	0
532	4	0	0	0	0	0	0	200	300	0	0.431519	10.9198	-494.501	-22834.5	24454.8	-43.2133	249.454	949.177	0	0	0	0	0	0	0	603	903	0
532	5	0	0	0	0	0	0	200	300	0	-0.789184	10.9198	-501.52	-22834.5	24332.8	94.1158	248.518	948.531	0	0	0	0	0	0	0	603	903	0
532	6	0	0	0	0	0	0	200	300	0	0.889283	11.5302	-501.826	-23017.6	24454.8	277.221	248.732	948.868	0	0	0	0	0	0	0	603	903	0
532	7	0	0	0	0	0	0	200	300	0	-0.484008	11.6827	-501.52	-23017.6	24515.9	506.103	248.883	948.896	0	0	0	0	0	0	0	603	903	0
532	8	0	0	0	0	0	0	200	300	0	2.87293	11.6827	-502.436	-22743	24088.6	368.774	247.944	948.266	0	0	0	0	0	0	0	603	903	0
532	9	0	0	0	0	0	0	200	300	0	0.889283	13.3612	-503.962	-23200.7	24149.7	277.221	247.92	949.037	0	0	0	0	0	0	0	603	903	0
533	0	0	0	0	0	0	0	200	300	0	1.9574	13.5138	-507.013	-23292.3	24149.7	322.998	247.631	948.94	0	0	0	0	0	0	0	603	903	0
533	1	0	0	0	0	0	0	200	300	0	-0.484008	13.3612	-508.845	-22834.5	24515.9	414.55	248.18	947.875	0	0	0	0	0	0	0	603	903	0
533	2	0	0	0	0	0	0	200	300	0	1.19446	13.819	-509.455	-22559.9	24088.6	551.879	247.283	947.282	0	0	0	0	0	0	0	603	903	0
533	3	0	0	0	0	0	0	200	300	0	1.04187	14.5819	-509.76	-23200.7	24210.7	460.327	247.494	948.513	0	0	0	0	0	0	0	603	903	0
533	4	0	0	0	0	0	0	200	300	0	-0.33142	15.8026	-511.591	-23200.7	24637.9	689.209	248.159	948.35	0	0	0	0	0	0	0	603	903	0
533	5	0	0	0	0	0	0	200	300	0	-0.33142	16.5656	-511.896	-22468.3	24332.8	597.656	247.535	946.892	0	0	0	0	0	0	0	603	903	0
533	6	0	0	0	0	0	0	200	300	0	0.584107	17.1759	-516.169	-22743	24210.7	551.879	246.905	947.061	0	0	0	0	0	0	0	603	903	0
533	7	0	0	0	0	0	0	200	300	0	1.04187	16.5656	-517.084	-23200.7	24821.1	277.221	248.002	947.868	0	0	0	0	0	0	0	603	903	0
533	8	0	0	0	0	0	0	200	300	0	-0.0262447	17.9388	-518	-23109.2	24882.1	597.656	248.035	947.612	0	0	0	0	0	0	0	603	903	0
533	9	0	0	0	0	0	0	200	300	0	-0.636596	18.7018	-517.084	-22559.9	24210.7	414.55	246.822	946.629	0	0	0	0	0	0	0	603	903	0
534	0	0	0	0	0	0	0	200	300	0	0.278931	19.1595	-520.136	-22010.6	24943.1	185.669	247.955	945.317	0	0	0	0	0	0	0	603	903	0
534	1	0	0	0	0	0	0	200	300	0	0.736695	20.2277	-523.188	-22285.2	24882.1	414.55	247.559	945.595	0	0	0	0	0	0	0	603	903	0
534	2	0	0	0	0	0	0	200	300	0	-0.0262447	20.2277	-523.798	-22468.3	24454.8	734.985	246.688	945.895	0	0	0	0	0	0	0	603	903	0
534	3	0	0	0	0	0	0	200	300	0	-0.484008	20.5328	-524.714	-22559.9	24454.8	322.998	246.606	945.995	0	0	0	0	0	0	0	603	903	0
534	4	0	0	0	0	0	0	200	300	0	-0.789184	21.601	-523.188	-22376.8	24882.1	506.103	247.559	945.77	0	0	0	0	0	0	0	603	903	0
534	5	0	0	0	0	0	0	200	300	0	1.49963	22.0587	-528.376	-22559.9	24637.9	597.656	246.63	945.697	0	0	0	0	0	0	0	603	903	0
534	6	0	0	0	0	0	0	200	300	0	0.889283	23.8898	-531.122	-22926.1	24210.7	551.879	245.584	946.165	0	0	0	0	0	0	0	603	903	0
534	7	0	0	0	0	0	0	200	300	0	-0.178833	23.5846	-532.953	-22926.1	25065.2	551.879	247.031	946.017	0	0	0	0	0	0	0	603	903	0
534	8	0	0	0	0	0	0	200	300	0	-0.33142	24.1949	-533.564	-22559.9	24943.1	734.985	246.748	945.282	0	0	0	0	0	0	0	603	903	0
534	9	0	0	0	0	0	0	200	300	0	0.889283	23.7372	-533.869	-22559.9	24760	689.209	246.378	945.257	0	0	0	0	0	0	0	603	903	0
535	0	0	0	0	0	0	0	200	300	0	1.04187	25.7208	-537.226	-22285.2	25126.2	918.091	246.77	944.482	0	0	0	0	0	0	0	603	903	0
535	1	0	0	0	0	0	0	200	300	0	0.278931	26.3312	-539.667	-22743	25431.4	734.985	247.124	945.143	0	0	0	0	0	0	0	603	903	0
535	2	0	0	0	0	0	0	200	300	0	0.126343	26.4838	-539.667	-22193.7	25187.3	506.103	246.672	944.125	0	0	0	0	0	0	0	603	903	0
535	3	0	0	0	0	0	0	200	300	0	0.584107	26.1786	-540.888	-22285.2	24454.8	734.985	245.212	944.201	0	0	0	0	0	0	0	603	903	0
535	4	0	0	0	0	0	0	200	300	0	0.736695	28.3148	-543.024	-22559.9	25370.4	734.985	246.721	944.545	0	0	0	0	0	0	0	603	903	0
535	5	0	0	0	0	0	0	200	300	0	-0.0262447	29.2303	-545.16	-22285.2	25492.4	826.538	246.761	943.878	0	0	0	0	0	0	0	603	903	0
535	6	0	0	0	0	0	0	200	300	0	-0.178833	30.6036	-548.517	-22102.1	25248.3	780.761	246.03	943.294	0	0	0	0	0	0	0	603	903	0
535	7	0	0	0	0	0	0	200	300	0	1.19446	31.0614	-549.433	-22193.7	24699	918.091	244.954	943.394	0	0	0	0	0	0	0	603	903	0
535	8	0	0	0	0	0	0	200	300	0	2.72034	31.5192	-551.264	-22376.8	25065.2	734.985	245.469	943.592	0	0	0	0	0	0	0	603	903	0
535	9	0	0	0	0	0	0	200	300	0	1.80481	31.8243	-552.18	-22468.3	25553.5	826.538	246.277	943.69	0	0	0	0	0	0	0	603	903	0
536	0	0	0	0	0	0	0	200	300	0	2.10999	33.5028	-550.959	-22468.3	25126.2	963.867	245.605	943.78	0	0	0	0	0	0	0	603	903	0
536	1	0	0	0	0	0	0	200	300	0	1.65222	33.1976	-554.316	-22285.2	25126.2	963.867	245.328	943.203	0	0	0	0	0	0	0	603	903	0
536	2	0	0	0	0	0	0	200	300	0	1.49963	34.4183	-557.673	-21919	25370.4	1101.2	245.493	942.305	0	0	0	0	0	0	0	603	903	0
536	3	0	0	0	0	0	0	200	300	0	3.02551	34.5709	-557.673	-22743	25797.6	1284.3	246.259	943.782	0	0	0	0	0	0	0	603	903	0
536	4	0	0	0	0	0	0	200	300	0	1.19446	34.1132	-558.893	-22376.8	25309.3	963.867	245.285	943.038	0	0	0	0	0	0	0	603	903	0
536	5	0	0	0	0	0	0	200	300	0	0.889283	35.1813	-560.114	-21919	25736.6	918.091	245.949	942.133	0	0	0	0	0	0	0	603	903	0
536	6	0	0	0	0	0	0	200	300	0	1.9574	37.0123	-561.945	-21003.5	25858.7	1284.3	246.016	940.376	0	0	0	0	0	0	0	603	903	0
536	7	0	0	0	0	0	0	200	300	0	2.41516	36.7072	-562.861	-22102.1	25431.4	1146.97	245.182	942.267	0	0	0	0	0	0	0	603	903	0
536	8	0	0	0	0	0	0	200	300	0	1.34705	39.6063	-567.133	-22376.8	25492.4	1009.64	244.95	942.456	0	0	0	0	0	0	0	603	903	0
536	9	0	0	0	0	0	0	200	300	0	3.94104	39.9115	-568.049	-22285.2	25980.7	1146.97	245.737	942.231	0	0	0	0	0	0	0	603	903	0
537	0	0	0	0	0	0	0	200	300	0	1.19446	40.3693	-568.659	-21735.9	25858.7	1284.3	245.473	941.223	0	0	0	0	0	0	0	603	903	0
537	1	0	0	0	0	0	0	200	300	0	1.9574	41.2848	-570.795	-22010.6	25614.5	1192.75	244.875	941.561	0	0	0	0	0	0	0	603	903	0
537	2	0	0	0	0	0	0	200	300	0	2.41516	42.3529	-571.1	-21919	25675.5	1467.41	244.958	941.38	0	0	0	0	0	0	0	603	903	0
537	3	0	0	0	0	0	0	200	300	0	1.34705	43.7262	-574.152	-21461.2	25431.4	1787.84	244.294	940.379	0	0	0	0	0	0	0	603	903	0
537	4	0	0	0	0	0	0	200	300	0	3.63586	43.8788	-572.626	-22010.6	25614.5	1467.41	244.732	941.438	0	0	0	0	0	0	0	603	903	0
537	5	0	0	0	0	0	0	200	300	0	1.9574	44.3365	-575.678	-21827.5	25431.4	1604.74	244.176	940.916	0	0	0	0	0	0	0	603	903	0
537	6	0	0	0	0	0	0	200	300	0	3.02551	44.7943	-575.373	-21735.9	25980.7	2062.5	245.155	940.777	0	0	0	0	0	0	0	603	903	0
537	7	0	0	0	0	0	0	200	300	0	3.02551	45.5573	-575.068	-22559.9	25797.6	1467.41	244.86	942.23	0	0	0	0	0	0	0	603	903	0
537	8	0	0	0	0	0	0	200	300	0	1.80481	47.5409	-579.951	-21919	25553.5	1742.07	244.061	940.795	0	0	0	0	0	0	0	603	903	0
537	9	0	0	0	0	0	0	200	300	0	1.19446	48.609	-580.866	-21461.2	26041.8	1650.51	244.833	939.947	0	0	0	0	0	0	0	603	903	0
538	0	0	0	0	0	0	0	200	300	0	2.41516	49.2194	-580.561	-21644.3	25980.7	1833.62	244.751	940.282	0	0	0	0	0	0	0	603	903	0
538	1	0	0	0	0	0	0	200	300	0	3.02551	49.8297	-583.307	-21644.3	25736.6	1650.51	244.122	940.106	0	0	0	0	0	0	0	603	903	0
538	2	0	0	0	0	0	0	200	300	0	1.9574	50.2875	-583.613	-21552.8	26163.8	1787.84	244.831	939.93	0	0	0	0	0	0	0	603	903	0
538	3	0	0	0	0	0	0	200	300	0	2.41516	51.9659	-585.138	-21278.1	26102.8	1833.62	244.61	939.364	0	0	0	0	0	0	0	603	903	0
538	4	0	0	0	0	0	0	200	300	0	3.33069	53.0341	-586.359	-21369.7	25919.7	1833.62	244.204	939.445	0	0	0	0	0	0	0	603	903	0
538	5	0	0	0	0	0	0	200	300	0	2.87293	54.1022	-589.716	-21644.3	25858.7	2154.05	243.849	939.703	0	0	0	0	0	0	0	603	903	0
538	6	0	0	0	0	0	0	200	300	0	1.9574	54.7125	-589.411	-21461.2	25858.7	2108.28	243.872	939.411	0	0	0	0	0	0	0	603	903	0
538	7	0	0	0	0	0	0	200	300	0	1.9574	55.0177	-590.937	-21369.7	25919.7	2245.6	243.862	939.162	0	0	0	0	0	0	0	603	903	0
538	8	0	0	0	0	0	0	200	300	0	2.72034	56.0858	-590.937	-21186.6	25797.6	2154.05	243.655	938.853	0	0	0	0	0	0	0	603	903	0
538	9	0	0	0	0	0	0	200	300	0	3.33069	57.7643	-591.547	-21644.3	25797.6	2520.26	243.61	939.589	0	0	0	0	0	0	0	603	903	0
539	0	0	0	0	0	0	0	200	300	0	1.80481	58.222	-590.632	-21186.6	26163.8	2520.26	244.298	938.871	0	0	0	0	0	0	0	603	903	0
539	1	0	0	0	0	0	0	200	300	0	1.80481	59.1376	-595.209	-20911.9	26102.8	2428.71	243.855	938.134	0	0	0	0	0	0	0	603	903	0
539	2	0	0	0	0	0	0	200	300	0	2.72034	60.3583	-594.904	-19721.7	25797.6	2520.26	243.364	936.151	0	0	0	0	0	0	0	603	903	0
539	3	0	0	0	0	0	0	200	300	0	2.72034	60.9686	-595.209	-20362.6	26102.8	2566.04	243.855	937.211	0	0	0	0	0	0	0	603	903	0
539	4	0	0	0	0	0	0	200	300	0	1.04187	60.3583	-597.346	-20545.7	25797.6	2428.71	243.187	937.395	0	0	0	0	0	0	0	603	903	0
539	5	0	0	0	0	0	0	200	300	0	1.49963	62.9523	-596.125	-21003.5	25858.7	2703.37	243.378	938.233	0	0	0	0	0	0	0	603	903	0
539	6	0	0	0	0	0	0	200	300	0	2.41516	64.0204	-597.956	-20545.7	25614.5	2749.15	242.837	937.36	0	0	0	0	0	0	0	603	903	0
539	7	0	0	0	0	0	0	200	300	0	2.56775	65.5463	-597.651	-20728.8	26102.8	2566.04	243.676	937.684	0	0	0	0	0	0	0	603	903	0
539	8	0	0	0	0	0	0	200	300	0	1.19446	66.4618	-600.092	-20728.8	26041.8	2840.7	243.396	937.543	0	0	0	0	0	0	0	603	903	0
539	9	0	0	0	0	0	0	200	300	0	1.19446	65.0885	-595.82	-20820.4	25675.5	2566.04	243.093	937.944	0	0	0	0	0	0	0	603	903	0
540	0	0	0	0	0	0	0	200	300	0	2.72034	67.9877	-600.092	-20454.2	25553.5	3069.58	242.583	937.085	0	0	0	0	0	0	0	603	903	0
540	1	0	0	0	0	0	0	200	300	0	2.72034	69.0558	-599.787	-20088	25919.7	2978.03	243.215	936.492	0	0	0	0	0	0	0	603	903	0
540	2	0	0	0	0	0	0	200	300	0	2.87293	69.8187	-600.092	-20637.3	25797.6	3390.01	242.989	937.39	0	0	0	0	0	0	0	603	903	0
540	3	0	0	0	0	0	0	200	300	0	0.584107	71.3446	-599.177	-20454.2	25614.5	3206.91	242.75	937.137	0	0	0	0	0	0	0	603	903	0
540	4	0	0	0	0	0	0	200	300	0	1.04187	72.1075	-600.702	-20179.5	25919.7	3206.91	243.149	936.593	0	0	0	0	0	0	0	603	903	0
540	5	0	0	0	0	0	0	200	300	0	1.49963	73.1757	-601.923	-19721.7	25980.7	3115.36	243.163	935.765	0	0	0	0	0	0	0	603	903	0
540	6	0	0	0	0	0	0	200	300	0	2.26257	73.1757	-601.923	-20271.1	25431.4	3344.24	242.25	936.677	0	0	0	0	0	0	0	603	903	0
540	7	0	0	0	0	0	0	200	300	0	0.584107	74.0912	-601.618	-19264	25492.4	3344.24	242.373	935.02	0	0	0	0	0	0	0	603	903	0
540	8	0	0	0	0	0	0	200	300	0	2.56775	75.6171	-601.923	-19996.4	25980.7	3527.34	243.163	936.221	0	0	0	0	0	0	0	603	903	0
540	9	0	0	0	0	0	0	200	300	0	1.49963	76.8378	-601.923	-19813.3	25858.7	3527.34	242.96	935.917	0	0	0	0	0	0	0	603	903	0
541	0	0	0	0	0	0	0	200	300	0	0.889283	77.7533	-603.144	-19447.1	25431.4	3481.57	242.165	935.243	0	0	0	0	0	0	0	603	903	0
541	1	0	0	0	0	0	0	200	300	0	1.80481	78.5162	-601.313	-19447.1	25431.4	3573.12	242.293	935.341	0	0	0	0	0	0	0	603	903	0
541	2	0	0	0	0	0	0	200	300	0	0.431519	80.1947	-603.449	-19172.4	25248.3	3618.9	241.84	934.771	0	0	0	0	0	0	0	603	903	0
541	3	0	0	0	0	0	0	200	300	0	-0.178833	80.3473	-602.534	-19080.9	24943.1	3664.67	241.397	934.668	0	0	0	0	0	0	0	603	903	0
541	4	0	0	0	0	0	0	200	300	0	1.04187	82.1783	-601.923	-18989.3	25004.2	3756.23	241.54	934.548	0	0	0	0	0	0	0	603	903	0
541	5	0	0	0	0	0	0	200	300	0	3.1781	83.0939	-601.313	-19080.9	25248.3	4076.66	241.989	934.732	0	0	0	0	0	0	0	603	903	0
541	6	0	0	0	0	0	0	200	300	0	-0.484008	84.3146	-603.144	-18989.3	25248.3	4122.44	241.861	934.484	0	0	0	0	0	0	0	603	903	0
541	7	0	0	0	0	0	0	200	300	0	-0.484008	82.9413	-598.871	-19080.9	25126.2	4213.99	241.956	934.861	0	0	0	0	0	0	0	603	903	0
541	8	0	0	0	0	0	0	200	300	0	-0.941772	85.2301	-601.923	-18531.6	24943.1	4168.21	241.439	933.787	0	0	0	0	0	0	0	603	903	0
541	9	0	0	0	0	0	0	200	300	0	-0.484008	86.756	-600.092	-18806.2	25187.3	4168.21	241.972	934.339	0	0	0	0	0	0	0	603	903	0
542	0	0	0	0	0	0	0	200	300	0	-0.636596	85.993	-598.566	-18714.7	25187.3	4168.21	242.079	934.266	0	0	0	0	0	0	0	603	903	0
542	1	0	0	0	0	0	0	200	300	0	-1.70471	88.8922	-598.871	-18348.4	24637.9	4442.87	241.141	933.638	0	0	0	0	0	0	0	603	903	0
542	2	0	0	0	0	0	0	200	300	0	-2.31506	90.2655	-598.871	-18165.3	24821.1	4351.32	241.446	933.333	0	0	0	0	0	0	0	603	903	0
542	3	0	0	0	0	0	0	200	300	0	-1.24695	90.4181	-597.04	-18256.9	24454.8	4671.75	240.96	933.579	0	0	0	0	0	0	0	603	903	0
542	4	0	0	0	0	0	0	200	300	0	0.736695	91.3336	-598.566	-17616	24515.9	4763.31	240.958	932.43	0	0	0	0	0	0	0	603	903	0
542	5	0	0	0	0	0	0	200	300	0	-2.31506	92.2491	-597.04	-18073.8	24515.9	4534.42	241.062	933.272	0	0	0	0	0	0	0	603	903	0
542	6	0	0	0	0	0	0	200	300	0	-2.16248	92.5543	-595.514	-17890.7	24637.9	4763.31	241.373	933.042	0	0	0	0	0	0	0	603	903	0
542	7	0	0	0	0	0	0	200	300	0	-3.53577	94.3854	-595.209	-17341.4	24699	4763.31	241.496	932.135	0	0	0	0	0	0	0	603	903	0
542	8	0	0	0	0	0	0	200	300	0	-1.8573	95.3009	-596.43	-17524.5	23844.5	4717.53	239.979	932.382	0	0	0	0	0	0	0	603	903	0
542	9	0	0	0	0	0	0	200	300	0	-3.99353	95.9113	-594.294	-17890.7	24027.6	4763.31	240.431	933.104	0	0	0	0	0	0	0	603	903	0
543	0	0	0	0	0	0	0	200	300	0	-4.75647	95.9113	-593.989	-17616	24454.8	4900.63	241.171	932.657	0	0	0	0	0	0	0	603	903	0
543	1	0	0	0	0	0	0	200	300	0	-4.90906	96.5216	-591.547	-17249.8	24210.7	4900.63	240.928	932.161	0	0	0	0	0	0	0	603	903	0
543	2	0	0	0	0	0	0	200	300	0	-4.14612	97.7423	-590.021	-17432.9	23600.3	5037.96	239.999	932.546	0	0	0	0	0	0	0	603	903	0
543	3	0	0	0	0	0	0	200	300	0	-4.14612	98.5052	-589.411	-16608.9	24210.7	5037.96	241.076	931.179	0	0	0	0	0	0	0	603	903	0
543	4	0	0	0	0	0	0	200	300	0	-4.90906	100.184	-589.411	-16517.4	24027.6	5037.96	240.765	931.024	0	0	0	0	0	0	0	603	903	0
543	5	0	0	0	0	0	0	200	300	0	-6.58752	98.963	-586.97	-16517.4	23478.3	5175.29	239.999	931.14	0	0	0	0	0	0	0	603	903	0
543	6	0	0	0	0	0	0	200	300	0	-5.51941	100.184	-587.275	-16517.4	23600.3	5312.62	240.186	931.126	0	0	0	0	0	0	0	603	903	0
543	7	0	0	0	0	0	0	200	300	0	-5.82458	100.947	-584.528	-16059.6	23722.4	5129.52	240.584	930.475	0	0	0	0	0	0	0	603	903	0
543	8	0	0	0	0	0	0	200	300	0	-7.19788	103.083	-583.613	-16151.2	23539.3	5312.62	240.334	930.675	0	0	0	0	0	0	0	603	903	0
543	9	0	0	0	0	0	0	200	300	0	-7.65564	102.473	-582.392	-16059.6	23417.2	5404.18	240.209	930.575	0	0	0	0	0	0	0	603	903	0
544	0	0	0	0	0	0	0	200	300	0	-5.97717	104.151	-582.697	-16059.6	23356.2	5404.18	240.083	930.561	0	0	0	0	0	0	0	603	903	0
544	1	0	0	0	0	0	0	200	300	0	-6.58752	104.304	-579.645	-15327.2	23112.1	5633.06	239.873	929.442	0	0	0	0	0	0	0	603	903	0
544	2	0	0	0	0	0	0	200	300	0	-6.74011	104.914	-579.645	-16059.6	22806.9	5678.83	239.346	930.706	0	0	0	0	0	0	0	603	903	0
544	3	0	0	0	0	0	0	200	300	0	-8.1134	105.677	-573.237	-15876.5	22684.8	5770.39	239.573	930.696	0	0	0	0	0	0	0	603	903	0
544	4	0	0	0	0	0	0	200	300	0	-8.1134	106.44	-574.457	-15601.9	22867.9	5724.61	239.808	930.159	0	0	0	0	0	0	0	603	903	0
544	5	0	0	0	0	0	0	200	300	0	-7.96081	107.355	-575.068	-15693.4	22929	5907.72	239.872	930.29	0	0	0	0	0	0	0	603	903	0
544	6	0	0	0	0	0	0	200	300	0	-7.80823	107.355	-572.016	-15510.3	22623.8	5587.28	239.551	930.115	0	0	0	0	0	0	0	603	903	0
544	7	0	0	0	0	0	0	200	300	0	-8.87634	106.44	-568.659	-14869.4	22318.6	5633.06	239.248	929.148	0	0	0	0	0	0	0	603	903	0
544	8	0	0	0	0	0	0	200	300	0	-9.48669	108.271	-568.049	-15418.8	22562.8	5495.73	239.72	930.143	0	0	0	0	0	0	0	603	903	0
544	9	0	0	0	0	0	0	200	300	0	-8.57117	109.949	-566.523	-14503.2	22379.6	5587.28	239.504	928.6	0	0	0	0	0	0	0	603	903	0
545	0	0	0	0	0	0	0	200	300	0	-9.33411	110.712	-564.081	-14686.3	21891.4	5404.18	238.809	929.036	0	0	0	0	0	0	0	603	903	0
545	1	0	0	0	0	0	0	200	300	0	-8.72375	111.475	-562.25	-14686.3	22257.6	5724.61	239.587	929.121	0	0	0	0	0	0	0	603	903	0
545	2	0	0	0	0	0	0	200	300	0	-10.5548	111.323	-561.945	-14228.6	22501.7	5404.18	240.043	928.32	0	0	0	0	0	0	0	603	903	0
545	3	0	0	0	0	0	0	200	300	0	-10.86	112.238	-558.588	-14228.6	21525.2	5404.18	238.535	928.472	0	0	0	0	0	0	0	603	903	0
545	4	0	0	0	0	0	0	200	300	0	-9.79187	113.154	-555.231	-13770.8	21769.3	5449.95	239.208	927.802	0	0	0	0	0	0	0	603	903	0
545	5	0	0	0	0	0	0	200	300	0	-9.63928	113.917	-555.536	-13862.4	21158.9	5724.61	238.087	927.953	0	0	0	0	0	0	0	603	903	0
545	6	0	0	0	0	0	0	200	300	0	-10.86	114.832	-554.316	-13496.2	21097.9	5953.49	238.061	927.347	0	0	0	0	0	0	0	603	903	0
545	7	0	0	0	0	0	0	200	300	0	-10.5548	114.527	-549.128	-13953.9	21342	5953.49	238.865	928.411	0	0	0	0	0	0	0	603	903	0
545	8	0	0	0	0	0	0	200	300	0	-10.097	114.832	-549.433	-13679.3	21464.1	5724.61	239.066	927.897	0	0	0	0	0	0	0	603	903	0
545	9	0	0	0	0	0	0	200	300	0	-7.65564	114.985	-545.771	-13496.2	21647.2	5861.94	239.664	927.729	0	0	0	0	0	0	0	603	903	0
546	0	0	0	0	0	0	0	200	300	0	-10.4022	116.511	-542.414	-13679.3	21158.9	5770.39	239.009	928.219	0	0	0	0	0	0	0	603	903	0
546	1	0	0	0	0	0	0	200	300	0	-11.9281	116.358	-541.498	-13679.3	20853.8	5861.94	238.511	928.262	0	0	0	0	0	0	0	603	903	0
546	2	0	0	0	0	0	0	200	300	0	-11.9281	117.426	-540.278	-12855.3	20975.8	5724.61	238.824	926.794	0	0	0	0	0	0	0	603	903	0
546	3	0	0	0	0	0	0	200	300	0	-11.1652	117.274	-536.005	-12763.7	20548.6	5541.5	238.337	926.813	0	0	0	0	0	0	0	603	903	0
546	4	0	0	0	0	0	0	200	300	0	-11.7755	117.884	-534.784	-12946.8	20731.7	5678.83	238.766	927.209	0	0	0	0	0	0	0	603	903	0
546	5	0	0	0	0	0	0	200	300	0	-13.454	118.189	-530.207	-12946.8	21158.9	5541.5	239.907	927.419	0	0	0	0	0	0	0	603	903	0
546	6	0	0	0	0	0	0	200	300	0	-10.4022	120.02	-528.681	-12763.7	20670.7	5449.95	239.099	927.143	0	0	0	0	0	0	0	603	903	0
546	7	0	0	0	0	0	0	200	300	0	-12.691	120.478	-525.629	-12489.1	20243.4	5312.62	238.513	926.76	0	0	0	0	0	0	0	603	903	0
546	8	0	0	0	0	0	0	200	300	0	-11.7755	120.783	-524.714	-12214.4	20060.3	5449.95	238.231	926.278	0	0	0	0	0	0	0	603	903	0
546	9	0	0	0	0	0	0	200	300	0	-11.9281	118.494	-518.61	-12580.6	20487.6	5495.73	239.505	927.258	0	0	0	0	0	0	0	603	903	0
547	0	-1.09634	0.872538	-10.011	-455.936	150.625	67.5668	215.046	345.543	0	-12.3859	120.325	-518.61	-12397.5	20243.4	5495.73	239.034	926.905	0	0	0	0	0	0	0	603	903	0
547	1	-5.97915	3.00877	-39.0027	-3385.62	394.765	388.001	210.121	386.805	0	-13.7592	120.936	-514.338	-11939.8	19877.2	5449.95	238.646	926.214	0	0	0	0	0	0	0	603	903	0
547	2	-15.7448	10.0278	-80.8118	-5125.13	638.906	754.213	207.906	363.421	0	-11.7755	121.851	-506.708	-11756.7	20182.4	5495.73	239.83	926.202	0	0	0	0	0	0	0	603	903	0
547	3	-21.3905	21.3193	-88.136	-4667.36	-398.692	1211.98	195.476	352.956	0	-12.3859	121.699	-506.708	-12031.3	20060.3	5312.62	239.589	926.744	0	0	0	0	0	0	0	603	903	0
547	4	-17.1181	27.8806	-66.4686	-4850.47	-459.727	525.331	193.084	372.974	0	-13.7592	121.393	-506.098	-11298.9	19694.1	5541.5	238.914	925.326	0	0	0	0	0	0	0	603	903	0
547	5	-3.23257	26.8125	-61.2806	-6406.86	333.73	-435.973	205.446	404.55	0	-13.9117	120.63	-499.384	-11573.5	19450	5678.83	238.948	926.176	0	0	0	0	0	0	0	603	903	0
547	6	6.53306	26.5073	-89.9671	-5491.34	1005.12	-69.7623	211.172	361.037	0	-12.5385	122.004	-498.469	-11390.4	19938.2	5678.83	239.999	925.851	0	0	0	0	0	0	0	603	903	0
547	7	2.2606	21.3193	-131.166	-7047.73	1676.5	1303.53	212.782	353.731	0	-11.0126	123.224	-492.06	-11207.3	19572	5266.85	239.776	925.776	0	0	0	0	0	0	0	603	903	0
547	8	-8.42056	21.0141	-150.392	-9428.11	760.976	845.765	205.06	362.69	0	-13.3014	122.156	-489.008	-11207.3	19388.9	5221.07	239.65	925.919	0	0	0	0	0	0	0	603	903	0
547	9	-19.8646	32.3056	-148.866	-11533.8	-32.4808	159.12	199.782	377.478	0	-14.0643	121.546	-488.093	-10841.1	19022.7	4946.41	238.974	925.211	0	0	0	0	0	0	0	603	903	0
548	0	-19.5595	34.5945	-167.177	-12083.1	577.871	571.107	203.457	372.278	0	-14.9799	123.682	-486.567	-10841.1	19266.9	4946.41	239.598	925.281	0	0	0	0	0	0	0	603	903	0
548	1	-5.97915	21.9297	-193.727	-11716.9	1432.36	296.449	207.394	360.482	0	-12.5385	123.377	-479.853	-10383.4	18900.6	5037.96	239.388	924.639	0	0	0	0	0	0	0	603	903	0
548	2	3.02354	11.0959	-213.563	-12083.1	2531	250.672	211.851	356.579	0	-11.7755	121.699	-474.055	-10383.4	18656.5	5129.52	239.355	924.903	0	0	0	0	0	0	0	603	903	0
548	3	2.87095	13.8425	-218.446	-13364.9	2836.17	21.7904	212.983	361.182	0	-13.6066	120.63	-471.918	-10200.3	18534.4	5266.85	239.275	924.615	0	0	0	0	0	0	0	603	903	0
548	4	-2.62222	17.9624	-221.803	-15104.4	2103.75	-756.408	209.485	368.098	0	-14.9799	122.309	-469.477	-10200.3	18717.5	5083.74	239.869	924.727	0	0	0	0	0	0	0	603	903	0
548	5	-7.81021	11.8589	-241.334	-16111.5	2042.71	-939.513	208.464	366.76	0	-12.0807	123.224	-463.373	-10291.8	18290.3	5083.74	239.472	925.211	0	0	0	0	0	0	0	603	903	0
548	6	-4.30068	4.68724	-257.203	-14829.7	2897.21	-161.315	211.264	357.658	0	-13.454	121.241	-457.27	-10291.8	18168.2	4992.19	239.732	925.507	0	0	0	0	0	0	0	603	903	0
548	7	8.97446	-0.0429889	-259.34	-15104.4	3995.84	-619.079	215.408	358.242	0	-13.6066	120.325	-455.134	-10017.2	17985.1	5221.07	239.516	925.009	0	0	0	0	0	0	0	603	903	0
548	8	15.9935	-2.78957	-259.645	-15836.8	4117.91	-1122.62	215.86	360.994	0	-15.7428	120.02	-450.251	-9467.83	18412.4	5037.96	240.894	924.028	0	0	0	0	0	0	0	603	903	0
548	9	9.58481	-9.04567	-264.222	-15745.2	3934.81	-1397.28	214.892	359.591	0	-13.7592	120.783	-441.401	-9467.83	17191.7	4809.08	238.948	924.45	0	0	0	0	0	0	0	603	903	0
549	0	1.19248	-13.7759	-279.176	-17118.5	3690.66	-985.29	213.22	361.318	0	-12.9962	120.478	-437.433	-8460.75	18046.1	4809.08	241.255	922.342	0	0	0	0	0	0	0	603	903	0
549	1	6.22788	-16.0647	-281.923	-16477.7	4362.05	-1855.04	215.473	358.447	0	-14.2169	120.02	-434.382	-9101.62	18046.1	4671.75	241.544	923.953	0	0	0	0	0	0	0	603	903	0
549	2	16.6039	-19.7268	-281.007	-16843.9	5582.75	-1900.82	219.867	359.941	0	-15.1324	118.342	-430.414	-8369.2	17313.7	4809.08	240.226	922.445	0	0	0	0	0	0	0	603	903	0
549	3	23.4703	-26.2881	-285.28	-16294.6	6376.21	-2083.92	222.351	357.118	0	-14.6747	117.426	-422.48	-8460.75	17191.7	4625.98	240.692	923.026	0	0	0	0	0	0	0	603	903	0
549	4	26.0643	-32.3916	-294.13	-15928.4	5887.93	-2450.13	220.018	354.154	0	-13.3014	117.426	-414.545	-8002.99	17313.7	4946.41	241.766	922.306	0	0	0	0	0	0	0	603	903	0
549	5	21.3341	-32.6968	-303.895	-17027	6376.21	-2770.57	220.982	356.029	0	-10.86	117.426	-408.442	-8002.99	17008.5	4580.2	241.643	922.594	0	0	0	0	0	0	0	603	903	0
549	6	21.1815	-34.833	-304.811	-17851	6376.21	-2999.45	220.919	358.564	0	-11.9281	115.748	-405.695	-7545.23	16337.2	4397.09	240.27	921.598	0	0	0	0	0	0	0	603	903	0
549	7	28.3531	-42.4624	-309.999	-17576.3	6803.46	-3091	221.947	356.698	0	-12.0807	114.985	-400.202	-7728.33	16459.2	4397.09	241.127	922.311	0	0	0	0	0	0	0	603	903	0
549	8	35.6773	-47.4978	-323.427	-17484.7	7902.09	-3274.11	224.432	354.061	0	-12.9962	113.917	-393.488	-7270.57	16032	4717.53	240.743	921.477	0	0	0	0	0	0	0	603	903	0
549	9	40.1024	-49.7866	-331.971	-17210.1	8207.26	-3274.11	224.723	351.842	0	-12.691	111.17	-384.943	-7087.47	15848.9	4351.32	241.172	921.412	0	0	0	0	0	0	0	603	903	0
550	0	38.7291	-51.7703	-338.991	-17484.7	7841.05	-3594.54	223.131	351.579	0	-12.5385	110.56	-380.366	-6995.91	15665.8	4488.65	241.186	921.393	0	0	0	0	0	0	0	603	903	0
550	1	36.898	-54.5169	-342.958	-17027	8207.26	-3548.77	223.931	349.647	0	-13.6066	107.661	-372.126	-6812.81	16093	4442.87	243.246	921.308	0	0	0	0	0	0	0	603	903	0
550	2	38.2713	-56.6531	-353.029	-17759.4	8573.48	-3365.66	224.285	350.306	0	-13.454	109.644	-367.853	-6904.36	15543.7	4030.88	242.255	921.769	0	0	0	0	0	0	0	603	903	0
550	3	44.3749	-59.7049	-364.32	-18491.8	8695.55	-3411.44	223.868	350.757	0	-12.0807	106.135	-359.003	-5988.83	15360.6	3939.33	242.787	919.682	0	0	0	0	0	0	0	603	903	0
550	4	49.1051	-61.8411	-373.475	-18766.5	9550.04	-3594.54	225.571	350.248	0	-10.7074	105.372	-352.289	-5897.28	14994.4	3847.78	242.563	919.74	0	0	0	0	0	0	0	603	903	0
550	5	48.7999	-63.2144	-386.293	-18766.5	10038.3	-2816.34	225.986	348.581	0	-12.3859	103.693	-344.965	-5714.17	14872.3	3618.9	243.113	919.565	0	0	0	0	0	0	0	603	903	0
550	6	49.1051	-64.8928	-398.805	-19682	10038.3	-3548.77	225.171	349.353	0	-13.3014	102.778	-339.167	-5805.73	14811.3	3847.78	243.67	920.118	0	0	0	0	0	0	0	603	903	0
550	7	49.7154	-67.9446	-414.674	-19590.5	9916.25	-3502.99	223.913	347.243	0	-13.6066	101.862	-330.927	-4981.75	13590.6	3802	241.068	918.054	0	0	0	0	0	0	0	603	903	0
550	8	48.9525	-72.0645	-431.764	-18858	11137	-3136.78	225.794	343.677	0	-11.9281	99.726	-325.434	-4707.09	13834.7	3527.34	242.512	917.464	0	0	0	0	0	0	0	603	903	0
550	9	52.3094	-76.3369	-443.055	-19132.7	11259	-2999.45	225.412	343.184	0	-12.0807	95.6061	-319.33	-4340.88	14078.9	3710.45	244.089	916.594	0	0	0	0	0	0	0	603	903	0
551	0	55.056	-76.4895	-456.483	-20048.2	10953.8	-3182.56	223.996	343.919	0	-12.5385	95.6061	-310.175	-4432.43	13407.5	3618.9	243.226	917.29	0	0	0	0	0	0	0	603	903	0
551	1	51.2413	-77.4051	-470.521	-18949.6	11686.3	-2816.34	224.837	340.274	0	-11.0126	94.8431	-303.766	-4523.99	12980.2	3344.24	242.731	917.893	0	0	0	0	0	0	0	603	903	0
551	2	48.6473	-80.4568	-484.559	-19773.6	11869.4	-2358.58	224.495	340.807	0	-12.0807	91.3336	-297.663	-3974.67	13041.3	3206.91	243.812	916.353	0	0	0	0	0	0	0	603	903	0
551	3	52.3094	-82.593	-493.715	-19956.7	11808.3	-2724.79	223.917	340.421	0	-11.1652	88.587	-290.644	-3791.57	13041.3	3390.01	244.87	916.045	0	0	0	0	0	0	0	603	903	0
551	4	54.2931	-85.3396	-509.279	-19498.9	12113.5	-2450.13	223.786	338.287	0	-11.1652	85.993	-283.625	-4157.78	12308.8	3252.69	243.398	917.659	0	0	0	0	0	0	0	603	903	0
551	5	53.8353	-89.1543	-521.18	-19590.5	12662.8	-2175.48	224.296	337.589	0	-12.691	83.5516	-275.69	-2784.49	12247.8	2794.92	244.426	913.1	0	0	0	0	0	0	0	603	903	0
551	6	53.225	-92.8164	-528.81	-20506	12418.7	-2633.24	223.484	338.778	0	-11.4703	80.9576	-266.23	-2876.04	12308.8	2886.47	246.234	913.803	0	0	0	0	0	0	0	603	903	0
551	7	54.2931	-92.969	-537.355	-20414.4	12479.7	-2541.69	223.224	337.991	0	-10.5548	79.8895	-262.263	-2967.59	11698.5	2794.92	244.606	914.315	0	0	0	0	0	0	0	603	903	0
551	8	52.9198	-94.0371	-545.9	-20231.3	13212.1	-2404.36	224.203	337.061	0	-9.79187	77.6007	-255.549	-2692.93	11210.2	2840.7	243.867	913.538	0	0	0	0	0	0	0	603	903	0
551	9	55.6664	-99.2251	-554.139	-20048.2	12968	-2358.58	223.402	336.179	0	-10.86	74.2438	-246.699	-2326.72	11210.2	2611.82	245.441	912.431	0	0	0	0	0	0	0	603	903	0
552	0	55.6664	-99.8355	-561.159	-19041.1	13090.1	-2312.8	223.327	333.932	0	-9.33411	72.7179	-240.595	-2509.83	11088.1	2337.16	246.086	913.432	0	0	0	0	0	0	0	603	903	0
552	1	54.4457	-99.2251	-563.6	-18766.5	13761.5	-2267.03	224.417	333.298	0	-12.3859	71.3446	-233.576	-2052.06	10783	2291.38	246.165	911.785	0	0	0	0	0	0	0	603	903	0
552	2	53.8353	-101.361	-567.567	-19041.1	13151.1	-2541.69	223.171	333.549	0	-11.4703	68.4454	-228.083	-1594.3	10477.8	2382.93	245.939	909.99	0	0	0	0	0	0	0	603	903	0
552	3	53.225	-103.345	-572.755	-19132.7	13090.1	-2358.58	222.855	333.405	0	-11.3177	65.5463	-220.759	-2052.06	9928.47	2337.16	244.974	912.296	0	0	0	0	0	0	0	603	903	0
552	4	50.631	-103.65	-575.807	-18491.8	13273.2	-2038.15	223.051	332.115	0	-11.1652	63.1049	-213.74	-1411.19	9806.4	2016.72	245.88	909.602	0	0	0	0	0	0	0	603	903	0
552	5	50.631	-101.667	-579.164	-18400.3	13334.2	-2129.7	223.023	331.77	0	-11.7755	60.2057	-207.636	-953.431	9501.23	2062.5	245.759	907.592	0	0	0	0	0	0	0	603	903	0
552	6	49.7154	-103.192	-580.385	-18034.1	13334.2	-2129.7	222.975	331.073	0	-10.86	56.0858	-200.617	-587.22	9196.05	2382.93	245.839	905.927	0	0	0	0	0	0	0	603	903	0
552	7	46.3585	-103.04	-583.742	-17027	13212.1	-2312.8	222.634	329.169	0	-10.2496	53.0341	-193.598	-1136.54	9135.02	1970.95	247.186	908.871	0	0	0	0	0	0	0	603	903	0
552	8	43.4593	-103.345	-586.183	-16935.4	13029	-2495.91	222.227	328.891	0	-11.7755	52.1185	-189.02	-1044.98	8951.91	1833.62	247.36	908.529	0	0	0	0	0	0	0	603	903	0
552	9	41.4757	-103.04	-587.404	-16935.4	12784.9	-2633.24	221.765	328.831	0	-10.86	51.203	-182.001	-37.9035	8402.59	2245.6	246.168	903.208	0	0	0	0	0	0	0	603	903	0
553	0	39.6446	-102.582	-588.624	-17576.3	12662.8	-2541.69	221.513	329.86	0	-9.94446	49.5245	-176.203	-404.114	7975.35	1513.18	245.262	905.294	0	0	0	0	0	0	0	603	903	0
553	1	37.3558	-103.04	-586.488	-16843.9	12540.8	-2267.03	221.383	328.72	0	-9.79187	47.5409	-170.405	-129.456	8280.52	1513.18	248.593	903.76	0	0	0	0	0	0	0	603	903	0
553	2	35.9825	-103.65	-587.098	-17027	12479.7	-2450.13	221.257	329.002	0	-10.4022	45.5573	-164.301	-221.009	7853.28	1604.74	247.798	904.345	0	0	0	0	0	0	0	603	903	0
553	3	33.0834	-101.361	-589.845	-15562.1	12601.8	-2404.36	221.365	326.383	0	-12.0807	42.6581	-157.587	-312.562	7426.03	1101.2	247.123	904.983	0	0	0	0	0	0	0	603	903	0
553	4	29.1161	-102.735	-584.657	-15470.6	12052.5	-2404.36	220.615	326.461	0	-12.0807	39.3011	-153.62	419.86	7181.89	1101.2	246.751	900.267	0	0	0	0	0	0	0	603	903	0
553	5	26.9798	-103.955	-586.793	-15562.1	12052.5	-2404.36	220.54	326.521	0	-10.4022	36.2494	-147.822	511.413	7548.1	918.091	251.062	899.54	0	0	0	0	0	0	0	603	903	0
553	6	24.8436	-103.04	-586.488	-15562.1	11869.4	-2312.8	220.238	326.534	0	-9.48669	34.5709	-143.244	511.413	6876.71	872.314	248.007	899.43	0	0	0	0	0	0	0	603	903	0
553	7	22.2496	-102.887	-584.657	-15195.9	11259	-2312.8	219.257	325.991	0	-10.86	30.2985	-138.666	145.202	6388.43	643.432	246.071	901.953	0	0	0	0	0	0	0	603	903	0
553	8	18.7401	-102.887	-584.962	-15104.4	11381.1	-2633.24	219.456	325.821	0	-9.02893	28.3148	-133.784	786.071	6266.36	826.538	246.84	897.124	0	0	0	0	0	0	0	603	903	0
553	9	16.2987	-103.04	-583.742	-14372	11442.1	-2633.24	219.601	324.62	0	-8.72375	26.7889	-127.07	877.624	6266.36	597.656	249.314	896.093	0	0	0	0	0	0	0	603	903	0
554	0	13.3995	-102.277	-582.521	-13731.1	11381.1	-2679.02	219.538	323.572	0	-6.12976	26.7889	-122.187	786.071	5961.19	643.432	248.787	896.567	0	0	0	0	0	0	0	603	903	0
554	1	12.9417	-103.498	-578.859	-13731.1	11014.9	-2541.69	219.029	323.721	0	-8.26599	27.7045	-117.609	694.518	5594.97	597.656	247.573	897.095	0	0	0	0	0	0	0	603	903	0
554	2	10.1952	-104.566	-574.586	-13273.3	10892.8	-2633.24	218.958	323.101	0	-7.50305	27.7045	-113.947	602.966	5594.97	597.656	249.102	897.708	0	0	0	0	0	0	0	603	903	0
554	3	8.5167	-103.65	-577.638	-13364.9	10709.7	-2404.36	218.541	323.137	0	-8.41858	27.0941	-106.318	694.518	5350.83	597.656	250.329	896.468	0	0	0	0	0	0	0	603	903	0
554	4	6.68564	-103.04	-578.248	-13364.9	10526.6	-2450.13	218.204	323.113	0	-7.35046	26.3312	-105.097	786.071	5167.73	689.209	249.171	895.521	0	0	0	0	0	0	0	603	903	0
554	5	4.702	-103.65	-577.028	-13273.3	10160.4	-2633.24	217.608	323.003	0	-6.28235	25.2631	-98.0779	419.86	5106.69	506.103	252.068	898.719	0	0	0	0	0	0	0	603	903	0
554	6	2.87095	-103.65	-571.534	-11991.6	10404.5	-2495.91	218.205	320.981	0	-6.58752	22.5165	-95.3314	877.624	5106.69	689.209	253.568	893.794	0	0	0	0	0	0	0	603	903	0
554	7	1.65024	-104.261	-573.366	-12174.7	10221.4	-2404.36	217.827	321.234	0	-7.50305	20.3802	-90.4485	602.966	4984.62	185.669	255.11	896.334	0	0	0	0	0	0	0	603	903	0
554	8	2.2606	-103.955	-572.755	-11991.6	10160.4	-2450.13	217.74	320.937	0	-6.43494	20.9906	-88.0071	786.071	4496.34	231.445	251.091	894.068	0	0	0	0	0	0	0	603	903	0
554	9	1.03989	-103.955	-575.197	-11442.3	10343.5	-1992.37	217.983	319.893	0	-4.29871	18.5492	-84.0398	786.071	4374.27	2.56305	252.05	893.646	0	0	0	0	0	0	0	603	903	0
555	0	-0.0282228	-104.871	-572.145	-12266.2	10160.4	-2175.48	217.758	321.439	0	-5.21423	15.65	-78.8519	145.202	4679.45	277.221	259.345	901.159	0	0	0	0	0	0	0	603	903	0
555	1	-1.5541	-103.803	-574.281	-11991.6	9550.04	-2083.92	216.63	320.881	0	-5.82458	14.5819	-76.7156	1060.73	4252.2	94.1158	255.428	889.173	0	0	0	0	0	0	0	603	903	0
555	2	-2.92739	-104.566	-573.06	-11350.7	9733.14	-2129.7	216.985	319.807	0	-4.29871	14.5819	-73.0535	419.86	3824.95	-43.2133	252.358	897.253	0	0	0	0	0	0	0	603	903	0
555	3	-2.92739	-105.176	-572.145	-11076.1	10099.4	-2038.15	217.652	319.359	0	-5.06165	12.1405	-72.4432	1243.83	3641.85	322.998	250.272	885.83	0	0	0	0	0	0	0	603	903	0
555	4	-3.07998	-105.481	-572.45	-9794.32	9855.21	-2083.92	217.216	317.109	0	-3.68835	10.7672	-69.6966	1243.83	3458.74	2.56305	249.626	885.154	0	0	0	0	0	0	0	603	903	0
555	5	-3.84292	-105.329	-575.807	-10343.6	9672.11	-2038.15	216.798	317.964	0	-3.99353	11.6827	-65.1189	969.177	3458.74	-88.9897	253.114	888.117	0	0	0	0	0	0	0	603	903	0
555	6	-4.91104	-105.786	-577.638	-10435.2	9489	-1626.16	216.427	318.065	0	-3.078	10.462	-62.0672	328.307	2848.39	-180.542	245.892	897.711	0	0	0	0	0	0	0	603	903	0
555	7	-3.23257	-106.549	-576.112	-10618.3	9916.25	-1900.82	217.212	318.431	0	-3.53577	10.3094	-59.0154	419.86	3153.57	-134.766	253.436	895.886	0	0	0	0	0	0	0	603	903	0
555	8	-5.21621	-105.023	-574.891	-10069	9305.9	-1671.94	216.187	317.515	0	-3.99353	9.54651	-55.6585	694.518	3092.53	-363.648	255.563	890.522	0	0	0	0	0	0	0	603	903	0
555	9	-5.21621	-105.023	-580.079	-9611.21	9427.97	-1397.28	216.253	316.569	0	-2.92541	10.0043	-53.2171	511.413	2238.04	-272.095	242.055	893.39	0	0	0	0	0	0	0	603	903	0
556	0	-4.75845	-105.329	-583.436	-9611.21	9427.97	-1214.17	216.159	316.473	0	-2.46765	8.78357	-51.0809	602.966	2238.04	-409.424	243.814	891.196	0	0	0	0	0	0	0	603	903	0
556	1	-5.82656	-105.786	-584.352	-9245	9305.9	-1168.4	215.925	315.821	0	-3.68835	8.78357	-47.4188	694.518	2787.36	-455.201	258.782	888.354	0	0	0	0	0	0	0	603	903	0
556	2	-4.60586	-104.871	-583.742	-9428.11	9061.76	-1031.07	215.524	316.151	0	-3.84094	8.32581	-41.6204	602.966	2665.29	-546.754	264.038	888.513	0	0	0	0	0	0	0	603	903	0
556	3	-5.82656	-105.329	-584.047	-9702.76	9550.04	-1031.07	216.352	316.613	0	-4.45129	6.34216	-42.8411	511.413	2238.04	368.774	252.24	891.063	0	0	0	0	0	0	0	603	903	0
556	4	-5.21621	-104.108	-591.676	-8695.68	9489	-710.631	216.037	314.697	0	-1.09436	6.95251	-41.0101	877.624	2054.94	-363.648	250.108	881.6	0	0	0	0	0	0	0	603	903	0
556	5	-4.60586	-103.803	-603.578	-7780.16	9427.97	-985.29	215.62	312.89	0	-1.39954	7.25769	-39.179	328.307	2177.01	-363.648	255.566	894.62	0	0	0	0	0	0	0	603	903	0
556	6	-8.11538	-104.261	-606.63	-7597.05	9427.97	-939.513	215.542	312.523	0	-2.00989	6.49475	-34.9066	602.966	2115.97	-272.095	260.618	885.726	0	0	0	0	0	0	0	603	903	0
556	7	-10.5568	-108.686	-603.578	-7047.73	9366.93	-1214.17	215.519	311.677	0	-1.8573	5.27405	-31.8548	53.6492	1688.72	-363.648	253.013	901.316	0	0	0	0	0	0	0	603	903	0
556	8	-14.9818	-107.923	-604.799	-7139.29	9305.9	-1214.17	215.387	311.804	0	-0.33142	5.8844	-32.7703	419.86	1505.62	-363.648	245.945	890.188	0	0	0	0	0	0	0	603	903	0
556	9	-14.6767	-105.023	-609.681	-6589.97	8939.69	-1214.17	214.663	310.809	0	-0.33142	5.57922	-31.8548	53.6492	1810.79	-43.2133	256.845	901.316	0	0	0	0	0	0	0	603	903	0
557	0	-15.287	-107.617	-618.226	-6773.08	9366.93	-1397.28	215.151	310.956	0	-0.33142	4.81628	-29.1082	-129.456	1810.79	-272.095	262.209	907.447	0	0	0	0	0	0	0	603	903	0
557	1	-17.2707	-111.89	-620.363	-6040.65	9244.86	-1122.62	214.902	309.737	0	-1.24695	2.68005	-26.0565	145.202	1444.58	-317.872	255.441	897.427	0	0	0	0	0	0	0	603	903	0
557	2	-14.8292	-112.195	-622.804	-6315.31	9183.83	-1031.07	214.746	310.14	0	-1.39954	3.44299	-24.2254	-221.009	1261.48	-455.201	252.073	912.123	0	0	0	0	0	0	0	603	903	0
557	3	-15.1344	-110.822	-626.466	-5491.34	8878.65	-847.961	214.173	308.766	0	-0.941772	3.59558	-22.0892	236.755	1444.58	-363.648	265.398	892.282	0	0	0	0	0	0	0	603	903	0
557	4	-12.3878	-113.263	-631.349	-5582.89	9611.07	-802.184	215.223	308.843	0	0.431519	3.44299	-20.8685	-129.456	1078.37	-409.424	251.675	909.203	0	0	0	0	0	0	0	603	903	0
557	5	-12.2353	-116.62	-635.011	-4484.26	9672.11	-481.75	215.231	307.062	0	0	0	0	0	0	0	200	903	0	0	0	0	0	0	0	603	903	0
557	6	-10.4042	-113.874	-636.537	-4484.26	9244.86	-802.184	214.524	307.045	0	0	0	0	0	0	0	200	903	0	0	0	0	0	0	0	603	903	0
557	7	-8.26797	-110.059	-640.199	-5125.13	10038.3	-756.408	215.68	308.006	0	0	0	0	0	0	0	200	903	0	0	0	0	0	0	0	603	903	0
557	8	-7.35244	-111.737	-644.166	-4484.26	10160.4	-619.079	215.773	306.961	0	0	0	0	0	0	0	200	903	0	0	0	0	0	0	0	603	903	0
557	9	-7.19985	-114.026	-644.166	-4301.15	10038.3	-298.644	215.583	306.677	0	0	0	0	0	0	0	200	903	0	0	0	0	0	0	0	603	903	0
558	0	-4.1481	-109.754	-646.303	-4392.7	10038.3	-390.197	215.532	306.797	0	0	0	0	0	0	0	200	903	0	0	0	0	0	0	0	603	903	0
558	1	-2.31704	-109.143	-649.965	-3568.73	10526.6	-252.868	216.196	305.491	0	0	0	0	0	0	0	200	903	0	0	0	0	0	0	0	603	903	0
558	2	-3.99551	-111.89	-648.744	-3110.97	10282.5	-161.315	215.85	304.795	0	0	0	0	0	0	0	200	903	0	0	0	0	0	0	0	603	903	0
558	3	-6.13174	-112.348	-649.965	-2927.86	9733.14	-252.868	214.975	304.505	0	0	0	0	0	0	0	200	903	0	0	0	0	0	0	0	603	903	0
558	4	-2.92739	-107.465	-649.659	-3202.52	10526.6	-298.644	216.203	304.93	0	0	0	0	0	0	0	200	903	0	0	0	0	0	0	0	603	903	0
558	5	-3.84292	-107.16	-653.322	-2286.99	10587.6	-344.421	216.206	303.501	0	0	0	0	0	0	0	200	903	0	0	0	0	0	0	0	603	903	0
558	6	-7.50503	-108.838	-655.458	-2836.31	10160.4	-527.526	215.501	304.327	0	0	0	0	0	0	0	200	903	0	0	0	0	0	0	0	603	903	0
558	7	-5.67397	-106.397	-653.627	-1920.78	10221.4	-344.421	215.638	302.939	0	0	0	0	0	0	0	200	903	0	0	0	0	0	0	0	603	903	0
558	8	-7.96279	-102.582	-653.932	-2286.99	10526.6	-161.315	216.097	303.497	0	0	0	0	0	0	0	200	903	0	0	0	0	0	0	0	603	903	0
558	9	-9.03091	-103.345	-655.458	-2378.54	10526.6	-252.868	216.06	303.629	0	0	0	0	0	0	0	200	903	0	0	0	0	0	0	0	603	903	0
559	0	-10.862	-105.176	-657.899	-1463.02	10099.4	-207.091	215.351	302.224	0	0	0	0	0	0	0	200	903	0	0	0	0	0	0	0	603	903	0
559	1	-12.0827	-101.361	-657.594	-2012.33	10465.6	-252.868	215.915	303.06	0	0	0	0	0	0	0	200	903	0	0	0	0	0	0	0	603	903	0
559	2	-12.693	-98.7674	-653.016	-913.699	10160.4	-390.197	215.559	301.399	0	0	0	0	0	0	0	200	903	0	0	0	0	0	0	0	603	903	0
559	3	-14.5241	-99.6829	-656.679	-1920.78	10099.4	-161.315	215.379	302.925	0	0	0	0	0	0	0	200	903	0	0	0	0	0	0	0	603	903	0
559	4	-14.8292	-99.9881	-657.289	-1096.8	10038.3	-69.7623	215.272	301.669	0	0	0	0	0	0	0	200	903	0	0	0	0	0	0	0	603	903	0
559	5	-15.1344	-97.5467	-658.204	-1188.36	10282.5	-69.7623	215.622	301.805	0	0	0	0	0	0	0	200	903	0	0	0	0	0	0	0	603	903	0
559	6	-15.8974	-96.6311	-659.12	-730.594	10526.6	-161.315	215.971	301.108	0	0	0	0	0	0	0	200	903	0	0	0	0	0	0	0	603	903	0
559	7	-16.05	-99.5303	-656.373	-639.041	9855.21	-69.7623	215.015	300.974	0	0	0	0	0	0	0	200	903	0	0	0	0	0	0	0	603	903	0
559	8	-18.3388	-97.5467	-658.815	-913.699	10221.4	-23.9859	215.515	301.387	0	0	0	0	0	0	0	200	903	0	0	0	0	0	0	0	603	903	0
559	9	-16.05	-94.4949	-659.425	-181.277	10038.3	67.5668	215.223	300.275	0	0	0	0	0	0	0	200	903	0	0	0	0	0	0	0	603	903	0
560	0	-15.7448	-95.1052	-660.035	-272.83	9794.18	159.12	214.839	300.413	0	0	0	0	0	0	0	200	903	0	0	0	0	0	0	0	603	903	0
560	1	-18.3388	-95.7156	-660.646	93.3808	10038.3	204.896	215.195	299.859	0	0	0	0	0	0	0	200	903	0	0	0	0	0	0	0	603	903	0
560	2	-17.2707	-94.3423	-659.425	551.144	9672.11	296.449	214.667	299.164	0	0	0	0	0	0	0	200	903	0	0	0	0	0	0	0	603	903	0
560	3	-16.5077	-92.969	-657.594	276.486	9794.18	250.672	214.894	299.58	0	0	0	0	0	0	0	200	903	0	0	0	0	0	0	0	603	903	0
560	4	-16.6603	-93.1216	-658.51	-181.277	9916.25	342.225	215.059	300.275	0	0	0	0	0	0	0	200	903	0	0	0	0	0	0	0	603	903	0
560	5	-15.8974	-93.732	-660.035	184.934	10038.3	250.672	215.209	299.72	0	0	0	0	0	0	0	200	903	0	0	0	0	0	0	0	603	903	0
560	6	-16.2025	-91.138	-662.172	368.039	10160.4	662.66	215.344	299.444	0	0	0	0	0	0	0	200	903	0	0	0	0	0	0	0	603	903	0
560	7	-16.6603	-88.8491	-658.815	917.356	9977.28	388.001	215.144	298.608	0	0	0	0	0	0	0	200	903	0	0	0	0	0	0	0	603	903	0
560	8	-16.9655	-90.0698	-656.373	917.356	10099.4	388.001	215.387	298.602	0	0	0	0	0	0	0	200	903	0	0	0	0	0	0	0	603	903	0
560	9	-15.287	-89.9173	-657.289	2015.99	9794.18	388.001	214.901	296.933	0	0	0	0	0	0	0	200	903	0	0	0	0	0	0	0	603	903	0
561	0	-15.7448	-89.1543	-658.204	1375.12	10099.4	754.213	215.344	297.911	0	0	0	0	0	0	0	200	903	0	0	0	0	0	0	0	603	903	0
561	1	-16.6603	-87.6284	-657.899	1192.01	9855.21	433.778	214.98	298.188	0	0	0	0	0	0	0	200	903	0	0	0	0	0	0	0	603	903	0
561	2	-16.5077	-87.4759	-656.373	1558.22	10343.5	754.213	215.759	297.626	0	0	0	0	0	0	0	200	903	0	0	0	0	0	0	0	603	903	0
561	3	-17.2707	-86.7129	-654.542	1832.88	10160.4	708.436	215.523	297.2	0	0	0	0	0	0	0	200	903	0	0	0	0	0	0	0	603	903	0
561	4	-16.2025	-84.5767	-654.542	2290.65	9794.18	479.554	214.963	296.5	0	0	0	0	0	0	0	200	903	0	0	0	0	0	0	0	603	903	0
561	5	-16.3551	-84.5767	-657.289	2565.3	9794.18	388.001	214.901	296.097	0	0	0	0	0	0	0	200	903	0	0	0	0	0	0	0	603	903	0
561	6	-18.0336	-85.187	-656.679	2748.41	10099.4	433.778	215.379	295.815	0	0	0	0	0	0	0	200	903	0	0	0	0	0	0	0	603	903	0
561	7	-18.6439	-85.187	-653.932	2839.96	9794.18	616.883	214.977	295.657	0	0	0	0	0	0	0	200	903	0	0	0	0	0	0	0	603	903	0
561	8	-16.5077	-82.8982	-654.847	2015.99	9733.14	616.883	214.863	296.921	0	0	0	0	0	0	0	200	903	0	0	0	0	0	0	0	603	903	0
561	9	-17.1181	-81.8301	-652.101	3206.17	9977.28	571.107	215.3	295.083	0	0	0	0	0	0	0	200	903	0	0	0	0	0	0	0	603	903	0
562	0	-17.4232	-81.5249	-652.406	2382.2	9794.18	433.778	215.012	296.349	0	0	0	0	0	0	0	200	903	0	0	0	0	0	0	0	603	903	0
562	1	-18.7965	-80.9146	-653.016	3206.17	9733.14	525.331	214.905	295.09	0	0	0	0	0	0	0	200	903	0	0	0	0	0	0	0	603	903	0
562	2	-18.3388	-79.8465	-649.354	3663.94	9733.14	525.331	214.989	294.358	0	0	0	0	0	0	0	200	903	0	0	0	0	0	0	0	603	903	0
562	3	-17.2707	-80.3042	-648.134	3389.28	10038.3	388.001	215.488	294.771	0	0	0	0	0	0	0	200	903	0	0	0	0	0	0	0	603	903	0
562	4	-16.8129	-80.3042	-648.744	3572.38	10038.3	342.225	215.473	294.493	0	0	0	0	0	0	0	200	903	0	0	0	0	0	0	0	603	903	0
562	5	-16.6603	-78.168	-642.64	3755.49	9794.18	891.542	215.241	294.156	0	0	0	0	0	0	0	200	903	0	0	0	0	0	0	0	603	903	0
562	6	-18.4914	-76.4895	-645.082	4762.57	9672.11	571.107	214.994	292.617	0	0	0	0	0	0	0	200	903	0	0	0	0	0	0	0	603	903	0
562	7	-18.3388	-76.6421	-644.471	3938.6	9672.11	708.436	215.008	293.889	0	0	0	0	0	0	0	200	903	0	0	0	0	0	0	0	603	903	0
562	8	-17.5758	-75.1162	-643.556	4945.68	9611.07	571.107	214.934	292.315	0	0	0	0	0	0	0	200	903	0	0	0	0	0	0	0	603	903	0
562	9	-17.1181	-74.8111	-645.082	4854.12	9672.11	708.436	214.994	292.475	0	0	0	0	0	0	0	200	903	0	0	0	0	0	0	0	603	903	0
563	0	-18.0336	-74.5059	-644.471	4671.02	9794.18	388.001	215.197	292.752	0	0	0	0	0	0	0	200	903	0	0	0	0	0	0	0	603	903	0
563	1	-16.05	-76.4895	-641.725	4762.57	10099.4	525.331	215.738	292.579	0	0	0	0	0	0	0	200	903	0	0	0	0	0	0	0	603	903	0
563	2	-18.7965	-73.5904	-639.894	4762.57	9794.18	616.883	215.306	292.557	0	0	0	0	0	0	0	200	903	0	0	0	0	0	0	0	603	903	0
563	3	-16.9655	-72.2171	-640.809	5403.44	9916.25	388.001	215.475	291.568	0	0	0	0	0	0	0	200	903	0	0	0	0	0	0	0	603	903	0
563	4	-16.9655	-72.0645	-641.115	5128.78	10038.3	388.001	215.658	292	0	0	0	0	0	0	0	200	903	0	0	0	0	0	0	0	603	903	0
563	5	-18.0336	-71.1489	-638.368	5678.1	10160.4	342.225	215.916	291.105	0	0	0	0	0	0	0	200	903	0	0	0	0	0	0	0	603	903	0
563	6	-16.5077	-69.7757	-635.011	5678.1	9427.97	433.778	214.847	291.058	0	0	0	0	0	0	0	200	903	0	0	0	0	0	0	0	603	903	0
563	7	-17.1181	-69.1653	-635.011	5678.1	10099.4	296.449	215.904	291.058	0	0	0	0	0	0	0	200	903	0	0	0	0	0	0	0	603	903	0
563	8	-16.8129	-70.0808	-633.18	6044.31	10160.4	388.001	216.047	290.454	0	0	0	0	0	0	0	200	903	0	0	0	0	0	0	0	603	903	0
563	9	-16.5077	-67.6394	-633.79	5861.2	9916.25	250.672	215.646	290.752	0	0	0	0	0	0	0	200	903	0	0	0	0	0	0	0	603	903	0
564	0	-18.0336	-65.6558	-632.875	6593.63	10038.3	342.225	215.861	289.582	0	0	0	0	0	0	0	200	903	0	0	0	0	0	0	0	603	903	0
564	1	-17.5758	-64.7403	-632.57	6502.07	10282.5	433.778	216.255	289.721	0	0	0	0	0	0	0	200	903	0	0	0	0	0	0	0	603	903	0
564	2	-18.1862	-64.5877	-629.518	6044.31	10282.5	250.672	216.334	290.398	0	0	0	0	0	0	0	200	903	0	0	0	0	0	0	0	603	903	0
564	3	-17.4232	-63.367	-628.908	6868.28	9916.25	67.5668	215.767	289.079	0	0	0	0	0	0	0	200	903	0	0	0	0	0	0	0	603	903	0
564	4	-16.6603	-63.0618	-629.213	7051.39	10160.4	296.449	216.148	288.793	0	0	0	0	0	0	0	200	903	0	0	0	0	0	0	0	603	903	0
564	5	-18.7965	-63.367	-628.602	6868.28	10343.5	250.672	216.455	289.074	0	0	0	0	0	0	0	200	903	0	0	0	0	0	0	0	603	903	0
564	6	-18.0336	-61.9937	-626.161	6776.73	9733.14	342.225	215.544	289.177	0	0	0	0	0	0	0	200	903	0	0	0	0	0	0	0	603	903	0
564	7	-17.4232	-60.773	-624.635	6868.28	10038.3	113.343	216.071	289.004	0	0	0	0	0	0	0	200	903	0	0	0	0	0	0	0	603	903	0
564	8	-16.2025	-59.5523	-622.804	7417.6	10526.6	571.107	216.902	288.09	0	0	0	0	0	0	0	200	903	0	0	0	0	0	0	0	603	903	0
564	9	-15.287	-59.8574	-622.499	7783.81	10038.3	342.225	216.126	287.496	0	0	0	0	0	0	0	200	903	0	0	0	0	0	0	0	603	903	0
565	0	-15.5922	-57.7212	-618.226	7875.36	9916.25	159.12	216.04	287.261	0	0	0	0	0	0	0	200	903	0	0	0	0	0	0	0	603	903	0
565	1	-16.6603	-56.9583	-618.837	8333.13	10282.5	296.449	216.616	286.534	0	0	0	0	0	0	0	200	903	0	0	0	0	0	0	0	603	903	0
565	2	-17.2707	-56.3479	-615.48	8058.47	10221.4	296.449	216.607	286.907	0	0	0	0	0	0	0	200	903	0	0	0	0	0	0	0	603	903	0
565	3	-15.7448	-55.8902	-614.259	8150.02	10099.4	-115.539	216.442	286.732	0	0	0	0	0	0	0	200	903	0	0	0	0	0	0	0	603	903	0
565	4	-14.0663	-55.7376	-615.175	8516.23	10099.4	-23.9859	216.417	286.156	0	0	0	0	0	0	0	200	903	0	0	0	0	0	0	0	603	903	0
565	5	-16.05	-54.2117	-613.344	8333.13	10465.6	159.12	217.063	286.414	0	0	0	0	0	0	0	200	903	0	0	0	0	0	0	0	603	903	0
565	6	-16.5077	-53.1436	-611.818	8333.13	10343.5	-115.539	216.906	286.38	0	0	0	0	0	0	0	200	903	0	0	0	0	0	0	0	603	903	0
565	7	-16.5077	-52.6858	-609.376	9157.1	9611.07	21.7904	215.772	284.973	0	0	0	0	0	0	0	200	903	0	0	0	0	0	0	0	603	903	0
565	8	-15.5922	-52.228	-606.63	9797.97	10465.6	67.5668	217.252	283.849	0	0	0	0	0	0	0	200	903	0	0	0	0	0	0	0	603	903	0
565	9	-15.8974	-51.7703	-602.052	9523.31	10038.3	296.449	216.674	284.182	0	0	0	0	0	0	0	200	903	0	0	0	0	0	0	0	603	903	0
566	0	-15.4396	-51.3125	-604.188	9157.1	10099.4	-23.9859	216.716	284.844	0	0	0	0	0	0	0	200	903	0	0	0	0	0	0	0	603	903	0
566	1	-16.2025	-50.397	-602.968	9340.21	10099.4	388.001	216.749	284.51	0	0	0	0	0	0	0	200	903	0	0	0	0	0	0	0	603	903	0
566	2	-16.3551	-49.4815	-600.221	9248.65	10282.5	67.5668	217.131	284.591	0	0	0	0	0	0	0	200	903	0	0	0	0	0	0	0	603	903	0
566	3	-14.6767	-50.0918	-598.39	9431.76	10343.5	342.225	217.286	284.238	0	0	0	0	0	0	0	200	903	0	0	0	0	0	0	0	603	903	0
566	4	-13.6085	-48.5659	-598.085	9981.08	9977.28	388.001	216.682	283.312	0	0	0	0	0	0	0	200	903	0	0	0	0	0	0	0	603	903	0
566	5	-14.9818	-48.5659	-593.507	10347.3	10282.5	159.12	217.325	282.566	0	0	0	0	0	0	0	200	903	0	0	0	0	0	0	0	603	903	0
566	6	-16.05	-47.3452	-594.117	10530.4	10343.5	-207.091	217.41	282.276	0	0	0	0	0	0	0	200	903	0	0	0	0	0	0	0	603	903	0
566	7	-15.8974	-47.0401	-590.455	10713.5	10404.5	-207.091	217.621	281.856	0	0	0	0	0	0	0	200	903	0	0	0	0	0	0	0	603	903	0
566	8	-14.6767	-47.0401	-587.709	10530.4	10343.5	-344.421	217.6	282.082	0	0	0	0	0	0	0	200	903	0	0	0	0	0	0	0	603	903	0
566	9	-14.0663	-45.0564	-587.709	11812.1	10465.6	-435.973	217.807	279.901	0	0	0	0	0	0	0	200	903	0	0	0	0	0	0	0	603	903	0
567	0	-14.8292	-44.9038	-586.488	10805.1	10465.6	-344.421	217.844	281.577	0	0	0	0	0	0	0	200	903	0	0	0	0	0	0	0	603	903	0
567	1	-13.6085	-44.9038	-583.436	10621.9	10343.5	-435.973	217.729	281.794	0	0	0	0	0	0	0	200	903	0	0	0	0	0	0	0	603	903	0
567	2	-15.4396	-44.1409	-580.69	11629	10160.4	-481.75	217.497	279.974	0	0	0	0	0	0	0	200	903	0	0	0	0	0	0	0	603	903	0
567	3	-13.7611	-44.1409	-578.859	12361.5	9733.14	-390.197	216.814	278.645	0	0	0	0	0	0	0	200	903	0	0	0	0	0	0	0	603	903	0
567	4	-13.9137	-43.3779	-579.164	11537.5	9916.25	-390.197	217.122	280.079	0	0	0	0	0	0	0	200	903	0	0	0	0	0	0	0	603	903	0
567	5	-15.1344	-43.0728	-577.028	11079.7	10404.5	-435.973	218.031	280.799	0	0	0	0	0	0	0	200	903	0	0	0	0	0	0	0	603	903	0
567	6	-12.9982	-42.3098	-573.976	11171.3	10404.5	-390.197	218.127	280.537	0	0	0	0	0	0	0	200	903	0	0	0	0	0	0	0	603	903	0
567	7	-14.6767	-40.9365	-571.229	11995.2	10648.7	-481.75	218.642	279.001	0	0	0	0	0	0	0	200	903	0	0	0	0	0	0	0	603	903	0
567	8	-13.7611	-40.6314	-570.314	11720.6	10282.5	-344.421	218.029	279.449	0	0	0	0	0	0	0	200	903	0	0	0	0	0	0	0	603	903	0
567	9	-13.1508	-38.9529	-569.093	11995.2	10343.5	-664.855	218.175	278.922	0	0	0	0	0	0	0	200	903	0	0	0	0	0	0	0	603	903	0
568	0	-14.2189	-39.1055	-567.567	12727.7	10526.6	-710.631	218.547	277.575	0	0	0	0	0	0	0	200	903	0	0	0	0	0	0	0	603	903	0
568	1	-14.6767	-38.8003	-560.853	12727.7	10587.6	-710.631	218.878	277.307	0	0	0	0	0	0	0	200	903	0	0	0	0	0	0	0	603	903	0
568	2	-14.0663	-38.4951	-562.074	13002.3	10465.6	-619.079	218.62	276.867	0	0	0	0	0	0	0	200	903	0	0	0	0	0	0	0	603	903	0
568	3	-12.9982	-38.19	-560.853	13917.8	10709.7	-710.631	219.095	275.185	0	0	0	0	0	0	0	200	903	0	0	0	0	0	0	0	603	903	0
568	4	-13.1508	-37.427	-559.938	13093.9	10526.6	-847.961	218.8	276.616	0	0	0	0	0	0	0	200	903	0	0	0	0	0	0	0	603	903	0
568	5	-13.9137	-35.4434	-559.022	13551.6	10465.6	-710.631	218.721	275.758	0	0	0	0	0	0	0	200	903	0	0	0	0	0	0	0	603	903	0
568	6	-12.3878	-35.596	-555.665	13368.5	10282.5	-573.302	218.505	275.941	0	0	0	0	0	0	0	200	903	0	0	0	0	0	0	0	603	903	0
568	7	-14.5241	-35.2908	-553.834	13917.8	10343.5	-619.079	218.676	274.87	0	0	0	0	0	0	0	200	903	0	0	0	0	0	0	0	603	903	0
568	8	-12.8456	-34.5279	-551.088	13917.8	10465.6	-619.079	218.991	274.745	0	0	0	0	0	0	0	200	903	0	0	0	0	0	0	0	603	903	0
568	9	-12.9982	-34.0701	-552.003	14192.5	10282.5	-527.526	218.628	274.289	0	0	0	0	0	0	0	200	903	0	0	0	0	0	0	0	603	903	0
569	0	-12.9982	-35.596	-549.562	14101	10465.6	-939.513	219.043	274.341	0	0	0	0	0	0	0	200	903	0	0	0	0	0	0	0	603	903	0
569	1	-11.7775	-33.1546	-547.12	14009.4	10465.6	-802.184	219.128	274.394	0	0	0	0	0	0	0	200	903	0	0	0	0	0	0	0	603	903	0
569	2	-12.9982	-32.239	-541.932	14650.3	10526.6	-847.961	219.424	272.967	0	0	0	0	0	0	0	200	903	0	0	0	0	0	0	0	603	903	0
569	3	-11.9301	-32.239	-542.848	14009.4	10343.5	-710.631	219.054	274.193	0	0	0	0	0	0	0	200	903	0	0	0	0	0	0	0	603	903	0
569	4	-10.862	-31.4761	-541.932	14833.4	10587.6	-1122.62	219.537	272.629	0	0	0	0	0	0	0	200	903	0	0	0	0	0	0	0	603	903	0
569	5	-12.9982	-31.3235	-540.101	14924.9	10648.7	-802.184	219.716	272.366	0	0	0	0	0	0	0	200	903	0	0	0	0	0	0	0	603	903	0
569	6	-12.9982	-30.8657	-536.439	15291.1	10282.5	-710.631	219.168	271.495	0	0	0	0	0	0	0	200	903	0	0	0	0	0	0	0	603	903	0
569	7	-12.5404	-30.8657	-536.439	15291.1	10587.6	-664.855	219.737	271.495	0	0	0	0	0	0	0	200	903	0	0	0	0	0	0	0	603	903	0
569	8	-11.1671	-29.645	-537.965	15657.3	10770.7	-847.961	220.021	270.895	0	0	0	0	0	0	0	200	903	0	0	0	0	0	0	0	603	903	0
569	9	-10.862	-29.9502	-535.524	15657.3	10587.6	-847.961	219.771	270.763	0	0	0	0	0	0	0	200	903	0	0	0	0	0	0	0	603	903	0
570	0	-12.5404	-27.9666	-533.388	15748.9	10099.4	-1076.84	218.934	270.474	0	0	0	0	0	0	0	200	903	0	0	0	0	0	0	0	603	903	0
570	1	-12.2353	-26.8985	-530.336	15565.8	10648.7	-847.961	220.079	270.649	0	0	0	0	0	0	0	200	903	0	0	0	0	0	0	0	603	903	0
570	2	-11.6249	-26.4407	-529.115	16206.7	10831.8	-939.513	220.471	269.37	0	0	0	0	0	0	0	200	903	0	0	0	0	0	0	0	603	903	0
570	3	-10.5568	-27.5088	-526.674	16206.7	10343.5	-939.513	219.639	269.228	0	0	0	0	0	0	0	200	903	0	0	0	0	0	0	0	603	903	0
570	4	-10.7094	-26.1355	-527.284	16572.9	10587.6	-847.961	220.08	268.569	0	0	0	0	0	0	0	200	903	0	0	0	0	0	0	0	603	903	0
570	5	-11.0146	-27.6614	-525.148	16664.4	10831.8	-985.29	220.626	268.267	0	0	0	0	0	0	0	200	903	0	0	0	0	0	0	0	603	903	0
570	6	-11.1671	-26.2881	-521.486	16298.2	10587.6	-985.29	220.303	268.747	0	0	0	0	0	0	0	200	903	0	0	0	0	0	0	0	603	903	0
570	7	-10.2516	-24.9148	-519.96	16756	10526.6	-985.29	220.245	267.775	0	0	0	0	0	0	0	200	903	0	0	0	0	0	0	0	603	903	0
570	8	-9.79385	-23.8467	-519.044	17030.6	10587.6	-893.737	220.398	267.188	0	0	0	0	0	0	0	200	903	0	0	0	0	0	0	0	603	903	0
570	9	-9.79385	-23.8467	-517.518	16847.5	10709.7	-1031.07	220.694	267.446	0	0	0	0	0	0	0	200	903	0	0	0	0	0	0	0	603	903	0
571	0	-11.0146	-22.626	-517.824	17488.4	10587.6	-1076.84	220.446	266.227	0	0	0	0	0	0	0	200	903	0	0	0	0	0	0	0	603	903	0
571	1	-11.0146	-22.626	-514.467	18129.3	10587.6	-893.737	220.58	264.761	0	0	0	0	0	0	0	200	903	0	0	0	0	0	0	0	603	903	0
571	2	-11.0146	-22.626	-514.161	17946.2	10709.7	-1031.07	220.829	265.096	0	0	0	0	0	0	0	200	903	0	0	0	0	0	0	0	603	903	0
571	3	-9.64126	-23.8467	-510.194	18312.4	10709.7	-1214.17	220.991	264.107	0	0	0	0	0	0	0	200	903	0	0	0	0	0	0	0	603	903	0
571	4	-10.099	-21.5579	-512.636	18129.3	10404.5	-985.29	220.296	264.635	0	0	0	0	0	0	0	200	903	0	0	0	0	0	0	0	603	903	0
571	5	-10.7094	-20.4898	-509.889	18495.5	10770.7	-1168.4	221.124	263.726	0	0	0	0	0	0	0	200	903	0	0	0	0	0	0	0	603	903	0
571	6	-10.099	-20.4898	-507.142	18129.3	10465.6	-1031.07	220.636	264.252	0	0	0	0	0	0	0	200	903	0	0	0	0	0	0	0	603	903	0
571	7	-8.72573	-19.8794	-506.837	19319.5	10282.5	-1122.62	220.288	261.882	0	0	0	0	0	0	0	200	903	0	0	0	0	0	0	0	603	903	0
571	8	-7.96279	-21.2527	-505.922	19319.5	10526.6	-802.184	220.807	261.813	0	0	0	0	0	0	0	200	903	0	0	0	0	0	0	0	603	903	0
571	9	-8.87832	-19.4217	-503.175	19227.9	10648.7	-985.29	221.163	261.787	0	0	0	0	0	0	0	200	903	0	0	0	0	0	0	0	603	903	0
572	0	-9.33608	-19.2691	-503.48	19685.7	10709.7	-847.961	221.271	260.901	0	0	0	0	0	0	0	200	903	0	0	0	0	0	0	0	603	903	0
572	1	-9.64126	-18.6587	-499.818	19411	10465.6	-1076.84	220.939	261.164	0	0	0	0	0	0	0	200	903	0	0	0	0	0	0	0	603	903	0
572	2	-8.72573	-17.5906	-497.987	19411	10648.7	-1168.4	221.383	261.021	0	0	0	0	0	0	0	200	903	0	0	0	0	0	0	0	603	903	0
572	3	-8.42056	-17.2854	-497.682	19868.8	10526.6	-1259.95	221.151	260.077	0	0	0	0	0	0	0	200	903	0	0	0	0	0	0	0	603	903	0
572	4	-8.87832	-16.6751	-493.409	20418.1	10587.6	-1168.4	221.458	258.618	0	0	0	0	0	0	0	200	903	0	0	0	0	0	0	0	603	903	0
572	5	-10.2516	-16.6751	-495.851	20601.2	10343.5	-985.29	220.86	258.453	0	0	0	0	0	0	0	200	903	0	0	0	0	0	0	0	603	903	0
572	6	-9.64126	-16.6751	-493.104	20509.6	10587.6	-1076.84	221.471	258.407	0	0	0	0	0	0	0	200	903	0	0	0	0	0	0	0	603	903	0
572	7	-8.57314	-18.2009	-490.968	20784.3	10587.6	-1259.95	221.565	257.667	0	0	0	0	0	0	0	200	903	0	0	0	0	0	0	0	603	903	0
572	8	-8.72573	-16.5225	-490.968	20784.3	10221.4	-1443.05	220.819	257.667	0	0	0	0	0	0	0	200	903	0	0	0	0	0	0	0	603	903	0
572	9	-9.1835	-15.4544	-490.358	20967.4	10404.5	-1168.4	221.218	257.241	0	0	0	0	0	0	0	200	903	0	0	0	0	0	0	0	603	903	0
573	0	-9.48867	-14.9966	-486.39	21425.2	10709.7	-985.29	222.019	255.951	0	0	0	0	0	0	0	200	903	0	0	0	0	0	0	0	603	903	0
573	1	-9.64126	-15.4544	-485.17	21425.2	10099.4	-939.513	220.816	255.84	0	0	0	0	0	0	0	200	903	0	0	0	0	0	0	0	603	903	0
573	2	-7.81021	-14.6914	-482.728	21974.5	10282.5	-1168.4	221.301	254.479	0	0	0	0	0	0	0	200	903	0	0	0	0	0	0	0	603	903	0
573	3	-7.50503	-14.844	-485.17	22523.8	10526.6	-802.184	221.697	253.575	0	0	0	0	0	0	0	200	903	0	0	0	0	0	0	0	603	903	0
573	4	-8.87832	-14.9966	-483.949	22340.7	10709.7	-985.29	222.13	253.837	0	0	0	0	0	0	0	200	903	0	0	0	0	0	0	0	603	903	0
573	5	-9.64126	-14.5388	-480.287	21699.8	9855.21	-1122.62	220.519	254.819	0	0	0	0	0	0	0	200	903	0	0	0	0	0	0	0	603	903	0
573	6	-9.79385	-12.7078	-478.761	22890	10587.6	-1351.5	222.115	252.189	0	0	0	0	0	0	0	200	903	0	0	0	0	0	0	0	603	903	0
573	7	-8.72573	-13.1655	-478.761	22340.7	10770.7	-985.29	222.497	253.336	0	0	0	0	0	0	0	200	903	0	0	0	0	0	0	0	603	903	0
573	8	-8.87832	-13.3181	-477.54	23164.7	10221.4	-985.29	221.404	251.492	0	0	0	0	0	0	0	200	903	0	0	0	0	0	0	0	603	903	0
573	9	-9.1835	-13.9285	-476.625	23622.4	10648.7	-985.29	222.342	250.438	0	0	0	0	0	0	0	200	903	0	0	0	0	0	0	0	603	903	0
574	0	-7.50503	-13.3181	-474.183	23988.6	9855.21	-1168.4	220.784	249.411	0	0	0	0	0	0	0	200	903	0	0	0	0	0	0	0	603	903	0
574	1	-11.1671	-13.4707	-471.742	23347.8	10221.4	-985.29	221.667	250.507	0	0	0	0	0	0	0	200	903	0	0	0	0	0	0	0	603	903	0
574	2	-8.72573	-12.8604	-471.132	23897.1	9977.28	-1076.84	221.177	249.277	0	0	0	0	0	0	0	200	903	0	0	0	0	0	0	0	603	903	0
574	3	-8.57314	-12.0974	-472.047	24171.8	10526.6	-1076.84	222.3	248.794	0	0	0	0	0	0	0	200	903	0	0	0	0	0	0	0	603	903	0
574	4	-9.94644	-12.25	-472.047	24263.3	10160.4	-1122.62	221.524	248.6	0	0	0	0	0	0	0	200	903	0	0	0	0	0	0	0	603	903	0
574	5	-8.42056	-12.0974	-467.164	24812.6	10160.4	-1305.72	221.749	246.887	0	0	0	0	0	0	0	200	903	0	0	0	0	0	0	0	603	903	0
574	6	-10.2516	-12.5552	-466.859	24995.7	10282.5	-1259.95	222.025	246.46	0	0	0	0	0	0	0	200	903	0	0	0	0	0	0	0	603	903	0
574	7	-8.87832	-13.9285	-465.944	25545	10404.5	-1259.95	222.33	245.176	0	0	0	0	0	0	0	200	903	0	0	0	0	0	0	0	603	903	0
574	8	-9.03091	-12.4026	-466.554	24904.2	10099.4	-1259.95	221.647	246.621	0	0	0	0	0	0	0	200	903	0	0	0	0	0	0	0	603	903	0
574	9	-9.33608	-11.3345	-465.638	25545	10282.5	-1534.61	222.082	245.14	0	0	0	0	0	0	0	200	903	0	0	0	0	0	0	0	603	903	0
575	0	-9.79385	-12.0974	-460.451	26002.8	10404.5	-1488.83	222.596	243.527	0	0	0	0	0	0	0	200	903	0	0	0	0	0	0	0	603	903	0
575	1	-9.94644	-11.6397	-461.366	26643.7	10038.3	-1534.61	221.758	242.25	0	0	0	0	0	0	0	200	903	0	0	0	0	0	0	0	603	903	0
575	2	-9.03091	-12.4026	-461.671	27009.9	10099.4	-1397.28	221.876	241.495	0	0	0	0	0	0	0	200	903	0	0	0	0	0	0	0	603	903	0
575	3	-9.1835	-11.4871	-462.892	27742.3	9916.25	-1351.5	221.422	240.067	0	0	0	0	0	0	0	200	903	0	0	0	0	0	0	0	603	903	0
575	4	-9.64126	-11.3345	-458.009	27284.5	10221.4	-1488.83	222.317	240.428	0	0	0	0	0	0	0	200	903	0	0	0	0	0	0	0	603	903	0
575	5	-9.64126	-11.3345	-460.145	27467.7	9794.18	-1488.83	221.285	240.307	0	0	0	0	0	0	0	200	903	0	0	0	0	0	0	0	603	903	0
575	6	-9.48867	-10.419	-458.314	27193	9977.28	-1397.28	221.77	240.667	0	0	0	0	0	0	0	200	903	0	0	0	0	0	0	0	603	903	0
575	7	-9.03091	-11.7923	-458.314	27833.9	9916.25	-1305.72	221.636	239.269	0	0	0	0	0	0	0	200	903	0	0	0	0	0	0	0	603	903	0
575	8	-8.42056	-9.9612	-458.009	28749.4	9977.28	-1214.17	221.784	237.23	0	0	0	0	0	0	0	200	903	0	0	0	0	0	0	0	603	903	0
575	9	-10.2516	-10.419	-455.263	29207.2	10038.3	-1443.05	222.05	235.845	0	0	0	0	0	0	0	200	903	0	0	0	0	0	0	0	603	903	0
576	0	-9.64126	-10.7241	-456.788	29390.3	10526.6	-1397.28	223.045	235.659	0	0	0	0	0	0	0	200	903	0	0	0	0	0	0	0	603	903	0
576	1	-9.79385	-10.2664	-454.347	29848	10282.5	-1443.05	222.631	234.306	0	0	0	0	0	0	0	200	903	0	0	0	0	0	0	0	603	903	0
576	2	-8.42056	-9.80861	-453.737	29481.8	10160.4	-1626.16	222.393	235.024	0	0	0	0	0	0	0	200	903	0	0	0	0	0	0	0	603	903	0
576	3	-8.42056	-9.65603	-455.263	29207.2	10221.4	-1443.05	222.452	235.845	0	0	0	0	0	0	0	200	903	0	0	0	0	0	0	0	603	903	0
576	4	-8.57314	-10.7241	-448.549	30122.7	10038.3	-1580.38	222.38	232.844	0	0	0	0	0	0	0	200	903	0	0	0	0	0	0	0	603	903	0
576	5	-9.33608	-9.19826	-454.652	31038.2	9855.21	-1626.16	221.676	231.732	0	0	0	0	0	0	0	200	903	0	0	0	0	0	0	0	603	903	0
576	6	-9.94644	-8.89309	-451.906	31953.7	9794.18	-1351.5	221.673	229.291	0	0	0	0	0	0	0	200	903	0	0	0	0	0	0	0	603	903	0
576	7	-9.79385	-9.65603	-452.516	31404.4	10221.4	-1443.05	222.588	230.6	0	0	0	0	0	0	0	200	903	0	0	0	0	0	0	0	603	903	0
576	8	-9.1835	-9.04567	-452.821	31770.6	9916.25	-1397.28	221.899	229.838	0	0	0	0	0	0	0	200	903	0	0	0	0	0	0	0	603	903	0
576	9	-9.03091	-8.89309	-447.328	31770.6	9855.21	-1443.05	222.031	228.977	0	0	0	0	0	0	0	200	903	0	0	0	0	0	0	0	603	903	0
577	0	-11.3197	-7.97756	-452.211	32136.8	9977.28	-1488.83	222.063	228.934	0	0	0	0	0	0	0	200	903	0	0	0	0	0	0	0	603	903	0
577	1	-10.5568	-9.04567	-450.38	31953.7	10099.4	-1305.72	222.424	229.052	0	0	0	0	0	0	0	200	903	0	0	0	0	0	0	0	603	903	0
577	2	-10.099	-7.97756	-449.769	33418.6	9855.21	-1168.4	221.912	225.698	0	0	0	0	0	0	0	200	903	0	0	0	0	0	0	0	603	903	0
577	3	-8.42056	-8.89309	-450.38	33510.1	9977.28	-1259.95	222.153	225.596	0	0	0	0	0	0	0	200	903	0	0	0	0	0	0	0	603	903	0
577	4	-10.2516	-8.43532	-451.6	33601.7	9611.07	-1305.72	221.282	225.594	0	0	0	0	0	0	0	200	903	0	0	0	0	0	0	0	603	903	0
577	5	-11.0146	-8.58791	-451.6	33967.9	10160.4	-985.29	222.499	224.783	0	0	0	0	0	0	0	200	903	0	0	0	0	0	0	0	603	903	0
577	6	-11.4723	-8.58791	-448.854	34151	9977.28	-1168.4	222.228	223.915	0	0	0	0	0	0	0	200	903	0	0	0	0	0	0	0	603	903	0
577	7	-10.5568	-7.36721	-448.243	34334.1	10160.4	-985.29	222.667	223.403	0	0	0	0	0	0	0	200	903	0	0	0	0	0	0	0	603	903	0
577	8	-10.5568	-7.21462	-450.685	34883.4	10038.3	-1443.05	222.273	222.599	0	0	0	0	0	0	0	200	903	0	0	0	0	0	0	0	603	903	0
577	9	-11.1671	-6.90944	-447.023	35798.9	9672.11	-1076.84	221.637	219.917	0	0	0	0	0	0	0	200	903	0	0	0	0	0	0	0	603	903	0
578	0	-11.9301	-7.67238	-450.38	36256.7	10160.4	-1626.16	222.56	219.497	0	0	0	0	0	0	0	200	903	0	0	0	0	0	0	0	603	903	0
578	1	-12.8456	-8.7405	-449.769	36531.4	10221.4	-1626.16	222.726	218.778	0	0	0	0	0	0	0	200	903	0	0	0	0	0	0	0	603	903	0
578	2	-11.6249	-7.5198	-450.075	36073.6	9855.21	-1397.28	221.897	219.85	0	0	0	0	0	0	0	200	903	0	0	0	0	0	0	0	603	903	0
578	3	-12.0827	-6.45168	-452.211	36714.5	9916.25	-1534.61	221.928	218.811	0	0	0	0	0	0	0	200	903	0	0	0	0	0	0	0	603	903	0
578	4	-11.7775	-6.75686	-449.464	36989.1	10099.4	-1397.28	222.47	217.704	0	0	0	0	0	0	0	200	903	0	0	0	0	0	0	0	603	903	0
578	5	-12.693	-6.60427	-452.211	37904.7	9977.28	-1534.61	222.063	216.179	0	0	0	0	0	0	0	200	903	0	0	0	0	0	0	0	603	903	0
578	6	-12.5404	-7.36721	-450.075	38728.6	9427.97	-1443.05	220.948	213.951	0	0	0	0	0	0	0	200	903	0	0	0	0	0	0	0	603	903	0
578	7	-11.7775	-6.45168	-450.99	38454	10160.4	-1351.5	222.529	214.734	0	0	0	0	0	0	0	200	903	0	0	0	0	0	0	0	603	903	0
578	8	-11.3197	-6.75686	-452.821	38728.6	10282.5	-1488.83	222.708	214.473	0	0	0	0	0	0	0	200	903	0	0	0	0	0	0	0	603	903	0
578	9	-12.0827	-6.1465	-448.243	39186.4	9855.21	-1626.16	221.986	212.578	0	0	0	0	0	0	0	200	903	0	0	0	0	0	0	0	603	903	0
579	0	-12.8456	-6.60427	-454.347	39461.1	9855.21	-1488.83	221.691	213.148	0	0	0	0	0	0	0	200	903	0	0	0	0	0	0	0	603	903	0
579	1	-13.1508	-5.68874	-453.431	40376.6	10160.4	-1763.49	222.408	210.953	0	0	0	0	0	0	0	200	903	0	0	0	0	0	0	0	603	903	0
579	2	-12.9982	-7.21462	-452.821	40468.1	9916.25	-1580.38	221.899	210.631	0	0	0	0	0	0	0	200	903	0	0	0	0	0	0	0	603	903	0
579	3	-12.8456	-5.68874	-455.568	41292.1	9916.25	-1717.71	221.767	209.361	0	0	0	0	0	0	0	200	903	0	0	0	0	0	0	0	603	903	0
579	4	-14.2189	-5.38356	-456.483	41017.5	10282.5	-1626.16	222.525	210.145	0	0	0	0	0	0	0	200	903	0	0	0	0	0	0	0	603	903	0
579	5	-11.1671	-6.29909	-454.957	41475.2	9977.28	-1580.38	221.93	208.837	0	0	0	0	0	0	0	200	903	0	0	0	0	0	0	0	603	903	0
579	6	-13.7611	-4.01027	-454.957	41658.3	9916.25	-1580.38	221.796	208.435	0	0	0	0	0	0	0	200	903	0	0	0	0	0	0	0	603	903	0
579	7	-12.5404	-3.7051	-456.788	41749.9	9672.11	-1809.26	221.174	208.601	0	0	0	0	0	0	0	200	903	0	0	0	0	0	0	0	603	903	0
579	8	-12.9982	-3.55251	-458.619	43031.6	9977.28	-1443.05	221.755	206.171	0	0	0	0	0	0	0	200	903	0	0	0	0	0	0	0	603	903	0
579	9	-14.0663	-4.62063	-459.535	43214.7	9733.14	-1351.5	221.18	205.96	0	0	0	0	0	0	0	200	903	0	0	0	0	0	0	0	603	903	0
580	0	-13.7611	-4.01027	-458.925	43855.6	10038.3	-1717.71	221.874	204.438	0	0	0	0	0	0	0	200	903	0	0	0	0	0	0	0	603	903	0
580	1	-11.9301	-4.62063	-461.061	43672.5	10160.4	-1214.17	222.037	205.278	0	0	0	0	0	0	0	200	903	0	0	0	0	0	0	0	603	903	0
580	2	-12.693	-2.63698	-457.094	43855.6	10038.3	-1305.72	221.961	204.056	0	0	0	0	0	0	0	200	903	0	0	0	0	0	0	0	603	903	0
580	3	-11.7775	-2.63698	-462.587	44221.8	9611.07	-1717.71	220.777	204.403	0	0	0	0	0	0	0	200	903	0	0	0	0	0	0	0	603	903	0
580	4	-12.5404	-2.94216	-461.976	45412	10404.5	-1809.26	222.522	201.701	0	0	0	0	0	0	0	200	903	0	0	0	0	0	0	0	603	903	0
580	5	-12.3878	-2.4844	-461.366	45412	10221.4	-1809.26	222.155	201.571	0	0	0	0	0	0	0	200	903	0	0	0	0	0	0	0	603	903	0
580	6	-11.0146	-1.87404	-461.671	46236	10038.3	-1809.26	221.743	199.851	0	0	0	0	0	0	0	200	903	0	0	0	0	0	0	0	603	903	0
580	7	-9.33608	-2.33181	-464.113	45961.3	10160.4	-1900.82	221.892	200.969	0	0	0	0	0	0	0	200	903	0	0	0	0	0	0	0	603	903	0
580	8	-11.3197	-1.41628	-462.587	46419.1	10221.4	-1900.82	222.096	199.653	0	0	0	0	0	0	0	200	903	0	0	0	0	0	0	0	603	903	0
580	9	-11.1671	-1.1111	-467.164	46968.4	10465.6	-1855.04	222.402	199.461	0	0	0	0	0	0	0	200	903	0	0	0	0	0	0	0	603	903	0
581	0	-10.7094	-1.26369	-466.249	48158.6	9916.25	-1717.71	221.268	196.711	0	0	0	0	0	0	0	200	903	0	0	0	0	0	0	0	603	903	0
581	1	-9.94644	-1.72146	-465.333	48250.1	10343.5	-2267.03	222.228	196.311	0	0	0	0	0	0	0	200	903	0	0	0	0	0	0	0	603	903	0
581	2	-10.2516	-1.26369	-468.69	48341.7	10282.5	-2038.15	221.939	196.858	0	0	0	0	0	0	0	200	903	0	0	0	0	0	0	0	603	903	0
581	3	-9.48867	-1.56887	-467.775	48433.2	10160.4	-1946.59	221.721	196.46	0	0	0	0	0	0	0	200	903	0	0	0	0	0	0	0	603	903	0
581	4	-10.5568	-1.26369	-471.437	48891	10038.3	-1763.49	221.293	196.294	0	0	0	0	0	0	0	200	903	0	0	0	0	0	0	0	603	903	0
581	5	-10.099	-0.500753	-470.826	49074.1	10587.6	-1992.37	222.487	195.77	0	0	0	0	0	0	0	200	903	0	0	0	0	0	0	0	603	903	0
581	6	-8.57314	0.262187	-473.573	49989.6	10160.4	-1855.04	221.455	194.442	0	0	0	0	0	0	0	200	903	0	0	0	0	0	0	0	603	903	0
581	7	-8.72573	0.567363	-474.794	50447.4	10343.5	-1900.82	221.785	193.749	0	0	0	0	0	0	0	200	903	0	0	0	0	0	0	0	603	903	0
581	8	-9.64126	0.719951	-476.014	50905.2	10465.6	-1946.59	221.986	193.06	0	0	0	0	0	0	0	200	903	0	0	0	0	0	0	0	603	903	0
581	9	-9.48867	1.94065	-473.878	51088.3	10160.4	-2358.58	221.441	192.191	0	0	0	0	0	0	0	200	903	0	0	0	0	0	0	0	603	903	0
582	0	-9.94644	2.09324	-475.709	51362.9	10526.6	-2129.7	222.128	192.029	0	0	0	0	0	0	0	200	903	0	0	0	0	0	0	0	603	903	0
582	1	-9.1835	2.70359	-477.846	52736.2	10404.5	-2175.48	221.774	189.638	0	0	0	0	0	0	0	200	903	0	0	0	0	0	0	0	603	903	0
582	2	-9.33608	2.70359	-481.202	52736.2	10160.4	-2083.92	221.115	190.407	0	0	0	0	0	0	0	200	903	0	0	0	0	0	0	0	603	903	0
582	3	-9.48867	3.00877	-481.508	53560.2	10221.4	-2312.8	221.228	188.766	0	0	0	0	0	0	0	200	903	0	0	0	0	0	0	0	603	903	0
582	4	-10.5568	3.31394	-484.254	53102.4	10404.5	-2358.58	221.486	190.342	0	0	0	0	0	0	0	200	903	0	0	0	0	0	0	0	603	903	0
582	5	-10.7094	4.22947	-483.034	53834.8	10343.5	-2038.15	221.414	188.548	0	0	0	0	0	0	0	200	903	0	0	0	0	0	0	0	603	903	0
582	6	-9.64126	4.83982	-484.559	54201.1	10404.5	-2083.92	221.472	188.144	0	0	0	0	0	0	0	200	903	0	0	0	0	0	0	0	603	903	0
582	7	-10.4042	4.99241	-488.527	54201.1	10526.6	-2038.15	221.548	189.052	0	0	0	0	0	0	0	200	903	0	0	0	0	0	0	0	603	903	0
582	8	-9.48867	5.75535	-487.306	55208.1	10404.5	-2221.25	221.351	186.707	0	0	0	0	0	0	0	200	903	0	0	0	0	0	0	0	603	903	0
582	9	-10.2516	5.45018	-492.494	55665.9	10343.5	-2038.15	221.002	186.971	0	0	0	0	0	0	0	200	903	0	0	0	0	0	0	0	603	903	0
583	0	-10.5568	5.90794	-491.884	56306.8	10709.7	-2038.15	221.773	185.528	0	0	0	0	0	0	0	200	903	0	0	0	0	0	0	0	603	903	0
583	1	-10.2516	6.97605	-493.715	55940.5	10465.6	-2358.58	221.198	186.695	0	0	0	0	0	0	0	200	903	0	0	0	0	0	0	0	603	903	0
583	2	-8.26797	7.89158	-494.02	56673	10770.7	-2312.8	221.802	185.282	0	0	0	0	0	0	0	200	903	0	0	0	0	0	0	0	603	903	0
583	3	-8.87832	8.19676	-499.513	56581.4	10648.7	-1946.59	221.318	186.727	0	0	0	0	0	0	0	200	903	0	0	0	0	0	0	0	603	903	0
583	4	-9.48867	9.26487	-501.039	57680.1	10892.8	-2404.36	221.74	184.879	0	0	0	0	0	0	0	200	903	0	0	0	0	0	0	0	603	903	0
583	5	-8.72573	8.9597	-502.26	58320.9	10770.7	-2267.03	221.445	183.883	0	0	0	0	0	0	0	200	903	0	0	0	0	0	0	0	603	903	0
583	6	-9.33608	8.34935	-501.954	58961.8	10282.5	-2129.7	220.485	182.536	0	0	0	0	0	0	0	200	903	0	0	0	0	0	0	0	603	903	0
583	7	-7.96279	10.1804	-507.142	58595.6	10953.8	-1855.04	221.599	184.459	0	0	0	0	0	0	0	200	903	0	0	0	0	0	0	0	603	903	0
583	8	-7.81021	12.0115	-511.72	58687.1	10953.8	-2312.8	221.406	185.314	0	0	0	0	0	0	0	200	903	0	0	0	0	0	0	0	603	903	0
583	9	-8.72573	11.4011	-515.992	59419.6	11014.9	-1855.04	221.347	184.844	0	0	0	0	0	0	0	200	903	0	0	0	0	0	0	0	603	903	0
584	0	-6.89468	13.5373	-516.603	60426.6	11014.9	-2175.48	221.322	183.031	0	0	0	0	0	0	0	200	903	0	0	0	0	0	0	0	603	903	0
584	1	-8.42056	13.9951	-518.129	60060.4	11259	-2038.15	221.73	184.082	0	0	0	0	0	0	0	200	903	0	0	0	0	0	0	0	603	903	0
584	2	-7.81021	13.9951	-520.875	60884.4	11564.2	-2175.48	222.201	183.111	0	0	0	0	0	0	0	200	903	0	0	0	0	0	0	0	603	903	0
584	3	-6.89468	15.521	-525.453	60792.9	11381.1	-2221.25	221.66	184.304	0	0	0	0	0	0	0	200	903	0	0	0	0	0	0	0	603	903	0
584	4	-8.42056	17.8098	-527.894	60335.1	11808.3	-2129.7	222.369	185.706	0	0	0	0	0	0	0	200	903	0	0	0	0	0	0	0	603	903	0
584	5	-5.21621	15.8262	-529.725	61799.9	11686.3	-2221.25	222.061	183.336	0	0	0	0	0	0	0	200	903	0	0	0	0	0	0	0	603	903	0
584	6	-7.50503	18.8779	-528.81	62166.1	11381.1	-2358.58	221.522	182.441	0	0	0	0	0	0	0	200	903	0	0	0	0	0	0	0	603	903	0
584	7	-6.43691	19.4883	-531.862	62074.6	11503.2	-2404.36	221.628	183.288	0	0	0	0	0	0	0	200	903	0	0	0	0	0	0	0	603	903	0
584	8	-6.28433	20.709	-537.66	63264.8	11564.2	-2129.7	221.508	182.333	0	0	0	0	0	0	0	200	903	0	0	0	0	0	0	0	603	903	0
584	9	-7.19985	20.8616	-539.186	62898.6	11625.2	-2038.15	221.561	183.345	0	0	0	0	0	0	0	200	903	0	0	0	0	0	0	0	603	903	0
585	0	-5.97915	21.9297	-539.796	63539.4	11747.3	-2495.91	221.762	182.29	0	0	0	0	0	0	0	200	903	0	0	0	0	0	0	0	603	903	0
585	1	-6.74209	23.9133	-543.458	63997.2	11930.4	-2129.7	221.953	182.241	0	0	0	0	0	0	0	200	903	0	0	0	0	0	0	0	603	903	0
585	2	-6.13174	24.5237	-545.289	63997.2	12052.5	-1855.04	222.103	182.636	0	0	0	0	0	0	0	200	903	0	0	0	0	0	0	0	603	903	0
585	3	-6.13174	24.9814	-549.257	65187.4	11747.3	-2495.91	221.388	181.317	0	0	0	0	0	0	0	200	903	0	0	0	0	0	0	0	603	903	0
585	4	-6.74209	25.4392	-552.308	65278.9	11991.4	-2312.8	221.712	181.807	0	0	0	0	0	0	0	200	903	0	0	0	0	0	0	0	603	903	0
585	5	-5.21621	26.3547	-551.393	65553.6	12052.5	-2267.03	221.858	181.113	0	0	0	0	0	0	0	200	903	0	0	0	0	0	0	0	603	903	0
585	6	-7.65762	26.6599	-554.139	65095.8	11747.3	-2175.48	221.199	182.528	0	0	0	0	0	0	0	200	903	0	0	0	0	0	0	0	603	903	0
585	7	-6.43691	27.2702	-556.581	65553.6	12174.5	-2587.46	221.874	182.221	0	0	0	0	0	0	0	200	903	0	0	0	0	0	0	0	603	903	0
585	8	-5.82656	28.7961	-561.159	65919.8	12052.5	-2404.36	221.478	182.529	0	0	0	0	0	0	0	200	903	0	0	0	0	0	0	0	603	903	0
585	9	-7.65762	27.8806	-562.379	66377.6	11930.4	-1992.37	221.214	181.97	0	0	0	0	0	0	0	200	903	0	0	0	0	0	0	0	603	903	0
586	0	-6.74209	30.4746	-565.431	67384.6	12113.5	-2495.91	221.424	180.826	0	0	0	0	0	0	0	200	903	0	0	0	0	0	0	0	603	903	0
586	1	-6.89468	29.4065	-565.736	67750.9	12479.7	-2495.91	222.059	180.243	0	0	0	0	0	0	0	200	903	0	0	0	0	0	0	0	603	903	0
586	2	-5.97915	31.0849	-566.652	67842.4	12540.8	-2450.13	222.131	180.275	0	0	0	0	0	0	0	200	903	0	0	0	0	0	0	0	603	903	0
586	3	-3.99551	31.5427	-570.009	68666.4	11991.4	-2495.91	221.037	179.534	0	0	0	0	0	0	0	200	903	0	0	0	0	0	0	0	603	903	0
586	4	-6.74209	32.0005	-573.671	68208.6	12723.9	-2633.24	222.18	181.101	0	0	0	0	0	0	0	200	903	0	0	0	0	0	0	0	603	903	0
586	5	-7.35244	33.6789	-575.197	68300.2	12540.8	-2633.24	221.803	181.258	0	0	0	0	0	0	0	200	903	0	0	0	0	0	0	0	603	903	0
586	6	-7.50503	33.5263	-577.028	68941	12540.8	-2221.25	221.733	180.524	0	0	0	0	0	0	0	200	903	0	0	0	0	0	0	0	603	903	0
586	7	-6.89468	34.8996	-577.943	70039.7	12601.8	-2312.8	221.805	178.812	0	0	0	0	0	0	0	200	903	0	0	0	0	0	0	0	603	903	0
586	8	-5.3688	34.7471	-582.216	70314.3	12540.8	-2679.02	221.54	179.23	0	0	0	0	0	0	0	200	903	0	0	0	0	0	0	0	603	903	0
586	9	-6.5895	36.1203	-583.131	70497.5	12235.6	-2633.24	220.983	179.105	0	0	0	0	0	0	0	200	903	0	0	0	0	0	0	0	603	903	0
587	0	-8.11538	36.2729	-584.047	70955.2	12540.8	-2495.91	221.472	178.511	0	0	0	0	0	0	0	200	903	0	0	0	0	0	0	0	603	903	0
587	1	-8.26797	36.4255	-584.657	70497.5	12479.7	-2450.13	221.345	179.421	0	0	0	0	0	0	0	200	903	0	0	0	0	0	0	0	603	903	0
587	2	-6.89468	37.9514	-587.098	70680.5	12357.7	-2724.79	221.049	179.61	0	0	0	0	0	0	0	200	903	0	0	0	0	0	0	0	603	903	0
587	3	-6.89468	39.4773	-590.455	71046.8	12540.8	-2312.8	221.239	179.675	0	0	0	0	0	0	0	200	903	0	0	0	0	0	0	0	603	903	0
587	4	-7.35244	39.6299	-585.878	72053.9	12845.9	-2633.24	221.926	177.016	0	0	0	0	0	0	0	200	903	0	0	0	0	0	0	0	603	903	0
587	5	-8.42056	39.7825	-594.117	72053.9	12723.9	-2679.02	221.416	178.721	0	0	0	0	0	0	0	200	903	0	0	0	0	0	0	0	603	903	0
587	6	-8.26797	39.1721	-592.592	72786.3	12601.8	-2724.79	221.266	177.173	0	0	0	0	0	0	0	200	903	0	0	0	0	0	0	0	603	903	0
587	7	-7.81021	40.698	-594.117	72328.5	12784.9	-2679.02	221.519	178.259	0	0	0	0	0	0	0	200	903	0	0	0	0	0	0	0	603	903	0
587	8	-8.42056	42.2239	-596.559	72420.1	12907	-2953.67	221.636	178.604	0	0	0	0	0	0	0	200	903	0	0	0	0	0	0	0	603	903	0
587	9	-8.87832	42.529	-598.39	73244	12174.5	-2679.02	220.346	177.598	0	0	0	0	0	0	0	200	903	0	0	0	0	0	0	0	603	903	0
588	0	-7.81021	43.5971	-597.78	74251.1	12968	-2587.46	221.694	175.788	0	0	0	0	0	0	0	200	903	0	0	0	0	0	0	0	603	903	0
588	1	-9.1835	44.3601	-599.611	74068	12907	-2907.9	221.526	176.473	0	0	0	0	0	0	0	200	903	0	0	0	0	0	0	0	603	903	0
588	2	-8.72573	44.3601	-601.442	74708.9	12540.8	-2175.48	220.851	175.784	0	0	0	0	0	0	0	200	903	0	0	0	0	0	0	0	603	903	0
588	3	-9.03091	42.6816	-605.104	74617.3	12662.8	-2587.46	220.927	176.687	0	0	0	0	0	0	0	200	903	0	0	0	0	0	0	0	603	903	0
588	4	-9.79385	44.6653	-606.325	74251.1	12357.7	-2724.79	220.381	177.539	0	0	0	0	0	0	0	200	903	0	0	0	0	0	0	0	603	903	0
588	5	-8.26797	45.886	-602.968	73884.9	12296.6	-2587.46	220.394	177.465	0	0	0	0	0	0	0	200	903	0	0	0	0	0	0	0	603	903	0
588	6	-10.2516	46.8015	-602.968	74434.2	12907	-2404.36	221.406	176.554	0	0	0	0	0	0	0	200	903	0	0	0	0	0	0	0	603	903	0
588	7	-9.1835	46.8015	-607.24	75441.3	13029	-2770.57	221.456	175.764	0	0	0	0	0	0	0	200	903	0	0	0	0	0	0	0	603	903	0
588	8	-9.03091	46.8015	-610.292	75716	13090.1	-2679.02	221.449	175.935	0	0	0	0	0	0	0	200	903	0	0	0	0	0	0	0	603	903	0
588	9	-9.79385	47.5644	-610.597	76173.7	13029	-2175.48	221.338	175.247	0	0	0	0	0	0	0	200	903	0	0	0	0	0	0	0	603	903	0
589	0	-7.65762	48.6325	-610.902	75624.4	12784.9	-2862.12	220.928	176.209	0	0	0	0	0	0	0	200	903	0	0	0	0	0	0	0	603	903	0
589	1	-9.64126	48.9377	-611.207	76082.2	13334.2	-2770.57	221.816	175.522	0	0	0	0	0	0	0	200	903	0	0	0	0	0	0	0	603	903	0
589	2	-9.1835	50.6162	-610.902	76356.8	12907	-2541.69	221.128	175.01	0	0	0	0	0	0	0	200	903	0	0	0	0	0	0	0	603	903	0
589	3	-9.64126	49.5481	-613.344	76173.7	12845.9	-2633.24	220.944	175.806	0	0	0	0	0	0	0	200	903	0	0	0	0	0	0	0	603	903	0
589	4	-10.4042	51.3791	-613.954	77455.5	13212.1	-2724.79	221.52	173.842	0	0	0	0	0	0	0	200	903	0	0	0	0	0	0	0	603	903	0
589	5	-9.33608	51.8369	-611.818	77730.1	13090.1	-2724.79	221.395	172.952	0	0	0	0	0	0	0	200	903	0	0	0	0	0	0	0	603	903	0
589	6	-10.7094	52.2947	-615.175	77730.1	12235.6	-2679.02	219.89	173.645	0	0	0	0	0	0	0	200	903	0	0	0	0	0	0	0	603	903	0
589	7	-9.48867	52.905	-614.869	77180.8	13090.1	-2816.34	221.289	174.476	0	0	0	0	0	0	0	200	903	0	0	0	0	0	0	0	603	903	0
589	8	-8.87832	53.6679	-616.701	77730.1	13273.2	-2633.24	221.523	173.958	0	0	0	0	0	0	0	200	903	0	0	0	0	0	0	0	603	903	0
589	9	-10.5568	54.5835	-617.006	77547	12968	-2816.34	221.018	174.317	0	0	0	0	0	0	0	200	903	0	0	0	0	0	0	0	603	903	0
590	0	-8.72573	54.5835	-616.395	77363.9	13029	-2770.57	221.137	174.49	0	0	0	0	0	0	0	200	903	0	0	0	0	0	0	0	603	903	0
590	1	-9.64126	55.3464	-614.869	78462.5	13395.3	-2633.24	221.786	172.392	0	0	0	0	0	0	0	200	903	0	0	0	0	0	0	0	603	903	0
590	2	-8.57314	54.8887	-616.09	78371	13456.3	-2679.02	221.841	172.793	0	0	0	0	0	0	0	200	903	0	0	0	0	0	0	0	603	903	0
590	3	-8.87832	55.6516	-617.921	78554.1	12907	-2633.24	220.888	172.874	0	0	0	0	0	0	0	200	903	0	0	0	0	0	0	0	603	903	0
590	4	-9.79385	56.2619	-617.616	78279.4	13334.2	-2587.46	221.59	173.256	0	0	0	0	0	0	0	200	903	0	0	0	0	0	0	0	603	903	0
590	5	-9.94644	57.6352	-616.701	78279.4	13273.2	-2495.91	221.523	173.067	0	0	0	0	0	0	0	200	903	0	0	0	0	0	0	0	603	903	0
590	6	-9.64126	55.6516	-615.785	78554.1	13090.1	-2587.46	221.258	172.433	0	0	0	0	0	0	0	200	903	0	0	0	0	0	0	0	603	903	0
590	7	-9.1835	59.3137	-615.785	79103.4	12968	-2587.46	221.059	171.541	0	0	0	0	0	0	0	200	903	0	0	0	0	0	0	0	603	903	0
590	8	-8.57314	59.1611	-618.532	79744.3	13578.4	-2541.69	221.953	171.075	0	0	0	0	0	0	0	200	903	0	0	0	0	0	0	0	603	903	0
590	9	-9.94644	59.6189	-618.837	79378.1	13395.3	-2267.03	221.646	171.73	0	0	0	0	0	0	0	200	903	0	0	0	0	0	0	0	603	903	0
591	0	-9.64126	60.8396	-616.701	79286.5	13151.1	-2724.79	221.325	171.434	0	0	0	0	0	0	0	200	903	0	0	0	0	0	0	0	603	903	0
591	1	-6.13174	60.8396	-617.921	79103.4	12907	-2129.7	220.888	171.985	0	0	0	0	0	0	0	200	903	0	0	0	0	0	0	0	603	903	0
591	2	-8.72573	62.3655	-616.09	78187.9	13273.2	-2267.03	221.544	173.09	0	0	0	0	0	0	0	200	903	0	0	0	0	0	0	0	603	903	0
591	3	-8.11538	61.2973	-616.09	78828.7	13090.1	-2129.7	221.247	172.05	0	0	0	0	0	0	0	200	903	0	0	0	0	0	0	0	603	903	0
591	4	-8.87832	63.8913	-617.616	79927.4	13090.1	-2129.7	221.195	170.587	0	0	0	0	0	0	0	200	903	0	0	0	0	0	0	0	603	903	0
591	5	-8.42056	62.2129	-614.564	80110.5	13273.2	-2129.7	221.598	169.647	0	0	0	0	0	0	0	200	903	0	0	0	0	0	0	0	603	903	0
591	6	-8.57314	63.5862	-614.564	79561.2	13334.2	-1717.71	221.697	170.541	0	0	0	0	0	0	0	200	903	0	0	0	0	0	0	0	603	903	0
591	7	-7.81021	64.8069	-612.428	79378.1	13090.1	-2129.7	221.374	170.388	0	0	0	0	0	0	0	200	903	0	0	0	0	0	0	0	603	903	0
591	8	-7.81021	65.4172	-616.09	79652.7	13395.3	-2129.7	221.742	170.713	0	0	0	0	0	0	0	200	903	0	0	0	0	0	0	0	603	903	0
591	9	-9.03091	66.4853	-614.564	79561.2	13395.3	-2358.58	221.796	170.541	0	0	0	0	0	0	0	200	903	0	0	0	0	0	0	0	603	903	0
592	0	-9.1835	65.112	-611.513	79286.5	13334.2	-1809.26	221.805	170.344	0	0	0	0	0	0	0	200	903	0	0	0	0	0	0	0	603	903	0
592	1	-7.96279	68.1638	-611.513	80293.6	13395.3	-2083.92	221.905	168.697	0	0	0	0	0	0	0	200	903	0	0	0	0	0	0	0	603	903	0
592	2	-6.89468	67.706	-615.48	80110.5	13212.1	-1717.71	221.466	169.841	0	0	0	0	0	0	0	200	903	0	0	0	0	0	0	0	603	903	0
592	3	-7.19985	68.6216	-612.428	80110.5	13334.2	-2221.25	221.773	169.192	0	0	0	0	0	0	0	200	903	0	0	0	0	0	0	0	603	903	0
592	4	-8.26797	68.9267	-610.902	79652.7	13273.2	-1809.26	221.727	169.615	0	0	0	0	0	0	0	200	903	0	0	0	0	0	0	0	603	903	0
592	5	-8.26797	70.3	-609.681	79286.5	13212.1	-2038.15	221.671	169.954	0	0	0	0	0	0	0	200	903	0	0	0	0	0	0	0	603	903	0
592	6	-7.19985	71.063	-608.156	79378.1	13273.2	-1992.37	221.825	169.477	0	0	0	0	0	0	0	200	903	0	0	0	0	0	0	0	603	903	0
592	7	-5.3688	71.8259	-611.513	79561.2	13578.4	-1900.82	222.205	169.894	0	0	0	0	0	0	0	200	903	0	0	0	0	0	0	0	603	903	0
592	8	-6.13174	71.9785	-608.156	80018.9	12968	-1717.71	221.324	168.424	0	0	0	0	0	0	0	200	903	0	0	0	0	0	0	0	603	903	0
592	9	-7.50503	72.2837	-607.85	79835.8	13151.1	-1809.26	221.635	168.659	0	0	0	0	0	0	0	200	903	0	0	0	0	0	0	0	603	903	0
593	0	-6.89468	71.9785	-605.714	79652.7	13151.1	-1671.94	221.712	168.498	0	0	0	0	0	0	0	200	903	0	0	0	0	0	0	0	603	903	0
593	1	-6.13174	73.5044	-602.968	79286.5	13273.2	-1626.16	222.013	168.506	0	0	0	0	0	0	0	200	903	0	0	0	0	0	0	0	603	903	0
593	2	-5.06362	74.7251	-603.273	78737.2	13090.1	-1580.38	221.698	169.483	0	0	0	0	0	0	0	200	903	0	0	0	0	0	0	0	603	903	0
593	3	-5.82656	75.7932	-601.137	79561.2	13578.4	-1717.71	222.588	167.649	0	0	0	0	0	0	0	200	903	0	0	0	0	0	0	0	603	903	0
593	4	-6.74209	76.4035	-602.052	79561.2	13456.3	-1671.94	222.351	167.85	0	0	0	0	0	0	0	200	903	0	0	0	0	0	0	0	603	903	0
593	5	-6.89468	76.8613	-598.085	79561.2	13090.1	-1534.61	221.887	166.973	0	0	0	0	0	0	0	200	903	0	0	0	0	0	0	0	603	903	0
593	6	-5.21621	76.8613	-597.78	79469.6	13090.1	-1443.05	221.898	167.059	0	0	0	0	0	0	0	200	903	0	0	0	0	0	0	0	603	903	0
593	7	-5.82656	77.7768	-597.169	79194.9	13212.1	-1534.61	222.125	167.383	0	0	0	0	0	0	0	200	903	0	0	0	0	0	0	0	603	903	0
593	8	-7.35244	78.6924	-593.812	78737.2	13212.1	-1488.83	222.25	167.404	0	0	0	0	0	0	0	200	903	0	0	0	0	0	0	0	603	903	0
593	9	-6.43691	80.0657	-594.728	78828.7	12784.9	-1397.28	221.497	167.454	0	0	0	0	0	0	0	200	903	0	0	0	0	0	0	0	603	903	0
594	0	-6.13174	80.2182	-592.286	78462.5	13090.1	-1214.17	222.101	167.526	0	0	0	0	0	0	0	200	903	0	0	0	0	0	0	0	603	903	0
594	1	-5.97915	80.676	-590.455	79011.9	12845.9	-1214.17	221.756	166.185	0	0	0	0	0	0	0	200	903	0	0	0	0	0	0	0	603	903	0
594	2	-5.3688	81.4389	-591.066	78645.7	12784.9	-1214.17	221.63	166.943	0	0	0	0	0	0	0	200	903	0	0	0	0	0	0	0	603	903	0
594	3	-4.1481	81.2864	-586.183	78828.7	13029	-939.513	222.227	165.522	0	0	0	0	0	0	0	200	903	0	0	0	0	0	0	0	603	903	0
594	4	-5.21621	82.0493	-587.404	77913.2	13395.3	-1031.07	222.804	167.36	0	0	0	0	0	0	0	200	903	0	0	0	0	0	0	0	603	903	0
594	5	-6.28433	83.4226	-583.742	77180.8	12723.9	-985.29	221.797	167.783	0	0	0	0	0	0	0	200	903	0	0	0	0	0	0	0	603	903	0
594	6	-4.91104	83.1174	-582.216	77547	12845.9	-939.513	222.064	166.807	0	0	0	0	0	0	0	200	903	0	0	0	0	0	0	0	603	903	0
594	7	-4.75845	84.6433	-581.3	77913.2	12968	-756.408	222.309	165.967	0	0	0	0	0	0	0	200	903	0	0	0	0	0	0	0	603	903	0
594	8	-4.45327	85.1011	-577.333	77547	12784.9	-893.737	222.145	165.681	0	0	0	0	0	0	0	200	903	0	0	0	0	0	0	0	603	903	0
594	9	-5.52139	85.4062	-578.248	77638.5	12968	-893.737	222.426	165.735	0	0	0	0	0	0	0	200	903	0	0	0	0	0	0	0	603	903	0
595	0	-5.3688	86.1692	-573.671	77180.8	12723.9	-802.184	222.18	165.462	0	0	0	0	0	0	0	200	903	0	0	0	0	0	0	0	603	903	0
595	1	-4.75845	87.0847	-571.229	76356.8	12845.9	-619.079	222.488	166.329	0	0	0	0	0	0	0	200	903	0	0	0	0	0	0	0	603	903	0
595	2	-4.60586	87.5425	-570.619	76631.5	12357.7	-619.079	221.657	165.705	0	0	0	0	0	0	0	200	903	0	0	0	0	0	0	0	603	903	0
595	3	-4.75845	88.458	-565.126	76814.6	12296.6	-619.079	221.759	164.075	0	0	0	0	0	0	0	200	903	0	0	0	0	0	0	0	603	903	0
595	4	-6.43691	88.6106	-566.652	76448.4	12357.7	-664.855	221.808	165.088	0	0	0	0	0	0	0	200	903	0	0	0	0	0	0	0	603	903	0
595	5	-5.67397	88.9157	-561.769	76082.2	12418.7	-344.421	222.106	164.567	0	0	0	0	0	0	0	200	903	0	0	0	0	0	0	0	603	903	0
595	6	-4.45327	89.5261	-561.464	75441.3	11991.4	-344.421	221.357	165.635	0	0	0	0	0	0	0	200	903	0	0	0	0	0	0	0	603	903	0
595	7	-3.84292	90.8994	-558.107	74708.9	12418.7	-527.526	222.251	166.139	0	0	0	0	0	0	0	200	903	0	0	0	0	0	0	0	603	903	0
595	8	-4.75845	89.9839	-556.276	74708.9	12357.7	-390.197	222.215	165.698	0	0	0	0	0	0	0	200	903	0	0	0	0	0	0	0	603	903	0
595	9	-2.62222	91.5097	-549.562	74983.5	12235.6	-207.091	222.264	163.558	0	0	0	0	0	0	0	200	903	0	0	0	0	0	0	0	603	903	0
596	0	-4.91104	92.2727	-546.815	74617.3	11808.3	-390.197	221.595	163.542	0	0	0	0	0	0	0	200	903	0	0	0	0	0	0	0	603	903	0
596	1	-3.53774	92.7304	-545.289	74617.3	12113.5	-252.868	222.215	163.16	0	0	0	0	0	0	0	200	903	0	0	0	0	0	0	0	603	903	0
596	2	-3.53774	93.4934	-544.374	73427.1	12052.5	-115.539	222.14	165.116	0	0	0	0	0	0	0	200	903	0	0	0	0	0	0	0	603	903	0
596	3	-4.60586	94.1037	-540.712	72877.8	11503.2	-115.539	221.274	165.219	0	0	0	0	0	0	0	200	903	0	0	0	0	0	0	0	603	903	0
596	4	-4.30068	95.6296	-536.134	72236.9	11381.1	204.896	221.228	165.263	0	0	0	0	0	0	0	200	903	0	0	0	0	0	0	0	603	903	0
596	5	-3.23257	96.3926	-532.472	73244	11442.1	67.5668	221.489	162.445	0	0	0	0	0	0	0	200	903	0	0	0	0	0	0	0	603	903	0
596	6	-3.07998	95.6296	-530.946	72328.5	11503.2	342.225	221.665	163.774	0	0	0	0	0	0	0	200	903	0	0	0	0	0	0	0	603	903	0
596	7	-3.53774	96.5451	-526.674	72236.9	11137	-481.75	221.146	162.843	0	0	0	0	0	0	0	200	903	0	0	0	0	0	0	0	603	903	0
596	8	-3.53774	96.6977	-522.401	70772.1	11381.1	342.225	221.786	164.525	0	0	0	0	0	0	0	200	903	0	0	0	0	0	0	0	603	903	0
596	9	-1.85928	98.3762	-516.908	70405.9	11259	296.449	221.781	163.794	0	0	0	0	0	0	0	200	903	0	0	0	0	0	0	0	603	903	0
597	0	-3.84292	98.834	-512.636	69856.6	10892.8	754.213	221.249	163.73	0	0	0	0	0	0	0	200	903	0	0	0	0	0	0	0	603	903	0
597	1	-1.70669	98.9865	-512.025	70131.2	10892.8	67.5668	221.274	163.032	0	0	0	0	0	0	0	200	903	0	0	0	0	0	0	0	603	903	0
597	2	-0.638574	99.4443	-510.194	69948.1	10770.7	388.001	221.111	162.899	0	0	0	0	0	0	0	200	903	0	0	0	0	0	0	0	603	903	0
597	3	-2.31704	99.5969	-503.48	69032.6	10770.7	388.001	221.393	162.889	0	0	0	0	0	0	0	200	903	0	0	0	0	0	0	0	603	903	0
597	4	0.582129	100.97	-497.987	67934	10465.6	571.107	221.016	163.583	0	0	0	0	0	0	0	200	903	0	0	0	0	0	0	0	603	903	0
597	5	-2.31704	102.343	-493.409	67659.3	10648.7	662.66	221.582	162.874	0	0	0	0	0	0	0	200	903	0	0	0	0	0	0	0	603	903	0
597	6	-0.791162	102.496	-489.137	66926.9	10465.6	708.436	221.396	163.174	0	0	0	0	0	0	0	200	903	0	0	0	0	0	0	0	603	903	0
597	7	-0.485986	102.649	-486.39	67201.6	10099.4	708.436	220.764	161.836	0	0	0	0	0	0	0	200	903	0	0	0	0	0	0	0	603	903	0
597	8	-1.09634	102.496	-482.728	66743.8	10160.4	845.765	221.048	161.736	0	0	0	0	0	0	0	200	903	0	0	0	0	0	0	0	603	903	0
597	9	-1.40151	102.496	-476.625	66011.4	9977.28	754.213	220.933	161.503	0	0	0	0	0	0	0	200	903	0	0	0	0	0	0	0	603	903	0
598	0	-1.09634	103.106	-471.742	65462	9672.11	616.883	220.503	161.233	0	0	0	0	0	0	0	200	903	0	0	0	0	0	0	0	603	903	0
598	1	1.03989	102.954	-468.08	63997.2	9183.83	1349.31	219.62	163.277	0	0	0	0	0	0	0	200	903	0	0	0	0	0	0	0	603	903	0
598	2	0.582129	104.175	-464.113	63447.9	9794.18	1028.87	221.103	163.292	0	0	0	0	0	0	0	200	903	0	0	0	0	0	0	0	603	903	0
598	3	1.03989	103.412	-458.925	62898.6	9244.86	1074.65	220.145	162.944	0	0	0	0	0	0	0	200	903	0	0	0	0	0	0	0	603	903	0
598	4	0.429541	104.175	-450.685	62715.5	9000.72	1257.75	219.971	160.844	0	0	0	0	0	0	0	200	903	0	0	0	0	0	0	0	603	903	0
598	5	0.734717	103.412	-447.633	61983	8817.62	1578.19	219.698	161.532	0	0	0	0	0	0	0	200	903	0	0	0	0	0	0	0	603	903	0
598	6	2.10801	103.412	-441.224	61159.1	8817.62	1303.53	219.984	161.388	0	0	0	0	0	0	0	200	903	0	0	0	0	0	0	0	603	903	0
598	7	4.09165	103.259	-437.867	60152	8695.55	1349.31	219.859	162.625	0	0	0	0	0	0	0	200	903	0	0	0	0	0	0	0	603	903	0
598	8	3.02354	102.649	-430.238	59328	8390.37	1532.41	219.502	162.104	0	0	0	0	0	0	0	200	903	0	0	0	0	0	0	0	603	903	0
598	9	2.87095	103.869	-426.881	58412.5	8207.26	1761.29	219.226	163.165	0	0	0	0	0	0	0	200	903	0	0	0	0	0	0	0	603	903	0
599	0	2.71836	101.428	-419.252	57863.2	8207.26	1761.29	219.576	161.985	0	0	0	0	0	0	0	200	903	0	0	0	0	0	0	0	603	903	0
599	1	3.32871	102.954	-411.012	57771.6	8390.37	1715.52	220.414	159.441	0	0	0	0	0	0	0	200	903	0	0	0	0	0	0	0	603	903	0
599	2	5.61753	101.581	-407.35	57222.3	7169.67	1898.62	217.601	159.525	0	0	0	0	0	0	0	200	903	0	0	0	0	0	0	0	603	903	0
599	3	4.54941	101.581	-400.941	55665.9	7841.05	2081.73	219.557	161.162	0	0	0	0	0	0	0	200	903	0	0	0	0	0	0	0	603	903	0
599	4	4.54941	100.512	-394.533	54567.3	7413.81	1944.4	218.791	161.691	0	0	0	0	0	0	0	200	903	0	0	0	0	0	0	0	603	903	0
599	5	3.93906	99.9021	-385.682	53743.3	7108.63	1944.4	218.431	160.654	0	0	0	0	0	0	0	200	903	0	0	0	0	0	0	0	603	903	0
599	6	5.31235	99.5969	-378.663	52644.6	6681.39	2173.28	217.645	160.972	0	0	0	0	0	0	0	200	903	0	0	0	0	0	0	0	603	903	0
599	7	7.296	98.6814	-373.781	51637.6	6986.56	2035.95	218.692	161.851	0	0	0	0	0	0	0	200	903	0	0	0	0	0	0	0	603	903	0
599	8	6.38047	97.4607	-366.151	51362.9	6498.28	2219.06	217.748	159.722	0	0	0	0	0	0	0	200	903	0	0	0	0	0	0	0	603	903	0
599	9	5.61753	95.1719	-358.217	50538.9	6315.18	2127.5	217.629	158.915	0	0	0	0	0	0	0	200	903	0	0	0	0	0	0	0	603	903	0
600	0	6.22788	92.4253	-349.367	49623.4	5948.96	2402.16	217.028	157.962	0	0	0	0	0	0	0	200	903	0	0	0	0	0	0	0	603	903	0
600	1	6.68564	93.4934	-341.127	48433.2	6071.03	2264.83	217.797	158.02	0	0	0	0	0	0	0	200	903	0	0	0	0	0	0	0	603	903	0
600	2	9.27964	92.2727	-336.549	47883.9	5826.89	2264.83	217.314	157.721	0	0	0	0	0	0	0	200	903	0	0	0	0	0	0	0	603	903	0
600	3	7.75376	90.8994	-327.089	46510.6	5521.72	2631.04	216.881	157.804	0	0	0	0	0	0	0	200	903	0	0	0	0	0	0	0	603	903	0
600	4	6.83823	89.2209	-323.121	45961.3	5704.82	2402.16	217.655	157.758	0	0	0	0	0	0	0	200	903	0	0	0	0	0	0	0	603	903	0
600	5	7.296	86.7795	-312.745	45686.6	5277.58	2219.06	216.875	153.917	0	0	0	0	0	0	0	200	903	0	0	0	0	0	0	0	603	903	0
600	6	8.66929	84.4907	-305.726	44221.8	5094.47	2219.06	216.664	155.355	0	0	0	0	0	0	0	200	903	0	0	0	0	0	0	0	603	903	0
600	7	9.43223	82.2019	-300.538	43397.8	5094.47	2447.94	216.951	155.6	0	0	0	0	0	0	0	200	903	0	0	0	0	0	0	0	603	903	0
600	8	8.5167	80.2182	-292.909	41841.4	4789.3	2493.72	216.351	157.152	0	0	0	0	0	0	0	200	903	0	0	0	0	0	0	0	603	903	0
600	9	8.82187	78.9975	-283.449	41109	4545.16	2356.39	216.035	154.968	0	0	0	0	0	0	0	200	903	0	0	0	0	0	0	0	603	903	0
601	0	8.82187	76.8613	-276.43	40834.4	4056.87	2447.94	214.676	152.279	0	0	0	0	0	0	0	200	903	0	0	0	0	0	0	0	603	903	0
601	1	9.58481	75.7932	-268.8	39461.1	4117.91	2539.49	215.32	153.196	0	0	0	0	0	0	0	200	903	0	0	0	0	0	0	0	603	903	0
601	2	10.0426	71.6733	-262.697	38545.5	4239.98	2585.27	216.14	153.27	0	0	0	0	0	0	0	200	903	0	0	0	0	0	0	0	603	903	0
601	3	10.3478	69.0793	-255.983	37355.4	3568.59	2493.72	213.941	154.071	0	0	0	0	0	0	0	200	903	0	0	0	0	0	0	0	603	903	0
601	4	11.4159	67.0957	-246.522	36439.8	3873.77	2310.61	215.714	152.184	0	0	0	0	0	0	0	200	903	0	0	0	0	0	0	0	603	903	0
601	5	9.88999	67.2483	-240.114	35524.3	3690.66	2585.27	215.37	152.052	0	0	0	0	0	0	0	200	903	0	0	0	0	0	0	0	603	903	0
601	6	12.1788	64.3491	-234.315	35249.6	3568.59	2493.72	215.23	149.563	0	0	0	0	0	0	0	200	903	0	0	0	0	0	0	0	603	903	0
601	7	10.3478	59.4663	-228.517	34700.3	3141.35	2539.49	213.747	148.15	0	0	0	0	0	0	0	200	903	0	0	0	0	0	0	0	603	903	0
601	8	11.1107	57.0249	-221.193	33601.7	2775.14	2173.28	212.546	148.089	0	0	0	0	0	0	0	200	903	0	0	0	0	0	0	0	603	903	0
601	9	10.9581	55.8042	-210.512	32228.4	3019.28	2447.94	214.343	146.904	0	0	0	0	0	0	0	200	903	0	0	0	0	0	0	0	603	903	0
602	0	10.8055	51.074	-205.629	31953.7	2958.24	2722.6	214.386	144.605	0	0	0	0	0	0	0	200	903	0	0	0	0	0	0	0	603	903	0
602	1	11.1107	49.8533	-199.525	30855.1	2408.93	2402.16	212.073	145.357	0	0	0	0	0	0	0	200	903	0	0	0	0	0	0	0	603	903	0
602	2	11.2633	47.5644	-195.253	30488.9	2286.86	2081.73	211.712	143.849	0	0	0	0	0	0	0	200	903	0	0	0	0	0	0	0	603	903	0
602	3	9.7374	45.7334	-191.285	29756.5	2408.93	2676.82	212.593	144.439	0	0	0	0	0	0	0	200	903	0	0	0	0	0	0	0	603	903	0
602	4	11.1107	41.6135	-182.435	28749.4	1859.61	1990.17	210.193	142.413	0	0	0	0	0	0	0	200	903	0	0	0	0	0	0	0	603	903	0
602	5	9.7374	38.8669	-176.332	27925.4	1676.5	2127.5	209.508	141.631	0	0	0	0	0	0	0	200	903	0	0	0	0	0	0	0	603	903	0
602	6	9.58481	36.5781	-170.228	27009.9	2103.75	2035.95	212.358	141.331	0	0	0	0	0	0	0	200	903	0	0	0	0	0	0	0	603	903	0
602	7	9.88999	35.3574	-168.092	26185.9	1798.57	2402.16	210.7	144.217	0	0	0	0	0	0	0	200	903	0	0	0	0	0	0	0	603	903	0
602	8	9.7374	33.0686	-162.294	25728.1	1615.47	1807.07	209.954	141.472	0	0	0	0	0	0	0	200	903	0	0	0	0	0	0	0	603	903	0
602	9	11.4159	29.7116	-154.054	25545	1798.57	1898.62	211.675	134.181	0	0	0	0	0	0	0	200	903	0	0	0	0	0	0	0	603	903	0
603	0	8.5167	26.6599	-146.425	24629.5	1371.33	1807.07	209.365	131.794	0	0	0	0	0	0	0	200	903	0	0	0	0	0	0	0	603	903	0
603	1	10.3478	25.134	-147.035	24263.3	1127.19	1761.29	207.666	134.983	0	0	0	0	0	0	0	200	903	0	0	0	0	0	0	0	603	903	0
603	2	9.43223	26.5073	-144.288	23256.2	1249.26	1532.41	208.658	138.821	0	0	0	0	0	0	0	200	903	0	0	0	0	0	0	0	603	903	0
603	3	7.44858	27.5754	-139.1	22706.9	1310.29	1349.31	209.42	136.759	0	0	0	0	0	0	0	200	903	0	0	0	0	0	0	0	603	903	0
603	4	6.83823	24.6762	-132.692	22157.6	1371.33	1395.08	210.335	133.014	0	0	0	0	0	0	0	200	903	0	0	0	0	0	0	0	603	903	0
603	5	7.75376	22.2348	-129.335	21974.5	1005.12	1211.98	207.771	130.096	0	0	0	0	0	0	0	200	903	0	0	0	0	0	0	0	603	903	0
603	6	7.296	20.0986	-126.893	21882.9	944.082	1395.08	207.44	127.549	0	0	0	0	0	0	0	200	903	0	0	0	0	0	0	0	603	903	0
603	7	7.90635	18.5727	-124.757	20875.9	1066.15	708.436	208.546	132.668	0	0	0	0	0	0	0	200	903	0	0	0	0	0	0	0	603	903	0
603	8	7.44858	17.352	-122.011	19594.1	638.906	1211.98	205.236	139.406	0	0	0	0	0	0	0	200	903	0	0	0	0	0	0	0	603	903	0
603	9	5.46494	18.4201	-114.992	19685.7	577.871	1349.31	205.025	128.808	0	0	0	0	0	0	0	200	903	0	0	0	0	0	0	0	603	903	0
604	0	5.9227	18.5727	-111.329	18495.5	760.976	1349.31	206.835	133.867	0	0	0	0	0	0	0	200	903	0	0	0	0	0	0	0	603	903	0
604	1	8.21152	17.352	-109.498	18220.8	577.871	891.542	205.277	133.597	0	0	0	0	0	0	0	200	903	0	0	0	0	0	0	0	603	903	0
604	2	6.83823	13.9951	-103.395	17946.2	28.5544	1257.75	200.276	126.431	0	0	0	0	0	0	0	200	903	0	0	0	0	0	0	0	603	903	0
604	3	5.31235	14.9106	-102.784	17580	883.047	983.094	208.591	128.963	0	0	0	0	0	0	0	200	903	0	0	0	0	0	0	0	603	903	0
604	4	6.38047	13.9951	-96.9861	15840.5	760.976	708.436	207.846	136.673	0	0	0	0	0	0	0	200	903	0	0	0	0	0	0	0	603	903	0
604	5	6.22788	13.3847	-92.7137	15108	333.73	891.542	203.6	137.046	0	0	0	0	0	0	0	200	903	0	0	0	0	0	0	0	603	903	0
604	6	5.77012	13.3847	-90.2723	14375.6	333.73	799.989	203.697	140.753	0	0	0	0	0	0	0	200	903	0	0	0	0	0	0	0	603	903	0
604	7	5.9227	11.5537	-85.6946	14467.2	577.871	616.883	206.743	131.178	0	0	0	0	0	0	0	200	903	0	0	0	0	0	0	0	603	903	0
604	8	5.31235	10.9433	-83.5584	13917.8	516.836	616.883	206.185	133.436	0	0	0	0	0	0	0	200	903	0	0	0	0	0	0	0	603	903	0
604	9	4.54941	8.9597	-78.3704	13917.8	272.695	1211.98	203.48	122.409	0	0	0	0	0	0	0	200	903	0	0	0	0	0	0	0	603	903	0
605	0	6.38047	8.80711	-74.098	12819.2	577.871	799.989	207.799	126.996	0	0	0	0	0	0	0	200	903	0	0	0	0	0	0	0	603	903	0
605	1	6.53306	8.9597	-72.8773	11903.7	272.695	983.094	203.742	136.661	0	0	0	0	0	0	0	200	903	0	0	0	0	0	0	0	603	903	0
605	2	6.83823	8.65452	-69.2151	11171.3	272.695	754.213	203.94	138.601	0	0	0	0	0	0	0	200	903	0	0	0	0	0	0	0	603	903	0
605	3	4.85459	8.34935	-66.4686	11079.7	89.5895	1349.31	201.348	133.309	0	0	0	0	0	0	0	200	903	0	0	0	0	0	0	0	603	903	0
605	4	5.61753	8.34935	-61.5858	10255.7	333.73	754.213	205.419	133.472	0	0	0	0	0	0	0	200	903	0	0	0	0	0	0	0	603	903	0
605	5	6.38047	9.57005	-57.9236	10072.6	89.5895	937.318	201.547	126.105	0	0	0	0	0	0	0	200	903	0	0	0	0	0	0	0	603	903	0
605	6	6.53306	9.11228	-57.0081	9981.08	516.836	891.542	209.066	124.918	0	0	0	0	0	0	0	200	903	0	0	0	0	0	0	0	603	903	0
605	7	5.61753	7.89158	-53.0408	8882.44	516.836	1349.31	209.744	132.536	0	0	0	0	0	0	0	200	903	0	0	0	0	0	0	0	603	903	0
605	8	5.00718	8.34935	-51.515	8699.34	28.5544	754.213	200.554	131.13	0	0	0	0	0	0	0	200	903	0	0	0	0	0	0	0	603	903	0
605	9	4.702	8.80711	-48.158	7600.71	638.906	845.765	213.267	142.172	0	0	0	0	0	0	0	200	903	0	0	0	0	0	0	0	603	903	0
606	0	6.53306	8.50193	-46.0218	7966.92	577.871	571.107	212.556	126.888	0	0	0	0	0	0	0	200	903	0	0	0	0	0	0	0	603	903	0
606	1	6.07529	6.06053	-46.327	6868.28	394.765	662.66	208.521	151.743	0	0	0	0	0	0	0	200	903	0	0	0	0	0	0	0	603	903	0
606	2	5.00718	7.28123	-39.9183	7051.39	394.765	571.107	209.889	123.354	0	0	0	0	0	0	0	200	903	0	0	0	0	0	0	0	603	903	0
606	3	4.24424	6.67088	-41.4442	6959.84	272.695	479.554	206.58	132.067	0	0	0	0	0	0	0	200	903	0	0	0	0	0	0	0	603	903	0
606	4	3.78647	5.75535	-36.8665	6685.18	89.5895	479.554	202.43	118.665	0	0	0	0	0	0	0	200	903	0	0	0	0	0	0	0	603	903	0
606	5	3.78647	5.60276	-35.6458	5494.99	28.5544	433.778	200.801	145.845	0	0	0	0	0	0	0	200	903	0	0	0	0	0	0	0	603	903	0
606	6	6.68564	5.29759	-34.4251	5678.1	150.625	388.001	204.375	135.059	0	0	0	0	0	0	0	200	903	0	0	0	0	0	0	0	603	903	0
606	7	5.00718	6.21311	-34.1199	5128.78	150.625	250.672	204.415	149.684	0	0	0	0	0	0	0	200	903	0	0	0	0	0	0	0	603	903	0
606	8	1.80283	6.21311	-31.0682	4671.02	-32.4808	342.225	198.955	149.653	0	0	0	0	0	0	0	200	903	0	0	0	0	0	0	0	603	903	0
606	9	2.41318	5.60276	-27.1009	4487.91	333.73	479.554	212.314	134.4	0	0	0	0	0	0	0	200	903	0	0	0	0	0	0	0	603	903	0
607	0	3.78647	5.145	-26.1854	4213.25	272.695	388.001	210.414	139.099	0	0	0	0	0	0	0	200	903	0	0	0	0	0	0	0	603	903	0
607	1	5.15977	3.00877	-24.3543	3480.83	-93.516	342.225	196.16	157.075	0	0	0	0	0	0	0	200	903	0	0	0	0	0	0	0	603	903	0
607	2	3.02354	4.53465	-24.0491	3114.62	272.695	571.107	211.339	170.489	0	0	0	0	0	0	0	200	903	0	0	0	0	0	0	0	603	903	0
607	3	3.32871	5.45018	-22.2181	3206.17	89.5895	296.449	204.032	155.695	0	0	0	0	0	0	0	200	903	0	0	0	0	0	0	0	603	903	0
607	4	2.10801	5.145	-19.4715	2199.09	-32.4808	388.001	198.332	187.061	0	0	0	0	0	0	0	200	903	0	0	0	0	0	0	0	603	903	0
607	5	3.17612	4.53465	-15.8094	2382.2	-154.551	342.225	190.224	149.317	0	0	0	0	0	0	0	200	903	0	0	0	0	0	0	0	603	903	0
607	6	4.09165	3.16136	-14.5887	2290.65	-93.516	250.672	193.59	142.985	0	0	0	0	0	0	0	200	903	0	0	0	0	0	0	0	603	903	0
607	7	3.93906	2.70359	-15.5042	2015.99	-32.4808	204.896	197.905	169.972	0	0	0	0	0	0	0	200	903	0	0	0	0	0	0	0	603	903	0
607	8	2.10801	2.55101	-14.5887	1375.12	-32.4808	113.343	197.774	205.741	0	0	0	0	0	0	0	200	903	0	0	0	0	0	0	0	603	903	0
607	9	3.4813	2.85618	-10.9266	1192.01	211.66	342.225	219.371	190.907	0	0	0	0	0	0	0	200	903	0	0	0	0	0	0	0	603	903	0
608	0	1.95542	1.17771	-10.3162	1008.91	28.5544	204.896	202.768	202.202	0	0	0	0	0	0	0	200	903	0	0	0	0	0	0	0	603	903	0
608	1	0	0	0	0	0	0	200	300	0	0	0	0	0	0	0	200	903	0	0	0	0	0	0	0	603	903	0
608	2	3.02354	1.02513	-11.2318	825.803	28.5544	204.896	202.542	226.476	0	0	0	0	0	0	0	200	903	0	0	0	0	0	0	0	603	903	0
608	3	0	0	0	0	0	0	200	300	0	0	0	0	0	0	0	200	903	0	0	0	0	0	0	0	603	903	0
608	4	0	0	0	0	0	0	200	300	0	0	0	0	0	0	0	200	903	0	0	0	0	0	0	0	603	903	0
608	5	0	0	0	0	0	0	200	300	0	0	0	0	0	0	0	200	903	0	0	0	0	0	0	0	603	903	0
608	6	0	0	0	0	0	0	200	300	0	0	0	0	0	0	0	200	903	0	0	0	0	0	0	0	603	903	0
608	7	1.95542	-3.85769	-9.09552	1.82809	-154.551	21.7904	183.008	299.799	0	0	0	0	0	0	0	200	903	0	0	0	0	0	0	0	603	903	0
608	8	0	0	0	0	0	0	200	300	0	0	0	0	0	0	0	200	903	0	0	0	0	0	0	0	603	903	0
608	9	0	0	0	0	0	0	200	300	0	0	0	0	0	0	0	200	903	0	0	0	0	0	0	0	603	903	0
609	0	0	0	0	0	0	0	200	300	0	0	0	0	0	0	0	200	903	0	0	0	0	0	0	0	603	903	0
609	1	0	0	0	0	0	0	200	300	0	0	0	0	0	0	0	200	903	0	0	0	0	0	0	0	603	903	0
609	2	0	0	0	0	0	0	200	300	0	0	0	0	0	0	0	200	903	0	0	0	0	0	0	0	603	903	0
609	3	0	0	0	0	0	0	200	300	0	0	0	0	0	0	0	200	903	0	0	0	0	0	0	0	603	903	0
609	4	0	0	0	0	0	0	200	300	0	0	0	0	0	0	0	200	903	0	0	0	0	0	0	0	603	903	0
609	5	0	0	0	0	0	0	200	300	0	0	0	0	0	0	0	200	903	0	0	0	0	0	0	0	603	903	0
609	6	0	0	0	0	0	0	200	300	0	0	0	0	0	0	0	200	903	0	0	0	0	0	0	0	603	903	0
609	7	0	0	0	0	0	0	200	300	0	0	0	0	0	0	0	200	903	0	0	0	0	0	0	0	603	903	0
609	8	0	0	0	0	0	0	200	300	0	0	0	0	0	0	0	200	903	0	0	0	0	0	0	0	603	903	0
609	9	0	0	0	0	0	0	200	300	0	0	0	0	0	0	0	200	903	0	0	0	0	0	0	0	603	903	0
610	0	0	0	0	0	0	0	200	300	0	0	0	0	0	0	0	200	903	0	0	0	0	0	0	0	603	903	0
610	1	0	0	0	0	0	0	200	300	0	0	0	0	0	0	0	200	903	0	0	0	0	0	0	0	603	903	0
610	2	0	0	0	0	0	0	200	300	0	0	0	0	0	0	0	200	903	0	0	0	0	0	0	0	603	903	0
610	3	0	0	0	0	0	0	200	300	0	0	0	0	0	0	0	200	903	0	0	0	0	0	0	0	603	903	0
610	4	0	0	0	0	0	0	200	300	0	0	0	0	0	0	0	200	903	0	0	0	0	0	0	0	603	903	0
610	5	0	0	0	0	0	0	200	300	0	0	0	0	0	0	0	200	903	0	0	0	0	0	0	0	603	903	0
610	6	0	0	0	0	0	0	200	300	0	0	0	0	0	0	0	200	903	0	0	0	0	0	0	0	603	903	0
610	7	0	0	0	0	0	0	200	300	0	0	0	0	0	0	0	200	903	0	0	0	0	0	0	0	603	903	0
610	8	0	0	0	0	0	0	200	300	0	0	0	0	0	0	0	200	903	0	0	0	0	0	0	0	603	903	0
610	9	0	0	0	0	0	0	200	300	0	0	0	0	0	0	0	200	903	0	0	0	0	0	0	0	603	903	0
611	0	0	0	0	0	0	0	200	300	0	0	0	0	0	0	0	200	903	0	0	0	0	0	0	0	603	903	0
611	1	0	0	0	0	0	0	200	300	0	0	0	0	0	0	0	200	903	0	0	0	0	0	0	0	603	903	0
611	2	0	0	0	0	0	0	200	300	0	0	0	0	0	0	0	200	903	0	0	0	0	0	0	0	603	903	0
611	3	0	0	0	0	0	0	200	300	0	0	0	0	0	0	0	200	903	0	0	0	0	0	0	0	603	903	0
611	4	0	0	0	0	0	0	200	300	0	0	0	0	0	0	0	200	903	0	0	0	0	0	0	0	603	903	0
611	5	0	0	0	0	0	0	200	300	0	0	0	0	0	0	0	200	903	0	0	0	0	0	0	0	603	903	0
611	6	0	0	0	0	0	0	200	300	0	0	0	0	0	0	0	200	903	0	0	0	0	0	0	0	603	903	0
611	7	0	0	0	0	0	0	200	300	0	0	0	0	0	0	0	200	903	0	0	0	0	0	0	0	603	903	0
611	8	0	0	0	0	0	0	200	300	0	0	0	0	0	0	0	200	903	0	0	0	0	0	0	0	603	903	0
611	9	0	0	0	0	0	0	200	300	0	0	0	0	0	0	0	200	903	0	0	0	0	0	0	0	603	903	0
612	0	0	0	0	0	0	0	200	300	0	0	0	0	0	0	0	200	903	0	0	0	0	0	0	0	603	903	0
612	1	0	0	0	0	0	0	200	300	0	0	0	0	0	0	0	200	903	0	0	0	0	0	0	0	603	903	0
612	2	0	0	0	0	0	0	200	300	0	0	0	0	0	0	0	200	903	0	0	0	0	0	0	0	603	903	0
612	3	0	0	0	0	0	0	200	300	0	0	0	0	0	0	0	200	903	0	0	0	0	0	0	0	603	903	0
612	4	0	0	0	0	0	0	200	300	0	0	0	0	0	0	0	200	903	0	0	0	0	0	0	0	603	903	0
612	5	0	0	0	0	0	0	200	300	0	0	0	0	0	0	0	200	903	0	0	0	0	0	0	0	603	903	0
612	6	0	0	0	0	0	0	200	300	0	0	0	0	0	0	0	200	903	0	0	0	0	0	0	0	603	903	0
612	7	0	0	0	0	0	0	200	300	0	0	0	0	0	0	0	200	903	0	0	0	0	0	0	0	603	903	0
612	8	0	0	0	0	0	0	200	300	0	0	0	0	0	0	0	200	903	0	0	0	0	0	0	0	603	903	0
612	9	0	0	0	0	0	0	200	300	0	0	0	0	0	0	0	200	903	0	0	0	0	0	0	0	603	903	0
613	0	0	0	0	0	0	0	200	300	0	0	0	0	0	0	0	200	903	0	0	0	0	0	0	0	603	903	0
613	1	0	0	0	0	0	0	200	300	0	0	0	0	0	0	0	200	903	0	0	0	0	0	0	0	603	903	0
613	2	0	0	0	0	0	0	200	300	0	0	0	0	0	0	0	200	903	0	0	0	0	0	0	0	603	903	0
613	3	0	0	0	0	0	0	200	300	0	0	0	0	0	0	0	200	903	0	0	0	0	0	0	0	603	903	0
613	4	0	0	0	0	0	0	200	300	0	0	0	0	0	0	0	200	903	0	0	0	0	0	0	0	603	903	0
613	5	0	0	0	0	0	0	200	300	0	0	0	0	0	0	0	200	903	0	0	0	0	0	0	0	603	903	0
613	6	0	0	0	0	0	0	200	300	0	0	0	0	0	0	0	200	903	0	0	0	0	0	0	0	603	903	0
613	7	0	0	0	0	0	0	200	300	0	0	0	0	0	0	0	200	903	0	0	0	0	0	0	0	603	903	0
613	8	0	0	0	0	0	0	200	300	0	0	0	0	0	0	0	200	903	0	0	0	0	0	0	0	603	903	0
613	9	0	0	0	0	0	0	200	300	0	0	0	0	0	0	0	200	903	0	0	0	0	0	0	0	603	903	0
614	0	0	0	0	0	0	0	200	300	0	0	0	0	0	0	0	200	903	0	0	0	0	0	0	0	603	903	0
614	1	0	0	0	0	0	0	200	300	0	0	0	0	0	0	0	200	903	0	0	0	0	0	0	0	603	903	0
614	2	0	0	0	0	0	0	200	300	0	0	0	0	0	0	0	200	903	0	0	0	0	0	0	0	603	903	0
614	3	0	0	0	0	0	0	200	300	0	0	0	0	0	0	0	200	903	0	0	0	0	0	0	0	603	903	0
614	4	0	0	0	0	0	0	200	300	0	0	0	0	0	0	0	200	903	0	0	0	0	0	0	0	603	903	0
614	5	0	0	0	0	0	0	200	300	0	0	0	0	0	0	0	200	903	0	0	0	0	0	0	0	603	903	0
614	6	0	0	0	0	0	0	200	300	0	0	0	0	0	0	0	200	903	0	0	0	0	0	0	0	603	903	0
614	7	0	0	0	0	0	0	200	300	0	0	0	0	0	0	0	200	903	0	0	0	0	0	0	0	603	903	0
614	8	0	0	0	0	0	0	200	300	0	0	0	0	0	0	0	200	903	0	0	0	0	0	0	0	603	903	0
614	9	0	0	0	0	0	0	200	300	0	0	0	0	0	0	0	200	903	0	0	0	0	0	0	0	603	903	0
615	0	0	0	0	0	0	0	200	300	0	0	0	0	0	0	0	200	903	0	0	0	0	0	0	0	603	903	0
615	1	0	0	0	0	0	0	200	300	0	0	0	0	0	0	0	200	903	0	0	0	0	0	0	0	603	903	0
615	2	0	0	0	0	0	0	200	300	0	0	0	0	0	0	0	200	903	0	0	0	0	0	0	0	603	903	0
615	3	0	0	0	0	0	0	200	300	0	0	0	0	0	0	0	200	903	0	0	0	0	0	0	0	603	903	0
615	4	0	0	0	0	0	0	200	300	0	0	0	0	0	0	0	200	903	0	0	0	0	0	0	0	603	903	0
615	5	0	0	0	0	0	0	200	300	0	0	0	0	0	0	0	200	903	0	0	0	0	0	0	0	603	903	0
615	6	0	0	0	0	0	0	200	300	0	0	0	0	0	0	0	200	903	0	0	0	0	0	0	0	603	903	0
615	7	0	0	0	0	0	0	200	300	0	0	0	0	0	0	0	200	903	0	0	0	0	0	0	0	603	903	0
615	8	0	0	0	0	0	0	200	300	0	0	0	0	0	0	0	200	903	0	0	0	0	0	0	0	603	903	0
615	9	0	0	0	0	0	0	200	300	0	0	0	0	0	0	0	200	903	0	0	0	0	0	0	0	603	903	0
616	0	0	0	0	0	0	0	200	300	0	0	0	0	0	0	0	200	903	0	0	0	0	0	0	0	603	903	0
616	1	0	0	0	0	0	0	200	300	0	0	0	0	0	0	0	200	903	0	0	0	0	0	0	0	603	903	0
616	2	0	0	0	0	0	0	200	300	0	0	0	0	0	0	0	200	903	0	0	0	0	0	0	0	603	903	0
616	3	0	0	0	0	0	0	200	300	0	0	0	0	0	0	0	200	903	0	0	0	0	0	0	0	603	903	0
616	4	0	0	0	0	0	0	200	300	0	0	0	0	0	0	0	200	903	0	0	0	0	0	0	0	603	903	0
616	5	0	0	0	0	0	0	200	300	0	0	0	0	0	0	0	200	903	0	0	0	0	0	0	0	603	903	0
616	6	0	0	0	0	0	0	200	300	0	0	0	0	0	0	0	200	903	0	0	0	0	0	0	0	603	903	0
616	7	0	0	0	0	0	0	200	300	0	0	0	0	0	0	0	200	903	0	0	0	0	0	0	0	603	903	0
616	8	0	0	0	0	0	0	200	300	0	0	0	0	0	0	0	200	903	0	0	0	0	0	0	0	603	903	0
616	9	0	0	0	0	0	0	200	300	0	0	0	0	0	0	0	200	903	0	0	0	0	0	0	0	603	903	0
617	0	0	0	0	0	0	0	200	300	0	0	0	0	0	0	0	200	903	0	0	0	0	0	0	0	603	903	0
617	1	0	0	0	0	0	0	200	300	0	0	0	0	0	0	0	200	903	0	0	0	0	0	0	0	603	903	0
617	2	0	0	0	0	0	0	200	300	0	0	0	0	0	0	0	200	903	0	0	0	0	0	0	0	603	903	0
617	3	0	0	0	0	0	0	200	300	0	0	0	0	0	0	0	200	903	0	0	0	0	0	0	0	603	903	0
617	4	0	0	0	0	0	0	200	300	0	0	0	0	0	0	0	200	903	0	0	0	0	0	0	0	603	903	0
617	5	0	0	0	0	0	0	200	300	0	0	0	0	0	0	0	200	903	0	0	0	0	0	0	0	603	903	0
[truncated: 1,164 more rows]
