# Supplementary material for: The Effects of an Extemporaneous Speech Dual-task on Older Adult Gait Control
Source: Research Square preprint supplement (doi:10.21203/rs.3.rs-7674245/v1), 2025-11-18
Supplement: Supplementary file 181 [file Over7ground08.xlsx]

## Sheet: Sheet1
Trajectories
		07:LFHD			07:RFHD			07:LBHD			07:RBHD			07:C7			07:T10			07:CLAV			07:STRN			07:RBAK			07:LSHO			07:LUPA			07:LELB			07:LFRM			07:LWRA			07:LWRB			07:LFIN
Frame	Sub Frame	X	Y	Z	X	Y	Z	X	Y	Z	X	Y	Z	X	Y	Z	X	Y	Z	X	Y	Z	X	Y	Z	X	Y	Z	X	Y	Z	X	Y	Z	X	Y	Z	X	Y	Z	X	Y	Z	X	Y	Z	X	Y	Z
		mm	mm	mm	mm	mm	mm	mm	mm	mm	mm	mm	mm	mm	mm	mm	mm	mm	mm	mm	mm	mm	mm	mm	mm	mm	mm	mm	mm	mm	mm	mm	mm	mm	mm	mm	mm	mm	mm	mm	mm	mm	mm	mm	mm	mm	mm	mm	mm
577	0	142.438	-1081.85	1624.51	240.544	-1071.55	1627.55	135.596	-1238.1	1622.08	264.712	-1241.1	1617.95	226.07	-1281.16	1497.22	232.898	-1351.59	1245.7	207.461	-1161.82	1411.56	204.55	-1098.97	1259.23	319.491	-1346.7	1307.35	50.667	-1282.09	1445.68	0.443569	-1295.92	1260.06	-10.6969	-1312.74	1107.68	-50.0592	-1199.39	972.674	-28.2757	-1144.49	911.168	-58.3938	-1201.98	889.793	-71.6223	-1125.52	838.23
578	0	141.715	-1066.77	1625.64	239.441	-1056.52	1628.35	134.743	-1223.08	1623.8	264.06	-1225.95	1620.03	225.883	-1266.44	1499.2	233.829	-1337.01	1247.94	207.016	-1147.56	1413.58	203.945	-1085.02	1260.89	320.033	-1331.92	1309.83	50.5967	-1268.33	1447.25	1.26858	-1283.28	1261.41	-8.71913	-1300.95	1109.38	-46.7091	-1192.99	969.888	-24.2315	-1140.63	906.387	-54.1936	-1198.64	886.998	-66.0244	-1124.52	831.925
579	0	140.787	-1051.62	1626.6	238.863	-1041.32	1629.74	134.261	-1208	1625.28	263.407	-1210.94	1621.69	225.741	-1251.81	1500.88	234.967	-1322.11	1249.95	206.478	-1133.12	1415.21	203.823	-1070.9	1262.87	320.816	-1316.95	1312.12	50.7391	-1254.53	1448.38	2.14413	-1270.59	1262.65	-6.77126	-1289.42	1111.02	-43.2721	-1186.88	967.418	-19.9944	-1136.97	901.862	-50.2244	-1195.55	884.93	-60.6112	-1124.1	826.048
580	0	140.159	-1036.72	1627.09	238.141	-1026.27	1630.52	133.51	-1192.87	1626.74	262.72	-1195.84	1622.94	225.626	-1237.02	1502.31	235.982	-1307.35	1251.75	206.135	-1118.65	1416.37	203.649	-1056.66	1264.33	321.547	-1302.06	1314.14	50.9244	-1240.67	1449.5	3.09099	-1257.87	1263.69	-4.70681	-1278.08	1112.57	-39.7462	-1180.82	965.355	-15.7297	-1133.88	898.014	-46.475	-1192.62	882.998	-54.9445	-1123.89	820.386
581	0	139.466	-1021.72	1627.72	237.357	-1011.3	1631.08	132.881	-1177.9	1627.36	262.023	-1180.9	1624.22	225.482	-1222.16	1503.44	236.734	-1292.66	1253.41	205.936	-1103.96	1417.71	203.408	-1042.27	1265.21	322.227	-1287.03	1316.07	51.1652	-1226.55	1450.08	3.90019	-1244.84	1264.25	-2.38774	-1267.04	1113.3	-36.3921	-1174.96	963.241	-11.5977	-1130.73	894.224	-42.8658	-1189.66	881.3	-49.4064	-1123.84	815.348
582	0	138.632	-1006.8	1628.19	236.427	-996.345	1631.37	132.256	-1163.06	1627.65	261.146	-1165.88	1624.74	225.341	-1207.37	1504.34	237.513	-1278.05	1254.66	205.794	-1089.34	1418.59	203.438	-1027.86	1265.96	322.761	-1272.08	1317.41	51.1929	-1212.43	1450.48	4.89041	-1231.7	1264.37	-0.091095	-1256.09	1114.02	-32.8985	-1169.12	961.158	-7.37423	-1127.67	890.505	-39.164	-1186.73	879.643	-44.1133	-1123.9	810.275
583	0	137.945	-991.907	1628.09	235.797	-981.393	1631.78	131.591	-1148.41	1627.74	260.733	-1150.9	1625.27	225.362	-1192.31	1504.53	238.43	-1263.19	1255.51	205.563	-1074.64	1419.07	203.601	-1013.33	1266.39	323.378	-1257.13	1318.52	51.4471	-1198.11	1450.54	6.21389	-1218.65	1264.11	2.53158	-1245.52	1114.61	-29.0662	-1163.67	958.66	-3.13281	-1125.48	886.282	-35.5512	-1184	877.92	-38.8552	-1124.26	805.865
584	0	137.253	-977.088	1627.91	235.213	-966.349	1632.24	131.076	-1133.41	1627.82	260.267	-1135.85	1625.49	225.231	-1177.41	1505.05	239.199	-1248.27	1255.93	205.372	-1059.71	1419.27	203.657	-998.637	1266.23	323.915	-1242.23	1319.31	51.4011	-1183.75	1450.49	7.71158	-1205.52	1264.43	5.33272	-1235.05	1114.98	-25.6374	-1158.2	956.627	0.820884	-1123.01	882.695	-31.7887	-1181.11	876.542	-34.0692	-1124.55	801.828
585	0	136.742	-962.187	1627.58	234.534	-951.19	1632.04	130.643	-1118.39	1627.26	259.94	-1120.69	1625.4	225.195	-1162.27	1504.95	239.739	-1233.53	1256.29	205.189	-1044.75	1419.04	203.568	-983.975	1265.62	324.326	-1227.31	1319.89	51.3736	-1169.18	1450.06	8.83885	-1192.7	1263.48	8.20644	-1224.55	1114.95	-22.2403	-1152.81	954.453	4.06632	-1119.09	881.094	-28.1895	-1178.28	875.439	-29.4191	-1124.66	797.896
586	0	136.055	-947.318	1627.12	233.818	-936.203	1631.77	130.263	-1103.53	1626.21	259.582	-1105.61	1624.49	225.037	-1147.28	1504.72	240.176	-1219.02	1256.19	205.074	-1029.8	1418.35	203.55	-969.375	1264.94	324.879	-1212.11	1319.95	51.4314	-1154.58	1449.3	10.3056	-1180.14	1262.29	11.2455	-1214.21	1114.94	-18.9158	-1147.36	952.661	8.85951	-1117.43	876.46	-24.3009	-1175.5	874.173	-24.9403	-1125.34	794.769
587	0	135.46	-932.361	1626.4	233.442	-921.029	1631.45	129.819	-1088.64	1624.89	258.943	-1090.58	1623.39	224.959	-1132.14	1503.91	240.513	-1204.17	1255.51	204.959	-1014.72	1417.39	203.937	-954.557	1264.22	325.073	-1197.33	1319.44	51.4823	-1139.82	1448.13	11.805	-1167.86	1261.14	14.3142	-1203.85	1114.47	-15.1686	-1142.49	950.404	12.5191	-1114.53	873.716	-20.3657	-1172.89	872.931	-20.8113	-1125.54	791.805
588	0	135.064	-917.26	1625.13	232.725	-906.027	1630.45	129.548	-1073.54	1623.33	258.72	-1075.36	1622.11	224.759	-1116.9	1502.87	240.919	-1188.98	1254.66	205.098	-999.448	1416.42	203.874	-939.879	1262.51	325.514	-1181.81	1318.95	51.3229	-1125.01	1446.77	13.2549	-1155.53	1260.07	17.4042	-1193.53	1114.21	-11.8467	-1137.17	948.507	16.5855	-1111.91	870.484	-16.26	-1170.19	871.644	-16.8351	-1125.63	788.832
589	0	134.528	-902.132	1624.13	232.29	-890.811	1629.36	129.304	-1058.32	1621.71	258.575	-1060.07	1620.42	224.68	-1101.51	1501.54	241.106	-1174.21	1253.78	204.814	-984.176	1414.8	204.108	-925.032	1261.06	325.618	-1167.03	1317.97	51.2916	-1109.88	1445.13	14.6924	-1143.38	1258.73	20.2822	-1183	1113.62	-8.30054	-1131.94	946.413	21.3721	-1109.38	867.708	-12.1459	-1167.35	870.536	-12.674	-1125.32	786.446
590	0	134.225	-887.034	1622.91	231.959	-875.568	1628.11	129.019	-1043.36	1619.67	258.157	-1044.85	1618.55	224.623	-1086.07	1500	241.288	-1159.47	1252.18	204.871	-968.626	1413.23	204.026	-910.212	1258.39	325.869	-1151.74	1316.77	51.3327	-1094.75	1443.33	16.2469	-1131.26	1257.14	23.2618	-1172.62	1113.02	-5.08986	-1126.66	944.455	24.9119	-1106.22	865.356	-7.82001	-1164.3	869.645	-8.62379	-1124.78	784.357
591	0	133.871	-871.94	1620.88	231.247	-860.467	1626.4	128.887	-1028.07	1617.53	258.114	-1029.4	1616.38	224.549	-1070.49	1498.05	241.638	-1144.14	1250.39	204.889	-953.221	1411.29	204.76	-895.519	1256.86	326.053	-1136.57	1315.16	51.3985	-1079.57	1441.47	17.7647	-1119.1	1255.73	25.9232	-1162.06	1112.56	-1.65988	-1121.34	942.415	28.3866	-1102.84	863.07	-3.62472	-1161.12	868.726	-4.63939	-1123.97	782.557
592	0	133.524	-856.664	1619.32	231.264	-844.933	1625.11	128.549	-1012.84	1615.2	257.833	-1014	1614.22	224.248	-1055.04	1496.17	241.268	-1129.47	1248.92	204.894	-937.748	1409.04	204.805	-880.7	1254.35	326.096	-1121.48	1313.32	51.3241	-1064.19	1439.17	19.1597	-1106.82	1254.19	28.4862	-1151.43	1111.86	1.33915	-1115.8	940.888	31.8379	-1099.05	861.049	0.321046	-1157.49	868.271	-0.697909	-1122.71	781.047
593	0	133.076	-841.301	1617.54	230.655	-829.628	1623.19	128.377	-997.49	1612.51	257.518	-998.558	1611.56	224.145	-1039.32	1494.01	241.382	-1114.03	1246.81	204.768	-922.056	1406.77	205.285	-865.62	1252.19	326.12	-1105.94	1311.67	51.1058	-1048.61	1436.93	20.4506	-1094.27	1252.56	30.9248	-1140.6	1110.99	4.12388	-1109.89	939.177	35.0871	-1094.76	858.707	3.93567	-1153.41	868.224	3.09755	-1121.03	779.471
594	0	132.818	-825.979	1615.23	230.439	-814.216	1621.2	128.219	-982.253	1609.76	257.154	-983.154	1608.71	224.073	-1023.76	1491.68	241.072	-1099.25	1244.44	204.577	-906.583	1404	205.08	-850.282	1248.89	325.733	-1091.09	1309.43	50.9928	-1033.05	1434.58	21.7044	-1081.53	1250.78	33.2663	-1129.78	1110.3	6.85669	-1103.89	937.863	37.6875	-1090.1	857.137	8.12675	-1149.09	867.166	6.86902	-1118.96	778.112
595	0	132.305	-810.636	1613.24	230.042	-798.747	1619.14	127.959	-966.831	1607.08	256.964	-967.602	1606.01	223.685	-1007.96	1489.41	240.84	-1084.2	1242.5	204.641	-890.836	1401.6	205.578	-834.955	1246.59	325.666	-1075.8	1307.28	50.7503	-1017.46	1432.07	22.7645	-1068.73	1248.95	35.3038	-1118.66	1109.53	9.38556	-1097.28	936.694	40.0835	-1084.8	855.899	11.6956	-1144.12	866.904	10.4906	-1116.39	777.082
596	0	132.226	-795.36	1610.79	229.548	-783.27	1616.93	127.792	-951.195	1604.33	257.044	-951.978	1603.62	223.479	-992.266	1487.11	240.64	-1069.04	1239.98	204.459	-875.049	1398.97	205.637	-819.388	1243.77	325.574	-1060.31	1305.3	50.6474	-1001.71	1429.65	23.6307	-1055.34	1247.4	37.193	-1107.14	1108.87	11.4993	-1090.16	935.558	42.4449	-1079.01	854.325	14.9238	-1138.39	866.941	14.0288	-1113.06	776.332
597	0	131.604	-779.848	1608.46	229.21	-767.727	1614.77	127.622	-935.838	1601.52	256.769	-936.441	1600.95	223.175	-976.612	1484.6	240.115	-1054.05	1237.23	204.241	-859.468	1396.04	205.448	-803.822	1240.59	324.667	-1045.69	1303.1	50.2899	-986.02	1427.16	23.9603	-1041.84	1245.73	38.7629	-1095.54	1107.98	13.4513	-1082.7	934.519	44.4709	-1072.75	852.793	18.0554	-1132.09	866.907	17.2793	-1109.16	775.694
598	0	131.321	-764.431	1605.82	228.674	-752.201	1612.25	127.257	-920.316	1598.75	256.515	-920.686	1597.9	222.573	-961.165	1482.23	239.368	-1038.65	1234.97	204.234	-843.585	1393.73	205.601	-788.311	1238.03	324.365	-1030.34	1300.38	49.8186	-970.23	1424.67	24.4952	-1028.13	1243.97	40.0668	-1083.46	1107.35	15.2513	-1074.57	933.397	43.3671	-1064.01	854.214	20.8009	-1125.51	866.858	20.6074	-1104.94	774.659
599	0	130.782	-748.781	1603.75	228.134	-736.624	1609.91	127.039	-904.863	1596.25	256.072	-905.04	1595.53	222.092	-945.705	1479.86	238.445	-1023.49	1232.65	203.744	-828.038	1391.06	205.393	-772.393	1235.49	323.648	-1015.07	1298.24	49.3876	-954.631	1422.44	24.7417	-1014.21	1242.1	41.1419	-1070.94	1106.49	16.7467	-1065.85	932.544	47.8056	-1058.33	850.938	23.4129	-1118.11	866.861	23.2797	-1099.86	774.278
600	0	130.293	-733.364	1601.35	227.61	-720.925	1607.73	126.614	-889.182	1594.02	255.764	-889.309	1593.47	221.534	-930.181	1477.65	237.397	-1007.61	1230.16	203.349	-812.285	1388.89	205.305	-757.061	1233.53	322.899	-999.401	1295.8	48.7389	-938.896	1420.19	24.6938	-1000.07	1240.46	41.8336	-1058.04	1105.61	18.0855	-1056.46	931.745	48.7056	-1050.11	850.65	25.5066	-1109.95	867.083	25.7296	-1093.45	774.428
601	0	129.952	-717.632	1599.35	227.072	-705.335	1605.79	126.323	-873.596	1592.16	255.242	-873.72	1591.41	220.918	-914.633	1475.57	236.172	-991.87	1228.05	202.821	-796.79	1386.58	204.757	-741.293	1231.22	321.788	-984.069	1293.49	48.0275	-923.064	1418.32	24.4909	-985.637	1239.09	42.4608	-1044.68	1104.69	19.0934	-1046.4	931.097	49.392	-1040.5	849.772	27.3565	-1101.07	867.453	28.0051	-1086.54	774.177
602	0	129.433	-702.016	1597.43	226.683	-689.536	1603.69	125.905	-857.964	1590.45	254.983	-857.941	1589.91	220.232	-899.09	1473.58	235.169	-975.435	1225.96	202.257	-781.16	1384.95	204.19	-725.577	1229.96	320.82	-968.251	1291.33	47.3511	-907.325	1416.65	24.1146	-970.766	1237.9	42.8438	-1030.93	1104.19	19.7299	-1035.61	930.724	50.7067	-1030.97	849.225	28.57	-1091.08	867.884	30.0491	-1079.1	774.002
603	0	128.965	-686.365	1595.59	226.225	-673.879	1601.93	125.332	-842.23	1589.12	254.349	-842.294	1588.29	219.335	-883.621	1472.08	233.871	-959.143	1223.84	201.561	-765.32	1383.57	203.336	-709.736	1228.76	319.508	-952.481	1289.18	46.4329	-891.514	1415.11	23.4191	-955.755	1236.66	42.5122	-1016.94	1103.86	20.1227	-1024	930.323	51.0484	-1020.35	849.209	29.3328	-1080.19	868.503	30.9979	-1069.56	774.752
604	0	128.445	-670.602	1593.68	225.69	-658.24	1600.01	124.695	-826.49	1587.8	253.775	-826.656	1587.16	218.438	-868.103	1470.32	232.337	-942.937	1221.88	200.539	-749.645	1382.15	202.427	-693.557	1227.75	317.961	-936.756	1287.1	45.4267	-875.628	1413.72	22.4718	-940.411	1235.82	42.2432	-1002.27	1103.49	20.081	-1011.46	930.159	51.1266	-1008.91	849.018	29.4713	-1068.47	868.913	32.0484	-1059.45	774.969
605	0	127.963	-654.847	1592.69	225.041	-642.842	1598.1	124.16	-810.958	1586.85	253.001	-811.214	1585.52	217.41	-852.54	1468.99	230.74	-926.759	1220.03	199.662	-733.787	1381.04	201.232	-677.157	1227.04	316.518	-920.806	1285.08	44.3825	-859.726	1412.54	21.5523	-924.921	1234.89	41.6289	-987.5	1102.93	19.774	-998.293	929.805	50.975	-996.602	848.916	29.303	-1055.71	869.494	32.5598	-1048.54	775.089
606	0	127.612	-639.315	1590.93	224.855	-627.098	1596.84	123.44	-795.334	1585.94	252.546	-795.891	1585.04	216.324	-836.914	1467.39	229.224	-910.216	1218.38	198.458	-717.945	1379.92	199.451	-660.524	1226.02	314.655	-904.633	1283.53	43.3115	-843.79	1411.45	20.3043	-909.35	1234.11	40.4052	-972.634	1102.67	18.8797	-984.378	929.561	49.8791	-983.09	848.968	28.4346	-1042.3	869.669	32.3555	-1036.33	775.43
607	0	126.957	-623.528	1590	223.97	-611.828	1595.01	122.822	-779.537	1585.57	251.782	-780.17	1583.91	215.212	-821.445	1466.26	227.733	-893.228	1216.66	197.247	-702.011	1379.09	197.887	-643.491	1225.67	313.179	-888.437	1281.64	41.9869	-827.722	1410.76	18.8937	-893.355	1233.38	39.1216	-956.869	1102.5	17.7155	-969.617	929.443	49.6418	-969.461	848.43	26.8466	-1027.93	869.877	31.5643	-1023.2	775.448
608	0	126.463	-607.661	1590.04	223.777	-595.823	1595.01	121.927	-763.683	1585.57	250.974	-764.545	1583.78	213.855	-805.937	1465.6	225.966	-876.727	1215.48	195.906	-686.044	1378.78	195.971	-626.643	1225.71	311.716	-872.142	1280.08	40.7706	-811.716	1410.02	17.3587	-876.963	1232.94	37.6549	-940.764	1101.86	16.0927	-954.102	929.078	48.1775	-954.698	848.191	25.085	-1012.62	869.937	30.2208	-1008.82	775.647
609	0	125.879	-591.809	1590.32	222.89	-580.423	1594.43	121.097	-747.819	1586.15	250.23	-748.911	1583.75	212.588	-790.288	1465.39	224.409	-860.083	1214.3	194.681	-670.059	1379	194.078	-609.844	1225.94	310.173	-856.026	1278.93	39.282	-795.705	1409.91	15.584	-860.581	1232.71	35.7285	-924.339	1101.39	14.2039	-937.941	928.791	46.3143	-938.821	848.13	22.7271	-996.788	869.633	28.4885	-993.386	775.404
610	0	125.282	-575.983	1590.48	222.352	-564.78	1594.61	120.172	-731.921	1586.98	249.19	-733.288	1584.25	211.511	-774.538	1465.48	223.281	-843.336	1213.95	193.543	-654.173	1379.56	192.623	-593.135	1227.12	308.789	-839.889	1278.27	37.7297	-779.717	1410.28	13.8865	-843.74	1232.39	33.4411	-907.599	1101.44	11.8513	-921.117	928.526	43.6207	-921.892	847.808	19.8718	-979.772	869.633	25.9073	-976.853	775.59
611	0	124.638	-560.105	1591.3	221.696	-549.138	1594.94	119.318	-716.12	1587.92	248.134	-717.795	1584.7	210.278	-758.709	1465.96	222.081	-826.973	1214.14	192.235	-638.169	1380.05	190.725	-576.567	1227.81	307.619	-823.845	1278.02	36.5802	-763.545	1410.6	11.872	-826.746	1232.44	31.2077	-890.199	1101.52	8.95791	-903.39	928.915	40.5639	-904.028	848.255	16.5742	-962.087	869.665	22.7197	-959.282	775.395
612	0	123.994	-544.154	1592.55	221.319	-533.368	1595.94	118.306	-700.206	1589.06	247.377	-702.032	1585.57	209.252	-742.897	1466.65	221.322	-810.618	1214.62	191.521	-622.308	1381.26	189.526	-559.991	1228.97	306.774	-807.784	1278.67	35.5758	-747.596	1411.35	10.102	-809.272	1233.11	28.5662	-872.638	1101.83	5.73333	-884.953	929.03	37.0531	-885.429	848.313	12.9743	-943.477	869.767	18.7751	-940.396	775.541
613	0	123.404	-528.396	1593.44	220.586	-517.747	1596.73	117.576	-684.434	1590.24	246.58	-686.51	1586.74	208.332	-727.124	1467.65	220.597	-794.88	1214.7	190.661	-606.541	1382.22	188.66	-543.618	1230.64	306.012	-791.94	1279.49	34.7661	-731.542	1412.47	8.34228	-791.971	1233.74	26.3213	-854.744	1102.06	2.21872	-865.923	929.576	33.1854	-866.046	848.634	8.89674	-924.107	869.835	14.4361	-920.63	775.411
614	0	122.772	-512.683	1594.42	220.004	-502.111	1597.94	116.682	-668.629	1591.64	245.726	-670.769	1588.09	207.569	-711.453	1468.84	219.989	-778.893	1216.16	189.972	-590.812	1383.32	187.717	-527.616	1231.94	305.353	-776.245	1281.12	33.9305	-715.484	1413.73	6.844	-774.459	1234.67	23.6029	-836.666	1102.74	-1.67037	-846.151	929.944	28.9243	-845.876	848.804	4.41107	-903.82	869.847	9.07991	-899.767	775.593
615	0	122.068	-496.838	1595.85	219.301	-486.406	1599.22	115.969	-652.879	1592.81	245.345	-655.177	1589.8	206.742	-695.889	1470.22	219.365	-763.283	1217.49	189.702	-575.267	1384.6	187.263	-511.651	1233.06	304.548	-761.218	1282.55	33.0952	-699.241	1415.1	5.03291	-756.774	1235.66	20.7576	-818.376	1103.1	-5.79692	-825.782	930.66	24.1698	-824.823	849.158	-0.36239	-882.869	869.575	3.39025	-877.561	775.481
616	0	121.555	-481.158	1596.68	218.558	-470.645	1600.38	115.372	-637.24	1593.96	244.172	-639.413	1590.83	205.995	-680.419	1471.83	218.676	-748.187	1219.11	189.422	-559.861	1385.92	187.216	-496.087	1234.82	303.76	-746.152	1284.42	32.4591	-683.162	1416.56	3.44655	-739.222	1236.76	17.6736	-799.995	1103.58	-10.1834	-805.155	930.914	19.0811	-803.161	849.24	-5.33024	-861.276	869.272	-2.62452	-854.608	775.185
617	0	121.06	-465.392	1598	218.287	-455.035	1602.07	114.826	-621.526	1595.35	243.784	-623.845	1592.6	205.431	-665.165	1473.62	218.027	-732.991	1221.58	189.528	-544.634	1387.3	187.738	-481.14	1236.41	302.989	-731.573	1286.45	31.8216	-667.153	1418.08	1.92528	-721.722	1237.72	14.709	-781.28	1104.2	-14.6539	-783.784	931.702	14.122	-780.47	849.581	-10.4968	-839.043	869.014	-9.05296	-830.56	774.954
618	0	120.577	-449.89	1599.04	217.708	-439.544	1603.19	114.323	-605.838	1597.1	243.582	-608.325	1595.07	204.966	-650.036	1475.32	217.163	-718.041	1223.91	189.56	-529.755	1388.88	188.178	-466.308	1237.26	302.242	-717.228	1288.53	31.2756	-651.118	1419.79	0.21549	-704.06	1239.09	11.3832	-762.58	1104.37	-19.3387	-761.98	932.276	8.49843	-757.222	849.991	-15.9166	-816.237	868.576	-15.9523	-805.568	774.934
619	0	120.432	-434.45	1600.1	217.655	-424.064	1604.93	113.916	-590.355	1598.75	243.15	-592.953	1597.4	204.468	-635.287	1477.45	216.661	-703.044	1225.72	189.729	-514.882	1390.36	189.179	-451.878	1238.67	301.5	-702.948	1290.42	30.8116	-635.206	1421.71	-1.46286	-686.404	1240.46	8.14867	-743.705	1105.06	-24.1064	-739.623	933.025	2.73442	-733.314	850.432	-21.5179	-792.602	868.288	-22.9871	-779.508	775.029
620	0	120.238	-418.85	1601.33	217.443	-408.75	1606.12	113.596	-574.803	1600.71	242.896	-577.702	1599.77	203.967	-620.563	1479.3	215.701	-688.626	1227.94	190.238	-500.139	1392.25	190.48	-437.242	1240.79	300.619	-688.835	1292.48	30.3917	-619.539	1423.48	-3.23837	-668.562	1242.05	5.17568	-724.372	1105.47	-28.9984	-716.959	933.84	-3.1076	-709.107	851.265	-27.2156	-768.626	867.842	-30.1599	-752.834	775.084
621	0	120.348	-403.583	1602.42	217.451	-393.609	1607.44	113.28	-559.542	1602.88	242.554	-562.628	1602.12	203.637	-606.032	1481.34	214.658	-674.335	1229.76	190.649	-485.639	1394.17	191.736	-423.087	1242.53	299.777	-674.996	1294.54	30.0894	-604.027	1425.36	-5.24399	-651	1243.44	1.42476	-705.723	1106.07	-34.2528	-693.714	934.862	-8.27203	-684.531	852.273	-33.1182	-744.018	867.643	-37.4536	-725.695	775.203
622	0	120.393	-388.219	1603.78	217.578	-378.452	1608.75	113.016	-544.182	1604.91	241.994	-547.478	1604.25	203.28	-591.726	1483.61	213.825	-659.974	1231.76	190.937	-471.235	1395.95	192.853	-408.524	1244.26	298.808	-661.162	1296.53	29.7249	-588.628	1427.51	-6.97337	-633.428	1245.12	-1.86035	-686.109	1107.09	-39.0819	-670.126	935.81	-15.2636	-658.222	854.458	-39.0629	-718.891	867.526	-45.2307	-697.068	776.297
623	0	120.658	-373.027	1604.97	217.888	-363.415	1610.25	112.914	-528.819	1607.42	242.158	-532.688	1607.3	203.006	-577.293	1485.64	212.719	-645.772	1233.71	191.373	-456.957	1397.94	194.202	-393.762	1247	297.872	-647.557	1298.36	29.5648	-573.477	1429.78	-8.63225	-615.887	1246.65	-5.52421	-667.104	1107.67	-44.0692	-646.098	937.098	-20.0636	-632.936	854.646	-45.1066	-693.261	867.591	-52.6997	-668.126	777.432
624	0	120.969	-357.958	1606.63	218.393	-348.565	1612.03	112.657	-513.698	1609.83	242.021	-517.862	1609.83	202.897	-563.117	1487.97	212.026	-631.495	1236.02	191.846	-442.747	1400.23	195.092	-379.212	1249.31	296.929	-634.004	1300.45	29.4639	-558.676	1431.96	-10.3318	-598.509	1248.85	-8.47118	-647.303	1108.05	-48.9193	-621.845	938.969	-25.7315	-606.49	856.862	-51.1568	-667.143	868.115	-60.4893	-638.602	779.036
625	0	121.271	-342.877	1607.93	218.728	-333.848	1613.67	112.76	-498.805	1612.14	242.016	-503.178	1612.58	202.879	-548.879	1490.31	210.913	-617.692	1237.49	192.404	-428.63	1402.75	195.979	-364.642	1252.11	296.08	-620.491	1302.58	29.4771	-543.816	1434.55	-12.1895	-581.216	1250.94	-12.0528	-627.708	1109.3	-53.8876	-597.305	941.06	-31.4957	-579.792	859.139	-57.0397	-640.373	868.738	-67.9575	-608.672	781.422
626	0	121.8	-327.986	1609.87	219.215	-319.191	1615.28	112.736	-483.818	1614.48	241.954	-488.485	1615.45	202.77	-534.667	1492.41	210.255	-603.433	1239.42	192.617	-414.507	1404.8	196.352	-350.307	1254.18	295.24	-606.675	1304.46	29.3597	-528.993	1437.01	-13.6802	-563.943	1253.3	-15.4518	-608.241	1110.5	-58.81	-572.449	943.58	-37.7292	-552.336	862.027	-63.1464	-613.489	870.357	-75.414	-578.107	784.446
627	0	122.233	-313.203	1611.25	219.733	-304.631	1616.74	112.728	-468.928	1616.69	241.9	-474.075	1617.47	202.648	-520.524	1494.52	207.788	-591.365	1242.79	192.77	-400.346	1406.77	197.008	-336.001	1256.8	294.353	-593.431	1306.43	29.282	-514.237	1439.37	-15.3891	-546.867	1255.69	-18.9027	-588.83	1112.74	-63.6599	-547.368	946.369	-43.9347	-524.173	866.04	-69.061	-586.257	871.972	-82.6767	-547.421	787.699
628	0	122.574	-298.546	1612.71	220.216	-290.095	1618.12	112.831	-454.151	1618.96	241.945	-459.55	1619.38	202.617	-506.286	1496.41	206.436	-579.276	1245.01	193.031	-386.362	1408.81	197.391	-322.134	1259.59	293.327	-580.32	1308.19	29.1721	-499.626	1441.65	-17.1253	-529.959	1257.92	-22.3634	-569.411	1113.38	-68.3579	-522.284	949.362	-48.5494	-497.199	869.138	-74.9488	-558.633	873.727	-89.7232	-516.401	791.677
629	0	123.113	-283.924	1614.18	220.689	-275.747	1619.55	112.839	-439.506	1620.85	242.29	-445.248	1621.38	202.404	-492.112	1498.24	205.704	-566.674	1246.85	193.07	-372.301	1410.57	197.094	-308.003	1260.91	292.714	-566.344	1309.82	29.103	-484.752	1444.03	-18.5861	-513.019	1260.29	-25.719	-550.158	1114.75	-73.0444	-497.022	952.903	-53.9524	-469.391	873.166	-80.6276	-530.736	876.259	-96.4473	-485.278	795.919
630	0	123.614	-269.253	1615.47	221.155	-261.44	1620.6	112.988	-424.928	1622.33	242.199	-430.859	1622.85	202.301	-477.789	1499.51	205.305	-551.881	1248.54	193.178	-358.109	1412.17	197.166	-293.957	1262.66	292.044	-552.52	1311.42	28.8948	-469.976	1445.95	-20.3986	-495.978	1262.54	-29.0763	-530.988	1116.34	-77.6099	-471.717	956.506	-59.8022	-440.949	878.247	-86.4258	-502.562	878.785	-102.735	-453.744	800.806
631	0	124.015	-254.8	1616.57	221.741	-247.092	1621.66	113.168	-410.336	1623.61	242.32	-416.613	1623.88	202.118	-463.478	1500.64	204.802	-537.16	1249.64	193.132	-343.952	1413.05	197.052	-279.945	1263.77	291.211	-538.626	1312.36	28.688	-455.104	1447.65	-22.0693	-479.147	1264.47	-32.5234	-512.04	1117.49	-82.0761	-446.483	960.173	-64.4594	-413.228	881.961	-92.0846	-474.429	881.674	-109.049	-422.307	805.675
632	0	124.615	-240.278	1617.7	222.153	-232.861	1622.24	113.182	-395.863	1624.79	242.36	-402.488	1624.86	201.907	-449.136	1501.6	203.924	-522.132	1250.7	193.148	-329.696	1413.76	196.895	-265.906	1264.59	290.566	-524.923	1313.26	28.457	-440.088	1449.27	-23.8239	-462.329	1266.02	-35.8916	-493.243	1118.42	-86.3691	-421.398	963.79	-69.5164	-385.296	887.377	-97.4785	-446.25	884.626	-115.13	-391.063	811.295
633	0	125	-225.913	1618.4	222.625	-218.629	1622.93	113.099	-381.465	1625.34	242.342	-388.113	1625.11	201.573	-434.703	1502.19	203.208	-507.54	1251.46	192.991	-315.412	1414.16	196.695	-251.732	1264.99	289.687	-510.74	1313.92	28.0788	-425.125	1450.38	-25.6216	-445.526	1267.49	-39.2521	-474.402	1119.2	-90.6206	-396.122	967.472	-74.075	-357.627	892.232	-102.713	-418.058	887.511	-120.685	-359.686	817.172
634	0	125.26	-211.36	1618.63	223.032	-204.374	1623.25	113.358	-366.808	1625.57	242.441	-373.932	1625.19	201.265	-420.216	1502.47	202.545	-492.886	1251.89	192.941	-301.098	1414.37	196.405	-237.499	1264.85	288.874	-496.577	1314.09	27.8374	-410.048	1451.32	-27.4862	-428.786	1268.65	-42.7341	-455.56	1119.92	-94.8152	-371.283	971.363	-78.7041	-329.899	897.588	-107.89	-389.83	890.906	-126.13	-328.406	823.221
635	0	125.724	-196.899	1619.16	223.416	-190.183	1623.22	113.239	-352.43	1625.66	242.666	-359.766	1624.94	201.03	-405.692	1502.44	201.732	-478.475	1251.96	192.784	-286.717	1414.18	196.397	-223.08	1264.61	288.084	-482.645	1314	27.4364	-395.03	1451.94	-29.276	-411.861	1269.55	-46.2504	-436.925	1120.26	-98.9772	-346.65	975.328	-83.0139	-302.271	903.376	-112.688	-361.889	894.273	-131.065	-297.518	829.358
636	0	126.122	-182.358	1619.25	223.908	-175.825	1623.2	113.292	-337.795	1625.43	242.495	-345.434	1624.34	200.981	-391.199	1502.13	201.05	-463.964	1251.94	192.782	-272.378	1413.69	196.104	-208.942	1264.15	287.17	-468.476	1313.77	27.2679	-380.302	1451.76	-31.0716	-395.237	1269.95	-49.6327	-418.355	1120.29	-102.714	-322.051	979.196	-86.9903	-275.054	908.759	-117.307	-334.199	897.648	-135.795	-266.935	835.746
637	0	126.467	-167.839	1619.09	224.334	-161.495	1622.86	113.628	-323.256	1624.86	242.598	-331.125	1623.72	200.508	-376.506	1501.56	200.514	-449.485	1251.63	192.395	-257.811	1412.61	195.865	-194.618	1262.94	286.555	-454.355	1313.2	26.9382	-365.108	1451.71	-32.9135	-378.476	1270.26	-53.1723	-399.638	1120.18	-106.263	-297.745	982.77	-90.7894	-248.184	914.113	-121.611	-306.377	901.204	-140.196	-236.617	842.32
638	0	126.761	-153.273	1618.36	224.826	-147.056	1622.37	113.539	-308.63	1624.14	242.686	-316.789	1623.05	200.18	-361.907	1500.68	199.758	-435.021	1251.1	192.365	-243.208	1411.85	195.808	-180.454	1262.01	285.719	-439.98	1312.42	26.7246	-350.039	1451.38	-34.4488	-361.988	1270.29	-56.4916	-380.901	1119.87	-109.74	-273.548	986.383	-94.6424	-221.29	919.808	-125.616	-278.975	904.484	-144.336	-206.572	849.205
639	0	127.038	-138.645	1617.66	225.004	-132.696	1621.32	113.418	-294.03	1623	242.537	-302.419	1621.38	199.829	-347.149	1499.57	199.248	-420.485	1250.16	192.043	-228.417	1410.5	195.653	-166.31	1260.37	285.079	-425.727	1311.28	26.413	-334.977	1450.51	-36.3769	-345.184	1270.01	-59.8141	-362.175	1119.27	-113.082	-249.673	989.841	-97.8566	-195.011	925.508	-129.357	-252.146	907.854	-148.141	-177.107	855.983
640	0	127.242	-123.931	1616.84	225.266	-118.21	1620.11	113.325	-279.331	1621.86	242.483	-287.998	1619.99	199.598	-332.31	1498.32	198.719	-406.063	1248.82	191.987	-213.561	1409.02	195.347	-152.318	1258.64	284.294	-411.125	1310.09	26.1096	-319.895	1449.48	-38.0462	-328.634	1269.29	-63.1527	-343.532	1118.33	-116.113	-226.048	993.151	-100.864	-169.139	930.651	-132.859	-225.276	911.414	-151.635	-148.238	862.494
641	0	127.615	-109.15	1615.68	225.668	-103.641	1618.97	113.549	-264.601	1620.54	242.49	-273.482	1618.25	199.441	-317.46	1496.87	198.428	-391.399	1247.38	191.799	-198.696	1407.33	195.007	-138.224	1256.46	283.838	-396.533	1308.56	25.9307	-304.785	1448.16	-39.5979	-311.973	1268.55	-66.2861	-324.791	1117.41	-118.863	-202.699	996.291	-103.638	-143.662	936.103	-136.229	-198.782	914.835	-154.771	-119.815	869.249
642	0	127.936	-94.309	1614.35	226.04	-88.9898	1617.48	113.577	-249.758	1618.65	242.819	-258.756	1616.78	199.308	-302.479	1495.19	198.169	-376.647	1245.97	191.573	-183.776	1405.54	194.683	-123.938	1254	283.44	-381.768	1306.89	25.7747	-289.675	1446.81	-40.9502	-295.39	1267.65	-69.1484	-305.976	1116.39	-121.395	-179.509	999.508	-106.332	-118.628	941.347	-139.157	-172.894	918.318	-157.448	-91.9261	875.995
643	0	128.313	-79.5523	1612.9	226.307	-74.2874	1615.95	113.798	-234.772	1617.23	242.882	-244.189	1614.72	199.238	-287.465	1493.28	197.956	-362.002	1244.28	191.55	-169.157	1403.69	194.641	-109.218	1252.43	283.166	-366.853	1304.82	25.6093	-274.209	1445.65	-42.1278	-278.852	1266.42	-72.4426	-286.996	1116.14	-123.674	-156.742	1002.67	-108.532	-94.011	946.601	-141.83	-147.329	921.774	-160.041	-64.8582	882.678
644	0	128.544	-64.6999	1611.29	226.668	-59.5447	1614.37	113.976	-220.019	1615.31	242.728	-229.441	1613.14	199.21	-272.494	1491.52	197.863	-347.346	1242.31	191.51	-153.844	1401.77	194.266	-94.4239	1250.33	282.79	-351.758	1302.92	25.4559	-259.051	1443.9	-43.2618	-262.34	1265.18	-74.9774	-268.323	1114.89	-125.821	-134.464	1005.57	-110.699	-69.9173	951.452	-144.28	-122.235	925.118	-162.291	-38.2658	889.197
645	0	128.902	-49.6943	1609.53	226.917	-44.7767	1612.58	113.892	-205.028	1613.37	242.847	-214.737	1611	199.202	-257.321	1489.43	197.883	-332.336	1240.17	191.493	-138.739	1399.77	193.833	-79.4479	1248.07	282.548	-336.431	1300.84	25.3718	-243.895	1442.15	-44.2614	-245.57	1263.82	-77.3354	-249.647	1113.53	-127.706	-112.406	1008.42	-112.472	-46.0858	956.43	-146.423	-97.5764	928.575	-164.229	-12.4358	895.323
646	0	129.191	-34.7698	1607.91	227.506	-29.8605	1611.15	114.15	-190.005	1611.26	242.939	-199.919	1609.03	199.326	-242.004	1487.29	197.926	-317.277	1238.08	191.552	-123.316	1397.73	193.446	-64.1138	1245.98	282.58	-321.102	1298.37	25.466	-228.537	1440.33	-45.0107	-228.895	1262.43	-79.0466	-231.072	1112.17	-129.338	-90.8387	1010.95	-113.991	-23.0388	960.75	-148.248	-73.5502	931.604	-165.962	12.6859	901.334
647	0	129.493	-19.7046	1606.15	227.78	-15.0097	1609.34	114.486	-174.972	1609.25	243.297	-184.891	1606.89	199.495	-226.786	1485.25	198.129	-302.189	1236.02	191.413	-108.005	1395.67	193.214	-48.5993	1243.99	282.654	-305.532	1296.11	25.4024	-213.36	1438.51	-45.6726	-212.374	1260.75	-80.7272	-212.701	1110.79	-130.794	-69.5227	1013.48	-115.286	-0.543385	965.159	-149.756	-50.1413	934.574	-167.468	37.0492	907.042
648	0	129.893	-4.52481	1604.84	228.261	0.147537	1607.87	114.658	-159.913	1607.29	243.572	-169.881	1604.46	199.677	-211.356	1483.08	198.33	-286.722	1233.87	191.358	-92.6476	1393.67	192.781	-33.0645	1241.55	282.912	-290.077	1293.92	25.5256	-197.943	1436.69	-46.3208	-195.594	1259.24	-82.1783	-194.37	1109.39	-131.878	-48.7425	1015.76	-116.311	21.5214	969.248	-150.747	-27.0949	937.354	-168.545	60.7051	912.437
649	0	130.335	10.5802	1603.28	228.566	15.2464	1606.18	114.947	-144.59	1605.61	244.133	-154.646	1602.59	199.956	-195.894	1481.16	198.731	-271.161	1231.68	191.31	-77.186	1391.59	192.437	-17.5597	1239.27	283.238	-274.399	1291.72	25.61	-182.502	1434.97	-46.591	-178.77	1257.86	-82.9044	-176.235	1107.47	-132.606	-28.2921	1017.66	-116.96	43.0945	973.214	-151.85	-4.79846	939.948	-169.27	83.7353	917.258
650	0	130.743	25.8073	1601.71	229.145	30.4711	1604.64	115.21	-129.41	1603.59	244.246	-139.532	1600.53	200.395	-180.473	1479.5	199.081	-255.487	1229.94	191.475	-61.6641	1389.63	192.465	-1.70583	1237.7	283.567	-258.62	1289.71	25.8803	-166.998	1433.27	-46.2786	-162.191	1256.36	-83.7508	-158.299	1106.04	-133.148	-8.2623	1019.32	-117.459	64.0407	976.337	-152.451	17.0277	942.407	-169.897	105.965	921.849
651	0	131.197	41.1451	1600.27	229.521	45.697	1603.07	115.821	-114.228	1602.03	244.818	-124.223	1598.66	200.787	-164.971	1477.51	199.496	-239.561	1228.35	191.724	-45.9733	1387.89	192.409	14.14	1236.05	284.103	-242.841	1287.94	26.1603	-151.575	1431.53	-46.4348	-145.415	1255.03	-84.1807	-140.448	1104.91	-133.273	11.3133	1020.79	-117.493	84.3541	979.33	-152.801	38.0042	944.518	-170.222	127.364	925.824
652	0	131.577	56.3236	1598.99	229.752	61.0268	1601.39	116.237	-98.8741	1600.53	245.058	-108.918	1596.86	201.444	-149.365	1475.77	200.403	-223.552	1226.65	191.947	-30.205	1386.23	192.436	29.8613	1234.37	284.776	-226.786	1286.23	26.6422	-136.085	1430.21	-46.281	-128.66	1253.77	-84.6376	-122.759	1104.24	-133.166	30.3781	1022.29	-117.381	104.125	982.171	-152.855	58.3956	946.424	-170.212	148.115	929.732
653	0	131.988	71.6606	1597.83	230.175	76.3494	1600.09	116.847	-83.6163	1598.85	245.762	-93.5547	1595.07	202.03	-133.82	1474.17	201.266	-207.329	1224.95	192.168	-14.4645	1384.59	192.326	45.1599	1232.53	285.597	-210.696	1284.39	27.2813	-120.634	1428.81	-45.8917	-111.972	1252.67	-84.7995	-105.49	1103.21	-132.876	48.9524	1023.52	-117.231	123.433	984.614	-152.253	78.2786	947.951	-169.877	168.169	932.832
654	0	132.331	86.9951	1596.73	230.605	91.7689	1598.92	117.396	-68.2716	1597.55	246.568	-78.0797	1593.54	202.724	-118.137	1472.56	202.325	-191.014	1223.15	192.701	1.33856	1383.51	192.969	61.9581	1232.27	286.512	-194.554	1282.7	27.9623	-104.972	1427.44	-45.5517	-95.5246	1251.43	-84.4564	-88.6729	1101.96	-132.648	67.1578	1024.43	-116.424	141.816	986.491	-151.936	97.2895	949.498	-169.207	187.624	935.701
655	0	132.77	102.308	1595.8	230.977	107.128	1598.09	118.035	-53.1804	1596.08	246.956	-62.5946	1592.35	203.44	-102.509	1471.06	203.234	-174.491	1221.21	193.373	17.3342	1382.39	193.396	77.7648	1231.1	287.449	-178.271	1281	28.7176	-89.5055	1425.95	-44.9295	-79.1173	1250.26	-84.2312	-72.1151	1100.82	-131.911	84.8197	1025.28	-115.666	159.886	988.024	-151.155	115.986	950.58	-168.318	206.408	938.102
656	0	132.974	117.471	1594.69	231.342	122.622	1597.36	118.598	-37.8987	1595.11	247.634	-47.1024	1591.19	204.126	-86.8071	1469.7	204.417	-157.824	1219.22	193.988	33.3182	1381.31	194.319	94.5664	1230.65	288.389	-161.977	1279.54	29.3609	-73.8142	1424.54	-44.3721	-62.9653	1248.88	-83.6264	-55.9901	1099.67	-130.848	101.977	1025.57	-114.47	177.305	989.215	-150.504	133.977	951.224	-167.225	224.551	939.846
657	0	133.388	133.025	1594.63	231.62	138.291	1596.99	119.202	-22.5169	1593.98	248.271	-31.472	1590.46	204.868	-70.9756	1468.76	205.493	-141.152	1217.74	194.88	49.3639	1380.7	195.266	110.833	1229.7	289.47	-145.534	1278.3	30.2439	-58.13	1423.02	-43.4297	-47.0309	1247.49	-82.8808	-40.0339	1098.39	-129.886	118.504	1025.84	-113.22	194.292	989.845	-149.376	151.374	951.858	-165.843	242.184	941.159
658	0	133.502	148.464	1594.37	231.72	154.066	1597.22	119.851	-6.98323	1593.71	248.941	-15.5645	1590.15	205.79	-55.0273	1468.12	206.659	-124.29	1216.49	195.984	65.4283	1380.38	196.842	127.676	1229.62	290.67	-129.241	1277.42	31.1852	-42.3328	1421.68	-42.3592	-31.4158	1246.41	-82.0278	-24.5061	1097.15	-128.434	134.749	1025.45	-111.916	210.72	990.262	-147.997	168.133	951.772	-164.067	259.03	941.927
659	0	133.571	164.11	1594.58	231.842	169.973	1597.9	120.54	8.50378	1593.62	249.842	0.608114	1590.74	206.716	-39.1138	1468.31	207.575	-107.562	1216.03	196.946	81.454	1380.73	198.245	144.277	1229.83	291.881	-112.72	1277.08	32.0768	-26.5775	1421.01	-41.0471	-16.0374	1245.58	-80.701	-9.46406	1095.93	-126.848	150.49	1025	-110.492	226.078	990.35	-146.472	184.058	951.593	-162.27	275.036	942.012
660	0	133.638	179.697	1595.24	231.825	185.952	1598.73	121.165	23.9564	1594.12	250.315	16.5154	1591.47	207.657	-22.9254	1468.88	208.229	-90.5912	1216.22	198.008	97.7208	1381.14	199.694	160.548	1229.78	292.673	-96.1344	1277.38	33.1299	-10.6623	1420.51	-39.6158	-0.986809	1244.94	-79.1273	5.60628	1095.22	-125.011	165.542	1024.4	-108.238	241.31	989.793	-144.53	199.386	951.035	-160.26	290.358	941.741
661	0	134.049	195.395	1596.39	231.932	201.926	1600.13	121.784	39.7003	1594.71	251.112	32.5311	1592.74	208.34	-6.66583	1469.53	208.706	-73.9641	1216.36	199.187	113.816	1382.29	201.177	177.367	1230.77	293.279	-79.7785	1277.87	34.0483	5.35436	1420.54	-37.8519	13.7022	1244.69	-77.3782	20.2516	1095.08	-123.256	180.102	1023.77	-106.244	255.775	988.941	-142.431	213.733	950.472	-157.949	304.643	940.724
662	0	134.259	211.193	1597.85	231.969	217.962	1601.76	122.36	55.4247	1595.43	251.754	48.7008	1594.06	209.13	9.46656	1470.76	208.647	-57.6723	1217.56	200.122	129.947	1383.29	203.079	194.45	1232.46	293.613	-63.4052	1279.25	34.8242	21.5682	1421.16	-36.1317	28.0328	1244.93	-75.2302	34.3072	1095.33	-120.885	194.189	1022.9	-103.874	269.353	987.82	-140.091	227.1	949.508	-155.73	317.994	939.188
663	0	134.263	226.89	1599.1	232.272	234.095	1603.77	123.04	71.0394	1596.49	252.403	64.7949	1595.35	209.6	25.8556	1472.11	208.433	-41.6071	1218.79	201.013	145.991	1384.71	204.92	211.123	1234.51	293.928	-47.2102	1280.43	35.5671	38.0465	1422.4	-34.5541	42.6761	1245.55	-72.7948	48.2104	1095.77	-118.404	207.344	1022.26	-101.374	282.234	986.328	-137.311	239.662	947.96	-153.287	330.492	937.361
664	0	134.465	242.831	1601.09	232.604	250.048	1605.91	123.946	86.9852	1597.92	253.06	80.942	1596.85	210.086	42.1244	1473.66	208.279	-25.6989	1220.75	201.802	162.067	1386.24	206.247	227.482	1236.09	294.038	-31.0372	1282.24	35.8708	54.4735	1424.01	-32.9744	57.2575	1246.56	-69.894	61.5157	1096.29	-115.876	219.948	1021.11	-98.7639	294.621	984.746	-134.339	251.594	946.457	-150.5	342.158	935.167
665	0	134.786	258.72	1602.89	232.858	265.987	1607.56	124.207	102.875	1599.05	253.521	96.8507	1598.01	210.318	58.2584	1475.22	208.775	-9.86489	1222.46	202.159	177.755	1387.43	207.52	243.615	1237.74	294.594	-14.8458	1283.8	36.2188	70.8874	1425.68	-31.4357	71.831	1247.53	-67.1145	74.4365	1096.83	-113	232.053	1019.93	-95.9969	306.276	982.754	-131.263	262.809	944.853	-147.602	353.145	932.325
666	0	135.09	274.592	1604.73	233.271	281.902	1609.36	124.301	118.818	1600.66	253.572	112.74	1599.54	210.637	74.2037	1477.12	208.755	5.23548	1224.51	202.368	193.363	1388.72	208.35	259.132	1238.91	294.738	0.716737	1285.78	36.3651	87.0668	1427.44	-30.2744	86.4914	1248.82	-64.1532	87.0739	1097.8	-110.088	243.528	1018.44	-93.276	317.5	980.533	-127.805	273.176	942.661	-144.296	363.411	928.92
667	0	135.403	290.568	1606.53	233.43	297.713	1610.85	124.554	134.747	1602.45	253.762	128.603	1600.65	210.852	89.9065	1478.87	209.09	20.644	1226.83	202.457	208.822	1389.85	208.654	274.474	1240.02	294.934	16.1315	1288.09	36.5406	102.637	1429.22	-28.9995	100.907	1249.88	-61.299	99.3823	1098.82	-107.175	254.676	1016.62	-90.015	327.97	977.502	-124.489	283.25	940.569	-140.933	373.107	924.85
668	0	135.405	306.449	1608.21	233.64	313.548	1612.28	124.533	150.727	1604.3	253.707	144.334	1602.22	211.182	105.458	1480.89	209.319	35.5601	1229.35	202.265	224.016	1391.02	208.505	289.446	1241.01	294.879	31.1751	1290.79	36.7477	117.716	1431.11	-27.2895	114.988	1251.01	-58.4546	111.371	1099.72	-104.014	265.281	1014.44	-86.742	338.125	974.35	-120.637	292.613	937.76	-137.222	382.107	920.513
669	0	135.715	322.355	1610.03	233.763	329.194	1613.74	124.578	166.451	1606.13	253.598	160.048	1604.36	211.324	120.803	1482.87	209.868	50.6144	1231.87	202.015	239.018	1392.52	207.744	304.338	1242.29	295.426	46.4031	1293.12	37.0095	132.389	1432.81	-26.2715	128.866	1252.33	-55.4423	123.386	1100.96	-100.872	275.718	1012.25	-83.2585	347.526	970.632	-116.881	301.104	934.849	-133.524	390.123	915.277
670	0	135.682	337.967	1611.49	233.897	344.959	1615.13	124.55	182.215	1608.58	253.794	175.641	1606.02	211.477	136.081	1485.01	210.518	65.4518	1233.99	201.84	253.678	1394.41	206.649	318.882	1243.87	296.409	61.7757	1295.09	37.2096	146.662	1434.78	-25.0155	142.5	1253.51	-52.4046	135.109	1101.98	-97.4566	285.499	1009.79	-79.7566	356.517	966.988	-112.911	309.259	931.885	-129.384	397.712	910.07
671	0	136.035	353.75	1613.51	233.8	360.433	1616.43	124.487	197.905	1611.21	253.662	191.18	1608.35	211.686	151.166	1487.24	211.229	80.1723	1236.03	201.363	268.308	1396.1	205.754	333.429	1246.15	296.922	76.8635	1297.42	37.2339	160.704	1436.71	-23.7377	155.675	1255.18	-49.3588	146.77	1103.13	-94.1503	294.834	1007.35	-76.0656	364.833	962.754	-108.851	316.952	928.533	-125.263	404.737	904.592
672	0	135.825	369.18	1614.56	233.725	375.969	1617.77	124.296	213.434	1613.31	253.571	206.77	1610.75	211.731	166.178	1489.26	211.649	94.349	1238.46	201.043	282.864	1397.81	203.842	347.215	1246.9	297.636	91.9038	1299.63	37.2258	174.571	1438.48	-22.4928	168.414	1256.48	-46.5631	158.019	1104.21	-90.7028	303.975	1004.4	-72.1817	372.978	958.599	-104.633	323.848	925.173	-120.656	411.07	898.709
673	0	135.502	384.552	1616	233.648	391.405	1619.28	124.189	228.824	1615.81	253.368	221.957	1613.1	211.89	181.039	1491.59	212.542	108.957	1240.74	200.714	297.309	1399.93	202.464	361.154	1248.75	298.426	106.878	1301.74	37.2674	188.277	1440.34	-21.354	180.579	1257.81	-43.754	169.427	1105.52	-87.2896	312.556	1001.61	-68.2902	380.163	954.216	-100.402	330.286	921.661	-116.095	416.673	892.522
674	0	135.518	399.897	1617.24	233.417	406.725	1620.82	123.962	243.991	1618.09	253.192	237.333	1615.59	211.887	195.862	1493.67	213.601	123.517	1242.39	200.066	311.667	1401.82	201.457	375.194	1251.11	299.025	121.855	1303.71	37.2397	201.916	1442.11	-20.3121	192.813	1259.69	-40.9169	180.756	1106.87	-83.8715	320.663	998.833	-64.424	386.954	949.521	-95.9122	336.143	917.962	-111.327	421.712	886.387
675	0	135.251	415.216	1618.98	233.348	422.005	1622.46	123.586	259.374	1620.44	252.967	252.523	1618.01	212.022	210.734	1495.81	214.744	138.201	1244.08	199.64	326.05	1403.86	200.187	389.323	1253.15	299.807	136.901	1305.97	37.2864	215.592	1444.03	-19.0231	204.532	1261.05	-38.1817	191.733	1108.11	-80.2232	328.471	996.115	-60.3227	393.361	944.787	-91.807	341.598	914.71	-106.513	426.05	879.902
676	0	134.927	430.326	1620.37	233.075	437.171	1623.69	123.288	274.452	1622.93	252.759	267.667	1620.11	212.12	225.516	1497.95	215.839	152.338	1246.18	199.33	340.349	1405.87	199.102	403.51	1255	300.749	151.869	1308.24	37.4928	229.103	1445.66	-17.66	216.31	1262.44	-35.6937	202.685	1109.57	-76.485	335.961	992.998	-56.1842	399.01	939.767	-87.3205	346.534	911.182	-101.607	429.809	873.612
677	0	134.958	445.368	1621.42	232.83	452.183	1624.93	122.932	289.173	1624.55	252.597	282.753	1621.84	212.208	240.232	1499.63	217.217	167.205	1248.04	198.851	354.612	1407.41	198.34	417.801	1256.84	301.592	166.621	1310.04	37.6996	242.582	1447.04	-16.1992	228.148	1263.56	-33.1647	213.311	1111.19	-72.896	342.897	989.851	-51.8619	404.383	935.029	-82.9904	350.814	907.797	-96.6114	432.876	866.836
678	0	134.648	460.467	1622.88	232.507	467.072	1626.08	122.455	304.163	1626.3	252.305	297.796	1623.57	212.295	254.947	1501.51	218.096	181.666	1249.66	198.614	369.009	1408.93	197.752	432.107	1258.63	302.312	181.645	1312.02	38.005	256.282	1448.29	-15.1335	240.166	1264.67	-30.5219	224.041	1112.09	-69.1792	349.833	986.821	-47.5543	408.896	929.671	-78.7065	354.912	904.568	-91.3532	435.481	860.34
679	0	134.338	475.115	1623.6	232.548	482.081	1627.4	122.416	319.121	1627.5	251.94	312.531	1624.79	212.339	269.673	1502.75	218.92	196.237	1251.33	198.539	383.445	1410.4	197.252	446.423	1259.89	303.097	196.571	1313.94	38.1581	270.135	1449.25	-13.7996	252.201	1265.39	-27.8317	234.523	1113.12	-65.6022	356.176	983.399	-43.3989	413.47	924.916	-74.419	358.701	901.034	-86.3426	437.685	853.95
680	0	134.198	489.947	1624.5	232.301	496.922	1628.17	122.292	333.849	1628.29	251.838	327.281	1625.82	212.42	284.266	1504.08	219.757	210.84	1252.44	198.234	397.686	1411.26	197.06	460.633	1260.74	303.657	211.425	1315.2	38.5115	283.988	1449.9	-12.3902	264.424	1266.02	-25.2038	244.918	1114.02	-61.8355	362.366	980.335	-39.1648	417.568	919.91	-70.4902	362.224	898.136	-81.1394	439.292	847.317
681	0	133.972	504.767	1625.33	232.046	511.58	1628.99	122.479	348.853	1629.19	251.675	342.028	1626.85	212.578	298.957	1505.02	220.408	225.321	1253.75	198.236	412	1412.29	197.358	474.948	1261.77	304.12	226.337	1317.01	38.8137	297.884	1450.35	-11.2806	277.037	1266.19	-22.4031	255.34	1114.56	-58.1705	368.231	977.652	-34.8085	421.545	915.101	-66.3684	365.476	895.13	-76.0415	440.467	841.156
682	0	133.841	519.391	1625.73	231.65	526.166	1629.56	121.836	363.256	1629.82	251.634	356.861	1627.46	212.515	313.739	1505.59	221.103	239.953	1254.47	198.523	426.569	1413.07	197.483	489.313	1262.2	305	241.17	1317.77	39.1713	311.957	1450.6	-9.89575	289.621	1266.14	-19.3222	265.48	1115.15	-54.4102	374.301	974.554	-30.3371	425.143	910.109	-62.6274	368.71	892.332	-70.8828	441.588	835.254
683	0	133.471	534	1626.09	231.621	540.9	1630.12	121.775	377.771	1629.97	251.241	371.156	1628.2	212.562	328.434	1505.88	221.691	254.407	1255.13	198.545	441.175	1413.11	197.822	503.774	1262.37	305.505	255.973	1318.44	39.453	326.204	1450.48	-8.31637	302.205	1265.79	-16.446	275.546	1115.25	-50.5358	379.873	971.227	-26.3398	428.611	905.288	-58.7737	371.74	889.51	-65.9842	442.371	829.362
684	0	133.329	548.563	1625.93	231.394	555.5	1630.33	121.931	392.424	1629.61	251.213	385.883	1627.94	212.506	343.097	1505.96	222.102	268.82	1255.2	198.563	455.694	1413.15	198.169	518.175	1262.26	305.879	270.777	1318.83	39.462	340.498	1450.12	-6.98107	314.931	1265.31	-13.1682	285.548	1114.92	-46.8958	384.98	968.602	-22.1278	431.616	900.823	-54.8689	374.662	886.535	-61.0771	442.994	823.589
685	0	133.225	563.019	1625.96	231.177	570.02	1630.52	121.638	406.699	1628.84	251.136	400.44	1627.65	212.516	357.933	1505.57	222.421	283.363	1254.98	198.541	470.304	1412.78	198.439	532.719	1261.68	306.173	285.52	1318.92	39.5377	354.92	1449.46	-5.54154	327.611	1264.58	-9.89058	295.674	1114.92	-43.0973	390.239	965.282	-17.9941	434.862	896.201	-51.0024	377.373	883.901	-56.1222	443.285	817.872
686	0	132.881	577.456	1625.59	230.925	584.646	1630.16	121.679	421.372	1628.38	251.127	415.199	1627.15	212.601	372.791	1505.04	222.769	298.023	1254.44	198.951	485.189	1412.28	199.156	547.279	1261.1	306.454	300.301	1318.51	39.7914	369.542	1448.38	-3.94584	340.029	1263.36	-6.65962	305.724	1114.54	-39.4239	395.871	962.257	-13.5302	438.123	891.575	-46.9931	380.266	881.157	-51.5474	443.561	812.8
687	0	132.781	592.183	1624.99	230.853	599.32	1629.88	121.578	435.902	1627.54	251.159	429.732	1626.34	212.603	387.598	1504.28	222.989	312.795	1253.47	198.922	499.852	1411.31	199.397	561.752	1259.89	306.846	315.164	1317.85	40.0541	384.26	1447.11	-2.32081	352.478	1262.08	-3.46001	315.82	1113.91	-35.5353	401.199	959.288	-9.63049	440.885	887.628	-42.9496	382.855	878.509	-47.12	443.619	808.203
688	0	132.592	606.656	1624.08	230.645	613.842	1629.39	121.527	450.509	1626.17	251.11	444.197	1624.66	212.69	402.515	1503.23	223.335	327.49	1252.39	199.123	514.751	1410.26	199.992	576.262	1258.4	307.089	329.973	1316.99	40.0726	398.942	1445.56	-0.599926	364.801	1260.59	-0.207401	326.021	1113.42	-31.8032	406.437	955.931	-5.66295	443.833	883.312	-39.016	385.638	876.138	-42.8219	443.798	803.355
689	0	132.505	621.176	1623.42	230.407	628.613	1628.4	121.596	464.982	1624.81	250.99	459.022	1623.57	212.687	417.465	1502.01	223.509	342.098	1251.4	199.163	529.797	1408.71	200.42	590.783	1256.71	307.263	344.827	1315.96	40.1912	413.95	1443.91	0.624115	377.186	1259.15	2.94332	336.361	1112.73	-28.325	411.982	953.001	-1.84482	446.983	879.405	-34.9207	388.784	873.91	-38.6889	444.224	798.937
690	0	132.432	636.051	1622.36	230.19	643.236	1627.51	121.548	479.682	1623.14	250.993	473.833	1621.78	212.555	432.591	1500.36	223.67	356.857	1250.06	199.422	544.962	1407.26	200.95	605.378	1254.74	307.351	359.776	1314.59	40.1637	429.011	1441.92	2.01479	389.613	1257.55	5.82434	346.914	1112	-24.7883	417.479	950.266	1.85409	450.209	875.566	-31.0791	392.029	871.78	-34.421	444.89	795.037
691	0	132.102	650.405	1620.96	230.259	658.178	1626.66	121.538	494.195	1621.17	250.962	488.518	1620.1	212.441	447.82	1498.66	223.638	371.557	1248.19	199.401	560.146	1405.24	201.461	619.989	1252.52	307.338	374.574	1312.82	40.1807	444.206	1439.96	3.75041	401.743	1256.44	8.67777	357.427	1111.1	-21.7306	423.247	947.381	5.12341	453.923	872.507	-27.2132	395.383	869.609	-30.5176	445.717	791.174
692	0	132.041	665.307	1619.68	229.74	672.815	1625.2	121.431	508.967	1619.14	250.911	503.37	1618.1	212.414	463.02	1496.92	223.349	386.418	1246.38	199.866	575.601	1403.66	201.819	634.729	1250.38	307.309	389.544	1311.15	40.0929	459.52	1437.79	4.89884	414.226	1254.85	11.1824	368.276	1110.13	-18.6518	428.87	944.71	8.61754	457.672	869.694	-23.4011	399.197	867.629	-26.4348	446.87	787.848
693	0	131.726	680.003	1618.47	229.661	687.683	1624.09	121.497	523.825	1616.74	250.859	518.43	1615.91	212.063	478.469	1494.75	223.215	401.117	1244.65	199.771	590.796	1401.71	202.51	649.767	1248.34	307.329	404.573	1309.54	39.993	474.746	1435.75	6.47659	426.807	1253.12	13.6192	379.336	1109.34	-16.0103	435.126	942.496	12.0081	462.091	866.646	-20.005	403.342	866.079	-22.7236	448.339	784.86
694	0	131.845	695.089	1617.18	229.453	702.582	1622.74	121.495	538.839	1614.59	250.787	533.291	1613.81	212.019	493.967	1492.73	222.958	415.915	1242.8	199.967	606.434	1399.62	203.126	664.968	1246.26	307.248	419.576	1307.67	39.9008	490.178	1433.47	7.73274	439.724	1251.39	15.9768	390.534	1108.46	-13.5535	441.769	940.408	14.2556	466.902	863.961	-16.7502	407.936	864.721	-19.3234	450.403	781.952
695	0	131.268	709.765	1615.22	229.178	717.554	1621.01	121.349	553.559	1612.04	250.727	548.221	1611.29	211.656	509.396	1490.35	222.808	430.788	1240.39	199.656	621.739	1397.05	203.185	680.046	1243.48	307.092	434.725	1305.48	39.6811	505.733	1431.11	8.57365	452.892	1249.59	18.1145	401.926	1107.63	-11.3702	448.666	938.331	16.9312	472.023	861.396	-13.5816	412.827	863.37	-15.5203	452.899	779.756
696	0	131.166	724.842	1613.45	228.711	732.478	1619.21	121.135	568.532	1609.66	250.425	563.2	1609.29	211.51	524.922	1488.36	222.401	445.8	1238.42	199.493	637.264	1394.54	203.313	695.363	1240.7	306.909	449.815	1303.52	39.3959	521.242	1428.58	9.51961	466.155	1247.7	19.8594	413.635	1106.71	-9.56479	455.968	936.5	19.003	477.811	859.248	-11.0474	418.346	862.441	-12.4329	455.825	777.009
697	0	130.793	739.708	1611.74	228.46	747.705	1617.51	120.953	583.64	1606.86	250.402	578.457	1606.55	211.216	540.455	1485.96	222.205	460.913	1236.34	199.575	652.941	1392.35	203.505	710.776	1238.13	306.786	464.992	1301.48	39.2045	536.96	1426.29	10.0091	479.791	1246.21	21.3145	425.854	1105.99	-7.49995	463.557	934.751	20.4488	484.225	857.045	-8.66394	424.372	861.501	-9.73278	459.261	775.181
698	0	130.414	754.704	1609.96	227.998	762.651	1615.7	120.813	598.588	1604.74	250.149	593.513	1604.22	210.905	555.841	1484.01	221.867	476.328	1234.15	199.351	668.402	1390.07	203.523	726.169	1235.74	306.543	480.279	1299.41	38.8732	552.43	1424.11	10.4485	493.735	1244.73	22.4528	438.419	1105.06	-6.11011	471.883	932.979	22.128	490.816	854.311	-6.34625	431.165	860.815	-6.9386	463.537	773.264
699	0	130.125	769.964	1608.07	227.504	777.732	1613.83	120.68	613.695	1602.47	250.082	608.814	1601.96	210.708	571.204	1481.82	221.513	491.839	1232.16	198.923	683.867	1387.88	203.434	741.77	1233.53	306.437	495.759	1297.5	38.511	568.008	1421.91	10.7156	508.021	1242.91	23.394	451.363	1104.2	-5.2199	480.846	931.698	23.3692	498.654	852.162	-4.44979	438.478	860.164	-5.06153	468.569	772.005
700	0	129.488	784.998	1606.54	227.212	793.07	1612.5	120.421	628.801	1600.58	249.768	624.01	1600.14	210.205	586.667	1479.89	221.059	507.582	1230.35	198.931	699.726	1386.04	203.132	757.457	1231.41	306.05	511.254	1295.55	38.0665	583.626	1420.07	10.6963	522.462	1241.24	23.8994	464.801	1103.34	-4.34549	490.487	930.283	24.2377	506.889	850.995	-2.96553	446.467	859.693	-3.23405	474.245	770.728
701	0	129.051	800.019	1604.83	226.518	808.237	1610.71	119.999	644.052	1598.6	249.512	639.46	1598.3	209.818	602.074	1478.14	220.371	523.398	1228.29	198.278	715.258	1384.09	202.954	773.137	1230.01	305.395	527.044	1293.47	37.4924	599.199	1418.37	10.398	537.196	1239.83	24.1403	478.585	1102.6	-4.01512	500.579	929.441	24.5239	515.777	849.513	-1.80643	455.152	859.349	-1.93643	480.822	769.759
702	0	128.618	815.24	1603.48	226.216	823.557	1609.39	119.674	659.212	1597.27	248.945	654.728	1596.71	209.033	617.472	1476.13	219.605	539.483	1226.35	197.634	730.943	1382.51	202.341	788.841	1228.7	304.652	542.812	1291.64	36.9615	614.913	1416.72	9.96173	552.417	1238.64	23.9481	492.853	1101.86	-3.90801	511.398	928.242	24.6812	525.483	848.421	-0.94108	464.647	859.406	-0.974014	488.364	769.265
703	0	128.034	830.354	1602.18	225.471	838.617	1607.99	119.383	674.267	1595.53	248.589	669.738	1595.26	208.392	632.896	1474.62	218.759	555.609	1224.54	197.25	746.696	1381.53	201.876	804.811	1227.51	303.881	558.672	1289.69	36.1518	630.557	1415.41	9.14027	567.548	1237.62	23.6821	507.497	1101.15	-4.45072	522.901	927.813	24.6604	535.713	847.255	-0.675741	475	859.253	-0.272944	496.519	768.51
704	0	127.538	845.531	1600.96	224.897	853.916	1606.75	118.941	689.547	1594.4	248.245	685.112	1594	207.645	648.356	1473.01	217.65	572.038	1222.38	196.546	762.416	1380.28	201.416	820.967	1226.93	302.789	574.521	1287.72	35.4721	646.322	1414	8.50917	583.16	1236.31	23.1435	522.609	1100.37	-4.8726	535.257	926.852	23.7845	546.921	846.263	-1.05673	485.963	859.662	-0.263475	505.887	767.977
705	0	127.128	860.871	1599.93	224.536	869.244	1605.63	118.352	704.802	1593.58	247.865	700.23	1592.97	206.844	663.86	1471.43	216.396	588.687	1220.56	195.798	778.11	1379.18	200.295	837.338	1225.96	301.688	590.628	1285.86	34.6665	662.084	1412.82	7.51467	598.904	1235.14	22.1821	537.794	1099.6	-5.4711	548.144	926.261	22.8497	558.88	845.466	-1.78333	498.205	859.539	-0.628914	516.374	767.904
706	0	126.343	875.96	1599.01	223.921	884.402	1604.61	117.821	719.956	1592.57	247.172	715.394	1591.75	206.017	679.255	1470.03	215.153	605.325	1218.71	194.704	794.11	1378.16	199.403	854.003	1225.79	300.356	606.628	1283.84	33.7193	677.793	1411.65	6.5608	614.904	1233.9	21.209	553.511	1098.89	-6.75571	561.677	925.715	21.6411	571.493	844.791	-2.85299	510.821	859.488	-1.49679	527.737	767.119
707	0	125.683	891.178	1598.44	223.143	899.543	1603.88	117.233	735.17	1591.78	246.475	730.611	1590.81	205.27	694.727	1468.9	213.859	622.003	1216.81	193.829	809.9	1377.69	197.861	870.858	1225.13	298.894	623.005	1281.98	32.7531	693.675	1410.64	4.99664	630.985	1233	19.8399	569.435	1097.97	-8.40538	575.953	924.966	19.3821	585.293	843.914	-4.5347	524.488	859.494	-3.0415	539.991	767.035
708	0	125.099	906.588	1598.49	222.644	914.934	1603.84	116.583	750.573	1591.62	245.705	746.215	1590.26	204.258	710.204	1468.2	212.71	639.032	1214.97	192.618	825.849	1377.29	196.596	887.899	1225.18	297.684	639.416	1280.28	31.7505	709.414	1409.99	3.63373	647.411	1232.05	18.5531	585.848	1097.59	-10.2175	590.997	924.286	17.7662	599.549	843.201	-6.53554	538.963	859.34	-5.11278	553.45	766.656
709	0	124.522	922.038	1599.22	221.811	930.33	1604.19	115.92	765.966	1592.23	245.058	761.477	1590.39	203.305	725.994	1467.88	211.564	656.006	1213.89	191.577	841.968	1377.35	195.146	904.909	1225.5	296.593	656.102	1278.73	30.7884	725.134	1409.52	2.27024	664.015	1231.7	16.7161	602.532	1096.83	-11.9568	606.373	923.321	14.6847	615.116	842.556	-8.90639	554.243	859.251	-7.44035	567.923	766.171
710	0	123.791	937.313	1600.4	221.166	945.59	1605.05	115.264	781.363	1592.76	244.382	776.568	1591.31	202.524	741.804	1468.11	210.785	673.046	1213.12	190.326	857.787	1378	193.747	921.877	1226.44	295.782	672.554	1277.96	29.8881	740.935	1409.58	0.799412	680.793	1231.21	14.773	619.8	1096.21	-14.8285	623.016	923.86	12.7888	630.865	842.17	-11.4803	570.576	859.334	-10.3191	583.461	766.434
711	0	123.099	952.734	1601.81	220.594	960.998	1606.43	114.374	796.779	1593.84	243.659	792.064	1591.6	201.637	757.74	1468.62	210.069	689.721	1212.97	189.47	873.687	1379.2	192.542	938.776	1227.98	294.97	688.986	1277.74	28.9973	756.519	1410.17	-0.82089	697.694	1231.35	13.0774	637.355	1096.54	-17.4588	640.358	923.834	9.72177	647.768	842.144	-14.4304	587.5	859.426	-13.7692	600.109	766.611
712	0	122.293	968.16	1603.69	219.836	976.346	1608.03	113.55	812.227	1594.83	242.889	807.277	1592.7	200.831	773.614	1469.49	209.634	706.2	1213.53	188.536	889.792	1380.28	191.241	955.53	1229.53	294.433	705.253	1278.3	28.2565	772.286	1410.97	-2.18384	714.955	1231.84	10.9144	655.182	1096.78	-20.7588	658.372	924.733	6.51548	665.81	842.8	-17.7549	605.537	860.185	-17.4818	618.249	767.061
713	0	121.417	983.325	1605.25	218.95	991.482	1609.66	112.809	827.559	1595.74	242.096	822.84	1593.19	200.24	789.501	1470.33	209.582	722.392	1214.62	188.031	905.737	1381.68	190.21	971.941	1231.02	293.996	721.492	1279.2	27.7018	788.112	1412.22	-3.45992	732.226	1232.75	8.74283	673.086	1097.52	-23.6692	676.99	925.215	2.8849	684.522	843.216	-21.4865	624.424	860.836	-21.9004	637.363	767.705
714	0	120.661	998.605	1606.76	217.966	1006.95	1611.12	112.194	842.786	1596.54	241.35	838.321	1594.11	199.939	805.327	1471.34	209.716	738.311	1215.78	187.158	921.271	1382.64	189.186	988.086	1232.29	293.856	737.461	1280.56	27.2153	803.858	1413.42	-4.88111	749.487	1233.65	6.62153	691.151	1097.81	-26.9948	696.298	926.065	-1.06744	704.349	843.953	-25.4745	644.11	861.25	-26.5956	657.455	768.139
715	0	119.735	1013.83	1608.33	217.257	1022.24	1613.05	111.852	857.898	1597.28	240.903	853.885	1594.97	199.61	820.97	1472.76	210.11	753.826	1217.51	186.516	937.039	1383.78	188.186	1003.71	1233.54	293.676	753.159	1282.24	26.797	819.604	1414.88	-6.05348	766.613	1234.67	4.29892	709.28	1098.54	-30.7424	716.184	927.035	-4.81563	724.961	845.048	-29.8644	664.732	861.696	-31.3342	678.823	768.769
716	0	119.009	1028.86	1609.79	216.231	1037.61	1614.76	111.471	873.086	1598.04	240.782	869.259	1596.44	198.986	836.383	1474.19	210.231	769.585	1219.23	186.557	952.439	1384.95	187.576	1019.13	1234.47	293.568	768.646	1284.15	26.4455	835.381	1416.44	-7.20059	783.74	1236.17	1.9918	727.448	1099.24	-34.2716	736.842	927.865	-9.24928	746.275	845.671	-33.9914	685.977	862.2	-36.3163	701.284	769.245
717	0	118.291	1044	1610.87	215.268	1052.88	1616.24	111.209	888.203	1599.03	240.409	884.789	1597.5	198.724	851.847	1475.63	210.179	784.924	1221.44	186.095	967.338	1386.09	187.076	1034.09	1235.12	293.642	783.868	1286.19	26.0796	851.279	1417.9	-8.45927	800.753	1237.36	-0.540034	745.693	1100.07	-38.1324	757.811	929.043	-13.5666	768.225	846.694	-38.6917	708.047	862.484	-41.607	724.631	769.882
718	0	117.7	1059.07	1612.36	214.538	1068.36	1617.85	111.148	903.197	1600.12	240.314	900.166	1599.27	198.432	866.819	1477.31	210.049	800.452	1223.34	185.778	982.185	1387.31	186.956	1048.59	1236	293.469	798.586	1288.09	25.8526	866.741	1419.53	-9.93161	817.712	1239.15	-3.39009	764.066	1100.66	-42.3402	779.2	930.227	-17.6042	790.727	847.792	-43.3704	730.434	862.946	-47.2443	748.882	770.733
719	0	117.138	1074.09	1613.66	214	1083.49	1619.49	110.853	918.102	1601.5	239.97	915.616	1600.89	198.123	881.728	1479.12	209.592	815.044	1225.67	186.253	997.338	1389.09	187.486	1063.14	1237.39	293.158	813.351	1290.02	25.5047	882.282	1421.43	-11.266	834.611	1240.48	-6.25802	782.544	1101.31	-46.2849	801.101	931.239	-22.0501	813.948	848.968	-48.1871	753.462	863.05	-52.7568	774.188	771.643
720	0	116.57	1089.02	1614.68	213.534	1098.72	1620.85	110.81	933.034	1603.19	239.965	930.769	1602.8	197.818	896.56	1480.81	209.253	829.269	1227.89	185.888	1011.89	1390.2	188.109	1077.51	1238.9	292.666	827.758	1291.89	25.2434	897.434	1423.32	-12.4753	851.525	1241.95	-8.9546	800.955	1101.83	-49.9694	823.41	932.646	-26.5457	837.748	850.282	-52.8651	777.155	863.053	-58.214	800.253	772.355
721	0	116.227	1103.94	1615.81	213.263	1113.84	1622.02	110.877	947.984	1604.92	239.957	945.762	1604.85	197.697	911.13	1482.44	208.623	843.663	1229.68	185.522	1026	1391.41	188.635	1091.83	1240.4	292.202	841.914	1293.57	25.0605	912.494	1425.28	-14.3305	868.564	1243.52	-11.8673	819.489	1102.63	-53.9995	845.922	933.934	-31.0948	861.848	851.739	-57.5467	801.198	863.238	-64.1953	826.804	773.606
722	0	116.168	1118.92	1616.96	213.127	1128.93	1623.11	110.851	962.876	1607.1	240.106	960.819	1606.86	197.691	925.435	1484.32	208.069	857.717	1231.64	185.908	1040.63	1393.28	189.437	1106.24	1242.02	291.409	855.932	1295.23	25.0733	927.034	1427.18	-15.4127	885.329	1244.74	-14.7993	838.178	1103.23	-57.8291	868.731	935.487	-35.2865	886.181	853.518	-62.1942	825.839	863.613	-70.0219	854.31	774.848
723	0	116.299	1133.87	1618.38	213.247	1144.09	1624.34	110.981	977.65	1609.41	240.142	975.729	1609.12	197.603	939.944	1486.18	207.308	871.929	1233.57	185.91	1054.84	1395.12	190.27	1120.38	1244.13	290.999	869.998	1296.99	25.0608	941.697	1429.04	-17.2314	902.259	1246.44	-17.8487	856.992	1103.91	-61.7443	891.86	937.107	-39.5443	911.269	855.628	-67.0867	850.797	864.49	-75.7589	882.028	776.591
724	0	116.367	1148.79	1619.61	213.393	1158.98	1625.46	110.913	992.504	1611.73	240.343	990.49	1611.05	197.671	954.082	1488.11	206.326	885.954	1235.49	185.981	1069.13	1396.88	190.583	1134.24	1245.94	290.109	883.732	1298.78	25.0388	955.724	1431.22	-18.668	918.963	1248.06	-20.8683	875.759	1104.62	-65.5378	915.393	939.09	-44.6048	936.298	857.497	-71.7008	876.214	865.194	-81.4769	910.365	778.87
725	0	116.385	1163.53	1620.68	213.512	1173.74	1626.47	111.143	1007.16	1613.83	240.414	1005.2	1613.07	197.556	968.084	1490.2	205.684	899.804	1237.11	185.78	1083.16	1398.62	190.74	1148.22	1247.56	289.554	897.396	1300.42	24.9599	969.808	1433.21	-19.9854	935.489	1249.89	-23.551	894.618	1105.49	-69.2324	938.841	941.143	-49.0186	962.346	860.368	-76.2635	901.608	866.601	-87.2057	939.023	781.517
726	0	116.526	1178.14	1621.78	213.593	1188.51	1627.38	111.264	1021.75	1616.09	240.403	1019.91	1615.31	197.601	982.288	1491.88	204.899	913.577	1238.85	185.94	1097.02	1400.77	190.724	1161.95	1249.67	288.926	911.358	1301.95	24.982	983.623	1435.39	-21.3821	951.859	1251.72	-26.2984	913.587	1106.72	-72.8477	962.52	943.471	-53.1983	987.963	863.411	-80.6019	927.568	867.904	-92.9096	968.123	784.772
727	0	116.706	1192.66	1623.09	213.854	1203.03	1628.36	111.492	1036.24	1618.4	240.67	1034.49	1617.34	197.425	996.071	1493.65	204.472	927.259	1240.54	185.603	1110.93	1402.41	190.591	1175.86	1251.66	288.44	924.826	1303.79	24.9782	997.462	1437.59	-22.6331	968.155	1253.69	-28.8971	932.532	1107.52	-76.3049	986.484	946.431	-57.0752	1014.08	866.75	-84.9969	953.663	870.02	-98.6293	997.206	788.219
728	0	117.048	1207.2	1624.52	214.115	1217.49	1629.37	111.686	1050.79	1620.5	240.789	1048.94	1619.06	197.537	1010.23	1495.28	204.039	941.035	1241.96	185.306	1124.8	1403.96	190.136	1189.63	1253.46	288.101	938.867	1305.2	24.9566	1011.12	1439.81	-23.8835	984.409	1255.4	-31.3225	951.189	1108.67	-79.6848	1010.36	949.303	-60.9888	1040.44	870.312	-89.1429	979.949	871.984	-103.532	1026.82	792.822
729	0	117.229	1221.62	1625.54	214.581	1232.08	1630.36	111.945	1065.01	1622.45	241.142	1063.1	1620.71	197.378	1023.99	1496.73	203.558	954.202	1243.48	185.254	1138.64	1405.82	189.651	1203.67	1255.05	287.871	952.326	1306.86	24.9244	1024.83	1441.76	-25.0098	1000.55	1257.43	-33.8814	969.77	1110.08	-82.9756	1034.39	952.74	-65.4711	1067.41	875.227	-93.276	1006.44	874.499	-108.512	1056.13	797.301
730	0	117.557	1235.86	1626.56	214.905	1246.34	1631.23	112.069	1079.35	1624.07	241.281	1077.44	1622.32	197.232	1037.9	1498.26	203.249	968.005	1244.86	185.123	1152.47	1407.34	188.995	1217.53	1256.58	287.585	966.216	1308.23	24.8373	1038.62	1443.81	-26.053	1016.65	1259.18	-36.1076	988.397	1111.08	-86.2802	1058.31	956.276	-68.5509	1093.37	879.334	-97.3877	1033.09	877.31	-113.188	1085.83	802.335
731	0	117.773	1250.05	1627.28	215.134	1260.49	1631.77	112.3	1093.68	1625.64	241.447	1091.66	1623.56	197.177	1051.85	1499.5	203.087	981.751	1246.13	184.815	1166.25	1408.42	188.491	1231.56	1257.72	287.343	979.996	1309.44	24.7478	1052.59	1445.55	-27.1637	1032.78	1261.05	-38.3479	1006.8	1112.1	-89.205	1082.31	960.045	-71.8853	1120.05	884.39	-101.094	1059.84	880.562	-117.772	1115.64	807.646
732	0	118.051	1264.31	1628.4	215.291	1274.56	1632.32	112.431	1107.83	1627.05	241.497	1105.83	1624.38	197.131	1065.87	1500.38	202.916	995.257	1247.29	184.451	1180.07	1409.16	187.746	1245.36	1258.54	287.164	993.966	1310.25	24.6493	1066.53	1446.84	-28.1387	1048.69	1262.46	-40.4124	1024.83	1113.1	-92.2402	1105.99	963.619	-75.1656	1146.5	889.151	-104.944	1086.11	883.932	-121.875	1145.11	813.146
733	0	118.127	1278.44	1628.95	215.434	1288.85	1632.71	112.505	1122.05	1628.05	241.623	1119.95	1625.22	197.191	1079.89	1501.19	202.815	1009.4	1248.11	184.14	1193.95	1409.85	187.286	1259.28	1259.44	286.892	1007.92	1311.21	24.5489	1080.54	1448.25	-28.6999	1064.59	1263.8	-42.6279	1042.98	1113.86	-94.7592	1129.64	967.518	-78.2052	1172.78	894.279	-108.056	1112.79	887.003	-125.647	1174.41	819.095
734	0	118.166	1292.66	1629.31	215.079	1302.83	1632.83	112.614	1136.21	1628.84	241.784	1134.16	1625.75	197.193	1094.03	1501.74	202.46	1022.94	1248.97	183.817	1207.89	1410.39	186.769	1273.01	1260.05	286.586	1021.84	1311.94	24.543	1094.58	1449.34	-30.0052	1080.65	1265.15	-44.6013	1060.99	1114.64	-97.2249	1153.06	971.352	-81.0698	1198.86	899.61	-111.227	1139.14	890.555	-128.991	1203.58	825.173
735	0	118.326	1306.98	1629.63	215.523	1317.13	1632.83	112.479	1150.37	1629.32	241.903	1148.21	1625.78	197.226	1108.18	1502.07	202.349	1037.08	1249.41	183.564	1221.95	1410.47	186.373	1286.9	1259.83	286.211	1035.91	1312.33	24.412	1108.68	1450	-31.2011	1096.6	1266	-46.579	1078.83	1115.14	-99.6697	1176.27	975.237	-83.6747	1224.5	905.202	-114.41	1165.26	894.65	-132.119	1232.67	831.77
736	0	118.439	1321.13	1629.92	215.446	1331.09	1632.82	112.699	1164.59	1629.67	241.815	1162.43	1625.88	196.986	1122.1	1502.27	201.886	1050.94	1249.83	183.002	1235.92	1410.25	185.752	1300.52	1259.58	285.906	1049.93	1312.33	24.3488	1122.8	1450.53	-32.2133	1112.34	1266.63	-48.7013	1096.42	1115.54	-101.911	1199.52	978.987	-85.9087	1250.08	910.855	-116.464	1191.43	897.703	-135.074	1261.21	838.307
737	0	118.429	1335.16	1630.01	215.435	1345.31	1632.69	112.842	1178.79	1629.49	241.822	1176.67	1625.58	197.043	1136.52	1501.89	201.73	1065	1249.78	183.111	1250.11	1410.47	185.573	1314.38	1259.55	285.62	1064.2	1312.17	24.4037	1136.76	1450.9	-33.2068	1128.07	1267.28	-50.7509	1114.13	1115.62	-103.981	1222.22	982.769	-88.1276	1275.32	916.535	-119.05	1217.17	901.465	-137.616	1289.29	845.122
738	0	118.401	1349.33	1629.94	215.584	1359.61	1632.55	112.839	1193.02	1629.24	241.923	1190.98	1625.09	197.035	1150.85	1501.72	202.194	1080.31	1248.8	182.798	1264.34	1409.9	185.071	1328.15	1258.98	285.282	1078.25	1311.84	24.3176	1150.98	1450.9	-33.8111	1143.64	1267.42	-52.8444	1131.76	1115.63	-105.867	1244.73	986.649	-89.9652	1300.09	922.507	-120.932	1242.72	904.969	-139.764	1317.24	852.055
739	0	118.297	1363.73	1629.53	215.747	1374.02	1632.11	112.863	1207.29	1628.73	241.84	1205.18	1624.42	197.422	1165.56	1501.1	201.29	1093.3	1248.91	182.522	1278.6	1409.44	184.85	1342.22	1258.33	285.062	1092.65	1311.19	24.1855	1165.2	1450.8	-35.0921	1159.28	1267.5	-54.7747	1149.16	1115.38	-107.51	1266.99	990.354	-91.6454	1324.5	928.132	-122.851	1268.02	908.727	-141.728	1344.65	858.929
740	0	118.399	1377.99	1628.99	215.567	1388.35	1631.39	112.862	1221.59	1627.71	241.812	1219.5	1623.37	197.374	1180.04	1500.23	201.144	1107.4	1248	182.301	1293.06	1408.56	184.521	1356.47	1257.55	284.913	1106.95	1310.17	24.2319	1179.42	1450.27	-36.0706	1174.8	1267.19	-56.7039	1166.54	1114.75	-109.034	1288.75	993.885	-93.3123	1348.5	933.676	-124.659	1292.67	912.188	-143.552	1371.46	865.794
741	0	118.232	1392.33	1628.61	215.732	1402.83	1630.97	112.765	1235.97	1626.75	241.808	1234	1622.13	197.435	1194.78	1499.24	201.163	1121.57	1247.08	182.11	1307.57	1407.58	184.298	1370.87	1256.4	284.891	1121.79	1309.13	24.0859	1193.8	1449.41	-36.5978	1190.06	1266.63	-58.6392	1183.9	1114.11	-110.396	1310.48	997.122	-94.5358	1372.13	939.238	-126.141	1317.24	915.632	-144.881	1397.81	872.558
742	0	118.343	1406.9	1627.97	215.474	1417.18	1630.14	112.827	1250.46	1625.81	241.793	1248.53	1620.89	197.507	1209.54	1498.34	201.026	1135.78	1245.96	181.838	1322.23	1406.31	183.845	1385.31	1255.14	284.831	1136.47	1307.95	24.137	1208.27	1448.49	-37.5377	1205.54	1265.6	-60.495	1201.28	1113.29	-111.677	1331.88	1000.44	-95.6865	1395.46	944.835	-127.176	1341.71	919.388	-145.987	1423.71	879.224
743	0	118.097	1421.39	1626.66	215.392	1431.87	1629.1	112.882	1265.03	1624.18	241.804	1263.23	1619.29	197.546	1224.3	1497.2	201.166	1149.86	1244.73	181.747	1337.07	1405.08	183.498	1399.86	1253.59	284.836	1151.27	1306.45	24.2521	1222.82	1447.14	-37.8182	1220.85	1265.15	-62.1613	1218.46	1112.32	-112.693	1352.95	1003.31	-96.6632	1418.01	949.829	-128.291	1365.4	922.677	-146.869	1448.75	885.466
744	0	118.042	1435.89	1625.98	215.29	1446.42	1628.07	113.043	1279.54	1622.74	241.946	1277.95	1617.57	197.699	1239.24	1495.58	201.513	1164.41	1243.38	181.652	1352.02	1403.42	182.968	1414.76	1252.07	284.854	1166.16	1305.15	24.4873	1237.36	1445.95	-38.6643	1236.36	1263.9	-63.7596	1235.61	1111.32	-113.578	1373.66	1006.18	-97.3056	1440.26	954.896	-129.17	1388.58	925.882	-147.464	1473.28	891.718
745	0	118.07	1450.44	1624.74	215.112	1461.12	1626.95	113.296	1294.12	1621.05	242.277	1292.78	1615.95	197.948	1254.28	1494.2	201.691	1178.67	1242.18	181.617	1366.91	1401.97	182.833	1429.6	1250.43	284.983	1181.23	1303.62	24.6407	1252.05	1444.47	-38.7756	1251.84	1262.52	-65.2631	1252.81	1110.28	-114.201	1394.07	1008.82	-97.6886	1462.11	959.647	-129.99	1411.43	929.102	-147.777	1497.18	897.771
746	0	118.092	1465.15	1623.52	214.831	1475.72	1625.53	113.46	1308.74	1619.24	242.511	1307.49	1613.78	198.083	1269.27	1492.48	202.151	1193.2	1240.47	181.732	1381.97	1400.47	182.545	1444.58	1248.49	285.188	1196.47	1301.93	24.7836	1266.83	1442.9	-39.4741	1267.45	1261.31	-66.5738	1269.8	1109.04	-114.735	1414.04	1011.29	-97.9784	1483.22	964.154	-130.505	1433.78	932.157	-148.043	1520.58	903.537
747	0	118.014	1479.71	1622.06	215.487	1490.85	1624.41	113.652	1323.44	1617.05	242.615	1322.46	1611.9	198.284	1284.33	1490.57	202.51	1207.48	1238.8	181.636	1397.06	1398.65	182.447	1460	1247.07	285.621	1211.86	1299.84	25.0379	1281.6	1441.25	-39.7986	1283.09	1260	-67.8865	1286.72	1107.69	-115.108	1433.88	1013.75	-98.1965	1503.98	968.384	-130.919	1455.63	935.041	-147.976	1543.19	908.988
748	0	117.889	1494.42	1620.5	215.05	1505.55	1622.59	113.968	1338.12	1614.89	242.931	1337.34	1609.8	198.59	1299.51	1488.6	202.968	1222.8	1236.61	181.705	1412.28	1396.84	182.195	1475.35	1245.3	285.929	1227.32	1297.93	25.3374	1296.38	1439.39	-40.0491	1298.65	1258.49	-68.8301	1303.46	1106.24	-115.324	1453.16	1015.85	-98.0446	1524.2	972.286	-131.016	1476.96	937.628	-147.817	1565.32	914.094
749	0	118.033	1509.04	1619.09	214.73	1520.35	1620.95	114.307	1352.87	1612.97	243.176	1352.3	1607.69	198.88	1314.61	1486.68	203.56	1237.69	1234.68	181.851	1427.59	1394.9	182.109	1490.6	1243.17	286.477	1242.9	1295.76	25.5912	1311.26	1437.66	-40.2756	1314.31	1256.88	-69.8722	1320.14	1104.74	-115.333	1472.04	1017.56	-97.6846	1543.98	975.734	-131.116	1497.85	940.018	-147.361	1586.8	918.579
750	0	118.111	1523.98	1617.19	214.803	1535.29	1619.25	114.785	1367.64	1610.72	243.631	1367.47	1605.21	199.268	1329.87	1484.58	204.101	1253.43	1232.51	181.808	1442.94	1392.75	181.795	1506.06	1240.91	287.081	1258.53	1293.54	25.9217	1326.16	1435.63	-39.8876	1330.05	1255.04	-70.5124	1336.67	1103.02	-115.232	1490.67	1019.02	-97.1281	1563.29	978.817	-131.135	1518.05	942.346	-146.727	1607.52	922.776
751	0	117.552	1538.66	1615.12	214.724	1550.39	1617.35	115.19	1382.48	1608.53	243.963	1382.6	1603.19	199.765	1345.04	1482.39	204.75	1268.86	1230.4	181.854	1458.38	1390.53	181.612	1521.48	1238.87	287.659	1274.3	1291.25	26.3776	1341.03	1433.58	-40.32	1345.99	1253.31	-71.1062	1352.96	1101.4	-114.886	1508.76	1020.29	-96.473	1582.04	981.195	-130.694	1537.9	944.012	-145.998	1627.81	926.326
752	0	117.91	1553.92	1613.67	214.826	1565.54	1615.32	115.648	1397.4	1606.48	244.342	1397.84	1600.78	200.082	1359.89	1480.41	205.51	1284.37	1228.56	181.875	1473.73	1388.28	181.418	1537.16	1236.86	288.426	1290.21	1288.88	26.9731	1355.89	1431.53	-40.1665	1361.6	1251.53	-71.6048	1369.17	1099.84	-114.467	1526.69	1021.17	-95.7419	1600.37	983.145	-130.462	1556.95	945.337	-145.04	1647.5	929.454
753	0	117.839	1567.99	1611.76	215.017	1580.7	1613.44	116.138	1412.31	1604.26	244.882	1412.99	1598.59	200.695	1375.23	1478.02	206.409	1300.51	1226.27	182.157	1489.15	1386.35	181.51	1552.89	1235.02	289.149	1306.1	1286.36	27.6786	1370.76	1429.46	-39.8618	1377.21	1249.71	-72.044	1385.26	1098.19	-113.872	1544.01	1021.53	-94.7426	1618.16	984.825	-130.183	1575.73	946.877	-143.848	1666.42	932.155
754	0	118.007	1583.34	1609.98	215.077	1595.69	1611.69	116.678	1427.2	1602.1	245.425	1428.31	1596.13	201.392	1390.5	1475.84	207.477	1316.55	1223.85	182.489	1504.77	1384.32	181.242	1568.61	1233.24	290.013	1322.24	1283.78	28.3694	1385.6	1427.45	-39.6747	1392.73	1247.97	-72.3067	1401.03	1096.73	-113.206	1561.09	1022.18	-93.6676	1635.49	986.085	-129.386	1593.75	947.54	-142.793	1684.73	934.103
755	0	118.252	1597.81	1608.3	215.245	1610.9	1609.91	117.308	1442.09	1600.06	245.892	1443.42	1594.24	201.975	1405.82	1473.51	208.489	1333.05	1221.37	182.978	1520.35	1382.65	181.24	1584.75	1231.66	291.055	1338.22	1281.26	29.1609	1400.47	1425.48	-39.3223	1407.91	1246.21	-72.3324	1416.5	1095.02	-112.415	1577.69	1022.23	-92.5179	1652.16	986.715	-128.852	1611.23	948.153	-141.358	1702.38	935.81
756	0	118.463	1612.94	1606.65	215.353	1626.12	1608.29	117.933	1457.05	1597.81	246.528	1458.82	1592.16	202.587	1421.09	1471.44	209.649	1349.64	1218.63	183.474	1535.87	1380.94	181.299	1600.84	1230.21	292.056	1354.21	1278.96	29.8663	1415.49	1423.49	-38.8402	1423.11	1244.57	-72.298	1431.67	1093.33	-111.493	1593.91	1022.21	-91.3703	1668.45	987.34	-127.994	1628.13	948.362	-140.018	1719.43	936.871
757	0	118.537	1627.63	1605.06	215.534	1641.22	1606.86	118.576	1472.09	1595.93	247.051	1474.14	1590.35	203.254	1436.41	1469.54	210.533	1365.91	1216.49	184.114	1551.74	1379.23	181.787	1617.1	1229.06	292.924	1370.19	1276.75	30.6146	1430.71	1421.41	-38.1119	1438.09	1242.52	-72.0976	1446.68	1091.48	-110.558	1609.48	1021.57	-90.1653	1684.18	987.407	-127.179	1644.37	948.042	-138.466	1735.9	937.314
758	0	118.749	1642.91	1603.8	215.642	1656.62	1605.76	119.244	1487.04	1594.34	247.625	1489.56	1588.94	203.998	1451.81	1467.86	211.288	1382.38	1214.24	184.722	1567.33	1377.74	182.439	1633.64	1227.91	293.971	1386.28	1274.43	31.1897	1445.8	1419.44	-37.5359	1452.95	1240.69	-71.6868	1461.4	1089.76	-109.326	1624.9	1020.56	-88.7508	1699.51	986.665	-126.216	1660.11	947.522	-136.91	1751.71	936.895
759	0	118.909	1658.08	1603.15	215.811	1672.19	1605.16	119.807	1502.34	1593.11	248.265	1505.23	1588	204.672	1467.27	1466.77	211.882	1398.72	1212.2	185.392	1583.05	1376.77	183.221	1650.23	1227.04	294.656	1402.33	1272.5	31.8962	1461.06	1417.58	-36.3132	1467.61	1239.08	-71.049	1475.91	1087.92	-108.306	1639.68	1019.66	-87.2366	1714.33	985.489	-124.986	1675.2	946.432	-135.277	1766.87	936.137
760	0	118.98	1673.19	1602.66	215.773	1687.54	1604.96	120.465	1517.54	1592.71	248.939	1520.71	1587.89	205.327	1482.67	1466.26	212.212	1414.75	1211.02	186.039	1598.73	1376.52	184.353	1666.66	1227.32	295.237	1418.38	1271.22	32.6066	1476.29	1416.42	-35.2447	1482.22	1237.61	-70.1289	1490.27	1086.45	-106.948	1654.01	1017.8	-85.7555	1728.53	983.739	-123.679	1689.45	944.684	-133.682	1781.25	934.661
761	0	119.002	1688.53	1602.57	215.979	1703.11	1605.12	121.117	1532.76	1592.78	249.511	1536.39	1588.01	205.915	1498.17	1466.14	212.565	1430.98	1209.98	186.952	1614.39	1376.73	185.199	1682.62	1227.4	295.629	1434.29	1270.26	33.2191	1491.55	1415.51	-34.4418	1496.75	1236.95	-68.5003	1504.69	1085.55	-105.417	1667.83	1015.75	-84.2074	1742.44	981.656	-122.216	1703	942.819	-131.969	1794.79	932.508
762	0	119.392	1703.95	1603.39	216.346	1718.73	1605.84	121.349	1548.05	1593.16	249.961	1552.06	1588.93	206.283	1513.5	1466.58	212.356	1446.99	1209.6	187.521	1630.12	1377.37	186.499	1699.05	1228.79	295.68	1450.16	1270.12	33.8415	1506.96	1415.58	-33.2047	1510.96	1236.45	-66.9345	1518.48	1084.92	-103.653	1681.16	1013.86	-82.3209	1755.53	979.286	-120.301	1715.67	940.424	-130.404	1807.43	929.857
763	0	119.635	1718.88	1604.11	216.543	1734.38	1607.07	121.956	1563.4	1594.19	250.613	1567.54	1590.15	206.579	1529.03	1467.22	212.282	1462.84	1209.78	188.376	1645.84	1378.75	187.368	1715.36	1230.21	295.762	1466.01	1270.49	34.2452	1522.45	1416.25	-31.8666	1525.08	1236.61	-64.8263	1532.1	1084.97	-101.901	1693.74	1011.77	-80.7259	1767.76	976.392	-118.061	1727.47	937.811	-128.779	1818.9	926.625
764	0	119.883	1734.17	1605.5	216.901	1749.82	1608.42	122.352	1578.69	1595.36	251.082	1583.09	1591.33	206.881	1544.77	1468.28	211.798	1478.42	1210.62	188.768	1661.42	1379.99	188.264	1731.29	1232.06	295.673	1481.64	1271.36	34.4326	1538.35	1417.57	-30.6006	1539.21	1237.49	-62.5632	1545.49	1085.49	-100.026	1705.96	1009.87	-78.9829	1779.55	973.55	-115.934	1738.2	935.141	-127.332	1829.37	922.92
765	0	120.191	1749.77	1607.15	217.157	1765.22	1609.71	122.811	1594.23	1596.57	251.512	1598.56	1592.17	206.832	1560.23	1469.57	211.52	1493.65	1212.54	189.119	1677.07	1381.57	188.916	1747.38	1233.81	295.497	1497.15	1272.66	34.3316	1554.16	1419.14	-29.6102	1553.65	1238.69	-59.8433	1558.49	1086.22	-97.9866	1717.26	1007.61	-77.0866	1790.64	970.352	-113.322	1748.37	932.092	-125.563	1839.29	918.713
766	0	120.191	1764.98	1608.43	217.454	1780.78	1611.03	122.937	1609.49	1597.78	251.674	1614.08	1593.44	206.628	1575.63	1470.87	211.476	1508.84	1214.37	189.176	1692.46	1382.81	189.315	1762.8	1235.06	295.404	1512.57	1274.32	34.3481	1570.03	1420.78	-28.3754	1568.14	1239.77	-57.283	1571.26	1087.16	-95.6641	1728.44	1005.29	-75.078	1801.17	966.602	-110.599	1757.73	929.029	-123.642	1848.38	913.867
767	0	120.424	1780.51	1610.1	217.492	1796.14	1612.41	123.135	1624.91	1599.71	251.75	1629.42	1594.71	206.666	1590.97	1472.71	211.294	1523.9	1216.66	189.161	1707.66	1384.29	189.489	1778.22	1236.45	295.362	1527.85	1276.53	34.1783	1585.55	1422.69	-27.2644	1582.75	1240.88	-54.4189	1583.73	1088.18	-93.5779	1738.94	1002.81	-72.7059	1811.01	962.462	-107.927	1766.41	925.902	-121.324	1856.62	908.379
768	0	120.737	1796.25	1612.38	217.681	1811.67	1613.67	123.278	1640.49	1601.52	251.833	1644.97	1595.96	206.656	1606.2	1474.51	211.177	1538.9	1219.29	188.635	1722.58	1385.71	189.419	1793.4	1237.67	295.242	1542.99	1279.09	34.095	1600.75	1424.77	-25.8212	1597.21	1242.25	-51.7356	1596.18	1089.6	-91.1842	1749.05	1000.18	-70.4711	1820.21	958.099	-104.742	1774.41	922.291	-119.136	1864.13	902.543
769	0	120.765	1811.33	1613.82	217.657	1826.91	1615.19	123.009	1655.75	1603.6	251.479	1660.22	1597.47	206.629	1621.31	1476.45	211.266	1553.83	1221.79	188.126	1737.26	1387.21	188.619	1808.05	1238.81	295.284	1558.06	1281.88	34.0072	1615.58	1426.75	-25.3005	1611.67	1243.96	-48.91	1608.37	1091.16	-88.6547	1758.66	997.214	-68.2033	1829.04	953.597	-101.799	1782.07	918.804	-116.451	1870.96	896.105
770	0	120.58	1826.7	1615.47	217.654	1842.4	1616.69	122.84	1671.2	1605.86	251.351	1675.56	1599.25	206.581	1636.22	1478.67	211.631	1568.53	1224.88	187.841	1752.18	1389.23	187.785	1821.83	1240.12	295.552	1572.9	1284.62	33.6688	1629.88	1428.89	-24.3885	1625.88	1245.48	-46.1819	1620.49	1092.48	-86.2336	1767.95	994.346	-65.5564	1837.07	948.786	-98.5297	1788.84	915.061	-113.575	1876.95	889.877
771	0	120.487	1841.86	1617.18	217.43	1857.67	1618.16	122.513	1686.41	1607.94	251.078	1690.74	1601.21	206.207	1650.86	1480.9	211.897	1583.22	1227.41	187.44	1766.63	1391.23	186.464	1835.46	1241.63	295.907	1587.75	1287.12	33.6101	1643.95	1431.1	-23.4687	1639.64	1247.16	-43.5483	1632.59	1094.28	-83.7274	1776.75	991.595	-63.0852	1844.98	943.949	-95.2399	1795.3	911.326	-110.284	1882.59	883.032
772	0	120.048	1857.24	1619.08	217.059	1872.85	1619.55	122.111	1701.53	1610.46	250.601	1705.91	1603.24	206.171	1665.71	1483.02	212.533	1597.91	1230.11	186.577	1780.81	1393.17	184.957	1849.03	1243.16	296.165	1602.55	1289.5	33.5422	1657.67	1433.26	-22.5151	1652.88	1248.78	-40.818	1644.42	1095.87	-80.8244	1785.33	988.327	-59.8559	1851.92	938.795	-91.8081	1801.07	907.554	-106.813	1887.45	876.225
773	0	119.668	1872.3	1620.55	216.762	1888.1	1620.96	121.74	1716.74	1612.87	250.345	1721.03	1605.67	205.931	1680.17	1485.35	213.028	1612.32	1232.51	186.074	1795.2	1395.37	183.464	1862.43	1244.89	296.799	1617.26	1292.08	33.2471	1671.18	1435.31	-21.4791	1665.64	1250.54	-38.3137	1656.13	1097.35	-78.0864	1793.29	985.263	-56.773	1858.35	933.613	-88.4435	1806.33	903.833	-103.136	1891.55	869.453
774	0	119.171	1887.26	1621.95	216.128	1903.11	1622.33	121.438	1731.6	1615.07	250.431	1736.49	1607.91	205.551	1694.56	1487.43	213.728	1626.76	1234.64	184.967	1809.19	1397.38	181.514	1875.62	1246.77	297.046	1632	1294.39	33.1485	1684.65	1437.22	-20.7275	1677.99	1252.23	-35.8435	1667.7	1099.02	-74.9869	1801.19	982.277	-53.3534	1864.27	928.53	-84.8248	1811.13	900.255	-99.2597	1894.84	862.697
775	0	118.686	1902.41	1623.51	215.635	1918.19	1623.66	120.916	1746.69	1617.41	249.883	1751.48	1610.1	205.739	1709.51	1489.64	214.325	1640.88	1236.98	184.391	1823.29	1399.38	179.63	1889.11	1248.35	297.698	1646.52	1296.8	32.8317	1698.08	1439.07	-19.2345	1689.99	1253.75	-33.601	1679.04	1100.8	-71.9323	1807.94	979.116	-49.7451	1869.53	923.081	-81.5222	1815.43	896.884	-95.0002	1897.72	855.897
776	0	118.181	1917.2	1624.68	215.127	1933.23	1624.94	120.243	1761.55	1619.73	249.369	1766.64	1612.19	204.957	1723.61	1491.85	215.439	1654.66	1239.14	183.687	1837.36	1401.45	178.298	1902.75	1250.46	298.194	1661.23	1298.79	32.8389	1711.44	1440.99	-19.2087	1701.98	1255.29	-31.5389	1690.37	1102.35	-68.7885	1814.92	976.085	-46.0396	1874.41	918.214	-77.9201	1819.23	893.463	-90.6932	1899.94	849.33
777	0	117.522	1932.21	1626.14	214.573	1948	1626.16	119.657	1776.42	1621.73	248.674	1781.26	1614.13	204.546	1737.99	1493.75	216.039	1668.79	1240.74	183.075	1851.32	1403.47	176.858	1916.67	1252.61	298.666	1675.58	1300.98	32.6743	1724.8	1442.69	-18.2526	1713.81	1257.03	-29.4695	1701.37	1104.1	-65.8215	1821.26	973.465	-42.5048	1878.46	913.334	-74.3853	1822.77	891.081	-86.1124	1901.72	843.141
778	0	116.85	1946.99	1627.22	213.906	1962.78	1627.34	119.178	1791.21	1623.67	248.007	1795.91	1616.06	204.218	1752.3	1495.52	216.755	1682.45	1242.91	182.543	1865.33	1405.32	175.908	1930.39	1254.79	299.186	1689.98	1303.05	32.5322	1738.35	1444.14	-17.2505	1725.57	1258.38	-27.2336	1712.1	1105.76	-62.6814	1827.3	971.214	-38.8816	1882.35	908.969	-70.793	1825.9	888.192	-81.5557	1902.82	837.114
779	0	116.18	1961.7	1628.18	213.393	1977.69	1628.31	118.462	1805.96	1624.81	247.397	1810.68	1617.56	204.054	1766.61	1497.03	217.394	1696.48	1244.73	182.116	1879.36	1406.92	175.046	1944.32	1256.63	299.756	1704.3	1304.94	32.4351	1751.94	1445.38	-16.3105	1737.74	1259.57	-25.2072	1722.52	1106.97	-59.4709	1833.32	968.757	-35.2176	1885.39	904.488	-67.4545	1828.8	886.138	-76.7722	1903.48	831.221
780	0	115.607	1976.46	1628.69	212.801	1992.36	1628.98	117.825	1820.6	1625.78	246.813	1825.26	1618.8	204.111	1781.11	1498.43	217.942	1710.39	1245.96	181.941	1893.38	1408.34	174.607	1958.19	1257.74	300.369	1718.71	1306.48	32.5033	1765.89	1446.37	-15.1059	1749.88	1260.56	-23.1144	1732.75	1108.47	-56.2771	1838.93	966.458	-31.5185	1888.3	900.247	-64.1745	1831.63	883.849	-71.8526	1904.1	825.718
781	0	114.902	1991.1	1629.15	212.107	2006.86	1629.61	117.022	1835.16	1626.5	246.122	1839.87	1619.69	203.727	1795.26	1499.56	218.782	1724.69	1247.71	181.707	1907.59	1409.42	174.564	1971.95	1258.72	300.648	1732.86	1308.06	32.5021	1780.02	1447.03	-14.0024	1762.14	1261.28	-20.9795	1742.58	1109.37	-53.038	1844.28	964.347	-27.7275	1890.83	896.766	-60.9329	1834.28	882.185	-67.0536	1904.17	820.674
782	0	114.407	2005.67	1629.85	211.391	2021.49	1630.18	116.42	1849.79	1627	245.419	1854.56	1620.51	203.425	1809.52	1500.52	218.997	1738.38	1248.63	181.868	1921.67	1410.33	174.695	1985.75	1259.55	300.974	1747.14	1309.33	32.5973	1794.19	1447.57	-13.3123	1774.71	1261.53	-18.7791	1752.04	1110.53	-49.8729	1849.42	962.473	-23.9065	1893.34	893.049	-57.7906	1837.14	880.714	-62.4559	1903.87	816.11
783	0	113.766	2020.25	1629.74	210.839	2036.1	1630.49	115.807	1864.35	1627.08	244.923	1869.07	1621.07	203.141	1823.9	1501.09	219.251	1752.58	1249.34	181.933	1935.91	1411.04	175.273	1999.66	1259.95	301.23	1761.39	1310.53	32.4287	1808.53	1447.77	-12.3235	1787.11	1261.54	-16.5382	1761.36	1111.33	-46.8666	1854.52	960.728	-20.0227	1895.9	889.793	-54.6943	1840.01	879.39	-57.7094	1903.9	811.933
784	0	113.121	2034.71	1629.63	210.177	2050.57	1630.71	115.187	1878.97	1626.66	244.558	1883.65	1621.25	202.823	1838.29	1501.5	219.382	1766.66	1249.87	182.079	1950.15	1411.28	175.957	2013.49	1260	301.328	1775.58	1311.23	32.2385	1822.79	1447.68	-11.4764	1799.48	1261.71	-14.1837	1770.18	1111.73	-43.5518	1859.48	959.299	-16.1569	1898.18	887.33	-51.6692	1842.68	878.116	-53.129	1903.93	808.066
785	0	112.552	2049.1	1629.27	209.55	2065.05	1630.89	114.672	1893.21	1626.2	244.114	1898.29	1621.26	202.627	1852.71	1501.67	220.037	1780.6	1250.42	182.273	1964.45	1411.32	176.535	2027.43	1259.58	301.481	1789.66	1311.83	32.1976	1837.35	1447.52	-10.1087	1811.46	1261.16	-11.6577	1779.15	1112.34	-40.2602	1864.41	957.37	-12.639	1900.51	883.797	-48.6665	1845.4	876.886	-48.7105	1903.78	804.515
786	0	111.955	2063.64	1628.98	208.875	2079.61	1630.69	114.329	1907.6	1625.43	243.605	1912.69	1621.03	202.111	1867.07	1501.5	219.731	1795	1250.25	182.498	1978.82	1411.03	177.365	2041.72	1259.22	301.508	1803.78	1312.16	32.082	1852.17	1446.89	-9.1446	1823.48	1260.79	-9.34079	1787.92	1112.82	-37.0084	1869.21	955.856	-8.63749	1903.18	881.667	-45.5916	1848.22	875.905	-44.4365	1903.9	801.496
787	0	111.341	2078.04	1628.01	208.41	2094.2	1630.41	114.088	1922.24	1624.14	243.311	1927.48	1620.52	201.767	1881.63	1501.04	219.562	1809.39	1249.82	182.797	1993.39	1410.66	178.368	2055.98	1258.64	301.237	1817.83	1312.16	31.7222	1866.85	1446.19	-8.1442	1835.01	1260.58	-7.16277	1796.63	1113.35	-33.9383	1874.01	954.369	-5.72316	1905.79	879.004	-42.3206	1851.04	874.916	-40.4363	1904.43	799.095
788	0	110.685	2092.39	1627.08	207.734	2108.69	1629.84	113.557	1936.61	1622.76	242.992	1942.18	1619.63	201.313	1896.05	1500.39	219.511	1823.78	1249.54	183.158	2007.73	1409.45	179.339	2070.47	1257.74	301.135	1832.09	1311.74	31.5892	1881.94	1445	-7.19718	1846.62	1260.23	-4.97986	1805.47	1113.77	-30.9907	1878.73	952.573	-0.549087	1908.11	876.601	-39.1595	1853.81	874.116	-36.3634	1904.93	796.367
789	0	110.524	2106.93	1626.06	207.313	2123.34	1628.93	113.19	1950.93	1620.95	242.877	1956.67	1618.21	201.027	1910.72	1499.38	219.201	1838.29	1248.97	183.236	2022.59	1408.45	180.029	2084.64	1256.19	301.024	1846.33	1310.96	31.2666	1897	1443.67	-6.09041	1857.99	1259.43	-2.93576	1814.47	1113.94	-28.1328	1883.64	951.011	2.18075	1911.15	874.245	-36.1732	1856.71	873.255	-32.6211	1905.68	793.909
790	0	109.932	2121.31	1624.48	206.833	2138.01	1627.87	113.45	1965.58	1619.6	243.248	1972.06	1616.94	200.791	1925.57	1498.08	218.783	1852.9	1247.66	183.601	2037.31	1407.05	181.058	2099.05	1254.84	300.621	1860.49	1310.04	31.2209	1912.2	1442.28	-5.19285	1869.41	1258.93	-0.770173	1823.72	1114.1	-25.3021	1888.92	949.535	6.01725	1913.67	872.03	-33.3782	1859.85	872.806	-28.2368	1906.55	792.047
791	0	109.477	2135.73	1623.11	206.229	2152.54	1626.84	113.187	1979.86	1617.8	243.131	1987.03	1615.54	200.436	1940.33	1496.73	218.156	1867.33	1246.14	183.603	2052.1	1405.65	181.799	2113.62	1253.38	300.578	1874.69	1309.2	30.8441	1927.2	1440.76	-4.18002	1880.97	1258.01	1.38389	1833.27	1114.18	-22.6426	1894.1	947.7	9.27067	1917.69	870.349	-30.3663	1863.25	872.041	-25.3266	1907.95	790.397
792	0	109.019	2150.27	1621.81	205.809	2167.42	1625.56	113.296	1994.49	1615.79	242.974	2001.62	1613.75	200.062	1955.28	1495.07	217.678	1881.7	1244.94	183.802	2066.89	1404.15	182.48	2128.12	1251.76	299.9	1889.01	1307.51	30.5679	1942.51	1439.13	-3.16239	1892.71	1257.15	2.99437	1842.96	1114.48	-21.0061	1899.71	946.898	11.6026	1921.5	868.277	-27.7082	1866.93	871.572	-22.3355	1909.57	788.422
793	0	108.402	2164.69	1620.25	205.162	2181.87	1624.1	113.179	2009.06	1613.8	242.834	2016.36	1611.84	199.469	1970.13	1493.32	217.055	1896.44	1242.5	183.967	2081.92	1402.62	183.137	2143.08	1250.07	299.293	1903.43	1305.8	30.1619	1957.45	1437.36	-2.77751	1904.92	1256.3	4.52061	1853.09	1114.58	-18.4184	1905.49	945.357	13.2434	1925.17	867.008	-25.208	1871.04	871.037	-19.8024	1911.51	786.587
794	0	107.791	2179.21	1618.43	204.655	2196.78	1622.46	112.516	2023.34	1611.01	242.81	2031.58	1609.73	199.391	1985.14	1491.5	216.217	1910.75	1241.06	183.996	2096.84	1400.37	183.597	2157.76	1248.06	298.953	1917.84	1304.08	29.9586	1972.87	1435.32	-2.09378	1917.25	1255.46	6.05513	1863.7	1114.72	-16.9487	1911.69	944.232	14.5954	1930.29	865.242	-22.8947	1875.53	870.606	-17.4694	1913.84	785.096
795	0	107.265	2193.7	1616.57	203.996	2211.66	1620.54	112.683	2037.98	1608.96	242.951	2046.42	1607.34	198.886	2000.09	1489.21	215.501	1925.38	1238.36	184.024	2111.83	1398.23	184.042	2172.82	1245.83	299.307	1933.16	1301.87	29.5852	1988.16	1433.46	-1.85903	1930.33	1254.45	7.10375	1874.69	1114.26	-15.6488	1918.49	943.006	16.1897	1935.76	864.012	-20.9081	1880.5	870.218	-15.2814	1916.68	783.967
796	0	106.714	2208.2	1614.45	203.338	2226.58	1618.71	112.898	2052.5	1606.07	242.76	2061.36	1604.86	198.706	2015.34	1487.13	214.15	1939.68	1236.05	183.856	2127.02	1396.12	184.226	2188.03	1243.68	298.711	1947.52	1299.94	29.1397	2003.47	1431.23	-1.38773	1943.46	1253.16	7.7829	1886.08	1114.07	-15.1712	1925.57	942.056	16.0852	1941.65	862.767	-19.3538	1886.08	869.652	-13.6243	1920.06	782.399
797	0	106.019	2222.62	1612.23	202.521	2241.32	1616.72	113.018	2067.06	1604	242.886	2076.58	1602.51	198.187	2030.32	1484.94	214.068	1954.58	1233.36	183.486	2142.37	1394.11	184.339	2203.06	1241.29	298.245	1962.36	1297.69	28.7542	2019.16	1429.03	-1.25797	1957.14	1251.7	8.72644	1897.99	1113.63	-14.6257	1933.49	940.787	16.2882	1948.72	861.524	-17.9815	1892.27	869.145	-12.5252	1923.92	781.114
798	0	105.426	2237.26	1610.22	201.745	2256.42	1614.5	112.994	2081.61	1601.34	242.937	2092.01	1599.81	198.201	2045.77	1482.71	213.017	1969.24	1231.06	183.397	2157.58	1391.32	184.132	2218.33	1238.63	297.144	1976.9	1295.2	28.1311	2034.73	1426.65	-1.36415	1971.29	1250.03	9.00473	1910.48	1113.14	-14.4627	1941.99	939.807	16.4636	1955.94	859.937	-17.165	1899.23	868.872	-11.479	1928.63	779.926
799	0	104.554	2251.82	1607.75	200.83	2271.52	1612.24	113.926	2096.73	1599.63	242.757	2107.36	1597.4	197.462	2060.78	1480.22	211.669	1983.92	1228.7	182.98	2172.84	1388.83	183.943	2233.7	1236.14	297.046	1992.03	1293.17	27.2888	2050.28	1424.41	-2.08664	1985.68	1248.44	9.04156	1923.41	1112.2	-14.4998	1951.18	938.537	16.2727	1964.02	858.613	-16.756	1906.84	868.523	-11.1372	1933.9	778.742
800	0	103.866	2266.57	1606.18	199.9	2286.61	1610.23	113.276	2111.37	1596.99	242.651	2122.65	1594.97	196.89	2075.93	1478.27	210.679	1999.09	1226.22	182.314	2188.37	1386.71	183.557	2249.25	1233.71	295.458	2006.8	1290.67	26.6987	2066	1422.34	-2.5513	2000.44	1246.95	9.00385	1936.87	1111.55	-15.0036	1961.03	937.296	15.5991	1972.7	856.969	-16.6014	1915.28	868.062	-10.9755	1940.18	778.029
801	0	103.002	2281.32	1604.3	199.098	2301.65	1608.36	113.769	2126.08	1595.55	242.465	2137.74	1593.04	196.331	2091.03	1476.19	209.571	2014.6	1224.6	181.914	2203.85	1384.88	183.031	2264.82	1231.61	294.805	2021.89	1288.88	25.8009	2081.61	1420.44	-3.24413	2015.31	1245.07	8.5884	1951.05	1110.74	-15.5807	1971.85	935.964	14.7961	1981.99	855.356	-16.7563	1924.57	867.792	-10.3052	1947.13	776.451
802	0	102.132	2295.96	1602.41	198.301	2316.79	1606.56	113.285	2140.79	1593.49	242.277	2153.09	1591.18	195.52	2106.21	1474.23	208.092	2030.19	1222.77	181.271	2219.14	1382.92	182.257	2280.43	1229.88	293.448	2037.09	1286.62	24.8171	2097.05	1418.74	-4.25931	2030.59	1243.53	7.78467	1965.85	1109.46	-16.4242	1983.36	934.462	13.8162	1992.08	853.795	-17.4101	1934.57	867.248	-10.9409	1955.28	775.433
803	0	101.251	2310.64	1600.9	197.347	2331.72	1604.75	113.488	2155.81	1592.25	241.939	2168.44	1589.44	194.733	2121.34	1472.26	206.009	2045.85	1221.56	180.534	2234.56	1381.23	181.557	2296.19	1228.49	292.584	2052.46	1284.56	23.7628	2112.65	1417.09	-5.41711	2046	1241.97	6.97049	1981.41	1108.21	-17.8624	1995.47	933.511	12.5905	2003.01	852.484	-18.514	1945.74	866.652	-11.6415	1964.45	774.603
804	0	100.381	2325.42	1599.3	196.487	2346.9	1603.05	112.735	2170.47	1590.64	241.476	2183.54	1587.93	193.737	2136.63	1470.29	204.604	2061.78	1219.3	179.751	2249.96	1379.85	180.708	2311.92	1227.3	290.637	2067.71	1282.15	22.6412	2128.41	1415.61	-6.75444	2061.89	1240.65	5.40156	1997.01	1107.01	-19.4789	2008.61	932.447	11.0013	2014.57	851.161	-19.9199	1957.72	866.334	-12.8953	1974.61	773.874
805	0	99.8519	2340.17	1597.88	195.63	2362.04	1601.54	112.382	2185.42	1589.22	240.695	2198.42	1586.36	192.695	2151.67	1468.88	202.66	2077.51	1217.38	178.609	2265.45	1378.56	179.611	2327.57	1226.31	289.309	2083.11	1280.62	21.3234	2143.95	1414.16	-8.44685	2077.74	1239.02	3.83249	2012.93	1105.86	-21.281	2022.58	931.222	8.87456	2027.36	850.055	-21.9462	1970.67	865.949	-14.8147	1985.76	773.006
806	0	98.9964	2355.17	1596.33	194.705	2376.98	1599.85	111.788	2200.2	1588.01	240.238	2213.63	1584.82	191.391	2166.77	1466.98	200.851	2093.4	1215.51	177.481	2280.93	1377.29	178.494	2343.43	1225.29	287.869	2098.84	1278.61	19.821	2159.65	1412.71	-10.3381	2093.99	1237.46	1.77657	2029.28	1104.28	-23.6254	2037.08	930.113	7.18019	2040.68	848.871	-24.6556	1984.65	865.621	-17.0386	1997.91	772.004
807	0	98.2128	2370.1	1594.84	194.038	2392.13	1598.3	111.336	2215.25	1586.67	239.707	2228.72	1583.34	190.261	2181.73	1465.47	198.839	2109.15	1213.45	176.089	2296.29	1375.95	177.139	2359.42	1224.35	285.993	2114.42	1276.39	18.3826	2175.54	1411.36	-12.0495	2110.27	1236.05	-0.662285	2045.9	1103	-26.3459	2052.31	928.782	4.50125	2055.13	847.518	-27.5036	1999.29	864.54	-19.5304	2011.38	770.813
808	0	97.2943	2385.02	1593.97	193.26	2407.23	1597.25	110.618	2230.3	1586	239.101	2244.02	1582.26	188.852	2196.61	1464.37	196.556	2124.93	1211.43	174.89	2311.82	1375.13	175.7	2375.66	1223.67	283.999	2129.95	1274.41	16.7663	2191.14	1410.16	-14.1497	2126.86	1234.49	-3.24907	2062.75	1101.47	-28.9385	2068.54	927.399	1.43422	2070.44	845.881	-30.5242	2014.86	863.377	-22.6508	2025.88	769.871
809	0	96.5045	2400.31	1593.6	192.312	2422.41	1596.67	109.708	2245.49	1585.86	238.302	2259.5	1581.75	187.423	2211.7	1463.8	195.192	2141.19	1210.21	173.479	2327.18	1374.63	173.989	2392	1223.24	282.245	2145.52	1273.16	15.2223	2206.66	1409.25	-16.3767	2143.77	1233.27	-5.91113	2080.2	1100.04	-32.662	2085.36	926.585	-1.7827	2086.52	844.81	-34.3991	2031.6	863.026	-26.1866	2041.66	769.103
810	0	95.6372	2415.43	1593.7	191.554	2437.76	1596.52	108.734	2260.71	1586.17	237.528	2274.81	1581.91	186.042	2226.66	1463.68	193.457	2157.15	1209.39	172.076	2342.52	1374.89	172.135	2408.38	1223.69	280.738	2161.02	1272.31	13.647	2222.19	1408.76	-19.0056	2160.89	1232.4	-9.02832	2098.14	1098.89	-35.8915	2102.68	925.487	-5.52259	2103.69	843.589	-38.0696	2048.82	861.837	-30.2352	2058.52	768.395
811	0	94.8161	2430.67	1594.77	190.639	2452.88	1596.94	107.877	2275.61	1587.07	236.642	2289.98	1582.49	184.778	2241.36	1464.06	192.784	2173.31	1209.15	170.906	2357.72	1375.59	170.328	2424.54	1224.68	279.458	2176.38	1271.83	12.2605	2237.52	1409.06	-21.1783	2178.07	1231.66	-11.2132	2116.43	1098.02	-39.4402	2120.95	924.652	-9.57474	2121.81	842.713	-42.5045	2067.02	860.961	-34.8413	2076.62	767.321
812	0	93.7688	2445.65	1595.77	189.728	2468.06	1597.6	107.25	2290.8	1588.84	235.58	2304.8	1583.51	183.918	2256.55	1464.87	192.065	2189.35	1209.73	169.636	2372.86	1376.72	168.568	2440.48	1226.29	278.594	2191.72	1271.99	10.674	2252.51	1409.8	-23.5318	2195.57	1231.5	-14.6261	2134.61	1097.44	-43.3411	2140.11	924.364	-13.7299	2141.51	842.631	-46.8205	2086.18	860.867	-39.8606	2096.11	767.565
813	0	92.9438	2460.75	1597.11	188.756	2483.13	1598.6	106.585	2305.92	1590.79	234.717	2319.79	1584.91	183.032	2271.58	1465.98	191.346	2205.2	1210.43	168.675	2387.92	1378.49	167.075	2456.23	1228.23	278.163	2206.96	1273.13	9.77167	2267.87	1411.08	-25.6687	2212.98	1231.8	-17.7313	2153.08	1097.29	-47.6643	2159.8	924.613	-18.1783	2161.46	842.336	-51.455	2106.33	860.669	-45.4804	2116.93	767.194
814	0	91.9937	2475.7	1598.42	187.812	2498.08	1599.96	105.596	2320.8	1592.09	233.987	2334.67	1586.69	182.023	2286.39	1467.52	191.382	2221.02	1212.64	167.776	2402.85	1380.25	165.692	2471.59	1230.13	277.461	2221.85	1274.87	9.01354	2282.94	1412.63	-27.8365	2230.58	1232.63	-20.6978	2171.72	1097.49	-51.7294	2180.35	925.256	-22.9237	2182.54	842.761	-56.0409	2127.6	860.633	-51.4568	2138.89	767.381
815	0	91.0873	2490.43	1599.89	186.854	2513.08	1601.15	105.012	2335.71	1593.7	233.483	2349.84	1588.41	181.47	2301.05	1469.07	190.827	2235.8	1214.65	166.906	2417.45	1382.08	164.587	2486.31	1231.96	277.292	2236.53	1276.86	8.0649	2297.68	1414.12	-29.5231	2247.96	1233.77	-23.6274	2190.33	1098.03	-56.2044	2201.35	926.361	-27.9489	2204.46	843.616	-61.1488	2149.51	861.034	-57.4992	2161.93	767.563
816	0	90.2015	2505.22	1601.06	185.981	2528.04	1602.57	104.394	2350.27	1595.55	232.912	2364.88	1590.32	181.26	2315.87	1470.82	189.458	2249.62	1214.83	166.411	2432.07	1383.57	163.711	2500.83	1233.42	277.175	2251.36	1278.95	7.57077	2312.72	1415.83	-31.5865	2265.11	1234.98	-26.747	2208.75	1098.85	-60.6034	2222.9	927.377	-33.3815	2227.33	844.492	-66.4866	2172.24	861.244	-63.8792	2186.44	768.453
817	0	89.4118	2519.67	1601.87	184.96	2542.92	1603.94	104.014	2364.99	1597.48	232.599	2379.93	1592.3	180.585	2330.37	1472.62	191.253	2264.93	1218.87	166.328	2446.74	1385.52	163.116	2515.19	1235.03	276.898	2265.56	1281.35	7.08556	2327.48	1417.83	-33.1441	2282.18	1237.07	-29.9232	2227.36	1099.71	-65.6255	2244.89	928.853	-38.5949	2250.93	845.527	-71.7484	2195.72	862.031	-70.4849	2211.91	769.366
818	0	88.7496	2534.23	1603.39	184.082	2557.72	1605.45	103.83	2379.58	1599.42	232.425	2395.12	1594.69	180.657	2344.55	1474.9	188.572	2277.55	1219.12	165.838	2460.55	1386.92	162.796	2529.04	1236.7	276.337	2279.57	1283.59	6.68707	2342.24	1419.63	-34.5613	2298.99	1239.05	-33.1816	2245.82	1100.62	-69.4724	2267.31	929.958	-43.9847	2275.13	847.026	-77.1487	2219.55	862.358	-77.5469	2238.16	769.487
819	0	87.8865	2548.49	1604.33	183.501	2572.49	1606.99	104.228	2393.63	1601.24	232.292	2410.05	1597.12	180.389	2358.7	1476.92	190.234	2292.65	1222.87	165.714	2474.68	1389.08	162.804	2542.93	1238.72	276.192	2293.45	1286.2	6.58253	2356.89	1422.14	-36.4288	2315.26	1240.9	-36.3987	2264.31	1101.64	-75.0647	2290.28	931.951	-49.548	2299.88	848.945	-82.987	2244.38	863.437	-84.2876	2265.92	771.859
820	0	87.4174	2562.68	1605.87	182.967	2586.86	1608.47	103.699	2407.91	1603.89	232.134	2424.66	1599.78	179.932	2372.56	1479.23	189.1	2306.09	1224.93	165.954	2488.5	1391.43	163.38	2556.58	1240.9	275.597	2307.02	1288.24	6.26191	2371.4	1424.78	-37.903	2331.59	1243.19	-39.2954	2282.91	1102.79	-79.4793	2313.44	933.811	-55.0095	2325.19	851.11	-88.4909	2269.57	864.482	-90.9999	2294.12	773.52
821	0	87.1524	2576.93	1607.49	182.505	2601.24	1609.89	103.719	2422.25	1606.06	232.02	2438.73	1602.4	179.78	2386.37	1481.25	188.907	2320.2	1227.81	166.183	2502.42	1393.82	163.99	2570.19	1243.22	275.308	2320.61	1290.21	6.05978	2385.91	1426.95	-39.4044	2347.72	1245.28	-42.5219	2301.31	1104	-84.1206	2336.91	936.52	-60.3293	2350.93	853.407	-94.1282	2295.06	865.445	-97.8594	2323.16	775.839
822	0	86.7843	2590.86	1608.9	181.566	2615.41	1611.41	103.602	2436.27	1608.4	231.901	2452.97	1605.02	179.788	2399.76	1483.76	188.081	2333.86	1229.94	166.119	2515.82	1396.06	164.686	2584.03	1245.51	274.494	2333.52	1292.64	5.82039	2399.91	1429.58	-40.4882	2363.48	1246.9	-46.1401	2319.58	1105.06	-89.0335	2360.4	939.09	-65.5194	2376.9	856.015	-99.8035	2320.78	866.561	-105.288	2352.67	778.667
823	0	86.5156	2604.83	1610.29	181.709	2629.62	1612.79	103.755	2450.41	1611.22	231.966	2467.12	1607.88	179.684	2413.4	1485.75	185.512	2346.51	1231.64	166.211	2529.34	1398.36	165.577	2597.72	1247.99	273.493	2346.5	1294.71	5.75891	2414.1	1431.83	-42.3187	2379.63	1249.59	-49.7005	2338.08	1106.48	-93.5464	2384.18	941.87	-69.7053	2403.27	858.82	-105.181	2346.87	868.077	-111.686	2382.7	782.013
824	0	86.548	2618.82	1611.58	181.632	2643.81	1613.82	103.792	2464.32	1613.69	232.073	2481.34	1610.18	179.488	2426.74	1487.72	185.781	2360.89	1234.58	166.325	2542.69	1400.25	166.384	2611.42	1250.21	273.008	2359.65	1296.64	5.60583	2428	1434.3	-43.8733	2395.58	1251.77	-52.8582	2356.61	1107.59	-98.0204	2408.27	944.99	-76.8183	2430.58	863.255	-110.374	2373.41	870.253	-118.561	2413.14	785.755
825	0	86.4622	2632.66	1612.62	181.49	2657.77	1614.92	104.196	2478.27	1616.57	232.35	2495.72	1612.53	179.714	2440	1490.03	184.681	2373.94	1236.23	166.595	2556.14	1402.33	167.072	2624.88	1252.28	271.881	2372.37	1298.44	5.53058	2441.94	1436.55	-45.3698	2411.5	1253.86	-55.8448	2375.13	1108.87	-102.153	2432.29	947.692	-81.6321	2457.23	866.824	-115.4	2400.05	872.408	-124.812	2443.72	790.203
826	0	86.4436	2646.46	1613.72	181.627	2671.72	1615.93	103.669	2491.75	1618.43	232.749	2509.73	1614.89	179.681	2453.28	1491.94	183.518	2386.95	1238.47	166.671	2569.45	1404.35	167.764	2638.15	1254.51	270.854	2385.17	1300.18	5.55165	2455.63	1438.66	-46.8751	2427.48	1256.16	-58.9672	2393.72	1110.43	-106.306	2456.38	951.52	-86.594	2484.27	871.291	-120.337	2426.9	875.352	-131.138	2474.46	795.185
827	0	86.4889	2659.95	1614.82	181.547	2685.5	1617.01	104.66	2505.83	1621.4	232.715	2523.42	1616.99	179.432	2466.37	1493.83	182.643	2400.22	1240.19	166.88	2582.54	1406.23	168.113	2651.04	1256.73	270.175	2398.13	1301.98	5.36493	2469.2	1441.23	-49.0483	2443.76	1258.77	-62.4523	2412.24	1112.38	-110.571	2480.5	955.658	-91.1385	2511.49	876.45	-124.711	2453.67	878.112	-137.419	2505.15	800.924
828	0	86.5736	2673.72	1616.32	181.612	2699.19	1618.06	103.88	2519.15	1623.16	233.031	2537.35	1619.2	179.613	2479.66	1495.8	182.008	2413.17	1242.14	166.874	2595.54	1408.12	168.189	2663.89	1258.81	269.22	2410.73	1303.82	5.24436	2482.98	1443.59	-50.5877	2459.71	1261.26	-65.3314	2430.78	1113.8	-114.546	2504.89	960.228	-96.3887	2538.88	882.261	-129.431	2480.77	881.595	-143.401	2535.88	807.399
829	0	86.7098	2687.05	1617.27	181.794	2712.88	1618.85	104.528	2532.83	1624.77	233.018	2550.49	1620.96	179.336	2492.82	1497.27	181.062	2425.91	1244	166.847	2608.77	1410.04	168.208	2676.74	1260.68	268.317	2423.31	1305.15	4.98147	2496.49	1445.82	-52.0665	2475.7	1263.28	-68.0909	2449.11	1115.64	-118.617	2528.94	964.859	-102.237	2567.18	889.021	-133.181	2508.23	885.089	-149.121	2566.51	814.633
830	0	86.7833	2700.64	1618.36	181.878	2726.27	1619.54	104.851	2546.3	1626.8	233.33	2564.28	1622.46	179.512	2506.01	1498.44	180.08	2438.98	1245.97	166.791	2621.74	1411.45	168.209	2689.51	1262.23	267.625	2436.02	1306.32	4.94967	2510.27	1448.05	-53.571	2491.74	1265.72	-71.0674	2467.45	1116.9	-122.393	2553.22	969.833	-107.052	2594.58	895.475	-137.54	2535.47	889.124	-154.507	2597.13	822.205
831	0	87.1021	2714.05	1619.06	182.216	2739.9	1620.22	104.931	2559.81	1628.27	233.378	2577.46	1623.58	179.382	2519.18	1499.58	179.395	2452.08	1247.12	166.768	2634.7	1412.6	167.981	2702.38	1263.38	266.951	2448.62	1307.7	4.68154	2523.96	1450	-55.3549	2507.68	1267.62	-74.0494	2485.83	1118.39	-126.157	2577.47	974.922	-111.301	2621.56	902.082	-141.805	2562.73	893.626	-159.544	2627.36	829.963
832	0	87.1971	2727.4	1619.45	182.303	2753.45	1620.32	104.862	2573.11	1629.36	233.656	2591.23	1624.24	179.07	2532.38	1500.5	178.903	2465.06	1247.95	166.705	2647.77	1413.4	167.6	2715.41	1264.31	266.253	2461.38	1308.61	4.59459	2537.8	1451.41	-56.891	2523.51	1269.18	-77.1623	2503.89	1120	-129.641	2601.45	979.948	-114.622	2647.86	908.518	-146.265	2589.99	898.48	-164.076	2657.4	837.752
833	0	87.4686	2740.9	1619.65	182.582	2766.69	1620.41	104.973	2586.65	1629.9	233.774	2604.54	1624.6	178.952	2545.53	1501.01	178.12	2477.75	1249.08	166.507	2661.19	1414.25	167.344	2728.56	1264.7	265.587	2473.98	1309.13	4.12136	2551.8	1452.57	-58.6523	2539.63	1270.93	-79.7894	2522.4	1121.06	-132.858	2625.38	985.044	-117.98	2674.63	915.179	-149.923	2617.28	903.213	-168.273	2687.43	845.799
834	0	87.5186	2754.42	1619.64	182.886	2780.39	1620.37	105.144	2600.19	1629.8	233.938	2618.19	1624.48	178.87	2558.88	1501.53	177.431	2490.68	1249.87	166.448	2674.3	1414.12	167.086	2741.58	1264.64	264.651	2486.4	1309.69	3.71549	2565.71	1453.35	-60.4472	2555.6	1271.9	-83.2235	2540.34	1122.16	-136.048	2649.16	989.981	-120.837	2700.62	921.782	-153.76	2644.18	908.157	-172.004	2717.07	853.897
835	0	87.8984	2767.98	1620.01	183.277	2793.76	1619.89	105.055	2613.55	1630.28	234.355	2631.85	1624.14	178.361	2572.11	1501.33	176.687	2503.69	1249.93	166.369	2687.38	1413.88	166.982	2754.6	1264.18	264.623	2499.67	1309.48	3.34758	2579.67	1453.72	-62.1687	2571.59	1272.93	-86.6926	2558.34	1122.97	-139.155	2672.72	994.617	-123.556	2726.52	928.467	-157.116	2671.01	913.111	-175.376	2746.23	862.014
836	0	88.2276	2781.4	1619.59	182.899	2806.78	1619.57	105.555	2627.06	1630.47	234.083	2644.65	1624.01	178.268	2585.4	1501.27	176.144	2516.72	1250.06	166.084	2700.62	1413.6	166.723	2767.45	1263.81	263.346	2512.1	1309.43	3.04379	2593.55	1454.14	-63.7484	2587.88	1273.99	-88.1863	2577.93	1123.62	-142.123	2695.89	999.633	-126.389	2752.05	935.455	-160.143	2697.74	918.265	-178.606	2774.97	870.347
837	0	88.3936	2794.98	1619.36	183.505	2820.49	1619.17	104.118	2640.24	1629.28	234.221	2658.03	1623.52	177.84	2598.69	1500.95	175.257	2529.27	1249.47	165.905	2713.9	1413.12	166.653	2780.36	1263.3	263.006	2524.92	1309.15	2.72451	2607.47	1454.31	-65.4184	2603.74	1274.59	-91.6688	2596.15	1123.99	-144.543	2719.04	1004.59	-128.938	2777.28	942.435	-162.784	2723.82	923.034	-181.282	2803.14	878.85
838	0	88.5039	2808.44	1618.85	183.602	2833.7	1618.55	105.006	2653.85	1629.37	233.989	2671.3	1622.7	177.651	2612.16	1500.16	174.918	2542.34	1249.42	165.803	2727.14	1412.38	166.637	2793.18	1262.28	262.476	2537.9	1308.5	2.39559	2621.25	1454.09	-66.9894	2619.73	1274.81	-94.8874	2614.18	1124.53	-147.166	2741.6	1009.19	-131.085	2801.97	949.456	-166.162	2749.63	928.241	-183.685	2830.77	887.105
839	0	88.7204	2822.02	1617.86	184.157	2847.29	1617.67	104.36	2667.7	1627.9	234.317	2684.75	1621.42	177.276	2625.44	1499.46	174.078	2555.47	1249.1	165.747	2740.8	1411.61	166.621	2806.1	1261.1	262.084	2550.87	1307.7	2.00005	2635.23	1453.65	-68.6867	2635.57	1275.1	-99.1865	2631.26	1124.57	-149.574	2764.07	1013.72	-132.98	2826.27	956.158	-168.622	2774.95	933.1	-185.795	2857.92	895.474
840	0	89.0495	2835.76	1617.08	184.133	2860.59	1616.62	104.58	2680.99	1627.24	234.164	2698.26	1620.56	177.422	2638.94	1498.72	173.992	2568.52	1247.76	165.711	2754.33	1410.52	166.598	2818.94	1259.79	261.583	2563.91	1306.96	1.87062	2649.09	1453.18	-70.2686	2651.28	1274.93	-101.65	2649.67	1124.5	-151.325	2786.6	1018.41	-134.614	2850.09	962.675	-171.057	2799.72	937.938	-187.473	2884.45	903.699
841	0	89.4533	2849.32	1616.12	184.931	2874.23	1615.69	104.275	2694.68	1626.31	234.202	2711.2	1619.58	177.072	2652.33	1497.75	173.482	2581.53	1246.63	165.624	2767.69	1409.39	166.575	2831.96	1258.49	260.917	2576.88	1305.99	1.67724	2663.06	1452.31	-71.3762	2667.1	1274.87	-104.082	2667.64	1124.37	-153.122	2808.21	1022.64	-136.297	2873.36	969.036	-173.831	2824.1	943.435	-188.938	2910.19	911.745
842	0	89.7356	2862.98	1615.07	184.851	2887.54	1614.54	104.6	2708.31	1624.76	233.998	2724.78	1618.27	177.097	2665.86	1496.57	173.172	2594.74	1245.78	165.569	2781.28	1408.14	166.625	2845.23	1257.26	260.302	2590.08	1304.7	1.4955	2676.97	1451.44	-72.4034	2682.78	1274.59	-106.988	2685.54	1124.24	-154.82	2829.32	1026.85	-137.461	2896.13	975.462	-175.841	2848	948.369	-190.255	2935.34	919.61
843	0	89.9451	2876.68	1613.75	185.701	2901.18	1613.27	103.73	2721.93	1623.69	234.387	2738.07	1616.99	176.733	2679.56	1495.25	172.971	2608.28	1244.69	165.723	2795.1	1406.88	166.725	2858.77	1255.98	260.081	2603.62	1303.31	1.35905	2690.84	1450.5	-73.4437	2698.45	1274.24	-109.278	2703.22	1123.77	-155.921	2850.51	1031.18	-138.327	2918.27	981.479	-177.441	2871.54	953.21	-191.195	2959.85	927.288
844	0	90.3849	2890.54	1612.42	186.112	2914.81	1611.89	104.414	2735.8	1622.17	234.192	2751.52	1615.54	176.873	2693.06	1493.82	172.623	2621.83	1243.56	165.819	2808.7	1405.42	166.837	2872.41	1254.56	259.893	2617.1	1301.79	1.29977	2704.94	1449.45	-74.4846	2714.11	1273.64	-111.707	2720.85	1123.82	-157.219	2871.03	1035.08	-139.237	2940.03	987.161	-178.938	2894.23	957.939	-191.895	2983.58	934.737
845	0	90.7126	2904.31	1611.08	186.671	2928.54	1610.63	105.068	2749.42	1620.77	234.533	2765.31	1614.16	176.554	2706.82	1492.34	172.543	2635.53	1242.13	165.911	2822.69	1404.15	166.803	2886.02	1253.2	259.641	2630.84	1300.46	1.23981	2718.78	1448.22	-75.4309	2729.72	1273.21	-113.815	2738.4	1123.72	-158.152	2891.11	1038.52	-139.784	2961.23	992.718	-179.697	2916.58	962.264	-192.401	3006.63	941.755
846	0	91.0455	2918.15	1609.48	187.186	2942	1609.35	104.628	2763.33	1619.23	234.394	2778.32	1612.73	177.004	2720.71	1490.89	172.252	2649.47	1240.29	166.024	2836.45	1402.74	166.911	2899.96	1251.95	259.216	2644.68	1298.78	1.34008	2732.89	1447.06	-76.2374	2745.31	1272.43	-115.696	2755.75	1123.27	-158.835	2910.92	1042.17	-140.123	2981.87	997.892	-180.497	2938.4	966.912	-192.634	3028.98	948.46
847	0	91.7001	2931.88	1608.07	187.673	2955.72	1607.96	105.044	2776.78	1618.53	234.855	2792.2	1611.24	176.923	2734.42	1489.25	172.195	2663.59	1238.87	166.204	2850.5	1401.27	167.013	2913.72	1250.53	259.141	2658.74	1296.79	1.72145	2746.93	1445.92	-76.7067	2760.68	1271.71	-117.196	2772.9	1122.86	-159.401	2930.14	1045.4	-140.088	3002.02	1002.66	-179.557	2959.5	970.067	-192.505	3050.64	954.641
848	0	92.3983	2945.7	1606.9	188.175	2969.29	1606.55	105.265	2790.96	1616.02	235.144	2805.47	1609.48	177.638	2748.62	1487.51	172.399	2677.95	1236.71	166.449	2864.52	1399.67	167	2927.71	1249.08	259.303	2673	1294.74	1.81657	2760.87	1444.36	-76.9419	2776.12	1270.77	-118.455	2789.91	1122.38	-159.548	2949.04	1048.19	-140.058	3021.7	1006.99	-181.332	2980.15	974.01	-192.106	3071.86	960.232
849	0	92.9102	2959.74	1605.3	188.724	2982.93	1605.22	104.596	2804.89	1614.21	235.34	2819.29	1607.68	177.778	2762.59	1485.55	172.364	2692.3	1234.59	166.687	2878.75	1398.16	167.154	2942.2	1247.51	259.432	2687.43	1292.64	2.21219	2775.2	1443.09	-77.41	2791.49	1269.79	-119.716	2806.61	1121.68	-159.734	2967.61	1050.67	-139.764	3040.8	1010.89	-181.696	3000.31	977.288	-191.708	3092.17	965.481
850	0	93.7263	2973.61	1603.93	189.468	2996.86	1603.78	105.579	2818.8	1612.51	235.663	2832.84	1605.96	178.284	2776.83	1484.13	172.596	2706.68	1233.15	167.008	2893.13	1396.46	167.077	2956.44	1245.92	259.4	2701.64	1290.93	2.66295	2789.42	1441.6	-77.4377	2806.78	1268.69	-120.367	2823.09	1120.97	-159.749	2985.66	1052.75	-139.309	3059.43	1014.3	-181.384	3019.68	980.381	-191.165	3111.92	970.113
851	0	94.0781	2987.73	1602.7	190.126	3010.67	1602.58	106.237	2832.98	1610.45	236.396	2846.91	1604.03	179.203	2790.86	1482.24	173.191	2720.93	1231.34	167.323	2907.54	1394.89	167.333	2971.29	1244.37	260.412	2716.32	1289.29	2.90462	2803.53	1440.16	-77.6118	2822.09	1267.62	-120.698	2839.31	1120.14	-159.571	3003.4	1054.58	-138.725	3077.5	1017.38	-182.17	3038.84	982.579	-190.46	3131.06	974.174
852	0	94.9898	3001.85	1601.38	190.966	3024.85	1601.17	106.002	2846.76	1608.82	236.542	2860.75	1602.39	179.471	2805.41	1480.37	173.957	2735.5	1229.47	167.836	2921.93	1393.17	167.579	2985.88	1242.8	261.002	2731	1287.08	3.50991	2817.94	1438.4	-77.2228	2837.2	1266.21	-121.08	2855.33	1119.08	-159.085	3020.4	1055.77	-137.93	3094.98	1019.72	-181.863	3057.22	984.919	-189.287	3149.69	977.469
853	0	95.6422	3015.84	1600.02	191.952	3038.76	1599.72	107.133	2861.01	1607.57	237.685	2874.95	1600.8	181.078	2819.5	1479.16	174.629	2750.14	1228.03	168.352	2936.67	1391.66	167.812	3000.77	1241.26	261.469	2745.59	1285.27	4.22616	2832.53	1437	-77.1606	2852.36	1264.98	-121.269	2871.09	1118.04	-158.444	3037.25	1056.85	-136.834	3112.2	1021.7	-180.991	3074.88	986.272	-188.021	3167.71	980.205
854	0	96.26	3029.98	1598.61	192.59	3052.83	1598.45	107.754	2875.22	1605.6	237.254	2888.11	1598.89	180.908	2833.89	1477.22	175.666	2765.05	1226.38	168.816	2951.1	1390.11	168.173	3015.92	1239.9	262.452	2760.62	1283.34	5.07109	2846.87	1435.66	-76.4192	2867.29	1263.67	-120.989	2886.64	1116.8	-157.538	3053.65	1057.48	-135.873	3128.88	1023.19	-180.141	3092.17	987.533	-187.156	3184.96	982.477
855	0	97.0111	3044.07	1597.7	193.391	3066.9	1597.25	107.983	2889.03	1604.25	238.627	2902.67	1597.38	182.477	2848.34	1475.77	176.768	2780.19	1224.39	169.459	2965.96	1388.62	168.603	3031.07	1238.67	263.296	2775.18	1281.82	5.92902	2861.13	1433.91	-75.8896	2882.2	1262.27	-120.682	2901.9	1115.54	-156.715	3069.48	1057.72	-134.814	3144.9	1024.01	-179.121	3108.81	987.977	-185.787	3201.5	983.993
856	0	97.6746	3058.06	1596.38	194.118	3081.15	1595.89	109.477	2903.31	1602.35	239.492	2916.75	1595.67	183.446	2862.7	1473.86	177.836	2795.1	1222.47	170.336	2980.64	1387.13	169.132	3046.02	1237.47	264.631	2790.37	1279.84	6.60643	2875.49	1432.23	-75.2103	2896.83	1260.84	-120.086	2916.75	1114.21	-155.563	3084.97	1057.67	-129	3159.58	1023.77	-178.104	3124.84	988.296	-184.26	3217.69	985.012
857	0	98.5144	3072.14	1595.23	194.83	3095.26	1594.67	110.551	2917.32	1600.45	240.252	2931.34	1593.7	183.345	2877.36	1471.68	179.36	2810.43	1220.78	171.162	2995.31	1385.57	169.72	3060.96	1236.32	266.547	2805.82	1277.9	7.63198	2889.87	1430.68	-74.324	2911.43	1259.33	-119.392	2931.39	1112.91	-154.396	3100.19	1057.23	-131.995	3175.82	1024.5	-173.378	3139.83	986.984	-182.853	3233.19	985.265
858	0	99.0771	3086.26	1593.71	195.745	3109.68	1593.58	111.182	2931.35	1598.97	241.213	2945.27	1592.45	184.65	2891.72	1470.04	180.887	2825.86	1218.6	172.101	3010.12	1384.11	170.646	3076.1	1235.05	267.413	2820.52	1276.24	8.57443	2904.5	1428.8	-73.4496	2925.9	1257.63	-118.589	2945.74	1111.14	-153.097	3114.88	1056.28	-130.42	3190.27	1023.63	-178.306	3149.2	991.82	-180.969	3248.33	984.723
859	0	99.9813	3100.1	1592.35	196.195	3123.61	1592.44	111.54	2945.51	1597.58	242.24	2959.8	1590.96	186.295	2906.13	1468.87	181.868	2840.86	1216.63	173.239	3024.92	1382.7	171.873	3091.26	1233.84	268.869	2835.59	1274.52	9.5555	2919.14	1426.81	-72.1977	2940.18	1255.63	-117.569	2959.57	1109.36	-151.555	3129.04	1054.77	-128.769	3204.68	1022.56	-173.882	3169.9	985.902	-179.053	3262.83	983.582
860	0	100.711	3114.52	1591.56	197.145	3138.31	1591.76	113.063	2959.75	1596.09	243.035	2974.3	1589.93	187.16	2920.36	1467.6	182.999	2856.27	1215.07	174.522	3039.92	1381.7	173.314	3106.2	1232.7	270.077	2850.52	1272.96	10.6117	2933.66	1425	-71.1309	2954.37	1253.59	-115.948	2973.33	1107.26	-149.873	3142.88	1052.92	-126.839	3218.67	1020.73	-172.135	3183.9	984.079	-176.949	3276.82	981.763
861	0	101.239	3128.7	1590.97	198.938	3153.95	1592.11	113.639	2973.84	1595.47	243.707	2988.49	1589.08	187.697	2935.03	1466.41	184.367	2871.79	1213.51	175.764	3054.62	1380.93	175.043	3121.44	1231.95	271.329	2865.41	1271.68	11.609	2948.16	1423.37	-70.1317	2968.31	1252	-114.145	2986.69	1105.11	-148.192	3156.25	1050.63	-125.147	3231.66	1018.43	-170.236	3197.22	981.797	-175.017	3290.15	979.202
862	0	101.702	3142.95	1590.48	197.843	3166.41	1590.89	114.554	2988.21	1594.62	244.237	3002.69	1588.84	189.76	2949.21	1466.29	185.024	2886.71	1212.81	177.138	3069.4	1380.5	176.859	3136.95	1231.67	272.478	2880.44	1270.81	12.5858	2962.65	1422.1	-68.3643	2981.94	1250.63	-112.894	3000.02	1103.68	-146.3	3169.45	1048.03	-123.067	3244.72	1015.49	-168.261	3209.86	979.09	-172.834	3302.91	976.144
863	0	102.555	3157.19	1590.38	200.087	3182.9	1592.41	115.319	3002.38	1594.69	246.115	3018.49	1589.31	189.426	2964.07	1465.56	186.06	2901.96	1212.12	178.489	3084.19	1380.71	178.74	3152.53	1232.27	272.867	2895.1	1270.51	13.6179	2977.1	1421.12	-66.671	2995.35	1249.46	-110.1	3012.75	1102.21	-144.469	3181.6	1045.11	-121.265	3256.69	1012.31	-165.951	3221.74	975.818	-170.711	3314.6	972.462
864	0	103.254	3171.59	1590.55	201.035	3197.16	1592.89	116.476	3016.89	1595.07	246.867	3032.54	1590.08	191.713	2978.06	1466.51	186.433	2917.07	1212.07	179.87	3098.78	1381.37	180.774	3168.15	1233.38	273.389	2909.86	1270.39	14.8412	2991.59	1420.92	-64.5302	3008.54	1248.63	-108.507	3025.6	1101.39	-142.234	3193.62	1042.19	-119.008	3268.48	1008.48	-163.767	3232.75	972.155	-168.582	3325.63	968.105
865	0	103.691	3185.93	1591.14	201.345	3211.77	1593.84	117.117	3030.95	1595.85	248.206	3047.51	1591.26	191.622	2992.88	1466.7	186.818	2931.69	1212.37	181.183	3113.48	1382.2	182.46	3183.07	1234.75	274.13	2924.72	1270.56	15.755	3006.21	1421.15	-62.7401	3021.55	1248.45	-106.429	3038.01	1100.75	-139.802	3204.71	1038.92	-116.722	3279.31	1004.32	-161.067	3243.14	968.389	-166.157	3335.52	963.148
866	0	104.592	3200.01	1591.85	202.279	3226.58	1594.68	118.627	3045.34	1595.79	249.005	3062.1	1592.33	192.367	3007.77	1467.27	186.703	2946.17	1213.07	182.327	3127.71	1383.2	184.269	3198.46	1236.23	274.68	2939.41	1271.28	16.7666	3020.98	1421.82	-60.7657	3034.47	1248.54	-102.272	3049.81	1100.29	-137.205	3215.87	1035.62	-113.866	3289.45	999.66	-158.341	3252.5	964.101	-163.749	3344.78	957.424
867	0	105.254	3214.47	1592.82	201.224	3239.28	1594.55	119.355	3059.85	1596.83	250.011	3076.87	1593.46	192.896	3022.18	1468.38	187.272	2960.49	1214.24	183.24	3142.27	1384.27	185.764	3213.25	1237.59	275.458	2953.89	1272.46	17.6449	3035.71	1422.96	-59.1392	3047.43	1248.88	-99.8866	3061.3	1100.37	-134.731	3226.14	1032.23	-111.583	3298.84	994.642	-155.463	3261.23	959.945	-160.978	3353.66	951.282
868	0	105.971	3228.88	1593.86	203.513	3255.17	1596.71	119.941	3074.01	1598.15	250.583	3090.89	1594.42	193.59	3036.55	1469.58	187.518	2974.39	1216.03	184.009	3156.61	1385.36	187.036	3228.11	1238.9	274.796	2967.93	1273.81	18.3654	3050.28	1424.35	-57.3929	3060.31	1249.44	-97.9463	3072.68	1100.71	-131.917	3235.89	1028.69	-108.743	3308.02	989.508	-152.356	3269.11	955.21	-158.487	3361.09	944.72
869	0	106.87	3243.11	1594.95	204.355	3269.57	1597.76	120.553	3088.24	1599.35	251.276	3105.52	1595.48	194.298	3050.75	1471.04	187.442	2988.07	1217.6	184.478	3170.63	1386.35	187.587	3241.51	1239.77	275.625	2982.24	1275.14	19.0084	3064.56	1425.5	-56.2324	3073.33	1250.26	-94.2218	3083.71	1101.07	-129.131	3245.26	1024.97	-105.856	3316.42	983.984	-149.156	3276.42	950.679	-155.704	3367.91	937.581
870	0	107.315	3257.39	1596.22	205.046	3283.87	1598.83	121.344	3102.66	1600.74	251.613	3119.68	1596.56	196.579	3066.72	1472.09	188.443	3002.05	1219.02	184.773	3184.46	1387.5	187.977	3255.43	1240.69	275.882	2996.09	1276.47	19.4557	3078.42	1426.97	-54.818	3086.24	1251.09	-91.0842	3094.49	1101.89	-126.157	3254.04	1021	-103.138	3323.87	978.139	-146.144	3282.99	945.772	-152.427	3374.47	929.932
871	0	107.856	3271.59	1597.76	205.789	3298.25	1600.11	121.908	3117	1602.41	252.222	3133.65	1597.99	197.287	3080.6	1473.8	189.278	3015.37	1220.96	185.01	3198.23	1388.79	187.955	3268.84	1241.57	276.6	3009.72	1278.55	20.0271	3091.88	1428.59	-53.5482	3098.58	1252.05	-90.8169	3105.16	1102.74	-123.443	3262.18	1016.92	-100.095	3330.94	972.2	-142.739	3289.14	940.585	-149.106	3379.87	921.975
872	0	108.596	3285.78	1599.12	204.542	3310.26	1600.15	121.749	3130.79	1604.4	252.43	3147.69	1599.64	199.913	3093.04	1477.1	188.92	3028.55	1223.21	184.875	3211.46	1390.32	187.153	3281.41	1242.55	277.154	3023.27	1280.42	20.4394	3105	1430.39	-51.9293	3110.97	1253.09	-87.5112	3115.99	1103.35	-120.567	3269.91	1012.7	-96.9832	3337.49	966.053	-139.45	3294.72	935.82	-145.895	3384.57	914.079
873	0	108.859	3299.51	1600.47	205.365	3324.46	1601.47	122.118	3144.99	1606.31	252.801	3161.29	1601.25	197.61	3107.83	1477.32	190.891	3041.9	1225.3	185.027	3224.99	1391.81	186.312	3294.11	1243.72	279.107	3037.1	1282.68	20.3959	3117.59	1431.98	-50.9388	3123.26	1254.44	-84.6219	3123.54	1107.84	-117.545	3277.46	1008.76	-93.8252	3343.24	959.699	-136.313	3299.56	930.731	-142.249	3388.68	905.945
874	0	109.014	3313.46	1601.72	205.861	3338.74	1602.76	122.477	3158.67	1608.15	252.788	3175.23	1602.83	198.571	3121.21	1478.93	192.039	3055.06	1227.04	184.966	3238.27	1393.29	185.283	3306.88	1245.06	280.124	3050.55	1284.48	21.1152	3130.35	1433.73	-49.5584	3135.24	1255.51	-82.0153	3136.78	1105.14	-114.647	3284.46	1004.38	-90.3264	3348.71	953.276	-133.044	3303.91	925.942	-138.316	3391.9	897.36
875	0	109.325	3326.91	1602.88	206.499	3352.77	1604.07	122.837	3172.33	1610.26	253.091	3188.94	1604.91	198.836	3134.85	1480.86	193.145	3068.29	1228.84	184.788	3251.33	1395.01	184.551	3319.65	1246.51	281.254	3064.43	1286.14	21.3002	3142.77	1435.46	-48.195	3146.98	1256.72	-79.5956	3146.97	1106.34	-111.376	3290.96	1000.08	-86.9207	3353.18	946.897	-127.989	3307.68	920.171	-134.771	3394.2	888.751
876	0	109.779	3340.51	1604.11	207.139	3366.95	1605.57	123.206	3185.9	1612.45	253.383	3202.96	1607.2	199.264	3147.92	1483.01	193.756	3081.31	1230.59	184.513	3264.03	1396.85	183.339	3332.18	1248.25	282.412	3077.85	1288.24	21.6496	3155.05	1436.89	-46.9503	3158.47	1257.83	-77.6937	3156.58	1107.56	-108.141	3297.14	996.174	-83.4637	3357.03	940.618	-125.242	3310.77	915.758	-130.6	3395.78	880.339
877	0	109.192	3353.81	1605.56	207.669	3381.85	1607.09	125.062	3202.22	1614.52	253.546	3216.5	1609.48	198.344	3159.51	1484.74	193.429	3094.26	1231.6	184.206	3276.53	1398.7	182.438	3344.71	1250.03	283.76	3090.9	1290.47	21.6804	3167.12	1438.44	-45.6635	3169.53	1259.07	-74.398	3166.55	1108.29	-105.011	3302.77	992.148	-79.9795	3360.35	934.439	-121.565	3314.18	910.859	-126.142	3397.02	872.122
878	0	109.373	3367.18	1606.97	207.495	3394.62	1608.83	123.123	3212.63	1616.69	253.372	3229.92	1611.43	199.351	3174.05	1486.76	195.147	3107.24	1233.64	184.175	3289.57	1400.59	181.71	3357.21	1251.65	284.321	3104.27	1292.48	22.066	3179.48	1439.97	-44.3259	3180.48	1259.92	-70.5674	3173.64	1111.3	-101.9	3307.95	988.347	-76.3448	3363.17	928.613	-117.733	3316.16	906.942	-121.96	3397.46	864.222
879	0	109.041	3380.25	1608.44	207.377	3407.85	1609.99	123.413	3226.04	1618.26	253.717	3243.24	1613.52	199.977	3187.33	1488.69	197.041	3120.55	1235.44	184.098	3302.32	1402.38	181.48	3369.81	1253.8	284.127	3117.73	1294.06	22.1434	3191.59	1441.4	-43.0159	3191.18	1260.97	-68.8103	3185.13	1110.05	-98.6841	3312.76	984.911	-72.4966	3365.47	923.217	-115.482	3317.76	903.751	-117.571	3397.39	856.6
880	0	108.915	3393.51	1609.71	207.434	3421.31	1611.43	123	3239.14	1620.74	253.622	3256.8	1615.46	200.35	3200.18	1490.61	198.24	3133.54	1237.2	183.927	3314.68	1404.14	181.319	3382.19	1255.56	285.81	3130.5	1296.45	22.6707	3204	1442.74	-41.8857	3201.9	1261.97	-66.452	3193.85	1111.33	-95.5318	3317.19	981.552	-68.9554	3367.61	917.607	-112.111	3319.87	900.598	-113.368	3396.67	849.487
881	0	109.111	3406.53	1610.97	207.376	3434.4	1612.95	123.066	3252.2	1621.84	253.715	3269.69	1617.24	200.524	3213.36	1492.5	199.567	3146.43	1238.86	183.879	3327.44	1405.89	181.533	3394.62	1257.21	286.179	3144	1298.14	22.8347	3216.05	1443.92	-40.2053	3212.47	1262.63	-64.1772	3202.25	1112.37	-92.2279	3321.2	978.403	-65.3712	3369.04	912.447	-109.533	3320.49	897.641	-109.449	3395.63	842.982
882	0	108.935	3419.31	1612.39	207.225	3447.24	1614.26	123.162	3265.38	1623.5	253.706	3282.85	1618.99	199.39	3224.14	1494.01	200.362	3159.06	1240.8	183.206	3338.95	1407.9	181.916	3406.94	1258.81	286.833	3156.89	1300.19	23.3014	3228.16	1445.04	-38.4916	3222.85	1263.21	-60.6404	3210.79	1112.84	-88.7208	3324.79	975.407	-61.6429	3370.29	907.787	-106.243	3321.54	894.912	-105.144	3393.95	836.632
[truncated: 69 more columns]

## Sheet: Sheet2
Devices
		025370 - Force			025370 - Moment			025370 - CoP			027571 - Force			027571 - Moment			027571 - CoP			037720 - Force			037720 - Moment			037720 - CoP
Frame	Sub Frame	Fx	Fy	Fz	Mx	My	Mz	Cx	Cy	Cz	Fx	Fy	Fz	Mx	My	Mz	Cx	Cy	Cz	Fx	Fy	Fz	Mx	My	Mz	Cx	Cy	Cz
		N	N	N	N.mm	N.mm	N.mm	mm	mm	mm	N	N	N	N.mm	N.mm	N.mm	mm	mm	mm	N	N	N	N.mm	N.mm	N.mm	mm	mm	mm
577	0	0	0	0	0	0	0	200	300	0	0	0	0	0	0	0	200	903	0	0	0	0	0	0	0	603	903	0
577	1	0	0	0	0	0	0	200	300	0	0	0	0	0	0	0	200	903	0	0	0	0	0	0	0	603	903	0
577	2	0	0	0	0	0	0	200	300	0	0	0	0	0	0	0	200	903	0	0	0	0	0	0	0	603	903	0
577	3	0	0	0	0	0	0	200	300	0	0	0	0	0	0	0	200	903	0	0	0	0	0	0	0	603	903	0
577	4	0	0	0	0	0	0	200	300	0	0	0	0	0	0	0	200	903	0	0	0	0	0	0	0	603	903	0
577	5	0	0	0	0	0	0	200	300	0	0	0	0	0	0	0	200	903	0	0	0	0	0	0	0	603	903	0
577	6	0	0	0	0	0	0	200	300	0	0	0	0	0	0	0	200	903	0	0	0	0	0	0	0	603	903	0
577	7	0	0	0	0	0	0	200	300	0	0	0	0	0	0	0	200	903	0	0	0	0	0	0	0	603	903	0
577	8	0	0	0	0	0	0	200	300	0	0	0	0	0	0	0	200	903	0	0	0	0	0	0	0	603	903	0
577	9	0	0	0	0	0	0	200	300	0	0	0	0	0	0	0	200	903	0	0	0	0	0	0	0	603	903	0
578	0	0	0	0	0	0	0	200	300	0	0	0	0	0	0	0	200	903	0	0	0	0	0	0	0	603	903	0
578	1	0	0	0	0	0	0	200	300	0	0	0	0	0	0	0	200	903	0	0	0	0	0	0	0	603	903	0
578	2	0	0	0	0	0	0	200	300	0	0	0	0	0	0	0	200	903	0	0	0	0	0	0	0	603	903	0
578	3	0	0	0	0	0	0	200	300	0	0	0	0	0	0	0	200	903	0	0	0	0	0	0	0	603	903	0
578	4	0	0	0	0	0	0	200	300	0	0	0	0	0	0	0	200	903	0	0	0	0	0	0	0	603	903	0
578	5	0	0	0	0	0	0	200	300	0	0	0	0	0	0	0	200	903	0	0	0	0	0	0	0	603	903	0
578	6	0	0	0	0	0	0	200	300	0	0	0	0	0	0	0	200	903	0	0	0	0	0	0	0	603	903	0
578	7	0	0	0	0	0	0	200	300	0	0	0	0	0	0	0	200	903	0	0	0	0	0	0	0	603	903	0
578	8	0	0	0	0	0	0	200	300	0	0	0	0	0	0	0	200	903	0	0	0	0	0	0	0	603	903	0
578	9	0	0	0	0	0	0	200	300	0	0	0	0	0	0	0	200	903	0	0	0	0	0	0	0	603	903	0
579	0	0	0	0	0	0	0	200	300	0	0	0	0	0	0	0	200	903	0	0	0	0	0	0	0	603	903	0
579	1	0	0	0	0	0	0	200	300	0	0	0	0	0	0	0	200	903	0	0	0	0	0	0	0	603	903	0
579	2	0	0	0	0	0	0	200	300	0	0	0	0	0	0	0	200	903	0	0	0	0	0	0	0	603	903	0
579	3	0	0	0	0	0	0	200	300	0	0	0	0	0	0	0	200	903	0	0	0	0	0	0	0	603	903	0
579	4	0	0	0	0	0	0	200	300	0	0	0	0	0	0	0	200	903	0	0	0	0	0	0	0	603	903	0
579	5	0	0	0	0	0	0	200	300	0	0	0	0	0	0	0	200	903	0	0	0	0	0	0	0	603	903	0
579	6	0	0	0	0	0	0	200	300	0	0	0	0	0	0	0	200	903	0	0	0	0	0	0	0	603	903	0
579	7	0	0	0	0	0	0	200	300	0	0	0	0	0	0	0	200	903	0	0	0	0	0	0	0	603	903	0
579	8	0	0	0	0	0	0	200	300	0	0	0	0	0	0	0	200	903	0	0	0	0	0	0	0	603	903	0
579	9	0	0	0	0	0	0	200	300	0	0	0	0	0	0	0	200	903	0	0	0	0	0	0	0	603	903	0
580	0	0	0	0	0	0	0	200	300	0	0	0	0	0	0	0	200	903	0	0	0	0	0	0	0	603	903	0
580	1	0	0	0	0	0	0	200	300	0	0	0	0	0	0	0	200	903	0	0	0	0	0	0	0	603	903	0
580	2	0	0	0	0	0	0	200	300	0	0	0	0	0	0	0	200	903	0	0	0	0	0	0	0	603	903	0
580	3	0	0	0	0	0	0	200	300	0	0	0	0	0	0	0	200	903	0	0	0	0	0	0	0	603	903	0
580	4	0	0	0	0	0	0	200	300	0	0	0	0	0	0	0	200	903	0	0	0	0	0	0	0	603	903	0
580	5	0	0	0	0	0	0	200	300	0	0	0	0	0	0	0	200	903	0	0	0	0	0	0	0	603	903	0
580	6	0	0	0	0	0	0	200	300	0	0	0	0	0	0	0	200	903	0	0	0	0	0	0	0	603	903	0
580	7	0	0	0	0	0	0	200	300	0	0	0	0	0	0	0	200	903	0	0	0	0	0	0	0	603	903	0
580	8	0	0	0	0	0	0	200	300	0	0	0	0	0	0	0	200	903	0	0	0	0	0	0	0	603	903	0
580	9	0	0	0	0	0	0	200	300	0	0	0	0	0	0	0	200	903	0	0	0	0	0	0	0	603	903	0
581	0	0	0	0	0	0	0	200	300	0	0	0	0	0	0	0	200	903	0	0	0	0	0	0	0	603	903	0
581	1	0	0	0	0	0	0	200	300	0	0	0	0	0	0	0	200	903	0	0	0	0	0	0	0	603	903	0
581	2	0	0	0	0	0	0	200	300	0	0	0	0	0	0	0	200	903	0	0	0	0	0	0	0	603	903	0
581	3	0	0	0	0	0	0	200	300	0	0	0	0	0	0	0	200	903	0	0	0	0	0	0	0	603	903	0
581	4	0	0	0	0	0	0	200	300	0	0	0	0	0	0	0	200	903	0	0	0	0	0	0	0	603	903	0
581	5	0	0	0	0	0	0	200	300	0	0	0	0	0	0	0	200	903	0	0	0	0	0	0	0	603	903	0
581	6	0	0	0	0	0	0	200	300	0	0	0	0	0	0	0	200	903	0	0	0	0	0	0	0	603	903	0
581	7	0	0	0	0	0	0	200	300	0	0	0	0	0	0	0	200	903	0	0	0	0	0	0	0	603	903	0
581	8	0	0	0	0	0	0	200	300	0	0	0	0	0	0	0	200	903	0	0	0	0	0	0	0	603	903	0
581	9	0	0	0	0	0	0	200	300	0	0	0	0	0	0	0	200	903	0	0	0	0	0	0	0	603	903	0
582	0	0	0	0	0	0	0	200	300	0	0	0	0	0	0	0	200	903	0	0	0	0	0	0	0	603	903	0
582	1	0	0	0	0	0	0	200	300	0	0	0	0	0	0	0	200	903	0	0	0	0	0	0	0	603	903	0
582	2	0	0	0	0	0	0	200	300	0	0	0	0	0	0	0	200	903	0	0	0	0	0	0	0	603	903	0
582	3	0	0	0	0	0	0	200	300	0	0	0	0	0	0	0	200	903	0	0	0	0	0	0	0	603	903	0
582	4	0	0	0	0	0	0	200	300	0	0	0	0	0	0	0	200	903	0	0	0	0	0	0	0	603	903	0
582	5	0	0	0	0	0	0	200	300	0	0	0	0	0	0	0	200	903	0	0	0	0	0	0	0	603	903	0
582	6	0	0	0	0	0	0	200	300	0	0	0	0	0	0	0	200	903	0	0	0	0	0	0	0	603	903	0
582	7	0	0	0	0	0	0	200	300	0	0	0	0	0	0	0	200	903	0	0	0	0	0	0	0	603	903	0
582	8	0	0	0	0	0	0	200	300	0	0	0	0	0	0	0	200	903	0	0	0	0	0	0	0	603	903	0
582	9	0	0	0	0	0	0	200	300	0	0	0	0	0	0	0	200	903	0	0	0	0	0	0	0	603	903	0
583	0	0	0	0	0	0	0	200	300	0	0	0	0	0	0	0	200	903	0	0	0	0	0	0	0	603	903	0
583	1	0	0	0	0	0	0	200	300	0	0	0	0	0	0	0	200	903	0	0	0	0	0	0	0	603	903	0
583	2	0	0	0	0	0	0	200	300	0	0	0	0	0	0	0	200	903	0	0	0	0	0	0	0	603	903	0
583	3	0	0	0	0	0	0	200	300	0	0	0	0	0	0	0	200	903	0	0	0	0	0	0	0	603	903	0
583	4	0	0	0	0	0	0	200	300	0	0	0	0	0	0	0	200	903	0	0	0	0	0	0	0	603	903	0
583	5	0	0	0	0	0	0	200	300	0	0	0	0	0	0	0	200	903	0	0	0	0	0	0	0	603	903	0
583	6	0	0	0	0	0	0	200	300	0	0	0	0	0	0	0	200	903	0	0	0	0	0	0	0	603	903	0
583	7	0	0	0	0	0	0	200	300	0	0	0	0	0	0	0	200	903	0	0	0	0	0	0	0	603	903	0
583	8	0	0	0	0	0	0	200	300	0	0	0	0	0	0	0	200	903	0	0	0	0	0	0	0	603	903	0
583	9	0	0	0	0	0	0	200	300	0	0	0	0	0	0	0	200	903	0	0	0	0	0	0	0	603	903	0
584	0	0	0	0	0	0	0	200	300	0	0	0	0	0	0	0	200	903	0	0	0	0	0	0	0	603	903	0
584	1	0	0	0	0	0	0	200	300	0	0	0	0	0	0	0	200	903	0	0	0	0	0	0	0	603	903	0
584	2	0	0	0	0	0	0	200	300	0	0	0	0	0	0	0	200	903	0	0	0	0	0	0	0	603	903	0
584	3	0	0	0	0	0	0	200	300	0	0	0	0	0	0	0	200	903	0	0	0	0	0	0	0	603	903	0
584	4	0	0	0	0	0	0	200	300	0	0	0	0	0	0	0	200	903	0	0	0	0	0	0	0	603	903	0
584	5	0	0	0	0	0	0	200	300	0	0	0	0	0	0	0	200	903	0	0	0	0	0	0	0	603	903	0
584	6	0	0	0	0	0	0	200	300	0	0	0	0	0	0	0	200	903	0	0	0	0	0	0	0	603	903	0
584	7	0	0	0	0	0	0	200	300	0	0	0	0	0	0	0	200	903	0	0	0	0	0	0	0	603	903	0
584	8	0	0	0	0	0	0	200	300	0	0	0	0	0	0	0	200	903	0	0	0	0	0	0	0	603	903	0
584	9	0	0	0	0	0	0	200	300	0	0	0	0	0	0	0	200	903	0	0	0	0	0	0	0	603	903	0
585	0	0	0	0	0	0	0	200	300	0	0	0	0	0	0	0	200	903	0	0	0	0	0	0	0	603	903	0
585	1	0	0	0	0	0	0	200	300	0	0	0	0	0	0	0	200	903	0	0	0	0	0	0	0	603	903	0
585	2	0	0	0	0	0	0	200	300	0	0	0	0	0	0	0	200	903	0	0	0	0	0	0	0	603	903	0
585	3	0	0	0	0	0	0	200	300	0	0	0	0	0	0	0	200	903	0	0	0	0	0	0	0	603	903	0
585	4	0	0	0	0	0	0	200	300	0	0	0	0	0	0	0	200	903	0	0	0	0	0	0	0	603	903	0
585	5	0	0	0	0	0	0	200	300	0	0	0	0	0	0	0	200	903	0	0	0	0	0	0	0	603	903	0
585	6	0	0	0	0	0	0	200	300	0	0	0	0	0	0	0	200	903	0	0	0	0	0	0	0	603	903	0
585	7	0	0	0	0	0	0	200	300	0	0	0	0	0	0	0	200	903	0	0	0	0	0	0	0	603	903	0
585	8	0	0	0	0	0	0	200	300	0	0	0	0	0	0	0	200	903	0	0	0	0	0	0	0	603	903	0
585	9	0	0	0	0	0	0	200	300	0	0	0	0	0	0	0	200	903	0	0	0	0	0	0	0	603	903	0
586	0	0	0	0	0	0	0	200	300	0	0	0	0	0	0	0	200	903	0	0	0	0	0	0	0	603	903	0
586	1	0	0	0	0	0	0	200	300	0	0	0	0	0	0	0	200	903	0	0	0	0	0	0	0	603	903	0
586	2	0	0	0	0	0	0	200	300	0	0	0	0	0	0	0	200	903	0	0	0	0	0	0	0	603	903	0
586	3	0	0	0	0	0	0	200	300	0	0	0	0	0	0	0	200	903	0	0	0	0	0	0	0	603	903	0
586	4	0	0	0	0	0	0	200	300	0	0	0	0	0	0	0	200	903	0	0	0	0	0	0	0	603	903	0
586	5	0	0	0	0	0	0	200	300	0	0	0	0	0	0	0	200	903	0	0	0	0	0	0	0	603	903	0
586	6	0	0	0	0	0	0	200	300	0	0	0	0	0	0	0	200	903	0	0	0	0	0	0	0	603	903	0
586	7	0	0	0	0	0	0	200	300	0	0	0	0	0	0	0	200	903	0	0	0	0	0	0	0	603	903	0
586	8	0	0	0	0	0	0	200	300	0	0	0	0	0	0	0	200	903	0	0	0	0	0	0	0	603	903	0
586	9	0	0	0	0	0	0	200	300	0	0	0	0	0	0	0	200	903	0	0	0	0	0	0	0	603	903	0
587	0	0	0	0	0	0	0	200	300	0	0	0	0	0	0	0	200	903	0	0	0	0	0	0	0	603	903	0
587	1	0	0	0	0	0	0	200	300	0	0	0	0	0	0	0	200	903	0	0	0	0	0	0	0	603	903	0
587	2	0	0	0	0	0	0	200	300	0	0	0	0	0	0	0	200	903	0	0	0	0	0	0	0	603	903	0
587	3	0	0	0	0	0	0	200	300	0	0	0	0	0	0	0	200	903	0	0	0	0	0	0	0	603	903	0
587	4	0	0	0	0	0	0	200	300	0	0	0	0	0	0	0	200	903	0	0	0	0	0	0	0	603	903	0
587	5	0	0	0	0	0	0	200	300	0	0	0	0	0	0	0	200	903	0	0	0	0	0	0	0	603	903	0
587	6	0	0	0	0	0	0	200	300	0	0	0	0	0	0	0	200	903	0	0	0	0	0	0	0	603	903	0
587	7	0	0	0	0	0	0	200	300	0	0	0	0	0	0	0	200	903	0	0	0	0	0	0	0	603	903	0
587	8	0	0	0	0	0	0	200	300	0	0	0	0	0	0	0	200	903	0	0	0	0	0	0	0	603	903	0
587	9	0	0	0	0	0	0	200	300	0	0	0	0	0	0	0	200	903	0	0	0	0	0	0	0	603	903	0
588	0	0	0	0	0	0	0	200	300	0	0	0	0	0	0	0	200	903	0	0	0	0	0	0	0	603	903	0
588	1	0	0	0	0	0	0	200	300	0	0	0	0	0	0	0	200	903	0	0	0	0	0	0	0	603	903	0
588	2	0	0	0	0	0	0	200	300	0	0	0	0	0	0	0	200	903	0	0	0	0	0	0	0	603	903	0
588	3	0	0	0	0	0	0	200	300	0	0	0	0	0	0	0	200	903	0	0	0	0	0	0	0	603	903	0
588	4	0	0	0	0	0	0	200	300	0	0	0	0	0	0	0	200	903	0	0	0	0	0	0	0	603	903	0
588	5	0	0	0	0	0	0	200	300	0	0	0	0	0	0	0	200	903	0	0	0	0	0	0	0	603	903	0
588	6	0	0	0	0	0	0	200	300	0	0	0	0	0	0	0	200	903	0	0	0	0	0	0	0	603	903	0
588	7	0	0	0	0	0	0	200	300	0	0	0	0	0	0	0	200	903	0	0	0	0	0	0	0	603	903	0
588	8	0	0	0	0	0	0	200	300	0	0	0	0	0	0	0	200	903	0	0	0	0	0	0	0	603	903	0
588	9	0	0	0	0	0	0	200	300	0	0	0	0	0	0	0	200	903	0	0	0	0	0	0	0	603	903	0
589	0	0	0	0	0	0	0	200	300	0	0	0	0	0	0	0	200	903	0	0	0	0	0	0	0	603	903	0
589	1	0	0	0	0	0	0	200	300	0	0	0	0	0	0	0	200	903	0	0	0	0	0	0	0	603	903	0
589	2	0	0	0	0	0	0	200	300	0	0	0	0	0	0	0	200	903	0	0	0	0	0	0	0	603	903	0
589	3	0	0	0	0	0	0	200	300	0	0	0	0	0	0	0	200	903	0	0	0	0	0	0	0	603	903	0
589	4	0	0	0	0	0	0	200	300	0	0	0	0	0	0	0	200	903	0	0	0	0	0	0	0	603	903	0
589	5	0	0	0	0	0	0	200	300	0	0	0	0	0	0	0	200	903	0	0	0	0	0	0	0	603	903	0
589	6	0	0	0	0	0	0	200	300	0	0	0	0	0	0	0	200	903	0	0	0	0	0	0	0	603	903	0
589	7	0	0	0	0	0	0	200	300	0	0	0	0	0	0	0	200	903	0	0	0	0	0	0	0	603	903	0
589	8	0	0	0	0	0	0	200	300	0	0	0	0	0	0	0	200	903	0	0	0	0	0	0	0	603	903	0
589	9	0	0	0	0	0	0	200	300	0	0	0	0	0	0	0	200	903	0	0	0	0	0	0	0	603	903	0
590	0	0	0	0	0	0	0	200	300	0	0	0	0	0	0	0	200	903	0	0	0	0	0	0	0	603	903	0
590	1	0	0	0	0	0	0	200	300	0	0	0	0	0	0	0	200	903	0	0	0	0	0	0	0	603	903	0
590	2	0	0	0	0	0	0	200	300	0	0	0	0	0	0	0	200	903	0	0	0	0	0	0	0	603	903	0
590	3	0	0	0	0	0	0	200	300	0	0	0	0	0	0	0	200	903	0	0	0	0	0	0	0	603	903	0
590	4	0	0	0	0	0	0	200	300	0	0	0	0	0	0	0	200	903	0	0	0	0	0	0	0	603	903	0
590	5	0	0	0	0	0	0	200	300	0	0	0	0	0	0	0	200	903	0	0	0	0	0	0	0	603	903	0
590	6	0	0	0	0	0	0	200	300	0	0	0	0	0	0	0	200	903	0	0	0	0	0	0	0	603	903	0
590	7	0	0	0	0	0	0	200	300	0	0	0	0	0	0	0	200	903	0	0	0	0	0	0	0	603	903	0
590	8	0	0	0	0	0	0	200	300	0	0	0	0	0	0	0	200	903	0	0	0	0	0	0	0	603	903	0
590	9	0	0	0	0	0	0	200	300	0	0	0	0	0	0	0	200	903	0	0	0	0	0	0	0	603	903	0
591	0	0	0	0	0	0	0	200	300	0	0	0	0	0	0	0	200	903	0	0	0	0	0	0	0	603	903	0
591	1	0	0	0	0	0	0	200	300	0	0	0	0	0	0	0	200	903	0	0	0	0	0	0	0	603	903	0
591	2	0	0	0	0	0	0	200	300	0	0	0	0	0	0	0	200	903	0	0	0	0	0	0	0	603	903	0
591	3	0	0	0	0	0	0	200	300	0	0	0	0	0	0	0	200	903	0	0	0	0	0	0	0	603	903	0
591	4	0	0	0	0	0	0	200	300	0	0	0	0	0	0	0	200	903	0	0	0	0	0	0	0	603	903	0
591	5	0	0	0	0	0	0	200	300	0	0	0	0	0	0	0	200	903	0	0	0	0	0	0	0	603	903	0
591	6	0	0	0	0	0	0	200	300	0	0	0	0	0	0	0	200	903	0	0	0	0	0	0	0	603	903	0
591	7	0	0	0	0	0	0	200	300	0	0	0	0	0	0	0	200	903	0	0	0	0	0	0	0	603	903	0
591	8	0	0	0	0	0	0	200	300	0	0	0	0	0	0	0	200	903	0	0	0	0	0	0	0	603	903	0
591	9	0	0	0	0	0	0	200	300	0	0	0	0	0	0	0	200	903	0	0	0	0	0	0	0	603	903	0
592	0	0	0	0	0	0	0	200	300	0	0	0	0	0	0	0	200	903	0	0	0	0	0	0	0	603	903	0
592	1	0	0	0	0	0	0	200	300	0	0	0	0	0	0	0	200	903	0	0	0	0	0	0	0	603	903	0
592	2	0	0	0	0	0	0	200	300	0	0	0	0	0	0	0	200	903	0	0	0	0	0	0	0	603	903	0
592	3	0	0	0	0	0	0	200	300	0	0	0	0	0	0	0	200	903	0	0	0	0	0	0	0	603	903	0
592	4	0	0	0	0	0	0	200	300	0	0	0	0	0	0	0	200	903	0	0	0	0	0	0	0	603	903	0
592	5	0	0	0	0	0	0	200	300	0	0	0	0	0	0	0	200	903	0	0	0	0	0	0	0	603	903	0
592	6	0	0	0	0	0	0	200	300	0	0	0	0	0	0	0	200	903	0	0	0	0	0	0	0	603	903	0
592	7	0	0	0	0	0	0	200	300	0	0	0	0	0	0	0	200	903	0	0	0	0	0	0	0	603	903	0
592	8	0	0	0	0	0	0	200	300	0	0	0	0	0	0	0	200	903	0	0	0	0	0	0	0	603	903	0
592	9	0	0	0	0	0	0	200	300	0	0	0	0	0	0	0	200	903	0	0	0	0	0	0	0	603	903	0
593	0	0	0	0	0	0	0	200	300	0	0	0	0	0	0	0	200	903	0	0	0	0	0	0	0	603	903	0
593	1	0	0	0	0	0	0	200	300	0	0	0	0	0	0	0	200	903	0	0	0	0	0	0	0	603	903	0
593	2	0	0	0	0	0	0	200	300	0	0	0	0	0	0	0	200	903	0	0	0	0	0	0	0	603	903	0
593	3	0	0	0	0	0	0	200	300	0	0	0	0	0	0	0	200	903	0	0	0	0	0	0	0	603	903	0
593	4	0	0	0	0	0	0	200	300	0	0	0	0	0	0	0	200	903	0	0	0	0	0	0	0	603	903	0
593	5	0	0	0	0	0	0	200	300	0	0	0	0	0	0	0	200	903	0	0	0	0	0	0	0	603	903	0
593	6	0	0	0	0	0	0	200	300	0	0	0	0	0	0	0	200	903	0	0	0	0	0	0	0	603	903	0
593	7	0	0	0	0	0	0	200	300	0	0	0	0	0	0	0	200	903	0	0	0	0	0	0	0	603	903	0
593	8	0	0	0	0	0	0	200	300	0	0	0	0	0	0	0	200	903	0	0	0	0	0	0	0	603	903	0
593	9	0	0	0	0	0	0	200	300	0	0	0	0	0	0	0	200	903	0	0	0	0	0	0	0	603	903	0
594	0	0	0	0	0	0	0	200	300	0	0	0	0	0	0	0	200	903	0	0	0	0	0	0	0	603	903	0
594	1	0	0	0	0	0	0	200	300	0	0	0	0	0	0	0	200	903	0	0	0	0	0	0	0	603	903	0
594	2	0	0	0	0	0	0	200	300	0	0	0	0	0	0	0	200	903	0	0	0	0	0	0	0	603	903	0
594	3	0	0	0	0	0	0	200	300	0	0	0	0	0	0	0	200	903	0	0	0	0	0	0	0	603	903	0
594	4	0	0	0	0	0	0	200	300	0	0	0	0	0	0	0	200	903	0	0	0	0	0	0	0	603	903	0
594	5	0	0	0	0	0	0	200	300	0	0	0	0	0	0	0	200	903	0	0	0	0	0	0	0	603	903	0
594	6	0	0	0	0	0	0	200	300	0	0	0	0	0	0	0	200	903	0	0	0	0	0	0	0	603	903	0
594	7	0	0	0	0	0	0	200	300	0	0	0	0	0	0	0	200	903	0	0	0	0	0	0	0	603	903	0
594	8	0	0	0	0	0	0	200	300	0	0	0	0	0	0	0	200	903	0	0	0	0	0	0	0	603	903	0
594	9	0	0	0	0	0	0	200	300	0	0	0	0	0	0	0	200	903	0	0	0	0	0	0	0	603	903	0
595	0	0	0	0	0	0	0	200	300	0	0	0	0	0	0	0	200	903	0	0	0	0	0	0	0	603	903	0
595	1	0	0	0	0	0	0	200	300	0	0	0	0	0	0	0	200	903	0	0	0	0	0	0	0	603	903	0
595	2	0	0	0	0	0	0	200	300	0	0	0	0	0	0	0	200	903	0	0	0	0	0	0	0	603	903	0
595	3	0	0	0	0	0	0	200	300	0	0	0	0	0	0	0	200	903	0	0	0	0	0	0	0	603	903	0
595	4	0	0	0	0	0	0	200	300	0	0	0	0	0	0	0	200	903	0	0	0	0	0	0	0	603	903	0
595	5	0	0	0	0	0	0	200	300	0	0	0	0	0	0	0	200	903	0	0	0	0	0	0	0	603	903	0
595	6	0	0	0	0	0	0	200	300	0	0	0	0	0	0	0	200	903	0	0	0	0	0	0	0	603	903	0
595	7	0	0	0	0	0	0	200	300	0	0	0	0	0	0	0	200	903	0	0	0	0	0	0	0	603	903	0
595	8	0	0	0	0	0	0	200	300	0	0	0	0	0	0	0	200	903	0	0	0	0	0	0	0	603	903	0
595	9	0	0	0	0	0	0	200	300	0	0	0	0	0	0	0	200	903	0	0	0	0	0	0	0	603	903	0
596	0	0	0	0	0	0	0	200	300	0	0	0	0	0	0	0	200	903	0	0	0	0	0	0	0	603	903	0
596	1	0	0	0	0	0	0	200	300	0	0	0	0	0	0	0	200	903	0	0	0	0	0	0	0	603	903	0
596	2	0	0	0	0	0	0	200	300	0	0	0	0	0	0	0	200	903	0	0	0	0	0	0	0	603	903	0
596	3	0	0	0	0	0	0	200	300	0	0	0	0	0	0	0	200	903	0	0	0	0	0	0	0	603	903	0
596	4	0	0	0	0	0	0	200	300	0	0	0	0	0	0	0	200	903	0	0	0	0	0	0	0	603	903	0
596	5	0	0	0	0	0	0	200	300	0	0	0	0	0	0	0	200	903	0	0	0	0	0	0	0	603	903	0
596	6	0	0	0	0	0	0	200	300	0	0	0	0	0	0	0	200	903	0	0	0	0	0	0	0	603	903	0
596	7	0	0	0	0	0	0	200	300	0	0	0	0	0	0	0	200	903	0	0	0	0	0	0	0	603	903	0
596	8	0	0	0	0	0	0	200	300	0	0	0	0	0	0	0	200	903	0	0	0	0	0	0	0	603	903	0
596	9	0	0	0	0	0	0	200	300	0	0	0	0	0	0	0	200	903	0	0	0	0	0	0	0	603	903	0
597	0	0	0	0	0	0	0	200	300	0	0	0	0	0	0	0	200	903	0	0	0	0	0	0	0	603	903	0
597	1	0	0	0	0	0	0	200	300	0	0	0	0	0	0	0	200	903	0	0	0	0	0	0	0	603	903	0
597	2	0	0	0	0	0	0	200	300	0	0	0	0	0	0	0	200	903	0	0	0	0	0	0	0	603	903	0
597	3	0	0	0	0	0	0	200	300	0	0	0	0	0	0	0	200	903	0	0	0	0	0	0	0	603	903	0
597	4	0	0	0	0	0	0	200	300	0	0	0	0	0	0	0	200	903	0	0	0	0	0	0	0	603	903	0
597	5	0	0	0	0	0	0	200	300	0	0	0	0	0	0	0	200	903	0	0	0	0	0	0	0	603	903	0
597	6	0	0	0	0	0	0	200	300	0	0	0	0	0	0	0	200	903	0	0	0	0	0	0	0	603	903	0
597	7	0	0	0	0	0	0	200	300	0	0	0	0	0	0	0	200	903	0	0	0	0	0	0	0	603	903	0
597	8	0	0	0	0	0	0	200	300	0	0	0	0	0	0	0	200	903	0	0	0	0	0	0	0	603	903	0
597	9	0	0	0	0	0	0	200	300	0	0	0	0	0	0	0	200	903	0	0	0	0	0	0	0	603	903	0
598	0	0	0	0	0	0	0	200	300	0	0	0	0	0	0	0	200	903	0	0	0	0	0	0	0	603	903	0
598	1	0	0	0	0	0	0	200	300	0	0	0	0	0	0	0	200	903	0	0	0	0	0	0	0	603	903	0
598	2	0	0	0	0	0	0	200	300	0	0	0	0	0	0	0	200	903	0	0	0	0	0	0	0	603	903	0
598	3	0	0	0	0	0	0	200	300	0	0	0	0	0	0	0	200	903	0	0	0	0	0	0	0	603	903	0
598	4	0	0	0	0	0	0	200	300	0	0	0	0	0	0	0	200	903	0	0	0	0	0	0	0	603	903	0
598	5	0	0	0	0	0	0	200	300	0	0	0	0	0	0	0	200	903	0	0	0	0	0	0	0	603	903	0
598	6	0	0	0	0	0	0	200	300	0	0	0	0	0	0	0	200	903	0	0	0	0	0	0	0	603	903	0
598	7	0	0	0	0	0	0	200	300	0	0	0	0	0	0	0	200	903	0	0	0	0	0	0	0	603	903	0
598	8	0	0	0	0	0	0	200	300	0	0	0	0	0	0	0	200	903	0	0	0	0	0	0	0	603	903	0
598	9	0	0	0	0	0	0	200	300	0	0	0	0	0	0	0	200	903	0	0	0	0	0	0	0	603	903	0
599	0	0	0	0	0	0	0	200	300	0	0	0	0	0	0	0	200	903	0	0	0	0	0	0	0	603	903	0
599	1	0	0	0	0	0	0	200	300	0	0	0	0	0	0	0	200	903	0	0	0	0	0	0	0	603	903	0
599	2	0	0	0	0	0	0	200	300	0	0	0	0	0	0	0	200	903	0	0	0	0	0	0	0	603	903	0
599	3	0	0	0	0	0	0	200	300	0	0	0	0	0	0	0	200	903	0	0	0	0	0	0	0	603	903	0
599	4	0	0	0	0	0	0	200	300	0	0	0	0	0	0	0	200	903	0	0	0	0	0	0	0	603	903	0
599	5	0	0	0	0	0	0	200	300	0	0	0	0	0	0	0	200	903	0	0	0	0	0	0	0	603	903	0
599	6	0	0	0	0	0	0	200	300	0	0	0	0	0	0	0	200	903	0	0	0	0	0	0	0	603	903	0
599	7	0	0	0	0	0	0	200	300	0	0	0	0	0	0	0	200	903	0	0	0	0	0	0	0	603	903	0
599	8	0	0	0	0	0	0	200	300	0	0	0	0	0	0	0	200	903	0	0	0	0	0	0	0	603	903	0
599	9	0	0	0	0	0	0	200	300	0	0	0	0	0	0	0	200	903	0	0	0	0	0	0	0	603	903	0
600	0	0	0	0	0	0	0	200	300	0	0	0	0	0	0	0	200	903	0	0	0	0	0	0	0	603	903	0
600	1	0	0	0	0	0	0	200	300	0	0	0	0	0	0	0	200	903	0	0	0	0	0	0	0	603	903	0
600	2	0	0	0	0	0	0	200	300	0	0	0	0	0	0	0	200	903	0	0	0	0	0	0	0	603	903	0
600	3	0	0	0	0	0	0	200	300	0	0	0	0	0	0	0	200	903	0	0	0	0	0	0	0	603	903	0
600	4	0	0	0	0	0	0	200	300	0	0	0	0	0	0	0	200	903	0	0	0	0	0	0	0	603	903	0
600	5	0	0	0	0	0	0	200	300	0	0	0	0	0	0	0	200	903	0	0	0	0	0	0	0	603	903	0
600	6	0	0	0	0	0	0	200	300	0	0	0	0	0	0	0	200	903	0	0	0	0	0	0	0	603	903	0
600	7	0	0	0	0	0	0	200	300	0	0	0	0	0	0	0	200	903	0	0	0	0	0	0	0	603	903	0
600	8	0	0	0	0	0	0	200	300	0	0	0	0	0	0	0	200	903	0	0	0	0	0	0	0	603	903	0
600	9	0	0	0	0	0	0	200	300	0	0	0	0	0	0	0	200	903	0	0	0	0	0	0	0	603	903	0
601	0	0	0	0	0	0	0	200	300	0	0	0	0	0	0	0	200	903	0	0	0	0	0	0	0	603	903	0
601	1	0	0	0	0	0	0	200	300	0	0	0	0	0	0	0	200	903	0	0	0	0	0	0	0	603	903	0
601	2	0	0	0	0	0	0	200	300	0	0	0	0	0	0	0	200	903	0	0	0	0	0	0	0	603	903	0
601	3	0	0	0	0	0	0	200	300	0	0	0	0	0	0	0	200	903	0	0	0	0	0	0	0	603	903	0
601	4	0	0	0	0	0	0	200	300	0	0	0	0	0	0	0	200	903	0	0	0	0	0	0	0	603	903	0
601	5	0	0	0	0	0	0	200	300	0	0	0	0	0	0	0	200	903	0	0	0	0	0	0	0	603	903	0
601	6	0	0	0	0	0	0	200	300	0	0	0	0	0	0	0	200	903	0	0	0	0	0	0	0	603	903	0
601	7	0	0	0	0	0	0	200	300	0	0	0	0	0	0	0	200	903	0	0	0	0	0	0	0	603	903	0
601	8	0	0	0	0	0	0	200	300	0	0	0	0	0	0	0	200	903	0	0	0	0	0	0	0	603	903	0
601	9	0	0	0	0	0	0	200	300	0	0	0	0	0	0	0	200	903	0	0	0	0	0	0	0	603	903	0
602	0	0	0	0	0	0	0	200	300	0	0	0	0	0	0	0	200	903	0	0	0	0	0	0	0	603	903	0
602	1	0	0	0	0	0	0	200	300	0	0	0	0	0	0	0	200	903	0	0	0	0	0	0	0	603	903	0
602	2	0	0	0	0	0	0	200	300	0	0	0	0	0	0	0	200	903	0	0	0	0	0	0	0	603	903	0
602	3	0	0	0	0	0	0	200	300	0	0	0	0	0	0	0	200	903	0	0	0	0	0	0	0	603	903	0
602	4	0	0	0	0	0	0	200	300	0	0	0	0	0	0	0	200	903	0	0	0	0	0	0	0	603	903	0
602	5	0	0	0	0	0	0	200	300	0	0	0	0	0	0	0	200	903	0	0	0	0	0	0	0	603	903	0
602	6	0	0	0	0	0	0	200	300	0	0	0	0	0	0	0	200	903	0	0	0	0	0	0	0	603	903	0
602	7	0	0	0	0	0	0	200	300	0	0	0	0	0	0	0	200	903	0	0	0	0	0	0	0	603	903	0
602	8	0	0	0	0	0	0	200	300	0	0	0	0	0	0	0	200	903	0	0	0	0	0	0	0	603	903	0
602	9	0	0	0	0	0	0	200	300	0	0	0	0	0	0	0	200	903	0	0	0	0	0	0	0	603	903	0
603	0	0	0	0	0	0	0	200	300	0	0	0	0	0	0	0	200	903	0	0	0	0	0	0	0	603	903	0
603	1	0	0	0	0	0	0	200	300	0	0	0	0	0	0	0	200	903	0	0	0	0	0	0	0	603	903	0
603	2	0	0	0	0	0	0	200	300	0	0	0	0	0	0	0	200	903	0	0	0	0	0	0	0	603	903	0
603	3	0	0	0	0	0	0	200	300	0	0	0	0	0	0	0	200	903	0	0	0	0	0	0	0	603	903	0
603	4	0	0	0	0	0	0	200	300	0	0	0	0	0	0	0	200	903	0	0	0	0	0	0	0	603	903	0
603	5	0	0	0	0	0	0	200	300	0	0	0	0	0	0	0	200	903	0	0	0	0	0	0	0	603	903	0
603	6	0	0	0	0	0	0	200	300	0	0	0	0	0	0	0	200	903	0	0	0	0	0	0	0	603	903	0
603	7	0	0	0	0	0	0	200	300	0	0	0	0	0	0	0	200	903	0	0	0	0	0	0	0	603	903	0
603	8	0	0	0	0	0	0	200	300	0	0	0	0	0	0	0	200	903	0	0	0	0	0	0	0	603	903	0
603	9	0	0	0	0	0	0	200	300	0	0	0	0	0	0	0	200	903	0	0	0	0	0	0	0	603	903	0
604	0	0	0	0	0	0	0	200	300	0	0	0	0	0	0	0	200	903	0	0	0	0	0	0	0	603	903	0
604	1	0	0	0	0	0	0	200	300	0	0	0	0	0	0	0	200	903	0	0	0	0	0	0	0	603	903	0
604	2	0	0	0	0	0	0	200	300	0	0	0	0	0	0	0	200	903	0	0	0	0	0	0	0	603	903	0
604	3	0	0	0	0	0	0	200	300	0	0	0	0	0	0	0	200	903	0	0	0	0	0	0	0	603	903	0
604	4	0	0	0	0	0	0	200	300	0	0	0	0	0	0	0	200	903	0	0	0	0	0	0	0	603	903	0
604	5	0	0	0	0	0	0	200	300	0	0	0	0	0	0	0	200	903	0	0	0	0	0	0	0	603	903	0
604	6	0	0	0	0	0	0	200	300	0	0	0	0	0	0	0	200	903	0	0	0	0	0	0	0	603	903	0
604	7	0	0	0	0	0	0	200	300	0	0	0	0	0	0	0	200	903	0	0	0	0	0	0	0	603	903	0
604	8	0	0	0	0	0	0	200	300	0	0	0	0	0	0	0	200	903	0	0	0	0	0	0	0	603	903	0
604	9	0	0	0	0	0	0	200	300	0	0	0	0	0	0	0	200	903	0	0	0	0	0	0	0	603	903	0
605	0	0	0	0	0	0	0	200	300	0	0	0	0	0	0	0	200	903	0	0	0	0	0	0	0	603	903	0
605	1	0	0	0	0	0	0	200	300	0	0	0	0	0	0	0	200	903	0	0	0	0	0	0	0	603	903	0
605	2	0	0	0	0	0	0	200	300	0	0	0	0	0	0	0	200	903	0	0	0	0	0	0	0	603	903	0
605	3	0	0	0	0	0	0	200	300	0	0	0	0	0	0	0	200	903	0	0	0	0	0	0	0	603	903	0
605	4	0	0	0	0	0	0	200	300	0	0	0	0	0	0	0	200	903	0	0	0	0	0	0	0	603	903	0
605	5	0	0	0	0	0	0	200	300	0	0	0	0	0	0	0	200	903	0	0	0	0	0	0	0	603	903	0
605	6	0	0	0	0	0	0	200	300	0	0	0	0	0	0	0	200	903	0	0	0	0	0	0	0	603	903	0
605	7	0	0	0	0	0	0	200	300	0	0	0	0	0	0	0	200	903	0	0	0	0	0	0	0	603	903	0
605	8	0	0	0	0	0	0	200	300	0	0	0	0	0	0	0	200	903	0	0	0	0	0	0	0	603	903	0
605	9	0	0	0	0	0	0	200	300	0	0	0	0	0	0	0	200	903	0	0	0	0	0	0	0	603	903	0
606	0	0	0	0	0	0	0	200	300	0	0	0	0	0	0	0	200	903	0	0	0	0	0	0	0	603	903	0
606	1	0	0	0	0	0	0	200	300	0	0	0	0	0	0	0	200	903	0	0	0	0	0	0	0	603	903	0
606	2	0	0	0	0	0	0	200	300	0	0	0	0	0	0	0	200	903	0	0	0	0	0	0	0	603	903	0
606	3	0	0	0	0	0	0	200	300	0	0	0	0	0	0	0	200	903	0	0	0	0	0	0	0	603	903	0
606	4	0	0	0	0	0	0	200	300	0	0	0	0	0	0	0	200	903	0	0	0	0	0	0	0	603	903	0
606	5	0	0	0	0	0	0	200	300	0	0	0	0	0	0	0	200	903	0	0	0	0	0	0	0	603	903	0
606	6	0	0	0	0	0	0	200	300	0	0	0	0	0	0	0	200	903	0	0	0	0	0	0	0	603	903	0
606	7	0	0	0	0	0	0	200	300	0	0	0	0	0	0	0	200	903	0	0	0	0	0	0	0	603	903	0
606	8	0	0	0	0	0	0	200	300	0	0	0	0	0	0	0	200	903	0	0	0	0	0	0	0	603	903	0
606	9	0	0	0	0	0	0	200	300	0	0	0	0	0	0	0	200	903	0	0	0	0	0	0	0	603	903	0
607	0	0	0	0	0	0	0	200	300	0	0	0	0	0	0	0	200	903	0	0	0	0	0	0	0	603	903	0
607	1	0	0	0	0	0	0	200	300	0	0	0	0	0	0	0	200	903	0	0	0	0	0	0	0	603	903	0
607	2	0	0	0	0	0	0	200	300	0	0	0	0	0	0	0	200	903	0	0	0	0	0	0	0	603	903	0
607	3	0	0	0	0	0	0	200	300	0	0	0	0	0	0	0	200	903	0	0	0	0	0	0	0	603	903	0
607	4	0	0	0	0	0	0	200	300	0	0	0	0	0	0	0	200	903	0	0	0	0	0	0	0	603	903	0
607	5	0	0	0	0	0	0	200	300	0	0	0	0	0	0	0	200	903	0	0	0	0	0	0	0	603	903	0
607	6	0	0	0	0	0	0	200	300	0	0	0	0	0	0	0	200	903	0	0	0	0	0	0	0	603	903	0
607	7	0	0	0	0	0	0	200	300	0	0	0	0	0	0	0	200	903	0	0	0	0	0	0	0	603	903	0
607	8	0	0	0	0	0	0	200	300	0	0	0	0	0	0	0	200	903	0	0	0	0	0	0	0	603	903	0
607	9	0	0	0	0	0	0	200	300	0	0	0	0	0	0	0	200	903	0	0	0	0	0	0	0	603	903	0
608	0	0	0	0	0	0	0	200	300	0	0	0	0	0	0	0	200	903	0	0	0	0	0	0	0	603	903	0
608	1	0	0	0	0	0	0	200	300	0	0	0	0	0	0	0	200	903	0	0	0	0	0	0	0	603	903	0
608	2	0	0	0	0	0	0	200	300	0	0	0	0	0	0	0	200	903	0	0	0	0	0	0	0	603	903	0
608	3	0	0	0	0	0	0	200	300	0	0	0	0	0	0	0	200	903	0	0	0	0	0	0	0	603	903	0
608	4	0	0	0	0	0	0	200	300	0	0	0	0	0	0	0	200	903	0	0	0	0	0	0	0	603	903	0
608	5	0	0	0	0	0	0	200	300	0	0	0	0	0	0	0	200	903	0	0	0	0	0	0	0	603	903	0
608	6	0	0	0	0	0	0	200	300	0	0	0	0	0	0	0	200	903	0	0	0	0	0	0	0	603	903	0
608	7	0	0	0	0	0	0	200	300	0	0	0	0	0	0	0	200	903	0	0	0	0	0	0	0	603	903	0
608	8	0	0	0	0	0	0	200	300	0	0	0	0	0	0	0	200	903	0	0	0	0	0	0	0	603	903	0
608	9	0	0	0	0	0	0	200	300	0	0	0	0	0	0	0	200	903	0	0	0	0	0	0	0	603	903	0
609	0	0	0	0	0	0	0	200	300	0	0	0	0	0	0	0	200	903	0	0	0	0	0	0	0	603	903	0
609	1	0	0	0	0	0	0	200	300	0	0	0	0	0	0	0	200	903	0	0	0	0	0	0	0	603	903	0
609	2	0	0	0	0	0	0	200	300	0	0	0	0	0	0	0	200	903	0	0	0	0	0	0	0	603	903	0
609	3	0	0	0	0	0	0	200	300	0	0	0	0	0	0	0	200	903	0	0	0	0	0	0	0	603	903	0
609	4	0	0	0	0	0	0	200	300	0	0	0	0	0	0	0	200	903	0	0	0	0	0	0	0	603	903	0
609	5	0	0	0	0	0	0	200	300	0	0	0	0	0	0	0	200	903	0	0	0	0	0	0	0	603	903	0
609	6	0	0	0	0	0	0	200	300	0	0	0	0	0	0	0	200	903	0	0	0	0	0	0	0	603	903	0
609	7	0	0	0	0	0	0	200	300	0	0	0	0	0	0	0	200	903	0	0	0	0	0	0	0	603	903	0
609	8	0	0	0	0	0	0	200	300	0	0	0	0	0	0	0	200	903	0	0	0	0	0	0	0	603	903	0
609	9	0	0	0	0	0	0	200	300	0	0	0	0	0	0	0	200	903	0	0	0	0	0	0	0	603	903	0
610	0	0	0	0	0	0	0	200	300	0	0	0	0	0	0	0	200	903	0	0	0	0	0	0	0	603	903	0
610	1	0	0	0	0	0	0	200	300	0	0	0	0	0	0	0	200	903	0	0	0	0	0	0	0	603	903	0
610	2	0	0	0	0	0	0	200	300	0	0	0	0	0	0	0	200	903	0	0	0	0	0	0	0	603	903	0
610	3	0	0	0	0	0	0	200	300	0	0	0	0	0	0	0	200	903	0	0	0	0	0	0	0	603	903	0
610	4	0	0	0	0	0	0	200	300	0	0	0	0	0	0	0	200	903	0	0	0	0	0	0	0	603	903	0
610	5	0	0	0	0	0	0	200	300	0	0	0	0	0	0	0	200	903	0	0	0	0	0	0	0	603	903	0
610	6	0	0	0	0	0	0	200	300	0	0	0	0	0	0	0	200	903	0	0	0	0	0	0	0	603	903	0
610	7	0	0	0	0	0	0	200	300	0	0	0	0	0	0	0	200	903	0	0	0	0	0	0	0	603	903	0
610	8	0	0	0	0	0	0	200	300	0	0	0	0	0	0	0	200	903	0	0	0	0	0	0	0	603	903	0
610	9	0	0	0	0	0	0	200	300	0	0	0	0	0	0	0	200	903	0	0	0	0	0	0	0	603	903	0
611	0	0	0	0	0	0	0	200	300	0	0	0	0	0	0	0	200	903	0	0	0	0	0	0	0	603	903	0
611	1	0	0	0	0	0	0	200	300	0	0	0	0	0	0	0	200	903	0	0	0	0	0	0	0	603	903	0
611	2	0	0	0	0	0	0	200	300	0	0	0	0	0	0	0	200	903	0	0	0	0	0	0	0	603	903	0
611	3	0	0	0	0	0	0	200	300	0	0	0	0	0	0	0	200	903	0	0	0	0	0	0	0	603	903	0
611	4	0	0	0	0	0	0	200	300	0	0	0	0	0	0	0	200	903	0	0	0	0	0	0	0	603	903	0
611	5	0	0	0	0	0	0	200	300	0	0	0	0	0	0	0	200	903	0	0	0	0	0	0	0	603	903	0
611	6	0	0	0	0	0	0	200	300	0	0	0	0	0	0	0	200	903	0	0	0	0	0	0	0	603	903	0
611	7	0	0	0	0	0	0	200	300	0	0	0	0	0	0	0	200	903	0	0	0	0	0	0	0	603	903	0
611	8	0	0	0	0	0	0	200	300	0	0	0	0	0	0	0	200	903	0	0	0	0	0	0	0	603	903	0
611	9	0	0	0	0	0	0	200	300	0	0	0	0	0	0	0	200	903	0	0	0	0	0	0	0	603	903	0
612	0	0	0	0	0	0	0	200	300	0	0	0	0	0	0	0	200	903	0	0	0	0	0	0	0	603	903	0
612	1	0	0	0	0	0	0	200	300	0	0	0	0	0	0	0	200	903	0	0	0	0	0	0	0	603	903	0
612	2	2.10801	6.06053	-7.87482	734.25	-581.797	-1443.05	126.119	206.76	0	0	0	0	0	0	0	200	903	0	0	0	0	0	0	0	603	903	0
612	3	0	0	0	0	0	0	200	300	0	0	0	0	0	0	0	200	903	0	0	0	0	0	0	0	603	903	0
612	4	0.124365	5.90794	-8.17999	734.25	-886.973	-1626.16	91.568	210.238	0	0	0	0	0	0	0	200	903	0	0	0	0	0	0	0	603	903	0
612	5	0	0	0	0	0	0	200	300	0	0	0	0	0	0	0	200	903	0	0	0	0	0	0	0	603	903	0
612	6	0	0	0	0	0	0	200	300	0	0	0	0	0	0	0	200	903	0	0	0	0	0	0	0	603	903	0
612	7	0	0	0	0	0	0	200	300	0	0	0	0	0	0	0	200	903	0	0	0	0	0	0	0	603	903	0
612	8	0.429541	6.97605	-7.26447	1283.57	-764.903	-1855.04	94.7062	123.309	0	0	0	0	0	0	0	200	903	0	0	0	0	0	0	0	603	903	0
612	9	-0.791162	6.97605	-7.56964	734.25	-642.832	-2038.15	115.078	203.001	0	0	0	0	0	0	0	200	903	0	0	0	0	0	0	0	603	903	0
613	0	0	0	0	0	0	0	200	300	0	0	0	0	0	0	0	200	903	0	0	0	0	0	0	0	603	903	0
613	1	-0.485986	8.34935	-6.34894	734.25	-703.868	-2083.92	89.1362	184.351	0	0	0	0	0	0	0	200	903	0	0	0	0	0	0	0	603	903	0
613	2	-0.180811	8.80711	-6.04376	917.356	-581.797	-2175.48	103.736	148.214	0	0	0	0	0	0	0	200	903	0	0	0	0	0	0	0	603	903	0
613	3	0.582129	8.50193	-7.26447	1192.01	-764.903	-2129.7	94.7062	135.912	0	0	0	0	0	0	0	200	903	0	0	0	0	0	0	0	603	903	0
613	4	-0.0282228	7.89158	-7.26447	1192.01	-764.903	-2175.48	94.7062	135.912	0	0	0	0	0	0	0	200	903	0	0	0	0	0	0	0	603	903	0
613	5	-1.40151	7.73899	-6.65411	917.356	-642.832	-2358.58	103.393	162.137	0	0	0	0	0	0	0	200	903	0	0	0	0	0	0	0	603	903	0
613	6	-1.40151	11.4011	-6.95929	1192.01	-1192.15	-2999.45	28.6968	128.716	0	0	0	0	0	0	0	200	903	0	0	0	0	0	0	0	603	903	0
613	7	-0.638574	14.6054	-10.011	2015.99	-1619.4	-3960.75	38.2392	98.6236	0	0	0	0	0	0	0	200	903	0	0	0	0	0	0	0	603	903	0
613	8	-1.85928	18.8779	-12.4525	2015.99	-1619.4	-4372.74	69.9537	138.105	0	0	0	0	0	0	0	200	903	0	0	0	0	0	0	0	603	903	0
613	9	-1.40151	20.8616	-13.0628	2931.52	-1497.32	-4784.73	85.3749	75.583	0	0	0	0	0	0	0	200	903	0	0	0	0	0	0	0	603	903	0
614	0	-0.791162	19.946	-12.4525	2473.75	-1863.54	-4143.86	50.3479	101.344	0	0	0	0	0	0	0	200	903	0	0	0	0	0	0	0	603	903	0
614	1	2.87095	21.1667	-13.368	3023.07	-1619.4	-4143.86	78.8601	73.8575	0	0	0	0	0	0	0	200	903	0	0	0	0	0	0	0	603	903	0
614	2	2.2606	22.9978	-11.2318	2656.86	-1436.29	-4738.95	72.1224	63.4512	0	0	0	0	0	0	0	200	903	0	0	0	0	0	0	0	603	903	0
614	3	4.54941	29.1013	-12.7576	2748.41	-1741.47	-4830.5	63.4961	84.5673	0	0	0	0	0	0	0	200	903	0	0	0	0	0	0	0	603	903	0
614	4	3.78647	31.5427	-13.6732	2748.41	-2595.96	-4967.83	10.142	98.9923	0	0	0	0	0	0	0	200	903	0	0	0	0	0	0	0	603	903	0
614	5	2.71836	27.4228	-12.1473	3114.62	-2168.71	-4281.19	21.4653	43.5951	0	0	0	0	0	0	0	200	903	0	0	0	0	0	0	0	603	903	0
614	6	2.41318	22.9978	-14.5887	3755.49	-1985.61	-4052.31	63.8941	42.5751	0	0	0	0	0	0	0	200	903	0	0	0	0	0	0	0	603	903	0
614	7	5.15977	23.9133	-12.7576	2931.52	-2229.75	-4006.53	25.2225	70.2147	0	0	0	0	0	0	0	200	903	0	0	0	0	0	0	0	603	903	0
614	8	6.68564	27.1177	-13.0628	3206.17	-2046.64	-3960.75	43.323	54.557	0	0	0	0	0	0	0	200	903	0	0	0	0	0	0	0	603	903	0
614	9	5.15977	28.7961	-13.6732	3480.83	-2412.85	-4693.18	23.5337	45.4259	0	0	0	0	0	0	0	200	903	0	0	0	0	0	0	0	603	903	0
615	0	1.95542	23.9133	-15.8094	2931.52	-2473.89	-4372.74	43.5178	114.571	0	0	0	0	0	0	0	200	903	0	0	0	0	0	0	0	603	903	0
615	1	2.87095	24.3711	-16.4197	4121.7	-2718.03	-3869.2	34.4658	48.9789	0	0	0	0	0	0	0	200	903	0	0	0	0	0	0	0	603	903	0
615	2	4.85459	24.5237	-14.8939	3480.83	-2107.68	-4006.53	58.4869	66.2908	0	0	0	0	0	0	0	200	903	0	0	0	0	0	0	0	603	903	0
615	3	4.702	25.5918	-12.4525	3572.38	-2473.89	-4601.62	1.33337	13.118	0	0	0	0	0	0	0	200	903	0	0	0	0	0	0	0	603	903	0
615	4	3.78647	26.2021	-15.8094	3755.49	-2473.89	-4784.73	43.5178	62.4519	0	0	0	0	0	0	0	200	903	0	0	0	0	0	0	0	603	903	0
615	5	2.56577	27.728	-17.6404	3480.83	-2412.85	-4647.4	63.2204	102.679	0	0	0	0	0	0	0	200	903	0	0	0	0	0	0	0	603	903	0
615	6	2.10801	28.3384	-18.2508	3663.94	-2656.99	-4830.5	54.4177	99.245	0	0	0	0	0	0	0	200	903	0	0	0	0	0	0	0	603	903	0
615	7	1.80283	28.1858	-16.7249	4213.25	-3206.31	-5196.72	8.29143	48.0852	0	0	0	0	0	0	0	200	903	0	0	0	0	0	0	0	603	903	0
615	8	2.87095	28.0332	-17.3353	4304.81	-2412.85	-5334.04	60.8125	51.6735	0	0	0	0	0	0	0	200	903	0	0	0	0	0	0	0	603	903	0
615	9	2.2606	27.5754	-17.6404	4487.91	-2656.99	-5562.93	49.3806	45.5896	0	0	0	0	0	0	0	200	903	0	0	0	0	0	0	0	603	903	0
616	0	2.71836	28.7961	-19.1663	3663.94	-2840.1	-5700.26	51.8183	108.835	0	0	0	0	0	0	0	200	903	0	0	0	0	0	0	0	603	903	0
616	1	-0.0282228	28.4909	-20.387	3663.94	-2901.13	-5929.14	57.697	120.281	0	0	0	0	0	0	0	200	903	0	0	0	0	0	0	0	603	903	0
616	2	-1.09634	29.2539	-19.1663	4213.25	-2656.99	-6203.8	61.3718	80.1741	0	0	0	0	0	0	0	200	903	0	0	0	0	0	0	0	603	903	0
616	3	-0.180811	29.7116	-19.4715	4487.91	-2901.13	-6020.69	51.0061	69.5138	0	0	0	0	0	0	0	200	903	0	0	0	0	0	0	0	603	903	0
616	4	0.582129	30.0168	-16.7249	5128.78	-3084.24	-6707.34	15.5901	-6.65518	0	0	0	0	0	0	0	200	903	0	0	0	0	0	0	0	603	903	0
616	5	-0.180811	30.1694	-17.9456	4945.68	-2840.1	-6661.56	41.7386	24.4076	0	0	0	0	0	0	0	200	903	0	0	0	0	0	0	0	603	903	0
616	6	-1.09634	29.8642	-20.0818	4671.02	-3206.31	-6386.9	40.3379	67.401	0	0	0	0	0	0	0	200	903	0	0	0	0	0	0	0	603	903	0
616	7	-0.94375	31.0849	-19.1663	5037.23	-3267.34	-6295.35	29.5268	37.1833	0	0	0	0	0	0	0	200	903	0	0	0	0	0	0	0	603	903	0
616	8	-0.180811	28.9487	-21.3026	4762.57	-3267.34	-6478.46	46.6219	76.4319	0	0	0	0	0	0	0	200	903	0	0	0	0	0	0	0	603	903	0
616	9	1.03989	30.1694	-18.556	5037.23	-3084.24	-6158.02	33.7872	28.5386	0	0	0	0	0	0	0	200	903	0	0	0	0	0	0	0	603	903	0
617	0	1.95542	28.9487	-18.8611	5128.78	-3328.38	-5746.03	23.5325	28.0769	0	0	0	0	0	0	0	200	903	0	0	0	0	0	0	0	603	903	0
617	1	2.87095	29.1013	-21.3026	4030.15	-3572.52	-5791.81	32.2961	110.814	0	0	0	0	0	0	0	200	903	0	0	0	0	0	0	0	603	903	0
617	2	1.49766	29.7116	-21.6077	4396.36	-3206.31	-4967.83	51.6128	96.5376	0	0	0	0	0	0	0	200	903	0	0	0	0	0	0	0	603	903	0
617	3	1.19248	29.5591	-21.3026	4396.36	-3145.27	-5608.7	52.3522	93.6229	0	0	0	0	0	0	0	200	903	0	0	0	0	0	0	0	603	903	0
617	4	2.41318	28.0332	-19.1663	5769.65	-3328.38	-5242.49	26.3423	-1.03067	0	0	0	0	0	0	0	200	903	0	0	0	0	0	0	0	603	903	0
617	5	1.65024	27.8806	-17.3353	4945.68	-2718.03	-5608.7	43.2082	14.7044	0	0	0	0	0	0	0	200	903	0	0	0	0	0	0	0	603	903	0
617	6	1.03989	27.728	-19.7767	5769.65	-2779.06	-5196.72	59.4777	8.2598	0	0	0	0	0	0	0	200	903	0	0	0	0	0	0	0	603	903	0
617	7	0.276953	27.8806	-20.9974	4579.46	-3572.52	-5654.48	29.8587	81.903	0	0	0	0	0	0	0	200	903	0	0	0	0	0	0	0	603	903	0
617	8	-0.333399	27.4228	-20.6922	4304.81	-2962.17	-5700.26	56.8461	91.9599	0	0	0	0	0	0	0	200	903	0	0	0	0	0	0	0	603	903	0
617	9	0.124365	28.0332	-21.6077	4762.57	-3145.27	-5746.03	54.4375	79.5895	0	0	0	0	0	0	0	200	903	0	0	0	0	0	0	0	603	903	0
618	0	0.276953	27.1177	-19.4715	5494.99	-3084.24	-5517.15	41.6024	17.793	0	0	0	0	0	0	0	200	903	0	0	0	0	0	0	0	603	903	0
618	1	0.582129	26.8125	-19.1663	4671.02	-3328.38	-5700.26	26.3423	56.2903	0	0	0	0	0	0	0	200	903	0	0	0	0	0	0	0	603	903	0
618	2	-0.0282228	27.4228	-17.9456	4945.68	-3267.34	-5288.27	17.9308	24.4076	0	0	0	0	0	0	0	200	903	0	0	0	0	0	0	0	603	903	0
618	3	0.734717	27.1177	-20.9974	4671.02	-3267.34	-5654.48	44.3927	77.5428	0	0	0	0	0	0	0	200	903	0	0	0	0	0	0	0	603	903	0
618	4	0.429541	26.8125	-20.6922	4396.36	-3145.27	-5608.7	47.9971	87.5354	0	0	0	0	0	0	0	200	903	0	0	0	0	0	0	0	603	903	0
618	5	1.95542	27.728	-18.8611	4304.81	-2962.17	-5562.93	42.9486	71.7632	0	0	0	0	0	0	0	200	903	0	0	0	0	0	0	0	603	903	0
618	6	0.429541	27.4228	-19.4715	4671.02	-3023.2	-5288.27	44.737	60.11	0	0	0	0	0	0	0	200	903	0	0	0	0	0	0	0	603	903	0
618	7	0.734717	27.4228	-18.2508	4762.57	-3206.31	-5700.26	24.3194	39.0486	0	0	0	0	0	0	0	200	903	0	0	0	0	0	0	0	603	903	0
618	8	0.276953	26.3547	-20.9974	4945.68	-3023.2	-5517.15	56.0199	64.4622	0	0	0	0	0	0	0	200	903	0	0	0	0	0	0	0	603	903	0
618	9	1.03989	26.2021	-21.6077	5037.23	-2901.13	-5425.6	65.7363	66.8784	0	0	0	0	0	0	0	200	903	0	0	0	0	0	0	0	603	903	0
619	0	0.276953	26.2021	-21.3026	4487.91	-3023.2	-5425.6	58.0825	89.3251	0	0	0	0	0	0	0	200	903	0	0	0	0	0	0	0	603	903	0
619	1	-0.0282228	26.3547	-19.4715	4487.91	-3145.27	-5425.6	38.4678	69.5138	0	0	0	0	0	0	0	200	903	0	0	0	0	0	0	0	603	903	0
619	2	0.124365	24.9814	-17.9456	4030.15	-2901.13	-5334.04	38.3375	75.4244	0	0	0	0	0	0	0	200	903	0	0	0	0	0	0	0	603	903	0
619	3	0.582129	26.6599	-17.6404	4671.02	-3023.2	-5150.94	28.6208	35.2097	0	0	0	0	0	0	0	200	903	0	0	0	0	0	0	0	603	903	0
619	4	1.19248	25.5918	-19.4715	4121.7	-2656.99	-5288.27	63.5445	88.3213	0	0	0	0	0	0	0	200	903	0	0	0	0	0	0	0	603	903	0
619	5	0.734717	23.9133	-18.556	4671.02	-2595.96	-5196.72	60.1012	48.2741	0	0	0	0	0	0	0	200	903	0	0	0	0	0	0	0	603	903	0
619	6	0.429541	24.5237	-18.8611	4304.81	-2595.96	-5105.16	62.3648	71.7632	0	0	0	0	0	0	0	200	903	0	0	0	0	0	0	0	603	903	0
619	7	0.276953	24.6762	-17.0301	3938.6	-2901.13	-5196.72	29.6466	68.7273	0	0	0	0	0	0	0	200	903	0	0	0	0	0	0	0	603	903	0
619	8	0.582129	23.7607	-17.6404	4304.81	-2962.17	-5150.94	32.0808	55.9695	0	0	0	0	0	0	0	200	903	0	0	0	0	0	0	0	603	903	0
619	9	1.03989	24.9814	-17.0301	4671.02	-2718.03	-4784.73	40.3985	25.7198	0	0	0	0	0	0	0	200	903	0	0	0	0	0	0	0	603	903	0
620	0	1.49766	23.9133	-18.556	5403.44	-3084.24	-5059.39	33.7872	8.80316	0	0	0	0	0	0	0	200	903	0	0	0	0	0	0	0	603	903	0
620	1	-0.333399	23.303	-18.8611	4671.02	-2901.13	-5196.72	46.1846	52.3471	0	0	0	0	0	0	0	200	903	0	0	0	0	0	0	0	603	903	0
620	2	0.276953	23.9133	-19.1663	4213.25	-2901.13	-4967.83	48.6338	80.1741	0	0	0	0	0	0	0	200	903	0	0	0	0	0	0	0	603	903	0
620	3	0.429541	24.5237	-18.8611	3938.6	-2718.03	-5105.16	55.8927	91.1794	0	0	0	0	0	0	0	200	903	0	0	0	0	0	0	0	603	903	0
620	4	1.49766	23.6081	-16.4197	4213.25	-2962.17	-4647.4	19.5971	43.4031	0	0	0	0	0	0	0	200	903	0	0	0	0	0	0	0	603	903	0
620	5	1.19248	24.0659	-15.199	4030.15	-2779.06	-4738.95	17.1553	34.8418	0	0	0	0	0	0	0	200	903	0	0	0	0	0	0	0	603	903	0
620	6	1.65024	22.9978	-18.8611	4304.81	-2595.96	-4784.73	62.3648	71.7632	0	0	0	0	0	0	0	200	903	0	0	0	0	0	0	0	603	903	0
620	7	0.734717	22.9978	-17.9456	4213.25	-2718.03	-4693.18	48.5408	65.221	0	0	0	0	0	0	0	200	903	0	0	0	0	0	0	0	603	903	0
620	8	2.2606	22.3874	-16.1146	3572.38	-2840.1	-4372.74	23.7558	78.3133	0	0	0	0	0	0	0	200	903	0	0	0	0	0	0	0	603	903	0
620	9	0.124365	23.1504	-16.4197	3663.94	-2656.99	-4784.73	38.183	76.8577	0	0	0	0	0	0	0	200	903	0	0	0	0	0	0	0	603	903	0
621	0	0.887305	22.9978	-16.4197	3755.49	-2351.82	-4693.18	56.7689	71.282	0	0	0	0	0	0	0	200	903	0	0	0	0	0	0	0	603	903	0
621	1	0.887305	22.0823	-18.2508	4304.81	-2718.03	-4372.74	51.0734	64.1304	0	0	0	0	0	0	0	200	903	0	0	0	0	0	0	0	603	903	0
621	2	0.734717	21.3193	-17.9456	3847.04	-2473.89	-4510.07	62.1454	85.6277	0	0	0	0	0	0	0	200	903	0	0	0	0	0	0	0	603	903	0
621	3	-0.0282228	20.0986	-18.2508	3938.6	-2534.92	-4464.29	61.1062	84.1959	0	0	0	0	0	0	0	200	903	0	0	0	0	0	0	0	603	903	0
621	4	0.429541	20.5564	-15.199	3480.83	-2840.1	-4510.07	13.1396	70.9834	0	0	0	0	0	0	0	200	903	0	0	0	0	0	0	0	603	903	0
621	5	0.124365	20.5564	-12.7576	3755.49	-2412.85	-4143.86	10.8699	5.6279	0	0	0	0	0	0	0	200	903	0	0	0	0	0	0	0	603	903	0
621	6	1.19248	20.8616	-15.5042	3297.73	-2351.82	-4235.41	48.3111	87.3012	0	0	0	0	0	0	0	200	903	0	0	0	0	0	0	0	603	903	0
621	7	1.80283	20.4038	-17.0301	4030.15	-2534.92	-4235.41	51.1504	63.3513	0	0	0	0	0	0	0	200	903	0	0	0	0	0	0	0	603	903	0
621	8	1.65024	18.8779	-12.1473	3938.6	-2656.99	-4464.29	-18.7316	-24.2369	0	0	0	0	0	0	0	200	903	0	0	0	0	0	0	0	603	903	0
621	9	0.124365	19.1831	-14.5887	3389.28	-2290.78	-4098.08	42.9755	67.6775	0	0	0	0	0	0	0	200	903	0	0	0	0	0	0	0	603	903	0
622	0	0.429541	19.6408	-14.8939	3755.49	-2290.78	-4052.31	46.1929	47.8498	0	0	0	0	0	0	0	200	903	0	0	0	0	0	0	0	603	903	0
622	1	0.582129	19.0305	-12.7576	3206.17	-2656.99	-4143.86	-8.267	48.6858	0	0	0	0	0	0	0	200	903	0	0	0	0	0	0	0	603	903	0
622	2	0.582129	19.1831	-14.8939	3297.73	-2290.78	-4143.86	46.1929	78.5848	0	0	0	0	0	0	0	200	903	0	0	0	0	0	0	0	603	903	0
622	3	1.03989	19.0305	-16.4197	3480.83	-2229.75	-3869.2	64.2033	88.0093	0	0	0	0	0	0	0	200	903	0	0	0	0	0	0	0	603	903	0
622	4	0.887305	18.7253	-15.5042	3663.94	-2107.68	-3960.75	64.0578	63.6811	0	0	0	0	0	0	0	200	903	0	0	0	0	0	0	0	603	903	0
622	5	-0.180811	17.9624	-16.4197	3480.83	-2656.99	-3960.75	38.183	88.0093	0	0	0	0	0	0	0	200	903	0	0	0	0	0	0	0	603	903	0
622	6	0.734717	16.4365	-15.199	3206.17	-2290.78	-3823.43	49.2811	89.0541	0	0	0	0	0	0	0	200	903	0	0	0	0	0	0	0	603	903	0
622	7	1.19248	17.8098	-15.199	2839.96	-2107.68	-3594.54	61.3283	113.148	0	0	0	0	0	0	0	200	903	0	0	0	0	0	0	0	603	903	0
622	8	1.34507	18.2676	-13.6732	3572.38	-2107.68	-3777.65	45.853	38.7301	0	0	0	0	0	0	0	200	903	0	0	0	0	0	0	0	603	903	0
622	9	1.03989	17.6572	-17.0301	2839.96	-2168.71	-3914.98	72.6542	133.239	0	0	0	0	0	0	0	200	903	0	0	0	0	0	0	0	603	903	0
623	0	0.429541	18.2676	-14.8939	3389.28	-1863.54	-3960.75	74.8789	72.4378	0	0	0	0	0	0	0	200	903	0	0	0	0	0	0	0	603	903	0
623	1	-0.0282228	16.8943	-15.199	3206.17	-2107.68	-3640.32	61.3283	89.0541	0	0	0	0	0	0	0	200	903	0	0	0	0	0	0	0	603	903	0
623	2	-0.0282228	16.7417	-13.368	3206.17	-2779.06	-3594.54	-7.88954	60.1602	0	0	0	0	0	0	0	200	903	0	0	0	0	0	0	0	603	903	0
623	3	1.34507	16.8943	-13.368	3389.28	-1863.54	-3960.75	60.5971	46.4629	0	0	0	0	0	0	0	200	903	0	0	0	0	0	0	0	603	903	0
623	4	1.19248	15.9787	-11.5369	3206.17	-1985.61	-3640.32	27.8912	22.0946	0	0	0	0	0	0	0	200	903	0	0	0	0	0	0	0	603	903	0
623	5	1.03989	16.8943	-13.9783	2382.2	-2290.78	-3365.66	36.1191	129.579	0	0	0	0	0	0	0	200	903	0	0	0	0	0	0	0	603	903	0
623	6	0.124365	15.521	-13.9783	3023.07	-2351.82	-3274.11	31.7527	83.7318	0	0	0	0	0	0	0	200	903	0	0	0	0	0	0	0	603	903	0
623	7	1.65024	15.9787	-12.4525	3023.07	-1985.61	-3274.11	40.545	57.2311	0	0	0	0	0	0	0	200	903	0	0	0	0	0	0	0	603	903	0
623	8	-0.180811	15.0632	-12.4525	2748.41	-2229.75	-3091	20.9392	79.2877	0	0	0	0	0	0	0	200	903	0	0	0	0	0	0	0	603	903	0
623	9	0.887305	14.1477	-12.4525	2565.3	-2046.64	-3228.33	35.6436	93.992	0	0	0	0	0	0	0	200	903	0	0	0	0	0	0	0	603	903	0
624	0	1.34507	12.4692	-13.9783	2565.3	-1619.4	-3091	84.1496	116.48	0	0	0	0	0	0	0	200	903	0	0	0	0	0	0	0	603	903	0
624	1	1.03989	13.6899	-9.4007	2199.09	-1802.5	-3045.23	8.2588	66.0712	0	0	0	0	0	0	0	200	903	0	0	0	0	0	0	0	603	903	0
624	2	-0.791162	13.8425	-11.2318	2656.86	-2046.64	-3136.78	17.7808	63.4512	0	0	0	0	0	0	0	200	903	0	0	0	0	0	0	0	603	903	0
624	3	-0.180811	13.8425	-10.9266	2015.99	-1802.5	-2816.34	35.0352	115.497	0	0	0	0	0	0	0	200	903	0	0	0	0	0	0	0	603	903	0
624	4	0.582129	13.6899	-10.3162	2656.86	-1375.25	-2816.34	66.6901	42.4583	0	0	0	0	0	0	0	200	903	0	0	0	0	0	0	0	603	903	0
624	5	0.124365	12.6218	-9.4007	2565.3	-1619.4	-2770.57	27.7367	27.1154	0	0	0	0	0	0	0	200	903	0	0	0	0	0	0	0	603	903	0
624	6	0.582129	12.3166	-12.1473	2473.75	-2046.64	-2999.45	31.5145	96.3534	0	0	0	0	0	0	0	200	903	0	0	0	0	0	0	0	603	903	0
624	7	-0.180811	9.87522	-13.368	2473.75	-1436.29	-2770.57	92.5575	114.949	0	0	0	0	0	0	0	200	903	0	0	0	0	0	0	0	603	903	0
624	8	0.429541	11.4011	-10.3162	1741.33	-1436.29	-2633.24	60.7737	131.205	0	0	0	0	0	0	0	200	903	0	0	0	0	0	0	0	603	903	0
624	9	-0.0282228	11.8589	-6.95929	2382.2	-1619.4	-2633.24	-32.6955	-42.3049	0	0	0	0	0	0	0	200	903	0	0	0	0	0	0	0	603	903	0
625	0	0.429541	11.4011	-10.3162	1741.33	-1497.32	-2587.46	54.8573	131.205	0	0	0	0	0	0	0	200	903	0	0	0	0	0	0	0	603	903	0
625	1	1.03989	11.4011	-12.1473	2290.65	-1314.22	-2450.13	91.8095	111.427	0	0	0	0	0	0	0	200	903	0	0	0	0	0	0	0	603	903	0
625	2	0.276953	10.4856	-10.6214	2015.99	-1436.29	-2541.69	64.774	110.196	0	0	0	0	0	0	0	200	903	0	0	0	0	0	0	0	603	903	0
625	3	0.276953	10.1804	-10.3162	2107.54	-1680.43	-2587.46	37.108	95.7061	0	0	0	0	0	0	0	200	903	0	0	0	0	0	0	0	603	903	0
625	4	0.429541	10.1804	-10.011	2107.54	-1558.36	-2312.8	44.336	89.4785	0	0	0	0	0	0	0	200	903	0	0	0	0	0	0	0	603	903	0
625	5	1.03989	10.333	-8.17999	1832.88	-1192.15	-2267.03	54.2604	75.931	0	0	0	0	0	0	0	200	903	0	0	0	0	0	0	0	603	903	0
625	6	1.80283	10.333	-8.17999	1375.12	-1314.22	-2358.58	39.3373	131.892	0	0	0	0	0	0	0	200	903	0	0	0	0	0	0	0	603	903	0
625	7	0.734717	10.9433	-10.011	1924.44	-1436.29	-2221.25	56.5295	107.769	0	0	0	0	0	0	0	200	903	0	0	0	0	0	0	0	603	903	0
625	8	-0.485986	9.87522	-10.3162	1466.67	-1314.22	-2129.7	72.6065	157.829	0	0	0	0	0	0	0	200	903	0	0	0	0	0	0	0	603	903	0
625	9	1.19248	9.87522	-9.09552	1924.44	-1375.25	-2312.8	48.7987	88.4194	0	0	0	0	0	0	0	200	903	0	0	0	0	0	0	0	603	903	0
626	0	-0.0282228	8.50193	-5.43341	1558.22	-1131.11	-2221.25	-8.17746	13.2142	0	0	0	0	0	0	0	200	903	0	0	0	0	0	0	0	603	903	0
626	1	0.734717	7.89158	-8.79034	1832.88	-1253.18	-1946.59	57.4363	91.489	0	0	0	0	0	0	0	200	903	0	0	0	0	0	0	0	603	903	0
626	2	0.429541	7.89158	-9.4007	1375.12	-1497.32	-1855.04	40.7219	153.722	0	0	0	0	0	0	0	200	903	0	0	0	0	0	0	0	603	903	0
626	3	-0.791162	9.11228	-8.17999	1466.67	-1253.18	-1809.26	46.7989	120.7	0	0	0	0	0	0	0	200	903	0	0	0	0	0	0	0	603	903	0
626	4	0.429541	8.80711	-9.09552	1283.57	-1253.18	-2083.92	62.2197	158.879	0	0	0	0	0	0	0	200	903	0	0	0	0	0	0	0	603	903	0
626	5	-0.485986	8.50193	-7.26447	1741.33	-948.008	-1855.04	69.5006	60.2948	0	0	0	0	0	0	0	200	903	0	0	0	0	0	0	0	603	903	0
626	6	0.582129	7.73899	-7.26447	1649.78	-948.008	-1992.37	69.5006	72.8976	0	0	0	0	0	0	0	200	903	0	0	0	0	0	0	0	603	903	0
626	7	0	0	0	0	0	0	200	300	0	0	0	0	0	0	0	200	903	0	0	0	0	0	0	0	603	903	0
626	8	0.582129	7.43382	-9.70587	1558.22	-1131.11	-1946.59	83.4609	139.455	0	0	0	0	0	0	0	200	903	0	0	0	0	0	0	0	603	903	0
626	9	-0.180811	7.12864	-8.17999	917.356	-1375.25	-1855.04	31.8758	187.854	0	0	0	0	0	0	0	200	903	0	0	0	0	0	0	0	603	903	0
627	0	0.582129	7.89158	-7.56964	1008.91	-1253.18	-1809.26	34.4461	166.717	0	0	0	0	0	0	0	200	903	0	0	0	0	0	0	0	603	903	0
627	1	0	0	0	0	0	0	200	300	0	0	0	0	0	0	0	200	903	0	0	0	0	0	0	0	603	903	0
627	2	0	0	0	0	0	0	200	300	0	0	0	0	0	0	0	200	903	0	0	0	0	0	0	0	603	903	0
627	3	0.734717	6.06053	-8.48517	1832.88	-764.903	-1717.71	109.854	83.9898	0	0	0	0	0	0	0	200	903	0	0	0	0	0	0	0	603	903	0
627	4	0	0	0	0	0	0	200	300	0	0	0	0	0	0	0	200	903	0	0	0	0	0	0	0	603	903	0
627	5	-0.180811	6.21311	-9.4007	1008.91	-948.008	-1488.83	99.1555	192.677	0	0	0	0	0	0	0	200	903	0	0	0	0	0	0	0	603	903	0
627	6	-0.180811	7.28123	-7.56964	1100.46	-520.762	-1626.16	131.204	154.622	0	0	0	0	0	0	0	200	903	0	0	0	0	0	0	0	603	903	0
627	7	0	0	0	0	0	0	200	300	0	0	0	0	0	0	0	200	903	0	0	0	0	0	0	0	603	903	0
627	8	0	0	0	0	0	0	200	300	0	0	0	0	0	0	0	200	903	0	0	0	0	0	0	0	603	903	0
627	9	0.124365	5.90794	-8.17999	2107.54	-642.832	-1717.71	121.414	42.3542	0	0	0	0	0	0	0	200	903	0	0	0	0	0	0	0	603	903	0
628	0	-0.94375	5.90794	-8.17999	1100.46	-642.832	-1626.16	121.414	165.469	0	0	0	0	0	0	0	200	903	0	0	0	0	0	0	0	603	903	0
628	1	0	0	0	0	0	0	200	300	0	0	0	0	0	0	0	200	903	0	0	0	0	0	0	0	603	903	0
628	2	0	0	0	0	0	0	200	300	0	0	0	0	0	0	0	200	903	0	0	0	0	0	0	0	603	903	0
628	3	0	0	0	0	0	0	200	300	0	0	0	0	0	0	0	200	903	0	0	0	0	0	0	0	603	903	0
628	4	0.582129	6.67088	-8.48517	1192.01	-398.692	-1259.95	153.013	159.518	0	0	0	0	0	0	0	200	903	0	0	0	0	0	0	0	603	903	0
628	5	-0.0282228	5.145	-8.79034	1008.91	-1009.04	-1671.94	85.21	185.225	0	0	0	0	0	0	0	200	903	0	0	0	0	0	0	0	603	903	0
628	6	0	0	0	0	0	0	200	300	0	0	0	0	0	0	0	200	903	0	0	0	0	0	0	0	603	903	0
628	7	0	0	0	0	0	0	200	300	0	0	0	0	0	0	0	200	903	0	0	0	0	0	0	0	603	903	0
628	8	0	0	0	0	0	0	200	300	0	0	0	0	0	0	0	200	903	0	0	0	0	0	0	0	603	903	0
628	9	0	0	0	0	0	0	200	300	0	0	0	0	0	0	0	200	903	0	0	0	0	0	0	0	603	903	0
629	0	0	0	0	0	0	0	200	300	0	0	0	0	0	0	0	200	903	0	0	0	0	0	0	0	603	903	0
629	1	0	0	0	0	0	0	200	300	0	0	0	0	0	0	0	200	903	0	0	0	0	0	0	0	603	903	0
629	2	0	0	0	0	0	0	200	300	0	0	0	0	0	0	0	200	903	0	0	0	0	0	0	0	603	903	0
629	3	0	0	0	0	0	0	200	300	0	0	0	0	0	0	0	200	903	0	0	0	0	0	0	0	603	903	0
629	4	0	0	0	0	0	0	200	300	0	0	0	0	0	0	0	200	903	0	0	0	0	0	0	0	603	903	0
629	5	0	0	0	0	0	0	200	300	0	0	0	0	0	0	0	200	903	0	0	0	0	0	0	0	603	903	0
629	6	0	0	0	0	0	0	200	300	0	0	0	0	0	0	0	200	903	0	0	0	0	0	0	0	603	903	0
629	7	0	0	0	0	0	0	200	300	0	0	0	0	0	0	0	200	903	0	0	0	0	0	0	0	603	903	0
629	8	0	0	0	0	0	0	200	300	0	0	0	0	0	0	0	200	903	0	0	0	0	0	0	0	603	903	0
629	9	0	0	0	0	0	0	200	300	0	0	0	0	0	0	0	200	903	0	0	0	0	0	0	0	603	903	0
630	0	0	0	0	0	0	0	200	300	0	0	0	0	0	0	0	200	903	0	0	0	0	0	0	0	603	903	0
630	1	0	0	0	0	0	0	200	300	0	0	0	0	0	0	0	200	903	0	0	0	0	0	0	0	603	903	0
630	2	0	0	0	0	0	0	200	300	0	0	0	0	0	0	0	200	903	0	0	0	0	0	0	0	603	903	0
630	3	0	0	0	0	0	0	200	300	0	0	0	0	0	0	0	200	903	0	0	0	0	0	0	0	603	903	0
630	4	0	0	0	0	0	0	200	300	0	0	0	0	0	0	0	200	903	0	0	0	0	0	0	0	603	903	0
630	5	0	0	0	0	0	0	200	300	0	0	0	0	0	0	0	200	903	0	0	0	0	0	0	0	603	903	0
630	6	0	0	0	0	0	0	200	300	0	0	0	0	0	0	0	200	903	0	0	0	0	0	0	0	603	903	0
630	7	0	0	0	0	0	0	200	300	0	0	0	0	0	0	0	200	903	0	0	0	0	0	0	0	603	903	0
630	8	0	0	0	0	0	0	200	300	0	0	0	0	0	0	0	200	903	0	0	0	0	0	0	0	603	903	0
630	9	0	0	0	0	0	0	200	300	0	0	0	0	0	0	0	200	903	0	0	0	0	0	0	0	603	903	0
631	0	0	0	0	0	0	0	200	300	0	0	0	0	0	0	0	200	903	0	0	0	0	0	0	0	603	903	0
631	1	0	0	0	0	0	0	200	300	0	0	0	0	0	0	0	200	903	0	0	0	0	0	0	0	603	903	0
631	2	0	0	0	0	0	0	200	300	0	0	0	0	0	0	0	200	903	0	0	0	0	0	0	0	603	903	0
631	3	0	0	0	0	0	0	200	300	0	0	0	0	0	0	0	200	903	0	0	0	0	0	0	0	603	903	0
631	4	0	0	0	0	0	0	200	300	0	0	0	0	0	0	0	200	903	0	0	0	0	0	0	0	603	903	0
631	5	0	0	0	0	0	0	200	300	0	0	0	0	0	0	0	200	903	0	0	0	0	0	0	0	603	903	0
631	6	0	0	0	0	0	0	200	300	0	0	0	0	0	0	0	200	903	0	0	0	0	0	0	0	603	903	0
631	7	0	0	0	0	0	0	200	300	0	0	0	0	0	0	0	200	903	0	0	0	0	0	0	0	603	903	0
631	8	0	0	0	0	0	0	200	300	0	0	0	0	0	0	0	200	903	0	0	0	0	0	0	0	603	903	0
631	9	0	0	0	0	0	0	200	300	0	0	0	0	0	0	0	200	903	0	0	0	0	0	0	0	603	903	0
632	0	0	0	0	0	0	0	200	300	0	0	0	0	0	0	0	200	903	0	0	0	0	0	0	0	603	903	0
632	1	0	0	0	0	0	0	200	300	0	0	0	0	0	0	0	200	903	0	0	0	0	0	0	0	603	903	0
632	2	0	0	0	0	0	0	200	300	0	0	0	0	0	0	0	200	903	0	0	0	0	0	0	0	603	903	0
632	3	0	0	0	0	0	0	200	300	0	0	0	0	0	0	0	200	903	0	0	0	0	0	0	0	603	903	0
632	4	0	0	0	0	0	0	200	300	0	0	0	0	0	0	0	200	903	0	0	0	0	0	0	0	603	903	0
632	5	0	0	0	0	0	0	200	300	0	0	0	0	0	0	0	200	903	0	0	0	0	0	0	0	603	903	0
632	6	0	0	0	0	0	0	200	300	0	0	0	0	0	0	0	200	903	0	0	0	0	0	0	0	603	903	0
632	7	0	0	0	0	0	0	200	300	0	0	0	0	0	0	0	200	903	0	0	0	0	0	0	0	603	903	0
632	8	0	0	0	0	0	0	200	300	0	0	0	0	0	0	0	200	903	0	0	0	0	0	0	0	603	903	0
632	9	0	0	0	0	0	0	200	300	0	0	0	0	0	0	0	200	903	0	0	0	0	0	0	0	603	903	0
633	0	0	0	0	0	0	0	200	300	0	0	0	0	0	0	0	200	903	0	0	0	0	0	0	0	603	903	0
633	1	0	0	0	0	0	0	200	300	0	0	0	0	0	0	0	200	903	0	0	0	0	0	0	0	603	903	0
633	2	0	0	0	0	0	0	200	300	0	0	0	0	0	0	0	200	903	0	0	0	0	0	0	0	603	903	0
633	3	0	0	0	0	0	0	200	300	0	0	0	0	0	0	0	200	903	0	0	0	0	0	0	0	603	903	0
633	4	0	0	0	0	0	0	200	300	0	0	0	0	0	0	0	200	903	0	0	0	0	0	0	0	603	903	0
633	5	0	0	0	0	0	0	200	300	0	0	0	0	0	0	0	200	903	0	0	0	0	0	0	0	603	903	0
633	6	0	0	0	0	0	0	200	300	0	0	0	0	0	0	0	200	903	0	0	0	0	0	0	0	603	903	0
633	7	0	0	0	0	0	0	200	300	0	0	0	0	0	0	0	200	903	0	0	0	0	0	0	0	603	903	0
633	8	0	0	0	0	0	0	200	300	0	0	0	0	0	0	0	200	903	0	0	0	0	0	0	0	603	903	0
633	9	0	0	0	0	0	0	200	300	0	0	0	0	0	0	0	200	903	0	0	0	0	0	0	0	603	903	0
634	0	0	0	0	0	0	0	200	300	0	0	0	0	0	0	0	200	903	0	0	0	0	0	0	0	603	903	0
634	1	0	0	0	0	0	0	200	300	0	0	0	0	0	0	0	200	903	0	0	0	0	0	0	0	603	903	0
634	2	0	0	0	0	0	0	200	300	0	0	0	0	0	0	0	200	903	0	0	0	0	0	0	0	603	903	0
634	3	0	0	0	0	0	0	200	300	0	0	0	0	0	0	0	200	903	0	0	0	0	0	0	0	603	903	0
634	4	0	0	0	0	0	0	200	300	0	0	0	0	0	0	0	200	903	0	0	0	0	0	0	0	603	903	0
634	5	0	0	0	0	0	0	200	300	0	0	0	0	0	0	0	200	903	0	0	0	0	0	0	0	603	903	0
634	6	0	0	0	0	0	0	200	300	0	0	0	0	0	0	0	200	903	0	0	0	0	0	0	0	603	903	0
634	7	0	0	0	0	0	0	200	300	0	0	0	0	0	0	0	200	903	0	0	0	0	0	0	0	603	903	0
634	8	0	0	0	0	0	0	200	300	0	0	0	0	0	0	0	200	903	0	0	0	0	0	0	0	603	903	0
634	9	0	0	0	0	0	0	200	300	0	0	0	0	0	0	0	200	903	0	0	0	0	0	0	0	603	903	0
635	0	0	0	0	0	0	0	200	300	0	0	0	0	0	0	0	200	903	0	0	0	0	0	0	0	603	903	0
635	1	0	0	0	0	0	0	200	300	0	0	0	0	0	0	0	200	903	0	0	0	0	0	0	0	603	903	0
635	2	0	0	0	0	0	0	200	300	0	0	0	0	0	0	0	200	903	0	0	0	0	0	0	0	603	903	0
635	3	0	0	0	0	0	0	200	300	0	0	0	0	0	0	0	200	903	0	0	0	0	0	0	0	603	903	0
635	4	0	0	0	0	0	0	200	300	0	0	0	0	0	0	0	200	903	0	0	0	0	0	0	0	603	903	0
635	5	0	0	0	0	0	0	200	300	0	0	0	0	0	0	0	200	903	0	0	0	0	0	0	0	603	903	0
635	6	0	0	0	0	0	0	200	300	0	0	0	0	0	0	0	200	903	0	0	0	0	0	0	0	603	903	0
635	7	0	0	0	0	0	0	200	300	0	0	0	0	0	0	0	200	903	0	0	0	0	0	0	0	603	903	0
635	8	0	0	0	0	0	0	200	300	0	0	0	0	0	0	0	200	903	0	0	0	0	0	0	0	603	903	0
635	9	0	0	0	0	0	0	200	300	0	0	0	0	0	0	0	200	903	0	0	0	0	0	0	0	603	903	0
636	0	0	0	0	0	0	0	200	300	0	0	0	0	0	0	0	200	903	0	0	0	0	0	0	0	603	903	0
636	1	0	0	0	0	0	0	200	300	0	0	0	0	0	0	0	200	903	0	0	0	0	0	0	0	603	903	0
636	2	0	0	0	0	0	0	200	300	0	0	0	0	0	0	0	200	903	0	0	0	0	0	0	0	603	903	0
636	3	0	0	0	0	0	0	200	300	0	0	0	0	0	0	0	200	903	0	0	0	0	0	0	0	603	903	0
636	4	0	0	0	0	0	0	200	300	0	0	0	0	0	0	0	200	903	0	0	0	0	0	0	0	603	903	0
636	5	0	0	0	0	0	0	200	300	0	0	0	0	0	0	0	200	903	0	0	0	0	0	0	0	603	903	0
636	6	0	0	0	0	0	0	200	300	0	0	0	0	0	0	0	200	903	0	0	0	0	0	0	0	603	903	0
636	7	0	0	0	0	0	0	200	300	0	0	0	0	0	0	0	200	903	0	0	0	0	0	0	0	603	903	0
636	8	0	0	0	0	0	0	200	300	0	0	0	0	0	0	0	200	903	0	0	0	0	0	0	0	603	903	0
636	9	0	0	0	0	0	0	200	300	0	0	0	0	0	0	0	200	903	0	0	0	0	0	0	0	603	903	0
637	0	0	0	0	0	0	0	200	300	0	0	0	0	0	0	0	200	903	0	0	0	0	0	0	0	603	903	0
637	1	0	0	0	0	0	0	200	300	0	0	0	0	0	0	0	200	903	0	0	0	0	0	0	0	603	903	0
637	2	0	0	0	0	0	0	200	300	0	0	0	0	0	0	0	200	903	0	0	0	0	0	0	0	603	903	0
637	3	0	0	0	0	0	0	200	300	0	0	0	0	0	0	0	200	903	0	0	0	0	0	0	0	603	903	0
637	4	0	0	0	0	0	0	200	300	0	0	0	0	0	0	0	200	903	0	0	0	0	0	0	0	603	903	0
637	5	0	0	0	0	0	0	200	300	0	0	0	0	0	0	0	200	903	0	0	0	0	0	0	0	603	903	0
637	6	0	0	0	0	0	0	200	300	0	0	0	0	0	0	0	200	903	0	0	0	0	0	0	0	603	903	0
637	7	0	0	0	0	0	0	200	300	0	0	0	0	0	0	0	200	903	0	0	0	0	0	0	0	603	903	0
637	8	0	0	0	0	0	0	200	300	0	0	0	0	0	0	0	200	903	0	0	0	0	0	0	0	603	903	0
637	9	0	0	0	0	0	0	200	300	0	0	0	0	0	0	0	200	903	0	0	0	0	0	0	0	603	903	0
638	0	0	0	0	0	0	0	200	300	0	0	0	0	0	0	0	200	903	0	0	0	0	0	0	0	603	903	0
638	1	0	0	0	0	0	0	200	300	0	0	0	0	0	0	0	200	903	0	0	0	0	0	0	0	603	903	0
638	2	0	0	0	0	0	0	200	300	0	0	0	0	0	0	0	200	903	0	0	0	0	0	0	0	603	903	0
638	3	0	0	0	0	0	0	200	300	0	0	0	0	0	0	0	200	903	0	0	0	0	0	0	0	603	903	0
638	4	0	0	0	0	0	0	200	300	0	0	0	0	0	0	0	200	903	0	0	0	0	0	0	0	603	903	0
638	5	0	0	0	0	0	0	200	300	0	0	0	0	0	0	0	200	903	0	0	0	0	0	0	0	603	903	0
638	6	0	0	0	0	0	0	200	300	0	0	0	0	0	0	0	200	903	0	0	0	0	0	0	0	603	903	0
638	7	0	0	0	0	0	0	200	300	0	0	0	0	0	0	0	200	903	0	0	0	0	0	0	0	603	903	0
638	8	0	0	0	0	0	0	200	300	0	0	0	0	0	0	0	200	903	0	0	0	0	0	0	0	603	903	0
638	9	0	0	0	0	0	0	200	300	0	0	0	0	0	0	0	200	903	0	0	0	0	0	0	0	603	903	0
639	0	0	0	0	0	0	0	200	300	0	0	0	0	0	0	0	200	903	0	0	0	0	0	0	0	603	903	0
639	1	0	0	0	0	0	0	200	300	0	0	0	0	0	0	0	200	903	0	0	0	0	0	0	0	603	903	0
639	2	0	0	0	0	0	0	200	300	0	0	0	0	0	0	0	200	903	0	0	0	0	0	0	0	603	903	0
639	3	0	0	0	0	0	0	200	300	0	0	0	0	0	0	0	200	903	0	0	0	0	0	0	0	603	903	0
639	4	0	0	0	0	0	0	200	300	0	0	0	0	0	0	0	200	903	0	0	0	0	0	0	0	603	903	0
639	5	0	0	0	0	0	0	200	300	0	0	0	0	0	0	0	200	903	0	0	0	0	0	0	0	603	903	0
639	6	0	0	0	0	0	0	200	300	0	0	0	0	0	0	0	200	903	0	0	0	0	0	0	0	603	903	0
639	7	0	0	0	0	0	0	200	300	0	0	0	0	0	0	0	200	903	0	0	0	0	0	0	0	603	903	0
639	8	0	0	0	0	0	0	200	300	0	0	0	0	0	0	0	200	903	0	0	0	0	0	0	0	603	903	0
639	9	0	0	0	0	0	0	200	300	0	0	0	0	0	0	0	200	903	0	0	0	0	0	0	0	603	903	0
640	0	0	0	0	0	0	0	200	300	0	0	0	0	0	0	0	200	903	0	0	0	0	0	0	0	603	903	0
640	1	0	0	0	0	0	0	200	300	0	0	0	0	0	0	0	200	903	0	0	0	0	0	0	0	603	903	0
640	2	0	0	0	0	0	0	200	300	0	0	0	0	0	0	0	200	903	0	0	0	0	0	0	0	603	903	0
640	3	0	0	0	0	0	0	200	300	0	0	0	0	0	0	0	200	903	0	0	0	0	0	0	0	603	903	0
640	4	0	0	0	0	0	0	200	300	0	0	0	0	0	0	0	200	903	0	0	0	0	0	0	0	603	903	0
640	5	0	0	0	0	0	0	200	300	0	0	0	0	0	0	0	200	903	0	0	0	0	0	0	0	603	903	0
640	6	0	0	0	0	0	0	200	300	0	0	0	0	0	0	0	200	903	0	0	0	0	0	0	0	603	903	0
640	7	0	0	0	0	0	0	200	300	0	0	0	0	0	0	0	200	903	0	0	0	0	0	0	0	603	903	0
640	8	0	0	0	0	0	0	200	300	0	0	0	0	0	0	0	200	903	0	0	0	0	0	0	0	603	903	0
640	9	0	0	0	0	0	0	200	300	0	0	0	0	0	0	0	200	903	0	0	0	0	0	0	0	603	903	0
641	0	0	0	0	0	0	0	200	300	0	0	0	0	0	0	0	200	903	0	0	0	0	0	0	0	603	903	0
641	1	0	0	0	0	0	0	200	300	0	0	0	0	0	0	0	200	903	0	0	0	0	0	0	0	603	903	0
641	2	0	0	0	0	0	0	200	300	0	0	0	0	0	0	0	200	903	0	0	0	0	0	0	0	603	903	0
641	3	0	0	0	0	0	0	200	300	0	0	0	0	0	0	0	200	903	0	0	0	0	0	0	0	603	903	0
641	4	0	0	0	0	0	0	200	300	0	0	0	0	0	0	0	200	903	0	0	0	0	0	0	0	603	903	0
641	5	0	0	0	0	0	0	200	300	0	0	0	0	0	0	0	200	903	0	0	0	0	0	0	0	603	903	0
641	6	0	0	0	0	0	0	200	300	0	0	0	0	0	0	0	200	903	0	0	0	0	0	0	0	603	903	0
641	7	0	0	0	0	0	0	200	300	0	0	0	0	0	0	0	200	903	0	0	0	0	0	0	0	603	903	0
641	8	0	0	0	0	0	0	200	300	0	0	0	0	0	0	0	200	903	0	0	0	0	0	0	0	603	903	0
641	9	0	0	0	0	0	0	200	300	0	0	0	0	0	0	0	200	903	0	0	0	0	0	0	0	603	903	0
642	0	0	0	0	0	0	0	200	300	0	0	0	0	0	0	0	200	903	0	0	0	0	0	0	0	603	903	0
642	1	0	0	0	0	0	0	200	300	0	0	0	0	0	0	0	200	903	0	0	0	0	0	0	0	603	903	0
642	2	0	0	0	0	0	0	200	300	0	0	0	0	0	0	0	200	903	0	0	0	0	0	0	0	603	903	0
642	3	0	0	0	0	0	0	200	300	0	0	0	0	0	0	0	200	903	0	0	0	0	0	0	0	603	903	0
642	4	0	0	0	0	0	0	200	300	0	0	0	0	0	0	0	200	903	0	0	0	0	0	0	0	603	903	0
642	5	0	0	0	0	0	0	200	300	0	0	0	0	0	0	0	200	903	0	0	0	0	0	0	0	603	903	0
642	6	0	0	0	0	0	0	200	300	0	0	0	0	0	0	0	200	903	0	0	0	0	0	0	0	603	903	0
642	7	0	0	0	0	0	0	200	300	0	0	0	0	0	0	0	200	903	0	0	0	0	0	0	0	603	903	0
642	8	0	0	0	0	0	0	200	300	0	0	0	0	0	0	0	200	903	0	0	0	0	0	0	0	603	903	0
642	9	0	0	0	0	0	0	200	300	0	0	0	0	0	0	0	200	903	0	0	0	0	0	0	0	603	903	0
643	0	0	0	0	0	0	0	200	300	0	0	0	0	0	0	0	200	903	0	0	0	0	0	0	0	603	903	0
643	1	0	0	0	0	0	0	200	300	0	0	0	0	0	0	0	200	903	0	0	0	0	0	0	0	603	903	0
643	2	0	0	0	0	0	0	200	300	0	0	0	0	0	0	0	200	903	0	0	0	0	0	0	0	603	903	0
643	3	0	0	0	0	0	0	200	300	0	0	0	0	0	0	0	200	903	0	0	0	0	0	0	0	603	903	0
643	4	0	0	0	0	0	0	200	300	0	0	0	0	0	0	0	200	903	0	0	0	0	0	0	0	603	903	0
643	5	0	0	0	0	0	0	200	300	0	0	0	0	0	0	0	200	903	0	0	0	0	0	0	0	603	903	0
643	6	0	0	0	0	0	0	200	300	0	0	0	0	0	0	0	200	903	0	0	0	0	0	0	0	603	903	0
643	7	0	0	0	0	0	0	200	300	0	0	0	0	0	0	0	200	903	0	0	0	0	0	0	0	603	903	0
643	8	0	0	0	0	0	0	200	300	0	0	0	0	0	0	0	200	903	0	0	0	0	0	0	0	603	903	0
643	9	0	0	0	0	0	0	200	300	0	0	0	0	0	0	0	200	903	0	0	0	0	0	0	0	603	903	0
644	0	0	0	0	0	0	0	200	300	0	0	0	0	0	0	0	200	903	0	0	0	0	0	0	0	603	903	0
644	1	0	0	0	0	0	0	200	300	0	0	0	0	0	0	0	200	903	0	0	0	0	0	0	0	603	903	0
644	2	0	0	0	0	0	0	200	300	0	0	0	0	0	0	0	200	903	0	0	0	0	0	0	0	603	903	0
644	3	0	0	0	0	0	0	200	300	0	0	0	0	0	0	0	200	903	0	0	0	0	0	0	0	603	903	0
644	4	0	0	0	0	0	0	200	300	0	0	0	0	0	0	0	200	903	0	0	0	0	0	0	0	603	903	0
644	5	0	0	0	0	0	0	200	300	0	0	0	0	0	0	0	200	903	0	0	0	0	0	0	0	603	903	0
644	6	0	0	0	0	0	0	200	300	0	0	0	0	0	0	0	200	903	0	0	0	0	0	0	0	603	903	0
644	7	0	0	0	0	0	0	200	300	0	0	0	0	0	0	0	200	903	0	0	0	0	0	0	0	603	903	0
644	8	0	0	0	0	0	0	200	300	0	0	0	0	0	0	0	200	903	0	0	0	0	0	0	0	603	903	0
644	9	0	0	0	0	0	0	200	300	0	0	0	0	0	0	0	200	903	0	0	0	0	0	0	0	603	903	0
645	0	0	0	0	0	0	0	200	300	0	0	0	0	0	0	0	200	903	0	0	0	0	0	0	0	603	903	0
645	1	0	0	0	0	0	0	200	300	0	0	0	0	0	0	0	200	903	0	0	0	0	0	0	0	603	903	0
645	2	0	0	0	0	0	0	200	300	0	0	0	0	0	0	0	200	903	0	0	0	0	0	0	0	603	903	0
645	3	0	0	0	0	0	0	200	300	0	0	0	0	0	0	0	200	903	0	0	0	0	0	0	0	603	903	0
645	4	0	0	0	0	0	0	200	300	0	0	0	0	0	0	0	200	903	0	0	0	0	0	0	0	603	903	0
645	5	0	0	0	0	0	0	200	300	0	0	0	0	0	0	0	200	903	0	0	0	0	0	0	0	603	903	0
645	6	0	0	0	0	0	0	200	300	0	0	0	0	0	0	0	200	903	0	0	0	0	0	0	0	603	903	0
645	7	0	0	0	0	0	0	200	300	0	0	0	0	0	0	0	200	903	0	0	0	0	0	0	0	603	903	0
645	8	0	0	0	0	0	0	200	300	0	0	0	0	0	0	0	200	903	0	0	0	0	0	0	0	603	903	0
645	9	0	0	0	0	0	0	200	300	0	0	0	0	0	0	0	200	903	0	0	0	0	0	0	0	603	903	0
646	0	0	0	0	0	0	0	200	300	0	0	0	0	0	0	0	200	903	0	0	0	0	0	0	0	603	903	0
646	1	0	0	0	0	0	0	200	300	0	0	0	0	0	0	0	200	903	0	0	0	0	0	0	0	603	903	0
646	2	0	0	0	0	0	0	200	300	0	0	0	0	0	0	0	200	903	0	0	0	0	0	0	0	603	903	0
646	3	0	0	0	0	0	0	200	300	0	0	0	0	0	0	0	200	903	0	0	0	0	0	0	0	603	903	0
646	4	0	0	0	0	0	0	200	300	0	0	0	0	0	0	0	200	903	0	0	0	0	0	0	0	603	903	0
646	5	0	0	0	0	0	0	200	300	0	0	0	0	0	0	0	200	903	0	0	0	0	0	0	0	603	903	0
646	6	0	0	0	0	0	0	200	300	0	0	0	0	0	0	0	200	903	0	0	0	0	0	0	0	603	903	0
646	7	0	0	0	0	0	0	200	300	0	0	0	0	0	0	0	200	903	0	0	0	0	0	0	0	603	903	0
646	8	0	0	0	0	0	0	200	300	0	0	0	0	0	0	0	200	903	0	0	0	0	0	0	0	603	903	0
646	9	0	0	0	0	0	0	200	300	0	0	0	0	0	0	0	200	903	0	0	0	0	0	0	0	603	903	0
647	0	0	0	0	0	0	0	200	300	0	0	0	0	0	0	0	200	903	0	0	0	0	0	0	0	603	903	0
647	1	0	0	0	0	0	0	200	300	0	0	0	0	0	0	0	200	903	0	0	0	0	0	0	0	603	903	0
647	2	0	0	0	0	0	0	200	300	0	0	0	0	0	0	0	200	903	0	0	0	0	0	0	0	603	903	0
647	3	0	0	0	0	0	0	200	300	0	0	0	0	0	0	0	200	903	0	0	0	0	0	0	0	603	903	0
647	4	0	0	0	0	0	0	200	300	0	0	0	0	0	0	0	200	903	0	0	0	0	0	0	0	603	903	0
647	5	0	0	0	0	0	0	200	300	0	0	0	0	0	0	0	200	903	0	0	0	0	0	0	0	603	903	0
647	6	0	0	0	0	0	0	200	300	0	0	0	0	0	0	0	200	903	0	0	0	0	0	0	0	603	903	0
647	7	0	0	0	0	0	0	200	300	0	0	0	0	0	0	0	200	903	0	0	0	0	0	0	0	603	903	0
647	8	0	0	0	0	0	0	200	300	0	0	0	0	0	0	0	200	903	0	0	0	0	0	0	0	603	903	0
647	9	0	0	0	0	0	0	200	300	0	0	0	0	0	0	0	200	903	0	0	0	0	0	0	0	603	903	0
648	0	0	0	0	0	0	0	200	300	0	0	0	0	0	0	0	200	903	0	0	0	0	0	0	0	603	903	0
648	1	0	0	0	0	0	0	200	300	0	0	0	0	0	0	0	200	903	0	0	0	0	0	0	0	603	903	0
648	2	0	0	0	0	0	0	200	300	0	0	0	0	0	0	0	200	903	0	0	0	0	0	0	0	603	903	0
648	3	0	0	0	0	0	0	200	300	0	0	0	0	0	0	0	200	903	0	0	0	0	0	0	0	603	903	0
648	4	0	0	0	0	0	0	200	300	0	0	0	0	0	0	0	200	903	0	0	0	0	0	0	0	603	903	0
648	5	0	0	0	0	0	0	200	300	0	0	0	0	0	0	0	200	903	0	0	0	0	0	0	0	603	903	0
648	6	0	0	0	0	0	0	200	300	0	0	0	0	0	0	0	200	903	0	0	0	0	0	0	0	603	903	0
648	7	0	0	0	0	0	0	200	300	0	0	0	0	0	0	0	200	903	0	0	0	0	0	0	0	603	903	0
648	8	0	0	0	0	0	0	200	300	0	0	0	0	0	0	0	200	903	0	0	0	0	0	0	0	603	903	0
648	9	0	0	0	0	0	0	200	300	0	0	0	0	0	0	0	200	903	0	0	0	0	0	0	0	603	903	0
649	0	0	0	0	0	0	0	200	300	0	0	0	0	0	0	0	200	903	0	0	0	0	0	0	0	603	903	0
649	1	0	0	0	0	0	0	200	300	0	0	0	0	0	0	0	200	903	0	0	0	0	0	0	0	603	903	0
649	2	0	0	0	0	0	0	200	300	0	0	0	0	0	0	0	200	903	0	0	0	0	0	0	0	603	903	0
649	3	0	0	0	0	0	0	200	300	0	0	0	0	0	0	0	200	903	0	0	0	0	0	0	0	603	903	0
649	4	0	0	0	0	0	0	200	300	0	0	0	0	0	0	0	200	903	0	0	0	0	0	0	0	603	903	0
649	5	0	0	0	0	0	0	200	300	0	0	0	0	0	0	0	200	903	0	0	0	0	0	0	0	603	903	0
649	6	0	0	0	0	0	0	200	300	0	0	0	0	0	0	0	200	903	0	0	0	0	0	0	0	603	903	0
649	7	0	0	0	0	0	0	200	300	0	0	0	0	0	0	0	200	903	0	0	0	0	0	0	0	603	903	0
649	8	0	0	0	0	0	0	200	300	0	0	0	0	0	0	0	200	903	0	0	0	0	0	0	0	603	903	0
649	9	0	0	0	0	0	0	200	300	0	0	0	0	0	0	0	200	903	0	0	0	0	0	0	0	603	903	0
650	0	0	0	0	0	0	0	200	300	0	0	0	0	0	0	0	200	903	0	0	0	0	0	0	0	603	903	0
650	1	0	0	0	0	0	0	200	300	0	0	0	0	0	0	0	200	903	0	0	0	0	0	0	0	603	903	0
650	2	0	0	0	0	0	0	200	300	0	0	0	0	0	0	0	200	903	0	0	0	0	0	0	0	603	903	0
650	3	0	0	0	0	0	0	200	300	0	0	0	0	0	0	0	200	903	0	0	0	0	0	0	0	603	903	0
650	4	0	0	0	0	0	0	200	300	0	0	0	0	0	0	0	200	903	0	0	0	0	0	0	0	603	903	0
650	5	0	0	0	0	0	0	200	300	0	0	0	0	0	0	0	200	903	0	0	0	0	0	0	0	603	903	0
650	6	0	0	0	0	0	0	200	300	0	0	0	0	0	0	0	200	903	0	0	0	0	0	0	0	603	903	0
650	7	0	0	0	0	0	0	200	300	0	0	0	0	0	0	0	200	903	0	0	0	0	0	0	0	603	903	0
650	8	0	0	0	0	0	0	200	300	0	0	0	0	0	0	0	200	903	0	0	0	0	0	0	0	603	903	0
650	9	0	0	0	0	0	0	200	300	0	0	0	0	0	0	0	200	903	0	0	0	0	0	0	0	603	903	0
651	0	0	0	0	0	0	0	200	300	0	0	0	0	0	0	0	200	903	0	0	0	0	0	0	0	603	903	0
651	1	0	0	0	0	0	0	200	300	0	0	0	0	0	0	0	200	903	0	0	0	0	0	0	0	603	903	0
651	2	0	0	0	0	0	0	200	300	0	0	0	0	0	0	0	200	903	0	0	0	0	0	0	0	603	903	0
651	3	0	0	0	0	0	0	200	300	0	0	0	0	0	0	0	200	903	0	0	0	0	0	0	0	603	903	0
651	4	0	0	0	0	0	0	200	300	0	0	0	0	0	0	0	200	903	0	0	0	0	0	0	0	603	903	0
651	5	0	0	0	0	0	0	200	300	0	0	0	0	0	0	0	200	903	0	0	0	0	0	0	0	603	903	0
651	6	0	0	0	0	0	0	200	300	0	0	0	0	0	0	0	200	903	0	0	0	0	0	0	0	603	903	0
651	7	0	0	0	0	0	0	200	300	0	0	0	0	0	0	0	200	903	0	0	0	0	0	0	0	603	903	0
651	8	0	0	0	0	0	0	200	300	0	0	0	0	0	0	0	200	903	0	0	0	0	0	0	0	603	903	0
651	9	0	0	0	0	0	0	200	300	0	0	0	0	0	0	0	200	903	0	0	0	0	0	0	0	603	903	0
652	0	0	0	0	0	0	0	200	300	0	0	0	0	0	0	0	200	903	0	0	0	0	0	0	0	603	903	0
652	1	0	0	0	0	0	0	200	300	0	0	0	0	0	0	0	200	903	0	0	0	0	0	0	0	603	903	0
652	2	0	0	0	0	0	0	200	300	0	0	0	0	0	0	0	200	903	0	0	0	0	0	0	0	603	903	0
652	3	0	0	0	0	0	0	200	300	0	0	0	0	0	0	0	200	903	0	0	0	0	0	0	0	603	903	0
652	4	0	0	0	0	0	0	200	300	0	0	0	0	0	0	0	200	903	0	0	0	0	0	0	0	603	903	0
652	5	0	0	0	0	0	0	200	300	0	0	0	0	0	0	0	200	903	0	0	0	0	0	0	0	603	903	0
652	6	0	0	0	0	0	0	200	300	0	0	0	0	0	0	0	200	903	0	0	0	0	0	0	0	603	903	0
652	7	0	0	0	0	0	0	200	300	0	0	0	0	0	0	0	200	903	0	0	0	0	0	0	0	603	903	0
652	8	0	0	0	0	0	0	200	300	0	0	0	0	0	0	0	200	903	0	0	0	0	0	0	0	603	903	0
652	9	0	0	0	0	0	0	200	300	0	0	0	0	0	0	0	200	903	0	0	0	0	0	0	0	603	903	0
653	0	0	0	0	0	0	0	200	300	0	0	0	0	0	0	0	200	903	0	0	0	0	0	0	0	603	903	0
653	1	0	0	0	0	0	0	200	300	0	0	0	0	0	0	0	200	903	0	0	0	0	0	0	0	603	903	0
653	2	0	0	0	0	0	0	200	300	0	0	0	0	0	0	0	200	903	0	0	0	0	0	0	0	603	903	0
653	3	0	0	0	0	0	0	200	300	0	0	0	0	0	0	0	200	903	0	0	0	0	0	0	0	603	903	0
653	4	0	0	0	0	0	0	200	300	0	0	0	0	0	0	0	200	903	0	0	0	0	0	0	0	603	903	0
653	5	0	0	0	0	0	0	200	300	0	0	0	0	0	0	0	200	903	0	0	0	0	0	0	0	603	903	0
653	6	0	0	0	0	0	0	200	300	0	0	0	0	0	0	0	200	903	0	0	0	0	0	0	0	603	903	0
653	7	0	0	0	0	0	0	200	300	0	0	0	0	0	0	0	200	903	0	0	0	0	0	0	0	603	903	0
653	8	0	0	0	0	0	0	200	300	0	0	0	0	0	0	0	200	903	0	0	0	0	0	0	0	603	903	0
653	9	0	0	0	0	0	0	200	300	0	0	0	0	0	0	0	200	903	0	0	0	0	0	0	0	603	903	0
654	0	0	0	0	0	0	0	200	300	0	0	0	0	0	0	0	200	903	0	0	0	0	0	0	0	603	903	0
654	1	0	0	0	0	0	0	200	300	0	0	0	0	0	0	0	200	903	0	0	0	0	0	0	0	603	903	0
654	2	0	0	0	0	0	0	200	300	0	0	0	0	0	0	0	200	903	0	0	0	0	0	0	0	603	903	0
654	3	0	0	0	0	0	0	200	300	0	0	0	0	0	0	0	200	903	0	0	0	0	0	0	0	603	903	0
654	4	0	0	0	0	0	0	200	300	0	0	0	0	0	0	0	200	903	0	0	0	0	0	0	0	603	903	0
654	5	0	0	0	0	0	0	200	300	0	0	0	0	0	0	0	200	903	0	0	0	0	0	0	0	603	903	0
654	6	0	0	0	0	0	0	200	300	0	0	0	0	0	0	0	200	903	0	0	0	0	0	0	0	603	903	0
654	7	0	0	0	0	0	0	200	300	0	0	0	0	0	0	0	200	903	0	0	0	0	0	0	0	603	903	0
654	8	0	0	0	0	0	0	200	300	0	0	0	0	0	0	0	200	903	0	0	0	0	0	0	0	603	903	0
654	9	0	0	0	0	0	0	200	300	0	0	0	0	0	0	0	200	903	0	0	0	0	0	0	0	603	903	0
655	0	0.429541	8.50193	-23.744	1192.01	1127.19	616.883	247.473	249.797	0	0	0	0	0	0	0	200	903	0	0	0	0	0	0	0	603	903	0
655	1	4.702	23.9133	-45.1063	1832.88	2347.89	1486.63	252.052	259.365	0	0	0	0	0	0	0	200	903	0	0	0	0	0	0	0	603	903	0
655	2	15.3832	27.1177	-49.9891	1741.33	1676.5	1761.29	233.537	265.166	0	0	0	0	0	0	0	200	903	0	0	0	0	0	0	0	603	903	0
655	3	18.4349	11.5537	-34.4251	642.697	1737.54	1257.75	250.473	281.331	0	0	0	0	0	0	0	200	903	0	0	0	0	0	0	0	603	903	0
655	4	6.22788	6.97605	-27.7112	734.25	1798.57	983.094	264.904	273.504	0	0	0	0	0	0	0	200	903	0	0	0	0	0	0	0	603	903	0
655	5	2.2606	17.6572	-44.1907	642.697	2103.75	845.765	247.606	285.456	0	0	0	0	0	0	0	200	903	0	0	0	0	0	0	0	603	903	0
655	6	9.27964	11.5537	-71.3514	1375.12	2958.24	113.343	241.46	280.728	0	0	0	0	0	0	0	200	903	0	0	0	0	0	0	0	603	903	0
655	7	6.22788	-8.58791	-83.5584	3938.6	4606.19	-69.7623	255.125	252.864	0	0	0	0	0	0	0	200	903	0	0	0	0	0	0	0	603	903	0
655	8	7.75376	-14.844	-91.1878	4396.36	5765.86	204.896	263.231	251.788	0	0	0	0	0	0	0	200	903	0	0	0	0	0	0	0	603	903	0
655	9	18.7401	-4.46804	-106.447	4671.02	6498.28	-435.973	261.047	256.119	0	0	0	0	0	0	0	200	903	0	0	0	0	0	0	0	603	903	0
656	0	18.2823	-3.24733	-131.166	4396.36	7169.67	-939.513	254.661	266.482	0	0	0	0	0	0	0	200	903	0	0	0	0	0	0	0	603	903	0
656	1	4.09165	-13.7759	-148.256	6044.31	6864.49	571.107	246.302	259.231	0	0	0	0	0	0	0	200	903	0	0	0	0	0	0	0	603	903	0
656	2	3.78647	-13.7759	-154.359	6135.86	8207.26	-252.868	253.17	260.249	0	0	0	0	0	0	0	200	903	0	0	0	0	0	0	0	603	903	0
656	3	10.9581	2.55101	-161.378	6318.97	8146.23	-893.737	250.479	260.844	0	0	0	0	0	0	0	200	903	0	0	0	0	0	0	0	603	903	0
656	4	6.83823	2.09324	-177.553	7875.36	9061.76	-573.302	251.037	255.645	0	0	0	0	0	0	0	200	903	0	0	0	0	0	0	0	603	903	0
656	5	0.276953	-12.4026	-192.506	8058.47	9427.97	-161.315	248.975	258.139	0	0	0	0	0	0	0	200	903	0	0	0	0	0	0	0	603	903	0
656	6	0.276953	-12.8604	-208.68	7875.36	9794.18	-985.29	246.934	262.261	0	0	0	0	0	0	0	200	903	0	0	0	0	0	0	0	603	903	0
656	7	0.124365	0.719951	-216.92	7875.36	9611.07	-1168.4	244.307	263.695	0	0	0	0	0	0	0	200	903	0	0	0	0	0	0	0	603	903	0
656	8	-2.46963	-3.85769	-224.55	8790.89	10831.8	-1122.62	248.238	260.851	0	0	0	0	0	0	0	200	903	0	0	0	0	0	0	0	603	903	0
656	9	-3.38516	-12.4026	-238.283	9065.55	10831.8	-1076.84	245.458	261.955	0	0	0	0	0	0	0	200	903	0	0	0	0	0	0	0	603	903	0
657	0	-6.74209	-5.07839	-252.321	10164.2	11075.9	-1259.95	243.896	259.717	0	0	0	0	0	0	0	200	903	0	0	0	0	0	0	0	603	903	0
657	1	-9.64126	6.67088	-258.729	9706.42	11747.3	-1122.62	245.404	262.484	0	0	0	0	0	0	0	200	903	0	0	0	0	0	0	0	603	903	0
657	2	-12.5404	4.07688	-261.476	8974	11075.9	-1076.84	242.359	265.679	0	0	0	0	0	0	0	200	903	0	0	0	0	0	0	0	603	903	0
657	3	-15.287	4.07688	-271.852	9706.42	11137	-1031.07	240.967	264.295	0	0	0	0	0	0	0	200	903	0	0	0	0	0	0	0	603	903	0
657	4	-16.8129	14.3003	-282.228	9614.87	11869.4	-573.302	242.056	265.932	0	0	0	0	0	0	0	200	903	0	0	0	0	0	0	0	603	903	0
657	5	-14.0663	21.9297	-290.162	9797.97	11381.1	-985.29	239.223	266.233	0	0	0	0	0	0	0	200	903	0	0	0	0	0	0	0	603	903	0
657	6	-20.0172	18.7253	-291.688	10255.7	11198	-756.408	238.39	264.84	0	0	0	0	0	0	0	200	903	0	0	0	0	0	0	0	603	903	0
657	7	-24.7475	23.6081	-295.961	10164.2	11564.2	-115.539	239.073	265.657	0	0	0	0	0	0	0	200	903	0	0	0	0	0	0	0	603	903	0
657	8	-22.7638	33.0686	-306.642	9431.76	11808.3	-115.539	238.509	269.242	0	0	0	0	0	0	0	200	903	0	0	0	0	0	0	0	603	903	0
657	9	-21.2379	39.4773	-311.525	9706.42	11564.2	-69.7623	237.121	268.842	0	0	0	0	0	0	0	200	903	0	0	0	0	0	0	0	603	903	0
658	0	-26.2733	39.3247	-315.797	9523.31	11869.4	433.778	237.585	269.844	0	0	0	0	0	0	0	200	903	0	0	0	0	0	0	0	603	903	0
658	1	-26.1208	43.9023	-320.985	9981.08	12052.5	433.778	237.548	268.905	0	0	0	0	0	0	0	200	903	0	0	0	0	0	0	0	603	903	0
658	2	-26.2733	52.905	-330.446	10072.6	12113.5	113.343	236.658	269.518	0	0	0	0	0	0	0	200	903	0	0	0	0	0	0	0	603	903	0
658	3	-29.9354	56.5671	-336.854	9523.31	12479.7	708.436	237.048	271.729	0	0	0	0	0	0	0	200	903	0	0	0	0	0	0	0	603	903	0
658	4	-30.5458	54.4309	-339.906	9431.76	12907	983.094	237.972	272.252	0	0	0	0	0	0	0	200	903	0	0	0	0	0	0	0	603	903	0
658	5	-28.4096	58.5508	-347.841	9248.65	12540.8	1028.87	236.053	273.411	0	0	0	0	0	0	0	200	903	0	0	0	0	0	0	0	603	903	0
658	6	-31.0036	66.3327	-355.165	9065.55	12784.9	1166.2	235.997	274.475	0	0	0	0	0	0	0	200	903	0	0	0	0	0	0	0	603	903	0
658	7	-31.7665	65.875	-369.508	9065.55	13578.4	1623.96	236.747	275.466	0	0	0	0	0	0	0	200	903	0	0	0	0	0	0	0	603	903	0
658	8	-32.3769	62.9758	-379.274	9706.42	14066.6	1852.85	237.088	274.408	0	0	0	0	0	0	0	200	903	0	0	0	0	0	0	0	603	903	0
658	9	-32.3769	68.0112	-392.091	9431.76	13822.5	1486.63	235.253	275.945	0	0	0	0	0	0	0	200	903	0	0	0	0	0	0	0	603	903	0
659	0	-32.9872	73.8095	-405.824	8790.89	15287.3	2127.5	237.67	278.338	0	0	0	0	0	0	0	200	903	0	0	0	0	0	0	0	603	903	0
659	1	-33.7501	71.9785	-416.505	8974	15592.5	1944.4	237.437	278.454	0	0	0	0	0	0	0	200	903	0	0	0	0	0	0	0	603	903	0
659	2	-35.7338	71.8259	-426.271	8607.79	15897.7	2173.28	237.295	279.807	0	0	0	0	0	0	0	200	903	0	0	0	0	0	0	0	603	903	0
659	3	-37.4123	76.0984	-434.816	8974	16324.9	2402.16	237.545	279.361	0	0	0	0	0	0	0	200	903	0	0	0	0	0	0	0	603	903	0
659	4	-34.3605	79.3027	-450.075	8516.23	16569.1	2539.49	236.814	281.078	0	0	0	0	0	0	0	200	903	0	0	0	0	0	0	0	603	903	0
659	5	-36.9545	77.0139	-461.061	8607.79	16935.3	2722.6	236.731	281.331	0	0	0	0	0	0	0	200	903	0	0	0	0	0	0	0	603	903	0
659	6	-41.9899	78.9975	-471.437	8058.47	17606.7	2951.48	237.347	282.907	0	0	0	0	0	0	0	200	903	0	0	0	0	0	0	0	603	903	0
659	7	-39.3959	82.9648	-478.761	7783.81	17911.9	3226.14	237.413	283.742	0	0	0	0	0	0	0	200	903	0	0	0	0	0	0	0	603	903	0
659	8	-38.9381	84.9485	-487.611	7509.15	18217	3455.02	237.36	284.6	0	0	0	0	0	0	0	200	903	0	0	0	0	0	0	0	603	903	0
659	9	-40.9218	85.5588	-496.461	7326.05	17911.9	3912.78	236.079	285.243	0	0	0	0	0	0	0	200	903	0	0	0	0	0	0	0	603	903	0
660	0	-40.464	88.1528	-502.87	7051.39	19193.6	4278.99	238.168	285.978	0	0	0	0	0	0	0	200	903	0	0	0	0	0	0	0	603	903	0
660	1	-39.8537	92.1201	-510.194	6685.18	19376.7	4233.22	237.979	286.897	0	0	0	0	0	0	0	200	903	0	0	0	0	0	0	0	603	903	0
660	2	-41.227	92.1201	-512.636	6593.63	19559.8	4599.43	238.155	287.138	0	0	0	0	0	0	0	200	903	0	0	0	0	0	0	0	603	903	0
660	3	-40.464	93.646	-517.518	5861.2	19803.9	4462.1	238.267	288.674	0	0	0	0	0	0	0	200	903	0	0	0	0	0	0	0	603	903	0
660	4	-38.7855	97.0029	-523.622	6135.86	20231.2	4553.65	238.637	288.282	0	0	0	0	0	0	0	200	903	0	0	0	0	0	0	0	603	903	0
660	5	-39.3959	99.9021	-525.758	5586.54	20597.4	4919.86	239.177	289.374	0	0	0	0	0	0	0	200	903	0	0	0	0	0	0	0	603	903	0
660	6	-38.3278	100.36	-532.167	5311.89	19865	4965.64	237.329	290.018	0	0	0	0	0	0	0	200	903	0	0	0	0	0	0	0	603	903	0
660	7	-37.87	99.5969	-535.219	5952.76	20780.5	4736.76	238.826	288.878	0	0	0	0	0	0	0	200	903	0	0	0	0	0	0	0	603	903	0
660	8	-35.4286	103.106	-539.186	4854.12	21085.7	4965.64	239.107	290.997	0	0	0	0	0	0	0	200	903	0	0	0	0	0	0	0	603	903	0
660	9	-34.0553	104.937	-544.374	4213.25	21146.7	5240.3	238.846	292.26	0	0	0	0	0	0	0	200	903	0	0	0	0	0	0	0	603	903	0
661	0	-33.1398	103.412	-546.51	3938.6	21390.9	5240.3	239.141	292.793	0	0	0	0	0	0	0	200	903	0	0	0	0	0	0	0	603	903	0
661	1	-32.2243	102.191	-547.731	3663.94	21329.8	5148.75	238.942	293.311	0	0	0	0	0	0	0	200	903	0	0	0	0	0	0	0	603	903	0
661	2	-29.6303	105.548	-550.172	3755.49	21757.1	5194.52	239.546	293.174	0	0	0	0	0	0	0	200	903	0	0	0	0	0	0	0	603	903	0
661	3	-26.1208	104.48	-552.614	3206.17	21757.1	5102.97	239.371	294.198	0	0	0	0	0	0	0	200	903	0	0	0	0	0	0	0	603	903	0
661	4	-25.5104	102.191	-548.951	3023.07	22123.3	4919.86	240.301	294.493	0	0	0	0	0	0	0	200	903	0	0	0	0	0	0	0	603	903	0
661	5	-25.2052	102.343	-552.614	2839.96	22550.5	5057.19	240.807	294.861	0	0	0	0	0	0	0	200	903	0	0	0	0	0	0	0	603	903	0
661	6	-21.8483	103.717	-550.783	3389.28	22489.5	4965.64	240.832	293.846	0	0	0	0	0	0	0	200	903	0	0	0	0	0	0	0	603	903	0
661	7	-19.4069	101.275	-551.393	1832.88	22733.6	4736.76	241.229	296.676	0	0	0	0	0	0	0	200	903	0	0	0	0	0	0	0	603	903	0
661	8	-18.1862	102.038	-552.003	2290.65	22733.6	4599.43	241.184	295.85	0	0	0	0	0	0	0	200	903	0	0	0	0	0	0	0	603	903	0
661	9	-15.287	101.275	-553.224	1741.33	22733.6	4645.21	241.093	296.852	0	0	0	0	0	0	0	200	903	0	0	0	0	0	0	0	603	903	0
662	0	-13.1508	100.818	-548.951	1558.22	22428.5	4507.87	240.857	297.161	0	0	0	0	0	0	0	200	903	0	0	0	0	0	0	0	603	903	0
662	1	-9.64126	101.123	-548.036	1283.57	22611.6	4507.87	241.259	297.658	0	0	0	0	0	0	0	200	903	0	0	0	0	0	0	0	603	903	0
662	2	-6.74209	100.512	-548.951	825.803	22916.7	4782.53	241.746	298.496	0	0	0	0	0	0	0	200	903	0	0	0	0	0	0	0	603	903	0
662	3	-5.3688	100.665	-543.458	642.697	23038.8	4462.1	242.393	298.817	0	0	0	0	0	0	0	200	903	0	0	0	0	0	0	0	603	903	0
662	4	-3.69033	101.733	-546.815	825.803	23405	4324.77	242.802	298.49	0	0	0	0	0	0	0	200	903	0	0	0	0	0	0	0	603	903	0
662	5	-1.40151	100.055	-542.543	642.697	23588.1	4095.89	243.477	298.815	0	0	0	0	0	0	0	200	903	0	0	0	0	0	0	0	603	903	0
662	6	0.582129	99.7495	-541.627	184.934	23466.1	4233.22	243.325	299.659	0	0	0	0	0	0	0	200	903	0	0	0	0	0	0	0	603	903	0
662	7	2.71836	101.275	-541.932	-89.7247	23466.1	3958.56	243.301	300.166	0	0	0	0	0	0	0	200	903	0	0	0	0	0	0	0	603	903	0
662	8	3.93906	101.733	-541.627	-639.041	23649.2	4187.44	243.663	301.18	0	0	0	0	0	0	0	200	903	0	0	0	0	0	0	0	603	903	0
662	9	7.90635	98.6814	-539.186	-364.383	23344	4050.11	243.295	300.676	0	0	0	0	0	0	0	200	903	0	0	0	0	0	0	0	603	903	0
663	0	6.68564	100.665	-537.965	-89.7247	23405	4645.21	243.507	300.167	0	0	0	0	0	0	0	200	903	0	0	0	0	0	0	0	603	903	0
663	1	9.43223	100.512	-537.965	-364.383	23771.2	4233.22	244.187	300.677	0	0	0	0	0	0	0	200	903	0	0	0	0	0	0	0	603	903	0
663	2	11.5685	98.834	-538.27	-455.936	23527.1	4187.44	243.709	300.847	0	0	0	0	0	0	0	200	903	0	0	0	0	0	0	0	603	903	0
663	3	10.8055	99.2917	-537.965	-1096.8	23588.1	4278.99	243.847	302.039	0	0	0	0	0	0	0	200	903	0	0	0	0	0	0	0	603	903	0
663	4	12.0262	100.512	-537.05	-1005.25	23954.3	4278.99	244.604	301.872	0	0	0	0	0	0	0	200	903	0	0	0	0	0	0	0	603	903	0
663	5	14.7728	101.123	-537.66	-1279.91	23710.2	4278.99	244.099	302.381	0	0	0	0	0	0	0	200	903	0	0	0	0	0	0	0	603	903	0
663	6	15.3832	101.275	-538.881	-822.147	24198.5	4324.77	244.905	301.526	0	0	0	0	0	0	0	200	903	0	0	0	0	0	0	0	603	903	0
663	7	14.9254	99.7495	-535.829	-1096.8	23954.3	4462.1	244.705	302.047	0	0	0	0	0	0	0	200	903	0	0	0	0	0	0	0	603	903	0
663	8	15.9935	100.36	-540.101	-1279.91	24381.6	4416.32	245.143	302.37	0	0	0	0	0	0	0	200	903	0	0	0	0	0	0	0	603	903	0
663	9	15.9935	101.581	-540.712	-2012.33	24503.7	4416.32	245.317	303.722	0	0	0	0	0	0	0	200	903	0	0	0	0	0	0	0	603	903	0
664	0	16.6039	99.9021	-541.017	-2195.44	24442.6	4507.87	245.179	304.058	0	0	0	0	0	0	0	200	903	0	0	0	0	0	0	0	603	903	0
664	1	16.909	100.97	-544.984	-2286.99	24503.7	4462.1	244.962	304.196	0	0	0	0	0	0	0	200	903	0	0	0	0	0	0	0	603	903	0
664	2	16.909	101.428	-545.9	-2286.99	24503.7	4965.64	244.887	304.189	0	0	0	0	0	0	0	200	903	0	0	0	0	0	0	0	603	903	0
664	3	15.8409	101.886	-546.205	-2470.1	24991.9	4782.53	245.756	304.522	0	0	0	0	0	0	0	200	903	0	0	0	0	0	0	0	603	903	0
664	4	15.8409	100.36	-547.426	-2561.65	24991.9	4919.86	245.654	304.679	0	0	0	0	0	0	0	200	903	0	0	0	0	0	0	0	603	903	0
664	5	16.7564	100.207	-549.257	-2470.1	24808.8	4919.86	245.168	304.497	0	0	0	0	0	0	0	200	903	0	0	0	0	0	0	0	603	903	0
664	6	17.2142	101.581	-553.834	-2927.86	25114	5102.97	245.346	305.287	0	0	0	0	0	0	0	200	903	0	0	0	0	0	0	0	603	903	0
664	7	16.1461	101.886	-556.581	-3019.41	25236.1	5194.52	245.341	305.425	0	0	0	0	0	0	0	200	903	0	0	0	0	0	0	0	603	903	0
664	8	17.3668	100.207	-556.581	-3385.62	25175	5102.97	245.232	306.083	0	0	0	0	0	0	0	200	903	0	0	0	0	0	0	0	603	903	0
664	9	15.8409	102.343	-555.665	-3019.41	25541.3	5377.63	245.965	305.434	0	0	0	0	0	0	0	200	903	0	0	0	0	0	0	0	603	903	0
665	0	16.2987	101.733	-560.243	-3385.62	25602.3	5514.96	245.699	306.043	0	0	0	0	0	0	0	200	903	0	0	0	0	0	0	0	603	903	0
665	1	15.5357	102.191	-567.567	-3660.28	25785.4	5423.4	245.431	306.449	0	0	0	0	0	0	0	200	903	0	0	0	0	0	0	0	603	903	0
665	2	12.3314	101.581	-575.807	-4392.7	26334.7	5698.06	245.735	307.629	0	0	0	0	0	0	0	200	903	0	0	0	0	0	0	0	603	903	0
665	3	15.5357	102.343	-582.216	-4850.47	27311.3	5331.85	246.909	308.331	0	0	0	0	0	0	0	200	903	0	0	0	0	0	0	0	603	903	0
665	4	18.2823	103.564	-578.859	-5399.78	26945.1	6018.5	246.549	309.328	0	0	0	0	0	0	0	200	903	0	0	0	0	0	0	0	603	903	0
665	5	20.5711	104.327	-583.131	-5582.89	27128.2	5469.18	246.522	309.574	0	0	0	0	0	0	0	200	903	0	0	0	0	0	0	0	603	903	0
665	6	19.9608	104.022	-589.845	-5308.23	27494.4	5331.85	246.613	308.999	0	0	0	0	0	0	0	200	903	0	0	0	0	0	0	0	603	903	0
665	7	21.4867	103.106	-595.033	-6040.65	27860.6	5469.18	246.822	310.152	0	0	0	0	0	0	0	200	903	0	0	0	0	0	0	0	603	903	0
665	8	21.6393	104.937	-597.169	-7139.29	27860.6	5514.96	246.654	311.955	0	0	0	0	0	0	0	200	903	0	0	0	0	0	0	0	603	903	0
665	9	21.0289	108.447	-599.916	-6315.31	28043.7	5469.18	246.746	310.527	0	0	0	0	0	0	0	200	903	0	0	0	0	0	0	0	603	903	0
666	0	22.4022	107.531	-602.968	-7230.84	28715.1	5835.39	247.623	311.992	0	0	0	0	0	0	0	200	903	0	0	0	0	0	0	0	603	903	0
666	1	19.6556	108.752	-607.24	-6773.08	27921.6	5881.17	245.981	311.154	0	0	0	0	0	0	0	200	903	0	0	0	0	0	0	0	603	903	0
666	2	16.909	108.6	-610.292	-6132.21	27738.5	5789.61	245.451	310.048	0	0	0	0	0	0	0	200	903	0	0	0	0	0	0	0	603	903	0
666	3	17.0616	105.243	-609.987	-7322.39	28409.9	5789.61	246.575	312.004	0	0	0	0	0	0	0	200	903	0	0	0	0	0	0	0	603	903	0
666	4	18.5875	105.7	-610.292	-7780.16	28715.1	5652.29	247.051	312.748	0	0	0	0	0	0	0	200	903	0	0	0	0	0	0	0	603	903	0
666	5	17.8246	105.7	-615.785	-7413.94	28348.9	6018.5	246.037	312.04	0	0	0	0	0	0	0	200	903	0	0	0	0	0	0	0	603	903	0
666	6	17.3668	103.869	-618.226	-8237.92	28532	5331.85	246.151	313.325	0	0	0	0	0	0	0	200	903	0	0	0	0	0	0	0	603	903	0
666	7	19.6556	101.886	-616.701	-7963.26	28776.1	5698.06	246.661	312.913	0	0	0	0	0	0	0	200	903	0	0	0	0	0	0	0	603	903	0
666	8	15.6883	101.123	-613.954	-8237.92	28837.2	5331.85	246.97	313.418	0	0	0	0	0	0	0	200	903	0	0	0	0	0	0	0	603	903	0
666	9	17.8246	100.665	-619.142	-8604.13	28532	5286.07	246.083	313.897	0	0	0	0	0	0	0	200	903	0	0	0	0	0	0	0	603	903	0
667	0	18.1297	98.9865	-624.025	-9245	29081.3	5102.97	246.603	314.815	0	0	0	0	0	0	0	200	903	0	0	0	0	0	0	0	603	903	0
667	1	15.5357	98.2236	-625.245	-9153.45	28959.2	5377.63	246.317	314.64	0	0	0	0	0	0	0	200	903	0	0	0	0	0	0	0	603	903	0
667	2	13.5521	98.834	-624.025	-9519.66	28532	5469.18	245.723	315.255	0	0	0	0	0	0	0	200	903	0	0	0	0	0	0	0	603	903	0
667	3	14.6202	99.9021	-624.635	-9153.45	28654	5606.51	245.873	314.654	0	0	0	0	0	0	0	200	903	0	0	0	0	0	0	0	603	903	0
667	4	13.7047	98.2236	-627.382	-9428.11	28532	5881.17	245.478	315.028	0	0	0	0	0	0	0	200	903	0	0	0	0	0	0	0	603	903	0
667	5	13.3995	97.3081	-630.128	-9885.87	28715.1	5698.06	245.57	315.689	0	0	0	0	0	0	0	200	903	0	0	0	0	0	0	0	603	903	0
667	6	14.4676	99.1391	-630.739	-9885.87	28776.1	5743.84	245.623	315.673	0	0	0	0	0	0	0	200	903	0	0	0	0	0	0	0	603	903	0
667	7	15.2306	100.055	-628.908	-10160.5	28959.2	5698.06	246.047	316.156	0	0	0	0	0	0	0	200	903	0	0	0	0	0	0	0	603	903	0
667	8	13.2469	98.5288	-629.213	-10709.8	28959.2	5560.73	246.025	317.021	0	0	0	0	0	0	0	200	903	0	0	0	0	0	0	0	603	903	0
667	9	15.3832	97.3081	-630.128	-10526.7	28776.1	5469.18	245.667	316.706	0	0	0	0	0	0	0	200	903	0	0	0	0	0	0	0	603	903	0
668	0	17.672	96.3926	-631.349	-10343.6	29142.3	5240.3	246.159	316.383	0	0	0	0	0	0	0	200	903	0	0	0	0	0	0	0	603	903	0
668	1	16.6039	96.5451	-632.875	-10526.7	29264.4	5148.75	246.24	316.633	0	0	0	0	0	0	0	200	903	0	0	0	0	0	0	0	603	903	0
668	2	17.0616	94.7141	-630.128	-11076.1	28898.2	4919.86	245.861	317.577	0	0	0	0	0	0	0	200	903	0	0	0	0	0	0	0	603	903	0
668	3	18.4349	93.4934	-631.349	-10709.8	28959.2	4919.86	245.869	316.963	0	0	0	0	0	0	0	200	903	0	0	0	0	0	0	0	603	903	0
668	4	19.3504	93.7986	-631.654	-10893	29203.4	4874.09	246.233	317.245	0	0	0	0	0	0	0	200	903	0	0	0	0	0	0	0	603	903	0
668	5	20.4186	92.1201	-633.79	-10801.4	29020.3	4553.65	245.788	317.043	0	0	0	0	0	0	0	200	903	0	0	0	0	0	0	0	603	903	0
668	6	20.7237	89.9839	-635.011	-10435.2	28959.2	4736.76	245.604	316.433	0	0	0	0	0	0	0	200	903	0	0	0	0	0	0	0	603	903	0
668	7	21.4867	89.9839	-634.096	-11076.1	29447.5	4690.98	246.44	317.467	0	0	0	0	0	0	0	200	903	0	0	0	0	0	0	0	603	903	0
668	8	20.1134	89.5261	-632.875	-11900	29142.3	4599.43	246.048	318.803	0	0	0	0	0	0	0	200	903	0	0	0	0	0	0	0	603	903	0
668	9	21.4867	88.6106	-634.401	-11808.5	29081.3	4507.87	245.841	318.614	0	0	0	0	0	0	0	200	903	0	0	0	0	0	0	0	603	903	0
669	0	21.7918	87.695	-636.232	-12174.7	29447.5	4599.43	246.284	319.136	0	0	0	0	0	0	0	200	903	0	0	0	0	0	0	0	603	903	0
669	1	20.4186	87.695	-637.452	-11625.4	29447.5	4507.87	246.196	318.237	0	0	0	0	0	0	0	200	903	0	0	0	0	0	0	0	603	903	0
669	2	22.5548	87.3899	-636.842	-12357.8	28898.2	4462.1	245.377	319.405	0	0	0	0	0	0	0	200	903	0	0	0	0	0	0	0	603	903	0
669	3	19.6556	84.9485	-633.18	-11808.5	28959.2	4416.32	245.736	318.65	0	0	0	0	0	0	0	200	903	0	0	0	0	0	0	0	603	903	0
669	4	19.8082	84.7959	-634.706	-12540.9	29142.3	4370.55	245.915	319.759	0	0	0	0	0	0	0	200	903	0	0	0	0	0	0	0	603	903	0
669	5	20.7237	85.2536	-637.758	-12632.5	28776.1	4370.55	245.121	319.808	0	0	0	0	0	0	0	200	903	0	0	0	0	0	0	0	603	903	0
669	6	19.3504	84.3381	-637.452	-12357.8	29081.3	4324.77	245.621	319.386	0	0	0	0	0	0	0	200	903	0	0	0	0	0	0	0	603	903	0
669	7	20.5711	82.0493	-636.537	-12083.1	29264.4	4370.55	245.974	318.983	0	0	0	0	0	0	0	200	903	0	0	0	0	0	0	0	603	903	0
669	8	18.4349	80.676	-633.79	-12449.3	29142.3	4370.55	245.981	319.643	0	0	0	0	0	0	0	200	903	0	0	0	0	0	0	0	603	903	0
669	9	19.503	80.8286	-635.621	-13181.8	28287.8	4507.87	244.504	320.738	0	0	0	0	0	0	0	200	903	0	0	0	0	0	0	0	603	903	0
670	0	19.1979	80.8286	-637.758	-12907.1	29264.4	4187.44	245.886	320.238	0	0	0	0	0	0	0	200	903	0	0	0	0	0	0	0	603	903	0
670	1	19.6556	78.2346	-636.232	-13181.8	29447.5	4278.99	246.284	320.719	0	0	0	0	0	0	0	200	903	0	0	0	0	0	0	0	603	903	0
670	2	19.0453	79.1501	-636.232	-13090.2	28715.1	4095.89	245.133	320.575	0	0	0	0	0	0	0	200	903	0	0	0	0	0	0	0	603	903	0
670	3	20.266	78.2346	-634.096	-12083.1	28715.1	4141.66	245.285	319.056	0	0	0	0	0	0	0	200	903	0	0	0	0	0	0	0	603	903	0
670	4	19.6556	76.8613	-634.706	-12907.1	28959.2	4141.66	245.626	320.336	0	0	0	0	0	0	0	200	903	0	0	0	0	0	0	0	603	903	0
670	5	19.1979	76.0984	-635.621	-13273.3	28776.1	4050.11	245.272	320.882	0	0	0	0	0	0	0	200	903	0	0	0	0	0	0	0	603	903	0
670	6	18.7401	75.7932	-635.316	-12998.7	28837.2	3867.01	245.39	320.46	0	0	0	0	0	0	0	200	903	0	0	0	0	0	0	0	603	903	0
670	7	18.5875	73.657	-633.485	-13364.9	29020.3	4187.44	245.811	321.097	0	0	0	0	0	0	0	200	903	0	0	0	0	0	0	0	603	903	0
670	8	19.503	73.5044	-633.79	-13090.2	28898.2	3638.12	245.596	320.654	0	0	0	0	0	0	0	200	903	0	0	0	0	0	0	0	603	903	0
670	9	19.3504	72.4363	-633.18	-13273.3	28470.9	3912.78	244.965	320.963	0	0	0	0	0	0	0	200	903	0	0	0	0	0	0	0	603	903	0
671	0	20.1134	70.3	-633.79	-13273.3	28837.2	3683.9	245.5	320.943	0	0	0	0	0	0	0	200	903	0	0	0	0	0	0	0	603	903	0
671	1	19.3504	70.4526	-633.18	-13914.2	28898.2	3912.78	245.64	321.975	0	0	0	0	0	0	0	200	903	0	0	0	0	0	0	0	603	903	0
671	2	19.1979	69.6897	-629.518	-13914.2	28959.2	3912.78	246.002	322.103	0	0	0	0	0	0	0	200	903	0	0	0	0	0	0	0	603	903	0
671	3	19.503	68.7741	-629.213	-14555.1	28654	3775.45	245.54	323.132	0	0	0	0	0	0	0	200	903	0	0	0	0	0	0	0	603	903	0
671	4	21.1815	68.3164	-630.739	-13639.5	28654	2951.48	245.429	321.625	0	0	0	0	0	0	0	200	903	0	0	0	0	0	0	0	603	903	0
671	5	19.9608	66.3327	-630.739	-13639.5	28593	3592.35	245.333	321.625	0	0	0	0	0	0	0	200	903	0	0	0	0	0	0	0	603	903	0
671	6	18.4349	64.8069	-628.908	-14280.4	28470.9	3683.9	245.27	322.707	0	0	0	0	0	0	0	200	903	0	0	0	0	0	0	0	603	903	0
671	7	19.3504	64.5017	-625.856	-13914.2	29020.3	3317.69	246.369	322.232	0	0	0	0	0	0	0	200	903	0	0	0	0	0	0	0	603	903	0
671	8	19.9608	63.8913	-624.94	-14188.8	28470.9	3043.03	245.558	322.704	0	0	0	0	0	0	0	200	903	0	0	0	0	0	0	0	603	903	0
671	9	19.503	62.518	-625.245	-13914.2	28409.9	3546.57	245.438	322.254	0	0	0	0	0	0	0	200	903	0	0	0	0	0	0	0	603	903	0
672	0	18.8927	60.3818	-624.025	-14372	28409.9	3043.03	245.527	323.031	0	0	0	0	0	0	0	200	903	0	0	0	0	0	0	0	603	903	0
672	1	19.0453	60.0766	-622.804	-14097.3	28165.8	2814.15	245.224	322.635	0	0	0	0	0	0	0	200	903	0	0	0	0	0	0	0	603	903	0
672	2	19.1979	58.8559	-620.363	-14646.6	28287.8	3226.14	245.599	323.61	0	0	0	0	0	0	0	200	903	0	0	0	0	0	0	0	603	903	0
672	3	19.9608	56.4145	-618.837	-14738.2	28593	2997.26	246.204	323.816	0	0	0	0	0	0	0	200	903	0	0	0	0	0	0	0	603	903	0
672	4	20.4186	57.9404	-618.837	-14738.2	28593	2997.26	246.204	323.816	0	0	0	0	0	0	0	200	903	0	0	0	0	0	0	0	603	903	0
672	5	19.3504	57.6352	-618.226	-14463.5	28409.9	2814.15	245.954	323.395	0	0	0	0	0	0	0	200	903	0	0	0	0	0	0	0	603	903	0
672	6	20.4186	56.7197	-613.954	-14829.7	28348.9	2768.37	246.174	324.154	0	0	0	0	0	0	0	200	903	0	0	0	0	0	0	0	603	903	0
672	7	18.1297	53.9731	-609.681	-14372	28226.8	2539.49	246.298	323.573	0	0	0	0	0	0	0	200	903	0	0	0	0	0	0	0	603	903	0
672	8	18.7401	54.2783	-610.902	-14188.8	27982.7	2585.27	245.805	323.226	0	0	0	0	0	0	0	200	903	0	0	0	0	0	0	0	603	903	0
672	9	18.7401	52.2947	-611.818	-15104.4	28226.8	2493.72	246.136	324.688	0	0	0	0	0	0	0	200	903	0	0	0	0	0	0	0	603	903	0
673	0	17.3668	52.7524	-609.987	-15562.1	27860.6	2585.27	245.674	325.512	0	0	0	0	0	0	0	200	903	0	0	0	0	0	0	0	603	903	0
673	1	19.0453	51.3791	-606.019	-14829.7	27677.5	2539.49	245.671	324.471	0	0	0	0	0	0	0	200	903	0	0	0	0	0	0	0	603	903	0
673	2	18.7401	50.1584	-603.273	-15012.8	27738.5	2768.37	245.98	324.886	0	0	0	0	0	0	0	200	903	0	0	0	0	0	0	0	603	903	0
673	3	20.8763	49.2429	-605.104	-15195.9	27555.4	2356.39	245.538	325.113	0	0	0	0	0	0	0	200	903	0	0	0	0	0	0	0	603	903	0
673	4	18.8927	48.7851	-602.357	-15928.4	27616.5	2356.39	245.847	326.443	0	0	0	0	0	0	0	200	903	0	0	0	0	0	0	0	603	903	0
673	5	18.4349	48.3274	-600.221	-15287.5	27677.5	2447.94	246.112	325.47	0	0	0	0	0	0	0	200	903	0	0	0	0	0	0	0	603	903	0
673	6	18.1297	46.8015	-597.474	-16111.5	27982.7	2264.83	246.835	326.966	0	0	0	0	0	0	0	200	903	0	0	0	0	0	0	0	603	903	0
673	7	18.7401	47.1067	-594.423	-15379	27738.5	2127.5	246.665	325.872	0	0	0	0	0	0	0	200	903	0	0	0	0	0	0	0	603	903	0
673	8	18.7401	45.123	-595.643	-15562.1	27372.3	2219.06	245.954	326.127	0	0	0	0	0	0	0	200	903	0	0	0	0	0	0	0	603	903	0
673	9	17.2142	44.3601	-591.676	-15470.6	27738.5	2264.83	246.881	326.147	0	0	0	0	0	0	0	200	903	0	0	0	0	0	0	0	603	903	0
674	0	17.672	43.292	-591.676	-16477.7	27555.4	2173.28	246.572	327.849	0	0	0	0	0	0	0	200	903	0	0	0	0	0	0	0	603	903	0
674	1	17.8246	44.5127	-587.404	-16294.6	27189.2	2035.95	246.287	327.74	0	0	0	0	0	0	0	200	903	0	0	0	0	0	0	0	603	903	0
674	2	19.1979	43.292	-586.183	-15928.4	27616.5	2127.5	247.112	327.173	0	0	0	0	0	0	0	200	903	0	0	0	0	0	0	0	603	903	0
674	3	18.2823	42.3764	-585.573	-16203	27311.3	2081.73	246.64	327.67	0	0	0	0	0	0	0	200	903	0	0	0	0	0	0	0	603	903	0
674	4	17.8246	42.0713	-583.436	-16203	27067.1	2035.95	246.393	327.772	0	0	0	0	0	0	0	200	903	0	0	0	0	0	0	0	603	903	0
674	5	20.1134	41.1557	-581.605	-17027	27311.3	2035.95	246.958	329.276	0	0	0	0	0	0	0	200	903	0	0	0	0	0	0	0	603	903	0
674	6	18.4349	40.5454	-574.891	-17210.1	27189.2	1944.4	247.295	329.936	0	0	0	0	0	0	0	200	903	0	0	0	0	0	0	0	603	903	0
674	7	18.5875	40.2402	-576.417	-17393.2	26945.1	2081.73	246.746	330.175	0	0	0	0	0	0	0	200	903	0	0	0	0	0	0	0	603	903	0
674	8	19.3504	40.5454	-575.502	-16843.9	27006.1	1807.07	246.926	329.268	0	0	0	0	0	0	0	200	903	0	0	0	0	0	0	0	603	903	0
674	9	18.1297	38.7143	-574.281	-16203	27494.4	1761.29	247.876	328.214	0	0	0	0	0	0	0	200	903	0	0	0	0	0	0	0	603	903	0
675	0	17.9771	37.7988	-570.314	-17118.5	27006.1	2035.95	247.353	330.016	0	0	0	0	0	0	0	200	903	0	0	0	0	0	0	0	603	903	0
675	1	18.7401	37.4936	-567.872	-18034.1	26578.9	1532.41	246.804	331.757	0	0	0	0	0	0	0	200	903	0	0	0	0	0	0	0	603	903	0
675	2	21.0289	38.2566	-568.178	-17210.1	27128.2	1761.29	247.746	330.29	0	0	0	0	0	0	0	200	903	0	0	0	0	0	0	0	603	903	0
675	3	18.7401	36.8833	-566.041	-18034.1	27250.2	1623.96	248.142	331.86	0	0	0	0	0	0	0	200	903	0	0	0	0	0	0	0	603	903	0
675	4	18.4349	36.5781	-562.99	-17942.5	26517.8	1761.29	247.102	331.87	0	0	0	0	0	0	0	200	903	0	0	0	0	0	0	0	603	903	0
675	5	18.8927	36.2729	-559.938	-18034.1	27006.1	1669.74	248.231	332.207	0	0	0	0	0	0	0	200	903	0	0	0	0	0	0	0	603	903	0
675	6	19.8082	33.8315	-555.971	-18308.7	27067.1	1623.96	248.684	332.931	0	0	0	0	0	0	0	200	903	0	0	0	0	0	0	0	603	903	0
675	7	20.8763	35.2048	-555.055	-19041.1	26334.7	1623.96	247.445	334.305	0	0	0	0	0	0	0	200	903	0	0	0	0	0	0	0	603	903	0
675	8	19.6556	34.8996	-551.088	-19224.2	26517.8	1578.19	248.119	334.884	0	0	0	0	0	0	0	200	903	0	0	0	0	0	0	0	603	903	0
675	9	19.3504	33.9841	-550.477	-19132.7	26700.9	1486.63	248.505	334.757	0	0	0	0	0	0	0	200	903	0	0	0	0	0	0	0	603	903	0
676	0	18.7401	34.8996	-545.9	-19041.1	26456.8	1440.86	248.465	334.88	0	0	0	0	0	0	0	200	903	0	0	0	0	0	0	0	603	903	0
676	1	19.3504	33.3738	-544.679	-18858	26273.7	1440.86	248.237	334.622	0	0	0	0	0	0	0	200	903	0	0	0	0	0	0	0	603	903	0
676	2	20.1134	33.0686	-543.763	-19041.1	26762	1532.41	249.216	335.017	0	0	0	0	0	0	0	200	903	0	0	0	0	0	0	0	603	903	0
676	3	19.503	32.6108	-538.576	-19956.7	26578.9	1303.53	249.35	337.055	0	0	0	0	0	0	0	200	903	0	0	0	0	0	0	0	603	903	0
676	4	18.2823	32.4582	-540.101	-20048.2	25724.4	1349.31	247.629	337.119	0	0	0	0	0	0	0	200	903	0	0	0	0	0	0	0	603	903	0
676	5	18.7401	32.0005	-536.134	-19773.6	26395.7	1486.63	249.234	336.882	0	0	0	0	0	0	0	200	903	0	0	0	0	0	0	0	603	903	0
676	6	19.3504	30.7798	-533.388	-19865.1	26456.8	1761.29	249.601	337.243	0	0	0	0	0	0	0	200	903	0	0	0	0	0	0	0	603	903	0
676	7	20.8763	30.6272	-531.251	-19956.7	25968.5	1349.31	248.882	337.565	0	0	0	0	0	0	0	200	903	0	0	0	0	0	0	0	603	903	0
676	8	19.6556	29.5591	-530.641	-20872.2	25907.5	1486.63	248.823	339.334	0	0	0	0	0	0	0	200	903	0	0	0	0	0	0	0	603	903	0
676	9	19.503	30.0168	-527.589	-20506	26395.7	1120.42	250.031	338.867	0	0	0	0	0	0	0	200	903	0	0	0	0	0	0	0	603	903	0
677	0	18.7401	28.9487	-524.843	-21238.4	26029.5	1257.75	249.595	340.466	0	0	0	0	0	0	0	200	903	0	0	0	0	0	0	0	603	903	0
677	1	19.3504	28.6435	-521.486	-20322.9	26029.5	983.094	249.914	338.971	0	0	0	0	0	0	0	200	903	0	0	0	0	0	0	0	603	903	0
677	2	19.8082	27.5754	-519.044	-20414.4	26395.7	983.094	250.855	339.331	0	0	0	0	0	0	0	200	903	0	0	0	0	0	0	0	603	903	0
677	3	19.3504	26.9651	-520.265	-20231.3	26151.6	1028.87	250.266	338.887	0	0	0	0	0	0	0	200	903	0	0	0	0	0	0	0	603	903	0
677	4	19.0453	26.9651	-518.434	-21330	25785.4	891.542	249.737	341.143	0	0	0	0	0	0	0	200	903	0	0	0	0	0	0	0	603	903	0
677	5	19.0453	26.0495	-515.687	-21421.5	25846.4	799.989	250.12	341.54	0	0	0	0	0	0	0	200	903	0	0	0	0	0	0	0	603	903	0
677	6	18.5875	25.5918	-511.11	-21513.1	25968.5	937.318	250.808	342.091	0	0	0	0	0	0	0	200	903	0	0	0	0	0	0	0	603	903	0
677	7	19.0453	24.8288	-511.11	-21238.4	24930.9	1120.42	248.778	341.554	0	0	0	0	0	0	0	200	903	0	0	0	0	0	0	0	603	903	0
677	8	19.1979	24.9814	-511.11	-21330	25480.2	799.989	249.853	341.733	0	0	0	0	0	0	0	200	903	0	0	0	0	0	0	0	603	903	0
677	9	18.2823	23.9133	-509.584	-21513.1	25846.4	1028.87	250.721	342.217	0	0	0	0	0	0	0	200	903	0	0	0	0	0	0	0	603	903	0
678	0	19.9608	23.303	-505.311	-20872.2	25846.4	845.765	251.15	341.306	0	0	0	0	0	0	0	200	903	0	0	0	0	0	0	0	603	903	0
678	1	18.2823	23.1504	-502.87	-22428.6	25724.4	616.883	251.155	344.601	0	0	0	0	0	0	0	200	903	0	0	0	0	0	0	0	603	903	0
678	2	19.1979	22.9978	-502.26	-22245.5	25785.4	479.554	251.339	344.291	0	0	0	0	0	0	0	200	903	0	0	0	0	0	0	0	603	903	0
678	3	19.1979	22.2348	-502.87	-21513.1	25724.4	342.225	251.155	342.781	0	0	0	0	0	0	0	200	903	0	0	0	0	0	0	0	603	903	0
678	4	17.8246	20.5564	-500.123	-22062.4	25358.2	525.331	250.704	344.114	0	0	0	0	0	0	0	200	903	0	0	0	0	0	0	0	603	903	0
678	5	18.4349	20.5564	-498.903	-22337	25785.4	204.896	251.684	344.772	0	0	0	0	0	0	0	200	903	0	0	0	0	0	0	0	603	903	0
678	6	18.2823	19.4883	-496.156	-23069.5	25175	250.672	250.74	346.496	0	0	0	0	0	0	0	200	903	0	0	0	0	0	0	0	603	903	0
678	7	18.8927	20.0986	-492.494	-22611.7	25358.2	342.225	251.489	345.913	0	0	0	0	0	0	0	200	903	0	0	0	0	0	0	0	603	903	0
678	8	20.1134	17.352	-491.884	-23801.9	25297.1	433.778	251.429	348.389	0	0	0	0	0	0	0	200	903	0	0	0	0	0	0	0	603	903	0
678	9	19.503	18.5727	-490.358	-22886.4	25541.3	342.225	252.087	346.673	0	0	0	0	0	0	0	200	903	0	0	0	0	0	0	0	603	903	0
679	0	19.0453	16.8943	-487.916	-23069.5	25175	296.449	251.597	347.282	0	0	0	0	0	0	0	200	903	0	0	0	0	0	0	0	603	903	0
679	1	19.9608	15.2158	-485.475	-23710.3	25419.2	250.672	252.359	348.839	0	0	0	0	0	0	0	200	903	0	0	0	0	0	0	0	603	903	0
679	2	19.1979	16.4365	-484.559	-24076.5	25358.2	342.225	252.332	349.688	0	0	0	0	0	0	0	200	903	0	0	0	0	0	0	0	603	903	0
679	3	19.8082	16.4365	-482.728	-24351.2	25358.2	21.7904	252.531	350.445	0	0	0	0	0	0	0	200	903	0	0	0	0	0	0	0	603	903	0
679	4	19.8082	15.6736	-482.118	-24351.2	25724.4	113.343	253.357	350.509	0	0	0	0	0	0	0	200	903	0	0	0	0	0	0	0	603	903	0
679	5	19.3504	15.3684	-481.508	-23893.4	25419.2	-115.539	252.791	349.622	0	0	0	0	0	0	0	200	903	0	0	0	0	0	0	0	603	903	0
679	6	18.8927	14.758	-478.456	-23893.4	25175	113.343	252.617	349.939	0	0	0	0	0	0	0	200	903	0	0	0	0	0	0	0	603	903	0
679	7	19.1979	13.0796	-476.93	-25358.3	25175	-161.315	252.786	353.17	0	0	0	0	0	0	0	200	903	0	0	0	0	0	0	0	603	903	0
679	8	19.9608	13.0796	-474.183	-25175.2	25297.1	-573.302	253.349	353.092	0	0	0	0	0	0	0	200	903	0	0	0	0	0	0	0	603	903	0
679	9	20.8763	12.927	-475.709	-25175.2	25236.1	-344.421	253.049	352.921	0	0	0	0	0	0	0	200	903	0	0	0	0	0	0	0	603	903	0
680	0	20.7237	12.6218	-472.352	-24717.4	25175	-344.421	253.297	352.328	0	0	0	0	0	0	0	200	903	0	0	0	0	0	0	0	603	903	0
680	1	19.6556	11.7063	-471.742	-25632.9	25602.3	-573.302	254.272	354.337	0	0	0	0	0	0	0	200	903	0	0	0	0	0	0	0	603	903	0
680	2	19.9608	11.5537	-468.995	-25358.3	25175	-619.079	253.679	354.069	0	0	0	0	0	0	0	200	903	0	0	0	0	0	0	0	603	903	0
680	3	22.2496	11.2485	-467.47	-26273.8	25480.2	-573.302	254.507	356.204	0	0	0	0	0	0	0	200	903	0	0	0	0	0	0	0	603	903	0
680	4	22.097	10.0278	-466.859	-26182.3	25419.2	-573.302	254.447	356.082	0	0	0	0	0	0	0	200	903	0	0	0	0	0	0	0	603	903	0
680	5	21.9444	10.6382	-462.282	-26090.7	25297.1	-939.513	254.722	356.439	0	0	0	0	0	0	0	200	903	0	0	0	0	0	0	0	603	903	0
680	6	21.1815	11.2485	-463.807	-27097.8	24442.6	-893.737	252.7	358.425	0	0	0	0	0	0	0	200	903	0	0	0	0	0	0	0	603	903	0
680	7	21.4867	10.6382	-461.671	-25999.1	25480.2	-619.079	255.191	356.315	0	0	0	0	0	0	0	200	903	0	0	0	0	0	0	0	603	903	0
680	8	21.7918	9.72264	-458.619	-26182.3	25358.2	-985.29	255.292	357.089	0	0	0	0	0	0	0	200	903	0	0	0	0	0	0	0	603	903	0
680	9	22.7074	10.0278	-459.84	-26640	24808.8	-756.408	253.951	357.933	0	0	0	0	0	0	0	200	903	0	0	0	0	0	0	0	603	903	0
681	0	23.3177	9.26487	-458.619	-27464	25297.1	-847.961	255.159	359.884	0	0	0	0	0	0	0	200	903	0	0	0	0	0	0	0	603	903	0
681	1	21.7918	9.26487	-457.094	-27738.7	24930.9	-847.961	254.542	360.685	0	0	0	0	0	0	0	200	903	0	0	0	0	0	0	0	603	903	0
681	2	24.3858	8.34935	-454.652	-28013.3	25114	-1031.07	255.238	361.615	0	0	0	0	0	0	0	200	903	0	0	0	0	0	0	0	603	903	0
681	3	23.4703	9.11228	-451.906	-27372.4	24930.9	-573.302	255.168	360.571	0	0	0	0	0	0	0	200	903	0	0	0	0	0	0	0	603	903	0
681	4	24.3858	8.04417	-451.295	-27738.7	25358.2	-1397.28	256.19	361.465	0	0	0	0	0	0	0	200	903	0	0	0	0	0	0	0	603	903	0
681	5	24.691	6.51829	-451.906	-27830.2	24991.9	-1122.62	255.303	361.584	0	0	0	0	0	0	0	200	903	0	0	0	0	0	0	0	603	903	0
681	6	24.3858	8.50193	-450.685	-28654.2	25175	-1214.17	255.86	363.579	0	0	0	0	0	0	0	200	903	0	0	0	0	0	0	0	603	903	0
681	7	24.3858	8.65452	-449.159	-28837.3	25724.4	-1076.84	257.272	364.203	0	0	0	0	0	0	0	200	903	0	0	0	0	0	0	0	603	903	0
681	8	24.0807	7.28123	-445.802	-29111.9	25236.1	-1443.05	256.608	365.302	0	0	0	0	0	0	0	200	903	0	0	0	0	0	0	0	603	903	0
681	9	25.6065	8.65452	-444.581	-29020.4	24930.9	-1305.72	256.077	365.276	0	0	0	0	0	0	0	200	903	0	0	0	0	0	0	0	603	903	0
682	0	26.0643	7.43382	-445.192	-28745.7	24930.9	-1397.28	256	364.569	0	0	0	0	0	0	0	200	903	0	0	0	0	0	0	0	603	903	0
682	1	25.1488	5.90794	-440.309	-29295	25358.2	-1580.38	257.592	366.533	0	0	0	0	0	0	0	200	903	0	0	0	0	0	0	0	603	903	0
682	2	24.5384	7.43382	-442.14	-30119	24747.8	-1580.38	255.973	368.121	0	0	0	0	0	0	0	200	903	0	0	0	0	0	0	0	603	903	0
682	3	24.8436	8.19676	-439.699	-30119	25053	-1397.28	256.978	368.499	0	0	0	0	0	0	0	200	903	0	0	0	0	0	0	0	603	903	0
682	4	25.3014	6.67088	-438.783	-30576.8	25114	-1717.71	257.236	369.685	0	0	0	0	0	0	0	200	903	0	0	0	0	0	0	0	603	903	0
682	5	25.6065	7.58641	-437.257	-30393.7	25602.3	-1946.59	258.552	369.51	0	0	0	0	0	0	0	200	903	0	0	0	0	0	0	0	603	903	0
682	6	26.9798	6.82347	-438.783	-29752.8	25175	-1671.94	257.375	367.808	0	0	0	0	0	0	0	200	903	0	0	0	0	0	0	0	603	903	0
682	7	25.1488	6.67088	-436.647	-30668.3	25297.1	-1717.71	257.935	370.236	0	0	0	0	0	0	0	200	903	0	0	0	0	0	0	0	603	903	0
682	8	26.9798	6.82347	-434.511	-31675.4	25297.1	-1855.04	258.22	372.899	0	0	0	0	0	0	0	200	903	0	0	0	0	0	0	0	603	903	0
682	9	24.8436	7.58641	-430.238	-31034.5	24991.9	-1855.04	258.089	372.133	0	0	0	0	0	0	0	200	903	0	0	0	0	0	0	0	603	903	0
683	0	25.9117	5.90794	-432.985	-31675.4	25541.3	-1946.59	258.989	373.156	0	0	0	0	0	0	0	200	903	0	0	0	0	0	0	0	603	903	0
683	1	25.9117	6.82347	-433.29	-31583.9	25236.1	-1900.82	258.243	372.893	0	0	0	0	0	0	0	200	903	0	0	0	0	0	0	0	603	903	0
683	2	25.1488	6.06053	-432.985	-30668.3	24991.9	-2404.36	257.72	370.83	0	0	0	0	0	0	0	200	903	0	0	0	0	0	0	0	603	903	0
683	3	25.6065	5.45018	-430.848	-32041.6	25114	-2129.7	258.29	374.369	0	0	0	0	0	0	0	200	903	0	0	0	0	0	0	0	603	903	0
683	4	24.9962	5.60276	-428.712	-32865.6	25419.2	-2175.48	259.292	376.661	0	0	0	0	0	0	0	200	903	0	0	0	0	0	0	0	603	903	0
683	5	26.3695	5.75535	-429.017	-33231.8	24869.9	-2221.25	257.969	377.46	0	0	0	0	0	0	0	200	903	0	0	0	0	0	0	0	603	903	0
683	6	27.4376	5.75535	-431.154	-33689.6	25114	-2267.03	258.248	378.138	0	0	0	0	0	0	0	200	903	0	0	0	0	0	0	0	603	903	0
683	7	27.1324	5.29759	-430.848	-32957.2	25419.2	-2358.58	258.998	376.494	0	0	0	0	0	0	0	200	903	0	0	0	0	0	0	0	603	903	0
683	8	25.7591	5.60276	-428.712	-33689.6	25053	-1809.26	258.438	378.583	0	0	0	0	0	0	0	200	903	0	0	0	0	0	0	0	603	903	0
683	9	26.9798	4.83982	-426.881	-33781.1	24869.9	-2450.13	258.259	379.135	0	0	0	0	0	0	0	200	903	0	0	0	0	0	0	0	603	903	0
684	0	25.9117	4.38206	-424.745	-34879.8	25175	-2404.36	259.271	382.119	0	0	0	0	0	0	0	200	903	0	0	0	0	0	0	0	603	903	0
684	1	26.2169	4.38206	-425.66	-34788.2	24991.9	-2404.36	258.713	381.728	0	0	0	0	0	0	0	200	903	0	0	0	0	0	0	0	603	903	0
684	2	26.2169	4.83982	-428.712	-35612.2	24930.9	-2495.91	258.153	383.068	0	0	0	0	0	0	0	200	903	0	0	0	0	0	0	0	603	903	0
684	3	25.6065	3.16136	-428.102	-35612.2	25297.1	-2633.24	259.091	383.186	0	0	0	0	0	0	0	200	903	0	0	0	0	0	0	0	603	903	0
684	4	26.5221	4.22947	-428.407	-35154.4	24564.7	-2724.79	257.34	382.059	0	0	0	0	0	0	0	200	903	0	0	0	0	0	0	0	603	903	0
684	5	24.8436	4.07688	-426.881	-35520.6	24991.9	-2633.24	258.545	383.21	0	0	0	0	0	0	0	200	903	0	0	0	0	0	0	0	603	903	0
684	6	26.2169	2.09324	-426.881	-36344.6	25114	-2450.13	258.831	385.14	0	0	0	0	0	0	0	200	903	0	0	0	0	0	0	0	603	903	0
684	7	25.6065	3.9243	-429.933	-36985.5	25236.1	-2633.24	258.698	386.026	0	0	0	0	0	0	0	200	903	0	0	0	0	0	0	0	603	903	0
684	8	25.9117	3.9243	-425.66	-36527.7	25175	-2816.34	259.143	385.814	0	0	0	0	0	0	0	200	903	0	0	0	0	0	0	0	603	903	0
684	9	25.3014	2.39842	-429.628	-37626.4	25358.2	-2724.79	259.024	387.579	0	0	0	0	0	0	0	200	903	0	0	0	0	0	0	0	603	903	0
685	0	25.454	4.07688	-428.102	-37077	25541.3	-2862.12	259.662	386.608	0	0	0	0	0	0	0	200	903	0	0	0	0	0	0	0	603	903	0
685	1	25.454	3.31394	-427.492	-36619.3	25297.1	-2907.9	259.176	385.661	0	0	0	0	0	0	0	200	903	0	0	0	0	0	0	0	603	903	0
685	2	25.9117	2.24583	-428.102	-37901	25480.2	-3091	259.519	388.533	0	0	0	0	0	0	0	200	903	0	0	0	0	0	0	0	603	903	0
685	3	25.9117	3.00877	-430.543	-38633.4	25480.2	-2907.9	259.182	389.732	0	0	0	0	0	0	0	200	903	0	0	0	0	0	0	0	603	903	0
685	4	24.691	3.9243	-431.764	-38725	25236.1	-2999.45	258.449	389.69	0	0	0	0	0	0	0	200	903	0	0	0	0	0	0	0	603	903	0
685	5	26.0643	3.77171	-429.323	-39274.3	25602.3	-3274.11	259.634	391.48	0	0	0	0	0	0	0	200	903	0	0	0	0	0	0	0	603	903	0
685	6	24.8436	3.61912	-429.933	-38908.1	24991.9	-3182.56	258.13	390.498	0	0	0	0	0	0	0	200	903	0	0	0	0	0	0	0	603	903	0
685	7	25.3014	3.00877	-431.154	-39365.8	25297.1	-3136.78	258.673	391.304	0	0	0	0	0	0	0	200	903	0	0	0	0	0	0	0	603	903	0
685	8	25.1488	2.39842	-432.985	-40647.6	25358.2	-2999.45	258.566	393.878	0	0	0	0	0	0	0	200	903	0	0	0	0	0	0	0	603	903	0
685	9	25.1488	2.55101	-432.68	-41196.9	25419.2	-3319.89	258.748	395.213	0	0	0	0	0	0	0	200	903	0	0	0	0	0	0	0	603	903	0
686	0	24.691	3.16136	-429.933	-41380	25480.2	-2999.45	259.266	396.248	0	0	0	0	0	0	0	200	903	0	0	0	0	0	0	0	603	903	0
686	1	24.3858	3.00877	-433.9	-40830.7	25968.5	-3319.89	259.849	394.102	0	0	0	0	0	0	0	200	903	0	0	0	0	0	0	0	603	903	0
686	2	25.1488	0.872538	-433.595	-41654.7	25541.3	-3411.44	258.906	396.068	0	0	0	0	0	0	0	200	903	0	0	0	0	0	0	0	603	903	0
686	3	25.1488	1.78807	-436.036	-41654.7	25663.3	-3411.44	258.856	395.53	0	0	0	0	0	0	0	200	903	0	0	0	0	0	0	0	603	903	0
686	4	25.1488	2.39842	-434.816	-42661.7	26151.6	-3365.66	260.144	398.115	0	0	0	0	0	0	0	200	903	0	0	0	0	0	0	0	603	903	0
686	5	23.7755	1.63548	-437.867	-42936.4	25663.3	-3365.66	258.61	398.058	0	0	0	0	0	0	0	200	903	0	0	0	0	0	0	0	603	903	0
686	6	23.7755	2.39842	-436.952	-43485.7	25846.4	-3777.65	259.152	399.521	0	0	0	0	0	0	0	200	903	0	0	0	0	0	0	0	603	903	0
686	7	24.5384	2.70359	-437.867	-42936.4	25419.2	-3548.77	258.052	398.058	0	0	0	0	0	0	0	200	903	0	0	0	0	0	0	0	603	903	0
686	8	25.9117	1.94065	-439.699	-43394.2	25663.3	-3731.87	258.366	398.691	0	0	0	0	0	0	0	200	903	0	0	0	0	0	0	0	603	903	0
686	9	24.691	1.3303	-441.224	-43851.9	25907.5	-3594.54	258.717	399.387	0	0	0	0	0	0	0	200	903	0	0	0	0	0	0	0	603	903	0
687	0	23.6229	-0.0429889	-441.224	-44126.6	25663.3	-3823.43	258.164	400.009	0	0	0	0	0	0	0	200	903	0	0	0	0	0	0	0	603	903	0
687	1	23.9281	0.567363	-440.309	-45225.2	25907.5	-3731.87	258.839	402.713	0	0	0	0	0	0	0	200	903	0	0	0	0	0	0	0	603	903	0
687	2	24.5384	1.48289	-441.53	-45683	25968.5	-3914.98	258.815	403.465	0	0	0	0	0	0	0	200	903	0	0	0	0	0	0	0	603	903	0
687	3	24.3858	1.48289	-441.224	-45957.6	26090.6	-3548.77	259.132	404.159	0	0	0	0	0	0	0	200	903	0	0	0	0	0	0	0	603	903	0
687	4	23.6229	1.3303	-443.666	-45499.9	26029.5	-3640.32	258.669	402.554	0	0	0	0	0	0	0	200	903	0	0	0	0	0	0	0	603	903	0
687	5	22.7074	0.414775	-443.055	-45683	26273.7	-3777.65	259.301	403.109	0	0	0	0	0	0	0	200	903	0	0	0	0	0	0	0	603	903	0
687	6	23.6229	-0.195577	-445.497	-46598.5	26334.7	-4098.08	259.113	404.599	0	0	0	0	0	0	0	200	903	0	0	0	0	0	0	0	603	903	0
687	7	22.2496	0.109599	-444.581	-46964.7	26090.6	-3686.1	258.686	405.638	0	0	0	0	0	0	0	200	903	0	0	0	0	0	0	0	603	903	0
687	8	22.86	-0.195577	-446.107	-47880.3	25846.4	-4372.74	257.938	407.329	0	0	0	0	0	0	0	200	903	0	0	0	0	0	0	0	603	903	0
687	9	22.097	-0.805928	-448.854	-47605.6	25785.4	-4372.74	257.447	406.06	0	0	0	0	0	0	0	200	903	0	0	0	0	0	0	0	603	903	0
688	0	23.1651	-0.348165	-448.549	-47880.3	26090.6	-4418.52	258.167	406.745	0	0	0	0	0	0	0	200	903	0	0	0	0	0	0	0	603	903	0
688	1	21.7918	-1.72146	-451.295	-48429.6	26151.6	-4281.19	257.948	407.312	0	0	0	0	0	0	0	200	903	0	0	0	0	0	0	0	603	903	0
688	2	21.6393	-4.16286	-449.159	-48704.2	26639.9	-4464.29	259.311	408.434	0	0	0	0	0	0	0	200	903	0	0	0	0	0	0	0	603	903	0
688	3	21.9444	-1.72146	-450.38	-49711.3	26517.8	-4647.4	258.879	410.376	0	0	0	0	0	0	0	200	903	0	0	0	0	0	0	0	603	903	0
688	4	21.9444	-1.56887	-451.295	-49528.2	26395.7	-4693.18	258.489	409.747	0	0	0	0	0	0	0	200	903	0	0	0	0	0	0	0	603	903	0
688	5	21.1815	-1.72146	-454.347	-50535.3	26334.7	-4510.07	257.962	411.226	0	0	0	0	0	0	0	200	903	0	0	0	0	0	0	0	603	903	0
688	6	19.9608	-2.17922	-455.568	-50077.5	26456.8	-4967.83	258.074	409.923	0	0	0	0	0	0	0	200	903	0	0	0	0	0	0	0	603	903	0
688	7	20.5711	-2.4844	-454.957	-50535.3	26639.9	-4876.28	258.555	411.077	0	0	0	0	0	0	0	200	903	0	0	0	0	0	0	0	603	903	0
688	8	20.1134	-3.7051	-452.516	-50718.4	26395.7	-4738.95	258.331	412.081	0	0	0	0	0	0	0	200	903	0	0	0	0	0	0	0	603	903	0
688	9	20.5711	-3.55251	-457.094	-51267.7	26884	-4876.28	258.815	412.16	0	0	0	0	0	0	0	200	903	0	0	0	0	0	0	0	603	903	0
689	0	20.7237	-3.7051	-458.619	-52274.8	26639.9	-4876.28	258.087	413.983	0	0	0	0	0	0	0	200	903	0	0	0	0	0	0	0	603	903	0
689	1	19.8082	-3.7051	-460.756	-52824.1	26762	-5150.94	258.083	414.647	0	0	0	0	0	0	0	200	903	0	0	0	0	0	0	0	603	903	0
689	2	20.266	-4.46804	-462.892	-53190.3	26884	-4601.62	258.078	414.909	0	0	0	0	0	0	0	200	903	0	0	0	0	0	0	0	603	903	0
689	3	20.1134	-5.53615	-461.671	-53648.1	26945.1	-5059.39	258.364	416.204	0	0	0	0	0	0	0	200	903	0	0	0	0	0	0	0	603	903	0
689	4	20.5711	-4.77321	-463.502	-53190.3	26884	-5288.27	258.002	414.757	0	0	0	0	0	0	0	200	903	0	0	0	0	0	0	0	603	903	0
689	5	22.4022	-5.38356	-465.333	-53007.2	27128.2	-5288.27	258.298	413.912	0	0	0	0	0	0	0	200	903	0	0	0	0	0	0	0	603	903	0
689	6	20.266	-6.1465	-467.164	-54105.9	27372.3	-5242.49	258.592	415.818	0	0	0	0	0	0	0	200	903	0	0	0	0	0	0	0	603	903	0
689	7	19.0453	-6.60427	-469.911	-55021.4	26334.7	-5334.04	256.042	417.089	0	0	0	0	0	0	0	200	903	0	0	0	0	0	0	0	603	903	0
689	8	19.6556	-6.60427	-469.301	-55204.5	27189.2	-5562.93	257.936	417.631	0	0	0	0	0	0	0	200	903	0	0	0	0	0	0	0	603	903	0
689	9	20.7237	-6.90944	-472.047	-55936.9	27799.6	-5700.26	258.891	418.499	0	0	0	0	0	0	0	200	903	0	0	0	0	0	0	0	603	903	0
690	0	20.1134	-7.36721	-472.658	-55845.3	27494.4	-5654.48	258.17	418.152	0	0	0	0	0	0	0	200	903	0	0	0	0	0	0	0	603	903	0
690	1	21.1815	-8.28273	-477.235	-56120	27494.4	-5608.7	257.612	417.594	0	0	0	0	0	0	0	200	903	0	0	0	0	0	0	0	603	903	0
690	2	19.6556	-9.65603	-478.456	-56577.8	27372.3	-5929.14	257.21	418.251	0	0	0	0	0	0	0	200	903	0	0	0	0	0	0	0	603	903	0
690	3	21.7918	-10.7241	-478.456	-57218.6	28043.7	-5883.36	258.613	419.59	0	0	0	0	0	0	0	200	903	0	0	0	0	0	0	0	603	903	0
690	4	20.266	-11.4871	-479.982	-58225.7	27555.4	-6112.24	257.409	421.308	0	0	0	0	0	0	0	200	903	0	0	0	0	0	0	0	603	903	0
690	5	21.7918	-11.1819	-480.287	-57768	28104.7	-6020.69	258.517	420.278	0	0	0	0	0	0	0	200	903	0	0	0	0	0	0	0	603	903	0
690	6	21.1815	-12.5552	-484.559	-59232.8	28043.7	-6249.57	257.875	422.241	0	0	0	0	0	0	0	200	903	0	0	0	0	0	0	0	603	903	0
690	7	22.86	-12.5552	-483.339	-58591.9	28287.8	-6341.13	258.526	421.223	0	0	0	0	0	0	0	200	903	0	0	0	0	0	0	0	603	903	0
690	8	20.7237	-13.3181	-487.306	-59415.9	28104.7	-6295.35	257.674	421.927	0	0	0	0	0	0	0	200	903	0	0	0	0	0	0	0	603	903	0
690	9	20.266	-13.4707	-486.696	-58683.5	28287.8	-6386.9	258.122	420.575	0	0	0	0	0	0	0	200	903	0	0	0	0	0	0	0	603	903	0
691	0	21.3341	-13.6233	-487.611	-60514.5	28532	-6753.11	258.514	424.104	0	0	0	0	0	0	0	200	903	0	0	0	0	0	0	0	603	903	0
691	1	21.1815	-14.844	-486.39	-60789.2	28348.9	-6707.34	258.284	424.98	0	0	0	0	0	0	0	200	903	0	0	0	0	0	0	0	603	903	0
691	2	21.6393	-13.9285	-494.63	-61338.5	28654	-6386.9	257.93	424.009	0	0	0	0	0	0	0	200	903	0	0	0	0	0	0	0	603	903	0
691	3	20.266	-15.4544	-494.935	-61796.3	28593	-6615.78	257.771	424.857	0	0	0	0	0	0	0	200	903	0	0	0	0	0	0	0	603	903	0
691	4	22.86	-14.844	-494.325	-61430.1	28593	-6798.89	257.843	424.271	0	0	0	0	0	0	0	200	903	0	0	0	0	0	0	0	603	903	0
691	5	21.9444	-16.3699	-494.02	-60880.8	28715.1	-6661.56	258.125	423.235	0	0	0	0	0	0	0	200	903	0	0	0	0	0	0	0	603	903	0
691	6	23.0125	-16.5225	-498.292	-62528.7	29386.5	-6753.11	258.974	425.486	0	0	0	0	0	0	0	200	903	0	0	0	0	0	0	0	603	903	0
691	7	21.9444	-16.6751	-501.039	-63902	28715.1	-6844.67	257.311	427.539	0	0	0	0	0	0	0	200	903	0	0	0	0	0	0	0	603	903	0
691	8	21.9444	-16.3699	-503.175	-64085.1	29081.3	-7256.65	257.796	427.361	0	0	0	0	0	0	0	200	903	0	0	0	0	0	0	0	603	903	0
691	9	23.0125	-16.8277	-502.565	-64359.8	29630.6	-7073.55	258.959	428.063	0	0	0	0	0	0	0	200	903	0	0	0	0	0	0	0	603	903	0
692	0	21.0289	-19.1165	-504.701	-64726	29569.6	-6982	258.588	428.246	0	0	0	0	0	0	0	200	903	0	0	0	0	0	0	0	603	903	0
692	1	22.86	-16.9802	-505.311	-64726	29447.5	-7073.55	258.276	428.091	0	0	0	0	0	0	0	200	903	0	0	0	0	0	0	0	603	903	0
692	2	22.86	-18.3535	-509.889	-65092.2	29630.6	-7165.1	258.112	427.66	0	0	0	0	0	0	0	200	903	0	0	0	0	0	0	0	603	903	0
692	3	24.2333	-19.4217	-509.279	-65458.4	29813.7	-7348.21	258.541	428.532	0	0	0	0	0	0	0	200	903	0	0	0	0	0	0	0	603	903	0
692	4	22.5548	-19.7268	-513.246	-66557	29386.5	-7119.32	257.256	429.679	0	0	0	0	0	0	0	200	903	0	0	0	0	0	0	0	603	903	0
692	5	22.4022	-20.3372	-513.551	-67106.3	29813.7	-7119.32	258.054	430.671	0	0	0	0	0	0	0	200	903	0	0	0	0	0	0	0	603	903	0
692	6	23.1651	-20.7949	-514.467	-67655.7	30118.9	-6798.89	258.544	431.506	0	0	0	0	0	0	0	200	903	0	0	0	0	0	0	0	603	903	0
692	7	23.3177	-21.8631	-512.941	-68113.4	30363	-7073.55	259.194	432.79	0	0	0	0	0	0	0	200	903	0	0	0	0	0	0	0	603	903	0
692	8	24.0807	-20.6424	-519.044	-67747.2	30118.9	-7393.98	258.028	430.523	0	0	0	0	0	0	0	200	903	0	0	0	0	0	0	0	603	903	0
692	9	23.1651	-21.8631	-520.875	-68205	30302	-7622.86	258.175	430.943	0	0	0	0	0	0	0	200	903	0	0	0	0	0	0	0	603	903	0
693	0	24.0807	-23.5415	-520.265	-68662.7	30179.9	-7668.64	258.009	431.976	0	0	0	0	0	0	0	200	903	0	0	0	0	0	0	0	603	903	0
693	1	23.7755	-22.1682	-520.265	-70036	30302	-7622.86	258.243	434.616	0	0	0	0	0	0	0	200	903	0	0	0	0	0	0	0	603	903	0
693	2	24.8436	-22.0156	-524.537	-69852.9	30668.2	-7531.31	258.467	433.171	0	0	0	0	0	0	0	200	903	0	0	0	0	0	0	0	603	903	0
693	3	24.9962	-23.3889	-530.031	-71043.1	30973.4	-8034.85	258.437	434.036	0	0	0	0	0	0	0	200	903	0	0	0	0	0	0	0	603	903	0
693	4	24.0807	-23.9993	-530.031	-70310.7	30790.3	-8126.4	258.092	432.654	0	0	0	0	0	0	0	200	903	0	0	0	0	0	0	0	603	903	0
693	5	25.9117	-25.0674	-533.082	-71317.8	30790.3	-7897.52	257.759	433.784	0	0	0	0	0	0	0	200	903	0	0	0	0	0	0	0	603	903	0
693	6	24.3858	-25.0674	-533.693	-71500.9	30973.4	-7805.97	258.036	433.974	0	0	0	0	0	0	0	200	903	0	0	0	0	0	0	0	603	903	0
693	7	24.691	-26.8985	-533.998	-72874.2	31034.4	-7989.08	258.117	436.469	0	0	0	0	0	0	0	200	903	0	0	0	0	0	0	0	603	903	0
693	8	24.5384	-26.1355	-538.881	-73331.9	31339.6	-8126.4	258.157	436.082	0	0	0	0	0	0	0	200	903	0	0	0	0	0	0	0	603	903	0
693	9	24.9962	-27.814	-537.355	-73331.9	31339.6	-8080.63	258.322	436.468	0	0	0	0	0	0	0	200	903	0	0	0	0	0	0	0	603	903	0
694	0	23.4703	-27.814	-545.289	-73698.1	32011	-8126.4	258.705	435.154	0	0	0	0	0	0	0	200	903	0	0	0	0	0	0	0	603	903	0
694	1	23.1651	-29.3399	-544.679	-73698.1	31949.9	-8355.29	258.658	435.306	0	0	0	0	0	0	0	200	903	0	0	0	0	0	0	0	603	903	0
694	2	23.6229	-31.4761	-547.426	-74613.7	31644.8	-8401.06	257.807	436.299	0	0	0	0	0	0	0	200	903	0	0	0	0	0	0	0	603	903	0
694	3	24.9962	-30.8657	-551.393	-75529.2	31888.9	-8034.85	257.833	436.979	0	0	0	0	0	0	0	200	903	0	0	0	0	0	0	0	603	903	0
694	4	23.0125	-31.3235	-554.445	-74796.8	31949.9	-7851.75	257.625	434.904	0	0	0	0	0	0	0	200	903	0	0	0	0	0	0	0	603	903	0
694	5	21.4867	-33.1546	-557.802	-76353.1	31827.9	-8629.94	257.06	436.882	0	0	0	0	0	0	0	200	903	0	0	0	0	0	0	0	603	903	0
694	6	21.0289	-33.4597	-558.412	-76170.1	32255.1	-8538.39	257.762	436.405	0	0	0	0	0	0	0	200	903	0	0	0	0	0	0	0	603	903	0
694	7	21.9444	-34.3753	-562.379	-76627.8	32255.1	-8446.84	257.355	436.257	0	0	0	0	0	0	0	200	903	0	0	0	0	0	0	0	603	903	0
694	8	22.86	-35.1382	-568.483	-77360.2	32560.3	-8813.05	257.276	436.082	0	0	0	0	0	0	0	200	903	0	0	0	0	0	0	0	603	903	0
694	9	22.097	-35.9011	-569.398	-78550.4	32316.2	-8813.05	256.755	437.953	0	0	0	0	0	0	0	200	903	0	0	0	0	0	0	0	603	903	0
695	0	21.4867	-38.0374	-571.534	-78825.1	33048.6	-8584.17	257.824	437.918	0	0	0	0	0	0	0	200	903	0	0	0	0	0	0	0	603	903	0
695	1	21.0289	-36.6641	-572.45	-79557.5	33109.6	-8813.05	257.838	438.977	0	0	0	0	0	0	0	200	903	0	0	0	0	0	0	0	603	903	0
695	2	20.8763	-37.1218	-570.619	-78642	32987.5	-8996.15	257.81	437.819	0	0	0	0	0	0	0	200	903	0	0	0	0	0	0	0	603	903	0
695	3	21.1815	-38.4951	-577.028	-79374.4	33170.7	-9133.48	257.485	437.557	0	0	0	0	0	0	0	200	903	0	0	0	0	0	0	0	603	903	0
695	4	20.5711	-40.1736	-581.3	-79832.2	33414.8	-8950.38	257.483	437.334	0	0	0	0	0	0	0	200	903	0	0	0	0	0	0	0	603	903	0
695	5	20.1134	-41.0891	-583.742	-79923.7	33353.8	-9225.04	257.138	436.916	0	0	0	0	0	0	0	200	903	0	0	0	0	0	0	0	603	903	0
695	6	20.4186	-42.1572	-583.742	-81297	33353.8	-9362.37	257.138	439.269	0	0	0	0	0	0	0	200	903	0	0	0	0	0	0	0	603	903	0
695	7	19.0453	-42.615	-586.793	-81754.8	33658.9	-9362.37	257.361	439.325	0	0	0	0	0	0	0	200	903	0	0	0	0	0	0	0	603	903	0
695	8	20.4186	-43.6831	-590.15	-82121	33597.9	-9316.59	256.931	439.153	0	0	0	0	0	0	0	200	903	0	0	0	0	0	0	0	603	903	0
695	9	20.4186	-44.5987	-595.033	-81937.9	33536.9	-9362.37	256.361	437.703	0	0	0	0	0	0	0	200	903	0	0	0	0	0	0	0	603	903	0
696	0	20.1134	-45.9719	-593.202	-82212.5	33903.1	-9408.14	257.153	438.591	0	0	0	0	0	0	0	200	903	0	0	0	0	0	0	0	603	903	0
696	1	18.7401	-46.4297	-597.474	-82212.5	34147.2	-9545.47	257.153	437.6	0	0	0	0	0	0	0	200	903	0	0	0	0	0	0	0	603	903	0
696	2	19.0453	-46.8875	-599	-83860.5	34208.2	-9408.14	257.109	440.001	0	0	0	0	0	0	0	200	903	0	0	0	0	0	0	0	603	903	0
696	3	19.3504	-47.0401	-600.221	-84409.8	33781	-9499.7	256.281	440.631	0	0	0	0	0	0	0	200	903	0	0	0	0	0	0	0	603	903	0
696	4	18.8927	-48.1082	-600.831	-83768.9	34513.4	-9820.13	257.443	439.422	0	0	0	0	0	0	0	200	903	0	0	0	0	0	0	0	603	903	0
696	5	19.0453	-49.6341	-606.325	-84409.8	34574.5	-9865.91	257.023	439.216	0	0	0	0	0	0	0	200	903	0	0	0	0	0	0	0	603	903	0
696	6	17.9771	-50.8548	-609.376	-84684.4	34147.2	-9682.8	256.036	438.969	0	0	0	0	0	0	0	200	903	0	0	0	0	0	0	0	603	903	0
696	7	17.9771	-51.7703	-610.292	-85050.7	34513.4	-9820.13	256.552	439.361	0	0	0	0	0	0	0	200	903	0	0	0	0	0	0	0	603	903	0
696	8	18.4349	-53.1436	-612.733	-86881.7	34452.4	-10094.8	256.227	441.794	0	0	0	0	0	0	0	200	903	0	0	0	0	0	0	0	603	903	0
696	9	18.7401	-52.5332	-614.259	-86973.3	34635.5	-10049	256.386	441.591	0	0	0	0	0	0	0	200	903	0	0	0	0	0	0	0	603	903	0
697	0	19.0453	-53.4487	-618.532	-85783.1	34818.6	-9820.13	256.292	438.688	0	0	0	0	0	0	0	200	903	0	0	0	0	0	0	0	603	903	0
697	1	18.1297	-54.3643	-619.142	-87064.8	35184.8	-9865.91	256.828	440.622	0	0	0	0	0	0	0	200	903	0	0	0	0	0	0	0	603	903	0
697	2	19.0453	-55.4324	-618.532	-87614.1	35062.7	-10232.1	256.687	441.649	0	0	0	0	0	0	0	200	903	0	0	0	0	0	0	0	603	903	0
697	3	17.8246	-56.1953	-621.888	-88712.8	35245.9	-10323.7	256.676	442.651	0	0	0	0	0	0	0	200	903	0	0	0	0	0	0	0	603	903	0
697	4	18.1297	-56.9583	-623.72	-88712.8	35551	-10186.3	256.998	442.232	0	0	0	0	0	0	0	200	903	0	0	0	0	0	0	0	603	903	0
697	5	18.1297	-56.9583	-626.771	-89536.7	35551	-10415.2	256.721	442.854	0	0	0	0	0	0	0	200	903	0	0	0	0	0	0	0	603	903	0
697	6	18.8927	-57.8738	-626.466	-88895.9	35795.2	-10369.4	257.138	441.901	0	0	0	0	0	0	0	200	903	0	0	0	0	0	0	0	603	903	0
697	7	17.672	-59.5523	-631.349	-89353.7	35245.9	-10552.6	255.826	441.528	0	0	0	0	0	0	0	200	903	0	0	0	0	0	0	0	603	903	0
697	8	17.5194	-60.4678	-631.654	-89628.3	35673.1	-10369.4	256.476	441.895	0	0	0	0	0	0	0	200	903	0	0	0	0	0	0	0	603	903	0
697	9	18.7401	-61.6885	-631.959	-90727	35367.9	-10369.4	255.965	443.565	0	0	0	0	0	0	0	200	903	0	0	0	0	0	0	0	603	903	0
698	0	20.1134	-61.6885	-637.147	-90452.3	35612.1	-10506.8	255.893	441.965	0	0	0	0	0	0	0	200	903	0	0	0	0	0	0	0	603	903	0
698	1	18.7401	-63.8247	-637.452	-91459.4	36100.3	-10415.2	256.632	443.476	0	0	0	0	0	0	0	200	903	0	0	0	0	0	0	0	603	903	0
698	2	18.1297	-63.6721	-638.673	-91184.7	35856.2	-10277.9	256.142	442.772	0	0	0	0	0	0	0	200	903	0	0	0	0	0	0	0	603	903	0
698	3	19.0453	-65.3506	-639.284	-90727	35795.2	-10644.1	255.993	441.92	0	0	0	0	0	0	0	200	903	0	0	0	0	0	0	0	603	903	0
698	4	18.1297	-65.5032	-636.537	-91550.9	36405.5	-10735.7	257.193	443.827	0	0	0	0	0	0	0	200	903	0	0	0	0	0	0	0	603	903	0
698	5	18.8927	-66.4187	-640.809	-92649.6	36405.5	-10735.7	256.812	444.582	0	0	0	0	0	0	0	200	903	0	0	0	0	0	0	0	603	903	0
698	6	18.7401	-66.8765	-644.471	-92741.1	36100.3	-10689.9	256.015	443.903	0	0	0	0	0	0	0	200	903	0	0	0	0	0	0	0	603	903	0
698	7	18.5875	-68.2498	-645.997	-93107.3	36405.5	-10964.5	256.356	444.13	0	0	0	0	0	0	0	200	903	0	0	0	0	0	0	0	603	903	0
698	8	19.0453	-68.555	-644.777	-92741.1	36466.6	-11010.3	256.557	443.834	0	0	0	0	0	0	0	200	903	0	0	0	0	0	0	0	603	903	0
698	9	17.9771	-69.9282	-646.913	-92924.2	36161.4	-11101.9	255.898	443.643	0	0	0	0	0	0	0	200	903	0	0	0	0	0	0	0	603	903	0
699	0	18.8927	-70.9964	-648.134	-93290.4	36100.3	-10964.5	255.699	443.937	0	0	0	0	0	0	0	200	903	0	0	0	0	0	0	0	603	903	0
699	1	18.8927	-71.6067	-650.88	-94297.5	36588.6	-11056.1	256.214	444.877	0	0	0	0	0	0	0	200	903	0	0	0	0	0	0	0	603	903	0
699	2	19.1979	-72.2171	-646.608	-94297.5	36527.6	-11147.6	256.491	445.834	0	0	0	0	0	0	0	200	903	0	0	0	0	0	0	0	603	903	0
699	3	18.2823	-73.5904	-651.185	-93839.7	36466.6	-11101.9	256	444.106	0	0	0	0	0	0	0	200	903	0	0	0	0	0	0	0	603	903	0
699	4	18.4349	-73.8955	-649.354	-94297.5	36893.8	-11056.1	256.816	445.217	0	0	0	0	0	0	0	200	903	0	0	0	0	0	0	0	603	903	0
699	5	19.0453	-75.2688	-649.965	-94572.1	36832.8	-11193.4	256.669	445.504	0	0	0	0	0	0	0	200	903	0	0	0	0	0	0	0	603	903	0
699	6	18.8927	-76.0318	-651.185	-94389.1	36710.7	-11468.1	256.375	444.95	0	0	0	0	0	0	0	200	903	0	0	0	0	0	0	0	603	903	0
699	7	19.0453	-76.9473	-653.627	-95579.2	36832.8	-11285	256.351	446.229	0	0	0	0	0	0	0	200	903	0	0	0	0	0	0	0	603	903	0
699	8	18.5875	-77.5576	-654.542	-95670.8	37015.9	-11376.5	256.552	446.164	0	0	0	0	0	0	0	200	903	0	0	0	0	0	0	0	603	903	0
699	9	18.8927	-78.0154	-653.016	-96403.2	36588.6	-11422.3	256.03	447.628	0	0	0	0	0	0	0	200	903	0	0	0	0	0	0	0	603	903	0
700	0	18.2823	-78.4732	-654.237	-95304.6	36405.5	-11559.6	255.646	445.673	0	0	0	0	0	0	0	200	903	0	0	0	0	0	0	0	603	903	0
700	1	18.4349	-79.8465	-654.542	-95487.7	36954.8	-11285	256.459	445.885	0	0	0	0	0	0	0	200	903	0	0	0	0	0	0	0	603	903	0
700	2	18.1297	-80.9146	-656.373	-95853.9	36466.6	-11147.6	255.558	446.036	0	0	0	0	0	0	0	200	903	0	0	0	0	0	0	0	603	903	0
700	3	18.7401	-81.5249	-653.016	-97044.1	36649.7	-11605.4	256.124	448.609	0	0	0	0	0	0	0	200	903	0	0	0	0	0	0	0	603	903	0
700	4	18.5875	-81.5249	-657.899	-96861	36405.5	-11285	255.336	447.228	0	0	0	0	0	0	0	200	903	0	0	0	0	0	0	0	603	903	0
700	5	18.1297	-82.593	-654.847	-97227.2	36405.5	-11285	255.594	448.473	0	0	0	0	0	0	0	200	903	0	0	0	0	0	0	0	603	903	0
700	6	17.672	-83.5086	-656.373	-96677.9	36588.6	-11330.8	255.744	447.291	0	0	0	0	0	0	0	200	903	0	0	0	0	0	0	0	603	903	0
700	7	18.4349	-84.8819	-654.237	-96586.3	36710.7	-11651.2	256.112	447.632	0	0	0	0	0	0	0	200	903	0	0	0	0	0	0	0	603	903	0
700	8	17.8246	-87.0181	-656.679	-96769.4	37137.9	-11376.5	256.554	447.362	0	0	0	0	0	0	0	200	903	0	0	0	0	0	0	0	603	903	0
700	9	16.909	-86.7129	-655.153	-97318.8	36588.6	-11468.1	255.847	448.544	0	0	0	0	0	0	0	200	903	0	0	0	0	0	0	0	603	903	0
701	0	16.4513	-86.4077	-656.068	-97776.5	36283.4	-11468.1	255.304	449.034	0	0	0	0	0	0	0	200	903	0	0	0	0	0	0	0	603	903	0
701	1	16.2987	-88.0862	-653.932	-97501.8	36771.7	-10918.8	256.232	449.101	0	0	0	0	0	0	0	200	903	0	0	0	0	0	0	0	603	903	0
701	2	17.5194	-88.6966	-654.542	-96952.5	36771.7	-11422.3	256.179	448.123	0	0	0	0	0	0	0	200	903	0	0	0	0	0	0	0	603	903	0
701	3	18.5875	-89.6121	-654.542	-96494.8	36222.4	-11239.2	255.34	447.423	0	0	0	0	0	0	0	200	903	0	0	0	0	0	0	0	603	903	0
701	4	16.909	-91.138	-655.458	-96861	36466.6	-11422.3	255.635	447.776	0	0	0	0	0	0	0	200	903	0	0	0	0	0	0	0	603	903	0
701	5	16.2987	-91.2906	-653.932	-97959.6	36527.6	-11468.1	255.858	449.801	0	0	0	0	0	0	0	200	903	0	0	0	0	0	0	0	603	903	0
701	6	15.8409	-91.138	-650.88	-97135.6	36344.5	-11193.4	255.839	449.237	0	0	0	0	0	0	0	200	903	0	0	0	0	0	0	0	603	903	0
701	7	16.7564	-92.8164	-649.354	-98051.2	36283.4	-11010.3	255.876	450.998	0	0	0	0	0	0	0	200	903	0	0	0	0	0	0	0	603	903	0
701	8	15.9935	-92.0535	-650.575	-96952.5	36466.6	-11605.4	256.053	449.026	0	0	0	0	0	0	0	200	903	0	0	0	0	0	0	0	603	903	0
701	9	16.2987	-93.5794	-650.575	-97135.6	36283.4	-11468.1	255.771	449.307	0	0	0	0	0	0	0	200	903	0	0	0	0	0	0	0	603	903	0
702	0	15.2306	-95.4104	-649.354	-97044.1	36039.3	-11285	255.5	449.447	0	0	0	0	0	0	0	200	903	0	0	0	0	0	0	0	603	903	0
702	1	14.9254	-95.4104	-649.659	-97501.8	36039.3	-11193.4	255.474	450.081	0	0	0	0	0	0	0	200	903	0	0	0	0	0	0	0	603	903	0
702	2	14.0099	-96.0208	-647.218	-97776.5	35734.1	-11513.9	255.212	451.072	0	0	0	0	0	0	0	200	903	0	0	0	0	0	0	0	603	903	0
702	3	13.5521	-96.326	-648.134	-97318.8	35673.1	-11468.1	255.04	450.152	0	0	0	0	0	0	0	200	903	0	0	0	0	0	0	0	603	903	0
702	4	15.078	-97.2415	-644.471	-97227.2	35612.1	-11101.9	255.258	450.863	0	0	0	0	0	0	0	200	903	0	0	0	0	0	0	0	603	903	0
702	5	14.6202	-98.3096	-645.997	-97135.6	35917.2	-11101.9	255.6	450.365	0	0	0	0	0	0	0	200	903	0	0	0	0	0	0	0	603	903	0
702	6	13.8573	-99.6829	-643.556	-97868	35673.1	-11330.8	255.431	452.074	0	0	0	0	0	0	0	200	903	0	0	0	0	0	0	0	603	903	0
702	7	12.6366	-98.9199	-643.556	-97959.6	35490	-11239.2	255.147	452.216	0	0	0	0	0	0	0	200	903	0	0	0	0	0	0	0	603	903	0
702	8	13.2469	-99.6829	-639.284	-97685	35612.1	-10689.9	255.706	452.804	0	0	0	0	0	0	0	200	903	0	0	0	0	0	0	0	603	903	0
702	9	13.3995	-101.056	-637.758	-97135.6	35490	-11193.4	255.648	452.308	0	0	0	0	0	0	0	200	903	0	0	0	0	0	0	0	603	903	0
703	0	13.8573	-101.667	-637.147	-97044.1	35123.8	-11422.3	255.127	452.31	0	0	0	0	0	0	0	200	903	0	0	0	0	0	0	0	603	903	0
703	1	13.3995	-102.124	-637.147	-96311.7	35184.8	-11056.1	255.222	451.161	0	0	0	0	0	0	0	200	903	0	0	0	0	0	0	0	603	903	0
703	2	11.2633	-103.345	-631.349	-96861	34879.6	-10964.5	255.246	453.419	0	0	0	0	0	0	0	200	903	0	0	0	0	0	0	0	603	903	0
703	3	11.2633	-104.108	-633.79	-96861	34574.5	-11147.6	254.552	452.828	0	0	0	0	0	0	0	200	903	0	0	0	0	0	0	0	603	903	0
703	4	10.6529	-103.955	-631.044	-96037	34391.4	-11101.9	254.499	452.188	0	0	0	0	0	0	0	200	903	0	0	0	0	0	0	0	603	903	0
703	5	11.721	-105.176	-630.128	-96311.7	34818.6	-10827.2	255.256	452.845	0	0	0	0	0	0	0	200	903	0	0	0	0	0	0	0	603	903	0
703	6	11.1107	-105.176	-627.992	-95762.3	34452.4	-10735.7	254.861	452.49	0	0	0	0	0	0	0	200	903	0	0	0	0	0	0	0	603	903	0
703	7	11.721	-106.549	-626.161	-95579.2	34330.3	-11056.1	254.827	452.643	0	0	0	0	0	0	0	200	903	0	0	0	0	0	0	0	603	903	0
703	8	10.5003	-106.702	-625.856	-96037	34574.5	-10552.6	255.244	453.449	0	0	0	0	0	0	0	200	903	0	0	0	0	0	0	0	603	903	0
703	9	9.58481	-107.465	-622.499	-95945.5	34513.4	-10552.6	255.443	454.13	0	0	0	0	0	0	0	200	903	0	0	0	0	0	0	0	603	903	0
704	0	9.27964	-107.312	-619.142	-95670.8	34086.2	-10689.9	255.054	454.522	0	0	0	0	0	0	0	200	903	0	0	0	0	0	0	0	603	903	0
704	1	9.88999	-108.38	-616.701	-95304.6	33842	-10735.7	254.876	454.539	0	0	0	0	0	0	0	200	903	0	0	0	0	0	0	0	603	903	0
704	2	10.6529	-107.923	-615.48	-94572.1	34086.2	-10689.9	255.382	453.656	0	0	0	0	0	0	0	200	903	0	0	0	0	0	0	0	603	903	0
704	3	8.97446	-109.601	-613.344	-94297.5	33353.8	-10552.6	254.38	453.743	0	0	0	0	0	0	0	200	903	0	0	0	0	0	0	0	603	903	0
704	4	8.21152	-109.906	-610.902	-94022.9	33597.9	-10369.4	254.997	453.908	0	0	0	0	0	0	0	200	903	0	0	0	0	0	0	0	603	903	0
704	5	9.12705	-110.669	-605.714	-93931.3	33781	-10415.2	255.771	455.075	0	0	0	0	0	0	0	200	903	0	0	0	0	0	0	0	603	903	0
704	6	7.75376	-110.669	-604.799	-93839.7	33231.7	-10506.8	254.947	455.159	0	0	0	0	0	0	0	200	903	0	0	0	0	0	0	0	603	903	0
704	7	8.5167	-111.737	-602.662	-93473.5	32499.3	-10232.1	253.926	455.101	0	0	0	0	0	0	0	200	903	0	0	0	0	0	0	0	603	903	0
704	8	10.1952	-111.89	-602.052	-92466.4	33170.7	-10140.6	255.096	453.585	0	0	0	0	0	0	0	200	903	0	0	0	0	0	0	0	603	903	0
704	9	7.75376	-113.416	-599	-92283.4	32682.4	-10186.3	254.562	454.062	0	0	0	0	0	0	0	200	903	0	0	0	0	0	0	0	603	903	0
705	0	7.14341	-113.568	-596.254	-92100.2	32377.2	-10277.9	254.301	454.465	0	0	0	0	0	0	0	200	903	0	0	0	0	0	0	0	603	903	0
705	1	8.66929	-114.026	-590.761	-92191.8	32560.3	-9774.35	255.116	456.056	0	0	0	0	0	0	0	200	903	0	0	0	0	0	0	0	603	903	0
705	2	6.99082	-114.026	-588.624	-91276.2	32438.2	-9682.8	255.109	455.067	0	0	0	0	0	0	0	200	903	0	0	0	0	0	0	0	603	903	0
705	3	7.44858	-114.331	-584.047	-91550.9	31827.9	-9957.46	254.495	456.753	0	0	0	0	0	0	0	200	903	0	0	0	0	0	0	0	603	903	0
705	4	7.60117	-114.942	-583.742	-90269.2	31766.8	-9957.46	254.419	454.639	0	0.431519	7.41028	-18.7322	-2876.04	-874.753	-912.964	153.302	1056.53	0	0	0	0	0	0	0	603	903	0
705	5	7.296	-114.789	-579.469	-89353.7	32072	-9591.25	255.347	454.199	0	-2.16248	30.6036	-46.1981	-4798.65	-1668.21	-1553.83	163.89	1006.87	0	0	0	0	0	0	0	603	903	0
705	6	6.22788	-114.942	-577.638	-89262.1	31278.6	-9682.8	254.149	454.529	0	-3.84094	38.0804	-43.7566	-3150.7	-630.613	-1645.39	185.588	975.005	0	0	0	0	0	0	0	603	903	0
705	7	5.61753	-115.247	-574.281	-89536.7	31278.6	-9774.35	254.466	455.911	0	0.278931	4.96887	-22.0892	-2967.59	-996.824	-180.542	154.873	1037.35	0	0	0	0	0	0	0	603	903	0
705	8	5.61753	-117.536	-568.178	-88346.6	31217.5	-9682.8	254.943	455.491	0	0	0	0	0	0	0	200	903	0	0	0	0	0	0	0	603	903	0
705	9	5.61753	-118.146	-564.515	-88712.8	31034.4	-9087.71	254.975	457.149	0	-5.36682	32.7399	-34.6014	-4066.22	-1057.86	-1508.06	169.427	1020.52	0	0	0	0	0	0	0	603	903	0
706	0	6.53306	-115.552	-561.464	-87888.8	30546.1	-9408.14	254.404	456.535	0	-3.078	25.7208	-51.386	-4798.65	-996.824	-134.766	180.601	996.384	0	0	0	0	0	0	0	603	903	0
706	1	5.77012	-116.62	-559.633	-86057.8	30912.3	-8996.15	255.237	453.775	0	0.889283	-6.47522	-52.3016	-6446.6	-2400.63	-317.872	154.1	1026.26	0	0	0	0	0	0	0	603	903	0
706	2	4.24424	-119.977	-556.581	-86240.8	30607.2	-8904.6	254.991	454.948	0	-9.33411	2.68005	-64.5086	-7270.57	-2888.91	-455.201	155.217	1015.71	0	0	0	0	0	0	0	603	903	0
706	3	3.02354	-118.909	-551.393	-87064.8	30118.9	-8446.84	254.623	457.9	0	-14.0643	13.5138	-87.3968	-9467.83	-2766.84	689.209	168.342	1011.33	0	0	0	0	0	0	0	603	903	0
706	4	6.99082	-116.62	-543.763	-86240.8	30363	-9133.48	255.839	458.6	0	-1.70471	-9.06921	-107.844	-10658	-3499.26	643.432	167.552	1001.83	0	0	0	0	0	0	0	603	903	0
706	5	7.296	-116.773	-541.322	-85142.2	30302	-8629.94	255.978	457.286	0	-7.65564	-13.0365	-114.557	-12489.1	-4781	2.56305	158.265	1012.02	0	0	0	0	0	0	0	603	903	0
706	6	3.63389	-119.367	-540.101	-84043.6	29508.5	-8492.62	254.635	455.607	0	-17.5739	9.54651	-127.985	-13862.4	-4964.11	963.867	161.213	1011.31	0	0	0	0	0	0	0	603	903	0
706	7	2.87095	-118.756	-536.134	-83494.3	29447.5	-8675.72	254.926	455.734	0	-7.50305	2.83264	-145.991	-15968.1	-4964.11	597.656	165.997	1012.38	0	0	0	0	0	0	0	603	903	0
706	8	3.78647	-117.23	-528.2	-82670.3	29508.5	-8858.83	255.866	456.513	0	1.9574	-13.4943	-166.437	-17799.1	-5757.57	414.55	165.407	1009.94	0	0	0	0	0	0	0	603	903	0
706	9	2.87095	-117.536	-521.486	-82853.4	28898.2	-8080.63	255.415	458.88	0	-11.9281	-1.74499	-177.729	-18897.8	-6673.09	826.538	162.454	1009.33	0	0	0	0	0	0	0	603	903	0
707	0	2.56577	-119.824	-519.96	-82029.4	28532	-8629.94	254.873	457.761	0	-12.2333	5.73181	-192.072	-20728.8	-6795.17	826.538	164.622	1010.92	0	0	0	0	0	0	0	603	903	0
707	1	3.93906	-119.977	-518.129	-80839.3	28470.9	-8034.85	254.95	456.022	0	4.24622	-13.3417	-207.026	-22834.5	-6795.17	368.774	167.177	1013.3	0	0	0	0	0	0	0	603	903	0
707	2	2.87095	-117.688	-512.025	-79008.2	28165.8	-8584.17	255.009	454.305	0	3.1781	-15.3253	-221.979	-24024.7	-7222.41	1101.2	167.464	1011.23	0	0	0	0	0	0	0	603	903	0
707	3	1.95542	-118.604	-507.142	-79282.8	27921.6	-8172.18	255.057	456.333	0	-8.26599	1.30676	-234.492	-25672.7	-7893.8	734.985	166.337	1012.48	0	0	0	0	0	0	0	603	903	0
707	4	1.49766	-119.824	-501.039	-79374.4	27799.6	-8080.63	255.484	458.42	0	0.431519	-5.71228	-244.867	-26954.4	-8015.87	2.56305	167.264	1013.08	0	0	0	0	0	0	0	603	903	0
707	5	3.4813	-118.909	-495.241	-78825.1	27555.4	-7851.75	255.64	459.165	0	13.8593	-14.4098	-255.854	-28144.6	-7771.73	597.656	169.624	1013	0	0	0	0	0	0	0	603	903	0
707	6	4.09165	-117.078	-490.968	-78001.1	27067.1	-7714.42	255.13	458.872	0	4.24622	0.848999	-266.23	-28968.6	-8321.04	231.445	168.745	1011.81	0	0	0	0	0	0	0	603	903	0
707	7	2.56577	-117.23	-483.949	-76353.1	27006.1	-7256.65	255.804	457.771	0	1.04187	8.32581	-271.418	-30158.8	-8015.87	-958.741	170.467	1014.12	0	0	0	0	0	0	0	603	903	0
707	8	1.49766	-118.909	-479.371	-75529.2	26762	-7622.86	255.827	457.559	0	10.0446	-4.03381	-275.995	-30799.6	-8809.32	-134.766	168.082	1014.59	0	0	0	0	0	0	0	603	903	0
707	9	1.19248	-118.146	-473.573	-74796.8	25907.5	-7073.55	254.706	457.941	0	17.9791	3.90076	-284.846	-32356	-8260.01	-226.319	171.002	1016.59	0	0	0	0	0	0	0	603	903	0
708	0	0.734717	-116.01	-463.807	-74155.9	26334.7	-7302.43	256.779	459.885	0	6.38245	19.7699	-291.865	-32905.3	-8260.01	-1187.62	171.699	1015.74	0	0	0	0	0	0	0	603	903	0
708	1	2.10801	-116.315	-458.925	-73057.2	25785.4	-6798.89	256.187	459.192	0	7.75574	13.6664	-296.137	-33637.8	-8321.04	-912.964	171.901	1016.59	0	0	0	0	0	0	0	603	903	0
708	2	1.34507	-117.688	-454.957	-71500.9	25175	-7531.31	255.335	457.16	0	16.911	10.3094	-301.02	-34370.2	-8565.18	-867.188	171.546	1017.18	0	0	0	0	0	0	0	603	903	0
708	3	0.734717	-115.552	-447.023	-70676.9	24747.8	-6615.78	255.361	458.106	0	15.5377	26.4838	-305.903	-34919.5	-8443.11	-2057.37	172.399	1017.15	0	0	0	0	0	0	0	603	903	0
708	4	0.887305	-114.026	-441.224	-69761.4	24808.8	-6524.23	256.227	458.109	0	11.8756	34.1132	-309.26	-36292.8	-8565.18	-1691.16	172.304	1020.35	0	0	0	0	0	0	0	603	903	0
708	5	1.03989	-114.331	-432.374	-69578.3	24625.7	-6615.78	256.955	460.921	0	15.9955	23.8898	-312.006	-36750.6	-8260.01	-1920.04	173.526	1020.79	0	0	0	0	0	0	0	603	903	0
708	6	0.887305	-115.094	-424.135	-67838.7	24259.5	-6386.9	257.198	459.946	0	20.4205	32.4347	-322.687	-37849.2	-8809.32	-2972.9	172.7	1020.29	0	0	0	0	0	0	0	603	903	0
708	7	1.34507	-113.416	-418.641	-67564.1	24015.4	-5700.26	257.365	461.389	0	19.1998	48.9142	-335.2	-38764.7	-8687.25	-2927.13	174.083	1018.65	0	0	0	0	0	0	0	603	903	0
708	8	2.56577	-110.669	-412.538	-65275.3	23649.2	-6249.57	257.326	458.229	0	21.4886	42.6581	-343.439	-41236.6	-9236.57	-3201.78	173.106	1023.07	0	0	0	0	0	0	0	603	903	0
708	9	0.887305	-111.89	-404.909	-64085.1	23099.8	-6020.69	257.05	458.271	0	21.7938	42.5055	-351.374	-41785.9	-9663.82	-3842.65	172.497	1021.92	0	0	0	0	0	0	0	603	903	0
709	0	-0.638574	-111.127	-393.007	-62803.4	22550.5	-5929.14	257.38	459.802	0	18.8947	59.1376	-359.919	-43708.6	-10213.1	-3888.43	171.624	1024.44	0	0	0	0	0	0	0	603	903	0
709	1	1.03989	-108.228	-388.124	-62254	22550.5	-6066.47	258.101	460.397	0	22.5568	62.6471	-370.905	-45448.1	-10152.1	-3659.55	172.629	1025.53	0	0	0	0	0	0	0	603	903	0
709	2	2.10801	-106.244	-378.969	-61338.5	21818.1	-6066.47	257.572	461.856	0	26.8292	54.2548	-380.671	-47370.7	-10762.4	-4437.74	171.728	1027.44	0	0	0	0	0	0	0	603	903	0
709	3	1.49766	-106.702	-375.001	-60331.4	21574	-5700.26	257.53	460.883	0	21.9464	63.8678	-393.183	-49384.8	-10762.4	-4254.64	172.627	1028.6	0	0	0	0	0	0	0	603	903	0
709	4	1.03989	-104.871	-365.236	-58500.4	20902.6	-5379.82	257.23	460.172	0	20.7257	74.3964	-402.643	-50941.2	-10579.3	-4941.29	173.725	1029.52	0	0	0	0	0	0	0	603	903	0
709	5	1.19248	-101.667	-358.217	-57218.6	20963.6	-5379.82	258.522	459.732	0	25.6085	68.4454	-413.325	-52680.7	-11006.6	-5124.39	173.371	1030.46	0	0	0	0	0	0	0	603	903	0
709	6	1.95542	-101.361	-347.841	-56486.2	19742.9	-5013.61	256.758	462.391	0	25.4559	66.6144	-423.395	-53779.4	-11433.8	-5032.84	172.995	1030.02	0	0	0	0	0	0	0	603	903	0
709	7	-0.638574	-100.293	-337.77	-55570.7	20231.2	-4967.83	259.896	464.522	0	21.3361	79.8895	-434.076	-56068.2	-11006.6	-5536.38	174.644	1032.17	0	0	0	0	0	0	0	603	903	0
709	8	1.34507	-96.7837	-330.446	-54197.4	19620.8	-4876.28	259.377	464.013	0	24.5404	81.2628	-441.096	-57075.3	-11494.9	-6131.47	173.94	1032.39	0	0	0	0	0	0	0	603	903	0
709	9	1.65024	-93.5794	-324.342	-53373.4	19132.6	-4830.5	258.989	464.559	0	29.4232	75.0067	-451.471	-58997.9	-11983.2	-6039.92	173.458	1033.68	0	0	0	0	0	0	0	603	903	0
710	0	0.734717	-92.969	-312.44	-51176.2	18583.2	-4464.29	259.478	463.795	0	25.7611	82.6361	-462.458	-59638.7	-12288.3	-6223.02	173.428	1031.96	0	0	0	0	0	0	0	603	903	0
710	1	-1.70669	-91.5957	-305.421	-49711.3	18156	-4326.96	259.446	462.763	0	25.7611	86.2982	-465.204	-61286.7	-12044.2	-6818.12	174.11	1034.74	0	0	0	0	0	0	0	603	903	0
710	2	-2.01187	-88.3914	-297.487	-48704.2	18278.1	-4235.41	261.442	463.719	0	31.2543	80.6525	-477.106	-63392.4	-12593.5	-6543.46	173.604	1035.87	0	0	0	0	0	0	0	603	903	0
710	3	-1.09634	-84.1189	-288.331	-48063.4	17423.6	-3914.98	260.429	466.695	0	32.7802	82.3309	-484.43	-64674.1	-12959.7	-6818.12	173.248	1036.51	0	0	0	0	0	0	0	603	903	0
710	4	-2.16445	-82.2879	-279.481	-46781.6	17240.5	-3731.87	261.687	467.387	0	27.7448	90.2655	-491.45	-65498.1	-13142.8	-7458.99	173.257	1036.28	0	0	0	0	0	0	0	603	903	0
710	5	-2.01187	-80.3042	-272.767	-45408.3	16447	-3640.32	260.297	466.473	0	28.6603	87.3663	-498.163	-66413.6	-12959.7	-7184.33	173.985	1036.32	0	0	0	0	0	0	0	603	903	0
710	6	-3.23257	-76.9473	-264.222	-43943.5	15897.7	-2907.9	260.168	466.312	0	32.9327	81.2628	-503.046	-68427.8	-12959.7	-6863.89	174.238	1039.03	0	0	0	0	0	0	0	603	903	0
710	7	-1.5541	-74.3533	-254.152	-42753.3	15409.4	-3045.23	260.631	468.22	0	29.2706	89.8077	-510.37	-69068.7	-13387	-8008.3	173.77	1038.33	0	0	0	0	0	0	0	603	903	0
710	8	-4.45327	-73.2852	-246.217	-41654.7	15287.3	-3136.78	262.089	469.179	0	27.4396	90.8759	-515.558	-69709.5	-13753.2	-7687.87	173.324	1038.21	0	0	0	0	0	0	0	603	903	0
710	9	-3.07998	-69.9282	-237.367	-41013.8	14860.1	-2907.9	262.604	472.786	0	30.6439	85.0775	-521.052	-70533.5	-13448	-7642.09	174.191	1038.37	0	0	0	0	0	0	0	603	903	0
711	0	-1.5541	-65.6558	-231.263	-39640.5	13578.4	-2770.57	258.714	471.408	0	30.0336	87.5189	-523.798	-70625.1	-13631.1	-7779.42	173.976	1037.83	0	0	0	0	0	0	0	603	903	0
711	1	-2.62222	-63.8247	-223.024	-38633.4	13883.5	-2770.57	262.251	473.226	0	25.9137	93.9276	-527.765	-72456.1	-13936.3	-7779.42	173.594	1040.29	0	0	0	0	0	0	0	603	903	0
711	2	-3.38516	-60.6204	-216.615	-37168.6	13639.4	-2495.91	262.966	471.588	0	28.2025	89.9603	-530.207	-73554.8	-14241.5	-7779.42	173.14	1041.73	0	0	0	0	0	0	0	603	903	0
711	3	-2.16445	-58.4841	-208.375	-36161.5	12723.9	-2129.7	261.062	473.54	0	27.5922	87.3663	-536.616	-73921	-14180.4	-7825.2	173.574	1040.75	0	0	0	0	0	0	0	603	903	0
711	4	-4.91104	-53.2962	-201.967	-35612.2	12723.9	-1809.26	263	476.327	0	25.3033	94.3854	-537.836	-74470.3	-13814.2	-7413.21	174.315	1041.46	0	0	0	0	0	0	0	603	903	0
711	5	-3.99551	-49.9392	-195.253	-34788.2	12174.5	-1534.61	262.353	478.17	0	23.7775	93.0121	-539.057	-75752	-14546.6	-7275.88	173.015	1043.53	0	0	0	0	0	0	0	603	903	0
711	6	-5.3688	-47.1926	-191.285	-33964.2	11747.3	-1214.17	261.412	477.558	0	23.9301	85.3827	-541.804	-76026.7	-14668.7	-7092.78	172.926	1043.32	0	0	0	0	0	0	0	603	903	0
711	7	-4.75845	-44.4461	-180.299	-32865.6	11259	-710.631	262.446	482.284	0	21.7938	90.2655	-543.024	-75843.6	-14424.6	-7001.22	173.437	1042.67	0	0	0	0	0	0	0	603	903	0
711	8	-5.06362	-40.6314	-175.416	-31309.2	11381.1	-710.631	264.88	478.485	0	20.2679	95.9113	-542.719	-75385.8	-14424.6	-6772.34	173.422	1041.9	0	0	0	0	0	0	0	603	903	0
711	9	-5.21621	-38.9529	-165.346	-29111.9	11075.9	-756.408	266.987	476.067	0	19.9628	90.4181	-542.109	-76576	-14912.8	-6772.34	172.491	1044.26	0	0	0	0	0	0	0	603	903	0
712	0	-5.3688	-38.19	-155.275	-29203.5	9916.25	-1031.07	263.863	488.076	0	18.4369	89.0448	-545.466	-77400	-14851.8	-6085.7	172.772	1044.9	0	0	0	0	0	0	0	603	903	0
712	1	-4.75845	-34.833	-153.138	-29020.4	10160.4	-756.408	266.348	489.504	0	16.6058	94.6906	-545.771	-77674.6	-15279.1	-5856.81	172.005	1045.32	0	0	0	0	0	0	0	603	903	0
712	2	-4.75845	-30.7132	-148.561	-27738.7	9916.25	-344.421	266.749	486.716	0	14.0118	93.3173	-545.16	-77857.7	-15095.9	-5948.37	172.309	1045.82	0	0	0	0	0	0	0	603	903	0
712	3	-5.67397	-30.7132	-143.373	-27006.2	9550.04	-298.644	266.61	488.364	0	14.6222	89.0448	-544.855	-77308.4	-15034.9	-5353.27	172.406	1044.89	0	0	0	0	0	0	0	603	903	0
712	4	-5.21621	-27.6614	-137.269	-25541.4	9183.83	-527.526	266.904	486.068	0	11.5704	93.1647	-546.076	-78315.5	-15584.2	-4941.29	171.461	1046.42	0	0	0	0	0	0	0	603	903	0
712	5	-5.97915	-26.1355	-136.659	-25083.6	9061.76	-298.644	266.309	483.549	0	8.97644	96.8268	-546.076	-78864.8	-15584.2	-4712.4	171.461	1047.42	0	0	0	0	0	0	0	603	903	0
712	6	-4.30068	-25.9829	-130.861	-24351.2	8512.44	-481.75	265.05	486.085	0	8.67126	92.7069	-542.719	-78681.7	-15034.9	-4849.73	172.297	1047.98	0	0	0	0	0	0	0	603	903	0
712	7	-4.91104	-25.22	-126.893	-24442.8	8512.44	-207.091	267.083	492.624	0	7.90833	91.181	-546.686	-78040.9	-15095.9	-4071.53	172.386	1045.75	0	0	0	0	0	0	0	603	903	0
712	8	-4.30068	-23.2363	-122.926	-23435.7	8329.33	-161.315	267.759	490.648	0	4.55139	95.4535	-544.245	-78864.8	-15340.1	-4300.42	171.814	1047.91	0	0	0	0	0	0	0	603	903	0
712	9	-4.75845	-22.0156	-121.095	-23069.5	8207.26	-298.644	267.775	490.507	0	2.72034	95.3009	-544.855	-79963.4	-15523.2	-3979.98	171.51	1049.76	0	0	0	0	0	0	0	603	903	0
713	0	-5.3688	-21.1001	-116.517	-21970.8	7657.95	-23.9859	265.724	488.563	0	3.78845	92.7069	-542.719	-79597.2	-15279.1	-3705.32	171.847	1049.66	0	0	0	0	0	0	0	603	903	0
713	1	-4.30068	-20.9475	-111.024	-21604.6	7780.02	-161.315	270.075	494.594	0	-0.178833	96.369	-543.94	-79414.1	-15279.1	-3522.22	171.91	1049	0	0	0	0	0	0	0	603	903	0
713	2	-3.07998	-19.2691	-108.583	-20780.6	7841.05	-344.421	272.213	491.381	0	-1.09436	97.2845	-543.024	-79047.9	-15645.3	-3110.23	171.189	1048.57	0	0	0	0	0	0	0	603	903	0
713	3	-3.23257	-16.3699	-106.752	-20689.1	7230.7	-435.973	267.734	493.806	0	-0.33142	93.3173	-543.329	-80055	-15889.4	-3293.34	170.756	1050.34	0	0	0	0	0	0	0	603	903	0
713	4	-3.84292	-14.3863	-102.479	-19865.1	6864.49	113.343	266.984	493.845	0	-2.00989	94.538	-543.94	-80604.3	-15828.4	-2881.35	170.901	1051.19	0	0	0	0	0	0	0	603	903	0
713	5	-2.46963	-12.0974	-98.512	-18674.9	6986.56	-344.421	270.921	489.57	0	-5.51941	99.2682	-543.94	-80879	-15645.3	-3018.68	171.237	1051.69	0	0	0	0	0	0	0	603	903	0
713	6	-4.60586	-11.7923	-94.2396	-17942.5	6681.39	-207.091	270.898	490.393	0	-5.51941	94.0802	-549.128	-81519.8	-16438.7	-2286.26	170.064	1051.45	0	0	0	0	0	0	0	603	903	0
713	7	-3.69033	-10.8767	-89.6619	-17210.1	5826.89	-23.9859	264.987	491.944	0	-5.36682	92.4017	-558.893	-83259.3	-17110.1	-2194.7	169.386	1051.97	0	0	0	0	0	0	0	603	903	0
713	8	-1.40151	-10.5716	-87.8309	-16569.2	5948.96	-23.9859	267.732	488.649	0	-9.33411	97.2845	-561.64	-85181.9	-16743.9	-1324.95	170.188	1054.67	0	0	0	0	0	0	0	603	903	0
713	9	-3.38516	-10.8767	-85.0843	-15745.2	5826.89	204.896	268.484	485.055	0	-15.285	102.625	-559.809	-85548.2	-17110.1	-317.872	169.436	1055.82	0	0	0	0	0	0	0	603	903	0
714	0	-5.06362	-9.65603	-81.117	-15836.8	5399.65	204.896	266.566	495.234	0	-19.2523	100.794	-556.147	-85822.8	-17537.4	-409.424	168.466	1057.32	0	0	0	0	0	0	0	603	903	0
714	1	-4.45327	-9.50344	-74.4031	-15287.5	5094.47	342.225	268.471	505.468	0	-19.8627	101.71	-563.471	-86646.8	-17415.3	2.56305	169.093	1056.77	0	0	0	0	0	0	0	603	903	0
714	2	-3.69033	-9.50344	-71.0462	-14188.8	4850.33	67.5668	268.27	499.713	0	-18.642	108.576	-569.575	-86463.7	-16804.9	322.998	170.496	1054.8	0	0	0	0	0	0	0	603	903	0
714	3	-4.1481	-9.50344	-67.0789	-13181.8	4728.26	159.12	270.488	496.511	0	-20.3204	110.102	-571.711	-88294.8	-17537.4	-775.635	169.325	1057.44	0	0	0	0	0	0	0	603	903	0
714	4	-3.69033	-10.5716	-65.553	-12815.6	4362.05	204.896	266.542	495.499	0	-19.4049	107.508	-574.763	-88386.3	-17537.4	-1233.4	169.488	1056.78	0	0	0	0	0	0	0	603	903	0
714	5	-4.45327	-11.4871	-62.1961	-12083.1	4178.94	21.7904	267.19	494.275	0	-16.8109	114.527	-577.814	-90125.8	-17537.4	-1370.73	169.649	1058.98	0	0	0	0	0	0	0	603	903	0
714	6	-3.38516	-11.1819	-58.8392	-11900	4056.87	159.12	268.949	502.247	0	-14.2169	117.121	-580.561	-90766.7	-17781.5	-2652.47	169.372	1059.34	0	0	0	0	0	0	0	603	903	0
714	7	-5.06362	-9.80861	-53.9564	-10618.3	3141.35	113.343	258.22	496.794	0	-12.8436	113.611	-583.918	-91865.3	-17659.4	-2972.9	169.757	1060.33	0	0	0	0	0	0	0	603	903	0
714	8	-4.1481	-10.2664	-51.2098	-10618.3	3568.59	67.5668	269.686	507.349	0	-10.7074	112.849	-587.58	-93147	-17232.2	-2789.8	170.673	1061.53	0	0	0	0	0	0	0	603	903	0
714	9	-4.1481	-10.419	-50.5994	-9428.11	3507.56	159.12	269.32	486.328	0	-8.26599	114.68	-589.411	-93055.5	-17232.2	-4071.53	170.764	1060.88	0	0	0	0	0	0	0	603	903	0
715	0	-3.84292	-10.419	-46.6321	-8878.79	3019.28	67.5668	264.747	490.401	0	-5.06165	111.323	-587.275	-94154.1	-17537.4	-4712.4	170.138	1063.32	0	0	0	0	0	0	0	603	903	0
715	1	-4.45327	-9.35085	-46.6321	-8787.24	2653.07	21.7904	256.894	488.437	0	-4.60388	109.644	-591.547	-94520.3	-17232.2	-4254.64	170.869	1062.78	0	0	0	0	0	0	0	603	903	0
715	2	-4.1481	-8.58791	-42.0545	-8878.79	2408.93	21.7904	257.281	511.126	0	-2.77283	112.849	-593.989	-95161.2	-17476.3	-5536.38	170.578	1063.21	0	0	0	0	0	0	0	603	903	0
715	3	-3.69033	-7.21462	-40.5286	-8329.47	2653.07	159.12	265.462	505.521	0	-0.941772	113.001	-595.82	-96168.3	-17537.4	-5811.04	170.566	1064.41	0	0	0	0	0	0	0	603	903	0
715	4	-2.01187	-6.75686	-38.3924	-8054.81	2897.21	67.5668	275.463	509.802	0	-3.68835	111.323	-599.177	-96442.9	-17232.2	-4666.63	171.24	1063.96	0	0	0	0	0	0	0	603	903	0
715	5	-2.16445	-5.99392	-39.0027	-7688.6	2408.93	-252.868	261.763	497.13	0	-5.672	109.797	-599.482	-95802.1	-17171.1	-4895.51	171.357	1062.81	0	0	0	0	0	0	0	603	903	0
715	6	-2.92739	-5.38356	-36.8665	-6589.97	2469.96	-207.091	266.997	478.752	0	-4.90906	112.849	-600.397	-96717.6	-17171.1	-5078.62	171.4	1064.09	0	0	0	0	0	0	0	603	903	0
715	7	-2.7748	-6.45168	-35.951	-6315.31	1920.64	433.778	253.424	475.665	0	-5.06165	110.102	-603.754	-97358.5	-17720.5	-3476.44	170.65	1064.26	0	0	0	0	0	0	0	603	903	0
715	8	-2.7748	-6.45168	-30.763	-5674.44	1981.68	-161.315	264.418	484.457	0	-9.79187	109.186	-605.585	-98548.7	-17354.2	-3567.99	171.343	1065.73	0	0	0	0	0	0	0	603	903	0
715	9	-2.46963	-5.07839	-28.3216	-5766	1981.68	-344.421	269.971	503.59	0	-10.2496	110.712	-607.721	-98914.9	-17842.5	-3018.68	170.64	1065.76	0	0	0	0	0	0	0	603	903	0
716	0	0.276953	-5.07839	-27.1009	-5216.68	1676.5	67.5668	261.862	492.491	0	-14.0643	109.339	-609.553	-99281.1	-17964.6	-1874.27	170.528	1065.88	0	0	0	0	0	0	0	603	903	0
716	1	-1.70669	-4.9258	-26.1854	-4758.92	1554.43	-252.868	259.363	481.74	0	-14.0643	107.813	-612.299	-100014	-17964.6	-1599.61	170.66	1066.34	0	0	0	0	0	0	0	603	903	0
716	2	-2.46963	-4.9258	-24.6595	-4301.15	1127.19	-161.315	245.71	474.422	0	-17.4213	108.271	-613.215	-101021	-17537.4	-1782.72	171.401	1067.74	0	0	0	0	0	0	0	603	903	0
716	3	-2.62222	-5.53615	-20.6922	-3751.83	1188.22	-252.868	257.424	481.316	0	-21.9989	109.339	-614.741	-101845	-18269.8	-821.412	170.281	1068.67	0	0	0	0	0	0	0	603	903	0
716	4	-1.5541	-6.29909	-17.0301	-3934.94	944.082	-23.9859	255.436	531.058	0	-21.5411	107.203	-617.487	-101753	-18269.8	-775.635	170.413	1067.79	0	0	0	0	0	0	0	603	903	0
716	5	-1.85928	-5.53615	-16.1146	-3751.83	1066.15	-115.539	266.161	532.823	0	-20.7782	108.118	-620.234	-101478	-17720.5	-1279.18	171.429	1066.61	0	0	0	0	0	0	0	603	903	0
716	6	-1.09634	-4.01027	-17.0301	-3110.97	944.082	-23.9859	255.436	482.675	0	-23.3722	108.423	-620.844	-103126	-18147.7	-546.754	170.769	1069.11	0	0	0	0	0	0	0	603	903	0
716	7	-1.70669	-3.7051	-14.8939	-1463.02	760.976	-69.7623	251.093	398.229	0	-25.0507	105.677	-621.454	-103309	-18452.9	-1004.52	170.307	1069.24	0	0	0	0	0	0	0	603	903	0
716	8	-2.31704	-2.94216	-13.368	-1920.78	-154.551	-23.9859	188.439	443.685	0	-22.1515	106.592	-624.201	-104042	-18208.7	-1004.52	170.829	1069.68	0	0	0	0	0	0	0	603	903	0
716	9	-3.53774	-3.09475	-10.011	-1554.57	577.871	-69.7623	257.723	455.285	0	-21.9989	107.661	-624.201	-104133	-18208.7	-1004.52	170.829	1069.83	0	0	0	0	0	0	0	603	903	0
717	0	-1.24893	-4.46804	-9.09552	-1371.46	577.871	-69.7623	263.534	450.784	0	-21.9989	107.966	-626.032	-104866	-18636	-1141.85	170.232	1070.51	0	0	0	0	0	0	0	603	903	0
717	1	0	0	0	0	0	0	200	300	0	-21.236	105.829	-627.863	-105232	-18330.8	-1645.39	170.804	1070.6	0	0	0	0	0	0	0	603	903	0
717	2	0	0	0	0	0	0	200	300	0	-20.9308	104.304	-628.779	-105690	-17964.6	-1096.07	171.429	1071.09	0	0	0	0	0	0	0	603	903	0
717	3	0	0	0	0	0	0	200	300	0	-20.6256	105.372	-627.253	-105873	-18452.9	-1920.04	170.581	1071.79	0	0	0	0	0	0	0	603	903	0
717	4	0	0	0	0	0	0	200	300	0	-18.7946	103.235	-628.779	-105873	-18269.8	-2011.6	170.944	1071.38	0	0	0	0	0	0	0	603	903	0
717	5	0	0	0	0	0	0	200	300	0	-20.1678	102.93	-629.694	-106239	-17659.4	-1462.28	171.956	1071.72	0	0	0	0	0	0	0	603	903	0
717	6	0	0	0	0	0	0	200	300	0	-19.2523	103.846	-629.694	-106605	-17781.5	-1874.27	171.762	1072.3	0	0	0	0	0	0	0	603	903	0
717	7	0	0	0	0	0	0	200	300	0	-20.7782	104.609	-631.22	-107155	-18574.9	-1965.82	170.573	1072.76	0	0	0	0	0	0	0	603	903	0
717	8	0	0	0	0	0	0	200	300	0	-21.6937	101.404	-631.22	-105690	-17781.5	-1233.4	171.83	1070.44	0	0	0	0	0	0	0	603	903	0
717	9	0	0	0	0	0	0	200	300	0	-19.7101	100.641	-632.136	-106880	-17842.5	-1233.4	171.774	1072.08	0	0	0	0	0	0	0	603	903	0
718	0	0	0	0	0	0	0	200	300	0	-20.7782	102.167	-631.83	-107521	-18391.8	-1645.39	170.891	1073.17	0	0	0	0	0	0	0	603	903	0
718	1	0	0	0	0	0	0	200	300	0	-21.6937	100.641	-633.051	-108162	-18269.8	-912.964	171.14	1073.86	0	0	0	0	0	0	0	603	903	0
718	2	0	0	0	0	0	0	200	300	0	-22.1515	98.963	-636.103	-108070	-17781.5	-638.306	172.046	1072.89	0	0	0	0	0	0	0	603	903	0
718	3	0	0	0	0	0	0	200	300	0	-23.6774	97.5897	-634.577	-108436	-18330.8	-821.412	171.113	1073.88	0	0	0	0	0	0	0	603	903	0
718	4	0	0	0	0	0	0	200	300	0	-23.9825	98.3527	-636.713	-108619	-17903.6	-226.319	171.881	1073.59	0	0	0	0	0	0	0	603	903	0
718	5	0	0	0	0	0	0	200	300	0	-24.7455	95.7587	-635.492	-108894	-17781.5	-363.648	172.019	1074.35	0	0	0	0	0	0	0	603	903	0
718	6	0	0	0	0	0	0	200	300	0	-26.2714	96.2164	-636.103	-108894	-17720.5	-455.201	172.142	1074.19	0	0	0	0	0	0	0	603	903	0
718	7	0	0	0	0	0	0	200	300	0	-27.3395	95.4535	-636.103	-109810	-18269.8	-88.9897	171.279	1075.63	0	0	0	0	0	0	0	603	903	0
718	8	0	0	0	0	0	0	200	300	0	-26.424	94.3854	-637.324	-109535	-17720.5	94.1158	172.196	1074.87	0	0	0	0	0	0	0	603	903	0
718	9	0	0	0	0	0	0	200	300	0	-26.2714	92.7069	-637.018	-109352	-17903.6	48.3394	171.895	1074.66	0	0	0	0	0	0	0	603	903	0
719	0	0	0	0	0	0	0	200	300	0	-26.5765	90.5707	-637.324	-110267	-18147.7	48.3394	171.525	1076.02	0	0	0	0	0	0	0	603	903	0
719	1	0	0	0	0	0	0	200	300	0	-27.6447	91.4862	-637.629	-109352	-18391.8	185.669	171.156	1074.5	0	0	0	0	0	0	0	603	903	0
719	2	0	0	0	0	0	0	200	300	0	-27.0343	90.4181	-637.629	-110084	-17964.6	-43.2133	171.826	1075.65	0	0	0	0	0	0	0	603	903	0
719	3	0	0	0	0	0	0	200	300	0	-24.2877	87.6715	-637.934	-109993	-18208.7	551.879	171.457	1075.42	0	0	0	0	0	0	0	603	903	0
719	4	0	0	0	0	0	0	200	300	0	-27.0343	89.0448	-640.375	-110451	-17964.6	277.221	171.947	1075.48	0	0	0	0	0	0	0	603	903	0
719	5	0	0	0	0	0	0	200	300	0	-26.5765	87.2137	-640.375	-110725	-17598.4	322.998	172.519	1075.91	0	0	0	0	0	0	0	603	903	0
719	6	0	0	0	0	0	0	200	300	0	-27.0343	85.6879	-639.155	-109993	-17476.3	460.327	172.657	1075.09	0	0	0	0	0	0	0	603	903	0
719	7	0	0	0	0	0	0	200	300	0	-27.7972	85.5353	-637.629	-111732	-17720.5	460.327	172.209	1078.23	0	0	0	0	0	0	0	603	903	0
719	8	0	0	0	0	0	0	200	300	0	-26.1188	85.5353	-635.492	-110725	-17842.5	185.669	171.923	1077.24	0	0	0	0	0	0	0	603	903	0
719	9	0	0	0	0	0	0	200	300	0	-26.7291	83.5516	-637.629	-110725	-17232.2	780.761	172.975	1076.65	0	0	0	0	0	0	0	603	903	0
720	0	0	0	0	0	0	0	200	300	0	-26.2714	83.8568	-638.544	-111915	-17293.2	872.314	172.918	1078.27	0	0	0	0	0	0	0	603	903	0
720	1	0	0	0	0	0	0	200	300	0	-28.5602	82.6361	-636.713	-111732	-17659.4	414.55	172.265	1078.48	0	0	0	0	0	0	0	603	903	0
720	2	0	0	0	0	0	0	200	300	0	-28.1024	81.2628	-639.46	-111824	-17293.2	918.091	172.957	1077.87	0	0	0	0	0	0	0	603	903	0
720	3	0	0	0	0	0	0	200	300	0	-26.5765	80.4999	-637.324	-111641	-17415.3	780.761	172.674	1078.17	0	0	0	0	0	0	0	603	903	0
720	4	0	0	0	0	0	0	200	300	0	-23.83	79.5844	-633.967	-111824	-17720.5	918.091	172.048	1079.39	0	0	0	0	0	0	0	603	903	0
720	5	0	0	0	0	0	0	200	300	0	-27.0343	80.0421	-637.018	-112098	-17842.5	872.314	171.991	1078.97	0	0	0	0	0	0	0	603	903	0
720	6	0	0	0	0	0	0	200	300	0	-27.1869	78.8214	-637.934	-111824	-16988	1055.42	173.37	1078.29	0	0	0	0	0	0	0	603	903	0
720	7	0	0	0	0	0	0	200	300	0	-27.3395	77.9059	-636.103	-111641	-17903.6	872.314	171.854	1078.51	0	0	0	0	0	0	0	603	903	0
720	8	0	0	0	0	0	0	200	300	0	-27.0343	75.9222	-636.713	-111274	-17476.3	1238.52	172.552	1077.76	0	0	0	0	0	0	0	603	903	0
720	9	0	0	0	0	0	0	200	300	0	-26.8817	74.549	-634.577	-112190	-17049.1	1238.52	173.133	1079.8	0	0	0	0	0	0	0	603	903	0
721	0	0	0	0	0	0	0	200	300	0	-26.8817	73.786	-633.051	-112373	-16927	963.867	173.261	1080.51	0	0	0	0	0	0	0	603	903	0
721	1	0	0	0	0	0	0	200	300	0	-27.1869	74.2438	-634.577	-112648	-16988	1009.64	173.229	1080.52	0	0	0	0	0	0	0	603	903	0
721	2	0	0	0	0	0	0	200	300	0	-28.1024	72.5653	-633.967	-111732	-16988	1238.52	173.204	1079.24	0	0	0	0	0	0	0	603	903	0
721	3	0	0	0	0	0	0	200	300	0	-25.661	71.192	-634.577	-112007	-16988	1192.75	173.229	1079.51	0	0	0	0	0	0	0	603	903	0
721	4	0	0	0	0	0	0	200	300	0	-25.5084	69.9713	-633.967	-112831	-17537.4	1375.85	172.337	1080.98	0	0	0	0	0	0	0	603	903	0
721	5	0	0	0	0	0	0	200	300	0	-26.8817	69.361	-632.136	-112922	-17293.2	1330.08	172.643	1081.64	0	0	0	0	0	0	0	603	903	0
721	6	0	0	0	0	0	0	200	300	0	-26.1188	67.8351	-634.272	-112282	-16682.9	1650.51	173.698	1080.02	0	0	0	0	0	0	0	603	903	0
721	7	0	0	0	0	0	0	200	300	0	-24.8981	67.6825	-631.83	-111915	-16804.9	1284.3	173.403	1080.13	0	0	0	0	0	0	0	603	903	0
721	8	0	0	0	0	0	0	200	300	0	-23.5248	65.8514	-629.999	-112556	-16927	1467.41	173.132	1081.66	0	0	0	0	0	0	0	603	903	0
721	9	0	0	0	0	0	0	200	300	0	-25.8136	66.004	-631.22	-113472	-16560.8	1330.08	173.764	1082.77	0	0	0	0	0	0	0	603	903	0
722	0	0	0	0	0	0	0	200	300	0	-24.2877	64.3256	-631.22	-113472	-16255.6	1421.63	174.247	1082.77	0	0	0	0	0	0	0	603	903	0
722	1	0	0	0	0	0	0	200	300	0	-23.3722	63.5626	-629.999	-113289	-16499.8	1192.75	173.81	1082.82	0	0	0	0	0	0	0	603	903	0
722	2	0	0	0	0	0	0	200	300	0	-22.1515	63.2574	-627.558	-113289	-16255.6	1101.2	174.097	1083.52	0	0	0	0	0	0	0	603	903	0
722	3	0	0	0	0	0	0	200	300	0	-22.7618	62.4945	-625.117	-113746	-16499.8	1558.96	173.605	1084.96	0	0	0	0	0	0	0	603	903	0
722	4	0	0	0	0	0	0	200	300	0	-23.3722	61.579	-626.948	-114204	-16560.8	1284.3	173.585	1085.16	0	0	0	0	0	0	0	603	903	0
722	5	0	0	0	0	0	0	200	300	0	-22.4567	61.2738	-627.558	-113655	-16804.9	1238.52	173.222	1084.11	0	0	0	0	0	0	0	603	903	0
722	6	0	0	0	0	0	0	200	300	0	-21.6937	59.9005	-624.506	-113655	-16133.5	1467.41	174.166	1084.99	0	0	0	0	0	0	0	603	903	0
722	7	0	0	0	0	0	0	200	300	0	-20.9308	58.985	-625.727	-114021	-16621.8	1467.41	173.436	1085.22	0	0	0	0	0	0	0	603	903	0
722	8	0	0	0	0	0	0	200	300	0	-21.6937	58.6798	-623.591	-114570	-16255.6	1375.85	173.932	1086.73	0	0	0	0	0	0	0	603	903	0
722	9	0	0	0	0	0	0	200	300	0	-20.7782	57.3065	-623.285	-114570	-15828.4	1558.96	174.605	1086.82	0	0	0	0	0	0	0	603	903	0
723	0	0	0	0	0	0	0	200	300	0	-21.236	57.9169	-621.76	-113930	-15828.4	1696.29	174.543	1086.24	0	0	0	0	0	0	0	603	903	0
723	1	0	0	0	0	0	0	200	300	0	-19.2523	57.7643	-621.454	-114113	-16072.5	1375.85	174.137	1086.62	0	0	0	0	0	0	0	603	903	0
723	2	0	0	0	0	0	0	200	300	0	-19.4049	56.5436	-618.403	-114662	-15523.2	1330.08	174.898	1088.42	0	0	0	0	0	0	0	603	903	0
723	3	0	0	0	0	0	0	200	300	0	-20.7782	56.5436	-619.623	-114570	-15462.2	1513.18	175.046	1087.9	0	0	0	0	0	0	0	603	903	0
723	4	0	0	0	0	0	0	200	300	0	-19.4049	55.9332	-615.656	-114479	-15950.4	1192.75	174.092	1088.95	0	0	0	0	0	0	0	603	903	0
723	5	0	0	0	0	0	0	200	300	0	-18.4894	56.0858	-614.741	-114845	-15950.4	1192.75	174.053	1089.82	0	0	0	0	0	0	0	603	903	0
723	6	0	0	0	0	0	0	200	300	0	-18.4894	54.1022	-614.13	-114937	-15218	1467.41	175.22	1090.15	0	0	0	0	0	0	0	603	903	0
723	7	0	0	0	0	0	0	200	300	0	-18.7946	55.3229	-611.689	-114387	-15706.3	1513.18	174.323	1090	0	0	0	0	0	0	0	603	903	0
723	8	0	0	0	0	0	0	200	300	0	-18.0316	53.3392	-609.858	-115028	-15462.2	1375.85	174.646	1091.61	0	0	0	0	0	0	0	603	903	0
723	9	0	0	0	0	0	0	200	300	0	-17.1161	53.797	-608.637	-114479	-15095.9	1375.85	175.197	1091.09	0	0	0	0	0	0	0	603	903	0
724	0	0	0	0	0	0	0	200	300	0	-14.2169	53.1866	-605.89	-114753	-15157	1421.63	174.984	1092.4	0	0	0	0	0	0	0	603	903	0
724	1	0	0	0	0	0	0	200	300	0	-16.048	53.6444	-604.059	-115303	-15095.9	1421.63	175.009	1093.88	0	0	0	0	0	0	0	603	903	0
724	2	0	0	0	0	0	0	200	300	0	-17.5739	52.2711	-602.534	-115120	-14973.9	1421.63	175.148	1094.06	0	0	0	0	0	0	0	603	903	0
724	3	0	0	0	0	0	0	200	300	0	-18.1842	52.5763	-601.313	-114296	-14851.8	1375.85	175.301	1093.08	0	0	0	0	0	0	0	603	903	0
724	4	0	0	0	0	0	0	200	300	0	-16.2006	51.9659	-598.566	-113930	-14912.8	1558.96	175.086	1093.34	0	0	0	0	0	0	0	603	903	0
724	5	0	0	0	0	0	0	200	300	0	-16.3531	51.6608	-597.04	-114570	-15034.9	1558.96	174.818	1094.9	0	0	0	0	0	0	0	603	903	0
724	6	0	0	0	0	0	0	200	300	0	-18.1842	51.5082	-594.294	-114387	-14729.7	1650.51	175.215	1095.48	0	0	0	0	0	0	0	603	903	0
724	7	0	0	0	0	0	0	200	300	0	-15.285	51.5082	-594.294	-114662	-15034.9	1558.96	174.701	1095.94	0	0	0	0	0	0	0	603	903	0
724	8	0	0	0	0	0	0	200	300	0	-17.2687	51.203	-592.768	-114662	-15095.9	1742.07	174.533	1096.43	0	0	0	0	0	0	0	603	903	0
724	9	0	0	0	0	0	0	200	300	0	-16.6583	49.5245	-587.275	-114753	-14363.5	1833.62	175.542	1098.4	0	0	0	0	0	0	0	603	903	0
725	0	0	0	0	0	0	0	200	300	0	-16.8109	49.2194	-589.106	-115211	-14302.5	2016.72	175.722	1098.57	0	0	0	0	0	0	0	603	903	0
725	1	0	0	0	0	0	0	200	300	0	-17.5739	47.9987	-585.749	-115028	-14607.7	1833.62	175.062	1099.38	0	0	0	0	0	0	0	603	903	0
725	2	0	0	0	0	0	0	200	300	0	-17.7264	46.015	-582.392	-114845	-14424.6	2062.5	175.232	1100.2	0	0	0	0	0	0	0	603	903	0
725	3	0	0	0	0	0	0	200	300	0	-16.9635	47.5409	-581.782	-114296	-14363.5	2154.05	175.311	1099.46	0	0	0	0	0	0	0	603	903	0
725	4	0	0	0	0	0	0	200	300	0	-17.1161	47.5409	-581.171	-114753	-14119.4	2199.83	175.705	1100.45	0	0	0	0	0	0	0	603	903	0
725	5	0	0	0	0	0	0	200	300	0	-18.1842	45.5573	-575.678	-114387	-14363.5	2062.5	175.049	1101.7	0	0	0	0	0	0	0	603	903	0
725	6	0	0	0	0	0	0	200	300	0	-18.4894	44.7943	-577.509	-114662	-13936.3	2474.49	175.868	1101.55	0	0	0	0	0	0	0	603	903	0
725	7	0	0	0	0	0	0	200	300	0	-17.1161	44.184	-574.152	-113197	-13997.3	2566.04	175.621	1100.16	0	0	0	0	0	0	0	603	903	0
725	8	0	0	0	0	0	0	200	300	0	-17.1161	44.184	-571.711	-114753	-14180.4	2474.49	175.197	1103.72	0	0	0	0	0	0	0	603	903	0
725	9	0	0	0	0	0	0	200	300	0	-18.9471	42.6581	-571.1	-113930	-14912.8	2428.71	173.888	1102.49	0	0	0	0	0	0	0	603	903	0
726	0	0	0	0	0	0	0	200	300	0	-18.642	42.6581	-571.1	-113930	-13875.2	2794.92	175.704	1102.49	0	0	0	0	0	0	0	603	903	0
726	1	0	0	0	0	0	0	200	300	0	-17.5739	42.2003	-567.743	-113380	-14058.3	2474.49	175.238	1102.7	0	0	0	0	0	0	0	603	903	0
726	2	0	0	0	0	0	0	200	300	0	-17.7264	41.4374	-565.912	-114387	-14119.4	2474.49	175.05	1105.13	0	0	0	0	0	0	0	603	903	0
726	3	0	0	0	0	0	0	200	300	0	-18.7946	40.9796	-564.081	-114204	-13692.1	2886.47	175.727	1105.46	0	0	0	0	0	0	0	603	903	0
726	4	0	0	0	0	0	0	200	300	0	-18.4894	41.4374	-562.555	-114296	-13448	2566.04	176.095	1106.17	0	0	0	0	0	0	0	603	903	0
726	5	0	0	0	0	0	0	200	300	0	-17.4213	41.2848	-561.945	-114845	-13753.2	2520.26	175.526	1107.37	0	0	0	0	0	0	0	603	903	0
726	6	0	0	0	0	0	0	200	300	0	-18.0316	38.996	-555.536	-114113	-13753.2	2520.26	175.243	1108.41	0	0	0	0	0	0	0	603	903	0
726	7	0	0	0	0	0	0	200	300	0	-18.3368	39.4537	-558.893	-114662	-13203.9	2520.26	176.375	1108.16	0	0	0	0	0	0	0	603	903	0
726	8	0	0	0	0	0	0	200	300	0	-18.642	39.6063	-555.842	-114570	-13570.1	2566.04	175.586	1109.12	0	0	0	0	0	0	0	603	903	0
726	9	0	0	0	0	0	0	200	300	0	-18.3368	39.3011	-553.705	-114479	-13570.1	2611.82	175.492	1109.75	0	0	0	0	0	0	0	603	903	0
727	0	0	0	0	0	0	0	200	300	0	-18.4894	37.6227	-551.264	-114570	-13875.2	2886.47	174.83	1110.83	0	0	0	0	0	0	0	603	903	0
727	1	0	0	0	0	0	0	200	300	0	-19.0997	39.3011	-550.348	-114937	-13203.9	3069.58	176.008	1111.84	0	0	0	0	0	0	0	603	903	0
727	2	0	0	0	0	0	0	200	300	0	-20.1678	37.6227	-548.823	-114937	-13509	2978.03	175.385	1112.42	0	0	0	0	0	0	0	603	903	0
727	3	0	0	0	0	0	0	200	300	0	-19.0997	36.0968	-547.602	-114662	-13448	3069.58	175.442	1112.39	0	0	0	0	0	0	0	603	903	0
727	4	0	0	0	0	0	0	200	300	0	-18.9471	37.1649	-545.771	-114753	-13203.9	3115.36	175.807	1113.26	0	0	0	0	0	0	0	603	903	0
727	5	0	0	0	0	0	0	200	300	0	-20.3204	37.1649	-542.719	-115394	-12959.7	3115.36	176.121	1115.62	0	0	0	0	0	0	0	603	903	0
727	6	0	0	0	0	0	0	200	300	0	-19.0997	35.3339	-541.193	-115394	-13081.8	3023.8	175.828	1116.22	0	0	0	0	0	0	0	603	903	0
727	7	0	0	0	0	0	0	200	300	0	-20.7782	36.5546	-540.583	-114021	-13081.8	3115.36	175.801	1113.92	0	0	0	0	0	0	0	603	903	0
727	8	0	0	0	0	0	0	200	300	0	-20.7782	36.0968	-538.447	-114753	-13142.8	3252.69	175.591	1116.12	0	0	0	0	0	0	0	603	903	0
727	9	0	0	0	0	0	0	200	300	0	-20.7782	34.4183	-535.09	-115211	-13631.1	3161.13	174.526	1118.31	0	0	0	0	0	0	0	603	903	0
728	0	0	0	0	0	0	0	200	300	0	-22.1515	34.5709	-534.174	-113930	-12959.7	3161.13	175.739	1116.28	0	0	0	0	0	0	0	603	903	0
728	1	0	0	0	0	0	0	200	300	0	-22.6093	35.0287	-532.038	-114570	-13020.8	3390.01	175.527	1118.34	0	0	0	0	0	0	0	603	903	0
728	2	0	0	0	0	0	0	200	300	0	-21.6937	34.2657	-531.122	-114479	-13142.8	3390.01	175.255	1118.54	0	0	0	0	0	0	0	603	903	0
728	3	0	0	0	0	0	0	200	300	0	-21.3885	34.5709	-529.596	-114387	-13142.8	3481.57	175.183	1118.99	0	0	0	0	0	0	0	603	903	0
728	4	0	0	0	0	0	0	200	300	0	-23.067	33.808	-528.071	-114937	-13509	3481.57	174.418	1120.65	0	0	0	0	0	0	0	603	903	0
728	5	0	0	0	0	0	0	200	300	0	-20.7782	33.1976	-526.545	-114937	-12593.5	3710.45	176.083	1121.28	0	0	0	0	0	0	0	603	903	0
728	6	0	0	0	0	0	0	200	300	0	-22.6093	33.3502	-524.409	-114387	-13020.8	3664.67	175.171	1121.13	0	0	0	0	0	0	0	603	903	0
728	7	0	0	0	0	0	0	200	300	0	-21.236	33.808	-519.831	-114479	-12776.6	3664.67	175.422	1123.22	0	0	0	0	0	0	0	603	903	0
728	8	0	0	0	0	0	0	200	300	0	-21.3885	33.5028	-520.136	-114845	-12654.5	3710.45	175.671	1123.8	0	0	0	0	0	0	0	603	903	0
728	9	0	0	0	0	0	0	200	300	0	-22.6093	33.1976	-519.221	-114753	-12654.5	3756.23	175.628	1124.01	0	0	0	0	0	0	0	603	903	0
729	0	0	0	0	0	0	0	200	300	0	-22.1515	31.214	-514.643	-114479	-12898.7	3756.23	174.937	1125.44	0	0	0	0	0	0	0	603	903	0
729	1	0	0	0	0	0	0	200	300	0	-21.6937	32.8925	-514.643	-114113	-12410.4	3573.12	175.885	1124.73	0	0	0	0	0	0	0	603	903	0
729	2	0	0	0	0	0	0	200	300	0	-21.236	32.2821	-511.896	-114753	-12288.3	3573.12	175.995	1127.17	0	0	0	0	0	0	0	603	903	0
729	3	0	0	0	0	0	0	200	300	0	-22.6093	31.5192	-509.455	-114479	-12532.5	3618.9	175.4	1127.71	0	0	0	0	0	0	0	603	903	0
729	4	0	0	0	0	0	0	200	300	0	-21.9989	33.045	-509.15	-114387	-12593.5	3573.12	175.266	1127.66	0	0	0	0	0	0	0	603	903	0
729	5	0	0	0	0	0	0	200	300	0	-20.3204	32.7399	-507.929	-114387	-12837.6	3573.12	174.726	1128.2	0	0	0	0	0	0	0	603	903	0
729	6	0	0	0	0	0	0	200	300	0	-20.6256	32.1295	-507.013	-115211	-12288.3	3618.9	175.763	1130.24	0	0	0	0	0	0	0	603	903	0
729	7	0	0	0	0	0	0	200	300	0	-21.3885	32.1295	-505.182	-114570	-12288.3	3664.67	175.675	1129.79	0	0	0	0	0	0	0	603	903	0
729	8	0	0	0	0	0	0	200	300	0	-20.7782	31.5192	-502.436	-114021	-12105.2	3344.24	175.907	1129.94	0	0	0	0	0	0	0	603	903	0
729	9	0	0	0	0	0	0	200	300	0	-20.0153	31.6718	-499.994	-114479	-11983.2	3390.01	176.033	1131.96	0	0	0	0	0	0	0	603	903	0
730	0	0	0	0	0	0	0	200	300	0	-20.3204	30.1459	-498.163	-113838	-12349.4	3573.12	175.21	1131.52	0	0	0	0	0	0	0	603	903	0
730	1	0	0	0	0	0	0	200	300	0	-21.0834	31.0614	-497.858	-114570	-11983.2	3252.69	175.931	1133.13	0	0	0	0	0	0	0	603	903	0
730	2	0	0	0	0	0	0	200	300	0	-20.3204	30.7562	-496.027	-113838	-11861.1	3298.46	176.088	1132.5	0	0	0	0	0	0	0	603	903	0
730	3	0	0	0	0	0	0	200	300	0	-19.4049	29.9933	-494.501	-114021	-11678	3252.69	176.384	1133.58	0	0	0	0	0	0	0	603	903	0
730	4	0	0	0	0	0	0	200	300	0	-19.7101	29.9933	-492.365	-114021	-11922.1	3390.01	175.786	1134.58	0	0	0	0	0	0	0	603	903	0
730	5	0	0	0	0	0	0	200	300	0	-20.7782	30.2985	-490.839	-113838	-11433.8	3206.91	176.706	1134.93	0	0	0	0	0	0	0	603	903	0
730	6	0	0	0	0	0	0	200	300	0	-20.0153	29.9933	-491.755	-114204	-11739	3390.01	176.128	1135.24	0	0	0	0	0	0	0	603	903	0
730	7	0	0	0	0	0	0	200	300	0	-17.1161	28.7726	-489.313	-114204	-11861.1	3344.24	175.76	1136.4	0	0	0	0	0	0	0	603	903	0
730	8	0	0	0	0	0	0	200	300	0	-18.7946	28.7726	-487.787	-114204	-12044.2	3435.79	175.309	1137.13	0	0	0	0	0	0	0	603	903	0
730	9	0	0	0	0	0	0	200	300	0	-18.3368	28.1622	-484.43	-114845	-11311.8	3344.24	176.649	1140.07	0	0	0	0	0	0	0	603	903	0
731	0	0	0	0	0	0	0	200	300	0	-18.9471	27.5519	-485.651	-114570	-11678	3435.79	175.954	1138.91	0	0	0	0	0	0	0	603	903	0
731	1	0	0	0	0	0	0	200	300	0	-18.4894	28.62	-483.21	-114479	-11494.9	3206.91	176.211	1139.91	0	0	0	0	0	0	0	603	903	0
731	2	0	0	0	0	0	0	200	300	0	-17.5739	28.4674	-482.599	-113930	-11189.7	3206.91	176.814	1139.07	0	0	0	0	0	0	0	603	903	0
731	3	0	0	0	0	0	0	200	300	0	-17.5739	27.7045	-478.327	-114662	-11067.6	2794.92	176.862	1142.71	0	0	0	0	0	0	0	603	903	0
731	4	0	0	0	0	0	0	200	300	0	-18.642	27.5519	-480.463	-113655	-11006.6	2932.25	177.092	1139.55	0	0	0	0	0	0	0	603	903	0
731	5	0	0	0	0	0	0	200	300	0	-16.048	27.3993	-478.937	-114937	-11006.6	2794.92	177.019	1142.98	0	0	0	0	0	0	0	603	903	0
731	6	0	0	0	0	0	0	200	300	0	-17.879	27.5519	-474.665	-114570	-11189.7	2749.15	176.426	1144.37	0	0	0	0	0	0	0	603	903	0
731	7	0	0	0	0	0	0	200	300	0	-16.9635	27.2467	-476.191	-114570	-11433.8	2840.7	175.989	1143.6	0	0	0	0	0	0	0	603	903	0
731	8	0	0	0	0	0	0	200	300	0	-16.5057	27.5519	-476.191	-115211	-11250.7	2749.15	176.373	1144.94	0	0	0	0	0	0	0	603	903	0
731	9	0	0	0	0	0	0	200	300	0	-16.9635	25.8734	-472.834	-115028	-10945.6	2840.7	176.851	1146.27	0	0	0	0	0	0	0	603	903	0
732	0	0	0	0	0	0	0	200	300	0	-17.5739	26.026	-474.97	-115211	-11311.8	2703.37	176.184	1145.57	0	0	0	0	0	0	0	603	903	0
732	1	0	0	0	0	0	0	200	300	0	-14.9799	26.026	-472.223	-114662	-11067.6	2840.7	176.563	1145.81	0	0	0	0	0	0	0	603	903	0
732	2	0	0	0	0	0	0	200	300	0	-15.7428	24.5001	-471.003	-114937	-10640.4	2657.59	177.409	1147.03	0	0	0	0	0	0	0	603	903	0
732	3	0	0	0	0	0	0	200	300	0	-15.4376	25.5682	-470.087	-115761	-10457.3	2657.59	177.755	1149.25	0	0	0	0	0	0	0	603	903	0
732	4	0	0	0	0	0	0	200	300	0	-16.6583	26.1786	-470.087	-115669	-11067.6	2657.59	176.456	1149.06	0	0	0	0	0	0	0	603	903	0
732	5	0	0	0	0	0	0	200	300	0	-16.048	24.8053	-467.646	-115211	-10701.4	2611.82	177.116	1149.36	0	0	0	0	0	0	0	603	903	0
732	6	0	0	0	0	0	0	200	300	0	-14.0643	25.7208	-468.256	-114570	-10884.5	2245.6	176.755	1147.67	0	0	0	0	0	0	0	603	903	0
732	7	0	0	0	0	0	0	200	300	0	-14.6747	22.9742	-469.172	-115120	-10762.4	2428.71	177.061	1148.37	0	0	0	0	0	0	0	603	903	0
732	8	0	0	0	0	0	0	200	300	0	-15.1324	24.6527	-466.425	-115944	-10884.5	2245.6	176.664	1151.58	0	0	0	0	0	0	0	603	903	0
732	9	0	0	0	0	0	0	200	300	0	-12.2333	24.9579	-465.51	-115944	-10518.3	2245.6	177.405	1152.07	0	0	0	0	0	0	0	603	903	0
733	0	0	0	0	0	0	0	200	300	0	-14.3695	24.8053	-463.679	-115577	-10762.4	2199.83	176.789	1152.26	0	0	0	0	0	0	0	603	903	0
733	1	0	0	0	0	0	0	200	300	0	-13.1488	24.6527	-462.763	-115669	-10701.4	2154.05	176.875	1152.95	0	0	0	0	0	0	0	603	903	0
733	2	0	0	0	0	0	0	200	300	0	-12.5385	22.2113	-460.932	-116401	-10518.3	1833.62	177.18	1155.54	0	0	0	0	0	0	0	603	903	0
733	3	0	0	0	0	0	0	200	300	0	-14.0643	23.432	-462.763	-116127	-10274.2	2062.5	177.798	1153.94	0	0	0	0	0	0	0	603	903	0
733	4	0	0	0	0	0	0	200	300	0	-13.7592	22.9742	-459.711	-115852	-10457.3	2016.72	177.253	1155.01	0	0	0	0	0	0	0	603	903	0
733	5	0	0	0	0	0	0	200	300	0	-12.2333	22.9742	-458.491	-116127	-10213.1	2062.5	177.724	1156.28	0	0	0	0	0	0	0	603	903	0
733	6	0	0	0	0	0	0	200	300	0	-12.0807	22.5165	-458.185	-115944	-10213.1	1925.17	177.71	1156.05	0	0	0	0	0	0	0	603	903	0
733	7	0	0	0	0	0	0	200	300	0	-12.691	21.4484	-456.354	-116493	-10518.3	1833.62	176.951	1158.27	0	0	0	0	0	0	0	603	903	0
733	8	0	0	0	0	0	0	200	300	0	-11.1652	22.2113	-456.049	-116768	-10457.3	1879.39	177.07	1159.04	0	0	0	0	0	0	0	603	903	0
733	9	0	0	0	0	0	0	200	300	0	-11.6229	21.7535	-455.744	-116401	-10518.3	1650.51	176.921	1158.41	0	0	0	0	0	0	0	603	903	0
734	0	0	0	0	0	0	0	200	300	0	-11.6229	21.1432	-456.049	-116035	-10335.2	1467.41	177.338	1157.44	0	0	0	0	0	0	0	603	903	0
734	1	0	0	0	0	0	0	200	300	0	-10.4022	21.2958	-456.354	-116493	-10213.1	1742.07	177.62	1158.27	0	0	0	0	0	0	0	603	903	0
734	2	0	0	0	0	0	0	200	300	0	-11.4703	21.601	-454.523	-117225	-10152.1	1330.08	177.664	1160.91	0	0	0	0	0	0	0	603	903	0
734	3	0	0	0	0	0	0	200	300	0	-7.80823	21.1432	-454.523	-117317	-10152.1	1330.08	177.664	1161.11	0	0	0	0	0	0	0	603	903	0
734	4	0	0	0	0	0	0	200	300	0	-10.4022	20.9906	-454.218	-116859	-10274.2	1467.41	177.381	1160.28	0	0	0	0	0	0	0	603	903	0
734	5	0	0	0	0	0	0	200	300	0	-9.02893	21.4484	-454.218	-116859	-10152.1	1375.85	177.649	1160.28	0	0	0	0	0	0	0	603	903	0
734	6	0	0	0	0	0	0	200	300	0	-9.18152	20.2277	-454.218	-117225	-9663.82	1330.08	178.724	1161.08	0	0	0	0	0	0	0	603	903	0
734	7	0	0	0	0	0	0	200	300	0	-10.097	19.6173	-452.997	-117775	-9846.92	1330.08	178.263	1162.99	0	0	0	0	0	0	0	603	903	0
734	8	0	0	0	0	0	0	200	300	0	-8.41858	19.7699	-451.471	-118141	-9907.96	1421.63	178.054	1164.68	0	0	0	0	0	0	0	603	903	0
734	9	0	0	0	0	0	0	200	300	0	-9.94446	19.1595	-449.335	-117866	-9724.85	1192.75	178.357	1165.31	0	0	0	0	0	0	0	603	903	0
735	0	0	0	0	0	0	0	200	300	0	-8.41858	19.4647	-450.251	-117775	-9724.85	1284.3	178.401	1164.58	0	0	0	0	0	0	0	603	903	0
735	1	0	0	0	0	0	0	200	300	0	-8.26599	19.007	-450.251	-117683	-9968.99	1238.52	177.859	1164.37	0	0	0	0	0	0	0	603	903	0
735	2	0	0	0	0	0	0	200	300	0	-9.18152	19.1595	-450.861	-118599	-9968.99	1284.3	177.889	1166.05	0	0	0	0	0	0	0	603	903	0
735	3	0	0	0	0	0	0	200	300	0	-6.12976	19.007	-450.556	-118233	-9907.96	918.091	178.009	1165.41	0	0	0	0	0	0	0	603	903	0
735	4	0	0	0	0	0	0	200	300	0	-9.02893	18.244	-450.251	-118233	-10091.1	1055.42	177.588	1165.59	0	0	0	0	0	0	0	603	903	0
735	5	0	0	0	0	0	0	200	300	0	-7.35046	18.244	-449.335	-118416	-10152.1	1009.64	177.406	1166.54	0	0	0	0	0	0	0	603	903	0
735	6	0	0	0	0	0	0	200	300	0	-7.35046	18.0914	-448.115	-118965	-9663.82	1055.42	178.435	1168.48	0	0	0	0	0	0	0	603	903	0
735	7	0	0	0	0	0	0	200	300	0	-9.02893	17.6337	-450.556	-119880	-9541.75	1192.75	178.822	1169.07	0	0	0	0	0	0	0	603	903	0
735	8	0	0	0	0	0	0	200	300	0	-8.57117	17.4811	-449.03	-119148	-9724.85	780.761	178.343	1168.35	0	0	0	0	0	0	0	603	903	0
735	9	0	0	0	0	0	0	200	300	0	-7.50305	17.1759	-449.64	-119148	-9907.96	689.209	177.965	1167.99	0	0	0	0	0	0	0	603	903	0
736	0	0	0	0	0	0	0	200	300	0	-7.65564	15.0397	-449.64	-119697	-9480.71	872.314	178.915	1169.21	0	0	0	0	0	0	0	603	903	0
736	1	0	0	0	0	0	0	200	300	0	-8.57117	15.9552	-449.03	-120430	-9541.75	1009.64	178.75	1171.2	0	0	0	0	0	0	0	603	903	0
736	2	0	0	0	0	0	0	200	300	0	-6.12976	16.5656	-448.725	-120521	-10091.1	872.314	177.512	1171.59	0	0	0	0	0	0	0	603	903	0
736	3	0	0	0	0	0	0	200	300	0	-7.35046	15.8026	-449.64	-120338	-9541.75	918.091	178.779	1170.63	0	0	0	0	0	0	0	603	903	0
736	4	0	0	0	0	0	0	200	300	0	-7.65564	15.8026	-450.251	-119972	-9602.78	963.867	178.672	1169.46	0	0	0	0	0	0	0	603	903	0
736	5	0	0	0	0	0	0	200	300	0	-7.35046	14.2767	-450.251	-121254	-9968.99	872.314	177.859	1172.3	0	0	0	0	0	0	0	603	903	0
736	6	0	0	0	0	0	0	200	300	0	-9.18152	14.4293	-449.946	-121071	-10091.1	872.314	177.573	1172.08	0	0	0	0	0	0	0	603	903	0
736	7	0	0	0	0	0	0	200	300	0	-8.26599	13.9716	-449.946	-120704	-10091.1	872.314	177.573	1171.26	0	0	0	0	0	0	0	603	903	0
736	8	0	0	0	0	0	0	200	300	0	-6.58752	14.2767	-450.251	-120521	-10152.1	1101.2	177.452	1170.68	0	0	0	0	0	0	0	603	903	0
736	9	0	0	0	0	0	0	200	300	0	-6.8927	13.3612	-452.387	-121803	-10030	826.538	177.829	1172.25	0	0	0	0	0	0	0	603	903	0
737	0	0	0	0	0	0	0	200	300	0	-8.57117	12.5983	-452.692	-122261	-9785.89	1055.42	178.383	1173.07	0	0	0	0	0	0	0	603	903	0
737	1	0	0	0	0	0	0	200	300	0	-5.51941	12.4457	-452.692	-122535	-9663.82	1009.64	178.653	1173.68	0	0	0	0	0	0	0	603	903	0
737	2	0	0	0	0	0	0	200	300	0	-8.72375	12.2931	-450.556	-122719	-10152.1	1101.2	177.468	1175.37	0	0	0	0	0	0	0	603	903	0
737	3	0	0	0	0	0	0	200	300	0	-6.74011	11.225	-449.03	-122535	-9968.99	872.314	177.799	1175.89	0	0	0	0	0	0	0	603	903	0
737	4	0	0	0	0	0	0	200	300	0	-6.8927	12.1405	-452.082	-122993	-9480.71	780.761	179.029	1175.06	0	0	0	0	0	0	0	603	903	0
737	5	0	0	0	0	0	0	200	300	0	-7.80823	11.8353	-452.387	-123359	-10030	734.985	177.829	1175.69	0	0	0	0	0	0	0	603	903	0
737	6	0	0	0	0	0	0	200	300	0	-8.41858	9.08875	-451.166	-123176	-9907.96	551.879	178.039	1176.02	0	0	0	0	0	0	0	603	903	0
737	7	0	0	0	0	0	0	200	300	0	-7.19788	10.462	-453.608	-123634	-9724.85	963.867	178.561	1175.56	0	0	0	0	0	0	0	603	903	0
737	8	0	0	0	0	0	0	200	300	0	-6.58752	9.6991	-452.387	-123726	-9724.85	826.538	178.503	1176.5	0	0	0	0	0	0	0	603	903	0
737	9	0	0	0	0	0	0	200	300	0	-7.04529	9.24133	-450.861	-124367	-10152.1	918.091	177.483	1178.84	0	0	0	0	0	0	0	603	903	0
738	0	0	0	0	0	0	0	200	300	0	-7.35046	9.6991	-454.218	-124550	-9602.78	963.867	178.859	1177.21	0	0	0	0	0	0	0	603	903	0
738	1	0	0	0	0	0	0	200	300	0	-5.672	9.08875	-455.439	-124733	-9907.96	872.314	178.245	1176.87	0	0	0	0	0	0	0	603	903	0
738	2	0	0	0	0	0	0	200	300	0	-5.51941	7.41028	-451.777	-124824	-10030	689.209	177.799	1179.3	0	0	0	0	0	0	0	603	903	0
738	3	0	0	0	0	0	0	200	300	0	-6.8927	7.41028	-455.439	-125648	-10030	734.985	177.977	1178.88	0	0	0	0	0	0	0	603	903	0
738	4	0	0	0	0	0	0	200	300	0	-6.43494	8.02063	-455.439	-125740	-9663.82	597.656	178.781	1179.08	0	0	0	0	0	0	0	603	903	0
738	5	0	0	0	0	0	0	200	300	0	-5.51941	7.56287	-451.471	-125831	-10213.1	551.879	177.378	1181.71	0	0	0	0	0	0	0	603	903	0
738	6	0	0	0	0	0	0	200	300	0	-3.53577	7.25769	-456.354	-125648	-9846.92	551.879	178.423	1178.33	0	0	0	0	0	0	0	603	903	0
738	7	0	0	0	0	0	0	200	300	0	-7.04529	6.49475	-457.88	-126381	-9419.67	872.314	179.428	1179.01	0	0	0	0	0	0	0	603	903	0
738	8	0	0	0	0	0	0	200	300	0	-5.82458	6.95251	-458.796	-126838	-9785.89	414.55	178.671	1179.46	0	0	0	0	0	0	0	603	903	0
738	9	0	0	0	0	0	0	200	300	0	-5.06165	5.42664	-460.627	-126747	-10152.1	277.221	177.96	1178.16	0	0	0	0	0	0	0	603	903	0
739	0	0	0	0	0	0	0	200	300	0	-4.14612	4.51111	-461.237	-127571	-10091.1	551.879	178.122	1179.58	0	0	0	0	0	0	0	603	903	0
739	1	0	0	0	0	0	0	200	300	0	-5.97717	4.51111	-460.932	-127022	-9724.85	689.209	178.902	1178.58	0	0	0	0	0	0	0	603	903	0
739	2	0	0	0	0	0	0	200	300	0	-5.06165	3.74817	-461.542	-128395	-9968.99	597.656	178.401	1181.19	0	0	0	0	0	0	0	603	903	0
739	3	0	0	0	0	0	0	200	300	0	-4.14612	3.29041	-464.289	-128120	-9846.92	460.327	178.791	1178.95	0	0	0	0	0	0	0	603	903	0
739	4	0	0	0	0	0	0	200	300	0	-3.68835	2.0697	-465.204	-128761	-9480.71	414.55	179.62	1179.78	0	0	0	0	0	0	0	603	903	0
739	5	0	0	0	0	0	0	200	300	0	-4.14612	1.15418	-467.341	-129127	-9907.96	414.55	178.799	1179.3	0	0	0	0	0	0	0	603	903	0
739	6	0	0	0	0	0	0	200	300	0	-4.60388	-0.0665281	-465.815	-129493	-9968.99	185.669	178.599	1180.99	0	0	0	0	0	0	0	603	903	0
739	7	0	0	0	0	0	0	200	300	0	-3.53577	-0.0665281	-467.646	-129677	-9968.99	460.327	178.683	1180.3	0	0	0	0	0	0	0	603	903	0
739	8	0	0	0	0	0	0	200	300	0	-3.38318	-0.524292	-468.561	-129860	-9602.78	414.55	179.506	1180.15	0	0	0	0	0	0	0	603	903	0
739	9	0	0	0	0	0	0	200	300	0	-3.84094	-1.13464	-467.341	-130501	-9846.92	368.774	178.93	1182.24	0	0	0	0	0	0	0	603	903	0
740	0	0	0	0	0	0	0	200	300	0	-3.078	-1.74499	-471.308	-130958	-10030	734.985	178.719	1180.86	0	0	0	0	0	0	0	603	903	0
740	1	0	0	0	0	0	0	200	300	0	-2.92541	-2.50793	-472.834	-130867	-10457.3	322.998	177.884	1179.77	0	0	0	0	0	0	0	603	903	0
740	2	0	0	0	0	0	0	200	300	0	-1.09436	-4.03381	-474.665	-131233	-10091.1	322.998	178.741	1179.48	0	0	0	0	0	0	0	603	903	0
740	3	0	0	0	0	0	0	200	300	0	-2.00989	-3.72864	-474.665	-132149	-10091.1	368.774	178.741	1181.4	0	0	0	0	0	0	0	603	903	0
740	4	0	0	0	0	0	0	200	300	0	-2.16248	-3.88123	-476.191	-132515	-10152.1	643.432	178.681	1181.28	0	0	0	0	0	0	0	603	903	0
740	5	0	0	0	0	0	0	200	300	0	-1.55212	-5.71228	-475.886	-132515	-9785.89	368.774	179.436	1181.46	0	0	0	0	0	0	0	603	903	0
740	6	0	0	0	0	0	0	200	300	0	-1.24695	-5.4071	-478.327	-132972	-9724.85	368.774	179.669	1180.99	0	0	0	0	0	0	0	603	903	0
740	7	0	0	0	0	0	0	200	300	0	-3.99353	-6.32263	-480.463	-133888	-10152.1	506.103	178.87	1181.66	0	0	0	0	0	0	0	603	903	0
740	8	0	0	0	0	0	0	200	300	0	-3.38318	-7.39075	-480.463	-134071	-10213.1	460.327	178.743	1182.05	0	0	0	0	0	0	0	603	903	0
740	9	0	0	0	0	0	0	200	300	0	-3.68835	-6.7804	-479.853	-133705	-10091.1	414.55	178.971	1181.64	0	0	0	0	0	0	0	603	903	0
741	0	0	0	0	0	0	0	200	300	0	-2.92541	-7.84851	-481.074	-133980	-9785.89	414.55	179.658	1181.5	0	0	0	0	0	0	0	603	903	0
741	1	0	0	0	0	0	0	200	300	0	-2.92541	-8.61145	-481.684	-134529	-10579.3	689.209	178.037	1182.29	0	0	0	0	0	0	0	603	903	0
741	2	0	0	0	0	0	0	200	300	0	-3.84094	-9.2218	-484.43	-135353	-9846.92	872.314	179.673	1182.41	0	0	0	0	0	0	0	603	903	0
741	3	0	0	0	0	0	0	200	300	0	-4.45129	-9.83215	-484.736	-134804	-10213.1	597.656	178.931	1181.1	0	0	0	0	0	0	0	603	903	0
741	4	0	0	0	0	0	0	200	300	0	-3.078	-9.52698	-485.041	-134529	-10152.1	689.209	179.07	1180.36	0	0	0	0	0	0	0	603	903	0
741	5	0	0	0	0	0	0	200	300	0	-2.77283	-10.5951	-487.177	-134163	-10457.3	780.761	178.535	1178.39	0	0	0	0	0	0	0	603	903	0
741	6	0	0	0	0	0	0	200	300	0	-3.84094	-11.8158	-487.482	-135902	-10274.2	826.538	178.924	1181.78	0	0	0	0	0	0	0	603	903	0
741	7	0	0	0	0	0	0	200	300	0	-3.68835	-12.5787	-490.534	-136635	-9907.96	1375.85	179.802	1181.54	0	0	0	0	0	0	0	603	903	0
741	8	0	0	0	0	0	0	200	300	0	-3.23059	-12.7313	-490.534	-136818	-10274.2	826.538	179.055	1181.92	0	0	0	0	0	0	0	603	903	0
741	9	0	0	0	0	0	0	200	300	0	-3.078	-13.1891	-491.45	-137276	-10091.1	780.761	179.467	1182.33	0	0	0	0	0	0	0	603	903	0
742	0	0	0	0	0	0	0	200	300	0	-2.46765	-14.1046	-490.534	-138191	-10091.1	689.209	179.428	1184.72	0	0	0	0	0	0	0	603	903	0
742	1	0	0	0	0	0	0	200	300	0	-3.53577	-14.5624	-492.975	-138283	-10152.1	918.091	179.406	1183.51	0	0	0	0	0	0	0	603	903	0
742	2	0	0	0	0	0	0	200	300	0	-4.14612	-14.1046	-492.975	-138099	-10335.2	551.879	179.035	1183.13	0	0	0	0	0	0	0	603	903	0
742	3	0	0	0	0	0	0	200	300	0	-3.68835	-15.3253	-496.027	-138740	-10091.1	780.761	179.656	1182.7	0	0	0	0	0	0	0	603	903	0
742	4	0	0	0	0	0	0	200	300	0	-3.84094	-16.0883	-497.248	-139015	-10274.2	963.867	179.338	1182.57	0	0	0	0	0	0	0	603	903	0
742	5	0	0	0	0	0	0	200	300	0	-4.90906	-16.2408	-499.384	-139473	-10335.2	963.867	179.304	1182.29	0	0	0	0	0	0	0	603	903	0
742	6	0	0	0	0	0	0	200	300	0	-4.45129	-17.1564	-499.079	-139290	-10457.3	1146.97	179.047	1182.09	0	0	0	0	0	0	0	603	903	0
742	7	0	0	0	0	0	0	200	300	0	-3.84094	-17.7667	-500.605	-139656	-10213.1	1238.52	179.598	1181.97	0	0	0	0	0	0	0	603	903	0
742	8	0	0	0	0	0	0	200	300	0	-3.38318	-17.9193	-500.91	-140297	-10579.3	1467.41	178.88	1183.08	0	0	0	0	0	0	0	603	903	0
742	9	0	0	0	0	0	0	200	300	0	-4.75647	-18.6823	-503.962	-141212	-10701.4	1421.63	178.765	1183.2	0	0	0	0	0	0	0	603	903	0
743	0	0	0	0	0	0	0	200	300	0	-3.23059	-19.2926	-503.351	-141304	-10335.2	1421.63	179.467	1183.73	0	0	0	0	0	0	0	603	903	0
743	1	0	0	0	0	0	0	200	300	0	-5.51941	-20.2081	-505.182	-141121	-10396.2	1375.85	179.421	1182.35	0	0	0	0	0	0	0	603	903	0
743	2	0	0	0	0	0	0	200	300	0	-4.45129	-20.8185	-503.657	-141670	-10945.6	1421.63	178.268	1184.28	0	0	0	0	0	0	0	603	903	0
743	3	0	0	0	0	0	0	200	300	0	-4.75647	-20.5133	-503.962	-142219	-10884.5	1284.3	178.402	1185.2	0	0	0	0	0	0	0	603	903	0
743	4	0	0	0	0	0	0	200	300	0	-6.74011	-21.8866	-508.539	-142586	-10152.1	1284.3	180.037	1183.38	0	0	0	0	0	0	0	603	903	0
743	5	0	0	0	0	0	0	200	300	0	-6.12976	-22.1918	-510.065	-142494	-10579.3	1284.3	179.259	1182.36	0	0	0	0	0	0	0	603	903	0
743	6	0	0	0	0	0	0	200	300	0	-5.36682	-22.9547	-510.981	-142769	-10762.4	1330.08	178.938	1182.4	0	0	0	0	0	0	0	603	903	0
743	7	0	0	0	0	0	0	200	300	0	-5.06165	-24.1754	-512.812	-143501	-10335.2	1696.29	179.846	1182.83	0	0	0	0	0	0	0	603	903	0
743	8	0	0	0	0	0	0	200	300	0	-5.51941	-23.8702	-512.201	-144233	-10396.2	1742.07	179.703	1184.6	0	0	0	0	0	0	0	603	903	0
743	9	0	0	0	0	0	0	200	300	0	-3.38318	-24.9384	-513.422	-144600	-10945.6	1879.39	178.681	1184.64	0	0	0	0	0	0	0	603	903	0
744	0	0	0	0	0	0	0	200	300	0	-6.58752	-24.7858	-517.084	-144600	-10457.3	1696.29	179.776	1182.64	0	0	0	0	0	0	0	603	903	0
744	1	0	0	0	0	0	0	200	300	0	-5.51941	-26.7694	-516.474	-144874	-10457.3	1742.07	179.753	1183.51	0	0	0	0	0	0	0	603	903	0
744	2	0	0	0	0	0	0	200	300	0	-5.82458	-26.922	-516.474	-145790	-10823.5	1787.84	179.044	1185.28	0	0	0	0	0	0	0	603	903	0
744	3	0	0	0	0	0	0	200	300	0	-7.04529	-28.1427	-516.474	-145698	-10762.4	1879.39	179.162	1185.1	0	0	0	0	0	0	0	603	903	0
744	4	0	0	0	0	0	0	200	300	0	-7.35046	-28.9056	-518.305	-146614	-10457.3	2016.72	179.824	1185.87	0	0	0	0	0	0	0	603	903	0
744	5	0	0	0	0	0	0	200	300	0	-6.43494	-28.9056	-518.915	-145973	-10579.3	1879.39	179.613	1184.3	0	0	0	0	0	0	0	603	903	0
744	6	0	0	0	0	0	0	200	300	0	-4.75647	-29.0582	-521.052	-146797	-10640.4	2108.28	179.579	1184.73	0	0	0	0	0	0	0	603	903	0
744	7	0	0	0	0	0	0	200	300	0	-7.19788	-29.8212	-521.357	-147255	-10640.4	2154.05	179.591	1185.45	0	0	0	0	0	0	0	603	903	0
744	8	0	0	0	0	0	0	200	300	0	-7.65564	-31.4996	-523.798	-147804	-10640.4	2291.38	179.686	1185.18	0	0	0	0	0	0	0	603	903	0
744	9	0	0	0	0	0	0	200	300	0	-7.50305	-31.4996	-525.324	-147713	-11006.6	2337.16	179.048	1184.18	0	0	0	0	0	0	0	603	903	0
745	0	0	0	0	0	0	0	200	300	0	-6.58752	-32.2626	-526.24	-148353	-11006.6	2566.04	179.084	1184.91	0	0	0	0	0	0	0	603	903	0
745	1	0	0	0	0	0	0	200	300	0	-6.8927	-33.1781	-527.46	-148720	-10640.4	2566.04	179.827	1184.95	0	0	0	0	0	0	0	603	903	0
745	2	0	0	0	0	0	0	200	300	0	-7.80823	-33.6359	-528.681	-149727	-10701.4	2474.49	179.758	1186.21	0	0	0	0	0	0	0	603	903	0
745	3	0	0	0	0	0	0	200	300	0	-6.12976	-34.3988	-529.291	-150184	-10640.4	2520.26	179.897	1186.75	0	0	0	0	0	0	0	603	903	0
745	4	0	0	0	0	0	0	200	300	0	-8.41858	-34.5514	-528.986	-149818	-10701.4	2428.71	179.77	1186.22	0	0	0	0	0	0	0	603	903	0
745	5	0	0	0	0	0	0	200	300	0	-8.41858	-35.6195	-530.512	-150368	-10396.2	2657.59	180.403	1186.44	0	0	0	0	0	0	0	603	903	0
745	6	0	0	0	0	0	0	200	300	0	-7.65564	-35.7721	-532.648	-150825	-10823.5	2566.04	179.68	1186.16	0	0	0	0	0	0	0	603	903	0
745	7	0	0	0	0	0	0	200	300	0	-9.02893	-36.8402	-534.479	-151558	-10823.5	2428.71	179.749	1186.56	0	0	0	0	0	0	0	603	903	0
745	8	0	0	0	0	0	0	200	300	0	-8.87634	-36.8402	-536.616	-151649	-10884.5	2840.7	179.716	1185.6	0	0	0	0	0	0	0	603	903	0
745	9	0	0	0	0	0	0	200	300	0	-8.1134	-38.3661	-536.921	-151283	-10701.4	2840.7	180.069	1184.76	0	0	0	0	0	0	0	603	903	0
746	0	0	0	0	0	0	0	200	300	0	-5.97717	-38.8239	-537.226	-151832	-11250.7	3115.36	179.058	1185.62	0	0	0	0	0	0	0	603	903	0
746	1	0	0	0	0	0	0	200	300	0	-9.48669	-39.7394	-538.447	-152748	-10945.6	2978.03	179.672	1186.68	0	0	0	0	0	0	0	603	903	0
746	2	0	0	0	0	0	0	200	300	0	-8.57117	-40.1971	-539.362	-153114	-10762.4	3344.24	180.046	1186.88	0	0	0	0	0	0	0	603	903	0
746	3	0	0	0	0	0	0	200	300	0	-9.63928	-39.892	-543.024	-153206	-11250.7	3115.36	179.281	1185.13	0	0	0	0	0	0	0	603	903	0
746	4	0	0	0	0	0	0	200	300	0	-9.02893	-42.6385	-543.329	-153480	-11128.7	3481.57	179.518	1185.48	0	0	0	0	0	0	0	603	903	0
746	5	0	0	0	0	0	0	200	300	0	-9.79187	-43.0963	-543.94	-154121	-10823.5	3527.34	180.102	1186.34	0	0	0	0	0	0	0	603	903	0
746	6	0	0	0	0	0	0	200	300	0	-10.097	-43.5541	-544.245	-154945	-11189.7	3573.12	179.44	1187.7	0	0	0	0	0	0	0	603	903	0
746	7	0	0	0	0	0	0	200	300	0	-9.02893	-43.7067	-545.16	-155220	-11067.6	3344.24	179.698	1187.72	0	0	0	0	0	0	0	603	903	0
746	8	0	0	0	0	0	0	200	300	0	-10.4022	-44.4696	-546.381	-154762	-11128.7	3664.67	179.632	1186.25	0	0	0	0	0	0	0	603	903	0
746	9	0	0	0	0	0	0	200	300	0	-10.097	-44.7748	-548.212	-155311	-11006.6	3710.45	179.923	1186.31	0	0	0	0	0	0	0	603	903	0
747	0	0	0	0	0	0	0	200	300	0	-10.86	-45.9955	-548.517	-156135	-11372.8	3618.9	179.266	1187.65	0	0	0	0	0	0	0	603	903	0
747	1	0	0	0	0	0	0	200	300	0	-11.0126	-47.8265	-551.264	-156593	-11067.6	3985.11	179.923	1187.06	0	0	0	0	0	0	0	603	903	0
747	2	0	0	0	0	0	0	200	300	0	-11.4703	-48.4369	-551.874	-156776	-10884.5	4030.88	180.277	1187.08	0	0	0	0	0	0	0	603	903	0
747	3	0	0	0	0	0	0	200	300	0	-10.2496	-49.505	-551.264	-157234	-11372.8	4122.44	179.37	1188.22	0	0	0	0	0	0	0	603	903	0
747	4	0	0	0	0	0	0	200	300	0	-10.097	-49.6576	-553.095	-157509	-11372.8	4122.44	179.438	1187.78	0	0	0	0	0	0	0	603	903	0
747	5	0	0	0	0	0	0	200	300	0	-11.0126	-50.2679	-554.011	-158058	-10701.4	4213.99	180.684	1188.3	0	0	0	0	0	0	0	603	903	0
747	6	0	0	0	0	0	0	200	300	0	-12.0807	-51.1835	-557.673	-158516	-11372.8	4580.2	179.607	1187.25	0	0	0	0	0	0	0	603	903	0
747	7	0	0	0	0	0	0	200	300	0	-12.8436	-52.5568	-556.452	-158516	-11311.8	4259.77	179.672	1187.87	0	0	0	0	0	0	0	603	903	0
747	8	0	0	0	0	0	0	200	300	0	-12.0807	-53.1671	-560.114	-158882	-11128.7	4763.31	180.131	1186.66	0	0	0	0	0	0	0	603	903	0
747	9	0	0	0	0	0	0	200	300	0	-12.8436	-53.9301	-558.893	-158882	-11067.6	4717.53	180.197	1187.28	0	0	0	0	0	0	0	603	903	0
748	0	0	0	0	0	0	0	200	300	0	-12.691	-54.5404	-561.335	-160255	-11311.8	4763.31	179.848	1188.49	0	0	0	0	0	0	0	603	903	0
748	1	0	0	0	0	0	0	200	300	0	-14.2169	-54.3878	-558.893	-160072	-11250.7	4900.63	179.87	1189.41	0	0	0	0	0	0	0	603	903	0
748	2	0	0	0	0	0	0	200	300	0	-13.7592	-56.0663	-563.776	-160438	-11189.7	4763.31	180.152	1187.58	0	0	0	0	0	0	0	603	903	0
748	3	0	0	0	0	0	0	200	300	0	-12.5385	-57.8973	-564.997	-160621	-11861.1	5129.52	179.007	1187.29	0	0	0	0	0	0	0	603	903	0
748	4	0	0	0	0	0	0	200	300	0	-11.9281	-58.8129	-567.743	-161171	-11433.8	5083.74	179.861	1186.88	0	0	0	0	0	0	0	603	903	0
748	5	0	0	0	0	0	0	200	300	0	-14.0643	-60.0336	-565.912	-161629	-11006.6	5358.4	180.551	1188.61	0	0	0	0	0	0	0	603	903	0
748	6	0	0	0	0	0	0	200	300	0	-14.5221	-60.9491	-566.523	-162086	-11311.8	5083.74	180.033	1189.11	0	0	0	0	0	0	0	603	903	0
748	7	0	0	0	0	0	0	200	300	0	-14.6747	-61.4069	-568.049	-162361	-11250.7	5404.18	180.194	1188.82	0	0	0	0	0	0	0	603	903	0
748	8	0	0	0	0	0	0	200	300	0	-14.2169	-62.475	-568.964	-161903	-11311.8	5495.73	180.119	1187.56	0	0	0	0	0	0	0	603	903	0
748	9	0	0	0	0	0	0	200	300	0	-14.2169	-63.8483	-569.269	-162910	-11128.7	5633.06	180.451	1189.17	0	0	0	0	0	0	0	603	903	0
749	0	0	0	0	0	0	0	200	300	0	-14.9799	-64.6112	-569.269	-163185	-11433.8	5495.73	179.915	1189.66	0	0	0	0	0	0	0	603	903	0
749	1	0	0	0	0	0	0	200	300	0	-15.7428	-67.0526	-570.795	-163002	-11006.6	5633.06	180.717	1188.57	0	0	0	0	0	0	0	603	903	0
749	2	0	0	0	0	0	0	200	300	0	-14.2169	-65.9845	-571.406	-162636	-11189.7	5907.72	180.417	1187.62	0	0	0	0	0	0	0	603	903	0
749	3	0	0	0	0	0	0	200	300	0	-14.9799	-67.3578	-573.847	-163460	-11372.8	5999.27	180.181	1187.85	0	0	0	0	0	0	0	603	903	0
749	4	0	0	0	0	0	0	200	300	0	-15.1324	-68.1207	-573.847	-163734	-11739	6319.7	179.543	1188.33	0	0	0	0	0	0	0	603	903	0
749	5	0	0	0	0	0	0	200	300	0	-16.048	-69.7992	-575.373	-164467	-11372.8	6228.15	180.234	1188.84	0	0	0	0	0	0	0	603	903	0
749	6	0	0	0	0	0	0	200	300	0	-14.5221	-70.8673	-574.457	-164924	-11128.7	6502.81	180.628	1190.1	0	0	0	0	0	0	0	603	903	0
749	7	0	0	0	0	0	0	200	300	0	-14.5221	-71.3251	-575.373	-164924	-11678	6365.48	179.704	1189.64	0	0	0	0	0	0	0	603	903	0
749	8	0	0	0	0	0	0	200	300	0	-16.2006	-73.4613	-577.204	-165382	-11189.7	6823.24	180.614	1189.52	0	0	0	0	0	0	0	603	903	0
749	9	0	0	0	0	0	0	200	300	0	-15.285	-73.6139	-578.119	-165657	-11006.6	6457.03	180.961	1189.54	0	0	0	0	0	0	0	603	903	0
750	0	0	0	0	0	0	0	200	300	0	-15.5902	-74.9872	-578.119	-165474	-11494.9	6640.14	180.117	1189.23	0	0	0	0	0	0	0	603	903	0
750	1	0	0	0	0	0	0	200	300	0	-14.2169	-75.7501	-578.73	-165474	-11555.9	6548.58	180.032	1188.93	0	0	0	0	0	0	0	603	903	0
750	2	0	0	0	0	0	0	200	300	0	-15.8954	-76.3605	-577.814	-166115	-11494.9	6457.03	180.106	1190.49	0	0	0	0	0	0	0	603	903	0
750	3	0	0	0	0	0	0	200	300	0	-13.454	-75.9027	-576.899	-165840	-11189.7	6731.69	180.604	1190.47	0	0	0	0	0	0	0	603	903	0
750	4	0	0	0	0	0	0	200	300	0	-16.2006	-76.6656	-577.814	-165748	-11494.9	6548.58	180.106	1189.85	0	0	0	0	0	0	0	603	903	0
750	5	0	0	0	0	0	0	200	300	0	-14.9799	-77.7338	-576.594	-165382	-11128.7	6777.47	180.699	1189.83	0	0	0	0	0	0	0	603	903	0
750	6	0	0	0	0	0	0	200	300	0	-14.6747	-78.3441	-578.119	-166115	-11006.6	6777.47	180.961	1190.34	0	0	0	0	0	0	0	603	903	0
750	7	0	0	0	0	0	0	200	300	0	-14.9799	-79.7174	-575.678	-166023	-11250.7	6960.57	180.457	1191.4	0	0	0	0	0	0	0	603	903	0
750	8	0	0	0	0	0	0	200	300	0	-15.7428	-80.3278	-575.678	-165565	-11128.7	6869.02	180.669	1190.6	0	0	0	0	0	0	0	603	903	0
750	9	0	0	0	0	0	0	200	300	0	-14.3695	-80.9381	-575.068	-165291	-11189.7	6869.02	180.542	1190.43	0	0	0	0	0	0	0	603	903	0
751	0	0	0	0	0	0	0	200	300	0	-14.3695	-81.3959	-575.678	-165748	-11006.6	6640.14	180.881	1190.92	0	0	0	0	0	0	0	603	903	0
751	1	0	0	0	0	0	0	200	300	0	-14.8273	-82.9218	-574.763	-165382	-10884.5	6823.24	181.063	1190.74	0	0	0	0	0	0	0	603	903	0
751	2	0	0	0	0	0	0	200	300	0	-14.8273	-84.4476	-574.152	-164741	-10396.2	6640.14	181.893	1189.93	0	0	0	0	0	0	0	603	903	0
751	3	0	0	0	0	0	0	200	300	0	-13.6066	-83.8373	-570.795	-164467	-10518.3	6640.14	181.573	1191.14	0	0	0	0	0	0	0	603	903	0
751	4	0	0	0	0	0	0	200	300	0	-13.1488	-85.6683	-571.1	-164650	-11006.6	6594.36	180.727	1191.3	0	0	0	0	0	0	0	603	903	0
751	5	0	0	0	0	0	0	200	300	0	-14.6747	-85.8209	-570.185	-163368	-10579.3	6594.36	181.446	1189.52	0	0	0	0	0	0	0	603	903	0
751	6	0	0	0	0	0	0	200	300	0	-14.0643	-86.1261	-568.049	-163917	-10091.1	6548.58	182.236	1191.56	0	0	0	0	0	0	0	603	903	0
751	7	0	0	0	0	0	0	200	300	0	-12.5385	-87.8046	-570.795	-164100	-10579.3	6457.03	181.466	1190.49	0	0	0	0	0	0	0	603	903	0
751	8	0	0	0	0	0	0	200	300	0	-10.097	-89.6356	-568.964	-163551	-10457.3	6548.58	181.621	1190.45	0	0	0	0	0	0	0	603	903	0
751	9	0	0	0	0	0	0	200	300	0	-11.1652	-90.3986	-566.523	-163917	-9907.96	6594.36	182.511	1192.34	0	0	0	0	0	0	0	603	903	0
752	0	0	0	0	0	0	0	200	300	0	-9.18152	-90.3986	-566.218	-163734	-10030	6502.81	182.286	1192.17	0	0	0	0	0	0	0	603	903	0
752	1	0	0	0	0	0	0	200	300	0	-11.6229	-91.1615	-564.387	-162727	-10091.1	6365.48	182.12	1191.33	0	0	0	0	0	0	0	603	903	0
752	2	0	0	0	0	0	0	200	300	0	-9.94446	-92.3822	-563.166	-162452	-9724.85	6502.81	182.732	1191.46	0	0	0	0	0	0	0	603	903	0
752	3	0	0	0	0	0	0	200	300	0	-11.1652	-92.6874	-557.062	-162636	-9724.85	6273.93	182.543	1194.95	0	0	0	0	0	0	0	603	903	0
752	4	0	0	0	0	0	0	200	300	0	-10.4022	-94.2133	-560.419	-162361	-9968.99	6136.6	182.212	1192.71	0	0	0	0	0	0	0	603	903	0
752	5	0	0	0	0	0	0	200	300	0	-10.86	-95.2814	-559.199	-161354	-9602.78	5907.72	182.828	1191.54	0	0	0	0	0	0	0	603	903	0
752	6	0	0	0	0	0	0	200	300	0	-9.18152	-94.9762	-555.536	-160896	-9480.71	6090.82	182.934	1192.62	0	0	0	0	0	0	0	603	903	0
752	7	0	0	0	0	0	0	200	300	0	-8.57117	-96.1969	-555.536	-161262	-9541.75	5816.16	182.824	1193.28	0	0	0	0	0	0	0	603	903	0
752	8	0	0	0	0	0	0	200	300	0	-9.33411	-95.7391	-555.842	-160621	-9480.71	5724.61	182.944	1191.97	0	0	0	0	0	0	0	603	903	0
752	9	0	0	0	0	0	0	200	300	0	-8.41858	-97.1124	-554.926	-159981	-9175.53	5633.06	183.465	1191.29	0	0	0	0	0	0	0	603	903	0
753	0	0	0	0	0	0	0	200	300	0	-6.58752	-98.4857	-553.4	-158882	-9419.67	5495.73	182.979	1190.1	0	0	0	0	0	0	0	603	903	0
753	1	0	0	0	0	0	0	200	300	0	-5.51941	-98.7909	-550.348	-159157	-9236.57	5266.85	183.217	1192.19	0	0	0	0	0	0	0	603	903	0
753	2	0	0	0	0	0	0	200	300	0	-6.43494	-98.7909	-548.517	-159248	-9175.53	5175.29	183.272	1193.32	0	0	0	0	0	0	0	603	903	0
753	3	0	0	0	0	0	0	200	300	0	-5.97717	-99.4012	-547.907	-158699	-8809.32	5037.96	183.922	1192.65	0	0	0	0	0	0	0	603	903	0
753	4	0	0	0	0	0	0	200	300	0	-4.29871	-100.164	-547.297	-158790	-8687.25	4946.41	184.127	1193.14	0	0	0	0	0	0	0	603	903	0
753	5	0	0	0	0	0	0	200	300	0	-4.45129	-101.232	-544.855	-157509	-8870.36	4534.42	183.72	1192.08	0	0	0	0	0	0	0	603	903	0
753	6	0	0	0	0	0	0	200	300	0	-3.68835	-101.385	-543.635	-157692	-8870.36	4488.65	183.683	1193.07	0	0	0	0	0	0	0	603	903	0
753	7	0	0	0	0	0	0	200	300	0	-1.70471	-102.148	-539.362	-156593	-8809.32	4442.87	183.667	1193.33	0	0	0	0	0	0	0	603	903	0
753	8	0	0	0	0	0	0	200	300	0	-2.92541	-102.453	-538.141	-155952	-8626.22	4168.21	183.97	1192.8	0	0	0	0	0	0	0	603	903	0
753	9	0	0	0	0	0	0	200	300	0	-1.39954	-101.69	-535.7	-155128	-8626.22	4076.66	183.897	1192.58	0	0	0	0	0	0	0	603	903	0
754	0	0	0	0	0	0	0	200	300	0	-0.178833	-101.995	-531.428	-154854	-8382.08	3939.33	184.227	1194.39	0	0	0	0	0	0	0	603	903	0
754	1	0	0	0	0	0	0	200	300	0	-0.33142	-103.674	-530.817	-154213	-8504.15	3756.23	183.979	1193.52	0	0	0	0	0	0	0	603	903	0
754	2	0	0	0	0	0	0	200	300	0	-0.0262447	-104.894	-530.207	-153389	-8504.15	3481.57	183.961	1192.3	0	0	0	0	0	0	0	603	903	0
754	3	0	0	0	0	0	0	200	300	0	1.9574	-106.573	-526.85	-152473	-8443.11	3481.57	183.974	1192.41	0	0	0	0	0	0	0	603	903	0
754	4	0	0	0	0	0	0	200	300	0	2.10999	-106.42	-522.577	-152748	-7893.8	3390.01	184.894	1195.3	0	0	0	0	0	0	0	603	903	0
754	5	0	0	0	0	0	0	200	300	0	1.80481	-108.709	-520.746	-151558	-8260.01	2978.03	184.138	1194.04	0	0	0	0	0	0	0	603	903	0
754	6	0	0	0	0	0	0	200	300	0	1.9574	-107.336	-517.695	-150734	-8076.9	2794.92	184.398	1194.16	0	0	0	0	0	0	0	603	903	0
754	7	0	0	0	0	0	0	200	300	0	3.63586	-107.946	-515.558	-149360	-7588.62	2749.15	185.281	1192.71	0	0	0	0	0	0	0	603	903	0
754	8	0	0	0	0	0	0	200	300	0	4.09363	-108.099	-511.591	-149269	-7466.55	2337.16	185.405	1194.77	0	0	0	0	0	0	0	603	903	0
754	9	0	0	0	0	0	0	200	300	0	3.02551	-109.777	-510.676	-148811	-7527.59	2291.38	185.26	1194.4	0	0	0	0	0	0	0	603	903	0
755	0	0	0	0	0	0	0	200	300	0	5.7721	-110.54	-507.624	-147804	-7344.48	2199.83	185.532	1194.17	0	0	0	0	0	0	0	603	903	0
755	1	0	0	0	0	0	0	200	300	0	4.3988	-112.524	-505.182	-147163	-7405.52	1833.62	185.341	1194.31	0	0	0	0	0	0	0	603	903	0
755	2	0	0	0	0	0	0	200	300	0	5.46692	-111.608	-503.657	-146339	-7527.59	2108.28	185.054	1193.55	0	0	0	0	0	0	0	603	903	0
755	3	0	0	0	0	0	0	200	300	0	6.84021	-111.913	-502.131	-145790	-7405.52	2016.72	185.252	1193.34	0	0	0	0	0	0	0	603	903	0
755	4	0	0	0	0	0	0	200	300	0	6.07727	-112.524	-499.689	-145515	-7283.45	1833.62	185.424	1194.21	0	0	0	0	0	0	0	603	903	0
755	5	0	0	0	0	0	0	200	300	0	6.22986	-113.745	-496.332	-144142	-6978.27	1742.07	185.94	1193.41	0	0	0	0	0	0	0	603	903	0
755	6	0	0	0	0	0	0	200	300	0	7.75574	-114.507	-491.755	-143501	-7161.38	1833.62	185.437	1194.81	0	0	0	0	0	0	0	603	903	0
755	7	0	0	0	0	0	0	200	300	0	7.60315	-115.27	-490.534	-143226	-7039.31	1604.74	185.65	1194.98	0	0	0	0	0	0	0	603	903	0
755	8	0	0	0	0	0	0	200	300	0	6.9928	-115.27	-487.177	-142402	-6978.27	1375.85	185.676	1195.3	0	0	0	0	0	0	0	603	903	0
755	9	0	0	0	0	0	0	200	300	0	6.9928	-115.423	-485.346	-141304	-6917.24	1421.63	185.748	1194.14	0	0	0	0	0	0	0	603	903	0
756	0	0	0	0	0	0	0	200	300	0	8.06091	-115.27	-478.937	-140022	-6856.2	1238.52	185.685	1195.36	0	0	0	0	0	0	0	603	903	0
756	1	0	0	0	0	0	0	200	300	0	8.06091	-116.186	-479.853	-139473	-6917.24	1238.52	185.585	1193.66	0	0	0	0	0	0	0	603	903	0
756	2	0	0	0	0	0	0	200	300	0	6.53503	-116.949	-476.801	-138374	-6306.88	1284.3	186.773	1193.21	0	0	0	0	0	0	0	603	903	0
756	3	0	0	0	0	0	0	200	300	0	7.60315	-118.322	-474.055	-138099	-7100.34	1055.42	185.022	1194.32	0	0	0	0	0	0	0	603	903	0
756	4	0	0	0	0	0	0	200	300	0	8.2135	-117.254	-471.308	-137001	-6673.09	963.867	185.841	1193.68	0	0	0	0	0	0	0	603	903	0
756	5	0	0	0	0	0	0	200	300	0	8.36609	-117.712	-468.867	-137276	-6306.88	1238.52	186.549	1195.78	0	0	0	0	0	0	0	603	903	0
756	6	0	0	0	0	0	0	200	300	0	7.60315	-117.712	-462.763	-135902	-6551.02	1101.2	185.844	1196.68	0	0	0	0	0	0	0	603	903	0
756	7	0	0	0	0	0	0	200	300	0	7.75574	-119.238	-464.899	-135536	-6306.88	1146.97	186.434	1194.54	0	0	0	0	0	0	0	603	903	0
756	8	0	0	0	0	0	0	200	300	0	8.97644	-118.932	-460.932	-134346	-6062.74	1009.64	186.847	1194.47	0	0	0	0	0	0	0	603	903	0
756	9	0	0	0	0	0	0	200	300	0	8.51868	-119.238	-457.88	-133613	-6062.74	1101.2	186.759	1194.81	0	0	0	0	0	0	0	603	903	0
757	0	0	0	0	0	0	0	200	300	0	8.2135	-118.932	-455.134	-133339	-6184.81	1101.2	186.411	1195.97	0	0	0	0	0	0	0	603	903	0
757	1	0	0	0	0	0	0	200	300	0	7.60315	-118.627	-450.556	-132332	-5879.64	1238.52	186.95	1196.71	0	0	0	0	0	0	0	603	903	0
757	2	0	0	0	0	0	0	200	300	0	8.67126	-119.695	-449.64	-131141	-5879.64	918.091	186.924	1194.66	0	0	0	0	0	0	0	603	903	0
757	3	0	0	0	0	0	0	200	300	0	9.89197	-120.458	-446.589	-129860	-5879.64	1101.2	186.834	1193.78	0	0	0	0	0	0	0	603	903	0
757	4	0	0	0	0	0	0	200	300	0	8.51868	-120.916	-443.232	-129677	-5940.67	1009.64	186.597	1195.57	0	0	0	0	0	0	0	603	903	0
757	5	0	0	0	0	0	0	200	300	0	8.82385	-121.221	-438.654	-128486	-5757.57	918.091	186.874	1195.91	0	0	0	0	0	0	0	603	903	0
757	6	0	0	0	0	0	0	200	300	0	7.60315	-119.39	-432.551	-127113	-5879.64	963.867	186.407	1196.87	0	0	0	0	0	0	0	603	903	0
757	7	0	0	0	0	0	0	200	300	0	7.90833	-119.695	-431.33	-126472	-6001.71	826.538	186.086	1196.21	0	0	0	0	0	0	0	603	903	0
757	8	0	0	0	0	0	0	200	300	0	8.36609	-120.306	-429.804	-125648	-5696.53	963.867	186.746	1195.34	0	0	0	0	0	0	0	603	903	0
757	9	0	0	0	0	0	0	200	300	0	6.84021	-120.153	-425.837	-124733	-5513.43	1375.85	187.053	1195.91	0	0	0	0	0	0	0	603	903	0
758	0	0	0	0	0	0	0	200	300	0	6.9928	-121.221	-422.785	-123085	-5452.39	1101.2	187.104	1194.13	0	0	0	0	0	0	0	603	903	0
758	1	0	0	0	0	0	0	200	300	0	7.29797	-120.001	-416.681	-122078	-5330.32	1146.97	187.208	1195.98	0	0	0	0	0	0	0	603	903	0
758	2	0	0	0	0	0	0	200	300	0	6.22986	-121.069	-412.104	-121162	-5635.5	1146.97	186.325	1197.01	0	0	0	0	0	0	0	603	903	0
758	3	0	0	0	0	0	0	200	300	0	5.16174	-120.306	-408.442	-120247	-5208.25	1558.96	187.249	1197.4	0	0	0	0	0	0	0	603	903	0
758	4	0	0	0	0	0	0	200	300	0	4.55139	-120.916	-404.169	-118233	-5269.28	1421.63	186.963	1195.53	0	0	0	0	0	0	0	603	903	0
758	5	0	0	0	0	0	0	200	300	0	5.46692	-120.153	-401.117	-115852	-4842.04	1604.74	187.929	1191.82	0	0	0	0	0	0	0	603	903	0
758	6	0	0	0	0	0	0	200	300	0	4.85657	-120.001	-394.098	-115486	-5086.18	1742.07	187.094	1196.04	0	0	0	0	0	0	0	603	903	0
758	7	0	0	0	0	0	0	200	300	0	3.48328	-119.848	-390.742	-115028	-5208.25	1742.07	186.671	1197.38	0	0	0	0	0	0	0	603	903	0
758	8	0	0	0	0	0	0	200	300	0	2.87293	-120.001	-384.943	-112465	-5391.35	2016.72	185.994	1195.16	0	0	0	0	0	0	0	603	903	0
758	9	0	0	0	0	0	0	200	300	0	3.63586	-119.39	-379.145	-110542	-5086.18	1970.95	186.585	1194.56	0	0	0	0	0	0	0	603	903	0
759	0	0	0	0	0	0	0	200	300	0	3.1781	-118.017	-373.652	-109627	-4903.07	2199.83	186.878	1196.39	0	0	0	0	0	0	0	603	903	0
759	1	0	0	0	0	0	0	200	300	0	1.19446	-117.407	-368.769	-108619	-4903.07	2199.83	186.704	1197.55	0	0	0	0	0	0	0	603	903	0
759	2	0	0	0	0	0	0	200	300	0	0.736695	-117.254	-366.327	-107246	-4475.83	2382.93	187.782	1195.76	0	0	0	0	0	0	0	603	903	0
759	3	0	0	0	0	0	0	200	300	0	1.04187	-116.949	-358.698	-105324	-4536.86	2337.16	187.352	1196.63	0	0	0	0	0	0	0	603	903	0
759	4	0	0	0	0	0	0	200	300	0	1.19446	-116.644	-353.51	-103584	-4658.93	2428.71	186.821	1196.02	0	0	0	0	0	0	0	603	903	0
759	5	0	0	0	0	0	0	200	300	0	0.584107	-116.033	-346.796	-101936	-4719.97	2382.93	186.39	1196.94	0	0	0	0	0	0	0	603	903	0
759	6	0	0	0	0	0	0	200	300	0	-0.33142	-115.27	-339.167	-100380	-3865.48	2474.49	188.603	1198.96	0	0	0	0	0	0	0	603	903	0
759	7	0	0	0	0	0	0	200	300	0	-0.33142	-112.371	-333.063	-97999.4	-4658.93	2520.26	186.012	1197.24	0	0	0	0	0	0	0	603	903	0
759	8	0	0	0	0	0	0	200	300	0	-0.33142	-112.524	-327.57	-95527.4	-4536.86	2245.6	186.15	1194.62	0	0	0	0	0	0	0	603	903	0
759	9	0	0	0	0	0	0	200	300	0	-0.0262447	-111.303	-322.077	-93971	-4292.72	2520.26	186.672	1194.77	0	0	0	0	0	0	0	603	903	0
760	0	0	0	0	0	0	0	200	300	0	-0.941772	-110.693	-314.448	-92780.8	-4109.62	2566.04	186.931	1198.06	0	0	0	0	0	0	0	603	903	0
760	1	0	0	0	0	0	0	200	300	0	0.431519	-109.319	-308.039	-90949.8	-4597.9	2611.82	185.074	1198.25	0	0	0	0	0	0	0	603	903	0
760	2	0	0	0	0	0	0	200	300	0	-1.39954	-108.709	-300.409	-88020.1	-4170.65	2611.82	186.117	1196	0	0	0	0	0	0	0	603	903	0
760	3	0	0	0	0	0	0	200	300	0	0.126343	-106.878	-293.39	-86280.6	-3926.51	2840.7	186.617	1197.08	0	0	0	0	0	0	0	603	903	0
760	4	0	0	0	0	0	0	200	300	0	-0.636596	-105.047	-285.761	-84815.7	-4109.62	2566.04	185.619	1199.81	0	0	0	0	0	0	0	603	903	0
760	5	0	0	0	0	0	0	200	300	0	-2.16248	-102.911	-276.301	-82526.9	-3865.48	2703.37	186.01	1201.69	0	0	0	0	0	0	0	603	903	0
760	6	0	0	0	0	0	0	200	300	0	-2.77283	-101.843	-270.807	-79780.4	-3499.26	2474.49	187.078	1197.6	0	0	0	0	0	0	0	603	903	0
760	7	0	0	0	0	0	0	200	300	0	-1.09436	-101.08	-262.873	-77033.8	-3499.26	2520.26	186.688	1196.05	0	0	0	0	0	0	0	603	903	0
760	8	0	0	0	0	0	0	200	300	0	-1.09436	-99.0961	-254.633	-75111.2	-3682.37	2291.38	185.539	1197.98	0	0	0	0	0	0	0	603	903	0
760	9	0	0	0	0	0	0	200	300	0	-1.70471	-98.028	-246.393	-73097	-3438.23	2337.16	186.046	1199.67	0	0	0	0	0	0	0	603	903	0
761	0	0	0	0	0	0	0	200	300	0	-2.62024	-96.0443	-238.459	-70991.3	-2827.88	2428.71	188.141	1200.71	0	0	0	0	0	0	0	603	903	0
761	1	0	0	0	0	0	0	200	300	0	-2.77283	-93.1451	-230.829	-68061.6	-3560.3	2199.83	184.576	1197.86	0	0	0	0	0	0	0	603	903	0
761	2	0	0	0	0	0	0	200	300	0	-1.39954	-90.5511	-223.2	-65864.3	-3438.23	2749.15	184.596	1198.09	0	0	0	0	0	0	0	603	903	0
761	3	0	0	0	0	0	0	200	300	0	-1.09436	-87.652	-213.434	-63850.2	-2766.84	2291.38	187.037	1202.16	0	0	0	0	0	0	0	603	903	0
761	4	0	0	0	0	0	0	200	300	0	-2.00989	-87.3468	-206.11	-60828.9	-2705.81	2245.6	186.872	1198.13	0	0	0	0	0	0	0	603	903	0
761	5	0	0	0	0	0	0	200	300	0	-2.00989	-83.6847	-198.176	-58723.2	-2766.84	2199.83	186.038	1199.32	0	0	0	0	0	0	0	603	903	0
761	6	0	0	0	0	0	0	200	300	0	0.584107	-82.7692	-188.41	-56251.3	-2522.7	2108.28	186.611	1201.56	0	0	0	0	0	0	0	603	903	0
761	7	0	0	0	0	0	0	200	300	0	0.278931	-79.5648	-178.034	-53504.7	-2705.81	1970.95	184.802	1203.53	0	0	0	0	0	0	0	603	903	0
761	8	0	0	0	0	0	0	200	300	0	-0.941772	-77.5812	-170.405	-51307.4	-2339.6	2062.5	186.27	1204.09	0	0	0	0	0	0	0	603	903	0
761	9	0	0	0	0	0	0	200	300	0	-2.46765	-75.1398	-162.165	-48744	-2217.53	2016.72	186.325	1203.58	0	0	0	0	0	0	0	603	903	0
762	0	0	0	0	0	0	0	200	300	0	-2.00989	-71.4777	-151.789	-45356.5	-1912.35	2199.83	187.401	1201.81	0	0	0	0	0	0	0	603	903	0
762	1	0	0	0	0	0	0	200	300	0	-1.70471	-69.3414	-143.244	-41602.8	-1729.25	1925.17	187.928	1193.43	0	0	0	0	0	0	0	603	903	0
762	2	0	0	0	0	0	0	200	300	0	-2.46765	-64.4586	-133.478	-39954.9	-1546.14	2154.05	188.417	1202.34	0	0	0	0	0	0	0	603	903	0
762	3	0	0	0	0	0	0	200	300	0	-3.99353	-62.475	-125.239	-37666.1	-1607.18	2016.72	187.167	1203.75	0	0	0	0	0	0	0	603	903	0
762	4	0	0	0	0	0	0	200	300	0	-3.38318	-59.5758	-110.59	-35194.2	-1363.03	1970.95	187.675	1221.24	0	0	0	0	0	0	0	603	903	0
762	5	0	0	0	0	0	0	200	300	0	-3.53577	-56.8292	-105.097	-31715.2	-1179.93	1879.39	188.773	1204.77	0	0	0	0	0	0	0	603	903	0
762	6	0	0	0	0	0	0	200	300	0	-3.38318	-53.6249	-97.4676	-28877	-813.718	2016.72	191.651	1199.27	0	0	0	0	0	0	0	603	903	0
762	7	0	0	0	0	0	0	200	300	0	-2.62024	-50.5731	-87.3968	-26679.7	-691.648	1650.51	192.086	1208.27	0	0	0	0	0	0	0	603	903	0
762	8	0	0	0	0	0	0	200	300	0	-3.38318	-48.5895	-78.2415	-23750.1	-569.578	1787.84	192.72	1206.55	0	0	0	0	0	0	0	603	903	0
762	9	0	0	0	0	0	0	200	300	0	-3.84094	-46.3007	-71.2225	-20728.8	-508.542	1558.96	192.86	1194.04	0	0	0	0	0	0	0	603	903	0
763	0	0	0	0	0	0	0	200	300	0	-3.68835	-43.2489	-61.1517	-18531.6	-508.542	1330.08	191.684	1206.04	0	0	0	0	0	0	0	603	903	0
763	1	0	0	0	0	0	0	200	300	0	-3.23059	-40.6549	-51.386	-16334.3	-264.402	1375.85	194.855	1220.87	0	0	0	0	0	0	0	603	903	0
763	2	0	0	0	0	0	0	200	300	0	-4.60388	-37.6031	-43.1463	-14045.5	-386.472	1421.63	191.043	1228.53	0	0	0	0	0	0	0	603	903	0
763	3	0	0	0	0	0	0	200	300	0	-4.75647	-32.8729	-34.9066	-11298.9	-386.472	1513.18	188.928	1226.69	0	0	0	0	0	0	0	603	903	0
763	4	0	0	0	0	0	0	200	300	0	-2.92541	-30.7367	-30.0237	-9101.62	-81.2963	1421.63	197.292	1206.15	0	0	0	0	0	0	0	603	903	0
763	5	0	0	0	0	0	0	200	300	0	-3.68835	-27.8375	-22.0892	-6995.91	-81.2963	1513.18	196.32	1219.71	0	0	0	0	0	0	0	603	903	0
763	6	0	0	0	0	0	0	200	300	0	-4.29871	-25.0909	-17.8167	-5256.41	-264.402	1192.75	185.16	1198.03	0	0	0	0	0	0	0	603	903	0
763	7	0	0	0	0	0	0	200	300	0	-3.23059	-22.0392	-9.57696	-3333.8	-203.367	1009.64	178.765	1251.11	0	0	0	0	0	0	0	603	903	0
763	8	0	0	0	0	0	0	200	300	0	-1.09436	-20.2081	-7.44073	-1868.96	-203.367	551.879	172.668	1154.18	0	0	0	0	0	0	0	603	903	0
763	9	0	0	0	0	0	0	200	300	0	0	0	0	0	0	0	200	903	0	0	0	0	0	0	0	603	903	0
764	0	0	0	0	0	0	0	200	300	0	0	0	0	0	0	0	200	903	0	0	0	0	0	0	0	603	903	0
764	1	0	0	0	0	0	0	200	300	0	0	0	0	0	0	0	200	903	0	0	0	0	0	0	0	603	903	0
764	2	0	0	0	0	0	0	200	300	0	0	0	0	0	0	0	200	903	0	0	0	0	0	0	0	603	903	0
764	3	0	0	0	0	0	0	200	300	0	0	0	0	0	0	0	200	903	0	0	0	0	0	0	0	603	903	0
764	4	0	0	0	0	0	0	200	300	0	0	0	0	0	0	0	200	903	0	0	0	0	0	0	0	603	903	0
764	5	0	0	0	0	0	0	200	300	0	0	0	0	0	0	0	200	903	0	0	0	0	0	0	0	603	903	0
764	6	0	0	0	0	0	0	200	300	0	0	0	0	0	0	0	200	903	0	0	0	0	0	0	0	603	903	0
764	7	0	0	0	0	0	0	200	300	0	0	0	0	0	0	0	200	903	0	0	0	0	0	0	0	603	903	0
764	8	0	0	0	0	0	0	200	300	0	0	0	0	0	0	0	200	903	0	0	0	0	0	0	0	603	903	0
764	9	0	0	0	0	0	0	200	300	0	0	0	0	0	0	0	200	903	0	0	0	0	0	0	0	603	903	0
765	0	0	0	0	0	0	0	200	300	0	0	0	0	0	0	0	200	903	0	0	0	0	0	0	0	603	903	0
765	1	0	0	0	0	0	0	200	300	0	0	0	0	0	0	0	200	903	0	0	0	0	0	0	0	603	903	0
765	2	0	0	0	0	0	0	200	300	0	0	0	0	0	0	0	200	903	0	0	0	0	0	0	0	603	903	0
765	3	0	0	0	0	0	0	200	300	0	0	0	0	0	0	0	200	903	0	0	0	0	0	0	0	603	903	0
765	4	0	0	0	0	0	0	200	300	0	0	0	0	0	0	0	200	903	0	0	0	0	0	0	0	603	903	0
765	5	0	0	0	0	0	0	200	300	0	0	0	0	0	0	0	200	903	0	0	0	0	0	0	0	603	903	0
765	6	0	0	0	0	0	0	200	300	0	0	0	0	0	0	0	200	903	0	0	0	0	0	0	0	603	903	0
765	7	0	0	0	0	0	0	200	300	0	0	0	0	0	0	0	200	903	0	0	0	0	0	0	0	603	903	0
765	8	0	0	0	0	0	0	200	300	0	0	0	0	0	0	0	200	903	0	0	0	0	0	0	0	603	903	0
765	9	0	0	0	0	0	0	200	300	0	0	0	0	0	0	0	200	903	0	0	0	0	0	0	0	603	903	0
766	0	0	0	0	0	0	0	200	300	0	0	0	0	0	0	0	200	903	0	0	0	0	0	0	0	603	903	0
766	1	0	0	0	0	0	0	200	300	0	0	0	0	0	0	0	200	903	0	0	0	0	0	0	0	603	903	0
766	2	0	0	0	0	0	0	200	300	0	0	0	0	0	0	0	200	903	0	0	0	0	0	0	0	603	903	0
766	3	0	0	0	0	0	0	200	300	0	0	0	0	0	0	0	200	903	0	0	0	0	0	0	0	603	903	0
766	4	0	0	0	0	0	0	200	300	0	0	0	0	0	0	0	200	903	0	0	0	0	0	0	0	603	903	0
766	5	0	0	0	0	0	0	200	300	0	0	0	0	0	0	0	200	903	0	0	0	0	0	0	0	603	903	0
766	6	0	0	0	0	0	0	200	300	0	0	0	0	0	0	0	200	903	0	0	0	0	0	0	0	603	903	0
766	7	0	0	0	0	0	0	200	300	0	0	0	0	0	0	0	200	903	0	0	0	0	0	0	0	603	903	0
766	8	0	0	0	0	0	0	200	300	0	0	0	0	0	0	0	200	903	0	0	0	0	0	0	0	603	903	0
766	9	0	0	0	0	0	0	200	300	0	0	0	0	0	0	0	200	903	0	0	0	0	0	0	0	603	903	0
767	0	0	0	0	0	0	0	200	300	0	0	0	0	0	0	0	200	903	0	0	0	0	0	0	0	603	903	0
767	1	0	0	0	0	0	0	200	300	0	0	0	0	0	0	0	200	903	0	0	0	0	0	0	0	603	903	0
767	2	0	0	0	0	0	0	200	300	0	0	0	0	0	0	0	200	903	0	0	0	0	0	0	0	603	903	0
767	3	0	0	0	0	0	0	200	300	0	0	0	0	0	0	0	200	903	0	0	0	0	0	0	0	603	903	0
767	4	0	0	0	0	0	0	200	300	0	0	0	0	0	0	0	200	903	0	0	0	0	0	0	0	603	903	0
767	5	0	0	0	0	0	0	200	300	0	0	0	0	0	0	0	200	903	0	0	0	0	0	0	0	603	903	0
767	6	0	0	0	0	0	0	200	300	0	0	0	0	0	0	0	200	903	0	0	0	0	0	0	0	603	903	0
767	7	0	0	0	0	0	0	200	300	0	0	0	0	0	0	0	200	903	0	0	0	0	0	0	0	603	903	0
767	8	0	0	0	0	0	0	200	300	0	0	0	0	0	0	0	200	903	0	0	0	0	0	0	0	603	903	0
767	9	0	0	0	0	0	0	200	300	0	0	0	0	0	0	0	200	903	0	0	0	0	0	0	0	603	903	0
768	0	0	0	0	0	0	0	200	300	0	0	0	0	0	0	0	200	903	0	0	0	0	0	0	0	603	903	0
768	1	0	0	0	0	0	0	200	300	0	0	0	0	0	0	0	200	903	0	0	0	0	0	0	0	603	903	0
768	2	0	0	0	0	0	0	200	300	0	0	0	0	0	0	0	200	903	0	0	0	0	0	0	0	603	903	0
768	3	0	0	0	0	0	0	200	300	0	0	0	0	0	0	0	200	903	0	0	0	0	0	0	0	603	903	0
768	4	0	0	0	0	0	0	200	300	0	0	0	0	0	0	0	200	903	0	0	0	0	0	0	0	603	903	0
768	5	0	0	0	0	0	0	200	300	0	0	0	0	0	0	0	200	903	0	0	0	0	0	0	0	603	903	0
768	6	0	0	0	0	0	0	200	300	0	0	0	0	0	0	0	200	903	0	0	0	0	0	0	0	603	903	0
768	7	0	0	0	0	0	0	200	300	0	0	0	0	0	0	0	200	903	0	0	0	0	0	0	0	603	903	0
768	8	0	0	0	0	0	0	200	300	0	0	0	0	0	0	0	200	903	0	0	0	0	0	0	0	603	903	0
768	9	0	0	0	0	0	0	200	300	0	0	0	0	0	0	0	200	903	0	0	0	0	0	0	0	603	903	0
769	0	0	0	0	0	0	0	200	300	0	0	0	0	0	0	0	200	903	0	0	0	0	0	0	0	603	903	0
769	1	0	0	0	0	0	0	200	300	0	0	0	0	0	0	0	200	903	0	0	0	0	0	0	0	603	903	0
769	2	0	0	0	0	0	0	200	300	0	0	0	0	0	0	0	200	903	0	0	0	0	0	0	0	603	903	0
769	3	0	0	0	0	0	0	200	300	0	0	0	0	0	0	0	200	903	0	0	0	0	0	0	0	603	903	0
769	4	0	0	0	0	0	0	200	300	0	0	0	0	0	0	0	200	903	0	0	0	0	0	0	0	603	903	0
769	5	0	0	0	0	0	0	200	300	0	0	0	0	0	0	0	200	903	0	0	0	0	0	0	0	603	903	0
769	6	0	0	0	0	0	0	200	300	0	0	0	0	0	0	0	200	903	0	0	0	0	0	0	0	603	903	0
769	7	0	0	0	0	0	0	200	300	0	0	0	0	0	0	0	200	903	0	0	0	0	0	0	0	603	903	0
769	8	0	0	0	0	0	0	200	300	0	0	0	0	0	0	0	200	903	0	0	0	0	0	0	0	603	903	0
769	9	0	0	0	0	0	0	200	300	0	0	0	0	0	0	0	200	903	0	0	0	0	0	0	0	603	903	0
770	0	0	0	0	0	0	0	200	300	0	0	0	0	0	0	0	200	903	0	0	0	0	0	0	0	603	903	0
770	1	0	0	0	0	0	0	200	300	0	0	0	0	0	0	0	200	903	0	0	0	0	0	0	0	603	903	0
770	2	0	0	0	0	0	0	200	300	0	0	0	0	0	0	0	200	903	0	0	0	0	0	0	0	603	903	0
770	3	0	0	0	0	0	0	200	300	0	0	0	0	0	0	0	200	903	0	0	0	0	0	0	0	603	903	0
770	4	0	0	0	0	0	0	200	300	0	0	0	0	0	0	0	200	903	0	0	0	0	0	0	0	603	903	0
770	5	0	0	0	0	0	0	200	300	0	0	0	0	0	0	0	200	903	0	0	0	0	0	0	0	603	903	0
770	6	0	0	0	0	0	0	200	300	0	0	0	0	0	0	0	200	903	0	0	0	0	0	0	0	603	903	0
770	7	0	0	0	0	0	0	200	300	0	0	0	0	0	0	0	200	903	0	0	0	0	0	0	0	603	903	0
770	8	0	0	0	0	0	0	200	300	0	0	0	0	0	0	0	200	903	0	0	0	0	0	0	0	603	903	0
770	9	0	0	0	0	0	0	200	300	0	0	0	0	0	0	0	200	903	0	0	0	0	0	0	0	603	903	0
771	0	0	0	0	0	0	0	200	300	0	0	0	0	0	0	0	200	903	0	0	0	0	0	0	0	603	903	0
771	1	0	0	0	0	0	0	200	300	0	0	0	0	0	0	0	200	903	0	0	0	0	0	0	0	603	903	0
771	2	0	0	0	0	0	0	200	300	0	0	0	0	0	0	0	200	903	0	0	0	0	0	0	0	603	903	0
771	3	0	0	0	0	0	0	200	300	0	0	0	0	0	0	0	200	903	0	0	0	0	0	0	0	603	903	0
771	4	0	0	0	0	0	0	200	300	0	0	0	0	0	0	0	200	903	0	0	0	0	0	0	0	603	903	0
771	5	0	0	0	0	0	0	200	300	0	0	0	0	0	0	0	200	903	0	0	0	0	0	0	0	603	903	0
771	6	0	0	0	0	0	0	200	300	0	0	0	0	0	0	0	200	903	0	0	0	0	0	0	0	603	903	0
771	7	0	0	0	0	0	0	200	300	0	0	0	0	0	0	0	200	903	0	0	0	0	0	0	0	603	903	0
771	8	0	0	0	0	0	0	200	300	0	0	0	0	0	0	0	200	903	0	0	0	0	0	0	0	603	903	0
771	9	0	0	0	0	0	0	200	300	0	0	0	0	0	0	0	200	903	0	0	0	0	0	0	0	603	903	0
772	0	0	0	0	0	0	0	200	300	0	0	0	0	0	0	0	200	903	0	0	0	0	0	0	0	603	903	0
772	1	0	0	0	0	0	0	200	300	0	0	0	0	0	0	0	200	903	0	0	0	0	0	0	0	603	903	0
772	2	0	0	0	0	0	0	200	300	0	0	0	0	0	0	0	200	903	0	0	0	0	0	0	0	603	903	0
772	3	0	0	0	0	0	0	200	300	0	0	0	0	0	0	0	200	903	0	0	0	0	0	0	0	603	903	0
772	4	0	0	0	0	0	0	200	300	0	0	0	0	0	0	0	200	903	0	0	0	0	0	0	0	603	903	0
772	5	0	0	0	0	0	0	200	300	0	0	0	0	0	0	0	200	903	0	0	0	0	0	0	0	603	903	0
772	6	0	0	0	0	0	0	200	300	0	0	0	0	0	0	0	200	903	0	0	0	0	0	0	0	603	903	0
772	7	0	0	0	0	0	0	200	300	0	0	0	0	0	0	0	200	903	0	0	0	0	0	0	0	603	903	0
772	8	0	0	0	0	0	0	200	300	0	0	0	0	0	0	0	200	903	0	0	0	0	0	0	0	603	903	0
772	9	0	0	0	0	0	0	200	300	0	0	0	0	0	0	0	200	903	0	0	0	0	0	0	0	603	903	0
773	0	0	0	0	0	0	0	200	300	0	0	0	0	0	0	0	200	903	0	0	0	0	0	0	0	603	903	0
773	1	0	0	0	0	0	0	200	300	0	0	0	0	0	0	0	200	903	0	0	0	0	0	0	0	603	903	0
773	2	0	0	0	0	0	0	200	300	0	0	0	0	0	0	0	200	903	0	0	0	0	0	0	0	603	903	0
773	3	0	0	0	0	0	0	200	300	0	0	0	0	0	0	0	200	903	0	0	0	0	0	0	0	603	903	0
773	4	0	0	0	0	0	0	200	300	0	0	0	0	0	0	0	200	903	0	0	0	0	0	0	0	603	903	0
773	5	0	0	0	0	0	0	200	300	0	0	0	0	0	0	0	200	903	0	0	0	0	0	0	0	603	903	0
773	6	0	0	0	0	0	0	200	300	0	0	0	0	0	0	0	200	903	0	0	0	0	0	0	0	603	903	0
773	7	0	0	0	0	0	0	200	300	0	0	0	0	0	0	0	200	903	0	0	0	0	0	0	0	603	903	0
773	8	0	0	0	0	0	0	200	300	0	0	0	0	0	0	0	200	903	0	0	0	0	0	0	0	603	903	0
773	9	0	0	0	0	0	0	200	300	0	0	0	0	0	0	0	200	903	0	0	0	0	0	0	0	603	903	0
774	0	0	0	0	0	0	0	200	300	0	0	0	0	0	0	0	200	903	0	0	0	0	0	0	0	603	903	0
774	1	0	0	0	0	0	0	200	300	0	0	0	0	0	0	0	200	903	0	0	0	0	0	0	0	603	903	0
774	2	0	0	0	0	0	0	200	300	0	0	0	0	0	0	0	200	903	0	0	0	0	0	0	0	603	903	0
774	3	0	0	0	0	0	0	200	300	0	0	0	0	0	0	0	200	903	0	0	0	0	0	0	0	603	903	0
774	4	0	0	0	0	0	0	200	300	0	0	0	0	0	0	0	200	903	0	0	0	0	0	0	0	603	903	0
774	5	0	0	0	0	0	0	200	300	0	0	0	0	0	0	0	200	903	0	0	0	0	0	0	0	603	903	0
774	6	0	0	0	0	0	0	200	300	0	0	0	0	0	0	0	200	903	0	0	0	0	0	0	0	603	903	0
774	7	0	0	0	0	0	0	200	300	0	0	0	0	0	0	0	200	903	0	0	0	0	0	0	0	603	903	0
774	8	0	0	0	0	0	0	200	300	0	0	0	0	0	0	0	200	903	0	0	0	0	0	0	0	603	903	0
774	9	0	0	0	0	0	0	200	300	0	0	0	0	0	0	0	200	903	0	0	0	0	0	0	0	603	903	0
775	0	0	0	0	0	0	0	200	300	0	0	0	0	0	0	0	200	903	0	0	0	0	0	0	0	603	903	0
775	1	0	0	0	0	0	0	200	300	0	0	0	0	0	0	0	200	903	0	0	0	0	0	0	0	603	903	0
775	2	0	0	0	0	0	0	200	300	0	0	0	0	0	0	0	200	903	0	0	0	0	0	0	0	603	903	0
775	3	0	0	0	0	0	0	200	300	0	0	0	0	0	0	0	200	903	0	0	0	0	0	0	0	603	903	0
775	4	0	0	0	0	0	0	200	300	0	0	0	0	0	0	0	200	903	0	0	0	0	0	0	0	603	903	0
775	5	0	0	0	0	0	0	200	300	0	0	0	0	0	0	0	200	903	0	0	0	0	0	0	0	603	903	0
775	6	0	0	0	0	0	0	200	300	0	0	0	0	0	0	0	200	903	0	0	0	0	0	0	0	603	903	0
775	7	0	0	0	0	0	0	200	300	0	0	0	0	0	0	0	200	903	0	0	0	0	0	0	0	603	903	0
775	8	0	0	0	0	0	0	200	300	0	0	0	0	0	0	0	200	903	0	0	0	0	0	0	0	603	903	0
775	9	0	0	0	0	0	0	200	300	0	0	0	0	0	0	0	200	903	0	0	0	0	0	0	0	603	903	0
776	0	0	0	0	0	0	0	200	300	0	0	0	0	0	0	0	200	903	0	0	0	0	0	0	0	603	903	0
776	1	0	0	0	0	0	0	200	300	0	0	0	0	0	0	0	200	903	0	0	0	0	0	0	0	603	903	0
776	2	0	0	0	0	0	0	200	300	0	0	0	0	0	0	0	200	903	0	0	0	0	0	0	0	603	903	0
776	3	0	0	0	0	0	0	200	300	0	0	0	0	0	0	0	200	903	0	0	0	0	0	0	0	603	903	0
776	4	0	0	0	0	0	0	200	300	0	0	0	0	0	0	0	200	903	0	0	0	0	0	0	0	603	903	0
776	5	0	0	0	0	0	0	200	300	0	0	0	0	0	0	0	200	903	0	0	0	0	0	0	0	603	903	0
[truncated: 1,064 more rows]
