# Supplementary material for: The Effects of an Extemporaneous Speech Dual-task on Older Adult Gait Control
Source: Research Square preprint supplement (doi:10.21203/rs.3.rs-7674245/v1), 2025-11-18
Supplement: Supplementary file 183 [file Over7ground09.xlsx]

## Sheet: Sheet1
Trajectories
		07:LFHD			07:RFHD			07:LBHD			07:RBHD			07:C7			07:T10			07:CLAV			07:STRN			07:RBAK			07:LSHO			07:LUPA			07:LELB			07:LFRM			07:LWRA			07:LWRB			07:LFIN
Frame	Sub Frame	X	Y	Z	X	Y	Z	X	Y	Z	X	Y	Z	X	Y	Z	X	Y	Z	X	Y	Z	X	Y	Z	X	Y	Z	X	Y	Z	X	Y	Z	X	Y	Z	X	Y	Z	X	Y	Z	X	Y	Z	X	Y	Z
		mm	mm	mm	mm	mm	mm	mm	mm	mm	mm	mm	mm	mm	mm	mm	mm	mm	mm	mm	mm	mm	mm	mm	mm	mm	mm	mm	mm	mm	mm	mm	mm	mm	mm	mm	mm	mm	mm	mm	mm	mm	mm	mm	mm	mm	mm	mm	mm
396	0	235.677	2467.03	1608.16	137.326	2457.4	1612.36	244.123	2622.63	1608.19	113.845	2626.72	1607.23	153.711	2668.56	1486.72	144.614	2750.08	1239.56	169.518	2555.01	1395.63	169.581	2497.77	1240.15	58.4727	2745.24	1302.69	328.95	2669.82	1429.82	368.307	2716.25	1248.49	366.713	2769.24	1108.52	409.998	2741.34	939.855	389.608	2722.16	857.453	411.037	2784.3	867.66	425.837	2751.13	781.334
397	0	236.585	2453.66	1609.55	137.378	2444.09	1614.21	244.663	2609.41	1609.88	114.528	2613.36	1609.36	154.1	2655.35	1488.52	145.208	2736.8	1241.33	169.563	2541.44	1397.54	168.664	2484.74	1241.98	59.1284	2732.38	1304.4	329.465	2655.95	1431.51	369.724	2700.46	1249.66	368.961	2751.38	1108.96	413.415	2718.98	940.882	393.645	2697.65	859.21	415.345	2760.03	867.643	430.777	2724.16	782.635
398	0	236.843	2441.1	1610.84	138.936	2431.39	1616.05	245.049	2595.84	1611.58	114.885	2600.11	1611.1	154.568	2642.13	1490.17	145.899	2723.58	1243.03	169.53	2528.31	1399.24	167.663	2471.59	1243.84	59.9678	2719.66	1306.2	329.964	2642.36	1433.16	371.218	2684.77	1250.97	372.25	2734.27	1109.38	416.997	2696.55	942.223	397.348	2673.08	861.046	419.623	2735.53	867.961	435.82	2696.73	784.309
399	0	237.208	2427.47	1612.3	139.211	2418.14	1617.79	245.158	2582.39	1613.47	115.589	2586.95	1613.27	154.979	2629.07	1491.99	146.634	2710.34	1244.8	169.546	2515.17	1401.06	167.283	2458.05	1245.77	60.6882	2706.74	1307.98	330.203	2628.38	1434.91	372.591	2668.96	1252.34	375.139	2716.5	1109.9	420.537	2673.84	943.933	401.753	2647.87	863.473	423.858	2710.58	868.493	440.803	2668.67	786.632
400	0	237.394	2414.05	1614.07	139.407	2404.84	1619.21	246.166	2569.34	1615.31	115.903	2573.84	1615.21	155.203	2616.04	1493.83	147.373	2697.05	1246.59	169.362	2502.04	1403.04	167.208	2444.35	1248.03	61.4793	2693.97	1309.74	330.491	2614.95	1436.85	374.027	2653.41	1254.11	377.955	2698.88	1110.5	424.121	2650.93	946.057	405.43	2622.6	865.999	428.837	2686.57	869.656	445.876	2640.55	789.559
401	0	237.709	2400.73	1615.86	139.156	2391.39	1621.26	246.648	2556.19	1617.11	116.347	2560.69	1617.37	155.578	2602.99	1495.67	148.099	2684.01	1248.3	169.377	2488.79	1404.87	166.217	2430.76	1250.11	62.1308	2681.07	1311.3	330.72	2601.27	1438.6	375.485	2637.65	1255.48	380.957	2681.18	1111.09	427.531	2627.86	948.199	410.053	2597.49	869.378	432.705	2660.52	870.874	451.044	2612.44	792.821
402	0	237.997	2387.31	1617.21	139.423	2378.34	1622.74	247.015	2543.09	1618.88	116.656	2547.67	1619.37	155.769	2589.98	1497.41	148.726	2670.99	1249.99	169.308	2475.75	1406.75	166.088	2417.35	1252.45	62.9828	2668.37	1313.02	330.926	2587.96	1440.39	376.801	2621.91	1257.07	383.621	2663.11	1111.89	430.893	2604.81	950.755	413.33	2572.11	872.521	436.93	2635.2	872.55	455.893	2584.05	796.71
403	0	238.096	2374.5	1618.44	139.41	2365.18	1623.94	247.277	2529.61	1620.56	117.033	2534.59	1621.15	156.067	2577.02	1499.08	149.398	2658.01	1251.58	169.498	2462.84	1408.53	165.456	2404.1	1253.83	63.5529	2655.65	1314.45	331.247	2574.49	1442.24	378.204	2606.31	1258.72	386.248	2644.95	1112.64	434.229	2581.62	953.349	416.974	2546.83	876.103	440.94	2609.51	874.439	460.693	2555.56	800.874
404	0	238.219	2361.1	1619.81	139.551	2352.17	1625.42	247.632	2516.64	1622.18	117.382	2521.65	1623.16	156.26	2564.17	1500.7	150.004	2644.96	1253.13	169.351	2450.01	1409.91	165.327	2391.18	1255.64	64.2905	2643.01	1316.06	331.481	2561.18	1443.9	379.705	2590.7	1260.37	389.253	2627.15	1113.7	437.438	2558.47	956.48	420.579	2521.34	880.12	444.947	2584	876.768	465.453	2527.05	805.617
405	0	238.289	2348.13	1620.91	139.881	2339.31	1626.69	247.862	2503.39	1623.61	117.765	2508.7	1624.42	156.652	2551.15	1501.92	150.503	2631.84	1254.49	169.368	2436.87	1411.51	165.138	2378.09	1257.37	64.9576	2630.32	1317.4	331.911	2547.9	1445.64	381.101	2575.14	1262.17	392.118	2609.38	1114.63	440.587	2535.31	959.667	424.05	2496.13	884.451	448.874	2558.21	879.291	470.21	2498.87	810.899
406	0	238.466	2335.18	1621.73	140.247	2326.87	1627.45	248.225	2490.36	1624.65	118.017	2495.86	1625.65	156.927	2538.23	1502.97	151.167	2618.81	1255.44	169.502	2423.89	1412.77	165.347	2365.54	1258.87	65.677	2617.64	1318.63	332.073	2534.41	1447.09	382.547	2559.5	1263.21	394.02	2590.72	1115	443.687	2512.41	962.909	427.407	2471.02	888.797	452.838	2532.79	882.053	474.488	2470.82	816.125
407	0	238.379	2322.3	1622.45	140.319	2313.77	1628.08	248.523	2477.56	1625.34	118.368	2483.01	1626.3	157.183	2525.28	1503.53	151.651	2605.84	1256.29	170.236	2411.14	1413.67	165.716	2352.63	1259.81	66.1805	2604.8	1319.39	332.306	2521.07	1448.27	384.022	2543.96	1264.35	396.644	2573.01	1115.54	446.571	2489.5	966.23	431.165	2445.87	893.879	456.553	2507.21	884.774	478.57	2442.91	821.57
408	0	238.476	2309.25	1622.98	139.782	2300.65	1628.77	248.279	2464.09	1626.02	118.763	2470.26	1626.81	157.627	2512.43	1504.33	152.144	2592.89	1256.96	170.194	2398.21	1414.27	166.729	2339.6	1260.66	66.5914	2591.95	1319.79	332.715	2507.52	1449.26	385.503	2528.44	1265.46	399.404	2555.54	1116.12	449.495	2466.8	969.687	434.175	2420.94	898.78	460.294	2481.97	887.808	482.442	2415.12	827.17
409	0	238.72	2296.32	1623.39	140.251	2287.92	1629.39	249.108	2451.42	1626.32	119.198	2457.42	1627.03	158.191	2499.48	1504.42	152.64	2579.72	1257.29	170.467	2385.16	1414.67	166.654	2326.54	1261.09	67.221	2579.14	1320.11	333.331	2494.34	1449.98	386.995	2512.93	1266.18	402.113	2538.15	1116.4	452.586	2444.42	973.007	437.381	2396.26	903.838	463.877	2456.51	890.812	486.237	2387.64	832.865
410	0	238.787	2283.54	1623.51	140.473	2275.22	1629.06	249.515	2438.52	1626.36	119.517	2444.58	1627.03	158.782	2486.41	1504.59	153.214	2566.59	1257.31	171.233	2372.24	1414.68	167.213	2313.33	1261.33	67.9499	2566.24	1320.21	334.021	2481.01	1450.38	388.659	2497.42	1266.77	404.734	2520.58	1116.6	455.377	2421.82	976.415	440.356	2371.69	908.633	467.533	2431.51	893.973	489.833	2360.33	838.71
411	0	239.001	2270.2	1623.45	140.332	2262.34	1628.88	249.777	2425.16	1626.41	119.857	2431.7	1626.57	159.018	2473.47	1504.42	153.743	2553.55	1257.24	171.196	2358.92	1414.53	167.775	2300.26	1260.73	68.512	2553.35	1319.97	334.428	2467.47	1450.7	390.18	2482	1267.16	407.515	2503.43	1116.58	458.204	2399.64	979.88	443.16	2347.38	913.464	470.91	2406.33	897.182	493.143	2333.26	844.461
412	0	239.191	2256.61	1623.49	140.368	2249.13	1628.66	250.269	2412.07	1625.83	120.252	2418.76	1626.01	159.602	2460.33	1503.87	154.327	2540.54	1256.77	171.903	2346	1414.04	168.18	2287.11	1260.64	69.1717	2540.51	1319.55	334.685	2454.06	1450.57	391.709	2466.64	1267.2	410.094	2486	1116.29	460.758	2377.69	982.89	445.726	2323.39	918.296	474.199	2381.77	900.339	496.167	2306.66	850.275
413	0	239.205	2244.18	1622.69	140.821	2236.56	1627.91	250.751	2399.11	1625.29	120.417	2405.83	1625.01	159.963	2447.34	1503.29	154.733	2527.44	1256.07	172.264	2332.68	1413.62	168.729	2273.96	1260.01	69.6091	2527.55	1318.82	335.254	2440.79	1450.24	393.258	2451.44	1266.96	412.846	2468.93	1115.79	463.56	2355.94	986.062	448.687	2299.71	923.24	477.204	2357.17	903.276	499.057	2280.49	856.034
414	0	239.271	2230.35	1622.12	140.498	2223.18	1627.17	251.116	2385.62	1624.4	121.1	2392.79	1624.06	160.613	2434.18	1502.43	155.12	2514.13	1255.18	172.61	2319.44	1412.7	169.252	2260.83	1258.99	70.2726	2514.42	1317.95	335.841	2427.43	1449.42	394.79	2436.2	1266.54	415.367	2451.46	1115.05	465.925	2334.44	988.73	451.116	2276.37	927.801	480.193	2332.92	906.312	501.846	2254.59	861.632
415	0	239.663	2217.43	1621.04	140.956	2209.94	1626	251.601	2372.54	1623.24	121.515	2379.71	1623.17	161.16	2420.93	1501.48	155.56	2501.04	1253.99	173.328	2306.44	1411.16	170.11	2247.53	1258.14	70.6957	2500.98	1316.71	336.146	2413.87	1448.62	396.18	2420.92	1265.9	418.042	2434.27	1114.28	468.382	2313.15	991.621	453.526	2253.38	932.189	482.898	2309.07	909.207	504.505	2229.27	867.309
416	0	239.817	2204.23	1620.04	141.391	2197.14	1624.92	252.053	2359.07	1622.08	121.876	2366.59	1621.81	161.716	2407.7	1500.16	155.896	2487.6	1252.7	173.58	2292.93	1409.8	170.08	2234.46	1256.62	71.2178	2487.74	1315.29	336.519	2400.61	1447.44	397.692	2406.04	1264.95	420.681	2417.06	1113.26	470.609	2292.31	993.987	455.774	2230.75	936.33	485.519	2285.65	911.966	506.834	2204.3	872.637
417	0	239.946	2190.64	1618.59	141.163	2183.45	1623.48	252.407	2345.89	1620.41	122.28	2353.33	1620.08	161.86	2394.39	1498.47	156.263	2474.16	1250.86	174.586	2279.18	1408.52	170.484	2221.21	1255.09	71.601	2474.38	1313.52	337.325	2387.5	1445.99	398.853	2391.06	1263.61	422.654	2399.43	1111.59	472.718	2271.58	996.282	457.88	2208.35	940.738	487.782	2262.59	914.295	508.889	2180.01	877.77
418	0	240.443	2177.77	1616.86	141.388	2170.26	1622.18	252.715	2332.5	1618.59	122.592	2340.09	1618.33	162.507	2380.95	1496.64	156.62	2460.77	1248.89	174.703	2265.75	1406.92	170.522	2207.66	1253.42	72.1859	2460.67	1311.53	337.71	2374.13	1444.09	400.11	2376.26	1262.05	424.876	2382.37	1109.93	474.804	2251.35	998.109	459.627	2186.64	944.356	489.919	2239.96	916.405	510.936	2156.23	882.512
419	0	240.536	2163.98	1615.16	141.649	2156.82	1620.68	253.078	2319.07	1616.81	122.967	2326.78	1616.65	162.86	2367.37	1494.79	157.028	2447.3	1246.97	174.905	2251.9	1405.22	170.906	2194.18	1251.49	72.5526	2447	1309.58	338.028	2360.66	1442.55	401.163	2361.35	1260.58	427.126	2365.26	1108.5	476.573	2231.23	999.812	461.346	2165.08	947.968	491.792	2217.8	918.651	512.593	2132.73	886.908
420	0	240.731	2150.65	1613.65	142.349	2143.82	1618.92	253.445	2305.45	1615.06	123.395	2313.38	1614.74	163.212	2353.77	1492.9	157.322	2433.41	1244.87	175.317	2238.09	1403.19	171.34	2180.33	1249.85	73.1401	2433.04	1307.6	338.118	2346.9	1440.48	402.316	2346.43	1259.04	429.27	2348.36	1107.04	478.115	2211.42	1001.62	462.944	2144.28	951.255	493.75	2195.91	920.804	514.328	2110.16	891.568
421	0	240.744	2136.85	1611.9	142.462	2130.3	1617.07	253.782	2291.9	1613.13	123.829	2299.83	1612.9	163.55	2340	1490.91	157.483	2419.43	1242.68	175.894	2224.24	1401.34	171.918	2166.66	1247.75	73.4114	2418.9	1305.31	338.888	2333.24	1439	403.313	2331.51	1257.47	431.204	2331.22	1105.55	479.697	2191.91	1003.32	464.238	2123.83	954.261	495.367	2174.71	922.807	515.949	2088.12	895.788
422	0	240.854	2123.3	1610.2	142.027	2116.42	1615.56	253.929	2278.09	1611.21	123.968	2286.39	1611.08	163.823	2326.21	1488.83	157.651	2405.34	1240.52	176.188	2210.17	1399.21	172.355	2152.32	1245.96	73.576	2404.52	1302.99	339.228	2319.35	1436.98	404.189	2316.52	1255.81	432.855	2314.41	1103.99	481.044	2172.73	1004.6	465.572	2103.67	957.04	496.724	2153.69	924.593	517.074	2066.64	899.634
423	0	240.879	2109.38	1608.51	142.493	2103.12	1613.76	254.224	2264.55	1609.13	124.071	2272.6	1608.75	163.941	2312.2	1486.59	157.926	2391.21	1238.18	176.349	2195.95	1397.26	172.706	2138.21	1243.62	74.0756	2390.24	1300.67	339.403	2305.43	1434.95	404.839	2301.35	1253.96	434.441	2297.9	1102.25	481.709	2153.92	1005.59	466.393	2084.08	959.669	497.271	2132.54	925.824	517.829	2045.5	903.078
424	0	240.941	2095.72	1606.69	142.447	2089.27	1611.71	254.287	2250.61	1607.12	124.191	2258.88	1606.58	164.251	2298.19	1484.28	157.87	2376.62	1235.7	176.926	2181.85	1395.23	173.234	2123.67	1241.92	73.9655	2375.45	1297.94	339.633	2291.4	1432.98	405.464	2286.24	1252.12	435.572	2281.29	1100.44	482.754	2135.61	1006.33	467.238	2065.04	961.625	498.297	2112.86	927.046	518.587	2025.16	905.903
425	0	240.962	2081.81	1605.21	141.957	2075	1610.11	254.374	2236.89	1605.16	124.359	2245.02	1604.55	164.395	2283.98	1482.41	157.9	2362.17	1233.43	177.067	2167.28	1393.19	173.863	2109.23	1239.7	74.2401	2360.98	1295.67	340.029	2277.52	1431.08	405.999	2270.89	1250.54	436.732	2265.04	1098.95	483.52	2117.71	1007.2	467.762	2046.56	963.393	499.188	2093.72	928.19	519.402	2005.55	908.928
426	0	241.036	2067.64	1603.68	142.425	2061.59	1608.5	254.403	2222.69	1603.3	124.328	2231.1	1602.61	164.092	2269.8	1480.27	157.793	2347.39	1231.25	177.336	2152.99	1391.37	174.18	2094.44	1238.01	74.2003	2346.03	1293.35	340.106	2263.2	1429.17	406.469	2255.74	1249.4	437.569	2248.85	1097.5	483.899	2100.13	1007.64	468.314	2028.35	964.928	499.962	2075.21	929.318	519.937	1986.6	911.365
427	0	240.733	2053.62	1602.25	142.469	2047.6	1607.17	254.294	2208.9	1601.47	124.127	2216.96	1600.65	164.158	2255.4	1478.38	157.745	2332.5	1229.02	177.355	2138.16	1389.7	175.033	2079.32	1236.27	73.7592	2331.01	1290.98	340.255	2248.78	1427.61	406.7	2240.33	1247.61	438.009	2232.95	1095.9	483.809	2082.33	1007.8	468.43	2010.9	966.115	500.272	2056.9	929.933	519.929	1967.95	913.264
428	0	240.738	2039.77	1600.79	141.704	2032.97	1605.71	253.984	2194.7	1599.52	123.845	2202.97	1598.74	163.778	2241.06	1476.42	157.291	2317.2	1226.76	177.269	2123.52	1387.92	174.768	2064.06	1234.6	73.6246	2316.13	1288.68	340.036	2234.27	1425.56	406.827	2225.1	1246.04	438.511	2217.57	1094.26	484.098	2066	1007.77	468.366	1993.76	967.1	500.406	2039.63	930.135	520.371	1950.65	914.605
429	0	240.586	2025.58	1599.45	141.524	2018.68	1604.38	253.793	2180.72	1597.76	123.788	2188.71	1596.96	163.586	2226.41	1474.43	156.818	2302	1224.66	176.968	2108.74	1386.48	175.576	2048.65	1233.8	73.0979	2300.81	1286.36	339.654	2219.85	1423.81	406.792	2209.92	1244.38	439.15	2202.59	1093	484.013	2049.87	1007.46	467.991	1977.08	967.415	500.306	2022.73	930.055	520.212	1933.61	915.548
430	0	240.587	2011.55	1598.36	141.634	2004.72	1603.07	253.481	2166.65	1596.19	123.45	2174.33	1595.27	163.005	2211.83	1472.74	156.304	2286.44	1222.68	176.907	2093.71	1385.2	175.491	2033.04	1232.72	72.4238	2285.35	1284.49	339.098	2205.27	1422.32	406.488	2194.61	1243.13	439.142	2187.5	1091.72	483.676	2034	1007.07	467.589	1960.93	967.564	500.105	2006.48	929.859	519.934	1917.21	916.209
431	0	240.24	1997.05	1597.31	141.243	1989.89	1602.32	252.96	2152.31	1594.87	123.117	2159.97	1594	162.216	2197.18	1470.97	155.603	2270.67	1220.75	176.593	2078.59	1383.89	175.265	2017.73	1231.43	71.55	2269.79	1282.57	338.409	2190.52	1420.87	406.168	2179.79	1242.05	438.592	2172.37	1090.24	483.185	2018.73	1006.26	466.97	1945.52	967.309	500.543	1991.78	929.835	519.318	1901.31	916.145
432	0	240.426	1983.16	1596.21	141.026	1975.34	1601.42	252.586	2138.3	1593.51	122.364	2145.48	1592.82	161.6	2182.37	1469.51	154.69	2254.63	1218.98	175.676	2063.33	1382.8	174.704	2001.93	1230.6	70.6846	2254.11	1280.77	337.711	2175.91	1419.28	405.739	2164.87	1240.63	438.353	2158.02	1089.07	482.897	2003.99	1005.8	466.31	1930.42	967.001	499.586	1975.95	928.927	518.973	1886.23	916.164
433	0	240.216	1968.56	1595.64	141.151	1960.83	1600.75	251.957	2123.69	1592.39	121.928	2130.7	1591.97	160.766	2167.33	1468.43	153.733	2238.54	1217.34	175.342	2048.09	1381.96	174.586	1986.45	1229.89	69.5902	2238.17	1279.4	336.943	2161.1	1417.98	405.061	2150.25	1239.49	437.876	2143.79	1087.89	482.111	1989.39	1004.86	465.78	1916.26	966.216	498.879	1961.44	928.126	518.312	1871.83	915.533
434	0	239.995	1954.1	1595.31	140.913	1945.92	1600.6	251.341	2109.47	1591.78	121.199	2115.8	1591.45	159.889	2152.27	1467.77	152.713	2222.36	1216.01	174.475	2032.5	1381.69	173.529	1970.48	1229.59	68.5313	2222.36	1278.36	336.113	2146.18	1416.98	404.202	2135.75	1238.45	437.386	2130.03	1087.04	481.02	1975.27	1003.63	464.197	1902.12	964.532	498.181	1947.51	926.97	517.175	1857.82	914.212
435	0	240.078	1939.63	1595.59	140.919	1931.08	1601.17	250.525	2094.73	1591.63	120.44	2100.67	1591.59	159.067	2137.08	1467.64	151.708	2206.29	1215.24	173.613	2017.14	1381.61	172.592	1954.64	1229.5	67.3522	2206.46	1277.86	335.159	2131.36	1416.06	403.172	2121.54	1237.73	436.449	2116.21	1086.18	480.172	1962.13	1002.45	463.499	1889.04	963.208	497.23	1934.34	925.754	516.144	1844.5	912.902
436	0	239.665	1924.39	1596.1	140.763	1915.85	1601.85	249.939	2080.12	1592	119.868	2085.5	1592.25	158.027	2121.78	1467.85	150.801	2190.28	1215.21	172.687	2001.66	1381.99	171.639	1938.42	1230.28	66.2146	2190.47	1277.59	334.109	2116.25	1415.66	401.973	2107.57	1237.39	435.696	2103.17	1086.06	478.812	1948.89	1000.68	461.93	1876.21	961.159	495.946	1921.9	924.162	514.556	1832.04	910.713
437	0	239.708	1910.06	1597.07	140.919	1900.69	1603.2	249.061	2065.53	1592.4	118.821	2070.25	1592.9	157.055	2106.43	1468.32	150.304	2174.4	1215.51	171.68	1985.9	1382.83	170.112	1921.72	1231.45	65.322	2174.48	1277.86	333.242	2101.25	1415.71	400.463	2093.97	1237.25	433.471	2089.51	1085.47	477.335	1936.58	998.976	460.533	1864.15	959.132	494.314	1910.21	922.21	513.107	1820.54	908.225
438	0	239.366	1894.99	1598.15	140.831	1885.33	1604.88	248.358	2050.67	1593.06	118.053	2055.03	1594.16	156.274	2091.07	1469.23	150.133	2158.73	1216.25	170.867	1970.59	1383.94	168.887	1905.2	1232.97	64.7538	2158.68	1278.59	332.448	2085.92	1416.18	398.9	2080.49	1237.39	431.318	2076.54	1085.46	475.594	1925.07	997.276	458.899	1852.85	956.895	492.294	1899.54	920.07	511.619	1810.32	905.308
439	0	239.19	1880.06	1599.48	140.708	1870.13	1606.5	247.719	2035.99	1594.28	117.246	2039.57	1595.47	155.586	2075.8	1470.46	149.926	2143.05	1217.48	169.902	1955.04	1385.4	168.205	1889.33	1234.91	64.1594	2142.94	1279.55	331.733	2070.65	1417.27	397.362	2067.14	1238.05	430.065	2064.99	1086.39	473.784	1914.05	995.763	456.993	1842.26	954.152	490.233	1889.73	917.834	509.669	1800.68	901.91
440	0	239.206	1865.35	1601.27	140.624	1854.85	1608.22	246.936	2021.1	1595.9	116.595	2024.25	1597.16	155.105	2060.43	1472.04	149.733	2127.64	1219.33	169.291	1939.54	1387.33	167.087	1873.15	1236.78	63.9255	2127.12	1281.04	330.814	2055.06	1418.85	395.534	2053.44	1239.22	426.683	2051.88	1087.21	471.443	1903.35	994.297	454.707	1832.35	951.684	488.083	1880.79	916.164	507.793	1792.1	898.712
441	0	238.569	1849.96	1603.03	140.375	1839.7	1609.88	246.296	2005.88	1597.73	116.077	2008.91	1598.9	154.602	2045.01	1473.79	149.593	2112.38	1221.3	168.477	1924.18	1389.05	166.226	1857.29	1238.73	63.7762	2111.45	1282.9	329.919	2039.35	1420.66	394.113	2040.03	1240.78	424.103	2040.04	1088.72	469.052	1893.38	993.115	452.473	1823.07	949.225	485.202	1872.12	914.196	505.365	1784.01	894.977
442	0	238.483	1834.76	1604.84	140.129	1824.42	1611.53	245.789	1990.78	1599.56	115.755	1993.67	1600.52	153.995	2029.76	1475.48	149.25	2097.24	1223.27	168.147	1908.92	1390.52	165.674	1841.87	1240.76	63.3719	2095.78	1284.73	329.518	2024.22	1422.61	392.64	2026.09	1242.01	421.491	2028.83	1090.15	466.749	1884.02	991.554	450.065	1814.6	945.954	482.035	1864.22	911.981	502.984	1776.73	891.223
443	0	238.238	1820.04	1606.83	140.027	1809.32	1613.39	245.702	1976.24	1601.55	115.484	1978.54	1602.4	153.596	2014.62	1477.44	149.083	2082.46	1225.34	168.177	1893.77	1392.47	165.322	1826.69	1242.24	63.0985	2080.42	1286.69	329.036	2009.34	1424.41	391.216	2012.57	1243.37	418.585	2017.68	1091.39	464.207	1875.05	989.883	447.852	1806.54	943.084	479.187	1857.03	909.844	500.523	1770.21	886.932
444	0	238.279	1804.79	1608.87	139.933	1794.28	1615.18	245.195	1960.65	1603.63	115.275	1963.46	1603.91	153.247	1999.65	1479.45	148.544	2067.59	1227.6	168.097	1878.86	1394.2	165.084	1811.48	1243.73	62.8061	2065.25	1288.95	328.684	1994.73	1426.37	389.993	1999.54	1245.25	416.168	2007.26	1093.25	461.654	1866.48	988.167	445.407	1798.9	940.039	476.237	1850.36	907.614	497.636	1764.22	882.421
445	0	237.881	1789.77	1611.06	139.917	1779.38	1616.84	245.054	1945.67	1605.92	115.161	1948.38	1605.94	152.759	1984.59	1481.55	148.022	2052.94	1229.93	168.285	1864.02	1396.01	165.755	1797.17	1245.24	61.8948	2049.87	1291.18	328.306	1980.53	1428.47	387.571	1985.4	1246.21	413.326	1997.04	1094.58	459.044	1858.58	986.447	442.729	1791.89	936.696	474.363	1845.35	905.849	494.618	1758.76	877.811
446	0	237.874	1775.14	1612.88	139.808	1764.44	1618.91	244.78	1930.87	1608.11	114.958	1933.58	1608.11	152.515	1969.94	1483.64	147.342	2038.34	1232.17	168.782	1849.61	1398	166.732	1783.02	1247.06	61.3038	2034.85	1293.37	327.816	1966.73	1430.2	385.974	1972.83	1247.6	410.342	1986.66	1096.11	456.263	1851.01	984.322	440.045	1785.49	933.359	470.54	1839.12	903.278	491.481	1754.08	873.034
447	0	238.051	1760.4	1614.71	139.772	1749.58	1620.6	244.801	1916.1	1610.13	114.85	1918.78	1610	152.189	1955.23	1485.72	146.492	2023.64	1234.13	169.166	1835.15	1399.84	168.005	1769.04	1248.58	60.3351	2019.96	1295.28	327.534	1953.33	1431.94	384.67	1960.87	1248.94	407.185	1976.42	1097.41	453.477	1843.94	982.077	437.132	1779.33	929.723	466.932	1833.99	900.496	488.011	1749.8	867.617
448	0	238.102	1745.68	1616.54	140.05	1734.92	1622.34	244.603	1901.37	1612.52	114.873	1904.06	1612.37	151.891	1940.69	1487.73	145.713	2009.4	1236.33	169.492	1820.35	1402.02	169.784	1755.13	1250.87	59.2318	2004.73	1297.34	327.269	1940.27	1433.92	383.143	1949.27	1250.45	403.943	1966.26	1098.88	450.632	1837.18	979.987	434.086	1773.79	925.95	463.682	1829.63	898.097	484.591	1746.22	862.599
449	0	238.304	1731.02	1618.67	140.333	1720.13	1624.39	244.613	1886.81	1614.94	114.916	1889.33	1614.7	151.423	1925.88	1489.99	144.752	1994.93	1238.49	170.094	1806.04	1404.17	171.301	1741.26	1252.64	58.5896	1990	1299.55	327.258	1927.18	1435.77	381.651	1938.1	1252.16	400.948	1956.22	1100.64	447.647	1830.65	977.927	431.161	1768.7	922.315	460.015	1825.41	895.738	481.063	1743.4	857.664
450	0	238.423	1716.37	1620.91	140.498	1705.45	1626.25	244.667	1872.1	1617.49	114.764	1874.58	1617.01	151.457	1911.59	1492.39	143.737	1980.44	1240.66	170.854	1792.07	1406.26	173.226	1727.24	1254.97	57.5511	1975.04	1301.94	327.159	1914.22	1437.78	379.875	1927.16	1254.16	397.745	1946.22	1102.48	444.783	1824.63	976.375	427.99	1764.15	918.814	456.144	1821.72	893.646	477.811	1741.61	852.826
451	0	238.436	1701.5	1622.91	140.518	1690.36	1628.34	244.89	1857.97	1619.93	115.025	1860.03	1619.49	151.247	1897.03	1494.67	143.107	1966.55	1242.84	171.397	1777.87	1408.56	174.96	1713.27	1257.35	57.0432	1960.27	1304.27	327.064	1901.33	1439.68	378.769	1916.51	1255.82	395.187	1936.6	1104.38	441.774	1818.92	974.266	424.478	1760.29	914.475	452.154	1818.42	891.424	473.704	1739.47	847.967
452	0	238.578	1687.14	1624.84	140.871	1675.94	1630.21	244.836	1843.2	1622.12	115.109	1845.47	1621.68	151.504	1882.76	1496.9	142.155	1952.48	1245.17	171.895	1763.73	1410.5	176.153	1699.12	1259.54	56.1288	1945.62	1306.55	326.86	1888.28	1441.5	377.155	1905.72	1257.61	392.254	1926.84	1106.21	438.847	1813.59	972.527	421.22	1756.54	910.957	448.385	1815.78	889.52	469.659	1738.24	843.09
453	0	239.075	1672.88	1626.84	141.325	1661.64	1631.93	245.154	1829.13	1624.43	115.28	1831.06	1623.79	151.064	1868.3	1498.92	141.154	1937.96	1247.31	172.364	1749.61	1412.69	177.308	1685.19	1261.76	55.561	1930.93	1309.02	326.636	1875.17	1443.39	375.46	1895.04	1259.49	389.504	1917.12	1108.4	435.791	1808.75	970.958	417.899	1753.11	907.895	444.573	1813.27	887.991	465.715	1737.63	838.614
454	0	239.24	1658.6	1628.71	141.605	1647.31	1633.49	245.429	1814.69	1626.61	115.56	1816.7	1625.68	151.243	1853.99	1500.89	140.496	1923.89	1249.55	172.751	1735.61	1414.68	178.279	1671.48	1263.53	54.9186	1916.18	1311.37	326.298	1861.84	1445.11	374.305	1884	1261.27	387.05	1907.56	1110.59	432.788	1803.75	969.395	414.989	1750.28	904.936	440.907	1811.17	886.694	461.876	1737.35	834.258
455	0	239.708	1644.31	1630.39	141.901	1633.05	1635.06	245.555	1800.58	1628.44	115.832	1802.37	1627.36	151.327	1839.76	1502.79	140.065	1910.02	1251.59	173.309	1721.54	1416.31	178.973	1657.73	1265.47	54.6176	1901.92	1313.57	326.12	1848.41	1446.68	372.994	1872.67	1262.8	384.482	1898.09	1112.42	429.783	1799.04	968.31	411.971	1747.51	902.031	436.971	1809.03	885.502	457.851	1737.34	830.173
456	0	240.078	1630.22	1631.77	142.481	1618.87	1636.49	246	1786.43	1629.95	116.01	1788.12	1628.81	151.534	1825.34	1504.19	139.607	1895.7	1253.12	173.583	1707.46	1417.82	179.328	1644.13	1266.85	54.4177	1887.2	1315.39	326.078	1834.85	1447.95	371.72	1860.93	1264.04	381.996	1888.51	1114.26	427.055	1794.58	967.164	409.218	1745.05	899.151	432.91	1806.72	884.266	454.094	1737.71	826.227
457	0	240.259	1616.09	1632.73	142.724	1604.68	1637.45	246.17	1772.52	1630.94	116.194	1773.95	1629.81	152.043	1811.26	1505.15	139.235	1881.66	1254.46	173.927	1693.49	1418.99	179.516	1630.46	1267.95	53.9148	1872.73	1316.82	325.939	1821.08	1448.97	370.647	1849.39	1264.99	379.37	1879.18	1115.91	424.449	1790.63	965.937	406.202	1742.69	896.631	429.98	1805.31	883.719	450.155	1738.32	822.445
458	0	240.707	1602.09	1633.61	143.145	1590.57	1638.45	246.837	1758.78	1631.94	116.573	1759.92	1630.53	151.893	1797.03	1506.06	138.997	1867.53	1255.65	173.964	1679.34	1419.88	179.272	1616.68	1268.63	53.7484	1858.66	1317.96	325.908	1807.27	1449.66	369.628	1837.49	1265.67	376.672	1869.66	1117.31	421.362	1785.74	964.764	403.375	1740.39	894.309	426.661	1803.57	882.866	446.272	1738.89	818.866
459	0	241.123	1588.08	1634.19	143.609	1576.61	1639.02	246.868	1744.64	1632.12	116.809	1745.89	1631.24	151.987	1782.68	1506.72	138.812	1853.56	1256.42	174.095	1665.13	1420.44	179.172	1602.82	1269.01	53.9931	1844.36	1318.99	325.883	1793.27	1450.14	368.488	1825.25	1265.99	373.862	1860.09	1118.3	418.417	1781.45	963.267	400.49	1737.99	891.728	423.426	1801.66	882.136	442.474	1739.56	815.314
460	0	241.405	1574.02	1634.53	143.904	1562.48	1639.57	247.126	1730.51	1631.99	117.102	1731.75	1631.42	152.358	1768.61	1506.94	138.769	1839.45	1256.81	174.527	1651	1420.53	179.121	1588.9	1268.9	53.7074	1830.2	1319.39	325.916	1779.2	1450.2	367.699	1813.29	1266.11	371.606	1850.97	1119.32	415.842	1777.24	962.028	397.837	1735.76	889.358	420.245	1799.75	881.349	438.747	1740.46	812.009
461	0	241.938	1560.04	1634.58	144.357	1548.45	1639.85	247.509	1716.58	1631.77	117.441	1717.62	1631.31	152.675	1754.29	1507.03	138.766	1825.41	1256.91	174.566	1636.82	1420.24	178.971	1574.79	1268.68	53.617	1815.91	1319.72	326.013	1765.03	1450.14	366.886	1800.96	1266.2	369.562	1841.67	1120.22	413.486	1772.74	960.949	395.727	1732.78	886.875	417.214	1797.83	880.897	434.77	1740.88	808.707
462	0	242.257	1545.75	1634.42	144.718	1534.19	1639.73	247.529	1702.02	1631.61	117.697	1703.49	1631.04	152.794	1739.96	1506.87	138.928	1811.48	1257.04	174.678	1622.47	1420.09	178.794	1560.7	1267.94	53.3042	1801.57	1319.45	326.037	1750.86	1449.71	366.027	1788.97	1265.94	367.099	1831.85	1121	410.623	1768.08	959.421	392.055	1730.67	883.573	413.893	1795.54	880.416	431.245	1741.21	805.721
463	0	242.559	1531.67	1633.98	145.288	1519.93	1639.36	247.613	1687.74	1630.43	117.84	1689.26	1630.13	152.971	1725.54	1506.2	138.619	1797.13	1256.29	174.734	1608.16	1419.09	178.583	1546.69	1266.65	53.4435	1787.55	1319.17	326.239	1736.55	1449.08	364.897	1776.78	1265.62	364.762	1821.79	1121.43	408.03	1763.19	958.12	389.228	1728.21	881.214	410.622	1792.91	879.925	427.753	1741.46	803.185
464	0	242.973	1517.53	1633.17	145.72	1505.71	1638.8	247.995	1673.56	1629.25	118.135	1675.01	1629.08	152.932	1711.07	1505.37	138.855	1783.12	1255.45	175.163	1593.96	1417.95	178.296	1532.7	1265.39	53.5143	1773.65	1318.57	326.323	1722.27	1448.01	364.341	1764.85	1264.94	363.34	1812.16	1121.77	405.722	1758.42	956.706	386.77	1725.34	878.697	407.533	1790.5	879.237	424.535	1741.56	800.737
465	0	243.647	1503.05	1631.97	146.197	1491.84	1637.67	248.304	1659.39	1627.57	118.442	1660.76	1627.62	153.132	1696.57	1504.03	139.159	1769.12	1254.33	175.255	1579.57	1416.46	178.454	1518.71	1263.82	53.8622	1759.58	1317.4	326.452	1707.98	1446.47	363.544	1752.86	1263.99	361.252	1801.75	1121.6	403.367	1753.24	955.127	384.359	1722.45	876.351	404.539	1787.67	878.648	421.473	1741.37	798.429
466	0	243.89	1489.07	1630.64	146.737	1477.61	1636.43	248.547	1645.17	1625.78	118.837	1646.42	1626.06	153.385	1682.08	1502.35	139.447	1755.04	1252.94	175.437	1565.23	1414.76	178.258	1504.88	1261.73	54.1723	1745.26	1315.82	326.681	1693.62	1444.84	362.841	1741.13	1262.77	359.274	1791.43	1121.06	401.185	1747.91	953.495	381.183	1719.29	874.056	401.472	1784.37	877.857	418.274	1740.63	796.345
467	0	244.347	1474.78	1629.1	147.126	1463.18	1634.97	248.842	1630.91	1623.84	119.196	1631.88	1623.64	153.932	1667.53	1500.65	139.901	1741.14	1251.33	175.601	1550.6	1412.93	178.241	1490.8	1259.48	54.3335	1731.55	1314.43	327.054	1679.05	1443.08	362.108	1729.14	1261.53	357.909	1780.9	1120.66	399.22	1742.24	952.039	379.352	1715.54	872.266	398.619	1780.63	877.323	415.386	1739.42	794.37
468	0	244.759	1460.35	1627.47	147.703	1449.05	1633.12	249.053	1616.45	1621.44	119.363	1617.39	1621.42	154.392	1652.74	1498.61	140.358	1727.25	1249.5	176.018	1536.14	1410.5	178.397	1476.86	1257.11	54.737	1717.39	1312.59	327.33	1664.53	1441	361.375	1716.87	1259.99	356.399	1770.18	1119.95	397.468	1736.23	950.555	377.098	1711.29	870.028	396.175	1776.55	876.681	412.744	1737.76	792.634
469	0	245.458	1445.98	1625.39	148.158	1434.51	1631.43	249.427	1601.97	1619.07	119.805	1602.91	1619.13	154.799	1638.01	1496.62	141.075	1713.24	1247.41	176.335	1521.56	1408.22	178.492	1462.74	1254.31	55.2752	1703.15	1310.55	327.816	1649.96	1438.71	360.953	1704.66	1258.34	355.499	1759.21	1119.21	395.918	1729.71	948.923	375.431	1706.72	867.93	393.843	1771.81	876.06	409.822	1735.83	790.841
470	0	245.725	1431.5	1623.52	148.764	1419.96	1629.24	249.776	1587.39	1616.62	120.063	1588.25	1616.49	155.37	1623.32	1494.43	141.762	1699.11	1245.32	176.536	1506.8	1405.63	178.568	1448.56	1251.67	55.7754	1689.19	1308.63	328.303	1635.31	1436.68	360.35	1691.98	1256.73	353.273	1747.19	1118.01	394.544	1722.66	947.5	374.186	1701.36	866.237	392.353	1766.7	876.041	407.576	1732.83	789.357
471	0	246.446	1416.9	1621.64	149.241	1405.31	1627.28	250.54	1573.24	1614.26	120.717	1573.44	1614.08	155.996	1608.49	1492.2	142.563	1684.83	1243.42	177.139	1492.14	1403.2	178.746	1434.39	1248.68	56.3156	1674.9	1306.74	328.851	1620.72	1434.57	360.346	1679.17	1255.38	353.278	1736	1117.51	393.466	1715.01	946.415	372.802	1695.37	864.547	390.61	1760.49	875.865	405.496	1729.22	788.194
472	0	246.944	1402.24	1619.71	150.089	1390.56	1625.32	250.771	1558.03	1611.79	120.914	1558.79	1611.29	156.671	1593.75	1490	143.531	1670.45	1241.25	177.62	1477.43	1400.59	179.288	1419.99	1245.95	57.3407	1660.41	1304.63	329.509	1605.82	1432.3	360.361	1665.89	1253.8	352.617	1723.99	1116.69	392.884	1706.88	945.375	372.179	1688.92	863.134	389.431	1753.79	875.76	403.908	1725.01	787.173
473	0	247.674	1387.53	1617.56	150.597	1375.9	1623.08	251.542	1543.93	1609.22	121.571	1543.88	1608.87	157.443	1578.86	1487.73	144.584	1656.1	1239.11	178.26	1462.81	1397.89	179.648	1405.66	1243.02	58.2323	1646.22	1302.48	330.266	1591.05	1430.07	360.596	1652.35	1252.08	352.526	1711.73	1115.78	392.551	1698.22	944.323	371.617	1681.77	861.487	388.296	1746.27	875.414	402.604	1719.92	786.1
474	0	248.418	1372.9	1615.27	151.419	1361.15	1620.94	251.906	1528.57	1606.8	122.708	1529.16	1606.32	158.338	1563.9	1485.43	145.791	1641.53	1236.94	179.009	1447.94	1395.37	180.061	1391.36	1240.26	59.2537	1631.85	1300.34	331.193	1576.2	1427.97	360.954	1638.63	1250.27	352.507	1699.14	1114.76	392.382	1688.83	943.324	371.071	1673.58	859.868	387.873	1738.21	875.196	401.373	1713.59	785.12
475	0	249.112	1358.11	1613.18	152.225	1346.46	1618.47	253.025	1514.36	1604.51	123.177	1514.36	1603.86	159.272	1549.15	1483.11	146.953	1627.2	1234.75	179.673	1433.21	1392.93	180.852	1376.75	1237.79	60.4394	1617.55	1298.23	332.144	1561.19	1425.76	361.693	1624.67	1248.7	352.56	1686.06	1113.71	392.362	1678.76	942.283	371.074	1664.85	858.692	387.496	1729.27	874.962	400.633	1706.87	784.171
476	0	249.967	1343.46	1610.93	152.972	1331.69	1616.4	253.619	1499.41	1601.93	124.196	1499.6	1601.46	160.21	1534.3	1480.81	148.382	1612.52	1232.47	180.705	1418.48	1390.6	181.499	1362.17	1235.39	61.8324	1603.26	1295.95	333.135	1546.17	1423.68	362.594	1610.51	1246.92	353.062	1672.88	1112.5	392.606	1668.25	941.174	371.522	1655.51	857.45	387.471	1719.63	874.544	400.231	1699.02	783.205
477	0	250.849	1328.61	1608.85	153.818	1316.78	1614.23	254.212	1484.26	1599.76	124.92	1484.77	1598.99	161.427	1519.57	1478.61	149.88	1597.66	1230.26	181.642	1403.65	1388.44	182.498	1347.4	1233.13	63.3727	1588.8	1293.67	334.354	1531.12	1421.63	363.624	1596.18	1245.01	353.839	1659.21	1111.22	393.229	1656.96	939.924	372.429	1645.26	856.168	387.916	1709.07	873.975	400.209	1690.27	782.287
478	0	251.677	1313.79	1606.87	154.83	1301.89	1612.21	255.47	1469.92	1597.61	126.147	1469.98	1596.95	162.772	1504.84	1476.48	151.659	1582.64	1227.98	182.651	1388.62	1386.39	183.345	1332.4	1231.17	65.0206	1574.21	1291.42	335.624	1515.94	1419.63	365.026	1581.56	1243.47	355.062	1645.19	1109.99	394.361	1645.11	938.7	373.265	1634.23	854.919	388.989	1698.16	873.661	400.635	1680.44	781.328
479	0	252.664	1298.77	1605.29	155.773	1287.18	1610.47	256.723	1454.92	1595.98	127.167	1455.14	1594.78	164.111	1490.02	1474.61	153.522	1567.4	1225.8	183.831	1373.68	1384.71	184.636	1317.11	1229.83	66.8771	1559.32	1289.28	337.061	1500.68	1417.9	366.513	1566.55	1241.85	356.374	1630.85	1108.77	395.743	1632.56	937.663	375.261	1622.45	854.449	390.076	1686.12	873.046	401.405	1669.57	780.452
480	0	253.637	1283.95	1603.62	156.671	1272.41	1608.85	257.872	1440.19	1594.21	128.253	1440.57	1593.36	165.716	1475.27	1472.8	155.539	1552.2	1223.72	185.053	1358.69	1382.95	185.436	1302.43	1227.51	68.812	1544.59	1287.23	338.622	1485.36	1416.27	368.228	1551.38	1240.4	358.273	1616.33	1107.63	397.751	1619.43	936.812	376.67	1609.65	853.231	391.654	1673.13	872.486	402.782	1657.84	779.576
481	0	254.71	1268.78	1602.18	157.533	1257.59	1606.97	258.982	1425.09	1592.8	129.745	1425.76	1591.87	167.29	1460.5	1470.97	157.503	1536.57	1221.84	186.356	1343.58	1381.43	186.628	1286.58	1226.7	70.8482	1529.37	1285.1	340.191	1469.96	1414.62	370.17	1535.99	1239.07	359.92	1601.1	1106.34	399.388	1605.16	935.684	379.111	1596.23	852.388	393.756	1659.54	871.837	404.446	1645.07	778.772
482	0	255.586	1253.93	1600.84	158.47	1242.82	1605.62	260.542	1410.02	1591.54	131.028	1411	1590.33	168.967	1445.62	1469.3	159.448	1520.54	1220.03	187.866	1328.47	1380.17	188.21	1270.88	1225.6	73.0067	1514.21	1283.09	341.954	1454.58	1413.21	372.224	1520.4	1237.67	362.42	1586.03	1105.39	401.804	1590.46	934.622	381.468	1581.89	851.148	396.362	1645.5	871.166	406.712	1631.41	777.848
483	0	256.532	1238.88	1599.63	159.398	1228.28	1604.44	261.983	1395.22	1590.26	132.402	1396.43	1588.8	170.715	1430.7	1467.88	161.522	1504.6	1218.15	189.499	1313.32	1378.75	189.76	1254.96	1224.67	75.2913	1498.91	1280.94	343.894	1439.16	1411.97	374.361	1504.65	1236.18	364.595	1570.21	1104.05	404.399	1575.11	933.418	383.427	1566.87	848.98	399.123	1630.16	870.151	409.333	1616.59	776.708
484	0	257.685	1224.03	1598.61	160.42	1213.63	1603.44	263.529	1380.38	1589.35	133.889	1381.9	1587.56	172.719	1415.9	1466.33	163.698	1488.61	1216.19	191.112	1298.07	1377.71	191.53	1238.91	1223.87	77.644	1483.42	1278.78	345.839	1423.65	1410.46	376.637	1488.68	1234.73	367.155	1554.19	1102.53	407.419	1559.28	932.146	387.699	1551.02	848.782	402.208	1614.3	868.857	412.348	1600.75	775.292
485	0	258.652	1208.96	1598.13	161.335	1198.81	1602.85	265.005	1365.23	1588.58	135.631	1367.29	1586.53	174.637	1401.07	1465.31	165.722	1472.28	1214.4	192.849	1282.86	1377.06	193.36	1222.75	1223.44	79.9854	1467.91	1276.83	347.8	1408.18	1409.42	379.072	1472.46	1233.4	369.686	1537.48	1101.07	410.435	1542.59	930.763	389.652	1534.06	846.317	405.261	1597.54	867.362	415.742	1583.95	773.948
486	0	259.675	1193.77	1598.44	162.321	1183.99	1602.99	266.493	1350.05	1588.57	137.174	1352.53	1586.57	176.542	1386.06	1464.77	167.826	1456.33	1212.66	194.52	1267.59	1376.97	195.305	1206.5	1223.47	82.1728	1452.28	1275.17	349.791	1392.65	1408.74	381.577	1455.96	1232.33	372.676	1520.67	1099.74	413.801	1525.13	929.496	394.358	1516.48	846.302	408.616	1579.96	865.902	419.788	1566.41	772.76
487	0	260.648	1178.63	1598.98	163.28	1169.28	1603.31	268.153	1334.81	1589.11	138.774	1337.66	1586.8	178.412	1371.15	1464.73	170.31	1440.89	1211.89	196.216	1252.46	1377.5	197.365	1190.41	1224.18	83.9377	1436.52	1273.82	351.816	1377.36	1408.47	384.181	1439.16	1231.55	375.276	1503.03	1098.46	417.119	1506.92	928.427	397.732	1498.08	844.964	412.473	1561.66	864.879	424.159	1547.58	771.862
488	0	261.855	1163.43	1600.06	164.507	1154.42	1604.24	269.918	1319.59	1590.06	140.532	1323	1587.89	180.087	1355.66	1465.45	172.388	1425.92	1211.18	198.003	1237.31	1378.15	199.353	1174.38	1225.37	85.717	1421.14	1273.57	353.582	1362.14	1408.74	386.596	1422.12	1231.11	378.441	1485.25	1097.7	420.932	1488.33	927.973	402.325	1478.93	844.92	416.424	1542.38	863.768	428.722	1527.66	771.129
489	0	263.022	1148.31	1601.54	165.647	1139.44	1605.29	271.509	1304.29	1591.25	142.167	1308.24	1588.61	181.646	1340.55	1466.32	173.069	1409.26	1211.83	199.539	1222.09	1379.37	201.225	1158.67	1226.7	87.1592	1406.15	1274.32	355.245	1346.94	1409.7	389.097	1404.97	1231.41	381.74	1467.33	1097.61	424.777	1468.62	927.865	406.722	1458.75	844.724	420.469	1521.94	863.437	433.753	1506.49	770.962
490	0	264.248	1133.07	1603.1	166.719	1124.6	1606.8	272.67	1288.59	1592.72	143.789	1293.36	1589.6	183.013	1325.47	1467.49	173.894	1394	1212.92	200.972	1207.05	1380.61	202.821	1143.14	1228.08	88.2401	1390.82	1275.59	356.492	1331.7	1410.75	391.475	1387.77	1232.13	384.703	1448.98	1097.71	428.756	1448.03	928.246	410.689	1437.36	844.856	425.037	1501.05	863.166	439.021	1484.3	771.071
491	0	265.318	1118.07	1604.61	168.068	1109.8	1608.07	274.499	1273.84	1593.94	145.197	1278.44	1591.02	184.339	1310.47	1468.7	175.535	1380.3	1214.57	202.435	1192.11	1381.91	204.548	1127.69	1229.84	89.1404	1375.71	1277.05	357.637	1316.56	1412.11	393.632	1370.75	1233.04	387.808	1430.66	1097.91	432.847	1427.08	928.657	415.682	1415.52	845.689	429.922	1479.22	863.064	444.735	1461.15	771.308
492	0	266.543	1103.19	1605.69	169.009	1094.99	1609.61	275.853	1258.92	1595.06	146.447	1263.58	1592.24	185.353	1295.55	1470.13	175.841	1365.37	1216.07	203.456	1177.29	1383.22	206.054	1112.52	1231.47	89.9477	1360.66	1278.75	358.809	1301.59	1413.63	395.648	1353.87	1234.09	390.811	1412.22	1098.14	436.983	1405.36	929.063	420.601	1392.74	846.547	434.977	1456.7	862.7	450.541	1437.22	771.467
493	0	267.668	1088.38	1606.95	170.213	1080.04	1610.93	276.943	1244.03	1596.22	147.701	1248.88	1593.81	186.234	1280.74	1471.56	176.176	1351.01	1218.07	204.416	1162.55	1384.74	207.263	1097.8	1232.83	90.4847	1346.09	1280.84	359.81	1286.51	1415.06	397.286	1337.12	1235.25	393.927	1393.83	1098.57	441.327	1383.56	929.78	423.591	1369.04	845.788	440.373	1433.81	862.637	456.259	1411.92	771.816
494	0	268.748	1073.56	1608.21	171.372	1065.34	1612.42	277.933	1229.24	1597.49	148.804	1234.1	1595.27	187.158	1266.12	1473.3	176.397	1336.58	1219.85	205.177	1148.09	1386.15	208.477	1083.32	1233.95	90.985	1331.56	1283.02	360.791	1271.52	1416.55	399.133	1320.59	1236.54	396.461	1375.07	1098.56	445.604	1361.17	930.478	428.32	1345.08	846.905	445.181	1409.59	862.071	462.437	1386.22	772.246
495	0	269.73	1058.99	1609.3	172.339	1050.54	1613.86	278.868	1214.69	1598.69	149.608	1219.43	1596.86	187.985	1251.97	1474.98	176.745	1322.23	1221.77	206.024	1133.94	1387.48	208.949	1069.2	1235.06	91.5223	1317.35	1285.12	361.644	1256.52	1418.16	400.895	1303.95	1237.84	399.748	1356.73	1098.89	449.912	1338.39	931.264	433.159	1320.59	848.238	450.441	1385.34	861.805	468.363	1359.29	772.651
496	0	270.664	1044.14	1610.39	173.497	1035.77	1615.03	279.659	1200.11	1600.3	150.422	1204.65	1599	188.892	1237.64	1476.71	177.305	1308.3	1223.94	206.244	1119.48	1389.27	209.088	1055.29	1236.28	92.3223	1303.39	1287.18	362.553	1241.77	1419.78	402.644	1287.43	1239.11	402.902	1338.12	1099.22	454.198	1315.34	932.214	438.665	1295.63	849.713	455.86	1360.64	861.724	474.304	1331.67	773.623
497	0	271.619	1029.59	1611.39	174.096	1021.21	1616.43	280.542	1185.47	1602.18	151.245	1190.01	1601.13	189.685	1223.55	1478.6	178.071	1294.27	1226.1	206.625	1105.43	1390.83	209.152	1042.25	1237.25	93.0744	1289.49	1289.12	363.455	1227.18	1421.49	404.31	1270.92	1240.42	406.167	1319.63	1099.6	458.492	1292.04	933.444	442.935	1270.27	850.905	461.298	1335.46	861.952	480.312	1303.57	774.937
498	0	272.234	1015.08	1612.51	174.724	1006.62	1617.5	281.265	1171.08	1604.1	151.933	1175.77	1603.64	190.372	1209.7	1480.37	179.244	1280.6	1228.34	207.005	1091.56	1392.45	208.732	1028.61	1238.91	93.8698	1276.2	1290.98	364.14	1212.67	1423.18	406.265	1254.44	1241.93	409.589	1301.19	1100.14	462.662	1268.5	934.855	447.604	1244.78	852.757	466.573	1309.83	862.419	486.519	1275.26	776.752
499	0	272.785	1000.49	1613.67	175.337	992.222	1618.64	281.872	1156.43	1606.14	152.738	1161.25	1605.58	190.938	1195.72	1482.26	180.301	1266.45	1230.18	207.25	1077.81	1394.14	208.183	1015.41	1240.21	94.8767	1262.88	1292.86	364.809	1198.47	1424.88	408.064	1237.85	1243.36	412.813	1282.73	1100.65	466.771	1244.97	936.452	452.233	1218.95	855.089	471.516	1284.08	862.716	492.381	1246.29	778.796
500	0	273.254	985.993	1614.8	175.976	977.76	1619.8	282.615	1141.99	1608.21	153.176	1146.9	1607.76	191.545	1182.06	1484.14	181.455	1252.46	1231.83	207.51	1064.14	1395.92	207.623	1001.69	1242.06	95.7584	1249.71	1294.55	365.344	1184.29	1426.76	409.877	1221.38	1244.73	416.06	1264.14	1101.07	470.73	1220.97	938.227	456.582	1192.7	857.614	475.868	1257.73	862.761	498.204	1216.82	781.503
501	0	273.715	971.685	1615.93	176.209	963.398	1621.07	283.301	1127.85	1610.34	153.91	1132.69	1610.04	192.145	1168.28	1486.12	182.91	1239	1233.38	207.734	1050.59	1397.71	207.131	988.501	1243.75	96.7626	1236.56	1296.37	365.93	1170.45	1428.5	411.773	1205.19	1246.11	419.131	1245.51	1101.66	474.699	1197.16	940.32	460.926	1166.38	860.601	480.795	1231.62	863.782	503.992	1187.38	784.732
502	0	274.068	957.264	1617.1	176.678	949.182	1622.29	283.776	1113.17	1612.46	154.542	1118.63	1612.12	192.627	1154.79	1488.11	184.104	1225.77	1235.14	208	1037.05	1399.57	206.812	975.04	1245.82	98.0902	1223.45	1298.25	366.294	1156.52	1430.37	413.526	1188.92	1247.73	422.366	1227.14	1102.31	478.382	1173.31	942.724	465.237	1140.26	863.98	485.427	1205.31	865.37	509.595	1157.73	788.53
503	0	274.278	942.829	1618.49	176.809	934.979	1623.84	284.291	1098.83	1614.57	154.886	1104.38	1614.44	193.123	1141.01	1489.92	185.055	1212.34	1236.96	208.251	1023.5	1401.57	206.652	961.391	1247.88	99.2245	1210.45	1300.08	366.817	1142.77	1432.41	415.146	1172.64	1249.47	425.201	1208.52	1103.22	481.854	1149.24	945.57	469.56	1113.77	868.609	489.713	1178.82	867.305	515.03	1128.28	793.248
504	0	274.526	928.588	1619.81	176.957	920.876	1624.99	284.905	1084.9	1616.56	155.356	1090.65	1616.67	193.822	1127.39	1491.99	186.072	1199.13	1238.74	208.438	1010	1403.5	206.549	947.974	1249.91	100.264	1197.48	1302.07	367.105	1128.69	1434.47	416.742	1156.48	1251.39	428.13	1190.08	1104.34	485.325	1125.35	949.139	472.831	1087.46	872.667	493.857	1152.43	869.768	520.247	1098.58	798.475
505	0	274.76	914.363	1621.1	177.139	906.683	1626.22	285.393	1070.39	1618.64	155.969	1076.24	1618.7	194.326	1113.74	1493.85	187.104	1186.18	1240.53	208.68	996.552	1405.31	206.539	934.464	1251.92	101.209	1184.4	1304	367.829	1114.81	1436.66	418.299	1140.33	1253.38	430.829	1171.6	1105.71	488.528	1101.43	952.746	476.721	1061.31	877.731	497.868	1125.91	872.659	525.193	1069.28	804.264
506	0	274.959	900.041	1622.31	177.382	892.703	1627.51	285.914	1056.14	1620.56	156.315	1062.67	1620.9	194.681	1100.31	1495.71	188.564	1173.93	1242.71	208.944	983.192	1407	206.771	920.762	1253.87	102.214	1171.43	1305.85	368.271	1100.74	1438.69	419.676	1124.44	1255.39	433.587	1153.21	1107.13	491.616	1077.69	956.761	480.015	1035.09	882.845	501.551	1099.36	875.871	529.628	1039.88	810.361
507	0	275.102	885.873	1623.6	177.46	878.64	1628.79	286.282	1041.85	1622.23	156.998	1048.52	1622.74	195.413	1086.57	1497.34	189.093	1160.73	1245.04	209.225	969.66	1408.65	207.113	907.293	1255.47	103.127	1158.38	1307.7	369.216	1086.87	1440.76	421.401	1108.17	1257.39	436.171	1134.91	1108.54	494.536	1053.96	961.05	483.166	1009.08	888.386	505.052	1072.7	879.505	533.779	1010.64	816.917
508	0	275.317	871.682	1624.61	177.542	864.75	1629.67	286.774	1027.69	1623.98	157.371	1034.75	1624.25	196.149	1072.94	1499	190.082	1147.67	1246.93	209.523	956.126	1410.18	207.389	893.944	1256.7	104.025	1145.47	1309.72	369.374	1072.46	1442.4	422.974	1091.93	1259.33	438.716	1116.7	1109.94	497.302	1030.44	965.327	486.093	983.221	894.179	508.47	1046.45	883.441	537.48	981.632	823.755
509	0	275.427	857.515	1625.56	177.638	850.787	1630.49	287.134	1013.48	1625.05	157.884	1020.97	1625.36	196.711	1059.36	1500.32	191.183	1134.51	1248.33	209.862	942.759	1411.35	207.729	880.516	1257.94	105.07	1132.54	1311.49	370.454	1058.33	1444.2	424.415	1075.9	1260.94	441.236	1098.72	1111.15	499.756	1007.03	969.656	488.803	957.507	900.057	511.62	1020.14	887.267	540.945	953.106	830.536
510	0	275.574	843.416	1626.26	177.55	836.843	1631.24	287.775	999.213	1626.31	158.403	1007.16	1626.3	197.434	1045.47	1501.4	191.995	1120.99	1249.44	210.17	929.211	1412.32	208.103	867.018	1258.98	105.894	1119.31	1312.6	370.901	1043.94	1445.52	425.874	1059.84	1262.23	443.632	1080.89	1111.95	502.193	983.888	973.81	491.239	931.962	906.152	514.552	994.086	891.058	543.931	924.707	837.294
511	0	275.552	829.312	1626.94	177.773	822.963	1631.8	288.199	985.068	1626.8	158.943	993.232	1626.98	198.253	1031.86	1502.18	192.901	1107.39	1250.4	210.677	915.521	1412.97	208.413	853.868	1259.45	106.898	1106.01	1313.86	371.743	1029.8	1446.61	427.495	1043.77	1263.37	446.09	1063.08	1112.73	504.572	961.075	977.851	493.492	906.956	912.356	517.265	968.225	895.035	546.668	896.638	844.292
512	0	275.645	815.125	1627.41	177.791	808.984	1632.23	288.718	970.994	1627.49	159.516	979.484	1627.52	198.771	1017.9	1502.89	193.199	1093.29	1250.97	211.105	901.791	1413.37	208.626	840.326	1259.93	108.338	1093.28	1314.87	372.571	1014.98	1447.73	428.989	1027.63	1264.45	448.626	1045.31	1113.5	506.697	938.239	982.275	495.54	881.908	918.52	519.738	942.721	899.036	548.996	868.922	851.358
513	0	275.726	800.929	1627.72	177.854	795.186	1632.52	289.204	956.802	1627.96	159.894	965.505	1627.64	199.603	1004.06	1503.31	194.473	1079.95	1251.87	211.559	887.992	1413.58	208.923	826.926	1260.02	109.387	1079.93	1315.48	373.443	1000.79	1448.56	430.723	1011.57	1265.47	451.08	1027.57	1114.02	508.704	915.824	986.396	497.238	857.544	924.896	522.14	917.315	903.206	551.094	841.615	858.419
514	0	276.069	786.888	1627.69	178.029	781.263	1632.54	289.862	942.746	1628.03	160.364	951.773	1627.63	200.277	990.103	1503.49	195.342	1066.23	1252.21	212.016	874.172	1413.58	209.086	813.687	1259.69	110.436	1066.45	1315.76	373.965	986.185	1448.93	432.247	995.596	1265.94	453.557	1009.83	1114.4	510.669	893.653	990.384	498.805	833.301	930.811	524.171	892.064	907.115	552.802	814.723	865.271
515	0	276.202	772.692	1627.68	178.089	767.294	1632.37	290.213	928.238	1628.02	160.996	937.811	1627.47	200.93	975.992	1503.46	196.208	1052.45	1252.37	212.723	860.558	1413.31	209.229	800.071	1259.33	111.471	1052.76	1315.93	374.734	971.764	1449.16	433.8	979.497	1266.37	456.029	992.093	1114.52	512.307	871.519	994.158	500.249	809.516	936.471	526.179	867.729	911.091	554.15	788.231	871.988
516	0	276.304	758.445	1627.42	178.206	753.305	1631.94	290.827	914.142	1627.69	161.095	923.91	1626.86	201.538	962.038	1503.11	197.008	1038.52	1252.45	212.957	846.296	1412.8	209.517	786.607	1258.64	112.454	1039.15	1315.76	375.453	957.324	1449.19	435.172	963.442	1266.4	458.508	974.401	1114.59	513.963	849.779	998.012	501.182	786.001	942.125	528.204	843.425	914.88	555.293	762.197	878.526
517	0	276.377	744.23	1627	178.468	739.273	1631.31	291.182	899.724	1627.17	161.865	910.085	1626.23	202.133	947.842	1502.62	198.011	1025.03	1252.22	213.574	832.56	1412.04	209.748	772.931	1257.81	113.44	1025.39	1315.37	376.056	942.793	1449.05	436.387	947.814	1266.49	460.836	956.628	1114.39	515.392	828.247	1001.25	502.39	762.976	947.283	529.533	818.84	918.824	556.148	736.69	884.953
518	0	276.102	729.814	1626.43	178.457	725.225	1630.64	291.619	885.427	1626.31	162.393	895.804	1625.34	202.718	933.763	1501.82	198.769	1011.09	1251.48	213.736	818.284	1411.1	210.278	759.774	1256.29	114.331	1011.42	1314.59	376.664	928.402	1448.37	438.038	931.889	1266.04	463.114	938.948	1113.85	516.639	806.887	1004.37	503.104	740.121	952.346	530.453	794.675	922.071	556.769	711.56	890.926
519	0	276.69	715.569	1625.48	178.692	711.086	1629.53	292.018	871.115	1625.22	163.025	881.705	1623.98	203.296	919.472	1500.81	199.238	997.027	1250.44	214.471	804.385	1409.82	210.562	745.583	1255.17	115.17	997.432	1313.46	377.249	913.75	1447.5	439.325	916.083	1265.32	465.349	921.451	1113.13	517.68	786.002	1007.19	503.935	717.904	957.337	531.977	771.608	925.472	557.125	687.018	896.731
520	0	276.917	701.349	1624.32	178.75	696.981	1628.47	292.268	856.783	1623.82	163.304	867.615	1622.63	203.838	905.195	1499.61	199.713	982.989	1249.2	214.914	790.256	1408.59	210.924	731.747	1253.83	115.844	983.127	1312.02	377.804	899.508	1446.33	440.428	900.42	1264.43	467.32	903.95	1112.18	518.586	765.355	1009.78	504.347	696.207	961.89	532.865	748.684	928.427	557.223	663.139	902.168
521	0	276.974	687.142	1623.2	179	682.774	1627.33	292.741	842.698	1622.3	163.505	853.449	1621.11	204.314	890.95	1498.09	200.003	968.865	1247.82	215.33	775.914	1407.09	211.259	717.354	1252.24	116.469	968.878	1310.73	378.122	884.872	1445.06	441.434	884.549	1263.48	469.211	886.579	1111.18	519.353	745.059	1012.13	504.393	674.789	966.111	533.167	725.844	931.208	557.13	639.73	907.467
522	0	277.184	672.717	1621.78	179.19	668.437	1625.78	293.022	828.236	1620.88	164.004	839.276	1619.55	204.571	876.377	1496.51	200.264	954.723	1246.14	215.705	761.583	1405.44	212.174	704.045	1250.13	116.909	954.487	1309.08	378.48	870.446	1443.54	442.406	868.959	1262.34	470.955	869.264	1110.03	519.83	725.119	1014.38	504.314	654.008	970.033	533.673	703.774	933.885	556.763	616.764	912.202
523	0	277.433	658.391	1620.23	179.318	654.306	1624.26	293.17	813.857	1619.03	164.101	824.896	1617.65	205.004	861.932	1494.83	200.429	940.453	1244.09	216.143	747.193	1403.68	212.691	689.358	1248.46	117.198	939.859	1307.04	378.919	855.957	1441.95	443.419	853.185	1260.96	472.687	852.202	1108.71	520.233	705.347	1016.25	504.724	633.952	973.336	534.06	682.21	936.157	556.244	594.57	916.566
524	0	277.636	644.16	1618.71	179.549	639.942	1622.91	293.596	799.719	1617.22	164.474	810.506	1615.86	205.151	847.372	1493.05	200.554	926.204	1242.2	216.448	732.603	1401.83	213.625	675.589	1246.26	117.517	925.28	1305.12	379.106	841.262	1440.41	444.191	837.558	1259.62	474.229	835.235	1107.46	520.483	686.091	1017.94	504.17	613.952	976.526	534.832	661.662	938.63	555.606	572.923	920.783
525	0	277.887	629.637	1617.14	179.722	625.415	1621.08	293.568	785.03	1615.5	164.639	796.087	1613.98	205.453	832.808	1491.3	200.571	911.785	1240.58	216.807	718.058	1400.02	213.943	660.129	1244.71	117.456	910.408	1303.43	379.368	826.846	1438.66	444.885	821.784	1258.29	475.636	818.499	1106.25	520.488	667.196	1019.32	503.259	594.32	979.196	534.435	640.668	940.717	554.833	551.873	924.599
526	0	278.088	615.191	1615.52	179.873	611.07	1619.5	293.721	770.739	1613.64	164.588	781.6	1612.2	205.387	818.18	1489.44	200.43	897.202	1238.93	216.884	703.518	1398.02	214.384	645.565	1242.5	117.422	895.611	1301.53	379.416	812.19	1436.82	445.4	806.251	1256.77	476.651	801.667	1104.96	520.412	648.821	1020.57	502.534	575.323	981.415	534.818	621.1	942.743	553.782	531.499	927.92
527	0	278.235	600.766	1614.03	180.05	596.61	1618.17	293.817	756.221	1611.97	164.783	767.115	1610.32	205.416	803.573	1487.68	200.065	882.51	1237.03	217.064	688.842	1396.29	215.332	631.417	1240.3	117.112	880.606	1299.56	379.636	797.666	1435.15	445.79	790.684	1255.21	477.575	785.484	1103.42	520.021	630.739	1021.34	501.639	556.967	983.404	534.501	601.811	944.031	552.664	511.816	930.763
528	0	278.586	586.368	1612.53	180.195	581.989	1616.44	293.715	741.739	1610.11	164.77	752.574	1608.79	205.267	788.818	1485.99	199.723	867.726	1235	217.267	674.046	1394.46	215.427	615.836	1238.94	116.887	865.703	1297.6	379.665	783.178	1433.42	446.112	775.293	1253.61	478.317	769.416	1101.79	519.599	613.314	1021.96	500.573	539.22	984.862	533.944	583.153	944.884	551.427	492.947	933.15
529	0	278.775	571.844	1610.97	180.406	567.362	1615.03	293.671	727.273	1608.37	164.93	737.969	1606.97	205.175	774.248	1484.24	199.145	852.781	1233.21	217.365	659.251	1393.01	216.032	601.491	1236.94	116.387	850.586	1295.68	379.399	768.577	1431.52	446.071	760.101	1252.04	478.65	753.527	1100.36	519.009	596.355	1022.23	499.534	522.014	985.989	533.355	565.204	945.501	550.091	474.631	935.065
530	0	278.977	557.352	1609.49	180.752	552.668	1613.7	293.658	712.802	1606.91	164.67	722.995	1605.47	204.841	759.508	1482.68	199.019	837.896	1232.35	217.368	644.411	1391.35	216.188	586.299	1235.68	116.21	835.645	1294.28	379.299	754.188	1430.24	446.123	745.04	1250.84	478.917	737.949	1099.21	518.147	579.662	1022.28	498.274	505.231	986.92	532.403	547.915	946.048	548.701	457.209	936.54
531	0	278.566	542.679	1608.27	180.827	537.902	1612.28	293.437	698.205	1605.48	164.672	708.445	1604.11	204.492	744.884	1481.09	197.991	822.299	1230.21	217.171	629.582	1390.08	216.127	570.405	1234.91	115.333	820.117	1292.42	378.923	739.669	1428.92	445.927	729.9	1249.64	478.922	722.733	1097.95	517.141	563.647	1022.18	496.937	489.089	987.24	531.54	531.214	946.344	547.185	440.385	937.445
532	0	279.018	528.261	1606.84	180.839	523.185	1611.05	293.217	683.789	1603.88	164.29	693.566	1602.89	204.131	730.075	1479.85	197.674	806.935	1228.75	216.941	614.643	1388.99	216.395	555.999	1233.7	114.925	804.988	1291.08	378.444	725.209	1427.23	445.442	715.14	1248.12	478.683	707.934	1096.59	516.183	548.222	1021.69	495.412	473.576	987.097	530.444	515.328	945.95	545.554	424.339	937.827
533	0	279.1	513.754	1605.65	181.071	508.449	1609.92	293.152	669.341	1602.79	164.223	678.817	1601.55	203.812	715.353	1478.31	196.781	791.118	1227.02	216.519	599.68	1387.85	215.826	539.937	1233.34	114.234	789.706	1289.6	377.949	710.736	1425.56	444.932	700.57	1246.64	478.407	693.56	1095.23	514.959	533.199	1021.01	494.243	458.861	986.772	529.232	499.987	945.39	543.983	408.848	937.698
534	0	279.194	499.15	1604.5	181.297	493.711	1608.97	292.854	654.695	1601.8	163.829	663.97	1600.83	203.237	700.595	1477.15	196.049	775.341	1225.71	216.089	584.789	1387.17	215.28	524.271	1232.83	113.373	774.265	1288.31	377.339	695.939	1424.05	444.361	686.05	1245.37	477.836	679.414	1093.95	513.698	518.617	1020.18	492.763	444.306	985.936	527.439	484.847	944.321	542.082	393.959	936.891
535	0	279.319	484.658	1603.56	181.289	479.025	1608.21	292.67	640.234	1600.82	163.777	649.349	1600.2	202.894	685.97	1476.07	194.805	759.331	1224.3	215.502	569.771	1386.39	214.586	509.02	1232.34	112.522	758.766	1287.18	376.886	681.393	1422.86	443.768	671.882	1244.08	477.153	665.589	1092.78	512.488	504.741	1018.89	491.175	430.438	984.822	526.865	471.068	943.611	540.323	379.722	936
536	0	279.519	470.027	1602.74	181.423	464.306	1607.59	292.341	625.637	1599.91	163.337	634.422	1599.8	202.101	671.181	1475.23	193.77	743.308	1222.77	214.845	554.585	1385.75	213.209	492.428	1232.47	111.419	743.109	1285.87	376.096	666.561	1421.35	442.812	657.765	1242.59	476.282	652.232	1091.37	511.171	491.152	1017.53	489.548	416.995	982.965	525.497	457.58	942.167	538.661	366.165	934.269
537	0	279.601	455.425	1602.48	181.576	449.429	1607.76	292.182	611.086	1599.63	163.266	619.672	1599.84	201.573	656.481	1474.83	192.891	727.184	1221.57	214.092	539.553	1385.74	212.232	477.59	1232.14	110.39	727.256	1284.88	375.354	652.173	1419.99	441.824	643.724	1241.32	475.056	638.629	1090.03	509.602	478.048	1015.39	487.933	403.829	980.745	523.63	444.288	939.926	536.703	353.169	931.797
538	0	279.331	440.853	1602.69	181.763	434.583	1608.31	292.044	596.476	1599.9	162.941	604.702	1600.7	200.53	641.491	1474.7	191.909	710.879	1220.47	213.241	524.511	1386.32	211.066	461.79	1232.79	109.248	711.18	1284.28	374.337	637.819	1419.08	440.405	630.089	1240.35	473.543	625.624	1088.93	508.234	465.5	1013.24	486.024	391.208	978.131	522.36	432.458	937.63	534.866	341.03	928.866
539	0	279.773	426.256	1603.06	181.885	419.717	1609.24	291.65	581.819	1600.31	162.309	589.958	1601.23	199.696	626.556	1475.08	191.14	694.529	1219.96	212.441	509.334	1387.13	209.474	444.529	1234.54	108.209	695.179	1283.93	373.23	623.593	1418.69	438.774	616.859	1239.81	471.639	612.624	1088.07	506.487	453.426	1010.76	483.851	379.188	975.102	520.387	421.047	934.878	533.118	329.741	925.516
540	0	279.907	411.591	1603.93	182.068	404.881	1610.47	291.482	567.499	1600.68	162.353	574.804	1602.53	198.946	611.543	1475.67	190.547	678.264	1220	211.79	494.154	1388.25	208.748	429.583	1235.53	107.51	679.158	1284.08	372.193	609.303	1418.62	437.196	603.987	1239.23	469.443	599.977	1087.51	504.551	441.812	1008.23	482.498	368.446	971.646	518.389	410.453	931.928	531.387	319.303	921.638
541	0	280.068	396.87	1605	182.238	389.918	1612.02	290.737	552.508	1601.3	161.973	559.894	1603.7	198.198	596.213	1476.43	190.267	662.415	1220.2	211.126	478.87	1389.41	207.905	413.41	1237.32	106.789	663.205	1284.56	371.162	594.831	1418.95	435.232	591.149	1239.31	467.008	587.669	1087.21	502.618	430.819	1005.61	480.738	357.869	967.943	516.086	400.802	928.51	529.651	309.889	917.126
542	0	280.225	382.228	1606.39	182.428	374.983	1613.75	290.599	538.161	1602.21	161.579	544.857	1604.9	197.702	581.064	1477.7	190.275	646.933	1221.19	210.549	463.789	1390.8	207.005	396.656	1239.43	106.217	647.191	1285.7	370.558	580.451	1420.11	433.589	578.294	1239.86	464.66	575.762	1087.87	500.383	420.375	1002.95	478.703	348.053	964.144	513.591	391.889	925.259	527.785	301.347	912.279
543	0	280.212	367.637	1607.88	182.415	360.176	1615.26	290.191	523.347	1603.34	161.158	529.77	1605.98	197.05	565.919	1478.75	190.418	631.932	1222.55	210.205	448.663	1392.17	206.836	381.444	1240.89	105.231	631.424	1286.24	369.798	565.572	1421.23	431.673	565.569	1240.69	461.958	564.102	1088.57	497.894	410.389	1000.52	476.455	338.86	960.248	510.91	383.684	922.132	525.751	293.665	907.271
544	0	280.251	352.887	1609.5	182.555	345.173	1616.78	289.832	508.664	1604.4	160.843	514.818	1607.12	196.456	550.715	1480.16	190.03	617.471	1224.12	210.122	433.616	1393.16	206.785	365.839	1242.16	105.134	616.124	1288.34	369.587	550.9	1422.83	429.941	552.671	1241.64	459.003	552.449	1089.66	495.31	401.014	997.826	474.136	330.301	956.071	507.935	376.294	918.795	523.297	286.772	901.375
545	0	280.303	338.184	1611.27	182.605	330.271	1618.47	289.723	493.986	1605.76	160.58	499.853	1608.38	196.319	535.77	1481.61	189.639	603.245	1226.09	210.293	418.789	1394.28	207.199	350.49	1243.3	104.924	601.022	1290.24	369.172	536.329	1424.33	428.587	539.734	1242.8	456.204	541.511	1090.67	492.844	392.154	995.159	471.844	322.413	951.633	504.935	369.618	915.308	521.045	280.756	895.817
546	0	280.593	323.5	1612.78	182.77	315.437	1620.02	289.351	479.046	1607.13	160.225	484.924	1609.2	195.951	520.784	1483.11	189.201	588.932	1228.05	210.692	404.069	1395.69	207.849	335.464	1244.48	104.507	586.025	1292.07	369.253	521.924	1426.32	427.627	527.114	1243.84	453.014	530.35	1091.68	490.174	383.956	992.104	469.691	315.457	946.83	501.541	363.703	911.563	518.495	275.647	889.379
547	0	280.691	308.688	1614.74	182.835	300.517	1621.49	289.305	464.485	1608.92	160.325	470.01	1610.48	195.779	506.044	1484.67	188.936	574.799	1230.19	211.129	389.603	1397.15	208.837	320.736	1245.74	104.388	571.351	1293.82	368.944	508.085	1428.21	425.978	513.987	1245.17	449.838	519.405	1092.77	487.376	376.26	988.936	466.997	308.789	941.966	498.06	358.273	907.561	515.703	271.165	883.1
548	0	280.568	294.05	1616.4	182.948	285.615	1622.95	289.073	449.75	1610.7	160.218	454.82	1612.02	195.741	491.417	1486.44	187.643	559.812	1230.84	211.62	375.33	1398.65	210.313	306.687	1246.81	104.368	556.724	1295.73	368.958	494.377	1430.12	424.867	501.341	1246.51	446.765	508.596	1094.14	484.433	368.818	985.787	463.814	302.441	937.159	494.431	353.496	903.773	512.552	267.289	876.492
549	0	280.853	279.382	1617.89	182.999	270.838	1624.23	289.105	435.009	1612.77	160.293	440.467	1613.55	195.643	476.73	1488.13	188.538	546.097	1233.79	212.198	361.018	1400.11	211.773	293.281	1247.98	104.248	542.072	1297.62	368.924	480.761	1432.07	423.79	488.47	1248.07	443.968	498.003	1095.76	481.559	361.857	982.683	460.678	296.85	931.907	490.746	349.275	899.995	509.139	264.019	869.662
550	0	281.003	264.681	1619.78	183.224	256.007	1625.45	289.019	420.569	1614.66	160.11	425.533	1615.02	195.884	462.314	1490.08	188.344	531.594	1235.63	212.966	346.935	1401.71	213.11	280.178	1249.28	104.016	527.515	1299.3	369.09	467.314	1433.97	422.664	476.02	1249.37	440.904	487.462	1097.11	478.42	355.189	979.416	457.558	291.999	926.691	486.716	345.236	896.201	505.459	261.608	862.944
551	0	281.091	250.195	1621.27	183.466	241.289	1626.97	288.976	405.956	1616.96	160.049	410.868	1617.01	196.136	447.931	1492.06	188.055	517.191	1237.67	213.717	332.775	1403.5	214.717	267.652	1250.34	103.865	513.093	1301.2	369.232	453.904	1435.78	421.705	463.986	1250.92	438.124	477.015	1098.73	475.285	349.031	976.329	454.212	287.541	921.571	482.975	342.127	892.793	501.435	259.616	856.291
552	0	281.51	235.566	1622.96	183.738	226.547	1628.23	289.208	391.218	1619.45	160.299	396.114	1618.95	196.248	433.635	1494.06	187.735	502.984	1239.72	214.539	318.894	1405.13	216.365	254.684	1251.78	103.772	498.738	1303.1	369.49	440.589	1437.72	421.136	451.958	1252.67	435.421	466.536	1100.31	472.227	343.078	973.497	450.784	283.774	917.114	479.173	339.297	889.483	497.355	258.293	849.626
553	0	281.871	221.004	1624.76	184.072	211.908	1629.58	289.266	376.636	1621.64	160.433	381.381	1621.17	196.449	419.358	1496.1	187.702	488.976	1242.13	215.23	304.955	1407.06	217.705	241.542	1253.63	103.45	484.486	1305.01	369.694	427.211	1439.63	419.826	440.137	1254.4	432.841	456.07	1102.17	468.821	337.622	970.26	447.383	280.19	912.03	475.367	336.822	886.579	493.002	257.561	843.156
554	0	281.938	206.681	1626.15	184.319	197.333	1630.92	289.665	362.345	1623.78	160.616	366.821	1623.06	196.799	405.16	1498.09	187.222	475.184	1243.77	215.828	291.159	1408.83	218.857	228.102	1255.39	103.349	470.229	1307.01	369.87	413.944	1441.33	419.218	428.663	1256.03	430.367	445.941	1103.76	465.835	332.615	967.648	443.972	277.255	907.129	471.618	334.802	883.945	488.445	257.427	836.747
555	0	282.291	192.478	1627.13	184.666	182.826	1632.13	289.856	347.845	1625.58	160.924	352.294	1624.7	197.145	391.053	1499.63	186.17	461.025	1245.07	216.314	277.397	1410.39	219.968	214.411	1257.18	103.255	455.929	1309.01	369.869	400.696	1442.73	417.881	417.138	1257.05	427.902	435.816	1105.13	462.78	327.798	964.864	440.362	274.451	902.578	467.707	332.996	881.171	483.963	257.723	830.466
556	0	282.684	178.065	1628.51	185.085	168.427	1633.2	290.258	333.526	1627.18	161.375	337.944	1626.26	197.536	377.034	1501.3	185.611	447.183	1246.72	216.837	263.318	1412.1	220.804	200.331	1259.05	102.932	441.776	1310.73	369.912	387.31	1443.91	416.785	405.673	1258.23	425.658	425.558	1106.8	459.961	323.4	962.55	436.687	272.328	897.986	463.964	331.639	878.665	479.409	258.564	824.608
557	0	282.667	163.707	1629.6	185.465	154.042	1634.15	290.604	319.176	1628.63	161.746	323.643	1627.59	197.829	362.972	1502.71	184.874	433.417	1248.3	217.083	249.556	1413.44	221.331	186.352	1260.46	102.529	427.517	1312.57	369.992	373.974	1445.19	415.636	394.152	1259.17	423.273	415.56	1108.12	456.789	318.862	960.383	433.199	270.397	894.039	460.346	330.392	876.708	474.804	259.741	818.986
558	0	283.342	149.513	1630.32	185.917	139.783	1634.97	291.143	304.937	1629.81	162.171	309.428	1628.79	198.196	348.966	1503.9	184.306	419.523	1249.6	217.375	235.743	1414.47	221.629	172.271	1261.93	102.232	413.337	1314.12	369.905	360.473	1445.99	414.836	382.532	1260.18	420.983	405.664	1109.43	453.906	314.549	958.326	429.943	268.5	890.284	457.072	329.258	875.146	470.292	261.033	813.733
559	0	283.918	135.318	1631	186.429	125.566	1635.79	291.98	290.911	1630.64	162.7	295.304	1629.95	198.409	334.913	1504.88	184.019	405.544	1250.96	217.518	221.872	1415.28	221.826	158.753	1262.73	101.778	399.056	1315.5	370.038	346.936	1446.6	413.536	370.376	1260.48	418.641	395.708	1110.55	451.134	310.474	956.68	426.891	267.024	886.645	453.797	327.973	873.743	465.975	263.231	808.797
560	0	284.045	121.059	1631.5	186.814	111.458	1636.4	292.283	276.66	1631.07	163.239	281.069	1630.56	198.602	320.829	1505.47	183.54	391.676	1251.69	217.784	207.842	1415.85	221.623	145.181	1263.37	101.505	384.954	1316.45	369.983	333.271	1446.81	412.664	358.373	1260.85	416.168	385.892	1111.56	448.386	306.428	954.492	424.437	265.317	883.671	450.942	327.131	872.852	461.501	265.004	804.704
561	0	284.788	107.008	1631.66	187.222	97.3422	1636.86	293.185	262.793	1631.44	163.709	266.897	1630.83	198.788	306.744	1505.98	183.282	377.564	1252.4	217.831	193.923	1416.06	221.399	131.818	1263.4	101.046	371.057	1317.06	370.01	319.539	1446.9	411.495	346.149	1260.85	413.613	376.223	1112.28	445.176	302.549	952.699	420.708	263.773	879.859	447.801	325.832	872.047	457.149	266.688	800.217
562	0	285.258	92.886	1631.51	187.714	83.2614	1636.98	293.306	248.554	1630.99	164.224	252.768	1630.91	199.101	292.597	1506.22	183.042	363.375	1252.6	218.024	179.917	1416.02	221.147	118.002	1263.39	100.707	356.751	1317.68	370.06	305.572	1446.61	410.379	333.807	1260.52	411.051	366.521	1112.86	442.349	298.563	950.821	417.616	262.283	876.925	444.791	324.511	871.187	453.15	268.623	796.564
563	0	285.758	78.8674	1631.3	188.282	69.183	1637.02	294.185	234.594	1630.48	164.702	238.75	1630.77	199.253	278.367	1506	182.726	349.219	1252.34	218.119	165.869	1415.66	220.951	104.417	1262.57	100.28	342.816	1317.7	370.206	291.642	1446.08	409.496	321.732	1260.07	408.378	356.978	1113.09	439.501	294.603	949.271	414.92	260.972	874.184	441.795	323.259	870.484	449.556	270.599	793.326
564	0	286.368	64.7712	1630.93	188.774	55.0593	1636.92	294.311	220.412	1629.45	165.183	224.611	1630.23	199.473	264.083	1505.46	182.542	335.118	1251.86	218.26	151.673	1415.1	220.532	90.4097	1261.8	100.217	328.768	1317.63	370.315	277.449	1445.27	408.022	309.462	1259.16	405.92	347.306	1113.47	436.968	290.466	947.925	412.705	259.715	872.193	439.174	321.939	870.457	446.004	272.484	790.751
565	0	286.997	50.7087	1630.35	189.333	40.9567	1636.52	295.019	206.375	1628.58	165.679	210.358	1629.2	199.699	249.769	1504.81	182.565	321.195	1251.19	218.257	137.372	1414.17	220.261	76.352	1260.96	100.01	314.748	1317.26	370.365	263.242	1444.33	406.852	297.505	1258.31	403.305	337.646	1113.58	434.173	286.369	946.505	409.602	258.371	870.692	436.05	320.371	870.201	442.626	274.108	788.669
566	0	287.52	36.5928	1629.49	189.956	26.8231	1635.96	295.531	192.247	1627.27	166.059	196.2	1628.16	199.859	235.376	1503.75	182.622	307.319	1250.27	218.326	123.242	1413.1	219.851	62.2613	1259.45	100.002	300.742	1316.55	370.582	248.93	1443.09	406.146	285.778	1257.56	400.885	327.694	1113.53	431.279	281.785	945.088	406.661	256.162	868.653	432.774	318.562	869.782	439.588	275.554	786.64
567	0	288.104	22.4619	1628.34	190.548	12.6055	1635.11	295.829	178.106	1625.4	166.577	181.97	1626.83	200.011	220.95	1502.36	182.871	293.475	1249.18	218.454	108.763	1411.56	219.586	48.1111	1257.93	100.105	286.732	1315.61	370.886	234.485	1441.73	404.852	273.75	1256.34	398.791	317.693	1113.44	428.665	277.352	943.69	404.113	254.197	866.796	429.454	316.603	869.542	435.804	276.817	784.922
568	0	288.779	8.38711	1627.03	191.322	-1.64135	1634.14	296.327	164.016	1623.81	166.939	167.67	1624.89	200.321	206.459	1501.16	183.621	279.627	1248.13	218.595	94.3659	1410.08	219.399	34.0623	1255.96	100.301	272.532	1314.43	371.063	219.942	1440.12	404.385	262.223	1255.49	396.746	307.476	1113.38	426.191	272.666	942.551	401.499	251.917	864.896	426.369	314.405	869.713	432.973	277.416	783.74
569	0	289.674	-5.7181	1625.89	192.101	-15.9518	1632.9	296.845	149.983	1621.9	167.556	153.368	1623.43	200.653	191.938	1499.5	184.393	265.7	1247.14	218.73	79.7729	1408.28	218.982	19.9283	1254.03	100.532	258.467	1313.15	371.327	205.331	1438.45	403.551	250.279	1254.54	395.029	297.124	1113.35	423.721	268.127	941.913	398.67	249.416	863.071	423.35	311.642	870.131	430.107	277.573	782.896
570	0	290.373	-19.9993	1624.52	192.799	-30.2004	1631.76	297.36	135.818	1619.85	168.29	138.994	1621.62	200.903	177.294	1497.72	185.183	251.644	1245.96	218.937	65.2514	1406.43	218.816	5.92223	1251.85	101.041	244.408	1311.59	371.769	190.607	1436.78	402.784	238.306	1253.4	393.461	286.488	1113.01	421.826	262.786	941.148	396.883	246.857	862.295	420.508	308.374	870.556	427.295	276.868	782.301
571	0	291.18	-34.0093	1622.91	193.614	-44.4487	1630.29	297.81	121.67	1617.47	168.514	124.729	1619.54	201.222	162.611	1495.67	185.935	237.215	1244.35	219.171	50.5694	1404.16	218.58	-8.13314	1249.57	101.505	230.227	1309.76	372.189	175.756	1434.69	402.221	226.104	1252.17	392.145	275.768	1112.64	420.13	257.009	940.242	394.93	242.94	861.214	417.911	304.453	870.947	424.817	275.793	781.592
572	0	292.064	-48.0867	1621.19	194.431	-58.8187	1628.77	298.085	107.329	1615.02	168.883	110.178	1616.74	201.86	147.877	1493.53	186.691	222.939	1242.33	219.442	35.7642	1402.01	218.337	-22.2684	1247.05	102.083	215.989	1307.83	372.575	160.794	1432.4	402.023	213.963	1250.64	390.972	264.805	1112.05	418.705	250.901	939.28	393.341	238.884	860.095	415.743	300.129	871.304	422.432	274.269	780.92
573	0	292.622	-62.287	1619.34	195.18	-73.1901	1627.14	298.65	93.2761	1612.28	169.387	95.6989	1614.46	202.34	132.928	1491.07	187.615	208.672	1240.4	219.628	21.2601	1399.64	218.147	-36.4919	1244.47	102.473	201.855	1305.85	373.25	145.773	1430.29	401.766	201.184	1249.03	390.175	253.749	1111.47	417.621	244.211	938.5	391.728	233.951	859.962	414.05	295.016	871.745	420.121	271.774	780.542
574	0	293.697	-76.4268	1617.5	196.246	-87.5916	1625.58	299.27	79.0265	1609.74	170.16	81.0948	1612.05	203.227	118.062	1488.9	188.36	194.426	1237.96	220.055	6.33804	1397.16	218.317	-51.0573	1241.86	103.175	187.298	1303.87	373.875	130.516	1427.88	401.85	188.121	1247.62	389.535	242.149	1110.8	416.976	236.931	937.907	391.363	228.04	858.477	412.943	289.199	872.621	418.409	268.727	780.398
575	0	294.613	-90.934	1616	197.188	-102.045	1623.94	299.842	64.7929	1606.99	170.55	66.5317	1609.24	203.918	103.188	1486.69	189.481	179.972	1235.91	220.635	-8.52787	1394.75	218.392	-65.7993	1239.33	104.232	173.019	1302.03	374.722	115.265	1425.62	402.197	174.746	1245.96	389.302	230.651	1109.93	416.664	228.911	937.396	391.295	221.611	857.701	412.162	282.716	873.288	416.789	264.692	780.268
576	0	295.597	-105.05	1614.35	198.126	-116.534	1622.32	300.51	50.3439	1604.41	171.322	51.9608	1606.69	204.642	88.2433	1484.44	190.556	165.271	1234.01	221.063	-23.3814	1392.53	218.445	-80.6279	1237.03	105.189	158.704	1299.91	375.638	99.9476	1423.41	402.64	160.926	1244.37	389.265	218.423	1109.27	416.639	220.296	936.832	391.001	214.243	857.1	411.594	275.228	874.033	415.584	259.801	780.144
577	0	296.48	-119.4	1612.37	199.146	-130.941	1620.79	301.164	35.8527	1601.83	172.072	37.4573	1603.99	205.716	73.3754	1482.31	191.512	150.43	1231.74	221.746	-38.3956	1390.01	218.581	-95.524	1234.51	106.395	144.308	1297.94	376.676	84.4499	1421.13	403.174	146.845	1242.65	389.598	205.752	1108.64	416.754	210.895	936.024	391.398	206.258	856.16	411.458	266.92	874.353	414.678	253.929	780.003
578	0	297.478	-133.935	1610.76	200.025	-145.404	1619.11	302.162	21.5122	1599.24	172.776	22.8289	1601.51	206.78	58.5282	1480.06	193.061	135.69	1230.16	222.464	-53.4222	1387.7	218.745	-110.674	1232.14	107.475	129.7	1295.99	377.759	68.8881	1418.72	404.208	132.501	1241.05	390.184	192.888	1107.88	417.298	200.801	935.383	391.959	197.264	855.452	411.731	257.802	874.543	414.314	247.119	779.968
579	0	298.445	-148.411	1609.4	201.282	-160.024	1617.52	303.048	6.91036	1596.96	173.788	8.18967	1599.08	207.992	43.7933	1478.05	194.592	120.702	1228.39	223.087	-68.3465	1385.69	219.182	-125.835	1229.99	108.795	114.855	1293.86	379.01	53.3165	1416.58	405.396	118.016	1239.28	390.977	179.58	1106.94	418.09	189.942	934.761	392.595	187.601	854.819	412.325	247.828	874.752	414.151	239.042	779.925
580	0	299.206	-162.874	1607.88	202.207	-174.37	1616.29	303.82	-7.78021	1594.56	174.748	-6.30861	1596.9	209.109	28.7862	1475.84	196.118	105.676	1226.35	224.149	-83.5202	1383.59	219.535	-141.052	1228.31	110.384	100.141	1292.01	380.306	37.7083	1414.67	406.727	103.2	1237.67	392.129	165.908	1106.11	419.18	178.392	933.962	393.49	176.907	854.127	413.122	236.869	874.518	414.473	229.929	779.677
581	0	300.314	-177.475	1606.47	203.101	-188.85	1615.09	304.922	-22.3828	1592.5	175.842	-20.8828	1594.88	210.499	13.8908	1474.05	197.739	90.3956	1224.29	224.542	-98.7027	1382.14	220.186	-156.44	1226.61	112.002	85.2453	1289.95	381.781	22.056	1412.87	408.094	88.1672	1236.04	393.324	151.764	1104.88	420.466	165.936	933.125	394.972	165.599	853.134	414.381	225.165	874.216	415.313	219.576	779.415
582	0	301.35	-192.016	1605.33	204.093	-203.271	1613.94	306.147	-36.9486	1590.55	176.853	-35.3267	1592.98	211.964	-0.945891	1472.15	199.471	75.0507	1222.39	226.021	-113.88	1380.28	220.901	-171.856	1225.29	113.971	70.0254	1288.11	383.308	6.47183	1411.04	409.674	72.913	1234.61	394.977	137.442	1103.98	422.055	152.656	932.183	397.201	152.837	851.624	416.194	212.462	873.7	416.519	207.968	779.081
583	0	302.17	-206.59	1604.13	204.772	-217.701	1612.76	307.169	-51.7525	1588.78	178.078	-49.7249	1591.15	213.53	-15.9581	1470.43	201.412	59.6275	1220.49	226.773	-129.098	1379.13	221.8	-187.51	1223.92	115.73	54.9114	1286.08	384.822	-9.11594	1409.36	411.519	57.6375	1233.32	396.714	122.671	1102.88	424.003	138.849	931.292	398.177	139.741	850.711	418.42	198.786	873.448	418.308	195.435	778.405
584	0	303.166	-221.329	1603.22	205.548	-232.106	1611.95	308.541	-66.4449	1587.56	179.324	-64.2534	1589.5	214.959	-30.763	1468.87	203.573	44.1194	1218.64	228.411	-144.322	1377.55	223.013	-203.062	1223.05	117.761	39.6622	1284.19	386.303	-24.7216	1407.87	413.532	42.2673	1232.09	398.59	107.538	1101.71	426.345	124.302	930.51	400.666	125.467	849.718	420.926	184.402	872.771	420.604	181.679	777.79
585	0	303.89	-236.035	1602.62	206.422	-246.423	1611.18	310.04	-80.9998	1586.18	180.604	-78.4874	1588.27	216.719	-45.6942	1467.54	205.716	28.4027	1216.88	229.825	-159.567	1376.55	224.36	-218.945	1222.02	119.348	24.4776	1281.79	388.076	-40.2979	1406.57	415.503	26.5723	1230.71	400.867	92.1198	1100.75	428.908	108.762	929.529	402.727	110.594	849.425	423.687	169.07	871.699	423.25	166.736	776.881
586	0	304.922	-250.758	1602.2	207.175	-260.89	1610.82	311.133	-95.9734	1585.2	182	-92.9053	1587.18	218.352	-60.4159	1466.27	207.452	12.3629	1214.64	231.435	-174.986	1375.99	226.162	-235.1	1221.67	121.391	8.84142	1279.92	389.926	-55.7407	1405.47	417.542	10.6001	1229.42	403.535	76.257	1099.83	431.698	92.6621	928.17	406.255	94.2095	847.912	426.993	152.927	870.605	426.45	150.816	775.677
587	0	305.84	-265.547	1602.86	208.125	-275.381	1611.15	312.699	-110.803	1585.24	183.599	-107.479	1586.68	220.074	-75.4442	1465.64	209.239	-3.87775	1212.83	232.959	-190.219	1375.88	228.008	-251.257	1221.8	123.46	-6.831	1278.48	391.651	-71.1043	1404.74	419.681	-5.73557	1228.61	406.106	59.8868	1098.56	434.777	75.9092	927.2	409.265	77.2561	846.596	430.481	136.014	869.658	430.284	133.72	774.641
588	0	306.81	-280.346	1603.87	208.884	-289.863	1611.62	314.305	-125.614	1585.75	185.046	-121.922	1586.83	221.714	-90.2969	1465.61	211.051	-20.1165	1212.01	234.587	-205.498	1376.26	229.82	-267.448	1222.43	125.258	-22.2277	1277.51	393.427	-86.4606	1404.45	422.106	-22.1048	1228.11	408.929	43.085	1097.8	438.211	58.2162	926.411	412.262	59.5874	845.959	434.169	118.177	868.5	434.333	115.376	773.628
589	0	307.751	-295.268	1604.68	209.775	-304.442	1612.57	315.527	-140.752	1586.26	186.44	-136.269	1587.3	223.454	-105.499	1465.91	212.324	-36.4772	1211.19	236.271	-220.823	1376.99	231.861	-283.442	1223.35	126.909	-37.81	1276.8	395.065	-101.735	1404.5	424.383	-38.7567	1227.61	411.692	25.7577	1096.96	441.794	39.8595	925.808	416.27	40.6041	845.215	438.041	99.3297	867.451	438.869	95.8634	772.679
590	0	308.698	-310.043	1606.11	210.659	-318.923	1613.77	317.172	-155.584	1587.52	188.075	-150.961	1587.54	225.025	-120.475	1466.69	213.369	-52.6602	1210.82	237.839	-235.95	1378.12	233.74	-299.368	1224.72	128.164	-52.9801	1277.13	396.597	-116.942	1405.13	426.267	-56.0259	1227.78	414.324	8.21063	1096.3	445.565	20.6889	925.404	420.522	20.7511	844.696	442.069	79.6825	866.303	443.887	75.2609	771.7
591	0	309.607	-324.99	1607.76	211.577	-333.557	1615.01	318.654	-170.458	1588.69	189.691	-165.443	1588.47	226.556	-135.591	1467.76	214.4	-68.4689	1211.65	239.44	-251.121	1379.36	235.659	-315.287	1226.48	129.225	-68.464	1278.05	398.122	-132.091	1406.06	428.741	-72.7249	1228.14	417.414	-9.51869	1096.36	449.513	0.758531	925.145	424.956	-0.313006	844.025	446.501	59.0132	865.694	449.214	53.2672	771.036
592	0	310.885	-339.545	1609.08	212.773	-348.09	1616.57	320.059	-185.392	1589.86	191.168	-180.029	1589.59	227.896	-150.477	1468.95	215.144	-83.9168	1213.03	240.819	-266.098	1380.78	237.322	-330.738	1228.16	130.353	-83.6668	1279.87	399.484	-147.336	1407.45	430.729	-89.8217	1228.98	420.154	-28.188	1096.31	453.703	-19.9514	925.309	429.545	-21.939	844.422	450.955	37.5211	864.885	454.892	30.2401	770.64
593	0	312.257	-354.483	1610.93	214.03	-362.649	1618.1	321.357	-200.198	1591.19	192.457	-194.558	1590.87	228.963	-165.348	1470.05	215.537	-98.8143	1215.12	242.163	-281.116	1382.4	238.787	-346.008	1229.67	131.151	-98.6853	1281.78	400.786	-162.576	1408.95	432.886	-106.707	1230.19	423.223	-46.5027	1096.74	458.005	-41.2133	925.834	434.112	-44.6763	844.172	455.826	15.1022	864.374	460.944	6.04781	770.231
594	0	312.989	-369.012	1612.75	215.198	-377.3	1619.89	322.683	-214.691	1592.3	193.662	-209.242	1592.35	230.328	-180.221	1471.77	215.851	-113.472	1217.15	243.093	-295.84	1384.01	240.223	-361.136	1231.2	131.988	-113.456	1283.56	401.936	-177.75	1410.48	434.72	-123.806	1231.26	426.348	-64.9488	1096.8	462.604	-62.982	926.234	439.804	-68.213	844.156	460.984	-7.83255	863.725	467.026	-19.0625	769.78
595	0	314.123	-383.673	1614.07	216.367	-391.874	1621.57	323.524	-229.485	1593.34	194.957	-223.92	1593.75	231.301	-194.822	1473.54	216.201	-127.727	1219.21	243.942	-310.48	1385.43	241.051	-375.776	1232.77	132.633	-127.895	1285.74	403.008	-193.078	1411.9	436.781	-140.677	1232.51	429.702	-83.4357	1097.42	467.318	-85.2782	926.56	445.265	-91.8312	845.94	466.297	-31.4838	863.141	473.161	-45.0442	769.423
596	0	315.395	-398.232	1615.62	217.632	-406.492	1623.37	324.623	-244.092	1594.76	195.794	-238.52	1595.38	232.451	-209.444	1475.26	216.561	-141.784	1221.21	244.813	-325.117	1387.07	241.68	-390.321	1234.19	133.498	-141.728	1288.08	404.104	-208.283	1413.46	438.697	-157.644	1233.57	433.059	-102.063	1097.5	471.84	-108.132	926.683	450.745	-116.236	847.136	471.597	-55.6857	862.187	479.441	-71.9131	768.762
597	0	316.547	-412.543	1617.04	218.946	-421.061	1624.93	325.813	-258.353	1596.04	196.817	-253.089	1597.22	233.555	-223.921	1477.08	217.247	-155.724	1223.68	245.614	-339.417	1388.7	241.99	-404.514	1235.58	134.112	-155.826	1290.58	405.165	-223.391	1415.09	440.631	-174.535	1234.85	436.392	-120.788	1097.54	476.383	-131.195	927.116	455.892	-141.602	846.982	476.995	-80.385	861.418	486	-99.4939	768.715
598	0	317.789	-427.059	1618.3	220.063	-435.633	1626.7	326.63	-272.995	1597.74	197.911	-267.756	1598.78	234.339	-238.058	1478.88	218.222	-169.009	1226.5	246.005	-353.508	1390.29	241.861	-418.507	1237.04	135.09	-169.594	1292.67	406.182	-238.39	1416.89	442.722	-191.451	1236.25	439.806	-139.632	1097.84	481.152	-154.578	928.001	461.809	-167.341	847.351	482.174	-105.584	860.393	492.441	-127.88	768.958
599	0	318.775	-441.447	1619.7	221.122	-450.15	1628.15	327.541	-287.191	1599.26	198.76	-282.112	1600.68	235.254	-252.175	1480.62	219.206	-183.283	1228.43	246.118	-367.462	1392.04	241.467	-432.141	1238.44	136.008	-183.058	1294.9	407.189	-253.243	1418.65	444.685	-208.479	1237.46	443.372	-158.397	1098.34	485.812	-178.525	928.795	466.58	-193.353	848.625	487.205	-131.084	859.469	498.939	-156.857	769.462
600	0	319.779	-455.881	1620.81	222.123	-464.702	1629.45	328.245	-301.53	1600.68	199.589	-296.543	1602.58	236.302	-266.295	1482.61	220.12	-196.968	1230.39	246.539	-381.616	1393.7	240.934	-445.782	1239.88	137.235	-196.353	1297.1	408.021	-268.072	1419.99	446.769	-225.346	1238.5	446.791	-177.279	1098.3	490.472	-202.554	929.636	472.426	-220.139	849.643	492.434	-157.471	858.666	505.43	-186.594	770.204
601	0	320.623	-470.126	1622.25	223.003	-479.117	1630.96	328.903	-316.031	1602.46	200.275	-310.887	1604.87	237.1	-280.229	1484.23	221.539	-210.538	1232.45	246.897	-395.417	1395.39	240.434	-459.189	1241.28	138.038	-209.576	1298.83	408.754	-282.606	1421.58	448.885	-242.059	1239.83	449.976	-196.245	1098.25	494.876	-226.888	930.576	477.104	-246.942	850.713	497.735	-183.992	858.292	512.233	-216.702	771.349
602	0	321.273	-484.625	1623.29	223.558	-493.532	1632.18	329.792	-330.027	1604.19	201.009	-325.141	1606.64	237.794	-293.929	1486.24	222.687	-223.932	1234.3	247.152	-409.018	1396.98	239.924	-472.579	1242.91	139.493	-222.699	1300.86	409.576	-296.985	1423.32	450.817	-258.825	1241.06	453.582	-215.061	1098.64	499.255	-251.382	931.962	482.412	-273.935	851.786	502.872	-210.984	858.235	518.645	-247.15	773.122
603	0	322.053	-498.946	1624.74	224.385	-507.859	1633.63	330.398	-344.51	1606.26	201.881	-339.468	1608.86	238.521	-307.679	1488.22	224.413	-236.5	1236.28	247.555	-422.811	1398.68	239.616	-485.984	1244.8	140.694	-235.784	1302.86	410.239	-311.288	1425.11	452.408	-276.089	1242.53	456.71	-234.155	1098.85	503.659	-276.033	933.734	486.248	-302.095	853.379	508.073	-238.087	858.833	525	-277.945	775.698
604	0	322.679	-513.13	1626.15	225.024	-522.213	1635.05	331.076	-358.659	1608.13	202.482	-353.561	1610.89	239.103	-321.345	1490.02	225.893	-249.771	1238.07	248.035	-436.564	1400.63	239.475	-499.421	1246.7	141.804	-249.1	1304.51	410.976	-325.36	1426.97	454.54	-292.423	1243.98	460.106	-253.063	1099.46	507.85	-300.917	935.838	491.273	-329.793	856.483	512.995	-265.554	859.629	531.174	-308.965	778.75
605	0	323.338	-527.49	1627.43	225.597	-536.433	1636.22	331.69	-372.882	1610.04	203.23	-367.621	1612.8	239.835	-335.172	1492.15	226.961	-263.611	1239.42	248.543	-450.146	1402.31	239.446	-512.92	1248.46	143.353	-262.119	1306.81	411.587	-339.437	1428.96	456.357	-308.973	1245.74	463.453	-272.047	1100.08	511.909	-325.609	938.414	495.37	-357.768	859.939	517.797	-293.117	861.098	537.175	-340.231	782.775
606	0	323.581	-541.636	1628.52	225.855	-550.65	1637.71	332.253	-387.149	1612.03	203.72	-381.599	1614.97	240.438	-348.883	1493.9	228.096	-276.606	1241.67	248.95	-463.696	1404.04	239.634	-526.415	1250.36	143.963	-274.493	1308.71	412.232	-353.422	1431.18	458.043	-325.641	1247.72	466.667	-291.032	1101.18	515.645	-350.561	941.466	499.636	-385.298	863.976	522.385	-320.899	863.272	542.917	-371.453	787.545
607	0	323.952	-555.992	1629.74	226.275	-564.777	1638.75	333.012	-401.194	1613.84	204.26	-395.82	1616.62	241.204	-362.675	1495.7	229.204	-289.949	1244.29	249.568	-477.268	1405.72	240.232	-540.072	1252.1	145.096	-287.808	1310.62	412.869	-367.482	1433.13	459.75	-342.007	1249.61	469.88	-309.913	1102.32	519.219	-375.581	944.57	503.937	-412.529	868.444	526.616	-348.581	865.221	548.38	-402.802	792.814
608	0	324.314	-570.129	1631.09	226.521	-578.918	1639.88	333.173	-415.61	1615.17	204.914	-409.631	1618.46	241.985	-376.332	1497.5	230.155	-303.227	1245.95	250.139	-490.8	1407.32	241.028	-553.622	1253.85	146.272	-300.701	1312.64	413.663	-381.401	1435.18	462.071	-357.891	1251.53	473.107	-328.615	1103.54	522.823	-400.574	948.224	508.027	-439.669	874.142	530.793	-376.437	868.021	553.788	-433.684	798.839
609	0	324.71	-584.09	1632.07	226.836	-592.914	1640.62	334.136	-429.404	1616.98	205.32	-423.541	1619.71	242.498	-390.031	1498.91	230.914	-316.301	1247.81	250.823	-504.319	1408.55	241.939	-567.067	1255.16	147.144	-313.91	1314.18	414.474	-395.421	1437.14	463.751	-374.173	1253.35	475.989	-347.263	1104.41	526.473	-425.373	952.591	511.964	-466.993	879.527	534.735	-404.399	870.859	558.643	-464.565	805.381
610	0	324.937	-598.294	1633.12	227.057	-606.783	1641.53	334.474	-443.791	1618.26	206.165	-437.357	1620.5	243.219	-403.615	1500.02	231.878	-329.644	1249.28	251.691	-517.887	1409.7	243.047	-580.446	1256.25	148.09	-327.162	1315.48	415.38	-409.431	1439.01	465.477	-390.599	1255.36	479.101	-365.729	1105.87	529.781	-449.878	957.04	515.341	-494.259	885.456	538.765	-432.258	874.647	563.162	-495.345	812.127
611	0	325.145	-612.341	1633.68	227.184	-620.791	1642.04	335.227	-457.59	1619.32	206.825	-451.221	1621.19	243.988	-417.517	1500.97	232.81	-342.865	1250.73	252.403	-531.462	1410.44	244.139	-593.807	1256.94	149.459	-341.298	1316.21	416.301	-423.497	1440.64	467.279	-406.6	1256.86	482.181	-383.877	1107.02	533.058	-474.289	961.34	518.776	-521.344	891.592	542.741	-459.831	878.488	567.135	-525.803	819.117
612	0	325.299	-626.346	1634.27	227.438	-634.561	1642.33	335.6	-471.899	1619.99	207.048	-464.953	1622.28	244.832	-431.225	1501.64	233.907	-356.114	1251.75	253.196	-545.102	1411.02	245.437	-607.082	1257.34	150.29	-354.194	1317.32	417.241	-437.613	1441.9	469.293	-423.09	1258.28	485.111	-402.032	1107.79	536.154	-498.495	965.794	522.076	-547.967	897.785	546.635	-487.369	882.841	570.965	-556.034	826.503
613	0	325.747	-640.427	1634.4	227.979	-648.024	1642.25	336.344	-485.667	1620.32	207.99	-478.863	1622.12	245.547	-444.971	1502.12	235.149	-369.496	1252.59	254.13	-558.768	1411.34	246.573	-620.017	1257.64	151.269	-367.552	1317.64	417.934	-451.815	1442.65	471.202	-439.234	1259.29	488.223	-419.717	1108.66	539.033	-522.404	970.208	524.92	-574.435	904.475	550.395	-514.71	887.318	574.465	-585.752	833.855
614	0	325.96	-654.313	1634.73	228.231	-662.082	1642.11	336.855	-499.955	1620.63	208.583	-492.668	1621.86	246.294	-458.864	1502.24	235.851	-383.022	1252.47	254.943	-572.446	1411.46	247.714	-633.15	1257.4	152.417	-380.905	1317.93	418.996	-465.88	1443.56	473.201	-455.248	1260.2	491.527	-437.345	1109.36	542.179	-545.684	974.938	527.813	-600.341	911.286	554.009	-541.547	891.677	577.68	-615.176	841.783
615	0	326.441	-668.415	1634.59	228.667	-675.628	1641.72	337.621	-513.907	1620.32	209.184	-506.384	1621.92	247.19	-472.768	1502.08	237.182	-396.414	1252.99	255.983	-586.231	1411.11	248.925	-646.346	1256.77	153.501	-394.587	1317.61	419.98	-480.029	1444.29	475.409	-471.11	1261.17	494.614	-455.062	1109.74	545.121	-568.978	979.758	530.571	-626.13	918.31	557.59	-568.284	896.853	580.879	-644.318	850.312
616	0	327.05	-682.428	1634.33	228.973	-689.427	1641.21	338.475	-527.769	1620.2	209.99	-520.225	1621.25	247.855	-486.627	1501.8	238.456	-409.96	1253	256.868	-600.046	1410.68	250.075	-659.65	1256.25	154.637	-408.198	1317.51	420.928	-494.152	1444.6	477.609	-486.893	1261.82	498.091	-472.413	1110.33	547.915	-592.011	984.846	532.986	-651.498	925.366	561.031	-594.365	901.911	583.398	-672.834	858.303
617	0	327.284	-696.403	1633.37	229.319	-703.27	1640.51	339.118	-542.048	1619.63	210.607	-534.186	1620.27	248.698	-500.601	1501.26	239.63	-423.519	1252.61	257.75	-613.867	1409.85	251.224	-673.021	1255.2	155.905	-421.508	1317.32	421.78	-508.303	1444.56	479.673	-502.574	1262.05	501.55	-489.77	1110.51	550.501	-614.632	989.33	535.339	-676.073	932.102	563.846	-620.555	906.516	585.802	-700.73	866.601
618	0	327.789	-710.555	1632.56	229.997	-717.056	1639.34	339.919	-555.968	1618.66	211.278	-547.932	1619.15	249.567	-514.606	1500.3	240.803	-437.065	1251.81	258.656	-627.865	1408.77	252.248	-686.643	1254	156.876	-435.38	1315.95	422.56	-522.502	1443.95	481.684	-518.13	1261.8	504.748	-507.292	1110	553.006	-636.932	993.485	537.386	-700.336	939.21	566.727	-646.183	911.109	587.891	-728.08	874.405
619	0	328.379	-724.488	1631.62	230.558	-731.093	1638.21	340.743	-570.009	1617.59	212.183	-561.926	1617.89	250.295	-528.623	1499.05	241.818	-450.752	1250.53	259.699	-641.88	1407.39	253.412	-700.376	1252.76	157.966	-449.38	1314.66	423.478	-536.654	1443	483.805	-533.503	1261.26	508.294	-524.433	1109.49	555.386	-658.945	997.487	539.311	-723.903	945.719	569.482	-671.354	915.734	589.831	-754.953	881.973
620	0	329.048	-738.702	1630.18	231.075	-745.286	1636.7	341.364	-584.278	1615.94	212.872	-575.837	1616.31	251.225	-542.778	1497.68	242.862	-464.514	1249.43	260.66	-655.971	1406.09	254.573	-714.288	1251.17	158.988	-463.031	1313.54	424.556	-550.73	1442.17	485.787	-548.8	1260.42	511.736	-541.782	1108.89	557.823	-680.488	1001.48	541.42	-747.06	952.267	572.157	-696.031	920.243	591.689	-781.033	890.173
621	0	329.718	-752.719	1628.9	231.798	-758.984	1635.09	342.175	-598.28	1614.22	213.981	-589.864	1614.67	252.181	-556.8	1496.18	243.901	-478.323	1247.74	261.463	-670.116	1404.39	255.678	-728.313	1249.37	159.991	-477.8	1311.37	425.48	-564.886	1440.86	487.783	-563.974	1259.4	514.97	-559.184	1107.66	560.156	-701.75	1005.29	542.861	-770.051	957.948	574.655	-720.223	924.626	593.313	-806.546	897.615
622	0	330.305	-766.845	1627.06	232.475	-773.013	1633.4	343	-612.564	1612.54	214.702	-603.83	1612.64	253.075	-571.143	1494.36	244.924	-492.296	1245.91	262.566	-684.466	1402.58	256.825	-742.369	1247.55	160.574	-492.218	1309	426.541	-579.233	1439.12	489.846	-579.148	1258.16	518.024	-576.74	1106.22	562.442	-722.578	1008.7	544.745	-792.227	963.44	576.778	-744.041	928.346	594.781	-831.509	904.728
623	0	330.812	-781.184	1625.34	232.968	-786.977	1631.77	343.669	-626.952	1610.66	215.509	-618.004	1610.74	253.901	-585.412	1492.59	245.581	-506.379	1243.91	263.436	-698.803	1400.65	257.814	-756.662	1245.54	161.425	-507.126	1306.37	427.45	-593.467	1437.32	491.56	-594.309	1256.68	521.368	-593.913	1104.96	564.219	-743.337	1011.73	546.234	-814.017	968.724	579.02	-767.146	932.318	596.024	-855.758	911.427
624	0	331.362	-795.308	1623.66	233.358	-801.016	1629.98	344.603	-641.029	1608.67	216.181	-631.984	1608.92	254.919	-599.653	1490.45	246.357	-520.794	1242.08	264.215	-713.257	1398.67	258.819	-771.171	1243.41	162.499	-521.402	1304.78	428.37	-607.894	1435.55	493.507	-609.618	1255.29	524.115	-611.451	1103.48	565.951	-763.624	1014.58	547.483	-835.363	973.497	581.025	-789.759	936.295	597.174	-879.23	917.926
625	0	331.819	-809.747	1621.65	233.876	-815.225	1627.89	345.543	-655.365	1607.03	217.121	-646.138	1606.69	255.695	-614.042	1488.39	247.319	-534.879	1240.5	265.215	-727.893	1396.68	259.875	-785.138	1241.12	163.401	-535.743	1303.06	429.355	-622.314	1433.53	495.189	-624.863	1253.73	527.225	-628.621	1102.45	567.684	-783.548	1017.49	548.832	-856.171	978.067	582.951	-811.812	939.757	598.161	-902.091	923.717
626	0	332.366	-823.896	1619.79	234.484	-829.371	1625.97	346.111	-669.906	1604.88	217.925	-660.182	1604.83	256.621	-628.503	1486.49	247.955	-549.3	1238.28	266.207	-742.533	1394.6	260.973	-799.83	1239.05	164.322	-550.299	1300.91	430.392	-636.847	1431.58	496.469	-640.281	1251.7	529.66	-646.041	1100.75	569.413	-803.074	1019.89	550.131	-876.511	982.11	584.627	-833.343	942.892	599.136	-924.23	929.405
627	0	332.916	-838.371	1618.22	234.948	-843.512	1624.39	347.044	-684.212	1602.89	218.658	-674.459	1602.98	257.485	-643.055	1484.31	248.694	-563.878	1235.98	267.138	-757.188	1392.75	262.083	-814.184	1237.08	165.056	-565.402	1298.18	431.332	-651.539	1429.58	498.012	-655.797	1250.08	532.043	-663.314	1099.19	570.931	-822.166	1021.77	551.16	-896.468	985.557	586.053	-854.354	945.375	600.302	-945.587	934.365
628	0	333.293	-852.893	1616.5	235.343	-857.68	1622.6	347.779	-698.722	1600.73	219.375	-688.83	1600.17	258.319	-657.546	1482.41	249.667	-578.174	1234.23	267.993	-772.029	1390.77	263.141	-828.499	1235.11	165.829	-580.016	1296.24	432.24	-666.206	1427.52	499.457	-671.19	1248.18	533.97	-680.485	1097.45	571.969	-841.03	1023.2	552.158	-915.79	988.469	587.105	-874.715	947.481	601.079	-966.259	938.374
629	0	333.691	-867.116	1614.92	235.727	-871.977	1620.67	348.343	-713.38	1598.68	220.176	-703.03	1598	258.958	-672.21	1480.31	250.161	-593.207	1231.76	268.669	-786.907	1389.02	263.85	-843.986	1233.32	166.548	-594.813	1294.13	433.116	-681.104	1425.64	500.127	-687.235	1246.4	535.286	-697.899	1095.7	572.933	-859.421	1023.93	552.969	-934.811	991.013	587.947	-894.556	949.171	601.853	-986.109	941.955
630	0	334.139	-881.827	1612.93	236.092	-886.431	1619.19	348.945	-727.887	1596.33	220.89	-717.284	1596.36	259.835	-686.791	1478.35	250.814	-608.183	1229.78	269.379	-801.74	1387.29	264.881	-859.162	1231.83	167.032	-609.807	1291.77	433.734	-696.019	1423.73	501.218	-703.031	1244.67	536.573	-714.81	1094.05	573.748	-877.511	1024.56	553.649	-953.315	992.876	588.521	-913.762	949.989	602.614	-1005.51	944.801
631	0	334.696	-896.271	1611.74	236.53	-900.758	1617.54	349.815	-742.301	1594.75	221.692	-731.939	1594.11	260.382	-701.44	1476.72	250.997	-623.506	1227.35	270.09	-816.751	1385.61	265.66	-874.69	1230.43	167.597	-624.87	1289.54	434.566	-710.991	1422.2	501.655	-719.179	1242.98	537.584	-731.645	1092.45	574.167	-895.117	1024.35	554.134	-971.197	994.242	589.084	-932.275	950.857	603.141	-1024.11	947.267
632	0	335.016	-910.755	1610.4	237.081	-915.174	1616.07	350.232	-757.159	1593.07	222.136	-746.195	1592.49	260.824	-716.131	1474.98	251.968	-638.652	1226.28	270.607	-831.814	1384.34	266.439	-890.382	1229.21	167.932	-640.001	1287.71	435.095	-726.066	1420.87	502.892	-735.607	1242.13	538.148	-748.316	1091.28	574.759	-912.328	1025.08	554.214	-988.652	994.881	589.571	-950.216	951.765	603.436	-1042.06	948.935
633	0	335.502	-925.29	1609.23	237.303	-929.701	1614.91	350.695	-771.581	1591.5	222.659	-760.67	1590.69	261.24	-730.788	1473.08	252.122	-654.255	1224.38	271.109	-846.963	1382.9	267.126	-905.948	1228.26	168.255	-655.161	1286.3	435.359	-741.097	1419.42	503.182	-751.838	1241.04	538.792	-764.5	1090.26	574.808	-929.198	1025.04	554.116	-1005.59	995.203	589.997	-967.504	952.226	603.536	-1059.32	950.058
634	0	335.748	-939.897	1607.57	237.848	-944.274	1613.4	351.472	-785.99	1590.34	223.025	-775.379	1589.61	261.421	-745.551	1471.56	252.579	-670.052	1223.04	271.532	-862.051	1381.79	267.492	-921.842	1227.36	168.341	-670.299	1284.94	435.852	-756.333	1418.33	503.626	-768.228	1239.91	539.179	-780.638	1089.38	574.557	-945.687	1024.56	553.716	-1021.97	994.597	590.329	-984.184	952.32	603.396	-1076.04	950.898
635	0	336.172	-954.179	1606.37	238.388	-958.577	1612.12	351.723	-800.693	1588.85	223.259	-789.75	1587.87	261.739	-760.311	1469.94	252.265	-685.903	1220.79	271.618	-877.267	1380.66	267.69	-937.471	1226.69	168.62	-685.415	1283.39	436.001	-771.471	1416.86	503.783	-784.258	1238.74	539.478	-796.313	1088.38	574.35	-961.668	1024.03	552.965	-1037.79	993.379	590.865	-1000.21	951.937	603.009	-1092.17	950.531
636	0	336.381	-968.679	1605.08	238.76	-972.851	1610.76	351.924	-815.04	1587.11	223.688	-804.203	1586.22	261.849	-775.114	1468.27	252.016	-702.03	1218.91	271.637	-892.601	1379.56	267.429	-953.429	1226.04	168.512	-700.686	1281.79	435.874	-786.684	1415.33	503.985	-800.5	1237.46	539.456	-811.867	1086.99	573.699	-977.442	1022.45	552.04	-1053.11	991.484	590.255	-1015.88	950.153	602.475	-1107.78	949.665
637	0	336.877	-983.075	1604.15	238.974	-987.318	1610.09	352.274	-829.288	1585.52	223.9	-818.657	1585.28	261.904	-789.852	1466.74	251.866	-718.202	1217.23	271.624	-907.828	1378.6	267.104	-969.399	1225.34	168.337	-716.414	1279.77	435.911	-801.817	1413.82	503.753	-816.224	1235.99	539.279	-827.286	1085.61	572.905	-992.691	1020.56	550.947	-1067.95	988.964	590.03	-1030.85	948.363	601.518	-1122.76	947.817
638	0	337.207	-997.423	1603.39	239.357	-1001.94	1609.52	352.134	-843.984	1584.22	224.147	-833.402	1583.75	261.935	-804.589	1465.45	251.744	-734.151	1215.09	271.455	-923.281	1377.95	266.459	-985.592	1224.92	167.869	-732.18	1277.96	435.762	-816.871	1412.53	503.576	-831.837	1234.8	538.986	-842.443	1084.24	572.224	-1007.43	1018.67	549.781	-1082.33	985.813	589.729	-1045.22	946.108	600.592	-1137.16	945.236
639	0	337.629	-1011.88	1603.2	239.836	-1016.41	1609.46	352.468	-858.336	1583.53	224.222	-847.972	1583.08	261.733	-819.637	1464.46	251.715	-750.289	1213.33	271.091	-938.655	1377.6	265.833	-1001.61	1225.1	167.804	-748.09	1276.79	435.569	-831.769	1411.26	503.196	-846.964	1233.75	538.359	-857.538	1082.86	571.29	-1021.74	1016.33	548.465	-1096.01	982.084	589.235	-1058.86	943.397	599.534	-1150.78	941.857
640	0	337.954	-1026.41	1603.57	240.27	-1030.92	1609.81	352.356	-872.894	1582.47	224.304	-862.675	1582.97	261.714	-834.595	1464.01	251.769	-766.419	1211.85	270.741	-954.112	1377.57	265.001	-1018.17	1225.29	167.51	-763.874	1275.59	435.325	-846.816	1410.37	502.541	-861.777	1232.55	537.898	-871.943	1081.77	570.144	-1035.53	1013.18	547.098	-1109.16	977.869	588.415	-1071.73	939.817	598.22	-1163.63	937.553
641	0	338.207	-1040.85	1603.99	240.507	-1045.59	1610.52	352.293	-887.55	1581.76	224.475	-877.356	1582.67	261.696	-849.847	1463.94	252.205	-781.661	1211.38	270.529	-969.584	1377.7	264.176	-1034.63	1225.67	167.532	-779.368	1275.25	435.09	-862.145	1409.73	502.112	-876.461	1231.93	536.626	-886.685	1080.7	568.8	-1048.91	1009.47	545.742	-1121.71	973.075	587.451	-1083.83	935.751	596.93	-1175.58	932.153
642	0	338.606	-1055.16	1604.81	240.861	-1060.34	1611.47	352.35	-902.081	1581.73	224.289	-892.118	1582.78	261.844	-865.114	1464.25	252.625	-797.039	1211.44	270.214	-984.978	1378.1	263.468	-1050.78	1226.62	167.948	-794.844	1275.61	434.906	-877.592	1409.79	501.375	-890.676	1231.86	535.829	-900.371	1080.82	567.4	-1061.62	1006.1	544.334	-1133.53	967.81	586.213	-1094.95	931.956	595.344	-1186.62	926.731
643	0	338.877	-1069.84	1605.94	241.14	-1074.76	1613.01	352.991	-916.254	1582.48	224.302	-906.929	1582.84	261.877	-880.46	1464.86	253.965	-811.392	1213.23	270.044	-1000.24	1378.72	262.837	-1066.81	1227.62	168.585	-810.107	1276.18	435.142	-893.126	1410.43	500.671	-904.908	1232.12	534.957	-913.581	1081.5	566.064	-1073.57	1002.78	542.795	-1144.55	962.288	584.753	-1105.26	927.671	593.72	-1196.68	920.312
644	0	338.988	-1084.37	1607.18	241.518	-1089.33	1614.31	352.551	-931.213	1582.4	224.303	-921.969	1582.8	262.277	-895.607	1465.81	255.005	-826.01	1214.42	270.184	-1015.29	1379.44	262.45	-1082.35	1228.53	169.555	-825.021	1277.62	435.409	-908.951	1411.42	500.202	-919.086	1232.52	533.017	-927.243	1081.14	564.45	-1084.9	998.73	540.876	-1154.76	956.857	582.927	-1114.64	922.981	592.001	-1205.78	913.203
645	0	339.341	-1098.75	1608.59	241.485	-1103.87	1615.65	352.553	-946.025	1582.48	224.405	-936.629	1583.21	262.644	-910.622	1466.86	255.893	-840.233	1215.77	270.397	-1030.21	1380.11	262.406	-1097.4	1229.2	170.484	-839.749	1278.77	435.916	-924.603	1412.42	499.567	-933.211	1232.87	531.51	-940.048	1081.55	562.636	-1095.73	994.741	539.067	-1164.17	951.046	580.779	-1123.11	917.881	590.043	-1213.75	905.781
646	0	339.583	-1113.26	1610.15	241.635	-1118.28	1616.76	352.45	-960.633	1582.68	224.655	-951.218	1583.31	263.147	-925.261	1467.91	256.415	-854.357	1217.22	270.717	-1044.78	1381.03	262.546	-1112.32	1229.73	171.227	-854.02	1280.12	436.371	-939.901	1413.65	499.539	-947.422	1233.58	530.778	-952.05	1083.45	560.851	-1105.78	990.804	536.87	-1172.84	944.924	578.615	-1130.96	912.761	587.842	-1221	897.711
647	0	339.66	-1127.93	1611.33	241.841	-1132.76	1617.81	353.144	-975.058	1584.11	224.97	-965.784	1583.98	263.679	-939.651	1469.23	257.216	-868.114	1219.17	271.199	-1059.15	1382.09	263.019	-1126.86	1230.57	171.793	-868.281	1281.8	436.863	-954.613	1415.06	498.88	-961.489	1234.44	528.402	-964.653	1083.5	558.664	-1115.32	986.68	534.472	-1180.79	938.868	576.211	-1137.84	908.094	585.033	-1227.21	889.573
648	0	339.826	-1142.41	1612.86	242.184	-1147.22	1619.06	353.331	-989.653	1585.3	225.28	-980.314	1585.04	264.003	-953.723	1470.61	257.718	-881.969	1220.75	271.917	-1073.29	1383.39	264.026	-1141.19	1231.56	172.372	-882.3	1283.75	437.421	-968.779	1416.67	498.76	-975.403	1235.49	526.964	-976.564	1084.44	556.601	-1124.28	982.364	532.08	-1188	932.601	573.576	-1144.22	903.066	582.23	-1232.57	881.334
649	0	340.124	-1156.69	1614.36	242.421	-1161.8	1620.4	353.703	-1004.12	1586.98	225.686	-994.353	1586.89	264.542	-967.574	1472.38	257.873	-895.685	1222.14	272.707	-1087.17	1385.04	265.499	-1154.99	1233.06	172.675	-896.055	1285.35	437.964	-982.359	1418.37	498.575	-988.814	1236.73	525.12	-988.39	1085.37	554.488	-1132.38	978.599	529.554	-1194.39	926.418	570.953	-1149.7	898.027	579.083	-1237.1	872.781
650	0	340.484	-1171.11	1615.93	242.572	-1175.79	1622.08	353.886	-1018.4	1588.96	226.413	-1008.62	1588.58	265.042	-981.199	1474.35	258.399	-909.728	1223.97	273.404	-1100.92	1387.12	267.313	-1167.97	1235.21	172.821	-909.756	1287.23	438.606	-995.578	1420.38	498.288	-1001.9	1238.25	523.672	-999.894	1086.92	552.205	-1140.2	974.737	526.728	-1200.09	920.141	568.144	-1154.35	893.732	575.588	-1240.57	864.207
651	0	340.752	-1185.29	1617.75	242.851	-1189.88	1623.58	354.408	-1032.46	1591.31	226.746	-1022.59	1590.95	265.629	-994.629	1476.29	258.569	-923.778	1225.59	274.168	-1114.46	1389.39	268.746	-1181.08	1237.09	173.159	-923.345	1289.3	439.182	-1008.69	1422.37	498.511	-1014.63	1240.27	522.14	-1011.1	1088.52	549.755	-1147.28	970.866	523.91	-1204.33	913.918	565.338	-1158.38	889.492	571.904	-1243.34	856.05
652	0	341.147	-1199.16	1619.62	243.352	-1203.99	1625.15	355.145	-1046.34	1593.98	227.159	-1036.45	1593.5	266.215	-1008.01	1478.78	259.116	-936.875	1228.55	274.873	-1128.1	1391.91	269.941	-1194.27	1239.56	173.335	-936.857	1291.61	439.787	-1021.77	1424.54	497.982	-1027.09	1241.73	520.244	-1022.37	1090.09	547.386	-1153.82	968.028	520.846	-1208.41	908.207	562.239	-1161.73	885.757	567.564	-1245.05	848.076
653	0	341.464	-1213.44	1621.37	243.668	-1218.09	1627.33	355.453	-1060.45	1596.59	227.682	-1050.24	1596.29	266.706	-1021.38	1481.24	259.442	-950.508	1231.13	275.435	-1141.52	1394.69	270.91	-1206.91	1242.22	173.71	-950.261	1294.3	440.355	-1034.9	1426.78	497.578	-1039.28	1243.82	518.675	-1033.21	1091.89	544.629	-1159.66	964.847	517.4	-1211.69	903.01	559.241	-1164.4	882.43	563.42	-1245.65	840.268
654	0	341.818	-1227.24	1623.64	244.057	-1231.67	1629.46	355.934	-1074.19	1599.31	228.251	-1063.9	1599.01	267.411	-1034.65	1484.19	259.186	-964.2	1233.14	275.996	-1154.95	1397.65	271.392	-1220.99	1244.92	173.999	-963.636	1296.87	441.04	-1048.03	1429.38	497.275	-1051.18	1245.97	517.268	-1043.56	1094.48	542.034	-1165.08	962.299	514.022	-1214.46	898.157	555.941	-1166.55	879.457	559.149	-1245.47	833.293
655	0	342.195	-1240.91	1625.92	244.459	-1245.57	1631.71	356.367	-1087.89	1601.96	228.856	-1077.63	1601.41	267.885	-1047.9	1486.61	259.592	-977.685	1235.97	276.455	-1168.23	1400.58	272.019	-1233.2	1248.19	174.403	-977.001	1299.61	441.419	-1061.34	1431.83	497.019	-1062.8	1248.34	515.535	-1054.11	1096.68	539.293	-1169.96	959.784	510.563	-1216.42	894.193	552.537	-1168.15	876.899	554.714	-1244.75	826.882
656	0	342.611	-1254.59	1628.33	244.799	-1259.03	1634.19	357.081	-1101.31	1604.09	229.196	-1090.89	1604.48	268.396	-1061.17	1489.08	259.983	-991.129	1238.79	276.846	-1181.61	1403.52	272.173	-1247	1251.34	174.772	-990.406	1302.23	441.86	-1074.49	1434.29	496.491	-1074.56	1250.28	513.867	-1064.09	1098.77	536.533	-1174.33	957.84	507.168	-1217.98	890.423	549.128	-1169.44	874.729	550.228	-1243.34	820.81
657	0	342.909	-1267.97	1630.63	245.112	-1272.64	1636.58	357.179	-1115.11	1606.49	229.392	-1104.59	1606.62	268.87	-1074.45	1491.53	259.968	-1004.84	1240.99	277.077	-1194.97	1406.36	272.077	-1260.33	1254.36	175.137	-1003.85	1304.94	442.134	-1087.87	1436.5	495.68	-1086.13	1252.21	512.161	-1073.99	1101.04	533.689	-1178.5	956.058	503.824	-1219.27	886.977	546.036	-1170.26	873.06	546.227	-1241.33	815.701
658	0	343.229	-1281.57	1632.82	245.471	-1286.05	1638.8	357.36	-1128.59	1608.27	229.732	-1117.95	1609.16	269.257	-1087.76	1493.96	260.228	-1018.53	1243.66	277.278	-1208.38	1409.12	271.57	-1274.77	1257.06	175.391	-1017.38	1307.54	442.281	-1101.21	1438.73	494.681	-1097.96	1253.58	509.949	-1083.69	1102.88	530.952	-1182.37	954.792	500.552	-1220.34	884.22	542.848	-1171.08	871.788	541.884	-1239.27	810.521
659	0	343.524	-1294.75	1635.05	245.83	-1299.42	1641.01	357.972	-1141.86	1610.54	230.024	-1131.29	1610.78	269.512	-1101.14	1495.99	260.097	-1032.23	1245.57	277.347	-1221.84	1411.51	271.179	-1287.86	1259.62	175.514	-1031.06	1309.97	442.42	-1114.7	1440.72	494.121	-1109.85	1255.49	507.705	-1093.06	1104.64	528.168	-1186.18	953.076	497.494	-1221.36	881.815	539.984	-1171.57	870.973	538.023	-1236.75	806.494
660	0	343.92	-1308.27	1636.85	246.251	-1312.83	1643.2	358.114	-1155.26	1611.58	230.158	-1144.83	1612.26	269.912	-1114.58	1497.94	260.225	-1045.83	1247.65	277.408	-1235.39	1413.86	270.368	-1302.42	1261.73	175.601	-1044.66	1312.22	442.395	-1128.13	1442.36	493.032	-1121.68	1256.55	505.416	-1102.06	1106.59	525.453	-1189.66	951.953	494.725	-1222.44	879.633	537.148	-1172.17	870.437	534.238	-1234.05	802.322
661	0	344.279	-1321.3	1638.79	246.413	-1325.9	1645.35	358.148	-1168.6	1612.54	230.357	-1158.41	1613.44	269.966	-1128.24	1499.38	260.32	-1059.49	1249.67	277.272	-1249.2	1415.78	270.233	-1314.15	1263.63	175.682	-1058.39	1314.29	442.312	-1141.88	1443.69	492.124	-1133.45	1257.78	503.082	-1110.69	1108.26	523.112	-1192.99	951.514	492.171	-1223.54	877.601	534.657	-1172.62	870.429	530.833	-1231.25	799.121
662	0	344.606	-1334.6	1640.46	246.752	-1339.26	1646.92	357.93	-1182.2	1613.69	230.552	-1171.8	1614.44	270.128	-1142.02	1500.92	260.401	-1073.23	1251.2	277.108	-1262.91	1417.26	269.203	-1329.75	1265.22	175.544	-1072.02	1316.07	442.246	-1155.67	1444.78	491.243	-1144.97	1258.5	500.616	-1119.13	1109.8	520.491	-1196.24	950.406	489.694	-1225.08	875.203	531.942	-1173.23	870.387	527.409	-1228.7	795.499
663	0	344.725	-1347.79	1641.62	247.163	-1352.93	1648.12	358.16	-1195.42	1614.36	230.435	-1185.4	1614.93	270.181	-1155.87	1502.03	260.238	-1087.09	1252.25	276.859	-1276.86	1418.35	268.683	-1343.81	1266.18	175.559	-1085.82	1317.65	442.152	-1169.53	1445.53	489.735	-1156.71	1259.01	497.9	-1127.55	1111	518.178	-1199.61	949.614	486.905	-1226.61	873.65	529.297	-1173.76	870.185	524.454	-1226.09	792.896
664	0	344.968	-1361.17	1642.59	247.235	-1366.33	1649.55	357.975	-1208.82	1614.12	230.235	-1199.06	1614.97	270.263	-1169.87	1502.7	260.269	-1100.94	1253.4	276.732	-1290.93	1419.14	268.343	-1357.8	1266.94	175.415	-1099.52	1318.71	442.089	-1183.52	1445.91	488.459	-1167.63	1259.52	494.941	-1136.01	1111.99	515.588	-1202.86	948.694	484.877	-1227.38	871.938	526.571	-1174.4	870.288	521.68	-1223.42	790.784
665	0	345.144	-1374.46	1643.28	247.57	-1380.31	1650.07	357.577	-1222.31	1613.19	229.95	-1212.57	1615.23	270.27	-1183.96	1503.14	260.235	-1114.62	1253.8	276.528	-1305.05	1419.47	267.952	-1371.94	1267.35	175.328	-1113.35	1319.42	441.989	-1197.59	1446.15	486.465	-1178.43	1259.31	492.642	-1143.98	1113.44	513.425	-1205.98	948.127	482.436	-1228.65	870.311	523.73	-1175.08	870.572	519.2	-1221.02	789.184
666	0	345.33	-1388.03	1643.67	247.688	-1393.65	1650.79	358.089	-1235.53	1613.56	229.855	-1226.65	1614.64	270.196	-1198.1	1502.95	260.218	-1128.52	1253.92	276.351	-1319.22	1419.33	267.6	-1386.16	1267.37	175.134	-1127.15	1319.66	441.969	-1211.67	1446.13	485.732	-1189.15	1260.4	490.046	-1152.33	1114.24	511.032	-1209.21	947.301	480.947	-1230.05	869.155	520.834	-1175.91	870.787	516.859	-1219.33	787.917
667	0	345.464	-1401.71	1643.65	247.774	-1407.33	1651.04	357.866	-1249.41	1612.56	229.578	-1240.79	1613.48	270.262	-1212.34	1502.82	260.543	-1142.61	1254.41	276.23	-1333.43	1419.04	267.389	-1400.15	1266.96	175.059	-1141.15	1319.86	441.97	-1225.89	1445.79	484.34	-1200.08	1259.57	487.167	-1161.28	1114.33	508.697	-1212.62	946.596	476.632	-1231.07	867.504	518.172	-1176.78	871.179	514.76	-1217.4	786.507
668	0	345.579	-1415.23	1643.53	247.841	-1421.3	1650.99	357.798	-1263.11	1611.52	229.161	-1254.87	1612.02	270.243	-1226.68	1502.25	260.691	-1156.45	1254.26	276.097	-1347.82	1418.25	267.224	-1413.36	1265.89	174.996	-1155.1	1319.49	441.979	-1240.13	1445.36	483.087	-1210.78	1259.19	485.235	-1169.78	1115.59	506.652	-1216.22	945.984	474.73	-1232.53	866.307	515.06	-1178.04	870.96	512.017	-1216	786.017
669	0	345.625	-1429.12	1643.23	247.964	-1435.54	1650.51	357.257	-1277.2	1609.64	228.896	-1269.26	1610.27	270.092	-1241.17	1501.4	260.671	-1170.44	1253.64	275.883	-1362.26	1417.26	266.773	-1427.46	1264.77	174.877	-1169.01	1318.91	441.895	-1254.36	1444.57	482.116	-1221.56	1258.93	482.659	-1178.9	1115.6	504.699	-1220.1	945.494	474.09	-1234.21	866.535	512.636	-1179.6	872.357	509.736	-1215.37	785.503
670	0	345.645	-1443.03	1642.63	248.25	-1449.65	1649.74	357.267	-1291.1	1608.38	227.846	-1283.23	1608.99	269.895	-1255.75	1500.36	260.725	-1184.51	1252.67	275.714	-1376.81	1415.89	267.372	-1439.85	1262.82	174.776	-1183.12	1317.87	441.83	-1268.73	1443.51	481.136	-1232.57	1258.45	480.753	-1188.08	1116.08	502.666	-1224.28	944.777	471.823	-1236.91	865.448	509.938	-1181.57	872.935	507.724	-1215.35	785.183
671	0	345.681	-1456.94	1641.74	248.412	-1463.8	1648.88	356.19	-1305.71	1605	227.783	-1297.72	1606.81	269.841	-1270.49	1499.04	260.884	-1198.6	1251.46	275.734	-1391.32	1414.26	267.639	-1452.3	1260.69	175.044	-1197.22	1316.94	441.836	-1283.2	1442.35	480.167	-1243.7	1257.7	478.782	-1197.5	1116.32	501.008	-1228.85	944.281	470.464	-1239.87	864.785	507.395	-1184.13	873.496	505.589	-1215.96	785.142
672	0	345.924	-1470.9	1640.73	248.483	-1478.05	1647.83	356.707	-1319.58	1604.18	227.676	-1312.34	1604.46	269.736	-1285.15	1497.56	261.244	-1212.68	1250.36	275.71	-1405.91	1412.6	268.801	-1464.65	1258.45	175.052	-1211.39	1315.52	441.838	-1297.74	1441.2	479.327	-1255.07	1257.02	477.121	-1207.03	1116.78	499.846	-1233.69	944.05	468.826	-1243.5	863.973	504.988	-1187.39	873.958	503.992	-1216.88	784.929
673	0	346.095	-1484.94	1639.42	248.395	-1492.34	1646.46	355.873	-1334.2	1600.73	227.215	-1326.99	1601.83	269.729	-1300.03	1495.79	261.595	-1226.57	1249.01	275.78	-1420.75	1410.59	269.069	-1478.23	1257.05	174.951	-1225.58	1313.72	441.921	-1312.4	1439.74	478.506	-1266.74	1256.27	475.439	-1216.74	1116.66	497.812	-1238.96	943.766	467.649	-1247.8	863.294	503.053	-1191.23	875.029	502.445	-1218.48	784.932
674	0	346.173	-1499.13	1637.85	248.689	-1506.4	1644.94	356.738	-1347.83	1599.6	227.051	-1341.75	1598.87	269.718	-1314.9	1493.9	261.817	-1240.56	1247.33	275.806	-1435.64	1408.36	269.176	-1492.65	1254.66	175.072	-1239.9	1312	442.022	-1327.15	1437.95	477.972	-1278.74	1255.32	473.895	-1226.91	1116.61	496.894	-1245.1	943.301	466.935	-1252.88	862.756	501.434	-1195.85	875.673	500.938	-1220.95	784.783
675	0	346.268	-1513.52	1635.94	248.799	-1521.08	1643.08	356.812	-1362.08	1597.39	226.954	-1356.47	1596.39	269.837	-1329.75	1491.92	262.028	-1254.67	1245.42	275.944	-1450.5	1406.03	269.39	-1507.27	1252.37	175.391	-1254.24	1310.34	442.178	-1342	1436.23	477.48	-1291.03	1254.16	472.801	-1237.35	1116.39	496.415	-1251.85	942.905	467.434	-1257.86	863.066	500.062	-1201.13	876.206	499.551	-1224.03	784.296
676	0	346.5	-1527.62	1634.4	249.089	-1535.44	1640.89	356.423	-1376.74	1594.4	226.695	-1371.17	1593.49	269.858	-1344.61	1489.83	262.371	-1268.88	1243.59	276.08	-1465.4	1403.61	269.542	-1522.54	1248.77	175.592	-1268.65	1308.39	442.31	-1356.82	1434.02	477.125	-1303.81	1252.69	471.899	-1248.18	1115.96	495.836	-1259.37	942.117	467.125	-1264.61	862.193	499.011	-1207.27	876.592	498.552	-1227.9	784.216
677	0	346.777	-1541.88	1632.35	249.211	-1549.99	1638.88	356.976	-1390.72	1592.32	226.836	-1385.86	1590.71	269.887	-1359.41	1487.53	262.957	-1283.01	1241.79	276.298	-1480.19	1401.14	269.948	-1537.29	1246.19	175.82	-1283.1	1306.27	442.461	-1371.69	1431.9	477.035	-1316.73	1251.25	471.219	-1259.38	1115.43	495.509	-1267.44	941.411	467.266	-1271.63	861.639	498.182	-1214.01	877.031	497.627	-1232.67	783.689
678	0	346.921	-1556.37	1630.09	249.647	-1564.43	1636.86	355.379	-1406.29	1587.92	226.671	-1400.55	1587.66	270.044	-1374.2	1485.26	263.078	-1297.55	1239.14	276.668	-1494.96	1398.65	270.495	-1551.95	1243.45	176.161	-1297.57	1304.07	442.763	-1386.42	1429.92	477.206	-1329.83	1249.73	470.489	-1271.77	1113.92	495.341	-1276.05	940.711	467.334	-1279.32	860.59	497.755	-1221.57	877.203	497.397	-1238.11	784.337
679	0	347.342	-1570.81	1628.03	249.91	-1579.04	1634.81	356.282	-1420.16	1586.35	226.718	-1415.43	1585.29	270.334	-1388.86	1483.04	263.578	-1312.16	1236.97	277.13	-1509.69	1396.3	271.337	-1566.24	1241.06	176.318	-1312.25	1301.58	443.176	-1401.07	1427.78	477.445	-1343.36	1247.97	470.39	-1283.74	1113.3	495.735	-1285.25	940.118	468.016	-1287.77	859.899	497.468	-1229.94	877.244	496.903	-1244.68	783.478
680	0	347.741	-1585.31	1626.21	250.415	-1593.5	1632.68	356.671	-1434.55	1584.51	226.83	-1430.04	1582.9	270.724	-1403.46	1480.86	264.612	-1326.82	1235.27	277.582	-1524.45	1394.12	272.372	-1580.54	1238.85	176.91	-1326.99	1299.5	443.62	-1415.65	1425.88	477.737	-1357.15	1246.26	470.526	-1295.72	1112.55	496.277	-1295.3	939.368	468.623	-1296.88	858.644	497.574	-1239.12	876.966	496.794	-1252.21	783.155
681	0	348.107	-1599.84	1624.45	250.781	-1608.17	1631.15	356.796	-1449.13	1582.49	226.974	-1444.74	1580.75	271.192	-1418.08	1478.78	265.177	-1341.89	1232.59	278.121	-1539.49	1392.09	272.439	-1595.5	1236.86	177.555	-1341.88	1297.01	444.143	-1430.23	1424.05	478.494	-1370.95	1244.97	471.662	-1308.16	1112.53	496.657	-1306.06	938.324	469.225	-1306.9	858.013	497.993	-1249.07	877.264	497.063	-1260.77	782.678
682	0	348.565	-1614.38	1622.7	251.255	-1622.84	1629.17	356.66	-1463.97	1580.13	227.326	-1459.41	1578.8	271.903	-1432.71	1476.84	266.052	-1357.12	1230.42	278.924	-1554.3	1390.27	273.328	-1610.41	1235.21	178.351	-1356.89	1294.59	444.834	-1444.89	1422.15	478.919	-1385.1	1243.33	472.078	-1321.56	1111.53	497.596	-1317.82	937.542	470.771	-1317.8	857.249	498.771	-1260.15	876.814	497.709	-1270.45	782.427
683	0	349.07	-1628.94	1621.2	251.693	-1637.47	1627.81	357.09	-1478.36	1578.32	227.855	-1474.13	1576.98	272.525	-1447.39	1474.94	267.381	-1372.28	1228.69	279.808	-1569.2	1388.65	274.777	-1625.24	1233.69	179.39	-1372.02	1292.43	445.525	-1459.47	1420.57	479.393	-1399.49	1241.6	472.689	-1335.33	1110.51	498.569	-1330.18	936.84	471.994	-1329.45	856.503	499.779	-1271.93	876.747	498.645	-1281.12	781.997
684	0	349.655	-1643.44	1620.29	252.192	-1651.99	1626.31	358.304	-1492.72	1578.2	228.522	-1488.65	1575.54	273.26	-1462.09	1473.31	268.509	-1387.63	1226.71	280.783	-1584.09	1387.47	276.026	-1640.5	1232.71	180.429	-1387.16	1290.23	446.544	-1474.02	1419.58	480.644	-1413.79	1240.83	473.395	-1349.55	1109.27	499.737	-1343.27	936.092	473.152	-1342.02	855.447	501.054	-1284.69	876.187	499.965	-1293	781.426
685	0	350.133	-1658.11	1619.13	252.728	-1666.65	1624.94	359.033	-1507.34	1577.31	229.189	-1503.07	1574.56	274.173	-1476.79	1471.88	269.645	-1403.26	1224.53	281.911	-1599.2	1386.33	277.427	-1656.32	1231.79	181.625	-1402.64	1288.15	447.494	-1488.71	1418.52	481.587	-1428.45	1239.68	474.622	-1363.97	1108.57	501.27	-1357.16	935.139	474.813	-1355.58	854.622	502.654	-1298.34	875.724	501.604	-1306.03	780.773
686	0	350.767	-1672.75	1618.32	253.264	-1681.34	1623.75	359.736	-1521.94	1576.45	230.213	-1517.7	1573.34	275.088	-1491.51	1470.52	270.688	-1418.98	1222.61	283.141	-1614.22	1385.25	279.127	-1672.11	1230.97	182.949	-1418.26	1286.4	448.465	-1503.44	1417.48	482.645	-1443.41	1238.7	475.775	-1378.89	1107.6	502.868	-1371.89	934.395	476.685	-1370	854.073	504.585	-1312.96	875.179	503.557	-1320.1	780.163
687	0	351.463	-1687.52	1617.89	253.88	-1695.92	1623.05	360.703	-1536.63	1576.19	231.033	-1532.25	1572.64	276.073	-1506.25	1469.71	271.887	-1434.76	1221.37	284.52	-1629.37	1384.71	280.896	-1688.11	1230.55	184.056	-1433.73	1284.54	449.579	-1518.14	1416.74	483.998	-1458.41	1238.06	477.412	-1393.99	1107.17	504.875	-1387.14	933.804	478.709	-1385.28	853.442	506.683	-1328.27	874.419	505.776	-1335.45	779.514
688	0	352.182	-1702.21	1618.3	254.614	-1710.54	1623.25	361.79	-1551.44	1576.66	232.077	-1546.94	1572.73	277.039	-1521.17	1469.31	273.29	-1450.68	1220.6	285.859	-1644.47	1384.63	282.895	-1703.89	1230.54	185.132	-1449.3	1283.38	450.707	-1532.77	1416.48	485.183	-1473.79	1237.39	478.856	-1409.65	1106.19	506.918	-1403.09	933.244	481.641	-1401.25	853.135	508.998	-1344.48	873.846	508.361	-1351.61	778.85
689	0	352.986	-1717.04	1619.07	255.394	-1725.3	1623.72	362.362	-1566.72	1577.02	233.089	-1561.68	1573.18	277.897	-1536.16	1469.44	274.41	-1466.58	1220.38	287.128	-1660.15	1384.93	284.81	-1719.7	1231.01	186.094	-1464.99	1282.68	451.962	-1547.4	1416.57	487.097	-1489.25	1237.72	480.733	-1425.64	1105.9	509.468	-1419.91	933.15	483.655	-1418.5	852.362	511.612	-1361.54	873.235	511.329	-1369.22	778.401
690	0	353.822	-1732.07	1619.88	256.158	-1740.16	1624.45	363.335	-1581.67	1577.51	234.121	-1576.5	1573.88	278.822	-1551.21	1470.06	275.088	-1482.23	1220.3	288.692	-1674.63	1385.68	286.736	-1735.53	1232.12	186.923	-1480.5	1282.82	452.893	-1562.09	1417.01	488.268	-1505.31	1237.56	482.491	-1442.15	1105.41	511.884	-1437.33	933.013	486.672	-1436.52	852.187	514.339	-1379.47	872.741	514.566	-1387.71	778.171
691	0	354.653	-1747.05	1621.41	256.995	-1754.98	1625.93	365.137	-1596.16	1580.13	235.428	-1591.24	1575.3	279.565	-1566.26	1471.04	275.306	-1497.72	1221.03	289.879	-1689.93	1386.89	288.536	-1751.19	1233.61	187.38	-1496.04	1283.42	453.932	-1576.65	1418.01	489.798	-1521.43	1237.89	484.565	-1458.77	1105.73	514.474	-1455.64	932.995	489.668	-1455.43	852.376	517.275	-1398.12	872.64	518.029	-1407.42	777.981
692	0	355.489	-1762.21	1622.96	257.959	-1769.84	1627.31	365.722	-1611.52	1581.02	236.382	-1605.91	1576.99	280.436	-1581.27	1472.6	275.524	-1513.18	1222.44	290.974	-1705.15	1388.49	290.122	-1766.98	1235.36	187.533	-1511.64	1284.63	454.686	-1591.23	1419.21	490.786	-1537.73	1237.96	486.58	-1475.69	1107.28	517.538	-1474.54	933.648	492.747	-1475.22	852.809	520.17	-1417.67	872.46	521.745	-1428.27	778.131
693	0	356.574	-1777.11	1624.73	258.998	-1784.8	1628.8	367.383	-1626.02	1583.83	237.51	-1620.65	1578.68	281.034	-1596.29	1474.22	275.387	-1528.61	1223.76	292.169	-1719.71	1390.21	290.981	-1782.25	1237.33	187.938	-1527.13	1286.42	455.37	-1605.74	1420.49	492.133	-1554.06	1239.58	488.238	-1493.08	1107	520.179	-1494.17	934.256	496.439	-1495.85	853.343	523.464	-1438.05	872.499	525.398	-1450.12	777.916
694	0	357.642	-1791.92	1626.41	259.89	-1799.73	1630.39	368.7	-1640.82	1585.99	238.608	-1635.42	1580.91	281.67	-1611.15	1475.67	275.536	-1543.67	1225.89	293.322	-1734.37	1391.83	292.737	-1796.98	1238.98	188.078	-1542.41	1288.36	456.025	-1620.28	1422.45	493.136	-1570.41	1240.97	490.436	-1510.2	1108.03	523.273	-1514.24	935.208	500.354	-1517.28	854.581	526.815	-1459.07	872.56	529.923	-1472.84	778.269
695	0	358.617	-1806.87	1627.83	260.986	-1814.44	1632.17	369.711	-1655.68	1587.93	239.634	-1650.27	1583.13	282.215	-1625.93	1477.52	275.616	-1558.47	1227.76	294.566	-1748.51	1393.57	294.041	-1811.49	1240.86	188.217	-1557.35	1290.58	456.582	-1634.98	1424.26	494.584	-1586.53	1242.69	492.549	-1527.48	1109.01	526.57	-1534.65	936.148	503.68	-1539.42	855.217	530.251	-1480.64	872.466	534.324	-1496.25	778.986
696	0	359.304	-1822.32	1628.56	261.959	-1829.44	1633.75	370.372	-1670.67	1589.49	240.503	-1664.84	1584.48	282.743	-1640.67	1479.45	275.432	-1573.03	1229.88	295.183	-1763.09	1395.45	294.456	-1825.98	1242.62	188.283	-1572.01	1293.04	457.118	-1649.6	1425.84	495.509	-1602.55	1244.1	494.509	-1544.72	1109.59	529.743	-1555.38	937.447	507.483	-1562.14	856.33	533.714	-1502.75	872.791	538.894	-1520.86	779.482
697	0	360.343	-1837.18	1630.27	262.868	-1844.39	1635.41	371.52	-1685.38	1591.65	240.975	-1679.46	1587.57	283.413	-1655.38	1481.32	275.535	-1587.51	1232.02	295.611	-1777.6	1397.11	294.437	-1840.38	1244.18	188.559	-1586.34	1295.59	457.612	-1664.51	1427.75	497.418	-1617.94	1246.58	496.802	-1561.94	1110.61	533.027	-1576.57	938.828	511.719	-1585.17	857.924	537.338	-1525.37	872.863	543.578	-1546.07	780.204
698	0	361.339	-1852.23	1631.49	263.757	-1859.37	1636.95	372.289	-1700.25	1593.66	242.178	-1694.28	1589.87	283.963	-1669.89	1483.24	275.622	-1601.69	1234.19	295.783	-1792.12	1398.68	294.219	-1854.57	1245.54	188.931	-1600.43	1298.07	458.301	-1679.37	1429.56	497.479	-1634.27	1247.66	498.923	-1579.31	1111.54	536.29	-1597.9	939.807	515.475	-1608.88	859.099	540.868	-1548.57	872.747	548.032	-1572.08	780.976
699	0	361.949	-1867.22	1632.76	264.494	-1874.3	1638.38	372.921	-1715.08	1595.55	242.622	-1708.84	1592.27	284.602	-1684.08	1485.35	276.119	-1615.67	1236.55	296.158	-1806.04	1400.58	294.779	-1868.4	1247.37	189.381	-1614.24	1300.41	458.841	-1694.2	1431.25	498.562	-1650.08	1249.19	501.025	-1596.54	1112.21	539.305	-1619.63	941.175	519.088	-1632.91	860.519	544.167	-1572.04	872.472	552.722	-1598.66	781.997
700	0	362.59	-1882.27	1633.95	265.168	-1889.22	1639.63	373.888	-1729.86	1597.89	243.359	-1723.31	1594.9	285.255	-1698.35	1487.37	276.631	-1629.55	1238.63	296.251	-1820.19	1402.25	294.303	-1881.92	1248.72	189.886	-1627.89	1302.51	459.442	-1709.07	1432.88	499.31	-1666.96	1250.48	503.208	-1613.89	1113.01	543.074	-1641.49	942.752	523.19	-1657.17	862.557	547.842	-1596.03	872.718	557.553	-1625.72	783.9
701	0	363.263	-1897.24	1634.43	265.611	-1904.14	1640.72	374.628	-1744.6	1599.95	244.311	-1737.89	1597.41	285.842	-1712.44	1489.13	277.131	-1643.4	1240.29	296.301	-1834.33	1403.83	293.448	-1895.72	1250.45	190.77	-1641.35	1304.91	460.039	-1723.77	1434.76	501.32	-1682.63	1252.27	505.448	-1631.22	1113.8	546.299	-1663.74	944.613	527.251	-1681.29	864.815	551.044	-1620.35	872.722	562.137	-1653.58	784.875
702	0	363.688	-1912.23	1635.62	266.169	-1918.83	1642.13	375.262	-1759.38	1602.16	245.033	-1752.43	1599.85	286.396	-1726.2	1491.56	278.053	-1656.94	1242.49	296.419	-1848.01	1405.59	292.517	-1909.46	1252.22	191.631	-1654.71	1307.01	460.541	-1738.35	1436.64	502.267	-1699.11	1253.62	507.349	-1648.53	1114.03	549.62	-1685.68	945.821	530.99	-1706.75	867.162	554.69	-1644.83	873.318	566.631	-1681.73	786.805
703	0	363.886	-1927.43	1637.08	266.479	-1933.57	1643.2	375.8	-1774.08	1604.34	245.697	-1766.83	1602.18	286.708	-1740.17	1493.34	279.023	-1670.44	1244.79	296.399	-1861.83	1407.24	291.823	-1922.94	1253.8	192.549	-1667.8	1309.17	461.074	-1752.77	1438.29	503.912	-1714.51	1255.08	509.7	-1665.78	1115.15	552.341	-1708.35	947.884	534.339	-1731.9	869.64	557.758	-1669.69	873.188	571.391	-1710.11	789.597
704	0	364.119	-1942.3	1637.98	266.719	-1948.31	1644.12	376.371	-1788.84	1606.43	246.335	-1781.31	1604.65	287.37	-1753.96	1495.56	279.902	-1683.9	1246.75	296.411	-1875.54	1408.85	291.985	-1936.27	1255.57	193.431	-1681.05	1310.89	461.48	-1767.03	1439.94	504.517	-1730.82	1256.56	512.056	-1682.88	1116	554.987	-1731.09	949.841	537.483	-1758.02	871.473	561.057	-1694.87	874.502	576.185	-1738.69	792.85
705	0	364.289	-1957.18	1639.07	266.944	-1962.96	1645.22	376.881	-1803.49	1608.73	247.041	-1795.61	1606.8	287.877	-1767.76	1497.41	280.681	-1697.36	1248.46	296.476	-1889.04	1410.6	291.313	-1949.69	1257.6	194.471	-1694.2	1313.1	461.704	-1781.19	1442.03	506.15	-1746.06	1258.22	514.239	-1700.2	1116.91	557.97	-1753.63	952.017	540.229	-1783.26	874.541	564.223	-1720.15	875.478	580.412	-1767.48	796.298
706	0	364.369	-1972.07	1640.07	267.049	-1977.46	1646.17	377.145	-1818.21	1610.69	247.47	-1809.89	1609.16	288.161	-1781.57	1499.27	281.536	-1710.67	1250.56	296.565	-1902.58	1412.22	291.628	-1962.8	1259.36	195.228	-1707.27	1314.87	461.978	-1795.17	1443.85	507.027	-1762.12	1260.19	516.437	-1717.49	1117.6	560.61	-1776.54	954.853	543.302	-1808.62	878.229	567.368	-1745.65	877.916	584.56	-1796.34	800.526
707	0	364.377	-1986.89	1640.95	267.054	-1992.01	1646.95	377.462	-1832.61	1612.81	247.782	-1824.06	1611.34	288.414	-1795.38	1501.07	282.114	-1724.02	1252.68	296.565	-1916.42	1413.63	291.496	-1975.99	1260.84	196.002	-1720.4	1316.76	462.372	-1809.14	1445.83	508.277	-1777.31	1261.77	518.567	-1734.82	1118.49	563.167	-1799.44	957.731	545.969	-1834.18	881.585	570.056	-1771.34	879.206	588.537	-1825.15	805.04
708	0	364.262	-2001.52	1641.82	267.081	-2006.53	1647.63	377.595	-1846.77	1614.66	248.05	-1838.27	1613.39	288.757	-1809.16	1502.69	282.628	-1737.27	1253.97	295.655	-1932.07	1415.35	290.054	-1989.87	1261.85	196.526	-1733.61	1318.41	462.731	-1823.18	1447.35	509.073	-1793.15	1263.27	520.931	-1752.01	1119.38	565.562	-1822.43	960.838	548.097	-1860.06	885.622	573.345	-1796.57	882.048	592.192	-1854.01	809.95
709	0	364.298	-2016.11	1642.54	267.079	-2020.86	1648.17	377.704	-1861.27	1616.42	248.343	-1852.43	1615.24	289.214	-1822.92	1504.13	283.113	-1750.49	1255.85	296.843	-1943.61	1416.31	290.329	-2002.93	1262.94	197.143	-1746.58	1320.26	462.976	-1836.92	1448.94	510.507	-1808.26	1265.26	523.085	-1769.15	1120.52	568.012	-1845.32	964.185	550.486	-1885.65	890.114	575.363	-1822.72	883.096	595.587	-1882.72	815.321
710	0	364.086	-2030.46	1642.56	267.043	-2035.11	1648.49	377.955	-1875.64	1617.91	248.761	-1866.51	1616.58	289.542	-1836.63	1505.48	283.375	-1763.78	1257.13	295.981	-1959.13	1417.64	289.364	-2016.71	1263.56	197.574	-1759.64	1321.79	462.812	-1850.28	1451.18	511.291	-1823.84	1266.44	525.175	-1786.19	1121.19	570.322	-1868.38	967.936	552.701	-1911.05	895.167	578.167	-1848.25	885.897	598.731	-1911.28	820.907
711	0	363.811	-2045.3	1643.14	266.992	-2049.45	1648.49	378.523	-1889.89	1619.47	249.151	-1880.58	1617.84	289.779	-1850.41	1506.43	283.947	-1776.99	1258.89	296.169	-1972.82	1418.45	290.902	-2029.67	1264.31	197.969	-1772.82	1322.87	463.068	-1864.23	1452.57	512.19	-1839.43	1267.38	527.406	-1803.15	1122.03	572.337	-1890.98	971.22	555.041	-1936.29	900.299	581.02	-1873.88	888.925	601.63	-1939.6	826.71
712	0	364.361	-2059.74	1643.21	267.002	-2063.66	1648.52	378.856	-1904.1	1620.53	249.396	-1894.57	1618.88	290.19	-1864.17	1507.19	284.525	-1790.2	1259.96	296.386	-1986.4	1419.02	291.417	-2042.88	1264.58	198.595	-1786.02	1324.02	463.301	-1878.28	1453.45	512.764	-1854.63	1268.56	529.523	-1820.05	1122.62	574.562	-1913.57	975.008	557.782	-1960.85	905.796	583.571	-1899.35	891.928	604.055	-1967.74	832.685
713	0	364.025	-2074.09	1643.11	266.899	-2077.82	1648.42	378.757	-1918.51	1620.94	249.493	-1908.6	1619.43	290.49	-1877.98	1507.77	284.559	-1803.49	1260.25	296.63	-1999.91	1419.38	291.939	-2055.77	1265.14	198.964	-1799.2	1324.59	463.741	-1892.3	1454.37	513.881	-1870.17	1269.77	531.326	-1836.96	1123	576.578	-1935.76	978.823	559.999	-1985.56	911.924	586.059	-1924.85	895.892	606.614	-1995.46	839.127
714	0	364.046	-2088.38	1642.78	266.998	-2091.86	1647.81	379.087	-1932.75	1621.48	249.988	-1922.77	1619.75	290.659	-1891.74	1508.03	284.895	-1816.64	1260.83	296.725	-2013.57	1419.44	292.158	-2068.99	1264.8	199.312	-1812.49	1324.81	463.887	-1906.28	1454.98	514.978	-1885.43	1269.94	533.816	-1853.46	1123.97	578.459	-1957.98	982.64	561.88	-2009.37	916.961	588.354	-1949.93	899.176	608.974	-2022.44	844.901
715	0	363.907	-2102.89	1642.15	267.007	-2106.07	1647.13	379.277	-1946.98	1621.62	249.994	-1936.7	1619.81	291.07	-1905.52	1508.11	285.373	-1829.96	1261.22	296.897	-2027.28	1419.11	292.575	-2082.05	1264.03	199.784	-1825.69	1325.12	464.24	-1920.3	1455.39	516.17	-1901.04	1270.84	535.704	-1870.27	1123.01	580.134	-1979.99	986.219	563.157	-2034.19	922.703	590.238	-1975.15	902.749	610.475	-2049.85	851.342
716	0	363.889	-2117.24	1641.4	267.155	-2120.23	1646.29	379.579	-1961.22	1621.4	250.33	-1950.65	1619.7	291.214	-1919.41	1507.87	285.772	-1843.15	1261.06	297.073	-2040.97	1418.45	292.449	-2095.27	1262.83	200.456	-1838.98	1325.1	464.549	-1934.34	1455.42	517.393	-1916.36	1270.99	537.955	-1886.96	1122.89	581.899	-2001.67	989.57	564.677	-2058.14	927.774	592.135	-2000.05	905.787	612.355	-2076.33	857.199
717	0	363.885	-2131.64	1640.49	267.046	-2134.41	1645.31	379.744	-1975.48	1620.87	250.632	-1964.82	1619.2	291.414	-1933.49	1506.79	286.05	-1856.51	1260.7	297.188	-2054.69	1417.74	292.823	-2108.54	1261.59	200.709	-1852.27	1324.37	464.624	-1948.39	1455.11	518.601	-1931.67	1270.95	540.226	-1903.51	1122.58	583.814	-2022.73	992.528	565.853	-2081.61	933.222	593.92	-2024.45	908.767	613.739	-2102.61	863.535
[truncated: 69 more columns]

## Sheet: Sheet2
Devices
		025370 - Force			025370 - Moment			025370 - CoP			027571 - Force			027571 - Moment			027571 - CoP			037720 - Force			037720 - Moment			037720 - CoP
Frame	Sub Frame	Fx	Fy	Fz	Mx	My	Mz	Cx	Cy	Cz	Fx	Fy	Fz	Mx	My	Mz	Cx	Cy	Cz	Fx	Fy	Fz	Mx	My	Mz	Cx	Cy	Cz
		N	N	N	N.mm	N.mm	N.mm	mm	mm	mm	N	N	N	N.mm	N.mm	N.mm	mm	mm	mm	N	N	N	N.mm	N.mm	N.mm	mm	mm	mm
396	0	0	0	0	0	0	0	200	300	0	0	0	0	0	0	0	200	903	0	0	0	0	0	0	0	603	903	0
396	1	0	0	0	0	0	0	200	300	0	0	0	0	0	0	0	200	903	0	0	0	0	0	0	0	603	903	0
396	2	0	0	0	0	0	0	200	300	0	0	0	0	0	0	0	200	903	0	0	0	0	0	0	0	603	903	0
396	3	0	0	0	0	0	0	200	300	0	0	0	0	0	0	0	200	903	0	0	0	0	0	0	0	603	903	0
396	4	0	0	0	0	0	0	200	300	0	0	0	0	0	0	0	200	903	0	0	0	0	0	0	0	603	903	0
396	5	0	0	0	0	0	0	200	300	0	0	0	0	0	0	0	200	903	0	0	0	0	0	0	0	603	903	0
396	6	0	0	0	0	0	0	200	300	0	0	0	0	0	0	0	200	903	0	0	0	0	0	0	0	603	903	0
396	7	0	0	0	0	0	0	200	300	0	0	0	0	0	0	0	200	903	0	0	0	0	0	0	0	603	903	0
396	8	0	0	0	0	0	0	200	300	0	0	0	0	0	0	0	200	903	0	0	0	0	0	0	0	603	903	0
396	9	0	0	0	0	0	0	200	300	0	0	0	0	0	0	0	200	903	0	0	0	0	0	0	0	603	903	0
397	0	0	0	0	0	0	0	200	300	0	0	0	0	0	0	0	200	903	0	0	0	0	0	0	0	603	903	0
397	1	0	0	0	0	0	0	200	300	0	0	0	0	0	0	0	200	903	0	0	0	0	0	0	0	603	903	0
397	2	0	0	0	0	0	0	200	300	0	0	0	0	0	0	0	200	903	0	0	0	0	0	0	0	603	903	0
397	3	0	0	0	0	0	0	200	300	0	0	0	0	0	0	0	200	903	0	0	0	0	0	0	0	603	903	0
397	4	0	0	0	0	0	0	200	300	0	0	0	0	0	0	0	200	903	0	0	0	0	0	0	0	603	903	0
397	5	0	0	0	0	0	0	200	300	0	0	0	0	0	0	0	200	903	0	0	0	0	0	0	0	603	903	0
397	6	0	0	0	0	0	0	200	300	0	0	0	0	0	0	0	200	903	0	0	0	0	0	0	0	603	903	0
397	7	0	0	0	0	0	0	200	300	0	0	0	0	0	0	0	200	903	0	0	0	0	0	0	0	603	903	0
397	8	0	0	0	0	0	0	200	300	0	0	0	0	0	0	0	200	903	0	0	0	0	0	0	0	603	903	0
397	9	0	0	0	0	0	0	200	300	0	0	0	0	0	0	0	200	903	0	0	0	0	0	0	0	603	903	0
398	0	0	0	0	0	0	0	200	300	0	0	0	0	0	0	0	200	903	0	0	0	0	0	0	0	603	903	0
398	1	0	0	0	0	0	0	200	300	0	0	0	0	0	0	0	200	903	0	0	0	0	0	0	0	603	903	0
398	2	0	0	0	0	0	0	200	300	0	0	0	0	0	0	0	200	903	0	0	0	0	0	0	0	603	903	0
398	3	0	0	0	0	0	0	200	300	0	0	0	0	0	0	0	200	903	0	0	0	0	0	0	0	603	903	0
398	4	0	0	0	0	0	0	200	300	0	0	0	0	0	0	0	200	903	0	0	0	0	0	0	0	603	903	0
398	5	0	0	0	0	0	0	200	300	0	0	0	0	0	0	0	200	903	0	0	0	0	0	0	0	603	903	0
398	6	0	0	0	0	0	0	200	300	0	0	0	0	0	0	0	200	903	0	0	0	0	0	0	0	603	903	0
398	7	0	0	0	0	0	0	200	300	0	0	0	0	0	0	0	200	903	0	0	0	0	0	0	0	603	903	0
398	8	0	0	0	0	0	0	200	300	0	0	0	0	0	0	0	200	903	0	0	0	0	0	0	0	603	903	0
398	9	0	0	0	0	0	0	200	300	0	0	0	0	0	0	0	200	903	0	0	0	0	0	0	0	603	903	0
399	0	0	0	0	0	0	0	200	300	0	0	0	0	0	0	0	200	903	0	0	0	0	0	0	0	603	903	0
399	1	0	0	0	0	0	0	200	300	0	0	0	0	0	0	0	200	903	0	0	0	0	0	0	0	603	903	0
399	2	0	0	0	0	0	0	200	300	0	0	0	0	0	0	0	200	903	0	0	0	0	0	0	0	603	903	0
399	3	0	0	0	0	0	0	200	300	0	0	0	0	0	0	0	200	903	0	0	0	0	0	0	0	603	903	0
399	4	0	0	0	0	0	0	200	300	0	0	0	0	0	0	0	200	903	0	0	0	0	0	0	0	603	903	0
399	5	0	0	0	0	0	0	200	300	0	0	0	0	0	0	0	200	903	0	0	0	0	0	0	0	603	903	0
399	6	0	0	0	0	0	0	200	300	0	0	0	0	0	0	0	200	903	0	0	0	0	0	0	0	603	903	0
399	7	0	0	0	0	0	0	200	300	0	0	0	0	0	0	0	200	903	0	0	0	0	0	0	0	603	903	0
399	8	0	0	0	0	0	0	200	300	0	0	0	0	0	0	0	200	903	0	0	0	0	0	0	0	603	903	0
399	9	0	0	0	0	0	0	200	300	0	0	0	0	0	0	0	200	903	0	0	0	0	0	0	0	603	903	0
400	0	0	0	0	0	0	0	200	300	0	0	0	0	0	0	0	200	903	0	0	0	0	0	0	0	603	903	0
400	1	0	0	0	0	0	0	200	300	0	0	0	0	0	0	0	200	903	0	0	0	0	0	0	0	603	903	0
400	2	0	0	0	0	0	0	200	300	0	0	0	0	0	0	0	200	903	0	0	0	0	0	0	0	603	903	0
400	3	0	0	0	0	0	0	200	300	0	0	0	0	0	0	0	200	903	0	0	0	0	0	0	0	603	903	0
400	4	0	0	0	0	0	0	200	300	0	0	0	0	0	0	0	200	903	0	0	0	0	0	0	0	603	903	0
400	5	0	0	0	0	0	0	200	300	0	0	0	0	0	0	0	200	903	0	0	0	0	0	0	0	603	903	0
400	6	0	0	0	0	0	0	200	300	0	0	0	0	0	0	0	200	903	0	0	0	0	0	0	0	603	903	0
400	7	0	0	0	0	0	0	200	300	0	0	0	0	0	0	0	200	903	0	0	0	0	0	0	0	603	903	0
400	8	0	0	0	0	0	0	200	300	0	0	0	0	0	0	0	200	903	0	0	0	0	0	0	0	603	903	0
400	9	0	0	0	0	0	0	200	300	0	0	0	0	0	0	0	200	903	0	0	0	0	0	0	0	603	903	0
401	0	0	0	0	0	0	0	200	300	0	0	0	0	0	0	0	200	903	0	0	0	0	0	0	0	603	903	0
401	1	0	0	0	0	0	0	200	300	0	0	0	0	0	0	0	200	903	0	0	0	0	0	0	0	603	903	0
401	2	0	0	0	0	0	0	200	300	0	0	0	0	0	0	0	200	903	0	0	0	0	0	0	0	603	903	0
401	3	0	0	0	0	0	0	200	300	0	0	0	0	0	0	0	200	903	0	0	0	0	0	0	0	603	903	0
401	4	0	0	0	0	0	0	200	300	0	0	0	0	0	0	0	200	903	0	0	0	0	0	0	0	603	903	0
401	5	0	0	0	0	0	0	200	300	0	0	0	0	0	0	0	200	903	0	0	0	0	0	0	0	603	903	0
401	6	0	0	0	0	0	0	200	300	0	0	0	0	0	0	0	200	903	0	0	0	0	0	0	0	603	903	0
401	7	0	0	0	0	0	0	200	300	0	0	0	0	0	0	0	200	903	0	0	0	0	0	0	0	603	903	0
401	8	0	0	0	0	0	0	200	300	0	0	0	0	0	0	0	200	903	0	0	0	0	0	0	0	603	903	0
401	9	0	0	0	0	0	0	200	300	0	0	0	0	0	0	0	200	903	0	0	0	0	0	0	0	603	903	0
402	0	0	0	0	0	0	0	200	300	0	0	0	0	0	0	0	200	903	0	0	0	0	0	0	0	603	903	0
402	1	0	0	0	0	0	0	200	300	0	0	0	0	0	0	0	200	903	0	0	0	0	0	0	0	603	903	0
402	2	0	0	0	0	0	0	200	300	0	0	0	0	0	0	0	200	903	0	0	0	0	0	0	0	603	903	0
402	3	0	0	0	0	0	0	200	300	0	0	0	0	0	0	0	200	903	0	0	0	0	0	0	0	603	903	0
402	4	0	0	0	0	0	0	200	300	0	0	0	0	0	0	0	200	903	0	0	0	0	0	0	0	603	903	0
402	5	0	0	0	0	0	0	200	300	0	0	0	0	0	0	0	200	903	0	0	0	0	0	0	0	603	903	0
402	6	0	0	0	0	0	0	200	300	0	0	0	0	0	0	0	200	903	0	0	0	0	0	0	0	603	903	0
402	7	0	0	0	0	0	0	200	300	0	0	0	0	0	0	0	200	903	0	0	0	0	0	0	0	603	903	0
402	8	0	0	0	0	0	0	200	300	0	0	0	0	0	0	0	200	903	0	0	0	0	0	0	0	603	903	0
402	9	0	0	0	0	0	0	200	300	0	0	0	0	0	0	0	200	903	0	0	0	0	0	0	0	603	903	0
403	0	0	0	0	0	0	0	200	300	0	0	0	0	0	0	0	200	903	0	0	0	0	0	0	0	603	903	0
403	1	0	0	0	0	0	0	200	300	0	0	0	0	0	0	0	200	903	0	0	0	0	0	0	0	603	903	0
403	2	0	0	0	0	0	0	200	300	0	0	0	0	0	0	0	200	903	0	0	0	0	0	0	0	603	903	0
403	3	0	0	0	0	0	0	200	300	0	0	0	0	0	0	0	200	903	0	0	0	0	0	0	0	603	903	0
403	4	0	0	0	0	0	0	200	300	0	0	0	0	0	0	0	200	903	0	0	0	0	0	0	0	603	903	0
403	5	0	0	0	0	0	0	200	300	0	0	0	0	0	0	0	200	903	0	0	0	0	0	0	0	603	903	0
403	6	0	0	0	0	0	0	200	300	0	0	0	0	0	0	0	200	903	0	0	0	0	0	0	0	603	903	0
403	7	0	0	0	0	0	0	200	300	0	0	0	0	0	0	0	200	903	0	0	0	0	0	0	0	603	903	0
403	8	0	0	0	0	0	0	200	300	0	0	0	0	0	0	0	200	903	0	0	0	0	0	0	0	603	903	0
403	9	0	0	0	0	0	0	200	300	0	0	0	0	0	0	0	200	903	0	0	0	0	0	0	0	603	903	0
404	0	0	0	0	0	0	0	200	300	0	0	0	0	0	0	0	200	903	0	0	0	0	0	0	0	603	903	0
404	1	0	0	0	0	0	0	200	300	0	0	0	0	0	0	0	200	903	0	0	0	0	0	0	0	603	903	0
404	2	0	0	0	0	0	0	200	300	0	0	0	0	0	0	0	200	903	0	0	0	0	0	0	0	603	903	0
404	3	0	0	0	0	0	0	200	300	0	0	0	0	0	0	0	200	903	0	0	0	0	0	0	0	603	903	0
404	4	0	0	0	0	0	0	200	300	0	0	0	0	0	0	0	200	903	0	0	0	0	0	0	0	603	903	0
404	5	0	0	0	0	0	0	200	300	0	0	0	0	0	0	0	200	903	0	0	0	0	0	0	0	603	903	0
404	6	0	0	0	0	0	0	200	300	0	0	0	0	0	0	0	200	903	0	0	0	0	0	0	0	603	903	0
404	7	0	0	0	0	0	0	200	300	0	0	0	0	0	0	0	200	903	0	0	0	0	0	0	0	603	903	0
404	8	0	0	0	0	0	0	200	300	0	0	0	0	0	0	0	200	903	0	0	0	0	0	0	0	603	903	0
404	9	0	0	0	0	0	0	200	300	0	0	0	0	0	0	0	200	903	0	0	0	0	0	0	0	603	903	0
405	0	0	0	0	0	0	0	200	300	0	0	0	0	0	0	0	200	903	0	0	0	0	0	0	0	603	903	0
405	1	0	0	0	0	0	0	200	300	0	0	0	0	0	0	0	200	903	0	0	0	0	0	0	0	603	903	0
405	2	0	0	0	0	0	0	200	300	0	0	0	0	0	0	0	200	903	0	0	0	0	0	0	0	603	903	0
405	3	0	0	0	0	0	0	200	300	0	0	0	0	0	0	0	200	903	0	0	0	0	0	0	0	603	903	0
405	4	0	0	0	0	0	0	200	300	0	0	0	0	0	0	0	200	903	0	0	0	0	0	0	0	603	903	0
405	5	0	0	0	0	0	0	200	300	0	0	0	0	0	0	0	200	903	0	0	0	0	0	0	0	603	903	0
405	6	0	0	0	0	0	0	200	300	0	0	0	0	0	0	0	200	903	0	0	0	0	0	0	0	603	903	0
405	7	0	0	0	0	0	0	200	300	0	0	0	0	0	0	0	200	903	0	0	0	0	0	0	0	603	903	0
405	8	0	0	0	0	0	0	200	300	0	0	0	0	0	0	0	200	903	0	0	0	0	0	0	0	603	903	0
405	9	0	0	0	0	0	0	200	300	0	0	0	0	0	0	0	200	903	0	0	0	0	0	0	0	603	903	0
406	0	0	0	0	0	0	0	200	300	0	0	0	0	0	0	0	200	903	0	0	0	0	0	0	0	603	903	0
406	1	0	0	0	0	0	0	200	300	0	0	0	0	0	0	0	200	903	0	0	0	0	0	0	0	603	903	0
406	2	0	0	0	0	0	0	200	300	0	0	0	0	0	0	0	200	903	0	0	0	0	0	0	0	603	903	0
406	3	0	0	0	0	0	0	200	300	0	0	0	0	0	0	0	200	903	0	0	0	0	0	0	0	603	903	0
406	4	0	0	0	0	0	0	200	300	0	0	0	0	0	0	0	200	903	0	0	0	0	0	0	0	603	903	0
406	5	0	0	0	0	0	0	200	300	0	0	0	0	0	0	0	200	903	0	0	0	0	0	0	0	603	903	0
406	6	0	0	0	0	0	0	200	300	0	0	0	0	0	0	0	200	903	0	0	0	0	0	0	0	603	903	0
406	7	0	0	0	0	0	0	200	300	0	0	0	0	0	0	0	200	903	0	0	0	0	0	0	0	603	903	0
406	8	0	0	0	0	0	0	200	300	0	0	0	0	0	0	0	200	903	0	0	0	0	0	0	0	603	903	0
406	9	0	0	0	0	0	0	200	300	0	0	0	0	0	0	0	200	903	0	0	0	0	0	0	0	603	903	0
407	0	0	0	0	0	0	0	200	300	0	0	0	0	0	0	0	200	903	0	0	0	0	0	0	0	603	903	0
407	1	0	0	0	0	0	0	200	300	0	0	0	0	0	0	0	200	903	0	0	0	0	0	0	0	603	903	0
407	2	0	0	0	0	0	0	200	300	0	0	0	0	0	0	0	200	903	0	0	0	0	0	0	0	603	903	0
407	3	0	0	0	0	0	0	200	300	0	0	0	0	0	0	0	200	903	0	0	0	0	0	0	0	603	903	0
407	4	0	0	0	0	0	0	200	300	0	0	0	0	0	0	0	200	903	0	0	0	0	0	0	0	603	903	0
407	5	0	0	0	0	0	0	200	300	0	0	0	0	0	0	0	200	903	0	0	0	0	0	0	0	603	903	0
407	6	0	0	0	0	0	0	200	300	0	0	0	0	0	0	0	200	903	0	0	0	0	0	0	0	603	903	0
407	7	0	0	0	0	0	0	200	300	0	0	0	0	0	0	0	200	903	0	0	0	0	0	0	0	603	903	0
407	8	0	0	0	0	0	0	200	300	0	0	0	0	0	0	0	200	903	0	0	0	0	0	0	0	603	903	0
407	9	0	0	0	0	0	0	200	300	0	0	0	0	0	0	0	200	903	0	0	0	0	0	0	0	603	903	0
408	0	0	0	0	0	0	0	200	300	0	0	0	0	0	0	0	200	903	0	0	0	0	0	0	0	603	903	0
408	1	0	0	0	0	0	0	200	300	0	0	0	0	0	0	0	200	903	0	0	0	0	0	0	0	603	903	0
408	2	0	0	0	0	0	0	200	300	0	0	0	0	0	0	0	200	903	0	0	0	0	0	0	0	603	903	0
408	3	0	0	0	0	0	0	200	300	0	0	0	0	0	0	0	200	903	0	0	0	0	0	0	0	603	903	0
408	4	0	0	0	0	0	0	200	300	0	0	0	0	0	0	0	200	903	0	0	0	0	0	0	0	603	903	0
408	5	0	0	0	0	0	0	200	300	0	0	0	0	0	0	0	200	903	0	0	0	0	0	0	0	603	903	0
408	6	0	0	0	0	0	0	200	300	0	0	0	0	0	0	0	200	903	0	0	0	0	0	0	0	603	903	0
408	7	0	0	0	0	0	0	200	300	0	0	0	0	0	0	0	200	903	0	0	0	0	0	0	0	603	903	0
408	8	0	0	0	0	0	0	200	300	0	0	0	0	0	0	0	200	903	0	0	0	0	0	0	0	603	903	0
408	9	0	0	0	0	0	0	200	300	0	0	0	0	0	0	0	200	903	0	0	0	0	0	0	0	603	903	0
409	0	0	0	0	0	0	0	200	300	0	0	0	0	0	0	0	200	903	0	0	0	0	0	0	0	603	903	0
409	1	0	0	0	0	0	0	200	300	0	0	0	0	0	0	0	200	903	0	0	0	0	0	0	0	603	903	0
409	2	0	0	0	0	0	0	200	300	0	0	0	0	0	0	0	200	903	0	0	0	0	0	0	0	603	903	0
409	3	0	0	0	0	0	0	200	300	0	0	0	0	0	0	0	200	903	0	0	0	0	0	0	0	603	903	0
409	4	0	0	0	0	0	0	200	300	0	0	0	0	0	0	0	200	903	0	0	0	0	0	0	0	603	903	0
409	5	0	0	0	0	0	0	200	300	0	0	0	0	0	0	0	200	903	0	0	0	0	0	0	0	603	903	0
409	6	0	0	0	0	0	0	200	300	0	0	0	0	0	0	0	200	903	0	0	0	0	0	0	0	603	903	0
409	7	0	0	0	0	0	0	200	300	0	0	0	0	0	0	0	200	903	0	0	0	0	0	0	0	603	903	0
409	8	0	0	0	0	0	0	200	300	0	0	0	0	0	0	0	200	903	0	0	0	0	0	0	0	603	903	0
409	9	0	0	0	0	0	0	200	300	0	0	0	0	0	0	0	200	903	0	0	0	0	0	0	0	603	903	0
410	0	0	0	0	0	0	0	200	300	0	0	0	0	0	0	0	200	903	0	0	0	0	0	0	0	603	903	0
410	1	0	0	0	0	0	0	200	300	0	0	0	0	0	0	0	200	903	0	0	0	0	0	0	0	603	903	0
410	2	0	0	0	0	0	0	200	300	0	0	0	0	0	0	0	200	903	0	0	0	0	0	0	0	603	903	0
410	3	0	0	0	0	0	0	200	300	0	0	0	0	0	0	0	200	903	0	0	0	0	0	0	0	603	903	0
410	4	0	0	0	0	0	0	200	300	0	0	0	0	0	0	0	200	903	0	0	0	0	0	0	0	603	903	0
410	5	0	0	0	0	0	0	200	300	0	0	0	0	0	0	0	200	903	0	0	0	0	0	0	0	603	903	0
410	6	0	0	0	0	0	0	200	300	0	0	0	0	0	0	0	200	903	0	0	0	0	0	0	0	603	903	0
410	7	0	0	0	0	0	0	200	300	0	0	0	0	0	0	0	200	903	0	0	0	0	0	0	0	603	903	0
410	8	0	0	0	0	0	0	200	300	0	0	0	0	0	0	0	200	903	0	0	0	0	0	0	0	603	903	0
410	9	0	0	0	0	0	0	200	300	0	0	0	0	0	0	0	200	903	0	0	0	0	0	0	0	603	903	0
411	0	0	0	0	0	0	0	200	300	0	0	0	0	0	0	0	200	903	0	0	0	0	0	0	0	603	903	0
411	1	0	0	0	0	0	0	200	300	0	0	0	0	0	0	0	200	903	0	0	0	0	0	0	0	603	903	0
411	2	0	0	0	0	0	0	200	300	0	0	0	0	0	0	0	200	903	0	0	0	0	0	0	0	603	903	0
411	3	0	0	0	0	0	0	200	300	0	0	0	0	0	0	0	200	903	0	0	0	0	0	0	0	603	903	0
411	4	0	0	0	0	0	0	200	300	0	0	0	0	0	0	0	200	903	0	0	0	0	0	0	0	603	903	0
411	5	0	0	0	0	0	0	200	300	0	0	0	0	0	0	0	200	903	0	0	0	0	0	0	0	603	903	0
411	6	0	0	0	0	0	0	200	300	0	0	0	0	0	0	0	200	903	0	0	0	0	0	0	0	603	903	0
411	7	0	0	0	0	0	0	200	300	0	0	0	0	0	0	0	200	903	0	0	0	0	0	0	0	603	903	0
411	8	0	0	0	0	0	0	200	300	0	0	0	0	0	0	0	200	903	0	0	0	0	0	0	0	603	903	0
411	9	0	0	0	0	0	0	200	300	0	0	0	0	0	0	0	200	903	0	0	0	0	0	0	0	603	903	0
412	0	0	0	0	0	0	0	200	300	0	0	0	0	0	0	0	200	903	0	0	0	0	0	0	0	603	903	0
412	1	0	0	0	0	0	0	200	300	0	0	0	0	0	0	0	200	903	0	0	0	0	0	0	0	603	903	0
412	2	0	0	0	0	0	0	200	300	0	0	0	0	0	0	0	200	903	0	0	0	0	0	0	0	603	903	0
412	3	0	0	0	0	0	0	200	300	0	0	0	0	0	0	0	200	903	0	0	0	0	0	0	0	603	903	0
412	4	0	0	0	0	0	0	200	300	0	0	0	0	0	0	0	200	903	0	0	0	0	0	0	0	603	903	0
412	5	0	0	0	0	0	0	200	300	0	0	0	0	0	0	0	200	903	0	0	0	0	0	0	0	603	903	0
412	6	0	0	0	0	0	0	200	300	0	0	0	0	0	0	0	200	903	0	0	0	0	0	0	0	603	903	0
412	7	0	0	0	0	0	0	200	300	0	0	0	0	0	0	0	200	903	0	0	0	0	0	0	0	603	903	0
412	8	0	0	0	0	0	0	200	300	0	0	0	0	0	0	0	200	903	0	0	0	0	0	0	0	603	903	0
412	9	0	0	0	0	0	0	200	300	0	0	0	0	0	0	0	200	903	0	0	0	0	0	0	0	603	903	0
413	0	0	0	0	0	0	0	200	300	0	0	0	0	0	0	0	200	903	0	0	0	0	0	0	0	603	903	0
413	1	0	0	0	0	0	0	200	300	0	0	0	0	0	0	0	200	903	0	0	0	0	0	0	0	603	903	0
413	2	0	0	0	0	0	0	200	300	0	0	0	0	0	0	0	200	903	0	0	0	0	0	0	0	603	903	0
413	3	0	0	0	0	0	0	200	300	0	0	0	0	0	0	0	200	903	0	0	0	0	0	0	0	603	903	0
413	4	0	0	0	0	0	0	200	300	0	0	0	0	0	0	0	200	903	0	0	0	0	0	0	0	603	903	0
413	5	0	0	0	0	0	0	200	300	0	0	0	0	0	0	0	200	903	0	0	0	0	0	0	0	603	903	0
413	6	0	0	0	0	0	0	200	300	0	0	0	0	0	0	0	200	903	0	0	0	0	0	0	0	603	903	0
413	7	0	0	0	0	0	0	200	300	0	0	0	0	0	0	0	200	903	0	0	0	0	0	0	0	603	903	0
413	8	0	0	0	0	0	0	200	300	0	0	0	0	0	0	0	200	903	0	0	0	0	0	0	0	603	903	0
413	9	0	0	0	0	0	0	200	300	0	0	0	0	0	0	0	200	903	0	0	0	0	0	0	0	603	903	0
414	0	0	0	0	0	0	0	200	300	0	0	0	0	0	0	0	200	903	0	0	0	0	0	0	0	603	903	0
414	1	0	0	0	0	0	0	200	300	0	0	0	0	0	0	0	200	903	0	0	0	0	0	0	0	603	903	0
414	2	0	0	0	0	0	0	200	300	0	0	0	0	0	0	0	200	903	0	0	0	0	0	0	0	603	903	0
414	3	0	0	0	0	0	0	200	300	0	0	0	0	0	0	0	200	903	0	0	0	0	0	0	0	603	903	0
414	4	0	0	0	0	0	0	200	300	0	0	0	0	0	0	0	200	903	0	0	0	0	0	0	0	603	903	0
414	5	0	0	0	0	0	0	200	300	0	0	0	0	0	0	0	200	903	0	0	0	0	0	0	0	603	903	0
414	6	0	0	0	0	0	0	200	300	0	0	0	0	0	0	0	200	903	0	0	0	0	0	0	0	603	903	0
414	7	0	0	0	0	0	0	200	300	0	0	0	0	0	0	0	200	903	0	0	0	0	0	0	0	603	903	0
414	8	0	0	0	0	0	0	200	300	0	0	0	0	0	0	0	200	903	0	0	0	0	0	0	0	603	903	0
414	9	0	0	0	0	0	0	200	300	0	0	0	0	0	0	0	200	903	0	0	0	0	0	0	0	603	903	0
415	0	0	0	0	0	0	0	200	300	0	0	0	0	0	0	0	200	903	0	0	0	0	0	0	0	603	903	0
415	1	0	0	0	0	0	0	200	300	0	0	0	0	0	0	0	200	903	0	0	0	0	0	0	0	603	903	0
415	2	0	0	0	0	0	0	200	300	0	0	0	0	0	0	0	200	903	0	0	0	0	0	0	0	603	903	0
415	3	0	0	0	0	0	0	200	300	0	0	0	0	0	0	0	200	903	0	0	0	0	0	0	0	603	903	0
415	4	0	0	0	0	0	0	200	300	0	0	0	0	0	0	0	200	903	0	0	0	0	0	0	0	603	903	0
415	5	0	0	0	0	0	0	200	300	0	0	0	0	0	0	0	200	903	0	0	0	0	0	0	0	603	903	0
415	6	0	0	0	0	0	0	200	300	0	0	0	0	0	0	0	200	903	0	0	0	0	0	0	0	603	903	0
415	7	0	0	0	0	0	0	200	300	0	0	0	0	0	0	0	200	903	0	0	0	0	0	0	0	603	903	0
415	8	0	0	0	0	0	0	200	300	0	0	0	0	0	0	0	200	903	0	0	0	0	0	0	0	603	903	0
415	9	0	0	0	0	0	0	200	300	0	0	0	0	0	0	0	200	903	0	0	0	0	0	0	0	603	903	0
416	0	0	0	0	0	0	0	200	300	0	0	0	0	0	0	0	200	903	0	0	0	0	0	0	0	603	903	0
416	1	0	0	0	0	0	0	200	300	0	0	0	0	0	0	0	200	903	0	0	0	0	0	0	0	603	903	0
416	2	0	0	0	0	0	0	200	300	0	0	0	0	0	0	0	200	903	0	0	0	0	0	0	0	603	903	0
416	3	0	0	0	0	0	0	200	300	0	0	0	0	0	0	0	200	903	0	0	0	0	0	0	0	603	903	0
416	4	0	0	0	0	0	0	200	300	0	0	0	0	0	0	0	200	903	0	0	0	0	0	0	0	603	903	0
416	5	0	0	0	0	0	0	200	300	0	0	0	0	0	0	0	200	903	0	0	0	0	0	0	0	603	903	0
416	6	0	0	0	0	0	0	200	300	0	0	0	0	0	0	0	200	903	0	0	0	0	0	0	0	603	903	0
416	7	0	0	0	0	0	0	200	300	0	0	0	0	0	0	0	200	903	0	0	0	0	0	0	0	603	903	0
416	8	0	0	0	0	0	0	200	300	0	0	0	0	0	0	0	200	903	0	0	0	0	0	0	0	603	903	0
416	9	0	0	0	0	0	0	200	300	0	0	0	0	0	0	0	200	903	0	0	0	0	0	0	0	603	903	0
417	0	0	0	0	0	0	0	200	300	0	0	0	0	0	0	0	200	903	0	0	0	0	0	0	0	603	903	0
417	1	0	0	0	0	0	0	200	300	0	0	0	0	0	0	0	200	903	0	0	0	0	0	0	0	603	903	0
417	2	0	0	0	0	0	0	200	300	0	0	0	0	0	0	0	200	903	0	0	0	0	0	0	0	603	903	0
417	3	0	0	0	0	0	0	200	300	0	0	0	0	0	0	0	200	903	0	0	0	0	0	0	0	603	903	0
417	4	0	0	0	0	0	0	200	300	0	0	0	0	0	0	0	200	903	0	0	0	0	0	0	0	603	903	0
417	5	0	0	0	0	0	0	200	300	0	0	0	0	0	0	0	200	903	0	0	0	0	0	0	0	603	903	0
417	6	0	0	0	0	0	0	200	300	0	0	0	0	0	0	0	200	903	0	0	0	0	0	0	0	603	903	0
417	7	0	0	0	0	0	0	200	300	0	0	0	0	0	0	0	200	903	0	0	0	0	0	0	0	603	903	0
417	8	0	0	0	0	0	0	200	300	0	0	0	0	0	0	0	200	903	0	0	0	0	0	0	0	603	903	0
417	9	0	0	0	0	0	0	200	300	0	0	0	0	0	0	0	200	903	0	0	0	0	0	0	0	603	903	0
418	0	0	0	0	0	0	0	200	300	0	0	0	0	0	0	0	200	903	0	0	0	0	0	0	0	603	903	0
418	1	0	0	0	0	0	0	200	300	0	0	0	0	0	0	0	200	903	0	0	0	0	0	0	0	603	903	0
418	2	0	0	0	0	0	0	200	300	0	0	0	0	0	0	0	200	903	0	0	0	0	0	0	0	603	903	0
418	3	0	0	0	0	0	0	200	300	0	0	0	0	0	0	0	200	903	0	0	0	0	0	0	0	603	903	0
418	4	0	0	0	0	0	0	200	300	0	0	0	0	0	0	0	200	903	0	0	0	0	0	0	0	603	903	0
418	5	0	0	0	0	0	0	200	300	0	0	0	0	0	0	0	200	903	0	0	0	0	0	0	0	603	903	0
418	6	0	0	0	0	0	0	200	300	0	0	0	0	0	0	0	200	903	0	0	0	0	0	0	0	603	903	0
418	7	0	0	0	0	0	0	200	300	0	0	0	0	0	0	0	200	903	0	0	0	0	0	0	0	603	903	0
418	8	0	0	0	0	0	0	200	300	0	0	0	0	0	0	0	200	903	0	0	0	0	0	0	0	603	903	0
418	9	0	0	0	0	0	0	200	300	0	0	0	0	0	0	0	200	903	0	0	0	0	0	0	0	603	903	0
419	0	0	0	0	0	0	0	200	300	0	0	0	0	0	0	0	200	903	0	0	0	0	0	0	0	603	903	0
419	1	0	0	0	0	0	0	200	300	0	0	0	0	0	0	0	200	903	0	0	0	0	0	0	0	603	903	0
419	2	0	0	0	0	0	0	200	300	0	0	0	0	0	0	0	200	903	0	0	0	0	0	0	0	603	903	0
419	3	0	0	0	0	0	0	200	300	0	0	0	0	0	0	0	200	903	0	0	0	0	0	0	0	603	903	0
419	4	0	0	0	0	0	0	200	300	0	0	0	0	0	0	0	200	903	0	0	0	0	0	0	0	603	903	0
419	5	0	0	0	0	0	0	200	300	0	0	0	0	0	0	0	200	903	0	0	0	0	0	0	0	603	903	0
419	6	0	0	0	0	0	0	200	300	0	0	0	0	0	0	0	200	903	0	0	0	0	0	0	0	603	903	0
419	7	0	0	0	0	0	0	200	300	0	0	0	0	0	0	0	200	903	0	0	0	0	0	0	0	603	903	0
419	8	0	0	0	0	0	0	200	300	0	0	0	0	0	0	0	200	903	0	0	0	0	0	0	0	603	903	0
419	9	0	0	0	0	0	0	200	300	0	0	0	0	0	0	0	200	903	0	0	0	0	0	0	0	603	903	0
420	0	0	0	0	0	0	0	200	300	0	0	0	0	0	0	0	200	903	0	0	0	0	0	0	0	603	903	0
420	1	0	0	0	0	0	0	200	300	0	0	0	0	0	0	0	200	903	0	0	0	0	0	0	0	603	903	0
420	2	0	0	0	0	0	0	200	300	0	0	0	0	0	0	0	200	903	0	0	0	0	0	0	0	603	903	0
420	3	0	0	0	0	0	0	200	300	0	0	0	0	0	0	0	200	903	0	0	0	0	0	0	0	603	903	0
420	4	0	0	0	0	0	0	200	300	0	0	0	0	0	0	0	200	903	0	0	0	0	0	0	0	603	903	0
420	5	0	0	0	0	0	0	200	300	0	0	0	0	0	0	0	200	903	0	0	0	0	0	0	0	603	903	0
420	6	0	0	0	0	0	0	200	300	0	0	0	0	0	0	0	200	903	0	0	0	0	0	0	0	603	903	0
420	7	0	0	0	0	0	0	200	300	0	0	0	0	0	0	0	200	903	0	0	0	0	0	0	0	603	903	0
420	8	0	0	0	0	0	0	200	300	0	0	0	0	0	0	0	200	903	0	0	0	0	0	0	0	603	903	0
420	9	0	0	0	0	0	0	200	300	0	0	0	0	0	0	0	200	903	0	0	0	0	0	0	0	603	903	0
421	0	0	0	0	0	0	0	200	300	0	0	0	0	0	0	0	200	903	0	0	0	0	0	0	0	603	903	0
421	1	0	0	0	0	0	0	200	300	0	0	0	0	0	0	0	200	903	0	0	0	0	0	0	0	603	903	0
421	2	0	0	0	0	0	0	200	300	0	0	0	0	0	0	0	200	903	0	0	0	0	0	0	0	603	903	0
421	3	0	0	0	0	0	0	200	300	0	0	0	0	0	0	0	200	903	0	0	0	0	0	0	0	603	903	0
421	4	0	0	0	0	0	0	200	300	0	0	0	0	0	0	0	200	903	0	0	0	0	0	0	0	603	903	0
421	5	0	0	0	0	0	0	200	300	0	0	0	0	0	0	0	200	903	0	0	0	0	0	0	0	603	903	0
421	6	0	0	0	0	0	0	200	300	0	0	0	0	0	0	0	200	903	0	0	0	0	0	0	0	603	903	0
421	7	0	0	0	0	0	0	200	300	0	0	0	0	0	0	0	200	903	0	0	0	0	0	0	0	603	903	0
421	8	0	0	0	0	0	0	200	300	0	0	0	0	0	0	0	200	903	0	0	0	0	0	0	0	603	903	0
421	9	0	0	0	0	0	0	200	300	0	0	0	0	0	0	0	200	903	0	0	0	0	0	0	0	603	903	0
422	0	0	0	0	0	0	0	200	300	0	0	0	0	0	0	0	200	903	0	0	0	0	0	0	0	603	903	0
422	1	0	0	0	0	0	0	200	300	0	0	0	0	0	0	0	200	903	0	0	0	0	0	0	0	603	903	0
422	2	0	0	0	0	0	0	200	300	0	0	0	0	0	0	0	200	903	0	0	0	0	0	0	0	603	903	0
422	3	0	0	0	0	0	0	200	300	0	0	0	0	0	0	0	200	903	0	0	0	0	0	0	0	603	903	0
422	4	0	0	0	0	0	0	200	300	0	0	0	0	0	0	0	200	903	0	0	0	0	0	0	0	603	903	0
422	5	0	0	0	0	0	0	200	300	0	0	0	0	0	0	0	200	903	0	0	0	0	0	0	0	603	903	0
422	6	0	0	0	0	0	0	200	300	0	0	0	0	0	0	0	200	903	0	0	0	0	0	0	0	603	903	0
422	7	0	0	0	0	0	0	200	300	0	0	0	0	0	0	0	200	903	0	0	0	0	0	0	0	603	903	0
422	8	0	0	0	0	0	0	200	300	0	0	0	0	0	0	0	200	903	0	0	0	0	0	0	0	603	903	0
422	9	0	0	0	0	0	0	200	300	0	0	0	0	0	0	0	200	903	0	0	0	0	0	0	0	603	903	0
423	0	0	0	0	0	0	0	200	300	0	0	0	0	0	0	0	200	903	0	0	0	0	0	0	0	603	903	0
423	1	0	0	0	0	0	0	200	300	0	0	0	0	0	0	0	200	903	0	0	0	0	0	0	0	603	903	0
423	2	0	0	0	0	0	0	200	300	0	0	0	0	0	0	0	200	903	0	0	0	0	0	0	0	603	903	0
423	3	0	0	0	0	0	0	200	300	0	0	0	0	0	0	0	200	903	0	0	0	0	0	0	0	603	903	0
423	4	0	0	0	0	0	0	200	300	0	0	0	0	0	0	0	200	903	0	0	0	0	0	0	0	603	903	0
423	5	0	0	0	0	0	0	200	300	0	0	0	0	0	0	0	200	903	0	0	0	0	0	0	0	603	903	0
423	6	0	0	0	0	0	0	200	300	0	0	0	0	0	0	0	200	903	0	0	0	0	0	0	0	603	903	0
423	7	0	0	0	0	0	0	200	300	0	0	0	0	0	0	0	200	903	0	0	0	0	0	0	0	603	903	0
423	8	0	0	0	0	0	0	200	300	0	0	0	0	0	0	0	200	903	0	0	0	0	0	0	0	603	903	0
423	9	0	0	0	0	0	0	200	300	0	0	0	0	0	0	0	200	903	0	0	0	0	0	0	0	603	903	0
424	0	0	0	0	0	0	0	200	300	0	0	0	0	0	0	0	200	903	0	0	0	0	0	0	0	603	903	0
424	1	0	0	0	0	0	0	200	300	0	0	0	0	0	0	0	200	903	0	0	0	0	0	0	0	603	903	0
424	2	0	0	0	0	0	0	200	300	0	0	0	0	0	0	0	200	903	0	0	0	0	0	0	0	603	903	0
424	3	0	0	0	0	0	0	200	300	0	0	0	0	0	0	0	200	903	0	0	0	0	0	0	0	603	903	0
424	4	0	0	0	0	0	0	200	300	0	0	0	0	0	0	0	200	903	0	0	0	0	0	0	0	603	903	0
424	5	0	0	0	0	0	0	200	300	0	0	0	0	0	0	0	200	903	0	0	0	0	0	0	0	603	903	0
424	6	0	0	0	0	0	0	200	300	0	0	0	0	0	0	0	200	903	0	0	0	0	0	0	0	603	903	0
424	7	0	0	0	0	0	0	200	300	0	0	0	0	0	0	0	200	903	0	0	0	0	0	0	0	603	903	0
424	8	0	0	0	0	0	0	200	300	0	0	0	0	0	0	0	200	903	0	0	0	0	0	0	0	603	903	0
424	9	0	0	0	0	0	0	200	300	0	0	0	0	0	0	0	200	903	0	0	0	0	0	0	0	603	903	0
425	0	0	0	0	0	0	0	200	300	0	0	0	0	0	0	0	200	903	0	0	0	0	0	0	0	603	903	0
425	1	0	0	0	0	0	0	200	300	0	0	0	0	0	0	0	200	903	0	0	0	0	0	0	0	603	903	0
425	2	0	0	0	0	0	0	200	300	0	0	0	0	0	0	0	200	903	0	0	0	0	0	0	0	603	903	0
425	3	0	0	0	0	0	0	200	300	0	0	0	0	0	0	0	200	903	0	0	0	0	0	0	0	603	903	0
425	4	0	0	0	0	0	0	200	300	0	0	0	0	0	0	0	200	903	0	0	0	0	0	0	0	603	903	0
425	5	0	0	0	0	0	0	200	300	0	0	0	0	0	0	0	200	903	0	0	0	0	0	0	0	603	903	0
425	6	0	0	0	0	0	0	200	300	0	0	0	0	0	0	0	200	903	0	0	0	0	0	0	0	603	903	0
425	7	0	0	0	0	0	0	200	300	0	0	0	0	0	0	0	200	903	0	0	0	0	0	0	0	603	903	0
425	8	0	0	0	0	0	0	200	300	0	0	0	0	0	0	0	200	903	0	0	0	0	0	0	0	603	903	0
425	9	0	0	0	0	0	0	200	300	0	0	0	0	0	0	0	200	903	0	0	0	0	0	0	0	603	903	0
426	0	0	0	0	0	0	0	200	300	0	0	0	0	0	0	0	200	903	0	0	0	0	0	0	0	603	903	0
426	1	0	0	0	0	0	0	200	300	0	0	0	0	0	0	0	200	903	0	0	0	0	0	0	0	603	903	0
426	2	0	0	0	0	0	0	200	300	0	0	0	0	0	0	0	200	903	0	0	0	0	0	0	0	603	903	0
426	3	0	0	0	0	0	0	200	300	0	0	0	0	0	0	0	200	903	0	0	0	0	0	0	0	603	903	0
426	4	0	0	0	0	0	0	200	300	0	0	0	0	0	0	0	200	903	0	0	0	0	0	0	0	603	903	0
426	5	0	0	0	0	0	0	200	300	0	0	0	0	0	0	0	200	903	0	0	0	0	0	0	0	603	903	0
426	6	0	0	0	0	0	0	200	300	0	0	0	0	0	0	0	200	903	0	0	0	0	0	0	0	603	903	0
426	7	0	0	0	0	0	0	200	300	0	0	0	0	0	0	0	200	903	0	0	0	0	0	0	0	603	903	0
426	8	0	0	0	0	0	0	200	300	0	0	0	0	0	0	0	200	903	0	0	0	0	0	0	0	603	903	0
426	9	0	0	0	0	0	0	200	300	0	0	0	0	0	0	0	200	903	0	0	0	0	0	0	0	603	903	0
427	0	0	0	0	0	0	0	200	300	0	0	0	0	0	0	0	200	903	0	0	0	0	0	0	0	603	903	0
427	1	0	0	0	0	0	0	200	300	0	0	0	0	0	0	0	200	903	0	0	0	0	0	0	0	603	903	0
427	2	0	0	0	0	0	0	200	300	0	0	0	0	0	0	0	200	903	0	0	0	0	0	0	0	603	903	0
427	3	0	0	0	0	0	0	200	300	0	0	0	0	0	0	0	200	903	0	0	0	0	0	0	0	603	903	0
427	4	0	0	0	0	0	0	200	300	0	0	0	0	0	0	0	200	903	0	0	0	0	0	0	0	603	903	0
427	5	0	0	0	0	0	0	200	300	0	0	0	0	0	0	0	200	903	0	0	0	0	0	0	0	603	903	0
427	6	0	0	0	0	0	0	200	300	0	0	0	0	0	0	0	200	903	0	0	0	0	0	0	0	603	903	0
427	7	0	0	0	0	0	0	200	300	0	0	0	0	0	0	0	200	903	0	0	0	0	0	0	0	603	903	0
427	8	0	0	0	0	0	0	200	300	0	0	0	0	0	0	0	200	903	0	0	0	0	0	0	0	603	903	0
427	9	0	0	0	0	0	0	200	300	0	0	0	0	0	0	0	200	903	0	0	0	0	0	0	0	603	903	0
428	0	0	0	0	0	0	0	200	300	0	0	0	0	0	0	0	200	903	0	0	0	0	0	0	0	603	903	0
428	1	0	0	0	0	0	0	200	300	0	0	0	0	0	0	0	200	903	0	0	0	0	0	0	0	603	903	0
428	2	0	0	0	0	0	0	200	300	0	0	0	0	0	0	0	200	903	0	0	0	0	0	0	0	603	903	0
428	3	0	0	0	0	0	0	200	300	0	0	0	0	0	0	0	200	903	0	0	0	0	0	0	0	603	903	0
428	4	0	0	0	0	0	0	200	300	0	0	0	0	0	0	0	200	903	0	0	0	0	0	0	0	603	903	0
428	5	0	0	0	0	0	0	200	300	0	0	0	0	0	0	0	200	903	0	0	0	0	0	0	0	603	903	0
428	6	0	0	0	0	0	0	200	300	0	0	0	0	0	0	0	200	903	0	0	0	0	0	0	0	603	903	0
428	7	0	0	0	0	0	0	200	300	0	0	0	0	0	0	0	200	903	0	0	0	0	0	0	0	603	903	0
428	8	0	0	0	0	0	0	200	300	0	0	0	0	0	0	0	200	903	0	0	0	0	0	0	0	603	903	0
428	9	0	0	0	0	0	0	200	300	0	0	0	0	0	0	0	200	903	0	0	0	0	0	0	0	603	903	0
429	0	0	0	0	0	0	0	200	300	0	0	0	0	0	0	0	200	903	0	0	0	0	0	0	0	603	903	0
429	1	0	0	0	0	0	0	200	300	0	0	0	0	0	0	0	200	903	0	0	0	0	0	0	0	603	903	0
429	2	0	0	0	0	0	0	200	300	0	0	0	0	0	0	0	200	903	0	0	0	0	0	0	0	603	903	0
429	3	0	0	0	0	0	0	200	300	0	0	0	0	0	0	0	200	903	0	0	0	0	0	0	0	603	903	0
429	4	0	0	0	0	0	0	200	300	0	0	0	0	0	0	0	200	903	0	0	0	0	0	0	0	603	903	0
429	5	0	0	0	0	0	0	200	300	0	0	0	0	0	0	0	200	903	0	0	0	0	0	0	0	603	903	0
429	6	0	0	0	0	0	0	200	300	0	0	0	0	0	0	0	200	903	0	0	0	0	0	0	0	603	903	0
429	7	0	0	0	0	0	0	200	300	0	0	0	0	0	0	0	200	903	0	0	0	0	0	0	0	603	903	0
429	8	0	0	0	0	0	0	200	300	0	0	0	0	0	0	0	200	903	0	0	0	0	0	0	0	603	903	0
429	9	0	0	0	0	0	0	200	300	0	0	0	0	0	0	0	200	903	0	0	0	0	0	0	0	603	903	0
430	0	0	0	0	0	0	0	200	300	0	0	0	0	0	0	0	200	903	0	0	0	0	0	0	0	603	903	0
430	1	0	0	0	0	0	0	200	300	0	0	0	0	0	0	0	200	903	0	0	0	0	0	0	0	603	903	0
430	2	0	0	0	0	0	0	200	300	0	0	0	0	0	0	0	200	903	0	0	0	0	0	0	0	603	903	0
430	3	0	0	0	0	0	0	200	300	0	0	0	0	0	0	0	200	903	0	0	0	0	0	0	0	603	903	0
430	4	0	0	0	0	0	0	200	300	0	0	0	0	0	0	0	200	903	0	0	0	0	0	0	0	603	903	0
430	5	0	0	0	0	0	0	200	300	0	0	0	0	0	0	0	200	903	0	0	0	0	0	0	0	603	903	0
430	6	0	0	0	0	0	0	200	300	0	0	0	0	0	0	0	200	903	0	0	0	0	0	0	0	603	903	0
430	7	0	0	0	0	0	0	200	300	0	0	0	0	0	0	0	200	903	0	0	0	0	0	0	0	603	903	0
430	8	0	0	0	0	0	0	200	300	0	0	0	0	0	0	0	200	903	0	0	0	0	0	0	0	603	903	0
430	9	0	0	0	0	0	0	200	300	0	0	0	0	0	0	0	200	903	0	0	0	0	0	0	0	603	903	0
431	0	0	0	0	0	0	0	200	300	0	0	0	0	0	0	0	200	903	0	0	0	0	0	0	0	603	903	0
431	1	0	0	0	0	0	0	200	300	0	0	0	0	0	0	0	200	903	0	0	0	0	0	0	0	603	903	0
431	2	0	0	0	0	0	0	200	300	0	0	0	0	0	0	0	200	903	0	0	0	0	0	0	0	603	903	0
431	3	0	0	0	0	0	0	200	300	0	0	0	0	0	0	0	200	903	0	0	0	0	0	0	0	603	903	0
431	4	0	0	0	0	0	0	200	300	0	0	0	0	0	0	0	200	903	0	0	0	0	0	0	0	603	903	0
431	5	0	0	0	0	0	0	200	300	0	0	0	0	0	0	0	200	903	0	0	0	0	0	0	0	603	903	0
431	6	0	0	0	0	0	0	200	300	0	0	0	0	0	0	0	200	903	0	0	0	0	0	0	0	603	903	0
431	7	0	0	0	0	0	0	200	300	0	0	0	0	0	0	0	200	903	0	0	0	0	0	0	0	603	903	0
431	8	0	0	0	0	0	0	200	300	0	0	0	0	0	0	0	200	903	0	0	0	0	0	0	0	603	903	0
431	9	0	0	0	0	0	0	200	300	0	0	0	0	0	0	0	200	903	0	0	0	0	0	0	0	603	903	0
432	0	0	0	0	0	0	0	200	300	0	0	0	0	0	0	0	200	903	0	0	0	0	0	0	0	603	903	0
432	1	0	0	0	0	0	0	200	300	0	0	0	0	0	0	0	200	903	0	0	0	0	0	0	0	603	903	0
432	2	0	0	0	0	0	0	200	300	0	0	0	0	0	0	0	200	903	0	0	0	0	0	0	0	603	903	0
432	3	0	0	0	0	0	0	200	300	0	0	0	0	0	0	0	200	903	0	0	0	0	0	0	0	603	903	0
432	4	0	0	0	0	0	0	200	300	0	0	0	0	0	0	0	200	903	0	0	0	0	0	0	0	603	903	0
432	5	0	0	0	0	0	0	200	300	0	0	0	0	0	0	0	200	903	0	0	0	0	0	0	0	603	903	0
432	6	0	0	0	0	0	0	200	300	0	0	0	0	0	0	0	200	903	0	0	0	0	0	0	0	603	903	0
432	7	0	0	0	0	0	0	200	300	0	0	0	0	0	0	0	200	903	0	0	0	0	0	0	0	603	903	0
432	8	0	0	0	0	0	0	200	300	0	0	0	0	0	0	0	200	903	0	0	0	0	0	0	0	603	903	0
432	9	0	0	0	0	0	0	200	300	0	0	0	0	0	0	0	200	903	0	0	0	0	0	0	0	603	903	0
433	0	0	0	0	0	0	0	200	300	0	0	0	0	0	0	0	200	903	0	0	0	0	0	0	0	603	903	0
433	1	0	0	0	0	0	0	200	300	0	0	0	0	0	0	0	200	903	0	0	0	0	0	0	0	603	903	0
433	2	0	0	0	0	0	0	200	300	0	0	0	0	0	0	0	200	903	0	0	0	0	0	0	0	603	903	0
433	3	0	0	0	0	0	0	200	300	0	0	0	0	0	0	0	200	903	0	0	0	0	0	0	0	603	903	0
433	4	0	0	0	0	0	0	200	300	0	0	0	0	0	0	0	200	903	0	0	0	0	0	0	0	603	903	0
433	5	0	0	0	0	0	0	200	300	0	0	0	0	0	0	0	200	903	0	0	0	0	0	0	0	603	903	0
433	6	0	0	0	0	0	0	200	300	0	0	0	0	0	0	0	200	903	0	0	0	0	0	0	0	603	903	0
433	7	0	0	0	0	0	0	200	300	0	0	0	0	0	0	0	200	903	0	0	0	0	0	0	0	603	903	0
433	8	0	0	0	0	0	0	200	300	0	0	0	0	0	0	0	200	903	0	0	0	0	0	0	0	603	903	0
433	9	0	0	0	0	0	0	200	300	0	0	0	0	0	0	0	200	903	0	0	0	0	0	0	0	603	903	0
434	0	0	0	0	0	0	0	200	300	0	0	0	0	0	0	0	200	903	0	0	0	0	0	0	0	603	903	0
434	1	0	0	0	0	0	0	200	300	0	0	0	0	0	0	0	200	903	0	0	0	0	0	0	0	603	903	0
434	2	0	0	0	0	0	0	200	300	0	0	0	0	0	0	0	200	903	0	0	0	0	0	0	0	603	903	0
434	3	0	0	0	0	0	0	200	300	0	0	0	0	0	0	0	200	903	0	0	0	0	0	0	0	603	903	0
434	4	0	0	0	0	0	0	200	300	0	0	0	0	0	0	0	200	903	0	0	0	0	0	0	0	603	903	0
434	5	0	0	0	0	0	0	200	300	0	0	0	0	0	0	0	200	903	0	0	0	0	0	0	0	603	903	0
434	6	0	0	0	0	0	0	200	300	0	0	0	0	0	0	0	200	903	0	0	0	0	0	0	0	603	903	0
434	7	0	0	0	0	0	0	200	300	0	0	0	0	0	0	0	200	903	0	0	0	0	0	0	0	603	903	0
434	8	0	0	0	0	0	0	200	300	0	0	0	0	0	0	0	200	903	0	0	0	0	0	0	0	603	903	0
434	9	0	0	0	0	0	0	200	300	0	0	0	0	0	0	0	200	903	0	0	0	0	0	0	0	603	903	0
435	0	0	0	0	0	0	0	200	300	0	0	0	0	0	0	0	200	903	0	0	0	0	0	0	0	603	903	0
435	1	0	0	0	0	0	0	200	300	0	0	0	0	0	0	0	200	903	0	0	0	0	0	0	0	603	903	0
435	2	0	0	0	0	0	0	200	300	0	0	0	0	0	0	0	200	903	0	0	0	0	0	0	0	603	903	0
435	3	0	0	0	0	0	0	200	300	0	0	0	0	0	0	0	200	903	0	0	0	0	0	0	0	603	903	0
435	4	0	0	0	0	0	0	200	300	0	0	0	0	0	0	0	200	903	0	0	0	0	0	0	0	603	903	0
435	5	0	0	0	0	0	0	200	300	0	0	0	0	0	0	0	200	903	0	0	0	0	0	0	0	603	903	0
435	6	0	0	0	0	0	0	200	300	0	0	0	0	0	0	0	200	903	0	0	0	0	0	0	0	603	903	0
435	7	0	0	0	0	0	0	200	300	0	0	0	0	0	0	0	200	903	0	0	0	0	0	0	0	603	903	0
435	8	0	0	0	0	0	0	200	300	0	0	0	0	0	0	0	200	903	0	0	0	0	0	0	0	603	903	0
435	9	0	0	0	0	0	0	200	300	0	0	0	0	0	0	0	200	903	0	0	0	0	0	0	0	603	903	0
436	0	0	0	0	0	0	0	200	300	0	0	0	0	0	0	0	200	903	0	0	0	0	0	0	0	603	903	0
436	1	0	0	0	0	0	0	200	300	0	0	0	0	0	0	0	200	903	0	0	0	0	0	0	0	603	903	0
436	2	0	0	0	0	0	0	200	300	0	0	0	0	0	0	0	200	903	0	0	0	0	0	0	0	603	903	0
436	3	0	0	0	0	0	0	200	300	0	0	0	0	0	0	0	200	903	0	0	0	0	0	0	0	603	903	0
436	4	0	0	0	0	0	0	200	300	0	0	0	0	0	0	0	200	903	0	0	0	0	0	0	0	603	903	0
436	5	0	0	0	0	0	0	200	300	0	0	0	0	0	0	0	200	903	0	0	0	0	0	0	0	603	903	0
436	6	0	0	0	0	0	0	200	300	0	0	0	0	0	0	0	200	903	0	0	0	0	0	0	0	603	903	0
436	7	0	0	0	0	0	0	200	300	0	0	0	0	0	0	0	200	903	0	0	0	0	0	0	0	603	903	0
436	8	0	0	0	0	0	0	200	300	0	0	0	0	0	0	0	200	903	0	0	0	0	0	0	0	603	903	0
436	9	0	0	0	0	0	0	200	300	0	0	0	0	0	0	0	200	903	0	0	0	0	0	0	0	603	903	0
437	0	0	0	0	0	0	0	200	300	0	0	0	0	0	0	0	200	903	0	0	0	0	0	0	0	603	903	0
437	1	0	0	0	0	0	0	200	300	0	0	0	0	0	0	0	200	903	0	0	0	0	0	0	0	603	903	0
437	2	0	0	0	0	0	0	200	300	0	0	0	0	0	0	0	200	903	0	0	0	0	0	0	0	603	903	0
437	3	0	0	0	0	0	0	200	300	0	0	0	0	0	0	0	200	903	0	0	0	0	0	0	0	603	903	0
437	4	0	0	0	0	0	0	200	300	0	0	0	0	0	0	0	200	903	0	0	0	0	0	0	0	603	903	0
437	5	0	0	0	0	0	0	200	300	0	0	0	0	0	0	0	200	903	0	0	0	0	0	0	0	603	903	0
437	6	0	0	0	0	0	0	200	300	0	0	0	0	0	0	0	200	903	0	0	0	0	0	0	0	603	903	0
437	7	0	0	0	0	0	0	200	300	0	0	0	0	0	0	0	200	903	0	0	0	0	0	0	0	603	903	0
437	8	0	0	0	0	0	0	200	300	0	0	0	0	0	0	0	200	903	0	0	0	0	0	0	0	603	903	0
437	9	0	0	0	0	0	0	200	300	0	0	0	0	0	0	0	200	903	0	0	0	0	0	0	0	603	903	0
438	0	0	0	0	0	0	0	200	300	0	0	0	0	0	0	0	200	903	0	0	0	0	0	0	0	603	903	0
438	1	0	0	0	0	0	0	200	300	0	0	0	0	0	0	0	200	903	0	0	0	0	0	0	0	603	903	0
438	2	0	0	0	0	0	0	200	300	0	0	0	0	0	0	0	200	903	0	0	0	0	0	0	0	603	903	0
438	3	0	0	0	0	0	0	200	300	0	0	0	0	0	0	0	200	903	0	0	0	0	0	0	0	603	903	0
438	4	0	0	0	0	0	0	200	300	0	0	0	0	0	0	0	200	903	0	0	0	0	0	0	0	603	903	0
438	5	0	0	0	0	0	0	200	300	0	0	0	0	0	0	0	200	903	0	0	0	0	0	0	0	603	903	0
438	6	0	0	0	0	0	0	200	300	0	0	0	0	0	0	0	200	903	0	0	0	0	0	0	0	603	903	0
438	7	0	0	0	0	0	0	200	300	0	0	0	0	0	0	0	200	903	0	0	0	0	0	0	0	603	903	0
438	8	0	0	0	0	0	0	200	300	0	0	0	0	0	0	0	200	903	0	0	0	0	0	0	0	603	903	0
438	9	0	0	0	0	0	0	200	300	0	0	0	0	0	0	0	200	903	0	0	0	0	0	0	0	603	903	0
439	0	0	0	0	0	0	0	200	300	0	0	0	0	0	0	0	200	903	0	0	0	0	0	0	0	603	903	0
439	1	0	0	0	0	0	0	200	300	0	0	0	0	0	0	0	200	903	0	0	0	0	0	0	0	603	903	0
439	2	0	0	0	0	0	0	200	300	0	0	0	0	0	0	0	200	903	0	0	0	0	0	0	0	603	903	0
439	3	0	0	0	0	0	0	200	300	0	0	0	0	0	0	0	200	903	0	0	0	0	0	0	0	603	903	0
439	4	0	0	0	0	0	0	200	300	0	0	0	0	0	0	0	200	903	0	0	0	0	0	0	0	603	903	0
439	5	0	0	0	0	0	0	200	300	0	0	0	0	0	0	0	200	903	0	0	0	0	0	0	0	603	903	0
439	6	0	0	0	0	0	0	200	300	0	0	0	0	0	0	0	200	903	0	0	0	0	0	0	0	603	903	0
439	7	0	0	0	0	0	0	200	300	0	0	0	0	0	0	0	200	903	0	0	0	0	0	0	0	603	903	0
439	8	0	0	0	0	0	0	200	300	0	0	0	0	0	0	0	200	903	0	0	0	0	0	0	0	603	903	0
439	9	0	0	0	0	0	0	200	300	0	0	0	0	0	0	0	200	903	0	0	0	0	0	0	0	603	903	0
440	0	0	0	0	0	0	0	200	300	0	0	0	0	0	0	0	200	903	0	0	0	0	0	0	0	603	903	0
440	1	0	0	0	0	0	0	200	300	0	0	0	0	0	0	0	200	903	0	0	0	0	0	0	0	603	903	0
440	2	0	0	0	0	0	0	200	300	0	0	0	0	0	0	0	200	903	0	0	0	0	0	0	0	603	903	0
440	3	0	0	0	0	0	0	200	300	0	0	0	0	0	0	0	200	903	0	0	0	0	0	0	0	603	903	0
440	4	0	0	0	0	0	0	200	300	0	0	0	0	0	0	0	200	903	0	0	0	0	0	0	0	603	903	0
440	5	0	0	0	0	0	0	200	300	0	0	0	0	0	0	0	200	903	0	0	0	0	0	0	0	603	903	0
440	6	0	0	0	0	0	0	200	300	0	0	0	0	0	0	0	200	903	0	0	0	0	0	0	0	603	903	0
440	7	0	0	0	0	0	0	200	300	0	0	0	0	0	0	0	200	903	0	0	0	0	0	0	0	603	903	0
440	8	0	0	0	0	0	0	200	300	0	0	0	0	0	0	0	200	903	0	0	0	0	0	0	0	603	903	0
440	9	0	0	0	0	0	0	200	300	0	0	0	0	0	0	0	200	903	0	0	0	0	0	0	0	603	903	0
441	0	0	0	0	0	0	0	200	300	0	0	0	0	0	0	0	200	903	0	0	0	0	0	0	0	603	903	0
441	1	0	0	0	0	0	0	200	300	0	0	0	0	0	0	0	200	903	0	0	0	0	0	0	0	603	903	0
441	2	0	0	0	0	0	0	200	300	0	0	0	0	0	0	0	200	903	0	0	0	0	0	0	0	603	903	0
441	3	0	0	0	0	0	0	200	300	0	0	0	0	0	0	0	200	903	0	0	0	0	0	0	0	603	903	0
441	4	0	0	0	0	0	0	200	300	0	0	0	0	0	0	0	200	903	0	0	0	0	0	0	0	603	903	0
441	5	0	0	0	0	0	0	200	300	0	0	0	0	0	0	0	200	903	0	0	0	0	0	0	0	603	903	0
441	6	0	0	0	0	0	0	200	300	0	0	0	0	0	0	0	200	903	0	0	0	0	0	0	0	603	903	0
441	7	0	0	0	0	0	0	200	300	0	0	0	0	0	0	0	200	903	0	0	0	0	0	0	0	603	903	0
441	8	0	0	0	0	0	0	200	300	0	0	0	0	0	0	0	200	903	0	0	0	0	0	0	0	603	903	0
441	9	0	0	0	0	0	0	200	300	0	0	0	0	0	0	0	200	903	0	0	0	0	0	0	0	603	903	0
442	0	0	0	0	0	0	0	200	300	0	0	0	0	0	0	0	200	903	0	0	0	0	0	0	0	603	903	0
442	1	0	0	0	0	0	0	200	300	0	0	0	0	0	0	0	200	903	0	0	0	0	0	0	0	603	903	0
442	2	0	0	0	0	0	0	200	300	0	0	0	0	0	0	0	200	903	0	0	0	0	0	0	0	603	903	0
442	3	0	0	0	0	0	0	200	300	0	0	0	0	0	0	0	200	903	0	0	0	0	0	0	0	603	903	0
442	4	0	0	0	0	0	0	200	300	0	0	0	0	0	0	0	200	903	0	0	0	0	0	0	0	603	903	0
442	5	0	0	0	0	0	0	200	300	0	0	0	0	0	0	0	200	903	0	0	0	0	0	0	0	603	903	0
442	6	0	0	0	0	0	0	200	300	0	0	0	0	0	0	0	200	903	0	0	0	0	0	0	0	603	903	0
442	7	0	0	0	0	0	0	200	300	0	0	0	0	0	0	0	200	903	0	0	0	0	0	0	0	603	903	0
442	8	0	0	0	0	0	0	200	300	0	0	0	0	0	0	0	200	903	0	0	0	0	0	0	0	603	903	0
442	9	0	0	0	0	0	0	200	300	0	0	0	0	0	0	0	200	903	0	0	0	0	0	0	0	603	903	0
443	0	0	0	0	0	0	0	200	300	0	0	0	0	0	0	0	200	903	0	0	0	0	0	0	0	603	903	0
443	1	0	0	0	0	0	0	200	300	0	0	0	0	0	0	0	200	903	0	0	0	0	0	0	0	603	903	0
443	2	0	0	0	0	0	0	200	300	0	0	0	0	0	0	0	200	903	0	0	0	0	0	0	0	603	903	0
443	3	0	0	0	0	0	0	200	300	0	0	0	0	0	0	0	200	903	0	0	0	0	0	0	0	603	903	0
443	4	0	0	0	0	0	0	200	300	0	0	0	0	0	0	0	200	903	0	0	0	0	0	0	0	603	903	0
443	5	0	0	0	0	0	0	200	300	0	0	0	0	0	0	0	200	903	0	0	0	0	0	0	0	603	903	0
443	6	0	0	0	0	0	0	200	300	0	0	0	0	0	0	0	200	903	0	0	0	0	0	0	0	603	903	0
443	7	0	0	0	0	0	0	200	300	0	0	0	0	0	0	0	200	903	0	0	0	0	0	0	0	603	903	0
443	8	0	0	0	0	0	0	200	300	0	0	0	0	0	0	0	200	903	0	0	0	0	0	0	0	603	903	0
443	9	0	0	0	0	0	0	200	300	0	0	0	0	0	0	0	200	903	0	0	0	0	0	0	0	603	903	0
444	0	0	0	0	0	0	0	200	300	0	0	0	0	0	0	0	200	903	0	0	0	0	0	0	0	603	903	0
444	1	0	0	0	0	0	0	200	300	0	0	0	0	0	0	0	200	903	0	0	0	0	0	0	0	603	903	0
444	2	0	0	0	0	0	0	200	300	0	0	0	0	0	0	0	200	903	0	0	0	0	0	0	0	603	903	0
444	3	0	0	0	0	0	0	200	300	0	0	0	0	0	0	0	200	903	0	0	0	0	0	0	0	603	903	0
444	4	0	0	0	0	0	0	200	300	0	0	0	0	0	0	0	200	903	0	0	0	0	0	0	0	603	903	0
444	5	0	0	0	0	0	0	200	300	0	0	0	0	0	0	0	200	903	0	0	0	0	0	0	0	603	903	0
444	6	0	0	0	0	0	0	200	300	0	0	0	0	0	0	0	200	903	0	0	0	0	0	0	0	603	903	0
444	7	0	0	0	0	0	0	200	300	0	0	0	0	0	0	0	200	903	0	0	0	0	0	0	0	603	903	0
444	8	0	0	0	0	0	0	200	300	0	0	0	0	0	0	0	200	903	0	0	0	0	0	0	0	603	903	0
444	9	0	0	0	0	0	0	200	300	0	0	0	0	0	0	0	200	903	0	0	0	0	0	0	0	603	903	0
445	0	0	0	0	0	0	0	200	300	0	0	0	0	0	0	0	200	903	0	0	0	0	0	0	0	603	903	0
445	1	0	0	0	0	0	0	200	300	0	0	0	0	0	0	0	200	903	0	0	0	0	0	0	0	603	903	0
445	2	0	0	0	0	0	0	200	300	0	0	0	0	0	0	0	200	903	0	0	0	0	0	0	0	603	903	0
445	3	0	0	0	0	0	0	200	300	0	0	0	0	0	0	0	200	903	0	0	0	0	0	0	0	603	903	0
445	4	0	0	0	0	0	0	200	300	0	0	0	0	0	0	0	200	903	0	0	0	0	0	0	0	603	903	0
445	5	0	0	0	0	0	0	200	300	0	0	0	0	0	0	0	200	903	0	0	0	0	0	0	0	603	903	0
445	6	0	0	0	0	0	0	200	300	0	0	0	0	0	0	0	200	903	0	0	0	0	0	0	0	603	903	0
445	7	0	0	0	0	0	0	200	300	0	0	0	0	0	0	0	200	903	0	0	0	0	0	0	0	603	903	0
445	8	0	0	0	0	0	0	200	300	0	0	0	0	0	0	0	200	903	0	0	0	0	0	0	0	603	903	0
445	9	0	0	0	0	0	0	200	300	0	0	0	0	0	0	0	200	903	0	0	0	0	0	0	0	603	903	0
446	0	0	0	0	0	0	0	200	300	0	0	0	0	0	0	0	200	903	0	0	0	0	0	0	0	603	903	0
446	1	0	0	0	0	0	0	200	300	0	0	0	0	0	0	0	200	903	0	0	0	0	0	0	0	603	903	0
446	2	0	0	0	0	0	0	200	300	0	0	0	0	0	0	0	200	903	0	0	0	0	0	0	0	603	903	0
446	3	0	0	0	0	0	0	200	300	0	0	0	0	0	0	0	200	903	0	0	0	0	0	0	0	603	903	0
446	4	0	0	0	0	0	0	200	300	0	0	0	0	0	0	0	200	903	0	0	0	0	0	0	0	603	903	0
446	5	0	0	0	0	0	0	200	300	0	0	0	0	0	0	0	200	903	0	0	0	0	0	0	0	603	903	0
446	6	0	0	0	0	0	0	200	300	0	0	0	0	0	0	0	200	903	0	0	0	0	0	0	0	603	903	0
446	7	0	0	0	0	0	0	200	300	0	0	0	0	0	0	0	200	903	0	0	0	0	0	0	0	603	903	0
446	8	0	0	0	0	0	0	200	300	0	0	0	0	0	0	0	200	903	0	0	0	0	0	0	0	603	903	0
446	9	0	0	0	0	0	0	200	300	0	0	0	0	0	0	0	200	903	0	0	0	0	0	0	0	603	903	0
447	0	0	0	0	0	0	0	200	300	0	0	0	0	0	0	0	200	903	0	0	0	0	0	0	0	603	903	0
447	1	0	0	0	0	0	0	200	300	0	0	0	0	0	0	0	200	903	0	0	0	0	0	0	0	603	903	0
447	2	0	0	0	0	0	0	200	300	0	0	0	0	0	0	0	200	903	0	0	0	0	0	0	0	603	903	0
447	3	0	0	0	0	0	0	200	300	0	0	0	0	0	0	0	200	903	0	0	0	0	0	0	0	603	903	0
447	4	0	0	0	0	0	0	200	300	0	0	0	0	0	0	0	200	903	0	0	0	0	0	0	0	603	903	0
447	5	0	0	0	0	0	0	200	300	0	0	0	0	0	0	0	200	903	0	0	0	0	0	0	0	603	903	0
447	6	0	0	0	0	0	0	200	300	0	0	0	0	0	0	0	200	903	0	0	0	0	0	0	0	603	903	0
447	7	0	0	0	0	0	0	200	300	0	0	0	0	0	0	0	200	903	0	0	0	0	0	0	0	603	903	0
447	8	0	0	0	0	0	0	200	300	0	0	0	0	0	0	0	200	903	0	0	0	0	0	0	0	603	903	0
447	9	0	0	0	0	0	0	200	300	0	0	0	0	0	0	0	200	903	0	0	0	0	0	0	0	603	903	0
448	0	0	0	0	0	0	0	200	300	0	0	0	0	0	0	0	200	903	0	0	0	0	0	0	0	603	903	0
448	1	0	0	0	0	0	0	200	300	0	0	0	0	0	0	0	200	903	0	0	0	0	0	0	0	603	903	0
448	2	0	0	0	0	0	0	200	300	0	0	0	0	0	0	0	200	903	0	0	0	0	0	0	0	603	903	0
448	3	0	0	0	0	0	0	200	300	0	0	0	0	0	0	0	200	903	0	0	0	0	0	0	0	603	903	0
448	4	0	0	0	0	0	0	200	300	0	0	0	0	0	0	0	200	903	0	0	0	0	0	0	0	603	903	0
448	5	0	0	0	0	0	0	200	300	0	0	0	0	0	0	0	200	903	0	0	0	0	0	0	0	603	903	0
448	6	0	0	0	0	0	0	200	300	0	0	0	0	0	0	0	200	903	0	0	0	0	0	0	0	603	903	0
448	7	0	0	0	0	0	0	200	300	0	0	0	0	0	0	0	200	903	0	0	0	0	0	0	0	603	903	0
448	8	0	0	0	0	0	0	200	300	0	0	0	0	0	0	0	200	903	0	0	0	0	0	0	0	603	903	0
448	9	0	0	0	0	0	0	200	300	0	0	0	0	0	0	0	200	903	0	0	0	0	0	0	0	603	903	0
449	0	0	0	0	0	0	0	200	300	0	0	0	0	0	0	0	200	903	0	0	0	0	0	0	0	603	903	0
449	1	0	0	0	0	0	0	200	300	0	0	0	0	0	0	0	200	903	0	0	0	0	0	0	0	603	903	0
449	2	0	0	0	0	0	0	200	300	0	0	0	0	0	0	0	200	903	0	0	0	0	0	0	0	603	903	0
449	3	0	0	0	0	0	0	200	300	0	0	0	0	0	0	0	200	903	0	0	0	0	0	0	0	603	903	0
449	4	0	0	0	0	0	0	200	300	0	0	0	0	0	0	0	200	903	0	0	0	0	0	0	0	603	903	0
449	5	0	0	0	0	0	0	200	300	0	0	0	0	0	0	0	200	903	0	0	0	0	0	0	0	603	903	0
449	6	0	0	0	0	0	0	200	300	0	0	0	0	0	0	0	200	903	0	0	0	0	0	0	0	603	903	0
449	7	0	0	0	0	0	0	200	300	0	0	0	0	0	0	0	200	903	0	0	0	0	0	0	0	603	903	0
449	8	0	0	0	0	0	0	200	300	0	0	0	0	0	0	0	200	903	0	0	0	0	0	0	0	603	903	0
449	9	0	0	0	0	0	0	200	300	0	0	0	0	0	0	0	200	903	0	0	0	0	0	0	0	603	903	0
450	0	0	0	0	0	0	0	200	300	0	0	0	0	0	0	0	200	903	0	0	0	0	0	0	0	603	903	0
450	1	0	0	0	0	0	0	200	300	0	0	0	0	0	0	0	200	903	0	0	0	0	0	0	0	603	903	0
450	2	0	0	0	0	0	0	200	300	0	0	0	0	0	0	0	200	903	0	0	0	0	0	0	0	603	903	0
450	3	0	0	0	0	0	0	200	300	0	0	0	0	0	0	0	200	903	0	0	0	0	0	0	0	603	903	0
450	4	0	0	0	0	0	0	200	300	0	0	0	0	0	0	0	200	903	0	0	0	0	0	0	0	603	903	0
450	5	0	0	0	0	0	0	200	300	0	0	0	0	0	0	0	200	903	0	0	0	0	0	0	0	603	903	0
450	6	0	0	0	0	0	0	200	300	0	0	0	0	0	0	0	200	903	0	0	0	0	0	0	0	603	903	0
450	7	0	0	0	0	0	0	200	300	0	0	0	0	0	0	0	200	903	0	0	0	0	0	0	0	603	903	0
450	8	0	0	0	0	0	0	200	300	0	0	0	0	0	0	0	200	903	0	0	0	0	0	0	0	603	903	0
450	9	0	0	0	0	0	0	200	300	0	0	0	0	0	0	0	200	903	0	0	0	0	0	0	0	603	903	0
451	0	0	0	0	0	0	0	200	300	0	0	0	0	0	0	0	200	903	0	0	0	0	0	0	0	603	903	0
451	1	0	0	0	0	0	0	200	300	0	0	0	0	0	0	0	200	903	0	0	0	0	0	0	0	603	903	0
451	2	0	0	0	0	0	0	200	300	0	0	0	0	0	0	0	200	903	0	0	0	0	0	0	0	603	903	0
451	3	0	0	0	0	0	0	200	300	0	0	0	0	0	0	0	200	903	0	0	0	0	0	0	0	603	903	0
451	4	0	0	0	0	0	0	200	300	0	0	0	0	0	0	0	200	903	0	0	0	0	0	0	0	603	903	0
451	5	0	0	0	0	0	0	200	300	0	0	0	0	0	0	0	200	903	0	0	0	0	0	0	0	603	903	0
451	6	0	0	0	0	0	0	200	300	0	0	0	0	0	0	0	200	903	0	0	0	0	0	0	0	603	903	0
451	7	0	0	0	0	0	0	200	300	0	0	0	0	0	0	0	200	903	0	0	0	0	0	0	0	603	903	0
451	8	0	0	0	0	0	0	200	300	0	0	0	0	0	0	0	200	903	0	0	0	0	0	0	0	603	903	0
451	9	0	0	0	0	0	0	200	300	0	0	0	0	0	0	0	200	903	0	0	0	0	0	0	0	603	903	0
452	0	0	0	0	0	0	0	200	300	0	0	0	0	0	0	0	200	903	0	0	0	0	0	0	0	603	903	0
452	1	0	0	0	0	0	0	200	300	0	0	0	0	0	0	0	200	903	0	0	0	0	0	0	0	603	903	0
452	2	0	0	0	0	0	0	200	300	0	0	0	0	0	0	0	200	903	0	0	0	0	0	0	0	603	903	0
452	3	0	0	0	0	0	0	200	300	0	0	0	0	0	0	0	200	903	0	0	0	0	0	0	0	603	903	0
452	4	0	0	0	0	0	0	200	300	0	0	0	0	0	0	0	200	903	0	0	0	0	0	0	0	603	903	0
452	5	0	0	0	0	0	0	200	300	0	0	0	0	0	0	0	200	903	0	0	0	0	0	0	0	603	903	0
452	6	0	0	0	0	0	0	200	300	0	0	0	0	0	0	0	200	903	0	0	0	0	0	0	0	603	903	0
452	7	0	0	0	0	0	0	200	300	0	0	0	0	0	0	0	200	903	0	0	0	0	0	0	0	603	903	0
452	8	0	0	0	0	0	0	200	300	0	0	0	0	0	0	0	200	903	0	0	0	0	0	0	0	603	903	0
452	9	0	0	0	0	0	0	200	300	0	0	0	0	0	0	0	200	903	0	0	0	0	0	0	0	603	903	0
453	0	0	0	0	0	0	0	200	300	0	0	0	0	0	0	0	200	903	0	0	0	0	0	0	0	603	903	0
453	1	0	0	0	0	0	0	200	300	0	0	0	0	0	0	0	200	903	0	0	0	0	0	0	0	603	903	0
453	2	0	0	0	0	0	0	200	300	0	0	0	0	0	0	0	200	903	0	0	0	0	0	0	0	603	903	0
453	3	0	0	0	0	0	0	200	300	0	0	0	0	0	0	0	200	903	0	0	0	0	0	0	0	603	903	0
453	4	0	0	0	0	0	0	200	300	0	0	0	0	0	0	0	200	903	0	0	0	0	0	0	0	603	903	0
453	5	0	0	0	0	0	0	200	300	0	0	0	0	0	0	0	200	903	0	0	0	0	0	0	0	603	903	0
453	6	0	0	0	0	0	0	200	300	0	0	0	0	0	0	0	200	903	0	0	0	0	0	0	0	603	903	0
453	7	0	0	0	0	0	0	200	300	0	0	0	0	0	0	0	200	903	0	0	0	0	0	0	0	603	903	0
453	8	0	0	0	0	0	0	200	300	0	0	0	0	0	0	0	200	903	0	0	0	0	0	0	0	603	903	0
453	9	0	0	0	0	0	0	200	300	0	0	0	0	0	0	0	200	903	0	0	0	0	0	0	0	603	903	0
454	0	0	0	0	0	0	0	200	300	0	0	0	0	0	0	0	200	903	0	0	0	0	0	0	0	603	903	0
454	1	0	0	0	0	0	0	200	300	0	0	0	0	0	0	0	200	903	0	0	0	0	0	0	0	603	903	0
454	2	0	0	0	0	0	0	200	300	0	0	0	0	0	0	0	200	903	0	0	0	0	0	0	0	603	903	0
454	3	0	0	0	0	0	0	200	300	0	0	0	0	0	0	0	200	903	0	0	0	0	0	0	0	603	903	0
454	4	0	0	0	0	0	0	200	300	0	0	0	0	0	0	0	200	903	0	0	0	0	0	0	0	603	903	0
454	5	0	0	0	0	0	0	200	300	0	0	0	0	0	0	0	200	903	0	0	0	0	0	0	0	603	903	0
454	6	0	0	0	0	0	0	200	300	0	0	0	0	0	0	0	200	903	0	0	0	0	0	0	0	603	903	0
454	7	0	0	0	0	0	0	200	300	0	0	0	0	0	0	0	200	903	0	0	0	0	0	0	0	603	903	0
454	8	0	0	0	0	0	0	200	300	0	0	0	0	0	0	0	200	903	0	0	0	0	0	0	0	603	903	0
454	9	0	0	0	0	0	0	200	300	0	0	0	0	0	0	0	200	903	0	0	0	0	0	0	0	603	903	0
455	0	0	0	0	0	0	0	200	300	0	0	0	0	0	0	0	200	903	0	0	0	0	0	0	0	603	903	0
455	1	0	0	0	0	0	0	200	300	0	0	0	0	0	0	0	200	903	0	0	0	0	0	0	0	603	903	0
455	2	0	0	0	0	0	0	200	300	0	0	0	0	0	0	0	200	903	0	0	0	0	0	0	0	603	903	0
455	3	0	0	0	0	0	0	200	300	0	0	0	0	0	0	0	200	903	0	0	0	0	0	0	0	603	903	0
455	4	0	0	0	0	0	0	200	300	0	0	0	0	0	0	0	200	903	0	0	0	0	0	0	0	603	903	0
455	5	0	0	0	0	0	0	200	300	0	0	0	0	0	0	0	200	903	0	0	0	0	0	0	0	603	903	0
455	6	0	0	0	0	0	0	200	300	0	0	0	0	0	0	0	200	903	0	0	0	0	0	0	0	603	903	0
455	7	0	0	0	0	0	0	200	300	0	0	0	0	0	0	0	200	903	0	0	0	0	0	0	0	603	903	0
455	8	0	0	0	0	0	0	200	300	0	0	0	0	0	0	0	200	903	0	0	0	0	0	0	0	603	903	0
455	9	0	0	0	0	0	0	200	300	0	0	0	0	0	0	0	200	903	0	0	0	0	0	0	0	603	903	0
456	0	0	0	0	0	0	0	200	300	0	0	0	0	0	0	0	200	903	0	0	0	0	0	0	0	603	903	0
456	1	0	0	0	0	0	0	200	300	0	0	0	0	0	0	0	200	903	0	0	0	0	0	0	0	603	903	0
456	2	0	0	0	0	0	0	200	300	0	0	0	0	0	0	0	200	903	0	0	0	0	0	0	0	603	903	0
456	3	0	0	0	0	0	0	200	300	0	0	0	0	0	0	0	200	903	0	0	0	0	0	0	0	603	903	0
456	4	0	0	0	0	0	0	200	300	0	0	0	0	0	0	0	200	903	0	0	0	0	0	0	0	603	903	0
456	5	0	0	0	0	0	0	200	300	0	0	0	0	0	0	0	200	903	0	0	0	0	0	0	0	603	903	0
456	6	0	0	0	0	0	0	200	300	0	0	0	0	0	0	0	200	903	0	0	0	0	0	0	0	603	903	0
456	7	0	0	0	0	0	0	200	300	0	0	0	0	0	0	0	200	903	0	0	0	0	0	0	0	603	903	0
456	8	0	0	0	0	0	0	200	300	0	0	0	0	0	0	0	200	903	0	0	0	0	0	0	0	603	903	0
456	9	0	0	0	0	0	0	200	300	0	0	0	0	0	0	0	200	903	0	0	0	0	0	0	0	603	903	0
457	0	0	0	0	0	0	0	200	300	0	0	0	0	0	0	0	200	903	0	0	0	0	0	0	0	603	903	0
457	1	0	0	0	0	0	0	200	300	0	0	0	0	0	0	0	200	903	0	0	0	0	0	0	0	603	903	0
457	2	0	0	0	0	0	0	200	300	0	0	0	0	0	0	0	200	903	0	0	0	0	0	0	0	603	903	0
457	3	0	0	0	0	0	0	200	300	0	0	0	0	0	0	0	200	903	0	0	0	0	0	0	0	603	903	0
457	4	0	0	0	0	0	0	200	300	0	0	0	0	0	0	0	200	903	0	0	0	0	0	0	0	603	903	0
457	5	0	0	0	0	0	0	200	300	0	0	0	0	0	0	0	200	903	0	0	0	0	0	0	0	603	903	0
457	6	0	0	0	0	0	0	200	300	0	0	0	0	0	0	0	200	903	0	0	0	0	0	0	0	603	903	0
457	7	0	0	0	0	0	0	200	300	0	0	0	0	0	0	0	200	903	0	0	0	0	0	0	0	603	903	0
457	8	0	0	0	0	0	0	200	300	0	0	0	0	0	0	0	200	903	0	0	0	0	0	0	0	603	903	0
457	9	0	0	0	0	0	0	200	300	0	0	0	0	0	0	0	200	903	0	0	0	0	0	0	0	603	903	0
458	0	0	0	0	0	0	0	200	300	0	0	0	0	0	0	0	200	903	0	0	0	0	0	0	0	603	903	0
458	1	0	0	0	0	0	0	200	300	0	0	0	0	0	0	0	200	903	0	0	0	0	0	0	0	603	903	0
458	2	0	0	0	0	0	0	200	300	0	0	0	0	0	0	0	200	903	0	0	0	0	0	0	0	603	903	0
458	3	0	0	0	0	0	0	200	300	0	0	0	0	0	0	0	200	903	0	0	0	0	0	0	0	603	903	0
458	4	0	0	0	0	0	0	200	300	0	0	0	0	0	0	0	200	903	0	0	0	0	0	0	0	603	903	0
458	5	0	0	0	0	0	0	200	300	0	0	0	0	0	0	0	200	903	0	0	0	0	0	0	0	603	903	0
458	6	0	0	0	0	0	0	200	300	0	0	0	0	0	0	0	200	903	0	0	0	0	0	0	0	603	903	0
458	7	0	0	0	0	0	0	200	300	0	0	0	0	0	0	0	200	903	0	0	0	0	0	0	0	603	903	0
458	8	0	0	0	0	0	0	200	300	0	0	0	0	0	0	0	200	903	0	0	0	0	0	0	0	603	903	0
458	9	0	0	0	0	0	0	200	300	0	0	0	0	0	0	0	200	903	0	0	0	0	0	0	0	603	903	0
459	0	0	0	0	0	0	0	200	300	0	0	0	0	0	0	0	200	903	0	0	0	0	0	0	0	603	903	0
459	1	0	0	0	0	0	0	200	300	0	0	0	0	0	0	0	200	903	0	0	0	0	0	0	0	603	903	0
459	2	0	0	0	0	0	0	200	300	0	0	0	0	0	0	0	200	903	0	0	0	0	0	0	0	603	903	0
459	3	0	0	0	0	0	0	200	300	0	0	0	0	0	0	0	200	903	0	0	0	0	0	0	0	603	903	0
459	4	0	0	0	0	0	0	200	300	0	0	0	0	0	0	0	200	903	0	0	0	0	0	0	0	603	903	0
459	5	0	0	0	0	0	0	200	300	0	0	0	0	0	0	0	200	903	0	0	0	0	0	0	0	603	903	0
459	6	0	0	0	0	0	0	200	300	0	0	0	0	0	0	0	200	903	0	0	0	0	0	0	0	603	903	0
459	7	0	0	0	0	0	0	200	300	0	0	0	0	0	0	0	200	903	0	0	0	0	0	0	0	603	903	0
459	8	0	0	0	0	0	0	200	300	0	0	0	0	0	0	0	200	903	0	0	0	0	0	0	0	603	903	0
459	9	0	0	0	0	0	0	200	300	0	0	0	0	0	0	0	200	903	0	0	0	0	0	0	0	603	903	0
460	0	0	0	0	0	0	0	200	300	0	0	0	0	0	0	0	200	903	0	0	0	0	0	0	0	603	903	0
460	1	0	0	0	0	0	0	200	300	0	0	0	0	0	0	0	200	903	0	0	0	0	0	0	0	603	903	0
460	2	0	0	0	0	0	0	200	300	0	0	0	0	0	0	0	200	903	0	0	0	0	0	0	0	603	903	0
460	3	0	0	0	0	0	0	200	300	0	0	0	0	0	0	0	200	903	0	0	0	0	0	0	0	603	903	0
460	4	0	0	0	0	0	0	200	300	0	0	0	0	0	0	0	200	903	0	0	0	0	0	0	0	603	903	0
460	5	0	0	0	0	0	0	200	300	0	0	0	0	0	0	0	200	903	0	0	0	0	0	0	0	603	903	0
460	6	0	0	0	0	0	0	200	300	0	0	0	0	0	0	0	200	903	0	0	0	0	0	0	0	603	903	0
460	7	0	0	0	0	0	0	200	300	0	0	0	0	0	0	0	200	903	0	0	0	0	0	0	0	603	903	0
460	8	0	0	0	0	0	0	200	300	0	0	0	0	0	0	0	200	903	0	0	0	0	0	0	0	603	903	0
460	9	0	0	0	0	0	0	200	300	0	0	0	0	0	0	0	200	903	0	0	0	0	0	0	0	603	903	0
461	0	0	0	0	0	0	0	200	300	0	0	0	0	0	0	0	200	903	0	0	0	0	0	0	0	603	903	0
461	1	0	0	0	0	0	0	200	300	0	0	0	0	0	0	0	200	903	0	0	0	0	0	0	0	603	903	0
461	2	0	0	0	0	0	0	200	300	0	0	0	0	0	0	0	200	903	0	0	0	0	0	0	0	603	903	0
461	3	0	0	0	0	0	0	200	300	0	0	0	0	0	0	0	200	903	0	0	0	0	0	0	0	603	903	0
461	4	0	0	0	0	0	0	200	300	0	0	0	0	0	0	0	200	903	0	0	0	0	0	0	0	603	903	0
461	5	0	0	0	0	0	0	200	300	0	0	0	0	0	0	0	200	903	0	0	0	0	0	0	0	603	903	0
461	6	0	0	0	0	0	0	200	300	0	0	0	0	0	0	0	200	903	0	0	0	0	0	0	0	603	903	0
461	7	0	0	0	0	0	0	200	300	0	0	0	0	0	0	0	200	903	0	0	0	0	0	0	0	603	903	0
461	8	0	0	0	0	0	0	200	300	0	0	0	0	0	0	0	200	903	0	0	0	0	0	0	0	603	903	0
461	9	0	0	0	0	0	0	200	300	0	0	0	0	0	0	0	200	903	0	0	0	0	0	0	0	603	903	0
462	0	0	0	0	0	0	0	200	300	0	0	0	0	0	0	0	200	903	0	0	0	0	0	0	0	603	903	0
462	1	0	0	0	0	0	0	200	300	0	0	0	0	0	0	0	200	903	0	0	0	0	0	0	0	603	903	0
462	2	0	0	0	0	0	0	200	300	0	0	0	0	0	0	0	200	903	0	0	0	0	0	0	0	603	903	0
462	3	0	0	0	0	0	0	200	300	0	0	0	0	0	0	0	200	903	0	0	0	0	0	0	0	603	903	0
462	4	0	0	0	0	0	0	200	300	0	0	0	0	0	0	0	200	903	0	0	0	0	0	0	0	603	903	0
462	5	0	0	0	0	0	0	200	300	0	0	0	0	0	0	0	200	903	0	0	0	0	0	0	0	603	903	0
462	6	0	0	0	0	0	0	200	300	0	0	0	0	0	0	0	200	903	0	0	0	0	0	0	0	603	903	0
462	7	0	0	0	0	0	0	200	300	0	0	0	0	0	0	0	200	903	0	0	0	0	0	0	0	603	903	0
462	8	0	0	0	0	0	0	200	300	0	0	0	0	0	0	0	200	903	0	0	0	0	0	0	0	603	903	0
462	9	0	0	0	0	0	0	200	300	0	0	0	0	0	0	0	200	903	0	0	0	0	0	0	0	603	903	0
463	0	0	0	0	0	0	0	200	300	0	0	0	0	0	0	0	200	903	0	0	0	0	0	0	0	603	903	0
463	1	0	0	0	0	0	0	200	300	0	0	0	0	0	0	0	200	903	0	0	0	0	0	0	0	603	903	0
463	2	0	0	0	0	0	0	200	300	0	0	0	0	0	0	0	200	903	0	0	0	0	0	0	0	603	903	0
463	3	0	0	0	0	0	0	200	300	0	0	0	0	0	0	0	200	903	0	0	0	0	0	0	0	603	903	0
463	4	0	0	0	0	0	0	200	300	0	0	0	0	0	0	0	200	903	0	0	0	0	0	0	0	603	903	0
463	5	0	0	0	0	0	0	200	300	0	0	0	0	0	0	0	200	903	0	0	0	0	0	0	0	603	903	0
463	6	0	0	0	0	0	0	200	300	0	0	0	0	0	0	0	200	903	0	0	0	0	0	0	0	603	903	0
463	7	0	0	0	0	0	0	200	300	0	0	0	0	0	0	0	200	903	0	0	0	0	0	0	0	603	903	0
463	8	0	0	0	0	0	0	200	300	0	0	0	0	0	0	0	200	903	0	0	0	0	0	0	0	603	903	0
463	9	0	0	0	0	0	0	200	300	0	0	0	0	0	0	0	200	903	0	0	0	0	0	0	0	603	903	0
464	0	0	0	0	0	0	0	200	300	0	0	0	0	0	0	0	200	903	0	0	0	0	0	0	0	603	903	0
464	1	0	0	0	0	0	0	200	300	0	0	0	0	0	0	0	200	903	0	0	0	0	0	0	0	603	903	0
464	2	0	0	0	0	0	0	200	300	0	0	0	0	0	0	0	200	903	0	0	0	0	0	0	0	603	903	0
464	3	0	0	0	0	0	0	200	300	0	0	0	0	0	0	0	200	903	0	0	0	0	0	0	0	603	903	0
464	4	0	0	0	0	0	0	200	300	0	0	0	0	0	0	0	200	903	0	0	0	0	0	0	0	603	903	0
464	5	0	0	0	0	0	0	200	300	0	0	0	0	0	0	0	200	903	0	0	0	0	0	0	0	603	903	0
464	6	0	0	0	0	0	0	200	300	0	0	0	0	0	0	0	200	903	0	0	0	0	0	0	0	603	903	0
464	7	0	0	0	0	0	0	200	300	0	0	0	0	0	0	0	200	903	0	0	0	0	0	0	0	603	903	0
464	8	0	0	0	0	0	0	200	300	0	0	0	0	0	0	0	200	903	0	0	0	0	0	0	0	603	903	0
464	9	0	0	0	0	0	0	200	300	0	0	0	0	0	0	0	200	903	0	0	0	0	0	0	0	603	903	0
465	0	0	0	0	0	0	0	200	300	0	0	0	0	0	0	0	200	903	0	0	0	0	0	0	0	603	903	0
465	1	0	0	0	0	0	0	200	300	0	0	0	0	0	0	0	200	903	0	0	0	0	0	0	0	603	903	0
465	2	0	0	0	0	0	0	200	300	0	0	0	0	0	0	0	200	903	0	0	0	0	0	0	0	603	903	0
465	3	0	0	0	0	0	0	200	300	0	0	0	0	0	0	0	200	903	0	0	0	0	0	0	0	603	903	0
465	4	0	0	0	0	0	0	200	300	0	0	0	0	0	0	0	200	903	0	0	0	0	0	0	0	603	903	0
465	5	0	0	0	0	0	0	200	300	0	0	0	0	0	0	0	200	903	0	0	0	0	0	0	0	603	903	0
465	6	0	0	0	0	0	0	200	300	0	0	0	0	0	0	0	200	903	0	0	0	0	0	0	0	603	903	0
465	7	0	0	0	0	0	0	200	300	0	0	0	0	0	0	0	200	903	0	0	0	0	0	0	0	603	903	0
465	8	0	0	0	0	0	0	200	300	0	0	0	0	0	0	0	200	903	0	0	0	0	0	0	0	603	903	0
465	9	0	0	0	0	0	0	200	300	0	0	0	0	0	0	0	200	903	0	0	0	0	0	0	0	603	903	0
466	0	0	0	0	0	0	0	200	300	0	0	0	0	0	0	0	200	903	0	0	0	0	0	0	0	603	903	0
466	1	0	0	0	0	0	0	200	300	0	0	0	0	0	0	0	200	903	0	0	0	0	0	0	0	603	903	0
466	2	0	0	0	0	0	0	200	300	0	0	0	0	0	0	0	200	903	0	0	0	0	0	0	0	603	903	0
466	3	0	0	0	0	0	0	200	300	0	0	0	0	0	0	0	200	903	0	0	0	0	0	0	0	603	903	0
466	4	0	0	0	0	0	0	200	300	0	0	0	0	0	0	0	200	903	0	0	0	0	0	0	0	603	903	0
466	5	0	0	0	0	0	0	200	300	0	0	0	0	0	0	0	200	903	0	0	0	0	0	0	0	603	903	0
466	6	0	0	0	0	0	0	200	300	0	0	0	0	0	0	0	200	903	0	0	0	0	0	0	0	603	903	0
466	7	0	0	0	0	0	0	200	300	0	0	0	0	0	0	0	200	903	0	0	0	0	0	0	0	603	903	0
466	8	0	0	0	0	0	0	200	300	0	0	0	0	0	0	0	200	903	0	0	0	0	0	0	0	603	903	0
466	9	0	0	0	0	0	0	200	300	0	0	0	0	0	0	0	200	903	0	0	0	0	0	0	0	603	903	0
467	0	0	0	0	0	0	0	200	300	0	0	0	0	0	0	0	200	903	0	0	0	0	0	0	0	603	903	0
467	1	0	0	0	0	0	0	200	300	0	0	0	0	0	0	0	200	903	0	0	0	0	0	0	0	603	903	0
467	2	0	0	0	0	0	0	200	300	0	0	0	0	0	0	0	200	903	0	0	0	0	0	0	0	603	903	0
467	3	0	0	0	0	0	0	200	300	0	0	0	0	0	0	0	200	903	0	0	0	0	0	0	0	603	903	0
467	4	0	0	0	0	0	0	200	300	0	0	0	0	0	0	0	200	903	0	0	0	0	0	0	0	603	903	0
467	5	0	0	0	0	0	0	200	300	0	0	0	0	0	0	0	200	903	0	0	0	0	0	0	0	603	903	0
467	6	0	0	0	0	0	0	200	300	0	0	0	0	0	0	0	200	903	0	0	0	0	0	0	0	603	903	0
467	7	0	0	0	0	0	0	200	300	0	0	0	0	0	0	0	200	903	0	0	0	0	0	0	0	603	903	0
467	8	0	0	0	0	0	0	200	300	0	0	0	0	0	0	0	200	903	0	0	0	0	0	0	0	603	903	0
467	9	0	0	0	0	0	0	200	300	0	0	0	0	0	0	0	200	903	0	0	0	0	0	0	0	603	903	0
468	0	0	0	0	0	0	0	200	300	0	0	0	0	0	0	0	200	903	0	0	0	0	0	0	0	603	903	0
468	1	0	0	0	0	0	0	200	300	0	0	0	0	0	0	0	200	903	0	0	0	0	0	0	0	603	903	0
468	2	0	0	0	0	0	0	200	300	0	0	0	0	0	0	0	200	903	0	0	0	0	0	0	0	603	903	0
468	3	0	0	0	0	0	0	200	300	0	0	0	0	0	0	0	200	903	0	0	0	0	0	0	0	603	903	0
468	4	0	0	0	0	0	0	200	300	0	0	0	0	0	0	0	200	903	0	0	0	0	0	0	0	603	903	0
468	5	0	0	0	0	0	0	200	300	0	0	0	0	0	0	0	200	903	0	0	0	0	0	0	0	603	903	0
468	6	0	0	0	0	0	0	200	300	0	0	0	0	0	0	0	200	903	0	0	0	0	0	0	0	603	903	0
468	7	0	0	0	0	0	0	200	300	0	0	0	0	0	0	0	200	903	0	0	0	0	0	0	0	603	903	0
468	8	0	0	0	0	0	0	200	300	0	0	0	0	0	0	0	200	903	0	0	0	0	0	0	0	603	903	0
468	9	0	0	0	0	0	0	200	300	0	0	0	0	0	0	0	200	903	0	0	0	0	0	0	0	603	903	0
469	0	0	0	0	0	0	0	200	300	0	0	0	0	0	0	0	200	903	0	0	0	0	0	0	0	603	903	0
469	1	0	0	0	0	0	0	200	300	0	0	0	0	0	0	0	200	903	0	0	0	0	0	0	0	603	903	0
469	2	0	0	0	0	0	0	200	300	0	0	0	0	0	0	0	200	903	0	0	0	0	0	0	0	603	903	0
469	3	0	0	0	0	0	0	200	300	0	0	0	0	0	0	0	200	903	0	0	0	0	0	0	0	603	903	0
469	4	0	0	0	0	0	0	200	300	0	0	0	0	0	0	0	200	903	0	0	0	0	0	0	0	603	903	0
469	5	0	0	0	0	0	0	200	300	0	0	0	0	0	0	0	200	903	0	0	0	0	0	0	0	603	903	0
469	6	0	0	0	0	0	0	200	300	0	0	0	0	0	0	0	200	903	0	0	0	0	0	0	0	603	903	0
469	7	0	0	0	0	0	0	200	300	0	0	0	0	0	0	0	200	903	0	0	0	0	0	0	0	603	903	0
469	8	0	0	0	0	0	0	200	300	0	0	0	0	0	0	0	200	903	0	0	0	0	0	0	0	603	903	0
469	9	0	0	0	0	0	0	200	300	0	0	0	0	0	0	0	200	903	0	0	0	0	0	0	0	603	903	0
470	0	0	0	0	0	0	0	200	300	0	0	0	0	0	0	0	200	903	0	0	0	0	0	0	0	603	903	0
470	1	0	0	0	0	0	0	200	300	0	0	0	0	0	0	0	200	903	0	0	0	0	0	0	0	603	903	0
470	2	0	0	0	0	0	0	200	300	0	0	0	0	0	0	0	200	903	0	0	0	0	0	0	0	603	903	0
470	3	0	0	0	0	0	0	200	300	0	0	0	0	0	0	0	200	903	0	0	0	0	0	0	0	603	903	0
470	4	0	0	0	0	0	0	200	300	0	0	0	0	0	0	0	200	903	0	0	0	0	0	0	0	603	903	0
470	5	0	0	0	0	0	0	200	300	0	0	0	0	0	0	0	200	903	0	0	0	0	0	0	0	603	903	0
470	6	0	0	0	0	0	0	200	300	0	0	0	0	0	0	0	200	903	0	0	0	0	0	0	0	603	903	0
470	7	0	0	0	0	0	0	200	300	0	0	0	0	0	0	0	200	903	0	0	0	0	0	0	0	603	903	0
470	8	0	0	0	0	0	0	200	300	0	0	0	0	0	0	0	200	903	0	0	0	0	0	0	0	603	903	0
470	9	0	0	0	0	0	0	200	300	0	0	0	0	0	0	0	200	903	0	0	0	0	0	0	0	603	903	0
471	0	0	0	0	0	0	0	200	300	0	0	0	0	0	0	0	200	903	0	0	0	0	0	0	0	603	903	0
471	1	0	0	0	0	0	0	200	300	0	0	0	0	0	0	0	200	903	0	0	0	0	0	0	0	603	903	0
471	2	0	0	0	0	0	0	200	300	0	0	0	0	0	0	0	200	903	0	0	0	0	0	0	0	603	903	0
471	3	0	0	0	0	0	0	200	300	0	0	0	0	0	0	0	200	903	0	0	0	0	0	0	0	603	903	0
471	4	0	0	0	0	0	0	200	300	0	0	0	0	0	0	0	200	903	0	0	0	0	0	0	0	603	903	0
471	5	0	0	0	0	0	0	200	300	0	0	0	0	0	0	0	200	903	0	0	0	0	0	0	0	603	903	0
471	6	0	0	0	0	0	0	200	300	0	0	0	0	0	0	0	200	903	0	0	0	0	0	0	0	603	903	0
471	7	0	0	0	0	0	0	200	300	0	0	0	0	0	0	0	200	903	0	0	0	0	0	0	0	603	903	0
471	8	0	0	0	0	0	0	200	300	0	0	0	0	0	0	0	200	903	0	0	0	0	0	0	0	603	903	0
471	9	0	0	0	0	0	0	200	300	0	0	0	0	0	0	0	200	903	0	0	0	0	0	0	0	603	903	0
472	0	0	0	0	0	0	0	200	300	0	0	0	0	0	0	0	200	903	0	0	0	0	0	0	0	603	903	0
472	1	0	0	0	0	0	0	200	300	0	0	0	0	0	0	0	200	903	0	0	0	0	0	0	0	603	903	0
472	2	0	0	0	0	0	0	200	300	0	0	0	0	0	0	0	200	903	0	0	0	0	0	0	0	603	903	0
472	3	0	0	0	0	0	0	200	300	0	0	0	0	0	0	0	200	903	0	0	0	0	0	0	0	603	903	0
472	4	0	0	0	0	0	0	200	300	0	0	0	0	0	0	0	200	903	0	0	0	0	0	0	0	603	903	0
472	5	0	0	0	0	0	0	200	300	0	0	0	0	0	0	0	200	903	0	0	0	0	0	0	0	603	903	0
472	6	0	0	0	0	0	0	200	300	0	0	0	0	0	0	0	200	903	0	0	0	0	0	0	0	603	903	0
472	7	0	0	0	0	0	0	200	300	0	0	0	0	0	0	0	200	903	0	0	0	0	0	0	0	603	903	0
472	8	0	0	0	0	0	0	200	300	0	0	0	0	0	0	0	200	903	0	0	0	0	0	0	0	603	903	0
472	9	0	0	0	0	0	0	200	300	0	0	0	0	0	0	0	200	903	0	0	0	0	0	0	0	603	903	0
473	0	0	0	0	0	0	0	200	300	0	0	0	0	0	0	0	200	903	0	0	0	0	0	0	0	603	903	0
473	1	0	0	0	0	0	0	200	300	0	0	0	0	0	0	0	200	903	0	0	0	0	0	0	0	603	903	0
473	2	0	0	0	0	0	0	200	300	0	0	0	0	0	0	0	200	903	0	0	0	0	0	0	0	603	903	0
473	3	0	0	0	0	0	0	200	300	0	0	0	0	0	0	0	200	903	0	0	0	0	0	0	0	603	903	0
473	4	0	0	0	0	0	0	200	300	0	0	0	0	0	0	0	200	903	0	0	0	0	0	0	0	603	903	0
473	5	0	0	0	0	0	0	200	300	0	0	0	0	0	0	0	200	903	0	0	0	0	0	0	0	603	903	0
473	6	0	0	0	0	0	0	200	300	0	0	0	0	0	0	0	200	903	0	0	0	0	0	0	0	603	903	0
473	7	0	0	0	0	0	0	200	300	0	0	0	0	0	0	0	200	903	0	0	0	0	0	0	0	603	903	0
473	8	0	0	0	0	0	0	200	300	0	0	0	0	0	0	0	200	903	0	0	0	0	0	0	0	603	903	0
473	9	0	0	0	0	0	0	200	300	0	0	0	0	0	0	0	200	903	0	0	0	0	0	0	0	603	903	0
474	0	0	0	0	0	0	0	200	300	0	0	0	0	0	0	0	200	903	0	0	0	0	0	0	0	603	903	0
474	1	0	0	0	0	0	0	200	300	0	0	0	0	0	0	0	200	903	0	0	0	0	0	0	0	603	903	0
474	2	0	0	0	0	0	0	200	300	0	0	0	0	0	0	0	200	903	0	0	0	0	0	0	0	603	903	0
474	3	0	0	0	0	0	0	200	300	0	0	0	0	0	0	0	200	903	0	0	0	0	0	0	0	603	903	0
474	4	0	0	0	0	0	0	200	300	0	0	0	0	0	0	0	200	903	0	0	0	0	0	0	0	603	903	0
474	5	0	0	0	0	0	0	200	300	0	0	0	0	0	0	0	200	903	0	0	0	0	0	0	0	603	903	0
474	6	0	0	0	0	0	0	200	300	0	0	0	0	0	0	0	200	903	0	0	0	0	0	0	0	603	903	0
474	7	0	0	0	0	0	0	200	300	0	0	0	0	0	0	0	200	903	0	0	0	0	0	0	0	603	903	0
474	8	0	0	0	0	0	0	200	300	0	0	0	0	0	0	0	200	903	0	0	0	0	0	0	0	603	903	0
474	9	0	0	0	0	0	0	200	300	0	0	0	0	0	0	0	200	903	0	0	0	0	0	0	0	603	903	0
475	0	0	0	0	0	0	0	200	300	0	0	0	0	0	0	0	200	903	0	0	0	0	0	0	0	603	903	0
475	1	0	0	0	0	0	0	200	300	0	0	0	0	0	0	0	200	903	0	0	0	0	0	0	0	603	903	0
475	2	0	0	0	0	0	0	200	300	0	0	0	0	0	0	0	200	903	0	0	0	0	0	0	0	603	903	0
475	3	0	0	0	0	0	0	200	300	0	0	0	0	0	0	0	200	903	0	0	0	0	0	0	0	603	903	0
475	4	0	0	0	0	0	0	200	300	0	0	0	0	0	0	0	200	903	0	0	0	0	0	0	0	603	903	0
475	5	0	0	0	0	0	0	200	300	0	0	0	0	0	0	0	200	903	0	0	0	0	0	0	0	603	903	0
475	6	0	0	0	0	0	0	200	300	0	0	0	0	0	0	0	200	903	0	0	0	0	0	0	0	603	903	0
475	7	0	0	0	0	0	0	200	300	0	0	0	0	0	0	0	200	903	0	0	0	0	0	0	0	603	903	0
475	8	0	0	0	0	0	0	200	300	0	0	0	0	0	0	0	200	903	0	0	0	0	0	0	0	603	903	0
475	9	0	0	0	0	0	0	200	300	0	0	0	0	0	0	0	200	903	0	0	0	0	0	0	0	603	903	0
476	0	0	0	0	0	0	0	200	300	0	0	0	0	0	0	0	200	903	0	0	0	0	0	0	0	603	903	0
476	1	0	0	0	0	0	0	200	300	0	0	0	0	0	0	0	200	903	0	0	0	0	0	0	0	603	903	0
476	2	0	0	0	0	0	0	200	300	0	0	0	0	0	0	0	200	903	0	0	0	0	0	0	0	603	903	0
476	3	0	0	0	0	0	0	200	300	0	0	0	0	0	0	0	200	903	0	0	0	0	0	0	0	603	903	0
476	4	0	0	0	0	0	0	200	300	0	0	0	0	0	0	0	200	903	0	0	0	0	0	0	0	603	903	0
476	5	0	0	0	0	0	0	200	300	0	0	0	0	0	0	0	200	903	0	0	0	0	0	0	0	603	903	0
476	6	0	0	0	0	0	0	200	300	0	0	0	0	0	0	0	200	903	0	0	0	0	0	0	0	603	903	0
476	7	0	0	0	0	0	0	200	300	0	0	0	0	0	0	0	200	903	0	0	0	0	0	0	0	603	903	0
476	8	0	0	0	0	0	0	200	300	0	0	0	0	0	0	0	200	903	0	0	0	0	0	0	0	603	903	0
476	9	0	0	0	0	0	0	200	300	0	0	0	0	0	0	0	200	903	0	0	0	0	0	0	0	603	903	0
477	0	0	0	0	0	0	0	200	300	0	0	0	0	0	0	0	200	903	0	0	0	0	0	0	0	603	903	0
477	1	0	0	0	0	0	0	200	300	0	0	0	0	0	0	0	200	903	0	0	0	0	0	0	0	603	903	0
477	2	0	0	0	0	0	0	200	300	0	0	0	0	0	0	0	200	903	0	0	0	0	0	0	0	603	903	0
477	3	0	0	0	0	0	0	200	300	0	0	0	0	0	0	0	200	903	0	0	0	0	0	0	0	603	903	0
477	4	0	0	0	0	0	0	200	300	0	0	0	0	0	0	0	200	903	0	0	0	0	0	0	0	603	903	0
477	5	0	0	0	0	0	0	200	300	0	0	0	0	0	0	0	200	903	0	0	0	0	0	0	0	603	903	0
477	6	0	0	0	0	0	0	200	300	0	0	0	0	0	0	0	200	903	0	0	0	0	0	0	0	603	903	0
477	7	0	0	0	0	0	0	200	300	0	0	0	0	0	0	0	200	903	0	0	0	0	0	0	0	603	903	0
477	8	0	0	0	0	0	0	200	300	0	0	0	0	0	0	0	200	903	0	0	0	0	0	0	0	603	903	0
477	9	0	0	0	0	0	0	200	300	0	0	0	0	0	0	0	200	903	0	0	0	0	0	0	0	603	903	0
478	0	0	0	0	0	0	0	200	300	0	0	0	0	0	0	0	200	903	0	0	0	0	0	0	0	603	903	0
478	1	0	0	0	0	0	0	200	300	0	0	0	0	0	0	0	200	903	0	0	0	0	0	0	0	603	903	0
478	2	0	0	0	0	0	0	200	300	0	0	0	0	0	0	0	200	903	0	0	0	0	0	0	0	603	903	0
478	3	0	0	0	0	0	0	200	300	0	0	0	0	0	0	0	200	903	0	0	0	0	0	0	0	603	903	0
478	4	0	0	0	0	0	0	200	300	0	0	0	0	0	0	0	200	903	0	0	0	0	0	0	0	603	903	0
478	5	0	0	0	0	0	0	200	300	0	0	0	0	0	0	0	200	903	0	0	0	0	0	0	0	603	903	0
478	6	0	0	0	0	0	0	200	300	0	0	0	0	0	0	0	200	903	0	0	0	0	0	0	0	603	903	0
478	7	0	0	0	0	0	0	200	300	0	0	0	0	0	0	0	200	903	0	0	0	0	0	0	0	603	903	0
478	8	0	0	0	0	0	0	200	300	0	0	0	0	0	0	0	200	903	0	0	0	0	0	0	0	603	903	0
478	9	0	0	0	0	0	0	200	300	0	0	0	0	0	0	0	200	903	0	0	0	0	0	0	0	603	903	0
479	0	0	0	0	0	0	0	200	300	0	0	0	0	0	0	0	200	903	0	0	0	0	0	0	0	603	903	0
479	1	0	0	0	0	0	0	200	300	0	0	0	0	0	0	0	200	903	0	0	0	0	0	0	0	603	903	0
479	2	0	0	0	0	0	0	200	300	0	0	0	0	0	0	0	200	903	0	0	0	0	0	0	0	603	903	0
479	3	0	0	0	0	0	0	200	300	0	0	0	0	0	0	0	200	903	0	0	0	0	0	0	0	603	903	0
479	4	0	0	0	0	0	0	200	300	0	0	0	0	0	0	0	200	903	0	0	0	0	0	0	0	603	903	0
479	5	0	0	0	0	0	0	200	300	0	0	0	0	0	0	0	200	903	0	0	0	0	0	0	0	603	903	0
479	6	0	0	0	0	0	0	200	300	0	0	0	0	0	0	0	200	903	0	0	0	0	0	0	0	603	903	0
479	7	0	0	0	0	0	0	200	300	0	0	0	0	0	0	0	200	903	0	0	0	0	0	0	0	603	903	0
479	8	0	0	0	0	0	0	200	300	0	0	0	0	0	0	0	200	903	0	0	0	0	0	0	0	603	903	0
479	9	0	0	0	0	0	0	200	300	0	0	0	0	0	0	0	200	903	0	0	0	0	0	0	0	603	903	0
480	0	0	0	0	0	0	0	200	300	0	0	0	0	0	0	0	200	903	0	0	0	0	0	0	0	603	903	0
480	1	0	0	0	0	0	0	200	300	0	0	0	0	0	0	0	200	903	0	0	0	0	0	0	0	603	903	0
480	2	0	0	0	0	0	0	200	300	0	0	0	0	0	0	0	200	903	0	0	0	0	0	0	0	603	903	0
480	3	0	0	0	0	0	0	200	300	0	0	0	0	0	0	0	200	903	0	0	0	0	0	0	0	603	903	0
480	4	0	0	0	0	0	0	200	300	0	0	0	0	0	0	0	200	903	0	0	0	0	0	0	0	603	903	0
480	5	0	0	0	0	0	0	200	300	0	0	0	0	0	0	0	200	903	0	0	0	0	0	0	0	603	903	0
480	6	0	0	0	0	0	0	200	300	0	0	0	0	0	0	0	200	903	0	0	0	0	0	0	0	603	903	0
480	7	0	0	0	0	0	0	200	300	0	0	0	0	0	0	0	200	903	0	0	0	0	0	0	0	603	903	0
480	8	0	0	0	0	0	0	200	300	0	0	0	0	0	0	0	200	903	0	0	0	0	0	0	0	603	903	0
480	9	0	0	0	0	0	0	200	300	0	0	0	0	0	0	0	200	903	0	0	0	0	0	0	0	603	903	0
481	0	0	0	0	0	0	0	200	300	0	0	0	0	0	0	0	200	903	0	0	0	0	0	0	0	603	903	0
481	1	0	0	0	0	0	0	200	300	0	0	0	0	0	0	0	200	903	0	0	0	0	0	0	0	603	903	0
481	2	0	0	0	0	0	0	200	300	0	0	0	0	0	0	0	200	903	0	0	0	0	0	0	0	603	903	0
481	3	0	0	0	0	0	0	200	300	0	0	0	0	0	0	0	200	903	0	0	0	0	0	0	0	603	903	0
481	4	0	0	0	0	0	0	200	300	0	0	0	0	0	0	0	200	903	0	0	0	0	0	0	0	603	903	0
481	5	0	0	0	0	0	0	200	300	0	0	0	0	0	0	0	200	903	0	0	0	0	0	0	0	603	903	0
481	6	0	0	0	0	0	0	200	300	0	0	0	0	0	0	0	200	903	0	0	0	0	0	0	0	603	903	0
481	7	0	0	0	0	0	0	200	300	0	0	0	0	0	0	0	200	903	0	0	0	0	0	0	0	603	903	0
481	8	0	0	0	0	0	0	200	300	0	0	0	0	0	0	0	200	903	0	0	0	0	0	0	0	603	903	0
481	9	0	0	0	0	0	0	200	300	0	0	0	0	0	0	0	200	903	0	0	0	0	0	0	0	603	903	0
482	0	0	0	0	0	0	0	200	300	0	0	0	0	0	0	0	200	903	0	0	0	0	0	0	0	603	903	0
482	1	0	0	0	0	0	0	200	300	0	0	0	0	0	0	0	200	903	0	0	0	0	0	0	0	603	903	0
482	2	0	0	0	0	0	0	200	300	0	0	0	0	0	0	0	200	903	0	0	0	0	0	0	0	603	903	0
482	3	0	0	0	0	0	0	200	300	0	0	0	0	0	0	0	200	903	0	0	0	0	0	0	0	603	903	0
482	4	0	0	0	0	0	0	200	300	0	0	0	0	0	0	0	200	903	0	0	0	0	0	0	0	603	903	0
482	5	0	0	0	0	0	0	200	300	0	0	0	0	0	0	0	200	903	0	0	0	0	0	0	0	603	903	0
482	6	0	0	0	0	0	0	200	300	0	0	0	0	0	0	0	200	903	0	0	0	0	0	0	0	603	903	0
482	7	0	0	0	0	0	0	200	300	0	0	0	0	0	0	0	200	903	0	0	0	0	0	0	0	603	903	0
482	8	0	0	0	0	0	0	200	300	0	0	0	0	0	0	0	200	903	0	0	0	0	0	0	0	603	903	0
482	9	0	0	0	0	0	0	200	300	0	5.16174	-24.1754	-40.3997	-9467.83	3153.57	-3705.32	278.059	1137.35	0	0	0	0	0	0	0	603	903	0
483	0	0	0	0	0	0	0	200	300	0	12.9437	-34.5514	-47.1136	-8186.1	3397.71	-4987.06	272.117	1076.75	0	0	0	0	0	0	0	603	903	0
483	1	0	0	0	0	0	0	200	300	0	14.6222	-11.0529	-27.8875	-4157.78	712.161	-2286.26	225.537	1052.09	0	0	0	0	0	0	0	603	903	0
483	2	0	0	0	0	0	0	200	300	0	0	0	0	0	0	0	200	903	0	0	0	0	0	0	0	603	903	0
483	3	0	0	0	0	0	0	200	300	0	-0.636596	-26.1591	-27.5823	-6812.81	2543.22	-4346.19	292.205	1150	0	0	0	0	0	0	0	603	903	0
483	4	0	0	0	0	0	0	200	300	0	23.6249	-23.5651	-47.1136	-7728.33	2177.01	-2927.13	246.208	1067.04	0	0	0	0	0	0	0	603	903	0
483	5	0	0	0	0	0	0	200	300	0	7.90833	-6.47522	-55.0482	-10658	3702.88	-2927.13	267.266	1096.61	0	0	0	0	0	0	0	603	903	0
483	6	0	0	0	0	0	0	200	300	0	-2.31506	-5.71228	-57.1844	-14228.6	4862.55	-4437.74	285.033	1151.82	0	0	0	0	0	0	0	603	903	0
483	7	0	0	0	0	0	0	200	300	0	20.2679	-8.91663	-77.6312	-15785	4801.52	-2744.02	261.85	1106.33	0	0	0	0	0	0	0	603	903	0
483	8	0	0	0	0	0	0	200	300	0	19.6576	1.76453	-102.961	-19996.4	7181.89	-2789.8	269.754	1097.21	0	0	0	0	0	0	0	603	903	0
483	9	0	0	0	0	0	0	200	300	0	5.92468	8.47839	-113.032	-23292.3	7181.89	-4025.76	263.539	1109.07	0	0	0	0	0	0	0	603	903	0
484	0	0	0	0	0	0	0	200	300	0	12.0282	-3.57605	-120.966	-24757.1	7609.13	-2881.35	262.903	1107.66	0	0	0	0	0	0	0	603	903	0
484	1	0	0	0	0	0	0	200	300	0	14.7748	-9.67957	-138.361	-28785.5	9257.09	-2377.81	266.905	1111.05	0	0	0	0	0	0	0	603	903	0
484	2	0	0	0	0	0	0	200	300	0	10.5023	4.05334	-159.113	-31257.4	10233.6	-3430.67	264.317	1099.45	0	0	0	0	0	0	0	603	903	0
484	3	0	0	0	0	0	0	200	300	0	7.90833	3.44299	-169.184	-33180	10233.6	-1828.49	260.488	1099.12	0	0	0	0	0	0	0	603	903	0
484	4	0	0	0	0	0	0	200	300	0	3.48328	-10.2899	-180.475	-37025.2	11271.2	-1233.4	262.453	1108.15	0	0	0	0	0	0	0	603	903	0
484	5	0	0	0	0	0	0	200	300	0	4.55139	1.30676	-201.533	-40687.3	12003.7	-958.741	259.562	1104.89	0	0	0	0	0	0	0	603	903	0
484	6	0	0	0	0	0	0	200	300	0	5.61951	12.5983	-218.012	-42152.2	12369.9	-226.319	256.739	1096.35	0	0	0	0	0	0	0	603	903	0
484	7	0	0	0	0	0	0	200	300	0	-6.12976	-2.50793	-228.083	-44898.7	13468.5	597.656	259.051	1099.85	0	0	0	0	0	0	0	603	903	0
484	8	0	0	0	0	0	0	200	300	0	-3.84094	-3.57605	-234.492	-47187.6	13102.3	826.538	255.875	1104.23	0	0	0	0	0	0	0	603	903	0
484	9	0	0	0	0	0	0	200	300	0	-1.24695	9.54651	-251.887	-49567.9	13346.4	1467.41	252.986	1099.79	0	0	0	0	0	0	0	603	903	0
485	0	0	0	0	0	0	0	200	300	0	-9.18152	0.238648	-262.263	-51124.3	15055.4	1833.62	257.406	1097.94	0	0	0	0	0	0	0	603	903	0
485	1	0	0	0	0	0	0	200	300	0	-9.18152	-11.6632	-267.145	-52772.3	14445.1	1696.29	254.072	1100.54	0	0	0	0	0	0	0	603	903	0
485	2	0	0	0	0	0	0	200	300	0	-9.48669	-4.49158	-277.521	-53779.4	14567.1	1970.95	252.49	1096.78	0	0	0	0	0	0	0	603	903	0
485	3	0	0	0	0	0	0	200	300	0	-12.2333	-5.10193	-284.54	-56068.2	16093	2016.72	256.558	1100.05	0	0	0	0	0	0	0	603	903	0
485	4	0	0	0	0	0	0	200	300	0	-8.87634	-17.1564	-292.78	-57075.3	15726.8	1970.95	253.715	1097.94	0	0	0	0	0	0	0	603	903	0
485	5	0	0	0	0	0	0	200	300	0	-13.1488	-21.8866	-297.053	-57807.7	15177.5	2108.28	251.094	1097.6	0	0	0	0	0	0	0	603	903	0
485	6	0	0	0	0	0	0	200	300	0	-18.1842	-18.6823	-306.513	-58631.7	16581.3	1925.17	254.097	1094.29	0	0	0	0	0	0	0	603	903	0
485	7	0	0	0	0	0	0	200	300	0	-10.2496	-24.6332	-311.091	-59181	15848.9	1970.95	250.946	1093.24	0	0	0	0	0	0	0	603	903	0
485	8	0	0	0	0	0	0	200	300	0	-12.0807	-35.7721	-318.11	-61012	16337.2	2016.72	251.357	1094.8	0	0	0	0	0	0	0	603	903	0
485	9	0	0	0	0	0	0	200	300	0	-21.0834	-34.704	-331.537	-62568.4	17435.8	1879.39	252.591	1091.72	0	0	0	0	0	0	0	603	903	0
486	0	0	0	0	0	0	0	200	300	0	-19.8627	-35.0092	-342.524	-63758.6	17741	1787.84	251.795	1089.14	0	0	0	0	0	0	0	603	903	0
486	1	0	0	0	0	0	0	200	300	0	-13.454	-49.3524	-351.374	-65040.3	17802	1375.85	250.664	1088.1	0	0	0	0	0	0	0	603	903	0
486	2	0	0	0	0	0	0	200	300	0	-20.1678	-56.6766	-358.088	-67420.7	18473.4	1421.63	251.589	1091.28	0	0	0	0	0	0	0	603	903	0
486	3	0	0	0	0	0	0	200	300	0	-25.5084	-51.7938	-369.99	-68336.2	18534.4	1192.75	250.094	1087.7	0	0	0	0	0	0	0	603	903	0
486	4	0	0	0	0	0	0	200	300	0	-19.7101	-59.4232	-380.976	-69618	19388.9	1055.42	250.893	1085.74	0	0	0	0	0	0	0	603	903	0
486	5	0	0	0	0	0	0	200	300	0	-17.7264	-69.494	-392.878	-71632.1	20365.5	918.091	251.837	1085.33	0	0	0	0	0	0	0	603	903	0
486	6	0	0	0	0	0	0	200	300	0	-23.067	-67.2052	-402.643	-72913.9	20487.6	643.432	250.883	1084.09	0	0	0	0	0	0	0	603	903	0
486	7	0	0	0	0	0	0	200	300	0	-26.424	-71.1725	-413.935	-74012.5	21220	185.669	251.264	1081.8	0	0	0	0	0	0	0	603	903	0
486	8	0	0	0	0	0	0	200	300	0	-22.1515	-83.5321	-423.09	-75935.1	22135.5	139.892	252.319	1082.48	0	0	0	0	0	0	0	603	903	0
486	9	0	0	0	0	0	0	200	300	0	-20.0153	-83.2269	-434.992	-76759.1	22135.5	551.879	250.887	1079.46	0	0	0	0	0	0	0	603	903	0
487	0	0	0	0	0	0	0	200	300	0	-27.6447	-80.6329	-446.284	-78956.4	22745.9	-317.872	250.967	1079.92	0	0	0	0	0	0	0	603	903	0
487	1	0	0	0	0	0	0	200	300	0	-27.4921	-89.6356	-456.659	-80879	23112.1	-363.648	250.611	1080.11	0	0	0	0	0	0	0	603	903	0
487	2	0	0	0	0	0	0	200	300	0	-21.3885	-92.3822	-467.951	-81794.5	23478.3	94.1158	250.173	1077.79	0	0	0	0	0	0	0	603	903	0
487	3	0	0	0	0	0	0	200	300	0	-26.2714	-88.4149	-477.717	-82710	24088.6	-638.306	250.425	1076.14	0	0	0	0	0	0	0	603	903	0
487	4	0	0	0	0	0	0	200	300	0	-30.2386	-91.1615	-487.482	-84449.5	24637.9	-867.188	250.541	1076.24	0	0	0	0	0	0	0	603	903	0
487	5	0	0	0	0	0	0	200	300	0	-26.5765	-98.7909	-495.417	-85914.4	25126.2	-226.319	250.717	1076.42	0	0	0	0	0	0	0	603	903	0
487	6	0	0	0	0	0	0	200	300	0	-28.7128	-97.5702	-503.962	-86921.4	25370.4	-729.859	250.342	1075.48	0	0	0	0	0	0	0	603	903	0
487	7	0	0	0	0	0	0	200	300	0	-31.6119	-93.2977	-510.981	-88111.6	25797.6	-729.859	250.486	1075.44	0	0	0	0	0	0	0	603	903	0
487	8	0	0	0	0	0	0	200	300	0	-30.5438	-98.4857	-518.305	-88752.5	25919.7	-409.424	250.009	1074.24	0	0	0	0	0	0	0	603	903	0
487	9	0	0	0	0	0	0	200	300	0	-28.7128	-101.537	-528.071	-89393.4	26041.8	-684.083	249.315	1072.28	0	0	0	0	0	0	0	603	903	0
488	0	0	0	0	0	0	0	200	300	0	-30.849	-96.8073	-530.512	-90858.2	26652.1	-958.741	250.238	1074.27	0	0	0	0	0	0	0	603	903	0
488	1	0	0	0	0	0	0	200	300	0	-28.7128	-97.5702	-537.836	-91316	27384.5	-958.741	250.916	1072.78	0	0	0	0	0	0	0	603	903	0
488	2	0	0	0	0	0	0	200	300	0	-30.3912	-103.521	-542.414	-91682.2	28055.9	-1462.28	251.724	1072.03	0	0	0	0	0	0	0	603	903	0
488	3	0	0	0	0	0	0	200	300	0	-29.6283	-101.232	-547.907	-91773.8	27628.7	-1599.61	250.426	1070.5	0	0	0	0	0	0	0	603	903	0
488	4	0	0	0	0	0	0	200	300	0	-28.1024	-96.9598	-552.18	-92780.8	27872.8	-1736.94	250.478	1071.03	0	0	0	0	0	0	0	603	903	0
488	5	0	0	0	0	0	0	200	300	0	-28.1024	-103.369	-554.316	-92780.8	28910.4	-2057.37	252.155	1070.38	0	0	0	0	0	0	0	603	903	0
488	6	0	0	0	0	0	0	200	300	0	-26.2714	-102.758	-558.893	-92872.4	28727.3	-2057.37	251.4	1069.17	0	0	0	0	0	0	0	603	903	0
488	7	0	0	0	0	0	0	200	300	0	-25.9662	-98.7909	-561.03	-93055.5	28910.4	-2515.14	251.531	1068.87	0	0	0	0	0	0	0	603	903	0
488	8	0	0	0	0	0	0	200	300	0	-24.4403	-101.69	-563.776	-93330.2	29276.6	-2698.24	251.93	1068.54	0	0	0	0	0	0	0	603	903	0
488	9	0	0	0	0	0	0	200	300	0	-22.4567	-104.284	-563.166	-92689.3	29215.6	-2515.14	251.877	1067.59	0	0	0	0	0	0	0	603	903	0
489	0	0	0	0	0	0	0	200	300	0	-21.6937	-101.69	-566.218	-92140	28727.3	-2789.8	250.735	1065.73	0	0	0	0	0	0	0	603	903	0
489	1	0	0	0	0	0	0	200	300	0	-21.236	-100.317	-566.523	-91956.9	29276.6	-3201.78	251.678	1065.32	0	0	0	0	0	0	0	603	903	0
489	2	0	0	0	0	0	0	200	300	0	-16.6583	-103.521	-567.133	-92323.1	29703.9	-3110.23	252.375	1065.79	0	0	0	0	0	0	0	603	903	0
489	3	0	0	0	0	0	0	200	300	0	-17.4213	-103.216	-565.912	-92323.1	29642.8	-3201.78	252.381	1066.14	0	0	0	0	0	0	0	603	903	0
489	4	0	0	0	0	0	0	200	300	0	-17.7264	-101.69	-564.997	-92414.6	29581.8	-3705.32	252.357	1066.57	0	0	0	0	0	0	0	603	903	0
489	5	0	0	0	0	0	0	200	300	0	-13.454	-102.758	-565.302	-91499.1	29520.8	-3796.88	252.221	1064.86	0	0	0	0	0	0	0	603	903	0
489	6	0	0	0	0	0	0	200	300	0	-11.7755	-104.894	-562.861	-91682.2	29825.9	-3567.99	252.99	1065.89	0	0	0	0	0	0	0	603	903	0
489	7	0	0	0	0	0	0	200	300	0	-12.691	-102.3	-562.25	-91499.1	29948	-4346.19	253.265	1065.74	0	0	0	0	0	0	0	603	903	0
489	8	0	0	0	0	0	0	200	300	0	-7.80823	-100.927	-561.64	-91041.3	29764.9	-4529.3	252.996	1065.1	0	0	0	0	0	0	0	603	903	0
489	9	0	0	0	0	0	0	200	300	0	-6.12976	-102.911	-560.419	-89851.1	29764.9	-4712.4	253.112	1063.33	0	0	0	0	0	0	0	603	903	0
490	0	0	0	0	0	0	0	200	300	0	-5.82458	-102.911	-560.114	-89851.1	29887	-5261.72	253.359	1063.42	0	0	0	0	0	0	0	603	903	0
490	1	0	0	0	0	0	0	200	300	0	-3.99353	-101.08	-559.199	-89484.9	30192.1	-5353.27	253.992	1063.02	0	0	0	0	0	0	0	603	903	0
490	2	0	0	0	0	0	0	200	300	0	-2.77283	-102.453	-557.367	-89484.9	29337.7	-5536.38	252.636	1063.55	0	0	0	0	0	0	0	603	903	0
490	3	0	0	0	0	0	0	200	300	0	-0.33142	-104.284	-555.842	-88294.8	29948	-5536.38	253.879	1061.85	0	0	0	0	0	0	0	603	903	0
490	4	0	0	0	0	0	0	200	300	0	1.80481	-100.469	-554.011	-88020.1	30253.2	-5902.59	254.608	1061.88	0	0	0	0	0	0	0	603	903	0
490	5	0	0	0	0	0	0	200	300	0	3.48328	-101.843	-554.011	-88020.1	29948	-6039.92	254.057	1061.88	0	0	0	0	0	0	0	603	903	0
490	6	0	0	0	0	0	0	200	300	0	4.70398	-104.437	-553.705	-87104.6	30009	-6589.24	254.197	1060.31	0	0	0	0	0	0	0	603	903	0
490	7	0	0	0	0	0	0	200	300	0	5.46692	-102.3	-550.654	-87287.7	30314.2	-6543.46	255.051	1061.52	0	0	0	0	0	0	0	603	903	0
490	8	0	0	0	0	0	0	200	300	0	7.29797	-100.775	-554.011	-87196.1	30680.4	-6726.56	255.379	1060.39	0	0	0	0	0	0	0	603	903	0
490	9	0	0	0	0	0	0	200	300	0	9.58679	-103.369	-560.114	-86921.4	31351.8	-6909.67	255.974	1058.19	0	0	0	0	0	0	0	603	903	0
491	0	0	0	0	0	0	0	200	300	0	12.6385	-102.606	-565.302	-87196.1	31290.8	-7321.66	255.352	1057.25	0	0	0	0	0	0	0	603	903	0
491	1	0	0	0	0	0	0	200	300	0	19.0472	-103.216	-563.471	-86463.7	32023.2	-8099.85	256.832	1056.45	0	0	0	0	0	0	0	603	903	0
491	2	0	0	0	0	0	0	200	300	0	20.7257	-106.878	-558.283	-86189	31534.9	-8557.62	256.486	1057.38	0	0	0	0	0	0	0	603	903	0
491	3	0	0	0	0	0	0	200	300	0	22.4042	-108.709	-563.471	-86097.5	31718	-8649.17	256.29	1055.8	0	0	0	0	0	0	0	603	903	0
491	4	0	0	0	0	0	0	200	300	0	24.8456	-108.404	-568.964	-86097.5	32389.4	-9473.14	256.927	1054.32	0	0	0	0	0	0	0	603	903	0
491	5	0	0	0	0	0	0	200	300	0	24.8456	-114.66	-568.354	-86829.9	32511.5	-9793.58	257.203	1055.77	0	0	0	0	0	0	0	603	903	0
491	6	0	0	0	0	0	0	200	300	0	23.3197	-117.254	-567.438	-86005.9	31901.1	-9839.36	256.22	1054.57	0	0	0	0	0	0	0	603	903	0
491	7	0	0	0	0	0	0	200	300	0	23.4723	-114.813	-569.575	-86005.9	32999.8	-10434.5	257.938	1054	0	0	0	0	0	0	0	603	903	0
491	8	0	0	0	0	0	0	200	300	0	22.4042	-117.407	-573.237	-86463.7	32633.5	-10251.3	256.929	1053.83	0	0	0	0	0	0	0	603	903	0
491	9	0	0	0	0	0	0	200	300	0	20.4205	-120.306	-572.321	-86280.6	32328.4	-9702.03	256.486	1053.76	0	0	0	0	0	0	0	603	903	0
492	0	0	0	0	0	0	0	200	300	0	19.6576	-117.101	-572.626	-86463.7	32267.3	-10114	256.35	1053.99	0	0	0	0	0	0	0	603	903	0
492	1	0	0	0	0	0	0	200	300	0	18.5895	-116.339	-573.542	-85731.3	33243.9	-10388.7	257.962	1052.48	0	0	0	0	0	0	0	603	903	0
492	2	0	0	0	0	0	0	200	300	0	19.3524	-114.813	-573.542	-86463.7	33121.8	-9976.68	257.75	1053.75	0	0	0	0	0	0	0	603	903	0
492	3	0	0	0	0	0	0	200	300	0	18.1317	-115.118	-574.763	-85822.8	32572.5	-10114	256.671	1052.32	0	0	0	0	0	0	0	603	903	0
492	4	0	0	0	0	0	0	200	300	0	16.7584	-110.998	-575.983	-85639.7	33121.8	-10205.6	257.505	1051.68	0	0	0	0	0	0	0	603	903	0
492	5	0	0	0	0	0	0	200	300	0	19.1998	-109.167	-577.509	-85365.1	33121.8	-9839.36	257.353	1050.82	0	0	0	0	0	0	0	603	903	0
492	6	0	0	0	0	0	0	200	300	0	19.505	-110.693	-580.866	-85822.8	32694.6	-10297.1	256.286	1050.75	0	0	0	0	0	0	0	603	903	0
492	7	0	0	0	0	0	0	200	300	0	18.8947	-109.319	-582.392	-85090.4	33182.9	-10297.1	256.977	1049.11	0	0	0	0	0	0	0	603	903	0
492	8	0	0	0	0	0	0	200	300	0	17.8265	-106.268	-587.275	-85090.4	33610.1	-10297.1	257.231	1047.89	0	0	0	0	0	0	0	603	903	0
492	9	0	0	0	0	0	0	200	300	0	21.4886	-108.557	-585.749	-85181.9	33671.1	-10251.3	257.484	1048.42	0	0	0	0	0	0	0	603	903	0
493	0	0	0	0	0	0	0	200	300	0	21.3361	-109.014	-590.326	-86097.5	33427	-10663.3	256.625	1048.85	0	0	0	0	0	0	0	603	903	0
493	1	0	0	0	0	0	0	200	300	0	18.4369	-107.336	-593.073	-85914.4	33488	-10480.2	256.465	1047.86	0	0	0	0	0	0	0	603	903	0
493	2	0	0	0	0	0	0	200	300	0	19.6576	-109.93	-595.82	-86280.6	34098.4	-10663.3	257.229	1047.81	0	0	0	0	0	0	0	603	903	0
493	3	0	0	0	0	0	0	200	300	0	23.1671	-113.134	-598.871	-84998.9	34403.6	-10388.7	257.447	1044.93	0	0	0	0	0	0	0	603	903	0
493	4	0	0	0	0	0	0	200	300	0	23.7775	-111.761	-599.787	-85914.4	33243.9	-10617.6	255.426	1046.24	0	0	0	0	0	0	0	603	903	0
493	5	0	0	0	0	0	0	200	300	0	22.099	-111.608	-601.618	-86738.4	34037.4	-11075.3	256.576	1047.18	0	0	0	0	0	0	0	603	903	0
493	6	0	0	0	0	0	0	200	300	0	25.4559	-113.897	-602.839	-86646.8	34647.7	-11166.9	257.474	1046.73	0	0	0	0	0	0	0	603	903	0
493	7	0	0	0	0	0	0	200	300	0	27.8973	-112.676	-605.28	-86280.6	34525.6	-10846.4	257.041	1045.55	0	0	0	0	0	0	0	603	903	0
493	8	0	0	0	0	0	0	200	300	0	27.1344	-110.998	-607.111	-86738.4	34525.6	-11029.5	256.869	1045.87	0	0	0	0	0	0	0	603	903	0
493	9	0	0	0	0	0	0	200	300	0	28.3551	-111.608	-607.721	-87104.6	35136	-11258.4	257.816	1046.33	0	0	0	0	0	0	0	603	903	0
494	0	0	0	0	0	0	0	200	300	0	30.3387	-111.608	-612.604	-86921.4	35380.1	-11075.3	257.754	1044.89	0	0	0	0	0	0	0	603	903	0
494	1	0	0	0	0	0	0	200	300	0	30.3387	-109.014	-613.52	-86829.9	34952.9	-11624.6	256.971	1044.53	0	0	0	0	0	0	0	603	903	0
494	2	0	0	0	0	0	0	200	300	0	30.7965	-107.641	-615.961	-86646.8	35319.1	-11716.2	257.34	1043.67	0	0	0	0	0	0	0	603	903	0
494	3	0	0	0	0	0	0	200	300	0	32.475	-107.794	-616.877	-87379.2	35624.3	-11350	257.749	1044.65	0	0	0	0	0	0	0	603	903	0
494	4	0	0	0	0	0	0	200	300	0	32.0172	-106.878	-618.097	-87837	35563.2	-11899.3	257.537	1045.11	0	0	0	0	0	0	0	603	903	0
494	5	0	0	0	0	0	0	200	300	0	31.1017	-103.979	-619.623	-87745.4	35380.1	-11716.2	257.099	1044.61	0	0	0	0	0	0	0	603	903	0
494	6	0	0	0	0	0	0	200	300	0	31.2543	-105.505	-621.149	-86921.4	35319.1	-11762	256.861	1042.94	0	0	0	0	0	0	0	603	903	0
494	7	0	0	0	0	0	0	200	300	0	32.7802	-106.115	-619.929	-87104.6	35929.4	-11990.8	257.957	1043.51	0	0	0	0	0	0	0	603	903	0
494	8	0	0	0	0	0	0	200	300	0	31.1017	-104.437	-619.318	-87013	35563.2	-12036.6	257.423	1043.5	0	0	0	0	0	0	0	603	903	0
494	9	0	0	0	0	0	0	200	300	0	33.2379	-102.606	-620.844	-87013	35319.1	-11624.6	256.889	1043.15	0	0	0	0	0	0	0	603	903	0
495	0	0	0	0	0	0	0	200	300	0	31.5594	-103.674	-622.065	-86829.9	35319.1	-11853.5	256.777	1042.58	0	0	0	0	0	0	0	603	903	0
495	1	0	0	0	0	0	0	200	300	0	31.712	-102.453	-620.539	-86189	35624.3	-11945.1	257.409	1041.89	0	0	0	0	0	0	0	603	903	0
495	2	0	0	0	0	0	0	200	300	0	30.6439	-101.537	-621.76	-86829.9	35685.3	-11807.7	257.394	1042.65	0	0	0	0	0	0	0	603	903	0
495	3	0	0	0	0	0	0	200	300	0	30.7965	-101.537	-620.539	-87104.6	35380.1	-11945.1	257.015	1043.37	0	0	0	0	0	0	0	603	903	0
495	4	0	0	0	0	0	0	200	300	0	31.1017	-100.469	-620.234	-86372.2	35380.1	-12036.6	257.043	1042.26	0	0	0	0	0	0	0	603	903	0
495	5	0	0	0	0	0	0	200	300	0	32.0172	-99.2487	-619.929	-85822.8	35624.3	-11807.7	257.465	1041.44	0	0	0	0	0	0	0	603	903	0
495	6	0	0	0	0	0	0	200	300	0	32.7802	-97.7228	-622.675	-85548.2	35807.4	-11853.5	257.506	1040.39	0	0	0	0	0	0	0	603	903	0
495	7	0	0	0	0	0	0	200	300	0	32.9327	-98.7909	-622.37	-86555.2	35441.2	-12174	256.946	1042.07	0	0	0	0	0	0	0	603	903	0
495	8	0	0	0	0	0	0	200	300	0	34.9164	-98.4857	-622.675	-86189	35746.3	-11533.1	257.408	1041.42	0	0	0	0	0	0	0	603	903	0
495	9	0	0	0	0	0	0	200	300	0	34.1534	-97.5702	-622.675	-86097.5	35868.4	-11990.8	257.604	1041.27	0	0	0	0	0	0	0	603	903	0
496	0	0	0	0	0	0	0	200	300	0	35.8319	-95.8917	-623.591	-86005.9	35258.1	-12036.6	256.54	1040.92	0	0	0	0	0	0	0	603	903	0
496	1	0	0	0	0	0	0	200	300	0	35.6793	-96.1969	-624.201	-86189	35502.2	-11899.3	256.876	1041.08	0	0	0	0	0	0	0	603	903	0
496	2	0	0	0	0	0	0	200	300	0	35.6793	-95.1288	-623.285	-86372.2	35746.3	-11899.3	257.352	1041.58	0	0	0	0	0	0	0	603	903	0
496	3	0	0	0	0	0	0	200	300	0	35.6793	-94.5184	-624.811	-86097.5	35807.4	-12311.3	257.309	1040.8	0	0	0	0	0	0	0	603	903	0
496	4	0	0	0	0	0	0	200	300	0	36.7474	-94.0607	-624.811	-85639.7	35624.3	-11853.5	257.016	1040.07	0	0	0	0	0	0	0	603	903	0
496	5	0	0	0	0	0	0	200	300	0	37.3578	-91.9244	-623.591	-85822.8	35868.4	-12082.4	257.519	1040.63	0	0	0	0	0	0	0	603	903	0
496	6	0	0	0	0	0	0	200	300	0	36.4423	-91.4667	-623.896	-85639.7	36051.5	-11899.3	257.785	1040.27	0	0	0	0	0	0	0	603	903	0
496	7	0	0	0	0	0	0	200	300	0	36.1371	-90.3986	-625.422	-86738.4	36173.6	-12036.6	257.839	1041.69	0	0	0	0	0	0	0	603	903	0
496	8	0	0	0	0	0	0	200	300	0	37.663	-90.246	-625.117	-84907.3	35746.3	-12128.2	257.184	1038.83	0	0	0	0	0	0	0	603	903	0
496	9	0	0	0	0	0	0	200	300	0	37.8156	-87.3468	-624.811	-85365.1	35807.4	-12219.7	257.309	1039.63	0	0	0	0	0	0	0	603	903	0
497	0	0	0	0	0	0	0	200	300	0	36.5948	-87.9572	-624.506	-85822.8	36173.6	-11899.3	257.924	1040.43	0	0	0	0	0	0	0	603	903	0
497	1	0	0	0	0	0	0	200	300	0	38.4259	-86.889	-622.98	-85639.7	36112.6	-11670.4	257.967	1040.47	0	0	0	0	0	0	0	603	903	0
497	2	0	0	0	0	0	0	200	300	0	38.7311	-84.4476	-625.117	-85731.3	35685.3	-11945.1	257.086	1040.14	0	0	0	0	0	0	0	603	903	0
497	3	0	0	0	0	0	0	200	300	0	37.663	-83.3795	-624.811	-84907.3	35685.3	-11578.9	257.114	1038.89	0	0	0	0	0	0	0	603	903	0
497	4	0	0	0	0	0	0	200	300	0	37.663	-84.295	-625.727	-85273.5	35563.2	-11624.6	256.835	1039.28	0	0	0	0	0	0	0	603	903	0
497	5	0	0	0	0	0	0	200	300	0	37.2052	-81.8536	-623.285	-85731.3	35258.1	-11807.7	256.568	1040.55	0	0	0	0	0	0	0	603	903	0
497	6	0	0	0	0	0	0	200	300	0	37.0526	-82.464	-624.201	-84998.9	35624.3	-11533.1	257.072	1039.17	0	0	0	0	0	0	0	603	903	0
497	7	0	0	0	0	0	0	200	300	0	37.8156	-80.6329	-625.117	-85273.5	36112.6	-11487.3	257.769	1039.41	0	0	0	0	0	0	0	603	903	0
497	8	0	0	0	0	0	0	200	300	0	38.4259	-79.4122	-623.591	-85639.7	36234.6	-11578.9	258.106	1040.33	0	0	0	0	0	0	0	603	903	0
497	9	0	0	0	0	0	0	200	300	0	37.0526	-79.5648	-625.117	-85365.1	35807.4	-11304.2	257.281	1039.56	0	0	0	0	0	0	0	603	903	0
498	0	0	0	0	0	0	0	200	300	0	36.4423	-79.2596	-626.337	-85548.2	35685.3	-11350	256.975	1039.58	0	0	0	0	0	0	0	603	903	0
498	1	0	0	0	0	0	0	200	300	0	39.0363	-79.4122	-625.117	-85090.4	36112.6	-11578.9	257.769	1039.12	0	0	0	0	0	0	0	603	903	0
498	2	0	0	0	0	0	0	200	300	0	40.4095	-77.8864	-624.201	-84632.6	36112.6	-11533.1	257.854	1038.59	0	0	0	0	0	0	0	603	903	0
498	3	0	0	0	0	0	0	200	300	0	38.5785	-75.9027	-622.065	-84724.2	35746.3	-11304.2	257.464	1039.2	0	0	0	0	0	0	0	603	903	0
498	4	0	0	0	0	0	0	200	300	0	37.9681	-75.7501	-623.896	-84541.1	35746.3	-11304.2	257.295	1038.51	0	0	0	0	0	0	0	603	903	0
498	5	0	0	0	0	0	0	200	300	0	38.1207	-74.5294	-626.948	-84358	35868.4	-11166.9	257.211	1037.55	0	0	0	0	0	0	0	603	903	0
498	6	0	0	0	0	0	0	200	300	0	37.9681	-74.682	-623.896	-84083.3	35685.3	-11029.5	257.198	1037.77	0	0	0	0	0	0	0	603	903	0
498	7	0	0	0	0	0	0	200	300	0	38.4259	-74.2242	-626.032	-84083.3	35380.1	-10892.2	256.515	1037.31	0	0	0	0	0	0	0	603	903	0
498	8	0	0	0	0	0	0	200	300	0	37.3578	-73.1561	-624.506	-84632.6	35868.4	-10983.8	257.435	1038.52	0	0	0	0	0	0	0	603	903	0
498	9	0	0	0	0	0	0	200	300	0	37.663	-72.2406	-623.591	-84174.9	35990.5	-10892.2	257.715	1037.98	0	0	0	0	0	0	0	603	903	0
499	0	0	0	0	0	0	0	200	300	0	38.1207	-71.3251	-624.811	-83259.3	35563.2	-10617.6	256.918	1036.26	0	0	0	0	0	0	0	603	903	0
499	1	0	0	0	0	0	0	200	300	0	38.8837	-70.7147	-625.422	-84266.4	35624.3	-10938	256.96	1037.74	0	0	0	0	0	0	0	603	903	0
499	2	0	0	0	0	0	0	200	300	0	37.663	-69.494	-622.065	-84174.9	36051.5	-10800.7	257.955	1038.32	0	0	0	0	0	0	0	603	903	0
499	3	0	0	0	0	0	0	200	300	0	37.3578	-69.9518	-627.253	-83900.2	36051.5	-10663.3	257.475	1036.76	0	0	0	0	0	0	0	603	903	0
499	4	0	0	0	0	0	0	200	300	0	37.9681	-68.8837	-625.117	-83534	35563.2	-10388.7	256.891	1036.63	0	0	0	0	0	0	0	603	903	0
499	5	0	0	0	0	0	0	200	300	0	39.0363	-68.4259	-622.37	-83717.1	35746.3	-10434.5	257.436	1037.51	0	0	0	0	0	0	0	603	903	0
499	6	0	0	0	0	0	0	200	300	0	37.0526	-66.7474	-624.506	-83625.5	35685.3	-10434.5	257.142	1036.91	0	0	0	0	0	0	0	603	903	0
499	7	0	0	0	0	0	0	200	300	0	36.7474	-65.6793	-624.506	-83625.5	35685.3	-10251.3	257.142	1036.91	0	0	0	0	0	0	0	603	903	0
499	8	0	0	0	0	0	0	200	300	0	36.2897	-64.306	-623.591	-83076.3	35319.1	-10297.1	256.638	1036.22	0	0	0	0	0	0	0	603	903	0
499	9	0	0	0	0	0	0	200	300	0	36.4423	-64.306	-625.422	-82710	35502.2	-10022.5	256.765	1035.25	0	0	0	0	0	0	0	603	903	0
500	0	0	0	0	0	0	0	200	300	0	36.7474	-63.2379	-624.506	-83076.3	35502.2	-9930.91	256.848	1036.03	0	0	0	0	0	0	0	603	903	0
500	1	0	0	0	0	0	0	200	300	0	35.6793	-62.475	-623.896	-82069.2	35319.1	-9930.91	256.611	1034.54	0	0	0	0	0	0	0	603	903	0
500	2	0	0	0	0	0	0	200	300	0	35.6793	-61.8646	-623.896	-82710	35013.9	-9702.03	256.121	1035.57	0	0	0	0	0	0	0	603	903	0
500	3	0	0	0	0	0	0	200	300	0	36.1371	-59.881	-620.844	-82893.1	35258.1	-9473.14	256.791	1036.52	0	0	0	0	0	0	0	603	903	0
500	4	0	0	0	0	0	0	200	300	0	36.2897	-60.0336	-623.285	-82435.4	34647.7	-8923.83	255.589	1035.26	0	0	0	0	0	0	0	603	903	0
500	5	0	0	0	0	0	0	200	300	0	34.9164	-59.5758	-622.37	-82526.9	35319.1	-9290.04	256.749	1035.6	0	0	0	0	0	0	0	603	903	0
500	6	0	0	0	0	0	0	200	300	0	36.1371	-57.8973	-618.708	-81611.4	34586.7	-9244.26	255.901	1034.91	0	0	0	0	0	0	0	603	903	0
500	7	0	0	0	0	0	0	200	300	0	34.1534	-57.4396	-619.929	-81428.3	35136	-9061.16	256.678	1034.35	0	0	0	0	0	0	0	603	903	0
500	8	0	0	0	0	0	0	200	300	0	34.6112	-56.524	-618.708	-81245.2	35136	-9106.93	256.789	1034.31	0	0	0	0	0	0	0	603	903	0
500	9	0	0	0	0	0	0	200	300	0	34.0009	-55.9137	-619.318	-81519.8	34708.7	-9015.38	256.043	1034.63	0	0	0	0	0	0	0	603	903	0
501	0	0	0	0	0	0	0	200	300	0	32.475	-55.1508	-616.877	-80329.6	34403.6	-8786.5	255.771	1033.22	0	0	0	0	0	0	0	603	903	0
501	1	0	0	0	0	0	0	200	300	0	32.9327	-54.5404	-617.182	-80146.6	34647.7	-8740.72	256.139	1032.86	0	0	0	0	0	0	0	603	903	0
501	2	0	0	0	0	0	0	200	300	0	33.3905	-54.0826	-615.961	-78681.7	34891.8	-8282.96	256.646	1030.74	0	0	0	0	0	0	0	603	903	0
501	3	0	0	0	0	0	0	200	300	0	33.0853	-53.7775	-615.046	-79963.4	34037.4	-8466.06	255.341	1033.01	0	0	0	0	0	0	0	603	903	0
501	4	0	0	0	0	0	0	200	300	0	31.712	-51.6412	-612.604	-79231	33854.2	-8557.62	255.263	1032.33	0	0	0	0	0	0	0	603	903	0
501	5	0	0	0	0	0	0	200	300	0	31.712	-51.3361	-612.299	-79871.9	34342.5	-8008.3	256.088	1033.45	0	0	0	0	0	0	0	603	903	0
501	6	0	0	0	0	0	0	200	300	0	32.0172	-51.0309	-611.078	-78681.7	34464.6	-7642.09	256.4	1031.76	0	0	0	0	0	0	0	603	903	0
501	7	0	0	0	0	0	0	200	300	0	32.475	-51.0309	-611.384	-78956.4	33732.2	-7779.42	255.174	1032.14	0	0	0	0	0	0	0	603	903	0
501	8	0	0	0	0	0	0	200	300	0	30.4913	-50.5731	-605.585	-78223.9	33793.2	-7596.32	255.803	1032.17	0	0	0	0	0	0	0	603	903	0
501	9	0	0	0	0	0	0	200	300	0	30.7965	-50.5731	-606.501	-77308.4	33243.9	-7001.22	254.813	1030.47	0	0	0	0	0	0	0	603	903	0
502	0	0	0	0	0	0	0	200	300	0	31.5594	-49.1998	-605.585	-77125.3	32877.7	-7413.21	254.291	1030.36	0	0	0	0	0	0	0	603	903	0
502	1	0	0	0	0	0	0	200	300	0	30.6439	-48.7421	-602.839	-77033.8	33366	-7275.88	255.348	1030.79	0	0	0	0	0	0	0	603	903	0
502	2	0	0	0	0	0	0	200	300	0	28.8129	-48.4369	-602.534	-76942.2	33610.1	-6955.45	255.781	1030.7	0	0	0	0	0	0	0	603	903	0
502	3	0	0	0	0	0	0	200	300	0	28.9655	-48.4369	-601.618	-75843.6	33549.1	-7321.66	255.765	1029.07	0	0	0	0	0	0	0	603	903	0
502	4	0	0	0	0	0	0	200	300	0	29.5758	-46.911	-598.871	-75294.2	32694.6	-7184.33	254.594	1028.73	0	0	0	0	0	0	0	603	903	0
502	5	0	0	0	0	0	0	200	300	0	28.9655	-47.9791	-597.346	-75294.2	32999.8	-6955.45	255.244	1029.05	0	0	0	0	0	0	0	603	903	0
502	6	0	0	0	0	0	0	200	300	0	28.5077	-46.7584	-593.989	-73829.4	33182.9	-6635.01	255.865	1027.29	0	0	0	0	0	0	0	603	903	0
502	7	0	0	0	0	0	0	200	300	0	27.8973	-46.1481	-593.378	-73921	33060.8	-7047	255.716	1027.58	0	0	0	0	0	0	0	603	903	0
502	8	0	0	0	0	0	0	200	300	0	28.9655	-46.1481	-594.294	-72822.4	32450.4	-6680.79	254.603	1025.54	0	0	0	0	0	0	0	603	903	0
502	9	0	0	0	0	0	0	200	300	0	28.5077	-44.9274	-591.547	-73005.4	32328.4	-6818.12	254.651	1026.41	0	0	0	0	0	0	0	603	903	0
503	0	0	0	0	0	0	0	200	300	0	27.5922	-45.6903	-590.326	-72547.7	32328.4	-6497.68	254.764	1025.89	0	0	0	0	0	0	0	603	903	0
503	1	0	0	0	0	0	0	200	300	0	27.5922	-45.3851	-587.275	-72639.2	32328.4	-6177.25	255.048	1026.69	0	0	0	0	0	0	0	603	903	0
503	2	0	0	0	0	0	0	200	300	0	28.8129	-44.4696	-585.138	-71632.1	31901.1	-6085.7	254.519	1025.42	0	0	0	0	0	0	0	603	903	0
503	3	0	0	0	0	0	0	200	300	0	29.118	-43.7067	-582.697	-71449.1	31596	-6085.7	254.224	1025.62	0	0	0	0	0	0	0	603	903	0
503	4	0	0	0	0	0	0	200	300	0	27.7448	-42.3334	-580.561	-71449.1	31657	-5765.26	254.528	1026.07	0	0	0	0	0	0	0	603	903	0
503	5	0	0	0	0	0	0	200	300	0	27.1344	-42.6385	-580.866	-70899.7	31840.1	-5902.59	254.815	1025.06	0	0	0	0	0	0	0	603	903	0
503	6	0	0	0	0	0	0	200	300	0	26.2189	-41.8756	-578.425	-70167.3	31473.9	-5719.48	254.413	1024.31	0	0	0	0	0	0	0	603	903	0
503	7	0	0	0	0	0	0	200	300	0	26.6766	-41.723	-577.204	-69618	31534.9	-5765.26	254.634	1023.61	0	0	0	0	0	0	0	603	903	0
503	8	0	0	0	0	0	0	200	300	0	26.8292	-40.0446	-576.899	-69526.5	31779.1	-5994.14	255.086	1023.52	0	0	0	0	0	0	0	603	903	0
503	9	0	0	0	0	0	0	200	300	0	26.0663	-39.129	-573.237	-69160.2	31046.6	-5719.48	254.16	1023.65	0	0	0	0	0	0	0	603	903	0
504	0	0	0	0	0	0	0	200	300	0	25.9137	-38.9764	-571.711	-68153.2	31229.7	-5627.93	254.625	1022.21	0	0	0	0	0	0	0	603	903	0
504	1	0	0	0	0	0	0	200	300	0	26.2189	-37.9083	-572.016	-67603.8	31168.7	-5536.38	254.489	1021.19	0	0	0	0	0	0	0	603	903	0
504	2	0	0	0	0	0	0	200	300	0	26.524	-37.4506	-569.575	-68061.6	31412.8	-5582.16	255.151	1022.5	0	0	0	0	0	0	0	603	903	0
504	3	0	0	0	0	0	0	200	300	0	25.7611	-37.298	-568.659	-66779.8	30375.3	-5307.5	253.416	1020.43	0	0	0	0	0	0	0	603	903	0
504	4	0	0	0	0	0	0	200	300	0	25.4559	-37.1454	-565.607	-67054.5	30802.5	-5124.39	254.459	1021.55	0	0	0	0	0	0	0	603	903	0
504	5	0	0	0	0	0	0	200	300	0	26.8292	-35.9247	-564.692	-65315	29948	-5307.5	253.034	1018.66	0	0	0	0	0	0	0	603	903	0
504	6	0	0	0	0	0	0	200	300	0	26.0663	-35.4669	-562.861	-66047.4	29764.9	-5170.17	252.881	1020.34	0	0	0	0	0	0	0	603	903	0
504	7	0	0	0	0	0	0	200	300	0	24.693	-34.3988	-560.419	-65681.2	30253.2	-4941.29	253.983	1020.2	0	0	0	0	0	0	0	603	903	0
504	8	0	0	0	0	0	0	200	300	0	24.9982	-33.7885	-560.724	-65498.1	30375.3	-5032.84	254.171	1019.81	0	0	0	0	0	0	0	603	903	0
504	9	0	0	0	0	0	0	200	300	0	25.9137	-33.941	-559.199	-64857.2	30131.1	-5032.84	253.883	1018.98	0	0	0	0	0	0	0	603	903	0
505	0	0	0	0	0	0	0	200	300	0	25.7611	-33.7885	-557.367	-64124.8	29887	-4987.06	253.622	1018.05	0	0	0	0	0	0	0	603	903	0
505	1	0	0	0	0	0	0	200	300	0	24.9982	-32.8729	-554.621	-64124.8	29887	-4849.73	253.887	1018.62	0	0	0	0	0	0	0	603	903	0
505	2	0	0	0	0	0	0	200	300	0	26.6766	-33.0255	-552.79	-63484	30009	-4895.51	254.287	1017.84	0	0	0	0	0	0	0	603	903	0
505	3	0	0	0	0	0	0	200	300	0	23.9301	-32.11	-551.874	-62476.9	29825.9	-4803.96	254.045	1016.21	0	0	0	0	0	0	0	603	903	0
505	4	0	0	0	0	0	0	200	300	0	24.9982	-30.8893	-547.297	-61927.6	29581.8	-4483.52	254.051	1016.15	0	0	0	0	0	0	0	603	903	0
505	5	0	0	0	0	0	0	200	300	0	25.7611	-29.9738	-548.517	-62293.8	29215.6	-4575.07	253.263	1016.57	0	0	0	0	0	0	0	603	903	0
505	6	0	0	0	0	0	0	200	300	0	24.8456	-30.8893	-549.738	-61652.9	29154.5	-4437.74	253.034	1015.15	0	0	0	0	0	0	0	603	903	0
505	7	0	0	0	0	0	0	200	300	0	24.5404	-31.4996	-546.992	-60554.3	29459.7	-4529.3	253.858	1013.7	0	0	0	0	0	0	0	603	903	0
505	8	0	0	0	0	0	0	200	300	0	25.3033	-29.2108	-543.94	-60371.2	28849.4	-4712.4	253.038	1013.99	0	0	0	0	0	0	0	603	903	0
505	9	0	0	0	0	0	0	200	300	0	25.3033	-29.516	-539.972	-60279.6	29154.5	-4437.74	253.993	1014.63	0	0	0	0	0	0	0	603	903	0
506	0	0	0	0	0	0	0	200	300	0	24.5404	-27.9901	-540.583	-60096.5	29093.5	-4437.74	253.819	1014.17	0	0	0	0	0	0	0	603	903	0
506	1	0	0	0	0	0	0	200	300	0	25.4559	-27.5323	-540.583	-59272.5	28849.4	-4391.97	253.367	1012.65	0	0	0	0	0	0	0	603	903	0
506	2	0	0	0	0	0	0	200	300	0	25.7611	-26.922	-538.141	-58814.8	28727.3	-4437.74	253.382	1012.29	0	0	0	0	0	0	0	603	903	0
506	3	0	0	0	0	0	0	200	300	0	25.7611	-26.922	-536.005	-58814.8	28910.4	-4391.97	253.937	1012.73	0	0	0	0	0	0	0	603	903	0
506	4	0	0	0	0	0	0	200	300	0	24.8456	-26.6168	-533.564	-58540.1	28788.3	-4346.19	253.955	1012.72	0	0	0	0	0	0	0	603	903	0
506	5	0	0	0	0	0	0	200	300	0	24.9982	-26.3116	-531.122	-57075.3	27994.9	-4254.64	252.709	1010.46	0	0	0	0	0	0	0	603	903	0
506	6	0	0	0	0	0	0	200	300	0	25.4559	-25.2435	-529.902	-56800.6	28544.2	-4254.64	253.867	1010.19	0	0	0	0	0	0	0	603	903	0
506	7	0	0	0	0	0	0	200	300	0	25.6085	-24.7858	-527.46	-56709.1	28422.1	-4163.09	253.885	1010.51	0	0	0	0	0	0	0	603	903	0
506	8	0	0	0	0	0	0	200	300	0	25.1508	-24.0228	-526.545	-56434.4	27872.8	-4071.53	252.935	1010.18	0	0	0	0	0	0	0	603	903	0
506	9	0	0	0	0	0	0	200	300	0	24.2352	-23.7177	-525.629	-54969.6	27628.7	-3705.32	252.563	1007.58	0	0	0	0	0	0	0	603	903	0
507	0	0	0	0	0	0	0	200	300	0	25.9137	-24.1754	-522.577	-53962.5	27994.9	-4025.76	253.571	1006.26	0	0	0	0	0	0	0	603	903	0
507	1	0	0	0	0	0	0	200	300	0	25.9137	-23.1073	-520.136	-53779.4	27506.6	-4025.76	252.883	1006.39	0	0	0	0	0	0	0	603	903	0
507	2	0	0	0	0	0	0	200	300	0	25.4559	-22.3444	-516.169	-54328.7	26957.3	-3796.88	252.226	1008.25	0	0	0	0	0	0	0	603	903	0
507	3	0	0	0	0	0	0	200	300	0	25.3033	-22.4969	-517.389	-53962.5	27750.7	-3842.65	253.636	1007.3	0	0	0	0	0	0	0	603	903	0
507	4	0	0	0	0	0	0	200	300	0	24.9982	-22.8021	-515.864	-52955.4	27567.6	-4025.76	253.44	1005.65	0	0	0	0	0	0	0	603	903	0
507	5	0	0	0	0	0	0	200	300	0	27.1344	-22.1918	-514.643	-52680.7	27201.4	-3842.65	252.855	1005.36	0	0	0	0	0	0	0	603	903	0
507	6	0	0	0	0	0	0	200	300	0	25.9137	-22.8021	-512.201	-52406.1	27201.4	-3522.22	253.107	1005.32	0	0	0	0	0	0	0	603	903	0
507	7	0	0	0	0	0	0	200	300	0	24.8456	-22.1918	-507.929	-51948.3	27201.4	-3934.21	253.554	1005.27	0	0	0	0	0	0	0	603	903	0
507	8	0	0	0	0	0	0	200	300	0	24.9982	-22.8021	-506.098	-50666.6	27018.3	-3979.98	253.386	1003.11	0	0	0	0	0	0	0	603	903	0
507	9	0	0	0	0	0	0	200	300	0	25.7611	-22.0392	-504.267	-50300.4	27079.4	-3842.65	253.7	1002.75	0	0	0	0	0	0	0	603	903	0
508	0	0	0	0	0	0	0	200	300	0	25.3033	-22.8021	-502.436	-50025.7	26713.1	-3979.98	253.167	1002.57	0	0	0	0	0	0	0	603	903	0
508	1	0	0	0	0	0	0	200	300	0	24.2352	-21.2762	-502.741	-50025.7	26224.9	-3796.88	252.164	1002.51	0	0	0	0	0	0	0	603	903	0
508	2	0	0	0	0	0	0	200	300	0	23.6249	-21.2762	-499.079	-48194.6	26224.9	-3522.22	252.547	999.567	0	0	0	0	0	0	0	603	903	0
508	3	0	0	0	0	0	0	200	300	0	25.4559	-21.2762	-498.774	-48103.1	26102.8	-3567.99	252.334	999.443	0	0	0	0	0	0	0	603	903	0
508	4	0	0	0	0	0	0	200	300	0	24.8456	-21.5814	-497.248	-47645.3	26224.9	-3430.67	252.74	998.818	0	0	0	0	0	0	0	603	903	0
508	5	0	0	0	0	0	0	200	300	0	23.4723	-21.1237	-492.365	-47920	26163.8	-3384.89	253.139	1000.33	0	0	0	0	0	0	0	603	903	0
508	6	0	0	0	0	0	0	200	300	0	25.6085	-20.5133	-491.755	-47004.5	25919.7	-3339.11	252.709	998.585	0	0	0	0	0	0	0	603	903	0
508	7	0	0	0	0	0	0	200	300	0	23.9301	-20.2081	-489.924	-45997.4	25736.6	-3339.11	252.532	996.887	0	0	0	0	0	0	0	603	903	0
508	8	0	0	0	0	0	0	200	300	0	24.3878	-20.0555	-488.703	-46088.9	25919.7	-3156.01	253.038	997.309	0	0	0	0	0	0	0	603	903	0
508	9	0	0	0	0	0	0	200	300	0	23.9301	-19.2926	-487.482	-45356.5	26102.8	-3384.89	253.546	996.042	0	0	0	0	0	0	0	603	903	0
509	0	0	0	0	0	0	0	200	300	0	23.3197	-19.903	-485.346	-44898.7	24576.9	-3156.01	250.638	995.509	0	0	0	0	0	0	0	603	903	0
509	1	0	0	0	0	0	0	200	300	0	22.7094	-20.5133	-484.43	-44807.2	25614.5	-3293.34	252.876	995.495	0	0	0	0	0	0	0	603	903	0
509	2	0	0	0	0	0	0	200	300	0	23.1671	-18.9874	-480.768	-43708.6	25431.4	-3201.78	252.897	993.914	0	0	0	0	0	0	0	603	903	0
509	3	0	0	0	0	0	0	200	300	0	24.9982	-18.5297	-478.937	-43159.3	24882.1	-2927.13	251.953	993.115	0	0	0	0	0	0	0	603	903	0
509	4	0	0	0	0	0	0	200	300	0	23.4723	-18.8348	-478.327	-43250.8	25004.2	-3018.68	252.274	993.421	0	0	0	0	0	0	0	603	903	0
509	5	0	0	0	0	0	0	200	300	0	23.4723	-17.9193	-477.411	-42335.3	24882.1	-3064.45	252.119	991.677	0	0	0	0	0	0	0	603	903	0
509	6	0	0	0	0	0	0	200	300	0	21.3361	-17.7667	-474.055	-41877.5	25187.3	-2789.8	253.132	991.339	0	0	0	0	0	0	0	603	903	0
509	7	0	0	0	0	0	0	200	300	0	22.099	-17.1564	-473.444	-41511.3	24454.8	-2927.13	251.653	990.679	0	0	0	0	0	0	0	603	903	0
509	8	0	0	0	0	0	0	200	300	0	22.8619	-16.8512	-471.613	-41694.4	24821.1	-2606.69	252.63	991.408	0	0	0	0	0	0	0	603	903	0
509	9	0	0	0	0	0	0	200	300	0	21.9464	-16.6986	-470.392	-41328.2	24760	-2789.8	252.637	990.859	0	0	0	0	0	0	0	603	903	0
510	0	0	0	0	0	0	0	200	300	0	22.2516	-16.0883	-467.951	-40687.3	24210.7	-2652.47	251.738	989.948	0	0	0	0	0	0	0	603	903	0
510	1	0	0	0	0	0	0	200	300	0	22.099	-16.0883	-466.12	-39954.9	24332.8	-2515.14	252.203	988.718	0	0	0	0	0	0	0	603	903	0
510	2	0	0	0	0	0	0	200	300	0	21.9464	-16.3934	-467.035	-40321.1	23722.4	-2698.24	250.794	989.334	0	0	0	0	0	0	0	603	903	0
510	3	0	0	0	0	0	0	200	300	0	21.4886	-15.6305	-464.899	-39222.5	24027.6	-2698.24	251.683	987.368	0	0	0	0	0	0	0	603	903	0
510	4	0	0	0	0	0	0	200	300	0	20.4205	-17.1564	-464.289	-38673.2	23966.6	-2652.47	251.62	986.296	0	0	0	0	0	0	0	603	903	0
510	5	0	0	0	0	0	0	200	300	0	21.6412	-15.1727	-461.847	-38123.8	24332.8	-2515.14	252.686	985.546	0	0	0	0	0	0	0	603	903	0
510	6	0	0	0	0	0	0	200	300	0	21.4886	-15.7831	-459.711	-37666.1	24332.8	-2377.81	252.931	984.934	0	0	0	0	0	0	0	603	903	0
510	7	0	0	0	0	0	0	200	300	0	20.2679	-14.1046	-460.322	-38123.8	23722.4	-2469.36	251.534	985.82	0	0	0	0	0	0	0	603	903	0
510	8	0	0	0	0	0	0	200	300	0	19.3524	-14.1046	-460.322	-37299.9	23783.5	-2515.14	251.667	984.03	0	0	0	0	0	0	0	603	903	0
510	9	0	0	0	0	0	0	200	300	0	22.7094	-13.4943	-457.88	-36292.8	23478.3	-2332.03	251.276	982.263	0	0	0	0	0	0	0	603	903	0
511	0	0	0	0	0	0	0	200	300	0	21.9464	-13.7994	-458.185	-36018.1	23417.2	-2194.7	251.109	981.61	0	0	0	0	0	0	0	603	903	0
511	1	0	0	0	0	0	0	200	300	0	20.5731	-13.7994	-453.608	-36201.2	23295.2	-1920.04	251.355	982.807	0	0	0	0	0	0	0	603	903	0
511	2	0	0	0	0	0	0	200	300	0	20.5731	-12.8839	-454.828	-35835	23661.4	-2148.93	252.023	981.788	0	0	0	0	0	0	0	603	903	0
511	3	0	0	0	0	0	0	200	300	0	20.5731	-12.4261	-453.913	-35377.3	23295.2	-2103.15	251.321	980.938	0	0	0	0	0	0	0	603	903	0
511	4	0	0	0	0	0	0	200	300	0	20.1154	-13.4943	-453.303	-34644.8	22990	-1874.27	250.717	979.428	0	0	0	0	0	0	0	603	903	0
511	5	0	0	0	0	0	0	200	300	0	19.8102	-12.2736	-453.303	-34553.3	23173.1	-1874.27	251.121	979.226	0	0	0	0	0	0	0	603	903	0
511	6	0	0	0	0	0	0	200	300	0	18.8947	-12.5787	-449.335	-34278.6	23417.2	-2103.15	252.115	979.287	0	0	0	0	0	0	0	603	903	0
511	7	0	0	0	0	0	0	200	300	0	18.2843	-12.8839	-450.861	-33729.3	23295.2	-1965.82	251.668	977.811	0	0	0	0	0	0	0	603	903	0
511	8	0	0	0	0	0	0	200	300	0	18.8947	-12.121	-449.03	-33271.6	23173.1	-2103.15	251.607	977.097	0	0	0	0	0	0	0	603	903	0
511	9	0	0	0	0	0	0	200	300	0	19.3524	-12.5787	-447.199	-33729.3	22990	-2011.6	251.409	978.424	0	0	0	0	0	0	0	603	903	0
512	0	0	0	0	0	0	0	200	300	0	17.8265	-11.5106	-446.894	-32813.8	22990	-1736.94	251.444	976.426	0	0	0	0	0	0	0	603	903	0
512	1	0	0	0	0	0	0	200	300	0	18.1317	-11.0529	-448.115	-31623.6	22806.9	-1920.04	250.895	973.57	0	0	0	0	0	0	0	603	903	0
512	2	0	0	0	0	0	0	200	300	0	18.8947	-10.4425	-446.894	-31074.3	22623.8	-1828.49	250.625	972.534	0	0	0	0	0	0	0	603	903	0
512	3	0	0	0	0	0	0	200	300	0	18.1317	-10.9003	-445.673	-31257.4	22990	-1965.82	251.585	973.135	0	0	0	0	0	0	0	603	903	0
512	4	0	0	0	0	0	0	200	300	0	17.674	-12.4261	-447.809	-31074.3	23051	-1828.49	251.475	972.392	0	0	0	0	0	0	0	603	903	0
512	5	0	0	0	0	0	0	200	300	0	16.911	-10.1373	-443.842	-31165.8	22501.7	-1645.39	250.698	973.218	0	0	0	0	0	0	0	603	903	0
512	6	0	0	0	0	0	0	200	300	0	18.5895	-10.1373	-442.011	-30525	22379.6	-1645.39	250.631	972.059	0	0	0	0	0	0	0	603	903	0
512	7	0	0	0	0	0	0	200	300	0	19.8102	-11.0529	-443.232	-29975.6	22562.8	-1736.94	250.905	970.63	0	0	0	0	0	0	0	603	903	0
512	8	0	0	0	0	0	0	200	300	0	18.4369	-9.98474	-442.316	-30158.8	22623.8	-1462.28	251.148	971.184	0	0	0	0	0	0	0	603	903	0
512	9	0	0	0	0	0	0	200	300	0	17.0636	-9.37439	-442.011	-29884.1	22318.6	-1736.94	250.493	970.609	0	0	0	0	0	0	0	603	903	0
513	0	0	0	0	0	0	0	200	300	0	16.3007	-9.67957	-441.401	-28785.5	22074.5	-1553.83	250.01	968.214	0	0	0	0	0	0	0	603	903	0
513	1	0	0	0	0	0	0	200	300	0	16.911	-8.91663	-438.959	-29151.7	22745.9	-1553.83	251.818	969.411	0	0	0	0	0	0	0	603	903	0
513	2	0	0	0	0	0	0	200	300	0	17.2162	-8.30627	-438.959	-29334.8	22257.6	-1599.61	250.705	969.828	0	0	0	0	0	0	0	603	903	0
513	3	0	0	0	0	0	0	200	300	0	15.6903	-8.0011	-438.654	-27778.4	22196.5	-1691.16	250.601	966.326	0	0	0	0	0	0	0	603	903	0
513	4	0	0	0	0	0	0	200	300	0	15.6903	-8.0011	-439.264	-28053	22562.8	-1599.61	251.365	966.864	0	0	0	0	0	0	0	603	903	0
513	5	0	0	0	0	0	0	200	300	0	17.2162	-9.2218	-436.213	-27320.6	22379.6	-1553.83	251.304	965.631	0	0	0	0	0	0	0	603	903	0
513	6	0	0	0	0	0	0	200	300	0	18.7421	-7.69592	-440.485	-27412.2	22074.5	-1645.39	250.114	965.232	0	0	0	0	0	0	0	603	903	0
513	7	0	0	0	0	0	0	200	300	0	16.911	-7.39075	-437.739	-27320.6	21830.3	-1599.61	249.871	965.413	0	0	0	0	0	0	0	603	903	0
513	8	0	0	0	0	0	0	200	300	0	15.5377	-8.45886	-436.823	-26862.9	22135.5	-1416.5	250.674	964.496	0	0	0	0	0	0	0	603	903	0
513	9	0	0	0	0	0	0	200	300	0	15.6903	-6.7804	-438.044	-26405.1	21891.4	-1599.61	249.975	963.28	0	0	0	0	0	0	0	603	903	0
514	0	0	0	0	0	0	0	200	300	0	16.4532	-5.55969	-437.128	-25764.2	21769.3	-1416.5	249.801	961.94	0	0	0	0	0	0	0	603	903	0
514	1	0	0	0	0	0	0	200	300	0	16.4532	-6.62781	-436.823	-26038.9	21952.4	-1141.85	250.255	962.61	0	0	0	0	0	0	0	603	903	0
514	2	0	0	0	0	0	0	200	300	0	14.9274	-6.7804	-437.433	-25489.6	21952.4	-1416.5	250.185	961.271	0	0	0	0	0	0	0	603	903	0
514	3	0	0	0	0	0	0	200	300	0	14.317	-7.54333	-436.823	-25123.4	21708.3	-1096.07	249.696	960.514	0	0	0	0	0	0	0	603	903	0
514	4	0	0	0	0	0	0	200	300	0	15.5377	-6.32263	-434.382	-24024.7	21769.3	-1233.4	250.116	958.308	0	0	0	0	0	0	0	603	903	0
514	5	0	0	0	0	0	0	200	300	0	15.6903	-5.4071	-434.992	-24665.6	22135.5	-1324.95	250.887	959.704	0	0	0	0	0	0	0	603	903	0
514	6	0	0	0	0	0	0	200	300	0	13.8593	-5.25452	-434.076	-23475.4	21952.4	-1233.4	250.573	957.081	0	0	0	0	0	0	0	603	903	0
514	7	0	0	0	0	0	0	200	300	0	14.317	-5.25452	-435.602	-24848.7	21708.3	-1004.52	249.835	960.044	0	0	0	0	0	0	0	603	903	0
514	8	0	0	0	0	0	0	200	300	0	15.08	-4.94934	-434.687	-22834.5	21830.3	-1324.95	250.221	955.531	0	0	0	0	0	0	0	603	903	0
514	9	0	0	0	0	0	0	200	300	0	14.6222	-5.25452	-435.297	-23383.8	21891.4	-1462.28	250.291	956.719	0	0	0	0	0	0	0	603	903	0
515	0	0	0	0	0	0	0	200	300	0	14.1644	-5.4071	-433.466	-22651.4	21891.4	-1279.18	250.503	955.257	0	0	0	0	0	0	0	603	903	0
515	1	0	0	0	0	0	0	200	300	0	13.8593	-5.25452	-432.551	-22926.1	21647.2	-1324.95	250.046	956.002	0	0	0	0	0	0	0	603	903	0
515	2	0	0	0	0	0	0	200	300	0	14.4696	-4.33899	-431.94	-22102.1	21403.1	-1096.07	249.551	954.169	0	0	0	0	0	0	0	603	903	0
515	3	0	0	0	0	0	0	200	300	0	14.4696	-4.33899	-433.466	-22193.7	21830.3	-1096.07	250.362	954.201	0	0	0	0	0	0	0	603	903	0
515	4	0	0	0	0	0	0	200	300	0	14.0118	-4.33899	-434.992	-22102.1	21586.2	-1050.29	249.624	953.81	0	0	0	0	0	0	0	603	903	0
515	5	0	0	0	0	0	0	200	300	0	13.4015	-4.64417	-433.466	-22010.6	20914.8	-1187.62	248.25	953.778	0	0	0	0	0	0	0	603	903	0
515	6	0	0	0	0	0	0	200	300	0	14.6222	-4.1864	-435.297	-21461.2	21708.3	-1050.29	249.87	952.302	0	0	0	0	0	0	0	603	903	0
515	7	0	0	0	0	0	0	200	300	0	16.7584	-3.88123	-433.466	-21003.5	22013.4	-958.741	250.785	951.455	0	0	0	0	0	0	0	603	903	0
515	8	0	0	0	0	0	0	200	300	0	13.4015	-3.88123	-433.771	-21278.1	21647.2	-1141.85	249.905	952.054	0	0	0	0	0	0	0	603	903	0
515	9	0	0	0	0	0	0	200	300	0	13.2489	-3.42346	-433.466	-20728.8	21525.2	-1416.5	249.658	950.821	0	0	0	0	0	0	0	603	903	0
516	0	0	0	0	0	0	0	200	300	0	13.2489	-4.49158	-434.382	-20271.1	21769.3	-1004.52	250.116	949.667	0	0	0	0	0	0	0	603	903	0
516	1	0	0	0	0	0	0	200	300	0	14.4696	-3.11829	-435.602	-19996.4	21708.3	-912.964	249.835	948.905	0	0	0	0	0	0	0	603	903	0
516	2	0	0	0	0	0	0	200	300	0	14.317	-3.42346	-435.908	-20362.6	21036.9	-1004.52	248.26	949.713	0	0	0	0	0	0	0	603	903	0
516	3	0	0	0	0	0	0	200	300	0	13.8593	-3.42346	-434.687	-19355.5	21708.3	-912.964	249.94	947.528	0	0	0	0	0	0	0	603	903	0
516	4	0	0	0	0	0	0	200	300	0	13.8593	-2.50793	-434.687	-19172.4	21891.4	-1004.52	250.361	947.106	0	0	0	0	0	0	0	603	903	0
516	5	0	0	0	0	0	0	200	300	0	14.4696	-2.66052	-433.161	-19080.9	21342	-958.741	249.27	947.05	0	0	0	0	0	0	0	603	903	0
516	6	0	0	0	0	0	0	200	300	0	14.7748	-1.89758	-434.687	-18714.7	21586.2	-958.741	249.659	946.053	0	0	0	0	0	0	0	603	903	0
516	7	0	0	0	0	0	0	200	300	0	13.5541	-1.28723	-436.518	-18256.9	21708.3	-775.635	249.731	944.824	0	0	0	0	0	0	0	603	903	0
516	8	0	0	0	0	0	0	200	300	0	14.0118	-1.74499	-436.518	-17524.5	21769.3	-546.754	249.87	943.146	0	0	0	0	0	0	0	603	903	0
516	9	0	0	0	0	0	0	200	300	0	15.2325	-2.05017	-437.739	-17066.7	21830.3	-500.977	249.871	941.988	0	0	0	0	0	0	0	603	903	0
517	0	0	0	0	0	0	0	200	300	0	15.2325	-2.66052	-436.518	-17524.5	21952.4	-867.188	250.29	943.146	0	0	0	0	0	0	0	603	903	0
517	1	0	0	0	0	0	0	200	300	0	14.317	-1.43982	-438.044	-18165.3	22074.5	-1096.07	250.393	944.469	0	0	0	0	0	0	0	603	903	0
517	2	0	0	0	0	0	0	200	300	0	13.8593	-0.67688	-438.044	-17249.8	21769.3	-912.964	249.697	942.379	0	0	0	0	0	0	0	603	903	0
517	3	0	0	0	0	0	0	200	300	0	16.4532	-0.524292	-438.654	-16883.6	21830.3	-867.188	249.767	941.49	0	0	0	0	0	0	0	603	903	0
517	4	0	0	0	0	0	0	200	300	0	16.911	-0.0665281	-438.959	-16883.6	21891.4	-912.964	249.871	941.463	0	0	0	0	0	0	0	603	903	0
517	5	0	0	0	0	0	0	200	300	0	13.8593	0.391236	-441.096	-17066.7	21952.4	-912.964	249.768	941.692	0	0	0	0	0	0	0	603	903	0
517	6	0	0	0	0	0	0	200	300	0	14.317	0.238648	-441.401	-16425.8	21830.3	-958.741	249.457	940.213	0	0	0	0	0	0	0	603	903	0
517	7	0	0	0	0	0	0	200	300	0	16.1481	0.848999	-442.621	-16242.7	22196.5	-958.741	250.148	939.697	0	0	0	0	0	0	0	603	903	0
517	8	0	0	0	0	0	0	200	300	0	17.8265	1.00159	-443.537	-15785	22196.5	-958.741	250.044	938.589	0	0	0	0	0	0	0	603	903	0
517	9	0	0	0	0	0	0	200	300	0	14.9274	1.76453	-443.842	-15876.5	21830.3	-912.964	249.185	938.771	0	0	0	0	0	0	0	603	903	0
518	0	0	0	0	0	0	0	200	300	0	16.4532	1.15418	-445.978	-16151.2	21769.3	-775.635	248.812	939.215	0	0	0	0	0	0	0	603	903	0
518	1	0	0	0	0	0	0	200	300	0	15.5377	1.91711	-446.894	-16151.2	22318.6	-684.083	249.942	939.141	0	0	0	0	0	0	0	603	903	0
518	2	0	0	0	0	0	0	200	300	0	15.2325	2.37488	-449.64	-15418.8	22684.8	-455.201	250.451	937.291	0	0	0	0	0	0	0	603	903	0
518	3	0	0	0	0	0	0	200	300	0	16.1481	1.91711	-447.809	-15785	22623.8	-729.859	250.521	938.249	0	0	0	0	0	0	0	603	903	0
518	4	0	0	0	0	0	0	200	300	0	14.4696	1.91711	-449.946	-15876.5	22379.6	-821.412	249.739	938.286	0	0	0	0	0	0	0	603	903	0
518	5	0	0	0	0	0	0	200	300	0	14.0118	2.52747	-451.471	-15052.6	22196.5	-775.635	249.165	936.341	0	0	0	0	0	0	0	603	903	0
518	6	0	0	0	0	0	0	200	300	0	15.9955	3.44299	-451.777	-15052.6	22257.6	-912.964	249.267	936.319	0	0	0	0	0	0	0	603	903	0
518	7	0	0	0	0	0	0	200	300	0	15.8429	1.30676	-454.218	-15052.6	22440.7	-638.306	249.405	936.14	0	0	0	0	0	0	0	603	903	0
518	8	0	0	0	0	0	0	200	300	0	14.1644	3.44299	-456.049	-14228.6	23051	-684.083	250.545	934.2	0	0	0	0	0	0	0	603	903	0
518	9	0	0	0	0	0	0	200	300	0	14.6222	5.27405	-455.439	-12946.8	22806.9	-592.53	250.077	931.427	0	0	0	0	0	0	0	603	903	0
519	0	0	0	0	0	0	0	200	300	0	15.8429	4.05334	-458.491	-14045.5	22440.7	-684.083	248.945	933.634	0	0	0	0	0	0	0	603	903	0
519	1	0	0	0	0	0	0	200	300	0	15.8429	4.51111	-457.575	-13679.3	22623.8	-638.306	249.443	932.895	0	0	0	0	0	0	0	603	903	0
519	2	0	0	0	0	0	0	200	300	0	14.7748	4.35852	-459.406	-14137	22990	-363.648	250.043	933.772	0	0	0	0	0	0	0	603	903	0
519	3	0	0	0	0	0	0	200	300	0	17.2162	5.73181	-460.932	-14045.5	22867.9	-272.095	249.612	933.472	0	0	0	0	0	0	0	603	903	0
519	4	0	0	0	0	0	0	200	300	0	15.8429	4.6637	-462.153	-13953.9	23295.2	-500.977	250.406	933.193	0	0	0	0	0	0	0	603	903	0
519	5	0	0	0	0	0	0	200	300	0	17.9791	6.34216	-464.289	-13587.7	22990	-317.872	249.517	932.266	0	0	0	0	0	0	0	603	903	0
519	6	0	0	0	0	0	0	200	300	0	15.5377	5.8844	-462.153	-13770.8	23112.1	-455.201	250.01	932.797	0	0	0	0	0	0	0	603	903	0
519	7	0	0	0	0	0	0	200	300	0	16.6058	6.49475	-468.561	-14045.5	23051	-409.424	249.195	932.976	0	0	0	0	0	0	0	603	903	0
519	8	0	0	0	0	0	0	200	300	0	16.3007	5.8844	-468.867	-12946.8	23295.2	-363.648	249.684	930.613	0	0	0	0	0	0	0	603	903	0
519	9	0	0	0	0	0	0	200	300	0	18.1317	6.64734	-470.392	-13221.5	23661.4	-317.872	250.301	931.107	0	0	0	0	0	0	0	603	903	0
520	0	0	0	0	0	0	0	200	300	0	15.9955	7.25769	-471.308	-13221.5	23661.4	-409.424	250.204	931.053	0	0	0	0	0	0	0	603	903	0
520	1	0	0	0	0	0	0	200	300	0	16.1481	7.41028	-474.665	-12946.8	23295.2	-455.201	249.077	930.276	0	0	0	0	0	0	0	603	903	0
520	2	0	0	0	0	0	0	200	300	0	14.9274	8.63098	-475.886	-12397.5	23417.2	-272.095	249.208	929.052	0	0	0	0	0	0	0	603	903	0
520	3	0	0	0	0	0	0	200	300	0	15.2325	8.78357	-478.632	-12763.7	23844.5	-455.201	249.818	929.667	0	0	0	0	0	0	0	603	903	0
520	4	0	0	0	0	0	0	200	300	0	15.2325	9.24133	-480.158	-12672.2	24027.6	-226.319	250.041	929.392	0	0	0	0	0	0	0	603	903	0
520	5	0	0	0	0	0	0	200	300	0	14.9274	9.54651	-481.989	-12489.1	23661.4	94.1158	249.091	928.912	0	0	0	0	0	0	0	603	903	0
520	6	0	0	0	0	0	0	200	300	0	14.4696	11.3776	-481.684	-12855.3	23356.2	-226.319	248.489	929.688	0	0	0	0	0	0	0	603	903	0
520	7	0	0	0	0	0	0	200	300	0	15.6903	11.3776	-486.872	-12122.9	23966.6	2.56305	249.226	927.9	0	0	0	0	0	0	0	603	903	0
520	8	0	0	0	0	0	0	200	300	0	15.5377	11.6827	-489.008	-13221.5	24027.6	48.3394	249.135	930.037	0	0	0	0	0	0	0	603	903	0
520	9	0	0	0	0	0	0	200	300	0	15.3851	12.9034	-490.534	-13221.5	23966.6	139.892	248.858	929.953	0	0	0	0	0	0	0	603	903	0
521	0	0	0	0	0	0	0	200	300	0	14.6222	13.3612	-492.975	-12489.1	24576.9	48.3394	249.854	928.334	0	0	0	0	0	0	0	603	903	0
521	1	0	0	0	0	0	0	200	300	0	16.6058	12.2931	-495.417	-12580.6	24576.9	368.774	249.609	928.394	0	0	0	0	0	0	0	603	903	0
521	2	0	0	0	0	0	0	200	300	0	15.9955	15.0397	-496.638	-12672.2	24149.7	185.669	248.626	928.516	0	0	0	0	0	0	0	603	903	0
521	3	0	0	0	0	0	0	200	300	0	15.3851	15.9552	-499.079	-12855.3	24821.1	414.55	249.734	928.758	0	0	0	0	0	0	0	603	903	0
521	4	0	0	0	0	0	0	200	300	0	14.4696	15.3448	-498.774	-12122.9	24943.1	368.774	250.009	927.305	0	0	0	0	0	0	0	603	903	0
521	5	0	0	0	0	0	0	200	300	0	15.2325	17.4811	-504.572	-12214.4	24576.9	689.209	248.708	927.208	0	0	0	0	0	0	0	603	903	0
521	6	0	0	0	0	0	0	200	300	0	15.8429	17.7863	-506.708	-12214.4	24821.1	780.761	248.985	927.105	0	0	0	0	0	0	0	603	903	0
521	7	0	0	0	0	0	0	200	300	0	14.317	16.7181	-511.896	-12672.2	25431.4	643.432	249.681	927.755	0	0	0	0	0	0	0	603	903	0
521	8	0	0	0	0	0	0	200	300	0	16.7584	19.007	-510.37	-12855.3	25248.3	780.761	249.471	928.188	0	0	0	0	0	0	0	603	903	0
521	9	0	0	0	0	0	0	200	300	0	14.4696	20.0751	-513.422	-12580.6	25065.2	551.879	248.82	927.504	0	0	0	0	0	0	0	603	903	0
522	0	0	0	0	0	0	0	200	300	0	15.6903	20.5328	-517.389	-12122.9	25065.2	826.538	248.446	926.431	0	0	0	0	0	0	0	603	903	0
522	1	0	0	0	0	0	0	200	300	0	15.2325	22.0587	-518.61	-12855.3	25492.4	1101.2	249.155	927.788	0	0	0	0	0	0	0	603	903	0
522	2	0	0	0	0	0	0	200	300	0	14.4696	21.7535	-521.967	-12855.3	25248.3	1055.42	248.371	927.629	0	0	0	0	0	0	0	603	903	0
522	3	0	0	0	0	0	0	200	300	0	14.1644	22.6691	-523.798	-12489.1	25126.2	918.091	247.969	926.843	0	0	0	0	0	0	0	603	903	0
522	4	0	0	0	0	0	0	200	300	0	15.6903	22.9742	-525.934	-12763.7	25614.5	1238.52	248.703	927.269	0	0	0	0	0	0	0	603	903	0
522	5	0	0	0	0	0	0	200	300	0	15.3851	24.5001	-527.155	-12489.1	25797.6	1101.2	248.937	926.692	0	0	0	0	0	0	0	603	903	0
522	6	0	0	0	0	0	0	200	300	0	14.317	23.8898	-529.596	-12580.6	26041.8	1146.97	249.173	926.755	0	0	0	0	0	0	0	603	903	0
522	7	0	0	0	0	0	0	200	300	0	16.911	24.9579	-533.564	-13038.4	26224.9	1238.52	249.15	927.436	0	0	0	0	0	0	0	603	903	0
522	8	0	0	0	0	0	0	200	300	0	14.1644	25.4156	-536.005	-12855.3	26224.9	1375.85	248.927	926.984	0	0	0	0	0	0	0	603	903	0
522	9	0	0	0	0	0	0	200	300	0	15.08	24.6527	-538.447	-12489.1	25919.7	1375.85	248.138	926.195	0	0	0	0	0	0	0	603	903	0
523	0	0	0	0	0	0	0	200	300	0	15.08	27.2467	-539.667	-12672.2	26346.9	1330.08	248.821	926.482	0	0	0	0	0	0	0	603	903	0
523	1	0	0	0	0	0	0	200	300	0	14.4696	28.62	-543.024	-12397.5	26591.1	1421.63	248.968	925.831	0	0	0	0	0	0	0	603	903	0
523	2	0	0	0	0	0	0	200	300	0	13.8593	27.8571	-544.855	-12489.1	26774.2	1330.08	249.14	925.922	0	0	0	0	0	0	0	603	903	0
523	3	0	0	0	0	0	0	200	300	0	14.7748	29.5355	-548.823	-12122.9	26285.9	1467.41	247.895	925.089	0	0	0	0	0	0	0	603	903	0
523	4	0	0	0	0	0	0	200	300	0	14.7748	29.5355	-549.128	-12580.6	26469	1421.63	248.202	925.91	0	0	0	0	0	0	0	603	903	0
523	5	0	0	0	0	0	0	200	300	0	13.5541	30.1459	-553.705	-12672.2	26652.1	1375.85	248.134	925.886	0	0	0	0	0	0	0	603	903	0
523	6	0	0	0	0	0	0	200	300	0	15.6903	30.9088	-555.536	-12580.6	27079.4	1421.63	248.745	925.646	0	0	0	0	0	0	0	603	903	0
523	7	0	0	0	0	0	0	200	300	0	14.1644	32.4347	-558.283	-12397.5	26713.1	1787.84	247.849	925.207	0	0	0	0	0	0	0	603	903	0
523	8	0	0	0	0	0	0	200	300	0	14.9274	33.6554	-562.25	-12397.5	26896.2	1833.62	247.837	925.05	0	0	0	0	0	0	0	603	903	0
523	9	0	0	0	0	0	0	200	300	0	14.9274	33.6554	-565.912	-12489.1	27262.5	2108.28	248.174	925.069	0	0	0	0	0	0	0	603	903	0
524	0	0	0	0	0	0	0	200	300	0	13.8593	34.8761	-567.438	-13038.4	27628.7	1970.95	248.69	925.978	0	0	0	0	0	0	0	603	903	0
524	1	0	0	0	0	0	0	200	300	0	14.1644	35.1813	-568.659	-12672.2	27018.3	2245.6	247.512	925.284	0	0	0	0	0	0	0	603	903	0
524	2	0	0	0	0	0	0	200	300	0	14.6222	36.0968	-570.185	-12031.3	27445.6	1833.62	248.135	924.101	0	0	0	0	0	0	0	603	903	0
524	3	0	0	0	0	0	0	200	300	0	15.08	36.402	-573.542	-12306	28117	2337.16	249.023	924.456	0	0	0	0	0	0	0	603	903	0
524	4	0	0	0	0	0	0	200	300	0	14.4696	37.6227	-574.152	-12489.1	27567.6	2154.05	248.015	924.752	0	0	0	0	0	0	0	603	903	0
524	5	0	0	0	0	0	0	200	300	0	16.3007	37.1649	-575.983	-12672.2	27628.7	2062.5	247.968	925.001	0	0	0	0	0	0	0	603	903	0
524	6	0	0	0	0	0	0	200	300	0	15.5377	39.4537	-581.782	-12031.3	28178	2154.05	248.434	923.68	0	0	0	0	0	0	0	603	903	0
524	7	0	0	0	0	0	0	200	300	0	15.8429	39.9115	-583.613	-12580.6	28239	2108.28	248.387	924.557	0	0	0	0	0	0	0	603	903	0
524	8	0	0	0	0	0	0	200	300	0	15.8429	40.5219	-584.223	-12397.5	27750.7	2474.49	247.5	924.221	0	0	0	0	0	0	0	603	903	0
524	9	0	0	0	0	0	0	200	300	0	14.6222	41.2848	-587.275	-12489.1	28055.9	2428.71	247.773	924.266	0	0	0	0	0	0	0	603	903	0
525	0	0	0	0	0	0	0	200	300	0	15.08	43.421	-588.495	-12122.9	28178	2474.49	247.881	923.6	0	0	0	0	0	0	0	603	903	0
525	1	0	0	0	0	0	0	200	300	0	15.9955	42.3529	-590.326	-12489.1	27994.9	2428.71	247.423	924.156	0	0	0	0	0	0	0	603	903	0
525	2	0	0	0	0	0	0	200	300	0	15.9955	44.3365	-594.599	-12306	28361.1	2840.7	247.698	923.696	0	0	0	0	0	0	0	603	903	0
525	3	0	0	0	0	0	0	200	300	0	14.6222	45.0995	-596.735	-11756.7	28788.3	2474.49	248.243	922.702	0	0	0	0	0	0	0	603	903	0
525	4	0	0	0	0	0	0	200	300	0	14.7748	46.3202	-596.735	-12672.2	28910.4	2566.04	248.448	924.236	0	0	0	0	0	0	0	603	903	0
525	5	0	0	0	0	0	0	200	300	0	15.8429	46.4728	-598.261	-11665.1	28605.2	2566.04	247.814	922.498	0	0	0	0	0	0	0	603	903	0
525	6	0	0	0	0	0	0	200	300	0	17.0636	48.7616	-600.702	-11848.2	28605.2	2657.59	247.62	922.724	0	0	0	0	0	0	0	603	903	0
525	7	0	0	0	0	0	0	200	300	0	15.6903	49.6771	-603.754	-12122.9	28544.2	2611.82	247.278	923.079	0	0	0	0	0	0	0	603	903	0
525	8	0	0	0	0	0	0	200	300	0	14.317	49.9823	-605.28	-12031.3	28910.4	2932.25	247.764	922.877	0	0	0	0	0	0	0	603	903	0
525	9	0	0	0	0	0	0	200	300	0	14.7748	50.4401	-607.416	-11390.4	28727.3	2886.47	247.294	921.752	0	0	0	0	0	0	0	603	903	0
526	0	0	0	0	0	0	0	200	300	0	15.5377	49.6771	-610.773	-11665.1	29032.5	3252.69	247.534	922.099	0	0	0	0	0	0	0	603	903	0
526	1	0	0	0	0	0	0	200	300	0	15.3851	52.4237	-609.553	-11573.5	29093.5	3298.46	247.729	921.987	0	0	0	0	0	0	0	603	903	0
526	2	0	0	0	0	0	0	200	300	0	15.08	53.9496	-611.384	-11573.5	29276.6	3344.24	247.886	921.93	0	0	0	0	0	0	0	603	903	0
526	3	0	0	0	0	0	0	200	300	0	15.2325	55.3229	-615.046	-11115.8	28849.4	3206.91	246.906	921.073	0	0	0	0	0	0	0	603	903	0
526	4	0	0	0	0	0	0	200	300	0	15.6903	55.9332	-615.961	-11573.5	29032.5	3206.91	247.134	921.789	0	0	0	0	0	0	0	603	903	0
526	5	0	0	0	0	0	0	200	300	0	15.5377	55.7806	-619.013	-11756.7	29215.6	3206.91	247.197	921.993	0	0	0	0	0	0	0	603	903	0
526	6	0	0	0	0	0	0	200	300	0	15.08	57.0013	-617.792	-11482	29276.6	3573.12	247.389	921.586	0	0	0	0	0	0	0	603	903	0
526	7	0	0	0	0	0	0	200	300	0	14.7748	58.3746	-619.929	-11024.2	29581.8	3435.79	247.718	920.783	0	0	0	0	0	0	0	603	903	0
526	8	0	0	0	0	0	0	200	300	0	15.3851	59.4427	-620.844	-10932.7	29764.9	3298.46	247.943	920.609	0	0	0	0	0	0	0	603	903	0
526	9	0	0	0	0	0	0	200	300	0	15.2325	60.6635	-622.065	-11482	29520.8	3527.34	247.456	921.458	0	0	0	0	0	0	0	603	903	0
527	0	0	0	0	0	0	0	200	300	0	14.317	60.816	-622.98	-11298.9	29459.7	3527.34	247.288	921.137	0	0	0	0	0	0	0	603	903	0
527	1	0	0	0	0	0	0	200	300	0	14.1644	61.7316	-624.506	-10841.1	29764.9	3664.67	247.662	920.36	0	0	0	0	0	0	0	603	903	0
527	2	0	0	0	0	0	0	200	300	0	14.6222	62.7997	-624.201	-10658	29642.8	3710.45	247.489	920.075	0	0	0	0	0	0	0	603	903	0
527	3	0	0	0	0	0	0	200	300	0	15.3851	64.6307	-624.506	-10932.7	29459.7	3618.9	247.173	920.506	0	0	0	0	0	0	0	603	903	0
527	4	0	0	0	0	0	0	200	300	0	12.9437	65.6989	-628.473	-10566.5	29642.8	3847.78	247.166	919.813	0	0	0	0	0	0	0	603	903	0
527	5	0	0	0	0	0	0	200	300	0	13.7067	66.6144	-629.694	-10841.1	30070.1	3985.11	247.753	920.217	0	0	0	0	0	0	0	603	903	0
527	6	0	0	0	0	0	0	200	300	0	14.0118	66.9196	-629.389	-10749.6	29337.7	3985.11	246.613	920.079	0	0	0	0	0	0	0	603	903	0
527	7	0	0	0	0	0	0	200	300	0	14.4696	67.9877	-630.915	-10749.6	29581.8	4168.21	246.887	920.038	0	0	0	0	0	0	0	603	903	0
527	8	0	0	0	0	0	0	200	300	0	13.8593	68.7506	-630.915	-10749.6	30070.1	4213.99	247.661	920.038	0	0	0	0	0	0	0	603	903	0
527	9	0	0	0	0	0	0	200	300	0	14.1644	70.2765	-631.525	-10658	29887	4168.21	247.325	919.877	0	0	0	0	0	0	0	603	903	0
528	0	0	0	0	0	0	0	200	300	0	14.1644	69.9713	-632.136	-10474.9	29398.7	4213.99	246.507	919.571	0	0	0	0	0	0	0	603	903	0
528	1	0	0	0	0	0	0	200	300	0	14.1644	71.8024	-633.967	-10383.4	29642.8	4351.32	246.758	919.378	0	0	0	0	0	0	0	603	903	0
528	2	0	0	0	0	0	0	200	300	0	13.0963	72.2601	-634.882	-10291.8	29887	4625.98	247.075	919.211	0	0	0	0	0	0	0	603	903	0
528	3	0	0	0	0	0	0	200	300	0	12.486	71.4972	-634.272	-10017.2	29887	4259.77	247.12	918.793	0	0	0	0	0	0	0	603	903	0
528	4	0	0	0	0	0	0	200	300	0	13.0963	75.1593	-634.882	-9834.05	29642.8	4580.2	246.69	918.49	0	0	0	0	0	0	0	603	903	0
528	5	0	0	0	0	0	0	200	300	0	12.7911	76.38	-634.882	-9925.6	29581.8	4488.65	246.594	918.634	0	0	0	0	0	0	0	603	903	0
528	6	0	0	0	0	0	0	200	300	0	12.486	74.3964	-632.746	-9284.73	29825.9	4625.98	247.137	917.674	0	0	0	0	0	0	0	603	903	0
528	7	0	0	0	0	0	0	200	300	0	11.2653	78.2111	-636.713	-9742.49	29032.5	4809.08	245.597	918.301	0	0	0	0	0	0	0	603	903	0
528	8	0	0	0	0	0	0	200	300	0	12.486	78.3636	-637.324	-9010.07	29337.7	4809.08	246.033	917.137	0	0	0	0	0	0	0	603	903	0
528	9	0	0	0	0	0	0	200	300	0	12.0282	80.1947	-637.018	-9284.73	29642.8	4763.31	246.534	917.575	0	0	0	0	0	0	0	603	903	0
529	0	0	0	0	0	0	0	200	300	0	11.4178	80.4999	-635.798	-9193.18	29825.9	4946.41	246.911	917.459	0	0	0	0	0	0	0	603	903	0
529	1	0	0	0	0	0	0	200	300	0	10.5023	81.8732	-633.967	-9193.18	29398.7	5083.74	246.373	917.501	0	0	0	0	0	0	0	603	903	0
529	2	0	0	0	0	0	0	200	300	0	11.4178	83.0939	-635.187	-9193.18	29398.7	5129.52	246.284	917.473	0	0	0	0	0	0	0	603	903	0
529	3	0	0	0	0	0	0	200	300	0	11.1127	84.162	-636.713	-9193.18	29215.6	5175.29	245.885	917.438	0	0	0	0	0	0	0	603	903	0
529	4	0	0	0	0	0	0	200	300	0	9.73938	83.7042	-634.272	-9101.62	29764.9	5358.4	246.928	917.35	0	0	0	0	0	0	0	603	903	0
529	5	0	0	0	0	0	0	200	300	0	10.0446	85.0775	-635.492	-9193.18	29398.7	5358.4	246.261	917.466	0	0	0	0	0	0	0	603	903	0
529	6	0	0	0	0	0	0	200	300	0	10.1971	85.3827	-633.661	-8735.41	29520.8	5404.18	246.588	916.786	0	0	0	0	0	0	0	603	903	0
529	7	0	0	0	0	0	0	200	300	0	10.0446	86.9086	-635.187	-8460.75	29520.8	5678.83	246.476	916.32	0	0	0	0	0	0	0	603	903	0
529	8	0	0	0	0	0	0	200	300	0	9.12903	88.7396	-633.356	-8643.86	29215.6	5495.73	246.128	916.648	0	0	0	0	0	0	0	603	903	0
529	9	0	0	0	0	0	0	200	300	0	8.82385	89.35	-634.272	-8277.65	29032.5	5633.06	245.773	916.051	0	0	0	0	0	0	0	603	903	0
530	0	0	0	0	0	0	0	200	300	0	7.29797	90.4181	-633.356	-7911.44	29337.7	5724.61	246.321	915.491	0	0	0	0	0	0	0	603	903	0
530	1	0	0	0	0	0	0	200	300	0	9.12903	90.4181	-634.882	-8094.54	29154.5	5861.94	245.921	915.75	0	0	0	0	0	0	0	603	903	0
530	2	0	0	0	0	0	0	200	300	0	8.67126	91.6388	-632.136	-8094.54	28300.1	5449.95	244.769	915.805	0	0	0	0	0	0	0	603	903	0
530	3	0	0	0	0	0	0	200	300	0	6.9928	91.944	-630.915	-8094.54	29093.5	5678.83	246.113	915.83	0	0	0	0	0	0	0	603	903	0
530	4	0	0	0	0	0	0	200	300	0	6.38245	94.2328	-629.999	-7636.78	29093.5	5861.94	246.18	915.122	0	0	0	0	0	0	0	603	903	0
530	5	0	0	0	0	0	0	200	300	0	8.06091	94.6906	-631.525	-8002.99	28666.3	6136.6	245.392	915.673	0	0	0	0	0	0	0	603	903	0
530	6	0	0	0	0	0	0	200	300	0	7.29797	95.3009	-631.83	-7819.89	28788.3	5953.49	245.563	915.377	0	0	0	0	0	0	0	603	903	0
530	7	0	0	0	0	0	0	200	300	0	6.22986	94.6906	-629.694	-8002.99	28849.4	6045.04	245.815	915.709	0	0	0	0	0	0	0	603	903	0
530	8	0	0	0	0	0	0	200	300	0	6.22986	96.5216	-628.168	-7728.33	29093.5	5861.94	246.315	915.303	0	0	0	0	0	0	0	603	903	0
530	9	0	0	0	0	0	0	200	300	0	7.14539	97.132	-626.642	-6904.36	28544.2	5907.72	245.551	914.018	0	0	0	0	0	0	0	603	903	0
531	0	0	0	0	0	0	0	200	300	0	5.7721	98.8104	-626.642	-7087.47	28544.2	6045.04	245.551	914.31	0	0	0	0	0	0	0	603	903	0
531	1	0	0	0	0	0	0	200	300	0	5.16174	99.1156	-623.896	-6904.36	28666.3	6090.82	245.947	914.067	0	0	0	0	0	0	0	603	903	0
531	2	0	0	0	0	0	0	200	300	0	6.68762	100.794	-624.811	-7179.02	28178	6045.04	245.098	914.49	0	0	0	0	0	0	0	603	903	0
531	3	0	0	0	0	0	0	200	300	0	4.70398	100.947	-624.506	-6263.49	28300.1	6365.48	245.316	913.03	0	0	0	0	0	0	0	603	903	0
531	4	0	0	0	0	0	0	200	300	0	8.06091	100.336	-622.37	-6538.15	28483.2	6136.6	245.766	913.505	0	0	0	0	0	0	0	603	903	0
531	5	0	0	0	0	0	0	200	300	0	3.94104	102.93	-620.539	-6538.15	28239	6136.6	245.507	913.536	0	0	0	0	0	0	0	603	903	0
531	6	0	0	0	0	0	0	200	300	0	5.61951	103.693	-619.013	-6355.04	27750.7	6365.48	244.831	913.266	0	0	0	0	0	0	0	603	903	0
531	7	0	0	0	0	0	0	200	300	0	4.55139	103.235	-616.877	-6080.39	27689.7	6273.93	244.887	912.857	0	0	0	0	0	0	0	603	903	0
531	8	0	0	0	0	0	0	200	300	0	5.92468	104.456	-617.487	-6538.15	27201.4	6365.48	244.052	913.588	0	0	0	0	0	0	0	603	903	0
531	9	0	0	0	0	0	0	200	300	0	4.3988	104.609	-615.961	-6080.39	27567.6	6228.15	244.755	912.871	0	0	0	0	0	0	0	603	903	0
532	0	0	0	0	0	0	0	200	300	0	4.09363	105.219	-613.825	-5988.83	27506.6	6319.7	244.812	912.757	0	0	0	0	0	0	0	603	903	0
532	1	0	0	0	0	0	0	200	300	0	3.02551	105.372	-610.468	-5988.83	27506.6	6045.04	245.058	912.81	0	0	0	0	0	0	0	603	903	0
532	2	0	0	0	0	0	0	200	300	0	3.78845	105.982	-606.501	-5531.07	27628.7	5999.27	245.554	912.12	0	0	0	0	0	0	0	603	903	0
532	3	0	0	0	0	0	0	200	300	0	3.78845	108.423	-607.416	-5714.17	27201.4	6273.93	244.782	912.407	0	0	0	0	0	0	0	603	903	0
532	4	0	0	0	0	0	0	200	300	0	2.26257	109.186	-606.501	-5531.07	27201.4	6182.37	244.85	912.12	0	0	0	0	0	0	0	603	903	0
532	5	0	0	0	0	0	0	200	300	0	2.26257	109.644	-605.89	-5622.62	26774.2	6182.37	244.19	912.28	0	0	0	0	0	0	0	603	903	0
532	6	0	0	0	0	0	0	200	300	0	3.1781	109.949	-603.449	-4523.99	27140.4	6090.82	244.975	910.497	0	0	0	0	0	0	0	603	903	0
532	7	0	0	0	0	0	0	200	300	0	5.61951	110.407	-600.092	-4981.75	26713.1	6182.37	244.515	911.302	0	0	0	0	0	0	0	603	903	0
532	8	0	0	0	0	0	0	200	300	0	2.10999	111.017	-597.956	-5256.41	27018.3	6273.93	245.184	911.791	0	0	0	0	0	0	0	603	903	0
532	9	0	0	0	0	0	0	200	300	0	1.9574	112.086	-596.125	-5164.86	26896.2	6365.48	245.118	911.664	0	0	0	0	0	0	0	603	903	0
533	0	0	0	0	0	0	0	200	300	0	1.49963	111.17	-589.106	-4798.65	26469	6228.15	244.931	911.146	0	0	0	0	0	0	0	603	903	0
533	1	0	0	0	0	0	0	200	300	0	3.02551	113.306	-591.547	-5073.31	26102.8	6502.81	244.126	911.576	0	0	0	0	0	0	0	603	903	0
533	2	0	0	0	0	0	0	200	300	0	2.87293	113.764	-589.716	-4432.43	26469	6365.48	244.884	910.516	0	0	0	0	0	0	0	603	903	0
533	3	0	0	0	0	0	0	200	300	0	2.26257	114.374	-586.97	-3883.12	26346.9	6594.36	244.886	909.616	0	0	0	0	0	0	0	603	903	0
533	4	0	0	0	0	0	0	200	300	0	1.80481	114.374	-582.697	-4432.43	25858.7	6090.82	244.378	910.607	0	0	0	0	0	0	0	603	903	0
533	5	0	0	0	0	0	0	200	300	0	3.1781	115.29	-581.476	-4340.88	26285.9	6319.7	245.205	910.465	0	0	0	0	0	0	0	603	903	0
533	6	0	0	0	0	0	0	200	300	0	3.78845	114.832	-577.509	-4066.22	25980.7	6365.48	244.988	910.041	0	0	0	0	0	0	0	603	903	0
533	7	0	0	0	0	0	0	200	300	0	2.26257	116.663	-576.899	-4798.65	25431.4	6136.6	244.083	911.318	0	0	0	0	0	0	0	603	903	0
533	8	0	0	0	0	0	0	200	300	0	2.10999	116.663	-573.542	-3974.67	25614.5	6045.04	244.66	909.93	0	0	0	0	0	0	0	603	903	0
533	9	0	0	0	0	0	0	200	300	0	1.04187	117.121	-571.1	-3883.12	25858.7	6045.04	245.279	909.799	0	0	0	0	0	0	0	603	903	0
534	0	0	0	0	0	0	0	200	300	0	2.56775	118.342	-566.218	-3516.91	25065.2	6045.04	244.268	909.211	0	0	0	0	0	0	0	603	903	0
534	1	0	0	0	0	0	0	200	300	0	1.49963	118.799	-561.335	-3608.46	25004.2	5861.94	244.544	909.428	0	0	0	0	0	0	0	603	903	0
534	2	0	0	0	0	0	0	200	300	0	0.584107	119.41	-560.419	-3333.8	24821.1	6090.82	244.29	908.949	0	0	0	0	0	0	0	603	903	0
534	3	0	0	0	0	0	0	200	300	0	0.278931	119.868	-558.893	-3333.8	25004.2	5999.27	244.739	908.965	0	0	0	0	0	0	0	603	903	0
534	4	-2.31704	4.22947	-38.3924	-2744.75	-520.762	-69.7623	186.436	371.492	0	1.34705	120.173	-554.926	-3059.14	24637.9	5816.16	244.399	908.513	0	0	0	0	0	0	0	603	903	0
534	5	-7.81021	9.87522	-74.098	-5033.57	-1375.25	204.896	181.44	367.931	0	0.889283	120.173	-552.79	-3150.7	24515.9	5907.72	244.349	908.7	0	0	0	0	0	0	0	603	903	0
534	6	-17.881	19.4883	-77.4549	-4484.26	-2412.85	113.343	168.848	357.895	0	0.126343	121.393	-548.212	-3608.46	24149.7	5907.72	244.052	909.582	0	0	0	0	0	0	0	603	903	0
534	7	-16.9655	26.3547	-57.0081	-4026.49	-2412.85	-390.197	157.675	370.63	0	-0.636596	120.478	-545.466	-3059.14	23905.5	5953.49	243.826	908.608	0	0	0	0	0	0	0	603	903	0
534	8	-1.5541	26.3547	-47.5477	-5399.78	-1558.36	-1534.61	167.225	413.566	0	0.889283	121.699	-543.024	-2326.72	24027.6	6090.82	244.248	907.285	0	0	0	0	0	0	0	603	903	0
534	9	12.3314	25.2866	-75.929	-4850.47	-1558.36	-939.513	179.476	363.882	0	0.889283	121.241	-539.362	-3242.25	24210.7	5953.49	244.888	909.011	0	0	0	0	0	0	0	603	903	0
535	0	4.54941	24.9814	-112.245	-5582.89	-1436.29	-298.644	187.204	349.738	0	-0.178833	123.224	-533.259	-2967.59	23966.6	5907.72	244.944	908.565	0	0	0	0	0	0	0	603	903	0
535	1	-7.35244	25.897	-123.842	-7230.84	-3511.49	-756.408	171.645	358.388	0	-0.636596	122.004	-530.817	-2876.04	23966.6	5587.28	245.15	908.418	0	0	0	0	0	0	0	603	903	0
535	2	-16.3551	34.5945	-125.062	-9611.21	-4243.91	-939.513	166.066	376.851	0	0.278931	121.546	-528.986	-2509.83	23417.2	5633.06	244.268	907.745	0	0	0	0	0	0	0	603	903	0
535	3	-17.4232	39.6299	-139.711	-10618.3	-3816.66	-527.526	172.682	376.002	0	0.889283	122.767	-524.409	-2235.17	22929	5495.73	243.723	907.262	0	0	0	0	0	0	0	603	903	0
535	4	-3.84292	28.4909	-165.956	-10252.1	-3084.24	-710.631	181.415	361.776	0	-0.0262447	124.598	-518	-2509.83	23539.3	5541.5	245.443	907.845	0	0	0	0	0	0	0	603	903	0
535	5	7.14341	16.8943	-183.351	-10893	-3084.24	-847.961	183.178	359.41	0	0.126343	122.462	-512.201	-2418.28	23234.1	5770.39	245.361	907.721	0	0	0	0	0	0	0	603	903	0
535	6	5.46494	22.0823	-186.097	-11991.6	-3328.38	-802.184	182.115	364.437	0	-1.09436	122.767	-511.591	-2235.17	22562.8	5587.28	244.103	907.369	0	0	0	0	0	0	0	603	903	0
535	7	-1.70669	25.5918	-192.811	-14097.3	-3755.63	-1397.28	180.522	373.114	0	-0.941772	122.767	-508.234	-1685.85	22684.8	5541.5	244.635	906.317	0	0	0	0	0	0	0	603	903	0
535	8	-5.67397	19.7934	-209.901	-14555.1	-4427.01	-1305.72	178.909	369.342	0	-0.484008	122.919	-502.436	-2235.17	22684.8	5587.28	245.15	907.449	0	0	0	0	0	0	0	603	903	0
535	9	-2.31704	14.758	-221.498	-14372	-3694.59	-619.079	183.32	364.885	0	-0.789184	123.224	-495.417	-1960.51	21952.4	5495.73	244.311	906.957	0	0	0	0	0	0	0	603	903	0
536	0	9.88999	12.927	-231.569	-14372	-3206.31	-1168.4	186.154	362.064	0	-2.16248	123.224	-492.67	-2235.17	21830.3	5770.39	244.31	907.537	0	0	0	0	0	0	0	603	903	0
536	1	18.2823	9.26487	-237.367	-15012.8	-2962.17	-1946.59	187.521	363.247	0	-1.8573	121.851	-489.618	-1502.75	22074.5	5770.39	245.085	906.069	0	0	0	0	0	0	0	603	903	0
536	2	12.484	3.61912	-247.743	-15287.5	-3389.42	-1580.38	186.319	361.707	0	-0.484008	122.919	-484.125	-1594.3	22013.4	5449.95	245.471	906.293	0	0	0	0	0	0	0	603	903	0
536	3	6.22788	-0.0429889	-262.391	-15836.8	-3389.42	-1534.61	187.083	360.356	0	-1.09436	121.851	-475.58	-2052.06	21220	5221.07	244.619	907.315	0	0	0	0	0	0	0	603	903	0
536	4	13.7047	-4.16286	-265.443	-16569.2	-3755.63	-2312.8	185.852	362.421	0	-2.92541	120.783	-473.444	-1685.85	21342	5221.07	245.078	906.561	0	0	0	0	0	0	0	603	903	0
536	5	26.3695	-9.35085	-271.547	-16477.7	-2595.96	-2267.03	190.44	360.681	0	-2.77283	120.783	-467.646	-1411.19	21220	5266.85	245.376	906.018	0	0	0	0	0	0	0	603	903	0
536	6	30.9471	-17.8958	-277.65	-16203	-1863.54	-1580.38	193.288	358.358	0	0.736695	119.562	-460.627	-1228.09	20853.8	5129.52	245.273	905.666	0	0	0	0	0	0	0	603	903	0
536	7	32.0152	-24.4571	-289.552	-17210.1	-1680.43	-2450.13	194.196	359.437	0	-1.8573	120.63	-454.523	-1411.19	20975.8	5312.62	246.149	906.105	0	0	0	0	0	0	0	603	903	0
536	8	29.2687	-25.3726	-297.487	-17210.1	-2229.75	-2679.02	192.505	357.852	0	-3.078	120.783	-449.03	-1044.98	20182.4	5129.52	244.947	905.327	0	0	0	0	0	0	0	603	903	0
536	9	30.7945	-27.051	-298.402	-17759.4	-1924.57	-2358.58	193.55	359.515	0	-3.99353	120.02	-441.401	-953.431	19938.2	4625.98	245.17	905.16	0	0	0	0	0	0	0	603	903	0
537	0	33.9989	-34.833	-304.811	-17942.5	-1863.54	-2495.91	193.886	358.864	0	-2.92541	118.647	-438.959	-495.667	19999.3	4854.86	245.561	904.129	0	0	0	0	0	0	0	603	903	0
537	1	42.2386	-40.4788	-312.745	-17027	-1558.36	-2633.24	195.017	354.444	0	-2.16248	118.952	-431.33	-1044.98	18900.6	5083.74	243.819	905.423	0	0	0	0	0	0	0	603	903	0
537	2	44.2223	-42.3098	-323.732	-16843.9	-1131.11	-2221.25	196.506	352.03	0	-3.38318	117.121	-423.09	-861.878	19144.8	4763.31	245.25	905.037	0	0	0	0	0	0	0	603	903	0
537	3	43.3067	-44.5987	-324.037	-17484.7	-1436.29	-2450.13	195.568	353.959	0	-3.53577	116.816	-417.292	-587.22	19144.8	4900.63	245.879	904.407	0	0	0	0	0	0	0	603	903	0
537	4	40.8653	-48.7185	-331.666	-17851	-1924.57	-2633.24	194.197	353.822	0	-2.46765	116.358	-413.019	-129.456	18900.6	4900.63	245.762	903.313	0	0	0	0	0	0	0	603	903	0
537	5	41.7809	-49.1763	-338.991	-17759.4	-1619.4	-2221.25	195.223	352.389	0	-2.16248	113.764	-400.202	-1044.98	18534.4	4671.75	246.313	905.611	0	0	0	0	0	0	0	603	903	0
537	6	47.8844	-51.4651	-346.315	-18217.2	-1131.11	-2083.92	196.734	352.603	0	-3.68835	112.696	-398.676	-770.326	18595.5	4671.75	246.643	904.932	0	0	0	0	0	0	0	603	903	0
537	7	52.0042	-54.3643	-353.944	-17851	-1497.32	-2221.25	195.77	350.434	0	-3.38318	111.323	-391.352	-129.456	18717.5	4854.86	247.828	903.331	0	0	0	0	0	0	0	603	903	0
537	8	50.4784	-55.2798	-355.165	-18766.5	-1497.32	-2083.92	195.784	352.839	0	-2.92541	111.475	-384.028	-221.009	17924.1	4534.42	246.674	903.576	0	0	0	0	0	0	0	603	903	0
537	9	48.7999	-54.9746	-375.612	-18858	-1802.5	-1534.61	195.201	350.206	0	-2.92541	107.813	-375.788	328.307	17557.9	4213.99	246.723	902.126	0	0	0	0	0	0	0	603	903	0
538	0	50.7835	-56.6531	-386.598	-19041.1	-1924.57	-1992.37	195.022	349.253	0	-4.29871	108.423	-369.99	694.518	17618.9	4442.87	247.62	901.123	0	0	0	0	0	0	0	603	903	0
538	1	52.3094	-60.6204	-398.805	-19041.1	-1741.47	-1580.38	195.633	347.746	0	-4.45129	106.287	-360.224	145.202	17191.7	4030.88	247.725	902.597	0	0	0	0	0	0	0	603	903	0
538	2	53.8353	-63.8247	-410.707	-18034.1	-2046.64	-1031.07	195.017	343.91	0	-1.70471	103.388	-355.036	694.518	16764.4	3847.78	247.219	901.044	0	0	0	0	0	0	0	603	903	0
538	3	53.8353	-64.8928	-422.609	-19407.4	-2107.68	-1397.28	195.013	345.923	0	-3.38318	102.93	-347.407	969.177	16459.2	3893.55	247.377	900.21	0	0	0	0	0	0	0	603	903	0
538	4	50.9361	-64.8928	-434.816	-19956.7	-2351.82	-1397.28	194.591	345.897	0	-3.38318	102.778	-339.777	602.966	16459.2	4030.88	248.441	901.225	0	0	0	0	0	0	0	603	903	0
538	5	49.5628	-67.3343	-446.412	-20139.8	-2534.92	-619.079	194.322	345.115	0	-5.51941	101.71	-331.843	694.518	15665.8	3664.67	247.208	900.907	0	0	0	0	0	0	0	603	903	0
538	6	51.6991	-70.5386	-453.126	-18583.4	-3084.24	-481.75	193.193	341.012	0	-5.51941	99.5734	-325.129	969.177	14933.4	3802	245.931	900.019	0	0	0	0	0	0	0	603	903	0
538	7	55.3612	-72.3697	-467.164	-19865.1	-3023.2	-664.855	193.529	342.523	0	-4.60388	96.8268	-315.668	1060.73	15421.6	3664.67	248.854	899.64	0	0	0	0	0	0	0	603	903	0
538	8	54.5982	-74.3533	-479.371	-19773.6	-2412.85	-161.315	194.967	341.249	0	-4.60388	94.8431	-308.039	877.624	15116.5	3939.33	249.073	900.151	0	0	0	0	0	0	0	603	903	0
538	9	53.225	-79.3887	-489.442	-19498.9	-3572.52	-390.197	192.701	339.839	0	-5.82458	94.0802	-301.02	786.071	14567.1	3435.79	248.393	900.389	0	0	0	0	0	0	0	603	903	0
539	0	51.5465	-82.4405	-498.292	-20048.2	-3511.49	-298.644	192.953	340.234	0	-6.58752	90.2655	-292.78	969.177	14262	3573.12	248.712	899.69	0	0	0	0	0	0	0	603	903	0
539	1	52.7672	-83.5086	-503.48	-19773.6	-3877.7	67.5668	192.298	339.274	0	-5.36682	89.9603	-284.54	1976.26	14384	3618.9	250.552	896.055	0	0	0	0	0	0	0	603	903	0
539	2	55.3612	-88.0862	-511.72	-19498.9	-3755.63	113.343	192.661	338.105	0	-6.12976	88.1293	-277.521	1793.15	13712.7	3115.36	249.411	896.539	0	0	0	0	0	0	0	603	903	0
539	3	56.5819	-91.5957	-520.265	-19865.1	-3389.42	204.896	193.485	338.183	0	-7.04529	86.1456	-271.113	1884.7	13346.4	3161.13	249.228	896.048	0	0	0	0	0	0	0	603	903	0
539	4	53.5301	-91.5957	-524.232	-20231.3	-3816.66	204.896	192.72	338.592	0	-5.97717	82.3309	-262.873	1610.05	12919.2	3023.8	249.146	896.875	0	0	0	0	0	0	0	603	903	0
539	5	51.8517	-92.0535	-532.777	-20048.2	-3938.73	250.672	192.607	337.63	0	-5.36682	79.7369	-254.633	2342.47	12614	2932.25	249.538	893.801	0	0	0	0	0	0	0	603	903	0
539	6	51.0887	-96.6311	-536.134	-20048.2	-4488.05	113.343	191.629	337.394	0	-6.58752	78.3636	-247.004	2250.91	12369.9	2840.7	250.08	893.887	0	0	0	0	0	0	0	603	903	0
539	7	50.7835	-96.326	-540.712	-18858	-4060.8	342.225	192.49	334.876	0	-7.35046	75.7697	-239.374	2342.47	11759.5	2657.59	249.126	893.214	0	0	0	0	0	0	0	603	903	0
539	8	50.4784	-95.8682	-545.595	-18491.8	-4182.87	433.778	192.333	333.893	0	-6.58752	72.8705	-232.355	1884.7	11393.3	2428.71	249.034	894.889	0	0	0	0	0	0	0	603	903	0
539	9	49.2577	-97.5467	-550.783	-17851	-4793.22	571.107	191.297	332.41	0	-6.43494	69.6661	-223.2	2250.91	11454.4	2474.49	251.319	892.915	0	0	0	0	0	0	0	603	903	0
540	0	44.3749	-98.0044	-554.139	-18308.7	-5098.4	250.672	190.799	333.04	0	-6.58752	68.2928	-217.707	2250.91	11027.1	2566.04	250.651	892.661	0	0	0	0	0	0	0	603	903	0
540	1	43.0016	-97.5467	-556.276	-18308.7	-4976.33	433.778	191.054	332.913	0	-7.04529	65.5463	-209.772	1976.26	10721.9	2337.16	251.112	893.579	0	0	0	0	0	0	0	603	903	0
540	2	41.6283	-97.3941	-559.022	-18400.3	-5342.54	433.778	190.443	332.915	0	-5.36682	64.3256	-200.922	2159.36	10538.8	2062.5	252.452	892.253	0	0	0	0	0	0	0	603	903	0
540	3	39.492	-96.6311	-562.684	-18308.7	-5708.75	388.001	189.854	332.538	0	-8.1134	61.4264	-196.65	2525.57	10294.7	2016.72	252.35	890.157	0	0	0	0	0	0	0	603	903	0
540	4	37.3558	-96.6311	-564.515	-18583.4	-5891.86	479.554	189.563	332.919	0	-5.97717	58.5272	-191.462	1976.26	9806.4	1925.17	251.219	892.678	0	0	0	0	0	0	0	603	903	0
540	5	34.1515	-95.8682	-567.262	-17759.4	-6258.07	433.778	188.968	331.307	0	-6.58752	53.4918	-182.306	2342.47	9318.12	1558.96	251.112	890.151	0	0	0	0	0	0	0	603	903	0
540	6	32.0152	-93.4268	-565.431	-17576.3	-6197.03	250.672	189.04	331.085	0	-8.1134	49.5245	-178.95	2525.57	9318.12	1833.62	252.071	888.887	0	0	0	0	0	0	0	603	903	0
540	7	29.7264	-93.8845	-568.788	-17210.1	-6197.03	388.001	189.105	330.258	0	-6.28235	48.1512	-169.184	3166.44	9012.95	1696.29	253.273	884.284	0	0	0	0	0	0	0	603	903	0
540	8	28.0479	-94.6475	-567.567	-16660.8	-6746.35	479.554	188.114	329.355	0	-6.28235	45.2521	-162.775	2891.78	8585.7	1284.3	252.746	885.235	0	0	0	0	0	0	0	603	903	0
540	9	24.3858	-94.8001	-569.703	-15379	-6929.45	250.672	187.837	326.995	0	-7.04529	44.4891	-157.892	3074.89	8158.45	1375.85	251.671	883.525	0	0	0	0	0	0	0	603	903	0
541	0	19.8082	-93.4268	-568.483	-16294.6	-6929.45	159.12	187.811	328.663	0	-7.65564	43.421	-150.873	2708.68	8036.38	1742.07	253.266	885.047	0	0	0	0	0	0	0	603	903	0
541	1	17.2142	-95.1052	-567.567	-15928.4	-7173.59	708.436	187.361	328.064	0	-7.19788	42.0477	-146.296	2983.34	7242.92	1284.3	249.509	882.608	0	0	0	0	0	0	0	603	903	0
541	2	14.9254	-95.1052	-567.262	-16019.9	-7600.84	296.449	186.601	328.241	0	-5.82458	38.996	-140.497	2891.78	6937.75	1009.64	249.38	882.418	0	0	0	0	0	0	0	603	903	0
541	3	14.4676	-94.6475	-566.346	-15836.8	-7906.02	296.449	186.04	327.963	0	-6.12976	38.3856	-135.309	2891.78	6937.75	1192.75	251.273	881.628	0	0	0	0	0	0	0	603	903	0
541	4	11.2633	-93.5794	-569.398	-14738.2	-7844.98	571.107	186.222	325.884	0	-6.28235	34.1132	-130.121	2525.57	6937.75	734.985	253.318	883.591	0	0	0	0	0	0	0	603	903	0
541	5	7.75376	-95.4104	-567.567	-15287.5	-8028.09	296.449	185.855	326.935	0	-6.58752	31.5192	-126.154	2525.57	6754.64	734.985	253.543	882.98	0	0	0	0	0	0	0	603	903	0
541	6	4.24424	-95.4104	-564.821	-15195.9	-8272.23	754.213	185.354	326.904	0	-5.672	27.5519	-120.966	3074.89	6388.43	506.103	252.812	877.581	0	0	0	0	0	0	0	603	903	0
541	7	4.24424	-96.1734	-564.21	-15379	-8455.34	708.436	185.014	327.258	0	-5.672	25.5682	-116.694	2525.57	6205.33	322.998	253.176	881.357	0	0	0	0	0	0	0	603	903	0
541	8	3.4813	-95.2578	-565.736	-14005.7	-8577.41	708.436	184.839	324.757	0	-6.28235	22.2113	-110.895	2434.02	6144.29	185.669	255.406	881.051	0	0	0	0	0	0	0	603	903	0
541	9	1.03989	-96.326	-559.633	-14005.7	-8211.2	571.107	185.328	325.027	0	-5.97717	20.6854	-107.538	2800.23	6022.22	551.879	256.001	876.961	0	0	0	0	0	0	0	603	903	0
542	0	-2.16445	-96.1734	-565.126	-13364.9	-8455.34	708.436	185.038	323.649	0	-4.90906	20.3802	-102.656	2525.57	5411.87	277.221	252.719	878.398	0	0	0	0	0	0	0	603	903	0
542	1	-1.85928	-96.0208	-562.074	-13456.4	-8943.62	799.989	184.088	323.941	0	-4.29871	21.601	-97.4676	2434.02	5228.76	368.774	253.646	878.027	0	0	0	0	0	0	0	603	903	0
542	2	-3.84292	-96.9363	-561.769	-13181.8	-9126.72	616.883	183.754	323.465	0	-5.06165	20.5328	-93.5003	2525.57	5106.69	368.774	254.617	875.989	0	0	0	0	0	0	0	603	903	0
542	3	-3.99551	-96.9363	-562.074	-13181.8	-8882.58	754.213	184.197	323.452	0	-4.14612	21.601	-89.533	2434.02	4862.55	94.1158	254.31	875.814	0	0	0	0	0	0	0	603	903	0
542	4	-4.75845	-96.6311	-561.769	-13364.9	-9065.69	1166.2	183.862	323.791	0	-3.23059	21.601	-84.6502	2617.13	4130.13	2.56305	248.791	872.083	0	0	0	0	0	0	0	603	903	0
542	5	-7.65762	-96.6311	-562.074	-12998.7	-9431.9	1211.98	183.219	323.126	0	-2.46765	20.5328	-80.9881	2434.02	4984.62	185.669	261.548	872.946	0	0	0	0	0	0	0	603	903	0
542	6	-8.57314	-97.0889	-560.548	-12907.1	-9309.83	1120.42	183.392	323.026	0	-3.38318	17.9388	-77.0208	2067.81	4496.34	414.55	258.378	876.153	0	0	0	0	0	0	0	603	903	0
542	7	-9.03091	-96.9363	-561.159	-12174.7	-9553.97	1257.75	182.975	321.696	0	-1.09436	16.413	-74.2742	1793.15	4069.1	-43.2133	254.785	878.858	0	0	0	0	0	0	0	603	903	0
542	8	-9.03091	-96.1734	-563.905	-12083.1	-9737.07	1761.29	182.733	321.428	0	-3.23059	16.2604	-71.8328	1976.26	3763.92	94.1158	252.398	875.488	0	0	0	0	0	0	0	603	903	0
542	9	-10.5568	-96.7837	-564.21	-11900	-9859.14	1486.63	182.526	321.091	0	-0.636596	14.7345	-67.8655	2250.91	4191.17	48.3394	261.757	869.833	0	0	0	0	0	0	0	603	903	0
543	0	-10.2516	-97.6992	-562.379	-11533.8	-10042.2	1623.96	182.143	320.509	0	-2.62024	12.2931	-64.2034	1610.05	4008.06	-180.542	262.428	877.923	0	0	0	0	0	0	0	603	903	0
543	1	-11.1671	-97.6992	-563.295	-10618.3	-10103.3	2081.73	182.064	318.85	0	-4.45129	10.462	-60.8465	1243.83	4008.06	48.3394	265.872	882.558	0	0	0	0	0	0	0	603	903	0
543	2	-10.7094	-97.2415	-565.126	-11350.7	-10103.3	1807.07	182.122	320.085	0	-2.62024	9.39392	-60.2361	2250.91	3153.57	-226.319	252.353	865.632	0	0	0	0	0	0	0	603	903	0
543	3	-9.94644	-97.3941	-568.788	-11350.7	-9981.21	2310.61	182.452	319.956	0	-1.55212	7.56287	-56.8792	1793.15	3214.6	-409.424	256.516	871.474	0	0	0	0	0	0	0	603	903	0
543	4	-9.1835	-98.4622	-571.534	-11167.6	-10408.5	2264.83	181.789	319.54	0	-2.77283	7.71545	-55.0482	2342.47	3153.57	-180.542	257.287	860.447	0	0	0	0	0	0	0	603	903	0
543	5	-7.19985	-98.3096	-577.333	-10526.7	-11018.8	2402.16	180.914	318.233	0	-3.23059	7.56287	-52.3016	1793.15	2787.36	-180.542	253.294	868.715	0	0	0	0	0	0	0	603	903	0
543	6	-10.099	-97.5467	-582.216	-9428.11	-11201.9	2722.6	180.76	316.193	0	-2.16248	7.1051	-49.2498	1793.15	2543.22	-455.201	251.639	866.591	0	0	0	0	0	0	0	603	903	0
543	7	-13.6085	-101.056	-582.826	-9611.21	-11018.8	2722.6	181.094	316.491	0	-1.24695	7.71545	-45.2825	1884.7	2482.18	-592.53	254.815	861.379	0	0	0	0	0	0	0	603	903	0
543	8	-15.4396	-101.514	-583.131	-9428.11	-11446.1	2264.83	180.371	316.168	0	-2.31506	7.56287	-44.0618	1152.28	2543.22	-363.648	257.719	876.849	0	0	0	0	0	0	0	603	903	0
543	9	-15.7448	-99.9881	-586.183	-9336.55	-11934.3	2447.94	179.641	315.928	0	-3.68835	6.95251	-41.3152	1426.94	2054.94	-455.201	249.738	868.462	0	0	0	0	0	0	0	603	903	0
544	0	-17.1181	-100.141	-593.202	-8512.58	-11263	2859.93	181.013	314.35	0	-1.39954	6.18958	-41.0101	1701.6	2054.94	-546.754	250.108	861.508	0	0	0	0	0	0	0	603	903	0
544	1	-18.0336	-105.786	-594.423	-8237.92	-11873.3	3088.81	180.025	313.859	0	-1.39954	6.03699	-38.2635	1426.94	2421.15	-409.424	263.276	865.708	0	0	0	0	0	0	0	603	903	0
544	2	-15.4396	-107.923	-595.338	-8054.81	-12056.4	3088.81	179.749	313.53	0	-0.789184	5.12146	-35.2117	1610.05	2238.04	-409.424	263.56	857.275	0	0	0	0	0	0	0	603	903	0
544	3	-12.5404	-105.176	-600.221	-8237.92	-12178.5	3363.47	179.71	313.725	0	-1.55212	3.90076	-34.6014	602.966	1749.76	-317.872	250.569	885.574	0	0	0	0	0	0	0	603	903	0
544	4	-12.8456	-107.923	-603.578	-8329.47	-11934.3	3226.14	180.227	313.8	0	-1.24695	4.6637	-32.4651	1426.94	1810.79	-500.977	255.777	859.047	0	0	0	0	0	0	0	603	903	0
544	5	-13.1508	-111.585	-604.799	-7413.94	-11995.4	3592.35	180.166	312.259	0	-1.24695	3.74817	-31.2444	1060.73	1932.86	-500.977	261.863	869.051	0	0	0	0	0	0	0	603	903	0
544	6	-11.7775	-109.143	-603.273	-7688.6	-11751.2	3271.91	180.521	312.745	0	-1.55212	2.52747	-29.7186	511.413	1749.76	-409.424	258.878	885.792	0	0	0	0	0	0	0	603	903	0
544	7	-10.7094	-106.092	-605.714	-7963.26	-12300.6	3455.02	179.692	313.147	0	-1.39954	3.29041	-27.5823	419.86	1688.72	-546.754	261.225	887.778	0	0	0	0	0	0	0	603	903	0
544	8	-11.1671	-107.465	-606.325	-6864.63	-12483.7	3363.47	179.411	311.322	0	-0.941772	4.05334	-25.7513	1243.83	1688.72	-592.53	265.578	854.698	0	0	0	0	0	0	0	603	903	0
544	9	-12.0827	-108.075	-610.902	-6406.86	-12361.6	3638.12	179.765	310.488	0	0.736695	2.37488	-24.5306	145.202	1627.69	-455.201	266.353	897.081	0	0	0	0	0	0	0	603	903	0
545	0	-13.456	-104.413	-611.513	-6406.86	-12117.4	3363.47	180.184	310.477	0	-0.484008	1.91711	-23.615	419.86	1566.65	-455.201	266.341	885.221	0	0	0	0	0	0	0	603	903	0
545	1	-11.4723	-103.192	-611.818	-6223.76	-12422.6	3317.69	179.696	310.173	0	-0.941772	2.98523	-23.0047	511.413	895.266	-500.977	238.917	880.769	0	0	0	0	0	0	0	603	903	0
545	2	-15.5922	-103.803	-611.207	-6315.31	-12605.7	3409.24	179.376	310.333	0	0	0	0	0	0	0	200	903	0	0	0	0	0	0	0	603	903	0
545	3	-15.8974	-103.498	-616.09	-5491.34	-12849.9	3683.9	179.143	308.913	0	0	0	0	0	0	0	200	903	0	0	0	0	0	0	0	603	903	0
545	4	-14.8292	-101.209	-619.752	-5033.57	-13033	3180.36	178.971	308.122	0	0	0	0	0	0	0	200	903	0	0	0	0	0	0	0	603	903	0
545	5	-15.7448	-100.446	-622.194	-5582.89	-12910.9	3180.36	179.249	308.973	0	0	0	0	0	0	0	200	903	0	0	0	0	0	0	0	603	903	0
545	6	-16.05	-104.108	-622.194	-5308.23	-13277.1	3638.12	178.661	308.531	0	0	0	0	0	0	0	200	903	0	0	0	0	0	0	0	603	903	0
545	7	-18.9491	-102.429	-624.33	-3934.94	-13643.3	3500.8	178.147	306.303	0	0	0	0	0	0	0	200	903	0	0	0	0	0	0	0	603	903	0
545	8	-18.0336	-101.056	-626.771	-4942.02	-13643.3	3592.35	178.232	307.885	0	0	0	0	0	0	0	200	903	0	0	0	0	0	0	0	603	903	0
545	9	-19.1017	-101.972	-630.128	-3934.94	-13704.4	3546.57	178.251	306.245	0	0	0	0	0	0	0	200	903	0	0	0	0	0	0	0	603	903	0
546	0	-20.0172	-103.955	-631.044	-3660.28	-13704.4	3729.68	178.283	305.8	0	0	0	0	0	0	0	200	903	0	0	0	0	0	0	0	603	903	0
546	1	-20.6276	-102.582	-632.57	-3843.39	-14314.7	4050.11	177.371	306.076	0	0	0	0	0	0	0	200	903	0	0	0	0	0	0	0	603	903	0
546	2	-20.7802	-102.582	-632.264	-3202.52	-13887.5	3683.9	178.035	305.065	0	0	0	0	0	0	0	200	903	0	0	0	0	0	0	0	603	903	0
546	3	-20.9328	-102.429	-633.485	-3202.52	-13887.5	3958.56	178.078	305.055	0	0	0	0	0	0	0	200	903	0	0	0	0	0	0	0	603	903	0
546	4	-21.0854	-102.429	-635.927	-3385.62	-13948.5	3546.57	178.066	305.324	0	0	0	0	0	0	0	200	903	0	0	0	0	0	0	0	603	903	0
546	5	-21.0854	-99.9881	-633.79	-2103.89	-14314.7	3821.23	177.414	303.32	0	0	0	0	0	0	0	200	903	0	0	0	0	0	0	0	603	903	0
546	6	-23.3742	-99.5303	-638.673	-2470.1	-14314.7	3958.56	177.587	303.868	0	0	0	0	0	0	0	200	903	0	0	0	0	0	0	0	603	903	0
546	7	-24.2897	-101.361	-637.452	-2561.65	-14314.7	3683.9	177.544	304.019	0	0	0	0	0	0	0	200	903	0	0	0	0	0	0	0	603	903	0
546	8	-24.4423	-98.4622	-637.758	-2286.99	-14497.8	3500.8	177.268	303.586	0	0	0	0	0	0	0	200	903	0	0	0	0	0	0	0	603	903	0
546	9	-23.3742	-96.7837	-637.452	-1829.23	-14803	3912.78	176.778	302.87	0	0	0	0	0	0	0	200	903	0	0	0	0	0	0	0	603	903	0
547	0	-23.2216	-97.6992	-638.978	-913.699	-14680.9	3729.68	177.024	301.43	0	0	0	0	0	0	0	200	903	0	0	0	0	0	0	0	603	903	0
547	1	-24.7475	-97.0889	-640.809	-1188.36	-14986.1	3867.01	176.614	301.854	0	0	0	0	0	0	0	200	903	0	0	0	0	0	0	0	603	903	0
547	2	-22.4586	-96.0208	-639.284	-913.699	-14558.9	3867.01	177.226	301.429	0	0	0	0	0	0	0	200	903	0	0	0	0	0	0	0	603	903	0
547	3	-24.5949	-95.8682	-639.589	-1371.46	-14803	3867.01	176.855	302.144	0	0	0	0	0	0	0	200	903	0	0	0	0	0	0	0	603	903	0
547	4	-23.8319	-95.4104	-638.368	-1279.91	-14986.1	3867.01	176.524	302.005	0	0	0	0	0	0	0	200	903	0	0	0	0	0	0	0	603	903	0
547	5	-23.2216	-93.4268	-640.199	-547.489	-15108.2	4187.44	176.401	300.855	0	0	0	0	0	0	0	200	903	0	0	0	0	0	0	0	603	903	0
547	6	-25.2052	-92.2061	-637.758	-455.936	-14742	3592.35	176.885	300.715	0	0	0	0	0	0	0	200	903	0	0	0	0	0	0	0	603	903	0
547	7	-25.0526	-92.969	-641.115	-547.489	-14803	3912.78	176.911	300.854	0	0	0	0	0	0	0	200	903	0	0	0	0	0	0	0	603	903	0
547	8	-25.8156	-91.4431	-636.842	-181.277	-15047.1	3958.56	176.372	300.285	0	0	0	0	0	0	0	200	903	0	0	0	0	0	0	0	603	903	0
547	9	-25.0526	-90.0698	-638.673	184.934	-14803	3912.78	176.822	299.71	0	0	0	0	0	0	0	200	903	0	0	0	0	0	0	0	603	903	0
548	0	-24.5949	-90.8328	-641.115	276.486	-15474.4	3729.68	175.863	299.569	0	0	0	0	0	0	0	200	903	0	0	0	0	0	0	0	603	903	0
548	1	-24.7475	-90.0698	-641.42	642.697	-15108.2	3821.23	176.446	298.998	0	0	0	0	0	0	0	200	903	0	0	0	0	0	0	0	603	903	0
548	2	-25.663	-89.4595	-641.115	825.803	-15230.2	3958.56	176.244	298.712	0	0	0	0	0	0	0	200	903	0	0	0	0	0	0	0	603	903	0
548	3	-25.2052	-88.544	-639.589	1192.01	-15474.4	3867.01	175.806	298.136	0	0	0	0	0	0	0	200	903	0	0	0	0	0	0	0	603	903	0
548	4	-26.8837	-88.2388	-636.537	825.803	-15596.4	3912.78	175.498	298.703	0	0	0	0	0	0	0	200	903	0	0	0	0	0	0	0	603	903	0
548	5	-25.8156	-87.781	-640.809	1192.01	-15413.3	4004.33	175.947	298.14	0	0	0	0	0	0	0	200	903	0	0	0	0	0	0	0	603	903	0
548	6	-25.0526	-88.0862	-641.42	1008.91	-15291.3	4050.11	176.16	298.427	0	0	0	0	0	0	0	200	903	0	0	0	0	0	0	0	603	903	0
548	7	-26.2733	-86.8655	-641.42	1466.67	-15230.2	3683.9	176.255	297.713	0	0	0	0	0	0	0	200	903	0	0	0	0	0	0	0	603	903	0
548	8	-24.4423	-86.1026	-639.894	1832.88	-15352.3	3867.01	176.008	297.136	0	0	0	0	0	0	0	200	903	0	0	0	0	0	0	0	603	903	0
548	9	-26.4259	-85.187	-638.673	2290.65	-15230.2	4004.33	176.153	296.413	0	0	0	0	0	0	0	200	903	0	0	0	0	0	0	0	603	903	0
549	0	-26.1208	-84.7293	-637.758	2656.86	-15474.4	3867.01	175.736	295.834	0	0	0	0	0	0	0	200	903	0	0	0	0	0	0	0	603	903	0
549	1	-25.8156	-84.5767	-640.809	2839.96	-15413.3	3729.68	175.947	295.568	0	0	0	0	0	0	0	200	903	0	0	0	0	0	0	0	603	903	0
549	2	-25.8156	-84.4241	-636.232	2931.52	-15474.4	3409.24	175.678	295.392	0	0	0	0	0	0	0	200	903	0	0	0	0	0	0	0	603	903	0
549	3	-27.0363	-83.6612	-641.42	3389.28	-15779.6	3821.23	175.399	294.716	0	0	0	0	0	0	0	200	903	0	0	0	0	0	0	0	603	903	0
549	4	-26.7311	-82.8982	-638.673	3023.07	-15474.4	3683.9	175.771	295.267	0	0	0	0	0	0	0	200	903	0	0	0	0	0	0	0	603	903	0
549	5	-25.2052	-81.3723	-640.199	3572.38	-15352.3	3912.78	176.019	294.42	0	0	0	0	0	0	0	200	903	0	0	0	0	0	0	0	603	903	0
549	6	-25.3578	-80.6094	-638.978	3206.17	-15474.4	3958.56	175.783	294.982	0	0	0	0	0	0	0	200	903	0	0	0	0	0	0	0	603	903	0
549	7	-24.5949	-81.0672	-639.284	3389.28	-16023.7	3592.35	174.935	294.698	0	0	0	0	0	0	0	200	903	0	0	0	0	0	0	0	603	903	0
549	8	-25.3578	-79.0835	-638.978	3847.04	-15718.5	3546.57	175.401	293.979	0	0	0	0	0	0	0	200	903	0	0	0	0	0	0	0	603	903	0
549	9	-22.6112	-79.2361	-638.368	4945.68	-15474.4	3729.68	175.759	292.253	0	0	0	0	0	0	0	200	903	0	0	0	0	0	0	0	603	903	0
550	0	-25.8156	-78.3206	-636.537	4121.7	-15657.5	3455.02	175.402	293.525	0	0	0	0	0	0	0	200	903	0	0	0	0	0	0	0	603	903	0
550	1	-23.2216	-77.2525	-635.621	4213.25	-15779.6	3638.12	175.175	293.371	0	0	0	0	0	0	0	200	903	0	0	0	0	0	0	0	603	903	0
550	2	-23.6793	-76.1843	-636.232	4121.7	-15840.6	3729.68	175.102	293.522	0	0	0	0	0	0	0	200	903	0	0	0	0	0	0	0	603	903	0
550	3	-23.069	-74.9636	-633.485	4579.46	-15657.5	3546.57	175.284	292.771	0	0	0	0	0	0	0	200	903	0	0	0	0	0	0	0	603	903	0
550	4	-25.0526	-74.6585	-635.316	4579.46	-15474.4	3500.8	175.643	292.792	0	0	0	0	0	0	0	200	903	0	0	0	0	0	0	0	603	903	0
550	5	-24.9	-73.1326	-632.264	5494.99	-15657.5	3409.24	175.236	291.309	0	0	0	0	0	0	0	200	903	0	0	0	0	0	0	0	603	903	0
550	6	-23.8319	-72.5222	-632.57	5494.99	-15962.7	3500.8	174.765	291.313	0	0	0	0	0	0	0	200	903	0	0	0	0	0	0	0	603	903	0
550	7	-23.3742	-72.2171	-630.739	5861.2	-16023.7	3180.36	174.595	290.707	0	0	0	0	0	0	0	200	903	0	0	0	0	0	0	0	603	903	0
550	8	-23.6793	-71.6067	-632.57	5586.54	-15474.4	3546.57	175.537	291.169	0	0	0	0	0	0	0	200	903	0	0	0	0	0	0	0	603	903	0
550	9	-24.7475	-70.5386	-631.349	5769.65	-15596.4	3180.36	175.297	290.861	0	0	0	0	0	0	0	200	903	0	0	0	0	0	0	0	603	903	0
551	0	-23.069	-70.2334	-628.602	5037.23	-16023.7	3546.57	174.509	291.987	0	0	0	0	0	0	0	200	903	0	0	0	0	0	0	0	603	903	0
551	1	-24.1371	-68.7075	-624.635	5952.76	-15718.5	3729.68	174.836	290.47	0	0	0	0	0	0	0	200	903	0	0	0	0	0	0	0	603	903	0
551	2	-22.4586	-67.792	-626.161	5769.65	-15657.5	2997.26	174.994	290.786	0	0	0	0	0	0	0	200	903	0	0	0	0	0	0	0	603	903	0
551	3	-22.6112	-68.555	-626.161	5769.65	-15535.4	3271.91	175.189	290.786	0	0	0	0	0	0	0	200	903	0	0	0	0	0	0	0	603	903	0
551	4	-22.9164	-65.961	-625.245	6318.97	-16023.7	3363.47	174.372	289.894	0	0	0	0	0	0	0	200	903	0	0	0	0	0	0	0	603	903	0
551	5	-22.4586	-65.0454	-621.583	6044.31	-15291.3	3043.03	175.399	290.276	0	0	0	0	0	0	0	200	903	0	0	0	0	0	0	0	603	903	0
551	6	-23.3742	-65.0454	-619.142	6318.97	-15657.5	3043.03	174.711	289.794	0	0	0	0	0	0	0	200	903	0	0	0	0	0	0	0	603	903	0
551	7	-22.1535	-64.1299	-617.616	6776.73	-15352.3	2997.26	175.143	289.028	0	0	0	0	0	0	0	200	903	0	0	0	0	0	0	0	603	903	0
551	8	-22.7638	-63.5196	-617.921	7051.39	-15047.1	2859.93	175.649	288.589	0	0	0	0	0	0	0	200	903	0	0	0	0	0	0	0	603	903	0
551	9	-22.6112	-62.7566	-612.733	6593.63	-15352.3	2905.7	174.945	289.239	0	0	0	0	0	0	0	200	903	0	0	0	0	0	0	0	603	903	0
552	0	-22.7638	-61.5359	-614.259	6685.18	-15779.6	2722.6	174.311	289.117	0	0	0	0	0	0	0	200	903	0	0	0	0	0	0	0	603	903	0
552	1	-22.6112	-60.9256	-610.292	6959.84	-15413.3	2768.37	174.744	288.596	0	0	0	0	0	0	0	200	903	0	0	0	0	0	0	0	603	903	0
552	2	-21.8483	-60.6204	-608.156	7234.5	-15474.4	3088.81	174.555	288.104	0	0	0	0	0	0	0	200	903	0	0	0	0	0	0	0	603	903	0
552	3	-21.2379	-59.3997	-605.104	7326.05	-15535.4	3043.03	174.326	287.893	0	0	0	0	0	0	0	200	903	0	0	0	0	0	0	0	603	903	0
552	4	-21.0854	-58.3316	-605.714	7600.71	-15596.4	2722.6	174.251	287.452	0	0	0	0	0	0	0	200	903	0	0	0	0	0	0	0	603	903	0
552	5	-21.6957	-59.5523	-604.188	7783.81	-15352.3	2859.93	174.59	287.117	0	0	0	0	0	0	0	200	903	0	0	0	0	0	0	0	603	903	0
552	6	-19.2543	-58.179	-600.831	7692.26	-15291.3	2676.82	174.55	287.197	0	0	0	0	0	0	0	200	903	0	0	0	0	0	0	0	603	903	0
552	7	-21.5431	-56.9583	-597.169	7875.36	-15352.3	2997.26	174.292	286.812	0	0	0	0	0	0	0	200	903	0	0	0	0	0	0	0	603	903	0
552	8	-20.3224	-56.1953	-594.728	8424.68	-15291.3	2447.94	174.289	285.834	0	0	0	0	0	0	0	200	903	0	0	0	0	0	0	0	603	903	0
552	9	-20.3224	-55.4324	-592.592	7417.6	-15169.2	2493.72	174.402	287.483	0	0	0	0	0	0	0	200	903	0	0	0	0	0	0	0	603	903	0
553	0	-22.0009	-54.3643	-592.286	8058.47	-15169.2	2539.49	174.389	286.394	0	0	0	0	0	0	0	200	903	0	0	0	0	0	0	0	603	903	0
553	1	-19.7121	-52.8384	-588.624	8241.57	-14864	2356.39	174.748	285.999	0	0	0	0	0	0	0	200	903	0	0	0	0	0	0	0	603	903	0
553	2	-21.3905	-54.2117	-584.657	8333.13	-15230.2	2402.16	173.95	285.747	0	0	0	0	0	0	0	200	903	0	0	0	0	0	0	0	603	903	0
553	3	-20.3224	-52.0755	-582.826	8790.89	-15291.3	2081.73	173.764	284.917	0	0	0	0	0	0	0	200	903	0	0	0	0	0	0	0	603	903	0
553	4	-20.6276	-51.3125	-584.352	8882.44	-15291.3	2356.39	173.832	284.8	0	0	0	0	0	0	0	200	903	0	0	0	0	0	0	0	603	903	0
553	5	-21.5431	-51.3125	-579.774	9340.21	-14864	2173.28	174.362	283.89	0	0	0	0	0	0	0	200	903	0	0	0	0	0	0	0	603	903	0
553	6	-21.5431	-50.8548	-576.417	9065.55	-14925.1	2264.83	174.107	284.273	0	0	0	0	0	0	0	200	903	0	0	0	0	0	0	0	603	903	0
553	7	-21.5431	-49.9392	-573.671	9523.31	-15108.2	2081.73	173.664	283.399	0	0	0	0	0	0	0	200	903	0	0	0	0	0	0	0	603	903	0
553	8	-20.0172	-49.0237	-570.314	9248.65	-15108.2	2356.39	173.509	283.783	0	0	0	0	0	0	0	200	903	0	0	0	0	0	0	0	603	903	0
553	9	-19.8646	-47.9556	-570.619	8790.89	-14864	2173.28	173.951	284.594	0	0	0	0	0	0	0	200	903	0	0	0	0	0	0	0	603	903	0
554	0	-19.8646	-47.1926	-562.074	9157.1	-14803	1990.17	173.664	283.708	0	0	0	0	0	0	0	200	903	0	0	0	0	0	0	0	603	903	0
554	1	-20.7802	-45.5142	-565.431	9065.55	-15047.1	1944.4	173.388	283.967	0	0	0	0	0	0	0	200	903	0	0	0	0	0	0	0	603	903	0
554	2	-21.2379	-45.209	-560.243	9889.52	-14803	2035.95	173.578	282.348	0	0	0	0	0	0	0	200	903	0	0	0	0	0	0	0	603	903	0
554	3	-19.4069	-44.5987	-558.412	9981.08	-14680.9	1944.4	173.71	282.126	0	0	0	0	0	0	0	200	903	0	0	0	0	0	0	0	603	903	0
554	4	-19.4069	-44.5987	-558.107	10164.2	-14375.7	1761.29	174.242	281.788	0	0	0	0	0	0	0	200	903	0	0	0	0	0	0	0	603	903	0
554	5	-20.1698	-43.6831	-556.886	10347.3	-14864	1669.74	173.309	281.419	0	0	0	0	0	0	0	200	903	0	0	0	0	0	0	0	603	903	0
554	6	-20.475	-44.4461	-553.834	10530.4	-14925.1	1898.62	173.051	280.986	0	0	0	0	0	0	0	200	903	0	0	0	0	0	0	0	603	903	0
554	7	-20.6276	-42.0047	-550.477	10072.6	-15108.2	1715.52	172.554	281.702	0	0	0	0	0	0	0	200	903	0	0	0	0	0	0	0	603	903	0
554	8	-20.6276	-41.0891	-544.984	10164.2	-14680.9	1578.19	173.062	281.35	0	0	0	0	0	0	0	200	903	0	0	0	0	0	0	0	603	903	0
554	9	-19.4069	-39.8684	-545.289	9614.87	-14436.8	1578.19	173.525	282.367	0	0	0	0	0	0	0	200	903	0	0	0	0	0	0	0	603	903	0
555	0	-19.1017	-39.2581	-545.289	10530.4	-14803	1898.62	172.853	280.688	0	0	0	0	0	0	0	200	903	0	0	0	0	0	0	0	603	903	0
555	1	-20.0172	-38.6477	-542.848	10713.5	-14619.9	1990.17	173.068	280.264	0	0	0	0	0	0	0	200	903	0	0	0	0	0	0	0	603	903	0
555	2	-19.2543	-37.427	-537.965	10713.5	-14314.7	1440.86	173.391	280.085	0	0	0	0	0	0	0	200	903	0	0	0	0	0	0	0	603	903	0
555	3	-18.9491	-37.1218	-536.134	11720.6	-14375.7	1578.19	173.186	278.139	0	0	0	0	0	0	0	200	903	0	0	0	0	0	0	0	603	903	0
555	4	-19.7121	-35.7486	-533.388	11537.5	-14497.8	1623.96	172.819	278.369	0	0	0	0	0	0	0	200	903	0	0	0	0	0	0	0	603	903	0
555	5	-17.1181	-34.6804	-532.167	11079.7	-14375.7	1807.07	172.986	279.18	0	0	0	0	0	0	0	200	903	0	0	0	0	0	0	0	603	903	0
555	6	-18.6439	-34.3753	-531.251	11171.3	-14131.6	1486.63	173.399	278.972	0	0	0	0	0	0	0	200	903	0	0	0	0	0	0	0	603	903	0
555	7	-19.5595	-34.2227	-529.725	11262.8	-14131.6	1395.08	173.323	278.738	0	0	0	0	0	0	0	200	903	0	0	0	0	0	0	0	603	903	0
555	8	-19.5595	-32.0864	-524.537	11995.2	-14619.9	1440.86	172.128	277.132	0	0	0	0	0	0	0	200	903	0	0	0	0	0	0	0	603	903	0
555	9	-19.7121	-31.7813	-520.57	11537.5	-14375.7	1303.53	172.385	277.837	0	0	0	0	0	0	0	200	903	0	0	0	0	0	0	0	603	903	0
556	0	-18.3388	-31.4761	-521.486	11720.6	-14375.7	1303.53	172.433	277.525	0	0	0	0	0	0	0	200	903	0	0	0	0	0	0	0	603	903	0
556	1	-18.3388	-30.7132	-519.96	11537.5	-14192.6	1120.42	172.704	277.811	0	0	0	0	0	0	0	200	903	0	0	0	0	0	0	0	603	903	0
556	2	-19.4069	-29.7976	-517.824	11903.7	-14497.8	1303.53	172.002	277.012	0	0	0	0	0	0	0	200	903	0	0	0	0	0	0	0	603	903	0
556	3	-17.5758	-29.4925	-515.382	12453	-14497.8	1211.98	171.87	275.837	0	0	0	0	0	0	0	200	903	0	0	0	0	0	0	0	603	903	0
556	4	-19.4069	-29.645	-514.161	12910.8	-14253.7	1257.75	172.278	274.89	0	0	0	0	0	0	0	200	903	0	0	0	0	0	0	0	603	903	0
556	5	-18.3388	-28.1192	-511.11	12544.6	-14192.6	1120.42	172.232	275.456	0	0	0	0	0	0	0	200	903	0	0	0	0	0	0	0	603	903	0
556	6	-17.881	-29.3399	-511.415	12453	-13704.4	1120.42	173.203	275.65	0	0	0	0	0	0	0	200	903	0	0	0	0	0	0	0	603	903	0
556	7	-18.6439	-26.8985	-508.973	12361.5	-14131.6	1166.2	172.235	275.713	0	0	0	0	0	0	0	200	903	0	0	0	0	0	0	0	603	903	0
556	8	-19.8646	-26.4407	-504.396	12361.5	-13887.5	983.094	172.467	275.493	0	0	0	0	0	0	0	200	903	0	0	0	0	0	0	0	603	903	0
556	9	-19.8646	-24.7622	-502.26	13093.9	-14192.6	891.542	171.742	273.93	0	0	0	0	0	0	0	200	903	0	0	0	0	0	0	0	603	903	0
557	0	-19.2543	-24.1519	-500.734	13093.9	-13643.3	891.542	172.753	273.851	0	0	0	0	0	0	0	200	903	0	0	0	0	0	0	0	603	903	0
557	1	-19.4069	-25.8303	-499.818	13002.3	-13948.5	937.318	172.093	273.986	0	0	0	0	0	0	0	200	903	0	0	0	0	0	0	0	603	903	0
557	2	-19.7121	-22.4734	-497.377	13460.1	-14009.5	616.883	171.833	272.938	0	0	0	0	0	0	0	200	903	0	0	0	0	0	0	0	603	903	0
557	3	-20.7802	-22.626	-494.63	13826.3	-14375.7	571.107	170.936	272.047	0	0	0	0	0	0	0	200	903	0	0	0	0	0	0	0	603	903	0
557	4	-21.3905	-23.0838	-492.494	14192.5	-13948.5	525.331	171.678	271.182	0	0	0	0	0	0	0	200	903	0	0	0	0	0	0	0	603	903	0
557	5	-19.5595	-22.3208	-490.053	13643.2	-14070.6	891.542	171.288	272.16	0	0	0	0	0	0	0	200	903	0	0	0	0	0	0	0	603	903	0
557	6	-19.5595	-21.8631	-489.747	14284.1	-14131.6	662.66	171.145	270.834	0	0	0	0	0	0	0	200	903	0	0	0	0	0	0	0	603	903	0
557	7	-21.2379	-21.7105	-487.306	13734.7	-14253.7	708.436	170.75	271.815	0	0	0	0	0	0	0	200	903	0	0	0	0	0	0	0	603	903	0
557	8	-18.6439	-20.032	-483.949	13643.2	-14253.7	571.107	170.547	271.809	0	0	0	0	0	0	0	200	903	0	0	0	0	0	0	0	603	903	0
557	9	-20.9328	-19.5742	-480.592	13734.7	-13887.5	754.213	171.103	271.421	0	0	0	0	0	0	0	200	903	0	0	0	0	0	0	0	603	903	0
558	0	-20.7802	-18.8113	-479.066	14101	-13826.4	754.213	171.139	270.566	0	0	0	0	0	0	0	200	903	0	0	0	0	0	0	0	603	903	0
558	1	-20.7802	-18.9639	-477.54	14284.1	-14253.7	708.436	170.152	270.088	0	0	0	0	0	0	0	200	903	0	0	0	0	0	0	0	603	903	0
558	2	-22.3061	-17.8958	-477.54	14924.9	-14192.6	388.001	170.28	268.746	0	0	0	0	0	0	0	200	903	0	0	0	0	0	0	0	603	903	0
558	3	-22.0009	-18.0484	-472.658	15291.1	-13582.3	662.66	171.264	267.649	0	0	0	0	0	0	0	200	903	0	0	0	0	0	0	0	603	903	0
558	4	-21.0854	-17.7432	-472.047	15382.7	-13704.4	479.554	170.968	267.413	0	0	0	0	0	0	0	200	903	0	0	0	0	0	0	0	603	903	0
558	5	-21.5431	-18.8113	-468.69	15382.7	-14009.5	479.554	170.109	267.179	0	0	0	0	0	0	0	200	903	0	0	0	0	0	0	0	603	903	0
558	6	-21.0854	-18.0484	-469.911	15108	-14192.6	250.672	169.797	267.849	0	0	0	0	0	0	0	200	903	0	0	0	0	0	0	0	603	903	0
558	7	-22.7638	-17.1328	-466.554	15291.1	-14436.8	296.449	169.057	267.225	0	0	0	0	0	0	0	200	903	0	0	0	0	0	0	0	603	903	0
558	8	-19.7121	-16.2173	-462.892	15748.9	-14131.6	159.12	169.471	265.977	0	0	0	0	0	0	0	200	903	0	0	0	0	0	0	0	603	903	0
558	9	-23.3742	-15.7595	-462.282	15565.8	-13704.4	204.896	170.355	266.328	0	0	0	0	0	0	0	200	903	0	0	0	0	0	0	0	603	903	0
559	0	-21.5431	-18.5061	-458.925	15932	-13948.5	342.225	169.606	265.284	0	0	0	0	0	0	0	200	903	0	0	0	0	0	0	0	603	903	0
559	1	-21.8483	-14.6914	-458.925	16206.7	-14192.6	113.343	169.074	264.686	0	0	0	0	0	0	0	200	903	0	0	0	0	0	0	0	603	903	0
559	2	-22.0009	-14.3863	-456.788	16389.8	-13643.3	296.449	170.132	264.12	0	0	0	0	0	0	0	200	903	0	0	0	0	0	0	0	603	903	0
559	3	-23.069	-14.844	-455.568	16389.8	-13643.3	67.5668	170.052	264.023	0	0	0	0	0	0	0	200	903	0	0	0	0	0	0	0	603	903	0
559	4	-23.5268	-15.1492	-451.295	16664.4	-13826.4	-23.9859	169.363	263.074	0	0	0	0	0	0	0	200	903	0	0	0	0	0	0	0	603	903	0
559	5	-22.1535	-15.9121	-450.38	16939.1	-14070.6	-23.9859	168.758	262.389	0	0	0	0	0	0	0	200	903	0	0	0	0	0	0	0	603	903	0
559	6	-20.475	-14.3863	-450.99	17122.2	-13521.3	-115.539	170.019	262.034	0	0	0	0	0	0	0	200	903	0	0	0	0	0	0	0	603	903	0
559	7	-22.7638	-14.2337	-449.769	17122.2	-13399.2	-115.539	170.209	261.931	0	0	0	0	0	0	0	200	903	0	0	0	0	0	0	0	603	903	0
559	8	-23.3742	-12.25	-448.549	17122.2	-13704.4	-115.539	169.447	261.828	0	0	0	0	0	0	0	200	903	0	0	0	0	0	0	0	603	903	0
559	9	-23.069	-12.4026	-445.802	17488.4	-14131.6	-115.539	168.301	260.771	0	0	0	0	0	0	0	200	903	0	0	0	0	0	0	0	603	903	0
560	0	-22.9164	-12.25	-443.666	17213.7	-14192.6	-115.539	168.011	261.201	0	0	0	0	0	0	0	200	903	0	0	0	0	0	0	0	603	903	0
560	1	-22.0009	-12.25	-442.445	18037.7	-13704.4	-23.9859	169.026	259.232	0	0	0	0	0	0	0	200	903	0	0	0	0	0	0	0	603	903	0
560	2	-21.5431	-13.1655	-442.445	18403.9	-13826.4	-161.315	168.75	258.404	0	0	0	0	0	0	0	200	903	0	0	0	0	0	0	0	603	903	0
560	3	-22.3061	-12.4026	-441.53	18495.5	-13826.4	67.5668	168.685	258.11	0	0	0	0	0	0	0	200	903	0	0	0	0	0	0	0	603	903	0
560	4	-22.4586	-11.6397	-438.173	18770.1	-13948.5	-252.868	168.167	257.163	0	0	0	0	0	0	0	200	903	0	0	0	0	0	0	0	603	903	0
560	5	-22.0009	-12.0974	-437.867	18678.6	-13582.3	-298.644	168.981	257.342	0	0	0	0	0	0	0	200	903	0	0	0	0	0	0	0	603	903	0
560	6	-21.6957	-10.2664	-436.647	18587	-13765.4	-115.539	168.475	257.432	0	0	0	0	0	0	0	200	903	0	0	0	0	0	0	0	603	903	0
560	7	-21.0854	-10.2664	-436.342	18587	-13826.4	-344.421	168.313	257.403	0	0	0	0	0	0	0	200	903	0	0	0	0	0	0	0	603	903	0
560	8	-22.4586	-9.35085	-435.731	18770.1	-13826.4	-481.75	168.268	256.923	0	0	0	0	0	0	0	200	903	0	0	0	0	0	0	0	603	903	0
560	9	-21.3905	-8.58791	-435.731	19319.5	-13338.1	-390.197	169.389	255.662	0	0	0	0	0	0	0	200	903	0	0	0	0	0	0	0	603	903	0
561	0	-22.9164	-10.7241	-432.985	19594.1	-13704.4	-344.421	168.349	254.746	0	0	0	0	0	0	0	200	903	0	0	0	0	0	0	0	603	903	0
561	1	-21.2379	-8.28273	-432.985	20143.4	-13948.5	-573.302	167.785	253.478	0	0	0	0	0	0	0	200	903	0	0	0	0	0	0	0	603	903	0
561	2	-21.0854	-8.43532	-433.595	20418.1	-13643.3	-390.197	168.534	252.91	0	0	0	0	0	0	0	200	903	0	0	0	0	0	0	0	603	903	0
561	3	-19.1017	-8.43532	-430.848	20692.8	-13582.3	-435.973	168.475	251.972	0	0	0	0	0	0	0	200	903	0	0	0	0	0	0	0	603	903	0
561	4	-22.0009	-8.89309	-432.985	20418.1	-13826.4	-344.421	168.067	252.843	0	0	0	0	0	0	0	200	903	0	0	0	0	0	0	0	603	903	0
561	5	-22.3061	-9.80861	-430.543	20784.3	-13948.5	-710.631	167.603	251.725	0	0	0	0	0	0	0	200	903	0	0	0	0	0	0	0	603	903	0
561	6	-20.9328	-8.43532	-430.238	20601.2	-13826.4	159.12	167.863	252.117	0	0	0	0	0	0	0	200	903	0	0	0	0	0	0	0	603	903	0
561	7	-20.3224	-6.90944	-429.628	20418.1	-13826.4	-344.421	167.818	252.475	0	0	0	0	0	0	0	200	903	0	0	0	0	0	0	0	603	903	0
561	8	-20.0172	-6.60427	-430.848	20601.2	-13582.3	-573.302	168.475	252.185	0	0	0	0	0	0	0	200	903	0	0	0	0	0	0	0	603	903	0
561	9	-20.9328	-6.1465	-430.848	21333.6	-13826.4	-390.197	167.909	250.485	0	0	0	0	0	0	0	200	903	0	0	0	0	0	0	0	603	903	0
562	0	-18.4914	-6.45168	-429.933	21333.6	-13887.5	-298.644	167.699	250.379	0	0	0	0	0	0	0	200	903	0	0	0	0	0	0	0	603	903	0
562	1	-21.2379	-5.84133	-428.712	22066	-13704.4	-527.526	168.034	248.529	0	0	0	0	0	0	0	200	903	0	0	0	0	0	0	0	603	903	0
562	2	-19.4069	-5.38356	-428.102	22706.9	-13460.2	-802.184	168.558	246.959	0	0	0	0	0	0	0	200	903	0	0	0	0	0	0	0	603	903	0
562	3	-19.7121	-6.75686	-429.628	22523.8	-13704.4	-847.961	168.102	247.574	0	0	0	0	0	0	0	200	903	0	0	0	0	0	0	0	603	903	0
562	4	-18.3388	-5.84133	-429.017	22798.5	-13704.4	-710.631	168.056	246.859	0	0	0	0	0	0	0	200	903	0	0	0	0	0	0	0	603	903	0
562	5	-20.6276	-5.84133	-430.543	23073.1	-14070.6	-756.408	167.319	246.409	0	0	0	0	0	0	0	200	903	0	0	0	0	0	0	0	603	903	0
562	6	-21.0854	-5.53615	-428.102	23073.1	-13704.4	-939.513	167.988	246.104	0	0	0	0	0	0	0	200	903	0	0	0	0	0	0	0	603	903	0
562	7	-19.2543	-5.99392	-428.712	22981.6	-14070.6	-939.513	167.179	246.394	0	0	0	0	0	0	0	200	903	0	0	0	0	0	0	0	603	903	0
562	8	-19.7121	-4.77321	-430.543	23164.7	-14070.6	-893.737	167.319	246.197	0	0	0	0	0	0	0	200	903	0	0	0	0	0	0	0	603	903	0
562	9	-19.2543	-4.62063	-425.355	23622.4	-14314.7	-573.302	166.346	244.464	0	0	0	0	0	0	0	200	903	0	0	0	0	0	0	0	603	903	0
563	0	-20.3224	-3.85769	-429.933	23714	-14192.6	-1122.62	166.989	244.843	0	0	0	0	0	0	0	200	903	0	0	0	0	0	0	0	603	903	0
563	1	-19.7121	-4.01027	-429.017	24354.9	-13887.5	-985.29	167.63	243.231	0	0	0	0	0	0	0	200	903	0	0	0	0	0	0	0	603	903	0
563	2	-19.4069	-4.16286	-428.712	24629.5	-14070.6	-756.408	167.179	242.55	0	0	0	0	0	0	0	200	903	0	0	0	0	0	0	0	603	903	0
563	3	-18.9491	-3.85769	-428.102	24629.5	-14375.7	-893.737	166.42	242.468	0	0	0	0	0	0	0	200	903	0	0	0	0	0	0	0	603	903	0
563	4	-19.1017	-3.85769	-430.848	25270.4	-14436.8	-1259.95	166.492	241.347	0	0	0	0	0	0	0	200	903	0	0	0	0	0	0	0	603	903	0
563	5	-19.8646	-3.55251	-432.374	25636.6	-13704.4	-1076.84	168.304	240.707	0	0	0	0	0	0	0	200	903	0	0	0	0	0	0	0	603	903	0
563	6	-19.1017	-3.7051	-431.154	25728.1	-14192.6	-1168.4	167.082	240.327	0	0	0	0	0	0	0	200	903	0	0	0	0	0	0	0	603	903	0
563	7	-19.2543	-4.01027	-430.543	25819.7	-14131.6	-1122.62	167.177	240.03	0	0	0	0	0	0	0	200	903	0	0	0	0	0	0	0	603	903	0
563	8	-18.0336	-2.78957	-432.985	26094.4	-14436.8	-1259.95	166.658	239.734	0	0	0	0	0	0	0	200	903	0	0	0	0	0	0	0	603	903	0
563	9	-18.6439	-2.94216	-434.205	26185.9	-14131.6	-1259.95	167.454	239.692	0	0	0	0	0	0	0	200	903	0	0	0	0	0	0	0	603	903	0
564	0	-18.4914	-2.4844	-435.426	26277.5	-14375.7	-1031.07	166.985	239.651	0	0	0	0	0	0	0	200	903	0	0	0	0	0	0	0	603	903	0
564	1	-18.6439	-1.87404	-436.036	27559.2	-14375.7	-1214.17	167.031	236.796	0	0	0	0	0	0	0	200	903	0	0	0	0	0	0	0	603	903	0
564	2	-18.3388	-2.94216	-435.426	27925.4	-14680.9	-1214.17	166.284	235.866	0	0	0	0	0	0	0	200	903	0	0	0	0	0	0	0	603	903	0
564	3	-16.9655	-2.4844	-434.511	27742.3	-14314.7	-1305.72	167.056	236.153	0	0	0	0	0	0	0	200	903	0	0	0	0	0	0	0	603	903	0
564	4	-14.2189	-3.24733	-436.647	28108.5	-14558.9	-1122.62	166.658	235.626	0	0	0	0	0	0	0	200	903	0	0	0	0	0	0	0	603	903	0
564	5	-16.5077	-1.41628	-438.783	27742.3	-14497.8	-1305.72	166.959	236.774	0	0	0	0	0	0	0	200	903	0	0	0	0	0	0	0	603	903	0
564	6	-17.5758	-1.72146	-439.088	28383.2	-14558.9	-1443.05	166.843	235.359	0	0	0	0	0	0	0	200	903	0	0	0	0	0	0	0	603	903	0
564	7	-17.1181	-0.348165	-437.867	28932.5	-14925.1	-1488.83	165.914	233.924	0	0	0	0	0	0	0	200	903	0	0	0	0	0	0	0	603	903	0
564	8	-16.3551	-0.0429889	-439.393	29298.7	-14192.6	-1351.5	167.699	233.32	0	0	0	0	0	0	0	200	903	0	0	0	0	0	0	0	603	903	0
564	9	-16.2025	-0.500753	-440.614	29207.2	-14680.9	-1305.72	166.681	233.713	0	0	0	0	0	0	0	200	903	0	0	0	0	0	0	0	603	903	0
565	0	-15.4396	0.872538	-442.445	30122.7	-14680.9	-1763.49	166.819	231.918	0	0	0	0	0	0	0	200	903	0	0	0	0	0	0	0	603	903	0
565	1	-16.6603	-1.1111	-444.887	30580.4	-15047.1	-1351.5	166.178	231.262	0	0	0	0	0	0	0	200	903	0	0	0	0	0	0	0	603	903	0
565	2	-14.8292	0.414775	-443.666	30397.3	-14803	-1626.16	166.635	231.486	0	0	0	0	0	0	0	200	903	0	0	0	0	0	0	0	603	903	0
565	3	-15.7448	0.719951	-443.971	30946.7	-14864	-1443.05	166.52	230.296	0	0	0	0	0	0	0	200	903	0	0	0	0	0	0	0	603	903	0
565	4	-14.2189	0.872538	-445.192	30946.7	-15169.2	-1534.61	165.927	230.487	0	0	0	0	0	0	0	200	903	0	0	0	0	0	0	0	603	903	0
565	5	-13.9137	1.17771	-448.854	31129.8	-15108.2	-1580.38	166.341	230.646	0	0	0	0	0	0	0	200	903	0	0	0	0	0	0	0	603	903	0
565	6	-12.8456	1.78807	-447.328	31679.1	-14864	-1809.26	166.772	229.182	0	0	0	0	0	0	0	200	903	0	0	0	0	0	0	0	603	903	0
565	7	-14.6767	2.39842	-449.769	31770.6	-14925.1	-1671.94	166.816	229.362	0	0	0	0	0	0	0	200	903	0	0	0	0	0	0	0	603	903	0
565	8	-14.8292	1.17771	-449.159	32045.3	-14619.9	-1717.71	167.451	228.655	0	0	0	0	0	0	0	200	903	0	0	0	0	0	0	0	603	903	0
565	9	-13.6085	3.31394	-449.159	32503.1	-15291.3	-1992.37	165.956	227.636	0	0	0	0	0	0	0	200	903	0	0	0	0	0	0	0	603	903	0
566	0	-12.0827	1.17771	-450.075	33235.5	-15169.2	-1946.59	166.296	226.156	0	0	0	0	0	0	0	200	903	0	0	0	0	0	0	0	603	903	0
566	1	-12.693	3.16136	-453.126	33235.5	-14803	-1855.04	167.331	226.653	0	0	0	0	0	0	0	200	903	0	0	0	0	0	0	0	603	903	0
566	2	-14.5241	3.77171	-454.957	33693.2	-15169.2	-1763.49	166.658	225.942	0	0	0	0	0	0	0	200	903	0	0	0	0	0	0	0	603	903	0
566	3	-14.0663	3.61912	-453.431	33601.7	-15291.3	-2221.25	166.277	225.895	0	0	0	0	0	0	0	200	903	0	0	0	0	0	0	0	603	903	0
566	4	-12.693	3.77171	-454.652	33876.4	-15535.4	-2129.7	165.83	225.49	0	0	0	0	0	0	0	200	903	0	0	0	0	0	0	0	603	903	0
566	5	-12.5404	4.99241	-454.957	33967.9	-15108.2	-2038.15	166.792	225.338	0	0	0	0	0	0	0	200	903	0	0	0	0	0	0	0	603	903	0
566	6	-11.9301	4.38206	-458.619	34425.7	-15169.2	-2038.15	166.924	224.936	0	0	0	0	0	0	0	200	903	0	0	0	0	0	0	0	603	903	0
566	7	-12.8456	5.145	-458.619	35249.6	-15596.4	-1992.37	165.993	223.14	0	0	0	0	0	0	0	200	903	0	0	0	0	0	0	0	603	903	0
566	8	-11.4723	5.145	-458.314	35982.1	-15840.6	-2129.7	165.437	221.49	0	0	0	0	0	0	0	200	903	0	0	0	0	0	0	0	603	903	0
566	9	-12.2353	6.06053	-455.568	35982.1	-15840.6	-2267.03	165.229	221.017	0	0	0	0	0	0	0	200	903	0	0	0	0	0	0	0	603	903	0
567	0	-10.7094	4.99241	-459.23	35890.5	-15596.4	-1900.82	166.038	221.846	0	0	0	0	0	0	0	200	903	0	0	0	0	0	0	0	603	903	0
567	1	-11.0146	5.90794	-461.061	36806	-15474.4	-2175.48	166.437	220.171	0	0	0	0	0	0	0	200	903	0	0	0	0	0	0	0	603	903	0
567	2	-11.4723	3.77171	-462.282	36806	-15657.5	-2267.03	166.13	220.382	0	0	0	0	0	0	0	200	903	0	0	0	0	0	0	0	603	903	0
567	3	-12.5404	6.06053	-463.807	37721.6	-15901.6	-2312.8	165.715	218.67	0	0	0	0	0	0	0	200	903	0	0	0	0	0	0	0	603	903	0
567	4	-12.2353	6.06053	-463.197	37630	-15474.4	-2358.58	166.592	218.76	0	0	0	0	0	0	0	200	903	0	0	0	0	0	0	0	603	903	0
567	5	-11.6249	6.82347	-464.723	37813.1	-15840.6	-1626.16	165.914	218.633	0	0	0	0	0	0	0	200	903	0	0	0	0	0	0	0	603	903	0
567	6	-10.2516	7.28123	-464.418	38087.8	-16206.8	-2221.25	165.103	217.988	0	0	0	0	0	0	0	200	903	0	0	0	0	0	0	0	603	903	0
567	7	-11.7775	7.28123	-468.08	38545.5	-16267.8	-2450.13	165.246	217.652	0	0	0	0	0	0	0	200	903	0	0	0	0	0	0	0	603	903	0
567	8	-13.1508	6.06053	-468.995	38545.5	-15962.7	-2450.13	165.964	217.813	0	0	0	0	0	0	0	200	903	0	0	0	0	0	0	0	603	903	0
567	9	-11.6249	7.43382	-468.385	39461.1	-15840.6	-2495.91	166.18	215.751	0	0	0	0	0	0	0	200	903	0	0	0	0	0	0	0	603	903	0
568	0	-13.1508	8.19676	-467.775	40193.5	-16084.7	-2907.9	165.614	214.075	0	0	0	0	0	0	0	200	903	0	0	0	0	0	0	0	603	903	0
568	1	-12.0827	7.43382	-470.826	40285	-16267.8	-2587.46	165.448	214.438	0	0	0	0	0	0	0	200	903	0	0	0	0	0	0	0	603	903	0
568	2	-12.2353	7.89158	-472.658	40193.5	-16450.9	-2450.13	165.195	214.963	0	0	0	0	0	0	0	200	903	0	0	0	0	0	0	0	603	903	0
568	3	-12.9982	8.34935	-471.437	41017.5	-16328.9	-2633.24	165.364	212.995	0	0	0	0	0	0	0	200	903	0	0	0	0	0	0	0	603	903	0
568	4	-14.2189	8.19676	-474.794	41933	-16145.8	-2312.8	165.994	211.682	0	0	0	0	0	0	0	200	903	0	0	0	0	0	0	0	603	903	0
568	5	-14.0663	8.65452	-472.963	41841.4	-16389.9	-2679.02	165.346	211.533	0	0	0	0	0	0	0	200	903	0	0	0	0	0	0	0	603	903	0
568	6	-13.456	9.11228	-474.794	41841.4	-16389.9	-2450.13	165.48	211.875	0	0	0	0	0	0	0	200	903	0	0	0	0	0	0	0	603	903	0
568	7	-11.0146	8.80711	-476.32	42940.1	-16328.9	-2770.57	165.719	209.85	0	0	0	0	0	0	0	200	903	0	0	0	0	0	0	0	603	903	0
568	8	-13.9137	9.41746	-479.677	43214.7	-16450.9	-2770.57	165.704	209.909	0	0	0	0	0	0	0	200	903	0	0	0	0	0	0	0	603	903	0
568	9	-14.5241	10.0278	-479.982	42940.1	-16756.1	-2862.12	165.09	210.538	0	0	0	0	0	0	0	200	903	0	0	0	0	0	0	0	603	903	0
569	0	-14.9818	9.72264	-479.982	43397.8	-16878.2	-2862.12	164.836	209.584	0	0	0	0	0	0	0	200	903	0	0	0	0	0	0	0	603	903	0
569	1	-15.4396	10.0278	-480.287	43947.2	-16634	-2999.45	165.366	208.498	0	0	0	0	0	0	0	200	903	0	0	0	0	0	0	0	603	903	0
569	2	-14.8292	10.0278	-481.508	44588	-17061.3	-2907.9	164.567	207.399	0	0	0	0	0	0	0	200	903	0	0	0	0	0	0	0	603	903	0
569	3	-14.9818	8.80711	-484.559	45045.8	-16756.1	-2907.9	165.42	207.038	0	0	0	0	0	0	0	200	903	0	0	0	0	0	0	0	603	903	0
569	4	-16.05	9.57005	-487.001	45137.3	-16695.1	-2724.79	165.719	207.316	0	0	0	0	0	0	0	200	903	0	0	0	0	0	0	0	603	903	0
569	5	-16.9655	10.1804	-485.475	45961.3	-17244.4	-2953.67	164.479	205.327	0	0	0	0	0	0	0	200	903	0	0	0	0	0	0	0	603	903	0
569	6	-15.5922	9.26487	-487.916	46236	-17061.3	-2862.12	165.032	205.238	0	0	0	0	0	0	0	200	903	0	0	0	0	0	0	0	603	903	0
569	7	-16.3551	11.4011	-488.832	46327.5	-16695.1	-2633.24	165.847	205.228	0	0	0	0	0	0	0	200	903	0	0	0	0	0	0	0	603	903	0
569	8	-16.5077	11.7063	-489.442	46510.6	-17366.5	-2953.67	164.518	204.972	0	0	0	0	0	0	0	200	903	0	0	0	0	0	0	0	603	903	0
569	9	-18.6439	12.3166	-491.578	47792.4	-17305.4	-2862.12	164.796	202.778	0	0	0	0	0	0	0	200	903	0	0	0	0	0	0	0	603	903	0
570	0	-17.1181	13.2322	-490.968	47609.3	-17366.5	-3091	164.628	203.03	0	0	0	0	0	0	0	200	903	0	0	0	0	0	0	0	603	903	0
570	1	-18.7965	12.0115	-490.663	48158.6	-17244.4	-3228.33	164.855	201.85	0	0	0	0	0	0	0	200	903	0	0	0	0	0	0	0	603	903	0
570	2	-18.4914	13.2322	-495.241	48067	-17488.5	-2999.45	164.687	202.942	0	0	0	0	0	0	0	200	903	0	0	0	0	0	0	0	603	903	0
570	3	-18.3388	13.6899	-498.597	49348.8	-17671.6	-3457.21	164.557	201.025	0	0	0	0	0	0	0	200	903	0	0	0	0	0	0	0	603	903	0
570	4	-19.8646	11.7063	-498.903	49806.5	-17488.5	-3365.66	164.946	200.168	0	0	0	0	0	0	0	200	903	0	0	0	0	0	0	0	603	903	0
570	5	-17.881	13.0796	-499.208	49898.1	-17549.6	-3502.99	164.845	200.046	0	0	0	0	0	0	0	200	903	0	0	0	0	0	0	0	603	903	0
570	6	-20.3224	12.6218	-501.039	50355.8	-17427.5	-3411.44	165.217	199.497	0	0	0	0	0	0	0	200	903	0	0	0	0	0	0	0	603	903	0
570	7	-18.9491	13.8425	-501.649	50355.8	-17549.6	-3411.44	165.016	199.619	0	0	0	0	0	0	0	200	903	0	0	0	0	0	0	0	603	903	0
570	8	-19.5595	13.8425	-505.006	50630.5	-17793.7	-3502.99	164.765	199.743	0	0	0	0	0	0	0	200	903	0	0	0	0	0	0	0	603	903	0
570	9	-20.1698	14.6054	-505.617	51271.4	-17488.5	-3548.77	165.411	198.596	0	0	0	0	0	0	0	200	903	0	0	0	0	0	0	0	603	903	0
571	0	-20.7802	15.3684	-509.584	51454.5	-17671.6	-3365.66	165.321	199.026	0	0	0	0	0	0	0	200	903	0	0	0	0	0	0	0	603	903	0
571	1	-21.5431	15.9787	-507.753	52370	-17488.5	-3731.87	165.557	196.859	0	0	0	0	0	0	0	200	903	0	0	0	0	0	0	0	603	903	0
571	2	-21.6957	16.5891	-511.72	53010.9	-17976.8	-3869.2	164.87	196.407	0	0	0	0	0	0	0	200	903	0	0	0	0	0	0	0	603	903	0
571	3	-19.8646	18.115	-515.077	53560.2	-18098.9	-3686.1	164.862	196.015	0	0	0	0	0	0	0	200	903	0	0	0	0	0	0	0	603	903	0
571	4	-20.7802	16.8943	-518.129	53743.3	-17976.8	-3823.43	165.304	196.274	0	0	0	0	0	0	0	200	903	0	0	0	0	0	0	0	603	903	0
571	5	-22.0009	17.8098	-519.349	54201.1	-18159.9	-4189.64	165.033	195.637	0	0	0	0	0	0	0	200	903	0	0	0	0	0	0	0	603	903	0
571	6	-22.4586	16.8943	-520.57	54475.7	-18221	-3777.65	164.998	195.354	0	0	0	0	0	0	0	200	903	0	0	0	0	0	0	0	603	903	0
571	7	-21.3905	19.4883	-523.927	54201.1	-18465.1	-3960.75	164.756	196.548	0	0	0	0	0	0	0	200	903	0	0	0	0	0	0	0	603	903	0
571	8	-21.8483	19.4883	-524.537	54292.6	-18343	-3686.1	165.03	196.494	0	0	0	0	0	0	0	200	903	0	0	0	0	0	0	0	603	903	0
571	9	-21.6957	21.1667	-530.031	55757.4	-18159.9	-3960.75	165.738	194.803	0	0	0	0	0	0	0	200	903	0	0	0	0	0	0	0	603	903	0
572	0	-22.6112	21.3193	-530.641	55757.4	-18587.2	-4098.08	164.972	194.924	0	0	0	0	0	0	0	200	903	0	0	0	0	0	0	0	603	903	0
572	1	-22.1535	21.3193	-531.251	55757.4	-18404.1	-4189.64	165.357	195.045	0	0	0	0	0	0	0	200	903	0	0	0	0	0	0	0	603	903	0
572	2	-22.3061	22.2348	-530.641	56673	-18159.9	-4143.86	165.777	193.199	0	0	0	0	0	0	0	200	903	0	0	0	0	0	0	0	603	903	0
572	3	-21.6957	22.6926	-534.913	57222.3	-18343	-4189.64	165.708	193.025	0	0	0	0	0	0	0	200	903	0	0	0	0	0	0	0	603	903	0
572	4	-22.0009	22.54	-539.796	57497	-18282	-4189.64	166.132	193.484	0	0	0	0	0	0	0	200	903	0	0	0	0	0	0	0	603	903	0
572	5	-22.6112	23.1504	-541.932	58137.8	-18892.3	-4418.52	165.139	192.721	0	0	0	0	0	0	0	200	903	0	0	0	0	0	0	0	603	903	0
572	6	-22.6112	24.2185	-541.627	58870.2	-18526.1	-4418.52	165.795	191.309	0	0	0	0	0	0	0	200	903	0	0	0	0	0	0	0	603	903	0
572	7	-21.6957	24.6762	-545.9	58320.9	-18709.2	-4510.07	165.728	193.166	0	0	0	0	0	0	0	200	903	0	0	0	0	0	0	0	603	903	0
572	8	-20.1698	25.4392	-548.646	58504	-18587.2	-4784.73	166.122	193.367	0	0	0	0	0	0	0	200	903	0	0	0	0	0	0	0	603	903	0
572	9	-19.7121	27.1177	-553.224	58504	-18953.4	-4784.73	165.74	194.249	0	0	0	0	0	0	0	200	903	0	0	0	0	0	0	0	603	903	0
573	0	-19.7121	28.0332	-551.698	59144.9	-18953.4	-4784.73	165.645	192.795	0	0	0	0	0	0	0	200	903	0	0	0	0	0	0	0	603	903	0
573	1	-20.6276	26.5073	-556.886	59144.9	-18587.2	-4555.85	166.623	193.794	0	0	0	0	0	0	0	200	903	0	0	0	0	0	0	0	603	903	0
573	2	-20.1698	29.5591	-559.327	60701.3	-18465.1	-4876.28	166.987	191.475	0	0	0	0	0	0	0	200	903	0	0	0	0	0	0	0	603	903	0
573	3	-19.1017	29.7116	-560.853	61067.5	-18648.2	-4738.95	166.75	191.117	0	0	0	0	0	0	0	200	903	0	0	0	0	0	0	0	603	903	0
573	4	-18.9491	30.0168	-563.6	60518.2	-19136.5	-4922.06	166.046	192.622	0	0	0	0	0	0	0	200	903	0	0	0	0	0	0	0	603	903	0
573	5	-17.881	30.6272	-568.483	61342.2	-18709.2	-4876.28	167.089	192.095	0	0	0	0	0	0	0	200	903	0	0	0	0	0	0	0	603	903	0
573	6	-19.2543	31.0849	-570.619	62074.6	-18770.3	-4922.06	167.105	191.215	0	0	0	0	0	0	0	200	903	0	0	0	0	0	0	0	603	903	0
573	7	-19.5595	32.4582	-567.872	61525.3	-18770.3	-4922.06	166.946	191.657	0	0	0	0	0	0	0	200	903	0	0	0	0	0	0	0	603	903	0
573	8	-19.7121	33.2212	-573.366	61983	-19014.4	-4922.06	166.837	191.896	0	0	0	0	0	0	0	200	903	0	0	0	0	0	0	0	603	903	0
573	9	-18.0336	35.3574	-576.417	62257.7	-19136.5	-5150.94	166.801	191.992	0	0	0	0	0	0	0	200	903	0	0	0	0	0	0	0	603	903	0
574	0	-18.1862	35.51	-580.079	62715.5	-18770.3	-4876.28	167.642	191.885	0	0	0	0	0	0	0	200	903	0	0	0	0	0	0	0	603	903	0
574	1	-18.1862	36.4255	-579.164	63173.2	-18953.4	-5517.15	167.275	190.923	0	0	0	0	0	0	0	200	903	0	0	0	0	0	0	0	603	903	0
574	2	-19.1017	36.8833	-584.047	63631	-18953.4	-4967.83	167.548	191.052	0	0	0	0	0	0	0	200	903	0	0	0	0	0	0	0	603	903	0
574	3	-19.1017	37.1885	-584.352	64546.5	-19075.5	-5288.27	167.356	189.542	0	0	0	0	0	0	0	200	903	0	0	0	0	0	0	0	603	903	0
574	4	-18.1862	37.7988	-586.793	64363.4	-19502.7	-5150.94	166.764	190.313	0	0	0	0	0	0	0	200	903	0	0	0	0	0	0	0	603	903	0
574	5	-18.3388	38.5617	-588.624	64912.7	-19014.4	-5334.04	167.697	189.721	0	0	0	0	0	0	0	200	903	0	0	0	0	0	0	0	603	903	0
574	6	-17.1181	39.0195	-592.592	64638.1	-19014.4	-5059.39	167.913	190.923	0	0	0	0	0	0	0	200	903	0	0	0	0	0	0	0	603	903	0
574	7	-18.6439	40.3928	-593.202	64546.5	-19258.6	-5837.59	167.535	191.19	0	0	0	0	0	0	0	200	903	0	0	0	0	0	0	0	603	903	0
574	8	-17.2707	41.3083	-595.033	65462	-19319.6	-5837.59	167.532	189.986	0	0	0	0	0	0	0	200	903	0	0	0	0	0	0	0	603	903	0
574	9	-18.1862	43.292	-593.812	65278.9	-18709.2	-5471.37	168.493	190.068	0	0	0	0	0	0	0	200	903	0	0	0	0	0	0	0	603	903	0
575	0	-17.2707	41.6135	-598.39	65736.7	-19014.4	-5700.26	168.224	190.144	0	0	0	0	0	0	0	200	903	0	0	0	0	0	0	0	603	903	0
575	1	-17.4232	44.8179	-601.747	66652.2	-19441.7	-6066.47	167.691	189.235	0	0	0	0	0	0	0	200	903	0	0	0	0	0	0	0	603	903	0
575	2	-18.1862	44.9704	-603.273	67018.4	-18953.4	-6249.57	168.582	188.909	0	0	0	0	0	0	0	200	903	0	0	0	0	0	0	0	603	903	0
575	3	-18.7965	45.123	-601.442	66926.9	-18892.3	-5883.36	168.588	188.723	0	0	0	0	0	0	0	200	903	0	0	0	0	0	0	0	603	903	0
575	4	-18.1862	46.6489	-606.019	67750.9	-19258.6	-5883.36	168.221	188.203	0	0	0	0	0	0	0	200	903	0	0	0	0	0	0	0	603	903	0
575	5	-17.2707	47.1067	-606.935	68300.2	-19075.5	-5837.59	168.571	187.467	0	0	0	0	0	0	0	200	903	0	0	0	0	0	0	0	603	903	0
575	6	-17.4232	48.1748	-610.902	67476.2	-19258.6	-6112.24	168.475	189.547	0	0	0	0	0	0	0	200	903	0	0	0	0	0	0	0	603	903	0
575	7	-17.2707	48.3274	-606.325	68117.1	-19624.8	-6386.9	167.633	187.656	0	0	0	0	0	0	0	200	903	0	0	0	0	0	0	0	603	903	0
575	8	-18.1862	50.0058	-613.954	67934	-19197.5	-6249.57	168.731	189.35	0	0	0	0	0	0	0	200	903	0	0	0	0	0	0	0	603	903	0
575	9	-18.1862	50.311	-614.564	68849.5	-18953.4	-6066.47	169.16	187.97	0	0	0	0	0	0	0	200	903	0	0	0	0	0	0	0	603	903	0
576	0	-17.1181	50.9214	-614.564	69398.8	-19807.9	-6478.46	167.769	187.076	0	0	0	0	0	0	0	200	903	0	0	0	0	0	0	0	603	903	0
576	1	-14.2189	52.4472	-617.616	69856.6	-19441.7	-6432.68	168.521	186.893	0	0	0	0	0	0	0	200	903	0	0	0	0	0	0	0	603	903	0
576	2	-16.2025	52.5998	-620.057	70222.8	-18831.3	-6432.68	169.63	186.748	0	0	0	0	0	0	0	200	903	0	0	0	0	0	0	0	603	903	0
576	3	-18.1862	53.2102	-621.278	70131.2	-19136.5	-6341.13	169.198	187.118	0	0	0	0	0	0	0	200	903	0	0	0	0	0	0	0	603	903	0
576	4	-17.5758	54.4309	-621.888	70589	-19258.6	-6798.89	169.032	186.493	0	0	0	0	0	0	0	200	903	0	0	0	0	0	0	0	603	903	0
576	5	-17.4232	54.4309	-620.973	70497.5	-19197.5	-6798.89	169.085	186.473	0	0	0	0	0	0	0	200	903	0	0	0	0	0	0	0	603	903	0
576	6	-16.6603	55.499	-623.414	70589	-18526.1	-6570.01	170.283	186.77	0	0	0	0	0	0	0	200	903	0	0	0	0	0	0	0	603	903	0
576	7	-17.1181	57.1775	-626.771	70680.5	-19014.4	-6844.67	169.663	187.231	0	0	0	0	0	0	0	200	903	0	0	0	0	0	0	0	603	903	0
576	8	-17.4232	57.6352	-627.076	71321.4	-19075.5	-7119.32	169.58	186.264	0	0	0	0	0	0	0	200	903	0	0	0	0	0	0	0	603	903	0
576	9	-16.2025	58.2456	-626.161	71321.4	-19441.7	-6386.9	168.951	186.097	0	0	0	0	0	0	0	200	903	0	0	0	0	0	0	0	603	903	0
577	0	-18.1862	59.3137	-627.382	71779.2	-19502.7	-6890.44	168.914	185.589	0	0	0	0	0	0	0	200	903	0	0	0	0	0	0	0	603	903	0
577	1	-16.2025	58.7034	-628.908	72420.1	-18770.3	-6753.11	170.154	184.848	0	0	0	0	0	0	0	200	903	0	0	0	0	0	0	0	603	903	0
577	2	-16.3551	60.0766	-630.128	72420.1	-19075.5	-6615.78	169.728	185.071	0	0	0	0	0	0	0	200	903	0	0	0	0	0	0	0	603	903	0
577	3	-15.8974	61.4499	-631.959	72420.1	-19197.5	-6936.22	169.622	185.404	0	0	0	0	0	0	0	200	903	0	0	0	0	0	0	0	603	903	0
577	4	-17.2707	62.518	-633.79	72328.5	-19258.6	-6936.22	169.614	185.879	0	0	0	0	0	0	0	200	903	0	0	0	0	0	0	0	603	903	0
577	5	-17.1181	62.9758	-632.264	72236.9	-19014.4	-6890.44	169.926	185.749	0	0	0	0	0	0	0	200	903	0	0	0	0	0	0	0	603	903	0
577	6	-14.9818	64.6543	-634.096	72969.4	-18831.3	-7165.1	170.302	184.924	0	0	0	0	0	0	0	200	903	0	0	0	0	0	0	0	603	903	0
577	7	-16.2025	65.4172	-633.485	72877.8	-19197.5	-7119.32	169.695	184.957	0	0	0	0	0	0	0	200	903	0	0	0	0	0	0	0	603	903	0
577	8	-16.5077	63.8913	-635.927	73244	-19014.4	-7348.21	170.1	184.823	0	0	0	0	0	0	0	200	903	0	0	0	0	0	0	0	603	903	0
577	9	-17.5758	66.7905	-636.232	74342.6	-18770.3	-7073.55	170.498	183.152	0	0	0	0	0	0	0	200	903	0	0	0	0	0	0	0	603	903	0
578	0	-17.881	67.706	-633.485	74159.6	-18648.2	-7348.21	170.563	182.934	0	0	0	0	0	0	0	200	903	0	0	0	0	0	0	0	603	903	0
578	1	-17.1181	68.1638	-635.621	74159.6	-18831.3	-7393.98	170.373	183.327	0	0	0	0	0	0	0	200	903	0	0	0	0	0	0	0	603	903	0
578	2	-16.2025	69.0793	-636.537	74525.8	-19014.4	-7393.98	170.128	182.92	0	0	0	0	0	0	0	200	903	0	0	0	0	0	0	0	603	903	0
578	3	-16.2025	69.6897	-639.894	74708.9	-19075.5	-7165.1	170.19	183.248	0	0	0	0	0	0	0	200	903	0	0	0	0	0	0	0	603	903	0
578	4	-16.2025	70.4526	-636.537	74068	-19014.4	-7210.88	170.128	183.639	0	0	0	0	0	0	0	200	903	0	0	0	0	0	0	0	603	903	0
578	5	-17.1181	70.9104	-640.199	74617.3	-18770.3	-7119.32	170.681	183.447	0	0	0	0	0	0	0	200	903	0	0	0	0	0	0	0	603	903	0
578	6	-16.9655	72.5888	-638.063	73976.4	-18709.2	-7165.1	170.678	184.061	0	0	0	0	0	0	0	200	903	0	0	0	0	0	0	0	603	903	0
578	7	-16.05	73.3518	-639.894	74617.3	-19014.4	-7073.55	170.285	183.391	0	0	0	0	0	0	0	200	903	0	0	0	0	0	0	0	603	903	0
578	8	-15.5922	74.2673	-639.284	74434.2	-18648.2	-7210.88	170.83	183.566	0	0	0	0	0	0	0	200	903	0	0	0	0	0	0	0	603	903	0
578	9	-15.287	74.5725	-640.809	75166.6	-18587.2	-7439.76	170.994	182.701	0	0	0	0	0	0	0	200	903	0	0	0	0	0	0	0	603	903	0
579	0	-15.8974	75.9458	-641.42	75807.5	-18404.1	-7485.54	171.307	181.813	0	0	0	0	0	0	0	200	903	0	0	0	0	0	0	0	603	903	0
579	1	-15.5922	76.5561	-637.147	74983.5	-18221	-7348.21	171.402	182.314	0	0	0	0	0	0	0	200	903	0	0	0	0	0	0	0	603	903	0
579	2	-16.6603	76.5561	-639.589	75807.5	-18709.2	-7531.31	170.748	181.475	0	0	0	0	0	0	0	200	903	0	0	0	0	0	0	0	603	903	0
579	3	-15.4396	77.3191	-640.809	76448.4	-18587.2	-7531.31	170.994	180.7	0	0	0	0	0	0	0	200	903	0	0	0	0	0	0	0	603	903	0
579	4	-14.9818	78.2346	-641.725	75990.6	-18343	-7531.31	171.416	181.584	0	0	0	0	0	0	0	200	903	0	0	0	0	0	0	0	603	903	0
579	5	-14.8292	78.2346	-638.368	75899	-18221	-7256.65	171.457	181.105	0	0	0	0	0	0	0	200	903	0	0	0	0	0	0	0	603	903	0
579	6	-16.3551	80.3708	-642.335	76448.4	-18770.3	-7577.09	170.778	180.984	0	0	0	0	0	0	0	200	903	0	0	0	0	0	0	0	603	903	0
579	7	-16.5077	80.8286	-639.589	75899	-18587.2	-7393.98	170.939	181.331	0	0	0	0	0	0	0	200	903	0	0	0	0	0	0	0	603	903	0
579	8	-14.8292	80.9812	-640.199	75807.5	-18648.2	-7439.76	170.871	181.588	0	0	0	0	0	0	0	200	903	0	0	0	0	0	0	0	603	903	0
579	9	-14.8292	82.0493	-638.978	76539.9	-18221	-7348.21	171.484	180.215	0	0	0	0	0	0	0	200	903	0	0	0	0	0	0	0	603	903	0
580	0	-15.287	83.27	-642.03	76906.1	-18221	-7165.1	171.62	180.214	0	0	0	0	0	0	0	200	903	0	0	0	0	0	0	0	603	903	0
580	1	-15.7448	83.1174	-641.115	77180.8	-18037.9	-7302.43	171.865	179.615	0	0	0	0	0	0	0	200	903	0	0	0	0	0	0	0	603	903	0
580	2	-14.5241	83.7278	-638.063	76539.9	-18343	-7393.98	171.252	180.043	0	0	0	0	0	0	0	200	903	0	0	0	0	0	0	0	603	903	0
580	3	-15.8974	85.2536	-637.147	77089.3	-18465.1	-7348.21	171.019	179.009	0	0	0	0	0	0	0	200	903	0	0	0	0	0	0	0	603	903	0
580	4	-14.6767	85.864	-637.452	76906.1	-17793.7	-7393.98	172.086	179.354	0	0	0	0	0	0	0	200	903	0	0	0	0	0	0	0	603	903	0
580	5	-14.5241	86.7795	-637.452	76723	-17732.7	-7531.31	172.182	179.641	0	0	0	0	0	0	0	200	903	0	0	0	0	0	0	0	603	903	0
580	6	-13.9137	88.0002	-638.063	76906.1	-17915.8	-7348.21	171.922	179.469	0	0	0	0	0	0	0	200	903	0	0	0	0	0	0	0	603	903	0
580	7	-14.9818	88.9157	-636.842	76631.5	-18098.9	-7302.43	171.58	179.67	0	0	0	0	0	0	0	200	903	0	0	0	0	0	0	0	603	903	0
580	8	-15.1344	90.1365	-634.706	76906.1	-18282	-7256.65	171.196	178.832	0	0	0	0	0	0	0	200	903	0	0	0	0	0	0	0	603	903	0
580	9	-14.2189	89.3735	-635.011	77089.3	-17854.8	-7210.88	171.883	178.602	0	0	0	0	0	0	0	200	903	0	0	0	0	0	0	0	603	903	0
581	0	-13.456	90.8994	-635.621	77638.5	-17549.6	-6707.34	172.39	177.854	0	0	0	0	0	0	0	200	903	0	0	0	0	0	0	0	603	903	0
581	1	-14.2189	91.5097	-635.316	77272.3	-17976.8	-7348.21	171.704	178.372	0	0	0	0	0	0	0	200	903	0	0	0	0	0	0	0	603	903	0
581	2	-13.9137	91.9675	-634.096	76448.4	-17671.6	-6890.44	172.131	179.437	0	0	0	0	0	0	0	200	903	0	0	0	0	0	0	0	603	903	0
581	3	-13.456	92.1201	-632.57	77363.9	-17915.8	-6890.44	171.678	177.699	0	0	0	0	0	0	0	200	903	0	0	0	0	0	0	0	603	903	0
581	4	-12.5404	91.052	-630.739	77272.3	-17244.4	-7302.43	172.66	177.489	0	0	0	0	0	0	0	200	903	0	0	0	0	0	0	0	603	903	0
581	5	-12.0827	94.1037	-631.654	76631.5	-17427.5	-7256.65	172.41	178.681	0	0	0	0	0	0	0	200	903	0	0	0	0	0	0	0	603	903	0
581	6	-11.9301	94.7141	-627.992	76723	-17488.5	-7073.55	172.152	177.828	0	0	0	0	0	0	0	200	903	0	0	0	0	0	0	0	603	903	0
581	7	-13.1508	95.477	-630.128	76906.1	-17427.5	-7027.77	172.343	177.952	0	0	0	0	0	0	0	200	903	0	0	0	0	0	0	0	603	903	0
581	8	-12.2353	96.8503	-625.551	76723	-17061.3	-7210.88	172.726	177.351	0	0	0	0	0	0	0	200	903	0	0	0	0	0	0	0	603	903	0
581	9	-12.3878	95.0193	-622.499	76906.1	-16878.2	-6844.67	172.886	176.456	0	0	0	0	0	0	0	200	903	0	0	0	0	0	0	0	603	903	0
582	0	-11.7775	97.6133	-623.414	77638.5	-17366.5	-6798.89	172.143	175.462	0	0	0	0	0	0	0	200	903	0	0	0	0	0	0	0	603	903	0
582	1	-11.3197	98.6814	-624.025	77180.8	-17244.4	-6798.89	172.366	176.318	0	0	0	0	0	0	0	200	903	0	0	0	0	0	0	0	603	903	0
582	2	-12.2353	98.834	-623.72	76814.6	-17122.3	-6936.22	172.548	176.844	0	0	0	0	0	0	0	200	903	0	0	0	0	0	0	0	603	903	0
582	3	-10.2516	99.2917	-621.888	77272.3	-16756.1	-6936.22	173.056	175.746	0	0	0	0	0	0	0	200	903	0	0	0	0	0	0	0	603	903	0
582	4	-11.7775	99.4443	-618.837	77272.3	-16878.2	-6844.67	172.726	175.133	0	0	0	0	0	0	0	200	903	0	0	0	0	0	0	0	603	903	0
582	5	-10.4042	99.9021	-618.226	76356.8	-16817.2	-6844.67	172.798	176.49	0	0	0	0	0	0	0	200	903	0	0	0	0	0	0	0	603	903	0
582	6	-10.4042	100.512	-619.142	76265.3	-17122.3	-6844.67	172.345	176.821	0	0	0	0	0	0	0	200	903	0	0	0	0	0	0	0	603	903	0
582	7	-11.1671	99.9021	-612.428	76356.8	-16756.1	-6798.89	172.64	175.321	0	0	0	0	0	0	0	200	903	0	0	0	0	0	0	0	603	903	0
582	8	-10.862	101.886	-615.785	76173.7	-16634	-6798.89	172.987	176.298	0	0	0	0	0	0	0	200	903	0	0	0	0	0	0	0	603	903	0
582	9	-10.2516	102.801	-611.207	75807.5	-16512	-6753.11	172.985	175.971	0	0	0	0	0	0	0	200	903	0	0	0	0	0	0	0	603	903	0
583	0	-9.33608	102.038	-610.292	75624.4	-16328.9	-6844.67	173.244	176.085	0	0	0	0	0	0	0	200	903	0	0	0	0	0	0	0	603	903	0
583	1	-9.64126	104.48	-609.071	76539.9	-16817.2	-6615.78	172.389	174.333	0	0	0	0	0	0	0	200	903	0	0	0	0	0	0	0	603	903	0
583	2	-9.03091	104.785	-606.325	76539.9	-16389.9	-6432.68	172.968	173.764	0	0	0	0	0	0	0	200	903	0	0	0	0	0	0	0	603	903	0
583	3	-9.94644	104.48	-604.799	76173.7	-16206.8	-6524.23	173.203	174.051	0	0	0	0	0	0	0	200	903	0	0	0	0	0	0	0	603	903	0
583	4	-9.79385	104.937	-602.357	75899	-16206.8	-6570.01	173.094	173.997	0	0	0	0	0	0	0	200	903	0	0	0	0	0	0	0	603	903	0
583	5	-8.57314	104.327	-600.221	76082.2	-16267.8	-6432.68	172.897	173.243	0	0	0	0	0	0	0	200	903	0	0	0	0	0	0	0	603	903	0
583	6	-6.89468	105.853	-599	75075.1	-16267.8	-6432.68	172.842	174.666	0	0	0	0	0	0	0	200	903	0	0	0	0	0	0	0	603	903	0
583	7	-8.57314	106.158	-598.39	74617.3	-15962.7	-6249.57	173.324	175.303	0	0	0	0	0	0	0	200	903	0	0	0	0	0	0	0	603	903	0
583	8	-8.57314	107.684	-594.728	74434.2	-16084.7	-6341.13	172.954	174.843	0	0	0	0	0	0	0	200	903	0	0	0	0	0	0	0	603	903	0
583	9	-8.72573	107.837	-591.676	74342.6	-15657.5	-6112.24	173.537	174.352	0	0	0	0	0	0	0	200	903	0	0	0	0	0	0	0	603	903	0
584	0	-7.35244	106.616	-590.455	73610.2	-15779.6	-5974.92	173.276	175.333	0	0	0	0	0	0	0	200	903	0	0	0	0	0	0	0	603	903	0
584	1	-7.50503	109.057	-582.216	74251.1	-15901.6	-5974.92	172.688	172.468	0	0	0	0	0	0	0	200	903	0	0	0	0	0	0	0	603	903	0
584	2	-7.04727	109.21	-584.047	74342.6	-15474.4	-6112.24	173.505	172.711	0	0	0	0	0	0	0	200	903	0	0	0	0	0	0	0	603	903	0
584	3	-8.72573	108.905	-581.3	73427.1	-15352.3	-5974.92	173.59	173.685	0	0	0	0	0	0	0	200	903	0	0	0	0	0	0	0	603	903	0
584	4	-6.74209	108.6	-578.248	73884.9	-15596.4	-5974.92	173.028	172.226	0	0	0	0	0	0	0	200	903	0	0	0	0	0	0	0	603	903	0
584	5	-6.89468	109.363	-571.84	74068	-15108.2	-5837.59	173.58	170.474	0	0	0	0	0	0	0	200	903	0	0	0	0	0	0	0	603	903	0
584	6	-6.13174	109.363	-573.06	73060.9	-15535.4	-5837.59	172.89	172.507	0	0	0	0	0	0	0	200	903	0	0	0	0	0	0	0	603	903	0
584	7	-6.74209	109.973	-570.314	72420.1	-15413.3	-5974.92	172.974	173.017	0	0	0	0	0	0	0	200	903	0	0	0	0	0	0	0	603	903	0
584	8	-7.19985	111.346	-566.652	72328.5	-15230.2	-5654.48	173.122	172.358	0	0	0	0	0	0	0	200	903	0	0	0	0	0	0	0	603	903	0
584	9	-7.50503	111.804	-560.548	71962.3	-15169.2	-5654.48	172.939	171.622	0	0	0	0	0	0	0	200	903	0	0	0	0	0	0	0	603	903	0
585	0	-6.5895	111.346	-559.327	71596.1	-15230.2	-5654.48	172.77	171.996	0	0	0	0	0	0	0	200	903	0	0	0	0	0	0	0	603	903	0
585	1	-4.75845	111.499	-556.886	71046.8	-15169.2	-5425.6	172.761	172.421	0	0	0	0	0	0	0	200	903	0	0	0	0	0	0	0	603	903	0
585	2	-5.67397	113.025	-555.055	71138.3	-14619.9	-5105.16	173.66	171.836	0	0	0	0	0	0	0	200	903	0	0	0	0	0	0	0	603	903	0
585	3	-4.45327	113.33	-548.951	70863.7	-14497.8	-5471.37	173.59	170.911	0	0	0	0	0	0	0	200	903	0	0	0	0	0	0	0	603	903	0
585	4	-5.06362	112.262	-547.12	69948.1	-14619.9	-5105.16	173.278	172.152	0	0	0	0	0	0	0	200	903	0	0	0	0	0	0	0	603	903	0
585	5	-4.75845	113.025	-542.848	70405.9	-14436.8	-5334.04	173.406	170.303	0	0	0	0	0	0	0	200	903	0	0	0	0	0	0	0	603	903	0
585	6	-3.69033	113.025	-538.576	69673.5	-14192.6	-5105.16	173.648	170.634	0	0	0	0	0	0	0	200	903	0	0	0	0	0	0	0	603	903	0
585	7	-3.07998	113.025	-533.388	68758	-14070.6	-5059.39	173.62	171.092	0	0	0	0	0	0	0	200	903	0	0	0	0	0	0	0	603	903	0
585	8	-3.38516	113.788	-530.946	68300.2	-13643.3	-4922.06	174.304	171.361	0	0	0	0	0	0	0	200	903	0	0	0	0	0	0	0	603	903	0
585	9	-3.69033	114.245	-526.674	67934	-14436.8	-4830.5	172.589	171.013	0	0	0	0	0	0	0	200	903	0	0	0	0	0	0	0	603	903	0
586	0	-3.53774	114.398	-522.401	67201.6	-13948.5	-4693.18	173.299	171.36	0	0	0	0	0	0	0	200	903	0	0	0	0	0	0	0	603	903	0
586	1	-3.69033	115.161	-517.518	67110	-13704.4	-4647.4	173.519	170.323	0	0	0	0	0	0	0	200	903	0	0	0	0	0	0	0	603	903	0
586	2	-2.31704	114.245	-514.467	66652.2	-13643.3	-4510.07	173.481	170.444	0	0	0	0	0	0	0	200	903	0	0	0	0	0	0	0	603	903	0
586	3	-1.24893	114.093	-510.499	65919.8	-13887.5	-4647.4	172.796	170.872	0	0	0	0	0	0	0	200	903	0	0	0	0	0	0	0	603	903	0
586	4	-2.01187	113.635	-504.701	65645.1	-13765.4	-4281.19	172.726	169.933	0	0	0	0	0	0	0	200	903	0	0	0	0	0	0	0	603	903	0
586	5	-2.92739	113.788	-499.818	64271.9	-13460.2	-4098.08	173.07	171.409	0	0	0	0	0	0	0	200	903	0	0	0	0	0	0	0	603	903	0
586	6	-2.01187	113.33	-492.189	64363.4	-13155	-4326.96	173.272	169.23	0	0	0	0	0	0	0	200	903	0	0	0	0	0	0	0	603	903	0
586	7	-2.31704	113.788	-483.644	63356.3	-13094	-4326.96	172.926	169.002	0	0	0	0	0	0	0	200	903	0	0	0	0	0	0	0	603	903	0
586	8	-1.24893	113.482	-480.287	63173.2	-12910.9	-4098.08	173.118	168.468	0	0	0	0	0	0	0	200	903	0	0	0	0	0	0	0	603	903	0
586	9	-1.40151	113.33	-475.709	61799.9	-12910.9	-4189.64	172.86	170.089	0	0	0	0	0	0	0	200	903	0	0	0	0	0	0	0	603	903	0
587	0	-1.40151	112.262	-469.301	61159.1	-12605.7	-4098.08	173.139	169.68	0	0	0	0	0	0	0	200	903	0	0	0	0	0	0	0	603	903	0
587	1	-1.5541	113.482	-463.807	59968.9	-12361.6	-3640.32	173.348	170.703	0	0	0	0	0	0	0	200	903	0	0	0	0	0	0	0	603	903	0
587	2	-2.01187	113.025	-456.178	60152	-12422.6	-3914.98	172.768	168.139	0	0	0	0	0	0	0	200	903	0	0	0	0	0	0	0	603	903	0
587	3	-0.94375	112.414	-449.159	59511.1	-12544.7	-3319.89	172.071	167.505	0	0	0	0	0	0	0	200	903	0	0	0	0	0	0	0	603	903	0
587	4	0.276953	112.414	-444.887	58961.8	-11995.4	-3502.99	173.037	167.468	0	0	0	0	0	0	0	200	903	0	0	0	0	0	0	0	603	903	0
587	5	-1.70669	109.21	-437.867	57954.7	-11995.4	-3365.66	172.605	167.643	0	0	0	0	0	0	0	200	903	0	0	0	0	0	0	0	603	903	0
587	6	-1.85928	110.431	-430.238	57130.7	-11995.4	-3640.32	172.119	167.211	0	0	0	0	0	0	0	200	903	0	0	0	0	0	0	0	603	903	0
587	7	-1.5541	108.905	-422.609	56215.2	-11812.3	-3045.23	172.049	166.98	0	0	0	0	0	0	0	200	903	0	0	0	0	0	0	0	603	903	0
587	8	-1.40151	107.837	-417.726	55940.5	-11385	-2862.12	172.745	166.083	0	0	0	0	0	0	0	200	903	0	0	0	0	0	0	0	603	903	0
587	9	-0.180811	107.531	-409.486	53834.8	-11385	-3091	172.197	168.531	0	0	0	0	0	0	0	200	903	0	0	0	0	0	0	0	603	903	0
588	0	-0.791162	107.531	-404.298	53194	-11201.9	-3228.33	172.293	168.429	0	0	0	0	0	0	0	200	903	0	0	0	0	0	0	0	603	903	0
588	1	-0.94375	106.616	-396.058	52461.5	-10957.8	-2999.45	172.333	167.541	0	0	0	0	0	0	0	200	903	0	0	0	0	0	0	0	603	903	0
588	2	-0.180811	104.327	-389.039	51454.5	-11140.9	-3045.23	171.363	167.74	0	0	0	0	0	0	0	200	903	0	0	0	0	0	0	0	603	903	0
588	3	-1.24893	104.175	-379.274	51454.5	-11201.9	-3045.23	170.465	164.334	0	0	0	0	0	0	0	200	903	0	0	0	0	0	0	0	603	903	0
588	4	-0.485986	103.106	-373.781	50538.9	-10896.7	-2862.12	170.847	164.79	0	0	0	0	0	0	0	200	903	0	0	0	0	0	0	0	603	903	0
588	5	-0.791162	101.275	-367.982	49440.3	-10530.5	-2679.02	171.383	165.645	0	0	0	0	0	0	0	200	903	0	0	0	0	0	0	0	603	903	0
588	6	-0.791162	99.9021	-356.386	47975.5	-10408.5	-2724.79	170.794	165.383	0	0	0	0	0	0	0	200	903	0	0	0	0	0	0	0	603	903	0
588	7	-1.24893	98.834	-352.723	48067	-10408.5	-2541.69	170.491	163.726	0	0	0	0	0	0	0	200	903	0	0	0	0	0	0	0	603	903	0
588	8	-0.94375	97.0029	-343.263	46785.3	-10164.3	-2724.79	170.389	163.704	0	0	0	0	0	0	0	200	903	0	0	0	0	0	0	0	603	903	0
588	9	-0.791162	94.7141	-334.108	45137.3	-10225.4	-2450.13	169.395	164.902	0	0	0	0	0	0	0	200	903	0	0	0	0	0	0	0	603	903	0
589	0	-0.638574	92.2727	-328.004	44221.8	-9798.11	-2358.58	170.128	165.179	0	0	0	0	0	0	0	200	903	0	0	0	0	0	0	0	603	903	0
589	1	-0.180811	91.8149	-322.816	43672.5	-9492.93	-2267.03	170.593	164.714	0	0	0	0	0	0	0	200	903	0	0	0	0	0	0	0	603	903	0
589	2	-0.333399	90.1365	-313.661	42390.7	-9309.83	-2358.58	170.319	164.852	0	0	0	0	0	0	0	200	903	0	0	0	0	0	0	0	603	903	0
589	3	0.124365	88.6106	-302.98	41200.6	-9065.69	-2129.7	170.078	164.015	0	0	0	0	0	0	0	200	903	0	0	0	0	0	0	0	603	903	0
589	4	-0.333399	87.2373	-292.604	40010.4	-8638.44	-2038.15	170.477	163.261	0	0	0	0	0	0	0	200	903	0	0	0	0	0	0	0	603	903	0
589	5	-0.180811	84.7959	-286.195	39827.3	-8821.55	-2083.92	169.176	160.839	0	0	0	0	0	0	0	200	903	0	0	0	0	0	0	0	603	903	0
589	6	-0.0282228	83.27	-279.786	39094.8	-8455.34	-2312.8	169.779	160.269	0	0	0	0	0	0	0	200	903	0	0	0	0	0	0	0	603	903	0
589	7	0.734717	80.3708	-272.157	37630	-8455.34	-1946.59	168.932	161.734	0	0	0	0	0	0	0	200	903	0	0	0	0	0	0	0	603	903	0
589	8	-0.333399	77.3191	-261.171	37172.2	-8394.3	-1717.71	167.859	157.671	0	0	0	0	0	0	0	200	903	0	0	0	0	0	0	0	603	903	0
589	9	0.887305	72.4363	-255.678	35982.1	-7844.98	-1763.49	169.317	159.268	0	0	0	0	0	0	0	200	903	0	0	0	0	0	0	0	603	903	0
590	0	2.2606	71.9785	-248.048	35066.5	-7844.98	-1717.71	168.373	158.63	0	0	0	0	0	0	0	200	903	0	0	0	0	0	0	0	603	903	0
590	1	2.2606	68.3164	-243.471	33967.9	-7661.88	-1397.28	168.531	160.485	0	0	0	0	0	0	0	200	903	0	0	0	0	0	0	0	603	903	0
590	2	1.49766	65.875	-229.738	32503.1	-7722.91	-1259.95	166.384	158.521	0	0	0	0	0	0	0	200	903	0	0	0	0	0	0	0	603	903	0
590	3	0.887305	62.6706	-225.465	31496	-7356.7	-1168.4	167.371	160.307	0	0	0	0	0	0	0	200	903	0	0	0	0	0	0	0	603	903	0
590	4	0.887305	61.6025	-216.31	30763.6	-6624.28	-985.29	169.376	157.78	0	0	0	0	0	0	0	200	903	0	0	0	0	0	0	0	603	903	0
590	5	1.95542	58.7034	-208.07	30397.3	-6441.17	-573.302	169.043	153.908	0	0	0	0	0	0	0	200	903	0	0	0	0	0	0	0	603	903	0
590	6	3.78647	55.1938	-200.136	28932.5	-6441.17	-1214.17	167.816	155.436	0	0	0	0	0	0	0	200	903	0	0	0	0	0	0	0	603	903	0
590	7	3.02354	52.4472	-194.948	28474.7	-6685.31	-985.29	165.707	153.936	0	0	0	0	0	0	0	200	903	0	0	0	0	0	0	0	603	903	0
590	8	2.2606	50.311	-187.623	27467.7	-6319.1	-847.961	166.32	153.602	0	0	0	0	0	0	0	200	903	0	0	0	0	0	0	0	603	903	0
590	9	3.02354	46.9541	-180.299	26826.8	-5891.86	-893.737	167.322	151.21	0	0	0	0	0	0	0	200	903	0	0	0	0	0	0	0	603	903	0
591	0	2.71836	43.9023	-170.839	25819.7	-5281.5	-710.631	169.085	148.865	0	0	0	0	0	0	0	200	903	0	0	0	0	0	0	0	603	903	0
591	1	4.24424	42.2239	-165.956	25087.3	-5586.68	-527.526	166.336	148.832	0	0	0	0	0	0	0	200	903	0	0	0	0	0	0	0	603	903	0
591	2	4.85459	39.3247	-161.073	23897.1	-5342.54	-481.75	166.832	151.638	0	0	0	0	0	0	0	200	903	0	0	0	0	0	0	0	603	903	0
591	3	2.71836	37.1885	-155.885	23622.4	-5159.43	-207.091	166.902	148.462	0	0	0	0	0	0	0	200	903	0	0	0	0	0	0	0	603	903	0
591	4	4.702	33.6789	-147.951	23164.7	-5281.5	-207.091	164.302	143.43	0	0	0	0	0	0	0	200	903	0	0	0	0	0	0	0	603	903	0
591	5	3.63389	31.0849	-140.931	22798.5	-4915.29	-344.421	165.123	138.23	0	0	0	0	0	0	0	200	903	0	0	0	0	0	0	0	603	903	0
591	6	4.702	29.1013	-136.354	21608.3	-4793.22	21.7904	164.847	141.528	0	0	0	0	0	0	0	200	903	0	0	0	0	0	0	0	603	903	0
591	7	4.24424	25.2866	-132.997	21150.5	-4793.22	-115.539	163.96	140.97	0	0	0	0	0	0	0	200	903	0	0	0	0	0	0	0	603	903	0
591	8	5.15977	24.6762	-127.504	20051.9	-4243.91	159.12	166.715	142.735	0	0	0	0	0	0	0	200	903	0	0	0	0	0	0	0	603	903	0
591	9	5.00718	22.2348	-125.062	19319.5	-4182.87	159.12	166.554	145.521	0	0	0	0	0	0	0	200	903	0	0	0	0	0	0	0	603	903	0
592	0	4.85459	20.2512	-118.959	19502.6	-3938.73	159.12	166.89	136.056	0	0	0	0	0	0	0	200	903	0	0	0	0	0	0	0	603	903	0
592	1	6.07529	18.7253	-118.348	18770.1	-4243.91	21.7904	164.141	141.399	0	0	0	0	0	0	0	200	903	0	0	0	0	0	0	0	603	903	0
592	2	5.61753	17.352	-115.602	18312.4	-4121.84	67.5668	164.345	141.591	0	0	0	0	0	0	0	200	903	0	0	0	0	0	0	0	603	903	0
592	3	4.09165	16.4365	-111.024	18587	-3572.52	204.896	167.822	132.586	0	0	0	0	0	0	0	200	903	0	0	0	0	0	0	0	603	903	0
592	4	3.02354	16.4365	-106.752	18129.3	-3755.63	21.7904	164.819	130.174	0	0	0	0	0	0	0	200	903	0	0	0	0	0	0	0	603	903	0
592	5	3.78647	17.8098	-102.479	16847.5	-3755.63	-69.7623	163.352	135.601	0	0	0	0	0	0	0	200	903	0	0	0	0	0	0	0	603	903	0
592	6	4.09165	15.9787	-99.4276	16939.1	-3511.49	-69.7623	164.683	129.634	0	0	0	0	0	0	0	200	903	0	0	0	0	0	0	0	603	903	0
592	7	5.15977	12.0115	-101.259	15932	-3450.45	-69.7623	165.924	142.66	0	0	0	0	0	0	0	200	903	0	0	0	0	0	0	0	603	903	0
592	8	3.78647	10.333	-96.0706	15016.5	-3511.49	-23.9859	163.449	143.693	0	0	0	0	0	0	0	200	903	0	0	0	0	0	0	0	603	903	0
592	9	3.4813	11.5537	-92.4085	14650.3	-3145.27	-161.315	165.963	141.462	0	0	0	0	0	0	0	200	903	0	0	0	0	0	0	0	603	903	0
593	0	3.4813	9.87522	-86.305	13917.8	-3511.49	-115.539	159.313	138.736	0	0	0	0	0	0	0	200	903	0	0	0	0	0	0	0	603	903	0
593	1	2.41318	5.90794	-80.5067	13460.1	-3145.27	250.672	160.932	132.808	0	0	0	0	0	0	0	200	903	0	0	0	0	0	0	0	603	903	0
593	2	3.93906	7.89158	-81.117	13277	-2901.13	21.7904	164.235	136.323	0	0	0	0	0	0	0	200	903	0	0	0	0	0	0	0	603	903	0
593	3	3.93906	8.04417	-79.8963	13093.9	-2290.78	-23.9859	171.328	136.114	0	0	0	0	0	0	0	200	903	0	0	0	0	0	0	0	603	903	0
593	4	3.02354	6.21311	-75.3187	12453	-2718.03	204.896	163.913	134.662	0	0	0	0	0	0	0	200	903	0	0	0	0	0	0	0	603	903	0
593	5	3.4813	5.145	-70.4359	11995.2	-2840.1	204.896	159.678	129.7	0	0	0	0	0	0	0	200	903	0	0	0	0	0	0	0	603	903	0
593	6	2.56577	4.68724	-67.9944	11445.9	-2534.92	204.896	162.719	131.664	0	0	0	0	0	0	0	200	903	0	0	0	0	0	0	0	603	903	0
593	7	3.93906	7.12864	-63.1116	10438.8	-1985.61	159.12	168.538	134.597	0	0	0	0	0	0	0	200	903	0	0	0	0	0	0	0	603	903	0
593	8	3.02354	6.21311	-61.8909	9797.97	-1802.5	250.672	170.876	141.69	0	0	0	0	0	0	0	200	903	0	0	0	0	0	0	0	603	903	0
593	9	3.63389	6.67088	-56.7029	9797.97	-2595.96	250.672	154.218	127.205	0	0	0	0	0	0	0	200	903	0	0	0	0	0	0	0	603	903	0
594	0	3.17612	6.3657	-54.8719	8699.34	-2168.71	388.001	160.477	141.461	0	0	0	0	0	0	0	200	903	0	0	0	0	0	0	0	603	903	0
594	1	3.02354	8.80711	-50.9046	8333.13	-1863.54	-115.539	163.392	136.299	0	0	0	0	0	0	0	200	903	0	0	0	0	0	0	0	603	903	0
594	2	3.63389	7.28123	-48.158	7966.92	-1558.36	-23.9859	167.641	134.567	0	0	0	0	0	0	0	200	903	0	0	0	0	0	0	0	603	903	0
594	3	3.17612	6.3657	-45.7166	7966.92	-1314.22	67.5668	171.253	125.733	0	0	0	0	0	0	0	200	903	0	0	0	0	0	0	0	603	903	0
594	4	4.24424	6.97605	-45.1063	6868.28	-1619.4	-69.7623	164.098	147.731	0	0	0	0	0	0	0	200	903	0	0	0	0	0	0	0	603	903	0
594	5	3.02354	6.97605	-43.5804	6868.28	-1558.36	250.672	164.242	142.4	0	0	0	0	0	0	0	200	903	0	0	0	0	0	0	0	603	903	0
594	6	3.17612	5.29759	-38.3924	6135.86	-1070.08	67.5668	172.128	140.18	0	0	0	0	0	0	0	200	903	0	0	0	0	0	0	0	603	903	0
594	7	2.41318	4.83982	-33.8148	5494.99	-1253.18	67.5668	162.94	137.497	0	0	0	0	0	0	0	200	903	0	0	0	0	0	0	0	603	903	0
594	8	4.39683	6.3657	-34.4251	5769.65	-1009.04	388.001	170.689	132.4	0	0	0	0	0	0	0	200	903	0	0	0	0	0	0	0	603	903	0
594	9	3.63389	5.75535	-34.7303	5311.89	-1192.15	-23.9859	165.674	147.053	0	0	0	0	0	0	0	200	903	0	0	0	0	0	0	0	603	903	0
595	0	2.41318	3.61912	-31.6785	4671.02	-1070.08	-252.868	166.221	152.549	0	0	0	0	0	0	0	200	903	0	0	0	0	0	0	0	603	903	0
595	1	3.4813	4.07688	-28.9319	4762.57	-764.903	113.343	173.562	135.387	0	0	0	0	0	0	0	200	903	0	0	0	0	0	0	0	603	903	0
595	2	2.41318	4.68724	-28.0164	4579.46	-1314.22	-69.7623	153.091	136.544	0	0	0	0	0	0	0	200	903	0	0	0	0	0	0	0	603	903	0
595	3	2.87095	3.31394	-25.2698	4213.25	-825.938	-23.9859	167.315	133.269	0	0	0	0	0	0	0	200	903	0	0	0	0	0	0	0	603	903	0
595	4	2.71836	3.46653	-25.575	3663.94	-1009.04	-435.973	160.546	156.738	0	0	0	0	0	0	0	200	903	0	0	0	0	0	0	0	603	903	0
595	5	3.93906	3.00877	-22.2181	3297.73	-948.008	67.5668	157.332	151.575	0	0	0	0	0	0	0	200	903	0	0	0	0	0	0	0	603	903	0
[truncated: 1,224 more rows]
