# Supplementary material for: The Effects of an Extemporaneous Speech Dual-task on Older Adult Gait Control
Source: Research Square preprint supplement (doi:10.21203/rs.3.rs-7674245/v1), 2025-11-18
Supplement: Supplementary file 185 [file Over7ground10.xlsx]

## Sheet: Sheet1
Trajectories
		07:LFHD			07:RFHD			07:LBHD			07:RBHD			07:C7			07:T10			07:CLAV			07:STRN			07:RBAK			07:LSHO			07:LUPA			07:LELB			07:LFRM			07:LWRA			07:LWRB			07:LFIN
Frame	Sub Frame	X	Y	Z	X	Y	Z	X	Y	Z	X	Y	Z	X	Y	Z	X	Y	Z	X	Y	Z	X	Y	Z	X	Y	Z	X	Y	Z	X	Y	Z	X	Y	Z	X	Y	Z	X	Y	Z	X	Y	Z	X	Y	Z
		mm	mm	mm	mm	mm	mm	mm	mm	mm	mm	mm	mm	mm	mm	mm	mm	mm	mm	mm	mm	mm	mm	mm	mm	mm	mm	mm	mm	mm	mm	mm	mm	mm	mm	mm	mm	mm	mm	mm	mm	mm	mm	mm	mm	mm	mm	mm	mm
566	0	146.169	-1185.82	1604.96	244.71	-1180.46	1606	131.126	-1341.13	1612.5	259.972	-1351.3	1606.63	218.548	-1398.51	1487.24				202.431	-1279.89	1397.47	199.62	-1216.57	1246.12	306.7	-1468.24	1294.02	42.3084	-1394.66	1438.09	-16.5672	-1405.89	1256.25	-38.9778	-1423.09	1105.11	-81.3558	-1279.39	1000.96	-62.7323	-1210.39	954.552	-93.345	-1261.07	920.741	-112.971	-1174.05	895.648
567	0	145.785	-1170.69	1606.59	244.409	-1165.01	1607.58	131.206	-1325.87	1615.09	260.185	-1335.8	1609.34	218.963	-1383.56	1489.3				202.042	-1265.22	1399.73	198.17	-1202.72	1247.97	307.744	-1452.97	1296.27	42.5247	-1381	1440.01	-15.2544	-1393.76	1257.89	-35.7219	-1412.32	1106.56	-77.572	-1272.56	997.493	-58.6476	-1204.7	949.053	-88.8008	-1256.57	916.553	-108.326	-1170.55	888.301
568	0	145.505	-1155.72	1607.78	244.03	-1149.68	1608.83	131.176	-1310.82	1617.43	260.305	-1320.48	1611.72	219.348	-1368.68	1491.31				201.747	-1250.55	1401.55	197.247	-1188.62	1250.2	308.646	-1437.86	1298.31	42.9389	-1367.48	1441.72	-13.2652	-1382.14	1259.59	-32.6379	-1401.68	1108.16	-73.7985	-1265.51	993.896	-54.4605	-1199.45	943.435	-84.103	-1252.47	912.645	-103.28	-1167.55	880.992
569	0	145.106	-1140.73	1609.24	243.727	-1134.48	1610.35	131.289	-1296.04	1619.37	260.272	-1305.29	1613.82	219.654	-1353.9	1493.43				201.699	-1236.01	1403.74	196.382	-1174.19	1252.42	309.455	-1422.8	1300.29	43.2752	-1353.88	1443.46	-11.8224	-1370.53	1260.96	-29.7506	-1390.97	1109.69	-70.0051	-1258.98	990.625	-50.2589	-1194.63	938.103	-79.7288	-1248.9	908.714	-98.135	-1165.18	873.599
570	0	144.693	-1125.92	1610.32	243.288	-1119.53	1611.78	131.235	-1281.18	1621.45	260.272	-1290.21	1616	219.924	-1339.08	1495.3				201.543	-1221.62	1405.66	195.904	-1159.58	1254.71	310.326	-1407.59	1302.21	43.7654	-1340.19	1444.87	-10.3022	-1359.08	1261.98	-26.7983	-1380.47	1110.95	-66.2148	-1252.71	987.35	-45.7919	-1190.5	932.153	-75.3961	-1245.55	905.125	-92.7314	-1163.2	866.09
571	0	144.26	-1111.17	1611.43	242.916	-1104.51	1613.01	131.137	-1266.42	1622.95	260.246	-1275.26	1617.9	220.165	-1324.35	1496.92				201.534	-1207	1407.31	195.373	-1144.82	1256.34	311.198	-1392.45	1303.96	44.2316	-1326.29	1445.65	-8.83841	-1347.2	1263.1	-23.8639	-1370.04	1112.03	-62.5767	-1246.62	984.075	-41.2298	-1186.85	926.946	-71.2946	-1242.4	901.507	-87.2758	-1161.71	858.817
572	0	144.039	-1096.56	1612.61	242.361	-1089.78	1613.64	131.131	-1251.71	1624.43	260.276	-1260.28	1619.43	220.451	-1309.59	1498.2	225.519	-1382.66	1244.89	201.869	-1192.51	1408.65	195.641	-1130.05	1258.56	312.032	-1377.35	1305.53	44.699	-1312.43	1446.62	-7.27869	-1335.34	1264.02	-20.625	-1359.7	1112.86	-58.6517	-1240.84	980.618	-36.792	-1183.43	921.689	-67.3007	-1239.44	898.23	-81.7059	-1160.5	851.633
573	0	143.837	-1081.9	1613.69	242.14	-1075.04	1614.76	131.056	-1237.21	1625.63	260.263	-1245.39	1620.95	220.626	-1294.77	1499.3	226.534	-1367.33	1246.14	201.962	-1177.87	1410.06	195.677	-1115.4	1259.42	312.792	-1362.24	1306.84	45.0612	-1298.59	1447.35	-5.56396	-1323.44	1264.48	-17.4774	-1349.33	1113.86	-54.6478	-1235.35	977.451	-32.0641	-1180.22	916.219	-63.585	-1237.01	895.319	-76.0185	-1159.92	844.4
574	0	143.559	-1067.19	1614.51	241.819	-1060.17	1615.89	130.841	-1222.37	1626.65	260.07	-1230.65	1622.19	220.604	-1280.23	1500.42	227.263	-1352.03	1247.19	202.122	-1163.28	1410.93	196.193	-1100.88	1260.65	313.404	-1347.2	1307.94	45.61	-1284.3	1447.67	-3.96875	-1311.19	1264.53	-14.2393	-1339.08	1114.28	-50.8364	-1229.95	974.28	-27.6111	-1177.54	910.738	-59.8159	-1234.42	892.35	-70.716	-1159.84	837.743
575	0	143.072	-1052.55	1615.05	241.422	-1045.68	1616.57	130.696	-1207.78	1627.4	259.843	-1216.12	1622.94	220.693	-1265.33	1501.03	227.759	-1337.27	1247.77	201.948	-1148.5	1411.85	196.713	-1086.3	1261.33	313.875	-1332.26	1308.79	45.7862	-1269.95	1447.67	-2.56649	-1298.59	1264.47	-10.9802	-1328.74	1114.65	-46.8975	-1224.74	971.124	-23.2414	-1174.83	906.104	-55.774	-1232.13	889.337	-65.415	-1160.15	831.203
576	0	142.771	-1038.03	1615.39	241.386	-1030.8	1617.41	130.478	-1193.42	1627.53	259.708	-1201.37	1623.41	220.751	-1250.68	1501.39	228.485	-1322.04	1248.29	202.197	-1133.85	1412.48	197.226	-1071.7	1261.65	314.453	-1317.19	1309.42	45.9313	-1255.59	1447.76	-0.993528	-1285.75	1264.35	-7.52704	-1318.39	1115.12	-42.8838	-1219.51	967.797	-18.8533	-1172.43	900.827	-51.6685	-1230.05	886.336	-60.3816	-1160.44	825.295
577	0	142.442	-1023.56	1615.82	240.831	-1016.23	1617.46	130.226	-1178.63	1627.69	259.472	-1186.74	1623.71	220.904	-1235.9	1501.53	229.002	-1307.09	1248.61	202.24	-1119.06	1412.59	197.758	-1057.02	1261.92	314.828	-1302.31	1309.76	46.1519	-1240.97	1447.6	0.657681	-1272.9	1264.05	-4.05305	-1307.98	1115.34	-38.7763	-1214.6	964.839	-14.4419	-1170.36	895.819	-47.5806	-1228.08	883.767	-55.4475	-1161.11	819.529
578	0	142.238	-1008.85	1615.92	240.289	-1001.77	1617.48	129.955	-1164.07	1627.49	259.238	-1172.02	1623.8	220.884	-1221.05	1501.42	229.433	-1292.04	1248.77	202.258	-1104.26	1412.51	198.17	-1042.06	1261.68	315.233	-1287.35	1309.96	46.1302	-1226.33	1446.99	2.62925	-1259.71	1263.48	-0.389024	-1297.29	1115.29	-34.9663	-1209.73	962.106	-10.5711	-1167.56	891.421	-43.2557	-1226.07	881.315	-50.8305	-1161.92	814.343
579	0	141.962	-994.193	1615.38	240.218	-987.043	1617.71	129.76	-1149.47	1626.87	259.034	-1157.37	1623.44	220.903	-1206.23	1501.24	229.768	-1276.97	1248.43	202.396	-1089.46	1412.13	198.714	-1026.93	1261.5	315.617	-1272.37	1309.94	46.1691	-1211.63	1446.29	4.15309	-1246.54	1262.52	3.21631	-1286.55	1115.22	-31.0048	-1204.79	959.163	-6.54694	-1165.29	887.78	-38.6845	-1224.29	878.956	-46.151	-1162.9	809.17
580	0	141.666	-979.669	1614.9	239.94	-972.287	1617.37	129.494	-1134.85	1625.92	258.657	-1142.68	1622.84	220.797	-1191.3	1500.6	230.02	-1261.92	1247.7	202.537	-1074.37	1411.61	198.837	-1011.72	1260.4	315.707	-1257.55	1309.39	46.2954	-1196.95	1445.38	5.80213	-1233.75	1261.31	6.73238	-1275.86	1115.11	-27.1918	-1200.06	956.246	-2.94408	-1162.5	884.011	-34.1478	-1222.57	876.65	-41.7492	-1164.13	804.905
581	0	141.334	-964.925	1614.34	239.43	-957.603	1616.81	129.049	-1120.32	1624.75	258.35	-1127.92	1621.79	220.781	-1176.32	1499.59	230.076	-1246.98	1246.68	202.529	-1059.52	1410.38	199.116	-996.682	1259.54	315.883	-1242.36	1308.55	46.4076	-1182.15	1444.08	7.37544	-1220.76	1260.19	10.0748	-1264.87	1114.85	-23.282	-1195.17	953.473	2.90112	-1162.03	877.782	-29.4484	-1220.69	874.66	-38.3306	-1164.8	801.066
582	0	140.907	-950.111	1613.53	238.505	-943.379	1615.55	128.763	-1105.53	1623.32	257.928	-1113.26	1620.52	220.679	-1161.14	1498.22	230.315	-1231.63	1245.44	202.684	-1044.3	1409.27	199.551	-981.649	1258.22	315.91	-1227.47	1307.71	46.3761	-1167.35	1442.59	8.86231	-1207.8	1259.13	13.3976	-1253.76	1114.39	-19.6064	-1190.29	950.57	7.74391	-1159.88	873.604	-24.6217	-1218.56	872.84	-34.2357	-1165.49	797.709
583	0	140.439	-935.457	1612.53	238.074	-928.465	1614.59	128.425	-1090.85	1621.6	257.578	-1098.45	1619.09	220.521	-1146.07	1496.88	230.401	-1216.63	1243.87	202.55	-1029.07	1407.91	199.626	-966.863	1256.57	315.937	-1212.28	1306.45	46.3089	-1152.43	1441.18	10.4616	-1195.25	1257.52	16.6776	-1242.61	1113.78	-16.167	-1185.04	948.04	11.0693	-1156.69	870.42	-19.6944	-1216.17	871.11	-30.1185	-1165.99	794.249
584	0	140.056	-920.646	1611.26	237.993	-913.365	1614.2	128.18	-1076.05	1619.86	257.388	-1083.48	1617.46	220.391	-1130.73	1495.29	230.577	-1201.31	1242.26	202.436	-1013.72	1406.44	200.066	-952.128	1255.52	315.833	-1197.39	1304.99	46.1902	-1137.42	1439.35	11.4544	-1182.41	1256.2	19.6248	-1231.15	1113.47	-12.8496	-1179.64	945.811	14.4565	-1153.51	867.349	-15.1159	-1213.19	869.824	-25.472	-1166.48	790.397
585	0	139.453	-905.707	1609.99	237.177	-898.71	1612.83	127.669	-1061.17	1618.01	256.957	-1068.53	1615.79	220.145	-1115.43	1493.61	230.329	-1186.24	1240.71	202.104	-998.333	1404.54	199.828	-937.231	1253.09	315.956	-1181.87	1303.42	45.9864	-1122.27	1437.44	12.8652	-1169.62	1254.68	22.3325	-1219.41	1113	-9.91786	-1173.93	943.9	17.3354	-1149.37	864.778	-10.7875	-1209.85	868.844	-21.2381	-1166.36	787.399
586	0	138.8	-890.832	1608.56	236.928	-883.417	1611.83	127.206	-1046.37	1615.77	256.45	-1053.67	1613.77	219.692	-1100.09	1491.49	229.804	-1171.18	1239	201.803	-983.128	1402.49	199.734	-922.231	1250.83	315.654	-1166.96	1301.71	45.559	-1107.1	1435.25	13.9233	-1156.67	1253.12	24.918	-1207.74	1111.88	-7.17628	-1167.84	941.844	20.1503	-1144.92	862.164	-6.98994	-1205.89	867.989	-17.2913	-1165.35	784.819
587	0	138.448	-875.999	1606.85	236.392	-868.461	1610.37	126.593	-1031.46	1613.68	255.877	-1038.64	1611.26	219.359	-1084.63	1489.46	229.809	-1155.65	1236.55	201.619	-967.72	1400.43	199.758	-907.197	1248.64	315.402	-1151.56	1299.83	45.2825	-1091.86	1433.11	15.0745	-1143.63	1251.18	27.2577	-1195.86	1111.1	-4.68668	-1161.35	940.131	22.8002	-1140.27	859.391	-2.81185	-1201.53	866.616	-13.3978	-1163.81	782.517
588	0	137.719	-860.928	1605.16	235.524	-853.513	1608.34	126.07	-1016.67	1611.21	255.338	-1023.57	1608.92	218.972	-1069.14	1487.22	229.017	-1140.94	1234.29	200.995	-952.231	1398.06	199.504	-891.752	1246.16	314.897	-1136.2	1297.74	44.8415	-1076.58	1430.64	15.839	-1130.28	1249.34	29.1359	-1183.79	1110.01	-2.20824	-1154.35	938.293	24.9725	-1134.83	857.2	0.753559	-1196.28	865.782	-9.50436	-1161.64	780.382
589	0	137.179	-845.869	1603.4	235.017	-838.356	1606.97	125.484	-1001.39	1608.92	254.663	-1008.38	1606.74	218.121	-1053.67	1484.99	228.285	-1125.33	1232.38	200.762	-936.711	1395.77	199.057	-876.131	1243.59	314.376	-1121.12	1295.68	44.3413	-1061.17	1428.2	16.4647	-1116.72	1247.5	30.6915	-1171.09	1109.22	-0.462731	-1146.66	936.667	26.6513	-1128.33	855.582	3.75121	-1190.17	865.235	-5.98205	-1158.59	778.485
590	0	136.655	-830.778	1601.54	234.153	-823.39	1604.9	124.962	-986.354	1606.41	254.145	-993.3	1604.6	217.482	-1038.17	1482.7	227.563	-1109.91	1229.84	200.107	-921.043	1393.52	198.872	-860.295	1241.22	313.762	-1105.49	1293.59	43.7562	-1045.62	1425.65	16.7309	-1102.51	1246.08	32.2103	-1158.04	1108.12	1.26488	-1138.29	935.149	28.8919	-1121.82	853.034	6.81004	-1183.42	864.728	-2.46032	-1154.7	776.868
591	0	135.809	-815.634	1599.7	233.188	-808.237	1602.89	124.087	-971.077	1604.27	253.449	-978.202	1602.18	216.624	-1022.58	1480.43	226.632	-1094.36	1227.46	199.528	-905.414	1390.98	198.417	-844.325	1238.93	313.005	-1089.94	1291.44	42.9528	-1029.89	1423.41	17.0309	-1088.44	1243.79	32.8029	-1145	1107.2	2.78504	-1129.26	933.792	30.0572	-1114.29	851.93	8.97813	-1176	864.412	0.656156	-1149.83	775.522
592	0	135.033	-800.274	1597.89	232.773	-792.683	1601.61	123.382	-955.856	1601.96	252.515	-962.696	1599.79	215.715	-1007.12	1478.21	225.296	-1078.35	1225.24	198.842	-889.759	1388.94	197.844	-828.583	1236.53	311.909	-1074.47	1289.05	42.0027	-1014	1421.08	16.5196	-1073.68	1241.89	33.4959	-1131.29	1105.72	3.80136	-1119.71	932.275	31.8573	-1106.24	849.905	10.9574	-1167.72	863.978	3.47824	-1144.05	774.322
593	0	134.1	-784.99	1596.32	231.659	-777.625	1599.74	122.387	-940.372	1599.76	251.795	-947.601	1597.87	214.49	-991.544	1476.1	223.955	-1062.5	1223.13	197.971	-873.989	1386.62	197.6	-812.581	1234.85	310.598	-1059.12	1286.97	40.8041	-998.034	1418.94	15.8564	-1058.59	1240.25	33.5401	-1117.19	1104.86	4.78581	-1109.16	931.204	32.2519	-1097.11	849.569	12.5612	-1158.61	863.749	5.84693	-1137.11	773.189
594	0	133.376	-769.546	1594.6	230.809	-762.289	1598.12	121.555	-924.978	1597.7	250.832	-932.278	1595.82	213.288	-975.98	1474.18	222.331	-1046.87	1221.22	197.195	-858.261	1384.84	197.036	-796.828	1233.1	309.217	-1043.42	1284.96	39.588	-981.891	1416.93	14.9761	-1043.12	1238.49	33.0262	-1102.84	1103.89	5.33475	-1097.88	929.845	32.111	-1085.93	849.069	13.5888	-1148.73	863.522	7.89046	-1129.37	772.157
595	0	132.374	-754.062	1593.08	230.001	-746.952	1596.61	120.616	-909.593	1595.8	249.936	-916.988	1594.05	212.035	-960.38	1471.97	221.07	-1030.6	1218.97	196.183	-842.423	1382.94	196.136	-780.922	1230.97	307.506	-1027.75	1282.75	38.1488	-965.559	1415.17	13.8652	-1027.45	1236.69	32.3965	-1088.14	1103.03	5.44684	-1085.86	929.037	32.7232	-1075.23	847.83	14.3154	-1137.92	863.308	9.44931	-1120.12	771.601
596	0	131.614	-738.573	1591.66	229.319	-731.477	1595.37	119.559	-894.031	1594.32	249.029	-901.516	1592.23	210.568	-944.768	1470.14	219.231	-1014.55	1217	195.017	-826.575	1381.35	195.325	-764.808	1229.69	305.76	-1011.77	1280.79	36.7322	-949.37	1413.36	12.3586	-1011.49	1235.16	31.59	-1072.83	1101.83	5.30129	-1073.11	927.947	33.0203	-1063.85	846.741	14.5017	-1125.82	863.269	10.361	-1109.98	770.99
597	0	130.803	-723.061	1590.31	228.229	-716.203	1593.56	118.513	-878.542	1592.61	247.964	-886.189	1591	209.089	-929.085	1468.34	218.265	-997.417	1214.66	193.824	-810.7	1379.69	193.606	-748.282	1227.45	303.612	-996.19	1278.95	35.1198	-932.87	1411.67	10.8129	-995.268	1233.59	30.2235	-1057.19	1100.85	4.57545	-1059.47	927.074	33.0349	-1051.61	845.562	13.8122	-1113.18	862.94	10.7678	-1098.72	770.184
598	0	130.045	-707.518	1588.67	227.709	-700.804	1592.29	117.311	-862.906	1591.11	246.697	-870.826	1588.86	207.356	-913.526	1466.77	216.233	-981.596	1212.57	192.472	-794.853	1378.17	192.845	-731.829	1226.83	301.521	-980.19	1276.89	33.5081	-916.668	1410.17	8.96041	-978.848	1232.02	28.5457	-1041.45	1099.69	3.53715	-1045.06	925.992	32.2793	-1038.14	844.76	12.6032	-1099.52	862.454	10.5718	-1086.33	769.628
599	0	129.194	-691.827	1588.03	226.859	-685.355	1591.18	116.32	-847.18	1589.98	245.508	-855.571	1587.58	205.684	-898.023	1465.37	214.263	-965.604	1210.92	191.182	-778.942	1377.14	191.557	-715.592	1226.47	299.369	-964.363	1274.79	31.7875	-900.418	1408.65	7.06178	-962.327	1230.59	26.559	-1025.31	1098.64	2.11058	-1030.05	924.851	31.8081	-1024.58	842.94	11.028	-1084.88	861.702	9.83149	-1073.05	768.485
600	0	128.435	-676.055	1587.69	226.062	-669.809	1590.51	115.229	-831.377	1589.56	244.389	-839.873	1586.89	203.746	-882.543	1464.58	212.507	-949.213	1209.13	189.674	-763.128	1376.64	190.024	-698.582	1226.25	297.498	-947.962	1273.33	29.9671	-884.203	1407.63	5.12124	-945.462	1229.15	24.4723	-1008.65	1097.37	0.136313	-1014.07	923.941	30.0257	-1009.21	841.938	8.9129	-1069.27	861.022	8.64748	-1058.65	767.344
601	0	127.641	-660.151	1587.77	225.255	-654.184	1590.38	113.944	-815.48	1589.85	243.218	-824.583	1587.28	202.06	-867.016	1464.3	210.988	-932.477	1207.99	188.19	-747.308	1376.57	188.325	-681.665	1226.47	295.799	-931.822	1272.12	28.1891	-868.208	1406.87	2.80173	-928.389	1228.37	22.3376	-991.316	1096.01	-2.01167	-997.191	922.987	27.1563	-992.346	841.768	6.08136	-1052.73	860.324	6.3936	-1042.56	766.964
602	0	126.81	-644.182	1588.52	224.452	-638.622	1590.4	112.526	-799.553	1590.77	241.638	-808.707	1586.96	200.478	-851.252	1464.18	209.288	-916.206	1207.38	186.706	-731.685	1376.92	186.361	-664.895	1226.96	294.206	-915.849	1271.35	26.5497	-852.183	1406.7	0.780365	-911.223	1227.58	19.7212	-974.008	1095.26	-4.56524	-979.785	922.154	25.6112	-975.811	840.577	3.10381	-1035.3	859.659	3.83724	-1025.61	766.072
603	0	125.845	-628.341	1589.04	223.689	-623.048	1591.15	111.315	-783.666	1591.69	240.561	-793.137	1587.93	198.839	-835.59	1464.86	207.828	-899.809	1207.26	185.351	-715.911	1377.8	184.886	-648.295	1228.54	292.756	-900.069	1271.14	24.9386	-836.295	1406.94	-1.3724	-893.901	1227.24	17.1969	-956.094	1094.67	-7.70592	-961.425	921.721	22.5326	-957.59	839.957	-0.546087	-1016.95	859.241	0.325424	-1007.3	765.736
604	0	125.123	-612.503	1590.19	223.088	-607.382	1592.24	110.005	-767.639	1592.82	239.24	-777.638	1588.67	197.414	-819.781	1465.47	206.924	-882.98	1207.8	184.203	-700.227	1378.74	183.555	-632.025	1230.06	291.514	-884.537	1271.57	23.5754	-820.418	1407.65	-3.27144	-876.461	1227.29	14.3901	-938.114	1094.53	-10.9574	-942.179	921.528	18.5104	-937.774	840.474	-4.41571	-997.542	859.047	-3.85393	-987.652	765.726
605	0	124.276	-596.787	1591.32	222.24	-591.902	1593.4	108.81	-752.049	1593.66	237.952	-762.068	1589.66	196.162	-804.079	1466.55	206.166	-866.514	1208.86	183.241	-684.504	1379.91	182.318	-615.964	1231.13	290.581	-868.833	1272.79	22.598	-804.53	1408.56	-5.18769	-859.012	1227.7	11.763	-919.741	1094.6	-14.5593	-922.466	921.826	15.0176	-918.046	840.008	-8.81645	-977.218	858.767	-8.39929	-966.775	765.263
606	0	123.47	-581.06	1592.34	221.128	-576.46	1594.35	107.719	-736.255	1594.83	236.915	-746.564	1590.75	195.195	-788.482	1467.65	205.695	-850.435	1210.05	182.297	-668.947	1380.75	181.384	-600.334	1232.21	289.779	-853.427	1274.35	21.662	-788.567	1409.58	-7.00497	-841.442	1228.89	8.95619	-901.343	1094.92	-18.4774	-901.896	922.286	10.8266	-896.841	840.614	-13.3588	-956.079	858.728	-13.6313	-944.697	765.29
607	0	122.579	-565.546	1593.9	220.52	-560.859	1596.03	106.852	-720.671	1595.84	236.013	-730.976	1592.38	194.262	-772.93	1469.2	205.134	-835.224	1211.94	181.876	-653.425	1382.03	180.732	-584.909	1233.35	288.904	-838.499	1276.12	20.8167	-772.334	1411.05	-8.72198	-824.055	1229.73	5.92218	-882.978	1095.33	-22.5354	-880.911	922.802	6.51351	-875.016	841.043	-18.2508	-934.161	858.477	-19.4198	-921.508	765.504
608	0	121.854	-549.989	1595.12	219.555	-545.428	1597.54	105.959	-705.136	1597.02	235.142	-715.5	1593.94	193.318	-757.551	1470.88	204.404	-820.436	1214.09	181.466	-638.157	1383.31	180.427	-569.872	1234.64	288.103	-823.456	1278.2	20.0191	-756.29	1412.75	-10.3743	-806.373	1231.11	2.96127	-864.022	1095.81	-26.8921	-859.21	923.576	1.45338	-852.206	841.563	-23.3697	-911.616	858.294	-25.4355	-897.232	765.506
609	0	121.054	-534.549	1596.71	218.749	-530.003	1599.17	105.205	-689.672	1598.29	234.317	-700.113	1595.59	192.614	-742.244	1472.62	203.728	-805.66	1216.02	181.223	-623.019	1384.74	180.363	-555.018	1235.67	287.334	-808.583	1280.25	19.1688	-740.271	1414.32	-12.3584	-788.829	1232.44	-0.198727	-845.229	1096.33	-31.2847	-837.244	924.192	-3.70969	-828.637	842.543	-28.6696	-888.444	858.055	-31.7168	-872.007	765.512
610	0	120.497	-519.218	1597.9	218.303	-514.664	1601.25	104.555	-674.314	1599.86	233.653	-684.863	1597.38	192.022	-727.183	1474.46	203.132	-790.678	1218.11	180.94	-608.107	1386.12	180.899	-540.275	1237.14	286.499	-794.198	1282.37	18.4555	-724.393	1416.07	-14.0961	-771.177	1233.7	-3.6031	-826.391	1096.83	-35.8998	-814.681	925.115	-8.17818	-805.554	842.897	-33.9598	-864.692	857.655	-38.0889	-845.97	765.857
611	0	119.933	-503.897	1599.56	217.866	-499.495	1602.97	104.061	-659.102	1601.47	233.078	-669.611	1599.66	191.466	-712.206	1476.35	202.133	-776.217	1220.75	181.129	-593.312	1388.14	181.536	-525.809	1238.59	285.645	-779.837	1284.49	17.8539	-708.556	1418.04	-15.942	-753.567	1235.31	-6.96501	-807.398	1097.25	-40.612	-791.739	926.091	-13.3351	-780.912	843.749	-39.5965	-840.171	857.538	-44.9483	-818.757	766.49
612	0	119.623	-488.734	1600.74	217.575	-484.305	1604.62	103.439	-643.746	1603.28	232.722	-654.534	1601.85	190.959	-697.456	1478.51	201.44	-761.543	1222.86	180.985	-578.728	1389.75	182.491	-511.041	1240.28	284.833	-765.668	1286.57	17.4887	-692.995	1419.91	-17.7836	-735.904	1236.76	-10.3816	-788.253	1097.83	-45.4801	-768.25	927.068	-19.0727	-755.574	844.96	-45.3521	-815.201	857.52	-52.984	-790.341	768.667
613	0	119.463	-473.594	1602.48	217.385	-469.352	1606.26	103.098	-628.688	1605.37	232.395	-639.403	1604.12	190.573	-682.714	1480.49	200.882	-746.916	1225.04	181.119	-564.184	1391.47	183.451	-496.714	1242	284.097	-751.589	1288.84	17.09	-677.636	1421.81	-19.4292	-718.395	1238.44	-13.7105	-769.134	1098.4	-50.1405	-744.521	928.442	-24.7251	-730.009	846.331	-51.1295	-789.78	857.696	-59.1339	-762.199	768.892
614	0	119.208	-458.59	1603.88	217.091	-454.468	1607.62	102.653	-613.642	1607.42	231.885	-624.568	1606.34	190.376	-668.157	1482.45	199.686	-732.943	1227.3	181.324	-549.89	1393.47	184.192	-482.342	1243.48	283.248	-737.816	1290.9	16.7962	-662.571	1423.72	-21.2461	-701.079	1240.07	-17.2812	-750.017	1099.19	-54.8867	-720.653	929.946	-30.075	-703.886	848.392	-56.919	-763.867	858.114	-66.3414	-733.137	770.247
615	0	119.169	-443.679	1605.49	217.187	-439.651	1609.39	102.41	-598.657	1609.59	231.616	-609.747	1608.65	190.077	-653.778	1484.71	198.932	-718.704	1229.39	181.429	-535.572	1395.28	185.175	-468.219	1245.5	282.413	-723.78	1292.99	16.5522	-647.73	1425.9	-22.9565	-683.62	1241.94	-20.8646	-730.643	1099.91	-59.835	-696.235	931.682	-35.6584	-677.4	850.253	-62.7411	-737.535	858.55	-73.4347	-703.552	772.274
616	0	119.168	-428.83	1606.86	217.157	-424.998	1610.98	102.291	-583.823	1611.59	231.372	-595.152	1610.93	189.767	-639.436	1487.11	198.178	-704.584	1231.19	181.443	-521.341	1397.11	185.859	-454.427	1247.6	281.754	-709.987	1294.82	16.3397	-632.993	1428.01	-24.6852	-666.551	1243.78	-24.5227	-711.577	1100.83	-64.5288	-671.77	933.663	-41.8121	-650.232	852.992	-68.666	-711.092	859.767	-80.5601	-673.388	775.003
617	0	119.244	-414.235	1608.64	216.892	-410.361	1612.25	102.08	-569.161	1613.92	231.253	-580.41	1613.17	189.724	-625.051	1488.96	197.63	-690.686	1233.27	181.631	-507.156	1399.24	186.141	-440.608	1249.42	281.039	-696.415	1296.87	16.1862	-618.46	1430.32	-26.2068	-649.677	1245.73	-27.5673	-692.396	1101.64	-69.3213	-647.172	936.333	-47.1823	-623.262	855.863	-74.3487	-684.208	861.099	-87.573	-643.046	778.301
618	0	119.287	-399.576	1610.34	217.224	-395.907	1614.24	102.197	-554.498	1615.88	231.248	-565.866	1615.18	189.583	-610.816	1490.89	196.88	-676.899	1235.44	181.601	-493.092	1401.1	186.498	-426.817	1251.65	280.504	-682.609	1299.1	16.0687	-603.937	1432.56	-27.739	-632.878	1248.03	-31.0625	-673.183	1103.14	-73.974	-622.46	939.348	-52.5705	-595.955	859.244	-80.1356	-656.903	863.136	-94.7652	-612.163	782.756
619	0	119.425	-385.126	1611.99	217.495	-381.438	1616.25	102.247	-539.887	1617.97	231.202	-551.474	1617.04	189.469	-596.432	1492.76	196.384	-663.094	1237.37	181.653	-478.879	1402.97	186.594	-412.929	1253.47	280.025	-668.53	1300.83	15.9907	-589.573	1434.78	-29.3087	-616.185	1250.29	-34.299	-654.211	1104.43	-78.5447	-597.564	942.634	-58.0779	-568.346	863.795	-85.732	-629.482	865.363	-102.295	-580.993	788.025
620	0	119.553	-370.704	1613.72	217.685	-367.05	1617.81	102.047	-525.476	1619.62	231.228	-537.203	1618.79	189.336	-582.172	1494.56	196.08	-649.284	1238.74	181.603	-464.842	1404.54	186.698	-399.059	1255.35	279.428	-654.919	1302.8	15.8783	-575.022	1436.92	-30.884	-599.559	1252.52	-37.5804	-635.442	1105.66	-83.1096	-572.851	946.272	-64.1946	-540.04	869.363	-91.0731	-601.722	868	-108.883	-549.902	793.084
621	0	119.653	-356.276	1615.23	217.92	-352.774	1619.25	102.235	-511.157	1621.02	231.167	-522.938	1620.07	189.251	-567.854	1495.96	195.58	-635.527	1240.45	181.591	-450.735	1405.83	186.448	-385.175	1256.61	278.941	-641.394	1304.54	15.7887	-560.56	1438.64	-32.445	-583.377	1254.64	-40.5883	-616.703	1106.84	-87.4015	-548.148	950.019	-68.6782	-513.018	873.068	-96.4601	-574.039	871.132	-114.914	-519.151	798.589
622	0	119.863	-342.185	1616.39	217.986	-338.603	1620.34	102.271	-496.909	1622.23	231.409	-508.769	1621.17	189.206	-553.556	1497.16	195.161	-621.726	1241.97	181.471	-436.668	1406.98	186.24	-371.116	1257.85	278.395	-628.381	1306.01	15.6365	-545.866	1440.35	-33.8265	-566.987	1256.43	-43.7647	-598.139	1108.25	-91.793	-523.305	954.025	-74.2326	-485.079	879.187	-101.637	-546.528	874.305	-121.106	-488.419	804.652
623	0	120.023	-327.813	1617.83	218.255	-324.409	1621.52	102.482	-482.629	1623.19	231.473	-494.534	1622.17	189.077	-539.193	1498.25	194.49	-609.189	1243.72	181.557	-422.551	1407.98	186.063	-357.189	1258.71	277.968	-614.707	1307.49	15.6093	-531.14	1441.9	-35.2986	-550.786	1258.04	-46.9958	-579.578	1109.53	-95.902	-498.745	958.107	-78.6252	-457.99	884.216	-106.849	-518.728	877.98	-126.812	-457.672	811.115
624	0	120.287	-313.581	1618.78	218.448	-310.346	1622.28	102.553	-468.493	1624.14	231.573	-480.418	1622.49	189.064	-524.824	1499.05	193.964	-596.398	1244.76	181.502	-408.275	1408.36	185.884	-343.279	1259.1	277.573	-600.537	1308.27	15.596	-516.404	1443.06	-36.6056	-534.612	1259.38	-50.0361	-561.175	1110.41	-99.9218	-474.322	962.342	-83.1166	-430.699	890.423	-111.588	-491.119	881.686	-132.331	-427.079	817.701
625	0	120.572	-299.457	1619.87	218.751	-296.185	1622.95	102.755	-454.194	1624.4	231.759	-466.297	1622.68	189.042	-510.425	1499.49	193.232	-583.981	1245.97	181.519	-394.141	1408.82	185.56	-329.436	1259.06	277.159	-586.945	1309.1	15.4253	-501.712	1444.19	-38.1881	-518.388	1260.82	-53.2299	-542.893	1111.15	-103.784	-450.133	966.807	-87.5432	-403.787	896.161	-116.261	-463.693	885.614	-137.414	-396.869	824.677
626	0	120.78	-285.198	1620.47	219.1	-282.101	1623.73	102.757	-439.98	1624.67	231.852	-452.224	1622.67	188.951	-496.022	1499.75	192.324	-571.219	1246.73	181.436	-379.814	1408.93	185.53	-315.407	1258.94	276.41	-573.088	1309.61	15.3632	-486.992	1444.82	-39.9444	-502.072	1261.8	-56.3913	-524.649	1111.64	-107.804	-426.053	971.381	-91.772	-376.83	902.651	-120.684	-436.42	889.586	-142.328	-366.873	831.75
627	0	121.086	-270.941	1620.81	219.308	-267.956	1623.88	102.906	-425.805	1624.45	231.793	-438.143	1622.26	188.812	-481.494	1499.64	191.903	-556.349	1246.89	181.338	-365.536	1408.59	185.448	-301.551	1258.76	276.012	-559.401	1309.39	15.1861	-472.258	1445.29	-41.3601	-485.764	1262.54	-59.5493	-506.219	1111.97	-111.354	-402.237	975.477	-95.7739	-350.375	908.678	-124.859	-409.357	893.561	-146.871	-337.362	839.096
628	0	121.33	-256.636	1621.13	219.507	-253.796	1623.83	103.105	-411.385	1624.23	232.568	-423.64	1621.39	188.906	-467.029	1499.33	191.442	-541.602	1246.73	181.468	-351.188	1408.18	185.633	-287.545	1258.18	275.71	-545.357	1309.21	15.2561	-457.574	1445.33	-42.8568	-469.706	1262.92	-62.6824	-487.909	1112.19	-114.874	-378.472	979.563	-99.4967	-324.287	914.894	-128.604	-382.545	897.412	-151.137	-308.302	846.179
629	0	121.585	-242.36	1620.97	219.816	-239.626	1623.59	103.223	-397.135	1623.76	232.756	-409.386	1620.83	188.935	-452.41	1498.77	191.008	-526.931	1246.63	181.444	-336.734	1407.53	185.525	-273.592	1256.86	275.564	-530.987	1308.77	15.4398	-442.745	1445.28	-44.2353	-453.312	1263.23	-65.717	-469.534	1112.14	-117.84	-355.22	983.416	-102.954	-298.609	920.894	-132.348	-356.059	901.302	-154.991	-279.671	853.711
630	0	121.907	-228.11	1620.88	220.224	-225.293	1623.48	103.504	-382.829	1622.93	232.182	-395.504	1619.99	188.95	-437.7	1497.85	190.63	-512.26	1246.25	181.462	-322.238	1406.6	185.572	-259.738	1256.02	275.227	-516.385	1308.11	15.4328	-428.099	1444.8	-45.6493	-436.93	1263.12	-68.8601	-451.025	1111.9	-121.085	-332.216	987.544	-106.232	-273.203	927.094	-135.891	-329.886	905.455	-158.692	-251.515	861.129
631	0	122.053	-213.656	1620.36	220.492	-211.092	1622.79	103.608	-368.319	1622.02	232.369	-381.079	1618.66	188.978	-423.061	1497.03	190.424	-497.684	1245.41	181.281	-307.82	1405	185.331	-245.714	1254.28	274.857	-501.761	1307.22	15.4164	-413.689	1443.77	-47.0821	-420.76	1262.98	-71.8539	-432.526	1111.41	-123.957	-309.305	991.259	-109.32	-248.221	932.967	-139.139	-304.047	909.207	-162.043	-223.989	868.235
632	0	122.341	-199.256	1619.56	220.795	-196.755	1622.02	103.822	-353.981	1620.84	232.421	-366.862	1617.31	188.922	-408.228	1495.71	190.234	-483.209	1244.27	181.242	-293.221	1403.81	185.336	-231.515	1252.98	274.573	-487.594	1306.01	15.4187	-399.047	1442.79	-48.2869	-404.526	1262.49	-74.5669	-414.137	1110.92	-126.659	-286.826	994.712	-112.007	-223.867	938.729	-141.969	-278.643	912.891	-164.986	-196.917	875.5
633	0	122.434	-184.815	1618.52	220.734	-182.381	1620.61	103.947	-339.512	1619.41	232.67	-352.324	1615.59	189.058	-393.568	1494.54	190.177	-468.689	1242.93	181.231	-278.453	1402.19	185.123	-217.28	1251.3	274.461	-472.724	1304.67	15.5084	-384.1	1441.62	-49.4143	-388.245	1261.59	-77.2277	-395.739	1110.24	-129.169	-264.499	998.257	-114.507	-199.861	944.143	-144.92	-253.764	916.692	-167.728	-170.513	882.502
634	0	122.864	-170.202	1617.69	221.152	-167.726	1619.62	104.201	-324.945	1618.12	232.828	-337.858	1614.19	189.079	-378.568	1492.99	190.181	-453.894	1241.51	181.357	-263.656	1400.72	184.83	-202.941	1249.27	274.22	-458.259	1303.37	15.5076	-369.352	1440.46	-50.4143	-371.882	1260.94	-79.7721	-377.329	1109.57	-131.357	-242.556	1001.46	-116.714	-175.984	949.854	-147.417	-229.192	920.845	-170.141	-144.866	889.283
635	0	123.111	-155.695	1616.33	221.401	-153.223	1618.38	104.447	-310.386	1616.5	233.16	-323.22	1612.46	189.22	-363.746	1491.35	190.388	-439.273	1239.88	181.271	-248.792	1398.86	184.726	-188.245	1247.55	273.956	-443.053	1302	15.5876	-354.442	1439.22	-51.351	-355.564	1260.01	-81.95	-359.053	1108.76	-133.268	-221.094	1004.83	-118.551	-153.138	954.973	-149.529	-205.117	924.461	-171.938	-119.804	895.565
636	0	123.413	-141.184	1615.15	221.716	-138.592	1617.09	104.799	-295.836	1614.77	233.508	-308.66	1610.66	189.369	-348.786	1489.56	190.397	-424.574	1238.28	181.407	-233.843	1397.31	184.318	-173.76	1245.35	273.904	-428.256	1300.25	15.7829	-339.474	1437.74	-52.2637	-339.154	1259.2	-83.9467	-340.966	1107.88	-135.109	-200.032	1007.87	-120.257	-130.584	960.041	-151.704	-181.793	928.139	-173.72	-95.4742	901.994
637	0	123.57	-126.483	1613.75	222.06	-123.981	1615.85	105.145	-281.15	1613.03	233.735	-294.008	1608.87	189.499	-333.721	1487.83	190.397	-409.889	1236.46	181.354	-218.827	1395.51	184.301	-158.932	1243.48	273.832	-413.127	1298.32	15.8097	-324.34	1436.35	-52.928	-322.697	1258.1	-86.2959	-322.554	1107.87	-136.646	-179.139	1010.74	-121.789	-108.625	964.737	-153.539	-158.743	931.663	-175.308	-71.8556	908.068
638	0	123.777	-111.809	1612.3	222.361	-109.251	1614.31	105.351	-266.441	1611.43	234.012	-279.451	1606.89	189.696	-318.559	1485.68	190.548	-394.991	1234.33	181.508	-203.511	1393.55	184.096	-144.061	1241.73	273.857	-397.774	1296.25	16.0271	-309.142	1434.88	-53.5143	-306.199	1257.1	-87.7638	-304.714	1106.79	-137.722	-158.824	1013.38	-122.954	-87.155	968.929	-154.807	-136.184	934.681	-176.779	-48.5919	913.621
639	0	124.269	-96.9724	1610.89	222.664	-94.579	1612.79	105.719	-251.771	1609.38	234.24	-264.552	1604.84	190.01	-303.494	1484	190.627	-380.089	1232.44	181.612	-188.384	1391.63	184.016	-129.013	1239.63	273.903	-382.562	1294.29	16.1755	-294.026	1433.11	-53.9641	-289.751	1255.63	-89.04	-286.951	1105.57	-138.83	-138.808	1015.66	-123.791	-66.2093	972.876	-156.006	-114.336	937.634	-177.701	-26.1447	918.852
640	0	124.519	-82.2904	1609.4	223.011	-79.742	1611.15	106.178	-237.018	1607.64	234.765	-249.795	1602.95	190.499	-288.184	1482.03	190.725	-365.061	1230.79	181.853	-173.259	1389.78	183.884	-113.645	1237.28	274.098	-367.168	1292.31	16.5982	-278.811	1431.61	-54.1897	-273.31	1254.43	-89.8764	-269.412	1104.44	-139.379	-119.202	1017.77	-124.321	-45.8679	976.576	-157.051	-93.0422	940.625	-178.372	-4.30454	923.704
641	0	124.87	-67.4525	1607.83	223.431	-64.8915	1609.78	106.599	-222.159	1605.94	235.108	-234.856	1601.21	190.841	-272.913	1480.1	191.195	-349.977	1228.78	182.259	-158.111	1387.92	183.981	-98.215	1235.75	274.504	-351.707	1290.18	16.7479	-263.253	1430.45	-54.342	-256.95	1253.08	-90.6866	-252.015	1103.25	-139.798	-99.8854	1019.67	-124.719	-25.7298	979.987	-157.542	-72.121	942.854	-178.881	16.8802	927.979
642	0	125.495	-52.5107	1606.75	223.941	-49.9274	1608.46	106.965	-207.202	1604.08	235.639	-219.92	1599.29	191.337	-257.673	1478.35	191.684	-334.477	1226.96	182.432	-142.797	1386.03	183.829	-82.7176	1233.67	274.96	-336.019	1288.2	17.138	-247.995	1428.83	-54.2735	-240.561	1251.84	-91.1964	-234.757	1101.89	-140.145	-81.1771	1020.83	-124.756	-6.31713	982.526	-157.834	-51.9319	944.99	-178.979	37.3691	931.9
643	0	125.893	-37.6399	1605.22	224.343	-34.9358	1606.91	107.494	-192.194	1602.43	236.165	-204.899	1597.43	192.023	-242.283	1476.55	192.467	-319.087	1225.31	182.595	-127.595	1384.24	183.94	-67.0079	1232	275.626	-320.406	1286.41	17.6945	-232.791	1427.35	-54.0562	-224.455	1250.47	-91.4471	-217.801	1100.73	-140.027	-62.7869	1021.97	-124.565	12.4637	984.815	-158.101	-32.2572	946.814	-178.951	57.1388	934.965
644	0	126.337	-22.6516	1604.06	224.654	-19.9277	1605.6	108.097	-177.41	1600.8	236.559	-189.886	1595.8	192.757	-227.146	1475.01	193.437	-303.282	1223.62	183.08	-112.15	1382.86	184.2	-51.0634	1230.75	276.501	-304.68	1284.57	18.2648	-217.708	1425.78	-53.6889	-208.314	1249.36	-91.0242	-201.223	1098.99	-139.862	-45.0689	1023.09	-124.492	30.8219	986.723	-157.902	-13.4124	948.064	-178.705	76.2651	937.856
645	0	126.636	-7.7141	1602.76	225.289	-4.93356	1604.6	108.581	-162.358	1599.46	237.213	-174.889	1594.19	193.615	-211.825	1473.2	194.478	-287.174	1222.05	183.469	-96.6171	1381.45	184.306	-35.2069	1229.2	277.479	-288.765	1282.75	19.0859	-202.587	1424.51	-53.1832	-192.465	1248.15	-90.8122	-184.785	1097.83	-139.283	-27.6291	1023.69	-123.74	48.6771	988.363	-157.521	4.83894	949.146	-178.193	94.7167	940.233
646	0	127.1	7.28323	1601.78	225.828	10.16	1603.54	109.34	-147.423	1597.78	238.026	-159.624	1592.9	194.589	-196.523	1471.72	195.812	-270.862	1220.38	183.969	-81.0217	1380.11	184.684	-19.2177	1228.66	278.646	-272.728	1281.02	19.9239	-187.611	1423.2	-52.5422	-176.732	1246.98	-90.4378	-168.569	1097.01	-138.672	-10.5229	1024.18	-122.778	65.7582	989.351	-156.859	22.4666	949.938	-177.409	112.487	941.993
647	0	127.552	22.2094	1600.68	226.123	25.2282	1602.36	110.011	-132.454	1596.63	238.627	-144.646	1591.61	195.465	-181.064	1470.12	197.141	-254.402	1218.44	184.844	-65.3896	1379	185	-3.23066	1227.49	279.919	-256.509	1279.35	20.9877	-172.555	1421.58	-51.7612	-161.264	1245.65	-89.8517	-152.983	1095.87	-137.714	5.91345	1024.18	-121.977	82.4986	989.908	-156.139	39.5265	950.263	-176.433	129.601	943.066
648	0	128.135	37.1905	1599.72	226.638	40.3274	1601.48	110.698	-117.537	1595.57	239.429	-129.374	1590.39	196.575	-165.666	1468.9	198.481	-237.974	1216.66	185.531	-49.7013	1377.77	185.8	13.0532	1226.97	281.186	-240.45	1277.72	22.072	-157.258	1420.19	-50.6337	-146.048	1244.29	-89.3573	-137.406	1095.14	-136.615	21.8377	1023.94	-120.675	98.7132	990.09	-154.88	56.1399	950.437	-175.029	146.292	943.785
649	0	128.781	52.3085	1599.2	227.31	55.6319	1601.07	111.531	-102.603	1594.53	240.156	-114.159	1589.8	197.482	-150.244	1467.83	199.866	-221.405	1214.93	186.505	-33.8569	1377.07	186.731	29.3911	1226.24	282.581	-224.256	1276.31	23.0315	-141.977	1418.56	-49.6299	-130.894	1242.73	-88.4037	-122.346	1093.76	-135.252	37.4656	1023.34	-119.164	114.231	989.749	-153.559	72.0524	949.813	-173.543	162.304	943.615
650	0	129.176	67.3814	1598.94	227.552	70.9965	1600.98	112.323	-87.4874	1594.21	241.062	-98.7462	1589.52	198.452	-134.534	1467.27	201.211	-204.849	1213.79	187.731	-18.1171	1376.81	188.004	45.8671	1226.28	283.885	-207.893	1275.32	23.9962	-126.742	1417.21	-48.265	-116.001	1241.34	-87.1702	-107.608	1092.46	-133.785	52.4467	1022.23	-117.396	129.325	988.83	-152.052	87.2212	949.053	-171.607	177.635	943.141
651	0	129.63	82.6292	1599.3	227.87	86.4746	1601.59	113.168	-72.2057	1594.28	242.204	-82.9553	1589.58	199.519	-118.844	1467.2	202.496	-188.594	1212.96	188.879	-2.29605	1377.07	189.47	62.0809	1226.15	285.145	-191.688	1274.94	25.019	-111.354	1416.34	-46.7454	-101.505	1240.38	-85.6756	-93.232	1091.36	-132.203	66.8399	1021.18	-115.517	143.63	987.654	-150.359	101.706	948.008	-169.694	191.999	941.923
652	0	130.022	97.9479	1600.1	228.434	102.04	1602.8	114.17	-56.8726	1594.51	242.946	-67.5227	1590.53	200.587	-103.132	1467.46	203.678	-172.178	1212.83	190.069	13.5874	1377.79	191.068	78.6573	1227.27	286.318	-175.381	1275	26.0825	-95.6297	1415.98	-45.2718	-87.0516	1239.91	-84.0898	-78.9924	1090.77	-130.142	80.8317	1019.79	-113.539	157.632	986.446	-148.509	115.384	946.664	-167.502	205.91	940.289
653	0	130.893	113.496	1601.53	229.131	117.708	1604.36	115.134	-41.53	1595.2	244.044	-51.7694	1591.5	201.566	-87.2343	1468.35	204.562	-155.885	1213.1	191.286	29.5706	1378.94	192.945	95.4609	1228.96	287.211	-159.052	1275.25	27.2632	-79.9322	1416.18	-43.3568	-72.8057	1239.85	-82.0512	-65.0866	1090.56	-127.936	94.4002	1018.29	-111.187	170.65	984.568	-146.08	128.531	944.924	-165.076	218.782	938.205
654	0	131.293	128.891	1602.7	229.702	133.289	1605.95	116.056	-26.2407	1596.2	245.209	-35.9613	1592.6	202.436	-71.3052	1469.35	205.245	-139.239	1213.31	192.474	45.4862	1380.31	194.52	111.721	1230.09	288.262	-142.674	1276.07	28.2874	-64.2298	1416.77	-41.4257	-58.7049	1240.16	-79.8663	-51.7808	1090.72	-125.569	107.17	1016.71	-108.876	182.882	982.383	-143.535	140.481	942.92	-162.535	230.68	935.436
655	0	131.907	144.296	1604.3	230.305	148.954	1607.62	116.843	-10.7399	1597.26	246.135	-20.4231	1594.02	203.4	-55.467	1470.71	205.453	-123.198	1214.69	193.546	61.4265	1381.69	196.471	128.475	1232.2	288.712	-126.464	1277.09	29.281	-48.2498	1417.91	-39.1488	-44.6375	1240.83	-77.2278	-38.6298	1091.27	-122.933	119.314	1015.01	-106.167	194.7	979.677	-140.68	151.579	940.729	-159.817	241.674	932.163
656	0	132.591	159.854	1605.88	230.989	164.612	1609.31	117.62	4.94731	1598.84	246.781	-4.6641	1595.25	204.071	-39.5614	1472.05	205.575	-107.398	1216.3	194.389	77.3255	1383.09	197.979	144.795	1234.05	289.169	-110.443	1278.88	30.0728	-32.1977	1419.32	-37.6596	-30.357	1241.7	-74.3181	-25.851	1091.75	-120.114	131.055	1013.5	-103.344	205.821	976.608	-137.283	161.98	938.199	-156.853	251.995	928.676
657	0	133.394	175.424	1607.52	231.52	180.162	1610.77	118.498	20.4644	1600.12	247.66	10.9544	1596.37	204.81	-23.7705	1473.75	205.733	-91.9504	1218.17	195.059	93.0352	1384.43	199.039	160.638	1235.26	289.652	-94.6399	1280.61	30.7635	-16.3357	1421.12	-35.5161	-16.1772	1243.02	-71.3273	-13.3736	1092.96	-116.987	142.23	1011.45	-100.252	216.194	973.468	-134.096	171.591	935.605	-153.626	261.358	924.395
658	0	133.987	190.939	1609.29	232.247	195.675	1612.23	119.246	35.8587	1601.52	248.338	26.5403	1597.9	205.448	-8.25808	1475.35	206.064	-76.7355	1220.39	195.738	108.594	1386.03	199.765	176.226	1236.6	290.086	-79.0707	1282.5	31.3099	-0.526789	1423.14	-34.1193	-1.95761	1244.13	-68.0642	-1.35406	1093.72	-113.704	152.81	1009.18	-97.1518	226.116	970.358	-130.122	180.804	932.539	-150.172	269.94	919.508
659	0	134.709	206.63	1611.2	233.087	211.26	1613.96	119.76	51.5814	1603.41	248.858	42.0707	1599.1	206.156	7.20551	1477.04	206.491	-61.6857	1222.74	195.923	123.845	1387.42	200.357	191.839	1238.28	290.668	-63.6742	1284.67	31.8535	14.8568	1425.22	-32.6727	12.2229	1245.85	-64.8322	10.6364	1095.08	-110.387	162.805	1007.08	-93.5257	235.303	966.289	-126.158	189.049	929.417	-146.523	277.883	914.279
660	0	135.269	222.212	1612.9	233.75	226.748	1615.51	120.244	67.182	1605.56	249.612	57.5113	1600.73	206.836	22.4791	1479	206.899	-46.8111	1225.01	196.073	138.883	1389.08	200.188	206.767	1239.32	291.05	-48.8536	1287.15	32.4467	29.8379	1427.51	-31.2887	26.2122	1247.38	-61.9104	22.3768	1096.59	-107.018	172.488	1004.5	-89.877	243.789	961.481	-122.17	196.797	926.119	-142.566	285.278	908.728
661	0	135.923	237.751	1614.87	234.219	242.202	1616.82	120.867	82.5823	1607.38	249.77	72.9457	1602.25	207.452	37.5769	1480.89	207.566	-31.9186	1227.27	196.05	153.744	1390.81	199.586	221.478	1240.95	291.733	-33.7562	1289.3	32.9212	44.2257	1429.63	-29.8443	40.0684	1248.91	-58.6305	34.2539	1097.93	-103.513	181.813	1001.58	-86.0963	252.086	957.687	-117.964	203.879	922.737	-138.515	291.521	902.7
662	0	136.357	253.087	1616.32	234.727	257.631	1618.2	121.281	97.958	1609.55	250.402	88.3986	1604.33	208.069	52.5459	1483.1	208.354	-17.1104	1229.39	196.121	168.33	1392.81	198.589	236.038	1242.83	292.851	-18.2265	1290.99	33.4343	58.2716	1431.74	-28.4844	53.5244	1250.78	-55.4293	45.8957	1099.41	-99.9549	190.469	999.028	-82.0825	259.638	953.025	-113.842	210.389	919.122	-134.13	297.549	896.494
663	0	136.719	268.368	1617.85	235.036	272.939	1619.44	121.73	113.236	1612.03	250.644	103.549	1606.55	208.625	67.398	1485.01	209.347	-2.34169	1231.66	195.952	182.96	1394.69	197.353	250.158	1244.26	293.78	-3.11613	1293.11	33.8387	72.0948	1433.93	-26.9596	66.5745	1252.55	-52.3001	57.3226	1100.96	-96.1133	198.962	996.15	-77.9638	266.8	948.069	-109.159	216.387	915.566	-129.068	302.859	889.97
664	0	136.947	283.554	1619.1	235.491	288.329	1620.67	121.972	128.558	1614.45	251.337	118.858	1608.98	209.137	82.1968	1487.02	210.259	12.2702	1233.8	195.822	197.486	1396.48	196.048	264.153	1245.99	294.718	11.7073	1295.18	34.3017	85.843	1436.03	-25.5368	79.4617	1254.08	-49.3021	68.5687	1102.71	-92.2422	206.976	992.987	-73.4801	273.234	943.099	-104.601	222.11	911.927	-123.97	307.401	883.072
665	0	137.324	298.823	1620.54	235.548	303.539	1621.61	122.32	143.72	1616.97	251.462	133.926	1610.94	209.626	96.8642	1489.06	210.683	26.0797	1235.89	195.638	211.845	1398.43	194.301	276.926	1246.42	295.594	26.6996	1296.92	34.7236	99.4078	1437.85	-23.7722	91.6637	1255.62	-46.0515	79.683	1103.71	-88.2042	214.792	989.712	-68.8482	279.212	937.867	-99.9123	227.123	908.39	-118.515	311.574	876.282
666	0	137.565	313.894	1621.85	235.76	318.619	1622.83	122.717	158.706	1619.37	251.966	149.19	1613.12	209.896	111.437	1491.03	212.149	41.1315	1237.36	195.421	226.185	1400.28	192.908	290.544	1248.02	296.589	41.649	1298.77	35.0825	112.912	1439.69	-22.6233	103.924	1257.24	-43.4214	90.7374	1105.46	-84.1832	221.994	986.774	-63.9591	284.627	932.648	-95.1161	231.574	904.859	-113.016	314.849	869.49
667	0	137.572	328.814	1623.07	236.094	333.725	1624.22	122.97	173.677	1621.41	251.885	164.077	1615.5	210.231	126.085	1493.21	213.056	55.2345	1239.49	195.14	240.551	1402.22	191.59	304.254	1249.72	297.524	56.4122	1300.62	35.362	126.329	1441.61	-21.4882	115.6	1258.85	-40.5951	101.58	1106.94	-79.9776	228.966	983.758	-58.9549	289.591	927.52	-90.3916	235.661	901.41	-107.332	317.744	862.969
668	0	138.143	343.978	1625.04	236.225	348.738	1625.43	123.093	188.674	1623.94	252.24	178.934	1617.6	210.446	140.66	1495.05	214.082	69.4805	1241.28	194.994	254.808	1404.31	190.535	318.13	1251.81	298.321	71.1559	1302.29	35.6243	139.624	1443.32	-20.1028	127.371	1260.4	-37.8462	112.306	1108.76	-75.8806	235.871	980.955	-54.0098	293.962	922.569	-85.6849	239.636	898.471	-101.38	320.053	856.364
669	0	138.111	358.841	1625.99	236.461	363.597	1626.62	123.259	203.5	1625.57	252.365	193.879	1619.47	210.765	155.199	1496.93	215.026	83.6156	1242.92	194.771	269.043	1406	189.754	332.054	1253.61	299.143	85.8706	1304.31	35.9898	153.129	1444.92	-18.5891	139.027	1261.68	-34.9028	122.801	1110.02	-71.4134	242.096	978.04	-48.96	297.718	917.926	-81.1335	243.172	895.755	-95.2722	321.963	850.029
670	0	138.151	373.669	1627.26	236.623	378.291	1627.84	123.326	218.378	1627.79	252.658	208.641	1621.09	210.963	169.713	1498.49	216.194	98.1742	1244.7	194.705	283.376	1407.65	189.266	346.035	1255.68	299.984	100.586	1306.21	36.326	166.789	1446.4	-17.2973	150.965	1263.11	-32.1458	132.882	1111.5	-67.1774	248.022	975.69	-43.9057	301.407	913.644	-76.7916	246.424	893.431	-89.2501	323.407	844.013
671	0	138.262	388.444	1628.54	236.932	393.096	1629.05	123.17	233.145	1628.99	252.56	223.322	1622.7	211.086	184.255	1500.04	217.111	112.524	1246.21	194.671	297.763	1409.16	188.96	360.275	1257.48	300.668	115.238	1307.81	36.6912	180.503	1447.63	-15.7829	162.883	1264.13	-29.397	143.108	1112.73	-62.9847	253.863	973.36	-38.6528	304.666	909.412	-72.5418	249.644	891.353	-83.1664	324.661	838.252
672	0	138.451	403.293	1629.53	236.978	407.768	1629.8	123.216	247.857	1630.46	252.47	238.042	1623.82	211.142	198.794	1501.16	217.761	126.855	1247.6	194.674	312.003	1410.38	188.734	374.413	1258.53	301.364	129.797	1309.44	36.9193	194.395	1448.5	-13.9988	175.16	1264.48	-26.1997	152.951	1113.85	-58.8157	259.536	971.241	-33.3986	307.783	905.212	-68.443	252.596	889.273	-77.1227	325.551	832.736
673	0	138.652	418.083	1630.2	237.045	422.294	1630.42	123.042	262.557	1631.51	252.519	252.474	1624.73	211.319	213.31	1502.28	218.328	141.114	1248.69	194.734	326.337	1411.17	188.882	388.72	1259	301.886	144.409	1310.57	37.1539	208.333	1449.07	-12.844	187.263	1264.98	-23.0212	162.671	1114.51	-54.3528	264.945	968.634	-28.4208	310.595	901.12	-64.2029	255.426	887.141	-71.0761	326.092	827.499
674	0	138.617	432.642	1630.65	237.091	436.829	1631	122.99	277.325	1632.14	252.207	267.013	1625.23	211.294	227.894	1503.06	218.799	155.519	1249.58	194.803	340.71	1411.81	189.075	402.83	1259.61	302.539	158.903	1311.79	37.4278	222.374	1449.63	-11.2764	199.587	1265.42	-19.686	172.325	1115.44	-49.9913	270.234	966.803	-23.614	313.508	897.599	-60.0778	258.238	885.54	-65.0527	326.494	822.594
675	0	138.65	447.232	1630.97	237.127	451.31	1631.5	122.897	291.932	1632.51	252.287	281.535	1625.89	211.393	242.456	1503.52	219.213	169.806	1250.36	194.817	355.165	1412.29	189.476	417.161	1260.04	302.941	173.476	1312.55	37.5485	236.608	1449.93	-9.66928	211.919	1265.32	-16.3268	181.834	1116.16	-45.7272	275.051	964.978	-18.573	316.02	894.102	-55.7778	260.851	883.922	-59.4455	326.677	817.841
676	0	138.766	461.928	1631.22	237.341	465.947	1631.87	122.84	306.522	1632.57	252.093	295.964	1626.31	211.5	257.008	1503.84	219.633	184.23	1251.03	194.911	369.582	1412.47	189.717	431.352	1259.84	303.288	187.969	1313.23	37.7871	250.975	1450.01	-7.7397	224.158	1265.28	-12.8497	191.482	1116.54	-41.5205	279.973	962.782	-13.8157	319.011	890.918	-51.2435	263.369	882.259	-54.0376	326.685	813.536
677	0	138.645	476.494	1630.92	237.23	480.404	1631.79	122.593	321.077	1632.31	251.813	310.449	1626.24	211.554	271.629	1503.74	219.941	198.697	1251.14	195.327	384.133	1412.55	190.38	445.747	1259.6	303.785	202.505	1313.52	37.985	265.504	1449.73	-6.45704	236.585	1264.94	-9.47231	201.085	1117.18	-37.4565	284.813	960.552	-9.10522	321.158	887.905	-46.7686	265.854	880.611	-48.8127	326.472	809.821
678	0	138.633	490.894	1630.56	237.065	494.774	1631.67	122.257	335.43	1631.81	251.604	324.819	1625.95	211.606	286.286	1503.5	220.214	213.068	1251.03	195.453	398.7	1411.81	190.812	459.974	1258.96	303.942	217.035	1313.65	38.0706	280.105	1449.24	-4.76023	248.771	1264.48	-6.22285	210.763	1117.32	-33.4088	289.862	958.542	-4.76315	323.787	884.912	-42.2863	268.071	879.15	-43.9834	326.403	806.305
679	0	138.396	505.666	1630.45	236.922	509.286	1631.51	122.054	349.986	1631.23	251.707	339.407	1625.36	211.828	300.973	1503.01	220.546	227.651	1250.8	195.497	413.172	1411.26	191.546	474.326	1258.53	304.255	231.644	1313.23	38.1756	294.715	1448.56	-3.15046	260.964	1263.95	-2.93072	220.75	1117.47	-29.3792	294.776	956.403	-0.569674	326.784	882.138	-37.5666	270.685	877.641	-39.3123	326.475	802.994
680	0	138.274	520.217	1629.56	236.907	523.951	1631.21	121.988	364.497	1630.09	251.425	354.06	1624.6	212.069	315.669	1502.27	220.72	242.106	1250.34	195.729	427.803	1410.6	191.991	488.507	1257.43	304.652	246.208	1312.79	38.4028	309.243	1447.55	-1.71643	273.01	1263.13	0.241842	230.711	1117.57	-25.8144	299.695	954.542	2.49228	329.967	880.191	-33.058	273.321	876.166	-35.0282	326.73	799.857
681	0	137.991	534.661	1628.74	236.565	538.49	1630.33	121.86	379.062	1628.45	251.286	368.795	1623.55	212.2	330.452	1501.33	221.1	256.578	1249.58	195.988	442.567	1409.4	192.686	502.841	1256.32	305.026	260.724	1312.23	38.5515	323.898	1446.5	-0.211273	285.218	1262.33	3.28227	240.781	1117.35	-22.2951	304.841	952.745	6.99374	332.877	877.966	-28.6352	276.264	875.119	-30.582	327.049	797.064
682	0	137.663	549.298	1627.53	236.348	553.092	1629.57	121.489	393.643	1627.34	251.264	383.288	1622.44	212.447	345.24	1500.24	221.444	271.057	1248.83	196.123	457.221	1408.18	193.062	516.976	1254.66	305.397	275.324	1311.38	38.8615	338.638	1445.05	1.56035	297.234	1261.43	6.24772	251.22	1117.37	-19.0767	310.19	950.712	10.2923	336.354	875.453	-24.2362	279.628	873.785	-26.4159	327.915	794.247
683	0	137.368	563.975	1626.01	236.038	567.859	1628.22	121.487	408.105	1625.35	251.053	398.01	1620.56	212.594	360.092	1498.84	221.602	285.512	1247.57	196.219	471.953	1406.38	193.354	531.282	1252.42	305.831	290.021	1310.25	39.0521	353.304	1443.4	2.64492	309.444	1260.49	9.12633	261.604	1116.98	-15.8056	316.018	948.87	13.5112	340.41	873.419	-20.3611	283.083	872.811	-22.1018	329.067	791.946
684	0	137.558	578.516	1625.01	235.393	582.452	1626.54	121.238	422.691	1623.42	250.793	412.711	1618.68	212.572	375.062	1497.02	222.051	300.127	1246.1	196.516	486.822	1404.74	193.703	545.639	1250.36	306.069	304.555	1309.01	39.1711	367.952	1441.49	4.32457	321.543	1259.26	11.706	272.265	1116.46	-13.0083	321.993	947.019	16.7349	344.877	871.101	-16.1914	286.971	871.558	-18.2712	330.51	789.616
685	0	137.085	593.008	1622.75	234.96	597.061	1625.14	121.092	437.185	1621.05	250.495	427.471	1616.93	212.645	390.022	1495.41	222.054	314.904	1244.68	196.389	501.608	1402.84	193.952	560.119	1248.4	306.455	319.359	1307.32	39.3569	382.668	1439.62	5.57404	333.746	1257.82	14.0795	283.192	1116	-10.7407	328.188	945.71	19.3508	349.617	868.968	-13.0213	291.477	871.059	-14.6547	332.622	787.777
686	0	136.504	607.744	1621.32	234.802	612.099	1623.82	120.891	451.844	1619.15	250.521	442.346	1614.75	212.587	404.981	1493.47	222.057	329.638	1242.96	196.456	516.744	1400.79	194.333	574.865	1246.53	306.768	334.064	1305.66	39.447	397.493	1437.7	6.64249	346.217	1256.59	16.4142	294.386	1115.57	-8.16964	334.882	944.487	21.579	355.24	867.055	-9.60887	296.52	870.359	-11.1196	335.273	785.614
687	0	135.917	622.368	1619.64	234.246	626.741	1622.15	120.647	466.55	1617.06	250.386	457.023	1612.77	212.648	420.012	1491.35	222.146	344.496	1240.98	196.225	531.633	1398.94	194.466	589.621	1244.32	306.88	348.793	1303.89	39.5039	412.247	1435.74	7.66479	358.964	1254.98	18.455	305.702	1114.7	-6.01591	342.124	942.854	23.6455	361.192	865.004	-6.8671	302.275	869.749	-8.03594	338.581	783.782
688	0	135.582	637.247	1617.84	233.665	641.569	1620.26	120.326	481.204	1614.82	249.815	471.93	1610.92	212.54	435.095	1489.42	221.974	359.468	1238.79	196.337	546.893	1397.03	194.608	604.66	1242.09	307.049	363.677	1302.17	39.3971	427.127	1433.43	8.79651	371.82	1253.29	20.2059	317.465	1113.98	-4.55261	349.832	941.604	25.7752	367.253	862.726	-4.39435	308.414	868.984	-5.27082	342.321	781.978
689	0	135.162	651.805	1616.33	233.251	656.494	1618.81	120.126	495.831	1612.25	249.709	486.825	1608.29	212.244	450.153	1487.25	221.982	374.389	1236.8	196.002	561.989	1394.83	194.738	619.711	1240.14	306.855	378.603	1300.14	39.3412	441.915	1431.33	9.42159	385.052	1251.73	21.626	329.542	1113.09	-2.79239	358.209	940.067	27.1032	374.825	860.879	-2.37507	315.263	868.212	-2.68683	346.928	780.21
690	0	134.376	666.715	1614.21	232.611	671.357	1617.12	119.81	510.682	1609.94	249.333	501.886	1606.02	211.966	465.345	1485.33	221.592	389.582	1234.41	195.827	577.314	1392.62	194.978	634.938	1238.26	306.71	393.634	1298.19	39.0546	457.023	1429.11	10.0335	398.555	1249.81	22.7492	341.971	1111.78	-1.73741	367.232	938.603	28.4331	382.441	859.39	-0.452081	322.877	867.691	-0.830482	352.274	778.926
691	0	133.912	681.414	1612.38	232.094	686.383	1615.47	119.501	525.485	1607.62	249.028	516.768	1603.94	211.679	480.503	1483.11	221.08	404.969	1232.26	195.429	592.432	1390.59	194.765	650.07	1235.87	306.448	408.508	1296.4	38.8508	472.179	1426.82	10.2292	412.504	1248.26	23.7289	354.865	1110.81	-0.667716	376.762	937.034	29.0593	390.857	857.458	0.941806	331	867.264	1.11322	358.728	777.691
692	0	133.152	696.355	1610.54	231.169	701.364	1613.73	119.06	540.414	1605.53	248.743	531.931	1601.8	211.219	495.659	1481.19	220.475	420.28	1230.16	195.382	607.838	1388.73	194.675	665.405	1233.69	306.024	423.451	1294.47	38.5016	487.297	1424.8	10.4438	426.427	1246.36	24.2843	368.196	1109.38	-0.19943	386.627	935.793	29.9666	399.777	856.093	2.12263	339.979	866.686	2.20371	365.644	776.596
693	0	132.502	711.25	1608.82	230.544	716.536	1612.03	118.719	555.338	1603.17	248.406	547.037	1599.72	210.728	510.764	1479.46	219.581	435.867	1228.23	194.809	623.095	1386.77	194.418	680.744	1231.8	305.483	438.638	1292.6	37.9472	502.686	1422.87	10.339	441.007	1244.73	24.6573	381.991	1108.5	0.334942	397.627	934.547	30.3989	409.399	854.858	3.01946	349.684	866.255	2.82963	373.73	775.867
694	0	131.838	726.245	1607.34	229.814	731.499	1610.71	118.337	570.283	1601.71	247.832	562.301	1598.01	210.052	525.989	1477.51	218.593	451.503	1226.63	194.492	638.685	1385.04	194.074	696.347	1230.16	304.731	453.933	1290.92	37.326	517.994	1421.16	9.91815	455.86	1243.48	24.8685	396.05	1107.6	0.331695	409.002	933.65	30.4138	419.917	853.301	3.3663	359.995	865.842	3.38609	382.579	774.89
695	0	131.108	741.228	1605.67	229.05	746.728	1609.11	117.96	585.294	1599.45	247.45	577.328	1596.27	209.26	541.068	1475.95	217.351	466.925	1225.2	193.768	653.931	1383.66	193.752	712.129	1228.97	303.565	469.105	1289.11	36.617	533.62	1419.26	9.28679	470.84	1241.96	24.4844	410.739	1106.53	0.001054	421.369	932.486	30.1701	430.927	852.156	3.31025	371.056	865.387	3.37211	392.455	774.165
696	0	130.52	756.326	1604.32	228.351	761.854	1607.82	117.347	600.4	1598.25	246.861	592.646	1594.38	208.431	556.36	1474.21	215.958	482.348	1223.41	193.35	669.605	1382.29	193.134	727.925	1227.65	302.146	484.56	1287.11	35.6281	549.157	1418.04	8.32724	486.173	1240.76	23.74	425.69	1105.41	-0.466128	434.094	931.176	29.7622	442.81	851.106	3.03294	383.08	865.062	2.793	403.216	773.212
697	0	129.92	771.045	1603.05	227.686	776.924	1606.55	116.917	615.491	1596.68	246.362	607.603	1593.34	207.411	571.548	1472.55	214.381	497.955	1221.67	192.52	685.033	1381.12	192.664	743.864	1226.85	300.638	500.184	1285.45	34.7099	564.921	1416.83	7.31203	501.873	1239.46	22.8353	441.067	1104.53	-1.58743	447.609	930.791	28.485	455.593	850.085	2.13667	395.975	864.879	1.65085	415.088	773.107
698	0	129.542	786.473	1602.14	227.291	792.037	1605.51	116.301	630.653	1595.34	245.963	622.565	1592.09	206.425	586.675	1471.19	212.813	513.727	1219.95	191.55	700.585	1380.16	191.826	759.926	1226.23	298.961	515.826	1283.42	33.5567	580.652	1415.67	5.83927	517.733	1238.19	21.5696	456.943	1103.57	-3.10082	461.932	929.915	27.1578	469.206	849.039	0.761457	409.705	864.515	0.517191	427.875	772.325
699	0	128.65	801.461	1601.01	226.552	807.067	1604.28	115.819	645.856	1594.2	245.359	637.619	1590.9	205.349	601.761	1469.68	211.054	529.79	1218.06	190.509	716.18	1379.06	190.659	776.04	1225.54	297.289	531.488	1281.42	32.2543	596.547	1414.47	4.30772	534.061	1237.15	19.8074	473.019	1102.5	-4.74262	476.909	928.827	25.2388	483.696	848.023	-1.05881	424.186	864.057	-1.22282	441.531	771.354
700	0	128.194	816.774	1600.44	226.252	822.4	1603.5	115.133	661.116	1593.71	244.466	652.729	1590.39	203.996	616.853	1468.85	209.197	546.252	1216.16	189.396	731.74	1378.36	189.253	792.345	1225.02	295.71	547.302	1279.52	30.7392	612.416	1413.59	2.4624	550.376	1236.17	18.0539	489.426	1101.6	-6.85657	492.557	927.711	22.9499	498.944	847.11	-3.35726	439.525	863.318	-3.49979	456.338	770.695
701	0	127.829	832.24	1600.34	225.708	837.551	1603.25	114.528	676.565	1593.7	243.675	668.062	1589.97	202.561	632.167	1468.18	207.526	562.594	1214.8	188.378	747.443	1378.03	187.819	808.814	1224.57	293.935	563.03	1277.89	29.4261	628.307	1412.9	0.611594	567.22	1235.09	15.7219	506.452	1100.43	-9.66773	509.003	927.134	20.1328	514.996	846.303	-6.01772	455.728	862.718	-6.47595	472.273	770.006
702	0	127.402	847.458	1600.82	225.25	852.903	1603.3	113.809	692.082	1594.35	242.873	683.248	1590.18	201.436	647.547	1468.2	206.163	578.837	1213.84	187.176	762.978	1378.17	186.176	825.203	1225.08	292.192	578.82	1276.81	28.0425	644.145	1412.73	-1.62542	584.265	1234.83	13.3237	523.825	1099.54	-12.446	526.126	926.474	17.0995	532.047	845.655	-9.13472	472.847	862.12	-9.61726	489.05	769.521
703	0	126.942	862.922	1602.02	224.884	868.254	1603.97	113.147	707.579	1595.2	242.203	698.624	1590.39	200.365	662.922	1468.66	205.135	594.826	1213.58	186.273	778.579	1379.2	184.678	841.5	1226.28	291.047	594.496	1276.4	26.9979	659.931	1413.13	-3.47887	601.484	1234.27	10.6206	541.599	1098.87	-15.5931	544.073	926.494	13.7183	549.826	845.356	-12.5983	490.803	862.027	-13.567	506.866	769.435
704	0	126.405	878.495	1602.98	224.298	883.403	1604.93	112.493	723.034	1596.11	241.639	714.138	1590.63	199.441	678.455	1469.46	204.31	610.384	1214.05	185.011	793.994	1380.06	183.366	857.77	1227.78	290.197	610.108	1276.65	25.8571	675.534	1413.9	-5.42323	619.071	1234.45	8.07336	559.973	1099.11	-19.0487	562.908	926.594	9.65087	569.156	844.969	-16.4348	509.731	861.888	-17.6153	526.151	769.204
705	0	125.899	893.901	1604.34	223.757	898.846	1605.94	111.865	738.519	1597.4	241.018	729.329	1591.56	198.57	693.903	1470.59	203.842	625.572	1215.32	184.341	809.643	1381.32	182.049	873.69	1229.19	289.583	625.783	1277.55	24.9774	691.354	1415.15	-7.42561	636.849	1235.16	5.50249	578.314	1099.54	-22.9104	582.531	927.11	5.56806	589.067	845.525	-20.6881	529.621	862.176	-22.4085	546.395	769.801
706	0	125.192	909.169	1605.82	223.163	914.35	1607.05	111.359	753.83	1598.55	240.529	744.717	1592.36	197.822	709.396	1471.72	203.442	640.88	1216.81	183.439	824.868	1382.62	181.057	889.484	1230.69	288.819	641.1	1279.07	24.0986	707.169	1416.62	-9.10049	654.395	1235.87	2.86974	596.704	1100.25	-26.7967	602.611	927.911	1.34484	609.652	846.083	-25.1092	550.249	862.536	-27.6409	567.771	770.238
707	0	124.644	924.477	1607.16	222.423	929.54	1608.65	110.932	769.08	1599.4	240.101	760.104	1593.47	197.165	724.688	1473.01	203.266	656.224	1217.96	183.126	840.422	1384.08	180.268	904.961	1232.16	288.457	656.227	1280.6	23.4831	722.956	1418.04	-10.9271	672.035	1237.23	0.042369	615.218	1100.66	-30.5282	623.234	928.748	-3.23682	631.177	847.024	-29.9594	571.708	862.89	-33.1887	590.214	770.791
708	0	124.386	939.612	1608.74	221.895	945.046	1610.27	110.703	784.208	1600.08	239.98	775.685	1594.78	196.601	740.056	1474.45	203.024	671.243	1219.72	182.841	855.597	1385.5	179.628	920.121	1233.6	287.701	671.019	1282.54	22.9122	738.888	1419.86	-12.5754	689.624	1238.43	-2.87813	633.881	1101.35	-34.8873	644.611	929.741	-8.13923	653.361	847.936	-34.9536	593.84	863.285	-39.0634	613.462	771.279
709	0	123.386	954.601	1609.78	221.388	960.506	1611.78	110.707	799.274	1601.39	239.909	791.329	1595.95	195.963	755.165	1475.85	202.686	685.984	1221.25	182.589	870.648	1386.53	179.44	935.213	1234.77	287.23	685.748	1284.41	22.3734	754.879	1421.39	-14.1374	707.211	1239.84	-5.84401	652.64	1102.18	-39.2064	666.225	930.811	-12.765	676.183	848.905	-40.0291	616.601	863.783	-44.8148	637.971	771.727
710	0	122.981	969.708	1610.74	220.337	975.776	1612.91	110.809	814.159	1602.63	240.025	806.638	1597.42	195.358	770.109	1477.45	202.184	700.54	1223.46	182.768	885.774	1387.7	179.269	950.066	1235.46	286.648	700.087	1286.35	21.8061	770.846	1423.16	-15.6981	724.764	1241.39	-8.97055	671.478	1102.95	-43.2146	688.316	931.961	-17.5951	699.496	849.985	-45.1261	640.022	863.738	-51.0531	663.359	772.782
711	0	122.497	984.709	1611.95	219.609	990.961	1614.19	110.79	829.07	1603.91	240.025	821.928	1599.12	194.92	784.923	1479.3	201.481	715.071	1225.79	181.773	899.621	1388.07	179.634	964.606	1236.48	286.028	714.166	1288.31	21.3335	786.799	1424.62	-17.4072	742.254	1242.59	-12.2599	690.527	1103.4	-48.0606	710.844	933.045	-22.4449	723.436	851.275	-50.233	663.869	863.842	-57.1208	689.488	773.888
712	0	121.968	999.55	1613.24	219.425	1006.37	1615.69	110.947	843.974	1605.54	240.134	837.378	1600.77	194.614	799.671	1480.9	200.543	729.488	1227.91	182.492	914.432	1390.07	180.568	979.314	1237.84	285.155	728.229	1290.25	20.9044	802.593	1426.45	-19.3534	759.925	1244.26	-15.6796	709.652	1104.05	-52.2454	734.002	934.218	-27.1808	747.796	852.602	-55.4617	688.265	864.162	-63.1965	716.202	774.951
713	0	121.629	1014.41	1614.37	219.016	1021.44	1617	111.151	858.642	1607.22	240.274	852.456	1602.85	194.361	814.208	1482.8	199.703	743.388	1230.06	182.685	928.942	1391.58	181.738	993.562	1239.55	284.164	742.002	1292	20.5592	818.221	1428.35	-21.0925	777.572	1245.5	-18.9627	728.937	1104.52	-56.4061	757.278	935.56	-32.1042	772.611	853.789	-60.4965	713.314	864.235	-69.3954	743.671	776.515
714	0	121.379	1029.13	1615.45	218.627	1036.35	1618.08	111.363	873.298	1608.99	240.527	867.403	1604.69	194.205	828.639	1484.49	198.733	757.413	1231.74	182.81	943.342	1393.14	182.785	1007.46	1240.96	283.458	755.712	1293.87	20.2944	833.575	1430.14	-22.7582	795.205	1247.09	-22.3261	748.308	1105.4	-60.5706	780.849	936.818	-36.5825	798.031	855.734	-65.7013	738.636	864.798	-75.7641	771.837	777.915
715	0	120.968	1043.68	1616.68	218.436	1051.43	1619.42	111.575	887.897	1611.25	240.97	882.347	1607.12	194.152	842.957	1486.4	197.68	771.577	1233.83	183.328	957.84	1394.88	184.26	1021.42	1242.73	282.567	769.473	1295.66	20.2083	848.644	1432.19	-24.4539	812.916	1248.69	-25.6939	767.895	1106.3	-64.7079	804.832	938.702	-42.1735	823.819	858.252	-70.7238	764.432	865.453	-81.7892	800.516	780.279
716	0	120.875	1058.32	1617.97	218.381	1066.49	1620.71	111.776	902.302	1613.39	241.016	897.431	1609.3	194.167	857.309	1488.38	196.391	785.47	1235.64	183.724	971.911	1396.94	185.462	1035.22	1244.51	281.677	782.863	1297.58	20.2132	863.496	1434.36	-26.084	830.654	1250.38	-29.1672	787.638	1107.18	-68.6471	828.986	940.561	-47.03	849.919	860.089	-75.7552	790.285	866.442	-87.797	829.381	782.862
717	0	120.692	1072.92	1619.26	218.254	1081.14	1622.06	112.021	916.799	1615.8	241.457	912.091	1611.58	194.227	871.268	1490.48	195.598	799.277	1237.76	184.181	986.27	1398.94	186.461	1049.07	1246.44	280.75	796.284	1299.55	20.1072	878.324	1436.41	-27.6502	848.316	1252.15	-32.2659	807.516	1107.99	-72.7283	853.539	943.041	-51.0437	876.068	862.688	-80.6685	816.823	867.878	-93.5568	858.61	785.807
718	0	120.602	1087.24	1620.49	218.095	1095.91	1623.34	112.413	931.124	1617.6	241.619	926.945	1613.6	194.229	885.442	1492.37	194.486	813.13	1239.63	184.169	1000.13	1400.71	187.232	1063.03	1248.42	279.897	809.706	1301.37	20.2289	892.811	1438.63	-28.8235	865.845	1254.14	-35.4484	827.463	1109.28	-76.5146	878.176	945.717	-55.2865	902.78	865.811	-85.3474	843.344	869.558	-99.2434	888.09	789.306
719	0	120.429	1101.54	1621.71	217.905	1110.62	1624.34	112.621	945.423	1620.06	242.024	941.6	1615.67	194.015	899.385	1494.24	193.762	826.675	1241.63	184.809	1014.2	1402.96	187.661	1076.88	1250.32	279.163	822.986	1303.31	20.1615	907.4	1440.86	-30.5181	883.376	1256.18	-38.7338	847.335	1110.73	-80.1671	902.925	948.601	-59.4246	929.511	869.359	-90.1918	870.311	871.781	-104.708	917.847	793.576
720	0	120.604	1115.96	1622.92	217.875	1125.21	1625.41	113.254	959.794	1621.65	242.247	956.171	1617.77	194.07	913.436	1496.15	193.122	840.387	1243.57	184.661	1028.06	1404.59	188.215	1090.98	1252.44	278.458	836.415	1305.19	20.1447	921.858	1443.16	-31.6942	900.815	1258.3	-41.6024	867.266	1112.14	-83.637	927.856	951.854	-63.1788	956.473	873.358	-94.3638	897.452	874.214	-109.624	947.872	797.882
721	0	120.391	1130.08	1623.86	217.878	1139.56	1626.65	113.409	973.833	1623.73	242.789	970.514	1619.65	193.994	927.527	1497.67	192.737	854.002	1245.38	184.815	1042.1	1406.13	188.08	1104.75	1254.16	277.807	849.639	1307.1	20.1728	936.272	1445.21	-33.0888	918.01	1260.61	-44.5512	887.105	1113.89	-87.1249	952.806	955.294	-66.9773	983.549	877.343	-98.8093	924.598	877.231	-114.439	977.8	802.588
722	0	120.439	1144.21	1624.99	217.83	1153.93	1627.59	113.81	987.883	1625.4	243.099	984.983	1621.36	193.962	941.361	1499.31	192.162	867.66	1246.96	184.827	1055.86	1407.77	188.145	1118.67	1255.73	277.337	863.007	1308.64	20.0457	950.766	1447.29	-34.4655	934.986	1262.91	-47.4835	906.664	1115.33	-90.3932	977.683	958.986	-70.5321	1010.53	881.674	-103.074	951.841	880.337	-118.669	1008.08	807.486
723	0	120.474	1158.23	1626.02	217.864	1168.32	1628.45	114.07	1001.9	1627.01	243.359	999.21	1622.77	193.927	955.312	1500.69	191.743	881.417	1248.59	185.085	1069.84	1409.43	187.789	1132.28	1256.87	276.82	876.705	1310.08	19.971	965.177	1449.04	-35.6176	951.837	1265.13	-50.2459	926.312	1117.04	-93.636	1002.61	962.904	-73.9203	1037.68	885.998	-106.991	979.175	883.627	-122.924	1038.19	813.102
724	0	120.237	1172.08	1626.77	217.797	1182.41	1629.03	114.356	1015.94	1628.29	243.545	1013.5	1623.76	193.83	969.285	1501.66	191.348	895.196	1249.91	185.097	1083.68	1410.6	187.776	1145.94	1257.99	276.379	890.003	1311.24	19.6486	979.616	1450.9	-37.1036	968.694	1266.78	-53.1899	945.76	1118.08	-96.6883	1027.22	966.698	-77.0861	1064.81	891.159	-110.593	1006.86	886.863	-126.751	1068.33	818.769
725	0	120.326	1186.2	1627.44	217.786	1196.52	1629.52	114.668	1029.86	1629.39	243.797	1027.67	1624.64	193.572	983.07	1502.64	191.092	908.98	1250.87	185.218	1097.43	1411.66	187.677	1159.59	1259.03	275.917	903.62	1312.32	19.4704	994.092	1452.15	-38.5317	985.366	1268.51	-55.9811	965.054	1119.36	-99.641	1052.15	970.602	-80.2154	1091.88	896.076	-114.22	1034.32	890.156	-130.336	1098.21	824.736
726	0	120.381	1200.14	1627.97	218.008	1210.75	1629.97	114.894	1043.8	1630.1	244.21	1041.76	1625.28	193.595	997.077	1503.37	190.761	922.841	1251.97	185.012	1111.2	1412.29	187.481	1173.17	1259.6	275.58	917.141	1313.11	19.3167	1008.59	1453.22	-39.7312	1001.97	1269.73	-58.4982	984.297	1120.34	-102.342	1076.56	974.519	-82.8382	1118.7	901.47	-117.618	1061.45	893.73	-133.579	1127.97	830.593
727	0	120.339	1214	1628.42	217.857	1224.93	1630.01	115.134	1057.79	1630.62	244.428	1055.9	1625.66	193.405	1011.12	1503.67	190.448	936.608	1252.62	185.035	1125.24	1412.66	187.515	1186.95	1259.84	275.113	930.843	1313.7	19.2535	1023	1453.97	-41.1544	1018.67	1270.83	-61.2973	1003.33	1121.18	-104.878	1100.86	978.36	-85.4581	1145.33	906.844	-120.497	1088.68	897.26	-136.433	1157.47	836.469
728	0	120.228	1228.02	1628.53	217.668	1238.89	1629.73	115.296	1071.72	1630.84	244.562	1070.04	1625.47	193.255	1025.06	1503.78	190.06	950.593	1252.85	184.672	1139.09	1412.44	187.157	1200.65	1259.63	274.815	944.504	1313.8	18.9766	1037.48	1454.43	-42.4622	1035.36	1271.68	-63.9898	1022.57	1121.55	-107.251	1124.99	982.001	-87.8795	1171.67	911.779	-123.352	1115.68	900.658	-139.102	1186.84	842.801
729	0	120.16	1242.12	1628.36	217.093	1252.77	1629.36	115.526	1085.65	1630.78	244.765	1084.09	1624.83	192.974	1039	1503.64	189.286	963.332	1253.25	184.587	1153.17	1412.38	187.21	1214.52	1259.51	274.351	958.252	1313.66	18.8177	1051.79	1454.75	-43.7594	1051.74	1271.96	-66.5993	1041.39	1121.73	-109.494	1148.76	985.667	-90.1039	1197.75	917.257	-125.958	1142.31	904.108	-141.635	1215.62	849.305
730	0	119.98	1255.96	1628.16	217.351	1266.99	1629.21	115.614	1099.64	1630.39	244.648	1098.29	1624.42	192.943	1053.3	1503.31	188.811	977.339	1253.05	184.532	1167.18	1412.13	187.166	1228.51	1259.18	273.954	972.014	1313.51	18.5498	1066.06	1454.54	-45.0435	1068.1	1272.46	-69.1517	1060.3	1121.89	-111.767	1172.33	989.234	-92.3229	1223.39	922.591	-128.2	1168.75	907.371	-144.076	1243.96	855.68
731	0	119.948	1269.99	1627.76	217.059	1281.14	1628.68	115.636	1113.72	1629.97	244.796	1112.56	1623.68	192.803	1067.41	1502.76	188.666	991.596	1252.6	184.13	1181.29	1411.36	186.853	1242.34	1258.3	273.579	985.919	1313.08	18.4467	1080.43	1454.2	-46.291	1084.6	1272.34	-71.4503	1079.11	1121.51	-113.604	1195.79	992.563	-93.9868	1248.78	928.007	-130.507	1194.77	910.935	-145.953	1272.14	862.039
732	0	120.033	1284	1626.87	216.603	1295.27	1627.58	115.729	1127.85	1628.94	244.881	1126.81	1622.66	192.657	1081.61	1501.9	188.235	1004.97	1252.13	184.151	1195.65	1410.55	186.779	1256.43	1257.18	273.365	999.955	1312.4	18.3485	1094.55	1453.51	-47.5366	1100.81	1272.36	-73.7796	1097.85	1121.3	-115.365	1218.89	995.929	-95.9109	1273.68	932.773	-132.188	1220.68	914.133	-147.574	1299.7	868.315
733	0	119.699	1298.38	1625.95	216.814	1309.63	1626.95	115.837	1141.92	1627.77	244.833	1141.15	1621.38	192.708	1095.87	1501.02	188.064	1018.97	1251.34	183.858	1209.89	1409.31	186.496	1270.42	1256.21	273.263	1014.12	1311.44	18.0627	1108.82	1452.63	-48.4586	1117.01	1271.64	-75.9262	1116.51	1120.91	-117	1241.54	999.069	-97.2096	1298.29	937.93	-133.682	1246.16	917.477	-148.941	1326.78	874.471
734	0	119.472	1312.53	1625.15	216.619	1323.99	1625.89	115.783	1156.12	1626.58	244.94	1155.56	1620.09	192.461	1110.15	1499.9	188.038	1032.73	1250.4	183.757	1224.18	1408.25	186.118	1284.38	1254.67	273.237	1028.38	1310.3	17.8941	1122.94	1451.69	-49.4556	1133.01	1271.12	-77.8173	1135.05	1120.2	-118.361	1264.01	1002.12	-98.5845	1322.58	942.846	-135.104	1271.32	920.694	-150.025	1353.42	880.629
735	0	119.235	1326.67	1624.11	216.514	1338.4	1624.9	115.923	1170.41	1625.28	245	1169.95	1618.82	192.443	1124.64	1498.59	188.021	1046.84	1249.14	183.581	1238.55	1406.89	185.864	1298.66	1253.15	273.087	1042.91	1309.02	17.7047	1137.17	1450.56	-50.3545	1148.99	1270.29	-79.6463	1153.54	1119.56	-119.55	1286.24	1005.13	-99.2333	1346.64	948.021	-136.353	1296.02	924.054	-151.105	1379.5	886.68
736	0	119.202	1340.92	1623	215.926	1352.66	1623.41	115.991	1184.72	1623.8	245.004	1184.43	1617.03	192.59	1139.1	1497.29	188.659	1062.08	1247.1	183.377	1253.15	1405.4	185.637	1312.91	1251.98	273.688	1057.73	1307.17	17.6214	1151.52	1449.27	-51.0035	1164.89	1269.18	-81.1216	1171.91	1118.54	-120.786	1307.97	1008.09	-100.18	1370.02	952.392	-137.396	1320.13	927.245	-151.832	1404.8	892.605
737	0	118.925	1355.43	1621.3	215.683	1367.15	1622.04	116.084	1199.05	1622.25	245.111	1199.11	1615.58	192.595	1153.64	1495.91	188.861	1076.48	1245.66	183.243	1267.79	1403.95	185.148	1327.27	1250.23	273.75	1072.41	1305.61	17.5915	1165.78	1447.71	-51.5888	1180.8	1268.06	-82.3069	1190.44	1117.42	-121.575	1329.45	1010.61	-100.714	1392.86	957.044	-138.126	1343.86	930.088	-152.507	1429.47	898.098
738	0	118.969	1369.83	1619.76	215.463	1381.75	1620.25	116.138	1213.5	1620.71	245.311	1213.64	1614.26	192.829	1168.15	1494.45	188.949	1090.35	1244.43	183.154	1282.42	1402.21	184.67	1341.72	1248.58	274.07	1087.33	1303.92	17.7229	1180	1446.15	-51.8893	1196.69	1266.96	-83.3311	1208.76	1116.5	-122.134	1350.55	1013.01	-101.185	1415.2	961.164	-138.419	1367.19	932.909	-152.733	1453.79	903.55
739	0	118.707	1384.12	1618.2	215.365	1396.29	1618.69	116.522	1227.9	1619.11	245.598	1228.23	1612.47	192.931	1182.62	1492.61	189.54	1104.9	1242.91	182.923	1297.05	1400.52	184.223	1356.55	1246.88	274.519	1102.22	1302.27	17.8371	1194.24	1444.53	-52.1417	1212.51	1265.66	-84.0236	1226.95	1115.31	-122.66	1371.15	1015.32	-101.413	1437.14	965.293	-138.683	1389.95	935.632	-153.012	1477.14	908.584
740	0	118.714	1398.7	1616.26	215.375	1410.92	1617.06	116.745	1242.32	1617.38	245.701	1242.96	1610.93	193.257	1197.28	1490.66	190.113	1119.04	1241.27	182.82	1311.74	1398.86	183.771	1371.47	1245.27	275.005	1117.27	1300.37	18.0658	1208.43	1442.74	-52.1437	1228.25	1264.28	-84.6863	1244.88	1114.34	-122.796	1391.41	1017.47	-101.461	1458.57	969.002	-138.906	1412.11	938.298	-152.933	1499.95	913.451
741	0	118.743	1413.15	1614.44	215.315	1425.57	1615.07	117.054	1256.8	1615.77	246.032	1257.75	1609.16	193.736	1211.75	1489.22	190.598	1133.78	1239.45	183.01	1326.41	1397.38	183.69	1386.55	1243.95	275.736	1132.51	1298.1	18.3011	1222.62	1441.04	-52.0174	1243.9	1263.08	-85.0952	1262.56	1113.33	-122.832	1411.13	1019.37	-101.454	1479.34	972.359	-138.935	1433.83	940.786	-152.691	1522.17	918.056
742	0	118.71	1427.55	1612.68	215.14	1440.34	1613	117.354	1271.31	1613.95	246.269	1272.47	1607.55	194.196	1226.4	1487.34	191.347	1148.58	1237.48	183.026	1341.28	1395.8	183.295	1401.73	1242.57	276.541	1147.77	1296.24	18.7278	1236.84	1439.3	-51.687	1259.77	1261.68	-85.2187	1279.89	1112.19	-122.573	1430.62	1021.27	-101.137	1499.75	975.711	-138.594	1454.75	942.741	-152.377	1543.78	922.252
743	0	118.771	1442.06	1610.76	215.29	1455.07	1611.09	117.819	1285.85	1612.54	246.784	1287.33	1605.98	194.747	1240.99	1485.46	192.295	1163.83	1235.44	183.123	1356.07	1394.4	183.035	1416.85	1241.27	277.426	1163.17	1294.22	19.2386	1251.01	1437.73	-51.4737	1275.61	1260.31	-85.1672	1297.1	1111.1	-122.068	1449.55	1023.01	-100.526	1519.49	978.71	-138.163	1475.18	944.983	-151.882	1564.55	926.15
744	0	118.756	1456.48	1609.05	215.31	1469.97	1609.34	118.5	1300.32	1611.17	247.295	1302.27	1604.5	195.504	1255.57	1483.8	193.151	1178.08	1233.91	183.513	1370.99	1393.14	182.898	1432.2	1239.93	278.428	1178.54	1292.25	19.8984	1265.12	1436.22	-51.0259	1291.25	1259.1	-84.9319	1313.85	1109.73	-121.566	1467.95	1024.45	-99.9555	1538.54	981.285	-137.494	1495.06	946.658	-151.191	1584.59	929.957
745	0	118.935	1471	1607.18	215.44	1484.84	1607.41	119.098	1314.83	1609.65	247.836	1317.22	1603	196.316	1270.15	1482.09	194.43	1194.33	1231.82	183.678	1385.94	1391.7	182.081	1447.16	1238.14	279.614	1194.06	1290.33	20.6449	1279.29	1434.69	-50.2769	1306.93	1258	-84.4926	1330.35	1108.65	-120.869	1485.88	1025.77	-98.956	1556.97	983.709	-137	1514.2	948.655	-150.204	1604.1	933.215
746	0	118.944	1485.57	1605.19	215.39	1499.83	1605.3	119.692	1329.47	1608.12	248.498	1332.27	1601.4	197.164	1284.79	1480.19	195.612	1209.67	1229.91	184.004	1400.95	1390.04	182.643	1462.95	1237.55	281.167	1209.83	1287.93	21.5164	1293.47	1433.11	-49.705	1322.29	1256.7	-84.0313	1346.39	1107.72	-119.927	1503.24	1026.6	-98.0347	1574.94	985.826	-136.055	1532.74	950.082	-149.042	1622.85	936.029
747	0	119.216	1499.81	1603.94	215.365	1514.68	1603.25	120.481	1343.98	1606.66	249.222	1347.27	1600.03	198.128	1299.47	1478.48	196.835	1225.67	1227.76	184.542	1416.04	1388.81	182.826	1478.47	1236.46	282.255	1225.31	1286.24	22.5035	1307.77	1431.36	-48.8741	1337.49	1255.22	-83.4356	1361.92	1106.44	-118.98	1520.26	1027.38	-96.793	1592.28	987.434	-134.965	1550.69	951.555	-147.86	1641.06	938.416
748	0	119.281	1514.57	1601.64	215.436	1529.62	1601.77	121.328	1358.37	1605.38	250.06	1362.15	1598.52	199.022	1314.14	1476.81	198.435	1241.92	1225.12	185.167	1431.13	1387.63	183.253	1494.28	1235.61	283.618	1241.08	1284.51	23.3994	1322.17	1429.65	-47.93	1352.51	1253.85	-82.727	1376.98	1105.15	-117.84	1536.42	1028.15	-95.3357	1608.9	988.806	-133.954	1567.96	952.796	-146.4	1658.52	940.796
749	0	119.314	1528.67	1600.32	215.362	1544.37	1600.22	122.202	1372.81	1603.83	250.949	1377.44	1597.41	200.058	1328.83	1475.24	199.749	1257.26	1223.67	186.02	1446.22	1386.52	184.228	1509.71	1234.6	285.096	1256.69	1282.58	24.3671	1336.78	1428.11	-46.8967	1367.29	1252.41	-82.0654	1391.54	1103.5	-116.593	1552.11	1028.66	-94.1856	1625	990.078	-132.954	1584.64	953.456	-144.721	1675.4	942.632
750	0	119.224	1542.96	1598.52	215.223	1559.29	1598.8	123.083	1387.24	1602.54	251.85	1392.49	1596.24	201.225	1343.65	1473.74	201.252	1273.68	1221.39	187.108	1461.59	1385.49	185.529	1526.16	1234.5	286.64	1272.52	1280.74	25.3921	1351.52	1426.48	-45.972	1381.76	1250.58	-81.2603	1405.59	1101.78	-115.264	1567.35	1028.63	-92.349	1640.48	990.885	-131.802	1600.68	954.13	-143.022	1691.57	944.044
751	0	119.03	1557.24	1597.47	215.419	1574.16	1598.08	124.106	1401.62	1601.28	252.674	1407.46	1595.57	202.104	1358.23	1472.48	202.365	1289.43	1219.78	188.1	1476.67	1384.76	186.814	1542.1	1233.96	287.965	1288.29	1278.88	26.3579	1366.32	1424.75	-45.0407	1396.06	1248.81	-80.3675	1419.34	1099.99	-113.931	1581.84	1028.56	-90.6823	1655.31	991.493	-130.522	1616.2	954.254	-141.09	1707.25	945.137
752	0	119.141	1571.83	1596.82	215.399	1589.33	1597.71	125.015	1416.13	1600.65	253.589	1422.81	1595.27	203.327	1373.11	1471.62	203.513	1305.77	1217.96	189.255	1492.05	1384.61	188.633	1558.34	1234.14	289.271	1304.03	1277.51	27.4897	1381.11	1423.27	-43.8361	1409.98	1247.38	-79.2807	1432.75	1098.18	-112.362	1596.01	1027.76	-89.0705	1669.52	991.355	-128.935	1630.82	953.848	-139.213	1722.07	945.681
753	0	119.298	1586.21	1596.63	215.265	1604.43	1597.64	125.926	1430.65	1600.43	254.554	1438	1595.53	204.338	1387.98	1471.28	204.381	1322.42	1216.71	190.645	1507.45	1384.78	190.17	1574.28	1233.92	290.4	1319.88	1276.58	28.5743	1395.86	1422.35	-42.5733	1423.55	1246.31	-78.0419	1445.84	1096.69	-110.663	1609.38	1026.84	-87.1445	1683.18	991.121	-127.325	1644.75	953.381	-137.214	1736.22	946.042
754	0	119.381	1600.73	1596.58	215.209	1619.44	1597.92	127.042	1445.26	1600.44	255.487	1453.48	1595.8	205.468	1402.99	1471.1	205.219	1339.24	1215.84	191.975	1522.88	1385.34	192.277	1591.2	1235.39	291.509	1335.69	1275.59	29.7257	1410.71	1421.6	-41.0496	1436.97	1245.14	-76.3338	1458.6	1095.39	-108.875	1622.47	1025.77	-85.1691	1696.05	990.135	-125.266	1657.88	952.477	-135.147	1749.29	945.492
755	0	119.669	1615.31	1596.95	215.227	1634.63	1598.68	128.178	1459.86	1600.73	256.486	1468.81	1596.53	206.53	1418.01	1471.54	205.601	1354.34	1216.15	193.034	1538.16	1385.79	193.874	1607.35	1236.4	292.488	1351.64	1275.47	30.9497	1425.75	1421.51	-39.228	1449.87	1244.56	-74.4103	1470.98	1094.69	-106.536	1634.89	1024.4	-83.1009	1708.33	989.19	-123.168	1669.95	951.326	-133.052	1761.41	944.294
756	0	119.861	1629.93	1597.5	215.316	1649.85	1599.6	129.035	1474.63	1601.51	257.393	1484.18	1597.6	207.334	1433.11	1472.4	205.78	1369.62	1216.79	194.074	1553.62	1386.71	195.455	1623.59	1237.86	292.766	1367.28	1276.28	31.8073	1440.96	1421.88	-37.4498	1462.66	1244.4	-72.1951	1482.95	1094.16	-104.417	1646.64	1023.02	-81.1477	1719.94	987.638	-120.76	1681.36	949.578	-131.127	1772.7	942.982
757	0	120.063	1644.7	1598.53	215.53	1665.04	1600.86	129.967	1489.34	1602.4	258.247	1499.48	1598.85	208.212	1448.45	1473.26	205.934	1384.98	1217.78	195.14	1569.14	1387.92	196.531	1639.32	1239.2	293.076	1382.68	1276.94	32.6197	1456.26	1422.93	-35.7022	1475.36	1244.59	-69.7674	1494.56	1094.15	-102.245	1657.46	1021.84	-78.8897	1730.82	986.032	-118.099	1691.77	947.944	-129.137	1782.99	941.156
758	0	120.259	1659.42	1599.74	215.699	1680.09	1602.2	130.881	1504.11	1603.32	259.118	1514.73	1599.7	208.772	1463.62	1474.45	205.821	1399.78	1219.15	195.582	1583.92	1389.18	197.792	1655.09	1240.8	293.358	1397.96	1277.96	33.1385	1471.73	1424.31	-34.0816	1488.17	1245.36	-67.2775	1505.74	1094.38	-99.7237	1668.09	1020.43	-76.6954	1740.9	984.072	-115.355	1701.39	946.18	-126.934	1792.39	938.466
759	0	120.563	1674.26	1601.26	216.035	1695.02	1603.57	131.572	1519.02	1604.29	259.659	1529.98	1600.71	209.359	1478.68	1475.64	206.075	1414.36	1220.93	196.167	1598.91	1390.47	197.984	1669.71	1241.53	293.611	1413.01	1279.31	33.6141	1487.01	1425.91	-32.7138	1501.06	1246.21	-64.4966	1516.5	1094.66	-97.2657	1677.94	1018.74	-74.4121	1750.43	981.809	-112.277	1710.24	943.673	-124.608	1801.12	935.169
760	0	120.898	1689.13	1602.88	216.403	1710.15	1604.87	132.048	1533.83	1605.8	260.103	1544.81	1601.86	209.858	1493.61	1477.11	206.514	1428.8	1222.83	196.573	1613.74	1391.88	198.223	1684.7	1242.95	293.899	1427.83	1281.1	33.893	1501.92	1427.81	-31.3966	1514.05	1247.08	-61.7112	1527.08	1095.42	-94.7894	1687.27	1017.08	-72.0975	1759.5	979.3	-109.482	1718.53	941.228	-122.488	1809.1	931.65
761	0	121.237	1703.99	1604.3	216.969	1725.18	1605.98	132.029	1548.82	1607.23	260.517	1559.87	1603	210.222	1508.32	1478.67	206.967	1443.16	1224.69	196.571	1628.4	1393.22	198.183	1699.28	1244.25	294.514	1442.54	1283.14	34.1742	1516.39	1429.53	-29.9892	1527.06	1248.36	-58.8241	1537.51	1096.33	-92.1587	1696.16	1014.97	-69.4612	1768.2	976.182	-106.126	1726.15	938.304	-119.795	1816.36	927.327
762	0	121.714	1718.96	1606.15	217.396	1740.01	1607.18	132.382	1563.69	1608.67	260.802	1574.69	1604.26	210.71	1522.93	1480.2	207.642	1457.38	1226.65	196.59	1642.77	1394.75	197.475	1713.54	1245.33	294.978	1456.99	1284.97	34.5299	1530.44	1431.28	-28.7964	1539.86	1249.48	-56.0182	1547.83	1097.27	-89.7519	1704.77	1012.55	-66.8999	1776.25	972.759	-102.892	1733.15	935.416	-117.158	1823.2	922.272
763	0	121.961	1733.73	1607.37	217.784	1754.74	1608.29	132.633	1578.27	1610.71	261.039	1589.36	1605.47	211.245	1537.42	1482.03	208.035	1471.5	1228.68	196.267	1657.09	1396.07	196.339	1727.46	1246.25	295.468	1471.57	1286.84	34.885	1544.15	1433.12	-27.5966	1552.55	1250.64	-53.3061	1558.02	1098.21	-87.0825	1712.78	1009.87	-64.2862	1783.63	968.744	-99.4653	1739.66	931.915	-114.318	1829.22	916.855
764	0	122.242	1748.44	1608.36	218.269	1769.44	1609.22	132.705	1593.05	1612.52	261.271	1603.95	1606.93	211.409	1551.69	1483.62	208.769	1485.62	1230.6	195.957	1671.27	1397.38	195.225	1741.39	1247.53	296.302	1485.99	1288.67	35.1213	1557.58	1434.7	-26.3768	1565.04	1251.61	-50.139	1568.35	1099.34	-84.3004	1720.84	1006.77	-61.561	1790.79	964.536	-95.9707	1745.64	928.586	-111.033	1835.05	910.977
765	0	122.607	1763.01	1609.5	218.551	1784.02	1610.32	132.844	1607.76	1614.59	261.245	1618.4	1608.54	211.329	1565.85	1485.3	209.47	1499.41	1232.54	195.607	1685.32	1398.91	193.945	1755.12	1249.1	296.815	1500.18	1290.61	35.416	1570.75	1436.52	-24.6479	1576.94	1253.3	-47.6654	1578.3	1100.5	-81.3851	1728.41	1003.88	-58.5112	1797.34	959.558	-92.2577	1751.05	924.626	-107.683	1839.95	904.651
766	0	122.927	1777.61	1611.16	218.883	1798.23	1611.53	132.753	1622.3	1616.49	261.312	1632.53	1610.22	211.524	1579.87	1487.12	210.365	1513.31	1234.17	195.293	1699.37	1400.66	192.89	1768.42	1250.63	297.716	1514.44	1292.39	35.4653	1583.74	1438.31	-23.9335	1588.9	1254.7	-44.9827	1588.36	1101.73	-78.6966	1735.47	1000.72	-55.3846	1803.61	954.819	-88.6952	1756	920.781	-104.172	1844.22	898.14
767	0	123.217	1792.02	1612.72	219.092	1812.44	1612.89	132.626	1636.85	1618.5	261.188	1646.79	1612.4	211.895	1593.92	1488.94	211.271	1527.15	1235.89	195.033	1713.19	1402.62	191.94	1781.05	1252.09	298.728	1528.73	1294.28	35.7707	1596.68	1440.02	-22.6465	1600.28	1255.97	-42.5172	1598.41	1102.63	-75.7865	1742.43	997.494	-52.1911	1809.05	949.496	-84.9196	1760.4	916.503	-100.489	1847.79	891.215
768	0	123.336	1806.34	1614.12	219.313	1826.59	1614.17	132.697	1651.13	1620.62	261.046	1660.71	1614.44	212.123	1607.75	1490.84	212.425	1540.87	1237.67	194.845	1726.86	1404.66	190.899	1794.21	1254.02	299.458	1542.75	1296.12	36.0302	1609.6	1441.72	-21.646	1611.68	1257.52	-39.9825	1608.5	1104	-72.7527	1748.85	994.227	-48.9251	1814.03	944.214	-81.438	1764.4	912.587	-96.2339	1850.88	883.758
769	0	123.422	1820.66	1615.86	219.571	1840.62	1615.6	132.358	1665.34	1622.35	260.882	1674.74	1616.35	212.393	1621.61	1492.62	213.579	1554.49	1239.64	194.773	1740.83	1406.54	190.476	1807.87	1256.14	300.509	1556.94	1298.14	35.9923	1622.36	1443.26	-20.5268	1622.76	1258.6	-37.5114	1618.59	1105.24	-69.9467	1755.07	990.765	-45.6679	1818.58	938.825	-77.9791	1767.79	908.462	-92.4709	1853.32	876.595
770	0	123.601	1834.83	1616.92	219.816	1854.67	1617.01	132.032	1679.56	1623.93	260.571	1688.54	1618.11	212.435	1635.41	1494.34	214.595	1568.19	1241.54	194.8	1754.55	1408.44	190.004	1821.19	1258.02	301.169	1570.67	1300.46	36.4462	1635.39	1444.7	-19.4624	1633.81	1259.9	-35.3241	1628.71	1106.45	-67.1555	1761.1	987.306	-42.3932	1822.69	933.178	-74.573	1770.78	904.359	-88.4536	1855.24	869.246
771	0	123.81	1848.97	1618.49	219.928	1868.42	1618.34	131.866	1693.66	1625.37	260.351	1702.35	1619.73	212.852	1649.19	1496.05	215.756	1581.95	1243.28	194.76	1768.15	1410.17	189.738	1834.5	1259.88	302.116	1584.66	1302.63	36.7506	1648.44	1445.92	-18.1721	1645.06	1261.09	-33.0093	1638.73	1107.42	-64.0807	1766.33	983.617	-39.2944	1826.45	927.404	-71.1962	1773.57	900.609	-84.1886	1856.58	861.81
772	0	123.818	1862.99	1619.28	220.093	1882.36	1619.51	131.604	1707.65	1626.94	260.243	1716.12	1621.21	212.891	1662.86	1497.55	217.001	1595.54	1245.01	194.563	1781.61	1411.65	189.613	1847.85	1261.29	303.23	1598.84	1304.45	37.2634	1661.56	1446.93	-16.8445	1656.47	1261.78	-30.5092	1648.82	1108.64	-61.0993	1771.77	980.272	-36.0343	1829.65	921.956	-68.15	1776	897.086	-80.1432	1857.41	854.27
773	0	123.838	1876.9	1620.26	220.26	1896.04	1620.53	131.316	1721.43	1628.03	260.44	1730.22	1622.29	213.317	1676.6	1498.94	218.11	1609.36	1246.65	194.854	1795.53	1412.98	189.738	1861.3	1262.46	304.287	1612.74	1306.36	37.6268	1674.68	1447.84	-15.5146	1668.09	1262.31	-27.9428	1658.83	1109.39	-58.1783	1776.87	976.832	-33.004	1832.52	916.006	-65.214	1778.15	893.374	-76.0899	1857.82	846.945
774	0	123.958	1890.72	1621.11	220.374	1909.6	1621.76	131.072	1735.28	1628.95	260.266	1743.85	1623.64	213.381	1690.25	1500.1	219.122	1623.21	1247.72	195.007	1809.1	1414.4	190.218	1874.89	1263.6	304.859	1626.96	1307.53	37.9118	1687.78	1448.42	-13.5368	1679.8	1262.76	-25.1901	1668.57	1110.01	-55.3039	1781.84	973.531	-30.0131	1835.21	910.917	-62.3357	1779.92	890.228	-72.2939	1857.53	839.926
775	0	124.043	1904.44	1622.11	220.421	1923.29	1622.89	130.79	1748.99	1629.78	259.9	1757.32	1624.76	213.809	1704.02	1501.23	220.14	1636.88	1249.36	195.135	1822.69	1415.52	190.788	1888.33	1264.72	305.906	1640.85	1309.26	38.368	1701.1	1448.83	-12.552	1692.1	1262.71	-22.3662	1678.28	1110.57	-52.4436	1786.57	970.491	-26.9212	1837.37	905.683	-59.6796	1781.53	887.382	-68.5944	1856.89	833.234
776	0	124.376	1918.07	1622.74	220.44	1936.77	1623.82	130.656	1762.75	1630.37	259.472	1770.57	1625.43	213.809	1717.71	1501.98	220.894	1650.7	1250.14	195.205	1836.37	1416.39	191.456	1901.89	1265.58	306.651	1654.9	1310.38	38.7253	1714.54	1448.99	-11.106	1704.41	1262.45	-19.2973	1687.94	1110.82	-49.5861	1791	967.333	-24.102	1839.19	900.557	-57.2763	1783.07	884.711	-64.9324	1855.99	827.072
777	0	124.388	1931.7	1623.14	220.6	1950.4	1624.46	130.515	1776.37	1630.52	259.496	1784.24	1625.94	214.165	1731.48	1502.42	221.737	1664.36	1250.67	195.665	1850.13	1416.99	192.213	1915.73	1266.07	307.512	1668.91	1311.3	39.0339	1728.03	1448.99	-9.44703	1716.63	1262.18	-16.0029	1697.38	1111.03	-46.6876	1795.43	964.555	-21.0043	1840.43	895.592	-54.3719	1784.39	882.11	-61.4143	1854.62	820.832
778	0	124.245	1945.37	1623.59	220.682	1964.01	1625.03	130.456	1789.97	1630.66	259.529	1797.92	1626.3	214.358	1745.25	1502.59	223.044	1678.43	1251.08	196.134	1863.88	1417.57	192.927	1929.83	1266.51	308.365	1682.88	1311.98	39.4906	1741.53	1448.9	-7.5997	1728.79	1261.84	-12.6412	1706.75	1111.13	-43.4362	1799.67	961.995	-18.032	1842.3	891.452	-51.6563	1785.28	879.533	-58.0905	1852.49	815.406
779	0	124.372	1959.1	1623.64	220.741	1977.46	1625.43	130.291	1803.61	1630.49	259.368	1811.23	1626.38	214.658	1759.05	1502.79	223.299	1691.85	1251.31	196.585	1877.9	1417.9	193.467	1943.71	1266.58	309.196	1696.98	1312.45	39.907	1755.2	1448.76	-6.10839	1740.87	1261.39	-9.33937	1716.04	1111.29	-40.4687	1803.55	959.123	-14.8806	1843.55	887.011	-48.378	1786.87	877.479	-54.7457	1850.58	810.165
780	0	124.274	1972.76	1623.54	220.733	1991.2	1625.59	130.255	1817.2	1629.77	259.313	1824.88	1626.22	214.846	1772.89	1502.67	224.065	1705.55	1251.59	196.921	1891.79	1417.8	194.018	1957.91	1266.78	309.698	1710.59	1313.03	40.1639	1769.05	1448.17	-3.76065	1752.53	1260.82	-5.94112	1725.26	1111.27	-37.35	1807.74	956.565	-11.7403	1845.14	883.033	-45.1598	1787.96	875.62	-51.8526	1848.8	805.773
781	0	124.319	1986.47	1623.23	220.855	2004.84	1625.62	130.207	1830.96	1628.93	259.191	1838.51	1625.68	215.393	1787.05	1502.07	224.426	1719.47	1251.24	197.168	1905.79	1417.48	194.827	1972.27	1266.67	310.304	1724.65	1312.88	40.7073	1783.17	1447.51	-2.03219	1763.9	1259.77	-2.5327	1734.54	1111.24	-34.3577	1811.52	954.249	-8.71162	1846.58	879.085	-42.0036	1789.01	873.694	-48.9858	1846.98	801.625
782	0	124.308	2000.15	1622.6	220.757	2018.53	1625.23	129.943	1844.7	1627.82	259.318	1852.15	1625.05	215.736	1801.06	1501.36	224.841	1733.44	1250.54	197.607	1919.92	1416.93	195.14	1985.73	1265.48	310.957	1738.69	1312.32	41.061	1797.2	1446.56	-0.491194	1775.37	1259.12	0.643119	1743.86	1111.26	-31.2874	1815.49	951.724	-5.62753	1847.86	875.479	-38.5617	1789.99	872.239	-45.8965	1845.32	798.096
783	0	124.43	2013.88	1622.01	220.906	2032.47	1624.75	130.085	1858.46	1626.82	259.493	1866.21	1623.96	215.944	1815.2	1500.41	225.488	1747.73	1249.98	197.974	1934.05	1416.1	195.82	1999.51	1264.58	311.437	1752.58	1311.75	41.4448	1811.26	1445.56	1.04798	1786.36	1258.47	3.57211	1753.29	1111.14	-28.3571	1819.28	949.576	-1.30046	1849.41	873.006	-34.9801	1791.25	871.138	-42.909	1843.84	794.627
784	0	124.363	2027.71	1621.04	220.844	2046.14	1624.13	130.266	1872.22	1625.39	259.473	1879.95	1622.97	216.058	1829.21	1499.39	226.107	1762.12	1249.16	198.359	1948.31	1415.33	196.369	2013.06	1263.56	311.945	1766.59	1311.14	41.6159	1825.28	1444.42	2.79929	1797.51	1257.24	6.31571	1762.64	1111.07	-25.6633	1823.37	947.398	1.44426	1850.98	869.61	-31.4426	1792.82	870.057	-39.6035	1842.67	791.838
785	0	124.222	2041.55	1619.88	220.736	2060.06	1623.17	130.403	1885.99	1623.66	259.457	1893.73	1621.5	216.125	1843.48	1498.24	225.772	1775.95	1247.84	198.805	1962.62	1414.2	196.986	2026.72	1262.02	312.178	1780.55	1310.17	41.7924	1839.63	1443.08	4.01592	1808.56	1256.61	9.00607	1772.04	1110.93	-23.0681	1827.57	945.733	4.01258	1852.78	866.386	-28.0665	1794.51	869.142	-36.6699	1841.82	789.234
786	0	124.196	2055.45	1618.57	220.801	2073.92	1622.08	130.328	1899.84	1622.02	259.211	1907.67	1619.87	216.255	1857.79	1496.67	225.973	1790.22	1246.82	199.049	1977.01	1412.77	197.708	2040.33	1260.26	312.21	1794.46	1308.78	41.9181	1854.19	1441.66	5.30327	1819.89	1255.38	11.161	1781.43	1110.93	-20.8168	1831.99	944.248	7.06671	1855.72	864.718	-24.9007	1796.86	868.58	-33.2004	1841.32	787.033
787	0	124.299	2069.41	1617.3	220.765	2088.02	1620.86	130.081	1913.8	1619.71	259.588	1921.86	1618.21	216.185	1872.13	1494.83	225.743	1804.56	1245.37	199.324	1991.56	1411.08	198.272	2054.3	1258.46	312.351	1808.58	1307.46	41.9893	1868.67	1440.27	6.57975	1831.16	1254.66	13.3356	1791.01	1110.71	-19.1159	1836.76	943.014	9.48858	1859.24	863.044	-21.9641	1799.63	867.989	-29.987	1841.46	785.005
788	0	124.216	2083.51	1615.43	220.716	2102.09	1619.39	130.379	1928.02	1618.22	259.925	1936.34	1616.38	216.19	1886.54	1493.07	225.317	1818.72	1243.89	199.451	2006.12	1409.36	198.9	2068.89	1256.79	312.12	1822.43	1305.96	41.9176	1883.31	1438.53	7.46009	1842.91	1253.59	15.211	1800.75	1110.29	-16.9379	1841.75	942.071	10.7606	1862.4	861.003	-19.2252	1802.88	867.563	-27.142	1842.16	783.322
789	0	124.158	2097.67	1614.01	220.731	2116.3	1617.93	130.413	1942.18	1615.56	259.833	1950.22	1614.42	216.029	1900.91	1491.28	224.866	1832.93	1241.86	199.681	2020.78	1407.59	199.349	2083.46	1254.84	311.649	1836.39	1304.23	41.9001	1898.3	1436.77	8.28888	1854.71	1252.62	16.8256	1810.51	1110.31	-15.1489	1847.21	940.641	12.2701	1866.56	859.899	-16.8012	1806.79	867.421	-24.2106	1843.5	781.852
790	0	124.199	2111.86	1612.32	220.681	2130.31	1616.33	130.249	1956.19	1613.33	260.373	1965.06	1612.26	216.003	1915.51	1489.29	224.324	1847.29	1240.04	199.898	2035.53	1405.73	199.939	2098.26	1252.76	311.222	1850.4	1302.39	41.7451	1913.11	1435	8.97442	1867.04	1251.64	17.9532	1820.75	1109.75	-14.0201	1853.33	939.99	13.3006	1871.48	858.358	-14.7572	1811.27	867.286	-21.6085	1845.35	780.42
791	0	124.188	2126.11	1610.46	220.78	2144.76	1614.52	130.075	1970.24	1610.93	260.363	1979.45	1610.08	215.787	1929.91	1487.38	223.396	1861.37	1238.1	200.027	2050.29	1403.71	200.429	2113.15	1250.61	310.669	1864.49	1300.59	41.5798	1928.33	1433.11	9.3464	1879.76	1250.26	18.7456	1831.36	1109.47	-12.7795	1859.97	938.974	14.5577	1876.88	857.566	-12.75	1816.36	867.208	-19.0634	1848.02	779.423
792	0	124.091	2140.46	1608.52	220.628	2159.13	1612.74	130.644	1984.95	1609.33	260.175	1993.68	1607.71	215.484	1944.49	1485.27	222.618	1875.73	1236.1	199.966	2065.16	1401.56	200.695	2127.87	1248.51	309.616	1878.54	1298.26	41.0642	1943.45	1431.23	9.38546	1892.81	1249.02	19.7428	1842.33	1109.61	-11.8573	1867.2	938.021	14.4937	1882.78	856.621	-11.2535	1822.08	867.272	-16.8343	1851.64	778.729
793	0	123.987	2155	1606.64	220.492	2173.45	1610.89	130.023	1999.38	1606.53	260.036	2008.19	1605.7	214.764	1958.95	1483.37	221.606	1890.07	1234.23	199.864	2079.93	1399.63	201.026	2142.85	1246.51	309.082	1892.64	1296.75	40.6196	1958.72	1429.29	8.85521	1906.35	1247.99	20.0257	1853.66	1109.43	-11.2031	1875.06	937.52	15.3791	1889.41	856.008	-9.72917	1828.55	867.253	-15.0322	1855.94	777.979
794	0	123.723	2169.59	1604.79	220.361	2188.1	1609.04	130.018	2013.98	1605.01	259.907	2022.52	1603.56	214.275	1973.29	1481.36	220.553	1904.66	1232.31	199.719	2094.79	1397.62	201.24	2157.45	1244.43	308.062	1906.82	1294.45	39.9937	1974	1427.42	8.49697	1920.12	1246.72	20.1434	1865.59	1108.92	-10.8827	1883.48	936.626	15.9543	1896.91	855.187	-8.82292	1835.7	867.547	-13.2451	1861.13	777.066
795	0	123.699	2184.16	1603	220.184	2202.45	1607.11	129.9	2028.58	1602.9	259.784	2037.32	1601.53	213.839	1988.09	1479.33	219.31	1919.49	1230.17	199.512	2109.67	1395.8	201.365	2172.13	1242.62	307.066	1921.06	1292.52	39.3512	1989.24	1425.79	7.86343	1934.13	1245.61	19.9167	1877.96	1108.61	-10.6832	1892.77	936.262	16.3712	1904.87	854.467	-8.04886	1843.71	867.775	-12.114	1867.33	776.699
796	0	123.493	2198.73	1601.14	220.096	2217.07	1605.32	128.994	2042.92	1600.92	259.487	2051.69	1599.87	213.166	2002.62	1477.46	218.099	1934.16	1228.45	199.388	2124.53	1394.14	201.617	2186.81	1240.97	305.939	1935.44	1290.49	38.7192	2004.66	1424.09	7.12412	1948.36	1244.03	19.6918	1890.8	1108.02	-10.8164	1902.76	935.508	15.6731	1913.63	853.667	-7.8261	1852.58	867.857	-11.3701	1874.35	776.442
797	0	123.353	2213.4	1599.38	219.886	2231.84	1603.51	129.234	2057.94	1599.55	259.061	2066.14	1598.4	212.204	2017.12	1475.68	216.907	1949.02	1226.41	198.94	2139.38	1392.56	201.295	2201.66	1239.67	305.481	1950.65	1288.45	37.6987	2019.87	1422.59	6.12348	1962.92	1242.92	19.0693	1904.02	1107.49	-10.9022	1913.34	934.82	15.9415	1923.15	853.23	-8.131	1862.33	867.953	-11.0561	1882.38	776.083
798	0	123.076	2228.12	1597.54	219.663	2246.33	1601.76	128.494	2072.62	1597.81	258.573	2080.92	1596.8	211.312	2031.73	1474.14	216.106	1964.61	1224.55	198.338	2154.21	1391.19	201.009	2216.61	1238.48	304.259	1965.43	1286.73	36.9184	2035.35	1421.1	4.91871	1977.96	1241.97	18.2789	1917.84	1107.03	-12.3123	1924.58	934.597	15.1406	1933.43	852.482	-8.47146	1872.88	868.071	-11.2698	1891.51	775.812
799	0	122.72	2242.99	1596.19	219.434	2261.05	1599.82	128.486	2087.42	1596.88	258.124	2095.42	1595.26	210.311	2046.12	1472.27	214.677	1979.61	1223.07	197.659	2169	1389.63	200.549	2231.87	1237.44	302.675	1980.32	1284.65	35.8172	2050.47	1419.71	3.69653	1992.91	1240.92	17.0833	1931.84	1106.37	-12.7523	1937.18	933.923	14.2767	1944.58	851.673	-9.52082	1884.29	868.038	-11.7063	1901.49	775.49
800	0	122.431	2257.71	1594.38	219.087	2275.63	1598.06	128.469	2102.35	1595.7	257.636	2109.85	1594.06	209.46	2060.65	1470.53	212.995	1994.95	1221	196.963	2183.84	1388.41	199.782	2247.42	1236.62	301.046	1995.15	1282.33	34.8847	2065.77	1418.45	2.68764	2007.97	1239.92	15.7943	1946.59	1105.36	-14.0161	1949.98	933.227	13.1594	1956.52	851.143	-10.8902	1896.59	867.888	-12.7098	1912.31	775.08
801	0	121.908	2272.36	1592.94	218.995	2290.4	1596.76	127.461	2116.82	1594.63	257.212	2124.62	1593.11	208.706	2075.04	1469.51	211.588	2010.52	1219.39	196.223	2198.82	1387.62	198.72	2263.14	1235.95	299.829	2010.19	1280.56	33.7057	2080.67	1417.42	1.56461	2023.23	1238.47	14.3969	1961.61	1104.58	-15.5185	1963.63	932.289	11.5047	1969.32	850.162	-12.521	1909.73	867.737	-14.413	1924.39	774.741
802	0	121.766	2287.35	1592.52	218.46	2304.98	1595.83	127.299	2131.92	1594.68	256.523	2139.32	1592.71	207.779	2089.4	1468.61	210.319	2026.15	1217.9	195.389	2213.55	1387.24	197.599	2278.92	1235.68	298.328	2025.35	1278.69	32.7025	2095.85	1416.6	-0.038692	2038.86	1237.55	13.0204	1977.52	1103.55	-16.7776	1977.92	931.134	9.78008	1983.01	849.368	-14.7088	1923.73	867.439	-16.4971	1937.49	774.296
803	0	121.538	2302.25	1592.13	218.364	2319.95	1595.36	126.829	2146.98	1595.09	255.815	2153.86	1592.57	206.572	2103.89	1467.99	209.015	2041.64	1216.38	194.328	2228.3	1387.04	196.384	2294.66	1235.94	297.355	2040.35	1277.49	31.4035	2110.65	1415.9	-1.66205	2054.66	1236.77	11.2117	1993.42	1102.74	-18.6641	1993.28	930.436	7.41072	1997.78	848.8	-17.0854	1938.66	866.976	-18.8245	1951.74	773.865
804	0	121.359	2317.31	1592.6	218.035	2334.54	1595.13	125.788	2161.88	1595.47	254.984	2168.41	1592.55	205.887	2118.64	1468.14	208.178	2057.3	1215.69	193.416	2243.18	1387.32	195.316	2310.16	1236.53	296.625	2055.41	1276.77	30.4909	2125.52	1415.65	-3.36532	2070.71	1236.17	9.21532	2009.92	1102.24	-21.55	2009.51	930.35	5.17379	2013.35	848.126	-19.8967	1954.54	866.757	-21.8175	1967.18	773.579
805	0	120.754	2332.13	1593.14	217.838	2349.2	1595.66	124.983	2176.8	1596.62	254.271	2183.21	1593.1	205.421	2133.36	1468.74	207.75	2072.63	1215.79	192.598	2258.05	1388.26	194.138	2325.56	1237.63	295.942	2070.27	1276.79	29.3963	2139.98	1415.93	-4.55237	2086.88	1235.91	7.24126	2026.56	1101.87	-23.4242	2026.39	930.005	2.51458	2029.82	847.84	-22.9653	1971.42	866.65	-24.9173	1983.84	773.503
806	0	120.29	2347.08	1594.39	217.335	2363.75	1596.68	124.179	2191.75	1597.67	253.312	2197.57	1594.11	204.53	2148.11	1469.55	207.499	2087.52	1216.41	191.738	2272.69	1389.5	192.969	2340.61	1239.08	295.679	2085.17	1277.62	28.807	2154.65	1416.91	-6.07756	2103.24	1235.98	4.74031	2043.58	1101.94	-26.3062	2044.17	930.21	-0.521248	2047.63	847.968	-26.1647	1989.28	866.854	-28.5217	2001.85	773.769
807	0	119.893	2361.94	1595.77	217.002	2378.53	1597.86	123.471	2206.52	1598.88	252.718	2211.99	1595.08	203.828	2162.71	1470.65	207.678	2102.44	1217.66	190.98	2287.4	1390.73	192.026	2355.57	1240.61	295.837	2100.31	1278.7	28.1498	2169.17	1418	-7.4871	2119.68	1236.62	3.04536	2060.76	1101.96	-29.7624	2062.67	930.921	-3.78602	2066.33	848.31	-29.748	2007.99	867.096	-32.4944	2020.95	774.076
808	0	119.36	2376.61	1597.13	216.499	2392.9	1599.26	122.589	2221.33	1599.69	252.126	2226.57	1596.1	203.509	2177.48	1471.94	207.961	2117.3	1218.73	190.553	2302.14	1392.02	191.413	2370.57	1241.97	296.147	2115.13	1280.18	27.8358	2183.9	1419.22	-8.45324	2135.94	1237.34	0.849668	2078.2	1102.48	-33.5199	2081.46	931.793	-7.37431	2085.89	848.676	-33.6157	2027.75	867.117	-37.1103	2041.34	774.246
809	0	118.773	2391.2	1598.65	216.338	2407.56	1601.03	122.212	2235.86	1601.21	251.729	2241.29	1597.42	202.862	2192.1	1473.23	208.117	2131.76	1220.61	190.094	2316.78	1393.27	190.87	2385.19	1243.3	295.893	2129.55	1282.3	27.3966	2198.52	1420.55	-9.61534	2152.33	1238.66	-0.708979	2095.74	1103.19	-36.2994	2101.55	932.446	-11.1186	2106.4	849.595	-37.6714	2048.36	867.394	-41.7206	2062.91	774.801
810	0	118.604	2405.76	1600.19	215.817	2422.04	1602.91	122.012	2250.43	1602.5	251.05	2255.68	1598.96	202.717	2206.88	1475.11	208.196	2146.36	1222.57	190.36	2331.37	1394.58	190.62	2399.46	1244.68	296.044	2143.93	1284.24	27.1205	2213.34	1422.04	-10.7523	2168.54	1240.09	-3.31476	2113.05	1103.8	-39.9687	2121.57	933.327	-14.3515	2128.51	850.589	-41.6918	2069.52	867.539	-46.3568	2085.7	775.604
811	0	118.237	2420.01	1601.71	215.449	2436.5	1604.81	121.292	2264.75	1603.37	250.57	2269.89	1600.55	202.304	2221.22	1476.96	208.364	2160.45	1224.6	190.202	2345.79	1396.17	190.617	2413.54	1245.99	295.872	2158.08	1286.65	26.9258	2228.07	1423.56	-11.9772	2184.63	1241.25	-5.60701	2130.57	1104.45	-43.0709	2142.32	934.283	-18.1374	2150.32	851.362	-45.8129	2091.22	867.808	-51.1728	2109.28	775.747
812	0	117.971	2434.46	1603.26	215.143	2450.74	1606.65	121.082	2279.28	1604.78	250.492	2284.47	1602.19	201.989	2235.62	1478.72	208.256	2174.56	1226.76	190.465	2359.96	1397.54	191.132	2427.3	1247.19	295.861	2171.91	1288.66	26.8405	2243	1425.21	-12.7057	2200.53	1242.67	-7.81527	2148.06	1105.39	-46.8002	2163.13	935.492	-22.0565	2172.63	852.182	-49.7191	2113.83	868.006	-56.2872	2133.85	776.533
813	0	117.793	2448.75	1605.03	214.966	2464.92	1608.47	120.816	2293.44	1606.35	250.478	2299.2	1603.85	201.883	2249.9	1480.52	208.307	2188.28	1228.91	190.52	2374.1	1399.13	191.825	2440.95	1248.47	295.874	2185.74	1290.81	26.7488	2257.61	1426.99	-13.5632	2216.61	1244.59	-10.2923	2165.99	1106.02	-50.39	2184.92	936.778	-25.976	2196	853.638	-53.9131	2136.92	868.138	-61.1095	2159.21	776.848
814	0	117.758	2463.01	1606.53	215.003	2479.28	1610.32	120.702	2307.68	1608.07	250.253	2312.68	1605.64	201.977	2263.99	1482.45	208.113	2201.93	1231.16	190.863	2387.99	1400.43	192.78	2454.75	1249.9	295.605	2199.35	1292.71	26.7308	2272.51	1428.93	-14.5444	2232.69	1245.98	-12.53	2183.56	1106.79	-53.5483	2206.78	937.922	-30.0173	2219.79	855.149	-57.8954	2160.25	868.498	-66.5446	2185.53	778.287
815	0	117.795	2476.94	1608.1	215.023	2493.04	1612.15	120.546	2321.77	1609.25	249.88	2326.81	1607.46	201.748	2277.83	1484.37	207.848	2215.81	1232.78	191.347	2402.05	1402.28	193.772	2468.31	1251.39	295.741	2212.54	1294.89	26.523	2287.03	1430.72	-15.7046	2248.71	1247.18	-14.9949	2201.53	1107.31	-57.0541	2228.7	939.476	-33.8802	2243.83	856.579	-62.0097	2184.09	868.635	-71.7439	2212.34	779.81
816	0	117.903	2491.09	1609.86	215.337	2507.19	1614.04	120.449	2335.77	1610.77	249.878	2340.34	1609.39	201.628	2291.67	1486.07	207.389	2229.2	1235	191.856	2415.75	1403.89	194.817	2482.06	1253.14	294.88	2225.65	1296.97	26.6331	2301.41	1432.62	-17.108	2264.81	1249.29	-17.4236	2219.54	1107.92	-60.2853	2251.21	940.852	-37.643	2267.96	858.1	-65.6039	2208.47	869.034	-77.9149	2239.94	781.791
817	0	118.161	2505.15	1611.57	215.594	2521.02	1615.63	120.807	2349.95	1612.91	250	2354.39	1611.18	201.781	2305.58	1487.97	206.636	2242.61	1237.01	192.447	2429.55	1405.65	195.96	2495.74	1254.62	294.355	2238.83	1298.63	26.7551	2315.84	1434.41	-17.5187	2281.53	1251.27	-19.2256	2237.79	1108.87	-63.8593	2273.78	942.721	-40.0565	2292.66	859.423	-69.6733	2232.98	869.729	-82.6648	2267.79	783.738
818	0	118.48	2519.06	1613	215.947	2534.87	1617.27	120.487	2363.93	1614.51	250.175	2368.18	1613.06	201.817	2319.38	1489.77	206.407	2255.88	1238.81	192.592	2443.16	1407.34	196.932	2509.11	1256.21	294.184	2252.03	1300.44	26.8872	2329.95	1436.33	-18.4512	2297.59	1252.63	-21.8403	2255.87	1109.34	-66.952	2296.83	944.736	-43.6697	2317.87	861.765	-73.2445	2258.02	870.466	-87.6889	2296.03	785.934
819	0	118.73	2532.97	1614.51	216.401	2548.66	1618.98	120.551	2377.7	1616.2	250.249	2381.82	1614.86	202.174	2333.07	1491.62	206.07	2269.12	1240.77	193.031	2456.67	1408.8	197.598	2522.43	1257.9	293.527	2264.82	1302.29	27.1649	2344.14	1438.42	-20.0051	2313.87	1254.33	-24.18	2273.95	1110.25	-69.7429	2320.11	946.528	-49.5319	2344.46	864.997	-76.8285	2283.51	871.359	-92.5321	2324.83	789.039
820	0	119.459	2546.86	1616.29	216.749	2562.4	1620.44	120.903	2391.7	1617.92	250.485	2395.59	1616.72	202.275	2346.76	1493.47	205.29	2282.33	1242.6	193.286	2470.29	1410.29	198.179	2535.61	1259.4	292.737	2277.75	1304.16	27.2004	2358.21	1440.36	-21.3656	2330.17	1256.14	-26.2797	2292.26	1111.34	-72.8002	2343.48	949.332	-53.203	2370.71	868.694	-80.6517	2309.28	872.874	-97.3753	2353.83	792.654
821	0	119.744	2560.69	1617.81	217.35	2576.03	1621.87	121.18	2405.41	1619.97	250.983	2409.41	1618.2	202.059	2360.43	1495.19	205.306	2295.34	1244.83	193.382	2483.62	1411.76	198.613	2548.61	1260.73	292.461	2290.85	1305.88	27.2954	2372.12	1442.23	-22.2802	2346.3	1258.13	-28.5669	2310.45	1112.32	-75.8366	2367.09	951.843	-57.1188	2397	872.427	-84.2711	2335.4	874.939	-101.842	2383.07	796.691
822	0	120.215	2574.35	1619.17	218.024	2589.8	1623.29	121.358	2419.19	1621.4	251.235	2423.04	1619.48	202.465	2374.15	1496.61	204.453	2308.42	1246.43	193.731	2497.04	1412.86	198.885	2561.49	1261.95	292.089	2303.74	1307.59	27.4357	2386.25	1444.31	-23.1152	2362.56	1260.37	-30.6664	2328.5	1113.39	-78.4554	2390.62	955.125	-60.2185	2423.24	876.438	-87.4672	2361.78	876.954	-106.048	2412.67	801.168
823	0	121.146	2588.31	1620.98	218.508	2603.3	1624.58	121.549	2432.98	1622.49	251.441	2436.48	1620.74	202.576	2387.79	1498.15	204.097	2321.61	1247.87	193.921	2510.63	1414.58	198.884	2574.39	1263.27	291.673	2316.77	1309	27.2457	2400.24	1446.18	-24.1411	2378.36	1261.75	-32.8843	2346.67	1114.5	-81.1407	2414.59	958.663	-63.8051	2449.18	880.726	-90.485	2388.5	879.169	-110.019	2442.47	806.159
824	0	121.408	2601.84	1622.13	219.032	2616.9	1625.67	121.806	2446.72	1623.86	251.503	2449.77	1621.92	202.373	2401.39	1499.53	203.706	2334.62	1249.56	194.054	2523.73	1415.2	198.885	2587.5	1264.33	291.089	2329.61	1310.61	27.4588	2414.33	1447.98	-25.0973	2394.22	1263.74	-35.1189	2364.5	1115.78	-83.6103	2438.56	962.396	-66.7589	2475.57	885.727	-93.7844	2415.5	881.94	-113.661	2472.2	811.507
825	0	121.86	2615.55	1623.3	219.223	2630.08	1626.75	122.305	2460.42	1624.94	252.097	2463.36	1622.73	202.559	2414.99	1500.61	203.238	2347.56	1251.07	194.1	2537.24	1416.11	198.826	2600.64	1265.11	290.644	2342.43	1311.99	27.268	2428.24	1449.54	-26.185	2410.04	1265.45	-37.5272	2382.38	1116.64	-86.0804	2462.38	965.982	-69.2704	2502.05	891.071	-96.6904	2442.47	885.123	-116.82	2501.95	817.225
826	0	122.51	2629.35	1624.35	219.789	2643.81	1627.34	122.277	2474.12	1625.64	251.682	2476.49	1623.06	202.513	2428.7	1501.53	202.945	2360.56	1252.07	194.181	2550.55	1416.61	198.838	2613.79	1265.53	290.37	2355.36	1312.91	27.1268	2442.56	1450.92	-27.2712	2425.79	1266.6	-39.4725	2400.3	1117.53	-88.5012	2486	969.717	-71.4997	2528.49	896.394	-99.9124	2469.32	888.293	-119.814	2531.75	823.124
827	0	123.252	2643.06	1624.89	220.634	2657.41	1627.66	122.812	2487.8	1626.7	252.429	2490.42	1623.31	202.116	2442.26	1502.11	201.906	2373.53	1252.04	194.082	2563.99	1417.04	198.745	2626.86	1265.52	289.641	2368.29	1313.6	26.8722	2456.54	1451.75	-28.3211	2441.62	1267.7	-41.794	2418.18	1118.14	-90.5417	2510.15	973.579	-73.6614	2554.6	901.426	-103.185	2496.18	891.93	-122.52	2561.4	829.043
828	0	123.547	2656.94	1625.34	221.287	2671.12	1628.08	122.835	2501.57	1626.9	252.26	2503.64	1623.44	202.189	2456	1502.63	201.326	2386.35	1253.09	194.342	2577.53	1416.85	198.819	2640.04	1265.47	289.342	2381.17	1314.3	27.0382	2470.77	1452.45	-29.6094	2457.26	1268.3	-44.0438	2436.08	1118.59	-92.7516	2533.75	977.453	-75.4653	2580.57	906.702	-105.893	2523.07	895.481	-124.798	2591.13	835.326
829	0	124.089	2670.63	1625.53	221.77	2684.55	1628.15	122.822	2515.38	1626.79	252.715	2517.56	1623.15	202.078	2469.67	1502.75	201.856	2399.35	1254.44	194.249	2590.95	1417.04	198.846	2653	1265.27	288.996	2394.01	1314.81	26.8718	2484.68	1453.1	-30.8786	2472.89	1269.14	-46.9247	2453.6	1118.69	-94.7046	2557.19	981.428	-77.0297	2606.71	912.484	-108.477	2549.67	898.994	-126.758	2620.42	841.952
830	0	124.562	2684.44	1625.82	222.341	2698.21	1628.21	123.664	2529.27	1626.82	252.59	2530.58	1623.12	201.807	2483.4	1502.88	201.486	2412.35	1254.68	194.345	2604.41	1416.78	199.158	2665.97	1264.81	288.464	2407.06	1314.94	26.8403	2498.78	1453.39	-31.7249	2488.64	1270.01	-48.1152	2472.73	1118.68	-96.4738	2580.55	985.18	-78.5966	2631.86	917.845	-111.069	2576.06	902.758	-128.382	2649.24	848.622
831	0	124.97	2698.31	1625.78	222.872	2711.82	1628.01	122.098	2542.59	1626.22	252.616	2544.34	1622.68	202	2497.04	1502.74	201.016	2425.56	1254.71	194.37	2617.98	1416.24	199.258	2678.82	1264.11	288.176	2420.17	1314.95	26.8607	2512.61	1453.4	-32.8739	2504.54	1270.51	-50.5812	2490.31	1119.1	-98.2892	2603.5	989.087	-79.8425	2657.04	923.618	-113.31	2602.25	906.605	-129.968	2677.75	855.562
832	0	125.478	2712.28	1625.68	223.26	2725.46	1627.59	122.705	2556.87	1625.89	252.709	2557.74	1622.11	201.736	2510.86	1502.37	200.678	2438.76	1254.52	194.455	2631.41	1415.52	199.508	2691.9	1263.24	287.669	2433.32	1314.68	26.7836	2526.82	1453.26	-34.1779	2519.97	1270.48	-53.3553	2508.26	1118.87	-99.959	2626.34	992.909	-80.9065	2681.9	929.279	-115.826	2627.85	910.882	-131.383	2705.71	862.518
833	0	125.862	2726.1	1625.19	223.769	2739.1	1627.08	122.803	2570.75	1625.31	252.562	2571.45	1621.45	201.742	2524.64	1501.94	200.489	2451.84	1254.32	194.571	2645.2	1414.86	199.714	2705.09	1262.29	287.143	2446.24	1314.36	26.6163	2540.52	1452.82	-35.3659	2535.59	1270.39	-55.53	2526.05	1118.86	-101.311	2648.93	996.588	-81.9274	2706.34	934.887	-117.901	2653.47	914.969	-132.403	2733.24	869.652
834	0	126.165	2739.99	1624.29	223.784	2752.63	1626.49	122.218	2584.53	1623.86	252.495	2584.71	1620.48	201.891	2538.51	1501.26	200.336	2464.99	1253.47	194.635	2658.8	1413.82	199.862	2718.17	1261.15	286.952	2459.47	1313.96	26.7335	2554.68	1452.16	-36.1941	2551.41	1270.4	-59.1852	2543.23	1118.26	-102.47	2671.24	1000.19	-82.7049	2730.25	940.549	-119.589	2678.61	918.857	-133.195	2760.22	876.619
835	0	126.495	2753.9	1623.38	224.43	2766.5	1625.51	122.305	2598.59	1622.79	252.383	2598.58	1619.41	201.704	2552.49	1500.22	200.351	2478.17	1252.7	194.845	2672.33	1412.32	200.167	2731.28	1259.77	286.652	2473.09	1313.17	26.6453	2568.53	1451.56	-37.3746	2566.99	1269.97	-61.0846	2561.15	1117.83	-103.517	2693.55	1003.91	-83.2586	2753.9	946.01	-121.047	2703.43	922.975	-133.739	2786.66	883.534
836	0	126.989	2767.81	1622.25	225.055	2780.24	1624.66	122.321	2612.72	1621.7	252.62	2612.33	1618.34	202.048	2566.34	1499.21	200.478	2491.58	1251.5	195.004	2686.22	1410.93	200.288	2744.54	1258.22	287	2486.78	1312.19	27.0558	2582.7	1450.51	-38.2843	2582.52	1269.18	-63.5135	2578.78	1116.96	-104.527	2715.27	1007.36	-83.6457	2777.06	951.278	-122.236	2727.71	926.818	-134.03	2812.5	890.501
837	0	127.296	2781.96	1621.26	225.301	2794.09	1623.38	122.438	2626.66	1620.41	252.31	2626.17	1616.87	201.974	2580.5	1497.97	200.477	2504.92	1250.25	195.087	2700.05	1409.52	200.416	2758.02	1256.45	287.053	2500.51	1310.87	26.9254	2596.68	1449.1	-38.9488	2598.31	1268.43	-65.629	2596.61	1116.49	-105.183	2736.56	1010.63	-84.0008	2799.77	956.431	-123.005	2751.88	930.969	-134.276	2837.76	897.009
838	0	127.464	2795.9	1619.63	225.683	2807.83	1622.18	122.045	2640.53	1618.82	252.217	2639.61	1615.38	202.102	2594.29	1496.66	200.993	2518.49	1249.23	195.387	2713.98	1407.96	200.569	2771.58	1254.69	286.76	2514.1	1309.74	27.1101	2610.75	1447.75	-39.9075	2613.98	1267.46	-67.6666	2614.02	1115.9	-105.827	2757.51	1014.15	-84.3411	2821.87	961.429	-123.591	2774.95	934.2	-134.414	2862.21	903.687
839	0	128.012	2809.92	1618.29	225.939	2821.77	1620.88	122.252	2654.65	1617.25	252.421	2653.56	1614.33	202.24	2608.39	1495.3	201.272	2532.14	1247.87	195.51	2727.97	1406.52	200.587	2785.13	1253.08	287.009	2527.97	1308.51	27.3325	2624.92	1446.85	-40.2011	2629.67	1266.93	-69.1311	2631.58	1115.13	-106.467	2777.86	1017.38	-84.3994	2843.51	966.548	-124.5	2797.78	938.207	-134.304	2886.05	910.316
840	0	128.443	2823.88	1617.12	226.193	2835.4	1619.71	122.338	2668.6	1615.67	252.708	2667.28	1612.78	202.756	2622.43	1493.8	201.672	2546	1246.29	195.817	2741.86	1404.78	200.761	2799.05	1251.38	287.279	2542.22	1306.88	27.7799	2638.81	1445.64	-40.6389	2645.35	1266.09	-70.5898	2648.81	1114.39	-106.78	2797.96	1020.38	-84.2412	2864.65	971.334	-125.33	2820.07	941.949	-134.236	2909.18	916.463
841	0	128.811	2837.86	1615.58	226.944	2849.53	1618.28	123.125	2682.61	1613.56	252.749	2681.19	1611.07	203.12	2636.63	1492.11	202.147	2560.05	1244.13	196.21	2755.87	1403.12	200.864	2812.73	1249.63	288.008	2556.57	1305.07	28.098	2652.91	1444.33	-40.8991	2661.02	1265.26	-71.7574	2665.78	1113.45	-107.027	2817.47	1023.31	-83.8246	2885.35	976.005	-125.313	2841.8	945.605	-133.709	2931.47	922.471
842	0	129.027	2851.9	1614.05	226.992	2863.13	1617.02	122.965	2696.84	1612.42	252.871	2694.75	1609.83	203.908	2650.59	1490.51	202.721	2574.05	1242.8	196.44	2770.06	1401.66	200.767	2826.71	1248.07	288.235	2570.59	1303.52	28.6022	2666.92	1442.93	-41.1476	2676.69	1264.4	-72.6858	2682.71	1112.79	-107.102	2836.69	1026	-83.5129	2905.51	980.483	-125.446	2862.97	949.276	-133.325	2953.21	928.059
843	0	129.882	2865.87	1612.76	227.669	2877.37	1615.62	123.182	2710.81	1610.61	253.105	2708.97	1608.22	204.199	2664.94	1488.96	203.443	2588.35	1241.39	196.711	2784.12	1400.01	200.838	2840.95	1246.42	288.907	2584.86	1302.06	28.9645	2681.03	1441.65	-41.0255	2692.11	1263.3	-73.5315	2699.31	1111.96	-106.987	2855.44	1028.49	-83.0835	2925.06	984.693	-124.948	2883.53	952.567	-133.026	2974.19	933.369
844	0	130.295	2879.88	1611.36	228.377	2891.24	1614.27	124.01	2725.4	1608.99	253.674	2722.84	1606.38	204.962	2679.08	1487.38	204.204	2602.46	1239.33	197.209	2798.48	1398.31	200.95	2855.08	1244.81	289.484	2599.28	1300.37	29.5048	2695.19	1440.28	-40.8983	2707.56	1262.28	-74.209	2715.75	1111	-106.841	2873.67	1030.66	-82.8285	2944.14	988.19	-125.006	2903.38	955.244	-132.4	2994.51	938.22
845	0	130.659	2893.97	1609.62	228.727	2905.32	1612.73	123.423	2738.49	1607.04	254.464	2737.32	1604.77	205.436	2693.25	1485.76	204.855	2616.9	1237.59	197.721	2812.81	1396.78	201.398	2869.88	1243.17	290.592	2613.97	1298.46	30.0274	2709.22	1438.6	-40.7948	2722.76	1260.98	-74.3464	2731.94	1110.14	-106.399	2891.46	1032.43	-82.2318	2962.55	991.301	-124.328	2922.7	957.703	-131.563	3014.27	942.519
846	0	131.535	2908.1	1608.22	229.749	2919.26	1611.76	124.409	2752.95	1605.64	254.898	2750.91	1602.97	206.171	2707.4	1484.2	205.64	2631.21	1236.08	198.212	2827.26	1395.18	201.6	2884.31	1241.67	291.055	2628.39	1296.87	30.8295	2723.45	1437.12	-40.2492	2737.88	1259.74	-74.4051	2747.81	1109.02	-105.691	2908.73	1034.02	-81.6346	2980.47	994.022	-123.649	2941.4	959.898	-130.728	3033.27	946.348
847	0	132.15	2922.22	1607.06	230.418	2933.45	1610.29	125.1	2767	1604.03	255.428	2765.29	1601.41	206.997	2721.63	1482.79	206.461	2646.09	1234.55	198.72	2841.45	1393.64	202.015	2899.13	1240.39	291.778	2642.91	1295.21	31.7317	2737.51	1435.79	-39.7468	2752.81	1258.53	-74.0099	2763.51	1107.82	-105.051	2925.72	1035.13	-80.5508	2998.11	996.493	-123.053	2959.53	961.686	-129.794	3051.77	949.854
848	0	132.802	2936.16	1605.58	230.874	2947.3	1608.99	125.616	2780.98	1602.65	256.278	2779.1	1599.92	207.877	2735.8	1481.05	207.599	2660.87	1232.89	199.396	2856.1	1392.41	202.505	2914.05	1239.24	292.739	2657.78	1293.47	32.3802	2751.46	1434.5	-39.0743	2767.43	1257.22	-73.8208	2778.97	1106.66	-104.249	2942.31	1036.21	-79.7362	3014.92	998.455	-120.723	2980.69	960.814	-128.787	3069.33	952.788
849	0	133.62	2950.24	1604.26	231.967	2961.45	1607.69	126.293	2795.06	1601.2	256.992	2793.18	1598.5	209.176	2750.04	1479.13	208.564	2676.01	1230.71	200.061	2870.29	1390.92	202.964	2928.69	1238.13	294.508	2672.91	1291.32	33.4593	2765.51	1433.25	-38.3916	2782.04	1256.09	-72.9576	2794.19	1105.6	-103.243	2958.39	1036.82	-78.6834	3031.44	1000.06	-121.089	2993.94	964.133	-127.635	3086.34	955.034
850	0	134.321	2964.12	1603.21	232.794	2975.33	1606.85	126.993	2808.93	1599.68	257.405	2807.08	1597.08	209.801	2764.43	1477.72	209.919	2691.32	1228.94	200.815	2884.91	1389.73	203.612	2943.72	1237.13	295.206	2687.84	1289.53	34.5103	2779.44	1431.73	-37.5437	2796.3	1254.83	-72.2146	2808.97	1104.26	-102.305	2973.93	1037.33	-77.6049	3047.33	1001.39	-120.236	3010.41	964.859	-126.491	3102.93	956.86
851	0	135.086	2978.15	1602.18	233.435	2989.39	1605.44	128.065	2823.27	1598.31	258.372	2820.95	1595.73	211.019	2778.71	1476.14	210.654	2706.2	1227.25	201.582	2899.45	1388.52	204.179	2958.62	1236.2	296.48	2702.75	1287.98	35.3724	2793.54	1430.22	-36.5155	2810.49	1253.36	-71.296	2823.44	1102.78	-101.365	2989.07	1037.21	-76.4064	3062.98	1002.16	-118.963	3026.14	965.251	-125.192	3118.74	958.032
852	0	135.691	2992.25	1600.81	234.422	3003.72	1604.34	128.357	2836.82	1596.93	259.209	2835.05	1594.32	211.599	2793.09	1474.37	212.312	2721.43	1225.33	202.543	2913.98	1387.21	205.026	2973.4	1235.11	297.59	2717.8	1286.02	36.5032	2807.89	1428.39	-35.5379	2824.59	1251.66	-70.5856	2837.56	1101.36	-100.134	3003.77	1036.88	-74.9947	3077.87	1002.36	-117.7	3041.33	965.088	-123.739	3133.92	958.573
853	0	136.931	3006.02	1599.74	235.591	3017.82	1603.34	129.959	2851	1595.55	260.041	2849.13	1592.81	213.184	2807.41	1473.08	213.511	2737.11	1223.23	203.542	2928.72	1385.91	206.121	2988.58	1234.02	298.957	2732.87	1284.29	37.5461	2822.16	1426.82	-34.3864	2838.5	1250.06	-69.2384	2851.5	1099.78	-98.7223	3018.08	1036.11	-73.5584	3092.06	1001.93	-116.285	3056.17	964.266	-122.158	3148.86	958.583
854	0	137.372	3020.23	1599.1	236.541	3032.31	1602.92	130.651	2865.14	1594.43	261.334	2863.73	1591.66	214.163	2821.89	1471.91	214.658	2752.54	1221.3	204.759	2943.35	1384.89	207.519	3004.1	1233.31	299.853	2747.91	1282.43	38.5451	2836.38	1425.27	-33.0398	2852.3	1248.35	-68.1946	2865.01	1098.18	-97.3424	3031.91	1034.9	-72.0605	3106.21	1001.19	-115.011	3070.36	963.364	-120.588	3163.08	957.855
855	0	138.1	3034.24	1598.9	237.105	3046.25	1602.71	131.673	2879.2	1593.85	262.128	2877.83	1591.43	214.907	2836.09	1470.98	215.419	2767.84	1219.98	205.763	2958.02	1384.65	208.858	3019.63	1232.94	301.422	2763.23	1280.96	39.4641	2850.6	1423.76	-31.7196	2865.98	1246.89	-66.5396	2878.41	1096.46	-95.907	3045.36	1033.25	-70.5444	3119.57	999.807	-113.413	3083.84	961.904	-119.086	3176.42	956.597
856	0	138.935	3048.36	1598.94	237.752	3060.56	1603.1	132.787	2893.34	1593.54	262.514	2891.37	1591.36	216.457	2850.54	1470.73	216.358	2783.27	1219.13	206.71	2972.63	1384.76	210.232	3035.21	1233.31	302.12	2778.38	1280.1	40.6801	2864.84	1422.94	-30.2082	2879.44	1245.79	-64.6623	2891.51	1095.07	-94.3983	3057.84	1031.35	-68.937	3132.59	998.129	-111.667	3096.61	959.895	-117.261	3189.35	954.809
857	0	139.577	3062.43	1599.27	238.592	3075.05	1603.7	133.78	2907.53	1593.82	263.893	2906.17	1591.65	216.956	2864.98	1470.48	217.062	2798.96	1218.43	207.88	2987.29	1384.95	211.548	3050.74	1234.06	303.23	2793.43	1279.51	41.5806	2878.95	1422.35	-28.7586	2892.68	1244.93	-62.4717	2904.24	1094.18	-92.5473	3070.45	1029.37	-67.196	3144.94	995.989	-109.478	3108.51	957.535	-115.611	3201.19	952.442
858	0	140.231	3076.54	1600.14	239.206	3089.07	1604.41	134.069	2921.08	1594.3	264.818	2920.33	1592.2	218.232	2879.46	1470.95	217.617	2814.45	1218.1	208.894	3001.85	1385.64	212.837	3066.28	1235.14	303.615	2808.78	1279.06	42.8212	2893.08	1422.41	-26.9815	2905.6	1244.72	-60.4916	2916.84	1093.65	-90.6529	3082.28	1027.22	-65.5262	3156.16	993.358	-106.937	3119.63	954.637	-113.82	3212.16	949.481
859	0	141.267	3090.66	1601.16	239.994	3103.62	1605.85	135.272	2935.46	1595.06	266.041	2934.85	1593.08	219.309	2894.1	1471.65	217.995	2829.16	1218.37	209.808	3016.36	1386.71	214.013	3081.65	1236.54	304.041	2823.81	1279.26	43.8227	2907.48	1422.82	-25.1682	2918.47	1244.71	-58.1996	2928.91	1093.55	-88.2259	3093.46	1024.87	-63.321	3167.57	990.401	-104.897	3129.89	952.038	-111.942	3222.4	945.882
860	0	141.732	3104.89	1602.88	240.681	3117.8	1607.2	135.855	2949.47	1596.14	266.781	2949.51	1594.43	219.896	2908.49	1472.53	217.728	2843.59	1219.4	210.676	3030.91	1387.75	214.924	3097	1238.06	304.443	2838.88	1279.85	44.5073	2921.99	1423.84	-23.6042	2931.3	1245.22	-55.6087	2940.51	1093.56	-86.0986	3104.13	1022.58	-61.4555	3177.75	987.126	-102.162	3139.37	949.058	-110.087	3231.51	941.792
861	0	142.667	3118.86	1604.03	241.256	3131.77	1608.4	136.612	2963.49	1597.31	267.72	2963.46	1595.41	220.803	2922.99	1473.56	218.676	2858.08	1220.63	211.218	3045.32	1389	215.493	3111.4	1239.44	304.344	2853.62	1280.83	45.1455	2936.49	1425.14	-21.8037	2944.24	1245.82	-51.9081	2951.66	1094.1	-83.7868	3114.18	1020.2	-59.3096	3187.15	983.501	-99.5864	3147.98	945.91	-108.116	3239.81	937.267
862	0	143.246	3133.1	1605.65	242.776	3146.72	1610.42	137.686	2978.23	1598.71	268.218	2977.6	1596.26	221.195	2937.62	1474.69	218.228	2872.02	1222.04	211.731	3059.63	1389.94	216.121	3126.65	1240.64	304.792	2868.19	1281.93	45.3177	2950.96	1426.67	-20.6172	2956.97	1246.89	-50.1777	2962.5	1095.17	-81.342	3123.64	1017.59	-56.8418	3196.26	979.797	-96.898	3155.69	942.551	-105.768	3247.73	932.103
[truncated: 69 more columns]

## Sheet: Sheet2
Devices
		025370 - Force			025370 - Moment			025370 - CoP			027571 - Force			027571 - Moment			027571 - CoP			037720 - Force			037720 - Moment			037720 - CoP
Frame	Sub Frame	Fx	Fy	Fz	Mx	My	Mz	Cx	Cy	Cz	Fx	Fy	Fz	Mx	My	Mz	Cx	Cy	Cz	Fx	Fy	Fz	Mx	My	Mz	Cx	Cy	Cz
		N	N	N	N.mm	N.mm	N.mm	mm	mm	mm	N	N	N	N.mm	N.mm	N.mm	mm	mm	mm	N	N	N	N.mm	N.mm	N.mm	mm	mm	mm
566	0	0	0	0	0	0	0	200	300	0	0	0	0	0	0	0	200	903	0	0	0	0	0	0	0	603	903	0
566	1	0	0	0	0	0	0	200	300	0	0	0	0	0	0	0	200	903	0	0	0	0	0	0	0	603	903	0
566	2	0	0	0	0	0	0	200	300	0	0	0	0	0	0	0	200	903	0	0	0	0	0	0	0	603	903	0
566	3	0	0	0	0	0	0	200	300	0	0	0	0	0	0	0	200	903	0	0	0	0	0	0	0	603	903	0
566	4	0	0	0	0	0	0	200	300	0	0	0	0	0	0	0	200	903	0	0	0	0	0	0	0	603	903	0
566	5	0	0	0	0	0	0	200	300	0	0	0	0	0	0	0	200	903	0	0	0	0	0	0	0	603	903	0
566	6	0	0	0	0	0	0	200	300	0	0	0	0	0	0	0	200	903	0	0	0	0	0	0	0	603	903	0
566	7	0	0	0	0	0	0	200	300	0	0	0	0	0	0	0	200	903	0	0	0	0	0	0	0	603	903	0
566	8	0	0	0	0	0	0	200	300	0	0	0	0	0	0	0	200	903	0	0	0	0	0	0	0	603	903	0
566	9	0	0	0	0	0	0	200	300	0	0	0	0	0	0	0	200	903	0	0	0	0	0	0	0	603	903	0
567	0	0	0	0	0	0	0	200	300	0	0	0	0	0	0	0	200	903	0	0	0	0	0	0	0	603	903	0
567	1	0	0	0	0	0	0	200	300	0	0	0	0	0	0	0	200	903	0	0	0	0	0	0	0	603	903	0
567	2	0	0	0	0	0	0	200	300	0	0	0	0	0	0	0	200	903	0	0	0	0	0	0	0	603	903	0
567	3	0	0	0	0	0	0	200	300	0	0	0	0	0	0	0	200	903	0	0	0	0	0	0	0	603	903	0
567	4	0	0	0	0	0	0	200	300	0	0	0	0	0	0	0	200	903	0	0	0	0	0	0	0	603	903	0
567	5	0	0	0	0	0	0	200	300	0	0	0	0	0	0	0	200	903	0	0	0	0	0	0	0	603	903	0
567	6	0	0	0	0	0	0	200	300	0	0	0	0	0	0	0	200	903	0	0	0	0	0	0	0	603	903	0
567	7	0	0	0	0	0	0	200	300	0	0	0	0	0	0	0	200	903	0	0	0	0	0	0	0	603	903	0
567	8	0	0	0	0	0	0	200	300	0	0	0	0	0	0	0	200	903	0	0	0	0	0	0	0	603	903	0
567	9	0	0	0	0	0	0	200	300	0	0	0	0	0	0	0	200	903	0	0	0	0	0	0	0	603	903	0
568	0	0	0	0	0	0	0	200	300	0	0	0	0	0	0	0	200	903	0	0	0	0	0	0	0	603	903	0
568	1	0	0	0	0	0	0	200	300	0	0	0	0	0	0	0	200	903	0	0	0	0	0	0	0	603	903	0
568	2	0	0	0	0	0	0	200	300	0	0	0	0	0	0	0	200	903	0	0	0	0	0	0	0	603	903	0
568	3	0	0	0	0	0	0	200	300	0	0	0	0	0	0	0	200	903	0	0	0	0	0	0	0	603	903	0
568	4	0	0	0	0	0	0	200	300	0	0	0	0	0	0	0	200	903	0	0	0	0	0	0	0	603	903	0
568	5	0	0	0	0	0	0	200	300	0	0	0	0	0	0	0	200	903	0	0	0	0	0	0	0	603	903	0
568	6	0	0	0	0	0	0	200	300	0	0	0	0	0	0	0	200	903	0	0	0	0	0	0	0	603	903	0
568	7	0	0	0	0	0	0	200	300	0	0	0	0	0	0	0	200	903	0	0	0	0	0	0	0	603	903	0
568	8	0	0	0	0	0	0	200	300	0	0	0	0	0	0	0	200	903	0	0	0	0	0	0	0	603	903	0
568	9	0	0	0	0	0	0	200	300	0	0	0	0	0	0	0	200	903	0	0	0	0	0	0	0	603	903	0
569	0	0	0	0	0	0	0	200	300	0	0	0	0	0	0	0	200	903	0	0	0	0	0	0	0	603	903	0
569	1	0	0	0	0	0	0	200	300	0	0	0	0	0	0	0	200	903	0	0	0	0	0	0	0	603	903	0
569	2	0	0	0	0	0	0	200	300	0	0	0	0	0	0	0	200	903	0	0	0	0	0	0	0	603	903	0
569	3	0	0	0	0	0	0	200	300	0	0	0	0	0	0	0	200	903	0	0	0	0	0	0	0	603	903	0
569	4	0	0	0	0	0	0	200	300	0	0	0	0	0	0	0	200	903	0	0	0	0	0	0	0	603	903	0
569	5	0	0	0	0	0	0	200	300	0	0	0	0	0	0	0	200	903	0	0	0	0	0	0	0	603	903	0
569	6	0	0	0	0	0	0	200	300	0	0	0	0	0	0	0	200	903	0	0	0	0	0	0	0	603	903	0
569	7	0	0	0	0	0	0	200	300	0	0	0	0	0	0	0	200	903	0	0	0	0	0	0	0	603	903	0
569	8	0	0	0	0	0	0	200	300	0	0	0	0	0	0	0	200	903	0	0	0	0	0	0	0	603	903	0
569	9	0	0	0	0	0	0	200	300	0	0	0	0	0	0	0	200	903	0	0	0	0	0	0	0	603	903	0
570	0	0	0	0	0	0	0	200	300	0	0	0	0	0	0	0	200	903	0	0	0	0	0	0	0	603	903	0
570	1	0	0	0	0	0	0	200	300	0	0	0	0	0	0	0	200	903	0	0	0	0	0	0	0	603	903	0
570	2	0	0	0	0	0	0	200	300	0	0	0	0	0	0	0	200	903	0	0	0	0	0	0	0	603	903	0
570	3	0	0	0	0	0	0	200	300	0	0	0	0	0	0	0	200	903	0	0	0	0	0	0	0	603	903	0
570	4	0	0	0	0	0	0	200	300	0	0	0	0	0	0	0	200	903	0	0	0	0	0	0	0	603	903	0
570	5	0	0	0	0	0	0	200	300	0	0	0	0	0	0	0	200	903	0	0	0	0	0	0	0	603	903	0
570	6	0	0	0	0	0	0	200	300	0	0	0	0	0	0	0	200	903	0	0	0	0	0	0	0	603	903	0
570	7	0	0	0	0	0	0	200	300	0	0	0	0	0	0	0	200	903	0	0	0	0	0	0	0	603	903	0
570	8	0	0	0	0	0	0	200	300	0	0	0	0	0	0	0	200	903	0	0	0	0	0	0	0	603	903	0
570	9	0	0	0	0	0	0	200	300	0	0	0	0	0	0	0	200	903	0	0	0	0	0	0	0	603	903	0
571	0	0	0	0	0	0	0	200	300	0	0	0	0	0	0	0	200	903	0	0	0	0	0	0	0	603	903	0
571	1	0	0	0	0	0	0	200	300	0	0	0	0	0	0	0	200	903	0	0	0	0	0	0	0	603	903	0
571	2	0	0	0	0	0	0	200	300	0	0	0	0	0	0	0	200	903	0	0	0	0	0	0	0	603	903	0
571	3	0	0	0	0	0	0	200	300	0	0	0	0	0	0	0	200	903	0	0	0	0	0	0	0	603	903	0
571	4	0	0	0	0	0	0	200	300	0	0	0	0	0	0	0	200	903	0	0	0	0	0	0	0	603	903	0
571	5	0	0	0	0	0	0	200	300	0	0	0	0	0	0	0	200	903	0	0	0	0	0	0	0	603	903	0
571	6	0	0	0	0	0	0	200	300	0	0	0	0	0	0	0	200	903	0	0	0	0	0	0	0	603	903	0
571	7	0	0	0	0	0	0	200	300	0	0	0	0	0	0	0	200	903	0	0	0	0	0	0	0	603	903	0
571	8	0	0	0	0	0	0	200	300	0	0	0	0	0	0	0	200	903	0	0	0	0	0	0	0	603	903	0
571	9	0	0	0	0	0	0	200	300	0	0	0	0	0	0	0	200	903	0	0	0	0	0	0	0	603	903	0
572	0	0	0	0	0	0	0	200	300	0	0	0	0	0	0	0	200	903	0	0	0	0	0	0	0	603	903	0
572	1	0	0	0	0	0	0	200	300	0	0	0	0	0	0	0	200	903	0	0	0	0	0	0	0	603	903	0
572	2	0	0	0	0	0	0	200	300	0	0	0	0	0	0	0	200	903	0	0	0	0	0	0	0	603	903	0
572	3	0	0	0	0	0	0	200	300	0	0	0	0	0	0	0	200	903	0	0	0	0	0	0	0	603	903	0
572	4	0	0	0	0	0	0	200	300	0	0	0	0	0	0	0	200	903	0	0	0	0	0	0	0	603	903	0
572	5	0	0	0	0	0	0	200	300	0	0	0	0	0	0	0	200	903	0	0	0	0	0	0	0	603	903	0
572	6	0	0	0	0	0	0	200	300	0	0	0	0	0	0	0	200	903	0	0	0	0	0	0	0	603	903	0
572	7	0	0	0	0	0	0	200	300	0	0	0	0	0	0	0	200	903	0	0	0	0	0	0	0	603	903	0
572	8	0	0	0	0	0	0	200	300	0	0	0	0	0	0	0	200	903	0	0	0	0	0	0	0	603	903	0
572	9	0	0	0	0	0	0	200	300	0	0	0	0	0	0	0	200	903	0	0	0	0	0	0	0	603	903	0
573	0	0	0	0	0	0	0	200	300	0	0	0	0	0	0	0	200	903	0	0	0	0	0	0	0	603	903	0
573	1	0	0	0	0	0	0	200	300	0	0	0	0	0	0	0	200	903	0	0	0	0	0	0	0	603	903	0
573	2	0	0	0	0	0	0	200	300	0	0	0	0	0	0	0	200	903	0	0	0	0	0	0	0	603	903	0
573	3	0	0	0	0	0	0	200	300	0	0	0	0	0	0	0	200	903	0	0	0	0	0	0	0	603	903	0
573	4	0	0	0	0	0	0	200	300	0	0	0	0	0	0	0	200	903	0	0	0	0	0	0	0	603	903	0
573	5	0	0	0	0	0	0	200	300	0	0	0	0	0	0	0	200	903	0	0	0	0	0	0	0	603	903	0
573	6	0	0	0	0	0	0	200	300	0	0	0	0	0	0	0	200	903	0	0	0	0	0	0	0	603	903	0
573	7	0	0	0	0	0	0	200	300	0	0	0	0	0	0	0	200	903	0	0	0	0	0	0	0	603	903	0
573	8	0	0	0	0	0	0	200	300	0	0	0	0	0	0	0	200	903	0	0	0	0	0	0	0	603	903	0
573	9	0	0	0	0	0	0	200	300	0	0	0	0	0	0	0	200	903	0	0	0	0	0	0	0	603	903	0
574	0	0	0	0	0	0	0	200	300	0	0	0	0	0	0	0	200	903	0	0	0	0	0	0	0	603	903	0
574	1	0	0	0	0	0	0	200	300	0	0	0	0	0	0	0	200	903	0	0	0	0	0	0	0	603	903	0
574	2	0	0	0	0	0	0	200	300	0	0	0	0	0	0	0	200	903	0	0	0	0	0	0	0	603	903	0
574	3	0	0	0	0	0	0	200	300	0	0	0	0	0	0	0	200	903	0	0	0	0	0	0	0	603	903	0
574	4	0	0	0	0	0	0	200	300	0	0	0	0	0	0	0	200	903	0	0	0	0	0	0	0	603	903	0
574	5	0	0	0	0	0	0	200	300	0	0	0	0	0	0	0	200	903	0	0	0	0	0	0	0	603	903	0
574	6	0	0	0	0	0	0	200	300	0	0	0	0	0	0	0	200	903	0	0	0	0	0	0	0	603	903	0
574	7	0	0	0	0	0	0	200	300	0	0	0	0	0	0	0	200	903	0	0	0	0	0	0	0	603	903	0
574	8	0	0	0	0	0	0	200	300	0	0	0	0	0	0	0	200	903	0	0	0	0	0	0	0	603	903	0
574	9	0	0	0	0	0	0	200	300	0	0	0	0	0	0	0	200	903	0	0	0	0	0	0	0	603	903	0
575	0	0	0	0	0	0	0	200	300	0	0	0	0	0	0	0	200	903	0	0	0	0	0	0	0	603	903	0
575	1	0	0	0	0	0	0	200	300	0	0	0	0	0	0	0	200	903	0	0	0	0	0	0	0	603	903	0
575	2	0	0	0	0	0	0	200	300	0	0	0	0	0	0	0	200	903	0	0	0	0	0	0	0	603	903	0
575	3	0	0	0	0	0	0	200	300	0	0	0	0	0	0	0	200	903	0	0	0	0	0	0	0	603	903	0
575	4	0	0	0	0	0	0	200	300	0	0	0	0	0	0	0	200	903	0	0	0	0	0	0	0	603	903	0
575	5	0	0	0	0	0	0	200	300	0	0	0	0	0	0	0	200	903	0	0	0	0	0	0	0	603	903	0
575	6	0	0	0	0	0	0	200	300	0	0	0	0	0	0	0	200	903	0	0	0	0	0	0	0	603	903	0
575	7	0	0	0	0	0	0	200	300	0	0	0	0	0	0	0	200	903	0	0	0	0	0	0	0	603	903	0
575	8	0	0	0	0	0	0	200	300	0	0	0	0	0	0	0	200	903	0	0	0	0	0	0	0	603	903	0
575	9	0	0	0	0	0	0	200	300	0	0	0	0	0	0	0	200	903	0	0	0	0	0	0	0	603	903	0
576	0	0	0	0	0	0	0	200	300	0	0	0	0	0	0	0	200	903	0	0	0	0	0	0	0	603	903	0
576	1	0	0	0	0	0	0	200	300	0	0	0	0	0	0	0	200	903	0	0	0	0	0	0	0	603	903	0
576	2	0	0	0	0	0	0	200	300	0	0	0	0	0	0	0	200	903	0	0	0	0	0	0	0	603	903	0
576	3	0	0	0	0	0	0	200	300	0	0	0	0	0	0	0	200	903	0	0	0	0	0	0	0	603	903	0
576	4	0	0	0	0	0	0	200	300	0	0	0	0	0	0	0	200	903	0	0	0	0	0	0	0	603	903	0
576	5	0	0	0	0	0	0	200	300	0	0	0	0	0	0	0	200	903	0	0	0	0	0	0	0	603	903	0
576	6	0	0	0	0	0	0	200	300	0	0	0	0	0	0	0	200	903	0	0	0	0	0	0	0	603	903	0
576	7	0	0	0	0	0	0	200	300	0	0	0	0	0	0	0	200	903	0	0	0	0	0	0	0	603	903	0
576	8	0	0	0	0	0	0	200	300	0	0	0	0	0	0	0	200	903	0	0	0	0	0	0	0	603	903	0
576	9	0	0	0	0	0	0	200	300	0	0	0	0	0	0	0	200	903	0	0	0	0	0	0	0	603	903	0
577	0	0	0	0	0	0	0	200	300	0	0	0	0	0	0	0	200	903	0	0	0	0	0	0	0	603	903	0
577	1	0	0	0	0	0	0	200	300	0	0	0	0	0	0	0	200	903	0	0	0	0	0	0	0	603	903	0
577	2	0	0	0	0	0	0	200	300	0	0	0	0	0	0	0	200	903	0	0	0	0	0	0	0	603	903	0
577	3	0	0	0	0	0	0	200	300	0	0	0	0	0	0	0	200	903	0	0	0	0	0	0	0	603	903	0
577	4	0	0	0	0	0	0	200	300	0	0	0	0	0	0	0	200	903	0	0	0	0	0	0	0	603	903	0
577	5	0	0	0	0	0	0	200	300	0	0	0	0	0	0	0	200	903	0	0	0	0	0	0	0	603	903	0
577	6	0	0	0	0	0	0	200	300	0	0	0	0	0	0	0	200	903	0	0	0	0	0	0	0	603	903	0
577	7	0	0	0	0	0	0	200	300	0	0	0	0	0	0	0	200	903	0	0	0	0	0	0	0	603	903	0
577	8	0	0	0	0	0	0	200	300	0	0	0	0	0	0	0	200	903	0	0	0	0	0	0	0	603	903	0
577	9	0	0	0	0	0	0	200	300	0	0	0	0	0	0	0	200	903	0	0	0	0	0	0	0	603	903	0
578	0	0	0	0	0	0	0	200	300	0	0	0	0	0	0	0	200	903	0	0	0	0	0	0	0	603	903	0
578	1	0	0	0	0	0	0	200	300	0	0	0	0	0	0	0	200	903	0	0	0	0	0	0	0	603	903	0
578	2	0	0	0	0	0	0	200	300	0	0	0	0	0	0	0	200	903	0	0	0	0	0	0	0	603	903	0
578	3	0	0	0	0	0	0	200	300	0	0	0	0	0	0	0	200	903	0	0	0	0	0	0	0	603	903	0
578	4	0	0	0	0	0	0	200	300	0	0	0	0	0	0	0	200	903	0	0	0	0	0	0	0	603	903	0
578	5	0	0	0	0	0	0	200	300	0	0	0	0	0	0	0	200	903	0	0	0	0	0	0	0	603	903	0
578	6	0	0	0	0	0	0	200	300	0	0	0	0	0	0	0	200	903	0	0	0	0	0	0	0	603	903	0
578	7	0	0	0	0	0	0	200	300	0	0	0	0	0	0	0	200	903	0	0	0	0	0	0	0	603	903	0
578	8	0	0	0	0	0	0	200	300	0	0	0	0	0	0	0	200	903	0	0	0	0	0	0	0	603	903	0
578	9	0	0	0	0	0	0	200	300	0	0	0	0	0	0	0	200	903	0	0	0	0	0	0	0	603	903	0
579	0	0	0	0	0	0	0	200	300	0	0	0	0	0	0	0	200	903	0	0	0	0	0	0	0	603	903	0
579	1	0	0	0	0	0	0	200	300	0	0	0	0	0	0	0	200	903	0	0	0	0	0	0	0	603	903	0
579	2	0	0	0	0	0	0	200	300	0	0	0	0	0	0	0	200	903	0	0	0	0	0	0	0	603	903	0
579	3	0	0	0	0	0	0	200	300	0	0	0	0	0	0	0	200	903	0	0	0	0	0	0	0	603	903	0
579	4	0	0	0	0	0	0	200	300	0	0	0	0	0	0	0	200	903	0	0	0	0	0	0	0	603	903	0
579	5	0	0	0	0	0	0	200	300	0	0	0	0	0	0	0	200	903	0	0	0	0	0	0	0	603	903	0
579	6	0	0	0	0	0	0	200	300	0	0	0	0	0	0	0	200	903	0	0	0	0	0	0	0	603	903	0
579	7	0	0	0	0	0	0	200	300	0	0	0	0	0	0	0	200	903	0	0	0	0	0	0	0	603	903	0
579	8	0	0	0	0	0	0	200	300	0	0	0	0	0	0	0	200	903	0	0	0	0	0	0	0	603	903	0
579	9	0	0	0	0	0	0	200	300	0	0	0	0	0	0	0	200	903	0	0	0	0	0	0	0	603	903	0
580	0	0	0	0	0	0	0	200	300	0	0	0	0	0	0	0	200	903	0	0	0	0	0	0	0	603	903	0
580	1	0	0	0	0	0	0	200	300	0	0	0	0	0	0	0	200	903	0	0	0	0	0	0	0	603	903	0
580	2	0	0	0	0	0	0	200	300	0	0	0	0	0	0	0	200	903	0	0	0	0	0	0	0	603	903	0
580	3	0	0	0	0	0	0	200	300	0	0	0	0	0	0	0	200	903	0	0	0	0	0	0	0	603	903	0
580	4	0	0	0	0	0	0	200	300	0	0	0	0	0	0	0	200	903	0	0	0	0	0	0	0	603	903	0
580	5	0	0	0	0	0	0	200	300	0	0	0	0	0	0	0	200	903	0	0	0	0	0	0	0	603	903	0
580	6	0	0	0	0	0	0	200	300	0	0	0	0	0	0	0	200	903	0	0	0	0	0	0	0	603	903	0
580	7	0	0	0	0	0	0	200	300	0	0	0	0	0	0	0	200	903	0	0	0	0	0	0	0	603	903	0
580	8	0	0	0	0	0	0	200	300	0	0	0	0	0	0	0	200	903	0	0	0	0	0	0	0	603	903	0
580	9	0	0	0	0	0	0	200	300	0	0	0	0	0	0	0	200	903	0	0	0	0	0	0	0	603	903	0
581	0	0	0	0	0	0	0	200	300	0	0	0	0	0	0	0	200	903	0	0	0	0	0	0	0	603	903	0
581	1	0	0	0	0	0	0	200	300	0	0	0	0	0	0	0	200	903	0	0	0	0	0	0	0	603	903	0
581	2	0	0	0	0	0	0	200	300	0	0	0	0	0	0	0	200	903	0	0	0	0	0	0	0	603	903	0
581	3	0	0	0	0	0	0	200	300	0	0	0	0	0	0	0	200	903	0	0	0	0	0	0	0	603	903	0
581	4	0	0	0	0	0	0	200	300	0	0	0	0	0	0	0	200	903	0	0	0	0	0	0	0	603	903	0
581	5	0	0	0	0	0	0	200	300	0	0	0	0	0	0	0	200	903	0	0	0	0	0	0	0	603	903	0
581	6	0	0	0	0	0	0	200	300	0	0	0	0	0	0	0	200	903	0	0	0	0	0	0	0	603	903	0
581	7	0	0	0	0	0	0	200	300	0	0	0	0	0	0	0	200	903	0	0	0	0	0	0	0	603	903	0
581	8	0	0	0	0	0	0	200	300	0	0	0	0	0	0	0	200	903	0	0	0	0	0	0	0	603	903	0
581	9	0	0	0	0	0	0	200	300	0	0	0	0	0	0	0	200	903	0	0	0	0	0	0	0	603	903	0
582	0	0	0	0	0	0	0	200	300	0	0	0	0	0	0	0	200	903	0	0	0	0	0	0	0	603	903	0
582	1	0	0	0	0	0	0	200	300	0	0	0	0	0	0	0	200	903	0	0	0	0	0	0	0	603	903	0
582	2	0	0	0	0	0	0	200	300	0	0	0	0	0	0	0	200	903	0	0	0	0	0	0	0	603	903	0
582	3	0	0	0	0	0	0	200	300	0	0	0	0	0	0	0	200	903	0	0	0	0	0	0	0	603	903	0
582	4	0	0	0	0	0	0	200	300	0	0	0	0	0	0	0	200	903	0	0	0	0	0	0	0	603	903	0
582	5	0	0	0	0	0	0	200	300	0	0	0	0	0	0	0	200	903	0	0	0	0	0	0	0	603	903	0
582	6	0	0	0	0	0	0	200	300	0	0	0	0	0	0	0	200	903	0	0	0	0	0	0	0	603	903	0
582	7	0	0	0	0	0	0	200	300	0	0	0	0	0	0	0	200	903	0	0	0	0	0	0	0	603	903	0
582	8	0	0	0	0	0	0	200	300	0	0	0	0	0	0	0	200	903	0	0	0	0	0	0	0	603	903	0
582	9	0	0	0	0	0	0	200	300	0	0	0	0	0	0	0	200	903	0	0	0	0	0	0	0	603	903	0
583	0	0	0	0	0	0	0	200	300	0	0	0	0	0	0	0	200	903	0	0	0	0	0	0	0	603	903	0
583	1	0	0	0	0	0	0	200	300	0	0	0	0	0	0	0	200	903	0	0	0	0	0	0	0	603	903	0
583	2	0	0	0	0	0	0	200	300	0	0	0	0	0	0	0	200	903	0	0	0	0	0	0	0	603	903	0
583	3	0	0	0	0	0	0	200	300	0	0	0	0	0	0	0	200	903	0	0	0	0	0	0	0	603	903	0
583	4	0	0	0	0	0	0	200	300	0	0	0	0	0	0	0	200	903	0	0	0	0	0	0	0	603	903	0
583	5	0	0	0	0	0	0	200	300	0	0	0	0	0	0	0	200	903	0	0	0	0	0	0	0	603	903	0
583	6	0	0	0	0	0	0	200	300	0	0	0	0	0	0	0	200	903	0	0	0	0	0	0	0	603	903	0
583	7	0	0	0	0	0	0	200	300	0	0	0	0	0	0	0	200	903	0	0	0	0	0	0	0	603	903	0
583	8	0	0	0	0	0	0	200	300	0	0	0	0	0	0	0	200	903	0	0	0	0	0	0	0	603	903	0
583	9	0	0	0	0	0	0	200	300	0	0	0	0	0	0	0	200	903	0	0	0	0	0	0	0	603	903	0
584	0	0	0	0	0	0	0	200	300	0	0	0	0	0	0	0	200	903	0	0	0	0	0	0	0	603	903	0
584	1	0	0	0	0	0	0	200	300	0	0	0	0	0	0	0	200	903	0	0	0	0	0	0	0	603	903	0
584	2	0	0	0	0	0	0	200	300	0	0	0	0	0	0	0	200	903	0	0	0	0	0	0	0	603	903	0
584	3	0	0	0	0	0	0	200	300	0	0	0	0	0	0	0	200	903	0	0	0	0	0	0	0	603	903	0
584	4	0	0	0	0	0	0	200	300	0	0	0	0	0	0	0	200	903	0	0	0	0	0	0	0	603	903	0
584	5	0	0	0	0	0	0	200	300	0	0	0	0	0	0	0	200	903	0	0	0	0	0	0	0	603	903	0
584	6	0	0	0	0	0	0	200	300	0	0	0	0	0	0	0	200	903	0	0	0	0	0	0	0	603	903	0
584	7	0	0	0	0	0	0	200	300	0	0	0	0	0	0	0	200	903	0	0	0	0	0	0	0	603	903	0
584	8	0	0	0	0	0	0	200	300	0	0	0	0	0	0	0	200	903	0	0	0	0	0	0	0	603	903	0
584	9	0	0	0	0	0	0	200	300	0	0	0	0	0	0	0	200	903	0	0	0	0	0	0	0	603	903	0
585	0	0	0	0	0	0	0	200	300	0	0	0	0	0	0	0	200	903	0	0	0	0	0	0	0	603	903	0
585	1	0	0	0	0	0	0	200	300	0	0	0	0	0	0	0	200	903	0	0	0	0	0	0	0	603	903	0
585	2	0	0	0	0	0	0	200	300	0	0	0	0	0	0	0	200	903	0	0	0	0	0	0	0	603	903	0
585	3	0	0	0	0	0	0	200	300	0	0	0	0	0	0	0	200	903	0	0	0	0	0	0	0	603	903	0
585	4	0	0	0	0	0	0	200	300	0	0	0	0	0	0	0	200	903	0	0	0	0	0	0	0	603	903	0
585	5	0	0	0	0	0	0	200	300	0	0	0	0	0	0	0	200	903	0	0	0	0	0	0	0	603	903	0
585	6	0	0	0	0	0	0	200	300	0	0	0	0	0	0	0	200	903	0	0	0	0	0	0	0	603	903	0
585	7	0	0	0	0	0	0	200	300	0	0	0	0	0	0	0	200	903	0	0	0	0	0	0	0	603	903	0
585	8	0	0	0	0	0	0	200	300	0	0	0	0	0	0	0	200	903	0	0	0	0	0	0	0	603	903	0
585	9	0	0	0	0	0	0	200	300	0	0	0	0	0	0	0	200	903	0	0	0	0	0	0	0	603	903	0
586	0	0	0	0	0	0	0	200	300	0	0	0	0	0	0	0	200	903	0	0	0	0	0	0	0	603	903	0
586	1	0	0	0	0	0	0	200	300	0	0	0	0	0	0	0	200	903	0	0	0	0	0	0	0	603	903	0
586	2	0	0	0	0	0	0	200	300	0	0	0	0	0	0	0	200	903	0	0	0	0	0	0	0	603	903	0
586	3	0	0	0	0	0	0	200	300	0	0	0	0	0	0	0	200	903	0	0	0	0	0	0	0	603	903	0
586	4	0	0	0	0	0	0	200	300	0	0	0	0	0	0	0	200	903	0	0	0	0	0	0	0	603	903	0
586	5	0	0	0	0	0	0	200	300	0	0	0	0	0	0	0	200	903	0	0	0	0	0	0	0	603	903	0
586	6	0	0	0	0	0	0	200	300	0	0	0	0	0	0	0	200	903	0	0	0	0	0	0	0	603	903	0
586	7	0	0	0	0	0	0	200	300	0	0	0	0	0	0	0	200	903	0	0	0	0	0	0	0	603	903	0
586	8	0	0	0	0	0	0	200	300	0	0	0	0	0	0	0	200	903	0	0	0	0	0	0	0	603	903	0
586	9	0	0	0	0	0	0	200	300	0	0	0	0	0	0	0	200	903	0	0	0	0	0	0	0	603	903	0
587	0	0	0	0	0	0	0	200	300	0	0	0	0	0	0	0	200	903	0	0	0	0	0	0	0	603	903	0
587	1	0	0	0	0	0	0	200	300	0	0	0	0	0	0	0	200	903	0	0	0	0	0	0	0	603	903	0
587	2	0	0	0	0	0	0	200	300	0	0	0	0	0	0	0	200	903	0	0	0	0	0	0	0	603	903	0
587	3	0	0	0	0	0	0	200	300	0	0	0	0	0	0	0	200	903	0	0	0	0	0	0	0	603	903	0
587	4	0	0	0	0	0	0	200	300	0	0	0	0	0	0	0	200	903	0	0	0	0	0	0	0	603	903	0
587	5	0	0	0	0	0	0	200	300	0	0	0	0	0	0	0	200	903	0	0	0	0	0	0	0	603	903	0
587	6	0	0	0	0	0	0	200	300	0	0	0	0	0	0	0	200	903	0	0	0	0	0	0	0	603	903	0
587	7	0	0	0	0	0	0	200	300	0	0	0	0	0	0	0	200	903	0	0	0	0	0	0	0	603	903	0
587	8	0	0	0	0	0	0	200	300	0	0	0	0	0	0	0	200	903	0	0	0	0	0	0	0	603	903	0
587	9	0	0	0	0	0	0	200	300	0	0	0	0	0	0	0	200	903	0	0	0	0	0	0	0	603	903	0
588	0	0	0	0	0	0	0	200	300	0	0	0	0	0	0	0	200	903	0	0	0	0	0	0	0	603	903	0
588	1	0	0	0	0	0	0	200	300	0	0	0	0	0	0	0	200	903	0	0	0	0	0	0	0	603	903	0
588	2	0	0	0	0	0	0	200	300	0	0	0	0	0	0	0	200	903	0	0	0	0	0	0	0	603	903	0
588	3	0	0	0	0	0	0	200	300	0	0	0	0	0	0	0	200	903	0	0	0	0	0	0	0	603	903	0
588	4	0	0	0	0	0	0	200	300	0	0	0	0	0	0	0	200	903	0	0	0	0	0	0	0	603	903	0
588	5	0	0	0	0	0	0	200	300	0	0	0	0	0	0	0	200	903	0	0	0	0	0	0	0	603	903	0
588	6	0	0	0	0	0	0	200	300	0	0	0	0	0	0	0	200	903	0	0	0	0	0	0	0	603	903	0
588	7	0	0	0	0	0	0	200	300	0	0	0	0	0	0	0	200	903	0	0	0	0	0	0	0	603	903	0
588	8	0	0	0	0	0	0	200	300	0	0	0	0	0	0	0	200	903	0	0	0	0	0	0	0	603	903	0
588	9	0	0	0	0	0	0	200	300	0	0	0	0	0	0	0	200	903	0	0	0	0	0	0	0	603	903	0
589	0	0	0	0	0	0	0	200	300	0	0	0	0	0	0	0	200	903	0	0	0	0	0	0	0	603	903	0
589	1	0	0	0	0	0	0	200	300	0	0	0	0	0	0	0	200	903	0	0	0	0	0	0	0	603	903	0
589	2	0	0	0	0	0	0	200	300	0	0	0	0	0	0	0	200	903	0	0	0	0	0	0	0	603	903	0
589	3	0	0	0	0	0	0	200	300	0	0	0	0	0	0	0	200	903	0	0	0	0	0	0	0	603	903	0
589	4	0	0	0	0	0	0	200	300	0	0	0	0	0	0	0	200	903	0	0	0	0	0	0	0	603	903	0
589	5	0	0	0	0	0	0	200	300	0	0	0	0	0	0	0	200	903	0	0	0	0	0	0	0	603	903	0
589	6	0	0	0	0	0	0	200	300	0	0	0	0	0	0	0	200	903	0	0	0	0	0	0	0	603	903	0
589	7	0	0	0	0	0	0	200	300	0	0	0	0	0	0	0	200	903	0	0	0	0	0	0	0	603	903	0
589	8	0	0	0	0	0	0	200	300	0	0	0	0	0	0	0	200	903	0	0	0	0	0	0	0	603	903	0
589	9	0	0	0	0	0	0	200	300	0	0	0	0	0	0	0	200	903	0	0	0	0	0	0	0	603	903	0
590	0	0	0	0	0	0	0	200	300	0	0	0	0	0	0	0	200	903	0	0	0	0	0	0	0	603	903	0
590	1	0	0	0	0	0	0	200	300	0	0	0	0	0	0	0	200	903	0	0	0	0	0	0	0	603	903	0
590	2	0	0	0	0	0	0	200	300	0	0	0	0	0	0	0	200	903	0	0	0	0	0	0	0	603	903	0
590	3	0	0	0	0	0	0	200	300	0	0	0	0	0	0	0	200	903	0	0	0	0	0	0	0	603	903	0
590	4	0	0	0	0	0	0	200	300	0	0	0	0	0	0	0	200	903	0	0	0	0	0	0	0	603	903	0
590	5	0	0	0	0	0	0	200	300	0	0	0	0	0	0	0	200	903	0	0	0	0	0	0	0	603	903	0
590	6	0	0	0	0	0	0	200	300	0	0	0	0	0	0	0	200	903	0	0	0	0	0	0	0	603	903	0
590	7	0	0	0	0	0	0	200	300	0	0	0	0	0	0	0	200	903	0	0	0	0	0	0	0	603	903	0
590	8	0	0	0	0	0	0	200	300	0	0	0	0	0	0	0	200	903	0	0	0	0	0	0	0	603	903	0
590	9	0	0	0	0	0	0	200	300	0	0	0	0	0	0	0	200	903	0	0	0	0	0	0	0	603	903	0
591	0	0	0	0	0	0	0	200	300	0	0	0	0	0	0	0	200	903	0	0	0	0	0	0	0	603	903	0
591	1	0	0	0	0	0	0	200	300	0	0	0	0	0	0	0	200	903	0	0	0	0	0	0	0	603	903	0
591	2	0	0	0	0	0	0	200	300	0	0	0	0	0	0	0	200	903	0	0	0	0	0	0	0	603	903	0
591	3	0	0	0	0	0	0	200	300	0	0	0	0	0	0	0	200	903	0	0	0	0	0	0	0	603	903	0
591	4	0	0	0	0	0	0	200	300	0	0	0	0	0	0	0	200	903	0	0	0	0	0	0	0	603	903	0
591	5	0	0	0	0	0	0	200	300	0	0	0	0	0	0	0	200	903	0	0	0	0	0	0	0	603	903	0
591	6	0	0	0	0	0	0	200	300	0	0	0	0	0	0	0	200	903	0	0	0	0	0	0	0	603	903	0
591	7	0	0	0	0	0	0	200	300	0	0	0	0	0	0	0	200	903	0	0	0	0	0	0	0	603	903	0
591	8	0	0	0	0	0	0	200	300	0	0	0	0	0	0	0	200	903	0	0	0	0	0	0	0	603	903	0
591	9	0	0	0	0	0	0	200	300	0	0	0	0	0	0	0	200	903	0	0	0	0	0	0	0	603	903	0
592	0	0	0	0	0	0	0	200	300	0	0	0	0	0	0	0	200	903	0	0	0	0	0	0	0	603	903	0
592	1	0	0	0	0	0	0	200	300	0	0	0	0	0	0	0	200	903	0	0	0	0	0	0	0	603	903	0
592	2	0	0	0	0	0	0	200	300	0	0	0	0	0	0	0	200	903	0	0	0	0	0	0	0	603	903	0
592	3	0	0	0	0	0	0	200	300	0	0	0	0	0	0	0	200	903	0	0	0	0	0	0	0	603	903	0
592	4	0	0	0	0	0	0	200	300	0	0	0	0	0	0	0	200	903	0	0	0	0	0	0	0	603	903	0
592	5	0	0	0	0	0	0	200	300	0	0	0	0	0	0	0	200	903	0	0	0	0	0	0	0	603	903	0
592	6	0	0	0	0	0	0	200	300	0	0	0	0	0	0	0	200	903	0	0	0	0	0	0	0	603	903	0
592	7	0	0	0	0	0	0	200	300	0	0	0	0	0	0	0	200	903	0	0	0	0	0	0	0	603	903	0
592	8	0	0	0	0	0	0	200	300	0	0	0	0	0	0	0	200	903	0	0	0	0	0	0	0	603	903	0
592	9	0	0	0	0	0	0	200	300	0	0	0	0	0	0	0	200	903	0	0	0	0	0	0	0	603	903	0
593	0	0	0	0	0	0	0	200	300	0	0	0	0	0	0	0	200	903	0	0	0	0	0	0	0	603	903	0
593	1	0	0	0	0	0	0	200	300	0	0	0	0	0	0	0	200	903	0	0	0	0	0	0	0	603	903	0
593	2	0	0	0	0	0	0	200	300	0	0	0	0	0	0	0	200	903	0	0	0	0	0	0	0	603	903	0
593	3	0	0	0	0	0	0	200	300	0	0	0	0	0	0	0	200	903	0	0	0	0	0	0	0	603	903	0
593	4	0	0	0	0	0	0	200	300	0	0	0	0	0	0	0	200	903	0	0	0	0	0	0	0	603	903	0
593	5	0	0	0	0	0	0	200	300	0	0	0	0	0	0	0	200	903	0	0	0	0	0	0	0	603	903	0
593	6	0	0	0	0	0	0	200	300	0	0	0	0	0	0	0	200	903	0	0	0	0	0	0	0	603	903	0
593	7	0	0	0	0	0	0	200	300	0	0	0	0	0	0	0	200	903	0	0	0	0	0	0	0	603	903	0
593	8	0	0	0	0	0	0	200	300	0	0	0	0	0	0	0	200	903	0	0	0	0	0	0	0	603	903	0
593	9	0	0	0	0	0	0	200	300	0	0	0	0	0	0	0	200	903	0	0	0	0	0	0	0	603	903	0
594	0	0	0	0	0	0	0	200	300	0	0	0	0	0	0	0	200	903	0	0	0	0	0	0	0	603	903	0
594	1	0	0	0	0	0	0	200	300	0	0	0	0	0	0	0	200	903	0	0	0	0	0	0	0	603	903	0
594	2	0	0	0	0	0	0	200	300	0	0	0	0	0	0	0	200	903	0	0	0	0	0	0	0	603	903	0
594	3	0	0	0	0	0	0	200	300	0	0	0	0	0	0	0	200	903	0	0	0	0	0	0	0	603	903	0
594	4	0	0	0	0	0	0	200	300	0	0	0	0	0	0	0	200	903	0	0	0	0	0	0	0	603	903	0
594	5	0	0	0	0	0	0	200	300	0	0	0	0	0	0	0	200	903	0	0	0	0	0	0	0	603	903	0
594	6	0	0	0	0	0	0	200	300	0	0	0	0	0	0	0	200	903	0	0	0	0	0	0	0	603	903	0
594	7	0	0	0	0	0	0	200	300	0	0	0	0	0	0	0	200	903	0	0	0	0	0	0	0	603	903	0
594	8	0	0	0	0	0	0	200	300	0	0	0	0	0	0	0	200	903	0	0	0	0	0	0	0	603	903	0
594	9	0	0	0	0	0	0	200	300	0	0	0	0	0	0	0	200	903	0	0	0	0	0	0	0	603	903	0
595	0	0	0	0	0	0	0	200	300	0	0	0	0	0	0	0	200	903	0	0	0	0	0	0	0	603	903	0
595	1	0	0	0	0	0	0	200	300	0	0	0	0	0	0	0	200	903	0	0	0	0	0	0	0	603	903	0
595	2	0	0	0	0	0	0	200	300	0	0	0	0	0	0	0	200	903	0	0	0	0	0	0	0	603	903	0
595	3	0	0	0	0	0	0	200	300	0	0	0	0	0	0	0	200	903	0	0	0	0	0	0	0	603	903	0
595	4	0	0	0	0	0	0	200	300	0	0	0	0	0	0	0	200	903	0	0	0	0	0	0	0	603	903	0
595	5	0	0	0	0	0	0	200	300	0	0	0	0	0	0	0	200	903	0	0	0	0	0	0	0	603	903	0
595	6	0	0	0	0	0	0	200	300	0	0	0	0	0	0	0	200	903	0	0	0	0	0	0	0	603	903	0
595	7	0	0	0	0	0	0	200	300	0	0	0	0	0	0	0	200	903	0	0	0	0	0	0	0	603	903	0
595	8	0	0	0	0	0	0	200	300	0	0	0	0	0	0	0	200	903	0	0	0	0	0	0	0	603	903	0
595	9	0	0	0	0	0	0	200	300	0	0	0	0	0	0	0	200	903	0	0	0	0	0	0	0	603	903	0
596	0	0	0	0	0	0	0	200	300	0	0	0	0	0	0	0	200	903	0	0	0	0	0	0	0	603	903	0
596	1	0	0	0	0	0	0	200	300	0	0	0	0	0	0	0	200	903	0	0	0	0	0	0	0	603	903	0
596	2	0	0	0	0	0	0	200	300	0	0	0	0	0	0	0	200	903	0	0	0	0	0	0	0	603	903	0
596	3	0	0	0	0	0	0	200	300	0	0	0	0	0	0	0	200	903	0	0	0	0	0	0	0	603	903	0
596	4	0	0	0	0	0	0	200	300	0	0	0	0	0	0	0	200	903	0	0	0	0	0	0	0	603	903	0
596	5	0	0	0	0	0	0	200	300	0	0	0	0	0	0	0	200	903	0	0	0	0	0	0	0	603	903	0
596	6	0	0	0	0	0	0	200	300	0	0	0	0	0	0	0	200	903	0	0	0	0	0	0	0	603	903	0
596	7	0	0	0	0	0	0	200	300	0	0	0	0	0	0	0	200	903	0	0	0	0	0	0	0	603	903	0
596	8	0	0	0	0	0	0	200	300	0	0	0	0	0	0	0	200	903	0	0	0	0	0	0	0	603	903	0
596	9	0	0	0	0	0	0	200	300	0	0	0	0	0	0	0	200	903	0	0	0	0	0	0	0	603	903	0
597	0	0	0	0	0	0	0	200	300	0	0	0	0	0	0	0	200	903	0	0	0	0	0	0	0	603	903	0
597	1	0	0	0	0	0	0	200	300	0	0	0	0	0	0	0	200	903	0	0	0	0	0	0	0	603	903	0
597	2	0	0	0	0	0	0	200	300	0	0	0	0	0	0	0	200	903	0	0	0	0	0	0	0	603	903	0
597	3	0	0	0	0	0	0	200	300	0	0	0	0	0	0	0	200	903	0	0	0	0	0	0	0	603	903	0
597	4	0	0	0	0	0	0	200	300	0	0	0	0	0	0	0	200	903	0	0	0	0	0	0	0	603	903	0
597	5	0	0	0	0	0	0	200	300	0	0	0	0	0	0	0	200	903	0	0	0	0	0	0	0	603	903	0
597	6	0	0	0	0	0	0	200	300	0	0	0	0	0	0	0	200	903	0	0	0	0	0	0	0	603	903	0
597	7	0	0	0	0	0	0	200	300	0	0	0	0	0	0	0	200	903	0	0	0	0	0	0	0	603	903	0
597	8	0	0	0	0	0	0	200	300	0	0	0	0	0	0	0	200	903	0	0	0	0	0	0	0	603	903	0
597	9	0	0	0	0	0	0	200	300	0	0	0	0	0	0	0	200	903	0	0	0	0	0	0	0	603	903	0
598	0	0	0	0	0	0	0	200	300	0	0	0	0	0	0	0	200	903	0	0	0	0	0	0	0	603	903	0
598	1	0	0	0	0	0	0	200	300	0	0	0	0	0	0	0	200	903	0	0	0	0	0	0	0	603	903	0
598	2	0	0	0	0	0	0	200	300	0	0	0	0	0	0	0	200	903	0	0	0	0	0	0	0	603	903	0
598	3	0	0	0	0	0	0	200	300	0	0	0	0	0	0	0	200	903	0	0	0	0	0	0	0	603	903	0
598	4	0	0	0	0	0	0	200	300	0	0	0	0	0	0	0	200	903	0	0	0	0	0	0	0	603	903	0
598	5	0	0	0	0	0	0	200	300	0	0	0	0	0	0	0	200	903	0	0	0	0	0	0	0	603	903	0
598	6	0	0	0	0	0	0	200	300	0	0	0	0	0	0	0	200	903	0	0	0	0	0	0	0	603	903	0
598	7	0	0	0	0	0	0	200	300	0	0	0	0	0	0	0	200	903	0	0	0	0	0	0	0	603	903	0
598	8	0	0	0	0	0	0	200	300	0	0	0	0	0	0	0	200	903	0	0	0	0	0	0	0	603	903	0
598	9	0	0	0	0	0	0	200	300	0	0	0	0	0	0	0	200	903	0	0	0	0	0	0	0	603	903	0
599	0	0	0	0	0	0	0	200	300	0	0	0	0	0	0	0	200	903	0	0	0	0	0	0	0	603	903	0
599	1	0	0	0	0	0	0	200	300	0	0	0	0	0	0	0	200	903	0	0	0	0	0	0	0	603	903	0
599	2	0	0	0	0	0	0	200	300	0	0	0	0	0	0	0	200	903	0	0	0	0	0	0	0	603	903	0
599	3	0	0	0	0	0	0	200	300	0	0	0	0	0	0	0	200	903	0	0	0	0	0	0	0	603	903	0
599	4	0	0	0	0	0	0	200	300	0	0	0	0	0	0	0	200	903	0	0	0	0	0	0	0	603	903	0
599	5	0	0	0	0	0	0	200	300	0	0	0	0	0	0	0	200	903	0	0	0	0	0	0	0	603	903	0
599	6	0	0	0	0	0	0	200	300	0	0	0	0	0	0	0	200	903	0	0	0	0	0	0	0	603	903	0
599	7	0	0	0	0	0	0	200	300	0	0	0	0	0	0	0	200	903	0	0	0	0	0	0	0	603	903	0
599	8	0	0	0	0	0	0	200	300	0	0	0	0	0	0	0	200	903	0	0	0	0	0	0	0	603	903	0
599	9	0	0	0	0	0	0	200	300	0	0	0	0	0	0	0	200	903	0	0	0	0	0	0	0	603	903	0
600	0	0	0	0	0	0	0	200	300	0	0	0	0	0	0	0	200	903	0	0	0	0	0	0	0	603	903	0
600	1	0	0	0	0	0	0	200	300	0	0	0	0	0	0	0	200	903	0	0	0	0	0	0	0	603	903	0
600	2	0	0	0	0	0	0	200	300	0	0	0	0	0	0	0	200	903	0	0	0	0	0	0	0	603	903	0
600	3	0	0	0	0	0	0	200	300	0	0	0	0	0	0	0	200	903	0	0	0	0	0	0	0	603	903	0
600	4	0	0	0	0	0	0	200	300	0	0	0	0	0	0	0	200	903	0	0	0	0	0	0	0	603	903	0
600	5	0	0	0	0	0	0	200	300	0	0	0	0	0	0	0	200	903	0	0	0	0	0	0	0	603	903	0
600	6	0	0	0	0	0	0	200	300	0	0	0	0	0	0	0	200	903	0	0	0	0	0	0	0	603	903	0
600	7	0	0	0	0	0	0	200	300	0	0	0	0	0	0	0	200	903	0	0	0	0	0	0	0	603	903	0
600	8	0	0	0	0	0	0	200	300	0	0	0	0	0	0	0	200	903	0	0	0	0	0	0	0	603	903	0
600	9	0	0	0	0	0	0	200	300	0	0	0	0	0	0	0	200	903	0	0	0	0	0	0	0	603	903	0
601	0	0	0	0	0	0	0	200	300	0	0	0	0	0	0	0	200	903	0	0	0	0	0	0	0	603	903	0
601	1	0	0	0	0	0	0	200	300	0	0	0	0	0	0	0	200	903	0	0	0	0	0	0	0	603	903	0
601	2	0	0	0	0	0	0	200	300	0	0	0	0	0	0	0	200	903	0	0	0	0	0	0	0	603	903	0
601	3	0	0	0	0	0	0	200	300	0	0	0	0	0	0	0	200	903	0	0	0	0	0	0	0	603	903	0
601	4	0	0	0	0	0	0	200	300	0	0	0	0	0	0	0	200	903	0	0	0	0	0	0	0	603	903	0
601	5	0	0	0	0	0	0	200	300	0	0	0	0	0	0	0	200	903	0	0	0	0	0	0	0	603	903	0
601	6	0	0	0	0	0	0	200	300	0	0	0	0	0	0	0	200	903	0	0	0	0	0	0	0	603	903	0
601	7	0	0	0	0	0	0	200	300	0	0	0	0	0	0	0	200	903	0	0	0	0	0	0	0	603	903	0
601	8	0	0	0	0	0	0	200	300	0	0	0	0	0	0	0	200	903	0	0	0	0	0	0	0	603	903	0
601	9	0	0	0	0	0	0	200	300	0	0	0	0	0	0	0	200	903	0	0	0	0	0	0	0	603	903	0
602	0	0	0	0	0	0	0	200	300	0	0	0	0	0	0	0	200	903	0	0	0	0	0	0	0	603	903	0
602	1	0	0	0	0	0	0	200	300	0	0	0	0	0	0	0	200	903	0	0	0	0	0	0	0	603	903	0
602	2	0	0	0	0	0	0	200	300	0	0	0	0	0	0	0	200	903	0	0	0	0	0	0	0	603	903	0
602	3	0	0	0	0	0	0	200	300	0	0	0	0	0	0	0	200	903	0	0	0	0	0	0	0	603	903	0
602	4	0	0	0	0	0	0	200	300	0	0	0	0	0	0	0	200	903	0	0	0	0	0	0	0	603	903	0
602	5	0	0	0	0	0	0	200	300	0	0	0	0	0	0	0	200	903	0	0	0	0	0	0	0	603	903	0
602	6	0	0	0	0	0	0	200	300	0	0	0	0	0	0	0	200	903	0	0	0	0	0	0	0	603	903	0
602	7	0	0	0	0	0	0	200	300	0	0	0	0	0	0	0	200	903	0	0	0	0	0	0	0	603	903	0
602	8	0	0	0	0	0	0	200	300	0	0	0	0	0	0	0	200	903	0	0	0	0	0	0	0	603	903	0
602	9	0	0	0	0	0	0	200	300	0	0	0	0	0	0	0	200	903	0	0	0	0	0	0	0	603	903	0
603	0	0	0	0	0	0	0	200	300	0	0	0	0	0	0	0	200	903	0	0	0	0	0	0	0	603	903	0
603	1	0	0	0	0	0	0	200	300	0	0	0	0	0	0	0	200	903	0	0	0	0	0	0	0	603	903	0
603	2	0	0	0	0	0	0	200	300	0	0	0	0	0	0	0	200	903	0	0	0	0	0	0	0	603	903	0
603	3	0	0	0	0	0	0	200	300	0	0	0	0	0	0	0	200	903	0	0	0	0	0	0	0	603	903	0
603	4	0	0	0	0	0	0	200	300	0	0	0	0	0	0	0	200	903	0	0	0	0	0	0	0	603	903	0
603	5	0	0	0	0	0	0	200	300	0	0	0	0	0	0	0	200	903	0	0	0	0	0	0	0	603	903	0
603	6	0	0	0	0	0	0	200	300	0	0	0	0	0	0	0	200	903	0	0	0	0	0	0	0	603	903	0
603	7	0	0	0	0	0	0	200	300	0	0	0	0	0	0	0	200	903	0	0	0	0	0	0	0	603	903	0
603	8	0	0	0	0	0	0	200	300	0	0	0	0	0	0	0	200	903	0	0	0	0	0	0	0	603	903	0
603	9	0	0	0	0	0	0	200	300	0	0	0	0	0	0	0	200	903	0	0	0	0	0	0	0	603	903	0
604	0	0	0	0	0	0	0	200	300	0	0	0	0	0	0	0	200	903	0	0	0	0	0	0	0	603	903	0
604	1	0	0	0	0	0	0	200	300	0	0	0	0	0	0	0	200	903	0	0	0	0	0	0	0	603	903	0
604	2	0	0	0	0	0	0	200	300	0	0	0	0	0	0	0	200	903	0	0	0	0	0	0	0	603	903	0
604	3	0	0	0	0	0	0	200	300	0	0	0	0	0	0	0	200	903	0	0	0	0	0	0	0	603	903	0
604	4	0	0	0	0	0	0	200	300	0	0	0	0	0	0	0	200	903	0	0	0	0	0	0	0	603	903	0
604	5	0.429541	7.43382	-7.87482	368.039	-459.727	-2129.7	141.621	253.264	0	0	0	0	0	0	0	200	903	0	0	0	0	0	0	0	603	903	0
604	6	-1.09634	8.65452	-7.26447	93.3808	-703.868	-1946.59	103.108	287.146	0	0	0	0	0	0	0	200	903	0	0	0	0	0	0	0	603	903	0
604	7	1.95542	8.34935	-6.34894	825.803	-948.008	-1900.82	50.6824	169.931	0	0	0	0	0	0	0	200	903	0	0	0	0	0	0	0	603	903	0
604	8	0	0	0	0	0	0	200	300	0	0	0	0	0	0	0	200	903	0	0	0	0	0	0	0	603	903	0
604	9	0	0	0	0	0	0	200	300	0	0	0	0	0	0	0	200	903	0	0	0	0	0	0	0	603	903	0
605	0	0	0	0	0	0	0	200	300	0	0	0	0	0	0	0	200	903	0	0	0	0	0	0	0	603	903	0
605	1	0.429541	8.19676	-7.26447	642.697	-764.903	-2083.92	94.7062	211.529	0	0	0	0	0	0	0	200	903	0	0	0	0	0	0	0	603	903	0
605	2	-0.180811	8.80711	-6.95929	368.039	-1009.04	-2312.8	55.0077	247.115	0	0	0	0	0	0	0	200	903	0	0	0	0	0	0	0	603	903	0
605	3	-0.791162	9.87522	-4.21271	93.3808	-825.938	-2587.46	3.94128	277.834	0	0	0	0	0	0	0	200	903	0	0	0	0	0	0	0	603	903	0
605	4	0.276953	10.333	-4.51788	276.486	-459.727	-2358.58	98.2428	238.802	0	0	0	0	0	0	0	200	903	0	0	0	0	0	0	0	603	903	0
605	5	1.34507	13.6899	-6.95929	2015.99	-764.903	-3182.56	90.0889	10.3169	0	0	0	0	0	0	0	200	903	0	0	0	0	0	0	0	603	903	0
605	6	-0.180811	17.0469	-8.17999	2382.2	-1741.47	-4189.64	-12.8933	8.77734	0	0	0	0	0	0	0	200	903	0	0	0	0	0	0	0	603	903	0
605	7	-2.62222	17.1994	-12.4525	3114.62	-1619.4	-4143.86	69.9537	49.8789	0	0	0	0	0	0	0	200	903	0	0	0	0	0	0	0	603	903	0
605	8	-2.01187	18.2676	-10.3162	2290.65	-1436.29	-4235.41	60.7737	77.9569	0	0	0	0	0	0	0	200	903	0	0	0	0	0	0	0	603	903	0
605	9	0.887305	18.2676	-10.3162	2015.99	-1436.29	-4098.08	60.7737	104.581	0	0	0	0	0	0	0	200	903	0	0	0	0	0	0	0	603	903	0
606	0	5.31235	21.7771	-8.79034	1832.88	-1436.29	-3914.98	36.606	91.489	0	0	0	0	0	0	0	200	903	0	0	0	0	0	0	0	603	903	0
606	1	3.78647	21.1667	-11.8421	1924.44	-1192.15	-4555.85	99.3296	137.492	0	0	0	0	0	0	0	200	903	0	0	0	0	0	0	0	603	903	0
606	2	2.41318	25.897	-11.8421	1924.44	-1985.61	-4693.18	32.3266	137.492	0	0	0	0	0	0	0	200	903	0	0	0	0	0	0	0	603	903	0
606	3	2.10801	28.7961	-10.9266	2015.99	-2107.68	-4555.85	7.10552	115.497	0	0	0	0	0	0	0	200	903	0	0	0	0	0	0	0	603	903	0
606	4	2.56577	25.5918	-9.70587	1741.33	-1558.36	-4052.31	39.4415	120.59	0	0	0	0	0	0	0	200	903	0	0	0	0	0	0	0	603	903	0
606	5	2.71836	21.7771	-10.6214	2290.65	-1863.54	-3502.99	24.5489	84.3366	0	0	0	0	0	0	0	200	903	0	0	0	0	0	0	0	603	903	0
606	6	5.46494	22.8452	-12.1473	2565.3	-1497.32	-3640.32	76.7358	88.8165	0	0	0	0	0	0	0	200	903	0	0	0	0	0	0	0	603	903	0
606	7	4.85459	25.7444	-13.0628	3206.17	-1375.25	-4281.19	94.7198	54.557	0	0	0	0	0	0	0	200	903	0	0	0	0	0	0	0	603	903	0
606	8	3.4813	25.7444	-10.6214	2656.86	-1619.4	-4555.85	47.5347	49.858	0	0	0	0	0	0	0	200	903	0	0	0	0	0	0	0	603	903	0
606	9	0.124365	22.6926	-12.1473	2565.3	-2046.64	-4052.31	31.5145	88.8165	0	0	0	0	0	0	0	200	903	0	0	0	0	0	0	0	603	903	0
607	0	3.32871	22.54	-12.4525	2473.75	-1863.54	-3548.77	50.3479	101.344	0	0	0	0	0	0	0	200	903	0	0	0	0	0	0	0	603	903	0
607	1	4.54941	22.9978	-13.9783	2382.2	-1741.47	-3686.1	75.4168	129.579	0	0	0	0	0	0	0	200	903	0	0	0	0	0	0	0	603	903	0
607	2	4.24424	24.0659	-14.2835	2656.86	-1802.5	-4372.74	73.8055	113.991	0	0	0	0	0	0	0	200	903	0	0	0	0	0	0	0	603	903	0
607	3	3.02354	24.9814	-12.7576	2656.86	-1985.61	-4555.85	44.3593	91.7436	0	0	0	0	0	0	0	200	903	0	0	0	0	0	0	0	603	903	0
607	4	0.734717	25.134	-13.9783	2382.2	-2595.96	-4372.74	14.287	129.579	0	0	0	0	0	0	0	200	903	0	0	0	0	0	0	0	603	903	0
607	5	1.95542	24.6762	-13.368	2748.41	-1924.57	-3914.98	56.0313	94.4035	0	0	0	0	0	0	0	200	903	0	0	0	0	0	0	0	603	903	0
607	6	3.17612	22.9978	-14.2835	3297.73	-1924.57	-4372.74	65.2592	69.1235	0	0	0	0	0	0	0	200	903	0	0	0	0	0	0	0	603	903	0
607	7	4.24424	22.9978	-13.0628	3663.94	-1558.36	-4555.85	80.7025	19.5137	0	0	0	0	0	0	0	200	903	0	0	0	0	0	0	0	603	903	0
607	8	2.56577	24.8288	-16.4197	2931.52	-2290.78	-4738.95	60.4861	121.464	0	0	0	0	0	0	0	200	903	0	0	0	0	0	0	0	603	903	0
607	9	0.734717	24.3711	-14.2835	3389.28	-1985.61	-4967.83	60.9861	62.7138	0	0	0	0	0	0	0	200	903	0	0	0	0	0	0	0	603	903	0
608	0	-0.485986	24.8288	-16.4197	2748.41	-2229.75	-5059.39	64.2033	132.615	0	0	0	0	0	0	0	200	903	0	0	0	0	0	0	0	603	903	0
608	1	-0.485986	24.2185	-13.368	3480.83	-2290.78	-5105.16	28.6367	39.6142	0	0	0	0	0	0	0	200	903	0	0	0	0	0	0	0	603	903	0
608	2	1.19248	26.0495	-16.1146	3755.49	-2412.85	-5471.37	50.2689	66.9505	0	0	0	0	0	0	0	200	903	0	0	0	0	0	0	0	603	903	0
608	3	1.19248	27.1177	-17.0301	4030.15	-2351.82	-5608.7	61.9023	63.3513	0	0	0	0	0	0	0	200	903	0	0	0	0	0	0	0	603	903	0
608	4	0.124365	26.0495	-17.0301	3480.83	-2229.75	-5654.48	69.0702	95.607	0	0	0	0	0	0	0	200	903	0	0	0	0	0	0	0	603	903	0
608	5	-0.180811	27.1177	-15.8094	3755.49	-2656.99	-5517.15	31.9357	62.4519	0	0	0	0	0	0	0	200	903	0	0	0	0	0	0	0	603	903	0
608	6	0.276953	27.1177	-16.1146	3755.49	-2779.06	-5196.72	27.5434	66.9505	0	0	0	0	0	0	0	200	903	0	0	0	0	0	0	0	603	903	0
608	7	1.80283	25.2866	-17.9456	3938.6	-2473.89	-5242.49	62.1454	80.5261	0	0	0	0	0	0	0	200	903	0	0	0	0	0	0	0	603	903	0
608	8	1.65024	24.2185	-18.556	3663.94	-2412.85	-4922.06	69.969	102.547	0	0	0	0	0	0	0	200	903	0	0	0	0	0	0	0	603	903	0
608	9	2.71836	24.9814	-15.8094	3755.49	-2473.89	-4876.28	43.5178	62.4519	0	0	0	0	0	0	0	200	903	0	0	0	0	0	0	0	603	903	0
609	0	0.276953	25.4392	-14.5887	4396.36	-2351.82	-4830.5	38.7917	-1.3541	0	0	0	0	0	0	0	200	903	0	0	0	0	0	0	0	603	903	0
609	1	0.734717	24.8288	-16.1146	3297.73	-2779.06	-5059.39	27.5434	95.3574	0	0	0	0	0	0	0	200	903	0	0	0	0	0	0	0	603	903	0
609	2	2.41318	24.5237	-17.0301	3663.94	-2718.03	-5105.16	40.3985	84.8551	0	0	0	0	0	0	0	200	903	0	0	0	0	0	0	0	603	903	0
609	3	1.80283	24.0659	-17.6404	3480.83	-2168.71	-4876.28	77.0603	102.679	0	0	0	0	0	0	0	200	903	0	0	0	0	0	0	0	603	903	0
609	4	1.34507	24.2185	-17.0301	3938.6	-2412.85	-4693.18	58.3183	68.7273	0	0	0	0	0	0	0	200	903	0	0	0	0	0	0	0	603	903	0
609	5	-0.485986	24.2185	-16.1146	3663.94	-2595.96	-5105.16	38.9061	72.6319	0	0	0	0	0	0	0	200	903	0	0	0	0	0	0	0	603	903	0
609	6	-0.0282228	24.3711	-16.4197	4213.25	-2779.06	-5150.94	30.7486	43.4031	0	0	0	0	0	0	0	200	903	0	0	0	0	0	0	0	603	903	0
609	7	1.19248	24.3711	-18.2508	3938.6	-2534.92	-4601.62	61.1062	84.1959	0	0	0	0	0	0	0	200	903	0	0	0	0	0	0	0	603	903	0
609	8	0.124365	22.9978	-17.0301	4579.46	-2534.92	-4830.5	51.1504	31.0957	0	0	0	0	0	0	0	200	903	0	0	0	0	0	0	0	603	903	0
609	9	0.429541	23.303	-17.6404	3938.6	-2840.1	-4967.83	39.0007	76.7292	0	0	0	0	0	0	0	200	903	0	0	0	0	0	0	0	603	903	0
610	0	0.124365	21.0141	-17.3353	3938.6	-2534.92	-4693.18	53.7708	72.7987	0	0	0	0	0	0	0	200	903	0	0	0	0	0	0	0	603	903	0
610	1	-0.485986	22.8452	-16.1146	3572.38	-2534.92	-4510.07	42.6937	78.3133	0	0	0	0	0	0	0	200	903	0	0	0	0	0	0	0	603	903	0
610	2	-0.180811	22.2348	-17.9456	3389.28	-2290.78	-4647.4	72.3487	111.136	0	0	0	0	0	0	0	200	903	0	0	0	0	0	0	0	603	903	0
610	3	-0.333399	22.9978	-15.199	3847.04	-2351.82	-5288.27	45.2654	46.889	0	0	0	0	0	0	0	200	903	0	0	0	0	0	0	0	603	903	0
610	4	1.19248	21.9297	-17.9456	3206.17	-2656.99	-4876.28	51.9419	121.339	0	0	0	0	0	0	0	200	903	0	0	0	0	0	0	0	603	903	0
610	5	0.276953	21.6245	-14.8939	3847.04	-2290.78	-4281.19	46.1929	41.7028	0	0	0	0	0	0	0	200	903	0	0	0	0	0	0	0	603	903	0
610	6	-0.0282228	23.1504	-15.5042	3755.49	-2595.96	-4281.19	32.5644	57.7761	0	0	0	0	0	0	0	200	903	0	0	0	0	0	0	0	603	903	0
610	7	-0.180811	22.54	-16.7249	4213.25	-2473.89	-4738.95	52.0837	48.0852	0	0	0	0	0	0	0	200	903	0	0	0	0	0	0	0	603	903	0
610	8	0.124365	21.9297	-15.5042	3480.83	-2779.06	-4601.62	20.7543	75.4912	0	0	0	0	0	0	0	200	903	0	0	0	0	0	0	0	603	903	0
610	9	0.429541	21.3193	-18.2508	4121.7	-2779.06	-4601.62	47.7292	74.1632	0	0	0	0	0	0	0	200	903	0	0	0	0	0	0	0	603	903	0
611	0	-0.0282228	18.8779	-15.5042	3663.94	-2351.82	-4601.62	48.3111	63.6811	0	0	0	0	0	0	0	200	903	0	0	0	0	0	0	0	603	903	0
611	1	-0.180811	20.4038	-15.199	3389.28	-2656.99	-4464.29	25.1867	77.007	0	0	0	0	0	0	0	200	903	0	0	0	0	0	0	0	603	903	0
611	2	-0.0282228	20.0986	-16.4197	2931.52	-2595.96	-4143.86	41.9002	121.464	0	0	0	0	0	0	0	200	903	0	0	0	0	0	0	0	603	903	0
611	3	0.582129	21.3193	-17.3353	3755.49	-2229.75	-4006.53	71.3751	83.3613	0	0	0	0	0	0	0	200	903	0	0	0	0	0	0	0	603	903	0
611	4	0.124365	20.4038	-16.1146	3480.83	-1985.61	-4235.41	76.7819	83.9946	0	0	0	0	0	0	0	200	903	0	0	0	0	0	0	0	603	903	0
611	5	1.80283	19.4883	-15.8094	2748.41	-2046.64	-4235.41	70.5427	126.153	0	0	0	0	0	0	0	200	903	0	0	0	0	0	0	0	603	903	0
611	6	0.124365	20.4038	-14.8939	4487.91	-2351.82	-4098.08	42.0949	-1.32632	0	0	0	0	0	0	0	200	903	0	0	0	0	0	0	0	603	903	0
611	7	0.429541	19.946	-15.5042	3206.17	-2351.82	-4143.86	48.3111	93.2063	0	0	0	0	0	0	0	200	903	0	0	0	0	0	0	0	603	903	0
611	8	0.124365	18.2676	-15.5042	3755.49	-2107.68	-4281.19	64.0578	57.7761	0	0	0	0	0	0	0	200	903	0	0	0	0	0	0	0	603	903	0
611	9	-0.333399	19.4883	-15.8094	3480.83	-2229.75	-4326.96	58.9606	79.825	0	0	0	0	0	0	0	200	903	0	0	0	0	0	0	0	603	903	0
612	0	-0.0282228	19.7934	-16.7249	4030.15	-2229.75	-4143.86	66.6812	59.0332	0	0	0	0	0	0	0	200	903	0	0	0	0	0	0	0	603	903	0
612	1	-0.94375	17.8098	-14.5887	3389.28	-2229.75	-3960.75	47.1592	67.6775	0	0	0	0	0	0	0	200	903	0	0	0	0	0	0	0	603	903	0
612	2	0.429541	18.4201	-13.9783	3114.62	-2351.82	-3777.65	31.7527	77.1822	0	0	0	0	0	0	0	200	903	0	0	0	0	0	0	0	603	903	0
612	3	1.19248	19.4883	-15.8094	2839.96	-2229.75	-3823.43	58.9606	120.362	0	0	0	0	0	0	0	200	903	0	0	0	0	0	0	0	603	903	0
612	4	0.887305	18.5727	-16.7249	3572.38	-2534.92	-3777.65	48.4344	86.4034	0	0	0	0	0	0	0	200	903	0	0	0	0	0	0	0	603	903	0
612	5	-0.0282228	18.115	-16.1146	3206.17	-2351.82	-3869.2	54.0564	101.039	0	0	0	0	0	0	0	200	903	0	0	0	0	0	0	0	603	903	0
612	6	0.276953	16.4365	-14.8939	2931.52	-2168.71	-3640.32	54.3889	103.173	0	0	0	0	0	0	0	200	903	0	0	0	0	0	0	0	603	903	0
612	7	0.124365	18.4201	-14.8939	3389.28	-2168.71	-3731.87	54.3889	72.4378	0	0	0	0	0	0	0	200	903	0	0	0	0	0	0	0	603	903	0
612	8	0.276953	18.115	-13.9783	3297.73	-2351.82	-3731.87	31.7527	64.083	0	0	0	0	0	0	0	200	903	0	0	0	0	0	0	0	603	903	0
612	9	0.582129	17.8098	-15.5042	3206.17	-1802.5	-3686.1	83.7412	93.2063	0	0	0	0	0	0	0	200	903	0	0	0	0	0	0	0	603	903	0
613	0	-0.180811	16.7417	-15.199	3206.17	-1741.47	-3045.23	85.4226	89.0541	0	0	0	0	0	0	0	200	903	0	0	0	0	0	0	0	603	903	0
613	1	2.2606	16.4365	-13.9783	3297.73	-1680.43	-3182.56	79.7832	64.083	0	0	0	0	0	0	0	200	903	0	0	0	0	0	0	0	603	903	0
613	2	0.124365	16.1313	-10.3162	2839.96	-1924.57	-3731.87	13.4423	24.709	0	0	0	0	0	0	0	200	903	0	0	0	0	0	0	0	603	903	0
613	3	0.734717	16.4365	-13.368	3023.07	-2168.71	-3502.99	37.7682	73.8575	0	0	0	0	0	0	0	200	903	0	0	0	0	0	0	0	603	903	0
613	4	0.276953	16.4365	-14.8939	3114.62	-1863.54	-3548.77	74.8789	90.8789	0	0	0	0	0	0	0	200	903	0	0	0	0	0	0	0	603	903	0
613	5	-0.0282228	16.5891	-13.9783	2565.3	-1924.57	-3319.89	62.3176	116.48	0	0	0	0	0	0	0	200	903	0	0	0	0	0	0	0	603	903	0
613	6	0.582129	15.3684	-15.5042	2748.41	-2107.68	-3457.21	64.0578	122.731	0	0	0	0	0	0	0	200	903	0	0	0	0	0	0	0	603	903	0
613	7	-0.180811	15.3684	-12.4525	1924.44	-1985.61	-3182.56	40.545	145.457	0	0	0	0	0	0	0	200	903	0	0	0	0	0	0	0	603	903	0
613	8	0.429541	15.521	-12.1473	2656.86	-1802.5	-3136.78	51.6128	81.2796	0	0	0	0	0	0	0	200	903	0	0	0	0	0	0	0	603	903	0
613	9	2.56577	15.0632	-14.2835	2748.41	-1924.57	-2953.67	65.2592	107.582	0	0	0	0	0	0	0	200	903	0	0	0	0	0	0	0	603	903	0
614	0	1.03989	13.9951	-13.0628	2656.86	-1680.43	-3136.78	71.3576	96.609	0	0	0	0	0	0	0	200	903	0	0	0	0	0	0	0	603	903	0
614	1	0.124365	13.5373	-12.7576	2199.09	-1802.5	-3136.78	58.7119	127.625	0	0	0	0	0	0	0	200	903	0	0	0	0	0	0	0	603	903	0
614	2	0.276953	13.8425	-11.5369	2839.96	-1680.43	-2816.34	54.3433	53.8371	0	0	0	0	0	0	0	200	903	0	0	0	0	0	0	0	603	903	0
614	3	-0.485986	12.4692	-9.70587	2290.65	-1375.25	-2862.12	58.3069	63.9937	0	0	0	0	0	0	0	200	903	0	0	0	0	0	0	0	603	903	0
614	4	0.582129	13.2322	-10.011	2382.2	-1558.36	-2679.02	44.336	62.043	0	0	0	0	0	0	0	200	903	0	0	0	0	0	0	0	603	903	0
614	5	1.80283	13.2322	-11.2318	1832.88	-1985.61	-3045.23	23.2149	136.812	0	0	0	0	0	0	0	200	903	0	0	0	0	0	0	0	603	903	0
614	6	-0.180811	13.0796	-11.2318	2748.41	-1741.47	-2862.12	44.9515	55.2999	0	0	0	0	0	0	0	200	903	0	0	0	0	0	0	0	603	903	0
614	7	0.734717	11.2485	-10.9266	2107.54	-1436.29	-2862.12	68.5508	107.118	0	0	0	0	0	0	0	200	903	0	0	0	0	0	0	0	603	903	0
614	8	-0.333399	12.6218	-10.6214	2656.86	-1680.43	-2633.24	41.7882	49.858	0	0	0	0	0	0	0	200	903	0	0	0	0	0	0	0	603	903	0
614	9	1.03989	12.3166	-10.3162	1741.33	-1924.57	-2541.69	13.4423	131.205	0	0	0	0	0	0	0	200	903	0	0	0	0	0	0	0	603	903	0
615	0	0.582129	11.7063	-12.4525	2015.99	-1741.47	-2450.13	60.1508	138.105	0	0	0	0	0	0	0	200	903	0	0	0	0	0	0	0	603	903	0
615	1	-0.333399	12.164	-9.4007	1741.33	-1436.29	-2541.69	47.2145	114.766	0	0	0	0	0	0	0	200	903	0	0	0	0	0	0	0	603	903	0
615	2	0.124365	12.6218	-12.4525	2107.54	-1314.22	-2358.58	94.461	130.753	0	0	0	0	0	0	0	200	903	0	0	0	0	0	0	0	603	903	0
615	3	0.276953	11.5537	-10.011	2015.99	-1497.32	-2404.36	50.4327	98.6236	0	0	0	0	0	0	0	200	903	0	0	0	0	0	0	0	603	903	0
615	4	0.582129	11.4011	-9.4007	2015.99	-1436.29	-2404.36	47.2145	85.549	0	0	0	0	0	0	0	200	903	0	0	0	0	0	0	0	603	903	0
615	5	1.49766	10.6382	-10.9266	2290.65	-1070.08	-2312.8	102.066	90.3601	0	0	0	0	0	0	0	200	903	0	0	0	0	0	0	0	603	903	0
615	6	0.734717	10.4856	-12.1473	1649.78	-1375.25	-2358.58	86.785	164.185	0	0	0	0	0	0	0	200	903	0	0	0	0	0	0	0	603	903	0
615	7	-0.485986	8.65452	-11.5369	1832.88	-1802.5	-2312.8	43.7625	141.129	0	0	0	0	0	0	0	200	903	0	0	0	0	0	0	0	603	903	0
615	8	-0.0282228	10.1804	-9.70587	1832.88	-1741.47	-2358.58	20.5761	111.157	0	0	0	0	0	0	0	200	903	0	0	0	0	0	0	0	603	903	0
615	9	1.80283	10.333	-10.3162	1832.88	-1558.36	-1946.59	48.9408	122.33	0	0	0	0	0	0	0	200	903	0	0	0	0	0	0	0	603	903	0
616	0	0.276953	10.0278	-8.48517	1741.33	-1314.22	-2495.91	45.1157	94.7795	0	0	0	0	0	0	0	200	903	0	0	0	0	0	0	0	603	903	0
616	1	0.276953	10.333	-10.3162	2015.99	-1497.32	-2129.7	54.8573	104.581	0	0	0	0	0	0	0	200	903	0	0	0	0	0	0	0	603	903	0
616	2	-0.333399	10.0278	-10.6214	1649.78	-1314.22	-2312.8	76.2668	144.674	0	0	0	0	0	0	0	200	903	0	0	0	0	0	0	0	603	903	0
616	3	-0.180811	8.50193	-10.011	1192.01	-1436.29	-1900.82	56.5295	180.93	0	0	0	0	0	0	0	200	903	0	0	0	0	0	0	0	603	903	0
616	4	0.276953	10.0278	-6.34894	1649.78	-1070.08	-2175.48	31.4555	40.149	0	0	0	0	0	0	0	200	903	0	0	0	0	0	0	0	603	903	0
616	5	1.34507	10.0278	-8.79034	1466.67	-1070.08	-2038.15	78.2666	133.15	0	0	0	0	0	0	0	200	903	0	0	0	0	0	0	0	603	903	0
616	6	1.03989	9.41746	-9.4007	1558.22	-1192.15	-2038.15	73.1851	134.244	0	0	0	0	0	0	0	200	903	0	0	0	0	0	0	0	603	903	0
616	7	-0.180811	9.11228	-9.09552	1466.67	-1192.15	-2221.25	68.9301	138.748	0	0	0	0	0	0	0	200	903	0	0	0	0	0	0	0	603	903	0
616	8	0.887305	8.80711	-7.56964	1558.22	-948.008	-1992.37	74.7618	94.1481	0	0	0	0	0	0	0	200	903	0	0	0	0	0	0	0	603	903	0
616	9	-0.791162	8.80711	-7.26447	1375.12	-825.938	-2083.92	86.3044	110.706	0	0	0	0	0	0	0	200	903	0	0	0	0	0	0	0	603	903	0
617	0	0.429541	8.04417	-6.95929	1008.91	-1314.22	-2129.7	11.1561	155.027	0	0	0	0	0	0	0	200	903	0	0	0	0	0	0	0	603	903	0
617	1	1.19248	8.9597	-10.011	1192.01	-1192.15	-2175.48	80.9167	180.93	0	0	0	0	0	0	0	200	903	0	0	0	0	0	0	0	603	903	0
617	2	0.276953	8.80711	-9.70587	1008.91	-1009.04	-1717.71	96.0379	196.052	0	0	0	0	0	0	0	200	903	0	0	0	0	0	0	0	603	903	0
617	3	-0.638574	7.58641	-9.70587	1008.91	-886.973	-1855.04	108.615	196.052	0	0	0	0	0	0	0	200	903	0	0	0	0	0	0	0	603	903	0
617	4	-0.0282228	7.43382	-7.26447	551.144	-1070.08	-1855.04	52.6969	224.131	0	0	0	0	0	0	0	200	903	0	0	0	0	0	0	0	603	903	0
617	5	1.19248	7.58641	-6.95929	1283.57	-1070.08	-1809.26	46.2374	115.561	0	0	0	0	0	0	0	200	903	0	0	0	0	0	0	0	603	903	0
617	6	0.887305	7.43382	-9.09552	1100.46	-764.903	-1488.83	115.903	179.011	0	0	0	0	0	0	0	200	903	0	0	0	0	0	0	0	603	903	0
617	7	0	0	0	0	0	0	200	300	0	0	0	0	0	0	0	200	903	0	0	0	0	0	0	0	603	903	0
617	8	0.124365	6.67088	-7.87482	1008.91	-764.903	-1717.71	102.867	171.882	0	0	0	0	0	0	0	200	903	0	0	0	0	0	0	0	603	903	0
617	9	0	0	0	0	0	0	200	300	0	0	0	0	0	0	0	200	903	0	0	0	0	0	0	0	603	903	0
618	0	0	0	0	0	0	0	200	300	0	0	0	0	0	0	0	200	903	0	0	0	0	0	0	0	603	903	0
618	1	0	0	0	0	0	0	200	300	0	0	0	0	0	0	0	200	903	0	0	0	0	0	0	0	603	903	0
618	2	0	0	0	0	0	0	200	300	0	0	0	0	0	0	0	200	903	0	0	0	0	0	0	0	603	903	0
618	3	0	0	0	0	0	0	200	300	0	0	0	0	0	0	0	200	903	0	0	0	0	0	0	0	603	903	0
618	4	0	0	0	0	0	0	200	300	0	0	0	0	0	0	0	200	903	0	0	0	0	0	0	0	603	903	0
618	5	0	0	0	0	0	0	200	300	0	0	0	0	0	0	0	200	903	0	0	0	0	0	0	0	603	903	0
618	6	0	0	0	0	0	0	200	300	0	0	0	0	0	0	0	200	903	0	0	0	0	0	0	0	603	903	0
618	7	0	0	0	0	0	0	200	300	0	0	0	0	0	0	0	200	903	0	0	0	0	0	0	0	603	903	0
618	8	0	0	0	0	0	0	200	300	0	0	0	0	0	0	0	200	903	0	0	0	0	0	0	0	603	903	0
618	9	0	0	0	0	0	0	200	300	0	0	0	0	0	0	0	200	903	0	0	0	0	0	0	0	603	903	0
619	0	0	0	0	0	0	0	200	300	0	0	0	0	0	0	0	200	903	0	0	0	0	0	0	0	603	903	0
619	1	0	0	0	0	0	0	200	300	0	0	0	0	0	0	0	200	903	0	0	0	0	0	0	0	603	903	0
619	2	0	0	0	0	0	0	200	300	0	0	0	0	0	0	0	200	903	0	0	0	0	0	0	0	603	903	0
619	3	0	0	0	0	0	0	200	300	0	0	0	0	0	0	0	200	903	0	0	0	0	0	0	0	603	903	0
619	4	0	0	0	0	0	0	200	300	0	0	0	0	0	0	0	200	903	0	0	0	0	0	0	0	603	903	0
619	5	0	0	0	0	0	0	200	300	0	0	0	0	0	0	0	200	903	0	0	0	0	0	0	0	603	903	0
619	6	0	0	0	0	0	0	200	300	0	0	0	0	0	0	0	200	903	0	0	0	0	0	0	0	603	903	0
619	7	0	0	0	0	0	0	200	300	0	0	0	0	0	0	0	200	903	0	0	0	0	0	0	0	603	903	0
619	8	0	0	0	0	0	0	200	300	0	0	0	0	0	0	0	200	903	0	0	0	0	0	0	0	603	903	0
619	9	0	0	0	0	0	0	200	300	0	0	0	0	0	0	0	200	903	0	0	0	0	0	0	0	603	903	0
620	0	0	0	0	0	0	0	200	300	0	0	0	0	0	0	0	200	903	0	0	0	0	0	0	0	603	903	0
620	1	0	0	0	0	0	0	200	300	0	0	0	0	0	0	0	200	903	0	0	0	0	0	0	0	603	903	0
620	2	0	0	0	0	0	0	200	300	0	0	0	0	0	0	0	200	903	0	0	0	0	0	0	0	603	903	0
620	3	0	0	0	0	0	0	200	300	0	0	0	0	0	0	0	200	903	0	0	0	0	0	0	0	603	903	0
620	4	0	0	0	0	0	0	200	300	0	0	0	0	0	0	0	200	903	0	0	0	0	0	0	0	603	903	0
620	5	0	0	0	0	0	0	200	300	0	0	0	0	0	0	0	200	903	0	0	0	0	0	0	0	603	903	0
620	6	0	0	0	0	0	0	200	300	0	0	0	0	0	0	0	200	903	0	0	0	0	0	0	0	603	903	0
620	7	0	0	0	0	0	0	200	300	0	0	0	0	0	0	0	200	903	0	0	0	0	0	0	0	603	903	0
620	8	0	0	0	0	0	0	200	300	0	0	0	0	0	0	0	200	903	0	0	0	0	0	0	0	603	903	0
620	9	0	0	0	0	0	0	200	300	0	0	0	0	0	0	0	200	903	0	0	0	0	0	0	0	603	903	0
621	0	0	0	0	0	0	0	200	300	0	0	0	0	0	0	0	200	903	0	0	0	0	0	0	0	603	903	0
621	1	0	0	0	0	0	0	200	300	0	0	0	0	0	0	0	200	903	0	0	0	0	0	0	0	603	903	0
621	2	0	0	0	0	0	0	200	300	0	0	0	0	0	0	0	200	903	0	0	0	0	0	0	0	603	903	0
621	3	0	0	0	0	0	0	200	300	0	0	0	0	0	0	0	200	903	0	0	0	0	0	0	0	603	903	0
621	4	0	0	0	0	0	0	200	300	0	0	0	0	0	0	0	200	903	0	0	0	0	0	0	0	603	903	0
621	5	0	0	0	0	0	0	200	300	0	0	0	0	0	0	0	200	903	0	0	0	0	0	0	0	603	903	0
621	6	0	0	0	0	0	0	200	300	0	0	0	0	0	0	0	200	903	0	0	0	0	0	0	0	603	903	0
621	7	0	0	0	0	0	0	200	300	0	0	0	0	0	0	0	200	903	0	0	0	0	0	0	0	603	903	0
621	8	0	0	0	0	0	0	200	300	0	0	0	0	0	0	0	200	903	0	0	0	0	0	0	0	603	903	0
621	9	0	0	0	0	0	0	200	300	0	0	0	0	0	0	0	200	903	0	0	0	0	0	0	0	603	903	0
622	0	0	0	0	0	0	0	200	300	0	0	0	0	0	0	0	200	903	0	0	0	0	0	0	0	603	903	0
622	1	0	0	0	0	0	0	200	300	0	0	0	0	0	0	0	200	903	0	0	0	0	0	0	0	603	903	0
622	2	0	0	0	0	0	0	200	300	0	0	0	0	0	0	0	200	903	0	0	0	0	0	0	0	603	903	0
622	3	0	0	0	0	0	0	200	300	0	0	0	0	0	0	0	200	903	0	0	0	0	0	0	0	603	903	0
622	4	0	0	0	0	0	0	200	300	0	0	0	0	0	0	0	200	903	0	0	0	0	0	0	0	603	903	0
622	5	0	0	0	0	0	0	200	300	0	0	0	0	0	0	0	200	903	0	0	0	0	0	0	0	603	903	0
622	6	0	0	0	0	0	0	200	300	0	0	0	0	0	0	0	200	903	0	0	0	0	0	0	0	603	903	0
622	7	0	0	0	0	0	0	200	300	0	0	0	0	0	0	0	200	903	0	0	0	0	0	0	0	603	903	0
622	8	0	0	0	0	0	0	200	300	0	0	0	0	0	0	0	200	903	0	0	0	0	0	0	0	603	903	0
622	9	0	0	0	0	0	0	200	300	0	0	0	0	0	0	0	200	903	0	0	0	0	0	0	0	603	903	0
623	0	0	0	0	0	0	0	200	300	0	0	0	0	0	0	0	200	903	0	0	0	0	0	0	0	603	903	0
623	1	0	0	0	0	0	0	200	300	0	0	0	0	0	0	0	200	903	0	0	0	0	0	0	0	603	903	0
623	2	0	0	0	0	0	0	200	300	0	0	0	0	0	0	0	200	903	0	0	0	0	0	0	0	603	903	0
623	3	0	0	0	0	0	0	200	300	0	0	0	0	0	0	0	200	903	0	0	0	0	0	0	0	603	903	0
623	4	0	0	0	0	0	0	200	300	0	0	0	0	0	0	0	200	903	0	0	0	0	0	0	0	603	903	0
623	5	0	0	0	0	0	0	200	300	0	0	0	0	0	0	0	200	903	0	0	0	0	0	0	0	603	903	0
623	6	0	0	0	0	0	0	200	300	0	0	0	0	0	0	0	200	903	0	0	0	0	0	0	0	603	903	0
623	7	0	0	0	0	0	0	200	300	0	0	0	0	0	0	0	200	903	0	0	0	0	0	0	0	603	903	0
623	8	0	0	0	0	0	0	200	300	0	0	0	0	0	0	0	200	903	0	0	0	0	0	0	0	603	903	0
623	9	0	0	0	0	0	0	200	300	0	0	0	0	0	0	0	200	903	0	0	0	0	0	0	0	603	903	0
624	0	0	0	0	0	0	0	200	300	0	0	0	0	0	0	0	200	903	0	0	0	0	0	0	0	603	903	0
624	1	0	0	0	0	0	0	200	300	0	0	0	0	0	0	0	200	903	0	0	0	0	0	0	0	603	903	0
624	2	0	0	0	0	0	0	200	300	0	0	0	0	0	0	0	200	903	0	0	0	0	0	0	0	603	903	0
624	3	0	0	0	0	0	0	200	300	0	0	0	0	0	0	0	200	903	0	0	0	0	0	0	0	603	903	0
624	4	0	0	0	0	0	0	200	300	0	0	0	0	0	0	0	200	903	0	0	0	0	0	0	0	603	903	0
624	5	0	0	0	0	0	0	200	300	0	0	0	0	0	0	0	200	903	0	0	0	0	0	0	0	603	903	0
624	6	0	0	0	0	0	0	200	300	0	0	0	0	0	0	0	200	903	0	0	0	0	0	0	0	603	903	0
624	7	0	0	0	0	0	0	200	300	0	0	0	0	0	0	0	200	903	0	0	0	0	0	0	0	603	903	0
624	8	0	0	0	0	0	0	200	300	0	0	0	0	0	0	0	200	903	0	0	0	0	0	0	0	603	903	0
624	9	0	0	0	0	0	0	200	300	0	0	0	0	0	0	0	200	903	0	0	0	0	0	0	0	603	903	0
625	0	0	0	0	0	0	0	200	300	0	0	0	0	0	0	0	200	903	0	0	0	0	0	0	0	603	903	0
625	1	0	0	0	0	0	0	200	300	0	0	0	0	0	0	0	200	903	0	0	0	0	0	0	0	603	903	0
625	2	0	0	0	0	0	0	200	300	0	0	0	0	0	0	0	200	903	0	0	0	0	0	0	0	603	903	0
625	3	0	0	0	0	0	0	200	300	0	0	0	0	0	0	0	200	903	0	0	0	0	0	0	0	603	903	0
625	4	0	0	0	0	0	0	200	300	0	0	0	0	0	0	0	200	903	0	0	0	0	0	0	0	603	903	0
625	5	0	0	0	0	0	0	200	300	0	0	0	0	0	0	0	200	903	0	0	0	0	0	0	0	603	903	0
625	6	0	0	0	0	0	0	200	300	0	0	0	0	0	0	0	200	903	0	0	0	0	0	0	0	603	903	0
625	7	0	0	0	0	0	0	200	300	0	0	0	0	0	0	0	200	903	0	0	0	0	0	0	0	603	903	0
625	8	0	0	0	0	0	0	200	300	0	0	0	0	0	0	0	200	903	0	0	0	0	0	0	0	603	903	0
625	9	0	0	0	0	0	0	200	300	0	0	0	0	0	0	0	200	903	0	0	0	0	0	0	0	603	903	0
626	0	0	0	0	0	0	0	200	300	0	0	0	0	0	0	0	200	903	0	0	0	0	0	0	0	603	903	0
626	1	0	0	0	0	0	0	200	300	0	0	0	0	0	0	0	200	903	0	0	0	0	0	0	0	603	903	0
626	2	0	0	0	0	0	0	200	300	0	0	0	0	0	0	0	200	903	0	0	0	0	0	0	0	603	903	0
626	3	0	0	0	0	0	0	200	300	0	0	0	0	0	0	0	200	903	0	0	0	0	0	0	0	603	903	0
626	4	0	0	0	0	0	0	200	300	0	0	0	0	0	0	0	200	903	0	0	0	0	0	0	0	603	903	0
626	5	0	0	0	0	0	0	200	300	0	0	0	0	0	0	0	200	903	0	0	0	0	0	0	0	603	903	0
626	6	0	0	0	0	0	0	200	300	0	0	0	0	0	0	0	200	903	0	0	0	0	0	0	0	603	903	0
626	7	0	0	0	0	0	0	200	300	0	0	0	0	0	0	0	200	903	0	0	0	0	0	0	0	603	903	0
626	8	0	0	0	0	0	0	200	300	0	0	0	0	0	0	0	200	903	0	0	0	0	0	0	0	603	903	0
626	9	0	0	0	0	0	0	200	300	0	0	0	0	0	0	0	200	903	0	0	0	0	0	0	0	603	903	0
627	0	0	0	0	0	0	0	200	300	0	0	0	0	0	0	0	200	903	0	0	0	0	0	0	0	603	903	0
627	1	0	0	0	0	0	0	200	300	0	0	0	0	0	0	0	200	903	0	0	0	0	0	0	0	603	903	0
627	2	0	0	0	0	0	0	200	300	0	0	0	0	0	0	0	200	903	0	0	0	0	0	0	0	603	903	0
627	3	0	0	0	0	0	0	200	300	0	0	0	0	0	0	0	200	903	0	0	0	0	0	0	0	603	903	0
627	4	0	0	0	0	0	0	200	300	0	0	0	0	0	0	0	200	903	0	0	0	0	0	0	0	603	903	0
627	5	0	0	0	0	0	0	200	300	0	0	0	0	0	0	0	200	903	0	0	0	0	0	0	0	603	903	0
627	6	0	0	0	0	0	0	200	300	0	0	0	0	0	0	0	200	903	0	0	0	0	0	0	0	603	903	0
627	7	0	0	0	0	0	0	200	300	0	0	0	0	0	0	0	200	903	0	0	0	0	0	0	0	603	903	0
627	8	0	0	0	0	0	0	200	300	0	0	0	0	0	0	0	200	903	0	0	0	0	0	0	0	603	903	0
627	9	0	0	0	0	0	0	200	300	0	0	0	0	0	0	0	200	903	0	0	0	0	0	0	0	603	903	0
628	0	0	0	0	0	0	0	200	300	0	0	0	0	0	0	0	200	903	0	0	0	0	0	0	0	603	903	0
628	1	0	0	0	0	0	0	200	300	0	0	0	0	0	0	0	200	903	0	0	0	0	0	0	0	603	903	0
628	2	0	0	0	0	0	0	200	300	0	0	0	0	0	0	0	200	903	0	0	0	0	0	0	0	603	903	0
628	3	0	0	0	0	0	0	200	300	0	0	0	0	0	0	0	200	903	0	0	0	0	0	0	0	603	903	0
628	4	0	0	0	0	0	0	200	300	0	0	0	0	0	0	0	200	903	0	0	0	0	0	0	0	603	903	0
628	5	0	0	0	0	0	0	200	300	0	0	0	0	0	0	0	200	903	0	0	0	0	0	0	0	603	903	0
628	6	0	0	0	0	0	0	200	300	0	0	0	0	0	0	0	200	903	0	0	0	0	0	0	0	603	903	0
628	7	0	0	0	0	0	0	200	300	0	0	0	0	0	0	0	200	903	0	0	0	0	0	0	0	603	903	0
628	8	0	0	0	0	0	0	200	300	0	0	0	0	0	0	0	200	903	0	0	0	0	0	0	0	603	903	0
628	9	0	0	0	0	0	0	200	300	0	0	0	0	0	0	0	200	903	0	0	0	0	0	0	0	603	903	0
629	0	0	0	0	0	0	0	200	300	0	0	0	0	0	0	0	200	903	0	0	0	0	0	0	0	603	903	0
629	1	0	0	0	0	0	0	200	300	0	0	0	0	0	0	0	200	903	0	0	0	0	0	0	0	603	903	0
629	2	0	0	0	0	0	0	200	300	0	0	0	0	0	0	0	200	903	0	0	0	0	0	0	0	603	903	0
629	3	0	0	0	0	0	0	200	300	0	0	0	0	0	0	0	200	903	0	0	0	0	0	0	0	603	903	0
629	4	0	0	0	0	0	0	200	300	0	0	0	0	0	0	0	200	903	0	0	0	0	0	0	0	603	903	0
629	5	0	0	0	0	0	0	200	300	0	0	0	0	0	0	0	200	903	0	0	0	0	0	0	0	603	903	0
629	6	0	0	0	0	0	0	200	300	0	0	0	0	0	0	0	200	903	0	0	0	0	0	0	0	603	903	0
629	7	0	0	0	0	0	0	200	300	0	0	0	0	0	0	0	200	903	0	0	0	0	0	0	0	603	903	0
629	8	0	0	0	0	0	0	200	300	0	0	0	0	0	0	0	200	903	0	0	0	0	0	0	0	603	903	0
629	9	0	0	0	0	0	0	200	300	0	0	0	0	0	0	0	200	903	0	0	0	0	0	0	0	603	903	0
630	0	0	0	0	0	0	0	200	300	0	0	0	0	0	0	0	200	903	0	0	0	0	0	0	0	603	903	0
630	1	0	0	0	0	0	0	200	300	0	0	0	0	0	0	0	200	903	0	0	0	0	0	0	0	603	903	0
630	2	0	0	0	0	0	0	200	300	0	0	0	0	0	0	0	200	903	0	0	0	0	0	0	0	603	903	0
630	3	0	0	0	0	0	0	200	300	0	0	0	0	0	0	0	200	903	0	0	0	0	0	0	0	603	903	0
630	4	0	0	0	0	0	0	200	300	0	0	0	0	0	0	0	200	903	0	0	0	0	0	0	0	603	903	0
630	5	0	0	0	0	0	0	200	300	0	0	0	0	0	0	0	200	903	0	0	0	0	0	0	0	603	903	0
630	6	0	0	0	0	0	0	200	300	0	0	0	0	0	0	0	200	903	0	0	0	0	0	0	0	603	903	0
630	7	0	0	0	0	0	0	200	300	0	0	0	0	0	0	0	200	903	0	0	0	0	0	0	0	603	903	0
630	8	0	0	0	0	0	0	200	300	0	0	0	0	0	0	0	200	903	0	0	0	0	0	0	0	603	903	0
630	9	0	0	0	0	0	0	200	300	0	0	0	0	0	0	0	200	903	0	0	0	0	0	0	0	603	903	0
631	0	0	0	0	0	0	0	200	300	0	0	0	0	0	0	0	200	903	0	0	0	0	0	0	0	603	903	0
631	1	0	0	0	0	0	0	200	300	0	0	0	0	0	0	0	200	903	0	0	0	0	0	0	0	603	903	0
631	2	0	0	0	0	0	0	200	300	0	0	0	0	0	0	0	200	903	0	0	0	0	0	0	0	603	903	0
631	3	0	0	0	0	0	0	200	300	0	0	0	0	0	0	0	200	903	0	0	0	0	0	0	0	603	903	0
631	4	0	0	0	0	0	0	200	300	0	0	0	0	0	0	0	200	903	0	0	0	0	0	0	0	603	903	0
631	5	0	0	0	0	0	0	200	300	0	0	0	0	0	0	0	200	903	0	0	0	0	0	0	0	603	903	0
631	6	0	0	0	0	0	0	200	300	0	0	0	0	0	0	0	200	903	0	0	0	0	0	0	0	603	903	0
631	7	0	0	0	0	0	0	200	300	0	0	0	0	0	0	0	200	903	0	0	0	0	0	0	0	603	903	0
631	8	0	0	0	0	0	0	200	300	0	0	0	0	0	0	0	200	903	0	0	0	0	0	0	0	603	903	0
631	9	0	0	0	0	0	0	200	300	0	0	0	0	0	0	0	200	903	0	0	0	0	0	0	0	603	903	0
632	0	0	0	0	0	0	0	200	300	0	0	0	0	0	0	0	200	903	0	0	0	0	0	0	0	603	903	0
632	1	0	0	0	0	0	0	200	300	0	0	0	0	0	0	0	200	903	0	0	0	0	0	0	0	603	903	0
632	2	0	0	0	0	0	0	200	300	0	0	0	0	0	0	0	200	903	0	0	0	0	0	0	0	603	903	0
632	3	0	0	0	0	0	0	200	300	0	0	0	0	0	0	0	200	903	0	0	0	0	0	0	0	603	903	0
632	4	0	0	0	0	0	0	200	300	0	0	0	0	0	0	0	200	903	0	0	0	0	0	0	0	603	903	0
632	5	0	0	0	0	0	0	200	300	0	0	0	0	0	0	0	200	903	0	0	0	0	0	0	0	603	903	0
632	6	0	0	0	0	0	0	200	300	0	0	0	0	0	0	0	200	903	0	0	0	0	0	0	0	603	903	0
632	7	0	0	0	0	0	0	200	300	0	0	0	0	0	0	0	200	903	0	0	0	0	0	0	0	603	903	0
632	8	0	0	0	0	0	0	200	300	0	0	0	0	0	0	0	200	903	0	0	0	0	0	0	0	603	903	0
632	9	0	0	0	0	0	0	200	300	0	0	0	0	0	0	0	200	903	0	0	0	0	0	0	0	603	903	0
633	0	0	0	0	0	0	0	200	300	0	0	0	0	0	0	0	200	903	0	0	0	0	0	0	0	603	903	0
633	1	0	0	0	0	0	0	200	300	0	0	0	0	0	0	0	200	903	0	0	0	0	0	0	0	603	903	0
633	2	0	0	0	0	0	0	200	300	0	0	0	0	0	0	0	200	903	0	0	0	0	0	0	0	603	903	0
633	3	0	0	0	0	0	0	200	300	0	0	0	0	0	0	0	200	903	0	0	0	0	0	0	0	603	903	0
633	4	0	0	0	0	0	0	200	300	0	0	0	0	0	0	0	200	903	0	0	0	0	0	0	0	603	903	0
633	5	0	0	0	0	0	0	200	300	0	0	0	0	0	0	0	200	903	0	0	0	0	0	0	0	603	903	0
633	6	0	0	0	0	0	0	200	300	0	0	0	0	0	0	0	200	903	0	0	0	0	0	0	0	603	903	0
633	7	0	0	0	0	0	0	200	300	0	0	0	0	0	0	0	200	903	0	0	0	0	0	0	0	603	903	0
633	8	0	0	0	0	0	0	200	300	0	0	0	0	0	0	0	200	903	0	0	0	0	0	0	0	603	903	0
633	9	0	0	0	0	0	0	200	300	0	0	0	0	0	0	0	200	903	0	0	0	0	0	0	0	603	903	0
634	0	0	0	0	0	0	0	200	300	0	0	0	0	0	0	0	200	903	0	0	0	0	0	0	0	603	903	0
634	1	0	0	0	0	0	0	200	300	0	0	0	0	0	0	0	200	903	0	0	0	0	0	0	0	603	903	0
634	2	0	0	0	0	0	0	200	300	0	0	0	0	0	0	0	200	903	0	0	0	0	0	0	0	603	903	0
634	3	0	0	0	0	0	0	200	300	0	0	0	0	0	0	0	200	903	0	0	0	0	0	0	0	603	903	0
634	4	0	0	0	0	0	0	200	300	0	0	0	0	0	0	0	200	903	0	0	0	0	0	0	0	603	903	0
634	5	0	0	0	0	0	0	200	300	0	0	0	0	0	0	0	200	903	0	0	0	0	0	0	0	603	903	0
634	6	0	0	0	0	0	0	200	300	0	0	0	0	0	0	0	200	903	0	0	0	0	0	0	0	603	903	0
634	7	0	0	0	0	0	0	200	300	0	0	0	0	0	0	0	200	903	0	0	0	0	0	0	0	603	903	0
634	8	0	0	0	0	0	0	200	300	0	0	0	0	0	0	0	200	903	0	0	0	0	0	0	0	603	903	0
634	9	0	0	0	0	0	0	200	300	0	0	0	0	0	0	0	200	903	0	0	0	0	0	0	0	603	903	0
635	0	0	0	0	0	0	0	200	300	0	0	0	0	0	0	0	200	903	0	0	0	0	0	0	0	603	903	0
635	1	0	0	0	0	0	0	200	300	0	0	0	0	0	0	0	200	903	0	0	0	0	0	0	0	603	903	0
635	2	0	0	0	0	0	0	200	300	0	0	0	0	0	0	0	200	903	0	0	0	0	0	0	0	603	903	0
635	3	0	0	0	0	0	0	200	300	0	0	0	0	0	0	0	200	903	0	0	0	0	0	0	0	603	903	0
635	4	0	0	0	0	0	0	200	300	0	0	0	0	0	0	0	200	903	0	0	0	0	0	0	0	603	903	0
635	5	0	0	0	0	0	0	200	300	0	0	0	0	0	0	0	200	903	0	0	0	0	0	0	0	603	903	0
635	6	0	0	0	0	0	0	200	300	0	0	0	0	0	0	0	200	903	0	0	0	0	0	0	0	603	903	0
635	7	0	0	0	0	0	0	200	300	0	0	0	0	0	0	0	200	903	0	0	0	0	0	0	0	603	903	0
635	8	0	0	0	0	0	0	200	300	0	0	0	0	0	0	0	200	903	0	0	0	0	0	0	0	603	903	0
635	9	0	0	0	0	0	0	200	300	0	0	0	0	0	0	0	200	903	0	0	0	0	0	0	0	603	903	0
636	0	0	0	0	0	0	0	200	300	0	0	0	0	0	0	0	200	903	0	0	0	0	0	0	0	603	903	0
636	1	0	0	0	0	0	0	200	300	0	0	0	0	0	0	0	200	903	0	0	0	0	0	0	0	603	903	0
636	2	0	0	0	0	0	0	200	300	0	0	0	0	0	0	0	200	903	0	0	0	0	0	0	0	603	903	0
636	3	0	0	0	0	0	0	200	300	0	0	0	0	0	0	0	200	903	0	0	0	0	0	0	0	603	903	0
636	4	0	0	0	0	0	0	200	300	0	0	0	0	0	0	0	200	903	0	0	0	0	0	0	0	603	903	0
636	5	0	0	0	0	0	0	200	300	0	0	0	0	0	0	0	200	903	0	0	0	0	0	0	0	603	903	0
636	6	0	0	0	0	0	0	200	300	0	0	0	0	0	0	0	200	903	0	0	0	0	0	0	0	603	903	0
636	7	0	0	0	0	0	0	200	300	0	0	0	0	0	0	0	200	903	0	0	0	0	0	0	0	603	903	0
636	8	0	0	0	0	0	0	200	300	0	0	0	0	0	0	0	200	903	0	0	0	0	0	0	0	603	903	0
636	9	0	0	0	0	0	0	200	300	0	0	0	0	0	0	0	200	903	0	0	0	0	0	0	0	603	903	0
637	0	0	0	0	0	0	0	200	300	0	0	0	0	0	0	0	200	903	0	0	0	0	0	0	0	603	903	0
637	1	0	0	0	0	0	0	200	300	0	0	0	0	0	0	0	200	903	0	0	0	0	0	0	0	603	903	0
637	2	0	0	0	0	0	0	200	300	0	0	0	0	0	0	0	200	903	0	0	0	0	0	0	0	603	903	0
637	3	0	0	0	0	0	0	200	300	0	0	0	0	0	0	0	200	903	0	0	0	0	0	0	0	603	903	0
637	4	0	0	0	0	0	0	200	300	0	0	0	0	0	0	0	200	903	0	0	0	0	0	0	0	603	903	0
637	5	0	0	0	0	0	0	200	300	0	0	0	0	0	0	0	200	903	0	0	0	0	0	0	0	603	903	0
637	6	0	0	0	0	0	0	200	300	0	0	0	0	0	0	0	200	903	0	0	0	0	0	0	0	603	903	0
637	7	0	0	0	0	0	0	200	300	0	0	0	0	0	0	0	200	903	0	0	0	0	0	0	0	603	903	0
637	8	0	0	0	0	0	0	200	300	0	0	0	0	0	0	0	200	903	0	0	0	0	0	0	0	603	903	0
637	9	0	0	0	0	0	0	200	300	0	0	0	0	0	0	0	200	903	0	0	0	0	0	0	0	603	903	0
638	0	0	0	0	0	0	0	200	300	0	0	0	0	0	0	0	200	903	0	0	0	0	0	0	0	603	903	0
638	1	0	0	0	0	0	0	200	300	0	0	0	0	0	0	0	200	903	0	0	0	0	0	0	0	603	903	0
638	2	0	0	0	0	0	0	200	300	0	0	0	0	0	0	0	200	903	0	0	0	0	0	0	0	603	903	0
638	3	0	0	0	0	0	0	200	300	0	0	0	0	0	0	0	200	903	0	0	0	0	0	0	0	603	903	0
638	4	0	0	0	0	0	0	200	300	0	0	0	0	0	0	0	200	903	0	0	0	0	0	0	0	603	903	0
638	5	0	0	0	0	0	0	200	300	0	0	0	0	0	0	0	200	903	0	0	0	0	0	0	0	603	903	0
638	6	0	0	0	0	0	0	200	300	0	0	0	0	0	0	0	200	903	0	0	0	0	0	0	0	603	903	0
638	7	0	0	0	0	0	0	200	300	0	0	0	0	0	0	0	200	903	0	0	0	0	0	0	0	603	903	0
638	8	0	0	0	0	0	0	200	300	0	0	0	0	0	0	0	200	903	0	0	0	0	0	0	0	603	903	0
638	9	0	0	0	0	0	0	200	300	0	0	0	0	0	0	0	200	903	0	0	0	0	0	0	0	603	903	0
639	0	0	0	0	0	0	0	200	300	0	0	0	0	0	0	0	200	903	0	0	0	0	0	0	0	603	903	0
639	1	0	0	0	0	0	0	200	300	0	0	0	0	0	0	0	200	903	0	0	0	0	0	0	0	603	903	0
639	2	0	0	0	0	0	0	200	300	0	0	0	0	0	0	0	200	903	0	0	0	0	0	0	0	603	903	0
639	3	0	0	0	0	0	0	200	300	0	0	0	0	0	0	0	200	903	0	0	0	0	0	0	0	603	903	0
639	4	0	0	0	0	0	0	200	300	0	0	0	0	0	0	0	200	903	0	0	0	0	0	0	0	603	903	0
639	5	0	0	0	0	0	0	200	300	0	0	0	0	0	0	0	200	903	0	0	0	0	0	0	0	603	903	0
639	6	0	0	0	0	0	0	200	300	0	0	0	0	0	0	0	200	903	0	0	0	0	0	0	0	603	903	0
639	7	0	0	0	0	0	0	200	300	0	0	0	0	0	0	0	200	903	0	0	0	0	0	0	0	603	903	0
639	8	0	0	0	0	0	0	200	300	0	0	0	0	0	0	0	200	903	0	0	0	0	0	0	0	603	903	0
639	9	0	0	0	0	0	0	200	300	0	0	0	0	0	0	0	200	903	0	0	0	0	0	0	0	603	903	0
640	0	0	0	0	0	0	0	200	300	0	0	0	0	0	0	0	200	903	0	0	0	0	0	0	0	603	903	0
640	1	0	0	0	0	0	0	200	300	0	0	0	0	0	0	0	200	903	0	0	0	0	0	0	0	603	903	0
640	2	0	0	0	0	0	0	200	300	0	0	0	0	0	0	0	200	903	0	0	0	0	0	0	0	603	903	0
640	3	0	0	0	0	0	0	200	300	0	0	0	0	0	0	0	200	903	0	0	0	0	0	0	0	603	903	0
640	4	0	0	0	0	0	0	200	300	0	0	0	0	0	0	0	200	903	0	0	0	0	0	0	0	603	903	0
640	5	0	0	0	0	0	0	200	300	0	0	0	0	0	0	0	200	903	0	0	0	0	0	0	0	603	903	0
640	6	0	0	0	0	0	0	200	300	0	0	0	0	0	0	0	200	903	0	0	0	0	0	0	0	603	903	0
640	7	0	0	0	0	0	0	200	300	0	0	0	0	0	0	0	200	903	0	0	0	0	0	0	0	603	903	0
640	8	0	0	0	0	0	0	200	300	0	0	0	0	0	0	0	200	903	0	0	0	0	0	0	0	603	903	0
640	9	0	0	0	0	0	0	200	300	0	0	0	0	0	0	0	200	903	0	0	0	0	0	0	0	603	903	0
641	0	0	0	0	0	0	0	200	300	0	0	0	0	0	0	0	200	903	0	0	0	0	0	0	0	603	903	0
641	1	0	0	0	0	0	0	200	300	0	0	0	0	0	0	0	200	903	0	0	0	0	0	0	0	603	903	0
641	2	0	0	0	0	0	0	200	300	0	0	0	0	0	0	0	200	903	0	0	0	0	0	0	0	603	903	0
641	3	0	0	0	0	0	0	200	300	0	0	0	0	0	0	0	200	903	0	0	0	0	0	0	0	603	903	0
641	4	0	0	0	0	0	0	200	300	0	0	0	0	0	0	0	200	903	0	0	0	0	0	0	0	603	903	0
641	5	0	0	0	0	0	0	200	300	0	0	0	0	0	0	0	200	903	0	0	0	0	0	0	0	603	903	0
641	6	0	0	0	0	0	0	200	300	0	0	0	0	0	0	0	200	903	0	0	0	0	0	0	0	603	903	0
641	7	0	0	0	0	0	0	200	300	0	0	0	0	0	0	0	200	903	0	0	0	0	0	0	0	603	903	0
641	8	0	0	0	0	0	0	200	300	0	0	0	0	0	0	0	200	903	0	0	0	0	0	0	0	603	903	0
641	9	0	0	0	0	0	0	200	300	0	0	0	0	0	0	0	200	903	0	0	0	0	0	0	0	603	903	0
642	0	0	0	0	0	0	0	200	300	0	0	0	0	0	0	0	200	903	0	0	0	0	0	0	0	603	903	0
642	1	0	0	0	0	0	0	200	300	0	0	0	0	0	0	0	200	903	0	0	0	0	0	0	0	603	903	0
642	2	0	0	0	0	0	0	200	300	0	0	0	0	0	0	0	200	903	0	0	0	0	0	0	0	603	903	0
642	3	0	0	0	0	0	0	200	300	0	0	0	0	0	0	0	200	903	0	0	0	0	0	0	0	603	903	0
642	4	0	0	0	0	0	0	200	300	0	0	0	0	0	0	0	200	903	0	0	0	0	0	0	0	603	903	0
642	5	0	0	0	0	0	0	200	300	0	0	0	0	0	0	0	200	903	0	0	0	0	0	0	0	603	903	0
642	6	0	0	0	0	0	0	200	300	0	0	0	0	0	0	0	200	903	0	0	0	0	0	0	0	603	903	0
642	7	0	0	0	0	0	0	200	300	0	0	0	0	0	0	0	200	903	0	0	0	0	0	0	0	603	903	0
642	8	0	0	0	0	0	0	200	300	0	0	0	0	0	0	0	200	903	0	0	0	0	0	0	0	603	903	0
642	9	0	0	0	0	0	0	200	300	0	0	0	0	0	0	0	200	903	0	0	0	0	0	0	0	603	903	0
643	0	0	0	0	0	0	0	200	300	0	0	0	0	0	0	0	200	903	0	0	0	0	0	0	0	603	903	0
643	1	0	0	0	0	0	0	200	300	0	0	0	0	0	0	0	200	903	0	0	0	0	0	0	0	603	903	0
643	2	0	0	0	0	0	0	200	300	0	0	0	0	0	0	0	200	903	0	0	0	0	0	0	0	603	903	0
643	3	0	0	0	0	0	0	200	300	0	0	0	0	0	0	0	200	903	0	0	0	0	0	0	0	603	903	0
643	4	0	0	0	0	0	0	200	300	0	0	0	0	0	0	0	200	903	0	0	0	0	0	0	0	603	903	0
643	5	0	0	0	0	0	0	200	300	0	0	0	0	0	0	0	200	903	0	0	0	0	0	0	0	603	903	0
643	6	0	0	0	0	0	0	200	300	0	0	0	0	0	0	0	200	903	0	0	0	0	0	0	0	603	903	0
643	7	0	0	0	0	0	0	200	300	0	0	0	0	0	0	0	200	903	0	0	0	0	0	0	0	603	903	0
643	8	0	0	0	0	0	0	200	300	0	0	0	0	0	0	0	200	903	0	0	0	0	0	0	0	603	903	0
643	9	0	0	0	0	0	0	200	300	0	0	0	0	0	0	0	200	903	0	0	0	0	0	0	0	603	903	0
644	0	0	0	0	0	0	0	200	300	0	0	0	0	0	0	0	200	903	0	0	0	0	0	0	0	603	903	0
644	1	0	0	0	0	0	0	200	300	0	0	0	0	0	0	0	200	903	0	0	0	0	0	0	0	603	903	0
644	2	0	0	0	0	0	0	200	300	0	0	0	0	0	0	0	200	903	0	0	0	0	0	0	0	603	903	0
644	3	0	0	0	0	0	0	200	300	0	0	0	0	0	0	0	200	903	0	0	0	0	0	0	0	603	903	0
644	4	0	0	0	0	0	0	200	300	0	0	0	0	0	0	0	200	903	0	0	0	0	0	0	0	603	903	0
644	5	0	0	0	0	0	0	200	300	0	0	0	0	0	0	0	200	903	0	0	0	0	0	0	0	603	903	0
644	6	0	0	0	0	0	0	200	300	0	0	0	0	0	0	0	200	903	0	0	0	0	0	0	0	603	903	0
644	7	0	0	0	0	0	0	200	300	0	0	0	0	0	0	0	200	903	0	0	0	0	0	0	0	603	903	0
644	8	0	0	0	0	0	0	200	300	0	0	0	0	0	0	0	200	903	0	0	0	0	0	0	0	603	903	0
644	9	0	0	0	0	0	0	200	300	0	0	0	0	0	0	0	200	903	0	0	0	0	0	0	0	603	903	0
645	0	0	0	0	0	0	0	200	300	0	0	0	0	0	0	0	200	903	0	0	0	0	0	0	0	603	903	0
645	1	0	0	0	0	0	0	200	300	0	0	0	0	0	0	0	200	903	0	0	0	0	0	0	0	603	903	0
645	2	0	0	0	0	0	0	200	300	0	0	0	0	0	0	0	200	903	0	0	0	0	0	0	0	603	903	0
645	3	0	0	0	0	0	0	200	300	0	0	0	0	0	0	0	200	903	0	0	0	0	0	0	0	603	903	0
645	4	0	0	0	0	0	0	200	300	0	0	0	0	0	0	0	200	903	0	0	0	0	0	0	0	603	903	0
645	5	0	0	0	0	0	0	200	300	0	0	0	0	0	0	0	200	903	0	0	0	0	0	0	0	603	903	0
645	6	0	0	0	0	0	0	200	300	0	0	0	0	0	0	0	200	903	0	0	0	0	0	0	0	603	903	0
645	7	0	0	0	0	0	0	200	300	0	0	0	0	0	0	0	200	903	0	0	0	0	0	0	0	603	903	0
645	8	0	0	0	0	0	0	200	300	0	0	0	0	0	0	0	200	903	0	0	0	0	0	0	0	603	903	0
645	9	0	0	0	0	0	0	200	300	0	0	0	0	0	0	0	200	903	0	0	0	0	0	0	0	603	903	0
646	0	0	0	0	0	0	0	200	300	0	0	0	0	0	0	0	200	903	0	0	0	0	0	0	0	603	903	0
646	1	0	0	0	0	0	0	200	300	0	0	0	0	0	0	0	200	903	0	0	0	0	0	0	0	603	903	0
646	2	0	0	0	0	0	0	200	300	0	0	0	0	0	0	0	200	903	0	0	0	0	0	0	0	603	903	0
646	3	0	0	0	0	0	0	200	300	0	0	0	0	0	0	0	200	903	0	0	0	0	0	0	0	603	903	0
646	4	0	0	0	0	0	0	200	300	0	0	0	0	0	0	0	200	903	0	0	0	0	0	0	0	603	903	0
646	5	0	0	0	0	0	0	200	300	0	0	0	0	0	0	0	200	903	0	0	0	0	0	0	0	603	903	0
646	6	0	0	0	0	0	0	200	300	0	0	0	0	0	0	0	200	903	0	0	0	0	0	0	0	603	903	0
646	7	0	0	0	0	0	0	200	300	0	0	0	0	0	0	0	200	903	0	0	0	0	0	0	0	603	903	0
646	8	0	0	0	0	0	0	200	300	0	0	0	0	0	0	0	200	903	0	0	0	0	0	0	0	603	903	0
646	9	0	0	0	0	0	0	200	300	0	0	0	0	0	0	0	200	903	0	0	0	0	0	0	0	603	903	0
647	0	0	0	0	0	0	0	200	300	0	0	0	0	0	0	0	200	903	0	0	0	0	0	0	0	603	903	0
647	1	0	0	0	0	0	0	200	300	0	0	0	0	0	0	0	200	903	0	0	0	0	0	0	0	603	903	0
647	2	-0.0282228	6.21311	-16.7249	2015.99	577.871	479.554	234.551	179.462	0	0	0	0	0	0	0	200	903	0	0	0	0	0	0	0	603	903	0
647	3	4.85459	19.6408	-40.2234	4396.36	2042.71	1852.85	250.784	190.702	0	0	0	0	0	0	0	200	903	0	0	0	0	0	0	0	603	903	0
647	4	14.315	26.0495	-48.158	4487.91	2469.96	2951.48	251.289	206.809	0	0	0	0	0	0	0	200	903	0	0	0	0	0	0	0	603	903	0
647	5	21.3341	13.5373	-39.0027	3480.83	1676.5	2173.28	242.984	210.754	0	0	0	0	0	0	0	200	903	0	0	0	0	0	0	0	603	903	0
647	6	10.0426	5.75535	-24.3543	3663.94	1615.47	1211.98	266.332	149.557	0	0	0	0	0	0	0	200	903	0	0	0	0	0	0	0	603	903	0
647	7	1.34507	15.8262	-32.5941	3755.49	2042.71	1578.19	262.671	184.78	0	0	0	0	0	0	0	200	903	0	0	0	0	0	0	0	603	903	0
647	8	4.39683	13.2322	-60.9754	4945.68	2286.86	754.213	237.505	218.891	0	0	0	0	0	0	0	200	903	0	0	0	0	0	0	0	603	903	0
647	9	7.44858	-5.84133	-79.5911	8241.57	3568.59	616.883	244.837	196.451	0	0	0	0	0	0	0	200	903	0	0	0	0	0	0	0	603	903	0
648	0	6.53306	-14.5388	-86.9153	10713.5	5033.44	662.66	257.912	176.736	0	0	0	0	0	0	0	200	903	0	0	0	0	0	0	0	603	903	0
648	1	16.4513	-8.28273	-96.681	11171.3	5521.72	662.66	257.113	184.452	0	0	0	0	0	0	0	200	903	0	0	0	0	0	0	0	603	903	0
648	2	17.3668	-6.45168	-116.517	12636.1	5765.86	-69.7623	249.485	191.552	0	0	0	0	0	0	0	200	903	0	0	0	0	0	0	0	603	903	0
648	3	2.87095	-12.7078	-132.692	14924.9	6132.07	342.225	246.213	187.522	0	0	0	0	0	0	0	200	903	0	0	0	0	0	0	0	603	903	0
648	4	2.10801	-14.5388	-142.763	16389.8	6254.14	571.107	243.808	185.196	0	0	0	0	0	0	0	200	903	0	0	0	0	0	0	0	603	903	0
648	5	10.6529	-5.07839	-152.833	17213.7	7352.77	-481.75	248.11	187.369	0	0	0	0	0	0	0	200	903	0	0	0	0	0	0	0	603	903	0
648	6	9.43223	-2.78957	-162.599	18953.2	8085.2	-69.7623	249.725	183.436	0	0	0	0	0	0	0	200	903	0	0	0	0	0	0	0	603	903	0
648	7	2.71836	-12.8604	-178.773	20509.6	8329.33	433.778	246.592	185.276	0	0	0	0	0	0	0	200	903	0	0	0	0	0	0	0	603	903	0
648	8	1.65024	-16.8277	-189.454	21516.7	8207.26	-481.75	243.321	186.428	0	0	0	0	0	0	0	200	903	0	0	0	0	0	0	0	603	903	0
648	9	0.582129	-6.45168	-198.305	22249.1	8695.55	-1259.95	243.849	187.803	0	0	0	0	0	0	0	200	903	0	0	0	0	0	0	0	603	903	0
649	0	-1.70669	-6.60427	-206.849	22981.6	9366.93	-1259.95	245.284	188.897	0	0	0	0	0	0	0	200	903	0	0	0	0	0	0	0	603	903	0
649	1	-0.94375	-16.8277	-213.258	24263.3	9183.83	-1351.5	243.064	186.226	0	0	0	0	0	0	0	200	903	0	0	0	0	0	0	0	603	903	0
649	2	-2.31704	-12.5552	-228.517	25728.1	9733.14	-1717.71	242.593	187.413	0	0	0	0	0	0	0	200	903	0	0	0	0	0	0	0	603	903	0
649	3	-5.06362	-0.500753	-233.705	25728.1	10099.4	-1717.71	243.214	189.912	0	0	0	0	0	0	0	200	903	0	0	0	0	0	0	0	603	903	0
649	4	-5.3688	0.262187	-238.283	26002.8	9733.14	-1900.82	240.847	190.874	0	0	0	0	0	0	0	200	903	0	0	0	0	0	0	0	603	903	0
649	5	-10.099	-3.39992	-242.25	27833.9	9489	-1855.04	239.17	185.103	0	0	0	0	0	0	0	200	903	0	0	0	0	0	0	0	603	903	0
649	6	-11.7775	5.75535	-254.762	27925.4	9855.21	-1488.83	238.684	190.386	0	0	0	0	0	0	0	200	903	0	0	0	0	0	0	0	603	903	0
649	7	-5.67397	12.4692	-259.95	28108.5	10282.5	-1671.94	239.556	191.87	0	0	0	0	0	0	0	200	903	0	0	0	0	0	0	0	603	903	0
649	8	-7.50503	12.0115	-261.781	28383.2	10221.4	-1855.04	239.046	191.577	0	0	0	0	0	0	0	200	903	0	0	0	0	0	0	0	603	903	0
649	9	-16.05	13.9951	-263.307	29390.3	9916.25	-1397.28	237.66	188.38	0	0	0	0	0	0	0	200	903	0	0	0	0	0	0	0	603	903	0
650	0	-14.5241	22.9978	-272.767	29298.7	9855.21	-1351.5	236.13	192.587	0	0	0	0	0	0	0	200	903	0	0	0	0	0	0	0	603	903	0
650	1	-11.3197	29.1013	-278.871	29481.8	10160.4	-1580.38	236.434	194.282	0	0	0	0	0	0	0	200	903	0	0	0	0	0	0	0	603	903	0
650	2	-16.2025	30.322	-282.533	29939.6	10465.6	-1397.28	237.042	194.032	0	0	0	0	0	0	0	200	903	0	0	0	0	0	0	0	603	903	0
650	3	-18.0336	31.8479	-286.805	30580.4	10404.5	-985.29	236.277	193.376	0	0	0	0	0	0	0	200	903	0	0	0	0	0	0	0	603	903	0
650	4	-16.6603	40.8506	-293.214	30855.1	10282.5	-1259.95	235.068	194.769	0	0	0	0	0	0	0	200	903	0	0	0	0	0	0	0	603	903	0
650	5	-20.3224	47.8696	-301.149	31221.3	10770.7	-1580.38	235.766	196.326	0	0	0	0	0	0	0	200	903	0	0	0	0	0	0	0	603	903	0
650	6	-22.6112	46.3437	-307.863	31953.7	10770.7	-939.513	234.986	196.208	0	0	0	0	0	0	0	200	903	0	0	0	0	0	0	0	603	903	0
650	7	-22.6112	48.3274	-315.492	32228.4	10221.4	-1397.28	232.398	197.847	0	0	0	0	0	0	0	200	903	0	0	0	0	0	0	0	603	903	0
650	8	-23.6793	56.4145	-324.952	33143.9	10892.8	-893.737	233.521	198.004	0	0	0	0	0	0	0	200	903	0	0	0	0	0	0	0	603	903	0
650	9	-25.8156	58.3982	-331.361	33876.4	11259	-1168.4	233.978	197.766	0	0	0	0	0	0	0	200	903	0	0	0	0	0	0	0	603	903	0
651	0	-26.7311	54.5835	-335.023	33601.7	11259	-1076.84	233.607	199.703	0	0	0	0	0	0	0	200	903	0	0	0	0	0	0	0	603	903	0
651	1	-26.8837	59.0085	-349.367	34883.4	11747.3	-847.961	233.625	200.152	0	0	0	0	0	0	0	200	903	0	0	0	0	0	0	0	603	903	0
651	2	-27.0363	63.8913	-363.405	36073.6	12296.6	-1031.07	233.837	200.734	0	0	0	0	0	0	0	200	903	0	0	0	0	0	0	0	603	903	0
651	3	-27.1889	62.3655	-375.917	36165.2	12784.9	-1031.07	234.01	203.795	0	0	0	0	0	0	0	200	903	0	0	0	0	0	0	0	603	903	0
651	4	-27.494	61.9077	-383.241	37172.2	13273.2	-893.737	234.634	203.006	0	0	0	0	0	0	0	200	903	0	0	0	0	0	0	0	603	903	0
651	5	-32.0717	68.469	-395.448	38179.3	13151.1	-756.408	233.256	203.453	0	0	0	0	0	0	0	200	903	0	0	0	0	0	0	0	603	903	0
651	6	-30.6984	69.9949	-406.74	38728.6	13578.4	-756.408	233.383	204.783	0	0	0	0	0	0	0	200	903	0	0	0	0	0	0	0	603	903	0
651	7	-32.0717	68.9267	-420.778	39552.6	14310.8	-710.631	234.01	206.001	0	0	0	0	0	0	0	200	903	0	0	0	0	0	0	0	603	903	0
651	8	-35.5812	69.9949	-427.186	40559.7	14982.2	-390.197	235.072	205.054	0	0	0	0	0	0	0	200	903	0	0	0	0	0	0	0	603	903	0
651	9	-33.7501	73.0466	-440.614	41017.5	15104.2	-390.197	234.28	206.908	0	0	0	0	0	0	0	200	903	0	0	0	0	0	0	0	603	903	0
652	0	-34.3605	74.5725	-447.328	41109	14921.1	-115.539	233.356	208.101	0	0	0	0	0	0	0	200	903	0	0	0	0	0	0	0	603	903	0
652	1	-36.4967	75.3354	-455.263	41841.4	15409.4	-115.539	233.847	208.094	0	0	0	0	0	0	0	200	903	0	0	0	0	0	0	0	603	903	0
652	2	-35.276	77.4717	-463.197	42024.5	15958.7	21.7904	234.453	209.273	0	0	0	0	0	0	0	200	903	0	0	0	0	0	0	0	603	903	0
652	3	-33.5976	78.6924	-469.911	42024.5	15592.5	388.001	233.182	210.569	0	0	0	0	0	0	0	200	903	0	0	0	0	0	0	0	603	903	0
652	4	-36.4967	83.1174	-477.846	41658.3	16630.1	1303.53	234.802	212.821	0	0	0	0	0	0	0	200	903	0	0	0	0	0	0	0	603	903	0
652	5	-37.7174	83.27	-481.813	42207.6	17057.4	662.66	235.402	212.398	0	0	0	0	0	0	0	200	903	0	0	0	0	0	0	0	603	903	0
652	6	-35.7338	86.1692	-487.916	41933	16935.3	1074.65	234.709	214.057	0	0	0	0	0	0	0	200	903	0	0	0	0	0	0	0	603	903	0
652	7	-35.276	90.7468	-492.189	42207.6	16935.3	937.318	234.408	214.245	0	0	0	0	0	0	0	200	903	0	0	0	0	0	0	0	603	903	0
652	8	-35.4286	91.6623	-498.903	42573.8	17911.9	1715.52	235.903	214.665	0	0	0	0	0	0	0	200	903	0	0	0	0	0	0	0	603	903	0
652	9	-34.8183	89.8313	-502.565	42848.5	17423.6	1486.63	234.669	214.74	0	0	0	0	0	0	0	200	903	0	0	0	0	0	0	0	603	903	0
653	0	-34.0553	95.0193	-505.311	43214.7	17606.7	1669.74	234.843	214.479	0	0	0	0	0	0	0	200	903	0	0	0	0	0	0	0	603	903	0
653	1	-35.1234	98.2236	-506.227	43489.4	17728.8	1807.07	235.021	214.091	0	0	0	0	0	0	0	200	903	0	0	0	0	0	0	0	603	903	0
653	2	-32.9872	96.3926	-512.941	43214.7	18156	1990.17	235.396	215.751	0	0	0	0	0	0	0	200	903	0	0	0	0	0	0	0	603	903	0
653	3	-32.9872	95.9348	-518.434	42848.5	18217	2219.06	235.139	217.35	0	0	0	0	0	0	0	200	903	0	0	0	0	0	0	0	603	903	0
653	4	-30.5458	98.9865	-520.265	42940.1	18339.1	2173.28	235.25	217.465	0	0	0	0	0	0	0	200	903	0	0	0	0	0	0	0	603	903	0
653	5	-29.6303	100.207	-525.148	42757	18522.2	2402.16	235.27	218.581	0	0	0	0	0	0	0	200	903	0	0	0	0	0	0	0	603	903	0
653	6	-29.6303	98.3762	-524.232	42390.7	19437.7	2539.49	237.078	219.137	0	0	0	0	0	0	0	200	903	0	0	0	0	0	0	0	603	903	0
653	7	-28.257	99.2917	-525.758	41933	19132.6	2676.82	236.39	220.243	0	0	0	0	0	0	0	200	903	0	0	0	0	0	0	0	603	903	0
653	8	-24.7475	101.275	-527.894	41292.1	19010.5	2447.94	236.012	221.78	0	0	0	0	0	0	0	200	903	0	0	0	0	0	0	0	603	903	0
653	9	-22.3061	100.512	-530.946	41658.3	19437.7	2631.04	236.61	221.539	0	0	0	0	0	0	0	200	903	0	0	0	0	0	0	0	603	903	0
654	0	-23.069	99.1391	-529.115	41749.9	19865	3043.03	237.544	221.095	0	0	0	0	0	0	0	200	903	0	0	0	0	0	0	0	603	903	0
654	1	-17.2707	99.2917	-530.031	41749.9	20048.1	3317.69	237.824	221.231	0	0	0	0	0	0	0	200	903	0	0	0	0	0	0	0	603	903	0
654	2	-17.4232	100.207	-529.42	41933	19498.8	3271.91	236.83	220.794	0	0	0	0	0	0	0	200	903	0	0	0	0	0	0	0	603	903	0
654	3	-15.1344	99.7495	-530.031	41200.6	19926	3363.47	237.594	222.268	0	0	0	0	0	0	0	200	903	0	0	0	0	0	0	0	603	903	0
654	4	-12.9982	98.9865	-530.946	41475.2	20292.2	3409.24	238.219	221.884	0	0	0	0	0	0	0	200	903	0	0	0	0	0	0	0	603	903	0
654	5	-10.2516	97.9184	-530.946	41749.9	20353.3	3455.02	238.334	221.367	0	0	0	0	0	0	0	200	903	0	0	0	0	0	0	0	603	903	0
654	6	-9.94644	99.5969	-530.336	40559.7	20048.1	3867.01	237.803	223.521	0	0	0	0	0	0	0	200	903	0	0	0	0	0	0	0	603	903	0
654	7	-8.11538	98.9865	-529.115	40193.5	20292.2	3500.8	238.351	224.036	0	0	0	0	0	0	0	200	903	0	0	0	0	0	0	0	603	903	0
654	8	-4.75845	99.1391	-528.81	39827.3	20719.5	3867.01	239.181	224.685	0	0	0	0	0	0	0	200	903	0	0	0	0	0	0	0	603	903	0
654	9	-2.31704	100.207	-528.81	39827.3	21024.6	4050.11	239.758	224.685	0	0	0	0	0	0	0	200	903	0	0	0	0	0	0	0	603	903	0
655	0	-0.791162	98.6814	-523.622	39186.4	20719.5	4141.66	239.57	225.163	0	0	0	0	0	0	0	200	903	0	0	0	0	0	0	0	603	903	0
655	1	0.734717	98.834	-527.894	40193.5	21024.6	4050.11	239.827	223.861	0	0	0	0	0	0	0	200	903	0	0	0	0	0	0	0	603	903	0
655	2	1.34507	98.834	-526.063	39644.2	21451.9	4187.44	240.778	224.64	0	0	0	0	0	0	0	200	903	0	0	0	0	0	0	0	603	903	0
655	3	3.17612	100.512	-525.758	39552.6	21512.9	4370.55	240.918	224.77	0	0	0	0	0	0	0	200	903	0	0	0	0	0	0	0	603	903	0
655	4	6.83823	99.2917	-530.031	39552.6	21085.7	4416.32	239.782	225.377	0	0	0	0	0	0	0	200	903	0	0	0	0	0	0	0	603	903	0
655	5	7.296	98.834	-526.979	39644.2	21635	4599.43	241.055	224.771	0	0	0	0	0	0	0	200	903	0	0	0	0	0	0	0	603	903	0
655	6	6.38047	99.2917	-528.81	38728.6	21879.1	4645.21	241.374	226.763	0	0	0	0	0	0	0	200	903	0	0	0	0	0	0	0	603	903	0
655	7	8.82187	100.207	-528.2	38637.1	21818.1	4919.86	241.307	226.851	0	0	0	0	0	0	0	200	903	0	0	0	0	0	0	0	603	903	0
655	8	10.3478	99.2917	-528.2	38637.1	21757.1	5057.19	241.191	226.851	0	0	0	0	0	0	0	200	903	0	0	0	0	0	0	0	603	903	0
655	9	10.3478	99.4443	-528.81	38362.4	21696	5102.97	241.028	227.455	0	0	0	0	0	0	0	200	903	0	0	0	0	0	0	0	603	903	0
656	0	12.6366	100.36	-532.167	38362.4	22245.4	5057.19	241.801	227.913	0	0	0	0	0	0	0	200	903	0	0	0	0	0	0	0	603	903	0
656	1	12.6366	100.97	-534.913	38179.3	22306.4	5286.07	241.701	228.625	0	0	0	0	0	0	0	200	903	0	0	0	0	0	0	0	603	903	0
656	2	14.315	100.36	-533.082	38820.2	22367.4	5286.07	241.959	227.178	0	0	0	0	0	0	0	200	903	0	0	0	0	0	0	0	603	903	0
656	3	13.7047	100.207	-533.388	38545.5	22123.3	5148.75	241.477	227.734	0	0	0	0	0	0	0	200	903	0	0	0	0	0	0	0	603	903	0
656	4	14.6202	100.512	-537.05	38820.2	22489.5	5057.19	241.876	227.716	0	0	0	0	0	0	0	200	903	0	0	0	0	0	0	0	603	903	0
656	5	14.1625	100.665	-540.712	38179.3	23038.8	5514.96	242.608	229.391	0	0	0	0	0	0	0	200	903	0	0	0	0	0	0	0	603	903	0
656	6	14.315	100.512	-541.932	38362.4	22489.5	5469.18	241.499	229.212	0	0	0	0	0	0	0	200	903	0	0	0	0	0	0	0	603	903	0
656	7	14.315	100.665	-543.763	37813.1	22916.7	5331.85	242.145	230.46	0	0	0	0	0	0	0	200	903	0	0	0	0	0	0	0	603	903	0
656	8	14.1625	101.275	-544.374	38179.3	23160.9	5606.51	242.546	229.866	0	0	0	0	0	0	0	200	903	0	0	0	0	0	0	0	603	903	0
656	9	14.9254	100.97	-548.036	38087.8	23282.9	5698.06	242.484	230.501	0	0	0	0	0	0	0	200	903	0	0	0	0	0	0	0	603	903	0
657	0	14.4676	101.123	-552.919	38087.8	23038.8	5926.94	241.668	231.115	0	0	0	0	0	0	0	200	903	0	0	0	0	0	0	0	603	903	0
657	1	14.1625	101.581	-553.834	38362.4	23282.9	6018.5	242.04	230.733	0	0	0	0	0	0	0	200	903	0	0	0	0	0	0	0	603	903	0
657	2	13.3995	100.665	-556.276	37996.2	23710.2	6110.05	242.623	231.695	0	0	0	0	0	0	0	200	903	0	0	0	0	0	0	0	603	903	0
657	3	14.0099	101.581	-558.412	37813.1	23893.3	6384.71	242.788	232.285	0	0	0	0	0	0	0	200	903	0	0	0	0	0	0	0	603	903	0
657	4	14.315	101.733	-561.159	38637.1	23771.2	6430.48	242.361	231.148	0	0	0	0	0	0	0	200	903	0	0	0	0	0	0	0	603	903	0
657	5	14.4676	101.428	-564.821	38545.5	24198.5	6338.93	242.843	231.756	0	0	0	0	0	0	0	200	903	0	0	0	0	0	0	0	603	903	0
657	6	12.9417	100.36	-573.06	38362.4	24686.8	6247.38	243.079	233.057	0	0	0	0	0	0	0	200	903	0	0	0	0	0	0	0	603	903	0
657	7	11.5685	100.512	-581.91	38545.5	25602.3	6155.83	243.997	233.76	0	0	0	0	0	0	0	200	903	0	0	0	0	0	0	0	603	903	0
657	8	16.2987	100.97	-582.521	38270.9	25724.4	7025.58	244.16	234.301	0	0	0	0	0	0	0	200	903	0	0	0	0	0	0	0	603	903	0
657	9	21.0289	102.343	-581.91	37355.4	25480.2	6888.25	243.787	235.806	0	0	0	0	0	0	0	200	903	0	0	0	0	0	0	0	603	903	0
658	0	19.9608	103.869	-585.267	37996.2	26212.6	6384.71	244.787	235.079	0	0	0	0	0	0	0	200	903	0	0	0	0	0	0	0	603	903	0
658	1	20.4186	100.818	-588.93	37996.2	26029.5	6705.14	244.198	235.483	0	0	0	0	0	0	0	200	903	0	0	0	0	0	0	0	603	903	0
658	2	22.86	102.954	-596.559	37721.6	26212.6	7162.91	243.94	236.768	0	0	0	0	0	0	0	200	903	0	0	0	0	0	0	0	603	903	0
658	3	21.9444	107.531	-597.169	38087.8	26273.7	7071.35	243.997	236.219	0	0	0	0	0	0	0	200	903	0	0	0	0	0	0	0	603	903	0
658	4	20.8763	107.684	-599.916	37996.2	26517.8	6888.25	244.203	236.664	0	0	0	0	0	0	0	200	903	0	0	0	0	0	0	0	603	903	0
658	5	23.3177	106.158	-603.578	38179.3	26395.7	7346.01	243.732	236.745	0	0	0	0	0	0	0	200	903	0	0	0	0	0	0	0	603	903	0
658	6	19.1979	108.142	-608.461	38087.8	25968.5	7346.01	242.679	237.403	0	0	0	0	0	0	0	200	903	0	0	0	0	0	0	0	603	903	0
658	7	17.2142	108.752	-609.376	37904.7	26884	7117.13	244.117	237.798	0	0	0	0	0	0	0	200	903	0	0	0	0	0	0	0	603	903	0
658	8	19.6556	105.395	-606.019	38179.3	26456.8	7208.68	243.657	237	0	0	0	0	0	0	0	200	903	0	0	0	0	0	0	0	603	903	0
658	9	19.3504	103.564	-609.376	37904.7	26945.1	7117.13	244.217	237.798	0	0	0	0	0	0	0	200	903	0	0	0	0	0	0	0	603	903	0
659	0	19.1979	103.717	-611.207	38362.4	26945.1	6705.14	244.085	237.235	0	0	0	0	0	0	0	200	903	0	0	0	0	0	0	0	603	903	0
659	1	19.9608	102.649	-613.038	37263.8	26945.1	6842.47	243.953	239.215	0	0	0	0	0	0	0	200	903	0	0	0	0	0	0	0	603	903	0
659	2	17.2142	100.512	-612.123	37630	27128.2	6796.69	244.318	238.525	0	0	0	0	0	0	0	200	903	0	0	0	0	0	0	0	603	903	0
659	3	19.1979	98.5288	-613.038	37446.9	27189.2	6567.81	244.352	238.916	0	0	0	0	0	0	0	200	903	0	0	0	0	0	0	0	603	903	0
659	4	19.1979	98.3762	-613.038	37446.9	26578.9	6659.37	243.356	238.916	0	0	0	0	0	0	0	200	903	0	0	0	0	0	0	0	603	903	0
659	5	18.8927	97.4607	-614.259	36989.1	27311.3	6842.47	244.462	239.783	0	0	0	0	0	0	0	200	903	0	0	0	0	0	0	0	603	903	0
659	6	17.5194	93.4934	-617.311	36897.6	27433.3	6750.92	244.44	240.229	0	0	0	0	0	0	0	200	903	0	0	0	0	0	0	0	603	903	0
659	7	17.5194	94.8667	-620.363	37355.4	27128.2	6567.81	243.73	239.785	0	0	0	0	0	0	0	200	903	0	0	0	0	0	0	0	603	903	0
659	8	16.6039	96.3926	-621.278	37263.8	26578.9	7071.35	242.781	240.021	0	0	0	0	0	0	0	200	903	0	0	0	0	0	0	0	603	903	0
659	9	15.6883	95.9348	-619.447	36897.6	27372.3	7071.35	244.188	240.435	0	0	0	0	0	0	0	200	903	0	0	0	0	0	0	0	603	903	0
660	0	17.2142	94.1037	-620.668	36989.1	27494.4	6888.25	244.298	240.404	0	0	0	0	0	0	0	200	903	0	0	0	0	0	0	0	603	903	0
660	1	18.7401	94.7141	-619.447	36897.6	27311.3	6842.47	244.09	240.435	0	0	0	0	0	0	0	200	903	0	0	0	0	0	0	0	603	903	0
660	2	16.909	96.5451	-621.888	36439.8	27494.4	7208.68	244.211	241.405	0	0	0	0	0	0	0	200	903	0	0	0	0	0	0	0	603	903	0
660	3	17.2142	95.6296	-622.194	37080.7	27616.5	6659.37	244.386	240.403	0	0	0	0	0	0	0	200	903	0	0	0	0	0	0	0	603	903	0
660	4	18.8927	94.4089	-620.973	35798.9	27433.3	6750.92	244.178	242.35	0	0	0	0	0	0	0	200	903	0	0	0	0	0	0	0	603	903	0
660	5	17.672	93.9511	-621.888	36165.2	27128.2	7025.58	243.622	241.846	0	0	0	0	0	0	0	200	903	0	0	0	0	0	0	0	603	903	0
660	6	20.4186	93.9511	-622.499	35890.5	26884	6613.59	243.187	242.344	0	0	0	0	0	0	0	200	903	0	0	0	0	0	0	0	603	903	0
660	7	21.0289	92.1201	-625.245	35982.1	27799.6	6796.69	244.462	242.451	0	0	0	0	0	0	0	200	903	0	0	0	0	0	0	0	603	903	0
660	8	20.5711	90.4416	-624.635	35524.3	27616.5	6888.25	244.212	243.128	0	0	0	0	0	0	0	200	903	0	0	0	0	0	0	0	603	903	0
660	9	22.2496	91.052	-625.551	35890.5	27799.6	6705.14	244.44	242.626	0	0	0	0	0	0	0	200	903	0	0	0	0	0	0	0	603	903	0
661	0	23.6229	89.5261	-625.551	35890.5	27433.3	6293.15	243.855	242.626	0	0	0	0	0	0	0	200	903	0	0	0	0	0	0	0	603	903	0
661	1	22.5548	89.2209	-624.33	35615.8	27738.5	7071.35	244.429	242.954	0	0	0	0	0	0	0	200	903	0	0	0	0	0	0	0	603	903	0
661	2	24.8436	86.7795	-629.518	35341.2	28043.7	6842.47	244.548	243.86	0	0	0	0	0	0	0	200	903	0	0	0	0	0	0	0	603	903	0
661	3	25.6065	87.2373	-627.992	35066.5	28226.8	6659.37	244.948	244.161	0	0	0	0	0	0	0	200	903	0	0	0	0	0	0	0	603	903	0
661	4	23.3177	86.1692	-627.687	35341.2	27921.6	6796.69	244.483	243.696	0	0	0	0	0	0	0	200	903	0	0	0	0	0	0	0	603	903	0
661	5	24.691	84.9485	-624.94	34334.1	28226.8	6659.37	245.167	245.06	0	0	0	0	0	0	0	200	903	0	0	0	0	0	0	0	603	903	0
661	6	24.3858	85.7114	-623.109	34608.8	28165.8	6613.59	245.202	244.458	0	0	0	0	0	0	0	200	903	0	0	0	0	0	0	0	603	903	0
661	7	24.3858	85.5588	-625.856	34334.1	28409.9	6705.14	245.394	245.141	0	0	0	0	0	0	0	200	903	0	0	0	0	0	0	0	603	903	0
661	8	23.9281	83.8803	-627.076	34059.5	27982.7	6888.25	244.624	245.685	0	0	0	0	0	0	0	200	903	0	0	0	0	0	0	0	603	903	0
661	9	23.7755	82.8122	-626.771	34059.5	28532	6705.14	245.522	245.659	0	0	0	0	0	0	0	200	903	0	0	0	0	0	0	0	603	903	0
662	0	25.1488	82.9648	-625.856	34059.5	28226.8	6659.37	245.101	245.579	0	0	0	0	0	0	0	200	903	0	0	0	0	0	0	0	603	903	0
662	1	23.1651	81.8967	-625.551	34242.6	28593	6796.69	245.709	245.26	0	0	0	0	0	0	0	200	903	0	0	0	0	0	0	0	603	903	0
662	2	24.0807	79.6079	-624.33	33510.1	27494.4	6705.14	244.038	246.326	0	0	0	0	0	0	0	200	903	0	0	0	0	0	0	0	603	903	0
662	3	23.9281	78.2346	-626.161	33784.8	28470.9	6613.59	245.469	246.045	0	0	0	0	0	0	0	200	903	0	0	0	0	0	0	0	603	903	0
662	4	24.2333	78.6924	-624.635	33052.4	28654	7208.68	245.873	247.085	0	0	0	0	0	0	0	200	903	0	0	0	0	0	0	0	603	903	0
662	5	23.1651	77.7768	-624.025	32869.3	28165.8	6476.26	245.136	247.327	0	0	0	0	0	0	0	200	903	0	0	0	0	0	0	0	603	903	0
662	6	23.4703	77.6242	-624.635	33143.9	28287.8	6476.26	245.287	246.939	0	0	0	0	0	0	0	200	903	0	0	0	0	0	0	0	603	903	0
662	7	23.7755	77.3191	-622.499	32594.6	28654	6613.59	246.031	247.639	0	0	0	0	0	0	0	200	903	0	0	0	0	0	0	0	603	903	0
662	8	24.3858	75.0303	-623.109	32594.6	28715.1	6567.81	246.084	247.69	0	0	0	0	0	0	0	200	903	0	0	0	0	0	0	0	603	903	0
662	9	24.3858	76.5561	-623.109	32686.2	28287.8	6201.6	245.398	247.543	0	0	0	0	0	0	0	200	903	0	0	0	0	0	0	0	603	903	0
663	0	23.3177	75.7932	-623.109	32503.1	28532	6338.93	245.79	247.837	0	0	0	0	0	0	0	200	903	0	0	0	0	0	0	0	603	903	0
663	1	23.1651	73.657	-620.363	31953.7	28593	6430.48	246.091	248.492	0	0	0	0	0	0	0	200	903	0	0	0	0	0	0	0	603	903	0
663	2	24.0807	74.1147	-620.363	32136.8	28593	6110.05	246.091	248.197	0	0	0	0	0	0	0	200	903	0	0	0	0	0	0	0	603	903	0
663	3	24.0807	71.063	-620.668	31770.6	28226.8	6384.71	245.478	248.812	0	0	0	0	0	0	0	200	903	0	0	0	0	0	0	0	603	903	0
663	4	23.9281	71.5207	-615.785	31038.2	28470.9	6384.71	246.235	249.596	0	0	0	0	0	0	0	200	903	0	0	0	0	0	0	0	603	903	0
663	5	24.0807	70.9104	-620.668	30488.9	28470.9	6201.6	245.871	250.877	0	0	0	0	0	0	0	200	903	0	0	0	0	0	0	0	603	903	0
663	6	23.7755	71.6733	-617.616	31496	28348.9	6201.6	245.9	249.004	0	0	0	0	0	0	0	200	903	0	0	0	0	0	0	0	603	903	0
663	7	24.8436	69.6897	-616.395	30397.3	28348.9	6476.26	245.991	250.685	0	0	0	0	0	0	0	200	903	0	0	0	0	0	0	0	603	903	0
663	8	25.454	68.0112	-616.395	29939.6	27860.6	6018.5	245.199	251.428	0	0	0	0	0	0	0	200	903	0	0	0	0	0	0	0	603	903	0
663	9	24.691	69.0793	-615.785	30488.9	28837.2	6110.05	246.83	250.488	0	0	0	0	0	0	0	200	903	0	0	0	0	0	0	0	603	903	0
664	0	24.2333	69.2319	-615.175	29939.6	28532	6110.05	246.38	251.332	0	0	0	0	0	0	0	200	903	0	0	0	0	0	0	0	603	903	0
664	1	23.3177	66.7905	-611.818	29664.9	28348.9	5835.39	246.336	251.513	0	0	0	0	0	0	0	200	903	0	0	0	0	0	0	0	603	903	0
664	2	23.3177	66.3327	-610.902	29756.5	27860.6	5835.39	245.606	251.291	0	0	0	0	0	0	0	200	903	0	0	0	0	0	0	0	603	903	0
664	3	24.691	65.7224	-610.902	29573.4	28470.9	5789.61	246.605	251.591	0	0	0	0	0	0	0	200	903	0	0	0	0	0	0	0	603	903	0
664	4	23.6229	64.8069	-610.292	29024	27860.6	5789.61	245.651	252.442	0	0	0	0	0	0	0	200	903	0	0	0	0	0	0	0	603	903	0
664	5	22.7074	64.3491	-609.071	28383.2	28654	5286.07	247.046	253.399	0	0	0	0	0	0	0	200	903	0	0	0	0	0	0	0	603	903	0
664	6	23.7755	64.0439	-608.461	28200.1	27982.7	5881.17	245.989	253.653	0	0	0	0	0	0	0	200	903	0	0	0	0	0	0	0	603	903	0
664	7	23.7755	62.8232	-605.714	28200.1	28287.8	5926.94	246.702	253.443	0	0	0	0	0	0	0	200	903	0	0	0	0	0	0	0	603	903	0
664	8	24.691	60.5344	-604.493	27833.9	28043.7	5606.51	246.392	253.955	0	0	0	0	0	0	0	200	903	0	0	0	0	0	0	0	603	903	0
664	9	24.3858	61.4499	-602.968	28017	28226.8	5835.39	246.813	253.535	0	0	0	0	0	0	0	200	903	0	0	0	0	0	0	0	603	903	0
665	0	24.691	60.3818	-603.273	27833.9	28287.8	5560.73	246.891	253.862	0	0	0	0	0	0	0	200	903	0	0	0	0	0	0	0	603	903	0
665	1	23.9281	59.0085	-601.747	27284.5	28409.9	5194.52	247.212	254.658	0	0	0	0	0	0	0	200	903	0	0	0	0	0	0	0	603	903	0
665	2	26.8272	58.7034	-599.611	27376.1	28043.7	5560.73	246.77	254.344	0	0	0	0	0	0	0	200	903	0	0	0	0	0	0	0	603	903	0
665	3	24.2333	57.4826	-597.78	26918.3	28654	5789.61	247.934	254.969	0	0	0	0	0	0	0	200	903	0	0	0	0	0	0	0	603	903	0
665	4	24.2333	57.0249	-596.559	26552.1	28043.7	5331.85	247.009	255.491	0	0	0	0	0	0	0	200	903	0	0	0	0	0	0	0	603	903	0
665	5	24.5384	56.1094	-595.949	26369	28226.8	5011.42	247.365	255.753	0	0	0	0	0	0	0	200	903	0	0	0	0	0	0	0	603	903	0
665	6	24.5384	56.1094	-592.286	25911.3	28776.1	5377.63	248.585	256.252	0	0	0	0	0	0	0	200	903	0	0	0	0	0	0	0	603	903	0
665	7	23.7755	55.3464	-594.728	25636.6	28043.7	5011.42	247.154	256.894	0	0	0	0	0	0	0	200	903	0	0	0	0	0	0	0	603	903	0
665	8	24.2333	54.8887	-590.455	25178.8	28104.7	4782.53	247.598	257.357	0	0	0	0	0	0	0	200	903	0	0	0	0	0	0	0	603	903	0
665	9	24.691	53.6679	-590.15	25361.9	28226.8	5102.97	247.83	257.025	0	0	0	0	0	0	0	200	903	0	0	0	0	0	0	0	603	903	0
666	0	24.3858	52.7524	-586.488	25361.9	28287.8	4919.86	248.233	256.756	0	0	0	0	0	0	0	200	903	0	0	0	0	0	0	0	603	903	0
666	1	24.8436	51.9895	-589.54	24904.2	28226.8	4965.64	247.879	257.757	0	0	0	0	0	0	0	200	903	0	0	0	0	0	0	0	603	903	0
666	2	24.691	51.3791	-587.709	24538	28104.7	4919.86	247.821	258.248	0	0	0	0	0	0	0	200	903	0	0	0	0	0	0	0	603	903	0
666	3	25.6065	49.2429	-584.352	23988.6	28043.7	5102.97	247.991	258.948	0	0	0	0	0	0	0	200	903	0	0	0	0	0	0	0	603	903	0
666	4	24.3858	49.8533	-580.079	23530.9	28348.9	4874.09	248.871	259.435	0	0	0	0	0	0	0	200	903	0	0	0	0	0	0	0	603	903	0
666	5	25.6065	49.3955	-582.826	23256.2	28470.9	4874.09	248.85	260.097	0	0	0	0	0	0	0	200	903	0	0	0	0	0	0	0	603	903	0
666	6	25.3014	49.7007	-581.605	23073.1	28104.7	4690.98	248.323	260.329	0	0	0	0	0	0	0	200	903	0	0	0	0	0	0	0	603	903	0
666	7	24.691	48.7851	-580.385	22615.4	28104.7	4507.87	248.424	261.034	0	0	0	0	0	0	0	200	903	0	0	0	0	0	0	0	603	903	0
666	8	24.0807	48.48	-576.417	22615.4	28348.9	4507.87	249.181	260.766	0	0	0	0	0	0	0	200	903	0	0	0	0	0	0	0	603	903	0
666	9	24.2333	47.717	-574.586	22615.4	28409.9	4690.98	249.444	260.641	0	0	0	0	0	0	0	200	903	0	0	0	0	0	0	0	603	903	0
667	0	24.9962	46.9541	-572.755	22706.9	28104.7	4507.87	249.069	260.355	0	0	0	0	0	0	0	200	903	0	0	0	0	0	0	0	603	903	0
667	1	24.3858	46.6489	-573.366	22066	27860.6	4233.22	248.591	261.515	0	0	0	0	0	0	0	200	903	0	0	0	0	0	0	0	603	903	0
667	2	24.5384	45.2756	-572.145	21699.8	28226.8	4416.32	249.335	262.073	0	0	0	0	0	0	0	200	903	0	0	0	0	0	0	0	603	903	0
667	3	23.3177	44.5127	-569.398	21333.6	28165.8	4324.77	249.466	262.533	0	0	0	0	0	0	0	200	903	0	0	0	0	0	0	0	603	903	0
667	4	23.9281	42.6816	-566.652	21059	27677.5	4233.22	248.844	262.836	0	0	0	0	0	0	0	200	903	0	0	0	0	0	0	0	603	903	0
667	5	24.5384	43.292	-565.126	20418.1	27799.6	4370.55	249.192	263.87	0	0	0	0	0	0	0	200	903	0	0	0	0	0	0	0	603	903	0
667	6	25.9117	42.3764	-563.905	20051.9	27982.7	4416.32	249.623	264.441	0	0	0	0	0	0	0	200	903	0	0	0	0	0	0	0	603	903	0
667	7	24.8436	40.8506	-560.243	19502.6	27860.6	4416.32	249.729	265.189	0	0	0	0	0	0	0	200	903	0	0	0	0	0	0	0	603	903	0
667	8	24.5384	43.1394	-560.243	18861.7	27555.4	4278.99	249.185	266.333	0	0	0	0	0	0	0	200	903	0	0	0	0	0	0	0	603	903	0
667	9	24.0807	43.1394	-556.276	19502.6	27677.5	4004.33	249.755	264.941	0	0	0	0	0	0	0	200	903	0	0	0	0	0	0	0	603	903	0
668	0	23.6229	40.5454	-553.834	18587	27616.5	3912.78	249.864	266.439	0	0	0	0	0	0	0	200	903	0	0	0	0	0	0	0	603	903	0
668	1	25.6065	41.4609	-553.834	18770.1	27860.6	3958.56	250.305	266.109	0	0	0	0	0	0	0	200	903	0	0	0	0	0	0	0	603	903	0
668	2	24.5384	40.698	-550.172	18953.2	27433.3	4187.44	249.863	265.55	0	0	0	0	0	0	0	200	903	0	0	0	0	0	0	0	603	903	0
668	3	23.7755	40.8506	-551.088	18495.5	27372.3	4187.44	249.67	266.438	0	0	0	0	0	0	0	200	903	0	0	0	0	0	0	0	603	903	0
668	4	23.0125	39.0195	-548.341	17854.6	27433.3	3821.23	250.03	267.439	0	0	0	0	0	0	0	200	903	0	0	0	0	0	0	0	603	903	0
668	5	24.3858	38.5617	-546.51	17854.6	26700.9	3729.68	248.857	267.33	0	0	0	0	0	0	0	200	903	0	0	0	0	0	0	0	603	903	0
668	6	23.4703	36.8833	-541.627	17213.7	27311.3	3775.45	250.424	268.218	0	0	0	0	0	0	0	200	903	0	0	0	0	0	0	0	603	903	0
668	7	24.0807	37.0359	-544.374	16572.9	27372.3	3638.12	250.282	269.556	0	0	0	0	0	0	0	200	903	0	0	0	0	0	0	0	603	903	0
668	8	23.3177	36.2729	-542.238	16206.7	27372.3	3638.12	250.48	270.112	0	0	0	0	0	0	0	200	903	0	0	0	0	0	0	0	603	903	0
668	9	25.454	35.8152	-540.101	16023.6	27494.4	3500.8	250.906	270.332	0	0	0	0	0	0	0	200	903	0	0	0	0	0	0	0	603	903	0
669	0	23.7755	35.9678	-537.05	16572.9	27189.2	3546.57	250.627	269.141	0	0	0	0	0	0	0	200	903	0	0	0	0	0	0	0	603	903	0
669	1	24.2333	35.8152	-534.608	15199.6	27006.1	3546.57	250.516	271.569	0	0	0	0	0	0	0	200	903	0	0	0	0	0	0	0	603	903	0
669	2	24.3858	35.3574	-534.608	15199.6	27067.1	3500.8	250.63	271.569	0	0	0	0	0	0	0	200	903	0	0	0	0	0	0	0	603	903	0
669	3	23.6229	34.5945	-529.42	14833.4	27128.2	3409.24	251.241	271.982	0	0	0	0	0	0	0	200	903	0	0	0	0	0	0	0	603	903	0
669	4	22.2496	33.8315	-532.167	15016.5	27067.1	3271.91	250.862	271.782	0	0	0	0	0	0	0	200	903	0	0	0	0	0	0	0	603	903	0
669	5	22.7074	33.8315	-529.42	15199.6	26884	3226.14	250.78	271.29	0	0	0	0	0	0	0	200	903	0	0	0	0	0	0	0	603	903	0
669	6	23.1651	32.3056	-528.2	14650.3	26700.9	3363.47	250.551	272.264	0	0	0	0	0	0	0	200	903	0	0	0	0	0	0	0	603	903	0
669	7	22.86	32.4582	-524.843	13917.8	26823	3088.81	251.107	273.482	0	0	0	0	0	0	0	200	903	0	0	0	0	0	0	0	603	903	0
669	8	23.3177	31.5427	-526.063	13917.8	26884	3180.36	251.104	273.543	0	0	0	0	0	0	0	200	903	0	0	0	0	0	0	0	603	903	0
669	9	22.097	30.9324	-525.453	13734.7	26700.9	3088.81	250.815	273.861	0	0	0	0	0	0	0	200	903	0	0	0	0	0	0	0	603	903	0
670	0	23.9281	30.322	-519.655	12727.7	26700.9	3226.14	251.382	275.507	0	0	0	0	0	0	0	200	903	0	0	0	0	0	0	0	603	903	0
670	1	22.7074	29.5591	-520.265	12361.5	26945.1	2951.48	251.791	276.24	0	0	0	0	0	0	0	200	903	0	0	0	0	0	0	0	603	903	0
670	2	23.6229	29.8642	-517.824	12636.1	27006.1	2905.7	252.153	275.598	0	0	0	0	0	0	0	200	903	0	0	0	0	0	0	0	603	903	0
670	3	23.1651	29.2539	-517.518	11812.1	26700.9	2768.37	251.594	277.175	0	0	0	0	0	0	0	200	903	0	0	0	0	0	0	0	603	903	0
670	4	24.2333	28.7961	-514.161	11812.1	26151.6	2722.6	250.863	277.026	0	0	0	0	0	0	0	200	903	0	0	0	0	0	0	0	603	903	0
670	5	22.7074	28.0332	-515.687	11262.8	26395.7	2859.93	251.186	278.16	0	0	0	0	0	0	0	200	903	0	0	0	0	0	0	0	603	903	0
670	6	22.2496	26.5073	-510.805	11354.4	26578.9	2997.26	252.033	277.772	0	0	0	0	0	0	0	200	903	0	0	0	0	0	0	0	603	903	0
670	7	23.6229	26.8125	-511.72	11354.4	26456.8	2768.37	251.702	277.811	0	0	0	0	0	0	0	200	903	0	0	0	0	0	0	0	603	903	0
670	8	24.0807	26.9651	-508.668	11354.4	26700.9	2402.16	252.492	277.678	0	0	0	0	0	0	0	200	903	0	0	0	0	0	0	0	603	903	0
670	9	23.7755	25.4392	-509.889	10896.6	26212.6	2539.49	251.409	278.629	0	0	0	0	0	0	0	200	903	0	0	0	0	0	0	0	603	903	0
671	0	22.5548	24.5237	-508.363	10164.2	26334.7	2402.16	251.803	280.006	0	0	0	0	0	0	0	200	903	0	0	0	0	0	0	0	603	903	0
671	1	24.691	23.7607	-504.701	10255.7	26151.6	2356.39	251.816	279.68	0	0	0	0	0	0	0	200	903	0	0	0	0	0	0	0	603	903	0
671	2	22.86	22.0823	-503.785	9981.08	25846.4	2402.16	251.304	280.188	0	0	0	0	0	0	0	200	903	0	0	0	0	0	0	0	603	903	0
671	3	24.0807	22.3874	-501.039	8790.89	26456.8	2356.39	252.804	282.455	0	0	0	0	0	0	0	200	903	0	0	0	0	0	0	0	603	903	0
671	4	24.8436	22.3874	-502.87	8516.23	25968.5	2631.04	251.641	283.065	0	0	0	0	0	0	0	200	903	0	0	0	0	0	0	0	603	903	0
671	5	26.0643	22.3874	-498.292	9340.21	26823	2219.06	253.83	281.256	0	0	0	0	0	0	0	200	903	0	0	0	0	0	0	0	603	903	0
671	6	23.6229	21.6245	-498.292	8058.47	25541.3	2310.61	251.258	283.828	0	0	0	0	0	0	0	200	903	0	0	0	0	0	0	0	603	903	0
671	7	24.3858	21.4719	-495.241	7875.36	26334.7	2081.73	253.176	284.098	0	0	0	0	0	0	0	200	903	0	0	0	0	0	0	0	603	903	0
671	8	24.8436	21.1667	-493.409	7326.05	26151.6	2356.39	253.002	285.152	0	0	0	0	0	0	0	200	903	0	0	0	0	0	0	0	603	903	0
671	9	24.5384	21.1667	-491.578	7783.81	26090.6	2219.06	253.075	284.166	0	0	0	0	0	0	0	200	903	0	0	0	0	0	0	0	603	903	0
672	0	24.9962	19.946	-491.884	7326.05	25846.4	1990.17	252.546	285.106	0	0	0	0	0	0	0	200	903	0	0	0	0	0	0	0	603	903	0
672	1	24.2333	19.946	-491.578	7692.26	26029.5	1852.85	252.951	284.352	0	0	0	0	0	0	0	200	903	0	0	0	0	0	0	0	603	903	0
672	2	25.9117	19.3357	-487.611	6959.84	26212.6	2035.95	253.757	285.727	0	0	0	0	0	0	0	200	903	0	0	0	0	0	0	0	603	903	0
672	3	23.4703	19.1831	-486.696	6318.97	25846.4	1761.29	253.106	287.017	0	0	0	0	0	0	0	200	903	0	0	0	0	0	0	0	603	903	0
672	4	25.3014	18.5727	-484.254	7051.39	25480.2	1807.07	252.617	285.439	0	0	0	0	0	0	0	200	903	0	0	0	0	0	0	0	603	903	0
672	5	24.8436	18.115	-486.085	5403.44	25724.4	2035.95	252.922	288.884	0	0	0	0	0	0	0	200	903	0	0	0	0	0	0	0	603	903	0
672	6	24.9962	17.9624	-478.151	4762.57	25724.4	1715.52	253.8	290.04	0	0	0	0	0	0	0	200	903	0	0	0	0	0	0	0	603	903	0
672	7	24.5384	18.5727	-483.339	5403.44	25907.5	1623.96	253.601	288.821	0	0	0	0	0	0	0	200	903	0	0	0	0	0	0	0	603	903	0
672	8	24.9962	18.5727	-478.151	4579.46	25541.3	1761.29	253.417	290.423	0	0	0	0	0	0	0	200	903	0	0	0	0	0	0	0	603	903	0
672	9	25.3014	17.9624	-476.625	4030.15	25419.2	1440.86	253.332	291.544	0	0	0	0	0	0	0	200	903	0	0	0	0	0	0	0	603	903	0
673	0	25.6065	16.2839	-475.099	4030.15	25724.4	1211.98	254.145	291.517	0	0	0	0	0	0	0	200	903	0	0	0	0	0	0	0	603	903	0
673	1	25.6065	17.8098	-476.32	3572.38	25602.3	1578.19	253.75	292.5	0	0	0	0	0	0	0	200	903	0	0	0	0	0	0	0	603	903	0
673	2	24.8436	17.6572	-473.573	3938.6	25297.1	1715.52	253.418	291.683	0	0	0	0	0	0	0	200	903	0	0	0	0	0	0	0	603	903	0
673	3	25.3014	17.1994	-469.911	3572.38	25236.1	1303.53	253.704	292.398	0	0	0	0	0	0	0	200	903	0	0	0	0	0	0	0	603	903	0
673	4	24.5384	17.0469	-469.911	3572.38	25419.2	1349.31	254.094	292.398	0	0	0	0	0	0	0	200	903	0	0	0	0	0	0	0	603	903	0
673	5	25.6065	15.8262	-469.911	3114.62	25480.2	1166.2	254.224	293.372	0	0	0	0	0	0	0	200	903	0	0	0	0	0	0	0	603	903	0
673	6	24.9962	15.9787	-469.911	2565.3	24686.8	1349.31	252.535	294.541	0	0	0	0	0	0	0	200	903	0	0	0	0	0	0	0	603	903	0
673	7	25.6065	15.9787	-466.859	1558.22	25053	1166.2	253.663	296.662	0	0	0	0	0	0	0	200	903	0	0	0	0	0	0	0	603	903	0
673	8	24.691	15.3684	-468.08	1832.88	25419.2	1395.08	254.305	296.084	0	0	0	0	0	0	0	200	903	0	0	0	0	0	0	0	603	903	0
673	9	24.691	15.6736	-464.113	1558.22	25419.2	1257.75	254.769	296.643	0	0	0	0	0	0	0	200	903	0	0	0	0	0	0	0	603	903	0
674	0	25.3014	14.9106	-461.976	551.144	24869.9	937.318	253.834	298.807	0	0	0	0	0	0	0	200	903	0	0	0	0	0	0	0	603	903	0
674	1	26.6747	15.2158	-462.587	642.697	25175	1028.87	254.422	298.611	0	0	0	0	0	0	0	200	903	0	0	0	0	0	0	0	603	903	0
674	2	25.3014	15.521	-461.976	734.25	25114	891.542	254.362	298.411	0	0	0	0	0	0	0	200	903	0	0	0	0	0	0	0	603	903	0
674	3	24.3858	14.758	-459.535	184.934	24930.9	708.436	254.252	299.598	0	0	0	0	0	0	0	200	903	0	0	0	0	0	0	0	603	903	0
674	4	24.2333	15.2158	-458.619	-89.7247	24869.9	1074.65	254.228	300.196	0	0	0	0	0	0	0	200	903	0	0	0	0	0	0	0	603	903	0
674	5	24.8436	14.758	-457.704	-364.383	24686.8	754.213	253.936	300.796	0	0	0	0	0	0	0	200	903	0	0	0	0	0	0	0	603	903	0
674	6	24.3858	15.0632	-455.263	-455.936	24869.9	799.989	254.628	301.001	0	0	0	0	0	0	0	200	903	0	0	0	0	0	0	0	603	903	0
674	7	24.5384	14.4529	-457.094	-547.489	24991.9	708.436	254.676	301.198	0	0	0	0	0	0	0	200	903	0	0	0	0	0	0	0	603	903	0
674	8	23.9281	13.6899	-455.263	-730.594	24503.7	754.213	253.823	301.605	0	0	0	0	0	0	0	200	903	0	0	0	0	0	0	0	603	903	0
674	9	23.4703	12.7744	-451.906	-822.147	24198.5	662.66	253.548	301.819	0	0	0	0	0	0	0	200	903	0	0	0	0	0	0	0	603	903	0
675	0	25.1488	12.7744	-451.906	-1463.02	24686.8	662.66	254.628	303.237	0	0	0	0	0	0	0	200	903	0	0	0	0	0	0	0	603	903	0
675	1	24.5384	12.927	-451.906	-1829.23	24686.8	1120.42	254.628	304.048	0	0	0	0	0	0	0	200	903	0	0	0	0	0	0	0	603	903	0
675	2	24.3858	10.7908	-451.906	-1829.23	24442.6	616.883	254.088	304.048	0	0	0	0	0	0	0	200	903	0	0	0	0	0	0	0	603	903	0
675	3	23.7755	11.8589	-452.516	-2653.2	24381.6	296.449	253.88	305.863	0	0	0	0	0	0	0	200	903	0	0	0	0	0	0	0	603	903	0
675	4	25.9117	12.0115	-449.159	-3385.62	24564.7	342.225	254.69	307.538	0	0	0	0	0	0	0	200	903	0	0	0	0	0	0	0	603	903	0
675	5	23.1651	11.8589	-448.549	-3751.83	24198.5	388.001	253.948	308.364	0	0	0	0	0	0	0	200	903	0	0	0	0	0	0	0	603	903	0
675	6	23.7755	11.2485	-447.023	-3294.07	24381.6	159.12	254.542	307.369	0	0	0	0	0	0	0	200	903	0	0	0	0	0	0	0	603	903	0
675	7	24.2333	12.0115	-449.464	-3019.41	24137.4	799.989	253.703	306.718	0	0	0	0	0	0	0	200	903	0	0	0	0	0	0	0	603	903	0
675	8	23.6229	11.7063	-449.159	-3751.83	24442.6	250.672	254.419	308.353	0	0	0	0	0	0	0	200	903	0	0	0	0	0	0	0	603	903	0
675	9	22.5548	10.333	-449.159	-4392.7	24076.4	296.449	253.603	309.78	0	0	0	0	0	0	0	200	903	0	0	0	0	0	0	0	603	903	0
676	0	22.4022	10.7908	-447.633	-4484.26	24076.4	296.449	253.786	310.018	0	0	0	0	0	0	0	200	903	0	0	0	0	0	0	0	603	903	0
676	1	23.1651	11.0959	-447.328	-4209.6	24076.4	433.778	253.823	309.411	0	0	0	0	0	0	0	200	903	0	0	0	0	0	0	0	603	903	0
676	2	23.9281	10.6382	-447.633	-4758.92	24198.5	159.12	254.059	310.631	0	0	0	0	0	0	0	200	903	0	0	0	0	0	0	0	603	903	0
676	3	24.3858	9.87522	-444.581	-5033.57	24137.4	204.896	254.293	311.322	0	0	0	0	0	0	0	200	903	0	0	0	0	0	0	0	603	903	0
676	4	23.0125	9.11228	-449.159	-5033.57	24503.7	250.672	254.555	311.207	0	0	0	0	0	0	0	200	903	0	0	0	0	0	0	0	603	903	0
676	5	23.0125	9.26487	-446.107	-5857.55	24625.7	113.343	255.201	313.13	0	0	0	0	0	0	0	200	903	0	0	0	0	0	0	0	603	903	0
676	6	23.9281	9.41746	-445.192	-6589.97	24381.6	204.896	254.766	314.803	0	0	0	0	0	0	0	200	903	0	0	0	0	0	0	0	603	903	0
676	7	23.3177	9.11228	-445.802	-6589.97	24198.5	-298.644	254.281	314.782	0	0	0	0	0	0	0	200	903	0	0	0	0	0	0	0	603	903	0
676	8	23.6229	8.04417	-447.328	-6864.63	24442.6	250.672	254.641	315.346	0	0	0	0	0	0	0	200	903	0	0	0	0	0	0	0	603	903	0
676	9	22.4022	8.65452	-447.023	-6315.31	23832.3	67.5668	253.313	314.128	0	0	0	0	0	0	0	200	903	0	0	0	0	0	0	0	603	903	0
677	0	22.4022	9.11228	-447.023	-7597.05	24869.9	-115.539	255.634	316.995	0	0	0	0	0	0	0	200	903	0	0	0	0	0	0	0	603	903	0
677	1	22.86	7.73899	-444.887	-7597.05	24320.5	-69.7623	254.667	317.076	0	0	0	0	0	0	0	200	903	0	0	0	0	0	0	0	603	903	0
677	2	22.86	8.50193	-444.581	-6956.18	24320.5	-298.644	254.704	315.647	0	0	0	0	0	0	0	200	903	0	0	0	0	0	0	0	603	903	0
677	3	22.4022	8.34935	-446.412	-7780.16	24076.4	-390.197	253.933	317.428	0	0	0	0	0	0	0	200	903	0	0	0	0	0	0	0	603	903	0
677	4	22.4022	7.73899	-449.464	-8237.92	24686.8	-527.526	254.925	318.328	0	0	0	0	0	0	0	200	903	0	0	0	0	0	0	0	603	903	0
677	5	22.86	6.97605	-445.497	-7963.26	24381.6	67.5668	254.729	317.875	0	0	0	0	0	0	0	200	903	0	0	0	0	0	0	0	603	903	0
677	6	22.097	6.51829	-447.023	-8604.13	24381.6	-69.7623	254.542	319.248	0	0	0	0	0	0	0	200	903	0	0	0	0	0	0	0	603	903	0
677	7	23.1651	6.67088	-447.023	-8970.34	24625.7	-252.868	255.088	320.067	0	0	0	0	0	0	0	200	903	0	0	0	0	0	0	0	603	903	0
677	8	22.5548	6.67088	-448.549	-9336.55	24747.8	-481.75	255.173	320.815	0	0	0	0	0	0	0	200	903	0	0	0	0	0	0	0	603	903	0
677	9	22.7074	5.75535	-444.276	-10252.1	24808.8	-481.75	255.841	323.076	0	0	0	0	0	0	0	200	903	0	0	0	0	0	0	0	603	903	0
678	0	22.097	6.21311	-448.243	-10526.7	24503.7	-435.973	254.666	323.484	0	0	0	0	0	0	0	200	903	0	0	0	0	0	0	0	603	903	0
678	1	22.2496	5.45018	-446.718	-10343.6	24503.7	-619.079	254.853	323.155	0	0	0	0	0	0	0	200	903	0	0	0	0	0	0	0	603	903	0
678	2	22.097	6.21311	-447.328	-10160.5	24869.9	-664.855	255.597	322.714	0	0	0	0	0	0	0	200	903	0	0	0	0	0	0	0	603	903	0
678	3	23.0125	6.3657	-452.821	-11167.6	24930.9	-756.408	255.057	324.662	0	0	0	0	0	0	0	200	903	0	0	0	0	0	0	0	603	903	0
678	4	23.0125	5.60276	-450.99	-11076.1	24625.7	-710.631	254.604	324.559	0	0	0	0	0	0	0	200	903	0	0	0	0	0	0	0	603	903	0
678	5	21.6393	5.90794	-450.38	-11167.6	24503.7	-756.408	254.407	324.796	0	0	0	0	0	0	0	200	903	0	0	0	0	0	0	0	603	903	0
678	6	21.9444	5.60276	-448.854	-11350.7	24808.8	-756.408	255.272	325.288	0	0	0	0	0	0	0	200	903	0	0	0	0	0	0	0	603	903	0
678	7	21.6393	4.83982	-449.769	-11442.3	24686.8	-802.184	254.888	325.44	0	0	0	0	0	0	0	200	903	0	0	0	0	0	0	0	603	903	0
678	8	22.86	4.22947	-449.159	-12174.7	24991.9	-619.079	255.642	327.106	0	0	0	0	0	0	0	200	903	0	0	0	0	0	0	0	603	903	0
678	9	22.5548	4.22947	-451.906	-12449.3	24259.5	-802.184	253.683	327.549	0	0	0	0	0	0	0	200	903	0	0	0	0	0	0	0	603	903	0
679	0	22.4022	2.55101	-451.295	-12724	24930.9	-893.737	255.243	328.194	0	0	0	0	0	0	0	200	903	0	0	0	0	0	0	0	603	903	0
679	1	22.4022	3.77171	-449.464	-13456.4	25114	-1122.62	255.875	329.939	0	0	0	0	0	0	0	200	903	0	0	0	0	0	0	0	603	903	0
679	2	20.8763	3.9243	-447.633	-14097.3	25114	-1122.62	256.104	331.493	0	0	0	0	0	0	0	200	903	0	0	0	0	0	0	0	603	903	0
679	3	21.9444	4.99241	-450.685	-14097.3	24869.9	-1168.4	255.182	331.28	0	0	0	0	0	0	0	200	903	0	0	0	0	0	0	0	603	903	0
679	4	22.4022	4.53465	-453.126	-14646.6	25114	-1305.72	255.424	332.323	0	0	0	0	0	0	0	200	903	0	0	0	0	0	0	0	603	903	0
679	5	20.8763	4.07688	-453.431	-14646.6	25175	-1397.28	255.521	332.302	0	0	0	0	0	0	0	200	903	0	0	0	0	0	0	0	603	903	0
679	6	23.3177	3.46653	-452.821	-14555.1	25175	-1626.16	255.596	332.143	0	0	0	0	0	0	0	200	903	0	0	0	0	0	0	0	603	903	0
679	7	21.0289	3.46653	-453.431	-14372	24808.8	-1214.17	254.714	331.696	0	0	0	0	0	0	0	200	903	0	0	0	0	0	0	0	603	903	0
679	8	21.6393	3.46653	-452.821	-14921.3	25175	-847.961	255.596	332.952	0	0	0	0	0	0	0	200	903	0	0	0	0	0	0	0	603	903	0
679	9	21.9444	3.16136	-455.568	-15195.9	25236.1	-1305.72	255.395	333.356	0	0	0	0	0	0	0	200	903	0	0	0	0	0	0	0	603	903	0
680	0	21.4867	2.39842	-455.568	-14738.2	25358.2	-1626.16	255.663	332.351	0	0	0	0	0	0	0	200	903	0	0	0	0	0	0	0	603	903	0
680	1	21.0289	1.94065	-456.788	-15928.4	24930.9	-1259.95	254.579	334.87	0	0	0	0	0	0	0	200	903	0	0	0	0	0	0	0	603	903	0
680	2	21.0289	1.94065	-455.568	-16203	24686.8	-1671.94	254.189	335.567	0	0	0	0	0	0	0	200	903	0	0	0	0	0	0	0	603	903	0
680	3	21.6393	-0.500753	-456.788	-16294.6	25236.1	-1580.38	255.247	335.672	0	0	0	0	0	0	0	200	903	0	0	0	0	0	0	0	603	903	0
680	4	23.0125	1.63548	-458.925	-17118.5	25236.1	-1763.49	254.99	337.301	0	0	0	0	0	0	0	200	903	0	0	0	0	0	0	0	603	903	0
680	5	21.1815	1.17771	-459.23	-18125.6	25480.2	-1809.26	255.485	339.47	0	0	0	0	0	0	0	200	903	0	0	0	0	0	0	0	603	903	0
680	6	21.0289	1.48289	-459.535	-18034.1	25114	-1763.49	254.651	339.244	0	0	0	0	0	0	0	200	903	0	0	0	0	0	0	0	603	903	0
680	7	20.266	1.02513	-458.925	-17942.5	25663.3	-1855.04	255.921	339.097	0	0	0	0	0	0	0	200	903	0	0	0	0	0	0	0	603	903	0
680	8	20.4186	1.17771	-461.366	-18949.6	25175	-1900.82	254.566	341.073	0	0	0	0	0	0	0	200	903	0	0	0	0	0	0	0	603	903	0
680	9	20.7237	1.17771	-459.84	-19132.7	25480.2	-2038.15	255.411	341.607	0	0	0	0	0	0	0	200	903	0	0	0	0	0	0	0	603	903	0
681	0	21.0289	-0.65334	-462.282	-18858	25602.3	-2083.92	255.382	340.793	0	0	0	0	0	0	0	200	903	0	0	0	0	0	0	0	603	903	0
681	1	20.1134	0.414775	-462.892	-19407.4	25663.3	-2221.25	255.441	341.926	0	0	0	0	0	0	0	200	903	0	0	0	0	0	0	0	603	903	0
681	2	21.7918	-0.348165	-463.807	-19041.1	25663.3	-2267.03	255.332	341.054	0	0	0	0	0	0	0	200	903	0	0	0	0	0	0	0	603	903	0
681	3	20.4186	-1.56887	-461.976	-19407.4	25907.5	-2312.8	256.08	342.009	0	0	0	0	0	0	0	200	903	0	0	0	0	0	0	0	603	903	0
681	4	21.0289	-1.56887	-465.028	-19865.1	25419.2	-2312.8	254.662	342.718	0	0	0	0	0	0	0	200	903	0	0	0	0	0	0	0	603	903	0
681	5	21.1815	-1.87404	-467.164	-19956.7	25785.4	-2175.48	255.196	342.719	0	0	0	0	0	0	0	200	903	0	0	0	0	0	0	0	603	903	0
681	6	21.1815	-3.24733	-464.113	-20506	25968.5	-2129.7	255.953	344.183	0	0	0	0	0	0	0	200	903	0	0	0	0	0	0	0	603	903	0
681	7	19.9608	-2.33181	-468.69	-21330	26212.6	-2221.25	255.927	345.51	0	0	0	0	0	0	0	200	903	0	0	0	0	0	0	0	603	903	0
681	8	20.266	-2.4844	-467.775	-21970.8	25968.5	-2679.02	255.515	346.969	0	0	0	0	0	0	0	200	903	0	0	0	0	0	0	0	603	903	0
681	9	20.8763	-1.87404	-469.301	-21330	25968.5	-2495.91	255.335	345.451	0	0	0	0	0	0	0	200	903	0	0	0	0	0	0	0	603	903	0
682	0	20.1134	-2.33181	-469.606	-22062.4	26578.9	-2495.91	256.598	346.981	0	0	0	0	0	0	0	200	903	0	0	0	0	0	0	0	603	903	0
682	1	20.5711	-2.63698	-473.268	-22428.6	26212.6	-2679.02	255.387	347.391	0	0	0	0	0	0	0	200	903	0	0	0	0	0	0	0	603	903	0
682	2	19.9608	-2.78957	-474.489	-22611.7	26212.6	-3045.23	255.244	347.655	0	0	0	0	0	0	0	200	903	0	0	0	0	0	0	0	603	903	0
682	3	21.1815	-3.85769	-473.573	-22611.7	25907.5	-2907.9	254.706	347.747	0	0	0	0	0	0	0	200	903	0	0	0	0	0	0	0	603	903	0
682	4	20.1134	-4.31545	-472.658	-22520.1	26395.7	-2724.79	255.845	347.646	0	0	0	0	0	0	0	200	903	0	0	0	0	0	0	0	603	903	0
682	5	21.0289	-6.29909	-476.32	-23252.6	26334.7	-2587.46	255.288	348.817	0	0	0	0	0	0	0	200	903	0	0	0	0	0	0	0	603	903	0
682	6	21.1815	-6.75686	-479.677	-22703.2	26823	-3091	255.919	347.33	0	0	0	0	0	0	0	200	903	0	0	0	0	0	0	0	603	903	0
682	7	20.266	-7.67238	-481.202	-23618.8	26517.8	-2587.46	255.107	349.083	0	0	0	0	0	0	0	200	903	0	0	0	0	0	0	0	603	903	0
682	8	21.1815	-7.97756	-479.066	-24168.1	26395.7	-2862.12	255.098	350.448	0	0	0	0	0	0	0	200	903	0	0	0	0	0	0	0	603	903	0
682	9	20.7237	-7.82497	-482.118	-24625.9	27494.4	-2907.9	257.028	351.079	0	0	0	0	0	0	0	200	903	0	0	0	0	0	0	0	603	903	0
683	0	20.7237	-7.97756	-482.118	-25083.6	27128.2	-3228.33	256.269	352.028	0	0	0	0	0	0	0	200	903	0	0	0	0	0	0	0	603	903	0
683	1	21.1815	-8.28273	-485.17	-25541.4	26884	-3045.23	255.412	352.644	0	0	0	0	0	0	0	200	903	0	0	0	0	0	0	0	603	903	0
683	2	19.9608	-8.43532	-486.085	-24809	27067.1	-3502.99	255.684	351.038	0	0	0	0	0	0	0	200	903	0	0	0	0	0	0	0	603	903	0
683	3	19.6556	-8.58791	-487.306	-25816	27555.4	-3136.78	256.546	352.977	0	0	0	0	0	0	0	200	903	0	0	0	0	0	0	0	603	903	0
683	4	19.6556	-8.7405	-487.916	-25907.6	27311.3	-3274.11	255.975	353.098	0	0	0	0	0	0	0	200	903	0	0	0	0	0	0	0	603	903	0
683	5	20.266	-8.89309	-488.832	-26090.7	27128.2	-3686.1	255.496	353.374	0	0	0	0	0	0	0	200	903	0	0	0	0	0	0	0	603	903	0
683	6	20.7237	-9.50344	-491.884	-26273.8	27189.2	-3594.54	255.276	353.415	0	0	0	0	0	0	0	200	903	0	0	0	0	0	0	0	603	903	0
683	7	20.4186	-9.9612	-487.306	-26456.9	27616.5	-3457.21	256.672	354.292	0	0	0	0	0	0	0	200	903	0	0	0	0	0	0	0	603	903	0
683	8	19.3504	-11.6397	-493.715	-26823.1	27738.5	-3457.21	256.183	354.329	0	0	0	0	0	0	0	200	903	0	0	0	0	0	0	0	603	903	0
683	9	19.503	-11.9448	-494.02	-26914.7	27372.3	-3777.65	255.407	354.481	0	0	0	0	0	0	0	200	903	0	0	0	0	0	0	0	603	903	0
684	0	20.4186	-12.7078	-495.546	-27189.3	27494.4	-3686.1	255.483	354.867	0	0	0	0	0	0	0	200	903	0	0	0	0	0	0	0	603	903	0
684	1	21.1815	-13.1655	-499.818	-28013.3	27738.5	-3686.1	255.497	356.047	0	0	0	0	0	0	0	200	903	0	0	0	0	0	0	0	603	903	0
684	2	20.5711	-13.013	-499.818	-28471.1	27921.6	-3686.1	255.864	356.963	0	0	0	0	0	0	0	200	903	0	0	0	0	0	0	0	603	903	0
684	3	19.8082	-13.6233	-501.039	-28928.8	27738.5	-3960.75	255.362	357.738	0	0	0	0	0	0	0	200	903	0	0	0	0	0	0	0	603	903	0
684	4	19.3504	-14.2337	-499.818	-29478.2	27860.6	-4098.08	255.741	358.978	0	0	0	0	0	0	0	200	903	0	0	0	0	0	0	0	603	903	0
684	5	17.8246	-14.3863	-497.377	-29295	28226.8	-3960.75	256.751	358.899	0	0	0	0	0	0	0	200	903	0	0	0	0	0	0	0	603	903	0
684	6	19.9608	-14.0811	-504.091	-28471.1	28470.9	-3869.2	256.48	356.48	0	0	0	0	0	0	0	200	903	0	0	0	0	0	0	0	603	903	0
684	7	19.9608	-14.6914	-507.753	-29935.9	27860.6	-4052.31	254.87	358.958	0	0	0	0	0	0	0	200	903	0	0	0	0	0	0	0	603	903	0
684	8	18.7401	-14.844	-508.973	-30576.8	28104.7	-4281.19	255.218	360.075	0	0	0	0	0	0	0	200	903	0	0	0	0	0	0	0	603	903	0
684	9	20.4186	-16.9802	-509.584	-30759.9	28593	-4281.19	256.111	360.363	0	0	0	0	0	0	0	200	903	0	0	0	0	0	0	0	603	903	0
685	0	18.5875	-16.8277	-509.279	-30210.6	28776.1	-4281.19	256.504	359.32	0	0	0	0	0	0	0	200	903	0	0	0	0	0	0	0	603	903	0
685	1	20.1134	-18.8113	-512.025	-30943	28532	-4464.29	255.724	360.433	0	0	0	0	0	0	0	200	903	0	0	0	0	0	0	0	603	903	0
685	2	19.8082	-19.5742	-515.687	-31034.5	28654	-4601.62	255.565	360.181	0	0	0	0	0	0	0	200	903	0	0	0	0	0	0	0	603	903	0
685	3	19.1979	-21.1001	-515.687	-31034.5	29142.3	-4418.52	256.512	360.181	0	0	0	0	0	0	0	200	903	0	0	0	0	0	0	0	603	903	0
685	4	19.503	-20.9475	-518.739	-31583.9	28898.2	-4052.31	255.709	360.886	0	0	0	0	0	0	0	200	903	0	0	0	0	0	0	0	603	903	0
685	5	20.4186	-22.4734	-518.434	-31309.2	28898.2	-4601.62	255.741	360.392	0	0	0	0	0	0	0	200	903	0	0	0	0	0	0	0	603	903	0
685	6	21.0289	-22.1682	-521.18	-32407.8	29081.3	-4601.62	255.799	362.182	0	0	0	0	0	0	0	200	903	0	0	0	0	0	0	0	603	903	0
685	7	20.5711	-22.7786	-524.537	-32774.1	29325.4	-4922.06	255.907	362.482	0	0	0	0	0	0	0	200	903	0	0	0	0	0	0	0	603	903	0
685	8	20.266	-22.4734	-526.063	-32682.5	29569.6	-4784.73	256.209	362.127	0	0	0	0	0	0	0	200	903	0	0	0	0	0	0	0	603	903	0
685	9	19.0453	-23.3889	-530.031	-33140.3	29508.5	-4784.73	255.673	362.525	0	0	0	0	0	0	0	200	903	0	0	0	0	0	0	0	603	903	0
686	0	19.8082	-25.0674	-529.725	-33506.5	29081.3	-4876.28	254.899	363.253	0	0	0	0	0	0	0	200	903	0	0	0	0	0	0	0	603	903	0
686	1	17.2142	-25.9829	-533.693	-33781.1	29691.6	-5059.39	255.634	363.297	0	0	0	0	0	0	0	200	903	0	0	0	0	0	0	0	603	903	0
686	2	18.8927	-26.5933	-535.219	-33323.4	29447.5	-5013.61	255.02	362.261	0	0	0	0	0	0	0	200	903	0	0	0	0	0	0	0	603	903	0
686	3	18.2823	-27.5088	-539.186	-33323.4	29813.7	-5196.72	255.294	361.803	0	0	0	0	0	0	0	200	903	0	0	0	0	0	0	0	603	903	0
686	4	17.8246	-28.8821	-535.219	-34147.4	30179.9	-5379.82	256.388	363.801	0	0	0	0	0	0	0	200	903	0	0	0	0	0	0	0	603	903	0
686	5	16.6039	-30.408	-543.763	-33323.4	29874.8	-5196.72	254.941	361.283	0	0	0	0	0	0	0	200	903	0	0	0	0	0	0	0	603	903	0
686	6	17.9771	-31.4761	-544.374	-34238.9	30546.1	-5379.82	256.112	362.896	0	0	0	0	0	0	0	200	903	0	0	0	0	0	0	0	603	903	0
686	7	17.5194	-31.9339	-546.51	-34879.8	30546.1	-5288.27	255.893	363.823	0	0	0	0	0	0	0	200	903	0	0	0	0	0	0	0	603	903	0
686	8	18.8927	-34.833	-552.308	-34605.1	30302	-5608.7	254.864	362.655	0	0	0	0	0	0	0	200	903	0	0	0	0	0	0	0	603	903	0
686	9	18.1297	-33.4597	-553.529	-35520.6	30607.2	-5791.81	255.295	364.171	0	0	0	0	0	0	0	200	903	0	0	0	0	0	0	0	603	903	0
687	0	17.2142	-33.9175	-555.971	-35337.5	30912.3	-5837.59	255.601	363.56	0	0	0	0	0	0	0	200	903	0	0	0	0	0	0	0	603	903	0
687	1	17.672	-35.4434	-554.75	-36253.1	30912.3	-5883.36	255.723	365.35	0	0	0	0	0	0	0	200	903	0	0	0	0	0	0	0	603	903	0
687	2	17.3668	-35.1382	-555.971	-35337.5	30668.2	-5746.03	255.162	363.56	0	0	0	0	0	0	0	200	903	0	0	0	0	0	0	0	603	903	0
687	3	18.4349	-36.6641	-560.548	-36344.6	30912.3	-6158.02	255.147	364.838	0	0	0	0	0	0	0	200	903	0	0	0	0	0	0	0	603	903	0
687	4	17.3668	-38.8003	-564.821	-36802.4	31034.4	-6112.24	254.946	365.158	0	0	0	0	0	0	0	200	903	0	0	0	0	0	0	0	603	903	0
687	5	17.0616	-38.19	-566.041	-36436.2	31339.6	-5974.92	255.366	364.37	0	0	0	0	0	0	0	200	903	0	0	0	0	0	0	0	603	903	0
687	6	18.2823	-39.7158	-568.483	-36436.2	31278.6	-5929.14	255.021	364.094	0	0	0	0	0	0	0	200	903	0	0	0	0	0	0	0	603	903	0
687	7	16.7564	-39.7158	-568.788	-36710.8	31522.7	-6249.57	255.421	364.542	0	0	0	0	0	0	0	200	903	0	0	0	0	0	0	0	603	903	0
687	8	17.2142	-42.0047	-570.619	-36619.3	31705.8	-6295.35	255.564	364.175	0	0	0	0	0	0	0	200	903	0	0	0	0	0	0	0	603	903	0
687	9	17.5194	-42.4624	-573.366	-37351.7	31827.9	-6203.8	255.511	365.145	0	0	0	0	0	0	0	200	903	0	0	0	0	0	0	0	603	903	0
688	0	17.0616	-43.3779	-571.84	-37809.5	31827.9	-6524.23	255.659	366.119	0	0	0	0	0	0	0	200	903	0	0	0	0	0	0	0	603	903	0
688	1	16.4513	-43.6831	-578.859	-38175.7	31705.8	-6661.56	254.773	365.95	0	0	0	0	0	0	0	200	903	0	0	0	0	0	0	0	603	903	0
688	2	17.0616	-44.7512	-578.859	-38725	32255.1	-6432.68	255.722	366.899	0	0	0	0	0	0	0	200	903	0	0	0	0	0	0	0	603	903	0
688	3	17.3668	-44.9038	-580.385	-38175.7	31949.9	-6341.13	255.05	365.777	0	0	0	0	0	0	0	200	903	0	0	0	0	0	0	0	603	903	0
688	4	18.8927	-45.8194	-584.657	-38450.3	32377.2	-6615.78	255.378	365.766	0	0	0	0	0	0	0	200	903	0	0	0	0	0	0	0	603	903	0
688	5	17.5194	-46.1245	-587.098	-39365.8	31705.8	-6753.11	254.004	367.052	0	0	0	0	0	0	0	200	903	0	0	0	0	0	0	0	603	903	0
688	6	17.0616	-48.1082	-588.93	-39365.8	32377.2	-6798.89	254.976	366.843	0	0	0	0	0	0	0	200	903	0	0	0	0	0	0	0	603	903	0
688	7	16.4513	-48.4133	-589.54	-39640.5	32499.3	-6707.34	255.127	367.24	0	0	0	0	0	0	0	200	903	0	0	0	0	0	0	0	603	903	0
688	8	18.4349	-48.5659	-590.455	-39457.4	32621.3	-6844.67	255.248	366.825	0	0	0	0	0	0	0	200	903	0	0	0	0	0	0	0	603	903	0
688	9	17.672	-49.3289	-592.592	-39915.2	32499.3	-6890.44	254.843	367.357	0	0	0	0	0	0	0	200	903	0	0	0	0	0	0	0	603	903	0
689	0	17.5194	-50.7022	-595.338	-40006.7	32621.3	-7302.43	254.795	367.2	0	0	0	0	0	0	0	200	903	0	0	0	0	0	0	0	603	903	0
689	1	17.0616	-50.8548	-597.474	-40281.4	33048.6	-7256.65	255.314	367.419	0	0	0	0	0	0	0	200	903	0	0	0	0	0	0	0	603	903	0
689	2	19.1979	-51.1599	-597.78	-40098.3	32987.5	-7165.1	255.183	367.079	0	0	0	0	0	0	0	200	903	0	0	0	0	0	0	0	603	903	0
689	3	16.6039	-52.991	-600.526	-40372.9	32926.5	-6844.67	254.829	367.229	0	0	0	0	0	0	0	200	903	0	0	0	0	0	0	0	603	903	0
689	4	17.672	-52.6858	-600.831	-40739.2	32926.5	-7256.65	254.802	367.805	0	0	0	0	0	0	0	200	903	0	0	0	0	0	0	0	603	903	0
689	5	18.1297	-53.4487	-604.799	-41654.7	33475.8	-7302.43	255.35	368.874	0	0	0	0	0	0	0	200	903	0	0	0	0	0	0	0	603	903	0
689	6	19.8082	-53.4487	-604.188	-41746.2	33231.7	-7439.76	255.002	369.095	0	0	0	0	0	0	0	200	903	0	0	0	0	0	0	0	603	903	0
689	7	16.909	-54.0591	-608.156	-42204	33536.9	-7256.65	255.145	369.397	0	0	0	0	0	0	0	200	903	0	0	0	0	0	0	0	603	903	0
689	8	17.5194	-54.9746	-608.156	-42295.5	33048.6	-7393.98	254.342	369.547	0	0	0	0	0	0	0	200	903	0	0	0	0	0	0	0	603	903	0
689	9	18.7401	-55.4324	-610.902	-42478.6	33536.9	-7348.21	254.897	369.534	0	0	0	0	0	0	0	200	903	0	0	0	0	0	0	0	603	903	0
690	0	19.503	-56.6531	-613.344	-42112.4	33597.9	-7531.31	254.778	368.66	0	0	0	0	0	0	0	200	903	0	0	0	0	0	0	0	603	903	0
690	1	18.7401	-57.1109	-614.564	-42387.1	33964.1	-7393.98	255.265	368.971	0	0	0	0	0	0	0	200	903	0	0	0	0	0	0	0	603	903	0
690	2	18.1297	-57.8738	-615.48	-41380	33781	-7348.21	254.886	367.232	0	0	0	0	0	0	0	200	903	0	0	0	0	0	0	0	603	903	0
690	3	18.1297	-58.7893	-615.48	-42661.7	33842	-7622.86	254.985	369.315	0	0	0	0	0	0	0	200	903	0	0	0	0	0	0	0	603	903	0
690	4	19.1979	-60.3152	-616.701	-43211.1	34086.2	-7851.75	255.272	370.068	0	0	0	0	0	0	0	200	903	0	0	0	0	0	0	0	603	903	0
690	5	18.5875	-59.8574	-615.175	-42936.4	34330.3	-7760.19	255.806	369.796	0	0	0	0	0	0	0	200	903	0	0	0	0	0	0	0	603	903	0
690	6	19.1979	-60.01	-620.973	-44035.1	34208.2	-7668.64	255.088	370.913	0	0	0	0	0	0	0	200	903	0	0	0	0	0	0	0	603	903	0
690	7	17.9771	-61.5359	-621.583	-43943.5	33903.1	-7714.42	254.543	370.696	0	0	0	0	0	0	0	200	903	0	0	0	0	0	0	0	603	903	0
690	8	19.1979	-61.6885	-623.72	-43851.9	34269.3	-7943.3	254.943	370.307	0	0	0	0	0	0	0	200	903	0	0	0	0	0	0	0	603	903	0
690	9	18.7401	-61.9937	-622.804	-44675.9	34269.3	-7714.42	255.024	371.734	0	0	0	0	0	0	0	200	903	0	0	0	0	0	0	0	603	903	0
691	0	19.3504	-62.7566	-622.499	-44950.6	34208.2	-7760.19	254.953	372.21	0	0	0	0	0	0	0	200	903	0	0	0	0	0	0	0	603	903	0
691	1	19.1979	-63.6721	-626.466	-45225.2	34025.1	-8034.85	254.313	372.191	0	0	0	0	0	0	0	200	903	0	0	0	0	0	0	0	603	903	0
691	2	19.1979	-64.1299	-624.94	-44492.8	34635.5	-7989.08	255.422	371.195	0	0	0	0	0	0	0	200	903	0	0	0	0	0	0	0	603	903	0
691	3	19.3504	-65.3506	-628.602	-44675.9	34696.5	-7760.19	255.196	371.072	0	0	0	0	0	0	0	200	903	0	0	0	0	0	0	0	603	903	0
691	4	19.3504	-66.2661	-626.161	-44950.6	34513.4	-7851.75	255.119	371.788	0	0	0	0	0	0	0	200	903	0	0	0	0	0	0	0	603	903	0
691	5	20.5711	-66.8765	-627.382	-45133.7	34086.2	-8126.4	254.331	371.94	0	0	0	0	0	0	0	200	903	0	0	0	0	0	0	0	603	903	0
691	6	19.503	-67.0291	-627.687	-45133.7	34330.3	-8080.63	254.693	371.905	0	0	0	0	0	0	0	200	903	0	0	0	0	0	0	0	603	903	0
691	7	19.6556	-68.4024	-631.349	-45499.9	34574.5	-8172.18	254.763	372.068	0	0	0	0	0	0	0	200	903	0	0	0	0	0	0	0	603	903	0
691	8	19.3504	-69.1653	-631.959	-46232.3	34757.6	-8584.17	255	373.157	0	0	0	0	0	0	0	200	903	0	0	0	0	0	0	0	603	903	0
691	9	19.9608	-70.0808	-631.349	-46140.8	34757.6	-8401.06	255.053	373.083	0	0	0	0	0	0	0	200	903	0	0	0	0	0	0	0	603	903	0
692	0	18.1297	-69.9282	-631.349	-45774.5	34391.4	-8217.96	254.473	372.503	0	0	0	0	0	0	0	200	903	0	0	0	0	0	0	0	603	903	0
692	1	19.503	-70.5386	-633.79	-46690.1	34635.5	-8629.94	254.648	373.668	0	0	0	0	0	0	0	200	903	0	0	0	0	0	0	0	603	903	0
692	2	19.6556	-72.5222	-635.621	-46690.1	34574.5	-8217.96	254.395	373.456	0	0	0	0	0	0	0	200	903	0	0	0	0	0	0	0	603	903	0
692	3	18.8927	-71.9119	-635.316	-46140.8	34513.4	-8217.96	254.325	372.626	0	0	0	0	0	0	0	200	903	0	0	0	0	0	0	0	603	903	0
692	4	20.4186	-72.8274	-634.096	-46598.5	34574.5	-8309.51	254.526	373.488	0	0	0	0	0	0	0	200	903	0	0	0	0	0	0	0	603	903	0
692	5	19.0453	-75.574	-634.096	-46781.6	34940.7	-8217.96	255.103	373.777	0	0	0	0	0	0	0	200	903	0	0	0	0	0	0	0	603	903	0
692	6	19.8082	-74.8111	-634.706	-46140.8	34757.6	-8263.73	254.762	372.696	0	0	0	0	0	0	0	200	903	0	0	0	0	0	0	0	603	903	0
692	7	19.3504	-74.9636	-636.537	-46964.7	34818.6	-8538.39	254.7	373.782	0	0	0	0	0	0	0	200	903	0	0	0	0	0	0	0	603	903	0
692	8	19.1979	-75.1162	-636.537	-46873.2	34696.5	-8355.29	254.508	373.638	0	0	0	0	0	0	0	200	903	0	0	0	0	0	0	0	603	903	0
692	9	18.2823	-76.9473	-636.232	-47330.9	34574.5	-8401.06	254.343	374.393	0	0	0	0	0	0	0	200	903	0	0	0	0	0	0	0	603	903	0
693	0	18.2823	-77.0999	-633.79	-47239.4	34940.7	-7943.3	255.13	374.535	0	0	0	0	0	0	0	200	903	0	0	0	0	0	0	0	603	903	0
693	1	18.8927	-77.4051	-633.79	-48154.9	34879.6	-8675.72	255.033	375.979	0	0	0	0	0	0	0	200	903	0	0	0	0	0	0	0	603	903	0
693	2	17.9771	-78.0154	-636.232	-47697.2	34391.4	-8355.29	254.055	374.968	0	0	0	0	0	0	0	200	903	0	0	0	0	0	0	0	603	903	0
693	3	17.3668	-79.6939	-637.147	-48154.9	34452.4	-8721.5	254.073	375.579	0	0	0	0	0	0	0	200	903	0	0	0	0	0	0	0	603	903	0
693	4	16.6039	-79.2361	-636.232	-46873.2	34513.4	-8629.94	254.247	373.673	0	0	0	0	0	0	0	200	903	0	0	0	0	0	0	0	603	903	0
693	5	17.5194	-79.6939	-634.096	-48612.7	34391.4	-8584.17	254.237	376.665	0	0	0	0	0	0	0	200	903	0	0	0	0	0	0	0	603	903	0
693	6	17.9771	-80.9146	-634.706	-48887.3	34269.3	-8538.39	253.992	377.024	0	0	0	0	0	0	0	200	903	0	0	0	0	0	0	0	603	903	0
693	7	17.2142	-82.2879	-635.621	-48795.8	33842	-8721.5	253.242	376.769	0	0	0	0	0	0	0	200	903	0	0	0	0	0	0	0	603	903	0
693	8	16.909	-81.9827	-635.621	-48338	34391.4	-8721.5	254.107	376.048	0	0	0	0	0	0	0	200	903	0	0	0	0	0	0	0	603	903	0
693	9	16.4513	-82.593	-630.433	-47971.8	34635.5	-8538.39	254.939	376.093	0	0	0	0	0	0	0	200	903	0	0	0	0	0	0	0	603	903	0
694	0	15.9935	-83.0508	-632.57	-48338	34513.4	-8904.6	254.561	376.415	0	0	0	0	0	0	0	200	903	0	0	0	0	0	0	0	603	903	0
694	1	16.7564	-84.2715	-631.044	-48429.6	34208.2	-8996.15	254.209	376.745	0	0	0	0	0	0	0	200	903	0	0	0	0	0	0	0	603	903	0
694	2	15.9935	-84.7293	-633.18	-48429.6	34269.3	-8813.05	254.122	376.486	0	0	0	0	0	0	0	200	903	0	0	0	0	0	0	0	603	903	0
694	3	15.2306	-85.95	-632.875	-48429.6	34269.3	-8492.62	254.149	376.523	0	0	0	0	0	0	0	200	903	0	0	0	0	0	0	0	603	903	0
694	4	13.7047	-87.4759	-631.654	-48795.8	34208.2	-8446.84	254.157	377.251	0	0	0	0	0	0	0	200	903	0	0	0	0	0	0	0	603	903	0
694	5	14.1625	-86.4077	-629.823	-49253.5	33658.9	-8217.96	253.442	378.202	0	0	0	0	0	0	0	200	903	0	0	0	0	0	0	0	603	903	0
694	6	14.315	-87.3233	-629.213	-49253.5	33597.9	-8446.84	253.397	378.278	0	0	0	0	0	0	0	200	903	0	0	0	0	0	0	0	603	903	0
694	7	14.6202	-88.0862	-629.823	-49253.5	33658.9	-8538.39	253.442	378.202	0	0	0	0	0	0	0	200	903	0	0	0	0	0	0	0	603	903	0
694	8	14.0099	-87.9336	-626.161	-48246.5	33720	-8721.5	253.852	377.051	0	0	0	0	0	0	0	200	903	0	0	0	0	0	0	0	603	903	0
694	9	12.7892	-88.2388	-630.433	-49436.6	33658.9	-8721.5	253.39	378.417	0	0	0	0	0	0	0	200	903	0	0	0	0	0	0	0	603	903	0
695	0	13.2469	-89.4595	-625.856	-49253.5	33292.7	-8904.6	253.196	378.698	0	0	0	0	0	0	0	200	903	0	0	0	0	0	0	0	603	903	0
695	1	12.7892	-90.9854	-625.856	-49528.2	33353.8	-8813.05	253.293	379.137	0	0	0	0	0	0	0	200	903	0	0	0	0	0	0	0	603	903	0
695	2	13.2469	-90.0698	-622.194	-48704.2	33414.8	-8584.17	253.705	378.278	0	0	0	0	0	0	0	200	903	0	0	0	0	0	0	0	603	903	0
695	3	13.0943	-91.138	-623.109	-48704.2	33658.9	-8950.38	254.018	378.163	0	0	0	0	0	0	0	200	903	0	0	0	0	0	0	0	603	903	0
695	4	11.4159	-92.6638	-621.888	-49070.4	33475.8	-8858.83	253.829	378.906	0	0	0	0	0	0	0	200	903	0	0	0	0	0	0	0	603	903	0
695	5	12.9417	-92.5113	-618.226	-48887.3	33353.8	-8538.39	253.951	379.077	0	0	0	0	0	0	0	200	903	0	0	0	0	0	0	0	603	903	0
695	6	11.1107	-93.4268	-616.395	-48429.6	33231.7	-8813.05	253.913	378.569	0	0	0	0	0	0	0	200	903	0	0	0	0	0	0	0	603	903	0
695	7	11.721	-94.0371	-616.09	-48887.3	33170.7	-8904.6	253.841	379.351	0	0	0	0	0	0	0	200	903	0	0	0	0	0	0	0	603	903	0
695	8	11.1107	-94.0371	-616.701	-49345.1	32560.3	-8904.6	252.798	380.015	0	0	0	0	0	0	0	200	903	0	0	0	0	0	0	0	603	903	0
695	9	10.6529	-95.4104	-614.564	-49162	32621.3	-8721.5	253.08	379.995	0	0	0	0	0	0	0	200	903	0	0	0	0	0	0	0	603	903	0
696	0	9.7374	-95.7156	-613.344	-49345.1	32621.3	-7989.08	253.186	380.453	0	0	0	0	0	0	0	200	903	0	0	0	0	0	0	0	603	903	0
696	1	10.5003	-95.8682	-609.376	-49528.2	32743.4	-8263.73	253.733	381.277	0	0	0	0	0	0	0	200	903	0	0	0	0	0	0	0	603	903	0
696	2	10.8055	-97.5467	-607.24	-49253.5	32621.3	-8309.51	253.721	381.111	0	0	0	0	0	0	0	200	903	0	0	0	0	0	0	0	603	903	0
696	3	11.721	-97.0889	-608.766	-48338	32621.3	-8858.83	253.586	379.403	0	0	0	0	0	0	0	200	903	0	0	0	0	0	0	0	603	903	0
696	4	9.88999	-97.0889	-605.409	-48521.1	32560.3	-8446.84	253.782	380.146	0	0	0	0	0	0	0	200	903	0	0	0	0	0	0	0	603	903	0
696	5	9.43223	-97.8518	-603.273	-48246.5	31827.9	-8904.6	252.759	379.975	0	0	0	0	0	0	0	200	903	0	0	0	0	0	0	0	603	903	0
696	6	9.27964	-99.0725	-599.611	-47605.6	32438.2	-8721.5	254.099	379.394	0	0	0	0	0	0	0	200	903	0	0	0	0	0	0	0	603	903	0
696	7	8.66929	-99.6829	-597.169	-47971.8	31766.8	-8813.05	253.196	380.332	0	0	0	0	0	0	0	200	903	0	0	0	0	0	0	0	603	903	0
696	8	9.27964	-100.141	-595.338	-47971.8	32072	-8584.17	253.872	380.579	0	0	0	0	0	0	0	200	903	0	0	0	0	0	0	0	603	903	0
696	9	9.27964	-99.9881	-594.728	-47788.7	31827.9	-8584.17	253.517	380.354	0	0	0	0	0	0	0	200	903	0	0	0	0	0	0	0	603	903	0
697	0	8.05894	-101.209	-591.981	-48521.1	31644.8	-8721.5	253.456	381.964	0	0	0	0	0	0	0	200	903	0	0	0	0	0	0	0	603	903	0
697	1	9.12705	-101.514	-587.098	-48521.1	31156.5	-8446.84	253.069	382.646	0	0	0	0	0	0	0	200	903	0	0	0	0	0	0	0	603	903	0
697	2	8.05894	-102.735	-587.404	-48246.5	31034.4	-8446.84	252.833	382.135	0	0	0	0	0	0	0	200	903	0	0	0	0	0	0	0	603	903	0
697	3	8.5167	-102.735	-584.657	-47514.1	31339.6	-8217.96	253.603	381.268	0	0	0	0	0	0	0	200	903	0	0	0	0	0	0	0	603	903	0
697	4	8.05894	-102.735	-584.047	-48246.5	31095.5	-8401.06	253.241	382.607	0	0	0	0	0	0	0	200	903	0	0	0	0	0	0	0	603	903	0
697	5	8.66929	-102.887	-579.469	-48063.4	30912.3	-8217.96	253.346	382.944	0	0	0	0	0	0	0	200	903	0	0	0	0	0	0	0	603	903	0
697	6	7.75376	-103.498	-578.248	-47422.5	30851.3	-8263.73	253.353	382.011	0	0	0	0	0	0	0	200	903	0	0	0	0	0	0	0	603	903	0
697	7	6.99082	-104.108	-574.281	-47056.3	30851.3	-7805.97	253.722	381.939	0	0	0	0	0	0	0	200	903	0	0	0	0	0	0	0	603	903	0
697	8	8.05894	-104.261	-571.229	-46415.4	30607.2	-8309.51	253.581	381.255	0	0.431519	8.47839	-19.9529	-1228.09	-569.578	-1233.4	171.454	964.549	0	0	0	0	0	0	0	603	903	0
697	9	7.60117	-104.413	-568.178	-46507	30485.1	-8172.18	253.654	381.853	0	0.278931	28.7726	-44.0618	-1136.54	-2400.63	-2011.6	145.517	928.794	0	0	0	0	0	0	0	603	903	0
698	0	7.44858	-105.023	-566.346	-45591.4	29569.6	-8401.06	252.211	380.501	0	-5.36682	28.9252	-38.2635	-221.009	-1240.96	-2148.93	167.568	908.776	0	0	0	0	0	0	0	603	903	0
698	1	6.53306	-105.786	-565.431	-46140.8	30057.9	-8126.4	253.159	381.603	0	-1.8573	5.57922	-20.8685	-1319.64	-813.718	-546.754	161.007	966.236	0	0	0	0	0	0	0	603	903	0
698	2	7.296	-107.617	-560.548	-45774.5	30057.9	-8080.63	253.622	381.66	0	0	0	0	0	0	0	200	903	0	0	0	0	0	0	0	603	903	0
698	3	5.46494	-106.855	-554.75	-46049.2	30118.9	-8172.18	254.293	383.009	0	-5.06165	31.3666	-31.5496	-1044.98	-1668.21	-2011.6	147.124	936.122	0	0	0	0	0	0	0	603	903	0
698	4	7.14341	-106.397	-551.698	-46507	29264.4	-8263.73	253.044	384.298	0	-8.41858	24.3475	-51.386	-953.431	-1363.03	-958.741	173.475	921.554	0	0	0	0	0	0	0	603	903	0
698	5	6.99082	-108.075	-552.919	-45774.5	29325.4	-7989.08	253.038	382.787	0	-2.62024	8.78357	-48.0291	-770.326	-2522.7	-1279.18	147.476	919.039	0	0	0	0	0	0	0	603	903	0
698	6	5.77012	-108.991	-549.867	-45225.2	29569.6	-7531.31	253.776	382.248	0	-7.50305	17.3285	-51.6912	-1777.41	-3133.05	-1645.39	139.389	937.385	0	0	0	0	0	0	0	603	903	0
698	7	5.15977	-109.449	-543.153	-45774.5	29081.3	-7851.75	253.542	384.276	0	-13.9117	16.1078	-76.4105	-1594.3	-3255.12	-455.201	157.399	923.865	0	0	0	0	0	0	0	603	903	0
698	8	6.68564	-108.991	-536.744	-45316.8	28898.2	-8034.85	253.84	384.429	0	-7.50305	-1.89758	-99.2986	-1777.41	-4536.86	-455.201	154.311	920.9	0	0	0	0	0	0	0	603	903	0
698	9	6.68564	-108.686	-536.439	-45133.7	28837.2	-7760.19	253.757	384.136	0	-7.80823	-2.66052	-109.369	-2052.06	-5574.46	-1096.07	149.031	921.763	0	0	0	0	0	0	0	603	903	0
699	0	5.00718	-110.211	-535.219	-44218.2	28776.1	-7348.21	253.765	382.617	0	-14.5221	11.225	-120.051	-2967.59	-5879.64	2.56305	151.024	927.72	0	0	0	0	0	0	0	603	903	0
699	1	4.702	-110.211	-525.758	-43943.5	28715.1	-7805.97	254.617	383.581	0	-5.97717	5.42664	-136.53	-2876.04	-6612.06	-272.095	151.571	924.065	0	0	0	0	0	0	0	603	903	0
699	2	4.54941	-109.906	-523.622	-42936.4	28165.8	-7760.19	253.79	381.999	0	-3.84094	-5.71228	-155.451	-3425.36	-7222.41	-684.083	153.539	925.035	0	0	0	0	0	0	0	603	903	0
699	3	3.63389	-110.211	-519.655	-42844.9	27311.3	-7302.43	252.557	382.449	0	-12.691	5.12146	-166.437	-3516.91	-7954.83	-88.9897	152.205	924.131	0	0	0	0	0	0	0	603	903	0
699	4	4.85459	-111.737	-518.129	-42936.4	27921.6	-7165.1	253.889	382.868	0	-6.74011	10.7672	-180.781	-4066.22	-8321.04	231.445	153.972	925.493	0	0	0	0	0	0	0	603	903	0
699	5	6.83823	-111.432	-512.941	-43028	27555.4	-7531.31	253.72	383.885	0	3.63586	-6.32263	-198.481	-4523.99	-8443.11	-226.319	157.461	925.793	0	0	0	0	0	0	0	603	903	0
699	6	4.702	-109.754	-506.532	-43028	27616.5	-7485.54	254.521	384.946	0	-1.39954	-7.39075	-215.265	-4890.2	-9236.57	689.209	157.092	925.717	0	0	0	0	0	0	0	603	903	0
699	7	3.63389	-111.432	-503.785	-42295.5	26884	-7165.1	253.364	383.955	0	-5.672	3.74817	-228.388	-5347.96	-9663.82	597.656	157.687	926.416	0	0	0	0	0	0	0	603	903	0
699	8	3.63389	-112.043	-498.903	-41654.7	26823	-7210.88	253.764	383.493	0	2.10999	-3.11829	-236.933	-6080.39	-10030	-180.542	157.667	928.663	0	0	0	0	0	0	0	603	903	0
699	9	5.46494	-112.043	-494.325	-41837.8	26884	-7119.32	254.385	384.636	0	9.28162	-10.7477	-251.581	-6080.39	-9907.96	643.432	160.617	927.169	0	0	0	0	0	0	0	603	903	0
700	0	4.54941	-110.211	-486.39	-41563.1	26823	-6615.78	255.147	385.452	0	4.55139	1.76453	-265.009	-6355.04	-10335.2	506.103	161.001	926.98	0	0	0	0	0	0	0	603	903	0
700	1	5.31235	-109.601	-484.559	-41105.4	26151.6	-6844.67	253.97	384.83	0	2.26257	5.57922	-270.807	-6812.81	-10762.4	-500.977	160.258	928.157	0	0	0	0	0	0	0	603	903	0
700	2	3.78647	-111.737	-480.287	-40006.7	25785.4	-6524.23	253.688	383.298	0	11.4178	-2.66052	-277.216	-7453.68	-10945.6	460.327	160.516	929.888	0	0	0	0	0	0	0	603	903	0
700	3	4.24424	-110.669	-472.963	-39549	26090.6	-6936.22	255.164	383.62	0	14.7748	4.35852	-286.982	-6446.6	-10945.6	368.774	161.86	925.464	0	0	0	0	0	0	0	603	903	0
700	4	3.93906	-108.228	-465.638	-39365.8	25297.1	-6798.89	254.328	384.542	0	7.90833	15.3448	-294.001	-7087.47	-11067.6	-821.412	162.355	927.107	0	0	0	0	0	0	0	603	903	0
700	5	5.15977	-109.754	-459.535	-37992.6	25785.4	-7073.55	256.112	382.676	0	10.9601	11.6827	-300.104	-8002.99	-11555.9	322.998	161.494	929.667	0	0	0	0	0	0	0	603	903	0
700	6	3.78647	-110.517	-455.873	-38267.2	24686.8	-6524.23	254.153	383.943	0	19.9628	12.1405	-305.903	-8735.41	-11494.9	48.3394	162.423	931.556	0	0	0	0	0	0	0	603	903	0
700	7	4.24424	-109.143	-450.38	-37809.5	24747.8	-6615.78	254.949	383.95	0	16.3007	26.1786	-312.617	-8735.41	-11494.9	-1141.85	163.23	930.943	0	0	0	0	0	0	0	603	903	0
700	8	3.93906	-107.465	-443.055	-37443.3	24625.7	-6478.46	255.582	384.511	0	14.6222	27.2467	-320.551	-9376.28	-11678	-912.964	163.569	932.251	0	0	0	0	0	0	0	603	903	0
700	9	3.78647	-108.228	-432.985	-37351.7	24442.6	-6432.68	256.451	386.266	0	19.0472	24.5001	-321.772	-9559.39	-12166.3	-500.977	162.19	932.709	0	0	0	0	0	0	0	603	903	0
701	0	4.54941	-108.686	-428.407	-36985.5	23710.2	-5837.59	255.345	386.333	0	20.8783	35.0287	-330.012	-10658	-11861.1	-1782.72	164.059	935.296	0	0	0	0	0	0	0	603	903	0
701	1	6.07529	-107.465	-424.44	-36069.9	23588.1	-6158.02	255.575	384.982	0	18.1317	43.8788	-342.524	-11390.4	-12288.3	-1370.73	164.124	936.255	0	0	0	0	0	0	0	603	903	0
701	2	6.38047	-105.481	-414.674	-35246	23344	-6432.68	256.295	384.997	0	21.3361	42.0477	-351.984	-11573.5	-12593.5	-1599.61	164.221	935.881	0	0	0	0	0	0	0	603	903	0
701	3	4.09165	-105.329	-408.571	-35886.8	22855.7	-5883.36	255.941	387.835	0	24.0826	45.5573	-360.224	-12580.6	-13020.8	-2744.02	163.854	937.924	0	0	0	0	0	0	0	603	903	0
701	4	5.00718	-105.481	-397.889	-34788.2	22489.5	-5517.15	256.522	387.432	0	22.099	60.2057	-369.684	-13770.8	-13142.8	-2560.91	164.449	940.25	0	0	0	0	0	0	0	603	903	0
701	5	6.99082	-102.582	-392.396	-33872.7	22062.2	-5883.36	256.224	386.323	0	22.4042	62.3419	-380.976	-14137	-13448	-2744.02	164.701	940.107	0	0	0	0	0	0	0	603	903	0
701	6	5.46494	-101.972	-382.936	-33231.8	22062.2	-5654.48	257.613	386.782	0	26.3715	57.9169	-391.962	-13679.3	-14424.6	-3522.22	163.199	937.899	0	0	0	0	0	0	0	603	903	0
701	7	5.31235	-101.361	-377.138	-32590.9	21451.9	-5334.04	256.881	386.417	0	24.8456	65.0885	-400.812	-15601.9	-14668.7	-3293.34	163.403	941.926	0	0	0	0	0	0	0	603	903	0
701	8	4.39683	-99.5303	-371.644	-31675.4	21329.8	-5334.04	257.393	385.23	0	23.4723	76.38	-412.104	-16700.5	-14485.6	-3110.23	164.85	943.525	0	0	0	0	0	0	0	603	903	0
701	9	5.9227	-98.4622	-363.405	-30302.1	20841.5	-5425.6	257.351	383.384	0	26.3715	71.0394	-423.395	-17249.8	-14912.8	-4254.64	164.778	943.742	0	0	0	0	0	0	0	603	903	0
702	0	2.87095	-97.3941	-352.418	-30759.9	20048.1	-5379.82	256.887	387.282	0	27.5922	72.2601	-434.992	-17249.8	-15706.3	-3430.67	163.893	942.656	0	0	0	0	0	0	0	603	903	0
702	1	5.00718	-96.326	-346.62	-30302.1	20231.2	-5196.72	258.367	387.422	0	25.3033	82.9413	-443.537	-19080.9	-16011.5	-3842.65	163.9	946.02	0	0	0	0	0	0	0	603	903	0
702	2	5.61753	-94.8001	-340.822	-29295	19681.9	-4830.5	257.748	385.954	0	27.4396	82.7887	-453.303	-19721.7	-15889.4	-4895.51	164.947	946.507	0	0	0	0	0	0	0	603	903	0
702	3	5.31235	-92.3587	-332.277	-29661.3	18949.5	-4326.96	257.029	389.267	0	30.0336	77.7533	-461.542	-20362.6	-16194.6	-4300.42	164.912	947.119	0	0	0	0	0	0	0	603	903	0
702	4	3.4813	-90.0698	-324.952	-29203.5	18766.3	-4052.31	257.751	389.87	0	27.1344	85.8405	-472.834	-21278.1	-16743.9	-4208.86	164.588	948.001	0	0	0	0	0	0	0	603	903	0
702	5	3.32871	-87.9336	-314.576	-28654.2	18888.4	-4418.52	260.044	391.088	0	29.118	88.7396	-480.158	-21919	-17049.1	-5261.72	164.493	948.65	0	0	0	0	0	0	0	603	903	0
702	6	3.78647	-84.1189	-307.863	-28104.9	17789.8	-3823.43	257.785	391.29	0	31.5594	83.5516	-486.567	-22651.4	-16804.9	-4758.18	165.462	949.554	0	0	0	0	0	0	0	603	903	0
702	7	5.46494	-82.593	-299.928	-27647.1	17728.8	-3594.54	259.11	392.179	0	32.3224	85.0775	-495.417	-23658.5	-17354.2	-4712.4	164.97	950.755	0	0	0	0	0	0	0	603	903	0
702	8	2.2606	-79.6939	-293.519	-27097.8	17240.5	-3686.1	258.737	392.32	0	28.2025	91.7914	-503.351	-23750.1	-18086.7	-5719.48	164.068	950.184	0	0	0	0	0	0	0	603	903	0
702	9	1.34507	-77.5576	-283.449	-26456.9	16752.2	-3960.75	259.101	393.339	0	31.5594	89.1974	-509.76	-24207.8	-18086.7	-5215.94	164.519	950.489	0	0	0	0	0	0	0	603	903	0
703	0	1.49766	-75.1162	-274.598	-25449.8	16447	-3686.1	259.895	392.68	0	34.4586	87.3663	-514.643	-25672.7	-17415.3	-4758.18	166.16	952.885	0	0	0	0	0	0	0	603	903	0
703	1	1.03989	-72.8274	-265.443	-24534.3	16019.8	-3411.44	260.351	392.428	0	31.4069	90.8759	-520.136	-26130.4	-18330.8	-6039.92	164.758	953.238	0	0	0	0	0	0	0	603	903	0
703	2	1.03989	-73.1326	-259.95	-24076.5	15470.5	-3594.54	259.513	392.62	0	29.7284	91.3336	-525.629	-26130.4	-18636	-5673.71	164.545	952.713	0	0	0	0	0	0	0	603	903	0
703	3	1.34507	-68.8601	-250.49	-22703.2	14860.1	-3731.87	259.324	390.636	0	32.475	88.1293	-530.512	-26771.3	-18391.8	-5032.84	165.332	953.463	0	0	0	0	0	0	0	603	903	0
703	4	-0.333399	-66.5713	-244.081	-23069.5	14616	-3136.78	259.882	394.516	0	32.1698	91.4862	-532.038	-27869.9	-18758.1	-6223.02	164.743	955.383	0	0	0	0	0	0	0	603	903	0
703	5	-0.94375	-66.1135	-234.926	-22428.6	13822.5	-2999.45	258.838	395.471	0	27.5922	94.8431	-537.531	-28236.1	-19185.3	-5902.59	164.308	955.529	0	0	0	0	0	0	0	603	903	0
703	6	0.582129	-63.2144	-225.465	-22611.7	14432.9	-3091	264.014	400.289	0	27.7448	91.4862	-539.057	-28053	-19246.3	-5536.38	164.296	955.041	0	0	0	0	0	0	0	603	903	0
703	7	0.887305	-58.6367	-220.277	-22245.5	13578.4	-2953.67	261.642	400.989	0	29.2706	90.7233	-542.109	-28144.6	-19002.2	-6177.25	164.948	954.917	0	0	0	0	0	0	0	603	903	0
703	8	0.887305	-55.1272	-214.174	-21421.5	13395.3	-2312.8	262.544	400.019	0	28.0499	96.6742	-544.245	-28968.6	-19246.3	-5811.04	164.637	956.227	0	0	0	0	0	0	0	603	903	0
703	9	-0.180811	-52.991	-207.765	-19956.7	12968	-2312.8	262.417	396.054	0	23.6249	94.6906	-546.076	-28785.5	-19795.7	-5627.93	163.749	955.713	0	0	0	0	0	0	0	603	903	0
704	0	-0.0282228	-49.9392	-200.746	-20780.6	12784.9	-2221.25	263.687	403.517	0	25.6085	92.4017	-547.602	-29426.3	-19551.5	-5719.48	164.296	956.737	0	0	0	0	0	0	0	603	903	0
704	1	-1.5541	-45.8194	-192.811	-20322.9	12052.5	-1717.71	262.509	405.403	0	24.9982	94.538	-544.855	-29884.1	-19490.5	-5856.81	164.228	957.848	0	0	0	0	0	0	0	603	903	0
704	2	-0.94375	-42.4624	-185.792	-18949.6	11320.1	-1671.94	260.929	401.993	0	21.9464	98.3527	-550.654	-30433.4	-20100.8	-4987.06	163.496	958.268	0	0	0	0	0	0	0	603	903	0
704	3	-1.40151	-40.4788	-181.215	-18674.9	11320.1	-1763.49	262.468	403.054	0	21.1835	93.9276	-550.043	-30250.3	-20100.8	-5627.93	163.456	957.996	0	0	0	0	0	0	0	603	903	0
704	4	-2.01187	-37.427	-171.144	-18125.6	10770.7	-1305.72	262.934	405.909	0	21.4886	93.1647	-550.043	-30982.7	-19795.7	-5444.83	164.011	959.328	0	0	0	0	0	0	0	603	903	0
704	5	-2.7748	-35.2908	-169.618	-16752.3	10770.7	-939.513	263.5	398.765	0	18.4369	97.7423	-550.043	-30799.6	-19551.5	-5032.84	164.455	958.995	0	0	0	0	0	0	0	603	903	0
704	6	-3.23257	-32.6968	-159.242	-17393.2	10099.4	-1397.28	263.421	409.225	0	17.9791	97.132	-549.433	-31165.8	-20161.9	-5444.83	163.304	959.724	0	0	0	0	0	0	0	603	903	0
704	7	-2.01187	-33.002	-154.97	-17027	9916.25	-1031.07	263.988	409.873	0	16.3007	93.775	-549.738	-31898.3	-20406	-5124.39	162.88	961.025	0	0	0	0	0	0	0	603	903	0
704	8	-1.85928	-29.7976	-151.307	-16111.5	9916.25	-527.526	265.537	406.482	0	14.9274	95.6061	-548.212	-31898.3	-19978.8	-4300.42	163.557	961.186	0	0	0	0	0	0	0	603	903	0
704	9	-3.23257	-27.051	-146.119	-16843.9	9305.9	-985.29	263.687	415.275	0	11.5704	98.3527	-547.907	-31440.5	-19856.7	-4941.29	163.759	960.383	0	0	0	0	0	0	0	603	903	0
705	0	-4.75845	-25.0674	-141.847	-16752.3	8878.65	-985.29	262.593	418.101	0	13.7067	94.538	-545.466	-31623.6	-20528.1	-4483.52	162.366	960.975	0	0	0	0	0	0	0	603	903	0
705	1	-5.06362	-23.6941	-136.354	-16019.9	8878.65	-573.302	265.115	417.488	0	10.5023	95.4535	-545.771	-32172.9	-20100.8	-4163.09	163.17	961.95	0	0	0	0	0	0	0	603	903	0
705	2	-4.60586	-22.7786	-131.471	-15745.2	9000.72	-756.408	268.462	419.762	0	6.68762	97.2845	-545.466	-31806.7	-20100.8	-4391.97	163.149	961.311	0	0	0	0	0	0	0	603	903	0
705	3	-2.46963	-22.1682	-129.64	-15195.9	8390.37	-939.513	264.721	417.216	0	6.9928	97.5897	-546.076	-32081.4	-20650.1	-4163.09	162.184	961.749	0	0	0	0	0	0	0	603	903	0
705	4	-3.07998	-20.1846	-127.504	-14646.6	8451.41	-710.631	266.284	414.872	0	6.38245	94.9957	-544.245	-32264.5	-20955.3	-3705.32	161.497	962.283	0	0	0	0	0	0	0	603	903	0
705	5	-4.75845	-21.4053	-122.011	-14005.7	7780.02	-435.973	263.765	414.791	0	4.24622	96.369	-543.94	-32905.3	-20283.9	-4025.76	162.709	963.495	0	0	0	0	0	0	0	603	903	0
705	6	-3.38516	-20.3372	-118.043	-14097.3	7596.91	-664.855	264.357	419.425	0	1.80481	98.3527	-543.329	-33454.7	-20345	-3888.43	162.555	964.573	0	0	0	0	0	0	0	603	903	0
705	7	-4.75845	-17.5906	-112.245	-13273.3	7474.84	-664.855	266.594	418.253	0	1.9574	96.0638	-539.972	-33088.5	-20589.1	-3247.56	161.87	964.278	0	0	0	0	0	0	0	603	903	0
705	8	-2.92739	-15.3018	-111.94	-13181.8	7230.7	-435.973	264.595	417.758	0	1.34705	97.7423	-541.193	-33088.5	-20528.1	-3659.55	162.069	964.14	0	0	0	0	0	0	0	603	903	0
705	9	-2.92739	-15.607	-110.719	-12907.1	6864.49	-344.421	261.999	416.575	0	-1.09436	99.4208	-541.498	-33088.5	-20650.1	-3842.65	161.865	964.105	0	0	0	0	0	0	0	603	903	0
706	0	-3.38516	-12.8604	-106.141	-13090.2	6742.42	-298.644	263.523	423.328	0	-2.00989	97.2845	-540.888	-33088.5	-20467	-3522.22	162.16	964.174	0	0	0	0	0	0	0	603	903	0
706	1	-3.69033	-11.1819	-102.784	-12632.5	6620.35	67.5668	264.41	422.902	0	-2.00989	96.369	-539.057	-33637.8	-21016.4	-3751.1	161.013	965.401	0	0	0	0	0	0	0	603	903	0
706	2	-3.69033	-10.2664	-97.2913	-11808.5	6376.21	-344.421	265.537	421.372	0	-3.38318	98.3527	-537.836	-33729.3	-20283.9	-3339.11	162.286	965.713	0	0	0	0	0	0	0	603	903	0
706	3	-2.7748	-9.80861	-93.9344	-12083.1	6376.21	-161.315	267.879	428.634	0	-4.90906	99.1156	-539.972	-33637.8	-20589.1	-3110.23	161.87	965.295	0	0	0	0	0	0	0	603	903	0
706	4	-3.23257	-9.04567	-92.4085	-11259.2	5948.96	-298.644	264.377	421.841	0	-4.45129	97.132	-543.329	-34919.5	-21260.5	-3613.77	160.87	967.27	0	0	0	0	0	0	0	603	903	0
706	5	-2.92739	-7.67238	-89.6619	-9885.87	5643.79	-207.091	262.945	410.257	0	-4.75647	96.8268	-549.128	-36292.8	-21931.9	-3613.77	160.061	969.092	0	0	0	0	0	0	0	603	903	0
706	6	-4.45327	-8.58791	-84.1688	-10069	5643.79	-161.315	267.053	419.628	0	-9.33411	99.1156	-557.062	-36659	-21626.7	-2744.02	161.177	968.808	0	0	0	0	0	0	0	603	903	0
706	7	-4.1481	-8.43532	-79.8963	-9794.32	5277.58	-207.091	266.055	422.588	0	-11.3177	100.489	-556.452	-37299.9	-22237.1	-2744.02	160.038	970.032	0	0	0	0	0	0	0	603	903	0
706	8	-3.07998	-8.89309	-75.6238	-8970.34	4789.3	250.672	263.331	418.618	0	-14.5221	104.304	-555.231	-38123.8	-22664.3	-2744.02	159.18	971.663	0	0	0	0	0	0	0	603	903	0
706	9	-3.38516	-9.65603	-73.4876	-9153.45	4728.26	-207.091	264.341	424.558	0	-17.879	103.998	-556.757	-38673.2	-22359.1	-2148.93	159.84	972.461	0	0	0	0	0	0	0	603	903	0
707	0	-2.92739	-10.8767	-68.6048	-8237.92	4484.12	-115.539	265.362	420.078	0	-17.2687	105.982	-563.471	-38306.9	-22359.1	-2240.48	160.319	970.984	0	0	0	0	0	0	0	603	903	0
707	1	-4.60586	-12.0974	-68.2996	-8146.37	3690.66	-298.644	254.036	419.274	0	-17.7264	107.05	-566.828	-38764.7	-22481.2	-3064.45	160.339	971.389	0	0	0	0	0	0	0	603	903	0
707	2	-4.1481	-10.2664	-61.8909	-8421.02	3873.77	-69.7623	262.59	436.062	0	-17.5739	110.865	-566.828	-39680.2	-22847.4	-2789.8	159.693	973.004	0	0	0	0	0	0	0	603	903	0
707	3	-3.69033	-10.2664	-59.1443	-7871.71	3751.7	-207.091	263.433	433.093	0	-15.7428	113.306	-567.133	-40595.8	-23335.7	-3430.67	158.853	974.581	0	0	0	0	0	0	0	603	903	0
707	4	-3.23257	-10.5716	-60.0599	-7780.16	3507.56	-115.539	258.401	429.54	0	-14.0643	112.391	-572.626	-40321.1	-22603.3	-4163.09	160.527	973.414	0	0	0	0	0	0	0	603	903	0
707	5	-3.99551	-9.35085	-55.4822	-6498.42	3812.73	-207.091	268.72	417.126	0	-13.6066	115.137	-576.288	-40504.2	-23091.6	-4117.31	159.931	973.285	0	0	0	0	0	0	0	603	903	0
707	6	-3.99551	-8.13015	-53.6512	-7322.39	3385.49	-161.315	263.102	436.481	0	-11.9281	114.069	-575.678	-41236.6	-23457.8	-4025.76	159.252	974.631	0	0	0	0	0	0	0	603	903	0
707	7	-3.99551	-8.13015	-49.6839	-6773.08	3080.31	-298.644	261.998	436.323	0	-10.5548	113.154	-577.509	-41694.4	-22969.5	-4575.07	160.227	975.197	0	0	0	0	0	0	0	603	903	0
707	8	-3.07998	-9.9612	-47.8528	-7139.29	3080.31	-390.197	264.371	449.193	0	-11.1652	111.933	-579.34	-41419.7	-23152.6	-4163.09	160.036	974.495	0	0	0	0	0	0	0	603	903	0
707	9	-3.23257	-6.29909	-47.8528	-6040.65	2958.24	-527.526	261.82	426.234	0	-11.1652	111.628	-581.476	-41785.9	-23396.7	-4300.42	159.763	974.862	0	0	0	0	0	0	0	603	903	0
708	0	-1.70669	-4.31545	-43.5804	-5491.34	2836.17	-344.421	265.079	426.005	0	-9.33411	109.949	-584.528	-42426.8	-23640.9	-4483.52	159.556	975.583	0	0	0	0	0	0	0	603	903	0
708	1	-3.99551	-5.68874	-43.8856	-4667.36	2592.03	-115.539	259.063	406.353	0	-9.63928	106.898	-586.359	-43159.3	-23091.6	-4117.31	160.619	976.606	0	0	0	0	0	0	0	603	903	0
708	2	-3.38516	-6.60427	-39.0027	-4942.02	2531	-344.421	264.893	426.71	0	-11.0126	105.219	-587.58	-43708.6	-23030.5	-4300.42	160.804	977.388	0	0	0	0	0	0	0	603	903	0
708	3	-2.62222	-4.9258	-38.0872	-4850.47	2286.86	-161.315	260.043	427.352	0	-11.4703	105.829	-592.768	-43617	-23579.8	-4117.31	160.221	976.582	0	0	0	0	0	0	0	603	903	0
708	4	-0.333399	-4.9258	-37.1717	-4484.26	2347.89	-435.973	263.163	420.636	0	-10.2496	105.067	-594.599	-44624.1	-23274.7	-4071.53	160.857	978.049	0	0	0	0	0	0	0	603	903	0
708	5	-2.46963	-7.5198	-35.6458	-4392.7	2164.78	342.225	260.73	423.232	0	-10.7074	104.914	-599.177	-45448.1	-23579.8	-4346.19	160.646	978.851	0	0	0	0	0	0	0	603	903	0
708	6	-3.07998	-5.38356	-33.5096	-3660.28	1554.43	-252.868	246.388	409.231	0	-12.5385	105.067	-601.618	-45814.3	-23518.8	-4620.85	160.907	979.152	0	0	0	0	0	0	0	603	903	0
708	7	-2.16445	-4.31545	-30.1526	-4301.15	1737.54	-23.9859	257.625	442.646	0	-12.691	105.829	-604.365	-45356.5	-23946	-4437.74	160.378	978.048	0	0	0	0	0	0	0	603	903	0
708	8	-2.46963	-5.23098	-29.2371	-4026.49	1737.54	-252.868	259.429	437.719	0	-11.3177	105.677	-605.585	-46363.6	-23579.8	-4620.85	161.063	979.56	0	0	0	0	0	0	0	603	903	0
708	9	-2.46963	-5.38356	-24.0491	-3843.39	1432.36	-298.644	259.56	459.814	0	-12.3859	107.508	-608.027	-47279.1	-23885	-4529.3	160.717	980.758	0	0	0	0	0	0	0	603	903	0
709	0	-2.16445	-4.77321	-24.9647	-3477.18	1432.36	-252.868	257.376	439.284	0	-14.8273	107.966	-610.773	-46455.2	-24251.2	-3979.98	160.294	979.06	0	0	0	0	0	0	0	603	903	0
709	1	-2.31704	-3.7051	-23.4388	-3202.52	1188.22	-161.315	250.695	436.633	0	-15.285	108.423	-612.299	-47279.1	-24434.3	-4071.53	160.094	980.216	0	0	0	0	0	0	0	603	903	0
709	2	-2.62222	-5.84133	-20.6922	-2744.75	1005.12	-161.315	248.575	432.647	0	-14.9799	107.966	-614.13	-47462.2	-24129.2	-4117.31	160.71	980.284	0	0	0	0	0	0	0	603	903	0
709	3	-3.23257	-4.46804	-17.3353	-2836.31	1188.22	-344.421	268.544	463.615	0	-14.8273	107.661	-615.961	-47828.4	-24251.2	-3476.44	160.629	980.648	0	0	0	0	0	0	0	603	903	0
709	4	-1.5541	-3.24733	-18.2508	-1920.78	1066.15	-69.7623	258.417	405.244	0	-19.0997	105.982	-614.435	-48652.4	-24922.6	-3339.11	159.438	982.182	0	0	0	0	0	0	0	603	903	0
709	5	-1.70669	-2.78957	-17.0301	-2012.33	699.941	-252.868	241.1	418.163	0	-18.9471	105.829	-617.182	-49110.2	-24800.5	-3156.01	159.816	982.572	0	0	0	0	0	0	0	603	903	0
709	6	-2.62222	-3.85769	-15.199	-1554.57	516.836	-207.091	234.005	402.281	0	-20.7782	105.829	-620.844	-48744	-24678.5	-3110.23	160.25	981.512	0	0	0	0	0	0	0	603	903	0
709	7	-1.85928	-3.55251	-12.4525	-1371.46	760.976	67.5668	261.111	410.136	0	-21.8463	103.541	-622.065	-48744	-24373.3	-2881.35	160.819	981.358	0	0	0	0	0	0	0	603	903	0
709	8	0	0	0	0	0	0	200	300	0	-22.3041	100.489	-622.98	-49934.2	-24983.6	-3247.56	159.897	983.154	0	0	0	0	0	0	0	603	903	0
709	9	-1.70669	-1.41628	-10.6214	-1463.02	28.5544	-69.7623	202.688	437.742	0	-23.067	102.015	-623.591	-49934.2	-24373.3	-2972.9	160.915	983.075	0	0	0	0	0	0	0	603	903	0
710	0	-0.94375	-1.56887	-10.9266	-1554.57	699.941	113.343	264.059	442.274	0	-23.067	102.625	-624.201	-49934.2	-24495.4	-3064.45	160.757	982.997	0	0	0	0	0	0	0	603	903	0
710	1	0	0	0	0	0	0	200	300	0	-22.4567	101.252	-626.948	-50300.4	-25044.7	-3522.22	160.053	983.231	0	0	0	0	0	0	0	603	903	0
710	2	0	0	0	0	0	0	200	300	0	-21.6937	100.184	-627.558	-50483.5	-24861.6	-3247.56	160.384	983.444	0	0	0	0	0	0	0	603	903	0
710	3	-0.180811	3.31394	-10.6214	-1463.02	638.906	342.225	260.153	437.742	0	-23.2196	99.1156	-627.253	-51032.8	-24617.4	-3522.22	160.754	984.359	0	0	0	0	0	0	0	603	903	0
710	4	0	0	0	0	0	0	200	300	0	-22.3041	99.4208	-626.948	-50483.5	-24739.5	-3339.11	160.54	983.523	0	0	0	0	0	0	0	603	903	0
710	5	-1.5541	3.77171	-9.4007	-1188.36	211.66	342.225	222.515	426.412	0	-20.9308	98.5052	-624.506	-49751.1	-24495.4	-3247.56	160.776	982.665	0	0	0	0	0	0	0	603	903	0
710	6	-1.85928	4.53465	-9.09552	-822.147	333.73	433.778	236.692	390.39	0	-20.6256	97.5897	-627.863	-50666.6	-24617.4	-3339.11	160.792	983.697	0	0	0	0	0	0	0	603	903	0
710	7	0	0	0	0	0	0	200	300	0	-21.9989	97.7423	-629.694	-51673.7	-24800.5	-3705.32	160.615	985.062	0	0	0	0	0	0	0	603	903	0
710	8	0	0	0	0	0	0	200	300	0	-22.4567	95.3009	-628.779	-51673.7	-25105.7	-2744.02	160.072	985.181	0	0	0	0	0	0	0	603	903	0
710	9	0	0	0	0	0	0	200	300	0	-23.2196	95.1483	-629.694	-51124.3	-24922.6	-3156.01	160.421	984.189	0	0	0	0	0	0	0	603	903	0
711	0	0	0	0	0	0	0	200	300	0	-21.9989	94.2328	-630.305	-51673.7	-24800.5	-3476.44	160.653	984.982	0	0	0	0	0	0	0	603	903	0
711	1	0	0	0	0	0	0	200	300	0	-22.4567	94.8431	-631.525	-52039.9	-24800.5	-3476.44	160.729	985.404	0	0	0	0	0	0	0	603	903	0
711	2	0	0	0	0	0	0	200	300	0	-23.9825	93.9276	-632.746	-51582.1	-24922.6	-3064.45	160.612	984.521	0	0	0	0	0	0	0	603	903	0
711	3	0	0	0	0	0	0	200	300	0	-23.6774	92.8595	-633.967	-52314.5	-25166.8	-3339.11	160.303	985.519	0	0	0	0	0	0	0	603	903	0
711	4	0	0	0	0	0	0	200	300	0	-23.83	90.8759	-633.967	-52406.1	-25105.7	-3110.23	160.399	985.664	0	0	0	0	0	0	0	603	903	0
711	5	0	0	0	0	0	0	200	300	0	-22.3041	91.4862	-633.967	-52406.1	-25349.9	-2835.57	160.014	985.664	0	0	0	0	0	0	0	603	903	0
711	6	0	0	0	0	0	0	200	300	0	-23.9825	91.181	-633.967	-53046.9	-25288.8	-2972.9	160.11	986.675	0	0	0	0	0	0	0	603	903	0
711	7	0	0	0	0	0	0	200	300	0	-24.8981	90.5707	-636.103	-53321.6	-25105.7	-3018.68	160.532	986.825	0	0	0	0	0	0	0	603	903	0
711	8	0	0	0	0	0	0	200	300	0	-26.8817	89.9603	-636.408	-53046.9	-25166.8	-2835.57	160.455	986.354	0	0	0	0	0	0	0	603	903	0
711	9	0	0	0	0	0	0	200	300	0	-25.3558	88.2819	-636.713	-53046.9	-25533	-2881.35	159.899	986.314	0	0	0	0	0	0	0	603	903	0
712	0	0	0	0	0	0	0	200	300	0	-24.7455	87.8241	-635.798	-54054	-25533	-2652.47	159.841	988.018	0	0	0	0	0	0	0	603	903	0
712	1	0	0	0	0	0	0	200	300	0	-27.4921	86.756	-635.187	-53230.1	-25227.8	-2835.57	160.283	986.802	0	0	0	0	0	0	0	603	903	0
712	2	0	0	0	0	0	0	200	300	0	-27.7972	85.6879	-637.018	-53596.3	-25105.7	-2652.47	160.589	987.136	0	0	0	0	0	0	0	603	903	0
712	3	0	0	0	0	0	0	200	300	0	-26.1188	85.2301	-636.713	-53779.4	-25594	-2744.02	159.803	987.464	0	0	0	0	0	0	0	603	903	0
712	4	0	0	0	0	0	0	200	300	0	-24.4403	84.162	-637.324	-53779.4	-25227.8	-2560.91	160.416	987.383	0	0	0	0	0	0	0	603	903	0
712	5	0	0	0	0	0	0	200	300	0	-26.2714	82.4835	-639.155	-54054	-25166.8	-2744.02	160.625	987.571	0	0	0	0	0	0	0	603	903	0
712	6	0	0	0	0	0	0	200	300	0	-26.424	81.568	-637.629	-54328.7	-25655	-2606.69	159.765	988.204	0	0	0	0	0	0	0	603	903	0
712	7	0	0	0	0	0	0	200	300	0	-27.4921	81.4154	-636.408	-54237.1	-26021.2	-2515.14	159.112	988.224	0	0	0	0	0	0	0	603	903	0
712	8	0	0	0	0	0	0	200	300	0	-25.8136	80.9576	-637.324	-54603.3	-25410.9	-2652.47	160.129	988.676	0	0	0	0	0	0	0	603	903	0
712	9	0	0	0	0	0	0	200	300	0	-26.5765	79.7369	-638.544	-54603.3	-25227.8	-2515.14	160.492	988.512	0	0	0	0	0	0	0	603	903	0
713	0	0	0	0	0	0	0	200	300	0	-27.4921	78.3636	-637.629	-54511.8	-25105.7	-2377.81	160.626	988.491	0	0	0	0	0	0	0	603	903	0
713	1	0	0	0	0	0	0	200	300	0	-27.4921	77.2955	-638.544	-54786.4	-25044.7	-2560.91	160.778	988.799	0	0	0	0	0	0	0	603	903	0
713	2	0	0	0	0	0	0	200	300	0	-26.1188	75.9222	-637.324	-54603.3	-25166.8	-2606.69	160.512	988.676	0	0	0	0	0	0	0	603	903	0
713	3	0	0	0	0	0	0	200	300	0	-24.2877	75.0067	-638.239	-54878	-25594	-2789.8	159.899	988.984	0	0	0	0	0	0	0	603	903	0
713	4	0	0	0	0	0	0	200	300	0	-27.3395	75.4645	-637.629	-55702	-25594	-2835.57	159.861	990.358	0	0	0	0	0	0	0	603	903	0
713	5	0	0	0	0	0	0	200	300	0	-26.424	75.0067	-639.155	-55610.4	-25166.8	-2560.91	160.625	990.006	0	0	0	0	0	0	0	603	903	0
713	6	0	0	0	0	0	0	200	300	0	-27.0343	74.0912	-637.324	-54786.4	-25655	-2377.81	159.746	988.963	0	0	0	0	0	0	0	603	903	0
713	7	0	0	0	0	0	0	200	300	0	-26.424	72.7179	-638.544	-55244.2	-25899.2	-2377.81	159.44	989.516	0	0	0	0	0	0	0	603	903	0
713	8	0	0	0	0	0	0	200	300	0	-26.8817	71.955	-638.849	-55610.4	-25227.8	-2469.36	160.511	990.048	0	0	0	0	0	0	0	603	903	0
713	9	0	0	0	0	0	0	200	300	0	-27.4921	72.2601	-638.849	-55976.6	-25288.8	-2103.15	160.415	990.621	0	0	0	0	0	0	0	603	903	0
714	0	0	0	0	0	0	0	200	300	0	-27.6447	71.4972	-637.934	-55061.1	-26021.2	-2194.7	159.21	989.312	0	0	0	0	0	0	0	603	903	0
714	1	0	0	0	0	0	0	200	300	0	-26.7291	70.2765	-639.765	-55610.4	-25899.2	-2240.48	159.518	989.923	0	0	0	0	0	0	0	603	903	0
714	2	0	0	0	0	0	0	200	300	0	-26.7291	68.9032	-638.239	-56251.3	-25166.8	-1920.04	160.568	991.135	0	0	0	0	0	0	0	603	903	0
714	3	0	0	0	0	0	0	200	300	0	-27.3395	68.2928	-638.544	-56709.1	-25105.7	-2011.6	160.683	991.81	0	0	0	0	0	0	0	603	903	0
714	4	0	0	0	0	0	0	200	300	0	-27.3395	67.0721	-637.324	-56983.7	-25838.1	-2103.15	159.458	992.411	0	0	0	0	0	0	0	603	903	0
714	5	0	0	0	0	0	0	200	300	0	-27.1869	66.3092	-636.408	-56342.8	-25471.9	-2057.37	159.975	991.533	0	0	0	0	0	0	0	603	903	0
714	6	0	0	0	0	0	0	200	300	0	-25.661	67.2247	-634.882	-57258.4	-25288.8	-2011.6	160.168	993.187	0	0	0	0	0	0	0	603	903	0
714	7	0	0	0	0	0	0	200	300	0	-26.8817	66.004	-635.798	-57258.4	-25533	-2148.93	159.841	993.058	0	0	0	0	0	0	0	603	903	0
714	8	0	0	0	0	0	0	200	300	0	-27.1869	64.173	-637.018	-56983.7	-25288.8	-2103.15	160.301	992.454	0	0	0	0	0	0	0	603	903	0
714	9	0	0	0	0	0	0	200	300	0	-26.1188	63.7152	-634.577	-56617.5	-25105.7	-1920.04	160.437	992.221	0	0	0	0	0	0	0	603	903	0
715	0	0	0	0	0	0	0	200	300	0	-23.2196	62.9523	-632.136	-56892.2	-25105.7	-1691.16	160.284	993	0	0	0	0	0	0	0	603	903	0
715	1	0	0	0	0	0	0	200	300	0	-24.7455	62.0367	-629.389	-57441.5	-25777.1	-1920.04	159.044	994.266	0	0	0	0	0	0	0	603	903	0
715	2	0	0	0	0	0	0	200	300	0	-26.1188	62.0367	-633.356	-57349.9	-25533	-1874.27	159.686	993.549	0	0	0	0	0	0	0	603	903	0
715	3	0	0	0	0	0	0	200	300	0	-25.2032	61.2738	-632.136	-57075.3	-25105.7	-1645.39	160.284	993.29	0	0	0	0	0	0	0	603	903	0
715	4	0	0	0	0	0	0	200	300	0	-24.1351	59.5953	-629.694	-56800.6	-25471.9	-1874.27	159.549	993.203	0	0	0	0	0	0	0	603	903	0
715	5	0	0	0	0	0	0	200	300	0	-24.2877	57.6117	-631.525	-57990.8	-25288.8	-1599.61	159.956	994.827	0	0	0	0	0	0	0	603	903	0
715	6	0	0	0	0	0	0	200	300	0	-25.2032	57.3065	-627.558	-56983.7	-24922.6	-1874.27	160.286	993.802	0	0	0	0	0	0	0	603	903	0
715	7	0	0	0	0	0	0	200	300	0	-25.8136	57.6117	-626.948	-58357	-24861.6	-1233.4	160.345	996.081	0	0	0	0	0	0	0	603	903	0
715	8	0	0	0	0	0	0	200	300	0	-22.4567	55.6281	-625.422	-57899.2	-25105.7	-1691.16	159.858	995.576	0	0	0	0	0	0	0	603	903	0
715	9	0	0	0	0	0	0	200	300	0	-23.2196	56.0858	-625.422	-57899.2	-25044.7	-1645.39	159.956	995.576	0	0	0	0	0	0	0	603	903	0
716	0	0	0	0	0	0	0	200	300	0	-24.8981	54.4073	-624.201	-58540.1	-24861.6	-1508.06	160.171	996.784	0	0	0	0	0	0	0	603	903	0
716	1	0	0	0	0	0	0	200	300	0	-25.5084	53.4918	-623.285	-58448.6	-25105.7	-1553.83	159.72	996.775	0	0	0	0	0	0	0	603	903	0
716	2	0	0	0	0	0	0	200	300	0	-24.7455	53.3392	-620.539	-57624.6	-25166.8	-1508.06	159.444	995.862	0	0	0	0	0	0	0	603	903	0
716	3	0	0	0	0	0	0	200	300	0	-23.3722	53.1866	-618.403	-57716.1	-24739.5	-1370.73	159.995	996.331	0	0	0	0	0	0	0	603	903	0
716	4	0	0	0	0	0	0	200	300	0	-23.5248	50.8978	-617.792	-57899.2	-24922.6	-1508.06	159.659	996.72	0	0	0	0	0	0	0	603	903	0
716	5	0	0	0	0	0	0	200	300	0	-23.5248	51.9659	-615.961	-58631.7	-24922.6	-1370.73	159.539	998.187	0	0	0	0	0	0	0	603	903	0
716	6	0	0	0	0	0	0	200	300	0	-22.7618	50.4401	-614.13	-58814.8	-24983.6	-1279.18	159.319	998.769	0	0	0	0	0	0	0	603	903	0
716	7	0	0	0	0	0	0	200	300	0	-23.9825	49.5245	-612.909	-58540.1	-24373.3	-1370.73	160.233	998.512	0	0	0	0	0	0	0	603	903	0
716	8	0	0	0	0	0	0	200	300	0	-22.9144	49.0668	-609.858	-58540.1	-24312.3	-1050.29	160.135	998.99	0	0	0	0	0	0	0	603	903	0
716	9	0	0	0	0	0	0	200	300	0	-22.7618	49.0668	-607.721	-58631.7	-24434.3	-1233.4	159.794	999.478	0	0	0	0	0	0	0	603	903	0
717	0	0	0	0	0	0	0	200	300	0	-23.3722	47.0831	-605.89	-58082.3	-24129.2	-1233.4	160.176	998.863	0	0	0	0	0	0	0	603	903	0
717	1	0	0	0	0	0	0	200	300	0	-23.3722	48.4564	-604.975	-59272.5	-24312.3	-1187.62	159.813	1000.98	0	0	0	0	0	0	0	603	903	0
717	2	0	0	0	0	0	0	200	300	0	-21.5411	47.3883	-602.228	-58631.7	-24190.2	-958.741	159.832	1000.36	0	0	0	0	0	0	0	603	903	0
717	3	0	0	0	0	0	0	200	300	0	-21.6937	47.2357	-600.397	-59089.4	-24129.2	-1096.07	159.811	1001.42	0	0	0	0	0	0	0	603	903	0
717	4	0	0	0	0	0	0	200	300	0	-21.6937	46.3202	-597.956	-59638.7	-23885	-958.741	160.056	1002.74	0	0	0	0	0	0	0	603	903	0
717	5	0	0	0	0	0	0	200	300	0	-22.4567	46.1676	-596.43	-59455.6	-23946	-867.188	159.851	1002.69	0	0	0	0	0	0	0	603	903	0
717	6	0	0	0	0	0	0	200	300	0	-19.5575	44.3365	-592.768	-59455.6	-24007.1	-867.188	159.5	1003.3	0	0	0	0	0	0	0	603	903	0
717	7	0	0	0	0	0	0	200	300	0	-21.6937	45.4047	-592.768	-59181	-23885	-821.412	159.706	1002.84	0	0	0	0	0	0	0	603	903	0
717	8	0	0	0	0	0	0	200	300	0	-20.9308	43.2684	-591.242	-58997.9	-23885	-684.083	159.602	1002.79	0	0	0	0	0	0	0	603	903	0
717	9	0	0	0	0	0	0	200	300	0	-20.473	42.8107	-585.444	-59821.9	-23518.8	-546.754	159.827	1005.18	0	0	0	0	0	0	0	603	903	0
718	0	0	0	0	0	0	0	200	300	0	-21.3885	42.9633	-584.833	-59089.4	-23762.9	-867.188	159.368	1004.04	0	0	0	0	0	0	0	603	903	0
718	1	0	0	0	0	0	0	200	300	0	-22.3041	43.1158	-582.697	-59821.9	-23335.7	-546.754	159.952	1005.66	0	0	0	0	0	0	0	603	903	0
718	2	0	0	0	0	0	0	200	300	0	-21.8463	40.9796	-581.171	-59455.6	-23457.8	-500.977	159.637	1005.3	0	0	0	0	0	0	0	603	903	0
718	3	0	0	0	0	0	0	200	300	0	-20.6256	41.7426	-578.425	-59730.3	-23640.9	-592.53	159.129	1006.26	0	0	0	0	0	0	0	603	903	0
718	4	0	0	0	0	0	0	200	300	0	-20.6256	39.1486	-572.626	-60005	-23640.9	-638.306	158.715	1007.79	0	0	0	0	0	0	0	603	903	0
718	5	0	0	0	0	0	0	200	300	0	-22.4567	39.7589	-574.763	-59638.7	-22908.5	-409.424	160.143	1006.76	0	0	0	0	0	0	0	603	903	0
718	6	0	0	0	0	0	0	200	300	0	-20.3204	39.3011	-571.406	-59821.9	-23274.7	-272.095	159.268	1007.69	0	0	0	0	0	0	0	603	903	0
718	7	0	0	0	0	0	0	200	300	0	-22.3041	38.0804	-569.88	-59638.7	-23518.8	-317.872	158.73	1007.65	0	0	0	0	0	0	0	603	903	0
718	8	0	0	0	0	0	0	200	300	0	-20.473	38.233	-567.743	-59913.4	-23640.9	-134.766	158.36	1008.53	0	0	0	0	0	0	0	603	903	0
718	9	0	0	0	0	0	0	200	300	0	-21.0834	38.3856	-567.133	-59913.4	-23091.6	-180.542	159.284	1008.64	0	0	0	0	0	0	0	603	903	0
719	0	0	0	0	0	0	0	200	300	0	-21.3885	37.1649	-566.218	-59364.1	-22908.5	-180.542	159.541	1007.84	0	0	0	0	0	0	0	603	903	0
719	1	0	0	0	0	0	0	200	300	0	-22.1515	35.639	-563.166	-60279.6	-23152.6	-226.319	158.889	1010.04	0	0	0	0	0	0	0	603	903	0
719	2	0	0	0	0	0	0	200	300	0	-20.7782	33.5028	-562.25	-59913.4	-22725.3	-88.9897	159.581	1009.56	0	0	0	0	0	0	0	603	903	0
719	3	0	0	0	0	0	0	200	300	0	-20.6256	34.5709	-557.367	-60005	-22542.2	48.3394	159.556	1010.66	0	0	0	0	0	0	0	603	903	0
719	4	0	0	0	0	0	0	200	300	0	-20.7782	34.4183	-554.316	-60737.4	-22786.4	-226.319	158.893	1012.57	0	0	0	0	0	0	0	603	903	0
719	5	0	0	0	0	0	0	200	300	0	-22.1515	32.5873	-551.874	-60371.2	-22664.3	-43.2133	158.932	1012.39	0	0	0	0	0	0	0	603	903	0
719	6	0	0	0	0	0	0	200	300	0	-21.9989	33.1976	-551.264	-59638.7	-22420.2	2.56305	159.33	1011.19	0	0	0	0	0	0	0	603	903	0
719	7	0	0	0	0	0	0	200	300	0	-21.236	32.5873	-549.433	-59272.5	-22664.3	48.3394	158.75	1010.88	0	0	0	0	0	0	0	603	903	0
719	8	0	0	0	0	0	0	200	300	0	-21.0834	30.6036	-547.602	-60279.6	-23030.5	94.1158	157.943	1013.08	0	0	0	0	0	0	0	603	903	0
719	9	0	0	0	0	0	0	200	300	0	-21.8463	31.214	-546.381	-60645.8	-22664.3	185.669	158.519	1014	0	0	0	0	0	0	0	603	903	0
720	0	0	0	0	0	0	0	200	300	0	-21.236	31.8243	-544.855	-60554.3	-22542.2	643.432	158.627	1014.14	0	0	0	0	0	0	0	603	903	0
720	1	0	0	0	0	0	0	200	300	0	-21.6937	30.6036	-542.414	-60462.7	-22664.3	185.669	158.216	1014.47	0	0	0	0	0	0	0	603	903	0
720	2	0	0	0	0	0	0	200	300	0	-20.9308	29.6881	-541.804	-60371.2	-22603.3	368.774	158.281	1014.43	0	0	0	0	0	0	0	603	903	0
720	3	0	0	0	0	0	0	200	300	0	-21.3885	29.3829	-539.362	-60645.8	-21992.9	231.445	159.224	1015.44	0	0	0	0	0	0	0	603	903	0
720	4	0	0	0	0	0	0	200	300	0	-22.3041	28.4674	-536.921	-61652.9	-21809.8	551.879	159.38	1017.83	0	0	0	0	0	0	0	603	903	0
720	5	0	0	0	0	0	0	200	300	0	-20.473	28.1622	-534.479	-61103.6	-22237.1	185.669	158.395	1017.32	0	0	0	0	0	0	0	603	903	0
720	6	0	0	0	0	0	0	200	300	0	-23.067	28.0096	-530.817	-60920.5	-22054	368.774	158.453	1017.77	0	0	0	0	0	0	0	603	903	0
720	7	0	0	0	0	0	0	200	300	0	-21.6937	27.3993	-529.902	-60920.5	-21992.9	322.998	158.496	1017.97	0	0	0	0	0	0	0	603	903	0
720	8	0	0	0	0	0	0	200	300	0	-21.9989	26.7889	-530.207	-61195.1	-21992.9	368.774	158.52	1018.42	0	0	0	0	0	0	0	603	903	0
720	9	0	0	0	0	0	0	200	300	0	-23.2196	25.7208	-526.24	-61561.4	-22237.1	551.879	157.743	1019.98	0	0	0	0	0	0	0	603	903	0
721	0	0	0	0	0	0	0	200	300	0	-22.7618	25.8734	-525.629	-61744.5	-21809.8	322.998	158.507	1020.47	0	0	0	0	0	0	0	603	903	0
721	1	0	0	0	0	0	0	200	300	0	-23.3722	24.3475	-524.409	-61378.2	-21809.8	826.538	158.411	1020.04	0	0	0	0	0	0	0	603	903	0
721	2	0	0	0	0	0	0	200	300	0	-22.7618	24.0424	-521.967	-61378.2	-21870.9	780.761	158.099	1020.59	0	0	0	0	0	0	0	603	903	0
721	3	0	0	0	0	0	0	200	300	0	-22.6093	24.3475	-519.831	-62019.1	-22115	1009.64	157.457	1022.31	0	0	0	0	0	0	0	603	903	0
721	4	0	0	0	0	0	0	200	300	0	-24.1351	24.0424	-518.915	-62019.1	-21443.6	872.314	158.676	1022.52	0	0	0	0	0	0	0	603	903	0
721	5	0	0	0	0	0	0	200	300	0	-24.8981	22.9742	-517.389	-61744.5	-21626.7	1375.85	158.2	1022.34	0	0	0	0	0	0	0	603	903	0
721	6	0	0	0	0	0	0	200	300	0	-23.6774	22.3639	-514.948	-61103.6	-21748.8	1101.2	157.765	1021.66	0	0	0	0	0	0	0	603	903	0
721	7	0	0	0	0	0	0	200	300	0	-23.3722	22.2113	-509.455	-62019.1	-21565.7	963.867	157.669	1024.74	0	0	0	0	0	0	0	603	903	0
721	8	0	0	0	0	0	0	200	300	0	-25.5084	21.9061	-510.676	-61836	-21443.6	1009.64	158.009	1024.09	0	0	0	0	0	0	0	603	903	0
721	9	0	0	0	0	0	0	200	300	0	-24.8981	22.2113	-507.929	-62568.4	-21443.6	1009.64	157.782	1026.18	0	0	0	0	0	0	0	603	903	0
722	0	0	0	0	0	0	0	200	300	0	-23.9825	20.9906	-503.962	-61927.6	-21748.8	1055.42	156.844	1025.88	0	0	0	0	0	0	0	603	903	0
722	1	0	0	0	0	0	0	200	300	0	-23.83	22.0587	-504.877	-62110.7	-21016.4	918.091	158.373	1026.02	0	0	0	0	0	0	0	603	903	0
722	2	0	0	0	0	0	0	200	300	0	-24.7455	20.9906	-502.741	-62476.9	-21077.4	1238.52	158.075	1027.27	0	0	0	0	0	0	0	603	903	0
722	3	0	0	0	0	0	0	200	300	0	-24.7455	19.7699	-502.436	-63209.3	-21199.5	1284.3	157.807	1028.81	0	0	0	0	0	0	0	603	903	0
722	4	0	0	0	0	0	0	200	300	0	-25.5084	20.9906	-497.553	-62385.3	-21321.5	1375.85	157.147	1028.38	0	0	0	0	0	0	0	603	903	0
722	5	0	0	0	0	0	0	200	300	0	-24.5929	20.9906	-495.417	-62385.3	-20772.2	1467.41	158.071	1028.92	0	0	0	0	0	0	0	603	903	0
722	6	0	0	0	0	0	0	200	300	0	-24.4403	19.4647	-493.281	-62476.9	-21199.5	1925.17	157.024	1029.66	0	0	0	0	0	0	0	603	903	0
722	7	0	0	0	0	0	0	200	300	0	-23.6774	20.838	-492.06	-63484	-21016.4	1604.74	157.289	1032.02	0	0	0	0	0	0	0	603	903	0
722	8	0	0	0	0	0	0	200	300	0	-25.3558	19.1595	-490.839	-63667.1	-20589.1	1696.29	158.053	1032.71	0	0	0	0	0	0	0	603	903	0
722	9	0	0	0	0	0	0	200	300	0	-25.8136	20.0751	-487.787	-62568.4	-20345	1742.07	158.291	1031.27	0	0	0	0	0	0	0	603	903	0
723	0	0	0	0	0	0	0	200	300	0	-24.4403	19.4647	-486.567	-63667.1	-20772.2	1650.51	157.309	1033.85	0	0	0	0	0	0	0	603	903	0
723	1	0	0	0	0	0	0	200	300	0	-25.0507	19.6173	-483.21	-63850.2	-20650.1	1696.29	157.265	1035.14	0	0	0	0	0	0	0	603	903	0
723	2	0	0	0	0	0	0	200	300	0	-25.9662	19.7699	-483.21	-62568.4	-19795.7	1558.96	159.033	1032.48	0	0	0	0	0	0	0	603	903	0
723	3	0	0	0	0	0	0	200	300	0	-26.1188	18.7018	-480.768	-63392.4	-20161.9	1604.74	158.063	1034.86	0	0	0	0	0	0	0	603	903	0
723	4	0	0	0	0	0	0	200	300	0	-25.2032	18.0914	-479.242	-63575.5	-20406	1558.96	157.42	1035.66	0	0	0	0	0	0	0	603	903	0
723	5	0	0	0	0	0	0	200	300	0	-22.6093	18.0914	-477.411	-63667.1	-20222.9	2016.72	157.641	1036.36	0	0	0	0	0	0	0	603	903	0
723	6	0	0	0	0	0	0	200	300	0	-23.9825	18.7018	-473.139	-64399.5	-19978.8	1513.18	157.774	1039.11	0	0	0	0	0	0	0	603	903	0
723	7	0	0	0	0	0	0	200	300	0	-25.2032	17.7863	-474.055	-64491	-19917.7	1970.95	157.984	1039.04	0	0	0	0	0	0	0	603	903	0
723	8	0	0	0	0	0	0	200	300	0	-25.3558	17.7863	-473.139	-63941.7	-20039.8	1970.95	157.645	1038.14	0	0	0	0	0	0	0	603	903	0
723	9	0	0	0	0	0	0	200	300	0	-23.3722	17.7863	-469.172	-63850.2	-19551.5	2016.72	158.328	1039.09	0	0	0	0	0	0	0	603	903	0
724	0	0	0	0	0	0	0	200	300	0	-24.5929	15.9552	-469.172	-64948.8	-19551.5	1879.39	158.328	1041.43	0	0	0	0	0	0	0	603	903	0
724	1	0	0	0	0	0	0	200	300	0	-25.2032	15.8026	-466.12	-63758.6	-19734.6	2108.28	157.662	1039.79	0	0	0	0	0	0	0	603	903	0
724	2	0	0	0	0	0	0	200	300	0	-25.661	15.65	-463.068	-65223.4	-19612.5	2245.6	157.647	1043.85	0	0	0	0	0	0	0	603	903	0
724	3	0	0	0	0	0	0	200	300	0	-25.2032	14.8871	-463.373	-64948.8	-19185.3	2245.6	158.596	1043.17	0	0	0	0	0	0	0	603	903	0
724	4	0	0	0	0	0	0	200	300	0	-24.2877	15.1923	-463.068	-64857.2	-19246.3	2154.05	158.437	1043.06	0	0	0	0	0	0	0	603	903	0
724	5	0	0	0	0	0	0	200	300	0	-23.5248	14.4293	-462.458	-65315	-19307.4	2108.28	158.251	1044.23	0	0	0	0	0	0	0	603	903	0
724	6	0	0	0	0	0	0	200	300	0	-24.7455	14.4293	-461.237	-65498.1	-19490.5	2016.72	157.743	1045.01	0	0	0	0	0	0	0	603	903	0
724	7	0	0	0	0	0	0	200	300	0	-24.8981	13.9716	-458.796	-65315	-19063.2	1970.95	158.449	1045.36	0	0	0	0	0	0	0	603	903	0
724	8	0	0	0	0	0	0	200	300	0	-23.3722	13.9716	-457.88	-64948.8	-19063.2	2154.05	158.366	1044.85	0	0	0	0	0	0	0	603	903	0
724	9	0	0	0	0	0	0	200	300	0	-23.2196	14.5819	-458.491	-66047.4	-19368.4	2199.83	157.756	1047.05	0	0	0	0	0	0	0	603	903	0
725	0	0	0	0	0	0	0	200	300	0	-24.1351	12.9034	-453.913	-66505.2	-19246.3	2245.6	157.599	1049.52	0	0	0	0	0	0	0	603	903	0
725	1	0	0	0	0	0	0	200	300	0	-21.8463	13.056	-455.439	-66505.2	-18880.1	2382.93	158.545	1049.02	0	0	0	0	0	0	0	603	903	0
725	2	0	0	0	0	0	0	200	300	0	-23.9825	12.7509	-453.608	-66322.1	-19002.2	2291.38	158.109	1049.21	0	0	0	0	0	0	0	603	903	0
725	3	0	0	0	0	0	0	200	300	0	-23.067	12.9034	-451.777	-66596.8	-19002.2	2154.05	157.939	1050.41	0	0	0	0	0	0	0	603	903	0
725	4	0	0	0	0	0	0	200	300	0	-22.7618	12.5983	-451.777	-66963	-18574.9	2199.83	158.885	1051.22	0	0	0	0	0	0	0	603	903	0
725	5	0	0	0	0	0	0	200	300	0	-24.7455	11.9879	-449.335	-66413.6	-18452.9	2062.5	158.933	1050.8	0	0	0	0	0	0	0	603	903	0
725	6	0	0	0	0	0	0	200	300	0	-23.83	11.6827	-449.64	-67329.2	-18880.1	2337.16	158.011	1052.74	0	0	0	0	0	0	0	603	903	0
725	7	0	0	0	0	0	0	200	300	0	-23.2196	12.5983	-447.504	-67603.8	-18697	2337.16	158.219	1054.07	0	0	0	0	0	0	0	603	903	0
725	8	0	0	0	0	0	0	200	300	0	-22.6093	10.462	-445.368	-67146.1	-18269.8	2382.93	158.978	1053.77	0	0	0	0	0	0	0	603	903	0
725	9	0	0	0	0	0	0	200	300	0	-23.067	11.6827	-445.063	-68061.6	-18452.9	2337.16	158.539	1055.93	0	0	0	0	0	0	0	603	903	0
726	0	0	0	0	0	0	0	200	300	0	-22.9144	11.8353	-445.978	-68061.6	-18819.1	2337.16	157.803	1055.61	0	0	0	0	0	0	0	603	903	0
726	1	0	0	0	0	0	0	200	300	0	-23.9825	10.9198	-445.673	-67970	-18636	2566.04	158.185	1055.51	0	0	0	0	0	0	0	603	903	0
726	2	0	0	0	0	0	0	200	300	0	-22.6093	10.462	-445.368	-68153.2	-18147.7	2520.26	159.252	1056.03	0	0	0	0	0	0	0	603	903	0
726	3	0	0	0	0	0	0	200	300	0	-21.9989	10.7672	-442.927	-68702.5	-18330.8	2154.05	158.614	1058.11	0	0	0	0	0	0	0	603	903	0
726	4	0	0	0	0	0	0	200	300	0	-23.067	10.7672	-442.621	-68794	-18391.8	2154.05	158.448	1058.42	0	0	0	0	0	0	0	603	903	0
726	5	0	0	0	0	0	0	200	300	0	-21.6937	9.24133	-440.485	-69160.2	-18330.8	2520.26	158.385	1060.01	0	0	0	0	0	0	0	603	903	0
726	6	0	0	0	0	0	0	200	300	0	-22.7618	10.462	-441.096	-68885.6	-18147.7	2337.16	158.858	1059.17	0	0	0	0	0	0	0	603	903	0
726	7	0	0	0	0	0	0	200	300	0	-22.6093	9.24133	-440.485	-68885.6	-18025.6	2245.6	159.078	1059.39	0	0	0	0	0	0	0	603	903	0
726	8	0	0	0	0	0	0	200	300	0	-22.3041	8.47839	-443.232	-69709.5	-18147.7	2291.38	159.056	1060.28	0	0	0	0	0	0	0	603	903	0
726	9	0	0	0	0	0	0	200	300	0	-23.067	9.39392	-438.349	-69709.5	-18208.7	2428.71	158.461	1062.03	0	0	0	0	0	0	0	603	903	0
727	0	0	0	0	0	0	0	200	300	0	-22.7618	9.85168	-438.044	-69618	-17537.4	2245.6	159.964	1061.93	0	0	0	0	0	0	0	603	903	0
727	1	0	0	0	0	0	0	200	300	0	-21.9989	10.1569	-438.959	-69618	-18025.6	2337.16	158.936	1061.6	0	0	0	0	0	0	0	603	903	0
727	2	0	0	0	0	0	0	200	300	0	-20.3204	8.02063	-434.687	-70075.7	-18086.7	2611.82	158.392	1064.21	0	0	0	0	0	0	0	603	903	0
727	3	0	0	0	0	0	0	200	300	0	-21.5411	9.39392	-437.433	-70899.7	-17720.5	2154.05	159.49	1065.08	0	0	0	0	0	0	0	603	903	0
727	4	0	0	0	0	0	0	200	300	0	-21.5411	8.93616	-436.518	-71265.9	-17842.5	2382.93	159.125	1066.26	0	0	0	0	0	0	0	603	903	0
727	5	0	0	0	0	0	0	200	300	0	-21.5411	9.54651	-435.602	-70716.6	-17964.6	2474.49	158.759	1065.34	0	0	0	0	0	0	0	603	903	0
727	6	0	0	0	0	0	0	200	300	0	-20.3204	6.79993	-434.687	-71082.8	-17903.6	2474.49	158.813	1066.53	0	0	0	0	0	0	0	603	903	0
727	7	0	0	0	0	0	0	200	300	0	-20.1678	9.24133	-435.602	-71174.4	-17659.4	2199.83	159.46	1066.39	0	0	0	0	0	0	0	603	903	0
727	8	0	0	0	0	0	0	200	300	0	-21.236	8.02063	-434.687	-71357.5	-17598.4	2245.6	159.515	1067.16	0	0	0	0	0	0	0	603	903	0
727	9	0	0	0	0	0	0	200	300	0	-20.9308	6.95251	-434.992	-72456.1	-17415.3	2199.83	159.964	1069.57	0	0	0	0	0	0	0	603	903	0
728	0	0	0	0	0	0	0	200	300	0	-19.8627	8.02063	-432.856	-72089.9	-17293.2	2428.71	160.049	1069.55	0	0	0	0	0	0	0	603	903	0
728	1	0	0	0	0	0	0	200	300	0	-17.4213	7.56287	-433.466	-72089.9	-17171.1	2291.38	160.386	1069.31	0	0	0	0	0	0	0	603	903	0
728	2	0	0	0	0	0	0	200	300	0	-20.6256	8.63098	-434.382	-73097	-17720.5	2245.6	159.205	1071.28	0	0	0	0	0	0	0	603	903	0
728	3	0	0	0	0	0	0	200	300	0	-19.5575	7.41028	-433.466	-73097	-17537.4	2154.05	159.542	1071.63	0	0	0	0	0	0	0	603	903	0
728	4	0	0	0	0	0	0	200	300	0	-21.236	6.95251	-434.076	-72730.8	-17476.3	2199.83	159.739	1070.55	0	0	0	0	0	0	0	603	903	0
728	5	0	0	0	0	0	0	200	300	0	-19.0997	7.25769	-434.076	-73280.1	-17232.2	2382.93	160.302	1071.82	0	0	0	0	0	0	0	603	903	0
728	6	0	0	0	0	0	0	200	300	0	-19.0997	6.64734	-433.466	-73829.4	-17720.5	2199.83	159.119	1073.32	0	0	0	0	0	0	0	603	903	0
728	7	0	0	0	0	0	0	200	300	0	-20.1678	6.95251	-433.771	-74561.8	-17659.4	2474.49	159.289	1074.89	0	0	0	0	0	0	0	603	903	0
728	8	0	0	0	0	0	0	200	300	0	-18.3368	6.95251	-435.908	-74836.5	-17415.3	2749.15	160.048	1074.68	0	0	0	0	0	0	0	603	903	0
728	9	0	0	0	0	0	0	200	300	0	-19.8627	6.18958	-432.551	-74653.4	-17476.3	2245.6	159.597	1075.59	0	0	0	0	0	0	0	603	903	0
729	0	0	0	0	0	0	0	200	300	0	-19.0997	5.73181	-434.687	-75111.2	-17537.4	2062.5	159.655	1075.79	0	0	0	0	0	0	0	603	903	0
729	1	0	0	0	0	0	0	200	300	0	-18.7946	5.8844	-432.245	-75477.4	-16804.9	2199.83	161.122	1077.62	0	0	0	0	0	0	0	603	903	0
729	2	0	0	0	0	0	0	200	300	0	-19.7101	6.49475	-432.856	-76301.3	-16804.9	2337.16	161.177	1079.27	0	0	0	0	0	0	0	603	903	0
729	3	0	0	0	0	0	0	200	300	0	-19.8627	5.12146	-433.161	-75660.5	-17537.4	2016.72	159.513	1077.67	0	0	0	0	0	0	0	603	903	0
729	4	0	0	0	0	0	0	200	300	0	-17.7264	6.18958	-435.602	-75019.6	-17232.2	2154.05	160.441	1075.22	0	0	0	0	0	0	0	603	903	0
729	5	0	0	0	0	0	0	200	300	0	-17.879	5.57922	-434.687	-76026.7	-16927	2428.71	161.059	1077.9	0	0	0	0	0	0	0	603	903	0
729	6	0	0	0	0	0	0	200	300	0	-19.0997	4.51111	-435.908	-76942.2	-16927	2016.72	161.168	1079.51	0	0	0	0	0	0	0	603	903	0
729	7	0	0	0	0	0	0	200	300	0	-19.5575	5.42664	-434.687	-77216.9	-17232.2	2199.83	160.357	1080.64	0	0	0	0	0	0	0	603	903	0
729	8	0	0	0	0	0	0	200	300	0	-17.1161	6.03699	-435.602	-77308.4	-16988	2199.83	161.001	1080.47	0	0	0	0	0	0	0	603	903	0
729	9	0	0	0	0	0	0	200	300	0	-16.8109	5.8844	-436.823	-77857.7	-17171.1	2245.6	160.691	1081.24	0	0	0	0	0	0	0	603	903	0
730	0	0	0	0	0	0	0	200	300	0	-18.0316	4.35852	-437.128	-78590.1	-17354.2	2382.93	160.299	1082.79	0	0	0	0	0	0	0	603	903	0
730	1	0	0	0	0	0	0	200	300	0	-17.7264	4.81628	-438.654	-78773.3	-17171.1	2474.49	160.855	1082.58	0	0	0	0	0	0	0	603	903	0
730	2	0	0	0	0	0	0	200	300	0	-18.4894	4.81628	-437.433	-78681.7	-16804.9	2245.6	161.583	1082.87	0	0	0	0	0	0	0	603	903	0
730	3	0	0	0	0	0	0	200	300	0	-17.2687	3.59558	-438.959	-79139.5	-16927	2382.93	161.438	1083.29	0	0	0	0	0	0	0	603	903	0
730	4	0	0	0	0	0	0	200	300	0	-17.4213	3.90076	-439.264	-79597.2	-17049.1	2016.72	161.187	1084.21	0	0	0	0	0	0	0	603	903	0
730	5	0	0	0	0	0	0	200	300	0	-17.4213	3.90076	-441.096	-79322.6	-16866	2154.05	161.763	1082.83	0	0	0	0	0	0	0	603	903	0
730	6	0	0	0	0	0	0	200	300	0	-17.4213	3.59558	-438.044	-80695.9	-16804.9	2016.72	161.636	1087.22	0	0	0	0	0	0	0	603	903	0
730	7	0	0	0	0	0	0	200	300	0	-16.8109	3.13782	-441.401	-80879	-16377.7	2291.38	162.896	1086.23	0	0	0	0	0	0	0	603	903	0
730	8	0	0	0	0	0	0	200	300	0	-16.3531	2.98523	-441.401	-80421.2	-16988	2154.05	161.513	1085.2	0	0	0	0	0	0	0	603	903	0
730	9	0	0	0	0	0	0	200	300	0	-17.1161	3.74817	-442.621	-81519.8	-17293.2	1925.17	160.93	1087.18	0	0	0	0	0	0	0	603	903	0
731	0	0	0	0	0	0	0	200	300	0	-15.4376	2.83264	-444.147	-81611.4	-16988	2062.5	161.751	1086.75	0	0	0	0	0	0	0	603	903	0
731	1	0	0	0	0	0	0	200	300	0	-16.9635	2.83264	-444.452	-81886	-17049.1	2291.38	161.64	1087.24	0	0	0	0	0	0	0	603	903	0
731	2	0	0	0	0	0	0	200	300	0	-14.9799	2.52747	-446.284	-82618.5	-16988	2245.6	161.934	1088.13	0	0	0	0	0	0	0	603	903	0
731	3	0	0	0	0	0	0	200	300	0	-15.4376	1.76453	-447.199	-83534	-16804.9	2245.6	162.422	1089.79	0	0	0	0	0	0	0	603	903	0
731	4	0	0	0	0	0	0	200	300	0	-16.6583	1.45935	-444.452	-84083.3	-16621.8	2291.38	162.602	1092.18	0	0	0	0	0	0	0	603	903	0
731	5	0	0	0	0	0	0	200	300	0	-16.6583	1.15418	-448.42	-83991.8	-17110.1	2199.83	161.844	1090.31	0	0	0	0	0	0	0	603	903	0
731	6	0	0	0	0	0	0	200	300	0	-15.285	0.391236	-451.166	-84266.4	-17293.2	2199.83	161.67	1089.77	0	0	0	0	0	0	0	603	903	0
731	7	0	0	0	0	0	0	200	300	0	-14.8273	0.238648	-452.387	-84266.4	-16682.9	2016.72	163.123	1089.27	0	0	0	0	0	0	0	603	903	0
731	8	0	0	0	0	0	0	200	300	0	-15.5902	-1.43982	-452.387	-85273.5	-16927	2016.72	162.583	1091.5	0	0	0	0	0	0	0	603	903	0
731	9	0	0	0	0	0	0	200	300	0	-16.3531	-0.982055	-453.303	-85731.3	-17354.2	2199.83	161.716	1092.13	0	0	0	0	0	0	0	603	903	0
732	0	0	0	0	0	0	0	200	300	0	-16.3531	-1.13464	-454.828	-86280.6	-16866	2016.72	162.918	1092.7	0	0	0	0	0	0	0	603	903	0
732	1	0	0	0	0	0	0	200	300	0	-14.9799	-1.59241	-457.27	-86372.2	-17049.1	2016.72	162.716	1091.89	0	0	0	0	0	0	0	603	903	0
732	2	0	0	0	0	0	0	200	300	0	-13.454	-1.59241	-459.101	-86646.8	-17232.2	2062.5	162.465	1091.73	0	0	0	0	0	0	0	603	903	0
732	3	0	0	0	0	0	0	200	300	0	-14.5221	-2.20276	-460.932	-87287.7	-17415.3	2199.83	162.217	1092.37	0	0	0	0	0	0	0	603	903	0
732	4	0	0	0	0	0	0	200	300	0	-15.5902	-2.20276	-460.932	-87562.3	-16927	2291.38	163.277	1092.97	0	0	0	0	0	0	0	603	903	0
732	5	0	0	0	0	0	0	200	300	0	-14.6747	-2.20276	-463.373	-88477.8	-17171.1	2382.93	162.943	1093.94	0	0	0	0	0	0	0	603	903	0
732	6	0	0	0	0	0	0	200	300	0	-14.2169	-2.9657	-463.373	-88477.8	-17476.3	2474.49	162.285	1093.94	0	0	0	0	0	0	0	603	903	0
732	7	0	0	0	0	0	0	200	300	0	-13.454	-3.27087	-466.425	-88661	-17354.2	2291.38	162.793	1093.09	0	0	0	0	0	0	0	603	903	0
732	8	0	0	0	0	0	0	200	300	0	-13.9117	-3.88123	-465.51	-89759.6	-16988	2108.28	163.507	1095.82	0	0	0	0	0	0	0	603	903	0
732	9	0	0	0	0	0	0	200	300	0	-14.0643	-5.4071	-468.867	-90217.3	-17110.1	2291.38	163.508	1095.42	0	0	0	0	0	0	0	603	903	0
733	0	0	0	0	0	0	0	200	300	0	-14.3695	-5.55969	-469.782	-90308.9	-17171.1	2062.5	163.449	1095.24	0	0	0	0	0	0	0	603	903	0
733	1	0	0	0	0	0	0	200	300	0	-14.8273	-5.4071	-469.477	-89851.1	-17110.1	2016.72	163.555	1094.39	0	0	0	0	0	0	0	603	903	0
733	2	0	0	0	0	0	0	200	300	0	-12.2333	-5.10193	-474.665	-90766.7	-17232.2	1925.17	163.696	1094.22	0	0	0	0	0	0	0	603	903	0
733	3	0	0	0	0	0	0	200	300	0	-12.3859	-6.17004	-475.886	-91773.8	-17415.3	2062.5	163.404	1095.85	0	0	0	0	0	0	0	603	903	0
733	4	0	0	0	0	0	0	200	300	0	-13.6066	-6.7804	-477.717	-91865.3	-17598.4	2154.05	163.161	1095.3	0	0	0	0	0	0	0	603	903	0
733	5	0	0	0	0	0	0	200	300	0	-13.454	-7.08557	-478.327	-92964	-17354.2	2199.83	163.719	1097.35	0	0	0	0	0	0	0	603	903	0
733	6	0	0	0	0	0	0	200	300	0	-11.4703	-6.93298	-476.801	-93055.5	-17415.3	2337.16	163.475	1098.17	0	0	0	0	0	0	0	603	903	0
733	7	0	0	0	0	0	0	200	300	0	-11.1652	-8.0011	-481.684	-92780.8	-17537.4	2245.6	163.592	1095.62	0	0	0	0	0	0	0	603	903	0
733	8	0	0	0	0	0	0	200	300	0	-11.4703	-9.06921	-485.651	-94154.1	-17476.3	2382.93	164.015	1096.87	0	0	0	0	0	0	0	603	903	0
733	9	0	0	0	0	0	0	200	300	0	-11.1652	-10.4425	-487.482	-94154.1	-17354.2	2474.49	164.4	1096.14	0	0	0	0	0	0	0	603	903	0
734	0	0	0	0	0	0	0	200	300	0	-11.6229	-12.2736	-489.008	-94062.6	-17415.3	2291.38	164.387	1095.35	0	0	0	0	0	0	0	603	903	0
734	1	0	0	0	0	0	0	200	300	0	-10.097	-11.6632	-489.924	-94337.2	-17842.5	2245.6	163.581	1095.55	0	0	0	0	0	0	0	603	903	0
734	2	0	0	0	0	0	0	200	300	0	-10.097	-12.4261	-491.45	-95435.9	-17903.6	2382.93	163.57	1097.19	0	0	0	0	0	0	0	603	903	0
734	3	0	0	0	0	0	0	200	300	0	-10.86	-12.7313	-494.501	-94703.5	-17720.5	2199.83	164.165	1094.51	0	0	0	0	0	0	0	603	903	0
734	4	0	0	0	0	0	0	200	300	0	-11.6229	-13.952	-496.332	-95435.9	-17293.2	2154.05	165.158	1095.28	0	0	0	0	0	0	0	603	903	0
734	5	0	0	0	0	0	0	200	300	0	-10.097	-14.2572	-499.384	-96442.9	-17537.4	2382.93	164.882	1096.12	0	0	0	0	0	0	0	603	903	0
734	6	0	0	0	0	0	0	200	300	0	-9.18152	-15.6305	-499.689	-96534.5	-17842.5	2062.5	164.293	1096.19	0	0	0	0	0	0	0	603	903	0
734	7	0	0	0	0	0	0	200	300	0	-9.94446	-16.0883	-502.436	-97633.1	-17720.5	2291.38	164.731	1097.32	0	0	0	0	0	0	0	603	903	0
734	8	0	0	0	0	0	0	200	300	0	-10.7074	-17.309	-503.657	-97816.2	-17964.6	2382.93	164.332	1097.21	0	0	0	0	0	0	0	603	903	0
734	9	0	0	0	0	0	0	200	300	0	-9.94446	-17.0038	-506.708	-99281.1	-18025.6	2474.49	164.426	1098.93	0	0	0	0	0	0	0	603	903	0
735	0	0	0	0	0	0	0	200	300	0	-9.33411	-17.6141	-509.15	-98640.2	-17842.5	2337.16	164.956	1096.74	0	0	0	0	0	0	0	603	903	0
735	1	0	0	0	0	0	0	200	300	0	-7.50305	-18.8348	-507.929	-98640.2	-17720.5	2428.71	165.112	1097.2	0	0	0	0	0	0	0	603	903	0
735	2	0	0	0	0	0	0	200	300	0	-8.87634	-19.14	-508.234	-100014	-17964.6	2428.71	164.653	1099.79	0	0	0	0	0	0	0	603	903	0
735	3	0	0	0	0	0	0	200	300	0	-9.63928	-19.7504	-512.507	-100197	-18025.6	2428.71	164.828	1098.5	0	0	0	0	0	0	0	603	903	0
735	4	0	0	0	0	0	0	200	300	0	-9.48669	-20.9711	-515.253	-100197	-17720.5	2520.26	165.608	1097.46	0	0	0	0	0	0	0	603	903	0
735	5	0	0	0	0	0	0	200	300	0	-10.097	-21.5814	-516.474	-100288	-17964.6	2474.49	165.217	1097.18	0	0	0	0	0	0	0	603	903	0
735	6	0	0	0	0	0	0	200	300	0	-8.57117	-23.1073	-518.305	-100929	-18391.8	2337.16	164.515	1097.73	0	0	0	0	0	0	0	603	903	0
735	7	0	0	0	0	0	0	200	300	0	-8.87634	-22.6495	-520.746	-101478	-17781.5	2520.26	165.854	1097.87	0	0	0	0	0	0	0	603	903	0
735	8	0	0	0	0	0	0	200	300	0	-9.48669	-23.2599	-521.662	-101570	-17964.6	2657.59	165.563	1097.7	0	0	0	0	0	0	0	603	903	0
735	9	0	0	0	0	0	0	200	300	0	-9.18152	-22.9547	-524.409	-102485	-18574.9	2428.71	164.579	1098.43	0	0	0	0	0	0	0	603	903	0
736	0	0	0	0	0	0	0	200	300	0	-8.26599	-24.7858	-526.545	-102760	-18452.9	2657.59	164.955	1098.16	0	0	0	0	0	0	0	603	903	0
736	1	0	0	0	0	0	0	200	300	0	-6.28235	-25.7013	-529.596	-103126	-18147.7	2932.25	165.733	1097.73	0	0	0	0	0	0	0	603	903	0
736	2	0	0	0	0	0	0	200	300	0	-8.72375	-25.5487	-528.986	-103950	-18025.6	3115.36	165.924	1099.51	0	0	0	0	0	0	0	603	903	0
736	3	0	0	0	0	0	0	200	300	0	-9.63928	-26.1591	-530.207	-104591	-18330.8	2886.47	165.427	1100.26	0	0	0	0	0	0	0	603	903	0
736	4	0	0	0	0	0	0	200	300	0	-9.79187	-26.922	-534.174	-104591	-18208.7	3115.36	165.912	1098.8	0	0	0	0	0	0	0	603	903	0
736	5	0	0	0	0	0	0	200	300	0	-9.94446	-27.8375	-536.31	-104774	-18025.6	2932.25	166.39	1098.36	0	0	0	0	0	0	0	603	903	0
736	6	0	0	0	0	0	0	200	300	0	-8.87634	-28.9056	-536.921	-105140	-18025.6	3023.8	166.428	1098.82	0	0	0	0	0	0	0	603	903	0
736	7	0	0	0	0	0	0	200	300	0	-9.02893	-29.8212	-539.362	-106239	-18086.7	3069.58	166.467	1099.97	0	0	0	0	0	0	0	603	903	0
736	8	0	0	0	0	0	0	200	300	0	-9.94446	-29.9738	-539.362	-105415	-18330.8	2840.7	166.014	1098.44	0	0	0	0	0	0	0	603	903	0
736	9	0	0	0	0	0	0	200	300	0	-9.63928	-31.0419	-543.329	-106788	-18330.8	2978.03	166.262	1099.54	0	0	0	0	0	0	0	603	903	0
737	0	0	0	0	0	0	0	200	300	0	-10.097	-31.6522	-541.804	-106605	-19002.2	3023.8	164.928	1099.76	0	0	0	0	0	0	0	603	903	0
737	1	0	0	0	0	0	0	200	300	0	-8.87634	-32.11	-546.076	-107063	-18574.9	3161.13	165.985	1099.06	0	0	0	0	0	0	0	603	903	0
737	2	0	0	0	0	0	0	200	300	0	-8.41858	-33.0255	-547.297	-107887	-18513.9	3344.24	166.172	1100.13	0	0	0	0	0	0	0	603	903	0
737	3	0	0	0	0	0	0	200	300	0	-11.0126	-33.7885	-548.823	-108345	-18452.9	3344.24	166.377	1100.41	0	0	0	0	0	0	0	603	903	0
737	4	0	0	0	0	0	0	200	300	0	-10.2496	-34.5514	-552.485	-108162	-18758.1	3481.57	166.048	1098.77	0	0	0	0	0	0	0	603	903	0
737	5	0	0	0	0	0	0	200	300	0	-9.63928	-34.3988	-553.095	-108803	-18513.9	3344.24	166.527	1099.72	0	0	0	0	0	0	0	603	903	0
737	6	0	0	0	0	0	0	200	300	0	-9.94446	-36.0773	-554.926	-109352	-18574.9	3481.57	166.527	1100.06	0	0	0	0	0	0	0	603	903	0
737	7	0	0	0	0	0	0	200	300	0	-11.4703	-36.535	-556.452	-109901	-19185.3	3481.57	165.522	1100.5	0	0	0	0	0	0	0	603	903	0
737	8	0	0	0	0	0	0	200	300	0	-9.79187	-36.535	-554.926	-110359	-18819.1	3802	166.087	1101.87	0	0	0	0	0	0	0	603	903	0
737	9	0	0	0	0	0	0	200	300	0	-11.3177	-37.298	-559.504	-110267	-18574.9	3710.45	166.801	1100.08	0	0	0	0	0	0	0	603	903	0
738	0	0	0	0	0	0	0	200	300	0	-10.7074	-38.3661	-562.25	-110542	-18697	3573.12	166.746	1099.61	0	0	0	0	0	0	0	603	903	0
738	1	0	0	0	0	0	0	200	300	0	-9.94446	-39.892	-564.692	-111274	-19124.3	3756.23	166.133	1100.05	0	0	0	0	0	0	0	603	903	0
738	2	0	0	0	0	0	0	200	300	0	-11.9281	-40.3497	-565.302	-112098	-19002.2	3939.33	166.386	1101.3	0	0	0	0	0	0	0	603	903	0
738	3	0	0	0	0	0	0	200	300	0	-11.4703	-41.1127	-566.523	-112098	-19185.3	3893.55	166.135	1100.87	0	0	0	0	0	0	0	603	903	0
738	4	0	0	0	0	0	0	200	300	0	-11.1652	-40.9601	-568.049	-111458	-18574.9	3893.55	167.3	1099.21	0	0	0	0	0	0	0	603	903	0
738	5	0	0	0	0	0	0	200	300	0	-11.0126	-42.0282	-569.269	-112556	-19307.4	4122.44	166.084	1100.72	0	0	0	0	0	0	0	603	903	0
738	6	0	0	0	0	0	0	200	300	0	-12.2333	-42.3334	-568.049	-113655	-19124.3	4030.88	166.333	1103.08	0	0	0	0	0	0	0	603	903	0
738	7	0	0	0	0	0	0	200	300	0	-12.691	-44.0118	-571.1	-113655	-18636	4076.66	167.368	1102.01	0	0	0	0	0	0	0	603	903	0
738	8	0	0	0	0	0	0	200	300	0	-10.097	-44.1644	-573.847	-113746	-18636	4168.21	167.524	1101.22	0	0	0	0	0	0	0	603	903	0
738	9	0	0	0	0	0	0	200	300	0	-11.4703	-44.4696	-573.542	-114204	-19368.4	4351.32	166.23	1102.12	0	0	0	0	0	0	0	603	903	0
739	0	0	0	0	0	0	0	200	300	0	-11.3177	-44.0118	-577.509	-115028	-18758.1	4259.77	167.519	1102.18	0	0	0	0	0	0	0	603	903	0
739	1	0	0	0	0	0	0	200	300	0	-13.7592	-46.1481	-578.425	-115394	-18697	4717.53	167.676	1102.5	0	0	0	0	0	0	0	603	903	0
739	2	0	0	0	0	0	0	200	300	0	-12.9962	-46.7584	-579.645	-115120	-19246.3	4442.87	166.796	1101.6	0	0	0	0	0	0	0	603	903	0
739	3	0	0	0	0	0	0	200	300	0	-12.5385	-47.0636	-579.951	-115669	-19063.2	4397.09	167.13	1102.45	0	0	0	0	0	0	0	603	903	0
739	4	0	0	0	0	0	0	200	300	0	-11.9281	-48.8947	-581.476	-116585	-18880.1	4625.98	167.531	1103.5	0	0	0	0	0	0	0	603	903	0
739	5	0	0	0	0	0	0	200	300	0	-13.454	-48.7421	-583.002	-117134	-19002.2	4534.42	167.406	1103.91	0	0	0	0	0	0	0	603	903	0
739	6	0	0	0	0	0	0	200	300	0	-13.1488	-49.9628	-586.054	-116676	-19246.3	4763.31	167.159	1102.09	0	0	0	0	0	0	0	603	903	0
739	7	0	0	0	0	0	0	200	300	0	-12.5385	-49.9628	-587.275	-117317	-19185.3	4580.2	167.332	1102.77	0	0	0	0	0	0	0	603	903	0
739	8	0	0	0	0	0	0	200	300	0	-12.0807	-51.7938	-588.19	-117683	-18758.1	4717.53	168.109	1103.08	0	0	0	0	0	0	0	603	903	0
739	9	0	0	0	0	0	0	200	300	0	-12.8436	-51.9464	-588.495	-118416	-18819.1	4717.53	168.022	1104.22	0	0	0	0	0	0	0	603	903	0
740	0	0	0	0	0	0	0	200	300	0	-11.9281	-53.3197	-589.106	-118690	-19307.4	4809.08	167.226	1104.48	0	0	0	0	0	0	0	603	903	0
740	1	0	0	0	0	0	0	200	300	0	-13.9117	-53.1671	-590.632	-117958	-19124.3	4854.86	167.621	1102.71	0	0	0	0	0	0	0	603	903	0
740	2	0	0	0	0	0	0	200	300	0	-12.5385	-53.9301	-592.463	-118599	-18819.1	4946.41	168.236	1103.18	0	0	0	0	0	0	0	603	903	0
740	3	0	0	0	0	0	0	200	300	0	-12.3859	-55.1508	-593.378	-119606	-19246.3	4809.08	167.565	1104.57	0	0	0	0	0	0	0	603	903	0
740	4	0	0	0	0	0	0	200	300	0	-13.9117	-55.7611	-594.599	-118873	-19246.3	5037.96	167.631	1102.92	0	0	0	0	0	0	0	603	903	0
740	5	0	0	0	0	0	0	200	300	0	-11.4703	-56.6766	-595.514	-120247	-18941.2	5037.96	168.194	1104.92	0	0	0	0	0	0	0	603	903	0
740	6	0	0	0	0	0	0	200	300	0	-13.454	-57.4396	-595.82	-119880	-19063.2	5129.52	168.005	1104.2	0	0	0	0	0	0	0	603	903	0
740	7	0	0	0	0	0	0	200	300	0	-13.1488	-57.8973	-597.346	-120338	-19246.3	5083.74	167.78	1104.45	0	0	0	0	0	0	0	603	903	0
740	8	0	0	0	0	0	0	200	300	0	-12.5385	-58.5077	-599.177	-121071	-19307.4	5449.95	167.777	1105.06	0	0	0	0	0	0	0	603	903	0
740	9	0	0	0	0	0	0	200	300	0	-13.7592	-59.881	-598.566	-121528	-18574.9	5175.29	168.968	1106.03	0	0	0	0	0	0	0	603	903	0
741	0	0	0	0	0	0	0	200	300	0	-13.6066	-60.1862	-601.923	-122352	-18819.1	5129.52	168.735	1106.27	0	0	0	0	0	0	0	603	903	0
741	1	0	0	0	0	0	0	200	300	0	-12.691	-61.712	-601.618	-121711	-19002.2	5129.52	168.415	1105.31	0	0	0	0	0	0	0	603	903	0
741	2	0	0	0	0	0	0	200	300	0	-12.3859	-62.1698	-603.754	-122261	-19246.3	4946.41	168.122	1105.5	0	0	0	0	0	0	0	603	903	0
741	3	0	0	0	0	0	0	200	300	0	-13.3014	-62.9327	-604.365	-122810	-19063.2	5129.52	168.457	1106.21	0	0	0	0	0	0	0	603	903	0
741	4	0	0	0	0	0	0	200	300	0	-11.6229	-64.4586	-603.144	-122810	-18636	5266.85	169.102	1106.62	0	0	0	0	0	0	0	603	903	0
741	5	0	0	0	0	0	0	200	300	0	-13.6066	-65.5267	-605.89	-122352	-19124.3	5495.73	168.436	1104.94	0	0	0	0	0	0	0	603	903	0
741	6	0	0	0	0	0	0	200	300	0	-12.3859	-65.2216	-605.89	-122993	-18880.1	5449.95	168.839	1106	0	0	0	0	0	0	0	603	903	0
741	7	0	0	0	0	0	0	200	300	0	-12.2333	-66.5948	-606.806	-122810	-19002.2	5449.95	168.685	1105.39	0	0	0	0	0	0	0	603	903	0
741	8	0	0	0	0	0	0	200	300	0	-11.1652	-66.7474	-607.416	-123909	-19063.2	5861.94	168.616	1106.99	0	0	0	0	0	0	0	603	903	0
741	9	0	0	0	0	0	0	200	300	0	-12.5385	-67.8156	-609.247	-124092	-19246.3	5770.39	168.41	1106.68	0	0	0	0	0	0	0	603	903	0
742	0	0	0	0	0	0	0	200	300	0	-13.7592	-69.1888	-609.858	-123817	-18452.9	5587.28	169.742	1106.03	0	0	0	0	0	0	0	603	903	0
742	1	0	0	0	0	0	0	200	300	0	-12.0807	-70.5621	-610.163	-124183	-18513.9	5999.27	169.657	1106.53	0	0	0	0	0	0	0	603	903	0
742	2	0	0	0	0	0	0	200	300	0	-11.9281	-70.5621	-609.858	-124916	-18880.1	5861.94	169.042	1107.83	0	0	0	0	0	0	0	603	903	0
742	3	0	0	0	0	0	0	200	300	0	-13.1488	-71.0199	-609.553	-123817	-18819.1	5587.28	169.126	1106.13	0	0	0	0	0	0	0	603	903	0
742	4	0	0	0	0	0	0	200	300	0	-13.454	-72.088	-612.604	-124824	-18513.9	5861.94	169.778	1106.76	0	0	0	0	0	0	0	603	903	0
742	5	0	0	0	0	0	0	200	300	0	-11.9281	-74.0717	-611.994	-124916	-18391.8	5633.06	169.948	1107.11	0	0	0	0	0	0	0	603	903	0
742	6	0	0	0	0	0	0	200	300	0	-10.4022	-73.7665	-613.215	-125099	-19002.2	5861.94	169.012	1107.01	0	0	0	0	0	0	0	603	903	0
742	7	0	0	0	0	0	0	200	300	0	-12.2333	-75.2924	-611.384	-125648	-18574.9	5724.61	169.618	1108.51	0	0	0	0	0	0	0	603	903	0
742	8	0	0	0	0	0	0	200	300	0	-12.5385	-75.4449	-613.52	-125740	-18452.9	5724.61	169.923	1107.95	0	0	0	0	0	0	0	603	903	0
742	9	0	0	0	0	0	0	200	300	0	-12.5385	-76.0553	-613.825	-125374	-18269.8	5861.94	170.236	1107.25	0	0	0	0	0	0	0	603	903	0
743	0	0	0	0	0	0	0	200	300	0	-10.7074	-77.8864	-611.689	-125740	-18819.1	5907.72	169.234	1108.56	0	0	0	0	0	0	0	603	903	0
743	1	0	0	0	0	0	0	200	300	0	-11.0126	-79.1071	-614.13	-126198	-18574.9	6090.82	169.754	1108.49	0	0	0	0	0	0	0	603	903	0
743	2	0	0	0	0	0	0	200	300	0	-11.6229	-80.6329	-613.52	-126106	-18025.6	6090.82	170.619	1108.55	0	0	0	0	0	0	0	603	903	0
743	3	0	0	0	0	0	0	200	300	0	-11.3177	-80.1752	-613.215	-126198	-18636	6045.04	169.609	1108.8	0	0	0	0	0	0	0	603	903	0
743	4	0	0	0	0	0	0	200	300	0	-10.4022	-82.464	-612.604	-126014	-18391.8	5999.27	169.978	1108.7	0	0	0	0	0	0	0	603	903	0
743	5	0	0	0	0	0	0	200	300	0	-8.87634	-82.6166	-614.435	-126106	-18086.7	6136.6	170.564	1108.24	0	0	0	0	0	0	0	603	903	0
743	6	0	0	0	0	0	0	200	300	0	-10.2496	-83.8373	-613.825	-126747	-18086.7	6090.82	170.534	1109.49	0	0	0	0	0	0	0	603	903	0
743	7	0	0	0	0	0	0	200	300	0	-11.6229	-83.6847	-610.468	-127022	-18452.9	5953.49	169.773	1111.07	0	0	0	0	0	0	0	603	903	0
743	8	0	0	0	0	0	0	200	300	0	-11.6229	-85.3632	-612.909	-125099	-18147.7	6090.82	170.391	1107.11	0	0	0	0	0	0	0	603	903	0
743	9	0	0	0	0	0	0	200	300	0	-9.33411	-85.6683	-613.215	-126289	-17842.5	6182.37	170.903	1108.95	0	0	0	0	0	0	0	603	903	0
744	0	0	0	0	0	0	0	200	300	0	-9.48669	-86.1261	-612.909	-126472	-17964.6	5953.49	170.69	1109.35	0	0	0	0	0	0	0	603	903	0
744	1	0	0	0	0	0	0	200	300	0	-10.2496	-87.9572	-612.909	-127022	-18330.8	6136.6	170.092	1110.24	0	0	0	0	0	0	0	603	903	0
744	2	0	0	0	0	0	0	200	300	0	-6.8927	-89.0253	-612.604	-126930	-18025.6	6136.6	170.575	1110.2	0	0	0	0	0	0	0	603	903	0
744	3	0	0	0	0	0	0	200	300	0	-9.33411	-90.0934	-611.078	-126564	-17293.2	5953.49	171.701	1110.12	0	0	0	0	0	0	0	603	903	0
744	4	0	0	0	0	0	0	200	300	0	-8.26599	-92.3822	-610.773	-126747	-17903.6	5861.94	170.687	1110.52	0	0	0	0	0	0	0	603	903	0
744	5	0	0	0	0	0	0	200	300	0	-7.96081	-91.7719	-609.553	-126198	-17659.4	5953.49	171.029	1110.03	0	0	0	0	0	0	0	603	903	0
744	6	0	0	0	0	0	0	200	300	0	-7.96081	-92.2296	-610.163	-126747	-17354.2	6045.04	171.558	1110.73	0	0	0	0	0	0	0	603	903	0
744	7	0	0	0	0	0	0	200	300	0	-8.26599	-93.2977	-607.416	-126564	-17293.2	6090.82	171.53	1111.36	0	0	0	0	0	0	0	603	903	0
744	8	0	0	0	0	0	0	200	300	0	-7.04529	-94.3658	-609.553	-126564	-17659.4	5861.94	171.029	1110.63	0	0	0	0	0	0	0	603	903	0
744	9	0	0	0	0	0	0	200	300	0	-4.90906	-94.8236	-606.501	-125923	-17476.3	6045.04	171.185	1110.62	0	0	0	0	0	0	0	603	903	0
745	0	0	0	0	0	0	0	200	300	0	-6.8927	-94.671	-606.196	-126655	-17049.1	5999.27	171.875	1111.93	0	0	0	0	0	0	0	603	903	0
745	1	0	0	0	0	0	0	200	300	0	-6.58752	-94.8236	-605.585	-126198	-17110.1	5770.39	171.746	1111.39	0	0	0	0	0	0	0	603	903	0
745	2	0	0	0	0	0	0	200	300	0	-7.04529	-96.1969	-606.806	-125831	-17415.3	5953.49	171.3	1110.37	0	0	0	0	0	0	0	603	903	0
745	3	0	0	0	0	0	0	200	300	0	-4.90906	-97.265	-605.89	-126289	-17049.1	5999.27	171.861	1111.44	0	0	0	0	0	0	0	603	903	0
745	4	0	0	0	0	0	0	200	300	0	-4.90906	-99.2487	-604.059	-126381	-16743.9	5678.83	172.281	1112.22	0	0	0	0	0	0	0	603	903	0
745	5	0	0	0	0	0	0	200	300	0	-5.51941	-98.6383	-601.008	-126198	-17049.1	5907.72	171.633	1112.98	0	0	0	0	0	0	0	603	903	0
745	6	0	0	0	0	0	0	200	300	0	-5.51941	-99.0961	-601.008	-125831	-16804.9	5678.83	172.039	1112.37	0	0	0	0	0	0	0	603	903	0
745	7	0	0	0	0	0	0	200	300	0	-4.14612	-100.164	-601.008	-125557	-16621.8	5724.61	172.343	1111.91	0	0	0	0	0	0	0	603	903	0
745	8	0	0	0	0	0	0	200	300	0	-4.60388	-101.385	-600.397	-125374	-16621.8	5724.61	172.315	1111.82	0	0	0	0	0	0	0	603	903	0
745	9	0	0	0	0	0	0	200	300	0	-5.06165	-100.469	-598.871	-125282	-16804.9	5587.28	171.939	1112.2	0	0	0	0	0	0	0	603	903	0
746	0	0	0	0	0	0	0	200	300	0	-4.45129	-102.606	-597.04	-125282	-16927	5724.61	171.648	1112.84	0	0	0	0	0	0	0	603	903	0
746	1	0	0	0	0	0	0	200	300	0	-1.8573	-102.911	-595.82	-124824	-16438.7	5404.18	172.41	1112.5	0	0	0	0	0	0	0	603	903	0
746	2	0	0	0	0	0	0	200	300	0	-2.62024	-102.3	-593.378	-124550	-16804.9	5495.73	171.679	1112.9	0	0	0	0	0	0	0	603	903	0
746	3	0	0	0	0	0	0	200	300	0	-2.46765	-103.674	-593.378	-125007	-16133.5	5495.73	172.811	1113.67	0	0	0	0	0	0	0	603	903	0
746	4	0	0	0	0	0	0	200	300	0	-3.078	-104.894	-592.768	-124916	-16194.6	5404.18	172.68	1113.73	0	0	0	0	0	0	0	603	903	0
746	5	0	0	0	0	0	0	200	300	0	-3.23059	-105.963	-590.021	-123726	-15889.4	5358.4	173.07	1112.7	0	0	0	0	0	0	0	603	903	0
746	6	0	0	0	0	0	0	200	300	0	-1.70471	-105.657	-589.106	-123359	-16438.7	5449.95	172.095	1112.4	0	0	0	0	0	0	0	603	903	0
746	7	0	0	0	0	0	0	200	300	0	-1.24695	-106.42	-586.359	-123359	-16133.5	5129.52	172.485	1113.38	0	0	0	0	0	0	0	603	903	0
746	8	0	0	0	0	0	0	200	300	0	-2.00989	-106.725	-587.275	-124000	-15584.2	5175.29	173.463	1114.15	0	0	0	0	0	0	0	603	903	0
746	9	0	0	0	0	0	0	200	300	0	-1.70471	-108.099	-583.918	-123909	-15523.2	5037.96	173.415	1115.2	0	0	0	0	0	0	0	603	903	0
747	0	0	0	0	0	0	0	200	300	0	-0.33142	-108.709	-581.171	-123176	-15462.2	4717.53	173.395	1114.95	0	0	0	0	0	0	0	603	903	0
747	1	0	0	0	0	0	0	200	300	0	-0.789184	-109.014	-579.035	-122535	-15584.2	4809.08	173.086	1114.62	0	0	0	0	0	0	0	603	903	0
747	2	0	0	0	0	0	0	200	300	0	-0.636596	-108.709	-578.425	-122719	-15157	4717.53	173.796	1115.16	0	0	0	0	0	0	0	603	903	0
747	3	0	0	0	0	0	0	200	300	0	-1.39954	-109.167	-577.509	-122444	-15462.2	4854.86	173.226	1115.02	0	0	0	0	0	0	0	603	903	0
747	4	0	0	0	0	0	0	200	300	0	-1.24695	-110.235	-575.678	-121803	-15462.2	4763.31	173.141	1114.58	0	0	0	0	0	0	0	603	903	0
747	5	0	0	0	0	0	0	200	300	0	-0.0262447	-109.625	-573.237	-120430	-15218	4809.08	173.452	1113.09	0	0	0	0	0	0	0	603	903	0
747	6	0	0	0	0	0	0	200	300	0	0.278931	-110.693	-570.185	-121254	-14912.8	4992.19	173.846	1115.66	0	0	0	0	0	0	0	603	903	0
747	7	0	0	0	0	0	0	200	300	0	-0.33142	-111.456	-568.964	-121071	-15401.1	4671.75	172.931	1115.79	0	0	0	0	0	0	0	603	903	0
747	8	0	0	0	0	0	0	200	300	0	1.65222	-111.151	-568.049	-120521	-15034.9	4671.75	173.532	1115.17	0	0	0	0	0	0	0	603	903	0
747	9	0	0	0	0	0	0	200	300	0	0.431519	-112.066	-565.607	-119880	-14729.7	4671.75	173.958	1114.95	0	0	0	0	0	0	0	603	903	0
748	0	0	0	0	0	0	0	200	300	0	1.04187	-113.134	-562.555	-119514	-14607.7	4442.87	174.033	1115.45	0	0	0	0	0	0	0	603	903	0
748	1	0	0	0	0	0	0	200	300	0	0.431519	-113.897	-558.893	-119423	-15218	4488.65	172.771	1116.68	0	0	0	0	0	0	0	603	903	0
748	2	0	0	0	0	0	0	200	300	0	-0.178833	-113.745	-555.536	-117409	-14302.5	4580.2	174.255	1114.34	0	0	0	0	0	0	0	603	903	0
748	3	0	0	0	0	0	0	200	300	0	0.126343	-114.05	-553.4	-118141	-14302.5	4351.32	174.155	1116.48	0	0	0	0	0	0	0	603	903	0
748	4	0	0	0	0	0	0	200	300	0	1.65222	-114.202	-552.79	-117225	-14851.8	4351.32	173.133	1115.06	0	0	0	0	0	0	0	603	903	0
748	5	0	0	0	0	0	0	200	300	0	0.584107	-115.423	-550.043	-116859	-14363.5	4351.32	173.887	1115.45	0	0	0	0	0	0	0	603	903	0
748	6	0	0	0	0	0	0	200	300	0	0.736695	-115.881	-549.738	-117134	-14302.5	4488.65	173.983	1116.07	0	0	0	0	0	0	0	603	903	0
748	7	0	0	0	0	0	0	200	300	0	2.41516	-115.27	-543.94	-116676	-14241.5	4122.44	173.818	1117.5	0	0	0	0	0	0	0	603	903	0
748	8	0	0	0	0	0	0	200	300	0	0.584107	-116.339	-542.109	-115577	-14302.5	4168.21	173.617	1116.2	0	0	0	0	0	0	0	603	903	0
748	9	0	0	0	0	0	0	200	300	0	1.80481	-115.728	-534.174	-115211	-14058.3	4213.99	173.682	1118.68	0	0	0	0	0	0	0	603	903	0
749	0	0	0	0	0	0	0	200	300	0	1.49963	-116.796	-536.005	-115120	-13875.2	4076.66	174.114	1117.77	0	0	0	0	0	0	0	603	903	0
749	1	0	0	0	0	0	0	200	300	0	0.736695	-118.17	-534.174	-114479	-13692.1	3893.55	174.368	1117.31	0	0	0	0	0	0	0	603	903	0
749	2	0	0	0	0	0	0	200	300	0	0.736695	-118.627	-529.291	-113289	-13997.3	3985.11	173.555	1117.04	0	0	0	0	0	0	0	603	903	0
749	3	0	0	0	0	0	0	200	300	0	1.9574	-119.085	-524.409	-112922	-13875.2	3893.55	173.541	1118.33	0	0	0	0	0	0	0	603	903	0
749	4	0	0	0	0	0	0	200	300	0	1.80481	-118.475	-520.441	-112648	-13692.1	4030.88	173.691	1119.45	0	0	0	0	0	0	0	603	903	0
749	5	0	0	0	0	0	0	200	300	0	0.736695	-118.17	-521.052	-110634	-13814.2	3664.67	173.488	1115.33	0	0	0	0	0	0	0	603	903	0
749	6	0	0	0	0	0	0	200	300	0	0.584107	-119.238	-517.084	-111000	-13753.2	3710.45	173.402	1117.66	0	0	0	0	0	0	0	603	903	0
749	7	0	0	0	0	0	0	200	300	0	3.63586	-117.407	-513.422	-109901	-13448	3710.45	173.807	1117.06	0	0	0	0	0	0	0	603	903	0
749	8	0	0	0	0	0	0	200	300	0	2.56775	-119.39	-508.845	-109077	-13387	3664.67	173.691	1117.36	0	0	0	0	0	0	0	603	903	0
749	9	0	0	0	0	0	0	200	300	0	1.9574	-118.627	-504.877	-108803	-13387	3573.12	173.485	1118.5	0	0	0	0	0	0	0	603	903	0
750	0	0	0	0	0	0	0	200	300	0	1.04187	-118.78	-501.215	-108162	-13631.1	3710.45	172.804	1118.8	0	0	0	0	0	0	0	603	903	0
750	1	0	0	0	0	0	0	200	300	0	0.736695	-119.848	-495.417	-107063	-13264.9	3618.9	173.225	1119.11	0	0	0	0	0	0	0	603	903	0
750	2	0	0	0	0	0	0	200	300	0	1.9574	-120.001	-494.501	-106239	-13081.8	3664.67	173.546	1117.84	0	0	0	0	0	0	0	603	903	0
750	3	0	0	0	0	0	0	200	300	0	2.10999	-119.848	-488.703	-105873	-13203.9	3435.79	172.982	1119.64	0	0	0	0	0	0	0	603	903	0
750	4	0	0	0	0	0	0	200	300	0	1.04187	-119.085	-483.515	-105140	-13203.9	3481.57	172.692	1120.45	0	0	0	0	0	0	0	603	903	0
750	5	0	0	0	0	0	0	200	300	0	1.19446	-118.932	-480.463	-103676	-12349.4	3252.69	174.297	1118.78	0	0	0	0	0	0	0	603	903	0
750	6	0	0	0	0	0	0	200	300	0	2.56775	-119.085	-475.886	-103035	-12715.6	3252.69	173.28	1119.51	0	0	0	0	0	0	0	603	903	0
750	7	0	0	0	0	0	0	200	300	0	1.9574	-119.39	-471.003	-102028	-12715.6	3115.36	173.003	1119.62	0	0	0	0	0	0	0	603	903	0
750	8	0	0	0	0	0	0	200	300	0	1.19446	-119.085	-464.899	-100288	-12410.4	3069.58	173.305	1118.72	0	0	0	0	0	0	0	603	903	0
750	9	0	0	0	0	0	0	200	300	0	1.65222	-118.627	-459.101	-99555.8	-12288.3	2840.7	173.234	1119.85	0	0	0	0	0	0	0	603	903	0
751	0	0	0	0	0	0	0	200	300	0	2.72034	-117.101	-455.439	-98731.8	-12349.4	2978.03	172.885	1119.78	0	0	0	0	0	0	0	603	903	0
751	1	0	0	0	0	0	0	200	300	0	2.72034	-117.559	-451.471	-97816.2	-12532.5	2932.25	172.241	1119.66	0	0	0	0	0	0	0	603	903	0
751	2	0	0	0	0	0	0	200	300	0	2.41516	-117.559	-445.368	-97083.8	-11983.2	3023.8	173.094	1120.99	0	0	0	0	0	0	0	603	903	0
751	3	0	0	0	0	0	0	200	300	0	2.41516	-118.017	-440.485	-95985.2	-12105.2	3023.8	172.518	1120.91	0	0	0	0	0	0	0	603	903	0
751	4	0	0	0	0	0	0	200	300	0	1.9574	-117.254	-433.466	-94428.8	-12105.2	2749.15	172.073	1120.85	0	0	0	0	0	0	0	603	903	0
751	5	0	0	0	0	0	0	200	300	0	2.56775	-115.881	-427.973	-93147	-11983.2	2749.15	172	1120.65	0	0	0	0	0	0	0	603	903	0
751	6	0	0	0	0	0	0	200	300	0	2.10999	-114.05	-421.869	-91773.8	-11555.9	2611.82	172.608	1120.54	0	0	0	0	0	0	0	603	903	0
751	7	0	0	0	0	0	0	200	300	0	1.9574	-113.745	-417.292	-91590.7	-11616.9	2566.04	172.161	1122.49	0	0	0	0	0	0	0	603	903	0
751	8	0	0	0	0	0	0	200	300	0	2.72034	-112.982	-411.799	-89942.7	-11494.9	2428.71	172.086	1121.41	0	0	0	0	0	0	0	603	903	0
751	9	0	0	0	0	0	0	200	300	0	1.04187	-111.608	-401.117	-88203.2	-11494.9	2428.71	171.343	1122.89	0	0	0	0	0	0	0	603	903	0
752	0	0	0	0	0	0	0	200	300	0	3.48328	-111.456	-398.676	-87104.6	-11555.9	2428.71	171.014	1121.48	0	0	0	0	0	0	0	603	903	0
752	1	0	0	0	0	0	0	200	300	0	3.02551	-109.167	-392.267	-86463.7	-11555.9	2245.6	170.541	1123.42	0	0	0	0	0	0	0	603	903	0
752	2	0	0	0	0	0	0	200	300	0	1.19446	-108.099	-386.164	-85090.4	-11372.8	2245.6	170.549	1123.35	0	0	0	0	0	0	0	603	903	0
752	3	0	0	0	0	0	0	200	300	0	1.19446	-106.725	-379.45	-83259.3	-10579.3	2474.49	172.119	1122.42	0	0	0	0	0	0	0	603	903	0
752	4	0	0	0	0	0	0	200	300	0	2.87293	-106.115	-371.515	-81977.6	-10640.4	2016.72	171.36	1123.66	0	0	0	0	0	0	0	603	903	0
752	5	0	0	0	0	0	0	200	300	0	2.41516	-104.742	-363.581	-81062.1	-10823.5	2016.72	170.231	1125.95	0	0	0	0	0	0	0	603	903	0
752	6	0	0	0	0	0	0	200	300	0	1.65222	-103.826	-357.477	-78773.3	-10396.2	2016.72	170.918	1123.36	0	0	0	0	0	0	0	603	903	0
752	7	0	0	0	0	0	0	200	300	0	1.9574	-101.385	-349.543	-78773.3	-10274.2	1696.29	170.607	1128.36	0	0	0	0	0	0	0	603	903	0
752	8	0	0	0	0	0	0	200	300	0	3.02551	-99.859	-343.134	-75660.5	-10152.1	1467.41	170.414	1123.5	0	0	0	0	0	0	0	603	903	0
752	9	0	0	0	0	0	0	200	300	0	2.41516	-98.1805	-338.251	-75294.2	-10213.1	1604.74	169.806	1125.6	0	0	0	0	0	0	0	603	903	0
753	0	0	0	0	0	0	0	200	300	0	2.10999	-96.6547	-330.622	-72456.1	-10091.1	1696.29	169.479	1122.15	0	0	0	0	0	0	0	603	903	0
753	1	0	0	0	0	0	0	200	300	0	2.26257	-95.5865	-322.382	-71815.3	-9541.75	1421.63	170.402	1125.76	0	0	0	0	0	0	0	603	903	0
753	2	0	0	0	0	0	0	200	300	0	3.48328	-93.7555	-314.753	-70167.3	-10030	1604.74	168.134	1125.93	0	0	0	0	0	0	0	603	903	0
753	3	0	0	0	0	0	0	200	300	0	5.31433	-91.1615	-308.039	-69068.7	-9602.78	1421.63	168.826	1127.22	0	0	0	0	0	0	0	603	903	0
753	4	0	0	0	0	0	0	200	300	0	3.78845	-88.2623	-299.494	-67970	-9358.64	1238.52	168.752	1129.95	0	0	0	0	0	0	0	603	903	0
753	5	0	0	0	0	0	0	200	300	0	2.72034	-87.4994	-293.696	-66322.1	-9114.5	1238.52	168.966	1128.82	0	0	0	0	0	0	0	603	903	0
753	6	0	0	0	0	0	0	200	300	0	2.41516	-86.889	-286.677	-65131.9	-8992.43	1238.52	168.632	1130.2	0	0	0	0	0	0	0	603	903	0
753	7	0	0	0	0	0	0	200	300	0	4.09363	-84.295	-276.911	-62751.5	-8748.29	826.538	168.408	1129.61	0	0	0	0	0	0	0	603	903	0
753	8	0	0	0	0	0	0	200	300	0	3.33069	-81.5485	-270.502	-61836	-8565.18	1146.97	168.336	1131.6	0	0	0	0	0	0	0	603	903	0
753	9	0	0	0	0	0	0	200	300	0	3.63586	-78.6493	-264.399	-60645.8	-8260.01	780.761	168.759	1132.37	0	0	0	0	0	0	0	603	903	0
754	0	0	0	0	0	0	0	200	300	0	4.09363	-76.0553	-258.6	-58997.9	-8137.94	551.879	168.531	1131.14	0	0	0	0	0	0	0	603	903	0
754	1	0	0	0	0	0	0	200	300	0	3.63586	-73.6139	-249.14	-57075.3	-7893.8	597.656	168.316	1132.09	0	0	0	0	0	0	0	603	903	0
754	2	0	0	0	0	0	0	200	300	0	4.55139	-72.3932	-243.647	-54969.6	-7283.45	368.774	170.107	1128.61	0	0	0	0	0	0	0	603	903	0
754	3	0	0	0	0	0	0	200	300	0	4.85657	-69.6466	-234.492	-53962.5	-7710.69	368.774	167.117	1133.13	0	0	0	0	0	0	0	603	903	0
754	4	0	0	0	0	0	0	200	300	0	3.94104	-66.5948	-224.726	-53413.2	-7161.38	231.445	168.133	1140.68	0	0	0	0	0	0	0	603	903	0
754	5	0	0	0	0	0	0	200	300	0	4.3988	-65.2216	-220.148	-51673.7	-7222.41	414.55	167.193	1137.72	0	0	0	0	0	0	0	603	903	0
754	6	0	0	0	0	0	0	200	300	0	3.63586	-62.7802	-215.571	-49476.4	-6612.06	322.998	169.328	1132.51	0	0	0	0	0	0	0	603	903	0
754	7	0	0	0	0	0	0	200	300	0	5.61951	-61.2543	-208.857	-48469.3	-7039.31	368.774	166.296	1135.07	0	0	0	0	0	0	0	603	903	0
754	8	0	0	0	0	0	0	200	300	0	4.85657	-58.5077	-201.227	-47187.6	-6856.2	139.892	165.928	1137.5	0	0	0	0	0	0	0	603	903	0
754	9	0	0	0	0	0	0	200	300	0	4.24622	-56.9818	-196.345	-46272	-6184.81	48.3394	168.5	1138.67	0	0	0	0	0	0	0	603	903	0
755	0	0	0	0	0	0	0	200	300	0	6.22986	-52.5568	-189.631	-44898.7	-5879.64	-409.424	168.994	1139.77	0	0	0	0	0	0	0	603	903	0
755	1	0	0	0	0	0	0	200	300	0	5.00916	-49.6576	-183.527	-43433.9	-5757.57	-363.648	168.628	1139.66	0	0	0	0	0	0	0	603	903	0
755	2	0	0	0	0	0	0	200	300	0	5.16174	-45.8429	-177.118	-41602.8	-6062.74	-409.424	165.77	1137.89	0	0	0	0	0	0	0	603	903	0
755	3	0	0	0	0	0	0	200	300	0	5.16174	-43.2489	-170.405	-40504.2	-5147.21	-684.083	169.794	1140.69	0	0	0	0	0	0	0	603	903	0
755	4	0	0	0	0	0	0	200	300	0	3.94104	-40.9601	-164.606	-39497.1	-5635.5	-363.648	165.764	1142.95	0	0	0	0	0	0	0	603	903	0
755	5	0	0	0	0	0	0	200	300	0	3.78845	-40.3497	-158.198	-38306.9	-5147.21	-592.53	167.463	1145.15	0	0	0	0	0	0	0	603	903	0
755	6	0	0	0	0	0	0	200	300	0	5.46692	-38.8239	-153.62	-36842.1	-4903.07	-638.306	168.083	1142.83	0	0	0	0	0	0	0	603	903	0
755	7	0	0	0	0	0	0	200	300	0	5.92468	-37.7557	-147.516	-35651.9	-4719.97	-546.754	168.004	1144.68	0	0	0	0	0	0	0	603	903	0
755	8	0	0	0	0	0	0	200	300	0	5.92468	-37.7557	-141.413	-35194.2	-4719.97	-363.648	166.623	1151.88	0	0	0	0	0	0	0	603	903	0
755	9	0	0	0	0	0	0	200	300	0	4.09363	-33.6359	-137.751	-33729.3	-4658.93	-821.412	166.179	1147.86	0	0	0	0	0	0	0	603	903	0
756	0	0	0	0	0	0	0	200	300	0	5.00916	-31.1945	-131.037	-32264.5	-4231.69	-729.859	167.706	1149.22	0	0	0	0	0	0	0	603	903	0
756	1	0	0	0	0	0	0	200	300	0	5.61951	-27.0746	-122.797	-30433.4	-3926.51	-775.635	168.024	1150.83	0	0	0	0	0	0	0	603	903	0
756	2	0	0	0	0	0	0	200	300	0	5.61951	-25.7013	-123.102	-30067.2	-4170.65	-638.306	166.12	1147.25	0	0	0	0	0	0	0	603	903	0
756	3	0	0	0	0	0	0	200	300	0	3.63586	-22.1918	-117.609	-29151.7	-3865.48	-1050.29	167.133	1150.87	0	0	0	0	0	0	0	603	903	0
756	4	0	0	0	0	0	0	200	300	0	6.68762	-20.2081	-110.895	-28327.7	-3621.34	-1324.95	167.345	1158.45	0	0	0	0	0	0	0	603	903	0
756	5	0	0	0	0	0	0	200	300	0	4.70398	-17.9193	-109.675	-27229.1	-3865.48	-1324.95	164.755	1151.27	0	0	0	0	0	0	0	603	903	0
756	6	0	0	0	0	0	0	200	300	0	3.48328	-16.6986	-104.487	-26222	-3377.19	-1004.52	167.678	1153.96	0	0	0	0	0	0	0	603	903	0
756	7	0	0	0	0	0	0	200	300	0	3.94104	-17.4615	-98.6883	-25855.8	-3316.16	-912.964	166.398	1164.99	0	0	0	0	0	0	0	603	903	0
756	8	0	0	0	0	0	0	200	300	0	2.72034	-16.8512	-97.4676	-25031.8	-3316.16	-1050.29	165.977	1159.82	0	0	0	0	0	0	0	603	903	0
756	9	0	0	0	0	0	0	200	300	0	2.41516	-17.0038	-92.5848	-23383.8	-3316.16	-912.964	164.182	1155.57	0	0	0	0	0	0	0	603	903	0
757	0	0	0	0	0	0	0	200	300	0	3.1781	-17.9193	-85.5657	-21919	-3072.02	-500.977	164.098	1159.17	0	0	0	0	0	0	0	603	903	0
757	1	0	0	0	0	0	0	200	300	0	5.00916	-18.0719	-85.8709	-21735.9	-2888.91	-684.083	166.357	1156.12	0	0	0	0	0	0	0	603	903	0
757	2	0	0	0	0	0	0	200	300	0	1.65222	-16.0883	-81.5984	-20728.8	-2644.77	-729.859	167.588	1157.03	0	0	0	0	0	0	0	603	903	0
757	3	0	0	0	0	0	0	200	300	0	2.72034	-16.2408	-76.7156	-19996.4	-2827.88	-775.635	163.138	1163.66	0	0	0	0	0	0	0	603	903	0
757	4	0	0	0	0	0	0	200	300	0	2.87293	-14.1046	-73.3587	-19080.9	-3010.98	-867.188	158.955	1163.1	0	0	0	0	0	0	0	603	903	0
757	5	0	0	0	0	0	0	200	300	0	1.9574	-13.1891	-71.2225	-18348.4	-2644.77	-684.083	162.866	1160.62	0	0	0	0	0	0	0	603	903	0
757	6	0	0	0	0	0	0	200	300	0	1.65222	-10.2899	-66.6448	-17707.6	-2461.67	-546.754	163.063	1168.7	0	0	0	0	0	0	0	603	903	0
757	7	0	0	0	0	0	0	200	300	0	1.80481	-8.15369	-66.95	-16975.2	-2461.67	-912.964	163.231	1156.55	0	0	0	0	0	0	0	603	903	0
757	8	0	0	0	0	0	0	200	300	0	1.65222	-8.0011	-62.9827	-16151.2	-2156.49	-912.964	165.761	1159.44	0	0	0	0	0	0	0	603	903	0
757	9	0	0	0	0	0	0	200	300	0	1.19446	-6.62781	-59.6258	-16059.6	-2095.46	-546.754	164.857	1172.34	0	0	0	0	0	0	0	603	903	0
758	0	0	0	0	0	0	0	200	300	0	1.65222	-5.4071	-58.4051	-15052.6	-2339.6	-1096.07	159.942	1160.73	0	0	0	0	0	0	0	603	903	0
758	1	0	0	0	0	0	0	200	300	0	3.48328	-5.25452	-56.2689	-15052.6	-2217.53	-1004.52	160.591	1170.51	0	0	0	0	0	0	0	603	903	0
758	2	0	0	0	0	0	0	200	300	0	2.41516	-5.4071	-52.3016	-14137	-1851.32	-775.635	164.603	1173.3	0	0	0	0	0	0	0	603	903	0
758	3	0	0	0	0	0	0	200	300	0	0.126343	-4.94934	-51.0809	-12855.3	-1546.14	-1004.52	169.732	1154.67	0	0	0	0	0	0	0	603	903	0
758	4	0	0	0	0	0	0	200	300	0	1.80481	-6.47522	-47.1136	-12580.6	-1363.03	-958.741	171.069	1170.03	0	0	0	0	0	0	0	603	903	0
758	5	0	0	0	0	0	0	200	300	0	2.41516	-4.94934	-44.9774	-12031.3	-1179.93	-684.083	173.766	1170.5	0	0	0	0	0	0	0	603	903	0
758	6	0	0	0	0	0	0	200	300	0	0.736695	-5.55969	-41.6204	-11298.9	-691.648	-912.964	183.382	1174.47	0	0	0	0	0	0	0	603	903	0
758	7	0	0	0	0	0	0	200	300	0	0.431519	-4.94934	-41.6204	-11207.3	-935.789	-912.964	177.516	1172.28	0	0	0	0	0	0	0	603	903	0
758	8	0	0	0	0	0	0	200	300	0	0.431519	-5.25452	-39.179	-10200.3	-1424.07	-684.083	163.652	1163.35	0	0	0	0	0	0	0	603	903	0
758	9	0	0	0	0	0	0	200	300	0	1.49963	-4.49158	-37.6531	-9467.83	-1302	-912.964	165.421	1154.45	0	0	0	0	0	0	0	603	903	0
759	0	0	0	0	0	0	0	200	300	0	0.736695	-3.72864	-33.6858	-8735.41	-813.718	-455.201	175.844	1162.32	0	0	0	0	0	0	0	603	903	0
759	1	0	0	0	0	0	0	200	300	0	-0.33142	-3.27087	-32.16	-8735.41	-813.718	-43.2133	174.698	1174.62	0	0	0	0	0	0	0	603	903	0
759	2	0	0	0	0	0	0	200	300	0	0.584107	-3.88123	-31.5496	-8186.1	-1363.03	-546.754	156.797	1162.47	0	0	0	0	0	0	0	603	903	0
759	3	0	0	0	0	0	0	200	300	0	-0.33142	-1.74499	-31.2444	-7728.33	-752.683	-272.095	175.91	1150.35	0	0	0	0	0	0	0	603	903	0
759	4	0	0	0	0	0	0	200	300	0	0.584107	-2.35535	-29.1082	-6812.81	-935.789	94.1158	167.851	1137.05	0	0	0	0	0	0	0	603	903	0
759	5	0	0	0	0	0	0	200	300	0	-0.484008	-4.33899	-26.6668	-7545.23	-813.718	-455.201	169.486	1185.94	0	0	0	0	0	0	0	603	903	0
759	6	0	0	0	0	0	0	200	300	0	-0.941772	-2.35535	-25.1409	-5988.83	-691.648	-226.319	172.489	1141.21	0	0	0	0	0	0	0	603	903	0
759	7	0	0	0	0	0	0	200	300	0	-1.39954	-1.43982	-21.4788	-6263.49	-386.472	-226.319	182.007	1194.61	0	0	0	0	0	0	0	603	903	0
759	8	0	0	0	0	0	0	200	300	0	-1.55212	-3.27087	-19.6478	-5805.73	-508.542	-546.754	174.117	1198.49	0	0	0	0	0	0	0	603	903	0
759	9	0	0	0	0	0	0	200	300	0	0	0	0	0	0	0	200	903	0	0	0	0	0	0	0	603	903	0
760	0	0	0	0	0	0	0	200	300	0	-0.636596	-1.43982	-19.3426	-5256.41	-264.402	-272.095	186.331	1174.75	0	0	0	0	0	0	0	603	903	0
760	1	0	0	0	0	0	0	200	300	0	0	0	0	0	0	0	200	903	0	0	0	0	0	0	0	603	903	0
760	2	0	0	0	0	0	0	200	300	0	0	0	0	0	0	0	200	903	0	0	0	0	0	0	0	603	903	0
760	3	0	0	0	0	0	0	200	300	0	0	0	0	0	0	0	200	903	0	0	0	0	0	0	0	603	903	0
760	4	0	0	0	0	0	0	200	300	0	0	0	0	0	0	0	200	903	0	0	0	0	0	0	0	603	903	0
760	5	0	0	0	0	0	0	200	300	0	0	0	0	0	0	0	200	903	0	0	0	0	0	0	0	603	903	0
760	6	0	0	0	0	0	0	200	300	0	0	0	0	0	0	0	200	903	0	0	0	0	0	0	0	603	903	0
760	7	0	0	0	0	0	0	200	300	0	0	0	0	0	0	0	200	903	0	0	0	0	0	0	0	603	903	0
760	8	0	0	0	0	0	0	200	300	0	0	0	0	0	0	0	200	903	0	0	0	0	0	0	0	603	903	0
760	9	0	0	0	0	0	0	200	300	0	0	0	0	0	0	0	200	903	0	0	0	0	0	0	0	603	903	0
761	0	0	0	0	0	0	0	200	300	0	0	0	0	0	0	0	200	903	0	0	0	0	0	0	0	603	903	0
761	1	0	0	0	0	0	0	200	300	0	0	0	0	0	0	0	200	903	0	0	0	0	0	0	0	603	903	0
761	2	0	0	0	0	0	0	200	300	0	0	0	0	0	0	0	200	903	0	0	0	0	0	0	0	603	903	0
761	3	0	0	0	0	0	0	200	300	0	0	0	0	0	0	0	200	903	0	0	0	0	0	0	0	603	903	0
761	4	0	0	0	0	0	0	200	300	0	0	0	0	0	0	0	200	903	0	0	0	0	0	0	0	603	903	0
761	5	0	0	0	0	0	0	200	300	0	0	0	0	0	0	0	200	903	0	0	0	0	0	0	0	603	903	0
761	6	0	0	0	0	0	0	200	300	0	0	0	0	0	0	0	200	903	0	0	0	0	0	0	0	603	903	0
761	7	0	0	0	0	0	0	200	300	0	0	0	0	0	0	0	200	903	0	0	0	0	0	0	0	603	903	0
761	8	0	0	0	0	0	0	200	300	0	0	0	0	0	0	0	200	903	0	0	0	0	0	0	0	603	903	0
761	9	0	0	0	0	0	0	200	300	0	0	0	0	0	0	0	200	903	0	0	0	0	0	0	0	603	903	0
762	0	0	0	0	0	0	0	200	300	0	0	0	0	0	0	0	200	903	0	0	0	0	0	0	0	603	903	0
762	1	0	0	0	0	0	0	200	300	0	0	0	0	0	0	0	200	903	0	0	0	0	0	0	0	603	903	0
762	2	0	0	0	0	0	0	200	300	0	0	0	0	0	0	0	200	903	0	0	0	0	0	0	0	603	903	0
762	3	0	0	0	0	0	0	200	300	0	0	0	0	0	0	0	200	903	0	0	0	0	0	0	0	603	903	0
762	4	0	0	0	0	0	0	200	300	0	0	0	0	0	0	0	200	903	0	0	0	0	0	0	0	603	903	0
762	5	0	0	0	0	0	0	200	300	0	0	0	0	0	0	0	200	903	0	0	0	0	0	0	0	603	903	0
762	6	0	0	0	0	0	0	200	300	0	0	0	0	0	0	0	200	903	0	0	0	0	0	0	0	603	903	0
762	7	0	0	0	0	0	0	200	300	0	0	0	0	0	0	0	200	903	0	0	0	0	0	0	0	603	903	0
762	8	0	0	0	0	0	0	200	300	0	0	0	0	0	0	0	200	903	0	0	0	0	0	0	0	603	903	0
762	9	0	0	0	0	0	0	200	300	0	0	0	0	0	0	0	200	903	0	0	0	0	0	0	0	603	903	0
763	0	0	0	0	0	0	0	200	300	0	0	0	0	0	0	0	200	903	0	0	0	0	0	0	0	603	903	0
763	1	0	0	0	0	0	0	200	300	0	0	0	0	0	0	0	200	903	0	0	0	0	0	0	0	603	903	0
763	2	0	0	0	0	0	0	200	300	0	0	0	0	0	0	0	200	903	0	0	0	0	0	0	0	603	903	0
763	3	0	0	0	0	0	0	200	300	0	0	0	0	0	0	0	200	903	0	0	0	0	0	0	0	603	903	0
763	4	0	0	0	0	0	0	200	300	0	0	0	0	0	0	0	200	903	0	0	0	0	0	0	0	603	903	0
763	5	0	0	0	0	0	0	200	300	0	0	0	0	0	0	0	200	903	0	0	0	0	0	0	0	603	903	0
763	6	0	0	0	0	0	0	200	300	0	0	0	0	0	0	0	200	903	0	0	0	0	0	0	0	603	903	0
763	7	0	0	0	0	0	0	200	300	0	0	0	0	0	0	0	200	903	0	0	0	0	0	0	0	603	903	0
763	8	0	0	0	0	0	0	200	300	0	0	0	0	0	0	0	200	903	0	0	0	0	0	0	0	603	903	0
763	9	0	0	0	0	0	0	200	300	0	0	0	0	0	0	0	200	903	0	0	0	0	0	0	0	603	903	0
764	0	0	0	0	0	0	0	200	300	0	0	0	0	0	0	0	200	903	0	0	0	0	0	0	0	603	903	0
764	1	0	0	0	0	0	0	200	300	0	0	0	0	0	0	0	200	903	0	0	0	0	0	0	0	603	903	0
764	2	0	0	0	0	0	0	200	300	0	0	0	0	0	0	0	200	903	0	0	0	0	0	0	0	603	903	0
764	3	0	0	0	0	0	0	200	300	0	0	0	0	0	0	0	200	903	0	0	0	0	0	0	0	603	903	0
764	4	0	0	0	0	0	0	200	300	0	0	0	0	0	0	0	200	903	0	0	0	0	0	0	0	603	903	0
764	5	0	0	0	0	0	0	200	300	0	0	0	0	0	0	0	200	903	0	0	0	0	0	0	0	603	903	0
764	6	0	0	0	0	0	0	200	300	0	0	0	0	0	0	0	200	903	0	0	0	0	0	0	0	603	903	0
764	7	0	0	0	0	0	0	200	300	0	0	0	0	0	0	0	200	903	0	0	0	0	0	0	0	603	903	0
764	8	0	0	0	0	0	0	200	300	0	0	0	0	0	0	0	200	903	0	0	0	0	0	0	0	603	903	0
764	9	0	0	0	0	0	0	200	300	0	0	0	0	0	0	0	200	903	0	0	0	0	0	0	0	603	903	0
765	0	0	0	0	0	0	0	200	300	0	0	0	0	0	0	0	200	903	0	0	0	0	0	0	0	603	903	0
765	1	0	0	0	0	0	0	200	300	0	0	0	0	0	0	0	200	903	0	0	0	0	0	0	0	603	903	0
765	2	0	0	0	0	0	0	200	300	0	0	0	0	0	0	0	200	903	0	0	0	0	0	0	0	603	903	0
765	3	0	0	0	0	0	0	200	300	0	0	0	0	0	0	0	200	903	0	0	0	0	0	0	0	603	903	0
765	4	0	0	0	0	0	0	200	300	0	0	0	0	0	0	0	200	903	0	0	0	0	0	0	0	603	903	0
765	5	0	0	0	0	0	0	200	300	0	0	0	0	0	0	0	200	903	0	0	0	0	0	0	0	603	903	0
[truncated: 974 more rows]
