# Supplementary material for: The Effects of an Extemporaneous Speech Dual-task on Older Adult Gait Control
Source: Research Square preprint supplement (doi:10.21203/rs.3.rs-7674245/v1), 2025-11-18
Supplement: Supplementary file 187 [file Over8ground1.xlsx]

## Sheet: Sheet1
Trajectories
		08:LFHD			08:RFHD			08:LBHD			08:RBHD			08:C7			08:T10			08:CLAV			08:STRN			08:RBAK			08:LSHO			08:LUPA			08:LELB			08:LFRM			08:LWRA			08:LWRB			08:LFIN
Frame	Sub Frame	X	Y	Z	X	Y	Z	X	Y	Z	X	Y	Z	X	Y	Z	X	Y	Z	X	Y	Z	X	Y	Z	X	Y	Z	X	Y	Z	X	Y	Z	X	Y	Z	X	Y	Z	X	Y	Z	X	Y	Z	X	Y	Z
		mm	mm	mm	mm	mm	mm	mm	mm	mm	mm	mm	mm	mm	mm	mm	mm	mm	mm	mm	mm	mm	mm	mm	mm	mm	mm	mm	mm	mm	mm	mm	mm	mm	mm	mm	mm	mm	mm	mm	mm	mm	mm	mm	mm	mm	mm	mm	mm
403	0	320.524	2607.2	1712.49	230.801	2618.76	1707.94	338.476	2798.34	1705.38	225.085	2792.42	1702.01	283.241	2822.79	1562.39	297.102	2904.3	1301.96	287.232	2680.83	1473.67	270.683	2624.6	1268.88	215.493	2909.31	1358.21	470.041	2736.21	1517.5	551.258	2731.66	1321.67	567.282	2718.76	1167.41	552.786	2605.26	1036.5	486.781	2561.67	963.362	550.334	2587.38	937.961	529.457	2524.61	904.222
404	0	319.948	2595.6	1712.16	230.285	2607.51	1707.13	338.789	2787.26	1704.94	225.198	2781.31	1701.26	283.433	2810.43	1561.49	297.444	2892.11	1301.01	287.213	2669.09	1473.22	270.736	2613.26	1268.43	216.553	2898.32	1357.4	470.586	2724.41	1516.96	552.169	2718.04	1322.32	567.957	2704.25	1167.13	552.917	2588.5	1038.48	486.622	2543.69	966.326	549.818	2569.02	940.469	528.395	2505.17	908.141
405	0	319.325	2583.93	1711.47	229.616	2596	1706.23	338.85	2775.61	1704.09	225.172	2769.96	1700.31	283.884	2798.97	1560.57	298.187	2880.54	1300.39	287.146	2657.54	1472.58	270.566	2601.79	1267.79	217.551	2887.23	1356.53	470.85	2712.4	1516.25	555.545	2708.98	1321.14	569.009	2690.27	1166.75	552.84	2571.82	1040.2	486.69	2526.52	969.312	549.357	2550.49	942.676	529.637	2487.08	911.514
406	0	318.802	2572.26	1710.44	229.128	2584.79	1705.12	338.839	2763.53	1703	225.217	2758.58	1699.17	284.505	2788.11	1559.68	298.785	2868.92	1299.46	287.28	2645.86	1471.54	270.309	2590.22	1266.62	218.32	2875.63	1355.47	471.109	2700.44	1514.93	556.431	2696.37	1319.85	570.162	2676.64	1165.82	552.895	2555.39	1041.73	485.411	2508.21	972.82	548.874	2532.25	944.658	527.25	2467.66	915.13
407	0	318.241	2560.47	1709.25	228.741	2573.23	1703.68	338.815	2752.18	1702.3	225.187	2747.28	1697.84	284.574	2775.88	1558.48	299.406	2857.24	1298.14	287.378	2634.28	1470.27	270.323	2578.7	1265.33	219.21	2864.42	1354.22	471.903	2688.64	1512.42	557.576	2683.66	1319.42	570.474	2662.42	1164.79	552.709	2539.06	1042.86	485.106	2490.55	975.178	549.246	2514.69	945.66	527.876	2449.23	918.398
408	0	317.56	2548.72	1708	228.202	2561.63	1702.2	339.028	2740.44	1700.66	225.23	2735.66	1696.21	285.062	2765	1557.01	299.999	2845.54	1296.69	287.216	2622.59	1468.76	270.121	2567.06	1263.53	219.934	2853.03	1352.66	471.187	2676.32	1512.33	558.033	2671	1318.08	571.338	2648.82	1163.57	552.407	2523.28	1043.26	484.563	2473.17	977.766	548.372	2496.74	948.2	527.05	2430.97	921.571
409	0	316.948	2536.75	1706.33	227.596	2550.28	1700.45	338.76	2728.17	1698.62	225.119	2724.11	1694.24	284.98	2752.8	1554.98	300.246	2833.78	1294.94	286.845	2610.7	1467.04	269.696	2555.05	1261.87	220.538	2841.52	1350.76	472.062	2664.51	1509.7	557.998	2658.61	1316.2	571.759	2635.22	1161.91	552.366	2507.57	1044.03	483.471	2455.7	979.86	543.629	2478.5	946.941	526.35	2412.65	924.788
410	0	316.489	2524.86	1704.33	226.922	2538.5	1698.55	338.741	2716.52	1696.69	225.122	2712.67	1691.92	284.946	2740.76	1553.03	301.213	2823.08	1293.26	286.982	2598.83	1465.08	269.546	2543.16	1260.08	220.966	2829.88	1348.67	471.891	2652.49	1507.49	557.408	2646.22	1313.66	572.1	2621.92	1159.6	552.119	2492.03	1044.38	483.008	2438.8	981.77	542.273	2461.13	947.694	525.531	2394.77	927.557
411	0	315.772	2512.82	1702.19	226.413	2526.69	1696.31	338.494	2704.48	1694.64	224.906	2700.84	1689.68	285.042	2728.94	1550.85	300.873	2810.39	1289.73	286.628	2586.87	1462.73	269.333	2531.32	1257.3	221.472	2818.39	1346.27	471.488	2640.39	1505.48	556.521	2633.92	1311.59	571.877	2608.03	1157.62	551.769	2476.58	1044.63	482.24	2421.99	983.385	545.017	2444.21	951.078	524.707	2377.16	930.055
412	0	315.074	2500.69	1700.01	225.899	2514.79	1693.96	338.406	2692.47	1692.08	224.712	2688.98	1687.15	284.945	2717.22	1548.3	300.554	2798.19	1288.22	286.166	2574.52	1460.56	268.977	2519.27	1254.67	221.555	2806.44	1343.77	471.099	2628.22	1503.34	555.319	2620.85	1309.61	571.881	2594.78	1155.41	550.914	2461.16	1044.68	481.137	2405.68	984.733	541.396	2426.93	950.796	523.325	2359.28	933.04
413	0	314.411	2488.51	1697.43	225.15	2502.94	1691.47	337.942	2680.09	1689.54	224.404	2677.02	1684.47	284.644	2705.08	1545.87	301.319	2787.2	1285.9	285.981	2562.52	1457.72	268.685	2507.04	1252.37	221.512	2794.19	1341.33	470.875	2616.13	1500.56	556.068	2609.14	1306.54	572.004	2581.59	1153.03	550.574	2445.99	1044.77	480.534	2389.63	985.937	540.841	2410.29	950.989	522.436	2342.55	934.941
414	0	313.746	2476.28	1694.67	224.592	2490.83	1688.93	337.716	2667.73	1686.71	223.971	2664.93	1681.9	284.203	2693.05	1543.38	300.42	2773.78	1282.12	285.631	2550.47	1455.24	268.624	2494.83	1249.74	221.096	2781.74	1338.4	470.659	2604.07	1497.51	556.61	2597.14	1304.08	571.643	2568.28	1150.34	550.198	2431.29	1044.25	479.486	2373.69	986.549	540.703	2394.55	951.694	521.332	2325.78	936.82
415	0	313.268	2464.01	1692.16	223.742	2478.52	1685.99	337.137	2655.54	1684.03	223.448	2652.76	1678.84	283.383	2680.31	1540.04	300.041	2761.06	1279.15	285.208	2538	1452.33	268.292	2482.57	1246.54	220.856	2769.52	1335.44	470.245	2591.91	1494.71	553.393	2584.7	1300.71	571.185	2555.18	1147.76	549.284	2416.72	1043.06	478.726	2357.97	987.395	538.104	2377.96	950.776	520.2	2309.23	938.27
416	0	312.213	2451.35	1689.28	222.953	2466.28	1683.02	336.395	2643.22	1681.29	222.837	2640.54	1675.88	282.817	2668.21	1537.47	299.172	2748.23	1276.16	284.61	2525.29	1449.29	267.961	2470.12	1243.59	220.238	2756.8	1332.36	469.473	2579.61	1492.07	552.495	2572.33	1297.81	570.629	2542.17	1144.89	548.513	2401.97	1042.71	477.44	2342.54	987.417	537.302	2362.43	950.525	518.691	2292.95	939.484
417	0	311.507	2438.82	1686.29	222.194	2453.91	1680.15	335.741	2630.53	1678.2	222.173	2628.24	1672.88	281.97	2655.7	1534.22	298.573	2735.73	1272.85	284.338	2512.72	1446.49	267.671	2457.43	1240.87	219.571	2743.91	1328.8	468.293	2566.97	1489.16	551.467	2560.01	1294.63	569.944	2529.34	1141.63	547.616	2387.66	1041.45	477.152	2327.63	987.891	537.122	2347.56	950.465	518.157	2277.65	940.382
418	0	310.436	2426.19	1683.12	221.395	2441.37	1677.24	335.015	2617.91	1674.95	221.462	2615.85	1669.77	280.947	2642.74	1530.69	298.385	2723.81	1270.64	283.732	2500.15	1443.14	267.224	2444.63	1237.17	218.989	2731.04	1325.18	467.211	2554.45	1486.03	550.723	2548.27	1291.26	569.184	2516.66	1138.26	546.767	2373.62	1039.79	476.606	2312.88	987.508	534.835	2331.63	948.958	516.743	2261.66	940.468
419	0	309.308	2413.35	1680.13	220.236	2428.54	1674.22	334.15	2605.23	1671.65	220.559	2603.1	1666.34	279.994	2630.02	1527.33	297.645	2710.95	1267.41	282.896	2487.07	1440.04	266.903	2431.41	1234.24	218.139	2718.05	1321.73	466.494	2541.99	1482.96	549.399	2535.89	1288.13	568.097	2503.79	1135.11	545.682	2359.62	1038.24	475.446	2298.07	986.77	533.801	2316.83	947.907	515.145	2245.95	940.474
420	0	308.439	2400.49	1677.66	219.296	2415.75	1671.29	333.068	2592.23	1668.55	219.615	2590.23	1663.1	279.231	2617.29	1524.05	296.822	2698	1264.17	282.247	2473.96	1437.17	266.256	2417.78	1231.56	217.213	2704.55	1318.36	465.302	2529.23	1479.97	548.036	2523.54	1284.69	567.236	2491.41	1131.79	544.762	2346.01	1036.39	474.506	2283.66	986.104	532.388	2302.24	946.448	514.331	2231.22	940.375
421	0	307.552	2387.61	1674.75	218.438	2403.08	1668.78	332.02	2579.22	1665.55	218.576	2577.52	1660.15	278.019	2604.23	1521.36	295.418	2683.76	1260.81	281.364	2460.74	1434.25	265.892	2404.06	1228.68	216.206	2691.1	1314.92	464.345	2516.52	1477.06	546.788	2511.45	1281.26	565.751	2478.6	1128.65	543.918	2332.67	1034.4	474.103	2269.65	985.024	531.135	2288.08	944.555	513.768	2217.09	939.795
422	0	306.187	2374.44	1671.95	217.131	2389.74	1665.91	330.923	2566.29	1662.8	217.421	2564.37	1657.24	276.831	2590.8	1518.21	293.936	2669.38	1257.39	280.615	2447.19	1431.09	265.38	2390.1	1225.48	215.209	2677.57	1311.81	463.137	2503.21	1474.32	545.422	2499.37	1278.12	564.411	2466.02	1125.46	542.866	2319.34	1032.14	472.838	2255.65	983.21	530.054	2274.24	942.982	513.231	2203.1	938.825
423	0	304.749	2361.22	1669.51	215.639	2376.42	1663.12	329.619	2552.97	1659.74	216.154	2551.21	1654.45	275.169	2576.83	1515.37	292.739	2654.63	1254.38	279.472	2433.45	1428.39	264.582	2376	1222.65	214.368	2663.8	1308.81	462.311	2490.15	1471.47	544.15	2487.05	1275.31	563.043	2453.66	1122.54	541.41	2306.1	1029.77	471.797	2242.08	981.255	528.625	2261.02	941.18	512.509	2189.53	937.35
424	0	303.312	2347.83	1666.92	214.245	2363.11	1660.81	327.744	2538.73	1656.76	214.851	2537.84	1651.42	274.148	2563.3	1512.84	292.153	2641.32	1251.8	278.518	2419.55	1425.39	263.887	2361.65	1220.06	213.204	2649.84	1305.92	461.197	2476.7	1468.75	542.344	2474.34	1272.36	561.395	2441.14	1119.55	540.479	2293.45	1027.06	471.13	2228.83	979.117	527.612	2248.02	938.915	511.863	2176.34	935.482
425	0	302.11	2334.36	1664.74	212.973	2349.57	1658.26	326.601	2525.77	1653.92	213.426	2524.46	1648.61	272.457	2549.19	1510.13	292.082	2627.9	1249.47	277.255	2405.57	1422.86	263.368	2347.37	1217.43	212.347	2635.91	1303	460.044	2463.14	1465.98	540.484	2461.71	1269.68	559.628	2428.85	1116.7	539.48	2280.91	1024.27	470.563	2215.89	976.842	526.599	2235.61	936.152	511.572	2163.71	933.735
426	0	300.344	2320.65	1662.5	211.514	2335.9	1656.1	325.174	2512.27	1651.24	211.959	2510.83	1645.92	271.122	2535.25	1507.54	291.413	2614.46	1247.13	275.775	2391.34	1420.47	262.386	2333.05	1214.75	211.145	2621.66	1300.44	458.193	2448.9	1463.75	538.718	2449.21	1267.38	557.814	2416.66	1113.81	538.201	2268.56	1021.54	468.711	2202.89	974.135	525.388	2223.36	933.162	511.063	2151.39	930.766
427	0	298.819	2306.7	1661.1	209.749	2322.04	1654.55	323.482	2498.42	1649.04	210.318	2497.09	1643.77	269.41	2521.09	1505.66	290.466	2599.96	1245.22	274.441	2376.86	1418.45	261.082	2318.32	1213.17	210.139	2607.54	1298.12	456.763	2434.96	1461.74	536.786	2436.01	1265.32	555.891	2404.4	1111.48	537.101	2256.51	1018.56	468.124	2190.58	971.376	524.353	2211.55	930.082	510.803	2139.7	927.709
428	0	297.446	2292.84	1659.75	208.151	2308	1653.17	321.63	2484.38	1647.33	208.675	2483.09	1642.16	267.6	2506.68	1504.1	289.261	2585.62	1243.69	272.867	2362.44	1416.71	260.042	2303.92	1211.2	208.955	2592.95	1296.23	454.972	2420.49	1460.26	535.111	2422.94	1263.66	553.903	2392.19	1109.48	536.176	2244.8	1015.62	468.06	2178.85	967.996	523.949	2200.62	927.287	510.303	2128.27	924.112
429	0	295.694	2278.79	1658.68	206.405	2293.87	1652.12	320.143	2470.45	1646.05	206.79	2468.91	1640.99	265.672	2491.88	1502.76	288.225	2572.8	1243.32	271.434	2348.07	1415.16	258.7	2289.21	1209.74	207.644	2578.49	1294.99	453.132	2405.87	1459.25	533.537	2409.23	1262.68	551.128	2379.42	1107.68	534.977	2233.09	1012.65	466.853	2166.98	964.468	523.046	2189.47	923.739	510.043	2117.31	920.522
430	0	293.606	2264.5	1658.26	204.612	2279.57	1651.61	318.221	2455.96	1645.39	205.03	2454.66	1640.28	264.034	2477.46	1502.58	287.554	2556.36	1241.98	269.517	2333.21	1414.59	257.215	2274.59	1209.11	206.356	2563.77	1294.28	451.865	2391.59	1458.84	531.847	2395.32	1262.56	549.654	2367.6	1107.44	533.87	2221.72	1010.07	466.234	2155.71	961.088	522.611	2179.3	920.954	509.974	2106.93	916.607
431	0	291.767	2250.08	1658.28	202.687	2265.18	1651.43	316.192	2441.82	1645.29	203.008	2440.22	1640	262.153	2462.71	1502.29	286.949	2542.89	1242.65	268.076	2318.89	1414.23	255.678	2259.69	1209.39	204.939	2549.14	1294.15	450.061	2376.89	1459.01	529.964	2380.5	1262.71	547.226	2355.06	1107.12	531.846	2209.93	1007.6	465.567	2144.92	957.363	521.717	2169.38	917.704	509.863	2097.18	912.669
432	0	290.324	2235.81	1658.11	200.867	2250.67	1651.56	314.47	2427.33	1644.91	201.031	2425.74	1639.86	260.603	2447.82	1501.76	286.327	2527.57	1242.39	266.6	2304.02	1414.79	254.494	2244.94	1209.55	203.676	2534.68	1294.03	448.386	2362.15	1459.34	528.503	2366.04	1263.18	544.415	2342.21	1106.87	530.679	2199.17	1005.02	465.31	2134.68	953.519	520.974	2160.15	914.528	510.083	2088.11	908.226
433	0	287.956	2221.3	1658.4	198.995	2236.29	1651.67	312.514	2412.86	1645.43	199.121	2411.21	1639.92	258.947	2433.78	1503.08	286.158	2513.67	1243.51	265.241	2290.3	1414.57	252.844	2230.13	1209.98	202.577	2520.22	1294.36	446.78	2347.35	1460.24	527.013	2351.56	1264.42	541.994	2329.69	1107.5	529.896	2188.75	1002.93	464.89	2124.69	949.902	520.5	2151.47	911.537	509.915	2079.43	903.574
434	0	286.012	2206.63	1659.37	196.924	2221.73	1652.21	310.39	2398.5	1646.48	197.311	2396.79	1640.69	257.343	2419.27	1503.1	285.717	2499.84	1244.44	263.683	2275.85	1415.58	251.469	2215.59	1210.98	201.273	2505.87	1294.99	445.229	2332.59	1461.74	525.658	2336.81	1266.03	539.898	2317.29	1108.68	528.81	2178.42	1000.91	464.587	2115.31	946.452	520.339	2143.37	908.666	510.012	2071.34	898.902
435	0	284.202	2192.15	1660.1	195.116	2207.13	1652.96	308.302	2383.74	1647.66	195.469	2382.37	1641.66	256.19	2405.52	1504.71	285.168	2484.03	1244.56	262.311	2261.71	1416.53	249.927	2201.03	1212.07	200.112	2491.47	1296.12	443.763	2317.93	1463.33	524.41	2321.88	1267.77	537.756	2304.65	1110.22	527.898	2168.39	999.098	464.177	2105.93	942.786	520.249	2135.49	905.941	510.402	2063.93	894.346
436	0	282.328	2177.74	1660.73	193.502	2192.84	1653.44	306.696	2369.52	1649.22	193.65	2367.92	1643.02	254.943	2391.47	1505.86	284.132	2470.05	1246.01	260.889	2247.52	1417.95	248.557	2186.69	1213.17	198.902	2477.56	1297.47	442.446	2303.61	1464.96	523.069	2306.86	1269.99	535.689	2291.84	1112.13	527.063	2158.54	997.5	464.016	2097.25	939.388	520.258	2128.11	903.418	510.666	2056.8	889.524
437	0	280.444	2163.23	1661.89	191.451	2178.25	1654.54	304.913	2355.04	1651.18	191.755	2353.39	1644.5	253.536	2377.59	1507.38	282.754	2456.37	1247.83	259.654	2233.69	1419.51	247.32	2172.65	1214.66	197.339	2463.77	1299.14	440.96	2289.23	1467.08	522.257	2292.19	1272.25	533.746	2279.13	1114.17	526.3	2148.84	996.23	463.771	2088.87	935.77	520.452	2120.87	901.245	510.814	2049.94	885.043
438	0	278.832	2148.86	1663.17	189.824	2164.01	1655.28	303.03	2340.57	1653.48	190.155	2339.17	1646.43	252.476	2364.31	1509.24	281.196	2442.39	1249.24	258.517	2219.97	1421.28	246.617	2159	1216.85	195.665	2449.9	1300.73	439.71	2275.37	1469.44	521.416	2277.45	1274.94	532.143	2266.39	1116.64	525.652	2139.39	995.123	464.069	2081.1	932.873	520.554	2114.1	899.348	511.057	2043.57	880.846
439	0	277.242	2134.65	1664.2	188.303	2149.69	1656.33	301.423	2326.42	1655.8	188.595	2324.95	1648.39	251.392	2351.08	1510.8	279.582	2428.91	1250.93	257.548	2206.49	1423.09	245.837	2145.41	1218.77	194.206	2436.32	1302.37	438.58	2261.93	1471.54	520.955	2262.68	1277.71	530.536	2253.71	1119.05	525.008	2129.91	994.185	464.029	2073.46	929.728	521.138	2107.3	897.497	511.238	2037.46	876.435
440	0	275.611	2120.52	1665.24	186.925	2135.84	1657.26	300.138	2312.31	1658.01	187.262	2311.04	1650.59	250.949	2337.98	1512.65	278.158	2415.3	1252.46	256.819	2193.17	1424.91	244.86	2131.76	1220.67	192.713	2422.96	1304.3	437.878	2248.98	1473.68	520.258	2248.31	1280.29	529.204	2241.25	1121.42	524.455	2120.7	993.436	463.752	2065.95	926.331	521.69	2100.69	896.1	511.557	2031.65	872.399
441	0	274.404	2106.65	1666.76	185.441	2121.77	1658.75	298.705	2298.43	1660.67	185.951	2297.12	1652.89	249.551	2324.77	1515.19	276.656	2402.09	1254.3	256.063	2179.92	1427.19	244.836	2118.86	1222.99	191.241	2409.7	1306.41	437.43	2236.54	1475.91	519.71	2234.69	1282.76	527.981	2228.59	1123.9	524.279	2111.72	993.298	463.953	2059.46	923.942	522.316	2094.19	895.012	511.821	2026.1	868.585
442	0	273.331	2092.96	1668.38	184.363	2108.18	1660.3	297.534	2284.74	1663.27	184.854	2283.52	1655.18	249.248	2311.71	1516.86	275.071	2389.37	1256.46	255.748	2166.76	1429.63	244.439	2105.73	1225.34	189.825	2396.61	1308.66	436.73	2224.04	1478.29	518.993	2221.39	1285.3	526.996	2216.26	1126.61	523.808	2102.6	993.245	464.046	2052.35	921.731	523.091	2087.59	894.332	511.833	2020.63	865.555
443	0	272.475	2079.4	1670.02	183.653	2094.78	1661.82	296.557	2271.22	1665.8	183.93	2270.1	1657.67	248.369	2299.02	1519.34	273.343	2376.76	1258.73	255.06	2153.7	1432.14	244.53	2092.86	1228.04	188.28	2383.74	1311.09	436.043	2211.7	1480.62	518.353	2208.61	1287.58	525.786	2203.94	1129.04	523.312	2093.6	993.412	464.133	2046.27	920.34	524.028	2081.11	894.13	511.881	2015.21	862.205
444	0	271.539	2066.07	1671.75	182.775	2081.39	1663.52	295.738	2257.77	1668.46	183.03	2256.73	1660.17	247.83	2286.39	1521.76	271.817	2364.11	1261.13	254.451	2140.69	1434.39	244.412	2080.08	1229.88	186.978	2370.98	1313.66	435.407	2199.4	1483.22	517.64	2196.26	1290.25	525.251	2192.31	1131.81	523.047	2084.67	994.174	464.133	2039.95	918.722	525.369	2074.6	895.03	511.783	2009.91	859.809
445	0	270.758	2052.9	1673.66	182.203	2068.26	1665.58	294.909	2244.68	1671.21	182.389	2243.58	1662.87	249.715	2273.93	1523.49	270.479	2351.73	1263.6	254.026	2127.95	1436.66	244.463	2067.52	1232.04	185.665	2358.38	1316.29	434.998	2187.44	1485.87	516.625	2184.31	1292.51	524.732	2180.95	1134.79	522.958	2075.98	995.372	464.45	2033.91	918.002	526.558	2067.76	895.484	511.844	2004.63	857.971
446	0	270.612	2040	1675.64	181.78	2055.32	1667.62	294.459	2231.73	1673.82	181.788	2230.6	1665.54	246.58	2261.13	1526.47	269.047	2340.01	1266.63	253.745	2115.47	1439.33	244.646	2055.08	1234.72	184.509	2345.97	1319.1	434.763	2175.8	1488.25	515.64	2172.85	1294.54	524.258	2170.16	1137.47	522.87	2067.57	996.458	464.547	2027.75	917.513	527.642	2060.75	896.754	511.715	1999.29	856.291
447	0	270.292	2027.21	1677.94	181.454	2042.52	1669.88	293.956	2218.93	1676.81	181.406	2217.81	1668.51	246.161	2248.76	1529.28	267.902	2327.32	1269.25	252.942	2102.49	1442.44	245.084	2042.8	1237.28	183.422	2333.61	1322.15	434.593	2164.19	1490.87	515.477	2162.84	1296.87	524.325	2160.3	1140.34	523.002	2059.32	998.038	464.542	2021.69	917.772	528.823	2053.78	898.19	511.69	1993.99	855.509
448	0	269.989	2014.5	1680.5	181.297	2029.76	1672.47	293.492	2206.18	1679.74	180.925	2205.26	1671.49	245.705	2236.62	1532.24	266.791	2314.89	1271.87	254.656	2092.21	1444.07	245.369	2030.5	1239.74	182.414	2321.44	1325.09	434.238	2152.63	1493.62	514.856	2152.5	1299.18	524.248	2150.55	1143.23	523.1	2051.34	999.981	464.83	2015.9	918.371	529.935	2046.88	900.297	511.773	1988.63	855.395
449	0	270.099	2002.1	1682.94	181.212	2017.15	1675.12	293.04	2193.68	1682.67	180.687	2192.58	1674.57	245.387	2224.67	1534.89	265.658	2303.18	1274.77	254.633	2080.2	1447.12	245.714	2018.55	1242.5	181.329	2309.38	1327.99	434.029	2141.36	1496.24	514.401	2142.82	1301.64	525.069	2141.97	1146.53	523.057	2043.55	1001.71	465.018	2010.26	919.51	530.739	2040.03	902.181	511.942	1983.39	855.692
450	0	270.429	1989.86	1685.17	181.276	2004.69	1677.68	293.061	2181.71	1685.51	180.615	2180.18	1677.44	244.143	2212.29	1537.87	264.384	2291.33	1277.74	254.421	2068.12	1450.05	246.351	2006.77	1245.36	180.338	2297.22	1330.8	433.748	2130.22	1498.91	513.998	2133.16	1303.91	524.492	2132.74	1148.73	523.393	2036.09	1003.65	464.942	2004.45	921.043	531.437	2033.27	904.041	511.061	1978.18	855.318
451	0	270.267	1977.61	1687.72	181.48	1992.41	1680.35	292.872	2169.29	1688.52	180.61	2167.9	1680.54	244.318	2200.6	1540.79	263.242	2279.06	1280.41	254.086	2056.06	1452.28	246.483	1994.97	1247.74	179.413	2285.25	1333.94	433.524	2119.12	1501.67	514.286	2124.19	1306.88	525.003	2124.24	1151.98	523.748	2028.97	1005.73	465.094	1998.93	922.441	532.301	2026.78	906.3	511.551	1972.71	857.192
452	0	270.661	1965.55	1690.52	181.464	1980.14	1682.99	292.872	2157.37	1691.59	180.374	2155.68	1683.79	243.593	2188.77	1543.82	262.191	2267.3	1283.33	253.78	2044.07	1455.21	246.786	1983.36	1250.51	178.264	2273.03	1336.97	433.437	2108.07	1504.53	514.537	2115.24	1310.19	525.641	2116	1155.25	524.114	2021.85	1008.02	465.177	1993.18	924.137	532.787	2020.28	908.69	511.157	1967.23	858.459
453	0	271.218	1953.72	1693.02	181.754	1967.99	1685.74	292.851	2145.6	1694.49	180.303	2143.56	1687.06	242.961	2176.91	1546.61	261.175	2255.42	1286.15	253.854	2032.45	1458.3	246.794	1971.91	1253.35	177.011	2260.91	1340.1	433.218	2097.16	1507.22	514.389	2106.21	1313.01	526.177	2107.76	1158.31	524.122	2014.9	1009.83	465.6	1987.21	926.102	533.151	2014.04	911.121	510.976	1961.67	859.816
454	0	272.059	1942.04	1695.48	182.436	1956.01	1688.53	292.696	2133.67	1697.24	180.348	2131.52	1690.06	242.529	2165.36	1549.25	259.887	2243.28	1288.91	253.865	2020.75	1461.36	246.663	1960.28	1256.33	175.928	2248.88	1342.94	432.794	2086.04	1509.71	514.442	2097.63	1315.48	526.987	2100.25	1161.43	524.624	2008.19	1012.05	465.063	1981.41	928.508	533.51	2008	913.229	511.132	1956	861.461
455	0	272.455	1930.34	1698.07	182.987	1944.03	1691.31	292.86	2122.27	1699.84	180.401	2119.6	1692.9	241.938	2153.65	1551.8	259.329	2231.14	1290.94	253.69	2009.03	1464.04	246.519	1949.13	1258.85	174.923	2236.6	1345.28	432.542	2075.16	1512.24	514.567	2089.09	1318.29	527.529	2092.58	1164.14	524.892	2001.59	1013.9	466.17	1975.09	930.401	533.792	2001.96	915.428	511.453	1950.13	863.519
456	0	273.128	1918.74	1700.59	183.534	1932.19	1693.86	292.69	2110.6	1702.28	180.441	2107.74	1695.53	241.603	2142.12	1554.15	258.366	2219.23	1293.3	253.582	1997.47	1466.46	245.952	1937.53	1261.42	173.937	2224.48	1347.53	432.381	2064.37	1514.5	514.769	2080.79	1321.07	528.125	2085.05	1166.85	525.567	1995.01	1016.21	466.623	1968.75	932.451	533.957	1996.34	917.543	511.895	1944.24	865.838
457	0	274.094	1907.35	1702.9	184.325	1920.36	1696.48	292.849	2099.27	1704.34	180.644	2096.14	1697.98	241.313	2130.52	1556.15	257.307	2207.2	1295.32	253.537	1985.76	1468.95	244.787	1925.71	1264.36	173.217	2212.45	1349.67	431.952	2053.26	1516.34	514.783	2072.44	1323.29	528.604	2077.63	1169.19	526.009	1988.44	1017.99	466.048	1962.07	933.433	534.083	1990.36	919.285	512.996	1938.2	868.352
458	0	274.819	1896.01	1704.94	184.961	1908.64	1698.86	293.071	2088.08	1706.28	180.639	2084.47	1700.11	241.362	2119.04	1558.19	256.658	2195.21	1297.1	253.526	1974.17	1471.46	244.438	1913.99	1266.74	172.52	2200.35	1351.72	431.72	2042.24	1518.24	514.75	2063.75	1325.57	529.002	2070.2	1171.45	526.412	1981.82	1019.73	466.074	1955.17	935.489	534.122	1984.61	921.328	513.326	1932.14	869.823
459	0	275.676	1884.61	1707.16	185.863	1897.09	1701.19	292.934	2076.55	1708.15	180.795	2072.75	1702.38	240.731	2107.27	1560.01	255.844	2183.23	1299.05	253.279	1962.45	1473.41	243.847	1902.05	1268.79	171.791	2188.17	1353.8	431.047	2030.76	1519.93	514.629	2054.71	1327.63	529.46	2062.84	1173.91	526.99	1975.38	1021.68	467.69	1948.15	937.693	534.418	1978.62	922.969	514.372	1925.84	871.962
460	0	276.547	1873.25	1709.13	186.401	1885.32	1703.16	293.352	2065.49	1709.65	180.97	2060.98	1704.35	239.841	2095.22	1562.02	254.94	2171.25	1300.86	253.164	1950.73	1475.47	243.598	1890.31	1270.87	171.151	2176.25	1355.65	430.864	2019.72	1521.27	514.517	2046.01	1329.61	529.628	2055.37	1175.86	527.459	1968.68	1023.19	468.435	1941.16	939.387	534.291	1972.86	924.645	515.292	1919.53	874.043
461	0	277.615	1862.06	1710.79	187.369	1873.8	1705.12	293.461	2054.29	1710.94	181.203	2049.34	1706.08	240.105	2083.8	1563.39	254.241	2159.39	1302.42	253.08	1939.05	1477.13	243.052	1878.18	1272.8	170.396	2164.15	1357.25	430.906	2008.79	1522.85	514.389	2037.41	1331.21	529.851	2047.98	1177.8	527.926	1962.01	1024.59	468.773	1933.8	941.063	534.215	1966.84	925.821	516.055	1913.02	875.431
462	0	278.453	1850.91	1712.07	188.374	1862.25	1706.93	293.443	2042.9	1712.01	181.309	2037.69	1707.27	239.586	2071.96	1564.64	253.296	2147.09	1303.57	252.952	1927.27	1478.33	242.827	1866.14	1273.86	169.723	2151.97	1358.53	430.217	1997.02	1523.9	514.265	2028.4	1332.85	530.011	2040.53	1179.57	528.657	1955.49	1025.89	469.602	1926.44	942.057	534.222	1960.9	927.005	516.982	1906.58	876.835
463	0	279.257	1839.69	1713.23	188.994	1850.59	1708.05	293.541	2031.82	1712.53	181.438	2026.12	1708.3	239.425	2060.33	1565.33	252.456	2135.05	1304.56	253.026	1915.68	1479.35	242.517	1853.99	1275.02	169.108	2139.99	1359.63	430.055	1985.85	1524.52	514.019	2019.17	1334.12	529.902	2032.92	1180.93	529	1948.69	1026.82	470.49	1919.1	943.135	533.949	1954.81	927.863	517.923	1900.13	877.902
464	0	280.343	1828.52	1714.05	189.947	1839.06	1709.2	293.881	2020.9	1712.8	181.75	2014.52	1708.93	238.841	2048.24	1566.17	251.522	2123.09	1305.19	252.944	1903.71	1480.19	242.451	1841.89	1276.04	168.571	2127.88	1360.13	430.603	1975.51	1524.95	513.79	2010.2	1334.86	529.666	2025.25	1181.95	529.36	1941.74	1027.37	471.11	1911.26	943.93	533.687	1948.69	928.336	518.413	1893.11	878.213
465	0	281.346	1817.3	1714.63	190.817	1827.54	1709.9	294.03	2009.69	1712.63	181.804	2002.97	1708.98	238.667	2036.55	1566.21	251.016	2110.9	1305.4	252.81	1891.71	1480.53	242.188	1829.58	1276.37	168.157	2115.65	1360.26	429.99	1963.86	1524.87	513.67	2001.07	1335.56	529.285	2017.4	1182.59	529.702	1934.7	1027.53	471.796	1903.42	944.47	533.507	1942.32	928.651	518.9	1886.4	877.945
466	0	280.984	1805.54	1714.57	191.718	1815.82	1710.59	293.925	1998.39	1712.26	182.055	1991.49	1708.94	238.456	2024.83	1565.74	250.161	2098.79	1305.27	252.911	1879.81	1480.5	242.397	1817.5	1276.65	167.518	2103.36	1360.32	429.595	1952.18	1524.73	513.314	1991.47	1335.93	528.858	2009.55	1182.92	530.036	1927.51	1027.61	472.476	1895.35	944.532	533.369	1935.77	928.452	519.739	1879.64	877.929
467	0	282.522	1794.51	1714.67	192.511	1804.14	1710.57	294.246	1987.32	1711.43	182.196	1979.88	1708.46	238.188	2012.82	1565.2	249.505	2086.73	1304.93	253.071	1867.94	1480.32	242.472	1805.29	1276.33	166.866	2091.08	1359.8	429.453	1940.79	1524.11	513.013	1982.15	1335.75	528.352	2001.42	1182.94	530.292	1920.17	1027.18	473.214	1887.17	944.1	533.164	1928.82	928.056	520.444	1872.5	877.491
468	0	284.186	1783.48	1714.23	193.453	1792.53	1710.24	294.362	1976	1710.23	182.312	1968.16	1707.65	238.158	2000.73	1564.41	248.805	2074.49	1304.44	253.072	1855.73	1479.79	242.5	1792.88	1275.57	166.449	2078.69	1359.09	429.254	1928.92	1523.13	512.934	1972.9	1335.38	527.774	1993.04	1182.6	530.534	1912.42	1026.52	474.19	1879.21	942.748	532.968	1921.7	927.507	521.226	1865.35	876.787
469	0	284.016	1771.62	1713.36	194.308	1780.79	1709.67	294.417	1964.43	1708.95	182.523	1956.35	1706.63	237.846	1988.45	1563.48	248.401	2062.16	1303.54	253.23	1843.61	1478.56	242.799	1780.59	1274.73	165.926	2066.15	1358.27	429.207	1917.16	1522.31	512.6	1963.2	1334.75	527.112	1984.37	1182.18	530.73	1904.46	1025.9	474.649	1870.24	942.37	532.846	1914.24	926.732	521.918	1857.85	875.818
470	0	284.818	1760.14	1712.39	195.174	1768.98	1708.97	294.751	1953	1707.28	182.706	1944.1	1705.35	237.964	1976.43	1561.72	247.979	2049.76	1302.1	253.477	1831.43	1477.43	243.076	1768.11	1273.32	165.598	2053.61	1356.91	429.4	1905.55	1520.98	512.278	1953.04	1334.02	526.242	1975.52	1181.28	530.851	1896.33	1024.68	475.308	1861.55	941.181	532.757	1906.43	925.624	522.613	1850.21	874.486
471	0	285.859	1748.52	1711.15	196.092	1757.1	1707.94	294.874	1941.48	1705.14	182.958	1932.42	1703.65	237.892	1963.94	1559.9	247.698	2037.27	1300.43	253.603	1818.99	1475.7	243.382	1755.48	1271.97	165.352	2040.95	1355.12	429.373	1893.76	1519.1	511.626	1942.93	1332.42	525.415	1966.59	1180.11	530.861	1887.97	1022.82	475.861	1852.67	939.27	532.593	1898.62	923.838	523.227	1842.42	872.408
472	0	286.623	1736.7	1709.51	196.984	1745.07	1706.51	295.113	1929.76	1702.71	183.151	1920.05	1701.26	238.264	1951.54	1557.6	247.457	2024.73	1298.22	253.799	1806.35	1473.79	243.671	1742.71	1270	165.161	2028.24	1352.85	429.553	1881.9	1516.82	511.146	1932.58	1330.48	524.306	1957.17	1178.18	530.832	1879.43	1020.7	476.378	1843.69	937.13	532.501	1890.63	921.594	523.822	1834.36	869.909
473	0	287.469	1724.81	1707.8	197.821	1732.83	1704.68	295.159	1918.02	1699.83	183.449	1908.16	1698.9	238.344	1938.83	1554.95	247.298	2012.22	1295.66	253.804	1793.55	1471.84	244.085	1729.77	1267.49	165.122	2015.31	1350.49	429.796	1869.66	1514.61	510.679	1921.91	1328.51	523.234	1947.57	1175.92	530.988	1870.61	1018.23	477.023	1834.47	934.54	532.586	1882.34	919.16	524.604	1826.32	867.296
474	0	288.276	1712.75	1705.84	198.775	1720.66	1702.84	295.596	1906.14	1696.9	183.828	1895.82	1696.06	238.339	1926.07	1552.4	247.35	1999.56	1293.32	254.187	1780.69	1469.28	244.398	1716.77	1264.83	165.337	2002.36	1347.54	430.077	1857.3	1511.94	510.059	1911.17	1326.1	522.106	1937.69	1173.68	530.886	1861.64	1015.41	477.662	1825.17	931.478	532.419	1873.75	916.548	525.223	1817.93	864.255
475	0	289.384	1700.83	1703.42	199.88	1708.22	1700.95	295.815	1893.93	1693.68	184.307	1883.03	1693.01	238.601	1912.97	1549.82	247.225	1986.72	1290.49	254.369	1767.39	1466.5	244.834	1703.65	1262.24	165.423	1989.28	1344.93	430.283	1844.65	1508.8	509.564	1900.13	1323.07	520.98	1927.41	1170.92	530.941	1852.44	1012.16	478.053	1815.62	928.382	531.965	1865.15	913.54	525.952	1809.42	860.82
476	0	290.249	1688.44	1701.02	200.792	1695.66	1698.64	296.286	1881.78	1690.37	184.672	1870.44	1689.82	239.128	1899.62	1546.96	247.727	1974.15	1287.94	254.815	1754.13	1463.37	245.158	1690.53	1259.05	165.608	1976.09	1341.97	430.812	1832.26	1505.75	509.056	1888.69	1320	519.948	1916.77	1168.07	530.946	1842.76	1008.93	478.746	1805.96	924.676	532.142	1856.24	910.269	526.772	1800.85	857.18
477	0	290.761	1675.54	1699.22	201.929	1682.98	1696.31	296.614	1869.11	1686.79	184.989	1857.54	1686.7	239.46	1886.05	1544.21	248.266	1960.86	1284.91	255.458	1740.9	1460.03	245.595	1677.31	1255.72	166.104	1962.81	1339.41	431.415	1819.04	1502.84	508.503	1876.79	1316.98	518.944	1905.77	1165.13	530.907	1832.91	1005.53	479.422	1796.08	920.613	532.004	1847.03	906.977	527.582	1791.9	853.617
478	0	291.786	1662.96	1696.48	202.941	1669.94	1693.95	297.005	1856.52	1683.34	185.631	1844.43	1683.46	239.853	1872.17	1541.44	248.994	1947.58	1282.08	255.99	1727.34	1456.85	246.199	1664.26	1252.2	166.522	1949.43	1336.63	432.065	1805.66	1499.5	508.086	1864.56	1313.57	517.88	1894.23	1162.13	530.935	1822.81	1002.01	480.171	1785.81	916.891	532.076	1837.7	903.505	528.429	1782.92	849.756
479	0	293.087	1650.08	1694.09	203.687	1656.74	1691.69	297.579	1843.5	1679.64	186.059	1831.22	1680.18	240.354	1858.39	1538.72	250.004	1934.48	1279.04	256.643	1713.79	1453.41	246.695	1651.09	1248.66	167.066	1935.98	1334.14	432.667	1792.06	1496.19	507.834	1851.99	1310.16	516.838	1882.25	1158.79	530.914	1812.33	998.254	480.868	1775.25	912.598	532.113	1828.09	899.91	529.336	1773.78	845.576
480	0	294.23	1636.88	1691.81	204.837	1643.44	1689.25	298.337	1830.39	1676.25	186.827	1817.79	1676.62	241.14	1844.47	1535.99	251.175	1921.05	1276.47	257.431	1700.25	1450.29	247.328	1637.86	1245	167.747	1922.55	1331.27	433.532	1778.33	1492.83	507.736	1838.84	1306.77	515.856	1869.9	1155.48	531.019	1801.68	994.275	481.896	1764.43	908.686	532.194	1818.36	896.064	530.119	1764.33	841.318
481	0	295.349	1623.73	1689.2	205.98	1629.97	1686.72	298.978	1817.15	1672.84	187.613	1804.22	1673.36	242.192	1830.66	1532.96	251.998	1907.14	1273.4	257.821	1686.25	1446.94	247.911	1624.76	1241.8	168.514	1909	1328.5	433.986	1764.68	1488.9	507.617	1825.53	1303.09	514.826	1857.1	1151.93	531.003	1790.61	990.407	481.503	1753.89	903.259	532.183	1808.33	892.253	530.885	1754.89	837.022
482	0	296.614	1610.17	1686.8	207.246	1616.29	1684.41	299.865	1803.68	1669.47	188.496	1790.52	1670.21	242.888	1816.48	1530.38	252.834	1893.32	1270.35	258.649	1672.32	1444.39	248.196	1611.38	1238.64	169.312	1895.53	1325.67	434.913	1750.69	1485.74	507.548	1811.78	1299.32	513.993	1843.84	1148.56	530.95	1779.18	986.234	481.746	1743.25	898.01	532.256	1797.98	888.267	531.564	1745.17	832.354
483	0	297.906	1596.39	1684.59	208.488	1602.46	1681.96	300.717	1790.02	1666.15	189.58	1776.7	1667.12	243.888	1802.51	1527.54	253.307	1879.58	1267.72	259.236	1658.17	1441.21	248.693	1597.92	1235.6	169.969	1881.88	1323.15	435.715	1736.6	1482.22	507.708	1797.62	1295.71	513.328	1830.4	1145.12	531.008	1767.31	982.179	482.408	1732.12	893.733	532.332	1787.3	884.452	532.053	1734.97	828.074
484	0	299.208	1582.64	1681.96	209.905	1588.52	1679.67	301.809	1776.19	1663.2	190.607	1762.68	1664.15	244.844	1788.4	1525.18	253.605	1865.89	1265.4	260.229	1644.09	1438.3	249.124	1584.41	1232.21	170.747	1868.05	1321.05	436.767	1722.42	1479.41	508.211	1783.07	1292.33	512.664	1816.3	1142.08	531.202	1754.96	978.665	482.999	1720.58	889.844	532.737	1776.13	881.139	532.73	1724.58	823.984
485	0	300.652	1568.65	1679.66	211.368	1574.48	1677.38	303.089	1762.18	1660.74	191.806	1748.54	1661.92	245.641	1774.21	1522.9	254.326	1851.92	1263.2	261.148	1629.8	1435.7	249.777	1570.76	1229.81	171.52	1854.08	1318.98	437.571	1708.2	1476.49	508.64	1768.3	1289.17	512.169	1801.74	1139.1	531.077	1742.31	974.848	483.489	1708.87	885.761	533.075	1764.39	877.874	533.384	1713.59	820.194
486	0	301.932	1554.42	1677.51	212.743	1560.22	1675.23	304.281	1747.91	1658.15	193.11	1734.28	1659.69	246.942	1759.95	1520.67	254.669	1837.9	1261.57	262.141	1615.5	1433.47	250.245	1556.58	1227.31	172.042	1839.81	1317.2	438.662	1693.95	1473.83	509.212	1753.25	1286.21	512.071	1786.96	1136.44	531.179	1729.2	971.606	483.752	1696.57	881.739	533.541	1752.28	874.819	533.631	1702.18	816.141
487	0	303.477	1540.07	1675.67	214.159	1545.87	1673.52	305.729	1733.59	1656.38	194.418	1720.27	1657.75	248.277	1745.59	1518.73	255.329	1823.5	1259.53	263.214	1601.08	1431.44	251.041	1542.35	1225.25	173.006	1825.58	1315.19	439.858	1679.52	1471.55	509.959	1738.1	1283.35	512.106	1772.15	1133.67	531.492	1715.61	968.68	484.066	1684.1	878.374	534.198	1739.71	872.102	533.621	1690.2	812.199
488	0	304.956	1525.75	1673.74	215.556	1531.39	1671.88	307.159	1719.24	1654.75	195.984	1705.61	1656.29	249.371	1731.27	1517.2	255.789	1809.1	1257.93	264.457	1586.53	1429.69	251.824	1527.74	1223.47	173.862	1811.03	1313.58	441.273	1665.24	1469.24	510.671	1722.9	1280.72	512.111	1756.93	1131.24	531.813	1701.67	965.931	484.34	1671.03	875.259	534.772	1726.67	869.423	533.99	1677.9	808.993
489	0	306.331	1511.12	1672.61	217.167	1516.99	1670.55	308.488	1704.62	1653.64	197.57	1691.15	1655.16	250.772	1716.83	1516.04	256.512	1794.34	1256.39	265.921	1571.96	1428.74	252.99	1513.06	1222.51	174.997	1796.46	1312.27	442.652	1650.81	1467.42	511.644	1707.65	1278.16	512.371	1741.64	1128.87	532.016	1687.26	963.348	484.644	1657.71	872.271	535.516	1712.99	867.112	533.974	1664.95	805.782
490	0	307.839	1496.39	1671.92	218.606	1502.39	1669.76	310.234	1690.08	1652.83	199.277	1676.58	1654.36	252.295	1702.33	1514.93	257.455	1779.53	1255.28	267.546	1557.48	1427.77	254.007	1498.02	1221.78	176.564	1781.59	1311.2	444.194	1636.38	1465.79	512.674	1692.32	1275.93	512.771	1726.07	1126.81	532.437	1672.52	961.151	484.876	1643.87	870.049	536.328	1698.77	864.978	534.247	1651.66	803.04
491	0	309.5	1481.82	1671.29	220.548	1487.79	1669.43	312.02	1675.4	1652.43	201.054	1662.06	1653.86	253.884	1687.69	1514.35	258.182	1764.51	1254.53	268.935	1542.82	1427.23	255.347	1482.85	1221.38	178.004	1766.68	1310.86	445.845	1621.87	1464.77	513.833	1676.94	1274.69	513.256	1710.25	1125.33	532.98	1657.28	959.825	485.138	1629.63	868.567	537.252	1683.91	863.769	534.453	1637.66	801.312
492	0	311.13	1467.17	1671.09	222.108	1473.19	1669.18	313.756	1660.72	1652.13	202.814	1647.62	1653.58	255.369	1672.93	1514.26	258.595	1749.36	1253.93	270.529	1528.19	1427.36	256.847	1467.74	1221.55	179.301	1752.04	1310.52	447.334	1607.4	1464.29	515.091	1661.37	1273.6	514.231	1694.49	1124.41	533.597	1641.79	958.618	485.21	1614.95	867.286	538.178	1668.58	862.891	534.435	1622.89	799.827
493	0	312.603	1452.43	1671.3	223.697	1458.55	1669.44	315.434	1645.93	1652.28	204.481	1632.99	1654.03	256.887	1658.31	1514.34	259.219	1734.61	1253.97	272.049	1513.44	1427.9	258.222	1452.35	1222.3	180.43	1737.44	1310.63	448.813	1593.01	1463.96	516.297	1646.15	1272.92	514.855	1678.54	1123.71	534.11	1625.82	957.995	485.26	1599.9	866.096	538.987	1652.7	862.058	534.244	1607.38	798.536
494	0	314.307	1437.72	1671.77	225.391	1443.97	1669.61	317.346	1631.24	1652.83	206.349	1618.35	1654.53	258.288	1643.82	1514.56	259.693	1719.82	1254.1	273.617	1498.81	1428.26	259.727	1437.12	1222.8	181.226	1722.91	1310.93	450.329	1578.56	1464.04	517.613	1630.71	1272.86	515.941	1662.26	1124.17	534.678	1609.65	957.689	485.397	1584.22	866.025	539.916	1636.19	862.036	534.278	1591.35	798.157
495	0	315.896	1423.17	1672.26	227.07	1429.41	1670.54	319.004	1616.54	1653.46	208	1603.93	1655.24	259.564	1629.38	1515.34	260.502	1705.37	1254.75	275.199	1484.33	1428.82	261.284	1422.14	1223.47	181.956	1708.22	1311.85	451.866	1564.27	1464.58	518.945	1615.42	1272.97	517.119	1646.57	1123.54	535.49	1593.02	958.056	485.867	1567.88	866.59	540.811	1619.26	862.3	534.396	1574.81	798.34
496	0	317.593	1408.73	1673.19	228.726	1415	1671.32	320.719	1602.07	1654.5	209.699	1589.48	1656.28	260.873	1615.05	1516.22	261.112	1690.9	1255.39	276.636	1469.91	1429.92	262.47	1407.03	1224.67	182.386	1694.03	1313.22	453.133	1549.78	1465.5	520.195	1600.14	1273.56	518.551	1630.7	1123.9	536.164	1576.08	958.715	485.924	1551.43	867.244	541.635	1601.82	862.739	534.501	1557.54	798.735
497	0	319.197	1394.16	1674.46	230.423	1400.62	1672.73	322.244	1587.61	1655.42	211.377	1575.01	1657.68	262.238	1600.91	1517.51	262.16	1676.93	1256.54	277.914	1455.59	1431.08	263.934	1392.51	1226.01	183.093	1679.77	1314.23	454.493	1535.62	1466.52	521.468	1585.39	1274.11	520.03	1614.61	1124.48	536.776	1558.92	959.566	486.152	1534.29	868.191	542.619	1584.1	863.409	534.446	1539.56	799.467
498	0	320.653	1379.9	1675.37	232.072	1386.39	1673.96	323.82	1573.33	1656.55	212.822	1560.93	1658.89	263.557	1586.95	1518.69	263.311	1662.85	1257.64	279.037	1441.51	1432.36	264.969	1377.96	1227.39	183.575	1665.9	1315.62	455.648	1521.27	1467.69	522.694	1570.18	1275.18	521.54	1598.56	1125.19	537.602	1541.62	960.567	486.521	1516.78	869.714	543.547	1565.87	864.394	534.58	1521.22	800.837
499	0	322.257	1365.81	1676.42	233.574	1372.24	1675.12	325.19	1559.16	1657.66	214.35	1546.93	1660.24	264.546	1573.17	1519.84	264.015	1648.57	1258.76	280.008	1427.64	1433.82	266.096	1363.86	1228.98	183.975	1652.37	1317.25	456.588	1506.96	1468.99	524.036	1555.17	1276.29	523.11	1582.33	1126.14	538.528	1524.02	961.918	486.807	1498.86	871.451	544.122	1547.4	865.506	534.747	1502.27	802.18
500	0	323.568	1351.88	1677.31	235.053	1358.35	1676.37	326.474	1545.3	1658.85	215.675	1532.91	1661.69	266.918	1559.75	1521.27	265.43	1635.1	1259.88	280.901	1414.01	1435.38	266.845	1349.98	1230.5	184.878	1639.16	1318.56	457.479	1492.79	1470.39	525.332	1539.97	1277.52	524.887	1566.25	1126.89	539.224	1506.22	963.168	486.897	1480.54	873.106	544.708	1528.56	866.578	534.729	1482.74	803.781
501	0	324.782	1337.91	1678.5	236.364	1344.58	1677.39	327.852	1531.51	1660.55	216.991	1519.19	1663.48	267.499	1546.55	1522.73	266.798	1621.65	1261.31	281.444	1400.56	1436.67	267.684	1336.51	1231.9	185.99	1626.47	1320.58	458.527	1478.66	1471.89	526.73	1524.65	1278.94	526.845	1550.07	1128.05	540.324	1488.11	965.008	487.43	1461.79	875.263	545.413	1509.45	867.947	535.165	1462.94	805.99
502	0	326.075	1324.32	1679.53	237.601	1330.86	1678.89	328.925	1517.78	1662.33	218.137	1505.54	1665.47	268.709	1533.61	1524.25	268.291	1608.5	1262.95	281.913	1387.45	1438.07	267.909	1323.15	1233.25	187.358	1613.55	1321.89	459.318	1464.57	1473.67	528.172	1509.04	1280.59	528.87	1533.65	1129.32	541.413	1469.9	967.062	488.052	1442.77	877.858	546.202	1489.95	869.565	535.76	1442.94	808.403
503	0	327.053	1310.89	1680.54	238.691	1317.53	1680.06	329.936	1504.43	1664.01	219.414	1492.19	1667.62	269.535	1520.73	1525.88	269.346	1595.49	1264.7	282.016	1374.48	1439.72	268.003	1310.21	1234.97	188.704	1600.75	1323.53	459.828	1450.58	1475.21	529.626	1493.71	1281.91	530.752	1517.03	1130.61	542.086	1451.53	968.86	488.253	1423.7	879.89	546.871	1470.18	871.199	535.867	1422.08	810.649
504	0	327.913	1297.45	1681.97	239.48	1304.19	1681.63	330.82	1491.15	1666.03	220.247	1479.04	1669.94	270.362	1507.98	1527.77	270.696	1583.13	1266.3	282.201	1361.8	1441.81	268.434	1297.89	1236.41	190.169	1588.27	1325.01	460.336	1436.95	1476.76	530.97	1478.27	1283.16	532.577	1500.37	1131.62	543.03	1432.94	970.419	488.613	1404.17	882.041	547.526	1450.25	872.574	536.5	1401.28	813.385
505	0	328.551	1284.33	1683.17	240.273	1291.14	1683.14	331.712	1478.27	1668.08	221.109	1465.97	1671.96	271.196	1495.31	1530	271.84	1570.37	1267.76	282.189	1349.26	1443.42	267.768	1285.24	1238.21	191.888	1575.99	1326.31	460.699	1423.56	1478.32	532.324	1462.7	1284.4	534.61	1483.83	1132.5	543.945	1414.05	972.359	489.158	1384.32	884.681	548.194	1430.1	874.171	536.945	1380.43	815.91
506	0	329.027	1271.44	1684.28	240.648	1278.16	1684.5	332.256	1465.17	1670.32	221.701	1453.26	1674.16	271.798	1483.05	1531.58	272.895	1557.77	1269.36	282	1336.89	1445.29	266.713	1272.67	1240.35	193.481	1563.81	1327.89	461.238	1410.32	1480.12	533.616	1447.01	1285.92	536.429	1467.06	1133.62	544.719	1394.92	974.493	489.813	1364.45	887.557	549.033	1409.57	876.08	537.406	1358.93	818.948
507	0	329.308	1258.53	1686.03	241.007	1265.4	1686.38	332.678	1452.36	1672.7	222.164	1440.59	1676.73	272.504	1470.86	1533.4	274.128	1545.44	1271.09	281.852	1324.7	1447.4	265.786	1260.69	1242.64	194.923	1551.72	1329.44	461.373	1397.24	1481.96	534.63	1431.16	1287.29	538.152	1449.84	1134.99	545.635	1375.75	976.626	490.422	1344.31	891.088	549.665	1388.97	878.017	537.919	1337.22	821.93
508	0	329.605	1245.79	1687.76	241.099	1252.74	1688.16	332.932	1439.69	1675.1	222.358	1427.85	1679.16	273.024	1458.74	1535.45	275.253	1534.09	1273.48	281.754	1312.6	1449.81	264.564	1248.78	1244.81	196.349	1539.68	1331.13	461.634	1384.44	1483.84	535.765	1415.43	1288.61	539.9	1432.57	1136.35	546.387	1356.2	979.044	490.636	1324.27	893.564	550.392	1368.03	880.203	538.419	1315.36	825.134
509	0	329.56	1233.18	1689.62	241.146	1240.18	1690.04	333.012	1427.1	1677.45	222.549	1415.41	1681.57	273.329	1446.54	1537.69	276.116	1521.96	1275.63	281.527	1300.58	1452.05	263.41	1237.1	1247.15	197.647	1527.76	1332.99	461.811	1371.75	1485.8	536.778	1399.74	1290.23	541.207	1415.04	1137.83	547.079	1336.72	981.601	491.059	1303.93	896.581	551.242	1346.96	882.516	538.868	1293.23	828.781
510	0	329.213	1220.8	1691.3	240.979	1227.78	1692.04	333.109	1414.7	1680	222.567	1403	1683.92	273.773	1434.45	1539.94	277.041	1509.79	1277.73	281.274	1288.61	1454.42	262.153	1225.25	1249.57	198.84	1515.93	1334.94	461.999	1359.34	1487.76	537.364	1383.94	1291.92	542.525	1397.46	1139.5	547.553	1316.98	984.224	491.382	1283.43	899.658	551.961	1325.86	885.108	539.301	1271.04	832.326
511	0	328.907	1208.35	1693.32	240.55	1215.39	1693.81	332.925	1402.21	1682.51	222.404	1390.36	1686.48	274.075	1422.36	1542.2	277.778	1497.51	1279.72	281.072	1276.7	1456.88	261.333	1213.55	1252.36	199.938	1504.13	1336.97	461.962	1346.88	1489.79	538.004	1368.4	1293.51	543.857	1379.99	1141.1	547.984	1297.09	986.981	491.616	1262.93	902.849	552.383	1304.41	887.702	539.732	1249.03	836.08
512	0	328.407	1195.88	1695.37	240.165	1203.11	1695.67	332.889	1389.88	1684.99	222.335	1378.15	1688.61	274.427	1410.34	1544.33	278.524	1485.42	1281.82	280.927	1264.81	1459.09	260.652	1201.59	1254.77	200.879	1492.34	1339.11	462.158	1334.61	1491.92	538.432	1352.92	1295.32	544.904	1362.34	1142.76	548.498	1277.19	990.329	491.871	1242.27	906.498	553.148	1283.05	890.671	540.265	1226.95	840.293
513	0	327.949	1183.35	1697.52	239.596	1190.91	1697.33	332.635	1377.52	1687.48	222.055	1366.1	1690.51	274.569	1398.34	1546.37	279.166	1473.49	1284.16	280.811	1252.99	1461.16	260.307	1189.81	1256.89	201.656	1480.6	1341.3	462.145	1322.11	1494.27	538.797	1337.51	1297.6	545.697	1344.56	1144.81	548.86	1257.19	993.766	491.989	1221.53	910.503	553.562	1261.53	894.019	540.808	1204.66	844.755
514	0	327.253	1171.15	1699.17	238.887	1178.74	1698.96	332.192	1365.04	1689.85	221.778	1354.06	1692.71	274.743	1386.43	1548.4	279.651	1461.69	1286.34	280.611	1241.12	1463.49	260.007	1178.15	1259.03	202.211	1468.8	1343.49	462.152	1309.85	1496.45	538.892	1322.22	1299.72	546.636	1326.98	1147.11	548.853	1237.12	997.236	491.924	1200.92	914.264	553.912	1239.9	897.509	540.841	1182.37	849.292
515	0	326.554	1158.68	1701.23	238.159	1166.5	1700.65	331.963	1352.84	1691.95	221.383	1341.87	1694.44	274.849	1374.64	1550.17	280.239	1449.93	1288.16	280.314	1229.2	1465.63	259.806	1166.4	1261.36	202.587	1456.89	1345.43	461.925	1297.38	1498.76	539.039	1307.29	1301.77	547.25	1309.32	1149.04	549.18	1217.32	1000.71	491.901	1180.25	918.277	554.356	1218.18	900.933	541.092	1160.08	854.09
516	0	325.564	1146.53	1702.5	237.338	1154.35	1701.92	331.628	1340.49	1694.17	221.007	1329.77	1696.23	274.934	1362.7	1552.11	280.397	1438.01	1289.88	280.077	1217.34	1467.31	259.781	1154.81	1262.94	202.842	1445	1347.21	461.823	1284.97	1500.85	539.017	1292.46	1303.99	548.021	1291.84	1151.11	549.333	1197.56	1004.12	492.092	1159.38	922.905	554.846	1196.83	904.56	541.1	1138.07	858.72
517	0	324.624	1133.96	1704.04	236.528	1142.24	1703.07	331.214	1328.03	1696.08	220.576	1317.69	1697.65	275.084	1350.78	1553.82	280.542	1425.97	1291.42	279.756	1205.44	1468.92	259.854	1143.26	1264.37	202.997	1433.17	1348.72	461.591	1272.52	1502.89	539.118	1277.98	1306.07	548.458	1274.45	1153.12	549.335	1177.66	1007.8	491.905	1139.06	927.123	555.011	1175.34	908.209	540.966	1115.99	863.471
518	0	323.693	1121.61	1705.27	235.619	1130.02	1704.19	330.802	1315.77	1697.72	220.19	1305.51	1699.17	274.85	1338.8	1555.24	280.772	1413.94	1293.03	279.462	1193.55	1470.47	259.429	1131.29	1266.42	203.04	1421.33	1350.25	461.244	1260.01	1504.78	538.849	1263.31	1307.99	549.237	1257.34	1155.16	549.279	1157.99	1011.28	491.652	1118.62	931.398	555.02	1153.84	911.9	540.688	1093.99	868.245
519	0	322.793	1109.13	1706.45	234.62	1117.8	1705.05	330.434	1303.21	1699.4	219.775	1293.39	1700.32	274.625	1326.72	1556.53	280.89	1402.13	1294.6	279.052	1181.56	1471.74	259.393	1119.63	1267.37	203.405	1409.44	1351.83	461.079	1247.56	1506.41	538.87	1249.1	1309.77	549.616	1240.06	1157	549.187	1138.38	1014.91	491.668	1098.29	936.125	554.943	1132.46	915.67	540.282	1071.98	873.113
520	0	321.868	1096.65	1707.29	233.646	1105.59	1705.52	329.85	1290.66	1700.72	219.235	1281.26	1701.14	274.574	1314.63	1557.65	280.956	1390.28	1295.7	278.679	1169.61	1472.79	259.476	1108.01	1268.32	203.523	1397.52	1352.98	460.677	1234.94	1508	538.699	1234.76	1311.45	550.299	1223.15	1158.79	548.882	1118.88	1018.33	491.302	1078.31	939.546	554.877	1111.53	919.096	539.677	1050.08	877.893
521	0	320.631	1084.22	1707.88	232.613	1093.37	1705.99	329.543	1278.23	1702.06	218.677	1268.96	1702.11	274.526	1302.65	1558.41	281.394	1378.38	1296.79	278.117	1157.48	1473.73	259.306	1096.32	1269.08	203.065	1385.31	1353.71	460.223	1222.5	1509.06	538.354	1220.42	1312.88	550.685	1206.37	1160.15	548.73	1099.63	1021.72	490.698	1057.96	944.244	554.302	1090.34	922.601	538.917	1028.27	882.537
522	0	319.613	1071.54	1708.49	231.527	1081.02	1706.34	328.802	1265.55	1702.87	218.106	1256.71	1702.58	274.125	1290.38	1559.31	281.332	1366.51	1297.48	277.71	1145.56	1474.43	258.982	1084.55	1269.9	203.172	1373.39	1354.31	459.721	1209.85	1509.88	538.109	1206.26	1313.85	551.103	1189.82	1161.32	548.436	1080.62	1024.6	490.017	1037.62	948.863	553.314	1069.36	925.931	537.984	1006.58	887.184
523	0	318.57	1058.9	1708.5	230.394	1068.64	1706.02	328.26	1253.05	1703.35	217.61	1244.44	1702.65	273.802	1278.13	1559.52	281.591	1354.39	1298.11	277.079	1133.24	1474.5	258.442	1072.6	1269.75	203.55	1361.43	1354.97	459.326	1197.19	1510.55	538.01	1192.22	1314.63	551.573	1173.39	1162.32	548.266	1061.55	1027.83	489.417	1017.48	952.121	552.892	1048.58	929.001	537.176	985.167	891.818
524	0	317.288	1046.42	1708.22	229.256	1056.22	1705.75	327.721	1240.39	1703.76	216.817	1232.09	1703.02	273.407	1265.79	1559.66	281.588	1342.14	1298.34	276.626	1121.2	1474.62	257.911	1060.67	1269.88	203.643	1349.38	1355.31	458.888	1184.59	1511.05	537.813	1177.88	1315.52	552.013	1157.19	1163.25	547.915	1043.09	1030.62	488.651	997.606	956.162	552.272	1028.1	932.245	535.99	963.706	896.51
525	0	316.029	1033.56	1707.77	228.049	1043.65	1705.07	327.001	1227.57	1703.75	216.221	1219.57	1702.47	273.025	1253.37	1559.57	281.531	1329.79	1298.23	275.966	1108.94	1474.47	257.402	1048.79	1269.62	203.517	1337.15	1355.22	458.461	1172.02	1510.98	537.606	1163.69	1315.73	552.357	1141.33	1163.62	547.426	1024.51	1033.22	487.737	977.774	960.327	551.271	1007.56	935.113	534.855	942.689	900.902
526	0	314.768	1020.78	1707.05	226.836	1031.12	1704.12	326.352	1214.87	1703.55	215.384	1207.08	1701.86	272.431	1240.82	1559.11	281.434	1317.58	1298.19	275.212	1096.39	1473.89	256.793	1036.92	1269.16	203.13	1324.84	1354.87	457.578	1159.17	1510.78	537.162	1149.55	1315.69	552.636	1125.44	1163.73	546.093	1006.09	1035.37	486.67	957.953	964.227	549.93	987.293	938.05	533.255	921.449	905.409
527	0	313.489	1007.97	1705.94	225.719	1018.57	1703.01	325.477	1201.92	1702.94	214.576	1194.41	1701.05	271.821	1228.21	1558.38	281.445	1305.51	1297.86	274.867	1084.17	1472.9	256.139	1024.96	1268.09	203.055	1312.69	1354.41	456.858	1146.34	1510.33	537.08	1135.52	1315.49	552.901	1109.94	1163.56	546.338	988.057	1038.17	485.595	938.535	967.554	548.858	967.097	940.55	531.995	900.881	909.685
528	0	312.16	994.869	1704.85	224.403	1005.79	1701.47	324.863	1189.13	1702.06	213.704	1181.74	1699.8	271.196	1215.59	1557.51	281.365	1293.48	1297.09	273.903	1071.35	1471.57	255.273	1012.79	1266.64	202.762	1300.34	1353.77	456.132	1133.5	1509.48	536.771	1121.52	1315.16	553.101	1094.61	1163.1	545.566	970.176	1039.98	484.504	919.327	970.751	547.299	947.317	943.162	530.278	880.21	913.684
529	0	310.826	981.802	1703.43	223.08	992.977	1699.68	323.856	1176.03	1700.94	212.752	1168.96	1698.2	270.316	1202.75	1556.13	280.888	1281.16	1295.81	273.4	1059.01	1470.08	254.456	1000.64	1265.23	202.122	1287.95	1352.52	455.402	1120.89	1508.12	536.381	1107.54	1314.21	553.141	1079.49	1162.18	544.297	952.479	1041.53	483.393	900.266	974.038	546.038	927.445	945.248	528.75	860.004	917.739
530	0	309.47	968.784	1701.4	221.807	980.165	1697.62	322.97	1162.94	1699.38	211.873	1156.12	1696.35	269.639	1189.91	1554.52	280.341	1268.71	1294.45	272.623	1046.29	1468.25	253.977	988.691	1262.71	201.535	1275.48	1351.37	454.42	1107.82	1506.62	536.126	1093.79	1312.91	553.092	1064.43	1160.89	543.582	934.991	1043.16	482.051	881.511	976.995	544.294	908.053	947.225	526.804	839.731	921.446
531	0	308.182	955.54	1699.43	220.427	967.113	1695.41	322.223	1149.68	1697.67	210.948	1143.17	1694.21	268.708	1176.87	1552.7	279.652	1256.33	1292.96	271.919	1033.59	1466.06	252.963	976.091	1260.77	201.049	1263.04	1349.92	453.501	1094.92	1504.94	535.726	1079.99	1311.53	553.142	1049.81	1159.42	543.096	917.869	1044.49	480.671	862.901	979.529	542.942	888.977	949.036	525.113	820.135	924.829
532	0	306.6	942.33	1697.03	219.1	954.102	1692.88	321.225	1136.41	1695.46	209.945	1130.06	1691.88	267.603	1163.76	1550.45	278.988	1244.04	1291.34	270.957	1020.64	1463.89	252.074	963.705	1258.3	199.887	1250.29	1348.05	452.439	1082.08	1502.73	535.141	1066.42	1309.72	552.899	1035.05	1157.74	542.09	900.88	1045.55	479.122	844.617	982.654	541.367	870.053	950.453	523.609	800.567	928.715
533	0	305.188	929.496	1693.97	217.581	940.867	1690	320.354	1123.12	1693.12	208.948	1117	1689.2	266.381	1150.52	1548.34	277.853	1231.42	1288.91	269.766	1007.42	1461.05	251.322	951.238	1255.52	198.945	1237.66	1345.9	451.281	1069.13	1500.3	534.405	1052.91	1307.59	552.604	1020.63	1155.67	540.402	884.052	1046	477.584	826.641	985.292	539.555	851.551	951.869	521.773	781.371	932.136
534	0	303.761	916.139	1690.89	216.141	927.626	1686.92	319.206	1109.63	1690.23	207.87	1103.66	1685.96	265.078	1137.25	1545.82	276.684	1218.65	1286.73	268.93	994.411	1458.11	250.388	938.548	1252.28	197.547	1224.63	1343.68	450.153	1056.08	1497.67	533.699	1039.48	1305.61	552.196	1006.36	1153.44	539.735	867.539	1046.61	475.984	808.841	987.236	537.733	833.233	953.135	519.842	762.701	935.135
535	0	302.351	902.184	1688.36	214.67	914.247	1683.66	318.04	1096.11	1687.08	206.606	1090.36	1682.85	263.704	1123.86	1542.96	275.553	1206.11	1283.96	267.861	981.206	1454.75	249.485	925.917	1248.84	196.242	1211.67	1340.86	448.811	1043.11	1494.94	532.794	1026.26	1303.49	551.713	992.163	1151.23	537.936	851.297	1046.8	474.361	791.447	989.274	535.192	815.183	954.24	517.785	744.221	938.11
536	0	300.694	888.532	1684.9	213.091	900.793	1680.19	316.321	1082.33	1683.79	205.315	1076.87	1679.35	262.165	1110.57	1539.73	274.082	1193.04	1281.08	266.716	967.881	1451.53	248.444	913.089	1245.55	194.687	1198.28	1337.89	447.401	1030.03	1491.81	531.709	1013.02	1300.88	551.225	978.337	1148.4	537.14	835.542	1047.01	472.619	774.359	991.291	533.188	797.557	954.88	515.94	726.293	940.5
537	0	299.018	875.335	1681.06	211.683	887.19	1676.76	315.461	1068.83	1680.39	204.016	1063.27	1675.81	260.641	1097.21	1536.36	272.719	1180.08	1277.93	265.421	954.403	1447.93	247.536	900.189	1241.83	193.363	1185.01	1334.69	446.074	1017.16	1488.4	530.492	1000.01	1298.1	550.578	964.582	1145.58	535.833	819.951	1046.77	470.868	757.6	992.854	531.419	780.137	956.175	514.271	708.428	943.549
538	0	297.478	861.221	1677.8	210.062	873.568	1673.02	314.265	1055.28	1676.93	202.503	1049.64	1672.25	259.026	1083.78	1533.12	271.209	1166.91	1274.48	264.092	940.863	1444.29	246.749	887.692	1238.03	191.548	1171.55	1331.13	444.55	1004.13	1485.21	529.192	986.982	1294.98	549.849	950.943	1142.63	534.41	804.549	1046.52	469.133	741.204	994.036	529.387	763.061	956.787	512.134	691.134	945.599
539	0	295.716	847.359	1674.16	208.29	859.756	1669.33	312.385	1041.23	1673.35	200.785	1035.84	1668.43	257.268	1070.27	1529.31	269.618	1153.64	1270.87	262.753	927.313	1440.67	245.417	874.698	1233.86	189.857	1157.97	1327.55	442.87	991.13	1481.71	527.701	974.145	1291.46	549.018	937.577	1139.28	532.524	789.49	1045.87	467.405	725.128	995.093	527.216	746.321	956.973	510.017	674.246	947.539
540	0	294.027	833.883	1670.13	206.526	845.85	1665.58	310.721	1027.49	1669.71	199.114	1022	1664.5	255.321	1056.62	1525.94	267.592	1139.85	1267	261.265	913.669	1437.01	244.389	861.446	1230.4	188.121	1144.43	1323.56	441.151	978.077	1477.86	526.228	961.616	1287.84	547.876	924.276	1135.63	531.506	774.623	1045.12	465.57	709.434	995.826	525.27	729.93	956.62	507.868	657.833	948.934
541	0	292.268	819.638	1666.91	204.691	831.799	1661.93	309.034	1013.59	1666.12	197.332	1008.11	1660.99	253.498	1042.93	1522.2	266.117	1126.37	1263.34	259.717	899.853	1433.44	243.193	847.657	1226.66	186.354	1130.62	1319.63	439.516	965.059	1474.23	524.609	949.12	1284.17	546.913	911.301	1132.02	529.545	760.154	1043.57	463.817	694.021	996.102	522.996	714.258	956.18	506.335	642.26	949.506
542	0	290.251	805.783	1663.3	202.828	817.868	1658.37	306.907	999.38	1662.9	195.485	993.962	1657.9	251.361	1028.99	1518.63	264.497	1112.48	1259.87	257.98	885.892	1429.83	242.074	833.408	1223.37	184.497	1116.65	1316.03	437.791	951.662	1470.84	522.878	936.769	1280.79	545.785	898.33	1128.7	528.418	745.944	1042.64	461.936	679.019	996.138	520.95	698.796	955.838	504.306	626.589	950.495
543	0	288.194	791.802	1659.6	200.631	803.662	1654.79	304.9	985.231	1659.62	193.348	979.799	1654.56	248.991	1014.71	1515.42	262.868	1098.42	1256.64	256.26	871.927	1426.6	240.651	819.516	1219.64	182.76	1102.64	1312.6	435.855	938.282	1467.33	520.902	924.526	1277.08	544.371	885.427	1125.24	526.258	732.07	1040.59	460.152	664.407	996.074	518.726	683.603	955.121	502.109	611.2	951.104
544	0	285.919	777.483	1656.33	198.448	789.368	1651.54	302.768	971.116	1656.59	190.838	965.539	1651.72	246.997	1000.45	1512.56	261.263	1084.47	1253.57	254.246	857.634	1423.31	239.278	804.91	1216.61	180.8	1088.6	1309.16	433.858	924.678	1463.96	518.673	912.207	1273.56	542.927	872.905	1121.84	525.194	718.427	1039.51	458.337	650.198	995.844	516.567	669.067	954.094	500.227	596.574	951.216
545	0	283.73	763.289	1653.32	196.195	775.092	1648.28	300.339	956.861	1653.59	188.418	951.163	1648.04	244.71	986.153	1509.16	259.634	1070.21	1250.54	252.335	843.365	1420.15	237.619	789.889	1213.26	178.955	1074.37	1306.1	431.859	910.752	1460.96	516.553	900.012	1270.22	541.146	860.279	1118.69	523.454	705.137	1037.41	456.725	636.375	994.533	514.602	655.132	952.546	498.62	582.52	950.792
546	0	281.31	748.881	1650.72	193.772	760.716	1645.33	297.806	942.488	1650.72	185.905	936.788	1645.04	242.249	971.626	1506.41	257.943	1055.81	1247.99	250.184	828.981	1417.25	235.761	775.061	1210.14	176.948	1059.91	1303.15	429.77	896.656	1458.27	514.073	887.895	1267.15	539.277	847.955	1115.65	521.713	692.203	1035.4	455.016	622.928	993.312	512.73	641.417	950.904	496.821	568.827	949.958
547	0	278.85	734.372	1648.26	191.219	746.106	1642.89	294.961	927.899	1648.24	183.331	922.28	1642.53	239.629	957.11	1504.07	255.864	1041.24	1245.34	247.872	814.305	1414.84	234.012	759.917	1207.7	174.946	1045.45	1300.59	427.406	882.271	1455.74	511.421	875.452	1264.41	537.13	835.885	1112.64	519.873	679.633	1032.91	453.427	609.91	992.003	510.487	628.676	948.852	495.318	555.835	948.468
548	0	276.236	719.704	1646.39	188.543	731.382	1640.98	292.264	913.34	1646.26	180.593	907.566	1640.54	237.049	942.413	1502.12	254.15	1026.58	1243.65	245.627	799.642	1412.73	232.18	745.067	1205.53	172.982	1030.81	1298.51	425.008	867.781	1453.85	508.889	863.032	1262.02	534.834	823.712	1110.16	518.148	667.219	1030.79	451.924	597.214	990.157	508.745	616.125	946.486	493.866	543.382	946.521
549	0	273.478	705.066	1644.78	185.757	716.588	1639.26	289.423	898.623	1644.79	177.579	892.753	1638.81	234.468	927.616	1500.46	252.725	1011.69	1242.04	243.086	784.885	1411.06	229.93	729.736	1203.9	170.97	1016.2	1296.66	422.755	853.147	1452.62	506.168	850.172	1260.53	532.362	811.784	1108.34	516.355	655.366	1028.44	450.363	584.93	987.752	507.031	604.405	944.217	492.64	531.477	944.336
550	0	270.577	690.235	1643.68	182.875	701.762	1638	286.495	883.789	1643.89	174.639	877.89	1637.64	231.767	912.703	1499.38	251.491	996.531	1240.89	240.404	770.029	1409.94	227.628	714.603	1202.87	169.082	1001.49	1295.4	420.209	838.146	1451.71	503.492	836.977	1259.41	529.67	799.892	1106.85	514.398	643.744	1025.89	448.921	573.099	985.425	505.026	593.238	941.702	491.54	520.184	941.649
551	0	267.746	675.476	1642.88	180.049	686.844	1637.2	283.318	869.019	1643.24	171.388	862.932	1636.96	229.317	897.887	1498.72	250.745	981.306	1240.26	237.832	755.116	1409.27	225.255	699.224	1202.44	167.309	986.679	1294.7	417.692	822.975	1451.4	500.902	823.415	1259.03	526.857	788.074	1105.9	512.669	632.447	1023.7	447.552	561.71	982.759	503.382	582.623	938.94	490.419	509.414	938.562
552	0	264.921	660.556	1642.78	177.212	671.963	1636.83	280.38	854.09	1643.17	168.321	848.011	1636.7	226.775	883.265	1498.36	250.08	966.164	1240.21	235.283	740.239	1409.08	222.723	683.935	1202.24	165.449	971.991	1294.29	415.186	807.462	1451.61	498.414	809.518	1259.52	523.991	776.214	1105.76	510.842	621.406	1021.45	446.25	550.724	979.656	501.846	572.607	936.239	489.48	499.298	934.977
553	0	261.879	645.692	1642.95	174.142	657.052	1636.79	277.354	839.118	1643.89	165.38	833.114	1637.03	224.386	868.554	1498.73	249.222	950.946	1240.27	232.679	725.504	1409.31	220.105	668.654	1202.7	163.929	957.245	1294.53	412.668	791.995	1452.52	496.103	795.018	1260.58	521.165	764.39	1106.17	509.17	610.662	1019.69	445.012	540.199	976.281	500.786	563.204	933.474	488.732	489.936	931.149
554	0	258.73	630.666	1643.46	171.125	642.167	1637.22	274.395	824.238	1644.88	162.622	818.33	1637.97	222.016	854.041	1499.36	248.205	935.673	1240.82	229.981	710.817	1410.15	217.576	653.572	1203.59	162.379	942.511	1295.05	410.048	776.595	1453.54	493.728	780.267	1261.94	518.315	752.551	1107.07	507.414	600.078	1017.63	443.709	530.105	973.136	499.282	554.305	930.841	488.007	480.939	926.751
555	0	255.758	615.884	1644.37	168.219	627.373	1638.11	271.336	809.416	1646.21	159.66	803.527	1638.8	219.605	839.498	1500.38	247.143	920.723	1241.9	227.556	696.281	1411.49	215.165	638.344	1205.11	160.799	927.779	1295.87	407.642	761.444	1454.9	491.702	765.328	1263.7	515.295	740.571	1108.03	505.732	590.029	1015.22	442.501	520.468	969.552	498.275	546.078	927.72	487.227	472.708	922.149
556	0	252.898	601.195	1645.63	165.169	612.612	1639.01	268.367	794.583	1648.22	156.749	788.814	1640.56	217.465	825.182	1501.97	245.732	905.981	1243.18	225.04	681.878	1412.91	212.645	623.348	1206.7	159.014	913.118	1296.71	405.35	746.505	1456.97	489.958	749.988	1266.17	512.441	728.564	1109.88	504.223	580.18	1013.53	441.977	511.421	965.963	497.232	538.174	924.825	486.86	465.031	917.421
557	0	249.94	586.426	1647.25	162.242	598.114	1640.23	265.492	779.957	1650.32	153.959	774.298	1642.27	215.247	811.031	1503.82	243.996	891.483	1244.74	222.608	667.672	1414.9	210.315	608.443	1209.1	157.143	898.584	1298.2	403.055	731.878	1459.37	488.231	734.871	1269.05	509.7	716.472	1112.02	502.843	570.538	1011.87	441.165	502.744	962.261	496.536	530.82	922.059	486.331	457.803	912.615
558	0	247.047	572.07	1648.73	159.51	583.709	1641.85	262.893	765.45	1652.88	151.142	759.893	1644.54	213.153	797.057	1505.88	242.141	877.139	1246.84	220.573	653.664	1417.28	208.365	593.764	1211.64	155.02	884.01	1299.86	400.927	717.61	1461.8	486.646	719.704	1271.95	506.97	704.152	1114.6	501.381	561.033	1010.25	440.404	494.415	958.626	496.091	523.862	919.534	486.023	451.055	907.649
559	0	244.337	557.813	1650.56	156.794	569.444	1643.43	260.323	751.14	1655.51	148.51	745.661	1647.03	211.042	783.155	1507.97	240.01	862.924	1249.12	218.805	639.758	1419.55	206.612	579.266	1214.28	153.035	869.778	1302.03	398.907	703.723	1464.64	485.221	704.851	1275.29	504.564	691.895	1117.56	500.213	551.731	1009.14	439.912	486.527	954.806	495.792	517.026	917.283	485.832	444.705	902.816
560	0	241.743	543.583	1652.84	154.247	555.414	1645.43	257.936	737.02	1658.4	146.139	731.506	1649.4	208.923	769.401	1510.62	237.982	849.254	1251.47	216.962	626.069	1421.98	204.954	564.989	1217.1	150.78	855.793	1304.38	397.107	690.416	1467.66	483.674	690.157	1278.74	502.14	679.573	1120.49	499.033	542.526	1008.28	439.23	478.86	951.028	495.877	510.676	915.426	485.887	438.763	898.177
561	0	239.378	529.817	1654.99	151.979	541.653	1647.5	255.611	723.074	1661.2	143.924	717.844	1652.52	207.093	756.021	1513.2	235.839	835.721	1254.09	215.756	612.564	1424.86	203.701	551.536	1219.55	148.444	842.153	1306.83	395.401	677.441	1470.47	482.148	676.443	1281.91	499.855	667.182	1123.71	498.056	533.651	1007.35	438.831	471.737	947.668	495.9	504.659	913.347	485.399	433.311	893.431
562	0	237.438	516.107	1657.55	149.757	527.947	1649.59	253.804	709.424	1664.37	141.907	704.182	1654.86	205.269	742.534	1515.6	233.521	822.244	1256.79	214.506	599.199	1427.53	202.961	537.373	1222.79	145.844	828.558	1309.32	393.901	664.615	1473.59	480.657	663.14	1284.9	497.798	654.8	1126.76	497.017	524.817	1006.69	438.612	465.055	944.434	495.927	498.74	911.688	485.311	428.214	888.818
563	0	235.431	502.624	1659.87	147.963	514.607	1652.12	251.817	695.803	1667.33	139.954	690.651	1657.83	203.389	729.516	1518.47	231.533	809.267	1259.53	213.411	585.975	1430.29	202.202	523.815	1225.66	143.368	815.041	1312.06	392.647	652.305	1476.66	479.307	650.427	1288.19	495.969	642.612	1129.96	496.197	516.249	1006.41	438.404	458.759	940.934	496.353	493.065	910.605	485.362	423.548	884.566
564	0	233.725	489.394	1662.63	146.207	501.363	1654.88	250.32	682.757	1670.44	138.489	677.551	1660.62	201.875	716.402	1521.29	229.233	796.075	1262.3	212.474	572.967	1433.37	202.178	511.033	1228.5	141.206	801.878	1314.98	391.379	639.984	1479.96	477.883	638.219	1291.31	494.416	630.684	1133.54	495.29	507.869	1006.47	437.665	451.929	938.411	496.956	487.533	909.945	485.415	419.228	881.03
565	0	232.211	476.44	1665.17	144.708	488.311	1657.45	248.735	669.52	1673.52	136.794	664.386	1663.88	200.447	703.621	1524.18	227.44	783.393	1265.11	211.618	560.107	1436.36	201.696	497.368	1231.75	138.73	788.357	1317.64	390.072	627.874	1482.92	476.338	626.483	1294.08	492.887	619.205	1136.64	494.528	499.792	1006.66	437.437	447.161	934.778	497.689	482.055	909.465	485.318	415.029	877.649
566	0	231.086	463.482	1668.15	143.634	475.472	1660.27	247.455	656.886	1676.5	135.767	651.543	1666.82	199.332	690.926	1527.13	225.52	770.766	1267.97	211.07	547.406	1439.45	201.896	484.945	1234.31	136.926	775.553	1320.65	389.069	615.916	1486.02	475.125	615.382	1296.78	491.403	607.922	1139.87	493.968	492.053	1007.21	437.574	442.48	932.665	497.96	476.856	909.438	485.288	411.094	874.808
567	0	230.155	450.985	1671.01	142.617	462.762	1663.29	246.428	644.169	1679.86	134.623	638.848	1670.27	197.756	678.181	1530.35	223.734	758.039	1271	210.318	534.759	1442.5	202.192	473.223	1236.65	135.075	762.629	1323.71	388.191	603.947	1489.35	474.074	604.576	1299.83	490.266	597.389	1143.34	493.36	484.437	1008.39	437.492	437.736	931.415	499.291	471.658	910.038	485.183	407.401	872.497
568	0	229.426	438.422	1674.13	141.837	450.164	1666.5	245.485	631.771	1683.25	133.593	626.201	1673.62	196.791	665.668	1533.63	222.196	745.763	1274.26	209.744	522.379	1445.75	202.339	459.983	1240.4	133.467	750.01	1326.92	387.316	592.215	1492.82	472.883	593.896	1303.09	489.232	587.307	1146.93	493.024	477.233	1009.77	437.386	433.193	930.775	500.183	466.306	911.414	485.284	403.703	871.234
569	0	228.966	426.034	1677.25	141.371	437.648	1669.89	244.823	619.42	1686.66	132.743	613.602	1677.09	195.663	653.281	1536.96	220.514	733.443	1277.66	209.225	509.95	1448.98	202.4	448.236	1242.7	131.945	737.424	1330.31	386.436	580.345	1496.29	472.051	583.597	1306.41	488.435	577.673	1150.68	492.777	470.178	1011.55	437.476	428.896	930.622	500.774	461.103	912.999	485.476	400.052	870.529
570	0	228.643	413.81	1680.53	140.971	425.273	1673.23	244.063	607.173	1689.93	132.007	601.167	1680.82	194.598	640.837	1540.27	218.734	720.999	1280.88	208.853	497.649	1452.36	202.658	436.196	1245.9	130.335	724.614	1333.63	385.689	568.665	1499.74	471.398	573.55	1309.88	487.836	568.417	1154.43	492.688	463.451	1013.53	437.096	424.604	931.13	501.975	456.044	915.18	485.719	396.347	870.628
571	0	228.402	401.664	1683.69	140.661	412.96	1676.6	243.665	595.126	1693.41	131.207	588.884	1684.55	193.192	628.689	1543.56	216.978	708.534	1284.18	208.38	485.41	1455.79	202.714	424.27	1249.25	129.01	712.115	1336.92	384.906	557.202	1503.26	470.819	563.605	1313.38	487.195	559.522	1158.32	492.213	456.975	1015.39	437.475	420.375	931.927	502.773	450.722	917.545	485.258	393.025	870.195
572	0	228.417	389.804	1686.67	140.487	400.656	1679.96	243.208	583.295	1696.5	130.765	576.638	1687.91	192.159	616.436	1546.86	215.389	696.298	1287.29	207.847	473.145	1459.27	202.579	412.517	1252.25	127.817	699.685	1340.57	384.024	545.571	1506.75	470.255	553.828	1316.79	486.742	551.034	1162.15	492.717	450.786	1017.86	437.588	416.648	932.846	503.871	445.499	919.857	485.331	389.34	870.858
573	0	228.633	377.875	1689.77	140.575	388.446	1683.37	242.674	571.377	1699.39	130.408	564.396	1691.05	191.388	604.311	1549.81	214.019	684.189	1290.36	207.408	461.045	1462.32	202.503	400.953	1255.33	126.316	687.13	1343.45	383.402	534.208	1510.18	469.863	544.333	1320.31	486.44	542.815	1165.77	492.856	444.613	1020.09	437.772	412.178	934.318	504.568	440.47	922.251	485.662	385.666	871.921
574	0	228.956	366.118	1692.76	140.909	376.405	1686.81	242.289	559.59	1702.21	130.083	552.237	1694.11	190.486	592.344	1552.74	212.813	671.984	1293.25	206.939	448.835	1465.42	202.275	389.355	1258.43	124.848	674.473	1346.46	382.7	522.825	1513.41	469.656	535.134	1323.84	486.382	534.82	1169.42	493.157	438.533	1022.61	438.26	407.601	935.998	505.374	435.647	924.708	486.075	381.856	873.27
575	0	229.257	354.404	1695.66	141.18	364.369	1689.9	241.887	547.889	1704.94	129.778	540.187	1697.27	189.752	580.269	1555.54	211.497	659.709	1296.01	206.567	436.793	1468.46	201.896	377.65	1261.56	123.628	662.094	1349.18	382.085	511.477	1516.49	469.318	525.922	1327.17	486.37	527.075	1172.85	493.151	432.654	1024.83	438.497	402.88	937.836	505.882	430.859	927.136	486.511	377.84	874.692
576	0	229.704	342.69	1698.4	141.432	352.281	1692.93	241.774	536.184	1707.71	129.606	528.123	1700.07	188.893	568.432	1557.96	210.398	647.516	1298.6	206.259	424.715	1471.44	201.513	365.895	1264.31	122.387	649.701	1351.67	381.367	500.113	1519.17	469.032	516.897	1330	486.374	519.474	1175.95	493.609	426.499	1027.22	438.81	397.862	939.552	506.329	426.153	929.109	487.095	373.717	876.1
577	0	230.277	331.181	1700.81	142.05	340.335	1695.77	241.504	524.755	1709.91	129.452	516.155	1702.9	188.007	556.289	1560.67	209.284	635.149	1301.11	205.908	412.539	1474.15	201.154	353.977	1266.87	121.128	637.132	1354.2	380.856	488.57	1521.71	468.807	507.956	1332.94	486.564	512.025	1179.16	494.067	420.721	1029.22	439.594	392.717	941.443	506.886	421.51	931.364	487.915	369.428	877.755
578	0	230.913	319.568	1703.34	142.486	328.405	1698.37	241.419	513.189	1712.15	129.372	504.153	1705.45	187.446	544.181	1562.86	208.401	622.916	1303.24	205.58	400.236	1476.38	200.876	341.999	1269.4	120.136	624.907	1356.62	380.456	477.152	1524.26	468.542	499.103	1335.73	486.89	504.682	1182.21	494.57	414.431	1031.43	440.958	387.291	943.304	507.297	416.754	933.565	488.872	364.981	879.467
579	0	231.489	307.96	1705.47	143.03	316.372	1700.92	241.237	501.506	1714.21	129.395	492.09	1707.5	186.974	532.145	1564.89	207.517	610.745	1305.52	205.385	388.223	1478.44	200.629	329.865	1271.73	119.29	612.81	1359.03	380.162	465.536	1526.45	468.291	489.718	1338.28	486.973	497.395	1184.9	494.87	408.852	1032.71	441.66	381.56	945.076	507.617	412.009	935.351	489.706	360.22	881.108
580	0	232.199	296.448	1707.15	143.722	304.524	1702.87	241.197	490.083	1715.73	129.316	480.036	1709.3	186.895	519.931	1566.62	206.712	598.391	1307.32	205.384	376.242	1480.64	200.448	317.6	1273.62	118.54	600.469	1361.09	379.749	453.889	1528.22	468.341	481.061	1340.62	487.076	490.156	1187.29	495.403	402.904	1034.32	442.247	375.625	946.588	507.869	407.197	936.789	490.774	355.422	882.39
581	0	233.005	284.847	1708.9	144.319	292.583	1704.81	241.174	478.612	1716.97	129.209	468.171	1711.26	186.431	507.786	1568.1	205.826	586.226	1308.76	205.254	364.121	1482.3	200.252	305.205	1275.16	117.865	588.22	1362.46	379.532	442.301	1529.65	468.296	472.218	1342.74	487.253	482.994	1189.44	496.314	397.233	1035.89	443.399	368.802	948.053	508.225	402.424	938.195	491.943	350.292	883.856
582	0	233.668	273.298	1710.13	145.054	280.762	1706.26	241.387	467	1718.15	129.347	456.24	1712.47	186.243	495.683	1569.29	205.147	573.97	1310.17	205.261	351.951	1483.55	200.165	292.844	1276.62	117.25	575.901	1363.96	379.337	430.533	1530.84	468.177	463.186	1344.43	487.313	475.726	1191.31	496.98	391.034	1037.01	443.577	363.22	948.635	508.416	397.554	939.259	493	344.968	884.941
583	0	234.482	261.727	1711.01	145.711	268.718	1707.53	241.382	455.528	1718.42	129.385	444.229	1713.38	185.897	483.405	1569.96	204.391	561.734	1310.86	205.32	339.727	1484.59	200.072	280.445	1277.49	116.782	563.537	1364.83	379.121	418.734	1531.3	467.974	454.271	1345.54	487.394	468.593	1192.69	497.655	385.225	1037.72	444.629	356.536	949.481	508.262	392.335	940.079	494.487	339.517	885.977
584	0	235.355	250.016	1711.66	146.577	256.836	1708.17	241.417	443.859	1718.54	129.609	432.13	1713.57	185.684	471.236	1570.48	203.734	549.499	1311.37	205.231	327.397	1485.05	200.211	268.132	1278.03	116.303	551.18	1365.32	379.042	407.031	1531.48	467.837	445.138	1346.54	487.66	461.319	1193.91	498.451	378.89	1038.25	446.212	349.7	949.909	508.127	387.271	940.367	495.923	334.04	886.266
585	0	236.28	238.367	1712.05	147.346	244.796	1708.74	241.746	432.338	1718.45	130.069	420.234	1713.71	185.75	459.004	1570.4	203.224	537.173	1311.55	205.241	315.146	1485.09	200.377	255.756	1278.47	115.945	538.772	1365.58	379.012	395.129	1531.77	467.73	436.019	1347.32	487.491	453.812	1194.71	499.38	372.882	1038.63	447.452	342.5	950.7	508.331	381.719	940.515	497.296	328.475	886.593
586	0	237.054	226.617	1711.98	148.17	232.867	1708.93	241.857	420.6	1717.77	130.239	408.164	1713.63	185.417	446.747	1570.22	202.643	524.855	1311.5	205.466	302.884	1485.01	200.384	243.359	1278.34	115.609	526.457	1365.38	378.977	383.195	1531.37	467.588	426.643	1347.63	487.408	446.201	1195.22	500.07	366.212	1038.8	448.707	335.055	950.727	508.378	375.957	940.503	498.362	322.347	886.435
587	0	238.022	214.789	1711.59	149.079	220.763	1708.7	242.36	408.869	1717.17	130.635	395.969	1712.86	185.852	434.386	1569.64	202.33	512.57	1311.03	205.694	290.474	1484.72	200.573	231.167	1277.54	115.123	513.969	1364.97	378.984	371.216	1530.55	467.395	417.2	1347.39	487.136	438.228	1195.28	500.607	359.254	1038.17	449.867	327.463	950.19	508.283	369.89	940.055	499.379	315.677	885.685
588	0	239.006	203.013	1710.67	149.971	208.576	1708.12	242.758	397.003	1715.84	131.089	383.838	1712.12	185.595	422.185	1568.51	202.041	500.361	1310.19	205.757	278.039	1483.75	200.432	217.87	1276.61	114.868	501.411	1364.09	379.327	359.161	1529.55	467.111	407.675	1347.06	486.915	430.132	1195.21	501.344	352.279	1037.55	451.133	319.633	949.446	508.378	363.46	939.525	500.09	309.053	884.683
589	0	239.99	191.082	1709.66	150.971	196.497	1707.24	243.089	385.161	1714.39	131.351	371.568	1711.11	186.084	409.661	1567.41	202.141	488.264	1309.23	205.975	265.811	1482.13	200.689	205.797	1275.45	114.75	488.867	1363.16	379.568	347.157	1528.21	466.976	397.744	1346.44	486.61	421.866	1194.7	501.903	344.872	1036.87	452.376	311.511	948.733	508.727	357.265	938.375	501.338	302.243	883.74
590	0	241.051	179.046	1708.18	151.922	184.152	1705.97	243.673	373.093	1712.58	131.871	359.322	1709.64	186.51	397.347	1565.77	201.849	475.71	1307.49	206.378	253.229	1480.68	200.94	193.501	1273.63	114.804	476.363	1361.7	379.816	334.911	1526.45	466.744	387.723	1345.1	486.135	413.291	1193.53	502.515	337.384	1035.21	453.48	303.289	947.163	508.598	350.024	936.87	502.44	295.322	882.116
591	0	242.296	166.991	1706.61	153.087	171.863	1704.49	244.337	361.034	1710.44	132.607	346.891	1707.69	186.764	384.649	1564.4	201.811	463.259	1305.63	206.798	240.72	1478.72	201.772	182.17	1271.62	114.96	463.815	1359.92	380.179	322.843	1524.29	466.507	377.456	1343.29	485.495	404.216	1192	502.905	329.355	1033.17	454.602	294.86	945.092	508.885	342.931	934.995	503.587	287.978	879.954
592	0	243.392	154.818	1704.69	154.2	159.502	1702.84	244.921	348.967	1708.01	133.536	334.47	1705.16	187.158	372.145	1561.95	202.154	450.828	1303.34	207.318	228.256	1476.38	202.182	169.736	1269.37	115.107	451.132	1357.52	380.661	310.531	1522.09	466.463	366.972	1341.3	484.934	394.943	1190.05	503.422	321.276	1031.03	455.737	286.275	943.023	508.859	335.288	932.781	504.815	280.569	877.785
593	0	244.528	142.593	1702.29	155.247	146.955	1700.73	245.556	336.802	1705.19	134.083	322.013	1703.1	187.404	359.637	1559.43	202.488	438.328	1300.94	207.889	215.535	1474.05	202.563	157.211	1266.77	115.382	438.46	1355.16	381.176	298.245	1519.32	466.43	356.444	1339.22	484.274	385.225	1187.85	503.757	312.759	1028.45	457.23	277.884	940.001	509.018	327.359	930.257	505.996	272.935	874.959
594	0	245.955	130.229	1699.94	156.68	134.438	1698.4	246.231	324.406	1702.24	135.06	309.242	1699.95	188.322	346.897	1556.84	202.468	425.284	1298.04	208.779	202.784	1471.65	203.286	144.526	1264.08	115.946	425.764	1352.51	381.673	285.987	1516.49	466.238	345.349	1336.35	483.469	375.118	1185.28	503.998	303.872	1025.38	458.049	268.915	936.665	509.233	319.233	927.321	506.795	264.55	871.829
595	0	247.255	117.812	1697.14	157.975	121.772	1695.95	247.272	312.007	1699.13	135.952	296.675	1697.46	188.916	334.118	1553.97	203.392	412.965	1295.28	209.453	189.989	1468.66	203.889	131.779	1261.09	116.466	412.908	1349.64	382.424	273.589	1513.39	466.162	333.965	1333.49	482.839	364.622	1182.54	504.26	294.569	1022.24	459.003	259.707	933.348	509.365	310.449	924.258	507.952	256.365	868.525
596	0	248.824	105.236	1694.55	159.341	109.025	1693.22	248.249	299.415	1696.13	136.86	283.841	1694.58	189.539	321.315	1550.98	203.893	400.066	1292.17	210.137	177.143	1465.39	204.802	118.862	1258.22	116.806	399.947	1346.52	383.332	261.277	1510.54	466.19	322.43	1330.57	482.187	353.81	1179.62	504.786	285.047	1019.18	460.116	250.124	930.005	509.816	301.56	921.151	509.191	247.876	865.28
597	0	250.146	92.6955	1691.37	160.869	96.2822	1690.37	249.307	286.956	1692.57	138.247	271.047	1691.25	190.575	308.369	1547.9	204.367	386.978	1289.02	211.129	164.189	1462.24	205.706	105.951	1255.09	117.546	387.019	1343.58	384.084	248.624	1507.38	466.1	310.642	1327.31	481.575	342.457	1176.61	504.99	274.919	1015.62	460.513	240.017	926.011	510.183	292.313	917.813	510.26	238.944	861.461
598	0	251.677	79.8174	1688.4	162.405	83.3394	1687.45	250.492	274.083	1689.49	139.127	258.048	1688.18	191.564	295.438	1544.64	205.522	374.154	1285.64	212.271	151.073	1459.2	206.584	92.7875	1251.55	118.347	373.867	1340.21	385.017	236.001	1503.85	465.852	298.645	1323.78	480.919	330.737	1173.2	505.154	264.411	1011.69	461.329	230.008	921.494	510.796	282.895	914.05	511.193	229.669	857.308
599	0	253.258	67.0588	1685.23	163.864	70.26	1684.38	251.795	261.354	1685.98	140.622	245.082	1684.59	192.612	282.47	1541.33	206.217	360.865	1282.07	213.315	137.825	1455.9	207.596	79.4172	1248.46	118.931	360.583	1336.92	386.191	223.223	1500.43	466.131	286.151	1320.03	480.29	318.627	1169.78	505.413	253.374	1007.89	462.334	219.633	917.322	511.459	273.166	910.296	512.263	220.286	853.236
600	0	255.042	54.1189	1682.42	165.542	57.2159	1681.58	253.084	248.302	1682.55	142.045	231.876	1681.68	193.83	269.355	1538.2	206.923	347.384	1278.69	214.46	124.6	1452.58	208.705	65.9368	1245.59	119.928	347.259	1333.75	387.379	210.397	1497.14	466.374	273.578	1316.32	479.711	306.294	1166.07	505.84	242.427	1003.96	463.339	208.93	913.082	512.117	262.939	906.588	513.347	210.656	848.962
601	0	256.735	41.0022	1679.32	167.318	44.0008	1678.77	254.637	235.266	1679.45	143.565	218.614	1678.43	194.766	256.052	1534.74	207.769	333.82	1275	215.883	111.207	1449.62	209.743	52.3319	1242.28	120.944	333.897	1330.28	388.665	197.365	1493.48	466.739	260.523	1312.25	479.5	293.808	1162.29	506.006	230.744	999.76	464.166	197.944	908.335	512.655	252.351	902.514	514.316	200.536	844.353
602	0	258.657	27.8343	1676.47	168.971	30.6048	1675.84	256.234	222.073	1676.25	145.039	205.328	1675.58	196.39	242.509	1531.5	208.705	320.29	1271.92	217.143	97.6607	1446.29	210.723	38.4483	1239.2	122.047	320.208	1327.14	390.097	184.163	1489.83	467.134	247.345	1308.44	479.154	280.673	1158.47	506.785	219.636	995.579	465.06	186.772	903.735	513.118	241.385	898.548	515.411	190.263	839.857
603	0	260.53	14.4054	1673.87	170.932	17.2836	1673.41	257.87	208.724	1673.13	146.89	191.954	1672.52	197.937	228.909	1528.7	209.405	306.258	1268.7	218.558	83.9952	1443.31	211.796	24.4923	1236.57	123.274	306.501	1324.43	391.657	170.685	1486.66	467.78	233.696	1304.58	478.975	267.136	1154.83	507.39	207.548	991.663	465.92	175.131	899.671	513.777	229.924	894.835	516.414	179.481	835.762
604	0	262.472	1.00782	1671.34	172.859	3.78369	1670.86	259.844	195.295	1670.37	148.812	178.442	1669.94	199.28	215.077	1526.3	210.122	292.225	1265.84	220.029	70.4871	1439.99	212.848	10.414	1233.71	124.587	292.713	1321.52	393.21	157.146	1483.17	468.698	219.868	1300.75	478.819	253.262	1151.2	507.828	195.024	987.705	466.719	163.041	895.142	514.357	218.14	890.913	517.5	168.462	831.268
605	0	264.427	-12.591	1668.84	174.756	-9.86006	1668.58	261.638	181.709	1667.44	150.496	164.891	1667.47	201.981	201.071	1523.6	210.97	278.066	1263.11	221.662	56.3984	1437.4	213.83	-3.83299	1230.85	125.911	278.589	1319.07	394.853	143.369	1479.78	469.629	205.727	1297.02	478.832	239.223	1147.39	508.297	181.893	983.649	467.548	150.762	890.554	514.835	206.003	887.102	518.097	156.616	827.046
606	0	266.477	-26.2731	1666.72	176.913	-23.5391	1666.47	263.796	168.109	1664.92	152.794	151.136	1664.59	203.325	187.157	1521.16	212.005	263.848	1260.8	223.368	42.2191	1434.99	215.021	-18.1877	1228.48	127.272	264.253	1316.77	396.733	129.46	1476.8	470.723	191.314	1293.51	479.004	224.658	1143.98	508.898	168.786	980.035	468.334	138.019	886.682	515.587	193.466	883.679	518.979	144.517	822.988
607	0	268.666	-40.007	1664.93	179.008	-37.2914	1665	265.766	154.265	1662.3	154.733	137.42	1662.67	205.308	173.064	1518.97	212.872	249.41	1258.35	225.379	28.2593	1432.71	216.371	-32.5478	1226.49	128.74	249.843	1314.6	398.736	115.54	1474.05	471.845	176.706	1289.95	479.406	210.169	1140.6	509.699	155.302	976.516	469.164	124.795	883.157	516.075	180.225	880.121	519.912	132.226	819.475
608	0	270.844	-53.9893	1663.36	181.074	-51.1258	1663.32	268.167	140.483	1660.27	157.154	123.685	1660.64	207.28	158.892	1517.16	213.822	234.855	1256.33	227.196	13.7889	1430.76	217.742	-47.037	1224.61	130.17	235.166	1312.59	400.682	101.555	1471.28	473.248	161.89	1286.52	480.154	195.41	1137.25	510.221	141.121	973.107	469.686	111.181	879.346	516.877	166.723	876.872	520.437	118.948	815.618
609	0	273.065	-67.9849	1662.16	183.337	-65.069	1662.23	270.52	126.387	1658.52	159.404	109.761	1659.33	209.24	144.704	1515.41	214.822	220.199	1254.5	229.241	-0.598072	1429.17	219.314	-61.6928	1223.09	131.645	220.315	1310.94	402.674	87.5295	1468.85	474.496	146.988	1283.46	480.451	179.748	1134.25	510.846	126.539	969.997	470.669	97.7844	875.772	517.563	152.673	873.812	521.039	105.496	812.148
610	0	275.276	-82.0051	1661.34	185.499	-79.0239	1661.73	273.01	112.466	1657.29	161.993	95.9046	1658.14	211.328	130.531	1514.24	215.552	205.372	1253.1	231.339	-14.9435	1428.21	221.095	-76.4478	1222.36	133.109	205.369	1309.64	404.835	73.6071	1466.94	475.831	132.024	1280.9	481.091	164.308	1131.82	511.477	111.546	967.404	471.199	83.0184	873.244	518.302	137.9	871.339	521.607	91.2019	809.398
611	0	277.509	-96.0917	1660.91	187.791	-92.9385	1661.33	275.564	98.2157	1656.53	164.476	81.9502	1657.63	213.583	116.239	1513.59	216.292	190.408	1252.15	233.424	-29.0456	1427.46	222.969	-91.4759	1221.95	134.534	190.408	1308.88	406.889	59.5711	1465.45	477.578	116.79	1278.74	482.039	148.687	1129.53	512.174	96.2057	965.278	471.632	68.1206	870.889	519.024	122.795	869.036	521.982	76.2124	807.069
612	0	279.847	-110.234	1660.83	190.104	-106.968	1661.33	278.355	84.1881	1656.02	167.068	68.0477	1657.27	215.532	101.975	1512.93	216.996	175.468	1251.36	235.705	-43.6007	1427.42	224.836	-106.907	1222.06	135.767	175.593	1308.24	409.105	45.5153	1464.31	479.097	101.668	1277.09	482.808	132.802	1127.6	512.922	80.3972	963.44	471.902	52.5527	868.856	519.831	106.974	867.316	522.266	60.5754	804.918
613	0	282.247	-124.357	1661.33	192.337	-120.927	1661.9	281.004	70.0511	1656.09	169.709	54.1775	1657.42	217.897	87.8481	1512.83	217.813	160.715	1250.99	237.835	-57.9843	1427.61	226.835	-122.334	1222.66	137.033	160.902	1308.02	411.293	31.6887	1463.53	480.707	86.3459	1275.77	483.834	116.919	1126.11	513.722	64.2614	962.199	472.572	36.7161	867.77	520.489	90.658	865.871	522.578	44.7026	803.419
614	0	284.421	-138.338	1661.99	194.599	-134.708	1662.61	283.662	56.0175	1656.18	172.416	40.3385	1657.68	219.901	73.6267	1512.99	218.573	146.024	1250.96	240.032	-72.05	1428.23	228.748	-138.02	1223.9	138.394	146.409	1308	413.474	17.7819	1463.38	482.065	71.2744	1274.69	484.855	100.783	1125.14	514.332	47.7313	961.467	472.627	20.3373	867.102	521.4	73.9841	865.008	522.795	28.0623	802.469
615	0	286.598	-152.359	1662.83	196.924	-148.541	1663.86	286.36	42.062	1656.66	174.975	26.6626	1658.21	221.967	59.5301	1513.41	219.533	131.492	1251.19	242.021	-86.4123	1428.96	230.707	-153.541	1225.02	139.919	132.064	1308.63	415.399	3.58445	1463.18	483.669	55.9663	1274.01	486.035	84.6741	1124.37	514.964	30.7757	960.796	472.949	3.5881	866.441	522.309	56.9555	864.823	522.692	10.3898	801.866
616	0	288.847	-166.33	1663.96	199.082	-162.364	1665.15	288.734	28.1418	1657.1	177.437	12.8355	1659.11	224.071	45.3116	1514.11	220.828	117.323	1251.89	243.768	-100.687	1429.76	232.304	-168.948	1226.4	141.501	117.992	1309.61	417.322	-10.594	1463.27	485.111	40.8878	1273.69	487.261	68.3528	1124.1	515.493	13.5518	960.414	472.643	-14.6011	866.609	522.72	38.9007	864.282	522.634	-7.72895	801.313
617	0	290.995	-179.95	1665.26	201.237	-176.003	1666.85	291.292	14.3439	1657.8	179.958	-0.800528	1660.07	226.405	31.4177	1515.21	222.034	103.221	1252.71	245.704	-114.758	1431.02	234.006	-183.818	1228	142.937	104.115	1310.9	419.313	-24.8171	1463.83	486.013	25.5359	1273.3	488.755	52.1552	1124	516.18	-4.00156	960.656	472.64	-32.4175	867.219	523.309	20.6613	864.424	522.549	-26.1527	801.705
618	0	293.299	-193.609	1666.85	203.562	-189.422	1668.19	293.704	0.629332	1658.71	182.425	-14.219	1661.34	229.013	17.2868	1516.7	223.389	89.368	1254	247.285	-128.731	1432.4	235.432	-198.365	1229.74	144.499	90.7005	1312.43	421.181	-39.3362	1465.03	488.058	10.3116	1274.39	490.195	35.7071	1124.24	516.967	-21.7308	961.509	472.901	-50.7201	868.624	523.629	1.81768	864.833	522.593	-45.1779	802.826
619	0	295.17	-207.237	1668.04	205.493	-202.942	1669.95	295.849	-12.915	1659.33	184.559	-27.709	1662.38	230.577	3.7949	1517.77	225.021	75.9755	1255.28	248.736	-142.522	1433.64	236.506	-212.345	1231.02	145.915	77.3198	1314.17	422.778	-53.9608	1465.98	489.553	-4.94876	1275.03	491.913	19.2889	1124.88	517.794	-39.4698	962.137	472.8	-69.3557	869.724	524.133	-17.1194	865.487	522.448	-64.8307	803.753
620	0	297.081	-220.799	1669.32	207.658	-216.031	1670.95	298.115	-26.4154	1660.64	186.615	-41.1015	1663.92	232.377	-9.63682	1519.28	226.549	62.5287	1256.77	249.941	-156.072	1434.76	237.372	-225.921	1232	147.566	64.3838	1315.83	424.376	-68.5775	1466.91	491.186	-20.5028	1275.89	493.559	2.59263	1125.28	518.312	-57.977	962.968	472.712	-88.3308	871.127	524.445	-36.36	866.167	522.177	-84.963	804.965
621	0	298.895	-234.074	1670.77	209.499	-229.273	1672.51	300.079	-39.8723	1661.8	188.681	-54.2615	1665.47	234.372	-22.7468	1520.79	228.559	49.5298	1258.42	250.973	-169.415	1436.22	237.874	-239.213	1233.27	149.408	51.6199	1317.37	425.932	-83.009	1468.44	492.913	-36.2847	1276.88	495.665	-13.9646	1126.21	518.804	-76.8517	964.405	472.874	-107.741	873.058	524.832	-56.2704	867.204	521.918	-105.579	806.734
622	0	300.366	-247.349	1671.95	210.998	-242.393	1674.14	301.809	-53.016	1662.98	190.476	-67.4045	1667.27	236.578	-35.7624	1522.59	230.386	36.5698	1259.88	251.714	-182.493	1437.53	238.089	-252.186	1234.43	151.381	39.0845	1319	427.177	-97.5452	1469.96	494.936	-52.1061	1277.89	497.205	-31.3438	1126.89	519.38	-95.8476	965.672	472.726	-127.367	875.032	525.007	-76.4691	868.196	521.688	-126.559	808.534
623	0	301.497	-260.365	1673.05	212.275	-255.501	1675.99	303.534	-66.273	1664.58	192.177	-80.3678	1669.1	237.62	-48.6339	1524.19	232.242	23.8471	1261.66	252.431	-195.111	1438.8	238.075	-264.87	1235.74	153.468	26.6947	1320.71	428.375	-111.613	1471.25	496.156	-68.309	1278.48	499.105	-48.4102	1127.74	519.898	-114.967	966.951	472.51	-147.387	876.902	525.183	-96.9784	869.246	521.398	-147.874	810.29
624	0	302.862	-273.349	1674.55	213.552	-268.437	1677.71	304.983	-79.343	1666.12	193.856	-93.2203	1671.04	239.3	-61.257	1525.96	234.148	11.4296	1263.35	253.105	-207.384	1440.24	237.754	-277.245	1237.3	155.512	14.4521	1322.27	429.486	-125.713	1472.72	498.059	-84.4283	1279.49	501.205	-65.6164	1128.58	520.497	-134.452	968.518	472.346	-167.507	879.306	525.707	-117.665	870.509	521.056	-169.401	812.505
625	0	303.932	-286.501	1676.35	214.576	-281.168	1679.33	306.556	-92.3228	1668.17	195.124	-106.065	1673.18	240.567	-73.9908	1527.83	236.265	-0.947502	1265.06	253.752	-219.976	1442.15	237.272	-289.405	1239.15	157.695	2.41587	1323.83	430.607	-139.419	1474.64	500.07	-100.822	1280.79	503.228	-82.8111	1129.32	521.105	-154.017	970.363	472.241	-187.915	881.865	525.879	-138.754	872.159	520.761	-191.429	815.114
626	0	304.545	-299.302	1677.8	215.281	-293.948	1681.18	307.589	-105.25	1670.08	196.345	-118.63	1675.22	241.873	-86.3576	1529.8	237.877	-13.3234	1266.83	254.055	-232.209	1443.87	236.643	-301.387	1240.93	159.739	-9.53595	1325.53	431.526	-152.776	1476.19	502.163	-117.16	1281.9	505.098	-100.466	1130.19	521.385	-174.112	972.058	471.768	-208.509	884.245	526.143	-160.152	873.734	520.273	-213.88	817.758
627	0	305.059	-312.09	1679.35	215.832	-306.496	1682.78	308.666	-117.989	1672.29	197.366	-131.198	1677.61	243.306	-98.6093	1531.98	239.194	-25.6214	1268.63	254.227	-244.149	1445.92	236.088	-313.215	1243	161.892	-21.4478	1327.13	432.407	-166.002	1477.98	503.759	-133.658	1283.14	507.156	-118.085	1131.38	521.668	-194.224	974.083	471.405	-229.143	886.874	526.43	-181.708	875.408	519.736	-236.357	820.521
628	0	305.579	-324.943	1681.57	216.118	-319.075	1684.97	309.747	-130.854	1674.86	198.319	-143.665	1679.63	244.315	-110.822	1533.9	240.983	-37.7772	1270.92	254.809	-256.321	1448.14	235.641	-325.038	1245.34	163.913	-33.2532	1329.02	433.38	-179.039	1480.09	505.476	-150.049	1284.62	508.888	-135.856	1132.57	521.984	-214.634	976.512	470.997	-250.077	890.018	526.532	-203.711	877.642	519.332	-259.012	823.726
629	0	305.775	-337.511	1683.54	216.359	-331.459	1686.63	310.431	-143.459	1677.01	199.17	-155.948	1681.93	245.322	-122.937	1536.04	241.952	-50.4304	1272.26	255.294	-268.32	1450.6	235.337	-336.827	1247.89	165.866	-44.9017	1330.94	434.245	-191.769	1482.25	506.824	-166.49	1286.07	510.378	-154.035	1133.71	522.278	-235.069	979.232	470.528	-271.006	893.395	527.27	-225.457	880.282	518.825	-281.82	827.525
630	0	305.758	-350.206	1685.55	216.533	-343.643	1688.64	311.391	-156.033	1679.64	199.864	-168.179	1684.16	246.494	-135.12	1538.3	243.414	-62.8491	1274.23	255.689	-280.273	1452.78	235.144	-348.577	1250.31	167.801	-56.4335	1333.07	435.052	-204.452	1484.26	508.004	-182.813	1287.68	512.302	-171.649	1135.37	522.352	-255.507	981.924	469.902	-292.044	896.62	527.436	-247.693	882.953	518.291	-304.677	831.092
631	0	305.713	-362.679	1687.56	216.544	-355.815	1690.46	312.176	-168.699	1682.06	200.395	-180.335	1686.26	247.5	-146.851	1540.02	245.747	-74.3163	1276.98	256.172	-292.254	1455.07	235.221	-360.374	1252.79	169.572	-68.1001	1334.98	435.802	-217.07	1486.41	509.212	-198.899	1289.58	513.933	-189.815	1137.26	522.382	-276.235	984.949	469.328	-312.998	900.313	527.204	-270.226	885.703	517.593	-327.768	835.126
632	0	305.61	-375.131	1689.8	216.238	-367.989	1692.44	312.728	-181.104	1684.21	200.959	-192.419	1688.17	248.811	-158.907	1542.25	247.166	-86.4565	1279.05	256.682	-304.071	1457.48	235.386	-372.19	1255.19	171.308	-79.7302	1336.97	436.665	-229.723	1488.81	510.33	-214.602	1291.74	515.514	-207.811	1139.34	522.443	-296.844	988.352	468.745	-334.123	904.311	527.489	-292.523	889.009	517.017	-351.328	839.796
633	0	305.199	-387.541	1691.55	216.043	-380.046	1693.97	313.242	-193.132	1686.84	201.402	-204.423	1690.07	249.808	-170.666	1544.18	248.5	-98.3243	1280.82	257.05	-315.9	1459.44	235.619	-383.935	1257.21	172.825	-91.3818	1338.92	437.314	-242.335	1490.74	511.101	-230.3	1293.66	516.456	-225.899	1140.76	522.383	-317.521	991.627	467.98	-355.155	908.103	527.558	-314.856	892.449	516.473	-373.945	844.343
634	0	304.968	-399.967	1693.64	215.808	-392.018	1695.46	313.716	-205.596	1689.23	201.779	-216.365	1692.15	250.574	-182.576	1546.1	249.945	-110.241	1282.83	257.508	-327.728	1461.51	235.738	-395.773	1259.2	174.251	-103.046	1340.78	437.849	-254.761	1492.87	511.945	-245.595	1295.76	518.189	-243.581	1143.02	522.24	-337.988	995.008	467.474	-376.173	912.054	527.39	-337.122	895.979	515.674	-396.895	848.704
635	0	304.565	-412.264	1695.4	215.49	-403.955	1697.22	314.314	-218.105	1691.17	202.213	-228.278	1693.9	251.322	-194.366	1547.88	251.07	-122.148	1284.47	257.91	-339.563	1463.71	236.151	-407.386	1261.32	175.551	-114.425	1342.52	438.596	-267.368	1495.14	512.726	-260.601	1298.1	519.502	-261.474	1145.03	522.358	-358.294	998.757	466.777	-397.349	916.683	527.366	-359.458	899.626	514.883	-419.748	853.94
636	0	304.269	-424.573	1697.22	215.091	-415.906	1698.46	314.357	-230.128	1693.05	202.495	-240.138	1695.4	252.506	-206.167	1549.99	252.256	-134.064	1286.06	258.337	-351.345	1465.56	236.451	-419.079	1263.13	176.719	-126.397	1344.23	439.185	-279.899	1497.02	513.466	-275.444	1300.11	520.73	-278.848	1146.85	522.375	-378.386	1002.45	466.314	-418.549	921.628	527.215	-381.561	903.307	514.003	-442.331	858.746
637	0	303.678	-436.936	1698.55	214.731	-427.79	1699.61	314.81	-242.438	1695.2	202.83	-252.028	1696.93	253.399	-217.941	1551.34	253.436	-146.071	1287.52	258.405	-363.131	1466.91	236.595	-430.756	1264.62	178.012	-138.107	1345.47	439.554	-292.614	1498.7	514.019	-290.256	1301.79	521.978	-296.651	1148.75	522.123	-398.791	1005.88	465.464	-439.312	925.746	526.814	-403.512	906.841	512.91	-465.337	863.62
638	0	303.251	-449.325	1700.02	214.159	-439.859	1700.63	315.168	-254.821	1696.83	203.065	-264.013	1698.09	254.084	-229.814	1552.59	254.568	-157.868	1288.93	258.627	-375.002	1468.34	236.644	-442.553	1266.03	179.02	-149.794	1347.09	440.039	-305.177	1500.27	514.451	-304.811	1303.38	523.202	-314.03	1150.57	521.851	-418.976	1009.27	464.631	-460.27	930.131	526.379	-425.455	910.503	511.928	-487.956	868.801
639	0	302.848	-461.493	1701.13	213.741	-451.727	1701.7	315.703	-267.293	1698.01	203.309	-275.931	1699.01	254.341	-241.673	1553.65	255.862	-169.691	1289.94	258.917	-386.838	1469.56	236.716	-454.295	1267.2	179.964	-161.458	1347.91	440.395	-317.821	1501.71	515.063	-319.406	1304.83	524.275	-331.382	1152.1	521.747	-438.511	1012.61	463.866	-481.107	934.668	525.812	-447.349	914.051	510.797	-510.386	873.787
640	0	302.319	-473.824	1702.03	213.458	-463.585	1702.23	315.852	-279.588	1699.05	203.491	-287.752	1699.87	256.04	-253.927	1554.97	256.781	-181.587	1290.95	259.039	-398.708	1470.64	236.848	-466.025	1268.34	181.099	-173.132	1348.97	440.637	-330.481	1502.71	515.436	-333.826	1306.09	525.312	-348.479	1153.27	521.648	-458.325	1016.06	462.632	-501.775	939.021	525.188	-469.043	917.513	509.607	-532.621	878.575
641	0	301.904	-486.181	1702.78	213.075	-475.559	1702.73	315.818	-291.813	1700.27	203.638	-299.796	1700.47	256.814	-265.75	1555.78	257.832	-193.659	1291.68	259.166	-410.715	1471.26	236.789	-477.736	1268.85	181.964	-184.979	1349.8	440.954	-343.36	1503.65	515.951	-348.21	1306.99	526.353	-365.413	1154.61	521.173	-477.993	1019.12	461.637	-522.367	943.369	524.554	-490.486	921.184	508.42	-554.909	883.764
642	0	301.378	-498.652	1703.44	212.548	-487.668	1702.84	315.939	-304.286	1701.05	203.868	-311.912	1701.09	256.777	-277.896	1556.4	258.799	-205.551	1292.4	259.289	-422.688	1471.87	236.585	-489.648	1269.38	182.764	-196.818	1350.36	441.25	-355.821	1504.47	516.354	-362.639	1307.96	527.479	-382.139	1155.72	520.914	-497.624	1022.66	460.761	-542.851	947.831	523.781	-511.714	924.753	506.961	-577.337	888.611
643	0	300.856	-510.923	1703.64	212.433	-499.36	1702.78	316.077	-316.65	1701.62	203.905	-323.833	1701.23	257.151	-289.96	1556.35	259.558	-217.489	1292.98	259.358	-434.66	1472.22	236.528	-501.306	1269.85	183.586	-208.666	1350.69	441.505	-368.505	1505.31	516.788	-376.938	1308.82	528.286	-398.828	1156.77	520.923	-516.514	1026.22	459.809	-562.969	952.209	523.021	-532.809	928.37	505.811	-598.577	893.831
644	0	300.204	-523.373	1703.37	211.654	-511.711	1702.47	316.149	-329.169	1701.69	204.02	-336.042	1701.13	257.374	-302.105	1556.38	260.299	-229.575	1292.93	259.507	-446.698	1472.07	236.247	-513.175	1269.58	184.28	-220.649	1350.9	441.528	-381.249	1505.38	517.078	-391.311	1309.09	529.174	-415.158	1157.11	519.852	-535.66	1028.7	458.895	-583.123	956.211	522.183	-553.874	931.296	504.369	-620.208	898.561
645	0	299.614	-536.068	1703.21	211.039	-524.088	1701.96	316.132	-341.775	1701.55	204.031	-348.225	1700.64	257.562	-314.277	1556.29	261.29	-240.956	1293.11	259.298	-458.929	1471.62	235.955	-525.171	1269.23	184.808	-232.614	1350.58	441.527	-394.012	1505	517.269	-405.793	1308.94	529.88	-431.44	1157.31	519.601	-554.42	1031.16	457.65	-603.006	959.894	520.99	-574.487	934.318	502.836	-641.551	903.147
646	0	299.018	-548.581	1702.69	210.551	-536.217	1701.12	316.209	-354.385	1701.17	203.968	-360.524	1700.09	257.842	-326.559	1555.96	261.556	-253.204	1292.41	259.314	-471.121	1471.19	235.756	-537.025	1268.8	185.319	-244.55	1350.13	441.79	-406.667	1504.86	517.67	-419.879	1308.9	530.519	-447.526	1157.29	518.917	-572.773	1033.8	456.715	-622.699	963.901	519.768	-595.022	937.031	501.539	-662.452	907.424
647	0	298.343	-561.147	1701.74	209.988	-548.496	1700.31	316.023	-367.178	1700.5	203.964	-372.768	1699.12	257.498	-338.895	1554.93	262.183	-265.264	1291.91	259.345	-483.251	1470.28	235.502	-549.112	1267.83	185.835	-256.564	1349.52	441.769	-419.449	1504.2	518.013	-434.067	1308.66	530.585	-463.721	1156.52	518.444	-591.164	1036.15	455.718	-642.109	967.511	518.833	-615.17	939.764	500.06	-683.205	911.923
648	0	297.639	-573.927	1700.72	209.373	-560.853	1698.66	315.839	-379.958	1699.57	203.783	-385.224	1697.95	257.559	-351.363	1553.99	262.399	-277.904	1290.63	259.02	-495.665	1468.99	235.029	-561.312	1266.4	186.104	-268.693	1348.57	441.672	-432.166	1503.27	518.002	-448.316	1307.75	531.007	-479.247	1155.95	517.746	-609.22	1037.91	454.479	-661.307	970.741	517.894	-635.156	942.413	498.414	-703.878	915.824
649	0	296.785	-586.652	1699.15	208.556	-573.43	1697.16	315.631	-392.68	1698.66	203.473	-397.644	1696.52	257.284	-363.996	1552.64	262.517	-289.592	1289.81	258.826	-508.146	1467.59	234.562	-573.551	1265.03	186.213	-280.821	1347.49	441.408	-444.988	1502.04	518.22	-462.369	1306.86	531.447	-494.866	1155.15	517.097	-627.075	1039.7	453.358	-680.347	974.154	516.609	-654.861	944.919	497.198	-723.976	919.818
650	0	296.112	-599.484	1697.73	207.734	-586.029	1695.76	315.257	-405.587	1697.02	203.225	-410.172	1695.12	257.428	-376.573	1551.26	262.836	-301.612	1288.85	258.627	-520.503	1466.1	234.438	-585.699	1263.56	186.28	-293.006	1345.93	441.246	-457.82	1500.76	518.39	-476.215	1305.92	531.792	-510.175	1154.19	516.623	-644.512	1041.34	452.449	-699.008	977.371	515.161	-674.257	947.16	495.485	-743.896	923.86
651	0	295.241	-612.28	1695.74	206.941	-598.67	1693.65	314.994	-418.421	1695.61	202.71	-422.813	1693.11	257.09	-389.389	1549.49	262.688	-313.8	1287.35	258.255	-533.073	1464.01	233.975	-598.171	1261.42	186.257	-305.337	1344.45	441.008	-470.603	1499.03	518.342	-490.062	1304.5	532.051	-525.384	1152.95	515.966	-661.818	1042.61	451.623	-717.448	980.061	513.981	-693.387	949.011	493.948	-763.465	927.293
652	0	294.264	-625.448	1693.73	206.337	-611.367	1691.27	314.45	-431.461	1693.34	202.246	-435.598	1690.84	256.466	-402.215	1547.49	262.426	-326.338	1285.12	257.727	-545.784	1461.72	233.239	-611.036	1259.19	186.107	-317.826	1342.43	440.485	-483.52	1496.87	518.125	-503.891	1302.46	532.09	-540.452	1151.18	515.1	-678.911	1043.45	450.316	-735.684	982.39	512.623	-712.174	950.265	492.523	-782.711	930.648
653	0	293.371	-638.391	1691.35	205.162	-624.334	1688.82	313.91	-444.509	1691.08	201.687	-448.349	1688.22	257.116	-415.18	1545.32	262.178	-338.64	1282.91	257.349	-558.567	1459.31	233.702	-621.96	1256.43	185.827	-330.437	1340.16	440.099	-496.447	1494.52	517.961	-517.403	1300.42	531.985	-555.322	1148.98	514.368	-695.751	1044.15	449.207	-753.566	984.695	511.433	-730.641	952.202	491.102	-801.568	933.761
654	0	292.284	-651.477	1688.88	204.147	-637.185	1686.3	313.016	-457.601	1688.12	200.923	-461.27	1685.64	255.716	-428.177	1542.59	261.717	-351.356	1280.32	256.842	-571.381	1456.75	233.216	-634.506	1253.66	185.564	-343.134	1337.81	439.634	-509.235	1492.09	517.629	-530.855	1298.24	531.918	-569.944	1146.82	513.57	-712.219	1044.66	448.003	-771.038	986.73	510.058	-748.72	953.348	489.724	-820.024	936.392
655	0	291.188	-664.683	1685.89	203.24	-650.122	1683.12	312.141	-470.819	1685.1	200.129	-474.296	1682.42	255.273	-441.09	1540.03	261.414	-364.018	1277.84	256.071	-584.412	1453.62	232.576	-647.226	1250.37	185.109	-356.033	1334.8	438.796	-522.314	1489.11	517.004	-544.344	1295.53	531.693	-584.589	1144.37	512.577	-728.578	1044.62	446.502	-788.467	988.295	508.95	-766.862	954.324	488.016	-838.287	938.861
656	0	289.995	-677.925	1683	202.008	-663.408	1680.48	311.403	-484.079	1682.67	199.146	-487.39	1679.61	254.533	-454.254	1537.03	260.671	-376.865	1274.69	255.357	-597.497	1450.59	232.117	-659.982	1247.08	184.541	-369.099	1332.08	437.823	-535.356	1485.99	516.443	-557.725	1292.69	531.386	-599.07	1141.84	511.571	-744.65	1044.42	445.296	-805.257	989.378	507.023	-784.152	954.696	486.454	-856.139	940.644
657	0	288.82	-691.3	1680.32	200.823	-676.573	1677.5	310.46	-497.367	1679.78	198.201	-500.515	1676.45	253.591	-467.364	1534.5	260.052	-389.799	1272.1	254.71	-610.58	1447.67	231.661	-672.669	1244.34	183.941	-382.295	1328.96	437.331	-548.169	1483.11	515.906	-570.749	1290.09	531.115	-613.147	1139.3	510.76	-760.301	1044.28	444.008	-821.724	990.536	505.647	-801.341	955.068	485.088	-873.29	942.74
658	0	287.552	-704.592	1677.21	199.378	-689.81	1674.15	309.387	-510.747	1676.83	197.104	-513.742	1673.47	252.577	-480.711	1531.17	259.31	-402.882	1269.02	253.889	-623.834	1444.53	231.074	-685.629	1241.07	183.179	-395.568	1325.63	436.508	-561.243	1480.47	515.049	-583.79	1287.12	530.698	-627.332	1136.57	509.772	-775.737	1043.56	442.595	-837.964	991.474	503.999	-818.138	954.865	483.667	-890.201	944.103
659	0	286.021	-718.246	1674.11	198.039	-703.222	1670.94	308	-524.298	1673.68	195.759	-527.148	1670.06	251.22	-494.047	1527.98	258.271	-416.394	1265.8	252.867	-637.263	1441.18	230.285	-699.05	1237.6	182.451	-409.122	1322.55	435.465	-574.379	1477.14	513.997	-596.841	1283.78	530.127	-641.192	1133.58	508.703	-790.983	1042.61	440.976	-854.224	991.718	502.514	-834.486	954.894	482.137	-906.839	945.078
660	0	284.465	-731.745	1670.9	196.505	-716.779	1667.64	306.816	-537.859	1670.83	194.436	-540.662	1666.94	250.052	-507.678	1524.83	257.323	-429.99	1262.7	251.863	-650.819	1437.94	229.683	-712.366	1234.35	181.491	-422.663	1319.19	434.212	-587.435	1473.79	512.899	-609.819	1280.53	529.459	-655.062	1130.71	507.535	-805.997	1041.41	439.713	-869.681	991.809	500.577	-850.539	954.469	480.561	-923.095	946.127
661	0	282.988	-745.541	1668.14	194.85	-730.388	1664.76	305.249	-551.52	1667.71	193.051	-554.192	1663.74	248.743	-521.381	1522.01	256.531	-443.479	1260.11	250.918	-664.499	1434.9	229.12	-725.923	1231.23	180.412	-436.344	1315.76	433.37	-600.587	1471.02	511.671	-622.479	1277.36	528.681	-668.782	1127.79	506.482	-820.573	1040.26	438.466	-884.765	991.599	499.116	-866.09	953.693	479.286	-938.571	946.569
662	0	281.121	-759.381	1665.33	193.238	-744.055	1661.73	303.696	-565.176	1664.77	191.32	-567.964	1660.41	247.22	-535.184	1519.06	255.564	-457.259	1256.59	249.739	-678.3	1431.73	228.384	-740.001	1227.9	179.217	-450.124	1312.36	432.003	-613.931	1467.89	510.279	-635.161	1274.05	527.684	-682.33	1124.66	505.257	-834.849	1038.55	437.114	-899.512	990.799	497.622	-881.155	952.354	477.909	-953.877	946.525
663	0	279.488	-773.23	1662.43	191.539	-757.82	1658.56	301.934	-578.997	1661.81	189.573	-581.638	1657.18	245.813	-548.994	1515.84	254.67	-471.223	1253.87	248.621	-692.316	1428.72	227.64	-754.279	1224.82	178.03	-464.051	1309.36	430.792	-627.336	1464.82	508.762	-647.866	1270.78	526.531	-695.584	1121.74	504.055	-848.843	1036.65	435.853	-914.058	989.82	495.947	-895.985	950.84	476.793	-968.596	946.044
664	0	277.654	-787.213	1659.99	189.652	-771.763	1655.73	300.128	-592.865	1658.74	187.927	-595.611	1654.01	244.21	-563.177	1513.17	253.676	-485.411	1251.04	247.429	-706.378	1425.84	227.005	-768.642	1222.02	176.919	-478.106	1306.49	429.663	-640.771	1462.13	507.33	-660.402	1267.83	525.495	-708.741	1118.93	502.983	-862.442	1034.82	434.645	-928.108	988.577	494.563	-910.153	949.238	475.606	-982.762	944.964
665	0	275.898	-801.088	1657.39	188.269	-785.536	1653.06	298.327	-606.761	1656.18	185.944	-609.591	1651.03	242.27	-577.381	1510.03	252.637	-499.931	1248.25	246.001	-720.606	1423.09	226.131	-783.222	1219.26	175.699	-492.36	1303.33	428.222	-654.513	1459.57	505.761	-672.906	1265.03	524.493	-721.542	1116.53	501.761	-875.828	1032.58	433.42	-941.866	986.932	493.393	-923.898	947.33	474.448	-996.583	943.622
666	0	273.688	-815.478	1654.92	186.282	-799.618	1650.37	296.379	-620.771	1653.68	183.949	-623.692	1648.07	240.592	-591.64	1507.54	251.525	-514.441	1245.78	244.434	-734.937	1420.16	225.007	-798.105	1216.34	174.523	-506.87	1300.67	426.579	-668.738	1457.06	504.003	-685.653	1262.22	522.794	-734.59	1113.53	500.473	-889.121	1030.28	432.391	-954.866	984.631	492.06	-937.225	945.134	473.381	-1010.02	941.678
667	0	271.753	-829.776	1652.75	184.246	-813.786	1647.73	294.264	-634.909	1650.87	182.018	-637.838	1645.41	238.836	-605.999	1505.36	250.21	-529.047	1242.99	242.903	-749.427	1417.71	223.948	-812.816	1213.89	173.261	-521.524	1297.94	424.907	-682.839	1454.87	502.157	-698.404	1259.62	521.515	-747.058	1111.14	499.349	-901.815	1027.67	431.386	-967.85	982.267	490.76	-949.951	942.791	472.3	-1022.97	939.556
668	0	269.616	-844.252	1651.07	182.392	-828.005	1645.92	292.116	-649.122	1648.65	179.835	-652.031	1643	236.768	-620.338	1503.15	248.902	-543.887	1240.45	241.418	-763.998	1415.7	222.752	-827.523	1211.95	171.873	-536.388	1295.14	423.59	-696.945	1453.14	500.343	-710.933	1257.57	519.921	-759.599	1108.91	498.288	-914.325	1025.37	430.514	-980.52	979.869	489.715	-962.4	939.755	471.534	-1035.19	936.615
669	0	267.437	-858.951	1649.83	180.209	-842.324	1644.26	289.937	-663.408	1647.11	177.563	-666.427	1641.1	234.823	-634.65	1501.12	247.453	-558.884	1238.47	239.633	-778.73	1413.93	221.444	-842.468	1210.33	170.43	-551.334	1292.77	421.431	-711.205	1451.25	498.219	-723.858	1255.67	517.912	-772.126	1106.55	497.169	-926.461	1022.49	429.568	-992.756	976.921	488.564	-974.095	936.825	470.842	-1047.12	933.712
670	0	265.176	-873.4	1648.68	178.085	-856.805	1643.07	287.745	-677.71	1646.07	175.449	-680.856	1639.93	232.803	-649.256	1499.47	246.165	-573.987	1237.08	237.909	-793.472	1412.63	220.071	-857.605	1209.03	169.121	-566.451	1291.08	419.684	-725.723	1450.27	496.436	-737.159	1254.46	515.871	-784.481	1105.04	495.963	-938.298	1019.34	428.626	-1004.65	973.603	487.49	-985.521	933.278	470.157	-1058.41	929.741
671	0	263.088	-887.894	1648.01	176.021	-871.256	1642.28	285.408	-692.091	1645.05	173.195	-695.29	1638.98	230.886	-663.877	1498.43	245.4	-589.207	1235.89	236.285	-807.981	1411.81	218.754	-872.905	1208.62	167.588	-581.567	1289.36	417.885	-740.391	1449.88	494.821	-750.565	1254.25	513.734	-796.705	1103.87	494.819	-949.783	1016.76	427.977	-1016.03	970.192	486.868	-996.015	930.479	469.782	-1069.12	926.102
672	0	260.729	-902.433	1647.94	173.747	-885.6	1641.77	283.115	-706.532	1644.89	170.981	-709.799	1638.15	228.679	-678.559	1498.35	245.224	-604.37	1235.22	234.604	-822.896	1411.71	217.429	-888.291	1208.59	166.283	-596.489	1288.73	416.196	-755.012	1450	493.434	-764.504	1254.59	511.679	-808.685	1103.67	493.943	-960.812	1014.18	427.304	-1026.94	966.669	486.829	-1005.87	927.716	469.585	-1079.14	922.273
673	0	258.304	-916.998	1648.14	171.431	-900.139	1641.85	280.934	-720.913	1645.39	168.67	-724.215	1638.21	227.075	-693.013	1498.45	245.019	-619.461	1235.17	232.798	-837.584	1411.67	216.048	-903.86	1208.88	165.146	-611.103	1288.57	414.42	-769.707	1450.43	491.552	-778.732	1255.43	509.396	-820.758	1103.91	492.743	-971.482	1011.44	426.779	-1037.32	962.749	485.686	-1015.37	924.055	469.452	-1088.52	917.811
674	0	255.768	-931.563	1649.02	169.084	-914.491	1642.4	278.756	-735.267	1646.13	166.441	-738.599	1638.7	225.002	-707.51	1498.5	244.681	-634.444	1235.47	231.261	-852.257	1412.41	214.906	-919.328	1209.89	164.157	-625.628	1288.68	412.83	-784.597	1451.68	490.142	-793.283	1256.59	507.214	-832.763	1104.42	491.876	-981.999	1009.15	426.434	-1047.24	959.094	485.148	-1023.96	920.848	469.714	-1097.18	913.688
675	0	253.608	-945.808	1650.17	166.791	-928.631	1643.37	276.578	-749.62	1647.06	164.354	-752.87	1639.46	223.593	-721.794	1499.01	244.516	-649.274	1236.44	229.661	-866.759	1413.67	213.713	-934.664	1211.54	163.191	-640.06	1289.09	411.354	-799.531	1453.35	488.859	-807.938	1258.67	504.896	-844.678	1105.45	491.058	-991.718	1006.94	426.419	-1056.25	955.144	484.759	-1032.06	917.373	470.21	-1104.9	908.751
676	0	251.113	-960.168	1651.55	164.572	-942.76	1644.33	274.223	-763.866	1647.93	162.175	-766.962	1640.43	222.368	-736.287	1500.85	243.837	-664.079	1237.17	227.886	-881.15	1415.11	212.368	-949.708	1213.21	162.495	-654.504	1290.26	409.659	-814.552	1455.32	487.413	-822.614	1260.83	502.784	-856.553	1106.94	490.161	-1001.26	1004.88	426.173	-1065.07	951.392	485.178	-1039.36	914.696	470.564	-1112.34	904.001
677	0	248.484	-974.582	1653.06	162.042	-956.894	1645.43	272.213	-778.034	1650.08	160.163	-781.068	1641.53	220.749	-750.311	1501.67	243.073	-678.537	1238.83	226.277	-895.504	1416.54	211.114	-964.395	1214.79	161.771	-668.708	1291.27	407.991	-829.689	1457.4	486.012	-837.456	1263.09	500.654	-868.454	1108.56	489.159	-1010.76	1002.97	426.078	-1073.37	947.503	485.094	-1046.36	912.097	470.924	-1119.19	899.318
678	0	247.194	-986.37	1654.35	159.874	-970.646	1647.13	270.331	-792.16	1652.01	158.137	-794.947	1643.19	219.638	-764.118	1503.53	242.058	-692.701	1240.31	224.951	-909.532	1418.4	210.033	-978.535	1216.93	161.168	-683.017	1293.32	406.574	-844.36	1459.89	485.019	-852.239	1266.04	498.64	-880.192	1110.89	488.588	-1019.58	1001.54	426.178	-1081.16	943.868	484.94	-1052.96	909.305	471.345	-1125.46	894.734
679	0	244.983	-999.852	1656.61	157.624	-984.24	1649.02	268.428	-805.937	1654.07	156.474	-808.46	1645.11	218.405	-777.84	1505.31	241.072	-706.691	1242.33	223.784	-923.522	1420.85	209.01	-992.311	1219.48	160.299	-697.15	1294.91	405.333	-858.367	1462.59	484.274	-866.86	1269.39	497.026	-891.861	1113.6	488.19	-1027.84	1000.33	426.312	-1088.4	940.646	485.745	-1058.8	907.786	472.08	-1131.07	890.526
680	0	241.904	-1015.83	1658.99	155.451	-997.732	1650.76	266.933	-819.713	1656.84	154.81	-821.946	1646.98	217.342	-791.367	1507.71	240.197	-720.35	1244.56	222.529	-937.194	1422.92	208.154	-1005.9	1221.73	159.035	-711.115	1297.16	404.14	-872.201	1465.37	483.549	-881.54	1272.57	495.507	-903.527	1116.5	487.967	-1036.29	999.276	426.453	-1095.26	937.302	485.181	-1064.71	904.972	472.727	-1136.3	886.094
681	0	239.505	-1029.58	1661.5	153.487	-1010.87	1652.59	265.477	-833.229	1659.73	153.226	-835.148	1649.46	216.288	-804.745	1510.08	238.954	-733.816	1246.98	222.035	-950.758	1425.34	207.584	-1019.23	1224.1	157.683	-724.776	1299.36	403.052	-885.547	1468.16	483.023	-895.864	1275.87	494.199	-915.088	1119.57	487.473	-1044.44	998.5	426.551	-1101.64	934.086	486.367	-1069.99	903.635	473.304	-1141.22	882.055
682	0	238.924	-1040.41	1663.68	151.686	-1023.93	1655	264.09	-846.588	1662.42	151.901	-848.202	1651.65	215.903	-817.909	1512.51	237.894	-747.153	1249.46	221.694	-963.98	1428.03	207.266	-1032.42	1226.96	156.239	-738.118	1301.71	402.367	-898.335	1471.11	482.704	-909.704	1279.34	493.141	-926.669	1122.74	487.264	-1052.44	998.232	426.856	-1107.55	931.259	486.789	-1075.44	901.976	473.858	-1145.65	878.363
683	0	237.068	-1053.71	1666.37	150.004	-1036.75	1657.18	262.764	-859.744	1665.17	150.736	-861.039	1654.16	214.381	-830.898	1515.1	236.56	-760.029	1251.93	220.846	-976.94	1430.85	207.097	-1045.45	1229.76	154.714	-751.354	1304.41	401.755	-910.809	1474.27	482.282	-922.853	1282.54	492.298	-938.048	1126.08	486.925	-1060.21	998.053	426.96	-1113.05	928.752	487.495	-1080.54	901.138	474.232	-1149.79	874.694
684	0	235.462	-1066.67	1669.05	148.683	-1049.49	1659.96	261.766	-872.615	1668	149.762	-873.761	1656.73	213.825	-843.77	1517.99	235.123	-773.069	1254.73	220.846	-989.786	1433.42	206.843	-1058.61	1232.53	153.299	-764.332	1307.13	400.955	-922.863	1476.8	481.73	-935.424	1285.69	491.488	-949.288	1129.18	486.663	-1067.83	998.151	427.054	-1118.18	926.439	488.114	-1085.51	900.743	474.468	-1153.8	871.692
685	0	234.396	-1079.38	1672.16	147.583	-1061.94	1662.64	261.128	-885.266	1671.43	148.98	-886.244	1659.51	213.116	-856.264	1520.79	233.74	-785.739	1257.06	220.607	-1002.47	1436.38	206.888	-1071.38	1235.57	151.832	-777.182	1310.21	400.51	-934.892	1479.71	481.26	-947.184	1288.7	490.982	-960.185	1132.26	486.25	-1075.39	998.717	427.063	-1123.19	924.821	489.229	-1090.38	900.544	474.835	-1157.55	868.912
686	0	233.804	-1091.25	1675.15	146.567	-1074.21	1665.52	260.266	-897.796	1674.05	148.334	-898.546	1662.39	212.402	-869.014	1523.69	232.643	-798.18	1260.13	220.462	-1014.92	1439.41	206.897	-1084.21	1238.76	150.426	-789.699	1313.18	400.282	-946.682	1482.94	481.017	-958.212	1291.78	490.812	-970.516	1135.66	485.903	-1082.73	999.747	426.827	-1127.71	923.216	490.267	-1095.56	901.019	475.011	-1161.39	867.225
687	0	233.029	-1103.35	1678.02	145.761	-1086.5	1668.39	259.769	-910.205	1677.22	147.856	-910.717	1665.11	211.904	-881.226	1526.84	231.253	-810.609	1263.23	220.151	-1027.36	1442.38	206.875	-1096.94	1241.64	149.084	-802.202	1316.56	400.038	-958.406	1485.78	480.611	-968.733	1294.44	490.522	-980.308	1138.7	485.921	-1089.82	1000.71	426.504	-1132.29	922.397	491.664	-1100.57	902.233	475.139	-1165.05	865.411
688	0	232.214	-1116.46	1681.5	145.316	-1098.56	1671.44	259.461	-922.3	1680.53	147.375	-922.892	1668.48	211.277	-893.471	1529.79	230.288	-822.864	1266.41	219.958	-1039.72	1445.48	207.219	-1109.55	1244.52	148.271	-814.416	1320.24	399.581	-970.326	1489.05	480.108	-978.989	1297.13	490.601	-989.555	1142.05	485.576	-1096.94	1002.15	426.599	-1136.75	922.103	492.884	-1105.81	903.433	474.552	-1169.11	864.159
689	0	232.422	-1126.72	1684.59	145.202	-1110.49	1675.02	259.207	-934.369	1683.71	147.181	-934.908	1671.69	210.991	-905.698	1533.28	229.266	-835.164	1269.74	219.926	-1051.86	1448.78	207.412	-1122.18	1247.78	147.319	-826.699	1323.77	399.318	-981.919	1491.89	479.95	-988.435	1300.1	490.642	-998.132	1145.11	485.874	-1103.33	1003.79	426.762	-1141.09	922.672	494.873	-1111.27	905.35	474.607	-1172.04	863.195
690	0	232.346	-1138.56	1688.03	145.101	-1122.36	1678.58	258.995	-946.255	1686.58	147.115	-946.788	1675.12	210.402	-917.816	1536.11	228.408	-847.341	1273.12	219.978	-1063.96	1452.18	207.715	-1134.53	1251.24	146.397	-838.941	1327.26	399.267	-993.473	1495.3	479.852	-997.547	1303.07	490.868	-1006.21	1148.43	486.237	-1109.55	1005.91	427.05	-1145.28	923.596	496.52	-1116.45	907.8	474.47	-1175.58	863.326
691	0	232.55	-1150.31	1691.33	145.144	-1134.27	1681.88	259.166	-957.944	1689.95	147.154	-958.681	1678.29	209.999	-929.977	1539.35	227.244	-859.585	1276.39	219.812	-1076.15	1455.42	207.845	-1146.98	1254.15	145.363	-851.172	1330.41	398.945	-1005	1498.38	479.847	-1006.6	1306.24	490.97	-1013.78	1151.42	486.647	-1115.6	1007.76	427.817	-1148.61	924.164	497.471	-1121.84	909.865	474.382	-1179.26	863.544
692	0	232.856	-1161.91	1694.59	145.425	-1146.05	1685.43	259.264	-969.65	1692.82	147.192	-970.529	1681.35	209.523	-942.041	1542.6	226.224	-871.457	1279.18	219.756	-1088.22	1458.55	207.979	-1159.16	1257.24	144.718	-863.372	1333.91	398.739	-1016.6	1501.47	479.763	-1015.29	1309.19	491.16	-1021.09	1154.27	487.199	-1121.37	1009.77	428.217	-1152.95	925.53	497.712	-1126.57	911.703	474.418	-1182.64	863.999
693	0	233.357	-1173.73	1698.08	145.847	-1157.87	1688.98	259.304	-981.386	1695.46	147.379	-982.319	1684.51	209.292	-954.185	1545.43	225.238	-883.664	1282.26	219.651	-1100.31	1461.62	207.866	-1171.41	1260.4	143.943	-875.612	1336.91	398.409	-1027.89	1504.2	479.881	-1023.46	1312	491.507	-1028.02	1157.64	487.946	-1126.9	1011.93	428.62	-1157.61	927.445	499.082	-1131.52	914.078	474.948	-1186.33	864.884
694	0	233.791	-1185.28	1701.03	146.295	-1169.61	1692.29	259.704	-992.899	1698.18	147.514	-994.119	1687.39	208.803	-966.101	1548.51	224.428	-895.572	1285.37	219.506	-1112.29	1464.65	207.583	-1183.63	1263.37	143.057	-887.872	1339.99	398.082	-1039.29	1507.16	480.041	-1031.7	1315.06	491.808	-1034.83	1160.58	488.797	-1132.17	1013.87	429.142	-1162.44	929.262	499.883	-1135.98	916.127	475.416	-1190.15	866.294
695	0	234.442	-1196.66	1703.86	146.84	-1181.43	1695.32	259.843	-1004.43	1700.54	147.698	-1005.91	1690.14	208.215	-978.048	1551.15	223.467	-907.529	1288.28	219.499	-1124.36	1467.37	207.266	-1195.76	1266.16	142.068	-900.121	1342.94	397.677	-1050.63	1509.69	480.094	-1040.04	1318	492.106	-1041.52	1163.53	489.563	-1137.48	1015.91	429.989	-1167.3	930.956	500.566	-1140.03	918.068	476.228	-1193.82	867.591
696	0	235.215	-1207.97	1706.65	147.391	-1193.32	1698.44	260.109	-1015.98	1702.76	147.965	-1017.73	1692.87	208.007	-990.067	1553.84	222.519	-919.531	1290.49	219.509	-1136.3	1470.03	206.916	-1208	1269.05	141.166	-912.375	1345.74	397.5	-1061.83	1512.31	480.079	-1047.93	1320.85	492.421	-1048.15	1166.29	490.967	-1142.37	1017.71	430.989	-1172.32	932.924	501.414	-1144.21	919.904	477.644	-1197.54	868.908
697	0	236.137	-1219.33	1709.36	148.307	-1205.09	1701.63	260.491	-1027.53	1704.82	148.319	-1029.62	1695.51	207.344	-1002.06	1556.08	221.893	-931.462	1293.35	219.516	-1148.22	1472.57	206.712	-1219.51	1271.77	140.184	-924.548	1348.17	397.367	-1073.09	1515.03	480.221	-1055.75	1323.57	492.911	-1054.68	1169.43	492.04	-1147.39	1019.84	432.311	-1177.44	934.926	502.017	-1147.86	921.912	479.133	-1201.35	870.552
698	0	236.918	-1231.27	1711.77	149.041	-1216.97	1704.14	260.739	-1039.07	1706.74	148.466	-1041.58	1697.61	206.973	-1014.18	1558.29	221.168	-943.484	1295.91	219.637	-1160.26	1474.86	206.291	-1231.85	1274.12	139.25	-936.621	1350.67	397.063	-1084.47	1517.19	480.013	-1063.81	1326.01	493.091	-1061.09	1171.98	492.986	-1152.39	1021.4	433.185	-1183.22	936.976	502.653	-1151.74	923.465	480.705	-1205.25	871.832
699	0	237.81	-1242.75	1713.7	149.848	-1228.97	1706.59	261.119	-1050.7	1708.47	148.784	-1053.57	1699.75	206.58	-1026.12	1560.43	220.458	-955.14	1297.68	219.141	-1171.9	1476.8	205.987	-1243.54	1276.05	138.419	-948.661	1353.01	396.951	-1095.87	1519.01	479.861	-1072.06	1328.25	493.294	-1067.84	1174.42	494.152	-1157.63	1022.99	434.765	-1188.86	938.444	503.221	-1155.59	924.783	482.415	-1209.35	873.162
700	0	238.666	-1254.34	1715.36	150.507	-1241.05	1708.55	261.308	-1062.48	1709.78	149.019	-1065.61	1701.47	206.499	-1038.38	1562.31	220.054	-967.2	1299.83	219.492	-1184.1	1478.46				137.742	-960.591	1354.83	396.73	-1107.16	1520.56	479.844	-1080.28	1330.53	493.45	-1074.24	1176.67	495.078	-1162.7	1024.39	436.168	-1194.84	940.126	503.689	-1159.28	926.36	484.331	-1213.45	874.216
701	0	239.633	-1266.19	1717	151.477	-1253	1710.4	261.792	-1073.65	1711.28	149.376	-1077.62	1703.14	206.363	-1050.41	1563.85	219.632	-979.156	1301.8	219.519	-1196.01	1479.99				137.19	-972.553	1356.67	396.694	-1118.66	1521.96	479.598	-1088.49	1332.5	493.609	-1080.92	1178.85	496.483	-1167.75	1025.69	437.714	-1200.21	941.232	504.15	-1163.1	927.378	486.405	-1217.66	875.287
702	0	240.589	-1278.11	1718.24	152.615	-1265	1711.55	262.146	-1085.29	1712.13	149.654	-1089.8	1704.42	206.319	-1062.53	1565.17	219.113	-990.911	1303.08	219.6	-1207.99	1481.04				136.642	-984.427	1358.28	396.631	-1130.4	1523.29	479.258	-1097.13	1334.09	493.562	-1087.71	1180.69	497.278	-1173.15	1026.69	439.119	-1206.52	942.51	504.824	-1167.28	928.462	488.277	-1222.16	876.064
703	0	241.68	-1289.77	1718.9	153.36	-1277.31	1712.74	262.213	-1097.48	1712.43	150.075	-1101.92	1705.36	206.369	-1074.68	1566.12	218.698	-1002.79	1304.23	219.61	-1219.87	1481.87				136.251	-996.293	1359.36	396.6	-1142.01	1524.08	478.91	-1105.68	1335.52	493.253	-1094.6	1181.86	498.416	-1178.67	1027.81	441.545	-1212.61	943.395	504.952	-1171.41	928.919	490.362	-1226.56	876.746
704	0	242.876	-1301.63	1719.51	154.301	-1289.41	1713.64	262.745	-1109.31	1712.81	150.454	-1114.06	1706.08	206.276	-1086.77	1566.77	218.22	-1014.61	1304.91	219.881	-1231.92	1482.49				135.9	-1008.2	1360.31	396.79	-1153.6	1524.71	478.788	-1114.54	1336.96	493.37	-1101.69	1183.51	499.559	-1184.02	1028.27	443.963	-1218.09	943.864	505.577	-1175.84	929.357	492.612	-1231.14	877.495
705	0	248.28	-1311.7	1722.26	155.323	-1301.66	1714	263.249	-1120.75	1713.17	150.868	-1126.33	1706.38	206.217	-1098.89	1567.16	217.978	-1026.27	1305.57	219.942	-1244.14	1482.73				135.534	-1020.03	1360.91	396.652	-1165.52	1525.01	478.244	-1123.65	1337.82	493.114	-1109.13	1184.59	500.318	-1189.87	1028.59	448.689	-1222.64	949.609	505.798	-1180.47	929.858	494.327	-1236.11	877.746
706	0	244.673	-1325.72	1719.35	156.285	-1313.96	1714.07	263.635	-1132.65	1712.86	151.14	-1138.72	1706.44	206.321	-1111.02	1567.24	217.865	-1038.23	1305.77	220.062	-1255.97	1482.42				135.416	-1031.95	1361.2	396.807	-1177.54	1525.16	477.893	-1133.16	1338.17	492.968	-1116.66	1185.3	501.206	-1195.91	1028.56	447.208	-1231.16	944.035	505.852	-1185.37	929.824	495.877	-1241.08	877.164
707	0	245.984	-1337.49	1719.03	157.36	-1326.34	1713.83	264.217	-1144.75	1712.31	151.676	-1151.19	1706.2	206.515	-1123.22	1566.95	217.818	-1050.17	1305.65	220.353	-1268.12	1482.02				135.258	-1043.86	1360.84	396.902	-1189.38	1524.49	477.956	-1142.88	1338.4	492.594	-1124.56	1185.47	502.154	-1202.16	1028.33	448.947	-1237.81	943.742	506.066	-1190.75	929.397	497.581	-1246.22	876.679
708	0	247.276	-1349.57	1718.46	158.359	-1338.58	1713.26	264.678	-1156.85	1711.29	152.093	-1163.44	1705.92	206.532	-1135.51	1566.3	217.792	-1061.93	1305.31	220.475	-1280.27	1481.58				135.267	-1055.91	1360.56	397.155	-1201.34	1524.15	477.999	-1152.83	1338.51	492.476	-1132.57	1185.98	502.973	-1208.65	1028.09	450.477	-1244.57	943.224	507.216	-1195.84	929.846	499.128	-1251.63	876.146
709	0	248.111	-1361.91	1717.12	159.149	-1351.13	1712.39	265.184	-1169.04	1710.43	152.661	-1175.87	1705.07	206.796	-1147.72	1565.45	218.081	-1073.79	1304.62	220.705	-1292.43	1480.39				135.207	-1067.89	1359.87	397.318	-1213.43	1523.17	478.033	-1163.05	1338.15	492.088	-1141	1185.66	503.573	-1215.74	1027.24	451.837	-1251.79	942.187	507.519	-1202.08	929.064	500.524	-1257.54	875.002
710	0	249.1	-1374.3	1715.66	160.327	-1363.63	1711.19	265.875	-1181.3	1709.19	153.335	-1188.44	1703.96	207.077	-1159.98	1564.41	218.342	-1085.9	1303.58	220.999	-1304.66	1478.93				135.411	-1080.02	1358.73	397.581	-1225.68	1521.94	478.374	-1173.44	1337.92	491.722	-1149.63	1185.16	504.338	-1223.02	1026.1	453.249	-1259.09	940.661	508.063	-1208.54	928.066	501.994	-1263.71	873.589
711	0	250.243	-1386.58	1714.06	161.348	-1376.15	1709.7	266.407	-1193.6	1707.39	153.913	-1200.91	1702.42	207.467	-1172.37	1562.87	218.793	-1097.89	1302.41	221.415	-1317.04	1477.5				135.729	-1092.22	1357.49	398.068	-1237.78	1520.62	478.267	-1184.18	1336.87	491.538	-1158.41	1184.63	505.03	-1230.58	1025.21	454.587	-1266.47	939.118	508.575	-1215.27	926.846	503.404	-1270.07	872.08
712	0	251.136	-1399.02	1712.15	162.398	-1388.79	1708.2	267.001	-1206.09	1705.58	154.529	-1213.59	1700.97	207.615	-1184.73	1561.24	219.139	-1110.04	1300.56	221.86	-1329.42	1475.76				135.993	-1104.38	1355.89	398.78	-1249.92	1519.21	478.232	-1194.99	1335.63	491.235	-1167.62	1183.85	505.729	-1238.41	1023.46	455.645	-1274.26	937.188	509.228	-1222.27	925.529	504.664	-1276.67	870.249
713	0	252.29	-1411.56	1710.04	163.43	-1401.44	1706.23	267.806	-1218.55	1703.61	155.313	-1226.3	1699.12	208.276	-1197.27	1559.41	219.832	-1122.25	1298.63	222.374	-1341.84	1473.63				136.263	-1117.08	1353.81	398.995	-1262.4	1517.13	478.255	-1206.11	1333.95	490.886	-1177.27	1182.52	506.262	-1246.74	1021.57	456.759	-1282.28	934.879	510.053	-1229.65	923.937	505.84	-1283.78	868.095
714	0	253.473	-1424.11	1707.79	164.354	-1414.22	1704.16	268.794	-1231.19	1701.38	156.204	-1239.04	1696.85	208.983	-1209.9	1557.37	221.001	-1134.45	1297.13	222.972	-1354.62	1471.57				136.891	-1129.76	1351.71	399.72	-1274.6	1514.9	478.446	-1217.34	1332.28	490.508	-1187.19	1180.75	506.942	-1255.14	1019.4	457.961	-1290.38	932.376	510.878	-1237.37	921.901	507.194	-1291.02	865.583
715	0	254.556	-1436.71	1705.46	165.572	-1426.88	1701.85	269.501	-1243.92	1698.68	157.105	-1251.79	1694.64	209.486	-1222.52	1554.86	222.046	-1146.73	1294.93	223.817	-1366.85	1468.98				137.851	-1142.28	1349.74	400.44	-1287.11	1512.73	478.656	-1228.78	1330.01	490.214	-1197.32	1178.89	507.647	-1263.85	1017.23	459.131	-1298.72	929.832	511.458	-1245.5	919.528	508.608	-1298.57	863.151
716	0	255.531	-1449.68	1702.83	166.525	-1439.78	1699.17	270.597	-1256.65	1696.3	157.957	-1264.58	1691.93	210.294	-1235.27	1552.35	223.058	-1159.52	1292.88	224.549	-1379.57	1466.29				138.498	-1154.75	1347.22	401.109	-1299.55	1510.04	478.997	-1240.31	1328.07	490.186	-1207.69	1176.98	508.248	-1273.05	1014.5	460.121	-1307.59	926.727	512.419	-1253.8	917.4	509.656	-1306.43	859.929
717	0	256.635	-1462.36	1699.71	167.677	-1452.75	1696.47	271.747	-1269.46	1693.48	158.982	-1277.57	1688.98	211.28	-1248.07	1549.77	223.92	-1171.59	1289.83	225.379	-1392.57	1463.5				139.45	-1167.33	1344.66	401.845	-1312.38	1507.16	478.979	-1252.02	1324.92	489.691	-1218.72	1174.15	508.893	-1282.49	1011.56	461.234	-1316.62	923.344	513.368	-1262.41	914.761	510.944	-1314.63	856.66
718	0	258.017	-1475.44	1697.16	168.996	-1465.7	1693.57	272.711	-1282.42	1690.59	160.104	-1290.59	1686.28	212.388	-1261.06	1547.09	225.002	-1184.34	1287.13	226.377	-1405.36	1460.39				140.232	-1179.99	1341.88	402.978	-1324.99	1504.36	479.445	-1263.81	1322.3	489.994	-1229.27	1172.04	509.729	-1292.1	1008.79	462.474	-1325.97	920.182	514.294	-1271.44	911.825	512.27	-1323.01	853.539
719	0	259.257	-1488.34	1694.32	170.155	-1478.72	1690.99	273.772	-1295.42	1687.5	161.399	-1303.53	1683.5	213.406	-1273.9	1544.11	226.025	-1197.04	1284.1	227.34	-1418.5	1457.82				141.142	-1192.76	1339.04	404.091	-1337.71	1501.33	480.117	-1275.78	1319.8	489.576	-1240.94	1168.9	510.608	-1302.07	1005.77	463.725	-1335.54	916.813	515.082	-1280.68	909.119	513.489	-1331.74	850.386
720	0	260.412	-1501.6	1691.03	171.517	-1491.79	1687.62	275.066	-1308.53	1684.54	162.54	-1316.71	1680.33	214.522	-1286.78	1541.31	227.066	-1209.96	1281.11	229.008	-1429.51	1453.52				142.174	-1205.58	1336.34	405.118	-1350.81	1498.31	480.506	-1287.9	1316.44	490.213	-1252.1	1166.87	511.317	-1312.61	1002.52	464.79	-1345.65	913.089	516.075	-1290.31	906.222	514.786	-1341.07	846.772
721	0	261.876	-1514.68	1688.05	172.863	-1505.12	1684.79	276.314	-1321.71	1681.62	163.913	-1329.89	1677.46	215.305	-1299.59	1538.31	227.575	-1223.27	1277.57	230.054	-1442.59	1450.66				143.274	-1218.64	1333.28	406.229	-1363.94	1495.07	481.272	-1300.22	1313.59	489.886	-1264.4	1163.15	512.238	-1323.15	999.176	466.148	-1356.04	909.38	517.073	-1300.43	902.933	516.256	-1350.59	843.143
722	0	263.532	-1527.68	1684.98	174.411	-1518.18	1681.77	277.803	-1334.99	1678.55	165.481	-1343.09	1674.58	217.064	-1312.78	1535.41	229.413	-1236.32	1275.18	231.6	-1455.52	1447.5				144.504	-1231.77	1330.54	407.72	-1376.97	1492.02	481.905	-1312.84	1310.32	490.796	-1276.08	1161.02	513.314	-1334.06	995.89	467.493	-1366.55	905.788	517.717	-1310.73	899.046	517.606	-1360.33	839.667
723	0	264.937	-1541.14	1682.04	175.772	-1531.62	1678.85	279.43	-1348.33	1675.55	166.935	-1356.43	1671.68	218.412	-1326.08	1532.36	229.725	-1249.41	1271.85	232.927	-1468.87	1444.54				145.603	-1245.04	1327.45	409.056	-1390.06	1488.69	482.68	-1325.7	1306.9	491.009	-1288.5	1157.62	514.269	-1345.36	992.38	468.912	-1377.56	902.104	518.799	-1321.64	895.611	519.15	-1370.56	835.977
724	0	266.575	-1554.44	1678.96	177.464	-1544.9	1675.86	281.201	-1361.75	1672.78	168.709	-1369.71	1668.78	220.216	-1339.28	1529.65	230.593	-1262.77	1268.98	234.376	-1481.88	1441.1				146.839	-1258.41	1324.47	410.577	-1403.3	1485.25	483.28	-1339.03	1302.85	490.96	-1301.71	1153.71	515.35	-1356.99	988.723	470.241	-1389.07	898.281	519.686	-1332.76	892.093	520.468	-1381.12	832.004
725	0	268.217	-1567.93	1676.18	179.064	-1558.39	1673.23	283.147	-1375.19	1670.1	170.414	-1383.15	1665.95	221.72	-1352.55	1526.53	231.422	-1276.21	1266.08	235.938	-1495.6	1438.65				148.209	-1271.91	1321.8	412.237	-1416.54	1482.19	484.475	-1352.22	1299.51	491.904	-1314.52	1150.8	516.451	-1369.09	985.244	471.691	-1400.88	894.609	520.754	-1344.57	888.317	521.852	-1392.24	828.338
726	0	270.008	-1581.38	1673.62	180.945	-1571.64	1670.42	284.783	-1388.71	1667.38	172.265	-1396.55	1663.5	223.052	-1365.81	1524.12	232.076	-1289.77	1263.46	237.763	-1508.98	1436.06				149.581	-1285.53	1319.33	414.085	-1429.85	1479.3	485.807	-1365.43	1296.65	492.469	-1327.8	1147.84	517.552	-1381.51	982.281	473.068	-1412.96	891.254	522.268	-1356.12	885.791	523.3	-1403.78	825.059
727	0	271.743	-1594.84	1670.97	182.528	-1585.23	1667.91	286.494	-1402.22	1664.82	174.155	-1410	1660.91	225.2	-1379.56	1521.76	232.807	-1303.56	1260.81	239.655	-1522.66	1433.52				150.935	-1299.39	1316.96	415.904	-1443.26	1476.54	487.035	-1378.86	1293.67	493.449	-1341.22	1145.13	518.673	-1394.41	979.013	474.398	-1425.5	887.599	523.613	-1368.43	883.045	524.622	-1415.85	821.679
728	0	273.526	-1608.67	1668.8	184.523	-1598.71	1665.57	288.66	-1415.77	1662.57	176.233	-1423.49	1658.77	227.133	-1393.14	1519.45	233.766	-1317.44	1258.37	241.597	-1536.43	1431.17				152.536	-1313.34	1314.54	417.79	-1456.68	1473.63	488.488	-1392.52	1290.66	494.309	-1355.04	1142.15	519.957	-1407.64	975.753	475.578	-1438.72	884.248	524.889	-1381.28	880.072	526.104	-1428.5	818.221
729	0	275.536	-1622.19	1667.13	186.305	-1612.28	1663.78	290.707	-1429.59	1660.75	178.365	-1437	1657.02	229.092	-1406.8	1517.49	234.899	-1331.47	1256.28	243.776	-1550.17	1429.17				154.006	-1327.32	1312.53	420.087	-1470.17	1471.3	490.051	-1406.29	1287.62	495.499	-1368.84	1139.37	521.194	-1421.13	973.034	477.14	-1451.83	881.062	526.13	-1394.63	876.868	527.582	-1441.43	815.286
730	0	277.588	-1635.77	1665.85	188.335	-1625.81	1662.44	293.095	-1443.28	1659.34	180.52	-1450.6	1655.51	231.221	-1420.2	1515.77	235.956	-1345.57	1254.34	245.956	-1563.97	1427.71				155.538	-1341.42	1310.99	422.433	-1483.52	1468.95	491.832	-1419.85	1285.04	496.453	-1383.18	1136.47	522.536	-1434.93	970.188	478.501	-1465.57	878.455	527.493	-1408.4	874.053	528.788	-1454.67	812.47
731	0	279.459	-1649.54	1664.76	190.214	-1639.51	1661.48	295.187	-1457.16	1658.18	183.011	-1464.1	1654.22	233.306	-1434.11	1514.41	237.143	-1359.8	1252.69	248.154	-1577.88	1426.58				157.506	-1355.5	1309.62	424.603	-1497.21	1466.99	493.397	-1434.31	1282.46	497.38	-1397.9	1133.58	523.701	-1449.31	967.673	479.647	-1479.83	875.937	528.617	-1422.47	871.677	529.969	-1468.74	809.79
732	0	281.41	-1663.39	1664.13	192.222	-1653.02	1660.61	297.66	-1470.95	1657.44	185.17	-1477.85	1653.25	236.1	-1448.31	1513.63	238.296	-1374.01	1251.57	250.431	-1591.78	1425.84				159.346	-1369.48	1308.28	426.95	-1510.68	1465.25	494.806	-1448.81	1280.05	498.753	-1412.85	1131.78	524.897	-1463.91	965.51	480.624	-1494.45	873.685	529.817	-1437.06	869.519	531.282	-1483.04	807.472
733	0	283.429	-1677.17	1664.02	194.237	-1666.71	1660.4	300.148	-1484.8	1656.87	187.823	-1491.33	1652.77	238.175	-1462.16	1513.04	239.322	-1388.17	1250.77	252.819	-1605.82	1425.63				161.167	-1383.74	1307.7	429.339	-1524.18	1464.1	496.614	-1463.2	1278.42	499.794	-1427.87	1129.94	526.083	-1478.86	963.914	481.896	-1509.33	871.961	531.913	-1451.26	868.853	532.398	-1497.98	805.834
734	0	285.406	-1690.94	1664.04	196.32	-1680.23	1660.35	302.631	-1498.65	1657.01	190.13	-1504.97	1652.5	240.638	-1475.98	1513.05	240.477	-1402.19	1250.4	255.013	-1619.8	1425.59				162.997	-1397.96	1307.47	431.52	-1537.86	1463.32	498.076	-1477.91	1276.87	501.14	-1443.33	1128.72	527.247	-1494.36	962.559	482.955	-1524.75	870.685	533.077	-1466.59	867.513	533.444	-1513.61	804.399
735	0	287.386	-1704.81	1664.5	198.406	-1693.84	1660.8	305.129	-1512.45	1657.21	192.83	-1518.41	1652.74	242.378	-1489.15	1512.69	241.687	-1416.24	1250.41	257.022	-1634.15	1426.75				164.567	-1412.09	1307.72	433.706	-1551.58	1463.05	499.973	-1492.6	1275.85	503.04	-1458.63	1128.13	528.484	-1510.18	961.594	483.841	-1540.77	869.832	533.156	-1483.62	865.411	534.493	-1529.59	803.414
[truncated: 69 more columns]

## Sheet: Sheet2
Devices
		025370 - Force			025370 - Moment			025370 - CoP			027571 - Force			027571 - Moment			027571 - CoP			037720 - Force			037720 - Moment			037720 - CoP
Frame	Sub Frame	Fx	Fy	Fz	Mx	My	Mz	Cx	Cy	Cz	Fx	Fy	Fz	Mx	My	Mz	Cx	Cy	Cz	Fx	Fy	Fz	Mx	My	Mz	Cx	Cy	Cz
		N	N	N	N.mm	N.mm	N.mm	mm	mm	mm	N	N	N	N.mm	N.mm	N.mm	mm	mm	mm	N	N	N	N.mm	N.mm	N.mm	mm	mm	mm
403	0	0	0	0	0	0	0	200	300	0	0	0	0	0	0	0	200	903	0	0	0	0	0	0	0	603	903	0
403	1	0	0	0	0	0	0	200	300	0	0	0	0	0	0	0	200	903	0	0	0	0	0	0	0	603	903	0
403	2	0	0	0	0	0	0	200	300	0	0	0	0	0	0	0	200	903	0	0	0	0	0	0	0	603	903	0
403	3	0	0	0	0	0	0	200	300	0	0	0	0	0	0	0	200	903	0	0	0	0	0	0	0	603	903	0
403	4	0	0	0	0	0	0	200	300	0	0	0	0	0	0	0	200	903	0	0	0	0	0	0	0	603	903	0
403	5	0	0	0	0	0	0	200	300	0	0	0	0	0	0	0	200	903	0	0	0	0	0	0	0	603	903	0
403	6	0	0	0	0	0	0	200	300	0	0	0	0	0	0	0	200	903	0	0	0	0	0	0	0	603	903	0
403	7	0	0	0	0	0	0	200	300	0	0	0	0	0	0	0	200	903	0	0	0	0	0	0	0	603	903	0
403	8	0	0	0	0	0	0	200	300	0	0	0	0	0	0	0	200	903	0	0	0	0	0	0	0	603	903	0
403	9	0	0	0	0	0	0	200	300	0	0	0	0	0	0	0	200	903	0	0	0	0	0	0	0	603	903	0
404	0	0	0	0	0	0	0	200	300	0	0	0	0	0	0	0	200	903	0	0	0	0	0	0	0	603	903	0
404	1	0	0	0	0	0	0	200	300	0	0	0	0	0	0	0	200	903	0	0	0	0	0	0	0	603	903	0
404	2	0	0	0	0	0	0	200	300	0	0	0	0	0	0	0	200	903	0	0	0	0	0	0	0	603	903	0
404	3	0	0	0	0	0	0	200	300	0	0	0	0	0	0	0	200	903	0	0	0	0	0	0	0	603	903	0
404	4	0	0	0	0	0	0	200	300	0	0	0	0	0	0	0	200	903	0	0	0	0	0	0	0	603	903	0
404	5	0	0	0	0	0	0	200	300	0	0	0	0	0	0	0	200	903	0	0	0	0	0	0	0	603	903	0
404	6	0	0	0	0	0	0	200	300	0	0	0	0	0	0	0	200	903	0	0	0	0	0	0	0	603	903	0
404	7	0	0	0	0	0	0	200	300	0	0	0	0	0	0	0	200	903	0	0	0	0	0	0	0	603	903	0
404	8	0	0	0	0	0	0	200	300	0	0	0	0	0	0	0	200	903	0	0	0	0	0	0	0	603	903	0
404	9	0	0	0	0	0	0	200	300	0	0	0	0	0	0	0	200	903	0	0	0	0	0	0	0	603	903	0
405	0	0	0	0	0	0	0	200	300	0	0	0	0	0	0	0	200	903	0	0	0	0	0	0	0	603	903	0
405	1	0	0	0	0	0	0	200	300	0	0	0	0	0	0	0	200	903	0	0	0	0	0	0	0	603	903	0
405	2	0	0	0	0	0	0	200	300	0	0	0	0	0	0	0	200	903	0	0	0	0	0	0	0	603	903	0
405	3	0	0	0	0	0	0	200	300	0	0	0	0	0	0	0	200	903	0	0	0	0	0	0	0	603	903	0
405	4	0	0	0	0	0	0	200	300	0	0	0	0	0	0	0	200	903	0	0	0	0	0	0	0	603	903	0
405	5	0	0	0	0	0	0	200	300	0	0	0	0	0	0	0	200	903	0	0	0	0	0	0	0	603	903	0
405	6	0	0	0	0	0	0	200	300	0	0	0	0	0	0	0	200	903	0	0	0	0	0	0	0	603	903	0
405	7	0	0	0	0	0	0	200	300	0	0	0	0	0	0	0	200	903	0	0	0	0	0	0	0	603	903	0
405	8	0	0	0	0	0	0	200	300	0	0	0	0	0	0	0	200	903	0	0	0	0	0	0	0	603	903	0
405	9	0	0	0	0	0	0	200	300	0	0	0	0	0	0	0	200	903	0	0	0	0	0	0	0	603	903	0
406	0	0	0	0	0	0	0	200	300	0	0	0	0	0	0	0	200	903	0	0	0	0	0	0	0	603	903	0
406	1	0	0	0	0	0	0	200	300	0	0	0	0	0	0	0	200	903	0	0	0	0	0	0	0	603	903	0
406	2	0	0	0	0	0	0	200	300	0	0	0	0	0	0	0	200	903	0	0	0	0	0	0	0	603	903	0
406	3	0	0	0	0	0	0	200	300	0	0	0	0	0	0	0	200	903	0	0	0	0	0	0	0	603	903	0
406	4	0	0	0	0	0	0	200	300	0	0	0	0	0	0	0	200	903	0	0	0	0	0	0	0	603	903	0
406	5	0	0	0	0	0	0	200	300	0	0	0	0	0	0	0	200	903	0	0	0	0	0	0	0	603	903	0
406	6	0	0	0	0	0	0	200	300	0	0	0	0	0	0	0	200	903	0	0	0	0	0	0	0	603	903	0
406	7	0	0	0	0	0	0	200	300	0	0	0	0	0	0	0	200	903	0	0	0	0	0	0	0	603	903	0
406	8	0	0	0	0	0	0	200	300	0	0	0	0	0	0	0	200	903	0	0	0	0	0	0	0	603	903	0
406	9	0	0	0	0	0	0	200	300	0	0	0	0	0	0	0	200	903	0	0	0	0	0	0	0	603	903	0
407	0	0	0	0	0	0	0	200	300	0	0	0	0	0	0	0	200	903	0	0	0	0	0	0	0	603	903	0
407	1	0	0	0	0	0	0	200	300	0	0	0	0	0	0	0	200	903	0	0	0	0	0	0	0	603	903	0
407	2	0	0	0	0	0	0	200	300	0	0	0	0	0	0	0	200	903	0	0	0	0	0	0	0	603	903	0
407	3	0	0	0	0	0	0	200	300	0	0	0	0	0	0	0	200	903	0	0	0	0	0	0	0	603	903	0
407	4	0	0	0	0	0	0	200	300	0	0	0	0	0	0	0	200	903	0	0	0	0	0	0	0	603	903	0
407	5	0	0	0	0	0	0	200	300	0	0	0	0	0	0	0	200	903	0	0	0	0	0	0	0	603	903	0
407	6	0	0	0	0	0	0	200	300	0	0	0	0	0	0	0	200	903	0	0	0	0	0	0	0	603	903	0
407	7	0	0	0	0	0	0	200	300	0	0	0	0	0	0	0	200	903	0	0	0	0	0	0	0	603	903	0
407	8	0	0	0	0	0	0	200	300	0	0	0	0	0	0	0	200	903	0	0	0	0	0	0	0	603	903	0
407	9	0	0	0	0	0	0	200	300	0	0	0	0	0	0	0	200	903	0	0	0	0	0	0	0	603	903	0
408	0	0	0	0	0	0	0	200	300	0	0	0	0	0	0	0	200	903	0	0	0	0	0	0	0	603	903	0
408	1	0	0	0	0	0	0	200	300	0	0	0	0	0	0	0	200	903	0	0	0	0	0	0	0	603	903	0
408	2	0	0	0	0	0	0	200	300	0	0	0	0	0	0	0	200	903	0	0	0	0	0	0	0	603	903	0
408	3	0	0	0	0	0	0	200	300	0	0	0	0	0	0	0	200	903	0	0	0	0	0	0	0	603	903	0
408	4	0	0	0	0	0	0	200	300	0	0	0	0	0	0	0	200	903	0	0	0	0	0	0	0	603	903	0
408	5	0	0	0	0	0	0	200	300	0	0	0	0	0	0	0	200	903	0	0	0	0	0	0	0	603	903	0
408	6	0	0	0	0	0	0	200	300	0	0	0	0	0	0	0	200	903	0	0	0	0	0	0	0	603	903	0
408	7	0	0	0	0	0	0	200	300	0	0	0	0	0	0	0	200	903	0	0	0	0	0	0	0	603	903	0
408	8	0	0	0	0	0	0	200	300	0	0	0	0	0	0	0	200	903	0	0	0	0	0	0	0	603	903	0
408	9	0	0	0	0	0	0	200	300	0	0	0	0	0	0	0	200	903	0	0	0	0	0	0	0	603	903	0
409	0	0	0	0	0	0	0	200	300	0	0	0	0	0	0	0	200	903	0	0	0	0	0	0	0	603	903	0
409	1	0	0	0	0	0	0	200	300	0	0	0	0	0	0	0	200	903	0	0	0	0	0	0	0	603	903	0
409	2	0	0	0	0	0	0	200	300	0	0	0	0	0	0	0	200	903	0	0	0	0	0	0	0	603	903	0
409	3	0	0	0	0	0	0	200	300	0	0	0	0	0	0	0	200	903	0	0	0	0	0	0	0	603	903	0
409	4	0	0	0	0	0	0	200	300	0	0	0	0	0	0	0	200	903	0	0	0	0	0	0	0	603	903	0
409	5	0	0	0	0	0	0	200	300	0	0	0	0	0	0	0	200	903	0	0	0	0	0	0	0	603	903	0
409	6	0	0	0	0	0	0	200	300	0	0	0	0	0	0	0	200	903	0	0	0	0	0	0	0	603	903	0
409	7	0	0	0	0	0	0	200	300	0	0	0	0	0	0	0	200	903	0	0	0	0	0	0	0	603	903	0
409	8	0	0	0	0	0	0	200	300	0	0	0	0	0	0	0	200	903	0	0	0	0	0	0	0	603	903	0
409	9	0	0	0	0	0	0	200	300	0	0	0	0	0	0	0	200	903	0	0	0	0	0	0	0	603	903	0
410	0	0	0	0	0	0	0	200	300	0	0	0	0	0	0	0	200	903	0	0	0	0	0	0	0	603	903	0
410	1	0	0	0	0	0	0	200	300	0	0	0	0	0	0	0	200	903	0	0	0	0	0	0	0	603	903	0
410	2	0	0	0	0	0	0	200	300	0	0	0	0	0	0	0	200	903	0	0	0	0	0	0	0	603	903	0
410	3	0	0	0	0	0	0	200	300	0	0	0	0	0	0	0	200	903	0	0	0	0	0	0	0	603	903	0
410	4	0	0	0	0	0	0	200	300	0	0	0	0	0	0	0	200	903	0	0	0	0	0	0	0	603	903	0
410	5	0	0	0	0	0	0	200	300	0	0	0	0	0	0	0	200	903	0	0	0	0	0	0	0	603	903	0
410	6	0	0	0	0	0	0	200	300	0	0	0	0	0	0	0	200	903	0	0	0	0	0	0	0	603	903	0
410	7	0	0	0	0	0	0	200	300	0	0	0	0	0	0	0	200	903	0	0	0	0	0	0	0	603	903	0
410	8	0	0	0	0	0	0	200	300	0	0	0	0	0	0	0	200	903	0	0	0	0	0	0	0	603	903	0
410	9	0	0	0	0	0	0	200	300	0	0	0	0	0	0	0	200	903	0	0	0	0	0	0	0	603	903	0
411	0	0	0	0	0	0	0	200	300	0	0	0	0	0	0	0	200	903	0	0	0	0	0	0	0	603	903	0
411	1	0	0	0	0	0	0	200	300	0	0	0	0	0	0	0	200	903	0	0	0	0	0	0	0	603	903	0
411	2	0	0	0	0	0	0	200	300	0	0	0	0	0	0	0	200	903	0	0	0	0	0	0	0	603	903	0
411	3	0	0	0	0	0	0	200	300	0	0	0	0	0	0	0	200	903	0	0	0	0	0	0	0	603	903	0
411	4	0	0	0	0	0	0	200	300	0	0	0	0	0	0	0	200	903	0	0	0	0	0	0	0	603	903	0
411	5	0	0	0	0	0	0	200	300	0	0	0	0	0	0	0	200	903	0	0	0	0	0	0	0	603	903	0
411	6	0	0	0	0	0	0	200	300	0	0	0	0	0	0	0	200	903	0	0	0	0	0	0	0	603	903	0
411	7	0	0	0	0	0	0	200	300	0	0	0	0	0	0	0	200	903	0	0	0	0	0	0	0	603	903	0
411	8	0	0	0	0	0	0	200	300	0	0	0	0	0	0	0	200	903	0	0	0	0	0	0	0	603	903	0
411	9	0	0	0	0	0	0	200	300	0	0	0	0	0	0	0	200	903	0	0	0	0	0	0	0	603	903	0
412	0	0	0	0	0	0	0	200	300	0	0	0	0	0	0	0	200	903	0	0	0	0	0	0	0	603	903	0
412	1	0	0	0	0	0	0	200	300	0	0	0	0	0	0	0	200	903	0	0	0	0	0	0	0	603	903	0
412	2	0	0	0	0	0	0	200	300	0	0	0	0	0	0	0	200	903	0	0	0	0	0	0	0	603	903	0
412	3	0	0	0	0	0	0	200	300	0	0	0	0	0	0	0	200	903	0	0	0	0	0	0	0	603	903	0
412	4	0	0	0	0	0	0	200	300	0	0	0	0	0	0	0	200	903	0	0	0	0	0	0	0	603	903	0
412	5	0	0	0	0	0	0	200	300	0	0	0	0	0	0	0	200	903	0	0	0	0	0	0	0	603	903	0
412	6	0	0	0	0	0	0	200	300	0	0	0	0	0	0	0	200	903	0	0	0	0	0	0	0	603	903	0
412	7	0	0	0	0	0	0	200	300	0	0	0	0	0	0	0	200	903	0	0	0	0	0	0	0	603	903	0
412	8	0	0	0	0	0	0	200	300	0	0	0	0	0	0	0	200	903	0	0	0	0	0	0	0	603	903	0
412	9	0	0	0	0	0	0	200	300	0	0	0	0	0	0	0	200	903	0	0	0	0	0	0	0	603	903	0
413	0	0	0	0	0	0	0	200	300	0	0	0	0	0	0	0	200	903	0	0	0	0	0	0	0	603	903	0
413	1	0	0	0	0	0	0	200	300	0	0	0	0	0	0	0	200	903	0	0	0	0	0	0	0	603	903	0
413	2	0	0	0	0	0	0	200	300	0	0	0	0	0	0	0	200	903	0	0	0	0	0	0	0	603	903	0
413	3	0	0	0	0	0	0	200	300	0	0	0	0	0	0	0	200	903	0	0	0	0	0	0	0	603	903	0
413	4	0	0	0	0	0	0	200	300	0	0	0	0	0	0	0	200	903	0	0	0	0	0	0	0	603	903	0
413	5	0	0	0	0	0	0	200	300	0	0	0	0	0	0	0	200	903	0	0	0	0	0	0	0	603	903	0
413	6	0	0	0	0	0	0	200	300	0	0	0	0	0	0	0	200	903	0	0	0	0	0	0	0	603	903	0
413	7	0	0	0	0	0	0	200	300	0	0	0	0	0	0	0	200	903	0	0	0	0	0	0	0	603	903	0
413	8	0	0	0	0	0	0	200	300	0	0	0	0	0	0	0	200	903	0	0	0	0	0	0	0	603	903	0
413	9	0	0	0	0	0	0	200	300	0	0	0	0	0	0	0	200	903	0	0	0	0	0	0	0	603	903	0
414	0	0	0	0	0	0	0	200	300	0	0	0	0	0	0	0	200	903	0	0	0	0	0	0	0	603	903	0
414	1	0	0	0	0	0	0	200	300	0	0	0	0	0	0	0	200	903	0	0	0	0	0	0	0	603	903	0
414	2	0	0	0	0	0	0	200	300	0	0	0	0	0	0	0	200	903	0	0	0	0	0	0	0	603	903	0
414	3	0	0	0	0	0	0	200	300	0	0	0	0	0	0	0	200	903	0	0	0	0	0	0	0	603	903	0
414	4	0	0	0	0	0	0	200	300	0	0	0	0	0	0	0	200	903	0	0	0	0	0	0	0	603	903	0
414	5	0	0	0	0	0	0	200	300	0	0	0	0	0	0	0	200	903	0	0	0	0	0	0	0	603	903	0
414	6	0	0	0	0	0	0	200	300	0	0	0	0	0	0	0	200	903	0	0	0	0	0	0	0	603	903	0
414	7	0	0	0	0	0	0	200	300	0	0	0	0	0	0	0	200	903	0	0	0	0	0	0	0	603	903	0
414	8	0	0	0	0	0	0	200	300	0	0	0	0	0	0	0	200	903	0	0	0	0	0	0	0	603	903	0
414	9	0	0	0	0	0	0	200	300	0	0	0	0	0	0	0	200	903	0	0	0	0	0	0	0	603	903	0
415	0	0	0	0	0	0	0	200	300	0	0	0	0	0	0	0	200	903	0	0	0	0	0	0	0	603	903	0
415	1	0	0	0	0	0	0	200	300	0	0	0	0	0	0	0	200	903	0	0	0	0	0	0	0	603	903	0
415	2	0	0	0	0	0	0	200	300	0	0	0	0	0	0	0	200	903	0	0	0	0	0	0	0	603	903	0
415	3	0	0	0	0	0	0	200	300	0	0	0	0	0	0	0	200	903	0	0	0	0	0	0	0	603	903	0
415	4	0	0	0	0	0	0	200	300	0	0	0	0	0	0	0	200	903	0	0	0	0	0	0	0	603	903	0
415	5	0	0	0	0	0	0	200	300	0	0	0	0	0	0	0	200	903	0	0	0	0	0	0	0	603	903	0
415	6	0	0	0	0	0	0	200	300	0	0	0	0	0	0	0	200	903	0	0	0	0	0	0	0	603	903	0
415	7	0	0	0	0	0	0	200	300	0	0	0	0	0	0	0	200	903	0	0	0	0	0	0	0	603	903	0
415	8	0	0	0	0	0	0	200	300	0	0	0	0	0	0	0	200	903	0	0	0	0	0	0	0	603	903	0
415	9	0	0	0	0	0	0	200	300	0	0	0	0	0	0	0	200	903	0	0	0	0	0	0	0	603	903	0
416	0	0	0	0	0	0	0	200	300	0	0	0	0	0	0	0	200	903	0	0	0	0	0	0	0	603	903	0
416	1	0	0	0	0	0	0	200	300	0	0	0	0	0	0	0	200	903	0	0	0	0	0	0	0	603	903	0
416	2	0	0	0	0	0	0	200	300	0	0	0	0	0	0	0	200	903	0	0	0	0	0	0	0	603	903	0
416	3	0	0	0	0	0	0	200	300	0	0	0	0	0	0	0	200	903	0	0	0	0	0	0	0	603	903	0
416	4	0	0	0	0	0	0	200	300	0	0	0	0	0	0	0	200	903	0	0	0	0	0	0	0	603	903	0
416	5	0	0	0	0	0	0	200	300	0	0	0	0	0	0	0	200	903	0	0	0	0	0	0	0	603	903	0
416	6	0	0	0	0	0	0	200	300	0	0	0	0	0	0	0	200	903	0	0	0	0	0	0	0	603	903	0
416	7	0	0	0	0	0	0	200	300	0	0	0	0	0	0	0	200	903	0	0	0	0	0	0	0	603	903	0
416	8	0	0	0	0	0	0	200	300	0	0	0	0	0	0	0	200	903	0	0	0	0	0	0	0	603	903	0
416	9	0	0	0	0	0	0	200	300	0	0	0	0	0	0	0	200	903	0	0	0	0	0	0	0	603	903	0
417	0	0	0	0	0	0	0	200	300	0	0	0	0	0	0	0	200	903	0	0	0	0	0	0	0	603	903	0
417	1	0	0	0	0	0	0	200	300	0	0	0	0	0	0	0	200	903	0	0	0	0	0	0	0	603	903	0
417	2	0	0	0	0	0	0	200	300	0	0	0	0	0	0	0	200	903	0	0	0	0	0	0	0	603	903	0
417	3	0	0	0	0	0	0	200	300	0	0	0	0	0	0	0	200	903	0	0	0	0	0	0	0	603	903	0
417	4	0	0	0	0	0	0	200	300	0	0	0	0	0	0	0	200	903	0	0	0	0	0	0	0	603	903	0
417	5	0	0	0	0	0	0	200	300	0	0	0	0	0	0	0	200	903	0	0	0	0	0	0	0	603	903	0
417	6	0	0	0	0	0	0	200	300	0	0	0	0	0	0	0	200	903	0	0	0	0	0	0	0	603	903	0
417	7	0	0	0	0	0	0	200	300	0	0	0	0	0	0	0	200	903	0	0	0	0	0	0	0	603	903	0
417	8	0	0	0	0	0	0	200	300	0	0	0	0	0	0	0	200	903	0	0	0	0	0	0	0	603	903	0
417	9	0	0	0	0	0	0	200	300	0	0	0	0	0	0	0	200	903	0	0	0	0	0	0	0	603	903	0
418	0	0	0	0	0	0	0	200	300	0	0	0	0	0	0	0	200	903	0	0	0	0	0	0	0	603	903	0
418	1	0	0	0	0	0	0	200	300	0	0	0	0	0	0	0	200	903	0	0	0	0	0	0	0	603	903	0
418	2	0	0	0	0	0	0	200	300	0	0	0	0	0	0	0	200	903	0	0	0	0	0	0	0	603	903	0
418	3	0	0	0	0	0	0	200	300	0	0	0	0	0	0	0	200	903	0	0	0	0	0	0	0	603	903	0
418	4	0	0	0	0	0	0	200	300	0	0	0	0	0	0	0	200	903	0	0	0	0	0	0	0	603	903	0
418	5	0	0	0	0	0	0	200	300	0	0	0	0	0	0	0	200	903	0	0	0	0	0	0	0	603	903	0
418	6	0	0	0	0	0	0	200	300	0	0	0	0	0	0	0	200	903	0	0	0	0	0	0	0	603	903	0
418	7	0	0	0	0	0	0	200	300	0	0	0	0	0	0	0	200	903	0	0	0	0	0	0	0	603	903	0
418	8	0	0	0	0	0	0	200	300	0	0	0	0	0	0	0	200	903	0	0	0	0	0	0	0	603	903	0
418	9	0	0	0	0	0	0	200	300	0	0	0	0	0	0	0	200	903	0	0	0	0	0	0	0	603	903	0
419	0	0	0	0	0	0	0	200	300	0	0	0	0	0	0	0	200	903	0	0	0	0	0	0	0	603	903	0
419	1	0	0	0	0	0	0	200	300	0	0	0	0	0	0	0	200	903	0	0	0	0	0	0	0	603	903	0
419	2	0	0	0	0	0	0	200	300	0	0	0	0	0	0	0	200	903	0	0	0	0	0	0	0	603	903	0
419	3	0	0	0	0	0	0	200	300	0	0	0	0	0	0	0	200	903	0	0	0	0	0	0	0	603	903	0
419	4	0	0	0	0	0	0	200	300	0	0	0	0	0	0	0	200	903	0	0	0	0	0	0	0	603	903	0
419	5	0	0	0	0	0	0	200	300	0	0	0	0	0	0	0	200	903	0	0	0	0	0	0	0	603	903	0
419	6	0	0	0	0	0	0	200	300	0	0	0	0	0	0	0	200	903	0	0	0	0	0	0	0	603	903	0
419	7	0	0	0	0	0	0	200	300	0	0	0	0	0	0	0	200	903	0	0	0	0	0	0	0	603	903	0
419	8	0	0	0	0	0	0	200	300	0	0	0	0	0	0	0	200	903	0	0	0	0	0	0	0	603	903	0
419	9	0	0	0	0	0	0	200	300	0	0	0	0	0	0	0	200	903	0	0	0	0	0	0	0	603	903	0
420	0	0	0	0	0	0	0	200	300	0	0	0	0	0	0	0	200	903	0	0	0	0	0	0	0	603	903	0
420	1	0	0	0	0	0	0	200	300	0	0	0	0	0	0	0	200	903	0	0	0	0	0	0	0	603	903	0
420	2	0	0	0	0	0	0	200	300	0	0	0	0	0	0	0	200	903	0	0	0	0	0	0	0	603	903	0
420	3	0	0	0	0	0	0	200	300	0	0	0	0	0	0	0	200	903	0	0	0	0	0	0	0	603	903	0
420	4	0	0	0	0	0	0	200	300	0	0	0	0	0	0	0	200	903	0	0	0	0	0	0	0	603	903	0
420	5	0	0	0	0	0	0	200	300	0	0	0	0	0	0	0	200	903	0	0	0	0	0	0	0	603	903	0
420	6	0	0	0	0	0	0	200	300	0	0	0	0	0	0	0	200	903	0	0	0	0	0	0	0	603	903	0
420	7	0	0	0	0	0	0	200	300	0	0	0	0	0	0	0	200	903	0	0	0	0	0	0	0	603	903	0
420	8	0	0	0	0	0	0	200	300	0	0	0	0	0	0	0	200	903	0	0	0	0	0	0	0	603	903	0
420	9	0	0	0	0	0	0	200	300	0	0	0	0	0	0	0	200	903	0	0	0	0	0	0	0	603	903	0
421	0	0	0	0	0	0	0	200	300	0	0	0	0	0	0	0	200	903	0	0	0	0	0	0	0	603	903	0
421	1	0	0	0	0	0	0	200	300	0	0	0	0	0	0	0	200	903	0	0	0	0	0	0	0	603	903	0
421	2	0	0	0	0	0	0	200	300	0	0	0	0	0	0	0	200	903	0	0	0	0	0	0	0	603	903	0
421	3	0	0	0	0	0	0	200	300	0	0	0	0	0	0	0	200	903	0	0	0	0	0	0	0	603	903	0
421	4	0	0	0	0	0	0	200	300	0	0	0	0	0	0	0	200	903	0	0	0	0	0	0	0	603	903	0
421	5	0	0	0	0	0	0	200	300	0	0	0	0	0	0	0	200	903	0	0	0	0	0	0	0	603	903	0
421	6	0	0	0	0	0	0	200	300	0	0	0	0	0	0	0	200	903	0	0	0	0	0	0	0	603	903	0
421	7	0	0	0	0	0	0	200	300	0	0	0	0	0	0	0	200	903	0	0	0	0	0	0	0	603	903	0
421	8	0	0	0	0	0	0	200	300	0	0	0	0	0	0	0	200	903	0	0	0	0	0	0	0	603	903	0
421	9	0	0	0	0	0	0	200	300	0	0	0	0	0	0	0	200	903	0	0	0	0	0	0	0	603	903	0
422	0	0	0	0	0	0	0	200	300	0	0	0	0	0	0	0	200	903	0	0	0	0	0	0	0	603	903	0
422	1	0	0	0	0	0	0	200	300	0	0	0	0	0	0	0	200	903	0	0	0	0	0	0	0	603	903	0
422	2	0	0	0	0	0	0	200	300	0	0	0	0	0	0	0	200	903	0	0	0	0	0	0	0	603	903	0
422	3	0	0	0	0	0	0	200	300	0	0	0	0	0	0	0	200	903	0	0	0	0	0	0	0	603	903	0
422	4	0	0	0	0	0	0	200	300	0	0	0	0	0	0	0	200	903	0	0	0	0	0	0	0	603	903	0
422	5	0	0	0	0	0	0	200	300	0	0	0	0	0	0	0	200	903	0	0	0	0	0	0	0	603	903	0
422	6	0	0	0	0	0	0	200	300	0	0	0	0	0	0	0	200	903	0	0	0	0	0	0	0	603	903	0
422	7	0	0	0	0	0	0	200	300	0	0	0	0	0	0	0	200	903	0	0	0	0	0	0	0	603	903	0
422	8	0	0	0	0	0	0	200	300	0	0	0	0	0	0	0	200	903	0	0	0	0	0	0	0	603	903	0
422	9	0	0	0	0	0	0	200	300	0	0	0	0	0	0	0	200	903	0	0	0	0	0	0	0	603	903	0
423	0	0	0	0	0	0	0	200	300	0	0	0	0	0	0	0	200	903	0	0	0	0	0	0	0	603	903	0
423	1	0	0	0	0	0	0	200	300	0	0	0	0	0	0	0	200	903	0	0	0	0	0	0	0	603	903	0
423	2	0	0	0	0	0	0	200	300	0	0	0	0	0	0	0	200	903	0	0	0	0	0	0	0	603	903	0
423	3	0	0	0	0	0	0	200	300	0	0	0	0	0	0	0	200	903	0	0	0	0	0	0	0	603	903	0
423	4	0	0	0	0	0	0	200	300	0	0	0	0	0	0	0	200	903	0	0	0	0	0	0	0	603	903	0
423	5	0	0	0	0	0	0	200	300	0	0	0	0	0	0	0	200	903	0	0	0	0	0	0	0	603	903	0
423	6	0	0	0	0	0	0	200	300	0	0	0	0	0	0	0	200	903	0	0	0	0	0	0	0	603	903	0
423	7	0	0	0	0	0	0	200	300	0	0	0	0	0	0	0	200	903	0	0	0	0	0	0	0	603	903	0
423	8	0	0	0	0	0	0	200	300	0	0	0	0	0	0	0	200	903	0	0	0	0	0	0	0	603	903	0
423	9	0	0	0	0	0	0	200	300	0	0	0	0	0	0	0	200	903	0	0	0	0	0	0	0	603	903	0
424	0	0	0	0	0	0	0	200	300	0	0	0	0	0	0	0	200	903	0	0	0	0	0	0	0	603	903	0
424	1	0	0	0	0	0	0	200	300	0	0	0	0	0	0	0	200	903	0	0	0	0	0	0	0	603	903	0
424	2	0	0	0	0	0	0	200	300	0	0	0	0	0	0	0	200	903	0	0	0	0	0	0	0	603	903	0
424	3	0	0	0	0	0	0	200	300	0	0	0	0	0	0	0	200	903	0	0	0	0	0	0	0	603	903	0
424	4	0	0	0	0	0	0	200	300	0	0	0	0	0	0	0	200	903	0	0	0	0	0	0	0	603	903	0
424	5	0	0	0	0	0	0	200	300	0	0	0	0	0	0	0	200	903	0	0	0	0	0	0	0	603	903	0
424	6	0	0	0	0	0	0	200	300	0	0	0	0	0	0	0	200	903	0	0	0	0	0	0	0	603	903	0
424	7	0	0	0	0	0	0	200	300	0	0	0	0	0	0	0	200	903	0	0	0	0	0	0	0	603	903	0
424	8	0	0	0	0	0	0	200	300	0	0	0	0	0	0	0	200	903	0	0	0	0	0	0	0	603	903	0
424	9	0	0	0	0	0	0	200	300	0	0	0	0	0	0	0	200	903	0	0	0	0	0	0	0	603	903	0
425	0	0	0	0	0	0	0	200	300	0	0	0	0	0	0	0	200	903	0	0	0	0	0	0	0	603	903	0
425	1	0	0	0	0	0	0	200	300	0	0	0	0	0	0	0	200	903	0	0	0	0	0	0	0	603	903	0
425	2	0	0	0	0	0	0	200	300	0	0	0	0	0	0	0	200	903	0	0	0	0	0	0	0	603	903	0
425	3	0	0	0	0	0	0	200	300	0	0	0	0	0	0	0	200	903	0	0	0	0	0	0	0	603	903	0
425	4	0	0	0	0	0	0	200	300	0	0	0	0	0	0	0	200	903	0	0	0	0	0	0	0	603	903	0
425	5	0	0	0	0	0	0	200	300	0	0	0	0	0	0	0	200	903	0	0	0	0	0	0	0	603	903	0
425	6	0	0	0	0	0	0	200	300	0	0	0	0	0	0	0	200	903	0	0	0	0	0	0	0	603	903	0
425	7	0	0	0	0	0	0	200	300	0	0	0	0	0	0	0	200	903	0	0	0	0	0	0	0	603	903	0
425	8	0	0	0	0	0	0	200	300	0	0	0	0	0	0	0	200	903	0	0	0	0	0	0	0	603	903	0
425	9	0	0	0	0	0	0	200	300	0	0	0	0	0	0	0	200	903	0	0	0	0	0	0	0	603	903	0
426	0	0	0	0	0	0	0	200	300	0	0	0	0	0	0	0	200	903	0	0	0	0	0	0	0	603	903	0
426	1	0	0	0	0	0	0	200	300	0	0	0	0	0	0	0	200	903	0	0	0	0	0	0	0	603	903	0
426	2	0	0	0	0	0	0	200	300	0	0	0	0	0	0	0	200	903	0	0	0	0	0	0	0	603	903	0
426	3	0	0	0	0	0	0	200	300	0	0	0	0	0	0	0	200	903	0	0	0	0	0	0	0	603	903	0
426	4	0	0	0	0	0	0	200	300	0	0	0	0	0	0	0	200	903	0	0	0	0	0	0	0	603	903	0
426	5	0	0	0	0	0	0	200	300	0	0	0	0	0	0	0	200	903	0	0	0	0	0	0	0	603	903	0
426	6	0	0	0	0	0	0	200	300	0	0	0	0	0	0	0	200	903	0	0	0	0	0	0	0	603	903	0
426	7	0	0	0	0	0	0	200	300	0	0	0	0	0	0	0	200	903	0	0	0	0	0	0	0	603	903	0
426	8	0	0	0	0	0	0	200	300	0	0	0	0	0	0	0	200	903	0	0	0	0	0	0	0	603	903	0
426	9	0	0	0	0	0	0	200	300	0	0	0	0	0	0	0	200	903	0	0	0	0	0	0	0	603	903	0
427	0	0	0	0	0	0	0	200	300	0	0	0	0	0	0	0	200	903	0	0	0	0	0	0	0	603	903	0
427	1	0	0	0	0	0	0	200	300	0	0	0	0	0	0	0	200	903	0	0	0	0	0	0	0	603	903	0
427	2	0	0	0	0	0	0	200	300	0	0	0	0	0	0	0	200	903	0	0	0	0	0	0	0	603	903	0
427	3	0	0	0	0	0	0	200	300	0	0	0	0	0	0	0	200	903	0	0	0	0	0	0	0	603	903	0
427	4	0	0	0	0	0	0	200	300	0	0	0	0	0	0	0	200	903	0	0	0	0	0	0	0	603	903	0
427	5	0	0	0	0	0	0	200	300	0	0	0	0	0	0	0	200	903	0	0	0	0	0	0	0	603	903	0
427	6	0	0	0	0	0	0	200	300	0	0	0	0	0	0	0	200	903	0	0	0	0	0	0	0	603	903	0
427	7	0	0	0	0	0	0	200	300	0	0	0	0	0	0	0	200	903	0	0	0	0	0	0	0	603	903	0
427	8	0	0	0	0	0	0	200	300	0	0	0	0	0	0	0	200	903	0	0	0	0	0	0	0	603	903	0
427	9	0	0	0	0	0	0	200	300	0	0	0	0	0	0	0	200	903	0	0	0	0	0	0	0	603	903	0
428	0	0	0	0	0	0	0	200	300	0	0	0	0	0	0	0	200	903	0	0	0	0	0	0	0	603	903	0
428	1	0	0	0	0	0	0	200	300	0	0	0	0	0	0	0	200	903	0	0	0	0	0	0	0	603	903	0
428	2	0	0	0	0	0	0	200	300	0	0	0	0	0	0	0	200	903	0	0	0	0	0	0	0	603	903	0
428	3	0	0	0	0	0	0	200	300	0	0	0	0	0	0	0	200	903	0	0	0	0	0	0	0	603	903	0
428	4	0	0	0	0	0	0	200	300	0	0	0	0	0	0	0	200	903	0	0	0	0	0	0	0	603	903	0
428	5	0	0	0	0	0	0	200	300	0	0	0	0	0	0	0	200	903	0	0	0	0	0	0	0	603	903	0
428	6	0	0	0	0	0	0	200	300	0	0	0	0	0	0	0	200	903	0	0	0	0	0	0	0	603	903	0
428	7	0	0	0	0	0	0	200	300	0	0	0	0	0	0	0	200	903	0	0	0	0	0	0	0	603	903	0
428	8	0	0	0	0	0	0	200	300	0	0	0	0	0	0	0	200	903	0	0	0	0	0	0	0	603	903	0
428	9	0	0	0	0	0	0	200	300	0	0	0	0	0	0	0	200	903	0	0	0	0	0	0	0	603	903	0
429	0	0	0	0	0	0	0	200	300	0	0	0	0	0	0	0	200	903	0	0	0	0	0	0	0	603	903	0
429	1	0	0	0	0	0	0	200	300	0	0	0	0	0	0	0	200	903	0	0	0	0	0	0	0	603	903	0
429	2	0	0	0	0	0	0	200	300	0	0	0	0	0	0	0	200	903	0	0	0	0	0	0	0	603	903	0
429	3	0	0	0	0	0	0	200	300	0	0	0	0	0	0	0	200	903	0	0	0	0	0	0	0	603	903	0
429	4	0	0	0	0	0	0	200	300	0	0	0	0	0	0	0	200	903	0	0	0	0	0	0	0	603	903	0
429	5	0	0	0	0	0	0	200	300	0	0	0	0	0	0	0	200	903	0	0	0	0	0	0	0	603	903	0
429	6	0	0	0	0	0	0	200	300	0	0	0	0	0	0	0	200	903	0	0	0	0	0	0	0	603	903	0
429	7	0	0	0	0	0	0	200	300	0	0	0	0	0	0	0	200	903	0	0	0	0	0	0	0	603	903	0
429	8	0	0	0	0	0	0	200	300	0	0	0	0	0	0	0	200	903	0	0	0	0	0	0	0	603	903	0
429	9	0	0	0	0	0	0	200	300	0	0	0	0	0	0	0	200	903	0	0	0	0	0	0	0	603	903	0
430	0	0	0	0	0	0	0	200	300	0	0	0	0	0	0	0	200	903	0	0	0	0	0	0	0	603	903	0
430	1	0	0	0	0	0	0	200	300	0	0	0	0	0	0	0	200	903	0	0	0	0	0	0	0	603	903	0
430	2	0	0	0	0	0	0	200	300	0	0	0	0	0	0	0	200	903	0	0	0	0	0	0	0	603	903	0
430	3	0	0	0	0	0	0	200	300	0	0	0	0	0	0	0	200	903	0	0	0	0	0	0	0	603	903	0
430	4	0	0	0	0	0	0	200	300	0	0	0	0	0	0	0	200	903	0	0	0	0	0	0	0	603	903	0
430	5	0	0	0	0	0	0	200	300	0	0	0	0	0	0	0	200	903	0	0	0	0	0	0	0	603	903	0
430	6	0	0	0	0	0	0	200	300	0	0	0	0	0	0	0	200	903	0	0	0	0	0	0	0	603	903	0
430	7	0	0	0	0	0	0	200	300	0	0	0	0	0	0	0	200	903	0	0	0	0	0	0	0	603	903	0
430	8	0	0	0	0	0	0	200	300	0	0	0	0	0	0	0	200	903	0	0	0	0	0	0	0	603	903	0
430	9	0	0	0	0	0	0	200	300	0	0	0	0	0	0	0	200	903	0	0	0	0	0	0	0	603	903	0
431	0	0	0	0	0	0	0	200	300	0	0	0	0	0	0	0	200	903	0	0	0	0	0	0	0	603	903	0
431	1	0	0	0	0	0	0	200	300	0	0	0	0	0	0	0	200	903	0	0	0	0	0	0	0	603	903	0
431	2	0	0	0	0	0	0	200	300	0	0	0	0	0	0	0	200	903	0	0	0	0	0	0	0	603	903	0
431	3	0	0	0	0	0	0	200	300	0	0	0	0	0	0	0	200	903	0	0	0	0	0	0	0	603	903	0
431	4	0	0	0	0	0	0	200	300	0	0	0	0	0	0	0	200	903	0	0	0	0	0	0	0	603	903	0
431	5	0	0	0	0	0	0	200	300	0	0	0	0	0	0	0	200	903	0	0	0	0	0	0	0	603	903	0
431	6	0	0	0	0	0	0	200	300	0	0	0	0	0	0	0	200	903	0	0	0	0	0	0	0	603	903	0
431	7	0	0	0	0	0	0	200	300	0	0	0	0	0	0	0	200	903	0	0	0	0	0	0	0	603	903	0
431	8	0	0	0	0	0	0	200	300	0	0	0	0	0	0	0	200	903	0	0	0	0	0	0	0	603	903	0
431	9	0	0	0	0	0	0	200	300	0	0	0	0	0	0	0	200	903	0	0	0	0	0	0	0	603	903	0
432	0	0	0	0	0	0	0	200	300	0	0	0	0	0	0	0	200	903	0	0	0	0	0	0	0	603	903	0
432	1	0	0	0	0	0	0	200	300	0	0	0	0	0	0	0	200	903	0	0	0	0	0	0	0	603	903	0
432	2	0	0	0	0	0	0	200	300	0	0	0	0	0	0	0	200	903	0	0	0	0	0	0	0	603	903	0
432	3	0	0	0	0	0	0	200	300	0	0	0	0	0	0	0	200	903	0	0	0	0	0	0	0	603	903	0
432	4	0	0	0	0	0	0	200	300	0	0	0	0	0	0	0	200	903	0	0	0	0	0	0	0	603	903	0
432	5	0	0	0	0	0	0	200	300	0	0	0	0	0	0	0	200	903	0	0	0	0	0	0	0	603	903	0
432	6	0	0	0	0	0	0	200	300	0	0	0	0	0	0	0	200	903	0	0	0	0	0	0	0	603	903	0
432	7	0	0	0	0	0	0	200	300	0	0	0	0	0	0	0	200	903	0	0	0	0	0	0	0	603	903	0
432	8	0	0	0	0	0	0	200	300	0	0	0	0	0	0	0	200	903	0	0	0	0	0	0	0	603	903	0
432	9	0	0	0	0	0	0	200	300	0	0	0	0	0	0	0	200	903	0	0	0	0	0	0	0	603	903	0
433	0	0	0	0	0	0	0	200	300	0	0	0	0	0	0	0	200	903	0	0	0	0	0	0	0	603	903	0
433	1	0	0	0	0	0	0	200	300	0	0	0	0	0	0	0	200	903	0	0	0	0	0	0	0	603	903	0
433	2	0	0	0	0	0	0	200	300	0	0	0	0	0	0	0	200	903	0	0	0	0	0	0	0	603	903	0
433	3	0	0	0	0	0	0	200	300	0	0	0	0	0	0	0	200	903	0	0	0	0	0	0	0	603	903	0
433	4	0	0	0	0	0	0	200	300	0	0	0	0	0	0	0	200	903	0	0	0	0	0	0	0	603	903	0
433	5	0	0	0	0	0	0	200	300	0	0	0	0	0	0	0	200	903	0	0	0	0	0	0	0	603	903	0
433	6	0	0	0	0	0	0	200	300	0	0	0	0	0	0	0	200	903	0	0	0	0	0	0	0	603	903	0
433	7	0	0	0	0	0	0	200	300	0	0	0	0	0	0	0	200	903	0	0	0	0	0	0	0	603	903	0
433	8	0	0	0	0	0	0	200	300	0	0	0	0	0	0	0	200	903	0	0	0	0	0	0	0	603	903	0
433	9	0	0	0	0	0	0	200	300	0	0	0	0	0	0	0	200	903	0	0	0	0	0	0	0	603	903	0
434	0	0	0	0	0	0	0	200	300	0	0	0	0	0	0	0	200	903	0	0	0	0	0	0	0	603	903	0
434	1	0	0	0	0	0	0	200	300	0	0	0	0	0	0	0	200	903	0	0	0	0	0	0	0	603	903	0
434	2	0	0	0	0	0	0	200	300	0	0	0	0	0	0	0	200	903	0	0	0	0	0	0	0	603	903	0
434	3	0	0	0	0	0	0	200	300	0	0	0	0	0	0	0	200	903	0	0	0	0	0	0	0	603	903	0
434	4	0	0	0	0	0	0	200	300	0	0	0	0	0	0	0	200	903	0	0	0	0	0	0	0	603	903	0
434	5	0	0	0	0	0	0	200	300	0	0	0	0	0	0	0	200	903	0	0	0	0	0	0	0	603	903	0
434	6	0	0	0	0	0	0	200	300	0	0	0	0	0	0	0	200	903	0	0	0	0	0	0	0	603	903	0
434	7	0	0	0	0	0	0	200	300	0	0	0	0	0	0	0	200	903	0	0	0	0	0	0	0	603	903	0
434	8	0	0	0	0	0	0	200	300	0	0	0	0	0	0	0	200	903	0	0	0	0	0	0	0	603	903	0
434	9	0	0	0	0	0	0	200	300	0	0	0	0	0	0	0	200	903	0	0	0	0	0	0	0	603	903	0
435	0	0	0	0	0	0	0	200	300	0	0	0	0	0	0	0	200	903	0	0	0	0	0	0	0	603	903	0
435	1	0	0	0	0	0	0	200	300	0	0	0	0	0	0	0	200	903	0	0	0	0	0	0	0	603	903	0
435	2	0	0	0	0	0	0	200	300	0	0	0	0	0	0	0	200	903	0	0	0	0	0	0	0	603	903	0
435	3	0	0	0	0	0	0	200	300	0	0	0	0	0	0	0	200	903	0	0	0	0	0	0	0	603	903	0
435	4	0	0	0	0	0	0	200	300	0	0	0	0	0	0	0	200	903	0	0	0	0	0	0	0	603	903	0
435	5	0	0	0	0	0	0	200	300	0	0	0	0	0	0	0	200	903	0	0	0	0	0	0	0	603	903	0
435	6	0	0	0	0	0	0	200	300	0	0	0	0	0	0	0	200	903	0	0	0	0	0	0	0	603	903	0
435	7	0	0	0	0	0	0	200	300	0	0	0	0	0	0	0	200	903	0	0	0	0	0	0	0	603	903	0
435	8	0	0	0	0	0	0	200	300	0	0	0	0	0	0	0	200	903	0	0	0	0	0	0	0	603	903	0
435	9	0	0	0	0	0	0	200	300	0	0	0	0	0	0	0	200	903	0	0	0	0	0	0	0	603	903	0
436	0	0	0	0	0	0	0	200	300	0	0	0	0	0	0	0	200	903	0	0	0	0	0	0	0	603	903	0
436	1	0	0	0	0	0	0	200	300	0	0	0	0	0	0	0	200	903	0	0	0	0	0	0	0	603	903	0
436	2	0	0	0	0	0	0	200	300	0	0	0	0	0	0	0	200	903	0	0	0	0	0	0	0	603	903	0
436	3	0	0	0	0	0	0	200	300	0	0	0	0	0	0	0	200	903	0	0	0	0	0	0	0	603	903	0
436	4	0	0	0	0	0	0	200	300	0	0	0	0	0	0	0	200	903	0	0	0	0	0	0	0	603	903	0
436	5	0	0	0	0	0	0	200	300	0	0	0	0	0	0	0	200	903	0	0	0	0	0	0	0	603	903	0
436	6	0	0	0	0	0	0	200	300	0	0	0	0	0	0	0	200	903	0	0	0	0	0	0	0	603	903	0
436	7	0	0	0	0	0	0	200	300	0	0	0	0	0	0	0	200	903	0	0	0	0	0	0	0	603	903	0
436	8	0	0	0	0	0	0	200	300	0	0	0	0	0	0	0	200	903	0	0	0	0	0	0	0	603	903	0
436	9	0	0	0	0	0	0	200	300	0	0	0	0	0	0	0	200	903	0	0	0	0	0	0	0	603	903	0
437	0	0	0	0	0	0	0	200	300	0	0	0	0	0	0	0	200	903	0	0	0	0	0	0	0	603	903	0
437	1	0	0	0	0	0	0	200	300	0	0	0	0	0	0	0	200	903	0	0	0	0	0	0	0	603	903	0
437	2	0	0	0	0	0	0	200	300	0	0	0	0	0	0	0	200	903	0	0	0	0	0	0	0	603	903	0
437	3	0	0	0	0	0	0	200	300	0	0	0	0	0	0	0	200	903	0	0	0	0	0	0	0	603	903	0
437	4	0	0	0	0	0	0	200	300	0	0	0	0	0	0	0	200	903	0	0	0	0	0	0	0	603	903	0
437	5	0	0	0	0	0	0	200	300	0	0	0	0	0	0	0	200	903	0	0	0	0	0	0	0	603	903	0
437	6	0	0	0	0	0	0	200	300	0	0	0	0	0	0	0	200	903	0	0	0	0	0	0	0	603	903	0
437	7	0	0	0	0	0	0	200	300	0	0	0	0	0	0	0	200	903	0	0	0	0	0	0	0	603	903	0
437	8	0	0	0	0	0	0	200	300	0	0	0	0	0	0	0	200	903	0	0	0	0	0	0	0	603	903	0
437	9	0	0	0	0	0	0	200	300	0	0	0	0	0	0	0	200	903	0	0	0	0	0	0	0	603	903	0
438	0	0	0	0	0	0	0	200	300	0	0	0	0	0	0	0	200	903	0	0	0	0	0	0	0	603	903	0
438	1	0	0	0	0	0	0	200	300	0	0	0	0	0	0	0	200	903	0	0	0	0	0	0	0	603	903	0
438	2	0	0	0	0	0	0	200	300	0	0	0	0	0	0	0	200	903	0	0	0	0	0	0	0	603	903	0
438	3	0	0	0	0	0	0	200	300	0	0	0	0	0	0	0	200	903	0	0	0	0	0	0	0	603	903	0
438	4	0	0	0	0	0	0	200	300	0	0	0	0	0	0	0	200	903	0	0	0	0	0	0	0	603	903	0
438	5	0	0	0	0	0	0	200	300	0	0	0	0	0	0	0	200	903	0	0	0	0	0	0	0	603	903	0
438	6	0	0	0	0	0	0	200	300	0	0	0	0	0	0	0	200	903	0	0	0	0	0	0	0	603	903	0
438	7	0	0	0	0	0	0	200	300	0	0	0	0	0	0	0	200	903	0	0	0	0	0	0	0	603	903	0
438	8	0	0	0	0	0	0	200	300	0	0	0	0	0	0	0	200	903	0	0	0	0	0	0	0	603	903	0
438	9	0	0	0	0	0	0	200	300	0	0	0	0	0	0	0	200	903	0	0	0	0	0	0	0	603	903	0
439	0	0	0	0	0	0	0	200	300	0	0	0	0	0	0	0	200	903	0	0	0	0	0	0	0	603	903	0
439	1	0	0	0	0	0	0	200	300	0	0	0	0	0	0	0	200	903	0	0	0	0	0	0	0	603	903	0
439	2	0	0	0	0	0	0	200	300	0	0	0	0	0	0	0	200	903	0	0	0	0	0	0	0	603	903	0
439	3	0	0	0	0	0	0	200	300	0	0	0	0	0	0	0	200	903	0	0	0	0	0	0	0	603	903	0
439	4	0	0	0	0	0	0	200	300	0	0	0	0	0	0	0	200	903	0	0	0	0	0	0	0	603	903	0
439	5	0	0	0	0	0	0	200	300	0	0	0	0	0	0	0	200	903	0	0	0	0	0	0	0	603	903	0
439	6	0	0	0	0	0	0	200	300	0	0	0	0	0	0	0	200	903	0	0	0	0	0	0	0	603	903	0
439	7	0	0	0	0	0	0	200	300	0	0	0	0	0	0	0	200	903	0	0	0	0	0	0	0	603	903	0
439	8	0	0	0	0	0	0	200	300	0	0	0	0	0	0	0	200	903	0	0	0	0	0	0	0	603	903	0
439	9	0	0	0	0	0	0	200	300	0	0	0	0	0	0	0	200	903	0	0	0	0	0	0	0	603	903	0
440	0	0	0	0	0	0	0	200	300	0	0	0	0	0	0	0	200	903	0	0	0	0	0	0	0	603	903	0
440	1	0	0	0	0	0	0	200	300	0	0	0	0	0	0	0	200	903	0	0	0	0	0	0	0	603	903	0
440	2	0	0	0	0	0	0	200	300	0	0	0	0	0	0	0	200	903	0	0	0	0	0	0	0	603	903	0
440	3	0	0	0	0	0	0	200	300	0	0	0	0	0	0	0	200	903	0	0	0	0	0	0	0	603	903	0
440	4	0	0	0	0	0	0	200	300	0	0	0	0	0	0	0	200	903	0	0	0	0	0	0	0	603	903	0
440	5	0	0	0	0	0	0	200	300	0	0	0	0	0	0	0	200	903	0	0	0	0	0	0	0	603	903	0
440	6	0	0	0	0	0	0	200	300	0	0	0	0	0	0	0	200	903	0	0	0	0	0	0	0	603	903	0
440	7	0	0	0	0	0	0	200	300	0	0	0	0	0	0	0	200	903	0	0	0	0	0	0	0	603	903	0
440	8	0	0	0	0	0	0	200	300	0	0	0	0	0	0	0	200	903	0	0	0	0	0	0	0	603	903	0
440	9	0	0	0	0	0	0	200	300	0	0	0	0	0	0	0	200	903	0	0	0	0	0	0	0	603	903	0
441	0	0	0	0	0	0	0	200	300	0	0	0	0	0	0	0	200	903	0	0	0	0	0	0	0	603	903	0
441	1	0	0	0	0	0	0	200	300	0	0	0	0	0	0	0	200	903	0	0	0	0	0	0	0	603	903	0
441	2	0	0	0	0	0	0	200	300	0	0	0	0	0	0	0	200	903	0	0	0	0	0	0	0	603	903	0
441	3	0	0	0	0	0	0	200	300	0	0	0	0	0	0	0	200	903	0	0	0	0	0	0	0	603	903	0
441	4	0	0	0	0	0	0	200	300	0	0	0	0	0	0	0	200	903	0	0	0	0	0	0	0	603	903	0
441	5	0	0	0	0	0	0	200	300	0	0	0	0	0	0	0	200	903	0	0	0	0	0	0	0	603	903	0
441	6	0	0	0	0	0	0	200	300	0	0	0	0	0	0	0	200	903	0	0	0	0	0	0	0	603	903	0
441	7	0	0	0	0	0	0	200	300	0	0	0	0	0	0	0	200	903	0	0	0	0	0	0	0	603	903	0
441	8	0	0	0	0	0	0	200	300	0	0	0	0	0	0	0	200	903	0	0	0	0	0	0	0	603	903	0
441	9	0	0	0	0	0	0	200	300	0	0	0	0	0	0	0	200	903	0	0	0	0	0	0	0	603	903	0
442	0	0	0	0	0	0	0	200	300	0	0	0	0	0	0	0	200	903	0	0	0	0	0	0	0	603	903	0
442	1	0	0	0	0	0	0	200	300	0	0	0	0	0	0	0	200	903	0	0	0	0	0	0	0	603	903	0
442	2	0	0	0	0	0	0	200	300	0	0	0	0	0	0	0	200	903	0	0	0	0	0	0	0	603	903	0
442	3	0	0	0	0	0	0	200	300	0	0	0	0	0	0	0	200	903	0	0	0	0	0	0	0	603	903	0
442	4	0	0	0	0	0	0	200	300	0	0	0	0	0	0	0	200	903	0	0	0	0	0	0	0	603	903	0
442	5	0	0	0	0	0	0	200	300	0	0	0	0	0	0	0	200	903	0	0	0	0	0	0	0	603	903	0
442	6	0	0	0	0	0	0	200	300	0	0	0	0	0	0	0	200	903	0	0	0	0	0	0	0	603	903	0
442	7	0	0	0	0	0	0	200	300	0	0	0	0	0	0	0	200	903	0	0	0	0	0	0	0	603	903	0
442	8	0	0	0	0	0	0	200	300	0	0	0	0	0	0	0	200	903	0	0	0	0	0	0	0	603	903	0
442	9	0	0	0	0	0	0	200	300	0	0	0	0	0	0	0	200	903	0	0	0	0	0	0	0	603	903	0
443	0	0	0	0	0	0	0	200	300	0	0	0	0	0	0	0	200	903	0	0	0	0	0	0	0	603	903	0
443	1	0	0	0	0	0	0	200	300	0	0	0	0	0	0	0	200	903	0	0	0	0	0	0	0	603	903	0
443	2	0	0	0	0	0	0	200	300	0	0	0	0	0	0	0	200	903	0	0	0	0	0	0	0	603	903	0
443	3	0	0	0	0	0	0	200	300	0	0	0	0	0	0	0	200	903	0	0	0	0	0	0	0	603	903	0
443	4	0	0	0	0	0	0	200	300	0	0	0	0	0	0	0	200	903	0	0	0	0	0	0	0	603	903	0
443	5	0	0	0	0	0	0	200	300	0	0	0	0	0	0	0	200	903	0	0	0	0	0	0	0	603	903	0
443	6	0	0	0	0	0	0	200	300	0	0	0	0	0	0	0	200	903	0	0	0	0	0	0	0	603	903	0
443	7	0	0	0	0	0	0	200	300	0	0	0	0	0	0	0	200	903	0	0	0	0	0	0	0	603	903	0
443	8	0	0	0	0	0	0	200	300	0	0	0	0	0	0	0	200	903	0	0	0	0	0	0	0	603	903	0
443	9	0	0	0	0	0	0	200	300	0	0	0	0	0	0	0	200	903	0	0	0	0	0	0	0	603	903	0
444	0	0	0	0	0	0	0	200	300	0	0	0	0	0	0	0	200	903	0	0	0	0	0	0	0	603	903	0
444	1	0	0	0	0	0	0	200	300	0	0	0	0	0	0	0	200	903	0	0	0	0	0	0	0	603	903	0
444	2	0	0	0	0	0	0	200	300	0	0	0	0	0	0	0	200	903	0	0	0	0	0	0	0	603	903	0
444	3	0	0	0	0	0	0	200	300	0	0	0	0	0	0	0	200	903	0	0	0	0	0	0	0	603	903	0
444	4	0	0	0	0	0	0	200	300	0	0	0	0	0	0	0	200	903	0	0	0	0	0	0	0	603	903	0
444	5	0	0	0	0	0	0	200	300	0	0	0	0	0	0	0	200	903	0	0	0	0	0	0	0	603	903	0
444	6	0	0	0	0	0	0	200	300	0	0	0	0	0	0	0	200	903	0	0	0	0	0	0	0	603	903	0
444	7	0	0	0	0	0	0	200	300	0	0	0	0	0	0	0	200	903	0	0	0	0	0	0	0	603	903	0
444	8	0	0	0	0	0	0	200	300	0	0	0	0	0	0	0	200	903	0	0	0	0	0	0	0	603	903	0
444	9	0	0	0	0	0	0	200	300	0	0	0	0	0	0	0	200	903	0	0	0	0	0	0	0	603	903	0
445	0	0	0	0	0	0	0	200	300	0	0	0	0	0	0	0	200	903	0	0	0	0	0	0	0	603	903	0
445	1	0	0	0	0	0	0	200	300	0	0	0	0	0	0	0	200	903	0	0	0	0	0	0	0	603	903	0
445	2	0	0	0	0	0	0	200	300	0	0	0	0	0	0	0	200	903	0	0	0	0	0	0	0	603	903	0
445	3	0	0	0	0	0	0	200	300	0	0	0	0	0	0	0	200	903	0	0	0	0	0	0	0	603	903	0
445	4	0	0	0	0	0	0	200	300	0	0	0	0	0	0	0	200	903	0	0	0	0	0	0	0	603	903	0
445	5	0	0	0	0	0	0	200	300	0	0	0	0	0	0	0	200	903	0	0	0	0	0	0	0	603	903	0
445	6	0	0	0	0	0	0	200	300	0	0	0	0	0	0	0	200	903	0	0	0	0	0	0	0	603	903	0
445	7	0	0	0	0	0	0	200	300	0	0	0	0	0	0	0	200	903	0	0	0	0	0	0	0	603	903	0
445	8	0	0	0	0	0	0	200	300	0	0	0	0	0	0	0	200	903	0	0	0	0	0	0	0	603	903	0
445	9	0	0	0	0	0	0	200	300	0	0	0	0	0	0	0	200	903	0	0	0	0	0	0	0	603	903	0
446	0	0	0	0	0	0	0	200	300	0	0	0	0	0	0	0	200	903	0	0	0	0	0	0	0	603	903	0
446	1	0	0	0	0	0	0	200	300	0	0	0	0	0	0	0	200	903	0	0	0	0	0	0	0	603	903	0
446	2	0	0	0	0	0	0	200	300	0	0	0	0	0	0	0	200	903	0	0	0	0	0	0	0	603	903	0
446	3	0	0	0	0	0	0	200	300	0	0	0	0	0	0	0	200	903	0	0	0	0	0	0	0	603	903	0
446	4	0	0	0	0	0	0	200	300	0	0	0	0	0	0	0	200	903	0	0	0	0	0	0	0	603	903	0
446	5	0	0	0	0	0	0	200	300	0	0	0	0	0	0	0	200	903	0	0	0	0	0	0	0	603	903	0
446	6	0	0	0	0	0	0	200	300	0	0	0	0	0	0	0	200	903	0	0	0	0	0	0	0	603	903	0
446	7	0	0	0	0	0	0	200	300	0	0	0	0	0	0	0	200	903	0	0	0	0	0	0	0	603	903	0
446	8	0	0	0	0	0	0	200	300	0	0	0	0	0	0	0	200	903	0	0	0	0	0	0	0	603	903	0
446	9	0	0	0	0	0	0	200	300	0	0	0	0	0	0	0	200	903	0	0	0	0	0	0	0	603	903	0
447	0	0	0	0	0	0	0	200	300	0	0	0	0	0	0	0	200	903	0	0	0	0	0	0	0	603	903	0
447	1	0	0	0	0	0	0	200	300	0	0	0	0	0	0	0	200	903	0	0	0	0	0	0	0	603	903	0
447	2	0	0	0	0	0	0	200	300	0	0	0	0	0	0	0	200	903	0	0	0	0	0	0	0	603	903	0
447	3	0	0	0	0	0	0	200	300	0	0	0	0	0	0	0	200	903	0	0	0	0	0	0	0	603	903	0
447	4	0	0	0	0	0	0	200	300	0	0	0	0	0	0	0	200	903	0	0	0	0	0	0	0	603	903	0
447	5	0	0	0	0	0	0	200	300	0	0	0	0	0	0	0	200	903	0	0	0	0	0	0	0	603	903	0
447	6	0	0	0	0	0	0	200	300	0	0	0	0	0	0	0	200	903	0	0	0	0	0	0	0	603	903	0
447	7	0	0	0	0	0	0	200	300	0	0	0	0	0	0	0	200	903	0	0	0	0	0	0	0	603	903	0
447	8	0	0	0	0	0	0	200	300	0	0	0	0	0	0	0	200	903	0	0	0	0	0	0	0	603	903	0
447	9	0	0	0	0	0	0	200	300	0	0	0	0	0	0	0	200	903	0	0	0	0	0	0	0	603	903	0
448	0	0	0	0	0	0	0	200	300	0	0	0	0	0	0	0	200	903	0	0	0	0	0	0	0	603	903	0
448	1	0	0	0	0	0	0	200	300	0	0	0	0	0	0	0	200	903	0	0	0	0	0	0	0	603	903	0
448	2	0	0	0	0	0	0	200	300	0	0	0	0	0	0	0	200	903	0	0	0	0	0	0	0	603	903	0
448	3	0	0	0	0	0	0	200	300	0	0	0	0	0	0	0	200	903	0	0	0	0	0	0	0	603	903	0
448	4	0	0	0	0	0	0	200	300	0	0	0	0	0	0	0	200	903	0	0	0	0	0	0	0	603	903	0
448	5	0	0	0	0	0	0	200	300	0	0	0	0	0	0	0	200	903	0	0	0	0	0	0	0	603	903	0
448	6	0	0	0	0	0	0	200	300	0	0	0	0	0	0	0	200	903	0	0	0	0	0	0	0	603	903	0
448	7	0	0	0	0	0	0	200	300	0	0	0	0	0	0	0	200	903	0	0	0	0	0	0	0	603	903	0
448	8	0	0	0	0	0	0	200	300	0	0	0	0	0	0	0	200	903	0	0	0	0	0	0	0	603	903	0
448	9	0	0	0	0	0	0	200	300	0	0	0	0	0	0	0	200	903	0	0	0	0	0	0	0	603	903	0
449	0	0	0	0	0	0	0	200	300	0	0	0	0	0	0	0	200	903	0	0	0	0	0	0	0	603	903	0
449	1	0	0	0	0	0	0	200	300	0	0	0	0	0	0	0	200	903	0	0	0	0	0	0	0	603	903	0
449	2	0	0	0	0	0	0	200	300	0	0	0	0	0	0	0	200	903	0	0	0	0	0	0	0	603	903	0
449	3	0	0	0	0	0	0	200	300	0	0	0	0	0	0	0	200	903	0	0	0	0	0	0	0	603	903	0
449	4	0	0	0	0	0	0	200	300	0	0	0	0	0	0	0	200	903	0	0	0	0	0	0	0	603	903	0
449	5	0	0	0	0	0	0	200	300	0	0	0	0	0	0	0	200	903	0	0	0	0	0	0	0	603	903	0
449	6	0	0	0	0	0	0	200	300	0	0	0	0	0	0	0	200	903	0	0	0	0	0	0	0	603	903	0
449	7	0	0	0	0	0	0	200	300	0	0	0	0	0	0	0	200	903	0	0	0	0	0	0	0	603	903	0
449	8	0	0	0	0	0	0	200	300	0	0	0	0	0	0	0	200	903	0	0	0	0	0	0	0	603	903	0
449	9	0	0	0	0	0	0	200	300	0	0	0	0	0	0	0	200	903	0	0	0	0	0	0	0	603	903	0
450	0	0	0	0	0	0	0	200	300	0	0	0	0	0	0	0	200	903	0	0	0	0	0	0	0	603	903	0
450	1	0	0	0	0	0	0	200	300	0	0	0	0	0	0	0	200	903	0	0	0	0	0	0	0	603	903	0
450	2	0	0	0	0	0	0	200	300	0	0	0	0	0	0	0	200	903	0	0	0	0	0	0	0	603	903	0
450	3	0	0	0	0	0	0	200	300	0	0	0	0	0	0	0	200	903	0	0	0	0	0	0	0	603	903	0
450	4	0	0	0	0	0	0	200	300	0	0	0	0	0	0	0	200	903	0	0	0	0	0	0	0	603	903	0
450	5	0	0	0	0	0	0	200	300	0	0	0	0	0	0	0	200	903	0	0	0	0	0	0	0	603	903	0
450	6	0	0	0	0	0	0	200	300	0	0	0	0	0	0	0	200	903	0	0	0	0	0	0	0	603	903	0
450	7	0	0	0	0	0	0	200	300	0	0	0	0	0	0	0	200	903	0	0	0	0	0	0	0	603	903	0
450	8	0	0	0	0	0	0	200	300	0	0	0	0	0	0	0	200	903	0	0	0	0	0	0	0	603	903	0
450	9	0	0	0	0	0	0	200	300	0	0	0	0	0	0	0	200	903	0	0	0	0	0	0	0	603	903	0
451	0	0	0	0	0	0	0	200	300	0	0	0	0	0	0	0	200	903	0	0	0	0	0	0	0	603	903	0
451	1	0	0	0	0	0	0	200	300	0	0	0	0	0	0	0	200	903	0	0	0	0	0	0	0	603	903	0
451	2	0	0	0	0	0	0	200	300	0	0	0	0	0	0	0	200	903	0	0	0	0	0	0	0	603	903	0
451	3	0	0	0	0	0	0	200	300	0	0	0	0	0	0	0	200	903	0	0	0	0	0	0	0	603	903	0
451	4	0	0	0	0	0	0	200	300	0	0	0	0	0	0	0	200	903	0	0	0	0	0	0	0	603	903	0
451	5	0	0	0	0	0	0	200	300	0	0	0	0	0	0	0	200	903	0	0	0	0	0	0	0	603	903	0
451	6	0	0	0	0	0	0	200	300	0	0	0	0	0	0	0	200	903	0	0	0	0	0	0	0	603	903	0
451	7	0	0	0	0	0	0	200	300	0	0	0	0	0	0	0	200	903	0	0	0	0	0	0	0	603	903	0
451	8	0	0	0	0	0	0	200	300	0	0	0	0	0	0	0	200	903	0	0	0	0	0	0	0	603	903	0
451	9	0	0	0	0	0	0	200	300	0	0	0	0	0	0	0	200	903	0	0	0	0	0	0	0	603	903	0
452	0	0	0	0	0	0	0	200	300	0	0	0	0	0	0	0	200	903	0	0	0	0	0	0	0	603	903	0
452	1	0	0	0	0	0	0	200	300	0	0	0	0	0	0	0	200	903	0	0	0	0	0	0	0	603	903	0
452	2	0	0	0	0	0	0	200	300	0	0	0	0	0	0	0	200	903	0	0	0	0	0	0	0	603	903	0
452	3	0	0	0	0	0	0	200	300	0	0	0	0	0	0	0	200	903	0	0	0	0	0	0	0	603	903	0
452	4	0	0	0	0	0	0	200	300	0	0	0	0	0	0	0	200	903	0	0	0	0	0	0	0	603	903	0
452	5	0	0	0	0	0	0	200	300	0	0	0	0	0	0	0	200	903	0	0	0	0	0	0	0	603	903	0
452	6	0	0	0	0	0	0	200	300	0	0	0	0	0	0	0	200	903	0	0	0	0	0	0	0	603	903	0
452	7	0	0	0	0	0	0	200	300	0	0	0	0	0	0	0	200	903	0	0	0	0	0	0	0	603	903	0
452	8	0	0	0	0	0	0	200	300	0	0	0	0	0	0	0	200	903	0	0	0	0	0	0	0	603	903	0
452	9	0	0	0	0	0	0	200	300	0	0	0	0	0	0	0	200	903	0	0	0	0	0	0	0	603	903	0
453	0	0	0	0	0	0	0	200	300	0	0	0	0	0	0	0	200	903	0	0	0	0	0	0	0	603	903	0
453	1	0	0	0	0	0	0	200	300	0	0	0	0	0	0	0	200	903	0	0	0	0	0	0	0	603	903	0
453	2	0	0	0	0	0	0	200	300	0	0	0	0	0	0	0	200	903	0	0	0	0	0	0	0	603	903	0
453	3	0	0	0	0	0	0	200	300	0	0	0	0	0	0	0	200	903	0	0	0	0	0	0	0	603	903	0
453	4	0	0	0	0	0	0	200	300	0	0	0	0	0	0	0	200	903	0	0	0	0	0	0	0	603	903	0
453	5	0	0	0	0	0	0	200	300	0	0	0	0	0	0	0	200	903	0	0	0	0	0	0	0	603	903	0
453	6	0	0	0	0	0	0	200	300	0	0	0	0	0	0	0	200	903	0	0	0	0	0	0	0	603	903	0
453	7	0	0	0	0	0	0	200	300	0	0	0	0	0	0	0	200	903	0	0	0	0	0	0	0	603	903	0
453	8	0	0	0	0	0	0	200	300	0	0	0	0	0	0	0	200	903	0	0	0	0	0	0	0	603	903	0
453	9	0	0	0	0	0	0	200	300	0	0	0	0	0	0	0	200	903	0	0	0	0	0	0	0	603	903	0
454	0	0	0	0	0	0	0	200	300	0	0	0	0	0	0	0	200	903	0	0	0	0	0	0	0	603	903	0
454	1	0	0	0	0	0	0	200	300	0	0	0	0	0	0	0	200	903	0	0	0	0	0	0	0	603	903	0
454	2	0	0	0	0	0	0	200	300	0	0	0	0	0	0	0	200	903	0	0	0	0	0	0	0	603	903	0
454	3	0	0	0	0	0	0	200	300	0	0	0	0	0	0	0	200	903	0	0	0	0	0	0	0	603	903	0
454	4	0	0	0	0	0	0	200	300	0	0	0	0	0	0	0	200	903	0	0	0	0	0	0	0	603	903	0
454	5	0	0	0	0	0	0	200	300	0	0	0	0	0	0	0	200	903	0	0	0	0	0	0	0	603	903	0
454	6	0	0	0	0	0	0	200	300	0	0	0	0	0	0	0	200	903	0	0	0	0	0	0	0	603	903	0
454	7	0	0	0	0	0	0	200	300	0	0	0	0	0	0	0	200	903	0	0	0	0	0	0	0	603	903	0
454	8	0	0	0	0	0	0	200	300	0	0	0	0	0	0	0	200	903	0	0	0	0	0	0	0	603	903	0
454	9	0	0	0	0	0	0	200	300	0	0	0	0	0	0	0	200	903	0	0	0	0	0	0	0	603	903	0
455	0	0	0	0	0	0	0	200	300	0	0	0	0	0	0	0	200	903	0	0	0	0	0	0	0	603	903	0
455	1	0	0	0	0	0	0	200	300	0	0	0	0	0	0	0	200	903	0	0	0	0	0	0	0	603	903	0
455	2	0	0	0	0	0	0	200	300	0	0	0	0	0	0	0	200	903	0	0	0	0	0	0	0	603	903	0
455	3	0	0	0	0	0	0	200	300	0	0	0	0	0	0	0	200	903	0	0	0	0	0	0	0	603	903	0
455	4	0	0	0	0	0	0	200	300	0	0	0	0	0	0	0	200	903	0	0	0	0	0	0	0	603	903	0
455	5	0	0	0	0	0	0	200	300	0	0	0	0	0	0	0	200	903	0	0	0	0	0	0	0	603	903	0
455	6	0	0	0	0	0	0	200	300	0	0	0	0	0	0	0	200	903	0	0	0	0	0	0	0	603	903	0
455	7	0	0	0	0	0	0	200	300	0	0	0	0	0	0	0	200	903	0	0	0	0	0	0	0	603	903	0
455	8	0	0	0	0	0	0	200	300	0	0	0	0	0	0	0	200	903	0	0	0	0	0	0	0	603	903	0
455	9	0	0	0	0	0	0	200	300	0	0	0	0	0	0	0	200	903	0	0	0	0	0	0	0	603	903	0
456	0	0	0	0	0	0	0	200	300	0	0	0	0	0	0	0	200	903	0	0	0	0	0	0	0	603	903	0
456	1	0	0	0	0	0	0	200	300	0	0	0	0	0	0	0	200	903	0	0	0	0	0	0	0	603	903	0
456	2	0	0	0	0	0	0	200	300	0	0	0	0	0	0	0	200	903	0	0	0	0	0	0	0	603	903	0
456	3	0	0	0	0	0	0	200	300	0	0	0	0	0	0	0	200	903	0	0	0	0	0	0	0	603	903	0
456	4	0	0	0	0	0	0	200	300	0	0	0	0	0	0	0	200	903	0	0	0	0	0	0	0	603	903	0
456	5	0	0	0	0	0	0	200	300	0	0	0	0	0	0	0	200	903	0	0	0	0	0	0	0	603	903	0
456	6	0	0	0	0	0	0	200	300	0	0	0	0	0	0	0	200	903	0	0	0	0	0	0	0	603	903	0
456	7	0	0	0	0	0	0	200	300	0	0	0	0	0	0	0	200	903	0	0	0	0	0	0	0	603	903	0
456	8	0	0	0	0	0	0	200	300	0	0	0	0	0	0	0	200	903	0	0	0	0	0	0	0	603	903	0
456	9	0	0	0	0	0	0	200	300	0	0	0	0	0	0	0	200	903	0	0	0	0	0	0	0	603	903	0
457	0	0	0	0	0	0	0	200	300	0	0	0	0	0	0	0	200	903	0	0	0	0	0	0	0	603	903	0
457	1	0	0	0	0	0	0	200	300	0	0	0	0	0	0	0	200	903	0	0	0	0	0	0	0	603	903	0
457	2	0	0	0	0	0	0	200	300	0	0	0	0	0	0	0	200	903	0	0	0	0	0	0	0	603	903	0
457	3	0	0	0	0	0	0	200	300	0	0	0	0	0	0	0	200	903	0	0	0	0	0	0	0	603	903	0
457	4	0	0	0	0	0	0	200	300	0	0	0	0	0	0	0	200	903	0	0	0	0	0	0	0	603	903	0
457	5	0	0	0	0	0	0	200	300	0	0	0	0	0	0	0	200	903	0	0	0	0	0	0	0	603	903	0
457	6	0	0	0	0	0	0	200	300	0	0	0	0	0	0	0	200	903	0	0	0	0	0	0	0	603	903	0
457	7	0	0	0	0	0	0	200	300	0	0	0	0	0	0	0	200	903	0	0	0	0	0	0	0	603	903	0
457	8	0	0	0	0	0	0	200	300	0	0	0	0	0	0	0	200	903	0	0	0	0	0	0	0	603	903	0
457	9	0	0	0	0	0	0	200	300	0	0	0	0	0	0	0	200	903	0	0	0	0	0	0	0	603	903	0
458	0	0	0	0	0	0	0	200	300	0	0	0	0	0	0	0	200	903	0	0	0	0	0	0	0	603	903	0
458	1	0	0	0	0	0	0	200	300	0	0	0	0	0	0	0	200	903	0	0	0	0	0	0	0	603	903	0
458	2	0	0	0	0	0	0	200	300	0	0	0	0	0	0	0	200	903	0	0	0	0	0	0	0	603	903	0
458	3	0	0	0	0	0	0	200	300	0	0	0	0	0	0	0	200	903	0	0	0	0	0	0	0	603	903	0
458	4	0	0	0	0	0	0	200	300	0	0	0	0	0	0	0	200	903	0	0	0	0	0	0	0	603	903	0
458	5	0	0	0	0	0	0	200	300	0	0	0	0	0	0	0	200	903	0	0	0	0	0	0	0	603	903	0
458	6	0	0	0	0	0	0	200	300	0	0	0	0	0	0	0	200	903	0	0	0	0	0	0	0	603	903	0
458	7	0	0	0	0	0	0	200	300	0	0	0	0	0	0	0	200	903	0	0	0	0	0	0	0	603	903	0
458	8	0	0	0	0	0	0	200	300	0	0	0	0	0	0	0	200	903	0	0	0	0	0	0	0	603	903	0
458	9	0	0	0	0	0	0	200	300	0	0	0	0	0	0	0	200	903	0	0	0	0	0	0	0	603	903	0
459	0	0	0	0	0	0	0	200	300	0	0	0	0	0	0	0	200	903	0	0	0	0	0	0	0	603	903	0
459	1	0	0	0	0	0	0	200	300	0	0	0	0	0	0	0	200	903	0	0	0	0	0	0	0	603	903	0
459	2	0	0	0	0	0	0	200	300	0	0	0	0	0	0	0	200	903	0	0	0	0	0	0	0	603	903	0
459	3	0	0	0	0	0	0	200	300	0	0	0	0	0	0	0	200	903	0	0	0	0	0	0	0	603	903	0
459	4	0	0	0	0	0	0	200	300	0	0	0	0	0	0	0	200	903	0	0	0	0	0	0	0	603	903	0
459	5	0	0	0	0	0	0	200	300	0	0	0	0	0	0	0	200	903	0	0	0	0	0	0	0	603	903	0
459	6	0	0	0	0	0	0	200	300	0	0	0	0	0	0	0	200	903	0	0	0	0	0	0	0	603	903	0
459	7	0	0	0	0	0	0	200	300	0	0	0	0	0	0	0	200	903	0	0	0	0	0	0	0	603	903	0
459	8	0	0	0	0	0	0	200	300	0	0	0	0	0	0	0	200	903	0	0	0	0	0	0	0	603	903	0
459	9	0	0	0	0	0	0	200	300	0	0	0	0	0	0	0	200	903	0	0	0	0	0	0	0	603	903	0
460	0	0	0	0	0	0	0	200	300	0	0	0	0	0	0	0	200	903	0	0	0	0	0	0	0	603	903	0
460	1	0	0	0	0	0	0	200	300	0	0	0	0	0	0	0	200	903	0	0	0	0	0	0	0	603	903	0
460	2	0	0	0	0	0	0	200	300	0	0	0	0	0	0	0	200	903	0	0	0	0	0	0	0	603	903	0
460	3	0	0	0	0	0	0	200	300	0	0	0	0	0	0	0	200	903	0	0	0	0	0	0	0	603	903	0
460	4	0	0	0	0	0	0	200	300	0	0	0	0	0	0	0	200	903	0	0	0	0	0	0	0	603	903	0
460	5	0	0	0	0	0	0	200	300	0	0	0	0	0	0	0	200	903	0	0	0	0	0	0	0	603	903	0
460	6	0	0	0	0	0	0	200	300	0	0	0	0	0	0	0	200	903	0	0	0	0	0	0	0	603	903	0
460	7	0	0	0	0	0	0	200	300	0	0	0	0	0	0	0	200	903	0	0	0	0	0	0	0	603	903	0
460	8	0	0	0	0	0	0	200	300	0	0	0	0	0	0	0	200	903	0	0	0	0	0	0	0	603	903	0
460	9	0	0	0	0	0	0	200	300	0	0	0	0	0	0	0	200	903	0	0	0	0	0	0	0	603	903	0
461	0	0	0	0	0	0	0	200	300	0	0	0	0	0	0	0	200	903	0	0	0	0	0	0	0	603	903	0
461	1	0	0	0	0	0	0	200	300	0	0	0	0	0	0	0	200	903	0	0	0	0	0	0	0	603	903	0
461	2	0	0	0	0	0	0	200	300	0	0	0	0	0	0	0	200	903	0	0	0	0	0	0	0	603	903	0
461	3	0	0	0	0	0	0	200	300	0	0	0	0	0	0	0	200	903	0	0	0	0	0	0	0	603	903	0
461	4	0	0	0	0	0	0	200	300	0	0	0	0	0	0	0	200	903	0	0	0	0	0	0	0	603	903	0
461	5	0	0	0	0	0	0	200	300	0	0	0	0	0	0	0	200	903	0	0	0	0	0	0	0	603	903	0
461	6	0	0	0	0	0	0	200	300	0	0	0	0	0	0	0	200	903	0	0	0	0	0	0	0	603	903	0
461	7	0	0	0	0	0	0	200	300	0	0	0	0	0	0	0	200	903	0	0	0	0	0	0	0	603	903	0
461	8	0	0	0	0	0	0	200	300	0	0	0	0	0	0	0	200	903	0	0	0	0	0	0	0	603	903	0
461	9	0	0	0	0	0	0	200	300	0	0	0	0	0	0	0	200	903	0	0	0	0	0	0	0	603	903	0
462	0	0	0	0	0	0	0	200	300	0	0	0	0	0	0	0	200	903	0	0	0	0	0	0	0	603	903	0
462	1	0	0	0	0	0	0	200	300	0	0	0	0	0	0	0	200	903	0	0	0	0	0	0	0	603	903	0
462	2	0	0	0	0	0	0	200	300	0	0	0	0	0	0	0	200	903	0	0	0	0	0	0	0	603	903	0
462	3	0	0	0	0	0	0	200	300	0	0	0	0	0	0	0	200	903	0	0	0	0	0	0	0	603	903	0
462	4	0	0	0	0	0	0	200	300	0	0	0	0	0	0	0	200	903	0	0	0	0	0	0	0	603	903	0
462	5	0	0	0	0	0	0	200	300	0	0	0	0	0	0	0	200	903	0	0	0	0	0	0	0	603	903	0
462	6	0	0	0	0	0	0	200	300	0	0	0	0	0	0	0	200	903	0	0	0	0	0	0	0	603	903	0
462	7	0	0	0	0	0	0	200	300	0	0	0	0	0	0	0	200	903	0	0	0	0	0	0	0	603	903	0
462	8	0	0	0	0	0	0	200	300	0	0	0	0	0	0	0	200	903	0	0	0	0	0	0	0	603	903	0
462	9	0	0	0	0	0	0	200	300	0	0	0	0	0	0	0	200	903	0	0	0	0	0	0	0	603	903	0
463	0	0	0	0	0	0	0	200	300	0	0	0	0	0	0	0	200	903	0	0	0	0	0	0	0	603	903	0
463	1	0	0	0	0	0	0	200	300	0	0	0	0	0	0	0	200	903	0	0	0	0	0	0	0	603	903	0
463	2	0	0	0	0	0	0	200	300	0	0	0	0	0	0	0	200	903	0	0	0	0	0	0	0	603	903	0
463	3	0	0	0	0	0	0	200	300	0	0	0	0	0	0	0	200	903	0	0	0	0	0	0	0	603	903	0
463	4	0	0	0	0	0	0	200	300	0	0	0	0	0	0	0	200	903	0	0	0	0	0	0	0	603	903	0
463	5	0	0	0	0	0	0	200	300	0	0	0	0	0	0	0	200	903	0	0	0	0	0	0	0	603	903	0
463	6	0	0	0	0	0	0	200	300	0	0	0	0	0	0	0	200	903	0	0	0	0	0	0	0	603	903	0
463	7	0	0	0	0	0	0	200	300	0	0	0	0	0	0	0	200	903	0	0	0	0	0	0	0	603	903	0
463	8	0	0	0	0	0	0	200	300	0	0	0	0	0	0	0	200	903	0	0	0	0	0	0	0	603	903	0
463	9	0	0	0	0	0	0	200	300	0	0	0	0	0	0	0	200	903	0	0	0	0	0	0	0	603	903	0
464	0	0	0	0	0	0	0	200	300	0	0	0	0	0	0	0	200	903	0	0	0	0	0	0	0	603	903	0
464	1	0	0	0	0	0	0	200	300	0	0	0	0	0	0	0	200	903	0	0	0	0	0	0	0	603	903	0
464	2	0	0	0	0	0	0	200	300	0	0	0	0	0	0	0	200	903	0	0	0	0	0	0	0	603	903	0
464	3	0	0	0	0	0	0	200	300	0	0	0	0	0	0	0	200	903	0	0	0	0	0	0	0	603	903	0
464	4	0	0	0	0	0	0	200	300	0	0	0	0	0	0	0	200	903	0	0	0	0	0	0	0	603	903	0
464	5	0	0	0	0	0	0	200	300	0	0	0	0	0	0	0	200	903	0	0	0	0	0	0	0	603	903	0
464	6	0	0	0	0	0	0	200	300	0	0	0	0	0	0	0	200	903	0	0	0	0	0	0	0	603	903	0
464	7	0	0	0	0	0	0	200	300	0	0	0	0	0	0	0	200	903	0	0	0	0	0	0	0	603	903	0
464	8	0	0	0	0	0	0	200	300	0	0	0	0	0	0	0	200	903	0	0	0	0	0	0	0	603	903	0
464	9	0	0	0	0	0	0	200	300	0	0	0	0	0	0	0	200	903	0	0	0	0	0	0	0	603	903	0
465	0	0	0	0	0	0	0	200	300	0	0	0	0	0	0	0	200	903	0	0	0	0	0	0	0	603	903	0
465	1	0	0	0	0	0	0	200	300	0	0	0	0	0	0	0	200	903	0	0	0	0	0	0	0	603	903	0
465	2	0	0	0	0	0	0	200	300	0	0	0	0	0	0	0	200	903	0	0	0	0	0	0	0	603	903	0
465	3	0	0	0	0	0	0	200	300	0	0	0	0	0	0	0	200	903	0	0	0	0	0	0	0	603	903	0
465	4	0	0	0	0	0	0	200	300	0	0	0	0	0	0	0	200	903	0	0	0	0	0	0	0	603	903	0
465	5	0	0	0	0	0	0	200	300	0	0	0	0	0	0	0	200	903	0	0	0	0	0	0	0	603	903	0
465	6	0	0	0	0	0	0	200	300	0	0	0	0	0	0	0	200	903	0	0	0	0	0	0	0	603	903	0
465	7	0	0	0	0	0	0	200	300	0	0	0	0	0	0	0	200	903	0	0	0	0	0	0	0	603	903	0
465	8	0	0	0	0	0	0	200	300	0	0	0	0	0	0	0	200	903	0	0	0	0	0	0	0	603	903	0
465	9	0	0	0	0	0	0	200	300	0	0	0	0	0	0	0	200	903	0	0	0	0	0	0	0	603	903	0
466	0	0	0	0	0	0	0	200	300	0	0	0	0	0	0	0	200	903	0	0	0	0	0	0	0	603	903	0
466	1	0	0	0	0	0	0	200	300	0	0	0	0	0	0	0	200	903	0	0	0	0	0	0	0	603	903	0
466	2	0	0	0	0	0	0	200	300	0	0	0	0	0	0	0	200	903	0	0	0	0	0	0	0	603	903	0
466	3	0	0	0	0	0	0	200	300	0	0	0	0	0	0	0	200	903	0	0	0	0	0	0	0	603	903	0
466	4	0	0	0	0	0	0	200	300	0	0	0	0	0	0	0	200	903	0	0	0	0	0	0	0	603	903	0
466	5	0	0	0	0	0	0	200	300	0	0	0	0	0	0	0	200	903	0	0	0	0	0	0	0	603	903	0
466	6	0	0	0	0	0	0	200	300	0	0	0	0	0	0	0	200	903	0	0	0	0	0	0	0	603	903	0
466	7	0	0	0	0	0	0	200	300	0	0	0	0	0	0	0	200	903	0	0	0	0	0	0	0	603	903	0
466	8	0	0	0	0	0	0	200	300	0	0	0	0	0	0	0	200	903	0	0	0	0	0	0	0	603	903	0
466	9	0	0	0	0	0	0	200	300	0	0	0	0	0	0	0	200	903	0	0	0	0	0	0	0	603	903	0
467	0	0	0	0	0	0	0	200	300	0	0	0	0	0	0	0	200	903	0	0	0	0	0	0	0	603	903	0
467	1	0	0	0	0	0	0	200	300	0	0	0	0	0	0	0	200	903	0	0	0	0	0	0	0	603	903	0
467	2	0	0	0	0	0	0	200	300	0	0	0	0	0	0	0	200	903	0	0	0	0	0	0	0	603	903	0
467	3	0	0	0	0	0	0	200	300	0	0	0	0	0	0	0	200	903	0	0	0	0	0	0	0	603	903	0
467	4	0	0	0	0	0	0	200	300	0	0	0	0	0	0	0	200	903	0	0	0	0	0	0	0	603	903	0
467	5	0	0	0	0	0	0	200	300	0	0	0	0	0	0	0	200	903	0	0	0	0	0	0	0	603	903	0
467	6	0	0	0	0	0	0	200	300	0	0	0	0	0	0	0	200	903	0	0	0	0	0	0	0	603	903	0
467	7	0	0	0	0	0	0	200	300	0	0	0	0	0	0	0	200	903	0	0	0	0	0	0	0	603	903	0
467	8	0	0	0	0	0	0	200	300	0	0	0	0	0	0	0	200	903	0	0	0	0	0	0	0	603	903	0
467	9	0	0	0	0	0	0	200	300	0	0	0	0	0	0	0	200	903	0	0	0	0	0	0	0	603	903	0
468	0	0	0	0	0	0	0	200	300	0	0	0	0	0	0	0	200	903	0	0	0	0	0	0	0	603	903	0
468	1	0	0	0	0	0	0	200	300	0	0	0	0	0	0	0	200	903	0	0	0	0	0	0	0	603	903	0
468	2	0	0	0	0	0	0	200	300	0	0	0	0	0	0	0	200	903	0	0	0	0	0	0	0	603	903	0
468	3	0	0	0	0	0	0	200	300	0	0	0	0	0	0	0	200	903	0	0	0	0	0	0	0	603	903	0
468	4	0	0	0	0	0	0	200	300	0	0	0	0	0	0	0	200	903	0	0	0	0	0	0	0	603	903	0
468	5	0	0	0	0	0	0	200	300	0	0	0	0	0	0	0	200	903	0	0	0	0	0	0	0	603	903	0
468	6	0	0	0	0	0	0	200	300	0	0	0	0	0	0	0	200	903	0	0	0	0	0	0	0	603	903	0
468	7	0	0	0	0	0	0	200	300	0	0	0	0	0	0	0	200	903	0	0	0	0	0	0	0	603	903	0
468	8	0	0	0	0	0	0	200	300	0	0	0	0	0	0	0	200	903	0	0	0	0	0	0	0	603	903	0
468	9	0	0	0	0	0	0	200	300	0	0	0	0	0	0	0	200	903	0	0	0	0	0	0	0	603	903	0
469	0	0	0	0	0	0	0	200	300	0	0	0	0	0	0	0	200	903	0	0	0	0	0	0	0	603	903	0
469	1	0	0	0	0	0	0	200	300	0	0	0	0	0	0	0	200	903	0	0	0	0	0	0	0	603	903	0
469	2	0	0	0	0	0	0	200	300	0	0	0	0	0	0	0	200	903	0	0	0	0	0	0	0	603	903	0
469	3	0	0	0	0	0	0	200	300	0	0	0	0	0	0	0	200	903	0	0	0	0	0	0	0	603	903	0
469	4	0	0	0	0	0	0	200	300	0	0	0	0	0	0	0	200	903	0	0	0	0	0	0	0	603	903	0
469	5	0	0	0	0	0	0	200	300	0	0	0	0	0	0	0	200	903	0	0	0	0	0	0	0	603	903	0
469	6	0	0	0	0	0	0	200	300	0	0	0	0	0	0	0	200	903	0	0	0	0	0	0	0	603	903	0
469	7	0	0	0	0	0	0	200	300	0	0	0	0	0	0	0	200	903	0	0	0	0	0	0	0	603	903	0
469	8	0	0	0	0	0	0	200	300	0	0	0	0	0	0	0	200	903	0	0	0	0	0	0	0	603	903	0
469	9	0	0	0	0	0	0	200	300	0	0	0	0	0	0	0	200	903	0	0	0	0	0	0	0	603	903	0
470	0	0	0	0	0	0	0	200	300	0	0	0	0	0	0	0	200	903	0	0	0	0	0	0	0	603	903	0
470	1	0	0	0	0	0	0	200	300	0	0	0	0	0	0	0	200	903	0	0	0	0	0	0	0	603	903	0
470	2	0	0	0	0	0	0	200	300	0	0	0	0	0	0	0	200	903	0	0	0	0	0	0	0	603	903	0
470	3	0	0	0	0	0	0	200	300	0	0	0	0	0	0	0	200	903	0	0	0	0	0	0	0	603	903	0
470	4	0	0	0	0	0	0	200	300	0	0	0	0	0	0	0	200	903	0	0	0	0	0	0	0	603	903	0
470	5	0	0	0	0	0	0	200	300	0	0	0	0	0	0	0	200	903	0	0	0	0	0	0	0	603	903	0
470	6	0	0	0	0	0	0	200	300	0	0	0	0	0	0	0	200	903	0	0	0	0	0	0	0	603	903	0
470	7	0	0	0	0	0	0	200	300	0	0	0	0	0	0	0	200	903	0	0	0	0	0	0	0	603	903	0
470	8	0	0	0	0	0	0	200	300	0	0	0	0	0	0	0	200	903	0	0	0	0	0	0	0	603	903	0
470	9	0	0	0	0	0	0	200	300	0	0	0	0	0	0	0	200	903	0	0	0	0	0	0	0	603	903	0
471	0	0	0	0	0	0	0	200	300	0	0	0	0	0	0	0	200	903	0	0	0	0	0	0	0	603	903	0
471	1	0	0	0	0	0	0	200	300	0	0	0	0	0	0	0	200	903	0	0	0	0	0	0	0	603	903	0
471	2	0	0	0	0	0	0	200	300	0	0	0	0	0	0	0	200	903	0	0	0	0	0	0	0	603	903	0
471	3	0	0	0	0	0	0	200	300	0	0	0	0	0	0	0	200	903	0	0	0	0	0	0	0	603	903	0
471	4	0	0	0	0	0	0	200	300	0	0	0	0	0	0	0	200	903	0	0	0	0	0	0	0	603	903	0
471	5	0	0	0	0	0	0	200	300	0	0	0	0	0	0	0	200	903	0	0	0	0	0	0	0	603	903	0
471	6	0	0	0	0	0	0	200	300	0	0	0	0	0	0	0	200	903	0	0	0	0	0	0	0	603	903	0
471	7	0	0	0	0	0	0	200	300	0	0	0	0	0	0	0	200	903	0	0	0	0	0	0	0	603	903	0
471	8	0	0	0	0	0	0	200	300	0	0	0	0	0	0	0	200	903	0	0	0	0	0	0	0	603	903	0
471	9	0	0	0	0	0	0	200	300	0	0	0	0	0	0	0	200	903	0	0	0	0	0	0	0	603	903	0
472	0	0	0	0	0	0	0	200	300	0	0	0	0	0	0	0	200	903	0	0	0	0	0	0	0	603	903	0
472	1	0	0	0	0	0	0	200	300	0	0	0	0	0	0	0	200	903	0	0	0	0	0	0	0	603	903	0
472	2	0	0	0	0	0	0	200	300	0	0	0	0	0	0	0	200	903	0	0	0	0	0	0	0	603	903	0
472	3	0	0	0	0	0	0	200	300	0	0	0	0	0	0	0	200	903	0	0	0	0	0	0	0	603	903	0
472	4	0	0	0	0	0	0	200	300	0	0	0	0	0	0	0	200	903	0	0	0	0	0	0	0	603	903	0
472	5	0	0	0	0	0	0	200	300	0	0	0	0	0	0	0	200	903	0	0	0	0	0	0	0	603	903	0
472	6	0	0	0	0	0	0	200	300	0	0	0	0	0	0	0	200	903	0	0	0	0	0	0	0	603	903	0
472	7	0	0	0	0	0	0	200	300	0	0	0	0	0	0	0	200	903	0	0	0	0	0	0	0	603	903	0
472	8	0	0	0	0	0	0	200	300	0	0	0	0	0	0	0	200	903	0	0	0	0	0	0	0	603	903	0
472	9	0	0	0	0	0	0	200	300	0	0	0	0	0	0	0	200	903	0	0	0	0	0	0	0	603	903	0
473	0	0	0	0	0	0	0	200	300	0	0	0	0	0	0	0	200	903	0	0	0	0	0	0	0	603	903	0
473	1	0	0	0	0	0	0	200	300	0	0	0	0	0	0	0	200	903	0	0	0	0	0	0	0	603	903	0
473	2	0	0	0	0	0	0	200	300	0	0	0	0	0	0	0	200	903	0	0	0	0	0	0	0	603	903	0
473	3	0	0	0	0	0	0	200	300	0	0	0	0	0	0	0	200	903	0	0	0	0	0	0	0	603	903	0
473	4	0	0	0	0	0	0	200	300	0	0	0	0	0	0	0	200	903	0	0	0	0	0	0	0	603	903	0
473	5	0	0	0	0	0	0	200	300	0	0	0	0	0	0	0	200	903	0	0	0	0	0	0	0	603	903	0
473	6	0	0	0	0	0	0	200	300	0	0	0	0	0	0	0	200	903	0	0	0	0	0	0	0	603	903	0
473	7	0	0	0	0	0	0	200	300	0	0	0	0	0	0	0	200	903	0	0	0	0	0	0	0	603	903	0
473	8	0	0	0	0	0	0	200	300	0	0	0	0	0	0	0	200	903	0	0	0	0	0	0	0	603	903	0
473	9	0	0	0	0	0	0	200	300	0	0	0	0	0	0	0	200	903	0	0	0	0	0	0	0	603	903	0
474	0	0	0	0	0	0	0	200	300	0	0	0	0	0	0	0	200	903	0	0	0	0	0	0	0	603	903	0
474	1	0	0	0	0	0	0	200	300	0	0	0	0	0	0	0	200	903	0	0	0	0	0	0	0	603	903	0
474	2	0	0	0	0	0	0	200	300	0	0	0	0	0	0	0	200	903	0	0	0	0	0	0	0	603	903	0
474	3	0	0	0	0	0	0	200	300	0	0	0	0	0	0	0	200	903	0	0	0	0	0	0	0	603	903	0
474	4	0	0	0	0	0	0	200	300	0	0	0	0	0	0	0	200	903	0	0	0	0	0	0	0	603	903	0
474	5	0	0	0	0	0	0	200	300	0	0	0	0	0	0	0	200	903	0	0	0	0	0	0	0	603	903	0
474	6	0	0	0	0	0	0	200	300	0	0	0	0	0	0	0	200	903	0	0	0	0	0	0	0	603	903	0
474	7	0	0	0	0	0	0	200	300	0	0	0	0	0	0	0	200	903	0	0	0	0	0	0	0	603	903	0
474	8	0	0	0	0	0	0	200	300	0	0	0	0	0	0	0	200	903	0	0	0	0	0	0	0	603	903	0
474	9	0	0	0	0	0	0	200	300	0	0	0	0	0	0	0	200	903	0	0	0	0	0	0	0	603	903	0
475	0	0	0	0	0	0	0	200	300	0	0	0	0	0	0	0	200	903	0	0	0	0	0	0	0	603	903	0
475	1	0	0	0	0	0	0	200	300	0	0	0	0	0	0	0	200	903	0	0	0	0	0	0	0	603	903	0
475	2	0	0	0	0	0	0	200	300	0	0	0	0	0	0	0	200	903	0	0	0	0	0	0	0	603	903	0
475	3	0	0	0	0	0	0	200	300	0	0	0	0	0	0	0	200	903	0	0	0	0	0	0	0	603	903	0
475	4	0	0	0	0	0	0	200	300	0	0	0	0	0	0	0	200	903	0	0	0	0	0	0	0	603	903	0
475	5	0	0	0	0	0	0	200	300	0	0	0	0	0	0	0	200	903	0	0	0	0	0	0	0	603	903	0
475	6	0	0	0	0	0	0	200	300	0	0	0	0	0	0	0	200	903	0	0	0	0	0	0	0	603	903	0
475	7	0	0	0	0	0	0	200	300	0	0	0	0	0	0	0	200	903	0	0	0	0	0	0	0	603	903	0
475	8	0	0	0	0	0	0	200	300	0	0	0	0	0	0	0	200	903	0	0	0	0	0	0	0	603	903	0
475	9	0	0	0	0	0	0	200	300	0	0	0	0	0	0	0	200	903	0	0	0	0	0	0	0	603	903	0
476	0	0	0	0	0	0	0	200	300	0	0	0	0	0	0	0	200	903	0	0	0	0	0	0	0	603	903	0
476	1	0	0	0	0	0	0	200	300	0	0	0	0	0	0	0	200	903	0	0	0	0	0	0	0	603	903	0
476	2	0	0	0	0	0	0	200	300	0	0	0	0	0	0	0	200	903	0	0	0	0	0	0	0	603	903	0
476	3	0	0	0	0	0	0	200	300	0	0	0	0	0	0	0	200	903	0	0	0	0	0	0	0	603	903	0
476	4	0	0	0	0	0	0	200	300	0	0	0	0	0	0	0	200	903	0	0	0	0	0	0	0	603	903	0
476	5	0	0	0	0	0	0	200	300	0	0	0	0	0	0	0	200	903	0	0	0	0	0	0	0	603	903	0
476	6	0	0	0	0	0	0	200	300	0	0	0	0	0	0	0	200	903	0	0	0	0	0	0	0	603	903	0
476	7	0	0	0	0	0	0	200	300	0	0	0	0	0	0	0	200	903	0	0	0	0	0	0	0	603	903	0
476	8	0	0	0	0	0	0	200	300	0	0	0	0	0	0	0	200	903	0	0	0	0	0	0	0	603	903	0
476	9	0	0	0	0	0	0	200	300	0	0	0	0	0	0	0	200	903	0	0	0	0	0	0	0	603	903	0
477	0	0	0	0	0	0	0	200	300	0	0	0	0	0	0	0	200	903	0	0	0	0	0	0	0	603	903	0
477	1	0	0	0	0	0	0	200	300	0	0	0	0	0	0	0	200	903	0	0	0	0	0	0	0	603	903	0
477	2	0	0	0	0	0	0	200	300	0	0	0	0	0	0	0	200	903	0	0	0	0	0	0	0	603	903	0
477	3	0	0	0	0	0	0	200	300	0	0	0	0	0	0	0	200	903	0	0	0	0	0	0	0	603	903	0
477	4	0	0	0	0	0	0	200	300	0	0	0	0	0	0	0	200	903	0	0	0	0	0	0	0	603	903	0
477	5	0	0	0	0	0	0	200	300	0	0	0	0	0	0	0	200	903	0	0	0	0	0	0	0	603	903	0
477	6	0	0	0	0	0	0	200	300	0	0	0	0	0	0	0	200	903	0	0	0	0	0	0	0	603	903	0
477	7	0	0	0	0	0	0	200	300	0	0	0	0	0	0	0	200	903	0	0	0	0	0	0	0	603	903	0
477	8	0	0	0	0	0	0	200	300	0	0	0	0	0	0	0	200	903	0	0	0	0	0	0	0	603	903	0
477	9	0	0	0	0	0	0	200	300	0	0	0	0	0	0	0	200	903	0	0	0	0	0	0	0	603	903	0
478	0	0	0	0	0	0	0	200	300	0	0	0	0	0	0	0	200	903	0	0	0	0	0	0	0	603	903	0
478	1	0	0	0	0	0	0	200	300	0	0	0	0	0	0	0	200	903	0	0	0	0	0	0	0	603	903	0
478	2	0	0	0	0	0	0	200	300	0	0	0	0	0	0	0	200	903	0	0	0	0	0	0	0	603	903	0
478	3	0	0	0	0	0	0	200	300	0	0	0	0	0	0	0	200	903	0	0	0	0	0	0	0	603	903	0
478	4	0	0	0	0	0	0	200	300	0	0	0	0	0	0	0	200	903	0	0	0	0	0	0	0	603	903	0
478	5	0	0	0	0	0	0	200	300	0	0	0	0	0	0	0	200	903	0	0	0	0	0	0	0	603	903	0
478	6	0	0	0	0	0	0	200	300	0	0	0	0	0	0	0	200	903	0	0	0	0	0	0	0	603	903	0
478	7	0	0	0	0	0	0	200	300	0	0	0	0	0	0	0	200	903	0	0	0	0	0	0	0	603	903	0
478	8	0	0	0	0	0	0	200	300	0	0	0	0	0	0	0	200	903	0	0	0	0	0	0	0	603	903	0
478	9	0	0	0	0	0	0	200	300	0	0	0	0	0	0	0	200	903	0	0	0	0	0	0	0	603	903	0
479	0	0	0	0	0	0	0	200	300	0	0	0	0	0	0	0	200	903	0	0	0	0	0	0	0	603	903	0
479	1	0	0	0	0	0	0	200	300	0	0	0	0	0	0	0	200	903	0	0	0	0	0	0	0	603	903	0
479	2	0	0	0	0	0	0	200	300	0	0	0	0	0	0	0	200	903	0	0	0	0	0	0	0	603	903	0
479	3	0	0	0	0	0	0	200	300	0	0	0	0	0	0	0	200	903	0	0	0	0	0	0	0	603	903	0
479	4	0	0	0	0	0	0	200	300	0	0	0	0	0	0	0	200	903	0	0	0	0	0	0	0	603	903	0
479	5	0	0	0	0	0	0	200	300	0	0	0	0	0	0	0	200	903	0	0	0	0	0	0	0	603	903	0
479	6	0	0	0	0	0	0	200	300	0	0	0	0	0	0	0	200	903	0	0	0	0	0	0	0	603	903	0
479	7	0	0	0	0	0	0	200	300	0	0	0	0	0	0	0	200	903	0	0	0	0	0	0	0	603	903	0
479	8	0	0	0	0	0	0	200	300	0	0	0	0	0	0	0	200	903	0	0	0	0	0	0	0	603	903	0
479	9	0	0	0	0	0	0	200	300	0	0	0	0	0	0	0	200	903	0	0	0	0	0	0	0	603	903	0
480	0	0	0	0	0	0	0	200	300	0	0	0	0	0	0	0	200	903	0	0	0	0	0	0	0	603	903	0
480	1	0	0	0	0	0	0	200	300	0	0	0	0	0	0	0	200	903	0	0	0	0	0	0	0	603	903	0
480	2	0	0	0	0	0	0	200	300	0	0	0	0	0	0	0	200	903	0	0	0	0	0	0	0	603	903	0
480	3	0	0	0	0	0	0	200	300	0	0	0	0	0	0	0	200	903	0	0	0	0	0	0	0	603	903	0
480	4	0	0	0	0	0	0	200	300	0	0	0	0	0	0	0	200	903	0	0	0	0	0	0	0	603	903	0
480	5	0	0	0	0	0	0	200	300	0	0	0	0	0	0	0	200	903	0	0	0	0	0	0	0	603	903	0
480	6	0	0	0	0	0	0	200	300	0	0	0	0	0	0	0	200	903	0	0	0	0	0	0	0	603	903	0
480	7	0	0	0	0	0	0	200	300	0	0	0	0	0	0	0	200	903	0	0	0	0	0	0	0	603	903	0
480	8	0	0	0	0	0	0	200	300	0	0	0	0	0	0	0	200	903	0	0	0	0	0	0	0	603	903	0
480	9	0	0	0	0	0	0	200	300	0	0	0	0	0	0	0	200	903	0	0	0	0	0	0	0	603	903	0
481	0	0	0	0	0	0	0	200	300	0	0	0	0	0	0	0	200	903	0	0	0	0	0	0	0	603	903	0
481	1	0	0	0	0	0	0	200	300	0	0	0	0	0	0	0	200	903	0	0	0	0	0	0	0	603	903	0
481	2	0	0	0	0	0	0	200	300	0	0	0	0	0	0	0	200	903	0	0	0	0	0	0	0	603	903	0
481	3	0	0	0	0	0	0	200	300	0	0	0	0	0	0	0	200	903	0	0	0	0	0	0	0	603	903	0
481	4	0	0	0	0	0	0	200	300	0	0	0	0	0	0	0	200	903	0	0	0	0	0	0	0	603	903	0
481	5	0	0	0	0	0	0	200	300	0	0	0	0	0	0	0	200	903	0	0	0	0	0	0	0	603	903	0
481	6	0	0	0	0	0	0	200	300	0	0	0	0	0	0	0	200	903	0	0	0	0	0	0	0	603	903	0
481	7	0	0	0	0	0	0	200	300	0	0	0	0	0	0	0	200	903	0	0	0	0	0	0	0	603	903	0
481	8	0	0	0	0	0	0	200	300	0	0	0	0	0	0	0	200	903	0	0	0	0	0	0	0	603	903	0
481	9	0	0	0	0	0	0	200	300	0	0	0	0	0	0	0	200	903	0	0	0	0	0	0	0	603	903	0
482	0	0	0	0	0	0	0	200	300	0	0	0	0	0	0	0	200	903	0	0	0	0	0	0	0	603	903	0
482	1	0	0	0	0	0	0	200	300	0	0	0	0	0	0	0	200	903	0	0	0	0	0	0	0	603	903	0
482	2	0	0	0	0	0	0	200	300	0	0	0	0	0	0	0	200	903	0	0	0	0	0	0	0	603	903	0
482	3	0	0	0	0	0	0	200	300	0	0	0	0	0	0	0	200	903	0	0	0	0	0	0	0	603	903	0
482	4	0	0	0	0	0	0	200	300	0	0	0	0	0	0	0	200	903	0	0	0	0	0	0	0	603	903	0
482	5	0	0	0	0	0	0	200	300	0	0	0	0	0	0	0	200	903	0	0	0	0	0	0	0	603	903	0
482	6	0	0	0	0	0	0	200	300	0	0	0	0	0	0	0	200	903	0	0	0	0	0	0	0	603	903	0
482	7	0	0	0	0	0	0	200	300	0	0	0	0	0	0	0	200	903	0	0	0	0	0	0	0	603	903	0
482	8	0	0	0	0	0	0	200	300	0	0	0	0	0	0	0	200	903	0	0	0	0	0	0	0	603	903	0
482	9	0	0	0	0	0	0	200	300	0	0	0	0	0	0	0	200	903	0	0	0	0	0	0	0	603	903	0
483	0	0	0	0	0	0	0	200	300	0	0	0	0	0	0	0	200	903	0	0	0	0	0	0	0	603	903	0
483	1	0	0	0	0	0	0	200	300	0	0	0	0	0	0	0	200	903	0	0	0	0	0	0	0	603	903	0
483	2	0	0	0	0	0	0	200	300	0	0	0	0	0	0	0	200	903	0	0	0	0	0	0	0	603	903	0
483	3	0	0	0	0	0	0	200	300	0	0	0	0	0	0	0	200	903	0	0	0	0	0	0	0	603	903	0
483	4	0	0	0	0	0	0	200	300	0	0	0	0	0	0	0	200	903	0	0	0	0	0	0	0	603	903	0
483	5	0	0	0	0	0	0	200	300	0	0	0	0	0	0	0	200	903	0	0	0	0	0	0	0	603	903	0
483	6	0	0	0	0	0	0	200	300	0	0	0	0	0	0	0	200	903	0	0	0	0	0	0	0	603	903	0
483	7	0	0	0	0	0	0	200	300	0	0	0	0	0	0	0	200	903	0	0	0	0	0	0	0	603	903	0
483	8	0	0	0	0	0	0	200	300	0	0	0	0	0	0	0	200	903	0	0	0	0	0	0	0	603	903	0
483	9	0	0	0	0	0	0	200	300	0	0	0	0	0	0	0	200	903	0	0	0	0	0	0	0	603	903	0
484	0	0	0	0	0	0	0	200	300	0	0	0	0	0	0	0	200	903	0	0	0	0	0	0	0	603	903	0
484	1	0	0	0	0	0	0	200	300	0	0	0	0	0	0	0	200	903	0	0	0	0	0	0	0	603	903	0
484	2	0	0	0	0	0	0	200	300	0	0	0	0	0	0	0	200	903	0	0	0	0	0	0	0	603	903	0
484	3	0	0	0	0	0	0	200	300	0	0	0	0	0	0	0	200	903	0	0	0	0	0	0	0	603	903	0
484	4	0	0	0	0	0	0	200	300	0	0	0	0	0	0	0	200	903	0	0	0	0	0	0	0	603	903	0
484	5	0	0	0	0	0	0	200	300	0	0	0	0	0	0	0	200	903	0	0	0	0	0	0	0	603	903	0
484	6	0	0	0	0	0	0	200	300	0	0	0	0	0	0	0	200	903	0	0	0	0	0	0	0	603	903	0
484	7	0	0	0	0	0	0	200	300	0	0	0	0	0	0	0	200	903	0	0	0	0	0	0	0	603	903	0
484	8	0	0	0	0	0	0	200	300	0	0	0	0	0	0	0	200	903	0	0	0	0	0	0	0	603	903	0
484	9	0	0	0	0	0	0	200	300	0	0	0	0	0	0	0	200	903	0	0	0	0	0	0	0	603	903	0
485	0	0	0	0	0	0	0	200	300	0	0	0	0	0	0	0	200	903	0	0	0	0	0	0	0	603	903	0
485	1	0	0	0	0	0	0	200	300	0	0	0	0	0	0	0	200	903	0	0	0	0	0	0	0	603	903	0
485	2	0	0	0	0	0	0	200	300	0	0	0	0	0	0	0	200	903	0	0	0	0	0	0	0	603	903	0
485	3	0	0	0	0	0	0	200	300	0	0	0	0	0	0	0	200	903	0	0	0	0	0	0	0	603	903	0
485	4	0	0	0	0	0	0	200	300	0	0	0	0	0	0	0	200	903	0	0	0	0	0	0	0	603	903	0
485	5	0	0	0	0	0	0	200	300	0	0	0	0	0	0	0	200	903	0	0	0	0	0	0	0	603	903	0
485	6	0	0	0	0	0	0	200	300	0	0	0	0	0	0	0	200	903	0	0	0	0	0	0	0	603	903	0
485	7	0	0	0	0	0	0	200	300	0	0	0	0	0	0	0	200	903	0	0	0	0	0	0	0	603	903	0
485	8	0	0	0	0	0	0	200	300	0	0	0	0	0	0	0	200	903	0	0	0	0	0	0	0	603	903	0
485	9	0	0	0	0	0	0	200	300	0	0	0	0	0	0	0	200	903	0	0	0	0	0	0	0	603	903	0
486	0	0	0	0	0	0	0	200	300	0	0	0	0	0	0	0	200	903	0	0	0	0	0	0	0	603	903	0
486	1	0	0	0	0	0	0	200	300	0	0	0	0	0	0	0	200	903	0	0	0	0	0	0	0	603	903	0
486	2	0	0	0	0	0	0	200	300	0	0	0	0	0	0	0	200	903	0	0	0	0	0	0	0	603	903	0
486	3	0	0	0	0	0	0	200	300	0	0	0	0	0	0	0	200	903	0	0	0	0	0	0	0	603	903	0
486	4	0	0	0	0	0	0	200	300	0	0	0	0	0	0	0	200	903	0	0	0	0	0	0	0	603	903	0
486	5	0	0	0	0	0	0	200	300	0	0	0	0	0	0	0	200	903	0	0	0	0	0	0	0	603	903	0
486	6	0	0	0	0	0	0	200	300	0	0	0	0	0	0	0	200	903	0	0	0	0	0	0	0	603	903	0
486	7	0	0	0	0	0	0	200	300	0	0	0	0	0	0	0	200	903	0	0	0	0	0	0	0	603	903	0
486	8	0	0	0	0	0	0	200	300	0	0	0	0	0	0	0	200	903	0	0	0	0	0	0	0	603	903	0
486	9	0	0	0	0	0	0	200	300	0	0	0	0	0	0	0	200	903	0	0	0	0	0	0	0	603	903	0
487	0	0	0	0	0	0	0	200	300	0	0	0	0	0	0	0	200	903	0	0	0	0	0	0	0	603	903	0
487	1	0	0	0	0	0	0	200	300	0	0	0	0	0	0	0	200	903	0	0	0	0	0	0	0	603	903	0
487	2	0	0	0	0	0	0	200	300	0	0	0	0	0	0	0	200	903	0	0	0	0	0	0	0	603	903	0
487	3	0	0	0	0	0	0	200	300	0	0	0	0	0	0	0	200	903	0	0	0	0	0	0	0	603	903	0
487	4	0	0	0	0	0	0	200	300	0	0	0	0	0	0	0	200	903	0	0	0	0	0	0	0	603	903	0
487	5	0	0	0	0	0	0	200	300	0	0	0	0	0	0	0	200	903	0	0	0	0	0	0	0	603	903	0
487	6	0	0	0	0	0	0	200	300	0	0	0	0	0	0	0	200	903	0	0	0	0	0	0	0	603	903	0
487	7	0	0	0	0	0	0	200	300	0	0	0	0	0	0	0	200	903	0	0	0	0	0	0	0	603	903	0
487	8	0	0	0	0	0	0	200	300	0	0	0	0	0	0	0	200	903	0	0	0	0	0	0	0	603	903	0
487	9	0	0	0	0	0	0	200	300	0	0	0	0	0	0	0	200	903	0	0	0	0	0	0	0	603	903	0
488	0	0	0	0	0	0	0	200	300	0	0	0	0	0	0	0	200	903	0	0	0	0	0	0	0	603	903	0
488	1	0	0	0	0	0	0	200	300	0	0	0	0	0	0	0	200	903	0	0	0	0	0	0	0	603	903	0
488	2	0	0	0	0	0	0	200	300	0	0	0	0	0	0	0	200	903	0	0	0	0	0	0	0	603	903	0
488	3	0	0	0	0	0	0	200	300	0	0	0	0	0	0	0	200	903	0	0	0	0	0	0	0	603	903	0
488	4	0	0	0	0	0	0	200	300	0	0	0	0	0	0	0	200	903	0	0	0	0	0	0	0	603	903	0
488	5	0	0	0	0	0	0	200	300	0	0	0	0	0	0	0	200	903	0	0	0	0	0	0	0	603	903	0
488	6	0	0	0	0	0	0	200	300	0	0	0	0	0	0	0	200	903	0	0	0	0	0	0	0	603	903	0
488	7	0	0	0	0	0	0	200	300	0	0	0	0	0	0	0	200	903	0	0	0	0	0	0	0	603	903	0
488	8	0	0	0	0	0	0	200	300	0	0	0	0	0	0	0	200	903	0	0	0	0	0	0	0	603	903	0
488	9	0	0	0	0	0	0	200	300	0	0	0	0	0	0	0	200	903	0	0	0	0	0	0	0	603	903	0
489	0	0	0	0	0	0	0	200	300	0	0	0	0	0	0	0	200	903	0	0	0	0	0	0	0	603	903	0
489	1	0	0	0	0	0	0	200	300	0	0	0	0	0	0	0	200	903	0	0	0	0	0	0	0	603	903	0
489	2	0	0	0	0	0	0	200	300	0	0	0	0	0	0	0	200	903	0	0	0	0	0	0	0	603	903	0
489	3	0	0	0	0	0	0	200	300	0	0	0	0	0	0	0	200	903	0	0	0	0	0	0	0	603	903	0
489	4	0	0	0	0	0	0	200	300	0	0	0	0	0	0	0	200	903	0	0	0	0	0	0	0	603	903	0
489	5	0	0	0	0	0	0	200	300	0	0	0	0	0	0	0	200	903	0	0	0	0	0	0	0	603	903	0
489	6	0	0	0	0	0	0	200	300	0	0	0	0	0	0	0	200	903	0	0	0	0	0	0	0	603	903	0
489	7	0	0	0	0	0	0	200	300	0	0	0	0	0	0	0	200	903	0	0	0	0	0	0	0	603	903	0
489	8	0	0	0	0	0	0	200	300	0	0	0	0	0	0	0	200	903	0	0	0	0	0	0	0	603	903	0
489	9	0	0	0	0	0	0	200	300	0	0	0	0	0	0	0	200	903	0	0	0	0	0	0	0	603	903	0
490	0	0	0	0	0	0	0	200	300	0	0	0	0	0	0	0	200	903	0	0	0	0	0	0	0	603	903	0
490	1	0	0	0	0	0	0	200	300	0	0	0	0	0	0	0	200	903	0	0	0	0	0	0	0	603	903	0
490	2	0	0	0	0	0	0	200	300	0	0	0	0	0	0	0	200	903	0	0	0	0	0	0	0	603	903	0
490	3	0	0	0	0	0	0	200	300	0	0	0	0	0	0	0	200	903	0	0	0	0	0	0	0	603	903	0
490	4	0	0	0	0	0	0	200	300	0	0	0	0	0	0	0	200	903	0	0	0	0	0	0	0	603	903	0
490	5	0	0	0	0	0	0	200	300	0	0	0	0	0	0	0	200	903	0	0	0	0	0	0	0	603	903	0
490	6	0	0	0	0	0	0	200	300	0	0	0	0	0	0	0	200	903	0	0	0	0	0	0	0	603	903	0
490	7	0	0	0	0	0	0	200	300	0	0	0	0	0	0	0	200	903	0	0	0	0	0	0	0	603	903	0
490	8	0	0	0	0	0	0	200	300	0	0	0	0	0	0	0	200	903	0	0	0	0	0	0	0	603	903	0
490	9	0	0	0	0	0	0	200	300	0	0	0	0	0	0	0	200	903	0	0	0	0	0	0	0	603	903	0
491	0	0	0	0	0	0	0	200	300	0	0	0	0	0	0	0	200	903	0	0	0	0	0	0	0	603	903	0
491	1	0	0	0	0	0	0	200	300	0	0	0	0	0	0	0	200	903	0	0	0	0	0	0	0	603	903	0
491	2	0	0	0	0	0	0	200	300	0	0	0	0	0	0	0	200	903	0	0	0	0	0	0	0	603	903	0
491	3	0	0	0	0	0	0	200	300	0	0	0	0	0	0	0	200	903	0	0	0	0	0	0	0	603	903	0
491	4	0	0	0	0	0	0	200	300	0	0	0	0	0	0	0	200	903	0	0	0	0	0	0	0	603	903	0
491	5	0	0	0	0	0	0	200	300	0	0	0	0	0	0	0	200	903	0	0	0	0	0	0	0	603	903	0
491	6	0	0	0	0	0	0	200	300	0	0	0	0	0	0	0	200	903	0	0	0	0	0	0	0	603	903	0
491	7	0	0	0	0	0	0	200	300	0	0	0	0	0	0	0	200	903	0	0	0	0	0	0	0	603	903	0
491	8	0	0	0	0	0	0	200	300	0	0	0	0	0	0	0	200	903	0	0	0	0	0	0	0	603	903	0
491	9	0	0	0	0	0	0	200	300	0	0	0	0	0	0	0	200	903	0	0	0	0	0	0	0	603	903	0
492	0	0	0	0	0	0	0	200	300	0	0	0	0	0	0	0	200	903	0	0	0	0	0	0	0	603	903	0
492	1	0	0	0	0	0	0	200	300	0	0	0	0	0	0	0	200	903	0	0	0	0	0	0	0	603	903	0
492	2	0	0	0	0	0	0	200	300	0	0	0	0	0	0	0	200	903	0	0	0	0	0	0	0	603	903	0
492	3	0	0	0	0	0	0	200	300	0	0	0	0	0	0	0	200	903	0	0	0	0	0	0	0	603	903	0
492	4	0	0	0	0	0	0	200	300	0	0	0	0	0	0	0	200	903	0	0	0	0	0	0	0	603	903	0
492	5	0	0	0	0	0	0	200	300	0	0	0	0	0	0	0	200	903	0	0	0	0	0	0	0	603	903	0
492	6	0	0	0	0	0	0	200	300	0	0	0	0	0	0	0	200	903	0	0	0	0	0	0	0	603	903	0
492	7	0	0	0	0	0	0	200	300	0	0	0	0	0	0	0	200	903	0	0	0	0	0	0	0	603	903	0
492	8	0	0	0	0	0	0	200	300	0	0	0	0	0	0	0	200	903	0	0	0	0	0	0	0	603	903	0
492	9	0	0	0	0	0	0	200	300	0	0	0	0	0	0	0	200	903	0	0	0	0	0	0	0	603	903	0
493	0	0	0	0	0	0	0	200	300	0	0	0	0	0	0	0	200	903	0	0	0	0	0	0	0	603	903	0
493	1	0	0	0	0	0	0	200	300	0	0	0	0	0	0	0	200	903	0	0	0	0	0	0	0	603	903	0
493	2	0	0	0	0	0	0	200	300	0	0	0	0	0	0	0	200	903	0	0	0	0	0	0	0	603	903	0
493	3	0	0	0	0	0	0	200	300	0	0	0	0	0	0	0	200	903	0	0	0	0	0	0	0	603	903	0
493	4	0	0	0	0	0	0	200	300	0	0	0	0	0	0	0	200	903	0	0	0	0	0	0	0	603	903	0
493	5	0	0	0	0	0	0	200	300	0	0	0	0	0	0	0	200	903	0	0	0	0	0	0	0	603	903	0
493	6	0	0	0	0	0	0	200	300	0	0	0	0	0	0	0	200	903	0	0	0	0	0	0	0	603	903	0
493	7	0	0	0	0	0	0	200	300	0	0	0	0	0	0	0	200	903	0	0	0	0	0	0	0	603	903	0
493	8	0	0	0	0	0	0	200	300	0	0	0	0	0	0	0	200	903	0	0	0	0	0	0	0	603	903	0
493	9	0	0	0	0	0	0	200	300	0	0	0	0	0	0	0	200	903	0	0	0	0	0	0	0	603	903	0
494	0	0	0	0	0	0	0	200	300	0	0	0	0	0	0	0	200	903	0	0	0	0	0	0	0	603	903	0
494	1	0	0	0	0	0	0	200	300	0	0	0	0	0	0	0	200	903	0	0	0	0	0	0	0	603	903	0
494	2	0	0	0	0	0	0	200	300	0	0	0	0	0	0	0	200	903	0	0	0	0	0	0	0	603	903	0
494	3	0	0	0	0	0	0	200	300	0	0	0	0	0	0	0	200	903	0	0	0	0	0	0	0	603	903	0
494	4	0	0	0	0	0	0	200	300	0	0	0	0	0	0	0	200	903	0	0	0	0	0	0	0	603	903	0
494	5	0	0	0	0	0	0	200	300	0	0	0	0	0	0	0	200	903	0	0	0	0	0	0	0	603	903	0
494	6	0	0	0	0	0	0	200	300	0	0	0	0	0	0	0	200	903	0	0	0	0	0	0	0	603	903	0
494	7	0	0	0	0	0	0	200	300	0	0	0	0	0	0	0	200	903	0	0	0	0	0	0	0	603	903	0
494	8	0	0	0	0	0	0	200	300	0	0	0	0	0	0	0	200	903	0	0	0	0	0	0	0	603	903	0
494	9	0	0	0	0	0	0	200	300	0	0	0	0	0	0	0	200	903	0	0	0	0	0	0	0	603	903	0
495	0	0	0	0	0	0	0	200	300	0	0	0	0	0	0	0	200	903	0	0	0	0	0	0	0	603	903	0
495	1	0	0	0	0	0	0	200	300	0	0	0	0	0	0	0	200	903	0	0	0	0	0	0	0	603	903	0
495	2	0	0	0	0	0	0	200	300	0	0	0	0	0	0	0	200	903	0	0	0	0	0	0	0	603	903	0
495	3	0	0	0	0	0	0	200	300	0	0	0	0	0	0	0	200	903	0	0	0	0	0	0	0	603	903	0
495	4	0	0	0	0	0	0	200	300	0	0	0	0	0	0	0	200	903	0	0	0	0	0	0	0	603	903	0
495	5	0	0	0	0	0	0	200	300	0	0	0	0	0	0	0	200	903	0	0	0	0	0	0	0	603	903	0
495	6	0	0	0	0	0	0	200	300	0	0	0	0	0	0	0	200	903	0	0	0	0	0	0	0	603	903	0
495	7	0	0	0	0	0	0	200	300	0	0	0	0	0	0	0	200	903	0	0	0	0	0	0	0	603	903	0
495	8	0	0	0	0	0	0	200	300	0	0	0	0	0	0	0	200	903	0	0	0	0	0	0	0	603	903	0
495	9	0	0	0	0	0	0	200	300	0	0	0	0	0	0	0	200	903	0	0	0	0	0	0	0	603	903	0
496	0	0	0	0	0	0	0	200	300	0	0	0	0	0	0	0	200	903	0	0	0	0	0	0	0	603	903	0
496	1	0	0	0	0	0	0	200	300	0	0	0	0	0	0	0	200	903	0	0	0	0	0	0	0	603	903	0
496	2	0	0	0	0	0	0	200	300	0	0	0	0	0	0	0	200	903	0	0	0	0	0	0	0	603	903	0
496	3	0	0	0	0	0	0	200	300	0	0	0	0	0	0	0	200	903	0	0	0	0	0	0	0	603	903	0
496	4	0	0	0	0	0	0	200	300	0	0	0	0	0	0	0	200	903	0	0	0	0	0	0	0	603	903	0
496	5	0	0	0	0	0	0	200	300	0	0	0	0	0	0	0	200	903	0	0	0	0	0	0	0	603	903	0
496	6	0	0	0	0	0	0	200	300	0	0	0	0	0	0	0	200	903	0	0	0	0	0	0	0	603	903	0
496	7	0	0	0	0	0	0	200	300	0	0	0	0	0	0	0	200	903	0	0	0	0	0	0	0	603	903	0
496	8	0	0	0	0	0	0	200	300	0	0	0	0	0	0	0	200	903	0	0	0	0	0	0	0	603	903	0
496	9	0	0	0	0	0	0	200	300	0	0	0	0	0	0	0	200	903	0	0	0	0	0	0	0	603	903	0
497	0	0	0	0	0	0	0	200	300	0	0	0	0	0	0	0	200	903	0	0	0	0	0	0	0	603	903	0
497	1	0	0	0	0	0	0	200	300	0	0	0	0	0	0	0	200	903	0	0	0	0	0	0	0	603	903	0
497	2	0	0	0	0	0	0	200	300	0	0	0	0	0	0	0	200	903	0	0	0	0	0	0	0	603	903	0
497	3	0	0	0	0	0	0	200	300	0	0	0	0	0	0	0	200	903	0	0	0	0	0	0	0	603	903	0
497	4	0	0	0	0	0	0	200	300	0	0	0	0	0	0	0	200	903	0	0	0	0	0	0	0	603	903	0
497	5	0	0	0	0	0	0	200	300	0	0	0	0	0	0	0	200	903	0	0	0	0	0	0	0	603	903	0
497	6	0	0	0	0	0	0	200	300	0	0	0	0	0	0	0	200	903	0	0	0	0	0	0	0	603	903	0
497	7	0	0	0	0	0	0	200	300	0	0	0	0	0	0	0	200	903	0	0	0	0	0	0	0	603	903	0
497	8	0	0	0	0	0	0	200	300	0	0	0	0	0	0	0	200	903	0	0	0	0	0	0	0	603	903	0
497	9	0	0	0	0	0	0	200	300	0	0	0	0	0	0	0	200	903	0	0	0	0	0	0	0	603	903	0
498	0	0	0	0	0	0	0	200	300	0	0	0	0	0	0	0	200	903	0	0	0	0	0	0	0	603	903	0
498	1	0	0	0	0	0	0	200	300	0	0	0	0	0	0	0	200	903	0	0	0	0	0	0	0	603	903	0
498	2	0	0	0	0	0	0	200	300	0	0	0	0	0	0	0	200	903	0	0	0	0	0	0	0	603	903	0
498	3	0	0	0	0	0	0	200	300	0	0	0	0	0	0	0	200	903	0	0	0	0	0	0	0	603	903	0
498	4	0	0	0	0	0	0	200	300	0	0	0	0	0	0	0	200	903	0	0	0	0	0	0	0	603	903	0
498	5	0	0	0	0	0	0	200	300	0	0	0	0	0	0	0	200	903	0	0	0	0	0	0	0	603	903	0
498	6	0	0	0	0	0	0	200	300	0	0	0	0	0	0	0	200	903	0	0	0	0	0	0	0	603	903	0
498	7	0	0	0	0	0	0	200	300	0	-3.60245	1.09131	-22.6397	-6953.82	4088.82	854.874	380.604	1210.15	0	0	0	0	0	0	0	603	903	0
498	8	0	0	0	0	0	0	200	300	0	7.38388	5.97412	-28.1329	-7777.79	4943.32	-381.088	375.713	1179.47	0	0	0	0	0	0	0	603	903	0
498	9	0	0	0	0	0	0	200	300	0	9.06235	3.99048	-28.438	-7503.13	4455.04	-1296.62	356.658	1166.84	0	0	0	0	0	0	0	603	903	0
499	0	0	0	0	0	0	0	200	300	0	-2.07657	-2.26563	-31.4898	-8693.32	5492.63	-1250.84	374.426	1179.07	0	0	0	0	0	0	0	603	903	0
499	1	0	0	0	0	0	0	200	300	0	1.43295	1.85425	-37.5933	-10799	6408.16	-1159.29	370.46	1190.26	0	0	0	0	0	0	0	603	903	0
499	2	0	0	0	0	0	0	200	300	0	11.046	2.15942	-43.0865	-11348.3	6713.34	-1205.06	355.811	1166.39	0	0	0	0	0	0	0	603	903	0
499	3	0	0	0	0	0	0	200	300	0	1.28037	-4.85962	-40.3399	-12721.6	7323.69	-793.075	381.549	1218.36	0	0	0	0	0	0	0	603	903	0
499	4	0	0	0	0	0	0	200	300	0	-3.44986	-3.02857	-43.0865	-12447	6530.23	-1342.39	351.561	1191.88	0	0	0	0	0	0	0	603	903	0
499	5	0	0	0	0	0	0	200	300	0	4.48471	0.175778	-46.1382	-12721.6	6957.48	-1708.6	350.796	1178.73	0	0	0	0	0	0	0	603	903	0
499	6	0	0	0	0	0	0	200	300	0	6.01059	-4.40186	-44.6124	-13728.7	7750.93	-1159.29	373.74	1210.73	0	0	0	0	0	0	0	603	903	0
499	7	0	0	0	0	0	0	200	300	0	0.517426	-5.1648	-48.5796	-13362.5	7750.93	-426.864	359.551	1178.06	0	0	0	0	0	0	0	603	903	0
499	8	0	0	0	0	0	0	200	300	0	-1.46622	-1.3501	-46.1382	-13545.6	7628.86	-976.181	365.348	1196.59	0	0	0	0	0	0	0	603	903	0
499	9	0	0	0	0	0	0	200	300	0	-1.92398	-3.79151	-49.4952	-14644.2	8361.29	-518.417	368.931	1198.87	0	0	0	0	0	0	0	603	903	0
500	0	0	0	0	0	0	0	200	300	0	2.19589	-3.48633	-49.8003	-15010.5	8849.57	168.228	377.701	1204.41	0	0	0	0	0	0	0	603	903	0
500	1	0	0	0	0	0	0	200	300	0	0.97519	0.938718	-51.021	-15102	8178.18	-197.982	360.29	1199	0	0	0	0	0	0	0	603	903	0
500	2	0	0	0	0	0	0	200	300	0	-6.50162	-0.739749	-54.0728	-16658.4	9581.99	-197.982	377.205	1211.07	0	0	0	0	0	0	0	603	903	0
500	3	0	0	0	0	0	0	200	300	0	-1.46622	-1.3501	-59.8711	-16841.5	9826.13	763.321	364.121	1184.3	0	0	0	0	0	0	0	603	903	0
500	4	0	0	0	0	0	0	200	300	0	4.6373	3.53271	-59.2608	-17573.9	10253.4	214.005	373.021	1199.55	0	0	0	0	0	0	0	603	903	0
500	5	0	0	0	0	0	0	200	300	0	-4.2128	3.6853	-65.9747	-18764.1	10924.8	214.005	365.59	1187.41	0	0	0	0	0	0	0	603	903	0
500	6	0	0	0	0	0	0	200	300	0	-3.90762	0.480954	-64.4488	-19496.5	10863.7	946.427	368.564	1205.51	0	0	0	0	0	0	0	603	903	0
500	7	0	0	0	0	0	0	200	300	0	2.19589	1.85425	-71.4678	-20412.1	11779.3	305.558	364.819	1188.61	0	0	0	0	0	0	0	603	903	0
500	8	0	0	0	0	0	0	200	300	0	-1.00845	3.83789	-72.9937	-21876.9	12267.5	-197.982	368.063	1202.71	0	0	0	0	0	0	0	603	903	0
500	9	0	0	0	0	0	0	200	300	0	-2.68692	3.83789	-76.0455	-22426.2	12572.7	671.769	365.332	1197.91	0	0	0	0	0	0	0	603	903	0
501	0	0	0	0	0	0	0	200	300	0	1.73813	1.09131	-80.3179	-22792.4	13122	168.228	363.376	1186.78	0	0	0	0	0	0	0	603	903	0
501	1	0	0	0	0	0	0	200	300	0	0.97519	1.09131	-84.5904	-24531.9	13610.3	-564.193	360.897	1193.01	0	0	0	0	0	0	0	603	903	0
501	2	0	0	0	0	0	0	200	300	0	0.670014	4.60083	-85.2007	-24348.8	14220.7	76.6757	366.908	1188.78	0	0	0	0	0	0	0	603	903	0
501	3	0	0	0	0	0	0	200	300	0	2.65366	2.92236	-87.0318	-25905.2	14586.9	-838.852	367.604	1200.65	0	0	0	0	0	0	0	603	903	0
501	4	0	0	0	0	0	0	200	300	0	1.12778	0.938718	-90.0835	-26729.2	14831	-1159.29	364.636	1199.72	0	0	0	0	0	0	0	603	903	0
501	5	0	0	0	0	0	0	200	300	0	2.50107	5.21118	-94.356	-26729.2	15319.3	-289.535	362.356	1186.28	0	0	0	0	0	0	0	603	903	0
501	6	0	0	0	0	0	0	200	300	0	3.56918	4.906	-96.4922	-28010.9	15868.6	-701.523	364.455	1193.29	0	0	0	0	0	0	0	603	903	0
501	7	0	0	0	0	0	0	200	300	0	2.19589	1.85425	-96.4922	-29201.1	16417.9	-1067.73	370.148	1205.63	0	0	0	0	0	0	0	603	903	0
501	8	0	0	0	0	0	0	200	300	0	2.34848	4.906	-101.985	-28285.6	16845.2	-197.982	365.172	1180.35	0	0	0	0	0	0	0	603	903	0
501	9	0	0	0	0	0	0	200	300	0	3.56918	7.34741	-104.427	-29475.8	17028.3	-747.299	363.064	1185.26	0	0	0	0	0	0	0	603	903	0
502	0	0	0	0	0	0	0	200	300	0	3.72177	5.36377	-101.68	-31123.7	16967.2	-1067.73	366.869	1209.09	0	0	0	0	0	0	0	603	903	0
502	1	0	0	0	0	0	0	200	300	0	2.19589	4.906	-106.258	-31215.3	16784.1	-14.877	357.957	1196.77	0	0	0	0	0	0	0	603	903	0
502	2	0	0	0	0	0	0	200	300	0	2.50107	7.19482	-106.563	-30574.4	17699.7	-152.206	366.096	1189.91	0	0	0	0	0	0	0	603	903	0
502	3	0	0	0	0	0	0	200	300	0	2.95883	6.73706	-111.141	-32405.5	18065.9	-426.864	362.55	1194.57	0	0	0	0	0	0	0	603	903	0
502	4	0	0	0	0	0	0	200	300	0	4.78989	5.36377	-108.699	-32222.4	18310	397.11	368.447	1199.44	0	0	0	0	0	0	0	603	903	0
502	5	0	0	0	0	0	0	200	300	0	2.50107	7.19482	-116.023	-32680.1	18432.1	-14.877	358.865	1184.67	0	0	0	0	0	0	0	603	903	0
502	6	0	0	0	0	0	0	200	300	0	2.95883	7.5	-116.634	-34602.8	19164.5	-518.417	364.313	1199.68	0	0	0	0	0	0	0	603	903	0
502	7	0	0	0	0	0	0	200	300	0	2.50107	7.95776	-120.296	-35152.1	19835.9	122.452	364.893	1195.21	0	0	0	0	0	0	0	603	903	0
502	8	0	0	0	0	0	0	200	300	0	2.80624	7.95776	-122.127	-34877.4	19652.8	-152.206	360.921	1188.58	0	0	0	0	0	0	0	603	903	0
502	9	0	0	0	0	0	0	200	300	0	1.43295	9.9414	-124.874	-35701.4	20080	-472.641	360.803	1188.9	0	0	0	0	0	0	0	603	903	0
503	0	0	0	0	0	0	0	200	300	0	3.11142	9.17846	-128.841	-36525.3	20263.1	351.334	357.273	1186.49	0	0	0	0	0	0	0	603	903	0
503	1	0	0	0	0	0	0	200	300	0	5.40024	8.41552	-130.062	-37440.9	20873.5	76.6757	360.489	1190.87	0	0	0	0	0	0	0	603	903	0
503	2	0	0	0	0	0	0	200	300	0	3.4166	10.3992	-132.808	-37990.2	21483.8	-564.193	361.766	1189.05	0	0	0	0	0	0	0	603	903	0
503	3	0	0	0	0	0	0	200	300	0	3.4166	11.925	-134.029	-38631.1	21850.1	-243.759	363.025	1191.23	0	0	0	0	0	0	0	603	903	0
503	4	0	0	0	0	0	0	200	300	0	6.62094	11.0095	-137.081	-39821.2	22277.3	-243.759	362.512	1193.5	0	0	0	0	0	0	0	603	903	0
503	5	0	0	0	0	0	0	200	300	0	5.55283	10.094	-140.132	-40279	22521.4	-747.299	360.716	1190.44	0	0	0	0	0	0	0	603	903	0
503	6	0	0	0	0	0	0	200	300	0	4.48471	12.2302	-141.048	-40828.3	22887.7	-381.088	362.269	1192.46	0	0	0	0	0	0	0	603	903	0
503	7	0	0	0	0	0	0	200	300	0	7.53647	11.925	-144.405	-41286.1	23437	-426.864	362.3	1188.91	0	0	0	0	0	0	0	603	903	0
503	8	0	0	0	0	0	0	200	300	0	5.55283	10.8569	-145.931	-41652.3	23314.9	-838.852	359.767	1188.43	0	0	0	0	0	0	0	603	903	0
503	9	0	0	0	0	0	0	200	300	0	5.40024	13.1457	-145.931	-42659.4	23681.1	-289.535	362.276	1195.33	0	0	0	0	0	0	0	603	903	0
504	0	0	0	0	0	0	0	200	300	0	5.70541	12.8406	-150.203	-43849.6	24108.4	-335.312	360.505	1194.94	0	0	0	0	0	0	0	603	903	0
504	1	0	0	0	0	0	0	200	300	0	5.70541	11.6199	-152.339	-44765.1	24352.5	-747.299	359.857	1196.85	0	0	0	0	0	0	0	603	903	0
504	2	0	0	0	0	0	0	200	300	0	5.40024	13.7561	-153.56	-44582	24840.8	-426.864	361.766	1193.32	0	0	0	0	0	0	0	603	903	0
504	3	0	0	0	0	0	0	200	300	0	5.24765	15.282	-157.527	-45039.8	25512.2	-381.088	361.954	1188.92	0	0	0	0	0	0	0	603	903	0
504	4	0	0	0	0	0	0	200	300	0	5.858	13.6035	-158.443	-44948.2	25268	-335.312	359.477	1186.69	0	0	0	0	0	0	0	603	903	0
504	5	0	0	0	0	0	0	200	300	0	6.46835	13.9087	-160.274	-46046.8	25573.2	-106.43	359.559	1190.3	0	0	0	0	0	0	0	603	903	0
504	6	0	0	0	0	0	0	200	300	0	6.31577	14.8242	-163.936	-46779.3	25878.4	-152.206	357.857	1188.35	0	0	0	0	0	0	0	603	903	0
504	7	0	0	0	0	0	0	200	300	0	4.78989	15.7397	-163.936	-47603.2	26122.5	-793.075	359.346	1193.38	0	0	0	0	0	0	0	603	903	0
504	8	0	0	0	0	0	0	200	300	0	8.60458	14.0613	-166.072	-47603.2	26549.8	-289.535	359.869	1189.64	0	0	0	0	0	0	0	603	903	0
504	9	0	0	0	0	0	0	200	300	0	6.92612	15.282	-169.429	-48518.8	26671.8	-106.43	357.422	1189.37	0	0	0	0	0	0	0	603	903	0
505	0	0	0	0	0	0	0	200	300	0	5.55283	15.8923	-169.429	-49434.3	26977	-426.864	359.223	1194.77	0	0	0	0	0	0	0	603	903	0
505	1	0	0	0	0	0	0	200	300	0	7.38388	15.8923	-172.786	-49525.8	27465.3	-197.982	358.955	1189.63	0	0	0	0	0	0	0	603	903	0
505	2	0	0	0	0	0	0	200	300	0	7.23129	15.282	-173.397	-50441.4	28014.6	-60.6534	361.564	1193.9	0	0	0	0	0	0	0	603	903	0
505	3	0	0	0	0	0	0	200	300	0	8.60458	17.5708	-174.617	-50532.9	27953.6	-518.417	360.085	1192.39	0	0	0	0	0	0	0	603	903	0
505	4	0	0	0	0	0	0	200	300	0	7.84164	17.876	-178.89	-49983.6	28075.6	-197.982	356.944	1182.41	0	0	0	0	0	0	0	603	903	0
505	5	0	0	0	0	0	0	200	300	0	7.68906	16.3501	-177.059	-51814.7	28319.8	-243.759	359.946	1195.64	0	0	0	0	0	0	0	603	903	0
505	6	0	0	0	0	0	0	200	300	0	7.38388	17.2656	-181.026	-51906.2	29113.2	-609.97	360.824	1189.73	0	0	0	0	0	0	0	603	903	0
505	7	0	0	0	0	0	0	200	300	0	7.53647	19.0967	-182.552	-52089.3	28869.1	-381.088	358.142	1188.34	0	0	0	0	0	0	0	603	903	0
505	8	0	0	0	0	0	0	200	300	0	6.62094	17.7234	-184.688	-53004.8	29052.2	-426.864	357.304	1190	0	0	0	0	0	0	0	603	903	0
505	9	0	0	0	0	0	0	200	300	0	7.84164	18.4863	-186.214	-53462.6	29174.3	-518.417	356.671	1190.1	0	0	0	0	0	0	0	603	903	0
506	0	0	0	0	0	0	0	200	300	0	10.1305	19.4019	-189.876	-53737.3	29601.5	-381.088	355.899	1186.01	0	0	0	0	0	0	0	603	903	0
506	1	0	0	0	0	0	0	200	300	0	7.23129	18.1811	-189.876	-53187.9	30395	-243.759	360.078	1183.12	0	0	0	0	0	0	0	603	903	0
506	2	0	0	0	0	0	0	200	300	0	8.14682	19.0967	-192.317	-54652.8	30700.2	-609.97	359.633	1187.18	0	0	0	0	0	0	0	603	903	0
506	3	0	0	0	0	0	0	200	300	0	9.52011	19.4019	-195.064	-54927.5	29784.6	-197.982	352.692	1184.59	0	0	0	0	0	0	0	603	903	0
506	4	0	0	0	0	0	0	200	300	0	7.53647	20.9277	-192.928	-56117.6	31188.4	-426.864	361.659	1193.87	0	0	0	0	0	0	0	603	903	0
506	5	0	0	0	0	0	0	200	300	0	10.1305	19.4019	-197.505	-56300.7	30883.3	-655.746	356.367	1188.06	0	0	0	0	0	0	0	603	903	0
506	6	0	0	0	0	0	0	200	300	0	9.82529	18.4863	-195.674	-57582.5	31249.5	-426.864	359.701	1197.28	0	0	0	0	0	0	0	603	903	0
506	7	0	0	0	0	0	0	200	300	0	11.5038	21.2329	-200.252	-57399.4	31371.5	-381.088	356.66	1189.64	0	0	0	0	0	0	0	603	903	0
506	8	0	0	0	0	0	0	200	300	0	9.82529	20.1648	-203.304	-56758.5	31615.7	-701.523	355.51	1182.18	0	0	0	0	0	0	0	603	903	0
506	9	0	0	0	0	0	0	200	300	0	9.21494	20.0122	-204.524	-58498	31920.9	-197.982	356.074	1189.02	0	0	0	0	0	0	0	603	903	0
507	0	0	0	0	0	0	0	200	300	0	8.60458	20.47	-205.44	-58955.8	32531.2	-243.759	358.349	1189.97	0	0	0	0	0	0	0	603	903	0
507	1	0	0	0	0	0	0	200	300	0	10.4356	21.0803	-207.881	-59047.3	32287.1	-747.299	355.315	1187.04	0	0	0	0	0	0	0	603	903	0
507	2	0	0	0	0	0	0	200	300	0	11.046	21.5381	-208.492	-60146	33019.5	-930.404	358.373	1191.48	0	0	0	0	0	0	0	603	903	0
507	3	0	0	0	0	0	0	200	300	0	9.06235	21.2329	-210.323	-60512.2	33446.7	-793.075	359.026	1190.71	0	0	0	0	0	0	0	603	903	0
507	4	0	0	0	0	0	0	200	300	0	11.3512	21.5381	-211.849	-60603.7	33324.7	-609.97	357.304	1189.07	0	0	0	0	0	0	0	603	903	0
507	5	0	0	0	0	0	0	200	300	0	10.2831	21.3855	-213.985	-61427.7	33812.9	-655.746	358.016	1190.07	0	0	0	0	0	0	0	603	903	0
507	6	0	0	0	0	0	0	200	300	0	10.1305	21.2329	-214.9	-61427.7	33812.9	-747.299	357.342	1188.84	0	0	0	0	0	0	0	603	903	0
507	7	0	0	0	0	0	0	200	300	0	12.5719	22.301	-214.9	-61519.3	33874	-1159.29	357.626	1189.27	0	0	0	0	0	0	0	603	903	0
507	8	0	0	0	0	0	0	200	300	0	11.1986	22.7588	-218.257	-61610.8	34423.3	-1067.73	357.719	1185.29	0	0	0	0	0	0	0	603	903	0
507	9	0	0	0	0	0	0	200	300	0	11.8089	20.7751	-219.783	-62892.5	34362.3	-793.075	356.346	1189.16	0	0	0	0	0	0	0	603	903	0
508	0	0	0	0	0	0	0	200	300	0	12.7245	22.7588	-220.699	-63350.3	35155.7	-976.181	359.293	1190.04	0	0	0	0	0	0	0	603	903	0
508	1	0	0	0	0	0	0	200	300	0	11.046	22.7588	-218.563	-63441.9	35338.8	-793.075	361.687	1193.27	0	0	0	0	0	0	0	603	903	0
508	2	0	0	0	0	0	0	200	300	0	11.8089	22.6062	-223.14	-63441.9	35338.8	-1067.73	358.371	1187.31	0	0	0	0	0	0	0	603	903	0
508	3	0	0	0	0	0	0	200	300	0	13.1822	21.6907	-224.971	-64174.3	35766.1	-1296.62	358.981	1188.26	0	0	0	0	0	0	0	603	903	0
508	4	0	0	0	0	0	0	200	300	0	12.877	23.064	-228.023	-64906.7	35460.9	-1113.51	355.515	1187.65	0	0	0	0	0	0	0	603	903	0
508	5	0	0	0	0	0	0	200	300	0	13.0296	22.9114	-223.751	-64906.7	35644	-930.404	359.302	1193.09	0	0	0	0	0	0	0	603	903	0
508	6	0	0	0	0	0	0	200	300	0	13.4874	23.2165	-229.244	-64723.6	36254.4	-1250.84	358.148	1185.34	0	0	0	0	0	0	0	603	903	0
508	7	0	0	0	0	0	0	200	300	0	12.877	22.4536	-232.601	-65730.7	36376.4	-1205.06	356.39	1185.59	0	0	0	0	0	0	0	603	903	0
508	8	0	0	0	0	0	0	200	300	0	13.9452	24.4373	-232.906	-65456	36498.5	-884.628	356.709	1184.04	0	0	0	0	0	0	0	603	903	0
508	9	0	0	0	0	0	0	200	300	0	14.2503	24.1321	-232.295	-65730.7	36864.7	-1113.51	358.698	1185.96	0	0	0	0	0	0	0	603	903	0
509	0	0	0	0	0	0	0	200	300	0	13.1822	23.9795	-233.516	-66737.8	36803.7	-1250.84	357.607	1188.8	0	0	0	0	0	0	0	603	903	0
509	1	0	0	0	0	0	0	200	300	0	13.9452	25.5054	-236.568	-67195.5	37291.9	-1159.29	357.637	1187.04	0	0	0	0	0	0	0	603	903	0
509	2	0	0	0	0	0	0	200	300	0	14.5555	25.2002	-237.178	-67287.1	37230.9	-1205.06	356.974	1186.7	0	0	0	0	0	0	0	603	903	0
509	3	0	0	0	0	0	0	200	300	0	15.471	25.8105	-238.399	-67104	37291.9	-1342.39	356.427	1184.48	0	0	0	0	0	0	0	603	903	0
509	4	0	0	0	0	0	0	200	300	0	14.5555	25.8105	-239.925	-67012.4	37780.2	-1021.96	357.467	1182.31	0	0	0	0	0	0	0	603	903	0
509	5	0	0	0	0	0	0	200	300	0	15.1659	25.8105	-239.62	-68385.7	37597.1	-1067.73	356.903	1188.39	0	0	0	0	0	0	0	603	903	0
509	6	0	0	0	0	0	0	200	300	0	16.0814	25.8105	-240.535	-68568.8	38268.5	-1205.06	359.097	1188.07	0	0	0	0	0	0	0	603	903	0
509	7	0	0	0	0	0	0	200	300	0	15.1659	26.4209	-242.977	-67836.4	38085.4	-1250.84	356.745	1182.19	0	0	0	0	0	0	0	603	903	0
509	8	0	0	0	0	0	0	200	300	0	15.0133	28.2519	-241.146	-69575.9	37230.9	-1479.72	354.392	1191.52	0	0	0	0	0	0	0	603	903	0
509	9	0	0	0	0	0	0	200	300	0	14.5555	27.1838	-245.418	-69759	38512.7	-1296.62	356.927	1187.25	0	0	0	0	0	0	0	603	903	0
510	0	0	0	0	0	0	0	200	300	0	15.7762	26.5735	-246.028	-69575.9	39000.9	-838.852	358.522	1185.8	0	0	0	0	0	0	0	603	903	0
510	1	0	0	0	0	0	0	200	300	0	14.5555	27.3364	-246.334	-69759	38695.8	-1342.39	357.087	1186.19	0	0	0	0	0	0	0	603	903	0
510	2	0	0	0	0	0	0	200	300	0	14.2503	27.6416	-249.385	-69575.9	38878.9	-1388.17	355.899	1181.99	0	0	0	0	0	0	0	603	903	0
510	3	0	0	0	0	0	0	200	300	0	17.7599	28.7097	-246.639	-70308.3	38878.9	-1021.96	357.635	1188.07	0	0	0	0	0	0	0	603	903	0
510	4	0	0	0	0	0	0	200	300	0	15.3185	28.0994	-250.606	-70674.5	38939.9	-1250.84	355.383	1185.01	0	0	0	0	0	0	0	603	903	0
510	5	0	0	0	0	0	0	200	300	0	15.0133	28.4045	-250.301	-71223.8	39550.2	-1205.06	358.011	1187.55	0	0	0	0	0	0	0	603	903	0
510	6	0	0	0	0	0	0	200	300	0	16.3866	28.7097	-250.606	-70949.2	39184	-1296.62	356.357	1186.11	0	0	0	0	0	0	0	603	903	0
510	7	0	0	0	0	0	0	200	300	0	15.3185	28.5571	-253.353	-71407	39733.4	-1205.06	356.83	1184.85	0	0	0	0	0	0	0	603	903	0
510	8	0	0	0	0	0	0	200	300	0	16.5392	29.4727	-253.353	-71407	39977.5	-1250.84	357.794	1184.85	0	0	0	0	0	0	0	603	903	0
510	9	0	0	0	0	0	0	200	300	0	16.9969	29.4727	-254.878	-71681.6	39428.2	-747.299	354.694	1184.24	0	0	0	0	0	0	0	603	903	0
511	0	0	0	0	0	0	0	200	300	0	15.9288	28.8623	-255.184	-72322.5	40038.5	-1113.51	356.901	1186.41	0	0	0	0	0	0	0	603	903	0
511	1	0	0	0	0	0	0	200	300	0	16.9969	30.3882	-256.099	-72139.4	39733.4	-1525.5	355.148	1184.69	0	0	0	0	0	0	0	603	903	0
511	2	0	0	0	0	0	0	200	300	0	17.1495	29.6252	-253.963	-72963.4	39916.5	-1113.51	357.174	1190.3	0	0	0	0	0	0	0	603	903	0
511	3	0	0	0	0	0	0	200	300	0	16.6917	30.083	-257.625	-73329.6	40221.6	-1067.73	356.125	1187.64	0	0	0	0	0	0	0	603	903	0
511	4	0	0	0	0	0	0	200	300	0	17.1495	30.6934	-259.456	-73421.1	40221.6	-976.181	355.023	1185.98	0	0	0	0	0	0	0	603	903	0
511	5	0	0	0	0	0	0	200	300	0	17.1495	30.5408	-261.592	-73878.9	41015.1	-976.181	356.79	1185.42	0	0	0	0	0	0	0	603	903	0
511	6	0	0	0	0	0	0	200	300	0	18.3702	31.1511	-260.066	-73695.8	40832	-1067.73	357.006	1186.37	0	0	0	0	0	0	0	603	903	0
511	7	0	0	0	0	0	0	200	300	0	17.6073	31.7615	-262.508	-74062	40648.9	-1067.73	354.848	1185.13	0	0	0	0	0	0	0	603	903	0
511	8	0	0	0	0	0	0	200	300	0	18.065	31.3037	-261.898	-74336.6	40709.9	-655.746	355.442	1186.84	0	0	0	0	0	0	0	603	903	0
511	9	0	0	0	0	0	0	200	300	0	18.2176	31.3037	-262.508	-74336.6	40709.9	-976.181	355.081	1186.18	0	0	0	0	0	0	0	603	903	0
512	0	0	0	0	0	0	0	200	300	0	17.3021	31.6089	-264.034	-74153.5	40893	-1021.96	354.878	1183.85	0	0	0	0	0	0	0	603	903	0
512	1	0	0	0	0	0	0	200	300	0	17.4547	32.677	-264.644	-74794.4	41198.2	-1113.51	355.674	1185.62	0	0	0	0	0	0	0	603	903	0
512	2	0	0	0	0	0	0	200	300	0	19.7435	33.1348	-267.086	-74885.9	41137.2	-838.852	354.022	1183.38	0	0	0	0	0	0	0	603	903	0
512	3	0	0	0	0	0	0	200	300	0	18.2176	33.2873	-267.391	-74153.5	40954.1	-884.628	353.162	1180.32	0	0	0	0	0	0	0	603	903	0
512	4	0	0	0	0	0	0	200	300	0	17.9124	33.4399	-266.475	-75526.8	41625.4	-838.852	356.208	1186.43	0	0	0	0	0	0	0	603	903	0
512	5	0	0	0	0	0	0	200	300	0	16.6917	33.8977	-265.254	-75801.5	41381.3	-747.299	356.006	1188.77	0	0	0	0	0	0	0	603	903	0
512	6	0	0	0	0	0	0	200	300	0	17.1495	33.7451	-268.306	-75435.3	41808.6	-655.746	355.824	1184.15	0	0	0	0	0	0	0	603	903	0
512	7	0	0	0	0	0	0	200	300	0	18.6754	34.5081	-270.442	-75893	41869.6	-838.852	354.819	1183.63	0	0	0	0	0	0	0	603	903	0
512	8	0	0	0	0	0	0	200	300	0	16.8443	33.7451	-271.358	-76167.7	41564.4	-838.852	353.172	1183.69	0	0	0	0	0	0	0	603	903	0
512	9	0	0	0	0	0	0	200	300	0	19.2857	34.6606	-269.832	-76167.7	42174.8	-793.075	356.3	1185.28	0	0	0	0	0	0	0	603	903	0
513	0	0	0	0	0	0	0	200	300	0	16.6917	34.9658	-271.358	-76808.5	41747.5	-838.852	353.847	1186.05	0	0	0	0	0	0	0	603	903	0
513	1	0	0	0	0	0	0	200	300	0	17.3021	34.9658	-273.189	-76350.8	41625.4	-747.299	352.369	1182.48	0	0	0	0	0	0	0	603	903	0
513	2	0	0	0	0	0	0	200	300	0	18.3702	35.7288	-272.884	-76625.5	42113.7	-609.97	354.328	1183.8	0	0	0	0	0	0	0	603	903	0
513	3	0	0	0	0	0	0	200	300	0	17.6073	35.7288	-273.799	-77357.9	41869.6	-197.982	352.921	1185.53	0	0	0	0	0	0	0	603	903	0
513	4	0	0	0	0	0	0	200	300	0	17.3021	35.271	-273.189	-76808.5	42663	-472.641	356.167	1184.16	0	0	0	0	0	0	0	603	903	0
513	5	0	0	0	0	0	0	200	300	0	17.3021	36.4917	-275.936	-77541	42724.1	-609.97	354.834	1184.01	0	0	0	0	0	0	0	603	903	0
513	6	0	0	0	0	0	0	200	300	0	17.7599	36.3391	-276.546	-77541	42296.8	-518.417	352.947	1183.39	0	0	0	0	0	0	0	603	903	0
513	7	0	0	0	0	0	0	200	300	0	18.2176	37.2546	-278.072	-77541	42357.9	-472.641	352.327	1181.85	0	0	0	0	0	0	0	603	903	0
513	8	0	0	0	0	0	0	200	300	0	18.065	36.9495	-278.377	-78273.4	42418.9	-289.535	352.379	1184.18	0	0	0	0	0	0	0	603	903	0
513	9	0	0	0	0	0	0	200	300	0	19.1331	36.6443	-277.767	-78365	42479.9	-14.877	352.934	1185.13	0	0	0	0	0	0	0	603	903	0
514	0	0	0	0	0	0	0	200	300	0	17.6073	35.4236	-278.682	-77815.6	42846.1	-152.206	353.746	1182.23	0	0	0	0	0	0	0	603	903	0
514	1	0	0	0	0	0	0	200	300	0	16.6917	37.2546	-279.903	-77998.8	42052.7	-152.206	350.24	1181.66	0	0	0	0	0	0	0	603	903	0
514	2	0	0	0	0	0	0	200	300	0	16.3866	38.1702	-279.903	-78456.5	42968.2	-197.982	353.511	1183.3	0	0	0	0	0	0	0	603	903	0
514	3	0	0	0	0	0	0	200	300	0	18.828	38.6279	-280.513	-78731.2	42479.9	122.452	351.436	1183.67	0	0	0	0	0	0	0	603	903	0
514	4	0	0	0	0	0	0	200	300	0	16.5392	37.865	-280.513	-78731.2	43029.3	-152.206	353.395	1183.67	0	0	0	0	0	0	0	603	903	0
514	5	0	0	0	0	0	0	200	300	0	16.3866	37.5598	-281.734	-78914.3	42724.1	214.005	351.647	1183.1	0	0	0	0	0	0	0	603	903	0
514	6	0	0	0	0	0	0	200	300	0	17.6073	38.3228	-283.87	-78639.6	43029.3	-14.877	351.581	1180.03	0	0	0	0	0	0	0	603	903	0
514	7	0	0	0	0	0	0	200	300	0	16.3866	39.2383	-282.039	-79829.8	43456.5	168.228	354.08	1186.05	0	0	0	0	0	0	0	603	903	0
514	8	0	0	0	0	0	0	200	300	0	18.9806	38.6279	-284.786	-79372	43700.6	351.334	353.451	1181.71	0	0	0	0	0	0	0	603	903	0
514	9	0	0	0	0	0	0	200	300	0	16.9969	38.6279	-285.091	-80287.6	43395.5	76.6757	352.216	1184.62	0	0	0	0	0	0	0	603	903	0
515	0	0	0	0	0	0	0	200	300	0	16.3866	40.3064	-285.091	-80012.9	43700.6	122.452	353.287	1183.66	0	0	0	0	0	0	0	603	903	0
515	1	0	0	0	0	0	0	200	300	0	16.9969	39.5435	-287.837	-80196	43334.4	-14.877	350.552	1181.62	0	0	0	0	0	0	0	603	903	0
515	2	0	0	0	0	0	0	200	300	0	17.1495	38.9331	-287.532	-80653.8	43700.6	397.11	351.985	1183.5	0	0	0	0	0	0	0	603	903	0
515	3	0	0	0	0	0	0	200	300	0	18.828	39.8486	-289.363	-80928.4	43761.7	580.216	351.234	1182.68	0	0	0	0	0	0	0	603	903	0
515	4	0	0	0	0	0	0	200	300	0	16.8443	38.9331	-289.058	-79646.7	43822.7	397.11	351.605	1178.54	0	0	0	0	0	0	0	603	903	0
515	5	0	0	0	0	0	0	200	300	0	16.9969	40.1538	-289.974	-80928.4	44188.9	214.005	352.389	1182.09	0	0	0	0	0	0	0	603	903	0
515	6	0	0	0	0	0	0	200	300	0	15.7762	40.7642	-291.5	-81386.2	44188.9	442.887	351.592	1182.2	0	0	0	0	0	0	0	603	903	0
515	7	0	0	0	0	0	0	200	300	0	17.1495	39.3909	-291.194	-81660.9	44127.9	442.887	351.541	1183.43	0	0	0	0	0	0	0	603	903	0
515	8	0	0	0	0	0	0	200	300	0	16.234	39.0857	-292.72	-82210.2	44250	397.11	351.168	1183.85	0	0	0	0	0	0	0	603	903	0
515	9	0	0	0	0	0	0	200	300	0	15.6236	40.0012	-294.246	-82210.2	44188.9	351.334	350.177	1182.39	0	0	0	0	0	0	0	603	903	0
516	0	0	0	0	0	0	0	200	300	0	16.3866	40.3064	-293.025	-81935.5	44005.8	625.992	350.177	1182.62	0	0	0	0	0	0	0	603	903	0
516	1	0	0	0	0	0	0	200	300	0	17.3021	40.1538	-296.993	-82759.5	44860.3	580.216	351.049	1181.66	0	0	0	0	0	0	0	603	903	0
516	2	0	0	0	0	0	0	200	300	0	16.0814	38.1702	-296.077	-82759.5	44494.1	854.874	350.279	1182.52	0	0	0	0	0	0	0	603	903	0
516	3	0	0	0	0	0	0	200	300	0	16.5392	41.0693	-296.993	-82667.9	44982.4	809.098	351.46	1181.35	0	0	0	0	0	0	0	603	903	0
516	4	0	0	0	0	0	0	200	300	0	15.7762	41.9849	-296.688	-83125.7	44677.2	397.11	350.587	1183.18	0	0	0	0	0	0	0	603	903	0
516	5	0	0	0	0	0	0	200	300	0	15.7762	40.3064	-299.129	-83400.3	44799.3	442.887	349.766	1181.81	0	0	0	0	0	0	0	603	903	0
516	6	0	0	0	0	0	0	200	300	0	16.8443	38.1702	-299.739	-82576.4	45165.5	671.769	350.683	1178.49	0	0	0	0	0	0	0	603	903	0
516	7	0	0	0	0	0	0	200	300	0	16.6917	40.7642	-301.57	-83949.7	45226.5	763.321	349.97	1181.38	0	0	0	0	0	0	0	603	903	0
516	8	0	0	0	0	0	0	200	300	0	15.7762	39.696	-300.35	-84224.3	45775.8	717.545	352.409	1183.42	0	0	0	0	0	0	0	603	903	0
516	9	0	0	0	0	0	0	200	300	0	15.9288	40.7642	-302.486	-84315.9	45775.8	763.321	351.332	1181.74	0	0	0	0	0	0	0	603	903	0
517	0	0	0	0	0	0	0	200	300	0	16.234	40.3064	-303.096	-84590.5	45470.7	1083.76	350.021	1182.09	0	0	0	0	0	0	0	603	903	0
517	1	0	0	0	0	0	0	200	300	0	17.4547	41.3745	-303.096	-84956.8	45409.6	763.321	349.819	1183.3	0	0	0	0	0	0	0	603	903	0
517	2	0	0	0	0	0	0	200	300	0	15.9288	40.6116	-304.927	-84773.6	45714.8	534.44	349.92	1181.01	0	0	0	0	0	0	0	603	903	0
517	3	0	0	0	0	0	0	200	300	0	16.0814	40.3064	-304.927	-85323	46142	809.098	351.322	1182.81	0	0	0	0	0	0	0	603	903	0
517	4	0	0	0	0	0	0	200	300	0	14.8607	40.459	-305.538	-85597.6	46508.3	809.098	352.218	1183.15	0	0	0	0	0	0	0	603	903	0
517	5	0	0	0	0	0	0	200	300	0	17.9124	40.459	-309.2	-85139.8	45409.6	900.65	346.862	1178.36	0	0	0	0	0	0	0	603	903	0
517	6	0	0	0	0	0	0	200	300	0	16.8443	40.7642	-308.284	-86238.5	46264.1	854.874	350.07	1182.74	0	0	0	0	0	0	0	603	903	0
517	7	0	0	0	0	0	0	200	300	0	15.6236	41.3745	-310.726	-86238.5	46081	1175.31	348.301	1180.54	0	0	0	0	0	0	0	603	903	0
517	8	0	0	0	0	0	0	200	300	0	15.0133	38.9331	-308.895	-85872.3	46325.2	854.874	349.971	1181	0	0	0	0	0	0	0	603	903	0
517	9	0	0	0	0	0	0	200	300	0	18.3702	41.2219	-311.946	-86238.5	46691.4	763.321	349.678	1179.45	0	0	0	0	0	0	0	603	903	0
518	0	0	0	0	0	0	0	200	300	0	15.9288	39.696	-310.115	-86513.2	46386.2	946.427	349.577	1181.97	0	0	0	0	0	0	0	603	903	0
518	1	0	0	0	0	0	0	200	300	0	14.8607	41.2219	-313.777	-86970.9	46935.5	1129.53	349.582	1180.17	0	0	0	0	0	0	0	603	903	0
518	2	0	0	0	0	0	0	200	300	0	15.0133	39.5435	-313.777	-86604.7	47179.6	1175.31	350.36	1179.01	0	0	0	0	0	0	0	603	903	0
518	3	0	0	0	0	0	0	200	300	0	14.7081	40.9167	-313.777	-87154	46935.5	1037.98	349.582	1180.76	0	0	0	0	0	0	0	603	903	0
518	4	0	0	0	0	0	0	200	300	0	14.8607	42.29	-314.693	-87337.1	47179.6	1037.98	349.923	1180.53	0	0	0	0	0	0	0	603	903	0
518	5	0	0	0	0	0	0	200	300	0	18.065	41.8323	-317.44	-87611.8	46752.4	1129.53	347.28	1179	0	0	0	0	0	0	0	603	903	0
518	6	0	0	0	0	0	0	200	300	0	14.7081	40.7642	-317.44	-87245.6	47301.7	1037.98	349.01	1177.84	0	0	0	0	0	0	0	603	903	0
518	7	0	0	0	0	0	0	200	300	0	14.2503	41.8323	-317.745	-87886.4	47973.1	1083.76	350.98	1179.59	0	0	0	0	0	0	0	603	903	0
518	8	0	0	0	0	0	0	200	300	0	14.8607	41.6797	-320.491	-88161.1	47851	1129.53	349.305	1178.08	0	0	0	0	0	0	0	603	903	0
518	9	0	0	0	0	0	0	200	300	0	15.0133	41.2219	-321.712	-88618.9	47851	1175.31	348.739	1178.46	0	0	0	0	0	0	0	603	903	0
519	0	0	0	0	0	0	0	200	300	0	15.471	42.1374	-322.933	-88435.7	47545.9	1724.63	347.231	1176.85	0	0	0	0	0	0	0	603	903	0
519	1	0	0	0	0	0	0	200	300	0	17.3021	41.6797	-322.933	-88893.5	47667.9	1083.76	347.61	1178.27	0	0	0	0	0	0	0	603	903	0
519	2	0	0	0	0	0	0	200	300	0	14.8607	41.8323	-322.322	-88802	47790	1037.98	348.268	1178.51	0	0	0	0	0	0	0	603	903	0
519	3	0	0	0	0	0	0	200	300	0	14.4029	42.1374	-325.984	-89351.3	47912.1	992.203	346.977	1177.1	0	0	0	0	0	0	0	603	903	0
519	4	0	0	0	0	0	0	200	300	0	15.7762	41.8323	-324.459	-89442.8	47790	1312.64	347.292	1178.67	0	0	0	0	0	0	0	603	903	0
519	5	0	0	0	0	0	0	200	300	0	14.2503	42.4426	-326.595	-90266.8	48461.4	1541.52	348.384	1179.39	0	0	0	0	0	0	0	603	903	0
519	6	0	0	0	0	0	0	200	300	0	14.5555	41.8323	-329.036	-89900.6	48339.3	1358.41	346.912	1176.22	0	0	0	0	0	0	0	603	903	0
519	7	0	0	0	0	0	0	200	300	0	15.6236	42.29	-326.9	-90175.3	48888.6	1175.31	349.552	1178.85	0	0	0	0	0	0	0	603	903	0
519	8	0	0	0	0	0	0	200	300	0	14.7081	43.053	-329.341	-89442.8	49010.7	1312.64	348.814	1174.58	0	0	0	0	0	0	0	603	903	0
519	9	0	0	0	0	0	0	200	300	0	15.6236	41.5271	-330.562	-90449.9	48217.2	1404.19	345.864	1176.62	0	0	0	0	0	0	0	603	903	0
520	0	0	0	0	0	0	0	200	300	0	17.9124	42.5952	-330.562	-90999.2	48766.6	1449.97	347.526	1178.29	0	0	0	0	0	0	0	603	903	0
520	1	0	0	0	0	0	0	200	300	0	14.4029	42.1374	-331.783	-89900.6	48888.6	1404.19	347.351	1173.96	0	0	0	0	0	0	0	603	903	0
520	2	0	0	0	0	0	0	200	300	0	14.0977	40.6116	-333.919	-91182.3	49010.7	1449.97	346.774	1176.07	0	0	0	0	0	0	0	603	903	0
520	3	0	0	0	0	0	0	200	300	0	16.5392	42.29	-333.614	-91365.4	49254.8	1449.97	347.64	1176.87	0	0	0	0	0	0	0	603	903	0
520	4	0	0	0	0	0	0	200	300	0	15.0133	42.5952	-334.835	-91548.6	48888.6	1175.31	346.008	1176.41	0	0	0	0	0	0	0	603	903	0
520	5	0	0	0	0	0	0	200	300	0	14.8607	41.9849	-334.835	-91914.8	49682.1	1449.97	348.378	1177.51	0	0	0	0	0	0	0	603	903	0
520	6	0	0	0	0	0	0	200	300	0	16.8443	40.7642	-334.224	-92372.5	49743.1	1404.19	348.832	1179.38	0	0	0	0	0	0	0	603	903	0
520	7	0	0	0	0	0	0	200	300	0	14.8607	42.4426	-336.666	-92555.6	49315.9	1266.86	346.483	1177.92	0	0	0	0	0	0	0	603	903	0
520	8	0	0	0	0	0	0	200	300	0	15.1659	42.7478	-336.971	-92281	49193.8	1541.52	345.988	1176.85	0	0	0	0	0	0	0	603	903	0
520	9	0	0	0	0	0	0	200	300	0	15.9288	43.2056	-339.412	-92647.2	49743.1	1541.52	346.557	1175.96	0	0	0	0	0	0	0	603	903	0
521	0	0	0	0	0	0	0	200	300	0	14.8607	41.6797	-339.107	-93288	49682.1	1587.3	346.509	1178.1	0	0	0	0	0	0	0	603	903	0
521	1	0	0	0	0	0	0	200	300	0	15.7762	43.8159	-339.717	-93745.8	50475.5	1724.63	348.581	1178.95	0	0	0	0	0	0	0	603	903	0
521	2	0	0	0	0	0	0	200	300	0	15.6236	43.6633	-340.938	-93471.2	50109.3	1312.64	346.975	1177.16	0	0	0	0	0	0	0	603	903	0
521	3	0	0	0	0	0	0	200	300	0	17.6073	42.7478	-341.548	-93654.2	50536.6	1404.19	347.963	1177.2	0	0	0	0	0	0	0	603	903	0
521	4	0	0	0	0	0	0	200	300	0	16.0814	43.5107	-343.379	-93837.4	50597.6	1404.19	347.352	1176.28	0	0	0	0	0	0	0	603	903	0
521	5	0	0	0	0	0	0	200	300	0	15.9288	42.5952	-343.685	-94295.1	50475.5	1861.95	346.866	1177.37	0	0	0	0	0	0	0	603	903	0
521	6	0	0	0	0	0	0	200	300	0	15.1659	42.5952	-343.99	-94569.8	50902.8	1495.74	347.978	1177.92	0	0	0	0	0	0	0	603	903	0
521	7	0	0	0	0	0	0	200	300	0	17.1495	43.8159	-345.821	-93928.9	50475.5	1404.19	345.959	1174.61	0	0	0	0	0	0	0	603	903	0
521	8	0	0	0	0	0	0	200	300	0	15.9288	41.9849	-347.957	-94478.2	50109.3	1404.19	344.01	1174.52	0	0	0	0	0	0	0	603	903	0
521	9	0	0	0	0	0	0	200	300	0	14.8607	43.3582	-347.347	-95576.9	50231.4	1221.09	344.615	1178.16	0	0	0	0	0	0	0	603	903	0
522	0	0	0	0	0	0	0	200	300	0	14.8607	43.053	-349.483	-95119.1	50963.8	1816.18	345.826	1175.17	0	0	0	0	0	0	0	603	903	0
522	1	0	0	0	0	0	0	200	300	0	15.7762	43.3582	-349.178	-95393.8	50780.7	1587.3	345.429	1176.2	0	0	0	0	0	0	0	603	903	0
522	2	0	0	0	0	0	0	200	300	0	15.1659	42.7478	-349.178	-95393.8	51452.1	1449.97	347.352	1176.2	0	0	0	0	0	0	0	603	903	0
522	3	0	0	0	0	0	0	200	300	0	15.7762	43.053	-351.009	-95668.4	50536.6	1541.52	343.975	1175.55	0	0	0	0	0	0	0	603	903	0
522	4	0	0	0	0	0	0	200	300	0	16.5392	43.053	-351.924	-96675.5	51696.2	1724.63	346.896	1177.71	0	0	0	0	0	0	0	603	903	0
522	5	0	0	0	0	0	0	200	300	0	15.7762	43.9685	-352.84	-96675.5	51513.1	1587.3	345.996	1176.99	0	0	0	0	0	0	0	603	903	0
522	6	0	0	0	0	0	0	200	300	0	15.7762	41.9849	-353.145	-96126.2	51574.2	1266.86	346.042	1175.2	0	0	0	0	0	0	0	603	903	0
522	7	0	0	0	0	0	0	200	300	0	15.6236	43.9685	-354.061	-96767.1	52367.6	1587.3	347.906	1176.31	0	0	0	0	0	0	0	603	903	0
522	8	0	0	0	0	0	0	200	300	0	15.6236	42.5952	-351.924	-97316.4	51696.2	1312.64	346.896	1179.53	0	0	0	0	0	0	0	603	903	0
522	9	0	0	0	0	0	0	200	300	0	16.234	43.2056	-356.807	-97133.3	52001.4	1541.52	345.741	1175.23	0	0	0	0	0	0	0	603	903	0
523	0	0	0	0	0	0	0	200	300	0	16.234	42.29	-357.112	-97682.6	52794.9	1404.19	347.838	1176.53	0	0	0	0	0	0	0	603	903	0
523	1	0	0	0	0	0	0	200	300	0	15.471	43.5107	-357.723	-97224.8	52367.6	1358.41	346.392	1174.79	0	0	0	0	0	0	0	603	903	0
523	2	0	0	0	0	0	0	200	300	0	15.6236	43.8159	-356.807	-97774.1	52855.9	1221.09	348.136	1177.03	0	0	0	0	0	0	0	603	903	0
523	3	0	0	0	0	0	0	200	300	0	17.4547	43.8159	-362.911	-98048.8	52855.9	1312.64	345.644	1173.17	0	0	0	0	0	0	0	603	903	0
523	4	0	0	0	0	0	0	200	300	0	15.471	42.7478	-361.08	-99055.9	52794.9	1633.07	346.214	1177.33	0	0	0	0	0	0	0	603	903	0
523	5	0	0	0	0	0	0	200	300	0	15.7762	43.9685	-361.995	-97865.7	53161.1	1358.41	346.856	1173.35	0	0	0	0	0	0	0	603	903	0
523	6	0	0	0	0	0	0	200	300	0	16.3866	43.053	-363.826	-98964.3	53039	1358.41	345.781	1175.01	0	0	0	0	0	0	0	603	903	0
523	7	0	0	0	0	0	0	200	300	0	16.0814	43.2056	-364.437	-99513.6	53466.3	1541.52	346.709	1176.06	0	0	0	0	0	0	0	603	903	0
523	8	0	0	0	0	0	0	200	300	0	16.6917	43.8159	-366.268	-99605.2	53344.2	1266.86	345.643	1174.95	0	0	0	0	0	0	0	603	903	0
523	9	0	0	0	0	0	0	200	300	0	16.8443	42.5952	-367.183	-99696.8	52611.8	1404.19	343.285	1174.52	0	0	0	0	0	0	0	603	903	0
524	0	0	0	0	0	0	0	200	300	0	15.9288	43.5107	-366.878	-100154	53954.5	1358.41	347.064	1175.99	0	0	0	0	0	0	0	603	903	0
524	1	0	0	0	0	0	0	200	300	0	15.471	42.29	-365.657	-100154	53893.5	1312.64	347.388	1176.9	0	0	0	0	0	0	0	603	903	0
524	2	0	0	0	0	0	0	200	300	0	17.3021	43.2056	-370.54	-100246	53832.5	1175.31	345.281	1173.54	0	0	0	0	0	0	0	603	903	0
524	3	0	0	0	0	0	0	200	300	0	17.6073	42.4426	-371.15	-101253	53466.3	1358.41	344.056	1175.81	0	0	0	0	0	0	0	603	903	0
524	4	0	0	0	0	0	0	200	300	0	16.8443	42.9004	-373.897	-101711	54198.7	1358.41	344.956	1175.03	0	0	0	0	0	0	0	603	903	0
524	5	0	0	0	0	0	0	200	300	0	17.4547	43.5107	-373.897	-101345	54625.9	1175.31	346.099	1174.05	0	0	0	0	0	0	0	603	903	0
524	6	0	0	0	0	0	0	200	300	0	16.9969	43.8159	-375.728	-101986	54809	1587.3	345.874	1174.43	0	0	0	0	0	0	0	603	903	0
524	7	0	0	0	0	0	0	200	300	0	16.3866	42.9004	-377.254	-101711	54625.9	1221.09	344.799	1172.61	0	0	0	0	0	0	0	603	903	0
524	8	0	0	0	0	0	0	200	300	0	17.7599	43.3582	-377.559	-102535	54992.1	1221.09	345.652	1174.57	0	0	0	0	0	0	0	603	903	0
524	9	0	0	0	0	0	0	200	300	0	17.7599	42.7478	-379.39	-103176	55053.2	1221.09	345.11	1174.95	0	0	0	0	0	0	0	603	903	0
525	0	0	0	0	0	0	0	200	300	0	16.6917	43.5107	-379.085	-103176	55419.4	1175.31	346.193	1175.17	0	0	0	0	0	0	0	603	903	0
525	1	0	0	0	0	0	0	200	300	0	17.9124	43.6633	-381.832	-102810	55541.5	1221.09	345.461	1172.25	0	0	0	0	0	0	0	603	903	0
525	2	0	0	0	0	0	0	200	300	0	17.4547	43.2056	-383.663	-103359	54748	1129.53	342.698	1172.4	0	0	0	0	0	0	0	603	903	0
525	3	0	0	0	0	0	0	200	300	0	17.3021	43.053	-383.357	-103908	55968.7	1037.98	345.996	1174.05	0	0	0	0	0	0	0	603	903	0
525	4	0	0	0	0	0	0	200	300	0	18.3702	42.9004	-384.578	-104183	55846.6	1175.31	345.215	1173.9	0	0	0	0	0	0	0	603	903	0
525	5	0	0	0	0	0	0	200	300	0	17.4547	42.9004	-385.494	-104824	56151.8	1037.98	345.662	1174.92	0	0	0	0	0	0	0	603	903	0
525	6	0	0	0	0	0	0	200	300	0	19.4383	42.5952	-385.189	-104457	56334.9	717.545	346.253	1174.19	0	0	0	0	0	0	0	603	903	0
525	7	0	0	0	0	0	0	200	300	0	18.5228	43.2056	-389.461	-104000	55968.7	854.874	343.708	1170.04	0	0	0	0	0	0	0	603	903	0
525	8	0	0	0	0	0	0	200	300	0	19.1331	43.2056	-388.24	-105556	56640.1	809.098	345.889	1174.88	0	0	0	0	0	0	0	603	903	0
525	9	0	0	0	0	0	0	200	300	0	18.2176	42.9004	-390.987	-105739	56518	1037.98	344.552	1173.44	0	0	0	0	0	0	0	603	903	0
526	0	0	0	0	0	0	0	200	300	0	18.5228	42.5952	-390.987	-105648	57006.3	854.874	345.801	1173.21	0	0	0	0	0	0	0	603	903	0
526	1	0	0	0	0	0	0	200	300	0	18.6754	43.053	-392.513	-106197	57250.4	854.874	345.856	1173.56	0	0	0	0	0	0	0	603	903	0
526	2	0	0	0	0	0	0	200	300	0	18.3702	42.7478	-395.259	-107021	57311.5	671.769	344.997	1173.76	0	0	0	0	0	0	0	603	903	0
526	3	0	0	0	0	0	0	200	300	0	19.2857	42.5952	-396.175	-107112	57433.6	854.874	344.97	1173.37	0	0	0	0	0	0	0	603	903	0
526	4	0	0	0	0	0	0	200	300	0	18.9806	43.5107	-398.006	-107296	58349.1	763.321	346.604	1172.58	0	0	0	0	0	0	0	603	903	0
526	5	0	0	0	0	0	0	200	300	0	18.2176	42.1374	-398.616	-107662	57799.8	671.769	345.001	1173.09	0	0	0	0	0	0	0	603	903	0
526	6	0	0	0	0	0	0	200	300	0	18.5228	42.9004	-400.142	-107204	58532.2	671.769	346.279	1170.92	0	0	0	0	0	0	0	603	903	0
526	7	0	0	0	0	0	0	200	300	0	19.5909	43.053	-401.973	-108028	58166	580.216	344.701	1171.74	0	0	0	0	0	0	0	603	903	0
526	8	0	0	0	0	0	0	200	300	0	18.9806	42.5952	-401.668	-107936	58349.1	946.427	345.267	1171.72	0	0	0	0	0	0	0	603	903	0
526	9	0	0	0	0	0	0	200	300	0	18.6754	41.6797	-402.889	-109127	58715.3	625.992	345.736	1173.86	0	0	0	0	0	0	0	603	903	0
527	0	0	0	0	0	0	0	200	300	0	19.5909	41.9849	-405.635	-109127	58654.3	488.663	344.599	1172.03	0	0	0	0	0	0	0	603	903	0
527	1	0	0	0	0	0	0	200	300	0	18.9806	43.053	-405.94	-109584	58288	488.663	343.588	1172.95	0	0	0	0	0	0	0	603	903	0
527	2	0	0	0	0	0	0	200	300	0	19.4383	42.9004	-409.908	-109951	58715.3	671.769	343.24	1171.23	0	0	0	0	0	0	0	603	903	0
527	3	0	0	0	0	0	0	200	300	0	22.0323	42.5952	-410.213	-110408	59264.6	671.769	344.473	1172.15	0	0	0	0	0	0	0	603	903	0
527	4	0	0	0	0	0	0	200	300	0	18.828	42.29	-411.739	-110500	59936	580.216	345.568	1171.37	0	0	0	0	0	0	0	603	903	0
527	5	0	0	0	0	0	0	200	300	0	19.2857	42.4426	-412.349	-111049	59630.8	763.321	344.612	1172.31	0	0	0	0	0	0	0	603	903	0
527	6	0	0	0	0	0	0	200	300	0	20.9642	42.1374	-413.875	-111324	60058.1	809.098	345.112	1171.98	0	0	0	0	0	0	0	603	903	0
527	7	0	0	0	0	0	0	200	300	0	20.0487	42.29	-416.316	-112056	60058.1	442.887	344.261	1172.16	0	0	0	0	0	0	0	603	903	0
527	8	0	0	0	0	0	0	200	300	0	19.7435	41.8323	-418.758	-112697	60241.2	397.11	343.857	1172.12	0	0	0	0	0	0	0	603	903	0
527	9	0	0	0	0	0	0	200	300	0	20.2013	43.2056	-418.758	-112148	60912.6	534.44	345.46	1170.81	0	0	0	0	0	0	0	603	903	0
528	0	0	0	0	0	0	0	200	300	0	20.3539	42.29	-421.199	-113063	60973.6	259.781	344.762	1171.43	0	0	0	0	0	0	0	603	903	0
528	1	0	0	0	0	0	0	200	300	0	22.1849	41.5271	-422.42	-113430	60729.4	442.887	343.766	1171.52	0	0	0	0	0	0	0	603	903	0
528	2	0	0	0	0	0	0	200	300	0	20.659	42.9004	-423.641	-114071	60973.6	305.558	343.928	1172.26	0	0	0	0	0	0	0	603	903	0
528	3	0	0	0	0	0	0	200	300	0	20.3539	41.5271	-425.777	-114437	61095.7	351.334	343.492	1171.77	0	0	0	0	0	0	0	603	903	0
528	4	0	0	0	0	0	0	200	300	0	19.4383	41.6797	-426.082	-114803	61706	442.887	344.822	1172.44	0	0	0	0	0	0	0	603	903	0
528	5	0	0	0	0	0	0	200	300	0	21.7271	42.9004	-429.134	-114711	61950.2	442.887	344.361	1170.31	0	0	0	0	0	0	0	603	903	0
528	6	0	0	0	0	0	0	200	300	0	22.9478	41.6797	-431.27	-114711	61706	305.558	343.08	1168.99	0	0	0	0	0	0	0	603	903	0
528	7	0	0	0	0	0	0	200	300	0	20.0487	42.29	-431.27	-115718	62072.2	305.558	343.929	1171.32	0	0	0	0	0	0	0	603	903	0
528	8	0	0	0	0	0	0	200	300	0	20.3539	42.1374	-431.88	-116268	62072.2	397.11	343.725	1172.21	0	0	0	0	0	0	0	603	903	0
528	9	0	0	0	0	0	0	200	300	0	21.422	42.7478	-432.796	-116542	62621.5	214.005	344.691	1172.28	0	0	0	0	0	0	0	603	903	0
529	0	0	0	0	0	0	0	200	300	0	21.8797	42.4426	-434.627	-117183	62865.7	351.334	344.643	1172.62	0	0	0	0	0	0	0	603	903	0
529	1	0	0	0	0	0	0	200	300	0	22.7953	41.8323	-437.679	-117000	62743.6	397.11	343.355	1170.32	0	0	0	0	0	0	0	603	903	0
529	2	0	0	0	0	0	0	200	300	0	21.2694	42.5952	-439.205	-117458	63415	122.452	344.386	1170.43	0	0	0	0	0	0	0	603	903	0
529	3	0	0	0	0	0	0	200	300	0	22.1849	42.7478	-441.646	-118374	63292.9	259.781	343.311	1171.03	0	0	0	0	0	0	0	603	903	0
529	4	0	0	0	0	0	0	200	300	0	21.8797	42.29	-442.562	-118648	63842.2	-60.6534	344.256	1171.09	0	0	0	0	0	0	0	603	903	0
529	5	0	0	0	0	0	0	200	300	0	21.8797	43.2056	-443.477	-118374	64330.5	-106.43	345.059	1169.92	0	0	0	0	0	0	0	603	903	0
529	6	0	0	0	0	0	0	200	300	0	23.4056	43.8159	-447.139	-118923	64147.4	-197.982	343.462	1168.96	0	0	0	0	0	0	0	603	903	0
529	7	0	0	0	0	0	0	200	300	0	21.8797	41.6797	-446.834	-119289	64513.6	76.6757	344.379	1169.97	0	0	0	0	0	0	0	603	903	0
529	8	0	0	0	0	0	0	200	300	0	21.8797	41.8323	-448.36	-119838	64879.8	351.334	344.705	1170.28	0	0	0	0	0	0	0	603	903	0
529	9	0	0	0	0	0	0	200	300	0	24.3211	42.4426	-450.496	-120113	64757.8	168.228	343.748	1169.62	0	0	0	0	0	0	0	603	903	0
530	0	0	0	0	0	0	0	200	300	0	22.1849	42.5952	-452.022	-120205	65307.1	-60.6534	344.478	1168.93	0	0	0	0	0	0	0	603	903	0
530	1	0	0	0	0	0	0	200	300	0	22.3375	40.459	-454.463	-121120	65429.2	-14.877	343.97	1169.51	0	0	0	0	0	0	0	603	903	0
530	2	0	0	0	0	0	0	200	300	0	24.3211	42.1374	-455.989	-121578	65307.1	214.005	343.221	1169.62	0	0	0	0	0	0	0	603	903	0
530	3	0	0	0	0	0	0	200	300	0	22.9478	42.9004	-457.515	-122676	65551.2	-152.206	343.277	1171.14	0	0	0	0	0	0	0	603	903	0
530	4	0	0	0	0	0	0	200	300	0	22.4901	42.5952	-459.957	-122493	65917.5	-14.877	343.312	1169.32	0	0	0	0	0	0	0	603	903	0
530	5	0	0	0	0	0	0	200	300	0	23.4056	42.5952	-461.788	-122676	66344.7	-152.206	343.669	1168.66	0	0	0	0	0	0	0	603	903	0
530	6	0	0	0	0	0	0	200	300	0	24.1685	43.2056	-462.093	-123592	66710.9	-14.877	344.367	1170.46	0	0	0	0	0	0	0	603	903	0
530	7	0	0	0	0	0	0	200	300	0	26.1522	43.3582	-464.839	-124233	65978.5	-106.43	341.938	1170.26	0	0	0	0	0	0	0	603	903	0
530	8	0	0	0	0	0	0	200	300	0	24.1685	41.5271	-466.365	-124050	67321.2	-60.6534	344.353	1168.99	0	0	0	0	0	0	0	603	903	0
530	9	0	0	0	0	0	0	200	300	0	24.1685	43.5107	-467.281	-123867	67260.2	-426.864	343.94	1168.08	0	0	0	0	0	0	0	603	903	0
531	0	0	0	0	0	0	0	200	300	0	24.016	43.5107	-471.553	-125606	67626.4	-793.075	343.412	1169.37	0	0	0	0	0	0	0	603	903	0
531	1	0	0	0	0	0	0	200	300	0	24.6263	43.053	-473.384	-125698	67748.5	-289.535	343.115	1168.53	0	0	0	0	0	0	0	603	903	0
531	2	0	0	0	0	0	0	200	300	0	26.7625	43.8159	-474.605	-126430	67931.6	-197.982	343.133	1169.39	0	0	0	0	0	0	0	603	903	0
531	3	0	0	0	0	0	0	200	300	0	24.1685	42.5952	-473.69	-126155	68297.8	-472.641	344.183	1169.33	0	0	0	0	0	0	0	603	903	0
531	4	0	0	0	0	0	0	200	300	0	24.6263	43.6633	-477.046	-127163	68847.1	-335.312	344.32	1169.56	0	0	0	0	0	0	0	603	903	0
531	5	0	0	0	0	0	0	200	300	0	26.61	42.9004	-480.403	-127620	68725.1	-472.641	343.057	1168.65	0	0	0	0	0	0	0	603	903	0
531	6	0	0	0	0	0	0	200	300	0	26.61	43.6633	-483.76	-128536	69213.4	-518.417	343.074	1168.7	0	0	0	0	0	0	0	603	903	0
531	7	0	0	0	0	0	0	200	300	0	26.7625	44.1211	-484.371	-128994	69640.6	-518.417	343.775	1169.31	0	0	0	0	0	0	0	603	903	0
531	8	0	0	0	0	0	0	200	300	0	26.3048	44.5789	-487.117	-128902	69701.6	-564.193	343.09	1167.62	0	0	0	0	0	0	0	603	903	0
531	9	0	0	0	0	0	0	200	300	0	26.7625	44.4263	-488.643	-129634	69884.7	-793.075	343.018	1168.29	0	0	0	0	0	0	0	603	903	0
532	0	0	0	0	0	0	0	200	300	0	26.61	44.884	-491.085	-130092	70128.9	-289.535	342.804	1167.91	0	0	0	0	0	0	0	603	903	0
532	1	0	0	0	0	0	0	200	300	0	27.3729	44.5789	-493.526	-130733	70556.1	-381.088	342.963	1167.9	0	0	0	0	0	0	0	603	903	0
532	2	0	0	0	0	0	0	200	300	0	28.2884	45.0366	-493.221	-131466	70983.4	-793.075	343.918	1169.54	0	0	0	0	0	0	0	603	903	0
532	3	0	0	0	0	0	0	200	300	0	27.9832	45.9521	-495.357	-132015	70434.1	-655.746	342.189	1169.5	0	0	0	0	0	0	0	603	903	0
532	4	0	0	0	0	0	0	200	300	0	27.2203	45.3418	-498.714	-132564	72021	-747.299	344.413	1168.81	0	0	0	0	0	0	0	603	903	0
532	5	0	0	0	0	0	0	200	300	0	29.3565	45.1892	-501.155	-131832	71959.9	-1113.51	343.588	1166.06	0	0	0	0	0	0	0	603	903	0
532	6	0	0	0	0	0	0	200	300	0	29.5091	45.0366	-503.597	-133571	72326.1	-655.746	343.619	1168.23	0	0	0	0	0	0	0	603	903	0
532	7	0	0	0	0	0	0	200	300	0	27.8307	45.7996	-505.733	-134395	72814.4	-518.417	343.978	1168.74	0	0	0	0	0	0	0	603	903	0
532	8	0	0	0	0	0	0	200	300	0	28.441	46.2573	-506.343	-134670	72814.4	-1113.51	343.804	1168.97	0	0	0	0	0	0	0	603	903	0
532	9	0	0	0	0	0	0	200	300	0	30.8824	47.0203	-511.226	-134945	73058.5	-1021.96	342.908	1166.96	0	0	0	0	0	0	0	603	903	0
533	0	0	0	0	0	0	0	200	300	0	29.9669	46.1047	-512.142	-135952	73241.7	-884.628	343.011	1168.46	0	0	0	0	0	0	0	603	903	0
533	1	0	0	0	0	0	0	200	300	0	28.8988	47.6306	-514.583	-136501	74035.1	-1067.73	343.874	1168.27	0	0	0	0	0	0	0	603	903	0
533	2	0	0	0	0	0	0	200	300	0	30.7298	46.5625	-517.024	-136592	74767.5	-838.852	344.611	1167.19	0	0	0	0	0	0	0	603	903	0
533	3	0	0	0	0	0	0	200	300	0	30.7298	47.6306	-518.245	-137325	74950.7	-1021.96	344.624	1167.98	0	0	0	0	0	0	0	603	903	0
533	4	0	0	0	0	0	0	200	300	0	32.5609	47.0203	-519.161	-137874	74645.5	-1205.06	343.781	1168.57	0	0	0	0	0	0	0	603	903	0
533	5	0	0	0	0	0	0	200	300	0	32.1031	48.3936	-523.738	-138240	75377.9	-1159.29	343.923	1166.95	0	0	0	0	0	0	0	603	903	0
533	6	0	0	0	0	0	0	200	300	0	31.9505	47.7832	-526.18	-139339	75438.9	-747.299	343.371	1167.81	0	0	0	0	0	0	0	603	903	0
533	7	0	0	0	0	0	0	200	300	0	31.4928	49.0039	-528.011	-139980	75866.2	-1021.96	343.683	1168.11	0	0	0	0	0	0	0	603	903	0
533	8	0	0	0	0	0	0	200	300	0	33.1712	47.0203	-531.673	-140346	76293.4	-1296.62	343.497	1166.97	0	0	0	0	0	0	0	603	903	0
533	9	0	0	0	0	0	0	200	300	0	33.0186	49.7668	-533.809	-141079	76354.4	-1021.96	343.037	1167.29	0	0	0	0	0	0	0	603	903	0
534	0	0	0	0	0	0	0	200	300	0	32.8661	51.7505	-535.03	-141903	77025.9	-1296.62	343.966	1168.22	0	0	0	0	0	0	0	603	903	0
534	1	0	0	0	0	0	0	200	300	0	34.2393	49.7668	-538.692	-142269	77514.1	-1205.06	343.893	1167.1	0	0	0	0	0	0	0	603	903	0
534	2	0	0	0	0	0	0	200	300	0	33.4764	49.0039	-540.828	-143459	77819.3	-976.181	343.889	1168.26	0	0	0	0	0	0	0	603	903	0
534	3	0	0	0	0	0	0	200	300	0	33.7816	51.5979	-543.27	-143642	78124.5	-1159.29	343.804	1167.4	0	0	0	0	0	0	0	603	903	0
534	4	0	0	0	0	0	0	200	300	0	34.3919	52.2082	-546.627	-143734	78673.8	-1388.17	343.926	1165.95	0	0	0	0	0	0	0	603	903	0
534	5	0	0	0	0	0	0	200	300	0	34.6971	51.7505	-550.594	-144191	78734.8	-976.181	343	1164.88	0	0	0	0	0	0	0	603	903	0
534	6	0	0	0	0	0	0	200	300	0	34.8497	51.4453	-551.204	-145656	79528.3	-884.628	344.281	1167.25	0	0	0	0	0	0	0	603	903	0
534	7	0	0	0	0	0	0	200	300	0	34.8497	53.7341	-553.951	-146114	79528.3	-1067.73	343.566	1166.77	0	0	0	0	0	0	0	603	903	0
534	8	0	0	0	0	0	0	200	300	0	35.9178	53.7341	-554.256	-146572	79772.4	-884.628	343.927	1167.45	0	0	0	0	0	0	0	603	903	0
534	9	0	0	0	0	0	0	200	300	0	35.7652	53.1238	-559.139	-147762	80443.8	-1159.29	343.871	1167.27	0	0	0	0	0	0	0	603	903	0
535	0	0	0	0	0	0	0	200	300	0	37.7489	54.0393	-561.275	-148311	80382.8	-884.628	343.215	1167.24	0	0	0	0	0	0	0	603	903	0
535	1	0	0	0	0	0	0	200	300	0	35.9178	54.9548	-566.158	-148403	80810	-609.97	342.734	1165.12	0	0	0	0	0	0	0	603	903	0
535	2	0	0	0	0	0	0	200	300	0	35.9178	54.6497	-566.463	-149776	81847.6	-701.523	344.489	1167.41	0	0	0	0	0	0	0	603	903	0
535	3	0	0	0	0	0	0	200	300	0	36.0704	56.1755	-570.125	-149776	81908.7	-1159.29	343.668	1165.71	0	0	0	0	0	0	0	603	903	0
535	4	0	0	0	0	0	0	200	300	0	37.4437	56.1755	-573.787	-150509	82458	-655.746	343.708	1165.31	0	0	0	0	0	0	0	603	903	0
535	5	0	0	0	0	0	0	200	300	0	37.9015	57.2436	-575.618	-151973	82824.2	-884.628	343.887	1167.02	0	0	0	0	0	0	0	603	903	0
535	6	0	0	0	0	0	0	200	300	0	38.6644	56.9385	-579.586	-152614	83068.3	-976.181	343.324	1166.32	0	0	0	0	0	0	0	603	903	0
535	7	0	0	0	0	0	0	200	300	0	37.5963	58.0066	-582.942	-152889	83800.7	-564.193	343.755	1165.27	0	0	0	0	0	0	0	603	903	0
535	8	0	0	0	0	0	0	200	300	0	37.4437	59.6851	-585.994	-154079	84350.1	-472.641	343.944	1165.94	0	0	0	0	0	0	0	603	903	0
535	9	0	0	0	0	0	0	200	300	0	39.2747	58.9221	-587.215	-154354	84166.9	-976.181	343.332	1165.86	0	0	0	0	0	0	0	603	903	0
536	0	0	0	0	0	0	0	200	300	0	40.0377	59.0747	-592.098	-155452	84838.4	-564.193	343.284	1165.55	0	0	0	0	0	0	0	603	903	0
536	1	0	0	0	0	0	0	200	300	0	39.5799	58.9221	-593.624	-155361	85387.6	-472.641	343.841	1164.72	0	0	0	0	0	0	0	603	903	0
536	2	0	0	0	0	0	0	200	300	0	39.8851	60.6006	-597.591	-156643	85204.6	-793.075	342.58	1165.12	0	0	0	0	0	0	0	603	903	0
536	3	0	0	0	0	0	0	200	300	0	42.1739	60.448	-599.727	-157283	86486.3	-747.299	344.209	1165.26	0	0	0	0	0	0	0	603	903	0
536	4	0	0	0	0	0	0	200	300	0	40.1903	61.6687	-605.22	-158016	86730.4	-426.864	343.304	1164.09	0	0	0	0	0	0	0	603	903	0
536	5	0	0	0	0	0	0	200	300	0	40.3429	62.1265	-608.577	-158931	87401.8	-701.523	343.617	1164.15	0	0	0	0	0	0	0	603	903	0
536	6	0	0	0	0	0	0	200	300	0	41.5636	61.8213	-608.882	-159572	88195.3	-564.193	344.848	1165.07	0	0	0	0	0	0	0	603	903	0
536	7	0	0	0	0	0	0	200	300	0	40.1903	62.5842	-612.544	-159298	88012.2	-609.97	343.683	1163.06	0	0	0	0	0	0	0	603	903	0
536	8	0	0	0	0	0	0	200	300	0	40.8006	63.1946	-616.512	-161220	88622.5	-655.746	343.748	1164.5	0	0	0	0	0	0	0	603	903	0
536	9	0	0	0	0	0	0	200	300	0	44.1576	64.2627	-619.564	-162319	88622.5	-518.417	343.04	1164.99	0	0	0	0	0	0	0	603	903	0
537	0	0	0	0	0	0	0	200	300	0	41.411	63.1946	-623.531	-162502	89477	-655.746	343.501	1163.62	0	0	0	0	0	0	0	603	903	0
537	1	0	0	0	0	0	0	200	300	0	41.5636	63.9575	-625.057	-163417	90270.5	-655.746	344.42	1164.44	0	0	0	0	0	0	0	603	903	0
537	2	0	0	0	0	0	0	200	300	0	43.0894	65.3308	-630.855	-164058	90331.5	-472.641	343.189	1163.06	0	0	0	0	0	0	0	603	903	0
537	3	0	0	0	0	0	0	200	300	0	42.4791	63.8049	-633.907	-165523	90819.8	-335.312	343.27	1164.12	0	0	0	0	0	0	0	603	903	0
537	4	0	0	0	0	0	0	200	300	0	43.5472	65.1782	-636.348	-166164	91247	-426.864	343.392	1164.12	0	0	0	0	0	0	0	603	903	0
537	5	0	0	0	0	0	0	200	300	0	44.005	66.2463	-640.621	-166622	91125	-335.312	342.245	1163.09	0	0	0	0	0	0	0	603	903	0
537	6	0	0	0	0	0	0	200	300	0	42.9369	65.636	-641.841	-167171	92101.5	-609.97	343.496	1163.46	0	0	0	0	0	0	0	603	903	0
537	7	0	0	0	0	0	0	200	300	0	42.9369	66.2463	-646.114	-168453	92956	-609.97	343.869	1163.72	0	0	0	0	0	0	0	603	903	0
537	8	0	0	0	0	0	0	200	300	0	44.3102	65.7886	-649.166	-169460	93078.1	-197.982	343.381	1164.04	0	0	0	0	0	0	0	603	903	0
537	9	0	0	0	0	0	0	200	300	0	44.1576	66.0938	-654.354	-170833	93749.5	-472.641	343.27	1164.07	0	0	0	0	0	0	0	603	903	0
538	0	0	0	0	0	0	0	200	300	0	44.4627	64.873	-656.49	-171016	94298.8	-426.864	343.641	1163.5	0	0	0	0	0	0	0	603	903	0
538	1	0	0	0	0	0	0	200	300	0	45.0731	66.7041	-660.457	-172115	94665	-289.535	343.333	1163.6	0	0	0	0	0	0	0	603	903	0
538	2	0	0	0	0	0	0	200	300	0	44.6153	66.5515	-664.119	-173030	95519.5	-701.523	343.829	1163.54	0	0	0	0	0	0	0	603	903	0
538	3	0	0	0	0	0	0	200	300	0	45.9886	67.467	-667.781	-173305	94848.1	-609.97	342.035	1162.52	0	0	0	0	0	0	0	603	903	0
538	4	0	0	0	0	0	0	200	300	0	45.9886	66.8567	-672.359	-173580	96740.2	-426.864	343.882	1161.17	0	0	0	0	0	0	0	603	903	0
538	5	0	0	0	0	0	0	200	300	0	45.0731	68.0774	-674.8	-175502	96557.1	-472.641	343.09	1163.08	0	0	0	0	0	0	0	603	903	0
538	6	0	0	0	0	0	0	200	300	0	46.2938	68.5352	-678.768	-176052	97411.6	-747.299	343.512	1162.37	0	0	0	0	0	0	0	603	903	0
538	7	0	0	0	0	0	0	200	300	0	46.7516	67.467	-681.514	-176509	97594.7	-381.088	343.203	1162	0	0	0	0	0	0	0	603	903	0
538	8	0	0	0	0	0	0	200	300	0	46.7516	68.9929	-684.261	-177883	98021.9	-701.523	343.252	1162.96	0	0	0	0	0	0	0	603	903	0
538	9	0	0	0	0	0	0	200	300	0	47.3619	68.3826	-687.618	-178890	98449.2	-609.97	343.174	1163.16	0	0	0	0	0	0	0	603	903	0
539	0	0	0	0	0	0	0	200	300	0	47.6671	68.3826	-691.89	-179348	99669.9	-426.864	344.055	1162.21	0	0	0	0	0	0	0	603	903	0
539	1	0	0	0	0	0	0	200	300	0	47.0567	69.1455	-694.942	-180446	99425.7	-335.312	343.071	1162.66	0	0	0	0	0	0	0	603	903	0
539	2	0	0	0	0	0	0	200	300	0	47.5145	68.3826	-694.942	-180080	100402	-701.523	344.476	1162.13	0	0	0	0	0	0	0	603	903	0
539	3	0	0	0	0	0	0	200	300	0	48.43	69.2981	-702.266	-182094	100707	-152.206	343.404	1162.3	0	0	0	0	0	0	0	603	903	0
539	4	0	0	0	0	0	0	200	300	0	47.9723	69.2981	-705.928	-183010	101379	-472.641	343.611	1162.25	0	0	0	0	0	0	0	603	903	0
539	5	0	0	0	0	0	0	200	300	0	48.7352	70.2136	-710.201	-183834	102050	-426.864	343.692	1161.85	0	0	0	0	0	0	0	603	903	0
539	6	0	0	0	0	0	0	200	300	0	47.5145	72.3499	-712.337	-184383	102294	-152.206	343.604	1161.84	0	0	0	0	0	0	0	603	903	0
539	7	0	0	0	0	0	0	200	300	0	49.4981	72.655	-716.915	-184749	102966	168.228	343.623	1160.7	0	0	0	0	0	0	0	603	903	0
539	8	0	0	0	0	0	0	200	300	0	48.1248	72.8076	-719.356	-185024	103454	168.228	343.815	1160.21	0	0	0	0	0	0	0	603	903	0
539	9	0	0	0	0	0	0	200	300	0	47.9723	75.5542	-719.661	-186580	103576	625.992	343.923	1162.26	0	0	0	0	0	0	0	603	903	0
540	0	0	0	0	0	0	0	200	300	0	47.2093	76.1646	-726.68	-187862	104125	671.769	343.289	1161.52	0	0	0	0	0	0	0	603	903	0
540	1	0	0	0	0	0	0	200	300	0	48.7352	76.3171	-729.122	-187862	104492	625.992	343.312	1160.66	0	0	0	0	0	0	0	603	903	0
540	2	0	0	0	0	0	0	200	300	0	47.2093	79.5215	-731.868	-188778	104614	717.545	342.941	1160.94	0	0	0	0	0	0	0	603	903	0
540	3	0	0	0	0	0	0	200	300	0	46.9041	79.9792	-736.141	-189144	105407	1404.19	343.189	1159.94	0	0	0	0	0	0	0	603	903	0
540	4	0	0	0	0	0	0	200	300	0	49.9559	79.9792	-737.667	-189785	105712	1541.52	343.306	1160.28	0	0	0	0	0	0	0	603	903	0
540	5	0	0	0	0	0	0	200	300	0	48.1248	82.4207	-740.718	-190792	106628	1678.85	343.952	1160.58	0	0	0	0	0	0	0	603	903	0
540	6	0	0	0	0	0	0	200	300	0	48.43	83.4888	-742.855	-190975	106811	1724.63	343.785	1160.08	0	0	0	0	0	0	0	603	903	0
540	7	0	0	0	0	0	0	200	300	0	48.2774	84.4043	-746.517	-191982	106811	1770.4	343.079	1160.17	0	0	0	0	0	0	0	603	903	0
540	8	0	0	0	0	0	0	200	300	0	49.3456	86.0828	-749.568	-193081	107482	2411.27	343.392	1160.59	0	0	0	0	0	0	0	603	903	0
540	9	0	0	0	0	0	0	200	300	0	49.3456	86.5405	-753.536	-192714	107910	2182.39	343.204	1158.75	0	0	0	0	0	0	0	603	903	0
541	0	0	0	0	0	0	0	200	300	0	48.5826	87.6086	-754.146	-193721	108337	2731.7	343.655	1159.88	0	0	0	0	0	0	0	603	903	0
541	1	0	0	0	0	0	0	200	300	0	47.8197	89.2871	-758.113	-194362	109008	2273.94	343.789	1159.38	0	0	0	0	0	0	0	603	903	0
541	2	0	0	0	0	0	0	200	300	0	49.3456	88.8293	-761.165	-193905	108886	2319.72	343.052	1157.75	0	0	0	0	0	0	0	603	903	0
541	3	0	0	0	0	0	0	200	300	0	50.2611	92.4915	-763.301	-195736	109558	2365.49	343.531	1159.43	0	0	0	0	0	0	0	603	903	0
541	4	0	0	0	0	0	0	200	300	0	48.8878	92.7966	-765.743	-196560	109985	2914.81	343.632	1159.69	0	0	0	0	0	0	0	603	903	0
541	5	0	0	0	0	0	0	200	300	0	49.8033	92.7966	-767.574	-196651	110229	3097.92	343.607	1159.2	0	0	0	0	0	0	0	603	903	0
541	6	0	0	0	0	0	0	200	300	0	50.2611	95.238	-771.846	-197109	110778	3006.36	343.524	1158.37	0	0	0	0	0	0	0	603	903	0
541	7	0	0	0	0	0	0	200	300	0	49.9559	95.3906	-775.203	-198391	111816	3052.14	344.241	1158.92	0	0	0	0	0	0	0	603	903	0
541	8	0	0	0	0	0	0	200	300	0	50.7188	96.001	-777.034	-198299	111511	3052.14	343.508	1158.2	0	0	0	0	0	0	0	603	903	0
541	9	0	0	0	0	0	0	200	300	0	50.1085	97.5269	-779.476	-199031	111877	3372.57	343.528	1158.34	0	0	0	0	0	0	0	603	903	0
542	0	0	0	0	0	0	0	200	300	0	49.0404	98.7476	-781.307	-199489	112121	3281.02	343.505	1158.33	0	0	0	0	0	0	0	603	903	0
542	1	0	0	0	0	0	0	200	300	0	51.3292	100.273	-781.307	-199398	112243	3693.01	343.661	1158.21	0	0	0	0	0	0	0	603	903	0
542	2	0	0	0	0	0	0	200	300	0	50.4137	100.579	-785.884	-199306	112853	3830.34	343.601	1156.61	0	0	0	0	0	0	0	603	903	0
542	3	0	0	0	0	0	0	200	300	0	49.8033	101.494	-788.326	-200588	112487	3738.78	342.691	1157.45	0	0	0	0	0	0	0	603	903	0
542	4	0	0	0	0	0	0	200	300	0	50.2611	102.715	-790.462	-200771	113952	3967.67	344.159	1156.99	0	0	0	0	0	0	0	603	903	0
542	5	0	0	0	0	0	0	200	300	0	50.7188	103.173	-793.209	-201687	114013	3830.34	343.737	1157.27	0	0	0	0	0	0	0	603	903	0
542	6	0	0	0	0	0	0	200	300	0	52.2447	104.851	-795.04	-201320	114135	4196.55	343.559	1156.22	0	0	0	0	0	0	0	603	903	0
542	7	0	0	0	0	0	0	200	300	0	51.1766	107.14	-796.871	-202602	113891	4059.22	342.923	1157.25	0	0	0	0	0	0	0	603	903	0
542	8	0	0	0	0	0	0	200	300	0	53.0077	106.53	-800.838	-202968	114685	4471.21	343.206	1156.44	0	0	0	0	0	0	0	603	903	0
542	9	0	0	0	0	0	0	200	300	0	51.9395	108.208	-798.702	-202785	115234	4562.76	344.276	1156.89	0	0	0	0	0	0	0	603	903	0
543	0	0	0	0	0	0	0	200	300	0	51.9395	109.734	-804.195	-203701	115905	4608.54	344.126	1156.3	0	0	0	0	0	0	0	603	903	0
543	1	0	0	0	0	0	0	200	300	0	53.1602	108.818	-806.026	-203518	115722	4562.76	343.571	1155.5	0	0	0	0	0	0	0	603	903	0
543	2	0	0	0	0	0	0	200	300	0	52.5499	111.565	-806.636	-203975	116210	4562.76	344.068	1155.87	0	0	0	0	0	0	0	603	903	0
543	3	0	0	0	0	0	0	200	300	0	53.1602	112.786	-809.078	-204799	116638	4700.09	344.161	1156.13	0	0	0	0	0	0	0	603	903	0
543	4	0	0	0	0	0	0	200	300	0	52.2447	113.549	-812.129	-205074	116699	4654.31	343.695	1155.51	0	0	0	0	0	0	0	603	903	0
543	5	0	0	0	0	0	0	200	300	0	53.4654	114.006	-812.129	-204525	117065	4516.98	344.146	1154.84	0	0	0	0	0	0	0	603	903	0
543	6	0	0	0	0	0	0	200	300	0	53.7706	115.38	-814.571	-204708	117187	4654.31	343.863	1154.31	0	0	0	0	0	0	0	603	903	0
543	7	0	0	0	0	0	0	200	300	0	53.4654	116.143	-817.012	-205532	117187	5112.08	343.434	1154.56	0	0	0	0	0	0	0	603	903	0
543	8	0	0	0	0	0	0	200	300	0	54.8387	118.126	-817.928	-205623	118041	5112.08	344.318	1154.4	0	0	0	0	0	0	0	603	903	0
543	9	0	0	0	0	0	0	200	300	0	54.381	117.516	-820.369	-205715	118041	4791.64	343.888	1153.76	0	0	0	0	0	0	0	603	903	0
544	0	0	0	0	0	0	0	200	300	0	54.381	120.72	-820.674	-206264	117858	4745.87	343.612	1154.33	0	0	0	0	0	0	0	603	903	0
544	1	0	0	0	0	0	0	200	300	0	54.381	121.941	-822.2	-206081	118530	4791.64	344.162	1153.65	0	0	0	0	0	0	0	603	903	0
544	2	0	0	0	0	0	0	200	300	0	56.9749	121.788	-822.811	-206539	118530	5066.3	344.055	1154.02	0	0	0	0	0	0	0	603	903	0
544	3	0	0	0	0	0	0	200	300	0	54.8387	120.873	-825.557	-207180	119262	5112.08	344.463	1153.96	0	0	0	0	0	0	0	603	903	0
544	4	0	0	0	0	0	0	200	300	0	55.6017	123.925	-825.862	-206630	119262	5386.73	344.409	1153.2	0	0	0	0	0	0	0	603	903	0
544	5	0	0	0	0	0	0	200	300	0	55.9068	125.145	-824.947	-206813	119323	5157.85	344.643	1153.7	0	0	0	0	0	0	0	603	903	0
544	6	0	0	0	0	0	0	200	300	0	58.0431	126.976	-828.304	-207363	119506	5203.63	344.278	1153.35	0	0	0	0	0	0	0	603	903	0
544	7	0	0	0	0	0	0	200	300	0	57.7379	126.366	-828.914	-205989	119262	5524.06	343.878	1151.51	0	0	0	0	0	0	0	603	903	0
544	8	0	0	0	0	0	0	200	300	0	56.5172	128.96	-830.135	-207363	119689	5295.18	344.181	1152.79	0	0	0	0	0	0	0	603	903	0
544	9	2.36754	-7.93503	-13.5089	-4283.11	-225.597	315.993	183.3	617.058	0	56.3646	129.418	-829.83	-207363	119995	5478.29	344.602	1152.89	0	0	0	0	0	0	0	603	903	0
545	0	-0.379043	-14.0385	-24.8004	-5931.06	-652.843	773.757	173.676	539.152	0	56.8224	130.486	-830.745	-206173	120056	5478.29	344.516	1151.18	0	0	0	0	0	0	0	603	903	0
545	1	-6.17738	-12.3601	-27.2418	-6114.17	-958.019	682.204	164.833	524.441	0	57.5853	130.638	-832.576	-207271	119934	5707.17	344.051	1151.95	0	0	0	0	0	0	0	603	903	0
545	2	-6.02479	-13.123	-26.9366	-7487.46	-896.984	1002.64	166.7	577.966	0	57.5853	131.859	-834.102	-207363	119995	5432.51	343.861	1151.61	0	0	0	0	0	0	0	603	903	0
545	3	1.45201	-15.717	-28.1573	-7487.46	-835.949	1002.64	170.312	565.915	0	57.2801	132.469	-832.881	-207180	120178	5524.06	344.292	1151.75	0	0	0	0	0	0	0	603	903	0
545	4	-0.684218	-18.4636	-34.2609	-9043.85	-835.949	1231.52	175.6	563.971	0	58.5008	134.301	-832.576	-207271	120361	5615.62	344.564	1151.95	0	0	0	0	0	0	0	603	903	0
545	5	-0.226455	-18.7688	-41.2799	-10600.2	-1202.16	956.862	170.878	556.79	0	57.7379	134.758	-832.881	-207546	119995	5890.27	344.072	1152.19	0	0	0	0	0	0	0	603	903	0
545	6	-1.14198	-13.7334	-47.0782	-12339.8	-1751.48	911.086	162.796	562.112	0	58.0431	136.284	-832.881	-206447	120300	5936.05	344.438	1150.87	0	0	0	0	0	0	0	603	903	0
545	7	-4.19374	-10.0713	-56.5387	-16459.6	-1873.55	819.533	166.863	591.122	0	57.2801	137.352	-834.407	-206813	120788	5936.05	344.759	1150.86	0	0	0	0	0	0	0	603	903	0
545	8	-2.97304	-7.0195	-67.2198	-18382.2	-1995.62	407.546	170.312	573.464	0	57.2801	137.963	-834.407	-206264	120178	5890.27	344.028	1150.2	0	0	0	0	0	0	0	603	903	0
545	9	1.45201	-7.62985	-75.7648	-20671.1	-1812.51	-50.2177	176.077	572.832	0	58.1956	139.336	-832.881	-205989	120605	5981.83	344.804	1150.32	0	0	0	0	0	0	0	603	903	0
546	0	0.689073	-9.6135	-83.3942	-22502.1	-2239.76	132.888	173.143	569.828	0	57.7379	141.167	-833.187	-205989	120483	5936.05	344.605	1150.23	0	0	0	0	0	0	0	603	903	0
546	1	0.383897	-7.32468	-91.6339	-24424.7	-2361.83	-507.981	174.225	566.547	0	58.5008	140.709	-832.271	-204616	119873	6348.04	344.031	1148.85	0	0	0	0	0	0	0	603	903	0
546	2	2.67272	-8.85056	-101.094	-26988.2	-2728.04	-782.64	173.015	566.96	0	58.0431	142.083	-831.356	-205074	120544	6485.37	344.997	1149.67	0	0	0	0	0	0	0	603	903	0
546	3	3.74083	-7.17209	-112.081	-29368.6	-3460.46	-324.876	169.125	562.031	0	57.5853	142.083	-829.219	-205349	120361	6851.58	345.15	1150.64	0	0	0	0	0	0	0	603	903	0
546	4	3.13048	-2.89963	-120.32	-32115.1	-2911.14	-1103.07	175.805	566.914	0	56.8224	142.998	-831.05	-204891	120178	6531.14	344.609	1149.54	0	0	0	0	0	0	0	603	903	0
546	5	5.72447	-2.13669	-127.034	-34129.3	-3277.36	-1972.83	174.201	568.662	0	58.1956	142.845	-829.83	-203151	120361	6897.35	345.043	1147.81	0	0	0	0	0	0	0	603	903	0
546	6	9.08141	0.915068	-135.884	-36326.6	-3704.6	-2110.15	172.737	567.334	0	57.1275	144.829	-830.44	-204158	119506	7034.68	343.907	1148.84	0	0	0	0	0	0	0	603	903	0
546	7	7.70812	4.272	-148.091	-39347.8	-3704.6	-2430.59	174.984	565.699	0	57.1275	144.829	-828.914	-203609	119934	6988.91	344.688	1148.63	0	0	0	0	0	0	0	603	903	0
546	8	10.4547	7.01858	-160.298	-42002.8	-4070.81	-3300.34	174.605	562.029	0	57.5853	146.813	-827.999	-202694	119750	7629.78	344.626	1147.8	0	0	0	0	0	0	0	603	903	0
546	9	11.5228	8.69705	-166.402	-43742.3	-4498.06	-3437.67	172.969	562.872	0	58.0431	146.965	-826.473	-202602	119323	7584	344.376	1148.14	0	0	0	0	0	0	0	603	903	0
547	0	11.6754	8.69705	-167.928	-45390.3	-4009.78	-3346.12	176.122	570.296	0	56.5172	147.271	-825.557	-201412	119506	7355.12	344.758	1146.97	0	0	0	0	0	0	0	603	903	0
547	1	12.1332	8.84964	-180.135	-46946.7	-4437.02	-4032.76	175.368	560.62	0	56.9749	148.949	-824.031	-201320	118713	7629.78	344.064	1147.31	0	0	0	0	0	0	0	603	903	0
547	2	12.8961	5.79788	-186.238	-48777.8	-4620.13	-3986.99	175.192	561.91	0	56.212	148.796	-821.895	-201046	118652	7812.88	344.364	1147.61	0	0	0	0	0	0	0	603	903	0
547	3	11.3702	5.03494	-192.952	-50425.7	-4498.06	-3575	176.688	561.338	0	55.6017	149.712	-818.843	-199947	118652	7812.88	344.902	1147.18	0	0	0	0	0	0	0	603	903	0
547	4	11.3702	4.72977	-197.225	-51982.1	-4864.27	-3895.43	175.336	563.568	0	55.9068	150.475	-818.538	-199489	118041	7995.99	344.21	1146.71	0	0	0	0	0	0	0	603	903	0
547	5	14.1168	-0.000459142	-200.887	-52989.2	-4498.06	-4078.54	177.609	563.776	0	54.8387	150.78	-817.623	-198665	117553	8453.75	343.774	1145.98	0	0	0	0	0	0	0	603	903	0
547	6	13.2013	-0.305635	-204.854	-53080.7	-4986.34	-3849.66	175.659	559.115	0	55.1439	151.39	-814.876	-197933	117980	8316.42	344.783	1145.9	0	0	0	0	0	0	0	603	903	0
547	7	13.8116	-3.05222	-208.821	-55461.1	-5169.44	-3941.21	175.245	565.591	0	56.6698	151.39	-811.824	-197384	117492	8957.29	344.726	1146.14	0	0	0	0	0	0	0	603	903	0
547	8	14.422	-6.40915	-213.399	-56102	-4925.3	-3712.33	176.92	562.897	0	53.618	152.764	-810.604	-196285	117187	8682.63	344.568	1145.15	0	0	0	0	0	0	0	603	903	0
547	9	13.8116	-10.2238	-214.62	-56651.3	-5169.44	-3803.88	175.913	563.961	0	53.1602	152.611	-808.162	-195369	116394	8819.96	344.022	1144.75	0	0	0	0	0	0	0	603	903	0
548	0	13.2013	-15.1067	-223.165	-57658.4	-4925.3	-3575	177.93	558.367	0	55.9068	153.679	-806.941	-194912	115844	8591.08	343.56	1144.54	0	0	0	0	0	0	0	603	903	0
548	1	13.5065	-17.8532	-226.522	-59031.7	-5169.44	-3575	177.179	560.601	0	53.1602	153.984	-802.669	-194545	115905	9323.5	344.4	1145.37	0	0	0	0	0	0	0	603	903	0
548	2	13.9642	-21.9731	-231.71	-60130.3	-5352.55	-3254.56	176.9	559.507	0	52.0921	155.205	-800.838	-193264	115295	9598.16	343.968	1144.33	0	0	0	0	0	0	0	603	903	0
548	3	13.9642	-26.093	-234.456	-60771.2	-5230.48	-3071.46	177.691	559.2	0	52.0921	154.595	-796.871	-192073	114929	9460.83	344.225	1144.03	0	0	0	0	0	0	0	603	903	0
548	4	13.659	-30.0603	-239.034	-62510.7	-5474.62	-3071.46	177.097	561.514	0	51.3292	154.9	-793.514	-191524	114685	9689.71	344.527	1144.36	0	0	0	0	0	0	0	603	903	0
548	5	14.7272	-35.706	-246.358	-63883.9	-5657.73	-2888.35	177.035	559.313	0	51.4818	156.121	-792.293	-190425	113952	9781.27	343.826	1143.35	0	0	0	0	0	0	0	603	903	0
548	6	13.2013	-38.7578	-252.462	-63700.8	-5840.83	-2247.48	176.864	552.319	0	51.3292	155.358	-786.8	-190334	113769	10010.1	344.597	1144.91	0	0	0	0	0	0	0	603	903	0
548	7	12.2858	-41.0466	-257.955	-66813.6	-5657.73	-2613.69	178.067	559.013	0	50.2611	155.815	-784.969	-189144	113464	10193.3	344.546	1143.96	0	0	0	0	0	0	0	603	903	0
548	8	12.2858	-42.5725	-263.448	-68095.4	-5779.8	-2476.36	178.061	558.478	0	48.8878	156.426	-780.086	-187404	112731	10422.1	344.512	1143.24	0	0	0	0	0	0	0	603	903	0
548	9	11.5228	-47.1501	-265.584	-68644.7	-5779.8	-2018.6	178.237	558.467	0	48.1248	156.273	-777.95	-186397	112609	10605.2	344.751	1142.6	0	0	0	0	0	0	0	603	903	0
549	0	11.2176	-49.7441	-275.35	-70109.5	-6268.08	-1835.5	177.236	554.62	0	48.5826	154.29	-774.288	-185848	111694	10925.7	344.254	1143.02	0	0	0	0	0	0	0	603	903	0
549	1	10.4547	-50.8122	-281.148	-71849	-6390.15	-1881.27	177.271	555.556	0	48.2774	155.51	-773.067	-184200	110839	11063	343.376	1141.27	0	0	0	0	0	0	0	603	903	0
549	2	10.3021	-53.2536	-286.641	-72581.5	-6451.18	-1286.18	177.494	553.214	0	46.7516	156.121	-767.269	-183559	110778	10925.7	344.38	1142.24	0	0	0	0	0	0	0	603	903	0
549	3	11.6754	-54.7795	-287.252	-74229.4	-6695.32	-1469.29	176.692	558.412	0	45.6834	156.731	-764.217	-182735	109802	11291.9	343.679	1142.11	0	0	0	0	0	0	0	603	903	0
549	4	10.1495	-54.9321	-293.965	-75236.5	-6695.32	-1286.18	177.224	555.937	0	45.3783	153.984	-760.25	-181362	109680	11200.3	344.268	1141.56	0	0	0	0	0	0	0	603	903	0
549	5	9.38658	-55.8476	-299.764	-75602.7	-7000.5	-1057.3	176.647	552.208	0	44.3102	156.731	-755.977	-180446	108886	11383.4	344.034	1141.69	0	0	0	0	0	0	0	603	903	0
549	6	9.53917	-56.7632	-306.783	-77525.3	-6878.43	-1011.52	177.579	552.704	0	43.242	157.189	-753.841	-178890	108154	12070.1	343.47	1140.3	0	0	0	0	0	0	0	603	903	0
549	7	11.828	-56.1528	-314.717	-80455	-6817.39	-1743.94	178.338	555.642	0	43.0894	156.578	-748.043	-177517	107910	11978.5	344.256	1140.31	0	0	0	0	0	0	0	603	903	0
549	8	14.422	-54.4743	-322.347	-82377.6	-7061.53	-2476.36	178.093	555.556	0	42.1739	157.189	-742.855	-176418	106811	12024.3	343.785	1140.49	0	0	0	0	0	0	0	603	903	0
549	9	17.9315	-57.2209	-333.943	-84300.2	-7244.64	-2659.47	178.306	552.439	0	42.0213	157.341	-740.413	-175319	106201	12482.1	343.434	1139.79	0	0	0	0	0	0	0	603	903	0
550	0	18.0841	-58.5942	-344.319	-86314.4	-7488.78	-2842.58	178.25	550.681	0	43.0894	156.273	-734.004	-173946	105590	12756.7	343.855	1139.98	0	0	0	0	0	0	0	603	903	0
550	1	19.1522	-60.2727	-354.695	-88511.6	-7854.99	-2293.26	177.854	549.543	0	40.648	157.341	-731.258	-172847	104797	12802.5	343.31	1139.37	0	0	0	0	0	0	0	603	903	0
550	2	18.2367	-58.4416	-363.851	-90342.7	-7671.89	-2110.15	178.915	548.296	0	39.1222	157.036	-726.07	-171199	104797	13168.7	344.334	1138.79	0	0	0	0	0	0	0	603	903	0
550	3	15.4901	-59.8149	-372.09	-93547	-8160.17	-1972.83	178.069	551.409	0	40.4955	157.646	-721.797	-169460	104125	13031.4	344.259	1137.77	0	0	0	0	0	0	0	603	903	0
550	4	15.6427	-62.8667	-380.025	-94737.2	-8404.31	-2247.48	177.885	549.292	0	38.5118	157.494	-718.746	-167812	102661	13489.2	342.833	1136.48	0	0	0	0	0	0	0	603	903	0
550	5	18.2367	-62.5615	-387.349	-95561.2	-8587.42	-1743.94	177.83	546.706	0	38.054	156.578	-711.421	-166805	102050	13351.8	343.446	1137.47	0	0	0	0	0	0	0	603	903	0
550	6	16.8634	-63.9348	-396.199	-98307.8	-8953.63	-1057.3	177.401	548.127	0	37.4437	156.884	-706.539	-165615	101135	13260.3	343.141	1137.4	0	0	0	0	0	0	0	603	903	0
550	7	15.1849	-66.6814	-402.913	-99223.3	-8953.63	-874.192	177.778	546.265	0	36.0704	156.273	-700.13	-164608	100463	13443.4	343.492	1138.11	0	0	0	0	0	0	0	603	903	0
550	8	11.9806	-68.3598	-407.186	-98307.8	-9136.73	-462.205	177.561	541.432	0	35.6126	155.968	-696.468	-162685	99791.9	13718	343.283	1136.59	0	0	0	0	0	0	0	603	903	0
550	9	11.6754	-68.665	-409.017	-100871	-9563.98	-4.44129	176.617	546.619	0	35.3075	153.374	-690.059	-161495	98937.5	13901.1	343.375	1137.03	0	0	0	0	0	0	0	603	903	0
551	0	10.9125	-69.2754	-416.951	-102153	-9686.05	132.888	176.769	545	0	33.9342	155.205	-686.397	-160396	98388.2	13855.4	343.34	1136.68	0	0	0	0	0	0	0	603	903	0
551	1	10.4547	-73.3952	-421.834	-102336	-9808.12	361.77	176.749	542.598	0	33.629	154.747	-681.209	-158474	97838.8	14084.2	343.625	1135.64	0	0	0	0	0	0	0	603	903	0
551	2	8.62364	-75.5315	-425.801	-103892	-9991.22	865.31	176.536	543.993	0	33.4764	153.832	-676.326	-157466	96129.8	13946.9	342.135	1135.83	0	0	0	0	0	0	0	603	903	0
551	3	7.09776	-75.5315	-428.548	-104808	-10052.3	911.086	176.543	544.565	0	31.6454	152.764	-671.443	-154445	96313	14038.5	343.442	1133.02	0	0	0	0	0	0	0	603	903	0
551	4	6.33482	-76.447	-433.431	-104625	-10479.5	1185.74	175.822	541.388	0	32.8661	153.527	-665.645	-153530	95031.2	14038.5	342.766	1133.65	0	0	0	0	0	0	0	603	903	0
551	5	5.57189	-81.1772	-437.398	-105632	-10296.4	1551.96	176.46	541.501	0	31.3402	152.153	-659.236	-151332	94298.8	14221.6	343.042	1132.56	0	0	0	0	0	0	0	603	903	0
551	6	5.87706	-82.0927	-441.976	-106456	-10540.5	1643.51	176.151	540.864	0	29.9669	149.254	-653.438	-150966	93322.2	14633.6	342.817	1134.03	0	0	0	0	0	0	0	603	903	0
551	7	5.57189	-82.0927	-445.638	-107097	-10845.7	1689.28	175.663	540.323	0	29.6617	151.543	-646.724	-149227	92711.9	14633.6	343.356	1133.74	0	0	0	0	0	0	0	603	903	0
551	8	4.19859	-84.229	-447.774	-107646	-10784.7	1872.39	175.915	540.403	0	27.8307	151.39	-641.841	-148037	91918.4	14587.8	343.211	1133.64	0	0	0	0	0	0	0	603	903	0
551	9	3.43565	-86.2126	-452.047	-109019	-10723.6	2101.27	176.278	541.169	0	28.5936	150.017	-633.602	-146389	90697.7	14725.1	343.146	1134.04	0	0	0	0	0	0	0	603	903	0
552	0	3.28307	-87.4333	-456.014	-109569	-11334	2055.5	175.146	540.275	0	27.8307	148.491	-627.803	-144924	89599.1	14725.1	342.718	1133.84	0	0	0	0	0	0	0	603	903	0
552	1	3.43565	-87.5859	-459.066	-109569	-10967.8	2650.59	176.108	538.678	0	27.3729	148.644	-621.7	-143093	89232.9	14816.7	343.531	1133.16	0	0	0	0	0	0	0	603	903	0
552	2	4.04601	-89.1118	-461.812	-109569	-10967.8	2879.47	176.251	537.258	0	25.9996	148.491	-614.681	-140621	87890.1	14725.1	342.985	1131.77	0	0	0	0	0	0	0	603	903	0
552	3	1.14684	-90.3325	-465.474	-110942	-11517.1	2925.25	175.257	538.342	0	25.9996	148.339	-609.188	-138881	86730.4	15137.1	342.371	1130.98	0	0	0	0	0	0	0	603	903	0
552	4	0.078721	-90.1799	-468.831	-110759	-11639.2	3154.13	175.174	536.245	0	24.016	147.271	-602.169	-137783	86425.3	15045.5	343.523	1131.81	0	0	0	0	0	0	0	603	903	0
552	5	-0.531631	-92.3161	-470.662	-111308	-11883.3	3703.45	174.752	536.493	0	24.016	146.965	-592.098	-136043	84960.4	15228.7	343.491	1132.76	0	0	0	0	0	0	0	603	903	0
552	6	-1.90492	-92.4687	-469.136	-112224	-12127.5	3611.89	174.149	539.214	0	22.1849	145.592	-589.656	-134670	84289	15228.7	342.946	1131.39	0	0	0	0	0	0	0	603	903	0
552	7	-3.27821	-93.3842	-476.766	-111858	-11639.2	4252.76	175.587	534.618	0	21.8797	143.914	-580.501	-132198	82946.2	14862.4	342.887	1130.73	0	0	0	0	0	0	0	603	903	0
552	8	-4.95668	-94.7575	-479.818	-112407	-11944.3	4618.97	175.106	534.27	0	22.4901	144.219	-575.008	-130001	82091.8	15182.9	342.766	1129.09	0	0	0	0	0	0	0	603	903	0
552	9	-5.41444	-96.436	-485.616	-114055	-12615.7	4481.64	174.021	534.866	0	20.2013	142.083	-567.684	-128261	81481.4	15045.5	343.533	1128.94	0	0	0	0	0	0	0	603	903	0
553	0	-6.32997	-97.9619	-490.499	-115153	-12737.8	4527.42	174.031	534.768	0	19.5909	140.557	-561.58	-126888	79528.3	15228.7	341.615	1128.95	0	0	0	0	0	0	0	603	903	0
553	1	-5.41444	-99.3352	-492.025	-114513	-12676.8	4985.18	174.235	532.738	0	19.5909	138.726	-550.289	-125240	79406.2	15228.7	344.299	1130.59	0	0	0	0	0	0	0	603	903	0
553	2	-7.39809	-100.708	-496.297	-116161	-13043	5305.62	173.719	534.055	0	17.6073	139.031	-546.932	-123409	78124.5	14954	342.841	1128.64	0	0	0	0	0	0	0	603	903	0
553	3	-7.85585	-102.54	-501.485	-116985	-12920.9	5305.62	174.235	533.276	0	18.6754	136.284	-537.776	-121120	77025.9	15320.2	343.23	1128.22	0	0	0	0	0	0	0	603	903	0
553	4	-9.38173	-103.608	-505.147	-117442	-13165.1	5717.6	173.938	532.491	0	17.4547	136.742	-534.114	-119655	76232.4	15411.8	342.727	1127.03	0	0	0	0	0	0	0	603	903	0
553	5	-9.22914	-104.828	-510.64	-118632	-13592.3	6038.04	173.382	532.321	0	15.6236	134.911	-526.485	-118099	75072.7	15182.9	342.592	1127.32	0	0	0	0	0	0	0	603	903	0
553	6	-9.07655	-106.202	-517.049	-119914	-13287.1	6312.7	174.302	531.92	0	15.471	134.606	-519.466	-115810	74279.2	14954	342.992	1125.94	0	0	0	0	0	0	0	603	903	0
553	7	-10.4498	-107.117	-522.847	-120097	-13958.5	6541.58	173.303	529.699	0	15.1659	133.232	-510.005	-113796	72875.5	15137.1	342.892	1126.13	0	0	0	0	0	0	0	603	903	0
553	8	-11.9757	-110.322	-528.951	-121379	-14568.9	6953.57	172.457	529.471	0	15.9288	131.401	-503.902	-112239	71532.7	15320.2	341.958	1125.74	0	0	0	0	0	0	0	603	903	0
553	9	-12.1283	-111.084	-533.834	-122661	-14690.9	7182.45	172.48	529.774	0	14.0977	128.044	-493.831	-110408	70617.1	15228.7	342.999	1126.58	0	0	0	0	0	0	0	603	903	0
554	0	-11.2128	-111.695	-541.158	-122935	-14629.9	7640.21	172.966	527.171	0	12.5719	128.502	-488.643	-108394	69640.6	15182.9	342.518	1124.83	0	0	0	0	0	0	0	603	903	0
554	1	-14.7223	-113.526	-545.735	-123668	-14996.1	8418.41	172.521	526.608	0	11.046	127.281	-478.572	-106014	68419.9	15137.1	342.967	1124.52	0	0	0	0	0	0	0	603	903	0
554	2	-15.7904	-115.052	-552.449	-123851	-14935.1	7914.87	172.966	524.185	0	11.1986	127.129	-473.384	-104000	67809.5	14954	343.244	1122.69	0	0	0	0	0	0	0	603	903	0
554	3	-16.2482	-116.272	-556.417	-125133	-15484.4	8281.08	172.171	524.89	0	9.97787	122.704	-465.755	-102810	66283.7	15228.7	342.314	1123.74	0	0	0	0	0	0	0	603	903	0
554	4	-17.1637	-118.409	-558.248	-125957	-16094.7	8509.96	171.169	525.629	0	9.52011	123.619	-456.905	-100612	65429.2	14862.4	343.201	1123.2	0	0	0	0	0	0	0	603	903	0
554	5	-18.2318	-119.172	-566.793	-127513	-15911.6	8921.95	171.927	524.973	0	11.5038	122.551	-448.97	-99055.9	64086.4	14954	342.741	1123.63	0	0	0	0	0	0	0	603	903	0
554	6	-18.537	-120.697	-571.37	-127971	-16155.8	9059.28	171.725	523.972	0	7.99423	121.178	-441.341	-97133.3	62804.7	14999.8	342.304	1123.09	0	0	0	0	0	0	0	603	903	0
554	7	-18.9948	-120.85	-576.558	-128520	-16338.9	9196.61	171.661	522.909	0	7.53647	117.974	-434.322	-94661.3	62133.3	14908.2	343.058	1120.95	0	0	0	0	0	0	0	603	903	0
554	8	-18.9948	-123.139	-580.831	-129527	-16705.1	9242.38	171.239	523.004	0	8.29941	117.058	-427.608	-92555.6	60607.4	14679.3	341.736	1119.45	0	0	0	0	0	0	0	603	903	0
554	9	-20.0629	-124.054	-585.408	-130443	-16766.1	9425.49	171.36	522.824	0	6.16318	115.074	-417.537	-91090.8	59997	14679.3	343.693	1121.16	0	0	0	0	0	0	0	603	903	0
555	0	-20.6732	-124.817	-589.376	-130809	-17193.4	9700.15	170.828	521.945	0	6.31577	114.159	-410.213	-88618.9	58776.3	14450.5	343.283	1119.03	0	0	0	0	0	0	0	603	903	0
555	1	-20.3681	-127.106	-593.648	-132182	-17193.4	9700.15	171.038	522.661	0	7.07871	110.955	-400.753	-86879.4	57250.4	14267.4	342.857	1119.79	0	0	0	0	0	0	0	603	903	0
555	2	-21.2836	-127.564	-598.531	-132457	-17559.6	9745.92	170.662	521.303	0	6.16318	111.718	-392.513	-84956.8	56334.9	14038.5	343.524	1119.44	0	0	0	0	0	0	0	603	903	0
555	3	-21.7413	-129.395	-603.719	-132548	-18231	10203.7	169.802	519.553	0	6.16318	110.802	-384.273	-81294.6	54442.8	13992.7	341.678	1114.55	0	0	0	0	0	0	0	603	903	0
555	4	-22.0465	-130.158	-607.076	-133922	-17986.8	10524.1	170.371	520.601	0	5.09506	108.818	-376.033	-81203.1	53527.3	14038.5	342.347	1118.95	0	0	0	0	0	0	0	603	903	0
555	5	-22.5043	-130.311	-613.79	-134746	-18231	10569.9	170.298	519.531	0	3.11142	105.004	-367.794	-78822.7	52916.9	13946.9	343.877	1117.31	0	0	0	0	0	0	0	603	903	0
555	6	-23.5724	-132.294	-618.672	-134288	-18475.1	10661.5	170.137	517.058	0	3.72177	105.461	-361.69	-76900.1	50902.8	13672.3	340.736	1115.61	0	0	0	0	0	0	0	603	903	0
555	7	-23.5724	-134.125	-624.471	-136028	-18536.1	10707.2	170.317	517.829	0	2.80624	104.088	-351.924	-75435.3	50597.6	13763.8	343.774	1117.35	0	0	0	0	0	0	0	603	903	0
555	8	-24.6405	-133.667	-627.523	-136668	-18902.4	10844.6	169.878	517.79	0	3.26401	103.63	-345.516	-73695.8	49254.8	13260.3	342.555	1116.29	0	0	0	0	0	0	0	603	903	0
555	9	-25.2509	-134.736	-633.321	-137035	-19207.5	11393.9	169.672	516.375	0	3.26401	99.5105	-338.191	-71681.6	48156.2	13168.7	342.393	1114.96	0	0	0	0	0	0	0	603	903	0
556	0	-25.0983	-135.651	-637.593	-138316	-18841.3	11210.8	170.449	516.935	0	3.11142	97.2217	-329.952	-70125.2	47545.9	12573.6	344.099	1115.53	0	0	0	0	0	0	0	603	903	0
556	1	-25.0983	-136.567	-640.95	-138957	-19146.5	11393.9	170.128	516.799	0	1.28037	94.7803	-323.238	-68019.5	45958.9	12344.7	342.183	1113.43	0	0	0	0	0	0	0	603	903	0
556	2	-26.0138	-137.024	-647.054	-139506	-20001	11485.4	169.089	515.603	0	2.34848	89.4397	-311.946	-66005.3	45287.6	12115.9	345.177	1114.59	0	0	0	0	0	0	0	603	903	0
556	3	-27.3871	-138.55	-652.852	-140239	-20001	11485.4	169.364	514.81	0	3.87436	89.4397	-306.453	-64357.4	43822.7	11795.4	343	1113.01	0	0	0	0	0	0	0	603	903	0
556	4	-27.3871	-139.466	-658.345	-141978	-20306.2	11760.1	169.156	515.659	0	0.670014	87.1509	-297.603	-62251.7	42541	11612.3	342.945	1112.18	0	0	0	0	0	0	0	603	903	0
556	5	-27.2345	-138.855	-663.839	-142253	-20611.3	11805.9	168.951	514.289	0	2.0433	85.9302	-288.448	-60512.2	41808.6	11429.2	344.943	1112.79	0	0	0	0	0	0	0	603	903	0
556	6	-26.9293	-138.703	-664.144	-142619	-20489.3	11805.9	169.149	514.742	0	1.28037	85.9302	-280.208	-57765.6	40221.6	11566.5	343.542	1109.15	0	0	0	0	0	0	0	603	903	0
556	7	-26.7767	-140.229	-672.689	-142986	-20550.3	11760.1	169.45	512.558	0	0.517426	83.9465	-273.189	-56300.7	38878.9	11291.9	342.315	1109.09	0	0	0	0	0	0	0	603	903	0
556	8	-27.0819	-141.297	-678.487	-143901	-21160.7	12126.3	168.812	512.091	0	2.80624	83.031	-264.949	-54378.1	38268.5	11017.2	344.437	1108.24	0	0	0	0	0	0	0	603	903	0
556	9	-26.4716	-141.907	-683.065	-145000	-21404.8	12217.8	168.664	512.278	0	-0.245513	80.437	-256.099	-53279.5	36986.8	11017.2	344.424	1111.04	0	0	0	0	0	0	0	603	903	0
557	0	-27.0819	-141.755	-687.642	-146281	-21282.7	12217.8	169.05	512.729	0	0.21225	79.3689	-249.996	-51631.6	36315.4	10467.9	345.264	1109.53	0	0	0	0	0	0	0	603	903	0
557	1	-28.15	-142.975	-690.694	-146648	-21526.9	12034.7	168.833	512.319	0	0.822602	77.2327	-242.061	-49434.3	35033.6	10330.6	344.731	1107.22	0	0	0	0	0	0	0	603	903	0
557	2	-27.5397	-142.823	-699.849	-146556	-21710	12217.8	168.979	509.411	0	-0.398101	75.8594	-235.958	-48518.8	33812.9	10193.3	343.301	1108.62	0	0	0	0	0	0	0	603	903	0
557	3	-27.3871	-143.738	-705.342	-148296	-22137.2	12217.8	168.615	510.246	0	0.517426	71.4343	-229.549	-46504.6	32897.4	9735.49	343.313	1105.59	0	0	0	0	0	0	0	603	903	0
557	4	-27.9975	-144.196	-710.225	-149486	-22381.4	12904.5	168.487	510.477	0	-0.550689	69.2981	-221.919	-45406	31859.8	9460.83	343.565	1107.61	0	0	0	0	0	0	0	603	903	0
557	5	-28.4552	-143.891	-713.582	-148845	-22198.3	12629.8	168.892	508.588	0	-1.31363	67.3145	-215.206	-43574.9	30944.3	9003.07	343.789	1105.48	0	0	0	0	0	0	0	603	903	0
557	6	-28.7604	-145.112	-717.549	-149852	-22503.4	12492.5	168.639	508.839	0	0.0596623	64.5679	-206.356	-41560.8	30456	8636.86	347.59	1104.4	0	0	0	0	0	0	0	603	903	0
557	7	-29.9811	-145.417	-721.517	-150127	-22747.6	12767.2	168.473	508.071	0	0.97519	62.279	-199.336	-40736.8	28380.8	8133.32	342.376	1107.36	0	0	0	0	0	0	0	603	903	0
557	8	-31.507	-146.943	-727.01	-150951	-22991.7	13087.6	168.375	507.632	0	-0.550689	59.3799	-193.538	-39088.8	28197.7	8087.54	345.696	1104.97	0	0	0	0	0	0	0	603	903	0
557	9	-31.3544	-146.943	-732.198	-151683	-23235.9	13087.6	168.266	507.161	0	0.822602	58.9221	-185.909	-37807.1	27282.2	7584	346.75	1106.36	0	0	0	0	0	0	0	603	903	0
558	0	-31.3544	-145.722	-735.555	-152965	-23541	13087.6	167.996	507.958	0	-0.855865	57.0911	-180.11	-36067.6	26244.6	7172.01	345.714	1103.25	0	0	0	0	0	0	0	603	903	0
558	1	-31.9647	-146.027	-739.522	-153697	-23357.9	13179.2	168.415	507.833	0	-0.0929256	54.3445	-174.922	-34145	25756.3	7126.24	347.244	1098.2	0	0	0	0	0	0	0	603	903	0
558	2	-30.744	-147.706	-742.574	-153148	-24029.3	13133.4	167.641	506.239	0	0.0596623	53.7341	-167.598	-33504.1	24474.6	7126.24	346.031	1102.91	0	0	0	0	0	0	0	603	903	0
558	3	-32.5751	-148.163	-745.931	-154613	-24456.6	13224.9	167.213	507.275	0	0.517426	52.3608	-163.631	-32222.4	23986.3	6760.03	346.588	1099.92	0	0	0	0	0	0	0	603	903	0
558	4	-32.8803	-147.4	-748.983	-154887	-24029.3	13362.3	167.917	506.797	0	0.822602	48.6987	-156.307	-31123.7	23192.8	6119.16	348.38	1102.12	0	0	0	0	0	0	0	603	903	0
558	5	-33.1854	-147.553	-751.119	-153697	-24517.6	13408	167.359	504.624	0	0.517426	46.1047	-149.898	-30025.1	22094.2	5798.72	347.395	1103.3	0	0	0	0	0	0	0	603	903	0
558	6	-34.101	-148.468	-754.476	-155711	-24700.7	13362.3	167.261	506.383	0	0.670014	43.9685	-146.846	-28743.4	20934.5	5340.96	342.561	1098.74	0	0	0	0	0	0	0	603	903	0
558	7	-34.101	-147.248	-756.307	-155528	-24639.7	13820	167.421	505.642	0	0.97519	40.459	-141.658	-27553.2	20324.2	5157.85	343.473	1097.5	0	0	0	0	0	0	0	603	903	0
558	8	-33.0329	-146.485	-759.969	-155803	-25005.9	13911.6	167.096	505.012	0	-0.0929256	39.0857	-136.165	-26637.7	19896.9	5066.3	346.124	1098.63	0	0	0	0	0	0	0	603	903	0
558	9	-33.6432	-147.553	-763.326	-155803	-24883.8	13591.1	167.401	504.111	0	-1.31363	36.1865	-130.062	-24715	19408.7	4745.87	349.227	1093.03	0	0	0	0	0	0	0	603	903	0
559	0	-34.5587	-147.095	-766.378	-157268	-24944.8	13728.5	167.451	505.209	0	1.12778	37.865	-123.043	-23433.3	17943.8	4379.65	345.834	1093.45	0	0	0	0	0	0	0	603	903	0
559	1	-34.2536	-146.332	-770.04	-156352	-25555.2	13682.7	166.813	503.044	0	0.0596623	37.102	-118.465	-22975.5	17699.7	4196.55	349.409	1096.94	0	0	0	0	0	0	0	603	903	0
559	2	-34.8639	-146.943	-770.65	-156810	-25494.2	13865.8	166.919	503.478	0	0.517426	36.6443	-113.277	-21876.9	16417.9	4333.88	344.936	1096.13	0	0	0	0	0	0	0	603	903	0
559	3	-33.6432	-147.706	-776.754	-158000	-25616.2	14003.1	167.021	503.411	0	0.670014	35.7288	-105.648	-20778.3	15990.7	4288.1	351.359	1099.68	0	0	0	0	0	0	0	603	903	0
559	4	-35.932	-146.485	-781.331	-157726	-25799.3	14277.8	166.98	501.868	0	-0.855865	33.1348	-102.901	-19679.6	15624.5	3876.11	351.84	1094.25	0	0	0	0	0	0	0	603	903	0
559	5	-37.4579	-146.943	-783.773	-158000	-25860.4	14415.1	167.005	501.589	0	-0.550689	31.7615	-99.8492	-18397.9	14708.9	3830.34	347.312	1087.26	0	0	0	0	0	0	0	603	903	0
559	6	-38.8312	-148.468	-785.909	-158733	-26409.7	14598.2	166.396	501.973	0	1.43295	30.083	-96.7974	-17848.6	14159.6	3555.68	346.281	1087.39	0	0	0	0	0	0	0	603	903	0
559	7	-39.4415	-148.621	-787.74	-158916	-26592.8	14460.9	166.242	501.736	0	0.822602	28.4045	-90.9991	-17299.3	13366.2	3097.92	346.883	1093.1	0	0	0	0	0	0	0	603	903	0
559	8	-38.6786	-147.858	-784.383	-159282	-26470.7	14735.6	166.253	503.067	0	0.517426	24.5898	-87.337	-16475.3	12877.9	3006.36	347.451	1091.64	0	0	0	0	0	0	0	603	903	0
559	9	-39.289	-147.706	-793.233	-159373	-26775.9	14781.3	166.245	500.916	0	1.28037	24.4373	-82.4542	-15285.1	12572.7	2640.15	352.481	1088.38	0	0	0	0	0	0	0	603	903	0
560	0	-40.0519	-148.316	-794.149	-159831	-26959	14644	166.053	501.261	0	0.0596623	24.7424	-76.3506	-14918.9	11840.3	2502.82	355.078	1098.4	0	0	0	0	0	0	0	603	903	0
560	1	-39.4415	-147.858	-797.2	-159740	-26898	14827.1	166.259	500.376	0	1.12778	23.6743	-75.4351	-13545.6	10680.6	2502.82	341.587	1082.57	0	0	0	0	0	0	0	603	903	0
560	2	-39.7467	-146.79	-799.337	-160289	-27020	14506.7	166.197	500.528	0	1.89072	22.301	-69.9419	-13179.4	10802.7	2319.72	354.452	1091.43	0	0	0	0	0	0	0	603	903	0
560	3	-39.4415	-146.18	-796.285	-160930	-27325.2	14598.2	165.684	502.101	0	0.670014	21.9958	-66.2798	-12630.1	9765.09	2228.16	347.331	1093.56	0	0	0	0	0	0	0	603	903	0
560	4	-38.3734	-146.79	-800.252	-160197	-27203.1	14003.1	166.007	500.184	0	0.97519	20.3174	-62.6177	-11623	9765.09	2045.06	355.948	1088.62	0	0	0	0	0	0	0	603	903	0
560	5	-39.1364	-144.806	-800.862	-160747	-27203.1	14232	166.033	500.717	0	3.56918	18.6389	-60.1763	-10799	8849.57	1770.4	347.061	1082.46	0	0	0	0	0	0	0	603	903	0
560	6	-38.526	-143.433	-803.914	-160838	-27447.3	14186.2	165.858	500.069	0	1.73813	17.876	-57.4297	-9791.95	8117.14	1404.19	341.34	1073.5	0	0	0	0	0	0	0	603	903	0
560	7	-38.6786	-144.043	-806.966	-160838	-27203.1	14369.3	166.29	499.312	0	0.517426	15.5872	-54.0728	-9791.95	8361.29	1495.74	354.63	1084.09	0	0	0	0	0	0	0	603	903	0
560	8	-38.0683	-143.128	-806.661	-160930	-27569.4	14369.3	165.823	499.501	0	2.34848	15.4346	-48.8848	-8967.97	7628.86	1266.86	356.058	1086.45	0	0	0	0	0	0	0	603	903	0
560	9	-37.9157	-142.212	-808.797	-162028	-27569.4	14369.3	165.913	500.333	0	1.12778	14.9768	-47.3589	-8418.66	7689.9	946.427	362.375	1080.76	0	0	0	0	0	0	0	603	903	0
561	0	-38.526	-141.755	-811.238	-161296	-27447.3	14644	166.166	498.827	0	0.97519	14.9768	-44.002	-7777.79	6591.27	1083.76	349.795	1079.76	0	0	0	0	0	0	0	603	903	0
561	1	-39.5941	-140.992	-812.154	-161845	-27996.6	14140.5	165.528	499.279	0	3.26401	14.9768	-43.0865	-7228.47	6041.95	1037.98	340.228	1070.77	0	0	0	0	0	0	0	603	903	0
561	2	-38.6786	-140.686	-814.29	-161754	-28301.8	14506.7	165.244	498.644	0	2.19589	13.9087	-37.8985	-6404.5	5919.88	992.203	356.204	1071.99	0	0	0	0	0	0	0	603	903	0
561	3	-37.0001	-139.161	-817.952	-162120	-27813.5	14460.9	165.996	498.202	0	1.43295	14.2139	-34.5416	-6129.84	5309.53	992.203	353.714	1080.46	0	0	0	0	0	0	0	603	903	0
561	4	-39.4415	-140.381	-820.394	-162212	-27996.6	14186.2	165.874	497.724	0	3.87436	12.9932	-33.9312	-5763.63	5126.42	580.216	351.083	1072.86	0	0	0	0	0	0	0	603	903	0
561	5	-40.0519	-139.161	-823.14	-162669	-28118.7	14323.6	165.84	497.62	0	2.19589	11.4673	-29.6587	-4848.1	4760.21	671.769	360.499	1066.46	0	0	0	0	0	0	0	603	903	0
561	6	-39.5941	-138.398	-824.666	-162120	-28301.8	14598.2	165.681	496.589	0	1.89072	9.63623	-28.7432	-5031.21	3966.75	580.216	338.007	1078.04	0	0	0	0	0	0	0	603	903	0
561	7	-40.5097	-138.398	-823.445	-163493	-28606.9	14552.4	165.259	498.548	0	2.80624	10.3992	-25.6915	-4481.89	3783.65	259.781	347.273	1077.45	0	0	0	0	0	0	0	603	903	0
561	8	-41.4252	-137.482	-827.718	-164226	-28484.9	14506.7	165.586	498.408	0	1.58554	9.9414	-19.8931	-4665	3417.44	259.781	371.79	1137.5	0	0	0	0	0	0	0	603	903	0
561	9	-42.7985	-137.33	-829.854	-163951	-28606.9	14689.8	165.528	497.566	0	2.19589	8.26294	-21.1138	-3841.02	3295.37	168.228	356.076	1084.92	0	0	0	0	0	0	0	603	903	0
562	0	-41.5778	-135.804	-831.075	-162395	-28484.9	14460.9	165.725	495.403	0	2.80624	7.95776	-19.2828	-2833.94	2868.12	122.452	348.74	1049.97	0	0	0	0	0	0	0	603	903	0
562	1	-41.8829	-135.346	-832.906	-164592	-28851.1	14552.4	165.361	497.612	0	0	0	0	0	0	0	200	903	0	0	0	0	0	0	0	603	903	0
562	2	-41.7304	-134.736	-833.516	-164684	-28912.1	14506.7	165.313	497.577	0	0	0	0	0	0	0	200	903	0	0	0	0	0	0	0	603	903	0
562	3	-40.9674	-133.057	-833.821	-164043	-29095.2	14506.7	165.106	496.736	0	0	0	0	0	0	0	200	903	0	0	0	0	0	0	0	603	903	0
562	4	-42.9511	-132.599	-834.432	-164226	-29095.2	14140.5	165.132	496.811	0	0	0	0	0	0	0	200	903	0	0	0	0	0	0	0	603	903	0
562	5	-42.9511	-131.684	-835.347	-164958	-29156.3	14140.5	165.097	497.473	0	0	0	0	0	0	0	200	903	0	0	0	0	0	0	0	603	903	0
562	6	-43.2562	-131.073	-837.178	-164592	-29522.5	14369.3	164.736	496.603	0	0	0	0	0	0	0	200	903	0	0	0	0	0	0	0	603	903	0
562	7	-42.0355	-130.463	-837.789	-164684	-29156.3	14460.9	165.199	496.569	0	0	0	0	0	0	0	200	903	0	0	0	0	0	0	0	603	903	0
562	8	-40.2045	-129.7	-839.925	-163310	-29034.2	14460.9	165.432	494.434	0	0	0	0	0	0	0	200	903	0	0	0	0	0	0	0	603	903	0
562	9	-42.7985	-128.785	-838.399	-164226	-29522.5	14369.3	164.787	495.88	0	0	0	0	0	0	0	200	903	0	0	0	0	0	0	0	603	903	0
563	0	-42.4933	-128.174	-841.146	-164867	-29583.5	14506.7	164.83	496.003	0	0	0	0	0	0	0	200	903	0	0	0	0	0	0	0	603	903	0
563	1	-42.0355	-128.022	-841.756	-165874	-29644.5	14369.3	164.783	497.057	0	0	0	0	0	0	0	200	903	0	0	0	0	0	0	0	603	903	0
563	2	-42.1881	-125.58	-840.84	-165691	-29644.5	14277.8	164.744	497.054	0	0	0	0	0	0	0	200	903	0	0	0	0	0	0	0	603	903	0
563	3	-41.7304	-125.58	-841.756	-164775	-29583.5	14094.7	164.855	495.752	0	0	0	0	0	0	0	200	903	0	0	0	0	0	0	0	603	903	0
563	4	-42.6459	-124.207	-845.723	-165233	-29583.5	14140.5	165.02	495.375	0	0	0	0	0	0	0	200	903	0	0	0	0	0	0	0	603	903	0
563	5	-42.6459	-123.291	-845.418	-165324	-29827.7	14048.9	164.718	495.553	0	0	0	0	0	0	0	200	903	0	0	0	0	0	0	0	603	903	0
563	6	-42.4933	-124.054	-845.418	-164684	-29644.5	14323.6	164.935	494.795	0	0	0	0	0	0	0	200	903	0	0	0	0	0	0	0	603	903	0
563	7	-42.4933	-122.681	-846.028	-165416	-29888.7	13636.9	164.672	495.521	0	0	0	0	0	0	0	200	903	0	0	0	0	0	0	0	603	903	0
563	8	-42.6459	-121.155	-845.723	-164958	-29888.7	14094.7	164.659	495.05	0	0	0	0	0	0	0	200	903	0	0	0	0	0	0	0	603	903	0
563	9	-42.9511	-119.935	-845.113	-164500	-29888.7	13591.1	164.634	494.649	0	0	0	0	0	0	0	200	903	0	0	0	0	0	0	0	603	903	0
564	0	-43.5614	-120.392	-844.808	-164134	-30132.8	13957.4	164.332	494.286	0	0	0	0	0	0	0	200	903	0	0	0	0	0	0	0	603	903	0
564	1	-43.8666	-118.866	-846.639	-163036	-29949.7	14140.5	164.625	492.568	0	0	0	0	0	0	0	200	903	0	0	0	0	0	0	0	603	903	0
564	2	-44.0192	-117.035	-846.028	-164500	-29949.7	14140.5	164.6	494.438	0	0	0	0	0	0	0	200	903	0	0	0	0	0	0	0	603	903	0
564	3	-44.1718	-116.883	-845.113	-163768	-30010.8	14003.1	164.489	493.782	0	0	0	0	0	0	0	200	903	0	0	0	0	0	0	0	603	903	0
564	4	-44.7821	-116.73	-845.723	-164226	-30254.9	14003.1	164.226	494.184	0	0	0	0	0	0	0	200	903	0	0	0	0	0	0	0	603	903	0
564	5	-43.4088	-114.899	-844.808	-164134	-30499	14048.9	163.898	494.286	0	0	0	0	0	0	0	200	903	0	0	0	0	0	0	0	603	903	0
564	6	-44.7821	-114.899	-843.282	-162852	-30377	13957.4	163.978	493.118	0	0	0	0	0	0	0	200	903	0	0	0	0	0	0	0	603	903	0
564	7	-44.6295	-113.526	-844.197	-163585	-30071.8	13728.5	164.378	493.776	0	0	0	0	0	0	0	200	903	0	0	0	0	0	0	0	603	903	0
564	8	-45.5451	-112.458	-843.587	-163402	-29888.7	13911.6	164.57	493.699	0	0	0	0	0	0	0	200	903	0	0	0	0	0	0	0	603	903	0
564	9	-44.9347	-112	-843.587	-162486	-30560.1	13728.5	163.774	492.613	0	0	0	0	0	0	0	200	903	0	0	0	0	0	0	0	603	903	0
565	0	-43.4088	-111.39	-843.282	-163219	-30743.2	13865.8	163.543	493.552	0	0	0	0	0	0	0	200	903	0	0	0	0	0	0	0	603	903	0
565	1	-44.1718	-110.627	-843.282	-163310	-30132.8	13728.5	164.267	493.66	0	0	0	0	0	0	0	200	903	0	0	0	0	0	0	0	603	903	0
565	2	-44.4769	-110.016	-841.451	-162669	-30682.1	13270.7	163.537	493.32	0	0	0	0	0	0	0	200	903	0	0	0	0	0	0	0	603	903	0
565	3	-44.0192	-109.253	-842.977	-161937	-30377	13499.6	163.965	492.101	0	0	0	0	0	0	0	200	903	0	0	0	0	0	0	0	603	903	0
565	4	-43.8666	-107.88	-842.366	-161662	-30621.1	13545.4	163.649	491.915	0	0	0	0	0	0	0	200	903	0	0	0	0	0	0	0	603	903	0
565	5	-43.1037	-107.27	-842.366	-160838	-30804.2	13682.7	163.431	490.936	0	0	0	0	0	0	0	200	903	0	0	0	0	0	0	0	603	903	0
565	6	-44.1718	-106.507	-841.146	-160930	-30743.2	13591.1	163.451	491.322	0	0	0	0	0	0	0	200	903	0	0	0	0	0	0	0	603	903	0
565	7	-44.7821	-105.439	-840.535	-161479	-30438	13362.3	163.787	492.115	0	0	0	0	0	0	0	200	903	0	0	0	0	0	0	0	603	903	0
565	8	-44.7821	-104.981	-840.535	-160838	-30926.3	13682.7	163.206	491.352	0	0	0	0	0	0	0	200	903	0	0	0	0	0	0	0	603	903	0
565	9	-44.7821	-104.828	-839.925	-160289	-31109.4	13408	162.962	490.837	0	0	0	0	0	0	0	200	903	0	0	0	0	0	0	0	603	903	0
566	0	-44.7821	-103.76	-839.925	-159923	-30438	13270.7	163.761	490.401	0	0	0	0	0	0	0	200	903	0	0	0	0	0	0	0	603	903	0
566	1	-44.1718	-102.387	-838.399	-159373	-30804.2	13408	163.258	490.093	0	0	0	0	0	0	0	200	903	0	0	0	0	0	0	0	603	903	0
566	2	-45.5451	-101.929	-837.484	-159099	-30560.1	13362.3	163.51	489.972	0	0	0	0	0	0	0	200	903	0	0	0	0	0	0	0	603	903	0
566	3	-45.8502	-101.624	-836.568	-158641	-31109.4	13408	162.813	489.633	0	0	0	0	0	0	0	200	903	0	0	0	0	0	0	0	603	903	0
566	4	-46.4606	-101.319	-836.568	-159282	-31475.6	13224.9	162.375	490.399	0	0	0	0	0	0	0	200	903	0	0	0	0	0	0	0	603	903	0
566	5	-45.3925	-100.098	-833.821	-158824	-31170.4	13087.6	162.617	490.477	0	0	0	0	0	0	0	200	903	0	0	0	0	0	0	0	603	903	0
566	6	-42.4933	-99.3352	-832.296	-157817	-30926.3	13270.7	162.842	489.617	0	0	0	0	0	0	0	200	903	0	0	0	0	0	0	0	603	903	0
566	7	-45.6976	-99.03	-831.685	-157726	-30926.3	13087.6	162.815	489.646	0	0	0	0	0	0	0	200	903	0	0	0	0	0	0	0	603	903	0
566	8	-45.8502	-98.5722	-830.77	-157268	-31353.5	13179.2	162.26	489.304	0	0	0	0	0	0	0	200	903	0	0	0	0	0	0	0	603	903	0
566	9	-45.0873	-98.4196	-829.244	-156535	-30865.2	12812.9	162.779	488.769	0	0	0	0	0	0	0	200	903	0	0	0	0	0	0	0	603	903	0
567	0	-44.9347	-96.7412	-828.023	-155711	-31231.5	13316.5	162.282	488.052	0	0	0	0	0	0	0	200	903	0	0	0	0	0	0	0	603	903	0
567	1	-44.7821	-95.5205	-825.276	-156535	-31353.5	12858.7	162.008	489.676	0	0	0	0	0	0	0	200	903	0	0	0	0	0	0	0	603	903	0
567	2	-44.9347	-95.3679	-824.361	-154887	-31170.4	13041.8	162.188	487.888	0	0	0	0	0	0	0	200	903	0	0	0	0	0	0	0	603	903	0
567	3	-43.8666	-94.2998	-823.751	-154521	-31536.6	12996	161.716	487.582	0	0	0	0	0	0	0	200	903	0	0	0	0	0	0	0	603	903	0
567	4	-44.1718	-94.1472	-823.751	-154796	-31292.5	12584.1	162.012	487.916	0	0	0	0	0	0	0	200	903	0	0	0	0	0	0	0	603	903	0
567	5	-43.4088	-92.011	-821.614	-154338	-31048.4	13041.8	162.211	487.847	0	0	0	0	0	0	0	200	903	0	0	0	0	0	0	0	603	903	0
567	6	-41.8829	-92.011	-820.699	-152324	-31048.4	12721.4	162.168	485.603	0	0	0	0	0	0	0	200	903	0	0	0	0	0	0	0	603	903	0
567	7	-44.1718	-91.7058	-820.699	-153239	-31536.6	12812.9	161.573	486.718	0	0	0	0	0	0	0	200	903	0	0	0	0	0	0	0	603	903	0
567	8	-43.714	-90.1799	-819.173	-153056	-31414.6	12401	161.651	486.842	0	0	0	0	0	0	0	200	903	0	0	0	0	0	0	0	603	903	0
567	9	-43.1037	-89.7221	-817.647	-152049	-31475.6	12629.8	161.505	485.96	0	0	0	0	0	0	0	200	903	0	0	0	0	0	0	0	603	903	0
568	0	-42.6459	-90.1799	-811.238	-151408	-31292.5	12812.9	161.426	486.639	0	0	0	0	0	0	0	200	903	0	0	0	0	0	0	0	603	903	0
568	1	-44.3244	-87.4333	-814.901	-149669	-30987.3	12538.3	161.974	483.665	0	0	0	0	0	0	0	200	903	0	0	0	0	0	0	0	603	903	0
568	2	-44.3244	-86.6704	-814.595	-150127	-31414.6	12629.8	161.435	484.296	0	0	0	0	0	0	0	200	903	0	0	0	0	0	0	0	603	903	0
568	3	-44.1718	-86.823	-812.459	-150218	-31353.5	12355.2	161.409	484.893	0	0	0	0	0	0	0	200	903	0	0	0	0	0	0	0	603	903	0
568	4	-43.5614	-86.2126	-810.323	-150401	-31048.4	12675.6	161.684	485.607	0	0	0	0	0	0	0	200	903	0	0	0	0	0	0	0	603	903	0
568	5	-42.6459	-85.6023	-806.05	-149760	-31414.6	12172.1	161.027	485.795	0	0	0	0	0	0	0	200	903	0	0	0	0	0	0	0	603	903	0
568	6	-44.3244	-84.6867	-805.135	-147838	-31536.6	12217.8	160.831	483.619	0	0	0	0	0	0	0	200	903	0	0	0	0	0	0	0	603	903	0
568	7	-43.5614	-83.6186	-804.219	-148204	-31231.5	12126.3	161.166	484.283	0	0	0	0	0	0	0	200	903	0	0	0	0	0	0	0	603	903	0
568	8	-43.1037	-82.3979	-803.304	-148021	-31170.4	12263.6	161.197	484.265	0	0	0	0	0	0	0	200	903	0	0	0	0	0	0	0	603	903	0
568	9	-43.2562	-81.635	-797.505	-146831	-31719.7	12309.4	160.226	484.112	0	0	0	0	0	0	0	200	903	0	0	0	0	0	0	0	603	903	0
569	0	-42.1881	-82.0927	-799.337	-146281	-31109.4	12217.8	161.081	483.004	0	0	0	0	0	0	0	200	903	0	0	0	0	0	0	0	603	903	0
569	1	-42.1881	-80.872	-797.2	-146465	-31353.5	11760.1	160.67	483.724	0	0	0	0	0	0	0	200	903	0	0	0	0	0	0	0	603	903	0
569	2	-42.6459	-79.9565	-795.98	-145457	-31536.6	11989	160.38	482.74	0	0	0	0	0	0	0	200	903	0	0	0	0	0	0	0	603	903	0
569	3	-41.7304	-79.9565	-793.233	-145091	-31353.5	11897.4	160.474	482.911	0	0	0	0	0	0	0	200	903	0	0	0	0	0	0	0	603	903	0
569	4	-39.1364	-78.7358	-793.233	-144817	-31658.7	11989	160.089	482.565	0	0	0	0	0	0	0	200	903	0	0	0	0	0	0	0	603	903	0
569	5	-42.1881	-78.8884	-791.097	-143810	-31475.6	11805.9	160.213	481.785	0	0	0	0	0	0	0	200	903	0	0	0	0	0	0	0	603	903	0
569	6	-41.2726	-77.6677	-788.961	-141887	-31292.5	11714.3	160.337	479.84	0	0	0	0	0	0	0	200	903	0	0	0	0	0	0	0	603	903	0
569	7	-41.4252	-77.2099	-787.74	-142894	-31719.7	11485.4	159.733	481.397	0	0	0	0	0	0	0	200	903	0	0	0	0	0	0	0	603	903	0
569	8	-41.12	-76.1418	-786.214	-142619	-31658.7	11760.1	159.733	481.4	0	0	0	0	0	0	0	200	903	0	0	0	0	0	0	0	603	903	0
569	9	-40.5097	-75.5315	-778.89	-141795	-31292.5	11714.3	159.824	482.048	0	0	0	0	0	0	0	200	903	0	0	0	0	0	0	0	603	903	0
570	0	-41.8829	-74.6159	-781.331	-139964	-31902.8	11027.7	159.169	479.136	0	0	0	0	0	0	0	200	903	0	0	0	0	0	0	0	603	903	0
570	1	-41.2726	-73.5478	-779.5	-140514	-31536.6	11348.1	159.542	480.261	0	0	0	0	0	0	0	200	903	0	0	0	0	0	0	0	603	903	0
570	2	-40.9674	-73.853	-777.669	-139506	-31475.6	11210.8	159.526	479.391	0	0	0	0	0	0	0	200	903	0	0	0	0	0	0	0	603	903	0
570	3	-40.8148	-73.3952	-776.143	-139323	-31414.6	11302.3	159.525	479.507	0	0	0	0	0	0	0	200	903	0	0	0	0	0	0	0	603	903	0
570	4	-40.6622	-72.1745	-774.007	-138683	-31353.5	11165	159.492	479.175	0	0	0	0	0	0	0	200	903	0	0	0	0	0	0	0	603	903	0
570	5	-39.4415	-71.259	-768.819	-137492	-31353.5	10753	159.219	478.836	0	0	0	0	0	0	0	200	903	0	0	0	0	0	0	0	603	903	0
570	6	-40.6622	-71.259	-767.903	-136943	-31292.5	10661.5	159.249	478.334	0	0	0	0	0	0	0	200	903	0	0	0	0	0	0	0	603	903	0
570	7	-40.6622	-70.9538	-766.683	-137218	-31353.5	10707.2	159.105	478.976	0	0	0	0	0	0	0	200	903	0	0	0	0	0	0	0	603	903	0
570	8	-39.8993	-69.8857	-764.547	-136485	-31170.4	10981.9	159.23	478.518	0	0	0	0	0	0	0	200	903	0	0	0	0	0	0	0	603	903	0
570	9	-38.0683	-69.2754	-761.8	-134196	-31231.5	10661.5	159.003	476.157	0	0	0	0	0	0	0	200	903	0	0	0	0	0	0	0	603	903	0
571	0	-38.6786	-69.1228	-758.748	-134837	-31597.7	10478.3	158.356	477.71	0	0	0	0	0	0	0	200	903	0	0	0	0	0	0	0	603	903	0
571	1	-38.526	-67.9021	-757.527	-134105	-31292.5	10386.8	158.691	477.03	0	0	0	0	0	0	0	200	903	0	0	0	0	0	0	0	603	903	0
571	2	-38.0683	-69.2754	-755.696	-133464	-31597.7	10478.3	158.187	476.611	0	0	0	0	0	0	0	200	903	0	0	0	0	0	0	0	603	903	0
571	3	-38.3734	-67.1391	-751.729	-133464	-31170.4	10386.8	158.535	477.543	0	0	0	0	0	0	0	200	903	0	0	0	0	0	0	0	603	903	0
571	4	-37.6105	-65.7658	-752.95	-132457	-31109.4	10295.2	158.683	475.917	0	0	0	0	0	0	0	200	903	0	0	0	0	0	0	0	603	903	0
571	5	-37.7631	-64.8503	-750.508	-131084	-31231.5	10157.9	158.386	474.66	0	0	0	0	0	0	0	200	903	0	0	0	0	0	0	0	603	903	0
571	6	-37.7631	-65.9184	-748.983	-130443	-31414.6	10112.1	158.057	474.16	0	0	0	0	0	0	0	200	903	0	0	0	0	0	0	0	603	903	0
571	7	-38.0683	-64.0874	-745.931	-129710	-31536.6	10249.5	157.722	473.891	0	0	0	0	0	0	0	200	903	0	0	0	0	0	0	0	603	903	0
571	8	-38.6786	-63.0193	-742.879	-129344	-31292.5	9883.25	157.877	474.112	0	0	0	0	0	0	0	200	903	0	0	0	0	0	0	0	603	903	0
571	9	-38.0683	-62.7141	-741.658	-128612	-31841.8	9745.92	157.067	473.411	0	0	0	0	0	0	0	200	903	0	0	0	0	0	0	0	603	903	0
572	0	-38.2208	-61.9511	-739.522	-128612	-31292.5	9654.37	157.686	473.912	0	0	0	0	0	0	0	200	903	0	0	0	0	0	0	0	603	903	0
572	1	-38.0683	-61.7986	-737.386	-128062	-31536.6	9700.15	157.232	473.671	0	0	0	0	0	0	0	200	903	0	0	0	0	0	0	0	603	903	0
572	2	-36.2372	-61.1882	-732.503	-126781	-31719.7	9745.92	156.697	473.079	0	0	0	0	0	0	0	200	903	0	0	0	0	0	0	0	603	903	0
572	3	-37.0001	-60.5779	-731.893	-126598	-31414.6	9562.82	157.078	472.973	0	0	0	0	0	0	0	200	903	0	0	0	0	0	0	0	603	903	0
572	4	-38.2208	-59.2046	-728.536	-126231	-31475.6	9562.82	156.796	473.267	0	0	0	0	0	0	0	200	903	0	0	0	0	0	0	0	603	903	0
572	5	-37.7631	-58.7468	-726.4	-125041	-31780.8	9196.61	156.249	472.138	0	0	0	0	0	0	0	200	903	0	0	0	0	0	0	0	603	903	0
572	6	-37.9157	-59.052	-723.958	-124675	-31597.7	9242.38	156.354	472.213	0	0	0	0	0	0	0	200	903	0	0	0	0	0	0	0	603	903	0
572	7	-36.0846	-57.0683	-723.958	-124400	-31536.6	9379.71	156.439	471.834	0	0	0	0	0	0	0	200	903	0	0	0	0	0	0	0	603	903	0
572	8	-35.932	-56.3054	-721.212	-123027	-31719.7	9150.83	156.019	470.584	0	0	0	0	0	0	0	200	903	0	0	0	0	0	0	0	603	903	0
572	9	-36.3898	-56.6106	-718.77	-122295	-31536.6	8921.95	156.124	470.144	0	0	0	0	0	0	0	200	903	0	0	0	0	0	0	0	603	903	0
573	0	-36.3898	-55.695	-716.024	-122020	-31597.7	8967.73	155.871	470.413	0	0	0	0	0	0	0	200	903	0	0	0	0	0	0	0	603	903	0
573	1	-35.6268	-55.695	-715.718	-121013	-32085.9	8738.84	155.17	469.079	0	0	0	0	0	0	0	200	903	0	0	0	0	0	0	0	603	903	0
573	2	-35.6268	-55.2373	-713.582	-120464	-31902.8	8830.4	155.292	468.815	0	0	0	0	0	0	0	200	903	0	0	0	0	0	0	0	603	903	0
573	3	-35.3217	-54.6269	-710.836	-120372	-31414.6	8830.4	155.806	469.339	0	0	0	0	0	0	0	200	903	0	0	0	0	0	0	0	603	903	0
573	4	-35.0165	-54.3217	-709.31	-119731	-31780.8	8738.84	155.195	468.8	0	0	0	0	0	0	0	200	903	0	0	0	0	0	0	0	603	903	0
573	5	-35.6268	-53.5588	-705.953	-117992	-31841.8	8555.74	154.895	467.138	0	0	0	0	0	0	0	200	903	0	0	0	0	0	0	0	603	903	0
573	6	-36.8475	-52.9485	-705.953	-118449	-31475.6	8555.74	155.414	467.787	0	0	0	0	0	0	0	200	903	0	0	0	0	0	0	0	603	903	0
573	7	-36.2372	-52.6433	-701.985	-117900	-31902.8	8601.52	154.553	467.952	0	0	0	0	0	0	0	200	903	0	0	0	0	0	0	0	603	903	0
573	8	-36.3898	-52.1855	-698.934	-116252	-31841.8	8418.41	154.442	466.328	0	0	0	0	0	0	0	200	903	0	0	0	0	0	0	0	603	903	0
573	9	-36.8475	-51.4226	-697.408	-116252	-31780.8	8281.08	154.43	466.692	0	0	0	0	0	0	0	200	903	0	0	0	0	0	0	0	603	903	0
574	0	-34.8639	-49.7441	-692.83	-115245	-32085.9	8326.86	153.689	466.34	0	0	0	0	0	0	0	200	903	0	0	0	0	0	0	0	603	903	0
574	1	-35.7794	-49.5915	-691.915	-114146	-31902.8	8326.86	153.892	464.972	0	0	0	0	0	0	0	200	903	0	0	0	0	0	0	0	603	903	0
574	2	-35.7794	-49.7441	-689.473	-114330	-31597.7	8281.08	154.171	465.822	0	0	0	0	0	0	0	200	903	0	0	0	0	0	0	0	603	903	0
574	3	-36.2372	-47.9131	-687.032	-113872	-31841.8	8006.42	153.653	465.745	0	0	0	0	0	0	0	200	903	0	0	0	0	0	0	0	603	903	0
574	4	-36.2372	-47.6079	-682.454	-112407	-32085.9	7960.65	152.984	464.71	0	0	0	0	0	0	0	200	903	0	0	0	0	0	0	0	603	903	0
574	5	-35.932	-47.6079	-683.98	-112224	-31841.8	7869.09	153.446	464.075	0	0	0	0	0	0	0	200	903	0	0	0	0	0	0	0	603	903	0
574	6	-34.8639	-46.3872	-679.708	-112041	-32024.9	8235.3	152.884	464.837	0	0	0	0	0	0	0	200	903	0	0	0	0	0	0	0	603	903	0
574	7	-34.4061	-45.6242	-678.182	-110484	-32085.9	7869.09	152.688	462.913	0	0	0	0	0	0	0	200	903	0	0	0	0	0	0	0	603	903	0
574	8	-35.4743	-45.3191	-675.435	-109843	-31597.7	7914.87	153.219	462.626	0	0	0	0	0	0	0	200	903	0	0	0	0	0	0	0	603	903	0
574	9	-35.0165	-44.4035	-672.994	-109477	-31719.7	8006.42	152.868	462.672	0	0	0	0	0	0	0	200	903	0	0	0	0	0	0	0	603	903	0
575	0	-34.2536	-44.0984	-673.604	-108653	-31963.9	7640.21	152.548	461.301	0	0	0	0	0	0	0	200	903	0	0	0	0	0	0	0	603	903	0
575	1	-35.3217	-43.7932	-669.332	-108379	-31536.6	7777.54	152.883	461.921	0	0	0	0	0	0	0	200	903	0	0	0	0	0	0	0	603	903	0
575	2	-35.6268	-43.7932	-668.111	-108562	-31536.6	7548.66	152.797	462.491	0	0	0	0	0	0	0	200	903	0	0	0	0	0	0	0	603	903	0
575	3	-35.932	-43.7932	-665.364	-106914	-32085.9	7502.88	151.777	460.685	0	0	0	0	0	0	0	200	903	0	0	0	0	0	0	0	603	903	0
575	4	-35.3217	-42.2673	-664.449	-106090	-31658.7	7548.66	152.353	459.666	0	0	0	0	0	0	0	200	903	0	0	0	0	0	0	0	603	903	0
575	5	-33.6432	-41.9621	-661.397	-106273	-31658.7	7594.44	152.134	460.679	0	0	0	0	0	0	0	200	903	0	0	0	0	0	0	0	603	903	0
575	6	-35.932	-40.7414	-658.651	-105449	-31719.7	7457.11	151.841	460.098	0	0	0	0	0	0	0	200	903	0	0	0	0	0	0	0	603	903	0
575	7	-36.8475	-39.9785	-657.43	-104350	-31597.7	7548.66	151.938	458.725	0	0	0	0	0	0	0	200	903	0	0	0	0	0	0	0	603	903	0
575	8	-37.1527	-40.5888	-654.073	-103252	-31658.7	7228.22	151.598	457.86	0	0	0	0	0	0	0	200	903	0	0	0	0	0	0	0	603	903	0
575	9	-37.1527	-38.7578	-652.242	-103252	-32085.9	7045.12	150.807	458.303	0	0	0	0	0	0	0	200	903	0	0	0	0	0	0	0	603	903	0
576	0	-36.2372	-37.9948	-649.19	-103160	-31780.8	7411.33	151.046	458.906	0	0	0	0	0	0	0	200	903	0	0	0	0	0	0	0	603	903	0
576	1	-35.0165	-38.1474	-644.612	-101970	-31658.7	7914.87	150.887	458.188	0	0	0	0	0	0	0	200	903	0	0	0	0	0	0	0	603	903	0
576	2	-36.0846	-36.6216	-644.002	-101970	-31658.7	7319.78	150.841	458.338	0	0	0	0	0	0	0	200	903	0	0	0	0	0	0	0	603	903	0
576	3	-37.0001	-36.3164	-640.95	-100963	-31597.7	7136.67	150.702	457.52	0	0	0	0	0	0	0	200	903	0	0	0	0	0	0	0	603	903	0
576	4	-37.7631	-36.3164	-639.119	-100139	-31597.7	7045.12	150.561	456.683	0	0	0	0	0	0	0	200	903	0	0	0	0	0	0	0	603	903	0
576	5	-36.3898	-35.8586	-636.678	-100597	-31658.7	7182.45	150.275	458.002	0	0	0	0	0	0	0	200	903	0	0	0	0	0	0	0	603	903	0
576	6	-36.8475	-35.5534	-633.626	-99864.2	-31414.6	6999.34	150.421	457.607	0	0	0	0	0	0	0	200	903	0	0	0	0	0	0	0	603	903	0
576	7	-36.695	-34.6379	-631.795	-98399.3	-31536.6	6678.91	150.084	455.746	0	0	0	0	0	0	0	200	903	0	0	0	0	0	0	0	603	903	0
576	8	-36.2372	-33.2646	-629.659	-98216.2	-31719.7	6770.46	149.624	455.983	0	0	0	0	0	0	0	200	903	0	0	0	0	0	0	0	603	903	0
576	9	-35.7794	-32.9594	-629.048	-97941.6	-31475.6	6770.46	149.963	455.698	0	0	0	0	0	0	0	200	903	0	0	0	0	0	0	0	603	903	0
577	0	-35.6268	-32.5017	-626.912	-96751.4	-31536.6	6953.57	149.695	454.33	0	0	0	0	0	0	0	200	903	0	0	0	0	0	0	0	603	903	0
577	1	-35.7794	-34.0276	-623.86	-96110.5	-31780.8	6450.03	149.058	454.058	0	0	0	0	0	0	0	200	903	0	0	0	0	0	0	0	603	903	0
577	2	-35.7794	-31.281	-621.114	-95927.4	-31292.5	6358.47	149.619	454.444	0	0	0	0	0	0	0	200	903	0	0	0	0	0	0	0	603	903	0
577	3	-35.6268	-30.8232	-620.198	-94920.3	-31414.6	6358.47	149.348	453.048	0	0	0	0	0	0	0	200	903	0	0	0	0	0	0	0	603	903	0
577	4	-35.1691	-32.6543	-614.4	-94371	-31597.7	6358.47	148.572	453.599	0	0	0	0	0	0	0	200	903	0	0	0	0	0	0	0	603	903	0
577	5	-33.6432	-29.7551	-616.536	-93730.1	-31902.8	6587.36	148.255	452.027	0	0	0	0	0	0	0	200	903	0	0	0	0	0	0	0	603	903	0
577	6	-35.6268	-28.5344	-614.095	-93363.9	-31109.4	6266.92	149.341	452.035	0	0	0	0	0	0	0	200	903	0	0	0	0	0	0	0	603	903	0
577	7	-35.6268	-29.4499	-611.653	-92814.6	-31353.5	6358.47	148.74	451.744	0	0	0	0	0	0	0	200	903	0	0	0	0	0	0	0	603	903	0
577	8	-35.7794	-27.924	-611.043	-92539.9	-31475.6	6266.92	148.489	451.446	0	0	0	0	0	0	0	200	903	0	0	0	0	0	0	0	603	903	0
577	9	-35.1691	-27.7715	-607.991	-91899.1	-31109.4	6129.59	148.833	451.152	0	0	0	0	0	0	0	200	903	0	0	0	0	0	0	0	603	903	0
578	0	-35.1691	-27.0085	-605.245	-91349.8	-31292.5	6038.04	148.298	450.93	0	0	0	0	0	0	0	200	903	0	0	0	0	0	0	0	603	903	0
578	1	-34.8639	-27.1611	-600.057	-91532.9	-31170.4	6129.59	148.054	452.54	0	0	0	0	0	0	0	200	903	0	0	0	0	0	0	0	603	903	0
578	2	-35.932	-25.33	-600.667	-90434.2	-30682.1	6175.37	148.92	450.556	0	0	0	0	0	0	0	200	903	0	0	0	0	0	0	0	603	903	0
578	3	-35.932	-26.093	-601.277	-89793.4	-31536.6	5900.71	147.551	449.338	0	0	0	0	0	0	0	200	903	0	0	0	0	0	0	0	603	903	0
578	4	-35.932	-25.7878	-598.226	-89884.9	-31475.6	5809.16	147.385	450.253	0	0	0	0	0	0	0	200	903	0	0	0	0	0	0	0	603	903	0
578	5	-35.0165	-24.8723	-594.869	-89427.2	-31048.4	5717.6	147.806	450.331	0	0	0	0	0	0	0	200	903	0	0	0	0	0	0	0	603	903	0
578	6	-34.8639	-24.4145	-594.564	-87962.3	-31048.4	5488.72	147.78	447.944	0	0	0	0	0	0	0	200	903	0	0	0	0	0	0	0	603	903	0
578	7	-33.1854	-23.499	-590.596	-88328.5	-30926.3	5534.5	147.635	449.558	0	0	0	0	0	0	0	200	903	0	0	0	0	0	0	0	603	903	0
578	8	-34.5587	-22.1257	-589.07	-87779.2	-31231.5	5442.95	146.982	449.013	0	0	0	0	0	0	0	200	903	0	0	0	0	0	0	0	603	903	0
578	9	-34.2536	-21.8205	-586.934	-86589	-31231.5	5397.17	146.789	447.528	0	0	0	0	0	0	0	200	903	0	0	0	0	0	0	0	603	903	0
579	0	-33.7958	-21.9731	-583.882	-86131.3	-30987.3	5122.51	146.929	447.515	0	0	0	0	0	0	0	200	903	0	0	0	0	0	0	0	603	903	0
579	1	-34.101	-20.2946	-582.662	-85765.1	-30254.9	5214.06	148.075	447.195	0	0	0	0	0	0	0	200	903	0	0	0	0	0	0	0	603	903	0
579	2	-33.1854	-20.5998	-581.136	-85215.7	-30987.3	4939.41	146.678	446.637	0	0	0	0	0	0	0	200	903	0	0	0	0	0	0	0	603	903	0
579	3	-32.8803	-21.2102	-579.305	-84941.1	-30865.2	5076.74	146.72	446.626	0	0	0	0	0	0	0	200	903	0	0	0	0	0	0	0	603	903	0
579	4	-32.2699	-19.6843	-578.084	-84941.1	-30499	4481.64	147.241	446.936	0	0	0	0	0	0	0	200	903	0	0	0	0	0	0	0	603	903	0
579	5	-32.2699	-18.9214	-575.032	-84574.9	-30377	4756.3	147.173	447.078	0	0	0	0	0	0	0	200	903	0	0	0	0	0	0	0	603	903	0
579	6	-31.9647	-18.4636	-574.422	-83476.2	-30560.1	4573.2	146.799	445.322	0	0	0	0	0	0	0	200	903	0	0	0	0	0	0	0	603	903	0
579	7	-31.8121	-18.1584	-572.591	-83384.7	-30377	4802.08	146.948	445.627	0	0	0	0	0	0	0	200	903	0	0	0	0	0	0	0	603	903	0
579	8	-30.1337	-17.5481	-571.675	-83384.7	-30377	4573.2	146.863	445.86	0	0	0	0	0	0	0	200	903	0	0	0	0	0	0	0	603	903	0
579	9	-31.2018	-16.7851	-569.539	-82377.6	-30621.1	4435.87	146.235	444.639	0	0	0	0	0	0	0	200	903	0	0	0	0	0	0	0	603	903	0
580	0	-31.0492	-16.6325	-567.708	-81279	-30315.9	4115.43	146.599	443.17	0	0	0	0	0	0	0	200	903	0	0	0	0	0	0	0	603	903	0
580	1	-31.2018	-15.717	-566.793	-81919.8	-30132.8	4115.43	146.836	444.532	0	0	0	0	0	0	0	200	903	0	0	0	0	0	0	0	603	903	0
580	2	-30.5914	-14.9541	-565.572	-80912.8	-30560.1	4252.76	145.966	443.064	0	0	0	0	0	0	0	200	903	0	0	0	0	0	0	0	603	903	0
580	3	-30.8966	-14.8015	-561.605	-80546.5	-30071.8	4115.43	146.454	443.422	0	0	0	0	0	0	0	200	903	0	0	0	0	0	0	0	603	903	0
580	4	-30.2863	-13.886	-561.299	-80638.1	-29888.7	4069.66	146.751	443.663	0	0	0	0	0	0	0	200	903	0	0	0	0	0	0	0	603	903	0
580	5	-31.2018	-13.4282	-559.774	-80363.4	-30499	4069.66	145.515	443.564	0	0	0	0	0	0	0	200	903	0	0	0	0	0	0	0	603	903	0
580	6	-31.6596	-13.7334	-558.248	-79356.4	-29949.7	4115.43	146.35	442.153	0	0	0	0	0	0	0	200	903	0	0	0	0	0	0	0	603	903	0
580	7	-30.5914	-14.3437	-556.722	-79539.5	-30315.9	3932.33	145.546	442.871	0	0	0	0	0	0	0	200	903	0	0	0	0	0	0	0	603	903	0
580	8	-30.744	-12.2075	-555.501	-78990.1	-30315.9	3566.12	145.426	442.196	0	0	0	0	0	0	0	200	903	0	0	0	0	0	0	0	603	903	0
580	9	-30.2863	-11.7497	-554.586	-77983.1	-29705.6	3520.34	146.436	440.615	0	0	0	0	0	0	0	200	903	0	0	0	0	0	0	0	603	903	0
581	0	-29.8285	-12.2075	-551.839	-77983.1	-29644.5	3611.89	146.28	441.315	0	0	0	0	0	0	0	200	903	0	0	0	0	0	0	0	603	903	0
581	1	-29.5233	-11.9023	-549.703	-77616.9	-30193.9	3474.56	145.072	441.198	0	0	0	0	0	0	0	200	903	0	0	0	0	0	0	0	603	903	0
581	2	-30.2863	-10.9868	-548.177	-75694.2	-29766.6	3245.68	145.699	438.084	0	0	0	0	0	0	0	200	903	0	0	0	0	0	0	0	603	903	0
581	3	-30.4389	-11.292	-545.735	-76976	-29888.7	3291.46	145.232	441.05	0	0	0	0	0	0	0	200	903	0	0	0	0	0	0	0	603	903	0
581	4	-30.2863	-9.30832	-545.735	-76243.6	-30254.9	3291.46	144.561	439.708	0	0	0	0	0	0	0	200	903	0	0	0	0	0	0	0	603	903	0
581	5	-30.2863	-9.46091	-544.82	-75511.2	-29461.4	3154.13	145.924	438.598	0	0	0	0	0	0	0	200	903	0	0	0	0	0	0	0	603	903	0
581	6	-29.9811	-9.76608	-541.463	-75053.4	-29827.7	3337.23	144.913	438.612	0	0	0	0	0	0	0	200	903	0	0	0	0	0	0	0	603	903	0
581	7	-29.3707	-8.2402	-542.073	-75053.4	-29949.7	3245.68	144.75	438.456	0	0	0	0	0	0	0	200	903	0	0	0	0	0	0	0	603	903	0
581	8	-28.3026	-7.78244	-539.937	-74137.9	-29400.4	3108.35	145.548	437.308	0	0	0	0	0	0	0	200	903	0	0	0	0	0	0	0	603	903	0
581	9	-28.7604	-8.2402	-537.801	-74137.9	-29522.5	2742.14	145.105	437.854	0	0	0	0	0	0	0	200	903	0	0	0	0	0	0	0	603	903	0
582	0	-28.6078	-7.78244	-535.97	-74504.1	-29949.7	3108.35	144.121	439.008	0	0	0	0	0	0	0	200	903	0	0	0	0	0	0	0	603	903	0
582	1	-28.4552	-8.85056	-534.444	-73680.1	-29827.7	2787.92	144.189	437.863	0	0	0	0	0	0	0	200	903	0	0	0	0	0	0	0	603	903	0
582	2	-26.319	-7.47727	-535.665	-72398.3	-29522.5	2696.36	144.886	435.156	0	0	0	0	0	0	0	200	903	0	0	0	0	0	0	0	603	903	0
582	3	-27.9975	-6.56174	-535.054	-73405.4	-29705.6	2971.02	144.481	437.193	0	0	0	0	0	0	0	200	903	0	0	0	0	0	0	0	603	903	0
582	4	-28.3026	-5.34104	-533.528	-72673	-29400.4	2787.92	144.894	436.212	0	0	0	0	0	0	0	200	903	0	0	0	0	0	0	0	603	903	0
582	5	-27.9975	-5.49362	-532.003	-71574.4	-29522.5	2559.04	144.507	434.538	0	0	0	0	0	0	0	200	903	0	0	0	0	0	0	0	603	903	0
582	6	-28.4552	-5.95139	-530.782	-71849	-29949.7	2421.71	143.574	435.365	0	0	0	0	0	0	0	200	903	0	0	0	0	0	0	0	603	903	0
582	7	-27.6923	-4.88327	-525.899	-71849	-29461.4	2467.48	143.979	436.621	0	0	0	0	0	0	0	200	903	0	0	0	0	0	0	0	603	903	0
582	8	-27.6923	-4.27292	-528.34	-70933.5	-29583.5	2559.04	144.007	434.257	0	0	0	0	0	0	0	200	903	0	0	0	0	0	0	0	603	903	0
582	9	-29.0656	-5.03586	-528.34	-70475.8	-29827.7	2238.6	143.545	433.391	0	0	0	0	0	0	0	200	903	0	0	0	0	0	0	0	603	903	0
583	0	-28.7604	-3.2048	-527.73	-70109.5	-29583.5	2284.38	143.942	432.851	0	0	0	0	0	0	0	200	903	0	0	0	0	0	0	0	603	903	0
583	1	-28.6078	-3.35739	-526.815	-69926.4	-29522.5	2192.82	143.96	432.734	0	0	0	0	0	0	0	200	903	0	0	0	0	0	0	0	603	903	0
583	2	-26.9293	-3.81516	-521.932	-69834.9	-29766.6	2009.72	142.968	433.801	0	0	0	0	0	0	0	200	903	0	0	0	0	0	0	0	603	903	0
583	3	-27.8449	-2.28928	-522.542	-70201.1	-29400.4	2101.27	143.736	434.345	0	0	0	0	0	0	0	200	903	0	0	0	0	0	0	0	603	903	0
583	4	-28.6078	-1.83151	-521.932	-68827.8	-29583.5	1780.84	143.319	431.871	0	0	0	0	0	0	0	200	903	0	0	0	0	0	0	0	603	903	0
583	5	-28.4552	-2.13669	-520.406	-68095.4	-29827.7	2101.27	142.684	430.85	0	0	0	0	0	0	0	200	903	0	0	0	0	0	0	0	603	903	0
583	6	-27.9975	-1.9841	-519.49	-68827.8	-29400.4	2009.72	143.405	432.491	0	0	0	0	0	0	0	200	903	0	0	0	0	0	0	0	603	903	0
583	7	-27.3871	-1.06857	-518.88	-69194	-29400.4	2055.5	143.339	433.353	0	0	0	0	0	0	0	200	903	0	0	0	0	0	0	0	603	903	0
583	8	-27.0819	-0.610811	-517.964	-67820.7	-29461.4	1597.73	143.121	430.937	0	0	0	0	0	0	0	200	903	0	0	0	0	0	0	0	603	903	0
583	9	-27.5397	-0.763399	-517.964	-67912.3	-29217.3	1689.28	143.592	431.114	0	0	0	0	0	0	0	200	903	0	0	0	0	0	0	0	603	903	0
584	0	-27.3871	-1.37375	-518.88	-67637.6	-29522.5	1368.85	143.103	430.353	0	0	0	0	0	0	0	200	903	0	0	0	0	0	0	0	603	903	0
584	1	-26.4716	-0.305635	-517.049	-67271.4	-30193.9	1735.06	141.603	430.106	0	0	0	0	0	0	0	200	903	0	0	0	0	0	0	0	603	903	0
584	2	-26.1664	0.304717	-516.439	-67912.3	-29217.3	1643.51	143.425	431.501	0	0	0	0	0	0	0	200	903	0	0	0	0	0	0	0	603	903	0
584	3	-26.4716	1.22024	-515.523	-66996.7	-29156.3	1368.85	143.443	429.959	0	0	0	0	0	0	0	200	903	0	0	0	0	0	0	0	603	903	0
584	4	-26.4716	1.52542	-513.997	-65989.7	-29705.6	1368.85	142.207	428.385	0	0	0	0	0	0	0	200	903	0	0	0	0	0	0	0	603	903	0
584	5	-26.7767	-0.305635	-512.776	-66264.3	-29583.5	1139.97	142.307	429.227	0	0	0	0	0	0	0	200	903	0	0	0	0	0	0	0	603	903	0
584	6	-24.0302	1.98318	-514.913	-65898.1	-29400.4	1689.28	142.902	427.979	0	0	0	0	0	0	0	200	903	0	0	0	0	0	0	0	603	903	0
584	7	-26.9293	2.59353	-514.913	-65715	-29461.4	1094.19	142.784	427.624	0	0	0	0	0	0	0	200	903	0	0	0	0	0	0	0	603	903	0
584	8	-26.0138	2.59353	-513.387	-65348.8	-29644.5	1002.64	142.257	427.29	0	0	0	0	0	0	0	200	903	0	0	0	0	0	0	0	603	903	0
584	9	-25.8612	3.50906	-513.692	-65715	-29095.2	956.862	143.361	427.927	0	0	0	0	0	0	0	200	903	0	0	0	0	0	0	0	603	903	0
585	0	-25.556	3.66165	-513.997	-65531.9	-29888.7	911.086	141.85	427.495	0	0	0	0	0	0	0	200	903	0	0	0	0	0	0	0	603	903	0
585	1	-25.556	2.28836	-513.387	-64433.3	-29644.5	1231.52	142.257	425.506	0	0	0	0	0	0	0	200	903	0	0	0	0	0	0	0	603	903	0
585	2	-25.556	3.0513	-510.335	-65440.4	-29217.3	773.757	142.749	428.23	0	0	0	0	0	0	0	200	903	0	0	0	0	0	0	0	603	903	0
585	3	-26.7767	4.42459	-512.471	-65074.1	-29644.5	727.981	142.154	426.981	0	0	0	0	0	0	0	200	903	0	0	0	0	0	0	0	603	903	0
585	4	-26.7767	4.272	-512.776	-64250.2	-29644.5	590.651	142.188	425.299	0	0	0	0	0	0	0	200	903	0	0	0	0	0	0	0	603	903	0
585	5	-26.319	3.81424	-512.166	-64707.9	-29644.5	819.533	142.119	426.342	0	0	0	0	0	0	0	200	903	0	0	0	0	0	0	0	603	903	0
585	6	-26.4716	5.79788	-512.471	-64982.6	-29705.6	727.981	142.035	426.802	0	0	0	0	0	0	0	200	903	0	0	0	0	0	0	0	603	903	0
585	7	-26.6242	5.18753	-512.166	-63151.5	-29705.6	499.099	142	423.303	0	0	0	0	0	0	0	200	903	0	0	0	0	0	0	0	603	903	0
585	8	-25.0983	3.35647	-509.114	-63243.1	-29461.4	407.546	142.132	424.222	0	0	0	0	0	0	0	200	903	0	0	0	0	0	0	0	603	903	0
585	9	-26.319	5.79788	-510.945	-63609.3	-29827.7	453.322	141.623	424.493	0	0	0	0	0	0	0	200	903	0	0	0	0	0	0	0	603	903	0
586	0	-26.1664	5.79788	-509.42	-63334.6	-29949.7	453.322	141.208	424.327	0	0	0	0	0	0	0	200	903	0	0	0	0	0	0	0	603	903	0
586	1	-26.6242	6.40823	-510.64	-63517.7	-29461.4	453.322	142.305	424.388	0	0	0	0	0	0	0	200	903	0	0	0	0	0	0	0	603	903	0
586	2	-26.7767	7.32376	-510.945	-63700.8	-29583.5	636.428	142.1	424.673	0	0	0	0	0	0	0	200	903	0	0	0	0	0	0	0	603	903	0
586	3	-26.7767	7.93411	-510.03	-62602.2	-29583.5	270.217	141.997	422.742	0	0	0	0	0	0	0	200	903	0	0	0	0	0	0	0	603	903	0
586	4	-26.4716	6.866	-508.809	-62602.2	-29644.5	270.217	141.737	423.037	0	0	0	0	0	0	0	200	903	0	0	0	0	0	0	0	603	903	0
586	5	-25.556	7.01858	-510.03	-63243.1	-30193.9	178.664	140.8	423.999	0	0	0	0	0	0	0	200	903	0	0	0	0	0	0	0	603	903	0
586	6	-25.4035	8.0867	-510.64	-62693.8	-29644.5	-4.44129	141.946	422.775	0	0	0	0	0	0	0	200	903	0	0	0	0	0	0	0	603	903	0
586	7	-26.4716	7.62894	-510.03	-62510.7	-29522.5	-141.77	142.116	422.563	0	0	0	0	0	0	0	200	903	0	0	0	0	0	0	0	603	903	0
586	8	-25.8612	8.0867	-510.03	-62876.9	-29522.5	178.664	142.116	423.281	0	0	0	0	0	0	0	200	903	0	0	0	0	0	0	0	603	903	0
586	9	-25.4035	8.84964	-511.861	-62785.3	-30132.8	132.888	141.131	422.661	0	0	0	0	0	0	0	200	903	0	0	0	0	0	0	0	603	903	0
587	0	-25.4035	8.69705	-510.945	-62144.4	-29644.5	87.1114	141.981	421.626	0	0	0	0	0	0	0	200	903	0	0	0	0	0	0	0	603	903	0
587	1	-24.1828	9.76517	-511.556	-62602.2	-29705.6	-50.2177	141.931	422.376	0	0	0	0	0	0	0	200	903	0	0	0	0	0	0	0	603	903	0
587	2	-25.7086	9.91775	-512.166	-62052.9	-29888.7	-95.994	141.643	421.158	0	0	0	0	0	0	0	200	903	0	0	0	0	0	0	0	603	903	0
587	3	-25.8612	10.2229	-513.082	-61686.7	-29888.7	-4.44129	141.747	420.228	0	0	0	0	0	0	0	200	903	0	0	0	0	0	0	0	603	903	0
587	4	-25.7086	9.3074	-513.082	-61961.3	-30315.9	-233.323	140.914	420.763	0	0	0	0	0	0	0	200	903	0	0	0	0	0	0	0	603	903	0
587	5	-26.0138	10.6807	-511.251	-62236	-30010.8	-279.099	141.299	421.733	0	0	0	0	0	0	0	200	903	0	0	0	0	0	0	0	603	903	0
587	6	-26.6242	11.4436	-512.776	-61412	-29766.6	-553.758	141.95	419.764	0	0	0	0	0	0	0	200	903	0	0	0	0	0	0	0	603	903	0
587	7	-27.0819	9.61258	-514.302	-60954.3	-29522.5	-416.429	142.597	418.518	0	0	0	0	0	0	0	200	903	0	0	0	0	0	0	0	603	903	0
587	8	-26.7767	11.1385	-515.828	-60771.2	-30560.1	-507.981	140.755	417.813	0	0	0	0	0	0	0	200	903	0	0	0	0	0	0	0	603	903	0
587	9	-27.5397	11.5962	-516.439	-60954.3	-30193.9	-507.981	141.534	418.028	0	0	0	0	0	0	0	200	903	0	0	0	0	0	0	0	603	903	0
588	0	-27.2345	11.4436	-515.218	-61045.8	-30254.9	-553.758	141.277	418.485	0	0	0	0	0	0	0	200	903	0	0	0	0	0	0	0	603	903	0
588	1	-27.3871	12.3592	-516.439	-61686.7	-30682.1	-324.876	140.589	419.446	0	0	0	0	0	0	0	200	903	0	0	0	0	0	0	0	603	903	0
588	2	-26.0138	10.6807	-515.523	-61595.1	-30193.9	-645.311	141.431	419.481	0	0	0	0	0	0	0	200	903	0	0	0	0	0	0	0	603	903	0
588	3	-27.5397	12.3592	-517.659	-59855.6	-30377	-233.323	141.319	415.627	0	0	0	0	0	0	0	200	903	0	0	0	0	0	0	0	603	903	0
588	4	-27.3871	12.9695	-517.964	-61686.7	-29949.7	-553.758	142.178	419.094	0	0	0	0	0	0	0	200	903	0	0	0	0	0	0	0	603	903	0
588	5	-27.3871	13.7325	-517.659	-61412	-30377	-691.087	141.319	418.634	0	0	0	0	0	0	0	200	903	0	0	0	0	0	0	0	603	903	0
588	6	-27.6923	15.1057	-513.997	-60679.6	-30499	-919.969	140.663	418.054	0	0	0	0	0	0	0	200	903	0	0	0	0	0	0	0	603	903	0
588	7	-27.0819	14.0376	-520.101	-61412	-30682.1	-874.192	141.007	418.077	0	0	0	0	0	0	0	200	903	0	0	0	0	0	0	0	603	903	0
588	8	-27.0819	14.4954	-520.101	-61137.4	-30804.2	-828.416	140.773	417.549	0	0	0	0	0	0	0	200	903	0	0	0	0	0	0	0	603	903	0
588	9	-27.0819	14.9532	-520.711	-60313.4	-30926.3	-1011.52	140.608	415.829	0	0	0	0	0	0	0	200	903	0	0	0	0	0	0	0	603	903	0
589	0	-26.6242	15.2583	-521.627	-60588.1	-30926.3	-919.969	140.712	416.152	0	0	0	0	0	0	0	200	903	0	0	0	0	0	0	0	603	903	0
589	1	-27.3871	16.0213	-521.627	-61228.9	-30377	-919.969	141.765	417.381	0	0	0	0	0	0	0	200	903	0	0	0	0	0	0	0	603	903	0
589	2	-27.8449	16.3264	-523.763	-60221.8	-31231.5	-1057.3	140.371	414.979	0	0	0	0	0	0	0	200	903	0	0	0	0	0	0	0	603	903	0
589	3	-26.4716	16.0213	-525.289	-60221.8	-31536.6	-1103.07	139.963	414.645	0	0	0	0	0	0	0	200	903	0	0	0	0	0	0	0	603	903	0
589	4	-26.7767	16.9368	-525.899	-60496.5	-31048.4	-1148.85	140.961	415.034	0	0	0	0	0	0	0	200	903	0	0	0	0	0	0	0	603	903	0
589	5	-27.5397	17.5471	-526.815	-60313.4	-31353.5	-1331.96	140.485	414.487	0	0	0	0	0	0	0	200	903	0	0	0	0	0	0	0	603	903	0
589	6	-28.4552	16.0213	-528.34	-60496.5	-31109.4	-1148.85	141.119	414.503	0	0	0	0	0	0	0	200	903	0	0	0	0	0	0	0	603	903	0
589	7	-28.6078	17.8523	-529.866	-60404.9	-31231.5	-1011.52	141.058	414	0	0	0	0	0	0	0	200	903	0	0	0	0	0	0	0	603	903	0
589	8	-28.15	18.7679	-527.425	-60404.9	-30987.3	-1194.63	141.248	414.528	0	0	0	0	0	0	0	200	903	0	0	0	0	0	0	0	603	903	0
589	9	-29.5233	18.3101	-528.035	-60496.5	-30987.3	-1286.18	141.316	414.569	0	0	0	0	0	0	0	200	903	0	0	0	0	0	0	0	603	903	0
590	0	-29.6759	19.3782	-532.003	-60496.5	-31170.4	-1148.85	141.409	413.715	0	0	0	0	0	0	0	200	903	0	0	0	0	0	0	0	603	903	0
590	1	-30.1337	19.5308	-534.139	-60221.8	-31475.6	-1469.29	141.072	412.746	0	0	0	0	0	0	0	200	903	0	0	0	0	0	0	0	603	903	0
590	2	-30.1337	18.3101	-535.054	-60496.5	-31536.6	-919.969	141.059	413.066	0	0	0	0	0	0	0	200	903	0	0	0	0	0	0	0	603	903	0
590	3	-30.2863	20.9041	-536.885	-61045.8	-31597.7	-1148.85	141.146	413.704	0	0	0	0	0	0	0	200	903	0	0	0	0	0	0	0	603	903	0
590	4	-29.6759	21.2093	-536.885	-60496.5	-31841.8	-1515.06	140.692	412.681	0	0	0	0	0	0	0	200	903	0	0	0	0	0	0	0	603	903	0
590	5	-27.9975	20.7515	-537.496	-60496.5	-31536.6	-1606.61	141.327	412.553	0	0	0	0	0	0	0	200	903	0	0	0	0	0	0	0	603	903	0
590	6	-31.0492	22.43	-538.411	-60313.4	-31780.8	-1927.05	140.973	412.021	0	0	0	0	0	0	0	200	903	0	0	0	0	0	0	0	603	903	0
590	7	-30.744	22.2774	-539.327	-60771.2	-32330.1	-1835.5	140.055	412.68	0	0	0	0	0	0	0	200	903	0	0	0	0	0	0	0	603	903	0
590	8	-30.8966	21.5144	-541.158	-60954.3	-31902.8	-1743.94	141.047	412.637	0	0	0	0	0	0	0	200	903	0	0	0	0	0	0	0	603	903	0
590	9	-30.8966	23.6507	-543.294	-60679.6	-32330.1	-1286.18	140.492	411.688	0	0	0	0	0	0	0	200	903	0	0	0	0	0	0	0	603	903	0
591	0	-31.3544	24.8714	-542.684	-60954.3	-32024.9	-1743.94	140.988	412.32	0	0	0	0	0	0	0	200	903	0	0	0	0	0	0	0	603	903	0
591	1	-31.2018	22.1248	-545.125	-60496.5	-32269.1	-1743.94	140.804	410.977	0	0	0	0	0	0	0	200	903	0	0	0	0	0	0	0	603	903	0
591	2	-31.0492	24.5662	-547.872	-61595.1	-32330.1	-2064.38	140.99	412.426	0	0	0	0	0	0	0	200	903	0	0	0	0	0	0	0	603	903	0
591	3	-30.744	25.024	-549.092	-61412	-32147	-1835.5	141.454	411.843	0	0	0	0	0	0	0	200	903	0	0	0	0	0	0	0	603	903	0
591	4	-31.0492	25.6343	-550.923	-61503.6	-32330.1	-2110.15	141.317	411.637	0	0	0	0	0	0	0	200	903	0	0	0	0	0	0	0	603	903	0
591	5	-31.3544	26.5498	-551.839	-61778.2	-32757.3	-2247.48	140.64	411.95	0	0	0	0	0	0	0	200	903	0	0	0	0	0	0	0	603	903	0
591	6	-30.5914	26.855	-555.501	-60862.7	-32391.1	-2155.93	141.69	409.564	0	0	0	0	0	0	0	200	903	0	0	0	0	0	0	0	603	903	0
591	7	-31.9647	26.5498	-557.332	-62052.9	-32818.4	-2201.71	141.115	411.339	0	0	0	0	0	0	0	200	903	0	0	0	0	0	0	0	603	903	0
591	8	-31.0492	27.6179	-557.332	-61869.8	-32757.3	-2110.15	141.225	411.011	0	0	0	0	0	0	0	200	903	0	0	0	0	0	0	0	603	903	0
591	9	-31.9647	27.9231	-560.384	-61686.7	-33123.5	-2384.81	140.891	410.079	0	0	0	0	0	0	0	200	903	0	0	0	0	0	0	0	603	903	0
592	0	-32.7277	28.0757	-562.52	-61961.3	-32879.4	-2110.15	141.55	410.15	0	0	0	0	0	0	0	200	903	0	0	0	0	0	0	0	603	903	0
592	1	-32.7277	28.2283	-563.741	-62052.9	-33428.7	-2567.92	140.702	410.073	0	0	0	0	0	0	0	200	903	0	0	0	0	0	0	0	603	903	0
592	2	-32.1173	29.6016	-565.572	-61503.6	-33917	-2293.26	140.031	408.746	0	0	0	0	0	0	0	200	903	0	0	0	0	0	0	0	603	903	0
592	3	-33.1854	30.0594	-569.539	-62327.6	-33367.7	-2430.59	141.413	409.435	0	0	0	0	0	0	0	200	903	0	0	0	0	0	0	0	603	903	0
592	4	-34.2536	28.9912	-570.76	-62602.2	-33489.8	-2567.92	141.324	409.682	0	0	0	0	0	0	0	200	903	0	0	0	0	0	0	0	603	903	0
592	5	-34.4061	31.2801	-571.981	-61595.1	-34039.1	-2293.26	140.489	407.687	0	0	0	0	0	0	0	200	903	0	0	0	0	0	0	0	603	903	0
592	6	-34.7113	31.8904	-574.117	-62785.3	-34100.1	-2339.04	140.604	409.36	0	0	0	0	0	0	0	200	903	0	0	0	0	0	0	0	603	903	0
592	7	-35.1691	31.7378	-574.117	-63060	-33917	-2567.92	140.923	409.838	0	0	0	0	0	0	0	200	903	0	0	0	0	0	0	0	603	903	0
592	8	-33.4906	33.1111	-576.558	-62693.8	-34161.1	-2705.25	140.75	408.738	0	0	0	0	0	0	0	200	903	0	0	0	0	0	0	0	603	903	0
592	9	-35.932	33.5689	-578.694	-63151.5	-34344.2	-2934.13	140.652	409.128	0	0	0	0	0	0	0	200	903	0	0	0	0	0	0	0	603	903	0
593	0	-35.932	35.5525	-580.526	-62236	-33978	-2751.02	141.47	407.206	0	0	0	0	0	0	0	200	903	0	0	0	0	0	0	0	603	903	0
593	1	-36.695	34.7896	-583.272	-62419.1	-34771.5	-2796.8	140.385	407.015	0	0	0	0	0	0	0	200	903	0	0	0	0	0	0	0	603	903	0
593	2	-35.932	35.8577	-584.493	-62876.9	-34832.5	-2567.92	140.406	407.575	0	0	0	0	0	0	0	200	903	0	0	0	0	0	0	0	603	903	0
593	3	-36.3898	37.0784	-590.291	-62876.9	-34283.2	-2888.35	141.922	406.518	0	0	0	0	0	0	0	200	903	0	0	0	0	0	0	0	603	903	0
593	4	-36.8475	36.3155	-589.376	-62693.8	-35259.8	-2705.25	140.174	406.373	0	0	0	0	0	0	0	200	903	0	0	0	0	0	0	0	603	903	0
593	5	-36.2372	37.9939	-592.733	-62876.9	-35198.8	-2979.91	140.616	406.08	0	0	0	0	0	0	0	200	903	0	0	0	0	0	0	0	603	903	0
593	6	-36.2372	38.6043	-594.869	-63426.2	-35259.8	-3025.68	140.727	406.622	0	0	0	0	0	0	0	200	903	0	0	0	0	0	0	0	603	903	0
593	7	-36.695	38.9095	-597.31	-63334.6	-35626	-2796.8	140.356	406.033	0	0	0	0	0	0	0	200	903	0	0	0	0	0	0	0	603	903	0
593	8	-35.7794	39.825	-600.057	-63426.2	-35626	-2979.91	140.629	405.7	0	0	0	0	0	0	0	200	903	0	0	0	0	0	0	0	603	903	0
593	9	-37.3053	40.8931	-601.888	-62785.3	-35565	-3117.23	140.911	404.314	0	0	0	0	0	0	0	200	903	0	0	0	0	0	0	0	603	903	0
594	0	-37.6105	40.8931	-605.245	-63517.7	-36053.2	-3208.79	140.432	404.946	0	0	0	0	0	0	0	200	903	0	0	0	0	0	0	0	603	903	0
594	1	-38.0683	41.656	-607.686	-63883.9	-36480.5	-2934.13	139.968	405.127	0	0	0	0	0	0	0	200	903	0	0	0	0	0	0	0	603	903	0
594	2	-38.526	42.7242	-608.297	-62968.4	-35870.1	-3254.56	141.032	403.516	0	0	0	0	0	0	0	200	903	0	0	0	0	0	0	0	603	903	0
594	3	-38.526	42.8767	-612.264	-63609.3	-35992.2	-3346.12	141.215	403.892	0	0	0	0	0	0	0	200	903	0	0	0	0	0	0	0	603	903	0
594	4	-40.2045	43.7923	-615.01	-64341.7	-36419.5	-3391.89	140.782	404.619	0	0	0	0	0	0	0	200	903	0	0	0	0	0	0	0	603	903	0
594	5	-40.8148	45.013	-618.367	-64250.2	-36663.6	-3254.56	140.709	403.903	0	0	0	0	0	0	0	200	903	0	0	0	0	0	0	0	603	903	0
594	6	-40.8148	43.1819	-621.114	-63700.8	-36968.8	-3208.79	140.48	402.559	0	0	0	0	0	0	0	200	903	0	0	0	0	0	0	0	603	903	0
594	7	-40.9674	46.0811	-622.64	-64799.5	-37029.8	-3483.45	140.528	404.072	0	0	0	0	0	0	0	200	903	0	0	0	0	0	0	0	603	903	0
594	8	-41.7304	46.844	-624.166	-64891	-37029.8	-3437.67	140.673	403.964	0	0	0	0	0	0	0	200	903	0	0	0	0	0	0	0	603	903	0
594	9	-42.0355	47.1492	-628.743	-64158.6	-37396	-3346.12	140.523	402.043	0	0	0	0	0	0	0	200	903	0	0	0	0	0	0	0	603	903	0
595	0	-40.8148	47.1492	-628.133	-64341.7	-37884.3	-3391.89	139.687	402.433	0	0	0	0	0	0	0	200	903	0	0	0	0	0	0	0	603	903	0
595	1	-42.3407	48.5225	-633.016	-65074.1	-37579.1	-3620.77	140.635	402.8	0	0	0	0	0	0	0	200	903	0	0	0	0	0	0	0	603	903	0
595	2	-42.6459	49.7432	-635.152	-64616.4	-37701.2	-3437.67	140.642	401.734	0	0	0	0	0	0	0	200	903	0	0	0	0	0	0	0	603	903	0
595	3	-43.2562	49.1328	-637.593	-64341.7	-38189.5	-3666.55	140.104	400.913	0	0	0	0	0	0	0	200	903	0	0	0	0	0	0	0	603	903	0
595	4	-43.5614	50.5061	-640.035	-65074.1	-38677.8	-3803.88	139.569	401.673	0	0	0	0	0	0	0	200	903	0	0	0	0	0	0	0	603	903	0
595	5	-43.4088	50.201	-642.476	-65165.7	-38616.7	-3666.55	139.894	401.429	0	0	0	0	0	0	0	200	903	0	0	0	0	0	0	0	603	903	0
595	6	-42.6459	51.7268	-645.833	-64067	-38860.9	-3803.88	139.828	399.201	0	0	0	0	0	0	0	200	903	0	0	0	0	0	0	0	603	903	0
595	7	-42.9511	52.9475	-647.969	-65165.7	-38860.9	-3849.66	140.027	400.569	0	0	0	0	0	0	0	200	903	0	0	0	0	0	0	0	603	903	0
595	8	-43.4088	54.3208	-651.021	-65074.1	-38494.6	-3803.88	140.87	399.957	0	0	0	0	0	0	0	200	903	0	0	0	0	0	0	0	603	903	0
595	9	-43.5614	54.3208	-655.294	-65074.1	-39410.2	-3849.66	139.859	399.305	0	0	0	0	0	0	0	200	903	0	0	0	0	0	0	0	603	903	0
596	0	-43.2562	54.3208	-657.43	-65440.4	-39776.4	-4078.54	139.497	399.54	0	0	0	0	0	0	0	200	903	0	0	0	0	0	0	0	603	903	0
596	1	-44.1718	56.4571	-658.651	-65715	-39288.1	-3986.99	140.351	399.772	0	0	0	0	0	0	0	200	903	0	0	0	0	0	0	0	603	903	0
596	2	-41.8829	56.9148	-665.67	-64707.9	-39959.5	-3849.66	139.971	397.207	0	0	0	0	0	0	0	200	903	0	0	0	0	0	0	0	603	903	0
596	3	-44.1718	57.0674	-667.501	-64891	-40020.5	-4215.87	140.044	397.215	0	0	0	0	0	0	0	200	903	0	0	0	0	0	0	0	603	903	0
596	4	-44.4769	57.8304	-671.163	-65348.8	-40447.8	-3986.99	139.735	397.367	0	0	0	0	0	0	0	200	903	0	0	0	0	0	0	0	603	903	0
596	5	-45.2399	58.5933	-672.994	-64799.5	-40630.9	-4032.76	139.627	396.285	0	0	0	0	0	0	0	200	903	0	0	0	0	0	0	0	603	903	0
596	6	-45.2399	59.3562	-676.046	-64524.8	-40630.9	-3712.33	139.899	395.445	0	0	0	0	0	0	0	200	903	0	0	0	0	0	0	0	603	903	0
596	7	-46.308	60.5769	-677.877	-65074.1	-40752.9	-4307.42	139.881	395.997	0	0	0	0	0	0	0	200	903	0	0	0	0	0	0	0	603	903	0
596	8	-46.308	60.8821	-679.708	-64433.3	-41607.4	-4307.42	138.786	394.796	0	0	0	0	0	0	0	200	903	0	0	0	0	0	0	0	603	903	0
596	9	-46.7658	61.4925	-681.234	-64433.3	-41668.5	-4353.2	138.834	394.583	0	0	0	0	0	0	0	200	903	0	0	0	0	0	0	0	603	903	0
597	0	-48.7494	62.5606	-683.675	-65257.2	-41424.3	-4444.75	139.409	395.451	0	0	0	0	0	0	0	200	903	0	0	0	0	0	0	0	603	903	0
597	1	-47.6813	64.239	-688.558	-65440.4	-41546.4	-4124.32	139.662	395.04	0	0	0	0	0	0	0	200	903	0	0	0	0	0	0	0	603	903	0
597	2	-49.6649	63.7813	-692.22	-64524.8	-41485.4	-4536.3	140.069	393.214	0	0	0	0	0	0	0	200	903	0	0	0	0	0	0	0	603	903	0
597	3	-50.1227	64.0865	-694.356	-64799.5	-42034.7	-3941.21	139.462	393.323	0	0	0	0	0	0	0	200	903	0	0	0	0	0	0	0	603	903	0
597	4	-50.8856	65.7649	-698.018	-65440.4	-42400.9	-4444.75	139.255	393.752	0	0	0	0	0	0	0	200	903	0	0	0	0	0	0	0	603	903	0
597	5	-50.1227	66.0701	-699.849	-64250.2	-42461.9	-4444.75	139.327	391.806	0	0	0	0	0	0	0	200	903	0	0	0	0	0	0	0	603	903	0
597	6	-50.2753	67.2908	-702.596	-64982.6	-42584	-4353.2	139.39	392.489	0	0	0	0	0	0	0	200	903	0	0	0	0	0	0	0	603	903	0
597	7	-49.5123	68.5115	-704.427	-64891	-42828.1	-4444.75	139.201	392.119	0	0	0	0	0	0	0	200	903	0	0	0	0	0	0	0	603	903	0
597	8	-48.5968	68.3589	-707.784	-63975.5	-43316.4	-4490.53	138.8	390.389	0	0	0	0	0	0	0	200	903	0	0	0	0	0	0	0	603	903	0
597	9	-50.8856	69.427	-709.31	-64250.2	-43133.3	-4536.3	139.19	390.581	0	0	0	0	0	0	0	200	903	0	0	0	0	0	0	0	603	903	0
598	0	-51.496	70.8003	-712.056	-64982.6	-43194.4	-4444.75	139.339	391.26	0	0	0	0	0	0	0	200	903	0	0	0	0	0	0	0	603	903	0
598	1	-52.1063	70.8003	-713.887	-64524.8	-43804.7	-4627.86	138.639	390.385	0	0	0	0	0	0	0	200	903	0	0	0	0	0	0	0	603	903	0
598	2	-52.8693	69.7322	-717.855	-63792.4	-43804.7	-4627.86	138.978	388.865	0	0	0	0	0	0	0	200	903	0	0	0	0	0	0	0	603	903	0
598	3	-52.7167	72.3262	-721.212	-63517.7	-43804.7	-4398.97	139.262	388.071	0	0	0	0	0	0	0	200	903	0	0	0	0	0	0	0	603	903	0
598	4	-51.9538	72.6314	-718.77	-63883.9	-44598.2	-4673.63	137.952	388.88	0	0	0	0	0	0	0	200	903	0	0	0	0	0	0	0	603	903	0
598	5	-50.8856	72.6314	-726.094	-63609.3	-44293	-4582.08	138.998	387.605	0	0	0	0	0	0	0	200	903	0	0	0	0	0	0	0	603	903	0
598	6	-51.8012	73.3943	-727.315	-64341.7	-44293	-4673.63	139.101	388.465	0	0	0	0	0	0	0	200	903	0	0	0	0	0	0	0	603	903	0
598	7	-52.5641	74.0047	-729.451	-63792.4	-45086.4	-5131.4	138.191	387.453	0	0	0	0	0	0	0	200	903	0	0	0	0	0	0	0	603	903	0
598	8	-53.1745	74.4624	-733.113	-63883.9	-45025.4	-4948.29	138.583	387.141	0	0	0	0	0	0	0	200	903	0	0	0	0	0	0	0	603	903	0
598	9	-53.327	74.9202	-734.944	-64341.7	-45269.6	-4673.63	138.404	387.546	0	0	0	0	0	0	0	200	903	0	0	0	0	0	0	0	603	903	0
599	0	-52.2589	76.2935	-737.081	-63700.8	-45452.7	-4765.18	138.334	386.423	0	0	0	0	0	0	0	200	903	0	0	0	0	0	0	0	603	903	0
599	1	-51.3434	77.3616	-741.048	-62785.3	-45208.5	-4810.96	138.994	384.725	0	0	0	0	0	0	0	200	903	0	0	0	0	0	0	0	603	903	0
599	2	-53.0219	76.7513	-742.879	-62236	-45757.8	-5039.84	138.405	383.777	0	0	0	0	0	0	0	200	903	0	0	0	0	0	0	0	603	903	0
599	3	-53.6322	78.1245	-745.32	-62510.7	-45818.9	-4948.29	138.525	383.871	0	0	0	0	0	0	0	200	903	0	0	0	0	0	0	0	603	903	0
599	4	-53.327	78.4297	-748.372	-62693.8	-46124	-4673.63	138.368	383.773	0	0	0	0	0	0	0	200	903	0	0	0	0	0	0	0	603	903	0
599	5	-53.6322	79.0401	-750.508	-62419.1	-46063	-4810.96	138.624	383.169	0	0	0	0	0	0	0	200	903	0	0	0	0	0	0	0	603	903	0
599	6	-54.09	79.6504	-752.339	-62876.9	-46063	-5222.95	138.774	383.575	0	0	0	0	0	0	0	200	903	0	0	0	0	0	0	0	603	903	0
599	7	-53.7848	79.0401	-751.119	-62144.4	-46429.2	-5222.95	138.187	382.736	0	0	0	0	0	0	0	200	903	0	0	0	0	0	0	0	603	903	0
599	8	-55.0055	80.7185	-758.748	-61595.1	-46673.4	-5222.95	138.486	381.18	0	0	0	0	0	0	0	200	903	0	0	0	0	0	0	0	603	903	0
599	9	-55.3107	81.3289	-760.579	-62052.9	-47100.6	-5085.62	138.073	381.586	0	0	0	0	0	0	0	200	903	0	0	0	0	0	0	0	603	903	0
600	0	-55.3107	82.397	-763.631	-62144.4	-47039.6	-5406.05	138.4	381.38	0	0	0	0	0	0	0	200	903	0	0	0	0	0	0	0	603	903	0
600	1	-55.921	83.9229	-764.852	-61320.5	-47039.6	-5406.05	138.498	380.173	0	0	0	0	0	0	0	200	903	0	0	0	0	0	0	0	603	903	0
600	2	-55.4633	83.1599	-768.514	-61137.4	-47100.6	-5543.38	138.712	379.553	0	0	0	0	0	0	0	200	903	0	0	0	0	0	0	0	603	903	0
600	3	-54.8529	83.1599	-769.429	-61778.2	-47711	-5085.62	137.992	380.291	0	0	0	0	0	0	0	200	903	0	0	0	0	0	0	0	603	903	0
600	4	-54.3952	83.6177	-771.26	-61595.1	-47588.9	-5268.72	138.297	379.863	0	0	0	0	0	0	0	200	903	0	0	0	0	0	0	0	603	903	0
600	5	-56.3788	85.9065	-772.176	-60679.6	-48260.3	-5497.61	137.501	378.583	0	0	0	0	0	0	0	200	903	0	0	0	0	0	0	0	603	903	0
600	6	-55.7684	86.0591	-774.617	-60954.3	-47894.1	-5497.61	138.171	378.69	0	0	0	0	0	0	0	200	903	0	0	0	0	0	0	0	603	903	0
600	7	-56.5314	86.5169	-777.364	-60954.3	-48321.3	-5726.49	137.84	378.412	0	0	0	0	0	0	0	200	903	0	0	0	0	0	0	0	603	903	0
600	8	-56.2262	87.2798	-775.838	-60038.7	-48931.7	-5360.28	136.931	377.386	0	0	0	0	0	0	0	200	903	0	0	0	0	0	0	0	603	903	0
600	9	-56.3788	88.0428	-781.026	-60221.8	-48565.4	-5772.26	137.818	377.106	0	0	0	0	0	0	0	200	903	0	0	0	0	0	0	0	603	903	0
601	0	-55.6159	88.9583	-782.857	-60313.4	-48382.3	-5680.71	138.198	377.043	0	0	0	0	0	0	0	200	903	0	0	0	0	0	0	0	603	903	0
601	1	-55.7684	89.5686	-784.688	-59947.2	-48931.7	-5909.59	137.642	376.396	0	0	0	0	0	0	0	200	903	0	0	0	0	0	0	0	603	903	0
601	2	-56.0736	90.4842	-787.435	-58940.1	-49419.9	-5589.16	137.239	374.851	0	0	0	0	0	0	0	200	903	0	0	0	0	0	0	0	603	903	0
601	3	-54.3952	90.7893	-792.012	-59855.6	-48992.7	-5726.49	138.141	375.574	0	0	0	0	0	0	0	200	903	0	0	0	0	0	0	0	603	903	0
601	4	-56.2262	91.7049	-792.623	-59764.1	-49419.9	-5726.49	137.65	375.4	0	0	0	0	0	0	0	200	903	0	0	0	0	0	0	0	603	903	0
601	5	-55.7684	92.773	-793.233	-58848.6	-49603	-6046.92	137.467	374.188	0	0	0	0	0	0	0	200	903	0	0	0	0	0	0	0	603	903	0
601	6	-55.921	92.1626	-796.285	-58665.4	-49419.9	-6046.92	137.937	373.674	0	0	0	0	0	0	0	200	903	0	0	0	0	0	0	0	603	903	0
601	7	-56.2262	94.1463	-795.369	-58024.6	-49908.2	-5863.82	137.252	372.953	0	0	0	0	0	0	0	200	903	0	0	0	0	0	0	0	603	903	0
601	8	-56.5314	95.2144	-801.168	-58482.3	-49969.3	-6092.7	137.629	372.996	0	0	0	0	0	0	0	200	903	0	0	0	0	0	0	0	603	903	0
601	9	-57.2943	95.6721	-801.778	-58390.8	-49908.2	-6001.15	137.753	372.827	0	0	0	0	0	0	0	200	903	0	0	0	0	0	0	0	603	903	0
602	0	-57.7521	96.2825	-802.999	-58848.6	-50335.5	-6184.25	137.316	373.286	0	0	0	0	0	0	0	200	903	0	0	0	0	0	0	0	603	903	0
602	1	-57.9047	97.5032	-805.44	-58482.3	-50518.6	-6046.92	137.278	372.609	0	0	0	0	0	0	0	200	903	0	0	0	0	0	0	0	603	903	0
602	2	-56.3788	97.198	-805.745	-57475.3	-50457.5	-6138.48	137.378	371.332	0	0	0	0	0	0	0	200	903	0	0	0	0	0	0	0	603	903	0
602	3	-57.4469	98.5713	-808.797	-58024.6	-50518.6	-5543.38	137.539	371.742	0	0	0	0	0	0	0	200	903	0	0	0	0	0	0	0	603	903	0
602	4	-56.684	98.4187	-809.407	-57658.4	-50518.6	-6138.48	137.586	371.235	0	0	0	0	0	0	0	200	903	0	0	0	0	0	0	0	603	903	0
602	5	-57.5995	99.792	-812.154	-57109	-50457.5	-6230.03	137.872	370.318	0	0	0	0	0	0	0	200	903	0	0	0	0	0	0	0	603	903	0
[truncated: 1,334 more rows]
