# Supplementary material for: The Effects of an Extemporaneous Speech Dual-task on Older Adult Gait Control
Source: Research Square preprint supplement (doi:10.21203/rs.3.rs-7674245/v1), 2025-11-18
Supplement: Supplementary file 189 [file Over8ground10.xlsx]

## Sheet: Sheet1
Trajectories
		08:LFHD			08:RFHD			08:LBHD			08:RBHD			08:C7			08:T10			08:CLAV			08:STRN			08:RBAK			08:LSHO			08:LUPA			08:LELB			08:LFRM			08:LWRA			08:LWRB			08:LFIN
Frame	Sub Frame	X	Y	Z	X	Y	Z	X	Y	Z	X	Y	Z	X	Y	Z	X	Y	Z	X	Y	Z	X	Y	Z	X	Y	Z	X	Y	Z	X	Y	Z	X	Y	Z	X	Y	Z	X	Y	Z	X	Y	Z	X	Y	Z
		mm	mm	mm	mm	mm	mm	mm	mm	mm	mm	mm	mm	mm	mm	mm	mm	mm	mm	mm	mm	mm	mm	mm	mm	mm	mm	mm	mm	mm	mm	mm	mm	mm	mm	mm	mm	mm	mm	mm	mm	mm	mm	mm	mm	mm	mm	mm	mm
616	0	138.858	-363.893	1692.81	226.042	-374.964	1691.11	122.976	-558.678	1701.14	234.382	-550.637	1697.83	181.067	-593.067	1554.97	177.88	-675.632	1292.21	179.665	-449.33	1467.98	203.077	-391.175	1262.83	256.711	-680.064	1350.07	-4.37122	-514.012	1502.97	-79.5877	-513.2	1307.67	-91.1943	-489.918	1153.14	-83.8887	-364.847	1029.62	-21.3593	-314.644	958.937	-86.1936	-341.385	934.214	-66.4717	-273.614	904.968
617	0	139.085	-351.514	1691.22	226.147	-362.596	1689.14	123.386	-546.351	1699.56	234.834	-538.278	1696.02	181.195	-580.476	1553.26	177.364	-663.992	1291.09	179.832	-436.838	1466.06	203.369	-379.027	1260.99	256.57	-667.808	1348.56	-4.24487	-501.301	1501.11	-79.755	-499.866	1305.98	-91.5769	-475.687	1151.53	-83.3335	-348.573	1029.85	-20.4761	-297.46	960.341	-84.3469	-323.767	934.649	-65.1178	-255.3	906.982
618	0	139.451	-339.112	1689.04	226.533	-350.184	1687.12	123.68	-533.785	1697.3	235.22	-525.785	1693.75	181.358	-567.81	1551.24	177.365	-651.59	1289.22	179.963	-424.29	1463.82	203.549	-366.818	1258.61	256.48	-655.505	1346.74	-3.95347	-488.611	1499.02	-79.829	-486.553	1304.04	-91.9527	-461.418	1149.63	-82.9662	-332.508	1029.97	-19.2856	-280.398	961.704	-83.3804	-305.993	935.383	-63.5807	-237.245	908.583
619	0	139.838	-326.508	1687.02	226.97	-337.636	1684.81	124.067	-521.231	1694.84	235.532	-513.31	1691.26	181.558	-555.144	1548.94	177.508	-639.118	1286.93	180.365	-411.668	1461.3	203.798	-354.625	1255.81	256.407	-643.091	1344.46	-3.81812	-475.837	1496.64	-79.7365	-473.242	1301.58	-92.3483	-447.213	1147.33	-82.2368	-316.57	1029.56	-18.3303	-263.53	962.398	-82.4312	-288.944	935.066	-62.1601	-219.493	909.947
620	0	140.449	-313.848	1684.41	227.434	-324.973	1682.31	124.648	-508.531	1691.9	235.769	-500.692	1688.25	181.868	-542.424	1546.11	177.819	-626.624	1284.31	180.756	-398.973	1458.75	204.282	-342.236	1253.14	256.602	-630.715	1342.01	-3.36898	-463.09	1493.87	-79.6178	-459.991	1299.01	-92.4809	-433.111	1144.82	-81.8222	-300.756	1029.05	-17.1161	-246.983	962.907	-80.9521	-271.518	934.957	-60.6919	-201.96	911.181
621	0	140.948	-301.098	1681.62	228.008	-312.259	1679.27	125.209	-495.847	1688.76	236.21	-488.001	1685.06	182.356	-529.681	1543.5	178.177	-614.179	1281.34	181.213	-386.196	1455.86	204.823	-329.85	1250.18	256.818	-618.145	1338.91	-3.01439	-450.296	1491.11	-79.3297	-446.668	1296.3	-92.498	-419.064	1142.05	-80.8298	-284.941	1028.12	-15.8291	-230.582	963.401	-80.2307	-254.427	934.669	-59.2134	-184.844	912.036
622	0	141.632	-288.23	1678.46	228.773	-299.431	1676.34	125.575	-483.164	1685.55	237.2	-475.298	1681.92	182.881	-516.919	1540.42	178.729	-601.612	1278.14	181.689	-373.341	1452.79	205.317	-317.231	1247.18	257.204	-605.448	1335.69	-2.45121	-437.485	1488.05	-79.2619	-433.426	1293.45	-92.4914	-405.055	1139.1	-80.0255	-269.4	1027.33	-14.7402	-214.493	963.143	-78.9588	-237.671	934.157	-57.7502	-167.809	912.441
623	0	142.258	-275.36	1675.33	229.595	-286.504	1673.16	126.712	-470.137	1682.25	237.845	-462.253	1678.39	183.595	-504.117	1537.07	179.497	-588.797	1275.09	182.366	-360.283	1449.52	205.879	-304.551	1243.88	257.917	-592.638	1332.59	-1.75763	-424.688	1484.82	-78.6041	-420.131	1290.32	-92.4322	-391.016	1136.27	-78.6873	-254.09	1025.68	-13.4965	-198.599	962.76	-77.8161	-221.143	933.373	-56.2303	-151.193	912.733
624	0	143.283	-262.395	1671.81	230.548	-273.514	1669.59	127.47	-457.174	1678.69	239.177	-449.301	1675.19	184.421	-491.262	1533.53	180.292	-575.943	1271.7	183.139	-347.172	1445.99	206.434	-291.827	1240.28	258.802	-579.655	1329.07	-0.87423	-411.756	1481.46	-77.8687	-406.953	1287.13	-92.3259	-376.948	1133.15	-78.2118	-238.777	1024.18	-12.1715	-182.933	962.009	-76.6717	-204.865	932.228	-54.5963	-134.775	912.514
625	0	144.4	-249.381	1667.97	231.581	-260.449	1665.86	128.501	-444.123	1675.01	240.065	-436.256	1671.31	185.387	-478.379	1529.61	181.064	-563.019	1267.9	183.757	-334.026	1442.29	207.077	-278.791	1236.65	259.637	-566.579	1325.29	-0.044093	-398.83	1477.91	-77.4175	-393.867	1283.57	-91.9452	-363.128	1129.82	-77.1723	-223.786	1022.26	-11.107	-167.603	960.571	-75.5132	-188.944	930.602	-53.3944	-118.728	911.796
626	0	145.555	-236.217	1664.3	232.537	-247.443	1661.88	129.811	-430.893	1671.15	241.049	-423.16	1667.22	186.494	-465.41	1525.96	181.956	-549.818	1263.6	184.811	-320.687	1438.77	207.776	-265.78	1232.91	260.604	-553.372	1321.14	0.82603	-385.796	1474.26	-76.6467	-380.648	1279.75	-91.5654	-349.338	1126.23	-76.2275	-209.014	1019.95	-9.78705	-152.467	958.937	-74.1799	-173.435	928.562	-51.95	-103.015	910.91
627	0	146.731	-223.027	1660.73	233.921	-234.184	1658.37	130.845	-417.819	1667.49	242.379	-409.993	1663.45	187.484	-452.211	1522.24	182.959	-536.468	1259.8	185.9	-307.276	1435.23	208.352	-252.614	1229.11	261.8	-540.025	1317.34	1.91885	-372.554	1470.91	-75.5587	-367.498	1276.4	-91.0249	-335.507	1122.76	-75.2513	-194.433	1017.67	-8.48624	-137.59	957.329	-72.9492	-158.104	926.612	-50.5689	-87.5673	909.459
628	0	148.071	-209.79	1657.19	234.988	-220.913	1654.5	132.47	-404.484	1664.06	243.913	-396.638	1659.89	188.819	-438.903	1518.5	183.957	-522.904	1256.11	187.056	-293.768	1431.81	209.22	-239.134	1225.66	263.043	-526.522	1313.43	3.15889	-359.28	1467.37	-74.5499	-354.551	1272.94	-90.2816	-321.714	1119.48	-74.241	-179.984	1014.93	-7.35063	-123.021	955.298	-71.322	-143.277	924.375	-49.3582	-72.6105	907.969
629	0	149.469	-196.464	1653.83	236.664	-207.469	1651.35	133.884	-391.125	1660.46	245.392	-383.274	1656.35	190.131	-425.352	1514.94	185.073	-509.063	1252.37	188.371	-280.034	1428.43	210.126	-225.415	1222.14	264.327	-512.937	1309.67	4.44326	-345.925	1464.27	-72.8696	-341.701	1269.19	-89.4957	-308.017	1116.31	-73.1686	-165.848	1012.53	-6.15289	-108.746	952.94	-70.7688	-128.525	922.167	-48.0497	-57.9784	906.101
630	0	150.769	-183.078	1650.72	238.256	-193.998	1648.15	135.675	-377.627	1656.93	246.943	-369.834	1652.85	191.646	-411.751	1511.42	185.885	-495.124	1248.83	189.834	-266.212	1425.2	211.039	-211.375	1218.75	265.303	-499.394	1306.02	5.82531	-332.118	1460.87	-71.6188	-328.362	1266.15	-88.3025	-294.313	1113.83	-72.1276	-151.938	1009.83	-4.97982	-94.7506	950.523	-69.6722	-114.314	919.45	-46.8106	-43.7445	903.954
631	0	152.604	-169.489	1647.71	239.884	-180.436	1644.91	137.253	-364.108	1653.44	248.524	-356.237	1649.35	193.366	-397.885	1508.04	187.202	-480.843	1245.22	191.397	-252.209	1421.84	212.215	-197.162	1215.34	266.664	-485.492	1302.49	7.45793	-318.238	1457.93	-70.0079	-315.121	1263.11	-87.1796	-280.648	1110.8	-71.1557	-138.246	1006.94	-3.92856	-81.0834	947.578	-68.635	-100.431	916.826	-45.7247	-30.0292	901.29
632	0	154.24	-155.925	1644.66	241.564	-166.708	1642.08	139.182	-350.546	1650.47	250.545	-342.642	1646.33	195.272	-384.004	1504.89	188.082	-466.733	1242.09	193.198	-238.016	1418.79	213.38	-182.766	1211.98	267.856	-471.459	1299.05	9.00044	-304.331	1454.86	-67.9559	-301.963	1260.12	-85.8389	-267.247	1108.09	-70.0059	-124.847	1004	-2.75832	-67.8218	944.49	-67.8691	-87.0214	913.875	-44.7071	-16.6384	898.22
633	0	155.863	-142.14	1642.28	243.32	-152.91	1639.59	141.174	-336.723	1647.43	252.444	-328.822	1643.35	197.357	-369.846	1502.03	189.107	-452.58	1239.13	195.008	-223.684	1415.92	214.73	-168.316	1209.05	269.07	-457.431	1295.94	11.1395	-289.864	1452.4	-66.0325	-288.422	1257.74	-84.1948	-253.895	1105.44	-68.9834	-111.768	1000.96	-1.8598	-54.8063	941.112	-66.8441	-74.2112	910.822	-43.8879	-3.80765	894.949
634	0	157.817	-128.234	1640.21	245.122	-138.829	1637.47	143.35	-322.904	1644.97	254.838	-314.695	1641.06	199.564	-355.507	1499.57	190.487	-437.975	1237.12	197.036	-209.143	1413.62	216.206	-153.656	1206.38	270.457	-443.079	1293.59	12.9711	-275.367	1450.45	-64.0897	-274.72	1255.74	-82.5178	-240.582	1103.22	-67.934	-98.9583	998.039	-0.927909	-42.1359	937.719	-66.0043	-61.6172	907.677	-43.1419	8.5926	891.59
635	0	159.784	-114.16	1638.76	246.996	-124.743	1635.87	145.728	-308.841	1642.86	256.993	-300.512	1638.96	201.756	-340.879	1497.83	191.437	-423.631	1235.4	199.026	-194.51	1411.53	217.808	-139.16	1204.34	271.796	-428.64	1291.45	14.9901	-260.614	1448.92	-62.1387	-260.477	1254.48	-80.7504	-227.287	1101.72	-66.7881	-86.4225	995.194	-0.076823	-29.9127	934.269	-65.3391	-49.6632	904.891	-42.4886	20.4929	888.019
636	0	161.769	-100.037	1637.66	249.113	-110.234	1634.98	148.054	-294.832	1641.08	259.407	-286.115	1637.14	203.869	-326.14	1496.16	192.336	-409.101	1233.93	201.058	-179.714	1409.86	219.585	-124.692	1202.68	273.197	-414.115	1289.68	17.156	-245.846	1447.81	-60.0962	-246.224	1253.32	-78.6798	-214.148	1100.4	-65.6752	-74.4306	992.517	0.647855	-18.0741	930.796	-64.5446	-38.3228	901.762	-42.159	31.6779	884.338
637	0	163.62	-85.831	1636.97	251.096	-95.8325	1634.27	150.599	-280.598	1639.48	261.61	-271.714	1635.35	205.928	-311.235	1494.94	193.169	-394.313	1232.42	203.28	-164.857	1408.84	221.296	-109.875	1201.53	274.319	-399.495	1288.2	19.2625	-230.66	1446.98	-58.182	-231.649	1252.77	-76.7831	-201.011	1099.51	-64.591	-62.6112	990.016	1.27755	-6.69512	927.417	-64.3946	-27.3609	899.072	-42.0029	42.3118	880.418
638	0	165.599	-71.6281	1636.77	253.368	-81.3602	1633.96	152.883	-266.322	1638.42	263.88	-257.302	1634.2	208.144	-296.373	1494.3	193.725	-379.418	1232	205.433	-149.965	1407.96	223.084	-95.1393	1200.81	275.856	-384.802	1287.55	21.335	-215.011	1447.03	-56.5021	-216.762	1252.9	-74.581	-187.791	1099.22	-63.3455	-50.8578	987.805	2.08292	4.37274	924.215	-63.6883	-17.012	896.325	-41.5418	52.5086	876.869
639	0	167.619	-57.2983	1636.96	255.336	-66.8438	1633.75	155.553	-252.03	1637.79	266.696	-242.686	1633.87	210.372	-281.588	1494.12	194.203	-364.412	1232.08	207.541	-135.126	1407.55	224.918	-80.2944	1200.42	277.093	-370.126	1287.26	23.5102	-199.665	1447.27	-54.5918	-201.708	1253.37	-72.281	-174.76	1099.35	-62.5153	-39.6568	985.641	2.6344	14.9388	920.704	-63.0238	-7.19333	893.556	-41.5949	62.1903	873.033
640	0	169.848	-42.7732	1637.23	257.385	-52.2708	1633.84	157.938	-237.646	1637.68	269.022	-227.994	1633.47	212.225	-267.015	1494.37	194.784	-349.484	1232.14	209.645	-120.338	1407.5	226.553	-65.5643	1200.28	278.558	-355.526	1287.44	25.752	-184.336	1447.67	-52.8005	-186.375	1254.2	-69.9343	-161.586	1099.9	-61.2655	-28.3995	983.56	3.04887	25.3587	917.455	-62.7465	2.19529	890.972	-41.698	71.4147	869.087
641	0	172.162	-28.4253	1637.7	259.43	-37.7392	1634.15	160.373	-223.234	1638.4	271.65	-213.517	1633.92	214.29	-252.416	1494.78	195.726	-334.492	1232.71	211.733	-105.649	1407.67	228.297	-50.6672	1200.67	279.973	-340.828	1287.78	27.9585	-169.074	1448.74	-51.0073	-170.833	1255.56	-67.6974	-148.595	1100.43	-60.3858	-17.655	982.066	3.26603	35.1443	914.137	-62.459	11.2733	888.757	-41.9343	80.1547	865.257
642	0	174.001	-14.1203	1638.63	261.418	-23.2919	1634.99	162.764	-208.901	1639.32	273.826	-199.093	1634.56	216.376	-238.219	1495.69	196.644	-319.811	1233.47	213.735	-91.1804	1408.66	229.812	-35.5528	1201.7	281.592	-326.184	1288.41	29.9556	-154.283	1450.1	-49.565	-155.391	1257.35	-65.2189	-135.706	1101.84	-59.2055	-6.99495	980.893	3.60494	44.5675	911.065	-62.3506	19.9468	886.976	-41.5383	88.2635	861.752
643	0	175.918	0.060883	1639.92	263.472	-8.9644	1636.22	164.974	-194.631	1640.65	275.897	-184.678	1635.72	218.08	-224.14	1496.9	197.791	-305.241	1234.47	215.386	-76.8917	1410	231.413	-20.7984	1203.52	283.28	-311.502	1289.12	31.7512	-139.849	1451.7	-48.3269	-140.041	1259.43	-62.7194	-122.861	1103.51	-58.1198	3.37536	979.788	3.77395	53.6732	908.768	-62.1039	28.0562	885.14	-41.9445	96.1553	858.238
644	0	177.788	14.177	1641.56	265.315	5.2018	1637.73	167.094	-180.498	1642.52	277.93	-170.5	1637.26	220.087	-210.145	1498.44	199.022	-290.709	1235.56	217.021	-62.8614	1411.97	232.884	-5.6387	1205.8	284.96	-297.061	1290.4	33.3504	-125.68	1453.94	-47.2165	-124.651	1262.27	-60.3407	-110.161	1105.44	-57.4479	13.3646	979.468	3.93318	62.5326	906.885	-62.6887	36.7263	885.228	-41.7655	103.328	855.017
645	0	179.536	28.112	1643.55	267.06	19.199	1639.37	168.997	-166.589	1644.46	280.031	-156.57	1639.28	221.803	-196.335	1500.08	200.428	-276.478	1237.31	218.44	-48.9597	1413.99	234.282	8.79357	1208.22	286.974	-282.764	1292.08	34.9816	-111.856	1456.34	-45.9431	-109.698	1264.94	-58.2533	-97.7752	1107.89	-56.7875	23.2404	979.752	3.8799	71.2271	905.418	-63.0602	44.669	885.075	-42.02	110.416	852.524
646	0	181.16	41.9071	1645.28	268.596	32.9092	1640.87	170.884	-152.848	1646.74	282.199	-142.403	1641.18	223.355	-182.616	1501.94	201.733	-262.646	1239.51	219.684	-35.1935	1416.21	235.23	23.2211	1211.01	288.863	-268.755	1293.91	36.3961	-98.3229	1458.85	-44.8461	-95.3945	1267.98	-56.2774	-85.7366	1110.44	-56.3518	32.8322	980.018	3.56593	78.8181	903.891	-63.3889	52.5331	884.888	-42.3483	117.216	850.154
647	0	182.662	55.4171	1647.35	270.234	46.5707	1643.04	172.328	-139.306	1649.07	283.553	-128.883	1643.35	224.568	-169.142	1504.01	203.195	-248.965	1241.47	220.479	-21.637	1418.49	235.993	37.4858	1213.57	290.471	-254.994	1295.81	37.5545	-85.318	1461.63	-43.761	-81.6544	1270.59	-54.3495	-73.7674	1112.96	-55.6027	42.4307	980.703	3.20064	86.3204	902.439	-63.0152	59.5526	883.99	-42.8797	123.937	848.163
648	0	184.058	68.6826	1649.51	271.494	59.9436	1645.09	173.679	-125.93	1651.36	284.35	-115.62	1645.18	225.845	-155.921	1506.24	204.832	-235.459	1243.35	221.226	-8.25109	1420.95	236.438	51.2867	1216.15	292.2	-241.45	1297.88	38.3834	-72.5466	1464.11	-42.6921	-68.5951	1273.36	-52.8622	-62.2286	1115.69	-55.0392	51.7467	981.557	3.38178	94.1636	902.085	-63.4425	67.2672	884.549	-43.2912	130.389	846.077
649	0	185.252	81.9488	1652.16	272.735	73.1763	1647.37	174.99	-112.765	1653.8	285.725	-102.444	1647.6	227.028	-142.821	1508.75	206.531	-222.257	1245.66	221.893	4.99564	1423.52	236.564	64.9531	1219.04	294.012	-228.019	1300.3	39.2618	-59.8029	1466.82	-41.9852	-56.4131	1276.24	-51.2281	-50.8283	1118.44	-54.2949	60.9291	982.786	2.74541	101.415	901.41	-63.9067	74.7898	885.696	-43.8042	136.408	845.115
650	0	186.302	94.9782	1654.7	273.6	86.144	1649.68	176.141	-99.8051	1656.43	286.839	-89.4535	1650.08	228.081	-129.684	1511.12	207.976	-209.352	1248.34	222.26	18.0081	1426.09	236.397	78.1053	1221.54	295.555	-214.661	1303.4	39.8772	-47.5854	1469.71	-41.1418	-44.6877	1278.58	-50.1482	-39.9199	1121.23	-53.9053	69.9615	983.987	2.74026	108.801	901.575	-64.1527	82.4001	886.884	-44.074	142.763	844.368
651	0	187.063	107.688	1657.48	274.256	98.8077	1652.3	176.914	-87.0465	1659.12	287.809	-76.6331	1652.63	228.979	-116.858	1513.78	209.421	-196.516	1251.04	222.355	30.9523	1428.83	236.129	91.5743	1224.49	297.109	-201.584	1306.36	40.3637	-35.1083	1472.58	-40.2225	-33.8186	1281.35	-49.5117	-29.4477	1124.1	-53.5802	78.7529	985.593	2.59052	116.206	902.021	-64.5276	89.8072	888.37	-44.2694	149.243	844.238
652	0	187.579	120.169	1660.44	275.077	111.519	1655.25	177.684	-74.4558	1661.76	288.519	-63.9952	1655.19	229.698	-104.182	1516.6	210.8	-183.727	1253.73	222.548	43.7184	1431.7	235.631	103.948	1226.96	298.494	-189.047	1309.23	40.7442	-23.3406	1475.74	-39.6917	-23.4024	1283.97	-48.9737	-19.2951	1127.14	-53.4999	87.2699	987.652	2.44314	123.315	903.076	-64.8353	97.2836	890.462	-44.4823	155.648	844.745
653	0	188.157	132.663	1663.58	275.593	123.944	1658.3	178.141	-62.1133	1664.65	288.945	-51.6425	1657.99	230.358	-91.6405	1519.53	211.956	-171.289	1256.62	222.407	56.2549	1434.63	234.969	116.257	1229.95	299.887	-175.929	1312.1	41.0466	-11.8835	1479.07	-39.4909	-13.4894	1286.98	-48.6646	-9.71464	1130.02	-53.5096	95.5558	989.519	2.50227	130.475	904.699	-65.4089	104.741	892.584	-44.4743	161.993	845.596
654	0	188.336	144.818	1666.92	275.853	136.219	1661.48	178.605	-49.8375	1667.65	289.289	-39.2985	1660.81	230.721	-79.3045	1522.63	212.9	-158.979	1259.62	222.181	68.7363	1437.65	234.264	128.815	1232.67	300.874	-163.367	1315.33	41.2273	-0.167303	1482.26	-39.2127	-3.95266	1289.86	-48.6036	-0.438117	1132.82	-53.5249	103.672	991.673	2.65066	137.555	906.749	-65.9202	111.914	894.776	-44.3966	168.415	846.79
655	0	188.711	157.025	1670.15	276.047	148.391	1664.8	178.774	-37.7065	1670.76	289.505	-27.1751	1663.83	230.992	-66.8335	1525.7	213.65	-146.952	1263.51	221.889	81.0465	1440.78	233.459	140.867	1235.51	301.872	-150.842	1318.53	41.3079	11.3467	1485.27	-39.4608	5.32407	1292.96	-48.9646	8.4426	1136.08	-53.7254	111.402	994.364	2.3916	144.345	908.656	-65.798	118.953	897.014	-43.9715	174.854	848.408
656	0	188.605	168.92	1673.59	275.944	160.468	1667.9	179	-25.6906	1673.82	289.675	-15.0008	1666.7	231.443	-54.851	1529.51	215.002	-134.676	1266.21	221.561	93.2355	1443.94	232.517	152.89	1238.58	302.813	-138.323	1322.2	41.3357	22.621	1488.58	-39.3872	14.242	1296.26	-49.1755	17.1009	1139.72	-54.0103	119.062	996.643	2.01401	151.186	910.726	-66.0226	126.006	899.478	-44.2201	181.474	850.812
657	0	188.556	180.824	1677.32	275.749	172.317	1671.32	179.095	-13.7697	1677.05	289.825	-3.06353	1670.1	231.72	-42.6077	1532.67	215.88	-122.655	1269.7	221.276	105.397	1447.4	231.843	164.872	1241.68	303.603	-126.032	1325.7	41.184	33.9568	1492.05	-39.7225	23.2368	1299.79	-49.7496	25.5106	1143.36	-54.4512	126.519	999.432	1.86771	157.981	913.36	-66.1511	132.663	902.244	-44.3513	187.872	853.095
658	0	188.356	192.69	1680.52	275.739	184.386	1675.06	178.991	-2.03868	1680.31	289.645	8.74916	1673.42	231.851	-30.5632	1536.11	216.374	-110.838	1273.55	220.69	117.411	1450.81	230.977	176.721	1245.06	304.214	-113.891	1329.43	41.088	45.1883	1495.74	-40.1672	32.0366	1303.69	-50.3698	33.7272	1146.94	-54.9189	133.598	1002.66	1.65821	164.628	916.416	-66.4907	139.397	905.17	-44.4459	194.429	856.029
659	0	187.681	204.265	1684.23	275.343	196.053	1678.65	178.804	9.64943	1683.55	289.452	20.6394	1676.59	231.953	-18.722	1539.57	217.173	-98.977	1276.81	220.295	129.211	1454.57	230.206	188.176	1248.3	304.96	-101.771	1332.82	40.9877	56.4197	1499.46	-40.5723	40.6936	1307.38	-51.2751	41.7007	1150.79	-55.3634	140.773	1005.75	1.64758	171.404	919.839	-66.288	145.921	908.269	-43.6754	200.753	858.95
660	0	187.557	215.909	1687.74	274.9	207.714	1682.06	178.669	21.2903	1686.64	289.204	32.3404	1679.85	232.094	-6.89824	1542.97	218.069	-87.0997	1280.19	219.937	141.099	1458.08	229.324	199.885	1251.8	305.633	-89.7836	1336.52	40.9262	67.4724	1502.89	-40.953	49.5966	1311.09	-51.9699	49.6683	1154.63	-55.7787	147.904	1009.17	1.33005	178.375	923.312	-66.5524	152.485	911.355	-44.5944	207.574	862.344
661	0	186.954	227.515	1690.94	274.354	219.502	1685.42	178.443	32.9211	1689.77	289.044	44.1086	1683.04	232.115	4.82088	1546.3	218.716	-75.2461	1283.64	219.445	152.903	1461.48	228.699	211.531	1254.99	306.299	-77.802	1339.99	40.7126	78.5509	1506.29	-41.4775	58.3567	1314.84	-52.9762	57.5301	1158.44	-56.5011	154.778	1012.19	0.904002	185.11	926.588	-66.7153	158.821	914.399	-45.1372	214.256	865.939
662	0	186.413	238.924	1694.38	273.857	231.169	1688.75	178.138	44.3768	1692.8	288.742	55.7308	1686.15	232.166	16.5218	1549.52	219.314	-63.5169	1286.98	218.894	164.595	1464.8	228.245	223.347	1258.44	306.951	-65.7176	1343.4	40.5143	89.5536	1509.79	-41.8212	67.3415	1318.55	-54.1651	65.2407	1162.35	-57.1154	161.802	1015.44	0.51438	191.821	929.705	-66.895	165.322	917.772	-45.4754	220.983	869.295
663	0	185.608	250.385	1697.57	273.107	242.575	1691.9	177.939	55.7747	1695.83	288.498	67.377	1689.22	232.115	28.1006	1552.58	220.036	-51.7096	1290.14	218.315	176.3	1468.1	227.961	235.11	1261.83	307.607	-53.7652	1346.85	40.3039	100.623	1513.16	-42.4152	76.4849	1322.48	-55.1576	73.1618	1166.17	-57.6252	169.135	1018.68	0.274791	198.722	933.215	-67.0387	171.867	920.746	-45.9499	227.763	872.854
664	0	185.121	261.847	1700.57	272.594	254.242	1695.01	177.476	67.2241	1698.41	288.048	78.9174	1692.01	232.028	39.8284	1555.53	220.529	-39.9507	1293.08	218.005	187.926	1471.13	227.444	246.782	1264.92	308.124	-41.6862	1349.73	40.0009	111.802	1516.39	-43.0373	85.4511	1325.97	-56.166	81.0244	1169.73	-58.2171	176.139	1021.45	0.021211	205.658	936.433	-66.2778	178.075	923.348	-46.3926	234.446	876.089
665	0	184.196	273.247	1703.15	271.805	265.855	1697.85	177.03	78.6961	1700.94	287.404	90.4537	1694.42	231.69	51.5164	1558.24	220.73	-28.2416	1295.9	217.289	199.649	1474.06	226.941	258.571	1267.82	308.427	-29.8294	1352.74	39.7985	123.014	1519.08	-43.4444	94.7174	1329.03	-57.4316	88.6146	1172.92	-58.837	183.009	1024.43	-0.554271	212.748	939.68	-66.9127	184.493	926.134	-46.7942	241.198	879.076
666	0	183.474	284.584	1705.9	271.021	277.301	1700.42	176.647	90.0354	1703.34	286.855	102.051	1696.78	231.467	63.1429	1560.79	221.054	-16.4949	1298.62	216.815	211.203	1476.92	226.447	270.197	1270.55	308.734	-17.8756	1355.53	39.4492	134.347	1521.81	-44.1403	104.061	1332.27	-58.373	96.5891	1176.2	-59.27	190.232	1027.2	-1.1455	219.709	942.49	-67.1063	190.955	928.861	-47.3543	248.018	882.094
667	0	182.459	295.9	1708.12	270.146	288.784	1702.81	176.116	101.396	1705.02	286.512	113.561	1698.93	231.203	74.921	1562.8	221.473	-4.76061	1300.93	216.212	222.953	1479.23	225.905	281.783	1272.93	309.121	-6.00422	1358.03	39.0396	145.656	1524.27	-44.6784	113.332	1335.41	-59.44	104.527	1179.34	-59.9798	197.466	1029.7	-1.54566	227.288	945.304	-66.9537	197.582	931.164	-47.935	254.788	884.736
668	0	181.774	307.319	1710.07	269.476	300.437	1704.9	175.539	112.731	1706.83	286.047	125.111	1700.78	230.862	86.5406	1564.77	221.73	7.01016	1303.05	215.708	234.666	1481.33	225.462	293.407	1274.98	309.121	5.81682	1360.13	38.7094	157.072	1526.38	-45.3996	122.744	1337.96	-60.5987	112.454	1182.18	-60.7333	204.483	1031.83	-1.97032	234.76	947.654	-67.0272	204.192	933.336	-48.3038	261.646	886.989
669	0	180.929	318.672	1711.73	268.574	311.949	1706.55	175.006	124.081	1708.23	285.384	136.703	1702.29	230.466	98.2192	1566.53	221.727	18.7681	1304.97	214.777	246.308	1483.21	224.176	304.541	1276.07	308.958	17.6209	1362.07	38.2108	168.787	1528.26	-46.0051	132.304	1340.37	-61.461	120.647	1184.62	-61.4419	211.804	1033.58	-2.52869	242.106	949.832	-67.3618	210.826	935.297	-48.8675	268.517	888.927
670	0	179.801	329.978	1713.14	267.462	323.313	1707.81	174.621	135.54	1708.99	284.755	148.412	1702.86	229.943	110.038	1567.6	221.873	30.6058	1306.38	214.429	258.155	1484.57	223.603	316.205	1277.42	308.895	29.4888	1363.42	37.8053	180.419	1529.79	-46.5616	141.985	1342.31	-62.3722	128.762	1186.79	-61.8084	219.332	1035.25	-2.96514	249.834	951.743	-67.1833	217.669	936.548	-49.4675	275.353	890.427
671	0	179.038	341.371	1714.1	266.741	335.045	1708.91	173.952	146.905	1709.55	284.112	160.002	1703.57	229.466	121.895	1568.61	221.924	42.4214	1307.27	213.808	270.102	1485.51	222.961	328.044	1278.39	308.858	41.3284	1364.54	37.2672	192.178	1530.94	-47.0167	151.715	1343.85	-62.8118	137.254	1188.19	-62.5437	226.777	1036.61	-3.73381	257.326	952.942	-67.3699	224.549	937.793	-49.8962	282.39	891.59
672	0	178.158	352.92	1714.63	265.769	346.613	1709.54	173.179	158.328	1709.72	283.481	171.545	1703.91	228.917	133.691	1569.14	221.853	54.2609	1308.09	213.04	281.978	1486.22	222.213	339.88	1279	308.584	53.2649	1365.47	36.8693	204.098	1531.62	-47.6772	161.569	1345.43	-63.9051	145.447	1189.76	-63.2642	234.507	1037.44	-4.22676	265.312	954.126	-67.5897	231.588	938.674	-50.6067	289.37	892.146
673	0	177.064	364.342	1714.96	264.798	358.167	1709.89	172.758	169.835	1709.48	282.873	183.272	1703.95	228.233	145.562	1569.13	221.8	66.0531	1308.43	212.59	294.058	1486.48	221.559	351.996	1279.41	308.201	65.1288	1365.68	36.2589	215.994	1531.98	-48.2726	171.558	1346.5	-64.4122	154.124	1190.76	-64.0128	242.358	1038	-5.03979	273.057	954.603	-67.4515	238.8	939.027	-51.1245	296.612	892.382
674	0	176.204	375.906	1714.92	263.98	369.998	1709.91	172.143	181.395	1708.98	282.365	195.142	1703.51	227.617	157.642	1568.72	221.812	77.9848	1308.37	211.887	306.012	1486.4	220.752	363.89	1279.33	308.043	77.1147	1365.79	35.8726	228.179	1532	-48.855	181.714	1347.07	-64.8458	163.009	1191.48	-64.7631	250.527	1037.96	-5.63103	281.401	955.16	-67.8374	246.201	939.099	-51.5875	303.935	892.198
675	0	175.239	387.582	1714.43	262.795	381.567	1709.25	171.341	192.993	1707.95	281.583	206.824	1702.6	226.81	169.639	1567.9	221.403	89.8607	1308.01	211.353	318.25	1485.72	220.859	376.628	1279.41	307.388	89.1678	1365.2	35.066	240.339	1531.65	-49.5917	192.003	1347.21	-65.4003	171.914	1191.66	-65.2088	258.503	1037.82	-6.39235	289.729	954.899	-68.1266	253.777	939.002	-52.3653	311.337	891.61
676	0	174.217	399.169	1713.64	262.027	393.525	1708.49	170.744	204.764	1706.74	280.632	218.688	1701.27	225.979	181.648	1567.62	220.751	101.843	1306.89	210.574	330.403	1484.83	219.757	388.297	1277.99	306.64	101.089	1364.27	34.514	252.8	1530.58	-50.082	202.396	1346.57	-65.8226	180.911	1191.2	-65.9714	266.593	1036.68	-7.42232	298.147	953.897	-68.4412	261.439	937.973	-53.0979	318.799	890.486
677	0	173.232	411.072	1712.47	260.971	405.33	1707.39	169.914	216.511	1705.17	279.901	230.623	1699.56	225.034	193.903	1565.83	220.324	113.89	1305.74	209.975	342.721	1483.5	218.999	400.446	1276.5	305.93	113.287	1362.96	33.659	265.151	1529.48	-50.9062	213.035	1346.06	-66.0948	190.316	1190.66	-66.5941	275.213	1035.65	-7.98446	306.81	952.683	-68.9002	269.125	936.786	-53.8729	326.692	888.864
678	0	172.186	422.924	1711.23	260.1	417.4	1705.98	169.135	228.481	1702.99	279.078	242.569	1697.93	224.133	206.147	1564.01	219.594	126.068	1303.95	209.29	355.09	1481.85	218.755	412.895	1275.12	305.18	125.515	1361.33	32.7985	277.721	1527.75	-51.3015	223.948	1344.61	-66.3066	200.043	1189.48	-67.1021	283.916	1033.61	-8.33835	315.335	950.906	-69.2718	277.279	935.015	-54.4021	334.456	886.478
679	0	171.23	434.899	1709.44	258.895	429.322	1704.3	168.191	240.457	1700.78	278.256	254.752	1695.76	222.965	218.488	1561.99	218.737	138.296	1302.15	208.422	367.52	1479.96	217.9	425.056	1273.03	304.09	137.726	1359.35	31.9413	290.347	1525.67	-51.5279	235.299	1342.93	-66.4296	210.036	1188.2	-67.9875	292.732	1031.77	-9.4745	324.289	948.758	-69.7018	285.414	933.033	-55.3635	342.433	884.024
680	0	170.143	447.016	1707.42	257.854	441.535	1702.19	167.131	252.587	1698.19	277.055	266.86	1693.12	221.703	230.891	1559.56	217.564	150.593	1299.71	207.554	380.109	1477.58	217.426	437.444	1270.67	302.779	150.026	1357.12	30.8817	303.023	1523.39	-52.3983	246.403	1340.76	-66.4763	220.404	1186.19	-68.5957	301.785	1029.24	-10.4076	333.341	946.015	-70.2835	293.554	930.542	-56.3842	350.412	880.963
681	0	168.946	459.204	1705.23	256.736	453.63	1700.02	165.887	264.801	1695.17	275.896	279.068	1690.11	220.521	243.463	1556.96	216.446	162.993	1297.05	206.782	392.925	1474.96	216.842	449.883	1268.16	301.498	162.389	1354.47	29.8601	315.83	1520.55	-52.8521	258.243	1338.1	-66.6861	230.911	1183.7	-69.2901	311.112	1025.87	-11.474	342.471	942.758	-70.9726	301.917	927.464	-57.335	358.54	877.565
682	0	167.956	471.565	1702.84	255.593	465.845	1697.63	164.786	277.241	1692.04	274.533	291.265	1687.01	219.105	256.162	1554.26	215.201	175.462	1294.02	205.776	405.635	1472.3	216.011	462.228	1265.14	300.12	174.878	1351.63	28.706	328.761	1517.65	-53.6222	270.124	1335.2	-66.6557	241.833	1180.88	-70.0142	320.702	1022.65	-12.5918	351.999	939.466	-71.3116	310.558	923.986	-58.3592	366.855	873.632
683	0	166.668	483.914	1700.26	254.35	478.122	1695.01	163.208	289.562	1688.6	273.145	303.566	1683.65	217.812	268.909	1551.27	213.825	187.962	1290.83	204.55	418.555	1469.16	215.329	474.822	1262.01	298.659	187.462	1348.68	27.4799	341.592	1514.48	-54.0817	282.51	1332.1	-66.691	253.204	1178.04	-70.6909	330.686	1019.27	-13.7541	361.583	935.552	-72.0343	319.336	920.379	-59.5599	375.415	869.591
684	0	165.161	496.294	1697.53	252.815	490.472	1692.18	161.806	302.156	1684.98	271.658	316.061	1680.26	216.383	281.739	1547.9	212.544	200.658	1287.71	203.299	431.599	1465.88	214.578	487.657	1258.76	297.074	200.038	1345.42	26.0421	354.546	1511.1	-54.8378	295.062	1328.66	-66.5557	264.867	1174.73	-71.2733	340.357	1015.59	-14.4669	370.622	931.385	-72.7946	328.529	916.733	-60.5843	383.993	864.976
685	0	163.955	509.033	1694.84	251.648	503.05	1689.53	160.083	314.769	1681.2	270.119	328.656	1676.74	214.837	294.667	1544.6	211.287	213.457	1284.36	202.095	444.745	1462.48	213.858	500.606	1255.28	295.656	212.888	1342.06	24.8253	367.724	1507.47	-55.6109	307.878	1325.12	-66.6379	276.819	1171.4	-72.2525	350.618	1011.32	-15.4941	380.534	926.848	-73.7289	337.851	912.651	-61.7668	392.71	860.301
686	0	162.392	521.704	1692.09	250.113	515.563	1686.8	158.318	327.566	1677.39	268.351	341.204	1673.03	213.283	307.684	1541.31	209.956	226.395	1280.9	200.783	457.902	1459.21	212.818	513.481	1251.76	293.952	225.769	1338.6	23.2423	380.864	1503.87	-56.5674	320.974	1321.21	-66.6041	289.137	1167.73	-73.0177	361.275	1007.17	-16.6837	390.578	921.911	-74.7084	347.45	908.577	-63.1721	401.72	855.396
687	0	160.643	534.459	1689.23	248.355	528.084	1683.87	156.344	340.43	1673.67	266.268	353.872	1669.23	211.582	320.836	1537.95	208.452	239.333	1277.18	199.189	471.105	1455.66	211.567	526.512	1248.28	292.306	238.829	1335.32	21.5005	393.974	1500.4	-57.5556	334.343	1317.32	-66.5318	301.889	1163.71	-73.7728	372.306	1002.49	-17.9729	400.717	916.856	-75.9191	357.214	903.933	-64.8437	411.076	850.499
688	0	158.941	547.352	1686.47	246.635	540.926	1680.92	154.23	353.372	1669.98	264.298	366.751	1665.58	209.763	334.063	1534.46	207.319	252.416	1273.7	197.459	484.446	1452.3	210.457	539.722	1245.11	290.677	251.973	1331.77	19.7504	407.224	1497.01	-58.5217	347.83	1313.21	-66.593	314.916	1159.9	-74.7817	383.507	998.452	-19.3422	411.173	911.982	-77.2545	367.326	899.766	-66.3885	420.787	845.536
689	0	157.197	560.357	1683.58	244.812	553.845	1678.11	152.219	366.443	1666.35	262.284	379.484	1662.2	207.913	347.432	1531.14	206.145	265.582	1270.45	195.74	497.889	1448.99	208.991	553.029	1241.53	289.269	265.379	1328.71	17.9689	420.519	1493.38	-59.586	361.474	1309	-66.7399	328.257	1156.16	-75.626	395.15	993.668	-20.8172	421.807	906.899	-78.6211	377.81	895.348	-68.0036	430.17	840.66
690	0	155.046	573.401	1680.71	242.636	566.726	1675.27	149.777	379.438	1662.78	260.012	392.4	1658.8	205.919	360.775	1528.14	205.052	278.799	1267.53	193.797	511.408	1445.69	207.683	566.508	1238.15	287.606	278.798	1325.68	16.0251	433.843	1489.52	-60.6658	375.176	1304.96	-66.9525	341.917	1152.14	-76.8408	406.999	989.296	-22.1421	433.056	901.811	-80.0326	388.796	891.263	-69.6156	440.231	835.38
691	0	152.928	586.424	1678.02	240.379	579.731	1672.39	147.518	392.725	1659.31	257.569	405.457	1655.3	203.826	374.243	1525.03	203.788	292.189	1264.28	191.694	524.971	1442.49	206.037	580.031	1234.81	286.104	292.226	1322.81	13.853	447.193	1485.86	-62.0846	389.111	1300.63	-67.4279	355.731	1148.35	-77.9179	419.359	984.834	-23.646	444.329	896.725	-81.7946	400.044	887.048	-71.3096	450.722	830.262
692	0	150.663	599.627	1675.32	238.221	592.884	1669.76	145.03	406.021	1656.22	255.146	418.538	1652.13	201.624	387.816	1522.2	202.514	305.822	1261.13	189.426	538.649	1439.46	204.401	593.769	1232.01	284.602	305.503	1320.35	11.5101	460.658	1482.51	-63.3196	403.146	1296.79	-68.1067	369.74	1144.49	-79.2055	432.104	980.578	-25.1756	456.169	892.074	-83.6872	411.624	883.105	-72.9957	461.738	825.629
693	0	148.368	612.927	1673.23	235.912	606.041	1667.74	142.283	419.309	1653.14	252.485	431.725	1649.22	199.168	401.447	1519.53	201.128	319.561	1258.6	187.017	552.325	1436.82	202.505	607.544	1229.3	283	319.042	1317.95	9.10744	474.267	1479.29	-65.107	417.213	1292.81	-68.8725	383.858	1140.56	-80.6188	444.882	976.703	-26.9323	468.099	887.504	-85.3496	423.941	879.175	-74.8166	472.862	820.917
694	0	145.822	626.285	1671.62	233.367	619.173	1665.92	139.736	432.814	1650.58	249.908	444.767	1646.87	196.66	415.242	1517.09	199.684	333.316	1256.22	184.51	566.221	1434.25	200.469	621.355	1226.93	281.281	332.777	1315.86	6.45474	488.037	1476.26	-66.7392	431.506	1289.13	-69.6643	398.202	1137.29	-82.2109	458.078	972.702	-28.5989	480.507	883.246	-87.4445	436.432	875.523	-76.6291	484.606	816.497
695	0	143.24	639.67	1670.14	230.8	632.56	1664.3	136.774	446.294	1648.38	247.049	458.322	1644.52	194.028	429.237	1515.21	198.424	347.217	1254.34	182.017	580.305	1432.29	198.255	635.332	1224.94	279.573	346.632	1314.14	3.91418	501.682	1473.42	-68.3852	445.81	1285.89	-70.6213	412.756	1133.95	-83.7	471.617	969.346	-30.4011	493.139	879.37	-89.401	449.608	872.125	-78.3372	496.732	812.552
696	0	140.534	653.201	1669.28	228.372	646.089	1663.27	133.892	459.922	1646.42	244.317	471.631	1642.79	191.396	443.412	1513.55	197.044	360.979	1252.88	179.423	594.447	1430.38	196.061	649.362	1223.35	277.749	360.474	1313.05	1.09554	515.509	1470.98	-70.4775	460.187	1282.6	-71.6822	427.42	1130.99	-85.1968	485.529	966.338	-32.0314	506.442	876.053	-91.2566	463.061	869.327	-80.0802	509.469	808.887
697	0	137.85	666.802	1668.59	225.467	659.429	1662.66	130.84	473.706	1645.08	241.215	485.307	1641.3	188.653	457.774	1512.61	195.444	374.778	1251.91	176.657	608.644	1429.25	193.61	663.472	1222.4	275.593	374.457	1312.45	-1.72485	529.388	1468.7	-72.1921	474.532	1279.85	-72.9755	442.209	1128.14	-86.8988	499.606	963.386	-33.9114	520.009	873.049	-93.2902	476.803	866.68	-82.0456	522.498	806.055
698	0	135.178	680.51	1668.56	222.675	672.922	1662.5	127.644	487.423	1644	238.082	498.788	1640.18	185.746	472.122	1512.22	193.874	388.582	1251.39	173.91	622.864	1428.26	191.175	677.666	1221.55	273.382	388.392	1312.24	-4.6094	543.496	1467.2	-74.2042	489.143	1277.9	-74.4335	457.116	1125.9	-88.6574	513.952	961.225	-35.5097	533.898	870.66	-95.3957	490.881	864.439	-83.878	536.035	803.539
699	0	132.275	694.228	1668.71	219.999	686.611	1662.57	124.648	501.311	1643.14	235.017	512.522	1639.36	182.979	486.463	1512.28	192.391	402.453	1251.11	170.846	636.492	1427.39	188.497	692.115	1220.97	271.523	402.223	1312.54	-7.39645	557.547	1465.99	-76.0173	503.619	1276.28	-76.0819	472.072	1124.5	-90.42	528.616	959.664	-37.1377	548.232	869.015	-97.3769	505.327	862.865	-85.5357	550.125	801.575
700	0	129.473	707.891	1669.06	217.16	700.302	1662.93	121.543	515.148	1642.79	232.034	526.116	1639.08	179.812	500.306	1512.27	190.766	416.257	1251.52	167.796	650.252	1426.94	185.952	706.587	1220.72	269.72	416.009	1313.05	-10.1251	571.508	1465.17	-78.0345	518.104	1275.13	-77.734	487.061	1123.49	-92.1827	543.594	958.68	-38.9641	562.856	867.726	-99.2521	520.21	862.077	-87.4572	564.691	800.297
701	0	126.827	721.666	1669.86	214.222	713.839	1663.7	118.189	528.984	1642.78	228.775	539.783	1639.16	177.266	514.431	1512.85	188.775	430.084	1252.26	165.092	663.943	1426.83	183.552	720.963	1220.89	267.73	429.506	1314.02	-12.8515	585.706	1465.01	-79.9699	532.61	1274.46	-79.5594	502.166	1123	-93.9409	558.743	958.253	-40.6645	577.762	867.185	-101.182	535.451	861.865	-89.1714	579.758	799.812
702	0	124.305	735.405	1670.87	211.505	727.255	1664.71	115.18	542.883	1643.13	225.788	553.262	1639.82	174.437	528.014	1513.93	186.793	443.871	1253.1	162.984	677.701	1427.48	181.281	735.081	1221.55	265.881	442.947	1315.33	-15.3234	599.871	1465.26	-82.1376	547.253	1274.7	-81.5305	517.275	1123.16	-95.6568	574.259	958.363	-42.6162	592.955	867.186	-103.044	551.142	861.885	-91.0799	595.47	799.752
703	0	121.544	749.107	1672.16	209.014	740.753	1665.92	112.048	556.607	1643.96	222.935	566.668	1640.7	171.217	541.278	1514.62	184.396	457.285	1254.25	160.739	691.302	1428.59	179.441	748.787	1222.87	263.717	455.977	1316.71	-17.8995	614.239	1466.41	-84.3825	561.779	1275.45	-83.5677	532.392	1123.45	-97.6034	589.82	959.294	-44.4131	608.774	868.211	-104.917	566.892	862.473	-92.831	611.428	800.753
704	0	119.203	762.637	1673.39	206.519	754.092	1667.31	108.937	570.258	1644.9	219.807	579.987	1641.89	168.165	554.498	1515.9	181.746	470.551	1255.7	158.954	704.455	1430.26	177.734	762.189	1224.33	261.231	468.755	1318.3	-20.3916	628.577	1467.61	-86.7809	576.509	1276.35	-85.9521	547.448	1124.32	-99.6972	605.522	960.384	-46.0655	625.207	869.746	-106.724	583.021	863.166	-94.5248	627.993	802.155
705	0	116.704	776.1	1674.68	204.147	767.249	1668.86	106.216	583.844	1646.2	216.901	593.229	1643.27	165.351	567.544	1517.52	178.771	483.503	1257.03	156.984	717.477	1431.67	176.378	775.296	1225.69	258.541	481.383	1320.14	-22.5911	643.01	1468.9	-89.1052	591.338	1277.63	-88.3316	562.666	1125.61	-101.465	621.624	961.767	-48.0475	641.322	871.153	-108.343	599.642	864.706	-96.2276	644.927	803.807
706	0	114.635	789.428	1676.24	201.961	780.181	1670.46	103.406	597.094	1647.42	214.345	606.212	1644.77	162.621	580.217	1519.07	175.749	496.234	1258.69	155.352	730.426	1433.04	175.449	788.297	1227.31	255.487	493.58	1321.79	-24.7516	657.375	1470.29	-91.5523	606.27	1279.05	-90.8887	577.894	1127	-103.532	637.9	963.283	-49.5636	658.367	873.017	-110.061	616.473	866.244	-97.6353	662.466	805.668
707	0	112.704	802.542	1677.68	200.066	793.126	1671.96	100.878	610.429	1648.72	211.896	618.982	1646.53	159.876	592.85	1520.57	172.549	508.668	1260.31	153.836	743.163	1434.6	174.625	801.045	1229.08	252.314	505.533	1323.44	-26.7306	671.666	1471.89	-93.8414	621.199	1280.46	-93.6977	593.185	1128.49	-105.562	654.374	965.179	-51.1446	675.528	875.164	-111.838	633.604	867.812	-99.1355	680.275	807.739
708	0	111.079	815.511	1679.1	198.346	805.878	1673.56	98.5666	623.453	1650.59	209.494	631.596	1648.27	157.093	605.182	1522.25	169.138	520.824	1262.07	152.346	755.703	1436.46	174.158	813.707	1231.14	249.091	517.364	1325.22	-28.5991	685.808	1473.57	-96.5022	636.331	1282.42	-96.6745	608.578	1129.94	-107.573	671.034	966.904	-52.9479	692.572	877.322	-113.479	651.19	869.432	-100.625	698.364	810.018
709	0	109.68	828.391	1680.91	196.896	818.324	1675.69	96.2791	636.191	1652.39	207.352	644.044	1650.18	154.607	617.584	1524.11	165.731	532.19	1263.45	151.107	767.97	1438.66	173.716	826.209	1232.99	245.913	529.006	1327.1	-30.5697	699.883	1475.64	-99.1334	651.57	1284.37	-99.3678	624.269	1131.23	-109.637	688.029	969.07	-54.5683	710.277	879.907	-115.098	669.087	871.513	-102.024	716.948	812.492
710	0	108.44	840.987	1682.99	195.583	830.437	1677.58	94.4305	648.92	1654.13	205.454	656.352	1652.09	152.241	629.782	1526.14	162.517	543.283	1266.36	150.147	780.327	1440.58	173.233	838.555	1235.06	242.893	540.317	1329.18	-32.1402	713.735	1477.66	-101.801	666.902	1286.5	-102.482	639.813	1133.08	-111.534	705.186	971.293	-56.13	728.182	882.537	-116.681	687.166	873.371	-103.351	735.861	815.142
711	0	107.339	853.423	1684.9	194.626	842.626	1679.75	92.5091	661.365	1656.45	203.55	668.283	1654.4	150.04	641.691	1528.3	159.662	555.052	1268.44	149.399	792.435	1442.85	173.15	850.58	1237.48	239.902	551.492	1331.61	-33.5429	727.196	1479.6	-104.22	682.228	1288.48	-105.553	655.582	1134.81	-113.434	722.657	973.599	-57.726	746.254	885.278	-118.437	705.538	875.237	-104.722	754.835	817.999
712	0	106.413	865.67	1687.15	193.592	854.635	1681.88	90.783	673.708	1658.72	202.005	680.177	1656.82	148.23	653.589	1530.41	157.085	567.077	1270.73	148.632	804.16	1445.11	173.084	862.529	1239.64	237.103	563.023	1333.44	-34.8033	740.506	1481.82	-106.407	697.569	1290.61	-108.706	671.538	1136.72	-115.181	740.486	975.685	-59.0039	764.386	888.068	-120.178	724.239	877.364	-105.796	774.344	820.785
713	0	105.55	877.799	1689.64	192.715	866.273	1684.56	89.3342	685.901	1661.12	200.547	691.995	1659.23	146.374	665.406	1532.94	155.116	580.049	1272.57	147.96	816.019	1447.44	173.351	874.12	1242.3	234.477	574.342	1335.6	-35.9204	753.566	1484.13	-108.352	712.869	1292.95	-111.631	687.839	1138.68	-116.818	758.345	978.455	-60.5282	782.939	891.015	-121.823	743.253	879.769	-106.92	794.101	824.188
714	0	104.767	889.696	1692.07	191.941	877.956	1686.9	87.9062	697.892	1663.35	199.239	703.574	1661.78	144.935	677.07	1535.37	152.882	591.548	1275.1	147.645	827.684	1450.15	173.366	885.347	1244.82	232.09	585.771	1337.67	-37.003	766.316	1486.64	-110.463	727.994	1295.65	-114.357	704.021	1140.82	-118.568	776.378	981.285	-61.5598	800.704	893.932	-123.567	762.563	882.386	-108.068	813.915	828.119
715	0	104.31	901.541	1694.9	191.387	889.614	1689.79	86.6929	709.876	1666.2	197.943	715.126	1664.21	143.217	688.631	1537.87	150.768	603.23	1277.51	146.751	839.05	1452.66	173.478	896.462	1247.41	229.921	597.123	1340.27	-38.0739	778.912	1489.23	-112.036	743.06	1298.06	-117.163	720.148	1143.08	-120.058	794.636	984.338	-62.822	819.112	897.159	-125.611	781.881	885.359	-109.333	834.043	831.543
716	0	103.817	913.193	1697.59	190.752	900.902	1692.53	85.6265	721.427	1668.99	197.008	726.575	1666.93	141.726	699.907	1540.68	148.747	614.699	1280.21	146.292	850.648	1455.34	173.703	907.685	1249.88	227.965	608.51	1342.87	-39.0127	791.304	1491.96	-113.488	758	1300.65	-119.479	736.385	1145.43	-121.436	812.843	987.409	-63.5246	837.396	900.078	-126.975	801.515	888.357	-110.524	854.203	835.448
717	0	103.481	924.733	1700.44	190.215	912.239	1695.1	84.6646	733.187	1671.45	196.088	737.929	1669.53	140.565	711.529	1543.13	146.952	626.219	1282.9	145.766	861.871	1458.17	173.486	918.708	1252.96	225.674	619.325	1345.23	-39.7372	803.582	1494.56	-114.724	772.493	1303.26	-121.81	752.455	1147.92	-122.833	831.05	990.917	-64.4814	856.352	903.849	-128.83	821.236	892.089	-111.781	874.398	839.832
718	0	103.007	936.113	1703.21	190.011	923.568	1697.94	83.8408	744.451	1674.38	195.359	749.042	1672.32	139.249	722.586	1545.86	145.089	637.699	1285.46	145.118	873.12	1460.96	173.092	929.78	1255.41	223.805	630.546	1347.6	-40.5747	815.693	1497.34	-116.042	786.738	1306.07	-123.873	768.473	1150.41	-124.173	849.207	994.658	-65.8965	874.823	907.769	-130.499	840.936	895.799	-112.957	894.534	844.051
719	0	102.761	947.535	1706.4	189.625	934.492	1701.07	83.1141	755.945	1677.19	194.456	760.146	1675.03	138.301	734.076	1549.24	143.382	649.031	1288.29	144.733	884.386	1464.22	172.898	940.842	1258.64	221.912	641.599	1350.29	-41.4128	827.689	1500.54	-116.862	801.013	1308.86	-125.761	784.42	1153.09	-125.493	867.376	998.58	-67.5231	892.935	911.599	-132.262	860.535	899.541	-114.143	914.664	849.293
720	0	102.673	958.678	1709.24	189.488	945.549	1703.71	82.1991	767.308	1679.78	193.811	771.206	1677.66	137.103	745.193	1551.42	141.683	660.41	1290.92	144.106	895.394	1467.2	172.113	951.777	1261.99	220.254	652.67	1352.82	-42.219	839.517	1503.57	-118.034	814.782	1311.93	-127.687	800.065	1155.99	-126.712	885.355	1002.65	-68.2104	912.367	916.267	-133.833	880.006	903.438	-115.663	934.709	853.88
721	0	102.311	969.846	1712.06	189.288	956.544	1706.28	81.5336	778.515	1682.42	193.143	782.062	1680.29	135.944	756.273	1554.01	140.177	671.805	1293.25	143.689	906.584	1469.93	171.791	963.018	1264.69	218.634	663.821	1355.24	-42.9335	851.342	1506.56	-119.049	828.333	1314.88	-129.181	815.781	1158.73	-127.825	903.217	1006.7	-69.6236	930.604	919.926	-135.221	899.44	907.402	-116.781	954.907	858.853
722	0	102.302	980.981	1714.48	188.939	967.37	1708.9	80.9939	789.725	1684.98	192.375	793.194	1682.14	135.116	767.398	1556.42	138.722	683.109	1295.76	143.108	917.587	1472.62	171.1	973.819	1267.01	216.968	674.645	1357.47	-43.3934	862.965	1509.31	-120.036	841.661	1317.46	-130.814	831.196	1161.06	-129.167	920.961	1010.41	-71.0022	949.19	924.36	-136.692	918.545	911.241	-118.212	974.843	863.491
723	0	102.118	992.065	1717.05	188.834	978.389	1711.13	80.2984	800.787	1687.26	191.983	804.006	1684.7	134.268	778.379	1559.01	137.141	694.275	1297.98	142.687	928.658	1475.02	170.52	984.87	1269.38	215.699	685.846	1359.52	-44.0293	874.641	1511.84	-120.924	854.767	1319.79	-132.253	846.6	1163.51	-130.396	938.547	1014	-72.4878	968.701	928.957	-137.772	937.725	914.944	-119.145	994.773	868.456
724	0	101.934	1003.12	1719.11	188.496	989.395	1713.07	79.9584	811.896	1689.42	191.561	814.93	1686.62	133.472	789.566	1560.62	135.803	705.419	1299.96	142.289	939.787	1477.44	169.912	995.493	1271.32	214.22	696.809	1361.44	-44.5284	886.22	1514.16	-121.794	867.795	1322.04	-133.6	861.809	1165.94	-131.545	955.966	1017.58	-73.9315	986.812	933.039	-138.981	956.665	918.894	-120.464	1014.69	872.788
725	0	101.9	1014.15	1721.16	188.339	1000.03	1715.07	79.3295	822.893	1691.26	190.962	825.803	1688.38	132.794	800.475	1562.39	134.546	716.771	1301.77	141.818	950.74	1479.29	169.256	1006.19	1273.42	212.955	707.956	1363.05	-45.0381	897.847	1516.14	-122.578	880.739	1324	-135.031	877.004	1168.13	-132.613	973.383	1020.93	-74.6118	1005.11	936.53	-139.816	975.594	922.228	-121.511	1034.32	877.522
726	0	101.787	1025.21	1722.66	187.971	1010.9	1716.66	78.8041	834.023	1692.93	190.491	836.678	1690.01	132.011	811.635	1564.16	133.186	728.328	1303.38	141.612	961.884	1481.35	169.07	1017.24	1275.07	211.787	719.054	1364.69	-45.4219	909.378	1518.33	-123.369	893.597	1325.86	-136.112	892.081	1169.91	-133.469	990.646	1024.23	-75.4841	1023.95	940.602	-140.83	994.205	925.503	-122.653	1053.85	881.852
727	0	101.803	1036.23	1724.1	187.843	1021.94	1718.03	78.366	845.003	1694.39	190.086	847.71	1691.2	131.323	822.672	1565.37	132.099	739.708	1304.89	141.113	973.021	1482.76	168.535	1027.93	1276.72	210.791	730.278	1366.02	-45.8182	921.014	1519.9	-124.125	906.4	1327.47	-137.389	907.064	1171.6	-134.425	1007.85	1027.27	-76.759	1042.53	944.48	-141.452	1012.95	928.649	-123.382	1073.44	886.289
728	0	101.574	1047.27	1725.57	187.806	1032.64	1719.2	78.0223	856.07	1695.29	189.799	858.58	1692.22	130.813	833.812	1566.39	130.944	751.019	1305.65	140.809	983.874	1484.01	168.477	1038.91	1278.17	209.711	741.467	1366.68	-46.2577	932.477	1521.23	-124.7	919.175	1328.84	-138.445	921.89	1172.81	-135.509	1024.94	1030.35	-77.2879	1061.13	948.168	-142.055	1031.46	931.713	-124.268	1092.83	890.328
729	0	101.448	1058.33	1726.35	187.741	1043.55	1720.18	77.6913	867.212	1696.04	189.499	869.419	1693.15	130.321	845.029	1567	129.742	762.019	1306.58	140.572	995.105	1485.18	168.406	1049.77	1279.27	208.597	752.546	1367.25	-46.5502	944.082	1522.39	-125.386	932.001	1329.97	-139.534	936.654	1173.88	-136.569	1042.04	1033.04	-78.0877	1079.62	952.071	-142.393	1050	934.367	-125.042	1112.1	894.604
730	0	101.367	1069.38	1726.85	187.824	1054.59	1720.63	77.3496	878.31	1696.52	188.997	880.625	1693.03	129.648	856.049	1567.36	128.707	773.383	1307.03	140.866	1006.31	1486.48	168.111	1060.59	1280.04	207.844	763.946	1367.48	-46.7644	955.61	1523.14	-125.938	944.752	1330.77	-140.665	951.26	1174.66	-137.399	1058.84	1035.63	-78.7206	1097.94	955.213	-142.991	1068.28	936.901	-125.764	1131.2	898.33
731	0	101.429	1080.59	1726.99	187.883	1065.7	1720.82	77.4042	889.471	1696.56	188.657	891.625	1692.96	129.176	867.317	1567.32	127.859	784.961	1306.88	140.55	1017.45	1486.71	168.035	1071.67	1280.12	207.039	775.174	1367.48	-47.1403	967.183	1523.25	-126.464	957.558	1331.15	-141.503	965.841	1174.96	-138.259	1075.53	1037.81	-79.5066	1116.19	958.198	-143.46	1086.77	939.361	-126.201	1150.32	901.687
732	0	101.629	1091.78	1726.8	187.858	1076.81	1720.36	77.2145	900.74	1696.25	188.641	902.675	1692.75	128.911	878.653	1567.14	127.124	795.94	1306.95	140.487	1028.77	1486.39	167.845	1082.82	1280.02	206.294	786.423	1367.47	-47.4395	978.782	1523.19	-126.949	970.359	1331.05	-142.523	980.175	1175.02	-138.71	1092.13	1039.56	-79.9884	1134.38	960.918	-143.461	1105.01	941.053	-126.402	1169.39	904.956
733	0	101.626	1103.05	1726.29	187.872	1087.93	1719.71	77.1492	912.063	1695.68	188.193	913.885	1691.8	128.582	889.848	1566.54	126.417	807.16	1306.43	140.261	1040.1	1485.9	167.84	1094.08	1279.44	205.666	797.705	1366.79	-47.5823	990.325	1522.62	-127.434	983.123	1330.61	-143.347	994.392	1174.57	-139.263	1108.62	1040.96	-80.364	1152.37	963.31	-144.189	1123.27	943.276	-126.628	1188.23	907.932
734	0	101.757	1114.34	1725.54	187.937	1099.1	1718.75	77.0631	923.423	1694.49	188.425	925.177	1690.85	128.05	901.155	1565.3	125.837	818.347	1305.4	140.027	1051.5	1484.97	167.484	1105.31	1278.43	205.161	808.951	1365.92	-47.7831	1001.88	1521.96	-127.785	995.981	1329.85	-144.138	1008.52	1173.91	-139.782	1125.09	1042.12	-80.7364	1170.09	965.732	-144.13	1141.32	944.588	-126.839	1206.89	910.619
735	0	101.852	1125.78	1724.33	188.181	1110.3	1717.8	77.0508	934.922	1693.28	188.459	936.454	1689.47	128.028	912.564	1564.35	125.442	829.689	1304.03	139.867	1062.83	1483.85	167.355	1116.54	1277.48	204.838	820.403	1364.42	-47.8792	1013.47	1520.65	-128.031	1008.79	1328.83	-144.837	1022.54	1172.91	-140.239	1141.29	1042.97	-80.6121	1187.98	968.243	-144.072	1159.15	945.794	-126.857	1225.29	912.918
736	0	102.07	1137.18	1723.18	188.286	1121.73	1716.22	77.0585	946.391	1691.57	188.382	947.85	1687.72	127.721	924.099	1562.52	125.116	840.922	1302.7	139.179	1074.17	1481.71	167.175	1127.85	1275.96	204.587	831.793	1362.93	-48.0966	1025.03	1519.24	-128.473	1021.46	1327.3	-145.655	1036.4	1171.54	-140.509	1157.31	1043.66	-80.9845	1205.16	969.825	-143.825	1176.98	947.071	-126.756	1243.85	915.83
737	0	102.371	1148.72	1721.43	188.62	1133.18	1714.75	77.1155	957.993	1689.65	188.274	959.499	1685.4	127.619	935.632	1560.95	125.038	852.34	1301.07	139.304	1085.77	1480.19	166.852	1139.33	1274.05	204.427	843.25	1361.37	-48.1336	1036.61	1517.62	-128.936	1034.19	1325.75	-146.248	1050.17	1169.76	-140.812	1173.17	1044.02	-81.0884	1222.5	971.432	-144.356	1194.65	948.122	-126.515	1262.04	917.873
738	0	102.576	1160.38	1719.59	188.984	1144.87	1712.48	77.3368	969.685	1687.46	188.569	971.055	1683.35	127.667	947.239	1558.82	125.188	863.773	1298.98	139.306	1097.4	1478	166.918	1150.86	1271.83	204.378	854.724	1359.31	-48.2541	1048.29	1515.32	-129.188	1046.93	1323.75	-146.722	1063.9	1167.64	-140.831	1188.92	1043.94	-80.7088	1239.43	972.387	-143.404	1211.8	947.896	-126.096	1279.86	919.238
739	0	103.135	1171.9	1717.13	189.266	1156.68	1710	77.6303	981.425	1684.9	188.935	982.693	1680.92	127.748	958.977	1556.47	125.42	875.247	1296.52	139.324	1109.11	1475.58	166.796	1162.53	1269.24	204.335	866.299	1356.79	-47.9423	1059.92	1512.51	-129.293	1059.43	1321.07	-147.08	1077.46	1165.17	-140.796	1204.51	1043.39	-80.3692	1256.29	973.155	-143.871	1229.09	948.245	-125.873	1297.43	920.608
740	0	103.39	1183.9	1714.48	189.685	1168.38	1707.2	77.9206	993.214	1682.36	189.232	994.616	1677.97	127.941	970.744	1553.65	125.688	886.73	1293.93	139.355	1120.83	1472.84	166.823	1174.24	1266.5	204.511	877.993	1353.9	-47.9088	1071.57	1509.79	-129.33	1071.77	1318.23	-147.355	1090.93	1162.3	-140.85	1219.85	1042.44	-80.1495	1272.78	973.289	-143.384	1245.94	947.828	-125.529	1314.81	921.476
741	0	103.765	1195.82	1711.68	190.045	1180.18	1704.27	78.2955	1005.16	1679.43	189.607	1006.35	1674.99	128.07	982.562	1550.79	126.095	898.386	1291.05	139.534	1132.75	1469.92	167.121	1186.07	1263.33	204.81	889.791	1350.96	-47.7573	1083.32	1506.52	-129.242	1084.18	1315.06	-147.587	1104.37	1159.35	-140.841	1235.02	1041.31	-79.7719	1289.03	973.758	-142.993	1262.78	947.104	-125.089	1331.96	922.244
742	0	104.306	1207.78	1708.69	190.652	1192.26	1701.08	78.8897	1017.19	1676.35	189.809	1018.52	1671.37	128.453	994.395	1547.4	126.75	910.276	1287.84	139.876	1144.71	1466.88	167.269	1197.94	1260.31	205.223	901.687	1347.93	-47.4826	1095.14	1503.32	-128.961	1096.5	1311.77	-147.68	1117.65	1156.33	-140.558	1249.96	1040.03	-79.4269	1305.11	973.269	-142.102	1278.84	945.936	-124.92	1348.6	923.054
743	0	104.918	1219.91	1705.35	191.413	1204.41	1697.76	79.3938	1029.27	1673.08	190.309	1030.61	1668.1	128.719	1006.32	1544.32	127.397	922.232	1284.55	140.359	1156.81	1463.65	167.642	1209.83	1256.95	205.792	913.778	1344.68	-47.0489	1106.91	1500.06	-129.029	1108.54	1308.59	-147.623	1130.79	1152.88	-140.253	1264.68	1038.43	-78.9462	1320.69	972.561	-140.761	1294.63	944.079	-124.4	1365.13	922.911
744	0	105.646	1231.97	1702	191.838	1216.45	1694.36	80.1113	1041.5	1669.55	191.249	1042.66	1664.82	129.505	1018.35	1541.07	128.008	934.18	1281.05	140.647	1168.87	1460.2	167.839	1221.79	1253.33	206.379	925.91	1341.08	-46.5696	1118.94	1496.31	-128.519	1120.74	1304.85	-147.464	1143.84	1149.26	-140.017	1279.16	1036.46	-78.4653	1336.18	971.882	-140.228	1310.38	942.784	-123.93	1380.99	922.861
745	0	106.399	1244.22	1698.53	192.838	1229.01	1690.86	80.9054	1053.79	1666.12	191.938	1055.2	1661.07	130.297	1030.63	1537.96	128.651	946.39	1277.24	141.018	1180.98	1456.56	168.074	1233.78	1249.7	207.075	938.197	1337.18	-45.9788	1130.9	1492.6	-127.727	1132.77	1301.09	-147.034	1156.89	1145.7	-139.632	1293.43	1034.29	-78.0004	1351.28	970.659	-139.419	1325.64	941.076	-123.671	1396.72	922.203
746	0	107.26	1256.92	1695.18	193.694	1241.31	1687.48	81.9315	1066.23	1662.49	193.132	1067.57	1657.74	131.075	1042.82	1534.09	129.477	958.978	1273.35	141.666	1193.25	1453.03	168.882	1246.14	1246.17	207.629	950.604	1333.29	-45.2837	1143.06	1489.14	-127.007	1144.8	1297.51	-146.475	1169.79	1142.09	-139.206	1307.4	1032.06	-77.2736	1366.13	969.254	-138.562	1340.61	938.966	-122.768	1412.06	921.451
747	0	108.102	1269.18	1691.67	194.823	1254.06	1684.15	82.8696	1078.76	1659.1	194.16	1080.13	1654.17	131.967	1055.22	1530.38	130.054	971.528	1269.66	142.427	1205.72	1449.57	169.327	1258.45	1242.74	208.374	963.128	1329.49	-44.4612	1155.38	1485.69	-125.914	1156.88	1293.67	-145.857	1182.63	1138.67	-138.502	1321.15	1029.78	-76.7183	1380.55	967.44	-137.787	1355.26	937.139	-122.176	1426.68	919.976
748	0	109.312	1281.86	1688.33	195.777	1266.46	1680.86	84.0806	1091.44	1655.77	194.932	1092.88	1650.56	133.034	1067.91	1526.9	130.818	984.322	1266.22	143.617	1218.43	1446.37	170.024	1271.11	1239.28	209.142	975.892	1326.03	-43.7001	1167.88	1482.7	-125.057	1168.82	1290.35	-145.034	1195.34	1135.28	-137.979	1334.51	1027.22	-75.9383	1394.64	965.461	-136.995	1369.37	934.774	-121.704	1440.93	918.691
749	0	110.306	1294.83	1685.36	197.252	1279.44	1677.65	85.3579	1104.19	1652.48	196.436	1105.6	1647.41	134.164	1080.62	1523.72	131.634	997.316	1262.8	144.698	1231.23	1443.26	170.686	1283.93	1235.91	209.88	988.667	1322.56	-42.6421	1180.63	1479.67	-123.669	1181.15	1287.28	-143.753	1208.09	1132.01	-137.203	1347.78	1024.78	-75.2429	1408.28	963.486	-136.197	1383.09	932.65	-121.279	1454.84	917.595
750	0	111.676	1307.51	1682.41	198.636	1292.46	1674.56	86.7787	1117.14	1649.19	197.866	1118.54	1644.24	135.284	1093.58	1520.29	132.395	1010.36	1259.48	145.903	1244.24	1439.96	171.753	1297.17	1232.63	210.563	1001.61	1319.07	-41.48	1193.69	1476.7	-122.262	1193.08	1283.99	-142.63	1220.52	1128.81	-136.325	1360.75	1022.24	-74.5337	1421.51	961.265	-135.279	1396.41	930.203	-120.66	1468.22	915.606
751	0	113.036	1320.75	1679.47	199.788	1305.44	1671.6	88.3347	1130.25	1646.06	199.443	1131.71	1641.03	136.639	1106.83	1517.33	132.977	1023.69	1256.21	147.182	1257.52	1436.82	172.596	1310.39	1229.44	211.317	1014.79	1315.67	-40.1159	1206.99	1473.84	-120.554	1205.4	1280.71	-141.393	1232.9	1125.9	-135.57	1373.29	1019.42	-73.4098	1434.49	958.569	-134.525	1409.15	927.44	-119.965	1481.12	913.302
752	0	114.706	1333.96	1676.78	201.403	1318.69	1668.72	89.9113	1143.38	1643.09	200.907	1145.19	1637.64	138.189	1120.27	1514.63	133.763	1037.4	1253.38	148.497	1270.96	1433.82	173.566	1323.9	1226.33	212.02	1028.2	1312.54	-38.71	1220.53	1471.23	-118.937	1217.82	1277.79	-140.013	1245.26	1123.14	-134.522	1385.82	1016.58	-72.7014	1446.94	955.85	-133.493	1421.77	924.813	-119.374	1493.63	910.883
753	0	116.252	1347.25	1674.21	202.953	1332.21	1666.05	91.5428	1156.75	1640.42	202.924	1158.61	1635.01	139.701	1133.89	1512.05	134.574	1051.33	1250.61	149.978	1284.61	1430.83	174.749	1337.69	1223.33	212.85	1041.96	1309.64	-37.2861	1234.24	1468.82	-117.311	1230.45	1275.32	-138.545	1257.54	1120.76	-133.419	1397.87	1013.81	-71.6745	1459.08	952.816	-132.744	1433.72	922.098	-118.646	1505.75	908.168
754	0	118.019	1360.76	1671.98	204.904	1345.85	1663.91	93.6617	1170.23	1638.14	204.791	1172.26	1632.4	141.326	1147.6	1509.42	135.481	1065.3	1248.22	151.522	1298.42	1428.35	175.94	1351.6	1220.78	213.856	1055.92	1307.08	-35.6573	1248.07	1466.75	-115.631	1243.41	1273.3	-136.832	1269.87	1118.74	-132.3	1409.79	1011.04	-70.8465	1470.77	949.535	-131.8	1445.31	919.31	-117.795	1517.23	904.917
755	0	119.853	1374.34	1670.39	206.759	1359.64	1662.02	95.6746	1183.86	1636.1	206.573	1186.19	1629.97	143.282	1161.58	1507.22	136.547	1079.46	1246.3	153.036	1312.53	1426.09	177.09	1365.66	1218.63	214.921	1070.09	1304.78	-33.9072	1262.15	1465.41	-113.949	1256.79	1271.57	-135.029	1282.18	1116.95	-131.024	1421.39	1008.32	-69.9509	1482.21	946.539	-131.127	1456.45	916.697	-117.171	1528.17	901.836
756	0	121.855	1388.26	1669.21	208.787	1373.47	1660.82	97.8581	1197.75	1634.59	208.877	1199.94	1628.59	145.026	1175.66	1505.94	137.652	1093.91	1244.36	154.742	1326.82	1424.59	178.128	1379.92	1216.97	216.131	1084.42	1302.79	-32.3006	1276.28	1464.09	-112.245	1270.27	1270.57	-133.196	1294.43	1115.5	-129.915	1432.88	1005.67	-68.8435	1493.17	942.994	-129.982	1466.99	913.327	-116.552	1538.73	898.486
757	0	123.775	1402	1668.63	210.789	1387.33	1659.87	99.9984	1211.69	1633.24	211.171	1214.09	1627.27	146.977	1190.22	1505.02	138.813	1108.65	1243.09	156.53	1341.33	1423.55	179.272	1394.38	1216.13	217.332	1098.86	1301.17	-30.6214	1290.82	1463.4	-110.745	1283.91	1269.58	-131.312	1306.71	1114.34	-128.697	1444.01	1003.36	-67.7577	1503.65	940.048	-129.094	1477.34	910.792	-115.753	1548.72	895.116
758	0	125.753	1415.6	1668.2	212.899	1401.45	1659.32	102.144	1225.72	1632.44	213.221	1228.19	1626.23	148.787	1204.75	1503.93	140.011	1123.78	1242.21	158.305	1355.86	1422.9	180.316	1409.13	1215.39	218.528	1113.51	1300.09	-28.9074	1305.49	1463.06	-109.361	1297.89	1269.6	-129.37	1319	1113.62	-127.325	1454.98	1001.24	-66.8366	1513.64	936.616	-128.175	1487.05	907.999	-114.896	1558.28	891.633
759	0	127.774	1429.87	1668.16	215.283	1415.75	1659.12	104.345	1239.96	1631.88	215.305	1242.51	1625.43	150.386	1219.54	1503.55	141.045	1138.79	1241.78	160.019	1370.52	1422.17	181.652	1424.03	1214.83	219.677	1128.14	1299.57	-27.1045	1320.51	1463.06	-107.552	1312.32	1270	-126.948	1330.61	1112.79	-125.918	1465.43	998.834	-65.8015	1523.32	933.133	-127.425	1496.27	905.431	-114.105	1567.34	887.749
760	0	129.892	1444.06	1668.31	217.423	1430.12	1659	106.454	1254.19	1631.7	217.26	1256.96	1624.79	152.317	1234.3	1503.36	142.048	1153.81	1241.69	161.825	1385.3	1421.89	182.831	1439.04	1214.38	220.966	1142.82	1299.68	-25.1694	1335.75	1463.22	-106.331	1326.64	1270.57	-124.818	1342.92	1113.14	-124.497	1475.8	996.945	-64.8005	1532.42	929.728	-126.804	1505.11	903.328	-113.452	1575.72	884.099
761	0	132.073	1458.38	1668.51	219.315	1444.53	1659.25	108.677	1268.48	1631.96	219.602	1271.24	1625.06	154.233	1248.98	1503.56	143.142	1168.85	1241.95	163.701	1400.13	1421.87	184.342	1454.43	1214.57	222.23	1157.29	1299.84	-23.316	1350.91	1463.67	-104.675	1341.34	1271.41	-122.756	1355.03	1113.96	-122.851	1486.11	994.768	-63.7309	1540.96	926.309	-126.341	1513.73	901.673	-112.056	1583.92	880.565
762	0	133.993	1472.66	1669.1	220.566	1458.55	1659.64	110.667	1282.7	1632.47	221.688	1285.62	1625.42	155.987	1263.47	1504.23	144.192	1183.72	1242.49	165.504	1414.8	1422.18	185.974	1469.72	1214.98	223.591	1171.83	1300.23	-21.2806	1366.08	1464.56	-102.826	1356.06	1272.26	-120.77	1367.08	1114.89	-121.378	1495.89	993.248	-62.7738	1549.19	923.116	-125.309	1521.67	899.424	-111.173	1591.42	876.915
763	0	136.086	1486.86	1670.11	222.715	1472.83	1660.68	112.517	1296.9	1633.33	223.566	1299.93	1626.33	157.808	1277.98	1505.1	145.169	1198.44	1243.28	167.221	1429.24	1422.95	187.398	1484.62	1216.15	224.932	1186.45	1301.03	-19.361	1380.98	1466.03	-101.606	1370.84	1274.14	-118.719	1379.13	1116.46	-120.248	1505.27	992.175	-61.6917	1556.87	920.329	-125.551	1529.53	898.702	-110.097	1598.36	873.43
764	0	137.833	1500.96	1671.74	224.726	1486.91	1662.29	114.487	1311.11	1634.61	225.556	1313.87	1627.94	159.618	1292.3	1506.17	146.331	1213.13	1244.55	169.144	1443.64	1424.52	188.765	1499.46	1217.85	226.463	1201.07	1302.14	-17.5925	1395.64	1467.86	-100.365	1385.56	1276.72	-116.72	1391	1118.42	-118.797	1514.58	991.749	-60.7689	1564.09	918.067	-125.044	1536.83	897.973	-108.784	1604.87	870.386
765	0	139.658	1514.78	1673.29	226.105	1500.93	1663.82	116.335	1325.09	1636.52	227.365	1327.99	1629.64	161.431	1306.42	1507.69	147.532	1227.68	1246.09	170.861	1457.85	1426.53	190.228	1514.17	1219.91	228.127	1215.57	1303.68	-15.8569	1409.94	1470.14	-99.163	1400.19	1279.26	-114.762	1402.81	1120.5	-117.456	1523.58	991.6	-59.6941	1571.3	916.188	-124.477	1543.84	897.127	-107.806	1611.04	867.832
766	0	141.136	1528.71	1675.41	227.766	1514.93	1665.83	118.074	1339.04	1638.25	229.127	1341.99	1631.46	163.179	1320.39	1509.56	148.77	1241.88	1247.93	172.317	1471.99	1428.46	191.596	1529.05	1222.15	229.712	1229.85	1305.4	-14.1992	1423.9	1472.57	-98.1743	1414.47	1282.42	-113.017	1414.29	1122.77	-116.072	1532.31	991.758	-58.1069	1577.69	914.375	-123.055	1550.53	896.365	-106.935	1616.91	865.871
767	0	142.774	1542.51	1677.29	229.796	1528.89	1667.8	119.852	1352.81	1640.52	230.91	1355.85	1633.57	164.922	1334.27	1511.38	150.212	1255.92	1249.51	173.766	1485.96	1430.82	192.485	1543.48	1224.76	231.429	1244.01	1307.06	-12.6782	1437.61	1475.04	-96.8927	1428.23	1285.24	-111.18	1425.92	1125.48	-114.723	1540.85	992.086	-57.0269	1584.07	913.054	-122.43	1557.03	896.315	-105.781	1622.39	863.372
768	0	144.401	1556.26	1679.58	231.347	1542.57	1669.97	121.473	1366.46	1642.56	232.502	1369.59	1635.66	166.749	1348.04	1513.54	151.936	1269.82	1251.8	174.995	1499.82	1432.65	193.235	1558.03	1227.14	233.234	1257.94	1308.83	-11.0921	1451.19	1477.53	-95.3973	1441.42	1287.77	-109.522	1437.33	1128.85	-113.23	1549.47	992.649	-55.5929	1590.43	911.934	-122.89	1563.65	897.157	-104.469	1627.6	861.225
769	0	145.726	1569.75	1681.58	232.54	1556.25	1672	123.022	1380	1644.89	234.005	1383.31	1637.62	168.24	1361.62	1515.5	153.366	1283.35	1254.09	176.194	1513.58	1434.99	193.754	1572.36	1229.18	235.012	1271.75	1311.09	-9.71477	1464.52	1480.11	-94.3625	1453.93	1290.62	-108.004	1448.42	1132.08	-111.833	1557.45	992.926	-54.1756	1596.44	910.973	-121.516	1569.67	897.171	-103.05	1632.74	859.465
770	0	147.167	1583.15	1684.08	233.99	1569.8	1674.46	124.392	1393.28	1647.52	235.584	1396.78	1640.13	169.582	1375.11	1518.1	154.77	1296.61	1256.98	177.121	1527.1	1437.01	194.459	1586.54	1231.94	236.661	1285.25	1314.01	-8.54419	1477.64	1482.98	-93.2623	1465.83	1293.57	-106.605	1459.27	1135.09	-110.103	1565.65	994.059	-52.5827	1601.98	910.211	-119.778	1575.59	897.714	-101.782	1637.6	858.209
771	0	148.449	1596.34	1686.84	235.371	1583.2	1677	125.876	1406.58	1650.14	236.834	1410.05	1642.53	171.154	1388.59	1520.85	156.306	1309.81	1260.07	178.111	1540.42	1439.93	194.65	1600.33	1234.62	238.256	1298.63	1316.89	-7.53527	1490.46	1486.08	-92.0037	1477.66	1296.51	-105.395	1469.74	1138.13	-108.789	1573.48	995.645	-51.6706	1607.55	910.564	-120.488	1582.1	899.473	-100.211	1642.81	857.757
772	0	149.67	1609.35	1689.84	236.626	1596.35	1679.66	127.15	1419.65	1652.64	238.432	1423.3	1644.91	172.268	1401.76	1523.71	157.85	1322.85	1262.86	178.77	1553.56	1442.65	195.164	1613.94	1237.52	239.79	1311.76	1319.59	-6.38281	1503.34	1489.19	-91.1069	1488.67	1299.78	-104.16	1479.87	1141.41	-107.523	1581.12	997.36	-50.3285	1613.21	911.379	-119.767	1588.03	900.9	-98.5659	1647.22	856.995
773	0	150.704	1622.34	1692.7	237.716	1609.22	1682.55	128.303	1432.55	1655.46	239.623	1436.23	1647.74	173.293	1414.79	1526.64	158.959	1335.45	1265.78	179.303	1566.6	1445.43	195.356	1627.4	1240.26	241.105	1324.8	1322.63	-5.69031	1515.8	1492.22	-90.4467	1499.2	1302.87	-103.14	1489.59	1144.65	-106.592	1588.74	999.235	-49.1945	1618.93	912.49	-119.041	1593.98	902.774	-97.3286	1651.77	856.828
774	0	151.762	1635.15	1695.74	238.346	1621.93	1685.54	129.374	1445.42	1658.36	240.511	1449.12	1650.51	174.346	1427.8	1529.38	160.28	1348.23	1268.86	179.812	1579.32	1448.35	195.582	1640.44	1243.33	242.382	1337.65	1325.67	-5.26015	1528.01	1495.35	-89.8773	1509.64	1306.03	-102.047	1498.94	1147.82	-105.631	1596.14	1001.47	-48.1134	1624.85	914.033	-118.265	1599.89	904.213	-96.0596	1656.39	857.081
775	0	152.79	1647.87	1698.78	239.757	1634.89	1688.36	130.31	1458.18	1661.37	241.294	1461.99	1652.89	175.116	1440.49	1532.41	161.4	1360.57	1272.11	179.867	1592.04	1450.9	195.491	1653.25	1245.88	243.68	1350.29	1328.87	-4.77665	1540.13	1498.45	-89.2065	1519.89	1308.98	-101.15	1507.98	1151.07	-105.07	1603.22	1003.47	-47.4244	1630.89	915.821	-117.682	1606.04	906.432	-94.7397	1660.98	857.442
776	0	153.531	1660.5	1701.96	240.393	1647.51	1691.13	131.144	1470.78	1664.23	242.277	1474.54	1656.01	175.929	1453.02	1535.83	162.324	1372.95	1275.38	180.187	1604.56	1453.93	195.493	1665.87	1248.76	244.644	1362.79	1332.1	-4.31562	1552.09	1501.44	-88.7879	1529.97	1312.12	-100.351	1516.66	1154.3	-104.263	1610.33	1005.75	-46.8216	1637.07	917.697	-117.303	1612.02	908.837	-93.8798	1665.73	858.295
777	0	154.331	1673.05	1704.95	241.146	1660.19	1694.04	131.897	1483.41	1667.34	242.931	1487.14	1658.87	176.507	1465.35	1538.87	162.964	1384.9	1278.87	180.203	1617	1456.8	195.275	1678.25	1251.26	245.561	1375.24	1335.73	-4.07849	1563.77	1504.57	-88.5672	1539.74	1315.4	-99.4811	1525.18	1157.59	-103.696	1617.13	1007.67	-46.6313	1642.86	919.715	-115.362	1617.27	910.321	-92.8137	1670.55	859.16
778	0	154.905	1685.46	1708.2	242.533	1672.83	1696.93	132.549	1495.79	1670.36	243.79	1499.68	1661.82	177.31	1477.8	1541.97	164.085	1397.25	1282.08	180.241	1629.32	1459.62	195.194	1690.27	1254.29	246.655	1387.6	1338.67	-3.70105	1575.33	1507.44	-88.3543	1549.15	1318.67	-98.7931	1533.53	1160.92	-103.194	1623.9	1010.19	-45.9041	1648.62	921.466	-115.479	1623.27	912.947	-92.2217	1675.32	860.459
779	0	155.518	1697.81	1711.3	243.04	1685.12	1700	133.18	1508.04	1673.61	243.982	1512.15	1664.56	177.743	1489.87	1545.11	165.046	1409.36	1284.86	180.317	1641.5	1463	195.121	1702.18	1257.3	247.61	1399.93	1341.69	-3.44062	1586.75	1510.41	-88.0182	1558.53	1321.86	-98.2483	1541.83	1164.62	-102.947	1630.54	1012.47	-45.1421	1655	924.138	-114.721	1628.84	915.566	-91.5897	1680.49	862.541
780	0	155.648	1709.93	1714.48	243.483	1697.49	1703.07	133.491	1520.15	1676.65	244.527	1524.4	1667.83	178.56	1502.18	1548.14	165.973	1421.44	1287.96	180.432	1653.57	1466.42	195.067	1714.09	1260.33	248.523	1412.22	1344.82	-3.63012	1597.91	1513.61	-87.8123	1567.73	1325.14	-97.6605	1550.18	1168.08	-102.897	1637.53	1015.62	-45.4082	1661.51	927.386	-113.95	1634.36	917.884	-91.1842	1685.62	864.468
781	0	156.062	1722.03	1717.59	243.806	1709.62	1706.17	133.984	1532.24	1679.73	244.829	1536.62	1670.71	179.027	1514.04	1551.21	166.75	1433.26	1291.66	180.43	1665.51	1469.62	195.141	1725.74	1263.75	249.565	1424.4	1348.22	-3.54048	1608.88	1517.03	-87.6898	1576.66	1328.65	-97.3474	1558.37	1171.5	-102.787	1643.96	1019.02	-44.565	1667.55	929.649	-113.619	1640.14	920.818	-91.1916	1691.29	867.361
782	0	156.032	1733.98	1720.69	244.014	1721.61	1708.9	134.258	1544.24	1682.2	245.287	1548.75	1673.72	179.504	1525.96	1553.96	167.703	1445.18	1294.63	180.485	1677.45	1472.68	195.015	1737.47	1266.67	250.844	1436.69	1351.23	-3.18937	1620	1520.11	-87.3809	1585.96	1332.28	-97.0332	1566.57	1174.9	-102.6	1650.85	1021.78	-44.5289	1674.06	932.496	-112.544	1645.86	923.229	-90.9399	1697	869.729
783	0	156.086	1745.86	1723.57	244.147	1733.99	1711.9	134.82	1556.12	1684.93	245.596	1560.87	1676.2	180.277	1537.79	1556.61	168.823	1457.28	1297.1	180.604	1689.36	1475.63	195.068	1749.25	1269.65	251.854	1448.88	1353.86	-2.98175	1630.95	1522.81	-87.1886	1594.84	1335.46	-96.7308	1574.88	1178.11	-102.244	1657.68	1024.55	-44.7843	1681.11	935.668	-111.629	1651.61	925.175	-90.8912	1702.83	872.232
784	0	156.043	1757.75	1726.02	243.658	1745.68	1714.65	135.066	1567.83	1687.44	245.982	1572.85	1678.78	180.613	1549.79	1558.78	169.935	1469.29	1299.33	180.571	1701.37	1478.15	195.165	1761.15	1272.28	252.976	1461.07	1356.29	-2.53592	1642.01	1525.26	-86.6607	1603.99	1338.1	-96.5145	1583.11	1181.6	-102.064	1664.79	1026.83	-43.9047	1687.64	937.648	-111.726	1657.98	928.239	-90.7312	1709.1	874.363
785	0	155.826	1769.47	1728.41	243.935	1758.04	1716.95	135.529	1579.7	1689.44	246.407	1584.92	1681.02	180.961	1561.36	1561.09	170.576	1480.87	1302.03	180.635	1713.27	1480.61	195.149	1772.9	1274.72	254.448	1473.2	1358.46	-2.18806	1653.04	1527.62	-86.3575	1613.15	1340.67	-96.4435	1591.34	1184.75	-101.848	1672.01	1029.18	-43.691	1694.62	939.875	-111.099	1664.37	930.656	-90.4818	1715.57	876.725
786	0	155.731	1781.24	1730.55	243.027	1769.74	1719.12	135.623	1591.17	1691.67	246.562	1596.91	1682.83	181.645	1573.24	1563.32	171.64	1492.94	1303.88	180.708	1725.11	1482.71	195.084	1784.66	1276.78	255.516	1485.29	1360.35	-1.93229	1664.08	1529.67	-86.2578	1622.24	1343.43	-96.2278	1599.76	1187.31	-101.732	1679.29	1031.37	-44.2655	1702.33	942.745	-110.752	1670.99	932.882	-90.4282	1722.27	878.744
787	0	155.638	1792.95	1732.51	242.645	1781.36	1721	135.873	1602.88	1693.19	246.949	1609	1684.64	182.287	1585.2	1564.98	172.246	1504.67	1306.1	180.895	1736.94	1484.86	195.221	1797	1279.11	256.573	1497.43	1362.31	-1.83628	1675.17	1531.76	-85.9954	1631.71	1345.93	-96.2756	1608.07	1189.85	-101.664	1686.91	1033.81	-44.7949	1710.54	945.071	-110.305	1677.9	934.845	-90.3186	1729.27	880.832
788	0	155.25	1804.53	1734.32	242.604	1793.55	1722.84	136.128	1614.63	1694.8	247.06	1620.87	1686.39	182.655	1597.06	1566.45	173.096	1516.61	1308.13	180.962	1748.79	1486.41	195.155	1808.67	1280.75	257.364	1509.54	1364.3	-1.57624	1686.31	1533.77	-85.6693	1641.11	1348.39	-96.079	1616.64	1192.32	-101.836	1694.51	1035.73	-45.0263	1717.55	947.618	-109.958	1685.02	936.741	-90.4728	1736.48	882.857
789	0	155.032	1816.21	1735.84	242.361	1805.3	1724.42	136.457	1626.23	1695.82	247.323	1632.9	1687.58	183.789	1609.27	1568.17	173.686	1528.37	1309.24	181.071	1760.75	1487.9	195.097	1820.63	1282.14	258.309	1521.69	1365.75	-1.23147	1697.55	1535.09	-85.5444	1650.62	1350.2	-96.0069	1625.25	1194.16	-101.846	1702.42	1037.51	-45.2128	1725.06	949.404	-109.659	1692.5	938.348	-91.0602	1744.23	884.795
790	0	154.571	1827.71	1736.95	242.035	1817.09	1725.6	136.476	1637.77	1696.64	247.498	1644.84	1688.66	183.99	1620.97	1568.88	174.506	1540.25	1310.2	181.012	1772.7	1488.83	194.924	1832.62	1283.19	259.318	1534.04	1366.42	-1.14613	1708.66	1536.11	-85.3025	1660.17	1351.75	-95.9938	1633.96	1195.89	-102.094	1710.46	1038.87	-45.1883	1733.18	950.654	-109.62	1700.18	939.748	-91.7688	1751.76	886.756
791	0	154.234	1839.66	1737.64	241.753	1829.37	1726.38	136.783	1649.63	1697.07	247.644	1656.82	1689.39	184.479	1633.04	1569.59	175.098	1552.09	1311.07	180.821	1784.05	1489.26	194.747	1844.48	1283.91	259.722	1545.8	1367.41	-0.730943	1720.11	1536.68	-85.1334	1669.98	1353.02	-95.9385	1642.84	1197.5	-102.301	1718.73	1040.07	-45.0729	1741.4	951.605	-109.686	1707.93	940.754	-92.1216	1759.63	887.928
792	0	153.918	1851.62	1737.86	241.282	1841.1	1726.85	137.073	1661.63	1697.1	247.767	1669.08	1689.55	184.882	1645.09	1570.13	175.217	1563.62	1312.06	180.923	1796.17	1489.49	194.698	1856.35	1283.91	260.382	1557.91	1368.03	-0.456023	1731.73	1536.95	-85.1415	1679.95	1353.99	-95.8511	1651.93	1198.43	-102.444	1727.24	1040.74	-45.6513	1750.03	952.478	-109.613	1715.99	941.496	-92.257	1767.92	888.524
793	0	153.313	1863.24	1737.95	241.108	1853.69	1726.96	137.325	1673.58	1696.84	248.114	1681.18	1689.27	185.334	1657.39	1569.62	175.796	1575.68	1312.29	180.96	1808.14	1489.35	194.514	1868.07	1283.38	261.131	1570.09	1368.11	-0.457328	1743.26	1537.18	-85.201	1690.27	1354.61	-95.9669	1661.04	1199.14	-102.623	1735.99	1040.89	-45.9555	1759.04	952.595	-109.552	1724.42	942.155	-92.7587	1776.28	888.736
794	0	153.035	1875.27	1737.63	240.412	1865.48	1727.01	137.438	1685.45	1696.33	248.129	1693.41	1688.98	185.486	1669.45	1569.79	176.257	1587.64	1312.02	180.998	1820.24	1488.97	194.41	1879.7	1282.97	261.39	1582.15	1368.03	-0.119173	1755.05	1536.73	-84.7225	1700.44	1354.57	-95.8203	1670.62	1199.73	-102.87	1744.92	1040.92	-46.358	1767.84	952.258	-109.69	1732.84	942.291	-93.16	1784.86	888.59
795	0	152.369	1887.13	1737.1	240.054	1878.08	1726.68	137.32	1697.47	1695.74	248.199	1705.88	1688.35	186.017	1681.67	1569.23	176.661	1599.65	1311.28	180.885	1832.23	1488.07	194.238	1891.33	1282.03	261.847	1594.39	1367.29	-0.028125	1766.65	1536.04	-84.6455	1710.99	1354.4	-95.7984	1680.47	1199.76	-103.234	1753.98	1040.66	-46.5803	1777.15	952.184	-109.801	1741.61	941.917	-93.6172	1793.67	888.437
796	0	151.764	1899.27	1736.64	239.354	1889.94	1726.18	137.32	1709.65	1694.3	248.155	1718.19	1687.56	186.347	1693.96	1568.39	176.489	1611.23	1310.84	181.1	1844.41	1487.56	194.3	1902.87	1281.07	262.083	1606.55	1366.26	0.189124	1778.47	1535.3	-84.2993	1721.68	1354.23	-95.7786	1690.33	1199.52	-103.549	1763.41	1040.27	-47.1996	1786.68	951.69	-110.019	1750.55	941.707	-94.5214	1802.61	888.007
797	0	150.865	1911.29	1735.89	239.21	1902.59	1725.63	137.339	1721.83	1693.13	247.941	1730.31	1686.75	186.547	1706.12	1567.62	176.666	1623.29	1309.57	181.014	1856.58	1486.58	194.07	1913.97	1279.71	262.15	1618.74	1365.32	0.072574	1790.26	1534.36	-83.9302	1732.64	1353.3	-95.9027	1700.42	1198.87	-104.203	1772.91	1039.67	-48.177	1796.3	951.301	-110.398	1759.73	940.706	-95.3497	1811.87	887.388
798	0	150.492	1923.69	1734.72	238.447	1914.84	1724.46	137.072	1734.04	1691.38	247.714	1742.77	1685.49	186.492	1718.55	1566.06	176.503	1635.32	1308.63	180.99	1868.85	1485.04	194	1926.07	1278.16	262.355	1631.13	1363.99	0.060274	1802.4	1533.14	-84.2356	1743.69	1352.79	-95.7758	1710.83	1197.92	-104.653	1782.65	1038.84	-49.0619	1806.36	950.415	-110.698	1769.1	939.348	-96.1802	1821.28	886.243
799	0	149.605	1935.86	1733.22	237.775	1927.35	1723.19	137.076	1746.6	1689.55	247.602	1755.59	1683.83	186.758	1731.09	1564.86	176.21	1647.53	1307.17	180.929	1881.21	1483.38	193.669	1938.09	1276.27	262.501	1643.5	1362.23	0.049996	1814.52	1531.53	-84.366	1755.13	1351.47	-95.732	1721.54	1197.06	-105.264	1792.83	1037.49	-49.8173	1816.75	948.873	-111.167	1778.81	937.931	-97.1802	1830.94	884.765
800	0	149.03	1948.29	1731.23	237.264	1940.32	1721.4	136.834	1758.94	1687.29	247.316	1768.22	1681.8	187.321	1743.55	1562.49	176.137	1659.87	1304.92	180.715	1893.59	1481.28	193.566	1950.58	1274.05	262.48	1655.92	1360.39	0.05756	1826.6	1529.35	-84.078	1766.76	1349.31	-95.8284	1732.27	1195.2	-105.685	1803.05	1035.4	-50.403	1827.23	946.705	-111.672	1788.81	936.306	-97.9885	1840.79	882.576
801	0	148.316	1960.99	1728.95	236.12	1952.99	1719.39	136.502	1771.43	1684.89	247.038	1781.19	1679.42	187.365	1756.16	1560.28	175.64	1671.94	1303.11	180.585	1906.26	1478.96	193.303	1962.85	1271.63	262.142	1668.29	1358.43	-0.035541	1838.91	1527.04	-84.1036	1778.37	1347.19	-95.8366	1743.43	1193.41	-106.174	1813.74	1033.16	-51.5003	1837.9	944.193	-112.257	1798.89	934.264	-98.7279	1851.01	880.138
802	0	147.26	1973.51	1726.58	235.203	1965.68	1717.32	136.237	1784.24	1682.44	246.504	1794.01	1677.11	187.266	1768.81	1558.25	175.268	1684.34	1300.94	180.326	1918.8	1476.54	193.117	1975.37	1269.15	261.928	1680.83	1356.1	-0.032356	1851.37	1524.56	-83.9881	1790.28	1344.97	-95.6843	1754.71	1191.44	-106.866	1824.61	1030.82	-52.3283	1848.78	941.61	-112.822	1809.49	932.208	-99.7526	1861.44	877.654
803	0	146.022	1986.05	1724.22	234.427	1978.81	1714.89	135.603	1796.74	1679.57	246.161	1807.17	1674.4	186.868	1781.46	1555.58	174.837	1696.81	1298.43	179.821	1931.36	1473.93	192.889	1987.98	1266.53	261.628	1693.45	1353.74	-0.533856	1863.65	1522.15	-83.9597	1802.37	1342.57	-95.8387	1766.12	1189.14	-107.478	1835.86	1028.36	-53.2306	1860.2	939.282	-113.591	1820.2	929.852	-100.972	1872.17	875.267
804	0	145.111	1998.79	1721.8	233.423	1991.59	1712.38	135.065	1809.49	1676.52	245.312	1819.96	1671.79	186.74	1794.24	1553.04	174.073	1709.09	1295.92	179.378	1944.1	1471.22	192.378	2000.56	1263.83	261.463	1706.16	1351.1	-0.959416	1875.96	1519.66	-84.3386	1814.41	1340.32	-95.697	1778.16	1186.69	-108.273	1847.19	1025.87	-54.5773	1871.36	936.456	-114.345	1831.32	927.421	-102.397	1882.92	872.347
805	0	143.869	2011.55	1718.92	232.202	2004.44	1709.81	134.609	1822.4	1673.66	244.668	1832.85	1668.97	186.354	1806.96	1549.96	173.451	1721.63	1293.17	178.795	1956.87	1468.45	191.93	2013.25	1260.84	261.216	1718.93	1348.26	-1.28633	1888.42	1516.88	-84.7962	1826.88	1337.83	-95.9705	1790.04	1184.06	-109.192	1858.69	1023.41	-55.593	1883.55	933.669	-115.281	1842.64	924.468	-103.874	1894.15	869.627
806	0	142.51	2024.28	1716.23	231.054	2017.34	1707.14	133.691	1835.11	1670.56	243.772	1845.79	1666.05	185.932	1819.58	1547.15	174.34	1735.4	1289.11	178.17	1969.6	1465.64	191.515	2025.92	1258	260.518	1731.66	1345.26	-2.01643	1900.87	1514.09	-84.834	1839.17	1334.57	-95.9564	1802.33	1181.02	-110.002	1870.62	1020.22	-56.8965	1895	930.644	-116.373	1854.23	921.64	-105.331	1905.58	866.451
807	0	141.034	2037.12	1713.37	229.931	2030.58	1704.21	132.771	1848.07	1667.29	243.034	1859	1663.15	185.17	1832.25	1543.64	173.552	1748.3	1285.45	177.397	1982.4	1462.67	190.743	2038.6	1255.01	260.378	1744.72	1342.05	-2.7568	1913.2	1511.06	-84.7964	1851.46	1331.1	-95.906	1814.98	1177.95	-110.933	1882.57	1017.11	-58.027	1907.51	927.321	-117.472	1866.19	918.191	-106.675	1917.3	863.029
808	0	139.888	2050.14	1710.12	228.421	2043.66	1701.31	131.697	1860.98	1664.14	241.764	1872.02	1660.22	184.498	1845.07	1540.59	172.174	1761.01	1282.42	176.578	1995.33	1459.44	190.092	2051.6	1251.98	259.862	1757.8	1338.52	-3.44866	1925.79	1507.64	-85.9231	1864.01	1327.98	-96.286	1827.65	1174.5	-111.667	1895.05	1013.35	-59.4175	1919.84	923.42	-118.442	1878.31	914.923	-108.201	1929.47	859.451
809	0	138.479	2063.29	1706.98	227.032	2056.71	1698.2	130.587	1874.07	1661.32	240.559	1885.19	1657.18	183.364	1857.67	1537.76	171.129	1774.12	1279.63	175.538	2008.25	1456.31	189.304	2064.72	1249.18	259.704	1771.07	1335.02	-4.4413	1938.23	1504.25	-85.0808	1876.58	1323.74	-96.5048	1840.48	1170.94	-112.769	1907.67	1009.58	-60.7392	1932.72	919.38	-119.606	1890.63	911.427	-109.922	1941.71	855.483
810	0	137.062	2076.45	1703.89	225.458	2069.84	1695.36	129.226	1886.98	1658.82	239.226	1898.23	1654.46	182.458	1870.68	1534.75	170.42	1787.39	1276.79	174.306	2021.26	1453.56	188.23	2077.95	1246.33	258.956	1784.3	1332.27	-5.86342	1950.7	1501.07	-86.2166	1889.65	1320.33	-96.8879	1853.82	1167.35	-113.794	1920.56	1006.1	-62.2336	1945.54	915.334	-120.793	1903.38	907.889	-111.42	1954.5	851.688
811	0	135.586	2089.43	1701.07	223.946	2082.88	1692.52	127.972	1900.04	1655.9	237.872	1911.41	1651.58	181.083	1883.66	1531.45	169.88	1800.9	1273.34	172.832	2034.46	1450.55	187.034	2091.29	1243.61	257.477	1797.8	1328.94	-7.23201	1963.33	1497.63	-86.6296	1902.25	1316.61	-97.2766	1867.25	1163.56	-114.902	1933.66	1002.22	-63.7241	1958.77	911.42	-122.127	1916.21	903.962	-113.229	1967.3	847.842
812	0	133.849	2102.48	1698.32	222.523	2096.19	1689.77	126.472	1913.09	1652.96	236.387	1924.5	1648.75	179.641	1896.71	1528.52	169.207	1814.51	1270.12	171.283	2047.76	1447.78	185.851	2104.71	1241.18	256.344	1811.35	1325.91	-8.50414	1976.11	1494.49	-87.3948	1915.4	1312.49	-97.6686	1881.04	1159.74	-116.059	1947.14	998.338	-65.2099	1972.57	907.661	-123.39	1929.4	900.312	-115.097	1980.39	843.857
813	0	132.141	2115.51	1695.84	221.006	2109.47	1687.11	124.883	1926.31	1650.15	234.781	1937.59	1646.08	178.252	1909.91	1525.69	168.207	1828.09	1267.1	169.641	2061.18	1445.35	184.367	2118.5	1238.98	255.287	1824.8	1322.83	-10.3405	1988.74	1491.34	-88.4553	1928.64	1308.83	-98.0671	1895.05	1155.93	-117.298	1960.71	994.565	-66.8134	1986.39	903.844	-124.812	1942.99	896.75	-116.856	1993.84	840.384
814	0	130.452	2128.54	1693.88	219.464	2122.45	1684.77	123.302	1939.64	1647.62	233.063	1950.72	1643.43	176.204	1923.39	1522.79	167.206	1842	1264.46	167.839	2074.68	1442.96	182.826	2132.48	1236.57	254.105	1838.56	1320.38	-12.4646	2001.65	1488.66	-89.8475	1942.13	1305.63	-98.6986	1909.34	1152.4	-118.748	1974.62	991.368	-68.5025	2000.29	900.214	-126.274	1956.6	893.132	-118.691	2007.45	836.989
815	0	128.822	2141.78	1692.11	217.736	2135.58	1682.9	121.419	1952.82	1645.32	231.053	1963.7	1641.21	174.652	1936.99	1520.55	166.021	1855.86	1261.94	165.733	2088.24	1440.54	180.793	2146.56	1234.48	252.823	1852.27	1317.71	-14.4621	2014.83	1486.03	-90.7428	1956.05	1301.75	-99.7376	1923.76	1149.54	-120.171	1988.81	988.386	-70.2424	2014.92	896.872	-127.574	1970.76	889.805	-120.617	2021.46	833.656
816	0	126.971	2155.05	1690.59	215.8	2148.74	1681.3	119.489	1966.14	1643.47	229.187	1977.24	1639.08	172.298	1950.51	1518.4	164.559	1869.85	1259.67	163.546	2102.04	1438.4	179.026	2160.77	1232.35	250.489	1866.07	1316.07	-16.6141	2028.24	1483.17	-92.0329	1969.97	1298.7	-100.761	1938.14	1146.28	-121.606	2003.05	985.123	-72.0337	2029.22	893.411	-129.125	1984.97	886.468	-122.53	2035.85	830.597
817	0	125.26	2168.42	1689.35	214.01	2162.12	1680.12	117.464	1979.61	1641.98	227.241	1990.6	1637.21	170.03	1964.16	1516.65	163.413	1883.99	1257.75	161.445	2115.76	1436.49	176.812	2175.06	1230.7	248.679	1880.04	1314.31	-18.8796	2041.75	1480.83	-93.408	1984.09	1295.42	-101.417	1953.01	1143.21	-122.871	2017.69	981.833	-73.673	2043.92	890.3	-130.547	1999.54	883.819	-124.267	2050.23	827.227
818	0	123.403	2181.92	1688.52	212.13	2175.72	1679	115.647	1993.12	1640.86	225.29	2004.08	1635.96	167.969	1977.96	1515.49	162.164	1898.09	1256.04	159.225	2129.69	1435.14	174.837	2189.21	1229.16	246.65	1894.3	1312.62	-20.6199	2055.61	1478.56	-95.0378	1998.37	1292.88	-102.49	1967.86	1140.21	-124.131	2032.61	979.008	-75.078	2059.31	887.544	-131.852	2014.3	880.907	-125.948	2065.1	824.409
819	0	121.525	2195.33	1687.98	210.442	2189.13	1678.36	113.707	2006.72	1639.97	223.292	2017.66	1634.93	165.9	1991.84	1514.92	160.859	1912.34	1255	157.106	2143.41	1434.14	172.76	2203.64	1228.19	245.271	1908.46	1311.12	-22.9838	2069.26	1476.66	-96.6188	2013.03	1290.23	-103.545	1983.17	1137.95	-125.599	2047.52	976.418	-76.7248	2074.25	884.759	-133.232	2029.31	878.62	-127.51	2080.25	822.281
820	0	119.619	2208.84	1687.9	208.492	2202.64	1678.16	111.299	2020.28	1639.56	220.865	2030.81	1634.4	163.503	2005.58	1514.02	160.396	1926.49	1253.6	155.07	2157.34	1433.65	170.696	2218.04	1227.72	243.406	1922.64	1310.71	-25.2643	2082.93	1475.52	-98.2168	2027.98	1288.5	-104.893	1998.54	1136.03	-126.917	2063.04	974.854	-78.121	2089.96	883.148	-134.735	2044.75	876.861	-129.009	2095.57	820.229
821	0	117.866	2222.32	1688.13	206.83	2216	1678.47	109.151	2033.89	1639.65	218.708	2044.27	1634.28	162.036	2019.5	1514.33	159.692	1940.92	1253.34	152.839	2170.96	1433.55	168.914	2232.54	1228	241.923	1936.63	1310.59	-27.7385	2096.56	1474.84	-100.37	2042.81	1287.41	-105.993	2014.41	1134.53	-128.544	2078.75	973.888	-79.5533	2105.49	881.805	-136.13	2060.48	875.556	-130.571	2111.26	818.992
822	0	116.128	2235.85	1688.99	204.983	2229.12	1678.97	107.059	2047.4	1640.11	216.499	2057.61	1634.73	159.743	2033	1514.56	158.93	1954.95	1253.15	150.787	2184.69	1434.11	166.982	2247.01	1228.7	240.383	1950.57	1310.8	-30.0507	2109.91	1474.43	-101.921	2057.98	1286.28	-107.259	2030.16	1133.13	-129.912	2094.89	973.149	-81.0494	2121.83	881.086	-137.296	2076.68	874.578	-132.045	2127.29	818.123
823	0	114.262	2249.21	1689.81	203.191	2242.2	1679.79	105.377	2061.18	1640.98	215.373	2071.64	1635.53	157.431	2046.54	1514.79	157.738	1968.62	1253.35	148.896	2198.13	1434.73	165.473	2261.07	1229.74	238.817	1964.1	1311.56	-31.898	2123.32	1474.49	-103.753	2072.99	1285.39	-109.071	2046.17	1132.84	-131.189	2111.18	972.666	-82.3551	2137.86	880.77	-138.863	2092.98	873.932	-133.464	2143.65	817.61
824	0	112.68	2262.67	1690.73	201.6	2255.44	1680.66	103.161	2074.62	1641.9	213.259	2084.81	1636.52	155.226	2059.69	1515.59	156.207	1981.81	1254.09	146.992	2211.49	1435.68	163.884	2275.1	1230.96	237.437	1977.65	1312.39	-33.9172	2136.63	1474.68	-105.529	2088.2	1284.96	-110.212	2062.4	1132.3	-132.507	2127.81	972.6	-83.4676	2154.36	880.73	-140.428	2109.93	873.952	-134.542	2160.47	817.345
825	0	111.119	2276.07	1691.6	200.092	2268.47	1681.68	101.194	2087.96	1642.99	211.414	2097.99	1637.66	153.606	2072.86	1516.78	155.199	1995.76	1254.92	145.261	2224.75	1436.85	162.489	2288.63	1232.12	236.326	1990.97	1313.49	-35.7846	2149.86	1475.36	-107.708	2103.3	1285.5	-111.865	2078.79	1132.21	-133.803	2144.76	972.748	-84.5459	2171.26	880.964	-141.749	2127.15	873.959	-135.524	2177.65	817.587
826	0	109.632	2289.31	1692.76	198.69	2281.6	1682.95	99.3014	2101.32	1644.66	208.939	2110.39	1639.48	152.211	2085.93	1517.99	153.921	2009.15	1255.99	143.619	2237.52	1438.24	160.927	2302	1233.7	234.975	2004.03	1314.81	-37.5818	2163.03	1476.31	-109.484	2118.5	1285.72	-113.696	2095.18	1132.67	-134.961	2161.93	973.584	-85.4347	2188.19	881.695	-143.144	2144.8	874.478	-136.395	2195.31	818.169
827	0	108.182	2302.62	1693.76	197.321	2294.76	1684.31	97.1597	2114.31	1646.44	206.911	2123.25	1641.24	149.237	2098.26	1518.93	151.861	2022.12	1257.32	142.236	2250.36	1439.8	159.752	2315.17	1235.3	233.182	2016.81	1316.23	-39.2331	2176.06	1477.37	-111.544	2133.39	1286.75	-115.657	2111.65	1133.62	-136.165	2179.26	974.4	-86.3204	2205.74	882.623	-144.698	2162.82	875.75	-137.019	2213.36	819
828	0	106.922	2315.68	1694.96	196.03	2307.48	1685.59	95.2756	2127.27	1648.33	205.189	2135.91	1643.07	147.816	2110.88	1520.7	150.123	2035.1	1258.56	141.039	2263.12	1441.44	158.843	2327.86	1236.9	231.551	2029.48	1317.63	-40.6868	2189.18	1478.5	-113.228	2148.37	1287.21	-117.596	2127.92	1134.03	-137.196	2197.14	975.483	-87.0097	2223.38	883.908	-146.086	2181.04	876.573	-137.641	2231.68	819.94
829	0	105.812	2328.66	1696.31	194.657	2319.91	1687.04	93.4517	2140.02	1650.35	203.636	2148.4	1645.31	146.427	2123.45	1522.08	148.535	2047.98	1259.73	139.986	2275.58	1443.33	158.2	2340.53	1238.9	229.633	2041.7	1319.11	-42.0095	2202.24	1479.8	-114.994	2163.29	1288.06	-119.585	2144.35	1134.94	-138.261	2214.85	976.553	-87.6906	2240.91	885.291	-147.3	2199.73	877.854	-138.094	2250.49	821.646
830	0	104.627	2341.48	1697.86	193.607	2332.43	1688.97	91.8014	2152.82	1652.58	201.86	2160.49	1647.72	144.607	2135.72	1523.85	146.745	2060.5	1261.36	139.013	2287.81	1445.28	157.745	2353.01	1241.02	227.346	2053.71	1320.69	-43.4332	2215.27	1481.23	-116.502	2178.46	1289.4	-121.695	2160.81	1136.03	-139.208	2232.75	978.516	-88.2206	2259.01	887.229	-148.228	2218.91	879.701	-138.391	2269.53	823.625
831	0	103.676	2354.1	1699.6	192.792	2344.96	1691	90.2051	2165.39	1655.12	200.363	2172.76	1650.28	142.802	2147.77	1525.91	144.638	2072.67	1263.32	138.393	2300.05	1447.41	157.528	2365.31	1243.36	225.9	2066.04	1322.75	-44.5256	2228.36	1483.06	-118.268	2193.39	1291.25	-123.687	2177.49	1137.48	-140.124	2250.84	980.55	-88.5541	2277.05	889.796	-149.478	2237.69	881.288	-138.775	2288.95	825.937
832	0	102.703	2366.52	1701.64	191.981	2357.22	1692.84	88.7333	2177.73	1657.58	199.216	2185.05	1652.99	141.577	2160.03	1527.98	143.238	2085.21	1265.54	137.764	2312.24	1449.73	157.508	2377.48	1245.89	224	2077.96	1324.86	-45.686	2241.39	1485.2	-119.577	2208.61	1293.28	-125.611	2194.26	1140.85	-140.983	2269.04	983.038	-88.9019	2295.41	892.434	-151.039	2257.01	883.878	-139.059	2308.57	828.708
833	0	101.803	2378.88	1703.43	191.193	2369.1	1694.89	87.5891	2190.16	1660.05	197.944	2196.96	1655.67	140.484	2172.34	1529.86	141.971	2097.65	1267.49	137.062	2324.13	1451.84	157.63	2389.62	1248.16	221.92	2089.69	1326.95	-46.3669	2254.44	1487.46	-120.94	2223.46	1295.21	-127.168	2210.39	1140.95	-141.848	2287.13	985.715	-89.3301	2313.85	895.273	-151.902	2276.37	886.172	-139.24	2328.42	831.895
834	0	101.331	2391.15	1705.83	190.434	2381.4	1697.34	86.2196	2202.32	1662.8	196.769	2208.92	1658.33	139.265	2184.27	1532.55	140.436	2109.71	1269.98	136.73	2336.18	1454.13	157.862	2401.56	1250.52	220.133	2101.51	1329.19	-47.0778	2267.41	1489.45	-122.11	2238.36	1297.2	-128.957	2226.62	1143.04	-142.402	2305.53	988.443	-89.4649	2332.29	898.145	-152.741	2295.98	888.957	-139.306	2348.47	835.317
835	0	100.665	2403.46	1707.85	189.567	2393.42	1700.01	85.3044	2214.43	1665.77	195.85	2220.82	1661.26	138.174	2196.15	1535.46	138.982	2121.65	1272.76	136.305	2347.77	1456.26	158.28	2413.46	1252.96	218.282	2113.25	1331.44	-47.7023	2280.32	1491.8	-123.013	2253.55	1299.63	-130.525	2242.8	1145.22	-142.872	2323.72	991.59	-89.7537	2351.1	901.807	-153.377	2315.51	892.004	-139.333	2368.61	839.105
836	0	100.152	2415.7	1710.23	189.189	2405.39	1702.24	84.5151	2226.61	1668.49	194.979	2232.62	1664.34	137.435	2208.18	1537.79	137.631	2133.68	1275.22	135.972	2359.39	1458.93	158.819	2425.21	1255.43	216.327	2124.75	1333.48	-48.1589	2293.13	1494.48	-124.074	2268.05	1302.42	-132.025	2258.83	1148	-143.53	2341.74	994.732	-89.773	2369.82	905.618	-153.825	2334.96	895.209	-139.148	2388.68	842.791
837	0	99.704	2427.76	1712.83	188.692	2417.43	1704.95	83.7125	2238.48	1671.41	194.359	2244.56	1667.15	137.274	2220.27	1540.93	136.031	2145.54	1277.76	135.921	2371.38	1461.59	159.268	2436.88	1258.04	214.625	2136.19	1336.13	-48.3081	2306.06	1497.33	-124.845	2282.97	1305.12	-133.589	2274.77	1150.51	-143.755	2360.02	998.426	-89.5043	2388.58	909.205	-154.408	2354.6	899.19	-139.157	2408.91	847.473
838	0	99.2856	2439.76	1715.08	188.222	2429.32	1707.32	83.0337	2250.43	1674.77	193.437	2256.01	1670.52	136.241	2232.09	1543.79	134.968	2157.59	1281.39	135.71	2383.02	1464.29	159.529	2448.41	1260.81	214.019	2148.11	1339.58	-48.7989	2318.68	1500.21	-125.837	2297.33	1307.86	-134.99	2290.58	1153.19	-144.068	2377.99	1002.18	-91.095	2404.39	911.726	-157.016	2374.43	904.26	-139.071	2429.23	852.173
839	0	98.8442	2451.59	1717.24	188.039	2441.22	1709.85	82.7131	2262.45	1677.61	192.957	2267.56	1673.59	135.341	2243.8	1546.33	133.266	2169.33	1283.63	135.483	2394.64	1466.91	159.706	2459.95	1263.6	212.497	2159.62	1341.8	-49.0655	2331.12	1503.2	-126.494	2311.57	1310.79	-136.235	2306.17	1155.8	-144.545	2395.72	1006.08	-89.5013	2426.51	918.536	-155	2393.53	906.798	-139.135	2449.37	857.19
840	0	98.9983	2463.59	1719.75	188.038	2453.06	1711.97	82.1851	2274.22	1680.18	192.666	2279.27	1676.4	134.625	2255.47	1548.73	132.254	2181.37	1286.05	135.502	2406.33	1469.79	159.982	2471.4	1266.32	211.184	2171.22	1344.15	-49.3621	2343.45	1505.87	-127.109	2325.65	1313.49	-137.226	2321.74	1158.38	-144.848	2413.57	1010.21	-89.3942	2444.98	922.769	-157.427	2413.11	912.315	-138.882	2469.59	862.476
841	0	98.9728	2475.74	1722.26	187.822	2464.81	1714.34	81.7625	2286.07	1683.09	192.368	2290.77	1679.27	134.378	2267.4	1551.08	130.875	2193.08	1288.68	135.212	2417.78	1472.22	160.019	2482.74	1268.82	209.604	2182.74	1346.43	-49.659	2355.7	1508.75	-127.708	2339.67	1316.38	-138.329	2337.17	1160.94	-145.036	2431.48	1014.21	-89.2461	2463.96	927.701	-155.358	2432.13	914.943	-138.594	2489.76	867.629
842	0	98.887	2487.67	1724.21	187.965	2476.63	1715.97	81.5953	2297.98	1686.01	191.982	2302.36	1681.91	133.877	2279.15	1553.26	129.386	2204.6	1291.36	135.262	2429.42	1474.69	160.006	2494.14	1271.07	208.872	2194.46	1349	-49.9399	2367.79	1511.44	-128.491	2353.36	1319.03	-139.454	2352.44	1163.64	-145.311	2448.91	1018.09	-88.9804	2482.89	932.466	-157.199	2451.61	920.181	-138.192	2509.93	872.792
843	0	99.0335	2499.42	1725.49	188.05	2488.61	1717.78	81.5083	2309.78	1688.4	191.736	2313.95	1684.58	133.318	2290.71	1555.23	129.011	2216.8	1293.44	135.081	2440.92	1476.69	159.931	2505.49	1273.27	207.798	2205.93	1350.98	-50.1264	2379.84	1513.72	-129.136	2367.03	1321.41	-140.668	2367.59	1166.16	-145.364	2466.66	1021.98	-88.6454	2501.66	937.048	-157.274	2471.1	924.428	-137.655	2530.04	877.841
844	0	99.1635	2511.37	1726.77	188.238	2500.51	1719.16	81.389	2321.57	1690.69	191.891	2326.02	1686.35	133.307	2302.59	1557.12	127.496	2228.32	1295	135.037	2452.39	1478.52	159.822	2516.79	1275.07	207.088	2217.5	1352.89	-50.0879	2391.95	1515.67	-129.757	2380.6	1323.82	-141.797	2382.55	1168.25	-145.307	2484.36	1025.47	-88.181	2520.43	941.381	-155.109	2490.18	927.367	-136.92	2550.17	882.862
845	0	99.2564	2523.31	1727.62	188.301	2512.22	1720.17	81.1985	2333.48	1692.64	192.012	2338.05	1687.87	132.47	2314.12	1558.66	126.918	2240.37	1296.78	135.002	2463.97	1480.06	159.686	2528.29	1276.56	205.291	2228.58	1354.26	-50.1793	2404.02	1517.48	-130.448	2393.9	1325.62	-142.426	2397.62	1169.92	-145.319	2501.66	1028.78	-89.2081	2536.96	944.098	-155.011	2509.35	931.25	-136.221	2570.24	887.889
846	0	99.5644	2535.34	1728.57	188.523	2524	1720.96	81.3656	2345.52	1694.44	192.199	2349.68	1689.76	131.798	2325.57	1559.47	125.733	2252.01	1298.18	134.958	2475.31	1481.33	159.599	2539.69	1277.97	204.926	2240.3	1355.64	-50.0773	2416.05	1518.95	-130.912	2407.3	1327.34	-143.355	2412.38	1171.47	-145.187	2519.08	1032.17	-88.5067	2556.01	948.54	-154.081	2528.46	934.129	-135.264	2590.27	892.668
847	0	100.048	2547.4	1729.23	188.991	2536.01	1721.61	81.4172	2357.31	1695.8	191.888	2360.93	1691.32	131.859	2337.33	1560.46	125.161	2263.82	1298.99	135.074	2486.94	1482.47	159.514	2551.01	1279.22	203.902	2251.6	1356.31	-50.2496	2427.85	1520.24	-131.562	2420.43	1328.68	-144.474	2426.71	1172.45	-145.247	2536.42	1035.34	-86.5221	2576.42	954.213	-155.262	2547.85	938.675	-134.415	2610.08	897.422
848	0	100.422	2559.45	1729.2	189.627	2548.07	1721.59	81.3005	2369.16	1696.88	192.032	2372.71	1692.35	131.734	2349.24	1561.26	124.186	2275.53	1299.73	134.926	2498.38	1483.25	159.511	2562.44	1280.06	202.902	2262.91	1356.74	-50.293	2439.69	1521.2	-132.237	2433.66	1329.91	-145.145	2441.77	1173.56	-145.26	2553.48	1038.31	-85.9489	2594.85	958.442	-154.529	2566.97	941.885	-133.428	2629.96	902.133
849	0	100.926	2571.56	1729.27	189.662	2559.94	1721.37	81.532	2381.23	1697.93	192.612	2384.83	1693.15	131.002	2360.67	1561.62	123.668	2287.43	1300.51	134.893	2509.86	1483.48	159.528	2573.91	1280.48	201.448	2274.13	1356.84	-50.3534	2451.61	1521.98	-132.849	2446.59	1330.68	-145.795	2456.16	1174.25	-144.922	2570.75	1040.94	-85.1256	2613.45	962.245	-153.983	2585.96	944.672	-132.394	2649.71	906.644
850	0	101.4	2583.74	1728.59	190.344	2571.96	1720.59	81.7462	2393.28	1698.4	192.384	2396.31	1693.67	131.37	2372.55	1561.46	122.204	2298.62	1300.14	135.064	2521.56	1483.38	159.727	2585.53	1280.52	200.186	2285.38	1355.88	-50.4452	2463.47	1522.09	-133.223	2459.64	1330.81	-147.161	2470.87	1175.01	-144.878	2587.6	1043.41	-84.3436	2631.9	965.998	-151.809	2604.8	946.841	-131.136	2669.45	910.862
851	0	101.915	2595.89	1727.54	190.576	2583.31	1718.93	81.976	2405.46	1698.4	193.772	2409.49	1692.66	130.711	2383.63	1561.37	122.399	2310.91	1299.9	134.98	2532.9	1483.03	159.787	2597.08	1280.21	202.067	2298.26	1356.88	-50.4954	2475.27	1521.54	-133.523	2472.75	1330.98	-148.279	2485.23	1174.33	-144.333	2604.9	1045.52	-83.5719	2650.2	969.456	-148.433	2622.32	947.026	-129.792	2688.82	914.65
852	0	102.196	2608.09	1726.08	191.232	2595.94	1718.21	82.1649	2417.67	1697.96	193.347	2420.79	1692.91	130.325	2395.66	1560.52	121.593	2322.47	1299.28	135.05	2544.48	1482.15	159.952	2608.77	1279.49	198.856	2308.35	1355.1	-50.3155	2487.21	1520.85	-133.761	2485.65	1330.3	-148.248	2498.69	1172.91	-144.099	2621.57	1047.32	-78.5165	2667.61	971.594	-151.346	2642.72	952.216	-128.452	2708.28	918.585
853	0	102.949	2620.46	1724.69	191.666	2608.09	1716.53	82.2066	2429.7	1697.55	193.723	2433.15	1691.98	130.499	2407.78	1559.51	120.95	2334.16	1298.39	135.262	2556.25	1480.94	160.122	2620.34	1278.47	198.957	2320.3	1354.38	-50.359	2499.31	1520.06	-134.128	2498.38	1329.32	-150.051	2514.11	1173.48	-143.586	2638.42	1048.7	-81.3919	2686.29	975.132	-146.573	2659.95	951.512	-126.88	2727.33	921.794
854	0	103.287	2632.7	1722.58	192.335	2620.31	1714.57	82.6652	2442.17	1696.62	193.776	2445.04	1690.96	130.637	2419.62	1557.95	120.963	2346.03	1296.81	135.319	2567.85	1479.47	160.265	2631.88	1277.01	198.577	2332.14	1352.94	-50.1178	2511.28	1518.55	-134.429	2511.21	1328.2	-151.57	2528.37	1172.38	-142.94	2655.14	1049.9	-78.8075	2703.81	977.266	-147.915	2678.68	954.387	-125.225	2746.59	925.153
855	0	103.748	2645.08	1720.52	192.808	2632.74	1712.7	82.9041	2454.53	1695.37	194.834	2457.91	1689.47	130.483	2431.39	1556.29	120.75	2357.8	1295.34	135.551	2579.56	1477.63	160.464	2643.61	1275.08	197.157	2343.21	1350.55	-50.0589	2523.21	1516.69	-134.476	2524.12	1326.64	-151.052	2542.16	1170.51	-142.391	2671.51	1050.77	-77.6833	2721.41	979.956	-148.14	2698.44	957.569	-122.564	2768.33	929.514
856	0	104.322	2657.57	1718.26	193.228	2645.18	1710.55	83.0378	2466.84	1693.75	195.072	2470.2	1687.64	130.217	2443	1553.93	120.706	2369.42	1293.35	135.834	2591.46	1475.56	160.675	2655.36	1273.06	197.664	2355.41	1349.1	-49.7969	2535.16	1514.65	-134.412	2537.13	1324.72	-151.775	2556.73	1168.76	-141.682	2688.02	1051.5	-77.0028	2739.15	981.906	-146.302	2716.61	959.199	-122.186	2783.73	930.791
857	0	104.998	2670.13	1715.72	194.181	2657.42	1707.39	83.4208	2479.39	1691.91	195.659	2482.6	1685.94	130.906	2455.38	1552.18	120.832	2381.43	1290.87	136.077	2603.34	1473.2	160.809	2667.23	1270.62	197.807	2367.5	1346.91	-49.4223	2547.09	1512.37	-134.476	2549.59	1322.28	-151.102	2569.82	1165.09	-141.021	2704.37	1051.85	-76.4381	2756.56	984.156	-145.642	2734.74	960.005	-120.866	2802.17	933.725
858	0	106.414	2683.37	1713.44	195.569	2669.48	1703.38	83.8993	2491.84	1689.63	196.097	2495.04	1683.31	131.646	2467.69	1549.43	121.265	2393.36	1288.24	136.491	2615.29	1470.52	161.058	2679.16	1267.93	198.593	2379.81	1344.58	-49.1968	2559.1	1509.92	-134.441	2562.43	1320.26	-153.744	2585.39	1165.7	-140.349	2720.19	1051.98	-75.2206	2773.61	985.615	-143.932	2752.61	960.69	-119.085	2820.37	936.167
859	0	106.876	2696.02	1710.1	194.804	2681.89	1701.67	84.3613	2504.34	1687.23	196.882	2507.65	1681.03	132.043	2480.02	1546.67	121.658	2405.33	1285.71	136.903	2627.27	1467.52	161.323	2691.17	1264.93	196.839	2390.83	1340.86	-48.8762	2571.08	1506.8	-134.347	2575.09	1316.77	-151.619	2597.92	1159.75	-139.268	2736.37	1051.62	-73.8767	2790.54	986.699	-142.765	2770.26	961.319	-117.298	2838.44	938.016
860	0	107.316	2708.5	1706.5	195.803	2694.71	1697.49	84.768	2517.18	1684.96	196.774	2520.07	1678.59	132.36	2492.46	1543.98	122.143	2417.44	1283.14	137.205	2639.35	1464.37	161.621	2703.34	1261.58	199.239	2404.11	1339.48	-48.4934	2583.2	1503.7	-133.759	2588.03	1313.69	-153.792	2613.08	1159.37	-138.428	2752.08	1050.77	-72.4142	2807.26	987.174	-141.128	2787.81	961.183	-115.641	2855.97	939.226
861	0	108.094	2721.2	1702.68	196.751	2707.31	1693.61	85.5598	2529.27	1681.53	197.537	2532.79	1675.59	132.695	2504.76	1541.05	123.037	2429.7	1279.52	137.74	2651.62	1460.85	161.99	2715.45	1258.07	199.482	2416.25	1336.04	-48.0055	2594.94	1499.84	-133.224	2600.65	1310.09	-152.796	2626.8	1155.03	-137.424	2767.7	1049.78	-70.8683	2823.63	987.346	-139.819	2804.97	960.537	-113.369	2873.32	940.175
862	0	108.764	2733.93	1699.12	197.308	2720.04	1690.33	86.3901	2542.33	1678.59	198.215	2545.46	1672.44	133.75	2517.2	1537.21	123.924	2442.01	1276.12	138.274	2663.93	1457.47	162.42	2727.63	1254.64	199.715	2428.37	1332.5	-47.8158	2607.24	1496.49	-132.625	2613.01	1306.06	-150.81	2639.49	1150.32	-134.759	2785.24	1049.07	-69.5025	2839.8	987.435	-138.001	2821.98	960.126	-112.315	2890.46	941.381
863	0	109.491	2746.82	1695.3	197.898	2732.78	1687.03	87.0866	2554.9	1675.57	199.192	2558.39	1669.54	134.369	2529.49	1533.8	124.772	2454.43	1272.6	138.796	2676.27	1453.85	162.901	2739.91	1251	200.173	2440.76	1328.86	-47.0861	2618.97	1492.35	-132.003	2625.69	1302.67	-150.471	2653.3	1146.83	-133.695	2800.46	1047.59	-68.4346	2855.78	986.64	-136.678	2838.48	959.266	-110.421	2907.35	942.044
864	0	110.448	2759.64	1691.78	188.018	2744.84	1679.19	87.9972	2567.59	1672.36	200.014	2571.29	1666.22	135.524	2542.21	1530.47	125.944	2467.03	1268.84	139.571	2688.77	1450.34	163.439	2752.32	1247.58	201.283	2453.61	1325	-46.4857	2631.01	1488.69	-131.157	2638.34	1298.78	-151.726	2667.85	1144.38	-132.617	2815.36	1045.97	-67.0486	2871.49	986.206	-135.182	2854.73	958.214	-108.985	2923.65	942.391
865	0	110.922	2772.24	1688.12	200.313	2759.29	1678.3	89.3115	2580.67	1668.88	201.157	2584.4	1663.07	136.326	2554.94	1526.75	127.305	2479.83	1264.98	140.258	2701.43	1446.75	164.023	2764.89	1244.03	202.256	2466.45	1321.12	-45.9395	2643.18	1485.13	-130.174	2650.84	1294.58	-148.956	2680.58	1138.98	-131.389	2830.36	1044.23	-65.409	2887.08	986.222	-134.889	2870.46	958.038	-107.454	2939.79	942.58
866	0	113.636	2787.47	1685.27	183.958	2770.45	1670.57	90.1973	2593.59	1665.82	202.144	2597.35	1659.79	136.965	2567.53	1523.08	128.294	2492.89	1261.38	141.146	2714.25	1443.31	164.644	2777.74	1240.63	203.102	2479.16	1317.43	-45.2209	2654.95	1480.74	-129.148	2663.17	1290.33	-147.849	2693.79	1134.93	-130.108	2845.01	1041.95	-64.0392	2902.19	984.945	-132.217	2886.13	955.526	-105.915	2955.55	942.054
867	0	114.856	2800.58	1681.29	186.432	2783.58	1666.75	91.2356	2606.42	1662.6	203.4	2610.53	1656.35	139.217	2581.18	1519.44	129.365	2505.96	1257.69	142.077	2727.26	1439.69	165.446	2790.89	1237.16	204.109	2492.18	1313.39	-44.583	2667.61	1477.2	-127.956	2675.39	1286.1	-146.573	2707.28	1131.16	-128.808	2859.32	1039.45	-62.5336	2917.24	983.306	-130.587	2901.27	953.632	-104.501	2970.76	941.395
868	0	115.802	2813.7	1677.78	186.984	2796.95	1663.26	92.8745	2619.51	1659.08	204.918	2623.93	1652.79	140.156	2593.76	1516.07	130.721	2519.44	1253.61	143.309	2740.63	1436.43	166.346	2804.4	1233.66	205.635	2505.63	1309.6	-43.2081	2679.54	1472.8	-126.439	2687.59	1282.1	-145.12	2720.28	1127.34	-127.286	2873.35	1036.65	-61.0238	2931.95	981.375	-129.035	2915.34	951.036	-103.031	2985.64	940.312
869	0	115.323	2824.84	1673.88	192.015	2810.95	1660.91	94.2527	2632.63	1656.01	206.322	2637.23	1649.41	141.319	2606.9	1512.69	131.902	2532.92	1250.06	144.449	2753.72	1432.96	167.354	2818.09	1230.39	206.461	2518.76	1306.02	-42.2599	2692.27	1468.92	-124.818	2700.1	1277.93	-143.769	2733.47	1123.24	-125.818	2887.32	1034.05	-59.5779	2946.11	979.541	-126.668	2930.37	948.883	-101.494	3000.43	939.071
870	0	117.793	2839.84	1670.81	204.035	2824.64	1661.52	95.7142	2645.83	1653.12	207.615	2650.59	1646.49	142.819	2620.47	1509.05	132.972	2546.59	1247.2	145.675	2767	1429.75	168.304	2831.9	1227.28	207.73	2532.46	1302.67	-40.8475	2704.99	1465.63	-122.916	2712.56	1274.46	-141.748	2746.19	1119.69	-124.045	2901.08	1031.23	-58.0393	2960.02	977.39	-125.729	2944.4	946.495	-100.403	3014.13	937.2
871	0	119.476	2853.72	1668.24	187.064	2837.16	1653.56	97.3334	2659.08	1650.07	208.983	2664.05	1643.78	143.659	2633.6	1506.06	134.193	2560.33	1244.22	146.921	2780.64	1426.79	169.326	2845.95	1224.37	209.5	2546.57	1299.95	-39.5666	2718.32	1462.44	-121.218	2724.73	1271.03	-140.741	2760.03	1112.26	-122.653	2913.89	1028.21	-56.7012	2973.56	975.01	-125.194	2957.26	944.265	-99.2168	3027.71	935.328
872	0	120.942	2867.46	1665.97	190.248	2851	1650.63	99.2465	2672.32	1647.16	210.906	2677.89	1641.15	145.741	2647.37	1503.06	135.55	2574.63	1240.81	148.412	2794.54	1424	170.522	2859.92	1221.77	211.143	2560.44	1296.59	-38.1045	2731.66	1459.68	-119.415	2737.1	1268.45	-139.791	2772.68	1109.65	-120.768	2927.07	1025.59	-55.4999	2986.79	972.744	-124.366	2970.41	942.173	-98.3091	3040.68	932.938
873	0	122.102	2880.44	1663.04	190.346	2864.35	1647.71	100.897	2685.65	1644.59	213.009	2691.4	1638.06	147.768	2661.39	1500.19	136.684	2589.04	1238.17	150.071	2808.19	1421.22	171.816	2873.92	1219.4	212.106	2574.71	1293.28	-36.215	2745.61	1457.27	-117.176	2750.11	1266.07	-135.789	2783.79	1106.86	-119.037	2939.7	1022.83	-54.1356	2999.44	970.339	-123.634	2980.34	938.45	-97.2889	3052.76	930.687
874	0	123.62	2894.39	1661.02	210.481	2879.84	1652.29	102.633	2699.14	1642.56	214.461	2705.19	1636.45	149.416	2674.86	1498.18	137.844	2603.66	1235.62	151.652	2822.21	1418.98	173.097	2888.19	1217.14	212.939	2588.54	1290.77	-34.5318	2759.42	1455.13	-115.241	2762.81	1263.77	-132.397	2795.74	1107.16	-117.614	2951.3	1019.95	-52.6335	3011.91	967.636	-121.972	2991.43	935.213	-96.2774	3064.77	928.039
875	0	125.3	2908.47	1659.62	219.431	2885.86	1652.9	104.579	2712.88	1640.91	216.531	2718.92	1634.67	150.982	2688.29	1496.48	139.387	2618.63	1233.58	153.328	2836.28	1417.06	174.565	2902.56	1215.27	214.767	2603.47	1288.42	-32.9244	2773.51	1453.6	-113.147	2776.31	1261.93	-134.138	2809.47	1108.61	-115.787	2963.36	1017.03	-51.4779	3023.98	964.641	-120.923	3002.08	931.935	-95.1894	3076.53	924.88
876	0	126.71	2921.83	1657.9	228.014	2891.91	1653.64	106.578	2726.4	1639.72	218.399	2732.99	1633.68	153.397	2702.94	1494.62	140.704	2633.72	1231.93	154.869	2850.42	1415.69	175.512	2916.37	1214.3	217.546	2618.88	1286.73	-31.2023	2787.55	1452.11	-111.127	2789.93	1260.54	-126.955	2819.41	1102.61	-114.006	2974.97	1014.2	-50.0862	3035.81	961.638	-119.383	3013.57	929.39	-94.3635	3087.5	921.773
877	0	128.521	2936.02	1656.87	222.667	2913.74	1650.08	108.389	2740.15	1638.95	220.297	2746.9	1632.58	154.952	2716.65	1493.78	141.974	2648.65	1231.01	156.743	2864.86	1414.66	176.693	2930.87	1213.47	219.029	2633.47	1285.39	-29.4574	2801.72	1451.21	-106.232	2802.85	1257.76	-124.321	2831.31	1101.39	-112.232	2986.38	1011.44	-48.9228	3047.22	958.351	-117.481	3025.59	927.024	-93.492	3097.87	918.169
878	0	130.049	2949.6	1656.18	217.026	2935.55	1647.7	110.479	2753.94	1638.58	222.125	2761.05	1632.87	157.05	2731.18	1493.13	142.937	2663.47	1230.06	158.31	2878.92	1414.12	177.98	2945.81	1213.42	220.574	2648.45	1284.6	-27.788	2816.07	1450.75	-107.089	2817.76	1258.89	-121.266	2842.92	1100.42	-110.648	2997.19	1008.83	-47.8697	3058.12	955.097	-115.841	3037.58	925.362	-92.9524	3107.74	914.785
[truncated: 69 more columns]

## Sheet: Sheet2
Devices
		025370 - Force			025370 - Moment			025370 - CoP			027571 - Force			027571 - Moment			027571 - CoP			037720 - Force			037720 - Moment			037720 - CoP
Frame	Sub Frame	Fx	Fy	Fz	Mx	My	Mz	Cx	Cy	Cz	Fx	Fy	Fz	Mx	My	Mz	Cx	Cy	Cz	Fx	Fy	Fz	Mx	My	Mz	Cx	Cy	Cz
		N	N	N	N.mm	N.mm	N.mm	mm	mm	mm	N	N	N	N.mm	N.mm	N.mm	mm	mm	mm	N	N	N	N.mm	N.mm	N.mm	mm	mm	mm
616	0	0	0	0	0	0	0	200	300	0	0	0	0	0	0	0	200	903	0	0	0	0	0	0	0	603	903	0
616	1	0	0	0	0	0	0	200	300	0	0	0	0	0	0	0	200	903	0	0	0	0	0	0	0	603	903	0
616	2	0	0	0	0	0	0	200	300	0	0	0	0	0	0	0	200	903	0	0	0	0	0	0	0	603	903	0
616	3	0	0	0	0	0	0	200	300	0	0	0	0	0	0	0	200	903	0	0	0	0	0	0	0	603	903	0
616	4	0	0	0	0	0	0	200	300	0	0	0	0	0	0	0	200	903	0	0	0	0	0	0	0	603	903	0
616	5	0	0	0	0	0	0	200	300	0	0	0	0	0	0	0	200	903	0	0	0	0	0	0	0	603	903	0
616	6	0	0	0	0	0	0	200	300	0	0	0	0	0	0	0	200	903	0	0	0	0	0	0	0	603	903	0
616	7	0	0	0	0	0	0	200	300	0	0	0	0	0	0	0	200	903	0	0	0	0	0	0	0	603	903	0
616	8	0	0	0	0	0	0	200	300	0	0	0	0	0	0	0	200	903	0	0	0	0	0	0	0	603	903	0
616	9	0	0	0	0	0	0	200	300	0	0	0	0	0	0	0	200	903	0	0	0	0	0	0	0	603	903	0
617	0	0	0	0	0	0	0	200	300	0	0	0	0	0	0	0	200	903	0	0	0	0	0	0	0	603	903	0
617	1	0	0	0	0	0	0	200	300	0	0	0	0	0	0	0	200	903	0	0	0	0	0	0	0	603	903	0
617	2	0	0	0	0	0	0	200	300	0	0	0	0	0	0	0	200	903	0	0	0	0	0	0	0	603	903	0
617	3	0	0	0	0	0	0	200	300	0	0	0	0	0	0	0	200	903	0	0	0	0	0	0	0	603	903	0
617	4	0	0	0	0	0	0	200	300	0	0	0	0	0	0	0	200	903	0	0	0	0	0	0	0	603	903	0
617	5	0	0	0	0	0	0	200	300	0	0	0	0	0	0	0	200	903	0	0	0	0	0	0	0	603	903	0
617	6	0	0	0	0	0	0	200	300	0	0	0	0	0	0	0	200	903	0	0	0	0	0	0	0	603	903	0
617	7	0	0	0	0	0	0	200	300	0	0	0	0	0	0	0	200	903	0	0	0	0	0	0	0	603	903	0
617	8	0	0	0	0	0	0	200	300	0	0	0	0	0	0	0	200	903	0	0	0	0	0	0	0	603	903	0
617	9	0	0	0	0	0	0	200	300	0	0	0	0	0	0	0	200	903	0	0	0	0	0	0	0	603	903	0
618	0	0	0	0	0	0	0	200	300	0	0	0	0	0	0	0	200	903	0	0	0	0	0	0	0	603	903	0
618	1	0	0	0	0	0	0	200	300	0	0	0	0	0	0	0	200	903	0	0	0	0	0	0	0	603	903	0
618	2	0	0	0	0	0	0	200	300	0	0	0	0	0	0	0	200	903	0	0	0	0	0	0	0	603	903	0
618	3	0	0	0	0	0	0	200	300	0	0	0	0	0	0	0	200	903	0	0	0	0	0	0	0	603	903	0
618	4	0	0	0	0	0	0	200	300	0	0	0	0	0	0	0	200	903	0	0	0	0	0	0	0	603	903	0
618	5	0	0	0	0	0	0	200	300	0	0	0	0	0	0	0	200	903	0	0	0	0	0	0	0	603	903	0
618	6	0	0	0	0	0	0	200	300	0	0	0	0	0	0	0	200	903	0	0	0	0	0	0	0	603	903	0
618	7	0	0	0	0	0	0	200	300	0	0	0	0	0	0	0	200	903	0	0	0	0	0	0	0	603	903	0
618	8	0	0	0	0	0	0	200	300	0	0	0	0	0	0	0	200	903	0	0	0	0	0	0	0	603	903	0
618	9	0	0	0	0	0	0	200	300	0	0	0	0	0	0	0	200	903	0	0	0	0	0	0	0	603	903	0
619	0	0	0	0	0	0	0	200	300	0	0	0	0	0	0	0	200	903	0	0	0	0	0	0	0	603	903	0
619	1	0	0	0	0	0	0	200	300	0	0	0	0	0	0	0	200	903	0	0	0	0	0	0	0	603	903	0
619	2	0	0	0	0	0	0	200	300	0	0	0	0	0	0	0	200	903	0	0	0	0	0	0	0	603	903	0
619	3	0	0	0	0	0	0	200	300	0	0	0	0	0	0	0	200	903	0	0	0	0	0	0	0	603	903	0
619	4	0	0	0	0	0	0	200	300	0	0	0	0	0	0	0	200	903	0	0	0	0	0	0	0	603	903	0
619	5	0	0	0	0	0	0	200	300	0	0	0	0	0	0	0	200	903	0	0	0	0	0	0	0	603	903	0
619	6	0	0	0	0	0	0	200	300	0	0	0	0	0	0	0	200	903	0	0	0	0	0	0	0	603	903	0
619	7	0	0	0	0	0	0	200	300	0	0	0	0	0	0	0	200	903	0	0	0	0	0	0	0	603	903	0
619	8	0	0	0	0	0	0	200	300	0	0	0	0	0	0	0	200	903	0	0	0	0	0	0	0	603	903	0
619	9	0	0	0	0	0	0	200	300	0	0	0	0	0	0	0	200	903	0	0	0	0	0	0	0	603	903	0
620	0	0	0	0	0	0	0	200	300	0	0	0	0	0	0	0	200	903	0	0	0	0	0	0	0	603	903	0
620	1	0	0	0	0	0	0	200	300	0	0	0	0	0	0	0	200	903	0	0	0	0	0	0	0	603	903	0
620	2	0	0	0	0	0	0	200	300	0	0	0	0	0	0	0	200	903	0	0	0	0	0	0	0	603	903	0
620	3	0	0	0	0	0	0	200	300	0	0	0	0	0	0	0	200	903	0	0	0	0	0	0	0	603	903	0
620	4	0	0	0	0	0	0	200	300	0	0	0	0	0	0	0	200	903	0	0	0	0	0	0	0	603	903	0
620	5	0	0	0	0	0	0	200	300	0	0	0	0	0	0	0	200	903	0	0	0	0	0	0	0	603	903	0
620	6	0	0	0	0	0	0	200	300	0	0	0	0	0	0	0	200	903	0	0	0	0	0	0	0	603	903	0
620	7	0	0	0	0	0	0	200	300	0	0	0	0	0	0	0	200	903	0	0	0	0	0	0	0	603	903	0
620	8	0	0	0	0	0	0	200	300	0	0	0	0	0	0	0	200	903	0	0	0	0	0	0	0	603	903	0
620	9	0	0	0	0	0	0	200	300	0	0	0	0	0	0	0	200	903	0	0	0	0	0	0	0	603	903	0
621	0	0	0	0	0	0	0	200	300	0	0	0	0	0	0	0	200	903	0	0	0	0	0	0	0	603	903	0
621	1	0	0	0	0	0	0	200	300	0	0	0	0	0	0	0	200	903	0	0	0	0	0	0	0	603	903	0
621	2	0	0	0	0	0	0	200	300	0	0	0	0	0	0	0	200	903	0	0	0	0	0	0	0	603	903	0
621	3	0	0	0	0	0	0	200	300	0	0	0	0	0	0	0	200	903	0	0	0	0	0	0	0	603	903	0
621	4	0	0	0	0	0	0	200	300	0	0	0	0	0	0	0	200	903	0	0	0	0	0	0	0	603	903	0
621	5	0	0	0	0	0	0	200	300	0	0	0	0	0	0	0	200	903	0	0	0	0	0	0	0	603	903	0
621	6	0	0	0	0	0	0	200	300	0	0	0	0	0	0	0	200	903	0	0	0	0	0	0	0	603	903	0
621	7	0	0	0	0	0	0	200	300	0	0	0	0	0	0	0	200	903	0	0	0	0	0	0	0	603	903	0
621	8	0	0	0	0	0	0	200	300	0	0	0	0	0	0	0	200	903	0	0	0	0	0	0	0	603	903	0
621	9	0	0	0	0	0	0	200	300	0	0	0	0	0	0	0	200	903	0	0	0	0	0	0	0	603	903	0
622	0	0	0	0	0	0	0	200	300	0	0	0	0	0	0	0	200	903	0	0	0	0	0	0	0	603	903	0
622	1	0	0	0	0	0	0	200	300	0	0	0	0	0	0	0	200	903	0	0	0	0	0	0	0	603	903	0
622	2	0	0	0	0	0	0	200	300	0	0	0	0	0	0	0	200	903	0	0	0	0	0	0	0	603	903	0
622	3	0	0	0	0	0	0	200	300	0	0	0	0	0	0	0	200	903	0	0	0	0	0	0	0	603	903	0
622	4	0	0	0	0	0	0	200	300	0	0	0	0	0	0	0	200	903	0	0	0	0	0	0	0	603	903	0
622	5	0	0	0	0	0	0	200	300	0	0	0	0	0	0	0	200	903	0	0	0	0	0	0	0	603	903	0
622	6	0	0	0	0	0	0	200	300	0	0	0	0	0	0	0	200	903	0	0	0	0	0	0	0	603	903	0
622	7	0	0	0	0	0	0	200	300	0	0	0	0	0	0	0	200	903	0	0	0	0	0	0	0	603	903	0
622	8	0	0	0	0	0	0	200	300	0	0	0	0	0	0	0	200	903	0	0	0	0	0	0	0	603	903	0
622	9	0	0	0	0	0	0	200	300	0	0	0	0	0	0	0	200	903	0	0	0	0	0	0	0	603	903	0
623	0	0	0	0	0	0	0	200	300	0	0	0	0	0	0	0	200	903	0	0	0	0	0	0	0	603	903	0
623	1	0	0	0	0	0	0	200	300	0	0	0	0	0	0	0	200	903	0	0	0	0	0	0	0	603	903	0
623	2	0	0	0	0	0	0	200	300	0	0	0	0	0	0	0	200	903	0	0	0	0	0	0	0	603	903	0
623	3	0	0	0	0	0	0	200	300	0	0	0	0	0	0	0	200	903	0	0	0	0	0	0	0	603	903	0
623	4	0	0	0	0	0	0	200	300	0	0	0	0	0	0	0	200	903	0	0	0	0	0	0	0	603	903	0
623	5	0	0	0	0	0	0	200	300	0	0	0	0	0	0	0	200	903	0	0	0	0	0	0	0	603	903	0
623	6	0	0	0	0	0	0	200	300	0	0	0	0	0	0	0	200	903	0	0	0	0	0	0	0	603	903	0
623	7	0	0	0	0	0	0	200	300	0	0	0	0	0	0	0	200	903	0	0	0	0	0	0	0	603	903	0
623	8	0	0	0	0	0	0	200	300	0	0	0	0	0	0	0	200	903	0	0	0	0	0	0	0	603	903	0
623	9	0	0	0	0	0	0	200	300	0	0	0	0	0	0	0	200	903	0	0	0	0	0	0	0	603	903	0
624	0	0	0	0	0	0	0	200	300	0	0	0	0	0	0	0	200	903	0	0	0	0	0	0	0	603	903	0
624	1	0	0	0	0	0	0	200	300	0	0	0	0	0	0	0	200	903	0	0	0	0	0	0	0	603	903	0
624	2	0	0	0	0	0	0	200	300	0	0	0	0	0	0	0	200	903	0	0	0	0	0	0	0	603	903	0
624	3	0	0	0	0	0	0	200	300	0	0	0	0	0	0	0	200	903	0	0	0	0	0	0	0	603	903	0
624	4	0	0	0	0	0	0	200	300	0	0	0	0	0	0	0	200	903	0	0	0	0	0	0	0	603	903	0
624	5	0	0	0	0	0	0	200	300	0	0	0	0	0	0	0	200	903	0	0	0	0	0	0	0	603	903	0
624	6	0	0	0	0	0	0	200	300	0	0	0	0	0	0	0	200	903	0	0	0	0	0	0	0	603	903	0
624	7	0	0	0	0	0	0	200	300	0	0	0	0	0	0	0	200	903	0	0	0	0	0	0	0	603	903	0
624	8	0	0	0	0	0	0	200	300	0	0	0	0	0	0	0	200	903	0	0	0	0	0	0	0	603	903	0
624	9	0	0	0	0	0	0	200	300	0	0	0	0	0	0	0	200	903	0	0	0	0	0	0	0	603	903	0
625	0	0	0	0	0	0	0	200	300	0	0	0	0	0	0	0	200	903	0	0	0	0	0	0	0	603	903	0
625	1	0	0	0	0	0	0	200	300	0	0	0	0	0	0	0	200	903	0	0	0	0	0	0	0	603	903	0
625	2	0	0	0	0	0	0	200	300	0	0	0	0	0	0	0	200	903	0	0	0	0	0	0	0	603	903	0
625	3	0	0	0	0	0	0	200	300	0	0	0	0	0	0	0	200	903	0	0	0	0	0	0	0	603	903	0
625	4	0	0	0	0	0	0	200	300	0	0	0	0	0	0	0	200	903	0	0	0	0	0	0	0	603	903	0
625	5	0	0	0	0	0	0	200	300	0	0	0	0	0	0	0	200	903	0	0	0	0	0	0	0	603	903	0
625	6	0	0	0	0	0	0	200	300	0	0	0	0	0	0	0	200	903	0	0	0	0	0	0	0	603	903	0
625	7	0	0	0	0	0	0	200	300	0	0	0	0	0	0	0	200	903	0	0	0	0	0	0	0	603	903	0
625	8	0	0	0	0	0	0	200	300	0	0	0	0	0	0	0	200	903	0	0	0	0	0	0	0	603	903	0
625	9	0	0	0	0	0	0	200	300	0	0	0	0	0	0	0	200	903	0	0	0	0	0	0	0	603	903	0
626	0	0	0	0	0	0	0	200	300	0	0	0	0	0	0	0	200	903	0	0	0	0	0	0	0	603	903	0
626	1	0	0	0	0	0	0	200	300	0	0	0	0	0	0	0	200	903	0	0	0	0	0	0	0	603	903	0
626	2	0	0	0	0	0	0	200	300	0	0	0	0	0	0	0	200	903	0	0	0	0	0	0	0	603	903	0
626	3	0	0	0	0	0	0	200	300	0	0	0	0	0	0	0	200	903	0	0	0	0	0	0	0	603	903	0
626	4	0	0	0	0	0	0	200	300	0	0	0	0	0	0	0	200	903	0	0	0	0	0	0	0	603	903	0
626	5	0	0	0	0	0	0	200	300	0	0	0	0	0	0	0	200	903	0	0	0	0	0	0	0	603	903	0
626	6	0	0	0	0	0	0	200	300	0	0	0	0	0	0	0	200	903	0	0	0	0	0	0	0	603	903	0
626	7	0	0	0	0	0	0	200	300	0	0	0	0	0	0	0	200	903	0	0	0	0	0	0	0	603	903	0
626	8	0	0	0	0	0	0	200	300	0	0	0	0	0	0	0	200	903	0	0	0	0	0	0	0	603	903	0
626	9	0	0	0	0	0	0	200	300	0	0	0	0	0	0	0	200	903	0	0	0	0	0	0	0	603	903	0
627	0	0	0	0	0	0	0	200	300	0	0	0	0	0	0	0	200	903	0	0	0	0	0	0	0	603	903	0
627	1	0	0	0	0	0	0	200	300	0	0	0	0	0	0	0	200	903	0	0	0	0	0	0	0	603	903	0
627	2	0	0	0	0	0	0	200	300	0	0	0	0	0	0	0	200	903	0	0	0	0	0	0	0	603	903	0
627	3	0	0	0	0	0	0	200	300	0	0	0	0	0	0	0	200	903	0	0	0	0	0	0	0	603	903	0
627	4	0	0	0	0	0	0	200	300	0	0	0	0	0	0	0	200	903	0	0	0	0	0	0	0	603	903	0
627	5	0	0	0	0	0	0	200	300	0	0	0	0	0	0	0	200	903	0	0	0	0	0	0	0	603	903	0
627	6	0	0	0	0	0	0	200	300	0	0	0	0	0	0	0	200	903	0	0	0	0	0	0	0	603	903	0
627	7	0	0	0	0	0	0	200	300	0	0	0	0	0	0	0	200	903	0	0	0	0	0	0	0	603	903	0
627	8	0	0	0	0	0	0	200	300	0	0	0	0	0	0	0	200	903	0	0	0	0	0	0	0	603	903	0
627	9	0	0	0	0	0	0	200	300	0	0	0	0	0	0	0	200	903	0	0	0	0	0	0	0	603	903	0
628	0	0	0	0	0	0	0	200	300	0	0	0	0	0	0	0	200	903	0	0	0	0	0	0	0	603	903	0
628	1	0	0	0	0	0	0	200	300	0	0	0	0	0	0	0	200	903	0	0	0	0	0	0	0	603	903	0
628	2	0	0	0	0	0	0	200	300	0	0	0	0	0	0	0	200	903	0	0	0	0	0	0	0	603	903	0
628	3	0	0	0	0	0	0	200	300	0	0	0	0	0	0	0	200	903	0	0	0	0	0	0	0	603	903	0
628	4	0	0	0	0	0	0	200	300	0	0	0	0	0	0	0	200	903	0	0	0	0	0	0	0	603	903	0
628	5	0	0	0	0	0	0	200	300	0	0	0	0	0	0	0	200	903	0	0	0	0	0	0	0	603	903	0
628	6	0	0	0	0	0	0	200	300	0	0	0	0	0	0	0	200	903	0	0	0	0	0	0	0	603	903	0
628	7	0	0	0	0	0	0	200	300	0	0	0	0	0	0	0	200	903	0	0	0	0	0	0	0	603	903	0
628	8	0	0	0	0	0	0	200	300	0	0	0	0	0	0	0	200	903	0	0	0	0	0	0	0	603	903	0
628	9	0	0	0	0	0	0	200	300	0	0	0	0	0	0	0	200	903	0	0	0	0	0	0	0	603	903	0
629	0	0	0	0	0	0	0	200	300	0	0	0	0	0	0	0	200	903	0	0	0	0	0	0	0	603	903	0
629	1	0	0	0	0	0	0	200	300	0	0	0	0	0	0	0	200	903	0	0	0	0	0	0	0	603	903	0
629	2	0	0	0	0	0	0	200	300	0	0	0	0	0	0	0	200	903	0	0	0	0	0	0	0	603	903	0
629	3	0	0	0	0	0	0	200	300	0	0	0	0	0	0	0	200	903	0	0	0	0	0	0	0	603	903	0
629	4	0	0	0	0	0	0	200	300	0	0	0	0	0	0	0	200	903	0	0	0	0	0	0	0	603	903	0
629	5	0	0	0	0	0	0	200	300	0	0	0	0	0	0	0	200	903	0	0	0	0	0	0	0	603	903	0
629	6	0	0	0	0	0	0	200	300	0	0	0	0	0	0	0	200	903	0	0	0	0	0	0	0	603	903	0
629	7	0	0	0	0	0	0	200	300	0	0	0	0	0	0	0	200	903	0	0	0	0	0	0	0	603	903	0
629	8	0	0	0	0	0	0	200	300	0	0	0	0	0	0	0	200	903	0	0	0	0	0	0	0	603	903	0
629	9	0	0	0	0	0	0	200	300	0	0	0	0	0	0	0	200	903	0	0	0	0	0	0	0	603	903	0
630	0	0	0	0	0	0	0	200	300	0	0	0	0	0	0	0	200	903	0	0	0	0	0	0	0	603	903	0
630	1	0	0	0	0	0	0	200	300	0	0	0	0	0	0	0	200	903	0	0	0	0	0	0	0	603	903	0
630	2	0	0	0	0	0	0	200	300	0	0	0	0	0	0	0	200	903	0	0	0	0	0	0	0	603	903	0
630	3	0	0	0	0	0	0	200	300	0	0	0	0	0	0	0	200	903	0	0	0	0	0	0	0	603	903	0
630	4	0	0	0	0	0	0	200	300	0	0	0	0	0	0	0	200	903	0	0	0	0	0	0	0	603	903	0
630	5	0	0	0	0	0	0	200	300	0	0	0	0	0	0	0	200	903	0	0	0	0	0	0	0	603	903	0
630	6	0	0	0	0	0	0	200	300	0	0	0	0	0	0	0	200	903	0	0	0	0	0	0	0	603	903	0
630	7	0	0	0	0	0	0	200	300	0	0	0	0	0	0	0	200	903	0	0	0	0	0	0	0	603	903	0
630	8	0	0	0	0	0	0	200	300	0	0	0	0	0	0	0	200	903	0	0	0	0	0	0	0	603	903	0
630	9	0	0	0	0	0	0	200	300	0	0	0	0	0	0	0	200	903	0	0	0	0	0	0	0	603	903	0
631	0	0	0	0	0	0	0	200	300	0	0	0	0	0	0	0	200	903	0	0	0	0	0	0	0	603	903	0
631	1	0	0	0	0	0	0	200	300	0	0	0	0	0	0	0	200	903	0	0	0	0	0	0	0	603	903	0
631	2	-3.58339	5.79788	-10.4571	3590.42	750.966	361.77	271.814	-43.3463	0	0	0	0	0	0	0	200	903	0	0	0	0	0	0	0	603	903	0
631	3	-2.82045	10.8333	-19.6124	4597.5	1117.18	773.757	256.963	65.5821	0	0	0	0	0	0	0	200	903	0	0	0	0	0	0	0	603	903	0
631	4	2.21495	8.69705	-22.6642	5513.03	2093.74	819.533	292.381	56.7513	0	0	0	0	0	0	0	200	903	0	0	0	0	0	0	0	603	903	0
631	5	0.994248	11.9014	-22.359	6428.56	2215.81	1139.97	299.101	12.4846	0	0	0	0	0	0	0	200	903	0	0	0	0	0	0	0	603	903	0
631	6	-3.58339	15.1057	-22.0538	6703.22	2154.77	1460.4	297.705	-3.948	0	0	0	0	0	0	0	200	903	0	0	0	0	0	0	0	603	903	0
631	7	-0.684218	15.5635	-26.9366	6977.88	2154.77	1185.74	279.994	40.9523	0	0	0	0	0	0	0	200	903	0	0	0	0	0	0	0	603	903	0
631	8	0.231309	14.648	-30.9039	8259.62	2093.74	1323.07	267.75	32.7325	0	0	0	0	0	0	0	200	903	0	0	0	0	0	0	0	603	903	0
631	9	-1.44716	16.3264	-33.9557	8808.93	3192.37	2101.27	294.016	40.5757	0	0	0	0	0	0	0	200	903	0	0	0	0	0	0	0	603	903	0
632	0	3.89342	19.836	-37.0074	9907.56	3314.44	2467.48	289.562	32.2818	0	0	0	0	0	0	0	200	903	0	0	0	0	0	0	0	603	903	0
632	1	3.89342	19.3782	-43.4161	10731.5	3802.72	2650.59	287.588	52.8214	0	0	0	0	0	0	0	200	903	0	0	0	0	0	0	0	603	903	0
632	2	0.994248	23.4981	-48.6041	12745.7	4229.97	3108.35	287.029	37.7651	0	0	0	0	0	0	0	200	903	0	0	0	0	0	0	0	603	903	0
632	3	5.11412	23.4981	-54.7076	13935.9	4596.18	3474.56	284.014	45.2662	0	0	0	0	0	0	0	200	903	0	0	0	0	0	0	0	603	903	0
632	4	7.25035	25.1765	-58.6749	14851.4	4779.29	3337.23	281.454	46.8866	0	0	0	0	0	0	0	200	903	0	0	0	0	0	0	0	603	903	0
632	5	4.96153	25.7869	-65.3888	17231.8	5511.71	3566.12	284.291	36.4719	0	0	0	0	0	0	0	200	903	0	0	0	0	0	0	0	603	903	0
632	6	3.89342	22.2774	-72.1027	18330.4	6244.13	3245.68	286.601	45.7733	0	0	0	0	0	0	0	200	903	0	0	0	0	0	0	0	603	903	0
632	7	4.04601	20.5989	-81.5631	20344.6	6610.34	2650.59	281.046	50.5664	0	0	0	0	0	0	0	200	903	0	0	0	0	0	0	0	603	903	0
632	8	2.21495	19.5308	-86.7511	22816.5	7342.76	1918.17	284.642	36.9889	0	0	0	0	0	0	0	200	903	0	0	0	0	0	0	0	603	903	0
632	9	-1.14198	18.0049	-96.2115	24739.1	8197.25	1506.18	285.2	42.8676	0	0	0	0	0	0	0	200	903	0	0	0	0	0	0	0	603	903	0
633	0	-0.226455	11.5962	-105.672	27485.7	7831.04	911.086	274.107	39.8962	0	0	0	0	0	0	0	200	903	0	0	0	0	0	0	0	603	903	0
633	1	-2.82045	9.45999	-113.912	28767.4	9478.99	315.993	283.214	47.4586	0	0	0	0	0	0	0	200	903	0	0	0	0	0	0	0	603	903	0
633	2	-4.34633	7.93411	-122.151	30964.7	9906.24	41.3351	281.098	46.5058	0	0	0	0	0	0	0	200	903	0	0	0	0	0	0	0	603	903	0
633	3	-4.04115	5.34012	-129.171	33162	10333.5	-736.863	279.999	43.27	0	0	0	0	0	0	0	200	903	0	0	0	0	0	0	0	603	903	0
633	4	-6.63515	3.81424	-137.715	34901.5	11310	-1103.07	282.126	46.5683	0	0	0	0	0	0	0	200	903	0	0	0	0	0	0	0	603	903	0
633	5	-6.63515	2.89871	-145.65	37831.1	11737.3	-1652.39	280.586	40.2599	0	0	0	0	0	0	0	200	903	0	0	0	0	0	0	0	603	903	0
633	6	-6.94032	-2.44187	-151.754	39296	12225.6	-2339.04	280.562	41.0539	0	0	0	0	0	0	0	200	903	0	0	0	0	0	0	0	603	903	0
633	7	-9.83949	-2.74704	-159.688	40852.4	12713.9	-3025.68	279.617	44.1739	0	0	0	0	0	0	0	200	903	0	0	0	0	0	0	0	603	903	0
633	8	-12.8912	-3.50998	-166.707	42958.1	13629.4	-3254.56	281.756	42.314	0	0	0	0	0	0	0	200	903	0	0	0	0	0	0	0	603	903	0
633	9	-12.4335	-4.12033	-171.59	43782.1	13751.5	-3254.56	280.141	44.8447	0	0	0	0	0	0	0	200	903	0	0	0	0	0	0	0	603	903	0
634	0	-13.6542	-4.73068	-179.525	45430	14300.8	-4170.09	279.659	46.9425	0	0	0	0	0	0	0	200	903	0	0	0	0	0	0	0	603	903	0
634	1	-15.3327	-3.35739	-182.881	47718.8	15094.2	-3895.43	282.536	39.0723	0	0	0	0	0	0	0	200	903	0	0	0	0	0	0	0	603	903	0
634	2	-13.9594	-3.35739	-191.426	48725.9	14911.1	-4032.76	277.895	45.4587	0	0	0	0	0	0	0	200	903	0	0	0	0	0	0	0	603	903	0
634	3	-12.1283	-1.37375	-197.835	50648.5	15704.6	-3712.33	279.382	43.9861	0	0	0	0	0	0	0	200	903	0	0	0	0	0	0	0	603	903	0
634	4	-14.2645	-0.610811	-205.464	52204.9	16253.9	-3803.88	279.108	45.9175	0	0	0	0	0	0	0	200	903	0	0	0	0	0	0	0	603	903	0
634	5	-14.4171	1.8306	-209.737	52662.7	16986.3	-3391.89	280.989	48.9108	0	0	0	0	0	0	0	200	903	0	0	0	0	0	0	0	603	903	0
634	6	-13.6542	3.50906	-215.23	54493.7	17169.4	-3620.77	279.772	46.8117	0	0	0	0	0	0	0	200	903	0	0	0	0	0	0	0	603	903	0
634	7	-12.4335	9.00223	-222.249	55226.2	17413.6	-3346.12	278.352	51.5124	0	0	0	0	0	0	0	200	903	0	0	0	0	0	0	0	603	903	0
634	8	-15.1801	12.6643	-226.522	56507.9	18451.2	-2705.25	281.454	50.5408	0	0	0	0	0	0	0	200	903	0	0	0	0	0	0	0	603	903	0
634	9	-12.5861	14.648	-233.235	58430.5	18268.1	-2247.48	278.325	49.4784	0	0	0	0	0	0	0	200	903	0	0	0	0	0	0	0	603	903	0
635	0	-13.9594	19.5308	-237.203	58705.2	18634.3	-2018.6	278.558	52.5106	0	0	0	0	0	0	0	200	903	0	0	0	0	0	0	0	603	903	0
635	1	-14.112	23.6507	-242.086	60444.7	18817.4	-1606.61	277.73	50.3169	0	0	0	0	0	0	0	200	903	0	0	0	0	0	0	0	603	903	0
635	2	-12.4335	25.9395	-246.053	61451.8	19000.5	-1377.73	277.221	50.2498	0	0	0	0	0	0	0	200	903	0	0	0	0	0	0	0	603	903	0
635	3	-13.1964	30.2119	-248.799	62367.3	19671.9	-1194.63	279.067	49.3271	0	0	0	0	0	0	0	200	903	0	0	0	0	0	0	0	603	903	0
635	4	-15.3327	33.4163	-253.682	63557.5	19610.8	-645.311	277.305	49.4603	0	0	0	0	0	0	0	200	903	0	0	0	0	0	0	0	603	903	0
635	5	-13.5016	35.7051	-258.26	63649	19366.7	-736.863	274.989	53.5466	0	0	0	0	0	0	0	200	903	0	0	0	0	0	0	0	603	903	0
635	6	-13.6542	38.9095	-261.006	64289.9	19916	178.664	276.305	53.6847	0	0	0	0	0	0	0	200	903	0	0	0	0	0	0	0	603	903	0
635	7	-14.2645	41.1983	-264.974	65663.2	20587.4	87.1114	277.696	52.1898	0	0	0	0	0	0	0	200	903	0	0	0	0	0	0	0	603	903	0
635	8	-13.0438	44.4026	-264.363	65754.7	20343.2	544.875	276.952	51.2714	0	0	0	0	0	0	0	200	903	0	0	0	0	0	0	0	603	903	0
635	9	-11.9757	45.3181	-269.551	66670.3	20953.6	407.546	277.735	52.6622	0	0	0	0	0	0	0	200	903	0	0	0	0	0	0	0	603	903	0
636	0	-14.112	45.1656	-272.908	68135.1	21686	773.757	279.463	50.337	0	0	0	0	0	0	0	200	903	0	0	0	0	0	0	0	603	903	0
636	1	-12.8912	48.0647	-280.233	68867.5	21197.7	819.533	275.643	54.2487	0	0	0	0	0	0	0	200	903	0	0	0	0	0	0	0	603	903	0
636	2	-13.1964	46.9966	-291.524	72071.9	22784.7	1048.42	278.157	52.7756	0	0	0	0	0	0	0	200	903	0	0	0	0	0	0	0	603	903	0
636	3	-14.8749	47.7596	-300.679	72804.3	23456	819.533	278.01	57.8673	0	0	0	0	0	0	0	200	903	0	0	0	0	0	0	0	603	903	0
636	4	-14.7223	45.1656	-304.036	74269.1	24005.4	270.217	278.956	55.7228	0	0	0	0	0	0	0	200	903	0	0	0	0	0	0	0	603	903	0
636	5	-16.0956	50.5061	-313.192	76100.2	24371.6	499.099	277.817	57.0171	0	0	0	0	0	0	0	200	903	0	0	0	0	0	0	0	603	903	0
636	6	-18.2318	52.9475	-319.905	77839.7	24798.8	315.993	277.519	56.679	0	0	0	0	0	0	0	200	903	0	0	0	0	0	0	0	603	903	0
636	7	-16.5534	51.1165	-329.061	79670.7	25714.3	361.77	278.145	57.8843	0	0	0	0	0	0	0	200	903	0	0	0	0	0	0	0	603	903	0
636	8	-14.2645	49.2854	-336.995	80769.4	25775.4	1048.42	276.486	60.3249	0	0	0	0	0	0	0	200	903	0	0	0	0	0	0	0	603	903	0
636	9	-15.6378	52.1846	-340.657	81044.1	26507.8	1094.19	277.814	62.0951	0	0	0	0	0	0	0	200	903	0	0	0	0	0	0	0	603	903	0
637	0	-12.8912	53.1001	-346.456	82417.3	26996.1	1185.74	277.921	62.1129	0	0	0	0	0	0	0	200	903	0	0	0	0	0	0	0	603	903	0
637	1	-13.1964	52.4898	-351.339	83424.4	27057.1	1643.51	277.012	62.5526	0	0	0	0	0	0	0	200	903	0	0	0	0	0	0	0	603	903	0
637	2	-14.112	55.3889	-354.085	83882.2	27301.3	1918.17	277.104	63.1016	0	0	0	0	0	0	0	200	903	0	0	0	0	0	0	0	603	903	0
637	3	-12.5861	57.22	-355.611	84889.2	27606.4	2009.72	277.631	61.2862	0	0	0	0	0	0	0	200	903	0	0	0	0	0	0	0	603	903	0
637	4	-11.2128	56.3045	-358.663	84431.5	28216.8	2284.38	278.672	64.5936	0	0	0	0	0	0	0	200	903	0	0	0	0	0	0	0	603	903	0
637	5	-10.6024	59.2036	-363.851	85438.6	28155.8	2925.25	277.383	65.1823	0	0	0	0	0	0	0	200	903	0	0	0	0	0	0	0	603	903	0
637	6	-11.3654	60.7295	-368.123	86628.8	28583	3108.35	277.645	64.6745	0	0	0	0	0	0	0	200	903	0	0	0	0	0	0	0	603	903	0
637	7	-9.38173	63.0183	-368.123	86262.5	28949.2	3520.34	278.64	65.6693	0	0	0	0	0	0	0	200	903	0	0	0	0	0	0	0	603	903	0
637	8	-10.9076	64.239	-372.701	87086.5	29132.3	4115.43	278.165	66.3367	0	0	0	0	0	0	0	200	903	0	0	0	0	0	0	0	603	903	0
637	9	-9.6869	65.9175	-375.447	87635.9	29803.7	4298.54	279.382	66.5829	0	0	0	0	0	0	0	200	903	0	0	0	0	0	0	0	603	903	0
638	0	-6.94032	67.1382	-380.33	88093.6	29864.7	4573.2	278.523	68.376	0	0	0	0	0	0	0	200	903	0	0	0	0	0	0	0	603	903	0
638	1	-6.78773	70.19	-384.908	89466.9	30047.8	5214.06	278.065	67.5628	0	0	0	0	0	0	0	200	903	0	0	0	0	0	0	0	603	903	0
638	2	-6.94032	70.9529	-386.434	89924.6	30475.1	5717.6	278.862	67.2961	0	0	0	0	0	0	0	200	903	0	0	0	0	0	0	0	603	903	0
638	3	-4.34633	72.1736	-387.654	89833.1	30719.2	5626.05	279.244	68.265	0	0	0	0	0	0	0	200	903	0	0	0	0	0	0	0	603	903	0
638	4	-4.04115	74.1573	-391.011	90199.3	31329.6	6266.92	280.124	69.3179	0	0	0	0	0	0	0	200	903	0	0	0	0	0	0	0	603	903	0
638	5	-3.73598	74.615	-391.927	91389.5	31268.5	6633.13	279.782	66.82	0	0	0	0	0	0	0	200	903	0	0	0	0	0	0	0	603	903	0
638	6	-2.2101	76.2935	-394.673	90748.6	31451.7	6587.36	279.69	70.0666	0	0	0	0	0	0	0	200	903	0	0	0	0	0	0	0	603	903	0
638	7	-2.05751	76.1409	-397.42	92030.4	31634.8	7045.12	279.6	68.4305	0	0	0	0	0	0	0	200	903	0	0	0	0	0	0	0	603	903	0
638	8	-1.14198	77.3616	-399.556	91114.8	31146.5	7274	277.953	71.9599	0	0	0	0	0	0	0	200	903	0	0	0	0	0	0	0	603	903	0
638	9	1.14684	77.3616	-400.167	91481	32184.1	7457.11	280.427	71.3926	0	0	0	0	0	0	0	200	903	0	0	0	0	0	0	0	603	903	0
639	0	1.90978	78.1245	-404.134	92121.9	32184.1	7731.76	279.637	72.051	0	0	0	0	0	0	0	200	903	0	0	0	0	0	0	0	603	903	0
639	1	3.58824	79.9556	-404.439	92762.8	32367.2	8143.75	280.03	70.6384	0	0	0	0	0	0	0	200	903	0	0	0	0	0	0	0	603	903	0
639	2	3.43565	80.8711	-408.101	93220.5	32611.3	8326.86	279.91	71.5749	0	0	0	0	0	0	0	200	903	0	0	0	0	0	0	0	603	903	0
639	3	2.97789	78.8875	-412.679	93312.1	32916.5	8281.08	279.763	73.8869	0	0	0	0	0	0	0	200	903	0	0	0	0	0	0	0	603	903	0
639	4	3.74083	83.1599	-415.12	93403.7	33038.6	8693.07	279.588	74.9961	0	0	0	0	0	0	0	200	903	0	0	0	0	0	0	0	603	903	0
639	5	5.72447	85.1436	-417.867	94502.3	33587.9	9059.28	280.379	73.8459	0	0	0	0	0	0	0	200	903	0	0	0	0	0	0	0	603	903	0
639	6	7.09776	85.4488	-420.308	94227.6	34259.3	9242.38	281.51	75.813	0	0	0	0	0	0	0	200	903	0	0	0	0	0	0	0	603	903	0
639	7	8.16588	87.4324	-426.107	94776.9	34625.5	9745.92	281.26	77.5745	0	0	0	0	0	0	0	200	903	0	0	0	0	0	0	0	603	903	0
639	8	8.16588	88.0428	-430.074	95509.4	34747.5	9883.25	280.794	77.9233	0	0	0	0	0	0	0	200	903	0	0	0	0	0	0	0	603	903	0
639	9	9.84435	90.6367	-435.872	95692.5	35174.8	10295.2	280.7	80.4575	0	0	0	0	0	0	0	200	903	0	0	0	0	0	0	0	603	903	0
640	0	10.1495	93.0782	-439.534	96699.6	35480	10615.7	280.722	79.9954	0	0	0	0	0	0	0	200	903	0	0	0	0	0	0	0	603	903	0
640	1	9.99693	93.9937	-444.417	97248.9	36212.4	11622.8	281.483	81.1766	0	0	0	0	0	0	0	200	903	0	0	0	0	0	0	0	603	903	0
640	2	12.1332	96.4351	-448.384	97615.1	36456.5	11714.3	281.306	82.296	0	0	0	0	0	0	0	200	903	0	0	0	0	0	0	0	603	903	0
640	3	13.2013	99.1817	-452.352	98347.5	36700.7	11989	281.133	82.5862	0	0	0	0	0	0	0	200	903	0	0	0	0	0	0	0	603	903	0
640	4	13.3539	99.4868	-454.488	99537.7	37555.2	12263.6	282.632	80.9894	0	0	0	0	0	0	0	200	903	0	0	0	0	0	0	0	603	903	0
640	5	13.2013	102.844	-462.422	99720.8	37860.3	12858.7	281.874	84.3513	0	0	0	0	0	0	0	200	903	0	0	0	0	0	0	0	603	903	0
640	6	13.5065	104.217	-468.831	101186	38531.7	12904.5	282.187	84.1747	0	0	0	0	0	0	0	200	903	0	0	0	0	0	0	0	603	903	0
640	7	13.3539	106.658	-474.324	101369	38775.9	13316.5	281.75	86.2881	0	0	0	0	0	0	0	200	903	0	0	0	0	0	0	0	603	903	0
640	8	14.5746	108.795	-478.597	101918	39386.2	14140.5	282.295	87.0481	0	0	0	0	0	0	0	200	903	0	0	0	0	0	0	0	603	903	0
640	9	15.1849	109.558	-484.395	102559	39996.6	14186.2	282.57	88.2742	0	0	0	0	0	0	0	200	903	0	0	0	0	0	0	0	603	903	0
641	0	15.4901	112.304	-490.499	104207	40179.7	14506.7	281.916	87.5491	0	0	0	0	0	0	0	200	903	0	0	0	0	0	0	0	603	903	0
641	1	16.1004	112.457	-496.602	105214	41156.2	14781.3	282.876	88.1323	0	0	0	0	0	0	0	200	903	0	0	0	0	0	0	0	603	903	0
641	2	18.0841	114.44	-502.095	106496	41583.5	14827.1	282.82	87.8975	0	0	0	0	0	0	0	200	903	0	0	0	0	0	0	0	603	903	0
641	3	17.016	116.272	-507.589	106953	42071.8	14689.8	282.886	89.291	0	0	0	0	0	0	0	200	903	0	0	0	0	0	0	0	603	903	0
641	4	17.3212	118.408	-512.776	108144	42865.2	15330.6	283.594	89.1017	0	0	0	0	0	0	0	200	903	0	0	0	0	0	0	0	603	903	0
641	5	18.2367	119.323	-518.88	109242	43231.4	15696.9	283.317	89.4652	0	0	0	0	0	0	0	200	903	0	0	0	0	0	0	0	603	903	0
641	6	17.7789	121.002	-524.678	109059	43963.9	15788.4	283.792	92.1409	0	0	0	0	0	0	0	200	903	0	0	0	0	0	0	0	603	903	0
641	7	17.4737	122.07	-526.815	110982	44024.9	15971.5	283.568	89.3343	0	0	0	0	0	0	0	200	903	0	0	0	0	0	0	0	603	903	0
641	8	17.7789	123.291	-532.003	110890	44940.4	16291.9	284.474	91.5607	0	0	0	0	0	0	0	200	903	0	0	0	0	0	0	0	603	903	0
641	9	19.1522	124.664	-541.463	112172	45489.7	16200.4	284.013	92.8354	0	0	0	0	0	0	0	200	903	0	0	0	0	0	0	0	603	903	0
642	0	19.1522	125.579	-548.482	112630	45917	16612.4	283.716	94.6519	0	0	0	0	0	0	0	200	903	0	0	0	0	0	0	0	603	903	0
642	1	19.9151	126.953	-555.501	113728	46710.4	17024.4	284.087	95.2689	0	0	0	0	0	0	0	200	903	0	0	0	0	0	0	0	603	903	0
642	2	19.1522	129.699	-561.605	115559	47076.7	16795.5	283.825	94.2335	0	0	0	0	0	0	0	200	903	0	0	0	0	0	0	0	603	903	0
642	3	19.9151	130.157	-567.403	116383	47931.1	17024.4	284.475	94.884	0	0	0	0	0	0	0	200	903	0	0	0	0	0	0	0	603	903	0
642	4	19.4574	131.683	-571.981	117116	48358.4	17207.5	284.546	95.2451	0	0	0	0	0	0	0	200	903	0	0	0	0	0	0	0	603	903	0
642	5	19.61	131.835	-581.746	118581	48602.5	17299	283.546	96.1643	0	0	0	0	0	0	0	200	903	0	0	0	0	0	0	0	603	903	0
642	6	20.0677	130.767	-587.545	119222	49335	17253.2	283.968	97.0851	0	0	0	0	0	0	0	200	903	0	0	0	0	0	0	0	603	903	0
642	7	20.2203	134.124	-593.648	119496	49884.3	17619.5	284.03	98.7087	0	0	0	0	0	0	0	200	903	0	0	0	0	0	0	0	603	903	0
642	8	20.9833	134.887	-601.583	121144	50616.7	18077.2	284.139	98.6243	0	0	0	0	0	0	0	200	903	0	0	0	0	0	0	0	603	903	0
642	9	22.204	135.955	-609.822	121510	51227	18123	284.003	100.745	0	0	0	0	0	0	0	200	903	0	0	0	0	0	0	0	603	903	0
643	0	22.5091	137.329	-612.264	122792	52203.6	18123	285.263	99.4458	0	0	0	0	0	0	0	200	903	0	0	0	0	0	0	0	603	903	0
643	1	22.3566	137.634	-616.841	123616	52508.8	18397.7	285.125	99.5983	0	0	0	0	0	0	0	200	903	0	0	0	0	0	0	0	603	903	0
643	2	23.1195	138.244	-629.659	124532	52936	18580.8	284.071	102.224	0	0	0	0	0	0	0	200	903	0	0	0	0	0	0	0	603	903	0
643	3	23.1195	140.686	-635.762	125447	53302.2	18855.4	283.84	102.682	0	0	0	0	0	0	0	200	903	0	0	0	0	0	0	0	603	903	0
643	4	24.1876	140.838	-640.95	126820	54461.9	19450.5	284.971	102.137	0	0	0	0	0	0	0	200	903	0	0	0	0	0	0	0	603	903	0
643	5	24.798	141.143	-647.359	126820	55133.3	18992.8	285.167	104.096	0	0	0	0	0	0	0	200	903	0	0	0	0	0	0	0	603	903	0
643	6	25.4083	142.669	-652.852	128743	55621.6	19175.9	285.198	102.799	0	0	0	0	0	0	0	200	903	0	0	0	0	0	0	0	603	903	0
643	7	26.629	143.28	-657.43	129567	55926.8	19175.9	285.069	102.919	0	0	0	0	0	0	0	200	903	0	0	0	0	0	0	0	603	903	0
643	8	26.1712	144.348	-664.754	130299	56598.1	19633.6	285.142	103.989	0	0	0	0	0	0	0	200	903	0	0	0	0	0	0	0	603	903	0
643	9	25.5609	144.805	-671.163	131306	57208.5	19404.7	285.238	104.36	0	0	0	0	0	0	0	200	903	0	0	0	0	0	0	0	603	903	0
644	0	26.4764	142.974	-678.487	131856	58124	19862.5	285.667	105.662	0	0	0	0	0	0	0	200	903	0	0	0	0	0	0	0	603	903	0
644	1	28.3075	147.552	-686.422	132130	58368.2	19816.7	285.033	107.508	0	0	0	0	0	0	0	200	903	0	0	0	0	0	0	0	603	903	0
644	2	30.5963	149.383	-686.422	133504	59100.6	20640.7	286.1	105.508	0	0	0	0	0	0	0	200	903	0	0	0	0	0	0	0	603	903	0
644	3	29.6808	150.146	-694.966	134511	59894	20640.7	286.183	106.45	0	0	0	0	0	0	0	200	903	0	0	0	0	0	0	0	603	903	0
644	4	29.223	151.367	-699.239	134419	59955.1	20823.8	285.743	107.763	0	0	0	0	0	0	0	200	903	0	0	0	0	0	0	0	603	903	0
644	5	28.9178	151.824	-704.732	135152	60199.2	20732.3	285.421	108.223	0	0	0	0	0	0	0	200	903	0	0	0	0	0	0	0	603	903	0
644	6	29.5282	152.587	-708.699	135152	60565.4	21006.9	285.46	109.296	0	0	0	0	0	0	0	200	903	0	0	0	0	0	0	0	603	903	0
644	7	28.1549	153.656	-711.141	135976	60931.6	21281.6	285.682	108.792	0	0	0	0	0	0	0	200	903	0	0	0	0	0	0	0	603	903	0
644	8	27.2394	153.045	-714.498	136525	61603	20686.5	286.219	108.922	0	0	0	0	0	0	0	200	903	0	0	0	0	0	0	0	603	903	0
644	9	27.392	154.113	-717.244	136708	61542	20686.5	285.803	109.398	0	0	0	0	0	0	0	200	903	0	0	0	0	0	0	0	603	903	0
645	0	25.8661	154.418	-722.432	136800	61664.1	20274.5	285.356	110.64	0	0	0	0	0	0	0	200	903	0	0	0	0	0	0	0	603	903	0
645	1	23.8824	152.587	-724.874	137990	61847.2	20320.3	285.321	109.636	0	0	0	0	0	0	0	200	903	0	0	0	0	0	0	0	603	903	0
645	2	23.8824	152.74	-727.925	137898	62213.4	19999.8	285.467	110.56	0	0	0	0	0	0	0	200	903	0	0	0	0	0	0	0	603	903	0
645	3	23.8824	152.587	-730.367	138265	62457.5	19725.2	285.515	110.692	0	0	0	0	0	0	0	200	903	0	0	0	0	0	0	0	603	903	0
645	4	23.5773	152.13	-730.062	138539	62640.6	19908.3	285.802	110.236	0	0	0	0	0	0	0	200	903	0	0	0	0	0	0	0	603	903	0
645	5	23.2721	151.367	-734.944	138265	63189.9	19954.1	285.979	111.871	0	0	0	0	0	0	0	200	903	0	0	0	0	0	0	0	603	903	0
645	6	23.2721	151.062	-740.132	139272	63312	19862.5	285.541	111.829	0	0	0	0	0	0	0	200	903	0	0	0	0	0	0	0	603	903	0
645	7	24.9505	149.078	-743.184	140004	63678.2	20137.2	285.683	111.616	0	0	0	0	0	0	0	200	903	0	0	0	0	0	0	0	603	903	0
645	8	25.2557	151.367	-746.846	139455	64105.5	20411.8	285.835	113.275	0	0	0	0	0	0	0	200	903	0	0	0	0	0	0	0	603	903	0
645	9	26.9342	151.062	-750.508	140370	64593.7	20320.3	286.067	112.967	0	0	0	0	0	0	0	200	903	0	0	0	0	0	0	0	603	903	0
646	0	26.9342	151.824	-754.171	140096	65082	20686.5	286.296	114.239	0	0	0	0	0	0	0	200	903	0	0	0	0	0	0	0	603	903	0
646	1	28.6127	152.587	-756.917	140736	65326.2	20640.7	286.306	114.066	0	0	0	0	0	0	0	200	903	0	0	0	0	0	0	0	603	903	0
646	2	29.223	152.893	-758.443	141286	65631.3	21098.5	286.534	113.716	0	0	0	0	0	0	0	200	903	0	0	0	0	0	0	0	603	903	0
646	3	31.6644	153.198	-765.767	141286	66119.6	20823.8	286.344	115.498	0	0	0	0	0	0	0	200	903	0	0	0	0	0	0	0	603	903	0
646	4	31.5118	154.266	-767.903	141835	66546.9	21556.2	286.66	115.296	0	0	0	0	0	0	0	200	903	0	0	0	0	0	0	0	603	903	0
646	5	32.7325	154.266	-770.955	142751	67401.4	21602	287.426	114.839	0	0	0	0	0	0	0	200	903	0	0	0	0	0	0	0	603	903	0
646	6	34.5636	153.503	-777.364	142476	67340.3	22014	286.627	116.719	0	0	0	0	0	0	0	200	903	0	0	0	0	0	0	0	603	903	0
646	7	33.6481	155.487	-779.805	143849	67950.7	21876.7	287.138	115.532	0	0	0	0	0	0	0	200	903	0	0	0	0	0	0	0	603	903	0
646	8	34.8688	154.876	-782.552	143758	67767.6	22014	286.598	116.296	0	0	0	0	0	0	0	200	903	0	0	0	0	0	0	0	603	903	0
646	9	35.4791	154.418	-782.247	143758	68011.7	21693.6	286.944	116.225	0	0	0	0	0	0	0	200	903	0	0	0	0	0	0	0	603	903	0
647	0	35.6317	154.266	-788.655	145222	68255.9	21739.3	286.547	115.861	0	0	0	0	0	0	0	200	903	0	0	0	0	0	0	0	603	903	0
647	1	35.9369	153.198	-792.623	145222	68805.2	22288.6	286.807	116.782	0	0	0	0	0	0	0	200	903	0	0	0	0	0	0	0	603	903	0
647	2	36.3946	153.35	-795.369	144948	69232.4	22242.9	287.044	117.76	0	0	0	0	0	0	0	200	903	0	0	0	0	0	0	0	603	903	0
647	3	35.9369	152.893	-798.421	145863	69415.5	22242.9	286.941	117.31	0	0	0	0	0	0	0	200	903	0	0	0	0	0	0	0	603	903	0
647	4	37.4628	152.282	-800.252	145955	70025.9	22197.1	287.505	117.614	0	0	0	0	0	0	0	200	903	0	0	0	0	0	0	0	603	903	0
647	5	37.1576	150.756	-802.388	145772	70148	22288.6	287.424	118.328	0	0	0	0	0	0	0	200	903	0	0	0	0	0	0	0	603	903	0
647	6	36.8524	151.519	-806.661	147054	70453.1	22014	287.339	117.701	0	0	0	0	0	0	0	200	903	0	0	0	0	0	0	0	603	903	0
647	7	36.6998	151.367	-810.018	146504	70697.3	22242.9	287.279	119.135	0	0	0	0	0	0	0	200	903	0	0	0	0	0	0	0	603	903	0
647	8	36.3946	150.756	-809.713	147511	70697.3	22197.1	287.312	117.823	0	0	0	0	0	0	0	200	903	0	0	0	0	0	0	0	603	903	0
647	9	37.1576	150.299	-814.901	147969	71124.5	21922.4	287.28	118.421	0	0	0	0	0	0	0	200	903	0	0	0	0	0	0	0	603	903	0
648	0	37.7679	151.062	-817.037	147420	71490.7	22059.8	287.5	119.568	0	0	0	0	0	0	0	200	903	0	0	0	0	0	0	0	603	903	0
648	1	38.0731	151.214	-820.699	148427	72406.2	22151.3	288.225	119.146	0	0	0	0	0	0	0	200	903	0	0	0	0	0	0	0	603	903	0
648	2	37.9205	149.688	-825.276	148885	71918	22105.5	287.144	119.594	0	0	0	0	0	0	0	200	903	0	0	0	0	0	0	0	603	903	0
648	3	37.9205	149.993	-828.328	148427	72162.1	22105.5	287.118	120.812	0	0	0	0	0	0	0	200	903	0	0	0	0	0	0	0	603	903	0
648	4	38.836	149.536	-831.075	149068	72711.4	21922.4	287.491	120.633	0	0	0	0	0	0	0	200	903	0	0	0	0	0	0	0	603	903	0
648	5	38.5309	149.23	-835.042	148793	72589.4	22242.9	286.929	121.814	0	0	0	0	0	0	0	200	903	0	0	0	0	0	0	0	603	903	0
648	6	38.3783	147.857	-836.263	149526	73321.8	21922.4	287.678	121.198	0	0	0	0	0	0	0	200	903	0	0	0	0	0	0	0	603	903	0
648	7	38.2257	148.62	-836.263	150166	73138.7	22151.3	287.459	120.432	0	0	0	0	0	0	0	200	903	0	0	0	0	0	0	0	603	903	0
648	8	37.4628	148.62	-841.146	149800	73810.1	22014	287.749	121.909	0	0	0	0	0	0	0	200	903	0	0	0	0	0	0	0	603	903	0
648	9	38.5309	148.01	-843.892	150624	73871.1	21830.9	287.536	121.513	0	0	0	0	0	0	0	200	903	0	0	0	0	0	0	0	603	903	0
649	0	38.9886	147.399	-845.113	150533	73993.2	21830.9	287.554	121.879	0	0	0	0	0	0	0	200	903	0	0	0	0	0	0	0	603	903	0
649	1	38.0731	147.094	-846.028	149434	74054.2	21876.7	287.532	123.37	0	0	0	0	0	0	0	200	903	0	0	0	0	0	0	0	603	903	0
649	2	39.7516	146.637	-848.165	150624	74420.4	21922.4	287.743	122.412	0	0	0	0	0	0	0	200	903	0	0	0	0	0	0	0	603	903	0
649	3	38.9886	145.874	-848.775	150716	74786.6	21602	288.111	122.432	0	0	0	0	0	0	0	200	903	0	0	0	0	0	0	0	603	903	0
649	4	39.1412	146.026	-851.827	150441	74664.5	21510.5	287.652	123.39	0	0	0	0	0	0	0	200	903	0	0	0	0	0	0	0	603	903	0
649	5	39.2938	143.585	-851.522	151814	74847.6	21693.6	287.899	121.714	0	0	0	0	0	0	0	200	903	0	0	0	0	0	0	0	603	903	0
649	6	39.599	144.5	-855.489	150533	75152.8	21647.8	287.848	124.039	0	0	0	0	0	0	0	200	903	0	0	0	0	0	0	0	603	903	0
649	7	39.9042	142.364	-857.015	150533	75458	21510.5	288.047	124.352	0	0	0	0	0	0	0	200	903	0	0	0	0	0	0	0	603	903	0
649	8	40.2093	143.89	-857.32	150807	75702.1	21785.1	288.301	124.095	0	0	0	0	0	0	0	200	903	0	0	0	0	0	0	0	603	903	0
649	9	41.7352	143.89	-861.592	150807	76068.4	21693.6	288.288	124.967	0	0	0	0	0	0	0	200	903	0	0	0	0	0	0	0	603	903	0
650	0	41.2775	143.737	-863.118	151448	76312.5	21830.9	288.415	124.534	0	0	0	0	0	0	0	200	903	0	0	0	0	0	0	0	603	903	0
650	1	40.9723	142.364	-863.729	151082	76312.5	21602	288.352	125.082	0	0	0	0	0	0	0	200	903	0	0	0	0	0	0	0	603	903	0
650	2	41.1249	142.364	-866.17	150349	76251.5	21556.2	288.033	126.42	0	0	0	0	0	0	0	200	903	0	0	0	0	0	0	0	603	903	0
650	3	42.0404	141.906	-860.067	150533	76434.6	21785.1	288.871	124.976	0	0	0	0	0	0	0	200	903	0	0	0	0	0	0	0	603	903	0
650	4	42.8033	141.143	-868.306	150441	76495.6	21830.9	288.098	126.742	0	0	0	0	0	0	0	200	903	0	0	0	0	0	0	0	603	903	0
650	5	42.9559	142.211	-867.696	150624	76861.8	21556.2	288.582	126.409	0	0	0	0	0	0	0	200	903	0	0	0	0	0	0	0	603	903	0
650	6	43.5663	140.838	-868.001	150349	77106	21739.3	288.832	126.787	0	0	0	0	0	0	0	200	903	0	0	0	0	0	0	0	603	903	0
650	7	44.3292	139.007	-868.306	150624	76983.9	21556.2	288.66	126.531	0	0	0	0	0	0	0	200	903	0	0	0	0	0	0	0	603	903	0
650	8	44.4818	139.923	-868.917	149800	77289.1	21556.2	288.949	127.601	0	0	0	0	0	0	0	200	903	0	0	0	0	0	0	0	603	903	0
650	9	44.024	139.007	-870.137	150258	77044.9	21739.3	288.543	127.317	0	0	0	0	0	0	0	200	903	0	0	0	0	0	0	0	603	903	0
651	0	45.5499	137.939	-870.137	149434	77228	21739.3	288.754	128.264	0	0	0	0	0	0	0	200	903	0	0	0	0	0	0	0	603	903	0
651	1	45.2447	138.092	-871.663	149251	77594.2	21785.1	289.019	128.775	0	0	0	0	0	0	0	200	903	0	0	0	0	0	0	0	603	903	0
651	2	46.1603	137.634	-871.358	149159	77472.2	21190	288.91	128.82	0	0	0	0	0	0	0	200	903	0	0	0	0	0	0	0	603	903	0
651	3	46.618	137.481	-871.358	148702	77838.4	21739.3	289.33	129.345	0	0	0	0	0	0	0	200	903	0	0	0	0	0	0	0	603	903	0
651	4	46.4654	136.871	-872.579	149159	77594.2	21418.9	288.925	129.059	0	0	0	0	0	0	0	200	903	0	0	0	0	0	0	0	603	903	0
651	5	46.9232	135.955	-873.799	148976	77838.4	21464.7	289.08	129.508	0	0	0	0	0	0	0	200	903	0	0	0	0	0	0	0	603	903	0
651	6	47.2284	133.361	-874.41	148152	77960.5	21418.9	289.158	130.569	0	0	0	0	0	0	0	200	903	0	0	0	0	0	0	0	603	903	0
651	7	46.9232	135.192	-875.325	148244	77960.5	21510.5	289.065	130.642	0	0	0	0	0	0	0	200	903	0	0	0	0	0	0	0	603	903	0
651	8	47.2284	133.514	-875.02	148061	78448.7	21373.1	289.654	130.792	0	0	0	0	0	0	0	200	903	0	0	0	0	0	0	0	603	903	0
651	9	46.9232	134.429	-874.105	147420	78204.6	21006.9	289.468	131.348	0	0	0	0	0	0	0	200	903	0	0	0	0	0	0	0	603	903	0
652	0	46.9232	133.361	-876.546	148244	78326.7	21418.9	289.358	130.877	0	0	0	0	0	0	0	200	903	0	0	0	0	0	0	0	603	903	0
652	1	46.7706	132.141	-876.241	146687	78143.5	21006.9	289.18	132.595	0	0	0	0	0	0	0	200	903	0	0	0	0	0	0	0	603	903	0
652	2	47.5336	131.683	-877.767	146596	78143.5	21464.7	289.025	132.99	0	0	0	0	0	0	0	200	903	0	0	0	0	0	0	0	603	903	0
652	3	47.8387	131.683	-878.072	146596	78448.7	21098.5	289.342	133.048	0	0	0	0	0	0	0	200	903	0	0	0	0	0	0	0	603	903	0
652	4	49.212	130.31	-876.241	146230	78570.8	21327.3	289.668	133.117	0	0	0	0	0	0	0	200	903	0	0	0	0	0	0	0	603	903	0
652	5	48.4491	130.92	-875.63	146230	78631.8	21006.9	289.8	133.001	0	0	0	0	0	0	0	200	903	0	0	0	0	0	0	0	603	903	0
652	6	48.2965	129.241	-875.936	146413	78509.8	20961.1	289.63	132.85	0	0	0	0	0	0	0	200	903	0	0	0	0	0	0	0	603	903	0
652	7	48.6017	129.394	-876.546	145680	78570.8	21052.7	289.637	133.802	0	0	0	0	0	0	0	200	903	0	0	0	0	0	0	0	603	903	0
652	8	49.212	128.631	-877.462	146138	78753.9	20961.1	289.752	133.454	0	0	0	0	0	0	0	200	903	0	0	0	0	0	0	0	603	903	0
652	9	49.5172	127.563	-876.851	144582	78387.7	21006.9	289.397	135.113	0	0	0	0	0	0	0	200	903	0	0	0	0	0	0	0	603	903	0
653	0	49.6698	127.868	-875.936	144124	78204.6	20869.6	289.281	135.463	0	0	0	0	0	0	0	200	903	0	0	0	0	0	0	0	603	903	0
653	1	49.8224	126.647	-874.715	144215	78509.8	20732.3	289.755	135.129	0	0	0	0	0	0	0	200	903	0	0	0	0	0	0	0	603	903	0
653	2	49.6698	126.342	-878.377	143666	78814.9	20915.4	289.728	136.441	0	0	0	0	0	0	0	200	903	0	0	0	0	0	0	0	603	903	0
653	3	51.3483	125.885	-877.462	144582	78753.9	20686.5	289.752	135.227	0	0	0	0	0	0	0	200	903	0	0	0	0	0	0	0	603	903	0
653	4	50.2801	124.511	-875.936	143483	78631.8	20732.3	289.769	136.195	0	0	0	0	0	0	0	200	903	0	0	0	0	0	0	0	603	903	0
653	5	50.2801	124.206	-875.02	142384	78570.8	20594.9	289.793	137.279	0	0	0	0	0	0	0	200	903	0	0	0	0	0	0	0	603	903	0
653	6	50.4327	123.748	-874.41	142659	78570.8	20594.9	289.856	136.851	0	0	0	0	0	0	0	200	903	0	0	0	0	0	0	0	603	903	0
653	7	51.9586	123.138	-872.579	141927	78998	20549.1	290.534	137.348	0	0	0	0	0	0	0	200	903	0	0	0	0	0	0	0	603	903	0
653	8	50.7379	121.46	-873.799	141469	78998	20503.4	290.408	138.099	0	0	0	0	0	0	0	200	903	0	0	0	0	0	0	0	603	903	0
653	9	49.8224	121.46	-872.579	141652	78021.5	20320.3	289.415	137.663	0	0	0	0	0	0	0	200	903	0	0	0	0	0	0	0	603	903	0
654	0	49.8224	121.765	-871.663	140645	78448.7	20228.7	289.999	138.648	0	0	0	0	0	0	0	200	903	0	0	0	0	0	0	0	603	903	0
654	1	51.0431	120.849	-871.968	140462	78143.5	19999.8	289.617	138.914	0	0	0	0	0	0	0	200	903	0	0	0	0	0	0	0	603	903	0
654	2	50.8905	119.018	-867.391	140187	78570.8	20366	290.583	138.381	0	0	0	0	0	0	0	200	903	0	0	0	0	0	0	0	603	903	0
654	3	50.4327	119.934	-867.086	139272	78570.8	20228.7	290.615	139.38	0	0	0	0	0	0	0	200	903	0	0	0	0	0	0	0	603	903	0
654	4	49.8224	119.171	-866.17	139088	78326.7	20045.6	290.429	139.421	0	0	0	0	0	0	0	200	903	0	0	0	0	0	0	0	603	903	0
654	5	49.8224	118.713	-865.56	138448	78387.7	20091.4	290.563	140.048	0	0	0	0	0	0	0	200	903	0	0	0	0	0	0	0	603	903	0
654	6	49.8224	116.119	-862.508	138265	78326.7	19862.5	290.813	139.695	0	0	0	0	0	0	0	200	903	0	0	0	0	0	0	0	603	903	0
654	7	51.1957	117.187	-863.423	138265	78204.6	20045.6	290.575	139.865	0	0	0	0	0	0	0	200	903	0	0	0	0	0	0	0	603	903	0
654	8	49.975	115.814	-861.898	136708	77655.3	19816.7	290.098	141.387	0	0	0	0	0	0	0	200	903	0	0	0	0	0	0	0	603	903	0
654	9	49.8224	116.577	-860.372	136800	77777.3	19725.2	290.4	140.999	0	0	0	0	0	0	0	200	903	0	0	0	0	0	0	0	603	903	0
655	0	50.2801	115.203	-861.592	136617	77838.4	19221.6	290.342	141.437	0	0	0	0	0	0	0	200	903	0	0	0	0	0	0	0	603	903	0
655	1	51.0431	115.661	-859.151	134969	77777.3	19725.2	290.528	142.905	0	0	0	0	0	0	0	200	903	0	0	0	0	0	0	0	603	903	0
655	2	50.1275	113.83	-857.32	135976	77655.3	19267.4	290.579	141.395	0	0	0	0	0	0	0	200	903	0	0	0	0	0	0	0	603	903	0
655	3	50.4327	111.999	-857.015	134877	77411.1	19404.7	290.326	142.62	0	0	0	0	0	0	0	200	903	0	0	0	0	0	0	0	603	903	0
655	4	50.2801	112.609	-851.827	133870	77106	19267.4	290.518	142.844	0	0	0	0	0	0	0	200	903	0	0	0	0	0	0	0	603	903	0
655	5	49.5172	112.304	-853.963	133962	77655.3	19313.2	290.935	143.13	0	0	0	0	0	0	0	200	903	0	0	0	0	0	0	0	603	903	0
655	6	50.2801	112.152	-852.132	133138	77350.1	19084.3	290.772	143.759	0	0	0	0	0	0	0	200	903	0	0	0	0	0	0	0	603	903	0
655	7	49.6698	111.084	-851.216	132314	77350.1	18535	290.87	144.559	0	0	0	0	0	0	0	200	903	0	0	0	0	0	0	0	603	903	0
655	8	49.975	109.863	-847.554	132039	76983.9	18992.8	290.831	144.212	0	0	0	0	0	0	0	200	903	0	0	0	0	0	0	0	603	903	0
655	9	49.3646	110.015	-845.418	131581	76800.8	18580.8	290.844	144.36	0	0	0	0	0	0	0	200	903	0	0	0	0	0	0	0	603	903	0
656	0	49.3646	108.49	-844.808	130940	76739.8	19038.5	290.837	145.006	0	0	0	0	0	0	0	200	903	0	0	0	0	0	0	0	603	903	0
656	1	49.212	107.879	-839.315	130666	76495.6	18535	291.141	144.319	0	0	0	0	0	0	0	200	903	0	0	0	0	0	0	0	603	903	0
656	2	49.8224	106.201	-839.925	129750	76129.4	18260.3	290.638	145.522	0	0	0	0	0	0	0	200	903	0	0	0	0	0	0	0	603	903	0
656	3	48.9068	108.032	-837.789	129475	76068.4	18351.9	290.797	145.456	0	0	0	0	0	0	0	200	903	0	0	0	0	0	0	0	603	903	0
656	4	48.7543	105.896	-836.568	128835	76068.4	18260.3	290.929	145.996	0	0	0	0	0	0	0	200	903	0	0	0	0	0	0	0	603	903	0
656	5	49.6698	106.048	-835.958	128285	75946.3	17985.7	290.849	146.541	0	0	0	0	0	0	0	200	903	0	0	0	0	0	0	0	603	903	0
656	6	48.6017	104.98	-834.432	128285	75641.1	18123	290.65	146.26	0	0	0	0	0	0	0	200	903	0	0	0	0	0	0	0	603	903	0
656	7	48.6017	103.454	-832.906	127370	75274.9	17985.7	290.376	147.078	0	0	0	0	0	0	0	200	903	0	0	0	0	0	0	0	603	903	0
656	8	47.2284	103.302	-829.854	126454	75335.9	17482.1	290.782	147.619	0	0	0	0	0	0	0	200	903	0	0	0	0	0	0	0	603	903	0
656	9	47.5336	102.539	-827.108	126454	75091.8	17711	290.788	147.113	0	0	0	0	0	0	0	200	903	0	0	0	0	0	0	0	603	903	0
657	0	47.8387	101.928	-827.108	125539	75213.9	17573.7	290.936	148.22	0	0	0	0	0	0	0	200	903	0	0	0	0	0	0	0	603	903	0
657	1	48.2965	98.8765	-820.089	125264	74725.6	17482.1	291.119	147.255	0	0	0	0	0	0	0	200	903	0	0	0	0	0	0	0	603	903	0
657	2	47.2284	100.25	-820.394	124989	74725.6	17253.2	291.085	147.647	0	0	0	0	0	0	0	200	903	0	0	0	0	0	0	0	603	903	0
657	3	46.9232	98.8765	-817.952	123616	74237.3	17253.2	290.76	148.871	0	0	0	0	0	0	0	200	903	0	0	0	0	0	0	0	603	903	0
657	4	46.1603	99.1817	-815.816	122609	74481.4	16887	291.297	149.71	0	0	0	0	0	0	0	200	903	0	0	0	0	0	0	0	603	903	0
657	5	47.6861	98.4187	-812.154	123341	74542.5	17436.4	291.784	148.131	0	0	0	0	0	0	0	200	903	0	0	0	0	0	0	0	603	903	0
657	6	46.618	96.8929	-811.849	121785	73993.2	16887	291.142	149.991	0	0	0	0	0	0	0	200	903	0	0	0	0	0	0	0	603	903	0
657	7	47.5336	96.5877	-810.933	122151	73565.9	16978.6	290.718	149.37	0	0	0	0	0	0	0	200	903	0	0	0	0	0	0	0	603	903	0
657	8	46.4654	95.0618	-809.713	121419	73260.7	16475.1	290.477	150.047	0	0	0	0	0	0	0	200	903	0	0	0	0	0	0	0	603	903	0
657	9	46.618	95.367	-806.966	119313	73382.8	16612.4	290.937	152.146	0	0	0	0	0	0	0	200	903	0	0	0	0	0	0	0	603	903	0
658	0	46.1603	94.4514	-805.135	120137	73260.7	16200.4	290.992	150.786	0	0	0	0	0	0	0	200	903	0	0	0	0	0	0	0	603	903	0
658	1	45.2447	94.2989	-801.778	119862	72894.5	16291.9	290.916	150.504	0	0	0	0	0	0	0	200	903	0	0	0	0	0	0	0	603	903	0
658	2	44.6344	93.5359	-798.116	118672	72833.5	16246.2	291.257	151.31	0	0	0	0	0	0	0	200	903	0	0	0	0	0	0	0	603	903	0
658	3	45.5499	92.01	-796.285	118764	72467.3	16017.3	291.007	150.853	0	0	0	0	0	0	0	200	903	0	0	0	0	0	0	0	603	903	0
658	4	44.3292	90.9419	-793.538	117574	72162.1	16246.2	290.937	151.836	0	0	0	0	0	0	0	200	903	0	0	0	0	0	0	0	603	903	0
658	5	45.0921	89.2635	-792.012	116933	72467.3	15880	291.498	152.36	0	0	0	0	0	0	0	200	903	0	0	0	0	0	0	0	603	903	0
658	6	46.1603	89.5686	-790.181	116841	71734.9	16200.4	290.783	152.134	0	0	0	0	0	0	0	200	903	0	0	0	0	0	0	0	603	903	0
658	7	45.0921	89.1109	-786.519	115926	71673.8	15651.1	291.128	152.609	0	0	0	0	0	0	0	200	903	0	0	0	0	0	0	0	603	903	0
658	8	45.0921	88.8057	-783.162	115743	71307.6	15605.3	291.051	152.211	0	0	0	0	0	0	0	200	903	0	0	0	0	0	0	0	603	903	0
658	9	45.0921	87.585	-783.467	115010	71551.8	15513.7	291.327	153.204	0	0	0	0	0	0	0	200	903	0	0	0	0	0	0	0	603	903	0
659	0	43.8714	87.2798	-781.331	113545	71063.5	15330.6	290.952	154.677	0	0	0	0	0	0	0	200	903	0	0	0	0	0	0	0	603	903	0
659	1	43.8714	86.8221	-778.89	113911	70697.3	14918.7	290.767	153.751	0	0	0	0	0	0	0	200	903	0	0	0	0	0	0	0	603	903	0
659	2	43.5663	84.5332	-775.838	112264	70514.2	15513.7	290.888	155.3	0	0	0	0	0	0	0	200	903	0	0	0	0	0	0	0	603	903	0
659	3	42.8033	85.2962	-772.786	112172	70392.1	15056	291.089	154.847	0	0	0	0	0	0	0	200	903	0	0	0	0	0	0	0	603	903	0
659	4	42.6507	84.2281	-769.429	111897	70514.2	15101.8	291.645	154.571	0	0	0	0	0	0	0	200	903	0	0	0	0	0	0	0	603	903	0
659	5	43.1085	83.3125	-766.378	111348	70209	14872.9	291.611	154.709	0	0	0	0	0	0	0	200	903	0	0	0	0	0	0	0	603	903	0
659	6	42.6507	83.0074	-764.547	110799	69598.6	15010.2	291.033	155.079	0	0	0	0	0	0	0	200	903	0	0	0	0	0	0	0	603	903	0
659	7	41.8878	81.0237	-762.41	110616	69293.5	14506.7	290.887	154.913	0	0	0	0	0	0	0	200	903	0	0	0	0	0	0	0	603	903	0
659	8	43.2611	80.4134	-759.664	109151	69232.4	14552.4	291.136	156.317	0	0	0	0	0	0	0	200	903	0	0	0	0	0	0	0	603	903	0
659	9	42.8033	81.1763	-757.833	109425	69293.5	14552.4	291.436	155.607	0	0	0	0	0	0	0	200	903	0	0	0	0	0	0	0	603	903	0
660	0	42.4982	77.972	-753.255	109059	68927.2	14369.3	291.506	155.216	0	0	0	0	0	0	0	200	903	0	0	0	0	0	0	0	603	903	0
660	1	41.5826	79.4978	-750.814	107777	68561	14506.7	291.316	156.452	0	0	0	0	0	0	0	200	903	0	0	0	0	0	0	0	603	903	0
660	2	42.4982	78.1245	-751.729	107777	68500	13865.8	291.123	156.627	0	0	0	0	0	0	0	200	903	0	0	0	0	0	0	0	603	903	0
660	3	42.193	77.209	-748.983	106953	68011.7	13957.4	290.805	157.202	0	0	0	0	0	0	0	200	903	0	0	0	0	0	0	0	603	903	0
660	4	41.43	76.9038	-745.015	106496	67889.6	13682.7	291.125	157.056	0	0	0	0	0	0	0	200	903	0	0	0	0	0	0	0	603	903	0
660	5	40.6671	75.5305	-743.795	105763	67584.5	13865.8	290.864	157.806	0	0	0	0	0	0	0	200	903	0	0	0	0	0	0	0	603	903	0
660	6	40.2093	75.0728	-736.165	104848	67523.4	13499.6	291.723	157.576	0	0	0	0	0	0	0	200	903	0	0	0	0	0	0	0	603	903	0
660	7	40.0567	72.9366	-737.081	104756	67401.4	13499.6	291.444	157.877	0	0	0	0	0	0	0	200	903	0	0	0	0	0	0	0	603	903	0
660	8	39.9042	73.8521	-735.555	104939	67157.2	13087.6	291.301	157.333	0	0	0	0	0	0	0	200	903	0	0	0	0	0	0	0	603	903	0
660	9	39.2938	73.5469	-732.503	103658	66974.1	13224.9	291.432	158.489	0	0	0	0	0	0	0	200	903	0	0	0	0	0	0	0	603	903	0
661	0	38.5309	72.9366	-728.841	103749	66546.9	13041.8	291.305	157.652	0	0	0	0	0	0	0	200	903	0	0	0	0	0	0	0	603	903	0
661	1	40.2093	71.2581	-725.484	102834	66119.6	13179.2	291.139	158.255	0	0	0	0	0	0	0	200	903	0	0	0	0	0	0	0	603	903	0
661	2	38.9886	71.2581	-723.043	101643	66241.7	12767.2	291.615	159.423	0	0	0	0	0	0	0	200	903	0	0	0	0	0	0	0	603	903	0
661	3	38.9886	70.0374	-719.991	101460	65753.4	12858.7	291.325	159.081	0	0	0	0	0	0	0	200	903	0	0	0	0	0	0	0	603	903	0
661	4	38.3783	69.427	-716.939	101094	65692.4	12446.7	291.629	158.992	0	0	0	0	0	0	0	200	903	0	0	0	0	0	0	0	603	903	0
661	5	39.599	68.8167	-716.634	100911	65082	12675.6	290.816	159.188	0	0	0	0	0	0	0	200	903	0	0	0	0	0	0	0	603	903	0
661	6	38.5309	67.4434	-712.972	100545	65082	12080.5	291.283	158.978	0	0	0	0	0	0	0	200	903	0	0	0	0	0	0	0	603	903	0
661	7	38.0731	67.1382	-710.225	98439.1	64960	12492.5	291.464	161.397	0	0	0	0	0	0	0	200	903	0	0	0	0	0	0	0	603	903	0
661	8	38.0731	66.5279	-709.005	99079.9	64532.7	12401	291.019	160.255	0	0	0	0	0	0	0	200	903	0	0	0	0	0	0	0	603	903	0
661	9	37.7679	65.4597	-704.122	98347.5	64776.8	12217.8	291.997	160.326	0	0	0	0	0	0	0	200	903	0	0	0	0	0	0	0	603	903	0
662	0	38.2257	63.9339	-705.953	97615.1	64044.4	12263.6	290.721	161.726	0	0	0	0	0	0	0	200	903	0	0	0	0	0	0	0	603	903	0
662	1	38.3783	63.7813	-701.07	97523.5	63800.3	11805.9	291.004	160.893	0	0	0	0	0	0	0	200	903	0	0	0	0	0	0	0	603	903	0
662	2	37.4628	62.2554	-698.629	96791.1	63373	11805.9	290.711	161.456	0	0	0	0	0	0	0	200	903	0	0	0	0	0	0	0	603	903	0
662	3	36.8524	62.8658	-695.882	96699.6	63128.9	11531.2	290.718	161.04	0	0	0	0	0	0	0	200	903	0	0	0	0	0	0	0	603	903	0
662	4	37.4628	59.6614	-693.441	95967.1	63006.8	11851.6	290.861	161.607	0	0	0	0	0	0	0	200	903	0	0	0	0	0	0	0	603	903	0
662	5	37.1576	61.3399	-690.084	94960.1	62274.4	11393.9	290.242	162.393	0	0	0	0	0	0	0	200	903	0	0	0	0	0	0	0	603	903	0
662	6	36.5472	58.1355	-687.642	95417.8	62823.7	11302.3	291.361	161.239	0	0	0	0	0	0	0	200	903	0	0	0	0	0	0	0	603	903	0
662	7	34.8688	59.6614	-683.675	94227.6	62335.4	11348.1	291.177	162.175	0	0	0	0	0	0	0	200	903	0	0	0	0	0	0	0	603	903	0
662	8	36.2421	57.8304	-682.454	93861.4	62030.3	11119.2	290.893	162.465	0	0	0	0	0	0	0	200	903	0	0	0	0	0	0	0	603	903	0
662	9	35.3265	57.5252	-679.097	93678.3	61908.2	10936.1	291.162	162.055	0	0	0	0	0	0	0	200	903	0	0	0	0	0	0	0	603	903	0
663	0	35.6317	57.22	-676.961	92488.1	61481	11027.7	290.819	163.377	0	0	0	0	0	0	0	200	903	0	0	0	0	0	0	0	603	903	0
663	1	35.3265	57.3726	-673.909	92396.6	61419.9	10707.2	291.14	162.895	0	0	0	0	0	0	0	200	903	0	0	0	0	0	0	0	603	903	0
663	2	35.0213	54.1682	-670.247	92030.4	61053.7	10890.3	291.091	162.692	0	0	0	0	0	0	0	200	903	0	0	0	0	0	0	0	603	903	0
663	3	35.4791	55.8467	-666.89	91389.5	61175.8	10524.1	291.733	162.962	0	0	0	0	0	0	0	200	903	0	0	0	0	0	0	0	603	903	0
663	4	35.6317	54.3208	-664.449	91572.6	60626.5	10478.3	291.243	162.183	0	0	0	0	0	0	0	200	903	0	0	0	0	0	0	0	603	903	0
663	5	33.6481	53.5579	-660.176	89833.1	60016.1	10203.7	290.909	163.926	0	0	0	0	0	0	0	200	903	0	0	0	0	0	0	0	603	903	0
663	6	34.411	52.032	-656.819	89283.8	59772	10249.5	291.002	164.066	0	0	0	0	0	0	0	200	903	0	0	0	0	0	0	0	603	903	0
663	7	33.9532	52.032	-656.514	89558.4	59649.9	10524.1	290.859	163.585	0	0	0	0	0	0	0	200	903	0	0	0	0	0	0	0	603	903	0
663	8	33.8006	52.1846	-651.937	88734.5	59710.9	9837.48	291.59	163.891	0	0	0	0	0	0	0	200	903	0	0	0	0	0	0	0	603	903	0
663	9	33.1903	51.1165	-646.749	89192.2	59283.7	10066.4	291.664	162.091	0	0	0	0	0	0	0	200	903	0	0	0	0	0	0	0	603	903	0
664	0	33.1903	49.5906	-647.359	88185.1	58795.4	9745.92	290.823	163.777	0	0	0	0	0	0	0	200	903	0	0	0	0	0	0	0	603	903	0
664	1	33.1903	49.1328	-644.612	87452.7	58612.3	9700.15	290.926	164.333	0	0	0	0	0	0	0	200	903	0	0	0	0	0	0	0	603	903	0
664	2	33.4955	49.1328	-642.476	87178.1	58307.1	9471.27	290.754	164.309	0	0	0	0	0	0	0	200	903	0	0	0	0	0	0	0	603	903	0
664	3	33.3429	47.607	-638.814	86171	57818.8	9700.15	290.51	165.108	0	0	0	0	0	0	0	200	903	0	0	0	0	0	0	0	603	903	0
664	4	32.7325	46.5388	-635.762	85804.8	58307.1	9333.94	291.712	165.036	0	0	0	0	0	0	0	200	903	0	0	0	0	0	0	0	603	903	0
664	5	32.1222	46.0811	-632.711	86079.5	57696.8	9105.06	291.19	163.951	0	0	0	0	0	0	0	200	903	0	0	0	0	0	0	0	603	903	0
664	6	32.5799	45.1656	-631.49	84980.8	57818.8	8921.95	291.559	165.428	0	0	0	0	0	0	0	200	903	0	0	0	0	0	0	0	603	903	0
664	7	32.8851	45.1656	-629.048	85255.5	56903.3	9196.61	290.459	164.469	0	0	0	0	0	0	0	200	903	0	0	0	0	0	0	0	603	903	0
664	8	31.5118	43.1819	-628.133	84248.4	56964.4	8738.84	290.688	165.875	0	0	0	0	0	0	0	200	903	0	0	0	0	0	0	0	603	903	0
664	9	31.6644	43.7923	-623.86	83332.9	56964.4	8876.17	291.309	166.424	0	0	0	0	0	0	0	200	903	0	0	0	0	0	0	0	603	903	0
665	0	31.6644	43.1819	-620.809	83149.8	56354	8738.84	290.775	166.062	0	0	0	0	0	0	0	200	903	0	0	0	0	0	0	0	603	903	0
665	1	31.2066	42.1138	-618.062	82600.4	56476.1	8326.86	291.376	166.356	0	0	0	0	0	0	0	200	903	0	0	0	0	0	0	0	603	903	0
665	2	31.5118	42.8767	-613.484	82600.4	56048.8	8509.96	291.361	165.359	0	0	0	0	0	0	0	200	903	0	0	0	0	0	0	0	603	903	0
665	3	30.5963	40.2827	-615.316	82142.7	55682.6	8372.63	290.494	166.503	0	0	0	0	0	0	0	200	903	0	0	0	0	0	0	0	603	903	0
665	4	30.2911	39.2146	-611.043	81410.3	55438.5	8189.53	290.728	166.768	0	0	0	0	0	0	0	200	903	0	0	0	0	0	0	0	603	903	0
665	5	30.2911	39.9776	-607.686	80860.9	54889.2	8189.53	290.325	166.936	0	0	0	0	0	0	0	200	903	0	0	0	0	0	0	0	603	903	0
665	6	30.5963	38.6043	-606.16	80952.5	55316.4	8281.08	291.257	166.45	0	0	0	0	0	0	0	200	903	0	0	0	0	0	0	0	603	903	0
665	7	29.3756	38.1465	-601.888	80952.5	54889.2	7777.54	291.195	165.502	0	0	0	0	0	0	0	200	903	0	0	0	0	0	0	0	603	903	0
665	8	30.5963	37.5362	-598.531	80494.7	54522.9	7960.65	291.095	165.513	0	0	0	0	0	0	0	200	903	0	0	0	0	0	0	0	603	903	0
665	9	29.3756	34.0266	-597.005	80037	54522.9	7502.88	291.327	165.936	0	0	0	0	0	0	0	200	903	0	0	0	0	0	0	0	603	903	0
666	0	28.9178	35.8577	-594.258	79029.9	53668.5	7548.66	290.312	167.011	0	0	0	0	0	0	0	200	903	0	0	0	0	0	0	0	603	903	0
666	1	28.9178	35.0948	-592.122	78938.3	53790.5	7365.55	290.844	166.686	0	0	0	0	0	0	0	200	903	0	0	0	0	0	0	0	603	903	0
666	2	28.6127	34.0266	-585.103	78663.7	53424.3	7365.55	291.307	165.556	0	0	0	0	0	0	0	200	903	0	0	0	0	0	0	0	603	903	0
666	3	29.0704	34.0266	-586.934	77565	53424.3	7045.12	291.023	167.847	0	0	0	0	0	0	0	200	903	0	0	0	0	0	0	0	603	903	0
666	4	28.4601	32.8059	-584.798	77107.3	53424.3	6953.57	291.355	168.147	0	0	0	0	0	0	0	200	903	0	0	0	0	0	0	0	603	903	0
666	5	28.0023	32.3482	-582.357	77015.7	52691.9	6999.34	290.48	167.752	0	0	0	0	0	0	0	200	903	0	0	0	0	0	0	0	603	903	0
666	6	29.9859	30.2119	-582.357	76741.1	52691.9	6862.01	290.48	168.223	0	0	0	0	0	0	0	200	903	0	0	0	0	0	0	0	603	903	0
666	7	28.0023	30.3645	-579.61	76649.5	52325.7	6770.46	290.277	167.757	0	0	0	0	0	0	0	200	903	0	0	0	0	0	0	0	603	903	0
666	8	28.0023	29.7542	-576.558	75367.8	52081.5	6633.13	290.332	169.28	0	0	0	0	0	0	0	200	903	0	0	0	0	0	0	0	603	903	0
666	9	27.8497	29.9068	-574.422	75642.4	52325.7	6450.03	291.093	168.316	0	0	0	0	0	0	0	200	903	0	0	0	0	0	0	0	603	903	0
667	0	27.8497	28.8387	-569.539	75550.9	51959.5	6266.92	291.231	167.347	0	0	0	0	0	0	0	200	903	0	0	0	0	0	0	0	603	903	0
667	1	27.0868	28.8387	-569.844	74910	52020.5	6129.59	291.289	168.543	0	0	0	0	0	0	0	200	903	0	0	0	0	0	0	0	603	903	0
667	2	26.7816	27.1602	-568.929	75184.7	51043.9	6129.59	289.719	167.849	0	0	0	0	0	0	0	200	903	0	0	0	0	0	0	0	603	903	0
667	3	26.1712	26.3972	-565.877	73811.4	51105	5900.71	290.311	169.563	0	0	0	0	0	0	0	200	903	0	0	0	0	0	0	0	603	903	0
667	4	27.5445	26.2447	-562.215	73353.6	51105	5992.26	290.899	169.527	0	0	0	0	0	0	0	200	903	0	0	0	0	0	0	0	603	903	0
667	5	26.629	25.3291	-559.774	74086	50677.7	5992.26	290.533	167.65	0	0	0	0	0	0	0	200	903	0	0	0	0	0	0	0	603	903	0
667	6	25.5609	24.7188	-557.027	73078.9	50921.9	5580.28	291.417	168.805	0	0	0	0	0	0	0	200	903	0	0	0	0	0	0	0	603	903	0
667	7	25.5609	24.4136	-554.891	72895.8	50433.6	5580.28	290.889	168.63	0	0	0	0	0	0	0	200	903	0	0	0	0	0	0	0	603	903	0
667	8	26.0187	22.43	-551.839	72071.9	50189.4	5397.17	290.949	169.397	0	0	0	0	0	0	0	200	903	0	0	0	0	0	0	0	603	903	0
667	9	25.8661	22.5825	-551.229	72346.5	50006.3	5488.72	290.718	168.754	0	0	0	0	0	0	0	200	903	0	0	0	0	0	0	0	603	903	0
668	0	25.8661	20.1411	-548.787	71888.8	49884.3	5214.06	290.899	169.004	0	0	0	0	0	0	0	200	903	0	0	0	0	0	0	0	603	903	0
668	1	26.3238	21.5144	-546.651	71888.8	49762.2	5397.17	291.031	168.492	0	0	0	0	0	0	0	200	903	0	0	0	0	0	0	0	603	903	0
668	2	25.2557	20.7515	-541.768	71156.4	49457	5030.96	291.288	168.659	0	0	0	0	0	0	0	200	903	0	0	0	0	0	0	0	603	903	0
668	3	24.9505	21.0567	-543.294	71614.1	49151.9	4802.08	290.47	168.185	0	0	0	0	0	0	0	200	903	0	0	0	0	0	0	0	603	903	0
668	4	24.035	19.9886	-542.073	71064.8	48846.7	4847.85	290.111	168.902	0	0	0	0	0	0	0	200	903	0	0	0	0	0	0	0	603	903	0
668	5	24.4928	19.2256	-541.768	70057.7	48846.7	4802.08	290.162	170.687	0	0	0	0	0	0	0	200	903	0	0	0	0	0	0	0	603	903	0
668	6	24.4928	18.9204	-539.327	70515.5	48846.7	4802.08	290.57	169.253	0	0	0	0	0	0	0	200	903	0	0	0	0	0	0	0	603	903	0
668	7	24.1876	17.6997	-534.444	69783	48541.5	4618.97	290.826	169.429	0	0	0	0	0	0	0	200	903	0	0	0	0	0	0	0	603	903	0
668	8	23.7298	18.1575	-534.444	69142.2	48541.5	4481.64	290.826	170.628	0	0	0	0	0	0	0	200	903	0	0	0	0	0	0	0	603	903	0
668	9	23.1195	16.7842	-532.918	69874.6	48419.4	4115.43	290.857	168.883	0	0	0	0	0	0	0	200	903	0	0	0	0	0	0	0	603	903	0
669	0	23.1195	16.3264	-531.697	68867.5	48175.3	4435.87	290.607	170.476	0	0	0	0	0	0	0	200	903	0	0	0	0	0	0	0	603	903	0
669	1	23.4247	13.885	-530.782	68592.9	47809.1	4298.54	290.073	170.77	0	0	0	0	0	0	0	200	903	0	0	0	0	0	0	0	603	903	0
669	2	22.8143	14.648	-528.035	68684.4	47259.8	4023.88	289.501	169.925	0	0	0	0	0	0	0	200	903	0	0	0	0	0	0	0	603	903	0
669	3	24.9505	14.648	-524.373	67494.2	47626	4206.98	290.825	171.286	0	0	0	0	0	0	0	200	903	0	0	0	0	0	0	0	603	903	0
669	4	23.4247	14.1902	-522.542	67768.9	47626	4069.66	291.143	170.309	0	0	0	0	0	0	0	200	903	0	0	0	0	0	0	0	603	903	0
669	5	22.8143	13.5799	-520.406	67952	47320.8	3932.33	290.931	169.425	0	0	0	0	0	0	0	200	903	0	0	0	0	0	0	0	603	903	0
669	6	22.5091	13.2747	-519.185	67036.5	47259.8	3749.22	291.027	170.881	0	0	0	0	0	0	0	200	903	0	0	0	0	0	0	0	603	903	0
669	7	21.8988	11.9014	-514.913	67860.5	46954.6	3795	291.189	168.21	0	0	0	0	0	0	0	200	903	0	0	0	0	0	0	0	603	903	0
669	8	23.2721	11.5962	-515.828	66853.4	46893.6	3520.34	290.909	170.396	0	0	0	0	0	0	0	200	903	0	0	0	0	0	0	0	603	903	0
669	9	22.9669	10.9859	-515.218	66304	46832.5	3566.12	290.898	171.309	0	0	0	0	0	0	0	200	903	0	0	0	0	0	0	0	603	903	0
670	0	23.4247	9.45999	-512.776	66944.9	46588.4	3566.12	290.855	169.446	0	0	0	0	0	0	0	200	903	0	0	0	0	0	0	0	603	903	0
670	1	22.5091	10.0703	-511.556	65754.7	46405.3	3474.56	290.714	171.461	0	0	0	0	0	0	0	200	903	0	0	0	0	0	0	0	603	903	0
670	2	22.3566	9.91775	-509.42	65663.2	46283.2	3154.13	290.855	171.102	0	0	0	0	0	0	0	200	903	0	0	0	0	0	0	0	603	903	0
670	3	23.8824	9.00223	-510.335	65297	46405.3	2787.92	290.931	172.051	0	0	0	0	0	0	0	200	903	0	0	0	0	0	0	0	603	903	0
670	4	23.1195	8.23929	-510.03	65113.9	46039.1	3245.68	290.267	172.333	0	0	0	0	0	0	0	200	903	0	0	0	0	0	0	0	603	903	0
670	5	22.3566	7.32376	-508.504	64930.8	46100.1	3016.8	290.658	172.31	0	0	0	0	0	0	0	200	903	0	0	0	0	0	0	0	603	903	0
670	6	22.9669	7.17117	-506.063	65113.9	46161.1	2925.25	291.216	171.332	0	0	0	0	0	0	0	200	903	0	0	0	0	0	0	0	603	903	0
670	7	22.3566	6.866	-506.063	64106.8	45855.9	2833.69	290.613	173.322	0	0	0	0	0	0	0	200	903	0	0	0	0	0	0	0	603	903	0
670	8	22.3566	7.62894	-500.569	65113.9	45489.7	2604.81	290.876	169.92	0	0	0	0	0	0	0	200	903	0	0	0	0	0	0	0	603	903	0
670	9	21.441	6.25564	-503.316	65113.9	45855.9	2742.14	291.108	170.63	0	0	0	0	0	0	0	200	903	0	0	0	0	0	0	0	603	903	0
671	0	21.7462	5.95047	-502.095	63649	45733.9	2696.36	291.086	173.233	0	0	0	0	0	0	0	200	903	0	0	0	0	0	0	0	603	903	0
671	1	21.2884	5.03494	-501.485	64289.9	45367.7	2559.04	290.467	171.801	0	0	0	0	0	0	0	200	903	0	0	0	0	0	0	0	603	903	0
671	2	21.8988	4.272	-499.349	64656.1	45428.7	2421.71	290.976	170.519	0	0	0	0	0	0	0	200	903	0	0	0	0	0	0	0	603	903	0
671	3	21.8988	4.42459	-494.466	63557.5	45184.6	2879.47	291.381	171.462	0	0	0	0	0	0	0	200	903	0	0	0	0	0	0	0	603	903	0
671	4	22.6617	2.28836	-497.518	64289.9	45428.7	2421.71	291.311	170.779	0	0	0	0	0	0	0	200	903	0	0	0	0	0	0	0	603	903	0
671	5	20.9833	2.89871	-495.076	63557.5	45367.7	2238.6	291.638	171.621	0	0	0	0	0	0	0	200	903	0	0	0	0	0	0	0	603	903	0
671	6	21.441	3.0513	-495.381	63099.7	45245.6	2330.15	291.335	172.624	0	0	0	0	0	0	0	200	903	0	0	0	0	0	0	0	603	903	0
671	7	21.2884	1.52542	-493.856	63008.2	44818.3	2284.38	290.752	172.416	0	0	0	0	0	0	0	200	903	0	0	0	0	0	0	0	603	903	0
671	8	21.2884	1.37283	-493.55	62641.9	44513.2	2009.72	290.19	173.079	0	0	0	0	0	0	0	200	903	0	0	0	0	0	0	0	603	903	0
671	9	22.5091	1.98318	-492.94	62825.1	45184.6	2467.48	291.663	172.55	0	0	0	0	0	0	0	200	903	0	0	0	0	0	0	0	603	903	0
672	0	21.7462	0.915068	-491.719	62825.1	45184.6	2147.05	291.891	172.234	0	0	0	0	0	0	0	200	903	0	0	0	0	0	0	0	603	903	0
672	1	21.1358	0.457305	-491.109	62275.7	44940.4	1963.94	291.508	173.194	0	0	0	0	0	0	0	200	903	0	0	0	0	0	0	0	603	903	0
672	2	21.2884	0.152129	-491.109	63191.3	44757.3	1689.28	291.135	171.329	0	0	0	0	0	0	0	200	903	0	0	0	0	0	0	0	603	903	0
672	3	21.8988	-0.458223	-491.719	61634.9	44635.2	2055.5	290.774	174.654	0	0	0	0	0	0	0	200	903	0	0	0	0	0	0	0	603	903	0
672	4	21.1358	-0.458223	-491.719	62001.1	44879.4	1689.28	291.27	173.91	0	0	0	0	0	0	0	200	903	0	0	0	0	0	0	0	603	903	0
672	5	21.2884	-1.83151	-489.583	62092.6	45062.5	1735.06	292.043	173.172	0	0	0	0	0	0	0	200	903	0	0	0	0	0	0	0	603	903	0
672	6	21.8988	-2.44187	-490.499	61360.2	45062.5	1551.96	291.871	174.902	0	0	0	0	0	0	0	200	903	0	0	0	0	0	0	0	603	903	0
672	7	21.2884	-1.37375	-489.888	62001.1	44818.3	1551.96	291.487	173.438	0	0	0	0	0	0	0	200	903	0	0	0	0	0	0	0	603	903	0
672	8	21.1358	-2.13669	-490.499	62825.1	45001.5	1597.73	291.746	171.916	0	0	0	0	0	0	0	200	903	0	0	0	0	0	0	0	603	903	0
672	9	21.2884	-2.74704	-491.109	62184.2	44391.1	1277.3	290.389	173.38	0	0	0	0	0	0	0	200	903	0	0	0	0	0	0	0	603	903	0
673	0	20.5255	-3.50998	-489.278	62092.6	44879.4	1368.85	291.726	173.093	0	0	0	0	0	0	0	200	903	0	0	0	0	0	0	0	603	903	0
673	1	21.441	-5.34104	-486.531	62092.6	44696.3	1323.07	291.867	172.377	0	0	0	0	0	0	0	200	903	0	0	0	0	0	0	0	603	903	0
673	2	23.4247	-3.66257	-487.447	61360.2	44635.2	1368.85	291.569	174.119	0	0	0	0	0	0	0	200	903	0	0	0	0	0	0	0	603	903	0
673	3	21.5936	-4.88327	-488.973	62092.6	45001.5	1368.85	292.033	173.014	0	0	0	0	0	0	0	200	903	0	0	0	0	0	0	0	603	903	0
673	4	20.5255	-5.49362	-489.583	61909.5	44879.4	1048.42	291.669	173.546	0	0	0	0	0	0	0	200	903	0	0	0	0	0	0	0	603	903	0
673	5	20.3729	-6.86691	-489.583	61360.2	45001.5	865.31	291.918	174.668	0	0	0	0	0	0	0	200	903	0	0	0	0	0	0	0	603	903	0
673	6	20.6781	-6.56174	-488.973	61543.3	45001.5	1048.42	292.033	174.138	0	0	0	0	0	0	0	200	903	0	0	0	0	0	0	0	603	903	0
673	7	20.8307	-6.40915	-489.278	60810.9	44940.4	956.862	291.85	175.713	0	0	0	0	0	0	0	200	903	0	0	0	0	0	0	0	603	903	0
673	8	21.1358	-5.95139	-489.278	61360.2	45306.6	544.875	292.599	174.59	0	0	0	0	0	0	0	200	903	0	0	0	0	0	0	0	603	903	0
673	9	20.3729	-7.32468	-489.888	61634.9	44879.4	911.086	291.611	174.186	0	0	0	0	0	0	0	200	903	0	0	0	0	0	0	0	603	903	0
674	0	21.8988	-7.17209	-485.921	60994	45245.6	773.757	293.113	174.478	0	0	0	0	0	0	0	200	903	0	0	0	0	0	0	0	603	903	0
674	1	21.2884	-7.62985	-487.752	61726.4	45001.5	590.651	292.263	173.447	0	0	0	0	0	0	0	200	903	0	0	0	0	0	0	0	603	903	0
674	2	20.8307	-8.54538	-488.668	62001.1	44818.3	682.204	291.715	173.122	0	0	0	0	0	0	0	200	903	0	0	0	0	0	0	0	603	903	0
674	3	20.5255	-8.08762	-488.973	60994	45428.7	682.204	292.906	175.261	0	0	0	0	0	0	0	200	903	0	0	0	0	0	0	0	603	903	0
674	4	20.8307	-9.76608	-488.668	62092.6	45184.6	544.875	292.465	172.935	0	0	0	0	0	0	0	200	903	0	0	0	0	0	0	0	603	903	0
674	5	21.2884	-9.30832	-488.668	60810.9	45428.7	453.322	292.964	175.558	0	0	0	0	0	0	0	200	903	0	0	0	0	0	0	0	603	903	0
674	6	20.3729	-11.9023	-486.531	61177.1	45550.8	453.322	293.624	174.259	0	0	0	0	0	0	0	200	903	0	0	0	0	0	0	0	603	903	0
674	7	21.1358	-10.529	-489.888	62092.6	45428.7	270.217	292.733	173.251	0	0	0	0	0	0	0	200	903	0	0	0	0	0	0	0	603	903	0
674	8	21.441	-12.0549	-490.804	61268.6	44818.3	315.993	291.316	175.167	0	0	0	0	0	0	0	200	903	0	0	0	0	0	0	0	603	903	0
674	9	21.441	-11.292	-491.719	61818	45306.6	636.428	292.139	174.282	0	0	0	0	0	0	0	200	903	0	0	0	0	0	0	0	603	903	0
675	0	21.8988	-13.2756	-490.193	61634.9	45794.9	361.77	293.422	174.264	0	0	0	0	0	0	0	200	903	0	0	0	0	0	0	0	603	903	0
675	1	21.7462	-10.9868	-492.025	61085.5	45794.9	132.888	293.074	175.849	0	0	0	0	0	0	0	200	903	0	0	0	0	0	0	0	603	903	0
675	2	21.5936	-11.7497	-493.245	61726.4	45978	-50.2177	293.215	174.857	0	0	0	0	0	0	0	200	903	0	0	0	0	0	0	0	603	903	0
675	3	20.6781	-12.8178	-490.193	61634.9	45978	-141.77	293.796	174.264	0	0	0	0	0	0	0	200	903	0	0	0	0	0	0	0	603	903	0
675	4	22.8143	-12.3601	-495.076	61268.6	45978	-233.323	292.871	176.244	0	0	0	0	0	0	0	200	903	0	0	0	0	0	0	0	603	903	0
675	5	21.441	-14.0385	-496.602	60994	45794.9	-4.44129	292.217	177.177	0	0	0	0	0	0	0	200	903	0	0	0	0	0	0	0	603	903	0
675	6	21.2884	-13.7334	-496.907	60994	46222.2	-187.547	293.02	177.253	0	0	0	0	0	0	0	200	903	0	0	0	0	0	0	0	603	903	0
675	7	21.441	-13.2756	-498.433	62001.1	46222.2	-95.994	292.735	175.608	0	0	0	0	0	0	0	200	903	0	0	0	0	0	0	0	603	903	0
675	8	21.441	-14.1911	-498.738	61909.5	46649.4	-462.205	293.535	175.868	0	0	0	0	0	0	0	200	903	0	0	0	0	0	0	0	603	903	0
675	9	20.6781	-14.0385	-499.349	61451.8	46466.3	-691.087	293.054	176.936	0	0	0	0	0	0	0	200	903	0	0	0	0	0	0	0	603	903	0
676	0	20.9833	-14.3437	-500.875	61818	46649.4	-599.534	293.136	176.58	0	0	0	0	0	0	0	200	903	0	0	0	0	0	0	0	603	903	0
676	1	21.5936	-15.1067	-499.654	62641.9	46954.6	-553.758	293.974	174.629	0	0	0	0	0	0	0	200	903	0	0	0	0	0	0	0	603	903	0
676	2	19.9151	-15.5644	-500.569	61451.8	46893.6	-645.311	293.68	177.236	0	0	0	0	0	0	0	200	903	0	0	0	0	0	0	0	603	903	0
676	3	20.6781	-16.0222	-503.316	62275.7	46283.2	-599.534	291.957	176.269	0	0	0	0	0	0	0	200	903	0	0	0	0	0	0	0	603	903	0
676	4	21.441	-16.6325	-505.147	61268.6	46893.6	-1057.3	292.832	178.711	0	0	0	0	0	0	0	200	903	0	0	0	0	0	0	0	603	903	0
676	5	21.2884	-17.5481	-505.757	62092.6	47259.8	-691.087	293.444	177.228	0	0	0	0	0	0	0	200	903	0	0	0	0	0	0	0	603	903	0
676	6	21.1358	-17.0903	-507.894	62825.1	47748	-828.416	294.012	176.303	0	0	0	0	0	0	0	200	903	0	0	0	0	0	0	0	603	903	0
676	7	21.441	-17.7007	-508.199	61909.5	47442.9	-965.745	293.355	178.179	0	0	0	0	0	0	0	200	903	0	0	0	0	0	0	0	603	903	0
676	8	20.6781	-17.8532	-509.114	62550.4	47870.1	-919.969	294.026	177.139	0	0	0	0	0	0	0	200	903	0	0	0	0	0	0	0	603	903	0
676	9	21.2884	-19.0739	-506.368	62458.8	47809.1	-1103.07	294.416	176.653	0	0	0	0	0	0	0	200	903	0	0	0	0	0	0	0	603	903	0
677	0	24.035	-18.7688	-510.64	61909.5	48175.3	-874.192	294.343	178.761	0	0	0	0	0	0	0	200	903	0	0	0	0	0	0	0	603	903	0
677	1	22.3566	-19.3791	-512.166	63099.7	48358.4	-1240.4	294.419	176.798	0	0	0	0	0	0	0	200	903	0	0	0	0	0	0	0	603	903	0
677	2	21.7462	-21.9731	-512.776	63465.9	48297.4	-1240.4	294.188	176.231	0	0	0	0	0	0	0	200	903	0	0	0	0	0	0	0	603	903	0
677	3	21.2884	-20.4472	-514.608	62275.7	48297.4	-1469.29	293.853	178.984	0	0	0	0	0	0	0	200	903	0	0	0	0	0	0	0	603	903	0
677	4	22.3566	-20.5998	-516.133	63008.2	48297.4	-1286.18	293.575	177.923	0	0	0	0	0	0	0	200	903	0	0	0	0	0	0	0	603	903	0
677	5	21.8988	-21.6679	-516.439	62550.4	49029.8	-1560.84	294.938	178.881	0	0	0	0	0	0	0	200	903	0	0	0	0	0	0	0	603	903	0
677	6	23.7298	-22.2783	-519.185	62916.6	48968.7	-1423.51	294.318	178.817	0	0	0	0	0	0	0	200	903	0	0	0	0	0	0	0	603	903	0
677	7	22.5091	-22.5835	-521.016	63282.8	49212.9	-1698.17	294.456	178.54	0	0	0	0	0	0	0	200	903	0	0	0	0	0	0	0	603	903	0
677	8	22.8143	-23.9568	-523.152	63191.3	49335	-1881.27	294.303	179.211	0	0	0	0	0	0	0	200	903	0	0	0	0	0	0	0	603	903	0
677	9	22.9669	-22.7361	-524.373	63649	49335	-1972.83	294.084	178.619	0	0	0	0	0	0	0	200	903	0	0	0	0	0	0	0	603	903	0
678	0	23.8824	-24.2619	-525.899	63557.5	49762.2	-1698.17	294.623	179.145	0	0	0	0	0	0	0	200	903	0	0	0	0	0	0	0	603	903	0
678	1	23.5773	-23.6516	-527.425	63191.3	49884.3	-1881.27	294.581	180.189	0	0	0	0	0	0	0	200	903	0	0	0	0	0	0	0	603	903	0
678	2	24.3402	-24.4145	-529.561	64015.2	49945.3	-1469.29	294.315	179.116	0	0	0	0	0	0	0	200	903	0	0	0	0	0	0	0	603	903	0
678	3	23.7298	-25.4826	-531.697	63282.8	50555.7	-2064.38	295.084	180.98	0	0	0	0	0	0	0	200	903	0	0	0	0	0	0	0	603	903	0
678	4	23.1195	-25.33	-533.528	63832.1	50555.7	-2247.48	294.757	180.359	0	0	0	0	0	0	0	200	903	0	0	0	0	0	0	0	603	903	0
678	5	23.8824	-25.9404	-535.054	64198.3	50799.8	-2110.15	294.943	180.015	0	0	0	0	0	0	0	200	903	0	0	0	0	0	0	0	603	903	0
678	6	24.4928	-26.8559	-537.801	63832.1	50738.8	-1972.83	294.345	181.309	0	0	0	0	0	0	0	200	903	0	0	0	0	0	0	0	603	903	0
678	7	24.3402	-27.0085	-536.275	64381.4	51227	-1835.5	295.524	179.947	0	0	0	0	0	0	0	200	903	0	0	0	0	0	0	0	603	903	0
678	8	25.2557	-27.924	-539.937	64381.4	51593.3	-2247.48	295.554	180.761	0	0	0	0	0	0	0	200	903	0	0	0	0	0	0	0	603	903	0
678	9	24.9505	-27.4663	-542.073	64015.2	51654.3	-2339.04	295.29	181.907	0	0	0	0	0	0	0	200	903	0	0	0	0	0	0	0	603	903	0
679	0	25.2557	-28.0766	-545.125	64930.8	52020.5	-2430.59	295.429	180.888	0	0	0	0	0	0	0	200	903	0	0	0	0	0	0	0	603	903	0
679	1	24.9505	-29.9077	-547.261	65937.8	51776.4	-2247.48	294.61	179.513	0	0	0	0	0	0	0	200	903	0	0	0	0	0	0	0	603	903	0
679	2	24.9505	-29.9077	-547.261	64839.2	52630.9	-2522.14	296.171	181.521	0	0	0	0	0	0	0	200	903	0	0	0	0	0	0	0	603	903	0
679	3	27.0868	-31.1284	-548.177	64473	52081.5	-2705.25	295.009	182.387	0	0	0	0	0	0	0	200	903	0	0	0	0	0	0	0	603	903	0
679	4	26.1712	-31.281	-551.534	64656.1	52691.9	-2751.02	295.537	182.77	0	0	0	0	0	0	0	200	903	0	0	0	0	0	0	0	603	903	0
679	5	26.3238	-30.6706	-552.755	64656.1	53424.3	-2751.02	296.651	183.029	0	0	0	0	0	0	0	200	903	0	0	0	0	0	0	0	603	903	0
679	6	26.629	-32.0439	-555.196	65754.7	53241.2	-2522.14	295.896	181.565	0	0	0	0	0	0	0	200	903	0	0	0	0	0	0	0	603	903	0
679	7	26.629	-34.0276	-557.332	65297	53607.4	-2796.8	296.186	182.84	0	0	0	0	0	0	0	200	903	0	0	0	0	0	0	0	603	903	0
679	8	26.629	-33.5698	-559.163	65937.8	53424.3	-2934.13	295.543	182.078	0	0	0	0	0	0	0	200	903	0	0	0	0	0	0	0	603	903	0
679	9	27.8497	-34.4853	-560.994	66029.4	53973.6	-2888.35	296.211	182.299	0	0	0	0	0	0	0	200	903	0	0	0	0	0	0	0	603	903	0
680	0	28.1549	-34.1801	-563.741	65571.6	54645	-2796.8	296.933	183.685	0	0	0	0	0	0	0	200	903	0	0	0	0	0	0	0	603	903	0
680	1	27.5445	-35.4008	-565.877	65846.3	54217.8	-2842.58	295.812	183.639	0	0	0	0	0	0	0	200	903	0	0	0	0	0	0	0	603	903	0
680	2	29.9859	-35.4008	-567.403	66029.4	55072.3	-3117.23	297.06	183.629	0	0	0	0	0	0	0	200	903	0	0	0	0	0	0	0	603	903	0
680	3	29.8334	-35.706	-569.844	65846.3	55072.3	-3208.79	296.644	184.449	0	0	0	0	0	0	0	200	903	0	0	0	0	0	0	0	603	903	0
680	4	30.4437	-37.6897	-572.286	66853.4	55011.2	-3208.79	296.125	183.182	0	0	0	0	0	0	0	200	903	0	0	0	0	0	0	0	603	903	0
680	5	30.7489	-38.1474	-575.032	66120.9	55987.8	-2888.35	297.365	185.014	0	0	0	0	0	0	0	200	903	0	0	0	0	0	0	0	603	903	0
680	6	31.3592	-37.8423	-576.863	66853.4	55865.7	-2613.69	296.844	184.109	0	0	0	0	0	0	0	200	903	0	0	0	0	0	0	0	603	903	0
680	7	31.0541	-38.9104	-578.389	67036.5	55987.8	-3117.23	296.799	184.098	0	0	0	0	0	0	0	200	903	0	0	0	0	0	0	0	603	903	0
680	8	31.6644	-38.9104	-580.831	66487.1	56415	-3529.22	297.128	185.531	0	0	0	0	0	0	0	200	903	0	0	0	0	0	0	0	603	903	0
680	9	33.8006	-40.1311	-585.714	67311.1	57086.4	-3483.45	297.465	185.078	0	0	0	0	0	0	0	200	903	0	0	0	0	0	0	0	603	903	0
681	0	33.3429	-41.8095	-588.155	67677.3	57147.5	-3300.34	297.164	184.933	0	0	0	0	0	0	0	200	903	0	0	0	0	0	0	0	603	903	0
681	1	33.3429	-42.4199	-589.07	66853.4	57147.5	-3117.23	297.013	186.51	0	0	0	0	0	0	0	200	903	0	0	0	0	0	0	0	603	903	0
681	2	33.6481	-42.8777	-591.512	67494.2	57391.6	-3575	297.025	185.895	0	0	0	0	0	0	0	200	903	0	0	0	0	0	0	0	603	903	0
681	3	33.8006	-44.2509	-594.258	66670.3	57696.8	-3712.33	297.09	187.809	0	0	0	0	0	0	0	200	903	0	0	0	0	0	0	0	603	903	0
681	4	34.2584	-44.0984	-594.869	67677.3	58063	-3803.88	297.606	186.231	0	0	0	0	0	0	0	200	903	0	0	0	0	0	0	0	603	903	0
681	5	34.8688	-45.0139	-597.921	67860.5	58490.2	-3803.88	297.823	186.506	0	0	0	0	0	0	0	200	903	0	0	0	0	0	0	0	603	903	0
681	6	35.1739	-45.9294	-598.226	67311.1	58734.4	-3575	298.181	187.482	0	0	0	0	0	0	0	200	903	0	0	0	0	0	0	0	603	903	0
681	7	35.1739	-45.7768	-602.803	67585.8	58490.2	-3483.45	297.03	187.881	0	0	0	0	0	0	0	200	903	0	0	0	0	0	0	0	603	903	0
681	8	36.2421	-48.3708	-605.245	67768.9	59344.7	-3803.88	298.051	188.031	0	0	0	0	0	0	0	200	903	0	0	0	0	0	0	0	603	903	0
681	9	36.8524	-46.9975	-607.076	67677.3	59894	-3849.66	298.66	188.519	0	0	0	0	0	0	0	200	903	0	0	0	0	0	0	0	603	903	0
682	0	37.3102	-48.0656	-608.907	68135.1	60199.2	-3803.88	298.864	188.103	0	0	0	0	0	0	0	200	903	0	0	0	0	0	0	0	603	903	0
682	1	37.4628	-49.5915	-610.738	67494.2	60382.3	-4032.76	298.868	189.487	0	0	0	0	0	0	0	200	903	0	0	0	0	0	0	0	603	903	0
682	2	37.7679	-49.4389	-614.095	67860.5	60809.6	-4170.09	299.023	189.495	0	0	0	0	0	0	0	200	903	0	0	0	0	0	0	0	603	903	0
682	3	38.2257	-50.8122	-617.147	68409.8	60565.4	-3986.99	298.138	189.152	0	0	0	0	0	0	0	200	903	0	0	0	0	0	0	0	603	903	0
682	4	38.3783	-51.27	-617.757	67677.3	61297.8	-4307.42	299.227	190.447	0	0	0	0	0	0	0	200	903	0	0	0	0	0	0	0	603	903	0
682	5	40.3619	-52.4907	-620.198	67952	61908.2	-3986.99	299.82	190.435	0	0	0	0	0	0	0	200	903	0	0	0	0	0	0	0	603	903	0
682	6	40.0567	-52.6433	-622.335	68226.7	61847.2	-3986.99	299.379	190.37	0	0	0	0	0	0	0	200	903	0	0	0	0	0	0	0	603	903	0
682	7	39.7516	-54.4743	-624.776	68135.1	62213.4	-4215.87	299.577	190.945	0	0	0	0	0	0	0	200	903	0	0	0	0	0	0	0	603	903	0
682	8	40.5145	-53.864	-627.217	68409.8	62030.3	-4353.2	298.898	190.931	0	0	0	0	0	0	0	200	903	0	0	0	0	0	0	0	603	903	0
682	9	41.1249	-55.2373	-629.659	68409.8	62335.4	-4215.87	298.999	191.354	0	0	0	0	0	0	0	200	903	0	0	0	0	0	0	0	603	903	0
683	0	42.0404	-55.0847	-633.016	67494.2	63189.9	-4536.3	299.824	193.377	0	0	0	0	0	0	0	200	903	0	0	0	0	0	0	0	603	903	0
683	1	42.4982	-56.1528	-633.016	68592.9	63495.1	-3803.88	300.306	191.641	0	0	0	0	0	0	0	200	903	0	0	0	0	0	0	0	603	903	0
683	2	42.8033	-58.5942	-636.983	68501.3	63983.4	-4307.42	300.448	192.46	0	0	0	0	0	0	0	200	903	0	0	0	0	0	0	0	603	903	0
683	3	42.193	-57.3735	-638.204	68135.1	63800.3	-4536.3	299.969	193.239	0	0	0	0	0	0	0	200	903	0	0	0	0	0	0	0	603	903	0
683	4	44.024	-58.289	-641.866	68684.4	64227.5	-4536.3	300.064	192.993	0	0	0	0	0	0	0	200	903	0	0	0	0	0	0	0	603	903	0
683	5	44.787	-60.883	-644.612	68776	64776.8	-4536.3	300.49	193.306	0	0	0	0	0	0	0	200	903	0	0	0	0	0	0	0	603	903	0
683	6	45.0921	-59.9675	-646.443	67860.5	64654.8	-4582.08	300.016	195.025	0	0	0	0	0	0	0	200	903	0	0	0	0	0	0	0	603	903	0
683	7	46.1603	-60.2727	-649.8	68592.9	65326.2	-4856.74	300.533	194.44	0	0	0	0	0	0	0	200	903	0	0	0	0	0	0	0	603	903	0
683	8	47.381	-63.3244	-651.326	68592.9	65570.3	-4170.09	300.672	194.687	0	0	0	0	0	0	0	200	903	0	0	0	0	0	0	0	603	903	0
683	9	46.9232	-61.4934	-655.904	67677.3	66058.6	-4627.86	300.714	196.818	0	0	0	0	0	0	0	200	903	0	0	0	0	0	0	0	603	903	0
684	0	47.2284	-62.7141	-658.04	68959.1	66485.8	-4902.51	301.036	195.205	0	0	0	0	0	0	0	200	903	0	0	0	0	0	0	0	603	903	0
684	1	47.6861	-64.24	-661.092	68684.4	66668.9	-5039.84	300.847	196.105	0	0	0	0	0	0	0	200	903	0	0	0	0	0	0	0	603	903	0
684	2	48.2965	-64.0874	-663.228	68501.3	66791	-4765.18	300.706	196.715	0	0	0	0	0	0	0	200	903	0	0	0	0	0	0	0	603	903	0
684	3	48.6017	-64.6977	-666.89	68592.9	67279.3	-5039.84	300.885	197.145	0	0	0	0	0	0	0	200	903	0	0	0	0	0	0	0	603	903	0
684	4	48.4491	-65.7658	-665.364	68684.4	68072.8	-5360.28	302.309	196.772	0	0	0	0	0	0	0	200	903	0	0	0	0	0	0	0	603	903	0
684	5	48.9068	-66.071	-672.078	68776	68377.9	-5314.5	301.741	197.667	0	0	0	0	0	0	0	200	903	0	0	0	0	0	0	0	603	903	0
684	6	49.3646	-67.2917	-673.604	68776	68439	-5360.28	301.601	197.899	0	0	0	0	0	0	0	200	903	0	0	0	0	0	0	0	603	903	0
684	7	49.5172	-67.7495	-675.74	68592.9	68194.8	-4902.51	300.919	198.492	0	0	0	0	0	0	0	200	903	0	0	0	0	0	0	0	603	903	0
684	8	50.4327	-68.8176	-679.708	66944.9	68927.2	-5451.83	301.407	201.509	0	0	0	0	0	0	0	200	903	0	0	0	0	0	0	0	603	903	0
684	9	51.9586	-69.2754	-680.928	68226.7	69415.5	-5222.95	301.943	199.803	0	0	0	0	0	0	0	200	903	0	0	0	0	0	0	0	603	903	0
685	0	52.1112	-70.0383	-682.149	68318.2	70270	-5589.16	303.013	199.849	0	0	0	0	0	0	0	200	903	0	0	0	0	0	0	0	603	903	0
685	1	51.6534	-70.4961	-684.59	67402.7	70025.9	-5543.38	302.289	201.543	0	0	0	0	0	0	0	200	903	0	0	0	0	0	0	0	603	903	0
685	2	51.9586	-72.0219	-688.253	68318.2	70636.2	-5451.83	302.631	200.737	0	0	0	0	0	0	0	200	903	0	0	0	0	0	0	0	603	903	0
685	3	52.4164	-72.6323	-690.694	67860.5	70636.2	-5818.04	302.268	201.75	0	0	0	0	0	0	0	200	903	0	0	0	0	0	0	0	603	903	0
685	4	53.6371	-73.853	-692.525	67402.7	71002.4	-5726.49	302.527	202.671	0	0	0	0	0	0	0	200	903	0	0	0	0	0	0	0	603	903	0
685	5	54.7052	-74.1582	-696.492	67585.8	71551.8	-5634.94	302.732	202.963	0	0	0	0	0	0	0	200	903	0	0	0	0	0	0	0	603	903	0
685	6	53.6371	-74.4633	-698.629	66944.9	71673.8	-5863.82	302.592	204.177	0	0	0	0	0	0	0	200	903	0	0	0	0	0	0	0	603	903	0
685	7	53.6371	-74.6159	-700.46	66670.3	72284.2	-5543.38	303.195	204.819	0	0	0	0	0	0	0	200	903	0	0	0	0	0	0	0	603	903	0
685	8	54.4	-75.5315	-703.817	67768.9	72284.2	-5955.37	302.703	203.712	0	0	0	0	0	0	0	200	903	0	0	0	0	0	0	0	603	903	0
685	9	54.7052	-76.2944	-705.342	67219.6	72589.4	-6001.15	302.914	204.699	0	0	0	0	0	0	0	200	903	0	0	0	0	0	0	0	603	903	0
686	0	55.4681	-77.0573	-710.836	67585.8	73138.7	-6046.92	302.891	204.921	0	0	0	0	0	0	0	200	903	0	0	0	0	0	0	0	603	903	0
686	1	56.3837	-78.4306	-712.972	67036.5	73260.7	-5818.04	302.754	205.976	0	0	0	0	0	0	0	200	903	0	0	0	0	0	0	0	603	903	0
686	2	55.7733	-78.278	-715.718	66487.1	73382.8	-6184.25	302.53	207.104	0	0	0	0	0	0	0	200	903	0	0	0	0	0	0	0	603	903	0
686	3	56.2311	-78.4306	-718.16	67128	74176.3	-6367.36	303.287	206.528	0	0	0	0	0	0	0	200	903	0	0	0	0	0	0	0	603	903	0
686	4	55.7733	-79.8039	-721.212	67311.1	74725.6	-6550.46	303.611	206.669	0	0	0	0	0	0	0	200	903	0	0	0	0	0	0	0	603	903	0
686	5	55.7733	-80.4143	-719.075	66395.6	74725.6	-6275.8	303.919	207.665	0	0	0	0	0	0	0	200	903	0	0	0	0	0	0	0	603	903	0
686	6	55.7733	-81.635	-726.4	66487.1	74908.7	-6825.12	303.123	208.47	0	0	0	0	0	0	0	200	903	0	0	0	0	0	0	0	603	903	0
686	7	56.3837	-81.7876	-727.925	65480.1	75580.1	-6596.24	303.829	210.046	0	0	0	0	0	0	0	200	903	0	0	0	0	0	0	0	603	903	0
686	8	56.8414	-81.7876	-731.282	65388.5	75702.1	-6733.57	303.52	210.584	0	0	0	0	0	0	0	200	903	0	0	0	0	0	0	0	603	903	0
686	9	57.1466	-83.0083	-733.419	66395.6	75763.2	-6596.24	303.301	209.471	0	0	0	0	0	0	0	200	903	0	0	0	0	0	0	0	603	903	0
687	0	57.1466	-83.0083	-731.893	64564.5	76312.5	-7008.23	304.267	211.784	0	0	0	0	0	0	0	200	903	0	0	0	0	0	0	0	603	903	0
687	1	58.0621	-83.9238	-736.776	65022.3	76373.5	-6458.91	303.659	211.747	0	0	0	0	0	0	0	200	903	0	0	0	0	0	0	0	603	903	0
687	2	57.1466	-84.6867	-738.607	65480.1	76739.8	-6916.67	303.898	211.346	0	0	0	0	0	0	0	200	903	0	0	0	0	0	0	0	603	903	0
687	3	57.7569	-84.3816	-741.658	64473	77106	-6825.12	303.964	213.069	0	0	0	0	0	0	0	200	903	0	0	0	0	0	0	0	603	903	0
687	4	58.6725	-84.9919	-743.184	64198.3	77594.2	-6825.12	304.408	213.617	0	0	0	0	0	0	0	200	903	0	0	0	0	0	0	0	603	903	0
687	5	56.994	-86.3652	-746.846	63649	77960.5	-7008.23	304.386	214.776	0	0	0	0	0	0	0	200	903	0	0	0	0	0	0	0	603	903	0
687	6	58.3673	-86.9756	-746.846	63923.7	77960.5	-7328.66	304.386	214.409	0	0	0	0	0	0	0	200	903	0	0	0	0	0	0	0	603	903	0
687	7	58.6725	-87.1281	-749.593	63557.5	78387.7	-7237.11	304.574	215.211	0	0	0	0	0	0	0	200	903	0	0	0	0	0	0	0	603	903	0
687	8	58.9776	-87.5859	-751.424	63649	78326.7	-6870.9	304.238	215.295	0	0	0	0	0	0	0	200	903	0	0	0	0	0	0	0	603	903	0
687	9	59.1302	-88.5014	-753.255	62825.1	78753.9	-7145.56	304.551	216.595	0	0	0	0	0	0	0	200	903	0	0	0	0	0	0	0	603	903	0
688	0	60.6561	-87.7385	-757.222	63099.7	79242.2	-7191.33	304.649	216.67	0	0	0	0	0	0	0	200	903	0	0	0	0	0	0	0	603	903	0
688	1	60.8087	-87.7385	-756.917	62733.5	79181.2	-7511.77	304.61	217.12	0	0	0	0	0	0	0	200	903	0	0	0	0	0	0	0	603	903	0
688	2	59.8932	-88.1963	-759.969	62458.8	79730.5	-7557.54	304.913	217.814	0	0	0	0	0	0	0	200	903	0	0	0	0	0	0	0	603	903	0
688	3	60.0458	-88.5014	-761.8	62550.4	79974.6	-7511.77	304.981	217.891	0	0	0	0	0	0	0	200	903	0	0	0	0	0	0	0	603	903	0
688	4	60.6561	-90.1799	-760.579	61909.5	80035.6	-7511.77	305.23	218.602	0	0	0	0	0	0	0	200	903	0	0	0	0	0	0	0	603	903	0
688	5	59.7406	-89.7221	-764.547	60994	80035.6	-7557.54	304.684	220.222	0	0	0	0	0	0	0	200	903	0	0	0	0	0	0	0	603	903	0
688	6	60.1983	-89.8747	-767.293	60994	80035.6	-7099.78	304.309	220.508	0	0	0	0	0	0	0	200	903	0	0	0	0	0	0	0	603	903	0
688	7	60.8087	-90.3325	-768.514	60444.7	80890.1	-7694.87	305.255	221.349	0	0	0	0	0	0	0	200	903	0	0	0	0	0	0	0	603	903	0
688	8	60.0458	-90.6377	-768.819	59895.4	81012.2	-7511.77	305.372	222.094	0	0	0	0	0	0	0	200	903	0	0	0	0	0	0	0	603	903	0
688	9	60.6561	-91.4006	-770.04	59529.2	81195.3	-7786.42	305.443	222.693	0	0	0	0	0	0	0	200	903	0	0	0	0	0	0	0	603	903	0
689	0	61.1139	-91.7058	-771.566	59162.9	81561.5	-8198.41	305.709	223.321	0	0	0	0	0	0	0	200	903	0	0	0	0	0	0	0	603	903	0
689	1	61.1139	-93.0791	-772.786	58613.6	81561.5	-7694.87	305.542	224.153	0	0	0	0	0	0	0	200	903	0	0	0	0	0	0	0	603	903	0
689	2	61.1139	-92.011	-774.617	58796.7	82049.8	-7832.2	305.923	224.096	0	0	0	0	0	0	0	200	903	0	0	0	0	0	0	0	603	903	0
689	3	61.5716	-92.7739	-776.448	57789.6	82293.9	-7832.2	305.988	225.572	0	0	0	0	0	0	0	200	903	0	0	0	0	0	0	0	603	903	0
689	4	60.9613	-91.7058	-774.312	57789.6	82538.1	-7649.1	306.595	225.367	0	0	0	0	0	0	0	200	903	0	0	0	0	0	0	0	603	903	0
689	5	62.0294	-93.0791	-779.195	57789.6	82293.9	-7877.98	305.614	225.834	0	0	0	0	0	0	0	200	903	0	0	0	0	0	0	0	603	903	0
689	6	61.4191	-92.9265	-779.805	56691	82782.2	-8106.86	306.158	227.301	0	0	0	0	0	0	0	200	903	0	0	0	0	0	0	0	603	903	0
689	7	62.3346	-93.0791	-780.721	56874.1	82843.3	-7832.2	306.111	227.152	0	0	0	0	0	0	0	200	903	0	0	0	0	0	0	0	603	903	0
689	8	62.3346	-93.9946	-783.162	56416.4	82965.3	-7832.2	305.936	227.963	0	0	0	0	0	0	0	200	903	0	0	0	0	0	0	0	603	903	0
689	9	62.6398	-93.0791	-783.467	55683.9	83453.6	-8061.08	306.518	228.926	0	0	0	0	0	0	0	200	903	0	0	0	0	0	0	0	603	903	0
690	0	62.3346	-94.2998	-784.383	55775.5	83148.4	-8152.64	306.005	228.893	0	0	0	0	0	0	0	200	903	0	0	0	0	0	0	0	603	903	0
690	1	61.5716	-94.4524	-783.773	54951.5	83758.8	-8335.74	306.866	229.888	0	0	0	0	0	0	0	200	903	0	0	0	0	0	0	0	603	903	0
690	2	62.6398	-95.3679	-788.961	54768.4	83636.7	-8106.86	306.009	230.582	0	0	0	0	0	0	0	200	903	0	0	0	0	0	0	0	603	903	0
690	3	63.5553	-95.8257	-792.623	54402.2	83758.8	-7832.2	305.673	231.364	0	0	0	0	0	0	0	200	903	0	0	0	0	0	0	0	603	903	0
690	4	62.9449	-96.7412	-792.318	53761.3	84125	-8244.19	306.176	232.147	0	0	0	0	0	0	0	200	903	0	0	0	0	0	0	0	603	903	0
690	5	63.2501	-97.0464	-793.233	53212	84125	-8473.07	306.053	232.918	0	0	0	0	0	0	0	200	903	0	0	0	0	0	0	0	603	903	0
690	6	63.2501	-97.9619	-794.149	53852.9	84552.2	-8610.4	306.469	232.188	0	0	0	0	0	0	0	200	903	0	0	0	0	0	0	0	603	903	0
690	7	62.9449	-97.6567	-794.149	52662.7	84430.2	-8839.28	306.315	233.687	0	0	0	0	0	0	0	200	903	0	0	0	0	0	0	0	603	903	0
690	8	63.5553	-98.7248	-796.285	53486.7	84735.4	-8747.73	306.413	232.83	0	0	0	0	0	0	0	200	903	0	0	0	0	0	0	0	603	903	0
690	9	62.3346	-100.251	-797.2	52662.7	85162.6	-8747.73	306.827	233.94	0	0	0	0	0	0	0	200	903	0	0	0	0	0	0	0	603	903	0
691	0	63.4027	-99.6404	-798.421	51380.9	84674.3	-8885.06	306.052	235.647	0	2.19589	5.97412	-18.3672	2750.78	-1099.16	76.6757	140.156	753.235	0	0	0	0	0	0	0	603	903	0
691	1	62.9449	-100.403	-800.252	51838.7	85528.8	-8793.51	306.877	235.222	0	0	0	0	0	0	0	200	903	0	0	0	0	0	0	0	603	903	0
691	2	63.4027	-100.708	-801.473	51014.7	85467.8	-8885.06	306.638	236.349	0	4.33212	10.5518	-15.3155	3116.99	-1343.3	-60.6534	112.291	699.481	0	0	0	0	0	0	0	603	903	0
691	3	62.9449	-101.166	-802.693	51014.7	85711.9	-9205.49	306.78	236.446	0	3.72177	10.7043	-22.0293	3483.2	-1282.27	-289.535	141.793	744.884	0	0	0	0	0	0	0	603	903	0
691	4	62.9449	-102.234	-802.999	50648.5	85711.9	-9159.72	306.74	236.926	0	0.822602	8.87329	-25.0811	3940.96	-1282.27	76.6757	148.875	745.871	0	0	0	0	0	0	0	603	903	0
691	5	62.9449	-102.997	-802.083	50282.3	84979.5	-9205.49	305.948	237.31	0	4.02695	11.7725	-24.4708	4032.51	-1648.48	-152.206	132.635	738.211	0	0	0	0	0	0	0	603	903	0
691	6	63.5553	-103.302	-802.999	50007.7	85834	-9388.6	306.892	237.724	0	3.26401	14.0613	-23.5552	4032.51	-1892.62	-426.864	119.652	731.806	0	0	0	0	0	0	0	603	903	0
691	7	64.3182	-104.218	-804.219	49824.6	85650.9	-9251.27	306.502	238.046	0	3.4166	15.4346	-27.5225	4124.07	-1770.55	-289.535	135.669	753.157	0	0	0	0	0	0	0	603	903	0
691	8	62.7923	-103.913	-803.304	49366.8	86017.1	-9297.05	307.079	238.545	0	2.65366	16.5027	-35.1519	5497.36	-2564.01	-747.299	127.059	746.611	0	0	0	0	0	0	0	603	903	0
691	9	62.9449	-105.134	-804.525	49458.4	86078.1	-9800.59	306.993	238.525	0	0.97519	19.0967	-38.2037	6229.78	-2808.15	-976.181	126.495	739.932	0	0	0	0	0	0	0	603	903	0
692	0	63.5553	-107.117	-804.83	48909	85467.8	-9571.7	306.194	239.231	0	1.43295	20.47	-39.1192	5588.91	-2319.87	-1113.51	140.697	760.131	0	0	0	0	0	0	0	603	903	0
692	1	64.776	-106.812	-805.44	48268.2	85956.1	-9846.36	306.719	240.072	0	5.40024	21.0803	-41.8658	5955.12	-3174.36	-1296.62	124.178	760.757	0	0	0	0	0	0	0	603	903	0
692	2	62.3346	-107.88	-806.966	48634.4	86200.2	-9800.59	306.82	239.732	0	0.822602	23.064	-46.1382	7145.31	-2747.11	-1571.27	140.459	748.133	0	0	0	0	0	0	0	603	903	0
692	3	62.7923	-108.338	-807.576	47535.7	86261.2	-9983.69	306.815	241.138	0	-1.16104	26.1157	-51.3262	7328.41	-2930.22	-1021.96	142.91	760.219	0	0	0	0	0	0	0	603	903	0
692	4	62.182	-107.728	-807.576	46986.4	86566.4	-9892.14	307.193	241.818	0	1.28037	26.5735	-54.378	7603.07	-3479.54	-1525.5	136.012	763.181	0	0	0	0	0	0	0	603	903	0
692	5	62.4872	-109.559	-807.271	47535.7	86322.3	-10395.7	306.931	241.116	0	3.11142	28.5571	-55.5987	8427.04	-3723.68	-1937.48	133.026	751.431	0	0	0	0	0	0	0	603	903	0
692	6	61.8768	-110.169	-807.271	46803.3	86505.4	-9892.14	307.158	242.023	0	0.517426	30.3882	-62.3125	8610.15	-4028.85	-1662.83	135.344	764.823	0	0	0	0	0	0	0	603	903	0
692	7	61.5716	-110.932	-809.407	46894.9	86261.2	-10624.6	306.573	242.063	0	0.822602	27.3364	-67.5005	9251.02	-4578.17	-1342.39	132.176	765.949	0	0	0	0	0	0	0	603	903	0
692	8	62.182	-111.542	-810.323	46528.7	86383.3	-10487.2	306.604	242.58	0	2.80624	21.5381	-75.4351	10715.9	-4272.99	-884.628	143.355	760.946	0	0	0	0	0	0	0	603	903	0
692	9	61.4191	-112.61	-810.323	45704.7	86505.4	-10670.3	306.754	243.597	0	6.16318	17.5708	-83.0645	11631.4	-5188.52	-243.759	137.536	762.972	0	0	0	0	0	0	0	603	903	0
693	0	60.9613	-113.831	-811.238	45613.1	85895	-10899.2	305.881	243.773	0	5.09506	15.4346	-89.4732	12821.6	-5066.45	76.6757	143.375	759.699	0	0	0	0	0	0	0	603	903	0
693	1	60.5035	-114.899	-810.323	45338.5	86627.4	-11219.7	306.905	244.049	0	6.77353	8.56811	-99.8492	14286.4	-6165.08	488.663	138.256	759.92	0	0	0	0	0	0	0	603	903	0
693	2	60.8087	-115.509	-807.271	45338.5	86444.3	-11082.3	307.082	243.837	0	10.8934	3.99048	-109.615	15934.4	-6653.36	1404.19	139.302	757.633	0	0	0	0	0	0	0	603	903	0
693	3	59.2828	-117.341	-810.628	45521.6	86444.3	-11311.2	306.639	243.844	0	12.2667	4.14306	-113.887	16117.5	-6531.29	1678.85	142.651	761.479	0	0	0	0	0	0	0	603	903	0
693	4	59.7406	-118.866	-810.628	44331.4	86139.2	-11585.9	306.262	245.312	0	13.1822	0.480954	-123.348	17216.1	-7446.82	2045.06	139.627	763.426	0	0	0	0	0	0	0	603	903	0
693	5	59.588	-119.172	-810.933	44239.8	85895	-11540.1	305.921	245.446	0	15.0133	-3.33374	-129.146	18680.9	-7629.93	2502.82	140.92	758.35	0	0	0	0	0	0	0	603	903	0
693	6	59.1302	-120.24	-808.797	44514.5	85895	-11814.7	306.201	244.962	0	16.9969	-5.01221	-140.438	19962.7	-7935.1	2640.15	143.497	760.854	0	0	0	0	0	0	0	603	903	0
693	7	58.5199	-121.308	-809.407	43415.9	86200.2	-11814.7	306.498	246.361	0	17.7599	-7.30103	-149.593	20878.2	-8728.56	2960.59	141.651	763.433	0	0	0	0	0	0	0	603	903	0
693	8	58.9776	-121.308	-807.881	43415.9	86139.2	-11814.7	306.624	246.26	0	19.8961	-11.7261	-158.443	22251.5	-9094.77	3876.11	142.599	762.561	0	0	0	0	0	0	0	603	903	0
693	9	58.2147	-123.444	-806.661	43873.6	86078.1	-12226.7	306.709	245.611	0	21.1168	-13.7097	-167.598	23167	-9705.12	3921.89	142.093	764.77	0	0	0	0	0	0	0	603	903	0
694	0	57.4518	-124.665	-805.44	42500.3	85345.7	-12592.9	305.962	247.233	0	20.3539	-13.8623	-174.617	23807.9	-10254.4	3876.11	141.275	766.657	0	0	0	0	0	0	0	603	903	0
694	1	57.6044	-125.123	-805.44	42958.1	85895	-12409.8	306.644	246.665	0	20.659	-13.5571	-181.941	25272.7	-10376.5	4333.88	142.968	764.094	0	0	0	0	0	0	0	603	903	0
694	2	57.1466	-126.496	-803.609	43049.7	85711.9	-12730.3	306.659	246.43	0	23.5582	-15.2356	-189.571	26371.4	-11170	4196.55	141.078	763.889	0	0	0	0	0	0	0	603	903	0
694	3	56.3837	-126.954	-802.083	41951	85528.8	-12867.6	306.633	247.697	0	22.4901	-13.7097	-197.505	27470	-10742.7	4013.44	145.608	763.915	0	0	0	0	0	0	0	603	903	0
694	4	55.4681	-128.174	-798.116	42775	85345.7	-13142.3	306.934	246.405	0	22.4901	-11.5735	-206.356	28385.5	-11353.1	4059.22	144.983	765.443	0	0	0	0	0	0	0	603	903	0
694	5	56.6888	-129.242	-800.252	41493.3	84857.4	-13233.8	306.038	248.15	0	23.7108	-9.58985	-211.544	29209.5	-12573.8	3921.89	140.562	764.922	0	0	0	0	0	0	0	603	903	0
694	6	56.2311	-129.853	-798.726	40760.8	84918.5	-13233.8	306.317	248.968	0	24.016	-7.45362	-216.121	29484.2	-12268.6	3693.01	143.233	766.576	0	0	0	0	0	0	0	603	903	0
694	7	55.7733	-130.463	-797.2	41035.5	84613.3	-13188	306.138	248.525	0	24.016	-2.41822	-224.056	30308.1	-12512.7	4059.22	144.153	767.729	0	0	0	0	0	0	0	603	903	0
694	8	55.6207	-130.158	-794.759	40394.6	84735.4	-12592.9	306.618	249.174	0	23.253	0.328366	-228.939	30491.3	-13123.1	3464.13	142.679	769.815	0	0	0	0	0	0	0	603	903	0
694	9	54.5526	-131.531	-792.623	40486.2	84064	-13645.8	306.058	248.921	0	22.1849	3.53271	-232.906	31498.3	-13001	2823.26	144.179	767.759	0	0	0	0	0	0	0	603	903	0
695	0	53.7897	-132.599	-791.707	40211.5	83880.9	-13554.2	305.949	249.209	0	21.8797	8.41552	-239.314	31956.1	-13611.4	2869.03	143.123	769.468	0	0	0	0	0	0	0	603	903	0
695	1	54.7052	-132.752	-791.097	39662.2	83819.8	-13828.9	305.954	249.864	0	22.1849	12.9932	-243.587	32780.1	-14038.6	2411.27	142.367	768.428	0	0	0	0	0	0	0	603	903	0
695	2	54.2474	-133.21	-788.655	39662.2	83270.5	-13966.2	305.585	249.709	0	20.8116	16.0449	-246.944	32047.6	-13977.6	1953.51	143.398	773.223	0	0	0	0	0	0	0	603	903	0
695	3	53.4845	-134.736	-786.214	38655.1	83087.4	-13554.2	305.68	250.834	0	20.5064	16.6553	-253.047	33237.8	-14343.8	2090.84	143.316	771.65	0	0	0	0	0	0	0	603	903	0
695	4	53.0267	-135.346	-783.773	38197.4	83209.5	-13920.5	306.165	251.265	0	24.9315	23.9795	-259.761	34428	-14526.9	1999.28	144.076	770.463	0	0	0	0	0	0	0	603	903	0
695	5	52.8741	-135.193	-779.805	38288.9	82538.1	-14286.7	305.844	250.899	0	25.847	26.1157	-265.865	34611.1	-14282.8	1953.51	146.278	772.817	0	0	0	0	0	0	0	603	903	0
695	6	51.806	-136.567	-778.585	39021.3	82416	-14240.9	305.854	249.882	0	26.61	28.4045	-271.053	34885.8	-14893.1	1816.18	145.055	774.295	0	0	0	0	0	0	0	603	903	0
695	7	52.7215	-136.567	-774.922	37373.4	81683.6	-14424	305.409	251.771	0	26.9151	33.7451	-278.072	35892.9	-15259.3	1724.63	145.125	773.922	0	0	0	0	0	0	0	603	903	0
695	8	50.8905	-136.567	-773.091	37373.4	81683.6	-14424	305.658	251.657	0	27.6781	36.0339	-283.87	35984.4	-15320.4	1541.52	146.03	776.236	0	0	0	0	0	0	0	603	903	0
695	9	50.1275	-138.55	-769.124	36274.8	81439.4	-14286.7	305.886	252.836	0	28.441	36.3391	-289.363	36716.8	-15564.5	1587.3	146.211	776.112	0	0	0	0	0	0	0	603	903	0
696	0	49.6698	-138.703	-766.072	35817	80951.2	-14652.9	305.67	253.246	0	28.8988	39.0857	-295.467	37266.2	-15686.6	1358.41	146.909	776.874	0	0	0	0	0	0	0	603	903	0
696	1	49.3646	-138.55	-762.105	35908.5	80646	-14515.6	305.82	252.882	0	28.2884	40.9167	-299.434	37815.5	-15808.6	1221.09	147.205	776.71	0	0	0	0	0	0	0	603	903	0
696	2	48.4491	-138.703	-759.359	34809.9	80035.6	-14286.7	305.399	254.159	0	27.2203	38.7805	-305.538	38273.2	-16419	1175.31	146.262	777.735	0	0	0	0	0	0	0	603	903	0
696	3	47.8387	-139.618	-756.307	34901.5	79730.5	-14698.7	305.421	253.853	0	29.5091	40.6116	-312.252	39280.3	-16846.2	1037.98	146.049	777.203	0	0	0	0	0	0	0	603	903	0
696	4	47.381	-140.839	-754.171	34535.2	79120.1	-15064.9	304.91	254.208	0	29.8143	44.2737	-312.252	39463.4	-17456.6	1221.09	144.094	776.617	0	0	0	0	0	0	0	603	903	0
696	5	48.4491	-140.992	-748.372	33436.6	78631.8	-14927.5	305.071	255.321	0	27.0677	43.6633	-323.238	39646.5	-17883.8	763.321	144.673	780.346	0	0	0	0	0	0	0	603	903	0
696	6	48.7543	-140.839	-743.795	33162	78631.8	-14790.2	305.717	255.415	0	27.8307	42.1374	-327.205	40745.2	-17761.8	946.427	145.717	778.475	0	0	0	0	0	0	0	603	903	0
696	7	47.6861	-142.212	-739.522	33253.5	77655.3	-15110.6	305.007	255.034	0	25.847	44.1211	-334.835	40928.3	-18616.3	534.44	144.402	780.766	0	0	0	0	0	0	0	603	903	0
696	8	45.8551	-142.67	-734.334	32612.6	77716.3	-15293.8	305.832	255.589	0	23.253	45.1892	-339.107	41843.8	-18616.3	625.992	145.102	779.606	0	0	0	0	0	0	0	603	903	0
696	9	45.3973	-142.365	-730.672	32338	76861.8	-15293.8	305.193	255.742	0	24.7789	44.884	-343.99	41935.3	-19653.9	442.887	142.865	781.091	0	0	0	0	0	0	0	603	903	0
697	0	45.5499	-144.043	-726.705	32612.6	76312.5	-15110.6	305.012	255.123	0	24.9315	45.647	-349.483	42026.9	-20142.1	214.005	142.366	782.746	0	0	0	0	0	0	0	603	903	0
697	1	44.6344	-143.891	-723.348	31422.5	76190.4	-15522.6	305.33	256.56	0	20.8116	46.1047	-354.671	42759.3	-19775.9	-197.982	144.242	782.439	0	0	0	0	0	0	0	603	903	0
697	2	44.3292	-144.196	-714.193	30873.1	75397	-14790.2	305.57	256.772	0	19.8961	48.6987	-359.554	43491.8	-20569.4	-60.6534	142.792	782.04	0	0	0	0	0	0	0	603	903	0
697	3	44.9396	-144.501	-712.056	31056.2	75030.8	-15522.6	305.372	256.385	0	19.4383	47.7832	-362.911	43583.3	-20874.6	-472.641	142.48	782.906	0	0	0	0	0	0	0	603	903	0
697	4	43.1085	-144.501	-705.648	29499.9	74603.5	-15614.2	305.723	258.195	0	18.5228	50.6824	-369.625	43858	-21057.7	-701.523	143.03	784.345	0	0	0	0	0	0	0	603	903	0
697	5	42.8033	-144.501	-703.206	29225.2	73749	-15568.4	304.875	258.44	0	16.0814	53.5815	-375.423	44498.8	-21729	-838.852	142.121	784.47	0	0	0	0	0	0	0	603	903	0
697	6	42.3456	-145.722	-698.323	29316.7	73443.8	-15385.3	305.172	258.018	0	14.8607	52.3608	-380.306	45139.7	-21851.1	-655.746	142.543	784.307	0	0	0	0	0	0	0	603	903	0
697	7	42.3456	-145.569	-693.135	28035	72833.5	-15476.9	305.078	259.553	0	12.877	54.9548	-384.273	44498.8	-22522.5	-976.181	141.389	787.2	0	0	0	0	0	0	0	603	903	0
697	8	42.3456	-145.722	-688.558	27760.3	72528.3	-15660	305.334	259.683	0	11.9615	58.1592	-388.24	44956.6	-22827.7	-1250.84	141.202	787.204	0	0	0	0	0	0	0	603	903	0
697	9	41.1249	-145.874	-683.065	27577.2	71856.9	-15568.4	305.198	259.627	0	10.5882	59.0747	-391.902	45139.7	-22705.6	-1662.83	142.063	787.819	0	0	0	0	0	0	0	603	903	0
698	0	40.3619	-146.027	-677.571	27302.6	71124.5	-15476.9	304.97	259.705	0	7.99423	59.3799	-398.921	45414.3	-23438	-1891.71	141.246	789.157	0	0	0	0	0	0	0	603	903	0
698	1	39.4464	-145.722	-671.773	26936.4	70819.3	-15705.7	305.422	259.903	0	6.77353	61.0583	-405.33	46146.8	-23743.2	-2029.04	141.423	789.15	0	0	0	0	0	0	0	603	903	0
698	2	38.9886	-145.874	-666.28	26844.8	69659.7	-15843.1	304.55	259.709	0	7.68906	62.8894	-408.687	46146.8	-24353.6	-2257.92	140.41	790.085	0	0	0	0	0	0	0	603	903	0
698	3	38.2257	-145.722	-661.397	25380	69232.4	-15568.4	304.676	261.627	0	3.56918	63.6523	-411.739	46329.9	-24963.9	-2349.47	139.37	790.478	0	0	0	0	0	0	0	603	903	0
698	4	37.7679	-145.569	-649.19	24922.2	68744.1	-15888.8	305.892	261.61	0	1.28037	64.5679	-416.927	46513	-24780.8	-2624.13	140.563	791.439	0	0	0	0	0	0	0	603	903	0
698	5	36.8524	-146.637	-647.054	25013.8	67767.6	-15934.6	304.733	261.342	0	0.364838	67.467	-422.725	47153.9	-26062.5	-3081.89	138.346	791.453	0	0	0	0	0	0	0	603	903	0
698	6	35.3265	-146.485	-640.645	24098.2	67584.5	-15797.3	305.494	262.384	0	-0.855865	68.6877	-429.134	47153.9	-25635.3	-3036.12	140.263	793.119	0	0	0	0	0	0	0	603	903	0
698	7	35.3265	-144.959	-634.847	24372.9	66424.8	-16117.7	304.631	261.608	0	-1.92398	68.8403	-433.406	47520.1	-26367.7	-3219.22	139.162	793.357	0	0	0	0	0	0	0	603	903	0
698	8	33.4955	-146.18	-629.048	23457.4	65936.5	-15934.6	304.819	262.71	0	-2.9921	68.9929	-434.322	47337	-26795	-3493.88	138.306	794.01	0	0	0	0	0	0	0	603	903	0
698	9	32.4274	-145.874	-622.029	22267.2	64898.9	-15660	304.334	264.202	0	-3.60245	71.7395	-441.341	47337	-26978.1	-3493.88	138.872	795.743	0	0	0	0	0	0	0	603	903	0
699	0	31.817	-144.806	-615.621	22358.7	64044.4	-15934.6	304.032	263.681	0	-5.4335	73.5706	-446.529	47153.9	-27649.5	-3722.76	138.079	797.399	0	0	0	0	0	0	0	603	903	0
699	1	31.3592	-143.738	-603.719	21901	63678.2	-16117.7	305.477	263.723	0	-6.04385	74.6387	-453.853	47977.8	-27710.5	-4134.75	138.944	797.288	0	0	0	0	0	0	0	603	903	0
699	2	31.5118	-143.128	-600.362	20436.1	62518.6	-15705.7	304.135	265.96	0	-8.79044	76.7749	-458.736	48344	-28076.7	-4546.74	138.796	797.615	0	0	0	0	0	0	0	603	903	0
699	3	29.6808	-143.738	-592.733	20802.3	62152.3	-16026.2	304.857	264.904	0	-9.70596	77.843	-463.008	48252.5	-29175.3	-4500.96	136.987	798.785	0	0	0	0	0	0	0	603	903	0
699	4	27.392	-143.28	-586.019	19703.7	61664.1	-16255.1	305.225	266.377	0	-9.40079	77.9956	-467.586	48344	-29175.3	-5050.28	137.604	799.609	0	0	0	0	0	0	0	603	903	0
699	5	27.2394	-142.06	-579.305	18971.3	60565.4	-15660	304.548	267.252	0	-11.8422	79.9792	-470.943	47153.9	-29907.8	-5279.16	136.494	802.874	0	0	0	0	0	0	0	603	903	0
699	6	26.3238	-140.534	-571.675	19429.1	60199.2	-15705.7	305.303	266.014	0	-15.5043	82.4207	-476.436	47703.2	-30212.9	-5233.38	136.586	802.875	0	0	0	0	0	0	0	603	903	0
699	7	25.8661	-139.618	-563.436	18238.9	58795.4	-15705.7	304.352	267.629	0	-14.5888	81.5051	-477.962	48527.1	-29968.8	-5599.59	137.299	801.471	0	0	0	0	0	0	0	603	903	0
699	8	24.798	-138.55	-557.027	17506.4	58490.2	-15797.3	305.004	268.572	0	-14.7414	85.3198	-481.319	47794.7	-31067.4	-5828.48	135.454	803.701	0	0	0	0	0	0	0	603	903	0
699	9	24.035	-137.33	-549.398	17506.4	57696.8	-15248	305.018	268.135	0	-17.3354	88.0664	-485.897	47977.8	-31006.4	-6011.58	136.187	804.259	0	0	0	0	0	0	0	603	903	0
700	0	23.7298	-137.787	-542.073	16865.6	56720.2	-15522.6	304.636	268.887	0	-17.4879	88.5242	-490.169	48252.5	-31494.7	-6423.57	135.747	804.559	0	0	0	0	0	0	0	603	903	0
700	1	22.3566	-136.872	-532.918	16590.9	56170.9	-15568.4	305.403	268.868	0	-17.3354	90.3552	-495.357	48344	-31921.9	-6835.56	135.558	805.406	0	0	0	0	0	0	0	603	903	0
700	2	21.2884	-136.872	-525.289	16133.2	55072.3	-15293.8	304.842	269.287	0	-18.8612	92.644	-498.104	47703.2	-31799.8	-6835.56	136.158	807.23	0	0	0	0	0	0	0	603	903	0
700	3	20.5255	-134.736	-517.049	14851.4	53851.6	-15339.5	304.152	271.277	0	-19.6242	96.3062	-501.155	47886.3	-32654.3	-7201.77	134.842	807.448	0	0	0	0	0	0	0	603	903	0
700	4	19.3048	-134.583	-510.64	14668.3	53546.4	-15660	304.861	271.275	0	-18.4035	96.9165	-506.038	48160.9	-33020.6	-7613.75	134.747	807.827	0	0	0	0	0	0	0	603	903	0
700	5	17.7789	-132.599	-502.706	14302.1	52447.8	-14744.4	304.331	271.55	0	-20.0819	97.6794	-509.09	47337	-32532.3	-7659.53	136.097	810.017	0	0	0	0	0	0	0	603	903	0
700	6	17.1686	-131.989	-494.771	13569.7	51898.4	-15248	304.894	272.574	0	-20.3871	100.579	-512.142	47977.8	-33691.9	-7751.08	134.214	809.319	0	0	0	0	0	0	0	603	903	0
700	7	15.6427	-130.158	-486.531	13020.4	50860.8	-15431.1	304.538	273.238	0	-18.5561	101.647	-515.804	47703.2	-33325.7	-8071.52	135.391	810.517	0	0	0	0	0	0	0	603	903	0
700	8	14.8797	-129.853	-478.902	12287.9	50128.4	-14927.5	304.674	274.341	0	-20.5397	103.173	-515.804	47337	-33630.9	-8208.85	134.799	811.227	0	0	0	0	0	0	0	603	903	0
700	9	13.659	-127.259	-466.695	11738.6	49029.8	-14973.3	305.057	274.847	0	-21.1501	105.614	-522.823	46238.3	-34424.4	-8208.85	134.157	814.56	0	0	0	0	0	0	0	603	903	0
701	0	13.3539	-125.123	-463.033	11921.7	48846.7	-14378.2	305.493	274.253	0	-19.9294	106.377	-524.044	47520.1	-34119.2	-8849.72	134.892	812.32	0	0	0	0	0	0	0	603	903	0
701	1	10.7599	-123.444	-456.319	11006.2	48053.2	-14836	305.306	275.88	0	-21.3026	108.208	-531.063	47520.1	-34973.7	-8895.49	134.144	813.519	0	0	0	0	0	0	0	603	903	0
701	2	10.3021	-121.155	-447.164	10456.9	46832.5	-14195.1	304.732	276.615	0	-19.9294	109.734	-536.251	47794.7	-35523	-9078.6	133.757	813.872	0	0	0	0	0	0	0	603	903	0
701	3	9.38658	-120.697	-439.229	10456.9	45917	-14424	304.54	276.193	0	-19.9294	112.175	-540.523	47428.5	-35278.9	-9353.26	134.732	815.254	0	0	0	0	0	0	0	603	903	0
701	4	9.23399	-118.866	-430.684	8992.04	44269	-13966.2	302.788	279.122	0	-20.6923	112.328	-544.185	47153.9	-36377.5	-9307.48	133.152	816.35	0	0	0	0	0	0	0	603	903	0
701	5	9.69176	-116.425	-420.308	9175.14	44269	-13783.1	305.325	278.17	0	-21.4552	111.107	-547.542	47703.2	-36865.8	-9536.36	132.67	815.878	0	0	0	0	0	0	0	603	903	0
701	6	8.47106	-116.578	-412.068	8808.93	43231.4	-13554.2	304.913	278.623	0	-21.1501	115.532	-552.12	47611.6	-36499.6	-10131.5	133.892	816.766	0	0	0	0	0	0	0	603	903	0
701	7	6.94518	-114.747	-401.693	8717.38	42560	-13325.4	305.952	278.298	0	-20.9975	115.685	-554.866	47428.5	-37232	-9994.12	132.899	817.523	0	0	0	0	0	0	0	603	903	0
701	8	5.57189	-112.915	-394.368	8168.06	41522.4	-13416.9	305.289	279.288	0	-22.2182	116.753	-561.275	47428.5	-37109.9	-10039.9	133.883	818.499	0	0	0	0	0	0	0	603	903	0
701	9	5.26671	-111.237	-385.823	7618.74	40423.8	-13142.3	304.773	280.253	0	-21.7604	118.889	-567.073	47337	-37964.4	-10268.8	133.052	819.524	0	0	0	0	0	0	0	603	903	0
702	0	4.80895	-108.948	-377.278	6611.66	39996.6	-13004.9	306.013	282.475	0	-24.3544	119.5	-573.177	47245.4	-38513.7	-10314.6	132.807	820.573	0	0	0	0	0	0	0	603	903	0
702	1	4.65636	-107.575	-370.259	6520.11	39264.1	-12501.4	306.045	282.39	0	-24.507	120.72	-576.839	47886.3	-38391.7	-10268.8	133.445	819.985	0	0	0	0	0	0	0	603	903	0
702	2	4.19859	-105.744	-361.714	6153.9	38104.5	-12547.2	305.344	282.987	0	-24.2018	122.399	-583.553	47611.6	-39429.2	-11001.2	132.432	821.411	0	0	0	0	0	0	0	603	903	0
702	3	3.43565	-102.997	-352.254	5787.69	37494.1	-12272.5	306.441	283.57	0	-27.101	124.077	-589.046	47611.6	-39917.5	-11001.2	132.234	822.172	0	0	0	0	0	0	0	603	903	0
702	4	2.97789	-101.014	-344.625	5513.03	35907.2	-12226.7	304.192	284.003	0	-27.5587	124.993	-594.234	47886.3	-40161.7	-11321.6	132.414	822.415	0	0	0	0	0	0	0	603	903	0
702	5	3.13048	-100.556	-335.775	5055.27	35296.9	-11265.4	305.121	284.944	0	-27.5587	124.535	-597.896	48069.4	-41199.3	-11001.2	131.093	822.602	0	0	0	0	0	0	0	603	903	0
702	6	2.8253	-99.1826	-326.619	4322.85	34320.3	-11814.7	305.077	286.765	0	-29.5424	126.061	-606.136	47245.4	-41077.2	-10863.9	132.231	825.055	0	0	0	0	0	0	0	603	903	0
702	7	2.21495	-97.3515	-317.769	4505.95	33587.9	-11357	305.699	285.82	0	-32.1364	126.976	-606.746	47337	-41443.4	-11413.2	131.696	824.982	0	0	0	0	0	0	0	603	903	0
702	8	4.65636	-96.1308	-308.919	3315.77	33099.6	-11357	307.146	289.267	0	-31.526	127.739	-617.122	47611.6	-42481	-11825.2	131.163	825.849	0	0	0	0	0	0	0	603	903	0
702	9	1.6046	-93.9946	-301.9	3865.08	31878.9	-11082.3	305.594	287.198	0	-32.289	129.418	-619.869	47886.3	-42481	-11871	131.468	825.748	0	0	0	0	0	0	0	603	903	0
703	0	0.84166	-93.6894	-295.186	3865.08	31695.8	-10945	307.376	286.906	0	-33.0519	131.554	-630.245	48344	-43518.6	-11871	130.95	826.293	0	0	0	0	0	0	0	603	903	0
703	1	1.6046	-92.4687	-288.777	3590.42	30292	-10807.7	304.897	287.567	0	-34.4252	129.113	-635.433	47611.6	-44067.9	-12099.8	130.649	828.072	0	0	0	0	0	0	0	603	903	0
703	2	1.29942	-90.6377	-280.233	2858	29315.4	-10487.2	304.611	289.801	0	-33.9674	132.317	-640.621	47886.3	-44312.1	-11962.5	130.829	828.25	0	0	0	0	0	0	0	603	903	0
703	3	2.06236	-87.5859	-268.026	2858	28583	-10349.9	306.643	289.337	0	-37.0192	133.995	-645.503	47794.7	-45349.7	-11916.7	129.745	828.958	0	0	0	0	0	0	0	603	903	0
703	4	0.536485	-84.8393	-263.143	1850.92	28033.7	-9983.69	306.534	292.966	0	-36.2563	134.301	-650.691	48527.1	-45105.5	-12420.3	130.681	828.422	0	0	0	0	0	0	0	603	903	0
703	5	0.383897	-83.0083	-256.124	2308.69	27118.2	-9297.05	305.879	290.986	0	-35.7985	135.369	-656.49	48984.9	-45349.7	-12420.3	130.921	828.384	0	0	0	0	0	0	0	603	903	0
703	6	-0.0738669	-80.5669	-246.663	1667.82	26324.7	-9159.72	306.723	293.239	0	-37.477	136.284	-663.814	48160.9	-46326.2	-12054.1	130.212	830.448	0	0	0	0	0	0	0	603	903	0
703	7	0.536485	-78.1255	-239.034	1850.92	25409.2	-9251.27	306.299	292.257	0	-34.5778	137.505	-668.697	48893.4	-46448.3	-12786.5	130.539	829.883	0	0	0	0	0	0	0	603	903	0
703	8	0.84166	-77.2099	-229.879	1393.16	24615.7	-8747.73	307.081	293.94	0	-36.4088	138.42	-674.495	47703.2	-47485.9	-12557.6	129.598	832.276	0	0	0	0	0	0	0	603	903	0
703	9	3.13048	-75.6841	-220.418	843.842	23700.2	-8518.85	307.524	296.172	0	-37.477	138.726	-679.378	47520.1	-47669	-12603.4	129.834	833.054	0	0	0	0	0	0	0	603	903	0
704	0	2.97789	-72.4797	-212.484	1301.61	23272.9	-8381.52	309.528	293.874	0	-36.5614	140.251	-682.735	48801.8	-47424.9	-12969.6	130.537	831.52	0	0	0	0	0	0	0	603	903	0
704	1	1.14684	-72.3271	-205.77	935.395	22601.6	-8335.74	309.839	295.454	0	-36.5614	141.014	-688.838	48069.4	-48035.2	-13244.2	130.266	833.217	0	0	0	0	0	0	0	603	903	0
704	2	0.689073	-70.3435	-197.53	660.736	20892.6	-8106.86	305.769	296.655	0	-32.8993	140.251	-694.332	48527.1	-48889.7	-12969.6	129.587	833.11	0	0	0	0	0	0	0	603	903	0
704	3	0.84166	-69.2754	-192.342	477.631	21075.7	-8015.31	309.574	297.517	0	-34.2726	142.388	-698.299	48801.8	-49133.8	-13335.8	129.638	833.113	0	0	0	0	0	0	0	603	903	0
704	4	2.06236	-68.3598	-185.018	-71.6857	20038.1	-7877.98	308.304	300.387	0	-33.8148	142.235	-703.487	48160.9	-49561.1	-13015.4	129.549	834.54	0	0	0	0	0	0	0	603	903	0
704	5	1.75719	-64.8503	-178.914	202.973	19427.7	-7237.11	308.587	298.866	0	-31.9838	141.777	-707.759	47886.3	-49622.1	-12878	129.888	835.341	0	0	0	0	0	0	0	603	903	0
704	6	2.21495	-64.24	-168.233	294.525	19000.5	-7237.11	312.941	298.249	0	-32.5941	143.303	-713.253	48618.7	-49988.3	-13290	129.915	834.835	0	0	0	0	0	0	0	603	903	0
704	7	1.90978	-61.7986	-162.74	-529.449	17535.6	-7008.23	307.753	303.253	0	-33.3571	143.914	-717.83	48344	-51025.9	-13290	128.916	835.653	0	0	0	0	0	0	0	603	903	0
704	8	2.52013	-59.2046	-156.331	-437.897	17596.7	-6275.8	312.56	302.801	0	-32.8993	144.829	-721.797	48069.4	-50293.5	-13381.6	130.322	836.403	0	0	0	0	0	0	0	603	903	0
704	9	2.97789	-55.3899	-151.754	202.973	16559.1	-6230.03	309.118	298.662	0	-29.5424	144.829	-727.291	48710.2	-51880.4	-13015.4	128.666	836.025	0	0	0	0	0	0	0	603	903	0
705	0	4.19859	-53.4062	-145.345	-529.449	15948.7	-6275.8	309.73	303.643	0	-31.2209	145.745	-731.258	48618.7	-51880.4	-13564.7	129.053	836.514	0	0	0	0	0	0	0	603	903	0
705	1	4.50377	-50.2019	-138.936	-712.555	15582.5	-5497.61	312.156	305.129	0	-32.4416	146.813	-735.53	48344	-51392.1	-13198.5	130.129	837.273	0	0	0	0	0	0	0	603	903	0
705	2	3.74083	-47.6079	-133.748	-529.449	14911.1	-5451.83	311.487	303.959	0	-30.7631	145.745	-739.803	48435.6	-52185.6	-13473.1	129.46	837.529	0	0	0	0	0	0	0	603	903	0
705	3	3.89342	-45.9294	-128.255	-621.002	14728	-5360.28	314.834	304.842	0	-26.9484	147.118	-743.16	48801.8	-52185.6	-13518.9	129.779	837.332	0	0	0	0	0	0	0	603	903	0
705	4	5.4193	-41.8095	-126.119	-804.108	13873.5	-4444.75	310.004	306.376	0	-30.3053	148.033	-747.737	47611.6	-52368.7	-13610.5	129.964	839.326	0	0	0	0	0	0	0	603	903	0
705	5	5.11412	-39.8259	-121.846	-621.002	13080.1	-4353.2	307.349	305.097	0	-30.4579	146.508	-751.094	48435.6	-53467.3	-13610.5	128.814	838.513	0	0	0	0	0	0	0	603	903	0
705	6	5.11412	-37.9948	-115.132	-1170.32	12958	-4261.64	312.549	310.165	0	-27.8639	146.355	-755.367	48618.7	-53345.3	-13473.1	129.378	838.636	0	0	0	0	0	0	0	603	903	0
705	7	4.65636	-35.5534	-110.86	-1353.42	12347.6	-4170.09	311.381	312.208	0	-31.3734	146.813	-758.419	47520.1	-53833.5	-13335.8	129.019	840.343	0	0	0	0	0	0	0	603	903	0
705	8	4.04601	-34.6379	-105.672	-1261.87	12103.5	-3529.22	314.538	311.941	0	-31.526	145.897	-760.25	48344	-53772.5	-13290	129.27	839.41	0	0	0	0	0	0	0	603	903	0
705	9	4.80895	-33.4172	-98.653	-1170.32	11493.2	-3758.1	316.501	311.863	0	-31.526	145.592	-764.217	48435.6	-54260.8	-13198.5	128.998	839.621	0	0	0	0	0	0	0	603	903	0
706	0	4.50377	-31.281	-95.6012	-437.897	10638.7	-3575	311.282	304.58	0	-33.2045	144.524	-768.794	47977.8	-54932.2	-13152.7	128.548	840.593	0	0	0	0	0	0	0	603	903	0
706	1	4.65636	-30.3654	-91.9391	-621.002	10394.5	-3300.34	313.059	306.754	0	-33.9674	144.677	-770.32	48252.5	-54566	-13335.8	129.165	840.361	0	0	0	0	0	0	0	603	903	0
706	2	4.19859	-26.3982	-87.6666	-1170.32	9662.1	-2796.8	310.214	313.35	0	-33.3571	144.524	-774.593	47977.8	-54871.1	-13290	129.161	841.061	0	0	0	0	0	0	0	603	903	0
706	3	5.11412	-23.1938	-82.1735	-1170.32	9540.03	-2979.91	316.096	314.242	0	-34.5778	143.456	-777.339	47794.7	-55725.6	-13427.4	128.312	841.515	0	0	0	0	0	0	0	603	903	0
706	4	4.65636	-24.4145	-77.901	-895.66	8990.71	-2613.69	315.412	311.497	0	-34.5778	144.829	-778.255	48160.9	-55664.6	-13427.4	128.475	841.117	0	0	0	0	0	0	0	603	903	0
706	5	5.11412	-21.5154	-72.1027	-1078.77	8380.36	-2293.26	316.228	314.962	0	-35.4933	144.066	-782.833	47428.5	-56275	-13656.2	128.114	842.414	0	0	0	0	0	0	0	603	903	0
706	6	5.4193	-19.8369	-68.7457	-346.344	8014.15	-2430.59	316.577	305.038	0	-34.2726	142.845	-784.664	47428.5	-56824.3	-13198.5	127.581	842.556	0	0	0	0	0	0	0	603	903	0
706	7	4.65636	-19.2265	-66.3043	-712.555	7281.73	-2018.6	309.823	310.747	0	-35.6459	143.151	-786.8	47245.4	-56336	-13198.5	128.399	842.953	0	0	0	0	0	0	0	603	903	0
706	8	3.89342	-19.3791	-60.506	-1353.42	6915.52	-1927.05	314.295	322.368	0	-36.4088	142.54	-787.105	46696.1	-56458.1	-13427.4	128.271	843.674	0	0	0	0	0	0	0	603	903	0
706	9	3.28307	-18.4636	-56.8439	-437.897	6671.38	-1789.72	317.363	307.703	0	-35.1881	141.93	-790.767	46970.8	-56641.2	-13061.1	128.372	843.601	0	0	0	0	0	0	0	603	903	0
707	0	2.97789	-15.4118	-54.0973	-1078.77	6244.13	-1835.5	315.424	319.941	0	-36.5614	139.946	-791.988	47428.5	-57312.6	-13518.9	127.635	843.115	0	0	0	0	0	0	0	603	903	0
707	1	3.43565	-14.6489	-51.9611	-1078.77	6244.13	-1469.29	320.169	320.761	0	-37.7821	141.32	-796.26	47153.9	-57495.7	-13244.2	127.793	843.781	0	0	0	0	0	0	0	603	903	0
707	2	2.52013	-13.4282	-45.5524	-529.449	5572.74	-1423.51	322.337	311.623	0	-38.0873	140.557	-797.786	46787.6	-57617.7	-13152.7	127.778	844.353	0	0	0	0	0	0	0	603	903	0
707	3	4.04601	-12.5127	-45.5524	-895.66	5328.6	-1331.96	316.978	319.662	0	-35.3407	141.014	-799.617	46970.8	-58533.3	-13290	126.798	844.259	0	0	0	0	0	0	0	603	903	0
707	4	4.65636	-12.0549	-43.4161	-895.66	4901.36	-1240.4	312.893	320.63	0	-37.3244	140.251	-801.448	46970.8	-57922.9	-13106.9	127.727	844.393	0	0	0	0	0	0	0	603	903	0
707	5	4.50377	-12.9704	-39.1437	-712.555	4596.18	-1011.52	317.418	318.204	0	-39.308	139.794	-801.448	45780.6	-58289.1	-13152.7	127.27	845.878	0	0	0	0	0	0	0	603	903	0
707	6	4.04601	-12.5127	-36.3971	-621.002	4046.86	-1377.73	311.186	317.062	0	-37.7821	139.641	-804.5	46604.5	-59021.5	-13198.5	126.636	845.07	0	0	0	0	0	0	0	603	903	0
707	7	3.58824	-11.7497	-32.4298	-804.108	3619.62	-1469.29	311.614	324.795	0	-37.477	138.42	-806.941	46787.6	-58655.3	-13427.4	127.312	845.019	0	0	0	0	0	0	0	603	903	0
707	8	3.43565	-11.1394	-29.6832	-987.213	3558.58	-1103.07	319.885	333.258	0	-39.308	139.489	-809.383	45597.5	-59387.7	-13015.4	126.626	846.664	0	0	0	0	0	0	0	603	903	0
707	9	5.26671	-10.3764	-29.378	-712.555	3009.27	-1194.63	302.432	324.255	0	-37.3244	138.268	-810.604	45963.7	-59570.9	-13152.7	126.51	846.297	0	0	0	0	0	0	0	603	903	0
708	0	4.04601	-10.529	-26.3263	-163.238	2582.02	-1011.52	298.078	306.201	0	-36.8666	137.963	-813.35	45322.8	-59998.1	-13198.5	126.233	847.276	0	0	0	0	0	0	0	603	903	0
708	1	3.43565	-9.76608	-23.5797	-895.66	2215.81	-919.969	293.971	337.984	0	-37.1718	136.742	-815.181	45139.7	-60059.1	-13061.1	126.324	847.626	0	0	0	0	0	0	0	603	903	0
708	2	2.97789	-7.93503	-19.9176	-895.66	2276.84	-645.311	314.313	344.968	0	-39.308	137.963	-819.454	45322.8	-59876	-13244.2	126.932	847.691	0	0	0	0	0	0	0	603	903	0
708	3	2.8253	-8.2402	-17.171	-71.6857	2093.74	-965.745	321.934	304.175	0	-38.6977	137.81	-819.759	44865	-60730.5	-13381.6	125.917	848.27	0	0	0	0	0	0	0	603	903	0
708	4	1.75719	-7.78244	-16.8658	-621.002	1971.67	-828.416	316.903	336.82	0	-39.9184	137.2	-823.726	44315.7	-60486.4	-13381.6	126.57	849.201	0	0	0	0	0	0	0	603	903	0
708	5	1.90978	-6.40915	-15.0348	386.078	1544.42	-324.876	302.723	274.321	0	-38.8503	136.742	-826.778	45048.1	-60608.4	-13015.4	126.693	848.514	0	0	0	0	0	0	0	603	903	0
708	6	1.45201	-6.25656	-11.6779	-254.791	1422.35	-691.087	321.799	321.818	0	-39.9184	137.2	-825.557	44315.7	-61157.8	-12832.3	125.919	849.32	0	0	0	0	0	0	0	603	903	0
708	7	2.67272	-4.5781	-8.93127	-346.344	995.106	-462.205	311.418	338.779	0	-39.9184	136.589	-829.524	44590.4	-60547.4	-12878	127.009	849.246	0	0	0	0	0	0	0	603	903	0
708	8	0	0	0	0	0	0	200	300	0	-39.6132	132.775	-831.05	44224.2	-61646	-12969.6	125.822	849.785	0	0	0	0	0	0	0	603	903	0
708	9	0	0	0	0	0	0	200	300	0	-39.6132	135.826	-834.102	44041.1	-61462.9	-13015.4	126.312	850.199	0	0	0	0	0	0	0	603	903	0
709	0	0	0	0	0	0	0	200	300	0	-40.8339	135.063	-837.459	43949.5	-61890.2	-12923.8	126.098	850.52	0	0	0	0	0	0	0	603	903	0
709	1	0	0	0	0	0	0	200	300	0	-38.8503	134.148	-838.68	44224.2	-62439.5	-12786.5	125.55	850.269	0	0	0	0	0	0	0	603	903	0
709	2	0	0	0	0	0	0	200	300	0	-38.8503	134.148	-839.9	43491.8	-62317.4	-12603.4	125.804	851.218	0	0	0	0	0	0	0	603	903	0
709	3	0	0	0	0	0	0	200	300	0	-37.9347	132.927	-841.426	43125.5	-62683.6	-12740.7	125.503	851.747	0	0	0	0	0	0	0	603	903	0
709	4	0	0	0	0	0	0	200	300	0	-39.0028	132.622	-840.511	43949.5	-62744.7	-12878	125.349	850.711	0	0	0	0	0	0	0	603	903	0
709	5	0	0	0	0	0	0	200	300	0	-38.8503	132.012	-841.121	43308.6	-62561.6	-12878	125.621	851.511	0	0	0	0	0	0	0	603	903	0
709	6	0	0	0	0	0	0	200	300	0	-38.8503	131.859	-845.699	42850.9	-63294	-12786.5	125.158	852.331	0	0	0	0	0	0	0	603	903	0
709	7	0	0	0	0	0	0	200	300	0	-39.4606	131.554	-846.614	42942.4	-62805.7	-12694.9	125.815	852.278	0	0	0	0	0	0	0	603	903	0
709	8	0	0	0	0	0	0	200	300	0	-37.6295	131.249	-846.919	42210	-63049.9	-12374.5	125.554	853.161	0	0	0	0	0	0	0	603	903	0
709	9	0	0	0	0	0	0	200	300	0	-39.4606	130.333	-848.14	41752.2	-63660.2	-12328.7	124.941	853.772	0	0	0	0	0	0	0	603	903	0
710	0	0	0	0	0	0	0	200	300	0	-39.4606	130.028	-847.835	41752.2	-63171.9	-12511.8	125.49	853.754	0	0	0	0	0	0	0	603	903	0
710	1	0	0	0	0	0	0	200	300	0	-38.6977	130.638	-849.361	42210	-63477.1	-12557.6	125.265	853.304	0	0	0	0	0	0	0	603	903	0
710	2	0	0	0	0	0	0	200	300	0	-38.3925	128.044	-850.582	41294.5	-64209.5	-12420.3	124.511	854.452	0	0	0	0	0	0	0	603	903	0
710	3	0	0	0	0	0	0	200	300	0	-39.1554	126.824	-851.497	40928.3	-63782.3	-12466	125.094	854.934	0	0	0	0	0	0	0	603	903	0
710	4	0	0	0	0	0	0	200	300	0	-38.2399	126.671	-852.413	41111.4	-64575.7	-12145.6	124.244	854.771	0	0	0	0	0	0	0	603	903	0
710	5	0	0	0	0	0	0	200	300	0	-38.8503	126.213	-851.802	40195.9	-63782.3	-11825.2	125.121	855.811	0	0	0	0	0	0	0	603	903	0
710	6	0	0	0	0	0	0	200	300	0	-40.2235	126.519	-853.328	40195.9	-64270.6	-11733.6	124.682	855.895	0	0	0	0	0	0	0	603	903	0
710	7	0	0	0	0	0	0	200	300	0	-38.8503	125.298	-853.328	40653.6	-64758.9	-12008.3	124.11	855.359	0	0	0	0	0	0	0	603	903	0
710	8	0	0	0	0	0	0	200	300	0	-38.8503	125.603	-853.023	39646.5	-64636.8	-12282.9	124.226	856.522	0	0	0	0	0	0	0	603	903	0
710	9	0	0	0	0	0	0	200	300	0	-39.308	124.84	-854.854	39463.4	-65369.2	-12054.1	123.532	856.836	0	0	0	0	0	0	0	603	903	0
711	0	0	0	0	0	0	0	200	300	0	-38.5451	123.619	-854.549	39738.1	-65186.1	-12099.8	123.719	856.498	0	0	0	0	0	0	0	603	903	0
711	1	0	0	0	0	0	0	200	300	0	-39.4606	123.314	-854.244	38822.6	-64575.7	-11825.2	124.406	857.553	0	0	0	0	0	0	0	603	903	0
711	2	0	0	0	0	0	0	200	300	0	-39.0028	123.314	-855.464	38547.9	-65247.1	-11916.7	123.729	857.939	0	0	0	0	0	0	0	603	903	0
711	3	0	0	0	0	0	0	200	300	0	-38.2399	122.551	-853.939	38822.6	-65003	-12054.1	123.879	857.537	0	0	0	0	0	0	0	603	903	0
711	4	0	0	0	0	0	0	200	300	0	-38.0873	123.314	-856.38	38181.7	-65369.2	-11779.4	123.668	858.415	0	0	0	0	0	0	0	603	903	0
711	5	0	0	0	0	0	0	200	300	0	-37.6295	121.025	-855.77	37815.5	-65613.3	-11596.3	123.328	858.811	0	0	0	0	0	0	0	603	903	0
711	6	0	0	0	0	0	0	200	300	0	-38.2399	122.399	-855.464	37357.7	-65125.1	-11733.6	123.872	859.331	0	0	0	0	0	0	0	603	903	0
711	7	0	0	0	0	0	0	200	300	0	-38.5451	120.568	-855.159	36991.5	-65552.3	-11596.3	123.345	859.743	0	0	0	0	0	0	0	603	903	0
711	8	0	0	0	0	0	0	200	300	0	-39.4606	120.873	-853.328	36625.3	-64942	-11871	123.896	860.08	0	0	0	0	0	0	0	603	903	0
711	9	0	0	0	0	0	0	200	300	0	-37.477	120.415	-853.633	36991.5	-65613.3	-11779.4	123.136	859.666	0	0	0	0	0	0	0	603	903	0
712	0	0	0	0	0	0	0	200	300	0	-39.1554	119.957	-854.549	36350.6	-65796.4	-11550.5	123.004	860.462	0	0	0	0	0	0	0	603	903	0
712	1	0	0	0	0	0	0	200	300	0	-39.4606	119.652	-853.633	35892.9	-65430.2	-11413.2	123.351	860.953	0	0	0	0	0	0	0	603	903	0
712	2	0	0	0	0	0	0	200	300	0	-38.0873	120.11	-853.939	36442.2	-66040.6	-11459	122.664	860.325	0	0	0	0	0	0	0	603	903	0
712	3	0	0	0	0	0	0	200	300	0	-39.4606	117.974	-852.107	35252	-65613.3	-11275.9	122.999	861.63	0	0	0	0	0	0	0	603	903	0
712	4	0	0	0	0	0	0	200	300	0	-39.4606	117.821	-851.497	34977.3	-65796.4	-11321.6	122.729	861.923	0	0	0	0	0	0	0	603	903	0
712	5	0	0	0	0	0	0	200	300	0	-39.6132	117.821	-851.802	35618.2	-65918.5	-11367.4	122.613	861.185	0	0	0	0	0	0	0	603	903	0
712	6	0	0	0	0	0	0	200	300	0	-38.8503	116.143	-849.971	35709.8	-66040.6	-11413.2	122.303	860.987	0	0	0	0	0	0	0	603	903	0
712	7	0	0	0	0	0	0	200	300	0	-39.7658	116.6	-849.056	34061.8	-66101.6	-11184.3	122.147	862.883	0	0	0	0	0	0	0	603	903	0
712	8	0	0	0	0	0	0	200	300	0	-39.6132	114.464	-849.666	34153.4	-66223.7	-11001.2	122.059	862.804	0	0	0	0	0	0	0	603	903	0
712	9	0	0	0	0	0	0	200	300	0	-39.0028	113.854	-848.14	34336.5	-65857.5	-11138.5	122.351	862.516	0	0	0	0	0	0	0	603	903	0
713	0	0	0	0	0	0	0	200	300	0	-41.1391	113.701	-847.835	33420.9	-65308.2	-10818.1	122.971	863.581	0	0	0	0	0	0	0	603	903	0
713	1	0	0	0	0	0	0	200	300	0	-40.3761	112.48	-847.225	33512.5	-65674.4	-10863.9	122.483	863.444	0	0	0	0	0	0	0	603	903	0
713	2	0	0	0	0	0	0	200	300	0	-39.7658	113.091	-844.783	33054.7	-66284.7	-11001.2	121.536	863.872	0	0	0	0	0	0	0	603	903	0
713	3	0	0	0	0	0	0	200	300	0	-40.9865	112.328	-845.699	32230.8	-66467.8	-10726.5	121.405	864.889	0	0	0	0	0	0	0	603	903	0
713	4	0	0	0	0	0	0	200	300	0	-41.1391	109.734	-844.783	32322.3	-65979.6	-10726.5	121.898	864.739	0	0	0	0	0	0	0	603	903	0
713	5	0	0	0	0	0	0	200	300	0	-40.3761	110.344	-843.868	32139.2	-66345.8	-10589.2	121.379	864.914	0	0	0	0	0	0	0	603	903	0
713	6	0	0	0	0	0	0	200	300	0	-42.3598	109.276	-842.952	31315.2	-65918.5	-10314.6	121.8	865.851	0	0	0	0	0	0	0	603	903	0
713	7	0	0	0	0	0	0	200	300	0	-40.5287	108.208	-841.121	31223.7	-66162.6	-10451.9	121.34	865.879	0	0	0	0	0	0	0	603	903	0
713	8	0	0	0	0	0	0	200	300	0	-40.2235	108.666	-841.121	30765.9	-66773	-10497.7	120.614	866.423	0	0	0	0	0	0	0	603	903	0
713	9	0	0	0	0	0	0	200	300	0	-42.3598	107.14	-840.206	30857.5	-66223.7	-10406.1	121.182	866.274	0	0	0	0	0	0	0	603	903	0
714	0	0	0	0	0	0	0	200	300	0	-39.0028	106.835	-838.985	30674.4	-66284.7	-10085.7	120.994	866.439	0	0	0	0	0	0	0	603	903	0
714	1	0	0	0	0	0	0	200	300	0	-39.9184	105.767	-837.459	29941.9	-66528.9	-10223	120.559	867.247	0	0	0	0	0	0	0	603	903	0
714	2	0	0	0	0	0	0	200	300	0	-41.2917	105.004	-833.797	29392.6	-65918.5	-10314.6	120.942	867.748	0	0	0	0	0	0	0	603	903	0
714	3	0	0	0	0	0	0	200	300	0	-40.6813	104.851	-833.797	29301.1	-66467.8	-10131.5	120.283	867.858	0	0	0	0	0	0	0	603	903	0
714	4	0	0	0	0	0	0	200	300	0	-40.8339	103.783	-833.187	29026.4	-65979.6	-9994.12	120.811	868.162	0	0	0	0	0	0	0	603	903	0
714	5	0	0	0	0	0	0	200	300	0	-38.2399	102.715	-831.966	28934.9	-66040.6	-9994.12	120.621	868.221	0	0	0	0	0	0	0	603	903	0
714	6	0	0	0	0	0	0	200	300	0	-40.2235	101.952	-829.524	28568.6	-66284.7	-10223	120.093	868.56	0	0	0	0	0	0	0	603	903	0
714	7	0	0	0	0	0	0	200	300	0	-40.3761	101.342	-827.999	27836.2	-66040.6	-10177.2	120.241	869.381	0	0	0	0	0	0	0	603	903	0
714	8	0	0	0	0	0	0	200	300	0	-38.3925	101.189	-824.642	27470	-66162.6	-10131.5	119.768	869.689	0	0	0	0	0	0	0	603	903	0
714	9	0	0	0	0	0	0	200	300	0	-40.5287	101.342	-824.947	27378.5	-66223.7	-9948.35	119.724	869.812	0	0	0	0	0	0	0	603	903	0
715	0	0	0	0	0	0	0	200	300	0	-40.6813	99.3579	-823.116	27470	-65491.3	-9811.02	120.435	869.627	0	0	0	0	0	0	0	603	903	0
715	1	0	0	0	0	0	0	200	300	0	-40.6813	99.6631	-822.2	27195.4	-65613.3	-9627.91	120.198	869.924	0	0	0	0	0	0	0	603	903	0
715	2	0	0	0	0	0	0	200	300	0	-39.7658	99.9683	-818.538	26737.6	-65735.4	-9673.69	119.692	870.335	0	0	0	0	0	0	0	603	903	0
715	3	0	0	0	0	0	0	200	300	0	-40.071	97.832	-816.402	25730.5	-65613.3	-8803.94	119.631	871.483	0	0	0	0	0	0	0	603	903	0
715	4	0	0	0	0	0	0	200	300	0	-40.9865	96.6113	-814.571	25913.6	-65735.4	-9536.36	119.301	871.187	0	0	0	0	0	0	0	603	903	0
715	5	0	0	0	0	0	0	200	300	0	-40.8339	96.3062	-813.961	26096.7	-64942	-9582.14	120.215	870.939	0	0	0	0	0	0	0	603	903	0
715	6	0	0	0	0	0	0	200	300	0	-40.5287	95.6958	-810.909	26188.3	-65613.3	-9444.81	119.087	870.705	0	0	0	0	0	0	0	603	903	0
715	7	0	0	0	0	0	0	200	300	0	-41.2917	96.3062	-810.909	25181.2	-65369.2	-9399.03	119.388	871.947	0	0	0	0	0	0	0	603	903	0
715	8	0	0	0	0	0	0	200	300	0	-37.477	94.1699	-808.773	24815	-65247.1	-9170.15	119.326	872.318	0	0	0	0	0	0	0	603	903	0
715	9	0	0	0	0	0	0	200	300	0	-39.9184	94.1699	-805.721	23716.3	-65674.4	-9124.37	118.49	873.565	0	0	0	0	0	0	0	603	903	0
716	0	0	0	0	0	0	0	200	300	0	-40.9865	93.2544	-804.195	24357.2	-65003	-9215.93	119.17	872.712	0	0	0	0	0	0	0	603	903	0
716	1	0	0	0	0	0	0	200	300	0	-40.2235	92.3389	-801.448	23899.5	-65308.2	-8849.72	118.512	873.18	0	0	0	0	0	0	0	603	903	0
716	2	0	0	0	0	0	0	200	300	0	-39.7658	92.644	-798.702	23624.8	-65369.2	-9307.48	118.156	873.421	0	0	0	0	0	0	0	603	903	0
716	3	0	0	0	0	0	0	200	300	0	-40.3761	91.2708	-798.397	23167	-64697.8	-9032.82	118.965	873.983	0	0	0	0	0	0	0	603	903	0
716	4	0	0	0	0	0	0	200	300	0	-39.4606	90.5078	-795.955	23350.1	-65308.2	-8758.16	117.95	873.664	0	0	0	0	0	0	0	603	903	0
716	5	0	0	0	0	0	0	200	300	0	-39.7658	90.5078	-794.429	22800.8	-64514.7	-8758.16	118.791	874.299	0	0	0	0	0	0	0	603	903	0
716	6	0	0	0	0	0	0	200	300	0	-40.5287	88.6768	-792.598	22343.1	-64148.5	-8712.39	119.066	874.81	0	0	0	0	0	0	0	603	903	0
716	7	0	0	0	0	0	0	200	300	0	-40.3761	89.1345	-789.852	21976.8	-64819.9	-8666.61	117.934	875.176	0	0	0	0	0	0	0	603	903	0
716	8	0	0	0	0	0	0	200	300	0	-39.308	88.6768	-787.41	22160	-64453.7	-8437.73	118.145	874.857	0	0	0	0	0	0	0	603	903	0
716	9	0	0	0	0	0	0	200	300	0	-40.5287	86.9983	-784.664	21885.3	-64514.7	-8575.06	117.78	875.109	0	0	0	0	0	0	0	603	903	0
717	0	0	0	0	0	0	0	200	300	0	-39.4606	86.8457	-782.527	21336	-64758.9	-8529.28	117.244	875.735	0	0	0	0	0	0	0	603	903	0
717	1	0	0	0	0	0	0	200	300	0	-38.2399	85.3198	-778.56	20969.8	-64148.5	-8254.62	117.606	876.066	0	0	0	0	0	0	0	603	903	0
717	2	0	0	0	0	0	0	200	300	0	-39.6132	84.7095	-777.339	20420.5	-64453.7	-8437.73	117.084	876.73	0	0	0	0	0	0	0	603	903	0
717	3	0	0	0	0	0	0	200	300	0	-39.0028	83.031	-774.898	20695.1	-63965.4	-8163.07	117.453	876.293	0	0	0	0	0	0	0	603	903	0
717	4	0	0	0	0	0	0	200	300	0	-38.5451	83.3362	-773.982	20603.6	-64026.4	-8346.18	117.277	876.38	0	0	0	0	0	0	0	603	903	0
717	5	0	0	0	0	0	0	200	300	0	-39.308	81.6577	-767.879	20328.9	-63599.2	-8254.62	117.176	876.526	0	0	0	0	0	0	0	603	903	0
717	6	0	0	0	0	0	0	200	300	0	-38.0873	82.7258	-770.015	19596.5	-63416.1	-8254.62	117.643	877.551	0	0	0	0	0	0	0	603	903	0
717	7	0	0	0	0	0	0	200	300	0	-37.3244	79.3689	-767.879	18864.1	-63843.3	-8071.52	116.858	878.434	0	0	0	0	0	0	0	603	903	0
717	8	0	0	0	0	0	0	200	300	0	-38.8503	81.3525	-763.912	18680.9	-62683.6	-7888.41	117.944	878.546	0	0	0	0	0	0	0	603	903	0
717	9	0	0	0	0	0	0	200	300	0	-38.2399	79.8267	-760.555	19230.3	-63355	-7659.53	116.699	877.715	0	0	0	0	0	0	0	603	903	0
718	0	0	0	0	0	0	0	200	300	0	-37.7821	79.2163	-759.334	18680.9	-62805.7	-7934.19	117.288	878.398	0	0	0	0	0	0	0	603	903	0
718	1	0	0	0	0	0	0	200	300	0	-35.6459	79.2163	-757.503	18314.7	-62805.7	-7522.2	117.088	878.822	0	0	0	0	0	0	0	603	903	0
718	2	0	0	0	0	0	0	200	300	0	-36.8666	78.1482	-755.977	18131.6	-63355	-8025.74	116.195	879.016	0	0	0	0	0	0	0	603	903	0
718	3	0	0	0	0	0	0	200	300	0	-36.2563	77.0801	-753.231	17582.3	-62622.6	-7751.08	116.861	879.658	0	0	0	0	0	0	0	603	903	0
718	4	0	0	0	0	0	0	200	300	0	-38.5451	76.4697	-752.01	17307.7	-62866.8	-7476.43	116.402	879.985	0	0	0	0	0	0	0	603	903	0
718	5	0	0	0	0	0	0	200	300	0	-37.1718	75.4016	-746.822	17490.8	-62561.6	-7430.65	116.23	879.58	0	0	0	0	0	0	0	603	903	0
718	6	0	0	0	0	0	0	200	300	0	-36.714	75.5542	-742.855	17582.3	-62195.4	-7430.65	116.275	879.331	0	0	0	0	0	0	0	603	903	0
718	7	0	0	0	0	0	0	200	300	0	-38.0873	74.3335	-744.075	16666.8	-62073.3	-7476.43	116.577	880.601	0	0	0	0	0	0	0	603	903	0
718	8	0	0	0	0	0	0	200	300	0	-37.0192	72.9602	-739.803	16666.8	-62012.3	-7155.99	116.177	880.471	0	0	0	0	0	0	0	603	903	0
718	9	0	0	0	0	0	0	200	300	0	-36.2563	73.1128	-738.887	16575.2	-62073.3	-7293.32	115.991	880.567	0	0	0	0	0	0	0	603	903	0
719	0	0	0	0	0	0	0	200	300	0	-37.477	71.2817	-736.446	16025.9	-62073.3	-6606.67	115.712	881.239	0	0	0	0	0	0	0	603	903	0
719	1	0	0	0	0	0	0	200	300	0	-36.5614	72.1973	-733.699	15476.6	-60913.6	-7155.99	116.977	881.906	0	0	0	0	0	0	0	603	903	0
719	2	0	0	0	0	0	0	200	300	0	-35.9511	71.4343	-730.648	15568.2	-61829.2	-6881.33	115.378	881.693	0	0	0	0	0	0	0	603	903	0
719	3	0	0	0	0	0	0	200	300	0	-37.1718	70.3662	-726.985	14927.3	-61035.7	-7018.66	116.043	882.467	0	0	0	0	0	0	0	603	903	0
719	4	0	0	0	0	0	0	200	300	0	-35.9511	69.6033	-726.68	15293.5	-61218.8	-6515.12	115.756	881.954	0	0	0	0	0	0	0	603	903	0
719	5	0	0	0	0	0	0	200	300	0	-35.6459	68.5352	-724.849	14561.1	-61462.9	-6698.23	115.206	882.912	0	0	0	0	0	0	0	603	903	0
719	6	0	0	0	0	0	0	200	300	0	-36.5614	67.1619	-719.661	13645.6	-60608.4	-6698.23	115.782	884.039	0	0	0	0	0	0	0	603	903	0
719	7	0	0	0	0	0	0	200	300	0	-35.9511	68.23	-717.525	14194.9	-60852.6	-6698.23	115.191	883.217	0	0	0	0	0	0	0	603	903	0
719	8	0	0	0	0	0	0	200	300	0	-35.4933	66.7041	-715.999	13920.2	-60913.6	-7018.66	114.925	883.558	0	0	0	0	0	0	0	603	903	0
719	9	0	0	0	0	0	0	200	300	0	-36.5614	66.3989	-713.558	13737.1	-60120.2	-6652.45	115.746	883.748	0	0	0	0	0	0	0	603	903	0
720	0	0	0	0	0	0	0	200	300	0	-35.1881	65.4834	-711.727	13554	-60669.5	-6423.57	114.757	883.956	0	0	0	0	0	0	0	603	903	0
720	1	0	0	0	0	0	0	200	300	0	-34.5778	64.1101	-707.759	12913.1	-59998.1	-6332.02	115.228	884.755	0	0	0	0	0	0	0	603	903	0
720	2	0	0	0	0	0	0	200	300	0	-35.3407	63.6523	-705.623	12913.1	-60181.2	-6286.24	114.712	884.7	0	0	0	0	0	0	0	603	903	0
720	3	0	0	0	0	0	0	200	300	0	-34.12	62.1265	-703.182	13279.3	-60059.1	-6011.58	114.589	884.115	0	0	0	0	0	0	0	603	903	0
720	4	0	0	0	0	0	0	200	300	0	-34.2726	61.6687	-699.52	12363.8	-59204.6	-6332.02	115.364	885.325	0	0	0	0	0	0	0	603	903	0
720	5	0	0	0	0	0	0	200	300	0	-35.1881	62.1265	-697.689	12821.6	-59754	-5645.37	114.354	884.623	0	0	0	0	0	0	0	603	903	0
720	6	0	0	0	0	0	0	200	300	0	-34.883	60.2954	-696.163	12272.3	-59143.6	-6057.36	115.043	885.372	0	0	0	0	0	0	0	603	903	0
720	7	0	0	0	0	0	0	200	300	0	-33.2045	60.6006	-690.364	11814.5	-59448.8	-5828.48	113.888	885.887	0	0	0	0	0	0	0	603	903	0
720	8	0	0	0	0	0	0	200	300	0	-34.7304	59.0747	-691.28	11631.4	-59082.6	-5828.48	114.532	886.174	0	0	0	0	0	0	0	603	903	0
720	9	0	0	0	0	0	0	200	300	0	-34.12	58.0066	-687.923	11539.8	-58411.2	-5416.49	115.091	886.225	0	0	0	0	0	0	0	603	903	0
721	0	0	0	0	0	0	0	200	300	0	-32.7467	58.3118	-685.176	11448.3	-58777.4	-5736.92	114.216	886.292	0	0	0	0	0	0	0	603	903	0
721	1	0	0	0	0	0	0	200	300	0	-33.2045	57.7014	-684.566	10807.4	-58411.2	-5782.7	114.674	887.213	0	0	0	0	0	0	0	603	903	0
721	2	0	0	0	0	0	0	200	300	0	-33.2045	56.4807	-679.378	11173.6	-58350.1	-6011.58	114.112	886.553	0	0	0	0	0	0	0	603	903	0
721	3	0	0	0	0	0	0	200	300	0	-31.8312	56.4807	-679.073	10441.2	-58533.3	-5370.71	113.804	887.624	0	0	0	0	0	0	0	603	903	0
721	4	0	0	0	0	0	0	200	300	0	-32.8993	54.9548	-676.937	10166.5	-57617.7	-5462.27	114.885	887.982	0	0	0	0	0	0	0	603	903	0
721	5	0	0	0	0	0	0	200	300	0	-32.289	54.8022	-672.664	10258.1	-58106	-5370.71	113.618	887.75	0	0	0	0	0	0	0	603	903	0
721	6	0	0	0	0	0	0	200	300	0	-31.6786	54.1919	-670.528	9708.79	-57495.7	-5187.61	114.253	888.521	0	0	0	0	0	0	0	603	903	0
721	7	0	0	0	0	0	0	200	300	0	-32.289	52.9712	-667.781	9800.34	-57739.8	-5370.71	113.535	888.324	0	0	0	0	0	0	0	603	903	0
721	8	0	0	0	0	0	0	200	300	0	-31.526	53.2764	-666.561	9891.89	-57678.8	-5416.49	113.468	888.16	0	0	0	0	0	0	0	603	903	0
721	9	0	0	0	0	0	0	200	300	0	-30.7631	51.9031	-663.509	9708.79	-57434.6	-5096.05	113.438	888.368	0	0	0	0	0	0	0	603	903	0
722	0	0	0	0	0	0	0	200	300	0	-31.0683	50.6824	-661.678	8976.36	-57800.8	-4775.62	112.645	889.434	0	0	0	0	0	0	0	603	903	0
722	1	0	0	0	0	0	0	200	300	0	-31.0683	48.5461	-657.1	8701.7	-57556.7	-5050.28	112.408	889.758	0	0	0	0	0	0	0	603	903	0
722	2	0	0	0	0	0	0	200	300	0	-30.4579	49.4617	-655.269	8610.15	-56641.2	-4821.4	113.56	889.86	0	0	0	0	0	0	0	603	903	0
722	3	0	0	0	0	0	0	200	300	0	-31.3734	48.5461	-654.354	8335.49	-56641.2	-4638.29	113.44	890.262	0	0	0	0	0	0	0	603	903	0
722	4	0	0	0	0	0	0	200	300	0	-31.0683	48.5461	-652.828	8701.7	-56641.2	-4912.95	113.237	889.671	0	0	0	0	0	0	0	603	903	0
722	5	0	0	0	0	0	0	200	300	0	-28.0165	48.241	-650.997	7694.62	-56946.3	-4638.29	112.524	891.18	0	0	0	0	0	0	0	603	903	0
722	6	0	0	0	0	0	0	200	300	0	-30.3053	47.0203	-647.029	7603.07	-56702.2	-4729.84	112.365	891.249	0	0	0	0	0	0	0	603	903	0
722	7	0	0	0	0	0	0	200	300	0	-30.3053	47.0203	-645.198	7236.86	-55725.6	-4363.63	113.63	891.784	0	0	0	0	0	0	0	603	903	0
722	8	0	0	0	0	0	0	200	300	0	-28.7794	43.8159	-642.452	7419.97	-56152.9	-4500.96	112.596	891.451	0	0	0	0	0	0	0	603	903	0
722	9	0	0	0	0	0	0	200	300	0	-28.1691	45.9521	-640.01	7511.52	-55298.4	-4455.19	113.598	891.263	0	0	0	0	0	0	0	603	903	0
723	0	0	0	0	0	0	0	200	300	0	-29.3898	45.3418	-638.484	6962.2	-55481.5	-4317.86	113.104	892.096	0	0	0	0	0	0	0	603	903	0
723	1	0	0	0	0	0	0	200	300	0	-28.1691	44.4263	-635.433	6321.33	-56091.8	-4317.86	111.727	893.052	0	0	0	0	0	0	0	603	903	0
723	2	0	0	0	0	0	0	200	300	0	-28.1691	43.9685	-632.991	6138.23	-55481.5	-3997.42	112.35	893.303	0	0	0	0	0	0	0	603	903	0
723	3	0	0	0	0	0	0	200	300	0	-29.3898	42.1374	-630.245	6046.67	-55603.6	-4043.2	111.775	893.406	0	0	0	0	0	0	0	603	903	0
723	4	0	0	0	0	0	0	200	300	0	-29.8476	41.8323	-627.803	6138.23	-54504.9	-4226.3	113.182	893.223	0	0	0	0	0	0	0	603	903	0
723	5	0	0	0	0	0	0	200	300	0	-28.0165	40.7642	-625.667	5588.91	-54871.1	-3905.87	112.3	894.067	0	0	0	0	0	0	0	603	903	0
723	6	0	0	0	0	0	0	200	300	0	-28.932	40.6116	-623.531	5588.91	-54993.2	-3905.87	111.804	894.037	0	0	0	0	0	0	0	603	903	0
723	7	0	0	0	0	0	0	200	300	0	-28.1691	39.8486	-621.7	6046.67	-54627	-3722.76	112.133	893.274	0	0	0	0	0	0	0	603	903	0
723	8	0	0	0	0	0	0	200	300	0	-24.8122	39.8486	-619.258	5588.91	-54810.1	-3722.76	111.491	893.975	0	0	0	0	0	0	0	603	903	0
723	9	0	0	0	0	0	0	200	300	0	-27.101	38.3228	-616.512	5314.25	-54443.9	-3448.1	111.69	894.38	0	0	0	0	0	0	0	603	903	0
724	0	0	0	0	0	0	0	200	300	0	-27.5587	38.6279	-614.07	4856.49	-53955.6	-3768.54	112.134	895.091	0	0	0	0	0	0	0	603	903	0
724	1	0	0	0	0	0	0	200	300	0	-25.1173	38.3228	-609.798	5039.59	-54566	-3676.99	110.518	894.736	0	0	0	0	0	0	0	603	903	0
724	2	0	0	0	0	0	0	200	300	0	-27.7113	37.102	-608.882	4490.28	-53650.4	-3631.21	111.887	895.625	0	0	0	0	0	0	0	603	903	0
724	3	0	0	0	0	0	0	200	300	0	-27.8639	36.7969	-607.051	4490.28	-53894.6	-3356.55	111.219	895.603	0	0	0	0	0	0	0	603	903	0
724	4	0	0	0	0	0	0	200	300	0	-23.8966	35.8813	-603.084	4124.07	-53833.5	-3219.22	110.736	896.162	0	0	0	0	0	0	0	603	903	0
724	5	0	0	0	0	0	0	200	300	0	-26.9484	35.1184	-601.863	3208.54	-52979.1	-3173.45	111.975	897.669	0	0	0	0	0	0	0	603	903	0
724	6	0	0	0	0	0	0	200	300	0	-26.7958	32.8296	-599.727	3666.3	-53711.5	-3173.45	110.44	896.887	0	0	0	0	0	0	0	603	903	0
724	7	0	0	0	0	0	0	200	300	0	-25.5751	34.2029	-597.286	3757.86	-52979.1	-3219.22	111.3	896.708	0	0	0	0	0	0	0	603	903	0
724	8	0	0	0	0	0	0	200	300	0	-27.101	33.4399	-596.065	3483.2	-52857	-3265	111.323	897.156	0	0	0	0	0	0	0	603	903	0
724	9	0	0	0	0	0	0	200	300	0	-26.1855	33.2873	-593.624	3300.09	-53284.2	-3127.67	110.239	897.441	0	0	0	0	0	0	0	603	903	0
725	0	0	0	0	0	0	0	200	300	0	-24.8122	32.2192	-591.182	3300.09	-52673.9	-2715.68	110.901	897.418	0	0	0	0	0	0	0	603	903	0
725	1	0	0	0	0	0	0	200	300	0	-25.7277	32.0666	-589.046	2750.78	-53101.1	-2715.68	109.852	898.33	0	0	0	0	0	0	0	603	903	0
725	2	0	0	0	0	0	0	200	300	0	-25.7277	31.4563	-586.605	2842.33	-52857	-2349.47	109.893	898.155	0	0	0	0	0	0	0	603	903	0
725	3	0	0	0	0	0	0	200	300	0	-23.1337	30.3882	-583.553	2384.56	-52063.5	-2624.13	110.782	898.914	0	0	0	0	0	0	0	603	903	0
725	4	0	0	0	0	0	0	200	300	0	-25.4225	30.6934	-581.111	3116.99	-52857	-2853.01	109.042	897.636	0	0	0	0	0	0	0	603	903	0
725	5	0	0	0	0	0	0	200	300	0	-24.6596	29.7778	-580.501	2201.46	-52063.5	-2624.13	110.313	899.208	0	0	0	0	0	0	0	603	903	0
725	6	0	0	0	0	0	0	200	300	0	-23.1337	29.1675	-576.534	1743.7	-52368.7	-2395.25	109.166	899.976	0	0	0	0	0	0	0	603	903	0
725	7	0	0	0	0	0	0	200	300	0	-24.9648	28.7097	-576.229	1469.04	-52185.6	-2074.81	109.436	900.451	0	0	0	0	0	0	0	603	903	0
725	8	0	0	0	0	0	0	200	300	0	-24.9648	27.489	-573.482	1926.8	-51758.4	-2166.37	109.747	899.64	0	0	0	0	0	0	0	603	903	0
725	9	0	0	0	0	0	0	200	300	0	-23.4389	27.6416	-571.346	1560.59	-51880.4	-2166.37	109.196	900.269	0	0	0	0	0	0	0	603	903	0
726	0	0	0	0	0	0	0	200	300	0	-23.8966	27.9468	-570.735	1194.38	-51697.3	-2120.59	109.42	900.907	0	0	0	0	0	0	0	603	903	0
726	1	0	0	0	0	0	0	200	300	0	-23.744	26.2683	-566.768	1469.04	-51392.1	-2257.92	109.324	900.408	0	0	0	0	0	0	0	603	903	0
726	2	0	0	0	0	0	0	200	300	0	-22.8285	25.3528	-564.327	828.168	-51758.4	-1891.71	108.283	901.533	0	0	0	0	0	0	0	603	903	0
726	3	0	0	0	0	0	0	200	300	0	-22.5233	24.895	-563.716	645.062	-51148	-1617.05	109.266	901.856	0	0	0	0	0	0	0	603	903	0
726	4	0	0	0	0	0	0	200	300	0	-24.0492	24.7424	-561.275	736.615	-51392.1	-1800.16	108.437	901.688	0	0	0	0	0	0	0	603	903	0
726	5	0	0	0	0	0	0	200	300	0	-22.5233	24.5898	-560.054	1011.27	-50781.8	-1800.16	109.327	901.194	0	0	0	0	0	0	0	603	903	0
726	6	0	0	0	0	0	0	200	300	0	-22.0656	22.7588	-557.308	461.957	-51025.9	-1845.93	108.442	902.171	0	0	0	0	0	0	0	603	903	0
726	7	0	0	0	0	0	0	200	300	0	-22.2182	23.5217	-556.697	553.51	-51392.1	-1479.72	107.684	902.006	0	0	0	0	0	0	0	603	903	0
726	8	0	0	0	0	0	0	200	300	0	-21.7604	22.301	-551.509	95.7459	-50415.6	-1525.5	108.586	902.826	0	0	0	0	0	0	0	603	903	0
726	9	0	0	0	0	0	0	200	300	0	-21.3026	21.5381	-552.12	-87.3596	-50964.9	-1067.73	107.692	903.158	0	0	0	0	0	0	0	603	903	0
727	0	0	0	0	0	0	0	200	300	0	-20.3871	21.2329	-549.983	-453.571	-50781.8	-1433.94	107.667	903.825	0	0	0	0	0	0	0	603	903	0
727	1	0	0	0	0	0	0	200	300	0	-21.7604	20.47	-548.458	-87.3596	-50110.4	-1525.5	108.634	903.159	0	0	0	0	0	0	0	603	903	0
727	2	0	0	0	0	0	0	200	300	0	-21.6078	20.9277	-544.49	-819.782	-50171.4	-1342.39	107.856	904.506	0	0	0	0	0	0	0	603	903	0
727	3	0	0	0	0	0	0	200	300	0	-21.913	20.1648	-547.847	-636.676	-50232.5	-976.181	108.309	904.162	0	0	0	0	0	0	0	603	903	0
727	4	0	0	0	0	0	0	200	300	0	-22.2182	18.7915	-542.659	-636.676	-50476.6	-1159.29	106.983	904.173	0	0	0	0	0	0	0	603	903	0
727	5	0	0	0	0	0	0	200	300	0	-20.3871	18.6389	-542.354	-1369.1	-50415.6	-884.628	107.043	905.524	0	0	0	0	0	0	0	603	903	0
727	6	0	0	0	0	0	0	200	300	0	-22.2182	17.876	-539.607	-1185.99	-49805.2	-1021.96	107.701	905.198	0	0	0	0	0	0	0	603	903	0
727	7	0	0	0	0	0	0	200	300	0	-22.3708	18.1811	-538.997	-728.229	-50293.5	-1113.51	106.691	904.351	0	0	0	0	0	0	0	603	903	0
727	8	0	0	0	0	0	0	200	300	0	-20.3871	16.8079	-536.861	-1277.55	-49561.1	-930.404	107.684	905.38	0	0	0	0	0	0	0	603	903	0
727	9	0	0	0	0	0	0	200	300	0	-21.1501	16.5027	-538.997	-1185.99	-49988.3	-655.746	107.257	905.2	0	0	0	0	0	0	0	603	903	0
728	0	0	0	0	0	0	0	200	300	0	-21.1501	15.8923	-534.419	-1918.41	-50293.5	-884.628	105.891	906.59	0	0	0	0	0	0	0	603	903	0
728	1	0	0	0	0	0	0	200	300	0	-20.6923	15.8923	-534.114	-1826.86	-49683.2	-609.97	106.98	906.42	0	0	0	0	0	0	0	603	903	0
728	2	0	0	0	0	0	0	200	300	0	-20.8449	14.6716	-533.504	-2193.07	-49927.3	-426.864	106.416	907.111	0	0	0	0	0	0	0	603	903	0
728	3	0	0	0	0	0	0	200	300	0	-22.2182	14.6716	-529.232	-2101.52	-49927.3	-564.193	105.661	906.971	0	0	0	0	0	0	0	603	903	0
728	4	0	0	0	0	0	0	200	300	0	-20.8449	14.8242	-528.926	-1552.2	-49378	-518.417	106.645	905.935	0	0	0	0	0	0	0	603	903	0
728	5	0	0	0	0	0	0	200	300	0	-20.5397	12.8406	-528.621	-2193.07	-49988.3	-564.193	105.436	907.149	0	0	0	0	0	0	0	603	903	0
728	6	0	0	0	0	0	0	200	300	0	-19.319	13.2983	-526.18	-2467.73	-49622.1	-381.088	105.694	907.69	0	0	0	0	0	0	0	603	903	0
728	7	0	0	0	0	0	0	200	300	0	-20.3871	12.9932	-526.485	-2009.97	-50110.4	-426.864	104.821	906.818	0	0	0	0	0	0	0	603	903	0
728	8	0	0	0	0	0	0	200	300	0	-21.4552	12.0776	-523.738	-2742.39	-49439	-14.877	105.604	908.236	0	0	0	0	0	0	0	603	903	0
728	9	0	0	0	0	0	0	200	300	0	-21.6078	12.5354	-522.823	-2833.94	-48889.7	-289.535	106.489	908.421	0	0	0	0	0	0	0	603	903	0
729	0	0	0	0	0	0	0	200	300	0	-19.1664	11.4673	-519.771	-2376.18	-49927.3	-472.641	103.944	907.572	0	0	0	0	0	0	0	603	903	0
729	1	0	0	0	0	0	0	200	300	0	-20.2345	11.3147	-521.297	-2833.94	-49194.9	-381.088	105.63	908.436	0	0	0	0	0	0	0	603	903	0
729	2	0	0	0	0	0	0	200	300	0	-21.1501	8.87329	-520.076	-3108.6	-49378	-60.6534	105.056	908.977	0	0	0	0	0	0	0	603	903	0
729	3	0	0	0	0	0	0	200	300	0	-20.3871	9.63623	-520.076	-3200.15	-49683.2	259.781	104.469	909.153	0	0	0	0	0	0	0	603	903	0
729	4	0	0	0	0	0	0	200	300	0	-20.5397	9.48364	-518.245	-3749.47	-49255.9	76.6757	104.956	910.235	0	0	0	0	0	0	0	603	903	0
729	5	0	0	0	0	0	0	200	300	0	-21.913	9.9414	-517.33	-3749.47	-49439	76.6757	104.434	910.248	0	0	0	0	0	0	0	603	903	0
729	6	0	0	0	0	0	0	200	300	0	-20.3871	9.17846	-517.024	-3383.26	-49500.1	-14.877	104.26	909.544	0	0	0	0	0	0	0	603	903	0
729	7	0	0	0	0	0	0	200	300	0	-20.3871	9.02588	-515.499	-3474.81	-49011.8	168.228	104.924	909.741	0	0	0	0	0	0	0	603	903	0
729	8	0	0	0	0	0	0	200	300	0	-21.1501	8.7207	-514.888	-4024.13	-49072.8	259.781	104.692	910.816	0	0	0	0	0	0	0	603	903	0
729	9	0	0	0	0	0	0	200	300	0	-19.6242	7.95776	-513.362	-3932.57	-49072.8	488.663	104.409	910.66	0	0	0	0	0	0	0	603	903	0
730	0	0	0	0	0	0	0	200	300	0	-19.7768	7.5	-512.752	-4481.89	-49500.1	351.334	103.462	911.741	0	0	0	0	0	0	0	603	903	0
730	1	0	0	0	0	0	0	200	300	0	-18.8612	8.26294	-510.921	-4481.89	-49378	351.334	103.355	911.772	0	0	0	0	0	0	0	603	903	0
730	2	0	0	0	0	0	0	200	300	0	-20.2345	6.12671	-511.226	-3657.92	-48767.6	397.11	104.607	910.155	0	0	0	0	0	0	0	603	903	0
730	3	0	0	0	0	0	0	200	300	0	-20.5397	5.97412	-510.616	-4115.68	-49500.1	442.887	103.058	911.06	0	0	0	0	0	0	0	603	903	0
730	4	0	0	0	0	0	0	200	300	0	-20.8449	5.36377	-510.005	-4665	-48889.7	534.44	104.139	912.147	0	0	0	0	0	0	0	603	903	0
730	5	0	0	0	0	0	0	200	300	0	-19.4716	4.60083	-508.785	-4665	-49072.8	671.769	103.549	912.169	0	0	0	0	0	0	0	603	903	0
730	6	0	0	0	0	0	0	200	300	0	-20.2345	5.05859	-509.395	-5031.21	-49194.9	809.098	103.425	912.877	0	0	0	0	0	0	0	603	903	0
730	7	0	0	0	0	0	0	200	300	0	-21.3026	4.29565	-509.09	-4665	-48889.7	854.874	103.966	912.163	0	0	0	0	0	0	0	603	903	0
730	8	0	0	0	0	0	0	200	300	0	-20.6923	4.14306	-508.174	-4665	-49439	671.769	102.713	912.18	0	0	0	0	0	0	0	603	903	0
730	9	0	0	0	0	0	0	200	300	0	-20.0819	3.6853	-508.48	-4939.65	-49500.1	854.874	102.651	912.715	0	0	0	0	0	0	0	603	903	0
731	0	0	0	0	0	0	0	200	300	0	-21.3026	1.70166	-509.395	-5397.42	-49133.8	809.098	103.545	913.596	0	0	0	0	0	0	0	603	903	0
731	1	0	0	0	0	0	0	200	300	0	-20.0819	3.22754	-506.343	-5397.42	-49439	992.203	102.361	913.66	0	0	0	0	0	0	0	603	903	0
731	2	0	0	0	0	0	0	200	300	0	-21.4552	1.70166	-507.869	-5397.42	-49133.8	1129.53	103.255	913.628	0	0	0	0	0	0	0	603	903	0
731	3	0	0	0	0	0	0	200	300	0	-22.2182	2.31201	-505.733	-5122.76	-49133.8	1495.74	102.846	913.129	0	0	0	0	0	0	0	603	903	0
731	4	0	0	0	0	0	0	200	300	0	-21.3026	1.70166	-505.733	-5214.31	-49744.2	1175.31	101.639	913.31	0	0	0	0	0	0	0	603	903	0
731	5	0	0	0	0	0	0	200	300	0	-21.1501	0.78613	-506.038	-5580.52	-49255.9	946.427	102.664	914.028	0	0	0	0	0	0	0	603	903	0
731	6	0	0	0	0	0	0	200	300	0	-21.3026	0.633542	-505.123	-5488.97	-50049.4	1312.64	100.916	913.867	0	0	0	0	0	0	0	603	903	0
731	7	0	0	0	0	0	0	200	300	0	-20.8449	0.480954	-506.954	-5580.52	-49744.2	1312.64	101.876	914.008	0	0	0	0	0	0	0	603	903	0
731	8	0	0	0	0	0	0	200	300	0	-21.7604	-0.281985	-505.733	-5946.73	-49255.9	1678.85	102.605	914.759	0	0	0	0	0	0	0	603	903	0
731	9	0	0	0	0	0	0	200	300	0	-20.6923	-0.434573	-502.681	-5946.73	-49744.2	1633.07	101.042	914.83	0	0	0	0	0	0	0	603	903	0
732	0	0	0	0	0	0	0	200	300	0	-20.6923	-0.892337	-505.733	-5763.63	-49378	1404.19	102.364	914.397	0	0	0	0	0	0	0	603	903	0
732	1	0	0	0	0	0	0	200	300	0	-20.9975	-1.65528	-506.343	-6312.95	-49194.9	1312.64	102.843	915.468	0	0	0	0	0	0	0	603	903	0
732	2	0	0	0	0	0	0	200	300	0	-19.7768	-1.80786	-505.733	-6404.5	-50049.4	1633.07	101.036	915.664	0	0	0	0	0	0	0	603	903	0
732	3	0	0	0	0	0	0	200	300	0	-20.9975	-1.80786	-506.343	-5946.73	-49561.1	1770.4	102.12	914.745	0	0	0	0	0	0	0	603	903	0
732	4	0	0	0	0	0	0	200	300	0	-20.8449	-2.87598	-505.428	-6679.16	-50049.4	1770.4	100.976	916.215	0	0	0	0	0	0	0	603	903	0
732	5	0	0	0	0	0	0	200	300	0	-20.8449	-2.26563	-504.512	-7136.92	-50415.6	1816.18	100.071	917.146	0	0	0	0	0	0	0	603	903	0
732	6	0	0	0	0	0	0	200	300	0	-20.8449	-3.02857	-502.986	-6038.29	-49866.3	1678.85	100.86	915.005	0	0	0	0	0	0	0	603	903	0
732	7	0	0	0	0	0	0	200	300	0	-21.6078	-3.48633	-506.038	-5305.87	-50110.4	1907.73	100.975	913.485	0	0	0	0	0	0	0	603	903	0
732	8	0	0	0	0	0	0	200	300	0	-21.913	-4.40186	-505.123	-6679.16	-50049.4	1953.51	100.916	916.223	0	0	0	0	0	0	0	603	903	0
732	9	0	0	0	0	0	0	200	300	0	-20.8449	-4.24927	-508.48	-6496.05	-50232.5	2090.84	101.21	915.775	0	0	0	0	0	0	0	603	903	0
733	0	0	0	0	0	0	0	200	300	0	-20.3871	-5.1648	-507.869	-6587.6	-50476.6	2457.05	100.611	915.971	0	0	0	0	0	0	0	603	903	0
733	1	0	0	0	0	0	0	200	300	0	-22.0656	-5.46997	-508.174	-7136.92	-50171.4	1999.28	101.271	917.044	0	0	0	0	0	0	0	603	903	0
733	2	0	0	0	0	0	0	200	300	0	-22.2182	-6.69068	-509.09	-6587.6	-50720.8	2136.61	100.37	915.94	0	0	0	0	0	0	0	603	903	0
733	3	0	0	0	0	0	0	200	300	0	-20.9975	-5.62256	-508.785	-6312.95	-50781.8	2273.94	100.19	915.408	0	0	0	0	0	0	0	603	903	0
733	4	0	0	0	0	0	0	200	300	0	-21.913	-5.77515	-510.311	-7228.47	-50537.6	2182.39	100.967	917.165	0	0	0	0	0	0	0	603	903	0
733	5	0	0	0	0	0	0	200	300	0	-21.4552	-7.14844	-510.311	-7136.92	-51209	2365.49	99.6512	916.986	0	0	0	0	0	0	0	603	903	0
733	6	0	0	0	0	0	0	200	300	0	-20.5397	-7.14844	-511.226	-7320.03	-50598.7	2548.6	101.025	917.319	0	0	0	0	0	0	0	603	903	0
733	7	0	0	0	0	0	0	200	300	0	-22.6759	-7.6062	-509.7	-7594.68	-50659.7	2411.27	100.609	917.9	0	0	0	0	0	0	0	603	903	0
733	8	0	0	0	0	0	0	200	300	0	-21.913	-8.36914	-511.836	-7320.03	-51148	2411.27	100.07	917.302	0	0	0	0	0	0	0	603	903	0
733	9	0	0	0	0	0	0	200	300	0	-20.9975	-8.36914	-511.836	-7686.24	-51148	2640.15	100.07	918.017	0	0	0	0	0	0	0	603	903	0
734	0	0	0	0	0	0	0	200	300	0	-20.9975	-8.67432	-514.278	-8144	-51514.2	2457.05	99.832	918.836	0	0	0	0	0	0	0	603	903	0
734	1	0	0	0	0	0	0	200	300	0	-22.3708	-9.74243	-513.973	-7777.79	-51819.4	2777.48	99.1787	918.133	0	0	0	0	0	0	0	603	903	0
734	2	0	0	0	0	0	0	200	300	0	-21.6078	-9.58985	-515.193	-7960.9	-51392.1	2914.81	100.247	918.452	0	0	0	0	0	0	0	603	903	0
734	3	0	0	0	0	0	0	200	300	0	-22.2182	-10.658	-515.804	-8327.11	-51697.3	2823.26	99.7733	919.144	0	0	0	0	0	0	0	603	903	0
734	4	0	0	0	0	0	0	200	300	0	-23.1337	-10.5054	-514.278	-8510.21	-51392.1	2731.7	100.069	919.548	0	0	0	0	0	0	0	603	903	0
734	5	0	0	0	0	0	0	200	300	0	-21.6078	-10.3528	-517.33	-8052.45	-51636.3	2914.81	100.187	918.565	0	0	0	0	0	0	0	603	903	0
734	6	0	0	0	0	0	0	200	300	0	-22.2182	-11.8787	-517.33	-8418.66	-52002.5	3006.36	99.479	919.273	0	0	0	0	0	0	0	603	903	0
734	7	0	0	0	0	0	0	200	300	0	-22.5233	-11.5735	-519.466	-8601.76	-51941.5	3143.69	100.01	919.559	0	0	0	0	0	0	0	603	903	0
734	8	0	0	0	0	0	0	200	300	0	-21.6078	-11.5735	-520.381	-8601.76	-52795.9	3189.47	98.5437	919.53	0	0	0	0	0	0	0	603	903	0
734	9	0	0	0	0	0	0	200	300	0	-22.2182	-12.489	-520.687	-8876.42	-52612.8	3235.24	98.9549	920.048	0	0	0	0	0	0	0	603	903	0
735	0	0	0	0	0	0	0	200	300	0	-22.0656	-12.6416	-520.381	-8876.42	-52185.6	3235.24	99.7166	920.058	0	0	0	0	0	0	0	603	903	0
735	1	0	0	0	0	0	0	200	300	0	-22.3708	-12.9468	-523.128	-8327.11	-52795.9	3326.8	99.0764	918.918	0	0	0	0	0	0	0	603	903	0
735	2	0	0	0	0	0	0	200	300	0	-22.5233	-13.4045	-523.128	-8967.97	-52734.9	3464.13	99.1931	920.143	0	0	0	0	0	0	0	603	903	0
735	3	0	0	0	0	0	0	200	300	0	-21.4552	-13.252	-522.212	-9151.08	-52979.1	3464.13	98.5489	920.524	0	0	0	0	0	0	0	603	903	0
735	4	0	0	0	0	0	0	200	300	0	-22.9811	-14.6252	-525.264	-9151.08	-53467.3	3509.9	98.2087	920.422	0	0	0	0	0	0	0	603	903	0
735	5	0	0	0	0	0	0	200	300	0	-23.1337	-14.9304	-526.18	-9608.84	-52979.1	3464.13	99.3138	921.262	0	0	0	0	0	0	0	603	903	0
735	6	0	0	0	0	0	0	200	300	0	-24.0492	-15.846	-528.011	-9334.19	-53650.4	3784.56	98.3914	920.678	0	0	0	0	0	0	0	603	903	0
735	7	0	0	0	0	0	0	200	300	0	-23.1337	-15.9985	-528.316	-9151.08	-53589.4	3601.46	98.5656	920.321	0	0	0	0	0	0	0	603	903	0
735	8	0	0	0	0	0	0	200	300	0	-22.6759	-15.9985	-528.316	-9517.29	-53406.3	3647.23	98.9122	921.014	0	0	0	0	0	0	0	603	903	0
735	9	0	0	0	0	0	0	200	300	0	-24.3544	-16.1511	-531.063	-9975.05	-54077.7	3738.78	98.1708	921.783	0	0	0	0	0	0	0	603	903	0
736	0	0	0	0	0	0	0	200	300	0	-23.5915	-18.4399	-533.199	-9700.4	-53650.4	3921.89	99.38	921.193	0	0	0	0	0	0	0	603	903	0
736	1	0	0	0	0	0	0	200	300	0	-24.2018	-17.8296	-534.419	-10341.3	-54138.7	3967.67	98.6962	922.351	0	0	0	0	0	0	0	603	903	0
736	2	0	0	0	0	0	0	200	300	0	-25.5751	-18.4399	-535.335	-10158.2	-54321.8	4013.44	98.5274	921.975	0	0	0	0	0	0	0	603	903	0
736	3	0	0	0	0	0	0	200	300	0	-24.3544	-18.2874	-536.556	-10158.2	-54321.8	3830.34	98.7583	921.932	0	0	0	0	0	0	0	603	903	0
736	4	0	0	0	0	0	0	200	300	0	-23.1337	-18.7451	-537.166	-10249.7	-54993.2	3967.67	97.6234	922.081	0	0	0	0	0	0	0	603	903	0
736	5	0	0	0	0	0	0	200	300	0	-25.5751	-19.3555	-538.692	-10249.7	-54932.2	4059.22	98.0267	922.027	0	0	0	0	0	0	0	603	903	0
736	6	0	0	0	0	0	0	200	300	0	-24.6596	-20.8814	-541.133	-10158.2	-54749.1	4196.55	98.8252	921.772	0	0	0	0	0	0	0	603	903	0
736	7	0	0	0	0	0	0	200	300	0	-24.2018	-20.5762	-540.828	-10249.7	-55481.5	4608.54	97.4138	921.952	0	0	0	0	0	0	0	603	903	0
736	8	0	0	0	0	0	0	200	300	0	-26.0329	-21.1865	-543.27	-10890.6	-54932.2	4288.1	98.886	923.046	0	0	0	0	0	0	0	603	903	0
736	9	0	0	0	0	0	0	200	300	0	-26.6432	-20.7288	-542.354	-10249.7	-54993.2	4013.44	98.6028	921.899	0	0	0	0	0	0	0	603	903	0
737	0	0	0	0	0	0	0	200	300	0	-24.9648	-21.6443	-544.185	-10982.1	-55664.6	4379.65	97.7102	923.181	0	0	0	0	0	0	0	603	903	0
737	1	0	0	0	0	0	0	200	300	0	-26.0329	-22.1021	-544.795	-10707.5	-55359.4	4562.76	98.3849	922.654	0	0	0	0	0	0	0	603	903	0
737	2	0	0	0	0	0	0	200	300	0	-25.4225	-22.865	-547.847	-11073.7	-56091.8	4379.65	97.6141	923.213	0	0	0	0	0	0	0	603	903	0
737	3	0	0	0	0	0	0	200	300	0	-24.9648	-23.7805	-547.847	-10890.6	-55847.7	4745.87	98.0597	922.879	0	0	0	0	0	0	0	603	903	0
737	4	0	0	0	0	0	0	200	300	0	-26.7958	-24.0857	-551.509	-11165.2	-56091.8	4700.09	98.2939	923.245	0	0	0	0	0	0	0	603	903	0
737	5	0	0	0	0	0	0	200	300	0	-27.2536	-23.7805	-551.815	-10707.5	-56641.2	4837.42	97.3547	922.404	0	0	0	0	0	0	0	603	903	0
737	6	0	0	0	0	0	0	200	300	0	-24.6596	-24.696	-553.035	-10982.1	-56213.9	4837.42	98.3538	922.858	0	0	0	0	0	0	0	603	903	0
737	7	0	0	0	0	0	0	200	300	0	-27.101	-25.3064	-557.003	-10890.6	-56946.3	4837.42	97.7629	922.552	0	0	0	0	0	0	0	603	903	0
737	8	0	0	0	0	0	0	200	300	0	-26.6432	-25.459	-555.782	-11531.5	-57922.9	4974.75	95.7812	923.748	0	0	0	0	0	0	0	603	903	0
737	9	0	0	0	0	0	0	200	300	0	-24.507	-26.6797	-557.918	-11531.5	-56946.3	5203.63	97.9306	923.669	0	0	0	0	0	0	0	603	903	0
738	0	0	0	0	0	0	0	200	300	0	-27.7113	-27.9004	-559.444	-11439.9	-57739.8	5386.73	96.7907	923.449	0	0	0	0	0	0	0	603	903	0
738	1	0	0	0	0	0	0	200	300	0	-27.7113	-26.8323	-557.308	-11623	-57495.7	5203.63	96.8332	923.856	0	0	0	0	0	0	0	603	903	0
738	2	0	0	0	0	0	0	200	300	0	-24.507	-27.7478	-561.58	-11439.9	-57678.8	5569.84	97.292	923.371	0	0	0	0	0	0	0	603	903	0
738	3	0	0	0	0	0	0	200	300	0	-27.2536	-28.053	-563.716	-11623	-58106	5386.73	96.9233	923.619	0	0	0	0	0	0	0	603	903	0
738	4	0	0	0	0	0	0	200	300	0	-27.2536	-28.5107	-564.632	-11897.7	-58350.1	5615.62	96.6581	924.072	0	0	0	0	0	0	0	603	903	0
738	5	0	0	0	0	0	0	200	300	0	-26.6432	-29.5789	-565.547	-12263.9	-58411.2	5524.06	96.7174	924.685	0	0	0	0	0	0	0	603	903	0
738	6	0	0	0	0	0	0	200	300	0	-27.5587	-30.647	-567.378	-12447	-58594.3	5615.62	96.7281	924.938	0	0	0	0	0	0	0	603	903	0
738	7	0	0	0	0	0	0	200	300	0	-27.8639	-30.0366	-568.599	-12538.5	-58228.1	6119.16	97.5938	925.052	0	0	0	0	0	0	0	603	903	0
738	8	0	0	0	0	0	0	200	300	0	-26.7958	-30.9522	-571.956	-12355.4	-58960.5	5752.95	96.9143	924.602	0	0	0	0	0	0	0	603	903	0
738	9	0	0	0	0	0	0	200	300	0	-27.8639	-31.8677	-572.566	-13087.8	-59326.7	5661.39	96.3846	925.858	0	0	0	0	0	0	0	603	903	0
739	0	0	0	0	0	0	0	200	300	0	-28.3217	-32.0203	-575.008	-12813.2	-59143.6	6164.93	97.143	925.284	0	0	0	0	0	0	0	603	903	0
739	1	0	0	0	0	0	0	200	300	0	-27.8639	-33.5461	-576.839	-12630.1	-59326.7	6164.93	97.152	924.895	0	0	0	0	0	0	0	603	903	0
739	2	0	0	0	0	0	0	200	300	0	-26.9484	-33.5461	-574.092	-13637.2	-59143.6	6393.81	96.9789	926.754	0	0	0	0	0	0	0	603	903	0
739	3	0	0	0	0	0	0	200	300	0	-28.4743	-34.1565	-578.975	-13637.2	-59265.7	6439.59	97.6369	926.554	0	0	0	0	0	0	0	603	903	0
739	4	0	0	0	0	0	0	200	300	0	-27.2536	-33.8513	-580.501	-13179.4	-59815	6439.59	96.9597	925.704	0	0	0	0	0	0	0	603	903	0
739	5	0	0	0	0	0	0	200	300	0	-27.8639	-34.9194	-581.722	-12904.7	-59692.9	6393.81	97.3858	925.184	0	0	0	0	0	0	0	603	903	0
739	6	0	0	0	0	0	0	200	300	0	-28.6269	-34.7668	-584.163	-13728.7	-60425.3	6576.92	96.5609	926.502	0	0	0	0	0	0	0	603	903	0
739	7	0	0	0	0	0	0	200	300	0	-29.0846	-36.4453	-585.079	-13820.3	-60669.5	6897.35	96.3054	926.621	0	0	0	0	0	0	0	603	903	0
739	8	0	0	0	0	0	0	200	300	0	-26.0329	-37.2083	-585.384	-13820.3	-60364.3	6714.25	96.8808	926.609	0	0	0	0	0	0	0	603	903	0
739	9	0	0	0	0	0	0	200	300	0	-29.5424	-37.9712	-586.605	-13545.6	-60730.5	6805.8	96.4711	926.092	0	0	0	0	0	0	0	603	903	0
740	0	0	0	0	0	0	0	200	300	0	-29.2372	-38.5815	-589.961	-14094.9	-60547.4	6805.8	97.3706	926.891	0	0	0	0	0	0	0	603	903	0
740	1	0	0	0	0	0	0	200	300	0	-27.101	-38.429	-590.877	-13911.8	-61096.7	7034.68	96.5999	926.544	0	0	0	0	0	0	0	603	903	0
740	2	0	0	0	0	0	0	200	300	0	-29.695	-39.1919	-593.013	-14094.9	-61646	7080.46	96.0461	926.768	0	0	0	0	0	0	0	603	903	0
740	3	0	0	0	0	0	0	200	300	0	-29.3898	-40.26	-594.539	-14827.4	-61707.1	7263.57	96.2102	927.939	0	0	0	0	0	0	0	603	903	0
740	4	0	0	0	0	0	0	200	300	0	-29.0846	-40.5652	-596.981	-15102	-61890.2	7400.9	96.328	928.297	0	0	0	0	0	0	0	603	903	0
740	5	0	0	0	0	0	0	200	300	0	-30.3053	-42.0911	-598.201	-14918.9	-62317.4	7584	95.8253	927.94	0	0	0	0	0	0	0	603	903	0
740	6	0	0	0	0	0	0	200	300	0	-30.9157	-41.6333	-599.422	-14735.8	-61585	7492.45	97.2593	927.583	0	0	0	0	0	0	0	603	903	0
740	7	0	0	0	0	0	0	200	300	0	-29.2372	-42.3962	-602.474	-15102	-61890.2	7584	97.2732	928.067	0	0	0	0	0	0	0	603	903	0
740	8	0	0	0	0	0	0	200	300	0	-29.5424	-43.4644	-602.779	-15834.4	-62561.6	7721.33	96.2114	929.269	0	0	0	0	0	0	0	603	903	0
740	9	0	0	0	0	0	0	200	300	0	-30.0002	-43.6169	-604.61	-15193.6	-63171.9	7858.66	95.5162	928.13	0	0	0	0	0	0	0	603	903	0
741	0	0	0	0	0	0	0	200	300	0	-29.2372	-45.448	-604.915	-15834.4	-63110.9	8224.87	95.6698	929.176	0	0	0	0	0	0	0	603	903	0
741	1	0	0	0	0	0	0	200	300	0	-30.9157	-46.0584	-607.357	-16200.6	-62622.6	8179.09	96.8932	929.674	0	0	0	0	0	0	0	603	903	0
741	2	0	0	0	0	0	0	200	300	0	-30.7631	-46.3635	-608.882	-15926	-63721.2	8591.08	95.3472	929.156	0	0	0	0	0	0	0	603	903	0
741	3	0	0	0	0	0	0	200	300	0	-30.3053	-47.2791	-611.324	-16200.6	-64026.4	8224.87	95.2659	929.501	0	0	0	0	0	0	0	603	903	0
741	4	0	0	0	0	0	0	200	300	0	-30.6105	-48.1946	-612.544	-16750	-63965.4	8407.98	95.5743	930.345	0	0	0	0	0	0	0	603	903	0
741	5	0	0	0	0	0	0	200	300	0	-31.3734	-48.4998	-616.512	-17024.6	-64148.5	8545.31	95.9493	930.615	0	0	0	0	0	0	0	603	903	0
741	6	0	0	0	0	0	0	200	300	0	-30.3053	-50.0256	-616.817	-16475.3	-63904.3	8957.29	96.3966	929.71	0	0	0	0	0	0	0	603	903	0
741	7	0	0	0	0	0	0	200	300	0	-30.6105	-49.5679	-618.343	-17116.2	-63782.3	9003.07	96.8497	930.681	0	0	0	0	0	0	0	603	903	0
741	8	0	0	0	0	0	0	200	300	0	-31.2209	-50.3308	-620.784	-17207.7	-64880.9	9003.07	95.4856	930.719	0	0	0	0	0	0	0	603	903	0
741	9	0	0	0	0	0	0	200	300	0	-30.3053	-50.3308	-622.615	-17482.4	-64880.9	9140.4	95.7929	931.079	0	0	0	0	0	0	0	603	903	0
742	0	0	0	0	0	0	0	200	300	0	-30.4579	-52.6196	-624.752	-17757	-65613.3	9277.73	94.9769	931.423	0	0	0	0	0	0	0	603	903	0
742	1	0	0	0	0	0	0	200	300	0	-31.9838	-53.23	-624.141	-17940.1	-65613.3	9460.83	94.8742	931.744	0	0	0	0	0	0	0	603	903	0
742	2	0	0	0	0	0	0	200	300	0	-31.526	-53.8403	-629.024	-17573.9	-65247.1	9369.28	96.2724	930.938	0	0	0	0	0	0	0	603	903	0
742	3	0	0	0	0	0	0	200	300	0	-31.6786	-54.2981	-630.245	-18489.5	-66101.6	9552.39	95.1175	932.337	0	0	0	0	0	0	0	603	903	0
742	4	0	0	0	0	0	0	200	300	0	-32.8993	-55.6714	-632.686	-17848.6	-65796.4	9598.16	96.0046	931.211	0	0	0	0	0	0	0	603	903	0
742	5	0	0	0	0	0	0	200	300	0	-31.8312	-56.5869	-634.517	-18031.7	-66223.7	9918.6	95.6314	931.418	0	0	0	0	0	0	0	603	903	0
742	6	0	0	0	0	0	0	200	300	0	-32.1364	-56.7395	-638.179	-19038.8	-66834	9827.04	95.2739	932.833	0	0	0	0	0	0	0	603	903	0
742	7	0	0	0	0	0	0	200	300	0	-33.0519	-58.2654	-640.01	-19405	-66528.9	10055.9	96.0503	933.32	0	0	0	0	0	0	0	603	903	0
742	8	0	0	0	0	0	0	200	300	0	-32.1364	-57.9602	-638.179	-18855.7	-67200.3	10010.1	94.7	932.546	0	0	0	0	0	0	0	603	903	0
742	9	0	0	0	0	0	0	200	300	0	-33.0519	-58.7231	-643.062	-19221.9	-67444.4	10193.3	95.1199	932.891	0	0	0	0	0	0	0	603	903	0
743	0	0	0	0	0	0	0	200	300	0	-34.7304	-59.1809	-645.198	-19771.2	-67200.3	10467.9	95.8456	933.644	0	0	0	0	0	0	0	603	903	0
743	1	0	0	0	0	0	0	200	300	0	-32.8993	-60.4016	-645.809	-19496.5	-68054.8	10330.6	94.6209	933.189	0	0	0	0	0	0	0	603	903	0
743	2	0	0	0	0	0	0	200	300	0	-33.6623	-60.5542	-649.471	-19862.8	-68054.8	10467.9	95.2151	933.583	0	0	0	0	0	0	0	603	903	0
743	3	0	0	0	0	0	0	200	300	0	-32.289	-61.1646	-651.607	-20503.6	-68298.9	10696.8	95.1839	934.466	0	0	0	0	0	0	0	603	903	0
743	4	0	0	0	0	0	0	200	300	0	-34.12	-62.3853	-653.743	-20412.1	-67688.5	10742.6	96.4601	934.223	0	0	0	0	0	0	0	603	903	0
743	5	0	0	0	0	0	0	200	300	0	-34.4252	-63.4534	-655.574	-20595.2	-68421	10879.9	95.632	934.416	0	0	0	0	0	0	0	603	903	0
743	6	0	0	0	0	0	0	200	300	0	-35.9511	-64.2163	-658.626	-21052.9	-68787.2	10971.5	95.5596	934.965	0	0	0	0	0	0	0	603	903	0
743	7	0	0	0	0	0	0	200	300	0	-32.4416	-64.3689	-661.678	-20595.2	-69580.6	10971.5	94.8422	934.126	0	0	0	0	0	0	0	603	903	0
743	8	0	0	0	0	0	0	200	300	0	-34.7304	-64.6741	-660.457	-20961.4	-69641.7	11200.3	94.5554	934.738	0	0	0	0	0	0	0	603	903	0
743	9	0	0	0	0	0	0	200	300	0	-36.1037	-66.5051	-664.424	-21693.8	-70435.1	11291.9	93.9908	935.651	0	0	0	0	0	0	0	603	903	0
744	0	0	0	0	0	0	0	200	300	0	-36.8666	-66.9629	-667.781	-21510.7	-70435.1	11566.5	94.5237	935.212	0	0	0	0	0	0	0	603	903	0
744	1	0	0	0	0	0	0	200	300	0	-35.7985	-68.7939	-669.002	-21693.8	-70313	11429.2	94.8986	935.427	0	0	0	0	0	0	0	603	903	0
744	2	0	0	0	0	0	0	200	300	0	-37.3244	-68.7939	-672.664	-22334.7	-70984.4	11520.8	94.4727	936.203	0	0	0	0	0	0	0	603	903	0
744	3	0	0	0	0	0	0	200	300	0	-36.4088	-69.2517	-674.8	-22151.6	-71472.7	11658.1	94.0832	935.827	0	0	0	0	0	0	0	603	903	0
744	4	0	0	0	0	0	0	200	300	0	-36.5614	-70.9302	-679.073	-22426.2	-71167.5	11795.4	95.199	936.025	0	0	0	0	0	0	0	603	903	0
744	5	0	0	0	0	0	0	200	300	0	-37.7821	-71.3879	-680.294	-22609.3	-72083.1	11841.2	94.0412	936.235	0	0	0	0	0	0	0	603	903	0
744	6	0	0	0	0	0	0	200	300	0	-38.0873	-71.2354	-682.735	-22884	-72205.1	12070.1	94.2413	936.518	0	0	0	0	0	0	0	603	903	0
744	7	0	0	0	0	0	0	200	300	0	-38.3925	-72.7612	-686.397	-23616.4	-72022	12070.1	95.0724	937.406	0	0	0	0	0	0	0	603	903	0
744	8	0	0	0	0	0	0	200	300	0	-39.308	-73.3716	-687.923	-23341.8	-72937.6	11978.5	93.9742	936.931	0	0	0	0	0	0	0	603	903	0
744	9	0	0	0	0	0	0	200	300	0	-39.1554	-73.5242	-691.89	-23341.8	-72632.4	12115.9	95.0233	936.736	0	0	0	0	0	0	0	603	903	0
745	0	0	0	0	0	0	0	200	300	0	-39.4606	-75.2026	-694.942	-24440.4	-72937.6	12344.7	95.0451	938.169	0	0	0	0	0	0	0	603	903	0
745	1	0	0	0	0	0	0	200	300	0	-38.3925	-77.1863	-697.078	-24715	-72815.5	12527.8	95.5419	938.455	0	0	0	0	0	0	0	603	903	0
745	2	0	0	0	0	0	0	200	300	0	-40.2235	-77.0337	-699.52	-24074.2	-73303.8	12665.2	95.2084	937.415	0	0	0	0	0	0	0	603	903	0
745	3	0	0	0	0	0	0	200	300	0	-40.6813	-77.9492	-702.266	-25355.9	-73853.1	12482.1	94.8361	939.106	0	0	0	0	0	0	0	603	903	0
745	4	0	0	0	0	0	0	200	300	0	-40.8339	-77.3389	-701.961	-25447.5	-74524.5	12436.3	93.8339	939.252	0	0	0	0	0	0	0	603	903	0
745	5	0	0	0	0	0	0	200	300	0	-41.4442	-78.5596	-707.454	-25172.8	-74646.5	12619.4	94.4857	938.582	0	0	0	0	0	0	0	603	903	0
745	6	0	0	0	0	0	0	200	300	0	-41.4442	-78.7122	-710.201	-25905.2	-75317.9	12894.1	93.9484	939.476	0	0	0	0	0	0	0	603	903	0
745	7	0	0	0	0	0	0	200	300	0	-42.5124	-80.238	-711.727	-26363	-75867.2	12985.6	93.404	940.041	0	0	0	0	0	0	0	603	903	0
745	8	0	0	0	0	0	0	200	300	0	-42.2072	-81.3062	-714.168	-26179.9	-75562.1	12894.1	94.1957	939.658	0	0	0	0	0	0	0	603	903	0
745	9	0	0	0	0	0	0	200	300	0	-43.1227	-82.3743	-716.609	-26912.3	-75317.9	13443.4	94.8968	940.555	0	0	0	0	0	0	0	603	903	0
746	0	0	0	0	0	0	0	200	300	0	-44.8012	-81.9165	-719.051	-26912.3	-75806.2	13168.7	94.5746	940.428	0	0	0	0	0	0	0	603	903	0
746	1	0	0	0	0	0	0	200	300	0	-43.4279	-83.1372	-723.018	-26729.2	-76355.5	13214.5	94.3933	939.969	0	0	0	0	0	0	0	603	903	0
746	2	0	0	0	0	0	0	200	300	0	-44.1908	-84.0527	-725.46	-27919.4	-77088	13214.5	93.7391	941.485	0	0	0	0	0	0	0	603	903	0
746	3	0	0	0	0	0	0	200	300	0	-44.496	-85.5786	-727.291	-28377.2	-77026.9	13534.9	94.0906	942.018	0	0	0	0	0	0	0	603	903	0
746	4	0	0	0	0	0	0	200	300	0	-44.8012	-86.0364	-730.953	-28102.5	-77332.1	13672.3	94.2037	941.446	0	0	0	0	0	0	0	603	903	0
746	5	0	0	0	0	0	0	200	300	0	-45.7167	-87.2571	-732.784	-28743.4	-77637.2	13489.2	94.0516	942.225	0	0	0	0	0	0	0	603	903	0
746	6	0	0	0	0	0	0	200	300	0	-46.7848	-87.1045	-737.667	-29018	-77637.2	13809.6	94.7529	942.338	0	0	0	0	0	0	0	603	903	0
746	7	0	0	0	0	0	0	200	300	0	-44.3434	-88.1726	-739.192	-28834.9	-78552.8	14084.2	93.7316	942.009	0	0	0	0	0	0	0	603	903	0
746	8	0	0	0	0	0	0	200	300	0	-45.5641	-87.4097	-741.023	-29201.1	-78674.9	13580.7	93.8295	942.407	0	0	0	0	0	0	0	603	903	0
746	9	0	0	0	0	0	0	200	300	0	-46.9374	-89.0881	-744.686	-30391.3	-78735.9	13809.6	94.2696	943.811	0	0	0	0	0	0	0	603	903	0
747	0	0	0	0	0	0	0	200	300	0	-47.7003	-90.7666	-747.432	-30025.1	-79102.1	14175.8	94.1682	943.171	0	0	0	0	0	0	0	603	903	0
747	1	0	0	0	0	0	0	200	300	0	-44.496	-90.614	-748.958	-30574.4	-79224.2	13901.1	94.2208	943.823	0	0	0	0	0	0	0	603	903	0
747	2	0	0	0	0	0	0	200	300	0	-48.0055	-91.5295	-750.789	-30482.9	-79285.2	14267.4	94.3975	943.601	0	0	0	0	0	0	0	603	903	0
747	3	0	0	0	0	0	0	200	300	0	-48.0055	-92.7502	-754.756	-30940.6	-80383.9	14084.2	93.497	943.994	0	0	0	0	0	0	0	603	903	0
747	4	0	0	0	0	0	0	200	300	0	-46.9374	-93.208	-757.808	-31123.7	-80566.9	14587.8	93.6843	944.071	0	0	0	0	0	0	0	603	903	0
747	5	0	0	0	0	0	0	200	300	0	-47.7003	-95.0391	-757.808	-32039.3	-80872.1	14358.9	93.2815	945.279	0	0	0	0	0	0	0	603	903	0
747	6	0	0	0	0	0	0	200	300	0	-46.7848	-95.9546	-761.775	-32222.4	-80994.2	14587.8	93.6771	945.299	0	0	0	0	0	0	0	603	903	0
747	7	0	0	0	0	0	0	200	300	0	-48.6159	-96.8701	-764.522	-32680.1	-80628	14587.8	94.5381	945.746	0	0	0	0	0	0	0	603	903	0
747	8	0	0	0	0	0	0	200	300	0	-48.4633	-96.8701	-766.048	-32771.7	-81726.6	14725.1	93.314	945.78	0	0	0	0	0	0	0	603	903	0
747	9	0	0	0	0	0	0	200	300	0	-50.1418	-97.9382	-770.015	-33412.6	-82092.8	15182.9	93.388	946.392	0	0	0	0	0	0	0	603	903	0
748	0	0	0	0	0	0	0	200	300	0	-50.1418	-97.4805	-771.541	-33229.4	-82092.8	15045.5	93.5989	946.069	0	0	0	0	0	0	0	603	903	0
748	1	0	0	0	0	0	0	200	300	0	-49.684	-99.9219	-775.814	-33778.8	-82520.1	15228.7	93.6341	946.54	0	0	0	0	0	0	0	603	903	0
748	2	0	0	0	0	0	0	200	300	0	-50.5995	-100.685	-776.119	-35060.5	-82398	15137.1	93.8333	948.174	0	0	0	0	0	0	0	603	903	0
748	3	0	0	0	0	0	0	200	300	0	-51.0573	-100.074	-780.696	-34694.3	-82886.3	14770.9	93.8303	947.44	0	0	0	0	0	0	0	603	903	0
748	4	0	0	0	0	0	0	200	300	0	-47.8529	-101.906	-781.917	-34877.4	-83435.6	15228.7	93.2935	947.605	0	0	0	0	0	0	0	603	903	0
748	5	0	0	0	0	0	0	200	300	0	-51.6676	-103.279	-782.833	-34969	-83008.3	15411.8	93.9641	947.67	0	0	0	0	0	0	0	603	903	0
748	6	0	0	0	0	0	0	200	300	0	-50.9047	-103.126	-787.41	-35060.5	-83984.9	15411.8	93.3403	947.526	0	0	0	0	0	0	0	603	903	0
748	7	0	0	0	0	0	0	200	300	0	-50.2943	-105.11	-789.546	-36159.1	-84534.2	15503.3	92.9332	948.797	0	0	0	0	0	0	0	603	903	0
748	8	0	0	0	0	0	0	200	300	0	-51.6676	-104.805	-788.326	-36250.7	-83740.8	15640.6	93.7739	948.984	0	0	0	0	0	0	0	603	903	0
748	9	0	0	0	0	0	0	200	300	0	-51.8202	-105.873	-792.598	-36708.5	-84656.3	15732.2	93.1914	949.314	0	0	0	0	0	0	0	603	903	0
749	0	0	0	0	0	0	0	200	300	0	-50.5995	-106.178	-795.04	-36983.1	-84900.5	15503.3	93.2123	949.517	0	0	0	0	0	0	0	603	903	0
749	1	0	0	0	0	0	0	200	300	0	-51.6676	-107.094	-797.176	-37349.3	-84656.3	15778	93.8047	949.852	0	0	0	0	0	0	0	603	903	0
749	2	0	0	0	0	0	0	200	300	0	-51.515	-108.009	-799.617	-38356.4	-85632.9	15869.5	92.9077	950.969	0	0	0	0	0	0	0	603	903	0
749	3	0	0	0	0	0	0	200	300	0	-50.7521	-109.535	-800.838	-38173.3	-85510.8	16373.1	93.2233	950.667	0	0	0	0	0	0	0	603	903	0
749	4	0	0	0	0	0	0	200	300	0	-50.5995	-109.84	-803.585	-39088.8	-85632.9	16373.1	93.4364	951.643	0	0	0	0	0	0	0	603	903	0
749	5	0	0	0	0	0	0	200	300	0	-52.5832	-111.671	-806.331	-38997.3	-85999.1	16418.8	93.3452	951.364	0	0	0	0	0	0	0	603	903	0
749	6	0	0	0	0	0	0	200	300	0	-51.6676	-111.976	-806.941	-38722.6	-85816	16785	93.6528	950.987	0	0	0	0	0	0	0	603	903	0
749	7	0	0	0	0	0	0	200	300	0	-50.5995	-110.908	-805.721	-39638.1	-86670.5	16281.5	92.4312	952.196	0	0	0	0	0	0	0	603	903	0
749	8	0	0	0	0	0	0	200	300	0	-50.9047	-113.502	-811.824	-40370.6	-86975.6	16235.7	92.864	952.728	0	0	0	0	0	0	0	603	903	0
749	9	0	0	0	0	0	0	200	300	0	-50.5995	-114.113	-811.824	-40095.9	-86914.6	16601.9	92.9392	952.39	0	0	0	0	0	0	0	603	903	0
750	0	0	0	0	0	0	0	200	300	0	-51.515	-115.486	-817.012	-41194.5	-87280.8	17013.9	93.1708	953.421	0	0	0	0	0	0	0	603	903	0
750	1	0	0	0	0	0	0	200	300	0	-53.0409	-117.622	-816.707	-41194.5	-87708.1	16922.4	92.6077	953.44	0	0	0	0	0	0	0	603	903	0
750	2	0	0	0	0	0	0	200	300	0	-51.515	-116.554	-817.012	-40919.9	-87158.7	16785	93.3202	953.085	0	0	0	0	0	0	0	603	903	0
750	3	0	0	0	0	0	0	200	300	0	-51.9728	-117.317	-820.674	-42201.6	-87952.2	17105.5	92.8293	954.423	0	0	0	0	0	0	0	603	903	0
750	4	0	0	0	0	0	0	200	300	0	-51.9728	-118.08	-819.454	-42110.1	-87769.1	16968.2	92.8932	954.388	0	0	0	0	0	0	0	603	903	0
750	5	0	0	0	0	0	0	200	300	0	-51.6676	-119.606	-822.811	-42476.3	-87769.1	17197	93.3301	954.623	0	0	0	0	0	0	0	603	903	0
750	6	0	0	0	0	0	0	200	300	0	-51.515	-121.132	-824.947	-43025.6	-88196.4	17517.5	93.0885	955.156	0	0	0	0	0	0	0	603	903	0
750	7	0	0	0	0	0	0	200	300	0	-52.278	-122.2	-826.168	-43666.5	-88196.4	17334.4	93.2464	955.854	0	0	0	0	0	0	0	603	903	0
750	8	0	0	0	0	0	0	200	300	0	-53.9565	-122.352	-827.083	-43117.1	-88684.6	17563.3	92.7742	955.132	0	0	0	0	0	0	0	603	903	0
750	9	0	0	0	0	0	0	200	300	0	-52.4306	-123.42	-829.524	-44124.2	-89111.9	17654.8	92.5748	956.192	0	0	0	0	0	0	0	603	903	0
751	0	0	0	0	0	0	0	200	300	0	-53.6513	-124.489	-830.44	-44582	-88501.5	17700.6	93.4282	956.685	0	0	0	0	0	0	0	603	903	0
751	1	0	0	0	0	0	0	200	300	0	-52.8883	-124.641	-833.492	-44490.4	-89295	17700.6	92.8664	956.378	0	0	0	0	0	0	0	603	903	0
751	2	0	0	0	0	0	0	200	300	0	-52.278	-126.777	-833.492	-45131.3	-88745.6	17883.7	93.5255	957.147	0	0	0	0	0	0	0	603	903	0
751	3	0	0	0	0	0	0	200	300	0	-52.8883	-126.777	-830.745	-45314.4	-88562.6	17929.5	93.3938	957.547	0	0	0	0	0	0	0	603	903	0
751	4	0	0	0	0	0	0	200	300	0	-52.8883	-128.151	-836.238	-45497.5	-89172.9	17746.4	93.3642	957.407	0	0	0	0	0	0	0	603	903	0
751	5	0	0	0	0	0	0	200	300	0	-50.1418	-127.845	-838.069	-45772.2	-88684.6	18204.1	94.1799	957.616	0	0	0	0	0	0	0	603	903	0
751	6	0	0	0	0	0	0	200	300	0	-52.5832	-129.524	-837.154	-45863.7	-89295	18433	93.335	957.785	0	0	0	0	0	0	0	603	903	0
751	7	0	0	0	0	0	0	200	300	0	-52.278	-129.677	-839.29	-46779.3	-89966.4	18478.8	92.8066	958.737	0	0	0	0	0	0	0	603	903	0
751	8	0	0	0	0	0	0	200	300	0	-52.5832	-132.271	-838.375	-47053.9	-89356	18387.2	93.4176	959.125	0	0	0	0	0	0	0	603	903	0
751	9	0	0	0	0	0	0	200	300	0	-52.8883	-132.423	-839.595	-47969.4	-89783.3	18433	93.0636	960.134	0	0	0	0	0	0	0	603	903	0
752	0	0	0	0	0	0	0	200	300	0	-52.5832	-132.728	-841.121	-48152.6	-89539.1	18478.8	93.5479	960.248	0	0	0	0	0	0	0	603	903	0
752	1	0	0	0	0	0	0	200	300	0	-51.3625	-134.254	-840.816	-47420.1	-89478.1	18616.1	93.5819	959.398	0	0	0	0	0	0	0	603	903	0
752	2	0	0	0	0	0	0	200	300	0	-51.0573	-134.407	-842.342	-48793.4	-89966.4	18616.1	93.195	960.926	0	0	0	0	0	0	0	603	903	0
752	3	0	0	0	0	0	0	200	300	0	-51.515	-136.238	-846.309	-49068.1	-89905.3	19028.1	93.7677	960.979	0	0	0	0	0	0	0	603	903	0
752	4	0	0	0	0	0	0	200	300	0	-51.515	-136.848	-844.478	-49159.6	-89661.2	18845	93.8265	961.213	0	0	0	0	0	0	0	603	903	0
752	5	0	0	0	0	0	0	200	300	0	-51.0573	-135.933	-843.563	-49434.3	-89966.4	19073.9	93.3495	961.602	0	0	0	0	0	0	0	603	903	0
752	6	0	0	0	0	0	0	200	300	0	-50.4469	-138.679	-845.699	-50075.2	-89356	18890.8	94.3406	962.212	0	0	0	0	0	0	0	603	903	0
752	7	0	0	0	0	0	0	200	300	0	-50.4469	-139.442	-844.173	-48701.9	-90149.5	18845	93.2097	960.692	0	0	0	0	0	0	0	603	903	0
752	8	0	0	0	0	0	0	200	300	0	-50.4469	-138.832	-847.225	-50441.4	-90149.5	19257	93.5944	962.537	0	0	0	0	0	0	0	603	903	0
752	9	0	0	0	0	0	0	200	300	0	-49.684	-141.273	-847.53	-51173.8	-89783.3	19440.1	94.0648	963.38	0	0	0	0	0	0	0	603	903	0
753	0	0	0	0	0	0	0	200	300	0	-50.1418	-142.036	-846.309	-50990.7	-90149.5	19577.4	93.4793	963.251	0	0	0	0	0	0	0	603	903	0
753	1	0	0	0	0	0	0	200	300	0	-49.8366	-142.646	-847.835	-51356.9	-89356	19669	94.6069	963.574	0	0	0	0	0	0	0	603	903	0
753	2	0	0	0	0	0	0	200	300	0	-50.9047	-142.799	-845.699	-51997.8	-89661.2	19531.6	93.9798	964.485	0	0	0	0	0	0	0	603	903	0
753	3	0	0	0	0	0	0	200	300	0	-49.8366	-144.02	-845.699	-51356.9	-90149.5	19669	93.4024	963.727	0	0	0	0	0	0	0	603	903	0
753	4	0	0	0	0	0	0	200	300	0	-48.7685	-144.935	-847.225	-51814.7	-89478.1	19623.2	94.3868	964.158	0	0	0	0	0	0	0	603	903	0
753	5	0	0	0	0	0	0	200	300	0	-48.7685	-146.156	-846.004	-52089.3	-90027.4	20172.5	93.5851	964.571	0	0	0	0	0	0	0	603	903	0
753	6	0	0	0	0	0	0	200	300	0	-48.9211	-146.919	-846.309	-52730.2	-90271.5	20035.2	93.335	965.306	0	0	0	0	0	0	0	603	903	0
753	7	0	0	0	0	0	0	200	300	0	-47.5478	-148.14	-843.868	-52364	-89356	20401.4	94.1114	965.052	0	0	0	0	0	0	0	603	903	0
753	8	0	0	0	0	0	0	200	300	0	-47.2426	-149.36	-843.868	-53279.5	-89905.3	20172.5	93.4604	966.137	0	0	0	0	0	0	0	603	903	0
753	9	0	0	0	0	0	0	200	300	0	-45.2589	-147.682	-844.478	-53554.2	-89111.9	20035.2	94.477	966.417	0	0	0	0	0	0	0	603	903	0
754	0	0	0	0	0	0	0	200	300	0	-46.3271	-150.123	-844.478	-52730.2	-89172.9	20309.8	94.4047	965.441	0	0	0	0	0	0	0	603	903	0
754	1	0	0	0	0	0	0	200	300	0	-46.4796	-150.276	-841.426	-54378.1	-89233.9	20492.9	93.9492	967.626	0	0	0	0	0	0	0	603	903	0
754	2	0	0	0	0	0	0	200	300	0	-46.6322	-151.039	-844.478	-54286.6	-89050.8	20309.8	94.5493	967.284	0	0	0	0	0	0	0	603	903	0
754	3	0	0	0	0	0	0	200	300	0	-45.5641	-151.497	-841.426	-54652.8	-88440.5	20721.8	94.8922	967.953	0	0	0	0	0	0	0	603	903	0
754	4	0	0	0	0	0	0	200	300	0	-45.2589	-152.26	-840.511	-54469.7	-88928.8	20447.2	94.1968	967.805	0	0	0	0	0	0	0	603	903	0
754	5	0	0	0	0	0	0	200	300	0	-46.1745	-153.175	-838.375	-54744.4	-88257.4	20492.9	94.728	968.298	0	0	0	0	0	0	0	603	903	0
754	6	0	0	0	0	0	0	200	300	0	-46.1745	-154.396	-838.069	-54286.6	-88684.6	20584.5	94.1799	967.776	0	0	0	0	0	0	0	603	903	0
754	7	0	0	0	0	0	0	200	300	0	-44.1908	-153.633	-838.069	-54561.2	-88562.6	20721.8	94.3255	968.104	0	0	0	0	0	0	0	603	903	0
754	8	0	0	0	0	0	0	200	300	0	-44.496	-155.769	-836.238	-55293.7	-88135.3	20996.5	94.605	969.122	0	0	0	0	0	0	0	603	903	0
754	9	0	0	0	0	0	0	200	300	0	-44.8012	-155.311	-835.323	-55202.1	-88257.4	21133.8	94.3434	969.085	0	0	0	0	0	0	0	603	903	0
755	0	0	0	0	0	0	0	200	300	0	-44.3434	-155.769	-833.492	-55385.2	-87341.9	20813.4	95.2097	969.45	0	0	0	0	0	0	0	603	903	0
755	1	0	0	0	0	0	0	200	300	0	-43.8857	-156.837	-829.524	-55751.4	-87280.8	20859.2	94.7821	970.209	0	0	0	0	0	0	0	603	903	0
755	2	0	0	0	0	0	0	200	300	0	-43.2753	-156.685	-829.83	-55659.9	-87158.7	20492.9	94.9679	970.074	0	0	0	0	0	0	0	603	903	0
755	3	0	0	0	0	0	0	200	300	0	-41.4442	-158.516	-826.168	-55385.2	-87158.7	21042.3	94.5023	970.039	0	0	0	0	0	0	0	603	903	0
755	4	0	0	0	0	0	0	200	300	0	-41.5968	-159.279	-825.557	-56209.2	-86792.5	21133.8	94.8679	971.086	0	0	0	0	0	0	0	603	903	0
755	5	0	0	0	0	0	0	200	300	0	-41.1391	-157.6	-820.674	-56392.3	-86731.5	21545.8	94.3168	971.715	0	0	0	0	0	0	0	603	903	0
755	6	0	0	0	0	0	0	200	300	0	-41.7494	-160.042	-821.59	-56392.3	-85999.1	21225.4	95.326	971.638	0	0	0	0	0	0	0	603	903	0
755	7	0	0	0	0	0	0	200	300	0	-40.8339	-159.584	-817.928	-56483.8	-86243.2	20859.2	94.5589	972.057	0	0	0	0	0	0	0	603	903	0
755	8	0	0	0	0	0	0	200	300	0	-42.0546	-160.042	-817.623	-56850.1	-86060.1	20859.2	94.7435	972.531	0	0	0	0	0	0	0	603	903	0
755	9	0	0	0	0	0	0	200	300	0	-40.9865	-161.415	-814.876	-56575.4	-85693.9	21042.3	94.8381	972.428	0	0	0	0	0	0	0	603	903	0
756	0	0	0	0	0	0	0	200	300	0	-39.4606	-160.957	-813.045	-56941.6	-85571.8	21179.6	94.7514	973.035	0	0	0	0	0	0	0	603	903	0
756	1	0	0	0	0	0	0	200	300	0	-40.8339	-162.025	-809.383	-56575.4	-84717.3	21133.8	95.331	972.899	0	0	0	0	0	0	0	603	903	0
756	2	0	0	0	0	0	0	200	300	0	-40.8339	-162.33	-806.331	-56850.1	-84412.2	21408.5	95.3133	973.505	0	0	0	0	0	0	0	603	903	0
756	3	0	0	0	0	0	0	200	300	0	-39.4606	-161.873	-804.805	-56666.9	-84229	21088	95.3423	973.411	0	0	0	0	0	0	0	603	903	0
756	4	0	0	0	0	0	0	200	300	0	-38.6977	-162.788	-803.279	-57307.8	-83618.7	21225.4	95.9033	974.342	0	0	0	0	0	0	0	603	903	0
756	5	0	0	0	0	0	0	200	300	0	-39.308	-162.941	-798.091	-57124.7	-83923.9	21225.4	94.8443	974.577	0	0	0	0	0	0	0	603	903	0
756	6	0	0	0	0	0	0	200	300	0	-37.0192	-163.398	-795.65	-56941.6	-83740.8	20813.4	94.7518	974.566	0	0	0	0	0	0	0	603	903	0
756	7	0	0	0	0	0	0	200	300	0	-37.3244	-164.314	-790.462	-57948.7	-82398	20996.5	95.7597	976.31	0	0	0	0	0	0	0	603	903	0
756	8	0	0	0	0	0	0	200	300	0	-38.8503	-163.856	-787.41	-57674	-82886.3	20996.5	94.7356	976.245	0	0	0	0	0	0	0	603	903	0
756	9	0	0	0	0	0	0	200	300	0	-37.3244	-164.467	-785.884	-56209.2	-82581.1	21225.4	94.9195	974.524	0	0	0	0	0	0	0	603	903	0
757	0	0	0	0	0	0	0	200	300	0	-36.4088	-164.772	-779.781	-57216.3	-81665.6	21133.8	95.2711	976.375	0	0	0	0	0	0	0	603	903	0
757	1	0	0	0	0	0	0	200	300	0	-36.2563	-164.619	-778.56	-58131.8	-81787.6	20904.9	94.9501	977.666	0	0	0	0	0	0	0	603	903	0
757	2	0	0	0	0	0	0	200	300	0	-34.883	-165.229	-774.593	-57582.5	-81055.2	20996.5	95.3576	977.339	0	0	0	0	0	0	0	603	903	0
757	3	0	0	0	0	0	0	200	300	0	-34.883	-166.603	-770.626	-57857.1	-80261.8	20813.4	95.8485	978.078	0	0	0	0	0	0	0	603	903	0
757	4	0	0	0	0	0	0	200	300	0	-35.9511	-165.229	-767.574	-57948.7	-79956.6	20996.5	95.832	978.496	0	0	0	0	0	0	0	603	903	0
757	5	0	0	0	0	0	0	200	300	0	-35.3407	-164.009	-763.301	-57399.4	-79346.2	20950.7	96.0486	978.199	0	0	0	0	0	0	0	603	903	0
757	6	0	0	0	0	0	0	200	300	0	-33.9674	-164.772	-758.724	-57307.8	-79590.4	20904.9	95.0997	978.532	0	0	0	0	0	0	0	603	903	0
757	7	0	0	0	0	0	0	200	300	0	-34.12	-164.619	-755.062	-57216.3	-79041.1	20676	95.3184	978.777	0	0	0	0	0	0	0	603	903	0
757	8	0	0	0	0	0	0	200	300	0	-33.6623	-165.687	-751.399	-57216.3	-78247.6	20447.2	95.8642	979.146	0	0	0	0	0	0	0	603	903	0
757	9	0	0	0	0	0	0	200	300	0	-31.2209	-165.382	-747.432	-57216.3	-78125.5	20721.8	95.4748	979.55	0	0	0	0	0	0	0	603	903	0
758	0	0	0	0	0	0	0	200	300	0	-33.3571	-165.687	-740.108	-56483.8	-76965.9	20721.8	96.0072	979.318	0	0	0	0	0	0	0	603	903	0
758	1	0	0	0	0	0	0	200	300	0	-32.5941	-165.992	-737.667	-57124.7	-76843.8	20447.2	95.8285	980.44	0	0	0	0	0	0	0	603	903	0
758	2	0	0	0	0	0	0	200	300	0	-29.8476	-164.009	-733.699	-57033.2	-76599.7	20538.7	95.598	980.734	0	0	0	0	0	0	0	603	903	0
758	3	0	0	0	0	0	0	200	300	0	-32.1364	-165.229	-730.342	-56575.4	-75562.1	20630.3	96.5389	980.464	0	0	0	0	0	0	0	603	903	0
758	4	0	0	0	0	0	0	200	300	0	-31.3734	-165.992	-723.628	-56575.4	-75623.1	20447.2	95.4946	981.183	0	0	0	0	0	0	0	603	903	0
758	5	0	0	0	0	0	0	200	300	0	-29.5424	-164.009	-720.577	-56758.5	-75256.9	20492.9	95.5602	981.768	0	0	0	0	0	0	0	603	903	0
758	6	0	0	0	0	0	0	200	300	0	-30.0002	-163.856	-715.999	-57124.7	-74280.3	20264.1	96.2564	982.783	0	0	0	0	0	0	0	603	903	0
758	7	0	0	0	0	0	0	200	300	0	-30.6105	-164.314	-710.201	-56850.1	-74280.3	20126.7	95.4094	983.048	0	0	0	0	0	0	0	603	903	0
758	8	0	0	0	0	0	0	200	300	0	-29.3898	-164.009	-705.928	-55659.9	-73303.8	19897.8	96.1598	981.846	0	0	0	0	0	0	0	603	903	0
758	9	0	0	0	0	0	0	200	300	0	-28.3217	-164.161	-701.045	-56209.2	-72510.3	20309.8	96.5683	983.179	0	0	0	0	0	0	0	603	903	0
759	0	0	0	0	0	0	0	200	300	0	-27.2536	-163.093	-695.857	-56850.1	-72449.3	20035.2	95.8849	984.698	0	0	0	0	0	0	0	603	903	0
759	1	0	0	0	0	0	0	200	300	0	-26.7958	-164.619	-690.364	-55385.2	-71350.6	20126.7	96.6478	983.226	0	0	0	0	0	0	0	603	903	0
759	2	0	0	0	0	0	0	200	300	0	-27.2536	-163.551	-685.482	-56758.5	-71289.6	19806.3	96.0007	985.801	0	0	0	0	0	0	0	603	903	0
759	3	0	0	0	0	0	0	200	300	0	-27.5587	-162.941	-680.294	-56209.2	-70557.2	19394.3	96.2842	985.625	0	0	0	0	0	0	0	603	903	0
759	4	0	0	0	0	0	0	200	300	0	-26.1855	-163.246	-674.8	-55659.9	-69397.5	19577.4	97.1584	985.484	0	0	0	0	0	0	0	603	903	0
759	5	0	0	0	0	0	0	200	300	0	-25.4225	-161.873	-669.002	-54927.5	-69702.7	19760.5	95.811	985.104	0	0	0	0	0	0	0	603	903	0
759	6	0	0	0	0	0	0	200	300	0	-26.0329	-161.415	-665.34	-55751.4	-68665.1	19211.2	96.797	986.794	0	0	0	0	0	0	0	603	903	0
759	7	0	0	0	0	0	0	200	300	0	-24.8122	-161.873	-657.405	-55476.8	-67993.7	19531.6	96.5726	987.387	0	0	0	0	0	0	0	603	903	0
759	8	0	0	0	0	0	0	200	300	0	-24.0492	-160.957	-653.133	-55019	-67749.6	19394.3	96.2699	987.239	0	0	0	0	0	0	0	603	903	0
759	9	0	0	0	0	0	0	200	300	0	-21.4552	-160.652	-646.724	-55293.7	-66345.8	19028.1	97.4126	988.498	0	0	0	0	0	0	0	603	903	0
760	0	0	0	0	0	0	0	200	300	0	-23.5915	-160.499	-639.705	-55019	-66467.8	19073.9	96.0961	989.007	0	0	0	0	0	0	0	603	903	0
760	1	0	0	0	0	0	0	200	300	0	-22.2182	-159.279	-635.433	-54103.5	-65857.5	19028.1	96.3581	988.144	0	0	0	0	0	0	0	603	903	0
760	2	0	0	0	0	0	0	200	300	0	-21.6078	-158.973	-629.94	-54469.7	-64453.7	18936.5	97.6828	989.468	0	0	0	0	0	0	0	603	903	0
760	3	0	0	0	0	0	0	200	300	0	-21.913	-158.058	-622.615	-53920.4	-64514.7	18845	96.3811	989.603	0	0	0	0	0	0	0	603	903	0
760	4	0	0	0	0	0	0	200	300	0	-20.9975	-157.753	-616.512	-53737.3	-63904.3	18936.5	96.3453	990.163	0	0	0	0	0	0	0	603	903	0
760	5	0	0	0	0	0	0	200	300	0	-19.319	-156.99	-609.493	-53187.9	-62439.5	18387.2	97.555	990.266	0	0	0	0	0	0	0	603	903	0
760	6	0	0	0	0	0	0	200	300	0	-18.5561	-155.922	-600.948	-53462.6	-62378.5	18066.8	96.1999	991.964	0	0	0	0	0	0	0	603	903	0
760	7	0	0	0	0	0	0	200	300	0	-19.6242	-155.464	-597.286	-53279.5	-61157.8	18112.6	97.6072	992.203	0	0	0	0	0	0	0	603	903	0
760	8	0	0	0	0	0	0	200	300	0	-18.2509	-155.006	-589.961	-51631.6	-60181.2	18295.7	97.9913	990.517	0	0	0	0	0	0	0	603	903	0
760	9	0	0	0	0	0	0	200	300	0	-17.1828	-153.48	-584.468	-52547.1	-60181.2	18158.3	97.0326	992.906	0	0	0	0	0	0	0	603	903	0
761	0	0	0	0	0	0	0	200	300	0	-17.4879	-153.175	-577.144	-52547.1	-59387.7	17837.9	97.1007	994.047	0	0	0	0	0	0	0	603	903	0
761	1	0	0	0	0	0	0	200	300	0	-17.1828	-151.954	-569.21	-52180.9	-58838.4	17563.3	96.6313	994.673	0	0	0	0	0	0	0	603	903	0
761	2	0	0	0	0	0	0	200	300	0	-13.6732	-150.276	-563.716	-51265.3	-58228.1	17197	96.7068	993.942	0	0	0	0	0	0	0	603	903	0
761	3	0	0	0	0	0	0	200	300	0	-16.5724	-150.581	-557.308	-51356.9	-56763.2	17288.6	98.1474	995.152	0	0	0	0	0	0	0	603	903	0
761	4	0	0	0	0	0	0	200	300	0	-15.6569	-148.903	-551.815	-50258.3	-56763.2	17059.7	97.1335	994.078	0	0	0	0	0	0	0	603	903	0
761	5	0	0	0	0	0	0	200	300	0	-13.0629	-148.292	-543.27	-50166.7	-55725.6	17013.9	97.4255	995.342	0	0	0	0	0	0	0	603	903	0
761	6	0	0	0	0	0	0	200	300	0	-12.4525	-146.156	-535.64	-50532.9	-54749.1	17151.3	97.7876	997.341	0	0	0	0	0	0	0	603	903	0
761	7	0	0	0	0	0	0	200	300	0	-13.3681	-145.393	-529.842	-50075.2	-54382.9	16876.6	97.3602	997.51	0	0	0	0	0	0	0	603	903	0
761	8	0	0	0	0	0	0	200	300	0	-11.537	-144.02	-522.212	-48976.5	-53101.1	16601.9	98.3151	996.787	0	0	0	0	0	0	0	603	903	0
761	9	0	0	0	0	0	0	200	300	0	-11.2318	-142.036	-513.973	-48061	-53101.1	16281.5	96.6849	996.509	0	0	0	0	0	0	0	603	903	0
762	0	0	0	0	0	0	0	200	300	0	-11.8422	-141.273	-508.785	-49068.1	-51819.4	16190	98.1507	999.442	0	0	0	0	0	0	0	603	903	0
762	1	0	0	0	0	0	0	200	300	0	-10.3163	-140.358	-500.24	-47969.4	-51087	15869.5	97.8751	998.893	0	0	0	0	0	0	0	603	903	0
762	2	0	0	0	0	0	0	200	300	0	-9.09561	-138.527	-494.441	-47694.8	-50598.7	15961.1	97.665	999.462	0	0	0	0	0	0	0	603	903	0
762	3	0	0	0	0	0	0	200	300	0	-10.4689	-138.679	-485.286	-46687.7	-49072.8	15869.5	98.8786	999.207	0	0	0	0	0	0	0	603	903	0
762	4	0	0	0	0	0	0	200	300	0	-9.2482	-135.933	-478.572	-46596.1	-48889.7	15640.6	97.8426	1000.36	0	0	0	0	0	0	0	603	903	0
762	5	0	0	0	0	0	0	200	300	0	-5.4335	-133.949	-470.943	-45863.7	-48462.5	15320.2	97.0949	1000.39	0	0	0	0	0	0	0	603	903	0
762	6	0	0	0	0	0	0	200	300	0	-7.56973	-133.186	-463.314	-45680.6	-46936.6	15091.3	98.6937	1001.6	0	0	0	0	0	0	0	603	903	0
762	7	0	0	0	0	0	0	200	300	0	-6.80679	-130.287	-456.905	-45406	-46570.4	14816.7	98.0743	1002.38	0	0	0	0	0	0	0	603	903	0
762	8	0	0	0	0	0	0	200	300	0	-3.75503	-130.745	-450.191	-44856.7	-45410.7	14679.3	99.1302	1002.64	0	0	0	0	0	0	0	603	903	0
762	9	0	0	0	0	0	0	200	300	0	-6.6542	-128.456	-438.594	-43941.1	-45105.5	14404.7	97.1589	1003.19	0	0	0	0	0	0	0	603	903	0
763	0	0	0	0	0	0	0	200	300	0	-5.58609	-126.472	-434.932	-43666.5	-44373.1	14038.5	97.977	1003.4	0	0	0	0	0	0	0	603	903	0
763	1	0	0	0	0	0	0	200	300	0	-4.2128	-125.099	-426.082	-42934	-43213.4	13946.9	98.5796	1003.76	0	0	0	0	0	0	0	603	903	0
763	2	0	0	0	0	0	0	200	300	0	-4.06021	-123.268	-419.368	-43117.1	-42969.3	13672.3	97.538	1005.81	0	0	0	0	0	0	0	603	903	0
763	3	0	0	0	0	0	0	200	300	0	-3.90762	-122.352	-411.434	-41835.4	-41443.4	13580.7	99.2707	1004.68	0	0	0	0	0	0	0	603	903	0
763	4	0	0	0	0	0	0	200	300	0	-2.22916	-120.216	-402.278	-41652.3	-40711	13580.7	98.799	1006.54	0	0	0	0	0	0	0	603	903	0
763	5	0	0	0	0	0	0	200	300	0	-2.53433	-117.622	-395.87	-41652.3	-39856.5	13168.7	99.3192	1008.22	0	0	0	0	0	0	0	603	903	0
763	6	0	0	0	0	0	0	200	300	0	-2.83951	-114.265	-387.325	-40645.2	-39185.1	12527.8	98.8314	1007.94	0	0	0	0	0	0	0	603	903	0
763	7	0	0	0	0	0	0	200	300	0	-1.31363	-114.265	-380.001	-40279	-38696.8	12344.7	98.1664	1009	0	0	0	0	0	0	0	603	903	0
763	8	0	0	0	0	0	0	200	300	0	-0.398101	-113.197	-373.287	-40004.4	-38208.5	12482.1	97.6429	1010.17	0	0	0	0	0	0	0	603	903	0
763	9	0	0	0	0	0	0	200	300	0	0.0596623	-111.366	-364.742	-39546.6	-36865.8	12115.9	98.9264	1011.42	0	0	0	0	0	0	0	603	903	0
764	0	0	0	0	0	0	0	200	300	0	0.21225	-109.23	-358.638	-38814.2	-36621.6	12024.3	97.887	1011.23	0	0	0	0	0	0	0	603	903	0
764	1	0	0	0	0	0	0	200	300	0	0.822602	-109.077	-351.619	-38631.1	-35706.1	11429.2	98.4524	1012.87	0	0	0	0	0	0	0	603	903	0
764	2	0	0	0	0	0	0	200	300	0	-0.398101	-105.11	-342.159	-37624	-34363.3	11291.9	99.569	1012.96	0	0	0	0	0	0	0	603	903	0
764	3	0	0	0	0	0	0	200	300	0	0.21225	-102.974	-336.666	-36616.9	-33936.1	11063	99.1994	1011.76	0	0	0	0	0	0	0	603	903	0
764	4	0	0	0	0	0	0	200	300	0	1.73813	-102.516	-329.341	-35609.8	-33264.7	10696.8	98.9963	1011.12	0	0	0	0	0	0	0	603	903	0
764	5	0	0	0	0	0	0	200	300	0	2.19589	-98.8538	-322.017	-36342.2	-32715.4	10422.1	98.4049	1015.86	0	0	0	0	0	0	0	603	903	0
764	6	0	0	0	0	0	0	200	300	0	1.43295	-98.0908	-315.303	-35426.7	-32227.1	10284.8	97.7902	1015.36	0	0	0	0	0	0	0	603	903	0
764	7	0	0	0	0	0	0	200	300	0	3.87436	-96.2598	-306.453	-34419.6	-30823.3	10101.7	99.4193	1015.32	0	0	0	0	0	0	0	603	903	0
764	8	0	0	0	0	0	0	200	300	0	1.58554	-93.208	-300.044	-32863.2	-30640.2	9598.16	97.8812	1012.53	0	0	0	0	0	0	0	603	903	0
764	9	0	0	0	0	0	0	200	300	0	1.43295	-91.5295	-291.805	-32954.8	-29785.7	9689.71	97.926	1015.93	0	0	0	0	0	0	0	603	903	0
765	0	0	0	0	0	0	0	200	300	0	2.34848	-89.2407	-285.396	-32680.1	-28748.1	9186.17	99.2695	1017.51	0	0	0	0	0	0	0	603	903	0
765	1	0	0	0	0	0	0	200	300	0	2.50107	-86.9519	-274.715	-32771.7	-28687.1	9140.4	95.5752	1022.29	0	0	0	0	0	0	0	603	903	0
765	2	0	0	0	0	0	0	200	300	0	2.0433	-85.5786	-270.442	-31581.5	-27283.2	8957.29	99.1163	1019.78	0	0	0	0	0	0	0	603	903	0
765	3	0	0	0	0	0	0	200	300	0	2.50107	-82.6794	-261.898	-30666	-26306.7	8591.08	99.5535	1020.09	0	0	0	0	0	0	0	603	903	0
765	4	0	0	0	0	0	0	200	300	0	2.34848	-83.2898	-256.404	-30116.7	-25452.2	8270.65	100.734	1020.46	0	0	0	0	0	0	0	603	903	0
765	5	0	0	0	0	0	0	200	300	0	2.80624	-82.2217	-248.775	-29750.4	-25269.1	7995.99	98.4259	1022.59	0	0	0	0	0	0	0	603	903	0
765	6	0	0	0	0	0	0	200	300	0	4.33212	-78.7122	-243.892	-29018	-24719.8	7767.11	98.6447	1021.98	0	0	0	0	0	0	0	603	903	0
765	7	0	0	0	0	0	0	200	300	0	4.6373	-77.1863	-236.263	-28560.3	-24536.7	7767.11	96.1467	1023.88	0	0	0	0	0	0	0	603	903	0
765	8	0	0	0	0	0	0	200	300	0	6.46835	-75.3552	-229.854	-27736.3	-23377	7492.45	98.2963	1023.67	0	0	0	0	0	0	0	603	903	0
765	9	0	0	0	0	0	0	200	300	0	3.87436	-73.0664	-222.835	-26820.8	-22827.7	7217.79	97.5579	1023.36	0	0	0	0	0	0	0	603	903	0
766	0	0	0	0	0	0	0	200	300	0	4.48471	-70.625	-216.121	-26637.7	-22522.5	6805.8	95.7876	1026.25	0	0	0	0	0	0	0	603	903	0
766	1	0	0	0	0	0	0	200	300	0	4.02695	-67.7258	-209.712	-26179.9	-21607	6714.25	96.9686	1027.84	0	0	0	0	0	0	0	603	903	0
766	2	0	0	0	0	0	0	200	300	0	3.72177	-67.1155	-205.44	-25081.3	-21179.7	6576.92	96.9055	1025.09	0	0	0	0	0	0	0	603	903	0
766	3	0	0	0	0	0	0	200	300	0	4.17954	-64.5215	-197.505	-24531.9	-20142.1	6119.16	98.0173	1027.21	0	0	0	0	0	0	0	603	903	0
766	4	0	0	0	0	0	0	200	300	0	3.4166	-62.9956	-193.538	-24348.8	-19592.8	6164.93	98.7651	1028.81	0	0	0	0	0	0	0	603	903	0
766	5	0	0	0	0	0	0	200	300	0	3.87436	-61.6223	-185.604	-23158.7	-19287.6	5798.72	96.0815	1027.77	0	0	0	0	0	0	0	603	903	0
766	6	0	0	0	0	0	0	200	300	0	3.87436	-59.1809	-179.805	-22700.9	-18372.1	5569.84	97.8221	1029.25	0	0	0	0	0	0	0	603	903	0
766	7	0	0	0	0	0	0	200	300	0	2.19589	-58.1128	-175.228	-22334.7	-18250	5661.39	95.8495	1030.46	0	0	0	0	0	0	0	603	903	0
766	8	0	0	0	0	0	0	200	300	0	3.26401	-56.8921	-170.04	-21327.6	-17761.8	5569.84	95.5434	1028.43	0	0	0	0	0	0	0	603	903	0
766	9	0	0	0	0	0	0	200	300	0	5.40024	-54.6033	-166.072	-20961.4	-16724.2	5020.52	99.2959	1029.22	0	0	0	0	0	0	0	603	903	0
767	0	0	0	0	0	0	0	200	300	0	3.56918	-52.3145	-159.053	-20869.8	-16663.1	5157.85	95.2355	1034.21	0	0	0	0	0	0	0	603	903	0
767	1	0	0	0	0	0	0	200	300	0	3.26401	-50.9412	-152.645	-19954.3	-15503.5	4745.87	98.4342	1033.72	0	0	0	0	0	0	0	603	903	0
767	2	0	0	0	0	0	0	200	300	0	3.4166	-49.1101	-144.71	-18855.7	-15442.4	4425.43	93.2871	1033.3	0	0	0	0	0	0	0	603	903	0
767	3	0	0	0	0	0	0	200	300	0	2.95883	-47.8894	-141.353	-18489.5	-15015.2	4654.31	93.7753	1033.8	0	0	0	0	0	0	0	603	903	0
767	4	0	0	0	0	0	0	200	300	0	2.34848	-45.1428	-138.912	-18031.7	-14160.7	4516.98	98.0598	1032.81	0	0	0	0	0	0	0	603	903	0
767	5	0	0	0	0	0	0	200	300	0	3.72177	-44.2273	-132.503	-16566.9	-14160.7	3967.67	93.1293	1028.03	0	0	0	0	0	0	0	603	903	0
767	6	0	0	0	0	0	0	200	300	0	3.11142	-42.3962	-126.094	-16658.4	-13428.3	4105	93.5061	1035.11	0	0	0	0	0	0	0	603	903	0
767	7	0	0	0	0	0	0	200	300	0	1.43295	-42.0911	-123.653	-16292.2	-12756.9	4150.77	96.8331	1034.76	0	0	0	0	0	0	0	603	903	0
767	8	0	0	0	0	0	0	200	300	0	3.87436	-41.4807	-119.075	-15102	-12390.7	4059.22	95.9425	1029.83	0	0	0	0	0	0	0	603	903	0
767	9	0	0	0	0	0	0	200	300	0	2.0433	-39.4971	-111.141	-14827.4	-11902.4	3693.01	92.907	1036.41	0	0	0	0	0	0	0	603	903	0
768	0	0	0	0	0	0	0	200	300	0	0.670014	-39.8022	-106.258	-14369.6	-11108.9	3738.78	95.4531	1038.23	0	0	0	0	0	0	0	603	903	0
768	1	0	0	0	0	0	0	200	300	0	1.73813	-38.5815	-103.511	-13637.2	-11414.1	4150.77	89.7308	1034.75	0	0	0	0	0	0	0	603	903	0
768	2	0	0	0	0	0	0	200	300	0	3.87436	-36.9031	-98.3233	-12996.3	-10132.4	3555.68	96.9484	1035.18	0	0	0	0	0	0	0	603	903	0
768	3	0	0	0	0	0	0	200	300	0	0.0596623	-35.072	-94.356	-12447	-9583.05	3601.46	98.4373	1034.92	0	0	0	0	0	0	0	603	903	0
768	4	0	0	0	0	0	0	200	300	0	0.364838	-32.1729	-87.6421	-11989.2	-9705.12	3189.47	89.2642	1039.8	0	0	0	0	0	0	0	603	903	0
768	5	0	0	0	0	0	0	200	300	0	1.58554	-30.647	-87.0318	-11165.2	-9094.77	2960.59	95.5006	1031.29	0	0	0	0	0	0	0	603	903	0
768	6	0	0	0	0	0	0	200	300	0	0.822602	-29.884	-82.4542	-11348.3	-8972.7	3189.47	91.1795	1040.63	0	0	0	0	0	0	0	603	903	0
768	7	0	0	0	0	0	0	200	300	0	0.670014	-27.9004	-79.7076	-11073.7	-8667.52	2914.81	91.2585	1041.93	0	0	0	0	0	0	0	603	903	0
768	8	0	0	0	0	0	0	200	300	0	1.58554	-27.29	-77.2662	-10066.6	-7874.07	2823.26	98.0917	1033.28	0	0	0	0	0	0	0	603	903	0
768	9	0	0	0	0	0	0	200	300	0	0.822602	-27.4426	-72.9937	-9425.74	-7996.14	2869.03	90.4544	1032.13	0	0	0	0	0	0	0	603	903	0
769	0	0	0	0	0	0	0	200	300	0	-1.31363	-25.3064	-68.7212	-9700.4	-7019.58	2685.93	97.8544	1044.16	0	0	0	0	0	0	0	603	903	0
769	1	0	0	0	0	0	0	200	300	0	-0.855865	-24.3909	-65.6695	-8510.21	-6775.43	2502.82	96.8252	1032.59	0	0	0	0	0	0	0	603	903	0
769	2	0	0	0	0	0	0	200	300	0	0.21225	-24.5435	-61.397	-7960.9	-6592.33	2685.93	92.6279	1032.66	0	0	0	0	0	0	0	603	903	0
769	3	0	0	0	0	0	0	200	300	0	0.21225	-23.4753	-54.6832	-7869.34	-5798.87	2640.15	93.9551	1046.91	0	0	0	0	0	0	0	603	903	0
769	4	0	0	0	0	0	0	200	300	0	-1.00845	-21.7969	-54.0728	-7777.79	-6043.01	2365.49	88.243	1046.84	0	0	0	0	0	0	0	603	903	0
769	5	0	0	0	0	0	0	200	300	0	-0.0929256	-20.271	-50.4107	-6862.26	-5432.66	1999.28	92.232	1039.13	0	0	0	0	0	0	0	603	903	0
769	6	0	0	0	0	0	0	200	300	0	0.0596623	-19.0503	-48.2745	-6862.26	-5005.42	1770.4	96.3134	1045.15	0	0	0	0	0	0	0	603	903	0
769	7	0	0	0	0	0	0	200	300	0	1.28037	-17.5244	-42.4761	-6404.5	-4883.34	1907.73	85.0332	1053.78	0	0	0	0	0	0	0	603	903	0
769	8	0	0	0	0	0	0	200	300	0	-0.398101	-16.3037	-43.3917	-5580.52	-4761.27	1953.51	90.2721	1031.61	0	0	0	0	0	0	0	603	903	0
769	9	0	0	0	0	0	0	200	300	0	-0.550689	-16.1511	-39.7295	-5946.73	-3967.82	1678.85	100.129	1052.68	0	0	0	0	0	0	0	603	903	0
770	0	0	0	0	0	0	0	200	300	0	-0.855865	-15.3882	-37.5933	-5763.63	-4028.85	2136.61	92.8306	1056.32	0	0	0	0	0	0	0	603	903	0
770	1	0	0	0	0	0	0	200	300	0	0.21225	-14.3201	-33.626	-5122.76	-3540.57	1587.3	94.7074	1055.35	0	0	0	0	0	0	0	603	903	0
770	2	0	0	0	0	0	0	200	300	0	-1.00845	-14.0149	-30.8794	-4848.1	-3052.29	1404.19	101.155	1060	0	0	0	0	0	0	0	603	903	0
770	3	0	0	0	0	0	0	200	300	0	-1.92398	-12.9468	-28.7432	-4024.13	-2930.22	1404.19	98.0553	1043	0	0	0	0	0	0	0	603	903	0
770	4	0	0	0	0	0	0	200	300	0	-1.00845	-11.8787	-28.438	-3566.36	-2808.15	1587.3	101.254	1028.41	0	0	0	0	0	0	0	603	903	0
770	5	0	0	0	0	0	0	200	300	0	-0.398101	-10.5054	-23.8604	-3383.26	-2625.04	1221.09	89.9833	1044.79	0	0	0	0	0	0	0	603	903	0
770	6	0	0	0	0	0	0	200	300	0	-1.77139	-9.74243	-22.3345	-3566.36	-2136.76	1358.41	104.329	1062.68	0	0	0	0	0	0	0	603	903	0
770	7	0	0	0	0	0	0	200	300	0	-2.38174	-9.89502	-18.9776	-2742.39	-1892.62	1587.3	100.271	1047.51	0	0	0	0	0	0	0	603	903	0
770	8	0	0	0	0	0	0	200	300	0	0	0	0	0	0	0	200	903	0	0	0	0	0	0	0	603	903	0
770	9	0	0	0	0	0	0	200	300	0	0	0	0	0	0	0	200	903	0	0	0	0	0	0	0	603	903	0
771	0	0	0	0	0	0	0	200	300	0	0	0	0	0	0	0	200	903	0	0	0	0	0	0	0	603	903	0
771	1	0	0	0	0	0	0	200	300	0	0	0	0	0	0	0	200	903	0	0	0	0	0	0	0	603	903	0
771	2	0	0	0	0	0	0	200	300	0	0	0	0	0	0	0	200	903	0	0	0	0	0	0	0	603	903	0
771	3	0	0	0	0	0	0	200	300	0	0	0	0	0	0	0	200	903	0	0	0	0	0	0	0	603	903	0
771	4	0	0	0	0	0	0	200	300	0	0	0	0	0	0	0	200	903	0	0	0	0	0	0	0	603	903	0
771	5	0	0	0	0	0	0	200	300	0	0	0	0	0	0	0	200	903	0	0	0	0	0	0	0	603	903	0
771	6	0	0	0	0	0	0	200	300	0	0	0	0	0	0	0	200	903	0	0	0	0	0	0	0	603	903	0
771	7	0	0	0	0	0	0	200	300	0	0	0	0	0	0	0	200	903	0	0	0	0	0	0	0	603	903	0
771	8	0	0	0	0	0	0	200	300	0	0	0	0	0	0	0	200	903	0	0	0	0	0	0	0	603	903	0
771	9	0	0	0	0	0	0	200	300	0	0	0	0	0	0	0	200	903	0	0	0	0	0	0	0	603	903	0
772	0	0	0	0	0	0	0	200	300	0	0	0	0	0	0	0	200	903	0	0	0	0	0	0	0	603	903	0
772	1	0	0	0	0	0	0	200	300	0	0	0	0	0	0	0	200	903	0	0	0	0	0	0	0	603	903	0
772	2	0	0	0	0	0	0	200	300	0	0	0	0	0	0	0	200	903	0	0	0	0	0	0	0	603	903	0
772	3	0	0	0	0	0	0	200	300	0	0	0	0	0	0	0	200	903	0	0	0	0	0	0	0	603	903	0
772	4	0	0	0	0	0	0	200	300	0	0	0	0	0	0	0	200	903	0	0	0	0	0	0	0	603	903	0
772	5	0	0	0	0	0	0	200	300	0	0	0	0	0	0	0	200	903	0	0	0	0	0	0	0	603	903	0
772	6	0	0	0	0	0	0	200	300	0	0	0	0	0	0	0	200	903	0	0	0	0	0	0	0	603	903	0
772	7	0	0	0	0	0	0	200	300	0	0	0	0	0	0	0	200	903	0	0	0	0	0	0	0	603	903	0
772	8	0	0	0	0	0	0	200	300	0	0	0	0	0	0	0	200	903	0	0	0	0	0	0	0	603	903	0
772	9	0	0	0	0	0	0	200	300	0	0	0	0	0	0	0	200	903	0	0	0	0	0	0	0	603	903	0
773	0	0	0	0	0	0	0	200	300	0	0	0	0	0	0	0	200	903	0	0	0	0	0	0	0	603	903	0
773	1	0	0	0	0	0	0	200	300	0	0	0	0	0	0	0	200	903	0	0	0	0	0	0	0	603	903	0
773	2	0	0	0	0	0	0	200	300	0	0	0	0	0	0	0	200	903	0	0	0	0	0	0	0	603	903	0
773	3	0	0	0	0	0	0	200	300	0	0	0	0	0	0	0	200	903	0	0	0	0	0	0	0	603	903	0
773	4	0	0	0	0	0	0	200	300	0	0	0	0	0	0	0	200	903	0	0	0	0	0	0	0	603	903	0
773	5	0	0	0	0	0	0	200	300	0	0	0	0	0	0	0	200	903	0	0	0	0	0	0	0	603	903	0
773	6	0	0	0	0	0	0	200	300	0	0	0	0	0	0	0	200	903	0	0	0	0	0	0	0	603	903	0
773	7	0	0	0	0	0	0	200	300	0	0	0	0	0	0	0	200	903	0	0	0	0	0	0	0	603	903	0
773	8	0	0	0	0	0	0	200	300	0	0	0	0	0	0	0	200	903	0	0	0	0	0	0	0	603	903	0
773	9	0	0	0	0	0	0	200	300	0	0	0	0	0	0	0	200	903	0	0	0	0	0	0	0	603	903	0
774	0	0	0	0	0	0	0	200	300	0	0	0	0	0	0	0	200	903	0	0	0	0	0	0	0	603	903	0
774	1	0	0	0	0	0	0	200	300	0	0	0	0	0	0	0	200	903	0	0	0	0	0	0	0	603	903	0
774	2	0	0	0	0	0	0	200	300	0	0	0	0	0	0	0	200	903	0	0	0	0	0	0	0	603	903	0
774	3	0	0	0	0	0	0	200	300	0	0	0	0	0	0	0	200	903	0	0	0	0	0	0	0	603	903	0
774	4	0	0	0	0	0	0	200	300	0	0	0	0	0	0	0	200	903	0	0	0	0	0	0	0	603	903	0
774	5	0	0	0	0	0	0	200	300	0	0	0	0	0	0	0	200	903	0	0	0	0	0	0	0	603	903	0
774	6	0	0	0	0	0	0	200	300	0	0	0	0	0	0	0	200	903	0	0	0	0	0	0	0	603	903	0
774	7	0	0	0	0	0	0	200	300	0	0	0	0	0	0	0	200	903	0	0	0	0	0	0	0	603	903	0
774	8	0	0	0	0	0	0	200	300	0	0	0	0	0	0	0	200	903	0	0	0	0	0	0	0	603	903	0
774	9	0	0	0	0	0	0	200	300	0	0	0	0	0	0	0	200	903	0	0	0	0	0	0	0	603	903	0
775	0	0	0	0	0	0	0	200	300	0	0	0	0	0	0	0	200	903	0	0	0	0	0	0	0	603	903	0
775	1	0	0	0	0	0	0	200	300	0	0	0	0	0	0	0	200	903	0	0	0	0	0	0	0	603	903	0
775	2	0	0	0	0	0	0	200	300	0	0	0	0	0	0	0	200	903	0	0	0	0	0	0	0	603	903	0
775	3	0	0	0	0	0	0	200	300	0	0	0	0	0	0	0	200	903	0	0	0	0	0	0	0	603	903	0
775	4	0	0	0	0	0	0	200	300	0	0	0	0	0	0	0	200	903	0	0	0	0	0	0	0	603	903	0
775	5	0	0	0	0	0	0	200	300	0	0	0	0	0	0	0	200	903	0	0	0	0	0	0	0	603	903	0
775	6	0	0	0	0	0	0	200	300	0	0	0	0	0	0	0	200	903	0	0	0	0	0	0	0	603	903	0
775	7	0	0	0	0	0	0	200	300	0	0	0	0	0	0	0	200	903	0	0	0	0	0	0	0	603	903	0
775	8	0	0	0	0	0	0	200	300	0	0	0	0	0	0	0	200	903	0	0	0	0	0	0	0	603	903	0
775	9	0	0	0	0	0	0	200	300	0	0	0	0	0	0	0	200	903	0	0	0	0	0	0	0	603	903	0
776	0	0	0	0	0	0	0	200	300	0	0	0	0	0	0	0	200	903	0	0	0	0	0	0	0	603	903	0
776	1	0	0	0	0	0	0	200	300	0	0	0	0	0	0	0	200	903	0	0	0	0	0	0	0	603	903	0
776	2	0	0	0	0	0	0	200	300	0	0	0	0	0	0	0	200	903	0	0	0	0	0	0	0	603	903	0
776	3	0	0	0	0	0	0	200	300	0	0	0	0	0	0	0	200	903	0	0	0	0	0	0	0	603	903	0
776	4	0	0	0	0	0	0	200	300	0	0	0	0	0	0	0	200	903	0	0	0	0	0	0	0	603	903	0
776	5	0	0	0	0	0	0	200	300	0	0	0	0	0	0	0	200	903	0	0	0	0	0	0	0	603	903	0
776	6	0	0	0	0	0	0	200	300	0	0	0	0	0	0	0	200	903	0	0	0	0	0	0	0	603	903	0
776	7	0	0	0	0	0	0	200	300	0	0	0	0	0	0	0	200	903	0	0	0	0	0	0	0	603	903	0
776	8	0	0	0	0	0	0	200	300	0	0	0	0	0	0	0	200	903	0	0	0	0	0	0	0	603	903	0
776	9	0	0	0	0	0	0	200	300	0	0	0	0	0	0	0	200	903	0	0	0	0	0	0	0	603	903	0
777	0	0	0	0	0	0	0	200	300	0	0	0	0	0	0	0	200	903	0	0	0	0	0	0	0	603	903	0
777	1	0	0	0	0	0	0	200	300	0	0	0	0	0	0	0	200	903	0	0	0	0	0	0	0	603	903	0
777	2	0	0	0	0	0	0	200	300	0	0	0	0	0	0	0	200	903	0	0	0	0	0	0	0	603	903	0
777	3	0	0	0	0	0	0	200	300	0	0	0	0	0	0	0	200	903	0	0	0	0	0	0	0	603	903	0
777	4	0	0	0	0	0	0	200	300	0	0	0	0	0	0	0	200	903	0	0	0	0	0	0	0	603	903	0
777	5	0	0	0	0	0	0	200	300	0	0	0	0	0	0	0	200	903	0	0	0	0	0	0	0	603	903	0
777	6	0	0	0	0	0	0	200	300	0	0	0	0	0	0	0	200	903	0	0	0	0	0	0	0	603	903	0
777	7	0	0	0	0	0	0	200	300	0	0	0	0	0	0	0	200	903	0	0	0	0	0	0	0	603	903	0
777	8	0	0	0	0	0	0	200	300	0	0	0	0	0	0	0	200	903	0	0	0	0	0	0	0	603	903	0
777	9	0	0	0	0	0	0	200	300	0	0	0	0	0	0	0	200	903	0	0	0	0	0	0	0	603	903	0
778	0	0	0	0	0	0	0	200	300	0	0	0	0	0	0	0	200	903	0	0	0	0	0	0	0	603	903	0
778	1	0	0	0	0	0	0	200	300	0	0	0	0	0	0	0	200	903	0	0	0	0	0	0	0	603	903	0
778	2	0	0	0	0	0	0	200	300	0	0	0	0	0	0	0	200	903	0	0	0	0	0	0	0	603	903	0
778	3	0	0	0	0	0	0	200	300	0	0	0	0	0	0	0	200	903	0	0	0	0	0	0	0	603	903	0
778	4	0	0	0	0	0	0	200	300	0	0	0	0	0	0	0	200	903	0	0	0	0	0	0	0	603	903	0
778	5	0	0	0	0	0	0	200	300	0	0	0	0	0	0	0	200	903	0	0	0	0	0	0	0	603	903	0
778	6	0	0	0	0	0	0	200	300	0	0	0	0	0	0	0	200	903	0	0	0	0	0	0	0	603	903	0
778	7	0	0	0	0	0	0	200	300	0	0	0	0	0	0	0	200	903	0	0	0	0	0	0	0	603	903	0
778	8	0	0	0	0	0	0	200	300	0	0	0	0	0	0	0	200	903	0	0	0	0	0	0	0	603	903	0
778	9	0	0	0	0	0	0	200	300	0	0	0	0	0	0	0	200	903	0	0	0	0	0	0	0	603	903	0
779	0	0	0	0	0	0	0	200	300	0	0	0	0	0	0	0	200	903	0	0	0	0	0	0	0	603	903	0
779	1	0	0	0	0	0	0	200	300	0	0	0	0	0	0	0	200	903	0	0	0	0	0	0	0	603	903	0
779	2	0	0	0	0	0	0	200	300	0	0	0	0	0	0	0	200	903	0	0	0	0	0	0	0	603	903	0
779	3	0	0	0	0	0	0	200	300	0	0	0	0	0	0	0	200	903	0	0	0	0	0	0	0	603	903	0
779	4	0	0	0	0	0	0	200	300	0	0	0	0	0	0	0	200	903	0	0	0	0	0	0	0	603	903	0
779	5	0	0	0	0	0	0	200	300	0	0	0	0	0	0	0	200	903	0	0	0	0	0	0	0	603	903	0
779	6	0	0	0	0	0	0	200	300	0	0	0	0	0	0	0	200	903	0	0	0	0	0	0	0	603	903	0
779	7	0	0	0	0	0	0	200	300	0	0	0	0	0	0	0	200	903	0	0	0	0	0	0	0	603	903	0
779	8	0	0	0	0	0	0	200	300	0	0	0	0	0	0	0	200	903	0	0	0	0	0	0	0	603	903	0
779	9	0	0	0	0	0	0	200	300	0	0	0	0	0	0	0	200	903	0	0	0	0	0	0	0	603	903	0
780	0	0	0	0	0	0	0	200	300	0	0	0	0	0	0	0	200	903	0	0	0	0	0	0	0	603	903	0
780	1	0	0	0	0	0	0	200	300	0	0	0	0	0	0	0	200	903	0	0	0	0	0	0	0	603	903	0
780	2	0	0	0	0	0	0	200	300	0	0	0	0	0	0	0	200	903	0	0	0	0	0	0	0	603	903	0
780	3	0	0	0	0	0	0	200	300	0	0	0	0	0	0	0	200	903	0	0	0	0	0	0	0	603	903	0
780	4	0	0	0	0	0	0	200	300	0	0	0	0	0	0	0	200	903	0	0	0	0	0	0	0	603	903	0
780	5	0	0	0	0	0	0	200	300	0	0	0	0	0	0	0	200	903	0	0	0	0	0	0	0	603	903	0
780	6	0	0	0	0	0	0	200	300	0	0	0	0	0	0	0	200	903	0	0	0	0	0	0	0	603	903	0
780	7	0	0	0	0	0	0	200	300	0	0	0	0	0	0	0	200	903	0	0	0	0	0	0	0	603	903	0
780	8	0	0	0	0	0	0	200	300	0	0	0	0	0	0	0	200	903	0	0	0	0	0	0	0	603	903	0
780	9	0	0	0	0	0	0	200	300	0	0	0	0	0	0	0	200	903	0	0	0	0	0	0	0	603	903	0
781	0	0	0	0	0	0	0	200	300	0	0	0	0	0	0	0	200	903	0	0	0	0	0	0	0	603	903	0
781	1	0	0	0	0	0	0	200	300	0	0	0	0	0	0	0	200	903	0	0	0	0	0	0	0	603	903	0
781	2	0	0	0	0	0	0	200	300	0	0	0	0	0	0	0	200	903	0	0	0	0	0	0	0	603	903	0
781	3	0	0	0	0	0	0	200	300	0	0	0	0	0	0	0	200	903	0	0	0	0	0	0	0	603	903	0
781	4	0	0	0	0	0	0	200	300	0	0	0	0	0	0	0	200	903	0	0	0	0	0	0	0	603	903	0
781	5	0	0	0	0	0	0	200	300	0	0	0	0	0	0	0	200	903	0	0	0	0	0	0	0	603	903	0
781	6	0	0	0	0	0	0	200	300	0	0	0	0	0	0	0	200	903	0	0	0	0	0	0	0	603	903	0
781	7	0	0	0	0	0	0	200	300	0	0	0	0	0	0	0	200	903	0	0	0	0	0	0	0	603	903	0
781	8	0	0	0	0	0	0	200	300	0	0	0	0	0	0	0	200	903	0	0	0	0	0	0	0	603	903	0
781	9	0	0	0	0	0	0	200	300	0	0	0	0	0	0	0	200	903	0	0	0	0	0	0	0	603	903	0
782	0	0	0	0	0	0	0	200	300	0	0	0	0	0	0	0	200	903	0	0	0	0	0	0	0	603	903	0
782	1	0	0	0	0	0	0	200	300	0	0	0	0	0	0	0	200	903	0	0	0	0	0	0	0	603	903	0
782	2	0	0	0	0	0	0	200	300	0	0	0	0	0	0	0	200	903	0	0	0	0	0	0	0	603	903	0
782	3	0	0	0	0	0	0	200	300	0	0	0	0	0	0	0	200	903	0	0	0	0	0	0	0	603	903	0
782	4	0	0	0	0	0	0	200	300	0	0	0	0	0	0	0	200	903	0	0	0	0	0	0	0	603	903	0
782	5	0	0	0	0	0	0	200	300	0	0	0	0	0	0	0	200	903	0	0	0	0	0	0	0	603	903	0
782	6	0	0	0	0	0	0	200	300	0	0	0	0	0	0	0	200	903	0	0	0	0	0	0	0	603	903	0
782	7	0	0	0	0	0	0	200	300	0	0	0	0	0	0	0	200	903	0	0	0	0	0	0	0	603	903	0
782	8	0	0	0	0	0	0	200	300	0	0	0	0	0	0	0	200	903	0	0	0	0	0	0	0	603	903	0
782	9	0	0	0	0	0	0	200	300	0	0	0	0	0	0	0	200	903	0	0	0	0	0	0	0	603	903	0
783	0	0	0	0	0	0	0	200	300	0	0	0	0	0	0	0	200	903	0	0	0	0	0	0	0	603	903	0
783	1	0	0	0	0	0	0	200	300	0	0	0	0	0	0	0	200	903	0	0	0	0	0	0	0	603	903	0
783	2	0	0	0	0	0	0	200	300	0	0	0	0	0	0	0	200	903	0	0	0	0	0	0	0	603	903	0
783	3	0	0	0	0	0	0	200	300	0	0	0	0	0	0	0	200	903	0	0	0	0	0	0	0	603	903	0
783	4	0	0	0	0	0	0	200	300	0	0	0	0	0	0	0	200	903	0	0	0	0	0	0	0	603	903	0
783	5	0	0	0	0	0	0	200	300	0	0	0	0	0	0	0	200	903	0	0	0	0	0	0	0	603	903	0
783	6	0	0	0	0	0	0	200	300	0	0	0	0	0	0	0	200	903	0	0	0	0	0	0	0	603	903	0
783	7	0	0	0	0	0	0	200	300	0	0	0	0	0	0	0	200	903	0	0	0	0	0	0	0	603	903	0
783	8	0	0	0	0	0	0	200	300	0	0	0	0	0	0	0	200	903	0	0	0	0	0	0	0	603	903	0
783	9	0	0	0	0	0	0	200	300	0	0	0	0	0	0	0	200	903	0	0	0	0	0	0	0	603	903	0
784	0	0	0	0	0	0	0	200	300	0	0	0	0	0	0	0	200	903	0	0	0	0	0	0	0	603	903	0
784	1	0	0	0	0	0	0	200	300	0	0	0	0	0	0	0	200	903	0	0	0	0	0	0	0	603	903	0
784	2	0	0	0	0	0	0	200	300	0	0	0	0	0	0	0	200	903	0	0	0	0	0	0	0	603	903	0
784	3	0	0	0	0	0	0	200	300	0	0	0	0	0	0	0	200	903	0	0	0	0	0	0	0	603	903	0
784	4	0	0	0	0	0	0	200	300	0	0	0	0	0	0	0	200	903	0	0	0	0	0	0	0	603	903	0
784	5	0	0	0	0	0	0	200	300	0	0	0	0	0	0	0	200	903	0	0	0	0	0	0	0	603	903	0
784	6	0	0	0	0	0	0	200	300	0	0	0	0	0	0	0	200	903	0	0	0	0	0	0	0	603	903	0
784	7	0	0	0	0	0	0	200	300	0	0	0	0	0	0	0	200	903	0	0	0	0	0	0	0	603	903	0
784	8	0	0	0	0	0	0	200	300	0	0	0	0	0	0	0	200	903	0	0	0	0	0	0	0	603	903	0
784	9	0	0	0	0	0	0	200	300	0	0	0	0	0	0	0	200	903	0	0	0	0	0	0	0	603	903	0
785	0	0	0	0	0	0	0	200	300	0	0	0	0	0	0	0	200	903	0	0	0	0	0	0	0	603	903	0
785	1	0	0	0	0	0	0	200	300	0	0	0	0	0	0	0	200	903	0	0	0	0	0	0	0	603	903	0
785	2	0	0	0	0	0	0	200	300	0	0	0	0	0	0	0	200	903	0	0	0	0	0	0	0	603	903	0
785	3	0	0	0	0	0	0	200	300	0	0	0	0	0	0	0	200	903	0	0	0	0	0	0	0	603	903	0
785	4	0	0	0	0	0	0	200	300	0	0	0	0	0	0	0	200	903	0	0	0	0	0	0	0	603	903	0
785	5	0	0	0	0	0	0	200	300	0	0	0	0	0	0	0	200	903	0	0	0	0	0	0	0	603	903	0
785	6	0	0	0	0	0	0	200	300	0	0	0	0	0	0	0	200	903	0	0	0	0	0	0	0	603	903	0
785	7	0	0	0	0	0	0	200	300	0	0	0	0	0	0	0	200	903	0	0	0	0	0	0	0	603	903	0
785	8	0	0	0	0	0	0	200	300	0	0	0	0	0	0	0	200	903	0	0	0	0	0	0	0	603	903	0
785	9	0	0	0	0	0	0	200	300	0	0	0	0	0	0	0	200	903	0	0	0	0	0	0	0	603	903	0
786	0	0	0	0	0	0	0	200	300	0	0	0	0	0	0	0	200	903	0	0	0	0	0	0	0	603	903	0
786	1	0	0	0	0	0	0	200	300	0	0	0	0	0	0	0	200	903	0	0	0	0	0	0	0	603	903	0
786	2	0	0	0	0	0	0	200	300	0	0	0	0	0	0	0	200	903	0	0	0	0	0	0	0	603	903	0
786	3	0	0	0	0	0	0	200	300	0	0	0	0	0	0	0	200	903	0	0	0	0	0	0	0	603	903	0
786	4	0	0	0	0	0	0	200	300	0	0	0	0	0	0	0	200	903	0	0	0	0	0	0	0	603	903	0
786	5	0	0	0	0	0	0	200	300	0	0	0	0	0	0	0	200	903	0	0	0	0	0	0	0	603	903	0
786	6	0	0	0	0	0	0	200	300	0	0	0	0	0	0	0	200	903	0	0	0	0	0	0	0	603	903	0
786	7	0	0	0	0	0	0	200	300	0	0	0	0	0	0	0	200	903	0	0	0	0	0	0	0	603	903	0
786	8	0	0	0	0	0	0	200	300	0	0	0	0	0	0	0	200	903	0	0	0	0	0	0	0	603	903	0
786	9	0	0	0	0	0	0	200	300	0	0	0	0	0	0	0	200	903	0	0	0	0	0	0	0	603	903	0
787	0	0	0	0	0	0	0	200	300	0	0	0	0	0	0	0	200	903	0	0	0	0	0	0	0	603	903	0
787	1	0	0	0	0	0	0	200	300	0	0	0	0	0	0	0	200	903	0	0	0	0	0	0	0	603	903	0
787	2	0	0	0	0	0	0	200	300	0	0	0	0	0	0	0	200	903	0	0	0	0	0	0	0	603	903	0
787	3	0	0	0	0	0	0	200	300	0	0	0	0	0	0	0	200	903	0	0	0	0	0	0	0	603	903	0
787	4	0	0	0	0	0	0	200	300	0	0	0	0	0	0	0	200	903	0	0	0	0	0	0	0	603	903	0
787	5	0	0	0	0	0	0	200	300	0	0	0	0	0	0	0	200	903	0	0	0	0	0	0	0	603	903	0
787	6	0	0	0	0	0	0	200	300	0	0	0	0	0	0	0	200	903	0	0	0	0	0	0	0	603	903	0
787	7	0	0	0	0	0	0	200	300	0	0	0	0	0	0	0	200	903	0	0	0	0	0	0	0	603	903	0
787	8	0	0	0	0	0	0	200	300	0	0	0	0	0	0	0	200	903	0	0	0	0	0	0	0	603	903	0
787	9	0	0	0	0	0	0	200	300	0	0	0	0	0	0	0	200	903	0	0	0	0	0	0	0	603	903	0
788	0	0	0	0	0	0	0	200	300	0	0	0	0	0	0	0	200	903	0	0	0	0	0	0	0	603	903	0
788	1	0	0	0	0	0	0	200	300	0	0	0	0	0	0	0	200	903	0	0	0	0	0	0	0	603	903	0
788	2	0	0	0	0	0	0	200	300	0	0	0	0	0	0	0	200	903	0	0	0	0	0	0	0	603	903	0
788	3	0	0	0	0	0	0	200	300	0	0	0	0	0	0	0	200	903	0	0	0	0	0	0	0	603	903	0
788	4	0	0	0	0	0	0	200	300	0	0	0	0	0	0	0	200	903	0	0	0	0	0	0	0	603	903	0
788	5	0	0	0	0	0	0	200	300	0	0	0	0	0	0	0	200	903	0	0	0	0	0	0	0	603	903	0
788	6	0	0	0	0	0	0	200	300	0	0	0	0	0	0	0	200	903	0	0	0	0	0	0	0	603	903	0
788	7	0	0	0	0	0	0	200	300	0	0	0	0	0	0	0	200	903	0	0	0	0	0	0	0	603	903	0
788	8	0	0	0	0	0	0	200	300	0	0	0	0	0	0	0	200	903	0	0	0	0	0	0	0	603	903	0
788	9	0	0	0	0	0	0	200	300	0	0	0	0	0	0	0	200	903	0	0	0	0	0	0	0	603	903	0
789	0	0	0	0	0	0	0	200	300	0	0	0	0	0	0	0	200	903	0	0	0	0	0	0	0	603	903	0
789	1	0	0	0	0	0	0	200	300	0	0	0	0	0	0	0	200	903	0	0	0	0	0	0	0	603	903	0
789	2	0	0	0	0	0	0	200	300	0	0	0	0	0	0	0	200	903	0	0	0	0	0	0	0	603	903	0
789	3	0	0	0	0	0	0	200	300	0	0	0	0	0	0	0	200	903	0	0	0	0	0	0	0	603	903	0
789	4	0	0	0	0	0	0	200	300	0	0	0	0	0	0	0	200	903	0	0	0	0	0	0	0	603	903	0
789	5	0	0	0	0	0	0	200	300	0	0	0	0	0	0	0	200	903	0	0	0	0	0	0	0	603	903	0
789	6	0	0	0	0	0	0	200	300	0	0	0	0	0	0	0	200	903	0	0	0	0	0	0	0	603	903	0
789	7	0	0	0	0	0	0	200	300	0	0	0	0	0	0	0	200	903	0	0	0	0	0	0	0	603	903	0
789	8	0	0	0	0	0	0	200	300	0	0	0	0	0	0	0	200	903	0	0	0	0	0	0	0	603	903	0
789	9	0	0	0	0	0	0	200	300	0	0	0	0	0	0	0	200	903	0	0	0	0	0	0	0	603	903	0
790	0	0	0	0	0	0	0	200	300	0	0	0	0	0	0	0	200	903	0	0	0	0	0	0	0	603	903	0
790	1	0	0	0	0	0	0	200	300	0	0	0	0	0	0	0	200	903	0	0	0	0	0	0	0	603	903	0
790	2	0	0	0	0	0	0	200	300	0	0	0	0	0	0	0	200	903	0	0	0	0	0	0	0	603	903	0
790	3	0	0	0	0	0	0	200	300	0	0	0	0	0	0	0	200	903	0	0	0	0	0	0	0	603	903	0
790	4	0	0	0	0	0	0	200	300	0	0	0	0	0	0	0	200	903	0	0	0	0	0	0	0	603	903	0
790	5	0	0	0	0	0	0	200	300	0	0	0	0	0	0	0	200	903	0	0	0	0	0	0	0	603	903	0
790	6	0	0	0	0	0	0	200	300	0	0	0	0	0	0	0	200	903	0	0	0	0	0	0	0	603	903	0
790	7	0	0	0	0	0	0	200	300	0	0	0	0	0	0	0	200	903	0	0	0	0	0	0	0	603	903	0
790	8	0	0	0	0	0	0	200	300	0	0	0	0	0	0	0	200	903	0	0	0	0	0	0	0	603	903	0
790	9	0	0	0	0	0	0	200	300	0	0	0	0	0	0	0	200	903	0	0	0	0	0	0	0	603	903	0
791	0	0	0	0	0	0	0	200	300	0	0	0	0	0	0	0	200	903	0	0	0	0	0	0	0	603	903	0
791	1	0	0	0	0	0	0	200	300	0	0	0	0	0	0	0	200	903	0	0	0	0	0	0	0	603	903	0
791	2	0	0	0	0	0	0	200	300	0	0	0	0	0	0	0	200	903	0	0	0	0	0	0	0	603	903	0
791	3	0	0	0	0	0	0	200	300	0	0	0	0	0	0	0	200	903	0	0	0	0	0	0	0	603	903	0
791	4	0	0	0	0	0	0	200	300	0	0	0	0	0	0	0	200	903	0	0	0	0	0	0	0	603	903	0
791	5	0	0	0	0	0	0	200	300	0	0	0	0	0	0	0	200	903	0	0	0	0	0	0	0	603	903	0
791	6	0	0	0	0	0	0	200	300	0	0	0	0	0	0	0	200	903	0	0	0	0	0	0	0	603	903	0
791	7	0	0	0	0	0	0	200	300	0	0	0	0	0	0	0	200	903	0	0	0	0	0	0	0	603	903	0
791	8	0	0	0	0	0	0	200	300	0	0	0	0	0	0	0	200	903	0	0	0	0	0	0	0	603	903	0
791	9	0	0	0	0	0	0	200	300	0	0	0	0	0	0	0	200	903	0	0	0	0	0	0	0	603	903	0
792	0	0	0	0	0	0	0	200	300	0	0	0	0	0	0	0	200	903	0	0	0	0	0	0	0	603	903	0
792	1	0	0	0	0	0	0	200	300	0	0	0	0	0	0	0	200	903	0	0	0	0	0	0	0	603	903	0
792	2	0	0	0	0	0	0	200	300	0	0	0	0	0	0	0	200	903	0	0	0	0	0	0	0	603	903	0
792	3	0	0	0	0	0	0	200	300	0	0	0	0	0	0	0	200	903	0	0	0	0	0	0	0	603	903	0
792	4	0	0	0	0	0	0	200	300	0	0	0	0	0	0	0	200	903	0	0	0	0	0	0	0	603	903	0
792	5	0	0	0	0	0	0	200	300	0	0	0	0	0	0	0	200	903	0	0	0	0	0	0	0	603	903	0
792	6	0	0	0	0	0	0	200	300	0	0	0	0	0	0	0	200	903	0	0	0	0	0	0	0	603	903	0
792	7	0	0	0	0	0	0	200	300	0	0	0	0	0	0	0	200	903	0	0	0	0	0	0	0	603	903	0
792	8	0	0	0	0	0	0	200	300	0	0	0	0	0	0	0	200	903	0	0	0	0	0	0	0	603	903	0
792	9	0	0	0	0	0	0	200	300	0	0	0	0	0	0	0	200	903	0	0	0	0	0	0	0	603	903	0
793	0	0	0	0	0	0	0	200	300	0	0	0	0	0	0	0	200	903	0	0	0	0	0	0	0	603	903	0
793	1	0	0	0	0	0	0	200	300	0	0	0	0	0	0	0	200	903	0	0	0	0	0	0	0	603	903	0
793	2	0	0	0	0	0	0	200	300	0	0	0	0	0	0	0	200	903	0	0	0	0	0	0	0	603	903	0
793	3	0	0	0	0	0	0	200	300	0	0	0	0	0	0	0	200	903	0	0	0	0	0	0	0	603	903	0
793	4	0	0	0	0	0	0	200	300	0	0	0	0	0	0	0	200	903	0	0	0	0	0	0	0	603	903	0
793	5	0	0	0	0	0	0	200	300	0	0	0	0	0	0	0	200	903	0	0	0	0	0	0	0	603	903	0
793	6	0	0	0	0	0	0	200	300	0	0	0	0	0	0	0	200	903	0	0	0	0	0	0	0	603	903	0
793	7	0	0	0	0	0	0	200	300	0	0	0	0	0	0	0	200	903	0	0	0	0	0	0	0	603	903	0
793	8	0	0	0	0	0	0	200	300	0	0	0	0	0	0	0	200	903	0	0	0	0	0	0	0	603	903	0
793	9	0	0	0	0	0	0	200	300	0	0	0	0	0	0	0	200	903	0	0	0	0	0	0	0	603	903	0
794	0	0	0	0	0	0	0	200	300	0	0	0	0	0	0	0	200	903	0	0	0	0	0	0	0	603	903	0
794	1	0	0	0	0	0	0	200	300	0	0	0	0	0	0	0	200	903	0	0	0	0	0	0	0	603	903	0
794	2	0	0	0	0	0	0	200	300	0	0	0	0	0	0	0	200	903	0	0	0	0	0	0	0	603	903	0
794	3	0	0	0	0	0	0	200	300	0	0	0	0	0	0	0	200	903	0	0	0	0	0	0	0	603	903	0
794	4	0	0	0	0	0	0	200	300	0	0	0	0	0	0	0	200	903	0	0	0	0	0	0	0	603	903	0
794	5	0	0	0	0	0	0	200	300	0	0	0	0	0	0	0	200	903	0	0	0	0	0	0	0	603	903	0
794	6	0	0	0	0	0	0	200	300	0	0	0	0	0	0	0	200	903	0	0	0	0	0	0	0	603	903	0
794	7	0	0	0	0	0	0	200	300	0	0	0	0	0	0	0	200	903	0	0	0	0	0	0	0	603	903	0
794	8	0	0	0	0	0	0	200	300	0	0	0	0	0	0	0	200	903	0	0	0	0	0	0	0	603	903	0
794	9	0	0	0	0	0	0	200	300	0	0	0	0	0	0	0	200	903	0	0	0	0	0	0	0	603	903	0
795	0	0	0	0	0	0	0	200	300	0	0	0	0	0	0	0	200	903	0	0	0	0	0	0	0	603	903	0
795	1	0	0	0	0	0	0	200	300	0	0	0	0	0	0	0	200	903	0	0	0	0	0	0	0	603	903	0
795	2	0	0	0	0	0	0	200	300	0	0	0	0	0	0	0	200	903	0	0	0	0	0	0	0	603	903	0
795	3	0	0	0	0	0	0	200	300	0	0	0	0	0	0	0	200	903	0	0	0	0	0	0	0	603	903	0
795	4	0	0	0	0	0	0	200	300	0	0	0	0	0	0	0	200	903	0	0	0	0	0	0	0	603	903	0
795	5	0	0	0	0	0	0	200	300	0	0	0	0	0	0	0	200	903	0	0	0	0	0	0	0	603	903	0
795	6	0	0	0	0	0	0	200	300	0	0	0	0	0	0	0	200	903	0	0	0	0	0	0	0	603	903	0
795	7	0	0	0	0	0	0	200	300	0	0	0	0	0	0	0	200	903	0	0	0	0	0	0	0	603	903	0
795	8	0	0	0	0	0	0	200	300	0	0	0	0	0	0	0	200	903	0	0	0	0	0	0	0	603	903	0
795	9	0	0	0	0	0	0	200	300	0	0	0	0	0	0	0	200	903	0	0	0	0	0	0	0	603	903	0
796	0	0	0	0	0	0	0	200	300	0	0	0	0	0	0	0	200	903	0	0	0	0	0	0	0	603	903	0
796	1	0	0	0	0	0	0	200	300	0	0	0	0	0	0	0	200	903	0	0	0	0	0	0	0	603	903	0
796	2	0	0	0	0	0	0	200	300	0	0	0	0	0	0	0	200	903	0	0	0	0	0	0	0	603	903	0
796	3	0	0	0	0	0	0	200	300	0	0	0	0	0	0	0	200	903	0	0	0	0	0	0	0	603	903	0
796	4	0	0	0	0	0	0	200	300	0	0	0	0	0	0	0	200	903	0	0	0	0	0	0	0	603	903	0
796	5	0	0	0	0	0	0	200	300	0	0	0	0	0	0	0	200	903	0	0	0	0	0	0	0	603	903	0
796	6	0	0	0	0	0	0	200	300	0	0	0	0	0	0	0	200	903	0	0	0	0	0	0	0	603	903	0
796	7	0	0	0	0	0	0	200	300	0	0	0	0	0	0	0	200	903	0	0	0	0	0	0	0	603	903	0
796	8	0	0	0	0	0	0	200	300	0	0	0	0	0	0	0	200	903	0	0	0	0	0	0	0	603	903	0
796	9	0	0	0	0	0	0	200	300	0	0	0	0	0	0	0	200	903	0	0	0	0	0	0	0	603	903	0
797	0	0	0	0	0	0	0	200	300	0	0	0	0	0	0	0	200	903	0	0	0	0	0	0	0	603	903	0
797	1	0	0	0	0	0	0	200	300	0	0	0	0	0	0	0	200	903	0	0	0	0	0	0	0	603	903	0
797	2	0	0	0	0	0	0	200	300	0	0	0	0	0	0	0	200	903	0	0	0	0	0	0	0	603	903	0
797	3	0	0	0	0	0	0	200	300	0	0	0	0	0	0	0	200	903	0	0	0	0	0	0	0	603	903	0
797	4	0	0	0	0	0	0	200	300	0	0	0	0	0	0	0	200	903	0	0	0	0	0	0	0	603	903	0
797	5	0	0	0	0	0	0	200	300	0	0	0	0	0	0	0	200	903	0	0	0	0	0	0	0	603	903	0
797	6	0	0	0	0	0	0	200	300	0	0	0	0	0	0	0	200	903	0	0	0	0	0	0	0	603	903	0
797	7	0	0	0	0	0	0	200	300	0	0	0	0	0	0	0	200	903	0	0	0	0	0	0	0	603	903	0
797	8	0	0	0	0	0	0	200	300	0	0	0	0	0	0	0	200	903	0	0	0	0	0	0	0	603	903	0
797	9	0	0	0	0	0	0	200	300	0	0	0	0	0	0	0	200	903	0	0	0	0	0	0	0	603	903	0
798	0	0	0	0	0	0	0	200	300	0	0	0	0	0	0	0	200	903	0	0	0	0	0	0	0	603	903	0
798	1	0	0	0	0	0	0	200	300	0	0	0	0	0	0	0	200	903	0	0	0	0	0	0	0	603	903	0
798	2	0	0	0	0	0	0	200	300	0	0	0	0	0	0	0	200	903	0	0	0	0	0	0	0	603	903	0
798	3	0	0	0	0	0	0	200	300	0	0	0	0	0	0	0	200	903	0	0	0	0	0	0	0	603	903	0
798	4	0	0	0	0	0	0	200	300	0	0	0	0	0	0	0	200	903	0	0	0	0	0	0	0	603	903	0
798	5	0	0	0	0	0	0	200	300	0	0	0	0	0	0	0	200	903	0	0	0	0	0	0	0	603	903	0
798	6	0	0	0	0	0	0	200	300	0	0	0	0	0	0	0	200	903	0	0	0	0	0	0	0	603	903	0
798	7	0	0	0	0	0	0	200	300	0	0	0	0	0	0	0	200	903	0	0	0	0	0	0	0	603	903	0
798	8	0	0	0	0	0	0	200	300	0	0	0	0	0	0	0	200	903	0	0	0	0	0	0	0	603	903	0
798	9	0	0	0	0	0	0	200	300	0	0	0	0	0	0	0	200	903	0	0	0	0	0	0	0	603	903	0
799	0	0	0	0	0	0	0	200	300	0	0	0	0	0	0	0	200	903	0	0	0	0	0	0	0	603	903	0
799	1	0	0	0	0	0	0	200	300	0	0	0	0	0	0	0	200	903	0	0	0	0	0	0	0	603	903	0
799	2	0	0	0	0	0	0	200	300	0	0	0	0	0	0	0	200	903	0	0	0	0	0	0	0	603	903	0
799	3	0	0	0	0	0	0	200	300	0	0	0	0	0	0	0	200	903	0	0	0	0	0	0	0	603	903	0
799	4	0	0	0	0	0	0	200	300	0	0	0	0	0	0	0	200	903	0	0	0	0	0	0	0	603	903	0
799	5	0	0	0	0	0	0	200	300	0	0	0	0	0	0	0	200	903	0	0	0	0	0	0	0	603	903	0
799	6	0	0	0	0	0	0	200	300	0	0	0	0	0	0	0	200	903	0	0	0	0	0	0	0	603	903	0
799	7	0	0	0	0	0	0	200	300	0	0	0	0	0	0	0	200	903	0	0	0	0	0	0	0	603	903	0
799	8	0	0	0	0	0	0	200	300	0	0	0	0	0	0	0	200	903	0	0	0	0	0	0	0	603	903	0
799	9	0	0	0	0	0	0	200	300	0	0	0	0	0	0	0	200	903	0	0	0	0	0	0	0	603	903	0
800	0	0	0	0	0	0	0	200	300	0	0	0	0	0	0	0	200	903	0	0	0	0	0	0	0	603	903	0
800	1	0	0	0	0	0	0	200	300	0	0	0	0	0	0	0	200	903	0	0	0	0	0	0	0	603	903	0
800	2	0	0	0	0	0	0	200	300	0	0	0	0	0	0	0	200	903	0	0	0	0	0	0	0	603	903	0
800	3	0	0	0	0	0	0	200	300	0	0	0	0	0	0	0	200	903	0	0	0	0	0	0	0	603	903	0
800	4	0	0	0	0	0	0	200	300	0	0	0	0	0	0	0	200	903	0	0	0	0	0	0	0	603	903	0
800	5	0	0	0	0	0	0	200	300	0	0	0	0	0	0	0	200	903	0	0	0	0	0	0	0	603	903	0
800	6	0	0	0	0	0	0	200	300	0	0	0	0	0	0	0	200	903	0	0	0	0	0	0	0	603	903	0
800	7	0	0	0	0	0	0	200	300	0	0	0	0	0	0	0	200	903	0	0	0	0	0	0	0	603	903	0
800	8	0	0	0	0	0	0	200	300	0	0	0	0	0	0	0	200	903	0	0	0	0	0	0	0	603	903	0
800	9	0	0	0	0	0	0	200	300	0	0	0	0	0	0	0	200	903	0	0	0	0	0	0	0	603	903	0
801	0	0	0	0	0	0	0	200	300	0	0	0	0	0	0	0	200	903	0	0	0	0	0	0	0	603	903	0
801	1	0	0	0	0	0	0	200	300	0	0	0	0	0	0	0	200	903	0	0	0	0	0	0	0	603	903	0
801	2	0	0	0	0	0	0	200	300	0	0	0	0	0	0	0	200	903	0	0	0	0	0	0	0	603	903	0
801	3	0	0	0	0	0	0	200	300	0	0	0	0	0	0	0	200	903	0	0	0	0	0	0	0	603	903	0
801	4	0	0	0	0	0	0	200	300	0	0	0	0	0	0	0	200	903	0	0	0	0	0	0	0	603	903	0
801	5	0	0	0	0	0	0	200	300	0	0	0	0	0	0	0	200	903	0	0	0	0	0	0	0	603	903	0
801	6	0	0	0	0	0	0	200	300	0	0	0	0	0	0	0	200	903	0	0	0	0	0	0	0	603	903	0
801	7	0	0	0	0	0	0	200	300	0	0	0	0	0	0	0	200	903	0	0	0	0	0	0	0	603	903	0
801	8	0	0	0	0	0	0	200	300	0	0	0	0	0	0	0	200	903	0	0	0	0	0	0	0	603	903	0
801	9	0	0	0	0	0	0	200	300	0	0	0	0	0	0	0	200	903	0	0	0	0	0	0	0	603	903	0
802	0	0	0	0	0	0	0	200	300	0	0	0	0	0	0	0	200	903	0	0	0	0	0	0	0	603	903	0
802	1	0	0	0	0	0	0	200	300	0	0	0	0	0	0	0	200	903	0	0	0	0	0	0	0	603	903	0
802	2	0	0	0	0	0	0	200	300	0	0	0	0	0	0	0	200	903	0	0	0	0	0	0	0	603	903	0
802	3	0	0	0	0	0	0	200	300	0	0	0	0	0	0	0	200	903	0	0	0	0	0	0	0	603	903	0
802	4	0	0	0	0	0	0	200	300	0	0	0	0	0	0	0	200	903	0	0	0	0	0	0	0	603	903	0
802	5	0	0	0	0	0	0	200	300	0	0	0	0	0	0	0	200	903	0	0	0	0	0	0	0	603	903	0
802	6	0	0	0	0	0	0	200	300	0	0	0	0	0	0	0	200	903	0	0	0	0	0	0	0	603	903	0
802	7	0	0	0	0	0	0	200	300	0	0	0	0	0	0	0	200	903	0	0	0	0	0	0	0	603	903	0
802	8	0	0	0	0	0	0	200	300	0	0	0	0	0	0	0	200	903	0	0	0	0	0	0	0	603	903	0
802	9	0	0	0	0	0	0	200	300	0	0	0	0	0	0	0	200	903	0	0	0	0	0	0	0	603	903	0
803	0	0	0	0	0	0	0	200	300	0	0	0	0	0	0	0	200	903	0	0	0	0	0	0	0	603	903	0
803	1	0	0	0	0	0	0	200	300	0	0	0	0	0	0	0	200	903	0	0	0	0	0	0	0	603	903	0
803	2	0	0	0	0	0	0	200	300	0	0	0	0	0	0	0	200	903	0	0	0	0	0	0	0	603	903	0
803	3	0	0	0	0	0	0	200	300	0	0	0	0	0	0	0	200	903	0	0	0	0	0	0	0	603	903	0
803	4	0	0	0	0	0	0	200	300	0	0	0	0	0	0	0	200	903	0	0	0	0	0	0	0	603	903	0
803	5	0	0	0	0	0	0	200	300	0	0	0	0	0	0	0	200	903	0	0	0	0	0	0	0	603	903	0
803	6	0	0	0	0	0	0	200	300	0	0	0	0	0	0	0	200	903	0	0	0	0	0	0	0	603	903	0
803	7	0	0	0	0	0	0	200	300	0	0	0	0	0	0	0	200	903	0	0	0	0	0	0	0	603	903	0
803	8	0	0	0	0	0	0	200	300	0	0	0	0	0	0	0	200	903	0	0	0	0	0	0	0	603	903	0
803	9	0	0	0	0	0	0	200	300	0	0	0	0	0	0	0	200	903	0	0	0	0	0	0	0	603	903	0
804	0	0	0	0	0	0	0	200	300	0	0	0	0	0	0	0	200	903	0	0	0	0	0	0	0	603	903	0
804	1	0	0	0	0	0	0	200	300	0	0	0	0	0	0	0	200	903	0	0	0	0	0	0	0	603	903	0
804	2	0	0	0	0	0	0	200	300	0	0	0	0	0	0	0	200	903	0	0	0	0	0	0	0	603	903	0
804	3	0	0	0	0	0	0	200	300	0	0	0	0	0	0	0	200	903	0	0	0	0	0	0	0	603	903	0
804	4	0	0	0	0	0	0	200	300	0	0	0	0	0	0	0	200	903	0	0	0	0	0	0	0	603	903	0
804	5	0	0	0	0	0	0	200	300	0	0	0	0	0	0	0	200	903	0	0	0	0	0	0	0	603	903	0
804	6	0	0	0	0	0	0	200	300	0	0	0	0	0	0	0	200	903	0	0	0	0	0	0	0	603	903	0
804	7	0	0	0	0	0	0	200	300	0	0	0	0	0	0	0	200	903	0	0	0	0	0	0	0	603	903	0
804	8	0	0	0	0	0	0	200	300	0	0	0	0	0	0	0	200	903	0	0	0	0	0	0	0	603	903	0
804	9	0	0	0	0	0	0	200	300	0	0	0	0	0	0	0	200	903	0	0	0	0	0	0	0	603	903	0
805	0	0	0	0	0	0	0	200	300	0	0	0	0	0	0	0	200	903	0	0	0	0	0	0	0	603	903	0
805	1	0	0	0	0	0	0	200	300	0	0	0	0	0	0	0	200	903	0	0	0	0	0	0	0	603	903	0
805	2	0	0	0	0	0	0	200	300	0	0	0	0	0	0	0	200	903	0	0	0	0	0	0	0	603	903	0
805	3	0	0	0	0	0	0	200	300	0	0	0	0	0	0	0	200	903	0	0	0	0	0	0	0	603	903	0
805	4	0	0	0	0	0	0	200	300	0	0	0	0	0	0	0	200	903	0	0	0	0	0	0	0	603	903	0
805	5	0	0	0	0	0	0	200	300	0	0	0	0	0	0	0	200	903	0	0	0	0	0	0	0	603	903	0
805	6	0	0	0	0	0	0	200	300	0	0	0	0	0	0	0	200	903	0	0	0	0	0	0	0	603	903	0
805	7	0	0	0	0	0	0	200	300	0	0	0	0	0	0	0	200	903	0	0	0	0	0	0	0	603	903	0
805	8	0	0	0	0	0	0	200	300	0	0	0	0	0	0	0	200	903	0	0	0	0	0	0	0	603	903	0
805	9	0	0	0	0	0	0	200	300	0	0	0	0	0	0	0	200	903	0	0	0	0	0	0	0	603	903	0
806	0	0	0	0	0	0	0	200	300	0	0	0	0	0	0	0	200	903	0	0	0	0	0	0	0	603	903	0
806	1	0	0	0	0	0	0	200	300	0	0	0	0	0	0	0	200	903	0	0	0	0	0	0	0	603	903	0
806	2	0	0	0	0	0	0	200	300	0	0	0	0	0	0	0	200	903	0	0	0	0	0	0	0	603	903	0
806	3	0	0	0	0	0	0	200	300	0	0	0	0	0	0	0	200	903	0	0	0	0	0	0	0	603	903	0
806	4	0	0	0	0	0	0	200	300	0	0	0	0	0	0	0	200	903	0	0	0	0	0	0	0	603	903	0
806	5	0	0	0	0	0	0	200	300	0	0	0	0	0	0	0	200	903	0	0	0	0	0	0	0	603	903	0
806	6	0	0	0	0	0	0	200	300	0	0	0	0	0	0	0	200	903	0	0	0	0	0	0	0	603	903	0
806	7	0	0	0	0	0	0	200	300	0	0	0	0	0	0	0	200	903	0	0	0	0	0	0	0	603	903	0
806	8	0	0	0	0	0	0	200	300	0	0	0	0	0	0	0	200	903	0	0	0	0	0	0	0	603	903	0
806	9	0	0	0	0	0	0	200	300	0	0	0	0	0	0	0	200	903	0	0	0	0	0	0	0	603	903	0
807	0	0	0	0	0	0	0	200	300	0	0	0	0	0	0	0	200	903	0	0	0	0	0	0	0	603	903	0
807	1	0	0	0	0	0	0	200	300	0	0	0	0	0	0	0	200	903	0	0	0	0	0	0	0	603	903	0
807	2	0	0	0	0	0	0	200	300	0	0	0	0	0	0	0	200	903	0	0	0	0	0	0	0	603	903	0
807	3	0	0	0	0	0	0	200	300	0	0	0	0	0	0	0	200	903	0	0	0	0	0	0	0	603	903	0
807	4	0	0	0	0	0	0	200	300	0	0	0	0	0	0	0	200	903	0	0	0	0	0	0	0	603	903	0
807	5	0	0	0	0	0	0	200	300	0	0	0	0	0	0	0	200	903	0	0	0	0	0	0	0	603	903	0
807	6	0	0	0	0	0	0	200	300	0	0	0	0	0	0	0	200	903	0	0	0	0	0	0	0	603	903	0
807	7	0	0	0	0	0	0	200	300	0	0	0	0	0	0	0	200	903	0	0	0	0	0	0	0	603	903	0
807	8	0	0	0	0	0	0	200	300	0	0	0	0	0	0	0	200	903	0	0	0	0	0	0	0	603	903	0
807	9	0	0	0	0	0	0	200	300	0	0	0	0	0	0	0	200	903	0	0	0	0	0	0	0	603	903	0
808	0	0	0	0	0	0	0	200	300	0	0	0	0	0	0	0	200	903	0	0	0	0	0	0	0	603	903	0
808	1	0	0	0	0	0	0	200	300	0	0	0	0	0	0	0	200	903	0	0	0	0	0	0	0	603	903	0
808	2	0	0	0	0	0	0	200	300	0	0	0	0	0	0	0	200	903	0	0	0	0	0	0	0	603	903	0
808	3	0	0	0	0	0	0	200	300	0	0	0	0	0	0	0	200	903	0	0	0	0	0	0	0	603	903	0
808	4	0	0	0	0	0	0	200	300	0	0	0	0	0	0	0	200	903	0	0	0	0	0	0	0	603	903	0
808	5	0	0	0	0	0	0	200	300	0	0	0	0	0	0	0	200	903	0	0	0	0	0	0	0	603	903	0
808	6	0	0	0	0	0	0	200	300	0	0	0	0	0	0	0	200	903	0	0	0	0	0	0	0	603	903	0
808	7	0	0	0	0	0	0	200	300	0	0	0	0	0	0	0	200	903	0	0	0	0	0	0	0	603	903	0
808	8	0	0	0	0	0	0	200	300	0	0	0	0	0	0	0	200	903	0	0	0	0	0	0	0	603	903	0
808	9	0	0	0	0	0	0	200	300	0	0	0	0	0	0	0	200	903	0	0	0	0	0	0	0	603	903	0
809	0	0	0	0	0	0	0	200	300	0	0	0	0	0	0	0	200	903	0	0	0	0	0	0	0	603	903	0
809	1	0	0	0	0	0	0	200	300	0	0	0	0	0	0	0	200	903	0	0	0	0	0	0	0	603	903	0
809	2	0	0	0	0	0	0	200	300	0	0	0	0	0	0	0	200	903	0	0	0	0	0	0	0	603	903	0
809	3	0	0	0	0	0	0	200	300	0	0	0	0	0	0	0	200	903	0	0	0	0	0	0	0	603	903	0
809	4	0	0	0	0	0	0	200	300	0	0	0	0	0	0	0	200	903	0	0	0	0	0	0	0	603	903	0
809	5	0	0	0	0	0	0	200	300	0	0	0	0	0	0	0	200	903	0	0	0	0	0	0	0	603	903	0
809	6	0	0	0	0	0	0	200	300	0	0	0	0	0	0	0	200	903	0	0	0	0	0	0	0	603	903	0
809	7	0	0	0	0	0	0	200	300	0	0	0	0	0	0	0	200	903	0	0	0	0	0	0	0	603	903	0
809	8	0	0	0	0	0	0	200	300	0	0	0	0	0	0	0	200	903	0	0	0	0	0	0	0	603	903	0
809	9	0	0	0	0	0	0	200	300	0	0	0	0	0	0	0	200	903	0	0	0	0	0	0	0	603	903	0
810	0	0	0	0	0	0	0	200	300	0	0	0	0	0	0	0	200	903	0	0	0	0	0	0	0	603	903	0
810	1	0	0	0	0	0	0	200	300	0	0	0	0	0	0	0	200	903	0	0	0	0	0	0	0	603	903	0
810	2	0	0	0	0	0	0	200	300	0	0	0	0	0	0	0	200	903	0	0	0	0	0	0	0	603	903	0
810	3	0	0	0	0	0	0	200	300	0	0	0	0	0	0	0	200	903	0	0	0	0	0	0	0	603	903	0
810	4	0	0	0	0	0	0	200	300	0	0	0	0	0	0	0	200	903	0	0	0	0	0	0	0	603	903	0
810	5	0	0	0	0	0	0	200	300	0	0	0	0	0	0	0	200	903	0	0	0	0	0	0	0	603	903	0
810	6	0	0	0	0	0	0	200	300	0	0	0	0	0	0	0	200	903	0	0	0	0	0	0	0	603	903	0
810	7	0	0	0	0	0	0	200	300	0	0	0	0	0	0	0	200	903	0	0	0	0	0	0	0	603	903	0
810	8	0	0	0	0	0	0	200	300	0	0	0	0	0	0	0	200	903	0	0	0	0	0	0	0	603	903	0
810	9	0	0	0	0	0	0	200	300	0	0	0	0	0	0	0	200	903	0	0	0	0	0	0	0	603	903	0
811	0	0	0	0	0	0	0	200	300	0	0	0	0	0	0	0	200	903	0	0	0	0	0	0	0	603	903	0
811	1	0	0	0	0	0	0	200	300	0	0	0	0	0	0	0	200	903	0	0	0	0	0	0	0	603	903	0
811	2	0	0	0	0	0	0	200	300	0	0	0	0	0	0	0	200	903	0	0	0	0	0	0	0	603	903	0
811	3	0	0	0	0	0	0	200	300	0	0	0	0	0	0	0	200	903	0	0	0	0	0	0	0	603	903	0
811	4	0	0	0	0	0	0	200	300	0	0	0	0	0	0	0	200	903	0	0	0	0	0	0	0	603	903	0
811	5	0	0	0	0	0	0	200	300	0	0	0	0	0	0	0	200	903	0	0	0	0	0	0	0	603	903	0
811	6	0	0	0	0	0	0	200	300	0	0	0	0	0	0	0	200	903	0	0	0	0	0	0	0	603	903	0
811	7	0	0	0	0	0	0	200	300	0	0	0	0	0	0	0	200	903	0	0	0	0	0	0	0	603	903	0
811	8	0	0	0	0	0	0	200	300	0	0	0	0	0	0	0	200	903	0	0	0	0	0	0	0	603	903	0
811	9	0	0	0	0	0	0	200	300	0	0	0	0	0	0	0	200	903	0	0	0	0	0	0	0	603	903	0
812	0	0	0	0	0	0	0	200	300	0	0	0	0	0	0	0	200	903	0	0	0	0	0	0	0	603	903	0
812	1	0	0	0	0	0	0	200	300	0	0	0	0	0	0	0	200	903	0	0	0	0	0	0	0	603	903	0
812	2	0	0	0	0	0	0	200	300	0	0	0	0	0	0	0	200	903	0	0	0	0	0	0	0	603	903	0
812	3	0	0	0	0	0	0	200	300	0	0	0	0	0	0	0	200	903	0	0	0	0	0	0	0	603	903	0
812	4	0	0	0	0	0	0	200	300	0	0	0	0	0	0	0	200	903	0	0	0	0	0	0	0	603	903	0
812	5	0	0	0	0	0	0	200	300	0	0	0	0	0	0	0	200	903	0	0	0	0	0	0	0	603	903	0
812	6	0	0	0	0	0	0	200	300	0	0	0	0	0	0	0	200	903	0	0	0	0	0	0	0	603	903	0
812	7	0	0	0	0	0	0	200	300	0	0	0	0	0	0	0	200	903	0	0	0	0	0	0	0	603	903	0
812	8	0	0	0	0	0	0	200	300	0	0	0	0	0	0	0	200	903	0	0	0	0	0	0	0	603	903	0
812	9	0	0	0	0	0	0	200	300	0	0	0	0	0	0	0	200	903	0	0	0	0	0	0	0	603	903	0
813	0	0	0	0	0	0	0	200	300	0	0	0	0	0	0	0	200	903	0	0	0	0	0	0	0	603	903	0
813	1	0	0	0	0	0	0	200	300	0	0	0	0	0	0	0	200	903	0	0	0	0	0	0	0	603	903	0
813	2	0	0	0	0	0	0	200	300	0	0	0	0	0	0	0	200	903	0	0	0	0	0	0	0	603	903	0
813	3	0	0	0	0	0	0	200	300	0	0	0	0	0	0	0	200	903	0	0	0	0	0	0	0	603	903	0
813	4	0	0	0	0	0	0	200	300	0	0	0	0	0	0	0	200	903	0	0	0	0	0	0	0	603	903	0
813	5	0	0	0	0	0	0	200	300	0	0	0	0	0	0	0	200	903	0	0	0	0	0	0	0	603	903	0
813	6	0	0	0	0	0	0	200	300	0	0	0	0	0	0	0	200	903	0	0	0	0	0	0	0	603	903	0
813	7	0	0	0	0	0	0	200	300	0	0	0	0	0	0	0	200	903	0	0	0	0	0	0	0	603	903	0
813	8	0	0	0	0	0	0	200	300	0	0	0	0	0	0	0	200	903	0	0	0	0	0	0	0	603	903	0
813	9	0	0	0	0	0	0	200	300	0	0	0	0	0	0	0	200	903	0	0	0	0	0	0	0	603	903	0
814	0	0	0	0	0	0	0	200	300	0	0	0	0	0	0	0	200	903	0	0	0	0	0	0	0	603	903	0
814	1	0	0	0	0	0	0	200	300	0	0	0	0	0	0	0	200	903	0	0	0	0	0	0	0	603	903	0
814	2	0	0	0	0	0	0	200	300	0	0	0	0	0	0	0	200	903	0	0	0	0	0	0	0	603	903	0
814	3	0	0	0	0	0	0	200	300	0	0	0	0	0	0	0	200	903	0	0	0	0	0	0	0	603	903	0
814	4	0	0	0	0	0	0	200	300	0	0	0	0	0	0	0	200	903	0	0	0	0	0	0	0	603	903	0
814	5	0	0	0	0	0	0	200	300	0	0	0	0	0	0	0	200	903	0	0	0	0	0	0	0	603	903	0
814	6	0	0	0	0	0	0	200	300	0	0	0	0	0	0	0	200	903	0	0	0	0	0	0	0	603	903	0
814	7	0	0	0	0	0	0	200	300	0	0	0	0	0	0	0	200	903	0	0	0	0	0	0	0	603	903	0
814	8	0	0	0	0	0	0	200	300	0	0	0	0	0	0	0	200	903	0	0	0	0	0	0	0	603	903	0
814	9	0	0	0	0	0	0	200	300	0	0	0	0	0	0	0	200	903	0	0	0	0	0	0	0	603	903	0
815	0	0	0	0	0	0	0	200	300	0	0	0	0	0	0	0	200	903	0	0	0	0	0	0	0	603	903	0
815	1	0	0	0	0	0	0	200	300	0	0	0	0	0	0	0	200	903	0	0	0	0	0	0	0	603	903	0
815	2	0	0	0	0	0	0	200	300	0	0	0	0	0	0	0	200	903	0	0	0	0	0	0	0	603	903	0
815	3	0	0	0	0	0	0	200	300	0	0	0	0	0	0	0	200	903	0	0	0	0	0	0	0	603	903	0
815	4	0	0	0	0	0	0	200	300	0	0	0	0	0	0	0	200	903	0	0	0	0	0	0	0	603	903	0
815	5	0	0	0	0	0	0	200	300	0	0	0	0	0	0	0	200	903	0	0	0	0	0	0	0	603	903	0
[truncated: 634 more rows]
