# Supplementary material for: The Effects of an Extemporaneous Speech Dual-task on Older Adult Gait Control
Source: Research Square preprint supplement (doi:10.21203/rs.3.rs-7674245/v1), 2025-11-18
Supplement: Supplementary file 191 [file Over8ground2.xlsx]

## Sheet: Sheet1
Trajectories
		08:LFHD			08:RFHD			08:LBHD			08:RBHD			08:C7			08:T10			08:CLAV			08:STRN			08:RBAK			08:LSHO			08:LUPA			08:LELB			08:LFRM			08:LWRA			08:LWRB			08:LFIN
Frame	Sub Frame	X	Y	Z	X	Y	Z	X	Y	Z	X	Y	Z	X	Y	Z	X	Y	Z	X	Y	Z	X	Y	Z	X	Y	Z	X	Y	Z	X	Y	Z	X	Y	Z	X	Y	Z	X	Y	Z	X	Y	Z	X	Y	Z
		mm	mm	mm	mm	mm	mm	mm	mm	mm	mm	mm	mm	mm	mm	mm	mm	mm	mm	mm	mm	mm	mm	mm	mm	mm	mm	mm	mm	mm	mm	mm	mm	mm	mm	mm	mm	mm	mm	mm	mm	mm	mm	mm	mm	mm	mm	mm	mm
691	0	191.809	-322.822	1694.11	278.163	-337.444	1682.19	168.127	-515.871	1698.4	278.994	-513.467	1683.58	213.984	-547.211	1546.36	191.468	-622.572	1284.66	203.791	-402.034	1461.35	210.764	-333.827	1258.16	275.61	-628.66	1337.37	23.108	-470.925	1508.33	-63.1621	-485.27	1319.21	-74.6297	-487.665	1161.46	-70.7169	-382.633	1019.88	-10.5575	-342.488	943.057	-74.5155	-373.556	921.951	-56.576	-310.119	885.451
692	0	191.339	-310.728	1696.94	278.077	-325.116	1685.76	168.057	-503.823	1701.26	278.847	-501.242	1686.73	214.518	-534.931	1549.12	192.557	-610.199	1287.57	203.623	-389.735	1464.52	210.446	-321.876	1261.17	276.842	-616.011	1340.46	23.206	-459.29	1511.52	-62.9841	-476.059	1322.46	-74.402	-479.449	1164.93	-70.9458	-375.736	1022.43	-10.9309	-336.574	944.354	-75.0746	-367.504	924.376	-56.739	-304.774	886.385
693	0	190.922	-298.709	1699.76	277.428	-312.972	1688.9	167.685	-491.794	1703.87	278.459	-489.136	1689.63	214.804	-522.747	1551.91	193.82	-597.113	1289.88	203.591	-377.501	1467.49	210.202	-310.01	1264.15	277.873	-603.376	1343.27	23.4336	-447.687	1514.4	-62.7561	-467.053	1325.46	-74.1959	-471.232	1168.37	-71.3617	-368.782	1024.97	-11.3884	-330.36	946.147	-75.7387	-361.365	927.027	-57.0766	-299.339	887.555
694	0	190.003	-286.632	1702.55	276.713	-300.803	1691.77	168.072	-479.809	1705.89	278.085	-476.907	1692.34	215.244	-510.547	1554.55	194.295	-585.304	1292.62	203.472	-365.303	1470.31	210.233	-298.234	1266.99	279.008	-590.781	1345.71	23.5802	-436.144	1517.34	-62.2964	-458.288	1328.35	-73.9603	-463.195	1171.33	-71.7826	-361.783	1027.28	-11.8418	-323.9	948.618	-75.169	-355.806	928.763	-57.7293	-293.948	888.807
695	0	189.254	-274.723	1704.84	275.913	-288.705	1694.44	167.492	-468.001	1708.05	278.047	-464.717	1695.3	215.49	-498.372	1556.87	194.95	-572.892	1295.01	203.36	-353.099	1472.87	210.249	-286.44	1269.71	280.168	-578.296	1348.01	23.6285	-424.595	1520.1	-62.1696	-449.178	1331.25	-73.9677	-455.051	1174.52	-72.0835	-355.043	1029.34	-12.5676	-317.534	950.087	-77.0202	-349.533	931.564	-58.4506	-288.585	889.856
696	0	188.227	-262.757	1707.01	275.205	-276.408	1697.28	166.487	-456.024	1710.58	277.283	-452.489	1697.58	215.764	-486.219	1559.12	195.58	-560.38	1297.15	203.166	-340.958	1475.22	210.141	-274.487	1272.01	281.195	-565.792	1350.36	23.7352	-412.922	1522.26	-61.7737	-440.073	1333.68	-73.7376	-446.934	1177.16	-72.48	-348.313	1031.12	-13.4371	-311.151	951.214	-77.3844	-343.79	933.193	-59.4481	-283.193	890.807
697	0	186.866	-250.769	1708.8	273.886	-264.308	1699.15	165.896	-444.175	1712.27	277.183	-440.255	1700.16	216.041	-474.003	1561.04	196.316	-547.845	1299.16	203.012	-328.65	1477.33	210.136	-262.349	1274.2	282.126	-552.801	1352.36	23.8622	-401.204	1524.35	-61.4939	-430.865	1335.95	-73.7609	-438.803	1179.61	-73.1568	-341.464	1032.72	-14.3409	-304.317	952.468	-77.8236	-338.025	934.756	-60.5996	-277.658	891.507
698	0	185.744	-238.838	1710.29	272.965	-252.107	1701.23	165.272	-432.277	1713.68	276.728	-427.949	1701.98	216.096	-461.61	1562.62	196.692	-535.404	1300.96	202.888	-316.4	1479.03	209.962	-250.401	1275.53	282.947	-540.257	1354.12	23.7575	-389.335	1526.21	-61.3718	-421.532	1337.99	-73.7103	-430.548	1182.02	-73.757	-334.589	1033.99	-15.2923	-297.34	953.834	-77.8747	-332.285	935.938	-61.7379	-271.99	892.215
699	0	184.599	-226.901	1711.6	271.593	-239.903	1702.79	164.66	-420.334	1714.85	275.889	-415.776	1703.32	216.059	-449.294	1564.01	197.15	-523.064	1302.16	202.622	-304.1	1480.51	209.918	-238.223	1277.03	283.357	-527.739	1355.49	23.5349	-377.461	1527.39	-61.2075	-411.978	1339.73	-73.5347	-422.349	1183.82	-74.508	-327.642	1035.1	-16.2132	-290.418	954.662	-77.536	-326.79	936.354	-62.9527	-266.281	892.599
700	0	183.203	-214.963	1712.74	270.597	-227.63	1704.39	163.869	-408.459	1715.55	275.041	-403.619	1704.42	215.898	-436.838	1564.92	197.507	-510.693	1302.96	202.344	-291.762	1481.66	209.916	-225.816	1278.37	283.748	-515.37	1356.57	23.4597	-365.323	1528.25	-61.1893	-402.274	1341.04	-73.7502	-414.017	1185.48	-75.3338	-320.482	1035.69	-17.1992	-283.2	955.466	-78.0025	-320.75	937.033	-64.256	-260.381	893.005
701	0	182.02	-202.988	1713.6	269.328	-215.306	1705.58	163.166	-396.448	1716.01	274.476	-391.237	1705.39	215.817	-424.273	1565.78	198.008	-498.153	1303.99	201.966	-279.335	1482.46	209.706	-213.539	1278.99	284.131	-502.718	1357.62	23.134	-353.152	1529.2	-61.1245	-392.37	1342.23	-73.5708	-405.512	1186.65	-76.0716	-313.283	1036.35	-18.2872	-275.793	955.95	-79.2359	-314.2	938.043	-65.5606	-254.286	893.022
702	0	180.516	-190.91	1713.98	267.952	-202.91	1706.25	162.425	-384.755	1715.91	273.524	-378.857	1705.96	215.747	-411.663	1566.25	198.339	-485.832	1304.66	201.695	-266.851	1482.83	209.521	-201.127	1279.43	284.579	-490.216	1358.25	22.9444	-340.887	1529.59	-61.1735	-382.244	1343.09	-73.6127	-396.924	1187.64	-76.601	-305.97	1036.48	-19.4929	-268.318	955.923	-78.7663	-308.231	937.534	-66.8442	-248.121	892.72
703	0	178.878	-178.793	1714.11	266.753	-190.516	1706.8	161.595	-372.7	1715.64	272.992	-366.418	1706.38	215.473	-399.087	1566.38	198.55	-473.352	1305.01	201.267	-254.266	1482.83	209.395	-188.713	1279.4	284.656	-477.709	1358.6	22.6874	-328.677	1529.25	-61.3515	-371.901	1343.48	-73.5738	-388.156	1188.2	-77.5028	-298.604	1036.24	-20.6287	-260.866	955.233	-79.7697	-301.534	937.725	-68.1816	-241.73	892.134
704	0	177.601	-166.68	1713.96	265.396	-178.02	1707.18	160.651	-360.56	1715.01	271.617	-353.915	1705.89	215.23	-386.477	1566.03	198.795	-460.943	1304.69	200.826	-241.706	1482.53	208.918	-176.196	1278.95	284.821	-465.2	1358.52	22.3633	-316.113	1528.85	-61.3968	-361.363	1343.37	-73.6181	-379.232	1188.45	-78.4138	-290.955	1035.82	-21.7316	-252.893	955.015	-79.9122	-294.875	936.885	-69.3825	-235.134	891.088
705	0	175.863	-154.42	1713.16	263.782	-165.512	1706.62	159.822	-348.32	1713.98	271.073	-341.365	1705.52	214.829	-373.619	1565.54	198.979	-448.482	1304.21	200.541	-228.981	1481.72	208.615	-163.734	1278.11	284.621	-452.798	1358.17	22.0874	-303.693	1528	-61.483	-350.574	1343.05	-73.7425	-370.106	1188.38	-78.9547	-283.034	1035.01	-22.9515	-244.907	953.61	-80.9454	-287.615	936.551	-70.5958	-228.23	889.903
706	0	174.498	-142.015	1712.34	262.249	-152.914	1705.86	158.919	-336.016	1712.61	269.946	-328.688	1704.51	214.249	-360.747	1564.65	198.901	-436.152	1303.65	200.124	-216.323	1480.72	208.12	-151.474	1276.92	284.591	-440.181	1357.47	21.785	-290.947	1526.92	-61.6973	-339.558	1342.39	-73.5517	-360.906	1187.61	-79.7172	-275.175	1033.66	-24.0063	-236.643	952.292	-80.7876	-280.782	934.852	-71.91	-221.316	888.214
707	0	172.934	-129.562	1710.96	260.813	-140.107	1705.02	157.945	-323.662	1711.18	269.172	-315.985	1703.53	213.686	-347.817	1563.64	198.853	-423.589	1302.55	199.588	-203.444	1479.31	207.68	-139.44	1275.1	284.535	-427.604	1356.5	21.2452	-278.154	1525.3	-61.9987	-328.4	1341.16	-73.4544	-351.308	1187	-80.3434	-266.87	1032.35	-25.1539	-228.581	950.368	-81.4107	-273.39	933.439	-73.2678	-214.108	886.402
708	0	171.357	-117.064	1709.4	259.402	-127.383	1704.01	156.984	-311.131	1709.24	268.302	-303.069	1702.19	213.214	-334.925	1562.2	198.8	-410.878	1301.3	199.131	-190.595	1477.65	207.232	-126.908	1273.3	284.512	-414.903	1355.34	20.8098	-265.161	1523.73	-62.1681	-317	1340	-73.3689	-341.472	1185.7	-81.1177	-258.358	1030.57	-26.3839	-220.191	948.07	-81.9922	-265.673	931.632	-74.5035	-206.742	884.193
709	0	169.597	-104.449	1707.73	257.786	-114.534	1702.51	155.968	-298.52	1707.14	267.132	-290.18	1700.45	212.683	-321.909	1560.51	198.602	-398.161	1299.8	198.623	-177.619	1475.68	206.628	-114.474	1271.19	284.231	-402.101	1353.62	20.1403	-252.245	1521.75	-62.2476	-305.529	1338.36	-73.4704	-331.365	1184.55	-81.8226	-249.627	1028.54	-27.2957	-211.527	945.951	-83.1236	-257.66	930.015	-75.7681	-199.082	881.903
710	0	168.033	-91.679	1705.66	256.316	-101.467	1700.96	154.89	-285.756	1704.79	266.173	-277.272	1698.69	212.001	-308.807	1558.56	198.124	-385.473	1297.62	197.945	-164.593	1473.72	206.025	-101.965	1269.03	283.659	-389.311	1351.65	19.544	-239.224	1519.68	-62.4069	-293.845	1336.42	-73.3241	-321.152	1182.6	-82.66	-240.717	1026.38	-28.5916	-202.63	943.611	-83.516	-249.779	927.393	-77.2046	-191.241	879.228
711	0	166.628	-78.8596	1703.22	254.557	-88.4476	1698.71	153.673	-272.878	1702.01	264.771	-264.185	1696.37	211.295	-295.69	1556.14	197.581	-372.569	1295.15	197.195	-151.472	1471.2	205.256	-89.2724	1266.43	282.945	-376.42	1349.36	18.9911	-226.613	1517.16	-62.8371	-282.066	1334.3	-73.4468	-310.346	1180.99	-83.2034	-231.564	1023.65	-29.8107	-193.605	941.04	-83.9317	-241.497	924.702	-78.3596	-183.1	876.251
712	0	164.713	-65.975	1700.69	252.953	-75.3424	1696.46	152.912	-260.133	1699.01	263.774	-251.009	1694	210.604	-282.454	1553.57	196.887	-359.642	1292.88	196.419	-138.277	1468.47	204.54	-76.5832	1263.71	282.458	-363.447	1347.11	18.4214	-213.482	1514.46	-63.2073	-270.151	1331.84	-73.4639	-299.358	1178.74	-83.8766	-221.953	1020.83	-31.14	-184.178	937.702	-84.7192	-232.83	922.091	-79.5935	-174.904	872.677
713	0	163.159	-53.0018	1697.65	251.542	-62.0416	1694	151.796	-247.122	1696.09	262.552	-237.658	1691.24	209.787	-269.162	1551	196.136	-346.71	1290.47	195.508	-124.999	1465.58	203.696	-64.4101	1260.32	281.863	-350.343	1344.67	17.7035	-200.434	1511.69	-63.3454	-258.093	1329.28	-73.3627	-288.241	1176.04	-84.4377	-212.233	1017.66	-32.0187	-175.362	934.248	-85.4585	-224.109	919.011	-80.5858	-166.527	869.139
714	0	161.198	-39.8358	1694.49	249.508	-48.8353	1690.87	150.453	-233.998	1692.9	261.325	-224.261	1688.53	208.919	-255.895	1548.04	195.252	-333.695	1287.69	194.511	-111.65	1462.57	202.659	-51.1571	1257.05	281.068	-337.259	1342.01	16.7647	-187.416	1508.66	-63.7746	-245.827	1326.33	-73.6141	-276.827	1173.38	-85.189	-202.257	1014.31	-33.0119	-165.828	930.489	-86.1884	-215.062	915.714	-81.5853	-158.016	864.852
715	0	159.542	-26.6808	1691.31	247.898	-35.388	1688.11	149.024	-220.787	1689.45	259.816	-210.954	1685.32	208.039	-242.45	1544.89	194.311	-320.519	1284.44	193.432	-98.1246	1459.27	201.683	-38.148	1253.84	280.226	-324.043	1338.91	15.7846	-174.23	1505.33	-64.4569	-233.563	1323.38	-74.1106	-264.995	1170.8	-85.9983	-191.862	1010.67	-34.0158	-155.964	926.743	-87.052	-205.589	912.438	-82.591	-148.986	860.975
716	0	157.772	-13.3689	1687.93	246.052	-22.0231	1684.86	147.571	-207.531	1685.89	258.321	-197.501	1682.09	206.856	-228.922	1541.53	193.39	-307.322	1281.01	192.24	-84.5455	1455.99	200.484	-24.8112	1250.51	279.331	-310.729	1335.56	14.5411	-161.006	1502.1	-64.7514	-220.993	1320.31	-74.1031	-252.997	1167.71	-87.0382	-181.058	1007.28	-35.2089	-145.791	922.657	-87.9617	-195.847	908.707	-83.3532	-140.021	856.893
717	0	155.611	-0.004559	1684.79	244.156	-8.35152	1681.94	145.968	-194.198	1682.35	256.676	-183.968	1678.91	205.671	-215.379	1538.35	192.506	-293.93	1277.75	191.007	-70.8871	1452.68	199.362	-11.387	1247.09	278.207	-297.146	1332.69	13.4503	-147.645	1498.8	-65.5848	-208.356	1316.81	-74.4857	-240.852	1164.56	-87.6859	-170.296	1003.48	-36.4781	-135.537	918.523	-88.7912	-185.9	905.047	-85.0679	-130.436	852.701
718	0	153.864	13.5187	1681.46	242.148	5.22513	1678.8	144.381	-180.601	1678.98	255.104	-170.22	1675.77	204.341	-201.716	1535.17	191.657	-280.367	1274.29	189.546	-57.1331	1449.36	198.153	2.28976	1243.61	277.271	-283.574	1329.76	12.0838	-134.235	1495.36	-66.2852	-195.433	1313.57	-74.4807	-228.268	1161.19	-88.6793	-159.254	1000.18	-37.6749	-124.762	914.42	-90.1304	-175.507	901.602	-86.1821	-120.63	848.288
719	0	151.839	27.1027	1678.21	240.331	19.0379	1675.72	142.648	-166.999	1675.67	253.575	-156.503	1672.79	203.067	-187.942	1532.15	190.879	-266.602	1271.26	188.212	-43.3196	1446.13	196.8	15.9327	1240.12	276.362	-269.687	1326.67	10.796	-120.626	1491.9	-66.8237	-182.434	1309.85	-75.0968	-215.602	1157.91	-89.4671	-147.917	996.205	-38.9822	-113.787	910.036	-91.1785	-164.873	897.715	-87.415	-110.551	843.877
720	0	149.741	40.8352	1674.85	238.326	32.7604	1672.71	141.058	-153.285	1672.21	251.843	-142.62	1669.64	201.628	-174.105	1528.99	189.982	-252.859	1268.25	186.754	-29.428	1442.9	195.532	29.5753	1236.79	275.078	-255.918	1323.49	9.19803	-107.042	1488.6	-67.7824	-169.164	1306.35	-75.4603	-202.607	1154.67	-90.6257	-136.212	992.462	-40.4215	-102.395	905.882	-92.2551	-153.997	893.909	-88.1399	-100.251	839.288
721	0	147.732	54.5572	1671.9	236.259	46.6911	1669.53	138.957	-139.549	1668.91	249.836	-128.813	1666.46	199.862	-160.171	1525.86	188.538	-239.684	1265.39	184.929	-15.461	1439.74	194.198	43.5392	1233.55	273.738	-242.04	1320.65	7.43555	-93.2589	1485.13	-68.8832	-155.795	1302.72	-76.0286	-189.502	1150.93	-91.676	-124.304	988.574	-41.3268	-91.3432	901.22	-93.4574	-142.759	890.096	-90.5598	-89.2318	835.434
722	0	145.51	68.3218	1668.59	234.056	60.5626	1666.55	137.205	-125.653	1665.68	247.798	-114.852	1663.08	197.958	-146.228	1522.68	188.087	-225.104	1261.35	183.149	-1.38853	1436.51	192.778	57.5472	1230.44	272.402	-228.172	1317.33	5.59991	-79.4783	1481.65	-69.9022	-142.168	1298.89	-76.489	-175.984	1147.46	-92.5756	-111.935	984.596	-42.7106	-79.6334	896.916	-94.7467	-131.182	886.425	-92.0287	-78.3567	831.681
723	0	143.401	82.3941	1665.77	231.833	74.5146	1663.44	135.096	-111.787	1662.66	245.843	-100.918	1660.32	196.107	-132.233	1519.93	187.026	-210.9	1258.91	181.303	12.7037	1433.62	191.295	71.7127	1227.37	270.982	-213.974	1314.81	3.69885	-65.4978	1478.35	-71.237	-128.453	1295.37	-77.5254	-162.26	1144.32	-93.7587	-99.4354	980.8	-44.0152	-67.4028	892.866	-96.0901	-119.329	882.777	-93.3638	-67.0139	827.343
724	0	141.122	96.2327	1663.15	229.883	88.6064	1661.13	132.978	-97.7789	1660.09	243.738	-86.9767	1657.76	193.949	-118.204	1517.17	185.708	-197.149	1256.58	179.226	26.8805	1430.86	189.617	85.9087	1224.6	269.583	-199.858	1312.05	1.69809	-51.5727	1475.16	-72.4454	-114.301	1291.64	-78.2778	-148.413	1140.7	-94.9085	-86.5609	977.123	-45.4653	-55.2359	888.573	-97.5279	-107.16	879.231	-94.7415	-55.3236	823.41
725	0	139.102	110.392	1660.82	227.493	102.606	1658.91	130.775	-83.6997	1657.79	241.497	-72.8072	1655.52	191.586	-104.139	1514.79	184.499	-182.692	1254.15	177.108	41.205	1428.41	187.873	100.315	1222.1	267.74	-185.713	1310.12	-0.685554	-37.4236	1472.31	-74.1209	-100.155	1288.23	-79.0808	-134.163	1137.3	-96.2344	-73.4659	973.3	-46.8685	-42.4312	884.944	-98.7898	-94.5894	875.782	-96.1764	-43.2642	819.402
726	0	136.604	124.543	1659.4	225.414	116.833	1657.21	128.264	-69.4594	1655.71	239.182	-58.7533	1653.69	189.267	-89.8353	1512.84	183.337	-168.341	1251.93	174.788	55.5251	1426.53	185.857	114.794	1220.21	265.552	-172.35	1308.2	-3.24136	-23.2908	1469.46	-75.8922	-85.7031	1285	-79.728	-119.655	1134.01	-97.5692	-59.8482	970.057	-48.3128	-29.4228	881.158	-100.193	-81.6227	872.437	-97.6904	-30.784	815.716
727	0	134.399	138.709	1657.91	223.048	130.955	1655.89	125.801	-55.2736	1654.36	236.918	-44.5387	1652.21	186.813	-75.3242	1511.22	182.099	-153.952	1250.19	172.64	70.0066	1424.81	183.697	129.51	1218.6	263.444	-158.028	1306.79	-5.67641	-9.04255	1467.17	-76.7865	-71.1625	1281.81	-81.0516	-104.787	1131.11	-99.0457	-46.0524	967.27	-49.7725	-16.1426	878.008	-101.681	-68.3988	869.484	-99.17	-17.9397	812.406
728	0	132.325	152.986	1656.98	220.737	145.142	1654.92	123.479	-40.9729	1653.11	234.432	-30.3459	1651.01	184.294	-60.7283	1510.35	180.986	-139.615	1249.06	170.177	84.437	1423.84	181.608	144.424	1217.5	261.493	-143.096	1305.35	-8.24937	5.13325	1464.93	-79.0696	-56.2227	1279.21	-82.5476	-89.5735	1128.81	-100.261	-31.9184	964.451	-51.1878	-2.43922	875.075	-102.973	-54.8601	866.701	-100.56	-4.63914	809.298
729	0	129.731	167.125	1656.44	218.486	159.453	1654.46	121.051	-26.713	1652.49	231.94	-16.152	1650.22	181.923	-46.1121	1509.78	179.989	-125.373	1248.37	167.784	98.8736	1423.01	179.456	159.457	1216.81	259.626	-128.431	1304.81	-10.6619	19.2934	1463.48	-80.9347	-41.2174	1276.93	-84.0649	-74.0964	1126.89	-101.695	-17.2969	962.183	-52.5425	11.517	872.414	-104.497	-40.6947	864.552	-102.086	9.08679	806.827
730	0	127.582	181.478	1656.25	216.027	173.562	1654.17	118.56	-12.4623	1652.03	229.689	-1.94228	1649.99	179.714	-31.6256	1509.51	179.049	-111.196	1247.98	165.426	113.345	1422.6	177.155	174.562	1216.76	258.027	-113.919	1304.85	-12.9804	33.4937	1462.46	-82.67	-26.0395	1275.36	-85.354	-58.3994	1125.31	-103.033	-2.36391	960.399	-53.9303	26.0762	870.461	-106.303	-26.1194	863.03	-103.448	23.2202	804.584
731	0	125.147	195.745	1656.47	213.697	187.827	1654.28	116.197	1.84521	1652.05	227.207	12.1693	1650.1	177.472	-17.3138	1509.72	178.051	-97.0985	1248.05	162.946	127.594	1422.7	174.925	189.621	1217.1	257.111	-98.5538	1305	-15.4252	47.4779	1462.01	-84.4113	-10.5794	1274.32	-86.4877	-42.6633	1124.22	-104.352	13.0451	959.164	-55.2433	40.6059	868.96	-107.709	-11.0301	861.813	-104.334	37.562	802.855
732	0	122.815	209.889	1656.94	211.245	201.914	1654.88	113.611	16.0212	1652.54	224.688	26.3112	1650.57	175.019	-3.2573	1510.25	176.877	-83.0021	1248.58	160.756	141.824	1423.22	172.821	204.649	1217.89	255.695	-84.4295	1306.06	-17.6603	61.6687	1462.16	-86.2058	4.90981	1273.42	-87.9361	-26.6291	1123.53	-105.822	28.901	958.776	-56.5786	55.265	867.563	-109.362	4.55122	861.261	-105.708	52.7257	802.003
733	0	120.825	224.077	1657.61	209.085	216.006	1655.71	111.298	30.2391	1653.32	222.257	40.3178	1651.46	172.883	10.5829	1511.29	175.574	-69.1114	1249.29	158.556	155.81	1424.17	170.674	219.441	1218.95	254.432	-70.4413	1307.06	-19.933	75.6493	1462.46	-88.1095	20.3561	1273.54	-89.3879	-10.3854	1123.54	-107.295	45.227	958.685	-57.6263	70.9814	867.793	-111.079	20.7904	861.323	-106.825	68.4584	801.457
734	0	118.498	238.048	1658.56	207.188	229.922	1656.99	109.081	44.3462	1654.27	220.018	54.2981	1652.59	170.658	24.2117	1512.39	174.32	-55.3317	1250.39	156.59	169.634	1425.19	168.65	233.751	1220.41	253.333	-56.9693	1308.41	-21.8581	89.7273	1463.51	-90.0491	35.7069	1273.83	-91.0106	5.84847	1123.74	-108.647	61.8605	959.393	-58.7167	86.5005	867.724	-112.945	37.509	861.909	-107.897	84.7522	801.63
735	0	116.481	251.971	1659.58	204.911	243.598	1657.98	106.889	58.1697	1655.82	217.846	68.1244	1654.34	168.693	37.6752	1513.46	172.712	-41.729	1251.81	154.712	183.109	1426.63	166.847	247.861	1221.81	252.002	-43.5026	1309.96	-23.847	103.566	1464.75	-91.9734	50.9731	1274.44	-92.6765	22.0338	1124.42	-109.955	78.7828	960.131	-60.0419	103.154	868.784	-114.774	54.6546	862.837	-108.991	101.66	802.173
736	0	114.815	265.725	1660.94	203.253	257.37	1659.54	104.659	71.861	1657.48	215.854	81.7115	1656.31	166.641	50.8574	1515.23	170.879	-28.3907	1253.4	153.187	196.483	1428.31	165.127	261.509	1223.79	250.47	-30.31	1311.84	-25.4745	117.62	1466.49	-93.8978	66.5388	1275.6	-94.6655	38.3259	1125.38	-111.47	96.0115	961.357	-61.1231	120.013	870.125	-116.804	72.3808	864.197	-110.248	119.412	803.594
737	0	113.042	279.171	1662.23	201.334	270.616	1660.71	102.746	85.4842	1659.42	214.016	95.0741	1658.32	164.687	63.9176	1516.92	169.037	-15.2452	1254.93	151.748	209.591	1430.15	163.62	274.792	1225.41	248.781	-17.505	1313.63	-27.2901	131.428	1468.25	-95.7884	81.902	1276.89	-96.8238	54.6051	1126.69	-113.049	113.452	963.081	-62.0343	137.308	871.847	-118.401	90.6351	865.686	-110.997	137.512	805.061
738	0	111.757	292.613	1663.65	199.933	283.971	1662.34	100.94	98.8775	1661.23	212.105	108.251	1660.26	162.907	76.7792	1518.66	167.081	-2.29386	1256.51	150.57	222.652	1431.86	162.545	287.762	1227.17	246.869	-4.82382	1315.39	-28.7235	145.318	1469.98	-97.9357	97.0666	1278.61	-99.155	70.826	1128.2	-114.387	131.121	964.839	-63.1031	155.014	873.786	-120.074	109.143	867.471	-111.615	156.032	806.759
739	0	110.317	305.739	1665.28	198.448	296.812	1664.18	99.3185	112.021	1663.58	210.381	121.22	1662.44	161.112	89.4409	1520.72	164.933	10.4405	1258.44	149.359	235.376	1433.89	161.738	300.452	1229.08	244.676	7.6214	1317.2	-30.2466	158.96	1472	-100.145	112.266	1280.47	-101.644	87.1087	1129.93	-115.866	149.083	966.789	-63.9612	172.95	876.091	-121.687	128.112	869.419	-112.214	175.117	808.877
740	0	109.168	318.761	1667.16	197.208	309.704	1665.92	97.9746	125.103	1665.9	208.997	134.018	1664.87	159.686	101.987	1522.88	162.911	22.9671	1260.41	148.68	248.127	1436.25	161.281	313.2	1231.28	242.74	20.0909	1319.19	-31.3541	172.62	1474.13	-102.03	127.689	1282.4	-104.235	103.542	1131.66	-117.404	167.15	969.144	-64.9605	191.257	878.619	-123.56	147.314	871.425	-112.958	194.774	811.365
741	0	108.076	331.556	1669.17	196.134	322.23	1668.2	96.6512	137.854	1668.31	207.88	146.799	1667.59	158.35	114.465	1525.14	161.163	35.4618	1262.64	147.71	260.607	1438.48	160.702	325.476	1233.6	240.923	32.165	1321.44	-32.4975	186.083	1476.35	-103.856	142.995	1284.53	-106.74	119.959	1133.26	-118.602	185.655	970.998	-65.9191	210.011	881.452	-124.654	166.873	873.272	-113.623	214.818	814.103
742	0	107.154	344.082	1671.66	195.32	334.816	1670.4	95.6372	150.49	1670.85	206.922	159.009	1670.42	157.078	126.816	1527.63	159.432	47.8793	1265.05	147.331	273.011	1441.01	160.542	337.788	1236.16	238.841	44.1584	1323.58	-33.4834	199.27	1478.71	-105.961	158.161	1286.56	-109.363	136.418	1134.92	-119.915	204.023	973.46	-66.492	228.881	884.527	-125.912	186.658	875.458	-114.193	235.181	816.733
743	0	106.628	356.635	1673.99	194.488	347.078	1673.07	94.6823	163.024	1673.68	205.877	171.513	1673.02	155.973	139.129	1530.28	157.601	60.0889	1267.41	146.661	285.186	1443.71	160.489	349.574	1238.67	236.933	56.3069	1325.75	-34.2474	212.514	1480.96	-107.922	173.306	1288.52	-112.01	153.113	1136.81	-121.192	222.713	975.969	-67.56	247.672	887.257	-127.269	206.665	877.918	-114.614	255.774	819.927
744	0	105.986	368.874	1676.83	193.962	359.419	1675.51	93.9575	175.281	1676.43	205.029	183.68	1675.54	154.928	151.336	1532.69	155.999	72.2755	1270.03	146.508	297.54	1446.31	160.881	361.436	1241.19	235.084	68.3746	1327.88	-35.0957	225.292	1483.58	-109.553	188.59	1290.75	-114.682	169.937	1138.88	-122.235	241.755	978.646	-68.2667	267.273	890.397	-128.622	226.955	880.649	-115.253	276.808	823.394
745	0	105.572	381.17	1679.6	193.432	371.408	1678.33	93.4884	187.55	1679.21	204.55	195.751	1678.42	154.271	163.409	1535.55	154.543	84.3403	1272.61	145.977	309.474	1449.15	161.143	373.057	1244	233.501	79.8936	1330.66	-35.6536	238.218	1486.02	-111.098	203.944	1293.19	-117.143	186.746	1140.91	-123.246	260.763	981.797	-68.6205	286.104	893.441	-130.255	247.526	883.667	-115.626	298.12	827.135
746	0	105.199	393.079	1682.69	193.072	383.539	1681.26	92.8989	199.51	1682.25	204.128	207.733	1681.44	153.29	175.5	1538.42	153.035	96.3324	1275.66	145.69	321.543	1452.11	161.547	384.627	1246.93	231.978	91.6264	1333.4	-36.3418	250.626	1488.86	-112.476	219.264	1295.57	-119.299	203.765	1143.13	-124.596	279.904	985.282	-69.2192	305.626	897.097	-131.244	268.067	886.648	-116.502	319.259	831.436
747	0	104.845	405.172	1685.41	192.876	395.335	1684.28	92.5514	211.517	1685.25	203.822	219.636	1684.42	152.588	187.457	1541.22	151.595	108.347	1278.79	145.249	333.457	1455.12	161.786	396.101	1249.91	230.565	103.53	1336.16	-36.7257	263.314	1491.53	-113.782	234.586	1298.31	-121.865	220.744	1145.78	-125.576	299.008	988.587	-69.7753	325.254	901.213	-132.368	288.735	890.063	-116.914	340.804	835.784
748	0	104.65	416.961	1688.5	192.61	407.18	1686.84	92.3294	223.464	1688.12	203.479	231.622	1686.7	151.87	199.21	1544.11	150.288	120.314	1281.61	145.061	345.376	1458.04	162.097	407.667	1252.84	229.165	115.198	1338.96	-37.4475	275.587	1494.58	-114.93	249.748	1301.3	-123.151	237.971	1147.78	-126.207	318.268	992.405	-70.2923	344.87	905.196	-133.828	309.539	893.904	-117.289	362.41	840.621
749	0	104.636	428.876	1691.39	192.464	418.909	1689.51	91.9189	235.216	1690.95	203.18	243.239	1689.53	151.002	210.978	1546.7	148.74	132.253	1284.14	144.728	357.114	1460.9	162.532	419.284	1256.64	227.878	126.749	1341.53	-37.8726	288.007	1497.6	-115.996	264.767	1304.06	-125.118	254.97	1150.36	-127.135	337.531	996.238	-70.7824	364.514	909.553	-134.161	330.168	897.185	-117.688	384.074	845.633
750	0	104.542	440.618	1694.06	192.346	430.611	1692.08	91.7817	247.127	1693.85	202.926	254.816	1692.25	149.916	222.343	1549.4	147.296	144.058	1287.02	144.437	368.84	1464	162.518	430.758	1259.51	226.556	138.484	1343.95	-38.3862	300.143	1500.4	-116.997	279.584	1307.01	-127.268	271.874	1153.46	-127.849	356.889	1000.24	-71.1673	384.143	913.915	-135.051	351.189	901.391	-118.163	405.832	850.58
751	0	104.363	452.377	1696.52	192.325	442.259	1694.48	91.5036	258.868	1696.51	202.649	266.544	1694.7	149.66	234.046	1551.96	145.973	155.751	1289.33	144.189	380.471	1466.54	161.847	441.87	1261.28	225.374	149.893	1346.42	-38.7812	312.447	1503.29	-117.777	294.365	1309.97	-129.288	288.717	1156.37	-128.538	376.191	1004.39	-71.5989	404.153	918.458	-136.729	372.453	905.714	-118.497	427.68	855.993
752	0	104.566	464.152	1699	192.277	453.838	1696.59	91.3756	270.645	1699.12	202.523	278.115	1697.03	148.834	245.333	1553.98	144.752	167.54	1291.56	143.889	391.987	1469.21	161.736	453.185	1263.87	224.335	161.597	1348.43	-39.1624	324.488	1506.04	-118.694	308.964	1312.91	-130.744	305.54	1158.86	-129.278	395.452	1008.7	-71.9806	424.266	923.205	-137.673	393.394	910.099	-118.883	449.28	861.154
753	0	104.404	475.782	1700.88	192.301	465.424	1698.58	90.9807	282.385	1701.39	202.421	289.524	1699.69	148.014	256.627	1555.86	143.554	179.25	1293.96	143.569	403.517	1471.54	161.495	464.36	1266.22	223.333	173.228	1350.69	-39.4088	336.608	1508.52	-119.57	323.373	1315.54	-132.248	322.094	1161.38	-129.817	414.626	1012.42	-72.4969	444.254	927.725	-138.037	414.381	914.017	-118.949	471.078	866.172
754	0	104.518	487.572	1702.79	192.203	476.878	1700.44	90.6312	294.112	1703.64	201.969	301.207	1701.5	147.265	267.956	1557.78	142.158	190.928	1295.6	143.099	414.865	1473.6	161.197	475.561	1268.43	222.285	184.795	1352.35	-39.801	348.501	1510.93	-120.445	337.701	1318.13	-133.883	338.561	1164.06	-130.659	433.534	1016.76	-72.8988	464.484	932.383	-138.844	435.244	918.058	-119.071	492.746	871.484
755	0	104.502	499.263	1704.35	192.23	488.646	1701.84	90.4292	305.906	1705.44	201.705	312.778	1703.26	146.796	279.393	1559.32	140.96	202.76	1297.09	143.121	426.445	1475.5	160.973	487.123	1270.5	221.401	196.376	1353.81	-40.0583	360.546	1512.85	-121.28	351.846	1320.2	-135.382	354.988	1166.35	-131.387	452.549	1020.53	-73.3001	484.781	936.83	-139.32	456.2	922.222	-119.181	514.288	876.535
756	0	104.461	510.967	1705.71	192.156	500.053	1703.09	89.9864	317.618	1707.06	201.348	324.262	1704.83	146.362	290.79	1560.49	139.815	214.456	1298.24	142.733	437.598	1477	160.699	498.592	1272.4	220.469	207.955	1354.96	-40.3383	372.364	1514.8	-121.985	365.774	1322.1	-136.47	371.32	1168.21	-131.835	471.406	1024.23	-73.4905	504.828	941.214	-139.639	476.865	925.728	-119.359	535.826	881.427
757	0	104.508	522.824	1706.65	192.191	511.808	1704.25	89.7126	329.475	1708.42	201.164	335.754	1706.39	145.812	302.091	1561.75	138.779	226.292	1299.51	142.592	449.252	1478.67	160.492	510.276	1273.77	219.72	219.454	1355.95	-40.5927	384.207	1516.32	-122.758	379.763	1323.95	-137.765	387.421	1169.86	-132.638	490.185	1027.68	-73.9267	525.136	945.572	-139.951	497.517	929.526	-119.224	557.305	886.313
758	0	104.26	534.495	1707.37	192.185	523.384	1704.97	89.2349	341.215	1709.39	200.83	347.504	1707.22	145.412	313.621	1562.35	137.683	238.118	1300.3	142.195	460.506	1479.43	160.392	522.166	1275.17	218.893	231.05	1356.78	-40.7124	396.007	1517.36	-123.601	393.753	1325.42	-139.135	403.466	1171.26	-133.051	508.846	1031	-74.181	545.239	949.708	-140.157	518.056	932.881	-119.159	578.687	891.066
759	0	104.285	546.305	1707.76	191.974	534.977	1705.31	88.9859	353.147	1709.89	200.375	359.116	1707.9	144.86	325.008	1562.62	136.745	249.931	1300.65	142.231	472.083	1480.06	160.168	533.989	1275.99	218.021	242.69	1357.12	-40.9715	407.75	1518.12	-124.18	407.591	1326.3	-140.071	419.542	1172.31	-133.484	527.458	1034.04	-74.2892	565.373	953.783	-140.298	538.566	935.992	-119.325	599.875	895.481
760	0	104.189	558.219	1707.77	192.024	546.788	1705.46	88.5628	364.968	1710.38	199.983	370.778	1708.3	144.474	336.539	1562.78	135.64	261.726	1300.8	141.855	483.533	1480.51	160.329	546.026	1276.52	217.193	254.305	1356.92	-41.2175	419.736	1518.47	-124.908	421.371	1326.79	-141.097	435.331	1172.71	-134.029	545.896	1036.76	-74.2713	585.45	957.612	-140.269	558.734	938.802	-119.332	620.95	899.794
761	0	104.224	570.094	1707.66	191.853	558.619	1705.27	88.2327	376.933	1710.34	199.596	382.64	1708.15	143.901	348.141	1562.46	134.642	273.549	1300.44	141.589	495.337	1480.4	160.457	558.01	1276.72	216.32	265.943	1356.84	-41.549	431.45	1518.45	-125.374	435.129	1326.89	-142.169	451.102	1173.27	-134.23	564.253	1038.92	-74.3113	605.369	961.253	-139.888	578.94	941.275	-119.085	642.045	903.844
762	0	103.926	582.08	1706.9	191.732	570.293	1704.67	87.9258	388.968	1709.95	199.361	394.515	1707.54	143.438	359.879	1561.9	133.303	285.377	1298.81	141.586	506.925	1480.02	160.399	569.83	1276.43	215.548	277.637	1356.16	-41.7501	443.381	1517.91	-125.81	448.703	1326.51	-142.885	466.777	1173.02	-134.583	582.458	1040.99	-74.4208	625.19	964.278	-139.997	598.947	943.797	-118.852	662.876	907.652
763	0	103.983	594.062	1706.17	191.566	582.282	1703.6	87.5524	400.947	1709.18	199.054	406.375	1707.06	143.104	371.577	1560.86	132.776	297.236	1298.33	141.132	518.552	1479.07	160.514	581.667	1275.58	214.961	289.323	1355.45	-41.7488	455.448	1517.1	-126.147	462.466	1326.11	-143.707	482.298	1172.44	-134.662	600.47	1042.65	-74.2795	644.777	967.173	-139.704	618.913	945.765	-118.789	683.447	911.329
764	0	103.843	606.241	1704.85	191.727	594.391	1702.57	87.2836	413.146	1708.07	198.831	418.405	1706.01	142.863	383.704	1559.84	132.845	309.07	1298.37	141.186	530.538	1478.01	160.731	593.651	1274.79	214.163	301.071	1354.44	-42.1123	467.483	1515.97	-126.449	475.981	1325.05	-144.352	497.788	1171.86	-134.806	618.349	1044.1	-74.1614	664.294	969.944	-139.105	638.463	947.581	-118.522	703.877	914.448
765	0	103.948	618.439	1703.4	191.666	606.54	1701.04	86.979	425.38	1706.78	198.481	430.502	1704.57	142.292	395.57	1558.46	132.32	320.92	1296.78	140.935	542.388	1476.43	160.892	605.56	1273.16	213.474	312.902	1353.06	-42.3818	479.641	1514.47	-126.73	489.559	1323.71	-144.979	513.041	1170.63	-134.923	636.012	1045.21	-73.7819	683.63	972.623	-139.05	658.033	949.117	-118.047	724.158	917.603
766	0	103.848	630.774	1701.45	191.621	618.657	1699.23	86.7793	437.688	1705.14	198.148	442.722	1702.63	142.107	407.703	1556.8	131.993	332.841	1294.94	140.94	554.359	1474.77	161.071	617.429	1271.5	212.86	324.789	1350.98	-42.6732	491.938	1512.76	-126.848	503.065	1321.98	-145.503	528.23	1169.01	-134.744	653.54	1046	-73.3904	702.661	974.481	-137.94	677.327	950.226	-117.583	744.382	920.586
767	0	103.867	643.203	1699.43	191.623	630.929	1697.05	86.4565	450.076	1702.98	198.056	454.88	1700.91	141.991	420.135	1554.8	131.943	344.849	1292.96	140.761	566.281	1472.43	161.18	629.267	1269.22	212.43	336.687	1349.06	-42.5542	504.235	1510.41	-126.904	516.531	1320	-145.688	543.232	1166.96	-134.866	670.909	1046.46	-73.1904	721.432	976.428	-138.027	696.406	951.424	-117.175	764.068	923.2
768	0	104.044	655.639	1697.1	191.71	643.263	1694.92	86.3431	462.517	1700.73	197.904	467.275	1698.68	141.884	432.35	1552.77	131.927	356.925	1290.87	140.946	578.547	1469.96	161.454	641.196	1266.72	212.178	348.593	1347.14	-42.527	516.615	1507.66	-126.827	529.864	1317.53	-146.003	558.089	1164.92	-134.476	687.871	1046.6	-72.481	739.985	977.87	-136.726	715.199	951.779	-116.551	783.467	925.416
769	0	104.035	668.251	1694.48	191.939	655.837	1692.22	86.3457	475.173	1698.11	197.879	479.763	1696.21	141.558	444.767	1550.14	132.051	369.036	1288.35	141.038	590.841	1467.3	161.778	653.339	1264.03	211.892	360.715	1344.58	-42.4812	529.032	1504.94	-126.642	543.165	1314.89	-146.061	572.864	1162.26	-134.264	704.738	1046.56	-72.153	758.148	979.205	-135.061	733.468	951.889	-115.899	802.764	927.496
770	0	104.378	680.898	1691.68	192.018	668.463	1689.45	86.4089	487.848	1695.3	197.905	492.344	1693.41	141.851	457.291	1547.55	132.399	381.291	1285.64	141.298	603.25	1464.48	162.083	665.504	1261.08	211.887	372.883	1342	-42.3766	541.503	1501.94	-126.559	556.277	1312.1	-146.241	587.448	1159.64	-133.959	721.38	1046.23	-71.3477	776.401	980.443	-134.091	751.895	952.059	-115.306	821.58	929.345
771	0	104.462	693.677	1688.58	192.416	681.214	1686.41	86.4278	500.646	1692.34	197.977	504.983	1690.52	141.644	469.937	1544.6	132.653	393.624	1282.5	141.319	615.731	1461.25	162.413	677.843	1257.95	211.771	385.185	1338.98	-42.4051	554.172	1498.74	-126.164	569.455	1308.79	-145.992	601.817	1156.52	-133.426	737.764	1045.42	-70.6791	794.17	980.997	-134.112	770.008	952.287	-114.597	840.037	930.87
772	0	104.93	706.609	1685.36	192.608	694.086	1683.04	86.6642	513.466	1689.19	198.166	517.955	1687.03	141.677	482.439	1541.48	133.088	406.105	1279.27	141.597	628.336	1457.94	162.752	690.287	1254.52	211.777	397.601	1335.75	-42.2089	566.739	1495.05	-125.777	582.607	1305.23	-145.949	615.974	1153.26	-133.153	753.98	1044.24	-69.9613	811.399	981.367	-132.943	787.805	951.82	-113.672	858.253	931.81
773	0	105.294	719.646	1682	192.988	706.906	1679.75	86.9506	526.423	1685.83	198.475	530.756	1683.83	141.969	495.275	1538.32	133.714	418.869	1275.83	141.674	641.112	1454.4	163.199	702.879	1251.04	211.98	410.162	1332.37	-42.0307	579.423	1491.4	-125.182	595.505	1301.31	-145.456	630.08	1149.4	-132.537	769.767	1042.82	-69.2275	828.566	981.119	-132.122	805.068	951.035	-112.873	875.945	932.439
774	0	105.897	732.61	1678.48	193.617	719.779	1676.36	87.5148	539.53	1682.43	199.022	543.694	1680.45	142.247	507.95	1534.84	134.4	431.689	1272.43	142.078	653.977	1450.92	163.696	715.585	1247.56	212.358	422.964	1328.85	-41.754	592.22	1487.76	-124.474	608.375	1297.25	-145.198	643.94	1145.96	-131.867	785.305	1041.32	-68.2202	845.33	981.067	-130.151	821.98	949.886	-112.146	893.34	933.052
775	0	106.552	745.744	1675.07	194.39	732.989	1672.73	88.0818	552.709	1679.18	199.593	556.742	1677.03	142.478	520.836	1531.2	135.029	444.708	1268.81	142.883	666.715	1447.74	164.267	728.469	1244.06	212.753	435.909	1325.42	-41.3256	605.062	1483.96	-123.768	621.143	1293.35	-144.532	657.799	1142.26	-131.176	800.638	1039.45	-67.4297	861.715	980.533	-128.982	838.584	948.621	-111.147	910.282	933.172
776	0	107.455	758.968	1671.64	195.184	746.067	1669.31	88.7647	565.929	1675.66	200.154	569.811	1673.54	142.693	533.605	1527.75	135.666	457.993	1265	143.543	679.901	1444.44	165.109	741.547	1240.83	213.117	449.043	1321.64	-40.8882	618.12	1480.14	-122.958	633.922	1289.26	-143.955	671.492	1138.32	-130.501	815.63	1037.46	-66.5442	877.744	979.965	-128.552	854.864	947.372	-110.395	926.711	933.075
777	0	108.347	772.273	1668.29	196.103	759.152	1665.8	89.4099	579.126	1672.5	201.008	583.017	1670.21	143.497	546.927	1524.17	136.244	471.45	1261.39	144.118	693.027	1441.06	165.687	754.531	1237.41	213.714	462.423	1317.95	-40.3774	631.223	1476.45	-121.88	646.635	1285.25	-143.081	685.227	1134.51	-129.779	830.376	1035.35	-65.6089	893.391	979.03	-127.526	870.606	945.69	-109.572	942.665	932.478
778	0	109.468	785.727	1664.93	196.898	772.595	1662.1	90.4631	592.63	1669.56	201.862	596.314	1666.95	144.027	560.248	1520.92	136.791	485.061	1257.72	144.879	706.408	1437.83	166.447	767.872	1234.24	214.238	475.923	1314.34	-39.7665	644.399	1472.93	-120.792	659.299	1281.49	-142.093	698.713	1130.82	-128.971	844.751	1032.96	-64.7416	908.677	977.56	-126.266	885.821	943.658	-108.698	958.078	931.648
779	0	110.634	799.126	1661.69	198.16	785.839	1659.03	91.4895	606.073	1666.29	202.877	609.801	1663.46	145.05	573.541	1517.77	137.492	498.816	1254.45	146.082	720.026	1434.67	167.612	781.675	1231.18	214.854	489.51	1310.93	-38.8753	657.912	1469.6	-119.513	672.139	1277.84	-141.072	712.039	1127.3	-128.025	858.918	1030.31	-63.7461	923.585	976.084	-124.179	900.465	941.071	-107.887	973.06	930.237
780	0	111.921	812.761	1658.57	199.396	799.448	1655.81	92.5485	619.622	1663.46	204.031	623.138	1660.57	145.995	587.216	1514.44	138.194	512.791	1251.24	146.893	733.736	1431.58	168.508	795.577	1227.99	215.629	503.401	1307.71	-37.911	671.445	1466.29	-118.031	684.958	1274.18	-139.857	725.325	1123.85	-127.076	872.757	1027.75	-62.8123	937.939	974.006	-122.903	914.872	938.686	-107.039	987.557	928.383
781	0	113.508	826.438	1655.88	200.794	812.896	1652.97	93.9205	633.311	1660.54	205.371	636.734	1657.72	147.182	601.162	1511.54	138.865	526.949	1248.31	148.123	747.698	1428.58	169.758	809.749	1225.02	216.437	517.363	1304.79	-36.635	685.356	1463.26	-116.405	697.888	1270.91	-138.405	738.479	1120.7	-126.025	886.294	1024.94	-62.0096	951.901	971.721	-121.842	928.625	936.323	-106.34	1001.44	926.465
782	0	114.827	840.177	1653.41	202.194	826.61	1650.3	95.1821	647.082	1657.92	206.689	650.483	1654.88	148.388	615.006	1508.85	139.608	541.453	1245.48	149.632	761.871	1425.88	171.042	824.263	1222.19	217.063	531.579	1301.87	-35.4639	699.396	1460.67	-114.944	711.009	1268.09	-136.98	751.399	1117.7	-124.978	899.438	1022.2	-60.9712	965.597	969.419	-120.672	941.899	933.6	-105.668	1014.82	924.104
783	0	116.274	854.057	1650.84	203.785	840.656	1647.75	96.698	660.932	1655.27	208.111	664.227	1652.15	150.036	629.303	1506.64	140.473	556.166	1242.87	150.693	775.933	1423.31	172.381	838.804	1219.7	217.988	546.07	1298.91	-34.143	713.758	1458.42	-113.42	724.465	1265.86	-135.404	764.288	1115.24	-123.942	912.409	1019.49	-60.1697	978.659	966.774	-119.689	954.772	930.895	-104.97	1027.76	921.374
784	0	117.933	868.15	1649.08	205.43	854.474	1645.91	98.3259	674.92	1653	209.625	678.338	1649.57	151.533	643.493	1504.21	141.336	570.878	1240.3	152.371	790.429	1421.19	173.637	853.386	1217.5	219.013	560.683	1296.09	-32.6033	728.244	1456.54	-111.891	738.005	1263.8	-133.578	777.103	1112.66	-122.934	924.988	1016.83	-59.3799	991.48	964.018	-118.711	967.266	928.025	-104.251	1040.19	918.615
785	0	119.711	882.254	1647.57	207.184	868.548	1644.36	99.9767	689.042	1651.17	211.467	692.224	1648.18	153.205	657.816	1502.22	142.575	585.695	1238.33	154.143	805.133	1419.23	175.174	868.154	1215.93	220.007	575.383	1293.82	-31.0148	742.922	1454.78	-110.154	751.772	1261.96	-131.92	789.757	1110.76	-121.936	937.233	1014.07	-58.4938	1003.86	960.964	-117.594	979.071	924.835	-103.628	1052.07	915.342
786	0	121.358	896.482	1646.66	208.977	882.827	1643.5	101.805	703.24	1649.82	213.276	706.585	1646.74	155.029	672.456	1500.88	143.828	600.609	1236.91	155.787	819.845	1418.12	176.691	883.157	1214.61	221.242	590.125	1292.43	-29.2841	757.736	1453.69	-108.75	765.909	1260.92	-129.971	802.391	1109.02	-120.765	949.255	1011.27	-57.988	1015.74	958.103	-116.775	990.341	921.721	-103.111	1063.35	911.618
787	0	123.289	910.605	1646.08	210.861	897.307	1642.61	103.679	717.679	1648.82	215.145	720.972	1645.44	156.788	687.319	1499.78	144.691	615.68	1235.79	157.379	834.634	1417.04	178.171	898.321	1213.73	222.413	603.807	1292.08	-27.703	772.724	1452.81	-107.196	780.188	1260.08	-128.055	814.856	1107.65	-119.716	960.862	1008.44	-57.451	1027	954.71	-116.252	1001.19	918.771	-102.651	1073.97	907.925
788	0	125.163	925.331	1645.7	212.819	911.811	1641.97	105.662	732.158	1648.11	217.009	735.383	1644.61	158.355	702.253	1499.05	145.482	631.004	1234.82	159.182	849.455	1416.51	179.728	913.62	1213.2	223.711	619.551	1290.77	-26.1279	787.949	1452.52	-105.89	794.727	1259.69	-125.953	827.357	1107.06	-118.585	972.172	1005.8	-56.7859	1037.79	950.83	-114.872	1011.34	915.546	-102.249	1084.12	904.095
789	0	127.26	939.828	1645.67	214.706	926.299	1641.9	107.581	746.616	1647.97	218.844	749.846	1644.17	159.957	717.106	1498.96	146.114	646.259	1234.46	160.735	864.267	1416.28	181.245	929.085	1213.04	224.915	634.294	1290.41	-24.4765	803.183	1452.47	-104.125	809.224	1259.86	-123.855	839.759	1106.6	-117.53	983.146	1003.3	-56.0468	1048.26	947.231	-114.429	1020.95	912.683	-102.008	1093.33	899.568
790	0	129.247	954.232	1646.14	216.699	940.837	1642.17	109.46	761.118	1648.14	220.854	764.442	1644.24	161.556	731.813	1498.81	146.938	661.438	1234.52	162.479	879.142	1416.45	182.945	944.618	1213.43	226.058	648.508	1291	-22.6983	818.437	1452.9	-102.715	823.944	1260.62	-122.18	851.917	1106.77	-116.556	993.733	1001.11	-55.5611	1058.17	943.635	-113.557	1030.01	909.553	-101.775	1102.21	895.369
791	0	131.188	969.008	1646.78	218.734	955.352	1642.82	111.507	775.765	1648.74	222.893	778.977	1644.85	163.346	746.529	1499.66	148.004	676.506	1235.02	164.161	893.845	1416.95	184.484	959.988	1214.15	227.249	663.951	1290.9	-20.9943	833.636	1453.79	-101.277	838.634	1261.8	-120.043	864.197	1107.38	-115.545	1004.01	998.947	-55.1286	1067.42	939.95	-113.175	1038.46	906.919	-101.479	1110.55	890.949
792	0	133.164	983.577	1647.64	220.737	969.815	1643.76	113.48	790.356	1649.69	224.916	793.551	1645.77	164.822	761.098	1500.35	149.222	691.465	1236.05	165.863	908.511	1417.89	186.01	975.286	1215.29	228.518	678.149	1292.3	-19.3175	848.685	1455.03	-99.7057	853.372	1263.17	-117.921	876.333	1108.41	-114.541	1013.92	996.975	-54.5476	1076.34	936.396	-112.759	1046.45	904.398	-101.4	1118.17	886.854
793	0	135.25	998.075	1648.87	222.575	984.284	1644.68	115.493	804.934	1651.17	226.653	808.044	1646.77	166.549	775.633	1501.72	150.495	706.251	1237.1	167.521	922.952	1419.14	187.606	990.334	1216.71	230.048	692.828	1293.4	-17.5948	863.457	1456.45	-98.3062	868.028	1265.15	-115.994	888.31	1109.9	-113.58	1023.44	995.569	-54.1245	1084.72	932.973	-112.415	1053.83	902.051	-101.255	1125.3	882.667
794	0	137.063	1012.56	1650.32	224.168	998.593	1646.03	117.281	819.266	1652.83	228.621	822.505	1648.32	168.112	789.931	1503.12	151.74	720.972	1238.22	169.122	937.189	1420.82	189.143	1005.2	1218.62	231.71	707.47	1295.14	-16.1053	877.924	1458.36	-97.0653	882.497	1267.39	-113.984	900.21	1111.64	-112.692	1032.62	994.322	-53.8132	1092.56	929.809	-112.069	1060.88	899.927	-101.184	1131.73	878.892
795	0	138.94	1026.83	1651.85	226.472	1013.05	1647.53	119.158	833.556	1654.79	230.483	836.781	1650	169.73	804.076	1504.55	153.163	735.398	1239.93	170.341	951.135	1422.54	190.198	1019.57	1220.41	233.709	721.902	1296.9	-14.5611	892.103	1460.72	-95.8384	896.679	1270.06	-111.742	911.988	1113.76	-111.746	1041.53	993.619	-53.2971	1099.94	927.043	-111.881	1067.52	898.297	-101.272	1137.65	875.095
796	0	140.831	1040.81	1653.56	228.286	1027.33	1649.08	120.991	847.684	1656.6	232.346	850.952	1652.02	171.36	818.069	1506.42	154.749	749.416	1241.9	171.506	965.126	1424.35	191.002	1033.66	1222.48	235.483	736.05	1298.54	-13.1115	905.925	1462.92	-94.4555	910.486	1272.64	-110.072	923.242	1116.07	-110.861	1050.03	993.059	-53.1373	1106.94	924.472	-111.922	1073.8	897.276	-101.011	1143.34	871.582
797	0	142.513	1054.93	1655.2	229.613	1041.15	1651.01	122.642	861.659	1658.9	233.968	864.856	1653.99	172.741	831.779	1508.45	156.4	763.2	1244.07	172.565	978.835	1426.34	192.109	1047.89	1224.71	237.364	749.902	1300.59	-11.8462	919.341	1465.34	-93.3936	923.653	1275.13	-108.377	934.325	1118.6	-110.056	1058.38	992.795	-52.9513	1113.38	922.323	-112.062	1079.81	896.419	-101.076	1148.43	868.323
798	0	144.057	1068.66	1657.37	231.271	1054.83	1652.73	124.105	875.439	1661.05	235.467	878.6	1656.12	174.221	845.346	1510.79	157.891	776.755	1246.2	173.033	992.407	1428.2	192.303	1061.5	1226.76	239.181	763.372	1303.2	-10.7471	932.734	1468.05	-92.2602	936.278	1277.86	-106.786	944.978	1121.17	-109.093	1066.44	992.69	-52.7033	1119.4	920.508	-112.26	1085.54	895.98	-101.263	1153.16	865.382
799	0	145.433	1082.31	1659.57	233.1	1068.69	1654.84	125.742	889.142	1663.52	236.922	892.259	1658.27	175.476	858.809	1513.06	159.424	790.069	1248.49	173.924	1005.85	1430.6	192.714	1075.17	1229.05	240.969	776.763	1305.8	-9.76534	945.712	1470.73	-91.3499	948.308	1280.59	-105.474	955.371	1123.92	-108.272	1074.3	992.99	-52.2453	1125.37	918.893	-112.394	1091.16	895.856	-100.81	1157.85	863.116
800	0	146.741	1095.66	1661.84	234.323	1081.93	1656.92	126.96	902.498	1666.16	238.269	905.732	1660.63	176.64	872.197	1515.47	160.989	803.086	1250.9	174.856	1019.25	1433.02	192.797	1088.35	1231.37	242.745	790.013	1308.54	-8.86084	958.516	1473.64	-90.5345	959.862	1283.43	-103.812	965.381	1126.52	-107.485	1081.56	993.469	-52.3611	1130.63	917.62	-112.808	1096.48	896.282	-100.447	1162.3	861.43
801	0	148.082	1108.98	1664.2	235.523	1095.28	1659.15	128.132	915.915	1668.61	239.329	919	1662.94	177.927	885.466	1518.28	162.414	815.923	1253.65	175.172	1032.25	1435.24	192.731	1101.4	1233.53	244.209	802.996	1311.23	-8.24209	971.201	1476.4	-89.789	970.698	1286.02	-103.189	974.904	1129.29	-106.917	1088.58	994.167	-52.1576	1135.79	916.716	-113.041	1101.64	896.689	-100.364	1166.33	859.76
802	0	149.17	1122.1	1666.64	236.658	1108.25	1661.44	129.18	928.947	1671.2	240.484	932.033	1665.51	178.568	898.283	1520.53	163.849	828.544	1256.27	175.536	1045.01	1437.48	192.645	1114.24	1235.93	245.54	815.862	1313.97	-7.63238	983.632	1479.17	-88.937	981.101	1288.65	-102.2	983.957	1132.03	-106.548	1095.3	995.104	-51.6782	1140.79	916.563	-113.271	1106.78	897.53	-100.063	1170.26	858.795
803	0	150.198	1135.05	1668.98	237.79	1121.42	1663.48	130.139	941.924	1674.07	241.424	944.955	1667.96	179.175	911.029	1523.31	165.253	841.007	1259.19	175.968	1057.74	1440.18	192.335	1126.86	1238.82	246.43	828.229	1317.01	-7.13921	995.949	1481.84	-88.3561	991.251	1291.16	-101.701	992.315	1135.47	-106.19	1101.82	996.393	-51.6282	1145.31	916.433	-113.553	1111.69	898.564	-99.811	1173.99	857.924
804	0	150.991	1147.91	1671.69	238.38	1133.97	1666.18	130.892	954.787	1676.94	242.143	957.77	1670.53	179.896	923.702	1526.27	166.327	853.297	1262.02	176.015	1070.52	1442.52	191.843	1139.45	1241.05	247.398	840.703	1320.03	-6.68367	1007.98	1484.69	-88.0344	1000.89	1294.13	-101.522	1001.37	1138.03	-105.97	1107.94	997.531	-51.2059	1150.3	916.698	-114.431	1116.43	899.979	-99.4523	1177.72	857.431
805	0	151.657	1160.6	1674.34	239.282	1146.67	1668.9	131.448	967.496	1679.83	242.711	970.443	1673.38	180.355	936.185	1528.85	167.275	865.483	1264.72	176.409	1082.8	1445.38	191.682	1151.69	1242.93	248.487	853.319	1323.06	-6.45388	1020.11	1487.75	-87.6814	1010.38	1296.9	-100.371	1008.99	1140.4	-105.833	1113.78	999.022	-50.5955	1154.91	917.024	-113.983	1120.85	901.158	-99.1258	1181.27	857.465
806	0	152.234	1173.13	1676.99	239.994	1159.33	1671.36	132.086	980.055	1682.86	243.164	982.903	1676.4	180.777	948.484	1531.93	168.458	877.307	1267.99	176.433	1094.96	1448.08	191.116	1163.75	1245.4	249.239	865.459	1326.4	-6.27405	1031.91	1490.82	-87.7271	1019.62	1300.07	-100.078	1016.81	1143.74	-105.618	1119.49	1000.51	-50.5176	1159.24	917.969	-114.826	1125.32	903.13	-98.8962	1184.81	857.873
807	0	152.685	1185.6	1679.81	240.354	1171.66	1674.11	132.389	992.466	1685.71	243.583	995.525	1678.89	181.308	960.701	1535.09	169.495	889.588	1270.73	176.52	1107.11	1450.93	190.838	1175.47	1248.16	249.794	877.552	1329.31	-5.87297	1043.5	1493.54	-87.5445	1028.64	1303.14	-99.8213	1024.47	1147.28	-105.599	1125	1002.4	-50.5529	1163.21	918.71	-114.795	1129.4	904.925	-98.521	1188.38	858.441
808	0	153.038	1197.93	1682.64	240.166	1183.74	1677.14	132.722	1004.8	1688.9	243.959	1007.71	1682.25	181.758	972.789	1538.06	170.565	901.071	1274.14	176.743	1119.08	1453.96	190.62	1186.89	1250.68	250.429	889.571	1332.23	-5.70009	1054.96	1496.67	-87.2391	1037.73	1306.15	-99.6518	1031.97	1150.55	-105.81	1130.26	1004.31	-50.5168	1167.57	920.262	-113.953	1133.3	906.349	-98.3297	1192.05	859.422
809	0	153.252	1210.07	1685.33	240.716	1195.9	1679.88	132.989	1017.06	1691.88	244.159	1019.98	1684.96	182.163	984.725	1540.99	171.505	913.349	1276.88	176.748	1130.91	1457.01	190.486	1198.1	1253.93	251.102	901.59	1335.33	-5.38044	1066.33	1499.64	-87.2607	1046.44	1309.5	-99.5968	1039.26	1153.86	-105.899	1135.49	1006.45	-50.4668	1171.85	922.102	-114.472	1137.06	908.637	-98.2116	1195.3	860.529
810	0	153.384	1222.17	1687.99	240.96	1208.11	1682.57	133.283	1029.16	1694.88	244.576	1031.96	1688.44	182.524	996.607	1543.6	172.502	925.217	1279.7	176.902	1142.69	1459.96	190.561	1209.43	1256.59	251.905	913.58	1338.37	-5.15531	1077.53	1502.71	-87.0362	1055.23	1312.84	-99.1158	1046.44	1157.01	-105.891	1140.81	1008.79	-50.6837	1176.01	923.868	-113.96	1140.96	910.536	-98.5089	1198.68	862.313
811	0	153.373	1234.15	1690.68	241.141	1220.21	1685.3	133.547	1041.15	1697.6	244.602	1044.08	1691.14	183.062	1008.27	1546.8	173.371	936.979	1282.42	177.171	1154.44	1462.9	190.802	1220.75	1259.68	252.632	925.471	1341.34	-4.81101	1088.64	1505.58	-87.0977	1063.96	1316.22	-99.5004	1053.76	1160.92	-106.027	1146.01	1011.09	-50.9988	1180.4	925.765	-114.254	1144.87	912.947	-98.529	1201.97	863.421
812	0	153.358	1246.11	1693.09	241.121	1232.28	1687.99	133.491	1052.96	1700.18	244.699	1056.01	1694.02	183.54	1019.96	1549.54	174.139	948.736	1285.1	177.172	1166.05	1465.73	191.002	1232.16	1262.28	253.453	937.394	1344.13	-4.53433	1099.64	1508.25	-86.8585	1072.69	1319.4	-98.983	1060.54	1163.45	-106.17	1151.28	1013.28	-51.6587	1185.1	927.79	-114.018	1148.85	914.909	-98.9829	1205.57	865.167
813	0	153.198	1257.59	1695.36	241.018	1244.26	1690.25	133.731	1064.77	1702.79	244.929	1067.96	1696.58	184.069	1031.57	1552.01	175.186	959.977	1288.06	177.135	1177.79	1467.97	191.065	1243.35	1264.69	254.39	949.326	1346.65	-4.04825	1110.67	1510.75	-86.6423	1081.41	1322.13	-98.8318	1067.74	1166.56	-106.313	1156.71	1015.31	-51.7405	1189.48	929.352	-113.997	1152.96	917.255	-99.1273	1209.29	866.707
814	0	153.119	1269.65	1697.63	241.103	1256.18	1692.78	133.875	1076.5	1704.94	244.993	1080.06	1698.83	184.688	1043.3	1554.24	176.104	971.672	1290.5	177.24	1189.4	1470.5	191.323	1254.89	1267.07	255.278	961.116	1348.84	-3.79628	1121.59	1513.01	-86.2028	1090.12	1324.79	-99.0193	1075	1169.88	-106.848	1162.28	1017.88	-51.9885	1194.51	931.303	-114.14	1157.27	919.333	-99.4631	1213.19	868.076
815	0	152.899	1281.31	1699.66	240.432	1267.92	1694.8	133.938	1088.17	1707.14	245.167	1091.74	1701.41	185.028	1054.94	1556.58	176.918	983.37	1292.68	177.631	1200.78	1472.71	191.44	1266.32	1269.5	256.186	972.95	1351.23	-3.33768	1132.6	1515.3	-86.1449	1098.8	1327.69	-99.047	1082.27	1173.11	-107.178	1167.64	1020.15	-52.236	1199.73	933.325	-114.129	1161.56	921.326	-100.105	1217.12	869.334
816	0	152.677	1292.98	1701.69	240.709	1279.82	1697.14	134.095	1099.81	1709.13	245.192	1103.57	1703.34	185.479	1066.65	1558.56	177.625	994.929	1294.73	177.826	1212.42	1475.07	191.438	1277.86	1271.23	256.929	984.686	1353.56	-3.20876	1143.59	1517.4	-86.0155	1107.63	1330.31	-98.9135	1089.44	1175.62	-107.371	1173.27	1022.33	-52.7984	1204.87	934.867	-114.129	1166.14	923.115	-100.666	1221.19	870.711
817	0	152.508	1304.69	1703.43	240.486	1291.58	1698.7	134.143	1111.4	1710.79	245.353	1115.47	1705.06	185.906	1078.35	1560.34	178.649	1006.19	1297.05	177.987	1224.04	1476.85	191.386	1289.41	1273.34	257.704	996.397	1355.45	-2.88633	1154.77	1519.32	-85.9506	1116.64	1332.79	-98.6792	1096.89	1178.24	-107.787	1178.99	1024.04	-53.6311	1210.17	936.506	-114.145	1170.96	924.84	-101.128	1225.61	872.205
818	0	152.255	1316.31	1704.8	239.895	1303.26	1700.33	134.274	1123.02	1711.87	245.314	1127.12	1706.59	186.297	1090.08	1561.7	179.4	1017.76	1298.53	178.018	1235.62	1478.23	191.4	1301.01	1274.76	258.483	1008.13	1356.91	-2.61097	1165.87	1520.67	-85.4021	1125.35	1334.53	-98.3413	1104.25	1180.36	-108.016	1184.9	1025.38	-54.4433	1216.96	938.629	-114.292	1175.75	926.423	-101.622	1230.22	873.48
819	0	151.945	1328	1705.96	239.991	1315.08	1701.53	134.382	1134.67	1713.16	245.501	1139.06	1707.58	186.684	1101.89	1563.12	180.021	1029.34	1299.83	177.963	1247.24	1479.45	191.352	1312.81	1275.83	259.172	1019.92	1358.22	-2.31302	1177.01	1521.66	-85.0481	1134.39	1336.14	-97.9267	1111.79	1182.33	-108.232	1190.93	1026.65	-54.8899	1222.08	939.612	-114.422	1180.75	927.741	-102.841	1234.98	874.947
820	0	151.709	1339.72	1706.95	239.61	1326.88	1702.39	134.477	1146.33	1713.97	245.552	1150.88	1708.64	186.967	1113.58	1563.99	180.802	1041.08	1300.78	178.181	1258.91	1480.26	191.156	1324.47	1276.84	259.832	1031.67	1359.27	-2.1814	1188.33	1522.54	-84.5517	1143.55	1337.6	-97.504	1119.51	1183.94	-108.496	1197.13	1027.6	-55.4499	1228.27	940.454	-114.477	1186.02	928.784	-103.493	1240.04	875.571
821	0	151.411	1351.43	1707.49	239.196	1338.61	1702.98	134.404	1157.93	1714.47	245.569	1162.72	1709.03	187.249	1125.42	1564.55	181.368	1053.2	1301.08	178.212	1270.75	1480.74	190.958	1336.15	1277.32	260.327	1043.39	1360.05	-1.8662	1199.61	1523.03	-84.2155	1152.77	1338.73	-97.0898	1127.32	1185.35	-108.734	1203.5	1028.29	-56.3509	1233.79	940.263	-114.52	1191.49	929.567	-104.056	1245.31	875.785
822	0	151.052	1363.19	1707.75	239.001	1350.56	1703.26	134.451	1169.6	1714.63	245.473	1174.57	1709.21	187.503	1137.29	1564.93	181.856	1064.85	1301.55	178.135	1282.49	1480.98	190.741	1347.89	1277.3	260.773	1055.2	1360.63	-1.7323	1210.94	1523.21	-83.7299	1162.21	1339.38	-96.6216	1135.36	1186.53	-108.983	1210.1	1028.7	-56.8214	1240.58	940.489	-114.651	1197.1	930.084	-104.877	1250.73	875.748
823	0	150.865	1375	1707.72	238.8	1362.57	1703.38	134.459	1181.39	1714.65	245.397	1186.6	1709.22	187.718	1149.17	1564.83	182.147	1075.92	1302.4	178.153	1294.24	1480.83	190.434	1359.55	1277.31	261.205	1067.08	1360.94	-1.54861	1222.52	1523.3	-83.4426	1171.77	1340.1	-96.0824	1143.64	1187.34	-109.269	1216.89	1028.75	-57.6148	1247.21	940.641	-114.565	1203.08	930.198	-105.789	1256.22	875.661
824	0	150.393	1386.93	1707.3	238.691	1374.67	1703.37	134.421	1193.16	1714.06	245.316	1198.49	1708.95	188.053	1161.12	1564.96	182.426	1087.72	1302.23	178.328	1306.22	1480.59	190.398	1371.1	1277.04	261.634	1079.07	1360.59	-1.34937	1234.01	1523.13	-83.0319	1181.4	1340.24	-95.4672	1152.15	1187.8	-109.555	1224.02	1028.88	-58.3504	1254.27	940.122	-114.878	1209.18	930.299	-106.613	1262.28	875.298
825	0	149.847	1398.75	1706.88	238.326	1386.63	1702.75	134.246	1205.01	1713.29	245.548	1210.45	1708.55	188.51	1173.2	1564.2	182.613	1100.03	1301.36	178.33	1318.16	1480.25	189.705	1382.61	1276.12	261.98	1091.12	1359.77	-1.25652	1245.49	1522.58	-82.3187	1191.29	1340.11	-94.9044	1160.76	1187.74	-109.837	1231.27	1028.46	-58.8905	1261.82	939.827	-115.006	1215.7	930.014	-107.673	1268.31	874.691
826	0	149.372	1410.74	1706	237.678	1398.53	1701.98	133.999	1216.85	1712.29	245.17	1222.54	1707.53	188.595	1185.3	1563.35	182.55	1111.4	1300.9	178.309	1330.18	1479.24	189.933	1394.45	1275.54	262.091	1103.16	1359.03	-1.29685	1257.13	1521.69	-81.9581	1201.3	1339.71	-94.2167	1169.81	1187.45	-110.13	1238.9	1027.83	-59.7457	1269.42	938.782	-115.1	1222.39	929.282	-108.383	1274.84	873.68
827	0	149.282	1422.53	1704.75	237.302	1410.64	1701.16	133.759	1228.87	1711.15	245.198	1234.74	1706.6	188.646	1197.55	1561.96	182.387	1123.35	1300	178.277	1342.22	1478.01	189.407	1405.92	1273.89	262.232	1115.3	1358.17	-1.2763	1268.89	1520.7	-81.4421	1211.52	1338.92	-93.6901	1178.93	1187.1	-110.421	1246.77	1026.88	-60.4554	1277.33	937.803	-114.997	1229.56	928.13	-109.351	1281.55	872.499
828	0	149.034	1434.71	1703.36	236.978	1423.15	1699.39	133.558	1240.97	1709.5	244.93	1247.03	1705.08	188.624	1209.66	1560.77	182.25	1135.43	1298.49	178.174	1354.44	1476.44	189.255	1417.86	1272.09	262.439	1127.58	1356.72	-1.17798	1280.8	1519.19	-81.2777	1222.08	1338	-93.0286	1188.5	1186.14	-110.692	1255	1025.64	-61.1443	1285.48	936.227	-115.285	1236.95	927.059	-110.316	1288.62	870.942
829	0	148.352	1446.88	1701.51	236.402	1435.32	1697.77	133.17	1253.13	1707.72	244.54	1259.31	1703.27	188.852	1222.07	1559.06	181.943	1148.07	1296.44	177.891	1366.87	1474.37	189.263	1429.96	1270.37	262.389	1139.92	1354.95	-1.16184	1292.66	1517.24	-80.7366	1232.64	1336.4	-92.4399	1198.1	1185.07	-110.645	1263.36	1023.57	-61.9248	1293.64	934.103	-115.542	1244.65	925.527	-111.102	1295.95	868.857
830	0	147.78	1459.19	1699.28	235.38	1447.43	1695.94	132.735	1265.38	1705.36	244.145	1271.69	1701.19	188.844	1234.53	1557.05	181.496	1159.7	1295.03	177.587	1379.18	1472.07	188.778	1441.72	1268	262.27	1152.24	1352.96	-1.24333	1304.61	1515.08	-80.3355	1243.5	1334.62	-91.8869	1208.08	1183.53	-110.915	1272.13	1021.61	-62.8465	1302.26	931.939	-115.887	1252.72	923.765	-111.968	1303.69	866.736
831	0	147.178	1471.61	1697.15	235.087	1460.23	1693.72	132.25	1277.77	1703.05	243.78	1284.18	1698.92	188.833	1247.15	1554.77	181.02	1171.9	1293.11	177.44	1391.69	1469.99	188.38	1453.76	1265.44	262.233	1164.71	1350.8	-1.34158	1316.71	1512.96	-80.031	1254.54	1332.53	-91.3159	1218.23	1181.77	-111.236	1281.21	1019.59	-63.4718	1311.25	929.652	-116.204	1261.14	921.848	-112.851	1311.82	864.529
832	0	146.516	1484.06	1694.83	234.362	1472.57	1691.33	131.686	1290.24	1700.3	243.22	1296.72	1696.34	188.694	1259.83	1552.22	180.478	1184.69	1290.18	177.159	1404.31	1467.43	188.243	1466.17	1262.87	262.03	1177.21	1348.34	-1.52544	1328.92	1510.61	-79.5537	1265.71	1330.36	-90.7185	1228.73	1180.07	-111.664	1290.59	1017.41	-64.0955	1320.89	927.318	-116.439	1269.94	919.672	-113.665	1320.29	862.149
833	0	145.883	1496.69	1692.1	233.388	1485.1	1688.72	131.01	1302.76	1697.5	242.511	1309.35	1693.67	188.526	1272.6	1549.64	179.996	1196.36	1288.53	176.688	1416.88	1464.47	187.873	1478.72	1259.91	261.829	1189.84	1345.97	-1.76913	1341.24	1508.16	-79.3357	1277.18	1328.06	-90.1846	1239.41	1177.78	-111.982	1300.29	1014.88	-65.0038	1330.12	924.271	-116.88	1279.06	917.313	-114.476	1329.13	859.458
834	0	144.964	1509.26	1689.25	232.741	1498	1685.99	130.145	1315.33	1694.76	241.752	1321.97	1690.88	188.176	1285.32	1546.94	179.3	1208.71	1286.09	176.329	1429.67	1461.58	187.187	1491.05	1256.97	261.817	1202.51	1343.57	-2.14689	1353.56	1505.18	-79.1184	1288.64	1325.54	-89.7358	1250.26	1175.31	-112.306	1310.27	1012.32	-65.7569	1340	921.087	-116.99	1288.34	914.403	-115.37	1338.22	856.512
835	0	144.172	1522.14	1686.48	231.575	1510.6	1683.2	129.518	1328.14	1691.45	240.988	1334.76	1687.94	188.054	1298.28	1544.08	178.819	1221.53	1282.66	175.88	1442.47	1458.61	186.891	1503.88	1253.86	261.687	1215.25	1340.32	-2.51185	1365.98	1502.31	-78.805	1300.23	1322.38	-89.3311	1261.42	1172.53	-112.678	1320.47	1009.51	-66.393	1350.6	918.632	-117.544	1298.18	911.67	-116.443	1347.66	853.503
836	0	143.198	1534.95	1683.54	231.061	1523.69	1680.38	128.598	1340.95	1688.42	240.154	1347.65	1684.95	187.646	1311.17	1541.22	178.429	1234.53	1279.4	175.42	1455.47	1455.63	186.564	1516.78	1250.63	261.392	1228.03	1337.46	-2.91187	1378.51	1499.2	-78.7318	1312.05	1319.23	-88.9924	1272.76	1169.69	-113.03	1330.96	1006.4	-67.4219	1360.83	915.121	-117.99	1308.22	908.706	-117.422	1357.48	850.557
837	0	142.193	1547.97	1680.52	229.965	1536.5	1677.62	127.515	1353.87	1685.45	239.084	1360.62	1681.98	187.183	1324.22	1538.24	177.672	1247.13	1276.56	174.727	1468.43	1452.34	186.031	1529.6	1247.24	261.007	1240.9	1334.56	-3.43514	1391.13	1495.87	-78.7621	1324.13	1316.17	-88.705	1284.5	1166.6	-113.53	1341.73	1003.04	-68.3885	1371.73	911.747	-118.633	1318.69	905.699	-118.208	1367.75	847.187
838	0	141.105	1561.09	1677.59	228.806	1549.81	1674.74	126.469	1366.99	1682.55	238.056	1373.75	1678.91	186.61	1337.44	1535.43	177.141	1259.9	1273.81	174.043	1481.65	1449.07	185.62	1542.49	1244.07	260.755	1254.02	1331.91	-4.15767	1403.82	1492.8	-79.0375	1336.28	1313.24	-88.4814	1296.58	1163.53	-114.067	1352.97	999.994	-69.1498	1383.07	908.387	-119.183	1329.46	902.6	-119.371	1378.24	843.927
839	0	140.089	1574.32	1674.61	227.937	1562.99	1671.87	125.43	1380.25	1679.2	237.086	1386.98	1675.88	185.942	1350.66	1532.51	176.971	1272.75	1271.06	173.149	1494.79	1445.86	185.356	1555.05	1240.49	260.462	1267.02	1329.09	-4.8967	1416.72	1489.68	-79.1312	1348.74	1309.93	-88.7312	1308.72	1160.9	-114.567	1364.53	996.682	-70.1466	1394.52	904.703	-119.469	1340.67	899.43	-120.29	1389.17	840.382
840	0	138.848	1587.7	1671.83	226.319	1576.21	1668.98	124.173	1393.48	1676.15	235.764	1400.23	1673.04	185.19	1363.97	1530.04	176.931	1286.07	1267.92	172.367	1508.19	1443	184.602	1568.31	1237.43	260.011	1280.15	1326.15	-5.7142	1429.54	1486.39	-79.3965	1361.3	1306.44	-88.3368	1321.33	1157.28	-115.064	1376.38	993.201	-71.0076	1406.69	901.445	-120.193	1352.15	896.081	-121.333	1400.46	837.064
841	0	137.2	1600.65	1669.04	225.489	1589.82	1666.34	122.897	1406.9	1673.46	234.487	1413.63	1670.35	184.242	1377.29	1527.41	176.694	1299.05	1265.61	171.367	1521.42	1440	184.043	1581.47	1234.61	259.72	1293.47	1323.61	-6.63501	1442.43	1483.16	-79.7511	1374.17	1303.38	-88.5876	1333.92	1153.81	-115.773	1388.62	989.982	-72.2488	1418.48	897.795	-120.871	1364.11	892.999	-122.216	1412.27	833.648
842	0	136.095	1614.39	1666.36	223.709	1602.99	1663.78	121.635	1420.42	1670.47	233.147	1427.07	1667.65	183.288	1390.77	1524.66	176.556	1312.23	1263.24	170.069	1534.76	1437.32	183.414	1594.78	1231.84	259.219	1306.89	1321.22	-7.65279	1455.48	1480.3	-80.2135	1387.1	1300.16	-88.9069	1347	1151.1	-116.412	1401.14	986.703	-72.901	1431.6	894.788	-121.495	1376.52	889.638	-123.063	1424.47	830.395
843	0	134.657	1627.79	1663.72	222.732	1616.67	1661.02	120.161	1433.95	1667.74	231.812	1440.54	1664.88	182.321	1404.38	1522.02	176.469	1325.83	1260.39	168.826	1548.35	1434.55	182.459	1608.08	1229.02	258.79	1320.51	1318.57	-8.8201	1468.43	1477.35	-80.68	1400.26	1296.63	-89.1866	1360.09	1148	-117.049	1414.11	983.688	-73.9192	1444.18	891.435	-122.03	1389.27	886.556	-124.031	1437.1	827.17
844	0	133.038	1641.3	1661.27	221.119	1630.32	1658.7	118.381	1447.58	1665.33	230.131	1454.16	1662.52	181.35	1418.07	1519.78	176.006	1339.18	1258.55	167.351	1562.08	1432.07	181.234	1621.62	1226.59	258.226	1334.35	1316.51	-10.2757	1481.55	1474.54	-81.4902	1413.43	1293.69	-89.2891	1373.46	1144.28	-117.788	1427.23	980.553	-74.6464	1458.15	888.6	-122.911	1402.26	883.22	-125.075	1449.99	824.162
845	0	131.447	1655.06	1659.19	219.426	1643.95	1656.69	116.802	1461.43	1663.42	228.434	1467.91	1660.6	179.717	1431.52	1517.81	175.62	1352.91	1256.68	165.97	1575.67	1429.8	179.97	1635.49	1224.37	257.671	1348.31	1314.32	-11.684	1494.62	1471.82	-82.2054	1426.81	1290.5	-90.0018	1387.1	1141.74	-118.581	1440.82	977.819	-75.8477	1470.8	884.976	-123.574	1415.74	880.412	-125.962	1463.52	820.975
846	0	130.11	1669.02	1657.45	218.218	1657.82	1654.72	115.187	1475.34	1661.58	226.836	1481.67	1658.78	178.471	1445.31	1515.86	175.326	1366.73	1254.47	164.465	1589.36	1427.77	178.845	1649.32	1222.2	256.959	1362.44	1312.24	-12.8845	1507.87	1469.12	-82.9066	1440.37	1287.27	-90.1082	1400.87	1138.38	-119.164	1454.52	974.418	-76.5334	1485.51	882.299	-124.152	1429.59	877.153	-126.779	1477.37	818.179
847	0	128.538	1683.03	1655.76	216.352	1671.84	1653.07	113.356	1489.26	1659.9	225.129	1495.64	1657.07	177.175	1459.17	1514.16	174.842	1380.35	1252.99	162.811	1602.76	1426.1	177.444	1663.95	1220.85	256.188	1376.67	1310.59	-14.5292	1520.84	1466.81	-83.7011	1453.94	1284.68	-90.8307	1414.87	1135.52	-119.789	1468.51	971.655	-77.3503	1499.78	879.495	-124.857	1443.72	874.414	-127.472	1491.47	815.179
848	0	127.024	1697.06	1654.2	214.764	1685.81	1651.79	111.635	1503.42	1658.53	222.983	1509.52	1655.67	175.938	1473.14	1512.96	174.936	1394.38	1251.51	161.325	1616.47	1424.77	175.824	1678.5	1219.81	255.471	1390.87	1309.23	-15.8796	1534.11	1464.66	-84.6201	1467.62	1282.3	-91.4062	1429.17	1133.09	-120.474	1482.83	969.117	-78.2377	1513.68	876.616	-125.535	1458.23	872.021	-128.346	1505.97	812.725
849	0	125.483	1711.21	1653.26	214.118	1699.98	1650.65	109.824	1517.46	1657.93	221.137	1523.53	1654.99	174.752	1487.01	1512.38	174.816	1408.24	1250.91	159.604	1630.39	1423.97	174.482	1692.09	1218.7	255.137	1405.13	1308.4	-17.3613	1547.07	1463.24	-85.4563	1481.47	1280.22	-91.889	1443.74	1130.8	-121.171	1497.66	966.896	-79.0195	1528.93	874.465	-126.115	1473.12	869.683	-129.187	1521.05	810.674
850	0	123.621	1725.21	1652.66	212.516	1713.79	1650.04	107.611	1531.45	1657.08	219.302	1537.48	1654.72	173.445	1500.86	1511.53	174.74	1422.14	1250.48	157.951	1644.01	1423.38	172.773	1706.64	1218.37	254.791	1419.35	1307.47	-18.8493	1559.98	1462.18	-86.313	1495.42	1278.38	-92.2953	1458.64	1128.95	-121.774	1512.76	965.267	-79.7199	1544.15	872.766	-126.586	1488.39	867.793	-129.805	1536.49	808.974
851	0	121.935	1739.24	1652.38	210.779	1727.89	1649.94	105.985	1545.56	1657.27	217.442	1551.56	1654.82	172.588	1514.68	1511.72	174.37	1435.91	1250.52	156.368	1657.65	1423.45	171.074	1721.09	1218.63	254.767	1433.89	1307.14	-20.4573	1572.7	1461.67	-87.014	1509.47	1276.93	-92.794	1473.73	1127.25	-122.489	1528.11	963.904	-80.4364	1559.65	871.337	-127.194	1503.97	866.445	-130.539	1552.2	807.61
852	0	120.344	1753.25	1652.3	209.127	1741.98	1650.23	104.181	1559.65	1657.77	215.848	1565.53	1655.37	171.201	1528.06	1511.95	174.574	1449.97	1250.15	154.749	1671.35	1423.81	169.44	1735.51	1218.98	254.212	1447.81	1307.68	-21.7893	1585.55	1461.38	-87.7169	1523.6	1275.61	-93.2045	1489.01	1126.05	-123.091	1543.92	963.118	-81.001	1576.1	870.75	-127.8	1520.02	865.453	-131.23	1568.25	806.766
853	0	118.916	1767.36	1652.46	207.46	1755.94	1650.5	102.578	1573.7	1658.22	214.308	1579.5	1656.21	170.13	1541.69	1512.5	174.211	1463.33	1250.6	153.154	1684.8	1424.48	167.743	1749.53	1219.96	254.019	1461.78	1308.07	-23.0308	1598.27	1461.61	-88.4846	1537.63	1275.05	-93.6749	1504.39	1125.18	-123.438	1559.97	962.578	-81.4301	1592.37	870.47	-128.211	1536.48	864.655	-131.631	1584.88	806.236
854	0	117.478	1781.2	1652.92	206.502	1769.84	1651.13	101.049	1587.58	1659.13	212.826	1593.37	1657.2	169.122	1555.19	1513.18	173.994	1477.08	1251.62	151.67	1698.17	1425.34	166.058	1763.36	1221.07	253.72	1475.55	1309	-24.13	1611.15	1462.02	-89.2731	1551.76	1274.91	-94.2976	1519.96	1124.76	-123.823	1576.33	962.443	-81.7351	1608.82	870.356	-128.744	1553.21	864.53	-131.969	1601.87	806.144
855	0	116.233	1795	1653.56	204.954	1783.42	1652.04	99.582	1601.35	1660.46	211.166	1607.11	1658.57	167.572	1568.39	1514.31	173.349	1490.49	1252.91	150.368	1711.53	1426.46	164.593	1777.06	1222.28	253.287	1489.11	1310.72	-25.7763	1623.78	1462.89	-90.1137	1565.89	1274.87	-94.8919	1535.76	1124.87	-124.214	1593.11	962.51	-81.9533	1626.03	870.548	-129.187	1570.42	864.748	-132.302	1619.32	806.445
856	0	114.896	1808.54	1654.43	203.904	1797.03	1652.99	98.2194	1614.91	1661.86	209.924	1620.71	1659.99	166.53	1581.65	1515.55	172.765	1503.69	1254.39	149.016	1724.62	1427.88	163.218	1790.57	1223.91	253.002	1502.49	1312.08	-26.7467	1636.84	1464.05	-90.8244	1580.17	1275.47	-95.3982	1551.52	1124.85	-124.547	1610.16	963.517	-82.0219	1643.35	871.503	-129.76	1587.83	865.357	-132.443	1637.24	807.231
857	0	113.795	1821.89	1655.42	202.383	1810.44	1654.13	97.0523	1628.29	1663.11	208.824	1633.97	1661.7	165.555	1594.7	1516.75	172.319	1516.97	1255.41	148.186	1737.73	1429.29	161.913	1803.82	1225.38	252.589	1515.63	1313.46	-27.5901	1649.78	1465.43	-91.5916	1594.37	1276.04	-96.1905	1567.33	1125.3	-124.793	1627.26	964.122	-82.1399	1660.76	872.438	-129.631	1605.93	865.862	-132.308	1655.61	808.126
858	0	112.779	1834.93	1656.46	201.167	1823.46	1655.42	96.1024	1641.47	1664.72	207.813	1647.24	1663.5	164.708	1607.47	1518.33	171.458	1530.06	1256.74	147.308	1750.46	1430.94	161.018	1816.93	1227.11	251.971	1528.58	1314.75	-28.528	1662.56	1466.56	-92.4095	1608.71	1276.71	-96.8232	1583.36	1125.74	-125.126	1644.51	965.019	-82.132	1678.19	873.444	-129.94	1624.14	866.727	-132.272	1674.26	809.533
859	0	111.81	1847.99	1657.88	200.246	1836.32	1656.91	95.324	1654.43	1666.57	206.945	1660.21	1665.54	164.052	1620.26	1519.89	170.658	1542.83	1258.55	146.822	1763.17	1432.62	160.305	1829.74	1228.8	251.198	1541.16	1316.66	-29.1206	1675.77	1468.19	-93.2967	1623.27	1277.6	-98.1712	1599.24	1126.79	-125.368	1662.1	966.554	-81.7511	1696.9	875.688	-130.207	1642.66	867.895	-131.962	1693.34	811.027
860	0	111.005	1860.66	1659.48	200.409	1849.39	1658.4	95.2942	1667.27	1667.9	206.376	1673.09	1667.45	163.185	1632.54	1521.76	169.757	1555.3	1260.44	146.26	1775.52	1434.29	160.014	1842.39	1230.66	250.434	1553.56	1318.64	-29.886	1688.67	1470.26	-94.1923	1638	1278.61	-99.1619	1615.65	1127.74	-125.646	1680.04	968.168	-81.4361	1715.09	877.647	-130.218	1661.68	869.05	-131.558	1712.96	813.035
861	0	110.209	1873.02	1661.26	199.557	1861.69	1660.34	94.7477	1679.78	1670.18	206.166	1685.73	1669.33	162.556	1644.94	1523.79	168.848	1567.62	1262.42	146.202	1787.96	1436.45	159.981	1854.78	1232.56	249.605	1565.87	1320.38	-30.5129	1701.58	1472.08	-95.128	1652.91	1279.77	-100.343	1631.86	1128.61	-125.621	1698.34	969.714	-80.9195	1733.51	879.637	-130.248	1680.96	870.476	-130.888	1732.94	814.955
862	0	109.702	1885.49	1662.9	198.347	1874.53	1662.32	94.592	1692.14	1672.27	205.77	1698.16	1671.86	162.407	1657.19	1526.33	167.954	1579.74	1264.65	146.121	1800.08	1438.51	160.118	1866.96	1234.75	248.796	1577.91	1322.46	-30.6398	1714.52	1473.84	-96.1155	1667.76	1281.08	-101.423	1648.48	1129.54	-125.653	1716.7	971.262	-80.1377	1752.49	881.855	-130.218	1700.53	872.094	-130.086	1753.21	817.11
863	0	109.175	1897.6	1664.9	197.694	1886.67	1664.54	94.4366	1704.22	1674.91	205.715	1710.59	1674.25	162.139	1669.03	1528.66	167.21	1591.71	1266.88	146.27	1812.04	1440.63	160.555	1878.83	1236.79	248.04	1589.86	1324.5	-30.892	1727.01	1475.76	-97.3023	1682.73	1282.56	-102.82	1664.99	1130.82	-125.528	1735.51	973.232	-79.33	1771.1	883.926	-130.174	1720.38	873.901	-129.101	1773.8	819.566
864	0	108.952	1909.75	1666.87	197.497	1899.12	1666.58	94.6557	1716.26	1677.12	205.849	1722.89	1676.66	162.018	1680.95	1530.82	166.567	1603.65	1268.96	146.503	1823.83	1443.05	161.264	1890.57	1239.12	247.46	1601.71	1326.38	-30.8579	1739.53	1477.79	-98.0422	1698.1	1284.33	-104.056	1681.87	1132.3	-125.337	1754.54	975.172	-78.3128	1790.14	886.324	-130.277	1740.44	875.904	-127.993	1794.57	822.072
865	0	108.546	1921.5	1669.28	197.242	1911.05	1669.21	94.7765	1728.04	1679.64	206.107	1735.13	1679.27	162.168	1692.94	1533.38	166.459	1615.99	1271.14	146.966	1835.64	1445.32	162.206	1902.02	1241.36	246.861	1613.43	1328.78	-30.3447	1751.85	1479.52	-99.2876	1713.39	1286.04	-105.265	1698.84	1133.8	-124.77	1773.7	977.482	-76.9865	1809.59	889.119	-130.138	1760.94	878.112	-126.606	1815.63	824.939
866	0	108.634	1933.42	1671.78	197.174	1923.23	1671.63	95.281	1739.76	1682.76	206.434	1747.05	1682.04	162.136	1704.56	1535.98	165.694	1627.52	1274.15	147.205	1847.18	1447.87	163.229	1913.58	1244.07	245.777	1624.92	1331.25	-30.3646	1763.96	1482.13	-100.531	1728.65	1288.44	-106.617	1715.78	1135.76	-124.383	1792.97	980.257	-75.5911	1828.98	892.521	-129.917	1781.65	880.853	-125.069	1837.02	828.271
867	0	108.772	1944.94	1674.59	197.304	1934.83	1674.38	96.007	1751.37	1685.77	206.921	1758.93	1685.03	162.276	1716.4	1538.31	164.921	1639.08	1277.18	147.765	1858.78	1450.77	164.207	1924.69	1246.88	245.431	1636.57	1334.05	-30.0365	1776.04	1484.97	-100.934	1744.21	1291.19	-107.886	1732.78	1138.03	-123.683	1812.53	983.816	-74.1939	1848.24	896.079	-129.631	1802.51	883.938	-123.66	1858.35	832.28
868	0	109.071	1956.5	1677.44	197.726	1946.74	1677.2	96.4696	1762.76	1688.39	207.589	1770.61	1687.92	162.589	1727.98	1541.3	163.822	1650.3	1280.18	148.214	1870.27	1453.72	165.292	1935.97	1250.01	244.958	1648.12	1336.63	-29.8173	1787.99	1487.85	-101.627	1759.35	1293.29	-108.794	1749.77	1140.02	-122.826	1831.99	987.123	-72.6021	1867.57	900.263	-129.094	1823.43	887.117	-121.877	1879.87	836.419
869	0	109.298	1967.85	1680.28	197.95	1958.02	1679.73	97.4881	1774.41	1691.22	208.429	1782.19	1690.71	162.708	1739.13	1544.62	163.563	1662	1282.74	148.74	1881.62	1456.65	166.185	1947.39	1253.07	244.692	1659.63	1339.11	-29.4401	1799.78	1490.89	-101.645	1774.47	1296.09	-109.662	1766.94	1142.61	-122.133	1851.3	990.902	-69.0001	1891.52	906.951	-128.491	1844.33	890.582	-119.974	1901.19	840.613
870	0	109.741	1979.2	1683.11	198.887	1969.93	1682.31	98.08	1785.56	1694.14	209.138	1793.57	1693.49	163.655	1750.82	1546.35	163.674	1674.15	1284.93	149.426	1893.08	1459.63	166.851	1958.59	1256.01	244.37	1671.14	1341.63	-28.9766	1811.66	1493.85	-102.02	1789.61	1299.18	-110.389	1783.78	1145.27	-121.29	1870.65	994.911	-68.9447	1907.07	908.75	-127.767	1865.33	894.488	-117.925	1922.76	845.417
871	0	110.346	1990.61	1685.66	199.149	1981.06	1684.88	99.0673	1796.8	1697.01	210.153	1805.21	1695.72	164.546	1762.37	1549	163.272	1685.82	1287.48	149.903	1904.55	1462.04	167.782	1970.18	1258.68	244.173	1682.77	1343.9	-28.405	1823.58	1496.72	-102.186	1804.23	1302.11	-111.088	1800.58	1147.97	-120.257	1889.96	999.026	-67.0329	1926.21	913.222	-126.97	1886.22	898.328	-116.012	1944.15	850.196
872	0	110.938	2001.76	1688.12	199.773	1992.67	1687.21	100.087	1808.03	1699.62	210.89	1816.58	1698.16	164.582	1773.57	1550.91	162.766	1697.19	1290.22	150.552	1916.04	1464.6	168.299	1981.7	1261.21	244.322	1694.34	1346.58	-27.7155	1835.48	1499.42	-102.024	1819.06	1304.87	-111.649	1817.09	1150.86	-119.06	1909.14	1003.13	-65.1226	1945.74	917.748	-125.951	1907.2	902.891	-113.711	1965.74	855.223
873	0	111.656	2013.12	1690.29	200.423	2004.1	1689.67	101.115	1819.18	1701.98	211.959	1828.03	1700.47	165.21	1784.78	1553.59	162.63	1708.95	1292.34	151.424	1927.5	1466.85	168.685	1993.05	1263.82	244.345	1705.96	1348.8	-27.0277	1847.24	1502.24	-101.987	1833.48	1307.7	-112.245	1833.44	1153.58	-117.788	1928.28	1007.11	-63.2639	1965.26	922.517	-124.884	1928	907.071	-111.502	1987.07	860.281
874	0	112.341	2024.06	1692.72	201.122	2015.13	1691.73	102.164	1830.22	1704.14	212.951	1839.2	1702.49	165.892	1796.31	1555.07	162.871	1720.82	1294.38	152.027	1938.9	1469	169.46	2004.51	1266.01	244.6	1717.57	1350.73	-26.1024	1859.22	1504.53	-101.914	1847.4	1310.26	-112.613	1849.8	1156.47	-116.605	1947.22	1011.35	-61.3312	1984.69	927.288	-123.615	1948.81	911.308	-109.164	2008.42	865.507
875	0	113.418	2035.32	1694.71	202.236	2026.75	1693.77	103.376	1841.29	1705.9	214.239	1850.65	1704.18	166.813	1807.76	1556.9	162.861	1732.54	1295.84	152.984	1950.33	1471.54	170.284	2015.84	1268.08	244.931	1729.31	1352.43	-25.0623	1871.09	1506.84	-101.549	1861.36	1312.76	-112.826	1865.92	1158.55	-115.622	1965.81	1015.48	-59.1463	2004.08	932.04	-122.221	1969.41	915.452	-106.946	2029.76	870.843
876	0	114.014	2046.24	1696.82	202.83	2037.73	1695.59	104.49	1852.25	1707.47	215.315	1861.76	1705.94	167.643	1819.29	1558.64	162.874	1744.48	1297.52	153.941	1962.04	1473.05	171.12	2027.55	1270.04	245.415	1741.04	1353.79	-24.2544	1882.84	1508.91	-101.43	1875.26	1315.29	-113.276	1881.55	1160.65	-114.384	1984.38	1019.04	-57.5535	2023.75	937.303	-120.599	1990.01	919.353	-104.953	2050.85	876.209
877	0	114.843	2057.46	1698.51	203.92	2049.44	1697.59	105.818	1863.39	1708.77	216.551	1873.03	1707.11	168.485	1830.94	1559.55	162.661	1756.27	1299.15	155.097	1973.73	1474.51	172.031	2038.95	1271.64	245.937	1752.73	1355.4	-23.3142	1894.88	1510.99	-101.077	1889.06	1317.21	-113.58	1897.31	1162.59	-113.006	2002.91	1023.06	-55.72	2043.12	942.161	-119.06	2010.47	923.656	-102.466	2072	881.612
878	0	115.7	2068.49	1699.99	204.673	2060.39	1698.78	107.159	1874.37	1709.55	217.949	1884.48	1708.03	169.926	1842.85	1560.55	162.541	1768.24	1300.44	156.169	1985.41	1475.6	173.192	2050.74	1272.97	246.774	1764.57	1356.26	-22.188	1907.27	1512.6	-100.792	1902.53	1318.99	-113.691	1912.96	1164.3	-111.886	2021.16	1026.68	-53.788	2062.63	946.992	-117.317	2030.77	927.268	-99.9823	2093.11	886.893
879	0	116.774	2079.68	1701.25	206.049	2072.01	1699.74	108.72	1885.49	1710.32	219.118	1895.62	1708.75	170.843	1854.6	1560.95	162.404	1780.32	1300.99	157.395	1997.17	1476.59	174.367	2062.5	1273.85	247.328	1776.4	1356.86	-21.0727	1919.43	1513.58	-100.499	1915.94	1320.41	-113.961	1928.29	1165.65	-110.894	2039.14	1030.09	-51.7691	2081.96	951.45	-115.443	2050.95	930.878	-97.5883	2114	891.985
880	0	117.682	2090.91	1701.98	206.592	2083.22	1700.6	110.042	1896.56	1710.47	220.618	1907.05	1708.76	171.587	1866.09	1561.61	162.242	1792.46	1301.53	158.739	2009.23	1476.81	175.828	2074.54	1273.81	247.92	1788.3	1357.2	-19.5638	1931.8	1513.96	-99.8155	1929.25	1321.11	-114.126	1943.66	1166.51	-109.274	2057.33	1032.83	-49.6397	2101.15	955.516	-113.43	2070.98	934.019	-95.196	2134.79	896.784
881	0	118.894	2102.42	1702.42	207.778	2094.99	1700.99	111.671	1907.88	1710.33	222.129	1918.53	1708.53	172.875	1878.31	1561.26	162.083	1804.55	1301.86	159.846	2021.22	1476.77	177.045	2086.53	1273.9	248.193	1800.18	1357.18	-18.4918	1944.2	1514.06	-99.0819	1942.77	1321.42	-114.15	1958.91	1167	-107.958	2075.11	1035.57	-47.4753	2120.29	959.526	-111.333	2090.88	937.536	-92.8055	2155.44	901.115
882	0	119.885	2113.54	1702.63	208.914	2106.52	1701.01	113.294	1919.13	1709.77	223.832	1930.4	1707.82	174.072	1890.3	1560.9	162.095	1816.69	1301.63	161.266	2033.31	1476.53	178.337	2098.23	1273.55	248.817	1812.18	1357.02	-17.1623	1956.84	1514.23	-98.2554	1956.25	1321.7	-114.47	1973.98	1167.35	-106.464	2092.96	1037.95	-45.237	2139.24	963.198	-109.388	2110.42	940.135	-89.7741	2176.09	905.898
883	0	121.403	2125.1	1702.43	210.06	2118.08	1700.84	114.847	1930.39	1709.16	225.308	1941.93	1707.1	175.593	1902.66	1560.29	162.266	1828.86	1301.21	162.588	2045.46	1475.82	179.757	2110.16	1272.75	249.184	1824.12	1356.42	-16.1208	1969.23	1513.91	-97.4581	1969.69	1321.85	-114.344	1989.24	1167.24	-104.897	2110.67	1040.1	-43.2506	2158.17	967.029	-106.942	2130.33	943.017	-87.2694	2196.31	910.287
884	0	122.818	2136.77	1702	211.602	2130.03	1700.5	117.505	1942.41	1708.43	227.693	1954.45	1706.08	176.08	1914.61	1559.12	162.388	1840.99	1300.72	163.958	2057.71	1474.99	181.223	2122.01	1271.85	249.838	1836.25	1355.43	-15.0283	1981.94	1513.17	-97.1027	1983.05	1321.29	-114.446	2004.3	1167.09	-103.653	2128.02	1042.14	-37.7756	2176.08	969.641	-104.693	2149.83	945.885	-84.7206	2216.36	914.652
885	0	123.902	2148.18	1701.64	213.091	2141.57	1699.38	119.249	1953.96	1707.1	229.432	1965.93	1704.73	177.572	1927.01	1557.77	162.993	1853.34	1299.18	165.274	2069.96	1473.72	182.489	2133.93	1270.58	250.348	1848.46	1354.09	-13.7454	1994.64	1512.37	-96.2818	1996.19	1320.72	-114.291	2019.3	1166.12	-101.928	2145.52	1043.85	-38.8666	2195.38	973.721	-102.476	2169.07	948.056	-82.7596	2236.15	918.941
886	0	125.323	2159.83	1700.61	214.757	2153.45	1698.23	121.045	1965.71	1705.03	231.643	1978.11	1702.8	178.942	1939.44	1556.09	163.613	1865.58	1297.55	166.641	2082.33	1472.25	183.801	2146.03	1268.96	251.068	1860.71	1352.72	-12.3663	2007.36	1510.96	-95.1667	2009.66	1319.51	-113.948	2034.3	1164.77	-100.592	2162.54	1045.4	-33.6537	2212.98	975.643	-100.109	2188.16	949.877	-80.0648	2255.76	922.568
887	0	127.12	2171.8	1699.18	216.063	2165.38	1696.7	122.905	1977.56	1703.18	233.468	1990.2	1700.52	180.198	1951.86	1554.22	164.222	1877.98	1295.57	168.01	2094.79	1470.22	185.267	2158.29	1266.85	251.753	1873.09	1350.84	-11.0001	2020.03	1509.11	-93.8822	2023.31	1317.66	-113.666	2049.17	1163.49	-98.7539	2179.82	1046.34	-34.0386	2231.54	979.146	-97.6563	2207.04	951.38	-77.0521	2275.28	925.571
888	0	128.777	2183.87	1697.35	217.717	2177.58	1694.91	124.86	1989.49	1701.06	234.917	2002	1698.31	181.502	1964.34	1551.9	165.266	1890.45	1293.89	169.447	2107.43	1467.88	186.643	2170.56	1264.38	252.879	1885.43	1348.11	-9.77264	2032.81	1507.15	-93.1518	2036.69	1315.61	-113.288	2064.14	1161.7	-96.9449	2196.66	1046.94	-32.3493	2249.49	981.008	-95.3193	2225.83	952.678	-74.2222	2294.34	928.361
889	0	130.589	2196.01	1695.36	219.735	2189.98	1692.65	126.898	2001.53	1698.67	237.323	2014.68	1695.36	182.888	1977.01	1549.33	167.281	1903.33	1290.54	170.964	2120.13	1465.35	187.968	2183.03	1261.75	254.059	1898.06	1345.61	-8.23814	2045.59	1504.84	-92.0117	2050.35	1313.48	-112.757	2078.91	1159.34	-94.9843	2213.6	1047.08	-29.1707	2267.16	982.584	-92.7175	2244.2	953.128	-71.4733	2313.24	930.893
890	0	132.416	2208.3	1693.25	221.562	2202.4	1690.38	129.018	2013.8	1695.86	239.178	2026.98	1692.54	184.417	1989.75	1546.75	168.702	1915.9	1287.96	172.51	2132.88	1462.58	189.406	2195.6	1258.86	255.209	1910.69	1342.96	-6.72976	2058.37	1502.15	-90.6004	2063.97	1311.01	-111.871	2093.78	1157.73	-93.0614	2230.31	1047.15	-27.2306	2284.29	983.825	-90.1378	2262.47	953.696	-68.5714	2331.79	932.894
891	0	134.289	2220.61	1690.89	223.481	2214.83	1687.89	131.119	2026.13	1693.03	241.147	2039.26	1689.56	186.011	2002.49	1544.01	170.065	1928.55	1284.95	174.138	2145.69	1459.81	190.676	2208.28	1255.94	256.343	1923.33	1340.21	-5.18862	2071.26	1499.2	-89.3855	2077.36	1308.35	-110.833	2108.57	1155.28	-91.4406	2246.6	1046.92	-24.6623	2301.8	985.011	-87.6648	2280.33	954.009	-65.9584	2350.11	934.777
892	0	136.129	2233.02	1688.53	225.341	2227.3	1685.3	133.277	2038.61	1689.92	243.463	2051.94	1686.37	188.255	2015.42	1541.23	171.713	1941.46	1281.8	175.746	2158.59	1457.06	191.779	2221.1	1253.18	257.484	1936.13	1337	-3.50988	2084.26	1496.48	-87.9305	2091.06	1305.29	-109.53	2123.25	1152.28	-89.2503	2262.95	1046.33	-22.7405	2318.68	985.928	-85.1586	2298.17	953.961	-63.3812	2368.05	936.297
893	0	138.132	2245.55	1686.05	227.699	2239.9	1682.26	135.56	2051.24	1686.76	246.834	2065.47	1682.2	190.268	2028.58	1537.86	173.581	1954.41	1278.26	177.486	2171.64	1453.95	193.173	2234.08	1250.05	258.993	1949.15	1333.36	-1.73697	2097.06	1493.58	-86.4406	2104.58	1302.33	-108.263	2137.83	1149.38	-87.3901	2279.01	1045.65	-20.2026	2335.63	986.52	-82.7488	2315.61	953.917	-60.8793	2385.62	937.325
894	0	140.348	2258.34	1683.11	229.904	2252.74	1679.3	137.729	2063.95	1683.57	247.903	2077.28	1679.82	191.783	2041.56	1534.34	175.538	1967.5	1275.12	179.27	2184.79	1450.91	194.352	2247.14	1246.91	260.439	1962.14	1330.05	-0.167308	2109.87	1490.74	-84.9053	2118.12	1299.57	-106.652	2152.35	1146.56	-85.2243	2294.99	1044.34	-18.0409	2352.05	986.136	-80.2908	2332.69	952.998	-58.4525	2402.96	937.875
895	0	142.77	2271.31	1679.97	231.921	2265.65	1676.19	140.05	2076.93	1680.19	250.079	2090.11	1676.27	194.135	2054.61	1531.42	177.556	1980.76	1271.9	181.157	2197.91	1447.63	195.793	2260.51	1243.55	262.24	1975.44	1326.36	1.80361	2122.97	1487.39	-82.97	2131.77	1296.11	-104.744	2167.06	1143.31	-83.3857	2310.54	1042.9	-15.8225	2368.56	985.785	-77.9203	2349.44	952.363	-55.782	2420.06	938.005
896	0	145.061	2284.23	1676.58	234.164	2278.83	1672.79	142.523	2089.8	1676.92	252.588	2103.27	1672.74	196.248	2067.86	1527.61	179.621	1994.13	1268.14	183.031	2211.21	1444.19	197.218	2273.89	1239.92	264.251	1988.99	1322.73	4.3763	2136.33	1483.95	-80.9148	2145.29	1292.48	-102.701	2181.45	1140.1	-81.0575	2326.07	1041.03	-13.6273	2384.63	984.628	-75.5538	2365.78	951.165	-53.9171	2436.43	937.541
897	0	147.357	2297.22	1673.27	236.62	2292.01	1669.15	145.066	2102.82	1673.51	255.1	2116.4	1668.99	198.361	2080.98	1523.76	181.609	2007.71	1264.18	185.201	2224.77	1440.68	198.807	2287.45	1236.36	266.48	2002.72	1318.55	6.28264	2149.08	1480.42	-78.3256	2158.78	1289.13	-100.442	2195.71	1137.07	-78.8231	2341.26	1039.03	-11.1567	2400.6	983.349	-72.9269	2381.88	949.558	-51.4234	2452.59	936.553
898	0	149.867	2310.42	1669.9	238.975	2305.11	1665.84	147.578	2115.99	1670	257.646	2129.53	1665.46	201.27	2094.55	1520.28	183.248	2021.2	1260.57	187.56	2238.53	1437.16	200.4	2301.02	1232.84	268.81	2016.59	1314.64	8.87535	2162.37	1476.99	-75.9005	2172.24	1285.99	-97.9343	2209.88	1133.51	-76.6105	2356.29	1036.7	-9.07193	2415.89	981.595	-70.5555	2397.36	947.492	-49.1472	2468.47	935.468
899	0	152.366	2323.67	1666.74	241.573	2318.35	1662.46	150.25	2129.24	1666.58	260.103	2142.64	1662.06	203.885	2107.77	1517.22	185.165	2034.86	1256.88	189.642	2251.91	1433.89	202.011	2314.8	1229.49	271.108	2030.44	1311.04	11.2514	2175.58	1473.69	-73.3762	2185.86	1283.04	-95.2289	2224.06	1130.45	-74.1257	2371.14	1034.4	-6.99868	2431.29	980.024	-68.2269	2412.51	945.384	-46.7454	2483.94	933.782
900	0	154.99	2336.98	1663.5	244.433	2331.64	1658.95	152.898	2142.43	1663.21	263.315	2156.4	1658.6	206.314	2121.13	1513.09	187.189	2048.8	1253.35	192.226	2265.62	1430.81	203.774	2328.77	1226.51	273.765	2044.34	1307.39	13.7897	2188.83	1470.64	-70.4576	2199.71	1280.16	-92.5053	2237.82	1127.42	-71.9935	2385.36	1031.98	-4.98762	2445.89	977.944	-66.0373	2427.42	943.289	-45.1652	2498.6	932.211
901	0	157.557	2350.26	1660.35	247.307	2345.09	1655.63	155.777	2155.81	1659.88	267.615	2170.78	1654.41	209.166	2134.24	1510.27	189.145	2062.77	1249.86	195.006	2279.38	1427.62	205.895	2342.72	1223.38	276.263	2058.33	1303.86	16.5824	2202.34	1467.89	-67.6179	2213.21	1277.4	-89.5902	2251.44	1124.21	-69.7974	2399.33	1029.3	-3.09324	2460.39	975.867	-63.9283	2441.67	940.556	-43.3811	2513.01	929.984
902	0	160.238	2363.63	1657.38	250.275	2358.83	1652.63	158.752	2169.24	1657	268.463	2182.72	1652.75	212.308	2148.07	1506.73	191.189	2076.77	1246.73	197.706	2293.27	1424.73	208.246	2356.88	1220.23	278.756	2072.34	1300.35	19.4244	2215.67	1464.7	-64.7896	2227.08	1274.58	-86.6185	2264.99	1120.98	-67.5229	2413.28	1026.66	-1.01992	2474.94	973.314	-61.7601	2455.75	937.757	-41.7742	2527.06	927.293
903	0	163.057	2377.22	1654.96	252.397	2372.15	1650.47	161.833	2182.71	1654.36	273.416	2197.84	1649.11	215.644	2161.85	1503.85	193.316	2091.01	1243.95	200.743	2307.32	1421.82	210.648	2370.97	1217.5	281.113	2086.24	1296.94	22.4556	2229.13	1461.93	-61.5453	2241.22	1271.93	-83.452	2278.29	1118.1	-65.2112	2426.72	1023.55	0.891015	2488.62	970.392	-59.7581	2469.03	934.914	-40.0136	2540.69	924.127
904	0	165.691	2390.68	1652.88	255.123	2386.03	1648.65	164.986	2196.27	1652.09	276.442	2211.62	1646.94	219.313	2175.89	1501.54	195.383	2105.19	1241.55	203.839	2321.4	1419.42	213.525	2385.3	1215.04	283.443	2100.07	1294.35	25.5178	2242.84	1459.42	-58.3335	2255.12	1269.29	-80.0116	2291.58	1115.63	-62.8746	2439.98	1020.42	2.51111	2501.61	966.492	-57.7428	2481.91	931.83	-38.6002	2553.38	920.94
905	0	168.559	2404.4	1651.31	257.793	2399.96	1647.17	168.244	2209.88	1650.52	279.176	2225.31	1645.54	222.148	2189.79	1499.72	196.969	2119.52	1239.74	206.755	2335.4	1417.78	216.297	2399.36	1213.42	285.556	2113.78	1292.48	28.3665	2256.37	1457.37	-55.147	2268.88	1267.1	-76.5986	2304.54	1113.5	-60.6496	2452.65	1017.4	4.47487	2514.83	963.324	-56.0737	2494.33	928.8	-37.1494	2565.94	917.405
906	0	171.271	2417.95	1650.04	260.613	2413.74	1645.87	171.555	2223.45	1649.1	282.335	2239.05	1644.01	225.467	2204.07	1498.57	198.595	2133.71	1238.53	209.689	2349.5	1416.33	219.359	2413.44	1212.13	287.947	2127.77	1290.83	31.3556	2270.26	1456.28	-51.927	2282.69	1265.86	-73.0936	2317.42	1111.98	-58.4738	2464.89	1014.66	6.31097	2527.1	959.948	-54.3636	2505.79	925.896	-35.5528	2577.68	913.826
907	0	174.241	2431.49	1649.57	263.513	2427.58	1645.19	175.129	2237.09	1648.21	286.225	2253.29	1642.86	228.841	2218.36	1497.41	200.423	2147.74	1237.84	212.49	2363.32	1415.91	222.138	2427.34	1211.86	291.058	2141.81	1290.17	34.4538	2284.17	1455.73	-48.9006	2295.9	1265.05	-69.3998	2330.13	1111.03	-56.186	2476.73	1012.16	7.56304	2538.63	956.652	-52.6211	2516.78	923.051	-34.7508	2588.42	910.441
908	0	176.805	2445	1649.52	266.481	2441.48	1644.92	178.534	2250.63	1647.47	289.868	2267.23	1642.09	232.002	2232.13	1497.07	201.825	2161.52	1237.23	215.56	2377.2	1415.42	225.11	2441.4	1211.72	293.063	2155.38	1289.54	37.3416	2297.87	1455.66	-45.6227	2309.19	1264.99	-65.9626	2342.63	1110.37	-54.3526	2487.85	1010.06	9.45097	2549.97	953.624	-50.7522	2527.02	919.575	-34.1945	2598.54	907.047
909	0	179.731	2458.64	1649.46	269.382	2455.09	1644.78	181.851	2264.2	1647.42	293.272	2281.03	1642.08	234.802	2245.55	1497.2	203.908	2175.37	1237.25	218.354	2391	1415.37	227.692	2455.08	1212.01	295.757	2169.24	1289.55	40.2609	2311.56	1455.9	-42.5995	2322.13	1265.38	-62.2159	2355.21	1110.72	-52.183	2498.89	1008.1	10.7153	2560.53	950.29	-49.4195	2536.53	916.917	-33.4976	2607.99	903.094
910	0	182.555	2471.94	1649.75	272.306	2468.85	1644.88	185.033	2277.53	1648.17	296.479	2294.83	1642.55	238.028	2258.84	1497.38	206.374	2189.11	1237.5	221.324	2404.52	1415.73	230.174	2468.92	1212.82	298.328	2183.05	1289.48	43.3465	2325.01	1456.9	-39.7179	2335.34	1266.16	-58.7356	2367.55	1111.48	-49.9971	2509.45	1006.22	12.2742	2571.13	947.293	-48.1189	2545.58	914.495	-32.7962	2616.84	899.631
911	0	185.247	2485.27	1650.44	274.991	2482.27	1645.56	188.202	2290.8	1649.48	299.65	2308.45	1643.39	240.909	2271.83	1498.36	209.6	2203.02	1238.54	224.062	2417.84	1416.9	232.616	2482.71	1213.83	302.947	2197.37	1290.33	46.1119	2338.02	1457.94	-37.1038	2348.41	1267.48	-55.414	2379.57	1112.52	-48.1372	2519.66	1004.77	13.6583	2580.55	944.108	-47.0932	2553.96	912.449	-31.9779	2625.2	895.623
912	0	187.849	2498.48	1651.43	277.654	2495.69	1646.59	191.381	2304.14	1650.82	302.617	2321.77	1645.23	243.501	2284.43	1499.18	212.084	2216.4	1239.33	226.589	2430.98	1418.42	234.782	2496.22	1215.41	303.578	2209.89	1290.88	48.9346	2350.69	1459.51	-34.4497	2361.72	1269.26	-52.1654	2391.67	1114.41	-46.3492	2529.51	1003.57	14.8576	2589.45	941.035	-46.405	2561.98	910.85	-31.3483	2632.81	891.959
913	0	190.288	2511.6	1652.42	280.042	2508.95	1647.81	194.299	2317.13	1652.92	305.264	2334.81	1647.03	246.762	2297.5	1500.69	215.093	2229.68	1240.74	228.802	2443.86	1419.93	236.76	2509.89	1217.33	308.729	2224.58	1292.32	51.7976	2363.12	1461.45	-31.9623	2374.55	1271.13	-48.9066	2403.28	1116.01	-44.4715	2539.25	1002.86	15.65	2597.8	938.395	-45.4332	2569.62	909.044	-30.7516	2640.08	888.529
914	0	193.132	2524.39	1654.03	282.611	2521.73	1649	197.018	2329.94	1654.68	308.086	2347.98	1648.95	249.423	2309.89	1502.11	217.242	2242.42	1241.93	230.962	2456.54	1422.16	238.67	2523.39	1219.75	311.904	2238.07	1293.64	54.2176	2375.09	1463.56	-29.9172	2387.08	1273.51	-45.9188	2414.81	1118.3	-42.8583	2548.52	1002.34	16.9544	2605.73	935.779	-45.1358	2576.95	908.297	-29.7728	2646.88	884.772
915	0	195.366	2536.98	1655.77	285.051	2534.34	1650.8	199.601	2342.38	1657.05	310.849	2360.71	1650.99	252.004	2322.45	1503.59	220.35	2255.54	1243.6	232.8	2469.06	1424.37	240.333	2536.66	1222.15	314.812	2251.16	1295.23	56.5026	2386.95	1465.88	-27.8381	2399.84	1275.99	-43.1096	2425.92	1120.64	-41.4809	2557.47	1002.36	17.4742	2613.4	934.044	-44.8156	2584.09	907.712	-29.1866	2653.35	882.013
916	0	197.659	2549.18	1657.78	287.255	2546.7	1652.7	202.052	2354.84	1659.62	313.337	2373.13	1653.18	254.104	2334.57	1505.91	223.311	2268.23	1245.73	234.544	2481.37	1426.97	241.701	2549.83	1225.12	317.863	2264.07	1297.06	58.5126	2398.54	1468.32	-25.9912	2411.94	1278.94	-40.5036	2436.55	1122.77	-40.2759	2566.03	1002.84	17.8579	2620.61	932.419	-46.1384	2591.19	908.253	-28.9401	2659.7	879.688
917	0	199.341	2561.4	1660.16	289.353	2558.86	1655.01	204.245	2367.02	1661.78	315.472	2385.31	1655.33	255.305	2346.6	1508.01	226.599	2280.57	1248.16	235.994	2493.5	1429.47	242.733	2562.65	1227.88	320.725	2276.78	1299.44	60.3812	2410.04	1471.15	-24.3916	2423.66	1281.73	-38.429	2447.13	1125.63	-39.2126	2574.42	1003.46	18.5628	2627.49	931.225	-46.1673	2598.12	908.159	-28.4023	2665.62	877.49
918	0	201.547	2573.23	1662.91	291.76	2570.82	1656.97	206.163	2378.75	1664.28	317.745	2397.39	1657.54	257.673	2358.59	1510.24	229.318	2292.93	1250.2	237.329	2505.56	1432.17	243.76	2575.23	1230.71	323.249	2289.44	1301.58	61.9108	2421.05	1473.74	-22.974	2434.79	1284.19	-36.5785	2457.27	1128.26	-38.312	2582.71	1004.48	19.034	2634.4	930.633	-45.1816	2604.73	907.808	-27.9222	2671.44	875.555
919	0	203.357	2585.04	1665.57	293.464	2582.63	1659.56	208.137	2390.65	1666.87	319.494	2409.11	1659.83	259.912	2370.74	1512.53	231.479	2304.91	1252.02	238.418	2517.54	1435.13	244.302	2587.56	1233.4	325.041	2301.49	1303.77	63.4386	2432.25	1476.17	-21.1971	2445.84	1286.95	-35.1819	2467.23	1130.94	-37.5894	2590.65	1005.43	19.5557	2640.69	930.015	-45.434	2611.44	908.514	-27.6203	2676.84	873.918
920	0	204.659	2596.39	1667.98	294.826	2594.3	1662.31	209.677	2402.1	1669.12	321.151	2420.69	1662.35	261.181	2382.3	1514.98	233.902	2316.92	1254.5	239.362	2529.24	1437.42	244.861	2599.65	1236.06	327.489	2313.78	1306.34	65.0177	2443.41	1478.76	-20.0416	2455.81	1288.93	-32.9403	2476.36	1132.66	-37.035	2598.32	1006.29	19.7182	2647.09	929.733	-48.2186	2618.37	911.126	-27.1528	2682.3	872.723
921	0	206.091	2607.79	1670.71	296.061	2605.62	1664.89	211.148	2413.5	1671.96	322.516	2432.1	1664.72	262.722	2393.96	1517.42	236.185	2328.67	1256.88	240.458	2541.09	1440.12	245.322	2611.48	1238.49	329.893	2325.98	1308.78	65.9958	2454.29	1481.02	-18.7011	2465.69	1291.44	-32.0381	2485.67	1135.58	-36.2502	2606.02	1007.37	20.1819	2653.12	929.531	-48.1767	2624.69	911.956	-26.7689	2687.7	871.888
922	0	207.475	2619.24	1673.71	297.203	2617	1667.8	212.467	2424.91	1674.58	323.668	2443.51	1667.47	264.381	2405.73	1520.14	238.342	2340.36	1259.65	241.233	2552.4	1442.4	245.749	2623.3	1241.21	331.894	2337.76	1311.67	67.1688	2465.44	1483.84	-17.5105	2475.25	1293.76	-31.4357	2494.52	1138.74	-35.7975	2613.34	1008.74	20.3317	2658.34	929.427	-48.3511	2630.84	913.101	-26.6392	2692.87	871.522
923	0	208.473	2630.48	1676.79	298.357	2628.24	1670.74	213.866	2436.31	1677.25	324.76	2454.75	1670.17	264.99	2416.87	1522.81	240.338	2351.87	1262.31	241.931	2563.78	1445.31	246.135	2635	1243.85	333.645	2349.44	1314.63	68.2982	2476.23	1486.62	-16.3031	2484.39	1296.32	-30.5802	2502.86	1141.24	-35.4214	2620.27	1010.34	20.4774	2664.79	930.306	-47.1756	2636.72	913.963	-26.5089	2697.75	871.354
924	0	209.252	2641.46	1679.7	299.072	2639.33	1673.89	214.771	2447.19	1679.87	325.77	2465.95	1672.81	266.334	2428.43	1525.77	242.315	2363.31	1265.03	242.696	2575.11	1448.08	246.41	2646.37	1246.71	335.315	2361.01	1317.5	69.0638	2487.01	1489.14	-15.5298	2492.86	1298.92	-29.345	2510.42	1142.91	-35.469	2626.91	1011.79	24.8998	2669.5	929.939	-48.8674	2642.41	916.013	-26.6962	2702.75	871.871
925	0	209.717	2652.15	1682.74	299.852	2650.47	1676.76	215.611	2458.08	1682.79	327.009	2477.23	1675.48	267.629	2439.78	1528.78	244.206	2374.83	1267.73	243.277	2586.15	1450.97	246.835	2657.83	1249.57	336.695	2372.48	1320.27	70.0193	2497.85	1492.05	-14.5612	2501.42	1301.27	-28.5599	2517.75	1144.77	-35.649	2633.11	1013.81	25.0076	2672.99	929.378	-48.9788	2647.84	917.545	-27.0128	2707.53	872.605
926	0	210.307	2663.08	1686.15	300.564	2661.51	1679.66	216.58	2469.19	1685.58	327.914	2488.42	1678.41	268.823	2451.12	1531.66	246.075	2386.13	1270.6	244.036	2597.31	1454.14	247.197	2668.92	1252.53	338.013	2383.93	1323.19	70.8104	2508.55	1495.01	-13.8367	2509.91	1304.16	-28.763	2526.04	1148.9	-35.8834	2639.37	1015.76	24.5902	2680.03	931.766	-47.4337	2652.78	917.924	-27.3747	2712.27	873.531
927	0	210.725	2673.99	1689.16	300.929	2672.59	1683.05	217.151	2480.04	1688.12	328.376	2499.43	1681.44	268.608	2461.94	1534.95	247.786	2397.56	1273.29	244.741	2608.3	1457.14	247.835	2680.16	1255.63	339.255	2395.14	1326.35	71.6113	2519.36	1497.93	-12.921	2518.24	1307.18	-27.9673	2532.76	1150.67	-36.0907	2645.24	1017.52	22.9419	2686.03	932.98	-47.3896	2657.31	919.036	-28.1293	2716.83	874.759
928	0	210.926	2684.7	1691.8	301.312	2683.57	1686	217.561	2490.93	1690.99	328.989	2510.54	1684.35	270.83	2473.85	1537.98	249.57	2408.76	1276.5	245.235	2619.36	1460.14	248.426	2691.18	1258.45	340.845	2406.51	1329.5	72.2716	2530.05	1500.75	-12.5363	2526.46	1310.05	-27.5247	2540.13	1153.8	-36.4	2650.93	1019.23	21.6356	2687.73	932.275	-49.9126	2662.47	922.422	-28.7717	2721.38	875.959
929	0	213.282	2697.92	1695.65	302.216	2694.74	1688.37	218.446	2502.18	1693.88	329.53	2521.65	1687.06	270.496	2484.09	1540.7	251.26	2420.03	1279.24	245.803	2630.39	1462.92	249.35	2702.37	1261.2	342.172	2417.89	1332.27	73.009	2540.86	1503.54	-11.9927	2534.63	1312.56	-27.2123	2547.02	1156.41	-36.6498	2656.68	1021.04	20.2622	2692.46	933.237	-50.4983	2667.21	924.218	-29.1264	2726.07	877.174
930	0	214.01	2709.23	1698.05	301.777	2705.73	1691.52	218.749	2512.61	1695.97	330.044	2532.73	1689.9	271.165	2495.03	1543.12	252.741	2431.23	1281.65	246.433	2641.41	1465.61	250.146	2713.39	1263.86	343.434	2429.17	1335.2	73.6948	2551.54	1505.93	-11.1954	2543.29	1315.59	-27.0299	2554.88	1160.19	-37.0944	2662.12	1022.7	18.3046	2698.56	935.103	-50.8173	2671.82	925.603	-30.1595	2730.52	878.488
931	0	214.126	2720.37	1700.46	301.854	2716.77	1694.39	219.118	2523.63	1698.5	330	2543.72	1692.73	271.053	2505.9	1545.72	254.115	2442.45	1284.08	246.8	2652.14	1467.95	250.811	2724.2	1266.47	344.391	2440.34	1337.86	74.3502	2562.27	1508.1	-10.7692	2551.65	1317.83	-26.8356	2562	1163.03	-37.4584	2667.66	1024.21	16.2294	2705.15	937.166	-50.8576	2676.26	927.053	-31.2925	2735.31	879.916
932	0	211.57	2727.84	1702.31	301.779	2727.88	1696.96	219.132	2534.61	1700.9	330.173	2554.82	1695.44	272.425	2517.28	1548.61	255.32	2453.41	1286.53	247.353	2662.97	1470.4	251.693	2734.88	1268.95	345.451	2451.61	1340.43	74.9275	2573.04	1510.57	-10.1373	2560	1320.18	-26.1727	2568.02	1164.69	-37.7725	2673.29	1025.76	14.1821	2711.26	938.772	-51.0924	2680.79	928.52	-32.5178	2740.25	881.57
933	0	214.62	2742.63	1705.11	301.945	2738.84	1699.3	219.216	2545.67	1703.05	330.586	2566.05	1697.48	273.452	2528.54	1550.94	256.472	2464.57	1289.14	247.838	2673.92	1472.66	252.407	2745.42	1271.18	346.859	2462.85	1342.98	75.4671	2583.83	1512.77	-9.75392	2568.43	1322.99	-25.7687	2574.83	1166.98	-38.1929	2678.98	1027.44	13.8944	2716.8	940.75	-51.407	2685.33	930.012	-33.6454	2744.87	882.719
934	0	211.551	2749.77	1706.7	302.186	2750.12	1701.13	219.436	2556.88	1704.89	330.596	2577.22	1699.66	272.148	2538.92	1552.69	257.701	2475.65	1291.31	248.166	2684.77	1474.93	253.123	2756.23	1273.51	347.735	2473.93	1345.23	75.9004	2594.65	1514.98	-9.60724	2577.04	1324.94	-25.5086	2581.82	1169.11	-38.7771	2684.47	1028.97	14.8521	2725.45	944.95	-51.6489	2689.92	931.232	-34.7105	2749.63	883.891
935	0	211.534	2760.86	1708.41	301.998	2761.23	1703.25	219.495	2568.01	1706.95	330.537	2588.39	1701.69	272.914	2549.74	1554.78	258.583	2486.7	1293.28	248.332	2695.61	1476.95	253.616	2766.64	1275.56	348.736	2485.02	1347.47	76.1843	2605.46	1516.76	-8.90202	2585.89	1327.31	-25.0656	2588.86	1171.25	-39.3349	2690.1	1030.31	13.5517	2731.77	946.687	-50.2746	2694.46	931.644	-35.7761	2754.45	884.569
936	0	211.413	2771.95	1709.89	301.279	2772.23	1705.02	219.119	2579.22	1708.38	330.577	2599.63	1703.52	273.907	2560.29	1556.46	259.529	2497.77	1294.9	248.6	2706.29	1478.51	254.141	2777.32	1277.12	349.754	2496.08	1349.35	76.5215	2616.16	1518.23	-8.38949	2594.85	1329.23	-24.7808	2595.69	1173.09	-39.828	2695.92	1031.44	12.523	2737.96	948.064	-50.1321	2699.25	932.477	-36.9745	2759.26	885.336
937	0	211.364	2783.27	1710.92	301.137	2783.43	1706.44	219.16	2590.6	1709.7	330.425	2610.88	1705.18	273.803	2571.97	1558.08	260.244	2508.9	1295.98	248.927	2717.24	1479.97	254.618	2788.29	1278.57	350.342	2507.08	1350.9	76.9612	2627	1519.26	-8.32085	2603.68	1330.41	-24.3003	2603	1174.71	-40.1215	2701.9	1032.19	11.6469	2744.17	948.678	-49.8647	2704.29	932.972	-37.9647	2764.47	885.69
938	0	211.12	2794.54	1711.65	301.433	2794.85	1707.17	218.791	2601.69	1710.84	330.342	2622.32	1706.35	274.09	2582.85	1559.5	261.096	2520.07	1297.32	249.065	2728.1	1481.07	254.853	2798.86	1279.74	351.01	2518.18	1352.08	77.1192	2637.62	1519.97	-7.3772	2612.57	1331.66	-23.765	2610.39	1176.01	-40.4506	2707.96	1032.69	10.6447	2750.21	948.866	-50.1301	2709.34	933.521	-39.4982	2769.34	886.438
939	0	210.898	2805.88	1712.08	301.353	2806.41	1707.72	218.821	2613.4	1711.6	329.912	2633.76	1707.42	273.947	2593.81	1560.52	261.69	2531.13	1298.86	249.304	2739.22	1481.82	255.356	2810.05	1280.53	351.953	2529.34	1353.28	77.2568	2648.66	1520.74	-7.38173	2621.62	1332.82	-23.175	2617.75	1177.11	-40.7964	2714.14	1032.88	9.73469	2756.65	948.967	-48.3757	2714.13	932.607	-40.3493	2774.72	886.464
940	0	210.557	2817.34	1712.35	300.391	2817.35	1708.44	218.165	2624.5	1712.13	329.529	2645.15	1708.36	273.929	2605.03	1561.18	262.358	2542.3	1299.49	249.348	2750.27	1482.59	255.539	2820.87	1281.27	352.469	2540.42	1354.3	77.3247	2659.3	1521.02	-6.91537	2630.6	1333.47	-22.863	2625.42	1177.47	-41.1532	2720.55	1032.98	8.89123	2763.18	948.818	-46.5789	2718.97	931.184	-41.3827	2780.02	886.029
941	0	210.191	2828.75	1712.27	300.047	2829.05	1708.46	218.132	2636.21	1712.32	329.167	2656.57	1709	274.137	2616.12	1561.58	262.757	2553.51	1299.26	249.373	2761.27	1482.88	255.813	2832.15	1281.58	352.794	2551.43	1354.67	77.5461	2670.28	1521.08	-6.90787	2639.76	1333.81	-22.2279	2633.32	1178.34	-41.521	2727.12	1032.86	8.14023	2769.87	948.622	-46.7544	2724.73	930.822	-42.1434	2785.54	885.506
942	0	209.67	2840.18	1711.83	300.282	2840.83	1708.36	217.733	2647.62	1712.42	329.071	2668.31	1708.89	274.284	2627.56	1561.61	263.045	2564.68	1299.31	249.299	2772.29	1482.9	255.868	2843.28	1281.7	353.056	2562.46	1354.83	77.4542	2681.18	1520.88	-3.79787	2648.66	1332.94	-21.5635	2641.32	1178.63	-41.7403	2733.88	1032.32	7.32026	2776.58	947.772	-46.8392	2730.81	930.347	-42.9984	2791.57	884.708
943	0	209.2	2851.77	1711.32	299.502	2852.04	1707.41	217.336	2659.38	1711.88	328.594	2679.95	1708.49	273.863	2638.7	1561.47	263.324	2575.98	1299.18	249.346	2783.41	1482.66	255.806	2854.16	1281.59	353.363	2573.71	1354.51	77.4408	2692.36	1520.64	-6.53552	2658.49	1334.11	-21.193	2649.59	1178.14	-41.9497	2741.1	1031.86	6.64949	2783.47	946.938	-47.0143	2737.07	929.695	-43.7739	2797.51	883.719
944	0	208.622	2863.33	1710.33	299.181	2864.06	1706.56	216.651	2671.03	1711.37	328.096	2691.76	1708.08	274.434	2650.43	1560.53	263.514	2587.16	1298.68	249.101	2794.63	1482.06	255.815	2865.2	1281.17	353.6	2584.84	1354.47	77.3603	2703.56	1519.99	-7.50031	2668.26	1333.42	-20.8024	2658.18	1177.8	-42.2437	2748.31	1030.73	6.11668	2790.74	945.785	-48.8335	2746.79	925.081	-44.497	2803.77	882.432
[truncated: 69 more columns]

## Sheet: Sheet2
Devices
		025370 - Force			025370 - Moment			025370 - CoP			027571 - Force			027571 - Moment			027571 - CoP			037720 - Force			037720 - Moment			037720 - CoP
Frame	Sub Frame	Fx	Fy	Fz	Mx	My	Mz	Cx	Cy	Cz	Fx	Fy	Fz	Mx	My	Mz	Cx	Cy	Cz	Fx	Fy	Fz	Mx	My	Mz	Cx	Cy	Cz
		N	N	N	N.mm	N.mm	N.mm	mm	mm	mm	N	N	N	N.mm	N.mm	N.mm	mm	mm	mm	N	N	N	N.mm	N.mm	N.mm	mm	mm	mm
691	0	0	0	0	0	0	0	200	300	0	0	0	0	0	0	0	200	903	0	0	0	0	0	0	0	603	903	0
691	1	0	0	0	0	0	0	200	300	0	0	0	0	0	0	0	200	903	0	0	0	0	0	0	0	603	903	0
691	2	0	0	0	0	0	0	200	300	0	0	0	0	0	0	0	200	903	0	0	0	0	0	0	0	603	903	0
691	3	0	0	0	0	0	0	200	300	0	0	0	0	0	0	0	200	903	0	0	0	0	0	0	0	603	903	0
691	4	0	0	0	0	0	0	200	300	0	0	0	0	0	0	0	200	903	0	0	0	0	0	0	0	603	903	0
691	5	0	0	0	0	0	0	200	300	0	0	0	0	0	0	0	200	903	0	0	0	0	0	0	0	603	903	0
691	6	0	0	0	0	0	0	200	300	0	0	0	0	0	0	0	200	903	0	0	0	0	0	0	0	603	903	0
691	7	0	0	0	0	0	0	200	300	0	0	0	0	0	0	0	200	903	0	0	0	0	0	0	0	603	903	0
691	8	0	0	0	0	0	0	200	300	0	0	0	0	0	0	0	200	903	0	0	0	0	0	0	0	603	903	0
691	9	0	0	0	0	0	0	200	300	0	0	0	0	0	0	0	200	903	0	0	0	0	0	0	0	603	903	0
692	0	0	0	0	0	0	0	200	300	0	0	0	0	0	0	0	200	903	0	0	0	0	0	0	0	603	903	0
692	1	0	0	0	0	0	0	200	300	0	0	0	0	0	0	0	200	903	0	0	0	0	0	0	0	603	903	0
692	2	0	0	0	0	0	0	200	300	0	0	0	0	0	0	0	200	903	0	0	0	0	0	0	0	603	903	0
692	3	0	0	0	0	0	0	200	300	0	0	0	0	0	0	0	200	903	0	0	0	0	0	0	0	603	903	0
692	4	0	0	0	0	0	0	200	300	0	0	0	0	0	0	0	200	903	0	0	0	0	0	0	0	603	903	0
692	5	0	0	0	0	0	0	200	300	0	0	0	0	0	0	0	200	903	0	0	0	0	0	0	0	603	903	0
692	6	0	0	0	0	0	0	200	300	0	0	0	0	0	0	0	200	903	0	0	0	0	0	0	0	603	903	0
692	7	0	0	0	0	0	0	200	300	0	0	0	0	0	0	0	200	903	0	0	0	0	0	0	0	603	903	0
692	8	0	0	0	0	0	0	200	300	0	0	0	0	0	0	0	200	903	0	0	0	0	0	0	0	603	903	0
692	9	0	0	0	0	0	0	200	300	0	0	0	0	0	0	0	200	903	0	0	0	0	0	0	0	603	903	0
693	0	0	0	0	0	0	0	200	300	0	0	0	0	0	0	0	200	903	0	0	0	0	0	0	0	603	903	0
693	1	0	0	0	0	0	0	200	300	0	0	0	0	0	0	0	200	903	0	0	0	0	0	0	0	603	903	0
693	2	0	0	0	0	0	0	200	300	0	0	0	0	0	0	0	200	903	0	0	0	0	0	0	0	603	903	0
693	3	0	0	0	0	0	0	200	300	0	0	0	0	0	0	0	200	903	0	0	0	0	0	0	0	603	903	0
693	4	0	0	0	0	0	0	200	300	0	0	0	0	0	0	0	200	903	0	0	0	0	0	0	0	603	903	0
693	5	0	0	0	0	0	0	200	300	0	0	0	0	0	0	0	200	903	0	0	0	0	0	0	0	603	903	0
693	6	0	0	0	0	0	0	200	300	0	0	0	0	0	0	0	200	903	0	0	0	0	0	0	0	603	903	0
693	7	0	0	0	0	0	0	200	300	0	0	0	0	0	0	0	200	903	0	0	0	0	0	0	0	603	903	0
693	8	0	0	0	0	0	0	200	300	0	0	0	0	0	0	0	200	903	0	0	0	0	0	0	0	603	903	0
693	9	0	0	0	0	0	0	200	300	0	0	0	0	0	0	0	200	903	0	0	0	0	0	0	0	603	903	0
694	0	0	0	0	0	0	0	200	300	0	0	0	0	0	0	0	200	903	0	0	0	0	0	0	0	603	903	0
694	1	0	0	0	0	0	0	200	300	0	0	0	0	0	0	0	200	903	0	0	0	0	0	0	0	603	903	0
694	2	0	0	0	0	0	0	200	300	0	0	0	0	0	0	0	200	903	0	0	0	0	0	0	0	603	903	0
694	3	0	0	0	0	0	0	200	300	0	0	0	0	0	0	0	200	903	0	0	0	0	0	0	0	603	903	0
694	4	0	0	0	0	0	0	200	300	0	0	0	0	0	0	0	200	903	0	0	0	0	0	0	0	603	903	0
694	5	0	0	0	0	0	0	200	300	0	0	0	0	0	0	0	200	903	0	0	0	0	0	0	0	603	903	0
694	6	0	0	0	0	0	0	200	300	0	0	0	0	0	0	0	200	903	0	0	0	0	0	0	0	603	903	0
694	7	0	0	0	0	0	0	200	300	0	0	0	0	0	0	0	200	903	0	0	0	0	0	0	0	603	903	0
694	8	0	0	0	0	0	0	200	300	0	0	0	0	0	0	0	200	903	0	0	0	0	0	0	0	603	903	0
694	9	0	0	0	0	0	0	200	300	0	0	0	0	0	0	0	200	903	0	0	0	0	0	0	0	603	903	0
695	0	0	0	0	0	0	0	200	300	0	0	0	0	0	0	0	200	903	0	0	0	0	0	0	0	603	903	0
695	1	0	0	0	0	0	0	200	300	0	0	0	0	0	0	0	200	903	0	0	0	0	0	0	0	603	903	0
695	2	0	0	0	0	0	0	200	300	0	0	0	0	0	0	0	200	903	0	0	0	0	0	0	0	603	903	0
695	3	0	0	0	0	0	0	200	300	0	0	0	0	0	0	0	200	903	0	0	0	0	0	0	0	603	903	0
695	4	0	0	0	0	0	0	200	300	0	0	0	0	0	0	0	200	903	0	0	0	0	0	0	0	603	903	0
695	5	0	0	0	0	0	0	200	300	0	0	0	0	0	0	0	200	903	0	0	0	0	0	0	0	603	903	0
695	6	0	0	0	0	0	0	200	300	0	0	0	0	0	0	0	200	903	0	0	0	0	0	0	0	603	903	0
695	7	0	0	0	0	0	0	200	300	0	0	0	0	0	0	0	200	903	0	0	0	0	0	0	0	603	903	0
695	8	0	0	0	0	0	0	200	300	0	0	0	0	0	0	0	200	903	0	0	0	0	0	0	0	603	903	0
695	9	0	0	0	0	0	0	200	300	0	0	0	0	0	0	0	200	903	0	0	0	0	0	0	0	603	903	0
696	0	0	0	0	0	0	0	200	300	0	0	0	0	0	0	0	200	903	0	0	0	0	0	0	0	603	903	0
696	1	0	0	0	0	0	0	200	300	0	0	0	0	0	0	0	200	903	0	0	0	0	0	0	0	603	903	0
696	2	0	0	0	0	0	0	200	300	0	0	0	0	0	0	0	200	903	0	0	0	0	0	0	0	603	903	0
696	3	0	0	0	0	0	0	200	300	0	0	0	0	0	0	0	200	903	0	0	0	0	0	0	0	603	903	0
696	4	0	0	0	0	0	0	200	300	0	0	0	0	0	0	0	200	903	0	0	0	0	0	0	0	603	903	0
696	5	0	0	0	0	0	0	200	300	0	0	0	0	0	0	0	200	903	0	0	0	0	0	0	0	603	903	0
696	6	0	0	0	0	0	0	200	300	0	0	0	0	0	0	0	200	903	0	0	0	0	0	0	0	603	903	0
696	7	0	0	0	0	0	0	200	300	0	0	0	0	0	0	0	200	903	0	0	0	0	0	0	0	603	903	0
696	8	0	0	0	0	0	0	200	300	0	0	0	0	0	0	0	200	903	0	0	0	0	0	0	0	603	903	0
696	9	0	0	0	0	0	0	200	300	0	0	0	0	0	0	0	200	903	0	0	0	0	0	0	0	603	903	0
697	0	0	0	0	0	0	0	200	300	0	0	0	0	0	0	0	200	903	0	0	0	0	0	0	0	603	903	0
697	1	0	0	0	0	0	0	200	300	0	0	0	0	0	0	0	200	903	0	0	0	0	0	0	0	603	903	0
697	2	0	0	0	0	0	0	200	300	0	0	0	0	0	0	0	200	903	0	0	0	0	0	0	0	603	903	0
697	3	0	0	0	0	0	0	200	300	0	0	0	0	0	0	0	200	903	0	0	0	0	0	0	0	603	903	0
697	4	0	0	0	0	0	0	200	300	0	0	0	0	0	0	0	200	903	0	0	0	0	0	0	0	603	903	0
697	5	0	0	0	0	0	0	200	300	0	0	0	0	0	0	0	200	903	0	0	0	0	0	0	0	603	903	0
697	6	0	0	0	0	0	0	200	300	0	0	0	0	0	0	0	200	903	0	0	0	0	0	0	0	603	903	0
697	7	0	0	0	0	0	0	200	300	0	0	0	0	0	0	0	200	903	0	0	0	0	0	0	0	603	903	0
697	8	0	0	0	0	0	0	200	300	0	0	0	0	0	0	0	200	903	0	0	0	0	0	0	0	603	903	0
697	9	0	0	0	0	0	0	200	300	0	0	0	0	0	0	0	200	903	0	0	0	0	0	0	0	603	903	0
698	0	0	0	0	0	0	0	200	300	0	0	0	0	0	0	0	200	903	0	0	0	0	0	0	0	603	903	0
698	1	0	0	0	0	0	0	200	300	0	0	0	0	0	0	0	200	903	0	0	0	0	0	0	0	603	903	0
698	2	0	0	0	0	0	0	200	300	0	0	0	0	0	0	0	200	903	0	0	0	0	0	0	0	603	903	0
698	3	0	0	0	0	0	0	200	300	0	0	0	0	0	0	0	200	903	0	0	0	0	0	0	0	603	903	0
698	4	0	0	0	0	0	0	200	300	0	0	0	0	0	0	0	200	903	0	0	0	0	0	0	0	603	903	0
698	5	0	0	0	0	0	0	200	300	0	0	0	0	0	0	0	200	903	0	0	0	0	0	0	0	603	903	0
698	6	0	0	0	0	0	0	200	300	0	0	0	0	0	0	0	200	903	0	0	0	0	0	0	0	603	903	0
698	7	0	0	0	0	0	0	200	300	0	0	0	0	0	0	0	200	903	0	0	0	0	0	0	0	603	903	0
698	8	0	0	0	0	0	0	200	300	0	0	0	0	0	0	0	200	903	0	0	0	0	0	0	0	603	903	0
698	9	0	0	0	0	0	0	200	300	0	0	0	0	0	0	0	200	903	0	0	0	0	0	0	0	603	903	0
699	0	0	0	0	0	0	0	200	300	0	0	0	0	0	0	0	200	903	0	0	0	0	0	0	0	603	903	0
699	1	0	0	0	0	0	0	200	300	0	0	0	0	0	0	0	200	903	0	0	0	0	0	0	0	603	903	0
699	2	0	0	0	0	0	0	200	300	0	0	0	0	0	0	0	200	903	0	0	0	0	0	0	0	603	903	0
699	3	0	0	0	0	0	0	200	300	0	0	0	0	0	0	0	200	903	0	0	0	0	0	0	0	603	903	0
699	4	0	0	0	0	0	0	200	300	0	0	0	0	0	0	0	200	903	0	0	0	0	0	0	0	603	903	0
699	5	0	0	0	0	0	0	200	300	0	0	0	0	0	0	0	200	903	0	0	0	0	0	0	0	603	903	0
699	6	0	0	0	0	0	0	200	300	0	0	0	0	0	0	0	200	903	0	0	0	0	0	0	0	603	903	0
699	7	0	0	0	0	0	0	200	300	0	0	0	0	0	0	0	200	903	0	0	0	0	0	0	0	603	903	0
699	8	0	0	0	0	0	0	200	300	0	0	0	0	0	0	0	200	903	0	0	0	0	0	0	0	603	903	0
699	9	0	0	0	0	0	0	200	300	0	0	0	0	0	0	0	200	903	0	0	0	0	0	0	0	603	903	0
700	0	0	0	0	0	0	0	200	300	0	0	0	0	0	0	0	200	903	0	0	0	0	0	0	0	603	903	0
700	1	0	0	0	0	0	0	200	300	0	0	0	0	0	0	0	200	903	0	0	0	0	0	0	0	603	903	0
700	2	0	0	0	0	0	0	200	300	0	0	0	0	0	0	0	200	903	0	0	0	0	0	0	0	603	903	0
700	3	0	0	0	0	0	0	200	300	0	0	0	0	0	0	0	200	903	0	0	0	0	0	0	0	603	903	0
700	4	0	0	0	0	0	0	200	300	0	0	0	0	0	0	0	200	903	0	0	0	0	0	0	0	603	903	0
700	5	0	0	0	0	0	0	200	300	0	0	0	0	0	0	0	200	903	0	0	0	0	0	0	0	603	903	0
700	6	0	0	0	0	0	0	200	300	0	0	0	0	0	0	0	200	903	0	0	0	0	0	0	0	603	903	0
700	7	0	0	0	0	0	0	200	300	0	0	0	0	0	0	0	200	903	0	0	0	0	0	0	0	603	903	0
700	8	0	0	0	0	0	0	200	300	0	0	0	0	0	0	0	200	903	0	0	0	0	0	0	0	603	903	0
700	9	0	0	0	0	0	0	200	300	0	0	0	0	0	0	0	200	903	0	0	0	0	0	0	0	603	903	0
701	0	0	0	0	0	0	0	200	300	0	0	0	0	0	0	0	200	903	0	0	0	0	0	0	0	603	903	0
701	1	0	0	0	0	0	0	200	300	0	0	0	0	0	0	0	200	903	0	0	0	0	0	0	0	603	903	0
701	2	0	0	0	0	0	0	200	300	0	0	0	0	0	0	0	200	903	0	0	0	0	0	0	0	603	903	0
701	3	0	0	0	0	0	0	200	300	0	0	0	0	0	0	0	200	903	0	0	0	0	0	0	0	603	903	0
701	4	0	0	0	0	0	0	200	300	0	0	0	0	0	0	0	200	903	0	0	0	0	0	0	0	603	903	0
701	5	0	0	0	0	0	0	200	300	0	0	0	0	0	0	0	200	903	0	0	0	0	0	0	0	603	903	0
701	6	0	0	0	0	0	0	200	300	0	0	0	0	0	0	0	200	903	0	0	0	0	0	0	0	603	903	0
701	7	0	0	0	0	0	0	200	300	0	0	0	0	0	0	0	200	903	0	0	0	0	0	0	0	603	903	0
701	8	0	0	0	0	0	0	200	300	0	0	0	0	0	0	0	200	903	0	0	0	0	0	0	0	603	903	0
701	9	0	0	0	0	0	0	200	300	0	0	0	0	0	0	0	200	903	0	0	0	0	0	0	0	603	903	0
702	0	0	0	0	0	0	0	200	300	0	0	0	0	0	0	0	200	903	0	0	0	0	0	0	0	603	903	0
702	1	0	0	0	0	0	0	200	300	0	0	0	0	0	0	0	200	903	0	0	0	0	0	0	0	603	903	0
702	2	0	0	0	0	0	0	200	300	0	0	0	0	0	0	0	200	903	0	0	0	0	0	0	0	603	903	0
702	3	0	0	0	0	0	0	200	300	0	0	0	0	0	0	0	200	903	0	0	0	0	0	0	0	603	903	0
702	4	0	0	0	0	0	0	200	300	0	0	0	0	0	0	0	200	903	0	0	0	0	0	0	0	603	903	0
702	5	0	0	0	0	0	0	200	300	0	0	0	0	0	0	0	200	903	0	0	0	0	0	0	0	603	903	0
702	6	0	0	0	0	0	0	200	300	0	0	0	0	0	0	0	200	903	0	0	0	0	0	0	0	603	903	0
702	7	0	0	0	0	0	0	200	300	0	0	0	0	0	0	0	200	903	0	0	0	0	0	0	0	603	903	0
702	8	0	0	0	0	0	0	200	300	0	0	0	0	0	0	0	200	903	0	0	0	0	0	0	0	603	903	0
702	9	0	0	0	0	0	0	200	300	0	0	0	0	0	0	0	200	903	0	0	0	0	0	0	0	603	903	0
703	0	0	0	0	0	0	0	200	300	0	0	0	0	0	0	0	200	903	0	0	0	0	0	0	0	603	903	0
703	1	0	0	0	0	0	0	200	300	0	0	0	0	0	0	0	200	903	0	0	0	0	0	0	0	603	903	0
703	2	0	0	0	0	0	0	200	300	0	0	0	0	0	0	0	200	903	0	0	0	0	0	0	0	603	903	0
703	3	0	0	0	0	0	0	200	300	0	0	0	0	0	0	0	200	903	0	0	0	0	0	0	0	603	903	0
703	4	0	0	0	0	0	0	200	300	0	0	0	0	0	0	0	200	903	0	0	0	0	0	0	0	603	903	0
703	5	0	0	0	0	0	0	200	300	0	0	0	0	0	0	0	200	903	0	0	0	0	0	0	0	603	903	0
703	6	0	0	0	0	0	0	200	300	0	0	0	0	0	0	0	200	903	0	0	0	0	0	0	0	603	903	0
703	7	0	0	0	0	0	0	200	300	0	0	0	0	0	0	0	200	903	0	0	0	0	0	0	0	603	903	0
703	8	0	0	0	0	0	0	200	300	0	0	0	0	0	0	0	200	903	0	0	0	0	0	0	0	603	903	0
703	9	0	0	0	0	0	0	200	300	0	0	0	0	0	0	0	200	903	0	0	0	0	0	0	0	603	903	0
704	0	0	0	0	0	0	0	200	300	0	0	0	0	0	0	0	200	903	0	0	0	0	0	0	0	603	903	0
704	1	0	0	0	0	0	0	200	300	0	0	0	0	0	0	0	200	903	0	0	0	0	0	0	0	603	903	0
704	2	0	0	0	0	0	0	200	300	0	0	0	0	0	0	0	200	903	0	0	0	0	0	0	0	603	903	0
704	3	0	0	0	0	0	0	200	300	0	0	0	0	0	0	0	200	903	0	0	0	0	0	0	0	603	903	0
704	4	0	0	0	0	0	0	200	300	0	0	0	0	0	0	0	200	903	0	0	0	0	0	0	0	603	903	0
704	5	0	0	0	0	0	0	200	300	0	0	0	0	0	0	0	200	903	0	0	0	0	0	0	0	603	903	0
704	6	0	0	0	0	0	0	200	300	0	0	0	0	0	0	0	200	903	0	0	0	0	0	0	0	603	903	0
704	7	0	0	0	0	0	0	200	300	0	0	0	0	0	0	0	200	903	0	0	0	0	0	0	0	603	903	0
704	8	0	0	0	0	0	0	200	300	0	0	0	0	0	0	0	200	903	0	0	0	0	0	0	0	603	903	0
704	9	0	0	0	0	0	0	200	300	0	0	0	0	0	0	0	200	903	0	0	0	0	0	0	0	603	903	0
705	0	0	0	0	0	0	0	200	300	0	0	0	0	0	0	0	200	903	0	0	0	0	0	0	0	603	903	0
705	1	0	0	0	0	0	0	200	300	0	0	0	0	0	0	0	200	903	0	0	0	0	0	0	0	603	903	0
705	2	0	0	0	0	0	0	200	300	0	0	0	0	0	0	0	200	903	0	0	0	0	0	0	0	603	903	0
705	3	0	0	0	0	0	0	200	300	0	0	0	0	0	0	0	200	903	0	0	0	0	0	0	0	603	903	0
705	4	0	0	0	0	0	0	200	300	0	0	0	0	0	0	0	200	903	0	0	0	0	0	0	0	603	903	0
705	5	0	0	0	0	0	0	200	300	0	0	0	0	0	0	0	200	903	0	0	0	0	0	0	0	603	903	0
705	6	0	0	0	0	0	0	200	300	0	0	0	0	0	0	0	200	903	0	0	0	0	0	0	0	603	903	0
705	7	0	0	0	0	0	0	200	300	0	0	0	0	0	0	0	200	903	0	0	0	0	0	0	0	603	903	0
705	8	0	0	0	0	0	0	200	300	0	0	0	0	0	0	0	200	903	0	0	0	0	0	0	0	603	903	0
705	9	0	0	0	0	0	0	200	300	0	0	0	0	0	0	0	200	903	0	0	0	0	0	0	0	603	903	0
706	0	0	0	0	0	0	0	200	300	0	0	0	0	0	0	0	200	903	0	0	0	0	0	0	0	603	903	0
706	1	0	0	0	0	0	0	200	300	0	0	0	0	0	0	0	200	903	0	0	0	0	0	0	0	603	903	0
706	2	0	0	0	0	0	0	200	300	0	0	0	0	0	0	0	200	903	0	0	0	0	0	0	0	603	903	0
706	3	0	0	0	0	0	0	200	300	0	0	0	0	0	0	0	200	903	0	0	0	0	0	0	0	603	903	0
706	4	0	0	0	0	0	0	200	300	0	0	0	0	0	0	0	200	903	0	0	0	0	0	0	0	603	903	0
706	5	0	0	0	0	0	0	200	300	0	0	0	0	0	0	0	200	903	0	0	0	0	0	0	0	603	903	0
706	6	0	0	0	0	0	0	200	300	0	0	0	0	0	0	0	200	903	0	0	0	0	0	0	0	603	903	0
706	7	0	0	0	0	0	0	200	300	0	0	0	0	0	0	0	200	903	0	0	0	0	0	0	0	603	903	0
706	8	0	0	0	0	0	0	200	300	0	0	0	0	0	0	0	200	903	0	0	0	0	0	0	0	603	903	0
706	9	0	0	0	0	0	0	200	300	0	0	0	0	0	0	0	200	903	0	0	0	0	0	0	0	603	903	0
707	0	0	0	0	0	0	0	200	300	0	0	0	0	0	0	0	200	903	0	0	0	0	0	0	0	603	903	0
707	1	0	0	0	0	0	0	200	300	0	0	0	0	0	0	0	200	903	0	0	0	0	0	0	0	603	903	0
707	2	0	0	0	0	0	0	200	300	0	0	0	0	0	0	0	200	903	0	0	0	0	0	0	0	603	903	0
707	3	0	0	0	0	0	0	200	300	0	0	0	0	0	0	0	200	903	0	0	0	0	0	0	0	603	903	0
707	4	0	0	0	0	0	0	200	300	0	0	0	0	0	0	0	200	903	0	0	0	0	0	0	0	603	903	0
707	5	0	0	0	0	0	0	200	300	0	0	0	0	0	0	0	200	903	0	0	0	0	0	0	0	603	903	0
707	6	0	0	0	0	0	0	200	300	0	0	0	0	0	0	0	200	903	0	0	0	0	0	0	0	603	903	0
707	7	0	0	0	0	0	0	200	300	0	0	0	0	0	0	0	200	903	0	0	0	0	0	0	0	603	903	0
707	8	0	0	0	0	0	0	200	300	0	0	0	0	0	0	0	200	903	0	0	0	0	0	0	0	603	903	0
707	9	0	0	0	0	0	0	200	300	0	0	0	0	0	0	0	200	903	0	0	0	0	0	0	0	603	903	0
708	0	0	0	0	0	0	0	200	300	0	0	0	0	0	0	0	200	903	0	0	0	0	0	0	0	603	903	0
708	1	0	0	0	0	0	0	200	300	0	0	0	0	0	0	0	200	903	0	0	0	0	0	0	0	603	903	0
708	2	0	0	0	0	0	0	200	300	0	0	0	0	0	0	0	200	903	0	0	0	0	0	0	0	603	903	0
708	3	0	0	0	0	0	0	200	300	0	0	0	0	0	0	0	200	903	0	0	0	0	0	0	0	603	903	0
708	4	0	0	0	0	0	0	200	300	0	0	0	0	0	0	0	200	903	0	0	0	0	0	0	0	603	903	0
708	5	0	0	0	0	0	0	200	300	0	0	0	0	0	0	0	200	903	0	0	0	0	0	0	0	603	903	0
708	6	0	0	0	0	0	0	200	300	0	0	0	0	0	0	0	200	903	0	0	0	0	0	0	0	603	903	0
708	7	0	0	0	0	0	0	200	300	0	0	0	0	0	0	0	200	903	0	0	0	0	0	0	0	603	903	0
708	8	0	0	0	0	0	0	200	300	0	0	0	0	0	0	0	200	903	0	0	0	0	0	0	0	603	903	0
708	9	0	0	0	0	0	0	200	300	0	0	0	0	0	0	0	200	903	0	0	0	0	0	0	0	603	903	0
709	0	0	0	0	0	0	0	200	300	0	0	0	0	0	0	0	200	903	0	0	0	0	0	0	0	603	903	0
709	1	0	0	0	0	0	0	200	300	0	0	0	0	0	0	0	200	903	0	0	0	0	0	0	0	603	903	0
709	2	0	0	0	0	0	0	200	300	0	0	0	0	0	0	0	200	903	0	0	0	0	0	0	0	603	903	0
709	3	0	0	0	0	0	0	200	300	0	0	0	0	0	0	0	200	903	0	0	0	0	0	0	0	603	903	0
709	4	0	0	0	0	0	0	200	300	0	0	0	0	0	0	0	200	903	0	0	0	0	0	0	0	603	903	0
709	5	0	0	0	0	0	0	200	300	0	0	0	0	0	0	0	200	903	0	0	0	0	0	0	0	603	903	0
709	6	0	0	0	0	0	0	200	300	0	0	0	0	0	0	0	200	903	0	0	0	0	0	0	0	603	903	0
709	7	0	0	0	0	0	0	200	300	0	0	0	0	0	0	0	200	903	0	0	0	0	0	0	0	603	903	0
709	8	0	0	0	0	0	0	200	300	0	0	0	0	0	0	0	200	903	0	0	0	0	0	0	0	603	903	0
709	9	0	0	0	0	0	0	200	300	0	0	0	0	0	0	0	200	903	0	0	0	0	0	0	0	603	903	0
710	0	0	0	0	0	0	0	200	300	0	0	0	0	0	0	0	200	903	0	0	0	0	0	0	0	603	903	0
710	1	0	0	0	0	0	0	200	300	0	0	0	0	0	0	0	200	903	0	0	0	0	0	0	0	603	903	0
710	2	0	0	0	0	0	0	200	300	0	0	0	0	0	0	0	200	903	0	0	0	0	0	0	0	603	903	0
710	3	0	0	0	0	0	0	200	300	0	0	0	0	0	0	0	200	903	0	0	0	0	0	0	0	603	903	0
710	4	0	0	0	0	0	0	200	300	0	0	0	0	0	0	0	200	903	0	0	0	0	0	0	0	603	903	0
710	5	0	0	0	0	0	0	200	300	0	0	0	0	0	0	0	200	903	0	0	0	0	0	0	0	603	903	0
710	6	0	0	0	0	0	0	200	300	0	0	0	0	0	0	0	200	903	0	0	0	0	0	0	0	603	903	0
710	7	0	0	0	0	0	0	200	300	0	0	0	0	0	0	0	200	903	0	0	0	0	0	0	0	603	903	0
710	8	0	0	0	0	0	0	200	300	0	0	0	0	0	0	0	200	903	0	0	0	0	0	0	0	603	903	0
710	9	0	0	0	0	0	0	200	300	0	0	0	0	0	0	0	200	903	0	0	0	0	0	0	0	603	903	0
711	0	0	0	0	0	0	0	200	300	0	0	0	0	0	0	0	200	903	0	0	0	0	0	0	0	603	903	0
711	1	0	0	0	0	0	0	200	300	0	0	0	0	0	0	0	200	903	0	0	0	0	0	0	0	603	903	0
711	2	0	0	0	0	0	0	200	300	0	0	0	0	0	0	0	200	903	0	0	0	0	0	0	0	603	903	0
711	3	0	0	0	0	0	0	200	300	0	0	0	0	0	0	0	200	903	0	0	0	0	0	0	0	603	903	0
711	4	0	0	0	0	0	0	200	300	0	0	0	0	0	0	0	200	903	0	0	0	0	0	0	0	603	903	0
711	5	0	0	0	0	0	0	200	300	0	0	0	0	0	0	0	200	903	0	0	0	0	0	0	0	603	903	0
711	6	0	0	0	0	0	0	200	300	0	0	0	0	0	0	0	200	903	0	0	0	0	0	0	0	603	903	0
711	7	0	0	0	0	0	0	200	300	0	0	0	0	0	0	0	200	903	0	0	0	0	0	0	0	603	903	0
711	8	0	0	0	0	0	0	200	300	0	0	0	0	0	0	0	200	903	0	0	0	0	0	0	0	603	903	0
711	9	0	0	0	0	0	0	200	300	0	0	0	0	0	0	0	200	903	0	0	0	0	0	0	0	603	903	0
712	0	0	0	0	0	0	0	200	300	0	0	0	0	0	0	0	200	903	0	0	0	0	0	0	0	603	903	0
712	1	0	0	0	0	0	0	200	300	0	0	0	0	0	0	0	200	903	0	0	0	0	0	0	0	603	903	0
712	2	0	0	0	0	0	0	200	300	0	0	0	0	0	0	0	200	903	0	0	0	0	0	0	0	603	903	0
712	3	0	0	0	0	0	0	200	300	0	0	0	0	0	0	0	200	903	0	0	0	0	0	0	0	603	903	0
712	4	0	0	0	0	0	0	200	300	0	0	0	0	0	0	0	200	903	0	0	0	0	0	0	0	603	903	0
712	5	0	0	0	0	0	0	200	300	0	0	0	0	0	0	0	200	903	0	0	0	0	0	0	0	603	903	0
712	6	0	0	0	0	0	0	200	300	0	0	0	0	0	0	0	200	903	0	0	0	0	0	0	0	603	903	0
712	7	0	0	0	0	0	0	200	300	0	0	0	0	0	0	0	200	903	0	0	0	0	0	0	0	603	903	0
712	8	0	0	0	0	0	0	200	300	0	0	0	0	0	0	0	200	903	0	0	0	0	0	0	0	603	903	0
712	9	0	0	0	0	0	0	200	300	0	0	0	0	0	0	0	200	903	0	0	0	0	0	0	0	603	903	0
713	0	0	0	0	0	0	0	200	300	0	0	0	0	0	0	0	200	903	0	0	0	0	0	0	0	603	903	0
713	1	0	0	0	0	0	0	200	300	0	0	0	0	0	0	0	200	903	0	0	0	0	0	0	0	603	903	0
713	2	0	0	0	0	0	0	200	300	0	0	0	0	0	0	0	200	903	0	0	0	0	0	0	0	603	903	0
713	3	0	0	0	0	0	0	200	300	0	0	0	0	0	0	0	200	903	0	0	0	0	0	0	0	603	903	0
713	4	0	0	0	0	0	0	200	300	0	0	0	0	0	0	0	200	903	0	0	0	0	0	0	0	603	903	0
713	5	0	0	0	0	0	0	200	300	0	0	0	0	0	0	0	200	903	0	0	0	0	0	0	0	603	903	0
713	6	0	0	0	0	0	0	200	300	0	0	0	0	0	0	0	200	903	0	0	0	0	0	0	0	603	903	0
713	7	0	0	0	0	0	0	200	300	0	0	0	0	0	0	0	200	903	0	0	0	0	0	0	0	603	903	0
713	8	0	0	0	0	0	0	200	300	0	0	0	0	0	0	0	200	903	0	0	0	0	0	0	0	603	903	0
713	9	0	0	0	0	0	0	200	300	0	0	0	0	0	0	0	200	903	0	0	0	0	0	0	0	603	903	0
714	0	0	0	0	0	0	0	200	300	0	0	0	0	0	0	0	200	903	0	0	0	0	0	0	0	603	903	0
714	1	0	0	0	0	0	0	200	300	0	0	0	0	0	0	0	200	903	0	0	0	0	0	0	0	603	903	0
714	2	0	0	0	0	0	0	200	300	0	0	0	0	0	0	0	200	903	0	0	0	0	0	0	0	603	903	0
714	3	0	0	0	0	0	0	200	300	0	0	0	0	0	0	0	200	903	0	0	0	0	0	0	0	603	903	0
714	4	0	0	0	0	0	0	200	300	0	0	0	0	0	0	0	200	903	0	0	0	0	0	0	0	603	903	0
714	5	0	0	0	0	0	0	200	300	0	0	0	0	0	0	0	200	903	0	0	0	0	0	0	0	603	903	0
714	6	0	0	0	0	0	0	200	300	0	0	0	0	0	0	0	200	903	0	0	0	0	0	0	0	603	903	0
714	7	0	0	0	0	0	0	200	300	0	0	0	0	0	0	0	200	903	0	0	0	0	0	0	0	603	903	0
714	8	0	0	0	0	0	0	200	300	0	0	0	0	0	0	0	200	903	0	0	0	0	0	0	0	603	903	0
714	9	0	0	0	0	0	0	200	300	0	0	0	0	0	0	0	200	903	0	0	0	0	0	0	0	603	903	0
715	0	0	0	0	0	0	0	200	300	0	0	0	0	0	0	0	200	903	0	0	0	0	0	0	0	603	903	0
715	1	0	0	0	0	0	0	200	300	0	0	0	0	0	0	0	200	903	0	0	0	0	0	0	0	603	903	0
715	2	0	0	0	0	0	0	200	300	0	0	0	0	0	0	0	200	903	0	0	0	0	0	0	0	603	903	0
715	3	0	0	0	0	0	0	200	300	0	0	0	0	0	0	0	200	903	0	0	0	0	0	0	0	603	903	0
715	4	0	0	0	0	0	0	200	300	0	0	0	0	0	0	0	200	903	0	0	0	0	0	0	0	603	903	0
715	5	0	0	0	0	0	0	200	300	0	0	0	0	0	0	0	200	903	0	0	0	0	0	0	0	603	903	0
715	6	0	0	0	0	0	0	200	300	0	0	0	0	0	0	0	200	903	0	0	0	0	0	0	0	603	903	0
715	7	0	0	0	0	0	0	200	300	0	0	0	0	0	0	0	200	903	0	0	0	0	0	0	0	603	903	0
715	8	0	0	0	0	0	0	200	300	0	0	0	0	0	0	0	200	903	0	0	0	0	0	0	0	603	903	0
715	9	0	0	0	0	0	0	200	300	0	0	0	0	0	0	0	200	903	0	0	0	0	0	0	0	603	903	0
716	0	0	0	0	0	0	0	200	300	0	0	0	0	0	0	0	200	903	0	0	0	0	0	0	0	603	903	0
716	1	0	0	0	0	0	0	200	300	0	0	0	0	0	0	0	200	903	0	0	0	0	0	0	0	603	903	0
716	2	0	0	0	0	0	0	200	300	0	0	0	0	0	0	0	200	903	0	0	0	0	0	0	0	603	903	0
716	3	0	0	0	0	0	0	200	300	0	0	0	0	0	0	0	200	903	0	0	0	0	0	0	0	603	903	0
716	4	0	0	0	0	0	0	200	300	0	0	0	0	0	0	0	200	903	0	0	0	0	0	0	0	603	903	0
716	5	0	0	0	0	0	0	200	300	0	0	0	0	0	0	0	200	903	0	0	0	0	0	0	0	603	903	0
716	6	0	0	0	0	0	0	200	300	0	0	0	0	0	0	0	200	903	0	0	0	0	0	0	0	603	903	0
716	7	0	0	0	0	0	0	200	300	0	0	0	0	0	0	0	200	903	0	0	0	0	0	0	0	603	903	0
716	8	0	0	0	0	0	0	200	300	0	0	0	0	0	0	0	200	903	0	0	0	0	0	0	0	603	903	0
716	9	0	0	0	0	0	0	200	300	0	0	0	0	0	0	0	200	903	0	0	0	0	0	0	0	603	903	0
717	0	0	0	0	0	0	0	200	300	0	0	0	0	0	0	0	200	903	0	0	0	0	0	0	0	603	903	0
717	1	0	0	0	0	0	0	200	300	0	0	0	0	0	0	0	200	903	0	0	0	0	0	0	0	603	903	0
717	2	0	0	0	0	0	0	200	300	0	0	0	0	0	0	0	200	903	0	0	0	0	0	0	0	603	903	0
717	3	0	0	0	0	0	0	200	300	0	0	0	0	0	0	0	200	903	0	0	0	0	0	0	0	603	903	0
717	4	0	0	0	0	0	0	200	300	0	0	0	0	0	0	0	200	903	0	0	0	0	0	0	0	603	903	0
717	5	0	0	0	0	0	0	200	300	0	0	0	0	0	0	0	200	903	0	0	0	0	0	0	0	603	903	0
717	6	0	0	0	0	0	0	200	300	0	0	0	0	0	0	0	200	903	0	0	0	0	0	0	0	603	903	0
717	7	0	0	0	0	0	0	200	300	0	0	0	0	0	0	0	200	903	0	0	0	0	0	0	0	603	903	0
717	8	0	0	0	0	0	0	200	300	0	0	0	0	0	0	0	200	903	0	0	0	0	0	0	0	603	903	0
717	9	0	0	0	0	0	0	200	300	0	0	0	0	0	0	0	200	903	0	0	0	0	0	0	0	603	903	0
718	0	0	0	0	0	0	0	200	300	0	0	0	0	0	0	0	200	903	0	0	0	0	0	0	0	603	903	0
718	1	0	0	0	0	0	0	200	300	0	0	0	0	0	0	0	200	903	0	0	0	0	0	0	0	603	903	0
718	2	0	0	0	0	0	0	200	300	0	0	0	0	0	0	0	200	903	0	0	0	0	0	0	0	603	903	0
718	3	0	0	0	0	0	0	200	300	0	0	0	0	0	0	0	200	903	0	0	0	0	0	0	0	603	903	0
718	4	0	0	0	0	0	0	200	300	0	0	0	0	0	0	0	200	903	0	0	0	0	0	0	0	603	903	0
718	5	0	0	0	0	0	0	200	300	0	0	0	0	0	0	0	200	903	0	0	0	0	0	0	0	603	903	0
718	6	0	0	0	0	0	0	200	300	0	0	0	0	0	0	0	200	903	0	0	0	0	0	0	0	603	903	0
718	7	0	0	0	0	0	0	200	300	0	0	0	0	0	0	0	200	903	0	0	0	0	0	0	0	603	903	0
718	8	0	0	0	0	0	0	200	300	0	0	0	0	0	0	0	200	903	0	0	0	0	0	0	0	603	903	0
718	9	0	0	0	0	0	0	200	300	0	0	0	0	0	0	0	200	903	0	0	0	0	0	0	0	603	903	0
719	0	0	0	0	0	0	0	200	300	0	0	0	0	0	0	0	200	903	0	0	0	0	0	0	0	603	903	0
719	1	0	0	0	0	0	0	200	300	0	0	0	0	0	0	0	200	903	0	0	0	0	0	0	0	603	903	0
719	2	0	0	0	0	0	0	200	300	0	0	0	0	0	0	0	200	903	0	0	0	0	0	0	0	603	903	0
719	3	0	0	0	0	0	0	200	300	0	0	0	0	0	0	0	200	903	0	0	0	0	0	0	0	603	903	0
719	4	0	0	0	0	0	0	200	300	0	0	0	0	0	0	0	200	903	0	0	0	0	0	0	0	603	903	0
719	5	0	0	0	0	0	0	200	300	0	0	0	0	0	0	0	200	903	0	0	0	0	0	0	0	603	903	0
719	6	0	0	0	0	0	0	200	300	0	0	0	0	0	0	0	200	903	0	0	0	0	0	0	0	603	903	0
719	7	0	0	0	0	0	0	200	300	0	0	0	0	0	0	0	200	903	0	0	0	0	0	0	0	603	903	0
719	8	0	0	0	0	0	0	200	300	0	0	0	0	0	0	0	200	903	0	0	0	0	0	0	0	603	903	0
719	9	0	0	0	0	0	0	200	300	0	0	0	0	0	0	0	200	903	0	0	0	0	0	0	0	603	903	0
720	0	0	0	0	0	0	0	200	300	0	0	0	0	0	0	0	200	903	0	0	0	0	0	0	0	603	903	0
720	1	0	0	0	0	0	0	200	300	0	0	0	0	0	0	0	200	903	0	0	0	0	0	0	0	603	903	0
720	2	0	0	0	0	0	0	200	300	0	0	0	0	0	0	0	200	903	0	0	0	0	0	0	0	603	903	0
720	3	0	0	0	0	0	0	200	300	0	0	0	0	0	0	0	200	903	0	0	0	0	0	0	0	603	903	0
720	4	0	0	0	0	0	0	200	300	0	0	0	0	0	0	0	200	903	0	0	0	0	0	0	0	603	903	0
720	5	0	0	0	0	0	0	200	300	0	0	0	0	0	0	0	200	903	0	0	0	0	0	0	0	603	903	0
720	6	0	0	0	0	0	0	200	300	0	0	0	0	0	0	0	200	903	0	0	0	0	0	0	0	603	903	0
720	7	0	0	0	0	0	0	200	300	0	0	0	0	0	0	0	200	903	0	0	0	0	0	0	0	603	903	0
720	8	0	0	0	0	0	0	200	300	0	0	0	0	0	0	0	200	903	0	0	0	0	0	0	0	603	903	0
720	9	0	0	0	0	0	0	200	300	0	0	0	0	0	0	0	200	903	0	0	0	0	0	0	0	603	903	0
721	0	0	0	0	0	0	0	200	300	0	0	0	0	0	0	0	200	903	0	0	0	0	0	0	0	603	903	0
721	1	0	0	0	0	0	0	200	300	0	0	0	0	0	0	0	200	903	0	0	0	0	0	0	0	603	903	0
721	2	0	0	0	0	0	0	200	300	0	0	0	0	0	0	0	200	903	0	0	0	0	0	0	0	603	903	0
721	3	0	0	0	0	0	0	200	300	0	0	0	0	0	0	0	200	903	0	0	0	0	0	0	0	603	903	0
721	4	0	0	0	0	0	0	200	300	0	0	0	0	0	0	0	200	903	0	0	0	0	0	0	0	603	903	0
721	5	0	0	0	0	0	0	200	300	0	0	0	0	0	0	0	200	903	0	0	0	0	0	0	0	603	903	0
721	6	0	0	0	0	0	0	200	300	0	0	0	0	0	0	0	200	903	0	0	0	0	0	0	0	603	903	0
721	7	0	0	0	0	0	0	200	300	0	0	0	0	0	0	0	200	903	0	0	0	0	0	0	0	603	903	0
721	8	0	0	0	0	0	0	200	300	0	0	0	0	0	0	0	200	903	0	0	0	0	0	0	0	603	903	0
721	9	0	0	0	0	0	0	200	300	0	0	0	0	0	0	0	200	903	0	0	0	0	0	0	0	603	903	0
722	0	0	0	0	0	0	0	200	300	0	0	0	0	0	0	0	200	903	0	0	0	0	0	0	0	603	903	0
722	1	0	0	0	0	0	0	200	300	0	0	0	0	0	0	0	200	903	0	0	0	0	0	0	0	603	903	0
722	2	2.06236	7.32376	-12.2882	1026.95	-1202.16	-645.311	102.17	216.428	0	0	0	0	0	0	0	200	903	0	0	0	0	0	0	0	603	903	0
722	3	1.45201	11.7488	-19.6124	477.631	-1324.23	-782.64	132.48	275.647	0	0	0	0	0	0	0	200	903	0	0	0	0	0	0	0	603	903	0
722	4	-0.684218	11.4436	-20.528	1210.05	-1507.34	-279.099	126.572	241.053	0	0	0	0	0	0	0	200	903	0	0	0	0	0	0	0	603	903	0
722	5	-1.75233	9.00223	-16.5607	1301.61	-1446.3	-919.969	112.667	221.404	0	0	0	0	0	0	0	200	903	0	0	0	0	0	0	0	603	903	0
722	6	2.67272	14.0376	-20.2228	1118.5	-1507.34	-1331.96	125.463	244.691	0	0	0	0	0	0	0	200	903	0	0	0	0	0	0	0	603	903	0
722	7	3.74083	16.6316	-25.7159	1393.16	-1995.62	-1057.3	122.398	245.825	0	0	0	0	0	0	0	200	903	0	0	0	0	0	0	0	603	903	0
722	8	1.14684	12.6643	-28.1573	1484.71	-1995.62	-919.969	129.126	247.271	0	0	0	0	0	0	0	200	903	0	0	0	0	0	0	0	603	903	0
722	9	-2.36269	16.0213	-29.378	1301.61	-1873.55	-1560.84	136.226	255.695	0	0	0	0	0	0	0	200	903	0	0	0	0	0	0	0	603	903	0
723	0	-0.531631	23.0403	-33.9557	1942.47	-2117.69	-1789.72	137.634	242.794	0	0	0	0	0	0	0	200	903	0	0	0	0	0	0	0	603	903	0
723	1	1.29942	24.1084	-37.6178	1850.92	-2728.04	-1606.61	127.48	250.797	0	0	0	0	0	0	0	200	903	0	0	0	0	0	0	0	603	903	0
723	2	-1.75233	21.5144	-42.1954	2217.13	-2789.07	-1835.5	133.901	247.456	0	0	0	0	0	0	0	200	903	0	0	0	0	0	0	0	603	903	0
723	3	-2.82045	22.8877	-44.3317	2766.45	-2850.11	-2018.6	135.709	237.597	0	0	0	0	0	0	0	200	903	0	0	0	0	0	0	0	603	903	0
723	4	-2.51527	29.9068	-47.6886	2034.03	-3460.46	-2155.93	127.436	257.348	0	0	0	0	0	0	0	200	903	0	0	0	0	0	0	0	603	903	0
723	5	-0.989394	32.043	-52.8766	2949.56	-3643.57	-2339.04	131.093	244.218	0	0	0	0	0	0	0	200	903	0	0	0	0	0	0	0	603	903	0
723	6	-4.04115	25.9395	-58.9801	3773.53	-4253.92	-2384.81	127.875	236.02	0	0	0	0	0	0	0	200	903	0	0	0	0	0	0	0	603	903	0
723	7	-2.2101	21.667	-68.1354	3498.87	-4620.13	-1835.5	132.192	248.648	0	0	0	0	0	0	0	200	903	0	0	0	0	0	0	0	603	903	0
723	8	0.383897	22.5825	-76.0699	4231.29	-5169.44	-1469.29	132.044	244.376	0	0	0	0	0	0	0	200	903	0	0	0	0	0	0	0	603	903	0
723	9	-0.226455	17.242	-81.8683	3956.64	-5901.87	-1286.18	127.91	251.671	0	0	0	0	0	0	0	200	903	0	0	0	0	0	0	0	603	903	0
724	0	0.994248	11.1385	-93.1598	4872.16	-6451.18	-874.192	130.751	247.701	0	0	0	0	0	0	0	200	903	0	0	0	0	0	0	0	603	903	0
724	1	2.06236	8.39188	-102.315	5604.58	-7000.5	-4.44129	131.579	245.222	0	0	0	0	0	0	0	200	903	0	0	0	0	0	0	0	603	903	0
724	2	4.80895	5.34012	-112.691	5787.69	-7671.89	-141.77	131.921	248.641	0	0	0	0	0	0	0	200	903	0	0	0	0	0	0	0	603	903	0
724	3	7.09776	0.76248	-121.541	6337.01	-8526.38	407.546	129.848	247.861	0	0	0	0	0	0	0	200	903	0	0	0	0	0	0	0	603	903	0
724	4	9.23399	-5.34104	-133.138	7160.98	-8587.42	773.757	135.5	246.214	0	0	0	0	0	0	0	200	903	0	0	0	0	0	0	0	603	903	0
724	5	8.92882	-7.32468	-142.903	7344.09	-9625.01	819.533	132.647	248.608	0	0	0	0	0	0	0	200	903	0	0	0	0	0	0	0	603	903	0
724	6	10.4547	-7.32468	-151.754	6977.88	-9869.15	911.086	134.966	254.018	0	0	0	0	0	0	0	200	903	0	0	0	0	0	0	0	603	903	0
724	7	11.5228	-12.5127	-162.13	8168.06	-10601.6	1689.28	134.61	249.62	0	0	0	0	0	0	0	200	903	0	0	0	0	0	0	0	603	903	0
724	8	11.828	-17.0903	-169.759	9083.59	-11150.9	1826.61	134.313	246.491	0	0	0	0	0	0	0	200	903	0	0	0	0	0	0	0	603	903	0
724	9	12.7435	-14.9541	-180.44	8808.93	-11639.2	1735.06	135.496	251.181	0	0	0	0	0	0	0	200	903	0	0	0	0	0	0	0	603	903	0
725	0	14.2694	-16.7851	-188.985	9175.14	-12371.6	2009.72	134.537	251.45	0	0	0	0	0	0	0	200	903	0	0	0	0	0	0	0	603	903	0
725	1	13.8116	-19.5317	-197.835	9266.7	-12798.8	2330.15	135.306	253.16	0	0	0	0	0	0	0	200	903	0	0	0	0	0	0	0	603	903	0
725	2	13.3539	-19.3791	-205.77	9907.57	-13592.3	1872.39	133.944	251.851	0	0	0	0	0	0	0	200	903	0	0	0	0	0	0	0	603	903	0
725	3	15.7953	-16.48	-212.178	9816.01	-13958.5	1872.39	134.213	253.737	0	0	0	0	0	0	0	200	903	0	0	0	0	0	0	0	603	903	0
725	4	15.4901	-14.3437	-219.808	10182.2	-13714.4	2009.72	137.607	253.677	0	0	0	0	0	0	0	200	903	0	0	0	0	0	0	0	603	903	0
725	5	13.659	-13.4282	-225.606	9999.12	-14568.9	1780.84	135.423	255.679	0	0	0	0	0	0	0	200	903	0	0	0	0	0	0	0	603	903	0
725	6	13.8116	-10.2238	-232.32	11555.5	-15118.2	1460.4	134.925	250.26	0	0	0	0	0	0	0	200	903	0	0	0	0	0	0	0	603	903	0
725	7	15.1849	-4.42551	-234.761	10640	-15484.4	1231.52	134.042	254.677	0	0	0	0	0	0	0	200	903	0	0	0	0	0	0	0	603	903	0
725	8	15.0323	-1.37375	-245.748	10182.2	-15911.6	773.757	135.252	258.566	0	0	0	0	0	0	0	200	903	0	0	0	0	0	0	0	603	903	0
725	9	14.2694	2.44095	-248.799	11097.8	-16094.7	682.204	135.31	255.395	0	0	0	0	0	0	0	200	903	0	0	0	0	0	0	0	603	903	0
726	0	13.659	7.47635	-253.377	10823.1	-16094.7	270.217	136.479	257.285	0	0	0	0	0	0	0	200	903	0	0	0	0	0	0	0	603	903	0
726	1	13.3539	13.7325	-254.598	11189.3	-16705.1	-4.44129	134.386	256.051	0	0	0	0	0	0	0	200	903	0	0	0	0	0	0	0	603	903	0
726	2	13.659	15.7161	-262.532	11097.8	-16705.1	-645.311	136.369	257.728	0	0	0	0	0	0	0	200	903	0	0	0	0	0	0	0	603	903	0
726	3	12.7435	18.7679	-265.279	10365.3	-17010.3	-462.205	135.878	260.927	0	0	0	0	0	0	0	200	903	0	0	0	0	0	0	0	603	903	0
726	4	11.9806	24.261	-269.857	10365.3	-17132.3	-691.087	136.513	261.59	0	0	0	0	0	0	0	200	903	0	0	0	0	0	0	0	603	903	0
726	5	11.6754	25.7869	-270.162	10823.1	-17376.5	-919.969	135.681	259.938	0	0	0	0	0	0	0	200	903	0	0	0	0	0	0	0	603	903	0
726	6	10.7599	30.2119	-281.148	10914.6	-17254.4	-1331.96	138.629	261.178	0	0	0	0	0	0	0	200	903	0	0	0	0	0	0	0	603	903	0
726	7	13.9642	31.1275	-287.862	10914.6	-17986.8	-1331.96	137.516	262.084	0	0	0	0	0	0	0	200	903	0	0	0	0	0	0	0	603	903	0
726	8	17.016	33.7215	-293.965	10640	-17742.7	-1515.06	139.644	263.805	0	0	0	0	0	0	0	200	903	0	0	0	0	0	0	0	603	903	0
726	9	18.6944	37.9939	-298.543	10731.5	-17986.8	-1652.39	139.751	264.054	0	0	0	0	0	0	0	200	903	0	0	0	0	0	0	0	603	903	0
727	0	19.1522	37.3836	-300.984	11189.3	-18841.3	-1789.72	137.401	262.824	0	0	0	0	0	0	0	200	903	0	0	0	0	0	0	0	603	903	0
727	1	16.8634	39.2146	-309.835	10640	-19146.5	-1743.94	138.204	265.659	0	0	0	0	0	0	0	200	903	0	0	0	0	0	0	0	603	903	0
727	2	17.7789	40.4353	-316.243	11006.2	-19451.7	-1743.94	138.491	265.197	0	0	0	0	0	0	0	200	903	0	0	0	0	0	0	0	603	903	0
727	3	19.3048	40.4353	-320.211	11006.2	-19634.8	-1972.83	138.682	265.628	0	0	0	0	0	0	0	200	903	0	0	0	0	0	0	0	603	903	0
727	4	20.0677	39.825	-324.483	10731.5	-19695.8	-1881.27	139.301	266.927	0	0	0	0	0	0	0	200	903	0	0	0	0	0	0	0	603	903	0
727	5	19.3048	41.656	-334.859	10914.6	-20550.3	-2293.26	138.63	267.405	0	0	0	0	0	0	0	200	903	0	0	0	0	0	0	0	603	903	0
727	6	17.6263	42.5716	-342.488	11006.2	-21587.9	-1835.5	136.967	267.864	0	0	0	0	0	0	0	200	903	0	0	0	0	0	0	0	603	903	0
727	7	16.1004	42.419	-349.202	10548.4	-21832	-2293.26	137.48	269.793	0	0	0	0	0	0	0	200	903	0	0	0	0	0	0	0	603	903	0
727	8	16.253	42.7242	-354.085	11097.8	-22320.3	-2339.04	136.963	268.658	0	0	0	0	0	0	0	200	903	0	0	0	0	0	0	0	603	903	0
727	9	16.7108	42.1138	-358.358	10914.6	-22381.4	-2476.36	137.545	269.543	0	0	0	0	0	0	0	200	903	0	0	0	0	0	0	0	603	903	0
728	0	15.0323	45.6233	-367.818	10365.3	-22869.6	-2522.14	137.823	271.819	0	0	0	0	0	0	0	200	903	0	0	0	0	0	0	0	603	903	0
728	1	11.828	46.0811	-372.701	10914.6	-23296.9	-2705.25	137.492	270.715	0	0	0	0	0	0	0	200	903	0	0	0	0	0	0	0	603	903	0
728	2	10.7599	47.3018	-378.194	9724.46	-23907.2	-3071.46	136.786	274.287	0	0	0	0	0	0	0	200	903	0	0	0	0	0	0	0	603	903	0
728	3	10.7599	49.8958	-385.518	9999.12	-24151.4	-2842.58	137.353	274.063	0	0	0	0	0	0	0	200	903	0	0	0	0	0	0	0	603	903	0
728	4	10.7599	50.8113	-390.706	10731.5	-25066.9	-2796.8	135.842	272.533	0	0	0	0	0	0	0	200	903	0	0	0	0	0	0	0	603	903	0
728	5	9.08141	52.9475	-397.725	9907.57	-25189	-3117.23	136.667	275.089	0	0	0	0	0	0	0	200	903	0	0	0	0	0	0	0	603	903	0
728	6	7.40294	54.3208	-402.913	9999.12	-25799.3	-3254.56	135.968	275.183	0	0	0	0	0	0	0	200	903	0	0	0	0	0	0	0	603	903	0
728	7	4.96153	57.3726	-409.322	10273.8	-26409.7	-3300.34	135.479	274.901	0	0	0	0	0	0	0	200	903	0	0	0	0	0	0	0	603	903	0
728	8	4.80895	58.4407	-415.12	9632.91	-26836.9	-3529.22	135.351	276.795	0	0	0	0	0	0	0	200	903	0	0	0	0	0	0	0	603	903	0
728	9	3.89342	60.7295	-422.75	9724.46	-26775.9	-3483.45	136.663	276.997	0	0	0	0	0	0	0	200	903	0	0	0	0	0	0	0	603	903	0
729	0	4.65636	62.5606	-425.496	9632.91	-27630.4	-3620.77	135.063	277.361	0	0	0	0	0	0	0	200	903	0	0	0	0	0	0	0	603	903	0
729	1	0.994248	65.3072	-431.295	9449.8	-27813.5	-3895.43	135.512	278.09	0	0	0	0	0	0	0	200	903	0	0	0	0	0	0	0	603	903	0
729	2	-0.684218	65.6123	-437.398	9266.7	-28790.1	-3483.45	134.179	278.814	0	0	0	0	0	0	0	200	903	0	0	0	0	0	0	0	603	903	0
729	3	-1.75233	64.3916	-441.976	8992.04	-29400.4	-3941.21	133.48	279.655	0	0	0	0	0	0	0	200	903	0	0	0	0	0	0	0	603	903	0
729	4	-1.75233	68.6641	-449.91	8351.17	-29583.5	-4124.32	134.246	281.438	0	0	0	0	0	0	0	200	903	0	0	0	0	0	0	0	603	903	0
729	5	-0.379043	70.4951	-455.403	8625.83	-30315.9	-4398.97	133.431	281.059	0	0	0	0	0	0	0	200	903	0	0	0	0	0	0	0	603	903	0
729	6	-1.90492	72.6314	-462.422	7710.3	-30621.1	-4078.54	133.781	283.326	0	0	0	0	0	0	0	200	903	0	0	0	0	0	0	0	603	903	0
729	7	-3.4308	74.3098	-467.305	8168.06	-30926.3	-4444.75	133.82	282.521	0	0	0	0	0	0	0	200	903	0	0	0	0	0	0	0	603	903	0
729	8	-4.19374	74.9202	-474.63	7801.85	-31719.7	-4902.51	133.169	283.562	0	0	0	0	0	0	0	200	903	0	0	0	0	0	0	0	603	903	0
729	9	-3.4308	76.7513	-480.428	6886.32	-32208	-4627.86	132.96	285.666	0	0	0	0	0	0	0	200	903	0	0	0	0	0	0	0	603	903	0
730	0	-4.34633	79.6504	-490.193	6245.45	-32696.3	-4582.08	133.299	287.259	0	0	0	0	0	0	0	200	903	0	0	0	0	0	0	0	603	903	0
730	1	-6.94032	81.4815	-494.771	6703.22	-33306.7	-4994.07	132.683	286.452	0	0	0	0	0	0	0	200	903	0	0	0	0	0	0	0	603	903	0
730	2	-8.00844	83.6177	-500.264	6337.01	-33856	-5589.16	132.324	287.333	0	0	0	0	0	0	0	200	903	0	0	0	0	0	0	0	603	903	0
730	3	-8.77138	85.1436	-505.452	5604.58	-34405.3	-5451.83	131.932	288.912	0	0	0	0	0	0	0	200	903	0	0	0	0	0	0	0	603	903	0
730	4	-9.6869	85.9065	-509.725	5329.93	-34832.5	-5772.27	131.664	289.544	0	0	0	0	0	0	0	200	903	0	0	0	0	0	0	0	603	903	0
730	5	-10.4498	88.3479	-515.523	4414.4	-34954.6	-6046.92	132.196	291.437	0	0	0	0	0	0	0	200	903	0	0	0	0	0	0	0	603	903	0
730	6	-11.6705	90.7893	-517.354	5238.37	-35198.8	-6275.81	131.964	289.875	0	0	0	0	0	0	0	200	903	0	0	0	0	0	0	0	603	903	0
730	7	-13.0438	93.0782	-523.763	3681.98	-35870.1	-6825.12	131.515	292.97	0	0	0	0	0	0	0	200	903	0	0	0	0	0	0	0	603	903	0
730	8	-12.5861	95.2144	-528.951	3498.87	-36419.5	-6458.91	131.148	293.385	0	0	0	0	0	0	0	200	903	0	0	0	0	0	0	0	603	903	0
730	9	-11.0602	96.7403	-533.528	3773.53	-36297.4	-6550.46	131.967	292.927	0	0	0	0	0	0	0	200	903	0	0	0	0	0	0	0	603	903	0
731	0	-11.8231	99.792	-535.054	2858	-36785.7	-7099.78	131.249	294.658	0	0	0	0	0	0	0	200	903	0	0	0	0	0	0	0	603	903	0
731	1	-12.8912	102.233	-539.022	1484.71	-36968.8	-7465.99	131.415	297.246	0	0	0	0	0	0	0	200	903	0	0	0	0	0	0	0	603	903	0
731	2	-14.112	102.844	-543.599	2034.03	-37518.1	-7465.99	130.982	296.258	0	0	0	0	0	0	0	200	903	0	0	0	0	0	0	0	603	903	0
731	3	-14.4171	105.438	-547.567	1301.61	-38372.6	-8061.08	129.922	297.623	0	0	0	0	0	0	0	200	903	0	0	0	0	0	0	0	603	903	0
731	4	-13.6542	107.421	-548.482	843.842	-37884.3	-8152.64	130.929	298.461	0	0	0	0	0	0	0	200	903	0	0	0	0	0	0	0	603	903	0
731	5	-12.4335	107.879	-555.806	1026.95	-38128.4	-8289.97	131.4	298.152	0	0	0	0	0	0	0	200	903	0	0	0	0	0	0	0	603	903	0
731	6	-13.8068	110.778	-558.858	477.631	-38433.6	-8701.95	131.228	299.145	0	0	0	0	0	0	0	200	903	0	0	0	0	0	0	0	603	903	0
731	7	-13.8068	112.152	-561.605	111.42	-39227.1	-8793.51	130.152	299.802	0	0	0	0	0	0	0	200	903	0	0	0	0	0	0	0	603	903	0
731	8	-14.2645	112.609	-564.962	-71.6857	-39227.1	-9022.39	130.567	300.127	0	0	0	0	0	0	0	200	903	0	0	0	0	0	0	0	603	903	0
731	9	-13.5016	114.44	-569.234	-1353.42	-40020.5	-8473.07	129.694	302.378	0	0	0	0	0	0	0	200	903	0	0	0	0	0	0	0	603	903	0
732	0	-13.0438	115.966	-577.169	-987.213	-40142.6	-9297.05	130.449	301.71	0	0	0	0	0	0	0	200	903	0	0	0	0	0	0	0	603	903	0
732	1	-14.4171	118.56	-582.051	-1811.19	-40447.8	-9297.05	130.508	303.112	0	0	0	0	0	0	0	200	903	0	0	0	0	0	0	0	603	903	0
732	2	-15.6378	119.323	-585.408	-2085.85	-41363.3	-9571.71	129.343	303.563	0	0	0	0	0	0	0	200	903	0	0	0	0	0	0	0	603	903	0
732	3	-15.943	118.713	-589.986	-2635.16	-41302.3	-9663.26	129.994	304.467	0	0	0	0	0	0	0	200	903	0	0	0	0	0	0	0	603	903	0
732	4	-16.2482	119.781	-592.733	-3459.14	-41973.7	-9571.71	129.186	305.836	0	0	0	0	0	0	0	200	903	0	0	0	0	0	0	0	603	903	0
732	5	-17.3163	122.222	-599.141	-4100.01	-42095.7	-9663.26	129.74	306.843	0	0	0	0	0	0	0	200	903	0	0	0	0	0	0	0	603	903	0
732	6	-18.3844	122.375	-603.109	-3184.48	-42461.9	-10349.9	129.595	305.28	0	0	0	0	0	0	0	200	903	0	0	0	0	0	0	0	603	903	0
732	7	-19.6051	123.291	-606.16	-4191.56	-42950.2	-10258.4	129.144	306.915	0	0	0	0	0	0	0	200	903	0	0	0	0	0	0	0	603	903	0
732	8	-20.3681	124.664	-613.484	-4374.66	-43621.6	-9663.26	128.895	307.131	0	0	0	0	0	0	0	200	903	0	0	0	0	0	0	0	603	903	0
732	9	-20.2155	125.122	-616.536	-4740.88	-43621.6	-10029.5	129.247	307.69	0	0	0	0	0	0	0	200	903	0	0	0	0	0	0	0	603	903	0
733	0	-20.2155	124.664	-618.062	-5931.06	-44293	-10166.8	128.336	309.596	0	0	0	0	0	0	0	200	903	0	0	0	0	0	0	0	603	903	0
733	1	-21.7413	127.105	-624.166	-5381.74	-44781.3	-10349.9	128.254	308.622	0	0	0	0	0	0	0	200	903	0	0	0	0	0	0	0	603	903	0
733	2	-23.5724	128.021	-631.49	-6205.72	-44964.4	-10349.9	128.796	309.827	0	0	0	0	0	0	0	200	903	0	0	0	0	0	0	0	603	903	0
733	3	-24.6405	128.326	-635.152	-6938.14	-45879.9	-10395.7	127.765	310.924	0	0	0	0	0	0	0	200	903	0	0	0	0	0	0	0	603	903	0
733	4	-25.8612	130.767	-639.424	-7121.25	-46551.3	-10304.1	127.198	311.137	0	0	0	0	0	0	0	200	903	0	0	0	0	0	0	0	603	903	0
733	5	-26.1664	131.073	-641.255	-7579.01	-46368.2	-10212.6	127.692	311.819	0	0	0	0	0	0	0	200	903	0	0	0	0	0	0	0	603	903	0
733	6	-27.2345	133.056	-649.19	-8219.88	-47283.7	-10670.3	127.165	312.662	0	0	0	0	0	0	0	200	903	0	0	0	0	0	0	0	603	903	0
733	7	-28.4552	133.667	-655.294	-8036.77	-47466.8	-10533	127.564	312.264	0	0	0	0	0	0	0	200	903	0	0	0	0	0	0	0	603	903	0
733	8	-28.7604	134.124	-660.482	-8677.64	-48321.3	-10304.1	126.839	313.138	0	0	0	0	0	0	0	200	903	0	0	0	0	0	0	0	603	903	0
733	9	-30.4389	134.735	-662.923	-8769.2	-48138.2	-10349.9	127.385	313.228	0	0	0	0	0	0	0	200	903	0	0	0	0	0	0	0	603	903	0
734	0	-29.8285	137.023	-672.383	-9226.96	-48565.5	-10624.6	127.771	313.723	0	0	0	0	0	0	0	200	903	0	0	0	0	0	0	0	603	903	0
734	1	-30.1337	136.413	-679.402	-9593.17	-49175.8	-10670.3	127.619	314.12	0	0	0	0	0	0	0	200	903	0	0	0	0	0	0	0	603	903	0
734	2	-30.744	138.549	-684.285	-10874.9	-49419.9	-10761.9	127.779	315.892	0	0	0	0	0	0	0	200	903	0	0	0	0	0	0	0	603	903	0
734	3	-31.507	138.855	-690.694	-11149.6	-50152.4	-10899.2	127.388	316.143	0	0	0	0	0	0	0	200	903	0	0	0	0	0	0	0	603	903	0
734	4	-29.8285	139.923	-692.83	-11973.5	-50762.7	-10945	126.731	317.282	0	0	0	0	0	0	0	200	903	0	0	0	0	0	0	0	603	903	0
734	5	-31.3544	138.855	-699.239	-12065.1	-51434.1	-10853.4	126.443	317.255	0	0	0	0	0	0	0	200	903	0	0	0	0	0	0	0	603	903	0
734	6	-31.8121	140.533	-705.648	-12339.8	-51373.1	-10853.4	127.197	317.487	0	0	0	0	0	0	0	200	903	0	0	0	0	0	0	0	603	903	0
734	7	-31.507	141.601	-711.141	-12522.9	-51739.3	-11357	127.245	317.61	0	0	0	0	0	0	0	200	903	0	0	0	0	0	0	0	603	903	0
734	8	-31.3544	142.517	-716.024	-13438.4	-52410.7	-11173.9	126.803	318.768	0	0	0	0	0	0	0	200	903	0	0	0	0	0	0	0	603	903	0
734	9	-30.744	142.211	-720.601	-13072.2	-52715.8	-11585.9	126.845	318.141	0	0	0	0	0	0	0	200	903	0	0	0	0	0	0	0	603	903	0
735	0	-28.3026	143.432	-723.348	-14262.4	-52776.9	-11494.3	127.038	319.717	0	0	0	0	0	0	0	200	903	0	0	0	0	0	0	0	603	903	0
735	1	-29.3707	144.5	-729.451	-13713	-53814.5	-11402.8	126.226	318.799	0	0	0	0	0	0	0	200	903	0	0	0	0	0	0	0	603	903	0
735	2	-29.8285	144.653	-734.639	-14353.9	-53509.3	-11677.4	127.162	319.539	0	0	0	0	0	0	0	200	903	0	0	0	0	0	0	0	603	903	0
735	3	-29.5233	144.653	-738.912	-14720.1	-54180.7	-11723.2	126.675	319.921	0	0	0	0	0	0	0	200	903	0	0	0	0	0	0	0	603	903	0
735	4	-28.3026	145.111	-742.269	-14811.7	-54974.1	-11677.4	125.938	319.955	0	0	0	0	0	0	0	200	903	0	0	0	0	0	0	0	603	903	0
735	5	-28.4552	145.111	-743.489	-15818.8	-54669	-11906.3	126.47	321.276	0	0	0	0	0	0	0	200	903	0	0	0	0	0	0	0	603	903	0
735	6	-26.4716	145.263	-752.034	-15818.8	-55462.4	-12043.6	126.25	321.035	0	0	0	0	0	0	0	200	903	0	0	0	0	0	0	0	603	903	0
735	7	-26.9293	143.737	-755.391	-15910.3	-55584.5	-11952.1	126.416	321.062	0	0	0	0	0	0	0	200	903	0	0	0	0	0	0	0	603	903	0
735	8	-26.6242	145.568	-761.8	-16825.8	-55828.6	-12181	126.715	322.087	0	0	0	0	0	0	0	200	903	0	0	0	0	0	0	0	603	903	0
735	9	-26.1664	144.958	-764.852	-17100.5	-56316.9	-11997.9	126.369	322.358	0	0	0	0	0	0	0	200	903	0	0	0	0	0	0	0	603	903	0
736	0	-24.9457	145.568	-769.734	-17008.9	-56439	-11997.9	126.677	322.097	0	0	0	0	0	0	0	200	903	0	0	0	0	0	0	0	603	903	0
736	1	-27.6923	146.331	-773.091	-17832.9	-56255.9	-11906.3	127.233	323.067	0	0	0	0	0	0	0	200	903	0	0	0	0	0	0	0	603	903	0
736	2	-27.0819	146.331	-776.754	-17283.6	-57659.7	-12043.6	125.768	322.251	0	0	0	0	0	0	0	200	903	0	0	0	0	0	0	0	603	903	0
736	3	-27.6923	145.721	-780.721	-17924.5	-57903.8	-11906.3	125.833	322.959	0	0	0	0	0	0	0	200	903	0	0	0	0	0	0	0	603	903	0
736	4	-28.15	146.331	-783.773	-18199.1	-57842.8	-11952.1	126.2	323.22	0	0	0	0	0	0	0	200	903	0	0	0	0	0	0	0	603	903	0
736	5	-29.3707	146.637	-788.961	-18382.2	-58392.1	-11860.5	125.989	323.299	0	0	0	0	0	0	0	200	903	0	0	0	0	0	0	0	603	903	0
736	6	-30.744	146.484	-793.538	-19664	-58453.1	-11860.5	126.339	324.78	0	0	0	0	0	0	0	200	903	0	0	0	0	0	0	0	603	903	0
736	7	-30.8966	147.094	-796.59	-19206.2	-58819.4	-12043.6	126.161	324.111	0	0	0	0	0	0	0	200	903	0	0	0	0	0	0	0	603	903	0
736	8	-31.6596	144.958	-799.642	-19480.9	-59551.8	-11814.7	125.527	324.362	0	0	0	0	0	0	0	200	903	0	0	0	0	0	0	0	603	903	0
736	9	-31.0492	145.263	-802.388	-20121.7	-59918	-11769	125.325	325.077	0	0	0	0	0	0	0	200	903	0	0	0	0	0	0	0	603	903	0
737	0	-29.0656	145.416	-804.525	-20396.4	-59429.7	-11219.7	126.131	325.352	0	0	0	0	0	0	0	200	903	0	0	0	0	0	0	0	603	903	0
737	1	-31.8121	145.111	-806.966	-19847.1	-60040.1	-11585.9	125.598	324.595	0	0	0	0	0	0	0	200	903	0	0	0	0	0	0	0	603	903	0
737	2	-32.4225	144.348	-809.407	-20121.7	-60040.1	-11631.6	125.822	324.86	0	0	0	0	0	0	0	200	903	0	0	0	0	0	0	0	603	903	0
737	3	-32.7277	144.348	-812.154	-20121.7	-60223.2	-11723.2	125.848	324.776	0	0	0	0	0	0	0	200	903	0	0	0	0	0	0	0	603	903	0
737	4	-32.8803	142.974	-811.849	-20762.6	-61077.7	-11219.7	124.767	325.574	0	0	0	0	0	0	0	200	903	0	0	0	0	0	0	0	603	903	0
737	5	-31.2018	142.211	-817.647	-21495	-60528.3	-11585.9	125.973	326.289	0	0	0	0	0	0	0	200	903	0	0	0	0	0	0	0	603	903	0
737	6	-31.9647	142.669	-818.257	-20762.6	-60650.4	-11723.2	125.879	325.374	0	0	0	0	0	0	0	200	903	0	0	0	0	0	0	0	603	903	0
737	7	-32.4225	141.754	-822.53	-21128.8	-60528.3	-11494.3	126.412	325.688	0	0	0	0	0	0	0	200	903	0	0	0	0	0	0	0	603	903	0
737	8	-33.0329	140.838	-824.666	-21495	-61199.7	-11448.5	125.788	326.065	0	0	0	0	0	0	0	200	903	0	0	0	0	0	0	0	603	903	0
737	9	-32.2699	139.617	-826.192	-21769.7	-61749	-10716.1	125.261	326.349	0	0	0	0	0	0	0	200	903	0	0	0	0	0	0	0	603	903	0
738	0	-32.8803	139.465	-829.854	-22044.3	-61810.1	-11265.4	125.517	326.564	0	0	0	0	0	0	0	200	903	0	0	0	0	0	0	0	603	903	0
738	1	-33.7958	139.617	-831.38	-22502.1	-62115.3	-11311.2	125.287	327.066	0	0	0	0	0	0	0	200	903	0	0	0	0	0	0	0	603	903	0
738	2	-33.9484	139.923	-835.652	-22227.4	-62237.3	-11402.8	125.522	326.599	0	0	0	0	0	0	0	200	903	0	0	0	0	0	0	0	603	903	0
738	3	-33.338	138.092	-837.789	-23143	-62786.6	-10990.8	125.057	327.624	0	0	0	0	0	0	0	200	903	0	0	0	0	0	0	0	603	903	0
738	4	-33.7958	136.871	-838.399	-23509.2	-62847.7	-11082.3	125.038	328.041	0	0	0	0	0	0	0	200	903	0	0	0	0	0	0	0	603	903	0
738	5	-34.5587	138.397	-842.672	-22868.3	-63397	-11036.5	124.767	327.138	0	0	0	0	0	0	0	200	903	0	0	0	0	0	0	0	603	903	0
738	6	-35.4743	137.176	-843.892	-23692.3	-63580.1	-11128.1	124.659	328.075	0	0	0	0	0	0	0	200	903	0	0	0	0	0	0	0	603	903	0
738	7	-35.6268	137.023	-848.47	-23143	-63641.1	-11265.4	124.993	327.276	0	0	0	0	0	0	0	200	903	0	0	0	0	0	0	0	603	903	0
738	8	-35.4743	136.108	-850.606	-23783.8	-64251.5	-10899.2	124.464	327.961	0	0	0	0	0	0	0	200	903	0	0	0	0	0	0	0	603	903	0
738	9	-35.6268	136.108	-852.437	-23875.4	-63946.3	-11082.3	124.984	328.008	0	0	0	0	0	0	0	200	903	0	0	0	0	0	0	0	603	903	0
739	0	-33.9484	134.887	-850.911	-23692.3	-63458	-10212.6	125.423	327.843	0	0	0	0	0	0	0	200	903	0	0	0	0	0	0	0	603	903	0
739	1	-35.3217	133.972	-853.963	-24699.4	-64251.5	-11082.3	124.761	328.923	0	0	0	0	0	0	0	200	903	0	0	0	0	0	0	0	603	903	0
739	2	-35.7794	133.361	-855.794	-24424.7	-64373.5	-10761.9	124.779	328.54	0	0	0	0	0	0	0	200	903	0	0	0	0	0	0	0	603	903	0
739	3	-35.932	131.988	-857.32	-24424.7	-64434.6	-10853.4	124.842	328.49	0	0	0	0	0	0	0	200	903	0	0	0	0	0	0	0	603	903	0
739	4	-35.3217	131.378	-857.93	-25157.1	-64861.8	-10716.1	124.397	329.323	0	0	0	0	0	0	0	200	903	0	0	0	0	0	0	0	603	903	0
739	5	-33.7958	130.004	-860.677	-24974	-64922.9	-10670.3	124.568	329.017	0	0	0	0	0	0	0	200	903	0	0	0	0	0	0	0	603	903	0
739	6	-34.4061	129.699	-860.982	-24699.4	-64312.5	-10533	125.303	328.687	0	0	0	0	0	0	0	200	903	0	0	0	0	0	0	0	603	903	0
739	7	-34.5587	128.631	-863.729	-24974	-65106	-10487.2	124.622	328.914	0	0	0	0	0	0	0	200	903	0	0	0	0	0	0	0	603	903	0
739	8	-34.5587	128.326	-862.203	-25065.6	-65289.1	-10533	124.276	329.072	0	0	0	0	0	0	0	200	903	0	0	0	0	0	0	0	603	903	0
739	9	-34.2536	126.953	-866.78	-25248.7	-64800.8	-9571.71	125.24	329.129	0	0	0	0	0	0	0	200	903	0	0	0	0	0	0	0	603	903	0
740	0	-34.7113	126.953	-867.696	-25340.2	-65472.2	-10349.9	124.545	329.204	0	0	0	0	0	0	0	200	903	0	0	0	0	0	0	0	603	903	0
740	1	-34.8639	125.732	-868.611	-25248.7	-65472.2	-10212.6	124.624	329.068	0	0	0	0	0	0	0	200	903	0	0	0	0	0	0	0	603	903	0
740	2	-34.8639	122.833	-869.527	-25065.6	-65289.1	-10258.4	124.914	328.827	0	0	0	0	0	0	0	200	903	0	0	0	0	0	0	0	603	903	0
740	3	-33.338	123.901	-869.832	-25889.6	-65838.4	-9800.59	124.309	329.764	0	0	0	0	0	0	0	200	903	0	0	0	0	0	0	0	603	903	0
740	4	-34.5587	122.985	-871.663	-25614.9	-65899.4	-9571.71	124.398	329.386	0	0	0	0	0	0	0	200	903	0	0	0	0	0	0	0	603	903	0
740	5	-35.4743	122.222	-871.358	-26530.4	-65472.2	-9754.81	124.862	330.447	0	0	0	0	0	0	0	200	903	0	0	0	0	0	0	0	603	903	0
740	6	-36.3898	122.222	-871.358	-26530.4	-66204.6	-9754.81	124.021	330.447	0	0	0	0	0	0	0	200	903	0	0	0	0	0	0	0	603	903	0
740	7	-36.3898	120.849	-872.579	-25614.9	-66143.6	-9892.14	124.198	329.355	0	0	0	0	0	0	0	200	903	0	0	0	0	0	0	0	603	903	0
740	8	-33.7958	119.781	-871.968	-26988.2	-65960.5	-9525.93	124.355	330.951	0	0	0	0	0	0	0	200	903	0	0	0	0	0	0	0	603	903	0
740	9	-33.7958	118.56	-872.884	-27079.7	-66387.7	-9022.39	123.944	331.023	0	0	0	0	0	0	0	200	903	0	0	0	0	0	0	0	603	903	0
741	0	-35.932	118.866	-871.968	-26530.4	-66143.6	-9434.38	124.145	330.426	0	0	0	0	0	0	0	200	903	0	0	0	0	0	0	0	603	903	0
741	1	-36.2372	117.797	-871.968	-27537.5	-65655.3	-9617.48	124.705	331.581	0	0	0	0	0	0	0	200	903	0	0	0	0	0	0	0	603	903	0
741	2	-35.932	117.645	-871.968	-26988.2	-66448.7	-9480.15	123.795	330.951	0	0	0	0	0	0	0	200	903	0	0	0	0	0	0	0	603	903	0
741	3	-35.932	115.966	-872.884	-26896.6	-66570.8	-9388.6	123.735	330.814	0	0	0	0	0	0	0	200	903	0	0	0	0	0	0	0	603	903	0
741	4	-35.6268	116.119	-870.748	-27629.1	-66143.6	-8610.4	124.038	331.73	0	0	0	0	0	0	0	200	903	0	0	0	0	0	0	0	603	903	0
741	5	-33.9484	114.746	-873.189	-27262.9	-66082.5	-9022.39	124.32	331.222	0	0	0	0	0	0	0	200	903	0	0	0	0	0	0	0	603	903	0
741	6	-35.0165	114.135	-872.579	-27629.1	-66448.7	-9297.05	123.848	331.664	0	0	0	0	0	0	0	200	903	0	0	0	0	0	0	0	603	903	0
741	7	-34.101	113.525	-873.189	-27354.4	-66265.6	-9022.39	124.111	331.327	0	0	0	0	0	0	0	200	903	0	0	0	0	0	0	0	603	903	0
741	8	-35.4743	112.457	-873.189	-27537.5	-66876	-9205.49	123.412	331.537	0	0	0	0	0	0	0	200	903	0	0	0	0	0	0	0	603	903	0
741	9	-35.3217	109.71	-871.968	-28086.8	-66814.9	-8518.85	123.375	332.211	0	0	0	0	0	0	0	200	903	0	0	0	0	0	0	0	603	903	0
742	0	-33.4906	110.626	-872.884	-28819.2	-66509.8	-8747.73	123.805	333.016	0	0	0	0	0	0	0	200	903	0	0	0	0	0	0	0	603	903	0
742	1	-34.4061	110.015	-873.494	-27903.7	-66509.8	-8656.18	123.858	331.945	0	0	0	0	0	0	0	200	903	0	0	0	0	0	0	0	603	903	0
742	2	-35.4743	108.49	-871.663	-28178.4	-66570.8	-8793.51	123.628	332.327	0	0	0	0	0	0	0	200	903	0	0	0	0	0	0	0	603	903	0
742	3	-35.4743	108.795	-872.579	-29185.5	-66509.8	-8610.4	123.778	333.447	0	0	0	0	0	0	0	200	903	0	0	0	0	0	0	0	603	903	0
742	4	-35.1691	106.811	-871.663	-29002.4	-66692.9	-8564.62	123.488	333.272	0	0	0	0	0	0	0	200	903	0	0	0	0	0	0	0	603	903	0
742	5	-35.3217	106.506	-864.949	-29551.7	-66326.7	-8473.07	123.317	334.166	0	0	0	0	0	0	0	200	903	0	0	0	0	0	0	0	603	903	0
742	6	-36.8475	106.201	-870.137	-29185.5	-66448.7	-8473.07	123.634	333.541	0	0	0	0	0	0	0	200	903	0	0	0	0	0	0	0	603	903	0
742	7	-37.4579	105.133	-870.443	-27720.6	-66387.7	-8518.85	123.731	331.847	0	0	0	0	0	0	0	200	903	0	0	0	0	0	0	0	603	903	0
742	8	-36.695	103.454	-869.222	-29368.6	-66509.8	-7557.54	123.484	333.787	0	0	0	0	0	0	0	200	903	0	0	0	0	0	0	0	603	903	0
742	9	-36.8475	102.081	-866.475	-29643.2	-66692.9	-7969.53	123.03	334.211	0	0	0	0	0	0	0	200	903	0	0	0	0	0	0	0	603	903	0
743	0	-34.8639	101.928	-866.475	-29185.5	-66570.8	-7832.2	123.171	333.683	0	0	0	0	0	0	0	200	903	0	0	0	0	0	0	0	603	903	0
743	1	-37.3053	101.165	-862.508	-29917.9	-66387.7	-8061.08	123.029	334.687	0	0	0	0	0	0	0	200	903	0	0	0	0	0	0	0	603	903	0
743	2	-37.4579	100.708	-863.118	-29093.9	-66021.5	-7923.75	123.508	333.708	0	0	0	0	0	0	0	200	903	0	0	0	0	0	0	0	603	903	0
743	3	-37.1527	99.3343	-861.592	-29368.6	-66692.9	-7328.66	122.593	334.086	0	0	0	0	0	0	0	200	903	0	0	0	0	0	0	0	603	903	0
743	4	-36.8475	98.8765	-858.541	-29734.8	-66509.8	-7603.32	122.532	334.634	0	0	0	0	0	0	0	200	903	0	0	0	0	0	0	0	603	903	0
743	5	-35.0165	97.8084	-858.846	-29734.8	-66021.5	-7557.54	123.128	334.622	0	0	0	0	0	0	0	200	903	0	0	0	0	0	0	0	603	903	0
743	6	-35.932	96.5877	-855.794	-29917.9	-66204.6	-7649.1	122.64	334.959	0	0	0	0	0	0	0	200	903	0	0	0	0	0	0	0	603	903	0
743	7	-36.2372	95.8247	-854.268	-30925	-66204.6	-6825.12	122.501	336.201	0	0	0	0	0	0	0	200	903	0	0	0	0	0	0	0	603	903	0
743	8	-36.0846	95.2144	-853.047	-30009.4	-66631.8	-7420.21	121.89	335.179	0	0	0	0	0	0	0	200	903	0	0	0	0	0	0	0	603	903	0
743	9	-35.7794	92.3152	-851.216	-30558.8	-65838.4	-7054	122.654	335.9	0	0	0	0	0	0	0	200	903	0	0	0	0	0	0	0	603	903	0
744	0	-34.4061	94.1463	-850.301	-31108.1	-65838.4	-7099.78	122.57	336.585	0	0	0	0	0	0	0	200	903	0	0	0	0	0	0	0	603	903	0
744	1	-36.695	92.4678	-849.691	-30101	-65655.3	-7008.23	122.73	335.426	0	0	0	0	0	0	0	200	903	0	0	0	0	0	0	0	603	903	0
744	2	-36.3898	91.0945	-846.944	-31382.7	-65716.3	-7054	122.408	337.054	0	0	0	0	0	0	0	200	903	0	0	0	0	0	0	0	603	903	0
744	3	-36.3898	91.2471	-846.028	-31199.6	-65411.1	-7008.23	122.684	336.878	0	0	0	0	0	0	0	200	903	0	0	0	0	0	0	0	603	903	0
744	4	-36.3898	89.7212	-837.789	-30101	-66021.5	-6687.79	121.196	335.929	0	0	0	0	0	0	0	200	903	0	0	0	0	0	0	0	603	903	0
744	5	-36.3898	89.1109	-839.925	-31474.3	-65533.2	-6596.24	121.977	337.473	0	0	0	0	0	0	0	200	903	0	0	0	0	0	0	0	603	903	0
744	6	-37.1527	89.5686	-839.315	-31199.6	-65106	-6550.46	122.43	337.173	0	0	0	0	0	0	0	200	903	0	0	0	0	0	0	0	603	903	0
744	7	-37.1527	87.2798	-837.789	-30467.2	-65716.3	-6642.02	121.56	336.366	0	0	0	0	0	0	0	200	903	0	0	0	0	0	0	0	603	903	0
744	8	-37.4579	86.0591	-835.042	-31840.5	-65533.2	-6504.69	121.521	338.13	0	0	0	0	0	0	0	200	903	0	0	0	0	0	0	0	603	903	0
744	9	-35.3217	85.7539	-831.38	-32115.1	-65228	-6321.58	121.542	338.629	0	0	0	0	0	0	0	200	903	0	0	0	0	0	0	0	603	903	0
745	0	-37.1527	84.0755	-829.549	-31565.8	-65044.9	-6230.03	121.59	338.052	0	0	0	0	0	0	0	200	903	0	0	0	0	0	0	0	603	903	0
745	1	-37.1527	84.2281	-826.497	-31565.8	-64739.8	-6413.13	121.67	338.192	0	0	0	0	0	0	0	200	903	0	0	0	0	0	0	0	603	903	0
745	2	-36.8475	84.2281	-824.361	-31291.2	-64739.8	-6138.48	121.467	337.958	0	0	0	0	0	0	0	200	903	0	0	0	0	0	0	0	603	903	0
745	3	-37.1527	82.0918	-821.309	-31565.8	-64678.7	-5955.37	121.249	338.434	0	0	0	0	0	0	0	200	903	0	0	0	0	0	0	0	603	903	0
745	4	-35.4743	80.8711	-820.699	-31565.8	-64251.5	-5772.27	121.711	338.462	0	0	0	0	0	0	0	200	903	0	0	0	0	0	0	0	603	903	0
745	5	-35.4743	80.1082	-817.037	-31748.9	-64556.6	-5818.04	120.987	338.859	0	0	0	0	0	0	0	200	903	0	0	0	0	0	0	0	603	903	0
745	6	-35.932	77.3616	-815.816	-31748.9	-64068.4	-5589.16	121.467	338.917	0	0	0	0	0	0	0	200	903	0	0	0	0	0	0	0	603	903	0
745	7	-35.7794	78.7349	-813.68	-32298.2	-63885.3	-5634.94	121.486	339.694	0	0	0	0	0	0	0	200	903	0	0	0	0	0	0	0	603	903	0
745	8	-35.4743	77.3616	-812.764	-31565.8	-64007.3	-5634.94	121.247	338.838	0	0	0	0	0	0	0	200	903	0	0	0	0	0	0	0	603	903	0
745	9	-35.1691	76.1409	-811.544	-32847.6	-63580.1	-5085.62	121.655	340.475	0	0	0	0	0	0	0	200	903	0	0	0	0	0	0	0	603	903	0
746	0	-35.1691	76.2935	-807.271	-32572.9	-63336	-5268.73	121.543	340.349	0	0	0	0	0	0	0	200	903	0	0	0	0	0	0	0	603	903	0
746	1	-35.3217	74.3098	-804.525	-31291.2	-63763.2	-4719.41	120.744	338.894	0	0	0	0	0	0	0	200	903	0	0	0	0	0	0	0	603	903	0
746	2	-35.3217	72.784	-799.642	-32664.5	-63274.9	-5268.73	120.871	340.849	0	0	0	0	0	0	0	200	903	0	0	0	0	0	0	0	603	903	0
746	3	-36.8475	71.4107	-800.862	-32939.1	-63763.2	-5222.95	120.382	341.13	0	0	0	0	0	0	0	200	903	0	0	0	0	0	0	0	603	903	0
746	4	-36.3898	71.5633	-797.505	-32115.1	-63458	-5039.84	120.429	340.27	0	0	0	0	0	0	0	200	903	0	0	0	0	0	0	0	603	903	0
746	5	-36.0846	70.8003	-795.369	-32847.6	-62664.6	-4582.08	121.213	341.299	0	0	0	0	0	0	0	200	903	0	0	0	0	0	0	0	603	903	0
746	6	-36.3898	70.4951	-792.928	-32389.8	-62847.7	-4902.51	120.74	340.848	0	0	0	0	0	0	0	200	903	0	0	0	0	0	0	0	603	903	0
746	7	-34.4061	68.6641	-788.961	-32847.6	-62908.7	-4902.51	120.264	341.634	0	0	0	0	0	0	0	200	903	0	0	0	0	0	0	0	603	903	0
746	8	-36.695	67.4434	-786.824	-33396.9	-62481.5	-4673.63	120.59	342.445	0	0	0	0	0	0	0	200	903	0	0	0	0	0	0	0	603	903	0
746	9	-35.3217	67.7486	-783.773	-32206.7	-62359.4	-4627.86	120.437	341.092	0	0	0	0	0	0	0	200	903	0	0	0	0	0	0	0	603	903	0
747	0	-35.6268	66.6805	-780.11	-32389.8	-62115.3	-4398.97	120.376	341.52	0	0	0	0	0	0	0	200	903	0	0	0	0	0	0	0	603	903	0
747	1	-35.7794	63.9339	-775.838	-33213.8	-61871.1	-4490.53	120.253	342.81	0	0	0	0	0	0	0	200	903	0	0	0	0	0	0	0	603	903	0
747	2	-35.1691	65.002	-774.922	-32572.9	-62176.3	-4307.42	119.765	342.034	0	0	0	0	0	0	0	200	903	0	0	0	0	0	0	0	603	903	0
747	3	-34.5587	63.4761	-772.786	-32939.1	-62176.3	-4215.87	119.543	342.624	0	0	0	0	0	0	0	200	903	0	0	0	0	0	0	0	603	903	0
747	4	-33.9484	63.4761	-769.734	-33213.8	-61504.9	-4078.54	120.096	343.15	0	0	0	0	0	0	0	200	903	0	0	0	0	0	0	0	603	903	0
747	5	-34.4061	62.7132	-766.072	-33396.9	-61382.8	-3941.21	119.873	343.595	0	0	0	0	0	0	0	200	903	0	0	0	0	0	0	0	603	903	0
747	6	-32.5751	60.8821	-763.936	-33396.9	-61016.6	-4032.76	120.129	343.717	0	0	0	0	0	0	0	200	903	0	0	0	0	0	0	0	603	903	0
747	7	-34.101	60.8821	-763.326	-33946.2	-60650.4	-3758.1	120.545	344.471	0	0	0	0	0	0	0	200	903	0	0	0	0	0	0	0	603	903	0
747	8	-34.101	59.0511	-760.884	-33213.8	-61077.7	-3941.21	119.728	343.652	0	0	0	0	0	0	0	200	903	0	0	0	0	0	0	0	603	903	0
747	9	-33.6432	58.7459	-757.833	-34037.8	-60589.4	-3620.77	120.049	344.915	0	0	0	0	0	0	0	200	903	0	0	0	0	0	0	0	603	903	0
748	0	-33.6432	56.1519	-752.034	-34404	-60223.2	-3300.34	119.92	345.748	0	0	0	0	0	0	0	200	903	0	0	0	0	0	0	0	603	903	0
748	1	-34.8639	56.7622	-752.339	-33488.4	-59795.9	-3712.33	120.52	344.512	0	0	0	0	0	0	0	200	903	0	0	0	0	0	0	0	603	903	0
748	2	-35.3217	56.3045	-749.593	-34861.7	-60223.2	-3849.66	119.659	346.508	0	0	0	0	0	0	0	200	903	0	0	0	0	0	0	0	603	903	0
748	3	-34.4061	55.9993	-746.846	-33396.9	-59857	-3391.89	119.854	344.717	0	0	0	0	0	0	0	200	903	0	0	0	0	0	0	0	603	903	0
748	4	-34.2536	54.626	-744.71	-34037.8	-59918	-3254.56	119.542	345.706	0	0	0	0	0	0	0	200	903	0	0	0	0	0	0	0	603	903	0
748	5	-34.4061	54.7786	-741.658	-34220.9	-59429.7	-3575	119.869	346.141	0	0	0	0	0	0	0	200	903	0	0	0	0	0	0	0	603	903	0
748	6	-32.5751	54.1682	-736.47	-34129.3	-59490.7	-3346.12	119.222	346.342	0	0	0	0	0	0	0	200	903	0	0	0	0	0	0	0	603	903	0
748	7	-34.4061	50.9639	-734.334	-34312.4	-59734.9	-3300.34	118.654	346.726	0	0	0	0	0	0	0	200	903	0	0	0	0	0	0	0	603	903	0
748	8	-34.4061	51.8794	-731.588	-35136.4	-59368.7	-2934.13	118.85	348.028	0	0	0	0	0	0	0	200	903	0	0	0	0	0	0	0	603	903	0
748	9	-34.101	51.4217	-728.841	-34770.2	-59368.7	-3071.46	118.544	347.706	0	0	0	0	0	0	0	200	903	0	0	0	0	0	0	0	603	903	0
749	0	-34.101	50.5061	-726.4	-35411.1	-59063.5	-2934.13	118.69	348.749	0	0	0	0	0	0	0	200	903	0	0	0	0	0	0	0	603	903	0
749	1	-34.7113	49.438	-720.906	-35411.1	-58819.4	-2934.13	118.409	349.12	0	0	0	0	0	0	0	200	903	0	0	0	0	0	0	0	603	903	0
749	2	-32.7277	49.438	-722.432	-34312.4	-59063.5	-2796.8	118.244	347.496	0	0	0	0	0	0	0	200	903	0	0	0	0	0	0	0	603	903	0
749	3	-33.1854	48.5225	-718.16	-35777.3	-58880.4	-2979.91	118.012	349.818	0	0	0	0	0	0	0	200	903	0	0	0	0	0	0	0	603	903	0
749	4	-32.5751	48.3699	-716.329	-36051.9	-58575.2	-2613.69	118.229	350.329	0	0	0	0	0	0	0	200	903	0	0	0	0	0	0	0	603	903	0
749	5	-32.1173	47.3018	-713.277	-35594.2	-58514.2	-2705.25	117.964	349.902	0	0	0	0	0	0	0	200	903	0	0	0	0	0	0	0	603	903	0
749	6	-32.5751	47.4544	-710.53	-36326.6	-58148	-2430.59	118.163	351.126	0	0	0	0	0	0	0	200	903	0	0	0	0	0	0	0	603	903	0
749	7	-30.5914	46.6914	-710.53	-35411.1	-57781.8	-2567.92	118.678	349.838	0	0	0	0	0	0	0	200	903	0	0	0	0	0	0	0	603	903	0
749	8	-33.0329	43.9449	-707.784	-36143.5	-58209	-2659.47	117.759	351.066	0	0	0	0	0	0	0	200	903	0	0	0	0	0	0	0	603	903	0
749	9	-31.507	44.7078	-703.817	-36875.9	-57964.9	-2110.15	117.642	352.394	0	0	0	0	0	0	0	200	903	0	0	0	0	0	0	0	603	903	0
750	0	-32.2699	42.8767	-701.375	-36509.7	-57049.3	-1972.83	118.661	352.054	0	0	0	0	0	0	0	200	903	0	0	0	0	0	0	0	603	903	0
750	1	-32.1173	42.8767	-699.239	-36875.9	-57720.7	-1972.83	117.452	352.737	0	0	0	0	0	0	0	200	903	0	0	0	0	0	0	0	603	903	0
750	2	-32.5751	41.9612	-697.103	-36784.3	-57598.7	-1835.5	117.374	352.767	0	0	0	0	0	0	0	200	903	0	0	0	0	0	0	0	603	903	0
750	3	-31.2018	42.2664	-690.694	-36326.6	-56927.3	-1881.27	117.58	352.594	0	0	0	0	0	0	0	200	903	0	0	0	0	0	0	0	603	903	0
750	4	-31.8121	41.3509	-692.22	-37150.5	-57171.4	-1606.61	117.409	353.669	0	0	0	0	0	0	0	200	903	0	0	0	0	0	0	0	603	903	0
750	5	-32.4225	41.656	-690.084	-37425.2	-56622.1	-1698.17	117.949	354.233	0	0	0	0	0	0	0	200	903	0	0	0	0	0	0	0	603	903	0
750	6	-33.6432	40.1302	-686.727	-36784.3	-56561.1	-1881.27	117.637	353.565	0	0	0	0	0	0	0	200	903	0	0	0	0	0	0	0	603	903	0
750	7	-33.1854	39.5198	-681.844	-37883	-57049.3	-2201.71	116.331	355.56	0	0	0	0	0	0	0	200	903	0	0	0	0	0	0	0	603	903	0
750	8	-31.507	39.6724	-681.539	-37242.1	-56378	-1698.17	117.278	354.644	0	0	0	0	0	0	0	200	903	0	0	0	0	0	0	0	603	903	0
750	9	-32.1173	38.2991	-678.792	-37150.5	-56133.8	-1698.17	117.303	354.73	0	0	0	0	0	0	0	200	903	0	0	0	0	0	0	0	603	903	0
751	0	-32.2699	38.4517	-675.435	-37333.6	-56194.8	-1743.94	116.802	355.273	0	0	0	0	0	0	0	200	903	0	0	0	0	0	0	0	603	903	0
751	1	-32.8803	38.1465	-672.689	-37242.1	-55828.6	-1469.29	117.007	355.363	0	0	0	0	0	0	0	200	903	0	0	0	0	0	0	0	603	903	0
751	2	-33.6432	34.7896	-668.416	-37699.9	-55767.6	-1698.17	116.568	356.402	0	0	0	0	0	0	0	200	903	0	0	0	0	0	0	0	603	903	0
751	3	-31.9647	36.468	-669.026	-38340.7	-55889.7	-1469.29	116.461	357.308	0	0	0	0	0	0	0	200	903	0	0	0	0	0	0	0	603	903	0
751	4	-31.8121	35.5525	-666.89	-37974.5	-55645.5	-1423.51	116.56	356.943	0	0	0	0	0	0	0	200	903	0	0	0	0	0	0	0	603	903	0
751	5	-31.6596	35.8577	-664.144	-38706.9	-55035.2	-1286.18	117.134	358.281	0	0	0	0	0	0	0	200	903	0	0	0	0	0	0	0	603	903	0
751	6	-31.6596	34.637	-661.702	-38432.3	-55401.4	-1423.51	116.274	358.081	0	0	0	0	0	0	0	200	903	0	0	0	0	0	0	0	603	903	0
751	7	-29.3707	34.637	-661.397	-37883	-55462.4	-1011.52	116.144	357.277	0	0	0	0	0	0	0	200	903	0	0	0	0	0	0	0	603	903	0
751	8	-32.4225	34.1792	-659.261	-39347.8	-55218.3	-874.192	116.242	359.685	0	0	0	0	0	0	0	200	903	0	0	0	0	0	0	0	603	903	0
751	9	-31.3544	33.8741	-655.904	-39805.6	-55279.3	-1148.85	115.72	360.688	0	0	0	0	0	0	0	200	903	0	0	0	0	0	0	0	603	903	0
752	0	-30.744	33.1111	-652.852	-38890.1	-54546.9	-1148.85	116.448	359.569	0	0	0	0	0	0	0	200	903	0	0	0	0	0	0	0	603	903	0
752	1	-30.8966	33.4163	-649.19	-39073.2	-54669	-1103.07	115.789	360.188	0	0	0	0	0	0	0	200	903	0	0	0	0	0	0	0	603	903	0
752	2	-31.6596	32.8059	-649.8	-38615.4	-55157.2	-1103.07	115.117	359.427	0	0	0	0	0	0	0	200	903	0	0	0	0	0	0	0	603	903	0
752	3	-31.9647	31.5852	-646.749	-39439.4	-54302.8	-874.192	116.037	360.981	0	0	0	0	0	0	0	200	903	0	0	0	0	0	0	0	603	903	0
752	4	-31.2018	31.5852	-644.002	-39714	-54363.8	-462.205	115.584	361.668	0	0	0	0	0	0	0	200	903	0	0	0	0	0	0	0	603	903	0
752	5	-32.2699	31.1275	-641.255	-39530.9	-54302.8	-919.969	115.318	361.646	0	0	0	0	0	0	0	200	903	0	0	0	0	0	0	0	603	903	0
752	6	-31.6596	29.9068	-634.542	-40263.3	-54058.6	-645.311	114.807	363.453	0	0	0	0	0	0	0	200	903	0	0	0	0	0	0	0	603	903	0
752	7	-29.9811	30.3645	-634.236	-39988.7	-54302.8	-782.64	114.381	363.05	0	0	0	0	0	0	0	200	903	0	0	0	0	0	0	0	603	903	0
752	8	-31.3544	29.2964	-633.931	-39714	-53997.6	-782.64	114.821	362.647	0	0	0	0	0	0	0	200	903	0	0	0	0	0	0	0	603	903	0
752	9	-30.744	28.6861	-629.964	-40446.4	-53326.2	-324.876	115.35	364.204	0	0	0	0	0	0	0	200	903	0	0	0	0	0	0	0	603	903	0
753	0	-31.2018	28.2283	-628.133	-40446.4	-53753.4	-416.429	114.423	364.392	0	0	0	0	0	0	0	200	903	0	0	0	0	0	0	0	603	903	0
753	1	-31.3544	27.9231	-627.217	-39714	-53692.4	-462.205	114.396	363.318	0	0	0	0	0	0	0	200	903	0	0	0	0	0	0	0	603	903	0
753	2	-30.4389	28.3809	-624.776	-40721.1	-53204.1	-507.981	114.843	365.177	0	0	0	0	0	0	0	200	903	0	0	0	0	0	0	0	603	903	0
753	3	-29.8285	27.3128	-622.029	-40171.8	-53509.3	-370.652	113.976	364.582	0	0	0	0	0	0	0	200	903	0	0	0	0	0	0	0	603	903	0
753	4	-29.5233	26.855	-620.198	-40354.9	-53326.2	-50.2177	114.018	365.068	0	0	0	0	0	0	0	200	903	0	0	0	0	0	0	0	603	903	0
753	5	-29.3707	24.261	-617.757	-40812.7	-52654.8	-233.323	114.765	366.066	0	0	0	0	0	0	0	200	903	0	0	0	0	0	0	0	603	903	0
753	6	-27.9975	26.3972	-616.536	-40354.9	-53021	-187.547	114.002	365.454	0	0	0	0	0	0	0	200	903	0	0	0	0	0	0	0	603	903	0
753	7	-29.8285	25.6343	-614.705	-40538	-52776.9	-279.099	114.143	365.947	0	0	0	0	0	0	0	200	903	0	0	0	0	0	0	0	603	903	0
753	8	-28.6078	25.1765	-612.569	-40263.3	-52532.7	-95.994	114.242	365.729	0	0	0	0	0	0	0	200	903	0	0	0	0	0	0	0	603	903	0
753	9	-29.5233	24.8714	-610.128	-40995.8	-52532.7	-141.77	113.899	367.192	0	0	0	0	0	0	0	200	903	0	0	0	0	0	0	0	603	903	0
754	0	-29.3707	23.0403	-608.297	-40904.2	-52044.5	-4.44129	114.442	367.244	0	0	0	0	0	0	0	200	903	0	0	0	0	0	0	0	603	903	0
754	1	-28.6078	24.7188	-604.024	-41728.2	-51922.4	-95.994	114.039	369.084	0	0	0	0	0	0	0	200	903	0	0	0	0	0	0	0	603	903	0
754	2	-28.7604	23.3455	-604.94	-40812.7	-52044.5	41.3351	113.968	367.466	0	0	0	0	0	0	0	200	903	0	0	0	0	0	0	0	603	903	0
754	3	-29.5233	22.2774	-601.583	-41087.3	-51983.4	224.441	113.589	368.299	0	0	0	0	0	0	0	200	903	0	0	0	0	0	0	0	603	903	0
754	4	-28.7604	23.0403	-600.362	-41911.3	-51861.4	-50.2177	113.617	369.81	0	0	0	0	0	0	0	200	903	0	0	0	0	0	0	0	603	903	0
754	5	-28.7604	22.7351	-598.226	-41453.5	-51922.4	499.099	113.206	369.294	0	0	0	0	0	0	0	200	903	0	0	0	0	0	0	0	603	903	0
754	6	-27.3871	21.3618	-594.564	-42094.4	-51373.1	270.217	113.595	370.799	0	0	0	0	0	0	0	200	903	0	0	0	0	0	0	0	603	903	0
754	7	-27.9975	21.8196	-593.343	-42369.1	-51434.1	315.993	113.315	371.407	0	0	0	0	0	0	0	200	903	0	0	0	0	0	0	0	603	903	0
754	8	-28.15	20.7515	-591.512	-42186	-51556.2	453.322	112.84	371.319	0	0	0	0	0	0	0	200	903	0	0	0	0	0	0	0	603	903	0
754	9	-27.9975	20.7515	-588.46	-42643.7	-51006.9	590.651	113.321	372.467	0	0	0	0	0	0	0	200	903	0	0	0	0	0	0	0	603	903	0
755	0	-28.6078	20.5989	-585.103	-43101.5	-51251	407.546	112.407	373.665	0	0	0	0	0	0	0	200	903	0	0	0	0	0	0	0	603	903	0
755	1	-27.6923	20.5989	-584.188	-41911.3	-51312	727.981	112.165	371.743	0	0	0	0	0	0	0	200	903	0	0	0	0	0	0	0	603	903	0
755	2	-27.3871	19.073	-582.357	-42552.2	-51373.1	499.099	111.784	373.069	0	0	0	0	0	0	0	200	903	0	0	0	0	0	0	0	603	903	0
755	3	-26.4716	19.5308	-580.526	-43009.9	-51128.9	590.651	111.926	374.088	0	0	0	0	0	0	0	200	903	0	0	0	0	0	0	0	603	903	0
755	4	-25.556	19.2256	-578.694	-42369.1	-50640.6	682.204	112.492	373.215	0	0	0	0	0	0	0	200	903	0	0	0	0	0	0	0	603	903	0
755	5	-26.4716	18.7679	-573.812	-42460.6	-50030.3	773.757	112.811	373.997	0	0	0	0	0	0	0	200	903	0	0	0	0	0	0	0	603	903	0
755	6	-25.7086	18.0049	-576.253	-43009.9	-50762.7	544.875	111.909	374.637	0	0	0	0	0	0	0	200	903	0	0	0	0	0	0	0	603	903	0
755	7	-26.1664	17.242	-574.422	-42826.8	-50518.6	544.875	112.053	374.556	0	0	0	0	0	0	0	200	903	0	0	0	0	0	0	0	603	903	0
755	8	-25.4035	16.7842	-573.201	-44017	-50152.4	956.862	112.505	376.792	0	0	0	0	0	0	0	200	903	0	0	0	0	0	0	0	603	903	0
755	9	-24.9457	17.3946	-571.37	-43742.3	-50518.6	1094.19	111.583	376.557	0	0	0	0	0	0	0	200	903	0	0	0	0	0	0	0	603	903	0
756	0	-25.4035	16.7842	-568.318	-43376.1	-49664.1	956.862	112.612	376.324	0	0	0	0	0	0	0	200	903	0	0	0	0	0	0	0	603	903	0
756	1	-24.7931	16.3264	-562.825	-43376.1	-49725.1	1048.42	111.651	377.069	0	0	0	0	0	0	0	200	903	0	0	0	0	0	0	0	603	903	0
756	2	-26.4716	15.8687	-564.656	-43833.9	-49908.2	956.862	111.613	377.629	0	0	0	0	0	0	0	200	903	0	0	0	0	0	0	0	603	903	0
756	3	-25.8612	15.4109	-563.13	-43009.9	-49542	1185.74	112.024	376.376	0	0	0	0	0	0	0	200	903	0	0	0	0	0	0	0	603	903	0
756	4	-25.8612	15.1057	-561.91	-44657.9	-49664.1	1139.97	111.616	379.475	0	0	0	0	0	0	0	200	903	0	0	0	0	0	0	0	603	903	0
756	5	-25.8612	15.4109	-558.858	-44474.8	-49664.1	1048.42	111.133	379.582	0	0	0	0	0	0	0	200	903	0	0	0	0	0	0	0	603	903	0
756	6	-25.556	14.9532	-558.553	-43742.3	-49114.8	1094.19	112.068	378.314	0	0	0	0	0	0	0	200	903	0	0	0	0	0	0	0	603	903	0
756	7	-23.5724	14.1902	-553.365	-44474.8	-49419.9	1551.96	110.692	380.372	0	0	0	0	0	0	0	200	903	0	0	0	0	0	0	0	603	903	0
756	8	-25.2509	13.7325	-552.755	-44657.9	-49603.1	1139.97	110.262	380.792	0	0	0	0	0	0	0	200	903	0	0	0	0	0	0	0	603	903	0
756	9	-25.2509	13.885	-551.534	-44200.1	-49053.7	1139.97	111.059	380.14	0	0	0	0	0	0	0	200	903	0	0	0	0	0	0	0	603	903	0
757	0	-25.0983	13.2747	-548.482	-44657.9	-49175.8	1094.19	110.342	381.421	0	0	0	0	0	0	0	200	903	0	0	0	0	0	0	0	603	903	0
757	1	-25.2509	13.7325	-546.956	-45115.6	-49297.9	1323.07	109.869	382.485	0	0	0	0	0	0	0	200	903	0	0	0	0	0	0	0	603	903	0
757	2	-25.0983	12.5117	-543.294	-43376.1	-49114.8	1780.84	109.598	379.839	0	0	0	0	0	0	0	200	903	0	0	0	0	0	0	0	603	903	0
757	3	-24.6405	12.2066	-546.041	-44841	-48870.6	1368.85	110.5	382.12	0	0	0	0	0	0	0	200	903	0	0	0	0	0	0	0	603	903	0
757	4	-23.5724	11.291	-543.294	-45390.3	-48931.7	1368.85	109.935	383.547	0	0	0	0	0	0	0	200	903	0	0	0	0	0	0	0	603	903	0
757	5	-23.5724	12.054	-541.463	-44932.5	-48748.6	1551.96	109.969	382.984	0	0	0	0	0	0	0	200	903	0	0	0	0	0	0	0	603	903	0
757	6	-23.725	10.3755	-541.158	-45481.9	-48748.6	1551.96	109.918	384.045	0	0	0	0	0	0	0	200	903	0	0	0	0	0	0	0	603	903	0
757	7	-21.8939	11.291	-540.853	-44657.9	-49053.7	2147.05	109.303	382.569	0	0	0	0	0	0	0	200	903	0	0	0	0	0	0	0	603	903	0
757	8	-24.3353	9.76517	-539.022	-45298.7	-48504.4	1735.06	110.014	384.039	0	0	0	0	0	0	0	200	903	0	0	0	0	0	0	0	603	903	0
757	9	-22.5043	10.6807	-538.106	-45207.2	-48809.6	1826.61	109.294	384.012	0	0	0	0	0	0	0	200	903	0	0	0	0	0	0	0	603	903	0
758	0	-22.8095	10.3755	-536.885	-45390.3	-48809.6	1735.06	109.087	384.544	0	0	0	0	0	0	0	200	903	0	0	0	0	0	0	0	603	903	0
758	1	-23.4198	8.0867	-535.97	-45481.9	-48504.4	1780.84	109.502	384.859	0	0	0	0	0	0	0	200	903	0	0	0	0	0	0	0	603	903	0
758	2	-23.4198	9.45999	-533.223	-46580.5	-48687.5	1551.96	108.692	387.356	0	0	0	0	0	0	0	200	903	0	0	0	0	0	0	0	603	903	0
758	3	-23.1146	8.84964	-534.139	-46122.7	-48748.6	2147.05	108.734	386.35	0	0	0	0	0	0	0	200	903	0	0	0	0	0	0	0	603	903	0
758	4	-22.8095	8.39188	-532.308	-46488.9	-48687.5	1918.17	108.535	387.335	0	0	0	0	0	0	0	200	903	0	0	0	0	0	0	0	603	903	0
758	5	-23.725	9.3074	-531.087	-46488.9	-48565.5	1918.17	108.555	387.535	0	0	0	0	0	0	0	200	903	0	0	0	0	0	0	0	603	903	0
758	6	-23.4198	8.0867	-529.256	-46305.8	-48565.5	1872.39	108.238	387.492	0	0	0	0	0	0	0	200	903	0	0	0	0	0	0	0	603	903	0
758	7	-23.5724	7.93411	-528.035	-47404.5	-48016.1	2009.72	109.066	389.775	0	0	0	0	0	0	0	200	903	0	0	0	0	0	0	0	603	903	0
758	8	-21.5888	8.0867	-526.815	-47312.9	-48809.6	2009.72	107.35	389.809	0	0	0	0	0	0	0	200	903	0	0	0	0	0	0	0	603	903	0
758	9	-22.3517	7.47635	-524.373	-46763.6	-48565.5	2009.72	107.384	389.18	0	0	0	0	0	0	0	200	903	0	0	0	0	0	0	0	603	903	0
759	0	-23.2672	7.17117	-524.984	-47312.9	-48077.2	2009.72	108.422	390.123	0	0	0	0	0	0	0	200	903	0	0	0	0	0	0	0	603	903	0
759	1	-23.1146	7.17117	-522.847	-47770.7	-48260.3	2284.38	107.697	391.366	0	0	0	0	0	0	0	200	903	0	0	0	0	0	0	0	603	903	0
759	2	-22.6569	6.40823	-521.932	-46672	-48077.2	2192.83	107.886	389.422	0	0	0	0	0	0	0	200	903	0	0	0	0	0	0	0	603	903	0
759	3	-22.9621	6.10306	-521.627	-48411.5	-48138.2	2192.83	107.715	392.809	0	0	0	0	0	0	0	200	903	0	0	0	0	0	0	0	603	903	0
759	4	-22.5043	4.57718	-519.796	-48228.4	-48077.2	2284.38	107.508	392.783	0	0	0	0	0	0	0	200	903	0	0	0	0	0	0	0	603	903	0
759	5	-22.1991	5.64529	-518.88	-46946.7	-48077.2	2009.72	107.344	390.477	0	0	0	0	0	0	0	200	903	0	0	0	0	0	0	0	603	903	0
759	6	-21.131	4.57718	-518.88	-48960.9	-48016.1	2330.15	107.462	394.359	0	0	0	0	0	0	0	200	903	0	0	0	0	0	0	0	603	903	0
759	7	-20.9784	3.50906	-518.88	-48869.3	-48260.3	2421.71	106.991	394.182	0	0	0	0	0	0	0	200	903	0	0	0	0	0	0	0	603	903	0
759	8	-20.8258	4.72977	-518.88	-48503.1	-48138.2	2467.48	107.227	393.477	0	0	0	0	0	0	0	200	903	0	0	0	0	0	0	0	603	903	0
759	9	-20.3681	4.42459	-516.133	-49235.5	-47772	2421.71	107.443	395.393	0	0	0	0	0	0	0	200	903	0	0	0	0	0	0	0	603	903	0
760	0	-20.5206	5.03494	-517.659	-49601.7	-48321.3	2604.81	106.654	395.819	0	0	0	0	0	0	0	200	903	0	0	0	0	0	0	0	603	903	0
760	1	-20.6732	3.96683	-516.439	-48869.3	-48016.1	2375.93	107.025	394.628	0	0	0	0	0	0	0	200	903	0	0	0	0	0	0	0	603	903	0
760	2	-20.5206	3.81424	-516.744	-49601.7	-48565.5	2650.59	106.016	395.989	0	0	0	0	0	0	0	200	903	0	0	0	0	0	0	0	603	903	0
760	3	-20.3681	4.42459	-517.049	-49235.5	-48565.5	2513.26	106.072	395.224	0	0	0	0	0	0	0	200	903	0	0	0	0	0	0	0	603	903	0
760	4	-19.1474	3.0513	-513.387	-49235.5	-48077.2	2604.81	106.353	395.903	0	0	0	0	0	0	0	200	903	0	0	0	0	0	0	0	603	903	0
760	5	-21.4362	3.66165	-512.776	-49418.6	-48504.4	2513.26	105.408	396.375	0	0	0	0	0	0	0	200	903	0	0	0	0	0	0	0	603	903	0
760	6	-20.9784	3.81424	-515.523	-49601.7	-48809.6	2604.81	105.32	396.216	0	0	0	0	0	0	0	200	903	0	0	0	0	0	0	0	603	903	0
760	7	-21.5888	2.13577	-516.133	-50242.6	-48626.5	2604.81	105.787	397.344	0	0	0	0	0	0	0	200	903	0	0	0	0	0	0	0	603	903	0
760	8	-20.6732	3.0513	-516.133	-50700.4	-48870.6	2696.37	105.314	398.231	0	0	0	0	0	0	0	200	903	0	0	0	0	0	0	0	603	903	0
760	9	-20.0629	3.0513	-516.133	-50608.8	-48626.5	2879.47	105.787	398.054	0	0	0	0	0	0	0	200	903	0	0	0	0	0	0	0	603	903	0
761	0	-20.5206	2.13577	-510.945	-51066.6	-48748.6	2879.47	104.591	399.945	0	0	0	0	0	0	0	200	903	0	0	0	0	0	0	0	603	903	0
761	1	-19.2999	2.59353	-512.776	-51158.1	-48870.6	3199.91	104.694	399.767	0	0	0	0	0	0	0	200	903	0	0	0	0	0	0	0	603	903	0
761	2	-20.9784	1.22024	-513.387	-51432.8	-48931.7	3108.35	104.689	400.183	0	0	0	0	0	0	0	200	903	0	0	0	0	0	0	0	603	903	0
761	3	-20.0629	1.22024	-512.776	-51890.5	-48443.4	3016.8	105.527	401.195	0	0	0	0	0	0	0	200	903	0	0	0	0	0	0	0	603	903	0
761	4	-20.5206	1.37283	-512.471	-52256.8	-48992.7	2971.02	104.399	401.97	0	0	0	0	0	0	0	200	903	0	0	0	0	0	0	0	603	903	0
761	5	-20.8258	0.609892	-512.471	-51432.8	-48809.6	2833.69	104.756	400.362	0	0	0	0	0	0	0	200	903	0	0	0	0	0	0	0	603	903	0
761	6	-20.0629	1.06766	-511.251	-51982.1	-48687.5	3337.23	104.768	401.676	0	0	0	0	0	0	0	200	903	0	0	0	0	0	0	0	603	903	0
761	7	-19.2999	-0.000459142	-513.082	-52256.8	-49175.8	3291.46	104.156	401.849	0	0	0	0	0	0	0	200	903	0	0	0	0	0	0	0	603	903	0
761	8	-18.6896	-0.458223	-512.776	-51249.7	-49114.8	3383.01	104.218	399.945	0	0	0	0	0	0	0	200	903	0	0	0	0	0	0	0	603	903	0
761	9	-19.4525	-0.610811	-512.471	-53172.3	-48870.6	3154.13	104.637	403.757	0	0	0	0	0	0	0	200	903	0	0	0	0	0	0	0	603	903	0
762	0	-18.9948	-0.610811	-513.082	-53172.3	-49175.8	3199.91	104.156	403.633	0	0	0	0	0	0	0	200	903	0	0	0	0	0	0	0	603	903	0
762	1	-19.7577	-0.305635	-514.913	-52714.5	-49114.8	3062.58	104.615	402.376	0	0	0	0	0	0	0	200	903	0	0	0	0	0	0	0	603	903	0
762	2	-19.9103	-1.52634	-515.828	-53630	-49481	3337.23	104.075	403.969	0	0	0	0	0	0	0	200	903	0	0	0	0	0	0	0	603	903	0
762	3	-19.4525	-0.458223	-512.166	-53355.4	-49664.1	3337.23	103.031	404.176	0	0	0	0	0	0	0	200	903	0	0	0	0	0	0	0	603	903	0
762	4	-20.0629	-0.610811	-515.218	-53080.7	-49419.9	3337.23	104.08	403.026	0	0	0	0	0	0	0	200	903	0	0	0	0	0	0	0	603	903	0
762	5	-20.8258	-1.22116	-516.133	-53813.2	-49542	3383.01	104.013	404.262	0	0	0	0	0	0	0	200	903	0	0	0	0	0	0	0	603	903	0
762	6	-20.8258	-1.67893	-516.439	-53721.6	-49908.2	3428.79	103.361	404.023	0	0	0	0	0	0	0	200	903	0	0	0	0	0	0	0	603	903	0
762	7	-18.9948	-3.35739	-514.913	-54087.8	-49969.3	3611.89	102.956	405.043	0	0	0	0	0	0	0	200	903	0	0	0	0	0	0	0	603	903	0
762	8	-20.5206	-2.13669	-515.218	-54087.8	-49908.2	3611.89	103.132	404.98	0	0	0	0	0	0	0	200	903	0	0	0	0	0	0	0	603	903	0
762	9	-20.5206	-2.13669	-514.913	-54454	-50152.4	3749.22	102.6	405.754	0	0	0	0	0	0	0	200	903	0	0	0	0	0	0	0	603	903	0
763	0	-21.131	-4.88327	-516.744	-54728.7	-50152.4	3566.12	102.945	405.911	0	0	0	0	0	0	0	200	903	0	0	0	0	0	0	0	603	903	0
763	1	-20.5206	-3.2048	-517.659	-55827.3	-50518.6	3703.45	102.41	407.846	0	0	0	0	0	0	0	200	903	0	0	0	0	0	0	0	603	903	0
763	2	-20.2155	-4.5781	-517.659	-55186.4	-50884.8	3749.22	101.702	406.608	0	0	0	0	0	0	0	200	903	0	0	0	0	0	0	0	603	903	0
763	3	-20.3681	-4.42551	-516.133	-56468.2	-50213.4	3840.77	102.712	409.406	0	0	0	0	0	0	0	200	903	0	0	0	0	0	0	0	603	903	0
763	4	-19.9103	-3.81516	-513.692	-56285.1	-50762.7	3795	101.181	409.57	0	0	0	0	0	0	0	200	903	0	0	0	0	0	0	0	603	903	0
763	5	-20.3681	-4.73068	-520.101	-56193.5	-51006.9	3978.1	101.929	408.044	0	0	0	0	0	0	0	200	903	0	0	0	0	0	0	0	603	903	0
763	6	-20.3681	-5.03586	-521.016	-56559.7	-50762.7	3932.33	102.57	408.557	0	0	0	0	0	0	0	200	903	0	0	0	0	0	0	0	603	903	0
763	7	-20.3681	-5.49362	-521.321	-57109.1	-51190	3932.33	101.807	409.547	0	0	0	0	0	0	0	200	903	0	0	0	0	0	0	0	603	903	0
763	8	-20.2155	-5.7988	-520.101	-55552.7	-51434.1	4206.98	101.107	406.811	0	0	0	0	0	0	0	200	903	0	0	0	0	0	0	0	603	903	0
763	9	-20.8258	-5.95139	-520.711	-57566.8	-50945.8	4252.76	102.161	410.554	0	0	0	0	0	0	0	200	903	0	0	0	0	0	0	0	603	903	0
764	0	-22.1991	-7.32468	-522.237	-57566.8	-51495.1	4206.98	101.395	410.231	0	0	0	0	0	0	0	200	903	0	0	0	0	0	0	0	603	903	0
764	1	-22.1991	-6.25656	-523.458	-57109.1	-51434.1	4435.87	101.742	409.1	0	0	0	0	0	0	0	200	903	0	0	0	0	0	0	0	603	903	0
764	2	-22.3517	-6.86691	-521.932	-58116.1	-51495.1	4344.31	101.337	411.348	0	0	0	0	0	0	0	200	903	0	0	0	0	0	0	0	603	903	0
764	3	-21.5888	-5.95139	-522.542	-58390.8	-52166.5	4481.64	100.168	411.744	0	0	0	0	0	0	0	200	903	0	0	0	0	0	0	0	603	903	0
764	4	-22.5043	-7.32468	-523.152	-57933	-51678.2	4756.3	101.218	410.738	0	0	0	0	0	0	0	200	903	0	0	0	0	0	0	0	603	903	0
764	5	-22.3517	-7.32468	-524.373	-58940.1	-52044.5	4481.64	100.749	412.401	0	0	0	0	0	0	0	200	903	0	0	0	0	0	0	0	603	903	0
764	6	-23.2672	-6.86691	-522.542	-58665.4	-51739.3	4435.87	100.985	412.269	0	0	0	0	0	0	0	200	903	0	0	0	0	0	0	0	603	903	0
764	7	-21.7413	-8.39279	-525.594	-59123.2	-52471.7	4847.85	100.167	412.488	0	0	0	0	0	0	0	200	903	0	0	0	0	0	0	0	603	903	0
764	8	-21.2836	-8.39279	-527.12	-59764.1	-52288.6	4847.85	100.803	413.379	0	0	0	0	0	0	0	200	903	0	0	0	0	0	0	0	603	903	0
764	9	-21.4362	-7.93503	-527.73	-59123.2	-52044.5	4802.08	101.381	412.033	0	0	0	0	0	0	0	200	903	0	0	0	0	0	0	0	603	903	0
765	0	-20.0629	-9.00314	-531.697	-59581	-52593.8	4985.18	101.083	412.058	0	0	0	0	0	0	0	200	903	0	0	0	0	0	0	0	603	903	0
765	1	-22.1991	-8.69797	-531.697	-60496.5	-52715.8	5076.74	100.854	413.78	0	0	0	0	0	0	0	200	903	0	0	0	0	0	0	0	603	903	0
765	2	-21.7413	-8.69797	-532.308	-60404.9	-53326.2	5259.84	99.8207	413.478	0	0	0	0	0	0	0	200	903	0	0	0	0	0	0	0	603	903	0
765	3	-21.7413	-9.30832	-532.003	-60588.1	-53143.1	5030.96	100.107	413.887	0	0	0	0	0	0	0	200	903	0	0	0	0	0	0	0	603	903	0
765	4	-21.2836	-8.85056	-532.003	-60771.2	-53631.4	4939.41	99.1896	414.231	0	0	0	0	0	0	0	200	903	0	0	0	0	0	0	0	603	903	0
765	5	-23.5724	-9.6135	-535.97	-60771.2	-53753.4	5168.29	99.7081	413.385	0	0	0	0	0	0	0	200	903	0	0	0	0	0	0	0	603	903	0
765	6	-23.4198	-10.529	-536.275	-61137.4	-53570.3	5305.62	100.107	414.004	0	0	0	0	0	0	0	200	903	0	0	0	0	0	0	0	603	903	0
765	7	-23.1146	-10.8342	-533.834	-60771.2	-54241.7	5442.95	98.3921	413.839	0	0	0	0	0	0	0	200	903	0	0	0	0	0	0	0	603	903	0
765	8	-23.725	-10.9868	-537.496	-62236	-54546.9	5305.62	98.5166	415.789	0	0	0	0	0	0	0	200	903	0	0	0	0	0	0	0	603	903	0
765	9	-24.0302	-13.2756	-537.496	-62236	-54058.6	5397.17	99.425	415.789	0	0	0	0	0	0	0	200	903	0	0	0	0	0	0	0	603	903	0
766	0	-24.3353	-11.292	-539.327	-63517.7	-54974.1	5305.62	98.069	417.772	0	0	0	0	0	0	0	200	903	0	0	0	0	0	0	0	603	903	0
766	1	-24.1828	-12.0549	-541.463	-63334.6	-54669	5580.28	99.0347	416.969	0	0	0	0	0	0	0	200	903	0	0	0	0	0	0	0	603	903	0
766	2	-24.6405	-12.6653	-539.632	-63884	-54791	5763.38	98.4659	418.384	0	0	0	0	0	0	0	200	903	0	0	0	0	0	0	0	603	903	0
766	3	-23.1146	-12.0549	-543.599	-63884	-54913.1	5717.6	98.9824	417.52	0	0	0	0	0	0	0	200	903	0	0	0	0	0	0	0	603	903	0
766	4	-22.8095	-13.5808	-544.21	-64341.7	-55340.4	5763.38	98.3106	418.23	0	0	0	0	0	0	0	200	903	0	0	0	0	0	0	0	603	903	0
766	5	-24.0302	-13.7334	-546.651	-64891	-55340.4	5626.05	98.7648	418.707	0	0	0	0	0	0	0	200	903	0	0	0	0	0	0	0	603	903	0
766	6	-23.4198	-15.1067	-546.956	-65074.1	-56561.1	6129.59	96.5894	418.975	0	0	0	0	0	0	0	200	903	0	0	0	0	0	0	0	603	903	0
766	7	-24.0302	-14.4963	-550.313	-63975.5	-55889.7	5946.49	98.4402	416.253	0	0	0	0	0	0	0	200	903	0	0	0	0	0	0	0	603	903	0
766	8	-24.4879	-14.4963	-547.261	-65898.1	-56194.8	6404.25	97.3163	420.414	0	0	0	0	0	0	0	200	903	0	0	0	0	0	0	0	603	903	0
766	9	-23.725	-14.1911	-554.28	-65715	-56194.8	6221.14	98.6166	418.559	0	0	0	0	0	0	0	200	903	0	0	0	0	0	0	0	603	903	0
767	0	-24.4879	-15.717	-555.196	-65531.9	-56255.9	6404.25	98.6738	418.034	0	0	0	0	0	0	0	200	903	0	0	0	0	0	0	0	603	903	0
767	1	-24.4879	-16.0222	-557.332	-66905.2	-57293.5	6175.37	97.2005	420.045	0	0	0	0	0	0	0	200	903	0	0	0	0	0	0	0	603	903	0
767	2	-23.8776	-15.5644	-558.858	-66539	-57110.4	6450.03	97.8088	419.062	0	0	0	0	0	0	0	200	903	0	0	0	0	0	0	0	603	903	0
767	3	-24.3353	-17.0903	-560.079	-66905.2	-56927.3	6358.47	98.3585	419.457	0	0	0	0	0	0	0	200	903	0	0	0	0	0	0	0	603	903	0
767	4	-24.3353	-16.7851	-562.215	-67271.4	-57598.7	6358.47	97.5505	419.654	0	0	0	0	0	0	0	200	903	0	0	0	0	0	0	0	603	903	0
767	5	-24.7931	-16.9377	-558.858	-67454.5	-57842.8	6587.36	96.4982	420.701	0	0	0	0	0	0	0	200	903	0	0	0	0	0	0	0	603	903	0
767	6	-24.6405	-18.7688	-566.182	-68003.8	-57537.6	6724.68	98.3762	420.109	0	0	0	0	0	0	0	200	903	0	0	0	0	0	0	0	603	903	0
767	7	-25.8612	-18.6162	-567.403	-68370	-58270	6770.46	97.3039	420.496	0	0	0	0	0	0	0	200	903	0	0	0	0	0	0	0	603	903	0
767	8	-26.1664	-18.1584	-568.624	-68827.8	-58025.9	6724.68	97.9538	421.043	0	0	0	0	0	0	0	200	903	0	0	0	0	0	0	0	603	903	0
767	9	-27.2345	-19.5317	-570.455	-69285.6	-58270	6999.34	97.8534	421.457	0	0	0	0	0	0	0	200	903	0	0	0	0	0	0	0	603	903	0
768	0	-26.7767	-19.0739	-573.812	-69743.3	-59124.5	6999.34	96.9618	421.544	0	0	0	0	0	0	0	200	903	0	0	0	0	0	0	0	603	903	0
768	1	-24.9457	-19.8369	-573.201	-69560.2	-58941.4	7365.55	97.1715	421.354	0	0	0	0	0	0	0	200	903	0	0	0	0	0	0	0	603	903	0
768	2	-26.1664	-21.0576	-575.032	-70933.5	-59124.5	7365.55	97.1805	423.356	0	0	0	0	0	0	0	200	903	0	0	0	0	0	0	0	603	903	0
768	3	-26.7767	-21.3628	-576.253	-70933.5	-59246.6	7274	97.1865	423.094	0	0	0	0	0	0	0	200	903	0	0	0	0	0	0	0	603	903	0
768	4	-27.5397	-21.8205	-578.389	-70475.8	-59429.7	7045.12	97.2496	421.848	0	0	0	0	0	0	0	200	903	0	0	0	0	0	0	0	603	903	0
768	5	-27.6923	-22.5835	-579.915	-71757.5	-59857	7319.78	96.7833	423.738	0	0	0	0	0	0	0	200	903	0	0	0	0	0	0	0	603	903	0
768	6	-27.8449	-22.2783	-577.474	-72398.3	-60162.1	7685.99	95.8184	425.371	0	0	0	0	0	0	0	200	903	0	0	0	0	0	0	0	603	903	0
768	7	-26.0138	-23.499	-584.493	-71116.6	-60162.1	7731.76	97.0695	421.672	0	0	0	0	0	0	0	200	903	0	0	0	0	0	0	0	603	903	0
768	8	-26.4716	-24.2619	-585.714	-72856.1	-60528.3	7823.32	96.6588	424.389	0	0	0	0	0	0	0	200	903	0	0	0	0	0	0	0	603	903	0
768	9	-26.7767	-26.093	-586.934	-72673	-61016.6	7365.55	96.0418	423.818	0	0	0	0	0	0	0	200	903	0	0	0	0	0	0	0	603	903	0
769	0	-27.2345	-25.6352	-589.681	-72306.8	-61138.7	8143.75	96.319	422.62	0	0	0	0	0	0	0	200	903	0	0	0	0	0	0	0	603	903	0
769	1	-27.0819	-26.7033	-591.512	-74321	-61993.2	8143.75	95.1954	425.646	0	0	0	0	0	0	0	200	903	0	0	0	0	0	0	0	603	903	0
769	2	-25.8612	-27.4663	-594.258	-74504.1	-61810.1	8143.75	95.9879	425.373	0	0	0	0	0	0	0	200	903	0	0	0	0	0	0	0	603	903	0
769	3	-26.6242	-26.8559	-596.395	-73954.7	-61688	8189.53	96.5651	424.003	0	0	0	0	0	0	0	200	903	0	0	0	0	0	0	0	603	903	0
769	4	-27.0819	-27.1611	-599.446	-75053.4	-61932.2	8052.2	96.6844	425.204	0	0	0	0	0	0	0	200	903	0	0	0	0	0	0	0	603	903	0
769	5	-27.2345	-28.2292	-601.888	-74412.5	-62664.6	8555.74	95.8866	423.632	0	0	0	0	0	0	0	200	903	0	0	0	0	0	0	0	603	903	0
769	6	-27.5397	-28.8396	-602.193	-75511.2	-62481.5	8555.74	96.2434	425.394	0	0	0	0	0	0	0	200	903	0	0	0	0	0	0	0	603	903	0
769	7	-28.913	-28.8396	-605.245	-76426.7	-63152.9	8555.74	95.6573	426.274	0	0	0	0	0	0	0	200	903	0	0	0	0	0	0	0	603	903	0
769	8	-28.3026	-29.6025	-605.55	-76060.5	-63397	8693.07	95.3068	425.606	0	0	0	0	0	0	0	200	903	0	0	0	0	0	0	0	603	903	0
769	9	-28.7604	-31.4336	-609.517	-76426.7	-63152.9	8693.07	96.3887	425.389	0	0	0	0	0	0	0	200	903	0	0	0	0	0	0	0	603	903	0
770	0	-28.7604	-30.9758	-611.653	-76609.8	-64129.4	8830.4	95.154	425.25	0	0	0	0	0	0	0	200	903	0	0	0	0	0	0	0	603	903	0
770	1	-28.913	-31.281	-614.4	-77708.4	-64129.4	9059.28	95.6227	426.479	0	0	0	0	0	0	0	200	903	0	0	0	0	0	0	0	603	903	0
770	2	-29.5233	-32.8069	-612.874	-78166.2	-64190.4	9333.94	95.2633	427.54	0	0	0	0	0	0	0	200	903	0	0	0	0	0	0	0	603	903	0
770	3	-28.4552	-32.6543	-616.536	-79173.3	-64556.6	9288.16	95.2914	428.416	0	0	0	0	0	0	0	200	903	0	0	0	0	0	0	0	603	903	0
770	4	-29.6759	-34.0276	-618.062	-78623.9	-64556.6	9654.37	95.5499	427.21	0	0	0	0	0	0	0	200	903	0	0	0	0	0	0	0	603	903	0
770	5	-29.8285	-35.0957	-621.114	-79173.3	-65167	9562.82	95.0804	427.47	0	0	0	0	0	0	0	200	903	0	0	0	0	0	0	0	603	903	0
770	6	-29.8285	-35.4008	-622.945	-79997.2	-64983.9	9700.15	95.6828	428.418	0	0	0	0	0	0	0	200	903	0	0	0	0	0	0	0	603	903	0
770	7	-29.9811	-36.469	-625.386	-78532.4	-65533.2	10157.9	95.2116	425.574	0	0	0	0	0	0	0	200	903	0	0	0	0	0	0	0	603	903	0
770	8	-29.9811	-37.3845	-626.607	-81004.3	-65716.3	10020.6	95.1236	429.275	0	0	0	0	0	0	0	200	903	0	0	0	0	0	0	0	603	903	0
770	9	-30.8966	-38.7578	-625.081	-81462.1	-66448.7	9883.25	93.6958	430.322	0	0	0	0	0	0	0	200	903	0	0	0	0	0	0	0	603	903	0
771	0	-31.0492	-38.6052	-632.405	-80729.7	-66387.7	10066.4	95.0235	427.655	0	0	0	0	0	0	0	200	903	0	0	0	0	0	0	0	603	903	0
771	1	-29.9811	-39.3681	-633.626	-82926.9	-66814.9	10524.1	94.5515	430.877	0	0	0	0	0	0	0	200	903	0	0	0	0	0	0	0	603	903	0
771	2	-29.8285	-40.2837	-636.983	-82835.4	-67425.3	10386.8	94.149	430.043	0	0	0	0	0	0	0	200	903	0	0	0	0	0	0	0	603	903	0
771	3	-30.5914	-40.5888	-638.204	-82103	-67242.2	10661.5	94.6384	428.647	0	0	0	0	0	0	0	200	903	0	0	0	0	0	0	0	603	903	0
771	4	-30.5914	-40.894	-640.95	-83018.5	-67791.5	10569.9	94.2328	429.524	0	0	0	0	0	0	0	200	903	0	0	0	0	0	0	0	603	903	0
771	5	-31.3544	-41.5044	-643.697	-83476.2	-68157.7	10753	94.1152	429.683	0	0	0	0	0	0	0	200	903	0	0	0	0	0	0	0	603	903	0
771	6	-29.8285	-43.1828	-646.749	-84117.1	-67974.6	10844.6	94.8979	430.062	0	0	0	0	0	0	0	200	903	0	0	0	0	0	0	0	603	903	0
771	7	-32.2699	-42.8777	-648.275	-84300.2	-68646	11027.7	94.1097	430.038	0	0	0	0	0	0	0	200	903	0	0	0	0	0	0	0	603	903	0
771	8	-31.6596	-42.8777	-651.021	-84300.2	-68829.1	10844.6	94.2752	429.489	0	0	0	0	0	0	0	200	903	0	0	0	0	0	0	0	603	903	0
771	9	-32.4225	-44.7087	-653.157	-85215.7	-68707	11348.1	94.8078	430.467	0	0	0	0	0	0	0	200	903	0	0	0	0	0	0	0	603	903	0
772	0	-32.1173	-44.8613	-655.599	-86131.3	-69561.5	11256.5	93.8962	431.378	0	0	0	0	0	0	0	200	903	0	0	0	0	0	0	0	603	903	0
772	1	-31.9647	-46.082	-651.937	-85856.6	-69500.5	11622.8	93.3938	431.695	0	0	0	0	0	0	0	200	903	0	0	0	0	0	0	0	603	903	0
772	2	-33.0329	-46.8449	-659.261	-87321.5	-69988.8	11714.3	93.8375	432.454	0	0	0	0	0	0	0	200	903	0	0	0	0	0	0	0	603	903	0
772	3	-33.9484	-47.4553	-660.787	-87687.7	-70355	11531.2	93.5285	432.702	0	0	0	0	0	0	0	200	903	0	0	0	0	0	0	0	603	903	0
772	4	-34.101	-48.5234	-664.144	-87413	-70355	11714.3	94.0666	431.618	0	0	0	0	0	0	0	200	903	0	0	0	0	0	0	0	603	903	0
772	5	-34.5587	-48.676	-666.585	-88237	-70843.3	11989	93.7221	432.372	0	0	0	0	0	0	0	200	903	0	0	0	0	0	0	0	603	903	0
772	6	-34.7113	-49.2863	-669.942	-88603.2	-71270.5	11943.2	93.6169	432.255	0	0	0	0	0	0	0	200	903	0	0	0	0	0	0	0	603	903	0
772	7	-32.8803	-51.7278	-668.721	-88603.2	-71331.5	12126.3	93.3314	432.496	0	0	0	0	0	0	0	200	903	0	0	0	0	0	0	0	603	903	0
772	8	-35.3217	-50.3545	-670.858	-89976.5	-71087.4	12309.4	94.035	434.122	0	0	0	0	0	0	0	200	903	0	0	0	0	0	0	0	603	903	0
772	9	-36.2372	-50.8122	-674.214	-89793.4	-72308.1	12355.2	92.7521	433.182	0	0	0	0	0	0	0	200	903	0	0	0	0	0	0	0	603	903	0
773	0	-36.0846	-52.7959	-675.74	-90983.6	-72247.1	12309.4	93.0846	434.643	0	0	0	0	0	0	0	200	903	0	0	0	0	0	0	0	603	903	0
773	1	-36.8475	-52.6433	-676.961	-90983.6	-72796.4	12721.4	92.4659	434.4	0	0	0	0	0	0	0	200	903	0	0	0	0	0	0	0	603	903	0
773	2	-34.4061	-53.864	-680.318	-91258.2	-72918.5	12812.9	92.8171	434.141	0	0	0	0	0	0	0	200	903	0	0	0	0	0	0	0	603	903	0
773	3	-36.2372	-54.3217	-682.149	-91716	-72979.5	12721.4	93.0153	434.452	0	0	0	0	0	0	0	200	903	0	0	0	0	0	0	0	603	903	0
773	4	-36.5424	-54.4743	-685.811	-92356.9	-73650.9	13087.6	92.6076	434.668	0	0	0	0	0	0	0	200	903	0	0	0	0	0	0	0	603	903	0
773	5	-37.1527	-55.695	-686.422	-92539.9	-74017.1	13041.8	92.1696	434.815	0	0	0	0	0	0	0	200	903	0	0	0	0	0	0	0	603	903	0
773	6	-35.932	-56.9157	-693.135	-93455.5	-73834	13224.9	93.4783	434.83	0	0	0	0	0	0	0	200	903	0	0	0	0	0	0	0	603	903	0
773	7	-36.3898	-56.9157	-692.83	-94371	-74505.4	13636.9	92.4623	436.211	0	0	0	0	0	0	0	200	903	0	0	0	0	0	0	0	603	903	0
773	8	-37.9157	-57.6787	-694.356	-94096.4	-74261.2	13408	93.0502	435.516	0	0	0	0	0	0	0	200	903	0	0	0	0	0	0	0	603	903	0
773	9	-38.526	-59.052	-695.577	-94371	-74627.4	13682.7	92.7114	435.673	0	0	0	0	0	0	0	200	903	0	0	0	0	0	0	0	603	903	0
774	0	-38.526	-59.3571	-698.629	-95927.4	-75176.8	13774.2	92.3938	437.308	0	0	0	0	0	0	0	200	903	0	0	0	0	0	0	0	603	903	0
774	1	-38.0683	-59.9675	-701.375	-95927.4	-75543	14003.1	92.2931	436.771	0	0	0	0	0	0	0	200	903	0	0	0	0	0	0	0	603	903	0
774	2	-39.289	-62.1037	-701.985	-96568.3	-75543	14186.2	92.3867	437.564	0	0	0	0	0	0	0	200	903	0	0	0	0	0	0	0	603	903	0
774	3	-40.9674	-61.9511	-703.817	-97026.1	-75787.1	13957.4	92.3198	437.857	0	0	0	0	0	0	0	200	903	0	0	0	0	0	0	0	603	903	0
774	4	-40.5097	-61.7986	-707.173	-96842.9	-76031.3	14323.6	92.4857	436.944	0	0	0	0	0	0	0	200	903	0	0	0	0	0	0	0	603	903	0
774	5	-41.2726	-63.3244	-710.225	-98033.1	-76519.6	14323.6	92.2602	438.031	0	0	0	0	0	0	0	200	903	0	0	0	0	0	0	0	603	903	0
774	6	-41.2726	-64.24	-712.361	-98582.5	-77190.9	14689.8	91.6408	438.388	0	0	0	0	0	0	0	200	903	0	0	0	0	0	0	0	603	903	0
774	7	-42.0355	-64.8503	-714.498	-98857.1	-76824.7	14552.4	92.4773	438.359	0	0	0	0	0	0	0	200	903	0	0	0	0	0	0	0	603	903	0
774	8	-42.7985	-66.071	-715.413	-99498	-77496.1	14735.6	91.6764	439.078	0	0	0	0	0	0	0	200	903	0	0	0	0	0	0	0	603	903	0
774	9	-41.12	-66.071	-717.549	-100322	-77984.4	14689.8	91.3184	439.812	0	0	0	0	0	0	0	200	903	0	0	0	0	0	0	0	603	903	0
775	0	-41.5778	-67.1391	-718.16	-100139	-78045.4	14735.6	91.3258	439.438	0	0	0	0	0	0	0	200	903	0	0	0	0	0	0	0	603	903	0
775	1	-42.9511	-68.3598	-721.822	-101237	-78350.6	15147.5	91.4544	440.253	0	0	0	0	0	0	0	200	903	0	0	0	0	0	0	0	603	903	0
775	2	-43.4088	-68.2072	-722.127	-101787	-78411.6	15193.3	91.4158	440.954	0	0	0	0	0	0	0	200	903	0	0	0	0	0	0	0	603	903	0
775	3	-43.8666	-68.9702	-725.789	-101604	-78716.8	15422.2	91.5431	439.991	0	0	0	0	0	0	0	200	903	0	0	0	0	0	0	0	603	903	0
775	4	-44.4769	-71.1064	-727.925	-102794	-79205.1	15468	91.1906	441.215	0	0	0	0	0	0	0	200	903	0	0	0	0	0	0	0	603	903	0
775	5	-44.4769	-71.4116	-726.094	-102977	-79693.4	15605.3	90.2438	441.823	0	0	0	0	0	0	0	200	903	0	0	0	0	0	0	0	603	903	0
775	6	-43.5614	-72.1745	-731.893	-103252	-79266.1	15376.4	91.6971	441.075	0	0	0	0	0	0	0	200	903	0	0	0	0	0	0	0	603	903	0
775	7	-42.9511	-73.3952	-733.724	-104259	-79937.5	16108.8	91.0523	442.095	0	0	0	0	0	0	0	200	903	0	0	0	0	0	0	0	603	903	0
775	8	-44.3244	-73.853	-735.555	-104716	-80181.7	15788.4	90.9916	442.364	0	0	0	0	0	0	0	200	903	0	0	0	0	0	0	0	603	903	0
775	9	-44.9347	-75.0737	-738.607	-104167	-80425.8	16154.6	91.1114	441.032	0	0	0	0	0	0	0	200	903	0	0	0	0	0	0	0	603	903	0
776	0	-45.2399	-75.9892	-740.132	-105907	-81097.2	16063.1	90.4288	443.092	0	0	0	0	0	0	0	200	903	0	0	0	0	0	0	0	603	903	0
776	1	-44.6295	-77.0573	-741.658	-106364	-80853	16383.5	90.9835	443.414	0	0	0	0	0	0	0	200	903	0	0	0	0	0	0	0	603	903	0
776	2	-44.1718	-77.8203	-741.048	-105449	-81036.2	16429.3	90.6465	442.297	0	0	0	0	0	0	0	200	903	0	0	0	0	0	0	0	603	903	0
776	3	-43.4088	-78.278	-746.541	-107188	-81036.2	16475.1	91.4512	443.58	0	0	0	0	0	0	0	200	903	0	0	0	0	0	0	0	603	903	0
776	4	-46.1554	-79.9565	-750.508	-107463	-81463.4	16703.9	91.4557	443.187	0	0	0	0	0	0	0	200	903	0	0	0	0	0	0	0	603	903	0
776	5	-45.0873	-80.4143	-752.034	-107097	-81768.6	16749.7	91.2701	442.41	0	0	0	0	0	0	0	200	903	0	0	0	0	0	0	0	603	903	0
776	6	-45.3925	-81.0246	-753.255	-109019	-82012.7	17115.9	91.1222	444.731	0	0	0	0	0	0	0	200	903	0	0	0	0	0	0	0	603	903	0
776	7	-46.0028	-82.5505	-755.696	-109569	-82256.9	16932.8	91.1509	444.99	0	0	0	0	0	0	0	200	903	0	0	0	0	0	0	0	603	903	0
776	8	-46.0028	-82.2453	-756.002	-109019	-82684.1	16932.8	90.6297	444.205	0	0	0	0	0	0	0	200	903	0	0	0	0	0	0	0	603	903	0
776	9	-45.6976	-83.1609	-758.443	-110301	-83111.4	17070.1	90.4184	445.431	0	0	0	0	0	0	0	200	903	0	0	0	0	0	0	0	603	903	0
777	0	-46.6132	-83.466	-763.021	-110210	-83111.4	17527.9	91.0759	444.439	0	0	0	0	0	0	0	200	903	0	0	0	0	0	0	0	603	903	0
777	1	-46.6132	-84.9919	-763.631	-110759	-83294.4	17527.9	90.9232	445.043	0	0	0	0	0	0	0	200	903	0	0	0	0	0	0	0	603	903	0
777	2	-46.9184	-86.06	-765.157	-112132	-83843.8	17436.4	90.4228	446.548	0	0	0	0	0	0	0	200	903	0	0	0	0	0	0	0	603	903	0
777	3	-45.5451	-86.5178	-766.683	-112498	-83721.7	17344.8	90.8001	446.734	0	0	0	0	0	0	0	200	903	0	0	0	0	0	0	0	603	903	0
777	4	-46.1554	-87.2807	-768.209	-112498	-83843.8	17665.2	90.8581	446.443	0	0	0	0	0	0	0	200	903	0	0	0	0	0	0	0	603	903	0
777	5	-46.9184	-89.1118	-770.955	-113506	-84637.2	17802.6	90.2177	447.227	0	0	0	0	0	0	0	200	903	0	0	0	0	0	0	0	603	903	0
777	6	-46.7658	-88.8066	-773.091	-113048	-84393.1	17985.7	90.8369	446.228	0	0	0	0	0	0	0	200	903	0	0	0	0	0	0	0	603	903	0
777	7	-46.7658	-89.7221	-774.007	-113963	-84881.4	18214.6	90.3352	447.238	0	0	0	0	0	0	0	200	903	0	0	0	0	0	0	0	603	903	0
777	8	-46.4606	-91.4006	-772.176	-114970	-85308.6	18077.2	89.5218	448.891	0	0	0	0	0	0	0	200	903	0	0	0	0	0	0	0	603	903	0
777	9	-46.308	-91.5532	-780.416	-114970	-84881.4	18123	91.2357	447.319	0	0	0	0	0	0	0	200	903	0	0	0	0	0	0	0	603	903	0
778	0	-45.3925	-93.3842	-780.721	-115611	-86163.1	18123	89.6365	448.083	0	0	0	0	0	0	0	200	903	0	0	0	0	0	0	0	603	903	0
778	1	-45.6976	-92.7739	-783.773	-116985	-86102.1	18489.2	90.1441	449.258	0	0	0	0	0	0	0	200	903	0	0	0	0	0	0	0	603	903	0
778	2	-45.3925	-93.3842	-785.909	-116618	-85552.8	18351.9	91.1416	448.387	0	0	0	0	0	0	0	200	903	0	0	0	0	0	0	0	603	903	0
778	3	-44.4769	-94.1472	-789.266	-116893	-86102.1	18260.3	90.9087	448.103	0	0	0	0	0	0	0	200	903	0	0	0	0	0	0	0	603	903	0
778	4	-44.9347	-95.3679	-790.792	-117900	-85919	18580.8	91.3507	449.091	0	0	0	0	0	0	0	200	903	0	0	0	0	0	0	0	603	903	0
778	5	-45.2399	-96.2834	-792.623	-118083	-86468.3	18763.9	90.9087	448.978	0	0	0	0	0	0	0	200	903	0	0	0	0	0	0	0	603	903	0
778	6	-45.0873	-97.5041	-794.149	-117808	-87078.6	18718.1	90.3497	448.346	0	0	0	0	0	0	0	200	903	0	0	0	0	0	0	0	603	903	0
778	7	-44.9347	-98.4196	-795.674	-119914	-87017.6	18809.6	90.6367	450.708	0	0	0	0	0	0	0	200	903	0	0	0	0	0	0	0	603	903	0
778	8	-46.9184	-99.1826	-794.149	-119273	-87078.6	19267.4	90.3497	450.19	0	0	0	0	0	0	0	200	903	0	0	0	0	0	0	0	603	903	0
778	9	-46.0028	-100.403	-800.252	-120464	-87322.8	18992.8	90.8809	450.532	0	0	0	0	0	0	0	200	903	0	0	0	0	0	0	0	603	903	0
779	0	-46.6132	-101.624	-801.778	-120738	-87383.8	19221.6	91.0125	450.588	0	0	0	0	0	0	0	200	903	0	0	0	0	0	0	0	603	903	0
779	1	-45.8502	-102.234	-803.609	-121288	-87689	18901.2	90.8811	450.929	0	0	0	0	0	0	0	200	903	0	0	0	0	0	0	0	603	903	0
779	2	-46.1554	-102.997	-805.135	-122386	-87994.2	19587.8	90.7088	452.007	0	0	0	0	0	0	0	200	903	0	0	0	0	0	0	0	603	903	0
779	3	-45.5451	-103.608	-805.44	-121654	-87994.2	19084.3	90.7502	451.04	0	0	0	0	0	0	0	200	903	0	0	0	0	0	0	0	603	903	0
779	4	-46.1554	-104.981	-807.881	-122111	-88177.2	19633.6	90.8537	451.15	0	0	0	0	0	0	0	200	903	0	0	0	0	0	0	0	603	903	0
779	5	-46.1554	-105.896	-809.407	-122752	-88665.5	19542.1	90.4562	451.657	0	0	0	0	0	0	0	200	903	0	0	0	0	0	0	0	603	903	0
779	6	-45.6976	-106.507	-810.323	-123119	-88604.5	19862.5	90.6553	451.938	0	0	0	0	0	0	0	200	903	0	0	0	0	0	0	0	603	903	0
779	7	-46.4606	-108.185	-813.375	-123851	-88421.4	19954.1	91.2907	452.268	0	0	0	0	0	0	0	200	903	0	0	0	0	0	0	0	603	903	0
779	8	-46.7658	-108.49	-813.069	-124492	-89275.9	19679.4	90.1989	453.113	0	0	0	0	0	0	0	200	903	0	0	0	0	0	0	0	603	903	0
779	9	-45.5451	-109.864	-816.121	-124858	-89031.7	19999.8	90.9087	452.99	0	0	0	0	0	0	0	200	903	0	0	0	0	0	0	0	603	903	0
780	0	-44.6295	-112.153	-817.342	-125224	-89153.8	19725.2	90.9222	453.209	0	0	0	0	0	0	0	200	903	0	0	0	0	0	0	0	603	903	0
780	1	-44.7821	-111.542	-819.783	-126140	-89764.2	20503.4	90.5026	453.87	0	0	0	0	0	0	0	200	903	0	0	0	0	0	0	0	603	903	0
780	2	-43.714	-112.153	-823.751	-125591	-89459	20182.9	91.4004	452.462	0	0	0	0	0	0	0	200	903	0	0	0	0	0	0	0	603	903	0
780	3	-45.3925	-113.984	-823.445	-126598	-89703.2	20457.6	91.0636	453.741	0	0	0	0	0	0	0	200	903	0	0	0	0	0	0	0	603	903	0
780	4	-44.9347	-114.747	-824.971	-127330	-90252.4	20320.3	90.5993	454.345	0	0	0	0	0	0	0	200	903	0	0	0	0	0	0	0	603	903	0
780	5	-44.9347	-116.578	-826.497	-127513	-90435.6	20686.5	90.5797	454.281	0	0	0	0	0	0	0	200	903	0	0	0	0	0	0	0	603	903	0
780	6	-43.5614	-117.188	-826.497	-128520	-89825.2	20549.1	91.3182	455.5	0	0	0	0	0	0	0	200	903	0	0	0	0	0	0	0	603	903	0
780	7	-46.1554	-117.341	-829.549	-128429	-90496.6	20366	90.9087	454.817	0	0	0	0	0	0	0	200	903	0	0	0	0	0	0	0	603	903	0
780	8	-46.4606	-118.256	-831.075	-127147	-90252.4	21006.9	91.4027	452.991	0	0	0	0	0	0	0	200	903	0	0	0	0	0	0	0	603	903	0
780	9	-46.6132	-119.935	-832.296	-129527	-90313.5	20869.6	91.4887	455.627	0	0	0	0	0	0	0	200	903	0	0	0	0	0	0	0	603	903	0
781	0	-46.0028	-121.308	-830.464	-129436	-91290.1	21052.7	90.0735	455.859	0	0	0	0	0	0	0	200	903	0	0	0	0	0	0	0	603	903	0
781	1	-46.308	-121.613	-832.906	-129161	-90740.7	20915.4	91.0553	455.073	0	0	0	0	0	0	0	200	903	0	0	0	0	0	0	0	603	903	0
781	2	-46.0028	-122.529	-832.601	-130443	-90740.7	21510.5	91.0153	456.669	0	0	0	0	0	0	0	200	903	0	0	0	0	0	0	0	603	903	0
781	3	-45.3925	-123.749	-831.075	-130809	-91045.9	20961.1	90.448	457.397	0	0	0	0	0	0	0	200	903	0	0	0	0	0	0	0	603	903	0
781	4	-46.1554	-124.512	-835.652	-129710	-91106.9	21373.1	90.9751	455.221	0	0	0	0	0	0	0	200	903	0	0	0	0	0	0	0	603	903	0
781	5	-45.3925	-125.733	-837.484	-131358	-91473.1	21235.8	90.7762	456.849	0	0	0	0	0	0	0	200	903	0	0	0	0	0	0	0	603	903	0
781	6	-44.7821	-126.343	-836.568	-131908	-91412.1	21739.3	90.7296	457.677	0	0	0	0	0	0	0	200	903	0	0	0	0	0	0	0	603	903	0
781	7	-44.9347	-126.954	-836.873	-131725	-91351.1	21602	90.8424	457.401	0	0	0	0	0	0	0	200	903	0	0	0	0	0	0	0	603	903	0
781	8	-44.6295	-128.174	-841.756	-132365	-91656.3	21602	91.113	457.249	0	0	0	0	0	0	0	200	903	0	0	0	0	0	0	0	603	903	0
781	9	-44.9347	-128.632	-839.62	-132091	-91534.2	21785.1	90.9814	457.322	0	0	0	0	0	0	0	200	903	0	0	0	0	0	0	0	603	903	0
782	0	-44.7821	-130.921	-840.535	-132182	-91106.9	21739.3	91.6084	457.26	0	0	0	0	0	0	0	200	903	0	0	0	0	0	0	0	603	903	0
782	1	-44.6295	-131.531	-840.23	-133098	-91534.2	22059.8	91.0605	458.406	0	0	0	0	0	0	0	200	903	0	0	0	0	0	0	0	603	903	0
782	2	-44.9347	-132.142	-839.925	-133647	-91351.1	21922.4	91.239	459.118	0	0	0	0	0	0	0	200	903	0	0	0	0	0	0	0	603	903	0
782	3	-44.3244	-134.125	-838.704	-133098	-91412.1	22197.1	91.0079	458.695	0	0	0	0	0	0	0	200	903	0	0	0	0	0	0	0	603	903	0
782	4	-46.0028	-135.193	-841.146	-134105	-91717.3	21876.7	90.9615	459.431	0	0	0	0	0	0	0	200	903	0	0	0	0	0	0	0	603	903	0
782	5	-45.3925	-135.956	-840.84	-133464	-91473.1	22471.8	91.2122	458.727	0	0	0	0	0	0	0	200	903	0	0	0	0	0	0	0	603	903	0
782	6	-44.4769	-136.872	-841.451	-133922	-91290.1	22380.2	91.5087	459.156	0	0	0	0	0	0	0	200	903	0	0	0	0	0	0	0	603	903	0
782	7	-45.0873	-138.703	-839.62	-134288	-91778.4	22517.5	90.6906	459.939	0	0	0	0	0	0	0	200	903	0	0	0	0	0	0	0	603	903	0
782	8	-44.3244	-138.55	-837.484	-135020	-91290.1	22471.8	90.9948	461.222	0	-8.33267	1.85425	-26.3018	-4390.34	976.031	305.558	237.109	1069.92	0	0	0	0	0	0	0	603	903	0
782	9	-45.5451	-139.466	-837.484	-134105	-91229	22426	91.0677	460.128	0	-9.2482	-1.04492	-41.5606	-6404.5	1769.49	442.887	242.576	1057.1	0	0	0	0	0	0	0	603	903	0
783	0	-45.0873	-141.602	-838.704	-134929	-91961.4	22883.7	90.353	460.878	0	-4.06021	-11.8787	-51.6314	-7869.34	1647.42	-426.864	231.907	1055.41	0	0	0	0	0	0	0	603	903	0
783	1	-44.9347	-141.602	-839.315	-134654	-91045.9	22654.9	91.5235	460.434	0	-8.79044	-15.9985	-56.5142	-9151.08	2196.73	-197.982	238.87	1064.93	0	0	0	0	0	0	0	603	903	0
783	2	-44.7821	-142.212	-834.127	-134746	-91168	23021.1	90.7024	461.541	0	-13.3681	-13.0994	-63.2281	-10524.4	2501.91	-14.877	239.57	1069.45	0	0	0	0	0	0	0	603	903	0
783	3	-43.2562	-143.128	-838.094	-135295	-90923.9	22746.4	91.5111	461.432	0	-10.3163	-15.846	-71.4678	-10982.1	2623.98	-197.982	236.716	1056.67	0	0	0	0	0	0	0	603	903	0
783	4	-43.5614	-144.349	-835.958	-135478	-90862.8	22792.2	91.3069	462.063	0	-8.0275	-23.3228	-81.2335	-12721.6	2868.12	397.11	235.307	1059.61	0	0	0	0	0	0	0	603	903	0
783	5	-43.5614	-145.722	-834.737	-134929	-90801.8	22883.7	91.2211	461.642	0	-15.6569	-22.7124	-88.8628	-14918.9	3295.37	854.874	237.084	1070.89	0	0	0	0	0	0	0	603	903	0
783	6	-42.7985	-145.722	-834.737	-136028	-90923.9	23295.7	91.0748	462.959	0	-13.9784	-19.9658	-99.8492	-16292.2	3356.4	168.228	233.615	1066.17	0	0	0	0	0	0	0	603	903	0
783	7	-40.2045	-145.874	-833.211	-135753	-90557.6	23204.2	91.3149	462.927	0	-11.9948	-25.1538	-109.92	-17207.7	4149.86	351.334	237.753	1059.55	0	0	0	0	0	0	0	603	903	0
783	8	-42.1881	-147.858	-833.516	-135112	-90496.6	23250	91.4279	462.099	0	-13.6732	-24.3909	-117.855	-19771.2	4394	854.874	237.283	1070.76	0	0	0	0	0	0	0	603	903	0
783	9	-42.4933	-148.621	-831.99	-135204	-90557.6	22792.2	91.1554	462.506	0	-15.3517	-18.7451	-131.282	-21052.9	4455.04	305.558	233.935	1063.36	0	0	0	0	0	0	0	603	903	0
784	0	-41.7304	-148.011	-831.99	-134929	-90191.4	23158.4	91.5956	462.176	0	-15.6569	-21.0339	-141.048	-22517.8	5004.35	671.769	235.48	1062.65	0	0	0	0	0	0	0	603	903	0
784	1	-40.5097	-149.689	-824.666	-135387	-90313.5	23295.7	90.4848	464.171	0	-13.3681	-23.1702	-148.067	-23799.5	5309.53	1953.51	235.859	1063.73	0	0	0	0	0	0	0	603	903	0
784	2	-42.1881	-149.842	-828.023	-135570	-90008.3	23250	91.2973	463.727	0	-18.7086	-17.3718	-154.781	-24715	5126.42	992.203	233.121	1062.68	0	0	0	0	0	0	0	603	903	0
784	3	-42.1881	-150.3	-825.887	-134746	-88909.7	23204.2	92.3464	463.153	0	-20.3871	-15.3882	-162.105	-26271.4	5248.49	1221.09	232.377	1065.06	0	0	0	0	0	0	0	603	903	0
784	4	-41.2726	-151.062	-823.14	-134563	-89642.1	22792.2	91.0974	463.475	0	-18.4035	-17.2192	-168.514	-27095.4	5187.46	1861.95	230.784	1063.79	0	0	0	0	0	0	0	603	903	0
784	5	-39.5941	-151.978	-821.614	-134196	-89520	23753.5	91.0437	463.333	0	-17.3354	-14.0149	-175.533	-28743.4	5553.67	1816.18	231.639	1066.75	0	0	0	0	0	0	0	603	903	0
784	6	-39.8993	-152.283	-818.257	-134654	-88970.7	23524.6	91.2681	464.562	0	-22.0656	-9.43726	-179.5	-29475.8	5797.81	1907.73	232.3	1067.21	0	0	0	0	0	0	0	603	903	0
784	7	-40.5097	-152.283	-816.426	-134654	-88909.7	23433.1	91.099	464.931	0	-21.3026	-8.36914	-184.078	-29475.8	5797.81	2685.93	231.497	1063.13	0	0	0	0	0	0	0	603	903	0
784	8	-40.3571	-152.894	-813.375	-134196	-88726.6	23112.6	90.9155	464.987	0	-17.9457	-6.3855	-185.298	-31215.3	5919.88	2182.39	231.948	1071.46	0	0	0	0	0	0	0	603	903	0
784	9	-40.3571	-153.656	-812.154	-134196	-88238.3	23341.5	91.3527	465.235	0	-20.0819	0.328366	-192.012	-32130.8	5736.77	1861.95	229.877	1070.34	0	0	0	0	0	0	0	603	903	0
785	0	-40.0519	-154.877	-809.407	-133556	-88360.4	23158.4	90.8332	465.004	0	-22.5233	2.92236	-195.674	-32863.2	5797.81	2777.48	229.63	1070.95	0	0	0	0	0	0	0	603	903	0
785	1	-39.7467	-154.572	-802.388	-134471	-87383.8	23341.5	91.0954	467.589	0	-18.8612	3.22754	-200.252	-32497	5919.88	2777.48	229.562	1065.28	0	0	0	0	0	0	0	603	903	0
785	2	-38.3734	-155.793	-802.083	-133647	-87139.7	23616.2	91.3583	466.625	0	-19.7768	8.41552	-202.388	-33321	5736.77	2411.27	228.345	1067.64	0	0	0	0	0	0	0	603	903	0
785	3	-38.3734	-156.403	-799.947	-133373	-87200.7	23295.7	90.9919	466.727	0	-22.2182	13.4509	-204.219	-34145	6225.06	3235.24	230.482	1070.2	0	0	0	0	0	0	0	603	903	0
785	4	-38.2208	-156.098	-796.895	-133464	-86590.3	23021.1	91.3404	467.48	0	-20.8449	14.6716	-209.407	-34236.5	5858.84	3006.36	227.978	1066.49	0	0	0	0	0	0	0	603	903	0
785	5	-37.4579	-157.929	-793.538	-132732	-86407.3	23341.5	91.1114	467.266	0	-19.1664	15.4346	-211.849	-35152.1	5492.63	3006.36	225.927	1068.93	0	0	0	0	0	0	0	603	903	0
785	6	-37.6105	-157.929	-792.012	-133006	-85491.7	23433.1	92.0576	467.935	0	-22.5233	22.1484	-216.426	-36525.3	5858.84	3555.68	227.071	1071.77	0	0	0	0	0	0	0	603	903	0
785	7	-34.8639	-156.861	-789.876	-132457	-85125.5	23433.1	92.2293	467.693	0	-21.6078	25.3528	-219.173	-36525.3	6408.16	3372.57	229.238	1069.65	0	0	0	0	0	0	0	603	903	0
785	8	-37.3053	-158.082	-785.604	-131541	-85003.4	23387.3	91.7986	467.44	0	-20.6923	24.5898	-221.004	-36983.1	6591.27	3143.69	229.824	1070.34	0	0	0	0	0	0	0	603	903	0
785	9	-36.8475	-158.997	-781.636	-131725	-85186.6	23158.4	91.0151	468.524	0	-21.7604	29.0149	-225.276	-37349.3	6408.16	3830.34	228.446	1068.79	0	0	0	0	0	0	0	603	903	0
786	0	-36.5424	-159.302	-778.585	-131358	-84454.1	23112.6	91.5286	468.714	0	-21.7604	33.4399	-229.854	-38448	5797.81	3693.01	225.224	1070.27	0	0	0	0	0	0	0	603	903	0
786	1	-35.6268	-158.844	-774.007	-130443	-83660.6	23112.6	91.9123	468.529	0	-20.6923	34.8132	-230.464	-39088.8	6591.27	3372.57	228.6	1072.61	0	0	0	0	0	0	0	603	903	0
786	2	-34.2536	-159.607	-767.293	-130626	-83599.6	23158.4	91.046	470.242	0	-22.2182	35.7288	-237.178	-40645.2	6652.3	4196.55	228.048	1074.37	0	0	0	0	0	0	0	603	903	0
786	3	-35.6268	-159.455	-766.378	-129893	-82745.1	23112.6	92.0308	469.49	0	-23.5915	40.6116	-243.892	-41377.7	6286.09	4196.55	225.774	1072.66	0	0	0	0	0	0	0	603	903	0
786	4	-35.4743	-159.15	-763.021	-128795	-82928.2	22975.3	91.3159	468.796	0	-20.0819	43.5107	-244.502	-41743.9	6408.16	3921.89	226.209	1073.73	0	0	0	0	0	0	0	603	903	0
786	5	-35.6268	-157.929	-759.969	-129527	-82317.9	22883.7	91.6826	470.438	0	-21.4552	44.2737	-252.437	-42750.9	6469.2	4608.54	225.627	1072.35	0	0	0	0	0	0	0	603	903	0
786	6	-35.0165	-159.302	-755.086	-128337	-81585.5	22746.4	91.9521	469.964	0	-23.1337	45.647	-257.015	-44032.7	7201.62	4516.98	228.02	1074.32	0	0	0	0	0	0	0	603	903	0
786	7	-33.338	-159.76	-748.677	-127971	-81219.2	22929.5	91.5164	470.929	0	-23.8966	50.6824	-262.813	-45131.3	7079.55	4471.21	226.938	1074.72	0	0	0	0	0	0	0	603	903	0
786	8	-34.7113	-159.607	-743.795	-127330	-80670	22197.1	91.5427	471.19	0	-20.0819	51.4453	-269.832	-46229.9	7079.55	4883.19	226.237	1074.33	0	0	0	0	0	0	0	603	903	0
786	9	-33.6432	-158.844	-739.217	-126506	-80181.7	22609.1	91.5316	471.135	0	-23.744	52.8186	-275.02	-46138.4	7018.51	5203.63	225.52	1070.76	0	0	0	0	0	0	0	603	903	0
787	0	-33.7958	-159.76	-734.639	-126323	-79876.5	22426	91.2712	471.952	0	-23.744	57.7014	-280.513	-48427.2	7262.65	4516.98	225.891	1075.64	0	0	0	0	0	0	0	603	903	0
787	1	-32.4225	-159.913	-730.672	-126140	-79388.2	22700.6	91.3491	472.635	0	-22.6759	59.2273	-285.701	-49434.3	7506.79	5157.85	226.275	1076.03	0	0	0	0	0	0	0	603	903	0
787	2	-32.2699	-159.302	-724.874	-125041	-78777.8	22380.2	91.322	472.501	0	-21.1501	59.2273	-291.5	-51173.8	7873.01	5020.52	227.009	1078.55	0	0	0	0	0	0	0	603	903	0
787	3	-32.8803	-159.76	-717.855	-124950	-78411.6	22197.1	90.7695	474.06	0	-20.2345	63.1946	-297.908	-51814.7	7262.65	4425.43	224.379	1076.93	0	0	0	0	0	0	0	603	903	0
787	4	-31.6596	-159.15	-714.803	-124126	-77801.3	21922.4	91.157	473.65	0	-20.9975	65.0256	-305.538	-52821.7	7689.9	4654.31	225.168	1075.88	0	0	0	0	0	0	0	603	903	0
787	5	-29.8285	-159.76	-711.446	-123576	-76885.8	22242.9	91.9303	473.697	0	-19.1664	64.7205	-309.2	-53920.4	7934.04	5203.63	225.66	1077.39	0	0	0	0	0	0	0	603	903	0
787	6	-28.4552	-158.997	-706.258	-123210	-76641.6	21876.7	91.4821	474.455	0	-19.0138	64.1101	-316.524	-54378.1	8361.29	4516.98	226.416	1074.8	0	0	0	0	0	0	0	603	903	0
787	7	-28.4552	-158.234	-700.154	-122386	-75481.9	21693.6	92.1924	474.799	0	-20.3871	68.5352	-323.543	-56758.5	8483.36	4700.09	226.22	1078.43	0	0	0	0	0	0	0	603	903	0
787	8	-28.4552	-158.844	-694.661	-121013	-75054.7	21830.9	91.955	474.204	0	-18.4035	68.5352	-333.003	-57857.1	8361.29	4562.76	225.109	1076.74	0	0	0	0	0	0	0	603	903	0
787	9	-28.4552	-158.997	-689.473	-121013	-74383.3	21556.2	92.1158	475.515	0	-15.5043	69.1455	-343.379	-60695.3	8971.64	3921.89	226.127	1079.76	0	0	0	0	0	0	0	603	903	0
788	0	-24.9457	-157.471	-685.506	-120006	-73956.1	21693.6	92.1146	475.062	0	-14.131	68.9929	-355.586	-62984.1	9154.74	4471.21	225.745	1080.13	0	0	0	0	0	0	0	603	903	0
788	1	-26.4716	-157.929	-679.708	-119090	-73101.6	21464.7	92.4515	475.208	0	-17.9457	70.2136	-364.437	-65456	9520.95	4516.98	226.125	1082.61	0	0	0	0	0	0	0	603	903	0
788	2	-26.0138	-157.776	-673.909	-118907	-72674.3	21281.6	92.1601	476.444	0	-16.8776	71.1292	-378.169	-67653.3	9887.16	4150.77	226.145	1081.9	0	0	0	0	0	0	0	603	903	0
788	3	-25.2509	-156.25	-668.416	-118724	-72002.9	20961.1	92.2783	477.62	0	-14.4362	71.4343	-389.156	-69667.5	10558.6	4471.21	227.132	1082.02	0	0	0	0	0	0	0	603	903	0
788	4	-24.1828	-156.403	-662.313	-116435	-71514.7	21144.2	92.0228	475.801	0	-16.4198	72.9602	-398.311	-70857.6	10497.5	4700.09	226.355	1080.9	0	0	0	0	0	0	0	603	903	0
788	5	-24.6405	-157.624	-656.514	-116618	-71209.5	21006.9	91.534	477.633	0	-16.1147	74.4861	-408.687	-74062	10497.5	4471.21	225.686	1084.22	0	0	0	0	0	0	0	603	903	0
788	6	-23.1146	-155.793	-645.528	-116069	-70049.8	20549.1	91.4845	479.805	0	-16.1147	73.1128	-414.485	-75435.3	10802.7	4700.09	226.063	1085	0	0	0	0	0	0	0	603	903	0
788	7	-23.2672	-155.03	-644.002	-113963	-69500.5	20686.5	92.0803	476.961	0	-16.5724	74.0283	-420.589	-76350.8	10985.8	4837.42	226.12	1084.53	0	0	0	0	0	0	0	603	903	0
788	8	-22.8095	-154.877	-639.424	-114146	-68707	19954.1	92.5486	478.514	0	-15.1991	75.0964	-424.861	-78090.3	11352	4333.88	226.719	1086.8	0	0	0	0	0	0	0	603	903	0
788	9	-22.9621	-154.114	-632.711	-112498	-67913.6	20182.9	92.6625	477.804	0	-14.7414	76.3171	-433.101	-79372	11107.9	4288.1	225.647	1086.26	0	0	0	0	0	0	0	603	903	0
789	0	-22.3517	-153.199	-627.217	-111674	-67547.4	19908.3	92.3063	478.048	0	-12.4525	75.5542	-438.289	-79738.2	11779.3	4654.31	226.876	1084.93	0	0	0	0	0	0	0	603	903	0
789	1	-21.2836	-152.894	-619.283	-111858	-66814.9	20137.2	92.1092	480.624	0	-12.6051	78.9111	-441.646	-81020	11779.3	4013.44	226.671	1086.45	0	0	0	0	0	0	0	603	903	0
789	2	-19.4525	-152.283	-611.959	-110759	-65838.4	20137.2	92.4137	480.991	0	-12.3	80.7422	-443.477	-82027.1	11474.1	3967.67	225.873	1087.96	0	0	0	0	0	0	0	603	903	0
789	3	-20.5206	-152.283	-605.855	-108745	-65533.2	19175.9	91.8335	479.49	0	-11.537	80.5896	-447.75	-82301.7	11901.3	4150.77	226.58	1086.81	0	0	0	0	0	0	0	603	903	0
789	4	-20.0629	-150.147	-599.446	-108470	-64739.8	19587.8	92.0008	480.951	0	-8.0275	82.8784	-450.801	-82851.1	11291	3921.89	225.046	1086.79	0	0	0	0	0	0	0	603	903	0
789	5	-19.4525	-149.079	-593.038	-107280	-63336	19175.9	93.2008	480.899	0	-10.0111	84.5569	-452.938	-84407.4	11779.3	3372.57	226.006	1089.36	0	0	0	0	0	0	0	603	903	0
789	6	-17.4689	-149.384	-586.629	-106456	-63030.8	19313.2	92.5543	481.471	0	-10.1637	86.3879	-457.515	-84773.6	12755.8	3967.67	227.881	1088.29	0	0	0	0	0	0	0	603	903	0
789	7	-17.3163	-147.858	-578.694	-105815	-62237.3	18580.8	92.4522	482.851	0	-7.11197	88.0664	-460.872	-85048.3	12267.5	3464.13	226.618	1087.54	0	0	0	0	0	0	0	603	903	0
789	8	-16.7059	-146.485	-571.981	-103892	-61260.8	18718.1	92.8971	481.636	0	-5.28091	91.1182	-462.398	-86696.2	12389.6	3006.36	226.794	1090.49	0	0	0	0	0	0	0	603	903	0
789	9	-15.6378	-145.722	-564.656	-103160	-60894.6	18123	92.1564	482.695	0	-5.4335	92.644	-466.67	-87794.9	12328.6	3143.69	226.418	1091.13	0	0	0	0	0	0	0	603	903	0
790	0	-15.4852	-145.569	-554.28	-103160	-60040.1	18443.4	91.6793	486.115	0	-2.68692	92.1863	-469.417	-88069.5	11962.4	3052.14	225.483	1090.61	0	0	0	0	0	0	0	603	903	0
790	1	-13.6542	-143.738	-551.839	-101054	-59002.5	18077.2	93.0803	483.123	0	-1.6188	94.4751	-471.858	-88893.5	12633.7	2640.15	226.774	1091.39	0	0	0	0	0	0	0	603	903	0
790	2	-13.8068	-142.975	-544.82	-99589.5	-58392.1	17619.5	92.8231	482.793	0	-2.83951	95.3906	-473.079	-89351.3	12816.9	2594.38	227.092	1091.87	0	0	0	0	0	0	0	603	903	0
790	3	-13.6542	-140.381	-537.801	-98765.5	-57720.7	17527.9	92.6727	483.647	0	-0.550689	96.7639	-478.267	-90083.7	12633.7	2411.27	226.416	1091.35	0	0	0	0	0	0	0	603	903	0
790	4	-12.8912	-139.771	-530.172	-97666.9	-56500	17207.5	93.4307	484.218	0	1.89072	96.7639	-480.098	-91640.1	13183.1	2090.84	227.459	1093.88	0	0	0	0	0	0	0	603	903	0
790	5	-13.349	-140.381	-523.152	-96751.4	-56072.8	17253.2	92.8175	484.939	0	0.21225	100.273	-484.981	-92921.8	13000	2411.27	226.805	1094.6	0	0	0	0	0	0	0	603	903	0
790	6	-12.2809	-137.177	-515.523	-95652.8	-55157.2	16475.1	93.0072	485.545	0	1.28037	101.799	-487.728	-93471.2	13305.1	2365.49	227.28	1094.65	0	0	0	0	0	0	0	603	903	0
790	7	-10.9076	-134.736	-507.589	-94279.5	-53753.4	16841.3	94.1004	485.74	0	4.02695	102.715	-491.39	-94112	13122	1861.95	226.704	1094.52	0	0	0	0	0	0	0	603	903	0
790	8	-11.0602	-134.888	-501.79	-93272.4	-53326.2	16337.7	93.7281	485.879	0	3.87436	103.63	-495.357	-94661.3	13061	2182.39	226.367	1094.1	0	0	0	0	0	0	0	603	903	0
790	9	-8.16103	-134.43	-492.94	-92173.7	-52349.6	16246.2	93.8012	486.988	0	2.95883	104.546	-495.967	-95851.5	12877.9	1907.73	225.965	1096.26	0	0	0	0	0	0	0	603	903	0
791	0	-9.53432	-132.599	-484.7	-91166.7	-51678.2	15925.7	93.381	488.089	0	5.55283	105.156	-501.461	-96126.2	13610.3	1953.51	227.141	1094.69	0	0	0	0	0	0	0	603	903	0
791	1	-8.61879	-131.379	-476.461	-90251.1	-51067.9	15468	92.8182	489.42	0	4.6373	103.173	-506.343	-98140.4	13488.2	1953.51	226.639	1096.82	0	0	0	0	0	0	0	603	903	0
791	2	-8.16103	-129.242	-467.916	-89244	-49786.2	15239.1	93.6002	490.727	0	6.01059	109.124	-510.616	-99422.1	14037.6	2045.06	227.491	1097.71	0	0	0	0	0	0	0	603	903	0
791	3	-8.00844	-126.496	-459.676	-87596.1	-48931.7	14872.9	93.5518	490.561	0	4.17954	110.192	-515.804	-100429	13854.5	2136.61	226.86	1097.7	0	0	0	0	0	0	0	603	903	0
791	4	-7.09291	-125.123	-454.793	-86131.3	-48931.7	14735.6	92.409	489.386	0	4.48471	109.734	-520.076	-101162	14037.6	2640.15	226.991	1097.51	0	0	0	0	0	0	0	603	903	0
791	5	-6.32997	-124.817	-445.638	-85673.5	-47466.8	14781.3	93.4857	492.249	0	3.11142	109.734	-528.316	-104091	14220.7	2960.59	226.917	1100.02	0	0	0	0	0	0	0	603	903	0
791	6	-6.02479	-123.902	-437.398	-83750.9	-46429.2	14552.4	93.8513	491.475	0	2.95883	114.464	-533.504	-104274	14586.9	2548.6	227.342	1098.45	0	0	0	0	0	0	0	603	903	0
791	7	-4.34633	-121.46	-429.769	-82743.8	-45757.8	13911.6	93.5292	492.531	0	6.77353	115.074	-538.387	-106014	14892	2548.6	227.661	1099.91	0	0	0	0	0	0	0	603	903	0
791	8	-2.82045	-119.324	-423.055	-81553.6	-44659.2	13957.4	94.4364	492.773	0	4.33212	116.753	-544.49	-107936	14708.9	2731.7	227.014	1101.23	0	0	0	0	0	0	0	603	903	0
791	9	-3.73598	-119.019	-414.205	-79447.9	-43865.7	13957.4	94.0965	491.808	0	5.09506	117.668	-550.594	-109859	14953.1	2685.93	227.158	1102.53	0	0	0	0	0	0	0	603	903	0
792	0	-3.12562	-117.798	-407.186	-78349.3	-42828.1	13362.3	94.8191	492.417	0	6.92612	121.025	-555.477	-110775	15746.5	2731.7	228.348	1102.42	0	0	0	0	0	0	0	603	903	0
792	1	-1.75233	-114.289	-398.946	-77800	-41973.7	13316.5	94.7886	495.014	0	7.53647	121.331	-559.749	-112148	15563.4	2685.93	227.804	1103.35	0	0	0	0	0	0	0	603	903	0
792	2	-1.90492	-113.221	-388.57	-76152	-41058.1	12904.5	94.3353	495.98	0	5.70541	122.246	-565.242	-113521	15746.5	2502.82	227.858	1103.84	0	0	0	0	0	0	0	603	903	0
792	3	-3.58339	-111.695	-383.382	-75236.5	-40753	12584.1	93.7014	496.244	0	7.99423	125.298	-570.43	-114254	15929.6	2914.81	227.926	1103.29	0	0	0	0	0	0	0	603	903	0
792	4	-3.88856	-108.643	-375.142	-73954.7	-39593.3	11805.9	94.4579	497.138	0	9.21494	125.145	-577.144	-116451	15807.6	2869.03	227.389	1104.77	0	0	0	0	0	0	0	603	903	0
792	5	-1.90492	-106.965	-367.513	-72306.8	-38982.9	12126.3	93.9277	496.746	0	9.97787	126.519	-579.891	-117733	16417.9	3006.36	228.312	1106.03	0	0	0	0	0	0	0	603	903	0
792	6	-1.29457	-106.202	-360.494	-71574.4	-38372.6	12034.7	93.5555	498.545	0	8.75717	129.113	-584.773	-118557	16295.9	2960.59	227.867	1105.74	0	0	0	0	0	0	0	603	903	0
792	7	-0.379043	-104.828	-351.033	-69651.8	-37335	11622.8	93.6426	498.419	0	8.452	128.807	-591.487	-120205	16906.2	3097.92	228.583	1106.22	0	0	0	0	0	0	0	603	903	0
792	8	-0.531631	-102.234	-342.794	-66996.7	-36602.6	11210.8	93.2227	495.443	0	9.21494	130.028	-595.455	-121395	16723.1	2960.59	228.085	1106.87	0	0	0	0	0	0	0	603	903	0
792	9	-0.379043	-99.4878	-336.385	-67637.6	-35931.2	10844.6	93.1843	501.072	0	8.90976	132.469	-600.643	-122676	16784.1	2914.81	227.944	1107.24	0	0	0	0	0	0	0	603	903	0
793	0	-0.0738669	-98.1145	-327.23	-66355.9	-34893.6	10569.9	93.3667	502.781	0	11.046	132.622	-603.389	-124324	16723.1	2960.59	227.715	1109.04	0	0	0	0	0	0	0	603	903	0
793	1	0.078721	-95.0627	-319.6	-63975.5	-34161.1	10112.1	93.1129	500.174	0	9.82529	133.69	-608.272	-125972	17333.5	2777.48	228.496	1110.1	0	0	0	0	0	0	0	603	903	0
793	2	0.994248	-92.011	-312.581	-63151.5	-33306.7	10432.6	93.4464	502.032	0	10.8934	134.606	-613.155	-126888	17699.7	2594.38	228.867	1109.94	0	0	0	0	0	0	0	603	903	0
793	3	0.994248	-91.0954	-304.341	-61961.3	-31902.8	9700.15	95.1742	503.592	0	11.1986	136.437	-618.953	-127437	17943.8	2685.93	228.991	1108.89	0	0	0	0	0	0	0	603	903	0
793	4	1.29942	-89.8747	-297.628	-58848.6	-31841.8	9700.15	93.0146	497.725	0	12.1141	136.589	-624.446	-129177	17394.5	2502.82	227.856	1109.87	0	0	0	0	0	0	0	603	903	0
793	5	0.689073	-88.9592	-288.167	-59123.2	-31109.4	9562.82	92.0439	505.17	0	14.0977	135.674	-628.414	-130642	18187.9	2457.05	228.943	1110.89	0	0	0	0	0	0	0	603	903	0
793	6	1.29942	-86.3652	-281.453	-57841.5	-29766.6	9379.71	94.2396	505.51	0	13.64	138.573	-632.686	-131923	17577.6	2228.16	227.783	1111.51	0	0	0	0	0	0	0	603	903	0
793	7	1.45201	-84.5341	-272.298	-55552.7	-29339.4	9013.5	92.2527	504.014	0	14.4029	140.251	-635.433	-132930	18371.1	1907.73	228.911	1112.2	0	0	0	0	0	0	0	603	903	0
793	8	1.90978	-82.5505	-266.194	-55094.9	-28240.7	8830.4	93.9094	506.972	0	14.2503	139.336	-640.315	-134487	18676.2	1907.73	229.167	1113.03	0	0	0	0	0	0	0	603	903	0
793	9	2.36754	-81.0246	-259.786	-53172.3	-27508.3	8784.62	94.1115	504.677	0	15.471	140.862	-644.893	-135311	18737.3	1907.73	229.055	1112.82	0	0	0	0	0	0	0	603	903	0
794	0	4.35118	-79.1936	-251.851	-51799	-27203.1	7869.09	91.9872	505.673	0	18.065	141.32	-650.081	-136592	18920.4	1724.63	229.105	1113.12	0	0	0	0	0	0	0	603	903	0
794	1	2.8253	-77.5151	-246.358	-51707.4	-25982.4	7914.87	94.5338	509.887	0	16.234	141.32	-652.828	-137691	19469.7	1633.07	229.824	1113.91	0	0	0	0	0	0	0	603	903	0
794	2	2.21495	-74.7685	-238.729	-50059.5	-25189	7731.76	94.487	509.692	0	16.8443	142.388	-658.626	-139339	19225.5	1495.74	229.19	1114.56	0	0	0	0	0	0	0	603	903	0
794	3	1.45201	-72.9375	-231.099	-47587.6	-24639.7	7457.11	93.3806	505.918	0	18.5228	143.456	-665.95	-140804	19652.8	1358.41	229.511	1114.43	0	0	0	0	0	0	0	603	903	0
794	4	2.52013	-69.5805	-224.385	-46855.1	-23663.1	7182.45	94.5426	508.816	0	18.828	144.982	-670.528	-142727	19591.8	1221.09	229.218	1115.86	0	0	0	0	0	0	0	603	903	0
794	5	4.65636	-68.5124	-218.892	-45756.5	-22991.7	7045.12	94.9633	509.037	0	18.3702	144.677	-677.242	-144283	19835.9	1221.09	229.289	1116.05	0	0	0	0	0	0	0	603	903	0
794	6	0.84166	-66.071	-209.127	-44017	-22625.5	6862.01	91.8095	510.48	0	19.2857	144.066	-680.294	-145198	20751.4	1358.41	230.504	1116.44	0	0	0	0	0	0	0	603	903	0
794	7	0.994248	-63.0193	-202.413	-43559.2	-21648.9	6541.58	93.0456	515.2	0	19.2857	146.965	-685.482	-147304	20629.4	1266.86	230.095	1117.89	0	0	0	0	0	0	0	603	903	0
794	8	0.994248	-62.8667	-196.004	-41819.7	-21465.8	6404.25	90.4827	513.362	0	20.9642	146.66	-691.585	-148220	20690.4	1221.09	229.917	1117.32	0	0	0	0	0	0	0	603	903	0
794	9	1.45201	-61.4934	-190.816	-40080.2	-20428.2	5854.93	92.9428	510.046	0	20.9642	146.66	-696.468	-149868	20385.2	1037.98	229.269	1118.18	0	0	0	0	0	0	0	603	903	0
795	0	1.90978	-60.5779	-181.661	-39530.9	-19878.9	6038.04	90.5712	517.608	0	20.2013	148.033	-702.266	-151607	20934.5	1312.64	229.81	1118.88	0	0	0	0	0	0	0	603	903	0
795	1	2.67272	-57.8313	-179.83	-38249.2	-19512.7	5900.71	91.4934	512.697	0	18.5228	147.728	-707.149	-152797	20934.5	1816.18	229.604	1119.08	0	0	0	0	0	0	0	603	903	0
795	2	2.67272	-54.9321	-170.98	-35594.2	-18353	5763.38	92.6595	508.178	0	19.7435	148.339	-708.065	-153530	21300.7	1312.64	230.083	1119.83	0	0	0	0	0	0	0	603	903	0
795	3	2.97789	-53.2536	-164.876	-35960.4	-17803.7	5259.84	92.0175	518.105	0	19.8961	149.407	-716.915	-155086	21178.7	1678.85	229.541	1119.32	0	0	0	0	0	0	0	603	903	0
795	4	2.52013	-50.9648	-159.688	-34861.7	-17498.6	5259.84	90.4204	518.311	0	18.828	148.796	-723.018	-156368	21789	1175.31	230.136	1119.27	0	0	0	0	0	0	0	603	903	0
795	5	4.35118	-48.8286	-155.416	-33213.8	-16705.1	4985.18	92.5134	513.709	0	19.1331	150.78	-725.765	-158291	21117.6	1404.19	229.097	1121.1	0	0	0	0	0	0	0	603	903	0
795	6	2.52013	-46.9975	-150.838	-32481.4	-15911.6	4618.97	94.5118	515.339	0	19.2857	150.322	-728.511	-159664	22338.3	1907.73	230.663	1122.16	0	0	0	0	0	0	0	603	903	0
795	7	2.36754	-43.9458	-145.345	-31291.2	-15301.3	4756.3	94.7243	515.289	0	19.7435	151.543	-734.92	-161220	22277.3	1541.52	230.313	1122.37	0	0	0	0	0	0	0	603	903	0
795	8	1.45201	-42.5725	-138.936	-28544.6	-14752	4618.97	93.822	505.451	0	18.9806	150.933	-739.192	-162227	21911.1	1449.97	229.642	1122.47	0	0	0	0	0	0	0	603	903	0
795	9	1.75719	-42.4199	-128.865	-29093.9	-14324.7	4481.64	88.8396	525.77	0	21.1168	152.001	-744.686	-163417	22460.4	1495.74	230.161	1122.44	0	0	0	0	0	0	0	603	903	0
796	0	0.383897	-42.5725	-129.476	-28086.8	-14141.6	4435.87	90.7779	516.927	0	20.659	152.306	-744.38	-164699	22338.3	1816.18	230.009	1124.26	0	0	0	0	0	0	0	603	903	0
796	1	-0.379043	-39.5207	-122.151	-26438.9	-13043	4573.2	93.2229	516.443	0	21.1168	153.069	-752.01	-165981	22948.7	1541.52	230.516	1123.72	0	0	0	0	0	0	0	603	903	0
796	2	0.994248	-37.8423	-116.964	-25981.1	-12920.9	4115.43	89.5304	522.13	0	21.422	151.238	-755.062	-166805	23131.8	1221.09	230.636	1123.92	0	0	0	0	0	0	0	603	903	0
796	3	0.689073	-37.0793	-112.081	-24333.2	-12310.6	4344.31	90.1634	517.104	0	21.422	153.374	-757.198	-167995	22643.5	1724.63	229.904	1124.86	0	0	0	0	0	0	0	603	903	0
796	4	0.994248	-37.6897	-106.282	-22685.2	-11639.2	4115.43	90.4882	513.443	0	20.659	152.458	-759.639	-168911	23498	1358.41	230.933	1125.36	0	0	0	0	0	0	0	603	903	0
796	5	-0.684218	-35.5534	-101.4	-22502.1	-11395	3932.33	87.6224	521.915	0	19.8961	152.458	-764.827	-169735	23192.8	1541.52	230.324	1124.93	0	0	0	0	0	0	0	603	903	0
796	6	0.84166	-32.5017	-95.9064	-21403.5	-10601.6	3749.22	89.4591	523.171	0	21.7271	150.322	-767.574	-170284	23498	1312.64	230.613	1124.85	0	0	0	0	0	0	0	603	903	0
796	7	0.231309	-30.6706	-91.0236	-20579.5	-10235.4	3657.67	87.5526	526.09	0	21.1168	152.001	-769.405	-171566	23681.1	1221.09	230.778	1125.98	0	0	0	0	0	0	0	603	903	0
796	8	-0.836806	-28.9922	-86.4459	-19480.9	-9747.08	3474.56	87.2465	525.353	0	21.5746	153.221	-773.372	-172573	23864.2	809.098	230.857	1126.14	0	0	0	0	0	0	0	603	903	0
796	9	-0.531631	-27.7715	-85.2252	-18290.7	-9319.84	3291.46	90.6446	514.616	0	25.0841	152.458	-777.034	-173397	23559	1358.41	230.319	1126.15	0	0	0	0	0	0	0	603	903	0
797	0	-0.226455	-27.4663	-80.9528	-17741.4	-8831.56	3520.34	90.9048	519.157	0	22.3375	151.696	-780.696	-175045	24535.6	946.427	231.428	1127.22	0	0	0	0	0	0	0	603	903	0
797	1	0.231309	-23.0412	-75.4596	-17192	-8526.38	3291.46	87.0073	527.831	0	21.7271	152.306	-782.833	-175502	24230.4	854.874	230.952	1127.19	0	0	0	0	0	0	0	603	903	0
797	2	0.689073	-23.3464	-73.0182	-16093.4	-7854.99	3154.13	92.4242	520.403	0	23.5582	152.458	-786.8	-176601	25146	580.216	231.96	1127.45	0	0	0	0	0	0	0	603	903	0
797	3	-0.989394	-26.093	-69.0509	-15086.3	-7916.03	3016.8	85.3596	518.481	0	24.9315	150.933	-788.326	-177791	24901.8	305.558	231.588	1128.53	0	0	0	0	0	0	0	603	903	0
797	4	-0.989394	-22.8886	-65.0836	-14628.6	-7305.67	2833.69	87.7494	524.766	0	25.2367	151.848	-791.378	-178890	24596.6	-106.43	231.081	1129.05	0	0	0	0	0	0	0	603	903	0
797	5	0.078721	-21.0576	-61.1163	-13621.5	-6451.18	2925.25	94.4442	522.878	0	26.3048	151.238	-791.072	-179531	24474.6	30.8993	230.938	1129.95	0	0	0	0	0	0	0	603	903	0
797	6	-0.226455	-21.3628	-57.7594	-12614.4	-6451.18	2925.25	88.3094	518.396	0	27.5255	150.78	-795.955	-180629	25329.1	30.8993	231.822	1129.93	0	0	0	0	0	0	0	603	903	0
797	7	-2.2101	-18.311	-51.9611	-11515.8	-5718.76	2971.02	89.9414	521.623	0	25.847	149.254	-797.481	-181270	25634.2	-152.206	232.144	1130.3	0	0	0	0	0	0	0	603	903	0
797	8	-2.51527	-17.2429	-50.7404	-10874.9	-5474.62	2513.26	92.1052	514.325	0	27.5255	150.78	-802.059	-181911	25634.2	-197.982	231.961	1129.81	0	0	0	0	0	0	0	603	903	0
797	9	-1.75233	-16.6325	-48.6041	-10600.2	-5413.58	2375.93	88.6188	518.094	0	27.8307	150.017	-803.279	-183010	25756.3	-381.088	232.064	1130.83	0	0	0	0	0	0	0	603	903	0
798	0	-1.75233	-15.1067	-44.6368	-10325.6	-5108.41	2421.71	85.5562	531.325	0	28.8988	150.017	-806.636	-184017	26122.5	-426.864	232.385	1131.13	0	0	0	0	0	0	0	603	903	0
798	1	-2.36269	-13.4282	-42.5006	-9226.96	-4742.2	1872.39	88.4205	517.102	0	27.9832	148.339	-807.247	-184841	26183.6	-609.97	232.436	1131.98	0	0	0	0	0	0	0	603	903	0
798	2	-1.44716	-14.1911	-37.923	-8402.98	-4437.02	1872.39	82.9991	521.58	0	28.7462	150.627	-809.078	-185482	25878.4	-747.299	231.985	1132.25	0	0	0	0	0	0	0	603	903	0
798	3	-3.27821	-11.7497	-36.0919	-8219.88	-3704.6	2055.5	97.3565	527.749	0	28.7462	150.78	-811.214	-185482	26183.6	-747.299	232.277	1131.65	0	0	0	0	0	0	0	603	903	0
798	4	-2.97304	-12.0549	-33.0402	-7029.69	-3765.64	2284.38	86.0285	512.762	0	28.5936	148.033	-813.961	-186306	26000.4	-976.181	231.943	1131.89	0	0	0	0	0	0	0	603	903	0
798	5	-2.66786	-13.7334	-29.378	-6022.61	-3338.39	2009.72	86.3645	505.004	0	30.1195	146.813	-816.707	-187130	26305.6	-884.628	232.209	1132.13	0	0	0	0	0	0	0	603	903	0
798	6	-3.12562	-9.76608	-23.8849	-5931.06	-3033.21	1826.61	73.0069	548.319	0	29.3565	147.271	-818.538	-188137	26732.9	-1205.06	232.659	1132.84	0	0	0	0	0	0	0	603	903	0
798	7	-1.75233	-9.00314	-22.6642	-5198.64	-3033.21	1689.28	66.167	529.377	0	29.2039	146.965	-818.233	-188320	26366.7	-1342.39	232.224	1133.15	0	0	0	0	0	0	0	603	903	0
798	8	-2.05751	-9.00314	-22.0538	-4557.77	-2300.79	1689.28	95.6738	506.666	0	30.2721	146.965	-822.811	-189144	26916	-1296.62	232.712	1132.88	0	0	0	0	0	0	0	603	903	0
798	9	-2.51527	-7.0195	-19.9176	-4466.22	-2422.86	1735.06	78.3557	524.235	0	30.7298	146.355	-824.947	-190334	27160.1	-1250.84	232.923	1133.72	0	0	0	0	0	0	0	603	903	0
799	0	-2.05751	-5.03586	-18.0865	-3550.69	-2117.69	1460.4	82.9137	496.317	0	32.4083	145.745	-827.083	-190975	26854.9	-976.181	232.469	1133.9	0	0	0	0	0	0	0	603	903	0
799	1	-1.75233	-7.17209	-14.1193	-3367.58	-1568.37	1368.85	88.9198	538.51	0	30.4247	145.439	-828.609	-191524	27587.4	-1205.06	233.294	1134.14	0	0	0	0	0	0	0	603	903	0
799	2	-1.75233	-3.66257	-13.2037	-3367.58	-1446.3	1185.74	90.4628	555.048	0	31.035	143.303	-827.693	-191890	26977	-1433.94	232.593	1134.84	0	0	0	0	0	0	0	603	903	0
799	3	-2.05751	-2.59445	-11.983	-2360.5	-1385.27	956.862	84.3977	496.987	0	30.5772	145.287	-831.661	-192806	27282.2	-1479.72	232.804	1134.83	0	0	0	0	0	0	0	603	903	0
799	4	-2.2101	-3.05222	-11.0675	-2085.85	-1202.16	773.757	91.3793	488.466	0	30.5772	143.761	-829.219	-193813	26610.8	-1342.39	232.091	1136.73	0	0	0	0	0	0	0	603	903	0
799	5	0	0	0	0	0	0	200	300	0	30.7298	144.219	-835.628	-194729	27526.3	-1433.94	232.941	1136.03	0	0	0	0	0	0	0	603	903	0
799	6	0	0	0	0	0	0	200	300	0	30.2721	143.151	-836.544	-195644	27526.3	-1388.17	232.905	1136.87	0	0	0	0	0	0	0	603	903	0
799	7	0	0	0	0	0	0	200	300	0	30.8824	144.066	-839.595	-196010	28136.7	-1525.5	233.512	1136.46	0	0	0	0	0	0	0	603	903	0
799	8	0	0	0	0	0	0	200	300	0	30.7298	143.608	-842.647	-196285	27587.4	-1479.72	232.739	1135.94	0	0	0	0	0	0	0	603	903	0
799	9	0	0	0	0	0	0	200	300	0	30.8824	143.914	-843.563	-196834	27770.5	-1891.71	232.92	1136.34	0	0	0	0	0	0	0	603	903	0
800	0	0	0	0	0	0	0	200	300	0	30.1195	142.235	-844.783	-197475	27892.5	-1662.83	233.017	1136.76	0	0	0	0	0	0	0	603	903	0
800	1	0	0	0	0	0	0	200	300	0	30.1195	142.388	-845.088	-198299	27953.6	-1525.5	233.078	1137.65	0	0	0	0	0	0	0	603	903	0
800	2	0	0	0	0	0	0	200	300	0	30.8824	142.388	-846.309	-198482	28136.7	-1845.93	233.246	1137.53	0	0	0	0	0	0	0	603	903	0
800	3	0	0	0	0	0	0	200	300	0	31.4928	141.014	-846.004	-199123	27953.6	-1845.93	233.042	1138.37	0	0	0	0	0	0	0	603	903	0
800	4	0	0	0	0	0	0	200	300	0	31.3402	141.014	-848.14	-199947	28075.6	-1845.93	233.103	1138.75	0	0	0	0	0	0	0	603	903	0
800	5	0	0	0	0	0	0	200	300	0	30.5772	139.489	-846.309	-200222	28441.9	-1708.6	233.607	1139.58	0	0	0	0	0	0	0	603	903	0
800	6	0	0	0	0	0	0	200	300	0	33.4764	139.183	-848.751	-200588	28258.7	-1937.48	233.295	1139.33	0	0	0	0	0	0	0	603	903	0
800	7	0	0	0	0	0	0	200	300	0	31.035	139.031	-849.971	-200954	28686	-2029.04	233.749	1139.42	0	0	0	0	0	0	0	603	903	0
800	8	0	0	0	0	0	0	200	300	0	31.4928	137.657	-849.971	-200862	28380.8	-2120.59	233.39	1139.32	0	0	0	0	0	0	0	603	903	0
800	9	0	0	0	0	0	0	200	300	0	32.4083	136.742	-850.276	-201778	28441.9	-2257.92	233.45	1140.31	0	0	0	0	0	0	0	603	903	0
801	0	0	0	0	0	0	0	200	300	0	31.9505	136.589	-850.582	-202327	28502.9	-2029.04	233.51	1140.87	0	0	0	0	0	0	0	603	903	0
801	1	0	0	0	0	0	0	200	300	0	33.629	136.284	-850.887	-202419	28441.9	-2349.47	233.426	1140.89	0	0	0	0	0	0	0	603	903	0
801	2	0	0	0	0	0	0	200	300	0	34.3919	136.132	-851.192	-202602	28441.9	-2532.58	233.414	1141.02	0	0	0	0	0	0	0	603	903	0
801	3	0	0	0	0	0	0	200	300	0	32.8661	135.826	-852.718	-202968	28869.1	-2486.8	233.855	1141.03	0	0	0	0	0	0	0	603	903	0
801	4	0	0	0	0	0	0	200	300	0	32.7135	133.995	-852.718	-203426	28502.9	-2257.92	233.426	1141.56	0	0	0	0	0	0	0	603	903	0
801	5	0	0	0	0	0	0	200	300	0	31.4928	133.995	-851.802	-203701	29113.2	-2395.25	234.178	1142.14	0	0	0	0	0	0	0	603	903	0
801	6	0	0	0	0	0	0	200	300	0	33.7816	134.453	-852.107	-203518	29113.2	-2715.68	234.166	1141.84	0	0	0	0	0	0	0	603	903	0
801	7	0	0	0	0	0	0	200	300	0	35.0023	134.606	-849.971	-203243	28625	-2990.34	233.678	1142.12	0	0	0	0	0	0	0	603	903	0
801	8	0	0	0	0	0	0	200	300	0	33.7816	135.826	-850.276	-203518	28869.1	-2807.24	233.953	1142.35	0	0	0	0	0	0	0	603	903	0
801	9	0	0	0	0	0	0	200	300	0	34.8497	134.453	-849.666	-202694	28075.6	-2669.91	233.043	1141.56	0	0	0	0	0	0	0	603	903	0
802	0	0	0	0	0	0	0	200	300	0	34.0868	134.758	-848.445	-203518	28502.9	-3081.89	233.594	1142.87	0	0	0	0	0	0	0	603	903	0
802	1	0	0	0	0	0	0	200	300	0	32.7135	135.521	-847.835	-202785	29052.2	-2853.01	234.266	1142.18	0	0	0	0	0	0	0	603	903	0
802	2	0	0	0	0	0	0	200	300	0	32.1031	134.606	-845.088	-202236	28502.9	-2898.79	233.728	1142.31	0	0	0	0	0	0	0	603	903	0
802	3	0	0	0	0	0	0	200	300	0	33.1712	133.385	-842.647	-201961	28380.8	-2669.91	233.681	1142.67	0	0	0	0	0	0	0	603	903	0
802	4	0	0	0	0	0	0	200	300	0	32.7135	133.08	-842.037	-201870	28136.7	-2349.47	233.415	1142.74	0	0	0	0	0	0	0	603	903	0
802	5	0	0	0	0	0	0	200	300	0	33.1712	130.791	-837.764	-201687	27892.5	-2349.47	233.294	1143.74	0	0	0	0	0	0	0	603	903	0
802	6	0	0	0	0	0	0	200	300	0	32.8661	130.181	-835.933	-200862	28258.7	-2395.25	233.805	1143.29	0	0	0	0	0	0	0	603	903	0
802	7	0	0	0	0	0	0	200	300	0	31.6454	129.57	-834.712	-200405	27953.6	-2715.68	233.489	1143.09	0	0	0	0	0	0	0	603	903	0
802	8	0	0	0	0	0	0	200	300	0	31.4928	127.434	-833.187	-198574	27648.4	-2441.02	233.184	1141.33	0	0	0	0	0	0	0	603	903	0
802	9	0	0	0	0	0	0	200	300	0	31.3402	127.129	-831.661	-199855	28075.6	-2486.8	233.759	1143.31	0	0	0	0	0	0	0	603	903	0
803	0	0	0	0	0	0	0	200	300	0	32.4083	125.45	-827.083	-200039	27770.5	-2578.35	233.576	1144.86	0	0	0	0	0	0	0	603	903	0
803	1	0	0	0	0	0	0	200	300	0	32.1031	125.298	-827.083	-200222	28075.6	-2624.13	233.945	1145.08	0	0	0	0	0	0	0	603	903	0
803	2	0	0	0	0	0	0	200	300	0	34.5445	124.382	-824.031	-199123	27892.5	-2853.01	233.849	1144.65	0	0	0	0	0	0	0	603	903	0
803	3	0	0	0	0	0	0	200	300	0	33.0186	124.23	-824.642	-198482	27709.4	-2624.13	233.602	1143.69	0	0	0	0	0	0	0	603	903	0
803	4	0	0	0	0	0	0	200	300	0	32.8661	124.23	-821.285	-198391	28014.6	-2853.01	234.111	1144.56	0	0	0	0	0	0	0	603	903	0
803	5	0	0	0	0	0	0	200	300	0	32.5609	124.382	-820.674	-197750	27404.3	-2532.58	233.392	1143.96	0	0	0	0	0	0	0	603	903	0
803	6	0	0	0	0	0	0	200	300	0	32.7135	122.704	-819.454	-197841	27709.4	-2990.34	233.815	1144.43	0	0	0	0	0	0	0	603	903	0
803	7	0	0	0	0	0	0	200	300	0	33.7816	123.467	-815.181	-197475	27892.5	-2990.34	234.216	1145.25	0	0	0	0	0	0	0	603	903	0
803	8	0	0	0	0	0	0	200	300	0	33.629	122.551	-814.876	-197567	27282.2	-3356.55	233.48	1145.45	0	0	0	0	0	0	0	603	903	0
803	9	0	0	0	0	0	0	200	300	0	34.3919	121.331	-810.909	-197017	27465.3	-2944.56	233.87	1145.96	0	0	0	0	0	0	0	603	903	0
804	0	0	0	0	0	0	0	200	300	0	33.9342	121.483	-809.383	-196193	27526.3	-2898.79	234.009	1145.4	0	0	0	0	0	0	0	603	903	0
804	1	0	0	0	0	0	0	200	300	0	32.8661	120.415	-807.247	-196102	27221.2	-3081.89	233.721	1145.93	0	0	0	0	0	0	0	603	903	0
804	2	0	0	0	0	0	0	200	300	0	31.9505	119.957	-802.669	-195095	27099.1	-2853.01	233.761	1146.06	0	0	0	0	0	0	0	603	903	0
804	3	0	0	0	0	0	0	200	300	0	32.4083	119.347	-801.143	-194454	26793.9	-2944.56	233.445	1145.72	0	0	0	0	0	0	0	603	903	0
804	4	0	0	0	0	0	0	200	300	0	33.1712	118.126	-798.397	-193996	26610.8	-3036.12	233.33	1145.98	0	0	0	0	0	0	0	603	903	0
804	5	0	0	0	0	0	0	200	300	0	31.6454	118.126	-792.293	-193813	27160.1	-2990.34	234.28	1147.62	0	0	0	0	0	0	0	603	903	0
804	6	0	0	0	0	0	0	200	300	0	31.3402	117.058	-791.988	-192623	26732.9	-2944.56	233.754	1146.21	0	0	0	0	0	0	0	603	903	0
804	7	0	0	0	0	0	0	200	300	0	31.7979	114.464	-789.546	-192165	27160.1	-2944.56	234.4	1146.39	0	0	0	0	0	0	0	603	903	0
804	8	0	0	0	0	0	0	200	300	0	31.3402	115.837	-787.105	-190700	26671.8	-2990.34	233.886	1145.28	0	0	0	0	0	0	0	603	903	0
804	9	0	0	0	0	0	0	200	300	0	31.9505	115.38	-785.274	-190975	26061.5	-2990.34	233.188	1146.2	0	0	0	0	0	0	0	603	903	0
805	0	0	0	0	0	0	0	200	300	0	34.2393	113.549	-779.781	-190700	26366.7	-2944.56	233.813	1147.56	0	0	0	0	0	0	0	603	903	0
805	1	0	0	0	0	0	0	200	300	0	31.035	113.549	-777.645	-188411	26305.6	-2853.01	233.827	1145.28	0	0	0	0	0	0	0	603	903	0
805	2	0	0	0	0	0	0	200	300	0	31.1876	112.633	-776.119	-189418	26427.7	-2898.79	234.051	1147.06	0	0	0	0	0	0	0	603	903	0
805	3	0	0	0	0	0	0	200	300	0	32.8661	111.718	-772.457	-188411	26122.5	-2990.34	233.817	1146.91	0	0	0	0	0	0	0	603	903	0
805	4	0	0	0	0	0	0	200	300	0	31.3402	111.87	-771.236	-188411	26000.4	-2853.01	233.713	1147.3	0	0	0	0	0	0	0	603	903	0
805	5	0	0	0	0	0	0	200	300	0	30.7298	110.344	-767.574	-187770	26183.6	-2853.01	234.112	1147.63	0	0	0	0	0	0	0	603	903	0
805	6	0	0	0	0	0	0	200	300	0	31.1876	110.039	-762.386	-186946	25939.4	-3036.12	234.024	1148.21	0	0	0	0	0	0	0	603	903	0
805	7	0	0	0	0	0	0	200	300	0	30.8824	109.734	-760.86	-186214	25756.3	-2944.56	233.852	1147.74	0	0	0	0	0	0	0	603	903	0
805	8	0	0	0	0	0	0	200	300	0	29.8143	108.513	-757.198	-185024	25512.2	-2898.79	233.693	1147.35	0	0	0	0	0	0	0	603	903	0
805	9	0	0	0	0	0	0	200	300	0	30.8824	108.666	-753.841	-184658	25512.2	-2990.34	233.843	1147.96	0	0	0	0	0	0	0	603	903	0
806	0	0	0	0	0	0	0	200	300	0	31.035	106.682	-749.263	-184475	25695.3	-2807.24	234.294	1149.21	0	0	0	0	0	0	0	603	903	0
806	1	0	0	0	0	0	0	200	300	0	31.035	106.53	-746.822	-183651	25878.4	-2944.56	234.651	1148.91	0	0	0	0	0	0	0	603	903	0
806	2	0	0	0	0	0	0	200	300	0	30.8824	107.292	-745.601	-182644	24657.7	-3173.45	233.071	1147.96	0	0	0	0	0	0	0	603	903	0
806	3	0	0	0	0	0	0	200	300	0	30.2721	104.851	-742.244	-182277	25268	-3081.89	234.043	1148.58	0	0	0	0	0	0	0	603	903	0
806	4	0	0	0	0	0	0	200	300	0	29.6617	104.851	-735.225	-182094	24962.8	-3173.45	233.953	1150.67	0	0	0	0	0	0	0	603	903	0
806	5	0	0	0	0	0	0	200	300	0	30.5772	103.478	-736.446	-180538	24901.8	-2944.56	233.814	1148.15	0	0	0	0	0	0	0	603	903	0
806	6	0	0	0	0	0	0	200	300	0	29.6617	100.426	-731.258	-180172	24962.8	-2990.34	234.137	1149.39	0	0	0	0	0	0	0	603	903	0
806	7	0	0	0	0	0	0	200	300	0	28.8988	102.867	-726.985	-178615	24413.5	-2990.34	233.582	1148.69	0	0	0	0	0	0	0	603	903	0
806	8	0	0	0	0	0	0	200	300	0	29.0514	101.647	-725.765	-178432	24596.6	-2990.34	233.891	1148.85	0	0	0	0	0	0	0	603	903	0
806	9	0	0	0	0	0	0	200	300	0	30.8824	100.426	-722.408	-177974	24474.6	-2853.01	233.879	1149.36	0	0	0	0	0	0	0	603	903	0
807	0	0	0	0	0	0	0	200	300	0	30.1195	98.1372	-718.135	-177974	24596.6	-2578.35	234.251	1150.83	0	0	0	0	0	0	0	603	903	0
807	1	0	0	0	0	0	0	200	300	0	27.8307	98.4424	-715.999	-177150	24474.6	-2944.56	234.182	1150.42	0	0	0	0	0	0	0	603	903	0
807	2	0	0	0	0	0	0	200	300	0	28.2884	97.832	-712.642	-174770	24718.7	-2669.91	234.686	1148.24	0	0	0	0	0	0	0	603	903	0
807	3	0	0	0	0	0	0	200	300	0	28.441	98.1372	-710.201	-175319	23986.3	-2944.56	233.774	1149.86	0	0	0	0	0	0	0	603	903	0
807	4	0	0	0	0	0	0	200	300	0	29.3565	96.001	-706.844	-175045	24169.4	-2349.47	234.193	1150.64	0	0	0	0	0	0	0	603	903	0
807	5	0	0	0	0	0	0	200	300	0	28.2884	96.6113	-702.266	-173946	23803.2	-2990.34	233.895	1150.69	0	0	0	0	0	0	0	603	903	0
807	6	0	0	0	0	0	0	200	300	0	27.5255	95.8484	-698.909	-172756	23681.1	-2853.01	233.883	1150.18	0	0	0	0	0	0	0	603	903	0
807	7	0	0	0	0	0	0	200	300	0	26.61	94.0173	-695.552	-172664	23986.3	-2944.56	234.485	1151.24	0	0	0	0	0	0	0	603	903	0
807	8	0	0	0	0	0	0	200	300	0	26.7625	93.8647	-693.721	-171566	23437	-2669.91	233.784	1150.31	0	0	0	0	0	0	0	603	903	0
807	9	0	0	0	0	0	0	200	300	0	29.3565	93.1018	-688.228	-170833	23314.9	-2578.35	233.877	1151.22	0	0	0	0	0	0	0	603	903	0
808	0	0	0	0	0	0	0	200	300	0	26.61	92.1863	-687.007	-169918	23925.3	-2532.58	234.825	1150.33	0	0	0	0	0	0	0	603	903	0
808	1	0	0	0	0	0	0	200	300	0	26.1522	89.5923	-680.904	-169460	23131.8	-2853.01	233.972	1151.88	0	0	0	0	0	0	0	603	903	0
808	2	0	0	0	0	0	0	200	300	0	27.0677	90.813	-680.904	-168544	23437	-2898.79	234.42	1150.53	0	0	0	0	0	0	0	603	903	0
808	3	0	0	0	0	0	0	200	300	0	26.9151	89.8975	-677.547	-168178	23192.8	-2669.91	234.231	1151.22	0	0	0	0	0	0	0	603	903	0
808	4	0	0	0	0	0	0	200	300	0	27.6781	89.4397	-674.19	-167354	23070.8	-2715.68	234.22	1151.23	0	0	0	0	0	0	0	603	903	0
808	5	0	0	0	0	0	0	200	300	0	26.61	87.4561	-671.749	-166073	23559	-2624.13	235.071	1150.22	0	0	0	0	0	0	0	603	903	0
808	6	0	0	0	0	0	0	200	300	0	26.61	88.3716	-666.255	-166073	23070.8	-2761.46	234.628	1152.26	0	0	0	0	0	0	0	603	903	0
808	7	0	0	0	0	0	0	200	300	0	25.9996	87.6086	-664.424	-165248	22582.5	-2578.35	233.988	1151.71	0	0	0	0	0	0	0	603	903	0
808	8	0	0	0	0	0	0	200	300	0	26.61	85.9302	-661.373	-164608	22765.6	-2853.01	234.422	1151.89	0	0	0	0	0	0	0	603	903	0
808	9	0	0	0	0	0	0	200	300	0	26.61	85.7776	-657.711	-163326	22521.4	-2761.46	234.242	1151.32	0	0	0	0	0	0	0	603	903	0
809	0	0	0	0	0	0	0	200	300	0	24.9315	84.0991	-652.828	-163509	22887.7	-2669.91	235.059	1153.46	0	0	0	0	0	0	0	603	903	0
809	1	0	0	0	0	0	0	200	300	0	25.6944	83.1836	-650.997	-162136	22765.6	-2898.79	234.97	1152.06	0	0	0	0	0	0	0	603	903	0
809	2	0	0	0	0	0	0	200	300	0	26.7625	82.1155	-648.25	-161220	22277.3	-3127.67	234.365	1151.7	0	0	0	0	0	0	0	603	903	0
809	3	0	0	0	0	0	0	200	300	0	24.9315	82.2681	-645.809	-161220	22521.4	-2853.01	234.873	1152.64	0	0	0	0	0	0	0	603	903	0
809	4	0	0	0	0	0	0	200	300	0	25.5418	81.3525	-641.536	-160396	21911.1	-3173.45	234.154	1153.02	0	0	0	0	0	0	0	603	903	0
809	5	0	0	0	0	0	0	200	300	0	25.3893	81.2	-638.79	-159023	22277.3	-2853.01	234.874	1151.94	0	0	0	0	0	0	0	603	903	0
809	6	0	0	0	0	0	0	200	300	0	25.0841	79.9792	-636.959	-158931	22338.3	-3036.12	235.07	1152.52	0	0	0	0	0	0	0	603	903	0
809	7	0	0	0	0	0	0	200	300	0	24.016	80.2844	-630.245	-158199	22277.3	-2898.79	235.347	1154.01	0	0	0	0	0	0	0	603	903	0
809	8	0	0	0	0	0	0	200	300	0	24.6263	79.0637	-630.245	-157283	22155.2	-2898.79	235.153	1152.56	0	0	0	0	0	0	0	603	903	0
809	9	0	0	0	0	0	0	200	300	0	27.5255	76.1646	-628.108	-156551	21911.1	-2761.46	234.884	1152.24	0	0	0	0	0	0	0	603	903	0
810	0	0	0	0	0	0	0	200	300	0	23.7108	77.843	-623.531	-156276	21544.9	-2990.34	234.553	1153.63	0	0	0	0	0	0	0	603	903	0
810	1	0	0	0	0	0	0	200	300	0	23.8634	76.3171	-619.258	-154537	21911.1	-3036.12	235.383	1152.55	0	0	0	0	0	0	0	603	903	0
810	2	0	0	0	0	0	0	200	300	0	24.6263	75.8594	-616.817	-154812	21911.1	-2853.01	235.523	1153.98	0	0	0	0	0	0	0	603	903	0
810	3	0	0	0	0	0	0	200	300	0	24.4737	75.5542	-614.681	-154262	21178.7	-2944.56	234.455	1153.96	0	0	0	0	0	0	0	603	903	0
810	4	0	0	0	0	0	0	200	300	0	23.5582	73.8757	-613.46	-153713	21667	-2898.79	235.319	1153.57	0	0	0	0	0	0	0	603	903	0
810	5	0	0	0	0	0	0	200	300	0	24.4737	73.1128	-607.662	-152706	21178.7	-2990.34	234.853	1154.3	0	0	0	0	0	0	0	603	903	0
810	6	0	0	0	0	0	0	200	300	0	24.3211	73.7231	-606.136	-152431	21422.8	-2898.79	235.343	1154.48	0	0	0	0	0	0	0	603	903	0
810	7	0	0	0	0	0	0	200	300	0	25.2367	72.1973	-603.084	-151699	21178.7	-2715.68	235.117	1154.54	0	0	0	0	0	0	0	603	903	0
810	8	0	0	0	0	0	0	200	300	0	24.1685	72.0447	-597.286	-149501	20629.4	-2990.34	234.539	1153.3	0	0	0	0	0	0	0	603	903	0
810	9	0	0	0	0	0	0	200	300	0	24.3211	71.4343	-598.201	-150325	21178.7	-2990.34	235.404	1154.3	0	0	0	0	0	0	0	603	903	0
811	0	0	0	0	0	0	0	200	300	0	25.0841	67.7722	-593.624	-149593	21239.7	-2944.56	235.78	1155	0	0	0	0	0	0	0	603	903	0
811	1	0	0	0	0	0	0	200	300	0	23.253	70.061	-590.267	-147853	20812.5	-3127.67	235.259	1153.49	0	0	0	0	0	0	0	603	903	0
811	2	0	0	0	0	0	0	200	300	0	23.4056	69.1455	-588.741	-148311	20690.4	-3265	235.143	1154.91	0	0	0	0	0	0	0	603	903	0
811	3	0	0	0	0	0	0	200	300	0	23.8634	68.0774	-584.468	-147945	20202.1	-3265	234.565	1156.13	0	0	0	0	0	0	0	603	903	0
811	4	0	0	0	0	0	0	200	300	0	23.4056	66.3989	-582.332	-146022	20385.2	-2898.79	235.006	1153.75	0	0	0	0	0	0	0	603	903	0
811	5	0	0	0	0	0	0	200	300	0	22.6427	65.636	-579.28	-146480	20202.1	-2944.56	234.874	1155.87	0	0	0	0	0	0	0	603	903	0
811	6	0	0	0	0	0	0	200	300	0	24.016	65.636	-577.449	-145839	20202.1	-2807.24	234.985	1155.56	0	0	0	0	0	0	0	603	903	0
811	7	0	0	0	0	0	0	200	300	0	22.7953	65.7886	-574.703	-144466	20019	-3173.45	234.834	1154.38	0	0	0	0	0	0	0	603	903	0
811	8	0	0	0	0	0	0	200	300	0	22.4901	65.0256	-571.651	-144649	20385.2	-3127.67	235.66	1156.04	0	0	0	0	0	0	0	603	903	0
811	9	0	0	0	0	0	0	200	300	0	22.1849	64.1101	-567.989	-144191	20019	-2944.56	235.245	1156.86	0	0	0	0	0	0	0	603	903	0
812	0	0	0	0	0	0	0	200	300	0	23.253	63.8049	-565.242	-143276	20324.2	-3036.12	235.957	1156.48	0	0	0	0	0	0	0	603	903	0
812	1	0	0	0	0	0	0	200	300	0	22.4901	62.5842	-561.58	-141719	20141.1	-3173.45	235.865	1155.36	0	0	0	0	0	0	0	603	903	0
812	2	0	0	0	0	0	0	200	300	0	21.1168	62.279	-559.749	-141719	19286.6	-3036.12	234.456	1156.18	0	0	0	0	0	0	0	603	903	0
812	3	0	0	0	0	0	0	200	300	0	21.422	60.7532	-558.223	-141079	19652.8	-2898.79	235.206	1155.73	0	0	0	0	0	0	0	603	903	0
812	4	0	0	0	0	0	0	200	300	0	22.3375	59.9902	-553.34	-140529	19652.8	-2898.79	235.517	1156.97	0	0	0	0	0	0	0	603	903	0
812	5	0	0	0	0	0	0	200	300	0	20.9642	60.2954	-551.509	-140255	19591.8	-2990.34	235.524	1157.31	0	0	0	0	0	0	0	603	903	0
812	6	0	0	0	0	0	0	200	300	0	20.9642	59.3799	-547.847	-139156	18981.4	-3219.22	234.647	1157.01	0	0	0	0	0	0	0	603	903	0
812	7	0	0	0	0	0	0	200	300	0	23.253	59.3799	-542.354	-138149	19408.7	-2944.56	235.786	1157.72	0	0	0	0	0	0	0	603	903	0
812	8	0	0	0	0	0	0	200	300	0	20.9642	58.1592	-544.185	-137508	19408.7	-3036.12	235.666	1155.69	0	0	0	0	0	0	0	603	903	0
812	9	0	0	0	0	0	0	200	300	0	19.8961	54.9548	-540.523	-137142	19469.7	-3036.12	236.02	1156.72	0	0	0	0	0	0	0	603	903	0
813	0	0	0	0	0	0	0	200	300	0	20.3539	57.0911	-536.861	-136501	19225.5	-2990.34	235.811	1157.26	0	0	0	0	0	0	0	603	903	0
813	1	0	0	0	0	0	0	200	300	0	20.5064	56.4807	-535.335	-136501	19286.6	-2990.34	236.027	1157.98	0	0	0	0	0	0	0	603	903	0
813	2	0	0	0	0	0	0	200	300	0	22.0323	54.9548	-531.978	-135402	19164.5	-3173.45	236.025	1157.53	0	0	0	0	0	0	0	603	903	0
813	3	0	0	0	0	0	0	200	300	0	21.1168	54.9548	-528.316	-134578	18554.2	-2761.46	235.119	1157.73	0	0	0	0	0	0	0	603	903	0
813	4	0	0	0	0	0	0	200	300	0	20.659	54.0393	-525.264	-134395	19103.5	-2990.34	236.369	1158.86	0	0	0	0	0	0	0	603	903	0
813	5	0	0	0	0	0	0	200	300	0	19.1331	52.666	-523.738	-133754	18798.3	-2898.79	235.893	1158.38	0	0	0	0	0	0	0	603	903	0
813	6	0	0	0	0	0	0	200	300	0	19.2857	51.9031	-520.076	-132747	18798.3	-3036.12	236.145	1158.25	0	0	0	0	0	0	0	603	903	0
813	7	0	0	0	0	0	0	200	300	0	21.2694	51.7505	-519.466	-132198	18737.3	-3081.89	236.07	1157.49	0	0	0	0	0	0	0	603	903	0
813	8	0	0	0	0	0	0	200	300	0	19.1331	51.1401	-515.804	-131923	18371.1	-3081.89	235.616	1158.76	0	0	0	0	0	0	0	603	903	0
813	9	0	0	0	0	0	0	200	300	0	18.9806	50.6824	-514.583	-131923	18615.2	-2944.56	236.175	1159.37	0	0	0	0	0	0	0	603	903	0
814	0	0	0	0	0	0	0	200	300	0	19.8961	49.0039	-511.531	-130458	18554.2	-2715.68	236.272	1158.04	0	0	0	0	0	0	0	603	903	0
814	1	0	0	0	0	0	0	200	300	0	19.4383	49.4617	-507.869	-130092	18065.9	-2853.01	235.572	1159.15	0	0	0	0	0	0	0	603	903	0
814	2	0	0	0	0	0	0	200	300	0	20.2013	48.8513	-506.648	-129268	18432.1	-2898.79	236.38	1158.14	0	0	0	0	0	0	0	603	903	0
814	3	0	0	0	0	0	0	200	300	0	18.9806	47.478	-503.902	-128627	17699.7	-2990.34	235.125	1158.26	0	0	0	0	0	0	0	603	903	0
814	4	0	0	0	0	0	0	200	300	0	19.2857	47.7832	-501.766	-127620	18126.9	-2853.01	236.126	1157.34	0	0	0	0	0	0	0	603	903	0
814	5	0	0	0	0	0	0	200	300	0	17.3021	46.2573	-499.935	-128170	18004.8	-2898.79	236.014	1159.37	0	0	0	0	0	0	0	603	903	0
814	6	0	0	0	0	0	0	200	300	0	17.4547	46.1047	-496.273	-126705	17882.8	-2853.01	236.034	1158.31	0	0	0	0	0	0	0	603	903	0
814	7	0	0	0	0	0	0	200	300	0	18.828	46.1047	-495.357	-126064	17943.8	-2486.8	236.224	1157.49	0	0	0	0	0	0	0	603	903	0
814	8	0	0	0	0	0	0	200	300	0	19.5909	45.0366	-493.526	-125972	18065.9	-2624.13	236.606	1158.25	0	0	0	0	0	0	0	603	903	0
814	9	0	0	0	0	0	0	200	300	0	17.4547	44.1211	-488.948	-125332	16906.2	-2669.91	234.577	1159.33	0	0	0	0	0	0	0	603	903	0
815	0	0	0	0	0	0	0	200	300	0	17.6073	44.1211	-488.033	-125057	17821.7	-2807.24	236.518	1159.25	0	0	0	0	0	0	0	603	903	0
815	1	0	0	0	0	0	0	200	300	0	17.3021	41.5271	-483.76	-124233	17577.6	-2853.01	236.335	1159.81	0	0	0	0	0	0	0	603	903	0
815	2	0	0	0	0	0	0	200	300	0	15.7762	42.9004	-482.54	-122493	17516.6	-2715.68	236.301	1156.85	0	0	0	0	0	0	0	603	903	0
815	3	0	0	0	0	0	0	200	300	0	16.0814	41.3745	-479.183	-123409	17516.6	-2624.13	236.555	1160.54	0	0	0	0	0	0	0	603	903	0
815	4	0	0	0	0	0	0	200	300	0	16.5392	40.9167	-478.878	-122768	17516.6	-2441.02	236.578	1159.37	0	0	0	0	0	0	0	603	903	0
815	5	0	0	0	0	0	0	200	300	0	15.1659	40.7642	-475.521	-122402	17272.4	-2212.14	236.323	1160.41	0	0	0	0	0	0	0	603	903	0
815	6	0	0	0	0	0	0	200	300	0	17.1495	39.696	-473.384	-122127	17516.6	-2624.13	237.003	1160.99	0	0	0	0	0	0	0	603	903	0
815	7	0	0	0	0	0	0	200	300	0	15.0133	39.2383	-471.248	-121212	17150.3	-2761.46	236.393	1160.21	0	0	0	0	0	0	0	603	903	0
815	8	0	0	0	0	0	0	200	300	0	15.9288	39.0857	-469.722	-120662	16967.2	-2395.25	236.122	1159.88	0	0	0	0	0	0	0	603	903	0
815	9	0	0	0	0	0	0	200	300	0	14.5555	38.0176	-468.196	-119747	17089.3	-2486.8	236.5	1158.76	0	0	0	0	0	0	0	603	903	0
816	0	0	0	0	0	0	0	200	300	0	14.2503	37.7124	-463.924	-119472	16601	-2486.8	235.784	1160.53	0	0	0	0	0	0	0	603	903	0
816	1	0	0	0	0	0	0	200	300	0	15.6236	38.0176	-463.619	-119472	17455.5	-2532.58	237.651	1160.69	0	0	0	0	0	0	0	603	903	0
816	2	0	0	0	0	0	0	200	300	0	13.64	36.4917	-461.788	-119014	16967.2	-2349.47	236.743	1160.73	0	0	0	0	0	0	0	603	903	0
816	3	0	0	0	0	0	0	200	300	0	14.0977	37.2546	-459.041	-118282	16479	-2395.25	235.899	1160.67	0	0	0	0	0	0	0	603	903	0
816	4	0	0	0	0	0	0	200	300	0	14.5555	36.0339	-458.126	-118099	16601	-1937.48	236.237	1160.79	0	0	0	0	0	0	0	603	903	0
816	5	0	0	0	0	0	0	200	300	0	13.64	34.0503	-454.463	-117824	16662.1	-2166.37	236.663	1162.26	0	0	0	0	0	0	0	603	903	0
816	6	0	0	0	0	0	0	200	300	0	12.1141	34.2029	-453.548	-117183	16540	-1891.71	236.468	1161.37	0	0	0	0	0	0	0	603	903	0
816	7	0	0	0	0	0	0	200	300	0	14.0977	33.5925	-449.581	-115444	16723.1	-2257.92	237.197	1159.78	0	0	0	0	0	0	0	603	903	0
816	8	0	0	0	0	0	0	200	300	0	13.7926	33.2873	-449.581	-116726	15990.7	-2120.59	235.568	1162.63	0	0	0	0	0	0	0	603	903	0
816	9	0	0	0	0	0	0	200	300	0	14.7081	31.4563	-448.055	-116451	16417.9	-2029.04	236.643	1162.9	0	0	0	0	0	0	0	603	903	0
817	0	0	0	0	0	0	0	200	300	0	12.7245	32.2192	-445.308	-115352	16723.1	-2074.81	237.554	1162.04	0	0	0	0	0	0	0	603	903	0
817	1	0	0	0	0	0	0	200	300	0	12.877	31.7615	-442.867	-114986	16173.8	-2395.25	236.521	1162.64	0	0	0	0	0	0	0	603	903	0
817	2	0	0	0	0	0	0	200	300	0	12.877	32.0666	-443.782	-114162	15990.7	-2120.59	236.033	1160.25	0	0	0	0	0	0	0	603	903	0
817	3	0	0	0	0	0	0	200	300	0	12.7245	30.083	-440.731	-113796	16051.7	-1662.83	236.421	1161.2	0	0	0	0	0	0	0	603	903	0
817	4	0	0	0	0	0	0	200	300	0	12.7245	28.7097	-438.594	-113704	15868.6	-1708.6	236.181	1162.25	0	0	0	0	0	0	0	603	903	0
817	5	0	0	0	0	0	0	200	300	0	11.6563	29.7778	-437.679	-113613	16295.9	-2074.81	237.232	1162.58	0	0	0	0	0	0	0	603	903	0
817	6	0	0	0	0	0	0	200	300	0	11.1986	28.2519	-435.237	-112697	15380.3	-2074.81	235.338	1161.93	0	0	0	0	0	0	0	603	903	0
817	7	0	0	0	0	0	0	200	300	0	13.4874	28.2519	-430.049	-112423	16112.7	-2120.59	237.467	1164.42	0	0	0	0	0	0	0	603	903	0
817	8	0	0	0	0	0	0	200	300	0	10.5882	27.7942	-434.322	-112148	15807.6	-1617.05	236.396	1161.21	0	0	0	0	0	0	0	603	903	0
817	9	0	0	0	0	0	0	200	300	0	10.4356	25.2002	-430.355	-111690	15929.6	-1617.05	237.015	1162.53	0	0	0	0	0	0	0	603	903	0
818	0	0	0	0	0	0	0	200	300	0	10.8934	26.5735	-428.829	-111141	15929.6	-1754.38	237.147	1162.17	0	0	0	0	0	0	0	603	903	0
818	1	0	0	0	0	0	0	200	300	0	11.046	25.658	-423.946	-111416	15807.6	-1845.93	237.287	1165.81	0	0	0	0	0	0	0	603	903	0
818	2	0	0	0	0	0	0	200	300	0	10.8934	25.2002	-426.082	-111049	15624.5	-1800.16	236.67	1163.63	0	0	0	0	0	0	0	603	903	0
818	3	0	0	0	0	0	0	200	300	0	10.7408	24.1321	-424.251	-110134	15563.4	-1662.83	236.684	1162.6	0	0	0	0	0	0	0	603	903	0
818	4	0	0	0	0	0	0	200	300	0	10.4356	24.4373	-422.725	-110225	15319.3	-1617.05	236.239	1163.75	0	0	0	0	0	0	0	603	903	0
818	5	0	0	0	0	0	0	200	300	0	8.75717	23.8269	-420.894	-109859	15807.6	-1479.72	237.557	1164.01	0	0	0	0	0	0	0	603	903	0
818	6	0	0	0	0	0	0	200	300	0	8.90976	24.1321	-421.199	-109218	15319.3	-1754.38	236.371	1162.3	0	0	0	0	0	0	0	603	903	0
818	7	0	0	0	0	0	0	200	300	0	9.6727	23.064	-418.148	-108669	15441.4	-1754.38	236.928	1162.88	0	0	0	0	0	0	0	603	903	0
818	8	0	0	0	0	0	0	200	300	0	9.06235	22.7588	-416.622	-108120	15319.3	-1754.38	236.77	1162.52	0	0	0	0	0	0	0	603	903	0
818	9	0	0	0	0	0	0	200	300	0	9.06235	21.5381	-417.232	-107662	15319.3	-1845.93	236.717	1161.04	0	0	0	0	0	0	0	603	903	0
819	0	0	0	0	0	0	0	200	300	0	9.06235	21.3855	-415.096	-107753	15502.4	-1525.5	237.347	1162.59	0	0	0	0	0	0	0	603	903	0
819	1	0	0	0	0	0	0	200	300	0	8.90976	20.7751	-410.518	-107845	15502.4	-1891.71	237.763	1165.7	0	0	0	0	0	0	0	603	903	0
819	2	0	0	0	0	0	0	200	300	0	8.14682	20.3174	-412.654	-107296	14953.1	-1525.5	236.236	1163.01	0	0	0	0	0	0	0	603	903	0
819	3	0	0	0	0	0	0	200	300	0	8.14682	19.707	-412.349	-107479	15502.4	-1525.5	237.595	1163.65	0	0	0	0	0	0	0	603	903	0
819	4	0	0	0	0	0	0	200	300	0	8.452	19.0967	-409.297	-107112	15014.1	-1388.17	236.683	1164.7	0	0	0	0	0	0	0	603	903	0
819	5	0	0	0	0	0	0	200	300	0	6.92612	19.4019	-408.687	-106197	15258.3	-1479.72	237.335	1162.85	0	0	0	0	0	0	0	603	903	0
819	6	0	0	0	0	0	0	200	300	0	7.07871	17.5708	-406.856	-106105	15380.3	-1159.29	237.803	1163.79	0	0	0	0	0	0	0	603	903	0
819	7	0	0	0	0	0	0	200	300	0	8.90976	18.1811	-405.94	-105831	15014.1	-1433.94	236.986	1163.71	0	0	0	0	0	0	0	603	903	0
819	8	0	0	0	0	0	0	200	300	0	6.62094	17.113	-406.246	-106197	15136.2	-1388.17	237.259	1164.41	0	0	0	0	0	0	0	603	903	0
819	9	0	0	0	0	0	0	200	300	0	6.62094	16.3501	-403.194	-105556	15075.2	-1159.29	237.389	1164.8	0	0	0	0	0	0	0	603	903	0
820	0	0	0	0	0	0	0	200	300	0	7.38388	16.1975	-402.584	-105190	15014.1	-1388.17	237.294	1164.29	0	0	0	0	0	0	0	603	903	0
820	1	0	0	0	0	0	0	200	300	0	6.62094	15.8923	-401.058	-105098	15258.3	-1388.17	238.045	1165.05	0	0	0	0	0	0	0	603	903	0
820	2	0	0	0	0	0	0	200	300	0	8.75717	15.7397	-400.753	-105007	14892	-1388.17	237.16	1165.02	0	0	0	0	0	0	0	603	903	0
820	3	0	0	0	0	0	0	200	300	0	7.38388	13.6035	-400.447	-104732	14953.1	-1250.84	237.341	1164.54	0	0	0	0	0	0	0	603	903	0
820	4	0	0	0	0	0	0	200	300	0	6.62094	14.2139	-400.447	-104824	15319.3	-1067.73	238.255	1164.77	0	0	0	0	0	0	0	603	903	0
820	5	0	0	0	0	0	0	200	300	0	4.94247	14.0613	-397.396	-104458	14953.1	-1250.84	237.628	1165.86	0	0	0	0	0	0	0	603	903	0
820	6	0	0	0	0	0	0	200	300	0	5.40024	13.1457	-396.175	-103725	14953.1	-1159.29	237.744	1164.82	0	0	0	0	0	0	0	603	903	0
820	7	0	0	0	0	0	0	200	300	0	7.84164	13.2983	-395.87	-103084	15014.1	-1159.29	237.927	1163.4	0	0	0	0	0	0	0	603	903	0
820	8	0	0	0	0	0	0	200	300	0	5.858	12.9932	-394.039	-103725	14342.7	-1159.29	236.399	1166.24	0	0	0	0	0	0	0	603	903	0
820	9	0	0	0	0	0	0	200	300	0	4.33212	12.688	-392.513	-103817	15075.2	-1067.73	238.407	1167.49	0	0	0	0	0	0	0	603	903	0
821	0	0	0	0	0	0	0	200	300	0	4.94247	11.925	-393.733	-103176	14647.9	-1067.73	237.203	1165.04	0	0	0	0	0	0	0	603	903	0
821	1	0	0	0	0	0	0	200	300	0	4.94247	11.6199	-391.292	-103359	14831	-1159.29	237.903	1167.15	0	0	0	0	0	0	0	603	903	0
821	2	0	0	0	0	0	0	200	300	0	5.55283	11.7725	-392.513	-102993	14831	-884.628	237.785	1165.39	0	0	0	0	0	0	0	603	903	0
821	3	0	0	0	0	0	0	200	300	0	5.24765	10.3992	-391.292	-102626	14281.7	-976.181	236.499	1165.28	0	0	0	0	0	0	0	603	903	0
821	4	0	0	0	0	0	0	200	300	0	4.78989	10.094	-389.461	-102810	14708.9	-1021.96	237.767	1166.98	0	0	0	0	0	0	0	603	903	0
821	5	0	0	0	0	0	0	200	300	0	3.26401	9.63623	-389.156	-102352	14770	-701.523	237.954	1166.01	0	0	0	0	0	0	0	603	903	0
821	6	0	0	0	0	0	0	200	300	0	2.65366	9.02588	-387.63	-101986	14525.8	-1067.73	237.473	1166.1	0	0	0	0	0	0	0	603	903	0
821	7	0	0	0	0	0	0	200	300	0	4.33212	8.7207	-388.24	-101711	14647.9	-793.075	237.729	1164.98	0	0	0	0	0	0	0	603	903	0
821	8	0	0	0	0	0	0	200	300	0	2.65366	8.56811	-388.24	-102077	14464.8	-655.746	237.257	1165.92	0	0	0	0	0	0	0	603	903	0
821	9	0	0	0	0	0	0	200	300	0	1.89072	7.80517	-386.409	-101711	14525.8	-747.299	237.592	1166.22	0	0	0	0	0	0	0	603	903	0
822	0	0	0	0	0	0	0	200	300	0	4.6373	8.26294	-385.799	-101345	14708.9	-655.746	238.126	1165.69	0	0	0	0	0	0	0	603	903	0
822	1	0	0	0	0	0	0	200	300	0	1.89072	8.11035	-385.189	-101253	14464.8	-747.299	237.553	1165.87	0	0	0	0	0	0	0	603	903	0
822	2	0	0	0	0	0	0	200	300	0	0.97519	7.5	-384.578	-101162	14586.9	-655.746	237.93	1166.05	0	0	0	0	0	0	0	603	903	0
822	3	0	0	0	0	0	0	200	300	0	2.65366	6.73706	-384.578	-101253	14647.9	-472.641	238.088	1166.28	0	0	0	0	0	0	0	603	903	0
822	4	0	0	0	0	0	0	200	300	0	1.89072	5.36377	-383.052	-100887	14159.6	-472.641	236.965	1166.38	0	0	0	0	0	0	0	603	903	0
822	5	0	0	0	0	0	0	200	300	0	2.80624	5.51635	-383.052	-100887	14464.8	-472.641	237.762	1166.38	0	0	0	0	0	0	0	603	903	0
822	6	0	0	0	0	0	0	200	300	0	1.73813	5.05859	-382.442	-100338	14342.7	-609.97	237.503	1165.36	0	0	0	0	0	0	0	603	903	0
822	7	0	0	0	0	0	0	200	300	0	1.58554	4.75342	-380.916	-100429	14403.8	-747.299	237.814	1166.65	0	0	0	0	0	0	0	603	903	0
822	8	0	0	0	0	0	0	200	300	0	0.21225	4.14306	-381.526	-100704	14342.7	-335.312	237.593	1166.95	0	0	0	0	0	0	0	603	903	0
822	9	0	0	0	0	0	0	200	300	0	-0.245513	3.38012	-382.442	-100246	13976.5	-197.982	236.545	1165.12	0	0	0	0	0	0	0	603	903	0
823	0	0	0	0	0	0	0	200	300	0	0.822602	3.22754	-379.695	-100063	14708.9	-152.206	238.739	1166.54	0	0	0	0	0	0	0	603	903	0
823	1	0	0	0	0	0	0	200	300	0	-0.0929256	2.92236	-379.39	-99971.4	13915.5	-14.877	236.679	1166.51	0	0	0	0	0	0	0	603	903	0
823	2	0	0	0	0	0	0	200	300	0	0.21225	2.31201	-378.78	-100704	14342.7	-289.535	237.866	1168.86	0	0	0	0	0	0	0	603	903	0
823	3	0	0	0	0	0	0	200	300	0	0.670014	2.92236	-378.78	-99971.4	13671.3	-289.535	236.093	1166.93	0	0	0	0	0	0	0	603	903	0
823	4	0	0	0	0	0	0	200	300	0	0.21225	1.54907	-379.39	-100063	14220.7	-152.206	237.483	1166.75	0	0	0	0	0	0	0	603	903	0
823	5	0	0	0	0	0	0	200	300	0	0.97519	0.938718	-377.864	-100063	14403.8	-152.206	238.119	1167.81	0	0	0	0	0	0	0	603	903	0
823	6	0	0	0	0	0	0	200	300	0	-0.398101	0.938718	-379.085	-99696.8	14708.9	-197.982	238.801	1165.99	0	0	0	0	0	0	0	603	903	0
823	7	0	0	0	0	0	0	200	300	0	-0.398101	0.480954	-378.169	-99788.3	14342.7	-106.43	237.927	1166.87	0	0	0	0	0	0	0	603	903	0
823	8	0	0	0	0	0	0	200	300	0	-1.00845	0.328366	-377.559	-99696.8	14220.7	-14.877	237.665	1167.06	0	0	0	0	0	0	0	603	903	0
823	9	0	0	0	0	0	0	200	300	0	-1.00845	-0.892337	-378.169	-99147.4	14586.9	30.8993	238.572	1165.18	0	0	0	0	0	0	0	603	903	0
824	0	0	0	0	0	0	0	200	300	0	-1.16104	-2.11304	-377.254	-99330.5	14037.6	168.228	237.21	1166.3	0	0	0	0	0	0	0	603	903	0
824	1	0	0	0	0	0	0	200	300	0	-1.77139	-0.739749	-377.864	-99788.3	14159.6	168.228	237.473	1167.09	0	0	0	0	0	0	0	603	903	0
824	2	0	0	0	0	0	0	200	300	0	-2.53433	-1.50269	-376.949	-99605.2	14159.6	30.8993	237.564	1167.24	0	0	0	0	0	0	0	603	903	0
824	3	0	0	0	0	0	0	200	300	0	-1.46622	-1.80786	-376.949	-99513.6	13732.4	-14.877	236.43	1167	0	0	0	0	0	0	0	603	903	0
824	4	0	0	0	0	0	0	200	300	0	-0.855865	-2.72339	-377.254	-99696.8	14464.8	305.558	238.342	1167.27	0	0	0	0	0	0	0	603	903	0
824	5	0	0	0	0	0	0	200	300	0	-2.68692	-2.87598	-378.169	-99513.6	13976.5	76.6757	236.958	1166.15	0	0	0	0	0	0	0	603	903	0
824	6	0	0	0	0	0	0	200	300	0	-2.68692	-3.18116	-376.338	-99330.5	14464.8	168.228	238.436	1166.94	0	0	0	0	0	0	0	603	903	0
824	7	0	0	0	0	0	0	200	300	0	-2.38174	-2.72339	-377.559	-99147.4	14220.7	305.558	237.665	1165.6	0	0	0	0	0	0	0	603	903	0
824	8	0	0	0	0	0	0	200	300	0	-1.6188	-3.94409	-378.78	-99788.3	14281.7	351.334	237.704	1166.45	0	0	0	0	0	0	0	603	903	0
824	9	0	0	0	0	0	0	200	300	0	-1.6188	-5.62256	-376.644	-99879.8	14159.6	580.216	237.594	1168.18	0	0	0	0	0	0	0	603	903	0
825	0	0	0	0	0	0	0	200	300	0	-2.38174	-4.85962	-378.169	-99696.8	14342.7	168.228	237.927	1166.63	0	0	0	0	0	0	0	603	903	0
825	1	0	0	0	0	0	0	200	300	0	-3.44986	-5.62256	-377.559	-99605.2	14525.8	122.452	238.473	1166.81	0	0	0	0	0	0	0	603	903	0
825	2	0	0	0	0	0	0	200	300	0	-3.75503	-5.46997	-377.559	-98872.8	14525.8	-14.877	238.473	1164.87	0	0	0	0	0	0	0	603	903	0
825	3	0	0	0	0	0	0	200	300	0	-3.60245	-6.08033	-380.001	-99513.6	13854.5	351.334	236.459	1164.88	0	0	0	0	0	0	0	603	903	0
825	4	0	0	0	0	0	0	200	300	0	-3.29727	-6.53809	-378.169	-100246	14770	671.769	239.057	1168.08	0	0	0	0	0	0	0	603	903	0
825	5	0	0	0	0	0	0	200	300	0	-3.75503	-6.99585	-378.169	-100429	14525.8	442.887	238.411	1168.57	0	0	0	0	0	0	0	603	903	0
825	6	0	0	0	0	0	0	200	300	0	-4.06021	-7.45362	-376.338	-100612	14525.8	259.781	238.598	1170.35	0	0	0	0	0	0	0	603	903	0
825	7	0	0	0	0	0	0	200	300	0	-4.2128	-7.6062	-378.78	-100429	14464.8	351.334	238.188	1168.14	0	0	0	0	0	0	0	603	903	0
825	8	0	0	0	0	0	0	200	300	0	-2.9921	-9.13208	-379.695	-100338	14220.7	442.887	237.453	1167.26	0	0	0	0	0	0	0	603	903	0
825	9	0	0	0	0	0	0	200	300	0	-5.12833	-9.13208	-381.526	-99971.4	14464.8	397.11	237.913	1165.03	0	0	0	0	0	0	0	603	903	0
826	0	0	0	0	0	0	0	200	300	0	-5.4335	-9.89502	-379.695	-100246	14708.9	442.887	238.739	1167.02	0	0	0	0	0	0	0	603	903	0
826	1	0	0	0	0	0	0	200	300	0	-4.06021	-9.28467	-382.747	-100612	14647.9	351.334	238.27	1165.87	0	0	0	0	0	0	0	603	903	0
826	2	0	0	0	0	0	0	200	300	0	-3.75503	-10.0476	-381.832	-100887	14403.8	351.334	237.723	1167.22	0	0	0	0	0	0	0	603	903	0
826	3	0	0	0	0	0	0	200	300	0	-4.06021	-9.89502	-379.39	-101253	14403.8	305.558	237.966	1169.88	0	0	0	0	0	0	0	603	903	0
826	4	0	0	0	0	0	0	200	300	0	-3.60245	-11.4209	-383.052	-100978	14586.9	488.663	238.081	1166.62	0	0	0	0	0	0	0	603	903	0
826	5	0	0	0	0	0	0	200	300	0	-5.12833	-12.7942	-384.578	-101162	14831	854.874	238.564	1166.05	0	0	0	0	0	0	0	603	903	0
826	6	0	0	0	0	0	0	200	300	0	-6.19644	-12.1838	-382.137	-100521	14953.1	488.663	239.13	1166.05	0	0	0	0	0	0	0	603	903	0
826	7	0	0	0	0	0	0	200	300	0	-5.73868	-12.0313	-383.357	-100978	14281.7	625.992	237.254	1166.41	0	0	0	0	0	0	0	603	903	0
826	8	0	0	0	0	0	0	200	300	0	-3.75503	-12.9468	-384.578	-101528	14953.1	717.545	238.882	1167	0	0	0	0	0	0	0	603	903	0
826	9	0	0	0	0	0	0	200	300	0	-5.73868	-13.252	-384.883	-101894	14770	488.663	238.375	1167.74	0	0	0	0	0	0	0	603	903	0
827	0	0	0	0	0	0	0	200	300	0	-6.80679	-13.8623	-384.578	-102077	14770	305.558	238.406	1168.43	0	0	0	0	0	0	0	603	903	0
827	1	0	0	0	0	0	0	200	300	0	-6.19644	-14.1675	-385.189	-102169	14953.1	305.558	238.82	1168.24	0	0	0	0	0	0	0	603	903	0
827	2	0	0	0	0	0	0	200	300	0	-7.41714	-14.7778	-386.104	-102077	14831	76.6757	238.412	1167.38	0	0	0	0	0	0	0	603	903	0
827	3	0	0	0	0	0	0	200	300	0	-6.6542	-15.5408	-389.461	-102260	14953.1	442.887	238.394	1165.57	0	0	0	0	0	0	0	603	903	0
827	4	0	0	0	0	0	0	200	300	0	-5.89127	-15.5408	-387.935	-102443	14831	397.11	238.231	1167.07	0	0	0	0	0	0	0	603	903	0
827	5	0	0	0	0	0	0	200	300	0	-5.4335	-15.846	-387.325	-103176	14892	488.663	238.449	1169.38	0	0	0	0	0	0	0	603	903	0
827	6	0	0	0	0	0	0	200	300	0	-5.28091	-17.0667	-390.071	-103267	15136.2	580.216	238.804	1167.74	0	0	0	0	0	0	0	603	903	0
827	7	0	0	0	0	0	0	200	300	0	-6.04385	-17.5244	-387.02	-102810	15319.3	442.887	239.583	1168.64	0	0	0	0	0	0	0	603	903	0
827	8	0	0	0	0	0	0	200	300	0	-5.73868	-17.9822	-391.292	-103084	14953.1	397.11	238.215	1166.45	0	0	0	0	0	0	0	603	903	0
827	9	0	0	0	0	0	0	200	300	0	-3.90762	-19.0503	-392.818	-103634	15502.4	351.334	239.465	1166.82	0	0	0	0	0	0	0	603	903	0
828	0	0	0	0	0	0	0	200	300	0	-6.19644	-18.5925	-391.597	-102993	15197.2	580.216	238.808	1166.01	0	0	0	0	0	0	0	603	903	0
828	1	0	0	0	0	0	0	200	300	0	-6.6542	-18.7451	-391.292	-104183	15136.2	397.11	238.683	1169.25	0	0	0	0	0	0	0	603	903	0
828	2	0	0	0	0	0	0	200	300	0	-5.28091	-19.5081	-392.208	-104366	15319.3	305.558	239.059	1169.1	0	0	0	0	0	0	0	603	903	0
828	3	0	0	0	0	0	0	200	300	0	-6.80679	-21.1865	-393.123	-103634	15319.3	488.663	238.968	1166.62	0	0	0	0	0	0	0	603	903	0
828	4	0	0	0	0	0	0	200	300	0	-6.80679	-21.6443	-396.48	-104732	15380.3	625.992	238.792	1167.15	0	0	0	0	0	0	0	603	903	0
828	5	0	0	0	0	0	0	200	300	0	-6.04385	-23.0176	-395.259	-104458	15502.4	671.769	239.221	1167.28	0	0	0	0	0	0	0	603	903	0
828	6	0	0	0	0	0	0	200	300	0	-7.11197	-22.2546	-396.785	-104824	15014.1	442.887	237.839	1167.18	0	0	0	0	0	0	0	603	903	0
828	7	0	0	0	0	0	0	200	300	0	-7.26456	-23.6279	-397.09	-105098	15563.4	305.558	239.194	1167.67	0	0	0	0	0	0	0	603	903	0
828	8	0	0	0	0	0	0	200	300	0	-8.79044	-23.1702	-398.006	-105465	15197.2	122.452	238.183	1167.98	0	0	0	0	0	0	0	603	903	0
828	9	0	0	0	0	0	0	200	300	0	-7.56973	-24.0857	-399.227	-105373	15319.3	580.216	238.372	1166.94	0	0	0	0	0	0	0	603	903	0
829	0	0	0	0	0	0	0	200	300	0	-8.0275	-24.696	-399.227	-105831	15868.6	671.769	239.748	1168.09	0	0	0	0	0	0	0	603	903	0
829	1	0	0	0	0	0	0	200	300	0	-9.55338	-25.3064	-399.532	-106289	15746.5	488.663	239.413	1169.03	0	0	0	0	0	0	0	603	903	0
829	2	0	0	0	0	0	0	200	300	0	-9.2482	-25.9168	-400.447	-105831	15807.6	488.663	239.475	1167.28	0	0	0	0	0	0	0	603	903	0
829	3	0	0	0	0	0	0	200	300	0	-8.33267	-26.0693	-402.278	-105922	15685.5	625.992	238.992	1166.31	0	0	0	0	0	0	0	603	903	0
829	4	0	0	0	0	0	0	200	300	0	-8.94302	-26.9849	-403.194	-106746	15075.2	488.663	237.389	1167.75	0	0	0	0	0	0	0	603	903	0
829	5	0	0	0	0	0	0	200	300	0	-9.85855	-27.9004	-403.804	-106563	16051.7	534.44	239.751	1166.9	0	0	0	0	0	0	0	603	903	0
829	6	0	0	0	0	0	0	200	300	0	-9.40079	-28.2056	-401.363	-106655	16051.7	397.11	239.993	1168.73	0	0	0	0	0	0	0	603	903	0
829	7	0	0	0	0	0	0	200	300	0	-10.4689	-28.8159	-405.33	-106472	15929.6	397.11	239.3	1165.68	0	0	0	0	0	0	0	603	903	0
829	8	0	0	0	0	0	0	200	300	0	-10.0111	-29.4263	-405.025	-107296	15685.5	580.216	238.727	1167.91	0	0	0	0	0	0	0	603	903	0
829	9	0	0	0	0	0	0	200	300	0	-6.80679	-29.884	-406.246	-107570	15685.5	534.44	238.611	1167.79	0	0	0	0	0	0	0	603	903	0
830	0	0	0	0	0	0	0	200	300	0	-10.1637	-31.2573	-407.772	-107845	16173.8	534.44	239.664	1167.47	0	0	0	0	0	0	0	603	903	0
830	1	0	0	0	0	0	0	200	300	0	-10.7741	-32.3254	-406.856	-107845	16417.9	625.992	240.353	1168.07	0	0	0	0	0	0	0	603	903	0
830	2	0	0	0	0	0	0	200	300	0	-10.3163	-32.1729	-408.992	-108211	16112.7	534.44	239.396	1167.58	0	0	0	0	0	0	0	603	903	0
830	3	0	0	0	0	0	0	200	300	0	-10.9267	-34.0039	-409.908	-108577	16173.8	442.887	239.457	1167.88	0	0	0	0	0	0	0	603	903	0
830	4	0	0	0	0	0	0	200	300	0	-11.537	-33.0884	-410.213	-108577	16051.7	442.887	239.13	1167.69	0	0	0	0	0	0	0	603	903	0
830	5	0	0	0	0	0	0	200	300	0	-10.3163	-33.3936	-410.823	-108669	16234.8	534.44	239.518	1167.52	0	0	0	0	0	0	0	603	903	0
830	6	0	0	0	0	0	0	200	300	0	-11.2318	-35.2246	-411.128	-109676	16479	351.334	240.082	1169.77	0	0	0	0	0	0	0	603	903	0
830	7	0	0	0	0	0	0	200	300	0	-11.3844	-34.6143	-411.739	-109127	16479	305.558	240.023	1168.04	0	0	0	0	0	0	0	603	903	0
830	8	0	0	0	0	0	0	200	300	0	-10.7741	-35.9876	-413.875	-109127	16662.1	442.887	240.259	1166.67	0	0	0	0	0	0	0	603	903	0
830	9	0	0	0	0	0	0	200	300	0	-11.3844	-37.666	-412.96	-110042	16540	442.887	240.052	1169.47	0	0	0	0	0	0	0	603	903	0
831	0	0	0	0	0	0	0	200	300	0	-11.0793	-37.2083	-414.18	-109768	16540	946.427	239.934	1168.02	0	0	0	0	0	0	0	603	903	0
831	1	0	0	0	0	0	0	200	300	0	-10.0111	-37.5134	-414.485	-110225	16662.1	442.887	240.199	1168.93	0	0	0	0	0	0	0	603	903	0
831	2	0	0	0	0	0	0	200	300	0	-11.0793	-38.429	-414.791	-110592	16356.9	442.887	239.434	1169.62	0	0	0	0	0	0	0	603	903	0
831	3	0	0	0	0	0	0	200	300	0	-11.6896	-38.8867	-413.875	-110683	16479	168.228	239.816	1170.43	0	0	0	0	0	0	0	603	903	0
831	4	0	0	0	0	0	0	200	300	0	-10.4689	-39.9548	-417.537	-110683	16723.1	534.44	240.052	1168.09	0	0	0	0	0	0	0	603	903	0
831	5	0	0	0	0	0	0	200	300	0	-10.7741	-41.4807	-417.537	-111416	16662.1	397.11	239.906	1169.84	0	0	0	0	0	0	0	603	903	0
831	6	0	0	0	0	0	0	200	300	0	-9.70596	-42.0911	-417.537	-111141	16967.2	259.781	240.637	1169.18	0	0	0	0	0	0	0	603	903	0
831	7	0	0	0	0	0	0	200	300	0	-10.9267	-43.3118	-417.842	-111141	16845.2	351.334	240.315	1168.99	0	0	0	0	0	0	0	603	903	0
831	8	0	0	0	0	0	0	200	300	0	-10.7741	-43.0066	-419.673	-111599	16845.2	305.558	240.139	1168.92	0	0	0	0	0	0	0	603	903	0
831	9	0	0	0	0	0	0	200	300	0	-11.9948	-44.5325	-419.368	-111782	16662.1	671.769	239.731	1169.55	0	0	0	0	0	0	0	603	903	0
832	0	0	0	0	0	0	0	200	300	0	-11.3844	-44.5325	-420.284	-111507	16784.1	488.663	239.935	1168.31	0	0	0	0	0	0	0	603	903	0
832	1	0	0	0	0	0	0	200	300	0	-11.9948	-45.6006	-420.589	-110317	16723.1	534.44	239.761	1165.29	0	0	0	0	0	0	0	603	903	0
832	2	0	0	0	0	0	0	200	300	0	-13.0629	-45.9058	-420.284	-112148	17333.5	397.11	241.242	1169.84	0	0	0	0	0	0	0	603	903	0
832	3	0	0	0	0	0	0	200	300	0	-11.537	-46.2109	-421.199	-112056	16845.2	259.781	239.993	1169.04	0	0	0	0	0	0	0	603	903	0
832	4	0	0	0	0	0	0	200	300	0	-11.6896	-47.5842	-421.504	-112514	16906.2	-60.6534	240.109	1169.93	0	0	0	0	0	0	0	603	903	0
832	5	0	0	0	0	0	0	200	300	0	-13.0629	-48.8049	-420.284	-112514	17150.3	351.334	240.807	1170.71	0	0	0	0	0	0	0	603	903	0
832	6	0	0	0	0	0	0	200	300	0	-13.5207	-48.8049	-422.115	-112331	16906.2	351.334	240.051	1169.11	0	0	0	0	0	0	0	603	903	0
832	7	0	0	0	0	0	0	200	300	0	-9.85855	-49.7205	-423.03	-112331	17455.5	259.781	241.263	1168.54	0	0	0	0	0	0	0	603	903	0
832	8	0	0	0	0	0	0	200	300	0	-13.6732	-50.4834	-422.725	-112514	16906.2	442.887	239.993	1169.16	0	0	0	0	0	0	0	603	903	0
832	9	0	0	0	0	0	0	200	300	0	-13.9784	-50.9412	-423.641	-111690	17455.5	214.005	241.204	1166.64	0	0	0	0	0	0	0	603	903	0
833	0	0	0	0	0	0	0	200	300	0	-13.0629	-52.3145	-422.725	-113063	17455.5	351.334	241.293	1170.46	0	0	0	0	0	0	0	603	903	0
833	1	0	0	0	0	0	0	200	300	0	-13.0629	-52.7722	-422.725	-113796	17638.6	214.005	241.726	1172.2	0	0	0	0	0	0	0	603	903	0
833	2	0	0	0	0	0	0	200	300	0	-14.2836	-54.1455	-423.641	-113063	17699.7	122.452	241.78	1169.89	0	0	0	0	0	0	0	603	903	0
833	3	0	0	0	0	0	0	200	300	0	-12.1474	-54.6033	-422.42	-112789	17455.5	214.005	241.323	1170.01	0	0	0	0	0	0	0	603	903	0
833	4	0	0	0	0	0	0	200	300	0	-13.5207	-54.2981	-424.251	-113155	17455.5	168.228	241.144	1169.72	0	0	0	0	0	0	0	603	903	0
833	5	0	0	0	0	0	0	200	300	0	-14.4362	-55.824	-424.556	-113338	17455.5	305.558	241.115	1169.96	0	0	0	0	0	0	0	603	903	0
833	6	0	0	0	0	0	0	200	300	0	-14.5888	-55.9766	-423.641	-113430	17150.3	625.992	240.483	1170.75	0	0	0	0	0	0	0	603	903	0
833	7	0	0	0	0	0	0	200	300	0	-12.3	-57.3499	-423.641	-113338	17821.7	214.005	242.068	1170.53	0	0	0	0	0	0	0	603	903	0
833	8	0	0	0	0	0	0	200	300	0	-15.5043	-58.5706	-422.725	-113155	18004.8	-14.877	242.592	1170.68	0	0	0	0	0	0	0	603	903	0
833	9	0	0	0	0	0	0	200	300	0	-15.1991	-59.3335	-423.336	-113338	17333.5	488.663	240.945	1170.73	0	0	0	0	0	0	0	603	903	0
834	0	0	0	0	0	0	0	200	300	0	-15.0465	-59.4861	-423.641	-113247	17577.6	488.663	241.492	1170.32	0	0	0	0	0	0	0	603	903	0
834	1	0	0	0	0	0	0	200	300	0	-16.725	-61.3171	-422.42	-113979	17516.6	351.334	241.467	1172.82	0	0	0	0	0	0	0	603	903	0
834	2	0	0	0	0	0	0	200	300	0	-15.9621	-60.8594	-423.336	-112423	17638.6	442.887	241.666	1168.56	0	0	0	0	0	0	0	603	903	0
834	3	0	0	0	0	0	0	200	300	0	-15.5043	-61.9275	-423.336	-113155	17699.7	442.887	241.81	1170.29	0	0	0	0	0	0	0	603	903	0
834	4	0	0	0	0	0	0	200	300	0	-16.2672	-62.3853	-421.199	-112880	16967.2	442.887	240.283	1171	0	0	0	0	0	0	0	603	903	0
834	5	0	0	0	0	0	0	200	300	0	-16.725	-62.843	-422.115	-113430	17577.6	580.216	241.642	1171.72	0	0	0	0	0	0	0	603	903	0
834	6	0	0	0	0	0	0	200	300	0	-16.1147	-63.7585	-416.927	-112972	16967.2	809.098	240.696	1173.96	0	0	0	0	0	0	0	603	903	0
834	7	0	0	0	0	0	0	200	300	0	-16.4198	-63.7585	-419.979	-113430	17455.5	397.11	241.563	1173.08	0	0	0	0	0	0	0	603	903	0
834	8	0	0	0	0	0	0	200	300	0	-15.1991	-66.2	-417.537	-113063	17028.3	534.44	240.783	1173.79	0	0	0	0	0	0	0	603	903	0
834	9	0	0	0	0	0	0	200	300	0	-16.725	-66.2	-417.842	-112239	17394.5	442.887	241.629	1171.62	0	0	0	0	0	0	0	603	903	0
835	0	0	0	0	0	0	0	200	300	0	-16.725	-66.5051	-417.232	-112880	17333.5	717.545	241.544	1173.55	0	0	0	0	0	0	0	603	903	0
835	1	0	0	0	0	0	0	200	300	0	-17.1828	-68.031	-416.622	-112697	17699.7	946.427	242.484	1173.5	0	0	0	0	0	0	0	603	903	0
835	2	0	0	0	0	0	0	200	300	0	-17.6405	-68.1836	-414.791	-111873	17089.3	854.874	241.2	1172.71	0	0	0	0	0	0	0	603	903	0
835	3	0	0	0	0	0	0	200	300	0	-17.9457	-68.1836	-413.875	-111599	17577.6	992.203	242.471	1172.64	0	0	0	0	0	0	0	603	903	0
835	4	0	0	0	0	0	0	200	300	0	-19.1664	-69.7095	-413.265	-111141	17638.6	946.427	242.681	1171.93	0	0	0	0	0	0	0	603	903	0
835	5	0	0	0	0	0	0	200	300	0	-19.0138	-69.2517	-411.739	-111507	16906.2	1129.53	241.061	1173.82	0	0	0	0	0	0	0	603	903	0
835	6	0	0	0	0	0	0	200	300	0	-18.8612	-70.0146	-410.823	-111232	17333.5	1129.53	242.192	1173.75	0	0	0	0	0	0	0	603	903	0
835	7	0	0	0	0	0	0	200	300	0	-20.5397	-70.9302	-410.518	-111507	17577.6	1266.86	242.818	1174.63	0	0	0	0	0	0	0	603	903	0
835	8	0	0	0	0	0	0	200	300	0	-20.6923	-71.2354	-407.772	-110958	17394.5	1037.98	242.657	1175.11	0	0	0	0	0	0	0	603	903	0
835	9	0	0	0	0	0	0	200	300	0	-20.0819	-71.9983	-406.246	-110225	17150.3	1083.76	242.217	1174.33	0	0	0	0	0	0	0	603	903	0
836	0	0	0	0	0	0	0	200	300	0	-19.9294	-72.6086	-404.415	-110317	16784.1	1358.41	241.502	1175.78	0	0	0	0	0	0	0	603	903	0
836	1	0	0	0	0	0	0	200	300	0	-20.8449	-73.3716	-402.278	-110134	17150.3	1129.53	242.633	1176.78	0	0	0	0	0	0	0	603	903	0
836	2	0	0	0	0	0	0	200	300	0	-20.5397	-74.2871	-402.584	-109584	17333.5	1541.52	243.056	1175.2	0	0	0	0	0	0	0	603	903	0
836	3	0	0	0	0	0	0	200	300	0	-21.3026	-73.9819	-398.921	-108852	17028.3	1358.41	242.686	1175.87	0	0	0	0	0	0	0	603	903	0
836	4	0	0	0	0	0	0	200	300	0	-22.0656	-74.4397	-398.006	-107387	17089.3	1541.52	242.937	1172.81	0	0	0	0	0	0	0	603	903	0
836	5	0	0	0	0	0	0	200	300	0	-22.2182	-75.5078	-395.87	-107936	17211.4	1449.97	243.477	1175.66	0	0	0	0	0	0	0	603	903	0
836	6	0	0	0	0	0	0	200	300	0	-21.6078	-75.6604	-393.428	-107845	16906.2	1633.07	242.972	1177.12	0	0	0	0	0	0	0	603	903	0
836	7	0	0	0	0	0	0	200	300	0	-21.913	-75.813	-391.292	-107845	16479	1587.3	242.114	1178.61	0	0	0	0	0	0	0	603	903	0
836	8	0	0	0	0	0	0	200	300	0	-21.6078	-75.813	-390.377	-106746	16784.1	1770.4	242.995	1176.44	0	0	0	0	0	0	0	603	903	0
836	9	0	0	0	0	0	0	200	300	0	-22.9811	-76.5759	-386.409	-105739	16784.1	1861.95	243.436	1176.65	0	0	0	0	0	0	0	603	903	0
837	0	0	0	0	0	0	0	200	300	0	-22.3708	-76.7285	-383.968	-105648	16784.1	1907.73	243.712	1178.15	0	0	0	0	0	0	0	603	903	0
837	1	0	0	0	0	0	0	200	300	0	-22.8285	-78.2544	-380.306	-104549	16417.9	2136.61	243.17	1177.91	0	0	0	0	0	0	0	603	903	0
837	2	0	0	0	0	0	0	200	300	0	-23.744	-77.4915	-379.39	-104366	16784.1	2136.61	244.24	1178.09	0	0	0	0	0	0	0	603	903	0
837	3	0	0	0	0	0	0	200	300	0	-24.0492	-78.407	-376.644	-103542	16662.1	2090.84	244.238	1177.91	0	0	0	0	0	0	0	603	903	0
837	4	0	0	0	0	0	0	200	300	0	-24.8122	-78.7122	-373.592	-103634	15746.5	2136.61	242.149	1180.4	0	0	0	0	0	0	0	603	903	0
837	5	0	0	0	0	0	0	200	300	0	-24.8122	-77.9492	-369.014	-103084	16723.1	2365.49	245.318	1182.35	0	0	0	0	0	0	0	603	903	0
837	6	0	0	0	0	0	0	200	300	0	-24.3544	-80.3906	-369.319	-101802	16540	2731.7	244.785	1178.65	0	0	0	0	0	0	0	603	903	0
837	7	0	0	0	0	0	0	200	300	0	-25.4225	-80.6958	-363.826	-100795	16173.8	2548.6	244.455	1180.04	0	0	0	0	0	0	0	603	903	0
837	8	0	0	0	0	0	0	200	300	0	-26.6432	-80.3906	-362.3	-100795	15990.7	2457.05	244.137	1181.21	0	0	0	0	0	0	0	603	903	0
837	9	0	0	0	0	0	0	200	300	0	-26.0329	-82.5269	-359.859	-99696.8	15868.6	2502.82	244.097	1180.04	0	0	0	0	0	0	0	603	903	0
838	0	0	0	0	0	0	0	200	300	0	-24.507	-81.001	-355.892	-99147.4	15807.6	2731.7	244.417	1181.59	0	0	0	0	0	0	0	603	903	0
838	1	0	0	0	0	0	0	200	300	0	-25.7277	-81.6113	-353.45	-98598.1	15807.6	2640.15	244.724	1181.96	0	0	0	0	0	0	0	603	903	0
838	2	0	0	0	0	0	0	200	300	0	-24.3544	-83.2898	-348.873	-97682.6	15258.3	2685.93	243.736	1182.99	0	0	0	0	0	0	0	603	903	0
838	3	0	0	0	0	0	0	200	300	0	-25.8803	-82.3743	-346.126	-96400.9	16051.7	2685.93	246.375	1181.51	0	0	0	0	0	0	0	603	903	0
838	4	0	0	0	0	0	0	200	300	0	-25.2699	-83.595	-343.074	-95393.8	15258.3	2914.81	244.475	1181.06	0	0	0	0	0	0	0	603	903	0
838	5	0	0	0	0	0	0	200	300	0	-26.6432	-83.2898	-339.107	-95302.2	15258.3	2731.7	244.995	1184.04	0	0	0	0	0	0	0	603	903	0
838	6	0	0	0	0	0	0	200	300	0	-26.6432	-82.3743	-333.309	-94203.6	15258.3	2960.59	245.778	1185.63	0	0	0	0	0	0	0	603	903	0
838	7	0	0	0	0	0	0	200	300	0	-26.4906	-84.6631	-332.088	-93288	15136.2	2914.81	245.579	1183.91	0	0	0	0	0	0	0	603	903	0
838	8	0	0	0	0	0	0	200	300	0	-27.5587	-85.1208	-328.121	-92372.5	14892	2960.59	245.386	1184.52	0	0	0	0	0	0	0	603	903	0
838	9	0	0	0	0	0	0	200	300	0	-27.7113	-84.6631	-324.459	-89992.1	15014.1	2731.7	246.274	1180.36	0	0	0	0	0	0	0	603	903	0
839	0	0	0	0	0	0	0	200	300	0	-26.7958	-86.0364	-321.407	-90449.9	14098.6	3097.92	243.865	1184.42	0	0	0	0	0	0	0	603	903	0
839	1	0	0	0	0	0	0	200	300	0	-26.7958	-85.5786	-315.608	-89809.1	14831	3052.14	246.992	1187.56	0	0	0	0	0	0	0	603	903	0
839	2	0	0	0	0	0	0	200	300	0	-27.7113	-86.189	-311.946	-89076.6	14403.8	3052.14	246.174	1188.55	0	0	0	0	0	0	0	603	903	0
839	3	0	0	0	0	0	0	200	300	0	-26.4906	-87.1045	-307.064	-86330	14281.7	3006.36	246.511	1184.15	0	0	0	0	0	0	0	603	903	0
839	4	0	0	0	0	0	0	200	300	0	-27.101	-86.189	-303.401	-86421.6	14586.9	3052.14	248.078	1187.84	0	0	0	0	0	0	0	603	903	0
839	5	0	0	0	0	0	0	200	300	0	-28.0165	-87.2571	-300.655	-85414.5	13976.5	3372.57	246.487	1187.1	0	0	0	0	0	0	0	603	903	0
839	6	0	0	0	0	0	0	200	300	0	-26.7958	-87.7148	-295.772	-83858.1	14037.6	3601.46	247.461	1186.52	0	0	0	0	0	0	0	603	903	0
839	7	0	0	0	0	0	0	200	300	0	-25.4225	-86.7993	-292.415	-82851.1	13915.5	3143.69	247.588	1186.33	0	0	0	0	0	0	0	603	903	0
839	8	0	0	0	0	0	0	200	300	0	-28.0165	-87.7148	-287.837	-81935.5	13000	3372.57	245.164	1187.66	0	0	0	0	0	0	0	603	903	0
839	9	0	0	0	0	0	0	200	300	0	-28.1691	-86.9519	-279.598	-81569.3	13671.3	3326.8	248.896	1194.74	0	0	0	0	0	0	0	603	903	0
840	0	0	0	0	0	0	0	200	300	0	-26.6432	-87.4097	-279.293	-79555.2	12938.9	3464.13	246.327	1187.85	0	0	0	0	0	0	0	603	903	0
840	1	0	0	0	0	0	0	200	300	0	-27.2536	-86.3416	-275.02	-78914.3	13122	3464.13	247.713	1189.94	0	0	0	0	0	0	0	603	903	0
840	2	0	0	0	0	0	0	200	300	0	-27.8639	-87.7148	-268.001	-77541	13000	3464.13	248.507	1192.33	0	0	0	0	0	0	0	603	903	0
840	3	0	0	0	0	0	0	200	300	0	-27.101	-87.4097	-264.644	-75343.7	12816.9	3418.35	248.431	1187.7	0	0	0	0	0	0	0	603	903	0
840	4	0	0	0	0	0	0	200	300	0	-26.6432	-88.1726	-259.456	-74977.5	12694.8	3464.13	248.928	1191.98	0	0	0	0	0	0	0	603	903	0
840	5	0	0	0	0	0	0	200	300	0	-27.101	-88.3252	-254.268	-73695.8	12389.6	3601.46	248.727	1192.83	0	0	0	0	0	0	0	603	903	0
840	6	0	0	0	0	0	0	200	300	0	-27.101	-88.783	-251.522	-72230.9	11840.3	3464.13	247.075	1190.18	0	0	0	0	0	0	0	603	903	0
840	7	0	0	0	0	0	0	200	300	0	-27.4062	-89.2407	-246.028	-71407	12572.7	3601.46	251.103	1193.24	0	0	0	0	0	0	0	603	903	0
840	8	0	0	0	0	0	0	200	300	0	-28.1691	-87.5623	-240.535	-70399.9	12267.5	3189.47	251.001	1195.68	0	0	0	0	0	0	0	603	903	0
840	9	0	0	0	0	0	0	200	300	0	-27.2536	-89.2407	-238.094	-68751.9	11596.2	3509.9	248.704	1191.76	0	0	0	0	0	0	0	603	903	0
841	0	0	0	0	0	0	0	200	300	0	-24.2018	-89.2407	-233.516	-67653.3	11229.9	3326.8	248.091	1192.72	0	0	0	0	0	0	0	603	903	0
841	1	0	0	0	0	0	0	200	300	0	-27.2536	-89.0881	-228.939	-66737.8	11229.9	3464.13	249.052	1194.51	0	0	0	0	0	0	0	603	903	0
841	2	0	0	0	0	0	0	200	300	0	-28.0165	-90.3088	-224.361	-64998.3	11291	3693.01	250.325	1192.7	0	0	0	0	0	0	0	603	903	0
841	3	0	0	0	0	0	0	200	300	0	-26.0329	-89.6985	-218.868	-63808.1	11413	3326.8	252.146	1194.54	0	0	0	0	0	0	0	603	903	0
841	4	0	0	0	0	0	0	200	300	0	-25.4225	-89.8511	-215.511	-62343.2	10680.6	3326.8	249.56	1192.28	0	0	0	0	0	0	0	603	903	0
841	5	0	0	0	0	0	0	200	300	0	-26.0329	-88.6304	-210.323	-61793.9	10985.8	3052.14	252.233	1196.81	0	0	0	0	0	0	0	603	903	0
841	6	0	0	0	0	0	0	200	300	0	-27.101	-89.3933	-207.271	-60329.1	10436.5	3097.92	250.352	1194.06	0	0	0	0	0	0	0	603	903	0
841	7	0	0	0	0	0	0	200	300	0	-24.9648	-90.1562	-200.862	-59138.9	10375.4	2960.59	251.655	1197.43	0	0	0	0	0	0	0	603	903	0
841	8	0	0	0	0	0	0	200	300	0	-26.6432	-90.4614	-196.59	-57216.3	10070.3	2731.7	251.225	1194.04	0	0	0	0	0	0	0	603	903	0
841	9	0	0	0	0	0	0	200	300	0	-26.4906	-89.5459	-191.402	-55751.4	10009.2	2594.38	252.294	1194.28	0	0	0	0	0	0	0	603	903	0
842	0	0	0	0	0	0	0	200	300	0	-24.6596	-90.3088	-187.435	-54835.9	9643.02	3097.92	251.447	1195.56	0	0	0	0	0	0	0	603	903	0
842	1	0	0	0	0	0	0	200	300	0	-24.8122	-90.1562	-180.721	-54011.9	9459.92	3052.14	252.346	1201.87	0	0	0	0	0	0	0	603	903	0
842	2	0	0	0	0	0	0	200	300	0	-25.1173	-88.1726	-175.228	-52455.5	9337.85	2777.48	253.29	1202.36	0	0	0	0	0	0	0	603	903	0
842	3	0	0	0	0	0	0	200	300	0	-23.744	-89.5459	-170.955	-49525.8	9337.85	2594.38	254.622	1192.7	0	0	0	0	0	0	0	603	903	0
842	4	0	0	0	0	0	0	200	300	0	-23.8966	-88.02	-166.072	-49800.5	9032.67	3052.14	254.39	1202.87	0	0	0	0	0	0	0	603	903	0
842	5	0	0	0	0	0	0	200	300	0	-24.3544	-87.1045	-162.715	-48061	8300.25	2502.82	251.011	1198.37	0	0	0	0	0	0	0	603	903	0
842	6	0	0	0	0	0	0	200	300	0	-23.4389	-87.4097	-158.138	-46596.1	8544.39	2457.05	254.031	1197.66	0	0	0	0	0	0	0	603	903	0
842	7	0	0	0	0	0	0	200	300	0	-20.5397	-85.8838	-152.034	-45131.3	8422.32	2273.94	255.398	1199.85	0	0	0	0	0	0	0	603	903	0
842	8	0	0	0	0	0	0	200	300	0	-22.9811	-84.8157	-147.457	-43666.5	7934.04	2182.39	253.806	1199.13	0	0	0	0	0	0	0	603	903	0
842	9	0	0	0	0	0	0	200	300	0	-21.6078	-82.3743	-141.963	-42293.2	7873.01	2273.94	255.458	1200.92	0	0	0	0	0	0	0	603	903	0
843	0	0	0	0	0	0	0	200	300	0	-20.2345	-79.9329	-137.386	-40736.8	7262.65	1999.28	252.863	1199.51	0	0	0	0	0	0	0	603	903	0
843	1	0	0	0	0	0	0	200	300	0	-20.3871	-79.1699	-134.029	-40187.5	7445.76	2090.84	255.553	1202.84	0	0	0	0	0	0	0	603	903	0
843	2	0	0	0	0	0	0	200	300	0	-20.5397	-77.4915	-127.925	-38722.6	7262.65	1999.28	256.773	1205.7	0	0	0	0	0	0	0	603	903	0
843	3	0	0	0	0	0	0	200	300	0	-18.2509	-72.7612	-123.348	-36067.6	7018.51	1770.4	256.9	1195.41	0	0	0	0	0	0	0	603	903	0
843	4	0	0	0	0	0	0	200	300	0	-17.1828	-70.625	-118.16	-35609.8	6713.34	1312.64	256.816	1204.37	0	0	0	0	0	0	0	603	903	0
843	5	0	0	0	0	0	0	200	300	0	-18.2509	-66.9629	-112.056	-34236.5	6164.02	1175.31	255.008	1208.53	0	0	0	0	0	0	0	603	903	0
843	6	0	0	0	0	0	0	200	300	0	-16.725	-64.9792	-109.92	-32680.1	6041.95	1129.53	254.967	1200.31	0	0	0	0	0	0	0	603	903	0
843	7	0	0	0	0	0	0	200	300	0	-14.4362	-63.4534	-106.868	-30849.1	6041.95	1266.86	256.536	1191.66	0	0	0	0	0	0	0	603	903	0
843	8	0	0	0	0	0	0	200	300	0	-15.6569	-60.5542	-98.6285	-29842	5492.63	992.203	255.69	1205.57	0	0	0	0	0	0	0	603	903	0
843	9	0	0	0	0	0	0	200	300	0	-15.0465	-57.3499	-94.6612	-27827.8	5309.53	1037.98	256.09	1196.97	0	0	0	0	0	0	0	603	903	0
844	0	0	0	0	0	0	0	200	300	0	-12.7577	-54.7559	-89.168	-25722.1	5309.53	1037.98	259.545	1191.47	0	0	0	0	0	0	0	603	903	0
844	1	0	0	0	0	0	0	200	300	0	-11.8422	-52.1619	-84.2852	-25722.1	4699.18	992.203	255.753	1208.18	0	0	0	0	0	0	0	603	903	0
844	2	0	0	0	0	0	0	200	300	0	-12.1474	-50.0256	-80.6231	-24257.3	4760.21	763.321	259.043	1203.87	0	0	0	0	0	0	0	603	903	0
844	3	0	0	0	0	0	0	200	300	0	-13.0629	-46.9739	-73.6041	-22060	4577.11	488.663	262.186	1202.71	0	0	0	0	0	0	0	603	903	0
844	4	0	0	0	0	0	0	200	300	0	-10.7741	-42.854	-68.1109	-20412.1	4271.93	442.887	262.72	1202.69	0	0	0	0	0	0	0	603	903	0
844	5	0	0	0	0	0	0	200	300	0	-10.7741	-41.1755	-66.8902	-18947.2	3905.72	534.44	258.39	1186.26	0	0	0	0	0	0	0	603	903	0
844	6	0	0	0	0	0	0	200	300	0	-8.94302	-38.429	-57.1246	-17940.1	3417.44	397.11	259.824	1217.05	0	0	0	0	0	0	0	603	903	0
844	7	0	0	0	0	0	0	200	300	0	-7.56973	-35.2246	-54.9883	-16200.6	3600.54	259.781	265.478	1197.62	0	0	0	0	0	0	0	603	903	0
844	8	0	0	0	0	0	0	200	300	0	-7.26456	-32.1729	-47.6641	-15102	3234.33	259.781	267.857	1219.84	0	0	0	0	0	0	0	603	903	0
844	9	0	0	0	0	0	0	200	300	0	-5.89127	-30.3418	-44.3072	-13454.1	2807.09	76.6757	263.355	1206.65	0	0	0	0	0	0	0	603	903	0
845	0	0	0	0	0	0	0	200	300	0	-6.04385	-26.5271	-38.814	-11531.5	2623.98	122.452	267.604	1200.1	0	0	0	0	0	0	0	603	903	0
845	1	0	0	0	0	0	0	200	300	0	-4.2128	-24.0857	-35.1519	-10432.8	2379.84	76.6757	267.702	1199.79	0	0	0	0	0	0	0	603	903	0
845	2	0	0	0	0	0	0	200	300	0	-5.28091	-22.865	-30.5743	-9334.19	2318.8	-14.877	275.842	1208.3	0	0	0	0	0	0	0	603	903	0
845	3	0	0	0	0	0	0	200	300	0	-4.97574	-19.5081	-25.9966	-7960.9	2196.73	30.8993	284.501	1209.23	0	0	0	0	0	0	0	603	903	0
845	4	0	0	0	0	0	0	200	300	0	-3.14468	-16.9141	-22.3345	-6679.16	1525.35	-289.535	268.296	1202.05	0	0	0	0	0	0	0	603	903	0
845	5	0	0	0	0	0	0	200	300	0	-1.77139	-14.6252	-20.8086	-5763.63	1464.31	-152.206	270.37	1179.98	0	0	0	0	0	0	0	603	903	0
845	6	0	0	0	0	0	0	200	300	0	-3.14468	-13.252	-18.0621	-5122.76	1647.42	30.8993	291.209	1186.62	0	0	0	0	0	0	0	603	903	0
845	7	0	0	0	0	0	0	200	300	0	0	0	0	0	0	0	200	903	0	0	0	0	0	0	0	603	903	0
845	8	0	0	0	0	0	0	200	300	0	0	0	0	0	0	0	200	903	0	0	0	0	0	0	0	603	903	0
845	9	0	0	0	0	0	0	200	300	0	0	0	0	0	0	0	200	903	0	0	0	0	0	0	0	603	903	0
846	0	0	0	0	0	0	0	200	300	0	0	0	0	0	0	0	200	903	0	0	0	0	0	0	0	603	903	0
846	1	0	0	0	0	0	0	200	300	0	0	0	0	0	0	0	200	903	0	0	0	0	0	0	0	603	903	0
846	2	0	0	0	0	0	0	200	300	0	0	0	0	0	0	0	200	903	0	0	0	0	0	0	0	603	903	0
846	3	0	0	0	0	0	0	200	300	0	0	0	0	0	0	0	200	903	0	0	0	0	0	0	0	603	903	0
846	4	0	0	0	0	0	0	200	300	0	0	0	0	0	0	0	200	903	0	0	0	0	0	0	0	603	903	0
846	5	0	0	0	0	0	0	200	300	0	0	0	0	0	0	0	200	903	0	0	0	0	0	0	0	603	903	0
846	6	0	0	0	0	0	0	200	300	0	0	0	0	0	0	0	200	903	0	0	0	0	0	0	0	603	903	0
846	7	0	0	0	0	0	0	200	300	0	0	0	0	0	0	0	200	903	0	0	0	0	0	0	0	603	903	0
846	8	0	0	0	0	0	0	200	300	0	0	0	0	0	0	0	200	903	0	0	0	0	0	0	0	603	903	0
846	9	0	0	0	0	0	0	200	300	0	0	0	0	0	0	0	200	903	0	0	0	0	0	0	0	603	903	0
847	0	0	0	0	0	0	0	200	300	0	0	0	0	0	0	0	200	903	0	0	0	0	0	0	0	603	903	0
847	1	0	0	0	0	0	0	200	300	0	0	0	0	0	0	0	200	903	0	0	0	0	0	0	0	603	903	0
847	2	0	0	0	0	0	0	200	300	0	0	0	0	0	0	0	200	903	0	0	0	0	0	0	0	603	903	0
847	3	0	0	0	0	0	0	200	300	0	0	0	0	0	0	0	200	903	0	0	0	0	0	0	0	603	903	0
847	4	0	0	0	0	0	0	200	300	0	0	0	0	0	0	0	200	903	0	0	0	0	0	0	0	603	903	0
847	5	0	0	0	0	0	0	200	300	0	0	0	0	0	0	0	200	903	0	0	0	0	0	0	0	603	903	0
847	6	0	0	0	0	0	0	200	300	0	0	0	0	0	0	0	200	903	0	0	0	0	0	0	0	603	903	0
847	7	0	0	0	0	0	0	200	300	0	0	0	0	0	0	0	200	903	0	0	0	0	0	0	0	603	903	0
847	8	0	0	0	0	0	0	200	300	0	0	0	0	0	0	0	200	903	0	0	0	0	0	0	0	603	903	0
847	9	0	0	0	0	0	0	200	300	0	0	0	0	0	0	0	200	903	0	0	0	0	0	0	0	603	903	0
848	0	0	0	0	0	0	0	200	300	0	0	0	0	0	0	0	200	903	0	0	0	0	0	0	0	603	903	0
848	1	0	0	0	0	0	0	200	300	0	0	0	0	0	0	0	200	903	0	0	0	0	0	0	0	603	903	0
848	2	0	0	0	0	0	0	200	300	0	0	0	0	0	0	0	200	903	0	0	0	0	0	0	0	603	903	0
848	3	0	0	0	0	0	0	200	300	0	0	0	0	0	0	0	200	903	0	0	0	0	0	0	0	603	903	0
848	4	0	0	0	0	0	0	200	300	0	0	0	0	0	0	0	200	903	0	0	0	0	0	0	0	603	903	0
848	5	0	0	0	0	0	0	200	300	0	0	0	0	0	0	0	200	903	0	0	0	0	0	0	0	603	903	0
848	6	0	0	0	0	0	0	200	300	0	0	0	0	0	0	0	200	903	0	0	0	0	0	0	0	603	903	0
848	7	0	0	0	0	0	0	200	300	0	0	0	0	0	0	0	200	903	0	0	0	0	0	0	0	603	903	0
848	8	0	0	0	0	0	0	200	300	0	0	0	0	0	0	0	200	903	0	0	0	0	0	0	0	603	903	0
848	9	0	0	0	0	0	0	200	300	0	0	0	0	0	0	0	200	903	0	0	0	0	0	0	0	603	903	0
849	0	0	0	0	0	0	0	200	300	0	0	0	0	0	0	0	200	903	0	0	0	0	0	0	0	603	903	0
849	1	0	0	0	0	0	0	200	300	0	0	0	0	0	0	0	200	903	0	0	0	0	0	0	0	603	903	0
849	2	0	0	0	0	0	0	200	300	0	0	0	0	0	0	0	200	903	0	0	0	0	0	0	0	603	903	0
849	3	0	0	0	0	0	0	200	300	0	0	0	0	0	0	0	200	903	0	0	0	0	0	0	0	603	903	0
849	4	0	0	0	0	0	0	200	300	0	0	0	0	0	0	0	200	903	0	0	0	0	0	0	0	603	903	0
849	5	0	0	0	0	0	0	200	300	0	0	0	0	0	0	0	200	903	0	0	0	0	0	0	0	603	903	0
849	6	0	0	0	0	0	0	200	300	0	0	0	0	0	0	0	200	903	0	0	0	0	0	0	0	603	903	0
849	7	0	0	0	0	0	0	200	300	0	0	0	0	0	0	0	200	903	0	0	0	0	0	0	0	603	903	0
849	8	0	0	0	0	0	0	200	300	0	0	0	0	0	0	0	200	903	0	0	0	0	0	0	0	603	903	0
849	9	0	0	0	0	0	0	200	300	0	0	0	0	0	0	0	200	903	0	0	0	0	0	0	0	603	903	0
850	0	0	0	0	0	0	0	200	300	0	0	0	0	0	0	0	200	903	0	0	0	0	0	0	0	603	903	0
850	1	0	0	0	0	0	0	200	300	0	0	0	0	0	0	0	200	903	0	0	0	0	0	0	0	603	903	0
850	2	0	0	0	0	0	0	200	300	0	0	0	0	0	0	0	200	903	0	0	0	0	0	0	0	603	903	0
850	3	0	0	0	0	0	0	200	300	0	0	0	0	0	0	0	200	903	0	0	0	0	0	0	0	603	903	0
850	4	0	0	0	0	0	0	200	300	0	0	0	0	0	0	0	200	903	0	0	0	0	0	0	0	603	903	0
850	5	0	0	0	0	0	0	200	300	0	0	0	0	0	0	0	200	903	0	0	0	0	0	0	0	603	903	0
850	6	0	0	0	0	0	0	200	300	0	0	0	0	0	0	0	200	903	0	0	0	0	0	0	0	603	903	0
850	7	0	0	0	0	0	0	200	300	0	0	0	0	0	0	0	200	903	0	0	0	0	0	0	0	603	903	0
850	8	0	0	0	0	0	0	200	300	0	0	0	0	0	0	0	200	903	0	0	0	0	0	0	0	603	903	0
850	9	0	0	0	0	0	0	200	300	0	0	0	0	0	0	0	200	903	0	0	0	0	0	0	0	603	903	0
851	0	0	0	0	0	0	0	200	300	0	0	0	0	0	0	0	200	903	0	0	0	0	0	0	0	603	903	0
851	1	0	0	0	0	0	0	200	300	0	0	0	0	0	0	0	200	903	0	0	0	0	0	0	0	603	903	0
851	2	0	0	0	0	0	0	200	300	0	0	0	0	0	0	0	200	903	0	0	0	0	0	0	0	603	903	0
851	3	0	0	0	0	0	0	200	300	0	0	0	0	0	0	0	200	903	0	0	0	0	0	0	0	603	903	0
851	4	0	0	0	0	0	0	200	300	0	0	0	0	0	0	0	200	903	0	0	0	0	0	0	0	603	903	0
851	5	0	0	0	0	0	0	200	300	0	0	0	0	0	0	0	200	903	0	0	0	0	0	0	0	603	903	0
851	6	0	0	0	0	0	0	200	300	0	0	0	0	0	0	0	200	903	0	0	0	0	0	0	0	603	903	0
851	7	0	0	0	0	0	0	200	300	0	0	0	0	0	0	0	200	903	0	0	0	0	0	0	0	603	903	0
851	8	0	0	0	0	0	0	200	300	0	0	0	0	0	0	0	200	903	0	0	0	0	0	0	0	603	903	0
851	9	0	0	0	0	0	0	200	300	0	0	0	0	0	0	0	200	903	0	0	0	0	0	0	0	603	903	0
852	0	0	0	0	0	0	0	200	300	0	0	0	0	0	0	0	200	903	0	0	0	0	0	0	0	603	903	0
852	1	0	0	0	0	0	0	200	300	0	0	0	0	0	0	0	200	903	0	0	0	0	0	0	0	603	903	0
852	2	0	0	0	0	0	0	200	300	0	0	0	0	0	0	0	200	903	0	0	0	0	0	0	0	603	903	0
852	3	0	0	0	0	0	0	200	300	0	0	0	0	0	0	0	200	903	0	0	0	0	0	0	0	603	903	0
852	4	0	0	0	0	0	0	200	300	0	0	0	0	0	0	0	200	903	0	0	0	0	0	0	0	603	903	0
852	5	0	0	0	0	0	0	200	300	0	0	0	0	0	0	0	200	903	0	0	0	0	0	0	0	603	903	0
852	6	0	0	0	0	0	0	200	300	0	0	0	0	0	0	0	200	903	0	0	0	0	0	0	0	603	903	0
852	7	0	0	0	0	0	0	200	300	0	0	0	0	0	0	0	200	903	0	0	0	0	0	0	0	603	903	0
852	8	0	0	0	0	0	0	200	300	0	0	0	0	0	0	0	200	903	0	0	0	0	0	0	0	603	903	0
852	9	0	0	0	0	0	0	200	300	0	0	0	0	0	0	0	200	903	0	0	0	0	0	0	0	603	903	0
853	0	0	0	0	0	0	0	200	300	0	0	0	0	0	0	0	200	903	0	0	0	0	0	0	0	603	903	0
853	1	0	0	0	0	0	0	200	300	0	0	0	0	0	0	0	200	903	0	0	0	0	0	0	0	603	903	0
853	2	0	0	0	0	0	0	200	300	0	0	0	0	0	0	0	200	903	0	0	0	0	0	0	0	603	903	0
853	3	0	0	0	0	0	0	200	300	0	0	0	0	0	0	0	200	903	0	0	0	0	0	0	0	603	903	0
853	4	0	0	0	0	0	0	200	300	0	0	0	0	0	0	0	200	903	0	0	0	0	0	0	0	603	903	0
853	5	0	0	0	0	0	0	200	300	0	0	0	0	0	0	0	200	903	0	0	0	0	0	0	0	603	903	0
853	6	0	0	0	0	0	0	200	300	0	0	0	0	0	0	0	200	903	0	0	0	0	0	0	0	603	903	0
853	7	0	0	0	0	0	0	200	300	0	0	0	0	0	0	0	200	903	0	0	0	0	0	0	0	603	903	0
853	8	0	0	0	0	0	0	200	300	0	0	0	0	0	0	0	200	903	0	0	0	0	0	0	0	603	903	0
853	9	0	0	0	0	0	0	200	300	0	0	0	0	0	0	0	200	903	0	0	0	0	0	0	0	603	903	0
854	0	0	0	0	0	0	0	200	300	0	0	0	0	0	0	0	200	903	0	0	0	0	0	0	0	603	903	0
854	1	0	0	0	0	0	0	200	300	0	0	0	0	0	0	0	200	903	0	0	0	0	0	0	0	603	903	0
854	2	0	0	0	0	0	0	200	300	0	0	0	0	0	0	0	200	903	0	0	0	0	0	0	0	603	903	0
854	3	0	0	0	0	0	0	200	300	0	0	0	0	0	0	0	200	903	0	0	0	0	0	0	0	603	903	0
854	4	0	0	0	0	0	0	200	300	0	0	0	0	0	0	0	200	903	0	0	0	0	0	0	0	603	903	0
854	5	0	0	0	0	0	0	200	300	0	0	0	0	0	0	0	200	903	0	0	0	0	0	0	0	603	903	0
854	6	0	0	0	0	0	0	200	300	0	0	0	0	0	0	0	200	903	0	0	0	0	0	0	0	603	903	0
854	7	0	0	0	0	0	0	200	300	0	0	0	0	0	0	0	200	903	0	0	0	0	0	0	0	603	903	0
854	8	0	0	0	0	0	0	200	300	0	0	0	0	0	0	0	200	903	0	0	0	0	0	0	0	603	903	0
854	9	0	0	0	0	0	0	200	300	0	0	0	0	0	0	0	200	903	0	0	0	0	0	0	0	603	903	0
855	0	0	0	0	0	0	0	200	300	0	0	0	0	0	0	0	200	903	0	0	0	0	0	0	0	603	903	0
855	1	0	0	0	0	0	0	200	300	0	0	0	0	0	0	0	200	903	0	0	0	0	0	0	0	603	903	0
855	2	0	0	0	0	0	0	200	300	0	0	0	0	0	0	0	200	903	0	0	0	0	0	0	0	603	903	0
855	3	0	0	0	0	0	0	200	300	0	0	0	0	0	0	0	200	903	0	0	0	0	0	0	0	603	903	0
855	4	0	0	0	0	0	0	200	300	0	0	0	0	0	0	0	200	903	0	0	0	0	0	0	0	603	903	0
855	5	0	0	0	0	0	0	200	300	0	0	0	0	0	0	0	200	903	0	0	0	0	0	0	0	603	903	0
855	6	0	0	0	0	0	0	200	300	0	0	0	0	0	0	0	200	903	0	0	0	0	0	0	0	603	903	0
855	7	0	0	0	0	0	0	200	300	0	0	0	0	0	0	0	200	903	0	0	0	0	0	0	0	603	903	0
855	8	0	0	0	0	0	0	200	300	0	0	0	0	0	0	0	200	903	0	0	0	0	0	0	0	603	903	0
855	9	0	0	0	0	0	0	200	300	0	0	0	0	0	0	0	200	903	0	0	0	0	0	0	0	603	903	0
856	0	0	0	0	0	0	0	200	300	0	0	0	0	0	0	0	200	903	0	0	0	0	0	0	0	603	903	0
856	1	0	0	0	0	0	0	200	300	0	0	0	0	0	0	0	200	903	0	0	0	0	0	0	0	603	903	0
856	2	0	0	0	0	0	0	200	300	0	0	0	0	0	0	0	200	903	0	0	0	0	0	0	0	603	903	0
856	3	0	0	0	0	0	0	200	300	0	0	0	0	0	0	0	200	903	0	0	0	0	0	0	0	603	903	0
856	4	0	0	0	0	0	0	200	300	0	0	0	0	0	0	0	200	903	0	0	0	0	0	0	0	603	903	0
856	5	0	0	0	0	0	0	200	300	0	0	0	0	0	0	0	200	903	0	0	0	0	0	0	0	603	903	0
856	6	0	0	0	0	0	0	200	300	0	0	0	0	0	0	0	200	903	0	0	0	0	0	0	0	603	903	0
856	7	0	0	0	0	0	0	200	300	0	0	0	0	0	0	0	200	903	0	0	0	0	0	0	0	603	903	0
856	8	0	0	0	0	0	0	200	300	0	0	0	0	0	0	0	200	903	0	0	0	0	0	0	0	603	903	0
856	9	0	0	0	0	0	0	200	300	0	0	0	0	0	0	0	200	903	0	0	0	0	0	0	0	603	903	0
857	0	0	0	0	0	0	0	200	300	0	0	0	0	0	0	0	200	903	0	0	0	0	0	0	0	603	903	0
857	1	0	0	0	0	0	0	200	300	0	0	0	0	0	0	0	200	903	0	0	0	0	0	0	0	603	903	0
857	2	0	0	0	0	0	0	200	300	0	0	0	0	0	0	0	200	903	0	0	0	0	0	0	0	603	903	0
857	3	0	0	0	0	0	0	200	300	0	0	0	0	0	0	0	200	903	0	0	0	0	0	0	0	603	903	0
857	4	0	0	0	0	0	0	200	300	0	0	0	0	0	0	0	200	903	0	0	0	0	0	0	0	603	903	0
857	5	0	0	0	0	0	0	200	300	0	0	0	0	0	0	0	200	903	0	0	0	0	0	0	0	603	903	0
857	6	0	0	0	0	0	0	200	300	0	0	0	0	0	0	0	200	903	0	0	0	0	0	0	0	603	903	0
857	7	0	0	0	0	0	0	200	300	0	0	0	0	0	0	0	200	903	0	0	0	0	0	0	0	603	903	0
857	8	0	0	0	0	0	0	200	300	0	0	0	0	0	0	0	200	903	0	0	0	0	0	0	0	603	903	0
857	9	0	0	0	0	0	0	200	300	0	0	0	0	0	0	0	200	903	0	0	0	0	0	0	0	603	903	0
858	0	0	0	0	0	0	0	200	300	0	0	0	0	0	0	0	200	903	0	0	0	0	0	0	0	603	903	0
858	1	0	0	0	0	0	0	200	300	0	0	0	0	0	0	0	200	903	0	0	0	0	0	0	0	603	903	0
858	2	0	0	0	0	0	0	200	300	0	0	0	0	0	0	0	200	903	0	0	0	0	0	0	0	603	903	0
858	3	0	0	0	0	0	0	200	300	0	0	0	0	0	0	0	200	903	0	0	0	0	0	0	0	603	903	0
858	4	0	0	0	0	0	0	200	300	0	0	0	0	0	0	0	200	903	0	0	0	0	0	0	0	603	903	0
858	5	0	0	0	0	0	0	200	300	0	0	0	0	0	0	0	200	903	0	0	0	0	0	0	0	603	903	0
858	6	0	0	0	0	0	0	200	300	0	0	0	0	0	0	0	200	903	0	0	0	0	0	0	0	603	903	0
858	7	0	0	0	0	0	0	200	300	0	0	0	0	0	0	0	200	903	0	0	0	0	0	0	0	603	903	0
858	8	0	0	0	0	0	0	200	300	0	0	0	0	0	0	0	200	903	0	0	0	0	0	0	0	603	903	0
858	9	0	0	0	0	0	0	200	300	0	0	0	0	0	0	0	200	903	0	0	0	0	0	0	0	603	903	0
859	0	0	0	0	0	0	0	200	300	0	0	0	0	0	0	0	200	903	0	0	0	0	0	0	0	603	903	0
859	1	0	0	0	0	0	0	200	300	0	0	0	0	0	0	0	200	903	0	0	0	0	0	0	0	603	903	0
859	2	0	0	0	0	0	0	200	300	0	0	0	0	0	0	0	200	903	0	0	0	0	0	0	0	603	903	0
859	3	0	0	0	0	0	0	200	300	0	0	0	0	0	0	0	200	903	0	0	0	0	0	0	0	603	903	0
859	4	0	0	0	0	0	0	200	300	0	0	0	0	0	0	0	200	903	0	0	0	0	0	0	0	603	903	0
859	5	0	0	0	0	0	0	200	300	0	0	0	0	0	0	0	200	903	0	0	0	0	0	0	0	603	903	0
859	6	0	0	0	0	0	0	200	300	0	0	0	0	0	0	0	200	903	0	0	0	0	0	0	0	603	903	0
859	7	0	0	0	0	0	0	200	300	0	0	0	0	0	0	0	200	903	0	0	0	0	0	0	0	603	903	0
859	8	0	0	0	0	0	0	200	300	0	0	0	0	0	0	0	200	903	0	0	0	0	0	0	0	603	903	0
859	9	0	0	0	0	0	0	200	300	0	0	0	0	0	0	0	200	903	0	0	0	0	0	0	0	603	903	0
860	0	0	0	0	0	0	0	200	300	0	0	0	0	0	0	0	200	903	0	0	0	0	0	0	0	603	903	0
860	1	0	0	0	0	0	0	200	300	0	0	0	0	0	0	0	200	903	0	0	0	0	0	0	0	603	903	0
860	2	0	0	0	0	0	0	200	300	0	0	0	0	0	0	0	200	903	0	0	0	0	0	0	0	603	903	0
860	3	0	0	0	0	0	0	200	300	0	0	0	0	0	0	0	200	903	0	0	0	0	0	0	0	603	903	0
860	4	0	0	0	0	0	0	200	300	0	0	0	0	0	0	0	200	903	0	0	0	0	0	0	0	603	903	0
860	5	0	0	0	0	0	0	200	300	0	0	0	0	0	0	0	200	903	0	0	0	0	0	0	0	603	903	0
860	6	0	0	0	0	0	0	200	300	0	0	0	0	0	0	0	200	903	0	0	0	0	0	0	0	603	903	0
860	7	0	0	0	0	0	0	200	300	0	0	0	0	0	0	0	200	903	0	0	0	0	0	0	0	603	903	0
860	8	0	0	0	0	0	0	200	300	0	0	0	0	0	0	0	200	903	0	0	0	0	0	0	0	603	903	0
860	9	0	0	0	0	0	0	200	300	0	0	0	0	0	0	0	200	903	0	0	0	0	0	0	0	603	903	0
861	0	0	0	0	0	0	0	200	300	0	0	0	0	0	0	0	200	903	0	0	0	0	0	0	0	603	903	0
861	1	0	0	0	0	0	0	200	300	0	0	0	0	0	0	0	200	903	0	0	0	0	0	0	0	603	903	0
861	2	0	0	0	0	0	0	200	300	0	0	0	0	0	0	0	200	903	0	0	0	0	0	0	0	603	903	0
861	3	0	0	0	0	0	0	200	300	0	0	0	0	0	0	0	200	903	0	0	0	0	0	0	0	603	903	0
861	4	0	0	0	0	0	0	200	300	0	0	0	0	0	0	0	200	903	0	0	0	0	0	0	0	603	903	0
861	5	0	0	0	0	0	0	200	300	0	0	0	0	0	0	0	200	903	0	0	0	0	0	0	0	603	903	0
861	6	0	0	0	0	0	0	200	300	0	0	0	0	0	0	0	200	903	0	0	0	0	0	0	0	603	903	0
861	7	0	0	0	0	0	0	200	300	0	0	0	0	0	0	0	200	903	0	0	0	0	0	0	0	603	903	0
861	8	0	0	0	0	0	0	200	300	0	0	0	0	0	0	0	200	903	0	0	0	0	0	0	0	603	903	0
861	9	0	0	0	0	0	0	200	300	0	0	0	0	0	0	0	200	903	0	0	0	0	0	0	0	603	903	0
862	0	0	0	0	0	0	0	200	300	0	0	0	0	0	0	0	200	903	0	0	0	0	0	0	0	603	903	0
862	1	0	0	0	0	0	0	200	300	0	0	0	0	0	0	0	200	903	0	0	0	0	0	0	0	603	903	0
862	2	0	0	0	0	0	0	200	300	0	0	0	0	0	0	0	200	903	0	0	0	0	0	0	0	603	903	0
862	3	0	0	0	0	0	0	200	300	0	0	0	0	0	0	0	200	903	0	0	0	0	0	0	0	603	903	0
862	4	0	0	0	0	0	0	200	300	0	0	0	0	0	0	0	200	903	0	0	0	0	0	0	0	603	903	0
862	5	0	0	0	0	0	0	200	300	0	0	0	0	0	0	0	200	903	0	0	0	0	0	0	0	603	903	0
862	6	0	0	0	0	0	0	200	300	0	0	0	0	0	0	0	200	903	0	0	0	0	0	0	0	603	903	0
862	7	0	0	0	0	0	0	200	300	0	0	0	0	0	0	0	200	903	0	0	0	0	0	0	0	603	903	0
862	8	0	0	0	0	0	0	200	300	0	0	0	0	0	0	0	200	903	0	0	0	0	0	0	0	603	903	0
862	9	0	0	0	0	0	0	200	300	0	0	0	0	0	0	0	200	903	0	0	0	0	0	0	0	603	903	0
863	0	0	0	0	0	0	0	200	300	0	0	0	0	0	0	0	200	903	0	0	0	0	0	0	0	603	903	0
863	1	0	0	0	0	0	0	200	300	0	0	0	0	0	0	0	200	903	0	0	0	0	0	0	0	603	903	0
863	2	0	0	0	0	0	0	200	300	0	0	0	0	0	0	0	200	903	0	0	0	0	0	0	0	603	903	0
863	3	0	0	0	0	0	0	200	300	0	0	0	0	0	0	0	200	903	0	0	0	0	0	0	0	603	903	0
863	4	0	0	0	0	0	0	200	300	0	0	0	0	0	0	0	200	903	0	0	0	0	0	0	0	603	903	0
863	5	0	0	0	0	0	0	200	300	0	0	0	0	0	0	0	200	903	0	0	0	0	0	0	0	603	903	0
863	6	0	0	0	0	0	0	200	300	0	0	0	0	0	0	0	200	903	0	0	0	0	0	0	0	603	903	0
863	7	0	0	0	0	0	0	200	300	0	0	0	0	0	0	0	200	903	0	0	0	0	0	0	0	603	903	0
863	8	0	0	0	0	0	0	200	300	0	0	0	0	0	0	0	200	903	0	0	0	0	0	0	0	603	903	0
863	9	0	0	0	0	0	0	200	300	0	0	0	0	0	0	0	200	903	0	0	0	0	0	0	0	603	903	0
864	0	0	0	0	0	0	0	200	300	0	0	0	0	0	0	0	200	903	0	0	0	0	0	0	0	603	903	0
864	1	0	0	0	0	0	0	200	300	0	0	0	0	0	0	0	200	903	0	0	0	0	0	0	0	603	903	0
864	2	0	0	0	0	0	0	200	300	0	0	0	0	0	0	0	200	903	0	0	0	0	0	0	0	603	903	0
864	3	0	0	0	0	0	0	200	300	0	0	0	0	0	0	0	200	903	0	0	0	0	0	0	0	603	903	0
864	4	0	0	0	0	0	0	200	300	0	0	0	0	0	0	0	200	903	0	0	0	0	0	0	0	603	903	0
864	5	0	0	0	0	0	0	200	300	0	0	0	0	0	0	0	200	903	0	0	0	0	0	0	0	603	903	0
864	6	0	0	0	0	0	0	200	300	0	0	0	0	0	0	0	200	903	0	0	0	0	0	0	0	603	903	0
864	7	0	0	0	0	0	0	200	300	0	0	0	0	0	0	0	200	903	0	0	0	0	0	0	0	603	903	0
864	8	0	0	0	0	0	0	200	300	0	0	0	0	0	0	0	200	903	0	0	0	0	0	0	0	603	903	0
864	9	0	0	0	0	0	0	200	300	0	0	0	0	0	0	0	200	903	0	0	0	0	0	0	0	603	903	0
865	0	0	0	0	0	0	0	200	300	0	0	0	0	0	0	0	200	903	0	0	0	0	0	0	0	603	903	0
865	1	0	0	0	0	0	0	200	300	0	0	0	0	0	0	0	200	903	0	0	0	0	0	0	0	603	903	0
865	2	0	0	0	0	0	0	200	300	0	0	0	0	0	0	0	200	903	0	0	0	0	0	0	0	603	903	0
865	3	0	0	0	0	0	0	200	300	0	0	0	0	0	0	0	200	903	0	0	0	0	0	0	0	603	903	0
865	4	0	0	0	0	0	0	200	300	0	0	0	0	0	0	0	200	903	0	0	0	0	0	0	0	603	903	0
865	5	0	0	0	0	0	0	200	300	0	0	0	0	0	0	0	200	903	0	0	0	0	0	0	0	603	903	0
865	6	0	0	0	0	0	0	200	300	0	0	0	0	0	0	0	200	903	0	0	0	0	0	0	0	603	903	0
865	7	0	0	0	0	0	0	200	300	0	0	0	0	0	0	0	200	903	0	0	0	0	0	0	0	603	903	0
865	8	0	0	0	0	0	0	200	300	0	0	0	0	0	0	0	200	903	0	0	0	0	0	0	0	603	903	0
865	9	0	0	0	0	0	0	200	300	0	0	0	0	0	0	0	200	903	0	0	0	0	0	0	0	603	903	0
866	0	0	0	0	0	0	0	200	300	0	0	0	0	0	0	0	200	903	0	0	0	0	0	0	0	603	903	0
866	1	0	0	0	0	0	0	200	300	0	0	0	0	0	0	0	200	903	0	0	0	0	0	0	0	603	903	0
866	2	0	0	0	0	0	0	200	300	0	0	0	0	0	0	0	200	903	0	0	0	0	0	0	0	603	903	0
866	3	0	0	0	0	0	0	200	300	0	0	0	0	0	0	0	200	903	0	0	0	0	0	0	0	603	903	0
866	4	0	0	0	0	0	0	200	300	0	0	0	0	0	0	0	200	903	0	0	0	0	0	0	0	603	903	0
866	5	0	0	0	0	0	0	200	300	0	0	0	0	0	0	0	200	903	0	0	0	0	0	0	0	603	903	0
866	6	0	0	0	0	0	0	200	300	0	0	0	0	0	0	0	200	903	0	0	0	0	0	0	0	603	903	0
866	7	0	0	0	0	0	0	200	300	0	0	0	0	0	0	0	200	903	0	0	0	0	0	0	0	603	903	0
866	8	0	0	0	0	0	0	200	300	0	0	0	0	0	0	0	200	903	0	0	0	0	0	0	0	603	903	0
866	9	0	0	0	0	0	0	200	300	0	0	0	0	0	0	0	200	903	0	0	0	0	0	0	0	603	903	0
867	0	0	0	0	0	0	0	200	300	0	0	0	0	0	0	0	200	903	0	0	0	0	0	0	0	603	903	0
867	1	0	0	0	0	0	0	200	300	0	0	0	0	0	0	0	200	903	0	0	0	0	0	0	0	603	903	0
867	2	0	0	0	0	0	0	200	300	0	0	0	0	0	0	0	200	903	0	0	0	0	0	0	0	603	903	0
867	3	0	0	0	0	0	0	200	300	0	0	0	0	0	0	0	200	903	0	0	0	0	0	0	0	603	903	0
867	4	0	0	0	0	0	0	200	300	0	0	0	0	0	0	0	200	903	0	0	0	0	0	0	0	603	903	0
867	5	0	0	0	0	0	0	200	300	0	0	0	0	0	0	0	200	903	0	0	0	0	0	0	0	603	903	0
867	6	0	0	0	0	0	0	200	300	0	0	0	0	0	0	0	200	903	0	0	0	0	0	0	0	603	903	0
867	7	0	0	0	0	0	0	200	300	0	0	0	0	0	0	0	200	903	0	0	0	0	0	0	0	603	903	0
867	8	0	0	0	0	0	0	200	300	0	0	0	0	0	0	0	200	903	0	0	0	0	0	0	0	603	903	0
867	9	0	0	0	0	0	0	200	300	0	0	0	0	0	0	0	200	903	0	0	0	0	0	0	0	603	903	0
868	0	0	0	0	0	0	0	200	300	0	0	0	0	0	0	0	200	903	0	0	0	0	0	0	0	603	903	0
868	1	0	0	0	0	0	0	200	300	0	0	0	0	0	0	0	200	903	0	0	0	0	0	0	0	603	903	0
868	2	0	0	0	0	0	0	200	300	0	0	0	0	0	0	0	200	903	0	0	0	0	0	0	0	603	903	0
868	3	0	0	0	0	0	0	200	300	0	0	0	0	0	0	0	200	903	0	0	0	0	0	0	0	603	903	0
868	4	0	0	0	0	0	0	200	300	0	0	0	0	0	0	0	200	903	0	0	0	0	0	0	0	603	903	0
868	5	0	0	0	0	0	0	200	300	0	0	0	0	0	0	0	200	903	0	0	0	0	0	0	0	603	903	0
868	6	0	0	0	0	0	0	200	300	0	0	0	0	0	0	0	200	903	0	0	0	0	0	0	0	603	903	0
868	7	0	0	0	0	0	0	200	300	0	0	0	0	0	0	0	200	903	0	0	0	0	0	0	0	603	903	0
868	8	0	0	0	0	0	0	200	300	0	0	0	0	0	0	0	200	903	0	0	0	0	0	0	0	603	903	0
868	9	0	0	0	0	0	0	200	300	0	0	0	0	0	0	0	200	903	0	0	0	0	0	0	0	603	903	0
869	0	0	0	0	0	0	0	200	300	0	0	0	0	0	0	0	200	903	0	0	0	0	0	0	0	603	903	0
869	1	0	0	0	0	0	0	200	300	0	0	0	0	0	0	0	200	903	0	0	0	0	0	0	0	603	903	0
869	2	0	0	0	0	0	0	200	300	0	0	0	0	0	0	0	200	903	0	0	0	0	0	0	0	603	903	0
869	3	0	0	0	0	0	0	200	300	0	0	0	0	0	0	0	200	903	0	0	0	0	0	0	0	603	903	0
869	4	0	0	0	0	0	0	200	300	0	0	0	0	0	0	0	200	903	0	0	0	0	0	0	0	603	903	0
869	5	0	0	0	0	0	0	200	300	0	0	0	0	0	0	0	200	903	0	0	0	0	0	0	0	603	903	0
869	6	0	0	0	0	0	0	200	300	0	0	0	0	0	0	0	200	903	0	0	0	0	0	0	0	603	903	0
869	7	0	0	0	0	0	0	200	300	0	0	0	0	0	0	0	200	903	0	0	0	0	0	0	0	603	903	0
869	8	0	0	0	0	0	0	200	300	0	0	0	0	0	0	0	200	903	0	0	0	0	0	0	0	603	903	0
869	9	0	0	0	0	0	0	200	300	0	0	0	0	0	0	0	200	903	0	0	0	0	0	0	0	603	903	0
870	0	0	0	0	0	0	0	200	300	0	0	0	0	0	0	0	200	903	0	0	0	0	0	0	0	603	903	0
870	1	0	0	0	0	0	0	200	300	0	0	0	0	0	0	0	200	903	0	0	0	0	0	0	0	603	903	0
870	2	0	0	0	0	0	0	200	300	0	0	0	0	0	0	0	200	903	0	0	0	0	0	0	0	603	903	0
870	3	0	0	0	0	0	0	200	300	0	0	0	0	0	0	0	200	903	0	0	0	0	0	0	0	603	903	0
870	4	0	0	0	0	0	0	200	300	0	0	0	0	0	0	0	200	903	0	0	0	0	0	0	0	603	903	0
870	5	0	0	0	0	0	0	200	300	0	0	0	0	0	0	0	200	903	0	0	0	0	0	0	0	603	903	0
870	6	0	0	0	0	0	0	200	300	0	0	0	0	0	0	0	200	903	0	0	0	0	0	0	0	603	903	0
870	7	0	0	0	0	0	0	200	300	0	0	0	0	0	0	0	200	903	0	0	0	0	0	0	0	603	903	0
870	8	0	0	0	0	0	0	200	300	0	0	0	0	0	0	0	200	903	0	0	0	0	0	0	0	603	903	0
870	9	0	0	0	0	0	0	200	300	0	0	0	0	0	0	0	200	903	0	0	0	0	0	0	0	603	903	0
871	0	0	0	0	0	0	0	200	300	0	0	0	0	0	0	0	200	903	0	0	0	0	0	0	0	603	903	0
871	1	0	0	0	0	0	0	200	300	0	0	0	0	0	0	0	200	903	0	0	0	0	0	0	0	603	903	0
871	2	0	0	0	0	0	0	200	300	0	0	0	0	0	0	0	200	903	0	0	0	0	0	0	0	603	903	0
871	3	0	0	0	0	0	0	200	300	0	0	0	0	0	0	0	200	903	0	0	0	0	0	0	0	603	903	0
871	4	0	0	0	0	0	0	200	300	0	0	0	0	0	0	0	200	903	0	0	0	0	0	0	0	603	903	0
871	5	0	0	0	0	0	0	200	300	0	0	0	0	0	0	0	200	903	0	0	0	0	0	0	0	603	903	0
871	6	0	0	0	0	0	0	200	300	0	0	0	0	0	0	0	200	903	0	0	0	0	0	0	0	603	903	0
871	7	0	0	0	0	0	0	200	300	0	0	0	0	0	0	0	200	903	0	0	0	0	0	0	0	603	903	0
871	8	0	0	0	0	0	0	200	300	0	0	0	0	0	0	0	200	903	0	0	0	0	0	0	0	603	903	0
871	9	0	0	0	0	0	0	200	300	0	0	0	0	0	0	0	200	903	0	0	0	0	0	0	0	603	903	0
872	0	0	0	0	0	0	0	200	300	0	0	0	0	0	0	0	200	903	0	0	0	0	0	0	0	603	903	0
872	1	0	0	0	0	0	0	200	300	0	0	0	0	0	0	0	200	903	0	0	0	0	0	0	0	603	903	0
872	2	0	0	0	0	0	0	200	300	0	0	0	0	0	0	0	200	903	0	0	0	0	0	0	0	603	903	0
872	3	0	0	0	0	0	0	200	300	0	0	0	0	0	0	0	200	903	0	0	0	0	0	0	0	603	903	0
872	4	0	0	0	0	0	0	200	300	0	0	0	0	0	0	0	200	903	0	0	0	0	0	0	0	603	903	0
872	5	0	0	0	0	0	0	200	300	0	0	0	0	0	0	0	200	903	0	0	0	0	0	0	0	603	903	0
872	6	0	0	0	0	0	0	200	300	0	0	0	0	0	0	0	200	903	0	0	0	0	0	0	0	603	903	0
872	7	0	0	0	0	0	0	200	300	0	0	0	0	0	0	0	200	903	0	0	0	0	0	0	0	603	903	0
872	8	0	0	0	0	0	0	200	300	0	0	0	0	0	0	0	200	903	0	0	0	0	0	0	0	603	903	0
872	9	0	0	0	0	0	0	200	300	0	0	0	0	0	0	0	200	903	0	0	0	0	0	0	0	603	903	0
873	0	0	0	0	0	0	0	200	300	0	0	0	0	0	0	0	200	903	0	0	0	0	0	0	0	603	903	0
873	1	0	0	0	0	0	0	200	300	0	0	0	0	0	0	0	200	903	0	0	0	0	0	0	0	603	903	0
873	2	0	0	0	0	0	0	200	300	0	0	0	0	0	0	0	200	903	0	0	0	0	0	0	0	603	903	0
873	3	0	0	0	0	0	0	200	300	0	0	0	0	0	0	0	200	903	0	0	0	0	0	0	0	603	903	0
873	4	0	0	0	0	0	0	200	300	0	0	0	0	0	0	0	200	903	0	0	0	0	0	0	0	603	903	0
873	5	0	0	0	0	0	0	200	300	0	0	0	0	0	0	0	200	903	0	0	0	0	0	0	0	603	903	0
873	6	0	0	0	0	0	0	200	300	0	0	0	0	0	0	0	200	903	0	0	0	0	0	0	0	603	903	0
873	7	0	0	0	0	0	0	200	300	0	0	0	0	0	0	0	200	903	0	0	0	0	0	0	0	603	903	0
873	8	0	0	0	0	0	0	200	300	0	0	0	0	0	0	0	200	903	0	0	0	0	0	0	0	603	903	0
873	9	0	0	0	0	0	0	200	300	0	0	0	0	0	0	0	200	903	0	0	0	0	0	0	0	603	903	0
874	0	0	0	0	0	0	0	200	300	0	0	0	0	0	0	0	200	903	0	0	0	0	0	0	0	603	903	0
874	1	0	0	0	0	0	0	200	300	0	0	0	0	0	0	0	200	903	0	0	0	0	0	0	0	603	903	0
874	2	0	0	0	0	0	0	200	300	0	0	0	0	0	0	0	200	903	0	0	0	0	0	0	0	603	903	0
874	3	0	0	0	0	0	0	200	300	0	0	0	0	0	0	0	200	903	0	0	0	0	0	0	0	603	903	0
874	4	0	0	0	0	0	0	200	300	0	0	0	0	0	0	0	200	903	0	0	0	0	0	0	0	603	903	0
874	5	0	0	0	0	0	0	200	300	0	0	0	0	0	0	0	200	903	0	0	0	0	0	0	0	603	903	0
874	6	0	0	0	0	0	0	200	300	0	0	0	0	0	0	0	200	903	0	0	0	0	0	0	0	603	903	0
874	7	0	0	0	0	0	0	200	300	0	0	0	0	0	0	0	200	903	0	0	0	0	0	0	0	603	903	0
874	8	0	0	0	0	0	0	200	300	0	0	0	0	0	0	0	200	903	0	0	0	0	0	0	0	603	903	0
874	9	0	0	0	0	0	0	200	300	0	0	0	0	0	0	0	200	903	0	0	0	0	0	0	0	603	903	0
875	0	0	0	0	0	0	0	200	300	0	0	0	0	0	0	0	200	903	0	0	0	0	0	0	0	603	903	0
875	1	0	0	0	0	0	0	200	300	0	0	0	0	0	0	0	200	903	0	0	0	0	0	0	0	603	903	0
875	2	0	0	0	0	0	0	200	300	0	0	0	0	0	0	0	200	903	0	0	0	0	0	0	0	603	903	0
875	3	0	0	0	0	0	0	200	300	0	0	0	0	0	0	0	200	903	0	0	0	0	0	0	0	603	903	0
875	4	0	0	0	0	0	0	200	300	0	0	0	0	0	0	0	200	903	0	0	0	0	0	0	0	603	903	0
875	5	0	0	0	0	0	0	200	300	0	0	0	0	0	0	0	200	903	0	0	0	0	0	0	0	603	903	0
875	6	0	0	0	0	0	0	200	300	0	0	0	0	0	0	0	200	903	0	0	0	0	0	0	0	603	903	0
875	7	0	0	0	0	0	0	200	300	0	0	0	0	0	0	0	200	903	0	0	0	0	0	0	0	603	903	0
875	8	0	0	0	0	0	0	200	300	0	0	0	0	0	0	0	200	903	0	0	0	0	0	0	0	603	903	0
875	9	0	0	0	0	0	0	200	300	0	0	0	0	0	0	0	200	903	0	0	0	0	0	0	0	603	903	0
876	0	0	0	0	0	0	0	200	300	0	0	0	0	0	0	0	200	903	0	0	0	0	0	0	0	603	903	0
876	1	0	0	0	0	0	0	200	300	0	0	0	0	0	0	0	200	903	0	0	0	0	0	0	0	603	903	0
876	2	0	0	0	0	0	0	200	300	0	0	0	0	0	0	0	200	903	0	0	0	0	0	0	0	603	903	0
876	3	0	0	0	0	0	0	200	300	0	0	0	0	0	0	0	200	903	0	0	0	0	0	0	0	603	903	0
876	4	0	0	0	0	0	0	200	300	0	0	0	0	0	0	0	200	903	0	0	0	0	0	0	0	603	903	0
876	5	0	0	0	0	0	0	200	300	0	0	0	0	0	0	0	200	903	0	0	0	0	0	0	0	603	903	0
876	6	0	0	0	0	0	0	200	300	0	0	0	0	0	0	0	200	903	0	0	0	0	0	0	0	603	903	0
876	7	0	0	0	0	0	0	200	300	0	0	0	0	0	0	0	200	903	0	0	0	0	0	0	0	603	903	0
876	8	0	0	0	0	0	0	200	300	0	0	0	0	0	0	0	200	903	0	0	0	0	0	0	0	603	903	0
876	9	0	0	0	0	0	0	200	300	0	0	0	0	0	0	0	200	903	0	0	0	0	0	0	0	603	903	0
877	0	0	0	0	0	0	0	200	300	0	0	0	0	0	0	0	200	903	0	0	0	0	0	0	0	603	903	0
877	1	0	0	0	0	0	0	200	300	0	0	0	0	0	0	0	200	903	0	0	0	0	0	0	0	603	903	0
877	2	0	0	0	0	0	0	200	300	0	0	0	0	0	0	0	200	903	0	0	0	0	0	0	0	603	903	0
877	3	0	0	0	0	0	0	200	300	0	0	0	0	0	0	0	200	903	0	0	0	0	0	0	0	603	903	0
877	4	0	0	0	0	0	0	200	300	0	0	0	0	0	0	0	200	903	0	0	0	0	0	0	0	603	903	0
877	5	0	0	0	0	0	0	200	300	0	0	0	0	0	0	0	200	903	0	0	0	0	0	0	0	603	903	0
877	6	0	0	0	0	0	0	200	300	0	0	0	0	0	0	0	200	903	0	0	0	0	0	0	0	603	903	0
877	7	0	0	0	0	0	0	200	300	0	0	0	0	0	0	0	200	903	0	0	0	0	0	0	0	603	903	0
877	8	0	0	0	0	0	0	200	300	0	0	0	0	0	0	0	200	903	0	0	0	0	0	0	0	603	903	0
877	9	0	0	0	0	0	0	200	300	0	0	0	0	0	0	0	200	903	0	0	0	0	0	0	0	603	903	0
878	0	0	0	0	0	0	0	200	300	0	0	0	0	0	0	0	200	903	0	0	0	0	0	0	0	603	903	0
878	1	0	0	0	0	0	0	200	300	0	0	0	0	0	0	0	200	903	0	0	0	0	0	0	0	603	903	0
878	2	0	0	0	0	0	0	200	300	0	0	0	0	0	0	0	200	903	0	0	0	0	0	0	0	603	903	0
878	3	0	0	0	0	0	0	200	300	0	0	0	0	0	0	0	200	903	0	0	0	0	0	0	0	603	903	0
878	4	0	0	0	0	0	0	200	300	0	0	0	0	0	0	0	200	903	0	0	0	0	0	0	0	603	903	0
878	5	0	0	0	0	0	0	200	300	0	0	0	0	0	0	0	200	903	0	0	0	0	0	0	0	603	903	0
878	6	0	0	0	0	0	0	200	300	0	0	0	0	0	0	0	200	903	0	0	0	0	0	0	0	603	903	0
878	7	0	0	0	0	0	0	200	300	0	0	0	0	0	0	0	200	903	0	0	0	0	0	0	0	603	903	0
878	8	0	0	0	0	0	0	200	300	0	0	0	0	0	0	0	200	903	0	0	0	0	0	0	0	603	903	0
878	9	0	0	0	0	0	0	200	300	0	0	0	0	0	0	0	200	903	0	0	0	0	0	0	0	603	903	0
879	0	0	0	0	0	0	0	200	300	0	0	0	0	0	0	0	200	903	0	0	0	0	0	0	0	603	903	0
879	1	0	0	0	0	0	0	200	300	0	0	0	0	0	0	0	200	903	0	0	0	0	0	0	0	603	903	0
879	2	0	0	0	0	0	0	200	300	0	0	0	0	0	0	0	200	903	0	0	0	0	0	0	0	603	903	0
879	3	0	0	0	0	0	0	200	300	0	0	0	0	0	0	0	200	903	0	0	0	0	0	0	0	603	903	0
879	4	0	0	0	0	0	0	200	300	0	0	0	0	0	0	0	200	903	0	0	0	0	0	0	0	603	903	0
879	5	0	0	0	0	0	0	200	300	0	0	0	0	0	0	0	200	903	0	0	0	0	0	0	0	603	903	0
879	6	0	0	0	0	0	0	200	300	0	0	0	0	0	0	0	200	903	0	0	0	0	0	0	0	603	903	0
879	7	0	0	0	0	0	0	200	300	0	0	0	0	0	0	0	200	903	0	0	0	0	0	0	0	603	903	0
879	8	0	0	0	0	0	0	200	300	0	0	0	0	0	0	0	200	903	0	0	0	0	0	0	0	603	903	0
879	9	0	0	0	0	0	0	200	300	0	0	0	0	0	0	0	200	903	0	0	0	0	0	0	0	603	903	0
880	0	0	0	0	0	0	0	200	300	0	0	0	0	0	0	0	200	903	0	0	0	0	0	0	0	603	903	0
880	1	0	0	0	0	0	0	200	300	0	0	0	0	0	0	0	200	903	0	0	0	0	0	0	0	603	903	0
880	2	0	0	0	0	0	0	200	300	0	0	0	0	0	0	0	200	903	0	0	0	0	0	0	0	603	903	0
880	3	0	0	0	0	0	0	200	300	0	0	0	0	0	0	0	200	903	0	0	0	0	0	0	0	603	903	0
880	4	0	0	0	0	0	0	200	300	0	0	0	0	0	0	0	200	903	0	0	0	0	0	0	0	603	903	0
880	5	0	0	0	0	0	0	200	300	0	0	0	0	0	0	0	200	903	0	0	0	0	0	0	0	603	903	0
880	6	0	0	0	0	0	0	200	300	0	0	0	0	0	0	0	200	903	0	0	0	0	0	0	0	603	903	0
880	7	0	0	0	0	0	0	200	300	0	0	0	0	0	0	0	200	903	0	0	0	0	0	0	0	603	903	0
880	8	0	0	0	0	0	0	200	300	0	0	0	0	0	0	0	200	903	0	0	0	0	0	0	0	603	903	0
880	9	0	0	0	0	0	0	200	300	0	0	0	0	0	0	0	200	903	0	0	0	0	0	0	0	603	903	0
881	0	0	0	0	0	0	0	200	300	0	0	0	0	0	0	0	200	903	0	0	0	0	0	0	0	603	903	0
881	1	0	0	0	0	0	0	200	300	0	0	0	0	0	0	0	200	903	0	0	0	0	0	0	0	603	903	0
881	2	0	0	0	0	0	0	200	300	0	0	0	0	0	0	0	200	903	0	0	0	0	0	0	0	603	903	0
881	3	0	0	0	0	0	0	200	300	0	0	0	0	0	0	0	200	903	0	0	0	0	0	0	0	603	903	0
881	4	0	0	0	0	0	0	200	300	0	0	0	0	0	0	0	200	903	0	0	0	0	0	0	0	603	903	0
881	5	0	0	0	0	0	0	200	300	0	0	0	0	0	0	0	200	903	0	0	0	0	0	0	0	603	903	0
881	6	0	0	0	0	0	0	200	300	0	0	0	0	0	0	0	200	903	0	0	0	0	0	0	0	603	903	0
881	7	0	0	0	0	0	0	200	300	0	0	0	0	0	0	0	200	903	0	0	0	0	0	0	0	603	903	0
881	8	0	0	0	0	0	0	200	300	0	0	0	0	0	0	0	200	903	0	0	0	0	0	0	0	603	903	0
881	9	0	0	0	0	0	0	200	300	0	0	0	0	0	0	0	200	903	0	0	0	0	0	0	0	603	903	0
882	0	0	0	0	0	0	0	200	300	0	0	0	0	0	0	0	200	903	0	0	0	0	0	0	0	603	903	0
882	1	0	0	0	0	0	0	200	300	0	0	0	0	0	0	0	200	903	0	0	0	0	0	0	0	603	903	0
882	2	0	0	0	0	0	0	200	300	0	0	0	0	0	0	0	200	903	0	0	0	0	0	0	0	603	903	0
882	3	0	0	0	0	0	0	200	300	0	0	0	0	0	0	0	200	903	0	0	0	0	0	0	0	603	903	0
882	4	0	0	0	0	0	0	200	300	0	0	0	0	0	0	0	200	903	0	0	0	0	0	0	0	603	903	0
882	5	0	0	0	0	0	0	200	300	0	0	0	0	0	0	0	200	903	0	0	0	0	0	0	0	603	903	0
882	6	0	0	0	0	0	0	200	300	0	0	0	0	0	0	0	200	903	0	0	0	0	0	0	0	603	903	0
882	7	0	0	0	0	0	0	200	300	0	0	0	0	0	0	0	200	903	0	0	0	0	0	0	0	603	903	0
882	8	0	0	0	0	0	0	200	300	0	0	0	0	0	0	0	200	903	0	0	0	0	0	0	0	603	903	0
882	9	0	0	0	0	0	0	200	300	0	0	0	0	0	0	0	200	903	0	0	0	0	0	0	0	603	903	0
883	0	0	0	0	0	0	0	200	300	0	0	0	0	0	0	0	200	903	0	0	0	0	0	0	0	603	903	0
883	1	0	0	0	0	0	0	200	300	0	0	0	0	0	0	0	200	903	0	0	0	0	0	0	0	603	903	0
883	2	0	0	0	0	0	0	200	300	0	0	0	0	0	0	0	200	903	0	0	0	0	0	0	0	603	903	0
883	3	0	0	0	0	0	0	200	300	0	0	0	0	0	0	0	200	903	0	0	0	0	0	0	0	603	903	0
883	4	0	0	0	0	0	0	200	300	0	0	0	0	0	0	0	200	903	0	0	0	0	0	0	0	603	903	0
883	5	0	0	0	0	0	0	200	300	0	0	0	0	0	0	0	200	903	0	0	0	0	0	0	0	603	903	0
883	6	0	0	0	0	0	0	200	300	0	0	0	0	0	0	0	200	903	0	0	0	0	0	0	0	603	903	0
883	7	0	0	0	0	0	0	200	300	0	0	0	0	0	0	0	200	903	0	0	0	0	0	0	0	603	903	0
883	8	0	0	0	0	0	0	200	300	0	0	0	0	0	0	0	200	903	0	0	0	0	0	0	0	603	903	0
883	9	0	0	0	0	0	0	200	300	0	0	0	0	0	0	0	200	903	0	0	0	0	0	0	0	603	903	0
884	0	0	0	0	0	0	0	200	300	0	0	0	0	0	0	0	200	903	0	0	0	0	0	0	0	603	903	0
884	1	0	0	0	0	0	0	200	300	0	0	0	0	0	0	0	200	903	0	0	0	0	0	0	0	603	903	0
884	2	0	0	0	0	0	0	200	300	0	0	0	0	0	0	0	200	903	0	0	0	0	0	0	0	603	903	0
884	3	0	0	0	0	0	0	200	300	0	0	0	0	0	0	0	200	903	0	0	0	0	0	0	0	603	903	0
884	4	0	0	0	0	0	0	200	300	0	0	0	0	0	0	0	200	903	0	0	0	0	0	0	0	603	903	0
884	5	0	0	0	0	0	0	200	300	0	0	0	0	0	0	0	200	903	0	0	0	0	0	0	0	603	903	0
884	6	0	0	0	0	0	0	200	300	0	0	0	0	0	0	0	200	903	0	0	0	0	0	0	0	603	903	0
884	7	0	0	0	0	0	0	200	300	0	0	0	0	0	0	0	200	903	0	0	0	0	0	0	0	603	903	0
884	8	0	0	0	0	0	0	200	300	0	0	0	0	0	0	0	200	903	0	0	0	0	0	0	0	603	903	0
884	9	0	0	0	0	0	0	200	300	0	0	0	0	0	0	0	200	903	0	0	0	0	0	0	0	603	903	0
885	0	0	0	0	0	0	0	200	300	0	0	0	0	0	0	0	200	903	0	0	0	0	0	0	0	603	903	0
885	1	0	0	0	0	0	0	200	300	0	0	0	0	0	0	0	200	903	0	0	0	0	0	0	0	603	903	0
885	2	0	0	0	0	0	0	200	300	0	0	0	0	0	0	0	200	903	0	0	0	0	0	0	0	603	903	0
885	3	0	0	0	0	0	0	200	300	0	0	0	0	0	0	0	200	903	0	0	0	0	0	0	0	603	903	0
885	4	0	0	0	0	0	0	200	300	0	0	0	0	0	0	0	200	903	0	0	0	0	0	0	0	603	903	0
885	5	0	0	0	0	0	0	200	300	0	0	0	0	0	0	0	200	903	0	0	0	0	0	0	0	603	903	0
885	6	0	0	0	0	0	0	200	300	0	0	0	0	0	0	0	200	903	0	0	0	0	0	0	0	603	903	0
885	7	0	0	0	0	0	0	200	300	0	0	0	0	0	0	0	200	903	0	0	0	0	0	0	0	603	903	0
885	8	0	0	0	0	0	0	200	300	0	0	0	0	0	0	0	200	903	0	0	0	0	0	0	0	603	903	0
885	9	0	0	0	0	0	0	200	300	0	0	0	0	0	0	0	200	903	0	0	0	0	0	0	0	603	903	0
886	0	0	0	0	0	0	0	200	300	0	0	0	0	0	0	0	200	903	0	0	0	0	0	0	0	603	903	0
886	1	0	0	0	0	0	0	200	300	0	0	0	0	0	0	0	200	903	0	0	0	0	0	0	0	603	903	0
886	2	0	0	0	0	0	0	200	300	0	0	0	0	0	0	0	200	903	0	0	0	0	0	0	0	603	903	0
886	3	0	0	0	0	0	0	200	300	0	0	0	0	0	0	0	200	903	0	0	0	0	0	0	0	603	903	0
886	4	0	0	0	0	0	0	200	300	0	0	0	0	0	0	0	200	903	0	0	0	0	0	0	0	603	903	0
886	5	0	0	0	0	0	0	200	300	0	0	0	0	0	0	0	200	903	0	0	0	0	0	0	0	603	903	0
886	6	0	0	0	0	0	0	200	300	0	0	0	0	0	0	0	200	903	0	0	0	0	0	0	0	603	903	0
886	7	0	0	0	0	0	0	200	300	0	0	0	0	0	0	0	200	903	0	0	0	0	0	0	0	603	903	0
886	8	0	0	0	0	0	0	200	300	0	0	0	0	0	0	0	200	903	0	0	0	0	0	0	0	603	903	0
886	9	0	0	0	0	0	0	200	300	0	0	0	0	0	0	0	200	903	0	0	0	0	0	0	0	603	903	0
887	0	0	0	0	0	0	0	200	300	0	0	0	0	0	0	0	200	903	0	0	0	0	0	0	0	603	903	0
887	1	0	0	0	0	0	0	200	300	0	0	0	0	0	0	0	200	903	0	0	0	0	0	0	0	603	903	0
887	2	0	0	0	0	0	0	200	300	0	0	0	0	0	0	0	200	903	0	0	0	0	0	0	0	603	903	0
887	3	0	0	0	0	0	0	200	300	0	0	0	0	0	0	0	200	903	0	0	0	0	0	0	0	603	903	0
887	4	0	0	0	0	0	0	200	300	0	0	0	0	0	0	0	200	903	0	0	0	0	0	0	0	603	903	0
887	5	0	0	0	0	0	0	200	300	0	0	0	0	0	0	0	200	903	0	0	0	0	0	0	0	603	903	0
887	6	0	0	0	0	0	0	200	300	0	0	0	0	0	0	0	200	903	0	0	0	0	0	0	0	603	903	0
887	7	0	0	0	0	0	0	200	300	0	0	0	0	0	0	0	200	903	0	0	0	0	0	0	0	603	903	0
887	8	0	0	0	0	0	0	200	300	0	0	0	0	0	0	0	200	903	0	0	0	0	0	0	0	603	903	0
887	9	0	0	0	0	0	0	200	300	0	0	0	0	0	0	0	200	903	0	0	0	0	0	0	0	603	903	0
888	0	0	0	0	0	0	0	200	300	0	0	0	0	0	0	0	200	903	0	0	0	0	0	0	0	603	903	0
888	1	0	0	0	0	0	0	200	300	0	0	0	0	0	0	0	200	903	0	0	0	0	0	0	0	603	903	0
888	2	0	0	0	0	0	0	200	300	0	0	0	0	0	0	0	200	903	0	0	0	0	0	0	0	603	903	0
888	3	0	0	0	0	0	0	200	300	0	0	0	0	0	0	0	200	903	0	0	0	0	0	0	0	603	903	0
888	4	0	0	0	0	0	0	200	300	0	0	0	0	0	0	0	200	903	0	0	0	0	0	0	0	603	903	0
888	5	0	0	0	0	0	0	200	300	0	0	0	0	0	0	0	200	903	0	0	0	0	0	0	0	603	903	0
888	6	0	0	0	0	0	0	200	300	0	0	0	0	0	0	0	200	903	0	0	0	0	0	0	0	603	903	0
888	7	0	0	0	0	0	0	200	300	0	0	0	0	0	0	0	200	903	0	0	0	0	0	0	0	603	903	0
888	8	0	0	0	0	0	0	200	300	0	0	0	0	0	0	0	200	903	0	0	0	0	0	0	0	603	903	0
888	9	0	0	0	0	0	0	200	300	0	0	0	0	0	0	0	200	903	0	0	0	0	0	0	0	603	903	0
889	0	0	0	0	0	0	0	200	300	0	0	0	0	0	0	0	200	903	0	0	0	0	0	0	0	603	903	0
889	1	0	0	0	0	0	0	200	300	0	0	0	0	0	0	0	200	903	0	0	0	0	0	0	0	603	903	0
889	2	0	0	0	0	0	0	200	300	0	0	0	0	0	0	0	200	903	0	0	0	0	0	0	0	603	903	0
889	3	0	0	0	0	0	0	200	300	0	0	0	0	0	0	0	200	903	0	0	0	0	0	0	0	603	903	0
889	4	0	0	0	0	0	0	200	300	0	0	0	0	0	0	0	200	903	0	0	0	0	0	0	0	603	903	0
889	5	0	0	0	0	0	0	200	300	0	0	0	0	0	0	0	200	903	0	0	0	0	0	0	0	603	903	0
889	6	0	0	0	0	0	0	200	300	0	0	0	0	0	0	0	200	903	0	0	0	0	0	0	0	603	903	0
889	7	0	0	0	0	0	0	200	300	0	0	0	0	0	0	0	200	903	0	0	0	0	0	0	0	603	903	0
889	8	0	0	0	0	0	0	200	300	0	0	0	0	0	0	0	200	903	0	0	0	0	0	0	0	603	903	0
889	9	0	0	0	0	0	0	200	300	0	0	0	0	0	0	0	200	903	0	0	0	0	0	0	0	603	903	0
890	0	0	0	0	0	0	0	200	300	0	0	0	0	0	0	0	200	903	0	0	0	0	0	0	0	603	903	0
890	1	0	0	0	0	0	0	200	300	0	0	0	0	0	0	0	200	903	0	0	0	0	0	0	0	603	903	0
890	2	0	0	0	0	0	0	200	300	0	0	0	0	0	0	0	200	903	0	0	0	0	0	0	0	603	903	0
890	3	0	0	0	0	0	0	200	300	0	0	0	0	0	0	0	200	903	0	0	0	0	0	0	0	603	903	0
890	4	0	0	0	0	0	0	200	300	0	0	0	0	0	0	0	200	903	0	0	0	0	0	0	0	603	903	0
890	5	0	0	0	0	0	0	200	300	0	0	0	0	0	0	0	200	903	0	0	0	0	0	0	0	603	903	0
[truncated: 544 more rows]
