# Supplementary material for: The Effects of an Extemporaneous Speech Dual-task on Older Adult Gait Control
Source: Research Square preprint supplement (doi:10.21203/rs.3.rs-7674245/v1), 2025-11-18
Supplement: Supplementary file 193 [file Over8ground3.xlsx]

## Sheet: Sheet1
Trajectories
		08:LFHD			08:RFHD			08:LBHD			08:RBHD			08:C7			08:T10			08:CLAV			08:STRN			08:RBAK			08:LSHO			08:LUPA			08:LELB			08:LFRM			08:LWRA			08:LWRB			08:LFIN
Frame	Sub Frame	X	Y	Z	X	Y	Z	X	Y	Z	X	Y	Z	X	Y	Z	X	Y	Z	X	Y	Z	X	Y	Z	X	Y	Z	X	Y	Z	X	Y	Z	X	Y	Z	X	Y	Z	X	Y	Z	X	Y	Z	X	Y	Z
		mm	mm	mm	mm	mm	mm	mm	mm	mm	mm	mm	mm	mm	mm	mm	mm	mm	mm	mm	mm	mm	mm	mm	mm	mm	mm	mm	mm	mm	mm	mm	mm	mm	mm	mm	mm	mm	mm	mm	mm	mm	mm	mm	mm	mm	mm	mm	mm
476	0	265.454	2465.64	1683.46	176.984	2480.55	1674.09	287.317	2657.65	1693.36	174.707	2654.69	1681.61	238.279	2688.72	1542.04	265.036	2770.29	1282.61	251.804	2545.98	1452.02	247.751	2491.92	1245.4	176.457	2775.24	1335.16	431.068	2611.21	1504.09	519.393	2627.73	1313.9	529.55	2629.92	1158.68	535.938	2537.63	1010.58	482.228	2508.92	923.173	545.883	2536	911.731	528.744	2482.35	861.96
477	0	265.424	2453.51	1686.37	176.682	2468.15	1677.38	286.796	2645.39	1696.41	174.115	2642.58	1685.03	237.53	2676.29	1544.92	264.786	2759.83	1286.38	251.915	2533.78	1455.41	248.068	2479.29	1249.28	175.714	2762.7	1338.07	430.276	2599.35	1507.52	517.263	2618.99	1316.96	530.438	2622.04	1162.48	536.514	2531.36	1013.5	482.844	2503.72	926.124	546.233	2530.75	914.417	529.804	2478.38	864.214
478	0	265.402	2441.28	1689.1	176.654	2455.66	1680.17	286.367	2633.08	1699.37	173.688	2630.32	1688.3	237.314	2664.67	1548.2	263.375	2747.11	1289.06	251.984	2521.65	1458.18	248	2466.71	1252.08	174.871	2750.21	1341.03	429.28	2587.39	1510.34	518.463	2609.88	1320.23	531.343	2614.21	1166.17	537.475	2525.4	1016.14	483.759	2498.7	928.276	546.634	2525.71	917.494	530.334	2473.89	866.234
479	0	265.103	2428.94	1691.7	176.44	2443.26	1682.82	285.685	2620.83	1702.79	173.232	2617.64	1691.07	236.71	2652.18	1550.71	261.883	2734.43	1291.73	251.33	2509.16	1461.37	247.673	2454.03	1255.09	174.199	2737.97	1343.93	429.41	2576.06	1513.53	517.743	2600.47	1324.26	532.316	2606.41	1170.07	537.972	2518.87	1018.9	484.279	2493.26	930.979	547.151	2520.38	920.23	530.799	2469.27	868.479
480	0	265.337	2416.62	1694.47	176.654	2430.88	1685.51	285.58	2608.69	1705.38	172.988	2605.42	1694.14	236.3	2640.24	1553.88	260.523	2721.99	1294.7	251.301	2497.06	1464.5	247.251	2441.26	1258.2	173.309	2725.48	1346.76	428.655	2564.18	1516.61	517.36	2591.28	1327.47	533.255	2598.63	1173.93	538.845	2512.78	1021.85	484.919	2487.72	933.954	547.638	2515.02	923.03	531.63	2465.02	870.705
481	0	265.791	2404.46	1696.65	177.142	2418.49	1687.84	285.679	2596.54	1707.75	172.865	2593.1	1697.13	235.618	2628.04	1556.68	259.398	2709.86	1297.44	251.203	2484.82	1467.02	247.203	2428.72	1261.08	172.355	2712.88	1349.36	428.333	2552.52	1519.16	518.874	2582.28	1330.6	534.302	2590.95	1177.35	539.557	2506.07	1024.45	485.766	2481.82	936.497	549.231	2510.43	926.029	532.292	2460.3	872.76
482	0	266.325	2392.18	1698.6	177.546	2406.06	1690.24	285.733	2584.34	1710.13	172.782	2580.64	1699.77	235.21	2615.72	1558.93	258.247	2697.86	1299.88	251.051	2472.63	1469.48	247.157	2416.36	1263.56	171.508	2700.42	1351.74	429.872	2542.08	1520.62	518.98	2573.1	1333.68	535.308	2583.21	1180.76	540.056	2498.98	1026.99	486.754	2475.99	938.994	549.49	2504.93	928.896	533.225	2455.84	874.675
483	0	266.77	2379.81	1700.6	177.896	2393.41	1692.34	285.242	2572.05	1712.45	172.873	2568.14	1702.05	235.121	2603.77	1560.76	257.074	2685.72	1302.16	250.756	2460.3	1472.04	246.998	2404.12	1265.87	170.626	2688.06	1353.96	427.676	2529.45	1524.04	517.589	2563.36	1336.78	536.043	2575.3	1184.07	540.425	2492.63	1029.19	487.371	2469.95	941.273	550.279	2499.69	930.881	533.783	2450.89	876.352
484	0	267.404	2367.51	1702.03	178.5	2380.8	1694.01	285.495	2559.79	1714.07	172.904	2555.65	1704.07	235.217	2591.86	1562.59	254.73	2671.29	1302.83	250.645	2448.05	1474.05	247.087	2392.05	1268.09	169.824	2675.7	1355.72	428.475	2518.71	1524.97	517.197	2553.53	1339.36	536.816	2567.57	1186.66	541.194	2486.21	1031.35	488.324	2462.62	943.388	549.989	2493.57	932.878	534.361	2445.9	877.798
485	0	268.348	2355.27	1702.91	179.266	2368.19	1695.39	285.566	2547.51	1715.42	173.151	2543.12	1705.79	234.595	2579.53	1563.89	254.815	2660.81	1304.91	250.455	2435.65	1475.47	247.146	2380.27	1269.24	169.115	2663.38	1357.28	429.059	2507.33	1526.55	518.052	2544.72	1341.47	537.177	2559.54	1189.03	541.945	2479.62	1032.83	484.863	2453.26	944.471	550.646	2488.07	934.643	535.286	2441.17	878.88
486	0	268.841	2342.73	1703.5	180.022	2355.53	1696.35	286.048	2535.06	1716.34	173.324	2530.3	1706.96	234.098	2567.25	1564.94	253.798	2648.35	1306.14	251.957	2424.99	1476.37	247.138	2368.36	1270.51	168.403	2650.97	1358.59	428.65	2495.66	1527.73	517.794	2534.82	1343.66	538.115	2551.96	1191.3	542.68	2473.03	1034.37	485.707	2446.78	945.647	551.167	2482.27	936.113	535.628	2435.6	879.97
487	0	269.861	2330.3	1704.16	180.701	2342.81	1697.18	286.224	2522.71	1717.25	173.592	2517.59	1708.21	234.099	2554.89	1566.08	252.957	2635.94	1306.97	250.607	2411.38	1477.71	247.154	2356.33	1271.78	167.703	2638.53	1359.6	427.877	2483.66	1528.93	517.965	2525.62	1345.35	538.305	2543.88	1193.12	543.43	2466.24	1035.64	486.446	2440.11	946.585	551.333	2476.28	937.357	536.204	2430.12	880.694
488	0	271.069	2317.78	1704.41	181.866	2330.18	1697.79	286.503	2510.23	1717.67	173.988	2505.01	1709.27	233.735	2542.38	1566.33	252.131	2623.4	1307.47	250.87	2399.2	1478.43	247.37	2344.28	1272.33	167.1	2626.05	1360.29	427.71	2471.82	1529.5	517.337	2515.24	1346.82	538.395	2535.81	1194.54	544.09	2459.28	1036.52	490.486	2437.96	946.524	551.672	2469.89	937.948	536.695	2424.3	881.29
489	0	271.981	2305.29	1703.71	182.941	2317.22	1697.84	287.16	2497.7	1717.29	174.416	2492.06	1709.69	233.491	2529.83	1566.49	251.259	2610.96	1307.65	252.481	2388.12	1478.24	247.765	2332.25	1272.28	166.53	2613.61	1360.5	428.621	2460.31	1528.83	512.759	2493.93	1346.5	538.294	2527.55	1195.28	544.795	2452.19	1037.17	488.157	2426.25	947.49	551.961	2463.27	938.439	537.683	2417.53	881.312
490	0	272.847	2292.64	1703.03	183.693	2304.27	1697.37	287.489	2485.05	1717.1	174.793	2479.08	1709.7	233.704	2517.57	1566.44	250.273	2598.88	1307.96	251.549	2375.09	1477.81	247.828	2319.9	1272	166.016	2600.92	1360.42	428.584	2448.32	1528.5	517.339	2495.59	1347.87	538.537	2519.4	1196.08	545.31	2444.82	1036.9	489.146	2418.96	947.468	552.73	2457.1	938.452	536.766	2410.57	879.96
491	0	274.23	2279.87	1702.37	184.844	2291.29	1696.79	287.947	2472.52	1716.27	175.282	2466	1709.2	233.555	2504.89	1565.5	249.806	2586.17	1307.06	251.873	2362.83	1477.35	247.264	2306.89	1271.79	165.716	2588.36	1359.8	427.888	2435.97	1528.01	518.868	2486.61	1346.88	538.142	2510.84	1195.9	545.904	2437.54	1036.47	490.067	2411.36	946.978	552.904	2450.02	938.008	537.654	2404.52	879.097
492	0	275.516	2267.2	1700.92	186.139	2278.23	1695.82	288.455	2459.86	1714.93	175.986	2452.95	1708.45	233.538	2492.36	1564.38	249.324	2573.55	1305.92	252.195	2350.37	1476.25	247.776	2294.5	1270.52	165.53	2575.72	1358.7	428.327	2424.02	1526.74	517.144	2475.79	1347.17	537.736	2502.12	1195.45	546.327	2429.84	1035.57	490.883	2403.66	946.126	553.132	2443.08	936.956	538.364	2397.84	877.742
493	0	276.839	2254.39	1699.26	187.493	2265.06	1694.59	289.071	2446.92	1713.36	176.62	2439.77	1707.3	233.805	2479.32	1563.12	248.835	2560.89	1304.68	252.225	2337.44	1475.12	248.455	2281.97	1269	165.327	2563	1357.48	428.093	2411.7	1525.37	517.071	2465.58	1345.93	537.251	2493.3	1194.7	546.877	2422.12	1034.22	491.608	2395.7	944.443	553.583	2436.18	935.887	539.223	2390.92	876.246
494	0	278.151	2241.43	1697.38	188.897	2251.79	1693.4	289.82	2434.06	1711.5	177.371	2426.47	1705.9	233.794	2466.44	1561.1	248.615	2548.04	1302.95	252.322	2324.59	1473.46	248.117	2268.61	1267.75	165.255	2550.22	1355.89	427.756	2398.96	1523.68	516.591	2454.89	1344.63	536.94	2484.09	1193.64	547.299	2414.17	1032.68	492.324	2387.6	942.561	552.033	2429.64	932.546	540.045	2383.83	874.343
495	0	279.841	2228.47	1695.13	190.158	2238.44	1691.57	290.49	2420.99	1709.37	178.146	2413.01	1704.42	234.298	2453.61	1559.51	248.448	2535.27	1301.33	253.569	2312.3	1471.59	248.25	2255.58	1265.8	165.122	2537.13	1354.24	428.509	2386.89	1521.44	516.606	2444.43	1342.58	536.48	2474.67	1192.14	547.859	2405.9	1030.83	493.345	2379.33	941.025	553.835	2421.64	932.049	541.174	2376.6	872.317
496	0	281.289	2215.32	1692.4	191.662	2225	1689.23	291.292	2407.77	1707.01	178.945	2399.57	1702.77	234.353	2440.23	1557.86	248.381	2522.31	1299.62	253.247	2298.73	1469.05	248.824	2242.69	1262.93	165.184	2523.98	1352.2	429.461	2374.57	1518.61	516.85	2433.74	1340.17	535.517	2464.46	1190.72	548.001	2397.28	1028.82	494.4	2370.64	937.815	552.87	2414.59	928.751	542.012	2368.8	869.84
497	0	282.629	2202.14	1689.63	193.051	2211.38	1686.88	292.228	2394.6	1704.13	179.796	2386.02	1700.66	234.817	2427.13	1555.1	248.856	2508.96	1296.86	253.376	2285.39	1466.27	249.078	2229.44	1260.45	165.298	2511.06	1350.14	429.861	2361.81	1516.25	516.578	2422.68	1337.95	534.87	2454.53	1188.71	548.398	2388.51	1026.32	495.599	2362.03	935.474	553.376	2406.74	926.607	543.286	2361.12	867.621
498	0	284.167	2188.67	1686.84	194.612	2197.74	1684.32	292.947	2381.26	1701.4	180.742	2372.29	1697.86	235.03	2413.69	1552.65	249.232	2496.06	1294.3	253.986	2272.2	1463.69	248.649	2215.69	1257.95	165.54	2497.87	1347.5	429.759	2348.72	1513.63	515.219	2410.94	1335.4	533.895	2444.4	1186.09	548.692	2379.76	1023.26	496.192	2353.06	932.166	555.523	2398.36	924.949	544.146	2352.85	864.534
499	0	286.221	2175.48	1683.59	196.451	2184.07	1681.62	293.797	2367.84	1698.16	181.877	2358.55	1695.07	235.478	2400.25	1549.4	249.717	2482.85	1291.3	255.22	2258.98	1460.86	249.641	2202.68	1255.07	165.877	2484.44	1344.53	430.3	2335.91	1510.56	513.874	2398.9	1332.49	532.829	2433.77	1183.23	548.679	2370.59	1020.01	497.107	2343.84	928.872	555.271	2389.89	921.808	545.878	2345.09	861.566
500	0	287.965	2161.84	1680.3	198.176	2170.2	1678.43	294.792	2354.31	1694.72	183.134	2344.68	1692.09	235.816	2386.44	1545.75	250.59	2469.57	1287.95	255.778	2245.45	1457.56	250.172	2189.29	1251.66	166.356	2471.12	1341.29	430.887	2322.66	1507.19	513.362	2387.09	1329.38	531.724	2423.05	1180.29	548.893	2361.16	1016.58	497.783	2334.43	924.955	555.75	2381.35	919.078	546.608	2336.13	857.799
501	0	289.531	2148.22	1676.9	199.677	2156.23	1675.3	296.006	2340.74	1691.33	184.293	2330.75	1688.78	237.115	2373.01	1542.63	251.514	2455.87	1284.49	256.467	2231.6	1454.11	250.347	2175.61	1248.37	166.952	2457.53	1338.24	431.166	2309	1503.97	513.158	2375.23	1326.08	530.82	2412.06	1177.34	548.814	2351.24	1012.95	498.667	2324.78	921.641	557.256	2373.11	916.485	547.497	2326.87	854.439
502	0	291.45	2134.48	1673.48	201.621	2142.24	1672.23	297.369	2327.1	1687.95	185.574	2316.71	1685.97	237.844	2359.24	1539.47	252.608	2442.35	1281.28	257.116	2217.82	1450.68	250.492	2161.89	1244.91	167.571	2443.97	1335.03	432.107	2295.5	1500.27	512.68	2362.82	1322.74	529.747	2400.52	1174.13	549.053	2341.34	1009.39	499.6	2314.6	917.505	556.503	2363.58	912.643	548.752	2317.74	850.808
503	0	293.334	2120.65	1669.79	203.478	2128.16	1668.91	298.83	2313.2	1684.56	187.012	2302.57	1683.14	238.921	2345.52	1536.68	253.763	2428.48	1278.13	258.111	2203.93	1447.33	250.837	2147.88	1241.2	168.173	2430.2	1332.3	434.587	2282.3	1496.4	512.594	2350.07	1319.14	528.656	2388.62	1170.89	549.201	2330.87	1005.69	500.631	2304.32	913.599	556.674	2354.05	909.048	550.361	2308.55	847.439
504	0	295.184	2106.68	1666.46	205.37	2113.97	1665.89	300.296	2299.31	1681.16	188.386	2288.26	1680.12	239.825	2331.59	1533.35	254.782	2414.61	1274.79	258.963	2189.83	1443.99	251.519	2134.06	1237.95	168.956	2416.42	1329.09	434.731	2268.72	1492.17	512.85	2337.72	1315.49	527.873	2376.67	1167.3	549.858	2320.64	1002.24	503.172	2294.37	910.376	557.214	2344.42	905.55	551.503	2298.85	843.497
505	0	297.27	2092.58	1663.49	207.448	2099.71	1663.16	301.824	2285.21	1678.06	189.996	2273.93	1677.5	241.546	2317.51	1530.23	255.72	2400.4	1271.31	260.201	2175.79	1441.18	252.084	2119.94	1234.92	170.032	2402.5	1326.25	436.535	2254.59	1488.96	512.509	2324.24	1312.16	526.455	2364.02	1163.38	549.532	2309.25	998.196	503.022	2282.09	905.249	557.371	2334.11	901.952	552.623	2288.71	839.704
506	0	299.561	2078.55	1660.26	209.588	2085.44	1660.25	303.562	2271.22	1674.91	191.782	2259.61	1674.46	242.643	2303.15	1527.29	256.025	2386.55	1268.54	261.473	2161.49	1438	252.733	2105.72	1231.88	171.074	2388.39	1323.05	436.826	2240.7	1484.89	514.853	2312.24	1307.46	525.483	2350.84	1159.84	549.864	2297.96	994.221	504.768	2271.2	902.256	557.425	2323.85	898.19	553.716	2278.68	836.202
507	0	301.553	2064.3	1657	211.76	2070.97	1657.32	305.306	2257	1671.53	193.677	2245.17	1671.68	243.748	2288.5	1524.39	256.472	2371.88	1265.19	262.579	2147.27	1434.68	253.377	2091.05	1228.52	172.379	2374.14	1320.27	438.577	2226.68	1481.36	513.057	2297.22	1304.53	524.663	2337.65	1156.04	550.095	2286.18	990.226	503.892	2260.76	896.045	557.499	2312.79	894.713	554.935	2268.08	831.964
508	0	303.627	2049.9	1654.18	213.929	2056.61	1654.77	307.152	2242.68	1668.74	195.534	2230.65	1668.83	245.51	2274.33	1521.55	256.891	2357.35	1262.43	263.854	2132.79	1431.91	253.868	2076.15	1225.75	173.487	2359.66	1317.6	439.064	2212	1478.91	514.884	2283.99	1300.61	524.024	2323.97	1152.54	550.365	2274	986.463	505.064	2247.9	892.704	557.38	2301.21	891.09	556.228	2257.25	828.236
509	0	305.942	2035.59	1651.54	215.971	2041.95	1652.44	309.055	2228.39	1665.83	197.435	2216.18	1666.6	246.51	2259.61	1519.1	257.301	2342.98	1259.94	265.51	2118.3	1429.52	254.795	2061.27	1223.25	174.375	2344.94	1315.09	440.51	2197.84	1475.72	515.125	2269.99	1297.12	524.174	2310.69	1149.34	550.524	2261.51	982.675	506.127	2235.04	888.456	557.674	2289.51	887.473	557.043	2245.77	824.292
510	0	308.642	2021.3	1649.27	218.701	2027.5	1650.51	311.075	2213.92	1663.6	199.545	2201.71	1664.55	249.097	2245.67	1516.91	257.989	2328.12	1257.51	267.65	2103.77	1427.17	256.161	2046.36	1221.24	175.803	2330.01	1312.95	442.607	2183.72	1472.28	516.057	2255.7	1293.35	523.271	2295.85	1145.65	550.758	2248.28	979.193	506.763	2222.26	884.395	557.974	2277.19	884.262	558.076	2233.81	820.8
511	0	310.865	2006.8	1647.37	221.012	2012.92	1648.67	313.291	2199.47	1661.74	201.753	2187.1	1662.82	251.375	2231.43	1514.9	259.027	2313.28	1255.59	269.659	2089.2	1425.32	257.519	2031.2	1219.51	176.886	2314.88	1311.19	444.309	2169.3	1470.07	516.34	2240.88	1290.61	523.089	2281.05	1142.71	550.842	2234.44	976.237	507.212	2209.11	881.173	558.061	2264.29	881.219	558.421	2221.16	817.078
512	0	313.14	1992.21	1646.17	223.078	1998.25	1647.43	315.446	2184.85	1660.55	204.065	2172.44	1661.77	253.242	2216.81	1513.58	259.952	2298.03	1253.94	270.432	2074.22	1423.63	259.089	2015.87	1218.11	178.286	2299.76	1309.57	446.077	2154.78	1468.19	517.138	2225.93	1287.93	523.266	2266.13	1140.01	551.34	2220.43	973.302	507.941	2195.06	878.123	558.458	2250.9	878.55	559.135	2208.29	813.955
513	0	315.579	1977.72	1645.05	225.391	1983.52	1646.73	317.967	2170.4	1659.72	206.463	2157.79	1661.4	255.561	2202.49	1512.86	260.708	2282.78	1252.66	273.054	2060.08	1422.77	260.785	2000.44	1217.68	179.59	2284.72	1308.77	448.221	2140.51	1466.34	518.397	2210.99	1285.22	523.549	2250.83	1137.46	551.762	2205.83	970.607	508.544	2180.62	875.185	558.672	2236.86	876.069	559.585	2194.8	811.153
514	0	318.105	1963.27	1644.41	227.849	1968.96	1646.2	320.442	2155.89	1659.31	208.703	2143.13	1661.29	257.683	2187.99	1512.36	261.342	2267.89	1252.27	275.215	2045.51	1422.49	262.597	1984.89	1217.56	181.244	2269.96	1308.48	448.077	2124.67	1464.41	521.296	2196.42	1282.2	523.786	2235.13	1135.26	551.75	2190.87	968.315	508.552	2166.5	873.045	558.737	2222.08	874.046	559.92	2180.63	808.862
515	0	320.24	1948.67	1644.38	230.069	1954.55	1646.2	322.876	2141.42	1659.19	211.203	2128.66	1661.49	260.266	2173.6	1511.84	262.315	2252.75	1251.61	276.946	2030.9	1422.74	264.007	1969.11	1218.45	182.982	2255.3	1307.91	452.431	2111.98	1464.16	519.265	2179.14	1281.27	524.165	2219.15	1134	552.396	2175.32	967.038	508.931	2151.34	871.185	558.95	2206.75	872.603	559.983	2165.95	807.434
516	0	323.004	1934.39	1644.96	232.427	1940.2	1647.04	325.247	2127.07	1659.9	213.591	2114.42	1662.21	261.962	2159.31	1512.38	263.294	2238.02	1251.42	278.647	2016.29	1423.64	265.887	1953.59	1219.67	184.752	2240.83	1308.09	452.4	2096.23	1463.54	522.82	2165.39	1280.23	524.667	2203.16	1132.79	552.393	2159.5	965.465	509.227	2135.5	870.219	559.385	2191.3	871.388	559.9	2150.45	805.679
517	0	325.266	1920.22	1645.69	235.174	1926.06	1648.14	327.661	2112.88	1660.36	216.036	2100.28	1663.38	264.24	2145.13	1512.8	264.615	2223.15	1251.51	281.77	2002.31	1424.77	267.429	1938.07	1221.1	186.362	2226.44	1308.4	454.357	2081.91	1463.71	523.802	2149.6	1279.67	525.309	2186.72	1132.04	552.703	2143.07	964.753	509.082	2119.36	869.83	559.832	2174.93	870.729	559.674	2134.3	804.419
518	0	327.666	1906.22	1646.59	237.419	1911.98	1649.25	329.978	2098.84	1661.21	218.567	2086.22	1664.4	266.328	2131.04	1513.82	265.761	2208.84	1252.42	283.63	1987.98	1425.75	268.93	1922.82	1222.37	188.012	2212.13	1309.19	456.697	2067.46	1464.63	524.39	2133.42	1278.97	526.255	2170.39	1131.5	553.331	2126.19	964.637	508.645	2103.45	869.181	560.257	2157.98	870.413	559.365	2117.39	803.839
519	0	329.567	1892.27	1648.15	239.297	1897.95	1650.78	332.303	2084.97	1662.55	220.834	2072.39	1665.62	268.396	2116.97	1515.18	267.225	2194.55	1253.3	283.303	1972.79	1427.23	270.339	1908.07	1223.87	189.373	2198.15	1310.48	458.695	2052.96	1465.84	525.503	2117.65	1279.69	527.381	2154.02	1131.81	553.792	2108.78	965.151	509.551	2084.33	870.349	560.478	2140.21	870.657	558.941	2099.67	804.041
520	0	331.682	1878.49	1650.01	241.272	1884.3	1652.51	334.446	2071.3	1663.71	222.846	2058.68	1667.23	270.596	2103.19	1516.8	268.542	2180.5	1254.77	284.906	1958.77	1429.22	271.481	1893.57	1225.92	190.827	2184.34	1312.24	460.407	2038.36	1467.06	526.649	2101.74	1280.3	528.838	2137.21	1132.4	554.122	2090.94	965.789	508.53	2068.15	870.911	560.903	2121.98	871.539	558.403	2081.24	804.454
521	0	333.894	1865.05	1651.53	243.329	1870.75	1654.51	336.583	2058	1664.88	224.843	2045.34	1669.04	272.922	2089.64	1518.19	269.971	2166.75	1256.35	285.935	1944.46	1430.89	272.461	1879.51	1228.07	192.333	2171.01	1314.17	461.689	2023.37	1468.38	527.401	2085.16	1281.21	530.12	2120.46	1133.15	554.451	2072.68	966.776	507.957	2049.74	871.641	560.825	2102.54	871.858	557.662	2062.03	805.196
522	0	335.357	1851.99	1652.97	244.928	1857.59	1656.46	338.198	2044.6	1666.47	226.661	2032.05	1670.79	274.345	2076.2	1520.18	271.616	2153.23	1258.05	287.007	1930.71	1432.83	273.1	1865.63	1229.4	193.791	2157.9	1316.11	463.161	2008.73	1470.13	529.284	2069.28	1282.23	531.787	2103.54	1134.12	554.831	2054.18	967.988	507.499	2030.9	873.609	561.201	2082.99	872.945	556.78	2042.06	806.156
523	0	336.387	1838.43	1654.88	246.48	1844.42	1658.64	339.917	2031.45	1668.18	228.307	2019.01	1672.79	276.237	2063.12	1521.77	273.535	2139.74	1259.54	287.354	1917.01	1434.69	273.76	1852.12	1231.31	195.444	2144.99	1318.02	464.595	1994.21	1471.92	531.236	2053.25	1283.71	533.822	2086.5	1134.96	555.261	2035.22	969.196	506.986	2011.73	875.423	561.699	2062.99	874.064	556.142	2021.54	807.778
524	0	338.196	1825.73	1656.91	247.895	1831.51	1660.75	341.477	2018.6	1670.09	229.729	2006.1	1674.91	277.752	2050.15	1523.79	275.394	2126.83	1261.46	288.082	1903.6	1436.69	274.18	1838.88	1233.28	197.373	2132.25	1319.62	465.899	1979.9	1473.88	533.315	2037.18	1285.21	535.658	2069.09	1136.37	555.749	2015.87	970.842	506.63	1991.93	877.414	561.937	2042.4	875.154	555.301	2000.35	809.251
525	0	339.399	1813.01	1658.88	248.907	1818.8	1662.7	342.637	2005.55	1672.09	231.097	1993.38	1677.11	279.587	2037.54	1525.65	277.244	2113.89	1263.44	288.531	1890.42	1438.82	273.981	1825.68	1235.02	199.447	2119.73	1321.44	466.906	1965.78	1475.93	535.172	2020.62	1286.7	537.766	2051.94	1136.97	556.184	1996.11	972.34	506.218	1971.89	879.543	562.316	2021.32	876.369	554.598	1978.65	811.165
526	0	339.56	1799.96	1661.12	249.526	1806.14	1664.97	343.725	1992.93	1674.28	232.156	1980.78	1679.27	280.589	2024.82	1527.81	279.082	2101.07	1265.17	288.811	1878.53	1441.26	273.896	1812.97	1237.19	201.446	2107.29	1323.23	467.98	1951.81	1478.01	537.393	2004.71	1288.51	539.69	2034.42	1138.11	556.669	1976.29	973.969	505.889	1951.51	882.038	562.788	1999.93	877.692	553.822	1956.39	812.942
527	0	339.762	1787.08	1663.56	250.238	1793.69	1667.5	344.559	1980.39	1676.6	232.985	1968.41	1681.54	281.792	2012.37	1530.02	280.766	2088.5	1267.08	289.276	1866.03	1443.78	273.637	1800.46	1240.19	203.45	2094.99	1324.92	468.7	1938.24	1479.89	539.196	1988.41	1289.93	541.592	2016.99	1139.12	557.058	1956.1	975.798	505.322	1930.79	884.011	563.224	1978.19	879.019	553.52	1934.14	815.367
528	0	341.165	1774.91	1666.24	250.711	1781.27	1670.06	345.313	1967.69	1678.95	233.707	1956.1	1684.08	282.992	1999.87	1532.25	282.526	2075.96	1269.15	289.866	1853.64	1446.39	273.201	1788.08	1242.53	205.547	2082.78	1326.91	469.68	1925.04	1482.27	541.113	1971.82	1291.18	543.412	1999.2	1140.18	557.691	1935.59	977.731	505.139	1909.56	886.845	563.646	1956.07	880.411	553.066	1911.04	817.656
529	0	340.236	1761.95	1668.64	251.009	1769.02	1672.33	345.946	1955.35	1681.75	234.288	1943.66	1686.43	283.799	1987.55	1534.7	284.401	2063.58	1271.33	290.156	1841.26	1448.5	272.748	1775.98	1244.75	207.499	2070.55	1328.93	470.708	1912.12	1484.56	542.84	1955.36	1292.74	545.126	1981.43	1141.64	558.458	1915.12	979.828	505.872	1887.73	891.326	564.177	1933.62	882.35	552.75	1887.63	820.359
530	0	340.161	1749.46	1671.52	250.936	1756.8	1675.04	346.366	1942.87	1684.58	234.719	1931.63	1688.82	284.878	1975.3	1537.24	286.337	2051.11	1273.78	290.628	1829.21	1451.18	272.532	1764.15	1247.29	209.59	2058.58	1331.12	471.699	1899.17	1487.1	544.529	1938.84	1294.35	547.011	1963.56	1142.66	558.79	1894.21	982.153	505.435	1866.37	893.545	564.828	1911.15	884.271	552.954	1864.1	823.585
531	0	340.1	1737.2	1674.28	250.855	1744.77	1677.42	346.917	1930.62	1687.29	235.023	1919.49	1691.27	285.761	1963.13	1539.8	288.032	2038.54	1276.45	290.759	1817.06	1454.12	272.198	1752.21	1250.39	211.468	2046.54	1333.22	472.501	1886.4	1489.44	546.069	1922.62	1295.98	548.568	1945.54	1143.8	559.129	1873.26	984.648	505.354	1844.55	896.596	565.275	1888.4	886.494	552.921	1840.1	826.718
532	0	339.891	1724.92	1676.96	250.668	1732.63	1679.77	347.113	1918.22	1690.11	235.239	1907.56	1693.77	286.814	1950.9	1542.31	289.988	2026.62	1279.11	291.223	1804.95	1457.08	272.089	1740.29	1253.6	213.287	2034.71	1335.51	473.283	1873.76	1491.8	547.361	1906.65	1297.55	550.01	1927.41	1145.32	559.7	1852.45	987.345	505.341	1822.45	899.819	565.95	1865.5	888.879	553.174	1816.28	830.291
533	0	339.425	1712.5	1679.95	250.323	1720.71	1682.29	347.326	1905.87	1692.98	235.541	1895.6	1695.93	287.811	1938.91	1545	291.61	2014.24	1281.47	291.744	1792.96	1459.71	272.496	1728.52	1256.22	215.167	2023.13	1338.15	474.052	1860.93	1494.52	548.403	1890.69	1299.54	551.285	1909.47	1146.81	560.176	1831.39	990.183	505.456	1800.36	903.313	566.381	1842.73	891.482	553.363	1791.94	834.321
534	0	338.201	1699.82	1682.99	249.934	1708.81	1684.73	347.588	1893.65	1695.68	235.671	1883.82	1698.16	288.689	1926.91	1547.36	293.03	2001.99	1283.85	292.483	1781.18	1462.5	272.908	1716.74	1258.98	216.714	2011.33	1340.42	474.989	1848.76	1497.2	549.406	1874.97	1301.4	552.445	1891.27	1148.4	560.6	1810.42	993.306	505.673	1778.16	907.237	566.842	1819.77	894.375	553.651	1767.8	838.562
535	0	337.851	1687.71	1685.22	249.648	1696.92	1686.79	347.939	1881.37	1698.29	235.932	1871.99	1700.29	289.984	1915.07	1549.75	294.703	1990.29	1286.17	292.776	1769.18	1464.88	273.353	1704.77	1261.26	218.073	1999.32	1342.69	475.786	1836.21	1499.61	550.33	1859.55	1303.16	553.663	1873.15	1150.18	561.029	1789.31	996.625	505.852	1755.82	911.163	567.355	1796.73	897.584	554.618	1743.75	843.586
536	0	337.27	1675.47	1687.58	249.173	1685.14	1688.67	348.343	1869.16	1700.89	236.159	1860.14	1702.2	290.897	1903.3	1552.01	296.069	1978.14	1288.25	293.27	1757.39	1466.98	273.831	1693.06	1263.48	219.496	1987.7	1344.93	476.5	1823.56	1502.16	550.866	1843.94	1305.38	554.732	1855.19	1152.05	561.42	1768.24	1000	506.036	1733.39	915.153	567.689	1773.68	900.79	555.018	1719.4	848.395
537	0	336.722	1663.22	1689.96	248.296	1673.17	1690.54	348.405	1856.78	1703.35	236.292	1848.37	1704.15	291.905	1891.51	1554.01	297.082	1965.92	1290.1	293.734	1745.65	1469.22	274.058	1681.26	1265.57	220.703	1975.97	1346.88	477.132	1811.01	1504.38	551.55	1828.83	1307.26	555.779	1837.12	1153.79	561.866	1747.53	1003.18	506.55	1711.21	919.401	568.15	1750.78	904.24	555.221	1695.04	853.402
538	0	336.25	1651.02	1692.08	248.007	1661.42	1692.39	348.629	1844.65	1705.52	236.687	1836.79	1705.88	292.815	1879.83	1555.72	298.173	1954.13	1291.87	294.234	1733.93	1471.72	274.505	1669.8	1268.11	221.824	1964.31	1348.71	477.783	1798.61	1506.43	552.099	1813.88	1308.84	556.62	1819.14	1155.36	562.183	1726.58	1006.56	506.952	1688.97	925.174	568.137	1727.96	907.338	555.263	1670.6	858.417
539	0	335.609	1638.72	1693.84	247.675	1649.74	1693.59	349.052	1832.46	1707.19	237.031	1825.22	1707.17	293.736	1868.26	1557.3	298.903	1942.52	1293.6	294.596	1722.12	1473.66	274.558	1658.11	1270.45	223.015	1952.61	1350.06	478.351	1786.21	1508.12	552.509	1799.1	1310.39	557.44	1801.25	1156.64	562.469	1705.82	1009.74	506.805	1666.45	929.545	568.217	1705.1	910.448	555.44	1646.35	863.345
540	0	335.087	1626.36	1695.45	247.403	1638.02	1694.77	349.383	1820.16	1708.91	237.398	1813.47	1708.43	294.788	1856.6	1558.62	299.776	1930.13	1294.78	294.956	1710.37	1474.95	274.828	1646.59	1271.25	223.878	1940.74	1351.17	478.984	1773.79	1509.61	552.956	1784.22	1311.84	558.481	1783.5	1158.02	562.918	1684.91	1012.96	506.861	1643.96	932.892	568.285	1682.02	913.858	555.596	1622.22	868.356
541	0	334.763	1614.3	1696.62	246.995	1626.26	1695.69	349.853	1807.97	1710.48	237.693	1801.7	1709.32	295.688	1844.75	1559.9	300.965	1918.16	1295.83	295.386	1698.55	1476.26	274.959	1635.06	1273.1	224.631	1928.81	1352.43	479.446	1761.42	1511.04	553.527	1769.69	1313.13	559.427	1765.95	1159.11	563.49	1664.34	1016.49	507.165	1621.7	937.549	568.43	1659.19	917.163	555.819	1598.24	873.548
542	0	334.268	1602.02	1697.65	246.716	1614.39	1696.53	350.201	1795.49	1711.6	238.087	1789.99	1710.25	296.129	1832.8	1560.91	301.829	1906.09	1296.76	295.773	1686.72	1477.59	275.227	1623.49	1274.13	225.805	1917.23	1353.63	479.916	1748.85	1512.18	553.975	1754.9	1314.15	560.477	1748.2	1160.26	563.824	1643.58	1019.62	507.147	1599.23	941.985	569.099	1636.75	920.478	555.855	1574.22	878.577
543	0	334.032	1589.77	1698.65	246.345	1602.5	1697.02	350.83	1783.29	1712.8	238.49	1778.03	1711.08	297.1	1820.93	1561.85	302.342	1893.84	1297.89	295.926	1674.73	1478.52	276.576	1612.97	1274.56	226.614	1905.62	1354.81	480.403	1736.41	1512.97	554.429	1739.96	1315.06	561.352	1730.53	1161.24	564.207	1622.72	1023.14	507.235	1576.84	946.449	568.781	1613.66	923.617	555.926	1550.31	883.789
544	0	333.644	1577.54	1699.08	246.033	1590.69	1697.27	351.084	1770.72	1713.36	238.787	1766.08	1711.59	297.372	1808.69	1562.41	306.289	1881.45	1297.2	296.43	1662.95	1478.91	276.241	1600.98	1275.12	227.178	1893.47	1355.45	480.8	1723.98	1513.47	554.921	1725.51	1315.44	562.098	1712.99	1162.03	564.582	1602.35	1026.15	507.477	1554.59	950.289	568.623	1590.75	927.183	555.49	1526.45	888.653
545	0	333.264	1565.2	1699.4	245.733	1578.71	1697.37	351.561	1758.6	1713.66	239.266	1754.16	1711.79	298.439	1796.73	1562.42	303.792	1870.03	1298.79	296.652	1650.9	1479.2	275.625	1588.6	1275.96	227.885	1881.46	1355.39	481.183	1711.6	1513.59	555.308	1710.85	1315.5	562.968	1695.7	1162.23	564.876	1582.24	1028.5	507.564	1532.6	954.563	568.163	1568.24	930.235	555.719	1503.25	893.504
546	0	333.058	1552.91	1699.13	245.539	1566.67	1696.96	351.616	1745.89	1713.62	239.547	1742.22	1711.36	298.899	1784.61	1562.34	305.284	1857.27	1297.88	297.171	1638.92	1479	275.548	1576.58	1275.68	228.662	1870.11	1355.77	481.521	1699.07	1513.31	555.681	1696.09	1315.41	563.768	1678.72	1161.83	565.18	1561.99	1031.09	507.564	1510.62	958.444	567.957	1546.16	932.559	555.445	1479.91	897.939
547	0	332.539	1540.34	1698.83	245.317	1554.56	1696.46	352.237	1733.78	1713.03	239.922	1730.24	1710.36	299.493	1772.35	1561.7	306.092	1845.41	1297.26	297.375	1626.78	1478.42	275.35	1564.39	1275.26	229.148	1857.7	1355.15	481.917	1686.54	1512.64	556.109	1681.42	1314.86	564.325	1661.63	1161.37	565.471	1542.09	1033.11	507.703	1488.9	961.934	567.619	1524.06	934.994	555.43	1457.06	902.066
548	0	332.309	1527.88	1698.25	244.806	1542.37	1695.58	352.314	1721.03	1712.2	240.246	1718.2	1709.26	299.562	1759.97	1560.99	305.975	1833.37	1296.67	297.472	1614.44	1477.58	275.185	1552.14	1274.34	229.749	1845.56	1354.26	482.176	1673.9	1511.67	556.357	1666.95	1313.91	565.155	1644.82	1160.62	565.764	1522.56	1034.88	507.827	1467.43	965.465	567.418	1502.23	937.08	555.207	1434.45	906.229
549	0	331.739	1515.31	1697.12	244.649	1530.14	1694.66	352.75	1708.61	1711.16	240.689	1705.99	1708.11	299.986	1747.42	1560.09	306.042	1820.94	1295.66	297.788	1602.09	1476.69	275.277	1540.08	1273.37	230.142	1833.16	1353.34	482.572	1661.27	1510.38	556.811	1652.48	1312.68	565.654	1627.94	1159.72	565.872	1502.98	1036.7	507.722	1446.21	969.32	566.86	1480.54	939.256	554.869	1411.98	910.25
550	0	331.561	1502.77	1695.9	244.189	1517.79	1693.09	352.939	1695.68	1709.93	240.765	1693.5	1706.75	300.199	1734.78	1558.91	306.454	1809.05	1294.66	297.847	1589.57	1475.33	274.93	1527.64	1272.2	230.496	1820.91	1352.43	482.689	1648.28	1509.08	556.895	1637.69	1311.57	566.24	1611.1	1158.75	565.807	1483.56	1038.35	507.46	1425.16	972.648	566.169	1459.08	941.495	554.381	1389.69	914.225
551	0	331.029	1489.97	1694.17	243.824	1505.43	1691.15	353.006	1682.98	1708.57	241.001	1681.11	1705.03	300.436	1721.88	1557.55	306.116	1796.4	1293.13	297.821	1577.02	1473.31	274.81	1515.35	1269.91	230.528	1808.29	1351.07	482.759	1635.27	1507.46	557.162	1623.31	1310.24	566.719	1594.31	1157.72	565.906	1464.39	1039.95	507.249	1404.5	975.405	565.551	1437.88	943.514	554.066	1367.96	918.157
552	0	330.662	1477.26	1692.4	243.331	1492.89	1689.37	352.922	1669.9	1706.4	241.012	1668.56	1702.83	300.817	1709.2	1555.62	306.189	1784.37	1291.53	297.925	1564.33	1471.14	274.968	1503.49	1267.4	230.645	1795.74	1349.38	482.913	1622.35	1505.46	557.216	1608.81	1308.57	567.411	1578.04	1156.23	565.638	1445.38	1041.07	507.019	1384.15	977.939	565.028	1416.91	945.329	553.576	1346.46	921.701
553	0	330.12	1464.27	1690.04	243.209	1480.28	1686.84	353.394	1657.06	1704.29	241.284	1655.88	1700.5	300.746	1696.19	1553.45	305.775	1771.85	1289.4	298.025	1551.63	1468.66	274.922	1491.47	1264.75	230.547	1783.07	1347.1	482.802	1609.14	1503.08	557.409	1594.65	1306.49	567.649	1561.61	1154.26	565.64	1426.96	1041.68	506.703	1364.19	980.478	564.324	1396.44	946.504	553.143	1325.39	924.937
554	0	329.55	1451.36	1687.37	242.564	1467.54	1684.13	353.272	1643.76	1701.38	241.562	1643.12	1697.76	301.143	1683.47	1550.8	305.269	1759.57	1286.97	297.826	1538.75	1465.94	275.088	1479.54	1261.56	230.711	1771.02	1345.17	482.752	1596.05	1500.4	557.237	1580.45	1303.84	568.124	1545.79	1151.84	565.16	1408.4	1042.18	506.531	1344.65	982.716	563.549	1376.15	947.623	553.111	1304.79	927.498
555	0	328.949	1438.15	1684.88	242.122	1454.78	1681.37	353.56	1630.76	1698.54	241.524	1630.47	1694.38	300.929	1670.47	1547.86	304.583	1746.94	1284.33	297.707	1525.87	1463.1	274.516	1467.01	1258.89	230.114	1757.63	1341.9	482.467	1582.99	1497.46	557.049	1566.44	1301.09	568.202	1529.87	1149.16	564.889	1390.48	1042.13	505.605	1324.94	984.433	562.42	1356.28	948.358	551.883	1284.26	930.568
556	0	328.343	1424.96	1681.91	241.495	1441.72	1678.36	353.256	1617.35	1695.43	241.505	1617.58	1691.11	301.884	1657.31	1545.15	303.904	1734.44	1281.35	297.393	1512.86	1460.03	274.315	1454.61	1255.62	229.97	1745.46	1339.4	482.258	1569.62	1494.13	556.761	1552.33	1297.94	568.551	1514.22	1146.25	564.516	1372.68	1041.93	505.069	1306.1	986.09	561.343	1336.5	948.924	551.346	1264.24	932.921
557	0	327.67	1411.64	1678.4	240.996	1428.71	1675.04	353.567	1604	1692.14	241.479	1604.49	1687.6	300.961	1644.19	1541.98	303.217	1721.56	1277.95	297.076	1499.75	1456.52	274.315	1442.4	1251.79	229.34	1732.12	1336.18	482.008	1556.38	1490.71	556.582	1538.43	1294.67	568.522	1498.45	1143.21	564.114	1355.18	1041.53	504.315	1287.47	987.073	560.404	1317.17	949.281	550.167	1244.6	935.032
558	0	326.997	1398.19	1675.28	240.185	1415.46	1671.5	353.535	1590.53	1688.88	241.246	1591.34	1684.34	300.615	1630.78	1538.83	302.502	1708.63	1274.96	296.84	1486.61	1452.78	274.096	1429.97	1247.85	228.884	1719.48	1333.13	481.863	1543.09	1487.26	556.248	1524.21	1291.42	568.398	1482.98	1140.2	563.555	1337.87	1040.97	503.275	1269.19	987.48	559.548	1298.26	949.486	549.207	1225.45	936.795
559	0	326.286	1384.77	1671.67	239.497	1402.22	1668.02	352.846	1576.75	1685.38	240.974	1577.99	1680.74	300.688	1617.61	1535.48	301.652	1695.66	1271.84	296.29	1473.3	1448.95	273.329	1416.9	1244.18	228.442	1706.36	1329.93	481.386	1529.47	1483.78	555.718	1510.41	1287.72	568.571	1467.99	1136.8	562.943	1320.97	1040.24	502.505	1251.62	988	558.353	1279.69	949.364	548.135	1206.63	938.322
560	0	325.326	1371.04	1668.07	238.705	1388.78	1664.33	352.66	1563.03	1681.82	240.654	1564.46	1677.35	300.262	1604.17	1531.85	300.769	1682.26	1268.13	295.853	1459.85	1445.62	273.04	1404.24	1240.53	227.589	1692.94	1326.51	480.85	1516.08	1479.72	555.202	1496.57	1284.02	568.176	1452.7	1133.4	562.27	1304.26	1039.2	501.786	1234.43	988.248	557.451	1261.69	949.024	547.298	1188.58	939.588
561	0	324.352	1357.26	1664.52	237.814	1375.22	1660.73	352.227	1549.3	1678.21	240.252	1550.93	1673.82	299.436	1590.5	1528.47	300.054	1668.57	1264.27	295.19	1446.2	1442.22	272.341	1390.76	1236.94	226.953	1679.12	1322.74	480.41	1502.58	1475.94	554.359	1482.66	1280.03	567.85	1437.84	1130.01	561.663	1288.21	1037.82	500.76	1217.51	988.37	556.412	1244.04	948.287	546.377	1170.93	940.191
562	0	323.427	1343.46	1660.76	236.877	1361.53	1657.12	351.216	1535.39	1674.57	239.546	1537.33	1670.06	298.926	1576.9	1524.9	299.381	1654.65	1260.62	294.578	1432.4	1438.25	271.573	1377.01	1233.19	226.264	1665.51	1318.89	479.711	1488.84	1472.05	553.646	1469.01	1276.18	567.191	1423.25	1126.13	560.817	1272.33	1035.75	499.852	1200.86	987.737	555.21	1226.96	947.131	545.307	1153.65	940.67
563	0	322.333	1329.42	1657.57	235.675	1347.65	1653.6	350.779	1521.36	1671.23	239.087	1523.51	1666.7	298.272	1563.12	1521.28	298.521	1640.76	1257.02	293.579	1418.37	1434.81	270.859	1363.09	1229.59	225.483	1651.46	1315.11	479.132	1475.05	1468.4	552.543	1455.43	1272.38	566.716	1409.04	1122.4	559.903	1256.89	1033.79	498.971	1184.92	986.795	554.026	1210.58	945.717	544.364	1137.16	940.603
564	0	321.011	1315.3	1654.08	234.507	1333.69	1650.2	349.82	1507.08	1667.99	237.95	1509.52	1663.23	297.213	1549.13	1517.84	298.008	1626.44	1253.39	292.575	1404.19	1431.5	269.707	1348.39	1226.36	224.983	1637.39	1311.61	478.205	1461.2	1464.65	551.365	1441.82	1268.68	565.87	1394.74	1118.98	559.069	1241.87	1031.67	497.987	1169.34	985.671	552.745	1194.71	944.142	543.483	1121.28	939.935
565	0	319.732	1300.98	1651.26	233.293	1319.68	1647.23	348.996	1492.85	1664.89	237.391	1495.51	1660.04	296.569	1534.91	1514.72	297.486	1611.9	1249.92	291.679	1390.02	1428.46	268.451	1333.53	1223.19	224.426	1622.88	1308.31	477.258	1447.25	1461.15	550.167	1428.42	1265.39	565.075	1380.81	1115.75	558.11	1227.2	1029.44	497.065	1154.27	984.304	551.236	1179.11	942.163	542.586	1105.97	939.171
566	0	318.354	1286.83	1648.29	231.873	1305.47	1644.56	347.85	1478.52	1661.9	236.268	1481.29	1657.31	295.426	1520.51	1511.8	296.741	1597.2	1247.15	290.213	1375.46	1425.54	267.046	1318.47	1220.52	223.711	1608.19	1304.95	475.889	1432.8	1458.14	548.723	1414.95	1262.4	564.037	1367.04	1112.82	557.042	1212.93	1027.25	496.061	1139.74	982.726	550.718	1165.07	940.674	541.647	1091.31	937.874
567	0	316.868	1272.42	1645.77	230.34	1291.13	1641.91	346.514	1464.07	1658.93	235.047	1467.08	1654.36	293.815	1505.86	1508.85	296.148	1582.23	1244.21	288.687	1360.78	1423.01	265.754	1303.44	1218.02	222.811	1593.29	1301.9	474.456	1418.37	1455.37	546.902	1401.34	1259.6	562.844	1353.41	1110.13	556.13	1199.27	1025.01	495.113	1125.82	980.937	549.355	1150.68	938.51	540.826	1077.27	936.52
568	0	315.328	1257.92	1643.19	228.858	1276.75	1639.44	345.06	1449.56	1656.04	233.559	1452.7	1651.83	291.795	1491.07	1506.29	295.429	1567.16	1241.48	286.957	1345.93	1420.27	264.061	1288.01	1215.48	221.834	1578.15	1299.13	472.855	1403.73	1452.89	545.37	1387.87	1257.29	561.762	1340.34	1107.69	555.048	1185.83	1022.63	494.209	1112.33	978.425	548.43	1137.3	936.268	540.029	1063.8	934.651
569	0	313.812	1243.34	1641.22	227.209	1262.1	1637.65	343.175	1434.9	1654.05	232.03	1438.11	1649.91	289.611	1476.22	1504.07	294.072	1551.7	1239.2	285.232	1330.91	1417.73	262.44	1272.47	1212.88	220.406	1562.77	1296.34	471.076	1388.91	1451.14	543.726	1374.25	1255.41	560.402	1327.26	1105.61	554.046	1172.96	1020.05	493.395	1099.42	975.92	547.181	1124.19	933.777	539.312	1051.03	931.896
570	0	311.981	1228.66	1639.74	225.483	1247.4	1636.33	341.473	1420.34	1652	230.232	1423.38	1648.15	287.728	1461.45	1501.94	292.974	1536.45	1237.38	283.329	1315.69	1415.86	260.737	1256.78	1211.3	219.109	1547.27	1294.21	469.194	1374.23	1449.28	541.904	1360.47	1253.61	558.745	1314.57	1103.39	553.216	1160.87	1017.33	492.545	1086.94	973.218	546.422	1112.47	930.779	538.612	1038.98	929.068
571	0	310.104	1213.75	1638.89	223.673	1232.48	1635.28	340.007	1405.72	1650.56	228.47	1408.49	1646.54	285.402	1446.24	1500.68	292.032	1521.01	1235.57	281.693	1300.55	1415.1	259.073	1240.99	1210.32	217.627	1531.84	1292.3	466.973	1359.38	1447.96	539.9	1346.5	1252.35	557.115	1302.19	1101.62	552.077	1148.88	1014.66	491.391	1074.82	970.094	545.247	1100.89	927.784	537.851	1027.53	925.681
572	0	308.278	1198.93	1637.93	221.855	1217.49	1634.75	337.914	1390.81	1649.35	226.361	1393.5	1645.66	282.871	1430.78	1499.45	290.743	1505.37	1234.73	279.804	1285.29	1414.17	257.45	1225.05	1209.61	215.699	1516.17	1290.86	464.902	1344.35	1447.26	538.021	1332.56	1251.63	555.266	1289.87	1100.43	550.808	1137.33	1011.9	489.962	1062.95	967.313	544.206	1090.14	924.589	537.144	1016.77	922.035
573	0	306.545	1183.92	1637.87	219.927	1202.33	1634.5	335.559	1375.75	1648.84	224.204	1378.43	1644.97	280.687	1415.46	1498.92	289.706	1489.66	1234.12	277.807	1269.88	1413.37	255.974	1209.14	1208.66	214.07	1500.94	1290.42	462.905	1329.32	1447.32	536.369	1318.29	1251.77	553.393	1277.7	1099.89	549.544	1126.11	1009.38	489.84	1052.7	964.08	543.513	1080.2	921.663	536.715	1006.76	918.227
574	0	304.476	1168.79	1638.24	217.898	1187.1	1634.67	333.395	1360.85	1648.8	221.929	1363.23	1644.84	278.234	1400.03	1499.1	288.358	1474.76	1234.45	275.499	1254.32	1413.22	254.58	1193.32	1208.95	212.104	1485.4	1290.45	460.752	1314.09	1447.62	534.69	1304.12	1252.32	551.406	1265.65	1099.91	548.337	1115.39	1007.27	489.141	1042.54	960.484	542.726	1070.94	918.716	536.257	997.523	914.278
575	0	302.409	1153.64	1638.69	215.927	1171.9	1635.17	330.896	1345.88	1649.2	219.396	1348.01	1645.25	275.908	1384.77	1499.49	287.206	1459.38	1235.02	273.885	1239.25	1413.6	253.287	1177.63	1209.17	210.007	1469.89	1290.93	458.652	1298.89	1448.61	533.044	1289.93	1253.18	549.509	1253.81	1100.5	547.284	1105.16	1005.19	488.457	1033.03	956.783	542.136	1062.19	916.027	535.799	988.925	909.918
576	0	300.552	1138.67	1639.57	213.9	1156.72	1636.1	328.851	1330.89	1649.87	217.05	1332.69	1646.25	273.53	1369.66	1500.28	285.694	1443.93	1236	271.441	1223.89	1414.26	251.668	1161.91	1210.13	207.911	1454.67	1291.89	456.589	1283.79	1449.83	531.341	1275.65	1254.7	547.554	1242	1101.65	546.51	1095.53	1003.25	487.803	1023.84	952.886	541.228	1054.15	912.951	535.304	980.918	905.236
577	0	298.349	1123.62	1640.57	211.841	1141.47	1637.18	326.189	1315.8	1650.9	214.711	1317.53	1647.05	271.309	1354.52	1501.72	284.449	1428.65	1237.14	269.884	1209.14	1415.64	250.138	1146.47	1211.28	206.028	1439.7	1293.07	454.321	1268.79	1451.42	529.645	1261.51	1256.38	545.433	1230.41	1102.79	544.978	1085.94	1001.12	486.987	1015.22	949.253	540.938	1047	910.118	534.795	973.667	900.686
578	0	296.483	1108.71	1642.07	209.828	1126.39	1638.33	324.062	1301.15	1652.34	212.472	1302.53	1648.41	269.031	1339.81	1503.02	282.838	1413.77	1238.32	267.98	1194.41	1417.38	248.347	1131.23	1213.57	203.471	1424.57	1294.21	452.012	1254.09	1453.28	528.01	1247.59	1258.38	543.26	1218.74	1104.49	543.806	1076.87	999.481	486.687	1007.61	945.7	540.899	1040.32	907.361	534.581	967.242	895.955
579	0	294.371	1093.95	1643.06	207.906	1111.38	1639.78	321.616	1286.49	1653.77	210.11	1287.51	1649.97	266.728	1325.29	1504.64	281.1	1399.16	1240.07	265.613	1179.64	1418.54	246.929	1116.44	1214.97	201.553	1409.93	1295.79	449.948	1239.79	1455.31	526.53	1233.58	1260.82	540.991	1207.11	1106.37	542.661	1068.22	997.573	485.907	999.944	941.397	539.966	1033.7	904.418	534.25	961.274	891.051
580	0	292.709	1079.28	1644.68	205.989	1096.62	1641	319.394	1271.91	1655.77	207.727	1272.7	1651.65	264.517	1311.01	1506.37	279.36	1384.64	1241.78	264.437	1165.45	1420.42	245.28	1101.71	1216.78	199.12	1395.13	1297.51	447.978	1225.87	1457.6	525.13	1219.87	1263.5	538.842	1195.56	1108.61	541.637	1059.77	996.316	484.98	993.5	937.497	539.7	1028.11	901.87	533.856	955.861	885.969
581	0	290.818	1064.86	1646.29	204.246	1082.05	1642.85	317.023	1257.56	1657.66	205.776	1258.1	1653.75	262.263	1296.99	1508.2	277.46	1370.34	1243.56	262.786	1151.36	1422.34	243.876	1087.42	1218.91	196.525	1380.62	1299.11	446.06	1212.31	1459.97	523.799	1206.3	1266.3	536.793	1183.96	1111.13	540.395	1051.42	995.02	484.25	987.203	933.975	539.416	1022.47	899.718	533.35	950.806	881.205
582	0	289.215	1050.6	1647.98	202.434	1067.61	1644.35	314.9	1243.41	1659.9	203.547	1243.68	1655.77	260.074	1283.09	1510.3	275.792	1356.6	1245.69	261.362	1137.42	1424.5	242.62	1073.39	1221.05	194.318	1366.48	1301.31	444.283	1199.17	1462.42	522.519	1192.93	1268.9	534.809	1172.53	1113.92	539.159	1043.34	994.04	483.533	981.28	930.518	539.421	1017.25	897.958	532.936	946.225	876.694
583	0	287.569	1036.53	1649.75	200.985	1053.39	1646.22	312.971	1229.43	1662.3	201.456	1229.35	1658.06	258.074	1269.39	1512.54	274.304	1343.12	1248.27	260.18	1123.7	1426.69	241.884	1059.7	1223.4	191.969	1352.41	1303.91	442.58	1186.07	1465.15	521.289	1179.8	1271.94	533.003	1160.99	1116.91	537.724	1035.17	993.475	482.9	975.69	927.544	539.378	1011.93	896.527	532.519	941.854	872.786
584	0	286.226	1022.86	1651.53	199.588	1039.42	1648.18	311.05	1215.75	1664.72	199.423	1215.26	1660.42	256.094	1255.81	1514.89	272.593	1329.8	1250.95	259.038	1110.25	1428.61	241.366	1046.23	1225.4	189.526	1338.66	1306.59	441.145	1173.4	1468.12	520.118	1166.99	1275.15	531.289	1149.78	1119.93	536.714	1027.63	993.228	482.228	970.611	924.203	539.546	1007.17	895.782	531.857	937.831	869.011
585	0	284.918	1009.34	1653.43	198.382	1025.66	1650.22	309.263	1202.27	1667.06	197.492	1201.41	1662.9	254.045	1242.33	1517.41	270.745	1316.43	1253.46	258.124	1096.99	1430.98	241.088	1033.01	1227.55	187.228	1325.14	1309.2	439.83	1161.01	1470.87	518.784	1154.77	1277.91	529.669	1138.84	1122.8	535.54	1020.09	993.03	481.433	965.848	921.43	539.909	1002.2	895.14	531.141	934.144	865.301
586	0	283.821	995.923	1655.65	197.187	1012	1652.24	307.392	1188.94	1669.6	195.752	1187.86	1665.25	252.333	1229.07	1519.89	268.972	1303.38	1255.96	257.36	1083.92	1433.23	240.849	1019.86	1230.07	184.929	1311.78	1311.78	438.659	1148.73	1473.56	517.609	1143.26	1280.5	528.164	1127.96	1125.84	534.578	1012.78	993.13	480.747	961.501	919.005	540.017	997.521	894.891	530.431	930.658	861.949
587	0	282.796	982.734	1657.88	196.145	998.543	1654.44	305.206	1175.73	1672.1	194.099	1174.43	1667.53	250.972	1216.24	1522.11	267.285	1291.06	1258.46	256.574	1070.94	1435.64	240.984	1006.89	1232.17	182.753	1298.75	1314.02	437.48	1136.6	1476.46	516.394	1131.84	1283.18	526.61	1117.5	1128.59	533.293	1005.45	993.664	479.933	957.343	916.938	540.155	992.579	894.929	529.875	927.636	859.041
588	0	281.803	969.877	1660.22	195.14	985.318	1656.73	304.028	1163.07	1674.64	192.617	1161.14	1669.95	249.391	1203.38	1524.64	265.337	1278.17	1260.92	255.902	1058.22	1438.26	241.085	994.076	1234.64	180.856	1285.85	1316.56	436.322	1124.61	1479.22	515.193	1121	1285.66	525.261	1107.61	1131.39	532.234	998.471	994.216	479	953.528	915.981	540.545	987.595	895.392	528.334	923.905	856.9
589	0	280.957	956.902	1662.89	194.269	972.254	1659.32	302.418	1150.22	1677.36	191.182	1148.06	1672.73	248.222	1190.81	1527.41	263.973	1265.84	1263.49	255.394	1045.66	1441.22	241.43	981.36	1237.91	179.292	1273.11	1319.32	435.41	1112.72	1482.19	514.079	1110.32	1288.35	524.201	1098.17	1134.23	531.192	991.619	995.26	477.464	948.806	916.237	540.679	982.558	896.295	527.421	920.706	855.459
590	0	280.286	944.141	1665.46	193.655	959.34	1661.79	301.546	1137.81	1680.48	189.975	1135.15	1675.64	246.894	1178.28	1530.49	262.342	1253.16	1266.44	254.817	1033.11	1443.87	242.023	968.793	1240.2	177.63	1260.39	1322.38	434.571	1100.78	1485.3	513.294	1099.87	1291.2	523.391	1089.07	1137.32	530.282	984.888	996.687	476.463	946.239	912.74	540.611	977.316	897.924	526.59	917.515	854.679
591	0	279.83	931.835	1668.09	193.073	946.539	1664.6	300.209	1125.19	1683.59	188.481	1122.13	1678.61	245.81	1165.94	1533.3	261.155	1241.11	1269.69	254.162	1020.67	1446.49	242.202	956.274	1242.55	176.536	1247.96	1325.31	434.005	1089.04	1488.65	512.706	1089.82	1294.48	522.534	1080.42	1140.55	529.589	978.548	998.309	475.588	942.575	913.72	541.111	972.287	899.818	525.213	913.801	854.505
592	0	279.327	919.524	1670.86	192.4	933.873	1667.26	299.14	1112.96	1686.77	187.434	1109.66	1681.52	244.733	1153.43	1536.37	259.891	1228.48	1272.57	253.496	1008.44	1449.59	242.329	944.034	1245.42	175.328	1235.46	1328.41	433.089	1077.33	1491.7	512.259	1080.18	1297.71	521.856	1072.4	1143.69	528.708	972.36	1000.1	473.832	939.062	914.564	540.983	967.214	901.641	522.785	910.753	853.015
593	0	278.732	907.863	1673.15	191.981	921.383	1670.17	298.29	1100.96	1689.89	186.358	1096.96	1684.78	243.594	1141.19	1539.4	258.712	1216.22	1275.56	253.062	996.23	1452.78	242.501	932.11	1248.71	174.403	1223.12	1331.39	432.199	1065.57	1495	511.815	1070.57	1300.87	521.29	1064.88	1146.71	528.279	966.487	1001.9	472.953	935.133	915.896	540.965	962.328	903.952	521.28	907.39	853.148
594	0	278.478	895.223	1676.57	191.605	908.967	1672.98	297.172	1088.78	1692.81	185.665	1084.6	1688.04	242.719	1129.07	1542.29	257.871	1204.09	1278.46	252.493	984.015	1455.95	242.18	919.991	1251.7	173.513	1210.75	1334.25	431.55	1053.97	1497.94	511.615	1061.48	1304.1	520.753	1057.44	1149.86	527.752	960.684	1003.93	472.154	930.937	917.614	540.466	957.037	905.968	520.164	903.714	854.023
595	0	278.296	883.425	1679.21	191.431	896.715	1676.12	296.247	1076.82	1695.9	184.503	1072.28	1690.67	241.723	1116.79	1545.24	256.931	1191.66	1281.31	251.991	971.97	1458.87	241.781	908.14	1254.59	172.509	1198.38	1337.03	430.828	1042.3	1501.31	511.444	1052.59	1307.55	520.368	1050.44	1153.11	527.616	955.27	1006.17	471.748	926.777	919.147	540.352	952.595	908.334	519.185	900.153	855.357
596	0	278.06	871.444	1682.32	191.268	884.449	1679.27	295.485	1065.08	1698.67	183.858	1059.95	1693.73	240.814	1104.81	1548.03	255.921	1179.27	1284.15	251.567	959.918	1462.05	241.283	896.218	1257.61	171.706	1186.16	1339.88	430.136	1030.72	1504.49	511.207	1043.81	1310.97	519.982	1043.55	1156.44	527.37	949.824	1008.5	472.251	922.153	921.388	540.043	948.175	910.591	518.626	896.643	856.85
597	0	278.106	859.501	1685.2	191.07	872.213	1682.11	294.837	1053.27	1701.38	183.105	1047.74	1696.56	240.1	1092.63	1550.8	255.164	1167.18	1287	251.045	947.738	1464.84	240.744	884.075	1260.69	170.81	1173.84	1342.59	429.541	1018.95	1507.36	511.094	1035.26	1314.15	519.683	1036.71	1159.58	527.435	944.552	1010.77	471.537	917.435	923.483	539.811	943.858	912.937	518.617	892.899	858.545
598	0	278.177	847.704	1687.98	190.985	859.994	1684.93	294.218	1041.46	1704.01	182.378	1035.61	1699.26	239.426	1080.51	1553.35	254.353	1154.76	1289.63	250.404	935.536	1467.51	240.03	872.027	1263.4	169.96	1161.62	1345.29	428.89	1007.29	1510.2	510.703	1026.85	1317.45	519.444	1029.95	1162.72	527.459	939.205	1013.03	471.6	912.036	925.775	539.499	939.814	915.105	518.578	888.783	860.538
599	0	277.919	836.22	1690.3	190.912	847.889	1687.85	293.559	1029.65	1706.7	181.672	1023.33	1701.98	238.408	1068.2	1556	253.355	1142.48	1292.2	249.881	923.45	1470.21	239.339	859.832	1266.32	169.105	1149.43	1347.98	428.273	995.497	1512.91	510.252	1018.52	1320.45	519.273	1023.28	1165.98	527.48	934.095	1015.15	472.362	906.798	927.803	538.768	935.806	917.377	518.9	884.766	862.374
600	0	277.829	824.28	1692.68	190.918	835.725	1690.32	293.063	1017.76	1709.04	181.175	1011.14	1704.54	238.124	1056.05	1558.21	252.708	1130.27	1294.75	249.555	911.345	1473	238.651	847.54	1269.57	168.328	1137.16	1350.5	427.704	983.699	1515.31	509.598	1009.97	1323.36	519.049	1016.44	1169.09	527.707	928.766	1017.46	472.041	901.221	930.398	538.547	931.618	919.128	519.839	881.273	863.713
601	0	278.065	812.429	1694.93	190.884	823.582	1692.58	292.491	1005.9	1710.98	180.78	999.009	1706.53	237.608	1043.82	1560.45	252.132	1118.02	1296.99	249.218	899.166	1474.98	238.143	835.279	1271.39	167.448	1125.01	1352.97	427.262	971.827	1517.67	509.141	1001.48	1326.14	518.826	1009.61	1172.01	528.115	923.62	1019.35	473.156	895.297	932.04	538.235	927.557	921.206	520.345	876.445	865.969
602	0	278.156	800.471	1697.2	190.885	811.318	1694.74	292.013	993.966	1712.87	180.292	986.87	1708.37	236.77	1031.51	1562.49	251.404	1105.76	1299.26	248.768	886.935	1476.89	237.596	823.058	1273.48	166.827	1113.01	1354.89	426.854	959.821	1519.75	508.622	992.996	1329.03	518.498	1002.64	1174.66	528.354	918.122	1021.46	474.082	889.458	934.275	537.453	923.551	922.896	521.158	871.967	868.038
603	0	278.347	788.529	1698.96	191.012	799.159	1696.59	291.448	982.105	1714.28	179.82	974.509	1709.89	236.534	1019.13	1564.25	250.55	1093.4	1300.89	248.383	874.703	1478.66	237.312	811.064	1275.06	166.024	1100.61	1356.93	426.437	947.873	1521.34	508.18	984.404	1331.17	518.308	995.811	1177.13	528.678	912.719	1023.11	474.706	883.306	936.078	537.1	919.462	924.399	522.279	866.978	870.195
604	0	278.492	776.521	1700.39	191.193	786.878	1698.23	290.936	970.035	1715.49	179.396	962.223	1711.21	235.912	1006.75	1565.46	249.739	1081.15	1302.56	248.137	862.429	1480.08	237.805	800.111	1275.43	165.34	1088.37	1358.42	426.019	935.83	1522.7	507.489	975.092	1333.19	518.008	988.648	1179.37	528.964	906.691	1024.6	475.271	876.63	937.647	536.608	914.855	925.833	523.098	862.14	871.423
605	0	278.764	764.509	1701.51	191.332	774.582	1699.3	290.831	958.2	1716.37	179.177	949.894	1712.27	235.627	994.37	1566.56	249.251	1069.07	1304.15	247.875	850.16	1481.19	236.68	786.554	1277.73	164.639	1076.02	1359.72	425.914	923.803	1523.93	506.969	965.925	1335.27	517.641	981.38	1181.44	528.98	900.865	1025.46	476.129	869.748	939.121	536.165	910.078	926.986	523.874	856.875	872.773
606	0	278.889	752.407	1702.17	191.516	762.297	1700.27	290.545	946.098	1716.82	178.955	937.579	1712.91	235.376	982.001	1567.3	248.397	1056.6	1304.71	247.598	837.793	1482.02	236.82	774.979	1277.58	164.167	1063.9	1360.8	425.517	911.583	1524.9	506.446	956.422	1336.96	517.281	974.161	1183.18	529.262	894.691	1026.6	476.392	860.373	942.68	535.905	905.001	928.215	524.616	851.471	873.941
607	0	279.174	740.307	1702.54	191.775	749.885	1700.77	290.35	933.917	1717.07	178.899	925.198	1713.2	235.113	969.371	1567.97	247.699	1044.31	1305.58	247.498	825.511	1482.54	235.849	761.545	1279.65	163.636	1051.67	1361.46	425.279	899.268	1525.25	506.069	946.672	1338.18	516.909	966.436	1184.69	529.773	888.603	1027.18	478.255	852.912	945.529	535.453	899.482	928.82	525.461	845.792	874.476
608	0	279.613	728.022	1702.53	192.099	737.419	1700.81	290.186	921.743	1716.75	178.825	912.716	1713.17	234.851	956.85	1568.06	247.563	1032.27	1306.04	247.146	812.95	1482.27	236.961	750.82	1277.26	163.311	1039.26	1361.82	425.098	886.798	1525.32	505.942	936.879	1339.1	516.561	958.721	1185.78	530.272	882.027	1027.98	477.812	845.687	942.421	535.152	893.737	929.316	526.553	839.689	874.924
609	0	280.056	715.741	1702.35	192.381	724.937	1700.67	290.171	909.489	1716.32	178.685	900.218	1712.9	234.672	944.353	1567.75	246.808	1019.69	1305.81	247.072	800.483	1481.91	236.91	738.347	1277.13	162.874	1026.93	1361.73	424.879	874.301	1525.24	505.575	926.606	1339.85	516.104	950.554	1186.63	530.647	875.115	1028.38	478.807	838.15	943.32	535.116	887.721	929.755	527.229	833.359	875.271
610	0	280.218	703.24	1701.64	192.746	712.371	1700.21	290.069	897.028	1715.52	178.666	887.601	1712.23	234.412	931.64	1567	246.496	1007.36	1305.34	246.863	787.923	1481.38	236.885	725.337	1277.04	162.602	1014.46	1361.19	424.635	861.764	1524.61	505.276	916.285	1340	515.659	942.106	1187.01	530.872	867.807	1028.23	479.581	830.477	942.823	534.984	881.217	929.582	527.795	826.592	874.581
611	0	280.712	690.819	1700.41	193.302	699.697	1699.29	290.201	884.54	1714.31	178.773	874.841	1711.21	234.319	918.99	1566.08	246.352	995.032	1304.55	247.082	775.122	1480.76	236.94	713.006	1275.97	162.477	1001.96	1360.34	424.462	849.233	1523.52	505.172	905.783	1339.79	515.333	933.366	1187	531.231	860.251	1027.42	480.526	822.671	942.013	535.111	874.432	929.264	528.708	819.716	873.663
612	0	281.291	678.155	1699.03	193.717	686.96	1697.74	290.57	872.092	1712.56	178.975	862	1709.76	234.392	906.292	1564.55	246.668	982.686	1303.5	246.388	762.184	1478.46	237.203	701.216	1273.83	162.337	989.401	1359.02	424.385	836.489	1522.36	504.886	894.638	1339.22	514.913	924.057	1186.71	531.701	852.398	1026.64	481.561	814.602	941.139	535.756	867.923	928.377	529.807	812.787	872.804
613	0	281.917	665.538	1697.52	194.153	674.081	1696.35	290.91	859.487	1710.85	179.076	849.195	1708.11	234.376	893.511	1562.88	246.592	970.077	1301.93	246.678	749.501	1477.15	237.215	689.563	1271.25	162.343	976.734	1357.39	424.317	823.779	1521.07	504.691	883.683	1338.39	514.498	914.527	1186.03	532.227	844.14	1025.78	482.506	806.296	939.973	535.907	860.248	927.564	530.829	805.522	871.687
614	0	282.473	652.814	1695.38	194.57	661.139	1694.42	291.153	846.809	1708.57	179.369	836.296	1706.26	234.332	880.56	1560.88	246.57	957.439	1299.88	246.788	736.625	1475.23	237.519	676.052	1270.36	162.389	963.875	1355.44	424.421	811.107	1519.28	504.414	872.248	1337.06	514.206	904.649	1185.03	532.563	835.425	1024.24	483.401	797.66	937.903	536.278	852.312	926.194	531.835	797.856	870.003
615	0	283.129	640.023	1693.03	195.282	648.185	1692.33	291.599	833.949	1706.21	179.719	823.287	1703.84	234.455	867.507	1558.63	246.655	944.598	1297.76	246.935	723.501	1472.88	237.439	664.277	1266.55	162.37	950.877	1353.18	424.497	798.353	1517.15	504.379	860.639	1335.26	513.862	894.123	1183.66	533.079	826.409	1022.37	484.258	788.784	935.702	536.802	843.942	924.458	532.945	790.026	867.839
616	0	283.821	626.979	1690.64	196.012	635.132	1689.91	292.154	821.099	1703.55	180.133	810.187	1701.3	234.353	854.406	1556.07	246.442	931.538	1295.09	247.226	710.372	1470.38	237.755	651.925	1263.62	162.411	937.738	1350.64	424.55	785.46	1514.64	504.216	848.891	1333.31	513.638	883.311	1182.08	533.443	816.821	1020.26	485.207	779.743	933.168	537.461	835.227	922.43	533.972	781.659	865.362
617	0	284.541	614.023	1687.84	196.716	622.044	1687.41	292.611	808.101	1700.66	180.695	797.107	1698.49	234.347	841.285	1553.47	247.054	918.709	1292.43	247.6	697.167	1467.74	237.982	638.73	1260.77	162.529	924.5	1347.82	424.772	772.509	1512.36	503.947	836.853	1331.26	513.66	872.302	1180.19	533.997	806.865	1017.75	486.045	770.191	930.043	538.26	826.209	920.116	535.196	773.158	862.472
618	0	285.295	600.911	1685.02	197.477	608.856	1684.4	293.308	795.019	1697.61	181.264	783.934	1695.49	234.705	827.998	1550.45	247.386	905.601	1289.45	248.065	683.822	1464.68	238.464	625.733	1257.63	162.733	911.367	1344.63	425.073	759.473	1509.42	503.96	824.661	1328.81	513.492	860.552	1177.94	534.64	796.821	1014.91	487.068	760.624	926.63	539.186	816.827	917.582	536.436	764.255	859.557
619	0	286.343	587.684	1682.07	198.436	595.59	1681.47	293.951	781.811	1694.45	181.931	770.596	1692.5	235.134	814.609	1547.4	247.83	892.435	1286.43	248.48	670.311	1461.32	239.007	612.551	1254.13	163.106	898.065	1341.36	425.535	746.309	1506.58	504.157	811.924	1326	513.385	848.503	1175.38	535.465	786.284	1012.1	488.355	750.523	923.646	540.311	807.097	914.764	538.036	755.258	856.196
620	0	287.281	574.475	1679.14	199.283	582.258	1678.58	294.646	768.597	1691.04	182.733	757.287	1689.32	235.651	801.295	1544.13	248.165	879.076	1282.89	248.985	656.778	1458.16	239.476	598.964	1250.86	163.495	884.741	1338.29	425.976	733.061	1503.57	504.213	799.213	1322.99	513.03	835.878	1172.25	536.227	775.312	1008.94	489.48	740.256	920	541.552	797.208	911.76	539.366	745.84	852.889
621	0	288.13	560.98	1676.17	200.207	568.768	1675.86	295.666	755.266	1688.16	183.501	743.802	1686.21	236.238	787.716	1541.13	248.389	865.409	1279.62	249.549	643.178	1455.01	240.092	585.602	1247.6	163.804	871.214	1334.91	426.447	719.778	1500.19	504.212	786.214	1319.8	512.993	822.954	1169.31	536.889	763.962	1005.36	490.63	729.74	915.785	542.759	786.86	908.482	540.724	736.088	848.985
622	0	289.184	547.552	1673.06	201.249	555.188	1672.9	296.578	741.845	1684.73	184.427	730.367	1683.06	237.15	774.15	1537.99	248.754	851.945	1276.46	250.491	629.532	1452.19	240.663	571.872	1244.02	164.375	857.63	1332	427.184	706.229	1497.03	504.353	772.936	1316.36	513.506	809.918	1166.38	537.78	752.293	1001.74	491.574	718.581	911.742	544.065	776.161	905.177	542.09	725.736	845.016
623	0	290.388	534.074	1670.26	202.389	541.589	1670.02	297.846	728.359	1681.99	185.53	716.719	1680.25	237.861	760.387	1535.07	248.871	838.328	1273.42	251.239	615.721	1448.87	241.321	557.977	1240.88	164.963	843.978	1328.91	428.074	692.613	1493.77	504.572	759.435	1313.22	513.716	796.224	1163.3	538.879	740.17	998.381	493.005	707.338	907.649	545.355	764.677	902.065	543.778	715.382	841.278
624	0	291.642	520.494	1667.48	203.547	528.012	1667.31	298.935	714.789	1678.8	186.69	703.085	1677.13	238.793	746.584	1532.1	249.133	824.814	1270.83	252.08	601.811	1445.85	242.091	543.976	1238.15	165.748	830.039	1326.14	429.099	678.872	1490.84	505.128	745.346	1309.84	514.096	782.345	1160.29	539.869	727.767	995.086	494.448	695.624	904.045	546.849	753.079	898.844	545.371	704.152	837.798
625	0	292.932	506.782	1664.94	204.873	514.41	1664.58	300.101	701.17	1675.73	187.871	689.392	1674.25	239.77	732.657	1529.47	249.203	811.062	1267.87	253.166	587.913	1442.82	242.724	529.933	1235.19	166.534	816.147	1323.66	430.166	665.066	1487.61	505.546	731.252	1306.52	514.531	768.221	1157.09	541.15	715.172	991.388	497.009	688.864	897.336	548.41	741.065	895.684	547.101	692.956	833.887
626	0	294.336	493.194	1662.39	206.285	500.766	1662.01	301.705	687.594	1672.9	189.221	675.78	1671.38	241.072	718.704	1526.65	249.588	797.04	1265.26	254.484	573.844	1440.06	243.648	515.878	1232.26	167.305	802.207	1320.92	431.432	651.215	1484.57	506.398	716.835	1302.73	514.85	753.658	1153.75	542.052	701.534	988.114	497.432	671.384	895.932	549.742	728.163	892.301	548.782	681.197	830.133
627	0	295.528	479.509	1659.9	207.491	487.045	1659.62	303.01	673.895	1670.17	190.611	662.115	1668.6	242.47	704.841	1523.91	249.821	782.768	1262.36	255.698	559.669	1437.4	244.445	501.628	1229.57	168.003	788.077	1318.36	432.692	637.277	1481.4	507.16	702.317	1299.28	515.31	739.15	1150.33	543.282	688.326	984.446	499.719	663.587	889.565	551.245	715.115	889.176	550.17	668.74	826.388
628	0	296.839	465.665	1657.87	208.728	473.299	1657.42	304.432	660.203	1667.36	192.216	648.586	1665.51	243.572	690.893	1521.54	250.5	768.643	1260.03	257.209	545.543	1435.04	245.285	487.351	1227.03	168.705	773.764	1316	434.173	623.395	1478.43	508.034	687.697	1295.78	515.903	724.435	1147.02	544.274	674.284	980.879	501.01	650.368	885.545	552.82	701.775	885.863	551.761	655.93	822.459
629	0	298.353	451.863	1656.25	210.31	459.571	1655.79	306.077	646.281	1665.41	194.053	634.985	1663.68	245.7	676.856	1519.41	251.175	754.556	1257.78	259.024	531.279	1432.98	246.499	473.157	1224.72	169.495	759.369	1313.91	435.839	609.328	1475.59	508.924	673.136	1292.47	516.514	709.499	1143.74	545.424	660.085	977.716	502.346	636.639	882.088	554.744	688.326	882.953	553.186	642.6	819.071
630	0	299.975	437.888	1655.18	211.832	445.76	1654.48	307.938	632.277	1663.94	195.923	621.165	1662.2	247.506	662.723	1518.03	251.729	740.028	1255.83	260.43	516.847	1431.05	248.057	458.873	1223.29	170.799	745.052	1312.36	437.662	595.306	1473.25	510.06	658.245	1289.41	517.371	694.355	1140.86	546.703	645.438	974.943	503.805	622.634	879.374	556.041	673.708	880.048	554.91	628.84	816.141
631	0	301.461	423.884	1654.58	213.219	431.969	1653.69	309.896	618.227	1663	197.789	607.343	1661.06	249.17	648.591	1516.6	252.098	725.339	1254.47	262.053	502.595	1429.95	249.386	444.247	1222.54	171.997	730.471	1311.12	439.463	581.385	1471.29	511.506	643.265	1286.72	518.285	678.947	1138.27	547.84	630.398	972.634	504.988	607.994	877.034	557.399	658.887	877.653	556.277	614.385	813.605
632	0	302.748	409.878	1654.03	214.574	418.225	1653.14	311.718	604.127	1662.23	199.584	593.577	1660.09	250.933	634.236	1515.84	252.491	710.902	1253.42	263.749	488.413	1429.36	250.492	429.611	1221.79	173.189	715.771	1310.29	441.224	567.479	1469.46	512.829	628.369	1284.48	519.176	663.354	1136.09	548.672	614.89	970.24	505.735	593.031	874.126	558.691	643.442	875.68	557.191	599.034	811.19
633	0	304.284	395.969	1653.83	216.193	404.404	1653.1	313.928	590.134	1661.89	201.348	579.998	1660.34	252.659	620.088	1515.37	253.052	696.498	1252.62	265.81	474.218	1429.49	251.961	414.651	1221.58	174.249	701.126	1309.63	443.005	553.809	1468.01	513.984	613.312	1282.59	520.101	647.645	1134.04	549.579	599.016	968.194	506.62	577.615	871.728	559.996	627.785	873.942	558.147	583.182	809.152
634	0	305.721	382.029	1654.17	217.716	390.7	1653.37	315.935	576.228	1662.02	203.514	566.364	1660.15	254.327	606.123	1515.15	253.327	681.69	1252.27	267.509	460.036	1429.53	253.183	398.712	1222.43	175.43	686.709	1309.41	444.83	540.286	1467.24	515.326	598.467	1281.22	521.193	631.685	1132.65	550.774	583.099	966.889	507.474	560.085	870.447	560.917	611.343	872.328	559.177	567.145	807.583
635	0	307.27	368.177	1655.1	219.128	377.17	1654.21	317.984	562.44	1662.35	205.867	552.825	1660.06	256.115	592.351	1515.6	253.811	667.381	1252.26	269.059	445.908	1430.12	254.606	383.68	1223.36	176.411	672.033	1309.67	446.507	526.833	1466.92	516.586	583.64	1280.17	522.103	615.869	1131.44	551.484	566.424	966.197	508.409	545.106	870.074	562.025	594.766	871.203	560.044	550.325	806.808
636	0	308.82	354.389	1656.35	220.644	363.655	1655.35	320.043	548.654	1662.94	207.676	539.452	1660.91	257.807	578.553	1516	254.379	653.363	1252.44	270.813	431.942	1431.15	255.656	367.718	1225.01	177.06	657.558	1310.15	448.199	513.487	1466.86	517.61	568.683	1279.41	522.979	599.888	1130.59	552.317	549.573	965.624	509.123	527.568	869.544	562.768	577.019	870.652	560.741	532.963	806.109
637	0	310.282	340.736	1657.73	222.033	350.16	1656.69	321.957	534.984	1663.69	209.514	526.025	1662.1	259.499	564.831	1517.02	254.953	639.544	1253.26	272.472	418.106	1432.33	256.967	352.442	1226.82	177.688	643.312	1310.9	449.768	500.185	1467.2	518.873	554.01	1279.11	523.998	583.883	1130.12	553.024	532.386	965.573	509.649	509.948	869.739	563.503	559.122	870.381	561.339	514.862	806.094
638	0	311.562	327.266	1659.28	223.388	336.985	1658.33	323.706	521.459	1664.7	211.39	512.898	1662.94	260.705	551.26	1518.06	255.375	625.672	1254.2	273.966	404.474	1433.77	258.498	338.328	1228.45	178.042	629.314	1311.91	451.104	486.786	1467.94	520.012	539.34	1279.29	524.849	567.849	1129.91	553.895	515.14	965.862	514.061	486.402	880.513	564.159	540.854	870.577	561.613	496.033	806.625
639	0	312.758	314.014	1660.74	224.817	323.932	1660.02	325.576	508.228	1665.99	213.155	499.998	1664.24	262.222	537.859	1519.46	255.951	612.163	1255.66	275.28	390.917	1435.51	259.705	323.956	1230.12	178.383	615.64	1313.31	452.287	473.334	1468.8	520.975	524.742	1279.66	525.785	551.638	1130.09	554.368	497.27	966.427	514.544	467.937	881.918	564.631	522.128	871.058	561.773	476.704	807.417
640	0	314.2	301.007	1662.35	226.083	310.942	1661.8	327.313	495.169	1667.04	214.797	487.012	1665.45	263.59	524.72	1520.77	256.563	598.778	1256.78	276.634	377.635	1436.99	261.004	310.011	1231.76	178.774	602.185	1315.07	453.53	459.951	1469.8	521.969	510.19	1280.24	527.058	535.737	1130.53	555.001	479.47	967.27	514.713	448.996	883.377	564.951	503.037	871.495	561.658	456.558	808.519
641	0	315.468	288.083	1664.12	227.263	298.134	1663.68	328.761	482.152	1668.31	216.345	474.21	1667.06	264.707	511.84	1522.34	257.388	585.498	1258.27	277.492	364.457	1438.22	262.192	296.339	1233.62	179.423	589.024	1316.73	454.695	446.607	1471.16	523.135	495.566	1280.98	528.531	519.903	1131.28	555.535	461.193	968.464	514.569	430.015	884.282	565.22	483.573	872.469	561.806	436.6	810.088
642	0	316.572	275.254	1666.23	228.3	285.505	1665.52	330.075	469.325	1670.07	217.708	461.672	1668.88	265.655	499.052	1523.91	258.468	572.436	1259.86	278.109	351.463	1439.97	262.773	283.102	1235.5	179.94	575.99	1318.5	455.641	433.285	1472.62	524.043	480.989	1282.14	529.851	504.038	1131.93	555.874	442.896	969.903	513.525	411.546	886.379	565.327	463.969	873.404	561.57	416.03	811.92
643	0	317.422	262.691	1667.88	229.175	272.92	1667.61	331.28	456.736	1671.75	218.707	449.077	1670.72	267.042	486.328	1525.72	259.194	559.371	1261.39	278.718	338.73	1441.85	263.109	270.23	1236.97	180.689	562.955	1320.08	456.25	419.839	1474.17	524.94	466.346	1283.04	531.063	487.563	1132.72	556.065	424.343	971.144	514.383	390.697	888.767	565.192	443.877	874.49	561.018	394.791	813.67
644	0	318.339	250.021	1670.01	230.184	260.514	1669.68	332.291	444.217	1673.6	219.781	436.656	1673.2	267.869	473.747	1527.76	260.405	546.598	1263.32	279.287	326.137	1443.88	263.172	257.754	1238.7	182.237	550.752	1322.92	456.947	406.565	1475.64	525.83	451.542	1283.97	532.1	470.892	1133.36	556.032	405.334	972.625	513.996	370.911	891.169	564.895	423.512	875.651	560.769	373.901	815.712
645	0	319.103	237.79	1671.95	230.841	248.074	1671.96	333.057	431.724	1675.51	220.709	424.402	1675.01	268.328	461.184	1529.65	261.573	534.218	1265.28	279.224	313.548	1445.74	263.072	245.558	1240.77	183.359	538.348	1324.55	457.539	393.719	1477.61	526.712	436.597	1285.44	533.367	454.313	1134.38	556.152	386.41	974.468	508.969	356.048	882.811	564.559	402.901	877.192	560.18	352.325	818.387
646	0	319.754	225.426	1674.46	231.453	235.9	1674.52	333.863	419.579	1677.71	221.274	412.051	1677.21	268.959	448.634	1532.29	262.482	521.789	1267.33	279.436	301.315	1447.9	262.654	233.542	1243.15	184.457	526.071	1326.32	457.978	380.65	1479.68	527.611	421.513	1286.97	534.643	437.663	1135.65	556.077	367.2	976.495	508.182	335.597	885.813	564.087	382.212	878.838	559.135	330.04	821.46
647	0	320.33	213.285	1676.82	232.022	223.635	1676.9	334.221	407.379	1679.8	221.897	399.848	1679.72	269.659	436.506	1534.47	263.272	509.161	1269.41	279.629	289.121	1450.17	262.223	221.82	1245.36	185.722	513.825	1328.24	458.386	367.865	1481.84	528.495	406.35	1288.4	535.67	420.652	1136.77	555.791	347.707	978.69	507.258	315.085	888.808	563.388	361.088	880.734	558.183	308.011	824.536
648	0	320.803	201.222	1679.46	232.353	211.48	1679.6	334.703	395.197	1682.33	222.433	387.778	1681.94	270.051	424.412	1536.58	264.656	497.283	1271.96	279.662	276.924	1452.54	261.689	210.29	1247.79	187.152	501.912	1330.4	458.867	355.449	1484.09	529.366	391.265	1290.07	536.979	403.813	1138.23	555.421	328.006	981.274	506.365	294.583	892.052	562.818	339.871	882.951	557.319	286.011	828.322
649	0	321.034	189.078	1682.09	232.638	199.469	1682.16	335.013	383.202	1684.87	222.609	375.662	1684.57	270.52	412.273	1539.3	265.528	484.795	1274.31	279.722	264.98	1455.18	260.931	198.793	1250.38	188.314	489.773	1332.86	459.017	342.867	1486.61	530.08	376.02	1292.13	538.187	386.808	1140.23	554.826	308.203	984.104	505.157	274.054	895.626	561.997	318.407	885.648	555.917	263.398	832.319
650	0	321.065	177.133	1684.6	232.693	187.422	1685.02	335.07	371.148	1687.48	222.637	363.591	1687.15	270.956	400.305	1541.83	266.479	472.337	1276.81	280.111	253.016	1458.24	260.234	187.18	1252.85	189.588	478.064	1335.07	459.232	330.529	1489.2	530.695	361.078	1294.11	538.388	369.241	1141.73	554.004	288.283	987.037	503.624	253.464	899.071	561.208	296.986	888.573	554.321	240.852	836.196
651	0	321.24	165.15	1687.34	232.925	175.484	1687.49	335.283	359.194	1690.12	222.82	351.697	1689.44	271.344	388.304	1544.28	267.062	459.56	1279.29	280.077	241.042	1460.74	260.043	175.568	1255.69	190.501	465.995	1337.64	459.459	318.182	1491.78	531.317	346.015	1296.3	539.152	352.095	1143.65	553.272	268.404	990.393	502.224	232.708	903.214	560.284	275.306	891.624	552.748	218.426	840.59
652	0	321.267	153.241	1689.95	232.809	163.552	1689.99	335.187	347.325	1692.59	222.825	339.787	1691.83	271.732	376.499	1546.62	268.108	447.504	1281.6	280.1	229.205	1463.17	259.842	163.813	1258.61	191.579	454.451	1339.7	459.789	306.084	1494.56	531.708	330.699	1298.9	539.945	334.871	1145.94	552.53	248.402	994.124	501.31	211.64	908.659	559.365	253.705	895.146	551.198	195.811	845.582
653	0	321.087	141.322	1692.6	232.526	151.653	1692.71	335.126	335.384	1695.24	222.661	327.889	1694.29	271.967	364.667	1548.94	269.031	435.449	1284.02	280.183	217.358	1465.81	259.703	152.105	1261.4	192.287	442.539	1341.99	459.934	293.814	1497.37	532.125	315.605	1301.55	540.726	317.908	1148.36	551.612	228.574	998.005	499.665	191.431	913.387	558.439	232.081	899.025	549.277	173.438	850.613
654	0	320.76	129.57	1694.87	232.649	140.234	1694.15	334.962	323.5	1697.67	222.617	316.156	1696.35	272.247	352.946	1551.34	270.048	423.632	1286.31	280.15	205.93	1468.09	259.678	140.457	1263.84	193.181	430.83	1344.35	459.983	281.75	1499.85	532.477	300.662	1303.9	541.367	301.016	1150.63	550.437	208.548	1001.88	497.738	170.792	917.771	557.376	210.307	902.93	547.192	150.749	855.662
655	0	320.418	117.77	1696.92	232.329	128.417	1696.32	334.73	311.727	1699.73	222.408	304.369	1698.49	272.436	341.232	1553.19	270.546	411.476	1288.5	280.217	194.189	1470.36	259.742	128.851	1266.11	193.72	419.154	1346.34	460.127	269.52	1502.44	532.804	285.773	1306.12	542.057	284.048	1152.85	549.342	188.797	1005.63	495.995	150.235	922.239	555.884	188.592	906.673	545.076	128.308	860.733
656	0	320.146	105.877	1699.23	232.082	116.704	1698.16	334.42	299.822	1701.92	222.157	292.555	1700.4	272.636	329.633	1555.18	271.117	399.619	1290.24	280.145	182.447	1472.52	259.663	117.21	1268.35	194.277	407.365	1348.22	460.008	257.196	1504.7	533.189	271.117	1308.41	542.648	267.309	1155.06	548.41	168.903	1009.46	494.127	129.733	927.133	554.715	167.075	910.674	542.824	105.995	865.999
657	0	319.77	94.0205	1701	231.592	104.949	1699.85	334.361	288.014	1703.97	222.024	280.925	1701.99	272.886	318.004	1556.76	271.599	387.721	1291.73	279.964	170.645	1474.57	259.514	105.687	1270.31	194.56	395.597	1349.97	460.004	245.125	1506.79	533.489	256.702	1310.52	543.033	250.574	1156.87	547.5	149.621	1013.34	492.21	109.315	931.901	552.858	145.641	914.424	540.504	83.8947	870.997
658	0	319.484	82.3627	1702.62	231.269	93.2548	1701.12	333.917	276.247	1705.26	221.669	269.101	1703.43	273.21	306.209	1558.5	272.171	375.755	1293.28	279.946	158.991	1476.15	259.444	94.0075	1272.16	195.477	383.892	1352.02	459.985	232.745	1508.61	533.825	242.206	1312.35	543.609	233.979	1158.58	546.487	130.456	1016.92	490.46	88.9181	936.627	551.468	124.33	918.117	538.272	62.0005	876.017
659	0	319.02	70.4937	1704.02	230.733	81.4575	1702.4	333.612	264.324	1706.79	221.465	257.413	1704.66	273.272	294.475	1559.43	272.598	363.764	1294.37	279.694	147.218	1477.56	259.364	82.3869	1273.7	195.945	372.079	1353.4	459.905	220.406	1510.3	534.236	227.908	1313.98	544.037	217.43	1160.13	545.347	110.813	1021.01	488.631	68.6314	941.426	549.753	103.093	921.521	535.875	40.0433	881.288
660	0	318.425	58.6468	1705.2	230.275	69.8219	1703.28	333.384	252.496	1708.03	221.07	245.62	1705.64	273.435	282.768	1560.57	273.076	351.678	1295.34	279.294	135.423	1478.75	258.842	70.4366	1275.06	196.284	360.383	1353.92	459.67	207.997	1511.75	534.517	213.509	1315.53	544.787	201.347	1161.67	544.231	91.983	1024.02	486.591	48.5465	946.019	547.846	82.211	925.1	533.336	18.2149	886.111
661	0	317.602	46.8999	1705.66	229.623	57.9152	1703.9	332.86	240.546	1708.62	220.717	233.845	1706.23	273.333	270.974	1561.12	273.484	339.554	1295.78	279.156	123.606	1479.73	258.378	58.4454	1275.79	196.738	348.579	1354.62	459.359	195.507	1512.56	534.615	198.991	1316.29	545.143	184.881	1162.58	543.042	73.0187	1026.76	484.46	28.2901	950.272	545.877	61.3141	928.24	530.698	-3.38098	890.75
662	0	317.076	35.0367	1705.96	229.119	46.1039	1704.3	332.528	228.643	1709.24	220.416	222.077	1706.75	273.22	259.156	1561.31	274.387	327.826	1295.91	278.876	111.705	1480.17	257.994	46.2782	1276.35	197.27	336.701	1354.94	459.193	183.047	1513.19	534.848	184.74	1317.09	545.608	168.525	1163.19	541.422	54.11	1029.56	482.512	8.3636	954.291	544.061	40.6929	931.243	528.209	-24.7883	895.222
663	0	316.512	23.0404	1706.25	228.44	34.1988	1704.4	332.246	216.642	1709.49	219.95	210.141	1706.72	273.4	247.175	1561.44	274.371	315.264	1296.05	278.434	99.7135	1480.4	257.487	34.0342	1277.04	197.872	325.119	1354.97	458.958	170.532	1513.7	535.008	170.435	1317.82	545.956	152.462	1163.75	540.62	35.4921	1032.41	480.529	-11.3264	958.473	542.126	20.0345	934.221	525.773	-45.9093	899.885
664	0	315.932	10.8522	1706.43	227.763	22.3104	1704.1	331.649	204.511	1709.36	219.54	198.258	1706.38	273.255	235.209	1561.2	274.781	303.057	1295.72	277.839	87.6	1480.31	256.897	21.8415	1277.14	198.046	312.92	1354.05	458.669	158.059	1513.75	535.097	156.127	1318.12	546.225	136.597	1163.86	539.331	17.1611	1034.9	478.48	-30.9364	962.278	540.256	-0.544195	936.939	523.195	-66.8734	904.163
665	0	315.117	-1.21352	1705.74	226.959	10.2701	1703.46	331.238	192.495	1708.85	218.955	186.236	1705.75	273.121	223.042	1560.62	275.249	290.793	1295.41	277.508	75.5491	1479.76	256.093	9.49099	1276.61	198.572	300.867	1353.59	458.256	145.319	1513.43	534.99	141.554	1317.8	546.499	119.927	1163.95	538.122	-1.44392	1036.8	476.516	-50.3136	965.563	538.385	-20.7671	939.507	520.588	-87.6965	908.128
666	0	314.338	-13.3527	1704.96	226.181	-1.79919	1702.85	330.691	180.34	1708.02	218.412	174.184	1704.87	272.948	210.858	1559.55	275.549	278.542	1294.52	277.13	63.3117	1478.95	255.362	-2.79816	1275.62	198.957	288.74	1352.66	457.83	132.591	1512.6	534.645	127.044	1317.29	546.703	103.908	1163.53	536.429	-19.7153	1038.38	474.672	-69.3355	968.212	536.482	-40.8111	941.501	518.099	-108.317	911.737
667	0	313.174	-25.3157	1703.58	225.3	-13.8899	1701.43	329.913	168.012	1706.78	217.8	162.074	1703.33	272.536	198.501	1558.41	275.699	266.201	1293.13	276.192	51.0352	1477.49	254.614	-15.1823	1274.62	199.044	276.591	1351.01	457.293	119.898	1511.44	534.637	112.956	1316.35	546.824	88.0621	1162.72	535.438	-37.8342	1040.06	472.405	-88.5633	971.549	534.409	-60.6665	943.507	515.448	-128.6	915.049
668	0	312.266	-37.6378	1702.22	224.304	-26.2044	1699.81	329.288	155.794	1705.09	217.058	149.786	1701.51	272.218	186.135	1556.69	275.712	253.899	1291.49	275.722	38.6758	1475.98	253.799	-27.4349	1272.96	199.272	264.346	1349.24	456.708	106.981	1509.92	534.297	98.7054	1315.06	546.812	72.3824	1161.31	534.097	-55.6461	1041.03	470.327	-107.309	973.867	532.497	-80.1997	945.087	512.875	-148.711	918.074
669	0	311.43	-50.0737	1700.45	223.473	-38.5033	1698.08	328.56	143.315	1703.13	216.418	137.586	1699.56	271.954	173.439	1554.7	275.54	241.438	1289.39	274.863	26.2041	1473.78	253.136	-39.7285	1270.91	199.434	252.064	1347.37	456.185	93.9365	1507.93	533.945	84.4389	1313.4	546.664	56.4444	1159.59	532.838	-73.271	1041.83	468.459	-125.85	976.022	530.327	-99.6082	946.081	510.531	-168.498	920.518
670	0	310.472	-62.7743	1698.76	222.391	-50.9955	1696.03	327.57	130.658	1700.59	215.604	125.168	1697.13	271.157	160.829	1552.17	275.395	229.028	1287.16	274.092	13.6775	1471.49	252.279	-52.242	1268.84	199.44	239.638	1345.25	455.517	80.8369	1505.82	533.64	70.3606	1311.4	546.617	40.8969	1157.61	531.529	-90.8585	1042.27	466.519	-144.274	977.847	528.458	-118.873	946.98	508.335	-188.27	923.503
671	0	309.233	-75.3031	1696.33	221.268	-63.4249	1693.55	326.821	118.199	1698.08	214.693	112.635	1694.55	270.454	148.114	1549.88	274.943	216.456	1284.54	273.144	1.16378	1468.77	251.286	-64.6335	1266.05	199.349	227.23	1342.59	454.783	67.5458	1503.4	532.952	56.322	1309.08	546.422	25.4367	1155.43	529.574	-108.319	1042.3	464.406	-162.436	979.181	526.292	-137.904	947.516	505.727	-207.412	925.12
672	0	307.872	-88.0216	1693.45	220.041	-76.1582	1690.81	325.919	105.304	1695.16	213.718	100.034	1691.39	269.997	135.02	1547.05	274.503	203.818	1281.96	272.482	-11.7044	1465.84	250.181	-77.2644	1262.68	198.884	214.713	1339.74	453.845	54.1343	1500.24	532.079	42.0892	1306.09	546.024	9.95121	1153	528.058	-125.486	1041.72	462.332	-180.357	979.787	525.166	-156.719	947.879	503.423	-226.711	927.331
673	0	306.612	-100.869	1690.43	218.811	-88.898	1687.92	324.807	92.3935	1691.86	212.802	87.2916	1688.05	269.199	121.991	1543.99	273.975	191.244	1279.01	271.666	-24.7132	1462.47	249.303	-89.8802	1259.1	198.374	202.079	1336.96	452.831	40.5895	1497.24	531.3	27.863	1303.01	545.668	-5.40052	1150.22	526.523	-142.559	1040.86	460.43	-197.963	980.29	522.229	-174.895	947.44	501.182	-245.458	928.362
674	0	305.349	-113.858	1687.6	217.421	-101.83	1684.71	323.802	79.4066	1688.81	211.592	74.3407	1684.76	268.384	108.918	1541.03	273.488	178.608	1276.16	270.196	-37.7294	1458.85	248.239	-102.675	1255.85	197.853	189.3	1333.68	452.128	27.1449	1494.37	530.598	14.115	1300.11	545.234	-20.7528	1147.38	525.128	-159.26	1039.99	458.585	-215.635	981.121	520.25	-192.901	947.07	499.096	-263.661	929.221
675	0	303.966	-126.978	1684.39	215.905	-114.855	1681.3	322.698	66.2854	1685.44	210.374	61.2969	1681.17	267.49	95.7017	1537.63	272.671	165.668	1273.01	268.921	-50.9317	1455.27	247.279	-115.338	1252.12	197.156	176.561	1330.06	451.178	13.5314	1491.06	529.608	0.140869	1296.61	544.692	-35.5674	1144.28	523.63	-175.73	1038.66	456.734	-232.547	980.76	518.15	-210.588	946.314	497.013	-281.603	929.892
676	0	302.36	-140.311	1680.91	214.327	-128.123	1677.88	321.33	52.9854	1681.67	209.01	48.2309	1677.52	266.366	82.3377	1534.22	271.612	152.575	1269.11	267.767	-64.2313	1451.54	246.021	-128.307	1248.01	196.46	163.411	1326.48	449.952	-0.154429	1487.33	528.452	-13.7846	1292.98	543.657	-51.1444	1140.7	522.127	-192.094	1036.88	454.847	-249.329	979.928	516.968	-228.267	945.251	494.896	-299.215	929.677
677	0	300.628	-153.757	1677.42	212.694	-141.512	1674.3	319.837	39.5532	1678.03	207.561	34.9497	1673.89	265.275	69.186	1530.61	270.577	139.263	1265.24	266.434	-77.7098	1447.65	244.951	-141.323	1243.94	195.58	149.987	1322.53	448.671	-13.9069	1483.58	527.136	-27.7069	1288.98	542.53	-66.324	1137.26	520.48	-208.264	1034.72	452.993	-265.93	978.734	514.246	-245.221	943.23	492.906	-316.302	928.961
678	0	298.769	-167.303	1673.97	211.038	-154.853	1670.68	318.172	25.9929	1674.47	205.996	21.4464	1669.98	264.084	55.6728	1527.15	269.441	125.624	1261.46	265.016	-91.2852	1443.91	243.692	-154.631	1240.04	194.708	136.954	1319.04	447.372	-27.6933	1479.98	525.609	-41.5184	1285.03	541.272	-81.2415	1133.46	518.806	-224.058	1032.38	451.185	-282.104	977.33	513.028	-261.791	941.638	490.989	-333.01	927.696
679	0	296.971	-180.978	1670.64	209.125	-168.382	1667.3	316.409	12.2892	1670.95	204.254	7.83266	1666.41	262.357	41.7379	1523.55	268.375	111.825	1257.66	263.22	-104.688	1440.47	242.512	-168.041	1236.17	193.493	123.387	1315.25	445.886	-41.5929	1476.22	523.88	-55.423	1281.27	539.809	-96.1443	1130.08	517.172	-239.606	1029.89	449.345	-298	975.462	510.389	-278	939.222	489.289	-349.222	926.463
680	0	294.934	-194.83	1667.21	207.005	-182.158	1663.8	314.545	-1.56404	1667.48	202.541	-5.79467	1663.05	261.33	28.048	1520.58	267.304	97.8863	1254.31	261.824	-118.851	1436.75	241.458	-181.707	1232.48	192.461	109.885	1312.03	444.384	-55.5128	1472.93	522.21	-69.3809	1277.81	538.226	-110.906	1126.67	515.692	-254.794	1027.25	447.642	-313.592	973.354	509.187	-293.822	936.891	487.667	-365.023	924.818
681	0	292.881	-208.704	1664.39	204.863	-196.011	1660.59	312.544	-15.4743	1664.26	200.6	-19.6218	1659.61	259.559	13.9625	1517.51	266.478	83.9611	1251.28	260.008	-133.011	1433.47	240.121	-195.65	1229.09	191.282	96.0885	1308.69	442.823	-69.6092	1469.77	520.352	-83.2799	1274.75	536.538	-125.48	1123.62	514.085	-269.706	1024.71	446.086	-328.666	971.019	506.789	-308.802	934.162	486.11	-380.314	922.768
682	0	290.359	-222.823	1661.39	202.477	-209.851	1657.48	310.462	-29.5395	1661.17	198.408	-33.5149	1656.27	257.454	-0.170758	1514.33	265.623	69.9868	1248.55	257.974	-147.167	1430.23	238.445	-209.759	1225.7	190.006	82.1821	1305.8	440.968	-83.9482	1466.88	518.273	-97.313	1271.84	534.639	-139.855	1120.9	512.383	-284.305	1021.88	444.536	-343.444	968.242	505.964	-323.7	931.855	484.559	-395.089	920.18
683	0	287.769	-237.054	1658.31	199.983	-223.974	1654.17	308.455	-43.7784	1658.55	196.342	-47.5498	1653.3	255.401	-14.4902	1511.3	264.48	55.5746	1245.85	255.92	-161.589	1426.93	236.696	-224.021	1222.19	188.619	68.0156	1302.9	438.857	-98.6027	1463.84	515.878	-111.596	1268.8	532.659	-154.339	1118.24	510.562	-298.791	1018.63	443.003	-357.775	965.567	503.783	-337.887	928.549	483.336	-409.288	917.078
684	0	285.353	-251.255	1655.72	197.565	-238.166	1651.73	306.132	-58.0111	1655.68	193.99	-61.7144	1650.34	253.498	-29.0426	1508.72	263.316	41.0879	1243.21	253.921	-176.071	1424.03	234.818	-238.512	1218.97	187.235	53.7317	1300.1	436.678	-113.42	1461.4	513.449	-125.9	1266.42	530.584	-168.473	1115.76	509.057	-312.7	1015.68	441.708	-371.827	962.31	502.434	-351.526	925.446	482.228	-422.994	913.682
685	0	282.817	-265.555	1653.49	194.895	-252.312	1649.34	303.792	-72.2787	1652.93	191.497	-75.9462	1647.72	251.102	-43.5894	1505.95	261.958	26.2786	1240.63	251.312	-190.567	1421.67	232.94	-252.858	1216.52	185.784	39.0562	1297.17	434.457	-128.166	1459.24	511.264	-140.261	1264.51	528.344	-182.493	1113.48	507.627	-326.264	1013.13	440.381	-385.419	958.891	501.254	-364.748	922.588	481.128	-436.233	910.534
686	0	280.167	-279.914	1651.38	192.345	-266.53	1646.94	300.959	-86.7279	1650.24	188.969	-90.2316	1645.02	248.327	-58.0491	1503.4	260.332	11.2372	1237.93	249.009	-205.424	1419.07	230.739	-267.55	1214.13	184.337	24.1958	1294.26	431.848	-142.877	1457.18	508.768	-154.937	1262.56	526.035	-196.261	1111.3	506.06	-339.593	1010.04	439.136	-398.608	955.245	500.902	-377.623	919.475	480.13	-448.973	906.807
687	0	277.495	-294.438	1649.56	189.509	-281.107	1645.34	298.397	-101.192	1648.45	186.29	-104.638	1642.87	246.333	-72.8912	1501.66	258.743	-3.85018	1235.66	246.189	-220.066	1416.92	228.499	-282.502	1211.89	182.646	9.45626	1291.88	429.249	-157.71	1455.31	506.478	-169.789	1260.8	523.554	-210.077	1109.25	504.506	-352.632	1006.86	438.031	-411.464	951.369	499.757	-389.894	915.924	479.295	-461.234	902.409
688	0	274.64	-308.986	1648.41	186.684	-295.764	1644.03	295.557	-115.624	1646.99	183.579	-119.271	1641.49	243.021	-87.5339	1499.92	257.105	-19.113	1234.08	244.038	-235.163	1415.29	226.286	-297.617	1210.45	180.693	-5.83578	1289.83	426.559	-172.682	1454.05	503.959	-184.833	1259.69	520.963	-223.839	1107.78	502.983	-365.339	1003.83	436.678	-424.19	947.34	498.801	-401.535	912.378	478.619	-473.011	898.496
689	0	271.862	-323.497	1647.75	184.019	-310.406	1643.19	292.657	-130.144	1646.12	180.493	-133.996	1640.57	240.05	-102.445	1498.67	255.398	-34.7157	1232.81	241.161	-250.028	1414.4	224.02	-313.122	1209.65	178.568	-21.1627	1288.42	423.956	-187.402	1453.21	501.657	-200.004	1259.18	518.429	-237.262	1106.97	501.482	-377.792	1001.05	435.626	-435.745	942.744	497.878	-412.943	909.28	477.975	-484.078	893.999
690	0	268.986	-338.176	1647.33	181.266	-324.928	1642.78	289.625	-144.725	1645.53	177.578	-148.554	1639.73	237.133	-117.555	1497.86	253.996	-50.2926	1232.05	238.774	-264.922	1413.69	221.889	-328.894	1209.31	176.188	-36.6441	1287.5	421.41	-202.156	1452.98	499.391	-215.342	1258.97	515.749	-250.802	1106.58	500.133	-389.628	998.114	434.693	-447.193	938.762	497.255	-423.647	906.117	477.483	-494.634	889.546
691	0	266.362	-352.721	1647.69	178.434	-339.622	1643.03	286.553	-159.226	1645.22	174.626	-163.181	1639.59	234.377	-132.852	1497.72	252.722	-65.9675	1231.9	236.813	-279.91	1413.45	219.871	-344.797	1209.59	173.834	-52.0135	1286.83	418.975	-216.86	1453.1	497.134	-230.409	1259.49	513.046	-264.102	1106.48	498.856	-401.249	995.857	434.21	-457.974	935.023	496.932	-433.64	903.179	477.361	-504.498	885.776
692	0	263.759	-367.157	1648.7	175.685	-354.272	1643.69	283.604	-173.675	1645.8	171.519	-177.936	1639.74	231.511	-147.807	1497.73	251.298	-81.3547	1232.07	234.352	-294.871	1413.9	217.803	-360.79	1210.56	171.628	-67.51	1286.73	416.779	-231.61	1453.95	495.111	-245.248	1260.46	510.427	-277.142	1107.04	497.622	-412.414	994.108	433.626	-468.291	931.401	497.029	-443.105	900.722	477.19	-513.616	881.248
693	0	260.789	-381.694	1649.81	172.84	-368.885	1644.54	280.346	-188.128	1646.33	168.491	-192.604	1640.13	228.843	-162.819	1498.27	249.762	-96.6336	1232.87	231.787	-310.027	1414.72	215.598	-376.705	1211.61	169.378	-82.8344	1287.3	414.144	-246.57	1454.96	492.797	-260.012	1261.54	507.66	-290.01	1108.07	496.381	-423.34	992.476	433.372	-477.695	927.564	495.628	-452.239	898.203	477.306	-522.122	876.692
694	0	257.907	-396.146	1651.14	170.457	-383.183	1645.54	277.461	-202.569	1647.52	165.427	-207.279	1640.84	226.281	-177.887	1499.22	247.987	-111.909	1234.14	229.356	-324.88	1415.45	213.513	-392.47	1212.77	167.256	-98.0378	1288.32	411.665	-261.692	1456.18	490.369	-274.573	1262.79	505.046	-302.72	1109.14	495.334	-433.932	990.988	432.901	-486.985	924.099	495.871	-461.006	896.243	477.278	-530.257	872.525
695	0	255.219	-410.636	1652.97	167.51	-397.936	1647.08	274.455	-216.842	1648.56	162.49	-221.8	1641.89	223.895	-192.996	1500.64	246.257	-126.886	1235.43	226.989	-339.893	1416.82	211.499	-408.002	1214.38	165.176	-113.085	1289.87	409.205	-276.881	1457.92	488.199	-288.856	1264.73	502.288	-315.304	1110.82	494.424	-444.045	990.089	432.833	-495.806	921.142	495.594	-469.079	894.604	477.683	-537.838	868.979
696	0	252.605	-424.856	1655.17	165.118	-412.148	1648.92	271.516	-231.129	1650.26	159.682	-236.245	1643.05	221.466	-207.899	1502.34	244.095	-142.054	1236.94	224.681	-354.905	1418.64	209.436	-423.294	1216.51	163.078	-128.01	1291.32	406.937	-291.826	1460.19	486.281	-302.788	1267.09	500.182	-327.369	1113.08	493.305	-453.799	989.663	432.418	-504.103	918.818	495.835	-476.764	893.46	478.013	-544.852	865.803
697	0	250.001	-439.085	1657.43	162.803	-426.217	1650.81	268.695	-245.353	1651.81	156.983	-250.557	1644.58	219.22	-222.657	1503.97	242.207	-156.754	1238.58	222.585	-369.805	1420.68	207.427	-438.179	1218.72	160.894	-142.875	1292.86	404.682	-306.57	1462.46	484.348	-316.872	1269.49	497.804	-339.443	1115.39	492.58	-463.158	989.337	432.018	-511.956	916.442	496.513	-484.299	892.606	478.446	-551.489	862.838
698	0	247.506	-453.305	1659.95	159.876	-440.653	1653.03	266.192	-259.456	1653.85	154.353	-264.782	1646.09	216.805	-237.175	1505.76	240.213	-171.249	1240.67	220.742	-384.495	1422.64	205.624	-452.876	1220.78	158.607	-157.768	1295.08	402.619	-321.294	1465	482.728	-330.725	1272.18	495.058	-351.661	1117.6	491.711	-472.432	989.322	431.998	-519.554	914.578	496.361	-491.429	891.987	478.885	-557.777	860.163
699	0	245.059	-467.117	1662.27	157.843	-454.456	1655.13	263.803	-273.428	1656.02	151.858	-278.826	1647.7	214.83	-251.487	1507.66	238.504	-185.217	1243.14	218.957	-399.09	1424.77	204.178	-467.169	1223.11	156.226	-172.394	1297.28	400.765	-335.38	1467.6	481.27	-344.487	1275.03	493.581	-363.096	1120.56	490.835	-481.485	989.737	431.95	-526.847	913.177	497.335	-498.419	892.195	479.398	-563.699	857.906
700	0	242.703	-481.162	1664.74	155.543	-468.449	1657.19	261.242	-287.281	1657.87	149.622	-292.82	1649.51	212.742	-265.85	1510	237.588	-198.119	1246.36	217.49	-413.218	1426.95	202.841	-481.234	1225.31	153.903	-186.962	1299.69	399.041	-349.34	1470.33	479.732	-358.092	1277.8	491.877	-374.593	1123.32	490.368	-490.377	990.112	431.928	-533.928	912.041	497.781	-505.299	892.263	479.733	-569.595	855.867
701	0	240.546	-494.959	1667.22	153.638	-482.303	1659.51	259.29	-301.151	1660.47	147.448	-306.783	1651.32	211.064	-279.844	1512.38	234.663	-212.998	1247.97	216.459	-427.314	1429.08	201.965	-495.102	1227.4	151.762	-201.107	1302.32	397.586	-362.894	1472.92	478.506	-371.389	1280.47	490.212	-385.905	1126.14	489.833	-499.151	990.64	431.81	-540.843	911.084	498.019	-512.231	892.703	479.8	-575.258	853.724
702	0	238.776	-508.862	1670.12	151.766	-496.024	1661.72	257.33	-314.868	1662.91	145.671	-320.579	1653.5	209.31	-293.797	1514.83	233.578	-225.495	1251.46	215.576	-441.012	1431.45	201.571	-508.597	1229.76	149.494	-215	1304.98	396.389	-376.076	1475.62	477.623	-383.942	1283.41	489.001	-396.937	1128.93	489.246	-507.365	991.231	431.964	-547.558	910.836	498.189	-518.742	893.377	480.057	-580.724	852.49
703	0	237.082	-522.327	1672.89	150.024	-509.724	1664.33	255.632	-328.488	1665.62	143.921	-334.222	1655.86	207.95	-307.474	1517.4	231.825	-238.677	1254.12	214.981	-454.557	1434.1	201.411	-521.93	1232.35	147.386	-228.711	1307.78	395.51	-388.754	1478.7	476.838	-396.172	1286.51	488.11	-407.765	1131.92	489.028	-515.679	992.777	432.006	-554.162	910.984	499.132	-525.633	894.8	480.2	-586.327	851.773
704	0	235.429	-535.872	1675.33	148.178	-523.38	1666.68	253.955	-342.029	1668.13	142.348	-347.775	1657.93	206.339	-320.958	1520.05	229.968	-251.754	1256.98	214.346	-468.008	1436.49	201.31	-535.109	1234.54	145.267	-242.118	1310.66	394.358	-401.485	1481.42	476.015	-408.008	1289.2	487.354	-418.288	1134.9	488.566	-524.275	994.057	431.795	-560.894	911.239	499.641	-532.597	895.991	480.016	-591.951	851.188
705	0	233.921	-549.533	1678	146.761	-536.946	1668.88	252.549	-355.486	1670.94	140.943	-361.273	1660.44	205.401	-334.23	1522.71	228.267	-264.589	1259.92	213.819	-481.276	1438.85	201.374	-548.158	1236.82	143.414	-255.39	1313.62	393.544	-413.891	1484.02	475.202	-419.367	1291.8	486.367	-428.533	1137.36	488.221	-532.632	995.398	431.754	-567.521	911.523	500.086	-539.884	897.69	479.793	-597.744	850.793
706	0	232.632	-562.956	1680.76	145.62	-550.296	1671.34	251.46	-368.819	1674.13	139.741	-374.658	1662.96	204.045	-347.48	1525.48	226.64	-277.313	1263.07	213.565	-494.335	1441.51	201.716	-561.016	1239.33	141.63	-268.402	1316.62	392.85	-426.133	1486.99	474.698	-430.039	1294.44	486.286	-438.138	1140.39	488.054	-540.773	997.063	431.816	-574.07	912.577	500.921	-546.79	899.331	479.918	-603.448	850.888
707	0	231.754	-576.192	1683.66	144.87	-563.471	1674.04	250.297	-382.06	1676.82	138.719	-387.915	1665.64	203.469	-360.449	1528.42	225.265	-289.987	1265.95	213.299	-507.175	1444.47	202.174	-573.658	1242.13	140.169	-281.272	1319.76	392.45	-438.228	1489.96	474.337	-440.264	1297.37	486.117	-447.343	1143.21	488.203	-548.531	999.25	431.646	-581.269	913.957	501.347	-553.945	901.471	479.687	-609.4	851.906
708	0	230.774	-589.46	1686.52	143.935	-576.642	1676.55	249.362	-395.211	1679.89	137.852	-401.206	1668.2	202.577	-373.202	1531.41	223.932	-302.462	1269.08	213.05	-519.92	1447.25	202.616	-586.319	1244.66	138.961	-293.972	1322.98	391.916	-450.444	1492.71	474.04	-450.207	1299.98	485.824	-456.345	1145.89	488.094	-556.561	1001.22	431.999	-587.826	915.056	501.616	-561.131	903.236	479.501	-615.356	852.802
709	0	230.135	-602.688	1689.54	143.444	-589.788	1679.46	248.835	-408.393	1683.37	137.164	-414.298	1671.42	201.841	-386.336	1534.53	222.682	-314.948	1272.35	212.882	-532.582	1450.14	203.106	-598.903	1247.28	137.925	-306.598	1326.24	391.605	-462.506	1495.58	473.856	-459.847	1302.81	485.777	-464.895	1148.66	488.339	-563.954	1003.21	431.59	-594.604	916.79	502.066	-568.03	905.634	479.457	-621.415	853.982
710	0	229.701	-615.67	1692.26	142.803	-602.769	1682.12	248.094	-421.334	1686.35	136.649	-427.277	1674.46	201.604	-399.166	1537.69	221.402	-327.463	1275.52	212.657	-545.101	1453.2	203.503	-611.347	1250.07	136.967	-319.146	1329.5	391.268	-474.557	1498.63	473.709	-469.065	1305.87	485.89	-473.103	1151.78	488.737	-571.28	1005.58	431.905	-601.32	918.983	502.446	-574.852	908.146	479.565	-627.667	856.039
711	0	229.059	-628.684	1694.97	142.413	-615.665	1684.82	247.528	-434.267	1689.1	136.319	-440.194	1677.39	200.924	-411.84	1540.52	220.312	-339.893	1278.57	212.381	-557.688	1456.07	203.666	-623.658	1252.57	136.203	-331.754	1332.66	390.794	-486.812	1501.5	473.361	-478.419	1308.73	485.774	-481.209	1154.67	488.561	-578.345	1007.49	432.462	-608.154	921.133	502.289	-581.386	910.282	479.661	-634.031	857.859
712	0	228.687	-641.508	1697.42	142.21	-628.54	1687.38	247.437	-447.048	1692.3	135.978	-453.067	1680.05	201.307	-424.383	1543.93	219.222	-352.268	1281.62	211.551	-570.591	1459.03	203.657	-636.055	1254.99	135.391	-344.23	1335.69	390.437	-499.032	1504.14	473.246	-487.567	1311.59	485.84	-489.183	1157.6	488.874	-585.47	1009.7	432.288	-615.155	923.175	502.46	-587.797	912.408	479.678	-640.359	859.355
713	0	228.725	-654.41	1700.44	142.094	-641.286	1690.11	247.419	-459.8	1695.25	135.883	-465.78	1683.13	199.901	-436.936	1546.16	218.182	-364.727	1284.23	211.624	-582.99	1461.94	203.7	-648.192	1257.89	134.596	-356.75	1338.52	390.339	-510.998	1507.15	473.357	-496.472	1314.81	486.033	-496.918	1160.66	490.102	-592.021	1012.27	432.957	-622.119	925.872	502.671	-593.73	914.778	480.541	-646.625	861.732
714	0	228.816	-667.089	1703.24	142.039	-653.889	1693.16	247.333	-472.505	1697.82	135.946	-478.39	1685.92	200.144	-449.427	1549.8	217.334	-377.036	1287.14	211.666	-595.408	1464.95	203.396	-660.354	1260.89	133.883	-369.251	1341.46	390.312	-523.061	1510.17	472.996	-505.411	1317.78	486.213	-504.249	1163.74	490.72	-598.675	1014.9	434.176	-629.231	928.816	502.206	-599.312	916.985	481.514	-652.805	864.499
715	0	228.78	-679.652	1705.44	141.903	-666.545	1695.57	247.459	-485.126	1700.36	136.034	-491	1688.46	200.065	-461.876	1552.57	216.099	-388.862	1290.21	211.435	-607.837	1467.44	202.994	-672.521	1263.28	133.171	-381.774	1344.17	390.04	-535.256	1512.55	473.022	-514.544	1320.6	486.166	-512.238	1166.6	491.172	-605.518	1017.01	434.345	-636.516	931.101	502.925	-605.294	919.319	482.374	-659.45	866.848
716	0	228.797	-692.509	1707.75	142.073	-679.1	1697.79	247.667	-497.768	1702.71	136.164	-503.646	1690.92	199.672	-474.383	1554.82	215.175	-401.157	1293.02	211.443	-620.166	1469.61	202.565	-684.753	1265.55	132.516	-394.388	1347.03	389.936	-547.416	1514.72	472.701	-523.843	1323.09	486.167	-519.975	1169.05	491.79	-612.234	1018.77	435.202	-643.963	933.127	502.873	-611.242	921.076	483.347	-665.914	868.736
717	0	229.109	-705.118	1709.82	142.393	-691.746	1700.21	248.037	-510.369	1704.82	136.356	-516.195	1693.25	199.847	-486.879	1557.47	214.11	-413.464	1295.1	211.508	-632.587	1471.75	202.325	-696.889	1267.6	131.936	-406.867	1349.36	389.778	-559.612	1516.79	472.511	-533.215	1325.35	485.988	-527.814	1171.42	492.448	-619.145	1020.75	436.06	-651.544	935.185	502.705	-617.23	922.843	484.392	-672.743	870.896
718	0	229.493	-717.594	1711.75	142.759	-704.296	1702.16	248.236	-522.978	1706.42	136.808	-528.793	1695.27	199.581	-499.372	1559.21	212.998	-425.951	1296.85	211.509	-645.052	1473.8	202.114	-708.941	1269.66	131.325	-419.335	1351.61	389.776	-571.719	1518.64	472.318	-542.6	1327.73	485.851	-535.491	1173.73	492.829	-625.961	1022.46	437.079	-659.306	937.33	502.518	-623.273	924.396	485.579	-679.505	873.013
719	0	229.992	-730.183	1713.39	143.317	-716.916	1704.42	248.711	-535.555	1708.15	137.152	-541.407	1697.02	199.453	-512.041	1561.09	212.141	-438.352	1299.12	211.667	-657.502	1475.52	201.8	-721.02	1271.23	130.659	-431.848	1353.85	389.656	-583.906	1520.14	472.227	-552.235	1329.56	485.763	-543.466	1175.65	493.597	-632.917	1023.95	438.471	-667.168	938.961	502.2	-629.457	925.755	486.74	-686.317	874.65
720	0	230.53	-742.915	1715.04	143.783	-729.541	1705.9	249.107	-548.151	1709.39	137.538	-553.959	1698.94	199.475	-524.61	1562.7	211.09	-450.724	1300.72	212.008	-669.922	1477.17	201.854	-733.061	1272.72	130.03	-444.412	1355.58	389.82	-595.859	1521.6	472.144	-561.818	1331.56	485.471	-551.537	1177.31	494.24	-640.021	1025.41	439.572	-675.07	940.672	502.02	-635.874	926.884	488.204	-693.242	876.505
721	0	231.134	-755.572	1716.32	144.292	-742.127	1707.45	249.543	-560.696	1710.27	138.042	-566.679	1700.24	199.571	-537.235	1564.01	210.245	-463.083	1302.36	212.164	-682.358	1478.48	201.816	-745.154	1274.02	129.47	-456.952	1357.3	390.013	-607.887	1522.9	472.139	-571.703	1333.09	485.249	-559.574	1179.04	494.846	-647.165	1026.49	440.599	-683.071	942.14	501.676	-642.731	927.829	489.289	-700.332	877.913
722	0	231.83	-768.116	1716.88	144.759	-754.861	1708.33	250.085	-573.28	1711.08	138.494	-579.339	1700.99	199.504	-550.029	1565.08	209.481	-475.595	1303.45	212.218	-694.921	1479.14	201.783	-757.361	1274.68	128.937	-469.43	1358.35	389.874	-620.189	1523.38	471.897	-581.803	1334.19	484.878	-567.903	1180.28	495.035	-654.9	1027.31	441.374	-691.454	942.756	501.602	-649.627	928.718	490.093	-707.793	878.483
723	0	232.479	-780.87	1717.12	145.727	-767.644	1708.95	250.893	-585.945	1711.78	139.107	-592.155	1701.51	199.696	-562.846	1565.92	208.695	-488.17	1304.28	212.43	-707.513	1479.49	201.812	-769.634	1274.79	128.409	-482.095	1359.49	389.88	-632.464	1523.63	471.698	-591.89	1334.9	484.478	-576.478	1181.17	495.315	-662.784	1027.53	442.162	-699.938	943.101	501.45	-656.805	929.098	491.001	-715.213	878.844
724	0	233.478	-793.839	1717.58	146.551	-780.432	1709.55	251.429	-598.568	1711.77	139.707	-604.938	1702.32	199.617	-575.568	1565.97	208.127	-500.697	1304.92	212.883	-720.17	1479.94	202.185	-781.987	1275.13	127.998	-494.656	1359.97	390.081	-644.619	1523.88	471.582	-602.067	1335.62	484.098	-585.085	1181.8	495.816	-670.536	1028.04	443.24	-708.39	943.568	501.485	-664.256	929.426	492.069	-722.518	879.134
725	0	234.465	-806.48	1717.56	147.45	-793.259	1709.8	251.96	-611.24	1711.14	140.319	-617.723	1702.38	199.52	-588.41	1566.43	207.594	-513.3	1305.06	213.23	-732.824	1480.02	202.684	-794.392	1275.25	127.57	-507.388	1360.15	390.41	-656.879	1523.99	471.793	-612.575	1335.96	483.632	-594.097	1182.17	496.368	-678.455	1028.12	444.15	-716.86	943.941	501.472	-671.841	929.376	493.077	-730.203	879.307
726	0	235.461	-819.449	1716.88	148.317	-806.109	1709.43	252.754	-623.989	1710.61	140.941	-630.673	1702.23	199.694	-601.411	1566.2	207.119	-525.901	1304.77	213.431	-745.55	1479.39	202.859	-807.09	1274.56	127.231	-520.152	1359.98	390.401	-669.41	1523.23	471.325	-623.097	1335.83	483.237	-603.187	1182.06	496.537	-687.009	1027.69	444.821	-725.648	943.321	501.404	-679.738	928.846	493.834	-738.135	878.521
727	0	236.422	-832.428	1715.94	149.425	-819.161	1708.82	253.458	-636.799	1709.64	141.651	-643.801	1701.49	199.985	-614.429	1565.55	207.012	-538.458	1304.52	213.785	-758.387	1478.4	203.155	-819.925	1273.48	127.059	-532.979	1359.56	390.554	-681.914	1522.28	471.319	-634.09	1335.31	482.63	-612.585	1181.79	496.833	-695.536	1026.76	445.531	-734.625	942.311	501.607	-687.788	928.219	494.622	-746.298	877.633
728	0	237.459	-845.504	1714.65	150.389	-832.265	1707.92	254.263	-649.688	1708.3	142.382	-656.908	1700.45	199.993	-627.455	1564.22	206.757	-551.156	1303.53	213.972	-771.031	1477.08	203.728	-832.821	1272.19	126.964	-545.901	1358.68	390.691	-694.642	1520.96	470.516	-644.472	1334.65	482.355	-622.185	1181.08	497.084	-704.413	1025.64	446.288	-743.646	940.975	501.551	-696.218	926.908	495.407	-754.527	876.404
729	0	238.598	-858.658	1713.1	151.646	-845.296	1706.59	254.876	-662.623	1706.3	143.146	-670.027	1699.11	200.107	-640.382	1562.59	206.77	-563.892	1302.25	214.261	-784.316	1475.59	203.938	-845.897	1270.58	126.954	-558.908	1357.45	390.798	-707.431	1519.36	470.403	-655.714	1333.67	481.761	-632.059	1180.15	497.36	-713.438	1024.35	447.014	-752.771	939.508	501.821	-704.612	925.678	496.214	-762.908	874.786
730	0	239.758	-872.044	1711.39	152.792	-858.554	1705.2	255.727	-675.559	1704.55	144.144	-683.314	1697.41	200.24	-653.854	1561.07	206.948	-576.773	1300.65	214.566	-797.44	1473.73	204.309	-858.93	1268.68	127.118	-571.956	1355.95	390.823	-720.251	1517.2	470.213	-667.155	1332.13	481.45	-642.203	1178.76	497.704	-722.774	1022.53	447.72	-762.206	937.492	502.029	-713.327	923.965	496.983	-771.489	872.784
731	0	241.177	-885.166	1709.52	154.154	-871.837	1703.63	256.588	-688.623	1701.98	145.021	-696.561	1695.9	200.621	-667.2	1559.26	207.178	-589.623	1298.74	215.016	-810.477	1471.81	204.917	-871.979	1266.69	127.202	-585.136	1354.16	391.453	-733.19	1515.42	469.82	-678.537	1330.36	480.955	-652.746	1177.14	498.195	-732.115	1020.63	448.9	-771.451	935.454	502.331	-722.358	921.906	498.013	-779.869	870.502
732	0	242.511	-898.375	1707.23	155.414	-885.105	1701.64	257.488	-701.771	1699.26	146.392	-710.008	1693.73	200.742	-680.569	1556.61	207.736	-602.716	1296.58	215.601	-824.039	1469.46	205.175	-885.083	1264.2	127.511	-598.4	1351.94	391.835	-746.302	1513.13	469.516	-690.375	1328.11	480.676	-663.625	1175.07	498.679	-741.663	1018.13	449.584	-781.102	932.983	502.71	-731.38	919.434	498.905	-788.613	867.985
733	0	243.747	-911.654	1704.3	156.503	-898.645	1699.23	258.447	-714.965	1696.29	146.959	-723.489	1690.97	201.399	-694.293	1554.66	208.473	-615.965	1294.06	215.801	-837.433	1466.37	205.18	-898.337	1261.12	127.867	-611.788	1349.56	391.995	-759.73	1510.17	469.333	-702.46	1325.69	480.194	-674.734	1172.71	498.847	-751.884	1015.18	450.123	-791.096	929.656	503.024	-740.726	916.885	499.435	-797.841	864.568
[truncated: 69 more columns]

## Sheet: Sheet2
Devices
		025370 - Force			025370 - Moment			025370 - CoP			027571 - Force			027571 - Moment			027571 - CoP			037720 - Force			037720 - Moment			037720 - CoP
Frame	Sub Frame	Fx	Fy	Fz	Mx	My	Mz	Cx	Cy	Cz	Fx	Fy	Fz	Mx	My	Mz	Cx	Cy	Cz	Fx	Fy	Fz	Mx	My	Mz	Cx	Cy	Cz
		N	N	N	N.mm	N.mm	N.mm	mm	mm	mm	N	N	N	N.mm	N.mm	N.mm	mm	mm	mm	N	N	N	N.mm	N.mm	N.mm	mm	mm	mm
476	0	0	0	0	0	0	0	200	300	0	0	0	0	0	0	0	200	903	0	0	0	0	0	0	0	603	903	0
476	1	0	0	0	0	0	0	200	300	0	0	0	0	0	0	0	200	903	0	0	0	0	0	0	0	603	903	0
476	2	0	0	0	0	0	0	200	300	0	0	0	0	0	0	0	200	903	0	0	0	0	0	0	0	603	903	0
476	3	0	0	0	0	0	0	200	300	0	0	0	0	0	0	0	200	903	0	0	0	0	0	0	0	603	903	0
476	4	0	0	0	0	0	0	200	300	0	0	0	0	0	0	0	200	903	0	0	0	0	0	0	0	603	903	0
476	5	0	0	0	0	0	0	200	300	0	0	0	0	0	0	0	200	903	0	0	0	0	0	0	0	603	903	0
476	6	0	0	0	0	0	0	200	300	0	0	0	0	0	0	0	200	903	0	0	0	0	0	0	0	603	903	0
476	7	0	0	0	0	0	0	200	300	0	0	0	0	0	0	0	200	903	0	0	0	0	0	0	0	603	903	0
476	8	0	0	0	0	0	0	200	300	0	0	0	0	0	0	0	200	903	0	0	0	0	0	0	0	603	903	0
476	9	0	0	0	0	0	0	200	300	0	0	0	0	0	0	0	200	903	0	0	0	0	0	0	0	603	903	0
477	0	0	0	0	0	0	0	200	300	0	0	0	0	0	0	0	200	903	0	0	0	0	0	0	0	603	903	0
477	1	0	0	0	0	0	0	200	300	0	0	0	0	0	0	0	200	903	0	0	0	0	0	0	0	603	903	0
477	2	0	0	0	0	0	0	200	300	0	0	0	0	0	0	0	200	903	0	0	0	0	0	0	0	603	903	0
477	3	0	0	0	0	0	0	200	300	0	0	0	0	0	0	0	200	903	0	0	0	0	0	0	0	603	903	0
477	4	0	0	0	0	0	0	200	300	0	0	0	0	0	0	0	200	903	0	0	0	0	0	0	0	603	903	0
477	5	0	0	0	0	0	0	200	300	0	0	0	0	0	0	0	200	903	0	0	0	0	0	0	0	603	903	0
477	6	0	0	0	0	0	0	200	300	0	0	0	0	0	0	0	200	903	0	0	0	0	0	0	0	603	903	0
477	7	0	0	0	0	0	0	200	300	0	0	0	0	0	0	0	200	903	0	0	0	0	0	0	0	603	903	0
477	8	0	0	0	0	0	0	200	300	0	0	0	0	0	0	0	200	903	0	0	0	0	0	0	0	603	903	0
477	9	0	0	0	0	0	0	200	300	0	0	0	0	0	0	0	200	903	0	0	0	0	0	0	0	603	903	0
478	0	0	0	0	0	0	0	200	300	0	0	0	0	0	0	0	200	903	0	0	0	0	0	0	0	603	903	0
478	1	0	0	0	0	0	0	200	300	0	0	0	0	0	0	0	200	903	0	0	0	0	0	0	0	603	903	0
478	2	0	0	0	0	0	0	200	300	0	0	0	0	0	0	0	200	903	0	0	0	0	0	0	0	603	903	0
478	3	0	0	0	0	0	0	200	300	0	0	0	0	0	0	0	200	903	0	0	0	0	0	0	0	603	903	0
478	4	0	0	0	0	0	0	200	300	0	0	0	0	0	0	0	200	903	0	0	0	0	0	0	0	603	903	0
478	5	0	0	0	0	0	0	200	300	0	0	0	0	0	0	0	200	903	0	0	0	0	0	0	0	603	903	0
478	6	0	0	0	0	0	0	200	300	0	0	0	0	0	0	0	200	903	0	0	0	0	0	0	0	603	903	0
478	7	0	0	0	0	0	0	200	300	0	0	0	0	0	0	0	200	903	0	0	0	0	0	0	0	603	903	0
478	8	0	0	0	0	0	0	200	300	0	0	0	0	0	0	0	200	903	0	0	0	0	0	0	0	603	903	0
478	9	0	0	0	0	0	0	200	300	0	0	0	0	0	0	0	200	903	0	0	0	0	0	0	0	603	903	0
479	0	0	0	0	0	0	0	200	300	0	0	0	0	0	0	0	200	903	0	0	0	0	0	0	0	603	903	0
479	1	0	0	0	0	0	0	200	300	0	0	0	0	0	0	0	200	903	0	0	0	0	0	0	0	603	903	0
479	2	0	0	0	0	0	0	200	300	0	0	0	0	0	0	0	200	903	0	0	0	0	0	0	0	603	903	0
479	3	0	0	0	0	0	0	200	300	0	0	0	0	0	0	0	200	903	0	0	0	0	0	0	0	603	903	0
479	4	0	0	0	0	0	0	200	300	0	0	0	0	0	0	0	200	903	0	0	0	0	0	0	0	603	903	0
479	5	0	0	0	0	0	0	200	300	0	0	0	0	0	0	0	200	903	0	0	0	0	0	0	0	603	903	0
479	6	0	0	0	0	0	0	200	300	0	0	0	0	0	0	0	200	903	0	0	0	0	0	0	0	603	903	0
479	7	0	0	0	0	0	0	200	300	0	0	0	0	0	0	0	200	903	0	0	0	0	0	0	0	603	903	0
479	8	0	0	0	0	0	0	200	300	0	0	0	0	0	0	0	200	903	0	0	0	0	0	0	0	603	903	0
479	9	0	0	0	0	0	0	200	300	0	0	0	0	0	0	0	200	903	0	0	0	0	0	0	0	603	903	0
480	0	0	0	0	0	0	0	200	300	0	0	0	0	0	0	0	200	903	0	0	0	0	0	0	0	603	903	0
480	1	0	0	0	0	0	0	200	300	0	0	0	0	0	0	0	200	903	0	0	0	0	0	0	0	603	903	0
480	2	0	0	0	0	0	0	200	300	0	0	0	0	0	0	0	200	903	0	0	0	0	0	0	0	603	903	0
480	3	0	0	0	0	0	0	200	300	0	0	0	0	0	0	0	200	903	0	0	0	0	0	0	0	603	903	0
480	4	0	0	0	0	0	0	200	300	0	0	0	0	0	0	0	200	903	0	0	0	0	0	0	0	603	903	0
480	5	0	0	0	0	0	0	200	300	0	0	0	0	0	0	0	200	903	0	0	0	0	0	0	0	603	903	0
480	6	0	0	0	0	0	0	200	300	0	0	0	0	0	0	0	200	903	0	0	0	0	0	0	0	603	903	0
480	7	0	0	0	0	0	0	200	300	0	0	0	0	0	0	0	200	903	0	0	0	0	0	0	0	603	903	0
480	8	0	0	0	0	0	0	200	300	0	0	0	0	0	0	0	200	903	0	0	0	0	0	0	0	603	903	0
480	9	0	0	0	0	0	0	200	300	0	0	0	0	0	0	0	200	903	0	0	0	0	0	0	0	603	903	0
481	0	0	0	0	0	0	0	200	300	0	0	0	0	0	0	0	200	903	0	0	0	0	0	0	0	603	903	0
481	1	0	0	0	0	0	0	200	300	0	0	0	0	0	0	0	200	903	0	0	0	0	0	0	0	603	903	0
481	2	0	0	0	0	0	0	200	300	0	0	0	0	0	0	0	200	903	0	0	0	0	0	0	0	603	903	0
481	3	0	0	0	0	0	0	200	300	0	0	0	0	0	0	0	200	903	0	0	0	0	0	0	0	603	903	0
481	4	0	0	0	0	0	0	200	300	0	0	0	0	0	0	0	200	903	0	0	0	0	0	0	0	603	903	0
481	5	0	0	0	0	0	0	200	300	0	0	0	0	0	0	0	200	903	0	0	0	0	0	0	0	603	903	0
481	6	0	0	0	0	0	0	200	300	0	0	0	0	0	0	0	200	903	0	0	0	0	0	0	0	603	903	0
481	7	0	0	0	0	0	0	200	300	0	0	0	0	0	0	0	200	903	0	0	0	0	0	0	0	603	903	0
481	8	0	0	0	0	0	0	200	300	0	0	0	0	0	0	0	200	903	0	0	0	0	0	0	0	603	903	0
481	9	0	0	0	0	0	0	200	300	0	0	0	0	0	0	0	200	903	0	0	0	0	0	0	0	603	903	0
482	0	0	0	0	0	0	0	200	300	0	0	0	0	0	0	0	200	903	0	0	0	0	0	0	0	603	903	0
482	1	0	0	0	0	0	0	200	300	0	0	0	0	0	0	0	200	903	0	0	0	0	0	0	0	603	903	0
482	2	0	0	0	0	0	0	200	300	0	0	0	0	0	0	0	200	903	0	0	0	0	0	0	0	603	903	0
482	3	0	0	0	0	0	0	200	300	0	0	0	0	0	0	0	200	903	0	0	0	0	0	0	0	603	903	0
482	4	0	0	0	0	0	0	200	300	0	0	0	0	0	0	0	200	903	0	0	0	0	0	0	0	603	903	0
482	5	0	0	0	0	0	0	200	300	0	0	0	0	0	0	0	200	903	0	0	0	0	0	0	0	603	903	0
482	6	0	0	0	0	0	0	200	300	0	0	0	0	0	0	0	200	903	0	0	0	0	0	0	0	603	903	0
482	7	0	0	0	0	0	0	200	300	0	0	0	0	0	0	0	200	903	0	0	0	0	0	0	0	603	903	0
482	8	0	0	0	0	0	0	200	300	0	0	0	0	0	0	0	200	903	0	0	0	0	0	0	0	603	903	0
482	9	0	0	0	0	0	0	200	300	0	0	0	0	0	0	0	200	903	0	0	0	0	0	0	0	603	903	0
483	0	0	0	0	0	0	0	200	300	0	0	0	0	0	0	0	200	903	0	0	0	0	0	0	0	603	903	0
483	1	0	0	0	0	0	0	200	300	0	0	0	0	0	0	0	200	903	0	0	0	0	0	0	0	603	903	0
483	2	0	0	0	0	0	0	200	300	0	0	0	0	0	0	0	200	903	0	0	0	0	0	0	0	603	903	0
483	3	0	0	0	0	0	0	200	300	0	0	0	0	0	0	0	200	903	0	0	0	0	0	0	0	603	903	0
483	4	0	0	0	0	0	0	200	300	0	0	0	0	0	0	0	200	903	0	0	0	0	0	0	0	603	903	0
483	5	0	0	0	0	0	0	200	300	0	0	0	0	0	0	0	200	903	0	0	0	0	0	0	0	603	903	0
483	6	0	0	0	0	0	0	200	300	0	0	0	0	0	0	0	200	903	0	0	0	0	0	0	0	603	903	0
483	7	0	0	0	0	0	0	200	300	0	0	0	0	0	0	0	200	903	0	0	0	0	0	0	0	603	903	0
483	8	0	0	0	0	0	0	200	300	0	0	0	0	0	0	0	200	903	0	0	0	0	0	0	0	603	903	0
483	9	0	0	0	0	0	0	200	300	0	0	0	0	0	0	0	200	903	0	0	0	0	0	0	0	603	903	0
484	0	0	0	0	0	0	0	200	300	0	0	0	0	0	0	0	200	903	0	0	0	0	0	0	0	603	903	0
484	1	0	0	0	0	0	0	200	300	0	0	0	0	0	0	0	200	903	0	0	0	0	0	0	0	603	903	0
484	2	0	0	0	0	0	0	200	300	0	0	0	0	0	0	0	200	903	0	0	0	0	0	0	0	603	903	0
484	3	0	0	0	0	0	0	200	300	0	0	0	0	0	0	0	200	903	0	0	0	0	0	0	0	603	903	0
484	4	0	0	0	0	0	0	200	300	0	0	0	0	0	0	0	200	903	0	0	0	0	0	0	0	603	903	0
484	5	0	0	0	0	0	0	200	300	0	0	0	0	0	0	0	200	903	0	0	0	0	0	0	0	603	903	0
484	6	0	0	0	0	0	0	200	300	0	0	0	0	0	0	0	200	903	0	0	0	0	0	0	0	603	903	0
484	7	0	0	0	0	0	0	200	300	0	0	0	0	0	0	0	200	903	0	0	0	0	0	0	0	603	903	0
484	8	0	0	0	0	0	0	200	300	0	0	0	0	0	0	0	200	903	0	0	0	0	0	0	0	603	903	0
484	9	0	0	0	0	0	0	200	300	0	0	0	0	0	0	0	200	903	0	0	0	0	0	0	0	603	903	0
485	0	0	0	0	0	0	0	200	300	0	0	0	0	0	0	0	200	903	0	0	0	0	0	0	0	603	903	0
485	1	0	0	0	0	0	0	200	300	0	0	0	0	0	0	0	200	903	0	0	0	0	0	0	0	603	903	0
485	2	0	0	0	0	0	0	200	300	0	0	0	0	0	0	0	200	903	0	0	0	0	0	0	0	603	903	0
485	3	0	0	0	0	0	0	200	300	0	0	0	0	0	0	0	200	903	0	0	0	0	0	0	0	603	903	0
485	4	0	0	0	0	0	0	200	300	0	0	0	0	0	0	0	200	903	0	0	0	0	0	0	0	603	903	0
485	5	0	0	0	0	0	0	200	300	0	0	0	0	0	0	0	200	903	0	0	0	0	0	0	0	603	903	0
485	6	0	0	0	0	0	0	200	300	0	0	0	0	0	0	0	200	903	0	0	0	0	0	0	0	603	903	0
485	7	0	0	0	0	0	0	200	300	0	0	0	0	0	0	0	200	903	0	0	0	0	0	0	0	603	903	0
485	8	0	0	0	0	0	0	200	300	0	0	0	0	0	0	0	200	903	0	0	0	0	0	0	0	603	903	0
485	9	0	0	0	0	0	0	200	300	0	0	0	0	0	0	0	200	903	0	0	0	0	0	0	0	603	903	0
486	0	0	0	0	0	0	0	200	300	0	0	0	0	0	0	0	200	903	0	0	0	0	0	0	0	603	903	0
486	1	0	0	0	0	0	0	200	300	0	0	0	0	0	0	0	200	903	0	0	0	0	0	0	0	603	903	0
486	2	0	0	0	0	0	0	200	300	0	0	0	0	0	0	0	200	903	0	0	0	0	0	0	0	603	903	0
486	3	0	0	0	0	0	0	200	300	0	0	0	0	0	0	0	200	903	0	0	0	0	0	0	0	603	903	0
486	4	0	0	0	0	0	0	200	300	0	0	0	0	0	0	0	200	903	0	0	0	0	0	0	0	603	903	0
486	5	0	0	0	0	0	0	200	300	0	0	0	0	0	0	0	200	903	0	0	0	0	0	0	0	603	903	0
486	6	0	0	0	0	0	0	200	300	0	0	0	0	0	0	0	200	903	0	0	0	0	0	0	0	603	903	0
486	7	0	0	0	0	0	0	200	300	0	0	0	0	0	0	0	200	903	0	0	0	0	0	0	0	603	903	0
486	8	0	0	0	0	0	0	200	300	0	0	0	0	0	0	0	200	903	0	0	0	0	0	0	0	603	903	0
486	9	0	0	0	0	0	0	200	300	0	0	0	0	0	0	0	200	903	0	0	0	0	0	0	0	603	903	0
487	0	0	0	0	0	0	0	200	300	0	0	0	0	0	0	0	200	903	0	0	0	0	0	0	0	603	903	0
487	1	0	0	0	0	0	0	200	300	0	0	0	0	0	0	0	200	903	0	0	0	0	0	0	0	603	903	0
487	2	0	0	0	0	0	0	200	300	0	0	0	0	0	0	0	200	903	0	0	0	0	0	0	0	603	903	0
487	3	0	0	0	0	0	0	200	300	0	0	0	0	0	0	0	200	903	0	0	0	0	0	0	0	603	903	0
487	4	0	0	0	0	0	0	200	300	0	0	0	0	0	0	0	200	903	0	0	0	0	0	0	0	603	903	0
487	5	0	0	0	0	0	0	200	300	0	0	0	0	0	0	0	200	903	0	0	0	0	0	0	0	603	903	0
487	6	0	0	0	0	0	0	200	300	0	0	0	0	0	0	0	200	903	0	0	0	0	0	0	0	603	903	0
487	7	0	0	0	0	0	0	200	300	0	0	0	0	0	0	0	200	903	0	0	0	0	0	0	0	603	903	0
487	8	0	0	0	0	0	0	200	300	0	0	0	0	0	0	0	200	903	0	0	0	0	0	0	0	603	903	0
487	9	0	0	0	0	0	0	200	300	0	0	0	0	0	0	0	200	903	0	0	0	0	0	0	0	603	903	0
488	0	0	0	0	0	0	0	200	300	0	0	0	0	0	0	0	200	903	0	0	0	0	0	0	0	603	903	0
488	1	0	0	0	0	0	0	200	300	0	0	0	0	0	0	0	200	903	0	0	0	0	0	0	0	603	903	0
488	2	0	0	0	0	0	0	200	300	0	0	0	0	0	0	0	200	903	0	0	0	0	0	0	0	603	903	0
488	3	0	0	0	0	0	0	200	300	0	0	0	0	0	0	0	200	903	0	0	0	0	0	0	0	603	903	0
488	4	0	0	0	0	0	0	200	300	0	0	0	0	0	0	0	200	903	0	0	0	0	0	0	0	603	903	0
488	5	0	0	0	0	0	0	200	300	0	0	0	0	0	0	0	200	903	0	0	0	0	0	0	0	603	903	0
488	6	0	0	0	0	0	0	200	300	0	0	0	0	0	0	0	200	903	0	0	0	0	0	0	0	603	903	0
488	7	0	0	0	0	0	0	200	300	0	0	0	0	0	0	0	200	903	0	0	0	0	0	0	0	603	903	0
488	8	0	0	0	0	0	0	200	300	0	0	0	0	0	0	0	200	903	0	0	0	0	0	0	0	603	903	0
488	9	0	0	0	0	0	0	200	300	0	0	0	0	0	0	0	200	903	0	0	0	0	0	0	0	603	903	0
489	0	0	0	0	0	0	0	200	300	0	0	0	0	0	0	0	200	903	0	0	0	0	0	0	0	603	903	0
489	1	0	0	0	0	0	0	200	300	0	0	0	0	0	0	0	200	903	0	0	0	0	0	0	0	603	903	0
489	2	0	0	0	0	0	0	200	300	0	0	0	0	0	0	0	200	903	0	0	0	0	0	0	0	603	903	0
489	3	0	0	0	0	0	0	200	300	0	0	0	0	0	0	0	200	903	0	0	0	0	0	0	0	603	903	0
489	4	0	0	0	0	0	0	200	300	0	0	0	0	0	0	0	200	903	0	0	0	0	0	0	0	603	903	0
489	5	0	0	0	0	0	0	200	300	0	0	0	0	0	0	0	200	903	0	0	0	0	0	0	0	603	903	0
489	6	0	0	0	0	0	0	200	300	0	0	0	0	0	0	0	200	903	0	0	0	0	0	0	0	603	903	0
489	7	0	0	0	0	0	0	200	300	0	0	0	0	0	0	0	200	903	0	0	0	0	0	0	0	603	903	0
489	8	0	0	0	0	0	0	200	300	0	0	0	0	0	0	0	200	903	0	0	0	0	0	0	0	603	903	0
489	9	0	0	0	0	0	0	200	300	0	0	0	0	0	0	0	200	903	0	0	0	0	0	0	0	603	903	0
490	0	0	0	0	0	0	0	200	300	0	0	0	0	0	0	0	200	903	0	0	0	0	0	0	0	603	903	0
490	1	0	0	0	0	0	0	200	300	0	0	0	0	0	0	0	200	903	0	0	0	0	0	0	0	603	903	0
490	2	0	0	0	0	0	0	200	300	0	0	0	0	0	0	0	200	903	0	0	0	0	0	0	0	603	903	0
490	3	0	0	0	0	0	0	200	300	0	0	0	0	0	0	0	200	903	0	0	0	0	0	0	0	603	903	0
490	4	0	0	0	0	0	0	200	300	0	0	0	0	0	0	0	200	903	0	0	0	0	0	0	0	603	903	0
490	5	0	0	0	0	0	0	200	300	0	0	0	0	0	0	0	200	903	0	0	0	0	0	0	0	603	903	0
490	6	0	0	0	0	0	0	200	300	0	0	0	0	0	0	0	200	903	0	0	0	0	0	0	0	603	903	0
490	7	0	0	0	0	0	0	200	300	0	0	0	0	0	0	0	200	903	0	0	0	0	0	0	0	603	903	0
490	8	0	0	0	0	0	0	200	300	0	0	0	0	0	0	0	200	903	0	0	0	0	0	0	0	603	903	0
490	9	0	0	0	0	0	0	200	300	0	0	0	0	0	0	0	200	903	0	0	0	0	0	0	0	603	903	0
491	0	0	0	0	0	0	0	200	300	0	0	0	0	0	0	0	200	903	0	0	0	0	0	0	0	603	903	0
491	1	0	0	0	0	0	0	200	300	0	0	0	0	0	0	0	200	903	0	0	0	0	0	0	0	603	903	0
491	2	0	0	0	0	0	0	200	300	0	0	0	0	0	0	0	200	903	0	0	0	0	0	0	0	603	903	0
491	3	0	0	0	0	0	0	200	300	0	0	0	0	0	0	0	200	903	0	0	0	0	0	0	0	603	903	0
491	4	0	0	0	0	0	0	200	300	0	0	0	0	0	0	0	200	903	0	0	0	0	0	0	0	603	903	0
491	5	0	0	0	0	0	0	200	300	0	0	0	0	0	0	0	200	903	0	0	0	0	0	0	0	603	903	0
491	6	0	0	0	0	0	0	200	300	0	0	0	0	0	0	0	200	903	0	0	0	0	0	0	0	603	903	0
491	7	0	0	0	0	0	0	200	300	0	0	0	0	0	0	0	200	903	0	0	0	0	0	0	0	603	903	0
491	8	0	0	0	0	0	0	200	300	0	0	0	0	0	0	0	200	903	0	0	0	0	0	0	0	603	903	0
491	9	0	0	0	0	0	0	200	300	0	0	0	0	0	0	0	200	903	0	0	0	0	0	0	0	603	903	0
492	0	0	0	0	0	0	0	200	300	0	0	0	0	0	0	0	200	903	0	0	0	0	0	0	0	603	903	0
492	1	0	0	0	0	0	0	200	300	0	0	0	0	0	0	0	200	903	0	0	0	0	0	0	0	603	903	0
492	2	0	0	0	0	0	0	200	300	0	0	0	0	0	0	0	200	903	0	0	0	0	0	0	0	603	903	0
492	3	0	0	0	0	0	0	200	300	0	0	0	0	0	0	0	200	903	0	0	0	0	0	0	0	603	903	0
492	4	0	0	0	0	0	0	200	300	0	0	0	0	0	0	0	200	903	0	0	0	0	0	0	0	603	903	0
492	5	0	0	0	0	0	0	200	300	0	0	0	0	0	0	0	200	903	0	0	0	0	0	0	0	603	903	0
492	6	0	0	0	0	0	0	200	300	0	0	0	0	0	0	0	200	903	0	0	0	0	0	0	0	603	903	0
492	7	0	0	0	0	0	0	200	300	0	0	0	0	0	0	0	200	903	0	0	0	0	0	0	0	603	903	0
492	8	0	0	0	0	0	0	200	300	0	0	0	0	0	0	0	200	903	0	0	0	0	0	0	0	603	903	0
492	9	0	0	0	0	0	0	200	300	0	0	0	0	0	0	0	200	903	0	0	0	0	0	0	0	603	903	0
493	0	0	0	0	0	0	0	200	300	0	0	0	0	0	0	0	200	903	0	0	0	0	0	0	0	603	903	0
493	1	0	0	0	0	0	0	200	300	0	0	0	0	0	0	0	200	903	0	0	0	0	0	0	0	603	903	0
493	2	0	0	0	0	0	0	200	300	0	0	0	0	0	0	0	200	903	0	0	0	0	0	0	0	603	903	0
493	3	0	0	0	0	0	0	200	300	0	0	0	0	0	0	0	200	903	0	0	0	0	0	0	0	603	903	0
493	4	0	0	0	0	0	0	200	300	0	0	0	0	0	0	0	200	903	0	0	0	0	0	0	0	603	903	0
493	5	0	0	0	0	0	0	200	300	0	0	0	0	0	0	0	200	903	0	0	0	0	0	0	0	603	903	0
493	6	0	0	0	0	0	0	200	300	0	0	0	0	0	0	0	200	903	0	0	0	0	0	0	0	603	903	0
493	7	0	0	0	0	0	0	200	300	0	0	0	0	0	0	0	200	903	0	0	0	0	0	0	0	603	903	0
493	8	0	0	0	0	0	0	200	300	0	0	0	0	0	0	0	200	903	0	0	0	0	0	0	0	603	903	0
493	9	0	0	0	0	0	0	200	300	0	0	0	0	0	0	0	200	903	0	0	0	0	0	0	0	603	903	0
494	0	0	0	0	0	0	0	200	300	0	0	0	0	0	0	0	200	903	0	0	0	0	0	0	0	603	903	0
494	1	0	0	0	0	0	0	200	300	0	0	0	0	0	0	0	200	903	0	0	0	0	0	0	0	603	903	0
494	2	0	0	0	0	0	0	200	300	0	0	0	0	0	0	0	200	903	0	0	0	0	0	0	0	603	903	0
494	3	0	0	0	0	0	0	200	300	0	0	0	0	0	0	0	200	903	0	0	0	0	0	0	0	603	903	0
494	4	0	0	0	0	0	0	200	300	0	0	0	0	0	0	0	200	903	0	0	0	0	0	0	0	603	903	0
494	5	0	0	0	0	0	0	200	300	0	0	0	0	0	0	0	200	903	0	0	0	0	0	0	0	603	903	0
494	6	0	0	0	0	0	0	200	300	0	0	0	0	0	0	0	200	903	0	0	0	0	0	0	0	603	903	0
494	7	0	0	0	0	0	0	200	300	0	0	0	0	0	0	0	200	903	0	0	0	0	0	0	0	603	903	0
494	8	0	0	0	0	0	0	200	300	0	0	0	0	0	0	0	200	903	0	0	0	0	0	0	0	603	903	0
494	9	0	0	0	0	0	0	200	300	0	0	0	0	0	0	0	200	903	0	0	0	0	0	0	0	603	903	0
495	0	0	0	0	0	0	0	200	300	0	0	0	0	0	0	0	200	903	0	0	0	0	0	0	0	603	903	0
495	1	0	0	0	0	0	0	200	300	0	0	0	0	0	0	0	200	903	0	0	0	0	0	0	0	603	903	0
495	2	0	0	0	0	0	0	200	300	0	0	0	0	0	0	0	200	903	0	0	0	0	0	0	0	603	903	0
495	3	0	0	0	0	0	0	200	300	0	0	0	0	0	0	0	200	903	0	0	0	0	0	0	0	603	903	0
495	4	0	0	0	0	0	0	200	300	0	0	0	0	0	0	0	200	903	0	0	0	0	0	0	0	603	903	0
495	5	0	0	0	0	0	0	200	300	0	0	0	0	0	0	0	200	903	0	0	0	0	0	0	0	603	903	0
495	6	0	0	0	0	0	0	200	300	0	0	0	0	0	0	0	200	903	0	0	0	0	0	0	0	603	903	0
495	7	0	0	0	0	0	0	200	300	0	0	0	0	0	0	0	200	903	0	0	0	0	0	0	0	603	903	0
495	8	0	0	0	0	0	0	200	300	0	0	0	0	0	0	0	200	903	0	0	0	0	0	0	0	603	903	0
495	9	0	0	0	0	0	0	200	300	0	0	0	0	0	0	0	200	903	0	0	0	0	0	0	0	603	903	0
496	0	0	0	0	0	0	0	200	300	0	0	0	0	0	0	0	200	903	0	0	0	0	0	0	0	603	903	0
496	1	0	0	0	0	0	0	200	300	0	0	0	0	0	0	0	200	903	0	0	0	0	0	0	0	603	903	0
496	2	0	0	0	0	0	0	200	300	0	0	0	0	0	0	0	200	903	0	0	0	0	0	0	0	603	903	0
496	3	0	0	0	0	0	0	200	300	0	0	0	0	0	0	0	200	903	0	0	0	0	0	0	0	603	903	0
496	4	0	0	0	0	0	0	200	300	0	0	0	0	0	0	0	200	903	0	0	0	0	0	0	0	603	903	0
496	5	0	0	0	0	0	0	200	300	0	0	0	0	0	0	0	200	903	0	0	0	0	0	0	0	603	903	0
496	6	0	0	0	0	0	0	200	300	0	0	0	0	0	0	0	200	903	0	0	0	0	0	0	0	603	903	0
496	7	0	0	0	0	0	0	200	300	0	0	0	0	0	0	0	200	903	0	0	0	0	0	0	0	603	903	0
496	8	0	0	0	0	0	0	200	300	0	0	0	0	0	0	0	200	903	0	0	0	0	0	0	0	603	903	0
496	9	0	0	0	0	0	0	200	300	0	0	0	0	0	0	0	200	903	0	0	0	0	0	0	0	603	903	0
497	0	0	0	0	0	0	0	200	300	0	0	0	0	0	0	0	200	903	0	0	0	0	0	0	0	603	903	0
497	1	0	0	0	0	0	0	200	300	0	0	0	0	0	0	0	200	903	0	0	0	0	0	0	0	603	903	0
497	2	0	0	0	0	0	0	200	300	0	0	0	0	0	0	0	200	903	0	0	0	0	0	0	0	603	903	0
497	3	0	0	0	0	0	0	200	300	0	0	0	0	0	0	0	200	903	0	0	0	0	0	0	0	603	903	0
497	4	0	0	0	0	0	0	200	300	0	0	0	0	0	0	0	200	903	0	0	0	0	0	0	0	603	903	0
497	5	0	0	0	0	0	0	200	300	0	0	0	0	0	0	0	200	903	0	0	0	0	0	0	0	603	903	0
497	6	0	0	0	0	0	0	200	300	0	0	0	0	0	0	0	200	903	0	0	0	0	0	0	0	603	903	0
497	7	0	0	0	0	0	0	200	300	0	0	0	0	0	0	0	200	903	0	0	0	0	0	0	0	603	903	0
497	8	0	0	0	0	0	0	200	300	0	0	0	0	0	0	0	200	903	0	0	0	0	0	0	0	603	903	0
497	9	0	0	0	0	0	0	200	300	0	0	0	0	0	0	0	200	903	0	0	0	0	0	0	0	603	903	0
498	0	0	0	0	0	0	0	200	300	0	0	0	0	0	0	0	200	903	0	0	0	0	0	0	0	603	903	0
498	1	0	0	0	0	0	0	200	300	0	0	0	0	0	0	0	200	903	0	0	0	0	0	0	0	603	903	0
498	2	0	0	0	0	0	0	200	300	0	0	0	0	0	0	0	200	903	0	0	0	0	0	0	0	603	903	0
498	3	0	0	0	0	0	0	200	300	0	0	0	0	0	0	0	200	903	0	0	0	0	0	0	0	603	903	0
498	4	0	0	0	0	0	0	200	300	0	0	0	0	0	0	0	200	903	0	0	0	0	0	0	0	603	903	0
498	5	0	0	0	0	0	0	200	300	0	0	0	0	0	0	0	200	903	0	0	0	0	0	0	0	603	903	0
498	6	0	0	0	0	0	0	200	300	0	0	0	0	0	0	0	200	903	0	0	0	0	0	0	0	603	903	0
498	7	0	0	0	0	0	0	200	300	0	0	0	0	0	0	0	200	903	0	0	0	0	0	0	0	603	903	0
498	8	0	0	0	0	0	0	200	300	0	0	0	0	0	0	0	200	903	0	0	0	0	0	0	0	603	903	0
498	9	0	0	0	0	0	0	200	300	0	0	0	0	0	0	0	200	903	0	0	0	0	0	0	0	603	903	0
499	0	0	0	0	0	0	0	200	300	0	0	0	0	0	0	0	200	903	0	0	0	0	0	0	0	603	903	0
499	1	0	0	0	0	0	0	200	300	0	0	0	0	0	0	0	200	903	0	0	0	0	0	0	0	603	903	0
499	2	0	0	0	0	0	0	200	300	0	0	0	0	0	0	0	200	903	0	0	0	0	0	0	0	603	903	0
499	3	0	0	0	0	0	0	200	300	0	0	0	0	0	0	0	200	903	0	0	0	0	0	0	0	603	903	0
499	4	0	0	0	0	0	0	200	300	0	0	0	0	0	0	0	200	903	0	0	0	0	0	0	0	603	903	0
499	5	0	0	0	0	0	0	200	300	0	0	0	0	0	0	0	200	903	0	0	0	0	0	0	0	603	903	0
499	6	0	0	0	0	0	0	200	300	0	0	0	0	0	0	0	200	903	0	0	0	0	0	0	0	603	903	0
499	7	0	0	0	0	0	0	200	300	0	0	0	0	0	0	0	200	903	0	0	0	0	0	0	0	603	903	0
499	8	0	0	0	0	0	0	200	300	0	0	0	0	0	0	0	200	903	0	0	0	0	0	0	0	603	903	0
499	9	0	0	0	0	0	0	200	300	0	0	0	0	0	0	0	200	903	0	0	0	0	0	0	0	603	903	0
500	0	0	0	0	0	0	0	200	300	0	0	0	0	0	0	0	200	903	0	0	0	0	0	0	0	603	903	0
500	1	0	0	0	0	0	0	200	300	0	0	0	0	0	0	0	200	903	0	0	0	0	0	0	0	603	903	0
500	2	0	0	0	0	0	0	200	300	0	0	0	0	0	0	0	200	903	0	0	0	0	0	0	0	603	903	0
500	3	0	0	0	0	0	0	200	300	0	0	0	0	0	0	0	200	903	0	0	0	0	0	0	0	603	903	0
500	4	0	0	0	0	0	0	200	300	0	0	0	0	0	0	0	200	903	0	0	0	0	0	0	0	603	903	0
500	5	0	0	0	0	0	0	200	300	0	0	0	0	0	0	0	200	903	0	0	0	0	0	0	0	603	903	0
500	6	0	0	0	0	0	0	200	300	0	0	0	0	0	0	0	200	903	0	0	0	0	0	0	0	603	903	0
500	7	0	0	0	0	0	0	200	300	0	0	0	0	0	0	0	200	903	0	0	0	0	0	0	0	603	903	0
500	8	0	0	0	0	0	0	200	300	0	0	0	0	0	0	0	200	903	0	0	0	0	0	0	0	603	903	0
500	9	0	0	0	0	0	0	200	300	0	0	0	0	0	0	0	200	903	0	0	0	0	0	0	0	603	903	0
501	0	0	0	0	0	0	0	200	300	0	0	0	0	0	0	0	200	903	0	0	0	0	0	0	0	603	903	0
501	1	0	0	0	0	0	0	200	300	0	0	0	0	0	0	0	200	903	0	0	0	0	0	0	0	603	903	0
501	2	0	0	0	0	0	0	200	300	0	0	0	0	0	0	0	200	903	0	0	0	0	0	0	0	603	903	0
501	3	0	0	0	0	0	0	200	300	0	0	0	0	0	0	0	200	903	0	0	0	0	0	0	0	603	903	0
501	4	0	0	0	0	0	0	200	300	0	0	0	0	0	0	0	200	903	0	0	0	0	0	0	0	603	903	0
501	5	0	0	0	0	0	0	200	300	0	0	0	0	0	0	0	200	903	0	0	0	0	0	0	0	603	903	0
501	6	0	0	0	0	0	0	200	300	0	0	0	0	0	0	0	200	903	0	0	0	0	0	0	0	603	903	0
501	7	0	0	0	0	0	0	200	300	0	0	0	0	0	0	0	200	903	0	0	0	0	0	0	0	603	903	0
501	8	0	0	0	0	0	0	200	300	0	0	0	0	0	0	0	200	903	0	0	0	0	0	0	0	603	903	0
501	9	0	0	0	0	0	0	200	300	0	0	0	0	0	0	0	200	903	0	0	0	0	0	0	0	603	903	0
502	0	0	0	0	0	0	0	200	300	0	0	0	0	0	0	0	200	903	0	0	0	0	0	0	0	603	903	0
502	1	0	0	0	0	0	0	200	300	0	0	0	0	0	0	0	200	903	0	0	0	0	0	0	0	603	903	0
502	2	0	0	0	0	0	0	200	300	0	0	0	0	0	0	0	200	903	0	0	0	0	0	0	0	603	903	0
502	3	0	0	0	0	0	0	200	300	0	0	0	0	0	0	0	200	903	0	0	0	0	0	0	0	603	903	0
502	4	0	0	0	0	0	0	200	300	0	0	0	0	0	0	0	200	903	0	0	0	0	0	0	0	603	903	0
502	5	0	0	0	0	0	0	200	300	0	0	0	0	0	0	0	200	903	0	0	0	0	0	0	0	603	903	0
502	6	0	0	0	0	0	0	200	300	0	0	0	0	0	0	0	200	903	0	0	0	0	0	0	0	603	903	0
502	7	0	0	0	0	0	0	200	300	0	0	0	0	0	0	0	200	903	0	0	0	0	0	0	0	603	903	0
502	8	0	0	0	0	0	0	200	300	0	0	0	0	0	0	0	200	903	0	0	0	0	0	0	0	603	903	0
502	9	0	0	0	0	0	0	200	300	0	0	0	0	0	0	0	200	903	0	0	0	0	0	0	0	603	903	0
503	0	0	0	0	0	0	0	200	300	0	0	0	0	0	0	0	200	903	0	0	0	0	0	0	0	603	903	0
503	1	0	0	0	0	0	0	200	300	0	0	0	0	0	0	0	200	903	0	0	0	0	0	0	0	603	903	0
503	2	0	0	0	0	0	0	200	300	0	0	0	0	0	0	0	200	903	0	0	0	0	0	0	0	603	903	0
503	3	0	0	0	0	0	0	200	300	0	0	0	0	0	0	0	200	903	0	0	0	0	0	0	0	603	903	0
503	4	0	0	0	0	0	0	200	300	0	0	0	0	0	0	0	200	903	0	0	0	0	0	0	0	603	903	0
503	5	0	0	0	0	0	0	200	300	0	0	0	0	0	0	0	200	903	0	0	0	0	0	0	0	603	903	0
503	6	0	0	0	0	0	0	200	300	0	0	0	0	0	0	0	200	903	0	0	0	0	0	0	0	603	903	0
503	7	0	0	0	0	0	0	200	300	0	0	0	0	0	0	0	200	903	0	0	0	0	0	0	0	603	903	0
503	8	0	0	0	0	0	0	200	300	0	0	0	0	0	0	0	200	903	0	0	0	0	0	0	0	603	903	0
503	9	0	0	0	0	0	0	200	300	0	0	0	0	0	0	0	200	903	0	0	0	0	0	0	0	603	903	0
504	0	0	0	0	0	0	0	200	300	0	0	0	0	0	0	0	200	903	0	0	0	0	0	0	0	603	903	0
504	1	0	0	0	0	0	0	200	300	0	0	0	0	0	0	0	200	903	0	0	0	0	0	0	0	603	903	0
504	2	0	0	0	0	0	0	200	300	0	0	0	0	0	0	0	200	903	0	0	0	0	0	0	0	603	903	0
504	3	0	0	0	0	0	0	200	300	0	0	0	0	0	0	0	200	903	0	0	0	0	0	0	0	603	903	0
504	4	0	0	0	0	0	0	200	300	0	0	0	0	0	0	0	200	903	0	0	0	0	0	0	0	603	903	0
504	5	0	0	0	0	0	0	200	300	0	0	0	0	0	0	0	200	903	0	0	0	0	0	0	0	603	903	0
504	6	0	0	0	0	0	0	200	300	0	0	0	0	0	0	0	200	903	0	0	0	0	0	0	0	603	903	0
504	7	0	0	0	0	0	0	200	300	0	0	0	0	0	0	0	200	903	0	0	0	0	0	0	0	603	903	0
504	8	0	0	0	0	0	0	200	300	0	0	0	0	0	0	0	200	903	0	0	0	0	0	0	0	603	903	0
504	9	0	0	0	0	0	0	200	300	0	0	0	0	0	0	0	200	903	0	0	0	0	0	0	0	603	903	0
505	0	0	0	0	0	0	0	200	300	0	0	0	0	0	0	0	200	903	0	0	0	0	0	0	0	603	903	0
505	1	0	0	0	0	0	0	200	300	0	0	0	0	0	0	0	200	903	0	0	0	0	0	0	0	603	903	0
505	2	0	0	0	0	0	0	200	300	0	0	0	0	0	0	0	200	903	0	0	0	0	0	0	0	603	903	0
505	3	0	0	0	0	0	0	200	300	0	0	0	0	0	0	0	200	903	0	0	0	0	0	0	0	603	903	0
505	4	0	0	0	0	0	0	200	300	0	0	0	0	0	0	0	200	903	0	0	0	0	0	0	0	603	903	0
505	5	0	0	0	0	0	0	200	300	0	0	0	0	0	0	0	200	903	0	0	0	0	0	0	0	603	903	0
505	6	0	0	0	0	0	0	200	300	0	0	0	0	0	0	0	200	903	0	0	0	0	0	0	0	603	903	0
505	7	0	0	0	0	0	0	200	300	0	0	0	0	0	0	0	200	903	0	0	0	0	0	0	0	603	903	0
505	8	0	0	0	0	0	0	200	300	0	0	0	0	0	0	0	200	903	0	0	0	0	0	0	0	603	903	0
505	9	0	0	0	0	0	0	200	300	0	0	0	0	0	0	0	200	903	0	0	0	0	0	0	0	603	903	0
506	0	0	0	0	0	0	0	200	300	0	0	0	0	0	0	0	200	903	0	0	0	0	0	0	0	603	903	0
506	1	0	0	0	0	0	0	200	300	0	0	0	0	0	0	0	200	903	0	0	0	0	0	0	0	603	903	0
506	2	0	0	0	0	0	0	200	300	0	0	0	0	0	0	0	200	903	0	0	0	0	0	0	0	603	903	0
506	3	0	0	0	0	0	0	200	300	0	0	0	0	0	0	0	200	903	0	0	0	0	0	0	0	603	903	0
506	4	0	0	0	0	0	0	200	300	0	0	0	0	0	0	0	200	903	0	0	0	0	0	0	0	603	903	0
506	5	0	0	0	0	0	0	200	300	0	0	0	0	0	0	0	200	903	0	0	0	0	0	0	0	603	903	0
506	6	0	0	0	0	0	0	200	300	0	0	0	0	0	0	0	200	903	0	0	0	0	0	0	0	603	903	0
506	7	0	0	0	0	0	0	200	300	0	0	0	0	0	0	0	200	903	0	0	0	0	0	0	0	603	903	0
506	8	0	0	0	0	0	0	200	300	0	0	0	0	0	0	0	200	903	0	0	0	0	0	0	0	603	903	0
506	9	0	0	0	0	0	0	200	300	0	0	0	0	0	0	0	200	903	0	0	0	0	0	0	0	603	903	0
507	0	0	0	0	0	0	0	200	300	0	0	0	0	0	0	0	200	903	0	0	0	0	0	0	0	603	903	0
507	1	0	0	0	0	0	0	200	300	0	0	0	0	0	0	0	200	903	0	0	0	0	0	0	0	603	903	0
507	2	0	0	0	0	0	0	200	300	0	0	0	0	0	0	0	200	903	0	0	0	0	0	0	0	603	903	0
507	3	0	0	0	0	0	0	200	300	0	0	0	0	0	0	0	200	903	0	0	0	0	0	0	0	603	903	0
507	4	0	0	0	0	0	0	200	300	0	0	0	0	0	0	0	200	903	0	0	0	0	0	0	0	603	903	0
507	5	0	0	0	0	0	0	200	300	0	0	0	0	0	0	0	200	903	0	0	0	0	0	0	0	603	903	0
507	6	0	0	0	0	0	0	200	300	0	0	0	0	0	0	0	200	903	0	0	0	0	0	0	0	603	903	0
507	7	0	0	0	0	0	0	200	300	0	0	0	0	0	0	0	200	903	0	0	0	0	0	0	0	603	903	0
507	8	0	0	0	0	0	0	200	300	0	0	0	0	0	0	0	200	903	0	0	0	0	0	0	0	603	903	0
507	9	0	0	0	0	0	0	200	300	0	0	0	0	0	0	0	200	903	0	0	0	0	0	0	0	603	903	0
508	0	0	0	0	0	0	0	200	300	0	0	0	0	0	0	0	200	903	0	0	0	0	0	0	0	603	903	0
508	1	0	0	0	0	0	0	200	300	0	0	0	0	0	0	0	200	903	0	0	0	0	0	0	0	603	903	0
508	2	0	0	0	0	0	0	200	300	0	0	0	0	0	0	0	200	903	0	0	0	0	0	0	0	603	903	0
508	3	0	0	0	0	0	0	200	300	0	0	0	0	0	0	0	200	903	0	0	0	0	0	0	0	603	903	0
508	4	0	0	0	0	0	0	200	300	0	0	0	0	0	0	0	200	903	0	0	0	0	0	0	0	603	903	0
508	5	0	0	0	0	0	0	200	300	0	0	0	0	0	0	0	200	903	0	0	0	0	0	0	0	603	903	0
508	6	0	0	0	0	0	0	200	300	0	0	0	0	0	0	0	200	903	0	0	0	0	0	0	0	603	903	0
508	7	0	0	0	0	0	0	200	300	0	0	0	0	0	0	0	200	903	0	0	0	0	0	0	0	603	903	0
508	8	0	0	0	0	0	0	200	300	0	0	0	0	0	0	0	200	903	0	0	0	0	0	0	0	603	903	0
508	9	0	0	0	0	0	0	200	300	0	0	0	0	0	0	0	200	903	0	0	0	0	0	0	0	603	903	0
509	0	0	0	0	0	0	0	200	300	0	0	0	0	0	0	0	200	903	0	0	0	0	0	0	0	603	903	0
509	1	0	0	0	0	0	0	200	300	0	0	0	0	0	0	0	200	903	0	0	0	0	0	0	0	603	903	0
509	2	0	0	0	0	0	0	200	300	0	0	0	0	0	0	0	200	903	0	0	0	0	0	0	0	603	903	0
509	3	0	0	0	0	0	0	200	300	0	0	0	0	0	0	0	200	903	0	0	0	0	0	0	0	603	903	0
509	4	0	0	0	0	0	0	200	300	0	0	0	0	0	0	0	200	903	0	0	0	0	0	0	0	603	903	0
509	5	0	0	0	0	0	0	200	300	0	0	0	0	0	0	0	200	903	0	0	0	0	0	0	0	603	903	0
509	6	0	0	0	0	0	0	200	300	0	0	0	0	0	0	0	200	903	0	0	0	0	0	0	0	603	903	0
509	7	0	0	0	0	0	0	200	300	0	0	0	0	0	0	0	200	903	0	0	0	0	0	0	0	603	903	0
509	8	0	0	0	0	0	0	200	300	0	0	0	0	0	0	0	200	903	0	0	0	0	0	0	0	603	903	0
509	9	0	0	0	0	0	0	200	300	0	0	0	0	0	0	0	200	903	0	0	0	0	0	0	0	603	903	0
510	0	0	0	0	0	0	0	200	300	0	0	0	0	0	0	0	200	903	0	0	0	0	0	0	0	603	903	0
510	1	0	0	0	0	0	0	200	300	0	0	0	0	0	0	0	200	903	0	0	0	0	0	0	0	603	903	0
510	2	0	0	0	0	0	0	200	300	0	0	0	0	0	0	0	200	903	0	0	0	0	0	0	0	603	903	0
510	3	0	0	0	0	0	0	200	300	0	0	0	0	0	0	0	200	903	0	0	0	0	0	0	0	603	903	0
510	4	0	0	0	0	0	0	200	300	0	0	0	0	0	0	0	200	903	0	0	0	0	0	0	0	603	903	0
510	5	0	0	0	0	0	0	200	300	0	0	0	0	0	0	0	200	903	0	0	0	0	0	0	0	603	903	0
510	6	0	0	0	0	0	0	200	300	0	0	0	0	0	0	0	200	903	0	0	0	0	0	0	0	603	903	0
510	7	0	0	0	0	0	0	200	300	0	0	0	0	0	0	0	200	903	0	0	0	0	0	0	0	603	903	0
510	8	0	0	0	0	0	0	200	300	0	0	0	0	0	0	0	200	903	0	0	0	0	0	0	0	603	903	0
510	9	0	0	0	0	0	0	200	300	0	0	0	0	0	0	0	200	903	0	0	0	0	0	0	0	603	903	0
511	0	0	0	0	0	0	0	200	300	0	0	0	0	0	0	0	200	903	0	0	0	0	0	0	0	603	903	0
511	1	0	0	0	0	0	0	200	300	0	0	0	0	0	0	0	200	903	0	0	0	0	0	0	0	603	903	0
511	2	0	0	0	0	0	0	200	300	0	0	0	0	0	0	0	200	903	0	0	0	0	0	0	0	603	903	0
511	3	0	0	0	0	0	0	200	300	0	0	0	0	0	0	0	200	903	0	0	0	0	0	0	0	603	903	0
511	4	0	0	0	0	0	0	200	300	0	0	0	0	0	0	0	200	903	0	0	0	0	0	0	0	603	903	0
511	5	0	0	0	0	0	0	200	300	0	0	0	0	0	0	0	200	903	0	0	0	0	0	0	0	603	903	0
511	6	0	0	0	0	0	0	200	300	0	0	0	0	0	0	0	200	903	0	0	0	0	0	0	0	603	903	0
511	7	0	0	0	0	0	0	200	300	0	0	0	0	0	0	0	200	903	0	0	0	0	0	0	0	603	903	0
511	8	0	0	0	0	0	0	200	300	0	0	0	0	0	0	0	200	903	0	0	0	0	0	0	0	603	903	0
511	9	0	0	0	0	0	0	200	300	0	0	0	0	0	0	0	200	903	0	0	0	0	0	0	0	603	903	0
512	0	0	0	0	0	0	0	200	300	0	0	0	0	0	0	0	200	903	0	0	0	0	0	0	0	603	903	0
512	1	0	0	0	0	0	0	200	300	0	0	0	0	0	0	0	200	903	0	0	0	0	0	0	0	603	903	0
512	2	0	0	0	0	0	0	200	300	0	0	0	0	0	0	0	200	903	0	0	0	0	0	0	0	603	903	0
512	3	0	0	0	0	0	0	200	300	0	0	0	0	0	0	0	200	903	0	0	0	0	0	0	0	603	903	0
512	4	0	0	0	0	0	0	200	300	0	0	0	0	0	0	0	200	903	0	0	0	0	0	0	0	603	903	0
512	5	0	0	0	0	0	0	200	300	0	0	0	0	0	0	0	200	903	0	0	0	0	0	0	0	603	903	0
512	6	0	0	0	0	0	0	200	300	0	0	0	0	0	0	0	200	903	0	0	0	0	0	0	0	603	903	0
512	7	0	0	0	0	0	0	200	300	0	0	0	0	0	0	0	200	903	0	0	0	0	0	0	0	603	903	0
512	8	0	0	0	0	0	0	200	300	0	0	0	0	0	0	0	200	903	0	0	0	0	0	0	0	603	903	0
512	9	0	0	0	0	0	0	200	300	0	0	0	0	0	0	0	200	903	0	0	0	0	0	0	0	603	903	0
513	0	0	0	0	0	0	0	200	300	0	0	0	0	0	0	0	200	903	0	0	0	0	0	0	0	603	903	0
513	1	0	0	0	0	0	0	200	300	0	0	0	0	0	0	0	200	903	0	0	0	0	0	0	0	603	903	0
513	2	0	0	0	0	0	0	200	300	0	0	0	0	0	0	0	200	903	0	0	0	0	0	0	0	603	903	0
513	3	0	0	0	0	0	0	200	300	0	0	0	0	0	0	0	200	903	0	0	0	0	0	0	0	603	903	0
513	4	0	0	0	0	0	0	200	300	0	0	0	0	0	0	0	200	903	0	0	0	0	0	0	0	603	903	0
513	5	0	0	0	0	0	0	200	300	0	0	0	0	0	0	0	200	903	0	0	0	0	0	0	0	603	903	0
513	6	0	0	0	0	0	0	200	300	0	0	0	0	0	0	0	200	903	0	0	0	0	0	0	0	603	903	0
513	7	0	0	0	0	0	0	200	300	0	0	0	0	0	0	0	200	903	0	0	0	0	0	0	0	603	903	0
513	8	0	0	0	0	0	0	200	300	0	0	0	0	0	0	0	200	903	0	0	0	0	0	0	0	603	903	0
513	9	0	0	0	0	0	0	200	300	0	0	0	0	0	0	0	200	903	0	0	0	0	0	0	0	603	903	0
514	0	0	0	0	0	0	0	200	300	0	0	0	0	0	0	0	200	903	0	0	0	0	0	0	0	603	903	0
514	1	0	0	0	0	0	0	200	300	0	0	0	0	0	0	0	200	903	0	0	0	0	0	0	0	603	903	0
514	2	0	0	0	0	0	0	200	300	0	0	0	0	0	0	0	200	903	0	0	0	0	0	0	0	603	903	0
514	3	0	0	0	0	0	0	200	300	0	0	0	0	0	0	0	200	903	0	0	0	0	0	0	0	603	903	0
514	4	0	0	0	0	0	0	200	300	0	0	0	0	0	0	0	200	903	0	0	0	0	0	0	0	603	903	0
514	5	0	0	0	0	0	0	200	300	0	0	0	0	0	0	0	200	903	0	0	0	0	0	0	0	603	903	0
514	6	0	0	0	0	0	0	200	300	0	0	0	0	0	0	0	200	903	0	0	0	0	0	0	0	603	903	0
514	7	0	0	0	0	0	0	200	300	0	0	0	0	0	0	0	200	903	0	0	0	0	0	0	0	603	903	0
514	8	0	0	0	0	0	0	200	300	0	0	0	0	0	0	0	200	903	0	0	0	0	0	0	0	603	903	0
514	9	0	0	0	0	0	0	200	300	0	0	0	0	0	0	0	200	903	0	0	0	0	0	0	0	603	903	0
515	0	0	0	0	0	0	0	200	300	0	0	0	0	0	0	0	200	903	0	0	0	0	0	0	0	603	903	0
515	1	0	0	0	0	0	0	200	300	0	0	0	0	0	0	0	200	903	0	0	0	0	0	0	0	603	903	0
515	2	0	0	0	0	0	0	200	300	0	0	0	0	0	0	0	200	903	0	0	0	0	0	0	0	603	903	0
515	3	0	0	0	0	0	0	200	300	0	0	0	0	0	0	0	200	903	0	0	0	0	0	0	0	603	903	0
515	4	0	0	0	0	0	0	200	300	0	0	0	0	0	0	0	200	903	0	0	0	0	0	0	0	603	903	0
515	5	0	0	0	0	0	0	200	300	0	0	0	0	0	0	0	200	903	0	0	0	0	0	0	0	603	903	0
515	6	0	0	0	0	0	0	200	300	0	0	0	0	0	0	0	200	903	0	0	0	0	0	0	0	603	903	0
515	7	0	0	0	0	0	0	200	300	0	0	0	0	0	0	0	200	903	0	0	0	0	0	0	0	603	903	0
515	8	0	0	0	0	0	0	200	300	0	0	0	0	0	0	0	200	903	0	0	0	0	0	0	0	603	903	0
515	9	0	0	0	0	0	0	200	300	0	0	0	0	0	0	0	200	903	0	0	0	0	0	0	0	603	903	0
516	0	0	0	0	0	0	0	200	300	0	0	0	0	0	0	0	200	903	0	0	0	0	0	0	0	603	903	0
516	1	0	0	0	0	0	0	200	300	0	0	0	0	0	0	0	200	903	0	0	0	0	0	0	0	603	903	0
516	2	0	0	0	0	0	0	200	300	0	0	0	0	0	0	0	200	903	0	0	0	0	0	0	0	603	903	0
516	3	0	0	0	0	0	0	200	300	0	0	0	0	0	0	0	200	903	0	0	0	0	0	0	0	603	903	0
516	4	0	0	0	0	0	0	200	300	0	0	0	0	0	0	0	200	903	0	0	0	0	0	0	0	603	903	0
516	5	0	0	0	0	0	0	200	300	0	0	0	0	0	0	0	200	903	0	0	0	0	0	0	0	603	903	0
516	6	0	0	0	0	0	0	200	300	0	0	0	0	0	0	0	200	903	0	0	0	0	0	0	0	603	903	0
516	7	0	0	0	0	0	0	200	300	0	0	0	0	0	0	0	200	903	0	0	0	0	0	0	0	603	903	0
516	8	0	0	0	0	0	0	200	300	0	0	0	0	0	0	0	200	903	0	0	0	0	0	0	0	603	903	0
516	9	0	0	0	0	0	0	200	300	0	0	0	0	0	0	0	200	903	0	0	0	0	0	0	0	603	903	0
517	0	0	0	0	0	0	0	200	300	0	0	0	0	0	0	0	200	903	0	0	0	0	0	0	0	603	903	0
517	1	0	0	0	0	0	0	200	300	0	0	0	0	0	0	0	200	903	0	0	0	0	0	0	0	603	903	0
517	2	0	0	0	0	0	0	200	300	0	0	0	0	0	0	0	200	903	0	0	0	0	0	0	0	603	903	0
517	3	0	0	0	0	0	0	200	300	0	0	0	0	0	0	0	200	903	0	0	0	0	0	0	0	603	903	0
517	4	0	0	0	0	0	0	200	300	0	0	0	0	0	0	0	200	903	0	0	0	0	0	0	0	603	903	0
517	5	0	0	0	0	0	0	200	300	0	0	0	0	0	0	0	200	903	0	0	0	0	0	0	0	603	903	0
517	6	0	0	0	0	0	0	200	300	0	0	0	0	0	0	0	200	903	0	0	0	0	0	0	0	603	903	0
517	7	0	0	0	0	0	0	200	300	0	0	0	0	0	0	0	200	903	0	0	0	0	0	0	0	603	903	0
517	8	0	0	0	0	0	0	200	300	0	0	0	0	0	0	0	200	903	0	0	0	0	0	0	0	603	903	0
517	9	0	0	0	0	0	0	200	300	0	0	0	0	0	0	0	200	903	0	0	0	0	0	0	0	603	903	0
518	0	0	0	0	0	0	0	200	300	0	0	0	0	0	0	0	200	903	0	0	0	0	0	0	0	603	903	0
518	1	0	0	0	0	0	0	200	300	0	0	0	0	0	0	0	200	903	0	0	0	0	0	0	0	603	903	0
518	2	0	0	0	0	0	0	200	300	0	0	0	0	0	0	0	200	903	0	0	0	0	0	0	0	603	903	0
518	3	0	0	0	0	0	0	200	300	0	0	0	0	0	0	0	200	903	0	0	0	0	0	0	0	603	903	0
518	4	0	0	0	0	0	0	200	300	0	0	0	0	0	0	0	200	903	0	0	0	0	0	0	0	603	903	0
518	5	0	0	0	0	0	0	200	300	0	0	0	0	0	0	0	200	903	0	0	0	0	0	0	0	603	903	0
518	6	0	0	0	0	0	0	200	300	0	0	0	0	0	0	0	200	903	0	0	0	0	0	0	0	603	903	0
518	7	0	0	0	0	0	0	200	300	0	0	0	0	0	0	0	200	903	0	0	0	0	0	0	0	603	903	0
518	8	0	0	0	0	0	0	200	300	0	0	0	0	0	0	0	200	903	0	0	0	0	0	0	0	603	903	0
518	9	0	0	0	0	0	0	200	300	0	0	0	0	0	0	0	200	903	0	0	0	0	0	0	0	603	903	0
519	0	0	0	0	0	0	0	200	300	0	0	0	0	0	0	0	200	903	0	0	0	0	0	0	0	603	903	0
519	1	0	0	0	0	0	0	200	300	0	0	0	0	0	0	0	200	903	0	0	0	0	0	0	0	603	903	0
519	2	0	0	0	0	0	0	200	300	0	0	0	0	0	0	0	200	903	0	0	0	0	0	0	0	603	903	0
519	3	0	0	0	0	0	0	200	300	0	0	0	0	0	0	0	200	903	0	0	0	0	0	0	0	603	903	0
519	4	0	0	0	0	0	0	200	300	0	0	0	0	0	0	0	200	903	0	0	0	0	0	0	0	603	903	0
519	5	0	0	0	0	0	0	200	300	0	0	0	0	0	0	0	200	903	0	0	0	0	0	0	0	603	903	0
519	6	0	0	0	0	0	0	200	300	0	0	0	0	0	0	0	200	903	0	0	0	0	0	0	0	603	903	0
519	7	0	0	0	0	0	0	200	300	0	0	0	0	0	0	0	200	903	0	0	0	0	0	0	0	603	903	0
519	8	0	0	0	0	0	0	200	300	0	0	0	0	0	0	0	200	903	0	0	0	0	0	0	0	603	903	0
519	9	0	0	0	0	0	0	200	300	0	0	0	0	0	0	0	200	903	0	0	0	0	0	0	0	603	903	0
520	0	0	0	0	0	0	0	200	300	0	0	0	0	0	0	0	200	903	0	0	0	0	0	0	0	603	903	0
520	1	0	0	0	0	0	0	200	300	0	0	0	0	0	0	0	200	903	0	0	0	0	0	0	0	603	903	0
520	2	0	0	0	0	0	0	200	300	0	0	0	0	0	0	0	200	903	0	0	0	0	0	0	0	603	903	0
520	3	0	0	0	0	0	0	200	300	0	0	0	0	0	0	0	200	903	0	0	0	0	0	0	0	603	903	0
520	4	0	0	0	0	0	0	200	300	0	0	0	0	0	0	0	200	903	0	0	0	0	0	0	0	603	903	0
520	5	0	0	0	0	0	0	200	300	0	0	0	0	0	0	0	200	903	0	0	0	0	0	0	0	603	903	0
520	6	0	0	0	0	0	0	200	300	0	0	0	0	0	0	0	200	903	0	0	0	0	0	0	0	603	903	0
520	7	0	0	0	0	0	0	200	300	0	0	0	0	0	0	0	200	903	0	0	0	0	0	0	0	603	903	0
520	8	0	0	0	0	0	0	200	300	0	0	0	0	0	0	0	200	903	0	0	0	0	0	0	0	603	903	0
520	9	0	0	0	0	0	0	200	300	0	0	0	0	0	0	0	200	903	0	0	0	0	0	0	0	603	903	0
521	0	0	0	0	0	0	0	200	300	0	0	0	0	0	0	0	200	903	0	0	0	0	0	0	0	603	903	0
521	1	0	0	0	0	0	0	200	300	0	0	0	0	0	0	0	200	903	0	0	0	0	0	0	0	603	903	0
521	2	0	0	0	0	0	0	200	300	0	0	0	0	0	0	0	200	903	0	0	0	0	0	0	0	603	903	0
521	3	0	0	0	0	0	0	200	300	0	0	0	0	0	0	0	200	903	0	0	0	0	0	0	0	603	903	0
521	4	0	0	0	0	0	0	200	300	0	0	0	0	0	0	0	200	903	0	0	0	0	0	0	0	603	903	0
521	5	0	0	0	0	0	0	200	300	0	0	0	0	0	0	0	200	903	0	0	0	0	0	0	0	603	903	0
521	6	0	0	0	0	0	0	200	300	0	0	0	0	0	0	0	200	903	0	0	0	0	0	0	0	603	903	0
521	7	0	0	0	0	0	0	200	300	0	0	0	0	0	0	0	200	903	0	0	0	0	0	0	0	603	903	0
521	8	0	0	0	0	0	0	200	300	0	0	0	0	0	0	0	200	903	0	0	0	0	0	0	0	603	903	0
521	9	0	0	0	0	0	0	200	300	0	0	0	0	0	0	0	200	903	0	0	0	0	0	0	0	603	903	0
522	0	0	0	0	0	0	0	200	300	0	0	0	0	0	0	0	200	903	0	0	0	0	0	0	0	603	903	0
522	1	0	0	0	0	0	0	200	300	0	0	0	0	0	0	0	200	903	0	0	0	0	0	0	0	603	903	0
522	2	0	0	0	0	0	0	200	300	0	0	0	0	0	0	0	200	903	0	0	0	0	0	0	0	603	903	0
522	3	0	0	0	0	0	0	200	300	0	0	0	0	0	0	0	200	903	0	0	0	0	0	0	0	603	903	0
522	4	0	0	0	0	0	0	200	300	0	0	0	0	0	0	0	200	903	0	0	0	0	0	0	0	603	903	0
522	5	0	0	0	0	0	0	200	300	0	0	0	0	0	0	0	200	903	0	0	0	0	0	0	0	603	903	0
522	6	0	0	0	0	0	0	200	300	0	0	0	0	0	0	0	200	903	0	0	0	0	0	0	0	603	903	0
522	7	0	0	0	0	0	0	200	300	0	0	0	0	0	0	0	200	903	0	0	0	0	0	0	0	603	903	0
522	8	0	0	0	0	0	0	200	300	0	0	0	0	0	0	0	200	903	0	0	0	0	0	0	0	603	903	0
522	9	0	0	0	0	0	0	200	300	0	0	0	0	0	0	0	200	903	0	0	0	0	0	0	0	603	903	0
523	0	0	0	0	0	0	0	200	300	0	0	0	0	0	0	0	200	903	0	0	0	0	0	0	0	603	903	0
523	1	0	0	0	0	0	0	200	300	0	0	0	0	0	0	0	200	903	0	0	0	0	0	0	0	603	903	0
523	2	0	0	0	0	0	0	200	300	0	0	0	0	0	0	0	200	903	0	0	0	0	0	0	0	603	903	0
523	3	0	0	0	0	0	0	200	300	0	0	0	0	0	0	0	200	903	0	0	0	0	0	0	0	603	903	0
523	4	0	0	0	0	0	0	200	300	0	0	0	0	0	0	0	200	903	0	0	0	0	0	0	0	603	903	0
523	5	0	0	0	0	0	0	200	300	0	0	0	0	0	0	0	200	903	0	0	0	0	0	0	0	603	903	0
523	6	0	0	0	0	0	0	200	300	0	0	0	0	0	0	0	200	903	0	0	0	0	0	0	0	603	903	0
523	7	0	0	0	0	0	0	200	300	0	0	0	0	0	0	0	200	903	0	0	0	0	0	0	0	603	903	0
523	8	0	0	0	0	0	0	200	300	0	0	0	0	0	0	0	200	903	0	0	0	0	0	0	0	603	903	0
523	9	0	0	0	0	0	0	200	300	0	0	0	0	0	0	0	200	903	0	0	0	0	0	0	0	603	903	0
524	0	0	0	0	0	0	0	200	300	0	0	0	0	0	0	0	200	903	0	0	0	0	0	0	0	603	903	0
524	1	0	0	0	0	0	0	200	300	0	0	0	0	0	0	0	200	903	0	0	0	0	0	0	0	603	903	0
524	2	0	0	0	0	0	0	200	300	0	0	0	0	0	0	0	200	903	0	0	0	0	0	0	0	603	903	0
524	3	0	0	0	0	0	0	200	300	0	0	0	0	0	0	0	200	903	0	0	0	0	0	0	0	603	903	0
524	4	0	0	0	0	0	0	200	300	0	0	0	0	0	0	0	200	903	0	0	0	0	0	0	0	603	903	0
524	5	0	0	0	0	0	0	200	300	0	0	0	0	0	0	0	200	903	0	0	0	0	0	0	0	603	903	0
524	6	0	0	0	0	0	0	200	300	0	0	0	0	0	0	0	200	903	0	0	0	0	0	0	0	603	903	0
524	7	0	0	0	0	0	0	200	300	0	0	0	0	0	0	0	200	903	0	0	0	0	0	0	0	603	903	0
524	8	0	0	0	0	0	0	200	300	0	0	0	0	0	0	0	200	903	0	0	0	0	0	0	0	603	903	0
524	9	0	0	0	0	0	0	200	300	0	0	0	0	0	0	0	200	903	0	0	0	0	0	0	0	603	903	0
525	0	0	0	0	0	0	0	200	300	0	0	0	0	0	0	0	200	903	0	0	0	0	0	0	0	603	903	0
525	1	0	0	0	0	0	0	200	300	0	0	0	0	0	0	0	200	903	0	0	0	0	0	0	0	603	903	0
525	2	0	0	0	0	0	0	200	300	0	0	0	0	0	0	0	200	903	0	0	0	0	0	0	0	603	903	0
525	3	0	0	0	0	0	0	200	300	0	0	0	0	0	0	0	200	903	0	0	0	0	0	0	0	603	903	0
525	4	0	0	0	0	0	0	200	300	0	0	0	0	0	0	0	200	903	0	0	0	0	0	0	0	603	903	0
525	5	0	0	0	0	0	0	200	300	0	0	0	0	0	0	0	200	903	0	0	0	0	0	0	0	603	903	0
525	6	0	0	0	0	0	0	200	300	0	0	0	0	0	0	0	200	903	0	0	0	0	0	0	0	603	903	0
525	7	0	0	0	0	0	0	200	300	0	0	0	0	0	0	0	200	903	0	0	0	0	0	0	0	603	903	0
525	8	0	0	0	0	0	0	200	300	0	0	0	0	0	0	0	200	903	0	0	0	0	0	0	0	603	903	0
525	9	0	0	0	0	0	0	200	300	0	0	0	0	0	0	0	200	903	0	0	0	0	0	0	0	603	903	0
526	0	0	0	0	0	0	0	200	300	0	0	0	0	0	0	0	200	903	0	0	0	0	0	0	0	603	903	0
526	1	0	0	0	0	0	0	200	300	0	0	0	0	0	0	0	200	903	0	0	0	0	0	0	0	603	903	0
526	2	0	0	0	0	0	0	200	300	0	0	0	0	0	0	0	200	903	0	0	0	0	0	0	0	603	903	0
526	3	0	0	0	0	0	0	200	300	0	0	0	0	0	0	0	200	903	0	0	0	0	0	0	0	603	903	0
526	4	0	0	0	0	0	0	200	300	0	0	0	0	0	0	0	200	903	0	0	0	0	0	0	0	603	903	0
526	5	0	0	0	0	0	0	200	300	0	0	0	0	0	0	0	200	903	0	0	0	0	0	0	0	603	903	0
526	6	0	0	0	0	0	0	200	300	0	0	0	0	0	0	0	200	903	0	0	0	0	0	0	0	603	903	0
526	7	0	0	0	0	0	0	200	300	0	0	0	0	0	0	0	200	903	0	0	0	0	0	0	0	603	903	0
526	8	0	0	0	0	0	0	200	300	0	0	0	0	0	0	0	200	903	0	0	0	0	0	0	0	603	903	0
526	9	0	0	0	0	0	0	200	300	0	0	0	0	0	0	0	200	903	0	0	0	0	0	0	0	603	903	0
527	0	0	0	0	0	0	0	200	300	0	0	0	0	0	0	0	200	903	0	0	0	0	0	0	0	603	903	0
527	1	0	0	0	0	0	0	200	300	0	0	0	0	0	0	0	200	903	0	0	0	0	0	0	0	603	903	0
527	2	0	0	0	0	0	0	200	300	0	0	0	0	0	0	0	200	903	0	0	0	0	0	0	0	603	903	0
527	3	0	0	0	0	0	0	200	300	0	0	0	0	0	0	0	200	903	0	0	0	0	0	0	0	603	903	0
527	4	0	0	0	0	0	0	200	300	0	0	0	0	0	0	0	200	903	0	0	0	0	0	0	0	603	903	0
527	5	0	0	0	0	0	0	200	300	0	0	0	0	0	0	0	200	903	0	0	0	0	0	0	0	603	903	0
527	6	0	0	0	0	0	0	200	300	0	0	0	0	0	0	0	200	903	0	0	0	0	0	0	0	603	903	0
527	7	0	0	0	0	0	0	200	300	0	0	0	0	0	0	0	200	903	0	0	0	0	0	0	0	603	903	0
527	8	0	0	0	0	0	0	200	300	0	0	0	0	0	0	0	200	903	0	0	0	0	0	0	0	603	903	0
527	9	0	0	0	0	0	0	200	300	0	0	0	0	0	0	0	200	903	0	0	0	0	0	0	0	603	903	0
528	0	0	0	0	0	0	0	200	300	0	0	0	0	0	0	0	200	903	0	0	0	0	0	0	0	603	903	0
528	1	0	0	0	0	0	0	200	300	0	0	0	0	0	0	0	200	903	0	0	0	0	0	0	0	603	903	0
528	2	0	0	0	0	0	0	200	300	0	0	0	0	0	0	0	200	903	0	0	0	0	0	0	0	603	903	0
528	3	0	0	0	0	0	0	200	300	0	0	0	0	0	0	0	200	903	0	0	0	0	0	0	0	603	903	0
528	4	0	0	0	0	0	0	200	300	0	0	0	0	0	0	0	200	903	0	0	0	0	0	0	0	603	903	0
528	5	0	0	0	0	0	0	200	300	0	0	0	0	0	0	0	200	903	0	0	0	0	0	0	0	603	903	0
528	6	0	0	0	0	0	0	200	300	0	0	0	0	0	0	0	200	903	0	0	0	0	0	0	0	603	903	0
528	7	0	0	0	0	0	0	200	300	0	0	0	0	0	0	0	200	903	0	0	0	0	0	0	0	603	903	0
528	8	0	0	0	0	0	0	200	300	0	0	0	0	0	0	0	200	903	0	0	0	0	0	0	0	603	903	0
528	9	0	0	0	0	0	0	200	300	0	0	0	0	0	0	0	200	903	0	0	0	0	0	0	0	603	903	0
529	0	0	0	0	0	0	0	200	300	0	0	0	0	0	0	0	200	903	0	0	0	0	0	0	0	603	903	0
529	1	0	0	0	0	0	0	200	300	0	0	0	0	0	0	0	200	903	0	0	0	0	0	0	0	603	903	0
529	2	0	0	0	0	0	0	200	300	0	0	0	0	0	0	0	200	903	0	0	0	0	0	0	0	603	903	0
529	3	0	0	0	0	0	0	200	300	0	0	0	0	0	0	0	200	903	0	0	0	0	0	0	0	603	903	0
529	4	0	0	0	0	0	0	200	300	0	0	0	0	0	0	0	200	903	0	0	0	0	0	0	0	603	903	0
529	5	0	0	0	0	0	0	200	300	0	0	0	0	0	0	0	200	903	0	0	0	0	0	0	0	603	903	0
529	6	0	0	0	0	0	0	200	300	0	0	0	0	0	0	0	200	903	0	0	0	0	0	0	0	603	903	0
529	7	0	0	0	0	0	0	200	300	0	0	0	0	0	0	0	200	903	0	0	0	0	0	0	0	603	903	0
529	8	0	0	0	0	0	0	200	300	0	0	0	0	0	0	0	200	903	0	0	0	0	0	0	0	603	903	0
529	9	0	0	0	0	0	0	200	300	0	0	0	0	0	0	0	200	903	0	0	0	0	0	0	0	603	903	0
530	0	0	0	0	0	0	0	200	300	0	0	0	0	0	0	0	200	903	0	0	0	0	0	0	0	603	903	0
530	1	0	0	0	0	0	0	200	300	0	0	0	0	0	0	0	200	903	0	0	0	0	0	0	0	603	903	0
530	2	0	0	0	0	0	0	200	300	0	0	0	0	0	0	0	200	903	0	0	0	0	0	0	0	603	903	0
530	3	0	0	0	0	0	0	200	300	0	0	0	0	0	0	0	200	903	0	0	0	0	0	0	0	603	903	0
530	4	0	0	0	0	0	0	200	300	0	0	0	0	0	0	0	200	903	0	0	0	0	0	0	0	603	903	0
530	5	0	0	0	0	0	0	200	300	0	0	0	0	0	0	0	200	903	0	0	0	0	0	0	0	603	903	0
530	6	0	0	0	0	0	0	200	300	0	0	0	0	0	0	0	200	903	0	0	0	0	0	0	0	603	903	0
530	7	0	0	0	0	0	0	200	300	0	0	0	0	0	0	0	200	903	0	0	0	0	0	0	0	603	903	0
530	8	0	0	0	0	0	0	200	300	0	0	0	0	0	0	0	200	903	0	0	0	0	0	0	0	603	903	0
530	9	0	0	0	0	0	0	200	300	0	0	0	0	0	0	0	200	903	0	0	0	0	0	0	0	603	903	0
531	0	0	0	0	0	0	0	200	300	0	0	0	0	0	0	0	200	903	0	0	0	0	0	0	0	603	903	0
531	1	0	0	0	0	0	0	200	300	0	0	0	0	0	0	0	200	903	0	0	0	0	0	0	0	603	903	0
531	2	0	0	0	0	0	0	200	300	0	0	0	0	0	0	0	200	903	0	0	0	0	0	0	0	603	903	0
531	3	0	0	0	0	0	0	200	300	0	0	0	0	0	0	0	200	903	0	0	0	0	0	0	0	603	903	0
531	4	0	0	0	0	0	0	200	300	0	0	0	0	0	0	0	200	903	0	0	0	0	0	0	0	603	903	0
531	5	0	0	0	0	0	0	200	300	0	0	0	0	0	0	0	200	903	0	0	0	0	0	0	0	603	903	0
531	6	0	0	0	0	0	0	200	300	0	0	0	0	0	0	0	200	903	0	0	0	0	0	0	0	603	903	0
531	7	0	0	0	0	0	0	200	300	0	0	0	0	0	0	0	200	903	0	0	0	0	0	0	0	603	903	0
531	8	0	0	0	0	0	0	200	300	0	0	0	0	0	0	0	200	903	0	0	0	0	0	0	0	603	903	0
531	9	0	0	0	0	0	0	200	300	0	0	0	0	0	0	0	200	903	0	0	0	0	0	0	0	603	903	0
532	0	0	0	0	0	0	0	200	300	0	0	0	0	0	0	0	200	903	0	0	0	0	0	0	0	603	903	0
532	1	0	0	0	0	0	0	200	300	0	0	0	0	0	0	0	200	903	0	0	0	0	0	0	0	603	903	0
532	2	0	0	0	0	0	0	200	300	0	0	0	0	0	0	0	200	903	0	0	0	0	0	0	0	603	903	0
532	3	0	0	0	0	0	0	200	300	0	0	0	0	0	0	0	200	903	0	0	0	0	0	0	0	603	903	0
532	4	0	0	0	0	0	0	200	300	0	0	0	0	0	0	0	200	903	0	0	0	0	0	0	0	603	903	0
532	5	0	0	0	0	0	0	200	300	0	0	0	0	0	0	0	200	903	0	0	0	0	0	0	0	603	903	0
532	6	0	0	0	0	0	0	200	300	0	0	0	0	0	0	0	200	903	0	0	0	0	0	0	0	603	903	0
532	7	0	0	0	0	0	0	200	300	0	0	0	0	0	0	0	200	903	0	0	0	0	0	0	0	603	903	0
532	8	0	0	0	0	0	0	200	300	0	0	0	0	0	0	0	200	903	0	0	0	0	0	0	0	603	903	0
532	9	0	0	0	0	0	0	200	300	0	0	0	0	0	0	0	200	903	0	0	0	0	0	0	0	603	903	0
533	0	0	0	0	0	0	0	200	300	0	0	0	0	0	0	0	200	903	0	0	0	0	0	0	0	603	903	0
533	1	0	0	0	0	0	0	200	300	0	0	0	0	0	0	0	200	903	0	0	0	0	0	0	0	603	903	0
533	2	0	0	0	0	0	0	200	300	0	0	0	0	0	0	0	200	903	0	0	0	0	0	0	0	603	903	0
533	3	0	0	0	0	0	0	200	300	0	0	0	0	0	0	0	200	903	0	0	0	0	0	0	0	603	903	0
533	4	0	0	0	0	0	0	200	300	0	0	0	0	0	0	0	200	903	0	0	0	0	0	0	0	603	903	0
533	5	0	0	0	0	0	0	200	300	0	0	0	0	0	0	0	200	903	0	0	0	0	0	0	0	603	903	0
533	6	0	0	0	0	0	0	200	300	0	0	0	0	0	0	0	200	903	0	0	0	0	0	0	0	603	903	0
533	7	0	0	0	0	0	0	200	300	0	0	0	0	0	0	0	200	903	0	0	0	0	0	0	0	603	903	0
533	8	0	0	0	0	0	0	200	300	0	0	0	0	0	0	0	200	903	0	0	0	0	0	0	0	603	903	0
533	9	0	0	0	0	0	0	200	300	0	0	0	0	0	0	0	200	903	0	0	0	0	0	0	0	603	903	0
534	0	0	0	0	0	0	0	200	300	0	0	0	0	0	0	0	200	903	0	0	0	0	0	0	0	603	903	0
534	1	0	0	0	0	0	0	200	300	0	0	0	0	0	0	0	200	903	0	0	0	0	0	0	0	603	903	0
534	2	0	0	0	0	0	0	200	300	0	0	0	0	0	0	0	200	903	0	0	0	0	0	0	0	603	903	0
534	3	0	0	0	0	0	0	200	300	0	0	0	0	0	0	0	200	903	0	0	0	0	0	0	0	603	903	0
534	4	0	0	0	0	0	0	200	300	0	0	0	0	0	0	0	200	903	0	0	0	0	0	0	0	603	903	0
534	5	0	0	0	0	0	0	200	300	0	0	0	0	0	0	0	200	903	0	0	0	0	0	0	0	603	903	0
534	6	0	0	0	0	0	0	200	300	0	0	0	0	0	0	0	200	903	0	0	0	0	0	0	0	603	903	0
534	7	0	0	0	0	0	0	200	300	0	0	0	0	0	0	0	200	903	0	0	0	0	0	0	0	603	903	0
534	8	0	0	0	0	0	0	200	300	0	0	0	0	0	0	0	200	903	0	0	0	0	0	0	0	603	903	0
534	9	0	0	0	0	0	0	200	300	0	0	0	0	0	0	0	200	903	0	0	0	0	0	0	0	603	903	0
535	0	0	0	0	0	0	0	200	300	0	0	0	0	0	0	0	200	903	0	0	0	0	0	0	0	603	903	0
535	1	0	0	0	0	0	0	200	300	0	0	0	0	0	0	0	200	903	0	0	0	0	0	0	0	603	903	0
535	2	0	0	0	0	0	0	200	300	0	0	0	0	0	0	0	200	903	0	0	0	0	0	0	0	603	903	0
535	3	0	0	0	0	0	0	200	300	0	0	0	0	0	0	0	200	903	0	0	0	0	0	0	0	603	903	0
535	4	0	0	0	0	0	0	200	300	0	0	0	0	0	0	0	200	903	0	0	0	0	0	0	0	603	903	0
535	5	0	0	0	0	0	0	200	300	0	0	0	0	0	0	0	200	903	0	0	0	0	0	0	0	603	903	0
535	6	0	0	0	0	0	0	200	300	0	0	0	0	0	0	0	200	903	0	0	0	0	0	0	0	603	903	0
535	7	0	0	0	0	0	0	200	300	0	0	0	0	0	0	0	200	903	0	0	0	0	0	0	0	603	903	0
535	8	0	0	0	0	0	0	200	300	0	0	0	0	0	0	0	200	903	0	0	0	0	0	0	0	603	903	0
535	9	0	0	0	0	0	0	200	300	0	0	0	0	0	0	0	200	903	0	0	0	0	0	0	0	603	903	0
536	0	0	0	0	0	0	0	200	300	0	0	0	0	0	0	0	200	903	0	0	0	0	0	0	0	603	903	0
536	1	0	0	0	0	0	0	200	300	0	0	0	0	0	0	0	200	903	0	0	0	0	0	0	0	603	903	0
536	2	0	0	0	0	0	0	200	300	0	0	0	0	0	0	0	200	903	0	0	0	0	0	0	0	603	903	0
536	3	0	0	0	0	0	0	200	300	0	0	0	0	0	0	0	200	903	0	0	0	0	0	0	0	603	903	0
536	4	0	0	0	0	0	0	200	300	0	0	0	0	0	0	0	200	903	0	0	0	0	0	0	0	603	903	0
536	5	0	0	0	0	0	0	200	300	0	0	0	0	0	0	0	200	903	0	0	0	0	0	0	0	603	903	0
536	6	0	0	0	0	0	0	200	300	0	0	0	0	0	0	0	200	903	0	0	0	0	0	0	0	603	903	0
536	7	0	0	0	0	0	0	200	300	0	0	0	0	0	0	0	200	903	0	0	0	0	0	0	0	603	903	0
536	8	0	0	0	0	0	0	200	300	0	0	0	0	0	0	0	200	903	0	0	0	0	0	0	0	603	903	0
536	9	0	0	0	0	0	0	200	300	0	0	0	0	0	0	0	200	903	0	0	0	0	0	0	0	603	903	0
537	0	0	0	0	0	0	0	200	300	0	0	0	0	0	0	0	200	903	0	0	0	0	0	0	0	603	903	0
537	1	0	0	0	0	0	0	200	300	0	0	0	0	0	0	0	200	903	0	0	0	0	0	0	0	603	903	0
537	2	0	0	0	0	0	0	200	300	0	0	0	0	0	0	0	200	903	0	0	0	0	0	0	0	603	903	0
537	3	0	0	0	0	0	0	200	300	0	0	0	0	0	0	0	200	903	0	0	0	0	0	0	0	603	903	0
537	4	0	0	0	0	0	0	200	300	0	0	0	0	0	0	0	200	903	0	0	0	0	0	0	0	603	903	0
537	5	0	0	0	0	0	0	200	300	0	0	0	0	0	0	0	200	903	0	0	0	0	0	0	0	603	903	0
537	6	0	0	0	0	0	0	200	300	0	0	0	0	0	0	0	200	903	0	0	0	0	0	0	0	603	903	0
537	7	0	0	0	0	0	0	200	300	0	0	0	0	0	0	0	200	903	0	0	0	0	0	0	0	603	903	0
537	8	0	0	0	0	0	0	200	300	0	0	0	0	0	0	0	200	903	0	0	0	0	0	0	0	603	903	0
537	9	0	0	0	0	0	0	200	300	0	0	0	0	0	0	0	200	903	0	0	0	0	0	0	0	603	903	0
538	0	0	0	0	0	0	0	200	300	0	0	0	0	0	0	0	200	903	0	0	0	0	0	0	0	603	903	0
538	1	0	0	0	0	0	0	200	300	0	0	0	0	0	0	0	200	903	0	0	0	0	0	0	0	603	903	0
538	2	0	0	0	0	0	0	200	300	0	0	0	0	0	0	0	200	903	0	0	0	0	0	0	0	603	903	0
538	3	0	0	0	0	0	0	200	300	0	0	0	0	0	0	0	200	903	0	0	0	0	0	0	0	603	903	0
538	4	0	0	0	0	0	0	200	300	0	0	0	0	0	0	0	200	903	0	0	0	0	0	0	0	603	903	0
538	5	0	0	0	0	0	0	200	300	0	0	0	0	0	0	0	200	903	0	0	0	0	0	0	0	603	903	0
538	6	0	0	0	0	0	0	200	300	0	0	0	0	0	0	0	200	903	0	0	0	0	0	0	0	603	903	0
538	7	0	0	0	0	0	0	200	300	0	0	0	0	0	0	0	200	903	0	0	0	0	0	0	0	603	903	0
538	8	0	0	0	0	0	0	200	300	0	0	0	0	0	0	0	200	903	0	0	0	0	0	0	0	603	903	0
538	9	0	0	0	0	0	0	200	300	0	0	0	0	0	0	0	200	903	0	0	0	0	0	0	0	603	903	0
539	0	0	0	0	0	0	0	200	300	0	0	0	0	0	0	0	200	903	0	0	0	0	0	0	0	603	903	0
539	1	0	0	0	0	0	0	200	300	0	0	0	0	0	0	0	200	903	0	0	0	0	0	0	0	603	903	0
539	2	0	0	0	0	0	0	200	300	0	0	0	0	0	0	0	200	903	0	0	0	0	0	0	0	603	903	0
539	3	0	0	0	0	0	0	200	300	0	0	0	0	0	0	0	200	903	0	0	0	0	0	0	0	603	903	0
539	4	0	0	0	0	0	0	200	300	0	0	0	0	0	0	0	200	903	0	0	0	0	0	0	0	603	903	0
539	5	0	0	0	0	0	0	200	300	0	0	0	0	0	0	0	200	903	0	0	0	0	0	0	0	603	903	0
539	6	0	0	0	0	0	0	200	300	0	0	0	0	0	0	0	200	903	0	0	0	0	0	0	0	603	903	0
539	7	0	0	0	0	0	0	200	300	0	0	0	0	0	0	0	200	903	0	0	0	0	0	0	0	603	903	0
539	8	0	0	0	0	0	0	200	300	0	0	0	0	0	0	0	200	903	0	0	0	0	0	0	0	603	903	0
539	9	0	0	0	0	0	0	200	300	0	0	0	0	0	0	0	200	903	0	0	0	0	0	0	0	603	903	0
540	0	0	0	0	0	0	0	200	300	0	0	0	0	0	0	0	200	903	0	0	0	0	0	0	0	603	903	0
540	1	0	0	0	0	0	0	200	300	0	0	0	0	0	0	0	200	903	0	0	0	0	0	0	0	603	903	0
540	2	0	0	0	0	0	0	200	300	0	0	0	0	0	0	0	200	903	0	0	0	0	0	0	0	603	903	0
540	3	0	0	0	0	0	0	200	300	0	0	0	0	0	0	0	200	903	0	0	0	0	0	0	0	603	903	0
540	4	0	0	0	0	0	0	200	300	0	0	0	0	0	0	0	200	903	0	0	0	0	0	0	0	603	903	0
540	5	0	0	0	0	0	0	200	300	0	0	0	0	0	0	0	200	903	0	0	0	0	0	0	0	603	903	0
540	6	0	0	0	0	0	0	200	300	0	0	0	0	0	0	0	200	903	0	0	0	0	0	0	0	603	903	0
540	7	0	0	0	0	0	0	200	300	0	0	0	0	0	0	0	200	903	0	0	0	0	0	0	0	603	903	0
540	8	0	0	0	0	0	0	200	300	0	0	0	0	0	0	0	200	903	0	0	0	0	0	0	0	603	903	0
540	9	0	0	0	0	0	0	200	300	0	0	0	0	0	0	0	200	903	0	0	0	0	0	0	0	603	903	0
541	0	0	0	0	0	0	0	200	300	0	0	0	0	0	0	0	200	903	0	0	0	0	0	0	0	603	903	0
541	1	0	0	0	0	0	0	200	300	0	0	0	0	0	0	0	200	903	0	0	0	0	0	0	0	603	903	0
541	2	0	0	0	0	0	0	200	300	0	0	0	0	0	0	0	200	903	0	0	0	0	0	0	0	603	903	0
541	3	0	0	0	0	0	0	200	300	0	0	0	0	0	0	0	200	903	0	0	0	0	0	0	0	603	903	0
541	4	0	0	0	0	0	0	200	300	0	0	0	0	0	0	0	200	903	0	0	0	0	0	0	0	603	903	0
541	5	0	0	0	0	0	0	200	300	0	0	0	0	0	0	0	200	903	0	0	0	0	0	0	0	603	903	0
541	6	0	0	0	0	0	0	200	300	0	0	0	0	0	0	0	200	903	0	0	0	0	0	0	0	603	903	0
541	7	0	0	0	0	0	0	200	300	0	0	0	0	0	0	0	200	903	0	0	0	0	0	0	0	603	903	0
541	8	0	0	0	0	0	0	200	300	0	0	0	0	0	0	0	200	903	0	0	0	0	0	0	0	603	903	0
541	9	0	0	0	0	0	0	200	300	0	0	0	0	0	0	0	200	903	0	0	0	0	0	0	0	603	903	0
542	0	0	0	0	0	0	0	200	300	0	0	0	0	0	0	0	200	903	0	0	0	0	0	0	0	603	903	0
542	1	0	0	0	0	0	0	200	300	0	0	0	0	0	0	0	200	903	0	0	0	0	0	0	0	603	903	0
542	2	0	0	0	0	0	0	200	300	0	0	0	0	0	0	0	200	903	0	0	0	0	0	0	0	603	903	0
542	3	0	0	0	0	0	0	200	300	0	0	0	0	0	0	0	200	903	0	0	0	0	0	0	0	603	903	0
542	4	0	0	0	0	0	0	200	300	0	0	0	0	0	0	0	200	903	0	0	0	0	0	0	0	603	903	0
542	5	0	0	0	0	0	0	200	300	0	0	0	0	0	0	0	200	903	0	0	0	0	0	0	0	603	903	0
542	6	0	0	0	0	0	0	200	300	0	0	0	0	0	0	0	200	903	0	0	0	0	0	0	0	603	903	0
542	7	0	0	0	0	0	0	200	300	0	0	0	0	0	0	0	200	903	0	0	0	0	0	0	0	603	903	0
542	8	0	0	0	0	0	0	200	300	0	0	0	0	0	0	0	200	903	0	0	0	0	0	0	0	603	903	0
542	9	0	0	0	0	0	0	200	300	0	0	0	0	0	0	0	200	903	0	0	0	0	0	0	0	603	903	0
543	0	0	0	0	0	0	0	200	300	0	0	0	0	0	0	0	200	903	0	0	0	0	0	0	0	603	903	0
543	1	0	0	0	0	0	0	200	300	0	0	0	0	0	0	0	200	903	0	0	0	0	0	0	0	603	903	0
543	2	0	0	0	0	0	0	200	300	0	0	0	0	0	0	0	200	903	0	0	0	0	0	0	0	603	903	0
543	3	0	0	0	0	0	0	200	300	0	0	0	0	0	0	0	200	903	0	0	0	0	0	0	0	603	903	0
543	4	0	0	0	0	0	0	200	300	0	0	0	0	0	0	0	200	903	0	0	0	0	0	0	0	603	903	0
543	5	0	0	0	0	0	0	200	300	0	0	0	0	0	0	0	200	903	0	0	0	0	0	0	0	603	903	0
543	6	0	0	0	0	0	0	200	300	0	0	0	0	0	0	0	200	903	0	0	0	0	0	0	0	603	903	0
543	7	0	0	0	0	0	0	200	300	0	0	0	0	0	0	0	200	903	0	0	0	0	0	0	0	603	903	0
543	8	0	0	0	0	0	0	200	300	0	0	0	0	0	0	0	200	903	0	0	0	0	0	0	0	603	903	0
543	9	0	0	0	0	0	0	200	300	0	0	0	0	0	0	0	200	903	0	0	0	0	0	0	0	603	903	0
544	0	0	0	0	0	0	0	200	300	0	0	0	0	0	0	0	200	903	0	0	0	0	0	0	0	603	903	0
544	1	0	0	0	0	0	0	200	300	0	0	0	0	0	0	0	200	903	0	0	0	0	0	0	0	603	903	0
544	2	0	0	0	0	0	0	200	300	0	0	0	0	0	0	0	200	903	0	0	0	0	0	0	0	603	903	0
544	3	0	0	0	0	0	0	200	300	0	0	0	0	0	0	0	200	903	0	0	0	0	0	0	0	603	903	0
544	4	0	0	0	0	0	0	200	300	0	0	0	0	0	0	0	200	903	0	0	0	0	0	0	0	603	903	0
544	5	0	0	0	0	0	0	200	300	0	0	0	0	0	0	0	200	903	0	0	0	0	0	0	0	603	903	0
544	6	0	0	0	0	0	0	200	300	0	0	0	0	0	0	0	200	903	0	0	0	0	0	0	0	603	903	0
544	7	0	0	0	0	0	0	200	300	0	0	0	0	0	0	0	200	903	0	0	0	0	0	0	0	603	903	0
544	8	0	0	0	0	0	0	200	300	0	0	0	0	0	0	0	200	903	0	0	0	0	0	0	0	603	903	0
544	9	0	0	0	0	0	0	200	300	0	0	0	0	0	0	0	200	903	0	0	0	0	0	0	0	603	903	0
545	0	0	0	0	0	0	0	200	300	0	0	0	0	0	0	0	200	903	0	0	0	0	0	0	0	603	903	0
545	1	0	0	0	0	0	0	200	300	0	0	0	0	0	0	0	200	903	0	0	0	0	0	0	0	603	903	0
545	2	0	0	0	0	0	0	200	300	0	0	0	0	0	0	0	200	903	0	0	0	0	0	0	0	603	903	0
545	3	0	0	0	0	0	0	200	300	0	0	0	0	0	0	0	200	903	0	0	0	0	0	0	0	603	903	0
545	4	0	0	0	0	0	0	200	300	0	0	0	0	0	0	0	200	903	0	0	0	0	0	0	0	603	903	0
545	5	0	0	0	0	0	0	200	300	0	0	0	0	0	0	0	200	903	0	0	0	0	0	0	0	603	903	0
545	6	0	0	0	0	0	0	200	300	0	0	0	0	0	0	0	200	903	0	0	0	0	0	0	0	603	903	0
545	7	0	0	0	0	0	0	200	300	0	0	0	0	0	0	0	200	903	0	0	0	0	0	0	0	603	903	0
545	8	0	0	0	0	0	0	200	300	0	0	0	0	0	0	0	200	903	0	0	0	0	0	0	0	603	903	0
545	9	0	0	0	0	0	0	200	300	0	0	0	0	0	0	0	200	903	0	0	0	0	0	0	0	603	903	0
546	0	0	0	0	0	0	0	200	300	0	0	0	0	0	0	0	200	903	0	0	0	0	0	0	0	603	903	0
546	1	0	0	0	0	0	0	200	300	0	0	0	0	0	0	0	200	903	0	0	0	0	0	0	0	603	903	0
546	2	0	0	0	0	0	0	200	300	0	0	0	0	0	0	0	200	903	0	0	0	0	0	0	0	603	903	0
546	3	0	0	0	0	0	0	200	300	0	0	0	0	0	0	0	200	903	0	0	0	0	0	0	0	603	903	0
546	4	0	0	0	0	0	0	200	300	0	0	0	0	0	0	0	200	903	0	0	0	0	0	0	0	603	903	0
546	5	0	0	0	0	0	0	200	300	0	0	0	0	0	0	0	200	903	0	0	0	0	0	0	0	603	903	0
546	6	0	0	0	0	0	0	200	300	0	0	0	0	0	0	0	200	903	0	0	0	0	0	0	0	603	903	0
546	7	0	0	0	0	0	0	200	300	0	0	0	0	0	0	0	200	903	0	0	0	0	0	0	0	603	903	0
546	8	0	0	0	0	0	0	200	300	0	0	0	0	0	0	0	200	903	0	0	0	0	0	0	0	603	903	0
546	9	0	0	0	0	0	0	200	300	0	0	0	0	0	0	0	200	903	0	0	0	0	0	0	0	603	903	0
547	0	0	0	0	0	0	0	200	300	0	0	0	0	0	0	0	200	903	0	0	0	0	0	0	0	603	903	0
547	1	0	0	0	0	0	0	200	300	0	0	0	0	0	0	0	200	903	0	0	0	0	0	0	0	603	903	0
547	2	0	0	0	0	0	0	200	300	0	0	0	0	0	0	0	200	903	0	0	0	0	0	0	0	603	903	0
547	3	0	0	0	0	0	0	200	300	0	0	0	0	0	0	0	200	903	0	0	0	0	0	0	0	603	903	0
547	4	0	0	0	0	0	0	200	300	0	0	0	0	0	0	0	200	903	0	0	0	0	0	0	0	603	903	0
547	5	0	0	0	0	0	0	200	300	0	0	0	0	0	0	0	200	903	0	0	0	0	0	0	0	603	903	0
547	6	0	0	0	0	0	0	200	300	0	0	0	0	0	0	0	200	903	0	0	0	0	0	0	0	603	903	0
547	7	0	0	0	0	0	0	200	300	0	0	0	0	0	0	0	200	903	0	0	0	0	0	0	0	603	903	0
547	8	0	0	0	0	0	0	200	300	0	0	0	0	0	0	0	200	903	0	0	0	0	0	0	0	603	903	0
547	9	0	0	0	0	0	0	200	300	0	0	0	0	0	0	0	200	903	0	0	0	0	0	0	0	603	903	0
548	0	0	0	0	0	0	0	200	300	0	0	0	0	0	0	0	200	903	0	0	0	0	0	0	0	603	903	0
548	1	0	0	0	0	0	0	200	300	0	0	0	0	0	0	0	200	903	0	0	0	0	0	0	0	603	903	0
548	2	0	0	0	0	0	0	200	300	0	0	0	0	0	0	0	200	903	0	0	0	0	0	0	0	603	903	0
548	3	0	0	0	0	0	0	200	300	0	0	0	0	0	0	0	200	903	0	0	0	0	0	0	0	603	903	0
548	4	0	0	0	0	0	0	200	300	0	0	0	0	0	0	0	200	903	0	0	0	0	0	0	0	603	903	0
548	5	0	0	0	0	0	0	200	300	0	0	0	0	0	0	0	200	903	0	0	0	0	0	0	0	603	903	0
548	6	0	0	0	0	0	0	200	300	0	0	0	0	0	0	0	200	903	0	0	0	0	0	0	0	603	903	0
548	7	0	0	0	0	0	0	200	300	0	0	0	0	0	0	0	200	903	0	0	0	0	0	0	0	603	903	0
548	8	0	0	0	0	0	0	200	300	0	0	0	0	0	0	0	200	903	0	0	0	0	0	0	0	603	903	0
548	9	0	0	0	0	0	0	200	300	0	0	0	0	0	0	0	200	903	0	0	0	0	0	0	0	603	903	0
549	0	0	0	0	0	0	0	200	300	0	0	0	0	0	0	0	200	903	0	0	0	0	0	0	0	603	903	0
549	1	0	0	0	0	0	0	200	300	0	0	0	0	0	0	0	200	903	0	0	0	0	0	0	0	603	903	0
549	2	0	0	0	0	0	0	200	300	0	0	0	0	0	0	0	200	903	0	0	0	0	0	0	0	603	903	0
549	3	0	0	0	0	0	0	200	300	0	0	0	0	0	0	0	200	903	0	0	0	0	0	0	0	603	903	0
549	4	0	0	0	0	0	0	200	300	0	0	0	0	0	0	0	200	903	0	0	0	0	0	0	0	603	903	0
549	5	0	0	0	0	0	0	200	300	0	0	0	0	0	0	0	200	903	0	0	0	0	0	0	0	603	903	0
549	6	0	0	0	0	0	0	200	300	0	0	0	0	0	0	0	200	903	0	0	0	0	0	0	0	603	903	0
549	7	0	0	0	0	0	0	200	300	0	0	0	0	0	0	0	200	903	0	0	0	0	0	0	0	603	903	0
549	8	0	0	0	0	0	0	200	300	0	0	0	0	0	0	0	200	903	0	0	0	0	0	0	0	603	903	0
549	9	0	0	0	0	0	0	200	300	0	0	0	0	0	0	0	200	903	0	0	0	0	0	0	0	603	903	0
550	0	0	0	0	0	0	0	200	300	0	0	0	0	0	0	0	200	903	0	0	0	0	0	0	0	603	903	0
550	1	0	0	0	0	0	0	200	300	0	0	0	0	0	0	0	200	903	0	0	0	0	0	0	0	603	903	0
550	2	0	0	0	0	0	0	200	300	0	0	0	0	0	0	0	200	903	0	0	0	0	0	0	0	603	903	0
550	3	0	0	0	0	0	0	200	300	0	0	0	0	0	0	0	200	903	0	0	0	0	0	0	0	603	903	0
550	4	0	0	0	0	0	0	200	300	0	0	0	0	0	0	0	200	903	0	0	0	0	0	0	0	603	903	0
550	5	0	0	0	0	0	0	200	300	0	0	0	0	0	0	0	200	903	0	0	0	0	0	0	0	603	903	0
550	6	0	0	0	0	0	0	200	300	0	0	0	0	0	0	0	200	903	0	0	0	0	0	0	0	603	903	0
550	7	0	0	0	0	0	0	200	300	0	0	0	0	0	0	0	200	903	0	0	0	0	0	0	0	603	903	0
550	8	0	0	0	0	0	0	200	300	0	0	0	0	0	0	0	200	903	0	0	0	0	0	0	0	603	903	0
550	9	0	0	0	0	0	0	200	300	0	0	0	0	0	0	0	200	903	0	0	0	0	0	0	0	603	903	0
551	0	0	0	0	0	0	0	200	300	0	0	0	0	0	0	0	200	903	0	0	0	0	0	0	0	603	903	0
551	1	0	0	0	0	0	0	200	300	0	0	0	0	0	0	0	200	903	0	0	0	0	0	0	0	603	903	0
551	2	0	0	0	0	0	0	200	300	0	0	0	0	0	0	0	200	903	0	0	0	0	0	0	0	603	903	0
551	3	0	0	0	0	0	0	200	300	0	0	0	0	0	0	0	200	903	0	0	0	0	0	0	0	603	903	0
551	4	0	0	0	0	0	0	200	300	0	0	0	0	0	0	0	200	903	0	0	0	0	0	0	0	603	903	0
551	5	0	0	0	0	0	0	200	300	0	0	0	0	0	0	0	200	903	0	0	0	0	0	0	0	603	903	0
551	6	0	0	0	0	0	0	200	300	0	0	0	0	0	0	0	200	903	0	0	0	0	0	0	0	603	903	0
551	7	0	0	0	0	0	0	200	300	0	0	0	0	0	0	0	200	903	0	0	0	0	0	0	0	603	903	0
551	8	0	0	0	0	0	0	200	300	0	0	0	0	0	0	0	200	903	0	0	0	0	0	0	0	603	903	0
551	9	0	0	0	0	0	0	200	300	0	0	0	0	0	0	0	200	903	0	0	0	0	0	0	0	603	903	0
552	0	0	0	0	0	0	0	200	300	0	0	0	0	0	0	0	200	903	0	0	0	0	0	0	0	603	903	0
552	1	0	0	0	0	0	0	200	300	0	0	0	0	0	0	0	200	903	0	0	0	0	0	0	0	603	903	0
552	2	0	0	0	0	0	0	200	300	0	0	0	0	0	0	0	200	903	0	0	0	0	0	0	0	603	903	0
552	3	0	0	0	0	0	0	200	300	0	0	0	0	0	0	0	200	903	0	0	0	0	0	0	0	603	903	0
552	4	0	0	0	0	0	0	200	300	0	0	0	0	0	0	0	200	903	0	0	0	0	0	0	0	603	903	0
552	5	0	0	0	0	0	0	200	300	0	0	0	0	0	0	0	200	903	0	0	0	0	0	0	0	603	903	0
552	6	0	0	0	0	0	0	200	300	0	0	0	0	0	0	0	200	903	0	0	0	0	0	0	0	603	903	0
552	7	0	0	0	0	0	0	200	300	0	0	0	0	0	0	0	200	903	0	0	0	0	0	0	0	603	903	0
552	8	0	0	0	0	0	0	200	300	0	0	0	0	0	0	0	200	903	0	0	0	0	0	0	0	603	903	0
552	9	0	0	0	0	0	0	200	300	0	0	0	0	0	0	0	200	903	0	0	0	0	0	0	0	603	903	0
553	0	0	0	0	0	0	0	200	300	0	0	0	0	0	0	0	200	903	0	0	0	0	0	0	0	603	903	0
553	1	0	0	0	0	0	0	200	300	0	0	0	0	0	0	0	200	903	0	0	0	0	0	0	0	603	903	0
553	2	0	0	0	0	0	0	200	300	0	0	0	0	0	0	0	200	903	0	0	0	0	0	0	0	603	903	0
553	3	0	0	0	0	0	0	200	300	0	0	0	0	0	0	0	200	903	0	0	0	0	0	0	0	603	903	0
553	4	0	0	0	0	0	0	200	300	0	0	0	0	0	0	0	200	903	0	0	0	0	0	0	0	603	903	0
553	5	0	0	0	0	0	0	200	300	0	0	0	0	0	0	0	200	903	0	0	0	0	0	0	0	603	903	0
553	6	0	0	0	0	0	0	200	300	0	0	0	0	0	0	0	200	903	0	0	0	0	0	0	0	603	903	0
553	7	0	0	0	0	0	0	200	300	0	0	0	0	0	0	0	200	903	0	0	0	0	0	0	0	603	903	0
553	8	0	0	0	0	0	0	200	300	0	0	0	0	0	0	0	200	903	0	0	0	0	0	0	0	603	903	0
553	9	0	0	0	0	0	0	200	300	0	0	0	0	0	0	0	200	903	0	0	0	0	0	0	0	603	903	0
554	0	0	0	0	0	0	0	200	300	0	0	0	0	0	0	0	200	903	0	0	0	0	0	0	0	603	903	0
554	1	0	0	0	0	0	0	200	300	0	0	0	0	0	0	0	200	903	0	0	0	0	0	0	0	603	903	0
554	2	0	0	0	0	0	0	200	300	0	0	0	0	0	0	0	200	903	0	0	0	0	0	0	0	603	903	0
554	3	0	0	0	0	0	0	200	300	0	0	0	0	0	0	0	200	903	0	0	0	0	0	0	0	603	903	0
554	4	0	0	0	0	0	0	200	300	0	0	0	0	0	0	0	200	903	0	0	0	0	0	0	0	603	903	0
554	5	0	0	0	0	0	0	200	300	0	0	0	0	0	0	0	200	903	0	0	0	0	0	0	0	603	903	0
554	6	0	0	0	0	0	0	200	300	0	0	0	0	0	0	0	200	903	0	0	0	0	0	0	0	603	903	0
554	7	0	0	0	0	0	0	200	300	0	0	0	0	0	0	0	200	903	0	0	0	0	0	0	0	603	903	0
554	8	0	0	0	0	0	0	200	300	0	0	0	0	0	0	0	200	903	0	0	0	0	0	0	0	603	903	0
554	9	0	0	0	0	0	0	200	300	0	0	0	0	0	0	0	200	903	0	0	0	0	0	0	0	603	903	0
555	0	0	0	0	0	0	0	200	300	0	0	0	0	0	0	0	200	903	0	0	0	0	0	0	0	603	903	0
555	1	0	0	0	0	0	0	200	300	0	0	0	0	0	0	0	200	903	0	0	0	0	0	0	0	603	903	0
555	2	0	0	0	0	0	0	200	300	0	0	0	0	0	0	0	200	903	0	0	0	0	0	0	0	603	903	0
555	3	0	0	0	0	0	0	200	300	0	0	0	0	0	0	0	200	903	0	0	0	0	0	0	0	603	903	0
555	4	0	0	0	0	0	0	200	300	0	0	0	0	0	0	0	200	903	0	0	0	0	0	0	0	603	903	0
555	5	0	0	0	0	0	0	200	300	0	0	0	0	0	0	0	200	903	0	0	0	0	0	0	0	603	903	0
555	6	0	0	0	0	0	0	200	300	0	0	0	0	0	0	0	200	903	0	0	0	0	0	0	0	603	903	0
555	7	0	0	0	0	0	0	200	300	0	0	0	0	0	0	0	200	903	0	0	0	0	0	0	0	603	903	0
555	8	0	0	0	0	0	0	200	300	0	0	0	0	0	0	0	200	903	0	0	0	0	0	0	0	603	903	0
555	9	0	0	0	0	0	0	200	300	0	0	0	0	0	0	0	200	903	0	0	0	0	0	0	0	603	903	0
556	0	0	0	0	0	0	0	200	300	0	0	0	0	0	0	0	200	903	0	0	0	0	0	0	0	603	903	0
556	1	0	0	0	0	0	0	200	300	0	0	0	0	0	0	0	200	903	0	0	0	0	0	0	0	603	903	0
556	2	0	0	0	0	0	0	200	300	0	0	0	0	0	0	0	200	903	0	0	0	0	0	0	0	603	903	0
556	3	0	0	0	0	0	0	200	300	0	0	0	0	0	0	0	200	903	0	0	0	0	0	0	0	603	903	0
556	4	0	0	0	0	0	0	200	300	0	0	0	0	0	0	0	200	903	0	0	0	0	0	0	0	603	903	0
556	5	0	0	0	0	0	0	200	300	0	0	0	0	0	0	0	200	903	0	0	0	0	0	0	0	603	903	0
556	6	0	0	0	0	0	0	200	300	0	0	0	0	0	0	0	200	903	0	0	0	0	0	0	0	603	903	0
556	7	0	0	0	0	0	0	200	300	0	0	0	0	0	0	0	200	903	0	0	0	0	0	0	0	603	903	0
556	8	0	0	0	0	0	0	200	300	0	0	0	0	0	0	0	200	903	0	0	0	0	0	0	0	603	903	0
556	9	0	0	0	0	0	0	200	300	0	0	0	0	0	0	0	200	903	0	0	0	0	0	0	0	603	903	0
557	0	0	0	0	0	0	0	200	300	0	0	0	0	0	0	0	200	903	0	0	0	0	0	0	0	603	903	0
557	1	0	0	0	0	0	0	200	300	0	0	0	0	0	0	0	200	903	0	0	0	0	0	0	0	603	903	0
557	2	0	0	0	0	0	0	200	300	0	0	0	0	0	0	0	200	903	0	0	0	0	0	0	0	603	903	0
557	3	0	0	0	0	0	0	200	300	0	0	0	0	0	0	0	200	903	0	0	0	0	0	0	0	603	903	0
557	4	0	0	0	0	0	0	200	300	0	0	0	0	0	0	0	200	903	0	0	0	0	0	0	0	603	903	0
557	5	0	0	0	0	0	0	200	300	0	0	0	0	0	0	0	200	903	0	0	0	0	0	0	0	603	903	0
557	6	0	0	0	0	0	0	200	300	0	0	0	0	0	0	0	200	903	0	0	0	0	0	0	0	603	903	0
557	7	0	0	0	0	0	0	200	300	0	0	0	0	0	0	0	200	903	0	0	0	0	0	0	0	603	903	0
557	8	0	0	0	0	0	0	200	300	0	0	0	0	0	0	0	200	903	0	0	0	0	0	0	0	603	903	0
557	9	0	0	0	0	0	0	200	300	0	0	0	0	0	0	0	200	903	0	0	0	0	0	0	0	603	903	0
558	0	0	0	0	0	0	0	200	300	0	0	0	0	0	0	0	200	903	0	0	0	0	0	0	0	603	903	0
558	1	0	0	0	0	0	0	200	300	0	0	0	0	0	0	0	200	903	0	0	0	0	0	0	0	603	903	0
558	2	0	0	0	0	0	0	200	300	0	0	0	0	0	0	0	200	903	0	0	0	0	0	0	0	603	903	0
558	3	0	0	0	0	0	0	200	300	0	0	0	0	0	0	0	200	903	0	0	0	0	0	0	0	603	903	0
558	4	0	0	0	0	0	0	200	300	0	0	0	0	0	0	0	200	903	0	0	0	0	0	0	0	603	903	0
558	5	0	0	0	0	0	0	200	300	0	0	0	0	0	0	0	200	903	0	0	0	0	0	0	0	603	903	0
558	6	0	0	0	0	0	0	200	300	0	0	0	0	0	0	0	200	903	0	0	0	0	0	0	0	603	903	0
558	7	0	0	0	0	0	0	200	300	0	0	0	0	0	0	0	200	903	0	0	0	0	0	0	0	603	903	0
558	8	0	0	0	0	0	0	200	300	0	0	0	0	0	0	0	200	903	0	0	0	0	0	0	0	603	903	0
558	9	0	0	0	0	0	0	200	300	0	0	0	0	0	0	0	200	903	0	0	0	0	0	0	0	603	903	0
559	0	0	0	0	0	0	0	200	300	0	0	0	0	0	0	0	200	903	0	0	0	0	0	0	0	603	903	0
559	1	0	0	0	0	0	0	200	300	0	0	0	0	0	0	0	200	903	0	0	0	0	0	0	0	603	903	0
559	2	0	0	0	0	0	0	200	300	0	0	0	0	0	0	0	200	903	0	0	0	0	0	0	0	603	903	0
559	3	0	0	0	0	0	0	200	300	0	0	0	0	0	0	0	200	903	0	0	0	0	0	0	0	603	903	0
559	4	0	0	0	0	0	0	200	300	0	0	0	0	0	0	0	200	903	0	0	0	0	0	0	0	603	903	0
559	5	0	0	0	0	0	0	200	300	0	0	0	0	0	0	0	200	903	0	0	0	0	0	0	0	603	903	0
559	6	0	0	0	0	0	0	200	300	0	0	0	0	0	0	0	200	903	0	0	0	0	0	0	0	603	903	0
559	7	0	0	0	0	0	0	200	300	0	0	0	0	0	0	0	200	903	0	0	0	0	0	0	0	603	903	0
559	8	0	0	0	0	0	0	200	300	0	0	0	0	0	0	0	200	903	0	0	0	0	0	0	0	603	903	0
559	9	0	0	0	0	0	0	200	300	0	0	0	0	0	0	0	200	903	0	0	0	0	0	0	0	603	903	0
560	0	0	0	0	0	0	0	200	300	0	0	0	0	0	0	0	200	903	0	0	0	0	0	0	0	603	903	0
560	1	0	0	0	0	0	0	200	300	0	0	0	0	0	0	0	200	903	0	0	0	0	0	0	0	603	903	0
560	2	0	0	0	0	0	0	200	300	0	0	0	0	0	0	0	200	903	0	0	0	0	0	0	0	603	903	0
560	3	0	0	0	0	0	0	200	300	0	0	0	0	0	0	0	200	903	0	0	0	0	0	0	0	603	903	0
560	4	0	0	0	0	0	0	200	300	0	0	0	0	0	0	0	200	903	0	0	0	0	0	0	0	603	903	0
560	5	0	0	0	0	0	0	200	300	0	0	0	0	0	0	0	200	903	0	0	0	0	0	0	0	603	903	0
560	6	0	0	0	0	0	0	200	300	0	0	0	0	0	0	0	200	903	0	0	0	0	0	0	0	603	903	0
560	7	0	0	0	0	0	0	200	300	0	0	0	0	0	0	0	200	903	0	0	0	0	0	0	0	603	903	0
560	8	0	0	0	0	0	0	200	300	0	0	0	0	0	0	0	200	903	0	0	0	0	0	0	0	603	903	0
560	9	0	0	0	0	0	0	200	300	0	0	0	0	0	0	0	200	903	0	0	0	0	0	0	0	603	903	0
561	0	0	0	0	0	0	0	200	300	0	0	0	0	0	0	0	200	903	0	0	0	0	0	0	0	603	903	0
561	1	0	0	0	0	0	0	200	300	0	0	0	0	0	0	0	200	903	0	0	0	0	0	0	0	603	903	0
561	2	0	0	0	0	0	0	200	300	0	0	0	0	0	0	0	200	903	0	0	0	0	0	0	0	603	903	0
561	3	0	0	0	0	0	0	200	300	0	0	0	0	0	0	0	200	903	0	0	0	0	0	0	0	603	903	0
561	4	0	0	0	0	0	0	200	300	0	0	0	0	0	0	0	200	903	0	0	0	0	0	0	0	603	903	0
561	5	0	0	0	0	0	0	200	300	0	0	0	0	0	0	0	200	903	0	0	0	0	0	0	0	603	903	0
561	6	0	0	0	0	0	0	200	300	0	0	0	0	0	0	0	200	903	0	0	0	0	0	0	0	603	903	0
561	7	0	0	0	0	0	0	200	300	0	0	0	0	0	0	0	200	903	0	0	0	0	0	0	0	603	903	0
561	8	0	0	0	0	0	0	200	300	0	0	0	0	0	0	0	200	903	0	0	0	0	0	0	0	603	903	0
561	9	0	0	0	0	0	0	200	300	0	0	0	0	0	0	0	200	903	0	0	0	0	0	0	0	603	903	0
562	0	0	0	0	0	0	0	200	300	0	0	0	0	0	0	0	200	903	0	0	0	0	0	0	0	603	903	0
562	1	0	0	0	0	0	0	200	300	0	0	0	0	0	0	0	200	903	0	0	0	0	0	0	0	603	903	0
562	2	0	0	0	0	0	0	200	300	0	0	0	0	0	0	0	200	903	0	0	0	0	0	0	0	603	903	0
562	3	0	0	0	0	0	0	200	300	0	0	0	0	0	0	0	200	903	0	0	0	0	0	0	0	603	903	0
562	4	0	0	0	0	0	0	200	300	0	0	0	0	0	0	0	200	903	0	0	0	0	0	0	0	603	903	0
562	5	0	0	0	0	0	0	200	300	0	0	0	0	0	0	0	200	903	0	0	0	0	0	0	0	603	903	0
562	6	0	0	0	0	0	0	200	300	0	0	0	0	0	0	0	200	903	0	0	0	0	0	0	0	603	903	0
562	7	0	0	0	0	0	0	200	300	0	0	0	0	0	0	0	200	903	0	0	0	0	0	0	0	603	903	0
562	8	0	0	0	0	0	0	200	300	0	0	0	0	0	0	0	200	903	0	0	0	0	0	0	0	603	903	0
562	9	0	0	0	0	0	0	200	300	0	0	0	0	0	0	0	200	903	0	0	0	0	0	0	0	603	903	0
563	0	0	0	0	0	0	0	200	300	0	0	0	0	0	0	0	200	903	0	0	0	0	0	0	0	603	903	0
563	1	0	0	0	0	0	0	200	300	0	0	0	0	0	0	0	200	903	0	0	0	0	0	0	0	603	903	0
563	2	0	0	0	0	0	0	200	300	0	0	0	0	0	0	0	200	903	0	0	0	0	0	0	0	603	903	0
563	3	0	0	0	0	0	0	200	300	0	0	0	0	0	0	0	200	903	0	0	0	0	0	0	0	603	903	0
563	4	0	0	0	0	0	0	200	300	0	0	0	0	0	0	0	200	903	0	0	0	0	0	0	0	603	903	0
563	5	0	0	0	0	0	0	200	300	0	0	0	0	0	0	0	200	903	0	0	0	0	0	0	0	603	903	0
563	6	0	0	0	0	0	0	200	300	0	0	0	0	0	0	0	200	903	0	0	0	0	0	0	0	603	903	0
563	7	0	0	0	0	0	0	200	300	0	0	0	0	0	0	0	200	903	0	0	0	0	0	0	0	603	903	0
563	8	0	0	0	0	0	0	200	300	0	0	0	0	0	0	0	200	903	0	0	0	0	0	0	0	603	903	0
563	9	0	0	0	0	0	0	200	300	0	0	0	0	0	0	0	200	903	0	0	0	0	0	0	0	603	903	0
564	0	0	0	0	0	0	0	200	300	0	0	0	0	0	0	0	200	903	0	0	0	0	0	0	0	603	903	0
564	1	0	0	0	0	0	0	200	300	0	0	0	0	0	0	0	200	903	0	0	0	0	0	0	0	603	903	0
564	2	0	0	0	0	0	0	200	300	0	0	0	0	0	0	0	200	903	0	0	0	0	0	0	0	603	903	0
564	3	0	0	0	0	0	0	200	300	0	0	0	0	0	0	0	200	903	0	0	0	0	0	0	0	603	903	0
564	4	0	0	0	0	0	0	200	300	0	0	0	0	0	0	0	200	903	0	0	0	0	0	0	0	603	903	0
564	5	0	0	0	0	0	0	200	300	0	0	0	0	0	0	0	200	903	0	0	0	0	0	0	0	603	903	0
564	6	0	0	0	0	0	0	200	300	0	0	0	0	0	0	0	200	903	0	0	0	0	0	0	0	603	903	0
564	7	0	0	0	0	0	0	200	300	0	0	0	0	0	0	0	200	903	0	0	0	0	0	0	0	603	903	0
564	8	0	0	0	0	0	0	200	300	0	0	0	0	0	0	0	200	903	0	0	0	0	0	0	0	603	903	0
564	9	0	0	0	0	0	0	200	300	0	0	0	0	0	0	0	200	903	0	0	0	0	0	0	0	603	903	0
565	0	0	0	0	0	0	0	200	300	0	0	0	0	0	0	0	200	903	0	0	0	0	0	0	0	603	903	0
565	1	0	0	0	0	0	0	200	300	0	0	0	0	0	0	0	200	903	0	0	0	0	0	0	0	603	903	0
565	2	0	0	0	0	0	0	200	300	0	0	0	0	0	0	0	200	903	0	0	0	0	0	0	0	603	903	0
565	3	0	0	0	0	0	0	200	300	0	0	0	0	0	0	0	200	903	0	0	0	0	0	0	0	603	903	0
565	4	0	0	0	0	0	0	200	300	0	0	0	0	0	0	0	200	903	0	0	0	0	0	0	0	603	903	0
565	5	0	0	0	0	0	0	200	300	0	0	0	0	0	0	0	200	903	0	0	0	0	0	0	0	603	903	0
565	6	0	0	0	0	0	0	200	300	0	0	0	0	0	0	0	200	903	0	0	0	0	0	0	0	603	903	0
565	7	0	0	0	0	0	0	200	300	0	0	0	0	0	0	0	200	903	0	0	0	0	0	0	0	603	903	0
565	8	0	0	0	0	0	0	200	300	0	0	0	0	0	0	0	200	903	0	0	0	0	0	0	0	603	903	0
565	9	0	0	0	0	0	0	200	300	0	0	0	0	0	0	0	200	903	0	0	0	0	0	0	0	603	903	0
566	0	0	0	0	0	0	0	200	300	0	0	0	0	0	0	0	200	903	0	0	0	0	0	0	0	603	903	0
566	1	0	0	0	0	0	0	200	300	0	0	0	0	0	0	0	200	903	0	0	0	0	0	0	0	603	903	0
566	2	0	0	0	0	0	0	200	300	0	0	0	0	0	0	0	200	903	0	0	0	0	0	0	0	603	903	0
566	3	0	0	0	0	0	0	200	300	0	0	0	0	0	0	0	200	903	0	0	0	0	0	0	0	603	903	0
566	4	0	0	0	0	0	0	200	300	0	0	0	0	0	0	0	200	903	0	0	0	0	0	0	0	603	903	0
566	5	0	0	0	0	0	0	200	300	0	0	0	0	0	0	0	200	903	0	0	0	0	0	0	0	603	903	0
566	6	0	0	0	0	0	0	200	300	0	0	0	0	0	0	0	200	903	0	0	0	0	0	0	0	603	903	0
566	7	0	0	0	0	0	0	200	300	0	0	0	0	0	0	0	200	903	0	0	0	0	0	0	0	603	903	0
566	8	0	0	0	0	0	0	200	300	0	0	0	0	0	0	0	200	903	0	0	0	0	0	0	0	603	903	0
566	9	0	0	0	0	0	0	200	300	0	0	0	0	0	0	0	200	903	0	0	0	0	0	0	0	603	903	0
567	0	0	0	0	0	0	0	200	300	0	0	0	0	0	0	0	200	903	0	0	0	0	0	0	0	603	903	0
567	1	0	0	0	0	0	0	200	300	0	0	0	0	0	0	0	200	903	0	0	0	0	0	0	0	603	903	0
567	2	0	0	0	0	0	0	200	300	0	0	0	0	0	0	0	200	903	0	0	0	0	0	0	0	603	903	0
567	3	0	0	0	0	0	0	200	300	0	0	0	0	0	0	0	200	903	0	0	0	0	0	0	0	603	903	0
567	4	0	0	0	0	0	0	200	300	0	3.4166	-10.8105	-24.4708	-4207.23	1281.21	-884.628	252.357	1074.93	0	0	0	0	0	0	0	603	903	0
567	5	0	0	0	0	0	0	200	300	0	4.78989	-10.9631	-32.4053	-4939.65	914.996	-793.075	228.236	1055.43	0	0	0	0	0	0	0	603	903	0
567	6	0	0	0	0	0	0	200	300	0	-0.398101	-6.23291	-34.8467	-5855.18	792.926	-335.312	222.755	1071.03	0	0	0	0	0	0	0	603	903	0
567	7	0	0	0	0	0	0	200	300	0	-1.6188	-5.1648	-39.7295	-6862.26	1464.31	-381.088	236.857	1075.72	0	0	0	0	0	0	0	603	903	0
567	8	0	0	0	0	0	0	200	300	0	2.65366	-4.24927	-45.2227	-7777.79	1708.45	-106.43	237.779	1074.99	0	0	0	0	0	0	0	603	903	0
567	9	0	0	0	0	0	0	200	300	0	2.50107	-0.129397	-51.9366	-8327.11	1708.45	-152.206	232.895	1063.33	0	0	0	0	0	0	0	603	903	0
568	0	0	0	0	0	0	0	200	300	0	3.26401	1.39648	-59.8711	-9425.74	2135.7	-564.193	235.672	1060.43	0	0	0	0	0	0	0	603	903	0
568	1	0	0	0	0	0	0	200	300	0	1.43295	1.54907	-68.7212	-11256.8	2440.88	-243.759	235.518	1066.8	0	0	0	0	0	0	0	603	903	0
568	2	0	0	0	0	0	0	200	300	0	3.56918	2.76977	-80.0127	-12996.3	2746.05	-243.759	234.32	1065.43	0	0	0	0	0	0	0	603	903	0
568	3	0	0	0	0	0	0	200	300	0	1.89072	3.38012	-87.9473	-14278	3295.37	-426.864	237.47	1065.35	0	0	0	0	0	0	0	603	903	0
568	4	0	0	0	0	0	0	200	300	0	-0.0929256	1.54907	-93.1353	-14735.8	3234.33	-289.535	234.727	1061.22	0	0	0	0	0	0	0	603	903	0
568	5	0	0	0	0	0	0	200	300	0	0.21225	-1.50269	-102.596	-16200.6	3844.68	-335.312	237.474	1060.91	0	0	0	0	0	0	0	603	903	0
568	6	0	0	0	0	0	0	200	300	0	4.94247	-0.434573	-110.836	-17665.5	4210.89	-701.523	237.992	1062.38	0	0	0	0	0	0	0	603	903	0
568	7	0	0	0	0	0	0	200	300	0	3.4166	1.85425	-119.686	-19038.8	3844.68	-747.299	232.123	1062.07	0	0	0	0	0	0	0	603	903	0
568	8	0	0	0	0	0	0	200	300	0	3.56918	-1.3501	-124.874	-20320.5	4332.96	-930.405	234.699	1065.73	0	0	0	0	0	0	0	603	903	0
568	9	0	0	0	0	0	0	200	300	0	7.38388	-1.3501	-131.587	-21419.1	4943.32	-1159.29	237.567	1065.78	0	0	0	0	0	0	0	603	903	0
569	0	0	0	0	0	0	0	200	300	0	7.68906	1.54907	-140.438	-22517.8	5126.42	-1296.62	236.503	1063.34	0	0	0	0	0	0	0	603	903	0
569	1	0	0	0	0	0	0	200	300	0	8.60458	-0.281985	-148.372	-23158.7	5309.53	-1617.05	235.785	1059.08	0	0	0	0	0	0	0	603	903	0
569	2	0	0	0	0	0	0	200	300	0	10.2831	-2.41822	-154.476	-24806.6	5736.77	-2029.04	237.137	1063.59	0	0	0	0	0	0	0	603	903	0
569	3	0	0	0	0	0	0	200	300	0	10.4356	-1.50269	-161.189	-25813.7	5797.81	-1800.16	235.969	1063.14	0	0	0	0	0	0	0	603	903	0
569	4	0	0	0	0	0	0	200	300	0	11.046	-3.94409	-166.377	-26912.3	6652.3	-2257.92	239.983	1064.75	0	0	0	0	0	0	0	603	903	0
569	5	0	0	0	0	0	0	200	300	0	12.4193	-8.36914	-171.871	-27278.5	7018.51	-2395.25	240.836	1061.72	0	0	0	0	0	0	0	603	903	0
569	6	0	0	0	0	0	0	200	300	0	9.21494	-9.13208	-179.805	-28102.5	7262.65	-2349.47	240.392	1059.29	0	0	0	0	0	0	0	603	903	0
569	7	0	0	0	0	0	0	200	300	0	10.5882	-11.1157	-184.993	-29018	7445.76	-2395.25	240.249	1059.86	0	0	0	0	0	0	0	603	903	0
569	8	0	0	0	0	0	0	200	300	0	13.9452	-14.6252	-190.792	-29750.4	7506.79	-2669.91	239.346	1058.93	0	0	0	0	0	0	0	603	903	0
569	9	0	0	0	0	0	0	200	300	0	12.7245	-18.4399	-196.59	-31581.5	7689.9	-2761.46	239.116	1063.65	0	0	0	0	0	0	0	603	903	0
570	0	0	0	0	0	0	0	200	300	0	10.7408	-19.8132	-199.031	-31398.4	8544.39	-2944.56	242.93	1060.76	0	0	0	0	0	0	0	603	903	0
570	1	0	0	0	0	0	0	200	300	0	12.4193	-23.9331	-208.187	-32680.1	8605.43	-2944.56	241.335	1059.98	0	0	0	0	0	0	0	603	903	0
570	2	0	0	0	0	0	0	200	300	0	13.64	-27.1375	-212.459	-33412.6	8788.53	-3127.67	241.366	1060.27	0	0	0	0	0	0	0	603	903	0
570	3	0	0	0	0	0	0	200	300	0	13.1822	-30.647	-217.647	-33870.3	9154.74	-3310.78	242.062	1058.62	0	0	0	0	0	0	0	603	903	0
570	4	0	0	0	0	0	0	200	300	0	11.9615	-34.4617	-223.751	-34969	9337.85	-3539.66	241.733	1059.29	0	0	0	0	0	0	0	603	903	0
570	5	0	0	0	0	0	0	200	300	0	12.5719	-37.666	-228.939	-36342.2	10009.2	-3219.22	243.72	1061.74	0	0	0	0	0	0	0	603	903	0
570	6	0	0	0	0	0	0	200	300	0	14.4029	-40.5652	-236.568	-36433.8	10436.5	-3951.65	244.116	1057.01	0	0	0	0	0	0	0	603	903	0
570	7	0	0	0	0	0	0	200	300	0	13.1822	-43.3118	-240.535	-37257.8	10314.4	-4088.97	242.881	1057.9	0	0	0	0	0	0	0	603	903	0
570	8	0	0	0	0	0	0	200	300	0	15.3185	-46.5161	-247.249	-38356.4	11046.8	-3997.42	244.679	1058.13	0	0	0	0	0	0	0	603	903	0
570	9	0	0	0	0	0	0	200	300	0	16.5392	-50.9412	-255.489	-38722.6	11046.8	-4134.75	243.238	1054.56	0	0	0	0	0	0	0	603	903	0
571	0	0	0	0	0	0	0	200	300	0	15.9288	-53.0774	-260.677	-40279	11535.1	-4500.96	244.251	1057.52	0	0	0	0	0	0	0	603	903	0
571	1	0	0	0	0	0	0	200	300	0	16.3866	-54.9085	-266.475	-41011.4	12084.4	-4867.17	245.349	1056.9	0	0	0	0	0	0	0	603	903	0
571	2	0	0	0	0	0	0	200	300	0	17.3021	-60.0964	-274.105	-40553.7	12328.6	-4729.84	244.978	1050.95	0	0	0	0	0	0	0	603	903	0
571	3	0	0	0	0	0	0	200	300	0	19.4383	-61.1646	-280.208	-42476.3	12572.7	-5233.38	244.869	1054.59	0	0	0	0	0	0	0	603	903	0
571	4	0	0	0	0	0	0	200	300	0	17.6073	-61.9275	-286.617	-43483.4	13061	-5324.94	245.57	1054.71	0	0	0	0	0	0	0	603	903	0
571	5	0	0	0	0	0	0	200	300	0	17.9124	-65.8948	-290.279	-44032.7	13183.1	-5279.16	245.415	1054.69	0	0	0	0	0	0	0	603	903	0
571	6	0	0	0	0	0	0	200	300	0	18.5228	-66.6577	-296.077	-45406	13610.3	-5370.71	245.969	1056.36	0	0	0	0	0	0	0	603	903	0
571	7	0	0	0	0	0	0	200	300	0	18.065	-68.4888	-305.843	-46138.4	14037.6	-5508.04	245.898	1053.86	0	0	0	0	0	0	0	603	903	0
571	8	0	0	0	0	0	0	200	300	0	18.2176	-69.0991	-311.946	-46138.4	14098.6	-5599.6	245.196	1050.91	0	0	0	0	0	0	0	603	903	0
571	9	0	0	0	0	0	0	200	300	0	17.9124	-70.7776	-324.459	-48061	14708.9	-5004.5	245.334	1051.13	0	0	0	0	0	0	0	603	903	0
572	0	0	0	0	0	0	0	200	300	0	15.9288	-72.7612	-332.698	-49251.2	15014.1	-5004.5	245.128	1051.04	0	0	0	0	0	0	0	603	903	0
572	1	0	0	0	0	0	0	200	300	0	15.6236	-72.7612	-343.379	-50624.5	15319.3	-5324.94	244.613	1050.43	0	0	0	0	0	0	0	603	903	0
572	2	0	0	0	0	0	0	200	300	0	17.1495	-73.5242	-358.028	-52730.2	16295.9	-5553.82	245.516	1050.28	0	0	0	0	0	0	0	603	903	0
572	3	0	0	0	0	0	0	200	300	0	20.3539	-74.5923	-369.319	-53187.9	16479	-5782.7	244.62	1047.02	0	0	0	0	0	0	0	603	903	0
572	4	0	0	0	0	0	0	200	300	0	19.7435	-77.7966	-381.526	-54652.8	16723.1	-5691.15	243.832	1046.25	0	0	0	0	0	0	0	603	903	0
572	5	0	0	0	0	0	0	200	300	0	17.9124	-79.7803	-389.461	-55110.6	17211.4	-5782.7	244.193	1044.5	0	0	0	0	0	0	0	603	903	0
572	6	0	0	0	0	0	0	200	300	0	20.2013	-80.8484	-400.142	-56941.6	18065.9	-5920.03	245.149	1045.3	0	0	0	0	0	0	0	603	903	0
572	7	0	0	0	0	0	0	200	300	0	21.422	-83.9001	-408.992	-57948.7	18432.1	-6103.14	245.067	1044.69	0	0	0	0	0	0	0	603	903	0
572	8	0	0	0	0	0	0	200	300	0	19.5909	-85.7312	-415.401	-59138.9	18615.2	-5965.81	244.813	1045.37	0	0	0	0	0	0	0	603	903	0
572	9	0	0	0	0	0	0	200	300	0	19.5909	-86.0364	-424.556	-59047.3	18493.1	-5508.04	243.559	1042.08	0	0	0	0	0	0	0	603	903	0
573	0	0	0	0	0	0	0	200	300	0	20.3539	-88.4778	-430.965	-60878.4	19408.7	-5828.48	245.035	1044.26	0	0	0	0	0	0	0	603	903	0
573	1	0	0	0	0	0	0	200	300	0	18.9806	-90.614	-437.068	-61427.7	19958	-5645.37	245.663	1043.54	0	0	0	0	0	0	0	603	903	0
573	2	0	0	0	0	0	0	200	300	0	18.5228	-91.9873	-444.087	-61519.3	19530.7	-5874.25	243.979	1041.53	0	0	0	0	0	0	0	603	903	0
573	3	0	0	0	0	0	0	200	300	0	17.4547	-93.8184	-450.191	-62068.6	20080	-6057.36	244.603	1040.87	0	0	0	0	0	0	0	603	903	0
573	4	0	0	0	0	0	0	200	300	0	17.9124	-95.4968	-458.126	-63258.8	20263.1	-5874.25	244.231	1041.08	0	0	0	0	0	0	0	603	903	0
573	5	0	0	0	0	0	0	200	300	0	17.4547	-98.2434	-463.314	-63258.8	20202.1	-5645.37	243.604	1039.54	0	0	0	0	0	0	0	603	903	0
573	6	0	0	0	0	0	0	200	300	0	16.8443	-99.0063	-467.281	-63899.6	20934.5	-5279.16	244.801	1039.75	0	0	0	0	0	0	0	603	903	0
573	7	0	0	0	0	0	0	200	300	0	13.3348	-101.753	-472.164	-64174.3	21056.6	-5508.04	244.596	1038.92	0	0	0	0	0	0	0	603	903	0
573	8	0	0	0	0	0	0	200	300	0	14.4029	-102.516	-476.741	-64540.5	20873.5	-5599.6	243.784	1038.38	0	0	0	0	0	0	0	603	903	0
573	9	0	0	0	0	0	0	200	300	0	13.7926	-102.668	-482.234	-64815.2	21239.7	-5599.6	244.044	1037.41	0	0	0	0	0	0	0	603	903	0
574	0	0	0	0	0	0	0	200	300	0	11.9615	-105.568	-486.507	-65456	20812.5	-5370.71	242.779	1037.54	0	0	0	0	0	0	0	603	903	0
574	1	0	0	0	0	0	0	200	300	0	11.8089	-106.178	-489.559	-65456	21056.6	-5324.94	243.011	1036.7	0	0	0	0	0	0	0	603	903	0
574	2	0	0	0	0	0	0	200	300	0	11.9615	-106.636	-491.695	-65822.2	21300.7	-5233.38	243.321	1036.87	0	0	0	0	0	0	0	603	903	0
574	3	0	0	0	0	0	0	200	300	0	10.4356	-107.856	-496.578	-66463.1	21483.8	-4958.73	243.264	1036.84	0	0	0	0	0	0	0	603	903	0
574	4	0	0	0	0	0	0	200	300	0	12.2667	-108.314	-499.629	-66188.4	21239.7	-5141.83	242.511	1035.48	0	0	0	0	0	0	0	603	903	0
574	5	0	0	0	0	0	0	200	300	0	9.52011	-109.535	-503.597	-66554.6	21239.7	-5004.5	242.176	1035.16	0	0	0	0	0	0	0	603	903	0
574	6	0	0	0	0	0	0	200	300	0	8.452	-110.603	-506.648	-67104	21422.8	-4867.17	242.283	1035.45	0	0	0	0	0	0	0	603	903	0
574	7	0	0	0	0	0	0	200	300	0	7.23129	-110.756	-511.226	-67104	21544.9	-4500.96	242.144	1034.26	0	0	0	0	0	0	0	603	903	0
574	8	0	0	0	0	0	0	200	300	0	6.01059	-113.807	-514.583	-67012.4	22216.3	-4821.4	243.173	1033.23	0	0	0	0	0	0	0	603	903	0
574	9	0	0	0	0	0	0	200	300	0	7.99423	-114.418	-519.161	-67012.4	21850.1	-4912.95	242.087	1032.08	0	0	0	0	0	0	0	603	903	0
575	0	0	0	0	0	0	0	200	300	0	6.92612	-115.944	-524.959	-67744.9	22216.3	-4729.84	242.32	1032.05	0	0	0	0	0	0	0	603	903	0
575	1	0	0	0	0	0	0	200	300	0	5.70541	-117.775	-528.011	-67744.9	22094.2	-4592.52	241.844	1031.3	0	0	0	0	0	0	0	603	903	0
575	2	0	0	0	0	0	0	200	300	0	7.84164	-118.995	-535.64	-68019.5	22094.2	-4409.41	241.248	1029.99	0	0	0	0	0	0	0	603	903	0
575	3	0	0	0	0	0	0	200	300	0	4.6373	-121.437	-540.218	-67744.9	22826.6	-4409.41	242.254	1028.4	0	0	0	0	0	0	0	603	903	0
575	4	0	0	0	0	0	0	200	300	0	3.87436	-122.352	-545.711	-68385.7	23009.7	-4500.96	242.165	1028.31	0	0	0	0	0	0	0	603	903	0
575	5	0	0	0	0	0	0	200	300	0	3.4166	-123.726	-550.594	-68385.7	22277.3	-4226.3	240.461	1027.2	0	0	0	0	0	0	0	603	903	0
575	6	0	0	0	0	0	0	200	300	0	3.56918	-124.031	-552.73	-69118.1	22521.4	-4226.3	240.746	1028.05	0	0	0	0	0	0	0	603	903	0
575	7	0	0	0	0	0	0	200	300	0	1.73813	-126.32	-559.444	-69301.2	22094.2	-3951.65	239.493	1026.88	0	0	0	0	0	0	0	603	903	0
575	8	0	0	0	0	0	0	200	300	0	1.43295	-128.456	-560.97	-69209.7	22582.5	-3585.43	240.256	1026.38	0	0	0	0	0	0	0	603	903	0
575	9	0	0	0	0	0	0	200	300	0	1.28037	-128.608	-563.716	-69209.7	22643.5	-3585.43	240.168	1025.77	0	0	0	0	0	0	0	603	903	0
576	0	0	0	0	0	0	0	200	300	0	0.517426	-129.982	-567.684	-69301.2	22582.5	-3631.21	239.78	1025.08	0	0	0	0	0	0	0	603	903	0
576	1	0	0	0	0	0	0	200	300	0	1.43295	-130.439	-569.82	-69301.2	22643.5	-3493.88	239.738	1024.62	0	0	0	0	0	0	0	603	903	0
576	2	0	0	0	0	0	0	200	300	0	1.28037	-130.745	-575.008	-69850.5	22643.5	-3310.78	239.38	1024.48	0	0	0	0	0	0	0	603	903	0
576	3	0	0	0	0	0	0	200	300	0	-0.703277	-132.881	-575.923	-70216.8	22704.5	-3265	239.423	1024.92	0	0	0	0	0	0	0	603	903	0
576	4	0	0	0	0	0	0	200	300	0	0.364838	-132.881	-579.28	-68385.7	23131.8	-3265	239.932	1021.05	0	0	0	0	0	0	0	603	903	0
576	5	0	0	0	0	0	0	200	300	0	-0.245513	-133.949	-583.553	-69942.1	22826.6	-3173.45	239.117	1022.86	0	0	0	0	0	0	0	603	903	0
576	6	0	0	0	0	0	0	200	300	0	1.28037	-135.017	-586.605	-69942.1	22643.5	-3036.12	238.601	1022.23	0	0	0	0	0	0	0	603	903	0
576	7	0	0	0	0	0	0	200	300	0	-0.550689	-135.17	-589.351	-69392.8	22460.4	-3081.89	238.11	1020.74	0	0	0	0	0	0	0	603	903	0
576	8	0	0	0	0	0	0	200	300	0	-0.855865	-135.322	-591.793	-70216.8	22521.4	-2944.56	238.056	1021.65	0	0	0	0	0	0	0	603	903	0
576	9	0	0	0	0	0	0	200	300	0	-2.38174	-137.458	-594.539	-70033.7	23009.7	-2715.68	238.702	1020.79	0	0	0	0	0	0	0	603	903	0
577	0	0	0	0	0	0	0	200	300	0	-3.14468	-137.916	-595.149	-69301.2	23131.8	-2807.24	238.867	1019.44	0	0	0	0	0	0	0	603	903	0
577	1	0	0	0	0	0	0	200	300	0	-2.53433	-139.29	-598.812	-69209.7	22582.5	-2669.91	237.712	1018.58	0	0	0	0	0	0	0	603	903	0
577	2	0	0	0	0	0	0	200	300	0	-4.06021	-138.679	-603.084	-69850.5	22887.7	-2853.01	237.951	1018.82	0	0	0	0	0	0	0	603	903	0
577	3	0	0	0	0	0	0	200	300	0	-4.36539	-140.815	-606.441	-69759	22887.7	-2349.47	237.741	1018.03	0	0	0	0	0	0	0	603	903	0
577	4	0	0	0	0	0	0	200	300	0	-4.97574	-141.121	-608.272	-69484.3	22338.3	-2486.8	236.724	1017.23	0	0	0	0	0	0	0	603	903	0
577	5	0	0	0	0	0	0	200	300	0	-6.80679	-142.036	-611.019	-69850.5	23070.8	-2532.58	237.758	1017.32	0	0	0	0	0	0	0	603	903	0
577	6	0	0	0	0	0	0	200	300	0	-7.56973	-143.104	-614.376	-69667.5	23131.8	-2532.58	237.651	1016.4	0	0	0	0	0	0	0	603	903	0
577	7	0	0	0	0	0	0	200	300	0	-6.6542	-142.799	-615.596	-69392.8	22521.4	-2303.7	236.585	1015.72	0	0	0	0	0	0	0	603	903	0
577	8	0	0	0	0	0	0	200	300	0	-8.18008	-143.867	-620.479	-70308.3	22643.5	-2349.47	236.494	1016.31	0	0	0	0	0	0	0	603	903	0
577	9	0	0	0	0	0	0	200	300	0	-8.18008	-143.867	-619.869	-69942.1	22460.4	-2120.59	236.234	1015.83	0	0	0	0	0	0	0	603	903	0
578	0	0	0	0	0	0	0	200	300	0	-9.40079	-144.783	-627.193	-70033.7	22521.4	-1891.71	235.908	1014.66	0	0	0	0	0	0	0	603	903	0
578	1	0	0	0	0	0	0	200	300	0	-10.9267	-145.851	-630.245	-70399.9	22887.7	-1983.26	236.316	1014.7	0	0	0	0	0	0	0	603	903	0
578	2	0	0	0	0	0	0	200	300	0	-10.3163	-145.546	-634.212	-69759	22704.5	-1937.48	235.8	1012.99	0	0	0	0	0	0	0	603	903	0
578	3	0	0	0	0	0	0	200	300	0	-11.2318	-146.919	-641.536	-70949.2	22643.5	-2120.59	235.296	1013.59	0	0	0	0	0	0	0	603	903	0
578	4	0	0	0	0	0	0	200	300	0	-11.3844	-148.597	-643.367	-71498.5	22399.4	-1983.26	234.816	1014.13	0	0	0	0	0	0	0	603	903	0
578	5	0	0	0	0	0	0	200	300	0	-12.7577	-148.292	-650.386	-70766.1	22765.6	-1891.71	235.003	1011.81	0	0	0	0	0	0	0	603	903	0
578	6	0	0	0	0	0	0	200	300	0	-10.9267	-149.36	-653.743	-70949.2	23009.7	-1891.71	235.197	1011.53	0	0	0	0	0	0	0	603	903	0
578	7	0	0	0	0	0	0	200	300	0	-14.131	-148.445	-659.236	-70308.3	23253.9	-1891.71	235.274	1009.65	0	0	0	0	0	0	0	603	903	0
578	8	0	0	0	0	0	0	200	300	0	-13.2155	-149.818	-666.255	-71407	22704.5	-1525.5	234.078	1010.18	0	0	0	0	0	0	0	603	903	0
578	9	0	0	0	0	0	0	200	300	0	-11.2318	-151.039	-669.918	-71773.2	22704.5	-1571.27	233.892	1010.14	0	0	0	0	0	0	0	603	903	0
579	0	0	0	0	0	0	0	200	300	0	-15.6569	-150.428	-676.631	-72047.8	23192.8	-1754.38	234.277	1009.48	0	0	0	0	0	0	0	603	903	0
579	1	0	0	0	0	0	0	200	300	0	-15.8095	-151.954	-681.819	-72230.9	23131.8	-1433.94	233.927	1008.94	0	0	0	0	0	0	0	603	903	0
579	2	0	0	0	0	0	0	200	300	0	-15.3517	-151.802	-687.007	-72505.6	23314.9	-1662.83	233.937	1008.54	0	0	0	0	0	0	0	603	903	0
579	3	0	0	0	0	0	0	200	300	0	-17.6405	-153.328	-693.111	-72688.7	23314.9	-1708.6	233.638	1007.87	0	0	0	0	0	0	0	603	903	0
579	4	0	0	0	0	0	0	200	300	0	-17.9457	-153.785	-697.994	-72047.8	23070.8	-1525.5	233.053	1006.22	0	0	0	0	0	0	0	603	903	0
579	5	0	0	0	0	0	0	200	300	0	-16.725	-153.938	-703.792	-73421.1	23131.8	-1342.39	232.867	1007.32	0	0	0	0	0	0	0	603	903	0
579	6	0	0	0	0	0	0	200	300	0	-17.1828	-153.175	-708.98	-73970.4	23314.9	-1617.05	232.885	1007.33	0	0	0	0	0	0	0	603	903	0
579	7	0	0	0	0	0	0	200	300	0	-19.4716	-154.854	-712.337	-73604.2	23314.9	-1433.94	232.73	1006.33	0	0	0	0	0	0	0	603	903	0
579	8	0	0	0	0	0	0	200	300	0	-18.8612	-155.922	-717.22	-72414	23803.2	-1617.05	233.188	1003.96	0	0	0	0	0	0	0	603	903	0
579	9	0	0	0	0	0	0	200	300	0	-17.9457	-156.99	-723.628	-73787.3	23131.8	-1342.39	231.966	1004.97	0	0	0	0	0	0	0	603	903	0
580	0	0	0	0	0	0	0	200	300	0	-18.0983	-154.854	-725.46	-74245.1	23070.8	-1571.27	231.802	1005.34	0	0	0	0	0	0	0	603	903	0
580	1	0	0	0	0	0	0	200	300	0	-17.4879	-157.448	-729.427	-74062	23620.1	-1342.39	232.382	1004.53	0	0	0	0	0	0	0	603	903	0
580	2	0	0	0	0	0	0	200	300	0	-17.7931	-157.295	-731.258	-74519.7	23437	-1388.17	232.05	1004.91	0	0	0	0	0	0	0	603	903	0
580	3	0	0	0	0	0	0	200	300	0	-18.8612	-156.532	-738.582	-74702.9	23803.2	-1479.72	232.228	1004.14	0	0	0	0	0	0	0	603	903	0
580	4	0	0	0	0	0	0	200	300	0	-17.9457	-157.142	-741.023	-73787.3	23559	-976.181	231.793	1002.57	0	0	0	0	0	0	0	603	903	0
580	5	0	0	0	0	0	0	200	300	0	-17.1828	-156.837	-744.991	-74702.9	22887.7	-1525.5	230.722	1003.27	0	0	0	0	0	0	0	603	903	0
580	6	0	0	0	0	0	0	200	300	0	-18.5561	-157.905	-746.517	-75160.6	23437	-1525.5	231.395	1003.68	0	0	0	0	0	0	0	603	903	0
580	7	0	0	0	0	0	0	200	300	0	-18.7086	-157.905	-751.094	-74519.7	23742.1	-1388.17	231.61	1002.21	0	0	0	0	0	0	0	603	903	0
580	8	0	0	0	0	0	0	200	300	0	-18.7086	-156.837	-754.451	-74611.3	23192.8	-1342.39	230.741	1001.89	0	0	0	0	0	0	0	603	903	0
580	9	0	0	0	0	0	0	200	300	0	-17.9457	-157.6	-758.113	-74611.3	23559	-1159.29	231.076	1001.42	0	0	0	0	0	0	0	603	903	0
581	0	0	0	0	0	0	0	200	300	0	-19.319	-157.295	-759.639	-74245.1	23192.8	-930.405	230.531	1000.74	0	0	0	0	0	0	0	603	903	0
581	1	0	0	0	0	0	0	200	300	0	-18.8612	-157.295	-763.607	-74794.4	23070.8	-1067.73	230.213	1000.95	0	0	0	0	0	0	0	603	903	0
581	2	0	0	0	0	0	0	200	300	0	-20.2345	-157.753	-763.912	-74611.3	23437	-1250.84	230.68	1000.67	0	0	0	0	0	0	0	603	903	0
581	3	0	0	0	0	0	0	200	300	0	-19.6242	-156.837	-766.658	-74245.1	23192.8	-1296.62	230.252	999.843	0	0	0	0	0	0	0	603	903	0
581	4	0	0	0	0	0	0	200	300	0	-20.0819	-156.99	-770.32	-74336.6	23375.9	-1388.17	230.346	999.501	0	0	0	0	0	0	0	603	903	0
581	5	0	0	0	0	0	0	200	300	0	-19.7768	-156.685	-771.541	-73970.4	23192.8	-1113.51	230.06	998.874	0	0	0	0	0	0	0	603	903	0
581	6	0	0	0	0	0	0	200	300	0	-17.0302	-156.074	-774.593	-74153.5	22582.5	-930.405	229.154	998.732	0	0	0	0	0	0	0	603	903	0
581	7	0	0	0	0	0	0	200	300	0	-20.0819	-153.938	-776.729	-73787.3	23375.9	-930.405	230.095	997.997	0	0	0	0	0	0	0	603	903	0
581	8	0	0	0	0	0	0	200	300	0	-20.5397	-155.006	-776.729	-74336.6	23192.8	-1067.73	229.86	998.705	0	0	0	0	0	0	0	603	903	0
581	9	0	0	0	0	0	0	200	300	0	-19.319	-155.159	-780.696	-74245.1	23009.7	-1021.96	229.473	998.101	0	0	0	0	0	0	0	603	903	0
582	0	0	0	0	0	0	0	200	300	0	-21.7604	-154.243	-782.222	-74336.6	22704.5	-930.405	229.026	998.033	0	0	0	0	0	0	0	603	903	0
582	1	0	0	0	0	0	0	200	300	0	-20.8449	-153.785	-785.579	-73787.3	22582.5	-1067.73	228.746	996.927	0	0	0	0	0	0	0	603	903	0
582	2	0	0	0	0	0	0	200	300	0	-20.6923	-153.785	-787.715	-74428.2	22643.5	-609.97	228.746	997.486	0	0	0	0	0	0	0	603	903	0
582	3	0	0	0	0	0	0	200	300	0	-23.1337	-152.412	-788.631	-74611.3	22948.7	-564.193	229.099	997.609	0	0	0	0	0	0	0	603	903	0
582	4	0	0	0	0	0	0	200	300	0	-22.8285	-151.497	-791.072	-73604.2	22399.4	-1021.96	228.315	996.044	0	0	0	0	0	0	0	603	903	0
582	5	0	0	0	0	0	0	200	300	0	-23.5915	-151.802	-795.04	-74062	22826.6	-793.075	228.711	996.155	0	0	0	0	0	0	0	603	903	0
582	6	0	0	0	0	0	0	200	300	0	-22.0656	-151.039	-796.871	-74062	22643.5	-655.746	228.416	995.941	0	0	0	0	0	0	0	603	903	0
582	7	0	0	0	0	0	0	200	300	0	-24.2018	-151.039	-800.838	-73238	21728	-609.97	227.132	994.452	0	0	0	0	0	0	0	603	903	0
582	8	0	0	0	0	0	0	200	300	0	-25.2699	-150.886	-800.533	-74336.6	22948.7	-472.641	228.667	995.859	0	0	0	0	0	0	0	603	903	0
582	9	0	0	0	0	0	0	200	300	0	-23.2863	-149.971	-803.585	-74519.7	21972.1	-426.864	227.343	995.734	0	0	0	0	0	0	0	603	903	0
583	0	0	0	0	0	0	0	200	300	0	-25.2699	-149.666	-806.026	-73146.4	22094.2	-609.97	227.411	993.75	0	0	0	0	0	0	0	603	903	0
583	1	0	0	0	0	0	0	200	300	0	-25.5751	-148.597	-807.857	-73695.8	21972.1	-243.759	227.198	994.224	0	0	0	0	0	0	0	603	903	0
583	2	0	0	0	0	0	0	200	300	0	-26.7958	-148.445	-811.519	-74153.5	21789	-747.299	226.85	994.376	0	0	0	0	0	0	0	603	903	0
583	3	0	0	0	0	0	0	200	300	0	-25.4225	-149.513	-812.435	-73695.8	21972.1	-60.6534	227.045	993.71	0	0	0	0	0	0	0	603	903	0
583	4	0	0	0	0	0	0	200	300	0	-26.6432	-147.072	-814.266	-73604.2	22399.4	-289.535	227.509	993.393	0	0	0	0	0	0	0	603	903	0
583	5	0	0	0	0	0	0	200	300	0	-27.101	-147.224	-816.097	-73512.6	21544.9	-518.417	226.4	993.078	0	0	0	0	0	0	0	603	903	0
583	6	0	0	0	0	0	0	200	300	0	-27.101	-146.614	-818.233	-73512.6	22155.2	-381.088	227.077	992.843	0	0	0	0	0	0	0	603	903	0
583	7	0	0	0	0	0	0	200	300	0	-25.4225	-145.851	-820.674	-73604.2	21972.1	-197.982	226.773	992.688	0	0	0	0	0	0	0	603	903	0
583	8	0	0	0	0	0	0	200	300	0	-27.4062	-145.698	-821.895	-73695.8	21789	-197.982	226.511	992.666	0	0	0	0	0	0	0	603	903	0
583	9	0	0	0	0	0	0	200	300	0	-28.0165	-144.325	-822.2	-73695.8	21972.1	-243.759	226.724	992.632	0	0	0	0	0	0	0	603	903	0
584	0	0	0	0	0	0	0	200	300	0	-26.1855	-143.715	-824.031	-73238	21483.8	-197.982	226.072	991.878	0	0	0	0	0	0	0	603	903	0
584	1	0	0	0	0	0	0	200	300	0	-27.4062	-143.257	-824.642	-73238	21361.8	-152.206	225.904	991.812	0	0	0	0	0	0	0	603	903	0
584	2	0	0	0	0	0	0	200	300	0	-27.5587	-142.341	-826.778	-73146.4	21178.7	168.228	225.616	991.472	0	0	0	0	0	0	0	603	903	0
584	3	0	0	0	0	0	0	200	300	0	-26.7958	-142.799	-830.44	-72230.9	21483.8	-106.43	225.87	989.979	0	0	0	0	0	0	0	603	903	0
584	4	0	0	0	0	0	0	200	300	0	-26.7958	-142.799	-830.745	-73146.4	21605.9	122.452	226.008	991.049	0	0	0	0	0	0	0	603	903	0
584	5	0	0	0	0	0	0	200	300	0	-27.8639	-140.51	-832.271	-73329.6	21544.9	30.8993	225.887	991.108	0	0	0	0	0	0	0	603	903	0
584	6	0	0	0	0	0	0	200	300	0	-26.9484	-139.747	-833.492	-72414	21056.6	-106.43	225.263	989.88	0	0	0	0	0	0	0	603	903	0
584	7	0	0	0	0	0	0	200	300	0	-27.2536	-139.747	-833.492	-72597.1	21117.6	-14.877	225.336	990.1	0	0	0	0	0	0	0	603	903	0
584	8	0	0	0	0	0	0	200	300	0	-28.0165	-140.205	-835.628	-72505.6	21056.6	214.005	225.199	989.768	0	0	0	0	0	0	0	603	903	0
584	9	0	0	0	0	0	0	200	300	0	-28.6269	-139.9	-835.628	-72414	20751.4	122.452	224.833	989.658	0	0	0	0	0	0	0	603	903	0
585	0	0	0	0	0	0	0	200	300	0	-28.4743	-138.832	-836.849	-72230.9	21361.8	168.228	225.526	989.313	0	0	0	0	0	0	0	603	903	0
585	1	0	0	0	0	0	0	200	300	0	-29.3898	-138.221	-836.238	-71956.2	21178.7	-14.877	225.326	989.048	0	0	0	0	0	0	0	603	903	0
585	2	0	0	0	0	0	0	200	300	0	-28.932	-137.153	-836.544	-71681.6	20507.3	-197.982	224.514	988.688	0	0	0	0	0	0	0	603	903	0
585	3	0	0	0	0	0	0	200	300	0	-28.0165	-136.085	-834.407	-71498.5	20385.2	168.228	224.431	988.688	0	0	0	0	0	0	0	603	903	0
585	4	0	0	0	0	0	0	200	300	0	-29.3898	-137.306	-836.544	-71223.8	20751.4	76.6757	224.806	988.141	0	0	0	0	0	0	0	603	903	0
585	5	0	0	0	0	0	0	200	300	0	-29.2372	-134.865	-836.849	-71040.8	19896.9	122.452	223.776	987.891	0	0	0	0	0	0	0	603	903	0
585	6	0	0	0	0	0	0	200	300	0	-28.6269	-135.627	-838.375	-70857.6	20629.4	122.452	224.606	987.518	0	0	0	0	0	0	0	603	903	0
585	7	0	0	0	0	0	0	200	300	0	-29.8476	-135.017	-836.238	-70857.6	20202.1	76.6757	224.158	987.734	0	0	0	0	0	0	0	603	903	0
585	8	0	0	0	0	0	0	200	300	0	-29.695	-133.339	-839.29	-70949.2	19896.9	214.005	223.707	987.535	0	0	0	0	0	0	0	603	903	0
585	9	0	0	0	0	0	0	200	300	0	-29.2372	-133.644	-839.29	-70674.5	19896.9	397.11	223.707	987.208	0	0	0	0	0	0	0	603	903	0
586	0	0	0	0	0	0	0	200	300	0	-29.8476	-132.271	-839.595	-70674.5	19774.9	442.887	223.553	987.177	0	0	0	0	0	0	0	603	903	0
586	1	0	0	0	0	0	0	200	300	0	-31.2209	-131.813	-839.595	-69301.2	19774.9	442.887	223.553	985.541	0	0	0	0	0	0	0	603	903	0
586	2	0	0	0	0	0	0	200	300	0	-30.4579	-130.592	-840.206	-69667.5	19958	351.334	223.754	985.917	0	0	0	0	0	0	0	603	903	0
586	3	0	0	0	0	0	0	200	300	0	-30.6105	-130.592	-839.595	-69667.5	19469.7	214.005	223.189	985.977	0	0	0	0	0	0	0	603	903	0
586	4	0	0	0	0	0	0	200	300	0	-30.4579	-129.219	-841.121	-69118.1	19164.5	488.663	222.784	985.174	0	0	0	0	0	0	0	603	903	0
586	5	0	0	0	0	0	0	200	300	0	-30.4579	-130.287	-840.511	-69301.2	19591.8	305.558	223.309	985.451	0	0	0	0	0	0	0	603	903	0
586	6	0	0	0	0	0	0	200	300	0	-31.3734	-128.608	-839.595	-69118.1	19042.4	671.769	222.681	985.323	0	0	0	0	0	0	0	603	903	0
586	7	0	0	0	0	0	0	200	300	0	-31.9838	-128.914	-840.206	-68843.5	19408.7	259.781	223.1	984.937	0	0	0	0	0	0	0	603	903	0
586	8	0	0	0	0	0	0	200	300	0	-30.6105	-127.845	-840.511	-68111.1	18920.4	442.887	222.511	984.035	0	0	0	0	0	0	0	603	903	0
586	9	0	0	0	0	0	0	200	300	0	-31.6786	-125.099	-840.206	-68477.3	18615.2	534.44	222.156	984.501	0	0	0	0	0	0	0	603	903	0
587	0	0	0	0	0	0	0	200	300	0	-31.2209	-127.693	-840.511	-67653.3	18493.1	534.44	222.002	983.491	0	0	0	0	0	0	0	603	903	0
587	1	0	0	0	0	0	0	200	300	0	-30.9157	-127.388	-841.426	-67561.7	18493.1	717.545	221.978	983.294	0	0	0	0	0	0	0	603	903	0
587	2	0	0	0	0	0	0	200	300	0	-31.6786	-125.557	-842.342	-67195.5	18554.2	442.887	222.027	982.772	0	0	0	0	0	0	0	603	903	0
587	3	0	0	0	0	0	0	200	300	0	-31.6786	-125.251	-842.037	-67195.5	18065.9	534.44	221.455	982.801	0	0	0	0	0	0	0	603	903	0
587	4	0	0	0	0	0	0	200	300	0	-30.7631	-123.878	-839.9	-66646.2	17882.8	580.216	221.292	982.35	0	0	0	0	0	0	0	603	903	0
587	5	0	0	0	0	0	0	200	300	0	-31.2209	-123.42	-842.037	-67287.1	17760.7	534.44	221.093	982.91	0	0	0	0	0	0	0	603	903	0
587	6	0	0	0	0	0	0	200	300	0	-31.9838	-123.115	-841.121	-66463.1	18249	305.558	221.696	982.017	0	0	0	0	0	0	0	603	903	0
587	7	0	0	0	0	0	0	200	300	0	-32.289	-122.2	-840.206	-65913.8	17943.8	534.44	221.356	981.45	0	0	0	0	0	0	0	603	903	0
587	8	0	0	0	0	0	0	200	300	0	-32.4416	-121.284	-841.121	-65913.8	18065.9	397.11	221.478	981.364	0	0	0	0	0	0	0	603	903	0
587	9	0	0	0	0	0	0	200	300	0	-31.8312	-120.369	-838.375	-65089.8	17638.6	534.44	221.039	980.638	0	0	0	0	0	0	0	603	903	0
588	0	0	0	0	0	0	0	200	300	0	-30.4579	-119.606	-840.206	-65181.4	17211.4	763.321	220.485	980.578	0	0	0	0	0	0	0	603	903	0
588	1	0	0	0	0	0	0	200	300	0	-32.289	-119.148	-840.816	-64449	17455.5	625.992	220.76	979.651	0	0	0	0	0	0	0	603	903	0
588	2	0	0	0	0	0	0	200	300	0	-32.4416	-119.911	-838.68	-64357.4	16967.2	809.098	220.231	979.737	0	0	0	0	0	0	0	603	903	0
588	3	0	0	0	0	0	0	200	300	0	-29.3898	-118.385	-838.069	-64174.3	17150.3	717.545	220.464	979.574	0	0	0	0	0	0	0	603	903	0
588	4	0	0	0	0	0	0	200	300	0	-32.7467	-118.995	-839.29	-63441.9	17028.3	717.545	220.289	978.59	0	0	0	0	0	0	0	603	903	0
588	5	0	0	0	0	0	0	200	300	0	-32.8993	-117.622	-838.375	-63716.5	16601	854.874	219.801	979	0	0	0	0	0	0	0	603	903	0
588	6	0	0	0	0	0	0	200	300	0	-31.3734	-116.554	-837.459	-63625	16723.1	854.874	219.969	978.974	0	0	0	0	0	0	0	603	903	0
588	7	0	0	0	0	0	0	200	300	0	-33.2045	-117.317	-837.459	-63350.3	16479	717.545	219.677	978.646	0	0	0	0	0	0	0	603	903	0
588	8	0	0	0	0	0	0	200	300	0	-33.5097	-115.486	-835.323	-62526.3	16234.8	809.098	219.435	977.853	0	0	0	0	0	0	0	603	903	0
588	9	0	0	0	0	0	0	200	300	0	-32.1364	-115.028	-835.018	-62068.6	16662.1	671.769	219.954	977.332	0	0	0	0	0	0	0	603	903	0
589	0	0	0	0	0	0	0	200	300	0	-32.8993	-115.791	-833.492	-62160.1	15990.7	488.663	219.185	977.578	0	0	0	0	0	0	0	603	903	0
589	1	0	0	0	0	0	0	200	300	0	-31.3734	-113.502	-831.966	-61702.4	15868.6	625.992	219.074	977.165	0	0	0	0	0	0	0	603	903	0
589	2	0	0	0	0	0	0	200	300	0	-31.2209	-114.265	-831.661	-62068.6	15868.6	763.321	219.081	977.632	0	0	0	0	0	0	0	603	903	0
589	3	0	0	0	0	0	0	200	300	0	-32.7467	-113.655	-830.44	-61610.8	15624.5	1083.76	218.815	977.191	0	0	0	0	0	0	0	603	903	0
589	4	0	0	0	0	0	0	200	300	0	-31.6786	-112.281	-829.219	-60603.7	15746.5	763.321	218.99	976.085	0	0	0	0	0	0	0	603	903	0
589	5	0	0	0	0	0	0	200	300	0	-31.526	-112.434	-829.219	-60054.4	15441.4	671.769	218.622	975.423	0	0	0	0	0	0	0	603	903	0
589	6	0	0	0	0	0	0	200	300	0	-30.9157	-110.145	-824.336	-60237.5	14647.9	809.098	217.769	976.074	0	0	0	0	0	0	0	603	903	0
589	7	0	0	0	0	0	0	200	300	0	-30.9157	-110.908	-826.473	-59505.1	15197.2	671.769	218.388	974.999	0	0	0	0	0	0	0	603	903	0
589	8	0	0	0	0	0	0	200	300	0	-31.526	-111.366	-825.557	-59962.8	15075.2	854.874	218.261	975.633	0	0	0	0	0	0	0	603	903	0
589	9	0	0	0	0	0	0	200	300	0	-32.7467	-109.84	-822.811	-59230.4	14831	900.651	218.025	974.986	0	0	0	0	0	0	0	603	903	0
590	0	0	0	0	0	0	0	200	300	0	-31.8312	-108.772	-822.811	-58681.1	15014.1	580.216	218.247	974.318	0	0	0	0	0	0	0	603	903	0
590	1	0	0	0	0	0	0	200	300	0	-30.9157	-109.23	-821.59	-58589.6	14525.8	671.769	217.68	974.312	0	0	0	0	0	0	0	603	903	0
590	2	0	0	0	0	0	0	200	300	0	-30.9157	-107.704	-819.759	-58131.8	13976.5	717.545	217.05	973.913	0	0	0	0	0	0	0	603	903	0
590	3	0	0	0	0	0	0	200	300	0	-30.7631	-108.162	-819.148	-57765.6	14403.8	717.545	217.584	973.519	0	0	0	0	0	0	0	603	903	0
590	4	0	0	0	0	0	0	200	300	0	-31.0683	-108.314	-816.402	-57582.5	13854.5	763.321	216.97	973.532	0	0	0	0	0	0	0	603	903	0
590	5	0	0	0	0	0	0	200	300	0	-30.4579	-106.331	-816.402	-57124.7	14342.7	717.545	217.568	972.971	0	0	0	0	0	0	0	603	903	0
590	6	0	0	0	0	0	0	200	300	0	-31.2209	-106.941	-815.181	-55751.4	13976.5	717.545	217.145	971.391	0	0	0	0	0	0	0	603	903	0
590	7	0	0	0	0	0	0	200	300	0	-30.9157	-105.415	-812.435	-56483.8	13732.4	671.769	216.903	972.524	0	0	0	0	0	0	0	603	903	0
590	8	0	0	0	0	0	0	200	300	0	-31.0683	-104.652	-812.435	-56300.7	13793.4	625.992	216.978	972.299	0	0	0	0	0	0	0	603	903	0
590	9	0	0	0	0	0	0	200	300	0	-31.2209	-104.5	-810.298	-55568.3	13610.3	717.545	216.797	971.578	0	0	0	0	0	0	0	603	903	0
591	0	0	0	0	0	0	0	200	300	0	-30.9157	-103.279	-808.467	-55293.7	13366.2	397.11	216.533	971.393	0	0	0	0	0	0	0	603	903	0
591	1	0	0	0	0	0	0	200	300	0	-31.9838	-103.126	-805.416	-54744.4	13244.1	625.992	216.444	970.97	0	0	0	0	0	0	0	603	903	0
591	2	0	0	0	0	0	0	200	300	0	-30.1527	-102.974	-805.11	-54103.5	13122	854.874	216.298	970.2	0	0	0	0	0	0	0	603	903	0
591	3	0	0	0	0	0	0	200	300	0	-29.695	-100.38	-801.753	-54011.9	12938.9	809.098	216.138	970.367	0	0	0	0	0	0	0	603	903	0
591	4	0	0	0	0	0	0	200	300	0	-31.0683	-101.753	-803.585	-54195	13061	625.992	216.253	970.442	0	0	0	0	0	0	0	603	903	0
591	5	0	0	0	0	0	0	200	300	0	-29.695	-100.227	-797.176	-53096.4	12694.8	625.992	215.925	969.606	0	0	0	0	0	0	0	603	903	0
591	6	0	0	0	0	0	0	200	300	0	-30.0002	-99.3115	-800.533	-53004.8	13000	534.44	216.239	969.212	0	0	0	0	0	0	0	603	903	0
591	7	0	0	0	0	0	0	200	300	0	-30.4579	-99.0063	-798.091	-52547.1	12511.7	580.216	215.677	968.841	0	0	0	0	0	0	0	603	903	0
591	8	0	0	0	0	0	0	200	300	0	-29.0846	-98.2434	-797.176	-52089.3	12389.6	580.216	215.542	968.342	0	0	0	0	0	0	0	603	903	0
591	9	0	0	0	0	0	0	200	300	0	-29.2372	-97.1753	-789.852	-52364	12633.7	763.321	215.995	969.296	0	0	0	0	0	0	0	603	903	0
592	0	0	0	0	0	0	0	200	300	0	-30.1527	-97.7856	-792.598	-52272.4	12206.5	671.769	215.401	968.951	0	0	0	0	0	0	0	603	903	0
592	1	0	0	0	0	0	0	200	300	0	-28.7794	-95.9546	-791.378	-50990.7	12084.4	442.887	215.27	967.433	0	0	0	0	0	0	0	603	903	0
592	2	0	0	0	0	0	0	200	300	0	-29.0846	-96.4124	-790.462	-50624.5	11596.2	534.44	214.67	967.044	0	0	0	0	0	0	0	603	903	0
592	3	0	0	0	0	0	0	200	300	0	-29.3898	-95.9546	-788.936	-50532.9	11718.2	580.216	214.853	967.052	0	0	0	0	0	0	0	603	903	0
592	4	0	0	0	0	0	0	200	300	0	-28.0165	-94.5813	-786.8	-49892	11413	580.216	214.506	966.411	0	0	0	0	0	0	0	603	903	0
592	5	0	0	0	0	0	0	200	300	0	-28.4743	-94.1235	-785.274	-50258.3	11779.3	671.769	215	967.001	0	0	0	0	0	0	0	603	903	0
592	6	0	0	0	0	0	0	200	300	0	-28.6269	-92.9028	-779.17	-50075.2	11352	625.992	214.569	967.267	0	0	0	0	0	0	0	603	903	0
592	7	0	0	0	0	0	0	200	300	0	-28.4743	-92.4451	-782.527	-49159.6	11718.2	488.663	214.975	965.822	0	0	0	0	0	0	0	603	903	0
592	8	0	0	0	0	0	0	200	300	0	-27.5587	-91.377	-781.612	-48793.4	11413	534.44	214.602	965.427	0	0	0	0	0	0	0	603	903	0
592	9	0	0	0	0	0	0	200	300	0	-28.6269	-90.9192	-777.95	-49251.2	10497.5	580.216	213.494	966.309	0	0	0	0	0	0	0	603	903	0
593	0	0	0	0	0	0	0	200	300	0	-28.0165	-89.6985	-775.508	-48152.6	11291	625.992	214.559	965.092	0	0	0	0	0	0	0	603	903	0
593	1	0	0	0	0	0	0	200	300	0	-28.0165	-90.3088	-774.593	-47877.9	10924.8	580.216	214.104	964.81	0	0	0	0	0	0	0	603	903	0
593	2	0	0	0	0	0	0	200	300	0	-28.4743	-88.4778	-772.762	-46321.5	10802.7	488.663	213.979	962.943	0	0	0	0	0	0	0	603	903	0
593	3	0	0	0	0	0	0	200	300	0	-28.4743	-89.2407	-771.236	-46779.3	10924.8	351.334	214.165	963.655	0	0	0	0	0	0	0	603	903	0
593	4	0	0	0	0	0	0	200	300	0	-25.7277	-88.02	-769.405	-46962.4	10558.6	488.663	213.723	964.037	0	0	0	0	0	0	0	603	903	0
593	5	0	0	0	0	0	0	200	300	0	-27.7113	-86.9519	-767.879	-46046.8	10375.4	580.216	213.512	962.966	0	0	0	0	0	0	0	603	903	0
593	6	0	0	0	0	0	0	200	300	0	-27.7113	-86.7993	-766.048	-46321.5	10619.6	580.216	213.863	963.468	0	0	0	0	0	0	0	603	903	0
593	7	0	0	0	0	0	0	200	300	0	-24.8122	-85.426	-760.555	-45955.3	10314.4	305.558	213.562	963.423	0	0	0	0	0	0	0	603	903	0
593	8	0	0	0	0	0	0	200	300	0	-28.3217	-84.3579	-763.912	-45406	10558.6	534.44	213.822	962.439	0	0	0	0	0	0	0	603	903	0
593	9	0	0	0	0	0	0	200	300	0	-27.7113	-83.1372	-761.47	-45131.3	10192.3	488.663	213.385	962.269	0	0	0	0	0	0	0	603	903	0
594	0	0	0	0	0	0	0	200	300	0	-26.338	-83.2898	-758.419	-44948.2	10070.3	534.44	213.278	962.266	0	0	0	0	0	0	0	603	903	0
594	1	0	0	0	0	0	0	200	300	0	-27.4062	-82.6794	-756.587	-45131.3	10131.3	488.663	213.391	962.651	0	0	0	0	0	0	0	603	903	0
594	2	0	0	0	0	0	0	200	300	0	-28.1691	-82.0691	-753.536	-45406	9765.09	442.887	212.959	963.257	0	0	0	0	0	0	0	603	903	0
594	3	0	0	0	0	0	0	200	300	0	-26.6432	-80.5432	-751.705	-44215.8	9520.95	625.992	212.666	961.821	0	0	0	0	0	0	0	603	903	0
594	4	0	0	0	0	0	0	200	300	0	-26.9484	-80.6958	-751.705	-43941.1	9826.13	397.11	213.072	961.455	0	0	0	0	0	0	0	603	903	0
594	5	0	0	0	0	0	0	200	300	0	-26.4906	-80.3906	-748.653	-43758	9459.92	305.558	212.636	961.449	0	0	0	0	0	0	0	603	903	0
594	6	0	0	0	0	0	0	200	300	0	-26.338	-77.9492	-745.906	-43117.1	9520.95	671.769	212.764	960.805	0	0	0	0	0	0	0	603	903	0
594	7	0	0	0	0	0	0	200	300	0	-26.1855	-78.8647	-745.906	-43208.7	9459.92	351.334	212.682	960.928	0	0	0	0	0	0	0	603	903	0
594	8	0	0	0	0	0	0	200	300	0	-28.0165	-79.1699	-742.855	-42934	8788.53	442.887	211.831	960.796	0	0	0	0	0	0	0	603	903	0
594	9	0	0	0	0	0	0	200	300	0	-25.4225	-76.7285	-742.244	-42201.6	9459.92	305.558	212.745	959.857	0	0	0	0	0	0	0	603	903	0
595	0	0	0	0	0	0	0	200	300	0	-26.338	-77.3389	-740.413	-42476.3	9398.88	671.769	212.694	960.368	0	0	0	0	0	0	0	603	903	0
595	1	0	0	0	0	0	0	200	300	0	-28.0165	-75.6604	-737.361	-42110.1	9093.71	259.781	212.333	960.109	0	0	0	0	0	0	0	603	903	0
595	2	0	0	0	0	0	0	200	300	0	-27.7113	-74.7449	-734.92	-41560.8	8971.64	488.663	212.208	959.551	0	0	0	0	0	0	0	603	903	0
595	3	0	0	0	0	0	0	200	300	0	-27.101	-74.7449	-733.089	-41194.6	8788.53	351.334	211.988	959.193	0	0	0	0	0	0	0	603	903	0
595	4	0	0	0	0	0	0	200	300	0	-27.8639	-73.0664	-730.953	-41377.7	8849.57	442.887	212.107	959.608	0	0	0	0	0	0	0	603	903	0
595	5	0	0	0	0	0	0	200	300	0	-28.3217	-71.5405	-728.816	-40462.1	8788.53	442.887	212.059	958.518	0	0	0	0	0	0	0	603	903	0
595	6	0	0	0	0	0	0	200	300	0	-25.7277	-72.3035	-726.68	-40370.6	8483.36	397.11	211.674	958.555	0	0	0	0	0	0	0	603	903	0
595	7	0	0	0	0	0	0	200	300	0	-27.8639	-71.2354	-723.323	-40279	8605.43	763.321	211.897	958.686	0	0	0	0	0	0	0	603	903	0
595	8	0	0	0	0	0	0	200	300	0	-28.0165	-70.9302	-720.882	-40004.4	8422.32	442.887	211.683	958.494	0	0	0	0	0	0	0	603	903	0
595	9	0	0	0	0	0	0	200	300	0	-26.6432	-69.5569	-719.966	-39455	7995.08	305.558	211.105	957.801	0	0	0	0	0	0	0	603	903	0
596	0	0	0	0	0	0	0	200	300	0	-26.9484	-69.4043	-718.44	-39455	8544.39	214.005	211.893	957.918	0	0	0	0	0	0	0	603	903	0
596	1	0	0	0	0	0	0	200	300	0	-25.1173	-68.7939	-716.609	-39363.5	8178.18	259.781	211.412	957.93	0	0	0	0	0	0	0	603	903	0
596	2	0	0	0	0	0	0	200	300	0	-27.101	-67.5732	-714.778	-38997.3	7995.08	351.334	211.185	957.559	0	0	0	0	0	0	0	603	903	0
596	3	0	0	0	0	0	0	200	300	0	-27.101	-65.8948	-711.727	-38631.1	8178.18	305.558	211.491	957.278	0	0	0	0	0	0	0	603	903	0
596	4	0	0	0	0	0	0	200	300	0	-28.1691	-66.0474	-709.285	-38539.5	7995.08	397.11	211.272	957.336	0	0	0	0	0	0	0	603	903	0
596	5	0	0	0	0	0	0	200	300	0	-27.7113	-65.2844	-707.454	-37807.1	7811.97	305.558	211.042	956.441	0	0	0	0	0	0	0	603	903	0
596	6	0	0	0	0	0	0	200	300	0	-24.8122	-63.7585	-705.928	-37349.3	7934.04	397.11	211.239	955.908	0	0	0	0	0	0	0	603	903	0
596	7	0	0	0	0	0	0	200	300	0	-27.7113	-63.9111	-704.402	-37257.8	7750.94	442.887	211.004	955.893	0	0	0	0	0	0	0	603	903	0
596	8	0	0	0	0	0	0	200	300	0	-27.4062	-64.6741	-701.656	-37074.7	8178.18	442.887	211.656	955.839	0	0	0	0	0	0	0	603	903	0
596	9	0	0	0	0	0	0	200	300	0	-25.1173	-61.7749	-699.52	-37166.2	8056.11	168.228	211.517	956.131	0	0	0	0	0	0	0	603	903	0
597	0	0	0	0	0	0	0	200	300	0	-27.8639	-61.012	-696.773	-36433.8	7018.51	259.781	210.073	955.289	0	0	0	0	0	0	0	603	903	0
597	1	0	0	0	0	0	0	200	300	0	-27.4062	-59.9439	-692.501	-36433.8	7995.08	122.452	211.545	955.612	0	0	0	0	0	0	0	603	903	0
597	2	0	0	0	0	0	0	200	300	0	-26.0329	-59.7913	-692.806	-36250.7	7567.83	442.887	210.923	955.325	0	0	0	0	0	0	0	603	903	0
597	3	0	0	0	0	0	0	200	300	0	-24.9648	-58.418	-690.669	-36342.2	7506.79	580.216	210.869	955.619	0	0	0	0	0	0	0	603	903	0
597	4	0	0	0	0	0	0	200	300	0	-27.5587	-58.1128	-687.618	-36067.6	7140.58	534.44	210.385	955.453	0	0	0	0	0	0	0	603	903	0
597	5	0	0	0	0	0	0	200	300	0	-25.8803	-56.5869	-685.787	-35609.8	7384.72	351.334	210.768	954.926	0	0	0	0	0	0	0	603	903	0
597	6	0	0	0	0	0	0	200	300	0	-26.1855	-56.7395	-683.345	-35701.4	7506.79	351.334	210.985	955.245	0	0	0	0	0	0	0	603	903	0
597	7	0	0	0	0	0	0	200	300	0	-25.7277	-55.6714	-681.819	-35243.6	7201.62	397.11	210.562	954.691	0	0	0	0	0	0	0	603	903	0
597	8	0	0	0	0	0	0	200	300	0	-24.9648	-55.5188	-680.294	-35060.5	7079.55	259.781	210.407	954.537	0	0	0	0	0	0	0	603	903	0
597	9	0	0	0	0	0	0	200	300	0	-25.4225	-54.6033	-677.547	-34969	7445.76	625.992	210.989	954.611	0	0	0	0	0	0	0	603	903	0
598	0	0	0	0	0	0	0	200	300	0	-24.507	-53.0774	-676.021	-34602.8	7323.69	763.321	210.834	954.186	0	0	0	0	0	0	0	603	903	0
598	1	0	0	0	0	0	0	200	300	0	-24.2018	-52.6196	-672.664	-34328.1	7140.58	305.558	210.615	954.033	0	0	0	0	0	0	0	603	903	0
598	2	0	0	0	0	0	0	200	300	0	-24.3544	-51.0938	-671.138	-34328.1	6957.48	76.6757	210.367	954.149	0	0	0	0	0	0	0	603	903	0
598	3	0	0	0	0	0	0	200	300	0	-24.8122	-50.9412	-668.697	-34236.5	6835.41	168.228	210.222	954.199	0	0	0	0	0	0	0	603	903	0
598	4	0	0	0	0	0	0	200	300	0	-23.744	-50.7886	-667.476	-33687.2	7323.69	351.334	210.972	953.47	0	0	0	0	0	0	0	603	903	0
598	5	0	0	0	0	0	0	200	300	0	-21.7604	-49.8731	-663.814	-33229.4	7079.55	168.228	210.665	953.058	0	0	0	0	0	0	0	603	903	0
598	6	0	0	0	0	0	0	200	300	0	-24.2018	-48.6523	-663.204	-32771.7	6835.41	214.005	210.307	952.414	0	0	0	0	0	0	0	603	903	0
598	7	0	0	0	0	0	0	200	300	0	-23.5915	-48.1946	-659.542	-32863.2	6835.41	305.558	210.364	952.827	0	0	0	0	0	0	0	603	903	0
598	8	0	0	0	0	0	0	200	300	0	-22.2182	-46.0584	-658.016	-33229.4	6591.27	305.558	210.017	953.5	0	0	0	0	0	0	0	603	903	0
598	9	0	0	0	0	0	0	200	300	0	-21.1501	-46.8213	-656.49	-32863.2	6957.48	305.558	210.598	953.059	0	0	0	0	0	0	0	603	903	0
599	0	0	0	0	0	0	0	200	300	0	-24.2018	-44.6851	-652.523	-32222.4	7018.51	168.228	210.756	952.381	0	0	0	0	0	0	0	603	903	0
599	1	0	0	0	0	0	0	200	300	0	-22.5233	-43.7695	-651.607	-32222.4	6896.44	214.005	210.584	952.451	0	0	0	0	0	0	0	603	903	0
599	2	0	0	0	0	0	0	200	300	0	-22.2182	-43.7695	-649.166	-32313.9	6835.41	30.8993	210.53	952.778	0	0	0	0	0	0	0	603	903	0
599	3	0	0	0	0	0	0	200	300	0	-22.9811	-42.5488	-647.335	-31947.7	6591.27	-106.43	210.182	952.353	0	0	0	0	0	0	0	603	903	0
599	4	0	0	0	0	0	0	200	300	0	-21.913	-42.3962	-645.503	-31856.2	6591.27	168.228	210.211	952.351	0	0	0	0	0	0	0	603	903	0
599	5	0	0	0	0	0	0	200	300	0	-21.6078	-42.5488	-643.978	-31856.2	6713.34	488.663	210.425	952.468	0	0	0	0	0	0	0	603	903	0
599	6	0	0	0	0	0	0	200	300	0	-22.9811	-40.1074	-640.926	-30391.3	6347.13	-14.877	209.903	950.418	0	0	0	0	0	0	0	603	903	0
599	7	0	0	0	0	0	0	200	300	0	-22.0656	-39.3445	-638.484	-30666	6408.16	122.452	210.037	951.029	0	0	0	0	0	0	0	603	903	0
599	8	0	0	0	0	0	0	200	300	0	-22.3708	-38.7341	-635.738	-31032.2	6713.34	-14.877	210.56	951.813	0	0	0	0	0	0	0	603	903	0
599	9	0	0	0	0	0	0	200	300	0	-21.4552	-37.666	-633.907	-30574.4	6041.95	214.005	209.531	951.232	0	0	0	0	0	0	0	603	903	0
600	0	0	0	0	0	0	0	200	300	0	-21.4552	-37.9712	-631.16	-30391.3	6591.27	-60.6534	210.443	951.152	0	0	0	0	0	0	0	603	903	0
600	1	0	0	0	0	0	0	200	300	0	-22.2182	-36.7505	-628.719	-30574.4	6469.2	76.6757	210.289	951.63	0	0	0	0	0	0	0	603	903	0
600	2	0	0	0	0	0	0	200	300	0	-22.3708	-36.2927	-628.719	-30116.7	6347.13	-14.877	210.095	950.902	0	0	0	0	0	0	0	603	903	0
600	3	0	0	0	0	0	0	200	300	0	-20.6923	-36.4453	-623.836	-29475.8	5858.84	30.8993	209.392	950.249	0	0	0	0	0	0	0	603	903	0
600	4	0	0	0	0	0	0	200	300	0	-20.6923	-34.4617	-623.531	-29750.4	5858.84	30.8993	209.396	950.713	0	0	0	0	0	0	0	603	903	0
600	5	0	0	0	0	0	0	200	300	0	-20.9975	-33.6987	-619.869	-28743.4	6347.13	76.6757	210.239	949.37	0	0	0	0	0	0	0	603	903	0
600	6	0	0	0	0	0	0	200	300	0	-19.9294	-33.6987	-617.427	-29018	6408.16	168.228	210.379	949.998	0	0	0	0	0	0	0	603	903	0
600	7	0	0	0	0	0	0	200	300	0	-21.3026	-32.3254	-615.291	-28926.5	6164.02	76.6757	210.018	950.013	0	0	0	0	0	0	0	603	903	0
600	8	0	0	0	0	0	0	200	300	0	-20.8449	-32.1729	-613.46	-28010.9	6041.95	30.8993	209.849	948.661	0	0	0	0	0	0	0	603	903	0
600	9	0	0	0	0	0	0	200	300	0	-20.0819	-30.9522	-611.019	-28468.7	5980.91	-14.877	209.788	949.592	0	0	0	0	0	0	0	603	903	0
601	0	0	0	0	0	0	0	200	300	0	-19.4716	-30.647	-611.019	-28194.1	5614.7	122.452	209.189	949.143	0	0	0	0	0	0	0	603	903	0
601	1	0	0	0	0	0	0	200	300	0	-20.0819	-30.1892	-607.967	-28468.7	6102.98	-152.206	210.038	949.826	0	0	0	0	0	0	0	603	903	0
601	2	0	0	0	0	0	0	200	300	0	-19.0138	-29.5789	-605.525	-27827.8	5858.84	122.452	209.676	948.957	0	0	0	0	0	0	0	603	903	0
601	3	0	0	0	0	0	0	200	300	0	-20.2345	-29.1211	-604.305	-27187	5858.84	-152.206	209.695	947.989	0	0	0	0	0	0	0	603	903	0
601	4	0	0	0	0	0	0	200	300	0	-19.1664	-29.4263	-600.643	-27370.1	5553.67	-14.877	209.246	948.568	0	0	0	0	0	0	0	603	903	0
601	5	0	0	0	0	0	0	200	300	0	-18.5561	-27.5952	-600.948	-27003.9	5309.53	-60.6534	208.835	947.936	0	0	0	0	0	0	0	603	903	0
601	6	0	0	0	0	0	0	200	300	0	-19.0138	-27.9004	-597.591	-27278.5	5492.63	-14.877	209.191	948.648	0	0	0	0	0	0	0	603	903	0
601	7	0	0	0	0	0	0	200	300	0	-19.1664	-26.3745	-595.455	-26820.8	5736.77	-60.6534	209.634	948.043	0	0	0	0	0	0	0	603	903	0
601	8	0	0	0	0	0	0	200	300	0	-18.4035	-25.3064	-593.318	-26637.7	5431.6	-60.6534	209.155	947.896	0	0	0	0	0	0	0	603	903	0
601	9	0	0	0	0	0	0	200	300	0	-17.6405	-25.1538	-591.182	-26363	5431.6	-106.43	209.188	947.594	0	0	0	0	0	0	0	603	903	0
602	0	0	0	0	0	0	0	200	300	0	-18.4035	-23.9331	-589.351	-26271.4	5614.7	-152.206	209.527	947.577	0	0	0	0	0	0	0	603	903	0
602	1	0	0	0	0	0	0	200	300	0	-17.7931	-24.0857	-585.079	-26179.9	5126.42	-152.206	208.762	947.746	0	0	0	0	0	0	0	603	903	0
602	2	0	0	0	0	0	0	200	300	0	-17.6405	-23.3228	-585.079	-26546.1	5309.53	-197.982	209.075	948.372	0	0	0	0	0	0	0	603	903	0
602	3	0	0	0	0	0	0	200	300	0	-15.1991	-22.5598	-581.417	-25813.7	5004.35	-243.759	208.607	947.398	0	0	0	0	0	0	0	603	903	0
602	4	0	0	0	0	0	0	200	300	0	-17.4879	-21.9495	-581.417	-24898.2	5309.53	-197.982	209.132	945.823	0	0	0	0	0	0	0	603	903	0
602	5	0	0	0	0	0	0	200	300	0	-16.5724	-22.2546	-580.196	-25447.5	5492.63	-14.877	209.467	946.86	0	0	0	0	0	0	0	603	903	0
602	6	0	0	0	0	0	0	200	300	0	-16.8776	-21.1865	-578.67	-25172.8	4821.25	76.6757	208.332	946.501	0	0	0	0	0	0	0	603	903	0
602	7	0	0	0	0	0	0	200	300	0	-16.2672	-20.7288	-576.229	-24715	5553.67	122.452	209.638	945.891	0	0	0	0	0	0	0	603	903	0
602	8	0	0	0	0	0	0	200	300	0	-16.725	-19.3555	-573.482	-24806.6	4638.14	-426.864	208.088	946.256	0	0	0	0	0	0	0	603	903	0
602	9	0	0	0	0	0	0	200	300	0	-17.0302	-18.1348	-572.566	-24715	5065.39	-243.759	208.847	946.165	0	0	0	0	0	0	0	603	903	0
603	0	0	0	0	0	0	0	200	300	0	-15.9621	-18.4399	-569.515	-23982.6	4821.25	-243.759	208.466	945.111	0	0	0	0	0	0	0	603	903	0
603	1	0	0	0	0	0	0	200	300	0	-15.9621	-17.5244	-568.599	-24348.8	4760.21	-152.206	208.372	945.823	0	0	0	0	0	0	0	603	903	0
603	2	0	0	0	0	0	0	200	300	0	-16.725	-17.2192	-565.853	-24257.3	4516.07	-197.982	207.981	945.869	0	0	0	0	0	0	0	603	903	0
603	3	0	0	0	0	0	0	200	300	0	-15.9621	-17.5244	-563.106	-23799.5	5004.35	-381.088	208.887	945.265	0	0	0	0	0	0	0	603	903	0
603	4	0	0	0	0	0	0	200	300	0	-15.8095	-15.2356	-561.885	-22792.4	4332.96	-381.088	207.711	943.564	0	0	0	0	0	0	0	603	903	0
603	5	0	0	0	0	0	0	200	300	0	-16.5724	-15.5408	-560.97	-23067.1	4943.32	-152.206	208.812	944.12	0	0	0	0	0	0	0	603	903	0
603	6	0	0	0	0	0	0	200	300	0	-16.1147	-14.9304	-559.444	-22884	4699.18	-335.312	208.4	943.905	0	0	0	0	0	0	0	603	903	0
603	7	0	0	0	0	0	0	200	300	0	-15.6569	-14.7778	-556.392	-22609.3	4455.04	-152.206	208.007	943.636	0	0	0	0	0	0	0	603	903	0
603	8	0	0	0	0	0	0	200	300	0	-15.9621	-14.0149	-554.561	-22884	4332.96	-335.312	207.813	944.265	0	0	0	0	0	0	0	603	903	0
603	9	0	0	0	0	0	0	200	300	0	-16.2672	-13.252	-552.12	-22517.8	4577.11	-335.312	208.29	943.784	0	0	0	0	0	0	0	603	903	0
604	0	0	0	0	0	0	0	200	300	0	-15.0465	-12.0313	-552.12	-22334.7	4394	-472.641	207.958	943.453	0	0	0	0	0	0	0	603	903	0
604	1	0	0	0	0	0	0	200	300	0	-14.5888	-12.7942	-548.763	-21327.6	4455.04	-609.97	208.118	941.865	0	0	0	0	0	0	0	603	903	0
604	2	0	0	0	0	0	0	200	300	0	-15.6569	-11.4209	-549.068	-22151.6	4027.79	-243.759	207.336	943.344	0	0	0	0	0	0	0	603	903	0
604	3	0	0	0	0	0	0	200	300	0	-15.3517	-11.4209	-546.016	-21693.8	4821.25	-152.206	208.83	942.731	0	0	0	0	0	0	0	603	903	0
604	4	0	0	0	0	0	0	200	300	0	-12.9103	-10.0476	-543.88	-21419.1	4577.11	-518.417	208.416	942.382	0	0	0	0	0	0	0	603	903	0
604	5	0	0	0	0	0	0	200	300	0	-15.0465	-11.1157	-541.133	-21510.7	4088.82	-381.088	207.556	942.751	0	0	0	0	0	0	0	603	903	0
604	6	0	0	0	0	0	0	200	300	0	-14.7414	-9.43726	-540.828	-20778.3	3966.75	-609.97	207.335	941.419	0	0	0	0	0	0	0	603	903	0
604	7	0	0	0	0	0	0	200	300	0	-13.9784	-8.52173	-536.861	-20595.2	4027.79	-655.746	207.503	941.362	0	0	0	0	0	0	0	603	903	0
604	8	0	0	0	0	0	0	200	300	0	-11.9948	-8.9795	-538.082	-20869.8	4210.89	-472.641	207.826	941.786	0	0	0	0	0	0	0	603	903	0
604	9	0	0	0	0	0	0	200	300	0	-14.4362	-7.6062	-536.861	-20595.2	4210.89	-472.641	207.844	941.362	0	0	0	0	0	0	0	603	903	0
605	0	0	0	0	0	0	0	200	300	0	-14.131	-7.14844	-535.335	-19954.3	3966.75	-564.193	207.41	940.274	0	0	0	0	0	0	0	603	903	0
605	1	0	0	0	0	0	0	200	300	0	-13.6732	-6.99585	-534.114	-20412.1	4210.89	-793.075	207.884	941.217	0	0	0	0	0	0	0	603	903	0
605	2	0	0	0	0	0	0	200	300	0	-11.537	-8.06397	-531.978	-20412.1	4149.86	-518.417	207.801	941.37	0	0	0	0	0	0	0	603	903	0
605	3	0	0	0	0	0	0	200	300	0	-13.3681	-6.99585	-532.588	-19313.4	3905.72	-381.088	207.333	939.263	0	0	0	0	0	0	0	603	903	0
605	4	0	0	0	0	0	0	200	300	0	-13.5207	-5.77515	-526.18	-19679.6	4271.93	-701.523	208.119	940.401	0	0	0	0	0	0	0	603	903	0
605	5	0	0	0	0	0	0	200	300	0	-14.894	-5.92774	-527.095	-19588.1	3600.54	-564.193	206.831	940.162	0	0	0	0	0	0	0	603	903	0
605	6	0	0	0	0	0	0	200	300	0	-14.7414	-5.1648	-527.4	-19405	3539.51	-701.523	206.711	939.794	0	0	0	0	0	0	0	603	903	0
605	7	0	0	0	0	0	0	200	300	0	-12.6051	-4.85962	-525.569	-18672.6	3722.61	-609.97	207.083	938.528	0	0	0	0	0	0	0	603	903	0
605	8	0	0	0	0	0	0	200	300	0	-14.5888	-4.70703	-526.18	-18489.5	3478.47	-747.299	206.611	938.139	0	0	0	0	0	0	0	603	903	0
605	9	0	0	0	0	0	0	200	300	0	-14.4362	-4.85962	-523.738	-18397.9	4088.82	-426.864	207.807	938.128	0	0	0	0	0	0	0	603	903	0
606	0	0	0	0	0	0	0	200	300	0	-13.2155	-3.48633	-524.044	-18306.4	3966.75	-793.075	207.57	937.933	0	0	0	0	0	0	0	603	903	0
606	1	0	0	0	0	0	0	200	300	0	-12.9103	-4.40186	-521.602	-18581	3478.47	-793.075	206.669	938.623	0	0	0	0	0	0	0	603	903	0
606	2	0	0	0	0	0	0	200	300	0	-11.2318	-2.72339	-520.687	-18306.4	3722.61	-1067.73	207.149	938.158	0	0	0	0	0	0	0	603	903	0
606	3	0	0	0	0	0	0	200	300	0	-12.3	-3.79151	-518.856	-17482.4	3356.4	-976.181	206.469	936.694	0	0	0	0	0	0	0	603	903	0
606	4	0	0	0	0	0	0	200	300	0	-12.6051	-3.18116	-518.245	-18214.8	3600.54	-747.299	206.948	938.147	0	0	0	0	0	0	0	603	903	0
606	5	0	0	0	0	0	0	200	300	0	-13.2155	-2.72339	-517.94	-17848.6	3844.68	-976.181	207.423	937.461	0	0	0	0	0	0	0	603	903	0
606	6	0	0	0	0	0	0	200	300	0	-10.9267	-2.26563	-516.109	-17207.7	3478.47	-1021.96	206.74	936.341	0	0	0	0	0	0	0	603	903	0
606	7	0	0	0	0	0	0	200	300	0	-12.4525	-1.80786	-513.668	-17116.2	3661.58	-884.628	207.128	936.321	0	0	0	0	0	0	0	603	903	0
606	8	0	0	0	0	0	0	200	300	0	-12.4525	-1.96045	-515.193	-17665.5	3295.37	-930.405	206.396	937.289	0	0	0	0	0	0	0	603	903	0
606	9	0	0	0	0	0	0	200	300	0	-12.7577	-1.96045	-513.362	-17207.7	3051.23	-976.181	205.944	936.52	0	0	0	0	0	0	0	603	903	0
607	0	0	0	0	0	0	0	200	300	0	-12.6051	-1.19751	-511.531	-16841.5	3600.54	-976.181	207.039	935.924	0	0	0	0	0	0	0	603	903	0
607	1	0	0	0	0	0	0	200	300	0	-12.9103	-0.587161	-511.226	-17116.2	3661.58	-1159.29	207.162	936.481	0	0	0	0	0	0	0	603	903	0
607	2	0	0	0	0	0	0	200	300	0	-12.6051	0.0231904	-513.057	-16566.9	3356.4	-1113.51	206.542	935.291	0	0	0	0	0	0	0	603	903	0
607	3	0	0	0	0	0	0	200	300	0	-10.0111	0.328366	-511.531	-16475.3	3478.47	-976.181	206.8	935.208	0	0	0	0	0	0	0	603	903	0
607	4	0	0	0	0	0	0	200	300	0	-12.9103	0.328366	-510.616	-16383.7	3295.37	-747.299	206.454	935.086	0	0	0	0	0	0	0	603	903	0
607	5	0	0	0	0	0	0	200	300	0	-12.6051	0.78613	-509.09	-16017.5	3234.33	-1159.29	206.353	934.463	0	0	0	0	0	0	0	603	903	0
607	6	0	0	0	0	0	0	200	300	0	-11.3844	1.24389	-508.48	-16109.1	3539.51	-1433.94	206.961	934.681	0	0	0	0	0	0	0	603	903	0
607	7	0	0	0	0	0	0	200	300	0	-12.6051	1.39648	-507.869	-15193.6	3051.23	-1296.62	206.008	932.916	0	0	0	0	0	0	0	603	903	0
607	8	0	0	0	0	0	0	200	300	0	-12.3	1.24389	-507.869	-15926	3051.23	-1296.62	206.008	934.358	0	0	0	0	0	0	0	603	903	0
607	9	0	0	0	0	0	0	200	300	0	-11.2318	2.15942	-508.174	-16017.5	3295.37	-1159.29	206.485	934.52	0	0	0	0	0	0	0	603	903	0
608	0	0	0	0	0	0	0	200	300	0	-11.3844	3.07495	-503.902	-16200.6	3539.51	-1250.84	207.024	935.15	0	0	0	0	0	0	0	603	903	0
608	1	0	0	0	0	0	0	200	300	0	-12.7577	3.22754	-506.343	-15559.8	3539.51	-1296.62	206.99	933.73	0	0	0	0	0	0	0	603	903	0
608	2	0	0	0	0	0	0	200	300	0	-11.537	3.22754	-502.681	-14461.1	3600.54	-1342.39	207.163	931.768	0	0	0	0	0	0	0	603	903	0
608	3	0	0	0	0	0	0	200	300	0	-10.7741	4.14306	-506.648	-15742.9	3295.37	-1479.72	206.504	934.073	0	0	0	0	0	0	0	603	903	0
608	4	0	0	0	0	0	0	200	300	0	-10.6215	3.83789	-505.123	-15651.3	3356.4	-1113.51	206.645	933.985	0	0	0	0	0	0	0	603	903	0
608	5	0	0	0	0	0	0	200	300	0	-10.9267	3.6853	-503.597	-14918.9	3112.26	-1433.94	206.18	932.625	0	0	0	0	0	0	0	603	903	0
608	6	0	0	0	0	0	0	200	300	0	-10.7741	4.44824	-504.512	-15468.2	3417.44	-1205.06	206.774	933.66	0	0	0	0	0	0	0	603	903	0
608	7	0	0	0	0	0	0	200	300	0	-11.9948	4.906	-504.817	-15193.6	3539.51	-1388.17	207.011	933.097	0	0	0	0	0	0	0	603	903	0
608	8	0	0	0	0	0	0	200	300	0	-11.2318	5.51635	-500.545	-14644.2	3112.26	-1479.72	206.218	932.257	0	0	0	0	0	0	0	603	903	0
608	9	0	0	0	0	0	0	200	300	0	-10.7741	5.51635	-503.902	-15285.1	3600.54	-1617.05	207.145	933.333	0	0	0	0	0	0	0	603	903	0
609	0	0	0	0	0	0	0	200	300	0	-11.2318	5.36377	-502.376	-15376.7	3356.4	-1662.83	206.681	933.608	0	0	0	0	0	0	0	603	903	0
609	1	0	0	0	0	0	0	200	300	0	-11.537	6.58447	-502.681	-15102	2929.16	-1525.5	205.827	933.043	0	0	0	0	0	0	0	603	903	0
609	2	0	0	0	0	0	0	200	300	0	-10.7741	6.58447	-501.155	-14461.1	3661.58	-1891.71	207.306	931.856	0	0	0	0	0	0	0	603	903	0
609	3	0	0	0	0	0	0	200	300	0	-11.2318	6.88965	-503.292	-14827.4	3844.68	-1800.16	207.639	932.461	0	0	0	0	0	0	0	603	903	0
609	4	0	0	0	0	0	0	200	300	0	-9.2482	7.5	-504.512	-14644.2	3173.3	-1662.83	206.29	932.027	0	0	0	0	0	0	0	603	903	0
609	5	0	0	0	0	0	0	200	300	0	-9.70596	7.95776	-503.597	-14644.2	3051.23	-1433.94	206.059	932.079	0	0	0	0	0	0	0	603	903	0
609	6	0	0	0	0	0	0	200	300	0	-10.3163	8.41552	-503.292	-14186.5	3356.4	-1662.83	206.669	931.187	0	0	0	0	0	0	0	603	903	0
609	7	0	0	0	0	0	0	200	300	0	-11.0793	9.17846	-502.681	-14369.6	3417.44	-1891.71	206.798	931.586	0	0	0	0	0	0	0	603	903	0
609	8	0	0	0	0	0	0	200	300	0	-11.537	9.17846	-504.207	-14827.4	3600.54	-1800.16	207.141	932.407	0	0	0	0	0	0	0	603	903	0
609	9	0	0	0	0	0	0	200	300	0	-10.1637	10.094	-504.512	-14369.6	3539.51	-1754.38	207.016	931.482	0	0	0	0	0	0	0	603	903	0
610	0	0	0	0	0	0	0	200	300	0	-11.3844	10.8569	-505.428	-14918.9	3661.58	-1845.93	207.245	932.517	0	0	0	0	0	0	0	603	903	0
610	1	0	0	0	0	0	0	200	300	0	-10.9267	10.8569	-504.207	-14552.7	3844.68	-1662.83	207.625	931.863	0	0	0	0	0	0	0	603	903	0
610	2	0	0	0	0	0	0	200	300	0	-10.6215	12.0776	-504.512	-14918.9	3173.3	-1845.93	206.29	932.571	0	0	0	0	0	0	0	603	903	0
610	3	0	0	0	0	0	0	200	300	0	-11.2318	12.2302	-506.038	-14552.7	3722.61	-2120.59	207.356	931.758	0	0	0	0	0	0	0	603	903	0
610	4	0	0	0	0	0	0	200	300	0	-10.1637	13.4509	-505.733	-14552.7	3722.61	-1937.48	207.361	931.776	0	0	0	0	0	0	0	603	903	0
610	5	0	0	0	0	0	0	200	300	0	-10.6215	12.0776	-506.038	-13911.8	3295.37	-1845.93	206.512	930.492	0	0	0	0	0	0	0	603	903	0
610	6	0	0	0	0	0	0	200	300	0	-10.0111	13.9087	-507.259	-14644.2	3356.4	-2029.04	206.617	931.869	0	0	0	0	0	0	0	603	903	0
610	7	0	0	0	0	0	0	200	300	0	-11.537	14.0613	-506.343	-15010.5	3661.58	-2166.37	207.231	932.645	0	0	0	0	0	0	0	603	903	0
610	8	0	0	0	0	0	0	200	300	0	-11.2318	14.9768	-507.869	-14644.2	3417.44	-2120.59	206.729	931.835	0	0	0	0	0	0	0	603	903	0
610	9	0	0	0	0	0	0	200	300	0	-10.6215	14.3665	-509.09	-14735.8	3905.72	-2074.81	207.672	931.945	0	0	0	0	0	0	0	603	903	0
611	0	0	0	0	0	0	0	200	300	0	-11.9948	16.6553	-510.005	-14461.1	3661.58	-1937.48	207.18	931.355	0	0	0	0	0	0	0	603	903	0
611	1	0	0	0	0	0	0	200	300	0	-11.9948	17.5708	-510.005	-14552.7	4027.79	-2120.59	207.898	931.534	0	0	0	0	0	0	0	603	903	0
611	2	0	0	0	0	0	0	200	300	0	-11.2318	17.2656	-509.7	-15102	3722.61	-1891.71	207.304	932.629	0	0	0	0	0	0	0	603	903	0
611	3	0	0	0	0	0	0	200	300	0	-10.1637	17.7234	-510.616	-15102	3783.65	-2303.7	207.41	932.576	0	0	0	0	0	0	0	603	903	0
611	4	0	0	0	0	0	0	200	300	0	-12.1474	18.9441	-511.836	-14918.9	3966.75	-2349.47	207.75	932.148	0	0	0	0	0	0	0	603	903	0
611	5	0	0	0	0	0	0	200	300	0	-11.2318	18.7915	-512.447	-14369.6	3905.72	-2303.7	207.622	931.041	0	0	0	0	0	0	0	603	903	0
611	6	0	0	0	0	0	0	200	300	0	-10.4689	20.1648	-514.278	-14918.9	3722.61	-2120.59	207.239	932.009	0	0	0	0	0	0	0	603	903	0
611	7	0	0	0	0	0	0	200	300	0	-11.0793	19.8596	-513.973	-15010.5	3661.58	-2029.04	207.124	932.205	0	0	0	0	0	0	0	603	903	0
611	8	0	0	0	0	0	0	200	300	0	-11.2318	21.6907	-515.193	-14918.9	3844.68	-2395.25	207.463	931.958	0	0	0	0	0	0	0	603	903	0
611	9	0	0	0	0	0	0	200	300	0	-11.6896	22.4536	-515.193	-14827.4	3600.54	-2395.25	206.989	931.78	0	0	0	0	0	0	0	603	903	0
612	0	0	0	0	0	0	0	200	300	0	-12.7577	22.7588	-517.33	-15102	4088.82	-2395.25	207.904	932.192	0	0	0	0	0	0	0	603	903	0
612	1	0	0	0	0	0	0	200	300	0	-11.9948	22.4536	-519.161	-14278	3905.72	-2395.25	207.523	930.502	0	0	0	0	0	0	0	603	903	0
612	2	0	0	0	0	0	0	200	300	0	-11.8422	23.3691	-520.381	-15102	4210.89	-2349.47	208.092	932.021	0	0	0	0	0	0	0	603	903	0
612	3	0	0	0	0	0	0	200	300	0	-12.9103	23.5217	-519.771	-15102	4149.86	-2303.7	207.984	932.055	0	0	0	0	0	0	0	603	903	0
612	4	0	0	0	0	0	0	200	300	0	-13.3681	25.658	-522.823	-15010.5	3783.65	-2349.47	207.237	931.71	0	0	0	0	0	0	0	603	903	0
612	5	0	0	0	0	0	0	200	300	0	-10.7741	25.5054	-522.518	-14735.8	4088.82	-2532.58	207.825	931.202	0	0	0	0	0	0	0	603	903	0
612	6	0	0	0	0	0	0	200	300	0	-13.0629	26.8787	-523.738	-14552.7	4027.79	-2486.8	207.69	930.786	0	0	0	0	0	0	0	603	903	0
612	7	0	0	0	0	0	0	200	300	0	-13.3681	27.6416	-526.18	-14735.8	3905.72	-2624.13	207.423	931.005	0	0	0	0	0	0	0	603	903	0
612	8	0	0	0	0	0	0	200	300	0	-11.9948	25.9631	-529.842	-14369.6	3966.75	-2349.47	207.487	930.121	0	0	0	0	0	0	0	603	903	0
612	9	0	0	0	0	0	0	200	300	0	-12.6051	28.4045	-527.4	-15285.1	4027.79	-2624.13	207.637	931.982	0	0	0	0	0	0	0	603	903	0
613	0	0	0	0	0	0	0	200	300	0	-13.6732	29.0149	-528.926	-15010.5	3722.61	-2624.13	207.038	931.379	0	0	0	0	0	0	0	603	903	0
613	1	0	0	0	0	0	0	200	300	0	-13.8258	29.7778	-531.978	-14644.2	4088.82	-2532.58	207.686	930.528	0	0	0	0	0	0	0	603	903	0
613	2	0	0	0	0	0	0	200	300	0	-13.0629	29.9304	-534.419	-14644.2	3661.58	-2578.35	206.852	930.402	0	0	0	0	0	0	0	603	903	0
613	3	0	0	0	0	0	0	200	300	0	-14.131	30.8459	-536.251	-14552.7	3966.75	-2532.58	207.397	930.138	0	0	0	0	0	0	0	603	903	0
613	4	0	0	0	0	0	0	200	300	0	-14.2836	31.6089	-535.335	-14827.4	4271.93	-2669.91	207.98	930.697	0	0	0	0	0	0	0	603	903	0
613	5	0	0	0	0	0	0	200	300	0	-11.537	32.8296	-538.082	-14644.2	3966.75	-2807.24	207.372	930.216	0	0	0	0	0	0	0	603	903	0
613	6	0	0	0	0	0	0	200	300	0	-14.5888	33.1348	-539.302	-14735.8	4149.86	-2898.79	207.695	930.324	0	0	0	0	0	0	0	603	903	0
613	7	0	0	0	0	0	0	200	300	0	-15.3517	33.7451	-541.133	-14278	3966.75	-2761.46	207.33	929.385	0	0	0	0	0	0	0	603	903	0
613	8	0	0	0	0	0	0	200	300	0	-12.9103	34.8132	-543.27	-14552.7	3661.58	-2486.8	206.74	929.787	0	0	0	0	0	0	0	603	903	0
613	9	0	0	0	0	0	0	200	300	0	-15.0465	34.8132	-542.659	-14735.8	4088.82	-2669.91	207.535	930.155	0	0	0	0	0	0	0	603	903	0
614	0	0	0	0	0	0	0	200	300	0	-15.5043	36.6443	-546.321	-14552.7	4210.89	-2761.46	207.708	929.638	0	0	0	0	0	0	0	603	903	0
614	1	0	0	0	0	0	0	200	300	0	-12.9103	36.3391	-547.847	-14369.6	3722.61	-3127.67	206.795	929.229	0	0	0	0	0	0	0	603	903	0
614	2	0	0	0	0	0	0	200	300	0	-16.2672	37.102	-549.678	-14278	3966.75	-2990.34	207.217	928.975	0	0	0	0	0	0	0	603	903	0
614	3	0	0	0	0	0	0	200	300	0	-16.1147	38.1702	-552.12	-14369.6	3661.58	-2990.34	206.632	929.026	0	0	0	0	0	0	0	603	903	0
614	4	0	0	0	0	0	0	200	300	0	-15.8095	38.7805	-555.171	-14461.1	3783.65	-2853.01	206.815	929.048	0	0	0	0	0	0	0	603	903	0
614	5	0	0	0	0	0	0	200	300	0	-15.1991	39.696	-553.035	-14644.2	4210.89	-3036.12	207.614	929.48	0	0	0	0	0	0	0	603	903	0
614	6	0	0	0	0	0	0	200	300	0	-14.894	40.3064	-557.613	-14552.7	3661.58	-2990.34	206.567	929.098	0	0	0	0	0	0	0	603	903	0
614	7	0	0	0	0	0	0	200	300	0	-15.6569	39.0857	-557.003	-14186.5	3905.72	-3081.89	207.012	928.469	0	0	0	0	0	0	0	603	903	0
614	8	0	0	0	0	0	0	200	300	0	-15.6569	41.9849	-561.58	-13637.2	3783.65	-3219.22	206.738	927.284	0	0	0	0	0	0	0	603	903	0
614	9	0	0	0	0	0	0	200	300	0	-17.1828	43.3582	-562.801	-14094.9	3966.75	-2853.01	207.048	928.044	0	0	0	0	0	0	0	603	903	0
615	0	0	0	0	0	0	0	200	300	0	-17.7931	42.29	-564.327	-13911.8	4027.79	-2990.34	207.137	927.652	0	0	0	0	0	0	0	603	903	0
615	1	0	0	0	0	0	0	200	300	0	-17.1828	42.7478	-566.768	-14094.9	3661.58	-2807.24	206.46	927.869	0	0	0	0	0	0	0	603	903	0
615	2	0	0	0	0	0	0	200	300	0	-17.1828	44.5789	-570.43	-14003.4	3539.51	-3448.1	206.205	927.549	0	0	0	0	0	0	0	603	903	0
615	3	0	0	0	0	0	0	200	300	0	-18.2509	45.647	-571.651	-14094.9	3600.54	-3402.33	206.299	927.657	0	0	0	0	0	0	0	603	903	0
615	4	0	0	0	0	0	0	200	300	0	-18.7086	47.0203	-575.008	-14186.5	3478.47	-3173.45	206.049	927.672	0	0	0	0	0	0	0	603	903	0
615	5	0	0	0	0	0	0	200	300	0	-18.5561	46.8677	-578.67	-13637.2	3234.33	-3219.22	205.589	926.566	0	0	0	0	0	0	0	603	903	0
615	6	0	0	0	0	0	0	200	300	0	-19.9294	47.9358	-578.06	-12996.3	3783.65	-3310.78	206.545	925.483	0	0	0	0	0	0	0	603	903	0
615	7	0	0	0	0	0	0	200	300	0	-19.9294	48.8513	-581.111	-13454.1	3295.37	-3448.1	205.671	926.152	0	0	0	0	0	0	0	603	903	0
615	8	0	0	0	0	0	0	200	300	0	-18.5561	49.1565	-583.553	-13179.4	3539.51	-3448.1	206.065	925.585	0	0	0	0	0	0	0	603	903	0
615	9	0	0	0	0	0	0	200	300	0	-19.7768	50.5298	-585.994	-13637.2	3234.33	-3493.88	205.519	926.272	0	0	0	0	0	0	0	603	903	0
616	0	0	0	0	0	0	0	200	300	0	-20.6923	50.835	-588.436	-13454.1	3173.3	-3265	205.393	925.864	0	0	0	0	0	0	0	603	903	0
616	1	0	0	0	0	0	0	200	300	0	-20.6923	51.7505	-590.572	-12813.2	3661.58	-3493.88	206.2	924.696	0	0	0	0	0	0	0	603	903	0
616	2	0	0	0	0	0	0	200	300	0	-20.5397	53.2764	-593.929	-13179.4	3295.37	-3631.21	205.548	925.19	0	0	0	0	0	0	0	603	903	0
616	3	0	0	0	0	0	0	200	300	0	-21.913	53.7341	-596.675	-12813.2	2990.19	-3585.43	205.011	924.474	0	0	0	0	0	0	0	603	903	0
616	4	0	0	0	0	0	0	200	300	0	-21.913	55.26	-598.506	-12630.1	2990.19	-3722.76	204.996	924.103	0	0	0	0	0	0	0	603	903	0
616	5	0	0	0	0	0	0	200	300	0	-21.913	56.0229	-600.643	-12447	2929.16	-3402.33	204.877	923.723	0	0	0	0	0	0	0	603	903	0
616	6	0	0	0	0	0	0	200	300	0	-21.3026	55.4126	-604	-12721.6	3234.33	-3402.33	205.355	924.062	0	0	0	0	0	0	0	603	903	0
616	7	0	0	0	0	0	0	200	300	0	-21.7604	54.8022	-605.525	-12447	3295.37	-3493.88	205.442	923.556	0	0	0	0	0	0	0	603	903	0
616	8	0	0	0	0	0	0	200	300	0	-22.8285	57.5488	-609.188	-11439.9	2868.12	-3448.1	204.708	921.779	0	0	0	0	0	0	0	603	903	0
616	9	0	0	0	0	0	0	200	300	0	-22.6759	58.7695	-609.188	-11989.2	3051.23	-3676.99	205.009	922.681	0	0	0	0	0	0	0	603	903	0
617	0	0	0	0	0	0	0	200	300	0	-23.2863	59.6851	-615.291	-11714.6	2623.98	-3631.21	204.265	922.039	0	0	0	0	0	0	0	603	903	0
617	1	0	0	0	0	0	0	200	300	0	-24.6596	59.5325	-618.343	-11714.6	2929.16	-3722.76	204.737	921.945	0	0	0	0	0	0	0	603	903	0
617	2	0	0	0	0	0	0	200	300	0	-24.2018	61.8213	-619.564	-11073.7	3234.33	-3722.76	205.22	920.873	0	0	0	0	0	0	0	603	903	0
617	3	0	0	0	0	0	0	200	300	0	-25.1173	62.4316	-623.531	-11165.2	2807.09	-3768.54	204.502	920.907	0	0	0	0	0	0	0	603	903	0
617	4	0	0	0	0	0	0	200	300	0	-25.4225	62.7368	-626.277	-11073.7	2685.02	-3814.32	204.287	920.682	0	0	0	0	0	0	0	603	903	0
617	5	0	0	0	0	0	0	200	300	0	-24.2018	64.2627	-627.803	-10890.6	2440.88	-3905.87	203.888	920.347	0	0	0	0	0	0	0	603	903	0
617	6	0	0	0	0	0	0	200	300	0	-24.8122	62.8894	-627.498	-10982.1	2501.91	-3860.09	203.987	920.502	0	0	0	0	0	0	0	603	903	0
617	7	0	0	0	0	0	0	200	300	0	-25.1173	65.0256	-633.296	-10615.9	2562.95	-3722.76	204.047	919.763	0	0	0	0	0	0	0	603	903	0
617	8	0	0	0	0	0	0	200	300	0	-26.0329	65.3308	-637.264	-10066.6	2318.8	-3722.76	203.639	918.797	0	0	0	0	0	0	0	603	903	0
617	9	0	0	0	0	0	0	200	300	0	-26.1855	66.7041	-641.231	-9883.5	1891.56	-3860.09	202.95	918.413	0	0	0	0	0	0	0	603	903	0
618	0	0	0	0	0	0	0	200	300	0	-26.7958	67.467	-642.757	-9883.5	2318.8	-4088.97	203.608	918.377	0	0	0	0	0	0	0	603	903	0
618	1	0	0	0	0	0	0	200	300	0	-26.7958	68.8403	-645.809	-9883.5	1708.45	-3768.54	202.645	918.304	0	0	0	0	0	0	0	603	903	0
618	2	0	0	0	0	0	0	200	300	0	-26.9484	69.1455	-649.166	-9151.08	2074.66	-4134.75	203.196	917.097	0	0	0	0	0	0	0	603	903	0
618	3	0	0	0	0	0	0	200	300	0	-28.3217	70.9766	-651.302	-8876.42	2135.7	-4134.75	203.279	916.629	0	0	0	0	0	0	0	603	903	0
618	4	0	0	0	0	0	0	200	300	0	-29.2372	71.2817	-654.354	-8510.21	1830.52	-4043.2	202.797	916.006	0	0	0	0	0	0	0	603	903	0
618	5	0	0	0	0	0	0	200	300	0	-26.1855	71.2817	-657.711	-8235.55	1830.52	-4088.97	202.783	915.522	0	0	0	0	0	0	0	603	903	0
618	6	0	0	0	0	0	0	200	300	0	-28.4743	73.1128	-658.626	-8418.66	1281.21	-4088.97	201.945	915.782	0	0	0	0	0	0	0	603	903	0
618	7	0	0	0	0	0	0	200	300	0	-29.8476	74.3335	-661.373	-8327.11	1525.35	-3905.87	202.306	915.591	0	0	0	0	0	0	0	603	903	0
618	8	0	0	0	0	0	0	200	300	0	-28.4743	73.7231	-664.73	-7411.58	1586.38	-3814.32	202.387	914.15	0	0	0	0	0	0	0	603	903	0
618	9	0	0	0	0	0	0	200	300	0	-28.4743	74.4861	-667.781	-7411.58	1220.17	-4088.97	201.827	914.099	0	0	0	0	0	0	0	603	903	0
619	0	0	0	0	0	0	0	200	300	0	-31.0683	75.0964	-671.749	-6312.95	853.961	-4043.2	201.271	912.398	0	0	0	0	0	0	0	603	903	0
619	1	0	0	0	0	0	0	200	300	0	-29.8476	76.012	-673.58	-5855.18	1220.17	-4272.08	201.811	911.693	0	0	0	0	0	0	0	603	903	0
619	2	0	0	0	0	0	0	200	300	0	-30.4579	76.9275	-678.157	-6679.16	609.821	-4088.97	200.899	912.849	0	0	0	0	0	0	0	603	903	0
619	3	0	0	0	0	0	0	200	300	0	-29.8476	77.5378	-680.904	-6496.05	1098.1	-4226.3	201.613	912.54	0	0	0	0	0	0	0	603	903	0
619	4	0	0	0	0	0	0	200	300	0	-29.695	78.7585	-679.378	-5397.42	853.961	-4180.53	201.257	910.945	0	0	0	0	0	0	0	603	903	0
619	5	0	0	0	0	0	0	200	300	0	-31.2209	78.7585	-686.092	-4939.65	548.785	-4134.75	200.8	910.2	0	0	0	0	0	0	0	603	903	0
619	6	0	0	0	0	0	0	200	300	0	-32.1364	77.9956	-687.923	-4573.44	548.785	-3951.65	200.798	909.648	0	0	0	0	0	0	0	603	903	0
619	7	0	0	0	0	0	0	200	300	0	-31.6786	79.9792	-689.754	-4481.89	-0.531226	-3905.87	199.999	909.498	0	0	0	0	0	0	0	603	903	0
619	8	0	0	0	0	0	0	200	300	0	-31.3734	79.9792	-690.364	-4024.13	60.5039	-4226.3	200.088	908.829	0	0	0	0	0	0	0	603	903	0
619	9	0	0	0	0	0	0	200	300	0	-32.7467	81.0474	-695.247	-3657.92	60.5039	-4363.63	200.087	908.261	0	0	0	0	0	0	0	603	903	0
620	0	0	0	0	0	0	0	200	300	0	-33.6623	80.8948	-700.13	-3200.15	-61.5664	-4226.3	199.912	907.571	0	0	0	0	0	0	0	603	903	0
620	1	0	0	0	0	0	0	200	300	0	-32.5941	81.8103	-702.266	-2376.18	-671.918	-4180.53	199.043	906.384	0	0	0	0	0	0	0	603	903	0
620	2	0	0	0	0	0	0	200	300	0	-32.289	83.3362	-703.182	-2376.18	-183.637	-4088.97	199.739	906.379	0	0	0	0	0	0	0	603	903	0
620	3	0	0	0	0	0	0	200	300	0	-34.12	84.0991	-705.623	-1918.41	-488.813	-4134.75	199.307	905.719	0	0	0	0	0	0	0	603	903	0
620	4	0	0	0	0	0	0	200	300	0	-33.6623	84.0991	-708.37	-911.334	-366.742	-4134.75	199.482	904.287	0	0	0	0	0	0	0	603	903	0
620	5	0	0	0	0	0	0	200	300	0	-33.3571	85.625	-708.065	-728.229	-488.813	-4134.75	199.31	904.029	0	0	0	0	0	0	0	603	903	0
620	6	0	0	0	0	0	0	200	300	0	-32.4416	85.7776	-713.558	-270.465	-977.094	-4272.08	198.631	903.379	0	0	0	0	0	0	0	603	903	0
620	7	0	0	0	0	0	0	200	300	0	-33.6623	83.6414	-717.83	95.7459	-732.953	-4317.86	198.979	902.867	0	0	0	0	0	0	0	603	903	0
620	8	0	0	0	0	0	0	200	300	0	-34.2726	86.5405	-718.44	553.51	-1221.23	-4180.53	198.3	902.23	0	0	0	0	0	0	0	603	903	0
620	9	0	0	0	0	0	0	200	300	0	-35.1881	87.1509	-722.103	1011.27	-1221.23	-4317.86	198.309	901.6	0	0	0	0	0	0	0	603	903	0
621	0	0	0	0	0	0	0	200	300	0	-34.883	87.1509	-722.408	2018.35	-1282.27	-4317.86	198.225	900.206	0	0	0	0	0	0	0	603	903	0
621	1	0	0	0	0	0	0	200	300	0	-32.4416	87.9138	-726.375	2109.91	-1831.59	-4134.75	197.478	900.095	0	0	0	0	0	0	0	603	903	0
621	2	0	0	0	0	0	0	200	300	0	-35.0356	88.0664	-729.427	2842.33	-1404.34	-4180.53	198.075	899.103	0	0	0	0	0	0	0	603	903	0
621	3	0	0	0	0	0	0	200	300	0	-35.7985	88.0664	-730.953	2933.88	-1892.62	-4272.08	197.411	898.986	0	0	0	0	0	0	0	603	903	0
621	4	0	0	0	0	0	0	200	300	0	-34.7304	89.4397	-733.394	3849.41	-1953.66	-4272.08	197.336	897.751	0	0	0	0	0	0	0	603	903	0
621	5	0	0	0	0	0	0	200	300	0	-35.1881	89.1345	-735.225	4215.62	-2075.73	-4134.75	197.177	897.266	0	0	0	0	0	0	0	603	903	0
621	6	0	0	0	0	0	0	200	300	0	-34.7304	90.5078	-737.667	5039.6	-2258.83	-4455.19	196.938	896.168	0	0	0	0	0	0	0	603	903	0
621	7	0	0	0	0	0	0	200	300	0	-35.1881	90.5078	-740.718	5863.57	-2686.08	-4409.41	196.374	895.084	0	0	0	0	0	0	0	603	903	0
621	8	0	0	0	0	0	0	200	300	0	-35.1881	87.9138	-742.549	5497.36	-2319.87	-4363.63	196.876	895.597	0	0	0	0	0	0	0	603	903	0
621	9	0	0	0	0	0	0	200	300	0	-37.3244	90.813	-743.16	6412.89	-2808.15	-3997.42	196.221	894.371	0	0	0	0	0	0	0	603	903	0
622	0	0	0	0	0	0	0	200	300	0	-36.5614	91.1182	-745.601	7145.31	-2319.87	-4500.96	196.889	893.417	0	0	0	0	0	0	0	603	903	0
622	1	0	0	0	0	0	0	200	300	0	-35.7985	91.7285	-747.737	7603.07	-2930.22	-4455.19	196.081	892.832	0	0	0	0	0	0	0	603	903	0
622	2	0	0	0	0	0	0	200	300	0	-37.0192	92.644	-748.348	8060.83	-3235.4	-4546.74	195.677	892.229	0	0	0	0	0	0	0	603	903	0
622	3	0	0	0	0	0	0	200	300	0	-35.1881	92.4915	-750.789	8518.6	-3296.43	-4409.41	195.609	891.654	0	0	0	0	0	0	0	603	903	0
622	4	0	0	0	0	0	0	200	300	0	-36.5614	91.7285	-752.62	9891.89	-3479.54	-4134.75	195.377	889.857	0	0	0	0	0	0	0	603	903	0
622	5	0	0	0	0	0	0	200	300	0	-37.9347	92.9492	-753.841	9800.34	-3357.47	-4272.08	195.546	890	0	0	0	0	0	0	0	603	903	0
622	6	0	0	0	0	0	0	200	300	0	-37.6295	93.1018	-756.282	10990.5	-3601.61	-4317.86	195.238	888.468	0	0	0	0	0	0	0	603	903	0
622	7	0	0	0	0	0	0	200	300	0	-37.1718	93.2544	-756.893	11265.2	-4334.03	-4134.75	194.274	888.117	0	0	0	0	0	0	0	603	903	0
622	8	0	0	0	0	0	0	200	300	0	-37.6295	92.644	-758.724	11631.4	-4089.89	-4180.53	194.61	887.67	0	0	0	0	0	0	0	603	903	0
622	9	0	0	0	0	0	0	200	300	0	-38.3925	94.0173	-761.165	12363.8	-4150.92	-4043.2	194.547	886.757	0	0	0	0	0	0	0	603	903	0
623	0	0	0	0	0	0	0	200	300	0	-37.7821	94.0173	-760.25	13279.3	-4150.92	-4409.41	194.54	885.533	0	0	0	0	0	0	0	603	903	0
623	1	0	0	0	0	0	0	200	300	0	-37.7821	95.0854	-764.217	13462.4	-4089.89	-4500.96	194.648	885.384	0	0	0	0	0	0	0	603	903	0
623	2	0	0	0	0	0	0	200	300	0	-37.477	94.1699	-765.438	14286.4	-4578.17	-4272.08	194.019	884.336	0	0	0	0	0	0	0	603	903	0
623	3	0	0	0	0	0	0	200	300	0	-37.477	95.6958	-763.912	14652.6	-5188.52	-4226.3	193.208	883.819	0	0	0	0	0	0	0	603	903	0
623	4	0	0	0	0	0	0	200	300	0	-37.7821	95.5432	-767.574	15659.7	-4944.38	-4088.97	193.558	882.599	0	0	0	0	0	0	0	603	903	0
623	5	0	0	0	0	0	0	200	300	0	-39.4606	92.4915	-770.32	15659.7	-5371.63	-3997.42	193.027	882.671	0	0	0	0	0	0	0	603	903	0
623	6	0	0	0	0	0	0	200	300	0	-39.6132	96.3062	-769.71	16575.2	-4944.38	-4272.08	193.576	881.466	0	0	0	0	0	0	0	603	903	0
623	7	0	0	0	0	0	0	200	300	0	-36.714	96.4587	-771.846	17857	-5432.66	-4272.08	192.961	879.865	0	0	0	0	0	0	0	603	903	0
623	8	0	0	0	0	0	0	200	300	0	-39.4606	96.4587	-773.067	17765.4	-5676.8	-4272.08	192.657	880.02	0	0	0	0	0	0	0	603	903	0
623	9	0	0	0	0	0	0	200	300	0	-38.8503	97.2217	-774.898	18040.1	-5676.8	-4226.3	192.674	879.719	0	0	0	0	0	0	0	603	903	0
624	0	0	0	0	0	0	0	200	300	0	-38.2399	97.5269	-776.729	18589.4	-5798.87	-4317.86	192.534	879.067	0	0	0	0	0	0	0	603	903	0
624	1	0	0	0	0	0	0	200	300	0	-38.5451	97.832	-777.95	19138.7	-5798.87	-4272.08	192.546	878.399	0	0	0	0	0	0	0	603	903	0
624	2	0	0	0	0	0	0	200	300	0	-37.477	99.5105	-781.612	19688	-5554.73	-4455.19	192.893	877.811	0	0	0	0	0	0	0	603	903	0
624	3	0	0	0	0	0	0	200	300	0	-38.2399	98.9001	-783.443	20695.1	-6348.19	-4272.08	191.897	876.584	0	0	0	0	0	0	0	603	903	0
624	4	0	0	0	0	0	0	200	300	0	-37.477	99.2053	-782.222	20786.7	-6287.15	-4180.53	191.962	876.426	0	0	0	0	0	0	0	603	903	0
624	5	0	0	0	0	0	0	200	300	0	-38.5451	100.579	-786.19	20969.8	-6043.01	-4409.41	192.314	876.327	0	0	0	0	0	0	0	603	903	0
624	6	0	0	0	0	0	0	200	300	0	-38.8503	100.884	-787.105	22160	-6653.36	-4134.75	191.547	874.846	0	0	0	0	0	0	0	603	903	0
624	7	0	0	0	0	0	0	200	300	0	-36.2563	102.104	-788.326	22526.2	-6287.15	-4317.86	192.025	874.425	0	0	0	0	0	0	0	603	903	0
624	8	0	0	0	0	0	0	200	300	0	-38.8503	103.02	-791.378	23350.1	-6714.4	-4226.3	191.516	873.494	0	0	0	0	0	0	0	603	903	0
624	9	0	0	0	0	0	0	200	300	0	-38.8503	102.562	-792.598	23075.5	-6592.33	-4226.3	191.683	873.886	0	0	0	0	0	0	0	603	903	0
625	0	0	0	0	0	0	0	200	300	0	-37.9347	103.783	-792.598	23807.9	-6897.51	-4180.53	191.298	872.962	0	0	0	0	0	0	0	603	903	0
625	1	0	0	0	0	0	0	200	300	0	-38.0873	104.851	-794.734	23899.5	-7019.58	-4180.53	191.167	872.928	0	0	0	0	0	0	0	603	903	0
625	2	0	0	0	0	0	0	200	300	0	-36.1037	104.851	-795.65	25089.6	-7080.61	-4363.63	191.101	871.466	0	0	0	0	0	0	0	603	903	0
625	3	0	0	0	0	0	0	200	300	0	-38.6977	106.53	-798.091	26096.7	-7019.58	-4043.2	191.205	870.301	0	0	0	0	0	0	0	603	903	0
625	4	0	0	0	0	0	0	200	300	0	-38.0873	106.377	-799.922	26188.3	-7446.82	-4180.53	190.691	870.261	0	0	0	0	0	0	0	603	903	0
625	5	0	0	0	0	0	0	200	300	0	-39.0028	108.666	-799.922	26188.3	-7385.79	-3997.42	190.767	870.261	0	0	0	0	0	0	0	603	903	0
625	6	0	0	0	0	0	0	200	300	0	-38.0873	109.276	-802.059	27195.4	-7752	-3997.42	190.335	869.093	0	0	0	0	0	0	0	603	903	0
625	7	0	0	0	0	0	0	200	300	0	-37.7821	109.276	-802.059	27470	-7446.82	-4134.75	190.715	868.751	0	0	0	0	0	0	0	603	903	0
625	8	0	0	0	0	0	0	200	300	0	-39.308	110.955	-804.195	27744.7	-7324.75	-4043.2	190.892	868.5	0	0	0	0	0	0	0	603	903	0
625	9	0	0	0	0	0	0	200	300	0	-38.3925	110.649	-807.247	28477.1	-7935.1	-4134.75	190.17	867.723	0	0	0	0	0	0	0	603	903	0
626	0	0	0	0	0	0	0	200	300	0	-35.3407	112.023	-806.941	28568.6	-7507.86	-3905.87	190.696	867.596	0	0	0	0	0	0	0	603	903	0
626	1	0	0	0	0	0	0	200	300	0	-38.2399	113.243	-809.688	27927.8	-8057.17	-4226.3	190.049	868.508	0	0	0	0	0	0	0	603	903	0
626	2	0	0	0	0	0	0	200	300	0	-38.2399	113.549	-810.604	29118	-7629.93	-4272.08	190.587	867.079	0	0	0	0	0	0	0	603	903	0
626	3	0	0	0	0	0	0	200	300	0	-38.0873	115.227	-808.467	29850.4	-7568.89	-4363.63	190.638	866.078	0	0	0	0	0	0	0	603	903	0
626	4	0	0	0	0	0	0	200	300	0	-38.3925	116.448	-813.655	30491.3	-7935.1	-4317.86	190.248	865.526	0	0	0	0	0	0	0	603	903	0
626	5	0	0	0	0	0	0	200	300	0	-37.0192	114.922	-811.214	30674.4	-8057.17	-4272.08	190.068	865.187	0	0	0	0	0	0	0	603	903	0
626	6	0	0	0	0	0	0	200	300	0	-35.7985	118.431	-815.181	30765.9	-8362.35	-4226.3	189.742	865.259	0	0	0	0	0	0	0	603	903	0
626	7	0	0	0	0	0	0	200	300	0	-36.4088	119.805	-817.012	30674.4	-7996.14	-4272.08	190.213	865.456	0	0	0	0	0	0	0	603	903	0
626	8	0	0	0	0	0	0	200	300	0	-36.2563	120.11	-817.623	31315.2	-7996.14	-4363.63	190.22	864.7	0	0	0	0	0	0	0	603	903	0
626	9	0	0	0	0	0	0	200	300	0	-35.0356	121.941	-818.843	32139.2	-8240.28	-4226.3	189.937	863.75	0	0	0	0	0	0	0	603	903	0
627	0	0	0	0	0	0	0	200	300	0	-34.4252	122.856	-820.674	32230.8	-8179.24	-4226.3	190.034	863.727	0	0	0	0	0	0	0	603	903	0
627	1	-11.9757	-3.81516	-24.1901	-804.108	3131.34	-462.205	329.447	333.241	0	-33.3571	124.23	-820.369	32322.3	-7752	-3951.65	190.551	863.6	0	0	0	0	0	0	0	603	903	0
627	2	-11.9757	-4.42551	-36.3971	-712.555	3863.76	132.888	306.156	319.577	0	-33.5097	124.077	-820.674	32871.6	-8301.31	-4134.75	189.885	862.946	0	0	0	0	0	0	0	603	903	0
627	3	-0.836806	5.34012	-43.4161	-1261.87	4474.11	1689.28	303.052	329.065	0	-32.8993	126.213	-822.505	32413.9	-8484.42	-4363.63	189.685	863.591	0	0	0	0	0	0	0	603	903	0
627	4	-2.66786	12.9695	-41.2799	-1353.42	5267.57	1506.18	327.606	332.787	0	-33.5097	128.197	-822.505	33237.8	-8362.35	-4455.19	189.833	862.59	0	0	0	0	0	0	0	603	903	0
627	5	-10.4498	14.648	-47.3834	-437.897	6427.24	1185.74	335.643	309.242	0	-33.0519	130.181	-825.252	34153.4	-8240.28	-4180.53	190.015	861.615	0	0	0	0	0	0	0	603	903	0
627	6	-11.6705	14.648	-63.2526	-1902.74	7098.62	2467.48	312.227	330.082	0	-29.3898	130.486	-824.947	33787.2	-8301.31	-4317.86	189.937	862.043	0	0	0	0	0	0	0	603	903	0
627	7	-9.83949	22.7351	-76.6803	-1719.64	7403.8	3749.22	296.554	322.426	0	-32.289	132.164	-821.895	34428	-8545.45	-4226.3	189.603	861.111	0	0	0	0	0	0	0	603	903	0
627	8	-10.2973	30.3645	-81.5631	-1994.29	9173.82	3199.91	312.475	324.451	0	-31.6786	133.843	-825.862	34519.6	-8179.24	-4409.41	190.096	861.202	0	0	0	0	0	0	0	603	903	0
627	9	-10.9076	29.7542	-82.1735	-2452.06	10028.3	3703.45	322.038	329.84	0	-29.8476	133.995	-824.947	35343.5	-8423.38	-4317.86	189.789	860.157	0	0	0	0	0	0	0	603	903	0
628	0	-9.83949	28.8387	-94.3805	-2085.85	10699.7	4344.31	313.368	322.1	0	-31.9838	136.132	-825.557	34702.7	-8667.52	-4363.63	189.501	860.965	0	0	0	0	0	0	0	603	903	0
628	1	-11.3654	32.1956	-108.724	-2177.4	11859.4	4115.43	309.078	320.027	0	-31.3734	137.963	-826.168	35068.9	-8423.38	-4317.86	189.804	860.552	0	0	0	0	0	0	0	603	903	0
628	2	-11.3654	30.5171	-113.912	-2543.61	12408.7	3840.77	308.932	322.33	0	-29.5424	136.437	-823.116	35618.2	-8545.45	-4317.86	189.618	859.728	0	0	0	0	0	0	0	603	903	0
628	3	-9.6869	27.1602	-116.048	-1628.08	13080.1	4069.66	312.713	314.029	0	-28.6269	139.489	-825.862	35252	-8240.28	-4226.3	190.022	860.315	0	0	0	0	0	0	0	603	903	0
628	4	-11.8231	27.6179	-122.457	-3092.93	14056.6	4023.88	314.789	325.257	0	-29.5424	140.251	-825.557	35709.8	-8362.35	-4409.41	189.871	859.745	0	0	0	0	0	0	0	603	903	0
628	5	-11.3654	30.5171	-131.917	-2543.61	14605.9	3337.23	310.721	319.282	0	-28.3217	142.083	-823.421	36350.6	-8606.49	-4363.63	189.548	858.854	0	0	0	0	0	0	0	603	903	0
628	6	-10.1447	27.4654	-138.326	-2635.16	15094.2	3840.77	309.121	319.05	0	-27.5587	142.998	-824.336	37174.6	-8179.24	-4226.3	190.078	857.904	0	0	0	0	0	0	0	603	903	0
628	7	-14.2645	25.9395	-144.734	-3184.48	15460.4	4069.66	306.819	322.002	0	-27.7113	142.388	-820.98	36259.1	-8545.45	-4317.86	189.591	858.834	0	0	0	0	0	0	0	603	903	0
628	8	-16.2482	28.8387	-149.007	-2726.72	16131.8	3428.79	308.262	318.299	0	-28.0165	144.371	-821.59	36991.5	-8606.49	-4180.53	189.525	857.976	0	0	0	0	0	0	0	603	903	0
628	9	-14.7223	27.6179	-153.585	-3367.58	16192.9	3474.56	305.433	321.927	0	-26.0329	144.066	-820.064	36991.5	-8362.35	-4180.53	189.803	857.892	0	0	0	0	0	0	0	603	903	0
629	0	-15.4852	23.4981	-158.162	-2726.72	17108.4	3795	308.17	317.24	0	-27.2536	146.202	-819.148	37266.2	-8667.52	-4409.41	189.419	857.506	0	0	0	0	0	0	0	603	903	0
629	1	-18.8422	19.836	-161.214	-2818.27	17230.5	2787.92	306.879	317.482	0	-26.7958	147.271	-817.928	37540.8	-8118.21	-4317.86	190.075	857.103	0	0	0	0	0	0	0	603	903	0
629	2	-17.4689	16.3264	-161.519	-2818.27	17718.7	2467.48	309.701	317.449	0	-25.7277	148.644	-817.928	37998.6	-8606.49	-3997.42	189.478	856.543	0	0	0	0	0	0	0	603	903	0
629	3	-16.4008	16.6316	-168.233	-3367.58	17901.8	2650.59	306.411	320.017	0	-27.4062	148.644	-816.402	37723.9	-8545.45	-4180.53	189.533	856.792	0	0	0	0	0	0	0	603	903	0
629	4	-19.1474	10.3755	-172.505	-2726.72	17962.9	2147.05	304.129	315.807	0	-25.7277	150.17	-811.824	37723.9	-8179.24	-3951.65	189.925	856.532	0	0	0	0	0	0	0	603	903	0
629	5	-18.8422	6.40823	-174.337	-3733.8	18390.1	1231.52	305.486	321.417	0	-24.2018	152.001	-810.298	38090.1	-8606.49	-4226.3	189.379	855.993	0	0	0	0	0	0	0	603	903	0
629	6	-17.7741	6.10306	-175.557	-3459.14	18451.2	1368.85	305.101	319.704	0	-24.2018	152.001	-809.078	38364.8	-8911.66	-4272.08	188.985	855.582	0	0	0	0	0	0	0	603	903	0
629	7	-18.8422	3.96683	-180.135	-2177.4	19244.6	1139.97	306.835	312.088	0	-23.744	153.069	-806.331	38639.4	-8423.38	-4180.53	189.553	855.08	0	0	0	0	0	0	0	603	903	0
629	8	-18.6896	-1.83151	-182.881	-3367.58	19061.5	773.757	304.229	318.414	0	-23.1337	153.679	-805.11	39005.7	-8484.42	-4043.2	189.462	854.552	0	0	0	0	0	0	0	603	903	0
629	9	-17.7741	-4.73068	-184.102	-3367.58	19061.5	499.099	303.538	318.292	0	-22.8285	153.527	-800.838	38639.4	-7996.14	-3814.32	190.015	854.751	0	0	0	0	0	0	0	603	903	0
630	0	-18.3844	-4.5781	-188.069	-2909.82	20038.1	178.664	306.546	315.472	0	-24.3544	155.205	-798.397	38822.6	-7996.14	-4088.97	189.985	854.374	0	0	0	0	0	0	0	603	903	0
630	1	-18.6896	-9.00314	-189.901	-3092.93	20099.1	-782.64	305.84	316.287	0	-23.5915	156.121	-796.565	39371.9	-8362.35	-4043.2	189.502	853.573	0	0	0	0	0	0	0	603	903	0
630	2	-19.6051	-11.4446	-193.563	-2085.85	20404.3	-874.192	305.414	310.776	0	-20.2345	156.884	-794.429	39463.4	-8301.31	-4043.2	189.551	853.325	0	0	0	0	0	0	0	603	903	0
630	3	-20.3681	-12.8178	-199.361	-2818.27	20587.4	-462.205	303.267	314.137	0	-22.5233	157.341	-790.767	39280.3	-8667.52	-3814.32	189.039	853.326	0	0	0	0	0	0	0	603	903	0
630	4	-20.9784	-13.7334	-200.276	-3092.93	21380.8	-1377.73	306.757	315.443	0	-22.6759	157.646	-787.715	39646.5	-8667.52	-3951.65	188.997	852.669	0	0	0	0	0	0	0	603	903	0
630	5	-19.6051	-16.48	-206.075	-3001.37	21625	-1652.39	304.938	314.564	0	-22.0656	156.578	-782.833	39646.5	-8423.38	-3860.09	189.24	852.355	0	0	0	0	0	0	0	603	903	0
630	6	-20.5206	-19.6843	-211.263	-3092.93	21991.2	-1515.06	304.094	314.64	0	-20.8449	159.325	-780.086	39738.1	-8484.42	-3860.09	189.124	852.059	0	0	0	0	0	0	0	603	903	0
630	7	-21.131	-20.1421	-216.756	-2543.61	22662.6	-2018.6	304.553	311.735	0	-19.7768	157.494	-776.729	39646.5	-7996.14	-3814.32	189.705	851.957	0	0	0	0	0	0	0	603	903	0
630	8	-20.2155	-20.7524	-221.334	-2360.5	22845.7	-2155.93	303.218	310.665	0	-19.9294	161.614	-772.457	40745.2	-8362.35	-3768.54	189.174	850.253	0	0	0	0	0	0	0	603	903	0
630	9	-20.5206	-25.6352	-226.216	-2543.61	23334	-2247.48	303.149	311.244	0	-19.4716	159.63	-765.743	39555	-8362.35	-3676.99	189.079	851.344	0	0	0	0	0	0	0	603	903	0
631	0	-20.0629	-26.3982	-231.71	-3001.37	23822.3	-2293.26	302.811	312.953	0	-20.2345	161.156	-764.827	40195.9	-7813.03	-3676.99	189.785	850.445	0	0	0	0	0	0	0	603	903	0
631	1	-19.4525	-26.8559	-237.508	-2726.72	24554.7	-3346.12	303.385	311.481	0	-19.9294	162.529	-762.081	40470.5	-7629.93	-3768.54	189.988	849.895	0	0	0	0	0	0	0	603	903	0
631	2	-19.4525	-28.3818	-241.475	-2818.27	25104	-3163.01	303.961	311.671	0	-18.8612	162.377	-756.282	40653.6	-8179.24	-3219.22	189.185	849.246	0	0	0	0	0	0	0	603	903	0
631	3	-18.6896	-30.0603	-247.274	-2818.27	25531.2	-3163.01	303.251	311.397	0	-19.0138	163.292	-749.874	40104.3	-8240.28	-3539.66	189.011	849.519	0	0	0	0	0	0	0	603	903	0
631	4	-18.6896	-32.5017	-254.293	-1902.74	26385.7	-3758.1	303.761	307.483	0	-18.0983	163.292	-748.653	40012.8	-8301.31	-3448.1	188.912	849.554	0	0	0	0	0	0	0	603	903	0
631	5	-19.7577	-31.5862	-264.058	-2726.72	26507.8	-3712.33	300.386	310.326	0	-17.7931	162.682	-744.686	40379	-8057.17	-3310.78	189.18	848.777	0	0	0	0	0	0	0	603	903	0
631	6	-22.1991	-32.0439	-272.298	-2452.06	28216.8	-3575	303.625	309.005	0	-18.2509	163.903	-738.887	40195.9	-7385.79	-3493.88	190.004	848.6	0	0	0	0	0	0	0	603	903	0
631	7	-23.8776	-35.706	-278.707	-2085.85	28644	-4032.76	302.775	307.484	0	-17.7931	163.445	-734.31	40562.1	-7935.1	-3493.88	189.194	847.762	0	0	0	0	0	0	0	603	903	0
631	8	-25.4035	-38.1474	-287.557	-2268.95	29742.7	-4810.96	303.432	307.89	0	-16.2672	163.75	-729.427	40745.2	-7690.96	-2990.34	189.456	847.141	0	0	0	0	0	0	0	603	903	0
631	9	-26.1664	-37.2319	-297.628	-1719.64	30536.1	-4536.3	302.598	305.778	0	-14.5888	163.903	-725.154	40379	-7935.1	-3539.66	189.057	847.317	0	0	0	0	0	0	0	603	903	0
632	0	-25.7086	-39.3681	-308.309	-1719.64	31390.6	-5039.84	301.816	305.578	0	-16.8776	163.903	-718.44	40470.5	-7874.07	-3493.88	189.04	846.669	0	0	0	0	0	0	0	603	903	0
632	1	-25.0983	-42.1147	-317.159	-2085.85	32428.2	-5268.73	302.246	306.577	0	-15.0465	164.513	-712.642	40562.1	-7385.79	-3402.33	189.636	846.082	0	0	0	0	0	0	0	603	903	0
632	2	-27.5397	-41.657	-324.483	-1444.98	32672.4	-5634.94	300.69	304.453	0	-14.5888	164.36	-708.675	40012.8	-7324.75	-3356.55	189.664	846.539	0	0	0	0	0	0	0	603	903	0
632	3	-27.0819	-42.7251	-332.723	-1353.42	34198.2	-5955.37	302.783	304.068	0	-15.0465	164.36	-702.877	40653.6	-7752	-3356.55	188.971	845.161	0	0	0	0	0	0	0	603	903	0
632	4	-26.4716	-45.3191	-344.319	-1536.53	34930.7	-6275.81	301.448	304.463	0	-14.7414	165.276	-697.078	40653.6	-7813.03	-3356.55	188.792	844.68	0	0	0	0	0	0	0	603	903	0
632	5	-27.2345	-46.5398	-352.864	-987.213	36273.4	-6046.92	302.797	302.798	0	-13.3681	164.36	-691.89	40836.7	-7690.96	-2853.01	188.884	843.978	0	0	0	0	0	0	0	603	903	0
632	6	-22.9621	-47.9131	-363.546	-621.002	37921.4	-5634.94	304.31	301.708	0	-13.6732	163.292	-685.176	40104.3	-7629.93	-3173.45	188.864	844.469	0	0	0	0	0	0	0	603	903	0
632	7	-21.7413	-49.2863	-370.259	-529.449	38531.7	-6687.79	304.067	301.43	0	-14.131	163.903	-678.768	40287.4	-7263.72	-2990.34	189.299	843.646	0	0	0	0	0	0	0	603	903	0
632	8	-23.725	-51.5752	-377.584	-529.449	39691.4	-6916.67	305.119	301.402	0	-10.9267	162.834	-672.969	40745.2	-7629.93	-3219.22	188.662	842.455	0	0	0	0	0	0	0	603	903	0
632	9	-24.6405	-55.5424	-385.823	-163.238	39935.5	-7054	303.507	300.423	0	-12.6051	163.445	-665.34	40653.6	-7263.72	-3173.45	189.083	841.898	0	0	0	0	0	0	0	603	903	0
633	0	-21.5888	-56.0002	-395.894	-163.238	41034.2	-7374.44	303.649	300.412	0	-11.2318	162.834	-659.847	40836.7	-7568.89	-3173.45	188.529	841.112	0	0	0	0	0	0	0	603	903	0
633	1	-20.6732	-56.1528	-400.472	569.184	41827.6	-7511.77	304.446	298.579	0	-11.3844	162.224	-652.217	40562.1	-7446.82	-2853.01	188.582	840.809	0	0	0	0	0	0	0	603	903	0
633	2	-20.5206	-59.6623	-410.237	386.078	42865.2	-7282.89	304.489	299.059	0	-11.0793	161.461	-645.809	39921.2	-7080.61	-2944.56	189.036	841.184	0	0	0	0	0	0	0	603	903	0
633	3	-19.6051	-62.8667	-418.782	660.736	44147	-7969.53	305.417	298.422	0	-10.9267	160.546	-639.4	39646.5	-7202.68	-3173.45	188.735	840.994	0	0	0	0	0	0	0	603	903	0
633	4	-19.6051	-63.6296	-427.632	1393.16	44574.2	-8152.64	304.235	296.742	0	-9.70596	160.546	-631.465	39738.1	-7385.79	-3081.89	188.304	840.07	0	0	0	0	0	0	0	603	903	0
633	5	-20.5206	-64.24	-435.262	1301.61	45123.5	-8381.52	303.67	297.01	0	-9.2482	160.24	-625.362	39555	-7019.58	-2853.01	188.775	839.749	0	0	0	0	0	0	0	603	903	0
633	6	-18.9948	-67.4443	-441.976	2308.69	46039.1	-8244.19	304.167	294.776	0	-9.70596	157.646	-617.122	39463.4	-7263.72	-2990.34	188.23	839.053	0	0	0	0	0	0	0	603	903	0
633	7	-16.7059	-69.1228	-448.995	2217.13	47137.7	-8427.3	304.985	295.062	0	-9.2482	157.341	-607.662	39646.5	-6775.44	-2624.13	188.85	837.756	0	0	0	0	0	0	0	603	903	0
633	8	-18.3844	-69.1228	-457.54	2858	47870.1	-8701.95	304.625	293.754	0	-8.94302	157.799	-602.779	40012.8	-6592.33	-2715.68	189.063	836.62	0	0	0	0	0	0	0	603	903	0
633	9	-17.0111	-70.8012	-464.254	2858	48541.5	-8793.51	304.558	293.844	0	-8.63785	155.052	-594.539	39371.9	-6836.47	-2715.68	188.501	836.778	0	0	0	0	0	0	0	603	903	0
634	0	-16.4008	-74.4633	-471.883	3498.87	49151.9	-8793.51	304.161	292.585	0	-7.72232	156.121	-586.299	39097.2	-6653.36	-2715.68	188.652	836.315	0	0	0	0	0	0	0	603	903	0
634	1	-15.7904	-73.853	-478.597	3773.53	49823.2	-8747.73	304.103	292.115	0	-6.04385	153.679	-576.534	39280.3	-7446.82	-2807.24	187.083	834.868	0	0	0	0	0	0	0	603	903	0
634	2	-13.5016	-74.4633	-485.616	4139.74	50860.8	-8930.84	304.735	291.475	0	-6.34903	153.374	-570.735	38364.8	-6714.4	-2532.58	188.236	835.78	0	0	0	0	0	0	0	603	903	0
634	3	-10.755	-78.278	-490.193	4689.06	52020.5	-8885.06	306.122	290.434	0	-6.80679	151.238	-560.359	38547.9	-6348.19	-2624.13	188.671	834.209	0	0	0	0	0	0	0	603	903	0
634	4	-13.5016	-78.4306	-502.401	5421.48	52997.1	-9297.05	305.488	289.209	0	-6.95938	151.39	-554.256	38547.9	-6409.22	-2669.91	188.436	833.451	0	0	0	0	0	0	0	603	903	0
634	5	-13.1964	-80.872	-510.03	6062.35	53790.5	-9617.48	305.465	288.114	0	-5.12833	148.491	-544.185	38639.4	-6409.22	-2486.8	188.222	831.996	0	0	0	0	0	0	0	603	903	0
634	6	-11.6705	-83.466	-517.659	6245.45	54400.9	-9846.36	305.09	287.935	0	-5.58609	148.949	-539.302	37723.9	-6287.15	-2395.25	188.342	833.051	0	0	0	0	0	0	0	603	903	0
634	7	-11.518	-83.9238	-525.594	6245.45	55743.7	-9937.92	306.058	288.117	0	-4.67056	143.914	-531.063	37540.8	-6775.44	-2349.47	187.242	832.31	0	0	0	0	0	0	0	603	903	0
634	8	-9.6869	-85.2971	-535.054	7527.19	56598.1	-9663.26	305.78	285.932	0	-3.90762	145.745	-521.297	37632.4	-5981.98	-2257.92	188.525	830.81	0	0	0	0	0	0	0	603	903	0
634	9	-7.09291	-88.1963	-541.463	7435.64	57452.6	-10258.4	306.106	286.268	0	-2.83951	144.524	-513.973	37266.2	-5859.91	-2441.02	188.599	830.494	0	0	0	0	0	0	0	603	903	0
635	0	-6.32997	-89.7221	-549.092	8168.06	58612.3	-9937.92	306.744	285.124	0	-3.75503	141.167	-505.123	37266.2	-6165.08	-2395.25	187.795	829.224	0	0	0	0	0	0	0	603	903	0
635	1	-4.6515	-91.0954	-557.637	9175.14	59588.9	-10441.5	306.86	283.546	0	-2.22916	141.014	-495.967	36900	-5554.73	-2349.47	188.8	828.6	0	0	0	0	0	0	0	603	903	0
635	2	-1.29457	-94.6049	-563.741	9358.25	60321.3	-10578.8	307.002	283.4	0	-0.855865	139.794	-486.812	35984.4	-6165.08	-2166.37	187.336	829.082	0	0	0	0	0	0	0	603	903	0
635	3	-1.14198	-96.1308	-571.675	10273.8	61297.9	-11036.5	307.225	282.029	0	-1.92398	138.42	-477.046	35618.2	-5981.98	-2120.59	187.46	828.336	0	0	0	0	0	0	0	603	903	0
635	4	-0.0738669	-97.3515	-578.694	11097.8	62274.4	-10761.9	307.612	280.823	0	-0.855865	137.352	-467.891	35892.9	-5249.56	-2074.81	188.78	826.288	0	0	0	0	0	0	0	603	903	0
635	5	1.6046	-98.8774	-584.493	11006.2	63067.9	-11402.8	307.902	281.17	0	1.28037	135.826	-459.346	35618.2	-5676.8	-2166.37	187.642	825.459	0	0	0	0	0	0	0	603	903	0
635	6	2.8253	-100.708	-590.596	11647.1	63617.2	-11448.5	307.717	280.279	0	-0.703277	135.063	-450.801	35160.4	-5554.73	-2120.59	187.678	825.005	0	0	0	0	0	0	0	603	903	0
635	7	2.36754	-102.54	-594.258	12379.5	63678.2	-11540.1	307.156	279.168	0	0.0596623	132.927	-443.477	34519.6	-5493.7	-2166.37	187.612	825.161	0	0	0	0	0	0	0	603	903	0
635	8	7.09776	-104.065	-601.888	12471	64776.8	-11723.2	307.623	279.28	0	0.97519	129.723	-432.796	34428	-5554.73	-1891.71	187.165	823.452	0	0	0	0	0	0	0	603	903	0
635	9	5.72447	-104.828	-605.855	13295	65753.4	-11540.1	308.53	278.056	0	1.12778	128.655	-422.725	33329.4	-5371.63	-1891.71	187.293	824.156	0	0	0	0	0	0	0	603	903	0
636	0	6.33482	-105.439	-612.569	14210.5	66546.9	-12043.6	308.636	276.802	0	-0.0929256	126.824	-414.18	33054.7	-5127.49	-1800.16	187.62	823.192	0	0	0	0	0	0	0	603	903	0
636	1	7.40294	-106.507	-616.231	14851.4	66791	-11814.7	308.386	275.9	0	1.89072	124.688	-402.889	33329.4	-4944.38	-1891.71	187.728	820.274	0	0	0	0	0	0	0	603	903	0
636	2	8.16588	-109.253	-621.114	14943	67584.5	-12318.3	308.812	275.942	0	1.58554	123.772	-393.733	32413.9	-4944.38	-1891.71	187.442	820.676	0	0	0	0	0	0	0	603	903	0
636	3	8.16588	-110.016	-624.166	15950	67462.4	-12226.7	308.084	274.446	0	0.822602	121.941	-385.189	31315.2	-5127.49	-1754.38	186.688	821.702	0	0	0	0	0	0	0	603	903	0
636	4	10.4547	-109.864	-629.048	15492.3	68500	-12455.6	308.895	275.372	0	0.517426	121.331	-374.507	31498.3	-4761.27	-1800.16	187.287	818.894	0	0	0	0	0	0	0	603	903	0
636	5	10.9125	-110.627	-632.1	16133.2	68866.2	-12318.3	308.948	274.477	0	2.95883	119.194	-365.047	31040.6	-4883.35	-1571.27	186.623	817.968	0	0	0	0	0	0	0	603	903	0
636	6	9.38658	-111.39	-634.847	15950	68744.1	-12821.8	308.285	274.876	0	-0.398101	117.516	-355.892	30033.5	-4761.27	-1845.93	186.622	818.611	0	0	0	0	0	0	0	603	903	0
636	7	9.69176	-113.373	-636.068	17048.7	69598.6	-12776.1	309.42	273.197	0	0.517426	116.143	-348.873	29941.9	-4761.27	-1754.38	186.352	817.175	0	0	0	0	0	0	0	603	903	0
636	8	10.9125	-114.441	-639.119	18055.8	69354.5	-13096.5	308.516	271.749	0	2.19589	114.464	-337.886	29392.6	-5188.52	-1662.83	184.644	816.01	0	0	0	0	0	0	0	603	903	0
636	9	11.6754	-115.052	-639.73	17231.8	69964.8	-13004.9	309.366	273.064	0	0.97519	111.718	-328.731	28843.3	-4395.06	-1250.84	186.63	815.259	0	0	0	0	0	0	0	603	903	0
637	0	12.4383	-116.272	-639.73	18055.8	69476.6	-12959.2	308.603	271.776	0	0.97519	109.124	-320.796	28294	-4456.1	-1571.27	186.109	814.801	0	0	0	0	0	0	0	603	903	0
637	1	12.7435	-116.883	-638.509	19612.2	70392.1	-13279.6	310.245	269.284	0	1.58554	106.987	-311.641	27744.7	-5005.42	-1800.16	183.939	813.972	0	0	0	0	0	0	0	603	903	0
637	2	11.9806	-116.883	-645.223	18971.3	70697.3	-13600	309.57	270.597	0	2.50107	106.072	-300.655	27103.8	-4334.03	-1525.5	185.585	812.851	0	0	0	0	0	0	0	603	903	0
637	3	11.828	-117.951	-649.8	19245.9	71246.6	-13737.4	309.644	270.382	0	0.822602	103.936	-293.025	25913.6	-4272.99	-1617.05	185.418	814.565	0	0	0	0	0	0	0	603	903	0
637	4	13.2013	-121.003	-653.768	19978.4	71185.5	-13645.8	308.885	269.441	0	2.0433	98.7476	-285.091	25181.2	-4334.03	-1342.39	184.798	814.673	0	0	0	0	0	0	0	603	903	0
637	5	13.8116	-119.629	-654.988	20253	71795.9	-14012	309.614	269.079	0	1.28037	99.9683	-273.494	24357.2	-3845.75	-1342.39	185.938	813.941	0	0	0	0	0	0	0	603	903	0
637	6	13.3539	-120.545	-656.514	21077	72284.2	-13874.7	310.103	267.896	0	2.0433	97.2217	-263.118	24265.7	-4334.03	-1433.94	183.528	810.777	0	0	0	0	0	0	0	603	903	0
637	7	13.9642	-121.155	-661.397	21443.2	72711.4	-14378.2	309.936	267.579	0	0.822602	95.0854	-255.489	24082.6	-3540.57	-1479.72	186.142	808.739	0	0	0	0	0	0	0	603	903	0
637	8	14.422	-122.529	-663.839	21168.6	72955.6	-14103.6	309.9	268.112	0	1.12778	91.1182	-245.113	23258.6	-3601.61	-1205.06	185.306	808.111	0	0	0	0	0	0	0	603	903	0
637	9	16.253	-123.902	-665.364	22267.2	72650.4	-14561.3	309.189	266.534	0	0.364838	91.4233	-239.009	22251.5	-4150.92	-1342.39	182.633	809.901	0	0	0	0	0	0	0	603	903	0
638	0	15.7953	-125.428	-666.89	22725	73565.9	-13828.9	310.312	265.924	0	-0.398101	90.2026	-229.549	21702.2	-3357.47	-1205.06	185.374	808.457	0	0	0	0	0	0	0	603	903	0
638	1	16.5582	-125.58	-669.942	23091.2	73504.9	-14469.8	309.718	265.533	0	0.670014	88.5242	-223.751	21610.6	-3601.61	-1433.94	183.903	806.416	0	0	0	0	0	0	0	603	903	0
638	2	16.5582	-126.648	-672.994	23732	74603.5	-14424	310.853	264.737	0	-1.00845	83.9465	-215.206	20512	-4028.85	-1479.72	181.279	807.687	0	0	0	0	0	0	0	603	903	0
638	3	16.8634	-127.717	-675.74	24372.9	74725.6	-14790.2	310.583	263.932	0	-0.855865	82.2681	-207.271	19596.5	-3357.47	-1205.06	183.802	808.455	0	0	0	0	0	0	0	603	903	0
638	4	17.4737	-128.022	-680.013	24556	75152.8	-14652.9	310.517	263.889	0	-0.245513	79.6741	-199.947	19596.5	-3235.4	-1205.06	183.819	804.992	0	0	0	0	0	0	0	603	903	0
638	5	18.0841	-128.937	-683.675	24830.7	75213.9	-14790.2	310.014	263.681	0	-1.00845	75.249	-190.792	18497.8	-3235.4	-1159.29	183.042	806.047	0	0	0	0	0	0	0	603	903	0
638	6	19.3048	-130.311	-683.065	24830.7	76068.4	-14607.1	311.363	263.648	0	-2.68692	73.2654	-183.467	17582.3	-3113.32	-1296.62	183.031	807.167	0	0	0	0	0	0	0	603	903	0
638	7	20.6781	-131.226	-690.084	25837.7	77228	-14836	311.911	262.559	0	-1.92398	70.6714	-176.753	17399.2	-3479.54	-1388.17	180.314	804.562	0	0	0	0	0	0	0	603	903	0
638	8	20.8307	-131.379	-694.966	26844.8	77228	-14881.8	311.125	261.372	0	0.21225	68.23	-168.819	17124.6	-3235.4	-1296.62	180.835	801.563	0	0	0	0	0	0	0	603	903	0
638	9	22.0514	-132.599	-699.849	26753.3	77350.1	-14744.4	310.524	261.773	0	-2.53433	66.0938	-162.715	16392.1	-3174.36	-1296.62	180.491	802.259	0	0	0	0	0	0	0	603	903	0
639	0	22.8143	-133.667	-702.596	27302.6	77960.5	-14790.2	310.961	261.14	0	-3.14468	63.1946	-157.222	15659.7	-2747.11	-1159.29	182.527	803.398	0	0	0	0	0	0	0	603	903	0
639	1	23.7298	-133.973	-706.563	27760.4	78631.8	-14652.9	311.288	260.711	0	-2.53433	61.5161	-149.288	15018.8	-2869.18	-1067.73	180.781	802.397	0	0	0	0	0	0	0	603	903	0
639	2	25.7135	-134.278	-711.446	28035	79425.3	-14881.8	311.639	260.594	0	-2.9921	59.3799	-142.574	14378	-3052.29	-1296.62	178.592	802.154	0	0	0	0	0	0	0	603	903	0
639	3	26.4764	-134.888	-717.549	29316.7	80218.7	-14652.9	311.795	259.143	0	-3.14468	56.1755	-135.555	13828.7	-2564.01	-1388.17	181.085	800.985	0	0	0	0	0	0	0	603	903	0
639	4	27.5445	-136.109	-722.432	30506.9	80585	-15064.9	311.547	257.772	0	-1.92398	53.429	-131.587	13828.7	-2930.22	-1067.73	177.732	797.909	0	0	0	0	0	0	0	603	903	0
639	5	29.3756	-136.567	-728.841	30049.2	81500.5	-14012	311.822	258.771	0	-2.9921	51.7505	-126.705	12913.1	-2808.15	-1159.29	177.837	801.085	0	0	0	0	0	0	0	603	903	0
639	6	29.8334	-136.719	-734.639	30873.1	81439.4	-14378.2	310.856	257.975	0	-2.68692	48.3936	-118.77	11997.6	-2380.9	-976.181	179.954	801.985	0	0	0	0	0	0	0	603	903	0
639	7	29.5282	-137.787	-740.743	31422.5	82965.3	-14881.8	312.003	257.58	0	-2.83951	46.4099	-114.192	11631.4	-2564.01	-1159.29	177.547	801.142	0	0	0	0	0	0	0	603	903	0
639	8	30.4437	-138.703	-746.236	31880.2	83514.6	-15019.1	311.915	257.279	0	-2.9921	43.053	-109.92	11539.8	-2319.87	-1067.73	178.895	798.016	0	0	0	0	0	0	0	603	903	0
639	9	31.2066	-138.55	-751.424	33070.4	84247.1	-14836	312.117	255.99	0	-2.38174	40.3064	-104.427	11082.1	-2319.87	-1067.73	177.785	796.877	0	0	0	0	0	0	0	603	903	0
640	0	31.3592	-139.771	-756.917	33253.5	84674.3	-15019.1	311.867	256.067	0	-2.83951	37.7124	-100.46	10715.9	-2441.94	-1159.29	175.692	796.332	0	0	0	0	0	0	0	603	903	0
640	1	31.3592	-141.449	-758.748	33528.2	85162.6	-14836	312.241	255.811	0	-2.68692	35.4236	-94.356	9983.44	-2075.73	-930.405	178.001	797.194	0	0	0	0	0	0	0	603	903	0
640	2	31.5118	-140.534	-767.293	34535.2	86139.2	-14973.3	312.264	254.991	0	-2.53433	33.4399	-88.5577	9251.02	-2197.8	-1296.62	175.182	798.537	0	0	0	0	0	0	0	603	903	0
640	3	31.0541	-141.755	-772.176	35176.1	86627.4	-15202.2	312.186	254.445	0	-3.14468	32.5244	-84.8956	9800.34	-2075.73	-1067.73	175.55	787.56	0	0	0	0	0	0	0	603	903	0
640	4	30.9015	-141.602	-777.669	35176.1	87298.8	-15202.2	312.257	254.767	0	-2.07657	30.9985	-76.961	8518.6	-1892.62	-1067.73	175.408	792.313	0	0	0	0	0	0	0	603	903	0
640	5	30.5963	-142.365	-783.467	36000.1	87848.1	-14881.8	312.127	254.05	0	-1.31363	29.0149	-77.5713	8060.83	-1953.66	-793.075	174.815	799.085	0	0	0	0	0	0	0	603	903	0
640	6	30.5963	-143.128	-787.13	36732.5	88153.3	-15156.4	311.993	253.334	0	-2.38174	24.5898	-74.5196	8243.94	-1709.52	-564.193	177.06	792.372	0	0	0	0	0	0	0	603	903	0
640	7	30.1385	-143.28	-791.707	36641	89068.8	-15339.5	312.502	253.719	0	-3.60245	24.895	-66.585	7328.41	-1526.41	-701.523	177.076	792.939	0	0	0	0	0	0	0	603	903	0
640	8	30.7489	-141.907	-792.318	36732.5	89068.8	-15156.4	312.416	253.639	0	-1.6188	23.2165	-62.9229	7053.76	-1892.62	-747.299	169.922	790.898	0	0	0	0	0	0	0	603	903	0
640	9	30.7489	-143.128	-797.811	37922.7	89007.8	-15476.9	311.565	252.467	0	-2.07657	22.1484	-60.7867	7328.41	-1404.34	-884.628	176.897	782.44	0	0	0	0	0	0	0	603	903	0
641	0	29.6808	-142.67	-802.388	38288.9	90289.5	-15568.4	312.526	252.281	0	-1.77139	21.6907	-57.7349	6229.78	-1526.41	-747.299	173.562	795.097	0	0	0	0	0	0	0	603	903	0
641	1	29.8334	-142.365	-806.05	38472	90472.7	-15431.1	312.242	252.271	0	-1.46622	21.0803	-54.378	5863.57	-1343.3	-701.523	175.297	795.17	0	0	0	0	0	0	0	603	903	0
641	2	29.6808	-142.365	-808.187	39296	90961	-15293.8	312.549	251.378	0	-1.31363	20.3174	-48.8848	6046.68	-1099.16	-426.864	177.515	779.308	0	0	0	0	0	0	0	603	903	0
641	3	28.7652	-141.755	-811.849	39570.7	91388.2	-14744.4	312.568	251.259	0	-1.16104	19.4019	-45.5279	5131.15	-1282.27	-426.864	171.836	790.297	0	0	0	0	0	0	0	603	903	0
641	4	28.3075	-141.297	-814.901	39936.9	91693.4	-15522.6	312.521	250.992	0	0.517426	17.4182	-42.1709	5039.6	-1404.34	-564.193	166.699	783.496	0	0	0	0	0	0	0	603	903	0
641	5	29.0704	-140.992	-818.563	40394.6	92242.7	-15339.5	312.689	250.652	0	-1.16104	15.7397	-40.3399	4948.04	-1099.16	-426.864	172.752	780.341	0	0	0	0	0	0	0	603	903	0
641	6	29.8334	-140.839	-822.53	40120	91815.4	-15293.8	311.626	251.224	0	-0.855865	14.3665	-37.8985	3666.3	-1465.38	-472.641	161.334	806.26	0	0	0	0	0	0	0	603	903	0
641	7	30.2911	-140.229	-824.056	41127	92975.1	-15202.2	312.826	250.092	0	-1.77139	13.1457	-33.3209	3757.86	-732.953	76.6757	178.003	790.222	0	0	0	0	0	0	0	603	903	0
641	8	30.4437	-140.534	-827.108	41767.9	93463.4	-14927.5	313	249.501	0	-1.6188	12.2302	-32.4053	3940.96	-671.918	-381.088	179.265	781.385	0	0	0	0	0	0	0	603	903	0
641	9	30.5963	-139.771	-828.939	41401.7	93829.6	-15156.4	313.192	250.055	0	1.12778	11.0095	-29.3536	3483.2	-977.094	-472.641	166.713	784.336	0	0	0	0	0	0	0	603	903	0
642	0	31.5118	-139.008	-832.296	43049.7	94073.7	-14836	313.029	248.276	0	-1.16104	9.63623	-26.3018	3208.54	-855.024	-243.759	167.492	781.011	0	0	0	0	0	0	0	603	903	0
642	1	32.7325	-139.161	-834.127	42591.9	94012.7	-14881.8	312.708	248.938	0	-0.855865	7.65259	-24.7759	2567.67	-1221.23	122.452	150.709	799.364	0	0	0	0	0	0	0	603	903	0
642	2	33.4955	-139.618	-838.094	42683.5	94867.2	-14286.7	313.194	249.071	0	-0.855865	5.97412	-21.1138	2567.67	-305.707	-106.43	185.521	781.389	0	0	0	0	0	0	0	603	903	0
642	3	33.8006	-139.618	-840.23	43690.5	94867.2	-14515.6	312.906	248.002	0	-0.855865	4.29565	-20.5035	2293.01	-305.707	-60.6534	185.09	791.165	0	0	0	0	0	0	0	603	903	0
642	4	33.4955	-139.008	-841.451	43141.2	95111.3	-14240.9	313.033	248.73	0	-1.77139	1.85425	-19.2828	2018.35	-244.672	-106.43	187.311	798.329	0	0	0	0	0	0	0	603	903	0
642	5	34.2584	-137.94	-842.977	43782.1	95538.6	-14424	313.335	248.063	0	0	0	0	0	0	0	200	903	0	0	0	0	0	0	0	603	903	0
642	6	35.3265	-137.482	-845.113	44514.5	95721.7	-13874.7	313.265	247.327	0	0	0	0	0	0	0	200	903	0	0	0	0	0	0	0	603	903	0
642	7	35.6317	-137.024	-847.554	44239.8	95965.8	-13828.9	313.227	247.803	0	0	0	0	0	0	0	200	903	0	0	0	0	0	0	0	603	903	0
642	8	36.3946	-136.567	-849.385	45338.5	96271	-13737.4	313.342	246.622	0	0	0	0	0	0	0	200	903	0	0	0	0	0	0	0	603	903	0
642	9	38.5309	-135.499	-850.301	45521.6	96759.3	-13462.7	313.794	246.464	0	0	0	0	0	0	0	200	903	0	0	0	0	0	0	0	603	903	0
643	0	38.0731	-135.193	-852.132	45521.6	96881.3	-13096.5	313.693	246.579	0	0	0	0	0	0	0	200	903	0	0	0	0	0	0	0	603	903	0
643	1	37.9205	-135.193	-852.742	46254	96881.3	-13279.6	313.612	245.759	0	0	0	0	0	0	0	200	903	0	0	0	0	0	0	0	603	903	0
643	2	38.836	-134.583	-854.573	46894.9	97064.5	-13233.8	313.582	245.125	0	0	0	0	0	0	0	200	903	0	0	0	0	0	0	0	603	903	0
643	3	39.9042	-133.973	-856.404	45613.1	97003.4	-12913.4	313.268	246.739	0	0	0	0	0	0	0	200	903	0	0	0	0	0	0	0	603	903	0
643	4	40.0567	-133.362	-856.404	46620.2	97247.6	-12867.6	313.553	245.563	0	0	0	0	0	0	0	200	903	0	0	0	0	0	0	0	603	903	0
643	5	39.9042	-132.447	-854.573	46437.1	97674.8	-12959.2	314.297	245.66	0	0	0	0	0	0	0	200	903	0	0	0	0	0	0	0	603	903	0
643	6	38.9886	-131.226	-854.573	46803.3	97491.7	-12821.8	314.082	245.232	0	0	0	0	0	0	0	200	903	0	0	0	0	0	0	0	603	903	0
643	7	38.6835	-130.463	-856.404	47444.2	97735.8	-12913.4	314.123	244.601	0	0	0	0	0	0	0	200	903	0	0	0	0	0	0	0	603	903	0
643	8	38.9886	-130.005	-857.015	47352.6	97552.8	-12455.6	313.829	244.747	0	0	0	0	0	0	0	200	903	0	0	0	0	0	0	0	603	903	0
643	9	39.1412	-128.479	-856.404	47352.6	97857.9	-12547.2	314.266	244.708	0	0	0	0	0	0	0	200	903	0	0	0	0	0	0	0	603	903	0
644	0	39.4464	-127.717	-855.489	47718.8	98346.2	-11677.4	314.959	244.22	0	0	0	0	0	0	0	200	903	0	0	0	0	0	0	0	603	903	0
644	1	40.0567	-127.106	-857.015	47810.4	97308.6	-11769	313.544	244.213	0	0	0	0	0	0	0	200	903	0	0	0	0	0	0	0	603	903	0
644	2	39.599	-126.648	-857.93	48268.2	98163.1	-12043.6	314.419	243.739	0	0	0	0	0	0	0	200	903	0	0	0	0	0	0	0	603	903	0
644	3	39.7516	-126.191	-860.372	49275.2	98224.1	-12226.7	314.165	242.728	0	0	0	0	0	0	0	200	903	0	0	0	0	0	0	0	603	903	0
644	4	39.599	-124.36	-861.287	48542.8	98407.2	-11814.7	314.256	243.639	0	0	0	0	0	0	0	200	903	0	0	0	0	0	0	0	603	903	0
644	5	39.9042	-123.749	-861.898	49824.6	98834.5	-11631.6	314.671	242.192	0	0	0	0	0	0	0	200	903	0	0	0	0	0	0	0	603	903	0
644	6	39.2938	-123.597	-862.203	49183.7	98712.4	-11585.9	314.489	242.956	0	0	0	0	0	0	0	200	903	0	0	0	0	0	0	0	603	903	0
644	7	39.2938	-123.597	-863.423	49916.1	99139.7	-11631.6	314.822	242.188	0	0	0	0	0	0	0	200	903	0	0	0	0	0	0	0	603	903	0
644	8	41.1249	-122.834	-866.78	50465.4	99078.6	-11769	314.306	241.778	0	0	0	0	0	0	0	200	903	0	0	0	0	0	0	0	603	903	0
644	9	40.0567	-122.071	-867.696	50465.4	99261.7	-11265.4	314.397	241.84	0	0	0	0	0	0	0	200	903	0	0	0	0	0	0	0	603	903	0
645	0	40.0567	-121.766	-869.527	51014.7	99444.8	-11357	314.367	241.33	0	0	0	0	0	0	0	200	903	0	0	0	0	0	0	0	603	903	0
645	1	40.3619	-121.155	-869.222	51747.2	99811	-10807.7	314.828	240.467	0	0	0	0	0	0	0	200	903	0	0	0	0	0	0	0	603	903	0
645	2	40.2093	-120.697	-868.917	51014.7	99872.1	-11265.4	314.939	241.289	0	0	0	0	0	0	0	200	903	0	0	0	0	0	0	0	603	903	0
645	3	39.4464	-120.087	-870.137	52113.4	99383.8	-10990.8	314.216	240.109	0	0	0	0	0	0	0	200	903	0	0	0	0	0	0	0	603	903	0
645	4	39.4464	-119.935	-870.443	51930.3	99627.9	-10899.2	314.457	240.34	0	0	0	0	0	0	0	200	903	0	0	0	0	0	0	0	603	903	0
645	5	39.4464	-118.714	-871.053	51838.7	100055	-10761.9	314.867	240.487	0	0	0	0	0	0	0	200	903	0	0	0	0	0	0	0	603	903	0
645	6	39.9042	-117.646	-866.17	52754.3	99933.1	-10212.6	315.374	239.095	0	0	0	0	0	0	0	200	903	0	0	0	0	0	0	0	603	903	0
645	7	39.599	-117.188	-868.611	52113.4	99994.2	-10670.3	315.12	240.004	0	0	0	0	0	0	0	200	903	0	0	0	0	0	0	0	603	903	0
645	8	37.9205	-116.12	-868.611	52754.3	99566.9	-10304.1	314.628	239.266	0	0	0	0	0	0	0	200	903	0	0	0	0	0	0	0	603	903	0
645	9	38.0731	-115.815	-869.527	53120.5	99872.1	-10029.5	314.858	238.909	0	0	0	0	0	0	0	200	903	0	0	0	0	0	0	0	603	903	0
646	0	38.9886	-114.594	-868.611	52479.6	99750	-10029.5	314.839	239.582	0	0	0	0	0	0	0	200	903	0	0	0	0	0	0	0	603	903	0
646	1	38.9886	-112.915	-870.137	52845.8	99811	-10029.5	314.707	239.267	0	0	0	0	0	0	0	200	903	0	0	0	0	0	0	0	603	903	0
646	2	38.2257	-112.763	-868.001	53852.9	100116	-9754.81	315.341	237.958	0	0	0	0	0	0	0	200	903	0	0	0	0	0	0	0	603	903	0
646	3	37.7679	-111.237	-863.118	53395.1	99872.1	-9800.59	315.711	238.137	0	0	0	0	0	0	0	200	903	0	0	0	0	0	0	0	603	903	0
646	4	38.3783	-111.39	-863.729	53669.8	99689	-9709.03	315.417	237.863	0	0	0	0	0	0	0	200	903	0	0	0	0	0	0	0	603	903	0
646	5	37.9205	-110.169	-864.034	53669.8	99383.8	-9251.27	315.023	237.885	0	0	0	0	0	0	0	200	903	0	0	0	0	0	0	0	603	903	0
646	6	37.7679	-109.253	-860.982	53852.9	99322.8	-9434.38	315.36	237.452	0	0	0	0	0	0	0	200	903	0	0	0	0	0	0	0	603	903	0
646	7	38.3783	-108.796	-860.372	53944.4	99627.9	-8793.51	315.796	237.301	0	0	0	0	0	0	0	200	903	0	0	0	0	0	0	0	603	903	0
646	8	37.9205	-107.88	-859.151	54768.4	99078.6	-9342.82	315.322	236.253	0	0	0	0	0	0	0	200	903	0	0	0	0	0	0	0	603	903	0
646	9	37.6153	-107.728	-856.099	54402.2	99139.7	-9022.39	315.804	236.453	0	0	0	0	0	0	0	200	903	0	0	0	0	0	0	0	603	903	0
647	0	37.6153	-107.117	-857.32	54493.7	98773.5	-9159.72	315.212	236.437	0	0	0	0	0	0	0	200	903	0	0	0	0	0	0	0	603	903	0
647	1	38.3783	-105.896	-854.268	54585.3	98712.4	-8793.51	315.552	236.103	0	0	0	0	0	0	0	200	903	0	0	0	0	0	0	0	603	903	0
647	2	38.6835	-104.981	-853.353	54402.2	98834.5	-8656.18	315.819	236.249	0	0	0	0	0	0	0	200	903	0	0	0	0	0	0	0	603	903	0
647	3	38.2257	-104.065	-850.301	54585.3	98529.3	-8656.18	315.876	235.805	0	0	0	0	0	0	0	200	903	0	0	0	0	0	0	0	603	903	0
647	4	38.3783	-103.302	-848.165	56050.2	98407.2	-8473.07	316.024	233.916	0	0	0	0	0	0	0	200	903	0	0	0	0	0	0	0	603	903	0
647	5	38.0731	-102.692	-846.639	54768.4	98285.2	-8335.74	316.089	235.311	0	0	0	0	0	0	0	200	903	0	0	0	0	0	0	0	603	903	0
647	6	39.7516	-102.54	-845.418	54402.2	97308.6	-8198.41	315.101	235.651	0	0	0	0	0	0	0	200	903	0	0	0	0	0	0	0	603	903	0
647	7	39.1412	-101.624	-843.892	55592.4	97980	-8198.41	316.105	234.124	0	0	0	0	0	0	0	200	903	0	0	0	0	0	0	0	603	903	0
647	8	38.3783	-100.403	-842.061	55226.2	97491.7	-7969.53	315.777	234.415	0	0	0	0	0	0	0	200	903	0	0	0	0	0	0	0	603	903	0
647	9	38.0731	-98.7248	-839.62	56050.2	97552.8	-8152.64	316.187	233.243	0	0	0	0	0	0	0	200	903	0	0	0	0	0	0	0	603	903	0
648	0	37.9205	-98.8774	-838.704	56050.2	97247.6	-7145.56	315.95	233.171	0	0	0	0	0	0	0	200	903	0	0	0	0	0	0	0	603	903	0
648	1	37.7679	-98.1145	-835.652	55226.2	96210	-7649.1	315.132	233.913	0	0	0	0	0	0	0	200	903	0	0	0	0	0	0	0	603	903	0
648	2	37.9205	-96.5886	-834.127	55867	96881.3	-7511.77	316.147	233.023	0	0	0	0	0	0	0	200	903	0	0	0	0	0	0	0	603	903	0
648	3	38.5309	-96.2834	-827.108	56233.3	96515.1	-7374.44	316.69	232.012	0	0	0	0	0	0	0	200	903	0	0	0	0	0	0	0	603	903	0
648	4	39.2938	-95.0627	-827.413	55592.4	96454.1	-7328.66	316.573	232.812	0	0	0	0	0	0	0	200	903	0	0	0	0	0	0	0	603	903	0
648	5	37.6153	-93.9946	-827.718	56782.6	96332	-7328.66	316.383	231.399	0	0	0	0	0	0	0	200	903	0	0	0	0	0	0	0	603	903	0
648	6	37.4628	-92.9265	-824.971	56324.8	96087.9	-7145.56	316.474	231.725	0	0	0	0	0	0	0	200	903	0	0	0	0	0	0	0	603	903	0
648	7	37.4628	-92.6213	-822.53	55592.4	95843.8	-6870.9	316.523	232.413	0	0	0	0	0	0	0	200	903	0	0	0	0	0	0	0	603	903	0
648	8	37.6153	-91.5532	-820.394	55867	95599.6	-6916.67	316.529	231.902	0	0	0	0	0	0	0	200	903	0	0	0	0	0	0	0	603	903	0
648	9	37.4628	-90.4851	-817.342	56965.7	94439.9	-6870.9	315.545	230.304	0	0	0	0	0	0	0	200	903	0	0	0	0	0	0	0	603	903	0
649	0	37.9205	-89.2644	-812.154	56141.7	95477.6	-6687.79	317.561	230.873	0	0	0	0	0	0	0	200	903	0	0	0	0	0	0	0	603	903	0
649	1	38.9886	-89.5695	-812.154	56599.5	94562	-6504.69	316.434	230.309	0	0	0	0	0	0	0	200	903	0	0	0	0	0	0	0	603	903	0
649	2	37.9205	-89.417	-809.407	56874.1	94012.7	-6230.03	316.15	229.734	0	0	0	0	0	0	0	200	903	0	0	0	0	0	0	0	603	903	0
649	3	37.1576	-87.1281	-806.966	56050.2	94378.9	-5680.71	316.955	230.542	0	0	0	0	0	0	0	200	903	0	0	0	0	0	0	0	603	903	0
649	4	37.4628	-86.3652	-803.914	56782.6	94317.9	-6001.15	317.323	229.367	0	0	0	0	0	0	0	200	903	0	0	0	0	0	0	0	603	903	0
649	5	37.3102	-86.2126	-803.304	56782.6	94134.8	-6046.92	317.185	229.314	0	0	0	0	0	0	0	200	903	0	0	0	0	0	0	0	603	903	0
649	6	37.4628	-84.9919	-800.862	56324.8	93768.6	-6001.15	317.085	229.67	0	0	0	0	0	0	0	200	903	0	0	0	0	0	0	0	603	903	0
649	7	37.3102	-83.3134	-797.811	57057.2	93463.4	-5818.04	317.15	228.483	0	0	0	0	0	0	0	200	903	0	0	0	0	0	0	0	603	903	0
649	8	37.4628	-84.0764	-795.674	56599.5	93341.3	-5451.83	317.311	228.866	0	0	0	0	0	0	0	200	903	0	0	0	0	0	0	0	603	903	0
649	9	36.6998	-81.1772	-789.571	55500.8	93158.2	-5589.16	317.986	229.708	0	0	0	0	0	0	0	200	903	0	0	0	0	0	0	0	603	903	0
650	0	36.6998	-80.872	-788.961	57148.8	92669.9	-5406.05	317.458	227.564	0	0	0	0	0	0	0	200	903	0	0	0	0	0	0	0	603	903	0
650	1	37.3102	-81.635	-787.74	57148.8	92608.9	-5406.05	317.563	227.452	0	0	0	0	0	0	0	200	903	0	0	0	0	0	0	0	603	903	0
650	2	36.5472	-79.1936	-785.604	56599.5	92486.8	-4948.29	317.727	227.954	0	0	0	0	0	0	0	200	903	0	0	0	0	0	0	0	603	903	0
650	3	36.5472	-78.7358	-782.247	57057.2	91876.5	-5039.84	317.452	227.06	0	0	0	0	0	0	0	200	903	0	0	0	0	0	0	0	603	903	0
650	4	36.3946	-78.1255	-779.195	56965.7	91937.5	-4902.51	317.99	226.892	0	0	0	0	0	0	0	200	903	0	0	0	0	0	0	0	603	903	0
650	5	35.9369	-76.9048	-777.059	56507.9	91571.3	-4994.07	317.844	227.28	0	0	0	0	0	0	0	200	903	0	0	0	0	0	0	0	603	903	0
650	6	35.9369	-75.8366	-775.228	57331.9	91266.1	-4719.41	317.728	226.045	0	0	0	0	0	0	0	200	903	0	0	0	0	0	0	0	603	903	0
650	7	37.005	-75.8366	-775.228	57789.6	91083	-4627.86	317.492	225.455	0	0	0	0	0	0	0	200	903	0	0	0	0	0	0	0	603	903	0
650	8	36.0895	-74.4633	-771.566	56691	90838.9	-4673.63	317.733	226.525	0	0	0	0	0	0	0	200	903	0	0	0	0	0	0	0	603	903	0
650	9	36.2421	-74.1582	-768.514	57240.3	90716.8	-4307.42	318.042	225.518	0	0	0	0	0	0	0	200	903	0	0	0	0	0	0	0	603	903	0
651	0	35.1739	-73.0901	-765.157	56233.3	90716.8	-4170.09	318.56	226.508	0	0	0	0	0	0	0	200	903	0	0	0	0	0	0	0	603	903	0
651	1	34.5636	-71.8694	-762.715	56782.6	89923.3	-4353.2	317.899	225.552	0	0	0	0	0	0	0	200	903	0	0	0	0	0	0	0	603	903	0
651	2	35.1739	-70.9538	-761.19	57515	89557.1	-4398.97	317.654	224.441	0	0	0	0	0	0	0	200	903	0	0	0	0	0	0	0	603	903	0
651	3	35.1739	-70.8012	-755.696	57515	89068.8	-4032.76	317.863	223.891	0	0	0	0	0	0	0	200	903	0	0	0	0	0	0	0	603	903	0
651	4	34.8688	-69.4279	-754.781	56782.6	89374	-3849.66	318.411	224.769	0	0	0	0	0	0	0	200	903	0	0	0	0	0	0	0	603	903	0
651	5	34.8688	-68.8176	-752.645	57057.2	89313	-3986.99	318.666	224.191	0	0	0	0	0	0	0	200	903	0	0	0	0	0	0	0	603	903	0
651	6	33.9532	-68.5124	-749.593	57423.4	88885.8	-3986.99	318.579	223.394	0	0	0	0	0	0	0	200	903	0	0	0	0	0	0	0	603	903	0
651	7	34.5636	-66.834	-747.457	56599.5	87970.2	-3666.55	317.693	224.277	0	0	0	0	0	0	0	200	903	0	0	0	0	0	0	0	603	903	0
651	8	34.7162	-66.3762	-745.626	57606.5	88275.4	-3208.79	318.391	222.741	0	0	0	0	0	0	0	200	903	0	0	0	0	0	0	0	603	903	0
651	9	33.9532	-65.4607	-738.607	56599.5	88336.4	-3437.67	319.599	223.37	0	0	0	0	0	0	0	200	903	0	0	0	0	0	0	0	603	903	0
652	0	35.4791	-64.3925	-736.776	56874.1	88092.3	-3346.12	319.565	222.807	0	0	0	0	0	0	0	200	903	0	0	0	0	0	0	0	603	903	0
652	1	34.5636	-63.6296	-735.25	57148.8	87604	-3300.34	319.149	222.273	0	0	0	0	0	0	0	200	903	0	0	0	0	0	0	0	603	903	0
652	2	34.1058	-63.1718	-733.419	56874.1	86810.6	-3208.79	318.364	222.453	0	0	0	0	0	0	0	200	903	0	0	0	0	0	0	0	603	903	0
652	3	33.3429	-63.0193	-730.062	56965.7	86871.6	-3117.23	318.992	221.971	0	0	0	0	0	0	0	200	903	0	0	0	0	0	0	0	603	903	0
652	4	33.9532	-61.7986	-728.536	57148.8	86993.7	-3025.68	319.409	221.557	0	0	0	0	0	0	0	200	903	0	0	0	0	0	0	0	603	903	0
652	5	34.1058	-61.1882	-725.179	56874.1	86688.5	-2567.92	319.541	221.572	0	0	0	0	0	0	0	200	903	0	0	0	0	0	0	0	603	903	0
652	6	33.0377	-60.2727	-719.686	56782.6	86322.3	-2888.35	319.944	221.101	0	0	0	0	0	0	0	200	903	0	0	0	0	0	0	0	603	903	0
652	7	32.5799	-59.2046	-718.77	57606.5	86017.1	-2979.91	319.673	219.854	0	0	0	0	0	0	0	200	903	0	0	0	0	0	0	0	603	903	0
652	8	32.7325	-58.5942	-717.244	56782.6	85895	-2888.35	319.757	220.832	0	0	0	0	0	0	0	200	903	0	0	0	0	0	0	0	603	903	0
652	9	33.6481	-57.0683	-714.498	56782.6	85528.8	-2110.15	319.705	220.528	0	0	0	0	0	0	0	200	903	0	0	0	0	0	0	0	603	903	0
653	0	33.8006	-57.0683	-712.667	57515	85345.7	-2476.36	319.755	219.296	0	0	0	0	0	0	0	200	903	0	0	0	0	0	0	0	603	903	0
653	1	33.1903	-56.0002	-708.394	56691	84918.5	-2293.26	319.875	219.973	0	0	0	0	0	0	0	200	903	0	0	0	0	0	0	0	603	903	0
653	2	32.7325	-54.9321	-706.258	56965.7	84918.5	-2476.36	320.237	219.342	0	0	0	0	0	0	0	200	903	0	0	0	0	0	0	0	603	903	0
653	3	33.3429	-54.9321	-704.427	57515	84796.4	-2430.59	320.376	218.352	0	0	0	0	0	0	0	200	903	0	0	0	0	0	0	0	603	903	0
653	4	32.7325	-53.5588	-702.901	56507.9	83819.8	-2201.71	319.248	219.608	0	0	0	0	0	0	0	200	903	0	0	0	0	0	0	0	603	903	0
653	5	32.2748	-52.9485	-700.765	57331.9	83819.8	-2339.04	319.612	218.187	0	0	0	0	0	0	0	200	903	0	0	0	0	0	0	0	603	903	0
653	6	32.7325	-54.0166	-696.797	57240.3	83636.7	-1881.27	320.03	217.852	0	0	0	0	0	0	0	200	903	0	0	0	0	0	0	0	603	903	0
653	7	31.9696	-51.27	-694.051	56599.5	83514.6	-2155.93	320.329	218.451	0	0	0	0	0	0	0	200	903	0	0	0	0	0	0	0	603	903	0
653	8	31.2066	-50.9648	-691.609	57881.2	83148.4	-2110.15	320.225	216.309	0	0	0	0	0	0	0	200	903	0	0	0	0	0	0	0	603	903	0
653	9	30.5963	-50.8122	-689.778	56965.7	82477	-2293.26	319.57	217.415	0	0	0	0	0	0	0	200	903	0	0	0	0	0	0	0	603	903	0
654	0	31.0541	-50.0493	-683.37	56233.3	82660.1	-1652.39	320.96	217.712	0	0	0	0	0	0	0	200	903	0	0	0	0	0	0	0	603	903	0
654	1	30.7489	-49.7441	-683.675	57240.3	82355	-1606.61	320.459	216.276	0	0	0	0	0	0	0	200	903	0	0	0	0	0	0	0	603	903	0
654	2	30.2911	-48.3708	-681.234	56782.6	82171.9	-1698.17	320.622	216.647	0	0	0	0	0	0	0	200	903	0	0	0	0	0	0	0	603	903	0
654	3	29.9859	-46.9975	-678.182	57057.2	81927.7	-1606.61	320.805	215.867	0	0	0	0	0	0	0	200	903	0	0	0	0	0	0	0	603	903	0
654	4	29.6808	-47.3027	-676.656	57240.3	81378.4	-1377.73	320.266	215.407	0	0	0	0	0	0	0	200	903	0	0	0	0	0	0	0	603	903	0
654	5	29.6808	-46.8449	-673.604	56507.9	81134.3	-1377.73	320.448	216.111	0	0	0	0	0	0	0	200	903	0	0	0	0	0	0	0	603	903	0
654	6	29.3756	-46.8449	-670.552	56782.6	81012.2	-1377.73	320.814	215.32	0	0	0	0	0	0	0	200	903	0	0	0	0	0	0	0	603	903	0
654	7	29.8334	-45.3191	-665.059	57331.9	80707	-1240.4	321.353	213.794	0	0	0	0	0	0	0	200	903	0	0	0	0	0	0	0	603	903	0
654	8	29.9859	-44.7087	-665.059	56874.1	80401.9	-1240.4	320.894	214.483	0	0	0	0	0	0	0	200	903	0	0	0	0	0	0	0	603	903	0
654	9	29.8334	-44.8613	-661.702	56965.7	80279.8	-965.745	321.323	213.91	0	0	0	0	0	0	0	200	903	0	0	0	0	0	0	0	603	903	0
655	0	28.6127	-43.9458	-659.261	57148.8	79791.5	-1286.18	321.032	213.314	0	0	0	0	0	0	0	200	903	0	0	0	0	0	0	0	603	903	0
655	1	29.0704	-43.6406	-657.125	56782.6	79730.5	-1057.3	321.332	213.589	0	0	0	0	0	0	0	200	903	0	0	0	0	0	0	0	603	903	0
655	2	29.0704	-42.8777	-653.768	57240.3	79364.2	-828.416	321.395	212.445	0	0	0	0	0	0	0	200	903	0	0	0	0	0	0	0	603	903	0
655	3	28.3075	-42.2673	-651.631	57515	79181.2	-553.758	321.512	211.737	0	0	0	0	0	0	0	200	903	0	0	0	0	0	0	0	603	903	0
655	4	28.1549	-41.9621	-649.19	57331.9	78876	-874.192	321.499	211.687	0	0	0	0	0	0	0	200	903	0	0	0	0	0	0	0	603	903	0
655	5	27.392	-40.4362	-647.664	57698.1	78876	-1011.52	321.785	210.914	0	0	0	0	0	0	0	200	903	0	0	0	0	0	0	0	603	903	0
655	6	28.0023	-39.9785	-642.476	57148.8	78509.8	-553.758	322.199	211.049	0	0	0	0	0	0	0	200	903	0	0	0	0	0	0	0	603	903	0
655	7	28.9178	-39.063	-641.255	56507.9	78387.7	-507.981	322.241	211.879	0	0	0	0	0	0	0	200	903	0	0	0	0	0	0	0	603	903	0
655	8	28.6127	-38.3	-640.34	57789.6	78204.6	-691.087	322.13	209.752	0	0	0	0	0	0	0	200	903	0	0	0	0	0	0	0	603	903	0
655	9	27.6971	-39.6733	-638.204	57698.1	77838.4	-645.311	321.965	209.593	0	0	0	0	0	0	0	200	903	0	0	0	0	0	0	0	603	903	0
656	0	27.6971	-37.2319	-636.373	57515	77594.2	-507.981	321.932	209.621	0	0	0	0	0	0	0	200	903	0	0	0	0	0	0	0	603	903	0
656	1	27.8497	-37.3845	-633.626	57789.6	77472.2	-324.876	322.268	208.795	0	0	0	0	0	0	0	200	903	0	0	0	0	0	0	0	603	903	0
656	2	27.8497	-37.0793	-631.185	56874.1	77350.1	-370.652	322.547	209.893	0	0	0	0	0	0	0	200	903	0	0	0	0	0	0	0	603	903	0
656	3	27.6971	-36.0112	-628.133	57515	77289.1	-324.876	323.046	208.435	0	0	0	0	0	0	0	200	903	0	0	0	0	0	0	0	603	903	0
656	4	28.6127	-35.8586	-629.354	57972.7	76617.7	-324.876	321.74	207.885	0	0	0	0	0	0	0	200	903	0	0	0	0	0	0	0	603	903	0
656	5	28.3075	-36.0112	-626.302	57698.1	76556.6	-141.77	322.236	207.875	0	0	0	0	0	0	0	200	903	0	0	0	0	0	0	0	603	903	0
656	6	27.0868	-35.5534	-624.166	57698.1	76373.5	-187.547	322.361	207.56	0	0	0	0	0	0	0	200	903	0	0	0	0	0	0	0	603	903	0
656	7	27.2394	-34.4853	-622.335	58155.9	76251.5	87.1114	322.525	206.552	0	0	0	0	0	0	0	200	903	0	0	0	0	0	0	0	603	903	0
656	8	26.9342	-33.875	-620.504	57331.9	76251.5	-187.547	322.886	207.604	0	0	0	0	0	0	0	200	903	0	0	0	0	0	0	0	603	903	0
656	9	26.0187	-33.2646	-617.147	58613.6	75885.2	41.3351	322.962	205.025	0	0	0	0	0	0	0	200	903	0	0	0	0	0	0	0	603	903	0
657	0	26.1712	-32.9594	-615.926	58613.6	75580.1	178.664	322.71	204.837	0	0	0	0	0	0	0	200	903	0	0	0	0	0	0	0	603	903	0
657	1	27.5445	-33.7224	-614.705	57881.2	75458	178.664	322.755	205.839	0	0	0	0	0	0	0	200	903	0	0	0	0	0	0	0	603	903	0
657	2	26.9342	-32.3491	-608.297	58522.1	75030.8	499.099	323.346	203.794	0	0	0	0	0	0	0	200	903	0	0	0	0	0	0	0	603	903	0
657	3	25.8661	-32.3491	-608.602	58247.4	75030.8	407.546	323.284	204.293	0	0	0	0	0	0	0	200	903	0	0	0	0	0	0	0	603	903	0
657	4	25.5609	-30.8232	-607.991	57515	75091.8	132.888	323.508	205.402	0	0	0	0	0	0	0	200	903	0	0	0	0	0	0	0	603	903	0
657	5	25.2557	-30.3654	-604.94	58613.6	74664.5	178.664	323.425	203.108	0	0	0	0	0	0	0	200	903	0	0	0	0	0	0	0	603	903	0
657	6	25.1031	-31.1284	-604.329	58613.6	74542.5	682.204	323.347	203.01	0	0	0	0	0	0	0	200	903	0	0	0	0	0	0	0	603	903	0
657	7	25.1031	-29.7551	-602.498	57972.7	74664.5	453.322	323.925	203.779	0	0	0	0	0	0	0	200	903	0	0	0	0	0	0	0	603	903	0
657	8	25.1031	-29.7551	-600.972	57972.7	74115.2	499.099	323.326	203.535	0	0	0	0	0	0	0	200	903	0	0	0	0	0	0	0	603	903	0
657	9	24.9505	-29.4499	-597.31	58155.9	74359.4	590.651	324.49	202.637	0	0	0	0	0	0	0	200	903	0	0	0	0	0	0	0	603	903	0
658	0	24.4928	-29.7551	-595.479	58430.5	73260.7	544.875	323.028	201.876	0	0	0	0	0	0	0	200	903	0	0	0	0	0	0	0	603	903	0
658	1	25.5609	-29.7551	-592.427	59071.4	73443.8	773.757	323.971	200.289	0	0	0	0	0	0	0	200	903	0	0	0	0	0	0	0	603	903	0
658	2	24.4928	-28.687	-591.512	58522.1	73443.8	727.981	324.163	201.064	0	0	0	0	0	0	0	200	903	0	0	0	0	0	0	0	603	903	0
658	3	24.4928	-28.0766	-589.07	59254.5	73504.9	956.862	324.781	199.41	0	0	0	0	0	0	0	200	903	0	0	0	0	0	0	0	603	903	0
658	4	23.8824	-28.2292	-587.239	59071.4	73443.8	1048.42	325.066	199.408	0	0	0	0	0	0	0	200	903	0	0	0	0	0	0	0	603	903	0
658	5	23.7298	-27.6189	-585.714	58339	73077.6	773.757	324.767	200.397	0	0	0	0	0	0	0	200	903	0	0	0	0	0	0	0	603	903	0
658	6	22.9669	-27.0085	-583.272	59346.1	72589.4	590.651	324.452	198.253	0	0	0	0	0	0	0	200	903	0	0	0	0	0	0	0	603	903	0
658	7	23.4247	-26.8559	-579.61	59071.4	72406.2	1048.42	324.922	198.084	0	0	0	0	0	0	0	200	903	0	0	0	0	0	0	0	603	903	0
658	8	24.798	-26.093	-579.61	58705.2	72284.2	1277.3	324.712	198.716	0	0	0	0	0	0	0	200	903	0	0	0	0	0	0	0	603	903	0
658	9	24.1876	-26.3982	-577.779	59712.3	72284.2	956.862	325.107	196.652	0	0	0	0	0	0	0	200	903	0	0	0	0	0	0	0	603	903	0
659	0	23.7298	-26.2456	-575.338	59162.9	72223.1	1139.97	325.532	197.168	0	0	0	0	0	0	0	200	903	0	0	0	0	0	0	0	603	903	0
659	1	23.5773	-25.9404	-574.117	59071.4	71551.8	1094.19	324.629	197.109	0	0	0	0	0	0	0	200	903	0	0	0	0	0	0	0	603	903	0
659	2	23.2721	-26.7033	-573.201	58796.7	70636.2	1506.18	323.231	197.424	0	0	0	0	0	0	0	200	903	0	0	0	0	0	0	0	603	903	0
659	3	24.4928	-25.4826	-572.896	58979.8	71368.7	1231.52	324.575	197.05	0	0	0	0	0	0	0	200	903	0	0	0	0	0	0	0	603	903	0
659	4	24.6454	-25.4826	-570.76	59437.6	71612.8	1414.63	325.469	195.862	0	0	0	0	0	0	0	200	903	0	0	0	0	0	0	0	603	903	0
659	5	22.6617	-24.2619	-569.539	59895.4	71490.7	1277.3	325.524	194.835	0	0	0	0	0	0	0	200	903	0	0	0	0	0	0	0	603	903	0
659	6	22.204	-24.2619	-567.708	59437.6	70819.3	1689.28	324.746	195.303	0	0	0	0	0	0	0	200	903	0	0	0	0	0	0	0	603	903	0
659	7	22.5091	-23.3464	-566.793	59529.2	70758.3	1323.07	324.84	194.972	0	0	0	0	0	0	0	200	903	0	0	0	0	0	0	0	603	903	0
659	8	22.8143	-23.499	-564.962	59986.9	70514.2	1460.4	324.812	193.821	0	0	0	0	0	0	0	200	903	0	0	0	0	0	0	0	603	903	0
659	9	22.8143	-24.2619	-560.384	59803.8	70270	1689.28	325.396	193.281	0	0	0	0	0	0	0	200	903	0	0	0	0	0	0	0	603	903	0
660	0	22.0514	-21.9731	-560.689	60261.6	70514.2	1597.73	325.763	192.522	0	0	0	0	0	0	0	200	903	0	0	0	0	0	0	0	603	903	0
660	1	22.204	-22.8886	-560.079	60627.8	69659.7	1735.06	324.375	191.751	0	0	0	0	0	0	0	200	903	0	0	0	0	0	0	0	603	903	0
660	2	21.1358	-21.2102	-557.637	59346.1	70086.9	1643.51	325.685	193.576	0	0	0	0	0	0	0	200	903	0	0	0	0	0	0	0	603	903	0
660	3	20.8307	-21.2102	-557.637	60078.5	69659.7	1872.39	324.919	192.262	0	0	0	0	0	0	0	200	903	0	0	0	0	0	0	0	603	903	0
660	4	20.9833	-20.5998	-556.111	59986.9	69659.7	1918.17	325.262	192.132	0	0	0	0	0	0	0	200	903	0	0	0	0	0	0	0	603	903	0
660	5	21.1358	-20.1421	-553.975	60261.6	69842.8	1735.06	326.076	191.22	0	0	0	0	0	0	0	200	903	0	0	0	0	0	0	0	603	903	0
660	6	21.8988	-20.2946	-550.923	60719.3	69171.4	1780.84	325.555	189.786	0	0	0	0	0	0	0	200	903	0	0	0	0	0	0	0	603	903	0
660	7	21.8988	-21.0576	-550.008	60078.5	69415.5	1872.39	326.208	190.768	0	0	0	0	0	0	0	200	903	0	0	0	0	0	0	0	603	903	0
660	8	20.9833	-19.9895	-548.787	60170	68866.2	2192.83	325.488	190.358	0	0	0	0	0	0	0	200	903	0	0	0	0	0	0	0	603	903	0
660	9	20.5255	-19.5317	-547.872	59986.9	69232.4	2101.27	326.366	190.509	0	0	0	0	0	0	0	200	903	0	0	0	0	0	0	0	603	903	0
661	0	20.6781	-18.9214	-545.125	60536.2	69232.4	2238.6	327.003	188.95	0	0	0	0	0	0	0	200	903	0	0	0	0	0	0	0	603	903	0
661	1	20.2203	-18.6162	-545.125	60902.4	68866.2	2147.05	326.331	188.278	0	0	0	0	0	0	0	200	903	0	0	0	0	0	0	0	603	903	0
661	2	20.3729	-18.1584	-544.82	61085.5	68866.2	2284.38	326.402	187.879	0	0	0	0	0	0	0	200	903	0	0	0	0	0	0	0	603	903	0
661	3	20.2203	-17.5481	-541.768	60078.5	69232.4	2330.15	327.79	189.107	0	0	0	0	0	0	0	200	903	0	0	0	0	0	0	0	603	903	0
661	4	20.9833	-17.3955	-536.885	60902.4	68500	2467.48	327.588	186.563	0	0	0	0	0	0	0	200	903	0	0	0	0	0	0	0	603	903	0
661	5	20.9833	-17.5481	-539.327	59986.9	68561	2696.37	327.123	188.774	0	0	0	0	0	0	0	200	903	0	0	0	0	0	0	0	603	903	0
661	6	20.9833	-16.7851	-538.411	60627.8	68194.8	2421.71	326.659	187.395	0	0	0	0	0	0	0	200	903	0	0	0	0	0	0	0	603	903	0
661	7	21.1358	-16.9377	-538.411	61177.1	68377.9	2604.81	326.999	186.375	0	0	0	0	0	0	0	200	903	0	0	0	0	0	0	0	603	903	0
661	8	20.5255	-16.7851	-537.191	60902.4	68255.9	2513.26	327.061	186.628	0	0	0	0	0	0	0	200	903	0	0	0	0	0	0	0	603	903	0
661	9	21.441	-16.1748	-535.054	61268.6	67706.5	2971.02	326.541	185.491	0	0	0	0	0	0	0	200	903	0	0	0	0	0	0	0	603	903	0
662	0	21.1358	-15.8696	-532.613	61543.3	67462.4	2696.37	326.663	184.45	0	0	0	0	0	0	0	200	903	0	0	0	0	0	0	0	603	903	0
662	1	22.204	-14.6489	-534.139	60994	67584.5	2604.81	326.53	185.809	0	0	0	0	0	0	0	200	903	0	0	0	0	0	0	0	603	903	0
662	2	21.8988	-14.8015	-535.054	61634.9	67889.6	2787.92	326.884	184.806	0	0	0	0	0	0	0	200	903	0	0	0	0	0	0	0	603	903	0
662	3	21.1358	-15.1067	-534.139	60994	67645.5	2787.92	326.644	185.809	0	0	0	0	0	0	0	200	903	0	0	0	0	0	0	0	603	903	0
662	4	21.441	-14.3437	-533.528	60994	67401.4	2925.25	326.331	185.678	0	0	0	0	0	0	0	200	903	0	0	0	0	0	0	0	603	903	0
662	5	21.2884	-14.0385	-531.087	61634.9	67706.5	2879.47	327.487	183.946	0	0	0	0	0	0	0	200	903	0	0	0	0	0	0	0	603	903	0
662	6	20.9833	-13.123	-529.866	61451.8	67401.4	3016.8	327.204	184.024	0	0	0	0	0	0	0	200	903	0	0	0	0	0	0	0	603	903	0
662	7	20.5255	-13.2756	-526.509	61818	67401.4	2879.47	328.016	182.589	0	0	0	0	0	0	0	200	903	0	0	0	0	0	0	0	603	903	0
662	8	20.3729	-13.123	-528.34	62275.7	67035.1	2833.69	326.879	182.13	0	0	0	0	0	0	0	200	903	0	0	0	0	0	0	0	603	903	0
662	9	20.5255	-12.5127	-528.34	61634.9	67218.3	3291.46	327.225	183.343	0	0	0	0	0	0	0	200	903	0	0	0	0	0	0	0	603	903	0
663	0	20.5255	-11.5971	-526.815	62184.2	67157.2	3337.23	327.478	181.962	0	0	0	0	0	0	0	200	903	0	0	0	0	0	0	0	603	903	0
663	1	20.0677	-12.3601	-526.815	61909.5	66974.1	3337.23	327.13	182.483	0	0	0	0	0	0	0	200	903	0	0	0	0	0	0	0	603	903	0
663	2	19.61	-11.4446	-525.289	62184.2	66974.1	3199.91	327.5	181.619	0	0	0	0	0	0	0	200	903	0	0	0	0	0	0	0	603	903	0
663	3	19.61	-11.5971	-525.289	62275.7	66791	3520.34	327.151	181.445	0	0	0	0	0	0	0	200	903	0	0	0	0	0	0	0	603	903	0
663	4	20.0677	-10.9868	-524.678	61634.9	66668.9	3474.56	327.066	182.528	0	0	0	0	0	0	0	200	903	0	0	0	0	0	0	0	603	903	0
663	5	21.1358	-12.3601	-521.627	62916.6	66852	3657.67	328.161	179.384	0	0	0	0	0	0	0	200	903	0	0	0	0	0	0	0	603	903	0
663	6	21.1358	-10.0713	-522.237	62001.1	66607.9	3657.67	327.543	181.278	0	0	0	0	0	0	0	200	903	0	0	0	0	0	0	0	603	903	0
663	7	19.7626	-9.00314	-519.796	62641.9	66852	3657.67	328.612	179.487	0	0	0	0	0	0	0	200	903	0	0	0	0	0	0	0	603	903	0
663	8	19.9151	-10.6816	-519.49	62733.5	66485.8	3886.55	327.983	179.24	0	0	0	0	0	0	0	200	903	0	0	0	0	0	0	0	603	903	0
663	9	20.3729	-9.15573	-520.406	61909.5	66302.7	3795	327.406	181.036	0	0	0	0	0	0	0	200	903	0	0	0	0	0	0	0	603	903	0
664	0	20.2203	-9.30832	-519.49	62184.2	66546.9	4023.88	328.1	180.298	0	0	0	0	0	0	0	200	903	0	0	0	0	0	0	0	603	903	0
664	1	20.3729	-8.54538	-518.88	62275.7	66241.7	3978.1	327.663	179.98	0	0	0	0	0	0	0	200	903	0	0	0	0	0	0	0	603	903	0
664	2	19.61	-7.17209	-517.964	62916.6	66668.9	4069.66	328.713	178.531	0	0	0	0	0	0	0	200	903	0	0	0	0	0	0	0	603	903	0
664	3	18.9996	-8.54538	-515.523	63099.7	66302.7	4023.88	328.613	177.601	0	0	0	0	0	0	0	200	903	0	0	0	0	0	0	0	603	903	0
664	4	20.8307	-6.71433	-519.185	62458.8	66241.7	3978.1	327.588	179.698	0	0	0	0	0	0	0	200	903	0	0	0	0	0	0	0	603	903	0
664	5	21.1358	-6.71433	-517.049	63099.7	66302.7	4298.54	328.233	177.962	0	0	0	0	0	0	0	200	903	0	0	0	0	0	0	0	603	903	0
664	6	20.8307	-6.40915	-518.27	62733.5	66180.7	4344.31	327.695	178.956	0	0	0	0	0	0	0	200	903	0	0	0	0	0	0	0	603	903	0
664	7	20.5255	-4.88327	-517.049	62825.1	66485.8	4573.2	328.587	178.493	0	0	0	0	0	0	0	200	903	0	0	0	0	0	0	0	603	903	0
664	8	19.9151	-5.7988	-516.439	63191.3	65753.4	4344.31	327.321	177.64	0	0	0	0	0	0	0	200	903	0	0	0	0	0	0	0	603	903	0
664	9	19.9151	-5.34104	-515.828	63099.7	66424.8	4481.64	328.773	177.673	0	0	0	0	0	0	0	200	903	0	0	0	0	0	0	0	603	903	0
665	0	20.0677	-5.64621	-516.133	63374.4	65875.5	4481.64	327.633	177.213	0	0	0	0	0	0	0	200	903	0	0	0	0	0	0	0	603	903	0
665	1	21.441	-4.42551	-517.659	63191.3	66302.7	4435.87	328.082	177.929	0	0	0	0	0	0	0	200	903	0	0	0	0	0	0	0	603	903	0
665	2	20.5255	-3.66257	-517.049	63465.9	66424.8	4664.75	328.469	177.254	0	0	0	0	0	0	0	200	903	0	0	0	0	0	0	0	603	903	0
665	3	19.9151	-2.89963	-517.354	63465.9	66241.7	4527.42	328.039	177.326	0	0	0	0	0	0	0	200	903	0	0	0	0	0	0	0	603	903	0
665	4	19.9151	-3.50998	-517.049	64289.9	66363.8	4710.52	328.351	175.66	0	0	0	0	0	0	0	200	903	0	0	0	0	0	0	0	603	903	0
665	5	19.1522	-3.05222	-516.744	63832.1	65997.6	4664.75	327.718	176.472	0	0	0	0	0	0	0	200	903	0	0	0	0	0	0	0	603	903	0
665	6	19.7626	-1.9841	-516.744	63923.7	66241.7	5122.51	328.191	176.295	0	0	0	0	0	0	0	200	903	0	0	0	0	0	0	0	603	903	0
665	7	20.3729	-1.83151	-517.964	64564.5	66241.7	5030.96	327.889	175.349	0	0	0	0	0	0	0	200	903	0	0	0	0	0	0	0	603	903	0
665	8	19.9151	-1.22116	-515.828	65022.3	66546.9	5076.74	329.01	173.946	0	0	0	0	0	0	0	200	903	0	0	0	0	0	0	0	603	903	0
665	9	19.7626	-0.458223	-516.744	64930.8	66302.7	4985.18	328.309	174.346	0	0	0	0	0	0	0	200	903	0	0	0	0	0	0	0	603	903	0
666	0	19.1522	-0.458223	-517.659	65022.3	66119.6	5488.72	327.728	174.392	0	0	0	0	0	0	0	200	903	0	0	0	0	0	0	0	603	903	0
666	1	19.3048	-0.153047	-517.049	64564.5	66119.6	5351.39	327.879	175.129	0	0	0	0	0	0	0	200	903	0	0	0	0	0	0	0	603	903	0
666	2	19.4574	0.915068	-517.354	65297	66424.8	5534.5	328.393	173.787	0	0	0	0	0	0	0	200	903	0	0	0	0	0	0	0	603	903	0
666	3	19.61	0.915068	-517.049	65571.6	66119.6	5854.93	327.879	173.181	0	0	0	0	0	0	0	200	903	0	0	0	0	0	0	0	603	903	0
666	4	20.5255	2.13577	-515.828	65297	66485.8	5534.5	328.891	173.413	0	0	0	0	0	0	0	200	903	0	0	0	0	0	0	0	603	903	0
666	5	20.5255	1.8306	-516.744	65846.3	66730	5397.17	329.136	172.575	0	0	0	0	0	0	0	200	903	0	0	0	0	0	0	0	603	903	0
666	6	18.847	1.98318	-516.439	65846.3	66607.9	5534.5	328.975	172.499	0	0	0	0	0	0	0	200	903	0	0	0	0	0	0	0	603	903	0
666	7	19.7626	2.13577	-516.133	65113.9	66485.8	5854.93	328.815	173.843	0	0	0	0	0	0	0	200	903	0	0	0	0	0	0	0	603	903	0
666	8	20.2203	1.8306	-516.744	65388.5	66607.9	5809.16	328.899	173.46	0	0	0	0	0	0	0	200	903	0	0	0	0	0	0	0	603	903	0
666	9	19.9151	3.0513	-516.133	66120.9	66607.9	6038.04	329.052	171.892	0	0	0	0	0	0	0	200	903	0	0	0	0	0	0	0	603	903	0
667	0	19.61	3.20389	-517.049	66120.9	66241.7	5809.16	328.115	172.119	0	0	0	0	0	0	0	200	903	0	0	0	0	0	0	0	603	903	0
667	1	18.847	4.42459	-516.744	66120.9	66852	6083.82	329.372	172.043	0	0	0	0	0	0	0	200	903	0	0	0	0	0	0	0	603	903	0
667	2	20.9833	3.66165	-517.659	66578.7	66791	6358.47	329.025	171.385	0	0	0	0	0	0	0	200	903	0	0	0	0	0	0	0	603	903	0
667	3	20.3729	5.03494	-518.27	65937.8	67279.3	6404.25	329.815	172.773	0	0	0	0	0	0	0	200	903	0	0	0	0	0	0	0	603	903	0
667	4	19.9151	5.64529	-518.88	67036.5	67096.2	6266.92	329.31	170.805	0	0	0	0	0	0	0	200	903	0	0	0	0	0	0	0	603	903	0
667	5	20.2203	5.03494	-518.88	67311.1	67279.3	6495.8	329.663	170.276	0	0	0	0	0	0	0	200	903	0	0	0	0	0	0	0	603	903	0
667	6	20.5255	6.56082	-521.932	66944.9	67340.3	6541.58	329.021	171.736	0	0	0	0	0	0	0	200	903	0	0	0	0	0	0	0	603	903	0
667	7	21.1358	5.95047	-523.152	67585.8	66791	6587.36	327.67	170.811	0	0	0	0	0	0	0	200	903	0	0	0	0	0	0	0	603	903	0
667	8	20.8307	6.40823	-524.373	67494.3	67645.5	6724.68	329.003	171.286	0	0	0	0	0	0	0	200	903	0	0	0	0	0	0	0	603	903	0
667	9	21.2884	7.17117	-521.932	67768.9	67584.5	6862.01	329.489	170.158	0	0	0	0	0	0	0	200	903	0	0	0	0	0	0	0	603	903	0
668	0	21.1358	7.47635	-524.068	68409.8	67767.6	6816.24	329.311	169.464	0	0	0	0	0	0	0	200	903	0	0	0	0	0	0	0	603	903	0
668	1	20.6781	7.32376	-524.373	68959.1	67889.6	6862.01	329.468	168.492	0	0	0	0	0	0	0	200	903	0	0	0	0	0	0	0	603	903	0
668	2	20.5255	8.39188	-526.204	68592.9	67950.7	7182.45	329.134	169.646	0	0	0	0	0	0	0	200	903	0	0	0	0	0	0	0	603	903	0
668	3	20.9833	8.23929	-525.289	68684.4	68072.8	7228.22	329.591	169.244	0	0	0	0	0	0	0	200	903	0	0	0	0	0	0	0	603	903	0
668	4	21.1358	9.00223	-524.984	68867.5	67767.6	7319.78	329.085	168.82	0	0	0	0	0	0	0	200	903	0	0	0	0	0	0	0	603	903	0
668	5	20.0677	10.5281	-528.035	68592.9	68500	7136.67	329.726	170.098	0	0	0	0	0	0	0	200	903	0	0	0	0	0	0	0	603	903	0
668	6	20.6781	10.5281	-529.561	70149.3	68927.2	7228.22	330.159	167.533	0	0	0	0	0	0	0	200	903	0	0	0	0	0	0	0	603	903	0
668	7	21.2884	9.15481	-530.172	70515.5	68622.1	7548.66	329.434	166.995	0	0	0	0	0	0	0	200	903	0	0	0	0	0	0	0	603	903	0
668	8	20.8307	10.6807	-529.866	69691.5	68744.1	7685.99	329.739	168.473	0	0	0	0	0	0	0	200	903	0	0	0	0	0	0	0	603	903	0
668	9	21.1358	12.2066	-530.477	70332.4	69354.5	7914.87	330.74	167.417	0	0	0	0	0	0	0	200	903	0	0	0	0	0	0	0	603	903	0
669	0	20.9833	11.1385	-531.392	70149.3	69110.3	7640.21	330.055	167.99	0	0	0	0	0	0	0	200	903	0	0	0	0	0	0	0	603	903	0
669	1	20.5255	12.2066	-532.918	70423.9	69232.4	7960.65	329.912	167.852	0	0	0	0	0	0	0	200	903	0	0	0	0	0	0	0	603	903	0
669	2	20.8307	11.9014	-532.613	71705.7	69293.5	7869.09	330.101	165.37	0	0	0	0	0	0	0	200	903	0	0	0	0	0	0	0	603	903	0
669	3	22.3566	12.9695	-534.749	70973.2	69781.7	7960.65	330.494	167.278	0	0	0	0	0	0	0	200	903	0	0	0	0	0	0	0	603	903	0
669	4	21.441	13.885	-534.444	71339.4	70086.9	8326.86	331.14	166.517	0	0	0	0	0	0	0	200	903	0	0	0	0	0	0	0	603	903	0
669	5	21.441	13.1221	-535.359	71522.6	70148	8235.3	331.03	166.403	0	0	0	0	0	0	0	200	903	0	0	0	0	0	0	0	603	903	0
669	6	20.8307	14.0376	-536.275	72071.9	69964.8	8281.08	330.464	165.607	0	0	0	0	0	0	0	200	903	0	0	0	0	0	0	0	603	903	0
669	7	21.441	14.8006	-538.411	72712.7	70453.1	8509.96	330.854	164.949	0	0	0	0	0	0	0	200	903	0	0	0	0	0	0	0	603	903	0
669	8	21.5936	14.3428	-539.937	73353.6	70697.3	8830.4	330.936	164.144	0	0	0	0	0	0	0	200	903	0	0	0	0	0	0	0	603	903	0
669	9	22.9669	15.2583	-539.327	72895.8	70819.3	9333.94	331.311	164.839	0	0	0	0	0	0	0	200	903	0	0	0	0	0	0	0	603	903	0
670	0	22.204	16.9368	-540.547	73078.9	71124.5	9013.5	331.579	164.806	0	0	0	0	0	0	0	200	903	0	0	0	0	0	0	0	603	903	0
670	1	22.5091	16.7842	-544.21	74086.1	71063.5	8967.73	330.581	163.865	0	0	0	0	0	0	0	200	903	0	0	0	0	0	0	0	603	903	0
670	2	23.5773	17.5471	-544.82	74086.1	71490.7	9059.28	331.219	164.017	0	0	0	0	0	0	0	200	903	0	0	0	0	0	0	0	603	903	0
670	3	23.7298	17.6997	-546.346	74818.5	71856.9	9562.82	331.523	163.057	0	0	0	0	0	0	0	200	903	0	0	0	0	0	0	0	603	903	0
670	4	24.6454	18.3101	-548.177	74818.5	72101.1	9654.37	331.529	163.514	0	0	0	0	0	0	0	200	903	0	0	0	0	0	0	0	603	903	0
670	5	24.4928	19.6834	-549.092	75093.1	72772.5	9745.92	332.532	163.241	0	0	0	0	0	0	0	200	903	0	0	0	0	0	0	0	603	903	0
670	6	24.6454	19.5308	-550.618	75642.4	72040	9654.37	330.835	162.623	0	0	0	0	0	0	0	200	903	0	0	0	0	0	0	0	603	903	0
670	7	26.3238	19.3782	-553.06	76100.2	72650.4	9837.48	331.361	162.402	0	0	0	0	0	0	0	200	903	0	0	0	0	0	0	0	603	903	0
670	8	25.4083	20.4463	-556.111	76100.2	73016.6	10066.4	331.298	163.157	0	0	0	0	0	0	0	200	903	0	0	0	0	0	0	0	603	903	0
670	9	25.5609	21.0567	-556.722	77015.7	73504.9	10112.1	332.032	161.662	0	0	0	0	0	0	0	200	903	0	0	0	0	0	0	0	603	903	0
671	0	26.1712	20.9041	-558.553	77198.8	73443.8	10798.8	331.49	161.788	0	0	0	0	0	0	0	200	903	0	0	0	0	0	0	0	603	903	0
671	1	25.8661	22.43	-560.079	77107.3	74176.3	10432.6	332.439	162.328	0	0	0	0	0	0	0	200	903	0	0	0	0	0	0	0	603	903	0
671	2	26.629	23.3455	-559.774	78389	73993.2	10661.5	332.184	159.963	0	0	0	0	0	0	0	200	903	0	0	0	0	0	0	0	603	903	0
671	3	25.7135	23.3455	-564.656	78205.9	74603.5	11165	332.122	161.498	0	0	0	0	0	0	0	200	903	0	0	0	0	0	0	0	603	903	0
671	4	26.629	24.5662	-567.098	78114.4	74664.5	10981.9	331.661	162.256	0	0	0	0	0	0	0	200	903	0	0	0	0	0	0	0	603	903	0
671	5	27.0868	24.4136	-569.539	78205.9	74908.7	11256.5	331.525	162.686	0	0	0	0	0	0	0	200	903	0	0	0	0	0	0	0	603	903	0
671	6	27.0868	25.3291	-570.76	78938.3	75641.1	11485.4	332.527	161.696	0	0	0	0	0	0	0	200	903	0	0	0	0	0	0	0	603	903	0
671	7	27.6971	26.855	-572.591	79304.5	75519	11348.1	331.89	161.499	0	0	0	0	0	0	0	200	903	0	0	0	0	0	0	0	603	903	0
671	8	27.8497	26.2447	-575.948	80677.9	76129.4	11485.4	332.181	159.922	0	0	0	0	0	0	0	200	903	0	0	0	0	0	0	0	603	903	0
671	9	28.0023	27.4654	-576.863	80860.9	76129.4	11989	331.971	159.827	0	0	0	0	0	0	0	200	903	0	0	0	0	0	0	0	603	903	0
672	0	29.8334	28.2283	-579.915	81868	76800.8	12034.7	332.435	158.828	0	0	0	0	0	0	0	200	903	0	0	0	0	0	0	0	603	903	0
672	1	30.9015	27.3128	-579	82325.8	77411.1	12263.6	333.698	157.814	0	0	0	0	0	0	0	200	903	0	0	0	0	0	0	0	603	903	0
672	2	29.6808	29.449	-582.967	81593.4	77655.3	12355.2	333.207	160.038	0	0	0	0	0	0	0	200	903	0	0	0	0	0	0	0	603	903	0
672	3	28.7652	29.7542	-584.798	83241.3	77472.2	12355.2	332.477	157.658	0	0	0	0	0	0	0	200	903	0	0	0	0	0	0	0	603	903	0
672	4	29.223	29.6016	-587.239	82692	78143.5	12538.3	333.069	159.185	0	0	0	0	0	0	0	200	903	0	0	0	0	0	0	0	603	903	0
672	5	30.2911	31.7378	-590.291	83149.8	78753.9	12767.2	333.415	159.138	0	0	0	0	0	0	0	200	903	0	0	0	0	0	0	0	603	903	0
672	6	31.2066	31.8904	-591.817	84797.7	79303.2	13453.8	334	156.716	0	0	0	0	0	0	0	200	903	0	0	0	0	0	0	0	603	903	0
672	7	30.9015	32.9585	-594.564	84431.5	79608.4	13041.8	333.894	157.994	0	0	0	0	0	0	0	200	903	0	0	0	0	0	0	0	603	903	0
672	8	31.0541	33.2637	-593.648	85163.9	79852.5	13316.5	334.512	156.541	0	0	0	0	0	0	0	200	903	0	0	0	0	0	0	0	603	903	0
672	9	31.0541	33.5689	-596.395	85347	80218.7	13453.8	334.506	156.895	0	0	0	0	0	0	0	200	903	0	0	0	0	0	0	0	603	903	0
673	0	32.8851	34.4844	-602.803	85804.8	80707	13820	333.886	157.657	0	0	0	0	0	0	0	200	903	0	0	0	0	0	0	0	603	903	0
673	1	32.5799	36.1629	-604.94	86262.5	81195.3	13911.6	334.221	157.403	0	0	0	0	0	0	0	200	903	0	0	0	0	0	0	0	603	903	0
673	2	33.4955	36.468	-608.297	88185.1	81561.5	14094.7	334.082	155.029	0	0	0	0	0	0	0	200	903	0	0	0	0	0	0	0	603	903	0
673	3	33.9532	37.0784	-610.738	87727.4	81744.6	14415.1	333.846	156.358	0	0	0	0	0	0	0	200	903	0	0	0	0	0	0	0	603	903	0
673	4	33.9532	37.9939	-613.79	88459.8	82355	14232	334.175	155.879	0	0	0	0	0	0	0	200	903	0	0	0	0	0	0	0	603	903	0
673	5	33.9532	38.4517	-616.536	88734.5	82782.2	14277.8	334.27	156.076	0	0	0	0	0	0	0	200	903	0	0	0	0	0	0	0	603	903	0
673	6	35.4791	38.9095	-616.536	89283.8	83148.4	14918.7	334.864	155.185	0	0	0	0	0	0	0	200	903	0	0	0	0	0	0	0	603	903	0
673	7	36.6998	38.4517	-623.555	90474	83758.8	15330.6	334.325	154.906	0	0	0	0	0	0	0	200	903	0	0	0	0	0	0	0	603	903	0
673	8	36.2421	40.7405	-626.302	91206.4	84064	15101.8	334.223	154.373	0	0	0	0	0	0	0	200	903	0	0	0	0	0	0	0	603	903	0
673	9	36.0895	41.9612	-628.743	91572.6	84369.2	15605.3	334.187	154.356	0	0	0	0	0	0	0	200	903	0	0	0	0	0	0	0	603	903	0
674	0	36.3946	42.5716	-632.711	91481	85284.7	15422.2	334.793	155.414	0	0	0	0	0	0	0	200	903	0	0	0	0	0	0	0	603	903	0
674	1	37.7679	42.7242	-634.542	92762.8	85467.8	15925.7	334.692	153.811	0	0	0	0	0	0	0	200	903	0	0	0	0	0	0	0	603	903	0
674	2	37.1576	44.7078	-637.593	92854.3	85895	15834.2	334.718	154.367	0	0	0	0	0	0	0	200	903	0	0	0	0	0	0	0	603	903	0
674	3	37.9205	45.9285	-640.34	94136.1	85895	16200.4	334.14	152.99	0	0	0	0	0	0	0	200	903	0	0	0	0	0	0	0	603	903	0
674	4	38.3783	44.4026	-640.34	94960.1	87054.7	16383.5	335.951	151.704	0	0	0	0	0	0	0	200	903	0	0	0	0	0	0	0	603	903	0
674	5	38.9886	46.5388	-646.443	94960.1	87481.9	16612.4	335.328	153.104	0	0	0	0	0	0	0	200	903	0	0	0	0	0	0	0	603	903	0
674	6	39.9042	46.9966	-650.106	95875.6	87726.1	17070.1	334.941	152.523	0	0	0	0	0	0	0	200	903	0	0	0	0	0	0	0	603	903	0
674	7	39.9042	48.3699	-652.852	95875.6	88153.3	17253.2	335.028	153.144	0	0	0	0	0	0	0	200	903	0	0	0	0	0	0	0	603	903	0
674	8	40.6671	49.438	-654.073	96791.1	88702.6	17390.6	335.616	152.018	0	0	0	0	0	0	0	200	903	0	0	0	0	0	0	0	603	903	0
674	9	40.6671	50.0484	-658.956	97523.6	89129.9	17344.8	335.259	152.003	0	0	0	0	0	0	0	200	903	0	0	0	0	0	0	0	603	903	0
675	0	42.8033	50.3535	-658.651	98256	89557.1	17619.5	335.971	150.822	0	0	0	0	0	0	0	200	903	0	0	0	0	0	0	0	603	903	0
675	1	42.9559	52.1846	-662.618	98622.2	89862.3	17802.6	335.617	151.163	0	0	0	0	0	0	0	200	903	0	0	0	0	0	0	0	603	903	0
675	2	43.7189	52.4898	-663.839	99537.7	90594.7	18168.8	336.471	150.057	0	0	0	0	0	0	0	200	903	0	0	0	0	0	0	0	603	903	0
675	3	43.7189	53.2527	-668.111	99446.1	91083	18397.7	336.329	151.153	0	0	0	0	0	0	0	200	903	0	0	0	0	0	0	0	603	903	0
675	4	42.6507	54.7786	-670.858	101277	91266.1	18351.9	336.044	149.033	0	0	0	0	0	0	0	200	903	0	0	0	0	0	0	0	603	903	0
675	5	43.7189	56.1519	-674.825	102193	92120.6	18580.8	336.51	148.564	0	0	0	0	0	0	0	200	903	0	0	0	0	0	0	0	603	903	0
[truncated: 584 more rows]
