# Supplementary material for: The Effects of an Extemporaneous Speech Dual-task on Older Adult Gait Control
Source: Research Square preprint supplement (doi:10.21203/rs.3.rs-7674245/v1), 2025-11-18
Supplement: Supplementary file 195 [file Over8ground4.xlsx]

## Sheet: Sheet1
Trajectories
		08:LFHD			08:RFHD			08:LBHD			08:RBHD			08:C7			08:T10			08:CLAV			08:STRN			08:RBAK			08:LSHO			08:LUPA			08:LELB			08:LFRM			08:LWRA			08:LWRB			08:LFIN
Frame	Sub Frame	X	Y	Z	X	Y	Z	X	Y	Z	X	Y	Z	X	Y	Z	X	Y	Z	X	Y	Z	X	Y	Z	X	Y	Z	X	Y	Z	X	Y	Z	X	Y	Z	X	Y	Z	X	Y	Z	X	Y	Z	X	Y	Z
		mm	mm	mm	mm	mm	mm	mm	mm	mm	mm	mm	mm	mm	mm	mm	mm	mm	mm	mm	mm	mm	mm	mm	mm	mm	mm	mm	mm	mm	mm	mm	mm	mm	mm	mm	mm	mm	mm	mm	mm	mm	mm	mm	mm	mm	mm	mm	mm
679	0	183.879	-272.068	1685.61	271.551	-282.755	1681.47	169.33	-466.035	1698.36	280.63	-458.218	1691.28	222.228	-501.057	1545.89	214.354	-577.762	1283.14	216.405	-355.399	1460.53	231.085	-291.463	1255.92	292.773	-582.952	1338.67	33.5876	-424.01	1499.48	-43.4841	-441.308	1305.27	-51.7796	-444.112	1151.38	-53.8325	-353.399	1001.45	3.20775	-327.404	914.37	-66.1232	-352.892	904.022	-42.1668	-302.557	850.622
680	0	183.21	-260.036	1688.92	270.846	-270.49	1684.67	168.905	-453.966	1701.42	280.23	-446.048	1694.49	222.026	-488.855	1549.29	214.812	-565.523	1286.5	216.011	-343.222	1463.72	230.89	-279.385	1259.38	293.1	-570.621	1342.13	33.481	-412.084	1502.92	-43.4386	-432.384	1309.62	-52.4104	-436.922	1155.13	-54.0667	-347.711	1004.37	3.02206	-322.282	916.825	-65.0166	-349.069	907.2	-41.7524	-298.129	853.316
681	0	182.476	-247.931	1691.75	270.282	-258.31	1687.79	168.525	-441.863	1704.13	279.793	-433.625	1697.64	222.168	-476.691	1552.21	216.032	-552.564	1289.67	215.809	-331.022	1466.92	230.586	-267.446	1262.45	293.624	-558.28	1345.48	33.2713	-400.04	1506.5	-43.8152	-423.032	1313.42	-52.9464	-429.757	1158.93	-54.1992	-341.9	1007.56	3.39177	-316.811	920.127	-64.7167	-344.511	909.907	-41.53	-293.64	855.739
682	0	181.828	-235.904	1694.59	269.578	-246.193	1690.62	168.118	-429.827	1706.95	279.578	-421.53	1700.73	221.772	-464.439	1555.29	215.903	-541.041	1293.06	215.384	-318.795	1469.82	230.106	-255.508	1265.22	294.058	-546.075	1348.7	32.9202	-388.001	1509.64	-44.3349	-413.947	1316.92	-53.6142	-422.591	1162.48	-54.3158	-336.582	1009.63	3.30224	-311.329	922.716	-64.3719	-339.964	912.317	-41.6536	-289.113	858.485
683	0	181.058	-224.028	1696.86	268.953	-234.097	1693.3	167.597	-417.905	1709.28	278.979	-409.568	1702.97	221.612	-452.229	1557.54	216.337	-528.665	1295.5	214.967	-306.62	1472.25	229.555	-243.675	1267.58	294.262	-533.822	1351.26	32.5987	-375.854	1512.38	-44.6917	-404.74	1320.06	-54.1049	-415.507	1165.78	-54.5749	-330.835	1012.34	3.18418	-305.602	925.522	-63.0928	-335.637	914.531	-41.7184	-284.36	860.758
684	0	180.357	-212.008	1699.23	268.084	-221.963	1695.37	167.225	-405.897	1711.4	278.512	-397.436	1705.08	221.474	-440.039	1560.05	216.926	-516.391	1297.9	214.575	-294.437	1474.65	228.866	-231.832	1269.69	294.786	-521.619	1353.9	32.3525	-363.683	1515.26	-45.0921	-395.545	1323.41	-54.4821	-408.399	1169.08	-54.8155	-325.103	1014.69	3.26169	-299.844	928.431	-62.566	-331.016	916.903	-41.6105	-279.612	863.292
685	0	179.651	-200.054	1700.85	267.558	-209.875	1697.28	166.764	-393.937	1713.42	277.965	-385.255	1707.06	221.012	-427.808	1562.19	217.434	-503.949	1300.29	213.992	-282.229	1476.55	228.242	-220.014	1271.67	295.102	-509.491	1356.41	31.9534	-351.255	1517.7	-45.3205	-386.073	1326.59	-54.9983	-401.099	1172.36	-55.3044	-319.017	1017.01	3.18248	-293.394	931.265	-62.2364	-326.257	919.214	-41.8296	-274.608	865.619
686	0	179.169	-188.067	1702.48	266.911	-197.781	1698.93	166.376	-381.919	1714.93	277.63	-373.143	1708.77	220.695	-415.469	1563.68	217.799	-491.625	1302.13	213.549	-270.08	1478.37	227.44	-208.296	1273.3	295.45	-497.271	1358.45	31.6841	-338.737	1520.11	-45.8104	-376.511	1329.53	-55.3069	-393.76	1175.46	-55.7574	-313.156	1019.15	2.49037	-287.477	933.554	-59.0708	-322.458	920.244	-41.8347	-269.56	867.594
687	0	178.488	-176.067	1703.86	266.298	-185.681	1700.21	165.898	-369.949	1716.04	277.189	-361.143	1709.97	220.423	-403.259	1565.08	218.106	-479.579	1303.64	213.238	-257.851	1479.73	226.602	-196.314	1274.57	295.722	-485.024	1359.92	31.2322	-326.132	1521.8	-46.1206	-366.945	1332.28	-55.8105	-386.36	1178.04	-55.9451	-307.077	1021.19	2.5139	-280.173	936.285	-59.7784	-317.003	922.687	-42.2016	-264.331	869.855
688	0	177.789	-164.07	1704.76	265.548	-173.671	1701.01	165.426	-357.96	1716.87	276.635	-348.902	1710.71	220.064	-390.81	1565.94	218.093	-467.496	1305.08	212.767	-245.58	1480.73	225.728	-184.475	1275.48	295.905	-472.871	1361.29	31.0543	-313.498	1523.32	-46.661	-357.061	1334.75	-56.1171	-378.89	1180.79	-56.5107	-300.927	1023.03	2.1343	-273.713	938.099	-59.6265	-311.72	924.394	-42.6093	-258.912	871.683
689	0	176.945	-152.037	1705.03	264.921	-161.47	1701.51	165.098	-345.772	1717.28	276.258	-336.736	1711.28	219.543	-378.491	1566.68	218.019	-455.243	1305.97	212.308	-233.225	1481.26	224.884	-172.096	1276.17	295.889	-460.72	1362.14	30.8973	-300.848	1524.51	-47.1582	-347.044	1336.93	-56.588	-371.228	1182.87	-56.9634	-294.54	1024.47	1.42013	-266.506	940.219	-59.5027	-306.108	926.114	-42.4941	-253.235	872.505
690	0	176.444	-139.883	1705.03	264.38	-149.239	1701.72	164.421	-333.704	1717.18	275.624	-324.654	1711.1	219.163	-366.197	1566.82	217.788	-443.04	1305.85	211.924	-220.872	1481.3	224.013	-159.775	1276.4	295.659	-448.421	1362.19	30.4647	-288.108	1525.13	-47.6738	-336.949	1338.4	-56.8261	-363.342	1184.51	-57.3677	-287.97	1025.44	0.966815	-259.663	942.026	-58.8103	-300.481	926.966	-42.9711	-247.458	873.429
691	0	175.755	-127.618	1704.71	263.657	-137.018	1701.3	164.074	-321.549	1716.55	275.062	-312.428	1710.72	218.846	-353.794	1566.33	217.336	-430.713	1305.68	211.596	-208.429	1481.12	223.147	-147.374	1276.52	295.58	-436.148	1361.95	30.4124	-275.472	1525.45	-48.0075	-326.607	1339.67	-56.9968	-355.419	1185.94	-57.9102	-281.166	1026.27	0.567439	-252.428	943.183	-58.6683	-294.354	927.928	-43.4807	-241.389	874.157
692	0	174.973	-115.431	1704.17	263.014	-124.706	1700.73	163.56	-309.186	1715.89	274.754	-299.983	1710.25	218.49	-341.257	1565.9	216.865	-418.225	1305.73	211.186	-195.859	1480.42	222.551	-135.021	1275.68	295.343	-423.788	1361.69	29.986	-262.398	1525.41	-48.5264	-316.051	1340.78	-57.3591	-347.159	1187.24	-58.3739	-274.014	1026.9	-0.038459	-244.966	944.029	-58.5032	-287.958	928.59	-44.1457	-234.754	874.752
693	0	174.406	-103.108	1703.12	262.411	-112.172	1699.91	163.332	-296.948	1714.6	274.095	-287.498	1709.08	217.829	-328.596	1564.67	216.167	-405.735	1304.82	210.677	-183.245	1479.43	221.733	-122.658	1274.43	294.648	-411.422	1361.24	29.7719	-249.427	1524.94	-49.1232	-305.272	1341.16	-57.5638	-338.66	1187.87	-58.8861	-266.565	1027	-0.760544	-237.6	943.516	-58.6679	-281.135	928.789	-44.5873	-228.452	874.719
694	0	173.84	-90.5434	1701.65	261.83	-99.718	1698.49	162.65	-284.529	1712.79	273.453	-275.096	1707.37	217.355	-315.899	1563.28	215.288	-393.194	1303.21	210.277	-170.474	1478	221.063	-110.23	1273.11	294.04	-399.023	1359.24	29.4869	-236.652	1523.75	-49.6387	-294.458	1340.98	-57.7137	-330.005	1187.9	-59.4661	-258.946	1026.45	-1.46231	-229.54	943.652	-58.7143	-274.237	928.418	-45.0656	-221.631	874.258
695	0	172.939	-78.101	1700.16	260.96	-87.2241	1696.93	162.034	-271.973	1710.84	272.581	-262.469	1705.32	216.927	-303.127	1561.57	214.495	-380.625	1301.43	209.837	-157.669	1476.17	220.384	-97.9026	1271.2	293.252	-386.416	1357.3	28.9763	-223.749	1522.39	-50.1243	-283.56	1340.33	-57.9743	-321.067	1187.72	-60.1073	-251.084	1025.69	-2.11378	-221.478	942.984	-58.8387	-266.981	927.625	-45.8191	-214.67	873.173
696	0	172.256	-65.2127	1698.09	260.256	-74.3983	1694.9	161.365	-259.251	1708.72	272.118	-249.833	1703.42	216.228	-290.094	1559.32	213.705	-367.836	1299.63	209.291	-144.689	1474.04	219.733	-85.4926	1268.91	292.463	-373.737	1355.38	28.4863	-210.669	1520.72	-50.6983	-272.431	1339.43	-58.3248	-311.76	1187.12	-60.7877	-242.663	1024.72	-3.03813	-213.241	941.647	-59.2322	-259.422	926.642	-46.4158	-207.411	871.809
697	0	171.402	-52.5267	1696.02	259.447	-61.6337	1692.88	160.487	-246.412	1706.3	271.336	-236.939	1700.91	215.399	-276.919	1557.11	212.613	-355.014	1297.27	208.533	-131.703	1471.63	219.031	-73.1856	1266.2	290.87	-361.542	1353.6	27.8884	-197.68	1518.66	-51.1716	-261.005	1338.11	-58.5181	-301.958	1186.24	-61.6136	-233.971	1023.2	-4.01227	-204.735	939.962	-59.7329	-251.556	925.174	-47.2428	-199.837	869.878
698	0	170.697	-39.5097	1693.78	258.635	-48.6564	1690.36	159.884	-233.402	1703.46	270.455	-224.178	1698.25	214.858	-263.858	1554.7	211.613	-342.072	1294.6	207.928	-118.526	1469.04	218.485	-60.341	1263.48	290.217	-348.079	1350.49	27.154	-184.449	1516.2	-51.681	-249.52	1336.41	-58.6795	-291.906	1184.74	-61.9907	-225.517	1021.45	-5.00316	-195.771	938.005	-60.3177	-243.541	923.333	-48.2117	-192.066	867.72
699	0	169.474	-26.6067	1691.07	257.656	-35.7443	1687.58	158.816	-220.404	1700.61	269.635	-211.077	1695.47	214.056	-250.423	1551.89	210.489	-329.15	1292.15	207.101	-105.283	1466.14	217.745	-47.637	1260.31	289.11	-335.16	1347.86	26.3042	-171.257	1513.81	-52.1236	-237.897	1334.3	-58.9682	-281.457	1183.11	-62.5608	-216.373	1019.29	-5.65399	-186.993	935.397	-60.9194	-235.097	921.276	-49.2411	-184.022	865.057
700	0	168.88	-13.301	1688.23	256.654	-22.4663	1684.84	157.631	-207.266	1697.46	268.534	-197.935	1692.34	213.259	-237.081	1549.1	209.182	-316.248	1289.15	206.225	-91.9235	1462.94	217.059	-34.5808	1257.08	287.857	-322.093	1344.88	25.3356	-157.978	1510.88	-52.7259	-225.921	1331.87	-59.2674	-270.535	1180.95	-63.5327	-206.891	1016.54	-6.70859	-177.917	932.302	-61.8589	-226.413	918.769	-50.6384	-175.725	862.215
701	0	167.465	-0.075873	1685.27	255.566	-9.29865	1682	156.609	-194.002	1694.32	267.186	-184.804	1688.78	212.213	-223.673	1546.22	207.98	-303.284	1285.72	205.191	-78.5908	1459.73	216.341	-22.1965	1253.2	286.405	-308.903	1341.34	24.3622	-144.893	1507.66	-53.144	-213.77	1328.96	-59.5947	-259.37	1178.23	-64.4196	-197.1	1013.48	-7.94693	-168.594	929.058	-62.7622	-217.522	915.765	-51.9227	-167.187	858.917
702	0	166.538	13.2748	1682.5	254.385	4.09365	1678.77	155.397	-180.663	1691.01	265.971	-171.473	1685.49	211.093	-210.185	1543.14	207.15	-290.06	1282.59	204.176	-65.077	1456.37	215.542	-8.84417	1250.07	285.045	-295.685	1338.73	23.2604	-131.462	1504.56	-53.9285	-201.603	1325.98	-59.8741	-247.87	1175.45	-65.1944	-186.991	1010.35	-9.29632	-158.829	925.309	-63.7812	-208.353	912.63	-53.3849	-158.512	855.315
703	0	165.178	26.8645	1679.41	253.246	17.5944	1675.8	153.992	-167.077	1687.76	264.844	-157.836	1682.4	209.864	-196.716	1539.98	206.042	-276.98	1279.68	203.053	-51.5701	1453.03	214.715	4.00471	1246.26	283.84	-282.31	1335.73	22.2712	-118.601	1501.18	-54.3808	-188.99	1322.86	-60.1327	-235.627	1172.7	-66.2564	-176.457	1006.83	-10.7153	-149.165	921.262	-65.1955	-198.625	909.546	-54.91	-149.352	851.625
704	0	163.461	40.3407	1675.85	251.657	31.1304	1672.52	152.336	-153.526	1684.57	263.085	-144.377	1679.13	208.534	-183.141	1537.03	204.576	-263.895	1277.39	201.531	-37.9781	1449.67	213.775	17.1576	1242.79	282.538	-268.774	1332.7	20.8924	-105.142	1497.78	-55.2567	-176.119	1319.35	-60.5822	-223.026	1169.37	-67.4319	-165.554	1002.85	-12.0772	-138.755	917.242	-66.4822	-188.775	905.939	-56.7133	-139.972	847.556
705	0	162.348	54.1207	1672.84	250.028	44.7149	1669.15	150.829	-139.852	1681.36	261.513	-130.807	1675.85	207.117	-169.609	1533.97	204.017	-250.429	1273.07	200.274	-24.3841	1446.48	212.959	30.4337	1239.58	281.25	-255.215	1329.45	19.3943	-91.8279	1494.26	-55.9995	-163.104	1315.7	-60.9734	-210.073	1165.94	-68.4992	-154.404	998.9	-13.7396	-128.37	912.401	-67.8617	-178.534	902.19	-58.0938	-130.49	843.157
706	0	160.605	67.6828	1669.85	248.347	58.2358	1666.05	148.958	-126.163	1678.27	259.764	-117.119	1672.78	205.642	-156.039	1530.59	202.872	-236.741	1270.72	198.666	-10.8344	1443.42	211.885	44.0291	1236.43	280.107	-241.567	1326.42	17.808	-78.4884	1490.96	-56.8743	-149.881	1312	-61.4194	-196.629	1162.45	-69.8214	-142.764	995.108	-15.3472	-117.348	908.217	-69.4489	-167.967	898.391	-60.3046	-120.386	838.747
707	0	158.657	81.378	1666.66	246.716	72.0556	1663.16	147.244	-112.388	1675.35	257.988	-103.536	1670.17	204.033	-142.571	1527.89	202.185	-223.238	1267.23	197.045	2.91157	1440.54	210.699	57.7408	1233.71	279.008	-227.85	1323.6	16.2103	-65.2115	1487.61	-57.8122	-136.308	1308.26	-61.788	-182.683	1158.97	-71.091	-130.565	990.939	-17.2125	-106.473	903.51	-71.2033	-156.854	894.713	-62.3751	-110.016	834.308
708	0	156.916	95.2496	1663.83	244.935	85.6807	1660.55	145.019	-98.719	1672.48	255.842	-89.8947	1667.41	202.214	-129.082	1525.13	200.955	-209.704	1264.86	195.125	16.4788	1437.92	209.439	71.5727	1231.19	277.77	-214.075	1320.8	14.3054	-51.9885	1484.42	-58.9622	-122.567	1304.55	-62.4365	-168.543	1155.13	-72.5208	-118.101	987.105	-18.9389	-95.6553	898.522	-73.1196	-145.358	890.883	-64.3807	-99.5892	829.576
709	0	154.685	108.88	1661	242.79	99.2526	1657.59	143.128	-84.98	1669.82	253.799	-76.2548	1664.77	200.486	-115.585	1522.08	200.209	-195.753	1261.82	193.295	30.2455	1435.3	207.971	85.5678	1228.49	276.819	-200.1	1318.03	12.5584	-38.7433	1481.26	-59.9877	-108.477	1300.45	-63.1443	-154.112	1151.57	-74.0265	-105.213	983.202	-20.9183	-84.0544	893.701	-75.1918	-133.461	886.951	-66.5889	-88.3921	825.469
710	0	152.754	122.588	1658.22	240.8	112.946	1654.9	140.839	-71.3019	1667.27	251.812	-62.5398	1662.36	198.561	-101.945	1519.46	199.357	-181.731	1259.27	191.238	44.0809	1432.74	206.143	99.6825	1226.05	275.82	-186.086	1315.61	10.4206	-25.5553	1478.14	-61.1775	-94.2653	1296.48	-63.753	-139.449	1147.72	-75.5289	-91.7718	979.249	-22.9655	-71.3248	889.331	-77.4605	-120.901	883.391	-68.9428	-76.7728	820.929
711	0	150.415	136.223	1655.58	238.448	126.474	1652.41	138.141	-57.6236	1664.99	249.329	-48.9986	1660.11	196.392	-88.3082	1517.07	198.171	-167.731	1256.7	188.972	57.9688	1430.3	204.342	114.059	1223.74	274.555	-171.979	1313.3	8.23426	-12.2981	1475.01	-62.5966	-79.9212	1292.56	-64.5284	-124.497	1144.07	-77.2392	-78.0767	975.325	-24.6977	-58.8395	884.746	-79.8217	-107.848	879.828	-71.2116	-64.4685	816.596
712	0	148.471	149.98	1653.68	236.167	140.23	1650.4	135.957	-43.8402	1663.22	246.751	-35.3923	1658.01	194.139	-74.5226	1514.72	196.956	-153.588	1254.12	186.88	72.0074	1428.3	202.348	128.664	1221.83	273.133	-157.821	1311.18	5.81416	0.960904	1471.99	-63.9772	-65.5496	1288.42	-65.2816	-109.413	1140.38	-78.7372	-63.9597	971.192	-26.8188	-45.7778	880.035	-82.188	-94.376	876.04	-73.4907	-51.7518	812.344
713	0	145.882	163.623	1652.27	233.564	153.744	1648.86	133.494	-30.1894	1661.68	244.429	-21.7657	1656.68	192.013	-60.7165	1513.03	196.03	-139.333	1251.98	184.406	85.9771	1426.62	199.855	143.365	1220.08	271.825	-143.386	1309.17	3.41202	14.1837	1469.33	-65.2732	-50.8832	1284.65	-66.1814	-94.2151	1136.76	-80.4174	-49.4116	967.982	-28.7054	-31.9287	876.474	-84.4541	-80.3108	872.872	-75.6874	-38.5856	808.474
714	0	143.686	177.333	1651.25	231.432	167.508	1648.16	131.08	-16.4571	1660.56	242.145	-8.11279	1655.8	189.766	-46.6901	1511.76	195.121	-124.917	1250.76	182.192	100.097	1425.61	197.628	158.271	1219.36	270.319	-129.016	1308.11	1.10898	27.5149	1467.06	-67.0803	-36.1882	1281.67	-67.1264	-78.6937	1133.75	-82.3172	-34.4974	965.255	-30.7463	-17.6524	873.109	-86.9347	-65.6495	870.135	-78.0685	-24.5196	805.401
715	0	141.084	190.921	1651.02	228.9	180.98	1647.75	128.566	-2.8289	1659.59	239.566	5.36004	1655.05	187.533	-32.6972	1510.97	193.984	-110.493	1249.57	179.516	114.135	1425.04	195.217	173.494	1218.9	268.682	-114.577	1306.82	-1.56098	40.7741	1465.33	-68.8477	-21.6012	1279.24	-68.2835	-63.08	1131.02	-84.2118	-19.2659	962.588	-33.0506	-2.92679	870.181	-89.2808	-50.5307	867.79	-80.3957	-10.0727	802.525
716	0	138.715	204.579	1650.99	226.608	194.566	1647.75	125.887	10.7666	1659.03	237.045	18.8666	1654.6	185.3	-18.7396	1510.42	192.775	-96.1163	1248.53	177.144	128.195	1424.84	192.903	188.788	1219.13	267.023	-100.092	1305.99	-4.1611	53.895	1464.12	-70.7461	-6.95062	1277.1	-69.4962	-47.3988	1128.62	-85.9483	-3.66829	960.502	-34.9787	12.3937	868.135	-91.604	-34.8351	865.477	-82.503	5.2473	800.385
717	0	136.282	218.011	1651.2	224.121	207.976	1647.83	123.561	24.3346	1658.99	234.56	32.388	1654.43	183.09	-4.81959	1510.18	191.586	-81.7381	1248.2	174.5	142.158	1425.01	190.551	204.023	1219.58	265.461	-85.7178	1305.4	-6.45357	67.2298	1463.13	-72.2393	7.70262	1275.57	-70.8149	-31.661	1126.89	-87.9473	12.4054	959.024	-37.0807	28.4053	866.662	-93.9575	-18.7798	863.927	-84.2795	21.0398	798.452
718	0	134.137	231.61	1651.82	221.789	221.382	1648.57	121.054	37.8294	1659.11	232.199	45.7208	1654.85	180.788	8.94776	1510.4	190.188	-67.5577	1248.06	172.011	156.154	1425.52	188.185	219.126	1220.35	263.742	-71.4707	1305.68	-8.8806	80.3407	1462.72	-74.1903	22.0559	1274.43	-72.3261	-15.7617	1125.53	-89.6959	28.7316	958.024	-38.8345	44.5575	865.267	-96.1741	-2.04385	862.922	-87.3	38.3124	798.234
719	0	131.683	244.947	1652.81	219.405	234.773	1649.3	118.538	51.2424	1659.65	229.678	59.045	1655.21	178.617	22.6482	1510.95	188.819	-53.5154	1248.51	169.534	169.98	1426.26	185.922	234.06	1221.37	262.042	-57.5011	1306.12	-11.2809	93.4492	1462.76	-76.0898	36.544	1273.73	-74.0908	0.183002	1124.72	-91.743	45.5669	957.331	-40.8263	61.4635	864.655	-98.4396	15.251	862.246	-89.3234	55.7361	797.678
720	0	129.832	258.304	1654.05	217.15	247.84	1650.48	116.342	64.5466	1660.47	227.507	72.2933	1656.01	176.651	36.0422	1511.77	187.557	-39.6224	1249.12	167.384	183.626	1427.29	183.621	248.748	1222.74	260.587	-43.4327	1306.74	-13.2003	106.715	1463.08	-77.8222	50.9498	1273.45	-75.964	16.0888	1124.37	-93.6171	62.6929	957.286	-42.6336	78.845	864.626	-100.72	33.0294	862.223	-91.1309	73.803	797.508
721	0	127.602	271.332	1655.39	215.271	261.091	1651.89	114.242	77.7722	1661.53	225.37	85.4815	1657.24	174.577	49.5713	1512.73	186.097	-25.8924	1250.34	165.184	197.132	1428.62	181.444	262.953	1224.34	259.264	-29.6473	1308.15	-15.2395	119.908	1463.92	-79.8538	65.2089	1274.07	-78.1056	32.0867	1124.82	-95.5347	80.2096	957.674	-44.2494	96.8725	865.345	-102.665	51.3651	862.739	-92.8552	92.528	797.965
722	0	125.884	284.509	1656.87	213.178	273.877	1653.42	111.929	90.8145	1662.86	223.128	98.4714	1658.53	172.571	62.7552	1514.31	184.298	-12.4125	1251.53	163.109	210.494	1430.21	179.317	276.796	1225.95	257.877	-16.1221	1309.54	-17.251	133.131	1465.16	-81.5243	79.7158	1274.64	-80.4739	48.0398	1124.96	-97.47	98.0528	958.598	-45.9988	115.212	866.175	-104.695	70.217	863.163	-94.5983	111.933	798.981
723	0	123.87	297.348	1658.6	211.409	286.858	1655.1	109.868	103.735	1664.11	221.105	111.094	1659.78	170.799	75.8419	1515.63	182.43	0.867236	1252.58	161.392	223.661	1431.76	177.39	290.24	1227.61	256.499	-2.80875	1311.15	-18.962	146.463	1466.41	-83.7577	94.0913	1275.64	-82.9219	64.0782	1125.56	-99.4933	115.993	959.818	-47.8738	134.226	867.785	-106.475	89.3354	864.052	-96.2405	131.934	800.49
724	0	122.296	310.221	1660.66	209.752	299.509	1657.1	108.214	116.533	1665.68	219.377	123.922	1661.53	169.058	88.7018	1517.19	180.644	13.9733	1253.98	159.808	236.614	1433.7	175.821	303.423	1229.69	254.965	10.2301	1312.47	-20.6589	159.515	1468.08	-85.6895	108.508	1276.87	-85.504	80.2595	1126.48	-101.369	134.366	961.24	-49.4584	153.561	869.994	-108.005	108.955	864.95	-97.867	152.41	802.489
725	0	120.652	322.814	1662.35	208.283	312.062	1659.32	106.479	129.184	1667.48	217.86	136.401	1663.6	167.433	101.364	1518.91	178.81	26.8234	1255.84	158.603	249.47	1435.59	174.689	316.449	1231.74	253.422	23.0417	1314.39	-22.0381	172.829	1469.73	-87.5532	123.321	1278.38	-87.9858	96.6674	1127.62	-103.305	153.004	963.314	-51.1573	173.301	872.268	-109.274	129.146	866.41	-99.4608	173.425	804.713
726	0	118.991	335.382	1664.6	206.694	324.748	1661.3	104.852	141.722	1669.28	216.339	148.968	1665.68	166.024	114.06	1521.02	176.803	39.4611	1257.6	157.315	262.12	1437.62	173.403	329.139	1233.8	251.675	35.6832	1316.13	-23.502	185.803	1471.83	-89.7616	138.084	1279.98	-90.8528	113.111	1128.76	-105.213	172.059	965.398	-52.6353	193.325	874.583	-110.571	149.495	867.965	-100.82	194.902	807.047
727	0	117.756	347.848	1666.64	205.233	337.044	1663.62	103.713	154.217	1671.2	214.956	161.423	1667.75	164.821	126.64	1522.83	174.979	52.0098	1259.41	156.448	274.735	1439.76	172.697	341.666	1235.72	249.888	48.134	1317.8	-24.5138	198.877	1473.73	-91.853	153.02	1281.59	-93.5372	129.702	1130.02	-107.044	191.104	967.559	-53.965	213.603	877.187	-111.623	170.077	869.356	-102.371	216.904	810.017
728	0	116.356	360.075	1668.92	203.973	349.674	1665.72	102.562	166.514	1673.21	213.802	173.845	1669.81	163.672	139.158	1525	173.36	64.4144	1261.4	155.398	287.074	1441.68	172.231	353.981	1237.88	248.25	60.3497	1319.67	-25.7169	211.605	1475.62	-93.8125	168.289	1283.27	-96.3934	146.328	1131.6	-108.743	210.582	969.671	-55.3839	234.055	879.793	-114.713	191.559	872.247	-103.404	239.099	812.809
729	0	115.301	372.399	1671.11	202.641	361.874	1668.2	101.486	178.709	1675.43	212.817	186.217	1672.22	162.751	151.521	1527.19	171.561	76.7156	1263.7	154.922	299.459	1444.01	171.883	366.125	1239.97	246.6	72.5348	1321.89	-26.4291	224.442	1477.83	-95.5871	183.528	1285.03	-99.2007	163.179	1132.95	-110.162	230.359	971.698	-56.4732	254.673	882.701	-116.46	212.937	874.494	-104.566	261.562	815.973
730	0	113.983	384.503	1673.53	201.563	374.295	1670.6	100.797	190.98	1677.75	211.798	198.612	1674.31	161.427	163.478	1529.47	169.836	88.8227	1266.06	154.203	311.635	1446.43	171.576	377.844	1242.22	244.88	84.5712	1323.95	-27.365	237.052	1480.1	-97.5668	198.974	1286.95	-101.882	180.228	1134.58	-111.727	250.191	974.346	-57.7598	275.555	886.028	-118.607	234.67	877.421	-105.258	284.385	819.301
731	0	112.969	396.672	1676.11	200.468	386.551	1673.28	100.142	202.948	1680.34	211.066	211.079	1676.62	161.177	175.929	1532.35	168.363	100.804	1268.7	153.735	323.822	1448.86	172.001	389.752	1245.64	243.379	96.4992	1326.23	-27.8324	249.7	1482.61	-99.157	214.286	1289.42	-104.371	197.287	1136.32	-113.126	270.174	977.318	-59.1881	296.605	889.526	-119.872	256.431	880.013	-106.323	307.157	823.237
732	0	111.973	408.773	1678.81	199.728	398.816	1676.1	99.593	215.098	1682.96	210.798	223.238	1679.85	160.375	187.978	1535.02	166.839	112.722	1271.72	153.237	335.81	1451.59	172.201	401.296	1248.26	242.012	108.359	1329.05	-28.634	262.087	1485.23	-100.682	229.567	1292.17	-106.786	214.541	1138.54	-114.475	290.243	980.703	-59.8329	317.277	893.043	-121.492	278.447	883.051	-107.384	330.261	827.609
733	0	111.247	420.795	1681.71	198.826	410.994	1678.82	99.0479	227.165	1685.51	210.212	235.496	1682.42	159.483	200.04	1537.99	165.183	124.609	1274.5	152.88	347.828	1454.45	172.317	412.776	1250.82	240.513	120.156	1331.83	-29.1295	274.689	1488.23	-102.088	244.801	1294.76	-109.003	231.804	1140.66	-115.828	310.428	984.581	-60.4669	338.401	897.261	-123.439	300.544	886.807	-108.432	353.354	832.785
734	0	110.507	432.868	1684.37	198.361	423.206	1681.52	98.7851	239.141	1688.51	209.885	247.449	1685.39	158.445	211.828	1540.55	163.738	136.41	1277.11	152.445	359.707	1457.12	172.334	424.227	1254	239.237	131.744	1334.41	-29.7776	286.982	1491.31	-103.361	260.003	1298.03	-111.055	249.045	1143.25	-116.784	330.585	988.566	-61.527	359.384	901.798	-124.575	322.728	890.886	-109.353	376.41	837.994
735	0	110.016	444.865	1687.11	197.721	435.14	1684.23	98.6332	251.194	1691.11	209.397	259.95	1687.47	157.932	223.646	1543.37	162.431	148.221	1279.94	152.171	371.445	1460.04	172.147	435.498	1255.96	237.94	143.371	1336.95	-30.086	299.4	1494.1	-104.341	274.854	1300.87	-113.169	266.178	1146.03	-117.641	350.618	992.777	-62.482	380.415	906.785	-126.108	344.769	895.122	-110.209	399.418	843.449
736	0	109.627	456.697	1689.35	197.436	447.395	1686.56	98.158	263.061	1693.79	209.507	271.649	1690.93	157.484	235.442	1546.26	161.141	159.892	1282.85	151.803	383.209	1462.74	172.23	446.844	1258.5	236.903	154.836	1339.99	-30.5993	311.541	1497.24	-105.174	289.677	1303.87	-114.818	283.505	1148.69	-118.705	370.775	997.138	-63.0997	401.302	911.582	-127.153	366.843	899.179	-110.95	422.492	849.081
737	0	109.359	468.802	1691.78	197.013	459.158	1688.92	98.1484	275.125	1696.54	209.313	283.696	1693.39	156.596	246.964	1548.61	159.829	171.509	1285.4	151.49	394.803	1465.3	171.939	458.132	1261.14	235.767	166.457	1342.45	-30.7464	323.927	1499.92	-105.939	304.357	1306.48	-116.713	300.459	1151.57	-119.637	390.761	1001.69	-63.8442	422.317	916.337	-128.291	388.865	903.629	-111.603	445.583	854.816
738	0	109.209	480.636	1693.98	196.876	471.296	1690.78	97.9424	286.992	1699.05	209.066	295.622	1695.74	156.094	258.505	1550.7	158.811	183.194	1287.7	151.351	406.433	1467.57	171.889	469.517	1263.61	234.86	177.841	1344.64	-31.0785	335.953	1502.6	-106.637	318.799	1309.3	-118.205	317.401	1154.37	-120.518	410.732	1006.11	-64.4221	443.273	921.214	-129.063	410.76	907.987	-112.156	468.397	860.54
739	0	109.083	492.566	1695.75	196.754	483.094	1692.84	97.904	298.982	1701.29	209.012	307.592	1697.95	155.488	269.815	1553.14	157.588	194.729	1289.82	151.03	417.86	1470	171.607	480.663	1266.05	233.865	189.263	1347.05	-31.1879	348.111	1505.24	-107.291	333.152	1311.73	-119.647	334.339	1157.02	-121.112	430.487	1010.72	-64.8909	464.444	926.411	-129.981	432.429	912.601	-112.658	491.008	866.263
740	0	109.105	504.545	1697.67	196.555	494.932	1694.55	97.69	310.795	1703.7	208.849	319.383	1700.09	155.062	281.276	1555.15	156.426	206.408	1292.01	150.911	429.492	1472.1	171.457	492.005	1268.24	232.958	200.773	1348.84	-31.512	360.211	1507.71	-107.987	347.44	1314.18	-121.173	351.085	1159.45	-121.936	450.028	1015.35	-65.5933	485.313	931.487	-130.687	454.257	916.834	-113.253	513.435	872.085
741	0	108.967	516.243	1699.37	196.827	506.942	1696.23	97.817	322.795	1705.56	208.811	331.124	1702.16	154.762	292.951	1556.78	155.417	217.98	1293.67	150.739	440.751	1474.01	171.069	503.249	1270.43	232.314	212.192	1350.76	-31.6892	372.198	1510.17	-108.646	361.637	1316.77	-122.354	367.853	1161.86	-122.739	469.57	1019.58	-66.0522	506.365	936.565	-131.672	475.689	921.635	-113.622	535.929	878.111
742	0	109.066	528.193	1700.78	196.809	518.543	1697.74	97.7612	334.575	1707.23	209.076	343.033	1703.83	154.398	304.342	1558.29	154.589	229.65	1295.25	150.752	452.334	1475.73	171.045	514.661	1272.3	231.53	223.688	1352.12	-31.5504	384.221	1512.09	-109.152	375.675	1318.59	-123.57	384.45	1164.19	-123.327	488.921	1023.79	-66.384	527.187	941.896	-131.901	497.059	925.773	-113.876	558.17	883.745
743	0	109.273	540.076	1701.94	196.869	530.381	1698.79	97.8259	346.539	1708.68	209.114	354.706	1705.56	154.404	316.064	1559.57	153.672	241.316	1296.79	150.592	463.806	1477.57	170.942	526.043	1273.86	230.793	235.009	1353.57	-31.6379	396.04	1514.03	-109.731	389.741	1320.61	-124.871	400.978	1166.26	-124.015	508.1	1027.64	-66.5634	547.928	946.791	-132.084	518.104	930.022	-114.001	580.204	889.154
744	0	109.309	551.842	1702.88	197.287	542.343	1699.73	97.9264	358.352	1709.92	209.126	366.592	1706.51	154.071	327.458	1560.67	152.633	253.042	1297.59	150.785	475.337	1478.68	171.128	537.75	1275.35	230.049	246.529	1354.33	-31.5636	408.046	1515.34	-110.377	403.728	1322.2	-125.813	417.434	1167.86	-124.563	527.213	1031.45	-67.0952	568.564	951.5	-132.48	539.156	933.853	-114.179	602.133	894.52
745	0	109.589	563.738	1703.38	197.514	554.073	1700.34	98.0754	370.177	1710.71	209.251	378.386	1707.12	153.927	339.275	1561.13	151.893	264.841	1298.22	150.666	486.709	1479.07	171.088	549.328	1276.31	229.282	258.108	1354.68	-31.5859	420.013	1516.54	-110.898	417.648	1323.48	-126.977	433.579	1169.09	-125.092	546.193	1034.87	-67.3334	588.981	955.71	-132.352	560.15	937.577	-114.302	623.772	899.776
746	0	109.833	575.599	1703.52	197.63	565.872	1700.38	98.2771	382.095	1711.01	209.408	390.244	1707.23	153.765	350.868	1561.24	151.077	276.54	1298.61	150.713	498.388	1479.5	171.122	560.996	1276.56	228.549	269.643	1354.9	-31.5415	431.749	1516.9	-111.19	431.475	1324.16	-127.766	449.934	1170.24	-125.471	565.001	1038.04	-67.3586	609.359	960.132	-132.799	580.896	941.077	-114.273	645.184	904.689
747	0	110.269	587.561	1703.42	197.977	577.789	1700.22	98.4833	393.997	1711.2	209.737	402.098	1707.42	153.936	362.76	1561.17	149.755	288.208	1297.8	151.005	510.236	1479.6	171.228	572.736	1276.5	227.863	281.169	1354.76	-31.3253	443.829	1517.04	-111.624	445.397	1324.45	-128.832	465.976	1170.93	-125.655	583.754	1040.94	-67.6368	629.427	963.85	-132.343	601.354	944.027	-114.133	666.577	909.113
748	0	110.696	599.522	1703.23	198.394	589.838	1699.67	98.7414	405.867	1710.95	209.877	414.023	1706.73	153.704	374.378	1560.75	149.038	299.983	1297.4	150.877	522.035	1479.23	171.294	584.509	1276.37	227.398	292.885	1354.33	-31.1468	455.9	1516.99	-111.927	459.236	1324.39	-129.621	482.043	1171.22	-125.944	602.324	1043.53	-67.4173	649.511	967.681	-132.21	621.988	946.941	-113.742	687.659	913.645
749	0	111.058	611.417	1702.5	198.938	601.793	1698.8	99.1721	417.917	1710.24	210.405	425.916	1706.14	153.64	386.398	1559.85	149.089	311.89	1297.58	151.183	533.745	1478.68	171.519	596.314	1275.97	226.848	304.702	1353.46	-31.0862	467.964	1516.6	-112.262	472.923	1324.34	-130.4	497.8	1171.43	-125.933	620.627	1045.91	-67.6138	669.141	971.161	-130.901	641.838	949.578	-113.334	708.583	917.707
750	0	111.491	623.482	1701.91	199.408	613.615	1698.11	99.4294	429.97	1709.38	210.613	437.732	1705.25	153.843	398.431	1558.86	148.528	323.758	1296.63	151.185	545.816	1477.7	171.704	608.243	1275.07	226.318	316.501	1352.53	-31.0094	480.242	1516	-112.615	486.766	1324.04	-131.12	513.519	1170.82	-126.146	638.83	1048.12	-66.8508	688.98	974.945	-131.573	662.125	952.619	-112.866	729.367	921.992
751	0	111.886	635.555	1700.67	199.911	625.66	1696.97	99.7536	442.059	1708.18	210.93	449.82	1703.74	153.621	410.328	1557.62	148.104	335.658	1295.47	151.738	557.828	1476.58	171.96	620.274	1273.87	225.852	328.307	1351.07	-31.0223	492.694	1514.99	-112.859	500.52	1323.16	-131.764	529.131	1170.27	-125.984	656.791	1049.96	-66.6331	708.172	978.106	-130.083	681.894	954.295	-112.279	749.888	925.689
752	0	112.388	647.73	1699.33	200.435	637.662	1695.17	100.252	454.231	1706.64	211.385	461.817	1702.12	153.667	422.509	1556.07	147.828	347.591	1293.65	151.872	569.903	1474.97	172.326	632.163	1272.11	225.564	340.221	1349.09	-30.7917	505.235	1513.8	-112.831	514.2	1321.89	-132.226	544.624	1169.15	-125.985	674.551	1051.43	-65.9522	727.443	980.793	-129.511	701.537	956.217	-111.57	770.21	929.376
753	0	113.1	659.982	1697.27	201.048	649.924	1693.4	100.549	466.398	1704.63	211.795	473.922	1700.23	154.034	434.777	1554.21	147.851	359.552	1291.76	152.311	582.164	1472.79	172.53	644.183	1270.07	225.473	352.166	1347.29	-30.4999	517.748	1511.6	-112.691	527.767	1320.12	-132.722	559.892	1167.5	-125.701	692.114	1052.25	-65.4125	746.055	983.025	-129.036	720.756	957.738	-110.703	790.113	932.256
754	0	113.777	672.433	1695.19	201.674	662.265	1691.05	100.969	478.786	1702.53	212.361	486.347	1697.91	154.363	447.209	1552.36	147.939	371.653	1290	152.952	594.312	1470.66	172.893	656.301	1267.32	225.327	364.345	1345.43	-30.0305	530.414	1509.24	-112.548	541.296	1317.78	-133.014	575.355	1165.82	-125.249	709.426	1052.75	-64.4933	764.705	984.801	-128.872	740.216	959.176	-109.799	809.646	935.035
755	0	114.389	684.929	1692.58	202.193	674.765	1688.37	101.587	491.242	1699.99	212.846	498.773	1695.2	154.613	459.668	1549.52	148.016	383.781	1287.46	153.1	606.777	1467.68	173.313	668.394	1264.35	225.181	376.485	1342.69	-29.6886	543.191	1506.7	-112.457	554.783	1315.29	-133.264	590.41	1163.84	-124.769	726.561	1052.93	-63.6452	783.063	986.176	-127.964	759.045	960.003	-108.766	828.864	937.326
756	0	115.185	697.387	1689.75	202.915	687.28	1685.64	102.217	503.753	1697.14	213.241	511.235	1692.11	154.963	472.249	1546.87	148.345	396.038	1284.5	153.701	619.228	1464.7	173.67	680.58	1261.11	225.295	388.834	1339.69	-29.0793	555.912	1503.82	-111.93	568.249	1312.5	-133.175	605.48	1161.34	-124.215	743.467	1052.64	-62.632	801.08	987.306	-126.354	777.164	960.278	-107.622	847.843	939.242
757	0	115.655	709.997	1686.63	203.664	699.879	1682.79	102.894	516.344	1694.16	213.94	523.73	1689.36	155.586	484.744	1543.85	148.751	408.353	1281.77	154.28	631.783	1461.5	174.154	692.809	1257.93	225.712	401.181	1336.98	-28.4264	568.737	1500.98	-111.47	581.827	1309.71	-133.144	620.349	1158.84	-123.41	760.125	1052.3	-61.9551	818.552	988.033	-125.695	795.56	960.716	-106.527	866.294	941.13
758	0	116.484	722.658	1683.69	204.407	712.337	1679.8	103.754	529.024	1691.07	214.894	536.495	1686.29	156.13	497.125	1540.95	149.316	420.853	1278.69	155.399	644.194	1458.57	174.704	705.161	1254.55	226.068	413.678	1333.8	-27.6603	581.49	1497.78	-110.925	595.197	1306.65	-132.854	635.234	1155.98	-123.08	776.498	1051.54	-60.8392	835.863	988.745	-124.915	813.357	960.586	-105.529	884.383	942.502
759	0	117.433	735.456	1680.38	205.16	725.065	1676.55	104.66	541.811	1687.51	215.757	549.049	1683.21	156.847	509.71	1537.3	150.006	433.445	1274.99	156.248	656.88	1455.2	175.481	717.635	1251.37	226.732	426.36	1330.36	-27.0063	594.252	1494.59	-110.118	608.705	1303.6	-132.498	649.878	1153.03	-122.307	792.63	1050.8	-59.637	852.981	989.139	-123.701	830.918	960.355	-104.163	902.198	943.49
760	0	118.323	748.345	1676.92	206.343	738.11	1673.23	105.652	554.669	1683.91	216.716	561.996	1679.73	157.846	522.303	1534.05	150.725	446.276	1271.41	157.066	669.586	1451.84	176.143	730.119	1247.68	227.624	439.204	1326.66	-26.0504	606.938	1491.07	-109.416	622.117	1300.29	-131.95	664.424	1149.93	-121.142	808.492	1049.54	-58.5506	869.577	988.828	-122.443	847.932	959.494	-103.185	919.336	943.932
761	0	119.329	761.224	1673.46	206.949	750.811	1669.6	106.534	567.492	1680.58	217.75	574.823	1676.48	158.9	535.309	1530.42	151.507	459.269	1267.87	158.27	682.671	1448.28	177.116	742.819	1244.18	228.532	452.109	1323.04	-25.0546	619.746	1487.42	-108.352	635.481	1296.5	-131.062	678.967	1146.67	-120.21	824.089	1047.93	-57.2147	885.994	988.49	-121.27	864.623	958.514	-101.831	936.308	944.127
762	0	120.597	774.33	1669.79	207.985	763.837	1665.89	107.829	580.526	1677.41	218.854	587.979	1672.7	159.733	547.947	1526.65	152.388	472.446	1263.95	159.255	695.721	1444.63	177.737	755.61	1240.36	229.259	465.171	1319.04	-24.0869	632.668	1483.56	-107.239	648.917	1292.66	-130.299	693.213	1143.15	-118.945	839.482	1046.02	-55.9715	901.94	987.278	-119.717	880.977	956.854	-100.496	952.871	943.473
763	0	121.535	787.379	1666.13	209.415	777.171	1662.15	109.2	593.689	1673.79	220.197	601.08	1669.23	160.994	561.251	1523.16	153.225	485.783	1259.95	160.187	708.876	1441.08	178.78	768.919	1236.89	230.366	478.252	1315.19	-23.1102	645.495	1479.89	-106.026	662.193	1288.79	-129.155	707.344	1139.61	-117.853	854.508	1043.76	-54.6166	917.697	985.795	-118.123	896.845	954.936	-99.2406	968.823	942.628
764	0	123.067	800.758	1662.69	210.623	790.089	1658.57	110.486	606.838	1670.46	221.582	614.312	1665.66	162.241	574.289	1519.59	154.164	499.208	1256.28	161.438	722.372	1437.46	179.814	782.502	1233.03	231.591	491.377	1311.63	-21.9509	658.51	1476.07	-104.392	675.475	1284.77	-127.763	721.448	1136.25	-116.431	869.286	1041.2	-53.0819	933.182	984.239	-116.494	912.234	952.868	-97.8478	984.326	941.365
765	0	124.523	813.988	1659.39	212.389	803.839	1655.22	111.942	620.246	1667.29	223.022	627.739	1662.28	163.571	587.688	1516.37	155.184	512.83	1252.89	162.594	735.741	1434.19	180.758	796.02	1229.42	232.404	504.614	1308.25	-20.867	671.769	1472.61	-102.792	688.647	1281.08	-126.449	735.315	1132.93	-115.02	883.807	1038.61	-51.645	948.118	982.282	-114.378	927.059	950.394	-96.5563	999.451	939.67
766	0	126.161	827.501	1656.42	213.647	817.055	1651.98	113.419	633.624	1664.19	224.491	641.101	1659.01	164.772	601.326	1512.81	156.048	526.539	1249.6	164.092	749.526	1430.99	182.212	810.177	1226.34	233.257	517.993	1304.86	-19.6593	685.302	1469.34	-101.06	701.771	1277.48	-124.859	748.988	1129.38	-113.901	897.921	1035.76	-50.2398	962.587	979.989	-113.373	941.772	947.926	-95.3235	1014.04	937.542
767	0	127.788	841.047	1653.65	215.601	830.621	1649.1	115.205	647.236	1661.06	226.061	654.543	1655.78	166.126	615.113	1509.62	156.863	540.462	1246.08	165.441	763.211	1428.01	183.685	824.34	1223.26	234.256	531.696	1301.55	-18.4183	699.05	1466.3	-99.3419	714.896	1274.07	-122.957	762.504	1125.86	-112.404	911.694	1032.83	-48.8998	976.731	977.453	-111.103	955.583	944.747	-93.7786	1028.13	934.975
768	0	129.473	854.768	1651.05	217.219	844.295	1646.25	116.697	660.818	1658.01	227.731	668.158	1652.96	167.665	629.077	1506.82	157.823	554.713	1243.3	167.062	777.134	1425.21	185.027	838.189	1220.42	235.147	545.721	1298.34	-16.828	713.208	1463.25	-97.2224	728.004	1270.7	-121.039	775.842	1122.66	-110.749	925.121	1029.62	-47.3936	990.545	974.462	-110.396	969.23	942.087	-92.5954	1041.65	932.247
769	0	131.257	868.572	1648.39	219.086	857.98	1643.82	118.604	674.689	1655.17	229.505	681.874	1650.19	169.371	643.19	1504.24	158.941	569.174	1240.5	168.894	791.383	1422.49	186.646	852.411	1217.51	236.073	559.823	1295.36	-15.1723	727.529	1460.69	-95.0068	741.215	1267.95	-118.932	789.084	1119.56	-109.217	938.254	1026.32	-45.9428	1003.91	971.239	-108.642	982.187	938.515	-91.4832	1054.58	928.862
770	0	133.336	882.315	1646.25	220.965	871.938	1641.66	120.438	688.581	1652.84	231.33	695.824	1647.64	171.086	657.326	1501.61	159.951	583.607	1237.77	170.638	805.639	1419.74	188.524	866.86	1214.87	237.075	574.207	1292.53	-13.4402	741.992	1458.27	-92.7181	754.534	1265.24	-116.554	802.22	1116.63	-107.582	951.062	1022.86	-44.6346	1016.66	967.889	-105.332	994.251	934.087	-90.0291	1067.19	924.992
771	0	135.222	896.613	1644.76	222.836	886.089	1640.07	122.247	702.638	1650.97	233.285	709.976	1645.79	172.988	671.618	1499.71	161.191	598.286	1235.8	172.534	820.109	1417.78	190.575	881.553	1213.19	237.896	587.252	1291.28	-11.6686	756.612	1456.4	-90.4146	768.082	1263.03	-114.12	815.1	1114.27	-105.876	963.445	1019.31	-42.9199	1029.32	963.981	-103.788	1006.15	930.241	-88.6741	1078.93	920.699
772	0	137.225	910.869	1643.54	224.479	900.239	1638.7	124.203	716.926	1649.48	235.267	724.229	1644.22	174.824	686.168	1498.22	162.127	613.176	1234.46	174.225	834.653	1416.25	192.265	896.228	1211.44	238.93	601.07	1290.52	-9.81793	771.48	1454.75	-88.4551	782.106	1261.2	-111.458	827.971	1112.26	-104.176	975.523	1015.73	-41.6787	1041.19	959.851	-102.599	1017.32	926.489	-87.7446	1090.11	916.189
773	0	139.32	925.24	1642.5	226.963	914.705	1637.77	126.247	731.315	1648.21	237.276	738.518	1642.87	176.6	700.902	1497.16	162.667	628.245	1233.07	176.233	849.429	1414.95	194.051	911.343	1210.35	240.317	616.428	1288.84	-8.03861	786.526	1453.63	-86.2411	796.376	1260.21	-108.803	840.636	1110.3	-102.441	987.119	1012.27	-40.305	1052.55	955.836	-101.047	1028.05	922.814	-86.6262	1100.72	911.729
774	0	141.442	939.675	1641.93	229.029	929.091	1637.02	128.447	745.774	1647.59	239.288	752.94	1641.82	178.321	715.696	1496.2	163.273	643.523	1232.05	177.96	864.03	1413.88	195.96	926.61	1209.54	241.592	630.997	1288.33	-6.14617	801.666	1453.09	-84.2755	810.997	1259.47	-105.951	853.063	1109.3	-100.594	998.34	1009.07	-39.2277	1063.15	951.533	-99.4045	1038.09	918.958	-85.4781	1110.8	906.901
775	0	143.608	954.211	1641.79	231.171	943.507	1636.89	130.46	760.251	1647.4	241.437	767.368	1641.51	180.067	730.329	1495.8	164.084	658.577	1231.79	180.135	878.94	1413.76	197.971	941.968	1209.61	242.47	645.803	1287.07	-4.15232	816.738	1452.75	-81.9475	825.703	1259.27	-103.09	865.489	1108.19	-98.9541	1009.23	1005.9	-38.0746	1073.41	947.227	-97.761	1047.46	914.982	-84.4078	1120.06	901.805
776	0	145.745	968.599	1642.32	233.358	957.899	1637.3	132.405	774.862	1647.61	243.55	781.923	1641.79	181.73	744.742	1496.09	165.335	673.612	1232.04	182.067	893.514	1414.14	199.893	957.185	1210.09	243.648	660.725	1287.02	-2.29881	831.836	1453.08	-79.962	840.705	1259.66	-100.38	877.853	1107.99	-97.1952	1019.72	1003.14	-36.6268	1083.33	943.332	-96.4671	1056.21	911.355	-83.4919	1128.64	897.049
777	0	148.115	983.178	1643.22	235.62	972.33	1637.95	134.458	789.414	1648.29	245.413	796.326	1642.4	183.383	759.262	1496.43	166.54	688.72	1232.22	183.97	908.075	1414.81	201.855	972.246	1210.89	244.962	675.636	1287.44	-0.575714	846.868	1454.07	-78.2553	855.819	1260.78	-97.3138	890.161	1108.05	-95.477	1029.83	1000.74	-35.55	1092.58	939.447	-95.2781	1064.69	908.237	-82.7346	1136.4	891.846
778	0	150.264	997.885	1644.5	237.757	986.781	1638.8	136.448	804.065	1649.54	247.449	810.761	1643.56	185.105	773.771	1497.29	167.807	703.789	1232.82	185.878	922.501	1416.28	203.814	987.15	1212.61	246.455	690.153	1288.84	1.19429	861.701	1455.53	-76.6556	870.778	1262.22	-94.5033	902.189	1108.71	-93.6014	1039.63	998.87	-34.3796	1101.15	935.841	-93.9886	1072.56	905.474	-81.7715	1143.84	887.32
779	0	152.335	1012.51	1646.01	240.003	1001.23	1640.34	138.305	818.672	1651.17	249.316	825.077	1645.22	186.73	788.156	1498.77	169.387	718.749	1234.12	187.651	936.934	1417.97	205.829	1001.91	1214.52	247.917	705.001	1289.58	2.8334	876.312	1456.82	-74.9673	885.635	1264.01	-91.8962	914.039	1109.86	-92.0436	1049.12	996.755	-33.2222	1109.5	932.317	-92.9584	1079.72	902.19	-80.8535	1150.83	882.316
780	0	154.461	1026.91	1647.57	242.123	1015.65	1641.79	140.191	833.177	1653.07	251.143	839.504	1646.81	188.35	802.543	1500.2	171.156	733.474	1235.71	189.226	951.197	1419.54	207.549	1016.56	1216.46	249.741	719.749	1291.27	4.65171	890.797	1458.66	-73.4252	900.35	1266.07	-89.0341	925.861	1111.34	-90.316	1058.37	995.192	-32.1053	1117.34	928.706	-92.0207	1086.79	900.033	-80.2349	1157.17	877.953
781	0	156.653	1041.25	1649.22	244.265	1030.07	1643.4	141.924	847.511	1655.25	252.878	853.773	1648.54	190.133	816.76	1502.36	173.244	747.967	1237.23	190.987	965.471	1421.61	209.236	1031	1218.84	251.921	734.703	1292.78	6.35783	904.878	1460.3	-71.8205	914.675	1268.15	-86.3175	937.401	1113.11	-88.7398	1067.16	993.867	-31.0535	1124.66	925.159	-91.3201	1093.39	898.447	-79.6408	1163.07	873.366
782	0	158.621	1055.46	1651.22	246.171	1044.35	1645.16	143.545	861.831	1657.4	254.563	867.902	1650.45	191.751	830.734	1504.32	175.34	762.112	1239.43	192.191	979.456	1423.31	210.817	1045.41	1221.08	253.81	748.856	1294.89	7.91537	918.62	1462.22	-70.352	928.562	1270.28	-83.7023	948.681	1115.19	-87.2914	1075.72	992.676	-30.0862	1131.5	921.811	-90.7181	1099.56	896.814	-78.4315	1168.72	869.22
783	0	160.459	1069.64	1653.37	247.834	1058.16	1647.44	145.186	875.955	1659.95	256.247	882.041	1652.63	193.409	844.648	1506.94	177.363	776.116	1241.83	193.394	993.269	1425.64	212.303	1059.81	1223.69	255.975	763.067	1297.44	9.47995	932.145	1464.31	-68.9691	942.027	1272.7	-81.2944	959.79	1117.21	-85.6727	1084.07	992.249	-29.2291	1137.84	919.228	-90.3068	1105.74	895.842	-77.3737	1173.81	866.053
784	0	162.128	1083.59	1655.58	249.313	1071.74	1649.59	146.42	889.82	1662.44	257.501	895.818	1655.07	194.933	858.446	1509.16	179.439	789.839	1244.01	194.538	1007.06	1427.96	213.014	1073.64	1226.2	258.421	777.153	1300.25	10.6996	945.363	1467.15	-67.7284	954.818	1275.36	-79.0861	970.693	1119.84	-84.2924	1092.18	992.209	-28.174	1144	917.272	-89.7262	1111.7	895.155	-76.4222	1178.78	862.756
785	0	163.5	1097.27	1658.35	251.376	1085.6	1652.26	147.926	903.636	1664.96	258.744	909.249	1657.78	196.444	872.021	1511.58	181.698	803.382	1246.65	195.651	1020.51	1430.85	214.08	1087.52	1229.05	260.899	790.957	1303.29	11.8875	958.211	1469.83	-66.4054	967.123	1278.29	-77.0438	981.246	1122.17	-82.8212	1100.15	992.535	-27.4241	1149.55	915.2	-89.417	1117.28	894.921	-75.715	1183.09	859.924
786	0	164.919	1110.8	1661.02	252.525	1098.87	1655.06	148.981	917.131	1667.49	260.033	922.641	1660.52	198.067	885.377	1514.41	183.868	816.693	1249.35	196.574	1033.89	1433.7	214.503	1100.76	1231.68	263.151	804.578	1305.69	13.0174	970.674	1472.47	-65.2203	978.779	1280.94	-75.3146	991.573	1124.68	-81.4419	1107.81	992.558	-26.5404	1154.86	914.11	-88.8152	1122.98	894.775	-74.6493	1187.45	857.607
787	0	165.961	1124.12	1663.65	253.989	1112.36	1657.53	150.047	930.549	1670.22	261.226	936.064	1663.27	199.484	898.681	1517.09	185.989	829.824	1252.27	197.287	1047.05	1436.4	215.148	1114.09	1234.63	265.538	818.018	1308.9	14.0501	982.929	1475.38	-64.0077	989.696	1283.49	-73.8206	1001.68	1127.56	-80.0202	1115.32	993.24	-25.5149	1159.91	913.137	-88.4999	1128.37	895.163	-73.6477	1191.68	855.896
788	0	166.875	1137.2	1666.51	254.59	1125.22	1660.4	151.076	943.677	1673	262.061	949.109	1666.06	200.724	911.706	1519.84	187.965	842.752	1254.88	197.903	1059.96	1439.36	215.509	1127.08	1237.09	267.805	831.263	1311.97	14.8708	995.023	1478.22	-62.9	1000.24	1286.2	-72.6143	1011.26	1129.94	-78.6393	1122.4	994.073	-24.656	1164.53	912.591	-87.9237	1133.88	895.698	-72.6382	1195.7	854.443
789	0	167.833	1150.32	1669.15	255.232	1138.39	1663.23	151.995	956.681	1675.78	263.001	962.172	1668.95	201.932	924.472	1522.89	189.819	855.573	1257.72	198.297	1072.87	1441.7	215.655	1139.86	1239.77	269.822	844.251	1315.1	15.7098	1006.83	1480.91	-61.7831	1010.32	1288.5	-71.6496	1020.39	1132.77	-77.5392	1129.37	995.035	-23.3723	1169.49	912.103	-87.8771	1139.18	896.768	-71.3822	1199.69	853.546
790	0	168.615	1163.24	1671.64	255.927	1151.15	1665.76	152.819	969.62	1678.63	263.658	975.243	1671.34	203.102	937.246	1525.76	191.522	868.117	1260.72	198.698	1085.61	1444.38	215.6	1152.73	1242.14	271.793	857.164	1318.21	16.4349	1018.6	1483.56	-60.6383	1020.04	1290.74	-70.8449	1029.25	1135.65	-76.2027	1136.12	996.26	-22.3443	1173.95	911.934	-87.481	1144.61	898.053	-69.7267	1203.9	853.088
791	0	169.129	1175.93	1674.24	256.425	1164.05	1668.34	153.404	982.259	1681.63	264.444	987.987	1674.54	204.127	949.701	1528.92	193.261	880.606	1263.81	198.899	1097.98	1446.89	215.764	1165.61	1244.72	273.259	869.674	1321.63	17.1228	1030.09	1486.21	-59.7646	1029.35	1293.16	-70.2122	1037.71	1138.42	-75.3527	1142.67	997.256	-20.6915	1178.82	912.052	-86.9667	1149.97	899.534	-68.2095	1207.87	852.715
792	0	169.53	1188.57	1676.98	256.732	1176.75	1671.26	154.116	994.749	1684.88	265.086	1000.73	1677.58	205.083	962.097	1531.72	194.944	893.031	1266.96	198.911	1110.21	1449.54	215.37	1178.06	1247.34	274.816	882.28	1325.06	17.8118	1041.42	1488.96	-59.1227	1038.38	1295.81	-69.7511	1045.74	1141.49	-74.297	1148.97	998.874	-19.0373	1183.6	912.636	-86.3017	1155.08	901.128	-66.7656	1211.82	853.054
793	0	170.049	1200.93	1680.23	257.589	1189.31	1674.57	154.709	1007.17	1688.17	265.707	1013.23	1681.03	206.036	974.312	1535.05	196.656	905.363	1270.16	199.384	1122.45	1453.08	215.154	1190.49	1250.67	276.626	894.995	1327.84	18.3576	1052.59	1492.18	-58.477	1047.13	1298.8	-69.3049	1053.41	1144.55	-73.5323	1155.04	1000.73	-17.8327	1187.81	914.103	-85.0415	1160.14	902.802	-65.726	1215.73	853.624
794	0	170.167	1213.27	1683.45	257.706	1201.52	1677.86	155.243	1019.43	1691.4	266.239	1025.57	1684.45	206.937	986.484	1538.2	198.197	917.607	1273.33	199.763	1134.54	1456.64	214.805	1202.96	1253.85	277.853	907.447	1331.04	18.7892	1063.62	1495.39	-58.2792	1055.61	1302.2	-68.9966	1060.72	1147.48	-72.9869	1160.75	1002.95	-17.4184	1192.48	916.318	-85.0584	1165.08	905.004	-64.0955	1219.85	854.883
795	0	170.295	1225.38	1686.46	257.888	1213.73	1681	155.678	1031.66	1694.41	266.586	1037.86	1687.74	207.829	998.659	1541.39	199.632	929.891	1276.25	200.016	1146.46	1460.02	214.538	1215.2	1257.33	279.238	919.821	1334.43	19.3624	1074.71	1498.76	-58.2069	1064.03	1305.84	-68.7642	1067.76	1150.52	-72.2903	1166.34	1005.39	-16.1529	1196.89	918.091	-84.4892	1169.85	907.363	-62.7722	1224.08	856.634
796	0	170.29	1237.43	1689.54	258.006	1226.03	1684.12	156.305	1043.67	1697.59	267.039	1050.03	1691.17	208.844	1010.59	1544.74	201.151	942.084	1279.22	200.257	1158.39	1463.33	214.524	1227.27	1260.9	280.511	932.154	1337.62	19.7761	1085.71	1502.24	-58.0264	1072.39	1309.48	-68.4865	1074.45	1153.8	-71.9345	1171.75	1007.85	-15.3617	1201.43	920.15	-83.9302	1174.61	910.107	-61.8295	1228.53	858.663
797	0	170.523	1249.18	1692.48	258.151	1238.14	1687.32	156.686	1055.63	1700.34	267.534	1062.24	1694.28	209.647	1022.6	1547.2	202.637	954.166	1282.25	200.686	1170.38	1466.6	214.742	1239.32	1263.86	281.736	944.542	1340.11	20.5379	1096.57	1504.92	-57.3338	1080.74	1312.48	-68.0072	1081.07	1157.05	-71.948	1177.02	1010.32	-14.9535	1206.23	922.823	-82.9606	1178.98	911.843	-61.3635	1232.66	861.02
798	0	170.372	1261.25	1695.37	258.337	1250.38	1690.38	157.03	1067.39	1703.13	267.895	1074.34	1697.26	210.384	1034.47	1550.68	203.947	966.285	1285.23	201.002	1182.28	1469.75	214.816	1251.27	1267.13	283.042	956.943	1343.2	21.2668	1107.64	1507.73	-57.0787	1088.8	1315.48	-67.6991	1087.37	1159.98	-71.7368	1182.2	1012.35	-14.6371	1211.53	925.344	-82.3884	1183.37	914.083	-60.7859	1236.89	862.575
799	0	170.137	1273.07	1697.94	258.267	1262.56	1693.1	157.414	1079.14	1705.91	268.323	1086.58	1699.86	211.423	1046.39	1553.18	205.296	978.294	1288.01	201.282	1194.25	1472.31	215.218	1263.22	1269.92	284.246	969.256	1346.08	21.8123	1118.61	1510.35	-56.605	1096.99	1318.44	-67.3237	1093.35	1162.41	-71.5607	1187.4	1014.54	-14.4841	1216.79	927.442	-81.9399	1187.56	916.336	-60.464	1241.34	864.732
800	0	170.087	1284.78	1700.1	258.078	1274.61	1695.56	157.918	1090.93	1708.19	268.626	1098.59	1702.23	212.233	1058.32	1555.78	206.423	990.293	1290.6	201.53	1206.3	1474.42	215.44	1275.21	1272.17	285.382	981.541	1348.56	22.5037	1129.71	1512.5	-56.0613	1105.19	1321.03	-66.7076	1099.72	1165.77	-71.5774	1192.59	1016.51	-15.0106	1222.6	929.948	-81.2941	1191.82	918.341	-60.3838	1245.94	866.389
801	0	169.913	1296.76	1702.66	257.684	1286.5	1697.98	158.139	1102.54	1710.46	268.921	1110.64	1704.64	213	1070.51	1557.8	207.407	1002.74	1292.83	201.896	1218.26	1477.07	215.992	1287.31	1274.78	286.444	993.923	1350.92	23.1573	1140.9	1514.73	-55.4257	1113.3	1323.73	-66.314	1106.17	1168.9	-71.912	1197.91	1018.61	-14.8048	1228.27	931.95	-80.2397	1195.99	920.069	-60.5149	1250.49	868.348
802	0	169.854	1308.21	1705.02	257.56	1298.38	1700.61	158.632	1114.2	1712.55	269.295	1122.69	1706.72	213.655	1082.49	1560.22	208.36	1014.88	1295.08	202.079	1230.16	1479.15	216.309	1299.3	1277.03	287.497	1006.17	1353.33	23.7301	1152.12	1516.99	-54.8119	1121.41	1326.43	-65.8105	1112.61	1171.48	-72.0708	1202.83	1021.2	-15.5165	1233.97	934.356	-80.0032	1200.4	922.094	-61.4164	1255.15	870.403
803	0	169.533	1319.93	1707.22	257.131	1310.15	1702.75	159.017	1125.9	1714.16	269.611	1134.6	1708.77	214.339	1094.62	1561.91	209.408	1026.7	1297.32	202.591	1242.13	1481.69	216.645	1311.14	1279.4	288.353	1018.46	1355.24	24.1773	1163.41	1519.27	-54.3355	1129.56	1329.18	-65.2165	1119.14	1174.18	-72.426	1208.02	1023.31	-16.0449	1240.41	936.861	-79.2654	1204.56	923.651	-62.1039	1259.86	872.288
804	0	169.251	1331.82	1709.15	256.901	1322.02	1705.11	159.416	1137.6	1715.42	270.039	1146.48	1710.59	215.1	1106.88	1563.45	210.365	1038.63	1299.33	202.761	1254.18	1483.5	216.799	1322.95	1281.37	289.386	1030.79	1356.92	24.6653	1174.75	1520.98	-53.4944	1137.91	1331.42	-64.2323	1125.36	1176.1	-72.7109	1213.36	1024.93	-17.6483	1247.35	939.509	-78.789	1209.04	925.379	-63.0488	1264.54	873.901
805	0	168.963	1343.55	1711.01	256.98	1334.27	1706.76	159.684	1149.2	1716.66	270.406	1158.66	1711.99	215.906	1119.13	1565.23	211.154	1050.67	1301.01	203.034	1266.29	1484.85	216.73	1334.62	1282.74	290.103	1043.14	1358.37	25.0631	1186.21	1522.58	-52.6737	1146.4	1333.54	-63.4738	1132.22	1178.01	-73.0369	1218.97	1026.64	-18.1528	1253.49	941.553	-78.365	1213.62	926.564	-64.1847	1269.42	875.57
806	0	168.676	1355.42	1712.07	256.508	1346.36	1707.9	160.015	1160.93	1717.57	270.665	1170.82	1712.99	216.459	1131.48	1566.06	211.891	1062.83	1302.07	203.338	1278.53	1485.88	216.946	1346.51	1283.56	290.959	1055.44	1359.96	25.4758	1197.84	1523.82	-52.0855	1155.09	1335.53	-62.5424	1139.31	1179.94	-73.2531	1224.79	1028.03	-19.1154	1259.82	942.832	-77.9222	1218.59	927.84	-65.5729	1274.64	877.58
807	0	168.465	1367.35	1712.73	256.517	1358.68	1708.88	160.462	1172.76	1718.03	270.985	1182.99	1713.38	216.925	1143.91	1566.51	212.76	1074.93	1303.13	203.599	1290.76	1486.33	216.722	1358.43	1283.98	291.796	1067.82	1361	26.1665	1209.52	1524.52	-50.9601	1164.04	1336.68	-61.6869	1146.56	1181.48	-73.4862	1230.72	1028.79	-19.7886	1266.74	943.548	-77.558	1223.49	928.586	-66.4791	1279.97	878.153
808	0	168.277	1379.37	1713.11	256.105	1370.79	1709.39	160.811	1184.69	1717.92	271.329	1195.36	1713.41	217.743	1156.36	1567.24	213.488	1086.9	1303.89	203.595	1303.12	1486.15	216.723	1370.66	1283.99	292.499	1080.17	1361.28	26.686	1221.21	1524.48	-49.9582	1173.08	1337.56	-60.7616	1154.2	1182.9	-73.6128	1236.94	1029.04	-20.61	1273.44	943.896	-77.2421	1228.79	929.384	-67.3077	1285.32	878.035
809	0	168.302	1391.32	1713.16	255.742	1383.03	1709.32	161.239	1196.77	1717.72	271.729	1207.84	1713.07	218.423	1168.93	1567.42	214.177	1099.15	1304.27	203.81	1315.56	1486.06	216.403	1382.79	1283.28	293.279	1092.62	1361.74	27.1715	1233.21	1524.52	-48.967	1182.6	1338.1	-59.9553	1162.02	1183.71	-73.9493	1243.47	1029.07	-21.5843	1280.34	943.905	-77.0166	1234.34	929.582	-68.4011	1290.83	877.968
810	0	167.794	1403.65	1712.98	255.622	1395.62	1709.12	161.542	1208.88	1716.94	272.005	1220.37	1712.34	218.817	1181.52	1566.92	214.72	1111.27	1304.29	204.056	1328.05	1485.58	216.408	1395.14	1282.83	293.923	1104.99	1361.83	27.5295	1245.19	1524.44	-48.1747	1192.33	1338.78	-58.9046	1170.18	1184.33	-73.7886	1249.81	1028.64	-22.5716	1287.43	943.625	-76.9068	1240.3	929.748	-69.5337	1296.68	878.014
811	0	167.67	1415.92	1712.51	255.479	1408.15	1708.67	161.726	1221.05	1716.19	272.198	1232.8	1711.72	219.315	1194.22	1566.45	215.063	1123.37	1303.78	204.032	1340.5	1484.62	216.022	1407.35	1281.79	294.391	1117.37	1361.33	27.9584	1257.38	1524.02	-47.0611	1202.14	1338.99	-57.8921	1178.76	1184.86	-74.1994	1257.1	1028.66	-23.4869	1294.87	943.082	-76.2052	1245.96	928.929	-70.5142	1302.73	877.399
812	0	167.261	1428.24	1711.7	255.199	1420.51	1708.22	162.027	1233.37	1715.08	272.498	1245.37	1710.85	219.805	1207.17	1565.33	215.198	1135.41	1302.37	204.437	1353.13	1483.85	216.008	1419.78	1280.94	295.065	1129.8	1360.33	28.0796	1269.64	1523.5	-46.4289	1212.5	1338.86	-57.0951	1187.48	1184.93	-74.5385	1264.5	1028.51	-24.2005	1302.58	942.948	-76.3997	1252.39	928.449	-72.136	1308.63	877.117
813	0	167.319	1440.5	1710.87	255.064	1433.4	1706.89	162.21	1245.8	1713.59	272.725	1258.07	1709.54	220.062	1219.93	1564.5	215.841	1148.06	1300.84	204.489	1365.76	1482.54	215.68	1431.99	1279.66	295.336	1142.23	1359.59	28.2951	1281.95	1522.9	-45.6011	1223.15	1338.41	-56.1845	1196.52	1184.55	-74.8426	1272.03	1027.77	-25.1703	1310.27	942.049	-76.3899	1259.07	927.67	-72.9972	1315.7	876.281
814	0	166.809	1453.29	1709.23	254.756	1445.85	1705.77	162.439	1258.36	1711.76	272.888	1270.81	1707.95	220.452	1232.85	1563.04	215.844	1160.32	1299.7	204.583	1378.45	1480.98	215.278	1444.08	1277.73	295.703	1154.7	1357.9	28.5672	1294.46	1521.5	-45.0928	1233.98	1337.59	-55.2564	1206.03	1184.2	-74.8108	1279.7	1026.83	-26.129	1318.17	940.489	-76.5531	1266.1	926.338	-74.3696	1322.15	874.982
815	0	166.409	1465.73	1707.38	254.698	1459.05	1703.8	162.589	1271.03	1709.6	273.271	1283.82	1705.88	220.805	1245.86	1561.24	215.278	1172.15	1298.66	204.706	1391.2	1478.83	214.98	1456.16	1275.07	295.771	1167.24	1356	28.7839	1307.15	1519.71	-44.6336	1245.2	1336.35	-54.6654	1215.82	1183.17	-74.9142	1287.83	1024.96	-26.8572	1326.3	938.517	-76.7633	1273.51	925.362	-75.4301	1329.08	872.825
816	0	165.945	1478.44	1705.03	253.982	1471.89	1701.36	162.569	1283.77	1707.36	273.313	1296.89	1703.53	220.959	1258.84	1559.29	214.766	1184.62	1296.6	204.632	1404.16	1476.1	215.005	1468.66	1272.35	295.812	1179.74	1354.16	28.9999	1319.92	1517.48	-44.3429	1256.66	1334.77	-53.9647	1226.09	1182.21	-75.2104	1296.5	1022.85	-27.6874	1334.61	935.985	-77.0371	1281.47	923.718	-76.092	1335.99	870.153
817	0	165.612	1491.47	1702.29	253.739	1485.29	1698.68	162.608	1296.68	1704.94	273.283	1310.16	1700.79	220.986	1271.79	1556.98	214.092	1197.39	1293.95	204.588	1417.04	1473.2	213.904	1480.17	1268.57	295.861	1192.36	1352.21	28.9138	1332.72	1515.35	-44.017	1268.53	1333.13	-53.5098	1236.56	1180.41	-75.4838	1305.41	1020.5	-28.4904	1342.87	933.086	-77.464	1289.35	921.593	-76.8869	1343.59	867.429
818	0	165.417	1504.22	1699.43	253.182	1498.33	1695.89	162.456	1309.64	1702.09	273.221	1323.48	1697.96	221.111	1284.87	1554.65	213.323	1209.91	1291.53	204.428	1430.08	1470.17	213.468	1492.29	1265.15	295.695	1205.12	1349.57	29.0295	1345.67	1512.69	-43.9646	1280.45	1330.75	-53.0519	1247.49	1178.54	-75.8935	1314.57	1017.84	-29.2091	1351.64	930.424	-77.972	1297.67	919.435	-77.8134	1351.35	864.542
819	0	164.882	1517.35	1696.36	252.695	1511.46	1692.96	162.386	1322.78	1698.95	273.079	1336.69	1695.11	220.959	1297.89	1551.63	212.716	1222.66	1289.06	204.289	1443.02	1467.23	213.448	1504.47	1262.06	295.437	1217.83	1346.67	28.9287	1358.49	1510.12	-43.9514	1292.68	1328.56	-52.8289	1258.73	1176.59	-76.1201	1324.29	1015.51	-29.9923	1360.76	927.324	-78.7252	1306.33	917.185	-78.8198	1359.28	861.608
820	0	164.38	1530.55	1693.36	252.203	1524.97	1689.96	162.04	1335.88	1696.25	272.775	1349.97	1692.35	221.016	1311.01	1548.94	211.947	1235.41	1286.03	203.977	1455.71	1463.87	213.023	1516.55	1258.81	295.137	1230.68	1343.82	28.6986	1371.39	1507.53	-44.0102	1305.17	1325.97	-52.6278	1270.29	1174.27	-76.819	1334.37	1013.05	-30.9787	1369.84	923.939	-79.5368	1315.33	914.592	-80.0058	1367.82	858.884
821	0	163.537	1543.72	1690	251.465	1538.17	1686.9	161.69	1349.15	1693.11	272.416	1363.32	1689.49	220.756	1324.04	1545.63	211.113	1248.22	1282.99	203.756	1469.09	1461.04	212.954	1529.28	1255.65	294.774	1243.67	1340.71	28.4896	1384.35	1504.96	-44.2661	1317.71	1323.45	-52.8472	1282.22	1171.98	-77.512	1344.65	1010.35	-31.992	1379.26	920.943	-80.4426	1324.85	911.85	-81.1854	1376.54	855.5
822	0	162.7	1557.07	1686.85	250.711	1551.61	1683.5	161.076	1362.5	1690.12	271.814	1376.76	1686.52	220.375	1337.26	1542.58	210.519	1261.4	1279.79	203.357	1482.28	1457.96	212.459	1541.65	1252.16	294.512	1256.73	1337.49	27.9907	1397.29	1501.96	-44.5047	1330.65	1320.55	-52.5852	1294.39	1169.04	-78.2855	1355.4	1007.27	-33.0529	1389.24	917.232	-81.5769	1334.59	908.754	-82.229	1385.73	852.169
823	0	161.833	1570.54	1683.6	249.841	1565.38	1680.06	160.407	1375.93	1687.21	271.158	1390.34	1683.6	219.875	1350.46	1539.52	209.639	1274.42	1276.48	202.869	1495.52	1454.9	212.257	1554.97	1249.16	294.009	1269.89	1334.35	27.4759	1410.37	1499.03	-44.9435	1343.51	1317.49	-52.705	1306.84	1166.39	-79.0106	1366.42	1004.19	-34.0555	1399.64	913.911	-82.8597	1344.73	905.85	-83.4519	1395.07	848.449
824	0	160.703	1583.99	1680.12	248.717	1578.9	1676.71	159.574	1389.46	1684.42	270.372	1403.99	1680.75	219.029	1363.76	1536.12	208.86	1287.67	1273.04	202.04	1508.52	1451.47	211.662	1568.04	1245.84	293.48	1283.17	1331.59	26.769	1423.55	1495.87	-45.4022	1356.63	1314.37	-53.1329	1319.8	1164.04	-79.9768	1377.93	1001.13	-35.2997	1409.71	909.613	-83.9987	1355.31	902.995	-84.7287	1405.13	845.034
825	0	159.573	1597.48	1676.79	247.502	1592.48	1673.41	158.52	1402.96	1681.67	269.404	1417.73	1677.59	218.526	1377.21	1533.39	208.58	1301.05	1270.04	201.251	1522.43	1448.43	211.132	1581.66	1242.53	292.882	1296.58	1328.26	26.0268	1436.83	1492.53	-46.0183	1369.75	1311.24	-53.2062	1332.61	1160.15	-80.8357	1389.5	997.462	-36.3011	1421	906.151	-85.348	1366.23	899.609	-86.0228	1415.12	841.128
826	0	158.34	1611.24	1673.48	246.477	1606.41	1670.17	157.683	1416.7	1678.6	268.267	1431.63	1674.51	217.5	1390.77	1530.61	208.479	1313.18	1268.6	200.336	1535.89	1445.39	210.792	1595.57	1239.51	292.069	1309.97	1325.43	25.3062	1450.31	1489.27	-46.6005	1383.05	1308.1	-53.8491	1346.09	1157.73	-81.7111	1401.51	993.792	-37.8587	1431.45	901.565	-86.9146	1377.52	896.688	-87.0975	1425.67	836.804
827	0	156.86	1625.03	1670.28	244.913	1620.3	1667.11	156.374	1430.38	1675.83	267.068	1445.46	1671.73	216.362	1404.44	1527.91	207.906	1327.89	1264.63	199.316	1549.65	1442.44	209.938	1609.3	1236.53	291.297	1323.72	1322.78	23.9817	1463.79	1486.04	-47.3794	1396.59	1304.65	-54.4704	1359.57	1154.81	-82.7433	1414	990.411	-38.9967	1443.42	897.766	-88.5061	1389.19	893.347	-88.5154	1436.73	833.234
828	0	155.364	1638.76	1667.56	243.343	1634.01	1664.3	154.961	1444.19	1673.3	265.758	1459.41	1668.98	215.089	1418.4	1524.82	207.286	1341.56	1261.62	197.983	1563.56	1439.37	209.161	1623.24	1233.71	290.415	1337.52	1320.23	22.741	1477.49	1482.94	-48.2016	1410.13	1301.53	-55.1115	1373.42	1151.55	-83.8638	1426.66	987.344	-40.5309	1454.72	894.13	-89.9095	1401.22	890.576	-89.9723	1448.19	829.514
829	0	153.57	1652.51	1665.01	241.588	1647.86	1661.68	153.523	1458.02	1670.64	264.149	1473.19	1666.52	213.858	1432.34	1522.8	207.074	1355.47	1259.14	196.63	1577.47	1436.86	207.938	1637.24	1231.22	289.587	1351.48	1317.95	21.3913	1491.3	1480.3	-49.0281	1424.01	1298.4	-55.7725	1387.45	1148.58	-85.0458	1439.65	984.212	-41.807	1467.33	890.753	-91.4029	1413.65	887.549	-91.6537	1460.12	826.588
830	0	152.059	1666.39	1662.52	240.099	1661.81	1659.23	151.862	1471.92	1667.99	262.546	1487.01	1664.16	212.23	1446.29	1520.28	206.557	1369.45	1256.98	195.001	1591.29	1434.42	207.039	1651.44	1228.89	288.609	1365.54	1315.82	19.8338	1505.15	1477.6	-50.0376	1438.1	1294.98	-56.516	1401.64	1145.75	-86.2693	1452.91	981.299	-43.2338	1479.34	887.38	-92.9603	1426.45	884.657	-93.2354	1472.21	823.324
831	0	150.445	1680.44	1660.09	238.373	1675.9	1657.01	149.945	1485.92	1665.71	260.218	1500.89	1661.77	210.619	1460.39	1517.72	206.03	1382.5	1257.04	193.322	1605.43	1432.19	205.409	1665.3	1226.63	287.784	1379.81	1313.51	18.005	1519.02	1475.14	-51.1181	1452.29	1292.12	-57.6162	1416.03	1142.45	-87.5584	1466.67	978.532	-44.6116	1492.39	884.137	-94.4538	1439.81	881.716	-94.889	1485.16	820.32
832	0	148.444	1694.61	1658.54	236.611	1689.93	1655.27	147.943	1499.98	1664.03	258.351	1514.89	1660.02	208.809	1474.23	1516.26	205.255	1396.8	1254.76	191.659	1619.46	1430.27	203.755	1679.87	1224.98	286.719	1394.04	1311.77	16.172	1532.97	1472.6	-52.4484	1466.65	1288.8	-58.2847	1430.59	1139.63	-88.9424	1480.57	975.622	-46.0184	1505.9	881.121	-95.944	1453.25	878.941	-96.2002	1498.49	817.453
833	0	146.662	1708.78	1657.21	235.252	1703.81	1653.62	145.682	1514.14	1662.44	256.333	1528.96	1658.82	206.998	1488.36	1514.76	204.291	1411.21	1253.01	189.872	1633.68	1428.68	202.498	1692.84	1222.71	285.434	1408.25	1310.35	14.4015	1547.11	1470.23	-53.7942	1481.26	1286.26	-59.6472	1445.59	1137.46	-90.2206	1494.8	972.618	-47.2733	1519.74	878.236	-97.3332	1467.33	876.329	-97.5758	1511.96	814.219
834	0	144.691	1723.06	1655.68	233.248	1718.09	1652.44	143.503	1528.38	1661.56	254.17	1543.18	1657.81	205.034	1502.53	1513.88	203.364	1425.54	1251.9	188.04	1647.58	1427.69	200.867	1707.58	1221.47	283.905	1422.36	1309.35	12.2078	1561.04	1468.35	-55.3724	1496.01	1283.87	-60.9882	1460.97	1134.72	-91.4932	1509.63	970.544	-48.5214	1534.12	875.572	-98.7523	1481.71	874.044	-99.0609	1526.11	811.815
835	0	142.704	1737.37	1654.99	231.653	1732.48	1651.75	141.234	1542.68	1661.03	251.9	1557.35	1657.15	202.894	1516.75	1513.03	202.203	1439.52	1252.06	186.223	1661.92	1426.9	199.317	1722.31	1220.95	282.302	1436.43	1308.79	10.0714	1575.11	1466.98	-56.9803	1511.01	1282.12	-62.1321	1476.55	1132.74	-92.6235	1524.81	968.591	-49.7697	1549.19	873.096	-99.9421	1496.58	872.237	-100.495	1541	809.852
836	0	140.841	1751.71	1654.38	229.677	1746.77	1651.29	139.023	1557.06	1660.55	249.753	1571.56	1656.65	200.898	1530.82	1512.97	201.484	1454.13	1250.78	184.434	1676.04	1426.44	197.798	1737.21	1220.73	280.808	1450.65	1307.78	8.22393	1589.12	1465.8	-58.4374	1526.17	1280.32	-63.147	1492.29	1130.63	-93.8462	1540.18	966.377	-50.8906	1564.28	871.285	-101.097	1511.93	870.327	-101.491	1556.02	807.551
837	0	139.076	1766.06	1654.38	227.756	1760.71	1651.52	136.64	1571.37	1660.42	247.431	1585.59	1656.97	198.982	1545.13	1512.44	200.299	1468.34	1250.48	182.457	1690.15	1426.52	196.154	1752.22	1221.3	279.144	1464.76	1307.73	6.40772	1603.22	1464.99	-60.017	1541.52	1279.01	-64.4425	1508.49	1129.5	-94.8962	1556.26	965.019	-52.0178	1580.02	870.147	-102.573	1527.88	869.072	-102.508	1571.83	806.186
838	0	137.238	1780.29	1654.84	225.799	1774.65	1652.02	134.297	1585.7	1660.84	245.153	1599.65	1657.65	197.013	1558.95	1513.21	199.049	1482.5	1250.9	180.803	1704.22	1427.36	194.7	1767.06	1222.12	277.32	1478.81	1308.34	4.14046	1617.25	1465.09	-61.6561	1556.72	1277.37	-65.8858	1524.92	1128.57	-96.2347	1572.81	964.267	-52.9434	1596.63	869.383	-103.752	1544.43	868.352	-103.537	1588.48	805.402
839	0	135.479	1794.47	1655.43	224.068	1788.62	1652.88	131.895	1599.95	1661.61	242.88	1613.62	1658.43	194.422	1572.87	1513.54	197.914	1496.36	1251.83	179.147	1718.09	1428.37	193.413	1781.72	1223.16	275.448	1492.72	1309.42	2.13265	1631.34	1465.44	-63.5152	1572.21	1276.47	-67.3903	1541.29	1127.81	-97.254	1589.93	964.341	-53.9772	1612.98	869.041	-104.879	1561.52	868.02	-104.586	1605.55	805.35
840	0	133.738	1808.63	1656.18	222.609	1802.7	1653.76	129.714	1614.23	1662.35	240.719	1627.4	1659.71	192.511	1586.7	1514.7	196.858	1510.12	1252.6	177.57	1731.89	1429.37	192.194	1796.12	1224.7	274.057	1506.31	1310.13	0.304872	1645.47	1466.04	-64.9955	1587.96	1276.67	-68.6635	1558.21	1128.13	-98.3744	1607.33	964.535	-54.6069	1630.49	869.468	-106.104	1579.33	867.762	-105.333	1623.27	805.294
841	0	132.246	1822.74	1656.76	221.031	1816.76	1654.73	127.559	1628.26	1663.3	238.581	1641.16	1660.83	190.853	1600.52	1516.07	196.139	1524.09	1253.11	176.225	1745.66	1430.57	191.221	1810.2	1225.94	272.498	1519.63	1312.03	-1.30498	1659.69	1466.83	-66.6859	1603.85	1276.59	-70.37	1574.79	1127.94	-99.3106	1625.17	964.826	-55.123	1648.26	869.99	-107.179	1597.62	867.983	-105.907	1641.68	805.666
842	0	130.665	1836.64	1657.68	219.248	1830.09	1655.73	125.536	1642.19	1664.46	236.562	1654.8	1662.26	189.061	1614.01	1517.26	195.003	1537.45	1254.9	174.909	1759.07	1431.58	190.066	1823.75	1227.23	271.193	1532.87	1313.5	-2.73226	1674.17	1468.06	-68.2516	1619.56	1277.34	-72.1623	1591.78	1128.57	-100.308	1643.29	965.538	-55.6627	1666.51	870.592	-108.255	1616.57	868.512	-106.192	1660.89	806.161
843	0	129.282	1850.4	1658.12	217.634	1843.55	1656.66	123.663	1655.91	1665.41	234.745	1668.39	1663.48	187.457	1627.22	1518.35	193.001	1549.97	1256.76	174.019	1772.43	1432.59	189.234	1837.35	1228.22	270.211	1545.8	1315.04	-4.02845	1688.36	1468.82	-69.9738	1635.36	1277.52	-73.6905	1608.46	1128.6	-101.082	1661.92	965.874	-55.9665	1685.06	871.61	-109.38	1635.93	868.971	-106.378	1680.41	806.594
844	0	127.797	1863.93	1658.67	216.559	1857.24	1657.55	122.537	1669.55	1666.13	232.978	1681.79	1664.94	185.81	1640.18	1519.59	191.697	1563.01	1257.67	173.099	1785.59	1433.81	188.579	1850.66	1229.36	268.986	1558.51	1316.58	-5.08587	1702.45	1469.78	-71.6898	1651.31	1278.5	-75.4603	1625.58	1129.07	-101.759	1680.65	966.652	-56.129	1704.22	872.536	-110.318	1655.9	869.627	-106.373	1700.67	807.367
845	0	126.336	1877.4	1659.36	215.093	1870.54	1658.64	120.735	1683.06	1667.49	231.595	1695.08	1666.34	184.258	1653	1520.85	189.913	1575.67	1259.44	172.3	1798.38	1434.97	188.054	1863.45	1230.22	267.579	1570.95	1318.32	-6.31399	1716.49	1471.07	-73.4217	1667.18	1279.6	-77.4209	1642.61	1129.7	-102.656	1699.77	967.375	-56.2339	1723.54	873.606	-111.311	1676.21	870.401	-106.266	1721.69	808.331
846	0	125.335	1890.57	1660.27	213.716	1883.35	1659.77	119.153	1696.15	1669.37	230.067	1708.09	1668.3	183.159	1665.52	1522.52	188.238	1588.1	1261.51	171.837	1811.08	1436.28	187.926	1876.07	1231.58	266.376	1583.26	1320.01	-7.30762	1730.28	1472.71	-75.5618	1683.25	1280.18	-79.3736	1659.76	1130.25	-103.141	1719.33	968.988	-56.0685	1743.67	875.515	-111.928	1696.85	871.321	-106.212	1743.03	810.138
847	0	124.445	1903.64	1661.48	212.893	1896.4	1661.04	117.863	1709.17	1670.81	228.764	1720.92	1670.19	182.152	1677.94	1524.27	186.866	1600.31	1263.01	171.469	1823.47	1437.97	187.924	1888.2	1233.23	264.906	1595.33	1321.53	-8.24258	1743.71	1474.1	-77.2244	1699.35	1281.45	-81.2502	1677.19	1130.75	-103.86	1738.78	970.047	-56.0435	1763.53	877.409	-112.437	1717.92	872.167	-105.863	1764.92	811.856
848	0	123.247	1916.36	1662.66	211.998	1909.08	1662.66	116.59	1722.12	1672.34	227.546	1733.51	1672.43	180.99	1690.3	1525.78	185.559	1612.54	1264.51	171.179	1835.73	1439.71	188.206	1900.17	1234.9	263.536	1607.34	1322.87	-8.5234	1756.91	1475.11	-78.804	1714.97	1282.34	-83.1951	1694.72	1131.46	-104.347	1758.68	971.635	-55.8663	1783.89	879.354	-113.062	1739.36	873.221	-105.516	1787.12	813.719
849	0	122.353	1928.96	1664.14	210.996	1921.43	1664.35	115.6	1734.87	1674.47	226.395	1746.07	1674.64	180.121	1702.65	1527.67	184.489	1624.86	1266.28	170.915	1847.54	1442.09	188.422	1911.63	1236.61	261.903	1619.01	1324.39	-9.14554	1770.05	1476.74	-80.4078	1731.31	1283.73	-85.1935	1712.24	1132.31	-104.585	1778.98	973.321	-55.4431	1804.42	881.359	-113.538	1761.08	874.587	-105.231	1809.76	816.183
850	0	121.694	1941.63	1665.72	210.64	1934.35	1665.88	114.659	1747.34	1676.54	225.467	1758.46	1676.86	179.742	1714.92	1529.61	183.477	1636.8	1268.19	170.712	1859.43	1444.02	189.153	1923.26	1238.42	260.568	1630.75	1326.22	-9.66765	1782.98	1478.61	-82.0377	1747.09	1285.1	-87.0956	1729.93	1133.31	-104.854	1799.45	975.284	-54.9944	1825.27	883.756	-113.917	1783.13	876.038	-104.5	1832.64	818.946
851	0	121.067	1953.97	1667.33	209.594	1946.29	1667.8	113.957	1759.7	1678.46	224.661	1770.83	1679.16	178.873	1726.72	1531.64	182.218	1648.48	1270.34	170.676	1871.28	1446.08	189.773	1934.6	1240.46	258.994	1642.34	1328.14	-9.91991	1795.69	1480.37	-83.0277	1763.31	1286.55	-88.9076	1747.74	1134.13	-104.887	1820.04	977.253	-54.2892	1846.23	886.27	-114.139	1805.4	878.102	-103.794	1855.78	821.655
852	0	120.605	1966.24	1668.9	209.424	1959.04	1670.04	113.194	1772	1681	224.004	1783.01	1681.73	178.059	1738.63	1534.04	180.926	1660.29	1272.93	170.75	1883.36	1447.58	190.32	1945.79	1242.54	257.697	1653.91	1330.1	-10.5432	1808.17	1482.07	-84.2763	1779.08	1288.24	-90.5957	1765.58	1135.57	-104.939	1840.85	979.507	-53.3119	1867.48	889.044	-114.294	1827.89	880.061	-102.913	1879.3	824.768
853	0	120.36	1978.45	1670.89	208.567	1970.77	1671.86	112.827	1784.13	1683.49	223.669	1795.45	1684.01	177.605	1750.32	1536.79	179.907	1672.1	1275.28	170.718	1895.12	1449.65	191.138	1957.21	1244.86	256.681	1665.49	1332.2	-10.7849	1820.65	1484.3	-85.0539	1794.92	1289.8	-91.9022	1783.44	1136.85	-104.592	1861.61	982.144	-52.4673	1888.62	892.133	-114.257	1850.57	882.647	-101.941	1902.94	828.36
854	0	119.947	1990.4	1672.79	208.653	1983.18	1674.06	112.594	1796.11	1685.77	223.294	1807.31	1686.62	177.635	1762.13	1538.33	178.803	1683.8	1277.38	170.739	1906.68	1452.15	191.776	1968.69	1247.07	255.538	1676.91	1334.23	-10.9423	1832.78	1486.21	-85.5965	1810.21	1292	-93.3175	1801.51	1138.65	-104.227	1882.36	984.985	-51.2211	1909.66	895.54	-114.011	1873.26	885.429	-100.335	1926.4	832.077
855	0	119.979	2002.44	1675.11	208.14	1994.7	1676.23	112.364	1808.12	1688.47	223.13	1819.27	1689.23	176.975	1773.36	1541.57	177.489	1695.4	1279.66	170.651	1918.2	1454.51	192.228	1979.91	1249.8	254.14	1688.36	1336.95	-11.1934	1844.95	1488.65	-86.0559	1825.74	1293.99	-94.6848	1819.45	1140.65	-103.639	1903.11	988.376	-49.5416	1931.43	898.975	-113.58	1895.78	888.553	-98.96	1949.98	836.412
856	0	119.576	2014.09	1677.29	208.318	2006.81	1678.7	112.059	1819.89	1691.18	222.744	1830.88	1691.98	177.064	1785.3	1543.91	176.456	1707.18	1282.23	170.893	1929.63	1457.41	192.613	1991.41	1252.42	252.973	1699.78	1339.72	-11.6483	1856.96	1491.36	-86.7543	1840.67	1296.21	-95.7667	1837.28	1142.79	-102.878	1923.92	992.189	-48.2914	1952.28	903.293	-113.147	1918.37	892.053	-97.8273	1973.48	841.501
857	0	119.959	2025.95	1679.73	208.212	2018.09	1680.7	112.133	1831.69	1693.88	222.604	1842.42	1694.63	176.318	1796.48	1546.12	175.402	1718.83	1284.76	170.78	1940.87	1460.11	192.722	2002.61	1255.43	251.837	1711.08	1342.28	-12.0221	1869.05	1494.48	-87.2273	1855.79	1299.14	-96.8626	1855.13	1145.38	-102.186	1944.48	996.383	-47.4006	1973.6	908.156	-112.368	1941.21	896.459	-96.4846	1996.89	846.82
858	0	119.766	2037.44	1681.89	208.806	2029.93	1682.87	112.084	1843.47	1696.34	222.669	1854.08	1696.92	175.812	1807.93	1547.83	174.009	1730.16	1286.96	170.974	1952.34	1462.74	192.728	2013.96	1257.95	251.163	1722.37	1343.73	-11.9958	1881.01	1496.86	-87.5092	1870.23	1301.82	-97.7423	1872.65	1147.71	-101.408	1964.92	1000	-45.8553	1994.87	912.73	-111.519	1963.59	899.781	-94.9016	2020.13	852.077
859	0	120.15	2049.22	1683.95	208.659	2041.29	1684.8	111.905	1855.13	1698.51	222.709	1865.75	1699.22	175.286	1819.19	1550.39	173.273	1742	1288.87	170.873	1963.8	1464.94	192.892	2025.43	1260.43	250.274	1733.89	1346.17	-12.1918	1892.97	1499.24	-87.6662	1884.49	1303.65	-98.4862	1890.04	1150.09	-100.635	1985.16	1004.14	-44.6441	2016.14	917.561	-110.683	1986	904.207	-93.0715	2043.47	857.534
860	0	120.314	2060.82	1685.74	208.995	2053.04	1686.54	112.038	1866.74	1701.1	222.737	1877.39	1701.22	174.862	1830.53	1552.19	172.343	1753.66	1291.09	170.968	1975.2	1467.21	193.006	2036.78	1262.42	249.502	1745.37	1348.23	-12.0882	1905.26	1501.38	-87.5491	1898.84	1305.62	-99.3468	1907.15	1152.34	-99.8354	2005.3	1008.04	-43.0377	2037.5	922.269	-109.807	2008.12	908.053	-91.2639	2066.66	863.024
861	0	120.611	2072.53	1687.41	209.205	2064.58	1688.14	112.138	1878.35	1703.08	222.671	1888.84	1703.06	175.216	1842.23	1554	171.391	1765.25	1292.93	170.87	1986.73	1468.82	193.045	2047.97	1264.24	248.875	1756.57	1349.54	-12.4184	1917.13	1503.46	-87.7219	1912.97	1307.68	-99.8612	1924.19	1154.6	-98.8874	2025.38	1012.1	-41.4449	2058.66	927.099	-109.666	2030.74	913.439	-89.1708	2089.6	868.396
862	0	120.696	2084.16	1689	209.513	2076.27	1689.58	112.116	1889.96	1705.03	222.824	1900.51	1704.65	174.195	1853.56	1555.49	170.545	1776.94	1294.44	171.104	1998.25	1470.67	193.25	2059.33	1266.08	247.911	1768.03	1351.35	-12.3841	1929.45	1505.21	-87.9612	1926.89	1309.69	-100.449	1940.91	1156.56	-97.9672	2045.17	1016.11	-39.9927	2080.07	932.401	-108.426	2052.8	917.761	-87.0807	2112.41	873.904
863	0	120.993	2095.82	1690.5	209.713	2087.74	1691	112.127	1901.59	1706.56	222.822	1911.87	1706.07	174.212	1865.25	1556.94	169.576	1788.5	1296.31	171.116	2009.71	1472.28	193.348	2070.86	1267.67	246.946	1779.55	1353.21	-12.1683	1941.79	1506.95	-88.0637	1940.82	1311.36	-100.742	1957.42	1158.44	-97.1504	2064.81	1020.05	-38.4361	2101.03	937.421	-107.669	2075.1	922.901	-85.1362	2134.99	879.47
864	0	121.233	2107.49	1691.95	210.11	2099.39	1692.18	112.502	1913.42	1708.03	222.845	1923.2	1707.36	173.534	1876.7	1557.95	168.789	1800.17	1297.67	171.268	2021.42	1473.6	193.455	2082.23	1269.14	246.13	1791.09	1354.7	-12.4872	1953.79	1508.65	-88.3673	1954.91	1313.07	-101.214	1973.65	1160.09	-96.3623	2084.11	1024.17	-36.875	2122.11	942.72	-103.853	2096.14	925.968	-83.058	2157.56	885.384
865	0	121.446	2118.95	1693.13	210.363	2110.96	1693.36	112.485	1924.89	1709.02	223.058	1934.75	1708.27	173.926	1888.61	1558.87	168.206	1811.98	1298.01	171.375	2033.01	1474.92	193.899	2093.88	1270.3	245.647	1802.65	1355.06	-12.5242	1966.09	1509.91	-88.3731	1968.83	1314.48	-101.475	1989.92	1161.63	-95.6152	2103.29	1028.21	-32.3312	2142.36	947.128	-104.722	2118.03	931.13	-81.0842	2179.8	891.367
866	0	121.91	2130.73	1694.03	210.772	2122.74	1694.13	112.76	1936.8	1709.81	224.043	1947.27	1709.25	172.972	1899.96	1559.55	167.5	1823.85	1298.75	171.608	2044.79	1475.91	194.115	2105.32	1271.29	245.294	1813.96	1355.47	-12.4366	1978.53	1511.06	-88.6886	1982.46	1315.63	-102.044	2005.43	1162.07	-94.6737	2122.2	1032.07	-33.5461	2163.82	953.572	-102.968	2139.36	935.675	-78.6176	2201.83	897.055
867	0	121.934	2142.37	1694.72	211.301	2134.43	1694.13	113.311	1948.78	1710.34	224.012	1958.71	1709.67	173.306	1912.05	1560.02	166.874	1835.75	1299.22	171.652	2056.51	1476.52	194.405	2117.09	1271.97	244.445	1825.68	1355.88	-12.4384	1990.98	1511.79	-89.2325	1996.47	1317.2	-102.427	2021.14	1162.58	-93.7245	2140.89	1035.52	-30.378	2183.91	958.048	-101.139	2160.36	939.47	-76.5672	2223.54	902.851
[truncated: 69 more columns]

## Sheet: Sheet2
Devices
		025370 - Force			025370 - Moment			025370 - CoP			027571 - Force			027571 - Moment			027571 - CoP			037720 - Force			037720 - Moment			037720 - CoP
Frame	Sub Frame	Fx	Fy	Fz	Mx	My	Mz	Cx	Cy	Cz	Fx	Fy	Fz	Mx	My	Mz	Cx	Cy	Cz	Fx	Fy	Fz	Mx	My	Mz	Cx	Cy	Cz
		N	N	N	N.mm	N.mm	N.mm	mm	mm	mm	N	N	N	N.mm	N.mm	N.mm	mm	mm	mm	N	N	N	N.mm	N.mm	N.mm	mm	mm	mm
679	0	0	0	0	0	0	0	200	300	0	0	0	0	0	0	0	200	903	0	0	0	0	0	0	0	603	903	0
679	1	0	0	0	0	0	0	200	300	0	0	0	0	0	0	0	200	903	0	0	0	0	0	0	0	603	903	0
679	2	0	0	0	0	0	0	200	300	0	0	0	0	0	0	0	200	903	0	0	0	0	0	0	0	603	903	0
679	3	0	0	0	0	0	0	200	300	0	0	0	0	0	0	0	200	903	0	0	0	0	0	0	0	603	903	0
679	4	0	0	0	0	0	0	200	300	0	0	0	0	0	0	0	200	903	0	0	0	0	0	0	0	603	903	0
679	5	0	0	0	0	0	0	200	300	0	0	0	0	0	0	0	200	903	0	0	0	0	0	0	0	603	903	0
679	6	0	0	0	0	0	0	200	300	0	0	0	0	0	0	0	200	903	0	0	0	0	0	0	0	603	903	0
679	7	0	0	0	0	0	0	200	300	0	0	0	0	0	0	0	200	903	0	0	0	0	0	0	0	603	903	0
679	8	0	0	0	0	0	0	200	300	0	0	0	0	0	0	0	200	903	0	0	0	0	0	0	0	603	903	0
679	9	0	0	0	0	0	0	200	300	0	0	0	0	0	0	0	200	903	0	0	0	0	0	0	0	603	903	0
680	0	0	0	0	0	0	0	200	300	0	0	0	0	0	0	0	200	903	0	0	0	0	0	0	0	603	903	0
680	1	0	0	0	0	0	0	200	300	0	0	0	0	0	0	0	200	903	0	0	0	0	0	0	0	603	903	0
680	2	0	0	0	0	0	0	200	300	0	0	0	0	0	0	0	200	903	0	0	0	0	0	0	0	603	903	0
680	3	0	0	0	0	0	0	200	300	0	0	0	0	0	0	0	200	903	0	0	0	0	0	0	0	603	903	0
680	4	0	0	0	0	0	0	200	300	0	0	0	0	0	0	0	200	903	0	0	0	0	0	0	0	603	903	0
680	5	0	0	0	0	0	0	200	300	0	0	0	0	0	0	0	200	903	0	0	0	0	0	0	0	603	903	0
680	6	0	0	0	0	0	0	200	300	0	0	0	0	0	0	0	200	903	0	0	0	0	0	0	0	603	903	0
680	7	0	0	0	0	0	0	200	300	0	0	0	0	0	0	0	200	903	0	0	0	0	0	0	0	603	903	0
680	8	0	0	0	0	0	0	200	300	0	0	0	0	0	0	0	200	903	0	0	0	0	0	0	0	603	903	0
680	9	0	0	0	0	0	0	200	300	0	0	0	0	0	0	0	200	903	0	0	0	0	0	0	0	603	903	0
681	0	0	0	0	0	0	0	200	300	0	0	0	0	0	0	0	200	903	0	0	0	0	0	0	0	603	903	0
681	1	0	0	0	0	0	0	200	300	0	0	0	0	0	0	0	200	903	0	0	0	0	0	0	0	603	903	0
681	2	0	0	0	0	0	0	200	300	0	0	0	0	0	0	0	200	903	0	0	0	0	0	0	0	603	903	0
681	3	0	0	0	0	0	0	200	300	0	0	0	0	0	0	0	200	903	0	0	0	0	0	0	0	603	903	0
681	4	0	0	0	0	0	0	200	300	0	0	0	0	0	0	0	200	903	0	0	0	0	0	0	0	603	903	0
681	5	0	0	0	0	0	0	200	300	0	0	0	0	0	0	0	200	903	0	0	0	0	0	0	0	603	903	0
681	6	0	0	0	0	0	0	200	300	0	0	0	0	0	0	0	200	903	0	0	0	0	0	0	0	603	903	0
681	7	0	0	0	0	0	0	200	300	0	0	0	0	0	0	0	200	903	0	0	0	0	0	0	0	603	903	0
681	8	0	0	0	0	0	0	200	300	0	0	0	0	0	0	0	200	903	0	0	0	0	0	0	0	603	903	0
681	9	0	0	0	0	0	0	200	300	0	0	0	0	0	0	0	200	903	0	0	0	0	0	0	0	603	903	0
682	0	0	0	0	0	0	0	200	300	0	0	0	0	0	0	0	200	903	0	0	0	0	0	0	0	603	903	0
682	1	0	0	0	0	0	0	200	300	0	0	0	0	0	0	0	200	903	0	0	0	0	0	0	0	603	903	0
682	2	0	0	0	0	0	0	200	300	0	0	0	0	0	0	0	200	903	0	0	0	0	0	0	0	603	903	0
682	3	0	0	0	0	0	0	200	300	0	0	0	0	0	0	0	200	903	0	0	0	0	0	0	0	603	903	0
682	4	0	0	0	0	0	0	200	300	0	0	0	0	0	0	0	200	903	0	0	0	0	0	0	0	603	903	0
682	5	0	0	0	0	0	0	200	300	0	0	0	0	0	0	0	200	903	0	0	0	0	0	0	0	603	903	0
682	6	0	0	0	0	0	0	200	300	0	0	0	0	0	0	0	200	903	0	0	0	0	0	0	0	603	903	0
682	7	0	0	0	0	0	0	200	300	0	0	0	0	0	0	0	200	903	0	0	0	0	0	0	0	603	903	0
682	8	0	0	0	0	0	0	200	300	0	0	0	0	0	0	0	200	903	0	0	0	0	0	0	0	603	903	0
682	9	0	0	0	0	0	0	200	300	0	0	0	0	0	0	0	200	903	0	0	0	0	0	0	0	603	903	0
683	0	0	0	0	0	0	0	200	300	0	0	0	0	0	0	0	200	903	0	0	0	0	0	0	0	603	903	0
683	1	0	0	0	0	0	0	200	300	0	0	0	0	0	0	0	200	903	0	0	0	0	0	0	0	603	903	0
683	2	0	0	0	0	0	0	200	300	0	0	0	0	0	0	0	200	903	0	0	0	0	0	0	0	603	903	0
683	3	0	0	0	0	0	0	200	300	0	0	0	0	0	0	0	200	903	0	0	0	0	0	0	0	603	903	0
683	4	0	0	0	0	0	0	200	300	0	0	0	0	0	0	0	200	903	0	0	0	0	0	0	0	603	903	0
683	5	0	0	0	0	0	0	200	300	0	0	0	0	0	0	0	200	903	0	0	0	0	0	0	0	603	903	0
683	6	0	0	0	0	0	0	200	300	0	0	0	0	0	0	0	200	903	0	0	0	0	0	0	0	603	903	0
683	7	0	0	0	0	0	0	200	300	0	0	0	0	0	0	0	200	903	0	0	0	0	0	0	0	603	903	0
683	8	0	0	0	0	0	0	200	300	0	0	0	0	0	0	0	200	903	0	0	0	0	0	0	0	603	903	0
683	9	0	0	0	0	0	0	200	300	0	0	0	0	0	0	0	200	903	0	0	0	0	0	0	0	603	903	0
684	0	0	0	0	0	0	0	200	300	0	0	0	0	0	0	0	200	903	0	0	0	0	0	0	0	603	903	0
684	1	0	0	0	0	0	0	200	300	0	0	0	0	0	0	0	200	903	0	0	0	0	0	0	0	603	903	0
684	2	0	0	0	0	0	0	200	300	0	0	0	0	0	0	0	200	903	0	0	0	0	0	0	0	603	903	0
684	3	0	0	0	0	0	0	200	300	0	0	0	0	0	0	0	200	903	0	0	0	0	0	0	0	603	903	0
684	4	0	0	0	0	0	0	200	300	0	0	0	0	0	0	0	200	903	0	0	0	0	0	0	0	603	903	0
684	5	0	0	0	0	0	0	200	300	0	0	0	0	0	0	0	200	903	0	0	0	0	0	0	0	603	903	0
684	6	0	0	0	0	0	0	200	300	0	0	0	0	0	0	0	200	903	0	0	0	0	0	0	0	603	903	0
684	7	0	0	0	0	0	0	200	300	0	0	0	0	0	0	0	200	903	0	0	0	0	0	0	0	603	903	0
684	8	0	0	0	0	0	0	200	300	0	0	0	0	0	0	0	200	903	0	0	0	0	0	0	0	603	903	0
684	9	0	0	0	0	0	0	200	300	0	0	0	0	0	0	0	200	903	0	0	0	0	0	0	0	603	903	0
685	0	0	0	0	0	0	0	200	300	0	0	0	0	0	0	0	200	903	0	0	0	0	0	0	0	603	903	0
685	1	0	0	0	0	0	0	200	300	0	0	0	0	0	0	0	200	903	0	0	0	0	0	0	0	603	903	0
685	2	0	0	0	0	0	0	200	300	0	0	0	0	0	0	0	200	903	0	0	0	0	0	0	0	603	903	0
685	3	0	0	0	0	0	0	200	300	0	0	0	0	0	0	0	200	903	0	0	0	0	0	0	0	603	903	0
685	4	0	0	0	0	0	0	200	300	0	0	0	0	0	0	0	200	903	0	0	0	0	0	0	0	603	903	0
685	5	0	0	0	0	0	0	200	300	0	0	0	0	0	0	0	200	903	0	0	0	0	0	0	0	603	903	0
685	6	0	0	0	0	0	0	200	300	0	0	0	0	0	0	0	200	903	0	0	0	0	0	0	0	603	903	0
685	7	0	0	0	0	0	0	200	300	0	0	0	0	0	0	0	200	903	0	0	0	0	0	0	0	603	903	0
685	8	0	0	0	0	0	0	200	300	0	0	0	0	0	0	0	200	903	0	0	0	0	0	0	0	603	903	0
685	9	0	0	0	0	0	0	200	300	0	0	0	0	0	0	0	200	903	0	0	0	0	0	0	0	603	903	0
686	0	0	0	0	0	0	0	200	300	0	0	0	0	0	0	0	200	903	0	0	0	0	0	0	0	603	903	0
686	1	0	0	0	0	0	0	200	300	0	0	0	0	0	0	0	200	903	0	0	0	0	0	0	0	603	903	0
686	2	0	0	0	0	0	0	200	300	0	0	0	0	0	0	0	200	903	0	0	0	0	0	0	0	603	903	0
686	3	0	0	0	0	0	0	200	300	0	0	0	0	0	0	0	200	903	0	0	0	0	0	0	0	603	903	0
686	4	0	0	0	0	0	0	200	300	0	0	0	0	0	0	0	200	903	0	0	0	0	0	0	0	603	903	0
686	5	0	0	0	0	0	0	200	300	0	0	0	0	0	0	0	200	903	0	0	0	0	0	0	0	603	903	0
686	6	0	0	0	0	0	0	200	300	0	0	0	0	0	0	0	200	903	0	0	0	0	0	0	0	603	903	0
686	7	0	0	0	0	0	0	200	300	0	0	0	0	0	0	0	200	903	0	0	0	0	0	0	0	603	903	0
686	8	0	0	0	0	0	0	200	300	0	0	0	0	0	0	0	200	903	0	0	0	0	0	0	0	603	903	0
686	9	0	0	0	0	0	0	200	300	0	0	0	0	0	0	0	200	903	0	0	0	0	0	0	0	603	903	0
687	0	0	0	0	0	0	0	200	300	0	0	0	0	0	0	0	200	903	0	0	0	0	0	0	0	603	903	0
687	1	0	0	0	0	0	0	200	300	0	0	0	0	0	0	0	200	903	0	0	0	0	0	0	0	603	903	0
687	2	0	0	0	0	0	0	200	300	0	0	0	0	0	0	0	200	903	0	0	0	0	0	0	0	603	903	0
687	3	0	0	0	0	0	0	200	300	0	0	0	0	0	0	0	200	903	0	0	0	0	0	0	0	603	903	0
687	4	0	0	0	0	0	0	200	300	0	0	0	0	0	0	0	200	903	0	0	0	0	0	0	0	603	903	0
687	5	0	0	0	0	0	0	200	300	0	0	0	0	0	0	0	200	903	0	0	0	0	0	0	0	603	903	0
687	6	0	0	0	0	0	0	200	300	0	0	0	0	0	0	0	200	903	0	0	0	0	0	0	0	603	903	0
687	7	0	0	0	0	0	0	200	300	0	0	0	0	0	0	0	200	903	0	0	0	0	0	0	0	603	903	0
687	8	0	0	0	0	0	0	200	300	0	0	0	0	0	0	0	200	903	0	0	0	0	0	0	0	603	903	0
687	9	0	0	0	0	0	0	200	300	0	0	0	0	0	0	0	200	903	0	0	0	0	0	0	0	603	903	0
688	0	0	0	0	0	0	0	200	300	0	0	0	0	0	0	0	200	903	0	0	0	0	0	0	0	603	903	0
688	1	0	0	0	0	0	0	200	300	0	0	0	0	0	0	0	200	903	0	0	0	0	0	0	0	603	903	0
688	2	0	0	0	0	0	0	200	300	0	0	0	0	0	0	0	200	903	0	0	0	0	0	0	0	603	903	0
688	3	0	0	0	0	0	0	200	300	0	0	0	0	0	0	0	200	903	0	0	0	0	0	0	0	603	903	0
688	4	0	0	0	0	0	0	200	300	0	0	0	0	0	0	0	200	903	0	0	0	0	0	0	0	603	903	0
688	5	0	0	0	0	0	0	200	300	0	0	0	0	0	0	0	200	903	0	0	0	0	0	0	0	603	903	0
688	6	0	0	0	0	0	0	200	300	0	0	0	0	0	0	0	200	903	0	0	0	0	0	0	0	603	903	0
688	7	0	0	0	0	0	0	200	300	0	0	0	0	0	0	0	200	903	0	0	0	0	0	0	0	603	903	0
688	8	0	0	0	0	0	0	200	300	0	0	0	0	0	0	0	200	903	0	0	0	0	0	0	0	603	903	0
688	9	0	0	0	0	0	0	200	300	0	0	0	0	0	0	0	200	903	0	0	0	0	0	0	0	603	903	0
689	0	0	0	0	0	0	0	200	300	0	0	0	0	0	0	0	200	903	0	0	0	0	0	0	0	603	903	0
689	1	0	0	0	0	0	0	200	300	0	0	0	0	0	0	0	200	903	0	0	0	0	0	0	0	603	903	0
689	2	0	0	0	0	0	0	200	300	0	0	0	0	0	0	0	200	903	0	0	0	0	0	0	0	603	903	0
689	3	0	0	0	0	0	0	200	300	0	0	0	0	0	0	0	200	903	0	0	0	0	0	0	0	603	903	0
689	4	0	0	0	0	0	0	200	300	0	0	0	0	0	0	0	200	903	0	0	0	0	0	0	0	603	903	0
689	5	0	0	0	0	0	0	200	300	0	0	0	0	0	0	0	200	903	0	0	0	0	0	0	0	603	903	0
689	6	0	0	0	0	0	0	200	300	0	0	0	0	0	0	0	200	903	0	0	0	0	0	0	0	603	903	0
689	7	0	0	0	0	0	0	200	300	0	0	0	0	0	0	0	200	903	0	0	0	0	0	0	0	603	903	0
689	8	0	0	0	0	0	0	200	300	0	0	0	0	0	0	0	200	903	0	0	0	0	0	0	0	603	903	0
689	9	0	0	0	0	0	0	200	300	0	0	0	0	0	0	0	200	903	0	0	0	0	0	0	0	603	903	0
690	0	0	0	0	0	0	0	200	300	0	0	0	0	0	0	0	200	903	0	0	0	0	0	0	0	603	903	0
690	1	0	0	0	0	0	0	200	300	0	0	0	0	0	0	0	200	903	0	0	0	0	0	0	0	603	903	0
690	2	0	0	0	0	0	0	200	300	0	0	0	0	0	0	0	200	903	0	0	0	0	0	0	0	603	903	0
690	3	0	0	0	0	0	0	200	300	0	0	0	0	0	0	0	200	903	0	0	0	0	0	0	0	603	903	0
690	4	0	0	0	0	0	0	200	300	0	0	0	0	0	0	0	200	903	0	0	0	0	0	0	0	603	903	0
690	5	0	0	0	0	0	0	200	300	0	0	0	0	0	0	0	200	903	0	0	0	0	0	0	0	603	903	0
690	6	0	0	0	0	0	0	200	300	0	0	0	0	0	0	0	200	903	0	0	0	0	0	0	0	603	903	0
690	7	0	0	0	0	0	0	200	300	0	0	0	0	0	0	0	200	903	0	0	0	0	0	0	0	603	903	0
690	8	0	0	0	0	0	0	200	300	0	0	0	0	0	0	0	200	903	0	0	0	0	0	0	0	603	903	0
690	9	0	0	0	0	0	0	200	300	0	0	0	0	0	0	0	200	903	0	0	0	0	0	0	0	603	903	0
691	0	0	0	0	0	0	0	200	300	0	0	0	0	0	0	0	200	903	0	0	0	0	0	0	0	603	903	0
691	1	0	0	0	0	0	0	200	300	0	0	0	0	0	0	0	200	903	0	0	0	0	0	0	0	603	903	0
691	2	0	0	0	0	0	0	200	300	0	0	0	0	0	0	0	200	903	0	0	0	0	0	0	0	603	903	0
691	3	0	0	0	0	0	0	200	300	0	0	0	0	0	0	0	200	903	0	0	0	0	0	0	0	603	903	0
691	4	0	0	0	0	0	0	200	300	0	0	0	0	0	0	0	200	903	0	0	0	0	0	0	0	603	903	0
691	5	0	0	0	0	0	0	200	300	0	0	0	0	0	0	0	200	903	0	0	0	0	0	0	0	603	903	0
691	6	0	0	0	0	0	0	200	300	0	0	0	0	0	0	0	200	903	0	0	0	0	0	0	0	603	903	0
691	7	0	0	0	0	0	0	200	300	0	0	0	0	0	0	0	200	903	0	0	0	0	0	0	0	603	903	0
691	8	0	0	0	0	0	0	200	300	0	0	0	0	0	0	0	200	903	0	0	0	0	0	0	0	603	903	0
691	9	0	0	0	0	0	0	200	300	0	0	0	0	0	0	0	200	903	0	0	0	0	0	0	0	603	903	0
692	0	0	0	0	0	0	0	200	300	0	0	0	0	0	0	0	200	903	0	0	0	0	0	0	0	603	903	0
692	1	0	0	0	0	0	0	200	300	0	0	0	0	0	0	0	200	903	0	0	0	0	0	0	0	603	903	0
692	2	0	0	0	0	0	0	200	300	0	0	0	0	0	0	0	200	903	0	0	0	0	0	0	0	603	903	0
692	3	0	0	0	0	0	0	200	300	0	0	0	0	0	0	0	200	903	0	0	0	0	0	0	0	603	903	0
692	4	0	0	0	0	0	0	200	300	0	0	0	0	0	0	0	200	903	0	0	0	0	0	0	0	603	903	0
692	5	0	0	0	0	0	0	200	300	0	0	0	0	0	0	0	200	903	0	0	0	0	0	0	0	603	903	0
692	6	0	0	0	0	0	0	200	300	0	0	0	0	0	0	0	200	903	0	0	0	0	0	0	0	603	903	0
692	7	0	0	0	0	0	0	200	300	0	0	0	0	0	0	0	200	903	0	0	0	0	0	0	0	603	903	0
692	8	0	0	0	0	0	0	200	300	0	0	0	0	0	0	0	200	903	0	0	0	0	0	0	0	603	903	0
692	9	0	0	0	0	0	0	200	300	0	0	0	0	0	0	0	200	903	0	0	0	0	0	0	0	603	903	0
693	0	0	0	0	0	0	0	200	300	0	0	0	0	0	0	0	200	903	0	0	0	0	0	0	0	603	903	0
693	1	0	0	0	0	0	0	200	300	0	0	0	0	0	0	0	200	903	0	0	0	0	0	0	0	603	903	0
693	2	0	0	0	0	0	0	200	300	0	0	0	0	0	0	0	200	903	0	0	0	0	0	0	0	603	903	0
693	3	0	0	0	0	0	0	200	300	0	0	0	0	0	0	0	200	903	0	0	0	0	0	0	0	603	903	0
693	4	0	0	0	0	0	0	200	300	0	0	0	0	0	0	0	200	903	0	0	0	0	0	0	0	603	903	0
693	5	0	0	0	0	0	0	200	300	0	0	0	0	0	0	0	200	903	0	0	0	0	0	0	0	603	903	0
693	6	0	0	0	0	0	0	200	300	0	0	0	0	0	0	0	200	903	0	0	0	0	0	0	0	603	903	0
693	7	0	0	0	0	0	0	200	300	0	0	0	0	0	0	0	200	903	0	0	0	0	0	0	0	603	903	0
693	8	0	0	0	0	0	0	200	300	0	0	0	0	0	0	0	200	903	0	0	0	0	0	0	0	603	903	0
693	9	0	0	0	0	0	0	200	300	0	0	0	0	0	0	0	200	903	0	0	0	0	0	0	0	603	903	0
694	0	0	0	0	0	0	0	200	300	0	0	0	0	0	0	0	200	903	0	0	0	0	0	0	0	603	903	0
694	1	0	0	0	0	0	0	200	300	0	0	0	0	0	0	0	200	903	0	0	0	0	0	0	0	603	903	0
694	2	0	0	0	0	0	0	200	300	0	0	0	0	0	0	0	200	903	0	0	0	0	0	0	0	603	903	0
694	3	0	0	0	0	0	0	200	300	0	0	0	0	0	0	0	200	903	0	0	0	0	0	0	0	603	903	0
694	4	0	0	0	0	0	0	200	300	0	0	0	0	0	0	0	200	903	0	0	0	0	0	0	0	603	903	0
694	5	0	0	0	0	0	0	200	300	0	0	0	0	0	0	0	200	903	0	0	0	0	0	0	0	603	903	0
694	6	0	0	0	0	0	0	200	300	0	0	0	0	0	0	0	200	903	0	0	0	0	0	0	0	603	903	0
694	7	0	0	0	0	0	0	200	300	0	0	0	0	0	0	0	200	903	0	0	0	0	0	0	0	603	903	0
694	8	0	0	0	0	0	0	200	300	0	0	0	0	0	0	0	200	903	0	0	0	0	0	0	0	603	903	0
694	9	0	0	0	0	0	0	200	300	0	0	0	0	0	0	0	200	903	0	0	0	0	0	0	0	603	903	0
695	0	0	0	0	0	0	0	200	300	0	0	0	0	0	0	0	200	903	0	0	0	0	0	0	0	603	903	0
695	1	0	0	0	0	0	0	200	300	0	0	0	0	0	0	0	200	903	0	0	0	0	0	0	0	603	903	0
695	2	0	0	0	0	0	0	200	300	0	0	0	0	0	0	0	200	903	0	0	0	0	0	0	0	603	903	0
695	3	0	0	0	0	0	0	200	300	0	0	0	0	0	0	0	200	903	0	0	0	0	0	0	0	603	903	0
695	4	0	0	0	0	0	0	200	300	0	0	0	0	0	0	0	200	903	0	0	0	0	0	0	0	603	903	0
695	5	0	0	0	0	0	0	200	300	0	0	0	0	0	0	0	200	903	0	0	0	0	0	0	0	603	903	0
695	6	0	0	0	0	0	0	200	300	0	0	0	0	0	0	0	200	903	0	0	0	0	0	0	0	603	903	0
695	7	0	0	0	0	0	0	200	300	0	0	0	0	0	0	0	200	903	0	0	0	0	0	0	0	603	903	0
695	8	0	0	0	0	0	0	200	300	0	0	0	0	0	0	0	200	903	0	0	0	0	0	0	0	603	903	0
695	9	0	0	0	0	0	0	200	300	0	0	0	0	0	0	0	200	903	0	0	0	0	0	0	0	603	903	0
696	0	0	0	0	0	0	0	200	300	0	0	0	0	0	0	0	200	903	0	0	0	0	0	0	0	603	903	0
696	1	0	0	0	0	0	0	200	300	0	0	0	0	0	0	0	200	903	0	0	0	0	0	0	0	603	903	0
696	2	0	0	0	0	0	0	200	300	0	0	0	0	0	0	0	200	903	0	0	0	0	0	0	0	603	903	0
696	3	0	0	0	0	0	0	200	300	0	0	0	0	0	0	0	200	903	0	0	0	0	0	0	0	603	903	0
696	4	0	0	0	0	0	0	200	300	0	0	0	0	0	0	0	200	903	0	0	0	0	0	0	0	603	903	0
696	5	0	0	0	0	0	0	200	300	0	0	0	0	0	0	0	200	903	0	0	0	0	0	0	0	603	903	0
696	6	0	0	0	0	0	0	200	300	0	0	0	0	0	0	0	200	903	0	0	0	0	0	0	0	603	903	0
696	7	0	0	0	0	0	0	200	300	0	0	0	0	0	0	0	200	903	0	0	0	0	0	0	0	603	903	0
696	8	0	0	0	0	0	0	200	300	0	0	0	0	0	0	0	200	903	0	0	0	0	0	0	0	603	903	0
696	9	0	0	0	0	0	0	200	300	0	0	0	0	0	0	0	200	903	0	0	0	0	0	0	0	603	903	0
697	0	0	0	0	0	0	0	200	300	0	0	0	0	0	0	0	200	903	0	0	0	0	0	0	0	603	903	0
697	1	0	0	0	0	0	0	200	300	0	0	0	0	0	0	0	200	903	0	0	0	0	0	0	0	603	903	0
697	2	0	0	0	0	0	0	200	300	0	0	0	0	0	0	0	200	903	0	0	0	0	0	0	0	603	903	0
697	3	0	0	0	0	0	0	200	300	0	0	0	0	0	0	0	200	903	0	0	0	0	0	0	0	603	903	0
697	4	0	0	0	0	0	0	200	300	0	0	0	0	0	0	0	200	903	0	0	0	0	0	0	0	603	903	0
697	5	0	0	0	0	0	0	200	300	0	0	0	0	0	0	0	200	903	0	0	0	0	0	0	0	603	903	0
697	6	0	0	0	0	0	0	200	300	0	0	0	0	0	0	0	200	903	0	0	0	0	0	0	0	603	903	0
697	7	0	0	0	0	0	0	200	300	0	0	0	0	0	0	0	200	903	0	0	0	0	0	0	0	603	903	0
697	8	0	0	0	0	0	0	200	300	0	0	0	0	0	0	0	200	903	0	0	0	0	0	0	0	603	903	0
697	9	0	0	0	0	0	0	200	300	0	0	0	0	0	0	0	200	903	0	0	0	0	0	0	0	603	903	0
698	0	0	0	0	0	0	0	200	300	0	0	0	0	0	0	0	200	903	0	0	0	0	0	0	0	603	903	0
698	1	0	0	0	0	0	0	200	300	0	0	0	0	0	0	0	200	903	0	0	0	0	0	0	0	603	903	0
698	2	0	0	0	0	0	0	200	300	0	0	0	0	0	0	0	200	903	0	0	0	0	0	0	0	603	903	0
698	3	0	0	0	0	0	0	200	300	0	0	0	0	0	0	0	200	903	0	0	0	0	0	0	0	603	903	0
698	4	0	0	0	0	0	0	200	300	0	0	0	0	0	0	0	200	903	0	0	0	0	0	0	0	603	903	0
698	5	0	0	0	0	0	0	200	300	0	0	0	0	0	0	0	200	903	0	0	0	0	0	0	0	603	903	0
698	6	0	0	0	0	0	0	200	300	0	0	0	0	0	0	0	200	903	0	0	0	0	0	0	0	603	903	0
698	7	0	0	0	0	0	0	200	300	0	0	0	0	0	0	0	200	903	0	0	0	0	0	0	0	603	903	0
698	8	0	0	0	0	0	0	200	300	0	0	0	0	0	0	0	200	903	0	0	0	0	0	0	0	603	903	0
698	9	0	0	0	0	0	0	200	300	0	0	0	0	0	0	0	200	903	0	0	0	0	0	0	0	603	903	0
699	0	0	0	0	0	0	0	200	300	0	0	0	0	0	0	0	200	903	0	0	0	0	0	0	0	603	903	0
699	1	0	0	0	0	0	0	200	300	0	0	0	0	0	0	0	200	903	0	0	0	0	0	0	0	603	903	0
699	2	0	0	0	0	0	0	200	300	0	0	0	0	0	0	0	200	903	0	0	0	0	0	0	0	603	903	0
699	3	0	0	0	0	0	0	200	300	0	0	0	0	0	0	0	200	903	0	0	0	0	0	0	0	603	903	0
699	4	0	0	0	0	0	0	200	300	0	0	0	0	0	0	0	200	903	0	0	0	0	0	0	0	603	903	0
699	5	0	0	0	0	0	0	200	300	0	0	0	0	0	0	0	200	903	0	0	0	0	0	0	0	603	903	0
699	6	0	0	0	0	0	0	200	300	0	0	0	0	0	0	0	200	903	0	0	0	0	0	0	0	603	903	0
699	7	0	0	0	0	0	0	200	300	0	0	0	0	0	0	0	200	903	0	0	0	0	0	0	0	603	903	0
699	8	0	0	0	0	0	0	200	300	0	0	0	0	0	0	0	200	903	0	0	0	0	0	0	0	603	903	0
699	9	0	0	0	0	0	0	200	300	0	0	0	0	0	0	0	200	903	0	0	0	0	0	0	0	603	903	0
700	0	0	0	0	0	0	0	200	300	0	0	0	0	0	0	0	200	903	0	0	0	0	0	0	0	603	903	0
700	1	0	0	0	0	0	0	200	300	0	0	0	0	0	0	0	200	903	0	0	0	0	0	0	0	603	903	0
700	2	0	0	0	0	0	0	200	300	0	0	0	0	0	0	0	200	903	0	0	0	0	0	0	0	603	903	0
700	3	0	0	0	0	0	0	200	300	0	0	0	0	0	0	0	200	903	0	0	0	0	0	0	0	603	903	0
700	4	0	0	0	0	0	0	200	300	0	0	0	0	0	0	0	200	903	0	0	0	0	0	0	0	603	903	0
700	5	0	0	0	0	0	0	200	300	0	0	0	0	0	0	0	200	903	0	0	0	0	0	0	0	603	903	0
700	6	0	0	0	0	0	0	200	300	0	0	0	0	0	0	0	200	903	0	0	0	0	0	0	0	603	903	0
700	7	0	0	0	0	0	0	200	300	0	0	0	0	0	0	0	200	903	0	0	0	0	0	0	0	603	903	0
700	8	0	0	0	0	0	0	200	300	0	0	0	0	0	0	0	200	903	0	0	0	0	0	0	0	603	903	0
700	9	0	0	0	0	0	0	200	300	0	0	0	0	0	0	0	200	903	0	0	0	0	0	0	0	603	903	0
701	0	0	0	0	0	0	0	200	300	0	0	0	0	0	0	0	200	903	0	0	0	0	0	0	0	603	903	0
701	1	0	0	0	0	0	0	200	300	0	0	0	0	0	0	0	200	903	0	0	0	0	0	0	0	603	903	0
701	2	0	0	0	0	0	0	200	300	0	0	0	0	0	0	0	200	903	0	0	0	0	0	0	0	603	903	0
701	3	0	0	0	0	0	0	200	300	0	0	0	0	0	0	0	200	903	0	0	0	0	0	0	0	603	903	0
701	4	0	0	0	0	0	0	200	300	0	0	0	0	0	0	0	200	903	0	0	0	0	0	0	0	603	903	0
701	5	0	0	0	0	0	0	200	300	0	0	0	0	0	0	0	200	903	0	0	0	0	0	0	0	603	903	0
701	6	0	0	0	0	0	0	200	300	0	0	0	0	0	0	0	200	903	0	0	0	0	0	0	0	603	903	0
701	7	0	0	0	0	0	0	200	300	0	0	0	0	0	0	0	200	903	0	0	0	0	0	0	0	603	903	0
701	8	0	0	0	0	0	0	200	300	0	0	0	0	0	0	0	200	903	0	0	0	0	0	0	0	603	903	0
701	9	0	0	0	0	0	0	200	300	0	0	0	0	0	0	0	200	903	0	0	0	0	0	0	0	603	903	0
702	0	0	0	0	0	0	0	200	300	0	0	0	0	0	0	0	200	903	0	0	0	0	0	0	0	603	903	0
702	1	0	0	0	0	0	0	200	300	0	0	0	0	0	0	0	200	903	0	0	0	0	0	0	0	603	903	0
702	2	0	0	0	0	0	0	200	300	0	0	0	0	0	0	0	200	903	0	0	0	0	0	0	0	603	903	0
702	3	0	0	0	0	0	0	200	300	0	0	0	0	0	0	0	200	903	0	0	0	0	0	0	0	603	903	0
702	4	0	0	0	0	0	0	200	300	0	0	0	0	0	0	0	200	903	0	0	0	0	0	0	0	603	903	0
702	5	0	0	0	0	0	0	200	300	0	0	0	0	0	0	0	200	903	0	0	0	0	0	0	0	603	903	0
702	6	0	0	0	0	0	0	200	300	0	0	0	0	0	0	0	200	903	0	0	0	0	0	0	0	603	903	0
702	7	0	0	0	0	0	0	200	300	0	0	0	0	0	0	0	200	903	0	0	0	0	0	0	0	603	903	0
702	8	0	0	0	0	0	0	200	300	0	0	0	0	0	0	0	200	903	0	0	0	0	0	0	0	603	903	0
702	9	0	0	0	0	0	0	200	300	0	0	0	0	0	0	0	200	903	0	0	0	0	0	0	0	603	903	0
703	0	0	0	0	0	0	0	200	300	0	0	0	0	0	0	0	200	903	0	0	0	0	0	0	0	603	903	0
703	1	0	0	0	0	0	0	200	300	0	0	0	0	0	0	0	200	903	0	0	0	0	0	0	0	603	903	0
703	2	0	0	0	0	0	0	200	300	0	0	0	0	0	0	0	200	903	0	0	0	0	0	0	0	603	903	0
703	3	0	0	0	0	0	0	200	300	0	0	0	0	0	0	0	200	903	0	0	0	0	0	0	0	603	903	0
703	4	0	0	0	0	0	0	200	300	0	0	0	0	0	0	0	200	903	0	0	0	0	0	0	0	603	903	0
703	5	0	0	0	0	0	0	200	300	0	0	0	0	0	0	0	200	903	0	0	0	0	0	0	0	603	903	0
703	6	0	0	0	0	0	0	200	300	0	0	0	0	0	0	0	200	903	0	0	0	0	0	0	0	603	903	0
703	7	0	0	0	0	0	0	200	300	0	0	0	0	0	0	0	200	903	0	0	0	0	0	0	0	603	903	0
703	8	0	0	0	0	0	0	200	300	0	0	0	0	0	0	0	200	903	0	0	0	0	0	0	0	603	903	0
703	9	0	0	0	0	0	0	200	300	0	0	0	0	0	0	0	200	903	0	0	0	0	0	0	0	603	903	0
704	0	0	0	0	0	0	0	200	300	0	0	0	0	0	0	0	200	903	0	0	0	0	0	0	0	603	903	0
704	1	0	0	0	0	0	0	200	300	0	0	0	0	0	0	0	200	903	0	0	0	0	0	0	0	603	903	0
704	2	0	0	0	0	0	0	200	300	0	0	0	0	0	0	0	200	903	0	0	0	0	0	0	0	603	903	0
704	3	0	0	0	0	0	0	200	300	0	0	0	0	0	0	0	200	903	0	0	0	0	0	0	0	603	903	0
704	4	0	0	0	0	0	0	200	300	0	0	0	0	0	0	0	200	903	0	0	0	0	0	0	0	603	903	0
704	5	0	0	0	0	0	0	200	300	0	0	0	0	0	0	0	200	903	0	0	0	0	0	0	0	603	903	0
704	6	0	0	0	0	0	0	200	300	0	0	0	0	0	0	0	200	903	0	0	0	0	0	0	0	603	903	0
704	7	0	0	0	0	0	0	200	300	0	0	0	0	0	0	0	200	903	0	0	0	0	0	0	0	603	903	0
704	8	0	0	0	0	0	0	200	300	0	0	0	0	0	0	0	200	903	0	0	0	0	0	0	0	603	903	0
704	9	0	0	0	0	0	0	200	300	0	0	0	0	0	0	0	200	903	0	0	0	0	0	0	0	603	903	0
705	0	0	0	0	0	0	0	200	300	0	0	0	0	0	0	0	200	903	0	0	0	0	0	0	0	603	903	0
705	1	0	0	0	0	0	0	200	300	0	0	0	0	0	0	0	200	903	0	0	0	0	0	0	0	603	903	0
705	2	0	0	0	0	0	0	200	300	0	0	0	0	0	0	0	200	903	0	0	0	0	0	0	0	603	903	0
705	3	0	0	0	0	0	0	200	300	0	0	0	0	0	0	0	200	903	0	0	0	0	0	0	0	603	903	0
705	4	0	0	0	0	0	0	200	300	0	0	0	0	0	0	0	200	903	0	0	0	0	0	0	0	603	903	0
705	5	0	0	0	0	0	0	200	300	0	0	0	0	0	0	0	200	903	0	0	0	0	0	0	0	603	903	0
705	6	0	0	0	0	0	0	200	300	0	0	0	0	0	0	0	200	903	0	0	0	0	0	0	0	603	903	0
705	7	0	0	0	0	0	0	200	300	0	0	0	0	0	0	0	200	903	0	0	0	0	0	0	0	603	903	0
705	8	0	0	0	0	0	0	200	300	0	0	0	0	0	0	0	200	903	0	0	0	0	0	0	0	603	903	0
705	9	0	0	0	0	0	0	200	300	0	0	0	0	0	0	0	200	903	0	0	0	0	0	0	0	603	903	0
706	0	0	0	0	0	0	0	200	300	0	0	0	0	0	0	0	200	903	0	0	0	0	0	0	0	603	903	0
706	1	0	0	0	0	0	0	200	300	0	0	0	0	0	0	0	200	903	0	0	0	0	0	0	0	603	903	0
706	2	0	0	0	0	0	0	200	300	0	0	0	0	0	0	0	200	903	0	0	0	0	0	0	0	603	903	0
706	3	0	0	0	0	0	0	200	300	0	0	0	0	0	0	0	200	903	0	0	0	0	0	0	0	603	903	0
706	4	0	0	0	0	0	0	200	300	0	0	0	0	0	0	0	200	903	0	0	0	0	0	0	0	603	903	0
706	5	0	0	0	0	0	0	200	300	0	0	0	0	0	0	0	200	903	0	0	0	0	0	0	0	603	903	0
706	6	0	0	0	0	0	0	200	300	0	0	0	0	0	0	0	200	903	0	0	0	0	0	0	0	603	903	0
706	7	0	0	0	0	0	0	200	300	0	0	0	0	0	0	0	200	903	0	0	0	0	0	0	0	603	903	0
706	8	0	0	0	0	0	0	200	300	0	0	0	0	0	0	0	200	903	0	0	0	0	0	0	0	603	903	0
706	9	0	0	0	0	0	0	200	300	0	0	0	0	0	0	0	200	903	0	0	0	0	0	0	0	603	903	0
707	0	0	0	0	0	0	0	200	300	0	0	0	0	0	0	0	200	903	0	0	0	0	0	0	0	603	903	0
707	1	0	0	0	0	0	0	200	300	0	0	0	0	0	0	0	200	903	0	0	0	0	0	0	0	603	903	0
707	2	0	0	0	0	0	0	200	300	0	0	0	0	0	0	0	200	903	0	0	0	0	0	0	0	603	903	0
707	3	0	0	0	0	0	0	200	300	0	0	0	0	0	0	0	200	903	0	0	0	0	0	0	0	603	903	0
707	4	0	0	0	0	0	0	200	300	0	0	0	0	0	0	0	200	903	0	0	0	0	0	0	0	603	903	0
707	5	0	0	0	0	0	0	200	300	0	0	0	0	0	0	0	200	903	0	0	0	0	0	0	0	603	903	0
707	6	0	0	0	0	0	0	200	300	0	0	0	0	0	0	0	200	903	0	0	0	0	0	0	0	603	903	0
707	7	0	0	0	0	0	0	200	300	0	0	0	0	0	0	0	200	903	0	0	0	0	0	0	0	603	903	0
707	8	0	0	0	0	0	0	200	300	0	0	0	0	0	0	0	200	903	0	0	0	0	0	0	0	603	903	0
707	9	0	0	0	0	0	0	200	300	0	0	0	0	0	0	0	200	903	0	0	0	0	0	0	0	603	903	0
708	0	0	0	0	0	0	0	200	300	0	0	0	0	0	0	0	200	903	0	0	0	0	0	0	0	603	903	0
708	1	0	0	0	0	0	0	200	300	0	0	0	0	0	0	0	200	903	0	0	0	0	0	0	0	603	903	0
708	2	0	0	0	0	0	0	200	300	0	0	0	0	0	0	0	200	903	0	0	0	0	0	0	0	603	903	0
708	3	0	0	0	0	0	0	200	300	0	0	0	0	0	0	0	200	903	0	0	0	0	0	0	0	603	903	0
708	4	0	0	0	0	0	0	200	300	0	0	0	0	0	0	0	200	903	0	0	0	0	0	0	0	603	903	0
708	5	0	0	0	0	0	0	200	300	0	0	0	0	0	0	0	200	903	0	0	0	0	0	0	0	603	903	0
708	6	0	0	0	0	0	0	200	300	0	0	0	0	0	0	0	200	903	0	0	0	0	0	0	0	603	903	0
708	7	0	0	0	0	0	0	200	300	0	0	0	0	0	0	0	200	903	0	0	0	0	0	0	0	603	903	0
708	8	0	0	0	0	0	0	200	300	0	0	0	0	0	0	0	200	903	0	0	0	0	0	0	0	603	903	0
708	9	0	0	0	0	0	0	200	300	0	0	0	0	0	0	0	200	903	0	0	0	0	0	0	0	603	903	0
709	0	0	0	0	0	0	0	200	300	0	0	0	0	0	0	0	200	903	0	0	0	0	0	0	0	603	903	0
709	1	0	0	0	0	0	0	200	300	0	0	0	0	0	0	0	200	903	0	0	0	0	0	0	0	603	903	0
709	2	0	0	0	0	0	0	200	300	0	0	0	0	0	0	0	200	903	0	0	0	0	0	0	0	603	903	0
709	3	0	0	0	0	0	0	200	300	0	0	0	0	0	0	0	200	903	0	0	0	0	0	0	0	603	903	0
709	4	5.57189	7.93411	-18.0865	569.184	-1568.37	-965.745	113.285	268.53	0	0	0	0	0	0	0	200	903	0	0	0	0	0	0	0	603	903	0
709	5	3.28307	15.4109	-27.2418	386.078	-1812.51	-1423.51	133.466	285.828	0	0	0	0	0	0	0	200	903	0	0	0	0	0	0	0	603	903	0
709	6	-0.684218	13.7325	-28.4625	19.8671	-2178.72	-691.087	123.453	299.302	0	0	0	0	0	0	0	200	903	0	0	0	0	0	0	0	603	903	0
709	7	-1.59975	9.91775	-24.1901	752.289	-2117.69	-1103.07	112.456	268.901	0	0	0	0	0	0	0	200	903	0	0	0	0	0	0	0	603	903	0
709	8	1.90978	14.9532	-26.9366	569.184	-2056.65	-1606.61	123.649	278.87	0	0	0	0	0	0	0	200	903	0	0	0	0	0	0	0	603	903	0
709	9	6.48741	16.7842	-34.2609	1118.5	-3155.29	-1194.63	107.904	267.353	0	0	0	0	0	0	0	200	903	0	0	0	0	0	0	0	603	903	0
710	0	2.97789	8.39188	-44.942	1850.92	-3399.43	-324.876	124.36	258.815	0	0	0	0	0	0	0	200	903	0	0	0	0	0	0	0	603	903	0
710	1	0.078721	-1.06857	-51.0455	1118.5	-4437.02	-416.429	113.077	278.088	0	0	0	0	0	0	0	200	903	0	0	0	0	0	0	0	603	903	0
710	2	2.97789	-2.28928	-60.2008	1576.26	-4986.34	178.664	117.172	273.817	0	0	0	0	0	0	0	200	903	0	0	0	0	0	0	0	603	903	0
710	3	6.33482	-0.763399	-71.7975	843.842	-5047.37	590.651	129.7	288.247	0	0	0	0	0	0	0	200	903	0	0	0	0	0	0	0	603	903	0
710	4	6.48741	-6.56174	-79.1217	2217.13	-5718.76	41.3351	127.722	271.978	0	0	0	0	0	0	0	200	903	0	0	0	0	0	0	0	603	903	0
710	5	5.26671	-11.292	-82.1735	1942.47	-6329.11	132.888	122.979	276.361	0	0	0	0	0	0	0	200	903	0	0	0	0	0	0	0	603	903	0
710	6	4.04601	-4.88327	-90.4132	1759.37	-7244.64	590.651	119.872	280.541	0	0	0	0	0	0	0	200	903	0	0	0	0	0	0	0	603	903	0
710	7	4.80895	-2.74704	-100.179	2034.03	-7916.03	636.428	120.981	279.696	0	0	0	0	0	0	0	200	903	0	0	0	0	0	0	0	603	903	0
710	8	4.35118	-11.1394	-107.503	2125.58	-8099.13	956.862	124.661	280.228	0	0	0	0	0	0	0	200	903	0	0	0	0	0	0	0	603	903	0
710	9	5.26671	-13.2756	-113.912	2217.13	-8770.52	1002.64	123.006	280.536	0	0	0	0	0	0	0	200	903	0	0	0	0	0	0	0	603	903	0
711	0	8.77623	-11.5971	-121.541	3041.11	-9441.91	1185.74	122.315	274.979	0	0	0	0	0	0	0	200	903	0	0	0	0	0	0	0	603	903	0
711	1	10.4547	-14.9541	-132.527	3224.21	-10052.3	1506.18	124.15	275.671	0	0	0	0	0	0	0	200	903	0	0	0	0	0	0	0	603	903	0
711	2	9.53917	-18.7688	-140.462	2583.34	-10845.7	1551.96	122.785	281.608	0	0	0	0	0	0	0	200	903	0	0	0	0	0	0	0	603	903	0
711	3	12.2858	-20.905	-147.481	2858	-11150.9	2101.27	124.391	280.621	0	0	0	0	0	0	0	200	903	0	0	0	0	0	0	0	603	903	0
711	4	14.8797	-16.7851	-153.279	3041.11	-11700.2	1597.73	123.667	280.16	0	0	0	0	0	0	0	200	903	0	0	0	0	0	0	0	603	903	0
711	5	16.1004	-15.8696	-158.773	2674.9	-11944.3	1643.51	124.771	283.153	0	0	0	0	0	0	0	200	903	0	0	0	0	0	0	0	603	903	0
711	6	14.422	-17.2429	-164.876	3041.11	-12371.6	1551.96	124.964	281.555	0	0	0	0	0	0	0	200	903	0	0	0	0	0	0	0	603	903	0
711	7	13.8116	-17.2429	-171.59	2858	-13104	1460.4	123.632	283.344	0	0	0	0	0	0	0	200	903	0	0	0	0	0	0	0	603	903	0
711	8	15.0323	-9.91867	-175.557	2491.79	-13226.1	1460.4	124.662	285.806	0	0	0	0	0	0	0	200	903	0	0	0	0	0	0	0	603	903	0
711	9	15.1849	-9.00314	-176.168	2949.56	-13348.2	1002.64	124.23	283.257	0	0	0	0	0	0	0	200	903	0	0	0	0	0	0	0	603	903	0
712	0	14.7272	-10.0713	-183.187	2674.9	-13531.3	819.533	126.134	285.398	0	0	0	0	0	0	0	200	903	0	0	0	0	0	0	0	603	903	0
712	1	13.659	-5.49362	-187.459	2949.56	-13897.5	270.217	125.864	284.266	0	0	0	0	0	0	0	200	903	0	0	0	0	0	0	0	603	903	0
712	2	14.2694	-0.153047	-192.037	3132.66	-14385.8	407.546	125.089	283.687	0	0	0	0	0	0	0	200	903	0	0	0	0	0	0	0	603	903	0
712	3	13.2013	1.52542	-194.478	2858	-14752	-50.2177	124.146	285.304	0	0	0	0	0	0	0	200	903	0	0	0	0	0	0	0	603	903	0
712	4	13.3539	3.81424	-195.394	2491.79	-14996.1	-141.77	123.252	287.247	0	0	0	0	0	0	0	200	903	0	0	0	0	0	0	0	603	903	0
712	5	13.0487	8.84964	-201.802	2858	-15118.2	-736.863	125.084	285.838	0	0	0	0	0	0	0	200	903	0	0	0	0	0	0	0	603	903	0
712	6	13.0487	12.3592	-206.075	3041.11	-15301.3	-965.745	125.749	285.243	0	0	0	0	0	0	0	200	903	0	0	0	0	0	0	0	603	903	0
712	7	11.828	14.3428	-210.347	2217.13	-15911.6	-1286.18	124.355	289.46	0	0	0	0	0	0	0	200	903	0	0	0	0	0	0	0	603	903	0
712	8	11.5228	16.479	-214.315	2308.69	-15789.6	-1240.4	126.325	289.228	0	0	0	0	0	0	0	200	903	0	0	0	0	0	0	0	603	903	0
712	9	13.8116	21.0567	-220.113	2949.56	-16277.8	-1377.73	126.048	286.6	0	0	0	0	0	0	0	200	903	0	0	0	0	0	0	0	603	903	0
713	0	14.422	24.1084	-224.385	2125.58	-16277.8	-2064.38	127.456	290.527	0	0	0	0	0	0	0	200	903	0	0	0	0	0	0	0	603	903	0
713	1	12.8961	25.9395	-228.353	2034.03	-16461	-2201.71	127.914	291.093	0	0	0	0	0	0	0	200	903	0	0	0	0	0	0	0	603	903	0
713	2	13.2013	27.7705	-233.235	2308.69	-17193.4	-2384.81	126.283	290.102	0	0	0	0	0	0	0	200	903	0	0	0	0	0	0	0	603	903	0
713	3	13.2013	31.7378	-237.813	2034.03	-17437.5	-2705.25	126.676	291.447	0	0	0	0	0	0	0	200	903	0	0	0	0	0	0	0	603	903	0
713	4	13.5065	32.6534	-243.001	2125.58	-18047.9	-2705.25	125.729	291.253	0	0	0	0	0	0	0	200	903	0	0	0	0	0	0	0	603	903	0
713	5	14.7272	32.1956	-249.715	1484.71	-18353	-2705.25	126.504	294.054	0	0	0	0	0	0	0	200	903	0	0	0	0	0	0	0	603	903	0
713	6	12.4383	35.2473	-255.208	1301.61	-18353	-2934.13	128.086	294.9	0	0	0	0	0	0	0	200	903	0	0	0	0	0	0	0	603	903	0
713	7	11.6754	37.9939	-258.565	2034.03	-19207.5	-3163.01	125.715	292.133	0	0	0	0	0	0	0	200	903	0	0	0	0	0	0	0	603	903	0
713	8	10.6073	37.3836	-264.669	1301.61	-19329.6	-3300.34	126.967	295.082	0	0	0	0	0	0	0	200	903	0	0	0	0	0	0	0	603	903	0
713	9	11.065	37.3836	-272.603	1484.71	-19634.8	-3391.89	127.973	294.554	0	0	0	0	0	0	0	200	903	0	0	0	0	0	0	0	603	903	0
714	0	14.1168	39.2146	-282.674	1118.5	-20611.3	-3529.22	127.084	296.043	0	0	0	0	0	0	0	200	903	0	0	0	0	0	0	0	603	903	0
714	1	16.5582	39.825	-286.946	1026.95	-20550.3	-3483.45	128.383	296.421	0	0	0	0	0	0	0	200	903	0	0	0	0	0	0	0	603	903	0
714	2	15.7953	42.1138	-296.712	294.525	-21282.7	-3941.21	128.271	299.007	0	0	0	0	0	0	0	200	903	0	0	0	0	0	0	0	603	903	0
714	3	15.0323	42.419	-304.341	935.395	-22076.2	-3986.99	127.462	296.927	0	0	0	0	0	0	0	200	903	0	0	0	0	0	0	0	603	903	0
714	4	15.7953	44.0974	-315.633	935.395	-22442.4	-4032.76	128.897	297.036	0	0	0	0	0	0	0	200	903	0	0	0	0	0	0	0	603	903	0
714	5	15.6427	45.4707	-322.957	569.184	-23663.1	-4032.76	126.73	298.238	0	0	0	0	0	0	0	200	903	0	0	0	0	0	0	0	603	903	0
714	6	16.8634	45.013	-328.45	386.078	-23602.1	-4719.41	128.141	298.825	0	0	0	0	0	0	0	200	903	0	0	0	0	0	0	0	603	903	0
714	7	17.4737	46.2337	-335.469	202.973	-24578.6	-4765.19	126.734	299.395	0	0	0	0	0	0	0	200	903	0	0	0	0	0	0	0	603	903	0
714	8	15.7953	48.9803	-342.488	-346.344	-24761.7	-4398.97	127.701	301.011	0	0	0	0	0	0	0	200	903	0	0	0	0	0	0	0	603	903	0
714	9	14.5746	50.5061	-351.644	-254.791	-25738.3	-5131.4	126.806	300.725	0	0	0	0	0	0	0	200	903	0	0	0	0	0	0	0	603	903	0
715	0	13.3539	50.6587	-360.494	-437.897	-26531.8	-5177.17	126.402	301.215	0	0	0	0	0	0	0	200	903	0	0	0	0	0	0	0	603	903	0
715	1	10.9125	52.795	-368.428	-1444.98	-26898	-5406.05	126.993	303.922	0	0	0	0	0	0	0	200	903	0	0	0	0	0	0	0	603	903	0
715	2	10.4547	55.0838	-371.785	-1170.32	-28240.7	-5360.28	124.04	303.148	0	0	0	0	0	0	0	200	903	0	0	0	0	0	0	0	603	903	0
715	3	9.99693	56.4571	-381.246	-1994.29	-28423.8	-5772.27	125.445	305.231	0	0	0	0	0	0	0	200	903	0	0	0	0	0	0	0	603	903	0
715	4	8.16588	58.2881	-388.57	-1536.53	-29156.3	-5909.59	124.965	303.954	0	0	0	0	0	0	0	200	903	0	0	0	0	0	0	0	603	903	0
715	5	6.18224	60.2718	-394.979	-895.66	-29278.3	-6138.48	125.874	302.268	0	0	0	0	0	0	0	200	903	0	0	0	0	0	0	0	603	903	0
715	6	6.02965	61.7976	-401.082	-2268.95	-30193.9	-6184.25	124.719	305.657	0	0	0	0	0	0	0	200	903	0	0	0	0	0	0	0	603	903	0
715	7	4.04601	61.9502	-407.491	-2726.72	-30743.2	-6092.7	124.555	306.691	0	0	0	0	0	0	0	200	903	0	0	0	0	0	0	0	603	903	0
715	8	3.74083	64.3916	-414.51	-2726.72	-31292.5	-5726.49	124.507	306.578	0	0	0	0	0	0	0	200	903	0	0	0	0	0	0	0	603	903	0
715	9	3.43565	66.2227	-421.834	-3276.03	-32085.9	-6092.7	123.937	307.766	0	0	0	0	0	0	0	200	903	0	0	0	0	0	0	0	603	903	0
716	0	2.21495	69.1219	-427.938	-3276.03	-32452.2	-6504.69	124.166	307.655	0	0	0	0	0	0	0	200	903	0	0	0	0	0	0	0	603	903	0
716	1	0.231309	70.0374	-434.346	-3001.37	-32757.3	-6275.81	124.582	306.91	0	0	0	0	0	0	0	200	903	0	0	0	0	0	0	0	603	903	0
716	2	-0.989394	71.2581	-440.145	-3825.35	-33306.7	-6367.36	124.328	308.691	0	0	0	0	0	0	0	200	903	0	0	0	0	0	0	0	603	903	0
716	3	-0.684218	73.2417	-442.586	-4740.88	-33794.9	-6504.69	123.642	310.712	0	0	0	0	0	0	0	200	903	0	0	0	0	0	0	0	603	903	0
716	4	-3.73598	74.4624	-450.215	-4557.77	-34588.4	-6550.46	123.174	310.124	0	0	0	0	0	0	0	200	903	0	0	0	0	0	0	0	603	903	0
716	5	-4.19374	74.7676	-456.319	-5107.09	-34893.6	-6550.46	123.532	311.192	0	0	0	0	0	0	0	200	903	0	0	0	0	0	0	0	603	903	0
716	6	-6.02479	75.9883	-461.812	-5290.19	-34893.6	-6321.58	124.442	311.455	0	0	0	0	0	0	0	200	903	0	0	0	0	0	0	0	603	903	0
716	7	-8.00844	78.1245	-468.831	-5015.53	-35503.9	-6733.57	124.271	310.698	0	0	0	0	0	0	0	200	903	0	0	0	0	0	0	0	603	903	0
716	8	-8.00844	78.8875	-470.967	-6297.27	-36358.4	-6596.24	122.801	313.371	0	0	0	0	0	0	0	200	903	0	0	0	0	0	0	0	603	903	0
716	9	-10.6024	79.9556	-473.714	-6938.14	-36785.7	-6687.79	122.346	314.646	0	0	0	0	0	0	0	200	903	0	0	0	0	0	0	0	603	903	0
717	0	-11.9757	81.3289	-479.207	-6480.38	-37273.9	-6642.02	122.217	313.523	0	0	0	0	0	0	0	200	903	0	0	0	0	0	0	0	603	903	0
717	1	-12.2809	82.8548	-488.057	-7395.9	-37640.2	-6825.12	122.878	315.154	0	0	0	0	0	0	0	200	903	0	0	0	0	0	0	0	603	903	0
717	2	-13.0438	84.5332	-494.161	-7395.9	-38555.7	-6962.45	121.977	314.967	0	0	0	0	0	0	0	200	903	0	0	0	0	0	0	0	603	903	0
717	3	-14.8749	86.8221	-499.654	-8128.33	-38799.8	-7237.11	122.347	316.268	0	0	0	0	0	0	0	200	903	0	0	0	0	0	0	0	603	903	0
717	4	-14.2645	87.4324	-507.283	-9410.06	-39471.2	-7282.89	122.191	318.55	0	0	0	0	0	0	0	200	903	0	0	0	0	0	0	0	603	903	0
717	5	-14.2645	88.9583	-512.471	-9593.17	-40264.7	-7649.1	121.43	318.719	0	0	0	0	0	0	0	200	903	0	0	0	0	0	0	0	603	903	0
717	6	-16.2482	92.1626	-518.575	-9501.62	-40386.7	-7649.1	122.12	318.323	0	0	0	0	0	0	0	200	903	0	0	0	0	0	0	0	603	903	0
717	7	-17.0111	93.2307	-526.509	-10417.1	-41241.2	-8244.19	121.67	319.785	0	0	0	0	0	0	0	200	903	0	0	0	0	0	0	0	603	903	0
717	8	-17.4689	95.367	-532.308	-11149.6	-42034.7	-8244.19	121.033	320.946	0	0	0	0	0	0	0	200	903	0	0	0	0	0	0	0	603	903	0
717	9	-18.3844	97.5032	-539.937	-11515.8	-42461.9	-8564.62	121.358	321.328	0	0	0	0	0	0	0	200	903	0	0	0	0	0	0	0	603	903	0
718	0	-20.2155	99.0291	-545.125	-12614.4	-43255.4	-8289.97	120.651	323.14	0	0	0	0	0	0	0	200	903	0	0	0	0	0	0	0	603	903	0
718	1	-18.6896	99.4868	-551.534	-12889.1	-43255.4	-8427.3	121.573	323.37	0	0	0	0	0	0	0	200	903	0	0	0	0	0	0	0	603	903	0
718	2	-19.7577	102.233	-555.806	-12706	-43499.5	-9068.17	121.736	322.86	0	0	0	0	0	0	0	200	903	0	0	0	0	0	0	0	603	903	0
718	3	-20.8258	104.064	-560.994	-13621.5	-44598.2	-8473.07	120.502	324.281	0	0	0	0	0	0	0	200	903	0	0	0	0	0	0	0	603	903	0
718	4	-20.6732	103.912	-563.13	-14262.4	-44537.1	-9525.93	120.912	325.327	0	0	0	0	0	0	0	200	903	0	0	0	0	0	0	0	603	903	0
718	5	-21.8939	106.048	-569.844	-14720.1	-45452.7	-9205.49	120.237	325.832	0	0	0	0	0	0	0	200	903	0	0	0	0	0	0	0	603	903	0
718	6	-22.9621	108.49	-574.422	-15544.1	-45147.5	-9342.82	121.404	327.06	0	0	0	0	0	0	0	200	903	0	0	0	0	0	0	0	603	903	0
718	7	-21.8939	110.015	-579.915	-15910.3	-45879.9	-9892.14	120.885	327.436	0	0	0	0	0	0	0	200	903	0	0	0	0	0	0	0	603	903	0
718	8	-23.5724	110.778	-582.662	-15818.8	-46551.3	-10029.5	120.106	327.149	0	0	0	0	0	0	0	200	903	0	0	0	0	0	0	0	603	903	0
718	9	-25.0983	112.152	-582.967	-16825.8	-46551.3	-9937.92	120.148	328.862	0	0	0	0	0	0	0	200	903	0	0	0	0	0	0	0	603	903	0
719	0	-22.5043	113.678	-590.596	-16734.3	-47466.8	-10395.7	119.629	328.335	0	0	0	0	0	0	0	200	903	0	0	0	0	0	0	0	603	903	0
719	1	-24.3353	113.525	-593.648	-18107.6	-47405.8	-10349.9	120.145	330.502	0	0	0	0	0	0	0	200	903	0	0	0	0	0	0	0	603	903	0
719	2	-25.4035	113.678	-597.005	-18382.2	-47772	-10304.1	119.981	330.791	0	0	0	0	0	0	0	200	903	0	0	0	0	0	0	0	603	903	0
719	3	-25.556	115.661	-598.836	-18473.8	-48016.1	-10533	119.818	330.849	0	0	0	0	0	0	0	200	903	0	0	0	0	0	0	0	603	903	0
719	4	-26.1664	116.729	-598.836	-18565.3	-48138.2	-10853.4	119.614	331.002	0	0	0	0	0	0	0	200	903	0	0	0	0	0	0	0	603	903	0
719	5	-26.6242	118.713	-604.634	-18931.5	-48260.3	-10761.9	120.183	331.311	0	0	0	0	0	0	0	200	903	0	0	0	0	0	0	0	603	903	0
719	6	-26.7767	117.95	-606.771	-19572.4	-48687.5	-10945	119.76	332.257	0	0	0	0	0	0	0	200	903	0	0	0	0	0	0	0	603	903	0
719	7	-27.2345	118.866	-608.907	-19938.6	-49236.8	-10761.9	119.139	332.745	0	0	0	0	0	0	0	200	903	0	0	0	0	0	0	0	603	903	0
719	8	-27.6923	120.544	-610.433	-20487.9	-49481	-10716.1	118.941	333.563	0	0	0	0	0	0	0	200	903	0	0	0	0	0	0	0	603	903	0
719	9	-26.4716	120.544	-613.79	-20762.6	-49358.9	-11173.9	119.583	333.827	0	0	0	0	0	0	0	200	903	0	0	0	0	0	0	0	603	903	0
720	0	-29.5233	120.391	-618.978	-21128.8	-50274.4	-11128.1	118.778	334.135	0	0	0	0	0	0	0	200	903	0	0	0	0	0	0	0	603	903	0
720	1	-30.2863	122.528	-623.25	-22227.4	-50518.6	-11265.4	118.943	335.664	0	0	0	0	0	0	0	200	903	0	0	0	0	0	0	0	603	903	0
720	2	-30.8966	124.053	-626.302	-22685.2	-50945.8	-10761.9	118.656	336.221	0	0	0	0	0	0	0	200	903	0	0	0	0	0	0	0	603	903	0
720	3	-31.3544	123.748	-630.269	-22959.9	-50884.8	-11219.7	119.265	336.429	0	0	0	0	0	0	0	200	903	0	0	0	0	0	0	0	603	903	0
720	4	-32.4225	124.969	-628.133	-23692.3	-51251	-10990.8	118.407	337.719	0	0	0	0	0	0	0	200	903	0	0	0	0	0	0	0	603	903	0
720	5	-34.101	126.647	-637.288	-23692.3	-52044.5	-10990.8	118.335	337.177	0	0	0	0	0	0	0	200	903	0	0	0	0	0	0	0	603	903	0
720	6	-34.8639	125.885	-641.255	-24333.2	-52227.6	-11357	118.554	337.946	0	0	0	0	0	0	0	200	903	0	0	0	0	0	0	0	603	903	0
720	7	-36.2372	125.732	-644.307	-25065.6	-52837.9	-10624.6	117.993	338.903	0	0	0	0	0	0	0	200	903	0	0	0	0	0	0	0	603	903	0
720	8	-37.0001	128.936	-648.275	-25157.1	-52654.8	-11128.1	118.777	338.806	0	0	0	0	0	0	0	200	903	0	0	0	0	0	0	0	603	903	0
720	9	-36.8475	129.852	-653.157	-25889.6	-53021	-10853.4	118.824	339.638	0	0	0	0	0	0	0	200	903	0	0	0	0	0	0	0	603	903	0
721	0	-37.0001	130.92	-653.463	-26805.1	-53814.5	-11448.5	117.647	341.02	0	0	0	0	0	0	0	200	903	0	0	0	0	0	0	0	603	903	0
721	1	-38.8312	131.53	-660.482	-26530.4	-54119.7	-11540.1	118.06	340.168	0	0	0	0	0	0	0	200	903	0	0	0	0	0	0	0	603	903	0
721	2	-39.5941	132.598	-665.059	-27354.4	-54730	-11448.5	117.707	341.131	0	0	0	0	0	0	0	200	903	0	0	0	0	0	0	0	603	903	0
721	3	-39.7467	133.972	-669.942	-27812.2	-54852.1	-11448.5	118.124	341.514	0	0	0	0	0	0	0	200	903	0	0	0	0	0	0	0	603	903	0
721	4	-40.3571	133.972	-674.825	-28453	-55157.2	-10761.9	118.264	342.164	0	0	0	0	0	0	0	200	903	0	0	0	0	0	0	0	603	903	0
721	5	-41.12	134.735	-677.877	-28819.2	-55889.7	-11677.4	117.552	342.514	0	0	0	0	0	0	0	200	903	0	0	0	0	0	0	0	603	903	0
721	6	-41.12	136.413	-681.844	-29368.6	-56194.8	-11402.8	117.584	343.072	0	0	0	0	0	0	0	200	903	0	0	0	0	0	0	0	603	903	0
721	7	-41.7304	136.261	-687.337	-29917.9	-57232.4	-11906.3	116.733	343.527	0	0	0	0	0	0	0	200	903	0	0	0	0	0	0	0	603	903	0
721	8	-41.5778	135.498	-694.051	-30558.8	-56927.3	-11769	117.978	344.03	0	0	0	0	0	0	0	200	903	0	0	0	0	0	0	0	603	903	0
721	9	-41.2726	137.481	-699.544	-31291.2	-57659.7	-11814.7	117.575	344.731	0	0	0	0	0	0	0	200	903	0	0	0	0	0	0	0	603	903	0
722	0	-42.3407	138.549	-705.648	-31840.5	-58392.1	-11540.1	117.25	345.122	0	0	0	0	0	0	0	200	903	0	0	0	0	0	0	0	603	903	0
722	1	-43.1037	138.244	-711.141	-32572.9	-58758.3	-11219.7	117.375	345.804	0	0	0	0	0	0	0	200	903	0	0	0	0	0	0	0	603	903	0
722	2	-42.9511	139.312	-716.024	-32939.1	-59429.7	-11814.7	117	346.003	0	0	0	0	0	0	0	200	903	0	0	0	0	0	0	0	603	903	0
722	3	-41.7304	140.228	-724.568	-33488.4	-59307.6	-11677.4	118.148	346.218	0	0	0	0	0	0	0	200	903	0	0	0	0	0	0	0	603	903	0
722	4	-43.4088	140.533	-730.977	-34404	-60406.3	-11860.5	117.362	347.066	0	0	0	0	0	0	0	200	903	0	0	0	0	0	0	0	603	903	0
722	5	-43.8666	141.449	-736.165	-35502.6	-60711.4	-11906.3	117.53	348.226	0	0	0	0	0	0	0	200	903	0	0	0	0	0	0	0	603	903	0
722	6	-43.1037	141.754	-740.743	-35411.1	-61016.6	-11723.2	117.628	347.805	0	0	0	0	0	0	0	200	903	0	0	0	0	0	0	0	603	903	0
722	7	-43.8666	141.906	-745.626	-36509.7	-61871.1	-12043.6	117.021	348.965	0	0	0	0	0	0	0	200	903	0	0	0	0	0	0	0	603	903	0
722	8	-43.714	142.364	-746.236	-37059	-62420.4	-11997.9	116.353	349.661	0	0	0	0	0	0	0	200	903	0	0	0	0	0	0	0	603	903	0
722	9	-45.2399	142.364	-754.476	-37608.3	-62298.4	-11814.7	117.428	349.847	0	0	0	0	0	0	0	200	903	0	0	0	0	0	0	0	603	903	0
723	0	-44.3244	143.432	-761.19	-37333.6	-63519.1	-12135.2	116.553	349.046	0	0	0	0	0	0	0	200	903	0	0	0	0	0	0	0	603	903	0
723	1	-44.3244	143.585	-765.767	-38706.9	-63580.1	-12089.4	116.972	350.547	0	0	0	0	0	0	0	200	903	0	0	0	0	0	0	0	603	903	0
723	2	-44.4769	143.89	-768.819	-39164.7	-63458	-12135.2	117.46	350.941	0	0	0	0	0	0	0	200	903	0	0	0	0	0	0	0	603	903	0
723	3	-43.8666	144.195	-769.734	-39439.4	-64312.5	-11997.9	116.448	351.238	0	0	0	0	0	0	0	200	903	0	0	0	0	0	0	0	603	903	0
723	4	-42.6459	144.195	-775.228	-40080.2	-63885.3	-12226.7	117.592	351.701	0	0	0	0	0	0	0	200	903	0	0	0	0	0	0	0	603	903	0
723	5	-44.6295	144.805	-778.89	-40446.4	-64983.9	-12043.6	116.569	351.928	0	0	0	0	0	0	0	200	903	0	0	0	0	0	0	0	603	903	0
723	6	-45.0873	143.432	-783.162	-40263.3	-64739.8	-12318.3	117.335	351.411	0	0	0	0	0	0	0	200	903	0	0	0	0	0	0	0	603	903	0
723	7	-45.0873	143.432	-785.298	-41545.1	-65289.1	-11997.9	116.861	352.904	0	0	0	0	0	0	0	200	903	0	0	0	0	0	0	0	603	903	0
723	8	-44.9347	144.195	-788.35	-41911.3	-65594.2	-12181	116.796	353.163	0	0	0	0	0	0	0	200	903	0	0	0	0	0	0	0	603	903	0
723	9	-45.2399	143.432	-790.181	-41453.5	-65411.1	-12181	117.22	352.461	0	0	0	0	0	0	0	200	903	0	0	0	0	0	0	0	603	903	0
724	0	-44.7821	142.669	-794.759	-42094.4	-66143.6	-11631.6	116.775	352.965	0	0	0	0	0	0	0	200	903	0	0	0	0	0	0	0	603	903	0
724	1	-45.0873	142.822	-798.421	-42643.7	-66204.6	-12089.4	117.081	353.41	0	0	0	0	0	0	0	200	903	0	0	0	0	0	0	0	603	903	0
724	2	-45.2399	141.906	-799.642	-42735.3	-66631.8	-11952.1	116.673	353.443	0	0	0	0	0	0	0	200	903	0	0	0	0	0	0	0	603	903	0
724	3	-45.0873	141.754	-801.778	-43833.9	-67181.2	-11906.3	116.21	354.671	0	0	0	0	0	0	0	200	903	0	0	0	0	0	0	0	603	903	0
724	4	-45.2399	141.143	-801.778	-44291.7	-67120.1	-11494.3	116.286	355.242	0	0	0	0	0	0	0	200	903	0	0	0	0	0	0	0	603	903	0
724	5	-45.8502	141.143	-808.187	-42460.6	-67364.3	-11631.6	116.648	352.538	0	0	0	0	0	0	0	200	903	0	0	0	0	0	0	0	603	903	0
724	6	-46.9184	141.143	-812.154	-44566.3	-67974.6	-11677.4	116.303	354.874	0	0	0	0	0	0	0	200	903	0	0	0	0	0	0	0	603	903	0
724	7	-47.9865	140.228	-815.206	-45207.2	-67791.5	-11402.8	116.841	355.455	0	0	0	0	0	0	0	200	903	0	0	0	0	0	0	0	603	903	0
724	8	-48.5968	139.77	-817.342	-44474.8	-68585	-10899.2	116.088	354.414	0	0	0	0	0	0	0	200	903	0	0	0	0	0	0	0	603	903	0
724	9	-48.902	140.686	-816.121	-45939.6	-68340.8	-11265.4	116.261	356.29	0	0	0	0	0	0	0	200	903	0	0	0	0	0	0	0	603	903	0
725	0	-49.3598	139.923	-821.309	-46122.7	-68951.2	-11265.4	116.047	356.158	0	0	0	0	0	0	0	200	903	0	0	0	0	0	0	0	603	903	0
725	1	-51.3434	140.075	-824.971	-45115.6	-69195.3	-11128.1	116.124	354.688	0	0	0	0	0	0	0	200	903	0	0	0	0	0	0	0	603	903	0
725	2	-51.9538	139.77	-827.108	-46946.7	-69134.3	-11128.1	116.414	356.76	0	0	0	0	0	0	0	200	903	0	0	0	0	0	0	0	603	903	0
725	3	-52.5641	140.228	-829.549	-47587.6	-70049.8	-11265.4	115.557	357.366	0	0	0	0	0	0	0	200	903	0	0	0	0	0	0	0	603	903	0
725	4	-52.4115	138.855	-832.296	-46214.3	-69805.7	-10304.1	116.129	355.526	0	0	0	0	0	0	0	200	903	0	0	0	0	0	0	0	603	903	0
725	5	-52.8693	138.397	-830.464	-48411.5	-70294	-10716.1	115.356	358.295	0	0	0	0	0	0	0	200	903	0	0	0	0	0	0	0	603	903	0
725	6	-52.2589	137.634	-835.958	-48228.4	-70721.2	-10670.3	115.401	357.692	0	0	0	0	0	0	0	200	903	0	0	0	0	0	0	0	603	903	0
725	7	-54.7003	138.702	-838.399	-48136.9	-70477.1	-10899.2	115.939	357.415	0	0	0	0	0	0	0	200	903	0	0	0	0	0	0	0	603	903	0
725	8	-54.3952	137.176	-840.84	-49327.1	-71270.5	-10853.4	115.239	358.664	0	0	0	0	0	0	0	200	903	0	0	0	0	0	0	0	603	903	0
725	9	-53.9374	137.939	-842.977	-48960.9	-70965.3	-10624.6	115.816	358.081	0	0	0	0	0	0	0	200	903	0	0	0	0	0	0	0	603	903	0
726	0	-54.09	137.023	-842.977	-49418.6	-71087.4	-10121	115.671	358.624	0	0	0	0	0	0	0	200	903	0	0	0	0	0	0	0	603	903	0
726	1	-51.9538	135.65	-846.639	-50334.1	-71697.8	-10349.9	115.315	359.452	0	0	0	0	0	0	0	200	903	0	0	0	0	0	0	0	603	903	0
726	2	-52.4115	136.413	-849.08	-50059.5	-71575.7	-10716.1	115.702	358.957	0	0	0	0	0	0	0	200	903	0	0	0	0	0	0	0	603	903	0
726	3	-52.7167	135.345	-850.911	-49967.9	-72247.1	-10853.4	115.094	358.723	0	0	0	0	0	0	0	200	903	0	0	0	0	0	0	0	603	903	0
726	4	-52.2589	135.955	-853.658	-50517.3	-72125	-10533	115.511	359.177	0	0	0	0	0	0	0	200	903	0	0	0	0	0	0	0	603	903	0
726	5	-51.9538	134.429	-853.658	-50700.4	-72247.1	-10533	115.368	359.392	0	0	0	0	0	0	0	200	903	0	0	0	0	0	0	0	603	903	0
726	6	-50.8856	131.835	-858.541	-51249.7	-72674.3	-10441.5	115.351	359.694	0	0	0	0	0	0	0	200	903	0	0	0	0	0	0	0	603	903	0
726	7	-51.0382	133.209	-858.846	-51799	-72308.1	-10395.7	115.808	360.312	0	0	0	0	0	0	0	200	903	0	0	0	0	0	0	0	603	903	0
726	8	-51.0382	132.751	-859.456	-51432.8	-72674.3	-10349.9	115.441	359.843	0	0	0	0	0	0	0	200	903	0	0	0	0	0	0	0	603	903	0
726	9	-51.0382	131.225	-861.592	-51890.5	-72552.2	-10441.5	115.793	360.226	0	0	0	0	0	0	0	200	903	0	0	0	0	0	0	0	603	903	0
727	0	-51.496	130.767	-863.423	-52165.2	-72613.3	-10258.4	115.901	360.417	0	0	0	0	0	0	0	200	903	0	0	0	0	0	0	0	603	903	0
727	1	-51.496	130.31	-865.865	-52165.2	-73223.6	-10029.5	115.433	360.246	0	0	0	0	0	0	0	200	903	0	0	0	0	0	0	0	603	903	0
727	2	-51.0382	128.631	-866.475	-52989.2	-73406.7	-9937.92	115.281	361.155	0	0	0	0	0	0	0	200	903	0	0	0	0	0	0	0	603	903	0
727	3	-51.8012	128.479	-868.001	-53263.8	-73467.8	-9846.36	115.36	361.364	0	0	0	0	0	0	0	200	903	0	0	0	0	0	0	0	603	903	0
727	4	-51.1908	127.716	-867.086	-52256.8	-73284.7	-10029.5	115.482	360.267	0	0	0	0	0	0	0	200	903	0	0	0	0	0	0	0	603	903	0
727	5	-52.2589	127.258	-869.222	-53813.2	-73284.7	-9571.71	115.689	361.91	0	0	0	0	0	0	0	200	903	0	0	0	0	0	0	0	603	903	0
727	6	-52.1063	126.037	-870.443	-54087.8	-73895	-9937.92	115.106	362.138	0	0	0	0	0	0	0	200	903	0	0	0	0	0	0	0	603	903	0
727	7	-53.0219	125.732	-871.968	-53813.2	-73650.9	-9709.03	115.535	361.715	0	0	0	0	0	0	0	200	903	0	0	0	0	0	0	0	603	903	0
727	8	-51.9538	125.274	-871.358	-54911.8	-74078.1	-9342.82	114.985	363.019	0	0	0	0	0	0	0	200	903	0	0	0	0	0	0	0	603	903	0
727	9	-51.496	125.427	-872.884	-55827.3	-74383.3	-9617.48	114.784	363.957	0	0	0	0	0	0	0	200	903	0	0	0	0	0	0	0	603	903	0
728	0	-51.8012	123.901	-873.189	-54820.2	-73773	-8885.06	115.513	362.782	0	0	0	0	0	0	0	200	903	0	0	0	0	0	0	0	603	903	0
728	1	-51.8012	123.291	-873.799	-55369.5	-73467.8	-9388.6	115.921	363.366	0	0	0	0	0	0	0	200	903	0	0	0	0	0	0	0	603	903	0
728	2	-51.496	123.901	-874.105	-54911.8	-74078.1	-9113.94	115.253	362.821	0	0	0	0	0	0	0	200	903	0	0	0	0	0	0	0	603	903	0
728	3	-49.6649	121.307	-878.377	-55827.3	-74688.5	-9068.17	114.97	363.557	0	0	0	0	0	0	0	200	903	0	0	0	0	0	0	0	603	903	0
728	4	-51.0382	121.612	-876.241	-54545.6	-74444.3	-8976.61	115.041	362.25	0	0	0	0	0	0	0	200	903	0	0	0	0	0	0	0	603	903	0
728	5	-50.8856	121.46	-875.325	-55827.3	-74200.2	-8885.06	115.231	363.779	0	0	0	0	0	0	0	200	903	0	0	0	0	0	0	0	603	903	0
728	6	-51.496	118.866	-875.63	-56102	-74017.1	-8976.61	115.47	364.07	0	0	0	0	0	0	0	200	903	0	0	0	0	0	0	0	603	903	0
728	7	-51.496	119.323	-876.546	-56559.7	-74566.4	-8564.62	114.932	364.526	0	0	0	0	0	0	0	200	903	0	0	0	0	0	0	0	603	903	0
728	8	-51.496	118.866	-871.663	-56559.7	-74810.6	-8976.61	114.175	364.887	0	0	0	0	0	0	0	200	903	0	0	0	0	0	0	0	603	903	0
728	9	-52.4115	117.95	-875.936	-57475.3	-74749.5	-8518.85	114.663	365.616	0	0	0	0	0	0	0	200	903	0	0	0	0	0	0	0	603	903	0
729	0	-52.2589	117.797	-876.241	-58024.6	-74322.3	-8335.74	115.181	366.22	0	0	0	0	0	0	0	200	903	0	0	0	0	0	0	0	603	903	0
729	1	-52.1063	116.272	-874.715	-56010.4	-74200.2	-8473.07	115.172	364.033	0	0	0	0	0	0	0	200	903	0	0	0	0	0	0	0	603	903	0
729	2	-52.1063	115.966	-875.63	-57658.4	-74322.3	-8335.74	115.121	365.848	0	0	0	0	0	0	0	200	903	0	0	0	0	0	0	0	603	903	0
729	3	-52.1063	114.44	-872.579	-58024.6	-74810.6	-8473.07	114.265	366.498	0	0	0	0	0	0	0	200	903	0	0	0	0	0	0	0	603	903	0
729	4	-51.6486	113.372	-872.579	-57658.4	-74993.7	-8198.41	114.055	366.078	0	0	0	0	0	0	0	200	903	0	0	0	0	0	0	0	603	903	0
729	5	-51.6486	112.915	-871.968	-58573.9	-74444.3	-7511.77	114.625	367.174	0	0	0	0	0	0	0	200	903	0	0	0	0	0	0	0	603	903	0
729	6	-51.6486	113.983	-871.358	-58573.9	-74810.6	-8106.86	114.145	367.221	0	0	0	0	0	0	0	200	903	0	0	0	0	0	0	0	603	903	0
729	7	-51.6486	111.084	-867.086	-58299.2	-74261.2	-8152.64	114.355	367.236	0	0	0	0	0	0	0	200	903	0	0	0	0	0	0	0	603	903	0
729	8	-51.3434	111.999	-868.611	-58573.9	-74322.3	-7694.87	114.436	367.434	0	0	0	0	0	0	0	200	903	0	0	0	0	0	0	0	603	903	0
729	9	-50.733	111.999	-868.306	-58390.8	-74688.5	-7832.2	113.984	367.247	0	0	0	0	0	0	0	200	903	0	0	0	0	0	0	0	603	903	0
730	0	-50.8856	110.626	-866.78	-58573.9	-74444.3	-7877.98	114.114	367.576	0	0	0	0	0	0	0	200	903	0	0	0	0	0	0	0	603	903	0
730	1	-50.8856	110.473	-865.865	-59397.9	-74505.4	-7054	113.953	368.6	0	0	0	0	0	0	0	200	903	0	0	0	0	0	0	0	603	903	0
730	2	-49.9701	109.71	-865.255	-58482.3	-73834	-7603.32	114.668	367.59	0	0	0	0	0	0	0	200	903	0	0	0	0	0	0	0	603	903	0
730	3	-51.496	109.1	-863.729	-59672.5	-74200.2	-7649.1	114.093	369.087	0	0	0	0	0	0	0	200	903	0	0	0	0	0	0	0	603	903	0
730	4	-51.3434	108.49	-863.118	-59397.9	-74200.2	-7191.33	114.032	368.818	0	0	0	0	0	0	0	200	903	0	0	0	0	0	0	0	603	903	0
730	5	-51.3434	107.116	-860.982	-59489.4	-73895	-7603.32	114.174	369.095	0	0	0	0	0	0	0	200	903	0	0	0	0	0	0	0	603	903	0
730	6	-51.0382	105.59	-860.982	-59947.2	-73773	-7237.11	114.315	369.627	0	0	0	0	0	0	0	200	903	0	0	0	0	0	0	0	603	903	0
730	7	-50.733	103.912	-856.404	-60221.8	-73650.9	-7191.33	114	370.319	0	0	0	0	0	0	0	200	903	0	0	0	0	0	0	0	603	903	0
730	8	-51.496	104.37	-856.71	-59214.8	-73956.1	-7099.78	113.674	369.119	0	0	0	0	0	0	0	200	903	0	0	0	0	0	0	0	603	903	0
730	9	-51.6486	103.759	-854.573	-59947.2	-73895	-7008.23	113.53	370.149	0	0	0	0	0	0	0	200	903	0	0	0	0	0	0	0	603	903	0
731	0	-52.5641	102.233	-854.268	-60221.8	-73345.7	-7054	114.142	370.495	0	0	0	0	0	0	0	200	903	0	0	0	0	0	0	0	603	903	0
731	1	-51.496	101.623	-853.047	-59855.6	-73284.7	-6321.58	114.091	370.167	0	0	0	0	0	0	0	200	903	0	0	0	0	0	0	0	603	903	0
731	2	-51.8012	101.013	-850.911	-60679.6	-73223.6	-6825.12	113.947	371.311	0	0	0	0	0	0	0	200	903	0	0	0	0	0	0	0	603	903	0
731	3	-49.9701	101.013	-845.113	-59672.5	-73284.7	-6642.02	113.284	370.609	0	0	0	0	0	0	0	200	903	0	0	0	0	0	0	0	603	903	0
731	4	-51.0382	100.097	-844.503	-59764.1	-73101.6	-6733.57	113.438	370.768	0	0	0	0	0	0	0	200	903	0	0	0	0	0	0	0	603	903	0
731	5	-51.9538	98.7239	-843.282	-59489.4	-72918.5	-6642.02	113.53	370.545	0	0	0	0	0	0	0	200	903	0	0	0	0	0	0	0	603	903	0
731	6	-51.9538	97.5032	-840.84	-59855.6	-73223.6	-6687.79	112.916	371.186	0	0	0	0	0	0	0	200	903	0	0	0	0	0	0	0	603	903	0
731	7	-51.0382	94.9092	-838.704	-60313.4	-72735.4	-6275.81	113.277	371.913	0	0	0	0	0	0	0	200	903	0	0	0	0	0	0	0	603	903	0
731	8	-51.8012	95.6721	-837.484	-60954.3	-72674.3	-5863.82	113.223	372.783	0	0	0	0	0	0	0	200	903	0	0	0	0	0	0	0	603	903	0
731	9	-51.0382	94.604	-833.821	-60038.7	-72674.3	-5726.49	112.842	372.004	0	0	0	0	0	0	0	200	903	0	0	0	0	0	0	0	603	903	0
732	0	-51.9538	93.3833	-831.685	-59947.2	-72125	-5909.59	113.278	372.079	0	0	0	0	0	0	0	200	903	0	0	0	0	0	0	0	603	903	0
732	1	-51.0382	92.9256	-829.549	-60588.1	-72125	-5863.82	113.055	373.037	0	0	0	0	0	0	0	200	903	0	0	0	0	0	0	0	603	903	0
732	2	-50.733	92.01	-827.718	-60130.3	-72308.1	-5634.94	112.642	372.646	0	0	0	0	0	0	0	200	903	0	0	0	0	0	0	0	603	903	0
732	3	-50.5805	91.2471	-825.887	-60404.9	-72247.1	-5360.28	112.522	373.139	0	0	0	0	0	0	0	200	903	0	0	0	0	0	0	0	603	903	0
732	4	-48.902	90.3316	-824.361	-60862.7	-71880.9	-4948.29	112.804	373.83	0	0	0	0	0	0	0	200	903	0	0	0	0	0	0	0	603	903	0
732	5	-50.8856	89.2635	-822.225	-60404.9	-71392.6	-5268.73	113.171	373.465	0	0	0	0	0	0	0	200	903	0	0	0	0	0	0	0	603	903	0
732	6	-50.4279	88.5005	-820.089	-60313.4	-71697.8	-5497.61	112.573	373.545	0	0	0	0	0	0	0	200	903	0	0	0	0	0	0	0	603	903	0
732	7	-50.4279	87.585	-817.342	-61228.9	-71392.6	-5039.84	112.653	374.912	0	0	0	0	0	0	0	200	903	0	0	0	0	0	0	0	603	903	0
732	8	-49.8175	86.6695	-815.816	-60679.6	-71636.7	-5039.84	112.19	374.379	0	0	0	0	0	0	0	200	903	0	0	0	0	0	0	0	603	903	0
732	9	-48.1391	86.0591	-811.544	-60679.6	-70721.2	-4856.74	112.856	374.771	0	0	0	0	0	0	0	200	903	0	0	0	0	0	0	0	603	903	0
733	0	-50.2753	86.2117	-810.933	-61045.8	-70660.2	-4856.74	112.866	375.279	0	0	0	0	0	0	0	200	903	0	0	0	0	0	0	0	603	903	0
733	1	-50.733	84.3806	-808.797	-60496.5	-70904.3	-4810.96	112.334	374.798	0	0	0	0	0	0	0	200	903	0	0	0	0	0	0	0	603	903	0
733	2	-51.0382	83.3125	-806.356	-60588.1	-70171.9	-4765.19	112.977	375.138	0	0	0	0	0	0	0	200	903	0	0	0	0	0	0	0	603	903	0
733	3	-50.4279	82.5496	-802.693	-61137.4	-70660.2	-4673.63	111.971	376.165	0	0	0	0	0	0	0	200	903	0	0	0	0	0	0	0	603	903	0
733	4	-48.4442	81.6341	-799.031	-60679.6	-70110.8	-4536.3	112.255	375.941	0	0	0	0	0	0	0	200	903	0	0	0	0	0	0	0	603	903	0
733	5	-49.3598	80.4134	-795.674	-61320.5	-69439.5	-3712.33	112.729	377.067	0	0	0	0	0	0	0	200	903	0	0	0	0	0	0	0	603	903	0
733	6	-49.9701	80.4134	-793.233	-61412	-69805.7	-4444.75	111.999	377.42	0	0	0	0	0	0	0	200	903	0	0	0	0	0	0	0	603	903	0
733	7	-50.2753	78.7349	-791.097	-60313.4	-69561.5	-4353.2	112.07	376.24	0	0	0	0	0	0	0	200	903	0	0	0	0	0	0	0	603	903	0
733	8	-48.7494	77.8194	-788.655	-61228.9	-69561.5	-4078.54	111.797	377.637	0	0	0	0	0	0	0	200	903	0	0	0	0	0	0	0	603	903	0
733	9	-48.2916	74.9202	-786.519	-61045.8	-68890.1	-4032.76	112.411	377.615	0	0	0	0	0	0	0	200	903	0	0	0	0	0	0	0	603	903	0
734	0	-47.9865	76.4461	-783.162	-60313.4	-69134.3	-3849.66	111.724	377.013	0	0	0	0	0	0	0	200	903	0	0	0	0	0	0	0	603	903	0
734	1	-47.8339	75.5305	-779.805	-61320.5	-68768.1	-3895.43	111.814	378.636	0	0	0	0	0	0	0	200	903	0	0	0	0	0	0	0	603	903	0
734	2	-46.1554	73.8521	-778.585	-61503.6	-68462.9	-3391.89	112.067	378.994	0	0	0	0	0	0	0	200	903	0	0	0	0	0	0	0	603	903	0
734	3	-47.8339	74.0047	-776.143	-59947.2	-68340.8	-3575	111.948	377.237	0	0	0	0	0	0	0	200	903	0	0	0	0	0	0	0	603	903	0
734	4	-48.5968	72.9366	-773.091	-61137.4	-68279.8	-3575	111.68	379.082	0	0	0	0	0	0	0	200	903	0	0	0	0	0	0	0	603	903	0
734	5	-47.5287	71.5633	-770.65	-61137.4	-68279.8	-3529.22	111.4	379.332	0	0	0	0	0	0	0	200	903	0	0	0	0	0	0	0	603	903	0
734	6	-46.7658	70.9529	-767.293	-60404.9	-68157.7	-3071.46	111.171	378.725	0	0	0	0	0	0	0	200	903	0	0	0	0	0	0	0	603	903	0
734	7	-48.7494	70.4951	-764.852	-61503.6	-67791.5	-3437.67	111.366	380.412	0	0	0	0	0	0	0	200	903	0	0	0	0	0	0	0	603	903	0
734	8	-48.7494	70.0374	-761.495	-59947.2	-67669.4	-3483.45	111.136	378.723	0	0	0	0	0	0	0	200	903	0	0	0	0	0	0	0	603	903	0
734	9	-48.1391	68.3589	-759.664	-60679.6	-67608.4	-3208.79	111.002	379.877	0	0	0	0	0	0	0	200	903	0	0	0	0	0	0	0	603	903	0
735	0	-45.8502	67.2908	-755.086	-60862.7	-67425.3	-2888.35	110.705	380.604	0	0	0	0	0	0	0	200	903	0	0	0	0	0	0	0	603	903	0
735	1	-47.0709	66.833	-753.56	-60679.6	-66509.8	-2751.02	111.739	380.524	0	0	0	0	0	0	0	200	903	0	0	0	0	0	0	0	603	903	0
735	2	-47.2235	65.6123	-749.593	-60404.9	-66082.5	-2659.47	111.842	380.584	0	0	0	0	0	0	0	200	903	0	0	0	0	0	0	0	603	903	0
735	3	-47.5287	65.4597	-744.1	-60130.3	-66509.8	-2705.25	110.617	380.809	0	0	0	0	0	0	0	200	903	0	0	0	0	0	0	0	603	903	0
735	4	-46.6132	64.239	-743.489	-60588.1	-65899.4	-2842.58	111.365	381.492	0	0	0	0	0	0	0	200	903	0	0	0	0	0	0	0	603	903	0
735	5	-45.8502	62.408	-740.743	-60221.8	-66143.6	-2522.14	110.706	381.299	0	0	0	0	0	0	0	200	903	0	0	0	0	0	0	0	603	903	0
735	6	-45.6976	62.7132	-738.301	-60588.1	-65533.2	-2476.36	111.238	382.064	0	0	0	0	0	0	0	200	903	0	0	0	0	0	0	0	603	903	0
735	7	-45.3925	61.4925	-735.555	-60496.5	-65655.3	-2247.48	110.74	382.246	0	0	0	0	0	0	0	200	903	0	0	0	0	0	0	0	603	903	0
735	8	-44.4769	59.0511	-733.724	-60588.1	-65777.4	-2247.48	110.351	382.576	0	0	0	0	0	0	0	200	903	0	0	0	0	0	0	0	603	903	0
735	9	-45.2399	60.5769	-730.367	-61320.5	-65167	-2293.26	110.775	383.958	0	0	0	0	0	0	0	200	903	0	0	0	0	0	0	0	603	903	0
736	0	-45.3925	60.1192	-729.451	-60404.9	-64800.8	-2110.15	111.165	382.809	0	0	0	0	0	0	0	200	903	0	0	0	0	0	0	0	603	903	0
736	1	-45.3925	56.9148	-724.568	-60496.5	-64800.8	-2018.6	110.566	383.493	0	0	0	0	0	0	0	200	903	0	0	0	0	0	0	0	603	903	0
736	2	-45.6976	58.4407	-723.958	-61228.9	-65167	-1972.83	109.985	384.575	0	0	0	0	0	0	0	200	903	0	0	0	0	0	0	0	603	903	0
736	3	-45.3925	57.5252	-720.601	-60771.2	-65167	-1789.72	109.566	384.334	0	0	0	0	0	0	0	200	903	0	0	0	0	0	0	0	603	903	0
736	4	-45.8502	56.1519	-718.465	-61228.9	-64068.4	-1789.72	110.826	385.222	0	0	0	0	0	0	0	200	903	0	0	0	0	0	0	0	603	903	0
736	5	-45.6976	55.6941	-715.718	-61137.4	-64373.5	-1743.94	110.057	385.421	0	0	0	0	0	0	0	200	903	0	0	0	0	0	0	0	603	903	0
736	6	-44.3244	55.8467	-711.141	-60496.5	-63824.2	-1698.17	110.251	385.07	0	0	0	0	0	0	0	200	903	0	0	0	0	0	0	0	603	903	0
736	7	-44.9347	53.7105	-707.784	-60954.3	-64068.4	-1148.85	109.48	386.12	0	0	0	0	0	0	0	200	903	0	0	0	0	0	0	0	603	903	0
736	8	-44.3244	53.2527	-706.563	-61228.9	-63702.2	-1423.51	109.842	386.657	0	0	0	0	0	0	0	200	903	0	0	0	0	0	0	0	603	903	0
736	9	-44.7821	52.795	-702.596	-60679.6	-63397	-1377.73	109.767	386.365	0	0	0	0	0	0	0	200	903	0	0	0	0	0	0	0	603	903	0
737	0	-44.6295	52.1846	-697.713	-61137.4	-63274.9	-1515.06	109.311	387.625	0	0	0	0	0	0	0	200	903	0	0	0	0	0	0	0	603	903	0
737	1	-43.714	51.4217	-696.187	-61320.5	-62725.6	-1331.96	109.901	388.08	0	0	0	0	0	0	0	200	903	0	0	0	0	0	0	0	603	903	0
737	2	-42.9511	51.4217	-694.661	-60679.6	-62908.7	-1057.3	109.44	387.351	0	0	0	0	0	0	0	200	903	0	0	0	0	0	0	0	603	903	0
737	3	-43.5614	49.5906	-692.22	-61228.9	-62603.5	-1148.85	109.561	388.453	0	0	0	0	0	0	0	200	903	0	0	0	0	0	0	0	603	903	0
737	4	-42.3407	49.5906	-689.168	-61412	-62420.4	-736.863	109.426	389.11	0	0	0	0	0	0	0	200	903	0	0	0	0	0	0	0	603	903	0
737	5	-41.5778	47.4544	-689.778	-60771.2	-62420.4	-919.969	109.507	388.102	0	0	0	0	0	0	0	200	903	0	0	0	0	0	0	0	603	903	0
737	6	-43.4088	47.9121	-684.285	-61137.4	-61565.9	-1057.3	110.029	389.345	0	0	0	0	0	0	0	200	903	0	0	0	0	0	0	0	603	903	0
737	7	-42.9511	47.607	-681.539	-61137.4	-61871.1	-782.64	109.218	389.705	0	0	0	0	0	0	0	200	903	0	0	0	0	0	0	0	603	903	0
737	8	-41.8829	46.5388	-680.318	-60221.8	-61627	-645.311	109.414	388.52	0	0	0	0	0	0	0	200	903	0	0	0	0	0	0	0	603	903	0
737	9	-42.3407	45.013	-674.214	-60954.3	-61504.9	-507.981	108.775	390.408	0	0	0	0	0	0	0	200	903	0	0	0	0	0	0	0	603	903	0
738	0	-42.9511	45.1656	-674.52	-61412	-61443.9	-599.534	108.907	391.046	0	0	0	0	0	0	0	200	903	0	0	0	0	0	0	0	603	903	0
738	1	-41.8829	44.25	-670.552	-59672.5	-60955.6	-599.534	109.096	388.99	0	0	0	0	0	0	0	200	903	0	0	0	0	0	0	0	603	903	0
738	2	-43.1037	44.0974	-669.332	-61137.4	-61016.6	-462.205	108.839	391.341	0	0	0	0	0	0	0	200	903	0	0	0	0	0	0	0	603	903	0
738	3	-42.3407	42.2664	-666.585	-60588.1	-60406.3	-233.323	109.38	390.893	0	0	0	0	0	0	0	200	903	0	0	0	0	0	0	0	603	903	0
738	4	-41.12	42.8767	-662.007	-59397.9	-60406.3	-462.205	108.753	389.724	0	0	0	0	0	0	0	200	903	0	0	0	0	0	0	0	603	903	0
738	5	-42.7985	41.9612	-659.261	-61045.8	-60589.4	-187.547	108.095	392.597	0	0	0	0	0	0	0	200	903	0	0	0	0	0	0	0	603	903	0
738	6	-42.3407	40.5879	-656.819	-61412	-60406.3	41.3351	108.032	393.499	0	0	0	0	0	0	0	200	903	0	0	0	0	0	0	0	603	903	0
738	7	-41.7304	40.7405	-654.073	-60588.1	-60223.2	-50.2177	107.926	392.632	0	0	0	0	0	0	0	200	903	0	0	0	0	0	0	0	603	903	0
738	8	-40.9674	40.4353	-650.411	-60679.6	-59429.7	41.3351	108.627	393.294	0	0	0	0	0	0	0	200	903	0	0	0	0	0	0	0	603	903	0
738	9	-40.9674	39.2146	-648.885	-60679.6	-59551.8	453.322	108.224	393.514	0	0	0	0	0	0	0	200	903	0	0	0	0	0	0	0	603	903	0
739	0	-40.6622	37.9939	-644.918	-59489.4	-59795.9	178.664	107.281	392.243	0	0	0	0	0	0	0	200	903	0	0	0	0	0	0	0	603	903	0
739	1	-40.2045	37.8413	-643.697	-61137.4	-59124.5	270.217	108.148	394.979	0	0	0	0	0	0	0	200	903	0	0	0	0	0	0	0	603	903	0
739	2	-39.7467	36.7732	-640.95	-61320.5	-59307.6	636.428	107.469	395.671	0	0	0	0	0	0	0	200	903	0	0	0	0	0	0	0	603	903	0
739	3	-40.3571	37.9939	-640.035	-59581	-58819.4	453.322	108.1	393.09	0	0	0	0	0	0	0	200	903	0	0	0	0	0	0	0	603	903	0
739	4	-39.7467	36.7732	-636.678	-60679.6	-58514.2	499.099	108.095	395.307	0	0	0	0	0	0	0	200	903	0	0	0	0	0	0	0	603	903	0
739	5	-39.5941	34.3318	-635.152	-61137.4	-58148	407.546	108.45	396.256	0	0	0	0	0	0	0	200	903	0	0	0	0	0	0	0	603	903	0
739	6	-41.12	34.9422	-628.133	-60496.5	-58392.1	911.086	107.039	396.312	0	0	0	0	0	0	0	200	903	0	0	0	0	0	0	0	603	903	0
739	7	-40.3571	35.5525	-629.659	-61045.8	-58209	727.981	107.555	396.951	0	0	0	0	0	0	0	200	903	0	0	0	0	0	0	0	603	903	0
739	8	-40.6622	35.7051	-625.997	-60679.6	-57842.8	682.204	107.599	396.933	0	0	0	0	0	0	0	200	903	0	0	0	0	0	0	0	603	903	0
739	9	-40.0519	34.1792	-625.386	-60130.3	-57110.4	1002.64	108.68	396.149	0	0	0	0	0	0	0	200	903	0	0	0	0	0	0	0	603	903	0
740	0	-37.7631	32.8059	-620.504	-60954.3	-57598.7	956.862	107.174	398.234	0	0	0	0	0	0	0	200	903	0	0	0	0	0	0	0	603	903	0
740	1	-39.4415	33.4163	-618.367	-60130.3	-57232.4	819.533	107.446	397.24	0	0	0	0	0	0	0	200	903	0	0	0	0	0	0	0	603	903	0
740	2	-38.8312	32.5008	-614.705	-60679.6	-57354.5	1460.4	106.696	398.713	0	0	0	0	0	0	0	200	903	0	0	0	0	0	0	0	603	903	0
740	3	-38.0683	32.9585	-611.959	-60679.6	-57110.4	1185.74	106.676	399.156	0	0	0	0	0	0	0	200	903	0	0	0	0	0	0	0	603	903	0
740	4	-38.526	32.5008	-607.991	-59672.5	-56378	1048.42	107.272	398.147	0	0	0	0	0	0	0	200	903	0	0	0	0	0	0	0	603	903	0
740	5	-37.7631	31.8904	-607.991	-60496.5	-56744.2	1139.97	106.669	399.502	0	0	0	0	0	0	0	200	903	0	0	0	0	0	0	0	603	903	0
740	6	-37.4579	30.0594	-605.245	-60588.1	-56255.9	1002.64	107.053	400.105	0	0	0	0	0	0	0	200	903	0	0	0	0	0	0	0	603	903	0
740	7	-37.0001	30.0594	-602.803	-60038.7	-56439	1277.3	106.372	399.599	0	0	0	0	0	0	0	200	903	0	0	0	0	0	0	0	603	903	0
740	8	-36.3898	30.2119	-599.752	-60679.6	-55950.7	1277.3	106.71	401.175	0	0	0	0	0	0	0	200	903	0	0	0	0	0	0	0	603	903	0
740	9	-35.4743	30.9749	-599.141	-60038.7	-55645.5	1368.85	107.125	400.208	0	0	0	0	0	0	0	200	903	0	0	0	0	0	0	0	603	903	0
741	0	-35.7794	28.9912	-597.615	-60221.8	-55706.6	1414.63	106.785	400.77	0	0	0	0	0	0	0	200	903	0	0	0	0	0	0	0	603	903	0
741	1	-35.3217	29.1438	-595.174	-60038.7	-54974.1	1368.85	107.633	400.876	0	0	0	0	0	0	0	200	903	0	0	0	0	0	0	0	603	903	0
741	2	-35.6268	28.9912	-589.07	-60038.7	-55584.5	1368.85	105.64	401.921	0	0	0	0	0	0	0	200	903	0	0	0	0	0	0	0	603	903	0
741	3	-36.0846	28.6861	-590.291	-60221.8	-54852.1	1506.18	107.076	402.021	0	0	0	0	0	0	0	200	903	0	0	0	0	0	0	0	603	903	0
741	4	-35.0165	28.3809	-588.46	-60771.2	-54791	1780.84	106.891	403.272	0	0	0	0	0	0	0	200	903	0	0	0	0	0	0	0	603	903	0
741	5	-35.3217	27.7705	-586.019	-59947.2	-54852.1	1643.51	106.399	402.296	0	0	0	0	0	0	0	200	903	0	0	0	0	0	0	0	603	903	0
741	6	-34.8639	26.855	-582.662	-60221.8	-54424.8	2055.5	106.593	403.356	0	0	0	0	0	0	0	200	903	0	0	0	0	0	0	0	603	903	0
741	7	-33.1854	25.1765	-579.61	-60588.1	-54607.9	1597.73	105.785	404.533	0	0	0	0	0	0	0	200	903	0	0	0	0	0	0	0	603	903	0
741	8	-34.8639	25.6343	-577.169	-59947.2	-54241.7	1918.17	106.021	403.864	0	0	0	0	0	0	0	200	903	0	0	0	0	0	0	0	603	903	0
741	9	-34.7113	25.7869	-575.948	-60496.5	-54180.7	2101.27	105.928	405.038	0	0	0	0	0	0	0	200	903	0	0	0	0	0	0	0	603	903	0
742	0	-33.4906	25.9395	-572.591	-59306.3	-53936.5	1826.61	105.803	403.575	0	0	0	0	0	0	0	200	903	0	0	0	0	0	0	0	603	903	0
742	1	-34.101	25.6343	-568.624	-59855.6	-53204.1	2009.72	106.434	405.264	0	0	0	0	0	0	0	200	903	0	0	0	0	0	0	0	603	903	0
742	2	-32.8803	24.8714	-569.539	-59764.1	-53814.5	2192.83	105.512	404.934	0	0	0	0	0	0	0	200	903	0	0	0	0	0	0	0	603	903	0
742	3	-33.0329	24.8714	-567.098	-59855.6	-53387.2	1872.39	105.859	405.547	0	0	0	0	0	0	0	200	903	0	0	0	0	0	0	0	603	903	0
742	4	-31.8121	23.9558	-565.572	-60862.7	-53143.1	2055.5	106.037	407.613	0	0	0	0	0	0	0	200	903	0	0	0	0	0	0	0	603	903	0
742	5	-29.6759	24.5662	-562.825	-60496.5	-53143.1	2192.83	105.578	407.487	0	0	0	0	0	0	0	200	903	0	0	0	0	0	0	0	603	903	0
742	6	-31.3544	23.6507	-562.825	-59489.4	-52532.7	2101.27	106.662	405.698	0	0	0	0	0	0	0	200	903	0	0	0	0	0	0	0	603	903	0
742	7	-31.6596	22.7351	-560.384	-60221.8	-52960	2101.27	105.493	407.465	0	0	0	0	0	0	0	200	903	0	0	0	0	0	0	0	603	903	0
742	8	-30.744	21.667	-555.806	-60404.9	-52227.6	2101.27	106.033	408.68	0	0	0	0	0	0	0	200	903	0	0	0	0	0	0	0	603	903	0
742	9	-31.507	21.8196	-556.722	-60038.7	-52715.8	2284.38	105.31	407.843	0	0	0	0	0	0	0	200	903	0	0	0	0	0	0	0	603	903	0
743	0	-31.3544	22.1248	-556.111	-60496.5	-52044.5	2238.6	106.414	408.785	0	0	0	0	0	0	0	200	903	0	0	0	0	0	0	0	603	903	0
743	1	-31.0492	21.8196	-553.975	-59855.6	-51739.3	2330.15	106.604	408.047	0	0	0	0	0	0	0	200	903	0	0	0	0	0	0	0	603	903	0
743	2	-29.3707	19.836	-549.092	-59947.2	-51861.4	2330.15	105.551	409.175	0	0	0	0	0	0	0	200	903	0	0	0	0	0	0	0	603	903	0
743	3	-31.2018	21.0567	-548.787	-60771.2	-51373.1	2330.15	106.388	410.737	0	0	0	0	0	0	0	200	903	0	0	0	0	0	0	0	603	903	0
743	4	-31.507	19.836	-546.651	-59672.5	-52044.5	2192.83	104.794	409.16	0	0	0	0	0	0	0	200	903	0	0	0	0	0	0	0	603	903	0
743	5	-30.2863	19.2256	-545.125	-60862.7	-51190	2650.59	106.095	411.649	0	0	0	0	0	0	0	200	903	0	0	0	0	0	0	0	603	903	0
743	6	-30.1337	19.836	-543.294	-60496.5	-51312	2604.81	105.554	411.351	0	0	0	0	0	0	0	200	903	0	0	0	0	0	0	0	603	903	0
743	7	-29.8285	19.2256	-541.158	-59397.9	-51312	2559.04	105.181	409.761	0	0	0	0	0	0	0	200	903	0	0	0	0	0	0	0	603	903	0
743	8	-29.0656	18.1575	-538.716	-60221.8	-50762.7	2513.26	105.771	411.788	0	0	0	0	0	0	0	200	903	0	0	0	0	0	0	0	603	903	0
743	9	-28.913	17.0894	-537.801	-60496.5	-51067.9	2330.15	105.043	412.489	0	0	0	0	0	0	0	200	903	0	0	0	0	0	0	0	603	903	0
744	0	-29.0656	16.9368	-537.191	-59855.6	-50823.8	2650.59	105.39	411.423	0	0	0	0	0	0	0	200	903	0	0	0	0	0	0	0	603	903	0
744	1	-28.4552	17.242	-535.359	-60404.9	-50640.6	2696.37	105.408	412.831	0	0	0	0	0	0	0	200	903	0	0	0	0	0	0	0	603	903	0
744	2	-27.8449	17.5471	-534.444	-59855.6	-50518.6	2696.37	105.475	411.996	0	0	0	0	0	0	0	200	903	0	0	0	0	0	0	0	603	903	0
744	3	-28.15	16.3264	-533.834	-59764.1	-50152.4	2650.59	106.052	411.953	0	0	0	0	0	0	0	200	903	0	0	0	0	0	0	0	603	903	0
744	4	-28.6078	16.3264	-532.308	-59306.3	-50457.5	2787.92	105.21	411.414	0	0	0	0	0	0	0	200	903	0	0	0	0	0	0	0	603	903	0
744	5	-28.15	15.7161	-532.003	-60038.7	-50274.4	2559.04	105.5	412.854	0	0	0	0	0	0	0	200	903	0	0	0	0	0	0	0	603	903	0
744	6	-27.3871	13.885	-530.172	-60130.3	-50030.3	2787.92	105.634	413.417	0	0	0	0	0	0	0	200	903	0	0	0	0	0	0	0	603	903	0
744	7	-27.6923	14.8006	-527.73	-60771.2	-50213.4	3154.13	104.85	415.156	0	0	0	0	0	0	0	200	903	0	0	0	0	0	0	0	603	903	0
744	8	-27.8449	15.2583	-526.815	-59672.5	-49358.9	3154.13	106.307	413.27	0	0	0	0	0	0	0	200	903	0	0	0	0	0	0	0	603	903	0
744	9	-28.6078	14.1902	-525.899	-60496.5	-49908.2	2971.02	105.099	415.034	0	0	0	0	0	0	0	200	903	0	0	0	0	0	0	0	603	903	0
745	0	-28.4552	13.885	-524.068	-60588.1	-49603.1	2971.02	105.35	415.611	0	0	0	0	0	0	0	200	903	0	0	0	0	0	0	0	603	903	0
745	1	-28.4552	13.1221	-523.458	-59123.2	-49908.2	3108.35	104.657	412.947	0	0	0	0	0	0	0	200	903	0	0	0	0	0	0	0	603	903	0
745	2	-28.15	12.8169	-523.458	-60588.1	-49786.2	3154.13	104.89	415.746	0	0	0	0	0	0	0	200	903	0	0	0	0	0	0	0	603	903	0
745	3	-27.0819	13.5799	-521.321	-60221.8	-49236.8	3337.23	105.554	415.518	0	0	0	0	0	0	0	200	903	0	0	0	0	0	0	0	603	903	0
745	4	-26.9293	12.054	-517.354	-60130.3	-49419.9	3199.91	104.476	416.227	0	0	0	0	0	0	0	200	903	0	0	0	0	0	0	0	603	903	0
745	5	-27.2345	9.45999	-517.354	-60221.8	-49297.9	3199.91	104.712	416.404	0	0	0	0	0	0	0	200	903	0	0	0	0	0	0	0	603	903	0
745	6	-27.9975	12.054	-517.354	-59947.2	-49419.9	3154.13	104.476	415.873	0	0	0	0	0	0	0	200	903	0	0	0	0	0	0	0	603	903	0
745	7	-27.5397	10.6807	-516.439	-60221.8	-49358.9	3337.23	104.424	416.61	0	0	0	0	0	0	0	200	903	0	0	0	0	0	0	0	603	903	0
745	8	-27.0819	10.8333	-515.828	-60038.7	-49053.7	3199.91	104.903	416.393	0	0	0	0	0	0	0	200	903	0	0	0	0	0	0	0	603	903	0
745	9	-26.4716	10.6807	-513.997	-59489.4	-48443.4	3520.34	105.752	415.739	0	0	0	0	0	0	0	200	903	0	0	0	0	0	0	0	603	903	0
746	0	-25.2509	10.0703	-514.302	-60771.2	-48748.6	3383.01	105.214	418.162	0	0	0	0	0	0	0	200	903	0	0	0	0	0	0	0	603	903	0
746	1	-26.0138	9.76517	-512.166	-60588.1	-48870.6	3566.12	104.581	418.298	0	0	0	0	0	0	0	200	903	0	0	0	0	0	0	0	603	903	0
746	2	-26.0138	7.01858	-511.861	-59764.1	-49175.8	3566.12	103.927	416.758	0	0	0	0	0	0	0	200	903	0	0	0	0	0	0	0	603	903	0
746	3	-25.556	8.39188	-511.251	-60771.2	-48565.5	3611.89	105.007	418.868	0	0	0	0	0	0	0	200	903	0	0	0	0	0	0	0	603	903	0
746	4	-24.7931	7.78152	-512.166	-60771.2	-48382.3	3886.55	105.534	418.655	0	0	0	0	0	0	0	200	903	0	0	0	0	0	0	0	603	903	0
746	5	-24.9457	7.62894	-512.471	-59489.4	-48565.5	3657.67	105.233	416.083	0	0	0	0	0	0	0	200	903	0	0	0	0	0	0	0	603	903	0
746	6	-25.556	7.47635	-510.03	-61137.4	-48931.7	3703.45	104.061	419.87	0	0	0	0	0	0	0	200	903	0	0	0	0	0	0	0	603	903	0
746	7	-25.4035	6.40823	-510.945	-61045.8	-48870.6	3657.67	104.353	419.476	0	0	0	0	0	0	0	200	903	0	0	0	0	0	0	0	603	903	0
746	8	-24.9457	6.866	-511.251	-59947.2	-48443.4	4344.31	105.245	417.256	0	0	0	0	0	0	0	200	903	0	0	0	0	0	0	0	603	903	0
746	9	-24.7931	6.71341	-510.945	-61412	-49053.7	3886.55	103.994	420.193	0	0	0	0	0	0	0	200	903	0	0	0	0	0	0	0	603	903	0
747	0	-24.1828	6.71341	-506.063	-61320.5	-48260.3	4023.88	104.636	421.172	0	0	0	0	0	0	0	200	903	0	0	0	0	0	0	0	603	903	0
747	1	-25.0983	6.10306	-506.978	-60954.3	-48626.5	3840.77	104.086	420.231	0	0	0	0	0	0	0	200	903	0	0	0	0	0	0	0	603	903	0
747	2	-25.2509	5.03494	-509.114	-61503.6	-48138.2	3749.22	105.447	420.805	0	0	0	0	0	0	0	200	903	0	0	0	0	0	0	0	603	903	0
747	3	-25.0983	5.64529	-509.114	-59855.6	-48565.5	4023.88	104.608	417.568	0	0	0	0	0	0	0	200	903	0	0	0	0	0	0	0	603	903	0
747	4	-24.4879	4.42459	-508.199	-61137.4	-48931.7	4481.64	103.716	420.302	0	0	0	0	0	0	0	200	903	0	0	0	0	0	0	0	603	903	0
747	5	-24.4879	4.57718	-508.504	-61412	-48565.5	4435.87	104.493	420.77	0	0	0	0	0	0	0	200	903	0	0	0	0	0	0	0	603	903	0
747	6	-25.0983	4.42459	-508.809	-61137.4	-48870.6	4069.66	103.951	420.158	0	0	0	0	0	0	0	200	903	0	0	0	0	0	0	0	603	903	0
747	7	-24.7931	3.96683	-506.673	-61503.6	-48382.3	4069.66	104.51	421.387	0	0	0	0	0	0	0	200	903	0	0	0	0	0	0	0	603	903	0
747	8	-23.4198	4.272	-504.842	-61503.6	-48260.3	4023.88	104.405	421.827	0	0	0	0	0	0	0	200	903	0	0	0	0	0	0	0	603	903	0
747	9	-24.4879	2.89871	-506.673	-61137.4	-48748.6	4527.42	103.787	420.664	0	0	0	0	0	0	0	200	903	0	0	0	0	0	0	0	603	903	0
748	0	-24.6405	1.8306	-506.673	-62052.9	-48321.3	4481.64	104.63	422.471	0	0	0	0	0	0	0	200	903	0	0	0	0	0	0	0	603	903	0
748	1	-24.6405	2.59353	-505.452	-62876.9	-48748.6	4481.64	103.555	424.397	0	0	0	0	0	0	0	200	903	0	0	0	0	0	0	0	603	903	0
748	2	-25.2509	1.8306	-506.368	-62144.4	-48931.7	4435.87	103.367	422.726	0	0	0	0	0	0	0	200	903	0	0	0	0	0	0	0	603	903	0
748	3	-24.6405	1.22024	-504.842	-62419.1	-48565.5	4527.42	103.801	423.641	0	0	0	0	0	0	0	200	903	0	0	0	0	0	0	0	603	903	0
748	4	-24.9457	1.98318	-503.011	-62602.2	-48565.5	4664.75	103.45	424.455	0	0	0	0	0	0	0	200	903	0	0	0	0	0	0	0	603	903	0
748	5	-24.3353	0.152129	-506.063	-62693.8	-48504.4	4893.63	104.153	423.885	0	0	0	0	0	0	0	200	903	0	0	0	0	0	0	0	603	903	0
748	6	-22.8095	-0.458223	-506.368	-63151.5	-49236.8	5030.96	102.765	424.715	0	0	0	0	0	0	0	200	903	0	0	0	0	0	0	0	603	903	0
748	7	-23.725	-0.000459142	-506.368	-63243.1	-48870.6	4939.41	103.488	424.896	0	0	0	0	0	0	0	200	903	0	0	0	0	0	0	0	603	903	0
748	8	-24.0302	-0.610811	-506.673	-61595.1	-48870.6	4939.41	103.546	421.568	0	0	0	0	0	0	0	200	903	0	0	0	0	0	0	0	603	903	0
748	9	-24.1828	-0.763399	-507.894	-63609.3	-48748.6	4985.18	104.018	425.241	0	0	0	0	0	0	0	200	903	0	0	0	0	0	0	0	603	903	0
749	0	-24.6405	-2.59445	-508.809	-63517.7	-48931.7	5122.51	103.831	424.836	0	0	0	0	0	0	0	200	903	0	0	0	0	0	0	0	603	903	0
749	1	-24.4879	-1.9841	-508.504	-61961.3	-49175.8	5168.29	103.293	421.85	0	0	0	0	0	0	0	200	903	0	0	0	0	0	0	0	603	903	0
749	2	-21.8939	-2.74704	-511.251	-64341.7	-49114.8	5122.51	103.932	425.852	0	0	0	0	0	0	0	200	903	0	0	0	0	0	0	0	603	903	0
749	3	-24.4879	-1.83151	-509.725	-64341.7	-48992.7	5305.62	103.884	426.228	0	0	0	0	0	0	0	200	903	0	0	0	0	0	0	0	603	903	0
749	4	-24.7931	-3.35739	-510.03	-63426.2	-49114.8	5214.06	103.702	424.358	0	0	0	0	0	0	0	200	903	0	0	0	0	0	0	0	603	903	0
749	5	-24.9457	-3.05222	-511.251	-64341.7	-49053.7	5214.06	104.051	425.852	0	0	0	0	0	0	0	200	903	0	0	0	0	0	0	0	603	903	0
749	6	-24.4879	-3.05222	-511.556	-64433.3	-49603.1	5534.5	103.035	425.956	0	0	0	0	0	0	0	200	903	0	0	0	0	0	0	0	603	903	0
749	7	-24.3353	-4.73068	-510.945	-64250.2	-50274.4	5534.5	101.605	425.748	0	0	0	0	0	0	0	200	903	0	0	0	0	0	0	0	603	903	0
749	8	-23.1146	-4.88327	-511.556	-64799.5	-49481	5534.5	103.274	426.671	0	0	0	0	0	0	0	200	903	0	0	0	0	0	0	0	603	903	0
749	9	-25.7086	-4.42551	-512.776	-65257.2	-49786.2	5763.38	102.909	427.263	0	0	0	0	0	0	0	200	903	0	0	0	0	0	0	0	603	903	0
750	0	-25.4035	-5.18845	-513.997	-64982.6	-49481	5626.05	103.733	426.426	0	0	0	0	0	0	0	200	903	0	0	0	0	0	0	0	603	903	0
750	1	-26.0138	-5.49362	-515.828	-65165.7	-50213.4	5717.6	102.655	426.332	0	0	0	0	0	0	0	200	903	0	0	0	0	0	0	0	603	903	0
750	2	-26.0138	-5.49362	-516.133	-66264.3	-50274.4	5763.38	102.594	428.386	0	0	0	0	0	0	0	200	903	0	0	0	0	0	0	0	603	903	0
750	3	-26.4716	-6.71433	-517.049	-65898.1	-49847.2	5946.49	103.593	427.45	0	0	0	0	0	0	0	200	903	0	0	0	0	0	0	0	603	903	0
750	4	-24.3353	-6.71433	-517.049	-66813.6	-50213.4	5854.93	102.885	429.221	0	0	0	0	0	0	0	200	903	0	0	0	0	0	0	0	603	903	0
750	5	-24.7931	-8.54538	-517.354	-66447.4	-49664.1	5946.49	104.004	428.437	0	0	0	0	0	0	0	200	903	0	0	0	0	0	0	0	603	903	0
750	6	-26.319	-7.0195	-518.575	-65531.9	-50396.5	6038.04	102.817	426.369	0	0	0	0	0	0	0	200	903	0	0	0	0	0	0	0	603	903	0
750	7	-26.1664	-7.93503	-519.185	-67271.4	-50640.6	6129.59	102.461	429.571	0	0	0	0	0	0	0	200	903	0	0	0	0	0	0	0	603	903	0
750	8	-26.1664	-8.2402	-519.796	-67729.2	-50640.6	6358.47	102.576	430.3	0	0	0	0	0	0	0	200	903	0	0	0	0	0	0	0	603	903	0
750	9	-26.319	-8.85056	-520.711	-66996.7	-50823.8	6312.7	102.395	428.664	0	0	0	0	0	0	0	200	903	0	0	0	0	0	0	0	603	903	0
751	0	-25.7086	-9.76608	-519.49	-67637.6	-50945.8	6221.14	101.931	430.2	0	0	0	0	0	0	0	200	903	0	0	0	0	0	0	0	603	903	0
751	1	-25.0983	-8.85056	-524.984	-67271.4	-51190	6495.8	102.492	428.14	0	0	0	0	0	0	0	200	903	0	0	0	0	0	0	0	603	903	0
751	2	-25.7086	-9.30832	-524.068	-67271.4	-50823.8	6541.58	103.021	428.364	0	0	0	0	0	0	0	200	903	0	0	0	0	0	0	0	603	903	0
751	3	-26.1664	-9.46091	-526.204	-67912.3	-51190	6404.25	102.718	429.061	0	0	0	0	0	0	0	200	903	0	0	0	0	0	0	0	603	903	0
751	4	-25.7086	-10.2238	-526.815	-68186.9	-51556.2	6907.79	102.136	429.433	0	0	0	0	0	0	0	200	903	0	0	0	0	0	0	0	603	903	0
751	5	-25.8612	-12.5127	-526.204	-68186.9	-51373.1	6724.68	102.37	429.583	0	0	0	0	0	0	0	200	903	0	0	0	0	0	0	0	603	903	0
751	6	-26.0138	-10.3764	-527.425	-69102.4	-51678.2	6770.46	102.018	431.019	0	0	0	0	0	0	0	200	903	0	0	0	0	0	0	0	603	903	0
751	7	-24.4879	-11.4446	-532.308	-68827.8	-51128.9	6816.24	103.949	429.301	0	0	0	0	0	0	0	200	903	0	0	0	0	0	0	0	603	903	0
751	8	-25.8612	-12.2075	-533.223	-69560.2	-51983.4	6907.79	102.511	430.452	0	0	0	0	0	0	0	200	903	0	0	0	0	0	0	0	603	903	0
751	9	-26.0138	-12.3601	-534.139	-70475.8	-52593.8	6907.79	101.535	431.943	0	0	0	0	0	0	0	200	903	0	0	0	0	0	0	0	603	903	0
752	0	-26.1664	-13.2756	-534.444	-69743.3	-52105.5	7090.9	102.505	430.497	0	0	0	0	0	0	0	200	903	0	0	0	0	0	0	0	603	903	0
752	1	-26.319	-13.4282	-535.054	-70384.2	-52593.8	7457.11	101.704	431.546	0	0	0	0	0	0	0	200	903	0	0	0	0	0	0	0	603	903	0
752	2	-26.9293	-13.886	-536.885	-70475.8	-52410.7	7319.78	102.38	431.268	0	0	0	0	0	0	0	200	903	0	0	0	0	0	0	0	603	903	0
752	3	-26.6242	-13.886	-535.97	-70201.1	-52776.9	7319.78	101.53	430.98	0	0	0	0	0	0	0	200	903	0	0	0	0	0	0	0	603	903	0
752	4	-27.8449	-14.8015	-539.022	-71574.4	-53082.1	7182.45	101.521	432.786	0	0	0	0	0	0	0	200	903	0	0	0	0	0	0	0	603	903	0
752	5	-28.15	-14.9541	-540.547	-72032.1	-53082.1	7457.11	101.799	433.258	0	0	0	0	0	0	0	200	903	0	0	0	0	0	0	0	603	903	0
752	6	-28.3026	-15.8696	-542.073	-71574.4	-53692.4	7594.44	100.95	432.038	0	0	0	0	0	0	0	200	903	0	0	0	0	0	0	0	603	903	0
752	7	-28.3026	-15.2592	-543.294	-72215.3	-53204.1	7548.66	102.071	432.921	0	0	0	0	0	0	0	200	903	0	0	0	0	0	0	0	603	903	0
752	8	-27.3871	-15.2592	-544.21	-71574.4	-53204.1	7502.88	102.236	431.52	0	0	0	0	0	0	0	200	903	0	0	0	0	0	0	0	603	903	0
752	9	-28.6078	-16.6325	-546.041	-72215.3	-53631.4	7823.32	101.781	432.253	0	0	0	0	0	0	0	200	903	0	0	0	0	0	0	0	603	903	0
753	0	-29.3707	-16.9377	-545.735	-71757.5	-54119.7	7777.54	100.832	431.488	0	0	0	0	0	0	0	200	903	0	0	0	0	0	0	0	603	903	0
753	1	-28.3026	-17.0903	-547.261	-73130.8	-54363.8	7960.65	100.662	433.63	0	0	0	0	0	0	0	200	903	0	0	0	0	0	0	0	603	903	0
753	2	-28.3026	-18.6162	-546.956	-73313.9	-54180.7	8281.08	100.941	434.04	0	0	0	0	0	0	0	200	903	0	0	0	0	0	0	0	603	903	0
753	3	-28.3026	-17.8532	-550.313	-74229.4	-54730	8097.98	100.548	434.886	0	0	0	0	0	0	0	200	903	0	0	0	0	0	0	0	603	903	0
753	4	-28.3026	-18.1584	-551.229	-73680.1	-54974.1	8235.3	100.27	433.665	0	0	0	0	0	0	0	200	903	0	0	0	0	0	0	0	603	903	0
753	5	-28.4552	-19.5317	-554.28	-74595.6	-54791	8235.3	101.149	434.581	0	0	0	0	0	0	0	200	903	0	0	0	0	0	0	0	603	903	0
753	6	-28.6078	-19.9895	-555.196	-75602.7	-55462.4	8555.74	100.103	436.173	0	0	0	0	0	0	0	200	903	0	0	0	0	0	0	0	603	903	0
753	7	-28.913	-20.2946	-557.027	-74961.8	-55401.4	8464.19	100.541	434.575	0	0	0	0	0	0	0	200	903	0	0	0	0	0	0	0	603	903	0
753	8	-29.2182	-20.905	-557.637	-75877.4	-55645.5	8601.52	100.212	436.069	0	0	0	0	0	0	0	200	903	0	0	0	0	0	0	0	603	903	0
753	9	-29.6759	-20.5998	-557.027	-76243.6	-55767.6	8647.29	99.8835	436.876	0	0	0	0	0	0	0	200	903	0	0	0	0	0	0	0	603	903	0
754	0	-27.9975	-21.3628	-561.91	-75602.7	-55828.6	8784.62	100.645	434.546	0	0	0	0	0	0	0	200	903	0	0	0	0	0	0	0	603	903	0
754	1	-30.1337	-22.5835	-564.351	-76609.8	-56439	9013.5	99.9931	435.748	0	0	0	0	0	0	0	200	903	0	0	0	0	0	0	0	603	903	0
754	2	-29.2182	-21.9731	-566.182	-77525.3	-56683.1	9059.28	99.8854	436.926	0	0	0	0	0	0	0	200	903	0	0	0	0	0	0	0	603	903	0
754	3	-29.5233	-22.7361	-568.318	-77067.5	-56744.2	9196.61	100.154	435.606	0	0	0	0	0	0	0	200	903	0	0	0	0	0	0	0	603	903	0
754	4	-30.1337	-23.3464	-569.234	-77616.9	-56316.9	9562.82	101.065	436.353	0	0	0	0	0	0	0	200	903	0	0	0	0	0	0	0	603	903	0
754	5	-29.8285	-23.6516	-570.15	-78349.3	-56805.2	9425.49	100.368	437.419	0	0	0	0	0	0	0	200	903	0	0	0	0	0	0	0	603	903	0
754	6	-29.8285	-25.0249	-566.793	-78440.9	-57415.6	9517.04	98.701	438.394	0	0	0	0	0	0	0	200	903	0	0	0	0	0	0	0	603	903	0
754	7	-29.9811	-26.2456	-573.506	-78898.6	-57171.4	9517.04	100.313	437.572	0	0	0	0	0	0	0	200	903	0	0	0	0	0	0	0	603	903	0
754	8	-31.8121	-26.5508	-575.643	-79447.9	-57842.8	9562.82	99.5162	438.016	0	0	0	0	0	0	0	200	903	0	0	0	0	0	0	0	603	903	0
754	9	-31.0492	-27.3137	-578.084	-78257.7	-57415.6	9654.37	100.68	435.374	0	0	0	0	0	0	0	200	903	0	0	0	0	0	0	0	603	903	0
755	0	-31.9647	-27.3137	-578.694	-80271.9	-57415.6	9791.7	100.784	438.712	0	0	0	0	0	0	0	200	903	0	0	0	0	0	0	0	603	903	0
755	1	-32.4225	-28.687	-580.526	-80271.9	-58575.2	9883.25	99.0997	438.275	0	0	0	0	0	0	0	200	903	0	0	0	0	0	0	0	603	903	0
755	2	-30.744	-29.1447	-579.61	-80271.9	-58025.9	10112.1	99.888	438.493	0	0	0	0	0	0	0	200	903	0	0	0	0	0	0	0	603	903	0
755	3	-31.6596	-29.7551	-583.272	-81187.4	-58819.4	10249.5	99.1562	439.193	0	0	0	0	0	0	0	200	903	0	0	0	0	0	0	0	603	903	0
755	4	-32.2699	-29.1447	-585.103	-81370.5	-58575.2	10524.1	99.8891	439.07	0	0	0	0	0	0	0	200	903	0	0	0	0	0	0	0	603	903	0
755	5	-32.4225	-30.3654	-584.493	-81279	-58880.4	10524.1	99.2624	439.059	0	0	0	0	0	0	0	200	903	0	0	0	0	0	0	0	603	903	0
755	6	-32.4225	-30.9758	-587.239	-82560.7	-59368.7	10478.3	98.9021	440.591	0	0	0	0	0	0	0	200	903	0	0	0	0	0	0	0	603	903	0
755	7	-33.0329	-31.281	-586.324	-81828.3	-59612.8	10798.8	98.3278	439.562	0	0	0	0	0	0	0	200	903	0	0	0	0	0	0	0	603	903	0
755	8	-32.4225	-32.1965	-591.817	-82103	-60162.1	10753	98.3434	438.73	0	0	0	0	0	0	0	200	903	0	0	0	0	0	0	0	603	903	0
755	9	-32.5751	-32.9594	-593.343	-83293.1	-59918	11165	99.0163	440.379	0	0	0	0	0	0	0	200	903	0	0	0	0	0	0	0	603	903	0
756	0	-31.9647	-33.5698	-594.869	-83384.7	-60528.3	11622.8	98.2493	440.173	0	0	0	0	0	0	0	200	903	0	0	0	0	0	0	0	603	903	0
756	1	-32.5751	-34.3327	-595.784	-83934	-60528.3	11210.8	98.4056	440.88	0	0	0	0	0	0	0	200	903	0	0	0	0	0	0	0	603	903	0
756	2	-32.7277	-34.1801	-599.446	-84391.8	-60650.4	11348.1	98.8226	440.783	0	0	0	0	0	0	0	200	903	0	0	0	0	0	0	0	603	903	0
756	3	-33.1854	-34.6379	-601.888	-84574.9	-61199.7	11439.7	98.3204	440.516	0	0	0	0	0	0	0	200	903	0	0	0	0	0	0	0	603	903	0
756	4	-33.1854	-37.8423	-604.024	-85307.3	-61138.7	11714.3	98.781	441.232	0	0	0	0	0	0	0	200	903	0	0	0	0	0	0	0	603	903	0
756	5	-33.4906	-36.469	-605.855	-86222.8	-61627	11851.6	98.281	442.316	0	0	0	0	0	0	0	200	903	0	0	0	0	0	0	0	603	903	0
756	6	-34.8639	-36.6216	-603.109	-85856.6	-61749	11989	97.6154	442.357	0	0	0	0	0	0	0	200	903	0	0	0	0	0	0	0	603	903	0
756	7	-34.4061	-37.6897	-607.991	-86863.7	-61565.9	12034.7	98.7388	442.87	0	0	0	0	0	0	0	200	903	0	0	0	0	0	0	0	603	903	0
756	8	-35.7794	-38.3	-610.128	-87596.1	-62176.3	12080.5	98.093	443.57	0	0	0	0	0	0	0	200	903	0	0	0	0	0	0	0	603	903	0
756	9	-35.7794	-38.6052	-612.569	-86589	-61871.1	12309.4	98.9973	441.354	0	0	0	0	0	0	0	200	903	0	0	0	0	0	0	0	603	903	0
757	0	-35.0165	-40.2837	-615.316	-88511.6	-62847.7	12355.2	97.8611	443.848	0	0	0	0	0	0	0	200	903	0	0	0	0	0	0	0	603	903	0
757	1	-34.5587	-41.0466	-614.705	-88969.4	-63580.1	12675.6	96.5681	444.735	0	0	0	0	0	0	0	200	903	0	0	0	0	0	0	0	603	903	0
757	2	-36.3898	-41.5044	-616.841	-88877.8	-63030.8	12950.3	97.8169	444.085	0	0	0	0	0	0	0	200	903	0	0	0	0	0	0	0	603	903	0
757	3	-36.2372	-42.1147	-618.367	-89793.4	-63580.1	12767.2	97.1807	445.21	0	0	0	0	0	0	0	200	903	0	0	0	0	0	0	0	603	903	0
757	4	-36.5424	-42.7251	-618.672	-90525.8	-63519.1	12950.3	97.3301	446.323	0	0	0	0	0	0	0	200	903	0	0	0	0	0	0	0	603	903	0
757	5	-35.932	-43.6406	-622.945	-89976.5	-64129.4	13362.3	97.0545	444.437	0	0	0	0	0	0	0	200	903	0	0	0	0	0	0	0	603	903	0
757	6	-36.2372	-43.488	-625.692	-91258.2	-63885.3	13270.7	97.8965	445.852	0	0	0	0	0	0	0	200	903	0	0	0	0	0	0	0	603	903	0
757	7	-36.2372	-45.1665	-627.523	-92082.2	-63885.3	13362.3	98.1945	446.739	0	0	0	0	0	0	0	200	903	0	0	0	0	0	0	0	603	903	0
757	8	-36.3898	-45.3191	-627.828	-91807.5	-64556.6	13453.8	97.1746	446.23	0	0	0	0	0	0	0	200	903	0	0	0	0	0	0	0	603	903	0
757	9	-37.1527	-45.4716	-632.405	-92723.1	-64556.6	13591.1	97.9189	446.62	0	0	0	0	0	0	0	200	903	0	0	0	0	0	0	0	603	903	0
758	0	-37.4579	-45.1665	-635.152	-92723.1	-65167	13774.2	97.3994	445.986	0	0	0	0	0	0	0	200	903	0	0	0	0	0	0	0	603	903	0
758	1	-37.6105	-47.1501	-638.509	-93180.8	-65533.2	14003.1	97.3652	445.935	0	0	0	0	0	0	0	200	903	0	0	0	0	0	0	0	603	903	0
758	2	-37.9157	-48.2182	-636.068	-94554.1	-65899.4	14094.7	96.3956	448.654	0	0	0	0	0	0	0	200	903	0	0	0	0	0	0	0	603	903	0
758	3	-39.289	-48.0656	-641.255	-94828.8	-66448.7	14277.8	96.3771	447.88	0	0	0	0	0	0	0	200	903	0	0	0	0	0	0	0	603	903	0
758	4	-39.289	-48.0656	-643.087	-94737.2	-66265.6	14689.8	96.9569	447.316	0	0	0	0	0	0	0	200	903	0	0	0	0	0	0	0	603	903	0
758	5	-40.3571	-48.5234	-645.528	-94828.8	-66204.6	14552.4	97.4412	446.901	0	0	0	0	0	0	0	200	903	0	0	0	0	0	0	0	603	903	0
758	6	-40.0519	-50.0493	-645.833	-95652.8	-66937	14918.7	96.3556	448.108	0	0	0	0	0	0	0	200	903	0	0	0	0	0	0	0	603	903	0
758	7	-38.9838	-51.7278	-646.749	-96751.4	-67547.4	14644	95.5585	449.597	0	0	0	0	0	0	0	200	903	0	0	0	0	0	0	0	603	903	0
758	8	-40.3571	-51.1174	-650.411	-97758.5	-68157.7	15147.5	95.2082	450.303	0	0	0	0	0	0	0	200	903	0	0	0	0	0	0	0	603	903	0
758	9	-41.4252	-51.7278	-652.852	-97483.8	-67791.5	15010.2	96.161	449.32	0	0	0	0	0	0	0	200	903	0	0	0	0	0	0	0	603	903	0
759	0	-41.7304	-52.4907	-654.683	-98490.9	-68279.8	15193.3	95.7056	450.441	0	0	0	0	0	0	0	200	903	0	0	0	0	0	0	0	603	903	0
759	1	-41.5778	-52.1855	-657.125	-99223.3	-68096.7	15513.8	96.3717	450.996	0	0	0	0	0	0	0	200	903	0	0	0	0	0	0	0	603	903	0
759	2	-42.0355	-54.4743	-658.956	-98857.1	-69073.2	15284.9	95.1777	450.021	0	0	0	0	0	0	0	200	903	0	0	0	0	0	0	0	603	903	0
759	3	-42.3407	-55.695	-661.092	-100322	-68951.2	15422.2	95.7011	451.752	0	0	0	0	0	0	0	200	903	0	0	0	0	0	0	0	603	903	0
759	4	-42.3407	-56.1528	-663.533	-101421	-69256.4	15834.2	95.6249	452.849	0	0	0	0	0	0	0	200	903	0	0	0	0	0	0	0	603	903	0
759	5	-40.8148	-55.8476	-667.806	-101237	-69988.8	16200.4	95.1959	451.597	0	0	0	0	0	0	0	200	903	0	0	0	0	0	0	0	603	903	0
759	6	-42.9511	-56.7632	-669.942	-102153	-69805.7	16612.4	95.8034	452.48	0	0	0	0	0	0	0	200	903	0	0	0	0	0	0	0	603	903	0
759	7	-43.2562	-57.8313	-670.552	-102428	-70660.2	16154.6	94.6239	452.751	0	0	0	0	0	0	0	200	903	0	0	0	0	0	0	0	603	903	0
759	8	-43.5614	-57.9839	-674.52	-102519	-70477.1	16429.3	95.5152	451.988	0	0	0	0	0	0	0	200	903	0	0	0	0	0	0	0	603	903	0
759	9	-43.5614	-58.7468	-677.266	-103618	-71392.6	16612.4	94.5871	452.994	0	0	0	0	0	0	0	200	903	0	0	0	0	0	0	0	603	903	0
760	0	-45.2399	-59.6623	-679.402	-104808	-71270.5	16749.7	95.0982	454.265	0	0	0	0	0	0	0	200	903	0	0	0	0	0	0	0	603	903	0
760	1	-45.2399	-60.4253	-681.234	-104350	-71453.6	16932.8	95.1114	453.178	0	0	0	0	0	0	0	200	903	0	0	0	0	0	0	0	603	903	0
760	2	-45.8502	-60.883	-683.98	-105724	-71758.8	17161.7	95.0864	454.571	0	0	0	0	0	0	0	200	903	0	0	0	0	0	0	0	603	903	0
760	3	-46.1554	-61.4934	-686.116	-105632	-72186	16978.6	94.7904	453.956	0	0	0	0	0	0	0	200	903	0	0	0	0	0	0	0	603	903	0
760	4	-46.9184	-63.477	-686.116	-105998	-72552.2	17253.2	94.2566	454.49	0	0	0	0	0	0	0	200	903	0	0	0	0	0	0	0	603	903	0
760	5	-46.0028	-64.24	-689.473	-107738	-73284.7	17665.2	93.7092	456.261	0	0	0	0	0	0	0	200	903	0	0	0	0	0	0	0	603	903	0
760	6	-47.9865	-63.3244	-692.22	-107738	-72918.5	17756.8	94.66	455.641	0	0	0	0	0	0	0	200	903	0	0	0	0	0	0	0	603	903	0
760	7	-48.4442	-65.3081	-694.356	-108379	-73101.6	17848.3	94.7204	456.085	0	0	0	0	0	0	0	200	903	0	0	0	0	0	0	0	603	903	0
760	8	-48.4442	-65.9184	-695.577	-109935	-73528.8	17802.6	94.2909	458.049	0	0	0	0	0	0	0	200	903	0	0	0	0	0	0	0	603	903	0
760	9	-48.5968	-66.2236	-698.934	-110210	-74200.2	18123	93.838	457.683	0	0	0	0	0	0	0	200	903	0	0	0	0	0	0	0	603	903	0
761	0	-48.7494	-66.834	-701.68	-110027	-74505.4	18077.2	93.8186	456.804	0	0	0	0	0	0	0	200	903	0	0	0	0	0	0	0	603	903	0
761	1	-48.5968	-68.8176	-704.122	-111400	-74566.4	18443.4	94.1001	458.211	0	0	0	0	0	0	0	200	903	0	0	0	0	0	0	0	603	903	0
761	2	-48.7494	-68.8176	-705.953	-111949	-75298.8	18763.9	93.3373	458.579	0	0	0	0	0	0	0	200	903	0	0	0	0	0	0	0	603	903	0
761	3	-49.3598	-69.7331	-709.31	-112132	-75420.9	18306.1	93.67	458.086	0	0	0	0	0	0	0	200	903	0	0	0	0	0	0	0	603	903	0
761	4	-49.2072	-70.9538	-710.225	-113231	-75787.1	18672.3	93.2914	459.43	0	0	0	0	0	0	0	200	903	0	0	0	0	0	0	0	603	903	0
761	5	-49.3598	-71.1064	-715.108	-113597	-75665	18809.6	94.1908	458.853	0	0	0	0	0	0	0	200	903	0	0	0	0	0	0	0	603	903	0
761	6	-50.2753	-72.1745	-718.16	-113872	-76275.4	18855.4	93.7905	458.56	0	0	0	0	0	0	0	200	903	0	0	0	0	0	0	0	603	903	0
761	7	-51.1908	-72.4797	-720.601	-115428	-76946.8	19359	93.2186	460.183	0	0	0	0	0	0	0	200	903	0	0	0	0	0	0	0	603	903	0
761	8	-50.8856	-73.3952	-721.822	-115794	-76946.8	19267.4	93.3992	460.42	0	0	0	0	0	0	0	200	903	0	0	0	0	0	0	0	603	903	0
761	9	-50.2753	-74.7685	-721.822	-116252	-77374.1	19587.8	92.8073	461.054	0	0	0	0	0	0	0	200	903	0	0	0	0	0	0	0	603	903	0
762	0	-52.4115	-74.0056	-726.705	-116344	-78045.4	19359	92.6037	460.098	0	0	0	0	0	0	0	200	903	0	0	0	0	0	0	0	603	903	0
762	1	-53.1745	-74.1582	-727.925	-116618	-77801.3	20045.6	93.1192	460.206	0	0	0	0	0	0	0	200	903	0	0	0	0	0	0	0	603	903	0
762	2	-53.1745	-78.1255	-730.977	-117900	-78655.8	19771	92.3964	461.291	0	0	0	0	0	0	0	200	903	0	0	0	0	0	0	0	603	903	0
762	3	-54.3952	-77.3625	-732.503	-119365	-78838.9	19999.8	92.3706	462.955	0	0	0	0	0	0	0	200	903	0	0	0	0	0	0	0	603	903	0
762	4	-51.8012	-77.3625	-732.503	-119548	-79022	19999.8	92.1206	463.205	0	0	0	0	0	0	0	200	903	0	0	0	0	0	0	0	603	903	0
762	5	-53.6322	-78.7358	-735.86	-120830	-79022	20137.2	92.6127	464.202	0	0	0	0	0	0	0	200	903	0	0	0	0	0	0	0	603	903	0
762	6	-55.3107	-78.8884	-739.827	-121379	-79449.2	20503.4	92.6111	464.064	0	0	0	0	0	0	0	200	903	0	0	0	0	0	0	0	603	903	0
762	7	-55.6159	-79.3462	-741.353	-120555	-80181.7	20366	91.8442	462.615	0	0	0	0	0	0	0	200	903	0	0	0	0	0	0	0	603	903	0
762	8	-55.921	-79.4987	-741.658	-122752	-80120.6	20274.5	91.971	465.511	0	0	0	0	0	0	0	200	903	0	0	0	0	0	0	0	603	903	0
762	9	-53.7848	-80.1091	-745.931	-123393	-80853	20778	91.6079	465.422	0	0	0	0	0	0	0	200	903	0	0	0	0	0	0	0	603	903	0
763	0	-55.0055	-81.1772	-748.067	-123943	-80608.9	20823.8	92.2438	465.684	0	0	0	0	0	0	0	200	903	0	0	0	0	0	0	0	603	903	0
763	1	-54.8529	-81.0246	-749.898	-124858	-81402.4	20869.6	91.4488	466.5	0	0	0	0	0	0	0	200	903	0	0	0	0	0	0	0	603	903	0
763	2	-55.7684	-82.0927	-753.255	-125041	-81524.4	20823.8	91.7705	466.001	0	0	0	0	0	0	0	200	903	0	0	0	0	0	0	0	603	903	0
763	3	-54.8529	-84.229	-756.002	-125865	-82012.7	21327.4	91.5178	466.488	0	0	0	0	0	0	0	200	903	0	0	0	0	0	0	0	603	903	0
763	4	-55.921	-84.5341	-759.053	-126598	-82684.1	21006.9	91.0695	466.784	0	0	0	0	0	0	0	200	903	0	0	0	0	0	0	0	603	903	0
763	5	-56.3788	-84.6867	-762.105	-127330	-82439.9	21373.1	91.826	467.077	0	0	0	0	0	0	0	200	903	0	0	0	0	0	0	0	603	903	0
763	6	-55.921	-85.7549	-764.241	-127971	-83111.4	21464.7	91.2499	467.448	0	0	0	0	0	0	0	200	903	0	0	0	0	0	0	0	603	903	0
763	7	-58.0573	-86.06	-762.715	-129161	-82989.3	21739.3	91.1923	469.344	0	0	0	0	0	0	0	200	903	0	0	0	0	0	0	0	603	903	0
763	8	-58.0573	-87.2807	-767.598	-129070	-83599.6	21647.8	91.0893	468.147	0	0	0	0	0	0	0	200	903	0	0	0	0	0	0	0	603	903	0
763	9	-58.2099	-87.7385	-771.26	-130534	-83904.8	21602	91.2108	469.248	0	0	0	0	0	0	0	200	903	0	0	0	0	0	0	0	603	903	0
764	0	-57.9047	-89.5695	-774.312	-131358	-84148.9	21647.8	91.3243	469.645	0	0	0	0	0	0	0	200	903	0	0	0	0	0	0	0	603	903	0
764	1	-58.6676	-89.5695	-772.786	-130809	-84576.2	21876.7	90.5568	469.269	0	0	0	0	0	0	0	200	903	0	0	0	0	0	0	0	603	903	0
764	2	-57.9047	-90.1799	-776.448	-132548	-84271	22197.1	91.4661	470.711	0	0	0	0	0	0	0	200	903	0	0	0	0	0	0	0	603	903	0
764	3	-59.7357	-90.1799	-777.974	-132732	-84637.2	21922.4	91.2082	470.612	0	0	0	0	0	0	0	200	903	0	0	0	0	0	0	0	603	903	0
764	4	-60.1935	-92.1635	-781.026	-133098	-85735.8	22014	90.2266	470.414	0	0	0	0	0	0	0	200	903	0	0	0	0	0	0	0	603	903	0
764	5	-60.8038	-92.011	-783.773	-133098	-85674.8	22563.3	90.6892	469.817	0	0	0	0	0	0	0	200	903	0	0	0	0	0	0	0	603	903	0
764	6	-59.278	-92.6213	-786.214	-134929	-86346.2	22426	90.1747	471.618	0	0	0	0	0	0	0	200	903	0	0	0	0	0	0	0	603	903	0
764	7	-59.4306	-93.2317	-787.74	-135661	-86773.5	22975.3	89.845	472.216	0	0	0	0	0	0	0	200	903	0	0	0	0	0	0	0	603	903	0
764	8	-59.1254	-93.5368	-788.961	-136577	-86529.3	22792.2	90.3249	473.11	0	0	0	0	0	0	0	200	903	0	0	0	0	0	0	0	603	903	0
764	9	-59.7357	-94.4524	-790.486	-136577	-86834.5	23021.1	90.1506	472.776	0	0	0	0	0	0	0	200	903	0	0	0	0	0	0	0	603	903	0
765	0	-61.2616	-96.1308	-789.571	-137950	-87139.7	22792.2	89.6367	474.715	0	0	0	0	0	0	0	200	903	0	0	0	0	0	0	0	603	903	0
765	1	-60.0409	-97.5041	-796.59	-138499	-88116.2	22792.2	89.3832	473.865	0	0	0	0	0	0	0	200	903	0	0	0	0	0	0	0	603	903	0
765	2	-60.4987	-97.3515	-798.116	-138133	-87505.9	23204.2	90.3594	473.074	0	0	0	0	0	0	0	200	903	0	0	0	0	0	0	0	603	903	0
765	3	-60.3461	-98.1145	-800.252	-140422	-87750	23387.3	90.347	475.472	0	0	0	0	0	0	0	200	903	0	0	0	0	0	0	0	603	903	0
765	4	-61.2616	-98.5722	-800.862	-141154	-88543.5	23616.2	89.4399	476.253	0	0	0	0	0	0	0	200	903	0	0	0	0	0	0	0	603	903	0
765	5	-62.6349	-99.6404	-802.083	-140788	-88482.5	23295.7	89.6842	475.528	0	0	0	0	0	0	0	200	903	0	0	0	0	0	0	0	603	903	0
765	6	-62.6349	-99.6404	-805.745	-142253	-89092.8	23433.1	89.4281	476.548	0	0	0	0	0	0	0	200	903	0	0	0	0	0	0	0	603	903	0
765	7	-62.6349	-100.251	-808.492	-142345	-89031.7	23707.7	89.8792	476.062	0	0	0	0	0	0	0	200	903	0	0	0	0	0	0	0	603	903	0
765	8	-63.3978	-101.929	-809.407	-142986	-89214.9	23661.9	89.7775	476.655	0	0	0	0	0	0	0	200	903	0	0	0	0	0	0	0	603	903	0
765	9	-60.0409	-100.861	-810.018	-144359	-89764.2	24073.9	89.1825	478.217	0	0	0	0	0	0	0	200	903	0	0	0	0	0	0	0	603	903	0
766	0	-63.8556	-102.234	-810.323	-144267	-89703.2	23982.4	89.2995	478.037	0	0	0	0	0	0	0	200	903	0	0	0	0	0	0	0	603	903	0
766	1	-64.0082	-103.76	-812.459	-145183	-90435.6	24211.3	88.6891	478.696	0	0	0	0	0	0	0	200	903	0	0	0	0	0	0	0	603	903	0
766	2	-64.6185	-104.676	-813.375	-145732	-90374.5	23982.4	88.8894	479.17	0	0	0	0	0	0	0	200	903	0	0	0	0	0	0	0	603	903	0
766	3	-64.6185	-105.439	-815.511	-145915	-90740.7	24531.7	88.7314	478.925	0	0	0	0	0	0	0	200	903	0	0	0	0	0	0	0	603	903	0
766	4	-62.6349	-105.591	-816.426	-147197	-90801.8	24577.5	88.7814	480.294	0	0	0	0	0	0	0	200	903	0	0	0	0	0	0	0	603	903	0
766	5	-62.9401	-106.354	-817.342	-147380	-90679.7	24073.9	89.0553	480.316	0	0	0	0	0	0	0	200	903	0	0	0	0	0	0	0	603	903	0
766	6	-63.703	-107.27	-817.037	-147746	-91351.1	24485.9	88.1922	480.832	0	0	0	0	0	0	0	200	903	0	0	0	0	0	0	0	603	903	0
766	7	-62.0246	-107.422	-820.699	-147105	-91106.9	24348.6	88.9886	479.244	0	0	0	0	0	0	0	200	903	0	0	0	0	0	0	0	603	903	0
766	8	-64.1608	-108.948	-821.614	-148662	-91778.4	24440.1	88.2951	480.939	0	0	0	0	0	0	0	200	903	0	0	0	0	0	0	0	603	903	0
766	9	-64.1608	-110.016	-823.445	-149486	-91656.3	24943.7	88.6917	481.537	0	0	0	0	0	0	0	200	903	0	0	0	0	0	0	0	603	903	0
767	0	-63.8556	-109.406	-822.835	-150676	-91534.2	25264.1	88.7575	483.118	0	0	0	0	0	0	0	200	903	0	0	0	0	0	0	0	603	903	0
767	1	-64.3134	-109.864	-825.276	-150951	-92144.6	25493	88.347	482.909	0	0	0	0	0	0	0	200	903	0	0	0	0	0	0	0	603	903	0
767	2	-65.3815	-111.237	-824.971	-151042	-92266.6	25081	88.1578	483.088	0	0	0	0	0	0	0	200	903	0	0	0	0	0	0	0	603	903	0
767	3	-65.6867	-111.695	-826.192	-151775	-92693.9	25355.7	87.8059	483.704	0	0	0	0	0	0	0	200	903	0	0	0	0	0	0	0	603	903	0
767	4	-65.2289	-113.068	-827.108	-151866	-92449.7	25309.9	88.2253	483.611	0	0	0	0	0	0	0	200	903	0	0	0	0	0	0	0	603	903	0
767	5	-64.6185	-113.526	-828.328	-153056	-92632.8	25813.4	88.1689	484.777	0	0	0	0	0	0	0	200	903	0	0	0	0	0	0	0	603	903	0
767	6	-65.3815	-114.136	-828.633	-153423	-92754.9	25447.2	88.0628	485.151	0	0	0	0	0	0	0	200	903	0	0	0	0	0	0	0	603	903	0
767	7	-63.0927	-114.747	-826.497	-152873	-92632.8	25676.1	87.9212	484.965	0	0	0	0	0	0	0	200	903	0	0	0	0	0	0	0	603	903	0
767	8	-65.2289	-115.815	-828.328	-154430	-93060.1	25813.4	87.6532	486.435	0	0	0	0	0	0	0	200	903	0	0	0	0	0	0	0	603	903	0
767	9	-65.8392	-116.425	-830.77	-155071	-93121.1	26042.3	87.9098	486.659	0	0	0	0	0	0	0	200	903	0	0	0	0	0	0	0	603	903	0
768	0	-65.8392	-116.578	-830.159	-154796	-93365.3	25950.8	87.5333	486.465	0	0	0	0	0	0	0	200	903	0	0	0	0	0	0	0	603	903	0
768	1	-63.2453	-118.561	-828.633	-155803	-93609.4	25950.8	87.0316	488.024	0	0	0	0	0	0	0	200	903	0	0	0	0	0	0	0	603	903	0
768	2	-62.7875	-118.256	-830.464	-155894	-93182.1	25859.2	87.7952	487.72	0	0	0	0	0	0	0	200	903	0	0	0	0	0	0	0	603	903	0
768	3	-63.0927	-119.324	-831.38	-155711	-93731.5	25950.8	87.258	487.293	0	-6.95938	3.99048	-22.6397	-4390.34	1464.31	214.005	264.679	1096.92	0	0	0	0	0	0	0	603	903	0
768	4	-63.0927	-119.782	-832.601	-155620	-93548.3	25767.7	87.6432	486.908	0	-5.28091	1.09131	-36.6778	-5763.63	2379.84	-335.312	264.885	1060.14	0	0	0	0	0	0	0	603	903	0
768	5	-62.4823	-121.155	-833.211	-156718	-93853.5	26317	87.3592	488.09	0	-2.68692	-6.69068	-44.9175	-7503.13	3051.23	-609.97	267.93	1070.04	0	0	0	0	0	0	0	603	903	0
768	6	-61.2616	-124.36	-833.516	-157085	-93426.3	26362.8	87.9131	488.46	0	-6.95938	-12.489	-47.9693	-8418.66	3722.61	-655.746	277.604	1078.5	0	0	0	0	0	0	0	603	903	0
768	7	-62.1771	-123.749	-835.958	-158275	-93731.5	26774.7	87.8753	489.334	0	-7.72232	-10.658	-56.8194	-9242.63	3661.58	-976.181	264.442	1065.67	0	0	0	0	0	0	0	603	903	0
768	8	-61.2616	-125.58	-835.958	-157909	-94036.6	26774.7	87.5103	488.895	0	-6.50162	-14.7778	-63.2281	-10249.7	4271.93	-1021.96	267.564	1065.11	0	0	0	0	0	0	0	603	903	0
768	9	-61.872	-125.885	-836.873	-158824	-93731.5	26637.4	87.998	489.783	0	-6.95938	-19.2029	-69.6368	-11623	4699.18	-793.075	267.481	1069.91	0	0	0	0	0	0	0	603	903	0
769	0	-61.5668	-127.869	-833.211	-159007	-93975.6	27003.6	87.2127	490.837	0	-9.85855	-18.8977	-75.7403	-12355.4	5004.35	-335.312	266.073	1066.13	0	0	0	0	0	0	0	603	903	0
769	1	-62.1771	-128.174	-838.094	-157909	-93670.4	26454.3	88.234	488.414	0	-8.48526	-18.4399	-87.337	-14735.8	5858.84	-1021.96	267.083	1071.72	0	0	0	0	0	0	0	603	903	0
769	2	-60.8038	-130.005	-838.704	-159923	-94158.7	27369.8	87.7331	490.678	0	-6.19644	-22.1021	-97.4078	-16566.9	6530.23	-930.405	267.04	1073.08	0	0	0	0	0	0	0	603	903	0
769	3	-60.6513	-129.7	-838.094	-160564	-93792.5	26957.8	88.0883	491.582	0	-8.94302	-21.6443	-107.479	-18214.8	6896.44	-381.088	264.166	1072.47	0	0	0	0	0	0	0	603	903	0
769	4	-60.9564	-131.531	-838.399	-159373	-93792.5	27552.9	88.1291	490.093	0	-11.2318	-20.5762	-112.972	-19405	7384.72	-976.181	265.368	1074.77	0	0	0	0	0	0	0	603	903	0
769	5	-58.0573	-132.599	-836.873	-160106	-93853.5	27415.6	87.8521	491.314	0	-9.09561	-19.6606	-123.958	-20503.6	7506.79	-564.193	260.559	1068.41	0	0	0	0	0	0	0	603	903	0
769	6	-59.1254	-133.515	-837.178	-159923	-93731.5	27186.7	88.0388	491.026	0	-10.0111	-20.8814	-132.808	-21602.3	8239.21	122.452	262.039	1065.66	0	0	0	0	0	0	0	603	903	0
769	7	-59.4306	-134.125	-836.263	-160289	-94341.8	27369.8	87.1864	491.673	0	-11.3844	-17.8296	-138.912	-23433.3	8483.36	-106.43	261.07	1071.69	0	0	0	0	0	0	0	603	903	0
769	8	-59.1254	-135.651	-834.737	-161205	-93792.5	27278.3	87.6383	493.12	0	-15.0465	-18.4399	-143.794	-24531.9	8788.53	30.8993	261.119	1073.6	0	0	0	0	0	0	0	603	903	0
769	9	-58.0573	-135.193	-834.127	-160381	-93853.5	27140.9	87.4829	492.274	0	-13.2155	-18.7451	-149.593	-25447.5	9337.85	-106.43	262.422	1073.11	0	0	0	0	0	0	0	603	903	0
770	0	-56.8366	-136.261	-835.042	-160655	-93853.5	27369.8	87.6062	492.392	0	-12.1474	-15.9985	-155.696	-26637.7	9215.78	-60.6534	259.191	1074.09	0	0	0	0	0	0	0	603	903	0
770	1	-56.8366	-136.261	-834.127	-161205	-93609.4	27736	87.7756	493.261	0	-14.131	-13.5571	-160.274	-27370.1	9948.2	122.452	262.07	1073.77	0	0	0	0	0	0	0	603	903	0
770	2	-56.5314	-137.482	-832.296	-160930	-93426.3	27232.5	87.7487	493.357	0	-14.5888	-14.6252	-162.715	-27919.4	10009.2	442.887	261.514	1074.58	0	0	0	0	0	0	0	603	903	0
770	3	-55.4633	-139.161	-829.854	-161113	-93426.3	27736	87.4184	494.146	0	-13.2155	-11.5735	-166.988	-29018	10314.4	763.321	261.767	1076.77	0	0	0	0	0	0	0	603	903	0
770	4	-55.921	-138.855	-831.99	-160472	-93487.3	27415.6	87.6341	492.877	0	-15.8095	-6.53809	-170.65	-29750.4	10497.5	900.651	261.515	1077.34	0	0	0	0	0	0	0	603	903	0
770	5	-54.8529	-138.703	-830.159	-160930	-92815.9	27324.1	88.195	493.854	0	-15.3517	-3.18116	-171.871	-29658.9	10131.3	1404.19	258.947	1075.57	0	0	0	0	0	0	0	603	903	0
770	6	-54.5477	-139.924	-829.854	-161205	-92632.8	27690.3	88.3745	494.257	0	-15.3517	-2.5708	-176.143	-30116.7	10619.6	1129.53	260.29	1073.98	0	0	0	0	0	0	0	603	903	0
770	7	-54.7003	-141.144	-828.939	-161296	-92815.9	27644.5	88.0304	494.581	0	-15.9621	0.78613	-178.279	-30666	10314.4	1175.31	257.855	1075.01	0	0	0	0	0	0	0	603	903	0
770	8	-54.2426	-140.839	-822.835	-160472	-92693.9	27736	87.3482	495.023	0	-15.3517	4.14306	-179.805	-31032.2	10436.5	1999.28	258.043	1075.59	0	0	0	0	0	0	0	603	903	0
770	9	-54.3952	-142.212	-824.056	-161845	-92693.9	27598.7	87.5151	496.401	0	-15.3517	6.12671	-181.331	-31673.1	10802.7	1907.73	259.574	1077.67	0	0	0	0	0	0	0	603	903	0
771	0	-53.9374	-142.975	-821.614	-161021	-91778.4	27919.1	88.2951	495.982	0	-16.725	7.04223	-181.026	-31581.5	10436.5	1816.18	257.652	1077.46	0	0	0	0	0	0	0	603	903	0
771	1	-54.2426	-143.891	-821.004	-159282	-91595.2	27507.2	88.4351	494.009	0	-16.4198	12.3828	-185.604	-31947.7	11046.8	2319.72	259.518	1075.13	0	0	0	0	0	0	0	603	903	0
771	2	-53.7848	-143.891	-818.257	-160472	-91961.4	27690.3	87.6131	496.115	0	-15.3517	14.8242	-187.435	-32863.2	10802.7	2182.39	257.634	1078.33	0	0	0	0	0	0	0	603	903	0
771	3	-51.6486	-144.349	-813.985	-160838	-91168	27781.8	87.9979	497.594	0	-14.131	16.5027	-189.266	-33321	10985.8	2411.27	258.044	1079.05	0	0	0	0	0	0	0	603	903	0
771	4	-51.9538	-146.485	-812.459	-160014	-91534.2	27690.3	87.3369	496.951	0	-16.2672	19.4019	-190.792	-33504.1	10680.6	3097.92	255.981	1078.61	0	0	0	0	0	0	0	603	903	0
771	5	-53.1745	-146.637	-809.407	-160564	-90557.6	27781.8	88.1186	498.372	0	-17.4879	22.4536	-195.674	-34785.9	11229.9	3006.36	257.391	1080.77	0	0	0	0	0	0	0	603	903	0
771	6	-51.9538	-146.027	-806.661	-160014	-90313.5	27552.9	88.0403	498.366	0	-15.1991	24.7424	-199.336	-34877.4	11413	2960.59	257.255	1077.97	0	0	0	0	0	0	0	603	903	0
771	7	-51.9538	-147.858	-803.914	-158733	-90130.4	27781.8	87.8856	497.45	0	-17.4879	26.5735	-200.862	-34785.9	11718.2	3509.9	258.34	1076.18	0	0	0	0	0	0	0	603	903	0
771	8	-52.1063	-148.163	-798.726	-158092	-89886.2	27552.9	87.463	497.93	0	-17.3354	30.3882	-204.219	-36067.6	11352	3693.01	255.587	1079.61	0	0	0	0	0	0	0	603	903	0
771	9	-51.1908	-148.011	-799.947	-158549	-90130.4	27552.9	87.3296	498.2	0	-17.6405	32.5244	-209.102	-36891.6	11718.2	3830.34	256.041	1079.43	0	0	0	0	0	0	0	603	903	0
772	0	-50.2753	-149.537	-794.454	-158275	-89031.7	27873.4	87.9334	499.225	0	-18.7086	32.3718	-211.544	-37715.5	11962.4	4059.22	256.548	1081.29	0	0	0	0	0	0	0	603	903	0
772	1	-49.5123	-149.537	-793.538	-158641	-88848.7	27552.9	88.0348	499.916	0	-17.9457	34.2029	-216.731	-38356.4	11962.4	4333.88	255.194	1079.98	0	0	0	0	0	0	0	603	903	0
772	2	-49.6649	-148.926	-789.266	-157085	-88604.5	27232.5	87.738	499.026	0	-19.319	38.0176	-222.835	-39729.7	12694.8	4333.88	256.969	1081.29	0	0	0	0	0	0	0	603	903	0
772	3	-47.0709	-150.147	-787.13	-157359	-87994.2	27552.9	88.2088	499.915	0	-18.7086	39.696	-224.666	-40095.9	12206.5	4837.42	254.332	1081.47	0	0	0	0	0	0	0	603	903	0
772	4	-49.2072	-150.452	-784.383	-157359	-87444.8	27552.9	88.5177	500.615	0	-17.3354	41.2219	-233.211	-41286.1	13244.1	4654.31	256.79	1080.03	0	0	0	0	0	0	0	603	903	0
772	5	-48.4442	-151.673	-781.636	-156535	-87750	27827.6	87.7355	500.266	0	-18.5561	43.5107	-236.263	-42384.7	13183.1	4791.64	255.798	1082.4	0	0	0	0	0	0	0	603	903	0
772	6	-48.1391	-151.062	-779.195	-156810	-87139.7	27415.6	88.167	501.246	0	-18.4035	45.4944	-241.146	-43666.5	13671.3	5020.52	256.693	1084.08	0	0	0	0	0	0	0	603	903	0
772	7	-46.6132	-151.368	-773.702	-155345	-86529.3	27552.9	88.1619	500.782	0	-15.9621	44.884	-246.639	-44215.8	14159.6	5249.41	257.41	1082.27	0	0	0	0	0	0	0	603	903	0
772	8	-46.7658	-151.673	-765.767	-154704	-85980	27049.4	87.7205	502.025	0	-17.6405	47.6306	-250.606	-45314.4	14220.7	4700.09	256.745	1083.82	0	0	0	0	0	0	0	603	903	0
772	9	-47.8339	-151.673	-766.683	-154796	-85919	27690.3	87.9341	501.903	0	-16.4198	49.6143	-257.625	-46138.4	14647.9	5020.52	256.857	1082.09	0	0	0	0	0	0	0	603	903	0
773	0	-47.3761	-152.131	-762.105	-153972	-85247.6	26820.5	88.142	502.035	0	-14.7414	47.478	-260.982	-47511.7	14586.9	5157.85	255.892	1085.05	0	0	0	0	0	0	0	603	903	0
773	1	-46.1554	-152.741	-759.053	-153514	-85125.5	27095.2	87.8531	502.244	0	-14.7414	50.3772	-266.475	-48885	15075.2	5020.52	256.572	1086.45	0	0	0	0	0	0	0	603	903	0
773	2	-45.3925	-152.741	-755.086	-153514	-84210	27507.2	88.4763	503.307	0	-15.5043	51.2927	-269.527	-49617.4	15136.2	5295.18	256.158	1087.09	0	0	0	0	0	0	0	603	903	0
773	3	-42.9511	-151.673	-749.593	-151866	-84026.9	27049.4	87.9033	502.598	0	-13.9784	51.9031	-278.072	-49892	15929.6	5020.52	257.286	1082.42	0	0	0	0	0	0	0	603	903	0
773	4	-45.2399	-153.351	-743.489	-152141	-83416.5	26774.7	87.804	504.631	0	-13.5207	52.0557	-288.753	-53004.8	16540	5112.08	257.281	1086.56	0	0	0	0	0	0	0	603	903	0
773	5	-44.4769	-153.351	-741.048	-151500	-82806.2	26591.6	88.258	504.44	0	-15.6569	52.666	-301.265	-55843	17272.4	5478.29	257.333	1088.36	0	0	0	0	0	0	0	603	903	0
773	6	-43.8666	-151.673	-737.081	-150310	-82562	27003.6	87.9878	503.926	0	-14.7414	54.0393	-311.336	-56666.9	16784.1	6302.26	253.91	1085.01	0	0	0	0	0	0	0	603	903	0
773	7	-42.4933	-153.351	-732.503	-150584	-81768.6	26454.3	88.371	505.575	0	-16.4198	53.8867	-320.491	-59779.7	18310	5981.83	257.131	1089.53	0	0	0	0	0	0	0	603	903	0
773	8	-41.7304	-153.351	-727.315	-149394	-81646.5	26683.2	87.7426	505.405	0	-15.0465	56.0229	-329.341	-61610.8	18859.3	6210.71	257.264	1090.07	0	0	0	0	0	0	0	603	903	0
773	9	-41.4252	-152.436	-723.043	-148479	-81036.2	26454.3	87.9234	505.353	0	-15.5043	56.3281	-338.191	-62892.5	19286.6	6302.26	257.029	1088.97	0	0	0	0	0	0	0	603	903	0
774	0	-41.12	-152.283	-716.024	-148296	-80242.7	26088.1	87.9329	507.11	0	-15.5043	57.2436	-347.042	-65089.8	19652.8	6256.49	256.63	1090.56	0	0	0	0	0	0	0	603	903	0
774	1	-40.9674	-152.588	-715.108	-147472	-80120.6	26271.2	87.9601	506.223	0	-16.8776	58.6169	-351.924	-66646.2	19896.9	6164.93	256.538	1092.38	0	0	0	0	0	0	0	603	903	0
774	2	-40.2045	-153.199	-711.141	-146373	-79449.2	26362.8	88.2792	505.828	0	-15.6569	60.448	-359.859	-68019.5	20690.4	6531.14	257.496	1092.02	0	0	0	0	0	0	0	603	903	0
774	3	-39.289	-151.978	-705.342	-146190	-78655.8	26225.4	88.4857	507.261	0	-14.2836	58.4644	-366.573	-69118.1	20873.5	6760.03	256.942	1091.55	0	0	0	0	0	0	0	603	903	0
774	4	-38.526	-152.894	-696.187	-145000	-77679.2	25721.9	88.422	508.277	0	-15.5043	61.3635	-368.709	-70308.3	21239.7	6714.25	257.606	1093.69	0	0	0	0	0	0	0	603	903	0
774	5	-39.8993	-152.741	-694.356	-144176	-77740.3	25905	88.0398	507.639	0	-15.5043	62.8894	-371.456	-70949.2	21361.8	6805.8	257.508	1094	0	0	0	0	0	0	0	603	903	0
774	6	-39.4415	-152.131	-690.084	-143626	-77190.9	25767.7	88.1426	508.129	0	-13.0629	64.5679	-378.169	-71864.7	21483.8	6348.04	256.81	1093.03	0	0	0	0	0	0	0	603	903	0
774	7	-38.6786	-151.978	-684.59	-141978	-76214.4	25493	88.6716	507.392	0	-12.6051	65.636	-382.442	-73238	21667	6668.47	256.654	1094.5	0	0	0	0	0	0	0	603	903	0
774	8	-37.6105	-153.351	-675.13	-141063	-76031.3	25126.8	87.3828	508.942	0	-13.3681	66.7041	-386.714	-73695.8	22277.3	6622.7	257.607	1093.57	0	0	0	0	0	0	0	603	903	0
774	9	-35.7794	-152.588	-672.383	-141154	-74932.6	25401.4	88.5567	509.932	0	-12.9103	68.9929	-388.545	-74702.9	22460.4	6714.25	257.806	1095.26	0	0	0	0	0	0	0	603	903	0
775	0	-37.4579	-152.741	-667.501	-139415	-74627.4	25355.7	88.1987	508.861	0	-12.3	71.2817	-392.513	-76076.1	22765.6	6531.14	258	1096.82	0	0	0	0	0	0	0	603	903	0
775	1	-36.0846	-151.825	-660.482	-139415	-74078.1	24806.4	87.8422	511.081	0	-10.1637	72.0447	-395.565	-76076.1	22521.4	6622.7	256.935	1095.32	0	0	0	0	0	0	0	603	903	0
775	2	-36.2372	-150.91	-656.209	-138225	-73223.6	24714.8	88.4142	510.641	0	-10.7741	74.3335	-399.227	-77541	22826.6	6622.7	257.177	1097.23	0	0	0	0	0	0	0	603	903	0
775	3	-35.7794	-151.52	-650.106	-136943	-72735.4	24989.5	88.1176	510.647	0	-10.4689	75.249	-401.973	-78639.6	23131.8	6622.7	257.546	1098.63	0	0	0	0	0	0	0	603	903	0
775	4	-34.2536	-150.91	-644.307	-136668	-71697.8	24165.5	88.7212	512.117	0	-8.94302	76.1646	-406.246	-79097.4	23009.7	6531.14	256.64	1097.7	0	0	0	0	0	0	0	603	903	0
775	5	-33.1854	-150.3	-638.814	-135020	-71514.7	24623.2	88.0509	511.361	0	-7.26456	77.5378	-407.772	-79555.2	23864.2	6027.6	258.524	1098.1	0	0	0	0	0	0	0	603	903	0
775	6	-32.8803	-151.062	-632.1	-134288	-70660.2	24257	88.2137	512.447	0	-7.56973	80.2844	-412.044	-81111.5	23864.2	5844.5	257.917	1099.85	0	0	0	0	0	0	0	603	903	0
775	7	-31.2018	-148.926	-629.048	-132457	-69866.7	24119.7	88.9327	510.567	0	-5.89127	81.5051	-416.316	-81477.7	23864.2	5752.95	257.322	1098.71	0	0	0	0	0	0	0	603	903	0
775	8	-31.8121	-148.468	-620.504	-131450	-69317.4	23661.9	88.2885	511.844	0	-3.29727	83.1836	-420.284	-82484.8	24474.6	5569.84	258.233	1099.26	0	0	0	0	0	0	0	603	903	0
775	9	-30.8966	-149.079	-616.231	-130717	-68707	23707.7	88.5044	512.124	0	-3.29727	83.9465	-424.556	-83308.8	24657.7	5478.29	258.079	1099.23	0	0	0	0	0	0	0	603	903	0
776	0	-30.8966	-148.011	-608.907	-129985	-68340.8	23570.4	87.7647	513.473	0	-2.38174	86.2354	-426.692	-84773.6	24962.8	5569.84	258.503	1101.68	0	0	0	0	0	0	0	603	903	0
776	1	-29.3707	-146.18	-600.057	-128429	-67059.1	23295.7	88.2454	514.027	0	1.43295	87.1509	-430.355	-85414.5	25268	4700.09	258.714	1101.47	0	0	0	0	0	0	0	603	903	0
776	2	-29.9811	-147.248	-595.479	-127788	-66326.7	23387.3	88.6163	514.597	0	0.364838	87.7612	-434.322	-85963.8	25207	4700.09	258.038	1100.93	0	0	0	0	0	0	0	603	903	0
776	3	-29.6759	-145.722	-589.376	-126598	-65777.4	22746.4	88.3949	514.8	0	0.97519	89.8975	-441.341	-87886.5	25512.2	4562.76	257.806	1102.14	0	0	0	0	0	0	0	603	903	0
776	4	-29.0656	-145.112	-582.967	-124583	-64434.6	22929.5	89.4713	513.706	0	5.40024	90.3552	-447.139	-89259.7	26122.5	4928.97	258.421	1102.62	0	0	0	0	0	0	0	603	903	0
776	5	-28.7604	-144.654	-575.948	-124492	-64312.5	22517.5	88.3362	516.151	0	3.26401	92.0337	-451.717	-90907.7	26427.7	4562.76	258.505	1104.25	0	0	0	0	0	0	0	603	903	0
776	6	-27.2345	-142.975	-568.929	-123210	-63274.9	22517.5	88.7824	516.565	0	3.56918	93.8647	-457.21	-91914.8	27221.2	4608.54	259.538	1104.03	0	0	0	0	0	0	0	603	903	0
776	7	-25.556	-142.975	-559.774	-121288	-62115.3	22059.8	89.035	516.672	0	4.94247	94.3225	-462.398	-93379.6	27343.2	4242.33	259.134	1104.95	0	0	0	0	0	0	0	603	903	0
776	8	-25.7086	-141.755	-554.28	-120372	-61810.1	21876.7	88.4859	517.168	0	5.55283	95.3906	-466.67	-95302.2	28014.6	4150.77	260.031	1107.22	0	0	0	0	0	0	0	603	903	0
776	9	-25.4035	-139.466	-547.872	-119273	-60772.5	21785.1	89.0753	517.703	0	6.46835	97.5269	-476.131	-96400.9	28380.8	3784.56	259.607	1105.47	0	0	0	0	0	0	0	603	903	0
777	0	-24.7931	-139.924	-542.379	-117442	-60833.5	21281.6	87.8394	516.532	0	8.14682	98.4424	-482.234	-98323.4	28380.8	3967.67	258.853	1106.89	0	0	0	0	0	0	0	603	903	0
777	1	-24.4879	-139.771	-532.918	-116893	-59551.8	21281.6	88.2534	519.345	0	9.21494	100.579	-485.591	-100612	28747	4196.55	259.2	1110.2	0	0	0	0	0	0	0	603	903	0
777	2	-21.8939	-137.635	-527.12	-114970	-58148	20503.4	89.6874	518.111	0	9.36752	101.189	-495.662	-102260	29479.5	3921.89	259.475	1109.31	0	0	0	0	0	0	0	603	903	0
777	3	-20.9784	-136.567	-519.796	-113780	-58086.9	20869.6	88.2504	518.894	0	11.8089	101.189	-500.24	-103450	30395	3509.9	260.761	1109.8	0	0	0	0	0	0	0	603	903	0
777	4	-20.9784	-134.43	-512.471	-113139	-56927.3	20366	88.9162	520.772	0	11.8089	104.698	-505.428	-104915	30639.1	3464.13	260.62	1110.58	0	0	0	0	0	0	0	603	903	0
777	5	-19.9103	-133.973	-506.368	-110759	-56927.3	20091.4	87.5772	518.732	0	12.7245	105.156	-512.752	-106380	30883.3	3555.68	260.23	1110.47	0	0	0	0	0	0	0	603	903	0
777	6	-20.0629	-132.294	-499.349	-110301	-55462.4	19771	88.9305	520.89	0	13.4874	106.835	-517.635	-108120	31615.7	3464.13	261.077	1111.87	0	0	0	0	0	0	0	603	903	0
777	7	-16.4008	-131.073	-491.414	-109111	-54730	19542.1	88.6275	522.035	0	13.7926	108.513	-523.433	-109127	31859.8	3418.35	260.867	1111.48	0	0	0	0	0	0	0	603	903	0
777	8	-17.4689	-129.548	-484.395	-107097	-53997.6	19084.3	88.5258	521.094	0	13.4874	109.581	-526.485	-111507	31920.9	3693.01	260.63	1114.8	0	0	0	0	0	0	0	603	903	0
777	9	-16.7059	-128.479	-476.766	-106090	-52593.8	18855.4	89.6863	522.52	0	14.7081	110.802	-533.199	-112423	32653.3	3647.23	261.24	1113.85	0	0	0	0	0	0	0	603	903	0
778	0	-16.7059	-127.259	-469.747	-104167	-51861.4	18763.9	89.5972	521.752	0	13.7926	112.328	-539.607	-114162	32836.4	3784.56	260.852	1114.57	0	0	0	0	0	0	0	603	903	0
778	1	-15.943	-126.038	-462.728	-102428	-51067.9	18260.3	89.6373	521.356	0	14.2503	113.701	-546.016	-115078	32958.5	4288.1	260.362	1113.76	0	0	0	0	0	0	0	603	903	0
778	2	-15.4852	-124.054	-451.741	-101329	-50030.3	17985.7	89.2501	524.308	0	15.9288	114.769	-549.983	-116268	33446.7	4105	260.814	1114.4	0	0	0	0	0	0	0	603	903	0
778	3	-14.7223	-122.834	-446.248	-100505	-49664.1	18031.5	88.7075	525.222	0	15.6236	117.211	-554.561	-118740	33629.8	4196.55	260.642	1117.11	0	0	0	0	0	0	0	603	903	0
778	4	-13.349	-121.613	-438.924	-98399.3	-48504.4	17482.1	89.4924	524.183	0	14.4029	117.211	-559.444	-119838	34606.4	4059.22	261.859	1117.21	0	0	0	0	0	0	0	603	903	0
778	5	-13.6542	-121.613	-430.989	-95835.8	-48016.1	17299	88.5909	522.362	0	15.3185	117.668	-563.106	-120571	34728.5	4516.98	261.673	1117.12	0	0	0	0	0	0	0	603	903	0
778	6	-12.7387	-119.019	-423.055	-95378.1	-46673.4	16932.8	89.6754	525.451	0	16.0814	121.025	-569.82	-122127	34606.4	4516.98	260.732	1117.33	0	0	0	0	0	0	0	603	903	0
778	7	-12.5861	-116.73	-415.731	-93638.6	-46429.2	16383.5	88.319	525.239	0	15.0133	122.094	-573.482	-124050	35338.8	4562.76	261.622	1119.31	0	0	0	0	0	0	0	603	903	0
778	8	-12.1283	-116.883	-407.186	-92082.2	-46002	16337.7	87.0246	526.143	0	15.6236	123.314	-577.449	-125057	34850.5	4654.31	260.353	1119.57	0	0	0	0	0	0	0	603	903	0
778	9	-9.53432	-114.136	-398.336	-90159.6	-43987.8	15925.7	89.571	526.341	0	18.5228	124.688	-582.637	-126064	35583	4516.98	261.072	1119.37	0	0	0	0	0	0	0	603	903	0
779	0	-7.55067	-111.847	-389.18	-88237	-42950.2	15880	89.6393	526.725	0	15.471	124.688	-585.384	-126705	36193.3	4837.42	261.828	1119.45	0	0	0	0	0	0	0	603	903	0
779	1	-10.1447	-112	-380.635	-86772.1	-41790.6	15422.2	90.2085	527.967	0	15.9288	126.213	-590.267	-128261	36254.4	4791.64	261.42	1120.29	0	0	0	0	0	0	0	603	903	0
779	2	-10.4498	-110.779	-371.785	-85490.4	-41729.5	15056	87.7591	529.946	0	17.6073	126.061	-596.981	-129726	36681.6	4837.42	261.445	1120.3	0	0	0	0	0	0	0	603	903	0
779	3	-9.38173	-108.338	-364.156	-84025.6	-40875	14781.3	87.7541	530.741	0	16.6917	127.892	-601.863	-131832	36803.7	4974.75	261.15	1122.04	0	0	0	0	0	0	0	603	903	0
779	4	-7.85585	-107.27	-356.832	-82103	-39593.3	14644	89.0421	530.089	0	16.8443	130.028	-607.357	-133114	37291.9	5066.3	261.4	1122.17	0	0	0	0	0	0	0	603	903	0
779	5	-7.70326	-105.744	-346.151	-81095.9	-38982.9	14460.9	87.3816	534.279	0	19.4383	130.028	-612.544	-134395	37353	5020.52	260.98	1122.4	0	0	0	0	0	0	0	603	903	0
779	6	-6.48256	-104.523	-341.268	-79356.4	-37945.3	14003.1	88.8106	532.534	0	17.1495	130.638	-614.07	-136043	37963.3	5020.52	261.822	1124.54	0	0	0	0	0	0	0	603	903	0
779	7	-5.56703	-101.471	-333.943	-77159.1	-37457.1	13453.8	87.8342	531.054	0	18.065	131.859	-622.92	-136959	38390.6	5112.08	261.63	1122.87	0	0	0	0	0	0	0	603	903	0
779	8	-5.87221	-97.9619	-326.924	-76060.5	-36114.3	13224.9	89.5333	532.655	0	20.0487	132.622	-626.888	-138790	38878.9	5066.3	262.019	1124.39	0	0	0	0	0	0	0	603	903	0
779	9	-4.80409	-95.9782	-318.685	-74321	-35626	12721.4	88.2093	533.212	0	18.9806	133.538	-632.686	-139980	38756.8	4928.97	261.258	1124.25	0	0	0	0	0	0	0	603	903	0
780	0	-4.6515	-93.3842	-311.36	-72306.8	-35015.6	12355.2	87.5398	532.229	0	18.828	133.385	-637.569	-141628	39672.3	4974.75	262.224	1125.14	0	0	0	0	0	0	0	603	903	0
780	1	-4.49892	-90.6377	-302.51	-71482.8	-33550.8	12080.5	89.0921	536.299	0	21.422	132.775	-639.095	-142727	40404.7	4654.31	263.222	1126.33	0	0	0	0	0	0	0	603	903	0
780	2	-2.66786	-88.5014	-293.965	-69285.6	-33062.5	11760.1	87.5293	535.693	0	19.4383	135.369	-647.945	-143367	40404.7	4700.09	262.358	1124.27	0	0	0	0	0	0	0	603	903	0
780	3	-4.19374	-87.2807	-287.557	-67454.5	-32147	11485.4	88.2065	534.578	0	20.8116	135.521	-652.523	-145839	40648.9	4791.64	262.295	1126.5	0	0	0	0	0	0	0	603	903	0
780	4	-4.95668	-86.823	-280.538	-65074.1	-31475.6	11348.1	87.8026	531.962	0	24.1685	137.81	-658.016	-147579	40709.9	4516.98	261.868	1127.28	0	0	0	0	0	0	0	603	903	0
780	5	-3.58339	-85.1445	-272.908	-64524.8	-30682.1	11393.9	87.5734	536.434	0	22.1849	137.352	-662.898	-149501	41442.3	4654.31	262.517	1128.53	0	0	0	0	0	0	0	603	903	0
780	6	-2.97304	-83.0083	-265.279	-61961.3	-29217.3	10844.6	89.862	533.571	0	22.7953	137.657	-667.476	-150600	41625.4	4928.97	262.362	1128.63	0	0	0	0	0	0	0	603	903	0
780	7	-2.51527	-82.2453	-252.462	-60404.9	-28729	10753	86.2044	539.264	0	24.016	139.031	-673.274	-152065	42174.8	4333.88	262.641	1128.86	0	0	0	0	0	0	0	603	903	0
780	8	-3.88856	-80.7195	-244.832	-59306.3	-27508.3	10615.7	87.6442	542.233	0	24.7789	139.794	-677.852	-153530	42968.2	4013.44	263.389	1129.49	0	0	0	0	0	0	0	603	903	0
780	9	-3.27821	-78.278	-241.78	-57017.5	-27020	9837.48	88.2456	535.824	0	27.6781	140.862	-682.735	-155269	42357.9	3830.34	262.041	1130.42	0	0	0	0	0	0	0	603	903	0
781	0	-2.36269	-76.2944	-234.456	-54820.2	-26104.5	9837.48	88.6593	533.819	0	27.8307	141.167	-689.144	-155910	43517.5	3693.01	263.147	1129.24	0	0	0	0	0	0	0	603	903	0
781	1	-2.36269	-73.0901	-227.132	-54637.1	-25677.3	9333.94	86.95	540.552	0	27.8307	141.472	-692.501	-158107	43700.6	3509.9	263.106	1131.31	0	0	0	0	0	0	0	603	903	0
781	2	-1.75233	-71.1064	-219.808	-52623	-25066.9	8967.73	85.9598	539.405	0	28.5936	140.709	-696.468	-159389	44494.1	3784.56	263.885	1131.85	0	0	0	0	0	0	0	603	903	0
781	3	0.078721	-67.5969	-212.484	-51432.8	-23907.2	8921.95	87.4866	542.055	0	29.8143	142.693	-702.877	-160488	44799.3	3418.35	263.737	1131.33	0	0	0	0	0	0	0	603	903	0
781	4	-0.684218	-64.24	-203.939	-50334.1	-23296.9	8235.3	85.7652	546.81	0	30.7298	143.608	-705.623	-161953	44921.3	3326.8	263.662	1132.52	0	0	0	0	0	0	0	603	903	0
781	5	-1.75233	-63.6296	-198.751	-48136.9	-22747.6	7960.65	85.5471	542.197	0	30.2721	144.829	-712.337	-163234	45470.7	2914.81	263.833	1132.15	0	0	0	0	0	0	0	603	903	0
781	6	-1.90492	-61.9511	-191.426	-46946.7	-21832	7777.54	85.9507	545.247	0	31.6454	144.677	-716.915	-164241	45409.6	3189.47	263.34	1132.09	0	0	0	0	0	0	0	603	903	0
781	7	-2.05751	-59.6623	-184.407	-45573.4	-21160.7	7731.76	85.2504	547.134	0	31.3402	144.829	-719.051	-165889	46142	3189.47	264.171	1133.71	0	0	0	0	0	0	0	603	903	0
781	8	-1.90492	-59.052	-175.557	-44474.8	-20367.2	7548.66	83.9854	553.335	0	31.7979	145.592	-723.323	-167080	46752.4	3143.69	264.636	1133.99	0	0	0	0	0	0	0	603	903	0
781	9	-1.14198	-57.5261	-174.031	-43101.5	-19573.7	7869.09	87.5275	547.665	0	31.7979	145.134	-725.765	-167812	46691.4	3143.69	264.334	1134.22	0	0	0	0	0	0	0	603	903	0
782	0	-2.36269	-55.5424	-166.097	-41453.5	-19146.5	7411.33	84.7269	549.575	0	31.9505	146.355	-730.342	-168911	46447.2	3235.24	263.596	1134.28	0	0	0	0	0	0	0	603	903	0
782	1	-2.2101	-52.6433	-159.993	-39073.2	-18353	6953.57	85.2887	544.218	0	31.1876	145.745	-734.92	-169918	46996.5	3235.24	263.948	1134.21	0	0	0	0	0	0	0	603	903	0
782	2	-1.90492	-50.3545	-156.026	-38706.9	-17986.8	6587.36	84.719	548.08	0	31.9505	146.202	-737.361	-170742	47606.9	3281.02	264.564	1134.56	0	0	0	0	0	0	0	603	903	0
782	3	-1.44716	-47.7605	-146.871	-36784.3	-17193.4	6175.37	82.9353	550.454	0	32.4083	146.05	-741.329	-171657	47790	3418.35	264.465	1134.55	0	0	0	0	0	0	0	603	903	0
782	4	-0.379043	-46.082	-145.04	-35777.3	-16522	6038.04	86.0864	546.672	0	31.6454	145.745	-744.075	-173214	48034.1	3326.8	264.555	1135.79	0	0	0	0	0	0	0	603	903	0
782	5	-0.684218	-41.1992	-140.157	-34495.5	-16094.7	5534.5	85.1662	546.121	0	31.7979	146.355	-742.855	-174038	48156.2	3372.57	264.826	1137.28	0	0	0	0	0	0	0	603	903	0
782	6	-1.29457	-39.2155	-135.274	-32939.1	-15240.2	5351.39	87.338	543.499	0	32.1031	146.813	-750.484	-174862	47912.1	3418.35	263.842	1136	0	0	0	0	0	0	0	603	903	0
782	7	-1.75233	-39.3681	-128.865	-31016.5	-14935.1	5488.72	84.1033	540.689	0	31.9505	145.897	-752.62	-175045	48827.6	3555.68	264.877	1135.58	0	0	0	0	0	0	0	603	903	0
782	8	-1.59975	-38.4526	-118.489	-30925	-14019.5	4847.85	81.681	560.994	0	31.6454	146.355	-755.977	-176967	49132.8	3464.13	264.992	1137.09	0	0	0	0	0	0	0	603	903	0
782	9	-0.684218	-39.063	-116.964	-28910.8	-13897.5	4939.41	81.1811	547.178	0	33.7816	145.439	-755.977	-177883	48888.6	3418.35	264.669	1138.3	0	0	0	0	0	0	0	603	903	0
783	0	-1.90492	-38.6052	-112.996	-28086.8	-12798.8	5214.06	86.7321	548.564	0	31.7979	145.287	-760.555	-179164	49132.8	3326.8	264.601	1138.57	0	0	0	0	0	0	0	603	903	0
783	1	-2.2101	-39.3681	-105.672	-26530.4	-12066.4	5076.74	85.8125	551.064	0	31.9505	145.592	-763.607	-179805	49376.9	3326.8	264.663	1138.47	0	0	0	0	0	0	0	603	903	0
783	2	-2.66786	-35.5534	-101.4	-24974	-11761.2	4664.75	84.0109	546.293	0	32.5609	145.134	-766.353	-179989	50231.4	3281.02	265.546	1137.86	0	0	0	0	0	0	0	603	903	0
783	3	-2.66786	-32.9594	-97.1271	-24699.4	-11089.9	4298.54	85.8212	554.3	0	34.2393	145.439	-768.794	-181362	49865.2	3281.02	264.862	1138.9	0	0	0	0	0	0	0	603	903	0
783	4	-2.82045	-28.8396	-94.0753	-23143	-11211.9	4206.98	80.8197	546.005	0	33.3238	145.745	-771.236	-182003	49682.1	3097.92	264.419	1138.99	0	0	0	0	0	0	0	603	903	0
783	5	-2.36269	-27.1611	-89.4977	-21769.7	-10479.5	4069.66	82.9075	543.243	0	34.5445	144.371	-773.067	-182827	50536.6	3326.8	265.372	1139.5	0	0	0	0	0	0	0	603	903	0
783	6	-1.75233	-24.1093	-83.6993	-21128.8	-9869.15	4115.43	82.088	552.437	0	34.0868	144.524	-776.119	-183834	50536.6	3052.14	265.115	1139.86	0	0	0	0	0	0	0	603	903	0
783	7	-2.97304	-23.3464	-80.0372	-20030.2	-9502.94	3978.1	81.2685	550.261	0	34.3919	143.761	-774.898	-184383	51085.9	2777.48	265.926	1140.94	0	0	0	0	0	0	0	603	903	0
783	8	-3.27821	-24.7197	-74.5441	-19114.7	-8465.35	3520.34	86.4384	556.421	0	35.9178	143.761	-779.17	-184841	50841.8	2594.38	265.251	1140.23	0	0	0	0	0	0	0	603	903	0
783	9	-3.88856	-24.2619	-69.6613	-18107.6	-8404.31	3657.67	79.3546	559.938	0	36.5282	143.761	-784.358	-186489	51269	2457.05	265.364	1140.76	0	0	0	0	0	0	0	603	903	0
784	0	-2.36269	-21.9731	-65.694	-16368.1	-7793.96	3657.67	81.3596	549.156	0	36.5282	142.998	-786.8	-187221	51330	2548.6	265.239	1140.95	0	0	0	0	0	0	0	603	903	0
784	1	-1.90492	-20.2946	-59.5905	-16001.9	-7244.64	3383.01	78.4262	568.531	0	36.9859	143.608	-788.326	-186580	51757.3	2045.06	265.655	1139.68	0	0	0	0	0	0	0	603	903	0
784	2	-1.59975	-20.2946	-58.6749	-15269.4	-7061.53	3245.68	79.6499	560.238	0	37.1385	142.693	-791.378	-188869	52611.8	2365.49	266.481	1141.66	0	0	0	0	0	0	0	603	903	0
784	3	-3.12562	-18.311	-55.0128	-14811.7	-6451.18	2971.02	82.7331	569.241	0	37.4437	142.693	-792.598	-189418	52489.7	1907.73	266.225	1141.98	0	0	0	0	0	0	0	603	903	0
784	4	-2.97304	-16.0222	-51.3507	-13621.5	-6329.11	2696.37	76.7473	565.264	0	38.6644	143.151	-795.04	-189785	52245.6	1587.3	265.714	1141.71	0	0	0	0	0	0	0	603	903	0
784	5	-2.66786	-13.2756	-48.9093	-13255.3	-5962.9	2421.71	78.0825	571.018	0	38.817	141.93	-796.565	-190517	52611.8	1449.97	266.048	1142.17	0	0	0	0	0	0	0	603	903	0
784	6	-2.05751	-14.3437	-46.1627	-11607.3	-5413.58	2742.14	82.7282	551.444	0	39.5799	141.014	-799.617	-191707	52611.8	1541.52	265.796	1142.75	0	0	0	0	0	0	0	603	903	0
784	7	-3.4308	-14.6489	-42.8058	-11332.7	-5108.41	2604.81	80.6608	564.746	0	39.7325	138.268	-802.974	-192440	53466.3	1449.97	266.585	1142.66	0	0	0	0	0	0	0	603	903	0
784	8	-1.90492	-12.9704	-40.0592	-10142.5	-4620.13	3062.58	84.6675	553.188	0	40.0377	140.099	-804.5	-192989	53588.3	1358.41	266.611	1142.89	0	0	0	0	0	0	0	603	903	0
784	9	-2.97304	-13.4282	-36.7023	-9410.06	-4192.88	2742.14	85.7596	556.389	0	39.2747	138.878	-805.416	-193905	53527.3	992.203	266.459	1143.75	0	0	0	0	0	0	0	603	903	0
785	0	-3.4308	-11.7497	-33.0402	-7853.67	-4253.92	2467.48	71.2501	537.701	0	40.4955	140.251	-809.078	-194179	53527.3	992.203	266.158	1143	0	0	0	0	0	0	0	603	903	0
785	1	-3.4308	-11.1394	-30.5988	-7304.35	-3216.32	2192.83	94.8872	538.714	0	41.7162	139.031	-810.604	-194362	53405.2	900.651	265.883	1142.77	0	0	0	0	0	0	0	603	903	0
785	2	-2.66786	-10.2238	-28.7677	-6571.93	-3216.32	2330.15	88.1968	528.448	0	42.3265	139.641	-810.909	-194545	54198.7	442.887	266.837	1142.91	0	0	0	0	0	0	0	603	903	0
785	3	-2.82045	-8.85056	-23.8849	-7212.8	-2972.18	2192.83	75.5623	601.982	0	43.3946	139.489	-810.298	-195369	54137.7	671.769	266.812	1144.11	0	0	0	0	0	0	0	603	903	0
785	4	-4.04115	-7.78244	-24.1901	-5747.96	-2972.18	1963.94	77.1322	537.617	0	44.4627	139.031	-811.824	-195827	54076.6	442.887	266.611	1144.22	0	0	0	0	0	0	0	603	903	0
785	5	-3.58339	-7.47727	-20.8331	-5473.3	-2483.9	1918.17	80.7717	562.721	0	43.0894	137.81	-810.604	-196376	54259.7	30.8993	266.937	1145.26	0	0	0	0	0	0	0	603	903	0
785	6	-3.12562	-4.88327	-18.0865	-4557.77	-1934.58	1780.84	93.0375	551.998	0	43.3946	138.42	-814.571	-196285	53954.5	-106.43	266.237	1143.97	0	0	0	0	0	0	0	603	903	0
785	7	-3.12562	-3.96774	-16.8658	-3642.24	-1995.62	1506.18	81.677	515.954	0	44.4627	137.657	-814.266	-196193	53832.5	168.228	266.112	1143.95	0	0	0	0	0	0	0	603	903	0
785	8	-2.97304	-3.96774	-13.5089	-3642.24	-1812.51	1185.74	65.8284	569.618	0	44.4627	137.047	-815.486	-197109	54503.9	-60.6534	266.836	1144.71	0	0	0	0	0	0	0	603	903	0
785	9	-1.44716	-4.12033	-11.0675	-3367.58	-1751.48	1185.74	41.746	604.277	0	44.9205	135.521	-814.571	-197475	53588.3	168.228	265.787	1145.43	0	0	0	0	0	0	0	603	903	0
786	0	0	0	0	0	0	0	200	300	0	43.8524	135.979	-813.655	-197109	54442.8	76.6757	266.911	1145.25	0	0	0	0	0	0	0	603	903	0
786	1	0	0	0	0	0	0	200	300	0	43.6998	135.521	-813.045	-197475	54259.7	-60.6534	266.736	1145.88	0	0	0	0	0	0	0	603	903	0
786	2	0	0	0	0	0	0	200	300	0	44.7679	133.232	-814.876	-197384	54320.8	-381.088	266.661	1145.23	0	0	0	0	0	0	0	603	903	0
786	3	0	0	0	0	0	0	200	300	0	44.6153	132.775	-816.402	-197200	54564.9	-335.312	266.836	1144.55	0	0	0	0	0	0	0	603	903	0
786	4	0	0	0	0	0	0	200	300	0	45.0731	131.707	-815.486	-197384	54137.7	-243.759	266.387	1145.04	0	0	0	0	0	0	0	603	903	0
786	5	0	0	0	0	0	0	200	300	0	44.9205	131.554	-815.181	-198116	54442.8	-335.312	266.786	1146.03	0	0	0	0	0	0	0	603	903	0
786	6	0	0	0	0	0	0	200	300	0	44.3102	130.638	-815.486	-197750	54503.9	-426.864	266.836	1145.49	0	0	0	0	0	0	0	603	903	0
786	7	0	0	0	0	0	0	200	300	0	47.0567	129.57	-814.571	-197841	54259.7	-564.193	266.611	1145.88	0	0	0	0	0	0	0	603	903	0
786	8	0	0	0	0	0	0	200	300	0	45.2257	129.113	-814.571	-196376	54687	-564.193	267.136	1144.08	0	0	0	0	0	0	0	603	903	0
786	9	0	0	0	0	0	0	200	300	0	45.3783	129.265	-814.266	-197933	54259.7	-518.417	266.636	1146.08	0	0	0	0	0	0	0	603	903	0
787	0	0	0	0	0	0	0	200	300	0	46.599	129.875	-813.35	-198116	54015.6	-701.523	266.411	1146.58	0	0	0	0	0	0	0	603	903	0
787	1	0	0	0	0	0	0	200	300	0	45.0731	128.807	-814.876	-198482	54625.9	-793.075	267.036	1146.57	0	0	0	0	0	0	0	603	903	0
787	2	0	0	0	0	0	0	200	300	0	44.7679	127.892	-812.129	-198665	54381.8	-976.181	266.962	1147.62	0	0	0	0	0	0	0	603	903	0
787	3	0	0	0	0	0	0	200	300	0	45.6834	125.45	-812.435	-197384	54870.1	-976.181	267.538	1145.95	0	0	0	0	0	0	0	603	903	0
787	4	0	0	0	0	0	0	200	300	0	47.2093	126.366	-812.129	-198024	54564.9	-1250.84	267.187	1146.83	0	0	0	0	0	0	0	603	903	0
787	5	0	0	0	0	0	0	200	300	0	45.9886	126.824	-811.214	-197384	54076.6	-1342.39	266.661	1146.32	0	0	0	0	0	0	0	603	903	0
787	6	0	0	0	0	0	0	200	300	0	46.4464	124.688	-810.298	-196834	54442.8	-1342.39	267.189	1145.92	0	0	0	0	0	0	0	603	903	0
787	7	0	0	0	0	0	0	200	300	0	46.4464	123.467	-809.383	-197933	54259.7	-1296.62	267.038	1147.55	0	0	0	0	0	0	0	603	903	0
787	8	0	0	0	0	0	0	200	300	0	46.7516	123.162	-808.773	-197658	54076.6	-1662.83	266.863	1147.39	0	0	0	0	0	0	0	603	903	0
787	9	0	0	0	0	0	0	200	300	0	49.4981	122.094	-808.162	-197109	54381.8	-1983.26	267.291	1146.9	0	0	0	0	0	0	0	603	903	0
788	0	0	0	0	0	0	0	200	300	0	46.9041	121.941	-806.941	-196926	54198.7	-1937.48	267.166	1147.04	0	0	0	0	0	0	0	603	903	0
788	1	0	0	0	0	0	0	200	300	0	47.3619	121.788	-806.026	-195186	54076.6	-1845.93	267.09	1145.16	0	0	0	0	0	0	0	603	903	0
788	2	0	0	0	0	0	0	200	300	0	47.2093	119.347	-805.721	-196743	54259.7	-1708.6	267.343	1147.18	0	0	0	0	0	0	0	603	903	0
788	3	0	0	0	0	0	0	200	300	0	47.5145	118.889	-804.5	-196743	53954.5	-1800.16	267.066	1147.55	0	0	0	0	0	0	0	603	903	0
788	4	0	0	0	0	0	0	200	300	0	47.9723	115.532	-802.669	-196926	53649.4	-2166.37	266.839	1148.34	0	0	0	0	0	0	0	603	903	0
788	5	0	0	0	0	0	0	200	300	0	47.2093	118.431	-801.448	-196376	53588.3	-2349.47	266.864	1148.03	0	0	0	0	0	0	0	603	903	0
788	6	0	0	0	0	0	0	200	300	0	47.3619	116.906	-801.753	-196102	54015.6	-2441.02	267.372	1147.59	0	0	0	0	0	0	0	603	903	0
788	7	0	0	0	0	0	0	200	300	0	47.5145	115.227	-801.143	-196376	53893.5	-2532.58	267.271	1148.12	0	0	0	0	0	0	0	603	903	0
788	8	0	0	0	0	0	0	200	300	0	46.9041	115.074	-800.533	-196468	53466.3	-2257.92	266.788	1148.42	0	0	0	0	0	0	0	603	903	0
788	9	0	0	0	0	0	0	200	300	0	47.5145	112.175	-799.312	-195736	54320.8	-2303.7	267.959	1147.88	0	0	0	0	0	0	0	603	903	0
789	0	0	0	0	0	0	0	200	300	0	47.3619	114.006	-796.871	-196285	53649.4	-2532.58	267.325	1149.32	0	0	0	0	0	0	0	603	903	0
789	1	0	0	0	0	0	0	200	300	0	47.6671	112.328	-796.26	-195644	53466.3	-2761.46	267.147	1148.7	0	0	0	0	0	0	0	603	903	0
789	2	0	0	0	0	0	0	200	300	0	47.5145	111.26	-794.124	-194362	53405.2	-2486.8	267.251	1147.75	0	0	0	0	0	0	0	603	903	0
789	3	0	0	0	0	0	0	200	300	0	47.5145	110.955	-794.734	-195278	53344.2	-2715.68	267.122	1148.71	0	0	0	0	0	0	0	603	903	0
789	4	0	0	0	0	0	0	200	300	0	48.8878	107.598	-794.124	-194820	53466.3	-2898.79	267.327	1148.33	0	0	0	0	0	0	0	603	903	0
789	5	0	0	0	0	0	0	200	300	0	47.9723	109.581	-789.852	-194271	53649.4	-2761.46	267.923	1148.96	0	0	0	0	0	0	0	603	903	0
789	6	0	0	0	0	0	0	200	300	0	47.2093	108.361	-788.936	-194362	53588.3	-2807.24	267.925	1149.36	0	0	0	0	0	0	0	603	903	0
789	7	0	0	0	0	0	0	200	300	0	46.4464	107.75	-787.715	-193996	53527.3	-2990.34	267.953	1149.28	0	0	0	0	0	0	0	603	903	0
789	8	0	0	0	0	0	0	200	300	0	47.2093	107.445	-787.41	-193081	52978	-3036.12	267.281	1148.21	0	0	0	0	0	0	0	603	903	0
789	9	0	0	0	0	0	0	200	300	0	48.43	105.461	-784.664	-192989	53161.1	-3081.89	267.75	1148.95	0	0	0	0	0	0	0	603	903	0
790	0	0	0	0	0	0	0	200	300	0	46.599	105.461	-782.527	-192806	53100.1	-2990.34	267.857	1149.39	0	0	0	0	0	0	0	603	903	0
790	1	0	0	0	0	0	0	200	300	0	46.7516	103.936	-779.17	-192806	52245.6	-3219.22	267.053	1150.45	0	0	0	0	0	0	0	603	903	0
790	2	0	0	0	0	0	0	200	300	0	47.6671	103.173	-777.95	-191890	53100.1	-3127.67	268.256	1149.66	0	0	0	0	0	0	0	603	903	0
790	3	0	0	0	0	0	0	200	300	0	45.6834	103.173	-777.95	-190975	52855.9	-3356.55	267.943	1148.48	0	0	0	0	0	0	0	603	903	0
790	4	0	0	0	0	0	0	200	300	0	46.599	102.104	-777.339	-191158	52550.7	-3173.45	267.603	1148.91	0	0	0	0	0	0	0	603	903	0
790	5	0	0	0	0	0	0	200	300	0	47.3619	101.799	-773.372	-190975	52611.8	-3310.78	268.029	1149.94	0	0	0	0	0	0	0	603	903	0
790	6	0	0	0	0	0	0	200	300	0	46.9041	101.342	-770.32	-191158	52489.7	-3356.55	268.14	1151.15	0	0	0	0	0	0	0	603	903	0
790	7	0	0	0	0	0	0	200	300	0	46.2938	98.9001	-769.1	-190609	52733.8	-3081.89	268.566	1150.83	0	0	0	0	0	0	0	603	903	0
790	8	0	0	0	0	0	0	200	300	0	45.9886	99.0527	-767.574	-189327	52184.5	-3402.33	267.986	1149.66	0	0	0	0	0	0	0	603	903	0
790	9	0	0	0	0	0	0	200	300	0	46.2938	97.3743	-765.743	-189235	51879.4	-3356.55	267.75	1150.13	0	0	0	0	0	0	0	603	903	0
791	0	0	0	0	0	0	0	200	300	0	45.6834	97.5269	-763.301	-188869	52123.5	-3448.1	268.287	1150.44	0	0	0	0	0	0	0	603	903	0
791	1	0	0	0	0	0	0	200	300	0	46.4464	96.4587	-760.86	-188411	51635.2	-3127.67	267.864	1150.63	0	0	0	0	0	0	0	603	903	0
791	2	0	0	0	0	0	0	200	300	0	45.9886	95.0854	-758.113	-188137	51940.4	-3448.1	268.513	1151.16	0	0	0	0	0	0	0	603	903	0
791	3	0	0	0	0	0	0	200	300	0	44.6153	93.5596	-754.451	-187587	52001.4	-3356.55	268.926	1151.64	0	0	0	0	0	0	0	603	903	0
791	4	0	0	0	0	0	0	200	300	0	44.1576	93.5596	-754.451	-186672	51391.1	-3631.21	268.117	1150.43	0	0	0	0	0	0	0	603	903	0
791	5	0	0	0	0	0	0	200	300	0	46.2938	94.0173	-748.348	-186031	51269	-3585.43	268.51	1151.59	0	0	0	0	0	0	0	603	903	0
791	6	0	0	0	0	0	0	200	300	0	44.6153	92.9492	-749.263	-186306	50902.8	-3860.09	267.937	1151.65	0	0	0	0	0	0	0	603	903	0
791	7	0	0	0	0	0	0	200	300	0	44.4627	91.1182	-744.991	-185390	51085.9	-3722.76	268.573	1151.85	0	0	0	0	0	0	0	603	903	0
791	8	0	0	0	0	0	0	200	300	0	44.7679	90.6604	-743.77	-184566	51269	-3493.88	268.931	1151.15	0	0	0	0	0	0	0	603	903	0
791	9	0	0	0	0	0	0	200	300	0	44.3102	89.2871	-741.634	-184566	50475.5	-3539.66	268.06	1151.86	0	0	0	0	0	0	0	603	903	0
792	0	0	0	0	0	0	0	200	300	0	43.3946	88.6768	-736.446	-184017	50719.7	-3676.99	268.871	1152.87	0	0	0	0	0	0	0	603	903	0
792	1	0	0	0	0	0	0	200	300	0	43.8524	88.8293	-735.836	-183010	50231.4	-3768.54	268.264	1151.71	0	0	0	0	0	0	0	603	903	0
792	2	0	0	0	0	0	0	200	300	0	44.3102	84.8621	-732.784	-182552	49865.2	-3676.99	268.049	1152.12	0	0	0	0	0	0	0	603	903	0
792	3	0	0	0	0	0	0	200	300	0	45.0731	86.8457	-730.342	-182277	50231.4	-3814.32	268.778	1152.58	0	0	0	0	0	0	0	603	903	0
792	4	0	0	0	0	0	0	200	300	0	43.8524	85.7776	-726.07	-180996	49071.7	-3265	267.585	1152.28	0	0	0	0	0	0	0	603	903	0
792	5	0	0	0	0	0	0	200	300	0	43.242	84.7095	-724.239	-180996	49987.3	-3860.09	269.02	1152.91	0	0	0	0	0	0	0	603	903	0
792	6	0	0	0	0	0	0	200	300	0	42.9369	85.3198	-722.408	-180263	49499	-3951.65	268.519	1152.53	0	0	0	0	0	0	0	603	903	0
792	7	0	0	0	0	0	0	200	300	0	44.1576	83.4888	-719.661	-179531	49254.8	-3722.76	268.442	1152.47	0	0	0	0	0	0	0	603	903	0
792	8	0	0	0	0	0	0	200	300	0	42.4791	83.1836	-715.999	-178890	49376.9	-3356.55	268.962	1152.85	0	0	0	0	0	0	0	603	903	0
792	9	0	0	0	0	0	0	200	300	0	41.2584	82.7258	-714.778	-178981	49010.7	-3493.88	268.568	1153.4	0	0	0	0	0	0	0	603	903	0
793	0	0	0	0	0	0	0	200	300	0	41.8687	80.7422	-708.98	-177700	49437.9	-3676.99	269.731	1153.64	0	0	0	0	0	0	0	603	903	0
793	1	0	0	0	0	0	0	200	300	0	41.5636	81.2	-706.539	-177608	48888.6	-3722.76	269.195	1154.38	0	0	0	0	0	0	0	603	903	0
793	2	0	0	0	0	0	0	200	300	0	42.0213	79.3689	-704.097	-176509	48339.3	-3722.76	268.654	1153.69	0	0	0	0	0	0	0	603	903	0
793	3	0	0	0	0	0	0	200	300	0	41.411	78.7585	-700.13	-175136	48278.3	-3814.32	268.956	1153.15	0	0	0	0	0	0	0	603	903	0
793	4	0	0	0	0	0	0	200	300	0	40.8006	78.4534	-698.299	-174953	48034.1	-3493.88	268.787	1153.54	0	0	0	0	0	0	0	603	903	0
793	5	0	0	0	0	0	0	200	300	0	41.5636	76.9275	-695.247	-174221	48034.1	-3173.45	269.089	1153.59	0	0	0	0	0	0	0	603	903	0
793	6	0	0	0	0	0	0	200	300	0	40.3429	76.7749	-690.975	-173397	47912.1	-3539.66	269.34	1153.95	0	0	0	0	0	0	0	603	903	0
793	7	0	0	0	0	0	0	200	300	0	39.8851	76.4697	-689.144	-173214	47362.8	-3539.66	268.727	1154.35	0	0	0	0	0	0	0	603	903	0
793	8	0	0	0	0	0	0	200	300	0	39.1222	74.9438	-685.482	-172573	47240.7	-3676.99	268.916	1154.75	0	0	0	0	0	0	0	603	903	0
793	9	0	0	0	0	0	0	200	300	0	39.4273	74.7913	-683.956	-171383	47057.6	-3493.88	268.802	1153.58	0	0	0	0	0	0	0	603	903	0
794	0	0	0	0	0	0	0	200	300	0	39.1222	73.1128	-681.514	-171199	47240.7	-3493.88	269.317	1154.2	0	0	0	0	0	0	0	603	903	0
794	1	0	0	0	0	0	0	200	300	0	38.3592	72.1973	-676.326	-170650	47179.6	-3402.33	269.759	1155.32	0	0	0	0	0	0	0	603	903	0
794	2	0	0	0	0	0	0	200	300	0	38.2066	72.3499	-675.106	-169918	46691.4	-3448.1	269.162	1154.69	0	0	0	0	0	0	0	603	903	0
794	3	0	0	0	0	0	0	200	300	0	38.3592	70.9766	-671.749	-168453	46813.4	-3539.66	269.689	1153.77	0	0	0	0	0	0	0	603	903	0
794	4	0	0	0	0	0	0	200	300	0	36.6808	71.1292	-665.95	-168270	46386.2	-3493.88	269.654	1155.68	0	0	0	0	0	0	0	603	903	0
794	5	0	0	0	0	0	0	200	300	0	36.9859	69.9084	-667.171	-167537	46081	-3265	269.069	1154.12	0	0	0	0	0	0	0	603	903	0
794	6	0	0	0	0	0	0	200	300	0	38.054	68.5352	-662.593	-166805	46081	-3402.33	269.546	1154.75	0	0	0	0	0	0	0	603	903	0
794	7	0	0	0	0	0	0	200	300	0	36.3756	68.5352	-658.931	-165798	45470.7	-3631.21	269.007	1154.62	0	0	0	0	0	0	0	603	903	0
794	8	0	0	0	0	0	0	200	300	0	36.0704	67.1619	-654.659	-165615	46081	-3631.21	270.389	1155.98	0	0	0	0	0	0	0	603	903	0
794	9	0	0	0	0	0	0	200	300	0	37.1385	66.7041	-652.217	-164791	44799.3	-3356.55	268.688	1155.66	0	0	0	0	0	0	0	603	903	0
795	0	0	0	0	0	0	0	200	300	0	36.223	65.3308	-651.302	-164425	45043.4	-3127.67	269.159	1155.46	0	0	0	0	0	0	0	603	903	0
795	1	0	0	0	0	0	0	200	300	0	35.0023	65.4834	-648.555	-163875	45409.6	-3585.43	270.017	1155.68	0	0	0	0	0	0	0	603	903	0
795	2	0	0	0	0	0	0	200	300	0	36.0704	63.6523	-644.588	-163051	44738.2	-3448.1	269.406	1155.95	0	0	0	0	0	0	0	603	903	0
795	3	0	0	0	0	0	0	200	300	0	36.3756	64.5679	-642.452	-162685	45043.4	-3493.88	270.112	1156.23	0	0	0	0	0	0	0	603	903	0
795	4	0	0	0	0	0	0	200	300	0	36.3756	63.042	-637.874	-161861	44921.3	-3493.88	270.424	1156.75	0	0	0	0	0	0	0	603	903	0
795	5	0	0	0	0	0	0	200	300	0	34.2393	63.1946	-635.738	-160854	44555.1	-3585.43	270.084	1156.02	0	0	0	0	0	0	0	603	903	0
795	6	0	0	0	0	0	0	200	300	0	35.1549	61.2109	-629.94	-159755	44005.8	-3219.22	269.857	1156.6	0	0	0	0	0	0	0	603	903	0
795	7	0	0	0	0	0	0	200	300	0	34.8497	61.3635	-629.024	-160030	43883.7	-3402.33	269.765	1157.41	0	0	0	0	0	0	0	603	903	0
795	8	0	0	0	0	0	0	200	300	0	33.7816	59.5325	-626.583	-159023	44188.9	-3402.33	270.524	1156.79	0	0	0	0	0	0	0	603	903	0
795	9	0	0	0	0	0	0	200	300	0	35.9178	59.2273	-622.92	-158199	43883.7	-3127.67	270.448	1156.96	0	0	0	0	0	0	0	603	903	0
796	0	0	0	0	0	0	0	200	300	0	32.8661	58.6169	-619.869	-157650	43395.5	-3356.55	270.008	1157.33	0	0	0	0	0	0	0	603	903	0
796	1	0	0	0	0	0	0	200	300	0	33.0186	58.9221	-617.427	-156276	43029.3	-3265	269.691	1156.11	0	0	0	0	0	0	0	603	903	0
796	2	0	0	0	0	0	0	200	300	0	33.4764	57.5488	-614.681	-156093	43029.3	-3493.88	270.003	1156.94	0	0	0	0	0	0	0	603	903	0
796	3	0	0	0	0	0	0	200	300	0	32.5609	57.7014	-610.713	-155727	43029.3	-3173.45	270.457	1157.99	0	0	0	0	0	0	0	603	903	0
796	4	0	0	0	0	0	0	200	300	0	31.9505	57.3962	-607.357	-155361	42968.2	-3265	270.746	1158.8	0	0	0	0	0	0	0	603	903	0
796	5	0	0	0	0	0	0	200	300	0	31.9505	56.0229	-603.694	-153988	42663	-3265	270.67	1158.08	0	0	0	0	0	0	0	603	903	0
796	6	0	0	0	0	0	0	200	300	0	31.9505	53.7341	-601.253	-153621	42907.2	-3402.33	271.363	1158.5	0	0	0	0	0	0	0	603	903	0
796	7	0	0	0	0	0	0	200	300	0	33.4764	54.8022	-598.201	-152431	41930.6	-3356.55	270.095	1157.82	0	0	0	0	0	0	0	603	903	0
796	8	0	0	0	0	0	0	200	300	0	31.9505	53.2764	-594.844	-152065	41320.3	-3585.43	269.464	1158.64	0	0	0	0	0	0	0	603	903	0
796	9	0	0	0	0	0	0	200	300	0	31.9505	53.2764	-592.708	-151607	41930.6	-3310.78	270.744	1158.79	0	0	0	0	0	0	0	603	903	0
797	0	0	0	0	0	0	0	200	300	0	30.4247	50.835	-589.351	-150875	41381.3	-3173.45	270.215	1159	0	0	0	0	0	0	0	603	903	0
797	1	0	0	0	0	0	0	200	300	0	30.8824	51.9031	-585.689	-149501	41015.1	-3127.67	270.029	1158.26	0	0	0	0	0	0	0	603	903	0
797	2	0	0	0	0	0	0	200	300	0	30.5772	50.6824	-581.722	-148586	41015.1	-3265	270.506	1158.42	0	0	0	0	0	0	0	603	903	0
797	3	0	0	0	0	0	0	200	300	0	29.6617	50.5298	-579.586	-148403	41137.2	-2944.56	270.977	1159.05	0	0	0	0	0	0	0	603	903	0
797	4	0	0	0	0	0	0	200	300	0	30.2721	50.9875	-576.839	-147213	40587.8	-3265	270.363	1158.21	0	0	0	0	0	0	0	603	903	0
797	5	0	0	0	0	0	0	200	300	0	30.1195	49.3091	-574.092	-146846	40648.9	-3219.22	270.806	1158.79	0	0	0	0	0	0	0	603	903	0
797	6	0	0	0	0	0	0	200	300	0	28.5936	48.5461	-569.515	-145839	39916.5	-2898.79	270.089	1159.08	0	0	0	0	0	0	0	603	903	0
797	7	0	0	0	0	0	0	200	300	0	27.9832	48.8513	-567.684	-145015	40099.6	-3127.67	270.637	1158.45	0	0	0	0	0	0	0	603	903	0
797	8	0	0	0	0	0	0	200	300	0	28.2884	47.478	-562.496	-144558	39977.5	-2898.79	271.072	1159.99	0	0	0	0	0	0	0	603	903	0
797	9	0	0	0	0	0	0	200	300	0	27.8307	45.9521	-558.223	-144100	39611.3	-3127.67	270.96	1161.14	0	0	0	0	0	0	0	603	903	0
798	0	0	0	0	0	0	0	200	300	0	28.1358	45.9521	-558.834	-144100	39428.2	-3036.12	270.554	1160.86	0	0	0	0	0	0	0	603	903	0
798	1	0	0	0	0	0	0	200	300	0	28.2884	45.9521	-555.477	-142543	39672.3	-2990.34	271.42	1159.61	0	0	0	0	0	0	0	603	903	0
798	2	0	0	0	0	0	0	200	300	0	28.1358	45.1892	-550.899	-141903	39245.1	-3173.45	271.238	1160.58	0	0	0	0	0	0	0	603	903	0
798	3	0	0	0	0	0	0	200	300	0	27.2203	44.2737	-546.932	-141353	39000.9	-3036.12	271.309	1161.45	0	0	0	0	0	0	0	603	903	0
798	4	0	0	0	0	0	0	200	300	0	27.9832	43.3582	-545.406	-139248	38939.9	-3036.12	271.396	1158.31	0	0	0	0	0	0	0	603	903	0
798	5	0	0	0	0	0	0	200	300	0	27.2203	42.9004	-542.659	-139248	38207.5	-2761.46	270.408	1159.6	0	0	0	0	0	0	0	603	903	0
798	6	0	0	0	0	0	0	200	300	0	27.6781	41.9849	-539.302	-138790	38512.7	-2898.79	271.412	1160.35	0	0	0	0	0	0	0	603	903	0
798	7	0	0	0	0	0	0	200	300	0	26.9151	41.2219	-536.556	-138057	38390.6	-2761.46	271.55	1160.3	0	0	0	0	0	0	0	603	903	0
798	8	0	0	0	0	0	0	200	300	0	26.4574	40.7642	-533.504	-137508	37963.3	-3036.12	271.159	1160.75	0	0	0	0	0	0	0	603	903	0
798	9	0	0	0	0	0	0	200	300	0	25.2367	41.2219	-528.621	-136684	37902.3	-3036.12	271.7	1161.57	0	0	0	0	0	0	0	603	903	0
799	0	0	0	0	0	0	0	200	300	0	24.9315	40.6116	-527.4	-135769	37414	-2990.34	270.94	1160.43	0	0	0	0	0	0	0	603	903	0
799	1	0	0	0	0	0	0	200	300	0	26.9151	39.3909	-523.433	-134853	37230.9	-2715.68	271.128	1160.63	0	0	0	0	0	0	0	603	903	0
799	2	0	0	0	0	0	0	200	300	0	24.4737	39.3909	-520.687	-133388	37353	-2395.25	271.738	1159.18	0	0	0	0	0	0	0	603	903	0
799	3	0	0	0	0	0	0	200	300	0	23.4056	37.7124	-517.33	-133571	36559.5	-2441.02	270.67	1161.19	0	0	0	0	0	0	0	603	903	0
799	4	0	0	0	0	0	0	200	300	0	24.9315	37.102	-513.668	-133022	37169.9	-2761.46	272.362	1161.97	0	0	0	0	0	0	0	603	903	0
799	5	0	0	0	0	0	0	200	300	0	23.1004	37.7124	-511.531	-132290	36315.4	-2761.46	270.993	1161.61	0	0	0	0	0	0	0	603	903	0
799	6	0	0	0	0	0	0	200	300	0	22.6427	34.6606	-508.785	-130916	36193.3	-2669.91	271.137	1160.31	0	0	0	0	0	0	0	603	903	0
799	7	0	0	0	0	0	0	200	300	0	23.4056	35.7288	-505.733	-130458	36254.4	-2578.35	271.687	1160.96	0	0	0	0	0	0	0	603	903	0
799	8	0	0	0	0	0	0	200	300	0	23.253	35.1184	-502.071	-130275	35766.1	-2349.47	271.237	1162.48	0	0	0	0	0	0	0	603	903	0
799	9	0	0	0	0	0	0	200	300	0	23.4056	34.3555	-498.104	-130001	36010.2	-2486.8	272.295	1163.99	0	0	0	0	0	0	0	603	903	0
800	0	0	0	0	0	0	0	200	300	0	22.3375	34.2029	-494.441	-128536	35460.9	-2532.58	271.719	1162.96	0	0	0	0	0	0	0	603	903	0
800	1	0	0	0	0	0	0	200	300	0	22.0323	32.8296	-493.831	-127803	35155.7	-2441.02	271.19	1161.8	0	0	0	0	0	0	0	603	903	0
800	2	0	0	0	0	0	0	200	300	0	20.8116	32.3718	-489.864	-126705	35338.8	-2441.02	272.14	1161.65	0	0	0	0	0	0	0	603	903	0
800	3	0	0	0	0	0	0	200	300	0	20.659	32.2192	-487.422	-126522	34789.5	-2395.25	271.374	1162.57	0	0	0	0	0	0	0	603	903	0
800	4	0	0	0	0	0	0	200	300	0	21.1168	30.8459	-484.371	-125698	35094.7	-2257.92	272.454	1162.51	0	0	0	0	0	0	0	603	903	0
800	5	0	0	0	0	0	0	200	300	0	20.3539	30.6934	-480.098	-125698	34728.5	-2349.47	272.336	1164.82	0	0	0	0	0	0	0	603	903	0
800	6	0	0	0	0	0	0	200	300	0	19.4383	30.083	-478.878	-124416	34118.1	-2257.92	271.246	1162.81	0	0	0	0	0	0	0	603	903	0
800	7	0	0	0	0	0	0	200	300	0	19.7435	29.7778	-474.605	-123500	33996.1	-2029.04	271.63	1163.22	0	0	0	0	0	0	0	603	903	0
800	8	0	0	0	0	0	0	200	300	0	19.7435	28.5571	-472.164	-122951	33751.9	-2212.14	271.484	1163.4	0	0	0	0	0	0	0	603	903	0
800	9	0	0	0	0	0	0	200	300	0	20.659	28.4045	-470.027	-122036	33629.8	-1754.38	271.549	1162.64	0	0	0	0	0	0	0	603	903	0
801	0	0	0	0	0	0	0	200	300	0	18.9806	28.4045	-464.229	-120388	33629.8	-2074.81	272.442	1162.33	0	0	0	0	0	0	0	603	903	0
801	1	0	0	0	0	0	0	200	300	0	18.6754	27.3364	-463.314	-121029	33141.6	-1983.26	271.532	1164.22	0	0	0	0	0	0	0	603	903	0
801	2	0	0	0	0	0	0	200	300	0	18.9806	26.5735	-460.872	-120113	32897.4	-2029.04	271.381	1163.62	0	0	0	0	0	0	0	603	903	0
801	3	0	0	0	0	0	0	200	300	0	18.065	26.1157	-457.82	-118923	32592.2	-1617.05	271.19	1162.76	0	0	0	0	0	0	0	603	903	0
801	4	0	0	0	0	0	0	200	300	0	17.6073	25.8105	-454.769	-118923	32897.4	-1891.71	272.339	1164.5	0	0	0	0	0	0	0	603	903	0
801	5	0	0	0	0	0	0	200	300	0	16.5392	24.895	-452.022	-118831	32470.2	-1800.16	271.833	1165.89	0	0	0	0	0	0	0	603	903	0
801	6	0	0	0	0	0	0	200	300	0	15.7762	24.7424	-450.191	-117550	32409.1	-1845.93	271.99	1164.11	0	0	0	0	0	0	0	603	903	0
801	7	0	0	0	0	0	0	200	300	0	17.7599	23.3691	-446.834	-116634	32348.1	-1891.71	272.394	1164.02	0	0	0	0	0	0	0	603	903	0
801	8	0	0	0	0	0	0	200	300	0	14.8607	23.2165	-441.646	-116176	31859.8	-1891.71	272.139	1166.05	0	0	0	0	0	0	0	603	903	0
801	9	0	0	0	0	0	0	200	300	0	15.3185	23.2165	-443.477	-115993	31432.6	-1800.16	270.878	1164.55	0	0	0	0	0	0	0	603	903	0
802	0	0	0	0	0	0	0	200	300	0	16.0814	22.9114	-438.289	-114986	31249.5	-1800.16	271.299	1165.35	0	0	0	0	0	0	0	603	903	0
802	1	0	0	0	0	0	0	200	300	0	15.471	22.1484	-435.848	-114528	31127.4	-1662.83	271.418	1165.77	0	0	0	0	0	0	0	603	903	0
802	2	0	0	0	0	0	0	200	300	0	14.4029	21.0803	-432.796	-113613	31432.6	-1479.72	272.627	1165.51	0	0	0	0	0	0	0	603	903	0
802	3	0	0	0	0	0	0	200	300	0	14.7081	20.47	-429.134	-111965	30883.3	-1479.72	271.967	1163.91	0	0	0	0	0	0	0	603	903	0
802	4	0	0	0	0	0	0	200	300	0	14.7081	19.5544	-426.998	-111965	30944.3	-1708.6	272.469	1165.21	0	0	0	0	0	0	0	603	903	0
802	5	0	0	0	0	0	0	200	300	0	13.64	19.707	-426.082	-112056	30822.2	-1800.16	272.339	1165.99	0	0	0	0	0	0	0	603	903	0
802	6	0	0	0	0	0	0	200	300	0	14.7081	19.5544	-419.673	-110958	30211.9	-1571.27	271.989	1167.39	0	0	0	0	0	0	0	603	903	0
802	7	0	0	0	0	0	0	200	300	0	13.7926	18.9441	-420.589	-110408	30395	-1479.72	272.268	1165.51	0	0	0	0	0	0	0	603	903	0
802	8	0	0	0	0	0	0	200	300	0	11.6563	16.8079	-417.537	-109859	30028.8	-1433.94	271.919	1166.11	0	0	0	0	0	0	0	603	903	0
802	9	0	0	0	0	0	0	200	300	0	11.5038	18.1811	-414.18	-108669	29906.7	-1342.39	272.207	1165.37	0	0	0	0	0	0	0	603	903	0
803	0	0	0	0	0	0	0	200	300	0	13.3348	17.4182	-410.823	-108211	29784.6	-1250.84	272.5	1166.4	0	0	0	0	0	0	0	603	903	0
803	1	0	0	0	0	0	0	200	300	0	11.8089	17.4182	-408.992	-108211	28991.2	-1479.72	270.884	1167.58	0	0	0	0	0	0	0	603	903	0
803	2	0	0	0	0	0	0	200	300	0	11.1986	16.0449	-407.466	-107021	29418.4	-1159.29	272.198	1165.65	0	0	0	0	0	0	0	603	903	0
803	3	0	0	0	0	0	0	200	300	0	11.8089	14.8242	-405.635	-106563	28991.2	-1113.51	271.471	1165.71	0	0	0	0	0	0	0	603	903	0
803	4	0	0	0	0	0	0	200	300	0	11.3512	15.282	-402.278	-106197	28869.1	-1250.84	271.764	1166.99	0	0	0	0	0	0	0	603	903	0
803	5	0	0	0	0	0	0	200	300	0	11.046	15.4346	-399.837	-105373	29113.2	-838.852	272.813	1166.54	0	0	0	0	0	0	0	603	903	0
803	6	0	0	0	0	0	0	200	300	0	11.3512	14.0613	-397.396	-104366	28625	-1113.51	272.031	1165.62	0	0	0	0	0	0	0	603	903	0
803	7	0	0	0	0	0	0	200	300	0	11.3512	14.2139	-394.344	-104824	28502.9	-793.075	272.279	1168.82	0	0	0	0	0	0	0	603	903	0
803	8	0	0	0	0	0	0	200	300	0	9.6727	12.8406	-394.039	-103908	28625	-1205.06	272.645	1166.7	0	0	0	0	0	0	0	603	903	0
803	9	0	0	0	0	0	0	200	300	0	9.6727	12.688	-389.766	-102626	28258.7	-930.405	272.502	1166.3	0	0	0	0	0	0	0	603	903	0
804	0	0	0	0	0	0	0	200	300	0	9.52011	12.3828	-389.156	-102993	28197.7	-1205.06	272.459	1167.66	0	0	0	0	0	0	0	603	903	0
804	1	0	0	0	0	0	0	200	300	0	8.90976	11.6199	-385.799	-102077	27648.4	-976.181	271.665	1167.59	0	0	0	0	0	0	0	603	903	0
804	2	0	0	0	0	0	0	200	300	0	9.97787	10.3992	-383.968	-101436	27709.4	-1113.51	272.166	1167.18	0	0	0	0	0	0	0	603	903	0
804	3	0	0	0	0	0	0	200	300	0	9.21494	10.094	-382.442	-100887	27770.5	-884.628	272.614	1166.8	0	0	0	0	0	0	0	603	903	0
804	4	0	0	0	0	0	0	200	300	0	7.68906	10.5518	-376.949	-100887	27465.3	-655.746	272.862	1170.64	0	0	0	0	0	0	0	603	903	0
804	5	0	0	0	0	0	0	200	300	0	7.38388	9.63623	-377.254	-99513.6	27282.2	-930.405	272.318	1166.78	0	0	0	0	0	0	0	603	903	0
804	6	0	0	0	0	0	0	200	300	0	9.82529	8.56811	-374.202	-99239	26977	-793.075	272.092	1168.2	0	0	0	0	0	0	0	603	903	0
804	7	0	0	0	0	0	0	200	300	0	7.07871	9.02588	-372.676	-98323.4	27038	-838.852	272.551	1166.83	0	0	0	0	0	0	0	603	903	0
804	8	0	0	0	0	0	0	200	300	0	7.23129	8.26294	-369.93	-98781.2	26854.9	-838.852	272.595	1170.03	0	0	0	0	0	0	0	603	903	0
804	9	0	0	0	0	0	0	200	300	0	7.23129	7.65259	-369.319	-98323.4	26549.8	-747.299	271.888	1169.23	0	0	0	0	0	0	0	603	903	0
805	0	0	0	0	0	0	0	200	300	0	5.858	7.04223	-365.352	-97865.7	26610.8	-335.312	272.836	1170.87	0	0	0	0	0	0	0	603	903	0
805	1	0	0	0	0	0	0	200	300	0	5.70541	7.34741	-365.657	-97133.3	26488.7	-747.299	272.441	1168.64	0	0	0	0	0	0	0	603	903	0
805	2	0	0	0	0	0	0	200	300	0	5.858	6.12671	-361.69	-96400.9	25756.3	-701.523	271.211	1169.53	0	0	0	0	0	0	0	603	903	0
805	3	0	0	0	0	0	0	200	300	0	6.31577	7.04223	-361.69	-96400.9	26183.6	-747.299	272.392	1169.53	0	0	0	0	0	0	0	603	903	0
805	4	0	0	0	0	0	0	200	300	0	7.07871	4.60083	-359.249	-96034.6	25390.1	-335.312	270.676	1170.32	0	0	0	0	0	0	0	603	903	0
805	5	0	0	0	0	0	0	200	300	0	5.24765	5.05859	-357.418	-95027.5	26183.6	-335.312	273.258	1168.87	0	0	0	0	0	0	0	603	903	0
805	6	0	0	0	0	0	0	200	300	0	5.40024	4.75342	-355.281	-95302.2	25756.3	-335.312	272.496	1171.24	0	0	0	0	0	0	0	603	903	0
805	7	0	0	0	0	0	0	200	300	0	3.72177	3.83789	-352.84	-94478.2	25756.3	-335.312	272.997	1170.77	0	0	0	0	0	0	0	603	903	0
805	8	0	0	0	0	0	0	200	300	0	5.55283	3.53271	-352.23	-93562.7	25817.3	-243.759	273.297	1168.63	0	0	0	0	0	0	0	603	903	0
805	9	0	0	0	0	0	0	200	300	0	4.94247	3.07495	-351.009	-93562.7	25207	-381.088	271.813	1169.55	0	0	0	0	0	0	0	603	903	0
806	0	0	0	0	0	0	0	200	300	0	3.4166	1.54907	-347.042	-92006.3	25268	-106.43	272.81	1168.12	0	0	0	0	0	0	0	603	903	0
806	1	0	0	0	0	0	0	200	300	0	2.65366	2.61718	-347.042	-92281	25939.4	-289.535	274.744	1168.91	0	0	0	0	0	0	0	603	903	0
806	2	0	0	0	0	0	0	200	300	0	3.56918	2.31201	-344.295	-91914.8	25084.9	-381.088	272.859	1169.97	0	0	0	0	0	0	0	603	903	0
806	3	0	0	0	0	0	0	200	300	0	3.11142	2.15942	-343.074	-92189.4	25084.9	-426.864	273.118	1171.72	0	0	0	0	0	0	0	603	903	0
806	4	0	0	0	0	0	0	200	300	0	3.56918	1.70166	-342.464	-91914.8	24718.7	-426.864	272.179	1171.39	0	0	0	0	0	0	0	603	903	0
806	5	0	0	0	0	0	0	200	300	0	4.17954	0.633542	-340.023	-90999.2	24901.8	-197.982	273.236	1170.63	0	0	0	0	0	0	0	603	903	0
806	6	0	0	0	0	0	0	200	300	0	2.19589	0.633542	-339.717	-90358.4	24962.8	305.558	273.481	1168.98	0	0	0	0	0	0	0	603	903	0
806	7	0	0	0	0	0	0	200	300	0	0.670014	0.328366	-337.276	-90449.9	24596.6	-14.877	272.927	1171.18	0	0	0	0	0	0	0	603	903	0
806	8	0	0	0	0	0	0	200	300	0	1.12778	-0.281985	-333.919	-89717.5	24230.4	-197.982	272.564	1171.68	0	0	0	0	0	0	0	603	903	0
806	9	0	0	0	0	0	0	200	300	0	1.28037	-0.129397	-331.783	-89259.7	24230.4	-60.6534	273.031	1172.03	0	0	0	0	0	0	0	603	903	0
807	0	0	0	0	0	0	0	200	300	0	2.34848	-1.19751	-332.088	-89259.7	24108.4	76.6757	272.596	1171.78	0	0	0	0	0	0	0	603	903	0
807	1	0	0	0	0	0	0	200	300	0	0.364838	-1.50269	-331.478	-88985.1	24352.5	259.781	273.466	1171.45	0	0	0	0	0	0	0	603	903	0
807	2	0	0	0	0	0	0	200	300	0	1.12778	-2.11304	-329.647	-87886.5	24108.4	351.334	273.134	1169.61	0	0	0	0	0	0	0	603	903	0
807	3	0	0	0	0	0	0	200	300	0	0.670014	-1.80786	-327.815	-88344.2	24047.3	122.452	273.356	1172.49	0	0	0	0	0	0	0	603	903	0
807	4	0	0	0	0	0	0	200	300	0	-0.855865	-1.50269	-325.984	-87886.5	23742.1	122.452	272.832	1172.6	0	0	0	0	0	0	0	603	903	0
807	5	0	0	0	0	0	0	200	300	0	-1.16104	-2.11304	-324.153	-87337.1	23986.3	76.6757	273.997	1172.43	0	0	0	0	0	0	0	603	903	0
807	6	0	0	0	0	0	0	200	300	0	2.65366	-2.5708	-320.796	-87245.6	23864.2	397.11	274.391	1174.97	0	0	0	0	0	0	0	603	903	0
807	7	0	0	0	0	0	0	200	300	0	-1.16104	-3.33374	-323.238	-87154	23253.9	442.887	271.94	1172.63	0	0	0	0	0	0	0	603	903	0
807	8	0	0	0	0	0	0	200	300	0	-1.46622	-3.79151	-320.186	-86055.4	23803.2	625.992	274.342	1171.77	0	0	0	0	0	0	0	603	903	0
807	9	0	0	0	0	0	0	200	300	0	-0.855865	-3.94409	-319.576	-86147	23314.9	534.44	272.956	1172.57	0	0	0	0	0	0	0	603	903	0
808	0	0	0	0	0	0	0	200	300	0	-0.855865	-4.24927	-318.05	-86147	23131.8	671.769	272.73	1173.86	0	0	0	0	0	0	0	603	903	0
808	1	0	0	0	0	0	0	200	300	0	0.0596623	-5.1648	-317.44	-85506.1	23070.8	534.44	272.678	1172.36	0	0	0	0	0	0	0	603	903	0
808	2	0	0	0	0	0	0	200	300	0	-1.46622	-5.01221	-317.134	-84315.9	22582.5	442.887	271.208	1168.87	0	0	0	0	0	0	0	603	903	0
808	3	0	0	0	0	0	0	200	300	0	-1.31363	-5.31739	-315.608	-85231.4	23314.9	717.545	273.873	1173.05	0	0	0	0	0	0	0	603	903	0
808	4	0	0	0	0	0	0	200	300	0	-2.68692	-5.46997	-314.083	-85048.3	22948.7	488.663	273.066	1173.78	0	0	0	0	0	0	0	603	903	0
808	5	0	0	0	0	0	0	200	300	0	-2.38174	-6.08033	-311.946	-84499	22643.5	442.887	272.588	1173.88	0	0	0	0	0	0	0	603	903	0
808	6	0	0	0	0	0	0	200	300	0	-2.22916	-6.99585	-312.252	-84132.8	23131.8	717.545	274.081	1172.44	0	0	0	0	0	0	0	603	903	0
808	7	0	0	0	0	0	0	200	300	0	-3.75503	-6.69068	-311.641	-84407.4	22033.2	763.321	270.7	1173.85	0	0	0	0	0	0	0	603	903	0
808	8	0	0	0	0	0	0	200	300	0	-4.2128	-6.69068	-307.979	-83766.6	22826.6	900.651	274.117	1174.99	0	0	0	0	0	0	0	603	903	0
808	9	0	0	0	0	0	0	200	300	0	-1.00845	-7.30103	-308.895	-83491.9	22460.4	763.321	272.712	1173.29	0	0	0	0	0	0	0	603	903	0
809	0	0	0	0	0	0	0	200	300	0	-4.36539	-7.6062	-306.758	-83400.3	22521.4	580.216	273.418	1174.88	0	0	0	0	0	0	0	603	903	0
809	1	0	0	0	0	0	0	200	300	0	-4.82315	-7.30103	-305.232	-82759.5	22643.5	488.663	274.185	1174.14	0	0	0	0	0	0	0	603	903	0
809	2	0	0	0	0	0	0	200	300	0	-4.06021	-8.06397	-305.843	-82484.8	21972.1	763.321	271.841	1172.7	0	0	0	0	0	0	0	603	903	0
809	3	0	0	0	0	0	0	200	300	0	-4.2128	-8.52173	-305.232	-82667.9	22399.4	854.874	273.385	1173.84	0	0	0	0	0	0	0	603	903	0
809	4	0	0	0	0	0	0	200	300	0	-5.12833	-9.43726	-304.317	-82484.8	22155.2	1129.53	272.803	1174.05	0	0	0	0	0	0	0	603	903	0
809	5	0	0	0	0	0	0	200	300	0	-4.36539	-10.658	-304.012	-82118.6	22338.3	854.874	273.479	1173.12	0	0	0	0	0	0	0	603	903	0
809	6	0	0	0	0	0	0	200	300	0	-4.82315	-9.58985	-301.265	-82301.7	22277.3	671.769	273.946	1176.19	0	0	0	0	0	0	0	603	903	0
809	7	0	0	0	0	0	0	200	300	0	-5.12833	-9.89502	-301.265	-82118.6	22216.3	900.651	273.743	1175.58	0	0	0	0	0	0	0	603	903	0
809	8	0	0	0	0	0	0	200	300	0	-4.82315	-10.658	-300.35	-81477.7	22338.3	1083.76	274.374	1174.28	0	0	0	0	0	0	0	603	903	0
809	9	0	0	0	0	0	0	200	300	0	-5.4335	-11.2683	-300.044	-81843.9	21972.1	1175.31	273.23	1175.77	0	0	0	0	0	0	0	603	903	0
810	0	0	0	0	0	0	0	200	300	0	-6.50162	-11.1157	-299.434	-81660.9	22155.2	1083.76	273.99	1175.72	0	0	0	0	0	0	0	603	903	0
810	1	0	0	0	0	0	0	200	300	0	-6.80679	-11.5735	-297.908	-81111.5	22399.4	946.427	275.189	1175.27	0	0	0	0	0	0	0	603	903	0
810	2	0	0	0	0	0	0	200	300	0	-5.28091	-11.5735	-297.908	-80836.9	21850.1	854.874	273.345	1174.35	0	0	0	0	0	0	0	603	903	0
810	3	0	0	0	0	0	0	200	300	0	-7.72232	-12.1838	-296.993	-80745.3	21850.1	946.427	273.571	1174.88	0	0	0	0	0	0	0	603	903	0
810	4	0	0	0	0	0	0	200	300	0	-6.95938	-12.3364	-296.993	-81660.9	21850.1	1175.31	273.571	1177.96	0	0	0	0	0	0	0	603	903	0
810	5	0	0	0	0	0	0	200	300	0	-5.58609	-12.6416	-294.857	-80836.9	21728	1358.41	273.69	1177.16	0	0	0	0	0	0	0	603	903	0
810	6	0	0	0	0	0	0	200	300	0	-6.50162	-12.9468	-295.772	-80928.4	22094.2	1083.76	274.7	1176.62	0	0	0	0	0	0	0	603	903	0
810	7	0	0	0	0	0	0	200	300	0	-7.87491	-13.4045	-293.941	-80928.4	21911.1	1037.98	274.542	1178.32	0	0	0	0	0	0	0	603	903	0
810	8	0	0	0	0	0	0	200	300	0	-7.56973	-13.7097	-294.857	-80287.6	22216.3	1221.09	275.346	1175.29	0	0	0	0	0	0	0	603	903	0
810	9	0	0	0	0	0	0	200	300	0	-5.73868	-13.5571	-294.246	-79829.8	21728	1037.98	273.843	1174.3	0	0	0	0	0	0	0	603	903	0
811	0	0	0	0	0	0	0	200	300	0	-8.0275	-13.8623	-295.162	-79921.4	21972.1	946.427	274.441	1173.77	0	0	0	0	0	0	0	603	903	0
811	1	0	0	0	0	0	0	200	300	0	-8.33267	-14.6252	-293.025	-80287.6	21667	1221.09	273.942	1177	0	0	0	0	0	0	0	603	903	0
811	2	0	0	0	0	0	0	200	300	0	-7.41714	-14.4727	-293.331	-80104.4	21667	1449.97	273.865	1176.09	0	0	0	0	0	0	0	603	903	0
811	3	0	0	0	0	0	0	200	300	0	-8.63785	-15.3882	-292.11	-80104.4	21911.1	1083.76	275.01	1177.23	0	0	0	0	0	0	0	603	903	0
811	4	0	0	0	0	0	0	200	300	0	-8.94302	-15.3882	-290.889	-79829.8	21667	1083.76	274.485	1177.43	0	0	0	0	0	0	0	603	903	0
811	5	0	0	0	0	0	0	200	300	0	-7.72232	-15.846	-292.72	-78639.6	21850.1	1312.64	274.645	1171.65	0	0	0	0	0	0	0	603	903	0
811	6	0	0	0	0	0	0	200	300	0	-7.72232	-15.3882	-292.11	-79097.4	21422.8	1037.98	273.338	1173.78	0	0	0	0	0	0	0	603	903	0
811	7	0	0	0	0	0	0	200	300	0	-9.40079	-16.7615	-290.584	-80196	21483.8	1266.86	273.933	1178.98	0	0	0	0	0	0	0	603	903	0
811	8	0	0	0	0	0	0	200	300	0	-9.40079	-16.6089	-290.584	-79372	22033.2	1449.97	275.824	1176.15	0	0	0	0	0	0	0	603	903	0
811	9	0	0	0	0	0	0	200	300	0	-7.72232	-16.7615	-289.974	-79555.2	21850.1	1358.41	275.352	1177.35	0	0	0	0	0	0	0	603	903	0
812	0	0	0	0	0	0	0	200	300	0	-8.48526	-17.2192	-287.532	-79372	21850.1	1587.3	275.992	1179.05	0	0	0	0	0	0	0	603	903	0
812	1	0	0	0	0	0	0	200	300	0	-9.85855	-17.9822	-290.889	-79738.2	21850.1	1266.86	275.115	1177.12	0	0	0	0	0	0	0	603	903	0
812	2	0	0	0	0	0	0	200	300	0	-8.63785	-18.8977	-289.974	-79829.8	21483.8	1312.64	274.089	1178.3	0	0	0	0	0	0	0	603	903	0
812	3	0	0	0	0	0	0	200	300	0	-9.70596	-18.5925	-291.5	-79188.9	21972.1	1266.86	275.376	1174.66	0	0	0	0	0	0	0	603	903	0
812	4	0	0	0	0	0	0	200	300	0	-10.3163	-19.2029	-289.363	-78365	21972.1	1312.64	275.933	1173.82	0	0	0	0	0	0	0	603	903	0
812	5	0	0	0	0	0	0	200	300	0	-10.7741	-18.8977	-289.058	-78548	21850.1	1495.74	275.591	1174.74	0	0	0	0	0	0	0	603	903	0
812	6	0	0	0	0	0	0	200	300	0	-9.70596	-19.0503	-289.363	-79097.4	21483.8	1358.41	274.245	1176.35	0	0	0	0	0	0	0	603	903	0
812	7	0	0	0	0	0	0	200	300	0	-9.70596	-19.6606	-288.448	-79555.2	21361.8	1358.41	274.058	1178.8	0	0	0	0	0	0	0	603	903	0
812	8	0	0	0	0	0	0	200	300	0	-10.4689	-20.5762	-288.753	-79921.4	21728	1266.86	275.248	1179.78	0	0	0	0	0	0	0	603	903	0
812	9	0	0	0	0	0	0	200	300	0	-9.70596	-20.8814	-290.279	-79463.6	21789	1587.3	275.062	1176.75	0	0	0	0	0	0	0	603	903	0
813	0	0	0	0	0	0	0	200	300	0	-10.6215	-21.3391	-289.669	-79188.9	21667	1266.86	274.799	1176.38	0	0	0	0	0	0	0	603	903	0
813	1	0	0	0	0	0	0	200	300	0	-10.9267	-21.7969	-289.363	-78365	21911.1	1175.31	275.722	1173.82	0	0	0	0	0	0	0	603	903	0
813	2	0	0	0	0	0	0	200	300	0	-11.0793	-21.6443	-289.058	-79097.4	21605.9	1266.86	274.746	1176.64	0	0	0	0	0	0	0	603	903	0
813	3	0	0	0	0	0	0	200	300	0	-8.33267	-22.5598	-289.058	-79555.2	21483.8	1541.52	274.324	1178.22	0	0	0	0	0	0	0	603	903	0
813	4	0	0	0	0	0	0	200	300	0	-11.537	-22.5598	-289.363	-79097.4	21850.1	1221.09	275.511	1176.35	0	0	0	0	0	0	0	603	903	0
813	5	0	0	0	0	0	0	200	300	0	-12.7577	-23.0176	-288.143	-79555.2	21361.8	1175.31	274.136	1179.1	0	0	0	0	0	0	0	603	903	0
813	6	0	0	0	0	0	0	200	300	0	-11.3844	-23.1702	-288.448	-79372	22338.3	1175.31	277.443	1178.17	0	0	0	0	0	0	0	603	903	0
813	7	0	0	0	0	0	0	200	300	0	-10.7741	-23.6279	-289.363	-79555.2	21605.9	1404.19	274.667	1177.93	0	0	0	0	0	0	0	603	903	0
813	8	0	0	0	0	0	0	200	300	0	-11.9948	-23.7805	-289.058	-79738.2	21544.9	1266.86	274.535	1178.86	0	0	0	0	0	0	0	603	903	0
813	9	0	0	0	0	0	0	200	300	0	-11.2318	-24.5435	-288.448	-79738.2	21972.1	1541.52	276.174	1179.44	0	0	0	0	0	0	0	603	903	0
814	0	0	0	0	0	0	0	200	300	0	-11.6896	-26.5271	-289.363	-80104.4	21850.1	1541.52	275.511	1179.83	0	0	0	0	0	0	0	603	903	0
814	1	0	0	0	0	0	0	200	300	0	-12.1474	-25.1538	-288.753	-79921.4	22094.2	1449.97	276.516	1179.78	0	0	0	0	0	0	0	603	903	0
814	2	0	0	0	0	0	0	200	300	0	-12.1474	-25.1538	-288.753	-79005.8	21850.1	1221.09	275.67	1176.61	0	0	0	0	0	0	0	603	903	0
814	3	0	0	0	0	0	0	200	300	0	-11.537	-26.3745	-287.837	-80196	21911.1	1312.64	276.123	1181.62	0	0	0	0	0	0	0	603	903	0
814	4	0	0	0	0	0	0	200	300	0	-12.3	-27.1375	-288.448	-80012.9	21483.8	1404.19	274.481	1180.39	0	0	0	0	0	0	0	603	903	0
814	5	0	0	0	0	0	0	200	300	0	-13.2155	-27.29	-289.669	-79555.2	21850.1	1358.41	275.431	1177.64	0	0	0	0	0	0	0	603	903	0
814	6	0	0	0	0	0	0	200	300	0	-10.9267	-28.5107	-288.448	-79463.6	21972.1	1541.52	276.174	1178.49	0	0	0	0	0	0	0	603	903	0
814	7	0	0	0	0	0	0	200	300	0	-13.5207	-27.9004	-288.753	-80012.9	22399.4	1404.19	277.573	1180.1	0	0	0	0	0	0	0	603	903	0
814	8	0	0	0	0	0	0	200	300	0	-13.6732	-28.6633	-288.448	-79188.9	21544.9	1266.86	274.692	1177.53	0	0	0	0	0	0	0	603	903	0
814	9	0	0	0	0	0	0	200	300	0	-12.9103	-27.7478	-288.448	-79555.2	21972.1	1266.86	276.174	1178.8	0	0	0	0	0	0	0	603	903	0
815	0	0	0	0	0	0	0	200	300	0	-13.2155	-28.8159	-288.143	-80287.6	21850.1	1495.74	275.831	1181.64	0	0	0	0	0	0	0	603	903	0
815	1	0	0	0	0	0	0	200	300	0	-13.9784	-29.7314	-288.143	-80196	21972.1	1404.19	276.254	1181.32	0	0	0	0	0	0	0	603	903	0
815	2	0	0	0	0	0	0	200	300	0	-13.5207	-30.3418	-287.837	-78822.7	22216.3	1404.19	277.183	1176.84	0	0	0	0	0	0	0	603	903	0
815	3	0	0	0	0	0	0	200	300	0	-13.8258	-30.0366	-288.448	-80104.4	21911.1	1678.85	275.962	1180.71	0	0	0	0	0	0	0	603	903	0
815	4	0	0	0	0	0	0	200	300	0	-12.3	-31.5625	-288.448	-80104.4	22277.3	1449.97	277.232	1180.71	0	0	0	0	0	0	0	603	903	0
815	5	0	0	0	0	0	0	200	300	0	-13.0629	-30.7996	-289.363	-78548	21972.1	1404.19	275.933	1174.45	0	0	0	0	0	0	0	603	903	0
815	6	0	0	0	0	0	0	200	300	0	-14.2836	-32.0203	-288.448	-80012.9	21972.1	1495.74	276.174	1180.39	0	0	0	0	0	0	0	603	903	0
815	7	0	0	0	0	0	0	200	300	0	-15.6569	-32.3254	-287.227	-80104.4	22399.4	1587.3	277.985	1181.89	0	0	0	0	0	0	0	603	903	0
815	8	0	0	0	0	0	0	200	300	0	-14.4362	-32.1729	-287.837	-79829.8	22094.2	1541.52	276.759	1180.34	0	0	0	0	0	0	0	603	903	0
815	9	0	0	0	0	0	0	200	300	0	-14.894	-32.478	-286.312	-79829.8	22216.3	1449.97	277.595	1181.82	0	0	0	0	0	0	0	603	903	0
816	0	0	0	0	0	0	0	200	300	0	-15.8095	-32.6306	-286.617	-80104.4	22094.2	1587.3	277.086	1182.48	0	0	0	0	0	0	0	603	903	0
816	1	0	0	0	0	0	0	200	300	0	-15.8095	-34.0039	-287.532	-79646.7	21605.9	1541.52	275.143	1180	0	0	0	0	0	0	0	603	903	0
816	2	0	0	0	0	0	0	200	300	0	-15.1991	-34.1565	-287.532	-79555.2	22338.3	1724.63	277.69	1179.68	0	0	0	0	0	0	0	603	903	0
816	3	0	0	0	0	0	0	200	300	0	-17.1828	-34.3091	-286.006	-79463.6	22216.3	1724.63	277.678	1180.84	0	0	0	0	0	0	0	603	903	0
816	4	0	0	0	0	0	0	200	300	0	-16.725	-34.7668	-286.006	-79646.7	22094.2	1541.52	277.251	1181.48	0	0	0	0	0	0	0	603	903	0
816	5	0	0	0	0	0	0	200	300	0	-15.8095	-35.072	-284.175	-79372	22399.4	1358.41	278.822	1182.31	0	0	0	0	0	0	0	603	903	0
816	6	0	0	0	0	0	0	200	300	0	-17.3354	-35.2246	-286.006	-79829.8	21789	1633.07	276.184	1182.12	0	0	0	0	0	0	0	603	903	0
816	7	0	0	0	0	0	0	200	300	0	-17.7931	-36.4453	-286.006	-79738.2	22277.3	1587.3	277.891	1181.8	0	0	0	0	0	0	0	603	903	0
816	8	0	0	0	0	0	0	200	300	0	-16.725	-36.9031	-284.786	-78548	22460.4	1953.51	278.868	1178.81	0	0	0	0	0	0	0	603	903	0
816	9	0	0	0	0	0	0	200	300	0	-17.0302	-37.5134	-283.87	-79829.8	22155.2	1449.97	278.047	1184.22	0	0	0	0	0	0	0	603	903	0
817	0	0	0	0	0	0	0	200	300	0	-16.8776	-37.5134	-284.175	-79738.2	22216.3	1724.63	278.178	1183.6	0	0	0	0	0	0	0	603	903	0
817	1	0	0	0	0	0	0	200	300	0	-17.0302	-37.666	-284.481	-79555.2	21911.1	1587.3	277.021	1182.65	0	0	0	0	0	0	0	603	903	0
817	2	0	0	0	0	0	0	200	300	0	-17.3354	-38.5815	-284.786	-79188.9	21972.1	1861.95	277.153	1181.07	0	0	0	0	0	0	0	603	903	0
817	3	0	0	0	0	0	0	200	300	0	-18.5561	-38.5815	-284.786	-79921.4	22399.4	1724.63	278.653	1183.64	0	0	0	0	0	0	0	603	903	0
817	4	0	0	0	0	0	0	200	300	0	-18.8612	-39.0393	-283.87	-79372	21911.1	1633.07	277.187	1182.61	0	0	0	0	0	0	0	603	903	0
817	5	0	0	0	0	0	0	200	300	0	-18.0983	-40.1074	-282.649	-79372	22582.5	1816.18	279.896	1183.81	0	0	0	0	0	0	0	603	903	0
817	6	0	0	0	0	0	0	200	300	0	-18.4035	-40.26	-282.649	-79372	22155.2	1587.3	278.384	1183.81	0	0	0	0	0	0	0	603	903	0
817	7	0	0	0	0	0	0	200	300	0	-18.8612	-40.4126	-283.87	-78456.5	21972.1	1678.85	277.402	1179.38	0	0	0	0	0	0	0	603	903	0
817	8	0	0	0	0	0	0	200	300	0	-17.6405	-42.7014	-281.429	-78731.2	22094.2	1495.74	278.507	1182.76	0	0	0	0	0	0	0	603	903	0
817	9	0	0	0	0	0	0	200	300	0	-17.9457	-41.9385	-282.649	-79463.6	21789	1999.28	277.089	1184.14	0	0	0	0	0	0	0	603	903	0
818	0	0	0	0	0	0	0	200	300	0	-19.0138	-42.0911	-278.072	-79280.5	22155.2	1953.51	279.674	1188.11	0	0	0	0	0	0	0	603	903	0
818	1	0	0	0	0	0	0	200	300	0	-19.6242	-42.0911	-279.903	-78548	22094.2	1495.74	278.935	1183.63	0	0	0	0	0	0	0	603	903	0
818	2	0	0	0	0	0	0	200	300	0	-17.0302	-43.1592	-281.734	-78548	21972.1	1770.4	277.989	1181.8	0	0	0	0	0	0	0	603	903	0
818	3	0	0	0	0	0	0	200	300	0	-19.6242	-43.9221	-280.208	-78822.7	22216.3	1770.4	279.285	1184.3	0	0	0	0	0	0	0	603	903	0
818	4	0	0	0	0	0	0	200	300	0	-20.5397	-44.2273	-280.208	-78822.7	22033.2	1953.51	278.631	1184.3	0	0	0	0	0	0	0	603	903	0
818	5	0	0	0	0	0	0	200	300	0	-19.6242	-44.0747	-278.682	-77266.3	22399.4	1861.95	280.376	1180.26	0	0	0	0	0	0	0	603	903	0
818	6	0	0	0	0	0	0	200	300	0	-20.2345	-44.6851	-277.461	-78822.7	21972.1	1770.4	279.19	1187.09	0	0	0	0	0	0	0	603	903	0
818	7	0	0	0	0	0	0	200	300	0	-20.6923	-45.9058	-278.072	-78365	22094.2	1770.4	279.455	1184.82	0	0	0	0	0	0	0	603	903	0
818	8	0	0	0	0	0	0	200	300	0	-21.1501	-46.9739	-276.851	-77815.6	22155.2	1816.18	280.026	1184.07	0	0	0	0	0	0	0	603	903	0
818	9	0	0	0	0	0	0	200	300	0	-20.2345	-46.6687	-278.377	-77815.6	21911.1	1907.73	278.71	1182.53	0	0	0	0	0	0	0	603	903	0
819	0	0	0	0	0	0	0	200	300	0	-20.9975	-48.6523	-277.156	-78273.4	22338.3	1953.51	280.598	1185.42	0	0	0	0	0	0	0	603	903	0
819	1	0	0	0	0	0	0	200	300	0	-21.7604	-47.5842	-275.325	-77907.2	22094.2	1953.51	280.248	1185.96	0	0	0	0	0	0	0	603	903	0
819	2	0	0	0	0	0	0	200	300	0	-20.9975	-47.7368	-275.02	-77541	21728	1633.07	279.005	1184.95	0	0	0	0	0	0	0	603	903	0
819	3	0	0	0	0	0	0	200	300	0	-21.1501	-49.2627	-274.41	-77998.8	22094.2	1587.3	280.515	1187.24	0	0	0	0	0	0	0	603	903	0
819	4	0	0	0	0	0	0	200	300	0	-20.0819	-50.0256	-274.715	-77632.5	21544.9	1999.28	278.426	1185.59	0	0	0	0	0	0	0	603	903	0
819	5	0	0	0	0	0	0	200	300	0	-21.6078	-50.1782	-275.325	-76991.7	21728	2182.39	278.918	1182.64	0	0	0	0	0	0	0	603	903	0
819	6	0	0	0	0	0	0	200	300	0	-22.3708	-51.3989	-271.663	-77449.4	22094.2	1999.28	281.329	1188.09	0	0	0	0	0	0	0	603	903	0
819	7	0	0	0	0	0	0	200	300	0	-23.2863	-51.0938	-271.663	-77541	21056.6	1953.51	277.51	1188.43	0	0	0	0	0	0	0	603	903	0
819	8	0	0	0	0	0	0	200	300	0	-22.3708	-52.6196	-270.748	-76442.3	21789	1907.73	280.477	1185.34	0	0	0	0	0	0	0	603	903	0
819	9	0	0	0	0	0	0	200	300	0	-22.3708	-52.3145	-269.832	-75343.7	21300.7	1953.51	278.941	1182.22	0	0	0	0	0	0	0	603	903	0
820	0	0	0	0	0	0	0	200	300	0	-23.5915	-53.0774	-270.137	-76625.5	21544.9	1999.28	279.755	1186.65	0	0	0	0	0	0	0	603	903	0
820	1	0	0	0	0	0	0	200	300	0	-23.1337	-54.4507	-268.001	-75893	21789	2045.06	281.302	1186.18	0	0	0	0	0	0	0	603	903	0
820	2	0	0	0	0	0	0	200	300	0	-23.1337	-53.3826	-266.475	-76076.1	21605.9	1953.51	281.08	1188.49	0	0	0	0	0	0	0	603	903	0
820	3	0	0	0	0	0	0	200	300	0	-23.8966	-54.6033	-267.391	-75893	21544.9	1907.73	280.575	1186.83	0	0	0	0	0	0	0	603	903	0
820	4	0	0	0	0	0	0	200	300	0	-24.507	-55.061	-262.508	-75343.7	21667	1999.28	282.538	1190.02	0	0	0	0	0	0	0	603	903	0
820	5	0	0	0	0	0	0	200	300	0	-23.5915	-55.6714	-264.949	-74885.9	21117.6	2045.06	279.704	1185.64	0	0	0	0	0	0	0	603	903	0
820	6	0	0	0	0	0	0	200	300	0	-24.507	-56.1292	-263.729	-75526.8	21483.8	2228.16	281.462	1189.38	0	0	0	0	0	0	0	603	903	0
820	7	0	0	0	0	0	0	200	300	0	-25.1173	-57.3499	-262.203	-75160.6	21483.8	2136.61	281.936	1189.65	0	0	0	0	0	0	0	603	903	0
820	8	0	0	0	0	0	0	200	300	0	-24.6596	-58.1128	-260.066	-73695.8	21300.7	2182.39	281.905	1186.37	0	0	0	0	0	0	0	603	903	0
820	9	0	0	0	0	0	0	200	300	0	-24.3544	-58.1128	-259.456	-74611.3	21422.8	2090.84	282.568	1190.57	0	0	0	0	0	0	0	603	903	0
821	0	0	0	0	0	0	0	200	300	0	-26.1855	-58.7231	-260.066	-74062	20934.5	2136.61	280.497	1187.78	0	0	0	0	0	0	0	603	903	0
821	1	0	0	0	0	0	0	200	300	0	-24.9648	-60.249	-258.541	-73604.2	21178.7	2319.72	281.916	1187.69	0	0	0	0	0	0	0	603	903	0
821	2	0	0	0	0	0	0	200	300	0	-24.6596	-60.5542	-255.794	-73512.6	21178.7	2502.82	282.796	1190.39	0	0	0	0	0	0	0	603	903	0
821	3	0	0	0	0	0	0	200	300	0	-26.6432	-60.7068	-256.71	-73604.2	20751.4	2273.94	280.836	1189.72	0	0	0	0	0	0	0	603	903	0
821	4	0	0	0	0	0	0	200	300	0	-26.7958	-62.0801	-253.658	-72688.7	20873.5	1861.95	282.29	1189.56	0	0	0	0	0	0	0	603	903	0
821	5	0	0	0	0	0	0	200	300	0	-26.6432	-61.7749	-253.658	-72414	20507.3	2090.84	280.846	1188.48	0	0	0	0	0	0	0	603	903	0
821	6	0	0	0	0	0	0	200	300	0	-26.338	-63.7585	-254.268	-72597.1	20446.2	2228.16	280.412	1188.51	0	0	0	0	0	0	0	603	903	0
821	7	0	0	0	0	0	0	200	300	0	-26.1855	-64.0637	-251.522	-72322.5	20751.4	2228.16	282.504	1190.54	0	0	0	0	0	0	0	603	903	0
821	8	0	0	0	0	0	0	200	300	0	-26.4906	-64.3689	-249.08	-71681.6	20385.2	2273.94	281.842	1190.79	0	0	0	0	0	0	0	603	903	0
821	9	0	0	0	0	0	0	200	300	0	-26.9484	-65.5896	-247.554	-70949.2	20629.4	2228.16	283.333	1189.6	0	0	0	0	0	0	0	603	903	0
822	0	0	0	0	0	0	0	200	300	0	-27.8639	-64.6741	-244.808	-69850.5	20507.3	2273.94	283.769	1188.33	0	0	0	0	0	0	0	603	903	0
822	1	0	0	0	0	0	0	200	300	0	-27.7113	-65.2844	-245.113	-69942.1	19774.9	2365.49	280.677	1188.35	0	0	0	0	0	0	0	603	903	0
822	2	0	0	0	0	0	0	200	300	0	-27.2536	-66.8103	-243.587	-69850.5	20019	2457.05	282.184	1189.76	0	0	0	0	0	0	0	603	903	0
822	3	0	0	0	0	0	0	200	300	0	-28.1691	-66.5051	-241.451	-69942.1	19774.9	2548.6	281.9	1192.67	0	0	0	0	0	0	0	603	903	0
822	4	0	0	0	0	0	0	200	300	0	-28.6269	-67.2681	-239.925	-68935	19835.9	2457.05	282.675	1190.32	0	0	0	0	0	0	0	603	903	0
822	5	0	0	0	0	0	0	200	300	0	-28.3217	-67.1155	-236.873	-68477.3	19835.9	2365.49	283.741	1192.09	0	0	0	0	0	0	0	603	903	0
822	6	0	0	0	0	0	0	200	300	0	-28.4743	-67.7258	-236.263	-68294.1	19408.7	2777.48	282.149	1192.06	0	0	0	0	0	0	0	603	903	0
822	7	0	0	0	0	0	0	200	300	0	-27.2536	-68.4888	-234.432	-68019.5	19591.8	2640.15	283.571	1193.15	0	0	0	0	0	0	0	603	903	0
822	8	0	0	0	0	0	0	200	300	0	-28.6269	-68.9465	-232.601	-66371.6	19408.7	2777.48	283.442	1188.35	0	0	0	0	0	0	0	603	903	0
822	9	0	0	0	0	0	0	200	300	0	-28.7794	-70.625	-230.464	-66829.3	18920.4	2731.7	282.097	1192.98	0	0	0	0	0	0	0	603	903	0
823	0	0	0	0	0	0	0	200	300	0	-29.8476	-71.0828	-227.718	-66554.6	18798.3	2640.15	282.551	1195.27	0	0	0	0	0	0	0	603	903	0
823	1	0	0	0	0	0	0	200	300	0	-29.3898	-69.7095	-225.887	-65272.9	18371.1	2548.6	281.329	1191.96	0	0	0	0	0	0	0	603	903	0
823	2	0	0	0	0	0	0	200	300	0	-30.3053	-71.9983	-224.361	-65089.8	18859.3	2548.6	284.058	1193.11	0	0	0	0	0	0	0	603	903	0
823	3	0	0	0	0	0	0	200	300	0	-30.9157	-71.0828	-221.309	-64357.4	18371.1	2731.7	283.011	1193.8	0	0	0	0	0	0	0	603	903	0
823	4	0	0	0	0	0	0	200	300	0	-30.3053	-71.6931	-220.088	-63533.4	18004.8	3052.14	281.807	1191.67	0	0	0	0	0	0	0	603	903	0
823	5	0	0	0	0	0	0	200	300	0	-31.0683	-72.7612	-216.121	-62709.4	18371.1	2869.03	285.004	1193.16	0	0	0	0	0	0	0	603	903	0
823	6	0	0	0	0	0	0	200	300	0	-32.4416	-72.4561	-213.069	-62617.9	17760.7	2914.81	283.356	1196.89	0	0	0	0	0	0	0	603	903	0
823	7	0	0	0	0	0	0	200	300	0	-32.5941	-73.5242	-212.154	-61610.8	17699.7	3097.92	283.428	1193.41	0	0	0	0	0	0	0	603	903	0
823	8	0	0	0	0	0	0	200	300	0	-28.7794	-74.4397	-207.881	-60695.3	17455.5	3189.47	283.969	1194.97	0	0	0	0	0	0	0	603	903	0
823	9	0	0	0	0	0	0	200	300	0	-32.8993	-73.6768	-207.881	-60878.4	17211.4	3235.24	282.794	1195.85	0	0	0	0	0	0	0	603	903	0
824	0	0	0	0	0	0	0	200	300	0	-33.0519	-73.8293	-204.219	-59962.8	17394.5	3281.02	285.176	1196.62	0	0	0	0	0	0	0	603	903	0
824	1	0	0	0	0	0	0	200	300	0	-31.9838	-73.6768	-200.252	-58131.8	16967.2	3235.24	284.729	1193.29	0	0	0	0	0	0	0	603	903	0
824	2	0	0	0	0	0	0	200	300	0	-32.5941	-75.3552	-196.285	-58314.9	16723.1	3235.24	285.198	1200.09	0	0	0	0	0	0	0	603	903	0
824	3	0	0	0	0	0	0	200	300	0	-34.12	-75.3552	-195.674	-57307.8	16845.2	3418.35	286.088	1195.87	0	0	0	0	0	0	0	603	903	0
824	4	0	0	0	0	0	0	200	300	0	-33.0519	-75.6604	-193.538	-56300.7	16051.7	3372.57	282.938	1193.9	0	0	0	0	0	0	0	603	903	0
824	5	0	0	0	0	0	0	200	300	0	-32.5941	-76.2708	-191.402	-55934.5	15685.5	3464.13	281.951	1195.24	0	0	0	0	0	0	0	603	903	0
824	6	0	0	0	0	0	0	200	300	0	-33.9674	-76.4233	-187.435	-55202.1	15807.6	3418.35	284.337	1197.51	0	0	0	0	0	0	0	603	903	0
824	7	0	0	0	0	0	0	200	300	0	-34.5778	-76.7285	-184.078	-53920.4	15319.3	3601.46	283.222	1195.92	0	0	0	0	0	0	0	603	903	0
824	8	0	0	0	0	0	0	200	300	0	-32.4416	-77.9492	-181.636	-53187.9	15441.4	3372.57	285.013	1195.83	0	0	0	0	0	0	0	603	903	0
824	9	0	0	0	0	0	0	200	300	0	-34.4252	-77.3389	-177.974	-51906.2	15075.2	3601.46	284.704	1194.65	0	0	0	0	0	0	0	603	903	0
825	0	0	0	0	0	0	0	200	300	0	-34.5778	-77.3389	-172.481	-51448.5	14831	3326.8	285.986	1201.28	0	0	0	0	0	0	0	603	903	0
825	1	0	0	0	0	0	0	200	300	0	-33.3571	-78.1018	-170.04	-50532.9	14525.8	3601.46	285.426	1200.18	0	0	0	0	0	0	0	603	903	0
825	2	0	0	0	0	0	0	200	300	0	-34.2726	-77.0337	-167.903	-50441.4	14342.7	3189.47	285.423	1203.42	0	0	0	0	0	0	0	603	903	0
825	3	0	0	0	0	0	0	200	300	0	-34.12	-77.9492	-166.072	-48793.4	14159.6	3235.24	285.262	1196.81	0	0	0	0	0	0	0	603	903	0
825	4	0	0	0	0	0	0	200	300	0	-33.3571	-78.407	-161.189	-46870.8	14159.6	3281.02	287.845	1193.78	0	0	0	0	0	0	0	603	903	0
825	5	0	0	0	0	0	0	200	300	0	-32.7467	-77.9492	-158.443	-47053.9	13549.3	3143.69	285.515	1199.98	0	0	0	0	0	0	0	603	903	0
825	6	0	0	0	0	0	0	200	300	0	-31.3734	-78.407	-155.391	-46321.5	13366.2	3281.02	286.016	1201.1	0	0	0	0	0	0	0	603	903	0
825	7	0	0	0	0	0	0	200	300	0	-31.9838	-77.644	-151.424	-45131.3	13061	3143.69	286.255	1201.05	0	0	0	0	0	0	0	603	903	0
825	8	0	0	0	0	0	0	200	300	0	-31.9838	-77.0337	-147.457	-44215.8	12816.9	2960.59	286.919	1202.86	0	0	0	0	0	0	0	603	903	0
825	9	0	0	0	0	0	0	200	300	0	-33.2045	-77.3389	-143.489	-43300.2	12694.8	3235.24	288.472	1204.77	0	0	0	0	0	0	0	603	903	0
826	0	0	0	0	0	0	0	200	300	0	-32.8993	-76.2708	-140.438	-41103	11718.2	3052.14	283.441	1195.68	0	0	0	0	0	0	0	603	903	0
826	1	0	0	0	0	0	0	200	300	0	-31.2209	-76.5759	-138.301	-40645.2	11962.4	2914.81	286.495	1196.89	0	0	0	0	0	0	0	603	903	0
826	2	0	0	0	0	0	0	200	300	0	-31.8312	-76.7285	-133.724	-40095.9	11901.3	2869.03	288.999	1202.84	0	0	0	0	0	0	0	603	903	0
826	3	0	0	0	0	0	0	200	300	0	-31.6786	-75.6604	-130.367	-38997.3	11291	2548.6	286.609	1202.14	0	0	0	0	0	0	0	603	903	0
826	4	0	0	0	0	0	0	200	300	0	-28.1691	-76.5759	-126.094	-37532.4	10985.8	2411.27	287.124	1200.65	0	0	0	0	0	0	0	603	903	0
826	5	0	0	0	0	0	0	200	300	0	-31.526	-74.7449	-122.737	-36067.6	10924.8	2457.05	289.009	1196.86	0	0	0	0	0	0	0	603	903	0
826	6	0	0	0	0	0	0	200	300	0	-30.4579	-74.7449	-119.075	-35518.3	10497.5	2640.15	288.159	1201.28	0	0	0	0	0	0	0	603	903	0
826	7	0	0	0	0	0	0	200	300	0	-28.3217	-74.4397	-115.108	-34419.6	10131.3	2502.82	288.016	1202.02	0	0	0	0	0	0	0	603	903	0
826	8	0	0	0	0	0	0	200	300	0	-29.3898	-73.9819	-110.225	-33595.7	9765.09	2228.16	288.592	1207.79	0	0	0	0	0	0	0	603	903	0
826	9	0	0	0	0	0	0	200	300	0	-29.0846	-73.6768	-107.784	-31398.4	9643.02	2319.72	289.466	1194.31	0	0	0	0	0	0	0	603	903	0
827	0	0	0	0	0	0	0	200	300	0	-27.4062	-73.8293	-102.901	-30940.6	9093.71	1953.51	288.373	1203.68	0	0	0	0	0	0	0	603	903	0
827	1	0	0	0	0	0	0	200	300	0	-26.9484	-71.8457	-101.375	-29933.6	8971.64	1861.95	288.499	1198.28	0	0	0	0	0	0	0	603	903	0
827	2	0	0	0	0	0	0	200	300	0	-26.338	-70.9302	-97.4078	-29201.1	8544.39	1633.07	287.718	1202.78	0	0	0	0	0	0	0	603	903	0
827	3	0	0	0	0	0	0	200	300	0	-24.6596	-70.1672	-92.8301	-27370.1	8178.18	1633.07	288.098	1197.84	0	0	0	0	0	0	0	603	903	0
827	4	0	0	0	0	0	0	200	300	0	-24.8122	-69.4043	-90.0835	-27187	8117.14	1449.97	290.107	1204.8	0	0	0	0	0	0	0	603	903	0
827	5	0	0	0	0	0	0	200	300	0	-23.4389	-68.3362	-83.98	-25630.6	7628.86	1312.64	290.841	1208.2	0	0	0	0	0	0	0	603	903	0
827	6	0	0	0	0	0	0	200	300	0	-23.5915	-66.6577	-81.2335	-24074.2	7628.86	1175.31	293.913	1199.36	0	0	0	0	0	0	0	603	903	0
827	7	0	0	0	0	0	0	200	300	0	-22.9811	-66.6577	-78.1817	-23616.4	6835.41	1358.41	287.43	1205.07	0	0	0	0	0	0	0	603	903	0
827	8	0	0	0	0	0	0	200	300	0	-21.913	-64.2163	-72.6885	-22243.1	6408.16	1037.98	288.159	1209.01	0	0	0	0	0	0	0	603	903	0
827	9	0	0	0	0	0	0	200	300	0	-21.4552	-62.6904	-69.3316	-20961.4	6469.2	900.651	293.308	1205.34	0	0	0	0	0	0	0	603	903	0
828	0	0	0	0	0	0	0	200	300	0	-20.3871	-62.3853	-65.0591	-19954.3	5858.84	854.874	290.054	1209.71	0	0	0	0	0	0	0	603	903	0
828	1	0	0	0	0	0	0	200	300	0	-21.3026	-60.4016	-62.0074	-19130.3	6041.95	671.769	297.439	1211.52	0	0	0	0	0	0	0	603	903	0
828	2	0	0	0	0	0	0	200	300	0	-19.4716	-58.5706	-59.566	-17573.9	5370.56	671.769	290.162	1198.03	0	0	0	0	0	0	0	603	903	0
828	3	0	0	0	0	0	0	200	300	0	-16.725	-57.8076	-54.0728	-16933.1	5187.46	305.558	295.935	1216.15	0	0	0	0	0	0	0	603	903	0
828	4	0	0	0	0	0	0	200	300	0	-17.3354	-54.1455	-53.1573	-16200.6	5126.42	259.781	296.439	1207.77	0	0	0	0	0	0	0	603	903	0
828	5	0	0	0	0	0	0	200	300	0	-17.0302	-51.3989	-48.2745	-15285.1	4638.14	214.005	296.079	1219.63	0	0	0	0	0	0	0	603	903	0
828	6	0	0	0	0	0	0	200	300	0	-14.894	-49.1101	-45.2227	-13728.7	4699.18	-197.982	303.912	1206.58	0	0	0	0	0	0	0	603	903	0
828	7	0	0	0	0	0	0	200	300	0	-13.8258	-46.5161	-43.6968	-12813.2	4332.96	-335.312	299.16	1196.23	0	0	0	0	0	0	0	603	903	0
828	8	0	0	0	0	0	0	200	300	0	-12.7577	-44.0747	-40.0347	-11897.7	3539.51	-197.982	288.411	1200.18	0	0	0	0	0	0	0	603	903	0
828	9	0	0	0	0	0	0	200	300	0	-11.0793	-40.7178	-37.2881	-10982.1	3173.3	-197.982	285.102	1197.52	0	0	0	0	0	0	0	603	903	0
829	0	0	0	0	0	0	0	200	300	0	-7.72232	-37.666	-32.7105	-10158.2	3295.37	-381.088	300.743	1213.55	0	0	0	0	0	0	0	603	903	0
829	1	0	0	0	0	0	0	200	300	0	-9.85855	-34.4617	-29.0484	-8510.21	2685.02	-518.417	292.433	1195.97	0	0	0	0	0	0	0	603	903	0
829	2	0	0	0	0	0	0	200	300	0	-8.94302	-31.4099	-28.1329	-8144	2868.12	-564.193	301.949	1192.48	0	0	0	0	0	0	0	603	903	0
829	3	0	0	0	0	0	0	200	300	0	-7.72232	-28.3582	-23.8604	-6679.16	2379.84	-564.193	299.74	1182.93	0	0	0	0	0	0	0	603	903	0
829	4	0	0	0	0	0	0	200	300	0	-6.95938	-24.8486	-21.1138	-6587.6	2135.7	-747.299	301.152	1215	0	0	0	0	0	0	0	603	903	0
829	5	0	0	0	0	0	0	200	300	0	-6.04385	-22.4072	-18.9776	-5946.73	1830.52	-426.864	296.457	1216.36	0	0	0	0	0	0	0	603	903	0
829	6	0	0	0	0	0	0	200	300	0	-4.06021	-19.5081	-15.9258	-4848.1	2013.63	-426.864	326.438	1207.42	0	0	0	0	0	0	0	603	903	0
829	7	0	0	0	0	0	0	200	300	0	-3.90762	-16.7615	-13.4844	-4481.89	1647.42	-518.417	322.172	1235.38	0	0	0	0	0	0	0	603	903	0
829	8	0	0	0	0	0	0	200	300	0	-4.2128	-13.5571	-12.8741	-3474.81	1281.21	-335.312	299.518	1172.91	0	0	0	0	0	0	0	603	903	0
829	9	0	0	0	0	0	0	200	300	0	0	0	0	0	0	0	200	903	0	0	0	0	0	0	0	603	903	0
830	0	0	0	0	0	0	0	200	300	0	0	0	0	0	0	0	200	903	0	0	0	0	0	0	0	603	903	0
830	1	0	0	0	0	0	0	200	300	0	0	0	0	0	0	0	200	903	0	0	0	0	0	0	0	603	903	0
830	2	0	0	0	0	0	0	200	300	0	0	0	0	0	0	0	200	903	0	0	0	0	0	0	0	603	903	0
830	3	0	0	0	0	0	0	200	300	0	0	0	0	0	0	0	200	903	0	0	0	0	0	0	0	603	903	0
830	4	0	0	0	0	0	0	200	300	0	0	0	0	0	0	0	200	903	0	0	0	0	0	0	0	603	903	0
830	5	0	0	0	0	0	0	200	300	0	0	0	0	0	0	0	200	903	0	0	0	0	0	0	0	603	903	0
830	6	0	0	0	0	0	0	200	300	0	0	0	0	0	0	0	200	903	0	0	0	0	0	0	0	603	903	0
830	7	0	0	0	0	0	0	200	300	0	0	0	0	0	0	0	200	903	0	0	0	0	0	0	0	603	903	0
830	8	0	0	0	0	0	0	200	300	0	0	0	0	0	0	0	200	903	0	0	0	0	0	0	0	603	903	0
830	9	0	0	0	0	0	0	200	300	0	0	0	0	0	0	0	200	903	0	0	0	0	0	0	0	603	903	0
831	0	0	0	0	0	0	0	200	300	0	0	0	0	0	0	0	200	903	0	0	0	0	0	0	0	603	903	0
831	1	0	0	0	0	0	0	200	300	0	0	0	0	0	0	0	200	903	0	0	0	0	0	0	0	603	903	0
831	2	0	0	0	0	0	0	200	300	0	0	0	0	0	0	0	200	903	0	0	0	0	0	0	0	603	903	0
831	3	0	0	0	0	0	0	200	300	0	0	0	0	0	0	0	200	903	0	0	0	0	0	0	0	603	903	0
831	4	0	0	0	0	0	0	200	300	0	0	0	0	0	0	0	200	903	0	0	0	0	0	0	0	603	903	0
831	5	0	0	0	0	0	0	200	300	0	0	0	0	0	0	0	200	903	0	0	0	0	0	0	0	603	903	0
831	6	0	0	0	0	0	0	200	300	0	0	0	0	0	0	0	200	903	0	0	0	0	0	0	0	603	903	0
831	7	0	0	0	0	0	0	200	300	0	0	0	0	0	0	0	200	903	0	0	0	0	0	0	0	603	903	0
831	8	0	0	0	0	0	0	200	300	0	0	0	0	0	0	0	200	903	0	0	0	0	0	0	0	603	903	0
831	9	0	0	0	0	0	0	200	300	0	0	0	0	0	0	0	200	903	0	0	0	0	0	0	0	603	903	0
832	0	0	0	0	0	0	0	200	300	0	0	0	0	0	0	0	200	903	0	0	0	0	0	0	0	603	903	0
832	1	0	0	0	0	0	0	200	300	0	0	0	0	0	0	0	200	903	0	0	0	0	0	0	0	603	903	0
832	2	0	0	0	0	0	0	200	300	0	0	0	0	0	0	0	200	903	0	0	0	0	0	0	0	603	903	0
832	3	0	0	0	0	0	0	200	300	0	0	0	0	0	0	0	200	903	0	0	0	0	0	0	0	603	903	0
832	4	0	0	0	0	0	0	200	300	0	0	0	0	0	0	0	200	903	0	0	0	0	0	0	0	603	903	0
832	5	0	0	0	0	0	0	200	300	0	0	0	0	0	0	0	200	903	0	0	0	0	0	0	0	603	903	0
832	6	0	0	0	0	0	0	200	300	0	0	0	0	0	0	0	200	903	0	0	0	0	0	0	0	603	903	0
832	7	0	0	0	0	0	0	200	300	0	0	0	0	0	0	0	200	903	0	0	0	0	0	0	0	603	903	0
832	8	0	0	0	0	0	0	200	300	0	0	0	0	0	0	0	200	903	0	0	0	0	0	0	0	603	903	0
832	9	0	0	0	0	0	0	200	300	0	0	0	0	0	0	0	200	903	0	0	0	0	0	0	0	603	903	0
833	0	0	0	0	0	0	0	200	300	0	0	0	0	0	0	0	200	903	0	0	0	0	0	0	0	603	903	0
833	1	0	0	0	0	0	0	200	300	0	0	0	0	0	0	0	200	903	0	0	0	0	0	0	0	603	903	0
833	2	0	0	0	0	0	0	200	300	0	0	0	0	0	0	0	200	903	0	0	0	0	0	0	0	603	903	0
833	3	0	0	0	0	0	0	200	300	0	0	0	0	0	0	0	200	903	0	0	0	0	0	0	0	603	903	0
833	4	0	0	0	0	0	0	200	300	0	0	0	0	0	0	0	200	903	0	0	0	0	0	0	0	603	903	0
833	5	0	0	0	0	0	0	200	300	0	0	0	0	0	0	0	200	903	0	0	0	0	0	0	0	603	903	0
833	6	0	0	0	0	0	0	200	300	0	0	0	0	0	0	0	200	903	0	0	0	0	0	0	0	603	903	0
833	7	0	0	0	0	0	0	200	300	0	0	0	0	0	0	0	200	903	0	0	0	0	0	0	0	603	903	0
833	8	0	0	0	0	0	0	200	300	0	0	0	0	0	0	0	200	903	0	0	0	0	0	0	0	603	903	0
833	9	0	0	0	0	0	0	200	300	0	0	0	0	0	0	0	200	903	0	0	0	0	0	0	0	603	903	0
834	0	0	0	0	0	0	0	200	300	0	0	0	0	0	0	0	200	903	0	0	0	0	0	0	0	603	903	0
834	1	0	0	0	0	0	0	200	300	0	0	0	0	0	0	0	200	903	0	0	0	0	0	0	0	603	903	0
834	2	0	0	0	0	0	0	200	300	0	0	0	0	0	0	0	200	903	0	0	0	0	0	0	0	603	903	0
834	3	0	0	0	0	0	0	200	300	0	0	0	0	0	0	0	200	903	0	0	0	0	0	0	0	603	903	0
834	4	0	0	0	0	0	0	200	300	0	0	0	0	0	0	0	200	903	0	0	0	0	0	0	0	603	903	0
834	5	0	0	0	0	0	0	200	300	0	0	0	0	0	0	0	200	903	0	0	0	0	0	0	0	603	903	0
834	6	0	0	0	0	0	0	200	300	0	0	0	0	0	0	0	200	903	0	0	0	0	0	0	0	603	903	0
834	7	0	0	0	0	0	0	200	300	0	0	0	0	0	0	0	200	903	0	0	0	0	0	0	0	603	903	0
834	8	0	0	0	0	0	0	200	300	0	0	0	0	0	0	0	200	903	0	0	0	0	0	0	0	603	903	0
834	9	0	0	0	0	0	0	200	300	0	0	0	0	0	0	0	200	903	0	0	0	0	0	0	0	603	903	0
835	0	0	0	0	0	0	0	200	300	0	0	0	0	0	0	0	200	903	0	0	0	0	0	0	0	603	903	0
835	1	0	0	0	0	0	0	200	300	0	0	0	0	0	0	0	200	903	0	0	0	0	0	0	0	603	903	0
835	2	0	0	0	0	0	0	200	300	0	0	0	0	0	0	0	200	903	0	0	0	0	0	0	0	603	903	0
835	3	0	0	0	0	0	0	200	300	0	0	0	0	0	0	0	200	903	0	0	0	0	0	0	0	603	903	0
835	4	0	0	0	0	0	0	200	300	0	0	0	0	0	0	0	200	903	0	0	0	0	0	0	0	603	903	0
835	5	0	0	0	0	0	0	200	300	0	0	0	0	0	0	0	200	903	0	0	0	0	0	0	0	603	903	0
835	6	0	0	0	0	0	0	200	300	0	0	0	0	0	0	0	200	903	0	0	0	0	0	0	0	603	903	0
835	7	0	0	0	0	0	0	200	300	0	0	0	0	0	0	0	200	903	0	0	0	0	0	0	0	603	903	0
835	8	0	0	0	0	0	0	200	300	0	0	0	0	0	0	0	200	903	0	0	0	0	0	0	0	603	903	0
835	9	0	0	0	0	0	0	200	300	0	0	0	0	0	0	0	200	903	0	0	0	0	0	0	0	603	903	0
836	0	0	0	0	0	0	0	200	300	0	0	0	0	0	0	0	200	903	0	0	0	0	0	0	0	603	903	0
836	1	0	0	0	0	0	0	200	300	0	0	0	0	0	0	0	200	903	0	0	0	0	0	0	0	603	903	0
836	2	0	0	0	0	0	0	200	300	0	0	0	0	0	0	0	200	903	0	0	0	0	0	0	0	603	903	0
836	3	0	0	0	0	0	0	200	300	0	0	0	0	0	0	0	200	903	0	0	0	0	0	0	0	603	903	0
836	4	0	0	0	0	0	0	200	300	0	0	0	0	0	0	0	200	903	0	0	0	0	0	0	0	603	903	0
836	5	0	0	0	0	0	0	200	300	0	0	0	0	0	0	0	200	903	0	0	0	0	0	0	0	603	903	0
836	6	0	0	0	0	0	0	200	300	0	0	0	0	0	0	0	200	903	0	0	0	0	0	0	0	603	903	0
836	7	0	0	0	0	0	0	200	300	0	0	0	0	0	0	0	200	903	0	0	0	0	0	0	0	603	903	0
836	8	0	0	0	0	0	0	200	300	0	0	0	0	0	0	0	200	903	0	0	0	0	0	0	0	603	903	0
836	9	0	0	0	0	0	0	200	300	0	0	0	0	0	0	0	200	903	0	0	0	0	0	0	0	603	903	0
837	0	0	0	0	0	0	0	200	300	0	0	0	0	0	0	0	200	903	0	0	0	0	0	0	0	603	903	0
837	1	0	0	0	0	0	0	200	300	0	0	0	0	0	0	0	200	903	0	0	0	0	0	0	0	603	903	0
837	2	0	0	0	0	0	0	200	300	0	0	0	0	0	0	0	200	903	0	0	0	0	0	0	0	603	903	0
837	3	0	0	0	0	0	0	200	300	0	0	0	0	0	0	0	200	903	0	0	0	0	0	0	0	603	903	0
837	4	0	0	0	0	0	0	200	300	0	0	0	0	0	0	0	200	903	0	0	0	0	0	0	0	603	903	0
837	5	0	0	0	0	0	0	200	300	0	0	0	0	0	0	0	200	903	0	0	0	0	0	0	0	603	903	0
837	6	0	0	0	0	0	0	200	300	0	0	0	0	0	0	0	200	903	0	0	0	0	0	0	0	603	903	0
837	7	0	0	0	0	0	0	200	300	0	0	0	0	0	0	0	200	903	0	0	0	0	0	0	0	603	903	0
837	8	0	0	0	0	0	0	200	300	0	0	0	0	0	0	0	200	903	0	0	0	0	0	0	0	603	903	0
837	9	0	0	0	0	0	0	200	300	0	0	0	0	0	0	0	200	903	0	0	0	0	0	0	0	603	903	0
838	0	0	0	0	0	0	0	200	300	0	0	0	0	0	0	0	200	903	0	0	0	0	0	0	0	603	903	0
838	1	0	0	0	0	0	0	200	300	0	0	0	0	0	0	0	200	903	0	0	0	0	0	0	0	603	903	0
838	2	0	0	0	0	0	0	200	300	0	0	0	0	0	0	0	200	903	0	0	0	0	0	0	0	603	903	0
838	3	0	0	0	0	0	0	200	300	0	0	0	0	0	0	0	200	903	0	0	0	0	0	0	0	603	903	0
838	4	0	0	0	0	0	0	200	300	0	0	0	0	0	0	0	200	903	0	0	0	0	0	0	0	603	903	0
838	5	0	0	0	0	0	0	200	300	0	0	0	0	0	0	0	200	903	0	0	0	0	0	0	0	603	903	0
838	6	0	0	0	0	0	0	200	300	0	0	0	0	0	0	0	200	903	0	0	0	0	0	0	0	603	903	0
838	7	0	0	0	0	0	0	200	300	0	0	0	0	0	0	0	200	903	0	0	0	0	0	0	0	603	903	0
838	8	0	0	0	0	0	0	200	300	0	0	0	0	0	0	0	200	903	0	0	0	0	0	0	0	603	903	0
838	9	0	0	0	0	0	0	200	300	0	0	0	0	0	0	0	200	903	0	0	0	0	0	0	0	603	903	0
839	0	0	0	0	0	0	0	200	300	0	0	0	0	0	0	0	200	903	0	0	0	0	0	0	0	603	903	0
839	1	0	0	0	0	0	0	200	300	0	0	0	0	0	0	0	200	903	0	0	0	0	0	0	0	603	903	0
839	2	0	0	0	0	0	0	200	300	0	0	0	0	0	0	0	200	903	0	0	0	0	0	0	0	603	903	0
839	3	0	0	0	0	0	0	200	300	0	0	0	0	0	0	0	200	903	0	0	0	0	0	0	0	603	903	0
839	4	0	0	0	0	0	0	200	300	0	0	0	0	0	0	0	200	903	0	0	0	0	0	0	0	603	903	0
839	5	0	0	0	0	0	0	200	300	0	0	0	0	0	0	0	200	903	0	0	0	0	0	0	0	603	903	0
839	6	0	0	0	0	0	0	200	300	0	0	0	0	0	0	0	200	903	0	0	0	0	0	0	0	603	903	0
839	7	0	0	0	0	0	0	200	300	0	0	0	0	0	0	0	200	903	0	0	0	0	0	0	0	603	903	0
839	8	0	0	0	0	0	0	200	300	0	0	0	0	0	0	0	200	903	0	0	0	0	0	0	0	603	903	0
839	9	0	0	0	0	0	0	200	300	0	0	0	0	0	0	0	200	903	0	0	0	0	0	0	0	603	903	0
840	0	0	0	0	0	0	0	200	300	0	0	0	0	0	0	0	200	903	0	0	0	0	0	0	0	603	903	0
840	1	0	0	0	0	0	0	200	300	0	0	0	0	0	0	0	200	903	0	0	0	0	0	0	0	603	903	0
840	2	0	0	0	0	0	0	200	300	0	0	0	0	0	0	0	200	903	0	0	0	0	0	0	0	603	903	0
840	3	0	0	0	0	0	0	200	300	0	0	0	0	0	0	0	200	903	0	0	0	0	0	0	0	603	903	0
840	4	0	0	0	0	0	0	200	300	0	0	0	0	0	0	0	200	903	0	0	0	0	0	0	0	603	903	0
840	5	0	0	0	0	0	0	200	300	0	0	0	0	0	0	0	200	903	0	0	0	0	0	0	0	603	903	0
840	6	0	0	0	0	0	0	200	300	0	0	0	0	0	0	0	200	903	0	0	0	0	0	0	0	603	903	0
840	7	0	0	0	0	0	0	200	300	0	0	0	0	0	0	0	200	903	0	0	0	0	0	0	0	603	903	0
840	8	0	0	0	0	0	0	200	300	0	0	0	0	0	0	0	200	903	0	0	0	0	0	0	0	603	903	0
840	9	0	0	0	0	0	0	200	300	0	0	0	0	0	0	0	200	903	0	0	0	0	0	0	0	603	903	0
841	0	0	0	0	0	0	0	200	300	0	0	0	0	0	0	0	200	903	0	0	0	0	0	0	0	603	903	0
841	1	0	0	0	0	0	0	200	300	0	0	0	0	0	0	0	200	903	0	0	0	0	0	0	0	603	903	0
841	2	0	0	0	0	0	0	200	300	0	0	0	0	0	0	0	200	903	0	0	0	0	0	0	0	603	903	0
841	3	0	0	0	0	0	0	200	300	0	0	0	0	0	0	0	200	903	0	0	0	0	0	0	0	603	903	0
841	4	0	0	0	0	0	0	200	300	0	0	0	0	0	0	0	200	903	0	0	0	0	0	0	0	603	903	0
841	5	0	0	0	0	0	0	200	300	0	0	0	0	0	0	0	200	903	0	0	0	0	0	0	0	603	903	0
841	6	0	0	0	0	0	0	200	300	0	0	0	0	0	0	0	200	903	0	0	0	0	0	0	0	603	903	0
841	7	0	0	0	0	0	0	200	300	0	0	0	0	0	0	0	200	903	0	0	0	0	0	0	0	603	903	0
841	8	0	0	0	0	0	0	200	300	0	0	0	0	0	0	0	200	903	0	0	0	0	0	0	0	603	903	0
841	9	0	0	0	0	0	0	200	300	0	0	0	0	0	0	0	200	903	0	0	0	0	0	0	0	603	903	0
842	0	0	0	0	0	0	0	200	300	0	0	0	0	0	0	0	200	903	0	0	0	0	0	0	0	603	903	0
842	1	0	0	0	0	0	0	200	300	0	0	0	0	0	0	0	200	903	0	0	0	0	0	0	0	603	903	0
842	2	0	0	0	0	0	0	200	300	0	0	0	0	0	0	0	200	903	0	0	0	0	0	0	0	603	903	0
842	3	0	0	0	0	0	0	200	300	0	0	0	0	0	0	0	200	903	0	0	0	0	0	0	0	603	903	0
842	4	0	0	0	0	0	0	200	300	0	0	0	0	0	0	0	200	903	0	0	0	0	0	0	0	603	903	0
842	5	0	0	0	0	0	0	200	300	0	0	0	0	0	0	0	200	903	0	0	0	0	0	0	0	603	903	0
842	6	0	0	0	0	0	0	200	300	0	0	0	0	0	0	0	200	903	0	0	0	0	0	0	0	603	903	0
842	7	0	0	0	0	0	0	200	300	0	0	0	0	0	0	0	200	903	0	0	0	0	0	0	0	603	903	0
842	8	0	0	0	0	0	0	200	300	0	0	0	0	0	0	0	200	903	0	0	0	0	0	0	0	603	903	0
842	9	0	0	0	0	0	0	200	300	0	0	0	0	0	0	0	200	903	0	0	0	0	0	0	0	603	903	0
843	0	0	0	0	0	0	0	200	300	0	0	0	0	0	0	0	200	903	0	0	0	0	0	0	0	603	903	0
843	1	0	0	0	0	0	0	200	300	0	0	0	0	0	0	0	200	903	0	0	0	0	0	0	0	603	903	0
843	2	0	0	0	0	0	0	200	300	0	0	0	0	0	0	0	200	903	0	0	0	0	0	0	0	603	903	0
843	3	0	0	0	0	0	0	200	300	0	0	0	0	0	0	0	200	903	0	0	0	0	0	0	0	603	903	0
843	4	0	0	0	0	0	0	200	300	0	0	0	0	0	0	0	200	903	0	0	0	0	0	0	0	603	903	0
843	5	0	0	0	0	0	0	200	300	0	0	0	0	0	0	0	200	903	0	0	0	0	0	0	0	603	903	0
843	6	0	0	0	0	0	0	200	300	0	0	0	0	0	0	0	200	903	0	0	0	0	0	0	0	603	903	0
843	7	0	0	0	0	0	0	200	300	0	0	0	0	0	0	0	200	903	0	0	0	0	0	0	0	603	903	0
843	8	0	0	0	0	0	0	200	300	0	0	0	0	0	0	0	200	903	0	0	0	0	0	0	0	603	903	0
843	9	0	0	0	0	0	0	200	300	0	0	0	0	0	0	0	200	903	0	0	0	0	0	0	0	603	903	0
844	0	0	0	0	0	0	0	200	300	0	0	0	0	0	0	0	200	903	0	0	0	0	0	0	0	603	903	0
844	1	0	0	0	0	0	0	200	300	0	0	0	0	0	0	0	200	903	0	0	0	0	0	0	0	603	903	0
844	2	0	0	0	0	0	0	200	300	0	0	0	0	0	0	0	200	903	0	0	0	0	0	0	0	603	903	0
844	3	0	0	0	0	0	0	200	300	0	0	0	0	0	0	0	200	903	0	0	0	0	0	0	0	603	903	0
844	4	0	0	0	0	0	0	200	300	0	0	0	0	0	0	0	200	903	0	0	0	0	0	0	0	603	903	0
844	5	0	0	0	0	0	0	200	300	0	0	0	0	0	0	0	200	903	0	0	0	0	0	0	0	603	903	0
844	6	0	0	0	0	0	0	200	300	0	0	0	0	0	0	0	200	903	0	0	0	0	0	0	0	603	903	0
844	7	0	0	0	0	0	0	200	300	0	0	0	0	0	0	0	200	903	0	0	0	0	0	0	0	603	903	0
844	8	0	0	0	0	0	0	200	300	0	0	0	0	0	0	0	200	903	0	0	0	0	0	0	0	603	903	0
844	9	0	0	0	0	0	0	200	300	0	0	0	0	0	0	0	200	903	0	0	0	0	0	0	0	603	903	0
845	0	0	0	0	0	0	0	200	300	0	0	0	0	0	0	0	200	903	0	0	0	0	0	0	0	603	903	0
845	1	0	0	0	0	0	0	200	300	0	0	0	0	0	0	0	200	903	0	0	0	0	0	0	0	603	903	0
845	2	0	0	0	0	0	0	200	300	0	0	0	0	0	0	0	200	903	0	0	0	0	0	0	0	603	903	0
845	3	0	0	0	0	0	0	200	300	0	0	0	0	0	0	0	200	903	0	0	0	0	0	0	0	603	903	0
845	4	0	0	0	0	0	0	200	300	0	0	0	0	0	0	0	200	903	0	0	0	0	0	0	0	603	903	0
845	5	0	0	0	0	0	0	200	300	0	0	0	0	0	0	0	200	903	0	0	0	0	0	0	0	603	903	0
845	6	0	0	0	0	0	0	200	300	0	0	0	0	0	0	0	200	903	0	0	0	0	0	0	0	603	903	0
845	7	0	0	0	0	0	0	200	300	0	0	0	0	0	0	0	200	903	0	0	0	0	0	0	0	603	903	0
845	8	0	0	0	0	0	0	200	300	0	0	0	0	0	0	0	200	903	0	0	0	0	0	0	0	603	903	0
845	9	0	0	0	0	0	0	200	300	0	0	0	0	0	0	0	200	903	0	0	0	0	0	0	0	603	903	0
846	0	0	0	0	0	0	0	200	300	0	0	0	0	0	0	0	200	903	0	0	0	0	0	0	0	603	903	0
846	1	0	0	0	0	0	0	200	300	0	0	0	0	0	0	0	200	903	0	0	0	0	0	0	0	603	903	0
846	2	0	0	0	0	0	0	200	300	0	0	0	0	0	0	0	200	903	0	0	0	0	0	0	0	603	903	0
846	3	0	0	0	0	0	0	200	300	0	0	0	0	0	0	0	200	903	0	0	0	0	0	0	0	603	903	0
846	4	0	0	0	0	0	0	200	300	0	0	0	0	0	0	0	200	903	0	0	0	0	0	0	0	603	903	0
846	5	0	0	0	0	0	0	200	300	0	0	0	0	0	0	0	200	903	0	0	0	0	0	0	0	603	903	0
846	6	0	0	0	0	0	0	200	300	0	0	0	0	0	0	0	200	903	0	0	0	0	0	0	0	603	903	0
846	7	0	0	0	0	0	0	200	300	0	0	0	0	0	0	0	200	903	0	0	0	0	0	0	0	603	903	0
846	8	0	0	0	0	0	0	200	300	0	0	0	0	0	0	0	200	903	0	0	0	0	0	0	0	603	903	0
846	9	0	0	0	0	0	0	200	300	0	0	0	0	0	0	0	200	903	0	0	0	0	0	0	0	603	903	0
847	0	0	0	0	0	0	0	200	300	0	0	0	0	0	0	0	200	903	0	0	0	0	0	0	0	603	903	0
847	1	0	0	0	0	0	0	200	300	0	0	0	0	0	0	0	200	903	0	0	0	0	0	0	0	603	903	0
847	2	0	0	0	0	0	0	200	300	0	0	0	0	0	0	0	200	903	0	0	0	0	0	0	0	603	903	0
847	3	0	0	0	0	0	0	200	300	0	0	0	0	0	0	0	200	903	0	0	0	0	0	0	0	603	903	0
847	4	0	0	0	0	0	0	200	300	0	0	0	0	0	0	0	200	903	0	0	0	0	0	0	0	603	903	0
847	5	0	0	0	0	0	0	200	300	0	0	0	0	0	0	0	200	903	0	0	0	0	0	0	0	603	903	0
847	6	0	0	0	0	0	0	200	300	0	0	0	0	0	0	0	200	903	0	0	0	0	0	0	0	603	903	0
847	7	0	0	0	0	0	0	200	300	0	0	0	0	0	0	0	200	903	0	0	0	0	0	0	0	603	903	0
847	8	0	0	0	0	0	0	200	300	0	0	0	0	0	0	0	200	903	0	0	0	0	0	0	0	603	903	0
847	9	0	0	0	0	0	0	200	300	0	0	0	0	0	0	0	200	903	0	0	0	0	0	0	0	603	903	0
848	0	0	0	0	0	0	0	200	300	0	0	0	0	0	0	0	200	903	0	0	0	0	0	0	0	603	903	0
848	1	0	0	0	0	0	0	200	300	0	0	0	0	0	0	0	200	903	0	0	0	0	0	0	0	603	903	0
848	2	0	0	0	0	0	0	200	300	0	0	0	0	0	0	0	200	903	0	0	0	0	0	0	0	603	903	0
848	3	0	0	0	0	0	0	200	300	0	0	0	0	0	0	0	200	903	0	0	0	0	0	0	0	603	903	0
848	4	0	0	0	0	0	0	200	300	0	0	0	0	0	0	0	200	903	0	0	0	0	0	0	0	603	903	0
848	5	0	0	0	0	0	0	200	300	0	0	0	0	0	0	0	200	903	0	0	0	0	0	0	0	603	903	0
848	6	0	0	0	0	0	0	200	300	0	0	0	0	0	0	0	200	903	0	0	0	0	0	0	0	603	903	0
848	7	0	0	0	0	0	0	200	300	0	0	0	0	0	0	0	200	903	0	0	0	0	0	0	0	603	903	0
848	8	0	0	0	0	0	0	200	300	0	0	0	0	0	0	0	200	903	0	0	0	0	0	0	0	603	903	0
848	9	0	0	0	0	0	0	200	300	0	0	0	0	0	0	0	200	903	0	0	0	0	0	0	0	603	903	0
849	0	0	0	0	0	0	0	200	300	0	0	0	0	0	0	0	200	903	0	0	0	0	0	0	0	603	903	0
849	1	0	0	0	0	0	0	200	300	0	0	0	0	0	0	0	200	903	0	0	0	0	0	0	0	603	903	0
849	2	0	0	0	0	0	0	200	300	0	0	0	0	0	0	0	200	903	0	0	0	0	0	0	0	603	903	0
849	3	0	0	0	0	0	0	200	300	0	0	0	0	0	0	0	200	903	0	0	0	0	0	0	0	603	903	0
849	4	0	0	0	0	0	0	200	300	0	0	0	0	0	0	0	200	903	0	0	0	0	0	0	0	603	903	0
849	5	0	0	0	0	0	0	200	300	0	0	0	0	0	0	0	200	903	0	0	0	0	0	0	0	603	903	0
849	6	0	0	0	0	0	0	200	300	0	0	0	0	0	0	0	200	903	0	0	0	0	0	0	0	603	903	0
849	7	0	0	0	0	0	0	200	300	0	0	0	0	0	0	0	200	903	0	0	0	0	0	0	0	603	903	0
849	8	0	0	0	0	0	0	200	300	0	0	0	0	0	0	0	200	903	0	0	0	0	0	0	0	603	903	0
849	9	0	0	0	0	0	0	200	300	0	0	0	0	0	0	0	200	903	0	0	0	0	0	0	0	603	903	0
850	0	0	0	0	0	0	0	200	300	0	0	0	0	0	0	0	200	903	0	0	0	0	0	0	0	603	903	0
850	1	0	0	0	0	0	0	200	300	0	0	0	0	0	0	0	200	903	0	0	0	0	0	0	0	603	903	0
850	2	0	0	0	0	0	0	200	300	0	0	0	0	0	0	0	200	903	0	0	0	0	0	0	0	603	903	0
850	3	0	0	0	0	0	0	200	300	0	0	0	0	0	0	0	200	903	0	0	0	0	0	0	0	603	903	0
850	4	0	0	0	0	0	0	200	300	0	0	0	0	0	0	0	200	903	0	0	0	0	0	0	0	603	903	0
850	5	0	0	0	0	0	0	200	300	0	0	0	0	0	0	0	200	903	0	0	0	0	0	0	0	603	903	0
850	6	0	0	0	0	0	0	200	300	0	0	0	0	0	0	0	200	903	0	0	0	0	0	0	0	603	903	0
850	7	0	0	0	0	0	0	200	300	0	0	0	0	0	0	0	200	903	0	0	0	0	0	0	0	603	903	0
850	8	0	0	0	0	0	0	200	300	0	0	0	0	0	0	0	200	903	0	0	0	0	0	0	0	603	903	0
850	9	0	0	0	0	0	0	200	300	0	0	0	0	0	0	0	200	903	0	0	0	0	0	0	0	603	903	0
851	0	0	0	0	0	0	0	200	300	0	0	0	0	0	0	0	200	903	0	0	0	0	0	0	0	603	903	0
851	1	0	0	0	0	0	0	200	300	0	0	0	0	0	0	0	200	903	0	0	0	0	0	0	0	603	903	0
851	2	0	0	0	0	0	0	200	300	0	0	0	0	0	0	0	200	903	0	0	0	0	0	0	0	603	903	0
851	3	0	0	0	0	0	0	200	300	0	0	0	0	0	0	0	200	903	0	0	0	0	0	0	0	603	903	0
851	4	0	0	0	0	0	0	200	300	0	0	0	0	0	0	0	200	903	0	0	0	0	0	0	0	603	903	0
851	5	0	0	0	0	0	0	200	300	0	0	0	0	0	0	0	200	903	0	0	0	0	0	0	0	603	903	0
851	6	0	0	0	0	0	0	200	300	0	0	0	0	0	0	0	200	903	0	0	0	0	0	0	0	603	903	0
851	7	0	0	0	0	0	0	200	300	0	0	0	0	0	0	0	200	903	0	0	0	0	0	0	0	603	903	0
851	8	0	0	0	0	0	0	200	300	0	0	0	0	0	0	0	200	903	0	0	0	0	0	0	0	603	903	0
851	9	0	0	0	0	0	0	200	300	0	0	0	0	0	0	0	200	903	0	0	0	0	0	0	0	603	903	0
852	0	0	0	0	0	0	0	200	300	0	0	0	0	0	0	0	200	903	0	0	0	0	0	0	0	603	903	0
852	1	0	0	0	0	0	0	200	300	0	0	0	0	0	0	0	200	903	0	0	0	0	0	0	0	603	903	0
852	2	0	0	0	0	0	0	200	300	0	0	0	0	0	0	0	200	903	0	0	0	0	0	0	0	603	903	0
852	3	0	0	0	0	0	0	200	300	0	0	0	0	0	0	0	200	903	0	0	0	0	0	0	0	603	903	0
852	4	0	0	0	0	0	0	200	300	0	0	0	0	0	0	0	200	903	0	0	0	0	0	0	0	603	903	0
852	5	0	0	0	0	0	0	200	300	0	0	0	0	0	0	0	200	903	0	0	0	0	0	0	0	603	903	0
852	6	0	0	0	0	0	0	200	300	0	0	0	0	0	0	0	200	903	0	0	0	0	0	0	0	603	903	0
852	7	0	0	0	0	0	0	200	300	0	0	0	0	0	0	0	200	903	0	0	0	0	0	0	0	603	903	0
852	8	0	0	0	0	0	0	200	300	0	0	0	0	0	0	0	200	903	0	0	0	0	0	0	0	603	903	0
852	9	0	0	0	0	0	0	200	300	0	0	0	0	0	0	0	200	903	0	0	0	0	0	0	0	603	903	0
853	0	0	0	0	0	0	0	200	300	0	0	0	0	0	0	0	200	903	0	0	0	0	0	0	0	603	903	0
853	1	0	0	0	0	0	0	200	300	0	0	0	0	0	0	0	200	903	0	0	0	0	0	0	0	603	903	0
853	2	0	0	0	0	0	0	200	300	0	0	0	0	0	0	0	200	903	0	0	0	0	0	0	0	603	903	0
853	3	0	0	0	0	0	0	200	300	0	0	0	0	0	0	0	200	903	0	0	0	0	0	0	0	603	903	0
853	4	0	0	0	0	0	0	200	300	0	0	0	0	0	0	0	200	903	0	0	0	0	0	0	0	603	903	0
853	5	0	0	0	0	0	0	200	300	0	0	0	0	0	0	0	200	903	0	0	0	0	0	0	0	603	903	0
853	6	0	0	0	0	0	0	200	300	0	0	0	0	0	0	0	200	903	0	0	0	0	0	0	0	603	903	0
853	7	0	0	0	0	0	0	200	300	0	0	0	0	0	0	0	200	903	0	0	0	0	0	0	0	603	903	0
853	8	0	0	0	0	0	0	200	300	0	0	0	0	0	0	0	200	903	0	0	0	0	0	0	0	603	903	0
853	9	0	0	0	0	0	0	200	300	0	0	0	0	0	0	0	200	903	0	0	0	0	0	0	0	603	903	0
854	0	0	0	0	0	0	0	200	300	0	0	0	0	0	0	0	200	903	0	0	0	0	0	0	0	603	903	0
854	1	0	0	0	0	0	0	200	300	0	0	0	0	0	0	0	200	903	0	0	0	0	0	0	0	603	903	0
854	2	0	0	0	0	0	0	200	300	0	0	0	0	0	0	0	200	903	0	0	0	0	0	0	0	603	903	0
854	3	0	0	0	0	0	0	200	300	0	0	0	0	0	0	0	200	903	0	0	0	0	0	0	0	603	903	0
854	4	0	0	0	0	0	0	200	300	0	0	0	0	0	0	0	200	903	0	0	0	0	0	0	0	603	903	0
854	5	0	0	0	0	0	0	200	300	0	0	0	0	0	0	0	200	903	0	0	0	0	0	0	0	603	903	0
854	6	0	0	0	0	0	0	200	300	0	0	0	0	0	0	0	200	903	0	0	0	0	0	0	0	603	903	0
854	7	0	0	0	0	0	0	200	300	0	0	0	0	0	0	0	200	903	0	0	0	0	0	0	0	603	903	0
854	8	0	0	0	0	0	0	200	300	0	0	0	0	0	0	0	200	903	0	0	0	0	0	0	0	603	903	0
854	9	0	0	0	0	0	0	200	300	0	0	0	0	0	0	0	200	903	0	0	0	0	0	0	0	603	903	0
855	0	0	0	0	0	0	0	200	300	0	0	0	0	0	0	0	200	903	0	0	0	0	0	0	0	603	903	0
855	1	0	0	0	0	0	0	200	300	0	0	0	0	0	0	0	200	903	0	0	0	0	0	0	0	603	903	0
855	2	0	0	0	0	0	0	200	300	0	0	0	0	0	0	0	200	903	0	0	0	0	0	0	0	603	903	0
855	3	0	0	0	0	0	0	200	300	0	0	0	0	0	0	0	200	903	0	0	0	0	0	0	0	603	903	0
855	4	0	0	0	0	0	0	200	300	0	0	0	0	0	0	0	200	903	0	0	0	0	0	0	0	603	903	0
855	5	0	0	0	0	0	0	200	300	0	0	0	0	0	0	0	200	903	0	0	0	0	0	0	0	603	903	0
855	6	0	0	0	0	0	0	200	300	0	0	0	0	0	0	0	200	903	0	0	0	0	0	0	0	603	903	0
855	7	0	0	0	0	0	0	200	300	0	0	0	0	0	0	0	200	903	0	0	0	0	0	0	0	603	903	0
855	8	0	0	0	0	0	0	200	300	0	0	0	0	0	0	0	200	903	0	0	0	0	0	0	0	603	903	0
855	9	0	0	0	0	0	0	200	300	0	0	0	0	0	0	0	200	903	0	0	0	0	0	0	0	603	903	0
856	0	0	0	0	0	0	0	200	300	0	0	0	0	0	0	0	200	903	0	0	0	0	0	0	0	603	903	0
856	1	0	0	0	0	0	0	200	300	0	0	0	0	0	0	0	200	903	0	0	0	0	0	0	0	603	903	0
856	2	0	0	0	0	0	0	200	300	0	0	0	0	0	0	0	200	903	0	0	0	0	0	0	0	603	903	0
856	3	0	0	0	0	0	0	200	300	0	0	0	0	0	0	0	200	903	0	0	0	0	0	0	0	603	903	0
856	4	0	0	0	0	0	0	200	300	0	0	0	0	0	0	0	200	903	0	0	0	0	0	0	0	603	903	0
856	5	0	0	0	0	0	0	200	300	0	0	0	0	0	0	0	200	903	0	0	0	0	0	0	0	603	903	0
856	6	0	0	0	0	0	0	200	300	0	0	0	0	0	0	0	200	903	0	0	0	0	0	0	0	603	903	0
856	7	0	0	0	0	0	0	200	300	0	0	0	0	0	0	0	200	903	0	0	0	0	0	0	0	603	903	0
856	8	0	0	0	0	0	0	200	300	0	0	0	0	0	0	0	200	903	0	0	0	0	0	0	0	603	903	0
856	9	0	0	0	0	0	0	200	300	0	0	0	0	0	0	0	200	903	0	0	0	0	0	0	0	603	903	0
857	0	0	0	0	0	0	0	200	300	0	0	0	0	0	0	0	200	903	0	0	0	0	0	0	0	603	903	0
857	1	0	0	0	0	0	0	200	300	0	0	0	0	0	0	0	200	903	0	0	0	0	0	0	0	603	903	0
857	2	0	0	0	0	0	0	200	300	0	0	0	0	0	0	0	200	903	0	0	0	0	0	0	0	603	903	0
857	3	0	0	0	0	0	0	200	300	0	0	0	0	0	0	0	200	903	0	0	0	0	0	0	0	603	903	0
857	4	0	0	0	0	0	0	200	300	0	0	0	0	0	0	0	200	903	0	0	0	0	0	0	0	603	903	0
857	5	0	0	0	0	0	0	200	300	0	0	0	0	0	0	0	200	903	0	0	0	0	0	0	0	603	903	0
857	6	0	0	0	0	0	0	200	300	0	0	0	0	0	0	0	200	903	0	0	0	0	0	0	0	603	903	0
857	7	0	0	0	0	0	0	200	300	0	0	0	0	0	0	0	200	903	0	0	0	0	0	0	0	603	903	0
857	8	0	0	0	0	0	0	200	300	0	0	0	0	0	0	0	200	903	0	0	0	0	0	0	0	603	903	0
857	9	0	0	0	0	0	0	200	300	0	0	0	0	0	0	0	200	903	0	0	0	0	0	0	0	603	903	0
858	0	0	0	0	0	0	0	200	300	0	0	0	0	0	0	0	200	903	0	0	0	0	0	0	0	603	903	0
858	1	0	0	0	0	0	0	200	300	0	0	0	0	0	0	0	200	903	0	0	0	0	0	0	0	603	903	0
858	2	0	0	0	0	0	0	200	300	0	0	0	0	0	0	0	200	903	0	0	0	0	0	0	0	603	903	0
858	3	0	0	0	0	0	0	200	300	0	0	0	0	0	0	0	200	903	0	0	0	0	0	0	0	603	903	0
858	4	0	0	0	0	0	0	200	300	0	0	0	0	0	0	0	200	903	0	0	0	0	0	0	0	603	903	0
858	5	0	0	0	0	0	0	200	300	0	0	0	0	0	0	0	200	903	0	0	0	0	0	0	0	603	903	0
858	6	0	0	0	0	0	0	200	300	0	0	0	0	0	0	0	200	903	0	0	0	0	0	0	0	603	903	0
858	7	0	0	0	0	0	0	200	300	0	0	0	0	0	0	0	200	903	0	0	0	0	0	0	0	603	903	0
858	8	0	0	0	0	0	0	200	300	0	0	0	0	0	0	0	200	903	0	0	0	0	0	0	0	603	903	0
858	9	0	0	0	0	0	0	200	300	0	0	0	0	0	0	0	200	903	0	0	0	0	0	0	0	603	903	0
859	0	0	0	0	0	0	0	200	300	0	0	0	0	0	0	0	200	903	0	0	0	0	0	0	0	603	903	0
859	1	0	0	0	0	0	0	200	300	0	0	0	0	0	0	0	200	903	0	0	0	0	0	0	0	603	903	0
859	2	0	0	0	0	0	0	200	300	0	0	0	0	0	0	0	200	903	0	0	0	0	0	0	0	603	903	0
859	3	0	0	0	0	0	0	200	300	0	0	0	0	0	0	0	200	903	0	0	0	0	0	0	0	603	903	0
859	4	0	0	0	0	0	0	200	300	0	0	0	0	0	0	0	200	903	0	0	0	0	0	0	0	603	903	0
859	5	0	0	0	0	0	0	200	300	0	0	0	0	0	0	0	200	903	0	0	0	0	0	0	0	603	903	0
859	6	0	0	0	0	0	0	200	300	0	0	0	0	0	0	0	200	903	0	0	0	0	0	0	0	603	903	0
859	7	0	0	0	0	0	0	200	300	0	0	0	0	0	0	0	200	903	0	0	0	0	0	0	0	603	903	0
859	8	0	0	0	0	0	0	200	300	0	0	0	0	0	0	0	200	903	0	0	0	0	0	0	0	603	903	0
859	9	0	0	0	0	0	0	200	300	0	0	0	0	0	0	0	200	903	0	0	0	0	0	0	0	603	903	0
860	0	0	0	0	0	0	0	200	300	0	0	0	0	0	0	0	200	903	0	0	0	0	0	0	0	603	903	0
860	1	0	0	0	0	0	0	200	300	0	0	0	0	0	0	0	200	903	0	0	0	0	0	0	0	603	903	0
860	2	0	0	0	0	0	0	200	300	0	0	0	0	0	0	0	200	903	0	0	0	0	0	0	0	603	903	0
860	3	0	0	0	0	0	0	200	300	0	0	0	0	0	0	0	200	903	0	0	0	0	0	0	0	603	903	0
860	4	0	0	0	0	0	0	200	300	0	0	0	0	0	0	0	200	903	0	0	0	0	0	0	0	603	903	0
860	5	0	0	0	0	0	0	200	300	0	0	0	0	0	0	0	200	903	0	0	0	0	0	0	0	603	903	0
860	6	0	0	0	0	0	0	200	300	0	0	0	0	0	0	0	200	903	0	0	0	0	0	0	0	603	903	0
860	7	0	0	0	0	0	0	200	300	0	0	0	0	0	0	0	200	903	0	0	0	0	0	0	0	603	903	0
860	8	0	0	0	0	0	0	200	300	0	0	0	0	0	0	0	200	903	0	0	0	0	0	0	0	603	903	0
860	9	0	0	0	0	0	0	200	300	0	0	0	0	0	0	0	200	903	0	0	0	0	0	0	0	603	903	0
861	0	0	0	0	0	0	0	200	300	0	0	0	0	0	0	0	200	903	0	0	0	0	0	0	0	603	903	0
861	1	0	0	0	0	0	0	200	300	0	0	0	0	0	0	0	200	903	0	0	0	0	0	0	0	603	903	0
861	2	0	0	0	0	0	0	200	300	0	0	0	0	0	0	0	200	903	0	0	0	0	0	0	0	603	903	0
861	3	0	0	0	0	0	0	200	300	0	0	0	0	0	0	0	200	903	0	0	0	0	0	0	0	603	903	0
861	4	0	0	0	0	0	0	200	300	0	0	0	0	0	0	0	200	903	0	0	0	0	0	0	0	603	903	0
861	5	0	0	0	0	0	0	200	300	0	0	0	0	0	0	0	200	903	0	0	0	0	0	0	0	603	903	0
861	6	0	0	0	0	0	0	200	300	0	0	0	0	0	0	0	200	903	0	0	0	0	0	0	0	603	903	0
861	7	0	0	0	0	0	0	200	300	0	0	0	0	0	0	0	200	903	0	0	0	0	0	0	0	603	903	0
861	8	0	0	0	0	0	0	200	300	0	0	0	0	0	0	0	200	903	0	0	0	0	0	0	0	603	903	0
861	9	0	0	0	0	0	0	200	300	0	0	0	0	0	0	0	200	903	0	0	0	0	0	0	0	603	903	0
862	0	0	0	0	0	0	0	200	300	0	0	0	0	0	0	0	200	903	0	0	0	0	0	0	0	603	903	0
862	1	0	0	0	0	0	0	200	300	0	0	0	0	0	0	0	200	903	0	0	0	0	0	0	0	603	903	0
862	2	0	0	0	0	0	0	200	300	0	0	0	0	0	0	0	200	903	0	0	0	0	0	0	0	603	903	0
862	3	0	0	0	0	0	0	200	300	0	0	0	0	0	0	0	200	903	0	0	0	0	0	0	0	603	903	0
862	4	0	0	0	0	0	0	200	300	0	0	0	0	0	0	0	200	903	0	0	0	0	0	0	0	603	903	0
862	5	0	0	0	0	0	0	200	300	0	0	0	0	0	0	0	200	903	0	0	0	0	0	0	0	603	903	0
862	6	0	0	0	0	0	0	200	300	0	0	0	0	0	0	0	200	903	0	0	0	0	0	0	0	603	903	0
862	7	0	0	0	0	0	0	200	300	0	0	0	0	0	0	0	200	903	0	0	0	0	0	0	0	603	903	0
862	8	0	0	0	0	0	0	200	300	0	0	0	0	0	0	0	200	903	0	0	0	0	0	0	0	603	903	0
862	9	0	0	0	0	0	0	200	300	0	0	0	0	0	0	0	200	903	0	0	0	0	0	0	0	603	903	0
863	0	0	0	0	0	0	0	200	300	0	0	0	0	0	0	0	200	903	0	0	0	0	0	0	0	603	903	0
863	1	0	0	0	0	0	0	200	300	0	0	0	0	0	0	0	200	903	0	0	0	0	0	0	0	603	903	0
863	2	0	0	0	0	0	0	200	300	0	0	0	0	0	0	0	200	903	0	0	0	0	0	0	0	603	903	0
863	3	0	0	0	0	0	0	200	300	0	0	0	0	0	0	0	200	903	0	0	0	0	0	0	0	603	903	0
863	4	0	0	0	0	0	0	200	300	0	0	0	0	0	0	0	200	903	0	0	0	0	0	0	0	603	903	0
863	5	0	0	0	0	0	0	200	300	0	0	0	0	0	0	0	200	903	0	0	0	0	0	0	0	603	903	0
863	6	0	0	0	0	0	0	200	300	0	0	0	0	0	0	0	200	903	0	0	0	0	0	0	0	603	903	0
863	7	0	0	0	0	0	0	200	300	0	0	0	0	0	0	0	200	903	0	0	0	0	0	0	0	603	903	0
863	8	0	0	0	0	0	0	200	300	0	0	0	0	0	0	0	200	903	0	0	0	0	0	0	0	603	903	0
863	9	0	0	0	0	0	0	200	300	0	0	0	0	0	0	0	200	903	0	0	0	0	0	0	0	603	903	0
864	0	0	0	0	0	0	0	200	300	0	0	0	0	0	0	0	200	903	0	0	0	0	0	0	0	603	903	0
864	1	0	0	0	0	0	0	200	300	0	0	0	0	0	0	0	200	903	0	0	0	0	0	0	0	603	903	0
864	2	0	0	0	0	0	0	200	300	0	0	0	0	0	0	0	200	903	0	0	0	0	0	0	0	603	903	0
864	3	0	0	0	0	0	0	200	300	0	0	0	0	0	0	0	200	903	0	0	0	0	0	0	0	603	903	0
864	4	0	0	0	0	0	0	200	300	0	0	0	0	0	0	0	200	903	0	0	0	0	0	0	0	603	903	0
864	5	0	0	0	0	0	0	200	300	0	0	0	0	0	0	0	200	903	0	0	0	0	0	0	0	603	903	0
864	6	0	0	0	0	0	0	200	300	0	0	0	0	0	0	0	200	903	0	0	0	0	0	0	0	603	903	0
864	7	0	0	0	0	0	0	200	300	0	0	0	0	0	0	0	200	903	0	0	0	0	0	0	0	603	903	0
864	8	0	0	0	0	0	0	200	300	0	0	0	0	0	0	0	200	903	0	0	0	0	0	0	0	603	903	0
864	9	0	0	0	0	0	0	200	300	0	0	0	0	0	0	0	200	903	0	0	0	0	0	0	0	603	903	0
865	0	0	0	0	0	0	0	200	300	0	0	0	0	0	0	0	200	903	0	0	0	0	0	0	0	603	903	0
865	1	0	0	0	0	0	0	200	300	0	0	0	0	0	0	0	200	903	0	0	0	0	0	0	0	603	903	0
865	2	0	0	0	0	0	0	200	300	0	0	0	0	0	0	0	200	903	0	0	0	0	0	0	0	603	903	0
865	3	0	0	0	0	0	0	200	300	0	0	0	0	0	0	0	200	903	0	0	0	0	0	0	0	603	903	0
865	4	0	0	0	0	0	0	200	300	0	0	0	0	0	0	0	200	903	0	0	0	0	0	0	0	603	903	0
865	5	0	0	0	0	0	0	200	300	0	0	0	0	0	0	0	200	903	0	0	0	0	0	0	0	603	903	0
865	6	0	0	0	0	0	0	200	300	0	0	0	0	0	0	0	200	903	0	0	0	0	0	0	0	603	903	0
865	7	0	0	0	0	0	0	200	300	0	0	0	0	0	0	0	200	903	0	0	0	0	0	0	0	603	903	0
865	8	0	0	0	0	0	0	200	300	0	0	0	0	0	0	0	200	903	0	0	0	0	0	0	0	603	903	0
865	9	0	0	0	0	0	0	200	300	0	0	0	0	0	0	0	200	903	0	0	0	0	0	0	0	603	903	0
866	0	0	0	0	0	0	0	200	300	0	0	0	0	0	0	0	200	903	0	0	0	0	0	0	0	603	903	0
866	1	0	0	0	0	0	0	200	300	0	0	0	0	0	0	0	200	903	0	0	0	0	0	0	0	603	903	0
866	2	0	0	0	0	0	0	200	300	0	0	0	0	0	0	0	200	903	0	0	0	0	0	0	0	603	903	0
866	3	0	0	0	0	0	0	200	300	0	0	0	0	0	0	0	200	903	0	0	0	0	0	0	0	603	903	0
866	4	0	0	0	0	0	0	200	300	0	0	0	0	0	0	0	200	903	0	0	0	0	0	0	0	603	903	0
866	5	0	0	0	0	0	0	200	300	0	0	0	0	0	0	0	200	903	0	0	0	0	0	0	0	603	903	0
866	6	0	0	0	0	0	0	200	300	0	0	0	0	0	0	0	200	903	0	0	0	0	0	0	0	603	903	0
866	7	0	0	0	0	0	0	200	300	0	0	0	0	0	0	0	200	903	0	0	0	0	0	0	0	603	903	0
866	8	0	0	0	0	0	0	200	300	0	0	0	0	0	0	0	200	903	0	0	0	0	0	0	0	603	903	0
866	9	0	0	0	0	0	0	200	300	0	0	0	0	0	0	0	200	903	0	0	0	0	0	0	0	603	903	0
867	0	0	0	0	0	0	0	200	300	0	0	0	0	0	0	0	200	903	0	0	0	0	0	0	0	603	903	0
867	1	0	0	0	0	0	0	200	300	0	0	0	0	0	0	0	200	903	0	0	0	0	0	0	0	603	903	0
867	2	0	0	0	0	0	0	200	300	0	0	0	0	0	0	0	200	903	0	0	0	0	0	0	0	603	903	0
867	3	0	0	0	0	0	0	200	300	0	0	0	0	0	0	0	200	903	0	0	0	0	0	0	0	603	903	0
867	4	0	0	0	0	0	0	200	300	0	0	0	0	0	0	0	200	903	0	0	0	0	0	0	0	603	903	0
867	5	0	0	0	0	0	0	200	300	0	0	0	0	0	0	0	200	903	0	0	0	0	0	0	0	603	903	0
867	6	0	0	0	0	0	0	200	300	0	0	0	0	0	0	0	200	903	0	0	0	0	0	0	0	603	903	0
867	7	0	0	0	0	0	0	200	300	0	0	0	0	0	0	0	200	903	0	0	0	0	0	0	0	603	903	0
867	8	0	0	0	0	0	0	200	300	0	0	0	0	0	0	0	200	903	0	0	0	0	0	0	0	603	903	0
867	9	0	0	0	0	0	0	200	300	0	0	0	0	0	0	0	200	903	0	0	0	0	0	0	0	603	903	0
