# Supplementary material for: The Effects of an Extemporaneous Speech Dual-task on Older Adult Gait Control
Source: Research Square preprint supplement (doi:10.21203/rs.3.rs-7674245/v1), 2025-11-18
Supplement: Supplementary file 197 [file Over8ground5.xlsx]

## Sheet: Sheet1
Trajectories
		08:LFHD			08:RFHD			08:LBHD			08:RBHD			08:C7			08:T10			08:CLAV			08:STRN			08:RBAK			08:LSHO			08:LUPA			08:LELB			08:LFRM			08:LWRA			08:LWRB			08:LFIN
Frame	Sub Frame	X	Y	Z	X	Y	Z	X	Y	Z	X	Y	Z	X	Y	Z	X	Y	Z	X	Y	Z	X	Y	Z	X	Y	Z	X	Y	Z	X	Y	Z	X	Y	Z	X	Y	Z	X	Y	Z	X	Y	Z	X	Y	Z
		mm	mm	mm	mm	mm	mm	mm	mm	mm	mm	mm	mm	mm	mm	mm	mm	mm	mm	mm	mm	mm	mm	mm	mm	mm	mm	mm	mm	mm	mm	mm	mm	mm	mm	mm	mm	mm	mm	mm	mm	mm	mm	mm	mm	mm	mm	mm	mm
454	0	191.7	2385.13	1703.91	101.969	2392.16	1698.44	197.303	2578.46	1696.96	84.9407	2566.1	1691.52	147.922	2597.4	1550.76	173.101	2671.09	1288.77	162.64	2451.32	1467.4	158.108	2386.45	1263.55	85.4508	2674.96	1340.5	341.621	2522.01	1514.86	427.775	2539.14	1325.68	443.717	2540.05	1171.1	450.618	2444.05	1025.2	392.916	2407.72	939.465	458.734	2438.77	925.262	442.267	2380.57	880.599
455	0	191.727	2373.34	1706.44	102.172	2380.47	1701.16	197.145	2566.82	1699.22	84.8081	2554.49	1694.28	147.434	2585.92	1553.31	171.723	2658.56	1290.9	162.132	2439.62	1470.25	157.442	2374.61	1266.54	84.1954	2663.08	1343.12	340.811	2510.7	1517.57	427.256	2529.82	1328.41	443.557	2531.92	1173.97	450.804	2436.53	1027.32	397.381	2404.57	941.906	458.847	2432.15	927.398	443.114	2374.36	882.771
456	0	192.169	2361.88	1708.63	102.39	2368.57	1703.74	196.797	2554.98	1701.42	84.7726	2542.81	1697	146.506	2573.8	1555.57	170.847	2648.2	1293.83	161.943	2427.9	1472.85	157.013	2362.9	1269.11	83.1455	2651.32	1345.66	340.309	2499.58	1519.85	426.961	2520.86	1330.91	443.192	2523.64	1176.69	450.993	2429.21	1029.42	393.874	2393.27	944.184	459.173	2425.69	929.436	444.075	2367.87	884.528
457	0	192.315	2350.26	1710.57	102.7	2356.61	1706	196.826	2543.49	1703.63	84.7302	2530.95	1699.48	145.774	2562.38	1558.5	169.931	2636.58	1296.16	161.272	2415.93	1475.39	156.556	2351.39	1271.45	82.1345	2639.43	1348.18	340.395	2488.73	1521.92	426.458	2511.5	1333.47	442.966	2515.41	1179.49	451.375	2421.9	1031.71	398.632	2390	945.631	459.455	2418.75	931.599	444.638	2360.96	886.376
458	0	192.907	2338.71	1712.7	103.134	2345.03	1708.17	196.995	2532.02	1705.32	84.7888	2519.21	1701.9	145.396	2551.01	1560.6	168.756	2624	1298.11	161.062	2404.35	1477.51	155.829	2339.44	1273.88	81.0252	2627.49	1350.5	340.176	2477.74	1523.87	425.818	2502.04	1335.72	442.912	2507.35	1181.82	451.315	2413.82	1033.36	399.14	2382.38	947.538	460.013	2412.3	933.47	445.639	2354.54	888.13
459	0	193.336	2326.97	1714.33	103.73	2333.18	1710.11	196.641	2520.12	1706.82	84.6545	2507.27	1703.65	144.834	2539.1	1562.26	172.408	2611.18	1298.59	160.774	2392.55	1479.8	155.616	2327.85	1276.28	79.9285	2615.67	1352.38	339.648	2466.62	1525.8	425.515	2493.04	1337.63	442.32	2499.09	1183.88	450.861	2406.21	1034.6	399.758	2374.64	949.418	461.1	2406.44	935.601	446.593	2347.84	889.479
460	0	193.837	2315.39	1715.59	104.033	2321.09	1711.54	196.348	2508.47	1708.01	84.5745	2495.26	1704.92	144.313	2527.21	1563.84	166.724	2600.64	1301.68	162.62	2382.75	1480.61	155.49	2316.59	1277.36	78.9126	2603.92	1353.91	338.997	2455.36	1526.19	424.848	2483.56	1339.22	441.946	2491.06	1185.56	451.11	2398.85	1035.83	400.372	2366.88	950.332	460.191	2398.98	936.542	447.166	2340.77	890.791
461	0	194.397	2303.64	1716.5	104.433	2309.18	1712.73	196.574	2497.04	1708.84	84.6586	2483.31	1705.94	143.882	2515.3	1564.11	170.451	2588.01	1301.03	162.404	2370.99	1481.61	155.213	2304.93	1278.73	78.0393	2592.04	1355.11	338.902	2444.22	1527.92	424.478	2474.2	1340.54	441.55	2482.78	1186.95	451.433	2391.41	1036.72	400.857	2359.03	951.33	459.993	2392.28	937.77	447.896	2333.71	891.395
462	0	194.724	2291.87	1716.99	105.046	2297.31	1713.33	196.34	2485.16	1709.25	84.7538	2471.41	1706.72	144.094	2503.91	1565.17	165.638	2576.83	1302.82	162.157	2359.25	1482.46	155.049	2293.29	1279.7	77.2177	2580.29	1355.92	338.337	2432.73	1528.78	423.964	2465.07	1341.84	441.3	2474.66	1187.92	451.499	2383.67	1037.2	401.288	2350.66	952.061	460.167	2385.16	938.193	448.641	2326.67	891.929
463	0	195.328	2280.15	1717.23	105.563	2285.34	1713.92	196.254	2473.33	1709.34	84.9248	2459.54	1707.01	143.603	2491.94	1565.19	164.885	2564.69	1302.91	162.343	2347.39	1483	154.672	2281.39	1280.12	76.4182	2568.35	1356.26	337.662	2421.24	1529.05	423.11	2455.05	1342.37	440.388	2466.02	1188.22	451.595	2375.95	1037.34	399.442	2339.58	953.281	459.868	2377.9	938.24	449.281	2319.35	891.797
464	0	196.155	2268.35	1717.14	106.188	2273.15	1714.07	196.558	2461.59	1709.15	85.0521	2447.44	1707.03	143.422	2480.04	1565.4	164.529	2552.9	1303.25	162.247	2335.63	1482.78	154.851	2269.92	1280.27	75.6429	2556.46	1356.63	337.753	2410.03	1528.77	422.876	2445.74	1342.55	440.262	2457.66	1188.72	451.894	2368.13	1037.28	399.625	2330.31	953.502	459.725	2370.43	938.048	449.888	2311.88	891.557
465	0	196.638	2256.39	1716.64	106.755	2261.08	1713.78	196.682	2449.71	1708.84	85.3329	2435.32	1707.2	142.922	2467.85	1565.51	167.108	2540.35	1302.31	162.441	2323.74	1482.86	154.671	2257.85	1280.1	74.9041	2544.41	1356.73	337.696	2398.48	1528.39	422.29	2435.56	1342.92	439.877	2448.98	1188.95	451.944	2359.8	1037.12	401.481	2325.73	949.867	459.656	2362.71	937.99	450.426	2304.05	891.077
466	0	197.522	2244.42	1715.91	107.556	2248.99	1713.13	196.713	2437.55	1708.01	85.3588	2423.04	1706.7	142.781	2455.91	1564.8	166.739	2528.37	1301.95	162.611	2311.7	1482.29	154.042	2245.43	1279.42	74.0503	2532.37	1356.46	338.426	2387.37	1527.43	422.255	2426.18	1342.39	439.534	2440.17	1188.63	452.104	2351.55	1036.29	402.037	2316.89	949.2	459.615	2355.02	937.519	451.151	2296.36	890.301
467	0	198.32	2232.42	1714.54	108.235	2236.75	1711.99	196.755	2425.37	1706.71	85.5545	2410.69	1705.66	142.963	2443.97	1563.57	166.924	2516.54	1300.81	162.377	2299.68	1480.66	154.324	2233.46	1278.34	73.4941	2520.4	1355.55	338.386	2375.85	1526	421.842	2416.07	1341.32	439.03	2431.32	1187.67	452.355	2343.27	1035.16	402.792	2308.22	948.155	459.547	2347.21	936.061	451.689	2288.4	889.032
468	0	198.883	2220.25	1713.04	108.835	2224.25	1710.76	197.012	2413.39	1705.09	85.8927	2398.29	1704.15	142.84	2431.74	1562.42	166.285	2504.58	1299.64	162.356	2287.58	1479.39	154.472	2221.43	1276.98	73.0282	2508.39	1354.39	338.293	2364.21	1524.5	421.667	2406.14	1339.84	437.96	2421.9	1186.13	452.678	2334.95	1033.55	403.077	2298.97	946.503	459.728	2339.31	934.424	452.403	2280.44	887.281
469	0	199.771	2208.04	1711.25	109.674	2211.95	1709.19	197.489	2401.28	1703.29	86.2973	2385.78	1702.57	142.548	2419.12	1560.47	165.68	2492.28	1297.83	162.713	2275.39	1477.85	154.331	2208.94	1275.33	72.7336	2496.31	1352.88	337.949	2352.42	1522.68	421.398	2395.92	1337.96	437.418	2412.58	1184.26	452.848	2326.38	1031.49	403.553	2289.97	944.527	459.82	2331.1	932.354	452.923	2272.18	885.114
470	0	201.063	2195.7	1709.41	110.71	2199.49	1707.24	197.642	2388.97	1701.04	86.654	2373.27	1700.88	142.648	2406.76	1558.58	161.467	2480.84	1296.69	163.209	2263.11	1475.99	154.377	2196.36	1273.26	72.4426	2484.05	1350.8	337.663	2340.33	1520.68	420.732	2385.16	1335.98	436.725	2402.98	1182.25	452.698	2317.15	1029.08	402.193	2276.49	944.553	459.535	2322.76	929.97	453.09	2263.45	882.422
471	0	201.641	2183.39	1706.63	111.62	2186.85	1705.05	197.977	2376.54	1698.82	87.1408	2360.55	1698.5	142.673	2394.14	1556.4	161.673	2468.84	1294.54	163.22	2250.6	1473.53	154.272	2183.75	1270.95	72.2329	2471.58	1348.58	337.832	2328.39	1518.23	420.523	2374.61	1333.64	435.997	2393	1179.87	453.102	2308.44	1026.38	402.755	2267.29	941.938	459.262	2314.08	927.375	453.656	2254.82	879.676
472	0	202.481	2170.86	1704.06	112.403	2174.04	1702.55	198.553	2364.01	1696.14	87.6531	2347.7	1696.38	142.896	2381.34	1553.67	162.003	2456.56	1292.23	163.546	2237.95	1471.01	154.725	2171.33	1268	72.1818	2459.02	1346.45	338.137	2316.43	1515.55	420.326	2363.69	1330.96	435.291	2382.7	1177.34	453.001	2298.81	1023.57	403.413	2257.4	938.511	459.401	2305.41	924.419	454.364	2246.29	876.644
473	0	203.663	2157.96	1701.66	113.305	2161.08	1700.07	199.119	2351.26	1693.68	88.1729	2334.8	1693.8	143.304	2368.83	1551.32	162.279	2443.9	1289.6	163.918	2225.05	1468.51	154.947	2158.58	1265.45	72.2146	2446.19	1343.79	338.322	2304.16	1513	420.184	2352.55	1328.27	435.462	2372.88	1175.19	453.248	2289.37	1020.59	403.719	2247.94	935.666	459.396	2296.25	921.714	454.897	2237.2	873.451
474	0	204.835	2145.29	1698.5	114.342	2147.95	1697.23	199.684	2338.57	1690.6	88.7929	2321.74	1691.34	143.404	2355.73	1548.8	162.591	2431.23	1287.12	164.977	2212.28	1465.79	155.508	2145.82	1262.7	72.3498	2433.4	1341.43	339.017	2291.93	1509.83	419.669	2340.77	1325.35	434.231	2361.51	1171.87	453.198	2279.42	1017.08	404.063	2237.84	931.777	459.459	2287.1	918.318	455.497	2227.74	869.746
475	0	205.775	2132.37	1695.48	115.628	2134.94	1694.22	200.352	2325.54	1687.95	89.5167	2308.55	1688.58	143.878	2342.72	1546.07	163.226	2418.43	1284.09	165.515	2199.4	1462.75	155.468	2132.63	1259.49	72.5982	2420.44	1338.71	339.074	2279.16	1507.13	419.649	2329.2	1322.19	433.732	2350.36	1169.03	453.553	2269.6	1014.06	404.622	2228.03	928.295	459.595	2277.51	915.111	455.96	2219.14	866.035
476	0	206.664	2119.24	1692.26	116.639	2121.7	1691.33	201.205	2312.44	1684.97	90.3349	2295.28	1685.42	144.492	2329.6	1542.99	163.841	2405.58	1281.41	165.98	2186.05	1459.54	155.91	2119.66	1256.01	72.952	2407.25	1335.89	339.685	2266.62	1504.06	419.7	2317.36	1319.18	433.26	2338.92	1165.98	453.48	2258.95	1010.5	405.16	2218.65	924.784	459.966	2267.89	911.598	456.593	2209.69	861.856
477	0	208.248	2106.03	1689.32	117.741	2108.25	1688.14	201.943	2299.33	1681.68	91.3561	2281.95	1682.58	144.989	2316.44	1539.97	164.449	2392.55	1278.07	167.092	2172.88	1456.64	156.503	2106.62	1252.94	73.3624	2393.98	1332.72	340.349	2253.94	1500.78	419.654	2305.19	1315.61	432.497	2327.03	1162.62	453.576	2248.35	1006.39	405.776	2207.94	920.242	460.2	2258.09	907.545	457.122	2200.31	857.647
478	0	209.494	2092.58	1686.43	119.236	2094.84	1685.01	202.9	2285.91	1678.76	92.3908	2268.46	1679.29	145.997	2303.39	1537.03	165.196	2379.39	1275.11	167.839	2159.6	1453.49	157.278	2093.45	1249.73	73.9193	2380.7	1329.92	340.701	2240.7	1497.73	419.094	2292.45	1312	431.838	2314.9	1159.16	453.749	2237.72	1002.61	406.245	2197.67	916.158	460.021	2248.2	903.932	457.679	2190.64	853.287
479	0	210.783	2079.03	1683.45	120.581	2081.25	1682.21	204.023	2272.54	1676.13	93.5263	2254.86	1676.65	146.769	2289.9	1534.07	165.817	2365.99	1271.94	168.898	2145.94	1450.74	158.211	2080.43	1246.75	74.5539	2367.23	1327.15	341.486	2227.55	1494.7	419.235	2279.58	1308.65	431.858	2302.83	1156.2	454.085	2226.56	998.995	406.878	2187.26	912.27	460.62	2237.8	900.231	458.423	2180.9	849.127
480	0	212.255	2065.48	1680.53	121.921	2067.47	1679.28	205.261	2258.77	1673.29	94.7066	2241.04	1674.04	147.928	2276.47	1531.55	166.285	2352.51	1269.31	170.148	2132.46	1447.92	159.009	2067.07	1244.03	75.1108	2353.49	1324.55	342.561	2214.23	1491.64	419.684	2266.53	1305.28	431.506	2289.82	1153.04	454.952	2215.73	995.568	407.576	2176.4	907.853	461.012	2227.21	896.676	459.113	2170.68	844.819
481	0	213.877	2051.71	1677.71	123.611	2053.71	1676.53	206.676	2245.12	1670.85	95.9974	2227.1	1671.62	148.615	2262.78	1528.45	166.408	2338.96	1266.45	171.533	2118.68	1445.41	160.02	2053.43	1241.6	75.746	2339.78	1322.22	343.93	2201.06	1488.55	419.938	2252.9	1301.85	431.226	2276.54	1149.63	454.927	2203.62	991.714	408.58	2165.24	904.406	461.402	2216.35	893.071	459.78	2160.36	840.437
482	0	215.206	2037.88	1674.77	125.166	2039.68	1673.99	208.149	2231.24	1668.32	97.4542	2213.19	1669.23	150.126	2248.92	1526.63	166.481	2325.33	1264.26	172.902	2104.88	1442.9	161.129	2039.76	1238.96	76.312	2325.79	1319.8	345.249	2187.43	1485.67	420.764	2239.38	1298.46	431.095	2262.93	1146.67	455.106	2191.31	988.304	408.944	2153.65	899.582	461.977	2205.11	889.478	460.385	2149.58	836.455
483	0	216.736	2023.85	1672.23	126.839	2025.75	1671.56	209.687	2217.14	1666.2	99.1479	2199.21	1667.03	151.641	2235.09	1523.86	166.703	2311.33	1261.95	173.232	2090.31	1440.49	162.427	2025.88	1236.5	77.1574	2311.73	1317.63	346.349	2173.49	1483.02	421.588	2225.5	1295.54	431.1	2249.2	1143.73	455.708	2178.97	984.775	409.676	2141.67	896.053	462.685	2193.54	886.297	461.001	2138.47	832.401
484	0	218.634	2009.7	1670.18	128.466	2011.55	1669.14	211.373	2203.08	1664.16	100.9	2185.16	1664.76	153.41	2221.21	1521.66	167.056	2297.16	1259.8	175.139	2076.48	1438.05	163.728	2011.6	1234.49	77.8526	2297.32	1315.84	348.128	2160	1480.33	422.353	2211.29	1292.43	431.309	2235.24	1140.68	456.23	2166.31	981.35	410.362	2129.97	892.178	463.431	2181.45	883.057	461.687	2127.07	828.419
485	0	220.491	1995.74	1667.68	130.164	1997.33	1667.05	213.388	2189.07	1661.9	102.762	2171.02	1662.76	154.751	2206.87	1519.97	167.498	2283.11	1257.69	176.803	2062.19	1435.75	165.091	1997.16	1232.45	78.8129	2282.87	1314.01	349.505	2145.91	1477.66	423.384	2196.97	1288.9	431.544	2221.07	1137.59	456.797	2153.21	978.034	411.215	2118.15	888.607	464.222	2169.35	879.796	462.419	2115.47	824.423
486	0	222.36	1981.42	1665.93	131.839	1983.08	1664.9	215.386	2174.77	1660.09	104.81	2156.81	1660.96	156.909	2192.69	1517.9	168.147	2268.47	1255.59	179.309	2047.95	1434.25	166.586	1982.7	1230.64	79.9326	2268.34	1312.3	351.184	2131.71	1475.19	424.832	2182.59	1285.89	432.176	2206.83	1134.81	457.542	2139.93	974.795	411.449	2105.94	884.757	464.998	2156.69	876.711	463.101	2103.33	820.773
487	0	224.053	1966.94	1664.6	133.559	1968.71	1663.32	217.441	2160.3	1658.75	106.925	2142.56	1659.41	159.271	2178.57	1516.18	168.671	2253.98	1254.22	180.85	2033.26	1432.92	168.186	1968.11	1229.25	80.8937	2253.65	1310.83	353.255	2117.73	1472.82	425.886	2167.69	1283.28	432.643	2192.16	1132.37	458.186	2126.28	972.181	412.14	2092.84	881.862	465.944	2143.67	873.982	463.814	2090.83	817.658
488	0	226.246	1952.56	1663.52	135.634	1954.36	1662.3	219.616	2145.91	1657.75	109.071	2128.19	1658.45	161.389	2164.09	1515.15	169.837	2239.5	1252.85	182.518	2018.42	1431.46	171.246	1954.56	1227.62	82.2349	2239.11	1309.77	355.512	2103.48	1470.82	427.109	2153.03	1280.74	433.251	2177.34	1129.93	458.905	2112.35	969.386	413.046	2079.44	879.054	466.674	2130.22	871.562	464.452	2077.83	814.443
489	0	228.261	1938.04	1662.78	137.6	1939.96	1661.51	221.883	2131.3	1657.21	111.317	2113.86	1657.64	163.538	2149.63	1514.24	170.487	2224.35	1252.07	184.873	2003.88	1430.88	172.707	1939.65	1226.63	83.6647	2224.64	1309.62	357.387	2088.76	1469.05	428.667	2138.29	1278.62	433.586	2162.17	1128.14	459.567	2097.95	967.268	414.147	2065.39	877.17	467.415	2116.45	869.481	465.118	2064.44	811.875
490	0	230.047	1923.45	1662.34	139.658	1925.57	1661	224.379	2116.76	1657.07	113.731	2099.54	1657.08	166.005	2135.03	1513.97	171.205	2209.61	1251.62	186.321	1989.23	1430.04	173.226	1923.92	1226.69	85.3314	2210.01	1309.08	359.891	2074.41	1468	430.388	2123.31	1277.05	434.738	2147.08	1126.7	460.479	2083.39	965.711	415.046	2051.21	875.468	468.325	2102.17	867.888	465.857	2050.67	810.04
491	0	232.314	1908.92	1662.34	141.689	1911.23	1660.87	226.813	2102.21	1656.74	116.04	2085.23	1657.12	168.522	2120.66	1513.91	172.082	2194.77	1251.11	188.595	1974.69	1430.18	174.648	1908.37	1227.07	87.0412	2195.35	1309.18	361.778	2059.6	1467.12	431.751	2108.1	1275.99	435.76	2131.78	1125.48	461.343	2068.49	964.381	414.314	2037.53	871.843	469.134	2087.58	866.735	466.53	2036.53	808.319
492	0	234.367	1894.37	1662.46	143.734	1896.9	1660.89	229.305	2087.77	1657	118.53	2070.99	1657.16	171.015	2106.36	1513.69	173.133	2179.77	1251.04	190.765	1960.13	1430.26	176.56	1893.27	1227.92	88.7721	2180.77	1309	364.168	2045.37	1466.46	433.449	2093.07	1275.01	436.933	2116.49	1124.31	462.208	2053.47	963.094	414.949	2022.66	870.849	469.894	2072.68	865.498	466.859	2021.76	807.033
493	0	235.675	1879.71	1662.59	145.794	1882.63	1661.38	231.746	2073.33	1657.41	120.997	2056.76	1657.46	173.48	2092.11	1513.89	174.331	2165.2	1251	192.511	1945.6	1430.47	178.277	1878.04	1228.73	90.3415	2166.21	1309.48	366.479	2030.89	1466.17	435.236	2078.12	1274.25	438.505	2101.08	1123.65	463.132	2038.07	962.417	415.682	2007.48	870.319	470.662	2057.28	864.889	467.294	2006.73	806.217
494	0	237.728	1865.26	1663.46	147.594	1868.43	1661.73	234.314	2058.97	1658.24	123.478	2042.69	1657.92	175.723	2077.88	1514.56	175.81	2150.74	1251.38	194.631	1931.21	1431.39	179.917	1862.75	1229.72	92.1798	2151.78	1310.17	368.808	2016.55	1466.33	437.116	2062.95	1273.98	439.61	2085.49	1123.42	464.142	2022.34	962.354	417.26	1991.24	871.614	471.56	2041.55	864.619	467.787	1991.06	805.724
495	0	239.513	1850.95	1664.19	149.625	1854.34	1662.79	236.795	2044.62	1659.04	125.897	2028.75	1659.3	178.213	2063.94	1515.21	177.35	2136.35	1252.16	196.565	1916.69	1432.78	181.398	1847.5	1231.27	93.9847	2137.69	1310.96	370.978	2001.85	1466.61	438.951	2047.77	1273.95	441.039	2069.75	1123.55	465.077	2006.3	962.536	417.9	1975.41	871.834	472.848	2025.28	864.597	468.19	1974.86	805.84
496	0	240.804	1836.41	1665.17	151.497	1840.44	1663.71	239.113	2030.33	1660.34	128.248	2014.84	1660.37	180.541	2049.78	1516.43	178.758	2122.37	1253.26	198.446	1902.77	1433.7	182.732	1832.49	1232.99	95.6935	2123.75	1312.58	373.12	1987.27	1467.34	440.711	2032.43	1274.52	442.597	2053.9	1123.97	466.072	1989.89	962.97	418.207	1958.88	872.348	473.598	2008.57	865.215	468.61	1958.22	806.318
497	0	242.608	1822.37	1666.33	153.302	1826.62	1664.74	241.596	2016.37	1661.69	130.547	2001.09	1661.53	182.601	2035.9	1517.9	180.019	2108.52	1254.74	199.856	1888.81	1434.59	184.105	1817.84	1234.31	97.5124	2110.12	1313.95	374.993	1972.43	1468.42	442.651	2017.1	1275.22	444.299	2038.04	1124.56	467.109	1973.22	963.811	418.85	1942.13	873.315	474.288	1991.48	865.905	468.97	1940.9	807.185
498	0	244.163	1808.29	1667.49	154.828	1812.98	1665.98	243.903	2002.32	1662.72	132.731	1987.42	1662.86	185.149	2022.09	1519.06	181.39	2094.84	1255.99	201.314	1875	1436.18	185.186	1803.44	1235.76	99.2986	2096.88	1315.56	376.861	1957.9	1469.63	444.578	2001.83	1275.9	445.807	2021.7	1126.08	468.049	1956.32	964.764	419.491	1925.24	874.64	475.257	1974.09	866.719	469.376	1923.29	808.054
499	0	245.486	1794.46	1668.55	156.333	1799.43	1667.22	246.027	1988.49	1663.98	134.86	1973.98	1664.48	186.751	2008.54	1520.64	183.018	2081.63	1257.23	202.392	1861.25	1437.26	185.943	1789.15	1237.28	101.089	2083.79	1317.12	378.327	1943.25	1470.57	446.271	1986.7	1277.15	447.94	2006.05	1126.03	469.017	1939.23	965.753	419.996	1907.87	875.923	476.067	1956.36	867.658	469.744	1905.3	809.383
500	0	246.707	1780.65	1669.83	157.778	1786.01	1668.59	248.013	1974.9	1665.35	136.829	1960.64	1665.93	188.657	1995.22	1522.22	184.679	2068.54	1258.87	203.497	1847.8	1438.73	186.532	1775.36	1238.33	102.812	2070.87	1318.9	380.024	1928.91	1471.92	448.145	1971.05	1278.11	449.81	1989.94	1127.02	470.146	1921.92	967.104	420.279	1890.22	877.519	476.84	1938.27	868.717	469.977	1886.76	810.942
501	0	248.052	1767.03	1671.27	159.139	1772.75	1670.36	249.936	1961.3	1667.02	138.706	1947.53	1667.61	190.671	1982.26	1523.74	186.291	2055.48	1260.54	204.334	1834.24	1440.49	186.952	1761.96	1239.66	104.594	2058.2	1320.64	381.4	1914.6	1473.38	449.954	1955.32	1279.44	451.924	1973.53	1128.02	470.998	1904.09	968.76	420.725	1872.44	879.483	477.775	1919.71	870.243	470.29	1867.8	812.859
502	0	249.083	1753.67	1672.75	160.367	1759.73	1671.98	251.723	1947.9	1668.76	140.359	1934.42	1669.55	192.152	1969.25	1525.49	187.821	2042.84	1262.34	205.059	1820.99	1442.35	187.157	1748.95	1241.4	106.381	2045.68	1322.28	382.415	1900.42	1474.89	451.711	1939.67	1280.59	453.902	1956.89	1129.24	471.891	1886.2	970.281	421.027	1854.34	881.494	478.506	1900.83	871.658	470.532	1848.52	814.857
503	0	250.093	1740.23	1674.54	161.528	1746.59	1673.85	253.186	1934.71	1670.7	141.81	1921.42	1671.62	193.128	1956.16	1527.59	189.271	2030.17	1264.16	205.173	1807.92	1444.42	187.067	1736.28	1243.12	108.232	2033.33	1324.01	383.455	1886.56	1476.8	453.343	1923.88	1281.98	456.029	1940.26	1130.42	472.727	1868.03	971.94	421.279	1835.99	883.718	479.488	1881.78	873.379	470.633	1828.84	817.17
504	0	251.127	1727.38	1675.99	162.392	1733.74	1675.65	254.687	1921.58	1672.66	143.169	1908.5	1673.97	194.813	1943.66	1529.4	190.752	2017.72	1266.2	205.75	1795.02	1446.58	187.065	1724.05	1245.03	109.936	2021.07	1325.9	384.378	1872.77	1478.66	454.982	1908.04	1283.63	458.035	1923.39	1131.89	473.466	1849.41	974.047	421.514	1817.37	886.191	480.337	1862.28	875.169	470.846	1808.88	819.81
505	0	251.963	1714.14	1678.39	163.311	1720.9	1677.83	255.833	1908.59	1674.92	144.355	1895.87	1676.3	195.867	1930.94	1531.54	191.984	2005.23	1268.38	206.144	1782.35	1448.84	186.786	1712.09	1247.07	111.615	2008.89	1327.96	385.388	1859.48	1480.71	456.628	1892.36	1285.46	460.106	1906.44	1133.62	474.154	1830.7	976.451	421.682	1798.72	888.825	481.166	1842.33	877.514	470.859	1788.59	822.701
506	0	252.691	1701.39	1680.39	163.93	1708.23	1680	256.906	1895.79	1677.27	145.4	1883.17	1678.72	196.766	1918.56	1533.82	193.25	1992.81	1270.56	206.479	1769.73	1451.38	186.427	1700.29	1249.15	113.32	1996.85	1329.89	386.053	1846.26	1482.98	457.891	1876.54	1287.49	462.051	1889.44	1135.23	474.787	1811.96	978.893	421.58	1779.87	891.815	481.828	1822.53	879.941	470.967	1768.32	825.824
507	0	253.186	1688.68	1682.57	164.711	1695.64	1682.47	257.777	1882.91	1679.77	146.354	1870.59	1681.16	197.85	1906.06	1536.23	194.611	1980.49	1272.6	206.802	1757.24	1453.84	186.272	1688.65	1251.54	115.078	1984.88	1331.99	386.69	1833.45	1485.35	459.133	1860.88	1289.59	463.778	1872.41	1137.16	475.314	1792.98	981.597	421.558	1760.84	895.075	482.754	1802.25	882.529	471.12	1747.77	829.366
508	0	253.397	1675.82	1685.38	165.152	1683.16	1685.04	258.75	1870.32	1682.33	147.249	1858.17	1683.91	198.636	1893.61	1539.05	195.782	1968.04	1275.13	206.916	1745.42	1456.66	186.073	1677	1254.21	116.519	1972.97	1334.45	387.46	1820.45	1487.8	460.341	1845.44	1292.14	465.678	1855.26	1139.46	475.843	1773.95	984.879	421.859	1742.08	898.705	483.452	1781.84	885.637	471.047	1726.92	833.375
509	0	253.778	1663.22	1688.23	165.504	1670.83	1687.55	259.559	1857.87	1684.99	147.864	1845.82	1686.62	199.568	1881.29	1541.6	197.114	1955.9	1278.04	207.253	1733.17	1459.43	186.84	1665.77	1256.5	118.056	1961.1	1337.19	388.106	1807.59	1490.62	461.314	1830.05	1294.81	467.348	1838.17	1141.92	476.25	1754.76	988.343	421.785	1723	902.388	483.945	1761.53	889.093	471.269	1706.41	837.678
510	0	254.088	1650.86	1690.68	165.663	1658.46	1690.46	260.184	1845.43	1687.67	148.587	1833.64	1689.15	200.33	1869.08	1544.24	197.776	1943.71	1281.32	207.536	1721	1462.29	186.338	1653.53	1259.53	119.501	1949.22	1339.83	388.579	1794.63	1493.34	462.134	1814.71	1297.53	468.965	1821.11	1144.6	476.475	1735.64	991.733	421.606	1703.64	906.598	484.529	1740.88	892.478	470.819	1685.22	841.987
511	0	254.32	1638.49	1693.29	165.809	1646.28	1692.97	260.748	1833.16	1690.25	149.104	1821.44	1691.56	201.256	1856.9	1546.8	198.993	1931.78	1283.9	207.918	1708.91	1464.71	186.204	1641.57	1262.05	120.719	1937.25	1342.32	389.207	1781.84	1496.12	463.109	1799.82	1300.16	470.658	1804.28	1147.13	476.935	1716.73	995.532	421.623	1684.49	910.285	485.096	1720.52	896.254	470.74	1664.51	846.772
512	0	254.416	1626.26	1695.89	165.902	1634.17	1695.44	261.298	1820.86	1692.77	149.645	1809.42	1694.03	202.201	1844.88	1549.16	200.454	1919.24	1285.68	208.085	1696.68	1467.15	186.307	1629.59	1264.51	122.003	1925.27	1344.73	389.685	1768.93	1498.83	463.953	1785.1	1302.94	472.143	1787.48	1149.7	477.57	1697.97	999.413	421.576	1665.19	914.677	485.499	1700.08	900.013	470.562	1643.54	851.457
513	0	254.628	1614.16	1698.44	166.146	1622.29	1697.88	261.757	1808.72	1695.18	149.983	1797.36	1696.36	202.74	1832.73	1551.72	201.572	1907.07	1287.96	208.382	1684.54	1469.88	186.579	1617.78	1267.07	123.188	1913.31	1347.02	390.134	1756.1	1501.52	464.775	1770.68	1305.53	473.538	1770.87	1152.27	477.961	1679.12	1003.45	421.243	1645.7	919.348	485.744	1679.65	903.921	470.2	1622.6	856.403
514	0	254.428	1601.99	1700.75	166.184	1610.21	1700.43	262.105	1796.58	1697.41	150.46	1785.53	1698.58	203.5	1820.67	1553.89	202.706	1895.05	1290.27	208.525	1672.34	1472.25	186.911	1605.92	1269.38	124.37	1901.32	1349.34	390.499	1743.38	1504.12	465.428	1756.05	1308.31	475.068	1754.42	1154.92	478.139	1660.33	1007.26	421.397	1626.31	924.833	485.91	1659.37	907.862	470.045	1601.95	861.259
515	0	254.45	1589.88	1703.15	166.232	1598.33	1702.4	262.485	1784.52	1699.39	150.776	1773.61	1700.51	205.464	1808.56	1555.7	203.395	1882.28	1292.31	208.895	1660.31	1474.39	187.011	1594.03	1271.52	125.296	1889.21	1351.29	390.85	1730.56	1506.55	466.182	1741.77	1310.8	476.477	1738.05	1157.46	478.663	1641.86	1011.05	421.327	1607.25	928.703	486.09	1639.23	911.624	469.472	1580.9	866.15
516	0	254.531	1577.81	1705.37	166.276	1586.55	1704.22	262.651	1772.46	1701.25	151.084	1761.93	1702.16	205.103	1796.5	1557.69	203.975	1869.62	1294.08	209.115	1648.2	1476.22	187.228	1582.18	1273.32	126.319	1877.07	1353.1	391.301	1717.84	1508.7	466.931	1727.52	1313.04	477.668	1721.73	1159.72	479.016	1623.43	1014.66	421.109	1587.87	933.054	485.939	1619.06	915.395	468.979	1560.15	870.977
517	0	254.437	1565.71	1707.47	166.331	1574.69	1706.17	263.179	1760.45	1702.96	151.375	1749.97	1703.75	205.579	1784.32	1559.12	205.509	1857.93	1294.6	209.199	1636	1478.12	187.33	1570.21	1275.13	127.009	1864.86	1354.76	391.42	1705.15	1510.67	467.782	1713.44	1315.08	479.022	1705.74	1161.62	479.104	1605.03	1018.02	420.8	1568.46	937.521	485.773	1598.99	918.815	468.439	1539.4	875.844
518	0	254.344	1553.68	1709.05	166.378	1562.87	1707.66	263.315	1748.36	1704.17	151.646	1738.18	1704.9	206.324	1772.27	1560.54	206.538	1845.76	1296.09	209.518	1623.84	1479.78	187.542	1558.27	1276.85	128.008	1852.66	1356.22	391.745	1692.35	1512.36	468.549	1699.22	1316.84	480.405	1689.75	1163.39	479.452	1586.74	1021.43	420.571	1549.18	941.55	485.801	1579.19	922.358	467.944	1518.82	880.674
519	0	254.426	1541.74	1710.3	166.156	1550.9	1708.83	263.625	1736.32	1705.53	151.885	1726.45	1705.95	206.843	1759.99	1561.79	207.43	1833.32	1297.44	209.571	1611.55	1480.83	187.64	1546.25	1277.71	128.913	1840.47	1357.27	392.054	1679.69	1513.84	469.275	1685.03	1318.5	481.531	1673.82	1164.98	479.659	1568.62	1024.64	420.364	1529.89	945.603	485.572	1559.59	925.538	467.295	1498.25	885.212
520	0	254.1	1529.72	1711.21	166.075	1539.01	1709.74	263.818	1724.29	1706.01	152.106	1714.44	1706.53	207.117	1747.75	1562.4	208.412	1820.97	1298.18	209.894	1599.5	1481.81	187.63	1534.13	1279.03	129.473	1828.19	1357.93	392.16	1666.87	1514.83	469.907	1671.05	1319.49	482.828	1658.19	1166.06	479.683	1550.52	1027.43	419.885	1510.69	949.809	485.024	1539.7	928.472	466.515	1477.8	889.677
521	0	253.95	1517.32	1712.58	166.095	1527.14	1710.51	263.977	1712.15	1706.49	152.362	1702.61	1706.84	206.937	1735.21	1563.19	209.233	1808.7	1298.36	209.946	1587.07	1482.49	187.819	1522	1279.63	130.106	1815.7	1358.4	392.401	1654.21	1515.37	470.537	1656.86	1320.35	483.861	1642.6	1166.69	479.793	1532.53	1029.99	419.535	1491.68	953.668	484.31	1520.18	931.054	465.73	1457.45	893.709
522	0	253.849	1505.36	1712.32	165.764	1515.04	1710.57	264.456	1700.06	1706.49	152.429	1690.71	1706.51	207.508	1723.04	1563.1	210.09	1796.32	1298.61	210.237	1574.84	1482.45	187.855	1509.72	1279.86	130.502	1802.98	1358.46	392.758	1641.5	1515.72	471.167	1642.85	1320.9	485.119	1627.2	1167.18	480.117	1514.94	1032.51	419.107	1472.6	956.815	484.082	1500.69	933.629	465.121	1437.42	897.775
523	0	253.651	1493.15	1712.32	165.754	1503.13	1710.38	264.483	1687.68	1706.4	152.792	1678.75	1706.57	207.784	1710.57	1563.05	210.923	1784	1298.68	210.428	1562.45	1482.38	187.996	1497.55	1279.34	132.775	1792.05	1358.53	392.935	1628.6	1515.77	471.847	1628.7	1321.18	486.076	1611.67	1167.41	480.084	1497.17	1034.5	418.684	1453.66	959.997	483.465	1481.38	935.973	464.177	1417.23	901.628
524	0	253.408	1480.77	1712.13	165.798	1491.07	1709.9	264.705	1675.47	1705.8	152.832	1666.54	1705.7	208.077	1698.01	1562.57	211.565	1771.56	1298.02	210.589	1550.09	1481.82	187.844	1485.1	1279.18	137.754	1780.39	1357.2	393.152	1615.82	1515.23	472.303	1614.61	1320.98	486.988	1596.21	1167.1	480.071	1479.66	1036.42	418.128	1434.87	963.096	482.642	1462.04	937.931	463.103	1397.05	905.115
525	0	253.105	1468.36	1711.23	165.517	1478.76	1709.13	264.481	1662.87	1704.84	153.023	1654.39	1704.78	208.395	1685.45	1561.61	212.359	1759.32	1297.1	210.73	1537.58	1481.12	187.878	1472.71	1278.17	133.502	1767.37	1357.85	393.191	1602.91	1514.3	472.891	1600.51	1320.35	487.975	1580.77	1166.8	480.068	1462.02	1037.96	417.675	1416.24	965.754	481.462	1442.73	939.955	462.621	1377.83	908.175
526	0	252.9	1455.92	1710.09	165.396	1466.63	1707.72	264.501	1650.32	1703.33	153.022	1642.06	1703.27	208.61	1672.93	1560.1	212.749	1746.77	1296.11	210.652	1525.06	1479.63	187.932	1460.41	1276.77	137.794	1755.37	1355.55	393.354	1590	1513.08	473.56	1586.79	1319.28	488.922	1565.66	1165.75	480.015	1444.74	1038.99	417.009	1397.63	968.045	480.955	1423.6	941.278	461.171	1357.67	911.328
527	0	252.591	1443.42	1708.4	165.032	1454.12	1706.01	264.641	1637.64	1701.86	152.968	1629.81	1701.4	208.968	1660.4	1558.53	212.778	1734.28	1295.51	210.605	1512.44	1477.87	187.569	1447.74	1275	134.781	1742.62	1355.08	393.374	1577.1	1511.44	473.783	1572.64	1317.99	489.621	1550.62	1164.21	479.256	1427.55	1039.21	416.348	1379.21	969.941	480.216	1404.76	942.23	460.32	1338.28	913.699
528	0	252.205	1430.68	1706.53	164.683	1441.59	1704.25	264.565	1624.93	1699.65	153.046	1617.28	1699.23	208.793	1647.46	1556.57	212.842	1721.78	1293.38	210.513	1499.74	1475.88	187.411	1435.19	1273.16	134.96	1730.04	1353.14	393.402	1564.32	1509.22	474.081	1558.9	1315.77	490.358	1535.68	1162.23	479.487	1410.48	1039.67	415.7	1360.88	971.615	479.341	1386.08	942.843	459.155	1318.93	915.687
529	0	251.932	1417.77	1704.63	164.296	1428.92	1701.82	264.489	1612.11	1697.42	153.098	1604.58	1696.89	209.925	1634.72	1554.08	212.953	1709.44	1291.02	210.208	1486.89	1473.52	187.24	1422.62	1270.51	135.259	1717.41	1350.86	393.194	1551.28	1506.58	474.389	1545.05	1313.63	490.701	1520.51	1160.03	479.123	1393.26	1039.71	414.798	1342.55	972.817	478.136	1367.39	943.23	458.23	1299.91	917.385
530	0	251.41	1404.94	1701.92	164.028	1416.18	1699.46	264.381	1599.24	1694.55	152.832	1591.94	1694.29	209.03	1621.81	1551.65	212.921	1697.03	1288.51	209.981	1474.11	1470.75	186.987	1410.01	1267.76	135.299	1704.73	1347.98	393.185	1538.28	1503.95	474.636	1531.26	1311.03	491.332	1505.69	1157.57	478.844	1376.4	1039.45	414.108	1324.82	973.599	477.176	1348.97	942.923	457.489	1280.73	919.693
531	0	251.07	1392.05	1698.97	163.511	1403.25	1696.63	264.078	1586.12	1691.76	152.606	1579.15	1691.25	208.558	1608.73	1548.67	212.553	1684.28	1285.8	209.666	1461.23	1467.96	186.644	1397.25	1264.78	135.332	1692.02	1345.19	392.848	1525.13	1500.91	474.496	1517.6	1308.16	491.919	1490.86	1154.84	478.369	1359.68	1038.87	413.183	1307.11	974.309	476.434	1330.46	942.975	456.452	1262.53	920.175
532	0	250.508	1378.8	1695.97	162.95	1390.24	1693.5	263.763	1572.99	1688.67	152.213	1566.17	1687.96	208.419	1595.8	1545.58	212.198	1671.53	1282.48	209.019	1448.13	1464.7	186.238	1384.38	1261.54	134.881	1678.97	1342.16	392.373	1511.9	1497.72	474.359	1503.74	1304.94	492.022	1475.79	1151.93	477.948	1343.2	1037.91	412.292	1289.6	974.57	475.13	1312.05	942.733	454.992	1243.65	921.5
533	0	249.879	1365.59	1692.38	162.314	1377.08	1690.03	263.412	1559.8	1685.41	151.729	1552.99	1684.75	207.825	1582.57	1542.17	211.767	1658.56	1279.26	208.505	1435.03	1461.11	185.677	1371.46	1257.57	134.668	1666.07	1338.65	392.048	1498.7	1494.1	474.172	1490.23	1301.49	492.187	1461.12	1148.59	476.863	1326.71	1036.38	411.487	1272.54	974.262	473.393	1294.55	941.276	453.48	1225.43	922.506
534	0	249.285	1352.39	1688.56	161.639	1363.76	1686.35	262.722	1546.29	1681.83	151.162	1539.79	1681.25	207.337	1569.39	1538.64	211.695	1645.64	1274.81	207.784	1421.79	1457.57	185.298	1358.81	1253.69	134.173	1652.82	1334.94	391.483	1485.27	1490.7	473.746	1476.66	1297.85	492.179	1446.25	1145.34	476.2	1310.46	1034.77	410.487	1255.54	973.643	473.293	1277.05	940.596	452.347	1207.72	922.53
535	0	248.429	1338.8	1684.88	160.817	1350.35	1682.56	262.123	1532.87	1678.29	150.545	1526.26	1677.72	206.776	1556.11	1535.27	211.29	1632.4	1270.94	207.088	1408.5	1453.91	184.521	1345.69	1249.91	133.695	1639.52	1331.14	390.74	1471.75	1487.06	472.871	1463.09	1293.97	492.001	1431.5	1141.89	475.486	1294.4	1033	409.335	1238.75	973.08	472.113	1259.74	939.218	451.034	1190.19	922.279
536	0	247.426	1325.23	1681.07	159.925	1336.79	1678.72	261.385	1519.27	1674.53	149.782	1512.72	1673.89	206.391	1542.87	1531.17	211.289	1620.74	1269.06	206.23	1395.04	1449.84	184.145	1333.16	1245.73	133.137	1626.14	1326.82	390.135	1458.34	1483.28	472.12	1449.76	1290.19	491.661	1416.82	1138.26	475.164	1278.48	1031.47	408.216	1222.25	972.014	470.081	1242.7	937.62	449.901	1173.04	921.672
537	0	246.385	1311.42	1677.28	158.94	1323.16	1674.83	260.471	1505.6	1670.65	149.149	1499.13	1670	205.356	1529.38	1527.35	210.406	1606.35	1264.28	205.311	1381.49	1445.92	183.363	1319.81	1241.73	132.49	1612.67	1322.71	389.287	1444.68	1479.52	471.094	1436.15	1286.27	490.995	1402.15	1134.5	474.22	1262.8	1028.98	407.071	1205.92	970.372	469.718	1226.09	936.02	448.734	1156.19	920.897
538	0	245.363	1297.67	1673.25	157.85	1309.44	1670.85	259.402	1491.74	1666.91	148.089	1485.36	1666.1	204.481	1515.81	1523.44	209.733	1592.57	1260.12	204.359	1367.78	1442	182.719	1306.51	1237.69	131.843	1599.01	1318.53	388.378	1431.02	1475.61	469.801	1422.62	1282.23	490.184	1387.55	1130.73	473.197	1247.24	1026.72	405.873	1189.87	968.631	468.473	1209.81	933.789	447.606	1139.78	919.608
539	0	243.989	1283.6	1669.6	156.477	1295.45	1666.91	258.195	1477.63	1663.24	147.028	1471.58	1662.2	203.455	1501.97	1519.98	208.908	1578.68	1256.18	203.332	1353.96	1438.22	182.163	1293.03	1233.52	130.921	1585.15	1314.4	387.324	1417.17	1471.76	468.481	1409.03	1278.27	489.348	1373.06	1127.14	472.195	1232.09	1023.98	404.862	1174.24	966.486	467.162	1193.78	931.459	446.733	1123.76	918.453
540	0	242.713	1269.62	1665.71	155.15	1281.39	1663.16	257.26	1463.57	1659.64	145.78	1457.55	1658.6	202.302	1488.18	1515.92	208.316	1564.54	1252.46	202.32	1340	1434.48	181.209	1278.93	1229.58	130.327	1571.2	1310.75	385.946	1403.26	1468.06	467.021	1395.33	1274.47	488.256	1358.52	1123.67	471.037	1216.95	1021.3	403.729	1158.81	964.053	465.985	1178.09	929.629	445.818	1107.98	916.985
541	0	241.26	1255.43	1662.21	153.726	1267.23	1659.55	256.053	1449.34	1656.08	144.391	1443.39	1655.06	201.194	1474.05	1512.27	207.798	1550.2	1249.17	200.955	1325.59	1430.69	180.295	1264.66	1225.92	129.551	1557.06	1307.11	385.138	1388.94	1464.85	465.557	1381.65	1270.87	487.104	1344.25	1120.17	469.873	1202.04	1018.39	402.559	1143.68	961.555	465.075	1163.17	926.391	444.561	1092.79	914.039
542	0	239.547	1241.03	1658.9	152.172	1252.96	1656.16	254.142	1434.97	1652.84	142.96	1428.93	1651.73	199.86	1459.56	1509.08	207.215	1535.7	1245.73	200.013	1311.43	1427.44	179.373	1250.15	1222.55	128.809	1542.76	1303.53	383.769	1374.45	1461.69	463.755	1367.74	1267.25	485.685	1329.86	1116.95	468.771	1187.48	1015.51	401.378	1128.76	958.945	463.663	1148.16	923.684	443.439	1077.67	912.227
543	0	238.142	1226.58	1655.8	150.553	1238.47	1652.97	252.542	1420.58	1649.39	141.484	1414.5	1648.67	198.183	1444.97	1505.97	206.353	1520.95	1242.38	198.582	1296.86	1424.13	178.401	1235.45	1219.26	127.905	1528.25	1300.04	382.255	1359.94	1458.17	461.955	1353.76	1263.88	483.984	1315.72	1113.61	467.576	1173.23	1012.12	400.461	1114.3	955.907	462.513	1133.73	920.63	442.471	1063.05	909.125
544	0	236.444	1212	1652.94	148.876	1223.88	1650.08	250.806	1405.96	1646.43	139.784	1400.15	1645.25	196.987	1430.33	1502.81	205.516	1505.83	1239.24	196.667	1281.87	1420.74	177.218	1220.58	1215.9	127.395	1513.85	1296.9	380.917	1345.1	1455.49	460.237	1339.63	1261.08	482.152	1301.66	1110.46	466.391	1159.15	1008.8	399.452	1100.08	952.534	461.443	1119.82	917.443	441.653	1049.21	905.853
545	0	234.657	1197.16	1650.75	147.087	1209.1	1647.57	249.248	1391.3	1644.24	138	1385.32	1642.9	195.404	1415.56	1500.38	204.616	1490.71	1236.58	195.391	1267.15	1418.29	175.995	1205.67	1213.39	126.432	1498.73	1294.11	379.351	1330	1452.94	458.449	1325.25	1258.71	480.06	1287.53	1107.69	465.266	1145.42	1005.59	398.318	1086.12	949.112	460.189	1106.17	914.029	440.867	1035.79	902.326
546	0	232.728	1182.33	1648.71	145.354	1194.25	1645.78	247.281	1376.45	1642.33	136.172	1370.36	1640.95	193.759	1400.51	1498.52	203.64	1475.63	1234.71	193.435	1251.96	1416	174.559	1190.53	1211.3	125.663	1484.09	1291.91	377.638	1314.63	1451.19	456.55	1310.48	1256.66	477.97	1273.68	1105.34	464.082	1132.09	1002.42	397.297	1072.61	945.622	459.099	1093.33	910.663	440.322	1022.79	898.693
547	0	230.868	1167.24	1647.46	143.427	1179.11	1644.2	245.704	1361.4	1641.13	134.254	1355.24	1639.44	192.229	1385.26	1497	202.938	1460.13	1233.17	192.251	1236.96	1414.5	173.248	1175.53	1209.6	124.987	1469.11	1290.22	376.168	1299.15	1449.57	454.767	1295.49	1255.26	475.731	1259.93	1103.47	462.382	1118.71	999.092	396.515	1059.63	941.992	458.206	1081.19	907.17	439.625	1010.57	894.186
548	0	228.948	1152.16	1646.46	141.535	1163.99	1643.22	243.789	1346.3	1640.14	132.278	1340.23	1638.24	190.588	1369.8	1496.27	202.581	1444.65	1232.21	190.457	1221.77	1413.3	171.714	1160.17	1208.39	124.316	1453.93	1289.17	374.443	1283.43	1448.79	453.029	1279.94	1254.68	473.215	1246.03	1102.22	461.149	1106.11	996.113	395.582	1047.03	938.419	457.207	1069.29	904.055	439.343	998.774	890.73
549	0	226.802	1136.86	1645.95	139.532	1148.77	1642.65	241.786	1331.09	1639.6	130.455	1324.88	1637.78	189.04	1354.49	1495.7	202.295	1428.92	1231.58	188.211	1206.28	1412.59	169.915	1144.63	1208.25	123.565	1438.84	1288.37	372.797	1267.67	1448.31	451.234	1264.37	1254.24	470.735	1232.5	1101.42	459.913	1093.73	993.673	394.717	1034.98	935.084	455.719	1058.19	900.97	438.774	987.532	886.881
550	0	224.952	1121.53	1646.08	137.561	1133.46	1642.45	239.815	1315.83	1639.46	128.441	1309.64	1637.47	187.6	1339.22	1495.42	202.376	1413.93	1231.81	186.928	1191.28	1412.5	168.288	1129.01	1208.08	122.381	1423.3	1287.79	371.116	1251.72	1448.46	449.513	1248.53	1254.64	468.199	1218.94	1101.14	458.544	1081.69	991.154	394.011	1023.43	931.568	455.366	1047.61	898.078	438.574	977.025	882.867
551	0	222.846	1106.2	1646.23	135.654	1118.18	1642.59	237.934	1300.62	1639.86	126.396	1294.36	1637.45	186.192	1324.12	1495.53	202.067	1398.49	1232.23	185.298	1176.19	1412.59	166.829	1113.48	1208.08	121.838	1408.17	1287.91	370.063	1236.22	1448.97	447.983	1232.49	1255.56	465.796	1205.55	1101.37	456.945	1070.02	989.113	393.324	1012.46	928.19	455.12	1037.35	895.915	438.142	967.21	878.525
552	0	220.949	1090.98	1646.97	133.665	1102.95	1643.09	235.902	1285.4	1640.81	124.49	1279.13	1638.23	184.664	1309.05	1496.34	201.328	1383.11	1232.88	183.009	1160.81	1413.01	165.136	1097.94	1209.11	121.122	1393.11	1288.64	368.198	1220.15	1450.2	446.475	1216.5	1256.96	463.517	1192.35	1102.27	456.213	1058.85	987.641	392.577	1002.04	925.206	454.753	1027.64	893.688	437.919	957.874	874.889
553	0	218.918	1075.81	1647.78	131.615	1087.74	1643.87	234.005	1270.14	1642.14	122.514	1263.78	1639.51	183.332	1294.16	1497.41	200.339	1367.48	1233.6	181.924	1146.11	1414.49	163.628	1082.49	1210.45	119.958	1377.88	1289.27	366.203	1204.37	1451.69	444.882	1200.42	1258.7	461.096	1179.22	1103.44	454.395	1047.57	986.355	392.129	992.219	922.618	453.823	1018.5	891.22	437.646	949.024	871.576
554	0	217.054	1060.62	1649.08	129.971	1072.63	1645.29	232.086	1255.04	1643.9	120.698	1248.76	1641.03	182.078	1279.43	1498.61	199.343	1352.23	1234.81	180.277	1131.21	1416	162.436	1067.39	1212.38	118.884	1362.79	1290.26	364.711	1188.8	1453.83	443.564	1184.79	1261.01	458.791	1166.42	1105.15	453.241	1036.67	985.559	391.467	982.748	920.315	453.21	1009.69	890.45	437.381	940.638	868.334
555	0	215.244	1045.74	1650.46	128.063	1057.63	1646.33	230.778	1240.4	1645.98	119.042	1233.84	1643.02	180.66	1264.84	1500.24	198.334	1337.01	1236.58	178.499	1116.38	1417.51	161.261	1052.3	1213.94	118.37	1348.23	1292.17	363.41	1173.68	1456.11	442.461	1169.52	1263.71	456.62	1153.82	1107.31	451.878	1026.47	984.813	391.191	973.929	918.021	453.547	1001.15	889.74	436.984	932.818	865.454
556	0	213.401	1030.84	1652.08	126.181	1043.16	1647.8	229.123	1225.65	1647.93	117.209	1219.1	1644.8	179.338	1250.15	1502.21	197.143	1322.04	1238.34	177.555	1101.96	1419.68	160.1	1037.16	1216.46	117.035	1333.34	1294.02	362	1158.73	1458.77	441.375	1154.52	1266.68	454.547	1141.52	1109.8	451.139	1016.52	984.891	390.7	965.266	916.576	453.535	992.988	889.295	436.707	925.211	863.193
557	0	211.934	1016.14	1654.26	124.777	1028.39	1649.71	227.71	1211.05	1650.32	115.876	1204.43	1647.06	178.008	1235.66	1504.2	195.769	1307.25	1240.25	176.537	1087.46	1422.04	159.325	1022.22	1218.98	115.577	1318.66	1296.22	360.705	1143.86	1461.48	440.368	1140.18	1269.82	452.738	1129.6	1112.36	450.238	1006.95	985.195	390.465	957.109	915.489	453.609	985.065	889.423	436.698	918.121	861.116
558	0	210.403	1001.89	1656.11	123.499	1014.07	1651.77	226.006	1196.58	1652.94	114.292	1190.09	1649.21	176.899	1221.36	1506.42	194.156	1292.61	1242.21	175.586	1073.08	1424.03	159.023	1007.57	1221.08	114.259	1304.35	1298.33	359.625	1129.4	1464.33	439.567	1126.43	1272.75	451.182	1118.23	1115.11	449.628	997.689	986.072	390.411	949.302	914.462	453.756	977.493	889.71	436.799	911.439	859.533
559	0	209.034	987.605	1658.63	122.091	999.791	1653.67	224.648	1182.32	1655.48	113.067	1175.87	1651.59	175.889	1207.17	1508.72	192.629	1278.3	1244.58	174.543	1058.77	1426.23	158.697	992.973	1223.48	112.999	1290.26	1300.45	358.609	1114.94	1467.41	438.723	1113.29	1275.95	449.755	1107.09	1118.01	449.191	988.77	987.088	390.524	941.879	913.92	454.068	970.229	890.402	436.972	904.972	858.232
560	0	207.817	973.512	1661.16	120.784	985.757	1656.26	223.304	1168.28	1657.89	111.898	1161.82	1653.87	174.973	1193.04	1511.12	191.015	1264.25	1246.78	174.444	1044.93	1429.23	158.648	978.776	1226.23	111.668	1276.16	1303.13	357.584	1100.7	1470.43	437.967	1100.77	1278.79	448.561	1096.23	1120.93	448.709	980.112	988.183	390.444	934.503	914.343	454.327	963.188	891.218	437.062	898.756	857.111
561	0	206.7	959.619	1663.87	120.247	972.147	1659.08	222.052	1154.36	1660.42	110.983	1148.01	1656.62	174.219	1178.96	1513.85	189.592	1250.38	1249.47	173.797	1030.88	1431.64	158.723	964.756	1228.69	110.419	1262.13	1306.11	356.978	1086.86	1473.55	437.384	1088.8	1281.91	447.746	1085.92	1123.92	448.598	971.852	989.4	390.557	927.196	914.621	454.395	956.312	892.28	437.334	892.8	856.572
562	0	205.848	945.972	1666.54	119.253	958.367	1661.79	221.269	1140.61	1663.22	109.969	1134.27	1658.88	173.349	1164.95	1516.82	188.636	1236.98	1252.61	173.262	1017.05	1434.04	158.897	951.01	1231.02	109.283	1248.36	1309.3	356.546	1073.13	1476.86	436.887	1077.2	1285.21	447.116	1075.81	1127.29	448.554	963.782	991.081	390.369	919.284	914.946	454.749	949.637	893.824	437.726	887.085	856.653
563	0	204.912	932.237	1669.54	118.421	944.782	1664.58	220.472	1127.03	1666.16	109.08	1120.56	1661.78	172.947	1151.21	1519.77	187.573	1223.45	1256.03	172.957	1003.35	1436.81	159.394	937.724	1233.55	108.441	1234.78	1312.76	356.113	1059.66	1480.19	436.446	1066.01	1288.28	446.771	1066.06	1130.76	448.708	955.947	993.03	390.925	914.129	913.932	455.372	943.429	895.594	438.075	881.39	857.005
564	0	204.163	918.861	1672.45	117.746	931.323	1667.55	219.845	1113.43	1669.18	108.549	1107.12	1664.82	172.355	1137.56	1522.91	186.699	1210.27	1259.33	172.792	989.758	1439.57	159.809	924.575	1236.46	107.703	1221.53	1315.86	355.844	1046.4	1483.43	436.167	1055.27	1291.51	446.647	1056.68	1134.17	448.855	948.435	994.884	391.246	907.644	914.989	455.671	937.255	897.32	438.631	875.846	857.686
565	0	203.692	905.383	1675.61	117.116	917.799	1670.58	219.345	1099.95	1672.4	107.946	1093.72	1667.51	171.935	1124	1526.1	185.9	1197.23	1262.44	172.638	976.332	1442.4	160.347	911.619	1238.9	107.041	1208.35	1319.3	355.734	1033.33	1486.77	436.166	1044.91	1294.81	446.567	1047.48	1137.6	449.217	941.043	997.002	391.771	901.259	916.636	456.019	931.121	899.307	438.793	870.225	858.4
566	0	203.202	891.821	1678.92	116.55	904.39	1673.4	218.729	1086.6	1675.57	107.384	1080.27	1670.57	171.73	1110.81	1529.45	185.034	1184.21	1265.71	173.065	963.379	1445.03	161.074	898.891	1241.37	106.758	1195.33	1322.71	355.761	1020.49	1490.19	436.233	1034.69	1298.29	446.757	1038.6	1141.17	449.824	934.102	999.214	392.356	894.916	918.394	456.506	925.326	901.331	439.127	864.796	859.406
567	0	202.749	878.451	1682.27	116.158	891.063	1676.95	218.57	1073.24	1678.85	107.29	1067	1674.09	171.341	1097.43	1532.87	184.416	1171.44	1269.12	173.264	950.361	1448.22	161.776	886.073	1244.62	106.552	1182.45	1326.39	355.762	1007.81	1493.49	436.415	1024.72	1301.78	447.058	1029.89	1144.78	450.281	927.233	1001.5	392.816	888.778	920.38	456.915	919.852	903.437	439.759	859.628	860.92
568	0	202.467	865.294	1685.22	115.827	877.748	1679.96	218.545	1060.07	1682.28	106.89	1053.61	1677.29	171.369	1084.39	1536.3	183.762	1158.64	1272.85	173.531	937.376	1451.56	162.495	873.371	1247.62	106.08	1169.59	1329.85	355.845	995.321	1496.98	436.739	1014.76	1305.42	447.489	1021.34	1148.48	450.842	920.392	1004.11	393.363	882.549	922.74	457.462	914.277	905.819	440.537	854.536	862.657
569	0	202.387	852.02	1688.56	115.788	864.589	1683.08	218.231	1046.74	1685.62	106.909	1040.47	1680.63	171.014	1071.33	1539.71	183.018	1145.93	1276.22	173.934	924.664	1454.78	163.348	860.825	1250.37	105.69	1157.04	1333.18	355.909	983.05	1500.45	437.215	1004.96	1309.4	448.007	1012.79	1152.37	451.629	913.813	1006.72	394.221	876.875	924.89	458.025	908.831	908.543	441.226	849.245	864.53
570	0	202.332	839.582	1690.91	115.797	851.449	1686.19	218.289	1033.66	1689.01	106.881	1027.28	1683.91	170.853	1058.54	1542.98	182.166	1133.33	1279.53	174.25	911.878	1457.95	164.085	848.208	1253.52	105.355	1144.21	1336.82	356.064	971.099	1503.66	437.509	995.204	1313.16	448.57	1004.29	1156.38	452.217	907.05	1009.53	394.784	870.67	927.602	458.548	903.383	911.179	441.927	844.103	866.711
571	0	202.443	826.169	1694.29	115.883	838.371	1689.3	218.453	1020.62	1692.3	107.018	1014.33	1687.14	170.823	1045.74	1546.41	181.519	1120.64	1282.94	174.587	899.151	1461.41	164.571	835.7	1256.86	104.74	1131.43	1340.45	355.954	958.921	1507.02	437.841	985.333	1316.89	449.343	996.011	1160.39	452.875	900.358	1012.47	395.573	864.937	929.843	459.04	897.894	913.767	442.695	838.793	869.059
572	0	202.824	813.345	1697.11	116.262	825.386	1692.28	218.616	1007.62	1695.47	107.082	1001.21	1690.49	170.603	1032.86	1549.47	180.899	1108.05	1286.53	174.851	886.492	1464.29	164.978	823.211	1259.7	104.197	1118.68	1343.93	356.128	947.083	1510.18	438.344	975.7	1320.66	450.054	987.597	1164.29	453.705	893.7	1015.28	396.512	858.905	932.333	459.557	892.204	916.738	443.68	833.716	871.326
573	0	203.285	800.381	1700.07	116.603	812.446	1695.04	218.611	994.807	1698.21	107.325	988.203	1693.44	170.365	1020.24	1552.61	180.289	1095.54	1289.59	175.187	873.893	1467.2	165.258	810.722	1262.54	103.532	1105.95	1346.74	356.192	935.277	1513.43	438.697	965.936	1324.34	450.992	979.232	1168.13	454.546	886.893	1018.27	397.498	852.95	934.992	459.93	886.686	919.777	444.594	828.388	873.773
574	0	203.736	787.916	1702.36	117.08	799.493	1697.87	219.144	982.074	1701.15	107.73	975.378	1696.26	170.119	1007.65	1555.56	179.569	1082.88	1292.4	175.692	861.416	1470.25	165.318	798.147	1265.61	102.858	1093.03	1349.91	356.291	923.467	1516.11	439.238	956.198	1327.66	451.802	970.854	1171.71	455.295	880.111	1020.94	398.26	846.657	937.772	460.822	880.822	922.245	445.456	822.962	875.831
575	0	204.255	775.163	1704.78	117.569	786.602	1700.54	219.543	969.299	1703.63	107.916	962.395	1698.82	169.934	995.043	1557.81	179.228	1070.46	1295.37	176.052	848.877	1472.86	165.569	785.703	1268.31	102.08	1080.05	1352.68	356.285	911.585	1518.69	439.553	946.5	1330.7	452.822	962.588	1175.1	456.132	873.189	1023.43	399.254	840.646	939.831	461.741	875.166	924.739	446.41	817.486	877.639
576	0	205.122	762.655	1706.83	118.237	773.808	1702.99	219.945	956.575	1705.81	108.234	949.57	1701.15	169.801	982.272	1560.16	178.266	1057.66	1297.46	176.313	836.315	1475.02	166.241	773.807	1269.9	101.356	1067.3	1354.81	356.45	899.844	1520.9	439.926	936.744	1333.64	453.709	954.199	1178.29	457.096	866.361	1025.65	400.327	834.326	941.926	462.638	869.296	926.977	447.425	811.906	879.505
577	0	205.902	749.855	1708.92	118.792	761.017	1705.04	220.269	943.982	1707.4	108.646	936.732	1703.11	169.72	969.606	1562.26	177.679	1045.09	1299.54	176.654	823.688	1477.16	166.186	761.213	1272.08	100.848	1054.56	1356.91	356.437	887.787	1522.95	440.316	926.801	1336.35	454.467	945.799	1181.11	458.034	859.24	1027.82	401.215	827.707	943.823	463.412	863.202	929.025	448.505	806.187	881.096
578	0	206.638	737.316	1710.44	119.87	748.178	1706.68	220.781	931.363	1709.11	109.142	923.984	1704.81	169.608	956.932	1564.16	177.666	1032.83	1301.67	176.983	811.139	1478.88	166.455	748.894	1273.98	100.03	1041.56	1358.79	356.489	875.974	1524.56	440.513	916.884	1338.7	455.242	937.159	1183.88	458.969	852.09	1029.69	402.326	821.213	945.224	464.166	857.142	931.056	449.501	800.385	882.517
579	0	207.528	724.73	1711.87	120.814	735.379	1708.26	221.175	918.865	1710.16	109.567	911.127	1706.21	169.255	944.154	1565.49	177.402	1020.32	1303.4	177.341	798.494	1480.33	166.783	736.651	1275.18	99.5286	1028.72	1360.74	356.611	863.878	1526.02	441.035	907.047	1340.69	456.018	928.531	1186.29	459.899	844.356	1031.34	403.477	814.492	946.47	465.398	850.689	932.638	450.845	794.519	883.491
580	0	208.559	712.289	1712.76	121.728	722.575	1709.38	221.585	906.287	1711.13	109.936	898.237	1707.35	169.345	931.318	1566.66	176.467	1007.23	1304.47	177.714	785.858	1481.29	167.254	724.46	1275.73	98.8895	1015.95	1361.75	356.806	851.799	1527.05	441.272	896.995	1342.49	456.519	919.9	1188.07	460.647	837.278	1032.05	404.633	807.394	947.486	466.388	844.141	934.09	452.012	788.359	884.293
581	0	209.412	699.561	1713.52	122.539	709.794	1710.28	222.153	893.797	1711.56	110.222	885.396	1708.08	169.361	918.59	1567.29	176.859	995.206	1305.71	178.011	773.17	1481.91	167.625	711.924	1276.47	98.4323	1003.11	1362.56	356.935	839.789	1527.68	441.519	886.839	1343.79	457.092	911.179	1189.69	461.549	829.777	1032.96	405.857	799.792	947.994	467.349	837.486	934.926	453.23	781.887	884.839
582	0	210.341	686.99	1713.81	123.498	697.034	1710.77	222.55	881.206	1711.62	110.766	872.544	1708.12	169.275	905.812	1567.63	176.485	982.571	1306.2	178.465	760.372	1482.23	167.822	699.094	1276.81	98.1151	990.154	1363.25	357.217	827.771	1527.75	441.656	876.595	1344.53	457.418	902.343	1190.75	462.539	822.133	1033.38	406.925	792.47	947.919	468.125	830.992	935.268	454.548	775.429	884.668
583	0	211.434	674.426	1713.74	124.643	684.217	1710.98	223.177	868.664	1711.15	111.328	859.664	1708.05	169.528	892.935	1567.54	176.182	969.83	1305.89	178.926	747.567	1482.13	168.58	686.806	1276.25	97.7158	977.485	1363.01	357.591	815.552	1527.46	442.012	866.414	1344.82	457.675	893.322	1191.23	463.538	814.52	1033.21	408.043	785.547	947.009	469.33	824.127	935.121	456.128	769.036	884.131
584	0	212.455	661.791	1713.35	125.334	671.248	1710.68	223.605	856.064	1710.56	111.898	846.73	1707.64	169.629	879.925	1567.26	175.944	957.035	1305.77	179.341	734.789	1481.41	169.095	674.446	1275.31	97.5133	964.52	1362.54	357.918	803.32	1527	442.204	856.085	1344.89	457.855	884.277	1191.41	464.54	806.687	1033	408.389	773.792	948.282	470.332	817.072	934.902	457.608	762.118	883.583
585	0	213.486	649.065	1712.61	126.292	658.354	1709.9	224.053	843.357	1709.49	112.407	833.837	1706.6	169.853	866.841	1566.42	176.033	944.175	1305.42	179.773	721.839	1480.61	169.802	661.755	1274.56	97.5073	951.554	1362.31	358.337	790.846	1526.12	442.331	845.584	1344.63	457.95	874.778	1191.49	465.505	798.599	1032.44	410.74	769.196	945.818	471.424	809.813	934.419	459.4	755.388	882.373
586	0	214.524	636.149	1711.54	127.212	645.321	1708.82	224.69	830.573	1708.21	113.007	820.809	1705.8	169.88	853.764	1565.42	176.361	931.571	1304.58	180.372	708.938	1479.53	170.335	648.775	1273.37	97.4667	938.653	1361.5	358.64	778.329	1524.88	442.511	834.853	1343.79	458.002	865.24	1191.19	466.562	790.334	1031.34	411.306	757.578	945.669	472.325	802.582	933.459	461.046	748.226	881.026
587	0	215.526	623.39	1710.06	128.163	632.219	1707.6	225.533	817.659	1706.81	113.669	807.696	1704.43	170.292	840.64	1564.15	176.69	918.6	1303.49	181.071	696.037	1477.89	170.937	637.607	1270.26	97.6067	925.652	1360.12	359.202	765.909	1523.37	442.536	824.109	1342.72	457.929	855.422	1190.34	467.608	781.94	1030.14	417.311	749.439	951.194	473.555	795.003	932.327	462.811	740.803	879.342
588	0	216.575	610.384	1708.41	129.169	619.096	1706.06	226.042	804.721	1704.93	114.441	794.566	1702.52	170.765	827.512	1562.29	177.078	905.759	1301.96	181.703	682.958	1476.09	171.716	623.896	1269.3	97.9041	912.719	1358.3	359.816	753.267	1521.47	442.611	812.972	1341.25	457.797	845.418	1189.11	468.531	773.342	1028.24	414.529	740.578	941.954	474.608	787.375	930.637	464.803	733.137	877.246
589	0	217.665	597.45	1706.26	130.185	605.877	1704.18	226.71	791.808	1702.88	115.201	781.302	1700.59	171.353	814.209	1560.26	177.687	892.768	1300.09	182.325	669.731	1474	172.248	611.29	1266.43	98.4155	899.552	1356.4	360.389	740.408	1519.36	442.531	801.586	1339.1	457.847	835.446	1187.52	469.494	764.466	1026	416.342	731.784	940.209	475.486	779.462	928.555	466.323	725.434	874.213
590	0	218.924	584.229	1704.31	131.301	592.626	1702.13	227.622	778.556	1700.31	116.038	767.987	1698.4	172.084	800.881	1557.95	178.231	879.556	1297.67	183.096	656.484	1471.5	173.022	598.424	1264	99.063	886.294	1354.05	361.204	727.517	1516.94	442.647	790.157	1336.87	457.208	824.564	1185.45	470.633	755.552	1023.65	418.145	722.596	937.423	476.621	771.403	925.966	468.155	717.529	871.394
591	0	219.874	570.849	1701.99	132.437	579.291	1699.75	228.541	765.363	1697.85	116.994	754.595	1695.67	173.055	787.461	1555.44	179.381	866.661	1295.22	184.081	643.171	1468.95	173.699	585.509	1261.11	99.7794	873.03	1351.46	362.001	714.43	1514.37	442.861	778.37	1334.45	457.347	813.988	1183.62	471.667	746.185	1021.13	420.824	718.545	931.475	477.686	762.984	923.562	470.226	709.573	868.488
592	0	221.06	557.564	1699.18	133.599	565.863	1697.05	229.523	752.043	1694.97	117.861	741.226	1692.95	174.007	773.884	1552.75	180.413	853.459	1292.57	185.004	629.71	1466.13	174.43	572.163	1258.27	101.121	859.469	1349.29	362.878	701.333	1511.52	442.881	766.339	1331.7	456.61	802.471	1181	472.621	736.586	1018.13	425.942	703.897	937.555	478.803	754.331	920.96	472.093	701.157	865.225
593	0	222.316	544.086	1696.47	134.809	552.316	1694.36	230.636	738.605	1691.94	119.031	727.665	1689.99	175.027	760.286	1549.84	181.514	840.07	1289.79	186.052	616.149	1463.3	175.302	558.801	1255.06	102.108	846.02	1346.47	363.798	687.894	1508.53	443.045	753.986	1328.82	456.663	791.088	1178.66	473.622	726.644	1014.91	428.895	694.612	934.738	479.96	745.476	917.985	474.042	692.702	861.622
594	0	223.546	530.623	1693.38	135.99	538.736	1691.27	231.947	725.031	1688.85	120.066	714.131	1686.97	176.026	746.597	1546.98	183.052	826.804	1287.02	187.036	602.471	1459.9	176.229	545.424	1251.84	103.451	832.591	1343.66	364.98	674.284	1505.58	443.313	741.286	1325.85	456.401	779.101	1176.14	474.73	716.441	1011.96	425.821	689.564	920.685	481.158	736.225	915.154	476.152	683.987	858.215
595	0	225.151	517.072	1690.41	137.389	525.069	1688.25	233.314	711.456	1685.84	121.353	700.459	1683.83	177.157	732.953	1543.86	184.497	813.25	1284.18	188.153	588.694	1456.55	177.361	532.029	1248.51	104.851	818.833	1340.94	366.23	660.629	1502.56	443.975	728.302	1322.83	456.373	766.774	1173.35	476.041	706.13	1008.58	427.565	679.358	917.045	482.428	726.562	912.08	477.987	674.744	854.896
596	0	226.54	503.398	1687.17	138.886	511.384	1685.33	234.764	697.822	1682.47	122.87	686.72	1680.63	178.409	719.108	1540.85	185.991	799.579	1281.03	189.459	574.806	1453.38	178.448	518.346	1245.18	105.925	805.276	1337.62	367.411	646.768	1499.43	444.222	715.262	1319.69	456.253	754.125	1170.25	476.949	694.888	1005.16	429.139	668.923	912.872	483.699	716.614	908.863	479.964	665.484	850.711
597	0	228.19	489.573	1684.1	140.512	497.587	1682.19	236.377	684.072	1679.08	124.296	672.962	1677.22	179.974	705.216	1537.52	187.084	785.58	1277.48	190.762	560.854	1449.9	179.517	504.52	1241.8	107.577	791.411	1334.87	368.801	632.812	1495.89	445.142	701.693	1316.04	456.315	741.139	1166.91	478.127	683.864	1001.17	430.837	658.199	908.734	485.002	706.297	905.361	481.904	655.861	846.584
598	0	229.903	475.7	1681.22	142.137	483.747	1679.13	238.097	670.272	1675.79	125.9	659.078	1673.84	181.59	691.283	1534.24	188.495	771.752	1274.15	192.268	546.785	1446.7	180.968	490.936	1238.44	108.946	777.76	1331.04	370.364	618.842	1492.63	445.816	687.892	1312.41	456.398	727.734	1163.45	479.335	672.128	997.645	432.571	646.995	904.69	486.369	695.574	901.693	483.623	645.61	842.504
599	0	231.565	461.794	1678.14	143.743	469.733	1676.27	239.787	656.458	1672.68	127.743	645.102	1670.79	182.847	677.154	1531.15	189.179	757.551	1270.65	193.802	532.535	1443.61	182.23	476.924	1235.26	110.599	763.632	1327.92	371.904	604.664	1489.29	447.011	673.654	1308.79	456.664	713.952	1160	480.487	660.022	993.894	434.221	635.557	900.558	487.828	684.494	898.122	485.407	635.324	838.401
600	0	233.569	447.893	1675.35	145.629	455.787	1673.43	241.716	642.405	1669.49	129.5	631.036	1667.66	184.798	662.893	1528.33	190.535	743.544	1267.73	195.57	518.291	1440.65	183.642	462.815	1232.23	112.033	749.313	1324.97	373.825	590.523	1486.22	448.349	659.288	1305.09	457.168	699.751	1156.69	481.769	647.391	990.304	435.836	623.589	896.581	489.261	672.692	894.731	487.229	624.194	834.243
601	0	235.448	433.838	1672.69	147.765	441.777	1670.82	243.558	628.326	1666.46	131.489	617.022	1664.69	186.74	648.617	1525.46	191.557	729.124	1264.94	197.556	503.975	1437.65	185.376	448.689	1229.33	113.781	735.261	1322.26	375.715	576.179	1483.18	449.769	644.56	1301.78	457.92	685.191	1153.48	483.156	634.23	986.84	437.625	611.503	892.62	490.921	660.387	891.583	488.941	612.633	830.512
602	0	237.575	419.835	1670.32	149.66	427.708	1668.33	245.638	614.232	1663.89	133.472	602.964	1662.3	188.887	634.205	1523.02	193.276	714.843	1262.81	199.461	489.423	1434.73	187.035	434.416	1226.83	115.435	720.875	1319.94	377.877	561.674	1480.66	451.402	629.645	1298.73	458.812	670.308	1150.66	484.536	620.615	983.82	439.389	598.715	889.018	492.864	647.839	888.75	490.758	600.744	826.87
603	0	239.567	405.591	1668.13	151.608	413.57	1665.96	247.903	599.973	1661.41	135.646	588.905	1659.51	190.93	619.756	1520.68	194.858	700.014	1260.53	201.769	474.867	1432.49	188.861	419.89	1224.58	117.125	706.381	1317.8	380.171	547.096	1477.97	453.103	614.671	1295.56	459.966	655.289	1147.65	485.882	606.508	980.585	441.01	585.664	885.326	494.627	634.533	885.873	492.418	588.11	823.261
604	0	241.61	391.453	1665.94	153.776	399.399	1663.89	250.132	585.794	1659.12	137.965	574.818	1657.18	193.864	605.29	1518.06	196.563	685.009	1258.51	204.19	460.236	1430.15	190.894	405.233	1222.28	119.2	691.718	1315.69	382.525	532.305	1475.52	454.829	599.255	1292.41	461.142	639.888	1144.78	487.394	592.017	977.61	442.712	572.02	881.815	496.447	620.76	882.99	494.122	575.153	819.779
605	0	243.885	377.114	1664.65	155.992	385.248	1662.36	252.55	571.514	1657.38	140.436	560.6	1655.1	196.478	590.723	1516.26	198.527	670.219	1256.24	206.575	445.354	1428.13	193.175	390.331	1220.47	121.276	676.925	1313.8	385.201	517.432	1473.28	457.007	584.065	1289.58	462.512	624.381	1141.93	489.042	577.395	974.808	444.352	557.835	878.885	498.422	606.548	880.353	495.842	561.642	816.647
606	0	246.078	362.713	1663.73	158.117	371.036	1661.06	255.142	557.117	1656.01	142.908	546.315	1653.41	199.227	575.97	1514.85	200.342	655.166	1254.5	209.081	430.514	1426.57	195.431	374.342	1219.4	123.95	662.248	1312.58	387.971	502.459	1471.25	459.04	568.417	1286.91	464.112	608.618	1139.46	490.642	562.147	972.285	446.017	543.353	876.407	500.093	591.631	877.833	497.604	547.571	813.635
607	0	248.299	348.248	1663.24	160.245	356.636	1660.33	257.733	542.669	1655.05	145.497	532.054	1652.28	202.232	561.181	1513.56	202.191	640.244	1253.17	211.91	415.704	1425.79	198.501	359.555	1218.25	126.434	647.357	1310.87	390.716	487.513	1469.53	461.209	552.679	1284.66	465.742	592.627	1137.32	492.271	546.618	969.924	447.451	528.277	873.992	502.183	576.719	875.783	498.844	532.599	811.288
608	0	250.512	333.87	1662.97	162.583	342.438	1660.1	260.454	528.24	1654.33	148.194	517.924	1651.54	205.323	546.481	1512.9	204.164	625.379	1252.36	214.518	400.755	1424.99	201.247	344.086	1217.54	129.502	632.443	1310.51	393.638	472.369	1468.31	463.584	536.824	1282.61	467.911	576.909	1135.23	493.894	530.651	968.012	448.988	512.837	872.166	503.555	560.525	873.74	500.379	517.351	809.1
609	0	252.845	319.48	1663.24	164.897	328.281	1660.11	263.163	513.709	1654.07	151.07	503.789	1651.07	208.557	531.69	1512.77	206.175	610.686	1251.88	217.139	385.828	1424.87	203.878	327.883	1217.76	132.051	617.654	1310.05	396.525	457.296	1467.62	466.039	520.933	1281.38	469.524	560.047	1133.98	495.662	514.348	966.821	450.424	496.805	870.972	505.386	544.153	872.456	501.603	500.972	807.673
610	0	255.026	305.195	1663.63	167.126	314.11	1660.54	265.805	499.316	1654.16	153.729	489.591	1650.94	211.434	516.942	1512.78	207.848	595.83	1251.77	219.86	371.068	1425.09	206.507	312.435	1218.05	134.54	603.02	1310.19	399.229	442.257	1467.25	468.408	504.771	1280.54	471.688	543.348	1133.13	497.419	497.522	965.925	451.718	480.209	870.061	507.45	527.531	871.822	502.874	484.269	806.591
611	0	257.233	290.799	1664.61	169.364	299.985	1661.44	268.914	484.892	1654.76	156.438	475.499	1651.28	214.128	502.504	1513.16	209.915	581.325	1252.26	222.458	356.207	1425.69	209.233	297.817	1218.5	136.81	588.498	1310.8	401.949	427.086	1467.42	471.004	488.668	1280.14	473.89	526.499	1132.74	499.173	480.225	965.548	453.087	463.14	869.697	508.886	509.687	871.233	504.197	466.897	806.053
612	0	259.513	276.643	1665.83	171.634	286.038	1662.55	271.751	470.705	1655.34	159.094	461.741	1652.68	217.227	488.042	1514.17	211.835	566.611	1253.44	224.76	341.5	1426.47	211.602	282.815	1219.41	139.172	574.124	1311.92	404.59	411.9	1467.92	473.467	472.378	1280.27	476.209	509.359	1132.81	500.909	462.382	965.63	454.446	445.588	869.92	511.045	491.888	871.35	505.321	448.646	806.182
613	0	261.601	262.483	1667.33	173.758	272.17	1663.96	274.409	456.451	1656.39	161.985	447.913	1653.42	220.165	473.706	1515.36	213.918	552.574	1254.48	227.004	327.058	1427.68	213.705	268.128	1220.78	139.864	559.149	1311.76	407.005	396.758	1469.12	475.959	456.204	1280.81	478.301	491.848	1132.7	502.631	444.384	966.259	455.651	427.543	870.729	512.913	473.191	871.89	506.494	429.917	806.784
614	0	263.659	248.484	1668.97	175.766	258.422	1665.66	277.266	442.335	1657.62	164.555	434.139	1654.61	222.956	459.542	1516.69	215.834	538.432	1256.03	229.002	312.67	1429.23	215.416	253.861	1222.07	141.953	545.252	1313.26	409.134	381.533	1469.95	478.332	439.657	1281.35	480.928	474.751	1133.17	504.176	425.672	966.719	456.599	409.156	871.487	514.543	453.975	872.253	507.508	410.564	807.331
615	0	265.7	234.644	1670.64	177.883	244.864	1667.43	279.93	428.45	1658.91	167.474	420.599	1655.61	225.431	445.694	1518.06	217.67	524.505	1257.35	230.876	298.698	1430.7	217.085	240.075	1223.49	144.008	531.563	1314.86	411.271	366.347	1471.39	480.552	422.996	1282.27	483.645	457.434	1133.82	505.738	406.773	967.581	457.656	390.122	872.778	516.163	434.198	872.97	508.453	390.433	808.362
616	0	267.59	220.872	1672.54	179.681	231.409	1669.31	282.371	414.655	1660.09	169.719	407.322	1657.55	227.793	431.974	1519.75	219.641	510.711	1258.92	232.307	284.823	1432.29	218.422	226.588	1225.25	145.999	518.194	1316.68	413.127	351.431	1472.98	483.126	406.629	1283.46	486.547	439.965	1135.1	507.413	387.609	969.06	458.715	370.713	874.604	517.962	414.061	874.042	509.111	369.915	809.619
617	0	269.278	207.286	1674.28	181.394	218.107	1671.37	284.672	400.966	1661.72	172.222	394.053	1659.51	230.236	418.435	1521.62	221.984	497.177	1260.97	233.697	271.634	1433.86	219.533	213.365	1226.98	149.509	506.015	1319.91	414.823	336.492	1474.93	485.442	389.776	1284.98	489.249	421.924	1136.08	508.877	367.847	970.535	459.615	350.964	876.432	519.611	393.353	875.35	510.156	348.6	811.634
618	0	270.809	193.82	1676.12	182.997	205.019	1673.19	287.056	387.483	1663.5	174.411	381.073	1661.15	232.25	405.2	1523.47	225.223	485.231	1262.96	234.881	258.41	1435.57	220.175	200.347	1228.59	151.823	493.041	1321.92	416.358	321.792	1476.72	487.652	372.995	1286.5	492.122	403.992	1137.33	510.261	347.787	972.218	460.342	330.817	878.204	520.706	371.807	876.569	510.826	326.922	813.639
619	0	272.156	180.614	1677.94	184.314	192.002	1675.28	289.249	374.229	1665.45	176.339	367.971	1663.15	233.956	392.156	1525.66	227.62	472.154	1265.19	236.016	245.622	1437.41	220.622	187.508	1230.47	154.157	480.385	1323.99	417.79	307.431	1478.83	489.89	356.026	1288	494.815	385.848	1138.57	511.83	327.557	974.118	461.204	310.357	880.387	522.216	350.091	878.072	511.463	304.553	815.675
620	0	273.441	167.401	1680.21	185.626	179.288	1677.45	290.783	360.814	1667.32	178.484	355.324	1665.57	236.05	379.179	1527.76	229.775	459.35	1267.18	236.798	232.792	1439.41	220.793	174.727	1232.51	156.415	467.706	1325.7	418.9	293.155	1480.84	492.055	339.019	1289.78	497.71	367.743	1139.93	512.986	306.855	976.133	461.711	290.364	882.674	524.073	328.096	879.767	511.702	282.245	817.675
621	0	274.452	154.391	1682.4	186.644	166.548	1679.77	292.731	347.941	1669.63	179.942	342.509	1667.85	237.691	366.435	1529.83	231.421	446.381	1269.23	237.675	220.094	1441.63	220.88	161.993	1234.77	158.503	455.224	1327.6	420.089	279.447	1482.86	493.94	322.134	1291.55	500.545	349.375	1141.33	514.275	286.323	978.003	462.402	268.869	885.411	525.316	305.732	881.39	512.048	258.982	820.415
622	0	275.335	141.547	1684.56	187.732	154.056	1681.94	294.189	334.93	1671.75	181.607	330.035	1669.98	239.226	353.77	1532.06	233.602	434.125	1271.56	238.477	207.579	1443.79	220.737	149.268	1237.15	160.819	442.744	1329.7	421.216	265.896	1484.98	495.839	305.325	1293.42	503.071	331.117	1142.46	515.099	265.333	979.752	463.024	247.218	887.957	526.504	283.179	883.408	512.589	235.718	823.223
623	0	276.219	128.677	1687.36	188.515	141.673	1684.52	295.506	322.047	1674.17	182.979	317.461	1672.32	240.536	341.196	1534.6	235.138	421.474	1273.56	239.121	195.143	1446.12	220.616	136.667	1239.67	162.921	430.826	1331.45	422.383	252.663	1487.34	497.542	288.741	1295.58	505.632	312.794	1143.99	516.409	244.17	982.587	462.956	225.777	891.04	528.147	260.189	885.527	513.239	212.272	826.79
624	0	276.759	116.065	1689.88	189.337	129.39	1687.13	297.005	309.439	1676.77	184.248	305.168	1675.31	241.821	328.75	1537.07	236.783	408.876	1275.8	239.835	182.86	1448.53	220.363	124.131	1242.25	164.563	418.421	1333.58	423.359	239.811	1489.54	499.173	272.415	1297.69	507.589	294.317	1145.07	517.45	223.055	985.263	463.251	204.037	894.281	529.281	237.02	888.012	513.47	188.496	830.173
625	0	277.312	103.475	1692.61	189.864	117.066	1689.89	298.037	296.763	1679.42	185.366	292.814	1677.61	242.88	316.255	1539.71	238.372	396.305	1278.52	240.558	170.529	1451.21	220.315	111.757	1244.77	166.18	406.119	1336.12	424.341	227.078	1491.71	500.391	256.289	1299.72	510.26	276.379	1147.02	518.16	201.852	987.944	463.534	182.095	897.394	530.346	213.905	890.67	513.727	164.456	833.851
626	0	277.759	91.0662	1695.36	190.419	104.906	1692.6	298.93	284.258	1682	186.365	280.639	1680.22	244.432	304.094	1542.17	239.939	383.981	1280.97	241.296	158.345	1453.85	220.351	99.5299	1247.47	167.715	393.981	1338.59	425.292	214.405	1494.24	501.6	240.472	1302.03	512.256	258.256	1148.85	518.948	180.832	991.151	463.969	160.1	901.066	531.289	190.814	893.593	513.905	140.367	838.048
627	0	278.181	78.7571	1698.19	190.724	92.737	1695.16	299.928	271.824	1684.6	187.431	268.49	1682.78	245.595	291.73	1545.03	241.194	371.427	1283.49	242.085	146.185	1456.63	220.585	87.561	1250.43	169.221	381.711	1341.39	426.297	201.837	1496.72	502.744	225.196	1304.51	514.116	240.456	1150.93	519.721	159.791	994.807	465.784	137.49	905.722	532.107	167.599	897.158	514.239	116.3	842.804
628	0	278.549	66.4166	1701.01	191.065	80.7297	1698.01	300.835	259.321	1687.3	188.32	256.474	1685.53	246.584	279.645	1547.56	242.654	359.249	1286.11	242.806	134.105	1459.44	220.973	75.8244	1253.02	170.616	369.666	1343.78	427.216	189.392	1499.07	503.702	210.335	1306.72	516.035	222.807	1152.88	520.433	138.948	998.208	465.242	115.742	909.825	532.66	144.692	900.413	514.332	92.0689	847.565
629	0	278.817	54.1208	1703.7	191.373	68.725	1700.49	301.844	247.121	1690	189.076	244.459	1687.57	247.721	267.594	1550.05	243.985	347.092	1288.46	243.395	122.107	1462	221.444	64.2072	1255.55	171.944	357.615	1346.35	428.05	177.061	1501.28	504.545	195.923	1308.77	517.293	205.274	1154.47	521.004	118.326	1001.73	465.416	93.5982	914.132	533.094	121.994	904.014	514.591	68.2502	852.55
630	0	278.913	41.9312	1706.23	191.706	56.8507	1703	302.471	234.791	1692.21	190.256	232.603	1690.54	248.993	255.658	1552.4	245.013	334.616	1290.65	243.94	110.201	1464.59	221.695	52.7012	1258.14	173.329	345.72	1348.47	428.782	164.403	1503.77	505.428	181.917	1311	519.155	188.809	1156.64	521.82	97.8757	1006.09	466.362	71.4732	918.558	533.287	99.1255	907.945	514.611	44.2835	858.117
631	0	279.204	29.8042	1708.68	191.906	44.9557	1705.29	303.448	222.673	1694.68	190.961	220.681	1692.39	249.909	243.568	1554.5	246.442	322.514	1292.88	244.56	98.3364	1467.08	221.936	41.1842	1260.75	174.457	333.77	1350.85	429.695	152.297	1506.07	506.226	168.073	1313.2	520.553	171.866	1158.66	521.979	77.7576	1009.89	465.794	49.4546	923.548	533.57	76.8973	911.683	514.651	20.5274	863.93
632	0	279.262	17.7411	1710.78	192.203	33.2169	1707.37	304.134	210.394	1696.93	191.732	208.853	1694.5	250.788	231.782	1556.73	247.93	310.645	1294.86	245.052	86.4208	1469.3	221.965	29.541	1263.08	175.789	321.931	1352.88	430.087	139.747	1508.14	506.79	154.308	1314.99	521.436	153.793	1160.64	522.633	57.6607	1013.66	465.805	27.5346	928.194	533.471	54.6192	915.545	514.537	-3.03926	869.391
633	0	279.389	5.94463	1712.72	192.447	21.2899	1709.41	304.987	198.288	1698.96	192.437	196.957	1696.56	251.702	219.847	1558.9	248.895	298.25	1296.69	245.439	74.6255	1471.39	222.07	17.8195	1265.07	176.8	309.857	1354.9	430.676	127.401	1509.92	507.358	140.789	1316.65	522.549	136.954	1162.41	523.054	37.7676	1017.36	465.799	5.63641	932.941	533.24	32.4972	919.346	514.339	-26.346	875.054
634	0	279.782	-6.33528	1714.82	192.755	9.57559	1711.12	305.716	186.123	1700.87	193.279	185.234	1698.33	252.567	207.889	1560.54	250.004	286.227	1298.67	245.844	62.8132	1473.39	222.171	5.93846	1267.25	178.079	298.033	1356.59	431.247	115.169	1512.02	508.058	127.268	1318.52	523.64	120.24	1164.28	523.394	18.0086	1021.36	465.788	-16.0296	937.931	532.603	11.1114	923.497	514.173	-49.3905	880.872
635	0	279.975	-18.3172	1716.48	192.977	-2.19082	1712.88	306.32	174.218	1702.26	193.918	173.338	1699.78	253.116	196.116	1562.25	250.979	273.842	1300.06	246.18	51.0566	1475.05	222.012	-5.95495	1268.95	178.957	286.033	1357.95	431.677	102.787	1513.62	508.509	113.577	1320	524.662	103.749	1166.09	523.584	-1.52478	1025.18	465.504	-37.6359	942.872	532.042	-10.7344	927.256	513.951	-72.313	886.941
636	0	280.264	-30.2553	1717.68	193.225	-14.0984	1714.09	306.978	162.075	1703.69	194.722	161.616	1701.39	253.788	184.181	1563.36	252.355	262.101	1301.43	246.426	39.2664	1476.58	221.962	-17.8105	1270.43	179.938	274.193	1359.14	431.927	90.5238	1515.04	508.87	100.1	1321.09	525.386	87.1749	1167.37	523.686	-20.9883	1028.56	465.131	-59.0719	947.635	531.428	-32.0444	931.095	513.422	-95.1273	892.677
637	0	280.519	-42.1853	1718.73	193.544	-25.8773	1715.17	307.429	150.118	1704.53	195.047	149.666	1702.32	254.254	172.415	1564.21	253.048	249.444	1302.14	246.628	27.4992	1477.67	221.691	-29.7079	1271.62	180.882	262.252	1360.09	432.218	78.245	1516.15	509.169	86.3419	1322.05	526.037	70.8341	1168.47	523.221	-40.3107	1032.06	464.611	-80.2012	952.347	530.875	-53.6361	934.594	512.77	-117.444	898.07
638	0	280.851	-54.1495	1719.61	193.793	-37.7514	1716.18	307.901	138.116	1705.23	195.51	137.83	1702.91	254.515	160.44	1565.06	254.08	237.552	1302.73	246.715	15.735	1478.49	221.707	-41.4736	1272.75	181.727	250.298	1360.4	432.465	66.0192	1517.05	509.444	72.5069	1322.98	526.663	54.6288	1169.39	523.427	-59.2699	1035.33	463.959	-101.048	957.141	530.117	-74.723	938.018	511.853	-139.544	903.565
639	0	280.967	-65.7838	1719.79	194.086	-49.6743	1716.59	308.174	126.126	1705.53	195.926	125.971	1703.18	254.794	148.688	1565.31	254.767	225.042	1302.93	246.859	3.8712	1479.04	221.417	-53.4032	1273.45	182.375	238.381	1360.71	432.591	53.7929	1517.54	509.691	58.8102	1323.31	527.059	38.3802	1169.82	523.173	-78.2085	1038.36	463.235	-121.84	961.417	528.992	-95.6645	941.321	510.917	-161.344	908.475
640	0	281.119	-77.7698	1719.98	194.264	-61.5802	1716.74	308.418	114.209	1705.45	196.088	113.91	1703.21	255.339	136.585	1565.34	255.609	212.96	1302.8	246.865	-8.00777	1479.25	221.319	-65.1969	1273.73	183.08	226.338	1360.54	432.597	41.488	1517.66	509.865	44.809	1323.54	527.59	22.4717	1170.3	522.744	-97.0846	1041.06	463.232	-142.356	965.627	528.088	-116.346	944.38	509.756	-182.954	913.365
641	0	281.332	-89.7491	1719.66	194.249	-73.604	1716.64	308.631	102.044	1705.45	196.428	101.976	1703.17	255.523	124.743	1564.93	256.307	200.725	1302.52	246.907	-19.9522	1479.23	221.069	-77.1593	1273.75	183.849	214.397	1360.24	432.794	29.1602	1517.78	510.084	31.0429	1323.59	527.942	6.59645	1170.36	522.325	-115.674	1043.92	461.805	-162.498	969.77	526.692	-136.815	947.347	508.611	-204.229	918.156
642	0	281.27	-101.73	1719.18	194.411	-85.6113	1716.18	308.7	90.174	1704.92	196.273	89.9126	1702.58	255.639	112.799	1564.54	256.924	188.352	1302	246.973	-31.741	1478.74	220.922	-89.1243	1273.56	184.413	202.246	1359.6	432.677	16.7841	1517.39	510.181	17.0475	1323.47	528.237	-9.19233	1170.38	521.922	-134.011	1046.46	460.923	-182.516	973.517	525.693	-157.312	950.442	507.26	-225.319	922.744
643	0	281.198	-113.92	1718.3	194.308	-97.7472	1715.26	308.632	77.9159	1704.11	196.668	77.9675	1702.14	255.524	100.577	1563.53	257.566	176.237	1300.96	246.803	-43.8677	1477.9	220.538	-101.228	1272.67	184.832	190.237	1358.61	432.616	4.25379	1516.8	510.058	2.99218	1322.68	528.425	-24.8332	1170.02	521.029	-152.345	1048.39	459.521	-202.359	977.248	524.657	-177.783	953.233	505.786	-246.318	927.199
644	0	281.115	-126.057	1717.1	193.994	-109.929	1713.97	308.772	65.9184	1703.04	196.169	65.6727	1700.6	256.013	88.6121	1562.08	257.995	163.724	1299.58	246.812	-55.8637	1476.75	220.347	-113.381	1271.58	185.44	178.069	1357.18	432.517	-8.1497	1515.65	510.19	-10.9676	1321.66	528.448	-40.3149	1169.2	520.461	-170.31	1050.26	458.29	-221.768	980.461	523.076	-197.578	955.363	504.278	-266.725	930.966
645	0	280.886	-138.193	1715.58	193.978	-122.045	1712.64	308.359	53.5582	1701.39	196.106	53.554	1699.06	255.688	76.5238	1560.47	258.512	151.405	1297.86	246.436	-67.9939	1475.21	219.979	-125.669	1270.36	185.864	165.819	1355.24	432.313	-20.6598	1514.23	510.093	-24.9909	1320.54	528.414	-55.7339	1167.97	519.717	-188.071	1051.74	457.732	-240.78	983.234	522.106	-217.37	957.692	502.846	-286.874	934.878
646	0	280.66	-150.435	1713.96	193.611	-134.323	1710.9	308.194	41.4763	1699.66	195.663	41.2035	1697.13	255.96	64.4729	1558.48	258.691	138.727	1295.88	246.173	-80.1957	1473.43	219.682	-138.004	1268.65	186.312	153.556	1353.14	432.095	-33.2342	1512.36	509.933	-38.8695	1318.91	528.461	-71.0285	1166.4	518.243	-205.737	1052.81	456.024	-260.129	986.519	520.369	-236.734	959.064	501.034	-306.877	938.308
647	0	280.216	-162.847	1711.79	193.22	-146.679	1708.62	307.549	28.9604	1697.25	195.459	28.9629	1694.89	255.866	52.024	1556.28	259.077	126.339	1293.41	245.754	-92.6222	1471.25	219.204	-150.595	1266.58	186.425	141.112	1350.54	431.681	-45.8525	1509.93	509.819	-52.7951	1316.88	528.243	-86.1904	1164.58	517.328	-222.959	1053.56	454.811	-278.359	988.884	519.567	-256.045	960.934	499.313	-326.388	941.492
648	0	279.703	-175.237	1709.38	192.724	-159.024	1706.16	307.274	16.6877	1694.81	194.829	16.4805	1692.16	255.733	39.6431	1553.6	259.138	113.522	1290.72	245.466	-104.936	1468.89	218.792	-163.154	1264.16	186.958	128.692	1347.83	431.332	-58.7514	1507.89	509.579	-66.8075	1314.63	528.061	-101.2	1162.29	516.412	-240.083	1054.05	453.386	-296.384	990.938	518.132	-274.885	962.231	497.563	-345.607	944.369
649	0	279.128	-187.686	1706.78	192.07	-171.49	1703.58	306.634	4.15184	1691.89	194.371	4.09579	1689.4	255.311	27.0577	1550.99	259.427	101.616	1287.86	244.921	-117.413	1466.15	218.194	-175.918	1261.46	186.934	116.01	1344.57	430.89	-71.5087	1505.07	509.298	-80.4891	1312.01	528.056	-115.922	1159.73	515.353	-256.932	1054.21	451.792	-314.279	992.478	516.306	-293.436	963.021	495.6	-364.558	946.997
650	0	278.585	-200.196	1703.72	191.478	-184.073	1700.67	306.048	-8.36804	1688.8	193.704	-8.54386	1686.4	254.711	14.609	1547.57	259.068	87.8292	1284.36	244.456	-130.093	1463.09	217.677	-188.76	1258.38	186.986	103.341	1341.07	430.252	-84.3403	1501.88	508.851	-94.4121	1309.03	527.754	-130.714	1156.91	514.254	-273.563	1053.84	450.195	-331.766	993.977	514.539	-311.761	963.536	493.7	-383.133	949.27
651	0	277.902	-212.882	1700.65	190.745	-196.809	1697.51	305.165	-21.0889	1685.4	193.105	-21.1512	1683.13	254.263	1.77518	1544.3	259.108	74.9811	1280.87	243.796	-142.861	1459.78	216.993	-201.81	1255.17	186.888	90.3434	1337.44	429.653	-97.315	1498.82	508.415	-108.137	1306.05	527.48	-145.522	1153.99	513.11	-289.971	1053.37	448.547	-349.104	994.872	512.714	-329.771	963.734	491.799	-401.335	951.015
652	0	277.133	-225.548	1697.3	190.086	-209.527	1694.11	304.417	-33.7469	1682.04	192.1	-33.9156	1679.51	253.238	-10.9026	1540.61	258.974	62.1291	1277.25	242.867	-155.742	1456.23	216.462	-214.94	1251.88	186.759	77.318	1333.84	429.023	-110.313	1495.6	507.967	-121.721	1302.89	527.453	-159.888	1151.24	512.009	-306.053	1052.66	446.805	-365.979	995.532	510.216	-347.303	963.562	489.82	-419.065	952.797
653	0	276.212	-238.488	1693.91	189.121	-222.5	1690.59	303.501	-46.6966	1678.43	191.3	-46.8472	1676.01	252.736	-24.0333	1536.86	258.309	48.6494	1273.46	241.838	-168.432	1452.66	215.682	-228.217	1248.29	186.406	64.1827	1330	428.197	-123.497	1492.2	507.434	-135.227	1299.45	527.287	-174.464	1147.95	510.75	-322.013	1051.62	445.082	-382.595	995.931	508.284	-364.599	963.175	487.797	-436.513	954.054
654	0	275.348	-251.352	1690.28	188.354	-235.426	1686.88	302.543	-59.6608	1674.75	190.339	-59.8599	1672.17	251.871	-37.0693	1533.13	258.045	35.6623	1269.49	241.275	-181.811	1448.85	214.915	-241.597	1244.39	186.091	51.0031	1325.86	427.207	-136.685	1488.27	506.71	-148.846	1295.72	526.793	-188.853	1144.46	509.55	-337.631	1050.34	443.382	-398.871	996.008	506.401	-381.854	962.728	485.736	-453.697	955.554
655	0	274.462	-264.464	1686.8	187.26	-248.66	1683.43	301.475	-72.6527	1670.9	189.114	-73.0192	1668.14	250.874	-50.2455	1529.17	257.163	22.0573	1265.21	240.38	-195.217	1445.13	214.112	-255.148	1240.69	185.538	37.8489	1321.54	426.328	-149.933	1484.57	505.867	-162.049	1291.96	526.404	-202.988	1140.82	508.212	-353.148	1048.66	441.547	-414.817	995.708	504.518	-398.454	961.778	483.713	-470.372	956.274
656	0	273.438	-277.682	1683.35	186.108	-261.989	1679.94	300.247	-85.9133	1667.14	187.857	-86.4284	1664.46	249.788	-63.8939	1525.45	256.206	8.23626	1261.26	239.278	-208.797	1441.38	213.378	-268.869	1237.05	184.776	24.0983	1317.42	425.494	-163.33	1481.16	505.074	-175.329	1288.25	525.754	-217.265	1137.13	506.841	-368.243	1047.01	439.858	-430.396	995.173	502.231	-414.565	960.508	481.657	-486.666	956.448
657	0	272.214	-291.148	1680.03	185.012	-275.397	1676.5	298.843	-99.391	1663.36	186.66	-99.8785	1660.69	248.574	-77.7911	1521.73	255.459	-5.58867	1257.42	238.245	-222.536	1437.69	212.571	-282.762	1233.22	184.049	10.6624	1313.48	424.064	-176.768	1476.81	504.031	-188.508	1284.48	525.025	-231.295	1133.51	505.463	-383.345	1045.22	438.111	-445.624	994.271	500.249	-430.429	958.97	479.786	-502.455	956.204
658	0	270.956	-304.688	1676.79	183.672	-289.169	1673.17	297.427	-112.934	1659.75	185.306	-113.514	1656.97	247.123	-91.6899	1518.5	254.407	-19.7315	1253.71	236.969	-236.598	1434	211.598	-296.905	1229.6	183.143	-3.1463	1309.54	423.1	-190.833	1473.88	502.699	-201.711	1280.82	524.224	-245.252	1130.03	504.077	-397.972	1043.11	436.38	-460.587	993.087	498.61	-445.866	957.693	477.857	-517.841	955.513
659	0	269.628	-318.395	1673.76	182.211	-302.974	1670.18	295.817	-126.553	1656.2	183.657	-127.375	1653.4	245.969	-105.895	1515.16	253.389	-33.9825	1250.27	235.282	-250.651	1430.72	210.639	-311.21	1226.15	182.356	-17.3697	1306.17	421.918	-204.826	1470.51	501.385	-214.847	1277.41	523.391	-258.917	1126.93	502.625	-412.341	1040.8	434.751	-475	991.564	497.06	-460.903	955.986	476.09	-532.732	954.579
660	0	268.214	-332.261	1671.01	180.795	-316.896	1667.19	294.237	-140.427	1652.89	182.021	-141.334	1649.86	244.192	-120.268	1511.9	252.182	-48.6856	1247.13	233.884	-265.137	1427.47	209.734	-325.668	1222.91	181.466	-31.5906	1302.92	420.354	-219.111	1467.49	499.884	-227.975	1274.38	522.369	-272.545	1123.88	501.238	-426.331	1038.54	433.186	-489.18	989.613	495.483	-475.38	954.061	474.342	-547.192	953.238
661	0	266.593	-346.312	1668.31	179.189	-330.971	1664.36	292.48	-154.45	1649.92	180.072	-155.511	1646.58	242.27	-134.799	1508.67	251.053	-63.2498	1244.27	232.693	-279.818	1424.28	208.581	-340.413	1219.77	180.196	-46.2163	1299.61	418.788	-233.553	1464.69	498.113	-241.088	1271.46	521.104	-286.042	1120.97	499.843	-440.108	1036.12	431.643	-502.911	987.557	494.503	-489.565	951.979	472.638	-561.178	951.485
662	0	264.882	-360.403	1665.73	177.377	-345.221	1661.74	290.705	-168.601	1647	178.235	-169.807	1643.66	240.21	-149.47	1505.91	249.825	-78.1702	1241.26	230.823	-294.583	1421.45	207.303	-355.343	1216.95	178.898	-61.1514	1296.39	417.055	-247.827	1462.01	496.287	-254.385	1269.01	519.69	-299.265	1118.46	498.424	-453.528	1033.6	430.217	-516.222	984.958	492.996	-503.224	949.537	471.275	-574.573	949.352
663	0	263.049	-374.623	1663.52	175.48	-359.603	1659.55	288.595	-182.923	1644.11	176.341	-184.179	1641.05	238.339	-164.143	1503.54	248.478	-93.2199	1238.75	228.862	-309.456	1418.94	205.948	-370.563	1214.56	177.583	-76.2591	1293.59	415.158	-262.33	1459.96	494.68	-267.745	1267.13	518.18	-312.325	1116.13	497.186	-466.503	1031.24	428.866	-529.135	982.044	492.005	-516.166	947.233	469.975	-587.527	946.835
664	0	261.045	-389.128	1661.7	173.509	-374.124	1657.71	286.322	-197.359	1641.69	174.173	-198.666	1638.85	236.017	-178.875	1501.71	246.794	-108.633	1236.28	226.916	-324.602	1416.83	204.56	-385.981	1212.59	175.861	-91.7452	1290.81	413.064	-276.781	1458.05	492.67	-281.627	1265.29	516.378	-325.293	1114.06	495.768	-479.203	1028.53	427.613	-541.534	979.161	490.556	-528.363	944.228	468.758	-599.93	944.019
665	0	258.873	-403.77	1660.46	171.341	-388.894	1656.43	284.003	-211.951	1640.05	171.72	-213.479	1636.92	233.403	-193.669	1499.5	245.119	-123.908	1234.5	224.911	-339.941	1415.37	203.111	-401.664	1211.13	173.959	-107.256	1288.73	410.799	-291.248	1456.3	490.492	-295.761	1263.98	514.38	-337.972	1112.27	494.387	-491.601	1025.92	426.407	-553.603	976.013	489.43	-540.15	941.478	467.734	-611.789	940.624
666	0	256.802	-418.347	1659.79	169.284	-403.61	1655.65	281.583	-226.607	1638.81	169.42	-228.376	1635.81	230.831	-208.887	1498.24	243.07	-139.914	1232.79	222.901	-355.315	1414.33	201.642	-417.559	1210.27	171.7	-122.983	1286.87	408.673	-305.783	1455.7	488.558	-309.879	1263.25	512.231	-350.422	1110.94	493.171	-503.422	1023.23	425.36	-565.28	972.468	489.054	-551.713	938.563	467.02	-623.009	936.941
667	0	254.789	-433.003	1659.48	167.088	-418.456	1655.26	278.836	-241.259	1637.65	166.82	-243.309	1634.68	227.979	-224.112	1497.27	241.089	-156.066	1231.52	220.811	-370.716	1413.64	200.437	-433.495	1209.93	169.712	-138.709	1286.07	406.559	-320.368	1455.36	486.458	-324.371	1262.94	509.958	-362.939	1110.16	492.008	-514.96	1020.92	424.137	-576.808	968.77	488.431	-562.307	935.71	466.382	-633.621	933.168
668	0	252.34	-447.838	1659.2	164.704	-433.479	1654.97	276.399	-256.05	1637.29	164.083	-258.313	1633.95	225.376	-239.362	1496.73	239.661	-172.013	1230.96	218.684	-386.158	1413.28	199.133	-449.75	1209.84	167.296	-154.576	1285.28	404.329	-335.144	1455.37	484.22	-338.743	1262.92	507.72	-375.099	1109.85	490.749	-526.119	1018.2	423.451	-587.16	964.696	487.804	-572.491	932.694	465.979	-643.769	929.038
669	0	250.024	-462.787	1659.67	162.322	-448.496	1655.09	273.61	-270.847	1637.28	161.421	-273.335	1633.85	222.797	-254.849	1496.61	237.975	-187.916	1230.63	216.652	-401.614	1413.5	197.838	-465.914	1210.05	165.049	-169.991	1285.18	402.079	-349.918	1455.72	482.031	-353.22	1263.48	505.738	-386.77	1110.18	489.512	-536.858	1015.85	422.817	-597.367	961.068	487.283	-581.665	929.623	465.877	-653.152	924.519
670	0	247.636	-477.526	1660.29	159.882	-463.455	1655.65	270.925	-285.651	1637.77	158.743	-288.362	1634.26	220.168	-269.911	1496.76	235.914	-203.787	1230.84	214.541	-417.068	1414.05	196.311	-482.018	1210.87	162.502	-185.71	1285.06	399.891	-364.676	1456.73	480.038	-367.377	1264.57	502.75	-398.853	1110.54	488.37	-547.134	1013.76	422.349	-607.114	957.334	486.638	-590.246	926.463	465.94	-661.736	919.951
671	0	245.276	-492.283	1661.33	157.783	-478.241	1656.33	268.057	-300.37	1638.4	156.001	-303.446	1634.76	217.78	-284.917	1497.85	233.79	-219.205	1231.52	212.402	-432.502	1415.06	194.761	-498.053	1211.86	160.169	-201.419	1285.61	397.528	-379.362	1457.88	477.963	-381.504	1265.88	500.028	-410.739	1111.29	487.341	-556.979	1011.61	421.976	-616.378	953.555	487.511	-598.398	923.714	466.008	-669.767	914.891
672	0	242.87	-507.093	1662.62	155.098	-493.521	1657.6	265.341	-315.142	1639.71	153.123	-318.473	1635.58	215.019	-299.896	1498.69	231.718	-234.455	1232.5	210.314	-447.684	1416.2	193.119	-513.821	1213.3	157.699	-216.943	1286.49	395.157	-393.911	1459.29	475.846	-395.456	1267.34	497.756	-422.082	1112.7	486.332	-566.449	1009.31	421.764	-625.116	949.791	487.301	-605.753	920.63	466.414	-677.162	909.805
673	0	240.411	-521.903	1664.26	152.756	-508.429	1659.22	262.327	-329.793	1640.85	150.279	-333.467	1637.01	212.155	-315.038	1499.92	229.461	-249.732	1233.91	208.206	-462.714	1417.88	191.602	-529.411	1215.19	155.279	-232.318	1288.02	392.9	-408.362	1461.25	473.818	-409.325	1269.34	494.838	-433.778	1114.23	485.366	-575.398	1007.26	421.845	-632.898	945.823	487.098	-612.467	917.692	466.886	-683.721	905.003
674	0	238.156	-536.648	1666.42	150.381	-523.234	1661.16	259.727	-344.497	1643.06	147.728	-348.363	1638.82	209.533	-329.876	1501.6	227.674	-264.218	1235.96	206.203	-477.703	1419.84	190.357	-544.735	1217.55	152.574	-247.549	1289.83	390.901	-422.462	1463.52	471.986	-422.942	1271.8	492.247	-445.189	1116.46	484.791	-584.091	1005.96	421.713	-640.442	942.112	486.99	-618.627	915.141	467.454	-689.687	900.404
675	0	235.794	-551.278	1668.35	148.184	-538.002	1662.69	257.059	-358.949	1644.95	144.892	-363.193	1640.45	207.289	-344.682	1503.77	225.373	-278.84	1237.75	204.466	-492.17	1421.51	188.997	-559.959	1219.53	149.94	-262.686	1291.88	388.721	-436.466	1465.81	470.09	-436.539	1274.2	489.636	-456.811	1118.75	483.534	-592.572	1004.28	421.604	-647.505	938.533	486.655	-624.479	912.289	467.928	-695.187	895.593
676	0	233.537	-565.794	1670.33	146.105	-552.655	1664.32	254.249	-373.38	1646.93	142.29	-378.004	1642.36	204.302	-359.137	1505.67	223.244	-292.835	1240.3	202.553	-506.548	1423.14	187.954	-574.855	1221.75	147.132	-277.564	1293.91	386.526	-450.173	1468.29	468.344	-449.898	1276.88	487.279	-468.189	1121.42	482.62	-600.723	1002.99	421.307	-654.129	934.865	486.623	-629.722	909.852	468.347	-700.183	890.818
677	0	231.524	-580.149	1672.51	143.9	-567.227	1666.52	251.978	-387.699	1649.73	139.878	-392.566	1644.57	202.198	-373.355	1508.23	220.897	-306.944	1242.61	201.137	-520.797	1425.66	186.978	-589.265	1224.02	144.287	-292.234	1296.03	384.719	-463.421	1471.04	466.73	-462.932	1279.79	484.829	-479.495	1124.15	481.71	-608.623	1002.11	421.205	-660.184	931.688	486.181	-634.77	908.047	468.8	-704.567	886.196
678	0	229.585	-594.391	1674.62	141.858	-581.644	1668.48	249.427	-401.812	1652.01	137.457	-406.944	1646.94	199.353	-387.158	1510.19	218.753	-320.443	1245.26	199.811	-534.872	1428.01	186.185	-603.285	1226.43	141.6	-306.797	1298.43	382.702	-476.246	1473.48	465.51	-475.449	1282.9	482.548	-490.879	1127.02	480.693	-616.167	1001.38	420.684	-665.785	928.794	486.255	-639.566	906.373	469.029	-708.492	881.801
679	0	227.603	-608.685	1676.82	139.714	-596.17	1670.78	247.285	-415.957	1654.82	135.247	-421.254	1649.32	197.347	-400.872	1512.69	216.508	-333.928	1247.93	198.536	-548.779	1430.44	185.425	-617.159	1228.71	138.633	-321.075	1301.03	381.117	-488.913	1476.24	463.926	-488.045	1285.74	480.414	-501.895	1129.69	479.531	-623.312	1000.25	420.632	-671.091	926.032	486.46	-644.155	904.928	469.146	-712.223	877.654
680	0	225.765	-622.789	1679.18	138.64	-610.003	1672.6	245.116	-429.846	1657.53	133.185	-435.483	1651.81	195.052	-414.753	1515.26	214.444	-347.019	1250.66	197.489	-562.55	1433.04	184.931	-630.467	1231.2	135.807	-335.111	1303.89	379.552	-501.271	1478.96	462.421	-500.155	1288.46	478.362	-512.973	1132.68	478.707	-630.549	999.97	420.166	-675.998	923.585	486.349	-648.866	904.039	469.167	-715.543	873.752
681	0	224.18	-636.725	1681.52	136.552	-624.249	1674.89	243.097	-443.705	1660.38	131.281	-449.492	1654.5	193.085	-428.048	1517.94	212.359	-360.572	1253.25	196.61	-575.99	1435.84	184.623	-643.707	1233.74	132.877	-348.859	1306.66	378.121	-513.511	1481.88	461.017	-511.868	1291.24	476.484	-523.703	1135.55	477.875	-637.625	1000.34	420.019	-680.695	921.724	486.894	-653.284	903.817	469.019	-718.729	870.469
682	0	222.537	-650.531	1683.83	135.024	-638.176	1677.36	241.167	-457.373	1663.14	129.422	-463.371	1657.17	191.187	-441.283	1521	210.359	-373.602	1256.45	195.661	-589.272	1438.46	184.311	-656.911	1236.25	130.079	-362.419	1309.79	376.779	-525.702	1484.75	459.758	-523.311	1293.99	474.911	-534.007	1138.64	476.937	-644.539	1000.66	420.052	-685.223	920.299	486.481	-657.562	903.774	468.672	-721.621	867.165
683	0	221.21	-664.323	1686.42	133.725	-652.044	1679.36	239.691	-471.042	1666.57	127.845	-477.217	1660.17	189.452	-454.749	1523.94	208.185	-386.553	1259.36	194.847	-602.376	1441.31	184.206	-670.063	1238.79	127.466	-375.726	1312.99	375.54	-537.832	1487.54	458.232	-534.506	1296.66	473.551	-543.864	1141.79	476.024	-651.508	1001.35	419.3	-689.665	919.319	487.214	-662.216	904.268	468.289	-724.371	864.281
684	0	219.89	-677.927	1688.96	132.65	-665.457	1681.96	237.987	-484.376	1669.74	126.25	-490.802	1663.32	187.57	-467.811	1526.81	206.003	-399.251	1262.54	193.968	-615.37	1444.23	184.207	-682.955	1241.44	125.061	-388.954	1316.36	374.435	-549.785	1490.7	457.064	-545.195	1299.63	472.115	-553.488	1144.9	475.311	-658.259	1002.69	418.377	-694.062	918.337	487.394	-666.884	905.382	467.769	-727.023	862.338
685	0	218.886	-691.364	1691.75	131.582	-678.968	1684.62	236.698	-497.688	1673.18	124.787	-504.319	1666.56	186.077	-480.739	1530.11	204.041	-411.726	1265.88	193.279	-628.143	1447.32	184.225	-695.784	1244.37	122.864	-401.991	1319.66	373.38	-561.68	1493.79	455.73	-555.578	1302.58	470.95	-562.758	1148.25	474.6	-664.66	1004.17	418.091	-698.174	918.532	488.169	-671.376	906.742	467.432	-729.596	861.043
686	0	217.833	-704.704	1694.4	130.616	-692.434	1687.39	235.28	-510.916	1676.33	123.461	-517.755	1669.73	184.924	-493.756	1533.44	202.224	-423.932	1269.47	192.39	-640.93	1450.14	184.126	-708.67	1246.94	120.904	-414.881	1323.04	372.019	-573.764	1496.49	454.843	-565.842	1305.48	469.719	-571.469	1151.22	473.812	-670.972	1005.53	417.553	-702.371	918.817	488.093	-675.93	908.046	466.813	-732.238	859.893
687	0	216.944	-717.951	1696.98	129.758	-705.849	1690.08	233.888	-523.96	1679.35	122.23	-531.16	1672.71	183.101	-506.625	1536.9	200.282	-436.556	1272.71	191.471	-653.607	1453.06	184.07	-721.41	1249.62	119.052	-427.577	1326.28	371.051	-585.823	1499.38	453.71	-575.826	1308.28	468.682	-579.93	1154.21	473.01	-677.083	1006.93	416.97	-706.69	919.448	487.917	-680.569	909.459	465.741	-734.784	858.696
688	0	216.342	-731.112	1699.84	129.097	-719.008	1692.78	232.821	-536.924	1682.58	120.989	-544.306	1675.8	181.918	-519.303	1539.49	198.628	-449.07	1275.83	190.736	-666.163	1456.18	183.898	-733.939	1252.5	117.287	-440.334	1329.42	370.039	-597.785	1502.44	452.801	-585.463	1311.2	467.887	-587.915	1157.36	472.569	-682.676	1008.71	416.593	-710.785	920.715	487.819	-684.943	911.517	465.238	-737.542	858.921
689	0	215.793	-743.937	1702.38	128.443	-732.187	1695.69	231.398	-549.687	1684.97	119.945	-557.531	1678.97	180.528	-532.016	1542.45	197.084	-461.94	1278.63	189.974	-678.763	1459.12	183.482	-746.5	1255.41	115.531	-453.087	1332.5	368.834	-609.762	1505.33	452.192	-594.948	1314.39	466.917	-595.757	1160.31	472.221	-688.345	1010.51	416.588	-714.884	922.22	487.889	-689.048	913.476	464.685	-740.349	859.328
690	0	215.158	-756.774	1704.85	127.858	-745.277	1698.32	230.295	-562.408	1687.92	118.776	-570.579	1681.74	179.298	-544.699	1545.4	195.338	-474.002	1281.47	189.014	-691.301	1461.8	182.636	-758.846	1257.99	113.804	-465.848	1335.38	367.697	-621.769	1507.97	451.388	-604.431	1317.33	466.363	-603.251	1163.45	471.798	-693.878	1012.42	415.688	-719.391	923.399	488.059	-693.254	915.664	464.144	-743.445	860.141
[truncated: 69 more columns]

## Sheet: Sheet2
Devices
		025370 - Force			025370 - Moment			025370 - CoP			027571 - Force			027571 - Moment			027571 - CoP			037720 - Force			037720 - Moment			037720 - CoP
Frame	Sub Frame	Fx	Fy	Fz	Mx	My	Mz	Cx	Cy	Cz	Fx	Fy	Fz	Mx	My	Mz	Cx	Cy	Cz	Fx	Fy	Fz	Mx	My	Mz	Cx	Cy	Cz
		N	N	N	N.mm	N.mm	N.mm	mm	mm	mm	N	N	N	N.mm	N.mm	N.mm	mm	mm	mm	N	N	N	N.mm	N.mm	N.mm	mm	mm	mm
454	0	0	0	0	0	0	0	200	300	0	0	0	0	0	0	0	200	903	0	0	0	0	0	0	0	603	903	0
454	1	0	0	0	0	0	0	200	300	0	0	0	0	0	0	0	200	903	0	0	0	0	0	0	0	603	903	0
454	2	0	0	0	0	0	0	200	300	0	0	0	0	0	0	0	200	903	0	0	0	0	0	0	0	603	903	0
454	3	0	0	0	0	0	0	200	300	0	0	0	0	0	0	0	200	903	0	0	0	0	0	0	0	603	903	0
454	4	0	0	0	0	0	0	200	300	0	0	0	0	0	0	0	200	903	0	0	0	0	0	0	0	603	903	0
454	5	0	0	0	0	0	0	200	300	0	0	0	0	0	0	0	200	903	0	0	0	0	0	0	0	603	903	0
454	6	0	0	0	0	0	0	200	300	0	0	0	0	0	0	0	200	903	0	0	0	0	0	0	0	603	903	0
454	7	0	0	0	0	0	0	200	300	0	0	0	0	0	0	0	200	903	0	0	0	0	0	0	0	603	903	0
454	8	0	0	0	0	0	0	200	300	0	0	0	0	0	0	0	200	903	0	0	0	0	0	0	0	603	903	0
454	9	0	0	0	0	0	0	200	300	0	0	0	0	0	0	0	200	903	0	0	0	0	0	0	0	603	903	0
455	0	0	0	0	0	0	0	200	300	0	0	0	0	0	0	0	200	903	0	0	0	0	0	0	0	603	903	0
455	1	0	0	0	0	0	0	200	300	0	0	0	0	0	0	0	200	903	0	0	0	0	0	0	0	603	903	0
455	2	0	0	0	0	0	0	200	300	0	0	0	0	0	0	0	200	903	0	0	0	0	0	0	0	603	903	0
455	3	0	0	0	0	0	0	200	300	0	0	0	0	0	0	0	200	903	0	0	0	0	0	0	0	603	903	0
455	4	0	0	0	0	0	0	200	300	0	0	0	0	0	0	0	200	903	0	0	0	0	0	0	0	603	903	0
455	5	0	0	0	0	0	0	200	300	0	0	0	0	0	0	0	200	903	0	0	0	0	0	0	0	603	903	0
455	6	0	0	0	0	0	0	200	300	0	0	0	0	0	0	0	200	903	0	0	0	0	0	0	0	603	903	0
455	7	0	0	0	0	0	0	200	300	0	0	0	0	0	0	0	200	903	0	0	0	0	0	0	0	603	903	0
455	8	0	0	0	0	0	0	200	300	0	0	0	0	0	0	0	200	903	0	0	0	0	0	0	0	603	903	0
455	9	0	0	0	0	0	0	200	300	0	0	0	0	0	0	0	200	903	0	0	0	0	0	0	0	603	903	0
456	0	0	0	0	0	0	0	200	300	0	0	0	0	0	0	0	200	903	0	0	0	0	0	0	0	603	903	0
456	1	0	0	0	0	0	0	200	300	0	0	0	0	0	0	0	200	903	0	0	0	0	0	0	0	603	903	0
456	2	0	0	0	0	0	0	200	300	0	0	0	0	0	0	0	200	903	0	0	0	0	0	0	0	603	903	0
456	3	0	0	0	0	0	0	200	300	0	0	0	0	0	0	0	200	903	0	0	0	0	0	0	0	603	903	0
456	4	0	0	0	0	0	0	200	300	0	0	0	0	0	0	0	200	903	0	0	0	0	0	0	0	603	903	0
456	5	0	0	0	0	0	0	200	300	0	0	0	0	0	0	0	200	903	0	0	0	0	0	0	0	603	903	0
456	6	0	0	0	0	0	0	200	300	0	0	0	0	0	0	0	200	903	0	0	0	0	0	0	0	603	903	0
456	7	0	0	0	0	0	0	200	300	0	0	0	0	0	0	0	200	903	0	0	0	0	0	0	0	603	903	0
456	8	0	0	0	0	0	0	200	300	0	0	0	0	0	0	0	200	903	0	0	0	0	0	0	0	603	903	0
456	9	0	0	0	0	0	0	200	300	0	0	0	0	0	0	0	200	903	0	0	0	0	0	0	0	603	903	0
457	0	0	0	0	0	0	0	200	300	0	0	0	0	0	0	0	200	903	0	0	0	0	0	0	0	603	903	0
457	1	0	0	0	0	0	0	200	300	0	0	0	0	0	0	0	200	903	0	0	0	0	0	0	0	603	903	0
457	2	0	0	0	0	0	0	200	300	0	0	0	0	0	0	0	200	903	0	0	0	0	0	0	0	603	903	0
457	3	0	0	0	0	0	0	200	300	0	0	0	0	0	0	0	200	903	0	0	0	0	0	0	0	603	903	0
457	4	0	0	0	0	0	0	200	300	0	0	0	0	0	0	0	200	903	0	0	0	0	0	0	0	603	903	0
457	5	0	0	0	0	0	0	200	300	0	0	0	0	0	0	0	200	903	0	0	0	0	0	0	0	603	903	0
457	6	0	0	0	0	0	0	200	300	0	0	0	0	0	0	0	200	903	0	0	0	0	0	0	0	603	903	0
457	7	0	0	0	0	0	0	200	300	0	0	0	0	0	0	0	200	903	0	0	0	0	0	0	0	603	903	0
457	8	0	0	0	0	0	0	200	300	0	0	0	0	0	0	0	200	903	0	0	0	0	0	0	0	603	903	0
457	9	0	0	0	0	0	0	200	300	0	0	0	0	0	0	0	200	903	0	0	0	0	0	0	0	603	903	0
458	0	0	0	0	0	0	0	200	300	0	0	0	0	0	0	0	200	903	0	0	0	0	0	0	0	603	903	0
458	1	0	0	0	0	0	0	200	300	0	0	0	0	0	0	0	200	903	0	0	0	0	0	0	0	603	903	0
458	2	0	0	0	0	0	0	200	300	0	0	0	0	0	0	0	200	903	0	0	0	0	0	0	0	603	903	0
458	3	0	0	0	0	0	0	200	300	0	0	0	0	0	0	0	200	903	0	0	0	0	0	0	0	603	903	0
458	4	0	0	0	0	0	0	200	300	0	0	0	0	0	0	0	200	903	0	0	0	0	0	0	0	603	903	0
458	5	0	0	0	0	0	0	200	300	0	0	0	0	0	0	0	200	903	0	0	0	0	0	0	0	603	903	0
458	6	0	0	0	0	0	0	200	300	0	0	0	0	0	0	0	200	903	0	0	0	0	0	0	0	603	903	0
458	7	0	0	0	0	0	0	200	300	0	0	0	0	0	0	0	200	903	0	0	0	0	0	0	0	603	903	0
458	8	0	0	0	0	0	0	200	300	0	0	0	0	0	0	0	200	903	0	0	0	0	0	0	0	603	903	0
458	9	0	0	0	0	0	0	200	300	0	0	0	0	0	0	0	200	903	0	0	0	0	0	0	0	603	903	0
459	0	0	0	0	0	0	0	200	300	0	0	0	0	0	0	0	200	903	0	0	0	0	0	0	0	603	903	0
459	1	0	0	0	0	0	0	200	300	0	0	0	0	0	0	0	200	903	0	0	0	0	0	0	0	603	903	0
459	2	0	0	0	0	0	0	200	300	0	0	0	0	0	0	0	200	903	0	0	0	0	0	0	0	603	903	0
459	3	0	0	0	0	0	0	200	300	0	0	0	0	0	0	0	200	903	0	0	0	0	0	0	0	603	903	0
459	4	0	0	0	0	0	0	200	300	0	0	0	0	0	0	0	200	903	0	0	0	0	0	0	0	603	903	0
459	5	0	0	0	0	0	0	200	300	0	0	0	0	0	0	0	200	903	0	0	0	0	0	0	0	603	903	0
459	6	0	0	0	0	0	0	200	300	0	0	0	0	0	0	0	200	903	0	0	0	0	0	0	0	603	903	0
459	7	0	0	0	0	0	0	200	300	0	0	0	0	0	0	0	200	903	0	0	0	0	0	0	0	603	903	0
459	8	0	0	0	0	0	0	200	300	0	0	0	0	0	0	0	200	903	0	0	0	0	0	0	0	603	903	0
459	9	0	0	0	0	0	0	200	300	0	0	0	0	0	0	0	200	903	0	0	0	0	0	0	0	603	903	0
460	0	0	0	0	0	0	0	200	300	0	0	0	0	0	0	0	200	903	0	0	0	0	0	0	0	603	903	0
460	1	0	0	0	0	0	0	200	300	0	0	0	0	0	0	0	200	903	0	0	0	0	0	0	0	603	903	0
460	2	0	0	0	0	0	0	200	300	0	0	0	0	0	0	0	200	903	0	0	0	0	0	0	0	603	903	0
460	3	0	0	0	0	0	0	200	300	0	0	0	0	0	0	0	200	903	0	0	0	0	0	0	0	603	903	0
460	4	0	0	0	0	0	0	200	300	0	0	0	0	0	0	0	200	903	0	0	0	0	0	0	0	603	903	0
460	5	0	0	0	0	0	0	200	300	0	0	0	0	0	0	0	200	903	0	0	0	0	0	0	0	603	903	0
460	6	0	0	0	0	0	0	200	300	0	0	0	0	0	0	0	200	903	0	0	0	0	0	0	0	603	903	0
460	7	0	0	0	0	0	0	200	300	0	0	0	0	0	0	0	200	903	0	0	0	0	0	0	0	603	903	0
460	8	0	0	0	0	0	0	200	300	0	0	0	0	0	0	0	200	903	0	0	0	0	0	0	0	603	903	0
460	9	0	0	0	0	0	0	200	300	0	0	0	0	0	0	0	200	903	0	0	0	0	0	0	0	603	903	0
461	0	0	0	0	0	0	0	200	300	0	0	0	0	0	0	0	200	903	0	0	0	0	0	0	0	603	903	0
461	1	0	0	0	0	0	0	200	300	0	0	0	0	0	0	0	200	903	0	0	0	0	0	0	0	603	903	0
461	2	0	0	0	0	0	0	200	300	0	0	0	0	0	0	0	200	903	0	0	0	0	0	0	0	603	903	0
461	3	0	0	0	0	0	0	200	300	0	0	0	0	0	0	0	200	903	0	0	0	0	0	0	0	603	903	0
461	4	0	0	0	0	0	0	200	300	0	0	0	0	0	0	0	200	903	0	0	0	0	0	0	0	603	903	0
461	5	0	0	0	0	0	0	200	300	0	0	0	0	0	0	0	200	903	0	0	0	0	0	0	0	603	903	0
461	6	0	0	0	0	0	0	200	300	0	0	0	0	0	0	0	200	903	0	0	0	0	0	0	0	603	903	0
461	7	0	0	0	0	0	0	200	300	0	0	0	0	0	0	0	200	903	0	0	0	0	0	0	0	603	903	0
461	8	0	0	0	0	0	0	200	300	0	0	0	0	0	0	0	200	903	0	0	0	0	0	0	0	603	903	0
461	9	0	0	0	0	0	0	200	300	0	0	0	0	0	0	0	200	903	0	0	0	0	0	0	0	603	903	0
462	0	0	0	0	0	0	0	200	300	0	0	0	0	0	0	0	200	903	0	0	0	0	0	0	0	603	903	0
462	1	0	0	0	0	0	0	200	300	0	0	0	0	0	0	0	200	903	0	0	0	0	0	0	0	603	903	0
462	2	0	0	0	0	0	0	200	300	0	0	0	0	0	0	0	200	903	0	0	0	0	0	0	0	603	903	0
462	3	0	0	0	0	0	0	200	300	0	0	0	0	0	0	0	200	903	0	0	0	0	0	0	0	603	903	0
462	4	0	0	0	0	0	0	200	300	0	0	0	0	0	0	0	200	903	0	0	0	0	0	0	0	603	903	0
462	5	0	0	0	0	0	0	200	300	0	0	0	0	0	0	0	200	903	0	0	0	0	0	0	0	603	903	0
462	6	0	0	0	0	0	0	200	300	0	0	0	0	0	0	0	200	903	0	0	0	0	0	0	0	603	903	0
462	7	0	0	0	0	0	0	200	300	0	0	0	0	0	0	0	200	903	0	0	0	0	0	0	0	603	903	0
462	8	0	0	0	0	0	0	200	300	0	0	0	0	0	0	0	200	903	0	0	0	0	0	0	0	603	903	0
462	9	0	0	0	0	0	0	200	300	0	0	0	0	0	0	0	200	903	0	0	0	0	0	0	0	603	903	0
463	0	0	0	0	0	0	0	200	300	0	0	0	0	0	0	0	200	903	0	0	0	0	0	0	0	603	903	0
463	1	0	0	0	0	0	0	200	300	0	0	0	0	0	0	0	200	903	0	0	0	0	0	0	0	603	903	0
463	2	0	0	0	0	0	0	200	300	0	0	0	0	0	0	0	200	903	0	0	0	0	0	0	0	603	903	0
463	3	0	0	0	0	0	0	200	300	0	0	0	0	0	0	0	200	903	0	0	0	0	0	0	0	603	903	0
463	4	0	0	0	0	0	0	200	300	0	0	0	0	0	0	0	200	903	0	0	0	0	0	0	0	603	903	0
463	5	0	0	0	0	0	0	200	300	0	0	0	0	0	0	0	200	903	0	0	0	0	0	0	0	603	903	0
463	6	0	0	0	0	0	0	200	300	0	0	0	0	0	0	0	200	903	0	0	0	0	0	0	0	603	903	0
463	7	0	0	0	0	0	0	200	300	0	0	0	0	0	0	0	200	903	0	0	0	0	0	0	0	603	903	0
463	8	0	0	0	0	0	0	200	300	0	0	0	0	0	0	0	200	903	0	0	0	0	0	0	0	603	903	0
463	9	0	0	0	0	0	0	200	300	0	0	0	0	0	0	0	200	903	0	0	0	0	0	0	0	603	903	0
464	0	0	0	0	0	0	0	200	300	0	0	0	0	0	0	0	200	903	0	0	0	0	0	0	0	603	903	0
464	1	0	0	0	0	0	0	200	300	0	0	0	0	0	0	0	200	903	0	0	0	0	0	0	0	603	903	0
464	2	0	0	0	0	0	0	200	300	0	0	0	0	0	0	0	200	903	0	0	0	0	0	0	0	603	903	0
464	3	0	0	0	0	0	0	200	300	0	0	0	0	0	0	0	200	903	0	0	0	0	0	0	0	603	903	0
464	4	0	0	0	0	0	0	200	300	0	0	0	0	0	0	0	200	903	0	0	0	0	0	0	0	603	903	0
464	5	0	0	0	0	0	0	200	300	0	0	0	0	0	0	0	200	903	0	0	0	0	0	0	0	603	903	0
464	6	0	0	0	0	0	0	200	300	0	0	0	0	0	0	0	200	903	0	0	0	0	0	0	0	603	903	0
464	7	0	0	0	0	0	0	200	300	0	0	0	0	0	0	0	200	903	0	0	0	0	0	0	0	603	903	0
464	8	0	0	0	0	0	0	200	300	0	0	0	0	0	0	0	200	903	0	0	0	0	0	0	0	603	903	0
464	9	0	0	0	0	0	0	200	300	0	0	0	0	0	0	0	200	903	0	0	0	0	0	0	0	603	903	0
465	0	0	0	0	0	0	0	200	300	0	0	0	0	0	0	0	200	903	0	0	0	0	0	0	0	603	903	0
465	1	0	0	0	0	0	0	200	300	0	0	0	0	0	0	0	200	903	0	0	0	0	0	0	0	603	903	0
465	2	0	0	0	0	0	0	200	300	0	0	0	0	0	0	0	200	903	0	0	0	0	0	0	0	603	903	0
465	3	0	0	0	0	0	0	200	300	0	0	0	0	0	0	0	200	903	0	0	0	0	0	0	0	603	903	0
465	4	0	0	0	0	0	0	200	300	0	0	0	0	0	0	0	200	903	0	0	0	0	0	0	0	603	903	0
465	5	0	0	0	0	0	0	200	300	0	0	0	0	0	0	0	200	903	0	0	0	0	0	0	0	603	903	0
465	6	0	0	0	0	0	0	200	300	0	0	0	0	0	0	0	200	903	0	0	0	0	0	0	0	603	903	0
465	7	0	0	0	0	0	0	200	300	0	0	0	0	0	0	0	200	903	0	0	0	0	0	0	0	603	903	0
465	8	0	0	0	0	0	0	200	300	0	0	0	0	0	0	0	200	903	0	0	0	0	0	0	0	603	903	0
465	9	0	0	0	0	0	0	200	300	0	0	0	0	0	0	0	200	903	0	0	0	0	0	0	0	603	903	0
466	0	0	0	0	0	0	0	200	300	0	0	0	0	0	0	0	200	903	0	0	0	0	0	0	0	603	903	0
466	1	0	0	0	0	0	0	200	300	0	0	0	0	0	0	0	200	903	0	0	0	0	0	0	0	603	903	0
466	2	0	0	0	0	0	0	200	300	0	0	0	0	0	0	0	200	903	0	0	0	0	0	0	0	603	903	0
466	3	0	0	0	0	0	0	200	300	0	0	0	0	0	0	0	200	903	0	0	0	0	0	0	0	603	903	0
466	4	0	0	0	0	0	0	200	300	0	0	0	0	0	0	0	200	903	0	0	0	0	0	0	0	603	903	0
466	5	0	0	0	0	0	0	200	300	0	0	0	0	0	0	0	200	903	0	0	0	0	0	0	0	603	903	0
466	6	0	0	0	0	0	0	200	300	0	0	0	0	0	0	0	200	903	0	0	0	0	0	0	0	603	903	0
466	7	0	0	0	0	0	0	200	300	0	0	0	0	0	0	0	200	903	0	0	0	0	0	0	0	603	903	0
466	8	0	0	0	0	0	0	200	300	0	0	0	0	0	0	0	200	903	0	0	0	0	0	0	0	603	903	0
466	9	0	0	0	0	0	0	200	300	0	0	0	0	0	0	0	200	903	0	0	0	0	0	0	0	603	903	0
467	0	0	0	0	0	0	0	200	300	0	0	0	0	0	0	0	200	903	0	0	0	0	0	0	0	603	903	0
467	1	0	0	0	0	0	0	200	300	0	0	0	0	0	0	0	200	903	0	0	0	0	0	0	0	603	903	0
467	2	0	0	0	0	0	0	200	300	0	0	0	0	0	0	0	200	903	0	0	0	0	0	0	0	603	903	0
467	3	0	0	0	0	0	0	200	300	0	0	0	0	0	0	0	200	903	0	0	0	0	0	0	0	603	903	0
467	4	0	0	0	0	0	0	200	300	0	0	0	0	0	0	0	200	903	0	0	0	0	0	0	0	603	903	0
467	5	0	0	0	0	0	0	200	300	0	0	0	0	0	0	0	200	903	0	0	0	0	0	0	0	603	903	0
467	6	0	0	0	0	0	0	200	300	0	0	0	0	0	0	0	200	903	0	0	0	0	0	0	0	603	903	0
467	7	0	0	0	0	0	0	200	300	0	0	0	0	0	0	0	200	903	0	0	0	0	0	0	0	603	903	0
467	8	0	0	0	0	0	0	200	300	0	0	0	0	0	0	0	200	903	0	0	0	0	0	0	0	603	903	0
467	9	0	0	0	0	0	0	200	300	0	0	0	0	0	0	0	200	903	0	0	0	0	0	0	0	603	903	0
468	0	0	0	0	0	0	0	200	300	0	0	0	0	0	0	0	200	903	0	0	0	0	0	0	0	603	903	0
468	1	0	0	0	0	0	0	200	300	0	0	0	0	0	0	0	200	903	0	0	0	0	0	0	0	603	903	0
468	2	0	0	0	0	0	0	200	300	0	0	0	0	0	0	0	200	903	0	0	0	0	0	0	0	603	903	0
468	3	0	0	0	0	0	0	200	300	0	0	0	0	0	0	0	200	903	0	0	0	0	0	0	0	603	903	0
468	4	0	0	0	0	0	0	200	300	0	0	0	0	0	0	0	200	903	0	0	0	0	0	0	0	603	903	0
468	5	0	0	0	0	0	0	200	300	0	0	0	0	0	0	0	200	903	0	0	0	0	0	0	0	603	903	0
468	6	0	0	0	0	0	0	200	300	0	0	0	0	0	0	0	200	903	0	0	0	0	0	0	0	603	903	0
468	7	0	0	0	0	0	0	200	300	0	0	0	0	0	0	0	200	903	0	0	0	0	0	0	0	603	903	0
468	8	0	0	0	0	0	0	200	300	0	0	0	0	0	0	0	200	903	0	0	0	0	0	0	0	603	903	0
468	9	0	0	0	0	0	0	200	300	0	0	0	0	0	0	0	200	903	0	0	0	0	0	0	0	603	903	0
469	0	0	0	0	0	0	0	200	300	0	0	0	0	0	0	0	200	903	0	0	0	0	0	0	0	603	903	0
469	1	0	0	0	0	0	0	200	300	0	0	0	0	0	0	0	200	903	0	0	0	0	0	0	0	603	903	0
469	2	0	0	0	0	0	0	200	300	0	0	0	0	0	0	0	200	903	0	0	0	0	0	0	0	603	903	0
469	3	0	0	0	0	0	0	200	300	0	0	0	0	0	0	0	200	903	0	0	0	0	0	0	0	603	903	0
469	4	0	0	0	0	0	0	200	300	0	0	0	0	0	0	0	200	903	0	0	0	0	0	0	0	603	903	0
469	5	0	0	0	0	0	0	200	300	0	0	0	0	0	0	0	200	903	0	0	0	0	0	0	0	603	903	0
469	6	0	0	0	0	0	0	200	300	0	0	0	0	0	0	0	200	903	0	0	0	0	0	0	0	603	903	0
469	7	0	0	0	0	0	0	200	300	0	0	0	0	0	0	0	200	903	0	0	0	0	0	0	0	603	903	0
469	8	0	0	0	0	0	0	200	300	0	0	0	0	0	0	0	200	903	0	0	0	0	0	0	0	603	903	0
469	9	0	0	0	0	0	0	200	300	0	0	0	0	0	0	0	200	903	0	0	0	0	0	0	0	603	903	0
470	0	0	0	0	0	0	0	200	300	0	0	0	0	0	0	0	200	903	0	0	0	0	0	0	0	603	903	0
470	1	0	0	0	0	0	0	200	300	0	0	0	0	0	0	0	200	903	0	0	0	0	0	0	0	603	903	0
470	2	0	0	0	0	0	0	200	300	0	0	0	0	0	0	0	200	903	0	0	0	0	0	0	0	603	903	0
470	3	0	0	0	0	0	0	200	300	0	0	0	0	0	0	0	200	903	0	0	0	0	0	0	0	603	903	0
470	4	0	0	0	0	0	0	200	300	0	0	0	0	0	0	0	200	903	0	0	0	0	0	0	0	603	903	0
470	5	0	0	0	0	0	0	200	300	0	0	0	0	0	0	0	200	903	0	0	0	0	0	0	0	603	903	0
470	6	0	0	0	0	0	0	200	300	0	0	0	0	0	0	0	200	903	0	0	0	0	0	0	0	603	903	0
470	7	0	0	0	0	0	0	200	300	0	0	0	0	0	0	0	200	903	0	0	0	0	0	0	0	603	903	0
470	8	0	0	0	0	0	0	200	300	0	0	0	0	0	0	0	200	903	0	0	0	0	0	0	0	603	903	0
470	9	0	0	0	0	0	0	200	300	0	0	0	0	0	0	0	200	903	0	0	0	0	0	0	0	603	903	0
471	0	0	0	0	0	0	0	200	300	0	0	0	0	0	0	0	200	903	0	0	0	0	0	0	0	603	903	0
471	1	0	0	0	0	0	0	200	300	0	0	0	0	0	0	0	200	903	0	0	0	0	0	0	0	603	903	0
471	2	0	0	0	0	0	0	200	300	0	0	0	0	0	0	0	200	903	0	0	0	0	0	0	0	603	903	0
471	3	0	0	0	0	0	0	200	300	0	0	0	0	0	0	0	200	903	0	0	0	0	0	0	0	603	903	0
471	4	0	0	0	0	0	0	200	300	0	0	0	0	0	0	0	200	903	0	0	0	0	0	0	0	603	903	0
471	5	0	0	0	0	0	0	200	300	0	0	0	0	0	0	0	200	903	0	0	0	0	0	0	0	603	903	0
471	6	0	0	0	0	0	0	200	300	0	0	0	0	0	0	0	200	903	0	0	0	0	0	0	0	603	903	0
471	7	0	0	0	0	0	0	200	300	0	0	0	0	0	0	0	200	903	0	0	0	0	0	0	0	603	903	0
471	8	0	0	0	0	0	0	200	300	0	0	0	0	0	0	0	200	903	0	0	0	0	0	0	0	603	903	0
471	9	0	0	0	0	0	0	200	300	0	0	0	0	0	0	0	200	903	0	0	0	0	0	0	0	603	903	0
472	0	0	0	0	0	0	0	200	300	0	0	0	0	0	0	0	200	903	0	0	0	0	0	0	0	603	903	0
472	1	0	0	0	0	0	0	200	300	0	0	0	0	0	0	0	200	903	0	0	0	0	0	0	0	603	903	0
472	2	0	0	0	0	0	0	200	300	0	0	0	0	0	0	0	200	903	0	0	0	0	0	0	0	603	903	0
472	3	0	0	0	0	0	0	200	300	0	0	0	0	0	0	0	200	903	0	0	0	0	0	0	0	603	903	0
472	4	0	0	0	0	0	0	200	300	0	0	0	0	0	0	0	200	903	0	0	0	0	0	0	0	603	903	0
472	5	0	0	0	0	0	0	200	300	0	0	0	0	0	0	0	200	903	0	0	0	0	0	0	0	603	903	0
472	6	0	0	0	0	0	0	200	300	0	0	0	0	0	0	0	200	903	0	0	0	0	0	0	0	603	903	0
472	7	0	0	0	0	0	0	200	300	0	0	0	0	0	0	0	200	903	0	0	0	0	0	0	0	603	903	0
472	8	0	0	0	0	0	0	200	300	0	0	0	0	0	0	0	200	903	0	0	0	0	0	0	0	603	903	0
472	9	0	0	0	0	0	0	200	300	0	0	0	0	0	0	0	200	903	0	0	0	0	0	0	0	603	903	0
473	0	0	0	0	0	0	0	200	300	0	0	0	0	0	0	0	200	903	0	0	0	0	0	0	0	603	903	0
473	1	0	0	0	0	0	0	200	300	0	0	0	0	0	0	0	200	903	0	0	0	0	0	0	0	603	903	0
473	2	0	0	0	0	0	0	200	300	0	0	0	0	0	0	0	200	903	0	0	0	0	0	0	0	603	903	0
473	3	0	0	0	0	0	0	200	300	0	0	0	0	0	0	0	200	903	0	0	0	0	0	0	0	603	903	0
473	4	0	0	0	0	0	0	200	300	0	0	0	0	0	0	0	200	903	0	0	0	0	0	0	0	603	903	0
473	5	0	0	0	0	0	0	200	300	0	0	0	0	0	0	0	200	903	0	0	0	0	0	0	0	603	903	0
473	6	0	0	0	0	0	0	200	300	0	0	0	0	0	0	0	200	903	0	0	0	0	0	0	0	603	903	0
473	7	0	0	0	0	0	0	200	300	0	0	0	0	0	0	0	200	903	0	0	0	0	0	0	0	603	903	0
473	8	0	0	0	0	0	0	200	300	0	0	0	0	0	0	0	200	903	0	0	0	0	0	0	0	603	903	0
473	9	0	0	0	0	0	0	200	300	0	0	0	0	0	0	0	200	903	0	0	0	0	0	0	0	603	903	0
474	0	0	0	0	0	0	0	200	300	0	0	0	0	0	0	0	200	903	0	0	0	0	0	0	0	603	903	0
474	1	0	0	0	0	0	0	200	300	0	0	0	0	0	0	0	200	903	0	0	0	0	0	0	0	603	903	0
474	2	0	0	0	0	0	0	200	300	0	0	0	0	0	0	0	200	903	0	0	0	0	0	0	0	603	903	0
474	3	0	0	0	0	0	0	200	300	0	0	0	0	0	0	0	200	903	0	0	0	0	0	0	0	603	903	0
474	4	0	0	0	0	0	0	200	300	0	0	0	0	0	0	0	200	903	0	0	0	0	0	0	0	603	903	0
474	5	0	0	0	0	0	0	200	300	0	0	0	0	0	0	0	200	903	0	0	0	0	0	0	0	603	903	0
474	6	0	0	0	0	0	0	200	300	0	0	0	0	0	0	0	200	903	0	0	0	0	0	0	0	603	903	0
474	7	0	0	0	0	0	0	200	300	0	0	0	0	0	0	0	200	903	0	0	0	0	0	0	0	603	903	0
474	8	0	0	0	0	0	0	200	300	0	0	0	0	0	0	0	200	903	0	0	0	0	0	0	0	603	903	0
474	9	0	0	0	0	0	0	200	300	0	0	0	0	0	0	0	200	903	0	0	0	0	0	0	0	603	903	0
475	0	0	0	0	0	0	0	200	300	0	0	0	0	0	0	0	200	903	0	0	0	0	0	0	0	603	903	0
475	1	0	0	0	0	0	0	200	300	0	0	0	0	0	0	0	200	903	0	0	0	0	0	0	0	603	903	0
475	2	0	0	0	0	0	0	200	300	0	0	0	0	0	0	0	200	903	0	0	0	0	0	0	0	603	903	0
475	3	0	0	0	0	0	0	200	300	0	0	0	0	0	0	0	200	903	0	0	0	0	0	0	0	603	903	0
475	4	0	0	0	0	0	0	200	300	0	0	0	0	0	0	0	200	903	0	0	0	0	0	0	0	603	903	0
475	5	0	0	0	0	0	0	200	300	0	0	0	0	0	0	0	200	903	0	0	0	0	0	0	0	603	903	0
475	6	0	0	0	0	0	0	200	300	0	0	0	0	0	0	0	200	903	0	0	0	0	0	0	0	603	903	0
475	7	0	0	0	0	0	0	200	300	0	0	0	0	0	0	0	200	903	0	0	0	0	0	0	0	603	903	0
475	8	0	0	0	0	0	0	200	300	0	0	0	0	0	0	0	200	903	0	0	0	0	0	0	0	603	903	0
475	9	0	0	0	0	0	0	200	300	0	0	0	0	0	0	0	200	903	0	0	0	0	0	0	0	603	903	0
476	0	0	0	0	0	0	0	200	300	0	0	0	0	0	0	0	200	903	0	0	0	0	0	0	0	603	903	0
476	1	0	0	0	0	0	0	200	300	0	0	0	0	0	0	0	200	903	0	0	0	0	0	0	0	603	903	0
476	2	0	0	0	0	0	0	200	300	0	0	0	0	0	0	0	200	903	0	0	0	0	0	0	0	603	903	0
476	3	0	0	0	0	0	0	200	300	0	0	0	0	0	0	0	200	903	0	0	0	0	0	0	0	603	903	0
476	4	0	0	0	0	0	0	200	300	0	0	0	0	0	0	0	200	903	0	0	0	0	0	0	0	603	903	0
476	5	0	0	0	0	0	0	200	300	0	0	0	0	0	0	0	200	903	0	0	0	0	0	0	0	603	903	0
476	6	0	0	0	0	0	0	200	300	0	0	0	0	0	0	0	200	903	0	0	0	0	0	0	0	603	903	0
476	7	0	0	0	0	0	0	200	300	0	0	0	0	0	0	0	200	903	0	0	0	0	0	0	0	603	903	0
476	8	0	0	0	0	0	0	200	300	0	0	0	0	0	0	0	200	903	0	0	0	0	0	0	0	603	903	0
476	9	0	0	0	0	0	0	200	300	0	0	0	0	0	0	0	200	903	0	0	0	0	0	0	0	603	903	0
477	0	0	0	0	0	0	0	200	300	0	0	0	0	0	0	0	200	903	0	0	0	0	0	0	0	603	903	0
477	1	0	0	0	0	0	0	200	300	0	0	0	0	0	0	0	200	903	0	0	0	0	0	0	0	603	903	0
477	2	0	0	0	0	0	0	200	300	0	0	0	0	0	0	0	200	903	0	0	0	0	0	0	0	603	903	0
477	3	0	0	0	0	0	0	200	300	0	0	0	0	0	0	0	200	903	0	0	0	0	0	0	0	603	903	0
477	4	0	0	0	0	0	0	200	300	0	0	0	0	0	0	0	200	903	0	0	0	0	0	0	0	603	903	0
477	5	0	0	0	0	0	0	200	300	0	0	0	0	0	0	0	200	903	0	0	0	0	0	0	0	603	903	0
477	6	0	0	0	0	0	0	200	300	0	0	0	0	0	0	0	200	903	0	0	0	0	0	0	0	603	903	0
477	7	0	0	0	0	0	0	200	300	0	0	0	0	0	0	0	200	903	0	0	0	0	0	0	0	603	903	0
477	8	0	0	0	0	0	0	200	300	0	0	0	0	0	0	0	200	903	0	0	0	0	0	0	0	603	903	0
477	9	0	0	0	0	0	0	200	300	0	0	0	0	0	0	0	200	903	0	0	0	0	0	0	0	603	903	0
478	0	0	0	0	0	0	0	200	300	0	0	0	0	0	0	0	200	903	0	0	0	0	0	0	0	603	903	0
478	1	0	0	0	0	0	0	200	300	0	0	0	0	0	0	0	200	903	0	0	0	0	0	0	0	603	903	0
478	2	0	0	0	0	0	0	200	300	0	0	0	0	0	0	0	200	903	0	0	0	0	0	0	0	603	903	0
478	3	0	0	0	0	0	0	200	300	0	0	0	0	0	0	0	200	903	0	0	0	0	0	0	0	603	903	0
478	4	0	0	0	0	0	0	200	300	0	0	0	0	0	0	0	200	903	0	0	0	0	0	0	0	603	903	0
478	5	0	0	0	0	0	0	200	300	0	0	0	0	0	0	0	200	903	0	0	0	0	0	0	0	603	903	0
478	6	0	0	0	0	0	0	200	300	0	0	0	0	0	0	0	200	903	0	0	0	0	0	0	0	603	903	0
478	7	0	0	0	0	0	0	200	300	0	0	0	0	0	0	0	200	903	0	0	0	0	0	0	0	603	903	0
478	8	0	0	0	0	0	0	200	300	0	0	0	0	0	0	0	200	903	0	0	0	0	0	0	0	603	903	0
478	9	0	0	0	0	0	0	200	300	0	0	0	0	0	0	0	200	903	0	0	0	0	0	0	0	603	903	0
479	0	0	0	0	0	0	0	200	300	0	0	0	0	0	0	0	200	903	0	0	0	0	0	0	0	603	903	0
479	1	0	0	0	0	0	0	200	300	0	0	0	0	0	0	0	200	903	0	0	0	0	0	0	0	603	903	0
479	2	0	0	0	0	0	0	200	300	0	0	0	0	0	0	0	200	903	0	0	0	0	0	0	0	603	903	0
479	3	0	0	0	0	0	0	200	300	0	0	0	0	0	0	0	200	903	0	0	0	0	0	0	0	603	903	0
479	4	0	0	0	0	0	0	200	300	0	0	0	0	0	0	0	200	903	0	0	0	0	0	0	0	603	903	0
479	5	0	0	0	0	0	0	200	300	0	0	0	0	0	0	0	200	903	0	0	0	0	0	0	0	603	903	0
479	6	0	0	0	0	0	0	200	300	0	0	0	0	0	0	0	200	903	0	0	0	0	0	0	0	603	903	0
479	7	0	0	0	0	0	0	200	300	0	0	0	0	0	0	0	200	903	0	0	0	0	0	0	0	603	903	0
479	8	0	0	0	0	0	0	200	300	0	0	0	0	0	0	0	200	903	0	0	0	0	0	0	0	603	903	0
479	9	0	0	0	0	0	0	200	300	0	0	0	0	0	0	0	200	903	0	0	0	0	0	0	0	603	903	0
480	0	0	0	0	0	0	0	200	300	0	0	0	0	0	0	0	200	903	0	0	0	0	0	0	0	603	903	0
480	1	0	0	0	0	0	0	200	300	0	0	0	0	0	0	0	200	903	0	0	0	0	0	0	0	603	903	0
480	2	0	0	0	0	0	0	200	300	0	0	0	0	0	0	0	200	903	0	0	0	0	0	0	0	603	903	0
480	3	0	0	0	0	0	0	200	300	0	0	0	0	0	0	0	200	903	0	0	0	0	0	0	0	603	903	0
480	4	0	0	0	0	0	0	200	300	0	0	0	0	0	0	0	200	903	0	0	0	0	0	0	0	603	903	0
480	5	0	0	0	0	0	0	200	300	0	0	0	0	0	0	0	200	903	0	0	0	0	0	0	0	603	903	0
480	6	0	0	0	0	0	0	200	300	0	0	0	0	0	0	0	200	903	0	0	0	0	0	0	0	603	903	0
480	7	0	0	0	0	0	0	200	300	0	0	0	0	0	0	0	200	903	0	0	0	0	0	0	0	603	903	0
480	8	0	0	0	0	0	0	200	300	0	0	0	0	0	0	0	200	903	0	0	0	0	0	0	0	603	903	0
480	9	0	0	0	0	0	0	200	300	0	0	0	0	0	0	0	200	903	0	0	0	0	0	0	0	603	903	0
481	0	0	0	0	0	0	0	200	300	0	0	0	0	0	0	0	200	903	0	0	0	0	0	0	0	603	903	0
481	1	0	0	0	0	0	0	200	300	0	0	0	0	0	0	0	200	903	0	0	0	0	0	0	0	603	903	0
481	2	0	0	0	0	0	0	200	300	0	0	0	0	0	0	0	200	903	0	0	0	0	0	0	0	603	903	0
481	3	0	0	0	0	0	0	200	300	0	0	0	0	0	0	0	200	903	0	0	0	0	0	0	0	603	903	0
481	4	0	0	0	0	0	0	200	300	0	0	0	0	0	0	0	200	903	0	0	0	0	0	0	0	603	903	0
481	5	0	0	0	0	0	0	200	300	0	0	0	0	0	0	0	200	903	0	0	0	0	0	0	0	603	903	0
481	6	0	0	0	0	0	0	200	300	0	0	0	0	0	0	0	200	903	0	0	0	0	0	0	0	603	903	0
481	7	0	0	0	0	0	0	200	300	0	0	0	0	0	0	0	200	903	0	0	0	0	0	0	0	603	903	0
481	8	0	0	0	0	0	0	200	300	0	0	0	0	0	0	0	200	903	0	0	0	0	0	0	0	603	903	0
481	9	0	0	0	0	0	0	200	300	0	0	0	0	0	0	0	200	903	0	0	0	0	0	0	0	603	903	0
482	0	0	0	0	0	0	0	200	300	0	0	0	0	0	0	0	200	903	0	0	0	0	0	0	0	603	903	0
482	1	0	0	0	0	0	0	200	300	0	0	0	0	0	0	0	200	903	0	0	0	0	0	0	0	603	903	0
482	2	0	0	0	0	0	0	200	300	0	0	0	0	0	0	0	200	903	0	0	0	0	0	0	0	603	903	0
482	3	0	0	0	0	0	0	200	300	0	0	0	0	0	0	0	200	903	0	0	0	0	0	0	0	603	903	0
482	4	0	0	0	0	0	0	200	300	0	0	0	0	0	0	0	200	903	0	0	0	0	0	0	0	603	903	0
482	5	0	0	0	0	0	0	200	300	0	0	0	0	0	0	0	200	903	0	0	0	0	0	0	0	603	903	0
482	6	0	0	0	0	0	0	200	300	0	0	0	0	0	0	0	200	903	0	0	0	0	0	0	0	603	903	0
482	7	0	0	0	0	0	0	200	300	0	0	0	0	0	0	0	200	903	0	0	0	0	0	0	0	603	903	0
482	8	0	0	0	0	0	0	200	300	0	0	0	0	0	0	0	200	903	0	0	0	0	0	0	0	603	903	0
482	9	0	0	0	0	0	0	200	300	0	0	0	0	0	0	0	200	903	0	0	0	0	0	0	0	603	903	0
483	0	0	0	0	0	0	0	200	300	0	0	0	0	0	0	0	200	903	0	0	0	0	0	0	0	603	903	0
483	1	0	0	0	0	0	0	200	300	0	0	0	0	0	0	0	200	903	0	0	0	0	0	0	0	603	903	0
483	2	0	0	0	0	0	0	200	300	0	0	0	0	0	0	0	200	903	0	0	0	0	0	0	0	603	903	0
483	3	0	0	0	0	0	0	200	300	0	0	0	0	0	0	0	200	903	0	0	0	0	0	0	0	603	903	0
483	4	0	0	0	0	0	0	200	300	0	0	0	0	0	0	0	200	903	0	0	0	0	0	0	0	603	903	0
483	5	0	0	0	0	0	0	200	300	0	0	0	0	0	0	0	200	903	0	0	0	0	0	0	0	603	903	0
483	6	0	0	0	0	0	0	200	300	0	0	0	0	0	0	0	200	903	0	0	0	0	0	0	0	603	903	0
483	7	0	0	0	0	0	0	200	300	0	0	0	0	0	0	0	200	903	0	0	0	0	0	0	0	603	903	0
483	8	0	0	0	0	0	0	200	300	0	0	0	0	0	0	0	200	903	0	0	0	0	0	0	0	603	903	0
483	9	0	0	0	0	0	0	200	300	0	0	0	0	0	0	0	200	903	0	0	0	0	0	0	0	603	903	0
484	0	0	0	0	0	0	0	200	300	0	0	0	0	0	0	0	200	903	0	0	0	0	0	0	0	603	903	0
484	1	0	0	0	0	0	0	200	300	0	0	0	0	0	0	0	200	903	0	0	0	0	0	0	0	603	903	0
484	2	0	0	0	0	0	0	200	300	0	0	0	0	0	0	0	200	903	0	0	0	0	0	0	0	603	903	0
484	3	0	0	0	0	0	0	200	300	0	0	0	0	0	0	0	200	903	0	0	0	0	0	0	0	603	903	0
484	4	0	0	0	0	0	0	200	300	0	0	0	0	0	0	0	200	903	0	0	0	0	0	0	0	603	903	0
484	5	0	0	0	0	0	0	200	300	0	0	0	0	0	0	0	200	903	0	0	0	0	0	0	0	603	903	0
484	6	0	0	0	0	0	0	200	300	0	0	0	0	0	0	0	200	903	0	0	0	0	0	0	0	603	903	0
484	7	0	0	0	0	0	0	200	300	0	0	0	0	0	0	0	200	903	0	0	0	0	0	0	0	603	903	0
484	8	0	0	0	0	0	0	200	300	0	0	0	0	0	0	0	200	903	0	0	0	0	0	0	0	603	903	0
484	9	0	0	0	0	0	0	200	300	0	0	0	0	0	0	0	200	903	0	0	0	0	0	0	0	603	903	0
485	0	0	0	0	0	0	0	200	300	0	0	0	0	0	0	0	200	903	0	0	0	0	0	0	0	603	903	0
485	1	0	0	0	0	0	0	200	300	0	0	0	0	0	0	0	200	903	0	0	0	0	0	0	0	603	903	0
485	2	0	0	0	0	0	0	200	300	0	0	0	0	0	0	0	200	903	0	0	0	0	0	0	0	603	903	0
485	3	0	0	0	0	0	0	200	300	0	0	0	0	0	0	0	200	903	0	0	0	0	0	0	0	603	903	0
485	4	0	0	0	0	0	0	200	300	0	0	0	0	0	0	0	200	903	0	0	0	0	0	0	0	603	903	0
485	5	0	0	0	0	0	0	200	300	0	0	0	0	0	0	0	200	903	0	0	0	0	0	0	0	603	903	0
485	6	0	0	0	0	0	0	200	300	0	0	0	0	0	0	0	200	903	0	0	0	0	0	0	0	603	903	0
485	7	0	0	0	0	0	0	200	300	0	0	0	0	0	0	0	200	903	0	0	0	0	0	0	0	603	903	0
485	8	0	0	0	0	0	0	200	300	0	0	0	0	0	0	0	200	903	0	0	0	0	0	0	0	603	903	0
485	9	0	0	0	0	0	0	200	300	0	0	0	0	0	0	0	200	903	0	0	0	0	0	0	0	603	903	0
486	0	0	0	0	0	0	0	200	300	0	0	0	0	0	0	0	200	903	0	0	0	0	0	0	0	603	903	0
486	1	0	0	0	0	0	0	200	300	0	0	0	0	0	0	0	200	903	0	0	0	0	0	0	0	603	903	0
486	2	0	0	0	0	0	0	200	300	0	0	0	0	0	0	0	200	903	0	0	0	0	0	0	0	603	903	0
486	3	0	0	0	0	0	0	200	300	0	0	0	0	0	0	0	200	903	0	0	0	0	0	0	0	603	903	0
486	4	0	0	0	0	0	0	200	300	0	0	0	0	0	0	0	200	903	0	0	0	0	0	0	0	603	903	0
486	5	0	0	0	0	0	0	200	300	0	0	0	0	0	0	0	200	903	0	0	0	0	0	0	0	603	903	0
486	6	0	0	0	0	0	0	200	300	0	0	0	0	0	0	0	200	903	0	0	0	0	0	0	0	603	903	0
486	7	0	0	0	0	0	0	200	300	0	0	0	0	0	0	0	200	903	0	0	0	0	0	0	0	603	903	0
486	8	0	0	0	0	0	0	200	300	0	0	0	0	0	0	0	200	903	0	0	0	0	0	0	0	603	903	0
486	9	0	0	0	0	0	0	200	300	0	0	0	0	0	0	0	200	903	0	0	0	0	0	0	0	603	903	0
487	0	0	0	0	0	0	0	200	300	0	0	0	0	0	0	0	200	903	0	0	0	0	0	0	0	603	903	0
487	1	0	0	0	0	0	0	200	300	0	0	0	0	0	0	0	200	903	0	0	0	0	0	0	0	603	903	0
487	2	0	0	0	0	0	0	200	300	0	0	0	0	0	0	0	200	903	0	0	0	0	0	0	0	603	903	0
487	3	0	0	0	0	0	0	200	300	0	0	0	0	0	0	0	200	903	0	0	0	0	0	0	0	603	903	0
487	4	0	0	0	0	0	0	200	300	0	0	0	0	0	0	0	200	903	0	0	0	0	0	0	0	603	903	0
487	5	0	0	0	0	0	0	200	300	0	0	0	0	0	0	0	200	903	0	0	0	0	0	0	0	603	903	0
487	6	0	0	0	0	0	0	200	300	0	0	0	0	0	0	0	200	903	0	0	0	0	0	0	0	603	903	0
487	7	0	0	0	0	0	0	200	300	0	0	0	0	0	0	0	200	903	0	0	0	0	0	0	0	603	903	0
487	8	0	0	0	0	0	0	200	300	0	0	0	0	0	0	0	200	903	0	0	0	0	0	0	0	603	903	0
487	9	0	0	0	0	0	0	200	300	0	0	0	0	0	0	0	200	903	0	0	0	0	0	0	0	603	903	0
488	0	0	0	0	0	0	0	200	300	0	0	0	0	0	0	0	200	903	0	0	0	0	0	0	0	603	903	0
488	1	0	0	0	0	0	0	200	300	0	0	0	0	0	0	0	200	903	0	0	0	0	0	0	0	603	903	0
488	2	0	0	0	0	0	0	200	300	0	0	0	0	0	0	0	200	903	0	0	0	0	0	0	0	603	903	0
488	3	0	0	0	0	0	0	200	300	0	0	0	0	0	0	0	200	903	0	0	0	0	0	0	0	603	903	0
488	4	0	0	0	0	0	0	200	300	0	0	0	0	0	0	0	200	903	0	0	0	0	0	0	0	603	903	0
488	5	0	0	0	0	0	0	200	300	0	0	0	0	0	0	0	200	903	0	0	0	0	0	0	0	603	903	0
488	6	0	0	0	0	0	0	200	300	0	0	0	0	0	0	0	200	903	0	0	0	0	0	0	0	603	903	0
488	7	0	0	0	0	0	0	200	300	0	0	0	0	0	0	0	200	903	0	0	0	0	0	0	0	603	903	0
488	8	0	0	0	0	0	0	200	300	0	0	0	0	0	0	0	200	903	0	0	0	0	0	0	0	603	903	0
488	9	0	0	0	0	0	0	200	300	0	0	0	0	0	0	0	200	903	0	0	0	0	0	0	0	603	903	0
489	0	0	0	0	0	0	0	200	300	0	0	0	0	0	0	0	200	903	0	0	0	0	0	0	0	603	903	0
489	1	0	0	0	0	0	0	200	300	0	0	0	0	0	0	0	200	903	0	0	0	0	0	0	0	603	903	0
489	2	0	0	0	0	0	0	200	300	0	0	0	0	0	0	0	200	903	0	0	0	0	0	0	0	603	903	0
489	3	0	0	0	0	0	0	200	300	0	0	0	0	0	0	0	200	903	0	0	0	0	0	0	0	603	903	0
489	4	0	0	0	0	0	0	200	300	0	0	0	0	0	0	0	200	903	0	0	0	0	0	0	0	603	903	0
489	5	0	0	0	0	0	0	200	300	0	0	0	0	0	0	0	200	903	0	0	0	0	0	0	0	603	903	0
489	6	0	0	0	0	0	0	200	300	0	0	0	0	0	0	0	200	903	0	0	0	0	0	0	0	603	903	0
489	7	0	0	0	0	0	0	200	300	0	0	0	0	0	0	0	200	903	0	0	0	0	0	0	0	603	903	0
489	8	0	0	0	0	0	0	200	300	0	0	0	0	0	0	0	200	903	0	0	0	0	0	0	0	603	903	0
489	9	0	0	0	0	0	0	200	300	0	0	0	0	0	0	0	200	903	0	0	0	0	0	0	0	603	903	0
490	0	0	0	0	0	0	0	200	300	0	0	0	0	0	0	0	200	903	0	0	0	0	0	0	0	603	903	0
490	1	0	0	0	0	0	0	200	300	0	0	0	0	0	0	0	200	903	0	0	0	0	0	0	0	603	903	0
490	2	0	0	0	0	0	0	200	300	0	0	0	0	0	0	0	200	903	0	0	0	0	0	0	0	603	903	0
490	3	0	0	0	0	0	0	200	300	0	0	0	0	0	0	0	200	903	0	0	0	0	0	0	0	603	903	0
490	4	0	0	0	0	0	0	200	300	0	0	0	0	0	0	0	200	903	0	0	0	0	0	0	0	603	903	0
490	5	0	0	0	0	0	0	200	300	0	0	0	0	0	0	0	200	903	0	0	0	0	0	0	0	603	903	0
490	6	0	0	0	0	0	0	200	300	0	0	0	0	0	0	0	200	903	0	0	0	0	0	0	0	603	903	0
490	7	0	0	0	0	0	0	200	300	0	0	0	0	0	0	0	200	903	0	0	0	0	0	0	0	603	903	0
490	8	0	0	0	0	0	0	200	300	0	0	0	0	0	0	0	200	903	0	0	0	0	0	0	0	603	903	0
490	9	0	0	0	0	0	0	200	300	0	0	0	0	0	0	0	200	903	0	0	0	0	0	0	0	603	903	0
491	0	0	0	0	0	0	0	200	300	0	0	0	0	0	0	0	200	903	0	0	0	0	0	0	0	603	903	0
491	1	0	0	0	0	0	0	200	300	0	0	0	0	0	0	0	200	903	0	0	0	0	0	0	0	603	903	0
491	2	0	0	0	0	0	0	200	300	0	0	0	0	0	0	0	200	903	0	0	0	0	0	0	0	603	903	0
491	3	0	0	0	0	0	0	200	300	0	0	0	0	0	0	0	200	903	0	0	0	0	0	0	0	603	903	0
491	4	0	0	0	0	0	0	200	300	0	0	0	0	0	0	0	200	903	0	0	0	0	0	0	0	603	903	0
491	5	0	0	0	0	0	0	200	300	0	0	0	0	0	0	0	200	903	0	0	0	0	0	0	0	603	903	0
491	6	0	0	0	0	0	0	200	300	0	0	0	0	0	0	0	200	903	0	0	0	0	0	0	0	603	903	0
491	7	0	0	0	0	0	0	200	300	0	0	0	0	0	0	0	200	903	0	0	0	0	0	0	0	603	903	0
491	8	0	0	0	0	0	0	200	300	0	0	0	0	0	0	0	200	903	0	0	0	0	0	0	0	603	903	0
491	9	0	0	0	0	0	0	200	300	0	0	0	0	0	0	0	200	903	0	0	0	0	0	0	0	603	903	0
492	0	0	0	0	0	0	0	200	300	0	0	0	0	0	0	0	200	903	0	0	0	0	0	0	0	603	903	0
492	1	0	0	0	0	0	0	200	300	0	0	0	0	0	0	0	200	903	0	0	0	0	0	0	0	603	903	0
492	2	0	0	0	0	0	0	200	300	0	0	0	0	0	0	0	200	903	0	0	0	0	0	0	0	603	903	0
492	3	0	0	0	0	0	0	200	300	0	0	0	0	0	0	0	200	903	0	0	0	0	0	0	0	603	903	0
492	4	0	0	0	0	0	0	200	300	0	0	0	0	0	0	0	200	903	0	0	0	0	0	0	0	603	903	0
492	5	0	0	0	0	0	0	200	300	0	0	0	0	0	0	0	200	903	0	0	0	0	0	0	0	603	903	0
492	6	0	0	0	0	0	0	200	300	0	0	0	0	0	0	0	200	903	0	0	0	0	0	0	0	603	903	0
492	7	0	0	0	0	0	0	200	300	0	0	0	0	0	0	0	200	903	0	0	0	0	0	0	0	603	903	0
492	8	0	0	0	0	0	0	200	300	0	0	0	0	0	0	0	200	903	0	0	0	0	0	0	0	603	903	0
492	9	0	0	0	0	0	0	200	300	0	0	0	0	0	0	0	200	903	0	0	0	0	0	0	0	603	903	0
493	0	0	0	0	0	0	0	200	300	0	0	0	0	0	0	0	200	903	0	0	0	0	0	0	0	603	903	0
493	1	0	0	0	0	0	0	200	300	0	0	0	0	0	0	0	200	903	0	0	0	0	0	0	0	603	903	0
493	2	0	0	0	0	0	0	200	300	0	0	0	0	0	0	0	200	903	0	0	0	0	0	0	0	603	903	0
493	3	0	0	0	0	0	0	200	300	0	0	0	0	0	0	0	200	903	0	0	0	0	0	0	0	603	903	0
493	4	0	0	0	0	0	0	200	300	0	0	0	0	0	0	0	200	903	0	0	0	0	0	0	0	603	903	0
493	5	0	0	0	0	0	0	200	300	0	0	0	0	0	0	0	200	903	0	0	0	0	0	0	0	603	903	0
493	6	0	0	0	0	0	0	200	300	0	0	0	0	0	0	0	200	903	0	0	0	0	0	0	0	603	903	0
493	7	0	0	0	0	0	0	200	300	0	0	0	0	0	0	0	200	903	0	0	0	0	0	0	0	603	903	0
493	8	0	0	0	0	0	0	200	300	0	0	0	0	0	0	0	200	903	0	0	0	0	0	0	0	603	903	0
493	9	0	0	0	0	0	0	200	300	0	0	0	0	0	0	0	200	903	0	0	0	0	0	0	0	603	903	0
494	0	0	0	0	0	0	0	200	300	0	0	0	0	0	0	0	200	903	0	0	0	0	0	0	0	603	903	0
494	1	0	0	0	0	0	0	200	300	0	0	0	0	0	0	0	200	903	0	0	0	0	0	0	0	603	903	0
494	2	0	0	0	0	0	0	200	300	0	0	0	0	0	0	0	200	903	0	0	0	0	0	0	0	603	903	0
494	3	0	0	0	0	0	0	200	300	0	0	0	0	0	0	0	200	903	0	0	0	0	0	0	0	603	903	0
494	4	0	0	0	0	0	0	200	300	0	0	0	0	0	0	0	200	903	0	0	0	0	0	0	0	603	903	0
494	5	0	0	0	0	0	0	200	300	0	0	0	0	0	0	0	200	903	0	0	0	0	0	0	0	603	903	0
494	6	0	0	0	0	0	0	200	300	0	0	0	0	0	0	0	200	903	0	0	0	0	0	0	0	603	903	0
494	7	0	0	0	0	0	0	200	300	0	0	0	0	0	0	0	200	903	0	0	0	0	0	0	0	603	903	0
494	8	0	0	0	0	0	0	200	300	0	0	0	0	0	0	0	200	903	0	0	0	0	0	0	0	603	903	0
494	9	0	0	0	0	0	0	200	300	0	0	0	0	0	0	0	200	903	0	0	0	0	0	0	0	603	903	0
495	0	0	0	0	0	0	0	200	300	0	0	0	0	0	0	0	200	903	0	0	0	0	0	0	0	603	903	0
495	1	0	0	0	0	0	0	200	300	0	0	0	0	0	0	0	200	903	0	0	0	0	0	0	0	603	903	0
495	2	0	0	0	0	0	0	200	300	0	0	0	0	0	0	0	200	903	0	0	0	0	0	0	0	603	903	0
495	3	0	0	0	0	0	0	200	300	0	0	0	0	0	0	0	200	903	0	0	0	0	0	0	0	603	903	0
495	4	0	0	0	0	0	0	200	300	0	0	0	0	0	0	0	200	903	0	0	0	0	0	0	0	603	903	0
495	5	0	0	0	0	0	0	200	300	0	0	0	0	0	0	0	200	903	0	0	0	0	0	0	0	603	903	0
495	6	0	0	0	0	0	0	200	300	0	0	0	0	0	0	0	200	903	0	0	0	0	0	0	0	603	903	0
495	7	0	0	0	0	0	0	200	300	0	0	0	0	0	0	0	200	903	0	0	0	0	0	0	0	603	903	0
495	8	0	0	0	0	0	0	200	300	0	0	0	0	0	0	0	200	903	0	0	0	0	0	0	0	603	903	0
495	9	0	0	0	0	0	0	200	300	0	0	0	0	0	0	0	200	903	0	0	0	0	0	0	0	603	903	0
496	0	0	0	0	0	0	0	200	300	0	0	0	0	0	0	0	200	903	0	0	0	0	0	0	0	603	903	0
496	1	0	0	0	0	0	0	200	300	0	0	0	0	0	0	0	200	903	0	0	0	0	0	0	0	603	903	0
496	2	0	0	0	0	0	0	200	300	0	0	0	0	0	0	0	200	903	0	0	0	0	0	0	0	603	903	0
496	3	0	0	0	0	0	0	200	300	0	0	0	0	0	0	0	200	903	0	0	0	0	0	0	0	603	903	0
496	4	0	0	0	0	0	0	200	300	0	0	0	0	0	0	0	200	903	0	0	0	0	0	0	0	603	903	0
496	5	0	0	0	0	0	0	200	300	0	0	0	0	0	0	0	200	903	0	0	0	0	0	0	0	603	903	0
496	6	0	0	0	0	0	0	200	300	0	0	0	0	0	0	0	200	903	0	0	0	0	0	0	0	603	903	0
496	7	0	0	0	0	0	0	200	300	0	0	0	0	0	0	0	200	903	0	0	0	0	0	0	0	603	903	0
496	8	0	0	0	0	0	0	200	300	0	0	0	0	0	0	0	200	903	0	0	0	0	0	0	0	603	903	0
496	9	0	0	0	0	0	0	200	300	0	0	0	0	0	0	0	200	903	0	0	0	0	0	0	0	603	903	0
497	0	0	0	0	0	0	0	200	300	0	0	0	0	0	0	0	200	903	0	0	0	0	0	0	0	603	903	0
497	1	0	0	0	0	0	0	200	300	0	0	0	0	0	0	0	200	903	0	0	0	0	0	0	0	603	903	0
497	2	0	0	0	0	0	0	200	300	0	0	0	0	0	0	0	200	903	0	0	0	0	0	0	0	603	903	0
497	3	0	0	0	0	0	0	200	300	0	0	0	0	0	0	0	200	903	0	0	0	0	0	0	0	603	903	0
497	4	0	0	0	0	0	0	200	300	0	0	0	0	0	0	0	200	903	0	0	0	0	0	0	0	603	903	0
497	5	0	0	0	0	0	0	200	300	0	0	0	0	0	0	0	200	903	0	0	0	0	0	0	0	603	903	0
497	6	0	0	0	0	0	0	200	300	0	0	0	0	0	0	0	200	903	0	0	0	0	0	0	0	603	903	0
497	7	0	0	0	0	0	0	200	300	0	0	0	0	0	0	0	200	903	0	0	0	0	0	0	0	603	903	0
497	8	0	0	0	0	0	0	200	300	0	0	0	0	0	0	0	200	903	0	0	0	0	0	0	0	603	903	0
497	9	0	0	0	0	0	0	200	300	0	0	0	0	0	0	0	200	903	0	0	0	0	0	0	0	603	903	0
498	0	0	0	0	0	0	0	200	300	0	0	0	0	0	0	0	200	903	0	0	0	0	0	0	0	603	903	0
498	1	0	0	0	0	0	0	200	300	0	0	0	0	0	0	0	200	903	0	0	0	0	0	0	0	603	903	0
498	2	0	0	0	0	0	0	200	300	0	0	0	0	0	0	0	200	903	0	0	0	0	0	0	0	603	903	0
498	3	0	0	0	0	0	0	200	300	0	0	0	0	0	0	0	200	903	0	0	0	0	0	0	0	603	903	0
498	4	0	0	0	0	0	0	200	300	0	0	0	0	0	0	0	200	903	0	0	0	0	0	0	0	603	903	0
498	5	0	0	0	0	0	0	200	300	0	0	0	0	0	0	0	200	903	0	0	0	0	0	0	0	603	903	0
498	6	0	0	0	0	0	0	200	300	0	0	0	0	0	0	0	200	903	0	0	0	0	0	0	0	603	903	0
498	7	0	0	0	0	0	0	200	300	0	0	0	0	0	0	0	200	903	0	0	0	0	0	0	0	603	903	0
498	8	0	0	0	0	0	0	200	300	0	0	0	0	0	0	0	200	903	0	0	0	0	0	0	0	603	903	0
498	9	0	0	0	0	0	0	200	300	0	0	0	0	0	0	0	200	903	0	0	0	0	0	0	0	603	903	0
499	0	0	0	0	0	0	0	200	300	0	0	0	0	0	0	0	200	903	0	0	0	0	0	0	0	603	903	0
499	1	0	0	0	0	0	0	200	300	0	0	0	0	0	0	0	200	903	0	0	0	0	0	0	0	603	903	0
499	2	0	0	0	0	0	0	200	300	0	0	0	0	0	0	0	200	903	0	0	0	0	0	0	0	603	903	0
499	3	0	0	0	0	0	0	200	300	0	0	0	0	0	0	0	200	903	0	0	0	0	0	0	0	603	903	0
499	4	0	0	0	0	0	0	200	300	0	0	0	0	0	0	0	200	903	0	0	0	0	0	0	0	603	903	0
499	5	0	0	0	0	0	0	200	300	0	0	0	0	0	0	0	200	903	0	0	0	0	0	0	0	603	903	0
499	6	0	0	0	0	0	0	200	300	0	0	0	0	0	0	0	200	903	0	0	0	0	0	0	0	603	903	0
499	7	0	0	0	0	0	0	200	300	0	0	0	0	0	0	0	200	903	0	0	0	0	0	0	0	603	903	0
499	8	0	0	0	0	0	0	200	300	0	0	0	0	0	0	0	200	903	0	0	0	0	0	0	0	603	903	0
499	9	0	0	0	0	0	0	200	300	0	0	0	0	0	0	0	200	903	0	0	0	0	0	0	0	603	903	0
500	0	0	0	0	0	0	0	200	300	0	0	0	0	0	0	0	200	903	0	0	0	0	0	0	0	603	903	0
500	1	0	0	0	0	0	0	200	300	0	0	0	0	0	0	0	200	903	0	0	0	0	0	0	0	603	903	0
500	2	0	0	0	0	0	0	200	300	0	0	0	0	0	0	0	200	903	0	0	0	0	0	0	0	603	903	0
500	3	0	0	0	0	0	0	200	300	0	0	0	0	0	0	0	200	903	0	0	0	0	0	0	0	603	903	0
500	4	0	0	0	0	0	0	200	300	0	0	0	0	0	0	0	200	903	0	0	0	0	0	0	0	603	903	0
500	5	0	0	0	0	0	0	200	300	0	0	0	0	0	0	0	200	903	0	0	0	0	0	0	0	603	903	0
500	6	0	0	0	0	0	0	200	300	0	0	0	0	0	0	0	200	903	0	0	0	0	0	0	0	603	903	0
500	7	0	0	0	0	0	0	200	300	0	0	0	0	0	0	0	200	903	0	0	0	0	0	0	0	603	903	0
500	8	0	0	0	0	0	0	200	300	0	0	0	0	0	0	0	200	903	0	0	0	0	0	0	0	603	903	0
500	9	0	0	0	0	0	0	200	300	0	0	0	0	0	0	0	200	903	0	0	0	0	0	0	0	603	903	0
501	0	0	0	0	0	0	0	200	300	0	0	0	0	0	0	0	200	903	0	0	0	0	0	0	0	603	903	0
501	1	0	0	0	0	0	0	200	300	0	0	0	0	0	0	0	200	903	0	0	0	0	0	0	0	603	903	0
501	2	0	0	0	0	0	0	200	300	0	0	0	0	0	0	0	200	903	0	0	0	0	0	0	0	603	903	0
501	3	0	0	0	0	0	0	200	300	0	0	0	0	0	0	0	200	903	0	0	0	0	0	0	0	603	903	0
501	4	0	0	0	0	0	0	200	300	0	0	0	0	0	0	0	200	903	0	0	0	0	0	0	0	603	903	0
501	5	0	0	0	0	0	0	200	300	0	0	0	0	0	0	0	200	903	0	0	0	0	0	0	0	603	903	0
501	6	0	0	0	0	0	0	200	300	0	0	0	0	0	0	0	200	903	0	0	0	0	0	0	0	603	903	0
501	7	0	0	0	0	0	0	200	300	0	0	0	0	0	0	0	200	903	0	0	0	0	0	0	0	603	903	0
501	8	0	0	0	0	0	0	200	300	0	0	0	0	0	0	0	200	903	0	0	0	0	0	0	0	603	903	0
501	9	0	0	0	0	0	0	200	300	0	0	0	0	0	0	0	200	903	0	0	0	0	0	0	0	603	903	0
502	0	0	0	0	0	0	0	200	300	0	0	0	0	0	0	0	200	903	0	0	0	0	0	0	0	603	903	0
502	1	0	0	0	0	0	0	200	300	0	0	0	0	0	0	0	200	903	0	0	0	0	0	0	0	603	903	0
502	2	0	0	0	0	0	0	200	300	0	0	0	0	0	0	0	200	903	0	0	0	0	0	0	0	603	903	0
502	3	0	0	0	0	0	0	200	300	0	0	0	0	0	0	0	200	903	0	0	0	0	0	0	0	603	903	0
502	4	0	0	0	0	0	0	200	300	0	0	0	0	0	0	0	200	903	0	0	0	0	0	0	0	603	903	0
502	5	0	0	0	0	0	0	200	300	0	0	0	0	0	0	0	200	903	0	0	0	0	0	0	0	603	903	0
502	6	0	0	0	0	0	0	200	300	0	0	0	0	0	0	0	200	903	0	0	0	0	0	0	0	603	903	0
502	7	0	0	0	0	0	0	200	300	0	0	0	0	0	0	0	200	903	0	0	0	0	0	0	0	603	903	0
502	8	0	0	0	0	0	0	200	300	0	0	0	0	0	0	0	200	903	0	0	0	0	0	0	0	603	903	0
502	9	0	0	0	0	0	0	200	300	0	0	0	0	0	0	0	200	903	0	0	0	0	0	0	0	603	903	0
503	0	0	0	0	0	0	0	200	300	0	0	0	0	0	0	0	200	903	0	0	0	0	0	0	0	603	903	0
503	1	0	0	0	0	0	0	200	300	0	0	0	0	0	0	0	200	903	0	0	0	0	0	0	0	603	903	0
503	2	0	0	0	0	0	0	200	300	0	0	0	0	0	0	0	200	903	0	0	0	0	0	0	0	603	903	0
503	3	0	0	0	0	0	0	200	300	0	0	0	0	0	0	0	200	903	0	0	0	0	0	0	0	603	903	0
503	4	0	0	0	0	0	0	200	300	0	0	0	0	0	0	0	200	903	0	0	0	0	0	0	0	603	903	0
503	5	0	0	0	0	0	0	200	300	0	0	0	0	0	0	0	200	903	0	0	0	0	0	0	0	603	903	0
503	6	0	0	0	0	0	0	200	300	0	0	0	0	0	0	0	200	903	0	0	0	0	0	0	0	603	903	0
503	7	0	0	0	0	0	0	200	300	0	0	0	0	0	0	0	200	903	0	0	0	0	0	0	0	603	903	0
503	8	0	0	0	0	0	0	200	300	0	0	0	0	0	0	0	200	903	0	0	0	0	0	0	0	603	903	0
503	9	0	0	0	0	0	0	200	300	0	0	0	0	0	0	0	200	903	0	0	0	0	0	0	0	603	903	0
504	0	0	0	0	0	0	0	200	300	0	0	0	0	0	0	0	200	903	0	0	0	0	0	0	0	603	903	0
504	1	0	0	0	0	0	0	200	300	0	0	0	0	0	0	0	200	903	0	0	0	0	0	0	0	603	903	0
504	2	0	0	0	0	0	0	200	300	0	0	0	0	0	0	0	200	903	0	0	0	0	0	0	0	603	903	0
504	3	0	0	0	0	0	0	200	300	0	0	0	0	0	0	0	200	903	0	0	0	0	0	0	0	603	903	0
504	4	0	0	0	0	0	0	200	300	0	0	0	0	0	0	0	200	903	0	0	0	0	0	0	0	603	903	0
504	5	0	0	0	0	0	0	200	300	0	0	0	0	0	0	0	200	903	0	0	0	0	0	0	0	603	903	0
504	6	0	0	0	0	0	0	200	300	0	0	0	0	0	0	0	200	903	0	0	0	0	0	0	0	603	903	0
504	7	0	0	0	0	0	0	200	300	0	0	0	0	0	0	0	200	903	0	0	0	0	0	0	0	603	903	0
504	8	0	0	0	0	0	0	200	300	0	0	0	0	0	0	0	200	903	0	0	0	0	0	0	0	603	903	0
504	9	0	0	0	0	0	0	200	300	0	0	0	0	0	0	0	200	903	0	0	0	0	0	0	0	603	903	0
505	0	0	0	0	0	0	0	200	300	0	0	0	0	0	0	0	200	903	0	0	0	0	0	0	0	603	903	0
505	1	0	0	0	0	0	0	200	300	0	0	0	0	0	0	0	200	903	0	0	0	0	0	0	0	603	903	0
505	2	0	0	0	0	0	0	200	300	0	0	0	0	0	0	0	200	903	0	0	0	0	0	0	0	603	903	0
505	3	0	0	0	0	0	0	200	300	0	0	0	0	0	0	0	200	903	0	0	0	0	0	0	0	603	903	0
505	4	0	0	0	0	0	0	200	300	0	0	0	0	0	0	0	200	903	0	0	0	0	0	0	0	603	903	0
505	5	0	0	0	0	0	0	200	300	0	0	0	0	0	0	0	200	903	0	0	0	0	0	0	0	603	903	0
505	6	0	0	0	0	0	0	200	300	0	0	0	0	0	0	0	200	903	0	0	0	0	0	0	0	603	903	0
505	7	0	0	0	0	0	0	200	300	0	0	0	0	0	0	0	200	903	0	0	0	0	0	0	0	603	903	0
505	8	0	0	0	0	0	0	200	300	0	0	0	0	0	0	0	200	903	0	0	0	0	0	0	0	603	903	0
505	9	0	0	0	0	0	0	200	300	0	0	0	0	0	0	0	200	903	0	0	0	0	0	0	0	603	903	0
506	0	0	0	0	0	0	0	200	300	0	0	0	0	0	0	0	200	903	0	0	0	0	0	0	0	603	903	0
506	1	0	0	0	0	0	0	200	300	0	0	0	0	0	0	0	200	903	0	0	0	0	0	0	0	603	903	0
506	2	0	0	0	0	0	0	200	300	0	0	0	0	0	0	0	200	903	0	0	0	0	0	0	0	603	903	0
506	3	0	0	0	0	0	0	200	300	0	0	0	0	0	0	0	200	903	0	0	0	0	0	0	0	603	903	0
506	4	0	0	0	0	0	0	200	300	0	0	0	0	0	0	0	200	903	0	0	0	0	0	0	0	603	903	0
506	5	0	0	0	0	0	0	200	300	0	0	0	0	0	0	0	200	903	0	0	0	0	0	0	0	603	903	0
506	6	0	0	0	0	0	0	200	300	0	0	0	0	0	0	0	200	903	0	0	0	0	0	0	0	603	903	0
506	7	0	0	0	0	0	0	200	300	0	0	0	0	0	0	0	200	903	0	0	0	0	0	0	0	603	903	0
506	8	0	0	0	0	0	0	200	300	0	0	0	0	0	0	0	200	903	0	0	0	0	0	0	0	603	903	0
506	9	0	0	0	0	0	0	200	300	0	0	0	0	0	0	0	200	903	0	0	0	0	0	0	0	603	903	0
507	0	0	0	0	0	0	0	200	300	0	0	0	0	0	0	0	200	903	0	0	0	0	0	0	0	603	903	0
507	1	0	0	0	0	0	0	200	300	0	0	0	0	0	0	0	200	903	0	0	0	0	0	0	0	603	903	0
507	2	0	0	0	0	0	0	200	300	0	0	0	0	0	0	0	200	903	0	0	0	0	0	0	0	603	903	0
507	3	0	0	0	0	0	0	200	300	0	0	0	0	0	0	0	200	903	0	0	0	0	0	0	0	603	903	0
507	4	0	0	0	0	0	0	200	300	0	0	0	0	0	0	0	200	903	0	0	0	0	0	0	0	603	903	0
507	5	0	0	0	0	0	0	200	300	0	0	0	0	0	0	0	200	903	0	0	0	0	0	0	0	603	903	0
507	6	0	0	0	0	0	0	200	300	0	0	0	0	0	0	0	200	903	0	0	0	0	0	0	0	603	903	0
507	7	0	0	0	0	0	0	200	300	0	0	0	0	0	0	0	200	903	0	0	0	0	0	0	0	603	903	0
507	8	0	0	0	0	0	0	200	300	0	0	0	0	0	0	0	200	903	0	0	0	0	0	0	0	603	903	0
507	9	0	0	0	0	0	0	200	300	0	0	0	0	0	0	0	200	903	0	0	0	0	0	0	0	603	903	0
508	0	0	0	0	0	0	0	200	300	0	0	0	0	0	0	0	200	903	0	0	0	0	0	0	0	603	903	0
508	1	0	0	0	0	0	0	200	300	0	0	0	0	0	0	0	200	903	0	0	0	0	0	0	0	603	903	0
508	2	0	0	0	0	0	0	200	300	0	0	0	0	0	0	0	200	903	0	0	0	0	0	0	0	603	903	0
508	3	0	0	0	0	0	0	200	300	0	0	0	0	0	0	0	200	903	0	0	0	0	0	0	0	603	903	0
508	4	0	0	0	0	0	0	200	300	0	0	0	0	0	0	0	200	903	0	0	0	0	0	0	0	603	903	0
508	5	0	0	0	0	0	0	200	300	0	0	0	0	0	0	0	200	903	0	0	0	0	0	0	0	603	903	0
508	6	0	0	0	0	0	0	200	300	0	0	0	0	0	0	0	200	903	0	0	0	0	0	0	0	603	903	0
508	7	0	0	0	0	0	0	200	300	0	0	0	0	0	0	0	200	903	0	0	0	0	0	0	0	603	903	0
508	8	0	0	0	0	0	0	200	300	0	0	0	0	0	0	0	200	903	0	0	0	0	0	0	0	603	903	0
508	9	0	0	0	0	0	0	200	300	0	0	0	0	0	0	0	200	903	0	0	0	0	0	0	0	603	903	0
509	0	0	0	0	0	0	0	200	300	0	0	0	0	0	0	0	200	903	0	0	0	0	0	0	0	603	903	0
509	1	0	0	0	0	0	0	200	300	0	0	0	0	0	0	0	200	903	0	0	0	0	0	0	0	603	903	0
509	2	0	0	0	0	0	0	200	300	0	0	0	0	0	0	0	200	903	0	0	0	0	0	0	0	603	903	0
509	3	0	0	0	0	0	0	200	300	0	0	0	0	0	0	0	200	903	0	0	0	0	0	0	0	603	903	0
509	4	0	0	0	0	0	0	200	300	0	0	0	0	0	0	0	200	903	0	0	0	0	0	0	0	603	903	0
509	5	0	0	0	0	0	0	200	300	0	0	0	0	0	0	0	200	903	0	0	0	0	0	0	0	603	903	0
509	6	0	0	0	0	0	0	200	300	0	0	0	0	0	0	0	200	903	0	0	0	0	0	0	0	603	903	0
509	7	0	0	0	0	0	0	200	300	0	0	0	0	0	0	0	200	903	0	0	0	0	0	0	0	603	903	0
509	8	0	0	0	0	0	0	200	300	0	0	0	0	0	0	0	200	903	0	0	0	0	0	0	0	603	903	0
509	9	0	0	0	0	0	0	200	300	0	0	0	0	0	0	0	200	903	0	0	0	0	0	0	0	603	903	0
510	0	0	0	0	0	0	0	200	300	0	0	0	0	0	0	0	200	903	0	0	0	0	0	0	0	603	903	0
510	1	0	0	0	0	0	0	200	300	0	0	0	0	0	0	0	200	903	0	0	0	0	0	0	0	603	903	0
510	2	0	0	0	0	0	0	200	300	0	0	0	0	0	0	0	200	903	0	0	0	0	0	0	0	603	903	0
510	3	0	0	0	0	0	0	200	300	0	0	0	0	0	0	0	200	903	0	0	0	0	0	0	0	603	903	0
510	4	0	0	0	0	0	0	200	300	0	0	0	0	0	0	0	200	903	0	0	0	0	0	0	0	603	903	0
510	5	0	0	0	0	0	0	200	300	0	0	0	0	0	0	0	200	903	0	0	0	0	0	0	0	603	903	0
510	6	0	0	0	0	0	0	200	300	0	0	0	0	0	0	0	200	903	0	0	0	0	0	0	0	603	903	0
510	7	0	0	0	0	0	0	200	300	0	0	0	0	0	0	0	200	903	0	0	0	0	0	0	0	603	903	0
510	8	0	0	0	0	0	0	200	300	0	0	0	0	0	0	0	200	903	0	0	0	0	0	0	0	603	903	0
510	9	0	0	0	0	0	0	200	300	0	0	0	0	0	0	0	200	903	0	0	0	0	0	0	0	603	903	0
511	0	0	0	0	0	0	0	200	300	0	0	0	0	0	0	0	200	903	0	0	0	0	0	0	0	603	903	0
511	1	0	0	0	0	0	0	200	300	0	0	0	0	0	0	0	200	903	0	0	0	0	0	0	0	603	903	0
511	2	0	0	0	0	0	0	200	300	0	0	0	0	0	0	0	200	903	0	0	0	0	0	0	0	603	903	0
511	3	0	0	0	0	0	0	200	300	0	0	0	0	0	0	0	200	903	0	0	0	0	0	0	0	603	903	0
511	4	0	0	0	0	0	0	200	300	0	0	0	0	0	0	0	200	903	0	0	0	0	0	0	0	603	903	0
511	5	0	0	0	0	0	0	200	300	0	0	0	0	0	0	0	200	903	0	0	0	0	0	0	0	603	903	0
511	6	0	0	0	0	0	0	200	300	0	0	0	0	0	0	0	200	903	0	0	0	0	0	0	0	603	903	0
511	7	0	0	0	0	0	0	200	300	0	0	0	0	0	0	0	200	903	0	0	0	0	0	0	0	603	903	0
511	8	0	0	0	0	0	0	200	300	0	0	0	0	0	0	0	200	903	0	0	0	0	0	0	0	603	903	0
511	9	0	0	0	0	0	0	200	300	0	0	0	0	0	0	0	200	903	0	0	0	0	0	0	0	603	903	0
512	0	0	0	0	0	0	0	200	300	0	0	0	0	0	0	0	200	903	0	0	0	0	0	0	0	603	903	0
512	1	0	0	0	0	0	0	200	300	0	0	0	0	0	0	0	200	903	0	0	0	0	0	0	0	603	903	0
512	2	0	0	0	0	0	0	200	300	0	0	0	0	0	0	0	200	903	0	0	0	0	0	0	0	603	903	0
512	3	0	0	0	0	0	0	200	300	0	0	0	0	0	0	0	200	903	0	0	0	0	0	0	0	603	903	0
512	4	0	0	0	0	0	0	200	300	0	0	0	0	0	0	0	200	903	0	0	0	0	0	0	0	603	903	0
512	5	0	0	0	0	0	0	200	300	0	0	0	0	0	0	0	200	903	0	0	0	0	0	0	0	603	903	0
512	6	0	0	0	0	0	0	200	300	0	0	0	0	0	0	0	200	903	0	0	0	0	0	0	0	603	903	0
512	7	0	0	0	0	0	0	200	300	0	0	0	0	0	0	0	200	903	0	0	0	0	0	0	0	603	903	0
512	8	0	0	0	0	0	0	200	300	0	0	0	0	0	0	0	200	903	0	0	0	0	0	0	0	603	903	0
512	9	0	0	0	0	0	0	200	300	0	0	0	0	0	0	0	200	903	0	0	0	0	0	0	0	603	903	0
513	0	0	0	0	0	0	0	200	300	0	0	0	0	0	0	0	200	903	0	0	0	0	0	0	0	603	903	0
513	1	0	0	0	0	0	0	200	300	0	0	0	0	0	0	0	200	903	0	0	0	0	0	0	0	603	903	0
513	2	0	0	0	0	0	0	200	300	0	0	0	0	0	0	0	200	903	0	0	0	0	0	0	0	603	903	0
513	3	0	0	0	0	0	0	200	300	0	0	0	0	0	0	0	200	903	0	0	0	0	0	0	0	603	903	0
513	4	0	0	0	0	0	0	200	300	0	0	0	0	0	0	0	200	903	0	0	0	0	0	0	0	603	903	0
513	5	0	0	0	0	0	0	200	300	0	0	0	0	0	0	0	200	903	0	0	0	0	0	0	0	603	903	0
513	6	0	0	0	0	0	0	200	300	0	0	0	0	0	0	0	200	903	0	0	0	0	0	0	0	603	903	0
513	7	0	0	0	0	0	0	200	300	0	0	0	0	0	0	0	200	903	0	0	0	0	0	0	0	603	903	0
513	8	0	0	0	0	0	0	200	300	0	0	0	0	0	0	0	200	903	0	0	0	0	0	0	0	603	903	0
513	9	0	0	0	0	0	0	200	300	0	0	0	0	0	0	0	200	903	0	0	0	0	0	0	0	603	903	0
514	0	0	0	0	0	0	0	200	300	0	0	0	0	0	0	0	200	903	0	0	0	0	0	0	0	603	903	0
514	1	0	0	0	0	0	0	200	300	0	0	0	0	0	0	0	200	903	0	0	0	0	0	0	0	603	903	0
514	2	0	0	0	0	0	0	200	300	0	0	0	0	0	0	0	200	903	0	0	0	0	0	0	0	603	903	0
514	3	0	0	0	0	0	0	200	300	0	0	0	0	0	0	0	200	903	0	0	0	0	0	0	0	603	903	0
514	4	0	0	0	0	0	0	200	300	0	0	0	0	0	0	0	200	903	0	0	0	0	0	0	0	603	903	0
514	5	0	0	0	0	0	0	200	300	0	0	0	0	0	0	0	200	903	0	0	0	0	0	0	0	603	903	0
514	6	0	0	0	0	0	0	200	300	0	0	0	0	0	0	0	200	903	0	0	0	0	0	0	0	603	903	0
514	7	0	0	0	0	0	0	200	300	0	0	0	0	0	0	0	200	903	0	0	0	0	0	0	0	603	903	0
514	8	0	0	0	0	0	0	200	300	0	0	0	0	0	0	0	200	903	0	0	0	0	0	0	0	603	903	0
514	9	0	0	0	0	0	0	200	300	0	0	0	0	0	0	0	200	903	0	0	0	0	0	0	0	603	903	0
515	0	0	0	0	0	0	0	200	300	0	0	0	0	0	0	0	200	903	0	0	0	0	0	0	0	603	903	0
515	1	0	0	0	0	0	0	200	300	0	0	0	0	0	0	0	200	903	0	0	0	0	0	0	0	603	903	0
515	2	0	0	0	0	0	0	200	300	0	0	0	0	0	0	0	200	903	0	0	0	0	0	0	0	603	903	0
515	3	0	0	0	0	0	0	200	300	0	0	0	0	0	0	0	200	903	0	0	0	0	0	0	0	603	903	0
515	4	0	0	0	0	0	0	200	300	0	0	0	0	0	0	0	200	903	0	0	0	0	0	0	0	603	903	0
515	5	0	0	0	0	0	0	200	300	0	0	0	0	0	0	0	200	903	0	0	0	0	0	0	0	603	903	0
515	6	0	0	0	0	0	0	200	300	0	0	0	0	0	0	0	200	903	0	0	0	0	0	0	0	603	903	0
515	7	0	0	0	0	0	0	200	300	0	0	0	0	0	0	0	200	903	0	0	0	0	0	0	0	603	903	0
515	8	0	0	0	0	0	0	200	300	0	0	0	0	0	0	0	200	903	0	0	0	0	0	0	0	603	903	0
515	9	0	0	0	0	0	0	200	300	0	0	0	0	0	0	0	200	903	0	0	0	0	0	0	0	603	903	0
516	0	0	0	0	0	0	0	200	300	0	0	0	0	0	0	0	200	903	0	0	0	0	0	0	0	603	903	0
516	1	0	0	0	0	0	0	200	300	0	0	0	0	0	0	0	200	903	0	0	0	0	0	0	0	603	903	0
516	2	0	0	0	0	0	0	200	300	0	0	0	0	0	0	0	200	903	0	0	0	0	0	0	0	603	903	0
516	3	0	0	0	0	0	0	200	300	0	0	0	0	0	0	0	200	903	0	0	0	0	0	0	0	603	903	0
516	4	0	0	0	0	0	0	200	300	0	0	0	0	0	0	0	200	903	0	0	0	0	0	0	0	603	903	0
516	5	0	0	0	0	0	0	200	300	0	0	0	0	0	0	0	200	903	0	0	0	0	0	0	0	603	903	0
516	6	0	0	0	0	0	0	200	300	0	0	0	0	0	0	0	200	903	0	0	0	0	0	0	0	603	903	0
516	7	0	0	0	0	0	0	200	300	0	0	0	0	0	0	0	200	903	0	0	0	0	0	0	0	603	903	0
516	8	0	0	0	0	0	0	200	300	0	0	0	0	0	0	0	200	903	0	0	0	0	0	0	0	603	903	0
516	9	0	0	0	0	0	0	200	300	0	0	0	0	0	0	0	200	903	0	0	0	0	0	0	0	603	903	0
517	0	0	0	0	0	0	0	200	300	0	0	0	0	0	0	0	200	903	0	0	0	0	0	0	0	603	903	0
517	1	0	0	0	0	0	0	200	300	0	0	0	0	0	0	0	200	903	0	0	0	0	0	0	0	603	903	0
517	2	0	0	0	0	0	0	200	300	0	0	0	0	0	0	0	200	903	0	0	0	0	0	0	0	603	903	0
517	3	0	0	0	0	0	0	200	300	0	0	0	0	0	0	0	200	903	0	0	0	0	0	0	0	603	903	0
517	4	0	0	0	0	0	0	200	300	0	0	0	0	0	0	0	200	903	0	0	0	0	0	0	0	603	903	0
517	5	0	0	0	0	0	0	200	300	0	0	0	0	0	0	0	200	903	0	0	0	0	0	0	0	603	903	0
517	6	0	0	0	0	0	0	200	300	0	0	0	0	0	0	0	200	903	0	0	0	0	0	0	0	603	903	0
517	7	0	0	0	0	0	0	200	300	0	0	0	0	0	0	0	200	903	0	0	0	0	0	0	0	603	903	0
517	8	0	0	0	0	0	0	200	300	0	0	0	0	0	0	0	200	903	0	0	0	0	0	0	0	603	903	0
517	9	0	0	0	0	0	0	200	300	0	0	0	0	0	0	0	200	903	0	0	0	0	0	0	0	603	903	0
518	0	0	0	0	0	0	0	200	300	0	0	0	0	0	0	0	200	903	0	0	0	0	0	0	0	603	903	0
518	1	0	0	0	0	0	0	200	300	0	0	0	0	0	0	0	200	903	0	0	0	0	0	0	0	603	903	0
518	2	0	0	0	0	0	0	200	300	0	0	0	0	0	0	0	200	903	0	0	0	0	0	0	0	603	903	0
518	3	0	0	0	0	0	0	200	300	0	0	0	0	0	0	0	200	903	0	0	0	0	0	0	0	603	903	0
518	4	0	0	0	0	0	0	200	300	0	0	0	0	0	0	0	200	903	0	0	0	0	0	0	0	603	903	0
518	5	0	0	0	0	0	0	200	300	0	0	0	0	0	0	0	200	903	0	0	0	0	0	0	0	603	903	0
518	6	0	0	0	0	0	0	200	300	0	0	0	0	0	0	0	200	903	0	0	0	0	0	0	0	603	903	0
518	7	0	0	0	0	0	0	200	300	0	0	0	0	0	0	0	200	903	0	0	0	0	0	0	0	603	903	0
518	8	0	0	0	0	0	0	200	300	0	0	0	0	0	0	0	200	903	0	0	0	0	0	0	0	603	903	0
518	9	0	0	0	0	0	0	200	300	0	0	0	0	0	0	0	200	903	0	0	0	0	0	0	0	603	903	0
519	0	0	0	0	0	0	0	200	300	0	0	0	0	0	0	0	200	903	0	0	0	0	0	0	0	603	903	0
519	1	0	0	0	0	0	0	200	300	0	0	0	0	0	0	0	200	903	0	0	0	0	0	0	0	603	903	0
519	2	0	0	0	0	0	0	200	300	0	0	0	0	0	0	0	200	903	0	0	0	0	0	0	0	603	903	0
519	3	0	0	0	0	0	0	200	300	0	0	0	0	0	0	0	200	903	0	0	0	0	0	0	0	603	903	0
519	4	0	0	0	0	0	0	200	300	0	0	0	0	0	0	0	200	903	0	0	0	0	0	0	0	603	903	0
519	5	0	0	0	0	0	0	200	300	0	0	0	0	0	0	0	200	903	0	0	0	0	0	0	0	603	903	0
519	6	0	0	0	0	0	0	200	300	0	0	0	0	0	0	0	200	903	0	0	0	0	0	0	0	603	903	0
519	7	0	0	0	0	0	0	200	300	0	0	0	0	0	0	0	200	903	0	0	0	0	0	0	0	603	903	0
519	8	0	0	0	0	0	0	200	300	0	0	0	0	0	0	0	200	903	0	0	0	0	0	0	0	603	903	0
519	9	0	0	0	0	0	0	200	300	0	0	0	0	0	0	0	200	903	0	0	0	0	0	0	0	603	903	0
520	0	0	0	0	0	0	0	200	300	0	0	0	0	0	0	0	200	903	0	0	0	0	0	0	0	603	903	0
520	1	0	0	0	0	0	0	200	300	0	0	0	0	0	0	0	200	903	0	0	0	0	0	0	0	603	903	0
520	2	0	0	0	0	0	0	200	300	0	0	0	0	0	0	0	200	903	0	0	0	0	0	0	0	603	903	0
520	3	0	0	0	0	0	0	200	300	0	0	0	0	0	0	0	200	903	0	0	0	0	0	0	0	603	903	0
520	4	0	0	0	0	0	0	200	300	0	0	0	0	0	0	0	200	903	0	0	0	0	0	0	0	603	903	0
520	5	0	0	0	0	0	0	200	300	0	0	0	0	0	0	0	200	903	0	0	0	0	0	0	0	603	903	0
520	6	0	0	0	0	0	0	200	300	0	0	0	0	0	0	0	200	903	0	0	0	0	0	0	0	603	903	0
520	7	0	0	0	0	0	0	200	300	0	0	0	0	0	0	0	200	903	0	0	0	0	0	0	0	603	903	0
520	8	0	0	0	0	0	0	200	300	0	0	0	0	0	0	0	200	903	0	0	0	0	0	0	0	603	903	0
520	9	0	0	0	0	0	0	200	300	0	0	0	0	0	0	0	200	903	0	0	0	0	0	0	0	603	903	0
521	0	0	0	0	0	0	0	200	300	0	0	0	0	0	0	0	200	903	0	0	0	0	0	0	0	603	903	0
521	1	0	0	0	0	0	0	200	300	0	0	0	0	0	0	0	200	903	0	0	0	0	0	0	0	603	903	0
521	2	0	0	0	0	0	0	200	300	0	0	0	0	0	0	0	200	903	0	0	0	0	0	0	0	603	903	0
521	3	0	0	0	0	0	0	200	300	0	0	0	0	0	0	0	200	903	0	0	0	0	0	0	0	603	903	0
521	4	0	0	0	0	0	0	200	300	0	0	0	0	0	0	0	200	903	0	0	0	0	0	0	0	603	903	0
521	5	0	0	0	0	0	0	200	300	0	0	0	0	0	0	0	200	903	0	0	0	0	0	0	0	603	903	0
521	6	0	0	0	0	0	0	200	300	0	0	0	0	0	0	0	200	903	0	0	0	0	0	0	0	603	903	0
521	7	0	0	0	0	0	0	200	300	0	0	0	0	0	0	0	200	903	0	0	0	0	0	0	0	603	903	0
521	8	0	0	0	0	0	0	200	300	0	0	0	0	0	0	0	200	903	0	0	0	0	0	0	0	603	903	0
521	9	0	0	0	0	0	0	200	300	0	0	0	0	0	0	0	200	903	0	0	0	0	0	0	0	603	903	0
522	0	0	0	0	0	0	0	200	300	0	0	0	0	0	0	0	200	903	0	0	0	0	0	0	0	603	903	0
522	1	0	0	0	0	0	0	200	300	0	0	0	0	0	0	0	200	903	0	0	0	0	0	0	0	603	903	0
522	2	0	0	0	0	0	0	200	300	0	0	0	0	0	0	0	200	903	0	0	0	0	0	0	0	603	903	0
522	3	0	0	0	0	0	0	200	300	0	0	0	0	0	0	0	200	903	0	0	0	0	0	0	0	603	903	0
522	4	0	0	0	0	0	0	200	300	0	0	0	0	0	0	0	200	903	0	0	0	0	0	0	0	603	903	0
522	5	0	0	0	0	0	0	200	300	0	0	0	0	0	0	0	200	903	0	0	0	0	0	0	0	603	903	0
522	6	0	0	0	0	0	0	200	300	0	0	0	0	0	0	0	200	903	0	0	0	0	0	0	0	603	903	0
522	7	0	0	0	0	0	0	200	300	0	0	0	0	0	0	0	200	903	0	0	0	0	0	0	0	603	903	0
522	8	0	0	0	0	0	0	200	300	0	0	0	0	0	0	0	200	903	0	0	0	0	0	0	0	603	903	0
522	9	0	0	0	0	0	0	200	300	0	0	0	0	0	0	0	200	903	0	0	0	0	0	0	0	603	903	0
523	0	0	0	0	0	0	0	200	300	0	0	0	0	0	0	0	200	903	0	0	0	0	0	0	0	603	903	0
523	1	0	0	0	0	0	0	200	300	0	0	0	0	0	0	0	200	903	0	0	0	0	0	0	0	603	903	0
523	2	0	0	0	0	0	0	200	300	0	0	0	0	0	0	0	200	903	0	0	0	0	0	0	0	603	903	0
523	3	0	0	0	0	0	0	200	300	0	0	0	0	0	0	0	200	903	0	0	0	0	0	0	0	603	903	0
523	4	0	0	0	0	0	0	200	300	0	0	0	0	0	0	0	200	903	0	0	0	0	0	0	0	603	903	0
523	5	0	0	0	0	0	0	200	300	0	0	0	0	0	0	0	200	903	0	0	0	0	0	0	0	603	903	0
523	6	0	0	0	0	0	0	200	300	0	0	0	0	0	0	0	200	903	0	0	0	0	0	0	0	603	903	0
523	7	0	0	0	0	0	0	200	300	0	0	0	0	0	0	0	200	903	0	0	0	0	0	0	0	603	903	0
523	8	0	0	0	0	0	0	200	300	0	0	0	0	0	0	0	200	903	0	0	0	0	0	0	0	603	903	0
523	9	0	0	0	0	0	0	200	300	0	0	0	0	0	0	0	200	903	0	0	0	0	0	0	0	603	903	0
524	0	0	0	0	0	0	0	200	300	0	0	0	0	0	0	0	200	903	0	0	0	0	0	0	0	603	903	0
524	1	0	0	0	0	0	0	200	300	0	0	0	0	0	0	0	200	903	0	0	0	0	0	0	0	603	903	0
524	2	0	0	0	0	0	0	200	300	0	0	0	0	0	0	0	200	903	0	0	0	0	0	0	0	603	903	0
524	3	0	0	0	0	0	0	200	300	0	0	0	0	0	0	0	200	903	0	0	0	0	0	0	0	603	903	0
524	4	0	0	0	0	0	0	200	300	0	0	0	0	0	0	0	200	903	0	0	0	0	0	0	0	603	903	0
524	5	0	0	0	0	0	0	200	300	0	0	0	0	0	0	0	200	903	0	0	0	0	0	0	0	603	903	0
524	6	0	0	0	0	0	0	200	300	0	0	0	0	0	0	0	200	903	0	0	0	0	0	0	0	603	903	0
524	7	0	0	0	0	0	0	200	300	0	0	0	0	0	0	0	200	903	0	0	0	0	0	0	0	603	903	0
524	8	0	0	0	0	0	0	200	300	0	0	0	0	0	0	0	200	903	0	0	0	0	0	0	0	603	903	0
524	9	0	0	0	0	0	0	200	300	0	0	0	0	0	0	0	200	903	0	0	0	0	0	0	0	603	903	0
525	0	0	0	0	0	0	0	200	300	0	0	0	0	0	0	0	200	903	0	0	0	0	0	0	0	603	903	0
525	1	0	0	0	0	0	0	200	300	0	0	0	0	0	0	0	200	903	0	0	0	0	0	0	0	603	903	0
525	2	0	0	0	0	0	0	200	300	0	0	0	0	0	0	0	200	903	0	0	0	0	0	0	0	603	903	0
525	3	0	0	0	0	0	0	200	300	0	0	0	0	0	0	0	200	903	0	0	0	0	0	0	0	603	903	0
525	4	0	0	0	0	0	0	200	300	0	0	0	0	0	0	0	200	903	0	0	0	0	0	0	0	603	903	0
525	5	0	0	0	0	0	0	200	300	0	0	0	0	0	0	0	200	903	0	0	0	0	0	0	0	603	903	0
525	6	0	0	0	0	0	0	200	300	0	0	0	0	0	0	0	200	903	0	0	0	0	0	0	0	603	903	0
525	7	0	0	0	0	0	0	200	300	0	0	0	0	0	0	0	200	903	0	0	0	0	0	0	0	603	903	0
525	8	0	0	0	0	0	0	200	300	0	0	0	0	0	0	0	200	903	0	0	0	0	0	0	0	603	903	0
525	9	0	0	0	0	0	0	200	300	0	0	0	0	0	0	0	200	903	0	0	0	0	0	0	0	603	903	0
526	0	0	0	0	0	0	0	200	300	0	0	0	0	0	0	0	200	903	0	0	0	0	0	0	0	603	903	0
526	1	0	0	0	0	0	0	200	300	0	0	0	0	0	0	0	200	903	0	0	0	0	0	0	0	603	903	0
526	2	0	0	0	0	0	0	200	300	0	0	0	0	0	0	0	200	903	0	0	0	0	0	0	0	603	903	0
526	3	0	0	0	0	0	0	200	300	0	0	0	0	0	0	0	200	903	0	0	0	0	0	0	0	603	903	0
526	4	0	0	0	0	0	0	200	300	0	0	0	0	0	0	0	200	903	0	0	0	0	0	0	0	603	903	0
526	5	0	0	0	0	0	0	200	300	0	0	0	0	0	0	0	200	903	0	0	0	0	0	0	0	603	903	0
526	6	0	0	0	0	0	0	200	300	0	0	0	0	0	0	0	200	903	0	0	0	0	0	0	0	603	903	0
526	7	0	0	0	0	0	0	200	300	0	0	0	0	0	0	0	200	903	0	0	0	0	0	0	0	603	903	0
526	8	0	0	0	0	0	0	200	300	0	0	0	0	0	0	0	200	903	0	0	0	0	0	0	0	603	903	0
526	9	0	0	0	0	0	0	200	300	0	0	0	0	0	0	0	200	903	0	0	0	0	0	0	0	603	903	0
527	0	0	0	0	0	0	0	200	300	0	0	0	0	0	0	0	200	903	0	0	0	0	0	0	0	603	903	0
527	1	0	0	0	0	0	0	200	300	0	0	0	0	0	0	0	200	903	0	0	0	0	0	0	0	603	903	0
527	2	0	0	0	0	0	0	200	300	0	0	0	0	0	0	0	200	903	0	0	0	0	0	0	0	603	903	0
527	3	0	0	0	0	0	0	200	300	0	0	0	0	0	0	0	200	903	0	0	0	0	0	0	0	603	903	0
527	4	0	0	0	0	0	0	200	300	0	0	0	0	0	0	0	200	903	0	0	0	0	0	0	0	603	903	0
527	5	0	0	0	0	0	0	200	300	0	0	0	0	0	0	0	200	903	0	0	0	0	0	0	0	603	903	0
527	6	0	0	0	0	0	0	200	300	0	0	0	0	0	0	0	200	903	0	0	0	0	0	0	0	603	903	0
527	7	0	0	0	0	0	0	200	300	0	0	0	0	0	0	0	200	903	0	0	0	0	0	0	0	603	903	0
527	8	0	0	0	0	0	0	200	300	0	0	0	0	0	0	0	200	903	0	0	0	0	0	0	0	603	903	0
527	9	0	0	0	0	0	0	200	300	0	0	0	0	0	0	0	200	903	0	0	0	0	0	0	0	603	903	0
528	0	0	0	0	0	0	0	200	300	0	0	0	0	0	0	0	200	903	0	0	0	0	0	0	0	603	903	0
528	1	0	0	0	0	0	0	200	300	0	0	0	0	0	0	0	200	903	0	0	0	0	0	0	0	603	903	0
528	2	0	0	0	0	0	0	200	300	0	0	0	0	0	0	0	200	903	0	0	0	0	0	0	0	603	903	0
528	3	0	0	0	0	0	0	200	300	0	0	0	0	0	0	0	200	903	0	0	0	0	0	0	0	603	903	0
528	4	0	0	0	0	0	0	200	300	0	0	0	0	0	0	0	200	903	0	0	0	0	0	0	0	603	903	0
528	5	0	0	0	0	0	0	200	300	0	0	0	0	0	0	0	200	903	0	0	0	0	0	0	0	603	903	0
528	6	0	0	0	0	0	0	200	300	0	0	0	0	0	0	0	200	903	0	0	0	0	0	0	0	603	903	0
528	7	0	0	0	0	0	0	200	300	0	0	0	0	0	0	0	200	903	0	0	0	0	0	0	0	603	903	0
528	8	0	0	0	0	0	0	200	300	0	0	0	0	0	0	0	200	903	0	0	0	0	0	0	0	603	903	0
528	9	0	0	0	0	0	0	200	300	0	0	0	0	0	0	0	200	903	0	0	0	0	0	0	0	603	903	0
529	0	0	0	0	0	0	0	200	300	0	0	0	0	0	0	0	200	903	0	0	0	0	0	0	0	603	903	0
529	1	0	0	0	0	0	0	200	300	0	0	0	0	0	0	0	200	903	0	0	0	0	0	0	0	603	903	0
529	2	0	0	0	0	0	0	200	300	0	0	0	0	0	0	0	200	903	0	0	0	0	0	0	0	603	903	0
529	3	0	0	0	0	0	0	200	300	0	0	0	0	0	0	0	200	903	0	0	0	0	0	0	0	603	903	0
529	4	0	0	0	0	0	0	200	300	0	0	0	0	0	0	0	200	903	0	0	0	0	0	0	0	603	903	0
529	5	0	0	0	0	0	0	200	300	0	0	0	0	0	0	0	200	903	0	0	0	0	0	0	0	603	903	0
529	6	0	0	0	0	0	0	200	300	0	0	0	0	0	0	0	200	903	0	0	0	0	0	0	0	603	903	0
529	7	0	0	0	0	0	0	200	300	0	0	0	0	0	0	0	200	903	0	0	0	0	0	0	0	603	903	0
529	8	0	0	0	0	0	0	200	300	0	0	0	0	0	0	0	200	903	0	0	0	0	0	0	0	603	903	0
529	9	0	0	0	0	0	0	200	300	0	0	0	0	0	0	0	200	903	0	0	0	0	0	0	0	603	903	0
530	0	0	0	0	0	0	0	200	300	0	0	0	0	0	0	0	200	903	0	0	0	0	0	0	0	603	903	0
530	1	0	0	0	0	0	0	200	300	0	0	0	0	0	0	0	200	903	0	0	0	0	0	0	0	603	903	0
530	2	0	0	0	0	0	0	200	300	0	0	0	0	0	0	0	200	903	0	0	0	0	0	0	0	603	903	0
530	3	0	0	0	0	0	0	200	300	0	0	0	0	0	0	0	200	903	0	0	0	0	0	0	0	603	903	0
530	4	0	0	0	0	0	0	200	300	0	0	0	0	0	0	0	200	903	0	0	0	0	0	0	0	603	903	0
530	5	0	0	0	0	0	0	200	300	0	0	0	0	0	0	0	200	903	0	0	0	0	0	0	0	603	903	0
530	6	0	0	0	0	0	0	200	300	0	0	0	0	0	0	0	200	903	0	0	0	0	0	0	0	603	903	0
530	7	0	0	0	0	0	0	200	300	0	0	0	0	0	0	0	200	903	0	0	0	0	0	0	0	603	903	0
530	8	0	0	0	0	0	0	200	300	0	0	0	0	0	0	0	200	903	0	0	0	0	0	0	0	603	903	0
530	9	0	0	0	0	0	0	200	300	0	0	0	0	0	0	0	200	903	0	0	0	0	0	0	0	603	903	0
531	0	0	0	0	0	0	0	200	300	0	0	0	0	0	0	0	200	903	0	0	0	0	0	0	0	603	903	0
531	1	0	0	0	0	0	0	200	300	0	0	0	0	0	0	0	200	903	0	0	0	0	0	0	0	603	903	0
531	2	0	0	0	0	0	0	200	300	0	0	0	0	0	0	0	200	903	0	0	0	0	0	0	0	603	903	0
531	3	0	0	0	0	0	0	200	300	0	0	0	0	0	0	0	200	903	0	0	0	0	0	0	0	603	903	0
531	4	0	0	0	0	0	0	200	300	0	0	0	0	0	0	0	200	903	0	0	0	0	0	0	0	603	903	0
531	5	0	0	0	0	0	0	200	300	0	0	0	0	0	0	0	200	903	0	0	0	0	0	0	0	603	903	0
531	6	0	0	0	0	0	0	200	300	0	0	0	0	0	0	0	200	903	0	0	0	0	0	0	0	603	903	0
531	7	0	0	0	0	0	0	200	300	0	0	0	0	0	0	0	200	903	0	0	0	0	0	0	0	603	903	0
531	8	0	0	0	0	0	0	200	300	0	0	0	0	0	0	0	200	903	0	0	0	0	0	0	0	603	903	0
531	9	0	0	0	0	0	0	200	300	0	0	0	0	0	0	0	200	903	0	0	0	0	0	0	0	603	903	0
532	0	0	0	0	0	0	0	200	300	0	0	0	0	0	0	0	200	903	0	0	0	0	0	0	0	603	903	0
532	1	0	0	0	0	0	0	200	300	0	0	0	0	0	0	0	200	903	0	0	0	0	0	0	0	603	903	0
532	2	0	0	0	0	0	0	200	300	0	0	0	0	0	0	0	200	903	0	0	0	0	0	0	0	603	903	0
532	3	0	0	0	0	0	0	200	300	0	0	0	0	0	0	0	200	903	0	0	0	0	0	0	0	603	903	0
532	4	0	0	0	0	0	0	200	300	0	0	0	0	0	0	0	200	903	0	0	0	0	0	0	0	603	903	0
532	5	0	0	0	0	0	0	200	300	0	0	0	0	0	0	0	200	903	0	0	0	0	0	0	0	603	903	0
532	6	0	0	0	0	0	0	200	300	0	0	0	0	0	0	0	200	903	0	0	0	0	0	0	0	603	903	0
532	7	0	0	0	0	0	0	200	300	0	0	0	0	0	0	0	200	903	0	0	0	0	0	0	0	603	903	0
532	8	0	0	0	0	0	0	200	300	0	0	0	0	0	0	0	200	903	0	0	0	0	0	0	0	603	903	0
532	9	0	0	0	0	0	0	200	300	0	0	0	0	0	0	0	200	903	0	0	0	0	0	0	0	603	903	0
533	0	0	0	0	0	0	0	200	300	0	0	0	0	0	0	0	200	903	0	0	0	0	0	0	0	603	903	0
533	1	0	0	0	0	0	0	200	300	0	0	0	0	0	0	0	200	903	0	0	0	0	0	0	0	603	903	0
533	2	0	0	0	0	0	0	200	300	0	0	0	0	0	0	0	200	903	0	0	0	0	0	0	0	603	903	0
533	3	0	0	0	0	0	0	200	300	0	0	0	0	0	0	0	200	903	0	0	0	0	0	0	0	603	903	0
533	4	0	0	0	0	0	0	200	300	0	0	0	0	0	0	0	200	903	0	0	0	0	0	0	0	603	903	0
533	5	0	0	0	0	0	0	200	300	0	0	0	0	0	0	0	200	903	0	0	0	0	0	0	0	603	903	0
533	6	0	0	0	0	0	0	200	300	0	0	0	0	0	0	0	200	903	0	0	0	0	0	0	0	603	903	0
533	7	0	0	0	0	0	0	200	300	0	0	0	0	0	0	0	200	903	0	0	0	0	0	0	0	603	903	0
533	8	0	0	0	0	0	0	200	300	0	0	0	0	0	0	0	200	903	0	0	0	0	0	0	0	603	903	0
533	9	0	0	0	0	0	0	200	300	0	0	0	0	0	0	0	200	903	0	0	0	0	0	0	0	603	903	0
534	0	0	0	0	0	0	0	200	300	0	0	0	0	0	0	0	200	903	0	0	0	0	0	0	0	603	903	0
534	1	0	0	0	0	0	0	200	300	0	0	0	0	0	0	0	200	903	0	0	0	0	0	0	0	603	903	0
534	2	0	0	0	0	0	0	200	300	0	0	0	0	0	0	0	200	903	0	0	0	0	0	0	0	603	903	0
534	3	0	0	0	0	0	0	200	300	0	0	0	0	0	0	0	200	903	0	0	0	0	0	0	0	603	903	0
534	4	0	0	0	0	0	0	200	300	0	0	0	0	0	0	0	200	903	0	0	0	0	0	0	0	603	903	0
534	5	0	0	0	0	0	0	200	300	0	0	0	0	0	0	0	200	903	0	0	0	0	0	0	0	603	903	0
534	6	0	0	0	0	0	0	200	300	0	0	0	0	0	0	0	200	903	0	0	0	0	0	0	0	603	903	0
534	7	0	0	0	0	0	0	200	300	0	0	0	0	0	0	0	200	903	0	0	0	0	0	0	0	603	903	0
534	8	0	0	0	0	0	0	200	300	0	0	0	0	0	0	0	200	903	0	0	0	0	0	0	0	603	903	0
534	9	0	0	0	0	0	0	200	300	0	0	0	0	0	0	0	200	903	0	0	0	0	0	0	0	603	903	0
535	0	0	0	0	0	0	0	200	300	0	0	0	0	0	0	0	200	903	0	0	0	0	0	0	0	603	903	0
535	1	0	0	0	0	0	0	200	300	0	0	0	0	0	0	0	200	903	0	0	0	0	0	0	0	603	903	0
535	2	0	0	0	0	0	0	200	300	0	0	0	0	0	0	0	200	903	0	0	0	0	0	0	0	603	903	0
535	3	0	0	0	0	0	0	200	300	0	0	0	0	0	0	0	200	903	0	0	0	0	0	0	0	603	903	0
535	4	0	0	0	0	0	0	200	300	0	0	0	0	0	0	0	200	903	0	0	0	0	0	0	0	603	903	0
535	5	0	0	0	0	0	0	200	300	0	0	0	0	0	0	0	200	903	0	0	0	0	0	0	0	603	903	0
535	6	0	0	0	0	0	0	200	300	0	0	0	0	0	0	0	200	903	0	0	0	0	0	0	0	603	903	0
535	7	0	0	0	0	0	0	200	300	0	0	0	0	0	0	0	200	903	0	0	0	0	0	0	0	603	903	0
535	8	0	0	0	0	0	0	200	300	0	0	0	0	0	0	0	200	903	0	0	0	0	0	0	0	603	903	0
535	9	0	0	0	0	0	0	200	300	0	0	0	0	0	0	0	200	903	0	0	0	0	0	0	0	603	903	0
536	0	0	0	0	0	0	0	200	300	0	0	0	0	0	0	0	200	903	0	0	0	0	0	0	0	603	903	0
536	1	0	0	0	0	0	0	200	300	0	0	0	0	0	0	0	200	903	0	0	0	0	0	0	0	603	903	0
536	2	0	0	0	0	0	0	200	300	0	0	0	0	0	0	0	200	903	0	0	0	0	0	0	0	603	903	0
536	3	0	0	0	0	0	0	200	300	0	0	0	0	0	0	0	200	903	0	0	0	0	0	0	0	603	903	0
536	4	0	0	0	0	0	0	200	300	0	0	0	0	0	0	0	200	903	0	0	0	0	0	0	0	603	903	0
536	5	0	0	0	0	0	0	200	300	0	0	0	0	0	0	0	200	903	0	0	0	0	0	0	0	603	903	0
536	6	0	0	0	0	0	0	200	300	0	0	0	0	0	0	0	200	903	0	0	0	0	0	0	0	603	903	0
536	7	0	0	0	0	0	0	200	300	0	0	0	0	0	0	0	200	903	0	0	0	0	0	0	0	603	903	0
536	8	0	0	0	0	0	0	200	300	0	0	0	0	0	0	0	200	903	0	0	0	0	0	0	0	603	903	0
536	9	0	0	0	0	0	0	200	300	0	0	0	0	0	0	0	200	903	0	0	0	0	0	0	0	603	903	0
537	0	0	0	0	0	0	0	200	300	0	0	0	0	0	0	0	200	903	0	0	0	0	0	0	0	603	903	0
537	1	0	0	0	0	0	0	200	300	0	0	0	0	0	0	0	200	903	0	0	0	0	0	0	0	603	903	0
537	2	0	0	0	0	0	0	200	300	0	0	0	0	0	0	0	200	903	0	0	0	0	0	0	0	603	903	0
537	3	0	0	0	0	0	0	200	300	0	0	0	0	0	0	0	200	903	0	0	0	0	0	0	0	603	903	0
537	4	0	0	0	0	0	0	200	300	0	0	0	0	0	0	0	200	903	0	0	0	0	0	0	0	603	903	0
537	5	0	0	0	0	0	0	200	300	0	0	0	0	0	0	0	200	903	0	0	0	0	0	0	0	603	903	0
537	6	0	0	0	0	0	0	200	300	0	0	0	0	0	0	0	200	903	0	0	0	0	0	0	0	603	903	0
537	7	0	0	0	0	0	0	200	300	0	0	0	0	0	0	0	200	903	0	0	0	0	0	0	0	603	903	0
537	8	0	0	0	0	0	0	200	300	0	0	0	0	0	0	0	200	903	0	0	0	0	0	0	0	603	903	0
537	9	0	0	0	0	0	0	200	300	0	0	0	0	0	0	0	200	903	0	0	0	0	0	0	0	603	903	0
538	0	0	0	0	0	0	0	200	300	0	0	0	0	0	0	0	200	903	0	0	0	0	0	0	0	603	903	0
538	1	0	0	0	0	0	0	200	300	0	0	0	0	0	0	0	200	903	0	0	0	0	0	0	0	603	903	0
538	2	0	0	0	0	0	0	200	300	0	0	0	0	0	0	0	200	903	0	0	0	0	0	0	0	603	903	0
538	3	0	0	0	0	0	0	200	300	0	0	0	0	0	0	0	200	903	0	0	0	0	0	0	0	603	903	0
538	4	0	0	0	0	0	0	200	300	0	0	0	0	0	0	0	200	903	0	0	0	0	0	0	0	603	903	0
538	5	0	0	0	0	0	0	200	300	0	0	0	0	0	0	0	200	903	0	0	0	0	0	0	0	603	903	0
538	6	0	0	0	0	0	0	200	300	0	0	0	0	0	0	0	200	903	0	0	0	0	0	0	0	603	903	0
538	7	0	0	0	0	0	0	200	300	0	0	0	0	0	0	0	200	903	0	0	0	0	0	0	0	603	903	0
538	8	0	0	0	0	0	0	200	300	0	0	0	0	0	0	0	200	903	0	0	0	0	0	0	0	603	903	0
538	9	0	0	0	0	0	0	200	300	0	0	0	0	0	0	0	200	903	0	0	0	0	0	0	0	603	903	0
539	0	0	0	0	0	0	0	200	300	0	0	0	0	0	0	0	200	903	0	0	0	0	0	0	0	603	903	0
539	1	0	0	0	0	0	0	200	300	0	0	0	0	0	0	0	200	903	0	0	0	0	0	0	0	603	903	0
539	2	0	0	0	0	0	0	200	300	0	0	0	0	0	0	0	200	903	0	0	0	0	0	0	0	603	903	0
539	3	0	0	0	0	0	0	200	300	0	0	0	0	0	0	0	200	903	0	0	0	0	0	0	0	603	903	0
539	4	0	0	0	0	0	0	200	300	0	0	0	0	0	0	0	200	903	0	0	0	0	0	0	0	603	903	0
539	5	0	0	0	0	0	0	200	300	0	0	0	0	0	0	0	200	903	0	0	0	0	0	0	0	603	903	0
539	6	0	0	0	0	0	0	200	300	0	0	0	0	0	0	0	200	903	0	0	0	0	0	0	0	603	903	0
539	7	0	0	0	0	0	0	200	300	0	0	0	0	0	0	0	200	903	0	0	0	0	0	0	0	603	903	0
539	8	0	0	0	0	0	0	200	300	0	0	0	0	0	0	0	200	903	0	0	0	0	0	0	0	603	903	0
539	9	0	0	0	0	0	0	200	300	0	0	0	0	0	0	0	200	903	0	0	0	0	0	0	0	603	903	0
540	0	0	0	0	0	0	0	200	300	0	0	0	0	0	0	0	200	903	0	0	0	0	0	0	0	603	903	0
540	1	0	0	0	0	0	0	200	300	0	0	0	0	0	0	0	200	903	0	0	0	0	0	0	0	603	903	0
540	2	0	0	0	0	0	0	200	300	0	0	0	0	0	0	0	200	903	0	0	0	0	0	0	0	603	903	0
540	3	0	0	0	0	0	0	200	300	0	0	0	0	0	0	0	200	903	0	0	0	0	0	0	0	603	903	0
540	4	0	0	0	0	0	0	200	300	0	0	0	0	0	0	0	200	903	0	0	0	0	0	0	0	603	903	0
540	5	0	0	0	0	0	0	200	300	0	0	0	0	0	0	0	200	903	0	0	0	0	0	0	0	603	903	0
540	6	0	0	0	0	0	0	200	300	0	0	0	0	0	0	0	200	903	0	0	0	0	0	0	0	603	903	0
540	7	0	0	0	0	0	0	200	300	0	0	0	0	0	0	0	200	903	0	0	0	0	0	0	0	603	903	0
540	8	0	0	0	0	0	0	200	300	0	0	0	0	0	0	0	200	903	0	0	0	0	0	0	0	603	903	0
540	9	0	0	0	0	0	0	200	300	0	0	0	0	0	0	0	200	903	0	0	0	0	0	0	0	603	903	0
541	0	0	0	0	0	0	0	200	300	0	0	0	0	0	0	0	200	903	0	0	0	0	0	0	0	603	903	0
541	1	0	0	0	0	0	0	200	300	0	0	0	0	0	0	0	200	903	0	0	0	0	0	0	0	603	903	0
541	2	0	0	0	0	0	0	200	300	0	0	0	0	0	0	0	200	903	0	0	0	0	0	0	0	603	903	0
541	3	0	0	0	0	0	0	200	300	0	0	0	0	0	0	0	200	903	0	0	0	0	0	0	0	603	903	0
541	4	0	0	0	0	0	0	200	300	0	0	0	0	0	0	0	200	903	0	0	0	0	0	0	0	603	903	0
541	5	0	0	0	0	0	0	200	300	0	0	0	0	0	0	0	200	903	0	0	0	0	0	0	0	603	903	0
541	6	0	0	0	0	0	0	200	300	0	0	0	0	0	0	0	200	903	0	0	0	0	0	0	0	603	903	0
541	7	0	0	0	0	0	0	200	300	0	0	0	0	0	0	0	200	903	0	0	0	0	0	0	0	603	903	0
541	8	0	0	0	0	0	0	200	300	0	0	0	0	0	0	0	200	903	0	0	0	0	0	0	0	603	903	0
541	9	0	0	0	0	0	0	200	300	0	0	0	0	0	0	0	200	903	0	0	0	0	0	0	0	603	903	0
542	0	0	0	0	0	0	0	200	300	0	0	0	0	0	0	0	200	903	0	0	0	0	0	0	0	603	903	0
542	1	0	0	0	0	0	0	200	300	0	0	0	0	0	0	0	200	903	0	0	0	0	0	0	0	603	903	0
542	2	0	0	0	0	0	0	200	300	0	0	0	0	0	0	0	200	903	0	0	0	0	0	0	0	603	903	0
542	3	0	0	0	0	0	0	200	300	0	0	0	0	0	0	0	200	903	0	0	0	0	0	0	0	603	903	0
542	4	0	0	0	0	0	0	200	300	0	0	0	0	0	0	0	200	903	0	0	0	0	0	0	0	603	903	0
542	5	0	0	0	0	0	0	200	300	0	0	0	0	0	0	0	200	903	0	0	0	0	0	0	0	603	903	0
542	6	0	0	0	0	0	0	200	300	0	0.21225	-11.7261	-19.2828	-2559.28	-1038.13	717.545	146.163	1035.72	0	0	0	0	0	0	0	603	903	0
542	7	0	0	0	0	0	0	200	300	0	1.58554	-12.9468	-24.4708	-2467.73	-1587.45	671.769	135.129	1003.84	0	0	0	0	0	0	0	603	903	0
542	8	0	0	0	0	0	0	200	300	0	-0.855865	-12.489	-24.4708	-2833.94	-2197.8	992.203	110.187	1018.81	0	0	0	0	0	0	0	603	903	0
542	9	0	0	0	0	0	0	200	300	0	0.0596623	-15.9985	-27.2173	-3657.92	-2014.69	1404.19	125.978	1037.4	0	0	0	0	0	0	0	603	903	0
543	0	0	0	0	0	0	0	200	300	0	-1.6188	-16.9141	-32.7105	-3657.92	-2197.8	1724.63	132.811	1014.83	0	0	0	0	0	0	0	603	903	0
543	1	0	0	0	0	0	0	200	300	0	-1.92398	-17.2192	-34.8467	-3841.02	-2197.8	1358.41	136.93	1013.23	0	0	0	0	0	0	0	603	903	0
543	2	0	0	0	0	0	0	200	300	0	-1.92398	-18.8977	-38.814	-4573.44	-2564.01	1816.18	133.941	1020.83	0	0	0	0	0	0	0	603	903	0
543	3	0	0	0	0	0	0	200	300	0	-1.6188	-20.5762	-43.0865	-5031.21	-2869.18	1678.85	133.409	1019.77	0	0	0	0	0	0	0	603	903	0
543	4	0	0	0	0	0	0	200	300	0	-2.68692	-18.4399	-51.3262	-5397.42	-3357.47	1770.4	134.586	1008.16	0	0	0	0	0	0	0	603	903	0
543	5	0	0	0	0	0	0	200	300	0	-3.60245	-16.6089	-59.8711	-6129.84	-3967.82	1816.18	133.727	1005.38	0	0	0	0	0	0	0	603	903	0
543	6	0	0	0	0	0	0	200	300	0	-3.60245	-18.2874	-65.9747	-7320.03	-4639.2	1770.4	129.682	1013.95	0	0	0	0	0	0	0	603	903	0
543	7	0	0	0	0	0	0	200	300	0	-1.77139	-17.0667	-73.6041	-8510.21	-4883.35	1495.74	133.654	1018.62	0	0	0	0	0	0	0	603	903	0
543	8	0	0	0	0	0	0	200	300	0	-1.92398	-15.2356	-81.2335	-8876.42	-5432.66	1221.09	133.123	1012.27	0	0	0	0	0	0	0	603	903	0
543	9	0	0	0	0	0	0	200	300	0	-2.07657	-15.2356	-89.7784	-9975.05	-5554.73	1221.09	138.128	1014.11	0	0	0	0	0	0	0	603	903	0
544	0	0	0	0	0	0	0	200	300	0	0.0596623	-15.2356	-99.544	-10707.5	-6592.33	946.427	133.775	1010.57	0	0	0	0	0	0	0	603	903	0
544	1	0	0	0	0	0	0	200	300	0	3.4166	-11.7261	-106.563	-11989.2	-6897.51	900.651	135.273	1015.51	0	0	0	0	0	0	0	603	903	0
544	2	0	0	0	0	0	0	200	300	0	2.0433	-9.13208	-111.446	-12721.6	-6958.54	580.216	137.561	1017.15	0	0	0	0	0	0	0	603	903	0
544	3	0	0	0	0	0	0	200	300	0	2.95883	-7.45362	-120.296	-13820.3	-8118.21	-14.877	132.515	1017.89	0	0	0	0	0	0	0	603	903	0
544	4	0	0	0	0	0	0	200	300	0	5.24765	-5.01221	-131.893	-14094.9	-8850.63	-335.312	132.895	1009.87	0	0	0	0	0	0	0	603	903	0
544	5	0	0	0	0	0	0	200	300	0	5.24765	-1.19751	-140.132	-15468.2	-9033.74	-335.312	135.534	1013.38	0	0	0	0	0	0	0	603	903	0
544	6	0	0	0	0	0	0	200	300	0	7.23129	-0.281985	-147.457	-16292.2	-9827.19	-930.405	133.355	1013.49	0	0	0	0	0	0	0	603	903	0
544	7	0	0	0	0	0	0	200	300	0	9.06235	-0.129397	-153.865	-17299.3	-9705.12	-793.075	136.925	1015.43	0	0	0	0	0	0	0	603	903	0
544	8	0	0	0	0	0	0	200	300	0	9.06235	2.31201	-163.021	-17940.1	-10315.5	-1113.51	136.723	1013.05	0	0	0	0	0	0	0	603	903	0
544	9	0	0	0	0	0	0	200	300	0	11.046	3.53271	-167.598	-18489.5	-10742.7	-1662.83	135.902	1013.32	0	0	0	0	0	0	0	603	903	0
545	0	0	0	0	0	0	0	200	300	0	11.9615	2.00683	-174.312	-19038.8	-10864.8	-1388.17	137.67	1012.22	0	0	0	0	0	0	0	603	903	0
545	1	0	0	0	0	0	0	200	300	0	13.4874	0.480954	-180.721	-19221.9	-11658.2	-1433.94	135.49	1009.36	0	0	0	0	0	0	0	603	903	0
545	2	0	0	0	0	0	0	200	300	0	12.2667	0.480954	-184.993	-20320.5	-11475.1	-1754.38	137.97	1012.84	0	0	0	0	0	0	0	603	903	0
545	3	0	0	0	0	0	0	200	300	0	12.7245	-1.3501	-191.707	-20778.3	-11536.2	-1479.72	139.824	1011.39	0	0	0	0	0	0	0	603	903	0
545	4	0	0	0	0	0	0	200	300	0	13.7926	-3.79151	-196.285	-21510.7	-12146.5	-1296.62	138.118	1012.59	0	0	0	0	0	0	0	603	903	0
545	5	0	0	0	0	0	0	200	300	0	12.877	-5.31739	-199.642	-21876.9	-12695.8	-1250.84	136.407	1012.58	0	0	0	0	0	0	0	603	903	0
545	6	0	0	0	0	0	0	200	300	0	12.5719	-7.6062	-208.187	-21968.5	-13001	-1021.96	137.551	1008.52	0	0	0	0	0	0	0	603	903	0
545	7	0	0	0	0	0	0	200	300	0	15.6236	-12.489	-213.069	-22334.7	-13489.3	-655.746	136.691	1007.82	0	0	0	0	0	0	0	603	903	0
545	8	0	0	0	0	0	0	200	300	0	14.8607	-15.9985	-217.647	-22792.4	-13306.2	-426.864	138.863	1007.72	0	0	0	0	0	0	0	603	903	0
545	9	0	0	0	0	0	0	200	300	0	14.2503	-18.2874	-220.088	-23433.3	-13489.3	-426.864	138.71	1009.47	0	0	0	0	0	0	0	603	903	0
546	0	0	0	0	0	0	0	200	300	0	15.1659	-23.1702	-226.192	-23891.1	-13672.4	-152.206	139.554	1008.62	0	0	0	0	0	0	0	603	903	0
546	1	0	0	0	0	0	0	200	300	0	14.0977	-26.9849	-235.652	-24348.8	-14404.8	168.228	138.873	1006.33	0	0	0	0	0	0	0	603	903	0
546	2	0	0	0	0	0	0	200	300	0	13.64	-31.5625	-240.84	-24623.5	-14710	717.545	138.922	1005.24	0	0	0	0	0	0	0	603	903	0
546	3	0	0	0	0	0	0	200	300	0	14.8607	-34.3091	-243.282	-25355.9	-14343.8	809.098	141.04	1007.22	0	0	0	0	0	0	0	603	903	0
546	4	0	0	0	0	0	0	200	300	0	15.0133	-39.0393	-249.996	-25996.8	-15320.4	763.321	138.717	1006.99	0	0	0	0	0	0	0	603	903	0
546	5	0	0	0	0	0	0	200	300	0	14.8607	-41.6333	-254.268	-26363	-15259.3	1312.64	139.987	1006.68	0	0	0	0	0	0	0	603	903	0
546	6	0	0	0	0	0	0	200	300	0	14.0977	-43.4644	-259.456	-26271.4	-15564.5	1358.41	140.011	1004.26	0	0	0	0	0	0	0	603	903	0
546	7	0	0	0	0	0	0	200	300	0	13.3348	-47.2791	-266.78	-26729.2	-16174.8	1587.3	139.37	1003.19	0	0	0	0	0	0	0	603	903	0
546	8	0	0	0	0	0	0	200	300	0	14.7081	-49.8731	-269.222	-27370.1	-15991.7	1953.51	140.6	1004.66	0	0	0	0	0	0	0	603	903	0
546	9	0	0	0	0	0	0	200	300	0	15.3185	-50.636	-274.715	-27461.6	-16235.9	2090.84	140.899	1002.96	0	0	0	0	0	0	0	603	903	0
547	0	0	0	0	0	0	0	200	300	0	14.7081	-52.3145	-278.072	-28651.8	-16480	1999.28	140.735	1006.04	0	0	0	0	0	0	0	603	903	0
547	1	0	0	0	0	0	0	200	300	0	15.0133	-53.3826	-281.429	-28468.7	-16419	2411.27	141.658	1004.16	0	0	0	0	0	0	0	603	903	0
547	2	0	0	0	0	0	0	200	300	0	14.2503	-53.6877	-287.837	-28560.3	-17090.4	2182.39	140.625	1002.22	0	0	0	0	0	0	0	603	903	0
547	3	0	0	0	0	0	0	200	300	0	14.2503	-53.8403	-292.72	-29475.8	-17822.8	2365.49	139.113	1003.7	0	0	0	0	0	0	0	603	903	0
547	4	0	0	0	0	0	0	200	300	0	15.3185	-53.6877	-303.401	-30391.3	-17883.8	2319.72	141.056	1003.17	0	0	0	0	0	0	0	603	903	0
547	5	0	0	0	0	0	0	200	300	0	16.6917	-53.23	-314.998	-30757.5	-18311.1	2136.61	141.869	1000.64	0	0	0	0	0	0	0	603	903	0
547	6	0	0	0	0	0	0	200	300	0	18.828	-53.3826	-323.848	-31947.7	-18860.4	1816.18	141.762	1001.65	0	0	0	0	0	0	0	603	903	0
547	7	0	0	0	0	0	0	200	300	0	18.9806	-53.6877	-331.172	-31856.2	-19409.7	2045.06	141.391	999.192	0	0	0	0	0	0	0	603	903	0
547	8	0	0	0	0	0	0	200	300	0	18.5228	-55.061	-339.717	-31581.5	-20020.1	2365.49	141.068	995.964	0	0	0	0	0	0	0	603	903	0
547	9	0	0	0	0	0	0	200	300	0	19.4383	-54.6033	-347.652	-32771.7	-20447.3	2319.72	141.185	997.266	0	0	0	0	0	0	0	603	903	0
548	0	0	0	0	0	0	0	200	300	0	18.5228	-56.1292	-355.892	-33229.4	-21057.7	2640.15	140.831	996.37	0	0	0	0	0	0	0	603	903	0
548	1	0	0	0	0	0	0	200	300	0	17.4547	-57.3499	-360.164	-33961.9	-21423.9	2731.7	140.516	997.296	0	0	0	0	0	0	0	603	903	0
548	2	0	0	0	0	0	0	200	300	0	17.4547	-56.7395	-364.742	-33321	-21423.9	2685.93	141.263	994.355	0	0	0	0	0	0	0	603	903	0
548	3	0	0	0	0	0	0	200	300	0	15.6236	-58.8757	-371.761	-34511.2	-22095.3	3052.14	140.566	995.832	0	0	0	0	0	0	0	603	903	0
548	4	0	0	0	0	0	0	200	300	0	16.5392	-60.7068	-375.728	-34328.1	-22156.3	3281.02	141.031	994.364	0	0	0	0	0	0	0	603	903	0
548	5	0	0	0	0	0	0	200	300	0	14.4029	-62.0801	-378.169	-34236.5	-22705.6	3509.9	139.959	993.532	0	0	0	0	0	0	0	603	903	0
548	6	0	0	0	0	0	0	200	300	0	12.4193	-64.5215	-381.526	-35060.5	-22766.6	3876.11	140.327	994.895	0	0	0	0	0	0	0	603	903	0
548	7	0	0	0	0	0	0	200	300	0	12.7245	-65.5896	-385.799	-34969	-22644.6	4059.22	141.305	993.64	0	0	0	0	0	0	0	603	903	0
548	8	0	0	0	0	0	0	200	300	0	14.2503	-68.6414	-389.461	-34602.8	-23438	3967.67	139.819	991.848	0	0	0	0	0	0	0	603	903	0
548	9	0	0	0	0	0	0	200	300	0	9.36752	-70.0146	-393.428	-34785.9	-23132.9	4242.33	141.202	991.417	0	0	0	0	0	0	0	603	903	0
549	0	0	0	0	0	0	0	200	300	0	10.1305	-71.8457	-398.006	-35060.5	-23499.1	4974.75	140.958	991.09	0	0	0	0	0	0	0	603	903	0
549	1	0	0	0	0	0	0	200	300	0	12.2667	-75.05	-399.227	-35243.6	-24475.6	4883.19	138.692	991.28	0	0	0	0	0	0	0	603	903	0
549	2	0	0	0	0	0	0	200	300	0	11.046	-75.9656	-402.889	-35609.8	-23987.3	4974.75	140.462	991.386	0	0	0	0	0	0	0	603	903	0
549	3	0	0	0	0	0	0	200	300	0	9.82529	-77.644	-406.246	-35426.7	-24475.6	5157.85	139.752	990.205	0	0	0	0	0	0	0	603	903	0
549	4	0	0	0	0	0	0	200	300	0	7.99423	-79.3225	-408.382	-34145	-24658.7	5112.08	139.618	986.61	0	0	0	0	0	0	0	603	903	0
549	5	0	0	0	0	0	0	200	300	0	8.75717	-79.6277	-412.96	-35335.2	-24597.7	5432.51	140.436	988.566	0	0	0	0	0	0	0	603	903	0
549	6	0	0	0	0	0	0	200	300	0	6.92612	-79.0173	-414.485	-35609.8	-24597.7	5478.29	140.655	988.913	0	0	0	0	0	0	0	603	903	0
549	7	0	0	0	0	0	0	200	300	0	6.01059	-81.001	-415.706	-35060.5	-24902.9	5661.39	140.095	987.34	0	0	0	0	0	0	0	603	903	0
549	8	0	0	0	0	0	0	200	300	0	6.31577	-82.5269	-416.927	-35518.3	-25269.1	5661.39	139.392	988.191	0	0	0	0	0	0	0	603	903	0
549	9	0	0	0	0	0	0	200	300	0	4.48471	-82.9846	-420.284	-35426.7	-25391.2	5890.27	139.586	987.292	0	0	0	0	0	0	0	603	903	0
550	0	0	0	0	0	0	0	200	300	0	3.56918	-82.3743	-423.03	-34785.9	-24841.8	5844.5	141.276	985.23	0	0	0	0	0	0	0	603	903	0
550	1	0	0	0	0	0	0	200	300	0	5.24765	-84.6631	-425.777	-34694.3	-25757.4	5981.83	139.505	984.485	0	0	0	0	0	0	0	603	903	0
550	2	0	0	0	0	0	0	200	300	0	2.0433	-83.9001	-426.692	-34694.3	-25696.3	6210.71	139.778	984.31	0	0	0	0	0	0	0	603	903	0
550	3	0	0	0	0	0	0	200	300	0	1.43295	-83.9001	-426.082	-34877.4	-25757.4	6256.49	139.548	984.856	0	0	0	0	0	0	0	603	903	0
550	4	0	0	0	0	0	0	200	300	0	1.73813	-85.426	-431.88	-34877.4	-26306.7	6485.37	139.088	983.757	0	0	0	0	0	0	0	603	903	0
550	5	0	0	0	0	0	0	200	300	0	0.517426	-85.1208	-434.627	-34877.4	-26550.8	6485.37	138.911	983.247	0	0	0	0	0	0	0	603	903	0
550	6	0	0	0	0	0	0	200	300	0	0.0596623	-87.8674	-439.205	-34694.3	-26733.9	6485.37	139.131	981.993	0	0	0	0	0	0	0	603	903	0
550	7	0	0	0	0	0	0	200	300	0	-0.0929256	-88.783	-440.425	-34236.5	-26550.8	6576.92	139.715	980.735	0	0	0	0	0	0	0	603	903	0
550	8	0	0	0	0	0	0	200	300	0	-0.550689	-88.1726	-442.867	-34969	-26795	6988.91	139.497	981.96	0	0	0	0	0	0	0	603	903	0
550	9	0	0	0	0	0	0	200	300	0	-1.77139	-89.3933	-447.139	-34969	-27039.1	6851.58	139.529	981.206	0	0	0	0	0	0	0	603	903	0
551	0	0	0	0	0	0	0	200	300	0	-1.46622	-91.0718	-448.36	-34511.2	-26917	6622.7	139.966	979.972	0	0	0	0	0	0	0	603	903	0
551	1	0	0	0	0	0	0	200	300	0	-2.53433	-92.7502	-452.022	-34602.8	-27405.3	7263.57	139.372	979.551	0	0	0	0	0	0	0	603	903	0
551	2	0	0	0	0	0	0	200	300	0	-4.97574	-94.5813	-457.82	-34511.2	-28137.7	7584	138.54	978.382	0	0	0	0	0	0	0	603	903	0
551	3	0	0	0	0	0	0	200	300	0	-4.06021	-94.5813	-459.041	-33595.7	-28320.8	7629.78	138.304	976.187	0	0	0	0	0	0	0	603	903	0
551	4	0	0	0	0	0	0	200	300	0	-5.73868	-97.3279	-465.145	-35060.5	-28626	7950.21	138.458	978.376	0	0	0	0	0	0	0	603	903	0
551	5	0	0	0	0	0	0	200	300	0	-8.0275	-97.6331	-464.839	-34511.2	-28626	8224.87	138.417	977.243	0	0	0	0	0	0	0	603	903	0
551	6	0	0	0	0	0	0	200	300	0	-7.41714	-98.8538	-473.384	-33687.2	-28748.1	8316.42	139.271	974.163	0	0	0	0	0	0	0	603	903	0
551	7	0	0	0	0	0	0	200	300	0	-8.18008	-99.7693	-474.605	-33870.3	-29785.7	8133.32	137.241	974.365	0	0	0	0	0	0	0	603	903	0
551	8	0	0	0	0	0	0	200	300	0	-8.63785	-101.448	-480.709	-34419.6	-29358.4	8499.53	138.927	974.602	0	0	0	0	0	0	0	603	903	0
551	9	0	0	0	0	0	0	200	300	0	-8.33267	-104.347	-482.845	-33321	-30457.1	8957.29	136.922	972.01	0	0	0	0	0	0	0	603	903	0
552	0	0	0	0	0	0	0	200	300	0	-9.40079	-104.805	-489.253	-34511.2	-29907.8	8819.96	138.871	973.539	0	0	0	0	0	0	0	603	903	0
552	1	0	0	0	0	0	0	200	300	0	-9.55338	-104.805	-493.526	-34145	-30457.1	8774.19	138.287	972.186	0	0	0	0	0	0	0	603	903	0
552	2	0	0	0	0	0	0	200	300	0	-11.0793	-106.788	-499.324	-33412.6	-30823.3	9140.4	138.27	969.916	0	0	0	0	0	0	0	603	903	0
552	3	0	0	0	0	0	0	200	300	0	-10.1637	-107.399	-500.85	-33778.8	-31555.7	9186.18	136.996	970.443	0	0	0	0	0	0	0	603	903	0
552	4	0	0	0	0	0	0	200	300	0	-11.2318	-107.399	-507.869	-33961.9	-31799.8	9140.4	137.386	969.871	0	0	0	0	0	0	0	603	903	0
552	5	0	0	0	0	0	0	200	300	0	-11.0793	-109.688	-510.005	-33961.9	-31555.7	9460.83	138.127	969.591	0	0	0	0	0	0	0	603	903	0
552	6	0	0	0	0	0	0	200	300	0	-10.9267	-111.366	-515.193	-34053.4	-31860.9	9735.49	138.157	969.098	0	0	0	0	0	0	0	603	903	0
552	7	0	0	0	0	0	0	200	300	0	-9.85855	-112.281	-518.856	-33961.9	-32410.2	9552.39	137.535	968.455	0	0	0	0	0	0	0	603	903	0
552	8	0	0	0	0	0	0	200	300	0	-11.537	-113.502	-520.992	-33137.9	-32532.3	9643.94	137.557	966.605	0	0	0	0	0	0	0	603	903	0
552	9	0	0	0	0	0	0	200	300	0	-11.6896	-113.197	-528.011	-33961.9	-33020.6	9735.49	137.462	967.32	0	0	0	0	0	0	0	603	903	0
553	0	0	0	0	0	0	0	200	300	0	-12.1474	-113.35	-531.063	-33504.1	-33203.7	10010.2	137.477	966.089	0	0	0	0	0	0	0	603	903	0
553	1	0	0	0	0	0	0	200	300	0	-13.0629	-114.723	-535.335	-33321	-33264.7	9964.37	137.862	965.243	0	0	0	0	0	0	0	603	903	0
553	2	0	0	0	0	0	0	200	300	0	-12.9103	-116.249	-539.302	-33412.6	-33630.9	9964.37	137.64	964.955	0	0	0	0	0	0	0	603	903	0
553	3	0	0	0	0	0	0	200	300	0	-14.2836	-117.622	-543.27	-33504.1	-33569.9	10193.3	138.208	964.671	0	0	0	0	0	0	0	603	903	0
553	4	0	0	0	0	0	0	200	300	0	-13.9784	-116.707	-549.068	-32954.8	-34485.4	10101.7	137.193	963.02	0	0	0	0	0	0	0	603	903	0
553	5	0	0	0	0	0	0	200	300	0	-12.4525	-118.232	-554.256	-33321	-35034.7	10239	136.79	963.118	0	0	0	0	0	0	0	603	903	0
553	6	0	0	0	0	0	0	200	300	0	-13.8258	-119.606	-559.139	-33687.2	-34790.6	10467.9	137.778	963.248	0	0	0	0	0	0	0	603	903	0
553	7	0	0	0	0	0	0	200	300	0	-14.5888	-120.521	-565.242	-33595.7	-35523	10651	137.154	962.436	0	0	0	0	0	0	0	603	903	0
553	8	0	0	0	0	0	0	200	300	0	-13.8258	-122.352	-568.904	-32313.9	-35339.9	10742.6	137.881	959.8	0	0	0	0	0	0	0	603	903	0
553	9	0	0	0	0	0	0	200	300	0	-13.3681	-120.674	-572.872	-33137.9	-35950.2	10605.2	137.246	960.845	0	0	0	0	0	0	0	603	903	0
554	0	0	0	0	0	0	0	200	300	0	-11.0793	-123.878	-580.501	-33412.6	-36560.6	10834.1	137.019	960.558	0	0	0	0	0	0	0	603	903	0
554	1	0	0	0	0	0	0	200	300	0	-12.9103	-123.726	-582.637	-33137.9	-36743.7	10925.7	136.936	959.876	0	0	0	0	0	0	0	603	903	0
554	2	0	0	0	0	0	0	200	300	0	-13.8258	-124.489	-590.572	-33046.3	-37109.9	10925.7	137.163	958.957	0	0	0	0	0	0	0	603	903	0
554	3	0	0	0	0	0	0	200	300	0	-15.0465	-126.32	-595.149	-33137.9	-36926.8	11200.3	137.954	958.68	0	0	0	0	0	0	0	603	903	0
554	4	0	0	0	0	0	0	200	300	0	-14.7414	-125.709	-601.863	-32863.2	-37598.2	10879.9	137.53	957.602	0	0	0	0	0	0	0	603	903	0
554	5	0	0	0	0	0	0	200	300	0	-13.6732	-127.235	-607.967	-32497	-38574.8	11154.6	136.551	956.452	0	0	0	0	0	0	0	603	903	0
554	6	0	0	0	0	0	0	200	300	0	-15.3517	-127.693	-613.46	-32771.7	-38818.9	10971.5	136.721	956.421	0	0	0	0	0	0	0	603	903	0
554	7	0	0	0	0	0	0	200	300	0	-14.7414	-128.456	-618.648	-33137.9	-39185.1	11429.2	136.66	956.565	0	0	0	0	0	0	0	603	903	0
554	8	0	0	0	0	0	0	200	300	0	-13.8258	-126.93	-623.836	-32588.6	-39124.1	11383.4	137.285	955.239	0	0	0	0	0	0	0	603	903	0
554	9	0	0	0	0	0	0	200	300	0	-13.9784	-129.524	-627.803	-32954.8	-39185.1	11063	137.584	955.492	0	0	0	0	0	0	0	603	903	0
555	0	0	0	0	0	0	0	200	300	0	-13.8258	-131.355	-632.686	-32863.2	-40161.7	11383.4	136.522	954.942	0	0	0	0	0	0	0	603	903	0
555	1	0	0	0	0	0	0	200	300	0	-14.2836	-131.202	-639.4	-32313.9	-39856.5	11291.9	137.666	953.538	0	0	0	0	0	0	0	603	903	0
555	2	0	0	0	0	0	0	200	300	0	-14.5888	-130.897	-646.114	-32863.2	-41260.3	11475	136.141	953.863	0	0	0	0	0	0	0	603	903	0
555	3	0	0	0	0	0	0	200	300	0	-17.0302	-130.439	-650.691	-32863.2	-40772	11887	137.34	953.505	0	0	0	0	0	0	0	603	903	0
555	4	0	0	0	0	0	0	200	300	0	-17.7931	-133.644	-655.269	-32222.4	-41138.2	11932.8	137.219	952.174	0	0	0	0	0	0	0	603	903	0
555	5	0	0	0	0	0	0	200	300	0	-16.725	-133.491	-661.678	-32497	-41870.7	11658.1	136.72	952.113	0	0	0	0	0	0	0	603	903	0
555	6	0	0	0	0	0	0	200	300	0	-18.2509	-133.949	-665.34	-32130.8	-42114.8	11749.7	136.702	951.292	0	0	0	0	0	0	0	603	903	0
555	7	0	0	0	0	0	0	200	300	0	-18.5561	-134.407	-671.138	-32680.1	-42908.3	11566.5	136.066	951.694	0	0	0	0	0	0	0	603	903	0
555	8	0	0	0	0	0	0	200	300	0	-18.2509	-136.696	-677.242	-32130.8	-43213.4	11749.7	136.192	950.444	0	0	0	0	0	0	0	603	903	0
555	9	0	0	0	0	0	0	200	300	0	-17.4879	-135.475	-682.125	-32313.9	-43091.4	12070.1	136.828	950.372	0	0	0	0	0	0	0	603	903	0
556	0	0	0	0	0	0	0	200	300	0	-19.9294	-136.39	-684.871	-31947.7	-43152.4	12207.4	136.992	949.648	0	0	0	0	0	0	0	603	903	0
556	1	0	0	0	0	0	0	200	300	0	-18.7086	-137.306	-690.059	-31489.9	-43762.8	12161.6	136.581	948.634	0	0	0	0	0	0	0	603	903	0
556	2	0	0	0	0	0	0	200	300	0	-18.7086	-136.696	-697.383	-31856.2	-44739.3	11932.8	135.847	948.68	0	0	0	0	0	0	0	603	903	0
556	3	0	0	0	0	0	0	200	300	0	-18.4035	-137.611	-704.097	-31764.6	-45410.7	12299	135.505	948.114	0	0	0	0	0	0	0	603	903	0
556	4	0	0	0	0	0	0	200	300	0	-19.7768	-138.984	-709.896	-31215.3	-45593.8	12253.2	135.774	946.972	0	0	0	0	0	0	0	603	903	0
556	5	0	0	0	0	0	0	200	300	0	-22.0656	-141.121	-713.558	-30208.2	-45899	12253.2	135.676	945.335	0	0	0	0	0	0	0	603	903	0
556	6	0	0	0	0	0	0	200	300	0	-23.2863	-141.426	-716.609	-31398.4	-45715.9	12527.9	136.205	946.815	0	0	0	0	0	0	0	603	903	0
556	7	0	0	0	0	0	0	200	300	0	-23.1337	-140.052	-719.051	-30666	-46204.2	12482.1	135.743	945.648	0	0	0	0	0	0	0	603	903	0
556	8	0	0	0	0	0	0	200	300	0	-20.9975	-143.715	-726.68	-30482.9	-46875.5	12756.7	135.494	944.948	0	0	0	0	0	0	0	603	903	0
556	9	0	0	0	0	0	0	200	300	0	-23.1337	-144.02	-727.596	-30208.2	-46936.6	12756.7	135.491	944.518	0	0	0	0	0	0	0	603	903	0
557	0	0	0	0	0	0	0	200	300	0	-22.6759	-142.952	-733.394	-30299.8	-47302.8	12711	135.502	944.314	0	0	0	0	0	0	0	603	903	0
557	1	0	0	0	0	0	0	200	300	0	-21.3026	-143.715	-733.394	-29933.6	-47241.8	12894.1	135.585	943.815	0	0	0	0	0	0	0	603	903	0
557	2	0	0	0	0	0	0	200	300	0	-21.4552	-143.409	-737.667	-30574.4	-47241.8	12802.5	135.958	944.448	0	0	0	0	0	0	0	603	903	0
557	3	0	0	0	0	0	0	200	300	0	-21.4552	-143.409	-740.108	-30025.1	-46936.6	12527.9	136.581	943.569	0	0	0	0	0	0	0	603	903	0
557	4	0	0	0	0	0	0	200	300	0	-20.9975	-142.799	-742.549	-29109.6	-47546.9	12894.1	135.968	942.202	0	0	0	0	0	0	0	603	903	0
557	5	0	0	0	0	0	0	200	300	0	-19.319	-141.121	-745.906	-30025.1	-47791.1	12939.8	135.929	943.253	0	0	0	0	0	0	0	603	903	0
557	6	0	0	0	0	0	0	200	300	0	-20.6923	-142.799	-748.958	-29109.6	-48157.3	12848.3	135.701	941.867	0	0	0	0	0	0	0	603	903	0
557	7	0	0	0	0	0	0	200	300	0	-22.3708	-142.952	-751.705	-29018	-47669	12573.6	136.585	941.603	0	0	0	0	0	0	0	603	903	0
557	8	0	0	0	0	0	0	200	300	0	-20.2345	-141.121	-755.367	-28926.5	-48950.7	12436.3	135.196	941.295	0	0	0	0	0	0	0	603	903	0
557	9	0	0	0	0	0	0	200	300	0	-21.1501	-140.205	-757.503	-28834.9	-49133.8	12665.2	135.137	941.066	0	0	0	0	0	0	0	603	903	0
558	0	0	0	0	0	0	0	200	300	0	-20.9975	-140.968	-762.386	-28560.3	-49072.8	12756.7	135.633	940.462	0	0	0	0	0	0	0	603	903	0
558	1	0	0	0	0	0	0	200	300	0	-21.1501	-141.578	-767.269	-27919.4	-49683.2	12894.1	135.247	939.388	0	0	0	0	0	0	0	603	903	0
558	2	0	0	0	0	0	0	200	300	0	-22.3708	-143.257	-770.015	-28285.6	-49439	12848.3	135.795	939.734	0	0	0	0	0	0	0	603	903	0
558	3	0	0	0	0	0	0	200	300	0	-22.8285	-142.646	-773.677	-27553.2	-49927.3	12848.3	135.468	938.613	0	0	0	0	0	0	0	603	903	0
558	4	0	0	0	0	0	0	200	300	0	-22.6759	-142.952	-777.034	-27370.1	-50476.6	12802.5	135.039	938.224	0	0	0	0	0	0	0	603	903	0
558	5	0	0	0	0	0	0	200	300	0	-22.5233	-144.02	-782.222	-27461.6	-50659.7	12848.3	135.236	938.107	0	0	0	0	0	0	0	603	903	0
558	6	0	0	0	0	0	0	200	300	0	-23.744	-145.24	-786.8	-27187	-51392.1	12894.1	134.682	937.554	0	0	0	0	0	0	0	603	903	0
558	7	0	0	0	0	0	0	200	300	0	-22.9811	-145.393	-791.378	-27187	-51697.3	13214.5	134.674	937.354	0	0	0	0	0	0	0	603	903	0
558	8	0	0	0	0	0	0	200	300	0	-24.0492	-145.088	-792.903	-27461.6	-51331.1	13122.9	135.262	937.634	0	0	0	0	0	0	0	603	903	0
558	9	0	0	0	0	0	0	200	300	0	-24.9648	-144.935	-797.481	-27095.4	-52185.6	13214.5	134.562	936.976	0	0	0	0	0	0	0	603	903	0
559	0	0	0	0	0	0	0	200	300	0	-24.2018	-146.156	-802.364	-26729.2	-51575.2	13077.2	135.721	936.313	0	0	0	0	0	0	0	603	903	0
559	1	0	0	0	0	0	0	200	300	0	-24.2018	-144.02	-804.805	-26363	-51819.4	13214.5	135.613	935.757	0	0	0	0	0	0	0	603	903	0
559	2	0	0	0	0	0	0	200	300	0	-23.1337	-144.325	-808.162	-26454.5	-52734.9	13031.4	134.747	935.734	0	0	0	0	0	0	0	603	903	0
559	3	0	0	0	0	0	0	200	300	0	-24.0492	-144.783	-808.773	-25905.2	-52307.7	12848.3	135.325	935.03	0	0	0	0	0	0	0	603	903	0
559	4	0	0	0	0	0	0	200	300	0	-24.3544	-143.257	-812.74	-26179.9	-53162.2	12848.3	134.589	935.212	0	0	0	0	0	0	0	603	903	0
559	5	0	0	0	0	0	0	200	300	0	-24.8122	-142.952	-815.792	-25630.6	-52979.1	12985.6	135.058	934.418	0	0	0	0	0	0	0	603	903	0
559	6	0	0	0	0	0	0	200	300	0	-22.9811	-144.02	-819.148	-24898.2	-53223.2	13031.4	135.026	933.395	0	0	0	0	0	0	0	603	903	0
559	7	0	0	0	0	0	0	200	300	0	-23.8966	-142.646	-821.895	-25172.8	-53955.6	13214.5	134.352	933.628	0	0	0	0	0	0	0	603	903	0
559	8	0	0	0	0	0	0	200	300	0	-24.9648	-142.341	-824.031	-24989.7	-53894.6	13031.4	134.596	933.326	0	0	0	0	0	0	0	603	903	0
559	9	0	0	0	0	0	0	200	300	0	-25.7277	-142.189	-826.168	-24623.5	-54199.8	12985.6	134.396	932.805	0	0	0	0	0	0	0	603	903	0
560	0	0	0	0	0	0	0	200	300	0	-25.5751	-141.273	-829.219	-24440.4	-53955.6	12848.3	134.932	932.474	0	0	0	0	0	0	0	603	903	0
560	1	0	0	0	0	0	0	200	300	0	-26.7958	-141.273	-831.356	-24806.6	-54077.7	12939.8	134.952	932.839	0	0	0	0	0	0	0	603	903	0
560	2	0	0	0	0	0	0	200	300	0	-26.6432	-141.426	-831.966	-23341.8	-54810.1	12939.8	134.12	931.056	0	0	0	0	0	0	0	603	903	0
560	3	0	0	0	0	0	0	200	300	0	-25.5751	-139.442	-836.544	-23799.5	-54504.9	13031.4	134.845	931.45	0	0	0	0	0	0	0	603	903	0
560	4	0	0	0	0	0	0	200	300	0	-25.8803	-140.815	-839.595	-24257.3	-55176.3	13031.4	134.282	931.892	0	0	0	0	0	0	0	603	903	0
560	5	0	0	0	0	0	0	200	300	0	-25.7277	-138.984	-839.595	-23524.9	-55176.3	12756.7	134.282	931.019	0	0	0	0	0	0	0	603	903	0
560	6	0	0	0	0	0	0	200	300	0	-27.4062	-139.29	-842.647	-23158.7	-54993.2	12665.2	134.738	930.483	0	0	0	0	0	0	0	603	903	0
560	7	0	0	0	0	0	0	200	300	0	-27.8639	-138.679	-843.563	-22426.2	-55481.5	12848.3	134.23	929.585	0	0	0	0	0	0	0	603	903	0
560	8	0	0	0	0	0	0	200	300	0	-28.1691	-138.527	-845.394	-22884	-55359.4	12939.8	134.516	930.069	0	0	0	0	0	0	0	603	903	0
560	9	0	0	0	0	0	0	200	300	0	-28.0165	-138.679	-848.445	-22243.1	-55603.6	13031.4	134.464	929.216	0	0	0	0	0	0	0	603	903	0
561	0	0	0	0	0	0	0	200	300	0	-27.5587	-139.747	-846.614	-21602.3	-56152.9	13077.2	133.674	928.516	0	0	0	0	0	0	0	603	903	0
561	1	0	0	0	0	0	0	200	300	0	-28.932	-138.374	-849.361	-22334.7	-55603.6	13168.7	134.535	929.296	0	0	0	0	0	0	0	603	903	0
561	2	0	0	0	0	0	0	200	300	0	-29.2372	-138.374	-848.14	-21602.3	-56213.9	12802.5	133.721	928.47	0	0	0	0	0	0	0	603	903	0
561	3	0	0	0	0	0	0	200	300	0	-28.7794	-138.527	-851.802	-20778.3	-56519.1	12436.3	133.648	927.393	0	0	0	0	0	0	0	603	903	0
561	4	0	0	0	0	0	0	200	300	0	-29.3898	-136.085	-851.802	-21419.1	-56091.9	12756.7	134.149	928.146	0	0	0	0	0	0	0	603	903	0
561	5	0	0	0	0	0	0	200	300	0	-28.6269	-137.611	-854.549	-21327.6	-56458.1	12939.8	133.932	927.958	0	0	0	0	0	0	0	603	903	0
561	6	0	0	0	0	0	0	200	300	0	-28.932	-137.001	-854.244	-20595.2	-56091.9	12665.2	134.337	927.109	0	0	0	0	0	0	0	603	903	0
561	7	0	0	0	0	0	0	200	300	0	-28.6269	-135.322	-856.075	-20229	-56275	12756.7	134.264	926.63	0	0	0	0	0	0	0	603	903	0
561	8	0	0	0	0	0	0	200	300	0	-29.8476	-135.17	-857.906	-20137.4	-56824.3	12802.5	133.764	926.473	0	0	0	0	0	0	0	603	903	0
561	9	0	0	0	0	0	0	200	300	0	-29.0846	-133.949	-856.38	-19679.6	-56885.3	12573.6	133.575	925.98	0	0	0	0	0	0	0	603	903	0
562	0	0	0	0	0	0	0	200	300	0	-28.7794	-133.339	-860.042	-19862.8	-57373.6	12436.3	133.29	926.095	0	0	0	0	0	0	0	603	903	0
562	1	0	0	0	0	0	0	200	300	0	-28.0165	-132.728	-862.483	-19588.1	-57068.4	12482.1	133.832	925.711	0	0	0	0	0	0	0	603	903	0
562	2	0	0	0	0	0	0	200	300	0	-29.695	-133.491	-862.178	-19130.3	-56946.3	13031.4	133.951	925.188	0	0	0	0	0	0	0	603	903	0
562	3	0	0	0	0	0	0	200	300	0	-30.0002	-131.355	-857.295	-18764.1	-56946.3	12619.4	133.574	924.888	0	0	0	0	0	0	0	603	903	0
562	4	0	0	0	0	0	0	200	300	0	-30.6105	-132.576	-862.483	-18306.4	-57068.4	12619.4	133.832	924.225	0	0	0	0	0	0	0	603	903	0
562	5	0	0	0	0	0	0	200	300	0	-29.5424	-130.134	-863.704	-17848.6	-57251.5	12253.2	133.714	923.665	0	0	0	0	0	0	0	603	903	0
562	6	0	0	0	0	0	0	200	300	0	-30.1527	-131.05	-864.62	-17757	-58045	12527.9	132.866	923.537	0	0	0	0	0	0	0	603	903	0
562	7	0	0	0	0	0	0	200	300	0	-31.6786	-131.05	-864.009	-17848.6	-57434.6	12161.6	133.525	923.658	0	0	0	0	0	0	0	603	903	0
562	8	0	0	0	0	0	0	200	300	0	-32.1364	-129.371	-865.23	-16933.1	-57800.8	12390.5	133.196	922.571	0	0	0	0	0	0	0	603	903	0
562	9	0	0	0	0	0	0	200	300	0	-29.8476	-129.677	-865.23	-16933.1	-57312.6	12299	133.76	922.571	0	0	0	0	0	0	0	603	903	0
563	0	0	0	0	0	0	0	200	300	0	-32.1364	-127.388	-864.62	-16200.6	-57556.7	12253.2	133.431	921.737	0	0	0	0	0	0	0	603	903	0
563	1	0	0	0	0	0	0	200	300	0	-32.1364	-126.777	-866.756	-16475.3	-58045	12024.3	133.032	922.008	0	0	0	0	0	0	0	603	903	0
563	2	0	0	0	0	0	0	200	300	0	-31.6786	-127.235	-865.23	-16109.1	-57434.6	11978.5	133.619	921.618	0	0	0	0	0	0	0	603	903	0
563	3	0	0	0	0	0	0	200	300	0	-32.7467	-125.404	-866.451	-16109.1	-58106	12207.4	132.938	921.592	0	0	0	0	0	0	0	603	903	0
563	4	0	0	0	0	0	0	200	300	0	-33.0519	-126.014	-866.756	-15285.1	-58289.1	11887	132.75	920.635	0	0	0	0	0	0	0	603	903	0
563	5	0	0	0	0	0	0	200	300	0	-31.526	-125.099	-864.925	-15193.6	-57739.8	12024.3	133.243	920.566	0	0	0	0	0	0	0	603	903	0
563	6	0	0	0	0	0	0	200	300	0	-31.9838	-122.657	-865.84	-15102	-58228.1	11795.4	132.75	920.442	0	0	0	0	0	0	0	603	903	0
563	7	0	0	0	0	0	0	200	300	0	-31.2209	-123.726	-866.451	-14552.7	-58045	11658.1	133.008	919.796	0	0	0	0	0	0	0	603	903	0
563	8	0	0	0	0	0	0	200	300	0	-31.9838	-122.2	-864.925	-14094.9	-58594.3	11612.3	132.255	919.296	0	0	0	0	0	0	0	603	903	0
563	9	0	0	0	0	0	0	200	300	0	-32.4416	-122.047	-866.146	-14461.1	-58350.2	11795.4	132.632	919.696	0	0	0	0	0	0	0	603	903	0
564	0	0	0	0	0	0	0	200	300	0	-33.6623	-121.589	-865.535	-14369.6	-57495.7	11475	133.572	919.602	0	0	0	0	0	0	0	603	903	0
564	1	0	0	0	0	0	0	200	300	0	-33.3571	-119.606	-863.094	-13545.6	-58289.1	11383.4	132.465	918.694	0	0	0	0	0	0	0	603	903	0
564	2	0	0	0	0	0	0	200	300	0	-31.0683	-119.148	-864.315	-13179.4	-57861.9	11475	133.055	918.248	0	0	0	0	0	0	0	603	903	0
564	3	0	0	0	0	0	0	200	300	0	-33.3571	-119.758	-861.873	-13087.9	-58045	11475	132.653	918.185	0	0	0	0	0	0	0	603	903	0
564	4	0	0	0	0	0	0	200	300	0	-33.6623	-118.08	-861.873	-12630.1	-57922.9	11520.8	132.794	917.654	0	0	0	0	0	0	0	603	903	0
564	5	0	0	0	0	0	0	200	300	0	-33.0519	-118.69	-860.042	-12447	-57800.8	11291.9	132.793	917.473	0	0	0	0	0	0	0	603	903	0
564	6	0	0	0	0	0	0	200	300	0	-34.12	-117.622	-858.516	-12263.9	-58228.1	11200.3	132.176	917.285	0	0	0	0	0	0	0	603	903	0
564	7	0	0	0	0	0	0	200	300	0	-34.2726	-115.944	-859.737	-11806.1	-58167	11154.6	132.343	916.732	0	0	0	0	0	0	0	603	903	0
564	8	0	0	0	0	0	0	200	300	0	-33.9674	-115.944	-857.601	-11165.2	-57861.9	11108.8	132.531	916.019	0	0	0	0	0	0	0	603	903	0
564	9	0	0	0	0	0	0	200	300	0	-34.4252	-114.875	-852.107	-11256.8	-58289.1	11154.6	131.594	916.211	0	0	0	0	0	0	0	603	903	0
565	0	0	0	0	0	0	0	200	300	0	-34.7304	-114.57	-854.549	-10799	-57861.9	11063	132.29	915.637	0	0	0	0	0	0	0	603	903	0
565	1	0	0	0	0	0	0	200	300	0	-34.12	-111.519	-853.939	-10615.9	-57739.8	10879.9	132.384	915.432	0	0	0	0	0	0	0	603	903	0
565	2	0	0	0	0	0	0	200	300	0	-32.7467	-112.129	-850.276	-10524.4	-58045	10513.7	131.734	915.378	0	0	0	0	0	0	0	603	903	0
565	3	0	0	0	0	0	0	200	300	0	-35.7985	-110.908	-850.887	-10615.9	-57251.5	10559.5	132.715	915.476	0	0	0	0	0	0	0	603	903	0
565	4	0	0	0	0	0	0	200	300	0	-34.12	-111.824	-849.361	-9517.29	-58106	10605.2	131.589	914.205	0	0	0	0	0	0	0	603	903	0
565	5	0	0	0	0	0	0	200	300	0	-35.0356	-110.603	-848.14	-9791.95	-57129.4	10467.9	132.642	914.545	0	0	0	0	0	0	0	603	903	0
565	6	0	0	0	0	0	0	200	300	0	-35.9511	-110.145	-843.563	-9608.84	-57373.6	10513.7	131.987	914.391	0	0	0	0	0	0	0	603	903	0
565	7	0	0	0	0	0	0	200	300	0	-35.0356	-109.84	-843.563	-9242.63	-56946.3	10467.9	132.493	913.957	0	0	0	0	0	0	0	603	903	0
565	8	0	0	0	0	0	0	200	300	0	-34.883	-107.551	-841.732	-8693.32	-57190.5	10239	132.056	913.328	0	0	0	0	0	0	0	603	903	0
565	9	0	0	0	0	0	0	200	300	0	-35.1881	-108.314	-841.732	-8235.55	-57068.4	10101.7	132.201	912.784	0	0	0	0	0	0	0	603	903	0
566	0	0	0	0	0	0	0	200	300	0	-34.883	-107.246	-839.9	-8052.45	-57617.7	10193.3	131.399	912.587	0	0	0	0	0	0	0	603	903	0
566	1	0	0	0	0	0	0	200	300	0	-34.2726	-105.262	-838.069	-8052.45	-57434.6	10147.5	131.468	912.608	0	0	0	0	0	0	0	603	903	0
566	2	0	0	0	0	0	0	200	300	0	-36.2563	-105.72	-836.544	-7960.9	-57251.5	9918.6	131.562	912.516	0	0	0	0	0	0	0	603	903	0
566	3	0	0	0	0	0	0	200	300	0	-37.1718	-105.415	-831.356	-7136.92	-57373.6	10147.5	130.988	911.585	0	0	0	0	0	0	0	603	903	0
566	4	0	0	0	0	0	0	200	300	0	-35.3407	-103.431	-832.271	-6953.82	-56519.1	9735.49	132.091	911.355	0	0	0	0	0	0	0	603	903	0
566	5	0	0	0	0	0	0	200	300	0	-35.9511	-103.584	-831.356	-6404.5	-56458.1	9781.27	132.089	910.704	0	0	0	0	0	0	0	603	903	0
566	6	0	0	0	0	0	0	200	300	0	-36.5614	-101.6	-826.168	-6404.5	-56458.1	9643.94	131.663	910.752	0	0	0	0	0	0	0	603	903	0
566	7	0	0	0	0	0	0	200	300	0	-35.0356	-100.99	-824.947	-6404.5	-57007.4	9323.5	130.896	910.764	0	0	0	0	0	0	0	603	903	0
566	8	0	0	0	0	0	0	200	300	0	-36.1037	-98.7012	-822.811	-6404.5	-56763.2	9323.5	131.013	910.784	0	0	0	0	0	0	0	603	903	0
566	9	0	0	0	0	0	0	200	300	0	-36.2563	-99.3115	-820.064	-5031.21	-56275	9369.28	131.377	909.135	0	0	0	0	0	0	0	603	903	0
567	0	0	0	0	0	0	0	200	300	0	-35.9511	-98.5486	-816.707	-5397.42	-56519.1	9415.06	130.796	909.609	0	0	0	0	0	0	0	603	903	0
567	1	0	0	0	0	0	0	200	300	0	-35.4933	-97.9382	-816.402	-5580.52	-55908.7	8957.29	131.518	909.836	0	0	0	0	0	0	0	603	903	0
567	2	0	0	0	0	0	0	200	300	0	-35.7985	-97.0227	-813.35	-5488.97	-55847.7	8865.74	131.336	909.749	0	0	0	0	0	0	0	603	903	0
567	3	0	0	0	0	0	0	200	300	0	-35.6459	-97.1753	-812.435	-5122.76	-56213.9	8911.52	130.808	909.305	0	0	0	0	0	0	0	603	903	0
567	4	0	0	0	0	0	0	200	300	0	-36.2563	-95.802	-808.467	-4939.65	-55176.3	9048.85	131.752	909.11	0	0	0	0	0	0	0	603	903	0
567	5	0	0	0	0	0	0	200	300	0	-36.5614	-93.9709	-808.467	-4756.55	-55908.7	8774.19	130.846	908.883	0	0	0	0	0	0	0	603	903	0
567	6	0	0	0	0	0	0	200	300	0	-35.1881	-93.6658	-805.416	-3749.47	-55237.4	8682.64	131.418	907.655	0	0	0	0	0	0	0	603	903	0
567	7	0	0	0	0	0	0	200	300	0	-35.3407	-91.9873	-801.448	-4207.23	-55054.3	8453.75	131.307	908.25	0	0	0	0	0	0	0	603	903	0
567	8	0	0	0	0	0	0	200	300	0	-35.6459	-91.6821	-799.617	-4298.79	-55298.4	8636.86	130.844	908.376	0	0	0	0	0	0	0	603	903	0
567	9	0	0	0	0	0	0	200	300	0	-35.1881	-91.377	-795.955	-3932.57	-54810.1	8316.42	131.139	907.941	0	0	0	0	0	0	0	603	903	0
568	0	0	0	0	0	0	0	200	300	0	-35.1881	-89.6985	-793.514	-3657.92	-55115.3	8224.87	130.543	907.61	0	0	0	0	0	0	0	603	903	0
568	1	0	0	0	0	0	0	200	300	0	-34.7304	-89.3933	-792.293	-3108.6	-54627	8087.54	131.052	906.924	0	0	0	0	0	0	0	603	903	0
568	2	0	0	0	0	0	0	200	300	0	-34.7304	-88.6304	-788.631	-2467.73	-54566	8087.54	130.809	906.129	0	0	0	0	0	0	0	603	903	0
568	3	0	0	0	0	0	0	200	300	0	-34.2726	-86.3416	-786.19	-3017.05	-54504.9	7812.88	130.672	906.838	0	0	0	0	0	0	0	603	903	0
568	4	0	0	0	0	0	0	200	300	0	-34.5778	-86.6467	-783.748	-2925.49	-54077.7	7995.99	131.001	906.733	0	0	0	0	0	0	0	603	903	0
568	5	0	0	0	0	0	0	200	300	0	-34.5778	-85.8838	-780.391	-2193.07	-54382.9	7995.99	130.313	905.81	0	0	0	0	0	0	0	603	903	0
568	6	0	0	0	0	0	0	200	300	0	-34.4252	-84.6631	-778.865	-2650.84	-54199.8	7767.11	130.412	906.404	0	0	0	0	0	0	0	603	903	0
568	7	0	0	0	0	0	0	200	300	0	-35.3407	-84.2053	-774.288	-1826.86	-53467.3	7675.55	130.946	905.359	0	0	0	0	0	0	0	603	903	0
568	8	0	0	0	0	0	0	200	300	0	-35.0356	-82.3743	-771.846	-1826.86	-53955.6	7492.45	130.095	905.367	0	0	0	0	0	0	0	603	903	0
568	9	0	0	0	0	0	0	200	300	0	-33.3571	-82.832	-770.626	-1643.76	-53345.3	7446.67	130.777	905.133	0	0	0	0	0	0	0	603	903	0
569	0	0	0	0	0	0	0	200	300	0	-35.0356	-81.4587	-766.963	-2101.52	-52918	7263.57	131.003	905.74	0	0	0	0	0	0	0	603	903	0
569	1	0	0	0	0	0	0	200	300	0	-35.4933	-80.0854	-764.827	-1185.99	-52979.1	7446.67	130.731	904.551	0	0	0	0	0	0	0	603	903	0
569	2	0	0	0	0	0	0	200	300	0	-34.4252	-80.3906	-761.775	-728.229	-52796	6988.91	130.694	903.956	0	0	0	0	0	0	0	603	903	0
569	3	0	0	0	0	0	0	200	300	0	-35.1881	-78.5596	-759.029	-362.018	-52979.1	6988.91	130.202	903.477	0	0	0	0	0	0	0	603	903	0
569	4	0	0	0	0	0	0	200	300	0	-34.883	-76.7285	-756.587	-362.018	-53162.2	6760.03	129.734	903.479	0	0	0	0	0	0	0	603	903	0
569	5	0	0	0	0	0	0	200	300	0	-34.2726	-77.1863	-752.62	-453.571	-52307.7	6943.13	130.499	903.603	0	0	0	0	0	0	0	603	903	0
569	6	0	0	0	0	0	0	200	300	0	-34.5778	-76.2708	-750.179	-453.571	-52063.5	6897.35	130.599	903.605	0	0	0	0	0	0	0	603	903	0
569	7	0	0	0	0	0	0	200	300	0	-35.1881	-75.813	-746.517	-87.3596	-51880.4	6714.25	130.503	903.117	0	0	0	0	0	0	0	603	903	0
569	8	0	0	0	0	0	0	200	300	0	-33.6623	-75.05	-741.939	553.51	-52246.6	6531.14	129.581	902.254	0	0	0	0	0	0	0	603	903	0
569	9	0	0	0	0	0	0	200	300	0	-33.3571	-72.9138	-741.329	95.7459	-52124.6	6393.81	129.688	902.871	0	0	0	0	0	0	0	603	903	0
570	0	0	0	0	0	0	0	200	300	0	-33.8148	-71.5405	-737.972	461.957	-51697.3	6348.04	129.947	902.374	0	0	0	0	0	0	0	603	903	0
570	1	0	0	0	0	0	0	200	300	0	-33.0519	-71.0828	-734.92	736.615	-51758.4	6210.71	129.573	901.998	0	0	0	0	0	0	0	603	903	0
570	2	0	0	0	0	0	0	200	300	0	-33.3571	-70.9302	-732.479	828.168	-50903.9	6531.14	130.505	901.869	0	0	0	0	0	0	0	603	903	0
570	3	0	0	0	0	0	0	200	300	0	-34.4252	-70.4724	-729.122	1102.83	-50781.8	5798.72	130.352	901.488	0	0	0	0	0	0	0	603	903	0
570	4	0	0	0	0	0	0	200	300	0	-32.7467	-68.1836	-725.46	1926.8	-51209	5844.5	129.412	900.344	0	0	0	0	0	0	0	603	903	0
570	5	0	0	0	0	0	0	200	300	0	-33.3571	-68.1836	-725.154	1560.59	-50476.6	5661.39	130.392	900.848	0	0	0	0	0	0	0	603	903	0
570	6	0	0	0	0	0	0	200	300	0	-33.6623	-67.4207	-719.966	1560.59	-50903.9	6027.6	129.297	900.832	0	0	0	0	0	0	0	603	903	0
570	7	0	0	0	0	0	0	200	300	0	-34.12	-66.5051	-719.356	2018.35	-50110.4	5844.5	130.34	900.194	0	0	0	0	0	0	0	603	903	0
570	8	0	0	0	0	0	0	200	300	0	-33.6623	-66.6577	-714.778	2384.57	-49805.2	5844.5	130.321	899.664	0	0	0	0	0	0	0	603	903	0
570	9	0	0	0	0	0	0	200	300	0	-31.6786	-65.2844	-711.421	2109.91	-50354.5	5569.84	129.22	900.034	0	0	0	0	0	0	0	603	903	0
571	0	0	0	0	0	0	0	200	300	0	-33.3571	-64.3689	-710.201	2476.12	-49744.2	5569.84	129.958	899.514	0	0	0	0	0	0	0	603	903	0
571	1	0	0	0	0	0	0	200	300	0	-32.289	-63.606	-706.233	3574.75	-50110.4	5478.29	129.046	897.938	0	0	0	0	0	0	0	603	903	0
571	2	0	0	0	0	0	0	200	300	0	-32.1364	-62.6904	-705.013	2933.88	-49439	5386.73	129.875	898.839	0	0	0	0	0	0	0	603	903	0
571	3	0	0	0	0	0	0	200	300	0	-33.2045	-63.1482	-701.961	3116.99	-49255.9	5569.84	129.831	898.56	0	0	0	0	0	0	0	603	903	0
571	4	0	0	0	0	0	0	200	300	0	-32.289	-61.4697	-698.299	3300.09	-49622.1	5157.85	128.939	898.274	0	0	0	0	0	0	0	603	903	0
571	5	0	0	0	0	0	0	200	300	0	-31.8312	-60.4016	-695.247	3940.96	-49133.8	4745.87	129.329	897.332	0	0	0	0	0	0	0	603	903	0
571	6	0	0	0	0	0	0	200	300	0	-33.0519	-59.7913	-693.416	3757.86	-49194.9	4883.19	129.054	897.581	0	0	0	0	0	0	0	603	903	0
571	7	0	0	0	0	0	0	200	300	0	-31.526	-59.1809	-690.669	3940.96	-49133.8	5432.51	128.861	897.294	0	0	0	0	0	0	0	603	903	0
571	8	0	0	0	0	0	0	200	300	0	-32.1364	-58.8757	-688.228	4032.52	-48340.4	4883.19	129.761	897.141	0	0	0	0	0	0	0	603	903	0
571	9	0	0	0	0	0	0	200	300	0	-33.0519	-58.1128	-683.65	4307.17	-48584.5	5020.52	128.934	896.7	0	0	0	0	0	0	0	603	903	0
572	0	0	0	0	0	0	0	200	300	0	-33.3571	-56.5869	-681.819	4124.07	-48035.2	4654.31	129.549	896.951	0	0	0	0	0	0	0	603	903	0
572	1	0	0	0	0	0	0	200	300	0	-31.526	-57.0447	-679.073	4948.04	-48035.2	4562.76	129.264	895.714	0	0	0	0	0	0	0	603	903	0
572	2	0	0	0	0	0	0	200	300	0	-32.5941	-54.7559	-677.242	5131.15	-48279.4	4242.33	128.712	895.424	0	0	0	0	0	0	0	603	903	0
572	3	0	0	0	0	0	0	200	300	0	-30.4579	-54.2981	-674.8	5222.7	-47791.1	4562.76	129.177	895.26	0	0	0	0	0	0	0	603	903	0
572	4	0	0	0	0	0	0	200	300	0	-31.526	-54.2981	-670.223	5588.91	-48157.3	4562.76	128.147	894.661	0	0	0	0	0	0	0	603	903	0
572	5	0	0	0	0	0	0	200	300	0	-31.8312	-53.5352	-668.392	4856.49	-47791.1	4333.88	128.498	895.734	0	0	0	0	0	0	0	603	903	0
572	6	0	0	0	0	0	0	200	300	0	-31.8312	-52.3145	-664.424	5863.57	-47180.7	4105	128.99	894.175	0	0	0	0	0	0	0	603	903	0
572	7	0	0	0	0	0	0	200	300	0	-31.2209	-52.1619	-662.898	5772.02	-47058.6	4196.55	129.011	894.293	0	0	0	0	0	0	0	603	903	0
572	8	0	0	0	0	0	0	200	300	0	-31.8312	-50.4834	-661.373	5863.57	-47241.8	3967.67	128.57	894.134	0	0	0	0	0	0	0	603	903	0
572	9	0	0	0	0	0	0	200	300	0	-32.289	-50.4834	-658.321	5772.02	-47302.8	3921.89	128.146	894.232	0	0	0	0	0	0	0	603	903	0
573	0	0	0	0	0	0	0	200	300	0	-30.9157	-48.6523	-653.438	7053.76	-47119.7	4059.22	127.89	892.205	0	0	0	0	0	0	0	603	903	0
573	1	0	0	0	0	0	0	200	300	0	-31.8312	-48.042	-651.912	5863.57	-46326.2	3509.9	128.938	894.006	0	0	0	0	0	0	0	603	903	0
573	2	0	0	0	0	0	0	200	300	0	-29.3898	-47.4316	-648.25	6595.99	-46692.4	3509.9	127.972	892.825	0	0	0	0	0	0	0	603	903	0
573	3	0	0	0	0	0	0	200	300	0	-31.2209	-46.5161	-645.809	7053.76	-46021.1	3555.68	128.739	892.078	0	0	0	0	0	0	0	603	903	0
573	4	0	0	0	0	0	0	200	300	0	-30.1527	-46.5161	-641.231	6962.2	-45837.9	3693.01	128.516	892.142	0	0	0	0	0	0	0	603	903	0
573	5	0	0	0	0	0	0	200	300	0	-31.0683	-46.0584	-640.926	7053.76	-46692.4	3601.46	127.148	891.995	0	0	0	0	0	0	0	603	903	0
573	6	0	0	0	0	0	0	200	300	0	-30.4579	-44.2273	-636.348	7877.73	-46082.1	3464.13	127.584	890.62	0	0	0	0	0	0	0	603	903	0
573	7	0	0	0	0	0	0	200	300	0	-30.4579	-44.3799	-634.822	7511.52	-45960	3281.02	127.602	891.168	0	0	0	0	0	0	0	603	903	0
573	8	0	0	0	0	0	0	200	300	0	-30.4579	-44.3799	-632.076	7603.07	-46021.1	3097.92	127.191	890.971	0	0	0	0	0	0	0	603	903	0
573	9	0	0	0	0	0	0	200	300	0	-30.6105	-42.854	-631.771	8518.6	-45471.7	3418.35	128.025	889.516	0	0	0	0	0	0	0	603	903	0
574	0	0	0	0	0	0	0	200	300	0	-30.4579	-42.7014	-628.719	7969.28	-45593.8	3097.92	127.481	890.325	0	0	0	0	0	0	0	603	903	0
574	1	0	0	0	0	0	0	200	300	0	-31.3734	-41.6333	-623.836	7969.28	-45044.5	3097.92	127.794	890.225	0	0	0	0	0	0	0	603	903	0
574	2	0	0	0	0	0	0	200	300	0	-31.2209	-40.26	-621.7	8427.04	-44861.4	3189.47	127.841	889.445	0	0	0	0	0	0	0	603	903	0
574	3	0	0	0	0	0	0	200	300	0	-30.0002	-40.5652	-618.343	9251.02	-44983.5	2914.81	127.252	888.039	0	0	0	0	0	0	0	603	903	0
574	4	0	0	0	0	0	0	200	300	0	-31.2209	-39.1919	-614.07	9159.47	-44251	2823.26	127.938	888.084	0	0	0	0	0	0	0	603	903	0
574	5	0	0	0	0	0	0	200	300	0	-30.4579	-39.3445	-614.681	9525.68	-45044.5	2823.26	126.719	887.503	0	0	0	0	0	0	0	603	903	0
574	6	0	0	0	0	0	0	200	300	0	-26.9484	-38.429	-608.577	9434.13	-45471.7	2869.03	125.282	887.498	0	0	0	0	0	0	0	603	903	0
574	7	0	0	0	0	0	0	200	300	0	-29.8476	-37.666	-608.882	9434.13	-44129	2640.15	127.525	887.506	0	0	0	0	0	0	0	603	903	0
574	8	0	0	0	0	0	0	200	300	0	-30.0002	-38.1238	-605.22	9891.89	-44251	2411.27	126.884	886.656	0	0	0	0	0	0	0	603	903	0
574	9	0	0	0	0	0	0	200	300	0	-29.3898	-37.0557	-602.779	10075	-43640.7	2273.94	127.601	886.286	0	0	0	0	0	0	0	603	903	0
575	0	0	0	0	0	0	0	200	300	0	-29.2372	-36.1401	-600.643	10441.2	-44190	2228.16	126.429	885.617	0	0	0	0	0	0	0	603	903	0
575	1	0	0	0	0	0	0	200	300	0	-30.1527	-35.9876	-598.506	10258.1	-43945.9	2365.49	126.574	885.86	0	0	0	0	0	0	0	603	903	0
575	2	0	0	0	0	0	0	200	300	0	-28.7794	-35.072	-596.065	9983.44	-43396.5	2365.49	127.195	886.251	0	0	0	0	0	0	0	603	903	0
575	3	0	0	0	0	0	0	200	300	0	-29.2372	-34.9194	-593.624	10075	-43579.6	2045.06	126.587	886.028	0	0	0	0	0	0	0	603	903	0
575	4	0	0	0	0	0	0	200	300	0	-30.7631	-33.5461	-589.656	10899	-43091.4	1907.73	126.921	884.516	0	0	0	0	0	0	0	603	903	0
575	5	0	0	0	0	0	0	200	300	0	-30.1527	-32.478	-589.351	11265.2	-43030.3	1953.51	126.987	883.885	0	0	0	0	0	0	0	603	903	0
575	6	0	0	0	0	0	0	200	300	0	-27.8639	-32.3254	-587.215	11265.2	-43213.4	1861.95	126.41	883.816	0	0	0	0	0	0	0	603	903	0
575	7	0	0	0	0	0	0	200	300	0	-29.2372	-31.7151	-583.248	11082.1	-42664.1	1907.73	126.851	883.999	0	0	0	0	0	0	0	603	903	0
575	8	0	0	0	0	0	0	200	300	0	-29.695	-31.5625	-581.417	11265.2	-43213.4	1770.4	125.676	883.625	0	0	0	0	0	0	0	603	903	0
575	9	0	0	0	0	0	0	200	300	0	-26.6432	-31.1047	-578.67	11722.9	-42420	1770.4	126.694	882.742	0	0	0	0	0	0	0	603	903	0
576	0	0	0	0	0	0	0	200	300	0	-29.8476	-29.2737	-577.449	12272.3	-42542	1633.07	126.328	881.747	0	0	0	0	0	0	0	603	903	0
576	1	0	0	0	0	0	0	200	300	0	-29.695	-29.884	-575.008	12638.5	-42725.2	1449.97	125.696	881.02	0	0	0	0	0	0	0	603	903	0
576	2	0	0	0	0	0	0	200	300	0	-28.4743	-28.5107	-572.872	12455.4	-42420	1358.41	125.952	881.258	0	0	0	0	0	0	0	603	903	0
576	3	0	0	0	0	0	0	200	300	0	-28.4743	-27.5952	-566.158	12272.3	-42725.2	1541.52	124.535	881.324	0	0	0	0	0	0	0	603	903	0
576	4	0	0	0	0	0	0	200	300	0	-28.932	-28.053	-567.073	12638.5	-41321.3	1221.09	127.132	880.713	0	0	0	0	0	0	0	603	903	0
576	5	0	0	0	0	0	0	200	300	0	-28.4743	-26.2219	-561.58	12638.5	-41504.4	1312.64	126.093	880.495	0	0	0	0	0	0	0	603	903	0
576	6	0	0	0	0	0	0	200	300	0	-28.4743	-26.5271	-564.632	12730	-41931.7	1266.86	125.736	880.454	0	0	0	0	0	0	0	603	903	0
576	7	0	0	0	0	0	0	200	300	0	-28.4743	-25.6116	-558.528	13096.2	-41565.5	1037.98	125.58	879.552	0	0	0	0	0	0	0	603	903	0
576	8	0	0	0	0	0	0	200	300	0	-26.9484	-25.1538	-559.444	13187.8	-42053.8	1083.76	124.829	879.427	0	0	0	0	0	0	0	603	903	0
576	9	0	0	0	0	0	0	200	300	0	-27.5587	-25.459	-556.697	12730	-41809.6	946.427	124.897	880.133	0	0	0	0	0	0	0	603	903	0
577	0	0	0	0	0	0	0	200	300	0	-27.8639	-24.696	-555.171	13279.3	-41077.2	1037.98	126.01	879.081	0	0	0	0	0	0	0	603	903	0
577	1	0	0	0	0	0	0	200	300	0	-26.9484	-23.7805	-553.34	13920.2	-41016.2	992.203	125.875	877.843	0	0	0	0	0	0	0	603	903	0
577	2	0	0	0	0	0	0	200	300	0	-26.4906	-23.1702	-549.983	13828.7	-40955.1	671.769	125.534	877.856	0	0	0	0	0	0	0	603	903	0
577	3	0	0	0	0	0	0	200	300	0	-24.6596	-22.2546	-549.678	13828.7	-41077.2	625.992	125.27	877.842	0	0	0	0	0	0	0	603	903	0
577	4	0	0	0	0	0	0	200	300	0	-25.1173	-23.1702	-547.542	14835.7	-41443.4	671.769	124.31	875.905	0	0	0	0	0	0	0	603	903	0
577	5	0	0	0	0	0	0	200	300	0	-25.7277	-21.7969	-544.49	14103.3	-40527.9	534.44	125.567	877.098	0	0	0	0	0	0	0	603	903	0
577	6	0	0	0	0	0	0	200	300	0	-26.7958	-21.3391	-543.27	14652.6	-40650	580.216	125.175	876.029	0	0	0	0	0	0	0	603	903	0
577	7	0	0	0	0	0	0	200	300	0	-25.8803	-21.4917	-541.439	14378	-40283.7	397.11	125.599	876.445	0	0	0	0	0	0	0	603	903	0
577	8	0	0	0	0	0	0	200	300	0	-24.9648	-19.8132	-539.913	14835.7	-40283.7	168.228	125.388	875.522	0	0	0	0	0	0	0	603	903	0
577	9	0	0	0	0	0	0	200	300	0	-26.0329	-19.6606	-537.471	14652.6	-40711	122.452	124.255	875.738	0	0	0	0	0	0	0	603	903	0
578	0	0	0	0	0	0	0	200	300	0	-24.6596	-19.5081	-533.504	14835.7	-40405.8	305.558	124.263	875.192	0	0	0	0	0	0	0	603	903	0
578	1	0	0	0	0	0	0	200	300	0	-24.6596	-18.8977	-535.03	14835.7	-40588.9	442.887	124.137	875.271	0	0	0	0	0	0	0	603	903	0
578	2	0	0	0	0	0	0	200	300	0	-26.1855	-18.4399	-531.368	15018.8	-40222.7	305.558	124.303	874.736	0	0	0	0	0	0	0	603	903	0
578	3	0	0	0	0	0	0	200	300	0	-24.3544	-17.2192	-528.621	15842.8	-39551.3	76.6757	125.18	873.03	0	0	0	0	0	0	0	603	903	0
578	4	0	0	0	0	0	0	200	300	0	-24.6596	-16.9141	-529.537	15385.1	-39734.4	168.228	124.964	873.946	0	0	0	0	0	0	0	603	903	0
578	5	0	0	0	0	0	0	200	300	0	-22.8285	-16.6089	-527.095	15842.8	-39856.5	-106.43	124.385	872.943	0	0	0	0	0	0	0	603	903	0
578	6	0	0	0	0	0	0	200	300	0	-24.0492	-15.9985	-526.79	16025.9	-39856.5	-197.982	124.341	872.578	0	0	0	0	0	0	0	603	903	0
578	7	0	0	0	0	0	0	200	300	0	-23.8966	-17.0667	-524.044	16025.9	-39673.4	-60.6534	124.294	872.419	0	0	0	0	0	0	0	603	903	0
578	8	0	0	0	0	0	0	200	300	0	-22.9811	-14.7778	-521.297	16025.9	-38879.9	-197.982	125.417	872.258	0	0	0	0	0	0	0	603	903	0
578	9	0	0	0	0	0	0	200	300	0	-23.4389	-14.0149	-517.94	16758.3	-39673.4	-426.864	123.402	870.644	0	0	0	0	0	0	0	603	903	0
579	0	0	0	0	0	0	0	200	300	0	-23.1337	-14.0149	-519.466	16392.1	-39551.3	-472.641	123.862	871.444	0	0	0	0	0	0	0	603	903	0
579	1	0	0	0	0	0	0	200	300	0	-23.5915	-14.0149	-515.499	16392.1	-39490.3	-426.864	123.394	871.201	0	0	0	0	0	0	0	603	903	0
579	2	0	0	0	0	0	0	200	300	0	-23.4389	-13.252	-517.94	16849.9	-39551.3	-472.641	123.637	870.467	0	0	0	0	0	0	0	603	903	0
579	3	0	0	0	0	0	0	200	300	0	-23.2863	-13.0994	-514.888	16666.8	-38757.9	-381.088	124.726	870.63	0	0	0	0	0	0	0	603	903	0
579	4	0	0	0	0	0	0	200	300	0	-23.5915	-12.1838	-514.278	16300.6	-39368.2	-701.523	123.45	871.304	0	0	0	0	0	0	0	603	903	0
579	5	0	0	0	0	0	0	200	300	0	-22.9811	-11.8787	-512.142	17490.8	-39185.1	-884.628	123.488	868.848	0	0	0	0	0	0	0	603	903	0
579	6	0	0	0	0	0	0	200	300	0	-22.6759	-11.4209	-510.311	17765.4	-38879.9	-747.299	123.811	868.187	0	0	0	0	0	0	0	603	903	0
579	7	0	0	0	0	0	0	200	300	0	-23.4389	-10.9631	-511.226	16849.9	-39307.2	-747.299	123.112	870.04	0	0	0	0	0	0	0	603	903	0
579	8	0	0	0	0	0	0	200	300	0	-22.9811	-10.8105	-508.174	17124.6	-38757.9	-609.97	123.731	869.302	0	0	0	0	0	0	0	603	903	0
579	9	0	0	0	0	0	0	200	300	0	-20.3871	-10.2002	-506.648	17673.9	-38757.9	-976.181	123.501	868.116	0	0	0	0	0	0	0	603	903	0
580	0	0	0	0	0	0	0	200	300	0	-22.6759	-10.2002	-505.733	17765.4	-39124.1	-884.628	122.639	867.872	0	0	0	0	0	0	0	603	903	0
580	1	0	0	0	0	0	0	200	300	0	-22.8285	-9.13208	-505.428	18223.2	-38391.7	-1159.29	124.041	866.945	0	0	0	0	0	0	0	603	903	0
580	2	0	0	0	0	0	0	200	300	0	-21.3026	-8.82691	-505.428	18314.7	-39124.1	-1021.96	122.592	866.764	0	0	0	0	0	0	0	603	903	0
580	3	0	0	0	0	0	0	200	300	0	-22.5233	-8.36914	-503.292	18314.7	-39124.1	-1021.96	122.264	866.61	0	0	0	0	0	0	0	603	903	0
580	4	0	0	0	0	0	0	200	300	0	-22.6759	-8.36914	-501.461	18040.1	-38391.7	-1067.73	123.44	867.025	0	0	0	0	0	0	0	603	903	0
580	5	0	0	0	0	0	0	200	300	0	-20.9975	-7.91138	-501.766	18040.1	-38818.9	-1205.06	122.635	867.047	0	0	0	0	0	0	0	603	903	0
580	6	0	0	0	0	0	0	200	300	0	-20.5397	-7.75879	-499.629	18314.7	-38391.7	-1662.83	123.16	866.343	0	0	0	0	0	0	0	603	903	0
580	7	0	0	0	0	0	0	200	300	0	-22.3708	-6.53809	-499.324	18864.1	-38330.6	-1250.84	123.235	865.221	0	0	0	0	0	0	0	603	903	0
580	8	0	0	0	0	0	0	200	300	0	-20.5397	-7.6062	-500.24	18955.6	-38879.9	-1525.5	122.277	865.107	0	0	0	0	0	0	0	603	903	0
580	9	0	0	0	0	0	0	200	300	0	-19.9294	-5.46997	-497.798	18772.5	-38941	-1388.17	121.774	865.289	0	0	0	0	0	0	0	603	903	0
581	0	0	0	0	0	0	0	200	300	0	-19.319	-6.08033	-493.831	18864.1	-38818.9	-1525.5	121.392	864.801	0	0	0	0	0	0	0	603	903	0
581	1	0	0	0	0	0	0	200	300	0	-20.0819	-5.46997	-495.052	19504.9	-38941	-1388.17	121.34	863.6	0	0	0	0	0	0	0	603	903	0
581	2	0	0	0	0	0	0	200	300	0	-20.6923	-4.24927	-495.052	19413.4	-38330.6	-1662.83	122.573	863.785	0	0	0	0	0	0	0	603	903	0
581	3	0	0	0	0	0	0	200	300	0	-20.8449	-3.94409	-494.441	19504.9	-39002	-1800.16	121.119	863.552	0	0	0	0	0	0	0	603	903	0
581	4	0	0	0	0	0	0	200	300	0	-19.7768	-3.79151	-493.526	19321.8	-38330.6	-1800.16	122.333	863.849	0	0	0	0	0	0	0	603	903	0
581	5	0	0	0	0	0	0	200	300	0	-19.319	-4.09668	-493.526	19321.8	-38879.9	-1708.6	121.22	863.849	0	0	0	0	0	0	0	603	903	0
581	6	0	0	0	0	0	0	200	300	0	-20.6923	-3.48633	-491.695	19779.6	-38208.6	-1845.93	122.292	862.773	0	0	0	0	0	0	0	603	903	0
581	7	0	0	0	0	0	0	200	300	0	-20.9975	-2.41822	-491.085	20237.3	-38330.6	-2029.04	121.947	861.791	0	0	0	0	0	0	0	603	903	0
581	8	0	0	0	0	0	0	200	300	0	-19.7768	-2.41822	-492	20054.2	-38574.8	-2029.04	121.596	862.239	0	0	0	0	0	0	0	603	903	0
581	9	0	0	0	0	0	0	200	300	0	-18.7086	-2.11304	-489.864	20054.2	-38574.8	-1800.16	121.254	862.062	0	0	0	0	0	0	0	603	903	0
582	0	0	0	0	0	0	0	200	300	0	-19.9294	-1.50269	-490.779	19871.1	-38941	-2166.37	120.655	862.511	0	0	0	0	0	0	0	603	903	0
582	1	0	0	0	0	0	0	200	300	0	-19.1664	-2.26563	-489.864	20237.3	-38330.6	-2303.7	121.753	861.688	0	0	0	0	0	0	0	603	903	0
582	2	0	0	0	0	0	0	200	300	0	-19.1664	-1.04492	-488.948	20237.3	-38391.7	-2120.59	121.481	861.611	0	0	0	0	0	0	0	603	903	0
582	3	0	0	0	0	0	0	200	300	0	-18.7086	-0.281985	-488.338	20420.5	-38757.9	-2074.81	120.633	861.184	0	0	0	0	0	0	0	603	903	0
582	4	0	0	0	0	0	0	200	300	0	-19.4716	-0.281985	-488.643	21519.1	-38452.7	-2303.7	121.307	858.962	0	0	0	0	0	0	0	603	903	0
582	5	0	0	0	0	0	0	200	300	0	-19.1664	0.328366	-488.033	20786.7	-38879.9	-2395.25	120.333	860.407	0	0	0	0	0	0	0	603	903	0
582	6	0	0	0	0	0	0	200	300	0	-19.0138	0.633542	-489.559	20420.5	-39429.3	-2212.14	119.46	861.288	0	0	0	0	0	0	0	603	903	0
582	7	0	0	0	0	0	0	200	300	0	-18.4035	0.633542	-489.559	21244.4	-38452.7	-2441.02	121.454	859.605	0	0	0	0	0	0	0	603	903	0
582	8	0	0	0	0	0	0	200	300	0	-19.4716	1.85425	-489.864	21793.7	-38635.8	-2532.58	121.13	858.511	0	0	0	0	0	0	0	603	903	0
582	9	0	0	0	0	0	0	200	300	0	-21.1501	0.938718	-490.779	21244.4	-38391.7	-2578.35	121.774	859.713	0	0	0	0	0	0	0	603	903	0
583	0	0	0	0	0	0	0	200	300	0	-20.0819	2.4646	-488.338	21793.7	-39490.3	-2807.24	119.133	858.372	0	0	0	0	0	0	0	603	903	0
583	1	0	0	0	0	0	0	200	300	0	-19.0138	2.31201	-485.591	21885.3	-39368.2	-3219.22	118.927	857.931	0	0	0	0	0	0	0	603	903	0
583	2	0	0	0	0	0	0	200	300	0	-19.9294	3.07495	-489.253	20969.8	-38879.9	-2715.68	120.532	860.139	0	0	0	0	0	0	0	603	903	0
583	3	0	0	0	0	0	0	200	300	0	-20.2345	3.53271	-489.559	21702.2	-39002	-2715.68	120.332	858.67	0	0	0	0	0	0	0	603	903	0
583	4	0	0	0	0	0	0	200	300	0	-17.6405	4.29565	-490.169	21976.8	-38757.9	-2898.79	120.93	858.165	0	0	0	0	0	0	0	603	903	0
583	5	0	0	0	0	0	0	200	300	0	-21.1501	5.51635	-486.202	21793.7	-39490.3	-2944.56	118.778	858.176	0	0	0	0	0	0	0	603	903	0
583	6	0	0	0	0	0	0	200	300	0	-20.8449	4.906	-489.864	22434.6	-39551.3	-2761.46	119.261	857.202	0	0	0	0	0	0	0	603	903	0
583	7	0	0	0	0	0	0	200	300	0	-17.6405	3.99048	-489.864	22526.2	-39490.3	-2898.79	119.385	857.016	0	0	0	0	0	0	0	603	903	0
583	8	0	0	0	0	0	0	200	300	0	-20.3871	5.66894	-490.474	22617.7	-39734.4	-3173.45	118.988	856.886	0	0	0	0	0	0	0	603	903	0
583	9	0	0	0	0	0	0	200	300	0	-20.6923	5.51635	-490.169	22709.3	-38941	-3127.67	120.556	856.671	0	0	0	0	0	0	0	603	903	0
584	0	0	0	0	0	0	0	200	300	0	-19.319	6.27929	-491.695	22709.3	-39612.4	-3081.89	119.437	856.814	0	0	0	0	0	0	0	603	903	0
584	1	0	0	0	0	0	0	200	300	0	-20.2345	6.43188	-488.643	23075.5	-39734.4	-3219.22	118.684	855.776	0	0	0	0	0	0	0	603	903	0
584	2	0	0	0	0	0	0	200	300	0	-20.9975	6.88965	-493.221	23075.5	-39734.4	-3448.1	119.439	856.215	0	0	0	0	0	0	0	603	903	0
584	3	0	0	0	0	0	0	200	300	0	-20.3871	7.65259	-489.864	23350.1	-40222.7	-3127.67	117.89	855.333	0	0	0	0	0	0	0	603	903	0
584	4	0	0	0	0	0	0	200	300	0	-21.3026	7.34741	-494.747	23258.6	-39734.4	-3265	119.687	855.989	0	0	0	0	0	0	0	603	903	0
584	5	0	0	0	0	0	0	200	300	0	-22.0656	7.5	-493.221	23716.3	-40222.7	-3493.88	118.449	854.915	0	0	0	0	0	0	0	603	903	0
584	6	0	0	0	0	0	0	200	300	0	-20.2345	8.26294	-494.441	23624.8	-40344.8	-3585.43	118.403	855.219	0	0	0	0	0	0	0	603	903	0
584	7	0	0	0	0	0	0	200	300	0	-21.4552	8.7207	-495.967	24265.7	-40161.7	-3631.21	119.024	854.074	0	0	0	0	0	0	0	603	903	0
584	8	0	0	0	0	0	0	200	300	0	-20.9975	9.02588	-494.747	24174.1	-40833.1	-3631.21	117.467	854.138	0	0	0	0	0	0	0	603	903	0
584	9	0	0	0	0	0	0	200	300	0	-20.5397	9.9414	-497.188	24082.6	-40161.7	-3676.99	119.222	854.562	0	0	0	0	0	0	0	603	903	0
585	0	0	0	0	0	0	0	200	300	0	-20.6923	8.7207	-497.798	23991	-40405.8	-3127.67	118.831	854.806	0	0	0	0	0	0	0	603	903	0
585	1	0	0	0	0	0	0	200	300	0	-22.0656	9.78882	-496.273	24082.6	-40772	-3860.09	117.843	854.473	0	0	0	0	0	0	0	603	903	0
585	2	0	0	0	0	0	0	200	300	0	-20.8449	11.1621	-498.714	24906.5	-40405.8	-4134.75	118.98	853.059	0	0	0	0	0	0	0	603	903	0
585	3	0	0	0	0	0	0	200	300	0	-21.1501	9.78882	-500.85	24631.9	-40833.1	-4226.3	118.473	853.82	0	0	0	0	0	0	0	603	903	0
585	4	0	0	0	0	0	0	200	300	0	-21.4552	11.6199	-501.155	24631.9	-40833.1	-4134.75	118.522	853.85	0	0	0	0	0	0	0	603	903	0
585	5	0	0	0	0	0	0	200	300	0	-21.4552	12.8406	-501.461	25547.4	-41382.4	-4134.75	117.476	852.054	0	0	0	0	0	0	0	603	903	0
585	6	0	0	0	0	0	0	200	300	0	-22.0656	11.7725	-502.071	24815	-41260.3	-4134.75	117.82	853.575	0	0	0	0	0	0	0	603	903	0
585	7	0	0	0	0	0	0	200	300	0	-22.5233	11.925	-502.986	24723.4	-41016.2	-4272.08	118.455	853.847	0	0	0	0	0	0	0	603	903	0
585	8	0	0	0	0	0	0	200	300	0	-21.3026	13.2983	-505.428	26279.8	-41199.3	-4317.86	118.486	851.005	0	0	0	0	0	0	0	603	903	0
585	9	0	0	0	0	0	0	200	300	0	-21.913	13.4509	-505.428	25730.5	-41504.4	-4455.19	117.883	852.092	0	0	0	0	0	0	0	603	903	0
586	0	0	0	0	0	0	0	200	300	0	-22.9811	14.2139	-507.564	25547.4	-41626.5	-4684.07	117.988	852.667	0	0	0	0	0	0	0	603	903	0
586	1	0	0	0	0	0	0	200	300	0	-21.6078	13.7561	-508.48	26096.7	-42053.8	-4180.53	117.295	851.677	0	0	0	0	0	0	0	603	903	0
586	2	0	0	0	0	0	0	200	300	0	-22.0656	14.9768	-509.395	26279.8	-41443.4	-4729.84	118.642	851.41	0	0	0	0	0	0	0	603	903	0
586	3	0	0	0	0	0	0	200	300	0	-23.4389	14.9768	-510.616	26462.9	-42297.9	-4958.73	117.163	851.175	0	0	0	0	0	0	0	603	903	0
586	4	0	0	0	0	0	0	200	300	0	-23.5915	15.4346	-512.752	26554.5	-42053.8	-4958.73	117.984	851.212	0	0	0	0	0	0	0	603	903	0
586	5	0	0	0	0	0	0	200	300	0	-22.5233	15.4346	-514.278	26920.7	-42481	-4821.4	117.397	850.653	0	0	0	0	0	0	0	603	903	0
586	6	0	0	0	0	0	0	200	300	0	-23.5915	16.3501	-515.804	26646	-42847.2	-4912.95	116.931	851.341	0	0	0	0	0	0	0	603	903	0
586	7	0	0	0	0	0	0	200	300	0	-23.744	16.9604	-514.888	27012.2	-42664.1	-4958.73	117.139	850.538	0	0	0	0	0	0	0	603	903	0
586	8	0	0	0	0	0	0	200	300	0	-23.1337	17.7234	-518.856	26737.6	-42908.3	-5050.28	117.302	851.468	0	0	0	0	0	0	0	603	903	0
586	9	0	0	0	0	0	0	200	300	0	-22.8285	18.1811	-518.55	27286.9	-43457.6	-5279.16	116.194	850.379	0	0	0	0	0	0	0	603	903	0
587	0	0	0	0	0	0	0	200	300	0	-24.9648	16.9604	-520.076	27927.8	-43030.3	-5279.16	117.262	849.301	0	0	0	0	0	0	0	603	903	0
587	1	0	0	0	0	0	0	200	300	0	-23.8966	18.3337	-523.433	28019.3	-43457.6	-5096.06	116.976	849.47	0	0	0	0	0	0	0	603	903	0
587	2	0	0	0	0	0	0	200	300	0	-21.6078	19.0967	-524.654	28110.9	-43457.6	-5324.94	117.169	849.42	0	0	0	0	0	0	0	603	903	0
587	3	0	0	0	0	0	0	200	300	0	-24.507	19.707	-525.875	28202.4	-44067.9	-5279.16	116.201	849.37	0	0	0	0	0	0	0	603	903	0
587	4	0	0	0	0	0	0	200	300	0	-24.6596	19.5544	-526.18	27836.2	-44129	-5599.6	116.133	850.098	0	0	0	0	0	0	0	603	903	0
587	5	0	0	0	0	0	0	200	300	0	-24.0492	19.707	-528.621	28477.1	-43762.8	-5645.37	117.213	849.13	0	0	0	0	0	0	0	603	903	0
587	6	0	0	0	0	0	0	200	300	0	-24.507	21.0803	-532.283	28843.3	-44739.3	-5874.25	115.948	848.812	0	0	0	0	0	0	0	603	903	0
587	7	0	0	0	0	0	0	200	300	0	-25.2699	22.301	-531.063	28660.2	-44312.1	-5736.92	116.56	849.032	0	0	0	0	0	0	0	603	903	0
587	8	0	0	0	0	0	0	200	300	0	-25.2699	22.301	-535.03	28934.9	-44434.1	-5874.25	116.95	848.919	0	0	0	0	0	0	0	603	903	0
587	9	0	0	0	0	0	0	200	300	0	-24.3544	23.064	-535.64	29484.2	-45044.5	-5828.48	115.905	847.955	0	0	0	0	0	0	0	603	903	0
588	0	0	0	0	0	0	0	200	300	0	-26.1855	23.064	-537.166	30125	-44983.5	-6011.58	116.258	846.919	0	0	0	0	0	0	0	603	903	0
588	1	0	0	0	0	0	0	200	300	0	-26.6432	23.6743	-539.607	30949	-45105.5	-6194.69	116.411	845.645	0	0	0	0	0	0	0	603	903	0
588	2	0	0	0	0	0	0	200	300	0	-24.9648	23.8269	-542.354	30399.7	-45288.6	-6286.24	116.496	846.949	0	0	0	0	0	0	0	603	903	0
588	3	0	0	0	0	0	0	200	300	0	-24.8122	25.9631	-544.185	30125	-45593.8	-6652.45	116.216	847.642	0	0	0	0	0	0	0	603	903	0
588	4	0	0	0	0	0	0	200	300	0	-26.0329	25.3528	-545.711	30399.7	-46265.2	-6286.24	115.22	847.293	0	0	0	0	0	0	0	603	903	0
588	5	0	0	0	0	0	0	200	300	0	-26.7958	26.1157	-547.237	30674.4	-45776.9	-6286.24	116.349	846.947	0	0	0	0	0	0	0	603	903	0
588	6	0	0	0	0	0	0	200	300	0	-24.3544	26.4209	-549.068	31406.8	-46326.2	-6606.68	115.628	845.8	0	0	0	0	0	0	0	603	903	0
588	7	0	0	0	0	0	0	200	300	0	-27.101	27.0312	-551.509	31498.3	-46692.4	-6560.9	115.337	845.887	0	0	0	0	0	0	0	603	903	0
588	8	0	0	0	0	0	0	200	300	0	-27.101	28.5571	-553.34	31315.2	-46387.3	-6698.23	116.169	846.407	0	0	0	0	0	0	0	603	903	0
588	9	0	0	0	0	0	0	200	300	0	-25.7277	27.3364	-556.392	31223.7	-47424.9	-6698.23	114.764	846.882	0	0	0	0	0	0	0	603	903	0
589	0	0	0	0	0	0	0	200	300	0	-27.101	29.3201	-557.003	31681.4	-46692.4	-7018.66	116.172	846.122	0	0	0	0	0	0	0	603	903	0
589	1	0	0	0	0	0	0	200	300	0	-28.0165	29.1675	-557.613	32047.6	-46814.5	-7110.22	116.045	845.527	0	0	0	0	0	0	0	603	903	0
589	2	0	0	0	0	0	0	200	300	0	-28.932	29.4727	-561.275	32413.9	-47485.9	-7247.54	115.396	845.25	0	0	0	0	0	0	0	603	903	0
589	3	0	0	0	0	0	0	200	300	0	-27.101	31.3037	-564.327	32963.2	-47363.8	-7339.1	116.07	844.589	0	0	0	0	0	0	0	603	903	0
589	4	0	0	0	0	0	0	200	300	0	-28.3217	30.083	-565.853	32871.6	-48157.3	-7384.87	114.894	844.908	0	0	0	0	0	0	0	603	903	0
589	5	0	0	0	0	0	0	200	300	0	-28.4743	32.0666	-568.599	32688.5	-47852.1	-7064.44	115.842	845.51	0	0	0	0	0	0	0	603	903	0
589	6	0	0	0	0	0	0	200	300	0	-27.5587	32.3718	-571.346	33421	-48096.2	-7339.1	115.819	844.505	0	0	0	0	0	0	0	603	903	0
589	7	0	0	0	0	0	0	200	300	0	-28.1691	32.677	-571.346	33237.8	-48523.5	-7659.53	115.072	844.825	0	0	0	0	0	0	0	603	903	0
589	8	0	0	0	0	0	0	200	300	0	-27.8639	34.3555	-574.092	34061.8	-48706.6	-7705.31	115.159	843.668	0	0	0	0	0	0	0	603	903	0
589	9	0	0	0	0	0	0	200	300	0	-28.0165	33.4399	-576.534	34061.8	-49072.8	-7934.19	114.883	843.92	0	0	0	0	0	0	0	603	903	0
590	0	0	0	0	0	0	0	200	300	0	-28.0165	35.5762	-578.06	34244.9	-49683.2	-7888.41	114.052	843.759	0	0	0	0	0	0	0	603	903	0
590	1	0	0	0	0	0	0	200	300	0	-30.3053	35.4236	-580.501	34519.6	-49072.8	-7979.97	115.465	843.535	0	0	0	0	0	0	0	603	903	0
590	2	0	0	0	0	0	0	200	300	0	-30.0002	35.4236	-583.248	35160.4	-49378	-7888.41	115.34	842.716	0	0	0	0	0	0	0	603	903	0
590	3	0	0	0	0	0	0	200	300	0	-29.2372	36.7969	-585.994	35160.4	-49683.2	-8208.85	115.216	842.999	0	0	0	0	0	0	0	603	903	0
590	4	0	0	0	0	0	0	200	300	0	-30.4579	37.7124	-587.52	35252	-50354.5	-8620.83	114.293	842.999	0	0	0	0	0	0	0	603	903	0
590	5	0	0	0	0	0	0	200	300	0	-30.9157	38.6279	-590.267	35801.3	-50659.7	-8391.95	114.175	842.347	0	0	0	0	0	0	0	603	903	0
590	6	0	0	0	0	0	0	200	300	0	-30.3053	38.9331	-592.708	36076	-50476.6	-8483.5	114.837	842.134	0	0	0	0	0	0	0	603	903	0
590	7	0	0	0	0	0	0	200	300	0	-31.3734	38.9331	-594.844	36076	-50964.9	-8437.73	114.322	842.352	0	0	0	0	0	0	0	603	903	0
590	8	0	0	0	0	0	0	200	300	0	-31.6786	38.3228	-596.065	36167.5	-50659.7	-8529.28	115.01	842.323	0	0	0	0	0	0	0	603	903	0
590	9	0	0	0	0	0	0	200	300	0	-31.526	40.7642	-599.422	36900	-51331.1	-8712.39	114.366	841.441	0	0	0	0	0	0	0	603	903	0
591	0	0	0	0	0	0	0	200	300	0	-31.3734	41.8323	-601.558	37083.1	-51758.4	-8849.72	113.96	841.355	0	0	0	0	0	0	0	603	903	0
591	1	0	0	0	0	0	0	200	300	0	-32.289	42.1374	-605.831	37815.5	-51331.1	-9078.6	115.272	840.581	0	0	0	0	0	0	0	603	903	0
591	2	0	0	0	0	0	0	200	300	0	-33.3571	41.9849	-607.051	37907	-52368.7	-9170.15	113.733	840.556	0	0	0	0	0	0	0	603	903	0
591	3	0	0	0	0	0	0	200	300	0	-32.1364	41.3745	-608.882	38639.4	-51880.4	-9078.6	114.794	839.54	0	0	0	0	0	0	0	603	903	0
591	4	0	0	0	0	0	0	200	300	0	-33.8148	43.6633	-612.544	38731	-52063.5	-9490.58	115.005	839.77	0	0	0	0	0	0	0	603	903	0
591	5	0	0	0	0	0	0	200	300	0	-33.6623	45.1892	-613.155	39005.7	-53101.1	-9536.36	113.397	839.385	0	0	0	0	0	0	0	603	903	0
591	6	0	0	0	0	0	0	200	300	0	-33.3571	45.7996	-617.427	39188.8	-53162.2	-9627.91	113.897	839.529	0	0	0	0	0	0	0	603	903	0
591	7	0	0	0	0	0	0	200	300	0	-33.5097	45.7996	-620.174	39555	-53711.5	-9490.58	113.393	839.22	0	0	0	0	0	0	0	603	903	0
591	8	0	0	0	0	0	0	200	300	0	-35.0356	45.647	-622.005	39555	-53284.2	-9582.14	114.335	839.407	0	0	0	0	0	0	0	603	903	0
591	9	0	0	0	0	0	0	200	300	0	-34.4252	47.0203	-624.446	40562.1	-53650.4	-10039.9	114.083	838.043	0	0	0	0	0	0	0	603	903	0
592	0	0	0	0	0	0	0	200	300	0	-34.7304	46.5625	-623.836	40287.4	-54260.8	-10177.2	113.021	838.42	0	0	0	0	0	0	0	603	903	0
592	1	0	0	0	0	0	0	200	300	0	-35.9511	49.3091	-629.024	41202.9	-54199.8	-10360.3	113.835	837.497	0	0	0	0	0	0	0	603	903	0
592	2	0	0	0	0	0	0	200	300	0	-36.5614	48.8513	-631.16	42026.9	-54932.2	-10314.6	112.966	836.413	0	0	0	0	0	0	0	603	903	0
592	3	0	0	0	0	0	0	200	300	0	-35.3407	50.835	-634.822	41752.2	-54688	-10406.1	113.853	837.23	0	0	0	0	0	0	0	603	903	0
592	4	0	0	0	0	0	0	200	300	0	-36.5614	50.2246	-637.264	41660.7	-54932.2	-10177.2	113.8	837.626	0	0	0	0	0	0	0	603	903	0
592	5	0	0	0	0	0	0	200	300	0	-37.0192	50.9875	-639.4	42576.2	-55481.5	-10543.4	113.229	836.412	0	0	0	0	0	0	0	603	903	0
592	6	0	0	0	0	0	0	200	300	0	-36.714	52.9712	-642.757	42942.4	-55664.6	-10589.2	113.397	836.19	0	0	0	0	0	0	0	603	903	0
592	7	0	0	0	0	0	0	200	300	0	-38.0873	52.666	-645.809	43125.5	-56030.8	-10543.4	113.239	836.222	0	0	0	0	0	0	0	603	903	0
592	8	0	0	0	0	0	0	200	300	0	-37.7821	53.7341	-647.945	43858	-56946.3	-10909.7	112.112	835.312	0	0	0	0	0	0	0	603	903	0
592	9	0	0	0	0	0	0	200	300	0	-37.477	54.4971	-650.997	43674.9	-56336	-10863.9	113.462	835.911	0	0	0	0	0	0	0	603	903	0
593	0	0	0	0	0	0	0	200	300	0	-38.5451	54.8022	-652.523	43858	-56702.2	-11138.5	113.103	835.787	0	0	0	0	0	0	0	603	903	0
593	1	0	0	0	0	0	0	200	300	0	-37.0192	56.7859	-653.743	44132.6	-56763.2	-11275.9	113.172	835.492	0	0	0	0	0	0	0	603	903	0
593	2	0	0	0	0	0	0	200	300	0	-38.2399	56.3281	-657.405	44956.6	-57373.6	-11321.6	112.727	834.615	0	0	0	0	0	0	0	603	903	0
593	3	0	0	0	0	0	0	200	300	0	-39.4606	56.9385	-659.542	45505.9	-57434.6	-11321.6	112.917	834.004	0	0	0	0	0	0	0	603	903	0
593	4	0	0	0	0	0	0	200	300	0	-40.6813	58.0066	-663.204	45689	-57556.7	-11413.2	113.214	834.109	0	0	0	0	0	0	0	603	903	0
593	5	0	0	0	0	0	0	200	300	0	-39.9184	58.4644	-665.035	46421.4	-58594.3	-11687.9	111.893	833.197	0	0	0	0	0	0	0	603	903	0
593	6	0	0	0	0	0	0	200	300	0	-39.0028	59.6851	-665.95	46604.5	-58106	-12008.3	112.747	833.018	0	0	0	0	0	0	0	603	903	0
593	7	0	0	0	0	0	0	200	300	0	-41.2917	60.448	-669.612	47153.9	-58411.2	-12008.3	112.769	832.58	0	0	0	0	0	0	0	603	903	0
593	8	0	0	0	0	0	0	200	300	0	-42.0546	59.9902	-670.223	47611.6	-58960.5	-12145.6	112.028	831.961	0	0	0	0	0	0	0	603	903	0
593	9	0	0	0	0	0	0	200	300	0	-40.3761	61.5161	-673.58	48527.1	-58533.3	-12008.3	113.101	830.956	0	0	0	0	0	0	0	603	903	0
594	0	0	0	0	0	0	0	200	300	0	-41.4442	61.8213	-677.547	48344	-59448.8	-11687.9	112.259	831.648	0	0	0	0	0	0	0	603	903	0
594	1	0	0	0	0	0	0	200	300	0	-40.6813	61.8213	-678.462	48344	-59265.7	-12191.4	112.647	831.745	0	0	0	0	0	0	0	603	903	0
594	2	0	0	0	0	0	0	200	300	0	-42.5124	63.9575	-681.819	48801.8	-59631.9	-12649.2	112.54	831.424	0	0	0	0	0	0	0	603	903	0
594	3	0	0	0	0	0	0	200	300	0	-43.1227	64.2627	-682.43	49625.8	-60181.2	-12832.3	111.813	830.281	0	0	0	0	0	0	0	603	903	0
594	4	0	0	0	0	0	0	200	300	0	-42.5124	65.636	-685.787	50449.8	-60059.1	-12923.8	112.423	829.435	0	0	0	0	0	0	0	603	903	0
594	5	0	0	0	0	0	0	200	300	0	-43.4279	65.3308	-689.449	51090.6	-60852.6	-12878	111.737	828.896	0	0	0	0	0	0	0	603	903	0
594	6	0	0	0	0	0	0	200	300	0	-43.1227	66.7041	-689.754	50724.4	-61218.8	-12832.3	111.245	829.46	0	0	0	0	0	0	0	603	903	0
594	7	0	0	0	0	0	0	200	300	0	-43.2753	67.7722	-693.111	51273.7	-60791.6	-12878	112.292	829.024	0	0	0	0	0	0	0	603	903	0
594	8	0	0	0	0	0	0	200	300	0	-43.8857	67.1619	-695.247	52097.7	-60608.5	-12878	112.825	828.066	0	0	0	0	0	0	0	603	903	0
594	9	0	0	0	0	0	0	200	300	0	-44.6486	68.9929	-696.773	52189.2	-61096.7	-13198.5	112.315	828.099	0	0	0	0	0	0	0	603	903	0
595	0	0	0	0	0	0	0	200	300	0	-43.4279	69.4507	-699.52	53104.8	-61768.1	-13427.4	111.699	827.084	0	0	0	0	0	0	0	603	903	0
595	1	0	0	0	0	0	0	200	300	0	-45.1064	69.6033	-701.961	52647	-62256.4	-13381.6	111.311	828	0	0	0	0	0	0	0	603	903	0
595	2	0	0	0	0	0	0	200	300	0	-44.496	70.3662	-701.961	53654.1	-62317.4	-13564.7	111.224	826.565	0	0	0	0	0	0	0	603	903	0
595	3	0	0	0	0	0	0	200	300	0	-45.1064	71.7395	-705.623	54111.9	-62439.5	-13518.9	111.512	826.313	0	0	0	0	0	0	0	603	903	0
595	4	0	0	0	0	0	0	200	300	0	-46.3271	72.655	-707.454	54295	-61829.2	-13564.7	112.603	826.253	0	0	0	0	0	0	0	603	903	0
595	5	0	0	0	0	0	0	200	300	0	-46.4796	73.8757	-711.116	54935.8	-62622.6	-13656.2	111.938	825.747	0	0	0	0	0	0	0	603	903	0
595	6	0	0	0	0	0	0	200	300	0	-46.0219	72.9602	-712.947	55668.3	-63416.1	-13793.6	111.051	824.918	0	0	0	0	0	0	0	603	903	0
595	7	0	0	0	0	0	0	200	300	0	-46.0219	74.3335	-714.473	55759.8	-62988.8	-13885.1	111.839	824.957	0	0	0	0	0	0	0	603	903	0
595	8	0	0	0	0	0	0	200	300	0	-46.6322	74.3335	-717.83	56492.2	-63782.3	-14342.9	111.146	824.301	0	0	0	0	0	0	0	603	903	0
595	9	0	0	0	0	0	0	200	300	0	-47.8529	73.418	-715.999	56950	-64209.5	-14251.3	110.322	823.461	0	0	0	0	0	0	0	603	903	0
596	0	0	0	0	0	0	0	200	300	0	-47.2426	76.4697	-720.577	58048.6	-63782.3	-14388.7	111.484	822.441	0	0	0	0	0	0	0	603	903	0
596	1	0	0	0	0	0	0	200	300	0	-47.5478	76.3171	-722.408	58231.7	-64026.4	-14617.5	111.371	822.392	0	0	0	0	0	0	0	603	903	0
596	2	0	0	0	0	0	0	200	300	0	-48.6159	77.5378	-725.46	58689.5	-64209.5	-14480.2	111.491	822.1	0	0	0	0	0	0	0	603	903	0
596	3	0	0	0	0	0	0	200	300	0	-47.2426	77.2327	-728.816	59513.5	-65247.1	-14526	110.475	821.342	0	0	0	0	0	0	0	603	903	0
596	4	0	0	0	0	0	0	200	300	0	-45.8693	77.5378	-729.122	59696.6	-64942	-14754.9	110.931	821.125	0	0	0	0	0	0	0	603	903	0
596	5	0	0	0	0	0	0	200	300	0	-49.5314	79.8267	-733.089	59330.4	-64636.8	-14709.1	111.83	822.068	0	0	0	0	0	0	0	603	903	0
596	6	0	0	0	0	0	0	200	300	0	-49.0736	79.3689	-730.953	60795.2	-64880.9	-15029.5	111.238	819.827	0	0	0	0	0	0	0	603	903	0
596	7	0	0	0	0	0	0	200	300	0	-47.3952	81.8103	-736.446	61436.1	-65308.2	-15212.6	111.32	819.578	0	0	0	0	0	0	0	603	903	0
596	8	0	0	0	0	0	0	200	300	0	-47.5478	82.1155	-739.192	61619.2	-66040.6	-15533.1	110.658	819.64	0	0	0	0	0	0	0	603	903	0
596	9	0	0	0	0	0	0	200	300	0	-48.9211	81.9629	-739.803	61619.2	-66528.9	-15258.4	110.072	819.709	0	0	0	0	0	0	0	603	903	0
597	0	0	0	0	0	0	0	200	300	0	-48.7685	83.3362	-743.77	61985.4	-65735.4	-14983.7	111.619	819.661	0	0	0	0	0	0	0	603	903	0
597	1	0	0	0	0	0	0	200	300	0	-48.1581	81.2	-745.601	62900.9	-66467.8	-14938	110.853	818.637	0	0	0	0	0	0	0	603	903	0
597	2	0	0	0	0	0	0	200	300	0	-49.5314	85.0146	-747.127	63633.4	-66467.8	-15533.1	111.035	817.829	0	0	0	0	0	0	0	603	903	0
597	3	0	0	0	0	0	0	200	300	0	-48.9211	85.625	-751.399	64182.7	-66834.1	-15761.9	111.054	817.582	0	0	0	0	0	0	0	603	903	0
597	4	0	0	0	0	0	0	200	300	0	-48.0055	85.4724	-752.01	64732	-67322.3	-15670.4	110.477	816.921	0	0	0	0	0	0	0	603	903	0
597	5	0	0	0	0	0	0	200	300	0	-49.2262	86.8457	-755.367	64823.5	-66712	-15807.7	111.683	817.183	0	0	0	0	0	0	0	603	903	0
597	6	0	0	0	0	0	0	200	300	0	-49.9892	86.9983	-757.198	65647.5	-67261.3	-15761.9	111.171	816.302	0	0	0	0	0	0	0	603	903	0
597	7	0	0	0	0	0	0	200	300	0	-46.9374	88.5242	-757.503	66196.8	-67078.2	-16219.7	111.448	815.612	0	0	0	0	0	0	0	603	903	0
597	8	0	0	0	0	0	0	200	300	0	-49.2262	88.9819	-760.555	66929.2	-67627.5	-15945.1	111.081	814.999	0	0	0	0	0	0	0	603	903	0
597	9	0	0	0	0	0	0	200	300	0	-49.2262	88.8293	-762.081	67387	-67932.7	-16128.2	110.859	814.575	0	0	0	0	0	0	0	603	903	0
598	0	0	0	0	0	0	0	200	300	0	-47.8529	88.5242	-763.912	67295.5	-68115.8	-16082.4	110.833	814.907	0	0	0	0	0	0	0	603	903	0
598	1	0	0	0	0	0	0	200	300	0	-48.9211	89.8975	-766.353	67753.2	-68482	-15899.3	110.639	814.59	0	0	0	0	0	0	0	603	903	0
598	2	0	0	0	0	0	0	200	300	0	-49.684	91.2708	-764.217	68211	-68237.8	-16402.8	110.709	813.744	0	0	0	0	0	0	0	603	903	0
598	3	0	0	0	0	0	0	200	300	0	-48.1581	92.1863	-769.405	69126.5	-68421	-16540.2	111.073	813.156	0	0	0	0	0	0	0	603	903	0
598	4	0	0	0	0	0	0	200	300	0	-47.5478	92.1863	-771.541	69218.1	-68970.3	-16585.9	110.607	813.286	0	0	0	0	0	0	0	603	903	0
598	5	0	0	0	0	0	0	200	300	0	-47.3952	93.8647	-772.457	69675.9	-68909.2	-16540.2	110.792	812.8	0	0	0	0	0	0	0	603	903	0
598	6	0	0	0	0	0	0	200	300	0	-48.1581	93.7122	-775.814	70499.8	-69336.5	-16631.7	110.627	812.128	0	0	0	0	0	0	0	603	903	0
598	7	0	0	0	0	0	0	200	300	0	-48.0055	94.1699	-777.034	70866	-69153.4	-16631.7	111.003	811.799	0	0	0	0	0	0	0	603	903	0
598	8	0	0	0	0	0	0	200	300	0	-48.7685	96.001	-780.391	71049.1	-69031.3	-16860.6	111.543	811.957	0	0	0	0	0	0	0	603	903	0
598	9	0	0	0	0	0	0	200	300	0	-46.9374	94.9329	-782.833	71964.7	-69397.5	-17043.7	111.351	811.071	0	0	0	0	0	0	0	603	903	0
599	0	0	0	0	0	0	0	200	300	0	-46.9374	98.1372	-782.833	71506.9	-69458.5	-17318.3	111.273	811.656	0	0	0	0	0	0	0	603	903	0
599	1	0	0	0	0	0	0	200	300	0	-48.1581	97.0691	-783.138	72056.2	-70252	-17135.2	110.294	810.99	0	0	0	0	0	0	0	603	903	0
599	2	0	0	0	0	0	0	200	300	0	-46.6322	97.3743	-787.715	73063.3	-70068.9	-17135.2	111.048	810.247	0	0	0	0	0	0	0	603	903	0
599	3	0	0	0	0	0	0	200	300	0	-48.1581	99.5105	-788.326	73521	-69885.8	-17272.6	111.349	809.738	0	0	0	0	0	0	0	603	903	0
599	4	0	0	0	0	0	0	200	300	0	-48.4633	99.5105	-789.852	73429.5	-70740.3	-17364.1	110.438	810.034	0	0	0	0	0	0	0	603	903	0
599	5	0	0	0	0	0	0	200	300	0	-48.4633	101.036	-790.767	74436.6	-70435.1	-17272.6	110.928	808.868	0	0	0	0	0	0	0	603	903	0
599	6	0	0	0	0	0	0	200	300	0	-46.3271	101.342	-791.072	74985.9	-70557.2	-17409.9	110.808	808.21	0	0	0	0	0	0	0	603	903	0
599	7	0	0	0	0	0	0	200	300	0	-46.7848	101.799	-795.345	74894.4	-70923.4	-17501.4	110.827	808.834	0	0	0	0	0	0	0	603	903	0
599	8	0	0	0	0	0	0	200	300	0	-47.3952	101.647	-795.955	74985.9	-70740.3	-17593	111.125	808.791	0	0	0	0	0	0	0	603	903	0
599	9	0	0	0	0	0	0	200	300	0	-46.7848	103.63	-799.922	75535.2	-71045.5	-17593	111.185	808.572	0	0	0	0	0	0	0	603	903	0
600	0	0	0	0	0	0	0	200	300	0	-46.3271	104.851	-798.702	76084.5	-71777.9	-17959.2	110.132	807.74	0	0	0	0	0	0	0	603	903	0
600	1	0	0	0	0	0	0	200	300	0	-45.8693	106.682	-803.279	76359.2	-71045.5	-17959.2	111.556	807.941	0	0	0	0	0	0	0	603	903	0
600	2	0	0	0	0	0	0	200	300	0	-46.0219	105.767	-805.416	76084.5	-71167.5	-17776.1	111.639	808.534	0	0	0	0	0	0	0	603	903	0
600	3	0	0	0	0	0	0	200	300	0	-46.0219	107.903	-805.11	77000.1	-71106.5	-17318.3	111.681	807.361	0	0	0	0	0	0	0	603	903	0
600	4	0	0	0	0	0	0	200	300	0	-46.1745	108.666	-807.857	77274.7	-71228.6	-17959.2	111.83	807.346	0	0	0	0	0	0	0	603	903	0
600	5	0	0	0	0	0	0	200	300	0	-46.1745	109.581	-807.247	78007.1	-71838.9	-18005	111.007	806.367	0	0	0	0	0	0	0	603	903	0
600	6	0	0	0	0	0	0	200	300	0	-45.7167	110.039	-808.162	78190.3	-71594.8	-18371.2	111.41	806.249	0	0	0	0	0	0	0	603	903	0
600	7	0	0	0	0	0	0	200	300	0	-46.9374	111.565	-811.824	78464.9	-72449.3	-18233.9	110.757	806.347	0	0	0	0	0	0	0	603	903	0
600	8	0	0	0	0	0	0	200	300	0	-45.5641	112.786	-809.688	78831.1	-72083.1	-18508.5	110.974	805.64	0	0	0	0	0	0	0	603	903	0
600	9	0	0	0	0	0	0	200	300	0	-46.0219	113.549	-813.961	79014.2	-71899.9	-18508.5	111.667	805.926	0	0	0	0	0	0	0	603	903	0
601	0	0	0	0	0	0	0	200	300	0	-46.7848	114.312	-814.571	79197.3	-72327.2	-18508.5	111.208	805.774	0	0	0	0	0	0	0	603	903	0
601	1	0	0	0	0	0	0	200	300	0	-46.6322	116.448	-815.486	80112.8	-72022	-18554.3	111.682	804.761	0	0	0	0	0	0	0	603	903	0
601	2	0	0	0	0	0	0	200	300	0	-44.1908	117.058	-817.317	80387.5	-72022	-18737.4	111.88	804.645	0	0	0	0	0	0	0	603	903	0
601	3	0	0	0	0	0	0	200	300	0	-46.4796	117.516	-818.233	80112.8	-72693.4	-18691.6	111.158	805.091	0	0	0	0	0	0	0	603	903	0
601	4	0	0	0	0	0	0	200	300	0	-46.9374	118.737	-820.98	80753.7	-72144.1	-18829	112.124	804.637	0	0	0	0	0	0	0	603	903	0
601	5	0	0	0	0	0	0	200	300	0	-45.2589	117.668	-819.759	81211.5	-72693.4	-18829	111.323	803.933	0	0	0	0	0	0	0	603	903	0
601	6	0	0	0	0	0	0	200	300	0	-46.6322	121.483	-819.148	80845.3	-72632.4	-19057.8	111.332	804.306	0	0	0	0	0	0	0	603	903	0
601	7	0	0	0	0	0	0	200	300	0	-46.6322	121.331	-820.064	81760.8	-72205.1	-19195.2	111.952	803.3	0	0	0	0	0	0	0	603	903	0
601	8	0	0	0	0	0	0	200	300	0	-45.7167	122.399	-821.59	82401.7	-73059.6	-19149.4	111.075	802.705	0	0	0	0	0	0	0	603	903	0
601	9	0	0	0	0	0	0	200	300	0	-46.3271	123.162	-823.421	81577.7	-72144.1	-19103.6	112.385	803.928	0	0	0	0	0	0	0	603	903	0
602	0	0	0	0	0	0	0	200	300	0	-46.4796	123.772	-823.421	81852.4	-72571.4	-19057.8	111.866	803.595	0	0	0	0	0	0	0	603	903	0
602	1	0	0	0	0	0	0	200	300	0	-45.7167	126.061	-821.895	82584.8	-72815.5	-19332.5	111.405	802.519	0	0	0	0	0	0	0	603	903	0
602	2	0	0	0	0	0	0	200	300	0	-46.6322	127.129	-822.811	82676.3	-72571.4	-19607.2	111.801	802.52	0	0	0	0	0	0	0	603	903	0
602	3	0	0	0	0	0	0	200	300	0	-46.7848	127.129	-824.642	82951	-72876.5	-19652.9	111.626	802.41	0	0	0	0	0	0	0	603	903	0
602	4	0	0	0	0	0	0	200	300	0	-45.4115	129.265	-824.031	83683.4	-73120.6	-19652.9	111.265	801.446	0	0	0	0	0	0	0	603	903	0
602	5	0	0	0	0	0	0	200	300	0	-45.5641	130.028	-823.116	83317.2	-72388.2	-19790.3	112.056	801.778	0	0	0	0	0	0	0	603	903	0
602	6	-5.87221	-8.69797	-16.8658	843.842	1300.28	-507.981	277.096	249.967	0	-46.7848	130.486	-822.811	83042.5	-72754.4	-19515.6	111.578	802.075	0	0	0	0	0	0	0	603	903	0
602	7	-4.95668	-13.7334	-26.6315	1484.71	1727.53	-782.64	264.868	244.25	0	-45.2589	130.944	-822.811	83042.5	-72266.2	-19515.6	112.172	802.075	0	0	0	0	0	0	0	603	903	0
602	8	-0.531631	-13.7334	-26.6315	1942.47	2032.7	-233.323	276.327	227.061	0	-45.5641	132.164	-823.726	84141.2	-72510.3	-19927.6	111.973	800.853	0	0	0	0	0	0	0	603	903	0
602	9	-1.75233	-12.5127	-26.3263	2034.03	2093.74	-736.863	279.53	222.738	0	-47.09	134.148	-822.811	84141.2	-72144.1	-20019.2	112.32	800.739	0	0	0	0	0	0	0	603	903	0
603	0	-6.48256	-13.2756	-27.8522	1393.16	2093.74	-1057.3	275.173	249.98	0	-45.8693	135.369	-824.031	84690.5	-72449.3	-20110.7	112.079	800.224	0	0	0	0	0	0	0	603	903	0
603	1	-8.00844	-19.6843	-35.4816	2034.03	1971.67	-1011.52	255.569	242.674	0	-43.8857	133.69	-819.148	84598.9	-72998.6	-19973.4	110.885	799.723	0	0	0	0	0	0	0	603	903	0
603	2	-6.02479	-15.8696	-42.8058	2034.03	2398.91	-233.323	256.042	252.482	0	-44.496	136.589	-820.369	84049.6	-72449.3	-20110.7	111.687	800.547	0	0	0	0	0	0	0	603	903	0
603	3	-5.10927	-8.54538	-48.6041	2308.69	3314.44	-553.758	268.193	252.5	0	-46.0219	138.268	-820.674	84690.5	-71655.8	-20202.3	112.687	799.804	0	0	0	0	0	0	0	603	903	0
603	4	-6.02479	-3.50998	-54.7076	3132.66	3497.55	-141.77	263.932	242.738	0	-44.8012	138.115	-820.674	84598.9	-72205.1	-20156.5	112.017	799.915	0	0	0	0	0	0	0	603	903	0
603	5	-7.2455	-2.44187	-65.3888	3498.87	4352.04	270.217	266.556	246.491	0	-44.3434	138.573	-817.928	85239.8	-71838.9	-19973.4	112.17	798.786	0	0	0	0	0	0	0	603	903	0
603	6	-9.6869	0.915068	-76.9855	4139.74	4718.25	224.441	261.288	246.227	0	-44.496	139.946	-817.623	84690.5	-71655.8	-20248	112.361	799.419	0	0	0	0	0	0	0	603	903	0
603	7	-8.4662	3.50906	-82.4786	4414.4	5206.53	407.546	263.126	246.478	0	-43.7331	139.641	-816.707	85056.7	-72266.2	-20248	111.515	798.854	0	0	0	0	0	0	0	603	903	0
603	8	-6.78773	5.03494	-86.7511	5238.37	6244.13	590.651	271.978	239.616	0	-44.3434	142.235	-817.012	84965.1	-71106.5	-20385.4	112.968	799.005	0	0	0	0	0	0	0	603	903	0
603	9	-8.4662	5.34012	-95.6012	5696.14	7037.59	590.651	273.614	240.418	0	-45.4115	140.404	-814.571	85239.8	-71472.7	-20385.4	112.257	798.356	0	0	0	0	0	0	0	603	903	0
604	0	-10.6024	6.25564	-112.081	6520.11	7281.73	544.875	264.969	241.827	0	-45.5641	144.219	-812.74	85514.5	-71594.8	-20110.7	111.909	797.782	0	0	0	0	0	0	0	603	903	0
604	1	-11.3654	10.9859	-121.846	6611.66	8014.15	819.533	265.773	245.738	0	-41.2917	144.066	-808.773	85606	-71045.5	-20522.7	112.156	797.153	0	0	0	0	0	0	0	603	903	0
604	2	-13.5016	13.7325	-129.476	7252.53	8746.57	1323.07	267.554	243.985	0	-44.1908	144.982	-810.604	85148.3	-71961	-20568.5	111.225	797.957	0	0	0	0	0	0	0	603	903	0
604	3	-15.6378	15.2583	-137.41	7527.19	9356.92	1185.74	268.095	245.221	0	-43.8857	146.05	-808.467	84965.1	-70618.2	-20431.1	112.652	797.906	0	0	0	0	0	0	0	603	903	0
604	4	-15.7904	19.073	-149.922	8076.51	9662.1	1323.07	264.447	246.129	0	-42.8175	146.355	-807.247	85789.1	-70374.1	-20019.2	112.822	796.726	0	0	0	0	0	0	0	603	903	0
604	5	-15.7904	21.5144	-157.247	9266.7	10333.5	1414.63	265.715	241.069	0	-42.6649	147.881	-803.279	85331.3	-70801.3	-20568.5	111.86	796.771	0	0	0	0	0	0	0	603	903	0
604	6	-18.3844	21.3618	-164.876	9449.8	10943.8	1094.19	266.376	242.685	0	-39.9184	148.796	-800.838	85789.1	-69946.8	-20431.1	112.658	795.876	0	0	0	0	0	0	0	603	903	0
604	7	-19.6051	22.1248	-173.421	9999.12	11554.2	1139.97	266.625	242.342	0	-42.2072	148.796	-800.228	85880.7	-70313	-20705.8	112.134	795.68	0	0	0	0	0	0	0	603	903	0
604	8	-18.537	21.8196	-181.05	10456.9	11920.4	1597.73	265.84	242.243	0	-41.5968	150.627	-798.702	85148.3	-70252	-20339.6	112.042	796.392	0	0	0	0	0	0	0	603	903	0
604	9	-20.3681	20.2937	-189.901	10823.1	12530.8	956.862	265.986	243.007	0	-42.5124	150.322	-795.04	85056.7	-69275.5	-20797.3	112.865	796.016	0	0	0	0	0	0	0	603	903	0
605	0	-20.9784	18.6153	-195.089	11372.4	13019	956.862	266.734	241.706	0	-42.2072	151.39	-791.378	85422.9	-69275.5	-20705.8	112.462	795.058	0	0	0	0	0	0	0	603	903	0
605	1	-20.5206	16.1739	-199.666	11921.7	13141.1	865.31	265.815	240.292	0	-41.2917	152.306	-790.462	85697.6	-68604	-20705.8	113.21	794.585	0	0	0	0	0	0	0	603	903	0
605	2	-21.4362	14.9532	-206.38	12379.5	13446.3	819.533	265.153	240.016	0	-41.7494	152.153	-787.105	85148.3	-68665.1	-20431.1	112.762	794.821	0	0	0	0	0	0	0	603	903	0
605	3	-22.9621	11.9014	-214.315	13203.5	14056.6	453.322	265.589	238.392	0	-41.2917	152.306	-783.443	85056.7	-68421	-20843.1	112.666	794.432	0	0	0	0	0	0	0	603	903	0
605	4	-21.5888	6.40823	-217.977	13478.1	13507.3	315.993	261.967	238.167	0	-39.9184	153.221	-781.002	85606	-68054.8	-20888.9	112.862	793.39	0	0	0	0	0	0	0	603	903	0
605	5	-22.5043	3.66165	-221.334	13203.5	14972.2	41.3351	267.645	240.346	0	-40.2235	154.29	-773.372	84415.8	-67810.6	-20751.6	112.318	793.847	0	0	0	0	0	0	0	603	903	0
605	6	-21.2836	-0.305635	-228.353	14485.2	15033.2	-462.205	265.833	236.567	0	-41.4442	154.595	-775.508	84507.4	-67749.6	-20705.8	112.639	794.03	0	0	0	0	0	0	0	603	903	0
605	7	-21.4362	-4.12033	-233.541	14210.5	15216.3	-736.863	265.155	239.152	0	-40.8339	154.747	-769.71	84965.1	-67078.2	-20797.3	112.853	792.614	0	0	0	0	0	0	0	603	903	0
605	8	-20.9784	-10.8342	-239.034	14943	15582.5	-919.969	265.19	237.486	0	-38.6977	156.121	-766.963	84507.4	-67139.2	-20888.9	112.461	792.816	0	0	0	0	0	0	0	603	903	0
605	9	-21.7413	-12.0549	-243.001	15766.9	15277.3	-1194.63	262.869	235.116	0	-39.7658	155.663	-763.301	84141.2	-67078.2	-20705.8	112.121	792.767	0	0	0	0	0	0	0	603	903	0
606	0	-20.0629	-16.0222	-248.799	15766.9	16253.9	-1331.96	265.329	236.628	0	-39.7658	155.968	-759.029	84507.4	-65674.4	-20568.5	113.476	791.664	0	0	0	0	0	0	0	603	903	0
606	1	-18.8422	-19.0739	-252.462	16133.2	16009.8	-1286.18	263.415	236.097	0	-37.1718	156.273	-756.587	84324.3	-65796.4	-20522.7	113.035	791.547	0	0	0	0	0	0	0	603	903	0
606	2	-17.6215	-23.3464	-257.65	16774	16498	-1927.05	264.033	234.896	0	-39.0028	156.426	-752.925	83774.9	-65064	-20797.3	113.585	791.734	0	0	0	0	0	0	0	603	903	0
606	3	-19.6051	-25.0249	-262.532	17048.7	17230.5	-2384.81	265.632	235.061	0	-37.9347	157.036	-748.043	83958.1	-65308.2	-20843.1	112.695	790.763	0	0	0	0	0	0	0	603	903	0
606	4	-20.9784	-26.7033	-271.688	18238.9	17413.6	-2384.81	264.094	232.868	0	-37.0192	157.341	-744.686	83774.9	-65064	-20476.9	112.629	790.503	0	0	0	0	0	0	0	603	903	0
606	5	-22.5043	-31.4336	-279.012	19154.4	17474.6	-2934.13	262.63	231.349	0	-36.8666	156.884	-739.803	82767.9	-64209.5	-20751.6	113.207	791.122	0	0	0	0	0	0	0	603	903	0
606	6	-24.1828	-33.2646	-285.115	18788.2	18084.9	-3117.23	263.43	234.103	0	-37.477	157.952	-734.92	82584.8	-63355	-20339.6	113.793	790.628	0	0	0	0	0	0	0	603	903	0
606	7	-23.5724	-35.0957	-290.609	19978.4	18512.2	-3071.46	263.702	231.253	0	-36.2563	157.646	-730.342	82401.7	-63110.9	-20522.7	113.587	790.174	0	0	0	0	0	0	0	603	903	0
606	8	-23.8776	-36.1638	-295.186	19795.3	19183.6	-3391.89	264.988	232.94	0	-35.7985	156.884	-721.187	81943.9	-62500.5	-20019.2	113.337	789.376	0	0	0	0	0	0	0	603	903	0
606	9	-21.8939	-38.1474	-305.257	21077	19305.7	-3941.21	263.244	230.953	0	-35.0356	158.867	-721.492	81760.8	-62744.7	-20476.9	113.035	789.678	0	0	0	0	0	0	0	603	903	0
607	0	-23.725	-39.5207	-314.107	22725	19732.9	-4032.76	262.822	227.652	0	-34.4252	157.952	-713.558	82035.4	-61585	-20064.9	113.693	788.033	0	0	0	0	0	0	0	603	903	0
607	1	-24.7931	-40.4362	-320.821	22267.2	19855	-3941.21	261.888	230.593	0	-33.9674	158.867	-710.201	81211.5	-61768.1	-20431.1	113.027	788.65	0	0	0	0	0	0	0	603	903	0
607	2	-24.1828	-42.1147	-326.314	23091.2	20587.4	-4536.3	263.091	229.236	0	-34.12	158.562	-705.318	80662.2	-60608.5	-19927.6	114.069	788.637	0	0	0	0	0	0	0	603	903	0
607	3	-24.3353	-43.488	-333.028	23915.1	20953.6	-4536.3	262.918	228.189	0	-34.4252	159.02	-699.214	80662.2	-60242.2	-20156.5	113.843	787.639	0	0	0	0	0	0	0	603	903	0
607	4	-23.2672	-45.1665	-339.131	24464.5	21686	-4261.65	263.946	227.861	0	-30.4579	160.088	-695.247	80479	-59876	-20202.3	113.878	787.244	0	0	0	0	0	0	0	603	903	0
607	5	-23.1146	-45.4716	-346.456	24922.2	22296.4	-4994.07	264.356	228.065	0	-33.2045	159.325	-690.364	80204.4	-59204.6	-19973.4	114.241	786.823	0	0	0	0	0	0	0	603	903	0
607	6	-22.1991	-46.2346	-357.137	26204	21869.1	-4994.07	261.235	226.628	0	-31.9838	159.63	-684.566	79746.6	-59326.7	-19424.1	113.337	786.508	0	0	0	0	0	0	0	603	903	0
607	7	-22.8095	-48.0656	-360.189	26204	23028.8	-4902.51	263.935	227.249	0	-30.6105	159.325	-679.378	79105.8	-58594.3	-19607.2	113.753	786.562	0	0	0	0	0	0	0	603	903	0
607	8	-21.5888	-48.676	-366.292	26570.2	23272.9	-4856.74	263.537	227.462	0	-30.1527	158.562	-670.833	78648	-57373.6	-19744.5	114.474	785.761	0	0	0	0	0	0	0	603	903	0
607	9	-20.0629	-49.8967	-371.48	27668.8	24188.5	-5085.62	265.114	225.517	0	-31.0683	159.02	-664.73	78190.3	-57312.6	-19790.3	113.781	785.373	0	0	0	0	0	0	0	603	903	0
608	0	-19.4525	-51.5752	-376.973	28218.1	24859.9	-5177.17	265.946	225.146	0	-29.2372	157.952	-657.405	77640.9	-56763.2	-19698.7	113.656	784.898	0	0	0	0	0	0	0	603	903	0
608	1	-19.2999	-52.0329	-385.823	29591.4	25104	-5360.28	265.066	223.303	0	-28.6269	157.646	-653.133	77640.9	-56091.9	-19698.7	114.119	784.125	0	0	0	0	0	0	0	603	903	0
608	2	-17.1637	-54.4743	-392.842	30323.8	25226.1	-4810.96	264.214	222.809	0	-29.3898	158.104	-647.945	76725.4	-56030.8	-19515.6	113.525	784.587	0	0	0	0	0	0	0	603	903	0
608	3	-15.3327	-55.695	-402.608	30873.1	25958.5	-5268.73	264.476	223.317	0	-28.0165	156.426	-640.621	76450.7	-54993.2	-18966.3	114.156	783.662	0	0	0	0	0	0	0	603	903	0
608	4	-13.9594	-58.4416	-408.712	31880.2	27301.3	-4627.86	266.798	221.998	0	-25.8803	156.273	-631.465	76176.1	-54199.8	-18966.3	114.168	782.366	0	0	0	0	0	0	0	603	903	0
608	5	-12.4335	-61.3408	-414.815	32612.6	27972.7	-5085.62	267.434	221.38	0	-26.4906	155.815	-628.414	75169	-54138.7	-18920.5	113.849	783.383	0	0	0	0	0	0	0	603	903	0
608	6	-11.0602	-61.0356	-423.97	33070.4	28277.8	-4902.51	266.698	221.998	0	-26.7958	155.052	-620.784	74802.8	-52918	-18874.7	114.756	782.503	0	0	0	0	0	0	0	603	903	0
608	7	-10.6024	-63.0193	-432.21	34901.5	28949.2	-5039.84	266.98	219.249	0	-24.9648	155.205	-613.765	74528.1	-52796	-18737.4	113.98	781.572	0	0	0	0	0	0	0	603	903	0
608	8	-10.1447	-66.071	-439.229	34809.9	28705.1	-5360.28	265.353	220.748	0	-24.0492	155.052	-606.136	73338	-52063.5	-18691.6	114.106	782.007	0	0	0	0	0	0	0	603	903	0
608	9	-6.78773	-67.7495	-445.027	35359.2	30108.9	-5039.84	267.656	220.546	0	-24.3544	153.679	-598.812	72788.6	-51087	-18417	114.686	781.445	0	0	0	0	0	0	0	603	903	0
609	0	-5.71962	-69.2754	-452.047	37464.9	30475.1	-5268.73	267.416	217.121	0	-23.5915	154.29	-592.708	72422.4	-50781.8	-18371.2	114.322	780.811	0	0	0	0	0	0	0	603	903	0
609	1	-5.71962	-71.259	-459.066	37648	31390.6	-4398.97	268.379	217.99	0	-22.6759	152.458	-585.384	72056.2	-49744.2	-18371.2	115.023	779.908	0	0	0	0	0	0	0	603	903	0
609	2	-4.80409	-74.4633	-465.169	38197.4	31939.9	-5222.95	268.663	217.885	0	-23.2863	152.764	-577.754	71506.9	-48889.7	-17867.7	115.38	779.233	0	0	0	0	0	0	0	603	903	0
609	3	-4.04115	-75.6841	-471.273	39753.8	32001	-4994.07	267.903	215.646	0	-21.4552	150.78	-568.599	70866	-48828.7	-17684.6	114.125	778.367	0	0	0	0	0	0	0	603	903	0
609	4	-3.27821	-76.447	-477.681	40303.1	32550.3	-5131.4	268.142	215.628	0	-19.6242	150.475	-562.496	70316.7	-47791.1	-17638.8	115.037	777.992	0	0	0	0	0	0	0	603	903	0
609	5	-0.836806	-78.1255	-483.48	41127	33221.7	-4719.41	268.714	214.935	0	-18.7086	148.796	-552.12	69126.5	-47546.9	-17455.7	113.883	777.798	0	0	0	0	0	0	0	603	903	0
609	6	0.078721	-81.1772	-486.837	41767.9	33893.1	-4627.86	269.619	214.205	0	-20.2345	147.881	-548.152	68760.3	-46509.3	-17318.3	115.153	777.56	0	0	0	0	0	0	0	603	903	0
609	7	1.14684	-79.9565	-492.94	42225.7	34442.4	-4765.19	269.871	214.339	0	-17.9457	146.355	-536.556	68027.9	-45715.9	-16906.4	114.798	776.214	0	0	0	0	0	0	0	603	903	0
609	8	3.58824	-82.0927	-499.349	43507.4	34808.6	-4902.51	269.708	212.872	0	-17.1828	145.287	-532.894	67661.7	-45410.7	-16677.5	114.785	776.03	0	0	0	0	0	0	0	603	903	0
609	9	4.65636	-84.229	-507.283	44056.7	35541	-4215.87	270.061	213.152	0	-17.7931	142.845	-523.738	66837.7	-44312.1	-16265.5	115.393	775.383	0	0	0	0	0	0	0	603	903	0
610	0	4.35118	-84.8393	-517.354	45521.6	35846.2	-4536.3	269.288	212.011	0	-16.4198	142.083	-518.55	66380	-43884.8	-16219.7	115.37	774.989	0	0	0	0	0	0	0	603	903	0
610	1	4.65636	-87.2807	-524.984	46254	36700.7	-4948.29	269.908	211.894	0	-15.0465	141.014	-508.174	66013.7	-42908.3	-16036.6	115.564	773.096	0	0	0	0	0	0	0	603	903	0
610	2	6.48741	-89.2644	-530.782	47169.5	37311	-4948.29	270.294	211.132	0	-16.2672	138.573	-500.545	64732	-41992.7	-15716.2	116.106	773.677	0	0	0	0	0	0	0	603	903	0
610	3	5.57189	-89.5695	-538.411	48817.5	37982.4	-5039.84	270.545	209.331	0	-15.3517	134.911	-492.305	64182.7	-41687.6	-15624.6	115.322	772.628	0	0	0	0	0	0	0	603	903	0
610	4	5.87706	-92.6213	-545.735	50007.7	38592.8	-5543.38	270.717	208.366	0	-11.8422	136.284	-485.591	63450.2	-41138.2	-15029.5	115.282	772.334	0	0	0	0	0	0	0	603	903	0
610	5	7.40294	-93.842	-553.06	50373.9	38348.6	-5543.38	269.339	208.918	0	-12.9103	135.063	-475.521	62351.6	-39734.4	-14983.7	116.44	771.877	0	0	0	0	0	0	0	603	903	0
610	6	7.40294	-95.6731	-559.774	52113.4	39874.5	-5543.38	271.233	206.903	0	-12.6051	133.995	-468.196	61619.2	-39734.4	-14800.6	115.133	771.39	0	0	0	0	0	0	0	603	903	0
610	7	7.55553	-98.4196	-569.234	53212	40423.8	-5634.94	271.014	206.52	0	-11.3844	130.486	-461.177	60978.3	-38513.7	-14342.9	116.488	770.777	0	0	0	0	0	0	0	603	903	0
610	8	10.3021	-100.098	-573.812	53303.6	41156.2	-5680.71	271.724	207.106	0	-11.0793	130.791	-451.107	60154.4	-37720.3	-14159.8	116.383	769.652	0	0	0	0	0	0	0	603	903	0
610	9	12.4383	-102.082	-584.493	55775.5	42132.8	-5909.59	272.084	204.575	0	-11.0793	127.892	-440.12	59513.5	-37476.1	-13747.8	114.85	767.779	0	0	0	0	0	0	0	603	903	0
611	0	11.6754	-103.913	-591.817	57515	42560	-6184.25	271.914	202.816	0	-9.09561	126.366	-434.932	58506.4	-36682.7	-13747.8	115.659	768.482	0	0	0	0	0	0	0	603	903	0
611	1	12.7435	-106.202	-598.836	57881.2	43048.3	-6367.36	271.887	203.344	0	-8.33267	122.856	-426.692	57316.2	-36682.7	-13061.1	114.03	768.673	0	0	0	0	0	0	0	603	903	0
611	2	13.659	-109.101	-606.16	59254.5	43536.6	-6367.36	271.824	202.246	0	-8.63785	121.788	-418.758	56675.3	-35400.9	-13244.2	115.462	767.658	0	0	0	0	0	0	0	603	903	0
611	3	13.8116	-110.169	-611.959	59803.8	44574.2	-6458.91	272.839	202.275	0	-7.72232	121.483	-406.246	56217.6	-34241.3	-12786.5	115.713	764.617	0	0	0	0	0	0	0	603	903	0
611	4	13.659	-112	-617.147	60536.2	44879.4	-6916.67	272.721	201.91	0	-7.87491	119.957	-402.584	55393.6	-33630.9	-12511.8	116.462	765.405	0	0	0	0	0	0	0	603	903	0
611	5	15.0323	-114.289	-623.555	62275.7	45367.7	-7374.44	272.756	200.128	0	-7.41714	115.837	-392.208	54020.3	-32837.5	-12466	116.275	765.266	0	0	0	0	0	0	0	603	903	0
611	6	15.1849	-115.204	-629.354	63008.2	46039.1	-6870.9	273.153	199.884	0	-6.6542	117.211	-383.663	53013.2	-32471.2	-12145.6	115.365	764.823	0	0	0	0	0	0	0	603	903	0
611	7	15.0323	-117.188	-637.288	63649	46466.3	-7237.11	272.913	200.125	0	-5.89127	115.837	-375.118	52006.1	-31616.7	-11916.7	115.715	764.36	0	0	0	0	0	0	0	603	903	0
611	8	15.6427	-118.866	-642.476	65205.4	47442.9	-7465.99	273.844	198.509	0	-5.73868	113.243	-366.268	50632.9	-30701.2	-11642.1	116.178	764.76	0	0	0	0	0	0	0	603	903	0
611	9	16.253	-120.392	-647.054	65754.7	48175.3	-7099.78	274.453	198.378	0	-5.28091	111.718	-357.112	49808.9	-30212.9	-11596.3	115.397	763.523	0	0	0	0	0	0	0	603	903	0
612	0	16.5582	-121.155	-650.716	66761.8	48114.3	-7603.32	273.94	197.403	0	-4.51797	110.955	-348.873	49900.4	-29297.4	-11321.6	116.023	759.967	0	0	0	0	0	0	0	603	903	0
612	1	17.4737	-122.986	-655.904	67860.5	48419.4	-7603.32	273.821	196.539	0	-3.60245	109.581	-338.497	49259.6	-28687.1	-11230.1	115.252	757.476	0	0	0	0	0	0	0	603	903	0
612	2	18.5419	-122.681	-659.871	68318.2	48907.7	-7191.33	274.117	196.467	0	-4.06021	108.666	-333.614	47062.3	-28565	-10726.5	114.377	761.932	0	0	0	0	0	0	0	603	903	0
612	3	17.9315	-123.597	-660.787	69142.2	49457	-7877.98	274.846	195.364	0	-4.82315	105.614	-324.764	46421.4	-27161.2	-10451.9	116.366	760.061	0	0	0	0	0	0	0	603	903	0
612	4	20.8307	-125.58	-664.754	69599.9	49701.2	-7694.87	274.766	195.3	0	-3.75503	104.698	-315.303	45231.2	-26672.9	-10314.6	115.406	759.547	0	0	0	0	0	0	0	603	903	0
612	5	21.441	-125.885	-667.806	70057.7	49884.3	-7420.21	274.699	195.093	0	-4.06021	103.63	-306.148	43858	-26001.5	-9902.57	115.069	759.743	0	0	0	0	0	0	0	603	903	0
612	6	20.5255	-125.428	-670.858	71705.7	50372.6	-7420.21	275.087	193.113	0	-4.06021	99.8157	-297.603	43125.5	-25086	-10131.5	115.707	758.09	0	0	0	0	0	0	0	603	903	0
612	7	21.1358	-125.885	-676.046	71705.7	50799.8	-7740.65	275.143	193.934	0	-2.9921	97.832	-289.669	42301.6	-24597.7	-9673.69	115.083	756.966	0	0	0	0	0	0	0	603	903	0
612	8	21.2884	-126.954	-681.539	73628.3	51593.3	-7511.77	275.701	191.968	0	-2.53433	96.001	-282.955	40928.3	-23804.2	-9444.81	115.873	758.354	0	0	0	0	0	0	0	603	903	0
612	9	22.6617	-129.548	-685.201	74086.1	52264.6	-7694.87	276.276	191.877	0	-2.07657	94.4751	-271.968	39829.6	-23316	-9307.48	114.27	756.55	0	0	0	0	0	0	0	603	903	0
613	0	24.035	-128.937	-687.642	73811.4	52142.6	-7328.66	275.828	192.66	0	-2.9921	92.7966	-265.56	39555	-22034.2	-9032.82	117.027	754.05	0	0	0	0	0	0	0	603	903	0
613	1	23.5773	-127.411	-691.304	75642.4	52875	-7237.11	276.486	190.58	0	-2.83951	90.2026	-257.93	37907	-21729	-9078.6	115.756	756.034	0	0	0	0	0	0	0	603	903	0
613	2	24.6454	-129.09	-694.661	75825.6	53119.1	-7282.89	276.468	190.845	0	-3.44986	90.5078	-248.165	36991.5	-21362.8	-8941.27	113.917	753.94	0	0	0	0	0	0	0	603	903	0
613	3	25.5609	-130.158	-698.323	76558	53607.4	-7557.54	276.766	190.369	0	-2.38174	87.3035	-240.535	36716.9	-20874.6	-8712.39	113.216	750.354	0	0	0	0	0	0	0	603	903	0
613	4	25.5609	-130.768	-701.985	77382	53668.5	-7191.33	276.452	189.767	0	-2.38174	85.4724	-233.211	35892.9	-20386.3	-8346.18	112.584	749.093	0	0	0	0	0	0	0	603	903	0
613	5	26.3238	-130.921	-700.46	77748.2	53851.6	-7237.11	276.88	189.004	0	-3.44986	84.2517	-227.413	34153.4	-19837	-8117.3	112.771	752.818	0	0	0	0	0	0	0	603	903	0
613	6	28.9178	-131.073	-706.868	77931.2	54400.9	-7557.54	276.96	189.751	0	-3.60245	80.7422	-220.394	33604.1	-18799.4	-8163.07	114.701	750.527	0	0	0	0	0	0	0	603	903	0
613	7	28.0023	-132.142	-710.53	79762.3	54584	-7099.78	276.822	187.743	0	-0.398101	80.2844	-210.933	32688.5	-18189	-7979.97	113.769	748.029	0	0	0	0	0	0	0	603	903	0
613	8	27.8497	-131.836	-712.972	80037	55011.2	-7511.77	277.158	187.742	0	-3.14468	76.9275	-204.219	31040.6	-17517.6	-7888.41	114.222	751.004	0	0	0	0	0	0	0	603	903	0
613	9	29.6808	-132.752	-716.024	81684.9	55316.4	-7237.11	277.255	185.919	0	-3.60245	74.1809	-199.031	30857.5	-17456.6	-7384.87	112.292	747.962	0	0	0	0	0	0	0	603	903	0
614	0	29.5282	-134.278	-719.686	82142.7	55804.7	-7099.78	277.54	185.863	0	-0.550689	70.9766	-191.402	29850.4	-16724.2	-7293.32	112.623	747.044	0	0	0	0	0	0	0	603	903	0
614	1	30.1385	-134.278	-721.517	81593.4	55926.8	-7191.33	277.513	186.914	0	-4.06021	68.8403	-184.688	27653.1	-15808.6	-6927.11	114.404	753.271	0	0	0	0	0	0	0	603	903	0
614	2	30.2911	-134.278	-726.4	83058.2	56659.2	-7420.21	278	185.658	0	-4.51797	67.1619	-177.364	27470	-15442.4	-6881.33	112.934	748.121	0	0	0	0	0	0	0	603	903	0
614	3	31.0541	-135.041	-730.062	83699.1	57269.5	-7282.89	278.445	185.353	0	-3.29727	65.9412	-170.04	26829.1	-14587.9	-6515.12	114.209	745.218	0	0	0	0	0	0	0	603	903	0
614	4	32.2748	-135.651	-733.419	84431.5	57635.7	-7420.21	278.585	184.88	0	-5.28091	61.6687	-164.852	26188.3	-13977.6	-6423.57	115.211	744.14	0	0	0	0	0	0	0	603	903	0
614	5	33.4955	-136.567	-737.691	85713.2	58002	-7191.33	278.626	183.809	0	-4.97574	62.1265	-157.527	25181.2	-14038.6	-6194.69	110.881	743.147	0	0	0	0	0	0	0	603	903	0
614	6	33.6481	-136.109	-743.489	85987.9	58368.2	-7099.78	278.506	184.346	0	-3.75503	59.8376	-148.372	23991	-13977.6	-6011.58	105.794	741.305	0	0	0	0	0	0	0	603	903	0
614	7	35.1739	-136.872	-748.067	86628.8	58673.3	-7008.23	278.433	184.197	0	-3.90762	57.2436	-142.879	22892.4	-13001	-5736.92	109.007	742.778	0	0	0	0	0	0	0	603	903	0
614	8	35.6317	-138.092	-752.034	88002.1	59588.9	-6825.12	279.237	182.981	0	-5.12833	53.7341	-138.606	21976.8	-12268.6	-5874.25	111.486	744.444	0	0	0	0	0	0	0	603	903	0
614	9	35.7843	-137.482	-755.086	88368.3	59894	-6916.67	279.321	182.969	0	-4.36539	53.1238	-134.639	21519.1	-11658.2	-5645.37	113.411	743.172	0	0	0	0	0	0	0	603	903	0
615	0	36.6998	-138.245	-758.138	89924.6	60321.3	-6413.13	279.565	181.387	0	-4.2128	51.4453	-126.705	20786.7	-11719.3	-5599.6	107.507	738.944	0	0	0	0	0	0	0	603	903	0
615	1	37.005	-139.466	-762.105	91023.3	60504.4	-6825.12	279.391	180.563	0	-2.38174	49.1565	-123.348	19871.1	-10925.8	-5462.27	111.423	741.901	0	0	0	0	0	0	0	603	903	0
615	2	37.3102	-139.618	-766.988	90840.2	60809.6	-6779.35	279.284	181.562	0	-3.90762	44.5789	-117.549	19047.2	-10864.8	-4912.95	107.573	740.965	0	0	0	0	0	0	0	603	903	0
615	3	37.6153	-139.771	-766.072	92579.7	61664.1	-6779.35	280.494	179.15	0	-4.06021	44.7314	-113.582	18040.1	-10315.5	-5004.5	109.18	744.172	0	0	0	0	0	0	0	603	903	0
615	4	39.1412	-140.076	-774.312	92671.3	61603	-6596.24	279.558	180.318	0	-5.89127	41.0693	-109.615	17857	-9522.02	-4821.4	113.132	740.093	0	0	0	0	0	0	0	603	903	0
615	5	38.836	-140.534	-778.279	93220.5	62701.7	-7054	280.564	180.222	0	-6.34903	39.3909	-103.511	16849.9	-9277.88	-4500.96	110.368	740.217	0	0	0	0	0	0	0	603	903	0
615	6	38.5309	-141.297	-781.026	95051.6	62579.6	-6825.12	280.125	178.299	0	-4.51797	38.0176	-98.0181	16392.1	-8728.56	-4409.41	110.95	735.764	0	0	0	0	0	0	0	603	903	0
615	7	39.4464	-141.449	-784.078	94960.1	63251	-6687.79	280.669	178.889	0	-4.2128	36.1865	-94.6612	15202	-8545.45	-4500.96	109.726	742.407	0	0	0	0	0	0	0	603	903	0
615	8	40.8197	-140.686	-788.35	96150.2	63739.3	-6642.02	280.851	178.036	0	-5.58609	34.3555	-88.5577	14561.1	-8179.24	-4088.97	107.639	738.575	0	0	0	0	0	0	0	603	903	0
615	9	40.9723	-141.602	-790.792	96791.1	63861.3	-6321.58	280.756	177.602	0	-4.82315	33.1348	-85.8111	13737.1	-7690.96	-3905.87	110.373	742.915	0	0	0	0	0	0	0	603	903	0
616	0	41.1249	-140.992	-792.012	96882.7	64654.8	-6504.69	281.634	177.675	0	-4.97574	31.1511	-80.0127	13279.3	-7385.79	-3814.32	107.692	737.035	0	0	0	0	0	0	0	603	903	0
616	1	40.6671	-140.992	-794.759	98713.7	64715.8	-6092.7	281.428	175.794	0	-5.28091	30.8459	-73.9092	13004.7	-7202.68	-3860.09	102.547	727.045	0	0	0	0	0	0	0	603	903	0
616	2	42.0404	-140.686	-795.98	98622.2	65082	-6184.25	281.763	176.1	0	-4.06021	28.4045	-71.1627	12180.7	-6409.22	-3585.43	109.936	731.833	0	0	0	0	0	0	0	603	903	0
616	3	43.1085	-140.992	-799.642	99446.1	65448.2	-6046.92	281.847	175.637	0	-3.44986	25.2002	-67.8057	11448.3	-6653.36	-3173.45	101.876	734.16	0	0	0	0	0	0	0	603	903	0
616	4	43.8714	-140.992	-802.388	100453	65875.5	-6001.15	282.099	174.807	0	-5.12833	24.7424	-65.6695	10624.3	-5920.94	-3081.89	109.837	741.215	0	0	0	0	0	0	0	603	903	0
616	5	44.4818	-140.076	-804.525	100728	66302.7	-5589.16	282.412	174.798	0	-5.4335	23.3691	-61.0918	10441.2	-5310.59	-2990.34	113.072	732.09	0	0	0	0	0	0	0	603	903	0
616	6	44.787	-140.076	-805.745	101186	66424.8	-5818.04	282.439	174.42	0	-1.6188	23.3691	-55.9039	9617.23	-5310.59	-3036.12	105.005	730.968	0	0	0	0	0	0	0	603	903	0
616	7	45.2447	-140.686	-807.576	101827	66852	-5909.59	282.781	173.911	0	-4.82315	22.4536	-54.0728	9434.13	-5066.45	-2990.34	106.303	728.529	0	0	0	0	0	0	0	603	903	0
616	8	45.5499	-139.924	-810.323	102010	67279.3	-5680.71	283.028	174.112	0	-4.82315	21.9958	-50.1055	8427.04	-4883.35	-3127.67	102.539	734.814	0	0	0	0	0	0	0	603	903	0
616	9	46.7706	-138.703	-811.238	102010	67157.2	-5451.83	282.784	174.254	0	-3.60245	20.6226	-46.4434	7969.28	-4700.24	-2807.24	98.7964	731.409	0	0	0	0	0	0	0	603	903	0
617	0	47.6861	-139.008	-810.628	102834	67706.5	-5222.95	283.524	173.143	0	-4.36539	18.0286	-44.6124	7236.86	-3845.75	-2532.58	113.796	740.784	0	0	0	0	0	0	0	603	903	0
617	1	49.5172	-138.55	-813.68	103291	67828.6	-5177.17	283.36	173.057	0	-4.2128	17.2656	-39.1192	6779.1	-3967.82	-2349.47	98.5711	729.707	0	0	0	0	0	0	0	603	903	0
617	2	48.4491	-138.855	-814.29	104298	68194.8	-4856.74	283.748	171.915	0	-4.06021	16.9604	-37.2881	6504.44	-3235.4	-2441.02	113.233	728.563	0	0	0	0	0	0	0	603	903	0
617	3	48.9068	-137.482	-817.952	104756	68744.1	-5314.5	284.044	171.929	0	-3.75503	14.3665	-35.4571	5863.57	-3174.36	-2074.81	110.473	737.629	0	0	0	0	0	0	0	603	903	0
617	4	49.0594	-136.872	-819.173	106038	68622.1	-5085.62	283.77	170.555	0	-2.07657	13.2983	-31.4898	5497.36	-3418.5	-2120.59	91.441	728.424	0	0	0	0	0	0	0	603	903	0
617	5	49.975	-138.398	-821.614	106679	68622.1	-5085.62	283.521	170.159	0	-3.44986	12.2302	-29.6587	4948.04	-2686.08	-1983.26	109.434	736.167	0	0	0	0	0	0	0	603	903	0
617	6	51.6534	-137.482	-822.53	106129	69171.4	-4307.42	284.096	170.972	0	-3.75503	10.7043	-25.9966	4490.28	-2441.94	-1708.6	106.067	730.275	0	0	0	0	0	0	0	603	903	0
617	7	52.1112	-136.872	-824.666	107411	69781.7	-4765.19	284.618	169.752	0	-4.2128	9.33105	-24.4708	3666.3	-2441.94	-1708.6	100.21	753.176	0	0	0	0	0	0	0	603	903	0
617	8	52.1112	-137.33	-824.361	107320	69903.8	-4902.51	284.798	169.815	0	-3.75503	7.5	-22.6397	4124.07	-1892.62	-1525.5	116.403	720.839	0	0	0	0	0	0	0	603	903	0
617	9	52.4164	-136.872	-826.802	107869	69842.8	-4490.53	284.473	169.535	0	-3.44986	6.43188	-19.8931	3391.65	-2075.73	-1479.72	95.656	732.507	0	0	0	0	0	0	0	603	903	0
618	0	53.4845	-137.177	-831.075	108785	70209	-4536.3	284.48	169.104	0	0	0	0	0	0	0	200	903	0	0	0	0	0	0	0	603	903	0
618	1	52.1112	-135.956	-831.075	108510	70514.2	-4582.08	284.847	169.434	0	0	0	0	0	0	0	200	903	0	0	0	0	0	0	0	603	903	0
618	2	53.7897	-135.651	-832.601	109517	70819.3	-4353.2	285.058	168.464	0	0	0	0	0	0	0	200	903	0	0	0	0	0	0	0	603	903	0
618	3	52.4164	-136.109	-833.516	109700	71429.7	-3895.43	285.697	168.389	0	0	0	0	0	0	0	200	903	0	0	0	0	0	0	0	603	903	0
618	4	52.569	-134.583	-834.127	109517	71124.5	-4215.87	285.268	168.705	0	0	0	0	0	0	0	200	903	0	0	0	0	0	0	0	603	903	0
618	5	52.7215	-133.515	-836.568	111256	71612.8	-4307.42	285.603	167.008	0	0	0	0	0	0	0	200	903	0	0	0	0	0	0	0	603	903	0
618	6	52.569	-133.82	-838.094	112080	71124.5	-4215.87	284.865	166.267	0	0	0	0	0	0	0	200	903	0	0	0	0	0	0	0	603	903	0
618	7	53.0267	-133.362	-838.399	111348	71795.9	-4078.54	285.635	167.19	0	0	0	0	0	0	0	200	903	0	0	0	0	0	0	0	603	903	0
618	8	53.0267	-133.057	-835.042	112355	71918	-4215.87	286.125	165.45	0	0	0	0	0	0	0	200	903	0	0	0	0	0	0	0	603	903	0
618	9	53.0267	-132.599	-839.009	112538	71856.9	-4032.76	285.645	165.868	0	0	0	0	0	0	0	200	903	0	0	0	0	0	0	0	603	903	0
619	0	52.7215	-132.599	-842.366	112996	72528.3	-4215.87	286.101	165.859	0	0	0	0	0	0	0	200	903	0	0	0	0	0	0	0	603	903	0
619	1	53.0267	-131.836	-843.282	113820	72467.3	-4353.2	285.935	165.027	0	0	0	0	0	0	0	200	903	0	0	0	0	0	0	0	603	903	0
619	2	52.7215	-131.226	-844.503	113454	72894.5	-3803.88	286.317	165.656	0	0	0	0	0	0	0	200	903	0	0	0	0	0	0	0	603	903	0
619	3	53.3319	-130.768	-843.587	113820	72833.5	-3986.99	286.338	165.076	0	0	0	0	0	0	0	200	903	0	0	0	0	0	0	0	603	903	0
619	4	52.569	-130.463	-845.113	114919	73321.8	-4032.76	286.76	164.02	0	0	0	0	0	0	0	200	903	0	0	0	0	0	0	0	603	903	0
619	5	52.569	-128.937	-845.723	115285	73382.8	-3941.21	286.769	163.685	0	0	0	0	0	0	0	200	903	0	0	0	0	0	0	0	603	903	0
619	6	52.2638	-128.632	-846.944	116200	73810.1	-3529.22	287.149	162.8	0	0	0	0	0	0	0	200	903	0	0	0	0	0	0	0	603	903	0
619	7	52.569	-129.242	-848.165	116383	73565.9	-3758.1	286.735	162.782	0	0	0	0	0	0	0	200	903	0	0	0	0	0	0	0	603	903	0
619	8	52.2638	-128.632	-847.859	116017	73504.9	-3620.77	286.695	163.165	0	0	0	0	0	0	0	200	903	0	0	0	0	0	0	0	603	903	0
619	9	52.569	-127.106	-845.113	116750	73932.1	-3620.77	287.482	161.853	0	0	0	0	0	0	0	200	903	0	0	0	0	0	0	0	603	903	0
620	0	53.3319	-126.343	-845.723	116933	74542.5	-3483.45	288.141	161.736	0	0	0	0	0	0	0	200	903	0	0	0	0	0	0	0	603	903	0
620	1	54.2474	-125.428	-847.859	117207	74237.3	-3254.56	287.559	161.761	0	0	0	0	0	0	0	200	903	0	0	0	0	0	0	0	603	903	0
620	2	52.7215	-125.733	-848.165	118398	74359.4	-3437.67	287.671	160.407	0	0	0	0	0	0	0	200	903	0	0	0	0	0	0	0	603	903	0
620	3	53.0267	-124.665	-849.996	117299	74115.2	-3208.79	287.195	162.001	0	0	0	0	0	0	0	200	903	0	0	0	0	0	0	0	603	903	0
620	4	53.0267	-124.36	-850.301	117940	74603.5	-3483.45	287.738	161.296	0	0	0	0	0	0	0	200	903	0	0	0	0	0	0	0	603	903	0
620	5	52.569	-123.597	-849.996	118855	74542.5	-3163.01	287.697	160.17	0	0	0	0	0	0	0	200	903	0	0	0	0	0	0	0	603	903	0
620	6	52.7215	-122.681	-849.996	118764	74969.7	-3208.79	288.2	160.277	0	0	0	0	0	0	0	200	903	0	0	0	0	0	0	0	603	903	0
620	7	52.8741	-121.918	-851.522	119222	75335.9	-3071.46	288.472	159.99	0	0	0	0	0	0	0	200	903	0	0	0	0	0	0	0	603	903	0
620	8	52.569	-122.071	-850.911	120137	74969.7	-3346.12	288.105	158.814	0	0	0	0	0	0	0	200	903	0	0	0	0	0	0	0	603	903	0
620	9	51.806	-121.308	-850.606	119313	75152.8	-3300.34	288.352	159.732	0	0	0	0	0	0	0	200	903	0	0	0	0	0	0	0	603	903	0
621	0	52.1112	-120.24	-847.859	120503	75091.8	-2888.35	288.566	157.874	0	0	0	0	0	0	0	200	903	0	0	0	0	0	0	0	603	903	0
621	1	51.806	-120.392	-847.859	120870	74908.7	-2842.58	288.35	157.442	0	0	0	0	0	0	0	200	903	0	0	0	0	0	0	0	603	903	0
621	2	52.8741	-119.324	-849.996	120503	75519	-2934.13	288.846	158.231	0	0	0	0	0	0	0	200	903	0	0	0	0	0	0	0	603	903	0
621	3	51.806	-119.629	-849.996	121785	75274.9	-2888.35	288.559	156.723	0	0	0	0	0	0	0	200	903	0	0	0	0	0	0	0	603	903	0
621	4	50.8905	-118.561	-850.911	120961	75580.1	-2659.47	288.823	157.845	0	0	0	0	0	0	0	200	903	0	0	0	0	0	0	0	603	903	0
621	5	51.3483	-117.798	-850.606	121053	75152.8	-2934.13	288.352	157.687	0	0	0	0	0	0	0	200	903	0	0	0	0	0	0	0	603	903	0
621	6	50.7379	-116.73	-849.691	122060	75213.9	-2842.58	288.519	156.348	0	0	0	0	0	0	0	200	903	0	0	0	0	0	0	0	603	903	0
621	7	51.6534	-116.578	-848.165	121693	75885.2	-2796.8	289.47	156.521	0	0	0	0	0	0	0	200	903	0	0	0	0	0	0	0	603	903	0
621	8	51.0431	-115.357	-848.775	122151	75274.9	-2796.8	288.687	156.085	0	0	0	0	0	0	0	200	903	0	0	0	0	0	0	0	603	903	0
621	9	49.975	-115.052	-846.944	122884	75641.1	-2705.25	289.311	154.909	0	0	0	0	0	0	0	200	903	0	0	0	0	0	0	0	603	903	0
622	0	49.8224	-114.289	-843.892	122060	75641.1	-2888.35	289.634	155.361	0	0	0	0	0	0	0	200	903	0	0	0	0	0	0	0	603	903	0
622	1	51.9586	-113.526	-846.944	122975	75458	-2384.81	289.094	154.801	0	0	0	0	0	0	0	200	903	0	0	0	0	0	0	0	603	903	0
622	2	50.8905	-113.068	-847.859	122243	75946.3	-2430.59	289.574	155.822	0	0	0	0	0	0	0	200	903	0	0	0	0	0	0	0	603	903	0
622	3	51.0431	-112	-845.723	122792	75946.3	-2293.26	289.8	154.808	0	0	0	0	0	0	0	200	903	0	0	0	0	0	0	0	603	903	0
622	4	50.1275	-112.305	-844.503	122517	75702.1	-2430.59	289.641	154.924	0	0	0	0	0	0	0	200	903	0	0	0	0	0	0	0	603	903	0
622	5	50.7379	-111.084	-844.197	123067	75702.1	-2293.26	289.674	154.22	0	0	0	0	0	0	0	200	903	0	0	0	0	0	0	0	603	903	0
622	6	50.7379	-110.169	-843.587	123799	75885.2	-2110.15	289.955	153.247	0	0	0	0	0	0	0	200	903	0	0	0	0	0	0	0	603	903	0
622	7	50.4327	-110.627	-842.061	123891	75824.2	-2110.15	290.046	152.872	0	0	0	0	0	0	0	200	903	0	0	0	0	0	0	0	603	903	0
622	8	51.0431	-109.101	-840.84	122792	75885.2	-1881.27	290.249	153.965	0	0	0	0	0	0	0	200	903	0	0	0	0	0	0	0	603	903	0
622	9	50.2801	-108.185	-839.315	123891	76068.4	-1881.27	290.632	152.391	0	0	0	0	0	0	0	200	903	0	0	0	0	0	0	0	603	903	0
623	0	49.975	-107.88	-835.958	123708	75274.9	-2201.71	290.046	152.017	0	0	0	0	0	0	0	200	903	0	0	0	0	0	0	0	603	903	0
623	1	49.212	-107.117	-837.178	123708	75885.2	-2155.93	290.644	152.233	0	0	0	0	0	0	0	200	903	0	0	0	0	0	0	0	603	903	0
623	2	49.975	-106.659	-836.263	123891	75580.1	-1560.84	290.378	151.852	0	0	0	0	0	0	0	200	903	0	0	0	0	0	0	0	603	903	0
623	3	50.1275	-105.896	-836.263	123525	75641.1	-1698.17	290.451	152.29	0	0	0	0	0	0	0	200	903	0	0	0	0	0	0	0	603	903	0
623	4	50.2801	-104.828	-832.296	124440	75885.2	-1789.72	291.176	150.486	0	0	0	0	0	0	0	200	903	0	0	0	0	0	0	0	603	903	0
623	5	50.1275	-104.218	-831.075	124165	75213.9	-1743.94	290.502	150.597	0	0	0	0	0	0	0	200	903	0	0	0	0	0	0	0	603	903	0
623	6	49.5172	-103.455	-829.549	123525	75580.1	-1652.39	291.11	151.094	0	0	0	0	0	0	0	200	903	0	0	0	0	0	0	0	603	903	0
623	7	49.3646	-102.845	-827.718	124715	75519	-1698.17	291.238	149.327	0	0	0	0	0	0	0	200	903	0	0	0	0	0	0	0	603	903	0
623	8	50.1275	-102.387	-826.192	123982	75946.3	-1652.39	291.923	149.935	0	0	0	0	0	0	0	200	903	0	0	0	0	0	0	0	603	903	0
623	9	50.5853	-101.777	-823.445	124074	75946.3	-1194.63	292.23	149.324	0	0	0	0	0	0	0	200	903	0	0	0	0	0	0	0	603	903	0
624	0	49.8224	-100.861	-822.53	124165	75458	-1469.29	291.739	149.045	0	0	0	0	0	0	0	200	903	0	0	0	0	0	0	0	603	903	0
624	1	49.212	-100.251	-819.783	124257	75335.9	-1515.06	291.897	148.427	0	0	0	0	0	0	0	200	903	0	0	0	0	0	0	0	603	903	0
624	2	49.212	-99.03	-818.563	124623	75458	-1286.18	292.184	147.754	0	0	0	0	0	0	0	200	903	0	0	0	0	0	0	0	603	903	0
624	3	49.0594	-98.5722	-817.037	124898	75519	-1240.4	292.43	147.133	0	0	0	0	0	0	0	200	903	0	0	0	0	0	0	0	603	903	0
624	4	49.3646	-97.5041	-811.849	123616	75702.1	-965.745	293.247	147.735	0	0	0	0	0	0	0	200	903	0	0	0	0	0	0	0	603	903	0
624	5	51.6534	-96.7412	-813.985	124806	75519	-1103.07	292.777	146.673	0	0	0	0	0	0	0	200	903	0	0	0	0	0	0	0	603	903	0
624	6	50.1275	-96.2834	-810.933	123799	75641.1	-782.64	293.277	147.337	0	0	0	0	0	0	0	200	903	0	0	0	0	0	0	0	603	903	0
624	7	48.6017	-94.7575	-810.628	124257	75030.8	-1103.07	292.559	146.715	0	0	0	0	0	0	0	200	903	0	0	0	0	0	0	0	603	903	0
624	8	49.0594	-94.4524	-806.966	124074	75091.8	-1057.3	293.055	146.246	0	0	0	0	0	0	0	200	903	0	0	0	0	0	0	0	603	903	0
624	9	49.3646	-94.7575	-806.356	124257	75152.8	-874.192	293.201	145.903	0	0	0	0	0	0	0	200	903	0	0	0	0	0	0	0	603	903	0
625	0	48.7543	-92.9265	-804.219	124074	74786.6	-645.311	292.993	145.721	0	0	0	0	0	0	0	200	903	0	0	0	0	0	0	0	603	903	0
625	1	48.9068	-92.3161	-802.693	124623	75030.8	-736.863	293.474	144.744	0	0	0	0	0	0	0	200	903	0	0	0	0	0	0	0	603	903	0
625	2	48.2965	-91.248	-799.642	124165	74908.7	-874.192	293.678	144.724	0	0	0	0	0	0	0	200	903	0	0	0	0	0	0	0	603	903	0
625	3	48.2965	-90.4851	-797.811	124806	74786.6	-462.205	293.74	143.564	0	0	0	0	0	0	0	200	903	0	0	0	0	0	0	0	603	903	0
625	4	49.0594	-91.0954	-800.252	124532	74420.4	-599.534	292.996	144.385	0	0	0	0	0	0	0	200	903	0	0	0	0	0	0	0	603	903	0
625	5	47.381	-88.8066	-797.505	124257	73993.2	-462.205	292.781	144.193	0	0	0	0	0	0	0	200	903	0	0	0	0	0	0	0	603	903	0
625	6	48.6017	-88.654	-795.064	124806	74908.7	-416.429	294.217	143.024	0	0	0	0	0	0	0	200	903	0	0	0	0	0	0	0	603	903	0
625	7	47.5336	-87.5859	-793.233	123891	74176.3	-416.429	293.511	143.815	0	0	0	0	0	0	0	200	903	0	0	0	0	0	0	0	603	903	0
625	8	47.381	-86.3652	-791.097	123891	74481.4	-416.429	294.15	143.394	0	0	0	0	0	0	0	200	903	0	0	0	0	0	0	0	603	903	0
625	9	47.381	-85.7549	-789.876	124074	74237.3	-416.429	293.986	142.92	0	0	0	0	0	0	0	200	903	0	0	0	0	0	0	0	603	903	0
626	0	47.2284	-85.2971	-788.045	123799	74176.3	-50.2177	294.127	142.903	0	0	0	0	0	0	0	200	903	0	0	0	0	0	0	0	603	903	0
626	1	47.5336	-84.229	-785.604	124440	73993.2	-141.77	294.186	141.599	0	0	0	0	0	0	0	200	903	0	0	0	0	0	0	0	603	903	0
626	2	47.381	-83.6186	-783.773	123982	74176.3	315.993	294.64	141.813	0	0	0	0	0	0	0	200	903	0	0	0	0	0	0	0	603	903	0
626	3	47.381	-81.7876	-781.331	123799	73932.1	-4.44129	294.623	141.554	0	0	0	0	0	0	0	200	903	0	0	0	0	0	0	0	603	903	0
626	4	46.618	-81.0246	-777.974	124257	73749	132.888	294.796	140.281	0	0	0	0	0	0	0	200	903	0	0	0	0	0	0	0	603	903	0
626	5	46.4654	-81.0246	-775.838	123891	73688	-50.2177	294.979	140.314	0	0	0	0	0	0	0	200	903	0	0	0	0	0	0	0	603	903	0
626	6	45.7025	-80.5669	-777.059	123616	73749	224.441	294.908	140.918	0	0	0	0	0	0	0	200	903	0	0	0	0	0	0	0	603	903	0
626	7	45.7025	-79.6513	-773.091	123616	73260.7	224.441	294.763	140.102	0	0	0	0	0	0	0	200	903	0	0	0	0	0	0	0	603	903	0
626	8	45.3973	-78.4306	-772.481	123158	73504.9	270.217	295.154	140.568	0	0	0	0	0	0	0	200	903	0	0	0	0	0	0	0	603	903	0
626	9	45.5499	-76.7522	-770.04	123708	73321.8	87.1114	295.218	139.349	0	0	0	0	0	0	0	200	903	0	0	0	0	0	0	0	603	903	0
627	0	45.5499	-76.2944	-767.293	123891	73199.7	178.664	295.4	138.535	0	0	0	0	0	0	0	200	903	0	0	0	0	0	0	0	603	903	0
627	1	44.787	-75.2263	-765.767	123067	73138.7	590.651	295.51	139.29	0	0	0	0	0	0	0	200	903	0	0	0	0	0	0	0	603	903	0
627	2	45.0921	-75.2263	-764.547	123616	72894.5	407.546	295.343	138.315	0	0	0	0	0	0	0	200	903	0	0	0	0	0	0	0	603	903	0
627	3	45.2447	-74.0056	-761.19	122517	72467.3	1002.64	295.203	139.045	0	0	0	0	0	0	0	200	903	0	0	0	0	0	0	0	603	903	0
627	4	44.787	-72.6323	-754.171	122975	72894.5	1002.64	296.655	136.94	0	0	0	0	0	0	0	200	903	0	0	0	0	0	0	0	603	903	0
627	5	45.8551	-72.3271	-754.781	123250	73016.6	865.31	296.739	136.708	0	0	0	0	0	0	0	200	903	0	0	0	0	0	0	0	603	903	0
627	6	45.2447	-71.5642	-753.56	123250	72894.5	911.086	296.734	136.443	0	0	0	0	0	0	0	200	903	0	0	0	0	0	0	0	603	903	0
627	7	44.4818	-70.1909	-751.424	122884	72528.3	819.533	296.521	136.466	0	0	0	0	0	0	0	200	903	0	0	0	0	0	0	0	603	903	0
627	8	44.6344	-70.1909	-749.288	122609	72284.2	1094.19	296.471	136.366	0	0	0	0	0	0	0	200	903	0	0	0	0	0	0	0	603	903	0
627	9	44.4818	-68.3598	-747.151	121602	72467.3	1094.19	296.991	137.246	0	0	0	0	0	0	0	200	903	0	0	0	0	0	0	0	603	903	0
628	0	44.787	-67.5969	-744.71	122792	72650.4	1323.07	297.555	135.114	0	0	0	0	0	0	0	200	903	0	0	0	0	0	0	0	603	903	0
628	1	44.3292	-66.9865	-743.795	122975	72223.1	1231.52	297.101	134.665	0	0	0	0	0	0	0	200	903	0	0	0	0	0	0	0	603	903	0
628	2	44.1766	-65.9184	-740.132	122151	72101.1	1460.4	297.416	134.96	0	0	0	0	0	0	0	200	903	0	0	0	0	0	0	0	603	903	0
628	3	43.2611	-65.7658	-738.301	122243	71979	1139.97	297.493	134.427	0	0	0	0	0	0	0	200	903	0	0	0	0	0	0	0	603	903	0
628	4	44.3292	-64.8503	-733.113	121236	71673.8	1597.73	297.766	134.629	0	0	0	0	0	0	0	200	903	0	0	0	0	0	0	0	603	903	0
628	5	44.024	-64.24	-734.334	121236	71918	1780.84	297.936	134.904	0	0	0	0	0	0	0	200	903	0	0	0	0	0	0	0	603	903	0
628	6	44.3292	-62.8667	-730.672	122151	71612.8	1551.96	298.01	132.823	0	0	0	0	0	0	0	200	903	0	0	0	0	0	0	0	603	903	0
628	7	44.3292	-61.646	-728.841	121693	71673.8	1963.94	298.339	133.032	0	0	0	0	0	0	0	200	903	0	0	0	0	0	0	0	603	903	0
628	8	43.7189	-61.3408	-727.315	121510	71551.8	1872.39	298.378	132.933	0	0	0	0	0	0	0	200	903	0	0	0	0	0	0	0	603	903	0
628	9	44.024	-62.1037	-725.484	121510	70819.3	1735.06	297.617	132.511	0	0	0	0	0	0	0	200	903	0	0	0	0	0	0	0	603	903	0
629	0	43.8714	-59.2046	-722.432	120778	71429.7	1780.84	298.874	132.818	0	0	0	0	0	0	0	200	903	0	0	0	0	0	0	0	603	903	0
629	1	43.8714	-58.4416	-718.77	121327	71124.5	2192.83	298.953	131.202	0	0	0	0	0	0	0	200	903	0	0	0	0	0	0	0	603	903	0
629	2	43.5663	-58.7468	-716.939	120320	71124.5	1872.39	299.206	132.175	0	0	0	0	0	0	0	200	903	0	0	0	0	0	0	0	603	903	0
629	3	42.6507	-57.3735	-715.108	120595	70636.2	1826.61	298.777	131.361	0	0	0	0	0	0	0	200	903	0	0	0	0	0	0	0	603	903	0
629	4	44.024	-57.0683	-715.108	119954	70575.2	2009.72	298.692	132.258	0	0	0	0	0	0	0	200	903	0	0	0	0	0	0	0	603	903	0
629	5	44.787	-56.458	-712.361	119954	70636.2	2284.38	299.158	131.611	0	0	0	0	0	0	0	200	903	0	0	0	0	0	0	0	603	903	0
629	6	43.4137	-55.8476	-711.141	120320	70331	2421.71	298.899	130.807	0	0	0	0	0	0	0	200	903	0	0	0	0	0	0	0	603	903	0
629	7	42.9559	-54.1692	-708.089	120595	70636.2	2055.5	299.756	129.69	0	0	0	0	0	0	0	200	903	0	0	0	0	0	0	0	603	903	0
629	8	42.6507	-53.4062	-705.648	119771	70086.9	2650.59	299.323	130.268	0	0	0	0	0	0	0	200	903	0	0	0	0	0	0	0	603	903	0
629	9	42.3456	-52.9485	-703.511	120137	70086.9	2421.71	299.624	129.232	0	0	0	0	0	0	0	200	903	0	0	0	0	0	0	0	603	903	0
630	0	42.4982	-53.7114	-701.985	120229	69720.7	2742.14	299.319	128.731	0	0	0	0	0	0	0	200	903	0	0	0	0	0	0	0	603	903	0
630	1	42.9559	-51.1174	-694.051	119588	69903.8	2513.26	300.719	127.696	0	0	0	0	0	0	0	200	903	0	0	0	0	0	0	0	603	903	0
630	2	42.9559	-51.1174	-695.577	120046	69659.7	2925.25	300.147	127.416	0	0	0	0	0	0	0	200	903	0	0	0	0	0	0	0	603	903	0
630	3	41.7352	-50.0493	-694.356	119313	69659.7	2650.59	300.323	128.167	0	0	0	0	0	0	0	200	903	0	0	0	0	0	0	0	603	903	0
630	4	40.9723	-50.0493	-692.22	119313	69781.7	2604.81	300.809	127.637	0	0	0	0	0	0	0	200	903	0	0	0	0	0	0	0	603	903	0
630	5	40.9723	-48.9812	-690.694	119405	69354.5	2833.69	300.413	127.124	0	0	0	0	0	0	0	200	903	0	0	0	0	0	0	0	603	903	0
630	6	42.0404	-47.3027	-688.558	119038	69232.4	3016.8	300.547	127.119	0	0	0	0	0	0	0	200	903	0	0	0	0	0	0	0	603	903	0
630	7	41.7352	-46.8449	-686.422	119222	68866.2	3108.35	300.326	126.314	0	0	0	0	0	0	0	200	903	0	0	0	0	0	0	0	603	903	0
630	8	42.0404	-47.7605	-681.234	119130	69232.4	3154.13	301.628	125.126	0	0	0	0	0	0	0	200	903	0	0	0	0	0	0	0	603	903	0
630	9	42.0404	-45.1665	-678.792	117940	68988.3	3245.68	301.634	126.25	0	0	0	0	0	0	0	200	903	0	0	0	0	0	0	0	603	903	0
631	0	40.8197	-45.6242	-678.182	118947	68316.9	3108.35	300.735	124.609	0	0	0	0	0	0	0	200	903	0	0	0	0	0	0	0	603	903	0
631	1	40.8197	-45.1665	-675.74	118123	68439	3108.35	301.28	125.195	0	0	0	0	0	0	0	200	903	0	0	0	0	0	0	0	603	903	0
631	2	41.2775	-42.7251	-674.52	117848	68439	3245.68	301.463	125.286	0	0	0	0	0	0	0	200	903	0	0	0	0	0	0	0	603	903	0
631	3	40.9723	-43.488	-671.773	118398	68316.9	3566.12	301.696	123.754	0	0	0	0	0	0	0	200	903	0	0	0	0	0	0	0	603	903	0
631	4	40.5145	-42.4199	-666.585	117757	68133.8	3703.45	302.213	123.343	0	0	0	0	0	0	0	200	903	0	0	0	0	0	0	0	603	903	0
631	5	40.9723	-41.3518	-666.89	117940	68377.9	3337.23	302.533	123.15	0	0	0	0	0	0	0	200	903	0	0	0	0	0	0	0	603	903	0
631	6	40.5145	-41.3518	-665.059	118031	67401.4	3566.12	301.346	122.525	0	0	0	0	0	0	0	200	903	0	0	0	0	0	0	0	603	903	0
631	7	40.5145	-40.4362	-662.618	117390	67706.5	3703.45	302.18	122.838	0	0	0	0	0	0	0	200	903	0	0	0	0	0	0	0	603	903	0
631	8	40.9723	-40.2837	-660.787	117390	68011.7	3749.22	302.925	122.347	0	0	0	0	0	0	0	200	903	0	0	0	0	0	0	0	603	903	0
631	9	40.2093	-39.5207	-658.345	116933	67767.6	3749.22	302.936	122.384	0	0	0	0	0	0	0	200	903	0	0	0	0	0	0	0	603	903	0
632	0	40.3619	-37.8423	-654.988	117116	67828.6	3886.55	303.557	121.194	0	0	0	0	0	0	0	200	903	0	0	0	0	0	0	0	603	903	0
632	1	40.0567	-39.8259	-654.073	117299	67523.4	3749.22	303.235	120.664	0	0	0	0	0	0	0	200	903	0	0	0	0	0	0	0	603	903	0
632	2	40.2093	-36.469	-652.852	116750	67523.4	3932.33	303.428	121.17	0	0	0	0	0	0	0	200	903	0	0	0	0	0	0	0	603	903	0
632	3	40.5145	-37.0793	-649.8	117207	67340.3	4069.66	303.632	119.626	0	0	0	0	0	0	0	200	903	0	0	0	0	0	0	0	603	903	0
632	4	41.1249	-36.1638	-645.833	116200	67035.1	4206.98	303.796	120.077	0	0	0	0	0	0	0	200	903	0	0	0	0	0	0	0	603	903	0
632	5	41.2775	-35.4008	-646.443	115651	67157.2	4069.66	303.887	121.097	0	0	0	0	0	0	0	200	903	0	0	0	0	0	0	0	603	903	0
632	6	40.9723	-35.5534	-643.392	116933	66363.8	4435.87	303.147	118.256	0	0	0	0	0	0	0	200	903	0	0	0	0	0	0	0	603	903	0
632	7	40.0567	-33.875	-641.866	115376	66974.1	3840.77	304.343	120.249	0	0	0	0	0	0	0	200	903	0	0	0	0	0	0	0	603	903	0
632	8	39.7516	-33.7224	-640.645	116292	66485.8	4344.31	303.78	118.477	0	0	0	0	0	0	0	200	903	0	0	0	0	0	0	0	603	903	0
632	9	38.9886	-33.875	-639.119	115376	66485.8	4344.31	304.027	119.476	0	0	0	0	0	0	0	200	903	0	0	0	0	0	0	0	603	903	0
633	0	38.836	-32.3491	-634.542	115376	66546.9	4435.87	304.874	118.174	0	0	0	0	0	0	0	200	903	0	0	0	0	0	0	0	603	903	0
633	1	38.2257	-32.3491	-634.236	115559	66241.7	4344.31	304.443	117.798	0	0	0	0	0	0	0	200	903	0	0	0	0	0	0	0	603	903	0
633	2	38.5309	-31.7387	-630.88	115285	66302.7	4298.54	305.096	117.263	0	0	0	0	0	0	0	200	903	0	0	0	0	0	0	0	603	903	0
633	3	38.2257	-30.518	-629.659	115926	65936.5	4390.09	304.718	115.891	0	0	0	0	0	0	0	200	903	0	0	0	0	0	0	0	603	903	0
633	4	38.6835	-30.2129	-622.945	115559	65692.4	4756.3	305.455	114.495	0	0	0	0	0	0	0	200	903	0	0	0	0	0	0	0	603	903	0
633	5	37.9205	-29.7551	-625.692	114186	65814.4	4664.75	305.187	117.504	0	0	0	0	0	0	0	200	903	0	0	0	0	0	0	0	603	903	0
633	6	37.4628	-28.9922	-623.86	115102	65692.4	4435.87	305.3	115.501	0	0	0	0	0	0	0	200	903	0	0	0	0	0	0	0	603	903	0
633	7	37.3102	-29.1447	-620.809	115559	65692.4	4527.42	305.817	113.857	0	0	0	0	0	0	0	200	903	0	0	0	0	0	0	0	603	903	0
633	8	37.005	-27.7715	-619.588	114278	65448.2	4710.52	305.632	115.559	0	0	0	0	0	0	0	200	903	0	0	0	0	0	0	0	603	903	0
633	9	37.9205	-28.687	-616.231	114735	65204.1	4710.52	305.811	113.811	0	0	0	0	0	0	0	200	903	0	0	0	0	0	0	0	603	903	0
634	0	38.0731	-27.4663	-614.095	114369	65326.2	5259.84	306.378	113.76	0	0	0	0	0	0	0	200	903	0	0	0	0	0	0	0	603	903	0
634	1	37.005	-26.5508	-611.043	114369	64837.9	5030.96	306.11	112.829	0	0	0	0	0	0	0	200	903	0	0	0	0	0	0	0	603	903	0
634	2	36.8524	-28.2292	-609.822	114186	65143.1	4939.41	306.823	112.755	0	0	0	0	0	0	0	200	903	0	0	0	0	0	0	0	603	903	0
634	3	36.2421	-25.4826	-607.381	114095	64776.8	4893.63	306.649	112.153	0	0	0	0	0	0	0	200	903	0	0	0	0	0	0	0	603	903	0
634	4	35.6317	-26.3982	-605.855	115102	64837.9	4847.85	307.019	110.018	0	0	0	0	0	0	0	200	903	0	0	0	0	0	0	0	603	903	0
634	5	35.7843	-25.4826	-604.94	113820	64776.8	5076.74	307.08	111.849	0	0	0	0	0	0	0	200	903	0	0	0	0	0	0	0	603	903	0
634	6	35.7843	-25.0249	-601.888	113728	64410.6	5076.74	307.014	111.047	0	0	0	0	0	0	0	200	903	0	0	0	0	0	0	0	603	903	0
634	7	35.4791	-24.1093	-600.057	113545	64166.5	5168.29	306.934	110.776	0	0	0	0	0	0	0	200	903	0	0	0	0	0	0	0	603	903	0
634	8	35.6317	-24.7197	-595.784	113271	64288.6	4985.18	307.906	109.88	0	0	0	0	0	0	0	200	903	0	0	0	0	0	0	0	603	903	0
634	9	35.7843	-22.4309	-596.089	113637	64227.5	4985.18	307.748	109.363	0	0	0	0	0	0	0	200	903	0	0	0	0	0	0	0	603	903	0
635	0	35.1739	-24.7197	-595.479	113820	64227.5	5305.62	307.859	108.86	0	0	0	0	0	0	0	200	903	0	0	0	0	0	0	0	603	903	0
635	1	35.0213	-21.5154	-592.733	113087	63922.4	5168.29	307.844	109.21	0	0	0	0	0	0	0	200	903	0	0	0	0	0	0	0	603	903	0
635	2	35.0213	-20.7524	-590.901	113271	64227.5	5259.84	308.694	108.309	0	0	0	0	0	0	0	200	903	0	0	0	0	0	0	0	603	903	0
635	3	34.1058	-21.5154	-589.681	112355	64288.6	5397.17	309.023	109.465	0	0	0	0	0	0	0	200	903	0	0	0	0	0	0	0	603	903	0
635	4	34.2584	-20.1421	-586.934	112813	63861.3	4985.18	308.805	107.793	0	0	0	0	0	0	0	200	903	0	0	0	0	0	0	0	603	903	0
635	5	34.1058	-19.6843	-586.324	112904	63678.2	5259.84	308.606	107.437	0	0	0	0	0	0	0	200	903	0	0	0	0	0	0	0	603	903	0
635	6	34.1058	-20.2946	-586.934	112538	63617.2	5488.72	308.389	108.261	0	0	0	0	0	0	0	200	903	0	0	0	0	0	0	0	603	903	0
635	7	33.9532	-19.2265	-585.408	111989	63189.9	5580.28	307.942	108.7	0	0	0	0	0	0	0	200	903	0	0	0	0	0	0	0	603	903	0
635	8	33.6481	-19.5317	-582.051	112904	63373	5214.06	308.879	106.023	0	0	0	0	0	0	0	200	903	0	0	0	0	0	0	0	603	903	0
635	9	33.6481	-18.7688	-580.22	112447	63128.9	5488.72	308.802	106.2	0	0	0	0	0	0	0	200	903	0	0	0	0	0	0	0	603	903	0
636	0	33.0377	-17.5481	-579	112355	63312	5397.17	309.347	105.95	0	0	0	0	0	0	0	200	903	0	0	0	0	0	0	0	603	903	0
636	1	33.3429	-17.8532	-575.338	112996	63128.9	5580.28	309.725	103.601	0	0	0	0	0	0	0	200	903	0	0	0	0	0	0	0	603	903	0
636	2	34.2584	-16.1748	-575.643	111989	62823.7	5442.95	309.137	105.454	0	0	0	0	0	0	0	200	903	0	0	0	0	0	0	0	603	903	0
636	3	32.2748	-16.6325	-573.506	112264	62945.8	5809.16	309.756	104.251	0	0	0	0	0	0	0	200	903	0	0	0	0	0	0	0	603	903	0
636	4	32.1222	-15.8696	-572.896	111989	62823.7	5763.38	309.66	104.522	0	0	0	0	0	0	0	200	903	0	0	0	0	0	0	0	603	903	0
636	5	31.817	-14.8015	-571.37	111897	62396.5	5488.72	309.205	104.16	0	0	0	0	0	0	0	200	903	0	0	0	0	0	0	0	603	903	0
636	6	31.5118	-14.4963	-571.37	112996	62701.7	5626.05	309.739	102.237	0	0	0	0	0	0	0	200	903	0	0	0	0	0	0	0	603	903	0
636	7	31.6644	-14.9541	-570.15	111623	62701.7	5809.16	309.974	104.222	0	0	0	0	0	0	0	200	903	0	0	0	0	0	0	0	603	903	0
636	8	31.9696	-14.9541	-568.013	111256	62396.5	6038.04	309.85	104.131	0	0	0	0	0	0	0	200	903	0	0	0	0	0	0	0	603	903	0
636	9	33.9532	-14.3437	-565.877	112080	62335.4	5671.83	310.157	101.935	0	0	0	0	0	0	0	200	903	0	0	0	0	0	0	0	603	903	0
637	0	31.5118	-12.6653	-563.13	111531	62274.4	6175.37	310.586	101.944	0	0	0	0	0	0	0	200	903	0	0	0	0	0	0	0	603	903	0
637	1	31.2066	-12.3601	-562.52	112172	62396.5	5946.49	310.923	100.59	0	0	0	0	0	0	0	200	903	0	0	0	0	0	0	0	603	903	0
637	2	31.2066	-12.9704	-560.994	112538	62396.5	5717.6	311.225	99.3951	0	0	0	0	0	0	0	200	903	0	0	0	0	0	0	0	603	903	0
637	3	30.1385	-11.5971	-560.689	111165	62030.3	5992.26	310.632	101.735	0	0	0	0	0	0	0	200	903	0	0	0	0	0	0	0	603	903	0
637	4	30.9015	-12.6653	-557.943	111897	62091.3	6312.7	311.286	99.4465	0	0	0	0	0	0	0	200	903	0	0	0	0	0	0	0	603	903	0
637	5	30.9015	-11.5971	-554.586	111165	62152.3	6083.82	312.07	99.5532	0	0	0	0	0	0	0	200	903	0	0	0	0	0	0	0	603	903	0
637	6	31.6644	-9.91867	-556.111	110982	62274.4	6038.04	311.982	100.432	0	0	0	0	0	0	0	200	903	0	0	0	0	0	0	0	603	903	0
637	7	30.7489	-10.6816	-554.891	111806	61419.9	5900.71	310.688	98.5085	0	0	0	0	0	0	0	200	903	0	0	0	0	0	0	0	603	903	0
637	8	30.7489	-9.76608	-553.365	111531	61725.1	5992.26	311.545	98.4493	0	0	0	0	0	0	0	200	903	0	0	0	0	0	0	0	603	903	0
637	9	29.8334	-9.46091	-552.755	111623	61908.2	6038.04	311.999	98.0611	0	0	0	0	0	0	0	200	903	0	0	0	0	0	0	0	603	903	0
638	0	30.7489	-11.1394	-551.229	111256	61847.2	6312.7	312.199	98.1665	0	0	0	0	0	0	0	200	903	0	0	0	0	0	0	0	603	903	0
638	1	30.1385	-8.54538	-550.923	110799	61725.1	6404.25	312.039	98.8856	0	0	0	0	0	0	0	200	903	0	0	0	0	0	0	0	603	903	0
638	2	30.5963	-9.15573	-548.787	111897	61542	6450.03	312.142	96.1008	0	0	0	0	0	0	0	200	903	0	0	0	0	0	0	0	603	903	0
638	3	29.8334	-8.39279	-547.261	110982	61542	6907.79	312.454	97.2051	0	0	0	0	0	0	0	200	903	0	0	0	0	0	0	0	603	903	0
638	4	31.0541	-8.2402	-548.787	111073	61664.1	6404.25	312.364	97.6021	0	0	0	0	0	0	0	200	903	0	0	0	0	0	0	0	603	903	0
638	5	30.9015	-7.93503	-547.261	111531	61297.9	6450.03	312.008	96.2014	0	0	0	0	0	0	0	200	903	0	0	0	0	0	0	0	603	903	0
638	6	30.1385	-8.2402	-546.346	110524	61419.9	6450.03	312.419	97.7032	0	0	0	0	0	0	0	200	903	0	0	0	0	0	0	0	603	903	0
638	7	30.2911	-5.7988	-545.125	111440	60870.6	6953.57	311.664	95.5707	0	0	0	0	0	0	0	200	903	0	0	0	0	0	0	0	603	903	0
638	8	29.223	-7.32468	-544.21	110890	61481	6358.47	312.973	96.2362	0	0	0	0	0	0	0	200	903	0	0	0	0	0	0	0	603	903	0
638	9	28.7652	-4.88327	-543.904	111165	61419.9	6450.03	312.924	95.6169	0	0	0	0	0	0	0	200	903	0	0	0	0	0	0	0	603	903	0
639	0	28.6127	-4.73068	-540.853	111440	61358.9	6587.36	313.448	93.9558	0	0	0	0	0	0	0	200	903	0	0	0	0	0	0	0	603	903	0
639	1	28.4601	-5.34104	-542.684	110524	60992.7	6633.13	312.391	96.3381	0	0	0	0	0	0	0	200	903	0	0	0	0	0	0	0	603	903	0
639	2	28.7652	-3.96774	-541.768	110707	61358.9	6724.68	313.257	95.6559	0	0	0	0	0	0	0	200	903	0	0	0	0	0	0	0	603	903	0
639	3	28.7652	-3.81516	-540.853	110524	60992.7	6587.36	312.771	95.6486	0	0	0	0	0	0	0	200	903	0	0	0	0	0	0	0	603	903	0
639	4	28.0023	-3.66257	-538.716	110799	61114.7	6907.79	313.445	94.3284	0	0	0	0	0	0	0	200	903	0	0	0	0	0	0	0	603	903	0
639	5	28.6127	-2.13669	-539.022	110707	60870.6	6678.91	312.928	94.6146	0	0	0	0	0	0	0	200	903	0	0	0	0	0	0	0	603	903	0
639	6	28.3075	-3.2048	-538.716	111073	60748.5	6816.24	312.765	93.8185	0	0	0	0	0	0	0	200	903	0	0	0	0	0	0	0	603	903	0
639	7	28.0023	-2.44187	-533.834	110158	61297.9	6816.24	314.826	93.6477	0	0	0	0	0	0	0	200	903	0	0	0	0	0	0	0	603	903	0
639	8	29.5282	-1.52634	-535.97	111531	60870.6	6907.79	313.571	91.9079	0	0	0	0	0	0	0	200	903	0	0	0	0	0	0	0	603	903	0
639	9	29.0704	-1.22116	-535.359	111348	61175.8	6907.79	314.271	92.0126	0	0	0	0	0	0	0	200	903	0	0	0	0	0	0	0	603	903	0
640	0	27.8497	-0.915986	-533.528	110982	60931.6	6770.46	314.205	91.9852	0	0	0	0	0	0	0	200	903	0	0	0	0	0	0	0	603	903	0
640	1	27.6971	-0.610811	-533.528	110524	60992.7	6816.24	314.319	92.8432	0	0	0	0	0	0	0	200	903	0	0	0	0	0	0	0	603	903	0
640	2	28.1549	-1.06857	-533.223	111165	60931.6	6907.79	314.27	91.5228	0	0	0	0	0	0	0	200	903	0	0	0	0	0	0	0	603	903	0
640	3	27.6971	0.457305	-532.613	110890	61053.7	7090.9	314.631	91.7996	0	0	0	0	0	0	0	200	903	0	0	0	0	0	0	0	603	903	0
640	4	28.0023	0.457305	-532.003	111531	61297.9	7045.12	315.221	90.3561	0	0	0	0	0	0	0	200	903	0	0	0	0	0	0	0	603	903	0
640	5	27.392	1.52542	-531.697	111440	61236.8	7319.78	315.172	90.4079	0	0	0	0	0	0	0	200	903	0	0	0	0	0	0	0	603	903	0
640	6	27.392	1.37283	-528.646	111531	60626.5	7182.45	314.683	89.0248	0	0	0	0	0	0	0	200	903	0	0	0	0	0	0	0	603	903	0
640	7	26.7816	1.52542	-526.815	112264	60809.6	7136.67	315.429	86.9013	0	0	0	0	0	0	0	200	903	0	0	0	0	0	0	0	603	903	0
640	8	28.6127	1.98318	-530.782	111348	60809.6	7182.45	314.566	90.2189	0	0	0	0	0	0	0	200	903	0	0	0	0	0	0	0	603	903	0
640	9	28.4601	1.8306	-528.951	111714	60931.6	7090.9	315.193	88.8003	0	0	0	0	0	0	0	200	903	0	0	0	0	0	0	0	603	903	0
641	0	28.0023	2.59353	-528.951	110982	60809.6	7182.45	314.963	90.185	0	0	0	0	0	0	0	200	903	0	0	0	0	0	0	0	603	903	0
641	1	27.8497	3.0513	-528.34	111897	60626.5	7365.55	314.749	88.2098	0	0	0	0	0	0	0	200	903	0	0	0	0	0	0	0	603	903	0
641	2	27.6971	2.28836	-527.425	111989	60870.6	7411.33	315.411	87.6686	0	0	0	0	0	0	0	200	903	0	0	0	0	0	0	0	603	903	0
641	3	28.0023	3.50906	-528.035	111440	60626.5	7411.33	314.815	88.9543	0	0	0	0	0	0	0	200	903	0	0	0	0	0	0	0	603	903	0
641	4	27.8497	4.72977	-526.509	111806	60809.6	7502.88	315.496	87.6471	0	0	0	0	0	0	0	200	903	0	0	0	0	0	0	0	603	903	0
641	5	28.9178	3.81424	-527.425	111348	60504.4	7914.87	314.717	88.8837	0	0	0	0	0	0	0	200	903	0	0	0	0	0	0	0	603	903	0
641	6	27.392	4.88235	-527.12	111440	60809.6	7594.44	315.362	88.5878	0	0	0	0	0	0	0	200	903	0	0	0	0	0	0	0	603	903	0
641	7	27.0868	4.72977	-525.899	112355	60931.6	7548.66	315.862	86.3562	0	0	0	0	0	0	0	200	903	0	0	0	0	0	0	0	603	903	0
641	8	27.2394	6.25564	-527.425	111440	60870.6	7731.76	315.411	88.7101	0	0	0	0	0	0	0	200	903	0	0	0	0	0	0	0	603	903	0
641	9	28.1549	5.34012	-526.509	112447	60809.6	8097.98	315.496	86.4299	0	0	0	0	0	0	0	200	903	0	0	0	0	0	0	0	603	903	0
642	0	27.8497	5.64529	-523.152	111897	60565.4	7914.87	315.77	86.1096	0	0	0	0	0	0	0	200	903	0	0	0	0	0	0	0	603	903	0
642	1	28.1549	4.57718	-524.068	111531	60504.4	7960.65	315.451	87.182	0	0	0	0	0	0	0	200	903	0	0	0	0	0	0	0	603	903	0
642	2	26.629	6.56082	-524.678	112630	60931.6	7777.54	316.131	85.3357	0	0	0	0	0	0	0	200	903	0	0	0	0	0	0	0	603	903	0
642	3	27.392	7.01858	-524.984	111989	60992.7	7823.32	316.18	86.6812	0	0	0	0	0	0	0	200	903	0	0	0	0	0	0	0	603	903	0
642	4	26.9342	7.93411	-524.984	112996	60870.6	8097.98	315.948	84.7629	0	0	0	0	0	0	0	200	903	0	0	0	0	0	0	0	603	903	0
642	5	26.9342	7.17117	-524.678	112904	60504.4	8097.98	315.317	84.8121	0	0	0	0	0	0	0	200	903	0	0	0	0	0	0	0	603	903	0
642	6	27.0868	8.23929	-524.068	111989	60626.5	8189.53	315.684	86.3085	0	0	0	0	0	0	0	200	903	0	0	0	0	0	0	0	603	903	0
642	7	27.392	8.39188	-523.763	112813	60931.6	8372.63	316.334	84.6108	0	0	0	0	0	0	0	200	903	0	0	0	0	0	0	0	603	903	0
642	8	27.8497	8.39188	-522.542	112538	60748.5	8281.08	316.256	84.6333	0	0	0	0	0	0	0	200	903	0	0	0	0	0	0	0	603	903	0
642	9	27.0868	8.69705	-522.847	113087	61297.9	8418.41	317.239	83.7084	0	0	0	0	0	0	0	200	903	0	0	0	0	0	0	0	603	903	0
643	0	27.2394	9.45999	-523.763	113728	60870.6	8601.52	316.218	82.8629	0	0	0	0	0	0	0	200	903	0	0	0	0	0	0	0	603	903	0
643	1	26.9342	8.84964	-522.847	112904	60565.4	8738.84	315.838	84.0585	0	0	0	0	0	0	0	200	903	0	0	0	0	0	0	0	603	903	0
643	2	27.8497	10.5281	-522.847	113637	61053.7	8509.96	316.772	82.6577	0	0	0	0	0	0	0	200	903	0	0	0	0	0	0	0	603	903	0
643	3	27.5445	10.3755	-522.847	113728	61114.7	8647.29	316.888	82.4826	0	0	0	0	0	0	0	200	903	0	0	0	0	0	0	0	603	903	0
643	4	27.6971	11.291	-521.016	113271	61358.9	8738.84	317.768	82.5968	0	0	0	0	0	0	0	200	903	0	0	0	0	0	0	0	603	903	0
643	5	27.392	11.7488	-520.711	114369	60992.7	8876.17	317.133	80.3595	0	0	0	0	0	0	0	200	903	0	0	0	0	0	0	0	603	903	0
643	6	28.1549	11.5962	-522.847	114644	60931.6	8784.62	316.538	80.7316	0	0	0	0	0	0	0	200	903	0	0	0	0	0	0	0	603	903	0
643	7	28.6127	11.5962	-523.458	113362	61419.9	9333.94	317.335	83.4359	0	0	0	0	0	0	0	200	903	0	0	0	0	0	0	0	603	903	0
643	8	28.4601	12.2066	-524.373	113454	60931.6	9196.61	316.199	83.6394	0	0	0	0	0	0	0	200	903	0	0	0	0	0	0	0	603	903	0
643	9	28.6127	13.1221	-523.458	114278	61481	9105.06	317.452	81.6868	0	0	0	0	0	0	0	200	903	0	0	0	0	0	0	0	603	903	0
644	0	28.6127	12.3592	-524.373	114186	61297.9	9196.61	316.897	82.2426	0	0	0	0	0	0	0	200	903	0	0	0	0	0	0	0	603	903	0
644	1	28.7652	13.1221	-524.984	115193	61175.8	9333.94	316.529	80.5775	0	0	0	0	0	0	0	200	903	0	0	0	0	0	0	0	603	903	0
644	2	28.6127	14.0376	-523.763	114644	61419.9	9471.27	317.267	81.1148	0	0	0	0	0	0	0	200	903	0	0	0	0	0	0	0	603	903	0
644	3	28.9178	14.0376	-522.237	115468	61053.7	9562.82	316.908	78.8975	0	0	0	0	0	0	0	200	903	0	0	0	0	0	0	0	603	903	0
644	4	30.5963	14.3428	-525.289	115376	61786.1	9745.92	317.623	80.3563	0	0	0	0	0	0	0	200	903	0	0	0	0	0	0	0	603	903	0
644	5	29.8334	15.1057	-526.815	114919	61725.1	9700.15	317.167	81.8615	0	0	0	0	0	0	0	200	903	0	0	0	0	0	0	0	603	903	0
644	6	29.6808	15.8687	-526.509	116292	61481	9700.15	316.771	79.1268	0	0	0	0	0	0	0	200	903	0	0	0	0	0	0	0	603	903	0
644	7	29.8334	15.8687	-527.73	116200	61786.1	9745.92	317.079	79.8111	0	0	0	0	0	0	0	200	903	0	0	0	0	0	0	0	603	903	0
644	8	29.9859	16.0213	-527.73	115743	61236.8	10203.7	316.038	80.6785	0	0	0	0	0	0	0	200	903	0	0	0	0	0	0	0	603	903	0
644	9	29.6808	16.479	-528.34	116292	61969.2	10020.6	317.29	79.8923	0	0	0	0	0	0	0	200	903	0	0	0	0	0	0	0	603	903	0
645	0	30.7489	16.7842	-525.289	116292	62091.3	10157.9	318.204	78.6135	0	0	0	0	0	0	0	200	903	0	0	0	0	0	0	0	603	903	0
645	1	29.9859	16.479	-523.763	116567	62335.4	10020.6	319.015	77.4441	0	0	0	0	0	0	0	200	903	0	0	0	0	0	0	0	603	903	0
645	2	29.3756	17.5471	-528.951	117574	62396.5	10112.1	317.963	77.723	0	0	0	0	0	0	0	200	903	0	0	0	0	0	0	0	603	903	0
645	3	29.8334	18.0049	-530.477	116750	61542	10386.8	316.013	79.9156	0	0	0	0	0	0	0	200	903	0	0	0	0	0	0	0	603	903	0
645	4	29.6808	18.9204	-530.782	117848	62396.5	10112.1	317.556	77.9723	0	0	0	0	0	0	0	200	903	0	0	0	0	0	0	0	603	903	0
645	5	30.2911	18.1575	-532.308	117940	62457.5	10707.2	317.334	78.4368	0	0	0	0	0	0	0	200	903	0	0	0	0	0	0	0	603	903	0
645	6	30.2911	20.1411	-531.087	117848	62457.5	10478.3	317.603	78.0999	0	0	0	0	0	0	0	200	903	0	0	0	0	0	0	0	603	903	0
645	7	30.2911	19.9886	-532.308	118489	63006.8	10890.3	318.365	77.4049	0	0	0	0	0	0	0	200	903	0	0	0	0	0	0	0	603	903	0
645	8	30.2911	19.9886	-533.223	118306	62335.4	10661.5	316.903	78.1304	0	0	0	0	0	0	0	200	903	0	0	0	0	0	0	0	603	903	0
645	9	30.5963	19.073	-532.918	119038	62823.7	10890.3	317.886	76.629	0	0	0	0	0	0	0	200	903	0	0	0	0	0	0	0	603	903	0
646	0	32.4274	20.7515	-533.223	119405	62884.8	11027.7	317.933	76.0701	0	0	0	0	0	0	0	200	903	0	0	0	0	0	0	0	603	903	0
646	1	32.2748	19.5308	-533.223	119405	63128.9	11531.2	318.391	76.0701	0	0	0	0	0	0	0	200	903	0	0	0	0	0	0	0	603	903	0
646	2	31.3592	21.8196	-533.528	119954	63434.1	11302.3	318.895	75.1686	0	0	0	0	0	0	0	200	903	0	0	0	0	0	0	0	603	903	0
646	3	31.3592	20.7515	-535.97	120412	62884.8	11256.5	317.329	75.3386	0	0	0	0	0	0	0	200	903	0	0	0	0	0	0	0	603	903	0
646	4	31.0541	23.3455	-535.665	120046	63617.2	11256.5	318.763	75.8943	0	0	0	0	0	0	0	200	903	0	0	0	0	0	0	0	603	903	0
646	5	32.1222	23.3455	-533.834	120961	63434.1	11622.8	318.827	73.4106	0	0	0	0	0	0	0	200	903	0	0	0	0	0	0	0	603	903	0
646	6	32.2748	23.3455	-537.801	120686	63739.3	11805.9	318.518	75.5928	0	0	0	0	0	0	0	200	903	0	0	0	0	0	0	0	603	903	0
646	7	33.3429	23.3455	-538.106	121053	64044.4	11760.1	319.018	75.0396	0	0	0	0	0	0	0	200	903	0	0	0	0	0	0	0	603	903	0
646	8	32.4274	23.8033	-538.716	121693	63373	11989	317.637	74.1048	0	0	0	0	0	0	0	200	903	0	0	0	0	0	0	0	603	903	0
646	9	31.9696	25.3291	-540.242	121877	64044.4	12126.3	318.548	74.4039	0	0	0	0	0	0	0	200	903	0	0	0	0	0	0	0	603	903	0
647	0	32.7325	25.4817	-542.989	122975	63983.4	12263.6	317.836	73.5217	0	0	0	0	0	0	0	200	903	0	0	0	0	0	0	0	603	903	0
647	1	33.3429	26.0921	-543.294	122792	64166.5	12309.4	318.106	73.9859	0	0	0	0	0	0	0	200	903	0	0	0	0	0	0	0	603	903	0
647	2	33.8006	26.7024	-542.989	122243	64715.8	12584.1	319.184	74.8706	0	0	0	0	0	0	0	200	903	0	0	0	0	0	0	0	603	903	0
647	3	32.8851	27.6179	-545.125	123525	64471.7	12492.5	318.27	73.4015	0	0	0	0	0	0	0	200	903	0	0	0	0	0	0	0	603	903	0
647	4	34.1058	27.3128	-546.346	123616	65021	12446.7	319.011	73.7403	0	0	0	0	0	0	0	200	903	0	0	0	0	0	0	0	603	903	0
647	5	33.0377	28.6861	-548.482	123891	65021	12584.1	318.547	74.1207	0	0	0	0	0	0	0	200	903	0	0	0	0	0	0	0	603	903	0
647	6	34.2584	28.5335	-550.618	124074	65021	13087.6	318.087	74.6645	0	0	0	0	0	0	0	200	903	0	0	0	0	0	0	0	603	903	0
647	7	34.2584	29.1438	-551.839	124623	65570.3	13087.6	318.821	74.1675	0	0	0	0	0	0	0	200	903	0	0	0	0	0	0	0	603	903	0
647	8	34.2584	30.2119	-553.06	125539	65448.2	13179.2	318.338	73.0106	0	0	0	0	0	0	0	200	903	0	0	0	0	0	0	0	603	903	0
647	9	34.1058	30.3645	-554.586	125996	65753.4	13270.7	318.563	72.8097	0	0	0	0	0	0	0	200	903	0	0	0	0	0	0	0	603	903	0
648	0	34.5636	31.5852	-556.111	126546	66119.6	13408	318.896	72.4454	0	0	0	0	0	0	0	200	903	0	0	0	0	0	0	0	603	903	0
648	1	34.411	32.1956	-558.553	127644	66058.6	13453.8	318.267	71.4731	0	0	0	0	0	0	0	200	903	0	0	0	0	0	0	0	603	903	0
648	2	35.3265	30.8223	-556.722	127461	66180.7	13728.5	318.876	71.0503	0	0	0	0	0	0	0	200	903	0	0	0	0	0	0	0	603	903	0
648	3	33.9532	32.1956	-556.722	127370	66058.6	14140.5	318.656	71.2147	0	0	0	0	0	0	0	200	903	0	0	0	0	0	0	0	603	903	0
648	4	34.7162	33.7215	-561.605	128652	66852	13957.4	319.038	70.9216	0	0	0	0	0	0	0	200	903	0	0	0	0	0	0	0	603	903	0
648	5	34.7162	34.0266	-562.825	128652	66974.1	13957.4	318.996	71.4184	0	0	0	0	0	0	0	200	903	0	0	0	0	0	0	0	603	903	0
648	6	34.7162	34.9422	-565.267	129201	67096.2	14186.2	318.698	71.434	0	0	0	0	0	0	0	200	903	0	0	0	0	0	0	0	603	903	0
648	7	35.3265	34.9422	-566.793	129659	67340.3	14506.7	318.809	71.2417	0	0	0	0	0	0	0	200	903	0	0	0	0	0	0	0	603	903	0
648	8	35.6317	36.0103	-568.929	129750	67523.4	14552.4	318.685	71.9396	0	0	0	0	0	0	0	200	903	0	0	0	0	0	0	0	603	903	0
648	9	35.3265	36.0103	-567.098	130483	67828.6	14918.7	319.607	69.9117	0	0	0	0	0	0	0	200	903	0	0	0	0	0	0	0	603	903	0
649	0	38.0731	36.6206	-571.675	131306	68255.9	15239.1	319.396	70.3129	0	0	0	0	0	0	0	200	903	0	0	0	0	0	0	0	603	903	0
649	1	37.005	37.5362	-571.675	131398	68072.8	14918.7	319.076	70.1527	0	0	0	0	0	0	0	200	903	0	0	0	0	0	0	0	603	903	0
649	2	36.8524	38.6043	-573.812	133229	68561	15284.9	319.484	67.8174	0	0	0	0	0	0	0	200	903	0	0	0	0	0	0	0	603	903	0
649	3	36.8524	38.4517	-576.558	133778	68622.1	15513.8	319.02	67.9707	0	0	0	0	0	0	0	200	903	0	0	0	0	0	0	0	603	903	0
649	4	37.6153	39.2146	-578.084	133504	68927.2	15696.9	319.234	69.0583	0	0	0	0	0	0	0	200	903	0	0	0	0	0	0	0	603	903	0
649	5	37.9205	37.5362	-580.526	134694	69293.5	15651.1	319.363	67.9793	0	0	0	0	0	0	0	200	903	0	0	0	0	0	0	0	603	903	0
649	6	38.5309	40.7405	-579.915	134328	69537.6	15880	319.91	68.3665	0	0	0	0	0	0	0	200	903	0	0	0	0	0	0	0	603	903	0
649	7	37.7679	41.0457	-583.272	135060	69720.7	15880	319.534	68.4439	0	0	0	0	0	0	0	200	903	0	0	0	0	0	0	0	603	903	0
649	8	38.5309	41.5034	-588.46	135884	69842.8	16246.2	318.687	69.0852	0	0	0	0	0	0	0	200	903	0	0	0	0	0	0	0	603	903	0
649	9	39.7516	41.8086	-589.986	136342	70331	16154.6	319.208	68.9065	0	0	0	0	0	0	0	200	903	0	0	0	0	0	0	0	603	903	0
650	0	39.7516	43.1819	-589.986	136708	70575.2	16337.7	319.622	68.2858	0	0	0	0	0	0	0	200	903	0	0	0	0	0	0	0	603	903	0
650	1	39.4464	43.1819	-592.427	137624	70636.2	16520.8	319.232	67.6954	0	0	0	0	0	0	0	200	903	0	0	0	0	0	0	0	603	903	0
650	2	40.0567	44.5552	-594.869	138265	70941.4	16703.9	319.256	67.5714	0	0	0	0	0	0	0	200	903	0	0	0	0	0	0	0	603	903	0
650	3	40.0567	45.4707	-596.395	139455	71246.6	16841.3	319.462	66.1704	0	0	0	0	0	0	0	200	903	0	0	0	0	0	0	0	603	903	0
650	4	40.5145	44.4026	-598.531	139821	71734.9	17024.4	319.852	66.3932	0	0	0	0	0	0	0	200	903	0	0	0	0	0	0	0	603	903	0
650	5	39.9042	45.9285	-598.531	139729	71612.8	17253.2	319.648	66.5461	0	0	0	0	0	0	0	200	903	0	0	0	0	0	0	0	603	903	0
650	6	41.1249	46.9966	-604.329	140462	71795.9	17207.5	318.803	67.574	0	0	0	0	0	0	0	200	903	0	0	0	0	0	0	0	603	903	0
650	7	42.3456	47.1492	-606.771	140736	71673.8	17527.9	318.123	68.0566	0	0	0	0	0	0	0	200	903	0	0	0	0	0	0	0	603	903	0
650	8	41.1249	46.844	-608.907	141469	72711.4	17802.6	319.413	67.6675	0	0	0	0	0	0	0	200	903	0	0	0	0	0	0	0	603	903	0
650	9	41.5826	48.2173	-610.738	143208	72955.6	17665.2	319.455	65.5159	0	0	0	0	0	0	0	200	903	0	0	0	0	0	0	0	603	903	0
651	0	41.1249	48.3699	-613.484	142384	73260.7	17527.9	319.417	67.9087	0	0	0	0	0	0	0	200	903	0	0	0	0	0	0	0	603	903	0
651	1	42.0404	49.5906	-615.621	143483	73199.7	18077.2	318.904	66.9296	0	0	0	0	0	0	0	200	903	0	0	0	0	0	0	0	603	903	0
651	2	42.3456	50.201	-618.978	144307	73321.8	18214.6	318.456	66.8624	0	0	0	0	0	0	0	200	903	0	0	0	0	0	0	0	603	903	0
651	3	42.4982	52.4898	-617.452	144856	74054.2	18123	319.935	65.3965	0	0	0	0	0	0	0	200	903	0	0	0	0	0	0	0	603	903	0
651	4	41.43	52.3372	-621.419	146047	74786.6	18489.2	320.348	64.979	0	0	0	0	0	0	0	200	903	0	0	0	0	0	0	0	603	903	0
651	5	42.193	52.6424	-625.386	146047	74786.6	18809.6	319.585	66.4699	0	0	0	0	0	0	0	200	903	0	0	0	0	0	0	0	603	903	0
651	6	42.6507	52.6424	-628.438	146962	74786.6	18672.3	319.004	66.1472	0	0	0	0	0	0	0	200	903	0	0	0	0	0	0	0	603	903	0
651	7	43.2611	54.4734	-630.269	147786	74481.4	18855.4	318.174	65.5192	0	0	0	0	0	0	0	200	903	0	0	0	0	0	0	0	603	903	0
651	8	44.3292	55.0838	-633.321	147878	75458	19359	319.147	66.5046	0	0	0	0	0	0	0	200	903	0	0	0	0	0	0	0	603	903	0
651	9	44.3292	56.6096	-635.152	149159	76251.5	19450.5	320.052	65.1597	0	0	0	0	0	0	0	200	903	0	0	0	0	0	0	0	603	903	0
652	0	44.9396	56.9148	-636.068	150166	76373.5	19496.3	320.071	63.9144	0	0	0	0	0	0	0	200	903	0	0	0	0	0	0	0	603	903	0
652	1	44.1766	57.8304	-638.204	149617	76373.5	19725.2	319.67	65.5654	0	0	0	0	0	0	0	200	903	0	0	0	0	0	0	0	603	903	0
652	2	45.0921	57.8304	-640.645	150990	76556.6	19862.5	319.499	64.3151	0	0	0	0	0	0	0	200	903	0	0	0	0	0	0	0	603	903	0
652	3	45.3973	58.2881	-640.035	150990	77106	19862.5	320.472	64.0904	0	0	0	0	0	0	0	200	903	0	0	0	0	0	0	0	603	903	0
652	4	46.1603	60.5769	-645.223	152364	77777.3	20274.5	320.543	63.8589	0	0	0	0	0	0	0	200	903	0	0	0	0	0	0	0	603	903	0
652	5	46.3129	60.5769	-648.275	152638	77960.5	20182.9	320.258	64.5468	0	0	0	0	0	0	0	200	903	0	0	0	0	0	0	0	603	903	0
652	6	46.1603	60.7295	-650.716	153462	78021.5	20320.3	319.901	64.164	0	0	0	0	0	0	0	200	903	0	0	0	0	0	0	0	603	903	0
652	7	47.2284	62.1028	-654.378	154652	78448.7	20594.9	319.883	63.6649	0	0	0	0	0	0	0	200	903	0	0	0	0	0	0	0	603	903	0
652	8	47.9913	62.2554	-656.514	155110	78448.7	20869.6	319.493	63.7367	0	0	0	0	0	0	0	200	903	0	0	0	0	0	0	0	603	903	0
652	9	46.9232	64.0865	-659.566	155293	78753.9	20915.4	319.403	64.5523	0	0	0	0	0	0	0	200	903	0	0	0	0	0	0	0	603	903	0
653	0	48.1439	64.8494	-661.397	156850	79547.4	21006.9	320.272	62.8509	0	0	0	0	0	0	0	200	903	0	0	0	0	0	0	0	603	903	0
653	1	47.5336	65.1546	-659.871	156758	79303.2	21144.2	320.18	62.4413	0	0	0	0	0	0	0	200	903	0	0	0	0	0	0	0	603	903	0
653	2	47.2284	66.5279	-664.754	157399	80035.6	21235.8	320.399	63.2222	0	0	0	0	0	0	0	200	903	0	0	0	0	0	0	0	603	903	0
653	3	47.381	66.0701	-669.026	158315	80096.7	21281.6	319.721	63.3657	0	0	0	0	0	0	0	200	903	0	0	0	0	0	0	0	603	903	0
653	4	47.9913	67.1382	-671.773	158589	80523.9	21602	319.868	63.9244	0	0	0	0	0	0	0	200	903	0	0	0	0	0	0	0	603	903	0
653	5	48.9068	68.3589	-672.994	160146	81195.3	21968.2	320.648	62.04	0	0	0	0	0	0	0	200	903	0	0	0	0	0	0	0	603	903	0
[truncated: 374 more rows]
