# Supplementary material for: The Effects of an Extemporaneous Speech Dual-task on Older Adult Gait Control
Source: Research Square preprint supplement (doi:10.21203/rs.3.rs-7674245/v1), 2025-11-18
Supplement: Supplementary file 199 [file Over8ground7.xlsx]

## Sheet: Sheet1
Trajectories
		08:LFHD			08:RFHD			08:LBHD			08:RBHD			08:C7			08:T10			08:CLAV			08:STRN			08:RBAK			08:LSHO			08:LUPA			08:LELB			08:LFRM			08:LWRA			08:LWRB			08:LFIN
Frame	Sub Frame	X	Y	Z	X	Y	Z	X	Y	Z	X	Y	Z	X	Y	Z	X	Y	Z	X	Y	Z	X	Y	Z	X	Y	Z	X	Y	Z	X	Y	Z	X	Y	Z	X	Y	Z	X	Y	Z	X	Y	Z	X	Y	Z
		mm	mm	mm	mm	mm	mm	mm	mm	mm	mm	mm	mm	mm	mm	mm	mm	mm	mm	mm	mm	mm	mm	mm	mm	mm	mm	mm	mm	mm	mm	mm	mm	mm	mm	mm	mm	mm	mm	mm	mm	mm	mm	mm	mm	mm	mm	mm	mm
392	0	220.989	2491.05	1670.7	132.026	2501.55	1662.66	233.416	2683.71	1681.62	120.949	2675.63	1671.96	184.082	2715.2	1528.9	207.354	2791.44	1265.61	201.244	2570.87	1441.72	195.73	2507.97	1238.78	118.782	2793.07	1318.07	378.696	2642.71	1490.21	462.672	2648.64	1297.11	469.372	2641.33	1141.49	471.873	2538.9	1000.04	415.825	2506.78	915.158	479.428	2528.83	900.542	460.527	2474.81	855.134
393	0	220.923	2479.87	1673.73	132.075	2490.27	1666.18	232.994	2672.74	1684.49	120.713	2664.27	1674.75	183.001	2703.55	1531.56	205.961	2779.24	1268.44	200.799	2559.24	1444.74	195.683	2496.09	1241.51	118.021	2781.36	1320.83	378.674	2632.15	1492.71	460.116	2639.93	1299.49	469.423	2633.01	1144.41	472.18	2531.6	1002.33	415.802	2499.59	917.479	479.583	2522.07	902.388	460.788	2467.45	857.346
394	0	221.223	2468.94	1677	132.218	2478.89	1669.39	232.886	2661.75	1687.24	120.329	2652.96	1677.68	182.785	2692.16	1534.26	205.08	2767.47	1271.13	201.18	2548.16	1448.03	195.719	2484.24	1244.75	117.164	2769.33	1323.5	378.603	2621.79	1495.37	460.057	2631.53	1302.18	469.506	2624.81	1147.35	472.454	2524.17	1004.74	416.093	2492.43	920.453	479.949	2515.27	904.978	461.085	2461.1	859.561
395	0	221.466	2457.74	1680.41	132.745	2467.81	1673.09	232.673	2650.67	1689.98	120.338	2641.89	1680.84	182.147	2680.85	1537.12	204.228	2756.21	1274.03	200.808	2536.39	1451.23	195.82	2472.3	1248.21	116.265	2757.58	1326.4	377.888	2611.01	1498.65	459.907	2622.99	1304.95	469.559	2616.74	1150.45	472.712	2516.85	1007.2	416.425	2485.43	922.515	479.774	2508.53	907.623	461.497	2454.29	862.047
396	0	222.039	2446.83	1683.83	133.029	2456.51	1676.49	232.465	2639.92	1692.85	120.158	2630.6	1683.58	181.462	2669.5	1540.29	203.131	2744.39	1276.75	200.71	2524.83	1454.62	195.8	2460.52	1251.64	115.372	2745.87	1329.38	377.503	2600.27	1501.79	458.772	2613.73	1308.71	469.984	2608.97	1153.86	472.962	2509.67	1009.85	416.884	2478.23	925.264	479.783	2502.15	910.167	461.837	2447.36	864.92
397	0	222.642	2435.92	1687.09	133.595	2445.45	1680.32	232.222	2629.12	1695.51	119.919	2619.44	1686.85	181.258	2658.3	1542.87	202.115	2732.29	1279.51	200.493	2513.13	1458.21	195.467	2448.55	1255.3	114.364	2734.11	1332.36	377.14	2589.69	1504.82	458.57	2605.23	1311.88	470.053	2601.1	1157.01	473.431	2502.86	1012.56	417.215	2470.98	928.411	479.612	2495.55	912.44	462.422	2440.87	867.683
398	0	223.571	2425.21	1690.41	134.227	2434.24	1683.56	232.309	2618.26	1698.17	120.077	2608.42	1690.06	180.774	2646.81	1545.84	201.669	2720.89	1282.47	200.342	2501.58	1461	195.172	2436.69	1258.41	113.436	2722.27	1335.29	377.12	2579.1	1506.62	458.953	2596.96	1314.46	470.173	2593.19	1160.13	473.751	2495.73	1015.32	417.807	2463.74	930.913	479.905	2489.39	914.864	463.143	2434.23	870.332
399	0	223.912	2414.18	1693.35	134.969	2423.09	1686.7	232.559	2607.47	1700.61	120.011	2597.08	1692.61	180.047	2635.34	1548.7	201.145	2709.59	1285.43	201.697	2491.93	1463.13	194.766	2424.98	1260.83	112.926	2710.66	1338.01	377.331	2568.11	1509.7	459.784	2588.41	1316.8	470.451	2585.56	1163.09	474.136	2488.6	1017.53	418.387	2456.45	933.128	480.152	2483.04	917.479	463.495	2427.15	872.658
400	0	224.652	2403.36	1696.58	135.639	2411.93	1690.12	232.369	2596.59	1703.2	120.14	2586.09	1695.39	180.296	2624.35	1551.38	200.286	2697.43	1287.72	201.402	2480.34	1466	194.264	2413.28	1263.53	112.232	2698.97	1340.77	376.952	2557.17	1512.54	458.179	2578.55	1320.41	470.747	2578.16	1165.93	474.262	2481.48	1020.05	418.94	2448.92	935.91	480.513	2476.45	920.127	463.614	2420.2	875.157
401	0	225.34	2392.5	1699.32	136.156	2400.64	1693.2	232.571	2585.94	1705.09	120.395	2574.94	1697.77	180.073	2612.52	1553.69	199.834	2685.95	1290.08	201.942	2468.78	1469.03	194.001	2401.51	1266.55	111.644	2687.29	1343.34	376.619	2546.03	1514.91	458.247	2569.97	1322.71	470.667	2570.45	1168.49	473.844	2473.63	1021.61	419.519	2441.33	938.71	480.14	2470.21	922.013	464.1	2413.34	877.291
402	0	226.147	2381.58	1701.68	136.965	2389.53	1695.98	232.663	2574.85	1706.79	120.598	2563.63	1699.99	179.876	2600.86	1556.09	199.388	2674.4	1292.39	202.159	2457.25	1471.31	194.267	2390.19	1269.14	111.045	2675.57	1345.8	376.81	2534.97	1516.7	453.863	2549.51	1324.21	470.713	2562.83	1170.82	474.876	2466.76	1023.96	420.339	2433.71	940.988	480.686	2464.35	924.961	464.351	2405.95	878.976
403	0	227.042	2370.57	1704.21	137.813	2378.18	1698.51	233.051	2564.1	1708.46	120.784	2552.35	1701.65	180.214	2589.64	1558.24	198.759	2662.29	1294.46	201.783	2445.46	1473.14	193.997	2378.82	1270.85	110.646	2663.85	1347.83	376.532	2523.67	1518.87	458.342	2551.63	1327.35	470.542	2555.18	1173.05	474.684	2459.56	1025.31	421.091	2425.96	943.029	480.029	2457.43	926.05	465.197	2399.37	881.114
404	0	227.827	2359.57	1706.45	138.483	2366.87	1700.93	232.916	2552.77	1709.99	121.078	2541.13	1703.36	179.911	2577.4	1559.43	198.282	2650.77	1296.26	201.708	2433.65	1474.91	193.826	2367.38	1272.71	110.22	2652.04	1349.81	376.331	2512.23	1520.64	456.987	2541.31	1329.79	470.501	2547.55	1175.16	475.431	2452.72	1027	421.545	2418.04	944.76	480.216	2450.85	927.698	465.746	2392.42	882.519
405	0	228.567	2348.36	1708.29	139.187	2355.35	1702.88	233.462	2542.09	1710.86	121.475	2529.79	1704.95	179.857	2565.59	1560.91	197.886	2639.21	1298.2	201.892	2421.87	1476.39	193.579	2355.89	1273.72	109.858	2640.2	1351.66	375.977	2500.42	1522.18	456.979	2531.78	1331.52	470.284	2539.58	1176.97	475.555	2445.2	1028.26	422.487	2410.04	946.381	480.069	2443.99	928.855	466.509	2385.29	883.628
406	0	229.562	2337.17	1709.79	140.203	2344.08	1704.45	233.506	2530.58	1711.63	121.935	2518.51	1706.12	179.723	2553.41	1562.33	197.311	2627.34	1299.86	202.001	2409.99	1477.3	193.785	2344.39	1274.69	109.423	2628.28	1353.39	376.243	2488.87	1522.96	458.978	2523.81	1331.74	470.182	2531.58	1178.52	476.247	2438.04	1029.28	423.168	2402	947.187	480.068	2437.44	930.117	467.369	2378.23	884.646
407	0	230.304	2325.93	1710.93	140.772	2332.26	1705.94	233.839	2519.62	1711.86	122.192	2506.86	1706.79	180.029	2541.57	1563.54	196.84	2615.58	1301.26	202.178	2397.97	1478.19	193.792	2332.97	1275.24	109.136	2616.4	1354.64	376.454	2477.33	1523.61	453.648	2503.43	1333.47	469.918	2523.36	1179.75	476.371	2430.32	1030.14	423.293	2392.89	948.153	480.341	2430.31	930.863	468.403	2371.37	885.389
408	0	231.502	2314.53	1711.93	141.899	2320.94	1707.11	234.243	2507.99	1711.82	122.557	2495.12	1706.96	180.145	2529.56	1563.92	196.224	2603.61	1302.03	202.736	2385.92	1478.96	193.6	2320.86	1276.29	108.784	2604.46	1355.57	375.831	2465	1524.43	457.219	2503.25	1335.15	469.711	2515.06	1180.59	476.787	2422.86	1030.54	427.786	2381.21	951.886	480.186	2423.22	931.298	469.224	2364.37	885.799
409	0	232.19	2302.99	1712.12	142.55	2309.05	1707.54	234.919	2496.71	1711.25	122.999	2483.45	1707.02	180.146	2517.14	1564.23	196.037	2592.32	1302.87	202.915	2373.89	1478.72	194.361	2309.74	1275.73	108.457	2592.4	1356.36	376.017	2453	1524.48	453.783	2483.07	1334.58	469.502	2506.49	1181.2	477.048	2414.79	1030.7	427.971	2373.13	951.877	480.605	2416	931.141	470.72	2357.56	885.989
410	0	233.108	2291.42	1712.09	143.501	2297.22	1707.57	234.853	2484.73	1710.6	123.492	2471.68	1706.56	180.343	2504.62	1564.09	195.875	2580.26	1302.78	203.227	2361.69	1478.24	194.262	2297.85	1274.88	108.184	2580.55	1356.67	377.11	2441.56	1523.52	453.758	2473.09	1334.95	469.34	2497.87	1181.33	477.484	2406.86	1030.47	422.459	2364.94	948.707	480.556	2408.49	930.993	471.832	2350.31	885.272
411	0	233.657	2279.58	1711.56	144.292	2285.33	1707.29	235.325	2473.23	1709.39	123.944	2459.55	1705.43	180.516	2492.16	1563.49	195.323	2568.38	1302.75	203.405	2349.39	1477.44	194.67	2286.45	1273.6	108.187	2568.43	1356.25	376.066	2428.87	1523.58	453.637	2463.08	1334.75	469.088	2488.98	1181.16	477.843	2398.72	1029.58	423.184	2356.57	947.888	480.888	2401.06	930.255	471.809	2342.09	883.912
412	0	234.793	2267.74	1710.86	145.127	2273.09	1706.82	235.843	2461.39	1707.69	124.48	2447.5	1704.28	180.758	2479.58	1562.28	195.547	2556.57	1301.85	203.972	2337.12	1476.26	194.904	2274.37	1272.57	107.949	2556.41	1355.98	376.364	2416.74	1522.43	456.521	2461.93	1334.96	468.769	2479.68	1180.52	478.039	2390.31	1028.45	423.986	2347.95	946.613	481.041	2393.35	928.991	472.763	2334.56	882.524
413	0	235.875	2255.75	1709.73	146.306	2261.06	1705.87	236.387	2449.17	1705.93	125.157	2435.27	1702.69	181.129	2467	1561.2	195.744	2544.76	1300.89	204.607	2324.85	1474.57	195.965	2262.89	1270.77	107.98	2544.32	1355.02	376.601	2404.61	1521.11	456.154	2451.31	1334.04	468.653	2470.41	1179.33	478.291	2381.68	1026.64	424.728	2339.26	944.972	481.313	2385.46	927.479	473.871	2326.95	880.774
414	0	236.727	2243.56	1708.2	147.214	2248.79	1704.33	236.936	2437.02	1703.95	125.777	2422.96	1700.81	181.44	2454.26	1559.75	195.361	2532.46	1299.68	204.9	2312.31	1472.74	196.071	2250.96	1268.46	108.106	2532.15	1353.73	376.929	2392.17	1519.42	456.312	2440.69	1332.76	468.505	2460.86	1178.02	478.619	2372.91	1024.91	425.285	2330.51	943.031	481.647	2377.32	925.727	474.319	2318.84	878.625
415	0	237.718	2231.36	1706.4	148.015	2236.27	1702.62	237.544	2424.82	1701.56	126.481	2410.54	1698.7	181.287	2440.81	1557.97	195.471	2520.22	1298.05	205.308	2299.6	1470.51	196.504	2239.01	1266.09	108.204	2520	1352.22	377.218	2379.73	1517.38	456.532	2429.81	1330.8	468.066	2450.81	1176.29	479.082	2363.97	1022.77	425.858	2321.78	940.394	482.009	2369.02	923.547	475.1	2310.62	876.121
416	0	238.898	2219.03	1704.01	149.097	2223.74	1700.64	238.359	2412.48	1698.79	127.201	2397.91	1696.37	182.382	2428.64	1555.68	195.87	2508.07	1296.24	206.061	2287.03	1467.81	197.472	2227.09	1263.39	108.467	2507.65	1350.43	378.312	2367.72	1514.71	456.576	2418.66	1328.66	467.436	2440.24	1174.02	479.588	2354.87	1019.84	427.137	2312.79	937.377	482.957	2360.75	920.73	475.802	2301.99	873.01
417	0	240.022	2206.6	1701.53	150.373	2211.17	1698.17	239.047	2399.93	1696.25	128.006	2385.24	1693.75	182.039	2415.06	1553.41	196.458	2495.73	1293.92	206.614	2274.36	1464.83	198.313	2215.17	1260.12	108.925	2495.28	1348.3	380.315	2356.1	1511.35	456.533	2407.29	1326.2	467.11	2430.01	1171.61	480.095	2345.89	1017.27	427.781	2303.64	934.368	482.507	2352.08	918.144	476.222	2293.49	869.305
418	0	241.108	2193.94	1699.08	151.569	2198.39	1695.85	239.647	2387.08	1693.24	128.926	2372.5	1690.95	183.29	2402.73	1550.57	197.293	2483.23	1291.05	207.445	2261.53	1462.19	198.178	2202.26	1257.21	109.677	2482.74	1345.79	378.993	2342.17	1509.58	456.608	2395.87	1323.62	467.484	2419.87	1169.44	480.314	2336.15	1013.96	428.633	2294.66	930.914	482.994	2343.05	915.206	477.021	2285.12	865.843
419	0	242.645	2181.28	1696.45	152.772	2185.46	1693.15	240.83	2374.62	1690.03	129.897	2359.54	1687.85	184.237	2389.67	1547.75	197.903	2470.66	1288.39	208.504	2248.49	1459.4	199.024	2189.89	1254.45	110.434	2470.24	1343.07	380.444	2329.92	1506.36	456.719	2384.03	1320.71	466.956	2408.75	1166.4	480.993	2326.84	1010.81	429.468	2285.12	927.274	483.923	2334.64	911.814	477.887	2276.66	862.052
420	0	244.129	2168.51	1693.28	154.191	2172.41	1690.31	241.989	2361.81	1686.77	130.944	2346.48	1684.95	184.508	2375.71	1545.2	198.881	2458.05	1285.31	209.493	2235.54	1455.9	199.935	2177.4	1251.01	111.333	2457.62	1340.39	382.145	2317.53	1502.55	456.972	2371.93	1317.54	467.285	2397.94	1163.76	481.328	2316.67	1007.16	430.389	2275.84	923.098	484.183	2325.16	908.21	479.081	2268.11	858.194
421	0	245.349	2155.55	1690.18	155.511	2159.28	1687.3	243.306	2348.93	1683.49	132.134	2333.42	1681.76	185.477	2362.32	1542.44	199.815	2445.49	1282.63	210.074	2222.34	1452.17	200.594	2164.63	1247.13	112.556	2445.09	1337.72	382.939	2304.33	1499.24	457.828	2360.03	1314.24	466.763	2386.14	1160.45	482.101	2306.89	1003.46	431.525	2266.38	919.058	485.214	2316.4	904.889	480.296	2259.37	854.104
422	0	246.854	2142.42	1687.19	156.888	2146.17	1684.31	244.246	2335.87	1680	133.208	2320.06	1678.45	186.344	2348.87	1539.37	200.664	2432.64	1279.59	210.849	2208.94	1449.09	201.323	2151.55	1243.52	113.606	2432.16	1334.82	383.319	2290.63	1496.46	458.194	2347.83	1311.17	466.838	2374.67	1157.49	483.054	2297.08	999.995	432.2	2256.38	915.012	485.873	2307.14	901.278	481.356	2250.62	850.065
423	0	248.428	2129.26	1684.26	158.761	2132.91	1681.56	245.4	2322.61	1676.64	134.506	2306.81	1675.46	187.55	2335.41	1536.2	201.803	2419.81	1276.64	211.726	2195.55	1445.66	202.42	2138.56	1240.13	114.896	2419.23	1332.16	383.996	2276.97	1493.27	458.57	2335.12	1307.9	466.607	2362.77	1154.32	483.512	2286.58	996.224	433.121	2246.74	910.601	487.624	2298.51	898.108	482.667	2241.74	845.773
424	0	250.325	2116.1	1681.19	160.538	2119.5	1678.63	246.838	2309.41	1673.22	135.984	2293.32	1672.31	188.477	2321.59	1533.72	202.545	2406.83	1273.67	213.306	2182.05	1442.32	203.286	2125.44	1236.73	116.039	2406.07	1329.17	385.062	2263.31	1489.89	458.948	2322.27	1304.34	466.531	2350.56	1151.1	484.218	2276.11	992.35	434.884	2237.68	907.091	488.093	2288.53	893.909	483.882	2232.86	841.398
425	0	252.159	2102.76	1678.23	162.443	2106.05	1675.91	248.316	2296.04	1669.97	137.489	2279.86	1669.07	189.665	2307.79	1530.46	203.187	2393.65	1270.85	214.253	2168.51	1439.07	203.89	2111.88	1233.24	117.366	2393.02	1326.7	385.95	2249.39	1486.73	459.701	2309.39	1300.99	466.679	2338.26	1147.8	484.954	2265.35	988.403	435.895	2227.22	902.465	488.519	2278.8	890.213	485.135	2223.58	836.933
426	0	254.03	2089.26	1675.56	164.133	2092.43	1673.38	249.778	2282.61	1666.57	139.032	2266.2	1665.92	191.24	2294.26	1527.81	204.002	2380.55	1268.15	215.514	2154.72	1436.22	204.982	2098.48	1230.3	118.781	2379.73	1323.9	387.066	2235.42	1483.74	460.508	2296.14	1297.63	466.903	2325.49	1144.78	485.768	2254.37	984.701	437.167	2217.12	898.141	489.324	2268.85	886.616	486.44	2214.5	832.607
427	0	255.89	2075.65	1672.8	166.14	2078.65	1670.53	251.516	2269.02	1663.59	140.858	2252.5	1663.17	193.146	2280.76	1524.89	204.63	2367.2	1265.61	216.844	2141.05	1432.96	205.948	2085.06	1226.9	120.154	2366.36	1321.3	388.558	2221.39	1480.57	461.544	2282.51	1294.29	467.235	2312.58	1141.51	486.851	2243.24	980.957	438.373	2206.45	893.886	490.422	2258.74	883.101	487.811	2204.89	828.395
428	0	257.868	2062.09	1670.1	168.093	2064.95	1668	253.241	2255.29	1660.96	142.614	2238.76	1660.36	194.751	2266.74	1522.86	205.708	2353.45	1263.09	218.315	2127.3	1430.13	207.108	2071.43	1224.02	121.616	2352.76	1319.18	389.903	2206.99	1477.84	462.905	2268.92	1291.17	467.72	2299.14	1138.76	487.575	2231.44	977.626	439.639	2195.36	889.672	491.467	2248.33	879.583	489.261	2195.41	824.384
429	0	259.913	2048.29	1667.73	169.928	2051.08	1665.69	255.152	2241.7	1658.41	144.557	2224.85	1658.13	197.025	2253.56	1520.45	206.589	2339.82	1261.26	219.989	2113.41	1427.78	208.187	2057.79	1221.52	123.166	2338.95	1317.02	392.718	2194.19	1474.82	464.053	2254.86	1288.11	468.288	2285.56	1136	488.557	2219.82	974.009	440.76	2184.85	885.392	492.717	2237.6	876.456	490.668	2185.37	820.06
430	0	262.128	2034.52	1665.7	172.174	2037.29	1663.77	257.192	2227.74	1656.19	146.478	2211	1656.16	199.181	2239.79	1518.31	208.132	2325.72	1258.86	222.275	2099.58	1425.86	209.675	2043.94	1219.77	124.582	2325.04	1315.21	393.093	2178.77	1472.18	464.489	2239.96	1284.39	469.036	2271.64	1133.15	489.561	2207.64	970.803	442.589	2173.63	882.159	494.191	2226.78	873.609	491.897	2175.19	816.577
431	0	264.356	2020.61	1664.01	174.228	2023.34	1661.88	259.296	2213.76	1654.54	148.524	2197.14	1654.39	201.577	2226.1	1516.5	209.263	2311.65	1257.16	224.04	2085.71	1423.89	211.234	2029.99	1217.72	126.43	2311.04	1313.24	396.331	2165.8	1469.92	465.752	2225.37	1281.45	469.864	2257.37	1130.45	490.763	2195.38	967.679	444.589	2161.9	878.754	495.374	2215.35	870.367	493.1	2164.63	812.637
432	0	266.127	2006.51	1662.66	175.919	2009.28	1660.32	261.412	2199.92	1653.38	150.806	2183.14	1652.87	204.035	2212.31	1515.08	210.94	2297.51	1255.21	225.623	2071.64	1422.5	212.514	2015.6	1216.24	128.29	2297.05	1312.05	398.098	2151.28	1467.38	467.795	2211.06	1278.99	470.497	2242.94	1128.35	491.937	2182.45	964.909	445	2149.18	874.184	496.769	2203.61	867.725	494.384	2153.78	809.072
433	0	268.026	1992.4	1661.72	178.049	1995.32	1659.51	263.797	2185.87	1652.34	153.156	2169.23	1651.81	206.405	2198.41	1514.12	212.391	2283.27	1253.93	227.029	2057.4	1421.5	214.262	2001.33	1215.55	130.56	2283.18	1310.58	400.165	2137.08	1465.43	469.41	2196.24	1276.62	471.652	2228.32	1126.1	493.297	2169.46	962.186	445.925	2137.83	871.192	498.278	2191.61	865.065	495.685	2142.61	805.724
434	0	270.427	1978.34	1661.12	180.221	1981.35	1658.58	266.388	2171.79	1651.74	155.667	2155.39	1651.44	209.056	2184.52	1513.19	213.648	2269.22	1252.99	229.414	2043.63	1420.78	215.961	1986.94	1215.19	132.988	2269.18	1310	402.413	2123	1463.73	471.175	2181.18	1274.43	472.78	2213.16	1124.28	494.538	2155.87	960.016	446.335	2127.31	867.953	499.739	2178.97	863.05	496.936	2130.95	802.938
435	0	272.704	1964.35	1660.88	182.66	1967.56	1658.41	268.892	2157.62	1651.86	158.058	2141.51	1651.23	211.695	2170.72	1512.98	215.262	2254.98	1252.61	232.265	2029.81	1420.9	217.625	1972.1	1215.27	135.188	2255.29	1309.42	404.839	2108.98	1462.84	472.834	2166.03	1272.86	474.058	2197.85	1122.92	495.822	2141.91	958.37	447.452	2114.54	865.8	501.479	2165.82	861.833	497.986	2118.57	800.806
436	0	274.806	1950.14	1661.26	184.674	1953.59	1658.7	271.424	2143.66	1652.06	160.635	2127.6	1651.47	214.513	2157.16	1513.03	216.788	2240.95	1252.5	233.159	2015.33	1421.12	218.571	1957.08	1216.16	137.179	2241.16	1309.69	407.056	2094.82	1462.46	474.808	2150.95	1271.98	475.426	2182.3	1122.19	497.144	2127.38	957.484	448.663	2101.43	864.234	503.223	2152.17	861.241	499.031	2105.7	799.124
437	0	277.072	1936.09	1661.72	186.837	1939.72	1659.2	274.253	2129.6	1652.69	163.163	2113.85	1652.05	217.21	2143.55	1513.26	218.295	2227.05	1252.85	235.021	2001.3	1421.7	220.276	1942.52	1216.96	139.233	2227.33	1309.95	409.325	2080.74	1462.28	476.851	2135.8	1271.13	476.985	2166.75	1121.63	498.602	2112.66	956.783	449.767	2087.77	863.229	505.154	2137.8	860.539	500.212	2092.2	797.898
438	0	279.303	1922.24	1661.9	189.128	1925.82	1659.78	276.865	2115.56	1653.27	165.858	2100.13	1653.1	219.319	2129.82	1514.13	219.687	2213.3	1253.31	237.18	1987.65	1422.16	221.776	1928	1217.55	140.874	2213.4	1310.98	411.641	2066.66	1462.21	478.771	2120.48	1270.57	478.726	2150.94	1121.11	500.048	2097.4	956.585	451.069	2073.47	862.768	507.073	2122.92	860.385	501.418	2078.26	797.384
439	0	281.489	1908.35	1662.97	191.289	1912.16	1660.76	279.505	2101.72	1654.05	168.607	2086.42	1653.91	221.231	2115.94	1515.44	221.319	2199.54	1254	238.8	1973.83	1423.35	223.406	1913.96	1218.7	142.565	2199.92	1311.94	413.671	2052.5	1462.84	480.597	2104.93	1270.79	480.267	2135.22	1121.4	501.571	2081.91	956.658	452.315	2058.75	863.217	509.019	2107.46	860.676	502.406	2063.57	796.995
440	0	283.302	1894.41	1663.94	193.325	1898.66	1661.69	282.167	2087.99	1655.31	171.047	2072.94	1655.06	224.061	2102.98	1516.49	222.699	2186.42	1255.25	240.161	1959.93	1424.94	224.799	1900.29	1220.15	144.133	2186.75	1313.27	415.442	2038.38	1463.38	482.546	2089.99	1270.9	482.154	2119.6	1121.81	502.899	2065.99	957.245	453.075	2044.05	863.799	510.868	2091.45	861.223	503.146	2048.19	796.862
441	0	285.824	1880.83	1664.89	195.609	1885.19	1663.15	284.583	2074.27	1656.34	173.542	2059.53	1656.73	226.42	2090.09	1517.51	224.36	2173.62	1256.54	241.903	1946.65	1426.18	226.103	1886.9	1221.78	145.461	2173.84	1314.67	417.174	2024.46	1464.47	484.187	2074.84	1271.69	483.626	2104	1122.51	504.271	2049.79	957.906	454.127	2028.52	864.086	512.606	2074.99	861.938	503.967	2032.18	797.223
442	0	288.279	1867.5	1665.55	197.645	1871.8	1664.26	287.208	2060.92	1657.38	176.093	2046.44	1658.34	227.967	2077.03	1518.96	226.276	2160.53	1257.69	242.872	1933.23	1427.27	227.067	1873.7	1222.7	146.576	2161.05	1316.33	418.688	2010.34	1465.58	486.311	2059.81	1272.38	485.981	2088.42	1123.06	505.676	2033.17	958.934	455.218	2012.15	865.357	514.404	2057.89	862.938	504.917	2015.54	797.922
443	0	288.853	1853.69	1666.04	199.457	1858.75	1665.1	289.567	2047.58	1658.84	178.216	2033.24	1660.08	230.052	2064.56	1520.34	227.944	2147.73	1259.04	243.718	1920.22	1428.75	228.097	1860.95	1223.78	147.808	2148.55	1317.98	420.411	1996.59	1466.88	488.262	2044.72	1273.51	488.134	2072.63	1124.25	507.149	2016.29	960.19	456.206	1995.44	867.071	516.13	2040.4	864.107	505.824	1998.13	799.307
444	0	290.701	1840.46	1667.11	201.217	1845.66	1666.47	291.658	2034.33	1660.56	180.277	2020.26	1662.17	231.818	2052.12	1521.9	229.742	2135.5	1260.61	244.637	1907.47	1430.44	229.029	1848.48	1225.23	149.32	2136.5	1319.43	421.911	1983.04	1468.33	490.256	2029.81	1274.83	490.376	2056.77	1125.43	508.663	1999.31	961.59	457.335	1978.54	868.51	517.792	2022.46	865.482	506.767	1980.22	800.7
445	0	292.444	1827.71	1667.45	202.779	1832.85	1667.62	293.694	2021.37	1662.29	182.41	2007.67	1664.3	233.659	2040.08	1523.53	231.618	2123.25	1261.93	245.417	1894.8	1431.91	229.546	1836.17	1226.62	150.992	2124.64	1320.93	423.061	1969.37	1469.57	492.126	2014.66	1275.99	492.646	2040.86	1126.4	510.059	1982.03	963.07	458.132	1961.18	870.209	519.315	2004.22	866.715	507.662	1961.86	802.226
446	0	294.24	1815.1	1668.49	204.175	1820.31	1668.63	295.497	2008.58	1664	184.14	1995.1	1666.37	235.278	2028.03	1525.18	233.346	2110.93	1263.29	245.8	1882.47	1433.56	229.748	1824.04	1228.26	152.596	2113.02	1322.51	424.166	1956.12	1471.26	494.129	2000.25	1277.33	495.157	2025.09	1127.4	511.413	1964.45	964.604	458.925	1943.65	872.068	520.834	1985.68	867.891	508.349	1942.81	803.897
447	0	294.468	1801.97	1669.55	205.452	1807.88	1670.34	297.117	1996	1665.8	185.822	1982.78	1668.45	236.745	2016.24	1526.59	235.311	2099.38	1264.77	246.373	1871.45	1435.5	229.904	1812.28	1230.07	154.655	2101.54	1323.85	425.324	1943.19	1472.64	496.128	1985.38	1278.69	497.627	2009.22	1128.41	512.659	1946.79	966.109	459.709	1925.58	873.777	522.117	1966.95	869.109	509.281	1923.37	806.067
448	0	295.466	1789.4	1670.82	206.361	1795.57	1671.72	298.508	1983.52	1667.85	187.22	1970.57	1670.78	238.523	2004.55	1528.33	236.789	2087.62	1266.46	246.797	1859.62	1437.54	229.677	1800.61	1231.88	156.685	2090.22	1325.19	426.085	1930.16	1474.36	497.833	1970.36	1279.85	500.041	1993.33	1129.5	513.968	1928.9	967.762	461.669	1906.52	878.235	523.257	1947.84	870.551	509.146	1903.72	807.317
449	0	296.153	1776.98	1672.16	207.356	1783.58	1673	299.877	1971.16	1670.07	188.57	1958.52	1673.02	239.383	1992.6	1530.44	238.43	2075.71	1268.06	247.419	1848.11	1439.15	229.312	1789.28	1233.56	158.821	2079.04	1326.76	427.25	1917.7	1475.94	499.8	1955.41	1281.3	502.416	1977.12	1130.67	515.166	1910.6	969.669	461.839	1888.5	879.032	524.444	1928.33	872.16	510.7	1883.2	810.395
450	0	296.724	1764.69	1673.99	207.952	1771.54	1674.9	301.116	1958.98	1672.41	189.559	1946.46	1675.41	240.881	1981.14	1532.44	240.252	2064.1	1270.01	247.737	1836.67	1441.17	228.822	1778.07	1235.41	160.79	2067.89	1328.51	428.245	1905.34	1477.71	501.568	1940.38	1283	504.765	1960.78	1131.93	516.232	1892.3	971.594	462.355	1869.59	881.604	525.8	1908.48	873.847	511.002	1862.69	812.527
451	0	296.917	1752.5	1675.81	208.343	1759.7	1676.96	301.966	1946.88	1675.01	190.462	1934.75	1677.84	241.869	1969.76	1534.77	241.92	2052.78	1272.25	248.118	1825.32	1443.61	228.304	1767.01	1237.85	162.855	2056.84	1330.48	428.953	1893.01	1479.61	502.936	1925.26	1284.32	506.973	1944.52	1133.06	517.29	1873.88	973.562	462.883	1850.68	883.767	526.899	1888.7	875.79	512.024	1841.32	816.122
452	0	297.092	1740.65	1677.62	208.555	1747.98	1679	302.843	1934.94	1677.52	191.279	1923.17	1680.61	243.031	1958.2	1537.08	243.695	2041.51	1274.64	248.323	1814.05	1446.64	227.727	1755.91	1240.92	164.78	2045.92	1332.8	429.735	1881	1481.62	504.45	1910.57	1285.81	509.109	1928.2	1134.37	518.147	1855.19	975.998	463.37	1831.49	886.597	527.796	1868.67	877.586	512.36	1820.21	818.829
453	0	297.296	1728.85	1679.64	208.83	1736.37	1680.78	303.617	1923.06	1680.25	191.916	1911.57	1682.88	244.016	1946.72	1539.42	245.387	2030.19	1277.17	248.641	1802.75	1448.73	227.291	1744.88	1243.28	166.663	2035.02	1335.04	430.587	1869.16	1483.61	505.714	1895.76	1287.46	510.991	1911.55	1135.86	518.849	1836.42	978.399	463.791	1812.11	889.542	528.601	1848.27	879.94	513.203	1798.87	822.6
454	0	297.213	1716.83	1682.19	208.83	1724.88	1682.81	304.077	1911.14	1683.04	192.552	1899.99	1685.23	244.893	1935.51	1541.85	246.643	2018.77	1279.51	249.049	1791.65	1451.05	227.017	1733.66	1245.68	168.279	2024.1	1337.23	431.497	1857.53	1485.66	506.86	1881.25	1289.39	512.76	1894.97	1137.61	519.913	1817.94	981.056	464.37	1792.73	892.393	529.354	1827.94	882.465	514.34	1777.45	827.338
455	0	297.121	1705.02	1684.47	208.826	1713.37	1684.92	304.623	1899.44	1685.65	192.995	1888.51	1687.56	246.241	1924.39	1544.15	248.137	2007.35	1281.55	249.441	1780.51	1453.73	226.898	1722.62	1248.39	170.002	2013.23	1339.62	432.204	1845.92	1487.96	507.827	1866.77	1291.4	514.499	1878.71	1139.28	520.22	1798.87	984.068	464.666	1773.15	895.897	529.956	1807.68	885.392	514.72	1756.09	831.183
456	0	296.908	1693.4	1686.41	208.783	1701.96	1686.82	305.234	1887.74	1688.21	193.497	1877.19	1689.77	247.414	1913.32	1546.31	249.361	1996.14	1283.67	249.943	1769.53	1456.07	226.859	1711.41	1250.95	171.361	2002.46	1341.86	432.835	1834.51	1490.3	508.702	1852.71	1293.43	515.947	1862.21	1141.15	520.69	1779.96	987.09	464.869	1753.35	899.939	530.629	1786.94	888.341	515.155	1734.53	835.409
457	0	296.133	1681.41	1688.87	208.454	1690.65	1688.67	305.656	1875.9	1690.95	193.952	1865.97	1692.06	248.094	1902.23	1548.81	250.43	1984.88	1286.02	250.235	1758.56	1458.57	227.102	1700.45	1253.44	172.675	1991.43	1344.03	433.415	1822.88	1492.76	509.318	1838.64	1295.79	517.39	1845.85	1143.45	521.179	1761.14	990.548	465.174	1733.77	904.072	531.139	1766.28	891.735	515.434	1712.92	840.225
458	0	296.001	1669.67	1691.37	208.147	1679.23	1690.55	306.126	1864.21	1693.64	194.238	1854.72	1694.29	248.583	1891.09	1551.2	251.638	1973.6	1288.08	250.545	1747.61	1461.08	227.267	1689.53	1256.02	173.657	1980.54	1346.3	433.955	1811.31	1495.33	509.8	1824.85	1298.29	518.541	1829.45	1145.85	521.397	1742.12	994.363	465.518	1713.9	909.151	531.319	1745.6	895.301	515.509	1691.31	845.364
459	0	295.696	1657.99	1693.05	207.635	1667.75	1692.45	306.5	1852.46	1695.98	194.564	1843.3	1696.48	249.503	1880.21	1552.98	252.476	1962.48	1290.11	250.932	1736.79	1463.43	227.497	1678.75	1258.45	174.307	1969.58	1348.55	434.517	1799.9	1497.82	510.334	1811.44	1300.36	519.753	1813.38	1147.97	521.07	1723.73	997.107	465.48	1694.2	913.251	531.556	1725.02	898.934	515.702	1670.03	850.057
460	0	295.178	1646.38	1694.41	207.348	1656.39	1693.72	306.806	1840.74	1698.02	194.982	1831.94	1698.3	250.142	1869.16	1555.02	253.065	1951.44	1292.12	251.216	1725.77	1465.21	227.67	1667.73	1260.15	175.121	1958.71	1350.37	434.833	1788.33	1499.83	510.704	1798.18	1302.54	520.701	1797.48	1149.92	521.872	1704.93	1001.3	465.287	1674.15	917.264	531.56	1704.44	902.652	515.074	1648.2	855.014
461	0	294.995	1634.62	1696.3	207.177	1645.12	1695.19	307.201	1829.18	1700.11	195.204	1820.57	1699.97	250.583	1858.17	1556.95	253.845	1940.29	1293.81	251.4	1714.83	1467.1	228.064	1657.23	1262.07	175.787	1947.63	1352.17	435.186	1776.91	1501.81	511.134	1785.03	1304.71	521.469	1781.53	1151.83	522.304	1686.41	1005.06	465.125	1654.22	921.513	531.506	1684.11	906.065	514.888	1627.13	859.8
462	0	294.544	1623.01	1697.69	206.657	1633.7	1696.21	307.338	1817.33	1702.09	195.439	1809.49	1701.47	251.096	1847.18	1558.44	254.429	1928.98	1295.36	251.668	1703.91	1468.97	229.759	1647.98	1263.26	176.271	1936.75	1353.71	435.369	1765.53	1503.7	511.402	1772.14	1306.44	522.389	1765.77	1153.63	522.405	1667.89	1008.77	465.015	1634.44	926.105	531.062	1663.7	909.749	514.146	1605.65	864.742
463	0	293.953	1611.21	1698.62	206.328	1622.28	1697.3	307.593	1805.52	1703.69	195.683	1798.09	1702.96	251.715	1836.24	1559.61	254.854	1917.72	1296.72	251.636	1692.82	1470.51	230.294	1637.39	1264.53	176.92	1925.82	1355.11	435.468	1754.05	1505.36	511.496	1759.25	1308.16	523.107	1750.14	1155.29	522.759	1649.66	1012.57	464.616	1614.37	930.879	531.219	1643.96	913.197	513.491	1584.5	869.572
464	0	293.602	1599.45	1699.52	206.123	1610.9	1697.75	307.796	1793.9	1704.96	195.737	1786.67	1704.06	251.742	1824.94	1561.01	255.393	1906.55	1297.79	252.137	1681.96	1471.24	228.832	1624.9	1266.66	177.466	1914.74	1356.13	435.694	1742.75	1506.73	511.755	1746.38	1309.8	523.81	1734.51	1157.04	522.945	1631.57	1015.79	464.072	1594.49	935.695	530.287	1623.48	916.706	512.783	1563.61	874.248
465	0	293.079	1587.67	1699.97	205.582	1599.42	1697.96	307.678	1781.87	1706.22	195.732	1775.26	1704.77	251.602	1813.63	1561.89	256.011	1895.32	1298.91	252.003	1670.85	1472.44	228.94	1613.65	1267.59	177.782	1903.68	1357.3	435.695	1731.31	1507.96	511.926	1733.39	1311.23	524.464	1719.09	1158.37	522.529	1613.22	1019.24	463.719	1574.86	939.282	529.685	1603.46	920.053	512.03	1542.83	879.203
466	0	292.678	1575.88	1700.23	205.213	1587.95	1698.1	307.747	1770.15	1706.83	195.726	1763.73	1705.3	251.983	1802.47	1562.46	256.511	1883.99	1299.27	251.93	1659.65	1473.19	229.229	1603.04	1268.02	178.105	1892.46	1357.73	435.706	1719.8	1508.82	512.114	1720.47	1312.22	525.058	1703.83	1159.45	522.225	1594.96	1022.49	463.208	1555.35	943.697	529.039	1583.8	923.303	511.014	1522.17	883.808
467	0	292.176	1564.1	1700.01	204.886	1576.41	1697.79	307.802	1758.27	1707.17	195.666	1752.11	1705.49	252.252	1791.2	1562.59	257.056	1872.67	1299.9	251.869	1648.41	1473.38	229.019	1591.59	1268.53	178.361	1881.56	1358.31	435.569	1708.33	1509.46	512.285	1707.73	1312.86	525.333	1688.55	1160.28	522.104	1577.44	1025.18	462.395	1535.69	947.912	528.02	1563.97	926.502	510.017	1501.62	888.347
468	0	291.587	1552.22	1699.73	204.183	1564.78	1697.02	307.55	1746.31	1707.3	195.617	1740.18	1705.46	252.242	1779.91	1562.45	257.379	1861.22	1299.71	251.86	1637.2	1473.15	228.963	1580.51	1268.52	178.863	1870.04	1358.06	435.461	1696.94	1509.55	512.246	1694.67	1313.45	525.857	1673.58	1160.74	521.764	1559.78	1027.84	461.842	1516.69	951.661	527.019	1544.5	929.315	508.878	1481.34	892.82
469	0	291.031	1540.35	1699.16	203.685	1553.16	1696.34	307.473	1734.46	1706.9	195.448	1728.64	1704.94	252.051	1768.3	1561.78	257.566	1849.86	1299.25	251.641	1625.77	1473.01	228.962	1569.48	1268.6	178.803	1858.77	1357.94	435.115	1685.41	1509.28	512.341	1681.75	1313.52	526.382	1658.97	1160.94	521.396	1542.43	1030.28	461.106	1497.7	955.602	525.662	1525.21	932.06	507.621	1461.19	896.857
470	0	290.351	1528.35	1698.07	203.196	1541.32	1695.14	307.164	1722.44	1705.98	195.183	1716.9	1703.76	251.697	1756.72	1561.1	257.88	1838.46	1298.5	251.58	1614.32	1472.16	229.307	1558.81	1267.32	178.99	1847.34	1357.02	434.99	1674.05	1508.53	512.351	1668.63	1313.23	526.569	1644.4	1160.5	521.084	1525.23	1032.33	460.088	1478.75	959.115	524.529	1505.85	934.28	506.347	1441.25	901.074
471	0	289.695	1516.35	1696.7	202.631	1529.61	1693.5	306.772	1710.4	1704.77	194.86	1705.2	1702.22	251.22	1745.04	1560.02	258.018	1827.05	1297.33	251.349	1602.76	1470.63	229.177	1547.39	1265.74	179.122	1835.77	1355.87	434.714	1662.35	1507.56	512.628	1655.68	1312.58	526.887	1630.03	1159.93	520.38	1508.07	1034.14	459.107	1460.07	962.172	523.346	1486.79	936.474	504.903	1421.34	904.677
472	0	289.001	1504.37	1694.73	201.818	1517.73	1691.63	306.567	1698.49	1703.4	194.352	1693.36	1700.38	250.92	1733.3	1558.29	257.841	1815.69	1296	251.19	1591.07	1468.87	228.711	1535.62	1264.33	179.159	1824.26	1354.47	434.287	1650.62	1506.17	512.574	1642.54	1311.89	526.989	1615.79	1158.78	519.948	1491.27	1035.78	458.137	1441.66	965.073	522.252	1468.2	938.532	503.358	1401.68	908.571
473	0	288.203	1492.35	1692.79	200.898	1505.78	1689.33	305.879	1686.16	1701.3	194.054	1681.52	1698.37	250.58	1721.51	1556.21	257.587	1804.09	1294.38	250.855	1579.36	1466.96	228.258	1523.93	1262.54	179.066	1812.67	1352.58	433.958	1639.09	1504.29	512.488	1629.52	1310.49	527.508	1601.9	1157.42	518.892	1474.73	1036.51	456.827	1423.36	967.993	520.702	1449.21	940.227	501.784	1382.39	911.976
474	0	287.316	1480.23	1690.2	200.407	1493.7	1687.03	305.189	1674.1	1699.25	193.502	1669.42	1695.99	250.081	1709.52	1554.01	257.462	1792.48	1292.05	250.542	1567.4	1465.02	228.198	1512.33	1260.23	178.863	1801.12	1350.47	433.412	1627.17	1502.11	512.315	1616.39	1308.64	527.485	1587.97	1155.48	518.379	1458.44	1037.41	455.642	1405.41	970.65	519.184	1430.64	941.809	500.473	1363.44	914.843
475	0	286.374	1467.84	1687.76	199.441	1481.61	1684.14	304.309	1661.71	1696.59	192.872	1657.39	1693.15	249.329	1697.31	1551.58	257.182	1780.92	1289.64	250.094	1555.48	1462.31	227.907	1500.48	1257.3	178.675	1789.45	1348.23	432.773	1615.26	1499.57	512.236	1603.57	1306.65	527.442	1574.27	1153.18	517.875	1442.11	1038.18	454.446	1387.81	972.923	517.707	1412.35	942.905	498.77	1344.56	917.854
476	0	285.51	1455.68	1685.04	198.393	1469.45	1681.03	303.693	1649.55	1693.67	191.97	1645.28	1689.88	248.748	1685.23	1548.71	256.136	1769.03	1286.99	249.474	1543.42	1459.09	227.373	1488.5	1254.21	178.201	1777.46	1345.3	432.26	1603.36	1496.83	511.928	1590.79	1304.14	527.625	1560.77	1150.73	517.056	1426.19	1038.41	453.038	1370.32	974.874	516.442	1394.62	943.652	497.309	1325.76	921.096
477	0	284.384	1443.3	1681.53	197.439	1457.17	1677.63	302.752	1637.01	1690.48	191.108	1632.87	1686.67	247.755	1672.78	1545.59	255.804	1757.39	1284.06	248.882	1531.16	1455.66	227.055	1476.56	1250.93	177.705	1765.46	1342.28	431.331	1591.42	1493.53	511.658	1578.04	1301.26	527.805	1547.43	1147.9	516.258	1410.42	1038.39	451.76	1353.32	976.342	514.501	1376.89	944.769	495.664	1307.51	923.799
478	0	283.367	1430.85	1678.17	196.311	1444.75	1673.97	301.922	1624.51	1687.22	190.142	1620.67	1683.02	246.972	1660.49	1542.35	254.932	1745.65	1280.76	247.988	1518.76	1452.29	226.539	1464.51	1246.9	176.933	1753.36	1339.2	430.534	1579.24	1490.02	511.333	1565.56	1298.44	527.575	1534.1	1144.75	515.218	1395.12	1037.86	450.43	1336.61	977.693	513.099	1359.22	945.478	494.162	1289.79	926.044
479	0	281.92	1418.13	1674.68	195.053	1432.31	1670.47	300.72	1611.89	1683.6	189.257	1608.17	1679.44	245.773	1648.02	1538.9	253.79	1733.19	1277.02	246.998	1506.29	1448.34	226.076	1452.58	1242.94	176.029	1741.01	1335.64	429.595	1567.04	1486.67	510.64	1553.16	1295.13	527.285	1520.98	1141.49	514.326	1379.77	1037.59	448.806	1320.1	978.698	511.369	1342.37	945.005	491.773	1272.09	928.282
480	0	280.659	1405.6	1671.2	193.754	1419.67	1666.81	299.647	1599.25	1680.12	188.021	1595.68	1675.65	244.785	1635.49	1535.3	252.83	1721.12	1273.37	246.075	1493.79	1445.08	224.934	1440.01	1239.46	175.053	1728.53	1331.75	428.401	1554.87	1482.69	509.854	1540.98	1291.51	527.109	1508.25	1137.77	513.24	1364.87	1036.92	447.457	1304.29	980.1	508.868	1325.65	945.039	490.026	1255.14	930.086
481	0	279.453	1392.82	1667.59	192.456	1406.96	1663.09	298.764	1586.6	1676.28	186.77	1583.07	1671.76	243.365	1622.88	1531.54	251.857	1708.38	1269.47	244.843	1480.92	1441.16	224.674	1428.08	1235.62	173.831	1715.87	1327.76	427.424	1542.51	1478.96	508.995	1528.77	1287.72	526.35	1495.36	1134.15	512.282	1350.33	1035.93	445.711	1288.62	980.853	507.7	1308.59	945.729	488.618	1238.6	932.002
482	0	277.849	1379.91	1663.68	190.979	1394.13	1659.27	296.796	1573.46	1672.78	185.583	1570.27	1668.08	243.198	1610.1	1527.66	250.582	1695.52	1265.73	243.717	1468.01	1437.08	223.429	1415.43	1231.08	172.644	1703.02	1323.95	426.121	1529.97	1475.06	507.931	1516.71	1284.3	525.841	1482.8	1130.36	510.656	1336.15	1034.24	444.342	1273.57	980.98	506.202	1293.43	945.411	486.985	1222.5	933.948
483	0	276.311	1366.99	1660.24	189.409	1381.22	1655.72	295.678	1560.73	1669.34	183.921	1557.41	1664.36	240.756	1597.18	1524.25	249.741	1682.8	1262.14	242.332	1454.95	1433.49	222.221	1402.62	1227.36	171.374	1689.93	1319.97	424.975	1517.58	1471.42	506.807	1505	1280.54	525.314	1470.57	1126.75	509.625	1322.11	1033.4	442.652	1258.78	981.103	505.16	1278.6	945.315	485.064	1206.89	934.831
484	0	274.535	1353.99	1656.68	187.748	1368.22	1652.26	293.712	1547.57	1665.88	182.342	1544.34	1660.84	239.327	1584.07	1520.73	248.743	1669.38	1258.5	241.022	1441.79	1430.1	221.123	1389.63	1223.71	170.047	1676.82	1316.32	423.467	1504.87	1467.66	505.277	1493.33	1276.86	524.443	1458.37	1123.2	508.374	1308.6	1032.17	441.317	1244.7	981.264	502.37	1263.17	944.332	483.135	1191.81	936.021
485	0	272.836	1340.68	1653.77	185.912	1354.98	1648.79	292.16	1534.38	1662.75	180.448	1531.11	1657.46	237.571	1570.71	1517.32	247.364	1656.38	1255.42	239.367	1428.25	1426.87	219.878	1376.08	1220.68	168.852	1663.57	1312.59	422.008	1492.08	1464.32	503.691	1481.62	1273.01	523.455	1446.42	1119.6	507.163	1295.41	1030.73	439.687	1230.75	980.985	500.682	1248.49	943.304	481.43	1177.37	936.454
486	0	270.894	1327.43	1650.55	184.035	1341.77	1645.56	290.218	1520.98	1659.63	178.834	1517.9	1654.18	235.813	1557.26	1513.98	246.622	1642.73	1252.03	237.711	1414.77	1423.55	218.112	1362.07	1217.7	167.709	1650.1	1309.22	420.509	1479.04	1461.08	501.875	1470.1	1269.68	522.169	1434.6	1116.27	505.401	1282.7	1028.4	438.188	1217.45	980.501	499.113	1234.73	942.322	480.246	1163.47	936.861
487	0	268.98	1314.15	1647.79	182.064	1328.41	1642.75	288.451	1507.66	1656.58	177.237	1504.58	1651.05	234.327	1543.67	1511.07	246.075	1628.97	1249.35	236.328	1401.31	1420.85	216.696	1348.17	1214.71	166.67	1636.45	1306.15	418.892	1465.81	1458.21	500.029	1458.7	1266.69	520.911	1423.22	1113.22	504.367	1270.27	1027.42	436.811	1204.55	979.667	497.642	1221.59	941.345	478.533	1150.09	937.055
488	0	266.954	1300.6	1645.44	180.073	1314.95	1640.15	286.458	1494.3	1653.65	175.23	1491.2	1648.05	232.277	1529.9	1508.26	245.091	1614.95	1246.28	234.542	1387.46	1417.99	215.133	1333.89	1211.91	165.555	1622.62	1303.2	417.268	1452.41	1455.47	498.075	1447.13	1263.82	519.241	1411.75	1110.29	502.901	1258.37	1025.15	435.482	1191.97	978.602	495.944	1208.9	940.155	477.317	1137.24	936.703
489	0	264.767	1287.12	1642.9	178.05	1301.46	1637.81	284.472	1480.85	1651.14	173.145	1477.65	1645.39	230.273	1516.12	1505.66	244.305	1600.87	1243.94	232.322	1373.36	1415.35	213.685	1319.75	1209.07	164.322	1608.58	1300.33	415.315	1438.68	1453.04	495.904	1435.56	1261.14	517.576	1400.67	1107.74	501.838	1246.6	1023.48	434.319	1179.92	977.309	494.687	1196.55	938.393	476.198	1124.86	936.275
490	0	262.608	1273.48	1641.18	175.743	1287.82	1635.76	282.377	1467.24	1649.14	170.715	1464.04	1643.2	227.872	1502.35	1503.25	243.117	1586.56	1241.43	230.575	1359.47	1413.34	211.756	1305.05	1207.37	163.076	1594.38	1297.68	413.263	1424.9	1451.27	493.62	1423.7	1259.22	515.747	1389.92	1105.46	500.238	1235.14	1021.64	433.136	1168.18	975.654	493.473	1184.92	936.87	475.262	1113.24	935.501
491	0	260.352	1259.76	1639.9	173.536	1273.96	1634.68	279.543	1453.36	1647.46	168.508	1450.3	1641.52	225.506	1488.35	1501.66	242.208	1571.93	1239.71	228.582	1345.29	1412.02	210.369	1290.52	1205.91	161.658	1580.04	1295.59	411.011	1410.92	1449.72	491.362	1411.72	1257.63	513.549	1379.1	1103.36	499.297	1224.4	1019.8	432.12	1156.85	974.361	492.138	1173.59	935.061	474.425	1101.98	934.438
492	0	258.004	1245.82	1639.2	171.241	1260.11	1633.6	277.545	1439.69	1646.26	166.021	1436.43	1640.34	223.103	1474.29	1500.2	241.412	1557.21	1238.48	226.428	1330.92	1410.88	208.78	1275.57	1204.72	159.955	1565.5	1293.93	408.812	1396.85	1448.68	489.251	1399.32	1256.53	511.032	1368.28	1101.92	497.899	1213.53	1017.91	431.195	1145.95	972.669	491.032	1162.94	933.118	473.945	1091.27	932.839
493	0	255.689	1232.09	1638.42	168.833	1246.2	1633.04	275.069	1425.81	1645.8	163.756	1422.39	1639.78	220.889	1460.06	1499.23	240.776	1542.15	1237.43	224.252	1316.53	1410.01	206.983	1260.29	1204	158.679	1551.06	1292.97	406.822	1382.72	1448.33	487.406	1386.6	1256.27	508.604	1357.69	1101.04	496.628	1203.23	1016	430.426	1135.38	970.146	490.036	1153.12	931.538	473.592	1081.05	931.156
494	0	253.23	1218.1	1638.61	166.449	1232.3	1633.04	272.626	1411.97	1645.63	161.006	1408.47	1639.31	218.376	1445.59	1498.97	239.963	1527.07	1236.9	222.329	1302.17	1409.98	205.204	1244.76	1204.18	157.18	1536.56	1292.3	404.668	1368.29	1448.75	485.52	1373.56	1256.6	505.943	1347.18	1100.76	495.586	1193.39	1014.49	429.787	1125.28	968.267	489.3	1143.65	929.733	473.48	1071.49	929.214
495	0	250.82	1204.23	1639.14	164.069	1218.33	1633.37	269.698	1397.91	1645.72	158.671	1394.56	1639.44	215.984	1431.16	1498.99	239.113	1512.22	1236.85	219.845	1287.55	1410.11	203.758	1229.58	1204.48	155.45	1521.87	1291.9	402.576	1353.9	1449.35	483.53	1360.31	1257.17	503.305	1336.82	1100.9	494.298	1183.62	1013.05	429.325	1115.57	966.083	488.802	1134.54	927.615	473.611	1062.45	927.181
496	0	248.28	1190.24	1640	161.649	1204.39	1634.15	267.467	1384.07	1646.39	156.21	1380.66	1639.96	213.77	1416.95	1499.48	238.087	1497.43	1237.53	217.514	1273.08	1410.97	202.144	1214.36	1205.82	153.926	1507.38	1292.5	400.454	1339.33	1450.41	481.673	1347	1258.36	500.483	1326.28	1101.59	493.506	1174.53	1011.88	428.845	1106.18	963.995	488.111	1126.01	925.785	473.792	1053.88	924.86
497	0	245.881	1176.4	1641.15	159.131	1190.5	1635.09	264.749	1370.2	1647.6	153.891	1366.77	1640.78	211.842	1402.84	1500.46	236.805	1482.7	1238.22	215.962	1258.86	1412.35	200.406	1199.08	1207.18	152.059	1492.79	1293.34	398.423	1324.85	1451.86	479.827	1333.59	1260.32	497.77	1316.06	1102.76	492.096	1165.1	1010.63	428.425	1097.13	961.776	487.771	1118.31	923.95	474.288	1046	922.248
498	0	243.451	1162.67	1642.75	156.789	1176.7	1636.65	262.73	1356.57	1648.92	151.555	1353	1642.17	209.725	1388.83	1501.71	235.493	1468.02	1239.48	214.086	1244.58	1413.91	198.895	1184.27	1208.99	150.398	1478.28	1294.24	396.269	1310.38	1453.69	478.254	1320.26	1262.52	495.196	1305.68	1104.27	491.005	1156.11	1009.66	428.277	1088.41	959.69	487.132	1110.88	922.242	474.869	1038.42	919.787
499	0	241.244	1148.83	1644.67	154.627	1163.03	1638.22	260.399	1342.84	1650.68	149.35	1339.22	1643.63	207.876	1374.88	1503.17	233.676	1453.38	1240.9	212.152	1230.46	1415.6	197.299	1169.41	1210.79	148.451	1463.75	1295.36	394.283	1295.99	1455.86	476.718	1306.74	1264.98	492.557	1294.99	1106.22	490.094	1147.21	1008.56	428.198	1079.78	957.105	486.86	1103.74	920.435	475.757	1031.28	916.84
500	0	238.937	1135.16	1646.81	152.385	1149.42	1640.19	257.684	1329.16	1652.44	146.929	1325.67	1645.27	205.898	1361.05	1504.85	231.709	1438.91	1242.4	210.271	1216.37	1417.52	195.823	1154.88	1212.83	146.495	1449.18	1297.12	392.404	1281.97	1458.19	475.249	1293.29	1267.61	490.055	1284.19	1108.55	488.977	1138.27	1007.63	428.48	1071.76	954.66	487.176	1097	918.736	476.648	1024.5	913.798
501	0	236.849	1121.83	1648.9	150.259	1136.06	1642.18	256.213	1315.94	1654.81	144.902	1312.23	1647.18	203.886	1347.36	1506.78	229.786	1424.69	1244.38	208.682	1202.56	1420.14	194.211	1140.45	1215.35	144.148	1434.66	1298.65	390.624	1268.44	1460.64	473.718	1280.06	1270.4	487.961	1273.45	1111.15	488.32	1130.06	1006.56	428.687	1063.84	952.549	487.18	1090.58	917.14	477.566	1018.01	910.816
502	0	234.758	1108.53	1651.16	148.417	1122.77	1644.45	254.237	1302.64	1656.96	143.116	1298.92	1649.43	201.936	1333.76	1508.97	227.729	1410.7	1246.49	207.264	1188.98	1422.49	192.737	1126.02	1218.32	141.883	1420.37	1300.7	388.914	1255.2	1462.99	472.21	1267.01	1273.13	486.009	1262.46	1113.92	487.794	1121.52	1005.91	429.048	1056.21	950.501	487.137	1083.99	915.529	478.46	1011.66	907.809
503	0	233.142	1095.37	1653.62	146.768	1109.67	1646.63	252.505	1289.6	1658.99	141.36	1285.83	1651.41	200.18	1320.44	1510.79	225.584	1397.05	1248.36	205.942	1175.44	1424.71	191.68	1111.89	1220.69	139.293	1406.01	1302.64	387.287	1242.25	1465.46	470.928	1254.16	1275.82	484.276	1251.4	1116.69	487.388	1113.04	1005.28	429.501	1048.62	948.113	487.391	1078.02	913.995	479.491	1005.58	904.535
504	0	231.657	1082.49	1656.13	145.18	1096.79	1648.86	250.93	1276.65	1661.4	139.685	1272.89	1653.36	198.445	1307.37	1512.96	223.562	1383.56	1250.2	204.925	1162.13	1426.82	190.586	1097.84	1223.35	137.202	1392.26	1304.73	386.049	1229.79	1468.13	469.694	1241.79	1278.58	482.742	1240.3	1119.42	487.247	1104.81	1004.83	430.083	1041.31	945.441	487.915	1072.07	912.742	480.55	999.831	901.13
505	0	230.358	1069.69	1658.61	143.816	1083.97	1651.39	249.498	1263.95	1663.67	138.212	1260.09	1655.54	197.155	1294.51	1514.99	221.719	1370.51	1252.4	204.152	1148.99	1429.17	189.854	1084.03	1225.92	134.775	1378.51	1306.67	385.014	1217.78	1470.62	468.502	1229.8	1281.08	481.372	1229.2	1121.92	487.105	1096.57	1004.12	430.636	1034.2	943.201	488.383	1066.35	911.094	481.696	994.366	897.737
506	0	229.081	1057.02	1661.24	142.718	1071.34	1653.9	248.16	1251.37	1665.81	137.263	1247.52	1657.9	195.638	1281.6	1517.16	219.719	1357.55	1254.54	203.559	1136.17	1431.73	189.645	1070.58	1228.55	132.429	1364.98	1308.92	383.849	1205.62	1472.99	467.288	1218.21	1283.33	480.15	1218.01	1124.57	487.115	1088.51	1003.62	431.155	1027.14	940.979	488.631	1060.55	909.598	482.581	988.848	894.46
507	0	228.028	1044.75	1663.57	141.695	1058.88	1656.39	247.163	1239.05	1668.24	136.137	1235	1660.21	194.558	1268.9	1519.99	217.65	1344.56	1256.59	203.081	1123.38	1434.11	189.445	1057.39	1231.16	130.226	1351.67	1311.25	383.117	1194.09	1475.38	466.199	1206.97	1285.57	479.155	1206.83	1127.33	487.017	1080.42	1003.28	431.878	1020.55	938.771	489.102	1054.84	908.527	483.631	983.715	891.508
508	0	227.222	1032.4	1666.54	140.809	1046.61	1658.97	245.764	1226.67	1670.84	135.176	1222.77	1662.54	193.188	1256.48	1522.09	215.694	1331.94	1258.8	202.777	1110.94	1436.76	189.315	1044.34	1234.1	128.1	1338.47	1313.56	382.233	1182.49	1477.98	465.057	1196.13	1287.98	478.396	1195.93	1130.08	487.035	1072.48	1003.12	432.478	1014.12	936.814	489.552	1049.45	907.693	484.413	978.704	888.529
509	0	226.541	1020.34	1669.17	140.256	1034.38	1661.64	245.438	1214.75	1673.4	134.239	1210.53	1665.01	192.265	1244.23	1524.4	213.993	1319.51	1261.07	202.482	1098.43	1439.45	189.617	1031.6	1236.97	125.985	1325.51	1315.87	381.594	1171.2	1480.51	464.055	1185.54	1290.11	477.709	1184.96	1132.88	487.13	1064.74	1003.23	432.899	1007.3	935.553	490.123	1043.98	906.937	485.302	973.888	885.852
510	0	226.1	1008.39	1671.84	139.687	1022.3	1664.27	244.564	1202.75	1675.99	133.47	1198.38	1667.55	191.212	1231.89	1527.11	212.145	1307.26	1263.68	202.248	1086.13	1441.87	190.067	1019.11	1239.13	124.115	1312.7	1318.52	381.078	1159.98	1483	463.227	1175.34	1292.45	476.997	1174.05	1135.73	487.203	1056.93	1003.38	432.761	1001.08	932.638	490.864	1038.69	906.498	486.007	969.204	883.331
511	0	225.797	996.411	1674.96	139.435	1010.32	1667.36	243.996	1190.95	1678.58	133.224	1186.49	1670.34	190.183	1219.9	1529.81	210.686	1295.13	1266.13	202.286	1074.1	1444.52	190.689	1006.86	1241.72	122.452	1300.19	1321.01	380.756	1148.98	1485.69	462.565	1165.29	1295.02	476.524	1163.58	1138.55	487.421	1049.46	1004.01	433.257	995.126	931.607	491.638	1033.41	906.659	486.658	964.488	881.181
512	0	225.596	984.815	1677.91	139.149	998.435	1670.42	243.337	1179.22	1681.36	132.372	1174.55	1673.01	189.545	1207.95	1532.42	209.03	1282.91	1268.68	202.304	1062.18	1447.56	191.236	994.862	1244.55	120.796	1287.56	1323.77	380.242	1137.99	1488.43	461.721	1155.29	1297.47	476.06	1153.3	1141.48	487.561	1042.14	1004.76	433.832	989.821	930.474	492.508	1028.21	906.975	487.156	959.953	879.211
513	0	225.454	973.089	1680.87	139.099	986.525	1673.46	242.95	1167.65	1684.01	131.999	1162.63	1675.95	188.612	1195.94	1535.37	207.314	1270.84	1271.44	202.262	1050.23	1450.68	191.899	982.963	1247.85	119.491	1275.2	1326.79	379.757	1127.14	1490.92	460.798	1145.22	1299.99	475.418	1142.94	1144.42	487.517	1034.76	1005.5	434.096	984.132	930.068	493.391	1022.96	907.382	486.99	955.365	876.921
514	0	225.566	961.534	1683.88	139.19	974.77	1676.59	242.702	1156.16	1686.86	131.707	1150.87	1678.85	187.846	1184.08	1538.09	205.827	1258.86	1274.11	202.298	1038.36	1453.68	192.408	971.207	1250.77	117.965	1262.75	1329.59	379.188	1116.13	1493.67	460.236	1135.21	1302.56	474.837	1132.91	1147.55	487.538	1027.42	1006.81	434.555	978.949	929.791	493.847	1017.92	908.275	487.334	951.005	875.628
515	0	225.862	950.072	1687.09	139.281	963.038	1679.78	242.385	1144.86	1689.7	131.505	1139.16	1681.8	187.055	1172.3	1541	204.255	1246.8	1276.82	202.289	1026.64	1456.59	192.795	959.531	1253.26	116.726	1250.42	1332.43	378.932	1105.39	1496.59	459.679	1125.22	1305.44	474.452	1123.26	1150.75	487.683	1020.38	1008.35	434.957	973.709	929.466	494.659	1012.7	909.664	487.837	946.831	874.778
516	0	226.09	938.561	1690.12	139.541	951.292	1682.96	242.21	1133.44	1692.6	131.163	1127.45	1684.54	186.437	1160.59	1543.84	202.825	1235.02	1279.68	202.134	1014.78	1459.58	192.901	947.701	1256.45	115.362	1238.05	1335.24	378.432	1094.38	1499.78	459.196	1115.21	1308.34	473.935	1113.6	1153.99	487.648	1013.2	1010.1	435.509	968.808	929.483	495.435	1007.52	911.196	488.21	942.605	874.145
517	0	226.451	927.125	1693.17	139.903	939.637	1686.21	241.85	1121.97	1695.22	130.937	1115.66	1687.85	185.816	1148.83	1546.56	202.023	1223.34	1282.63	202.111	1002.98	1462.54	193.007	935.801	1259.44	114.213	1225.81	1338.11	378.18	1083.5	1502.61	458.799	1105.12	1311.2	473.43	1104.05	1157.33	487.674	1006.14	1012	434.783	962.59	930.723	496.214	1002.09	913.079	488.377	938.227	873.928
518	0	226.816	915.781	1696.19	140.124	927.931	1689.27	241.888	1110.71	1697.92	130.541	1103.8	1690.57	185.141	1137.1	1549.31	200.87	1211.07	1285.17	202.072	991.185	1465.5	192.883	923.657	1262.41	112.951	1213.35	1341.03	377.76	1072.3	1505.52	458.375	1094.87	1314.1	473.14	1095.02	1160.52	487.679	999.111	1013.96	435.568	957.535	931.156	496.914	996.766	914.924	488.666	933.927	873.882
519	0	227.204	904.452	1699.04	140.448	916.16	1692.47	241.4	1099.3	1700.37	130.422	1092.13	1693.57	184.641	1125.33	1551.8	199.602	1198.89	1287.7	202.135	979.401	1468.51	192.744	911.455	1265.69	111.938	1201.14	1343.54	377.413	1061.25	1508.21	457.9	1084.78	1316.93	472.71	1086	1163.57	487.617	992.146	1015.93	435.747	951.924	932.403	497.425	991.444	916.896	488.635	929.402	873.777
520	0	227.496	893.518	1701.46	140.933	904.49	1695.53	241.559	1088.06	1702.72	130.21	1080.37	1695.83	184.382	1113.55	1554.31	198.753	1186.8	1290.14	202.074	967.527	1471.47	192.644	899.225	1268.93	110.578	1188.75	1346.07	376.997	1049.87	1510.7	457.594	1074.83	1319.64	472.282	1077.07	1166.38	487.702	985.346	1017.64	435.915	946.444	933.493	497.824	985.881	918.864	488.883	925.037	873.824
521	0	228.11	881.768	1704.33	141.36	892.638	1698.23	241.433	1076.69	1705.05	130.018	1068.61	1698.06	183.946	1101.56	1556.69	198.174	1174.83	1292.74	201.917	955.495	1473.72	192.55	887.075	1271.17	109.68	1176.51	1348.48	376.743	1038.36	1513.06	457.447	1064.69	1322.17	471.872	1068.31	1169.03	487.722	978.456	1019.33	436.105	940.478	934.345	498.02	980.237	920.634	489.33	920.797	874.131
522	0	228.617	870.138	1707.06	141.747	880.871	1700.97	241.108	1065.25	1706.89	129.886	1056.75	1700.23	183.679	1089.5	1558.78	197.257	1162.5	1295.02	201.864	943.461	1475.91	192.416	875.01	1273.21	109.111	1164.29	1350.7	376.603	1026.82	1515.36	457.443	1054.68	1324.73	471.532	1059.73	1171.68	487.779	971.637	1021.13	436.337	934.414	935.568	498.52	974.689	922.304	489.197	915.77	874.872
523	0	228.982	858.635	1709.29	142.075	869.06	1703.4	241.047	1053.69	1708.64	129.767	1044.87	1702.09	183.105	1077.3	1560.87	197.024	1150.61	1297.19	201.788	931.396	1478.15	192.234	863.04	1275.18	108.349	1151.82	1352.86	376.412	1014.96	1517.26	457.297	1044.71	1326.88	471.318	1051.34	1174.09	487.723	964.699	1022.59	436.246	928.086	936.436	498.475	968.759	923.855	489.213	910.76	875.061
524	0	229.386	847.389	1710.85	142.538	857.132	1705.4	240.862	1042.12	1709.97	129.711	1032.91	1703.75	183.08	1065.06	1562.59	196.075	1138.36	1298.85	201.866	919.219	1480.16	192.064	850.883	1277.53	108.169	1139.56	1354.77	376.136	1003.14	1518.76	457.094	1034.73	1328.64	470.846	1042.87	1175.98	487.71	957.773	1023.86	436.32	921.869	937.777	498.326	962.855	925.084	489.14	905.506	875.289
525	0	229.937	835.743	1712.71	143.038	845.124	1707.38	240.938	1030.4	1711.21	129.507	1020.77	1704.99	183.217	1052.73	1563.87	195.55	1126.05	1300.42	201.783	906.888	1481.43	191.934	838.843	1278.94	107.885	1127.26	1356.56	376.109	990.936	1520.22	457.074	1024.51	1330.62	470.593	1034.57	1177.89	487.835	950.819	1025	436.616	915.244	938.364	498.321	956.95	926.299	489.296	900.219	875.569
526	0	230.406	823.723	1714.49	143.437	833.061	1708.88	240.916	1018.55	1712.02	129.62	1008.71	1706.06	182.995	1040.28	1565.18	195.309	1113.79	1302.1	201.763	894.519	1482.45	192.026	826.721	1279.61	107.712	1114.9	1358.08	376.142	978.561	1521.49	457.164	1014.49	1332.36	470.384	1026.19	1179.58	487.986	943.668	1025.96	436.818	908.499	939.182	498.174	950.828	927.399	489.406	894.652	876.01
527	0	230.911	811.843	1715.59	143.906	820.873	1710.16	241.176	1006.77	1712.22	129.399	996.348	1706.58	183.125	1027.6	1566.2	194.752	1101.61	1303.17	201.966	882.158	1483.37	191.914	814.476	1280.15	107.299	1102.57	1359.05	376.139	966.142	1522.11	457.199	1004.46	1333.38	470.159	1017.77	1180.91	487.905	936.281	1026.61	436.916	901.591	939.808	497.929	944.8	927.953	489.3	888.754	876.068
528	0	231.37	799.801	1716.34	144.344	808.604	1710.88	241.482	994.665	1712.2	129.065	984.157	1706.68	183.235	1014.98	1566.58	194.795	1089.52	1304.27	201.951	869.601	1483.65	191.976	802.095	1280.54	107.282	1090.22	1360.02	376.248	953.656	1522.56	457.038	994.045	1334.66	469.789	1009.08	1181.92	487.687	928.846	1026.66	437.236	894.385	940.333	497.511	938.207	928.354	489.426	882.675	875.944
529	0	231.796	787.629	1716.88	144.691	796.225	1711.3	241.178	982.543	1712.09	129.637	971.651	1706.52	183.522	1002.21	1566.8	194.961	1077.38	1304.71	202.064	857.003	1483.62	192.02	789.823	1280.32	107.433	1078	1360.47	376.372	940.958	1522.56	457.012	983.775	1335.3	469.648	1000.58	1182.64	487.935	921.721	1026.65	437.378	886.666	940.162	497.179	931.514	928.524	489.463	876.356	875.648
530	0	232.213	775.405	1716.92	145.136	783.755	1711.5	241.262	970.22	1711.44	129.839	959.247	1705.91	183.539	989.391	1566.76	195.152	1065.09	1304.67	202.369	844.437	1483.51	192.066	777.326	1280.19	107.479	1065.64	1360.42	376.384	928.27	1522.16	456.968	973.488	1335.45	469.386	991.831	1183.08	487.811	913.988	1026.37	437.674	878.451	939.85	496.845	924.873	928.303	489.387	869.703	875.025
531	0	232.634	763	1716.33	145.601	771.145	1711.19	241.612	957.726	1710.47	130.074	946.566	1705.1	184.008	976.536	1566.19	195.259	1052.84	1304.54	202.522	831.658	1482.76	191.908	764.797	1279.82	107.633	1053.25	1360.18	376.471	915.232	1521.45	456.762	962.768	1335.38	469.166	982.868	1183.04	487.942	906.249	1025.76	437.414	870.374	938.077	496.332	917.654	927.643	489.494	862.799	873.977
532	0	233.291	750.442	1715.55	146.1	758.424	1710.38	241.762	945.008	1709.29	130.301	933.739	1703.92	184.164	963.42	1565.51	195.613	1040.54	1304.06	202.634	818.811	1481.33	192.153	752.547	1277.67	107.748	1040.82	1359.6	376.924	902.214	1520.59	456.882	952.004	1335.05	468.999	973.71	1182.78	488.096	898.212	1025.04	437.926	862.105	937.715	496.163	910.436	926.923	489.716	855.587	873.058
533	0	233.848	737.601	1714.7	146.569	745.589	1709.48	241.639	932.272	1707.61	130.532	920.922	1702.29	184.596	950.363	1564.31	196.007	1028.12	1303.24	202.884	805.971	1479.68	192.414	740.184	1275.92	107.972	1028.27	1358.72	377.248	889.025	1519.46	457.017	941.081	1334.44	468.826	964.319	1182.34	488.414	889.965	1024.26	438.507	853.731	937.066	495.756	902.662	926.007	490.109	848.146	871.927
534	0	234.436	724.818	1713.15	147.166	732.718	1708.07	242.394	919.441	1705.75	130.932	907.92	1700.49	184.991	937.215	1562.87	196.485	1015.59	1301.97	203.174	792.984	1477.87	192.582	727.932	1273.85	108.406	1015.77	1357.34	377.715	875.987	1517.8	457.022	929.807	1333.34	468.482	954.611	1181.29	488.428	881.35	1022.67	438.67	845.008	935.248	495.623	894.844	924.402	490.132	839.919	870.049
535	0	235.178	711.975	1711.13	147.937	719.639	1706.29	242.864	906.459	1703.35	131.587	894.879	1698.42	185.554	924.067	1560.89	197.226	1002.82	1300.19	203.574	779.914	1475.75	192.339	715.135	1273	108.929	1003.09	1355.69	378.154	862.774	1515.83	456.914	918.436	1331.85	468.277	944.64	1180.06	488.506	872.457	1020.7	439.097	835.997	933.002	495.731	887.228	922.771	490.067	831.835	867.598
536	0	235.88	698.874	1708.85	148.684	706.488	1704.17	243.463	893.438	1700.96	132.21	881.644	1696	186.226	910.891	1558.73	198.145	989.966	1298.1	203.971	766.756	1473.26	192.845	702.593	1269.16	109.664	990.434	1353.91	378.677	849.569	1513.65	457.056	906.72	1330.24	468.042	934.546	1178.38	488.716	863.329	1018.61	439.521	826.858	930.911	495.659	878.739	920.772	490.471	823.495	865.298
537	0	236.781	685.709	1706.61	149.409	693.254	1701.82	244.298	880.199	1698.18	132.933	868.396	1693.22	186.92	897.573	1556.31	199.08	977.109	1295.88	204.575	753.547	1470.48	194.092	692.288	1264.56	110.296	977.701	1351.46	379.297	836.102	1511.12	457.197	894.807	1328.14	467.923	924.092	1176.38	489.065	854.025	1016.43	440.111	817.502	928.696	495.308	869.602	918.386	491.058	815.211	862.781
538	0	237.741	672.369	1704.09	150.334	679.92	1699.37	244.986	866.946	1695.2	133.861	855.131	1690.68	187.635	884.103	1553.82	199.962	964.138	1293.19	205.15	740.155	1467.39	194.586	680.605	1260.86	111.241	964.836	1349.06	379.911	822.619	1508.49	457.527	882.648	1325.97	467.752	913.252	1174.29	489.34	844.234	1013.77	440.626	807.615	926.016	495.702	860.8	916.058	491.561	806.426	860.07
539	0	238.798	658.945	1701.33	151.361	666.545	1696.57	246.272	853.555	1692.24	134.87	841.745	1687.48	188.415	870.655	1551	200.933	951.126	1290.78	205.799	726.746	1464.27	195.23	667.981	1257.42	112.323	951.992	1346.3	380.756	809.043	1505.8	457.629	870.316	1323.55	467.693	902.083	1171.94	489.863	834.265	1011.07	441.48	797.68	923.257	495.957	851.331	913.39	492.16	797.07	857.163
540	0	239.86	645.575	1698.38	152.394	653.107	1693.71	247.192	840.046	1689.04	135.91	828.29	1684.44	189.395	857.15	1548.08	201.936	937.997	1287.56	206.519	713.24	1461.03	195.69	655.023	1254.03	113.545	938.879	1343.54	381.529	795.534	1502.81	458.247	857.657	1320.82	467.875	890.621	1169.68	490.267	823.874	1008.09	442.092	787.407	920.228	496.257	841.498	910.489	492.888	787.83	853.969
541	0	241.011	631.955	1695.46	153.665	639.588	1691.06	248.415	826.59	1685.75	137.002	814.746	1681.15	190.312	843.487	1545.15	203.006	924.804	1284.69	207.347	699.608	1457.82	196.487	641.75	1250.7	114.652	925.795	1340.43	382.434	781.979	1499.68	458.588	844.769	1317.93	467.942	878.869	1166.94	490.607	813.068	1004.93	442.616	776.749	916.473	496.627	831.243	907.605	493.52	777.772	850.534
542	0	242.178	618.372	1692.24	154.975	625.95	1687.87	249.757	812.936	1682.35	138.393	801.073	1677.92	191.37	829.829	1541.98	203.757	911.503	1281.48	208.396	685.975	1454.68	197.24	628.764	1246.8	116.071	912.601	1337.69	383.312	768.212	1496.55	459.165	831.818	1314.92	467.636	866.298	1163.84	491.167	801.829	1001.61	443.502	765.937	912.805	497.382	820.975	904.392	494.387	767.783	846.888
543	0	243.674	604.645	1689.25	156.341	612.281	1684.87	251.118	799.143	1678.97	139.773	787.381	1674.65	192.344	816.042	1538.91	204.523	898.073	1278.39	209.451	672.212	1451.02	198.189	615.211	1243.45	117.361	899.316	1334.66	384.505	754.545	1493.61	459.771	818.565	1311.78	468.286	853.965	1161.2	491.898	790.381	998.514	444.538	754.67	909.647	497.955	810.008	901.233	495.421	757.249	843.439
544	0	245.256	590.89	1686.45	157.72	598.547	1682	252.637	785.465	1675.75	141.14	773.578	1671.68	193.477	802.207	1535.83	205.219	884.547	1275.3	210.597	658.383	1447.85	199.267	601.321	1240.31	118.595	885.906	1331.84	385.816	740.869	1490.53	460.65	805.245	1308.74	468.433	840.903	1158.19	492.798	778.561	995.324	445.728	743.279	906.383	498.791	798.88	898.065	496.623	746.869	840.008
545	0	246.725	577.048	1683.26	159.244	584.664	1679	254.059	771.645	1672.44	142.588	759.766	1668.27	194.673	788.205	1533.05	205.806	870.823	1272.35	211.82	644.481	1444.56	200.295	587.475	1236.86	119.704	872.279	1328.79	386.983	727.081	1487.32	461.387	791.727	1305.36	468.799	827.58	1155.05	493.469	766.211	991.682	446.563	731.314	902.19	499.844	787.433	894.793	497.701	735.647	836.204
546	0	248.322	563.312	1680.1	160.828	570.732	1676.05	255.307	757.749	1669.17	144.182	745.816	1665.12	196.245	774.283	1529.95	206.398	857.122	1269.41	213.308	630.441	1441.52	201.778	573.813	1233.3	121.059	858.608	1326.29	388.363	713.239	1484.13	462.265	777.936	1302.17	469.264	814.006	1151.69	494.304	753.685	988.122	447.734	719.149	898.057	500.733	775.213	891.365	498.795	724.102	832.21
547	0	250.064	549.335	1677.53	162.428	556.784	1673.39	257.199	743.765	1665.94	145.703	731.966	1662.32	197.499	760.261	1527.06	207.061	843.198	1266.54	214.837	616.382	1438.41	203.123	559.955	1230.18	122.13	844.607	1323.19	389.967	699.44	1481.11	463.145	763.913	1298.85	469.849	800.107	1148.6	495.406	740.768	984.589	449.144	706.823	894.509	502.065	763.214	888.01	500.081	712.147	828.565
548	0	251.598	535.335	1674.7	164.05	542.813	1670.56	259.001	729.952	1663.08	147.394	718.012	1659.24	198.936	746.368	1524.25	207.913	829.276	1263.77	216.56	602.369	1435.47	204.761	546.005	1227.34	123.261	830.471	1320.6	391.556	685.491	1478.28	464.391	749.958	1295.54	470.613	786.018	1145.41	496.527	727.517	981.414	450.334	693.551	890.996	502.967	750.013	884.701	501.535	700.121	824.855
549	0	253.408	521.374	1672.15	165.763	528.906	1668.02	260.687	715.87	1660.32	149.137	704.019	1656.49	201.038	732.35	1521.69	208.879	815.13	1261.1	218.461	588.247	1432.63	206.476	531.927	1224.59	124.418	816.127	1318.13	393.36	671.594	1475.32	465.683	735.694	1292.34	471.493	771.597	1142.35	497.886	714.159	977.988	453.051	685.49	884.902	504.315	736.778	881.562	502.91	687.327	821.355
550	0	255.141	507.278	1670	167.503	514.903	1665.8	262.787	701.668	1658.06	151.032	690.02	1654.24	202.877	718.276	1519.72	209.913	800.791	1258.5	220.39	573.966	1430.16	208.351	517.696	1222.37	125.559	801.614	1315.6	395.48	657.598	1472.86	467.224	721.215	1289.16	472.577	756.878	1139.26	499.312	700.189	974.892	457.691	667.255	890.768	505.857	723.255	878.472	504.493	674.266	818.102
551	0	256.731	493.126	1668.39	169.143	500.957	1664	264.642	687.548	1656.24	153.045	676.054	1652.25	205.152	704.315	1517.45	211.157	786.312	1256.43	222.357	559.802	1428.23	210.289	503.524	1220.36	127.143	787.226	1313.79	397.487	643.552	1470.34	468.719	706.698	1286.23	473.686	742.021	1136.37	500.756	685.914	971.928	456.004	658.131	878.539	507.365	709.476	875.596	505.921	660.793	814.871
552	0	258.282	479.027	1667.05	170.812	486.986	1662.69	266.743	673.391	1654.88	154.869	662.028	1650.73	207.029	690.281	1515.99	212.349	771.892	1254.84	224.411	545.6	1426.86	212.058	489.181	1218.83	128.776	773.044	1312.2	399.655	629.462	1468.08	470.272	691.997	1283.41	474.987	726.898	1133.74	501.982	671.257	969.022	457.064	644.221	875.25	508.876	695.097	872.91	507.234	646.684	811.706
553	0	260.03	464.895	1666.28	172.56	472.981	1661.85	268.868	659.274	1653.97	156.832	648.06	1649.53	209.576	676.034	1514.87	213.43	757.563	1253.51	226.777	531.412	1426.12	214.253	474.824	1218.14	130.851	758.823	1310.86	401.968	615.39	1466.19	472.019	677.093	1280.94	476.302	711.251	1131.39	503.465	656.422	966.513	458.441	629.691	872.418	510.46	680.415	870.688	508.773	632.347	808.997
554	0	261.779	450.805	1665.92	174.214	459.032	1661.31	271.098	645.056	1653.28	159.027	634.096	1648.65	211.528	661.788	1514.29	214.551	743.203	1252.47	228.662	517.118	1425.24	216.432	460.212	1217.91	132.981	744.711	1309.96	404.356	601.343	1465.01	473.978	661.889	1279	477.643	695.529	1129.2	504.997	641.133	964.356	460.025	614.468	870.648	511.918	665.336	868.542	510.331	617.522	806.926
555	0	263.476	436.673	1666.19	175.787	445.141	1661.19	273.128	630.925	1652.98	161.246	620.289	1648.36	214.182	647.635	1513.98	215.64	728.703	1251.73	230.832	503.041	1425.24	218.329	445.282	1218.36	135.09	730.474	1309.29	406.606	587.283	1464.32	475.765	646.728	1277.5	479.187	679.427	1127.8	506.511	625.591	963.097	461.496	599.11	869.347	513.381	649.776	867.121	511.796	602.376	805.341
556	0	265.014	422.6	1666.56	177.512	431.356	1661.53	275.432	616.933	1653.33	163.363	606.559	1648.38	216.38	633.751	1514.1	216.989	714.252	1251.5	232.898	488.932	1425.53	220.092	430.436	1218.97	136.705	716.028	1308.62	408.862	573.165	1463.86	477.222	631.409	1276.46	480.486	662.971	1126.35	507.828	609.204	962.008	462.759	583.289	868.028	515.016	633.75	866.021	513.203	586.731	804.032
557	0	266.683	408.666	1667.23	179.278	417.636	1662.04	277.715	602.795	1653.81	165.652	592.868	1648.98	219.069	619.996	1514.49	218.566	700.095	1252	235.126	474.867	1426.28	221.885	415.587	1219.7	138.701	702.001	1309.07	411.087	559.087	1463.72	479.346	615.796	1275.75	481.988	646.307	1125.65	509.135	592.57	961.323	463.98	567.208	867.097	516.557	617.124	865.457	514.42	570.29	803.267
558	0	268.312	394.818	1668.32	180.858	403.987	1662.9	279.905	588.923	1654.74	167.761	579.258	1649.52	221.126	606.287	1515.14	220.05	686.217	1252.39	237.111	460.892	1427.3	223.498	400.436	1221.15	140.564	688.276	1309.93	413.256	544.852	1464.27	481.166	600.16	1275.58	483.821	629.973	1125.59	510.514	575.548	961.276	465.262	550.613	867.101	518.181	600.141	865.437	515.529	553.038	803.164
559	0	269.864	380.961	1669.61	182.357	390.346	1664.09	281.909	575.032	1655.59	169.836	565.661	1650.39	223.61	592.736	1516.1	221.83	672.547	1253.45	239.037	447.195	1428.56	225.281	386.253	1222.44	142.322	674.814	1311.02	415.209	530.699	1465.18	483.147	584.407	1275.78	485.958	613.514	1126.07	511.817	558.074	961.778	466.321	533.602	867.552	519.794	582.524	865.84	516.707	535.66	803.272
560	0	271.495	367.326	1670.83	184.008	376.922	1665.46	284.065	561.292	1656.96	171.879	552.241	1651.92	225.746	579.501	1517.5	223.441	659.004	1254.44	240.652	433.548	1429.93	226.86	372.359	1223.92	144.042	661.232	1312.36	417.203	516.56	1466.25	485.038	568.626	1276.25	487.987	596.675	1126.73	513.264	540.476	962.434	467.468	515.896	868.529	521.307	564.389	866.469	517.775	517.617	804.102
561	0	273.19	353.792	1672.51	185.647	363.687	1666.86	286.139	547.739	1658.31	174.042	539.022	1653.28	228.127	566.377	1518.72	225.34	645.947	1255.57	242.163	420.286	1431.28	227.843	357.742	1225.82	146.012	648.425	1314.72	419.116	502.289	1467.77	487.247	552.851	1277.12	489.871	579.604	1127.37	514.833	522.707	963.614	468.586	497.931	869.982	522.989	545.71	867.533	518.837	498.892	805.307
562	0	274.601	340.506	1673.8	187.017	350.529	1668.42	288.062	534.416	1659.74	175.999	525.984	1654.73	230.09	553.543	1520.18	227.254	632.74	1257.07	243.3	407.192	1432.77	229.011	344.448	1227.29	147.572	635.76	1316.38	420.69	488.159	1469.21	489.233	537.043	1278.23	491.96	562.73	1128.27	516.041	504.246	965.04	469.396	479.67	871.413	524.424	526.653	868.633	519.622	479.602	806.701
563	0	275.826	327.296	1675.13	188.406	337.525	1670.01	290.027	521.269	1661.28	177.684	512.983	1656.5	231.675	540.872	1521.65	228.833	619.589	1258.49	244.522	394.368	1434.72	230.053	332.557	1228.37	149.45	623.208	1317.72	422.005	474.091	1470.7	491.11	521.136	1279.23	494.235	545.827	1129.31	517.083	485.424	966.24	469.787	461.024	872.582	525.898	507.212	869.91	520.018	459.44	807.937
564	0	277.268	314.376	1676.43	189.937	324.738	1671.69	291.772	508.081	1662.91	179.333	500.344	1658.84	233.347	528.373	1523.37	230.486	606.614	1259.8	245.594	381.736	1436.54	230.825	319.844	1229.8	151.15	610.803	1319.31	423.273	460.128	1472.21	493.115	505.163	1280.41	496.546	528.707	1130.28	518.325	466.553	967.673	470.589	442.093	874.417	527.304	487.297	871.099	520.613	439.321	809.597
565	0	278.752	301.438	1678.27	191.12	311.911	1673.43	293.418	495.277	1664.88	180.995	487.702	1660.79	235.215	515.896	1525.21	232.182	594.024	1261.53	246.071	369.081	1438.05	231.315	307.288	1231.66	153.079	598.589	1321.02	424.463	446.398	1474.06	495.255	489.306	1281.85	499.046	511.615	1131.35	519.681	447.562	969.66	471.41	422.678	877.022	528.634	467.165	872.54	521.385	418.814	811.9
566	0	279.861	288.749	1680.05	192.357	299.421	1675.5	294.922	482.636	1666.83	182.418	475.039	1662.83	236.494	503.514	1527.01	233.991	581.758	1263.22	246.535	356.763	1439.9	231.294	294.987	1233.64	154.887	586.394	1322.56	425.475	433.041	1475.98	497.139	473.22	1283.5	501.547	494.255	1132.76	520.745	428.037	971.67	471.724	403.215	879.524	529.921	446.483	874.436	521.738	397.486	814.245
567	0	280.909	276.233	1681.67	193.333	286.988	1677.49	296.184	469.996	1668.82	183.671	462.788	1665.3	237.467	491.353	1528.96	235.571	569.34	1265.25	246.989	344.558	1442.01	231.184	283.045	1235.47	156.656	574.277	1324.16	426.151	419.714	1477.69	498.83	457.022	1285.07	503.906	476.854	1133.94	521.751	408.422	973.602	471.956	383.24	881.827	531.045	425.379	876.238	521.91	375.94	816.793
568	0	281.949	263.839	1683.69	194.388	274.684	1679.7	297.447	457.676	1671.11	184.975	450.49	1667.67	238.962	479.078	1531.29	237.362	557.126	1267.35	247.482	332.507	1444.27	231.016	271.18	1237.64	158.356	562.123	1326.14	426.925	406.728	1479.72	500.668	441.07	1286.65	506.407	459.181	1135.51	522.555	388.53	975.906	472.027	363.343	884.333	532.241	403.982	878.235	522.143	353.687	819.743
569	0	282.816	251.555	1685.77	195.265	262.514	1682.02	298.428	445.485	1673.25	185.798	438.29	1670.3	239.803	467.159	1533.6	238.634	544.994	1269.02	247.682	320.543	1446.49	230.453	259.455	1239.89	160.512	550.772	1328.64	427.613	393.971	1481.88	502.276	425.213	1288.59	508.442	441.37	1136.85	523.27	368.44	978.493	472.185	343.243	887.396	533.194	382.321	880.762	522.56	331.964	823.393
570	0	283.522	239.407	1687.96	195.975	250.354	1684.56	299.322	433.245	1675.73	186.857	426.332	1672.82	240.561	455.271	1535.63	240.235	532.897	1271.6	248.156	308.664	1449.29	229.697	247.744	1242.23	162.054	538.983	1330.61	428.137	381.501	1483.92	503.398	409.061	1290.81	511.234	423.98	1139.02	523.65	347.915	981.25	471.878	322.89	890.272	534.524	361.04	883.275	522.182	309.294	826.855
571	0	284.367	227.288	1690.56	196.69	238.38	1686.94	300.263	421.215	1678.38	187.764	414.124	1675.16	241.223	443.472	1538.15	241.553	520.723	1273.96	248.318	296.878	1451.62	229.268	236.055	1245.04	163.809	527.291	1333.03	428.811	369.08	1486.56	504.787	393.277	1293.15	513.168	406.118	1140.94	524.295	327.758	984.491	472.002	302.615	894.377	534.908	338.323	886.525	521.456	286.747	830.51
572	0	285.024	215.319	1693.14	197.222	226.343	1689.74	300.726	409.136	1680.74	188.277	402.299	1678.29	242.373	431.592	1540.54	242.995	508.709	1276.28	248.36	285.167	1454.03	228.985	224.345	1248.03	165.321	515.695	1335.09	429.328	356.904	1489.13	506.087	377.859	1295.8	515.26	388.326	1143.12	524.969	307.537	988.3	472.541	282.128	899.038	535.691	316.205	889.901	521.175	263.901	835.357
573	0	285.389	203.342	1695.64	197.704	214.587	1692.3	301.315	397.198	1683.37	188.832	390.48	1680.66	242.813	419.9	1543.09	244.241	496.71	1278.52	248.599	273.458	1456.74	228.584	212.491	1250.78	166.975	504.097	1337.38	429.762	344.723	1491.65	506.935	362.57	1298.28	517.344	370.858	1145.5	524.962	287.206	991.883	471.555	261.838	903.583	536.345	294.204	893.49	520.737	241.07	840.071
574	0	285.603	191.53	1697.9	197.974	202.638	1694.85	301.922	385.399	1685.98	189.244	378.581	1683.26	243.698	408.125	1545.58	245.635	484.638	1280.74	248.709	262.105	1459.44	228.286	200.723	1253.41	168.519	492.436	1339.81	430.03	332.622	1493.81	507.69	347.478	1300.62	519.278	353.249	1148.12	524.54	267.056	994.987	470.338	241.155	907.821	536.861	271.709	897.317	519.91	218.074	844.806
575	0	285.979	179.638	1700.41	198.447	190.947	1697.02	302.143	373.472	1688.42	189.864	366.82	1685.8	244.608	396.535	1547.74	247.041	472.613	1283.25	248.962	250.463	1462.06	228.236	188.818	1256.11	169.72	480.909	1341.95	430.536	320.644	1496.47	508.502	332.668	1303.35	521.08	335.974	1150.74	525.463	246.989	999.787	470.133	220.584	912.378	537.041	249.813	901.468	519.445	195.25	850.144
576	0	286.436	167.934	1702.87	198.705	179.111	1699.47	302.563	361.78	1690.79	190.169	354.969	1688.03	244.965	384.988	1550.02	248.088	460.766	1285.36	249.092	238.867	1464.55	228.408	177.042	1258.97	170.888	469.33	1343.83	430.902	308.635	1499.19	509.323	318.111	1306.36	522.942	318.894	1153.53	525.749	227.227	1004.23	469.951	199.952	917.293	537.573	227.696	905.738	518.917	172.72	855.918
577	0	286.634	156.051	1705.22	198.959	167.418	1701.58	302.894	349.907	1693.34	190.416	343.198	1690.28	245.883	373.316	1552.18	249.495	449.067	1287.86	249.21	227.216	1467.04	228.396	165.281	1261.47	171.9	457.674	1346.14	431.252	296.425	1501.81	509.972	303.915	1309.17	524.521	301.815	1156.27	525.757	207.342	1008.64	469.498	179.327	922.211	537.527	205.751	910.385	518.069	149.856	861.8
578	0	286.831	144.258	1707.23	199.154	155.617	1703.7	303.16	338.079	1695.55	190.924	331.501	1692.33	246.045	361.714	1554.16	250.498	437.17	1289.98	249.449	215.647	1469.32	228.528	153.546	1263.93	172.868	446.054	1348.38	431.471	284.358	1504.11	510.604	289.841	1311.83	526.08	285.093	1158.95	526.058	187.799	1012.91	469.247	158.574	927.389	537.574	184.14	914.82	517.42	127.399	867.468
579	0	287.031	132.459	1709.13	199.403	143.884	1705.38	303.456	326.361	1697.34	190.888	319.691	1694.52	246.862	349.872	1556.4	251.318	425.333	1291.66	249.549	203.961	1471.31	228.621	141.982	1265.97	173.59	434.309	1350.06	431.747	272.304	1506.29	511.235	275.968	1314.12	527.46	268.474	1161.26	526.276	168.431	1017.26	468.853	137.896	932.41	537.444	162.648	919.208	516.78	105.041	873.344
580	0	287.059	120.587	1710.55	199.559	132.054	1706.89	303.601	314.374	1699.06	191.215	307.946	1696.14	247.119	338.297	1557.8	252.248	413.46	1293.12	249.718	192.343	1473.18	228.575	130.442	1267.7	174.395	422.645	1351.47	431.894	260.108	1508.22	511.7	262.355	1316.25	528.731	252.233	1163.37	526.438	149.277	1021.23	469.45	117.431	937.002	537.029	141.335	923.364	515.939	82.8362	879.079
581	0	287.16	108.774	1711.85	199.75	120.342	1708.23	303.831	302.645	1700.33	191.367	296.051	1697.45	247.784	326.567	1559.19	252.985	401.51	1294.3	249.905	180.622	1474.86	228.559	118.845	1269.33	175.246	410.921	1352.76	431.863	247.913	1509.71	512.075	248.519	1318.01	529.959	236.274	1165.2	526.515	130.124	1025.28	468.093	96.8578	942.337	536.465	120.209	927.274	515.112	60.7108	884.857
582	0	287.571	96.8028	1713.16	199.883	108.326	1709.31	303.87	290.646	1701.53	191.594	284.181	1698.63	247.943	314.824	1560.01	253.647	389.477	1295.28	249.935	168.86	1475.98	228.634	107.323	1270.69	175.809	399.134	1353.83	432.087	235.757	1511.28	512.616	235.077	1319.73	530.924	219.93	1167.03	526.852	111.442	1028.96	467.874	76.2756	947.18	536.053	99.3762	931.202	514.585	39.0357	890.491
583	0	287.724	84.8883	1714.01	199.985	96.6192	1710.44	304.103	278.758	1702.44	191.876	272.261	1699.47	248.567	303.073	1560.86	254.499	377.6	1296.19	249.932	157.052	1477	228.78	95.7469	1271.91	176.465	387.442	1354.66	432.262	223.593	1512.64	513.2	221.695	1321.33	531.858	204.007	1168.54	527.01	92.8175	1032.93	467.654	55.8441	952.092	535.689	78.9252	935.286	513.877	17.3881	896.405
584	0	287.723	72.7981	1714.41	200.071	84.5973	1710.87	304.14	266.783	1703.03	191.96	260.25	1700.21	248.485	291.229	1561.6	255.401	365.526	1297.09	249.989	145.246	1477.63	228.499	83.9556	1272.64	176.988	375.611	1354.94	432.213	211.311	1513.65	513.53	208.043	1322.47	532.878	188.571	1169.94	526.553	74.199	1036.35	467.183	35.5774	956.917	534.971	58.3445	939.119	513.162	-4.00997	901.771
585	0	287.687	60.7937	1714.23	200.142	72.5543	1710.97	304.37	254.651	1703.59	192.104	248.278	1700.53	248.863	279.264	1561.91	256.516	353.784	1297.33	250.103	133.331	1478.02	228.362	72.353	1272.79	177.565	363.788	1355.47	432.104	198.933	1514.15	513.739	194.376	1323.18	533.589	172.944	1171.07	526.835	55.9225	1039.75	466.535	15.3779	961.562	534.247	37.8957	942.636	512.197	-25.354	906.628
586	0	287.788	48.7241	1713.92	200.305	60.4491	1710.81	304.412	242.569	1703.47	192.007	236.08	1700.61	249.059	267.39	1561.71	257.209	341.585	1297.61	250.382	121.407	1478.15	228.35	60.4913	1272.72	178.181	351.883	1355.66	432.119	186.663	1514.62	514.085	180.712	1323.82	534.376	157.442	1171.73	526.857	37.7148	1042.71	466.115	-4.68882	965.884	533.388	17.7845	946.064	511.552	-46.3959	911.752
587	0	287.982	36.5323	1713.59	200.315	48.2546	1710.32	304.452	230.368	1703.11	192.214	224.005	1700.43	248.782	255.338	1561.28	257.699	329.309	1297.5	250.208	109.324	1477.6	228.29	48.5363	1272.75	178.681	339.95	1355.29	432.217	174.4	1514.72	514.425	167.137	1324.29	534.869	142.006	1172.11	526.444	19.7885	1045.34	465.557	-24.7803	970.509	532.664	-2.17769	949.393	510.955	-67.3315	917.356
588	0	288.048	24.2868	1712.62	200.387	35.9894	1709.48	304.433	218.199	1702.29	192.139	211.616	1699.57	248.925	243.191	1560.48	258.177	317.117	1296.78	250.097	97.2956	1476.87	228.248	36.6795	1272.09	179.194	327.951	1354.54	432.044	162.042	1514.21	514.601	153.584	1323.92	535.283	126.981	1171.96	526.25	1.95537	1047.94	464.87	-44.1642	974.403	531.325	-21.6009	952.182	509.981	-88.169	922.076
589	0	288.05	11.9488	1711.35	200.399	23.6199	1708.15	304.227	205.808	1701.03	192.122	199.323	1698.52	248.799	231.013	1559.09	258.369	304.748	1295.52	250.113	85.1755	1475.65	228.184	24.5382	1271.07	179.477	315.789	1353.4	431.914	149.792	1513.28	514.823	140.24	1323.21	535.597	112.015	1171.13	526.071	-15.5947	1050.04	464.246	-63.7214	978.04	530.71	-41.1616	954.791	509.398	-108.358	926.647
590	0	288.141	-0.499207	1709.95	200.32	11.1967	1706.77	304.144	193.485	1699.46	192.103	186.906	1696.97	248.506	218.699	1557.64	258.639	292.568	1293.91	250.029	72.896	1474.14	228.039	12.3526	1269.65	179.725	303.537	1351.64	431.775	137.26	1512.1	514.927	126.773	1322.07	535.842	97.2519	1169.93	525.931	-32.9153	1051.66	464.246	-82.9291	981.592	529.778	-60.4671	956.74	508.583	-128.357	930.558
591	0	287.918	-12.9595	1707.81	200.141	-1.38509	1704.78	303.969	181.004	1697.69	191.848	174.278	1695.28	248.636	206.156	1556.02	258.735	280.278	1292.29	249.884	60.4697	1472.36	227.86	0.118026	1267.72	179.964	291.247	1350.07	431.53	124.782	1510.42	514.863	113.27	1320.64	535.995	82.518	1168.48	525.419	-50.2728	1053.11	462.92	-101.78	984.362	528.613	-79.7503	958.713	507.396	-148.367	934.531
592	0	287.733	-25.5971	1705.82	200.16	-13.9801	1702.88	303.748	168.431	1695.71	191.634	161.712	1693.07	248.469	193.663	1553.76	258.72	267.837	1290.23	249.862	48.2112	1470.09	227.716	-12.1818	1265.51	179.99	278.878	1348.23	431.343	112.127	1508.35	514.819	99.7953	1318.62	535.939	67.7763	1166.88	524.951	-67.2501	1053.88	462.117	-120.4	986.887	527.227	-98.7669	960.076	506.416	-167.981	938.152
593	0	287.7	-38.1614	1703.29	199.854	-26.7755	1700.31	303.428	155.825	1693.35	191.366	149.028	1691.17	248.019	180.903	1551.67	258.916	255.617	1288.41	249.577	35.584	1467.36	227.79	-24.555	1262.99	180.016	266.46	1346.12	431.212	99.5256	1506.29	514.864	86.567	1316.75	536.226	53.5268	1164.88	524.677	-83.9339	1054.56	461.972	-138.962	990.182	527.138	-117.358	961.936	505.576	-187.395	941.894
594	0	287.523	-51.0262	1700.87	199.622	-39.5551	1697.98	303.026	142.936	1690.82	190.892	136.121	1688.49	247.783	167.952	1548.99	258.866	243.127	1286.25	249.267	22.8446	1464.71	227.677	-37.068	1260.38	179.966	253.955	1343.73	431.089	86.7645	1504.06	514.777	73.3101	1314.52	536.219	39.1742	1162.62	524.183	-100.442	1055.25	461.278	-156.791	992.23	526.203	-135.715	963.435	504.666	-206.431	945.29
595	0	286.875	-63.6735	1697.64	199.166	-52.5133	1694.91	302.518	130.104	1688.03	190.323	123.171	1685.49	247.268	155.06	1546.2	258.481	230.493	1283.46	248.909	9.93455	1461.63	227.399	-49.5987	1257.08	179.736	241.209	1340.97	430.595	73.8395	1501.1	514.352	60.0751	1311.5	535.974	24.9452	1160	523.421	-116.764	1054.99	460.112	-174.581	993.705	524.693	-153.885	963.716	503.482	-225.084	948.02
596	0	286.396	-76.5201	1694.25	198.743	-65.5911	1691.62	301.888	117.264	1684.64	189.702	110.195	1682.26	247.51	141.916	1543.31	257.948	217.817	1280.23	248.618	-3.11212	1458.2	227.105	-62.3429	1253.42	179.503	228.294	1337.92	430.022	60.8979	1497.78	513.825	46.7003	1308.08	535.553	10.7528	1156.49	522.618	-132.84	1054.19	459.15	-191.985	995.122	523.254	-171.901	964.083	502.578	-243.285	950.148
597	0	285.91	-89.5352	1690.77	198.178	-78.7198	1688.26	301.094	104.173	1681.09	188.952	96.9473	1678.73	246.553	128.802	1539.82	257.378	205.045	1276.91	248.199	-16.2227	1454.51	226.95	-75.2181	1249.64	178.984	215.325	1334.24	429.596	47.9327	1494.24	513.248	33.7175	1304.34	535.085	-3.10475	1153.07	521.877	-148.732	1053.31	458.189	-209.163	995.839	521.695	-189.314	963.742	501.498	-261.232	952.067
598	0	285.248	-102.735	1687.47	197.355	-92.0039	1684.7	300.05	91.0755	1677.2	188.171	83.6695	1674.84	245.678	115.74	1536.13	256.267	192.007	1272.77	247.52	-29.49	1450.83	226.6	-88.1277	1245.86	178.654	202.08	1330.46	429.074	34.9428	1490.64	512.478	20.7089	1300.66	534.368	-17.0294	1149.06	521.001	-164.344	1052.35	457.077	-226.012	996.584	519.367	-206.498	963.347	500.592	-278.725	954.415
599	0	284.477	-116.151	1684.07	196.684	-105.306	1681.1	299.222	77.8713	1673.58	187.238	70.3448	1670.89	244.881	102.461	1532.64	255.183	178.792	1268.69	246.974	-42.7821	1447.12	226.183	-101.091	1241.93	177.988	188.549	1326.51	428.41	21.893	1486.58	511.702	7.76027	1296.51	533.574	-30.6763	1144.97	520.046	-179.573	1050.82	455.846	-242.445	996.87	517.728	-223.473	962.422	499.467	-295.797	955.695
600	0	283.818	-129.56	1680.67	195.863	-118.766	1677.45	298.179	64.5124	1669.92	186.183	56.941	1667.32	244.175	89.0637	1528.66	254.301	165.64	1265.13	246.441	-56.286	1443.24	225.902	-114.23	1237.99	177.13	175.003	1322.68	427.804	8.63391	1482.89	510.828	-5.30878	1292.56	532.649	-44.3564	1140.87	519.111	-194.553	1049.04	454.843	-258.627	996.702	515.699	-239.647	961.412	498.779	-312.315	956.818
601	0	282.797	-143.046	1677.08	194.722	-132.424	1673.74	296.914	51.0465	1666.32	185.037	43.2958	1663.54	243.225	75.4447	1525.07	253.461	152.092	1261.63	245.595	-69.9773	1439.37	225.543	-127.533	1234.08	176.333	161.349	1318.83	427.172	-4.54463	1479.12	509.838	-18.2721	1288.58	531.661	-57.8488	1136.97	518.102	-209.352	1047.05	453.52	-274.518	996.264	514.259	-255.761	960.355	497.809	-328.543	957.583
602	0	281.339	-156.455	1673.24	193.414	-146.197	1670.01	295.665	37.4032	1662.96	183.646	29.5921	1659.74	241.946	61.6712	1521.6	252.47	138.399	1257.98	244.657	-83.6476	1435.5	224.63	-141.075	1230	175.469	147.951	1315.5	426.23	-18.0184	1475.19	508.408	-31.4149	1284.37	530.544	-71.155	1133.1	516.637	-223.942	1044.74	452.177	-289.908	995.569	512.651	-271.297	959.014	496.545	-344.2	957.393
603	0	280.031	-170.411	1669.85	192.137	-159.98	1666.25	294.164	23.6307	1659.52	182.25	15.8232	1656.37	241.051	47.7214	1518.24	251.856	124.516	1254.79	243.933	-97.593	1432.14	224.036	-154.742	1226.11	174.45	134.199	1311.89	425.289	-31.7415	1471.53	506.896	-44.2903	1280.16	529.062	-84.4516	1128.97	515.706	-238.072	1042.43	451.073	-304.871	994.644	511.14	-286.463	957.19	495.66	-359.334	957.309
604	0	278.769	-184.302	1666.8	190.823	-173.84	1662.85	292.733	9.71949	1656.12	180.864	1.87169	1652.75	240.187	33.8355	1514.94	251.088	110.469	1251.21	242.805	-111.286	1428.46	223.496	-168.729	1222.64	173.743	120.409	1308.54	424.426	-45.4888	1467.83	505.529	-57.0177	1276.31	527.433	-97.3845	1124.84	514.581	-251.912	1039.78	449.949	-319.616	992.781	509.614	-301.044	954.974	494.851	-374.021	956.536
605	0	277.216	-197.91	1663.61	189.201	-187.849	1659.82	291.041	-4.22592	1652.68	179.288	-12.1041	1649.14	239.047	19.5837	1511.58	250.522	96.3479	1247.78	241.501	-125.832	1425.28	222.557	-182.931	1219.42	172.955	106.394	1305.06	423.412	-59.3648	1464.6	503.988	-69.7172	1272.56	525.671	-110.181	1120.87	513.11	-265.505	1037.13	448.658	-333.87	990.882	508.187	-315.227	952.538	494.007	-387.995	955.33
606	0	275.433	-212.009	1660.74	187.454	-202.015	1656.75	289.366	-18.3248	1649.65	177.566	-26.2444	1645.69	237.456	5.35111	1508.44	249.415	81.5743	1244.36	239.854	-140.087	1422.23	221.363	-197.254	1216.08	172.257	92.0362	1301.72	421.976	-73.5389	1461.33	502.011	-82.6576	1268.97	523.594	-122.819	1117.07	511.654	-278.605	1033.97	447.45	-347.593	988.647	506.258	-328.774	949.533	493.138	-401.606	953.344
607	0	273.59	-226.249	1657.77	185.739	-216.31	1653.88	287.622	-32.5463	1646.48	175.914	-40.5326	1642.59	235.747	-9.22744	1505.31	248.43	66.7088	1241.42	238.666	-154.656	1418.9	220.15	-211.821	1212.85	171.487	77.6092	1298.66	420.356	-88.1401	1458.14	500.175	-95.7377	1265.57	521.477	-135.418	1113.47	510.252	-291.432	1030.77	446.282	-360.907	986.002	504.812	-341.792	946.392	492.434	-414.648	951.092
608	0	271.808	-240.628	1655.26	183.901	-230.697	1651.17	285.788	-46.8176	1643.9	174.049	-54.9206	1639.99	233.943	-23.7373	1502.67	247.54	51.8674	1238.78	237.039	-169.287	1416.19	218.83	-226.416	1210.05	170.493	63.0044	1295.74	418.662	-102.679	1455.68	498.029	-108.896	1262.68	519.154	-147.94	1110.43	508.744	-303.997	1027.32	445.197	-373.828	983.273	503.39	-354.277	943.204	491.789	-427.159	948.269
609	0	269.983	-255.081	1653.32	182.005	-245.181	1648.86	283.805	-61.2104	1641.71	171.971	-69.3657	1637.59	231.926	-38.3133	1500.5	246.667	37.0232	1236.68	234.986	-183.598	1413.69	217.235	-241.36	1207.78	169.445	48.5239	1293.27	417.047	-117.281	1453.85	495.972	-122.323	1260.57	516.765	-160.238	1107.89	507.203	-316.146	1024.19	444.019	-386.421	979.879	502.057	-366.156	940.102	491.059	-439.168	945.158
610	0	268.114	-269.566	1651.69	180.08	-259.803	1647.51	281.695	-75.7921	1640.17	169.824	-84.0024	1636.11	229.467	-52.998	1498.66	245.618	22.0451	1235	233.109	-198.398	1411.78	215.694	-256.391	1206.18	168.071	33.499	1291.15	415.218	-132.056	1452.23	493.842	-135.98	1258.83	514.247	-172.581	1105.78	505.882	-327.979	1021.01	443.015	-398.424	976.212	500.813	-377.51	936.755	490.51	-450.52	941.607
611	0	266.23	-284.389	1650.92	178.027	-274.57	1646.44	279.243	-90.4567	1638.67	167.536	-98.8181	1634.72	227.634	-68.0736	1497.25	244.336	6.56173	1233.62	231.606	-213.358	1410.2	214.164	-271.776	1205.14	166.567	18.1977	1289.56	413.379	-146.933	1451.22	491.94	-149.82	1257.55	511.56	-184.982	1103.88	504.38	-339.508	1017.73	441.904	-410.27	972.212	499.626	-388.404	932.824	490.092	-461.303	937.325
612	0	264.038	-298.932	1650.11	175.912	-289.381	1645.58	277.055	-105.11	1638.04	165.269	-113.685	1633.78	225.261	-83.2066	1496.22	243.495	-8.8676	1232.56	229.896	-228.244	1409.5	212.581	-287.421	1204.68	165.206	2.85509	1288.18	411.509	-162.107	1450.52	489.961	-163.942	1256.77	508.764	-197.058	1102.49	502.883	-350.684	1014.45	440.36	-422.306	968.166	498.383	-398.493	928.922	489.621	-471.588	932.856
613	0	261.629	-313.79	1649.77	173.604	-304.292	1645.11	274.675	-119.898	1637.64	162.936	-128.584	1633.02	223.49	-98.3712	1495.63	242.539	-24.6576	1231.6	227.805	-243.37	1409	210.767	-303.32	1204.46	163.441	-12.77	1287.15	409.553	-177.32	1450.16	487.762	-178.301	1256.23	505.757	-209.267	1101.68	501.272	-361.654	1010.88	439.735	-432.114	963.175	497.15	-407.979	924.819	489.229	-481.161	927.783
614	0	259.288	-328.654	1649.8	171.252	-319.285	1645.06	272.221	-134.741	1637.51	160.397	-143.558	1632.68	221.417	-113.627	1495.33	241.841	-40.1442	1231.48	225.903	-258.543	1408.85	209.203	-319.283	1204.69	162.121	-27.8855	1286.98	407.651	-192.848	1450.52	485.872	-192.715	1256.27	503.363	-221.285	1101.43	499.694	-372.188	1007.64	438.917	-442.221	958.503	496.017	-416.983	920.66	488.976	-490.154	922.397
615	0	257.097	-343.449	1650.53	168.964	-334.154	1645.64	269.727	-149.568	1637.82	158.05	-158.475	1632.8	219.45	-128.546	1495.54	240.94	-55.3426	1231.87	223.923	-273.55	1409.35	207.683	-335.262	1205.55	160.59	-43.1854	1287.09	405.874	-208.394	1451.23	484.168	-207.412	1257.32	500.496	-233.691	1101.71	498.493	-382.43	1004.72	438.367	-451.798	953.861	495.122	-425.229	916.521	488.452	-498.927	916.8
616	0	254.801	-358.278	1651.67	166.886	-348.72	1646.3	267.442	-164.329	1638.88	155.858	-173.286	1633.45	217.939	-143.483	1496.19	239.665	-70.7896	1232.4	222.126	-288.798	1410.47	205.992	-351	1206.91	159.071	-58.3883	1287.66	404.092	-224.025	1452.7	482.538	-222.121	1258.81	497.632	-245.966	1102.54	496.976	-392.312	1001.87	437.749	-460.963	949.459	494.248	-432.834	912.564	488.311	-506.264	910.856
617	0	252.283	-373.15	1652.88	164.469	-363.461	1647.01	265.121	-179.05	1640.02	153.45	-188.129	1634.37	216.284	-158.376	1497.25	238.679	-85.9478	1233.61	219.99	-303.874	1411.56	204.028	-366.558	1208.13	157.599	-73.4733	1288.65	402.133	-239.75	1453.94	480.732	-237.151	1260.42	494.945	-258.416	1103.94	495.58	-401.96	999.097	437.258	-469.381	944.384	493.408	-440.109	908.816	488.137	-513.34	904.935
618	0	249.972	-387.977	1654.21	162.058	-378.228	1648.1	262.719	-193.898	1641.16	151.202	-202.742	1635.5	214.447	-173.193	1498.42	237.42	-100.989	1234.97	218.033	-318.77	1412.82	202.11	-381.836	1209.54	156.165	-88.3401	1289.91	400.18	-255.454	1455.55	479.167	-252.384	1262.32	492.453	-270.998	1105.39	494.367	-411.459	996.487	436.857	-477.639	939.406	492.756	-446.956	905.024	487.926	-520.021	898.781
619	0	247.572	-402.497	1655.76	159.517	-393.047	1650.01	260.682	-208.528	1643.05	149.065	-217.314	1636.9	212.846	-187.863	1500.16	235.654	-116.083	1236.13	216.038	-333.416	1414.38	200.222	-396.829	1211.2	154.773	-103.308	1291.26	398.385	-270.716	1457.5	477.629	-267.583	1264.71	490.061	-283.679	1107.23	493.186	-420.627	994.291	436.301	-485.349	934.786	492.268	-453.09	901.56	487.78	-526.086	892.732
620	0	245.214	-417.117	1657.5	157.407	-407.388	1651.46	258.69	-222.98	1644.96	147.002	-231.79	1638.4	211.103	-202.237	1501.82	234.113	-130.664	1237.87	214.094	-347.959	1416.25	198.336	-411.484	1213.23	153.03	-117.967	1292.68	396.586	-285.697	1459.85	476.409	-282.895	1267.24	487.984	-296.327	1109.72	492.046	-429.686	992.24	435.696	-492.644	930.346	491.855	-458.86	898.53	487.516	-531.71	886.585
621	0	243.114	-431.54	1659.39	155.539	-421.473	1652.86	256.696	-237.381	1646.88	145.195	-246.026	1640.38	209.217	-216.602	1503.59	232.44	-145.008	1239.84	212.681	-362.352	1418.27	196.654	-425.981	1215.33	151.158	-132.787	1294.64	394.924	-300.438	1461.88	475.205	-298.048	1269.83	485.939	-309.275	1112.22	491.08	-438.398	990.503	435.258	-499.454	925.797	491.539	-464.411	895.499	487.23	-536.767	880.993
622	0	241.143	-445.799	1661.34	153.538	-435.61	1654.61	255.078	-251.631	1649.33	143.386	-260.182	1642.35	207.806	-230.545	1505.66	230.789	-159.112	1241.92	211.368	-376.446	1420.24	195.381	-440.156	1217.55	149.076	-147.413	1296.65	393.573	-314.564	1464.44	474.081	-312.995	1272.62	484.25	-322.045	1114.87	490.253	-446.933	989.147	435.2	-505.401	921.411	491.45	-469.7	893.105	486.861	-541.556	875.514
623	0	239.163	-459.967	1663.44	151.765	-449.449	1656.63	253.272	-265.694	1651.56	141.787	-274.104	1644.34	205.986	-244.659	1507.78	230.075	-171.834	1244.97	210.002	-390.478	1422.52	194.317	-454.094	1220.01	146.911	-161.732	1298.82	392.14	-328.284	1466.82	473.041	-327.467	1275.3	482.779	-334.751	1117.83	489.234	-455.395	988.188	434.584	-511.28	917.688	491.373	-474.997	891.175	486.38	-545.963	870.277
624	0	237.145	-473.979	1665.29	150.021	-463.332	1658.01	251.887	-279.702	1654.2	140.171	-288.022	1646.3	204.471	-258.131	1510.03	227.092	-186.553	1246.34	208.688	-404.216	1424.35	193.393	-467.971	1221.87	144.735	-175.638	1301.03	390.83	-341.707	1469.18	471.65	-341.608	1277.73	481.446	-347.333	1120.79	487.863	-463.711	987.077	433.82	-516.898	914.01	491.687	-480.07	889.951	485.581	-550.248	865.39
625	0	235.683	-487.899	1667.33	148.508	-477.061	1660.09	250.465	-293.525	1656.56	138.868	-301.711	1648.78	203.389	-271.768	1512.78	226.42	-198.638	1249.77	207.932	-417.779	1426.44	193.129	-481.489	1224.03	142.617	-189.315	1303.69	389.607	-354.776	1471.41	470.55	-355.084	1280.14	480.199	-359.814	1123.53	486.961	-472.026	986.754	433.172	-522.13	911.032	491.853	-485.472	888.949	485.119	-554.287	860.744
626	0	234.287	-501.542	1669.65	146.968	-490.736	1662.37	249.29	-307.21	1659.16	137.654	-315.234	1651.24	201.852	-285.17	1515.02	224.573	-211.745	1252.27	207.323	-431.103	1429.06	193.053	-494.796	1226.47	140.576	-202.726	1306.26	388.806	-367.35	1474.11	469.623	-367.747	1282.84	479.216	-371.744	1126.36	486.227	-480.183	987.138	432.561	-527.058	908.887	492.424	-490.654	888.719	483.988	-558.138	856.774
627	0	233.069	-515.078	1672	145.592	-504.173	1664.55	248.158	-320.733	1661.89	136.683	-328.625	1653.71	200.969	-298.512	1517.91	222.517	-225.03	1254.5	206.805	-444.149	1431.72	192.911	-507.755	1229.01	138.436	-215.771	1308.94	388.005	-379.769	1476.94	468.666	-379.753	1285.41	478.325	-383.196	1129.36	485.391	-488.13	987.814	431.772	-531.801	907.428	492.961	-496.133	889.111	482.802	-561.931	853.629
628	0	231.964	-528.584	1674.34	144.683	-517.442	1666.67	247.066	-334.06	1664.41	135.706	-341.989	1656.17	199.677	-311.393	1520.22	219.745	-238.928	1256.18	206.178	-457.116	1434.15	192.903	-520.636	1231.22	136.611	-228.49	1311.91	387.216	-392.044	1479.26	467.701	-391.172	1287.52	477.596	-394.024	1132	484.394	-496.258	988.612	430.895	-536.543	906.379	493.686	-501.979	889.852	481.622	-565.613	850.556
629	0	231.008	-541.807	1676.45	143.872	-530.585	1668.88	246.402	-347.236	1667.44	134.854	-355.124	1658.91	198.993	-324.254	1523.02	219.71	-250.175	1260.19	205.773	-469.824	1436.48	192.952	-533.511	1233.51	134.945	-241.071	1314.86	386.469	-404.343	1481.7	466.898	-402.19	1289.82	476.941	-404.28	1134.46	483.628	-504.128	989.619	429.668	-541.455	905.849	494.11	-508.018	890.938	480.326	-569.558	848.478
630	0	230.254	-554.914	1678.91	142.989	-543.663	1671.28	245.72	-360.349	1670.46	134.162	-368.158	1661.89	198.315	-336.959	1526.09	218.248	-262.796	1262.99	205.254	-482.392	1439.12	193.133	-546.085	1236.06	133.533	-253.556	1317.99	385.974	-416.439	1484.59	466.3	-412.645	1292.38	476.456	-413.741	1137.54	482.99	-511.617	991.251	428.248	-546.094	905.327	494.658	-514.185	892.878	478.487	-573.33	846.722
631	0	229.612	-567.973	1681.39	142.824	-556.519	1673.78	244.948	-373.244	1673.48	133.509	-381.201	1664.91	197.621	-349.401	1529.06	216.994	-275.264	1266.09	204.798	-494.888	1441.93	193.261	-558.661	1238.61	132.285	-265.773	1321.26	385.438	-428.439	1487.38	465.82	-422.654	1295.08	476.019	-422.6	1140.54	482.319	-518.989	992.962	427.319	-551.049	906.115	495.632	-520.528	894.816	477.086	-576.947	845.629
632	0	229.252	-580.836	1683.99	142.39	-569.374	1676.46	244.63	-386.122	1676.92	132.981	-393.989	1668.37	196.627	-361.81	1531.95	215.852	-287.51	1269.34	204.555	-507.126	1444.94	193.696	-571.108	1241.41	131.498	-277.998	1324.37	385.014	-440.326	1490.24	465.612	-432.318	1298.01	475.675	-431.171	1143.69	481.942	-525.689	994.92	426.603	-555.867	907.509	495.438	-526.291	897.044	475.699	-580.664	845.433
633	0	229.099	-593.572	1686.78	142.092	-582.052	1679.41	244.163	-398.802	1680	132.719	-406.729	1671.8	195.944	-374.271	1535.09	214.808	-299.762	1272.36	204.35	-519.335	1448.06	194.115	-583.433	1244.35	130.594	-290.205	1327.37	384.698	-452.014	1493.46	465.713	-441.351	1301.25	475.409	-439.22	1146.51	481.838	-532.178	997.141	426.131	-560.582	909.294	496.228	-532.576	899.595	474.218	-584.296	845.393
634	0	228.847	-606.167	1689.3	141.77	-594.708	1682.08	243.82	-411.372	1683.04	132.219	-419.402	1675.11	195.413	-386.587	1538.36	213.807	-312.012	1275.34	203.922	-531.445	1451.15	194.151	-595.743	1247.23	129.863	-302.393	1330.39	384.208	-463.647	1496.48	465.466	-450.342	1304.41	475.037	-447.027	1149.55	481.621	-538.482	999.38	426.078	-565.63	911.369	495.916	-538.061	902.128	473.222	-588.062	846.417
635	0	228.672	-618.795	1691.54	141.718	-607.366	1684.69	243.456	-423.877	1686.11	131.955	-432.037	1678.1	194.926	-398.572	1541.24	212.698	-324.275	1278.01	203.476	-543.552	1453.93	193.872	-608.059	1249.9	129.116	-314.616	1333.4	383.507	-475.355	1499.17	465.179	-459.223	1307.33	474.666	-454.531	1152.71	481.546	-544.657	1001.43	424.999	-571.036	913.131	496.495	-543.223	904.552	472.205	-592.427	847.531
636	0	228.743	-631.339	1694	141.908	-619.922	1687.6	243.268	-436.259	1688.99	131.801	-444.547	1681.48	193.892	-410.651	1543.73	210.361	-338.132	1279.44	203.297	-555.533	1456.76	193.619	-620.344	1252.77	128.478	-326.856	1336.31	383.105	-486.85	1501.99	464.93	-467.819	1310.33	474.432	-461.92	1155.79	481.359	-550.665	1003.69	424.905	-576.414	915.221	495.811	-548.179	906.691	472.012	-596.616	849.024
637	0	228.973	-643.671	1696.47	141.791	-632.338	1690.14	243.068	-448.51	1691.85	131.698	-457.015	1684.71	193.571	-422.472	1546.89	211.042	-348.642	1283.46	203.113	-567.485	1460.02	193.015	-632.514	1256.12	127.733	-339.165	1339.1	382.754	-498.188	1505.2	464.784	-476.205	1313.79	474.099	-469.221	1159.12	481.581	-556.406	1006.47	425.391	-581.184	917.584	495.692	-553.038	909.501	472.215	-600.821	851.365
638	0	229.174	-656.076	1698.93	142.042	-644.649	1692.86	242.962	-460.794	1694.84	131.581	-469.299	1687.94	193.005	-434.432	1549.52	209.969	-361.2	1285.92	202.861	-579.334	1462.95	192.543	-644.615	1259.35	126.862	-351.314	1341.57	382.316	-509.449	1508.12	464.459	-484.635	1317.03	473.967	-476.284	1162.59	481.627	-562.127	1009.19	425.562	-587.189	920.368	495.453	-557.916	912.117	472.497	-605.437	853.676
639	0	229.459	-668.308	1700.9	142.222	-657.015	1695.11	242.956	-472.975	1697.72	131.422	-481.734	1690.96	192.497	-446.363	1552.31	209.376	-372.55	1289.03	202.668	-591.261	1465.67	192.038	-656.565	1262.05	126.135	-363.681	1344.28	381.985	-520.91	1510.86	464.099	-493.163	1320.08	473.712	-483.327	1165.77	481.805	-568.077	1011.6	425.797	-593.04	922.758	494.88	-562.428	914.617	472.967	-610.428	855.918
640	0	229.792	-680.673	1702.97	142.502	-669.337	1697.42	243.136	-485.128	1700.51	131.47	-494.02	1694.07	191.842	-458.125	1554.7	208.729	-384.728	1291.63	202.535	-603.064	1468.18	191.687	-668.465	1264.75	125.301	-375.873	1346.7	381.63	-532.211	1513.44	463.629	-501.753	1323.12	473.376	-490.468	1168.9	481.991	-573.772	1013.95	426.234	-599.2	925.197	495.007	-567.015	917.118	473.772	-615.643	858.268
641	0	230.115	-692.868	1704.7	142.88	-681.65	1699.71	243.045	-497.176	1702.82	131.565	-506.323	1696.72	191.569	-470.28	1557.06	208.015	-396.886	1293.68	202.359	-614.944	1470.58	191.266	-680.26	1267.16	124.61	-388.016	1348.75	381.402	-543.594	1515.87	463.298	-510.411	1325.75	473.05	-497.512	1171.87	482.319	-579.624	1016.28	426.57	-605.647	927.706	494.481	-572.15	919.07	474.452	-620.964	860.662
642	0	230.52	-705.005	1706.04	143.324	-693.938	1701.29	243.155	-509.293	1705.05	131.502	-518.566	1699.02	191.24	-482.275	1559.12	207.301	-409.672	1295.36	202.269	-626.936	1472.67	190.904	-692.045	1269.24	123.989	-400.201	1350.76	380.968	-555.049	1517.66	462.869	-519.225	1328.17	472.672	-504.556	1174.61	482.436	-585.755	1018.16	426.73	-612.173	929.737	494.381	-577.543	921.144	475.102	-627.064	862.99
643	0	231.093	-717.192	1707.54	143.873	-706.216	1703.01	243.17	-521.376	1706.7	131.658	-530.89	1701.42	191.002	-494.349	1560.87	206.713	-421.164	1297.51	202.375	-638.971	1474.67	190.898	-703.772	1271.11	123.463	-412.389	1352.67	380.87	-566.492	1519.51	462.596	-527.948	1330.56	472.253	-511.958	1176.82	482.752	-591.731	1020.1	427.428	-618.762	931.731	493.849	-582.619	922.931	476.383	-632.439	865.061
644	0	231.793	-729.651	1708.96	144.536	-718.453	1704.78	243.372	-533.387	1708.23	131.897	-543.179	1703.35	190.55	-506.336	1562.27	206.155	-433.884	1298.87	202.482	-650.946	1476.42	191.089	-715.499	1272.96	122.853	-424.631	1354.06	380.806	-577.74	1521.14	462.423	-536.823	1332.72	471.972	-519.162	1179.02	483.204	-597.815	1022.04	427.904	-625.437	933.894	493.307	-588.019	924.459	477.193	-639.064	867.692
645	0	232.333	-741.535	1709.65	145.042	-730.768	1705.84	243.607	-545.462	1709.59	131.967	-555.427	1705	190.335	-518.646	1563.42	205.426	-445.557	1300.5	202.43	-662.947	1477.87	191.156	-727.365	1274.27	122.24	-436.84	1355.53	380.549	-589.237	1522.35	462.158	-545.974	1334.74	471.525	-526.714	1180.99	483.344	-604.132	1023.49	429.069	-632.498	935.684	493.089	-593.826	925.902	477.947	-645.495	869.597
646	0	232.803	-754.278	1710.03	145.699	-743.093	1706.36	243.633	-557.521	1710.42	132.006	-567.828	1706.13	189.743	-530.743	1564.11	204.664	-457.756	1301.63	202.384	-675.084	1478.51	191.22	-739.405	1274.9	121.728	-449.163	1356.56	380.201	-601.004	1522.89	461.636	-555.361	1336.01	471.102	-534.479	1182.58	483.313	-611.149	1024.44	429.345	-639.888	936.522	492.555	-599.989	927.005	478.586	-652.559	870.88
647	0	233.494	-766.475	1710.01	146.384	-755.545	1706.66	243.888	-569.658	1711.15	132.223	-580.372	1707.18	189.757	-543.044	1564.92	203.864	-470.036	1302.3	202.422	-687.07	1479	191.527	-751.649	1275.28	121.182	-461.544	1357.38	380.072	-612.691	1523.47	461.241	-564.727	1337.25	470.927	-542.375	1184.13	483.586	-618.262	1025.35	429.965	-647.443	937.276	492.288	-606.422	927.883	479.487	-659.644	872.036
648	0	234.211	-778.925	1710.16	147.133	-767.953	1707.09	244.154	-581.743	1711.23	132.469	-592.799	1707.7	189.856	-555.564	1565.56	203.148	-482.207	1303.19	202.7	-699.493	1479.52	191.938	-763.828	1275.76	120.559	-474.02	1357.95	380.067	-624.455	1523.96	461.067	-574.209	1338.54	470.917	-550.034	1185.26	483.994	-625.396	1026.24	430.655	-655.139	938.357	492.257	-613.166	928.897	480.784	-666.595	873.434
649	0	234.897	-791.449	1709.78	147.947	-780.397	1706.85	244.158	-593.99	1710.89	132.761	-605.252	1707.82	188.905	-568.146	1565.32	202.471	-494.458	1303.3	202.723	-711.861	1479.47	192.312	-776.172	1275.74	119.952	-486.479	1357.99	379.972	-636.226	1523.86	460.285	-583.816	1339.05	470.167	-558.77	1186.04	484.141	-633.079	1026.83	431.536	-663.251	938.826	492.016	-620.359	929.253	481.394	-674.297	874.173
650	0	236.596	-801.083	1708.39	148.781	-792.913	1706.37	244.571	-606.193	1710.59	132.971	-617.938	1707.57	188.88	-580.69	1564.71	202.194	-506.972	1303.12	202.713	-724.143	1479	192.852	-788.637	1275.12	119.404	-499.059	1357.7	379.859	-648.063	1523.4	460.099	-593.963	1339.14	469.794	-567.298	1186.16	484.489	-640.994	1026.73	432.245	-671.755	938.856	491.853	-627.873	929.272	482.205	-682.035	874.274
651	0	236.49	-816.319	1707.95	149.537	-805.536	1705.68	244.764	-618.527	1709.5	133.361	-630.631	1706.98	188.874	-593.337	1563.96	201.171	-519.222	1302.22	203.095	-736.743	1477.99	193.287	-801.239	1274.24	118.951	-511.723	1356.96	379.784	-659.99	1522.56	459.683	-604.056	1338.87	469.447	-576.157	1186.01	484.834	-649.137	1026.43	433.093	-680.476	938.587	491.803	-635.635	928.768	483.139	-689.835	873.889
652	0	238.095	-826.443	1705.84	150.262	-818.282	1704.66	244.951	-630.878	1707.88	133.76	-643.445	1705.73	188.63	-605.974	1562.76	200.955	-531.626	1301.27	203.214	-749.417	1476.83	193.876	-813.831	1272.95	118.523	-524.454	1355.88	379.697	-672.081	1521.27	459.387	-614.44	1338.41	469.325	-584.899	1185.8	485.236	-657.549	1025.72	433.91	-689.487	937.949	491.881	-643.643	928.149	483.921	-697.982	873.204
653	0	238.723	-839.153	1703.86	151.166	-831.094	1702.93	245.238	-643.292	1706.37	133.919	-656.292	1704.29	188.914	-618.781	1561.17	200.611	-544.146	1299.77	203.159	-762.051	1475.07	194.377	-826.479	1271.08	118.203	-537.207	1354.52	379.577	-684.402	1519.64	459.054	-625.165	1337.37	469.028	-594.316	1185.02	485.486	-666.671	1024.57	434.691	-698.935	936.584	491.959	-652.088	927.15	483.87	-708.592	871.992
654	0	239.868	-851.697	1702.1	152.047	-844.009	1701.2	245.668	-655.921	1704.35	134.334	-669.208	1702.64	188.961	-631.975	1559.75	200.5	-556.615	1298.04	203.944	-774.864	1473.06	195.088	-839.163	1269.1	118.05	-550.124	1352.79	379.725	-696.636	1518.02	458.716	-636.011	1336.14	468.564	-604.191	1183.7	486.024	-675.508	1023.17	435.804	-708.353	935.179	492.225	-660.727	925.701	485.775	-714.681	870.081
655	0	241.064	-864.019	1700.19	152.971	-856.867	1699.53	246.093	-668.161	1702.42	134.656	-682.141	1700.72	188.685	-644.75	1557.71	200.39	-569.457	1295.88	204.406	-787.726	1471.09	195.847	-851.845	1266.99	117.816	-563.054	1350.7	380.076	-708.853	1516.31	458.419	-647.011	1334.63	468.171	-614.399	1182.37	486.715	-684.672	1021.69	437.001	-717.897	933.71	493.071	-669.079	924.739	486.705	-723.914	868.735
656	0	241.925	-876.708	1697.78	153.8	-869.81	1697.21	246.295	-681.261	1699.41	135.005	-695.17	1698.41	188.46	-657.703	1555.1	200.717	-581.567	1293.9	204.674	-800.721	1468.59	196.437	-864.698	1264.48	117.782	-576.014	1348.35	380.228	-721.337	1514.1	458.169	-658.316	1332.93	467.946	-624.375	1180.79	487.171	-694.234	1019.69	437.887	-727.799	931.75	493.365	-678.217	922.828	487.664	-732.901	866.607
657	0	242.757	-889.621	1694.88	154.762	-882.902	1694.55	246.831	-694.053	1696.9	135.439	-708.277	1695.63	188.747	-670.829	1552.75	201.18	-595.095	1291.28	204.999	-813.774	1465.56	197.097	-877.551	1261.31	117.805	-589.167	1345.72	380.226	-734.038	1511.21	458.284	-669.492	1330.8	467.764	-635.217	1178.68	487.542	-704.421	1017.37	438.753	-738.015	928.891	493.672	-687.704	920.203	488.559	-742.369	864.014
658	0	243.691	-902.397	1691.85	155.73	-896.056	1691.73	247.285	-706.45	1693.87	136.114	-721.56	1692.65	189.458	-684.114	1549.59	201.666	-607.671	1288.52	205.667	-826.965	1462.47	197.764	-890.519	1258.05	117.906	-602.284	1342.7	380.419	-746.87	1508.5	458.237	-681.213	1328.39	467.444	-646.773	1176.29	488.108	-714.634	1014.66	439.837	-748.405	925.957	493.981	-697.671	917.654	489.783	-751.768	860.999
659	0	244.852	-915.273	1689.07	156.699	-909.107	1688.83	248.007	-719.455	1690.85	136.778	-734.651	1689.67	189.124	-697.19	1546.61	202.18	-620.536	1285.31	206.196	-840.121	1459.49	198.486	-903.586	1255.09	118.105	-615.506	1339.68	380.888	-759.533	1505.73	458.025	-693.168	1325.68	467.359	-657.963	1173.87	488.853	-725.059	1011.85	440.963	-758.927	923.246	494.526	-707.708	914.766	490.784	-761.634	858.34
660	0	245.985	-928.217	1686.08	157.761	-922.331	1685.8	248.501	-732.439	1687.6	137.312	-747.95	1686.44	189.254	-710.455	1543.26	202.608	-634.223	1281.65	206.693	-853.504	1456.29	199.129	-916.775	1251.8	118.367	-628.835	1336.24	381.304	-772.411	1502.59	457.993	-705.409	1322.71	467.159	-669.821	1170.93	489.495	-735.986	1008.96	442.053	-769.758	920.009	495.063	-718.193	911.939	491.896	-771.398	854.852
661	0	247.251	-941.057	1682.89	158.872	-935.631	1682.88	249.29	-745.485	1684.33	138.165	-761.175	1683.31	189.772	-723.676	1539.89	203.245	-647.482	1277.99	207.495	-866.836	1452.92	199.928	-930.087	1248.39	119.311	-642.359	1333.15	381.78	-785.409	1499.32	458.151	-717.939	1319.39	467.286	-681.829	1167.91	490.277	-747.137	1005.6	443.224	-780.847	916.547	495.915	-728.921	908.535	493.202	-781.786	851.484
662	0	248.411	-954.115	1679.92	159.897	-948.917	1679.7	250.213	-758.664	1681.29	138.931	-774.587	1680.39	190.284	-736.982	1536.91	203.828	-660.719	1274.88	207.71	-880.237	1449.9	200.508	-943.546	1245.16	119.371	-655.821	1329.75	382.526	-798.354	1496.13	458.429	-730.541	1316.14	467.077	-694.475	1164.7	491.068	-758.532	1002.24	444.358	-792.181	912.905	496.516	-740.06	904.957	494.485	-792.397	847.899
663	0	249.493	-967.463	1676.78	161.093	-962.319	1676.85	251.05	-771.892	1678.21	139.904	-788.033	1677.5	190.83	-750.556	1533.65	204.274	-674.137	1271.33	208.371	-893.862	1446.74	201.016	-957.19	1242.06	119.937	-669.452	1326.62	382.996	-811.573	1492.81	458.743	-743.563	1312.84	467.131	-707.213	1161.38	491.805	-770.287	998.634	445.491	-803.828	909.075	497.486	-751.147	901.619	495.775	-803.208	844.255
664	0	250.758	-980.636	1673.53	162.427	-975.788	1673.84	252.241	-785.152	1675.46	140.872	-801.471	1674.46	192.092	-764.311	1531.36	204.782	-687.588	1268.68	209.275	-907.425	1443.49	201.627	-971.003	1238.85	120.34	-683.094	1323.52	383.748	-824.803	1489.38	459.05	-756.683	1309.39	467.249	-720.544	1158.13	492.467	-782.67	995.075	446.631	-815.797	904.974	498.625	-762.736	898.178	497.17	-814.438	840.134
665	0	252.29	-993.959	1670.73	163.802	-989.18	1671.08	253.315	-798.486	1672.38	141.99	-815.014	1671.64	192.278	-778	1528.07	205.129	-701.123	1265.1	210.33	-921.116	1440.62	202.39	-984.867	1236.16	120.843	-696.945	1320.55	384.688	-837.971	1486.39	459.692	-770.093	1306.11	467.537	-734.156	1154.93	493.536	-795.105	991.603	447.985	-827.864	901.139	499.637	-774.886	894.68	498.757	-825.843	836.57
666	0	254.014	-1006.38	1668.2	165.305	-1002.77	1668.76	254.539	-811.923	1669.5	143.303	-828.499	1669.06	193.371	-791.816	1525.71	205.491	-715.02	1262.54	211.521	-934.946	1438.2	203.228	-998.713	1233.78	121.425	-711	1317.84	385.708	-850.992	1483.35	460.213	-783.666	1302.75	467.642	-748.096	1151.48	494.569	-807.886	988.42	449.49	-840.253	897.578	500.958	-787.068	891.224	500.463	-837.381	833.009
667	0	255.389	-1019.93	1665.74	166.88	-1016.24	1666.13	255.817	-825.356	1666.89	144.519	-842.006	1666.58	194.212	-805.636	1522.99	205.865	-729.104	1259.86	212.632	-948.909	1435.55	203.94	-1012.85	1231.33	121.906	-725.191	1315.22	386.879	-864.569	1480.42	460.64	-797.647	1299.29	468.058	-762.333	1148.43	495.603	-821.019	984.876	450.77	-853.039	893.83	502.283	-799.443	888.154	501.923	-849.601	829.308
668	0	256.774	-1033.72	1663.4	168.252	-1029.93	1663.81	257.2	-838.905	1664.21	145.905	-855.688	1663.87	195.469	-819.415	1520.35	206.375	-743.188	1257.15	213.985	-962.919	1432.8	204.784	-1027.18	1228.84	122.528	-739.579	1312.92	388.104	-878.098	1477.4	461.36	-811.758	1295.81	468.332	-776.845	1145.05	496.444	-834.804	981.354	452.35	-865.903	889.404	503.567	-812.227	884.821	503.394	-862.034	825.454
669	0	258.419	-1047.92	1661.43	169.822	-1043.7	1661.6	258.993	-852.533	1662.1	147.458	-869.418	1661.58	197.007	-833.415	1518.12	206.926	-757.435	1254.88	215.584	-976.949	1430.46	205.843	-1041.54	1226.57	123.463	-754.066	1310.88	389.587	-891.78	1474.79	462.075	-825.991	1292.42	468.968	-791.402	1142.03	497.494	-848.64	978.093	453.731	-879.374	885.718	505.067	-825.515	881.918	505.117	-874.863	821.891
670	0	260.161	-1061.49	1659.9	171.63	-1057.37	1660.26	260.539	-866.281	1660.09	149.167	-883.013	1659.72	198.463	-847.396	1516.37	207.508	-771.836	1253.03	217.019	-991.122	1428.68	207.243	-1056.22	1225.09	124.332	-768.482	1309.06	391.115	-905.428	1472.23	463.171	-840.327	1289.5	469.372	-806.512	1138.97	498.67	-862.654	975.062	455.086	-893.222	882.574	506.222	-839.2	878.741	506.727	-887.817	818.612
[truncated: 69 more columns]

## Sheet: Sheet2
Devices
		025370 - Force			025370 - Moment			025370 - CoP			027571 - Force			027571 - Moment			027571 - CoP			037720 - Force			037720 - Moment			037720 - CoP
Frame	Sub Frame	Fx	Fy	Fz	Mx	My	Mz	Cx	Cy	Cz	Fx	Fy	Fz	Mx	My	Mz	Cx	Cy	Cz	Fx	Fy	Fz	Mx	My	Mz	Cx	Cy	Cz
		N	N	N	N.mm	N.mm	N.mm	mm	mm	mm	N	N	N	N.mm	N.mm	N.mm	mm	mm	mm	N	N	N	N.mm	N.mm	N.mm	mm	mm	mm
392	0	0	0	0	0	0	0	200	300	0	0	0	0	0	0	0	200	903	0	0	0	0	0	0	0	603	903	0
392	1	0	0	0	0	0	0	200	300	0	0	0	0	0	0	0	200	903	0	0	0	0	0	0	0	603	903	0
392	2	0	0	0	0	0	0	200	300	0	0	0	0	0	0	0	200	903	0	0	0	0	0	0	0	603	903	0
392	3	0	0	0	0	0	0	200	300	0	0	0	0	0	0	0	200	903	0	0	0	0	0	0	0	603	903	0
392	4	0	0	0	0	0	0	200	300	0	0	0	0	0	0	0	200	903	0	0	0	0	0	0	0	603	903	0
392	5	0	0	0	0	0	0	200	300	0	0	0	0	0	0	0	200	903	0	0	0	0	0	0	0	603	903	0
392	6	0	0	0	0	0	0	200	300	0	0	0	0	0	0	0	200	903	0	0	0	0	0	0	0	603	903	0
392	7	0	0	0	0	0	0	200	300	0	0	0	0	0	0	0	200	903	0	0	0	0	0	0	0	603	903	0
392	8	0	0	0	0	0	0	200	300	0	0	0	0	0	0	0	200	903	0	0	0	0	0	0	0	603	903	0
392	9	0	0	0	0	0	0	200	300	0	0	0	0	0	0	0	200	903	0	0	0	0	0	0	0	603	903	0
393	0	0	0	0	0	0	0	200	300	0	0	0	0	0	0	0	200	903	0	0	0	0	0	0	0	603	903	0
393	1	0	0	0	0	0	0	200	300	0	0	0	0	0	0	0	200	903	0	0	0	0	0	0	0	603	903	0
393	2	0	0	0	0	0	0	200	300	0	0	0	0	0	0	0	200	903	0	0	0	0	0	0	0	603	903	0
393	3	0	0	0	0	0	0	200	300	0	0	0	0	0	0	0	200	903	0	0	0	0	0	0	0	603	903	0
393	4	0	0	0	0	0	0	200	300	0	0	0	0	0	0	0	200	903	0	0	0	0	0	0	0	603	903	0
393	5	0	0	0	0	0	0	200	300	0	0	0	0	0	0	0	200	903	0	0	0	0	0	0	0	603	903	0
393	6	0	0	0	0	0	0	200	300	0	0	0	0	0	0	0	200	903	0	0	0	0	0	0	0	603	903	0
393	7	0	0	0	0	0	0	200	300	0	0	0	0	0	0	0	200	903	0	0	0	0	0	0	0	603	903	0
393	8	0	0	0	0	0	0	200	300	0	0	0	0	0	0	0	200	903	0	0	0	0	0	0	0	603	903	0
393	9	0	0	0	0	0	0	200	300	0	0	0	0	0	0	0	200	903	0	0	0	0	0	0	0	603	903	0
394	0	0	0	0	0	0	0	200	300	0	0	0	0	0	0	0	200	903	0	0	0	0	0	0	0	603	903	0
394	1	0	0	0	0	0	0	200	300	0	0	0	0	0	0	0	200	903	0	0	0	0	0	0	0	603	903	0
394	2	0	0	0	0	0	0	200	300	0	0	0	0	0	0	0	200	903	0	0	0	0	0	0	0	603	903	0
394	3	0	0	0	0	0	0	200	300	0	0	0	0	0	0	0	200	903	0	0	0	0	0	0	0	603	903	0
394	4	0	0	0	0	0	0	200	300	0	0	0	0	0	0	0	200	903	0	0	0	0	0	0	0	603	903	0
394	5	0	0	0	0	0	0	200	300	0	0	0	0	0	0	0	200	903	0	0	0	0	0	0	0	603	903	0
394	6	0	0	0	0	0	0	200	300	0	0	0	0	0	0	0	200	903	0	0	0	0	0	0	0	603	903	0
394	7	0	0	0	0	0	0	200	300	0	0	0	0	0	0	0	200	903	0	0	0	0	0	0	0	603	903	0
394	8	0	0	0	0	0	0	200	300	0	0	0	0	0	0	0	200	903	0	0	0	0	0	0	0	603	903	0
394	9	0	0	0	0	0	0	200	300	0	0	0	0	0	0	0	200	903	0	0	0	0	0	0	0	603	903	0
395	0	0	0	0	0	0	0	200	300	0	0	0	0	0	0	0	200	903	0	0	0	0	0	0	0	603	903	0
395	1	0	0	0	0	0	0	200	300	0	0	0	0	0	0	0	200	903	0	0	0	0	0	0	0	603	903	0
395	2	0	0	0	0	0	0	200	300	0	0	0	0	0	0	0	200	903	0	0	0	0	0	0	0	603	903	0
395	3	0	0	0	0	0	0	200	300	0	0	0	0	0	0	0	200	903	0	0	0	0	0	0	0	603	903	0
395	4	0	0	0	0	0	0	200	300	0	0	0	0	0	0	0	200	903	0	0	0	0	0	0	0	603	903	0
395	5	0	0	0	0	0	0	200	300	0	0	0	0	0	0	0	200	903	0	0	0	0	0	0	0	603	903	0
395	6	0	0	0	0	0	0	200	300	0	0	0	0	0	0	0	200	903	0	0	0	0	0	0	0	603	903	0
395	7	0	0	0	0	0	0	200	300	0	0	0	0	0	0	0	200	903	0	0	0	0	0	0	0	603	903	0
395	8	0	0	0	0	0	0	200	300	0	0	0	0	0	0	0	200	903	0	0	0	0	0	0	0	603	903	0
395	9	0	0	0	0	0	0	200	300	0	0	0	0	0	0	0	200	903	0	0	0	0	0	0	0	603	903	0
396	0	0	0	0	0	0	0	200	300	0	0	0	0	0	0	0	200	903	0	0	0	0	0	0	0	603	903	0
396	1	0	0	0	0	0	0	200	300	0	0	0	0	0	0	0	200	903	0	0	0	0	0	0	0	603	903	0
396	2	0	0	0	0	0	0	200	300	0	0	0	0	0	0	0	200	903	0	0	0	0	0	0	0	603	903	0
396	3	0	0	0	0	0	0	200	300	0	0	0	0	0	0	0	200	903	0	0	0	0	0	0	0	603	903	0
396	4	0	0	0	0	0	0	200	300	0	0	0	0	0	0	0	200	903	0	0	0	0	0	0	0	603	903	0
396	5	0	0	0	0	0	0	200	300	0	0	0	0	0	0	0	200	903	0	0	0	0	0	0	0	603	903	0
396	6	0	0	0	0	0	0	200	300	0	0	0	0	0	0	0	200	903	0	0	0	0	0	0	0	603	903	0
396	7	0	0	0	0	0	0	200	300	0	0	0	0	0	0	0	200	903	0	0	0	0	0	0	0	603	903	0
396	8	0	0	0	0	0	0	200	300	0	0	0	0	0	0	0	200	903	0	0	0	0	0	0	0	603	903	0
396	9	0	0	0	0	0	0	200	300	0	0	0	0	0	0	0	200	903	0	0	0	0	0	0	0	603	903	0
397	0	0	0	0	0	0	0	200	300	0	0	0	0	0	0	0	200	903	0	0	0	0	0	0	0	603	903	0
397	1	0	0	0	0	0	0	200	300	0	0	0	0	0	0	0	200	903	0	0	0	0	0	0	0	603	903	0
397	2	0	0	0	0	0	0	200	300	0	0	0	0	0	0	0	200	903	0	0	0	0	0	0	0	603	903	0
397	3	0	0	0	0	0	0	200	300	0	0	0	0	0	0	0	200	903	0	0	0	0	0	0	0	603	903	0
397	4	0	0	0	0	0	0	200	300	0	0	0	0	0	0	0	200	903	0	0	0	0	0	0	0	603	903	0
397	5	0	0	0	0	0	0	200	300	0	0	0	0	0	0	0	200	903	0	0	0	0	0	0	0	603	903	0
397	6	0	0	0	0	0	0	200	300	0	0	0	0	0	0	0	200	903	0	0	0	0	0	0	0	603	903	0
397	7	0	0	0	0	0	0	200	300	0	0	0	0	0	0	0	200	903	0	0	0	0	0	0	0	603	903	0
397	8	0	0	0	0	0	0	200	300	0	0	0	0	0	0	0	200	903	0	0	0	0	0	0	0	603	903	0
397	9	0	0	0	0	0	0	200	300	0	0	0	0	0	0	0	200	903	0	0	0	0	0	0	0	603	903	0
398	0	0	0	0	0	0	0	200	300	0	0	0	0	0	0	0	200	903	0	0	0	0	0	0	0	603	903	0
398	1	0	0	0	0	0	0	200	300	0	0	0	0	0	0	0	200	903	0	0	0	0	0	0	0	603	903	0
398	2	0	0	0	0	0	0	200	300	0	0	0	0	0	0	0	200	903	0	0	0	0	0	0	0	603	903	0
398	3	0	0	0	0	0	0	200	300	0	0	0	0	0	0	0	200	903	0	0	0	0	0	0	0	603	903	0
398	4	0	0	0	0	0	0	200	300	0	0	0	0	0	0	0	200	903	0	0	0	0	0	0	0	603	903	0
398	5	0	0	0	0	0	0	200	300	0	0	0	0	0	0	0	200	903	0	0	0	0	0	0	0	603	903	0
398	6	0	0	0	0	0	0	200	300	0	0	0	0	0	0	0	200	903	0	0	0	0	0	0	0	603	903	0
398	7	0	0	0	0	0	0	200	300	0	0	0	0	0	0	0	200	903	0	0	0	0	0	0	0	603	903	0
398	8	0	0	0	0	0	0	200	300	0	0	0	0	0	0	0	200	903	0	0	0	0	0	0	0	603	903	0
398	9	0	0	0	0	0	0	200	300	0	0	0	0	0	0	0	200	903	0	0	0	0	0	0	0	603	903	0
399	0	0	0	0	0	0	0	200	300	0	0	0	0	0	0	0	200	903	0	0	0	0	0	0	0	603	903	0
399	1	0	0	0	0	0	0	200	300	0	0	0	0	0	0	0	200	903	0	0	0	0	0	0	0	603	903	0
399	2	0	0	0	0	0	0	200	300	0	0	0	0	0	0	0	200	903	0	0	0	0	0	0	0	603	903	0
399	3	0	0	0	0	0	0	200	300	0	0	0	0	0	0	0	200	903	0	0	0	0	0	0	0	603	903	0
399	4	0	0	0	0	0	0	200	300	0	0	0	0	0	0	0	200	903	0	0	0	0	0	0	0	603	903	0
399	5	0	0	0	0	0	0	200	300	0	0	0	0	0	0	0	200	903	0	0	0	0	0	0	0	603	903	0
399	6	0	0	0	0	0	0	200	300	0	0	0	0	0	0	0	200	903	0	0	0	0	0	0	0	603	903	0
399	7	0	0	0	0	0	0	200	300	0	0	0	0	0	0	0	200	903	0	0	0	0	0	0	0	603	903	0
399	8	0	0	0	0	0	0	200	300	0	0	0	0	0	0	0	200	903	0	0	0	0	0	0	0	603	903	0
399	9	0	0	0	0	0	0	200	300	0	0	0	0	0	0	0	200	903	0	0	0	0	0	0	0	603	903	0
400	0	0	0	0	0	0	0	200	300	0	0	0	0	0	0	0	200	903	0	0	0	0	0	0	0	603	903	0
400	1	0	0	0	0	0	0	200	300	0	0	0	0	0	0	0	200	903	0	0	0	0	0	0	0	603	903	0
400	2	0	0	0	0	0	0	200	300	0	0	0	0	0	0	0	200	903	0	0	0	0	0	0	0	603	903	0
400	3	0	0	0	0	0	0	200	300	0	0	0	0	0	0	0	200	903	0	0	0	0	0	0	0	603	903	0
400	4	0	0	0	0	0	0	200	300	0	0	0	0	0	0	0	200	903	0	0	0	0	0	0	0	603	903	0
400	5	0	0	0	0	0	0	200	300	0	0	0	0	0	0	0	200	903	0	0	0	0	0	0	0	603	903	0
400	6	0	0	0	0	0	0	200	300	0	0	0	0	0	0	0	200	903	0	0	0	0	0	0	0	603	903	0
400	7	0	0	0	0	0	0	200	300	0	0	0	0	0	0	0	200	903	0	0	0	0	0	0	0	603	903	0
400	8	0	0	0	0	0	0	200	300	0	0	0	0	0	0	0	200	903	0	0	0	0	0	0	0	603	903	0
400	9	0	0	0	0	0	0	200	300	0	0	0	0	0	0	0	200	903	0	0	0	0	0	0	0	603	903	0
401	0	0	0	0	0	0	0	200	300	0	0	0	0	0	0	0	200	903	0	0	0	0	0	0	0	603	903	0
401	1	0	0	0	0	0	0	200	300	0	0	0	0	0	0	0	200	903	0	0	0	0	0	0	0	603	903	0
401	2	0	0	0	0	0	0	200	300	0	0	0	0	0	0	0	200	903	0	0	0	0	0	0	0	603	903	0
401	3	0	0	0	0	0	0	200	300	0	0	0	0	0	0	0	200	903	0	0	0	0	0	0	0	603	903	0
401	4	0	0	0	0	0	0	200	300	0	0	0	0	0	0	0	200	903	0	0	0	0	0	0	0	603	903	0
401	5	0	0	0	0	0	0	200	300	0	0	0	0	0	0	0	200	903	0	0	0	0	0	0	0	603	903	0
401	6	0	0	0	0	0	0	200	300	0	0	0	0	0	0	0	200	903	0	0	0	0	0	0	0	603	903	0
401	7	0	0	0	0	0	0	200	300	0	0	0	0	0	0	0	200	903	0	0	0	0	0	0	0	603	903	0
401	8	0	0	0	0	0	0	200	300	0	0	0	0	0	0	0	200	903	0	0	0	0	0	0	0	603	903	0
401	9	0	0	0	0	0	0	200	300	0	0	0	0	0	0	0	200	903	0	0	0	0	0	0	0	603	903	0
402	0	0	0	0	0	0	0	200	300	0	0	0	0	0	0	0	200	903	0	0	0	0	0	0	0	603	903	0
402	1	0	0	0	0	0	0	200	300	0	0	0	0	0	0	0	200	903	0	0	0	0	0	0	0	603	903	0
402	2	0	0	0	0	0	0	200	300	0	0	0	0	0	0	0	200	903	0	0	0	0	0	0	0	603	903	0
402	3	0	0	0	0	0	0	200	300	0	0	0	0	0	0	0	200	903	0	0	0	0	0	0	0	603	903	0
402	4	0	0	0	0	0	0	200	300	0	0	0	0	0	0	0	200	903	0	0	0	0	0	0	0	603	903	0
402	5	0	0	0	0	0	0	200	300	0	0	0	0	0	0	0	200	903	0	0	0	0	0	0	0	603	903	0
402	6	0	0	0	0	0	0	200	300	0	0	0	0	0	0	0	200	903	0	0	0	0	0	0	0	603	903	0
402	7	0	0	0	0	0	0	200	300	0	0	0	0	0	0	0	200	903	0	0	0	0	0	0	0	603	903	0
402	8	0	0	0	0	0	0	200	300	0	0	0	0	0	0	0	200	903	0	0	0	0	0	0	0	603	903	0
402	9	0	0	0	0	0	0	200	300	0	0	0	0	0	0	0	200	903	0	0	0	0	0	0	0	603	903	0
403	0	0	0	0	0	0	0	200	300	0	0	0	0	0	0	0	200	903	0	0	0	0	0	0	0	603	903	0
403	1	0	0	0	0	0	0	200	300	0	0	0	0	0	0	0	200	903	0	0	0	0	0	0	0	603	903	0
403	2	0	0	0	0	0	0	200	300	0	0	0	0	0	0	0	200	903	0	0	0	0	0	0	0	603	903	0
403	3	0	0	0	0	0	0	200	300	0	0	0	0	0	0	0	200	903	0	0	0	0	0	0	0	603	903	0
403	4	0	0	0	0	0	0	200	300	0	0	0	0	0	0	0	200	903	0	0	0	0	0	0	0	603	903	0
403	5	0	0	0	0	0	0	200	300	0	0	0	0	0	0	0	200	903	0	0	0	0	0	0	0	603	903	0
403	6	0	0	0	0	0	0	200	300	0	0	0	0	0	0	0	200	903	0	0	0	0	0	0	0	603	903	0
403	7	0	0	0	0	0	0	200	300	0	0	0	0	0	0	0	200	903	0	0	0	0	0	0	0	603	903	0
403	8	0	0	0	0	0	0	200	300	0	0	0	0	0	0	0	200	903	0	0	0	0	0	0	0	603	903	0
403	9	0	0	0	0	0	0	200	300	0	0	0	0	0	0	0	200	903	0	0	0	0	0	0	0	603	903	0
404	0	0	0	0	0	0	0	200	300	0	0	0	0	0	0	0	200	903	0	0	0	0	0	0	0	603	903	0
404	1	0	0	0	0	0	0	200	300	0	0	0	0	0	0	0	200	903	0	0	0	0	0	0	0	603	903	0
404	2	0	0	0	0	0	0	200	300	0	0	0	0	0	0	0	200	903	0	0	0	0	0	0	0	603	903	0
404	3	0	0	0	0	0	0	200	300	0	0	0	0	0	0	0	200	903	0	0	0	0	0	0	0	603	903	0
404	4	0	0	0	0	0	0	200	300	0	0	0	0	0	0	0	200	903	0	0	0	0	0	0	0	603	903	0
404	5	0	0	0	0	0	0	200	300	0	0	0	0	0	0	0	200	903	0	0	0	0	0	0	0	603	903	0
404	6	0	0	0	0	0	0	200	300	0	0	0	0	0	0	0	200	903	0	0	0	0	0	0	0	603	903	0
404	7	0	0	0	0	0	0	200	300	0	0	0	0	0	0	0	200	903	0	0	0	0	0	0	0	603	903	0
404	8	0	0	0	0	0	0	200	300	0	0	0	0	0	0	0	200	903	0	0	0	0	0	0	0	603	903	0
404	9	0	0	0	0	0	0	200	300	0	0	0	0	0	0	0	200	903	0	0	0	0	0	0	0	603	903	0
405	0	0	0	0	0	0	0	200	300	0	0	0	0	0	0	0	200	903	0	0	0	0	0	0	0	603	903	0
405	1	0	0	0	0	0	0	200	300	0	0	0	0	0	0	0	200	903	0	0	0	0	0	0	0	603	903	0
405	2	0	0	0	0	0	0	200	300	0	0	0	0	0	0	0	200	903	0	0	0	0	0	0	0	603	903	0
405	3	0	0	0	0	0	0	200	300	0	0	0	0	0	0	0	200	903	0	0	0	0	0	0	0	603	903	0
405	4	0	0	0	0	0	0	200	300	0	0	0	0	0	0	0	200	903	0	0	0	0	0	0	0	603	903	0
405	5	0	0	0	0	0	0	200	300	0	0	0	0	0	0	0	200	903	0	0	0	0	0	0	0	603	903	0
405	6	0	0	0	0	0	0	200	300	0	0	0	0	0	0	0	200	903	0	0	0	0	0	0	0	603	903	0
405	7	0	0	0	0	0	0	200	300	0	0	0	0	0	0	0	200	903	0	0	0	0	0	0	0	603	903	0
405	8	0	0	0	0	0	0	200	300	0	0	0	0	0	0	0	200	903	0	0	0	0	0	0	0	603	903	0
405	9	0	0	0	0	0	0	200	300	0	0	0	0	0	0	0	200	903	0	0	0	0	0	0	0	603	903	0
406	0	0	0	0	0	0	0	200	300	0	0	0	0	0	0	0	200	903	0	0	0	0	0	0	0	603	903	0
406	1	0	0	0	0	0	0	200	300	0	0	0	0	0	0	0	200	903	0	0	0	0	0	0	0	603	903	0
406	2	0	0	0	0	0	0	200	300	0	0	0	0	0	0	0	200	903	0	0	0	0	0	0	0	603	903	0
406	3	0	0	0	0	0	0	200	300	0	0	0	0	0	0	0	200	903	0	0	0	0	0	0	0	603	903	0
406	4	0	0	0	0	0	0	200	300	0	0	0	0	0	0	0	200	903	0	0	0	0	0	0	0	603	903	0
406	5	0	0	0	0	0	0	200	300	0	0	0	0	0	0	0	200	903	0	0	0	0	0	0	0	603	903	0
406	6	0	0	0	0	0	0	200	300	0	0	0	0	0	0	0	200	903	0	0	0	0	0	0	0	603	903	0
406	7	0	0	0	0	0	0	200	300	0	0	0	0	0	0	0	200	903	0	0	0	0	0	0	0	603	903	0
406	8	0	0	0	0	0	0	200	300	0	0	0	0	0	0	0	200	903	0	0	0	0	0	0	0	603	903	0
406	9	0	0	0	0	0	0	200	300	0	0	0	0	0	0	0	200	903	0	0	0	0	0	0	0	603	903	0
407	0	0	0	0	0	0	0	200	300	0	0	0	0	0	0	0	200	903	0	0	0	0	0	0	0	603	903	0
407	1	0	0	0	0	0	0	200	300	0	0	0	0	0	0	0	200	903	0	0	0	0	0	0	0	603	903	0
407	2	0	0	0	0	0	0	200	300	0	0	0	0	0	0	0	200	903	0	0	0	0	0	0	0	603	903	0
407	3	0	0	0	0	0	0	200	300	0	0	0	0	0	0	0	200	903	0	0	0	0	0	0	0	603	903	0
407	4	0	0	0	0	0	0	200	300	0	0	0	0	0	0	0	200	903	0	0	0	0	0	0	0	603	903	0
407	5	0	0	0	0	0	0	200	300	0	0	0	0	0	0	0	200	903	0	0	0	0	0	0	0	603	903	0
407	6	0	0	0	0	0	0	200	300	0	0	0	0	0	0	0	200	903	0	0	0	0	0	0	0	603	903	0
407	7	0	0	0	0	0	0	200	300	0	0	0	0	0	0	0	200	903	0	0	0	0	0	0	0	603	903	0
407	8	0	0	0	0	0	0	200	300	0	0	0	0	0	0	0	200	903	0	0	0	0	0	0	0	603	903	0
407	9	0	0	0	0	0	0	200	300	0	0	0	0	0	0	0	200	903	0	0	0	0	0	0	0	603	903	0
408	0	0	0	0	0	0	0	200	300	0	0	0	0	0	0	0	200	903	0	0	0	0	0	0	0	603	903	0
408	1	0	0	0	0	0	0	200	300	0	0	0	0	0	0	0	200	903	0	0	0	0	0	0	0	603	903	0
408	2	0	0	0	0	0	0	200	300	0	0	0	0	0	0	0	200	903	0	0	0	0	0	0	0	603	903	0
408	3	0	0	0	0	0	0	200	300	0	0	0	0	0	0	0	200	903	0	0	0	0	0	0	0	603	903	0
408	4	0	0	0	0	0	0	200	300	0	0	0	0	0	0	0	200	903	0	0	0	0	0	0	0	603	903	0
408	5	0	0	0	0	0	0	200	300	0	0	0	0	0	0	0	200	903	0	0	0	0	0	0	0	603	903	0
408	6	0	0	0	0	0	0	200	300	0	0	0	0	0	0	0	200	903	0	0	0	0	0	0	0	603	903	0
408	7	0	0	0	0	0	0	200	300	0	0	0	0	0	0	0	200	903	0	0	0	0	0	0	0	603	903	0
408	8	0	0	0	0	0	0	200	300	0	0	0	0	0	0	0	200	903	0	0	0	0	0	0	0	603	903	0
408	9	0	0	0	0	0	0	200	300	0	0	0	0	0	0	0	200	903	0	0	0	0	0	0	0	603	903	0
409	0	0	0	0	0	0	0	200	300	0	0	0	0	0	0	0	200	903	0	0	0	0	0	0	0	603	903	0
409	1	0	0	0	0	0	0	200	300	0	0	0	0	0	0	0	200	903	0	0	0	0	0	0	0	603	903	0
409	2	0	0	0	0	0	0	200	300	0	0	0	0	0	0	0	200	903	0	0	0	0	0	0	0	603	903	0
409	3	0	0	0	0	0	0	200	300	0	0	0	0	0	0	0	200	903	0	0	0	0	0	0	0	603	903	0
409	4	0	0	0	0	0	0	200	300	0	0	0	0	0	0	0	200	903	0	0	0	0	0	0	0	603	903	0
409	5	0	0	0	0	0	0	200	300	0	0	0	0	0	0	0	200	903	0	0	0	0	0	0	0	603	903	0
409	6	0	0	0	0	0	0	200	300	0	0	0	0	0	0	0	200	903	0	0	0	0	0	0	0	603	903	0
409	7	0	0	0	0	0	0	200	300	0	0	0	0	0	0	0	200	903	0	0	0	0	0	0	0	603	903	0
409	8	0	0	0	0	0	0	200	300	0	0	0	0	0	0	0	200	903	0	0	0	0	0	0	0	603	903	0
409	9	0	0	0	0	0	0	200	300	0	0	0	0	0	0	0	200	903	0	0	0	0	0	0	0	603	903	0
410	0	0	0	0	0	0	0	200	300	0	0	0	0	0	0	0	200	903	0	0	0	0	0	0	0	603	903	0
410	1	0	0	0	0	0	0	200	300	0	0	0	0	0	0	0	200	903	0	0	0	0	0	0	0	603	903	0
410	2	0	0	0	0	0	0	200	300	0	0	0	0	0	0	0	200	903	0	0	0	0	0	0	0	603	903	0
410	3	0	0	0	0	0	0	200	300	0	0	0	0	0	0	0	200	903	0	0	0	0	0	0	0	603	903	0
410	4	0	0	0	0	0	0	200	300	0	0	0	0	0	0	0	200	903	0	0	0	0	0	0	0	603	903	0
410	5	0	0	0	0	0	0	200	300	0	0	0	0	0	0	0	200	903	0	0	0	0	0	0	0	603	903	0
410	6	0	0	0	0	0	0	200	300	0	0	0	0	0	0	0	200	903	0	0	0	0	0	0	0	603	903	0
410	7	0	0	0	0	0	0	200	300	0	0	0	0	0	0	0	200	903	0	0	0	0	0	0	0	603	903	0
410	8	0	0	0	0	0	0	200	300	0	0	0	0	0	0	0	200	903	0	0	0	0	0	0	0	603	903	0
410	9	0	0	0	0	0	0	200	300	0	0	0	0	0	0	0	200	903	0	0	0	0	0	0	0	603	903	0
411	0	0	0	0	0	0	0	200	300	0	0	0	0	0	0	0	200	903	0	0	0	0	0	0	0	603	903	0
411	1	0	0	0	0	0	0	200	300	0	0	0	0	0	0	0	200	903	0	0	0	0	0	0	0	603	903	0
411	2	0	0	0	0	0	0	200	300	0	0	0	0	0	0	0	200	903	0	0	0	0	0	0	0	603	903	0
411	3	0	0	0	0	0	0	200	300	0	0	0	0	0	0	0	200	903	0	0	0	0	0	0	0	603	903	0
411	4	0	0	0	0	0	0	200	300	0	0	0	0	0	0	0	200	903	0	0	0	0	0	0	0	603	903	0
411	5	0	0	0	0	0	0	200	300	0	0	0	0	0	0	0	200	903	0	0	0	0	0	0	0	603	903	0
411	6	0	0	0	0	0	0	200	300	0	0	0	0	0	0	0	200	903	0	0	0	0	0	0	0	603	903	0
411	7	0	0	0	0	0	0	200	300	0	0	0	0	0	0	0	200	903	0	0	0	0	0	0	0	603	903	0
411	8	0	0	0	0	0	0	200	300	0	0	0	0	0	0	0	200	903	0	0	0	0	0	0	0	603	903	0
411	9	0	0	0	0	0	0	200	300	0	0	0	0	0	0	0	200	903	0	0	0	0	0	0	0	603	903	0
412	0	0	0	0	0	0	0	200	300	0	0	0	0	0	0	0	200	903	0	0	0	0	0	0	0	603	903	0
412	1	0	0	0	0	0	0	200	300	0	0	0	0	0	0	0	200	903	0	0	0	0	0	0	0	603	903	0
412	2	0	0	0	0	0	0	200	300	0	0	0	0	0	0	0	200	903	0	0	0	0	0	0	0	603	903	0
412	3	0	0	0	0	0	0	200	300	0	0	0	0	0	0	0	200	903	0	0	0	0	0	0	0	603	903	0
412	4	0	0	0	0	0	0	200	300	0	0	0	0	0	0	0	200	903	0	0	0	0	0	0	0	603	903	0
412	5	0	0	0	0	0	0	200	300	0	0	0	0	0	0	0	200	903	0	0	0	0	0	0	0	603	903	0
412	6	0	0	0	0	0	0	200	300	0	0	0	0	0	0	0	200	903	0	0	0	0	0	0	0	603	903	0
412	7	0	0	0	0	0	0	200	300	0	0	0	0	0	0	0	200	903	0	0	0	0	0	0	0	603	903	0
412	8	0	0	0	0	0	0	200	300	0	0	0	0	0	0	0	200	903	0	0	0	0	0	0	0	603	903	0
412	9	0	0	0	0	0	0	200	300	0	0	0	0	0	0	0	200	903	0	0	0	0	0	0	0	603	903	0
413	0	0	0	0	0	0	0	200	300	0	0	0	0	0	0	0	200	903	0	0	0	0	0	0	0	603	903	0
413	1	0	0	0	0	0	0	200	300	0	0	0	0	0	0	0	200	903	0	0	0	0	0	0	0	603	903	0
413	2	0	0	0	0	0	0	200	300	0	0	0	0	0	0	0	200	903	0	0	0	0	0	0	0	603	903	0
413	3	0	0	0	0	0	0	200	300	0	0	0	0	0	0	0	200	903	0	0	0	0	0	0	0	603	903	0
413	4	0	0	0	0	0	0	200	300	0	0	0	0	0	0	0	200	903	0	0	0	0	0	0	0	603	903	0
413	5	0	0	0	0	0	0	200	300	0	0	0	0	0	0	0	200	903	0	0	0	0	0	0	0	603	903	0
413	6	0	0	0	0	0	0	200	300	0	0	0	0	0	0	0	200	903	0	0	0	0	0	0	0	603	903	0
413	7	0	0	0	0	0	0	200	300	0	0	0	0	0	0	0	200	903	0	0	0	0	0	0	0	603	903	0
413	8	0	0	0	0	0	0	200	300	0	0	0	0	0	0	0	200	903	0	0	0	0	0	0	0	603	903	0
413	9	0	0	0	0	0	0	200	300	0	0	0	0	0	0	0	200	903	0	0	0	0	0	0	0	603	903	0
414	0	0	0	0	0	0	0	200	300	0	0	0	0	0	0	0	200	903	0	0	0	0	0	0	0	603	903	0
414	1	0	0	0	0	0	0	200	300	0	0	0	0	0	0	0	200	903	0	0	0	0	0	0	0	603	903	0
414	2	0	0	0	0	0	0	200	300	0	0	0	0	0	0	0	200	903	0	0	0	0	0	0	0	603	903	0
414	3	0	0	0	0	0	0	200	300	0	0	0	0	0	0	0	200	903	0	0	0	0	0	0	0	603	903	0
414	4	0	0	0	0	0	0	200	300	0	0	0	0	0	0	0	200	903	0	0	0	0	0	0	0	603	903	0
414	5	0	0	0	0	0	0	200	300	0	0	0	0	0	0	0	200	903	0	0	0	0	0	0	0	603	903	0
414	6	0	0	0	0	0	0	200	300	0	0	0	0	0	0	0	200	903	0	0	0	0	0	0	0	603	903	0
414	7	0	0	0	0	0	0	200	300	0	0	0	0	0	0	0	200	903	0	0	0	0	0	0	0	603	903	0
414	8	0	0	0	0	0	0	200	300	0	0	0	0	0	0	0	200	903	0	0	0	0	0	0	0	603	903	0
414	9	0	0	0	0	0	0	200	300	0	0	0	0	0	0	0	200	903	0	0	0	0	0	0	0	603	903	0
415	0	0	0	0	0	0	0	200	300	0	0	0	0	0	0	0	200	903	0	0	0	0	0	0	0	603	903	0
415	1	0	0	0	0	0	0	200	300	0	0	0	0	0	0	0	200	903	0	0	0	0	0	0	0	603	903	0
415	2	0	0	0	0	0	0	200	300	0	0	0	0	0	0	0	200	903	0	0	0	0	0	0	0	603	903	0
415	3	0	0	0	0	0	0	200	300	0	0	0	0	0	0	0	200	903	0	0	0	0	0	0	0	603	903	0
415	4	0	0	0	0	0	0	200	300	0	0	0	0	0	0	0	200	903	0	0	0	0	0	0	0	603	903	0
415	5	0	0	0	0	0	0	200	300	0	0	0	0	0	0	0	200	903	0	0	0	0	0	0	0	603	903	0
415	6	0	0	0	0	0	0	200	300	0	0	0	0	0	0	0	200	903	0	0	0	0	0	0	0	603	903	0
415	7	0	0	0	0	0	0	200	300	0	0	0	0	0	0	0	200	903	0	0	0	0	0	0	0	603	903	0
415	8	0	0	0	0	0	0	200	300	0	0	0	0	0	0	0	200	903	0	0	0	0	0	0	0	603	903	0
415	9	0	0	0	0	0	0	200	300	0	0	0	0	0	0	0	200	903	0	0	0	0	0	0	0	603	903	0
416	0	0	0	0	0	0	0	200	300	0	0	0	0	0	0	0	200	903	0	0	0	0	0	0	0	603	903	0
416	1	0	0	0	0	0	0	200	300	0	0	0	0	0	0	0	200	903	0	0	0	0	0	0	0	603	903	0
416	2	0	0	0	0	0	0	200	300	0	0	0	0	0	0	0	200	903	0	0	0	0	0	0	0	603	903	0
416	3	0	0	0	0	0	0	200	300	0	0	0	0	0	0	0	200	903	0	0	0	0	0	0	0	603	903	0
416	4	0	0	0	0	0	0	200	300	0	0	0	0	0	0	0	200	903	0	0	0	0	0	0	0	603	903	0
416	5	0	0	0	0	0	0	200	300	0	0	0	0	0	0	0	200	903	0	0	0	0	0	0	0	603	903	0
416	6	0	0	0	0	0	0	200	300	0	0	0	0	0	0	0	200	903	0	0	0	0	0	0	0	603	903	0
416	7	0	0	0	0	0	0	200	300	0	0	0	0	0	0	0	200	903	0	0	0	0	0	0	0	603	903	0
416	8	0	0	0	0	0	0	200	300	0	0	0	0	0	0	0	200	903	0	0	0	0	0	0	0	603	903	0
416	9	0	0	0	0	0	0	200	300	0	0	0	0	0	0	0	200	903	0	0	0	0	0	0	0	603	903	0
417	0	0	0	0	0	0	0	200	300	0	0	0	0	0	0	0	200	903	0	0	0	0	0	0	0	603	903	0
417	1	0	0	0	0	0	0	200	300	0	0	0	0	0	0	0	200	903	0	0	0	0	0	0	0	603	903	0
417	2	0	0	0	0	0	0	200	300	0	0	0	0	0	0	0	200	903	0	0	0	0	0	0	0	603	903	0
417	3	0	0	0	0	0	0	200	300	0	0	0	0	0	0	0	200	903	0	0	0	0	0	0	0	603	903	0
417	4	0	0	0	0	0	0	200	300	0	0	0	0	0	0	0	200	903	0	0	0	0	0	0	0	603	903	0
417	5	0	0	0	0	0	0	200	300	0	0	0	0	0	0	0	200	903	0	0	0	0	0	0	0	603	903	0
417	6	0	0	0	0	0	0	200	300	0	0	0	0	0	0	0	200	903	0	0	0	0	0	0	0	603	903	0
417	7	0	0	0	0	0	0	200	300	0	0	0	0	0	0	0	200	903	0	0	0	0	0	0	0	603	903	0
417	8	0	0	0	0	0	0	200	300	0	0	0	0	0	0	0	200	903	0	0	0	0	0	0	0	603	903	0
417	9	0	0	0	0	0	0	200	300	0	0	0	0	0	0	0	200	903	0	0	0	0	0	0	0	603	903	0
418	0	0	0	0	0	0	0	200	300	0	0	0	0	0	0	0	200	903	0	0	0	0	0	0	0	603	903	0
418	1	0	0	0	0	0	0	200	300	0	0	0	0	0	0	0	200	903	0	0	0	0	0	0	0	603	903	0
418	2	0	0	0	0	0	0	200	300	0	0	0	0	0	0	0	200	903	0	0	0	0	0	0	0	603	903	0
418	3	0	0	0	0	0	0	200	300	0	0	0	0	0	0	0	200	903	0	0	0	0	0	0	0	603	903	0
418	4	0	0	0	0	0	0	200	300	0	0	0	0	0	0	0	200	903	0	0	0	0	0	0	0	603	903	0
418	5	0	0	0	0	0	0	200	300	0	0	0	0	0	0	0	200	903	0	0	0	0	0	0	0	603	903	0
418	6	0	0	0	0	0	0	200	300	0	0	0	0	0	0	0	200	903	0	0	0	0	0	0	0	603	903	0
418	7	0	0	0	0	0	0	200	300	0	0	0	0	0	0	0	200	903	0	0	0	0	0	0	0	603	903	0
418	8	0	0	0	0	0	0	200	300	0	0	0	0	0	0	0	200	903	0	0	0	0	0	0	0	603	903	0
418	9	0	0	0	0	0	0	200	300	0	0	0	0	0	0	0	200	903	0	0	0	0	0	0	0	603	903	0
419	0	0	0	0	0	0	0	200	300	0	0	0	0	0	0	0	200	903	0	0	0	0	0	0	0	603	903	0
419	1	0	0	0	0	0	0	200	300	0	0	0	0	0	0	0	200	903	0	0	0	0	0	0	0	603	903	0
419	2	0	0	0	0	0	0	200	300	0	0	0	0	0	0	0	200	903	0	0	0	0	0	0	0	603	903	0
419	3	0	0	0	0	0	0	200	300	0	0	0	0	0	0	0	200	903	0	0	0	0	0	0	0	603	903	0
419	4	0	0	0	0	0	0	200	300	0	0	0	0	0	0	0	200	903	0	0	0	0	0	0	0	603	903	0
419	5	0	0	0	0	0	0	200	300	0	0	0	0	0	0	0	200	903	0	0	0	0	0	0	0	603	903	0
419	6	0	0	0	0	0	0	200	300	0	0	0	0	0	0	0	200	903	0	0	0	0	0	0	0	603	903	0
419	7	0	0	0	0	0	0	200	300	0	0	0	0	0	0	0	200	903	0	0	0	0	0	0	0	603	903	0
419	8	0	0	0	0	0	0	200	300	0	0	0	0	0	0	0	200	903	0	0	0	0	0	0	0	603	903	0
419	9	0	0	0	0	0	0	200	300	0	0	0	0	0	0	0	200	903	0	0	0	0	0	0	0	603	903	0
420	0	0	0	0	0	0	0	200	300	0	0	0	0	0	0	0	200	903	0	0	0	0	0	0	0	603	903	0
420	1	0	0	0	0	0	0	200	300	0	0	0	0	0	0	0	200	903	0	0	0	0	0	0	0	603	903	0
420	2	0	0	0	0	0	0	200	300	0	0	0	0	0	0	0	200	903	0	0	0	0	0	0	0	603	903	0
420	3	0	0	0	0	0	0	200	300	0	0	0	0	0	0	0	200	903	0	0	0	0	0	0	0	603	903	0
420	4	0	0	0	0	0	0	200	300	0	0	0	0	0	0	0	200	903	0	0	0	0	0	0	0	603	903	0
420	5	0	0	0	0	0	0	200	300	0	0	0	0	0	0	0	200	903	0	0	0	0	0	0	0	603	903	0
420	6	0	0	0	0	0	0	200	300	0	0	0	0	0	0	0	200	903	0	0	0	0	0	0	0	603	903	0
420	7	0	0	0	0	0	0	200	300	0	0	0	0	0	0	0	200	903	0	0	0	0	0	0	0	603	903	0
420	8	0	0	0	0	0	0	200	300	0	0	0	0	0	0	0	200	903	0	0	0	0	0	0	0	603	903	0
420	9	0	0	0	0	0	0	200	300	0	0	0	0	0	0	0	200	903	0	0	0	0	0	0	0	603	903	0
421	0	0	0	0	0	0	0	200	300	0	0	0	0	0	0	0	200	903	0	0	0	0	0	0	0	603	903	0
421	1	0	0	0	0	0	0	200	300	0	0	0	0	0	0	0	200	903	0	0	0	0	0	0	0	603	903	0
421	2	0	0	0	0	0	0	200	300	0	0	0	0	0	0	0	200	903	0	0	0	0	0	0	0	603	903	0
421	3	0	0	0	0	0	0	200	300	0	0	0	0	0	0	0	200	903	0	0	0	0	0	0	0	603	903	0
421	4	0	0	0	0	0	0	200	300	0	0	0	0	0	0	0	200	903	0	0	0	0	0	0	0	603	903	0
421	5	0	0	0	0	0	0	200	300	0	0	0	0	0	0	0	200	903	0	0	0	0	0	0	0	603	903	0
421	6	0	0	0	0	0	0	200	300	0	0	0	0	0	0	0	200	903	0	0	0	0	0	0	0	603	903	0
421	7	0	0	0	0	0	0	200	300	0	0	0	0	0	0	0	200	903	0	0	0	0	0	0	0	603	903	0
421	8	0	0	0	0	0	0	200	300	0	0	0	0	0	0	0	200	903	0	0	0	0	0	0	0	603	903	0
421	9	0	0	0	0	0	0	200	300	0	0	0	0	0	0	0	200	903	0	0	0	0	0	0	0	603	903	0
422	0	0	0	0	0	0	0	200	300	0	0	0	0	0	0	0	200	903	0	0	0	0	0	0	0	603	903	0
422	1	0	0	0	0	0	0	200	300	0	0	0	0	0	0	0	200	903	0	0	0	0	0	0	0	603	903	0
422	2	0	0	0	0	0	0	200	300	0	0	0	0	0	0	0	200	903	0	0	0	0	0	0	0	603	903	0
422	3	0	0	0	0	0	0	200	300	0	0	0	0	0	0	0	200	903	0	0	0	0	0	0	0	603	903	0
422	4	0	0	0	0	0	0	200	300	0	0	0	0	0	0	0	200	903	0	0	0	0	0	0	0	603	903	0
422	5	0	0	0	0	0	0	200	300	0	0	0	0	0	0	0	200	903	0	0	0	0	0	0	0	603	903	0
422	6	0	0	0	0	0	0	200	300	0	0	0	0	0	0	0	200	903	0	0	0	0	0	0	0	603	903	0
422	7	0	0	0	0	0	0	200	300	0	0	0	0	0	0	0	200	903	0	0	0	0	0	0	0	603	903	0
422	8	0	0	0	0	0	0	200	300	0	0	0	0	0	0	0	200	903	0	0	0	0	0	0	0	603	903	0
422	9	0	0	0	0	0	0	200	300	0	0	0	0	0	0	0	200	903	0	0	0	0	0	0	0	603	903	0
423	0	0	0	0	0	0	0	200	300	0	0	0	0	0	0	0	200	903	0	0	0	0	0	0	0	603	903	0
423	1	0	0	0	0	0	0	200	300	0	0	0	0	0	0	0	200	903	0	0	0	0	0	0	0	603	903	0
423	2	0	0	0	0	0	0	200	300	0	0	0	0	0	0	0	200	903	0	0	0	0	0	0	0	603	903	0
423	3	0	0	0	0	0	0	200	300	0	0	0	0	0	0	0	200	903	0	0	0	0	0	0	0	603	903	0
423	4	0	0	0	0	0	0	200	300	0	0	0	0	0	0	0	200	903	0	0	0	0	0	0	0	603	903	0
423	5	0	0	0	0	0	0	200	300	0	0	0	0	0	0	0	200	903	0	0	0	0	0	0	0	603	903	0
423	6	0	0	0	0	0	0	200	300	0	0	0	0	0	0	0	200	903	0	0	0	0	0	0	0	603	903	0
423	7	0	0	0	0	0	0	200	300	0	0	0	0	0	0	0	200	903	0	0	0	0	0	0	0	603	903	0
423	8	0	0	0	0	0	0	200	300	0	0	0	0	0	0	0	200	903	0	0	0	0	0	0	0	603	903	0
423	9	0	0	0	0	0	0	200	300	0	0	0	0	0	0	0	200	903	0	0	0	0	0	0	0	603	903	0
424	0	0	0	0	0	0	0	200	300	0	0	0	0	0	0	0	200	903	0	0	0	0	0	0	0	603	903	0
424	1	0	0	0	0	0	0	200	300	0	0	0	0	0	0	0	200	903	0	0	0	0	0	0	0	603	903	0
424	2	0	0	0	0	0	0	200	300	0	0	0	0	0	0	0	200	903	0	0	0	0	0	0	0	603	903	0
424	3	0	0	0	0	0	0	200	300	0	0	0	0	0	0	0	200	903	0	0	0	0	0	0	0	603	903	0
424	4	0	0	0	0	0	0	200	300	0	0	0	0	0	0	0	200	903	0	0	0	0	0	0	0	603	903	0
424	5	0	0	0	0	0	0	200	300	0	0	0	0	0	0	0	200	903	0	0	0	0	0	0	0	603	903	0
424	6	0	0	0	0	0	0	200	300	0	0	0	0	0	0	0	200	903	0	0	0	0	0	0	0	603	903	0
424	7	0	0	0	0	0	0	200	300	0	0	0	0	0	0	0	200	903	0	0	0	0	0	0	0	603	903	0
424	8	0	0	0	0	0	0	200	300	0	0	0	0	0	0	0	200	903	0	0	0	0	0	0	0	603	903	0
424	9	0	0	0	0	0	0	200	300	0	0	0	0	0	0	0	200	903	0	0	0	0	0	0	0	603	903	0
425	0	0	0	0	0	0	0	200	300	0	0	0	0	0	0	0	200	903	0	0	0	0	0	0	0	603	903	0
425	1	0	0	0	0	0	0	200	300	0	0	0	0	0	0	0	200	903	0	0	0	0	0	0	0	603	903	0
425	2	0	0	0	0	0	0	200	300	0	0	0	0	0	0	0	200	903	0	0	0	0	0	0	0	603	903	0
425	3	0	0	0	0	0	0	200	300	0	0	0	0	0	0	0	200	903	0	0	0	0	0	0	0	603	903	0
425	4	0	0	0	0	0	0	200	300	0	0	0	0	0	0	0	200	903	0	0	0	0	0	0	0	603	903	0
425	5	0	0	0	0	0	0	200	300	0	0	0	0	0	0	0	200	903	0	0	0	0	0	0	0	603	903	0
425	6	0	0	0	0	0	0	200	300	0	0	0	0	0	0	0	200	903	0	0	0	0	0	0	0	603	903	0
425	7	0	0	0	0	0	0	200	300	0	0	0	0	0	0	0	200	903	0	0	0	0	0	0	0	603	903	0
425	8	0	0	0	0	0	0	200	300	0	0	0	0	0	0	0	200	903	0	0	0	0	0	0	0	603	903	0
425	9	0	0	0	0	0	0	200	300	0	0	0	0	0	0	0	200	903	0	0	0	0	0	0	0	603	903	0
426	0	0	0	0	0	0	0	200	300	0	0	0	0	0	0	0	200	903	0	0	0	0	0	0	0	603	903	0
426	1	0	0	0	0	0	0	200	300	0	0	0	0	0	0	0	200	903	0	0	0	0	0	0	0	603	903	0
426	2	0	0	0	0	0	0	200	300	0	0	0	0	0	0	0	200	903	0	0	0	0	0	0	0	603	903	0
426	3	0	0	0	0	0	0	200	300	0	0	0	0	0	0	0	200	903	0	0	0	0	0	0	0	603	903	0
426	4	0	0	0	0	0	0	200	300	0	0	0	0	0	0	0	200	903	0	0	0	0	0	0	0	603	903	0
426	5	0	0	0	0	0	0	200	300	0	0	0	0	0	0	0	200	903	0	0	0	0	0	0	0	603	903	0
426	6	0	0	0	0	0	0	200	300	0	0	0	0	0	0	0	200	903	0	0	0	0	0	0	0	603	903	0
426	7	0	0	0	0	0	0	200	300	0	0	0	0	0	0	0	200	903	0	0	0	0	0	0	0	603	903	0
426	8	0	0	0	0	0	0	200	300	0	0	0	0	0	0	0	200	903	0	0	0	0	0	0	0	603	903	0
426	9	0	0	0	0	0	0	200	300	0	0	0	0	0	0	0	200	903	0	0	0	0	0	0	0	603	903	0
427	0	0	0	0	0	0	0	200	300	0	0	0	0	0	0	0	200	903	0	0	0	0	0	0	0	603	903	0
427	1	0	0	0	0	0	0	200	300	0	0	0	0	0	0	0	200	903	0	0	0	0	0	0	0	603	903	0
427	2	0	0	0	0	0	0	200	300	0	0	0	0	0	0	0	200	903	0	0	0	0	0	0	0	603	903	0
427	3	0	0	0	0	0	0	200	300	0	0	0	0	0	0	0	200	903	0	0	0	0	0	0	0	603	903	0
427	4	0	0	0	0	0	0	200	300	0	0	0	0	0	0	0	200	903	0	0	0	0	0	0	0	603	903	0
427	5	0	0	0	0	0	0	200	300	0	0	0	0	0	0	0	200	903	0	0	0	0	0	0	0	603	903	0
427	6	0	0	0	0	0	0	200	300	0	0	0	0	0	0	0	200	903	0	0	0	0	0	0	0	603	903	0
427	7	0	0	0	0	0	0	200	300	0	0	0	0	0	0	0	200	903	0	0	0	0	0	0	0	603	903	0
427	8	0	0	0	0	0	0	200	300	0	0	0	0	0	0	0	200	903	0	0	0	0	0	0	0	603	903	0
427	9	0	0	0	0	0	0	200	300	0	0	0	0	0	0	0	200	903	0	0	0	0	0	0	0	603	903	0
428	0	0	0	0	0	0	0	200	300	0	0	0	0	0	0	0	200	903	0	0	0	0	0	0	0	603	903	0
428	1	0	0	0	0	0	0	200	300	0	0	0	0	0	0	0	200	903	0	0	0	0	0	0	0	603	903	0
428	2	0	0	0	0	0	0	200	300	0	0	0	0	0	0	0	200	903	0	0	0	0	0	0	0	603	903	0
428	3	0	0	0	0	0	0	200	300	0	0	0	0	0	0	0	200	903	0	0	0	0	0	0	0	603	903	0
428	4	0	0	0	0	0	0	200	300	0	0	0	0	0	0	0	200	903	0	0	0	0	0	0	0	603	903	0
428	5	0	0	0	0	0	0	200	300	0	0	0	0	0	0	0	200	903	0	0	0	0	0	0	0	603	903	0
428	6	0	0	0	0	0	0	200	300	0	0	0	0	0	0	0	200	903	0	0	0	0	0	0	0	603	903	0
428	7	0	0	0	0	0	0	200	300	0	0	0	0	0	0	0	200	903	0	0	0	0	0	0	0	603	903	0
428	8	0	0	0	0	0	0	200	300	0	0	0	0	0	0	0	200	903	0	0	0	0	0	0	0	603	903	0
428	9	0	0	0	0	0	0	200	300	0	0	0	0	0	0	0	200	903	0	0	0	0	0	0	0	603	903	0
429	0	0	0	0	0	0	0	200	300	0	0	0	0	0	0	0	200	903	0	0	0	0	0	0	0	603	903	0
429	1	0	0	0	0	0	0	200	300	0	0	0	0	0	0	0	200	903	0	0	0	0	0	0	0	603	903	0
429	2	0	0	0	0	0	0	200	300	0	0	0	0	0	0	0	200	903	0	0	0	0	0	0	0	603	903	0
429	3	0	0	0	0	0	0	200	300	0	0	0	0	0	0	0	200	903	0	0	0	0	0	0	0	603	903	0
429	4	0	0	0	0	0	0	200	300	0	0	0	0	0	0	0	200	903	0	0	0	0	0	0	0	603	903	0
429	5	0	0	0	0	0	0	200	300	0	0	0	0	0	0	0	200	903	0	0	0	0	0	0	0	603	903	0
429	6	0	0	0	0	0	0	200	300	0	0	0	0	0	0	0	200	903	0	0	0	0	0	0	0	603	903	0
429	7	0	0	0	0	0	0	200	300	0	0	0	0	0	0	0	200	903	0	0	0	0	0	0	0	603	903	0
429	8	0	0	0	0	0	0	200	300	0	0	0	0	0	0	0	200	903	0	0	0	0	0	0	0	603	903	0
429	9	0	0	0	0	0	0	200	300	0	0	0	0	0	0	0	200	903	0	0	0	0	0	0	0	603	903	0
430	0	0	0	0	0	0	0	200	300	0	0	0	0	0	0	0	200	903	0	0	0	0	0	0	0	603	903	0
430	1	0	0	0	0	0	0	200	300	0	0	0	0	0	0	0	200	903	0	0	0	0	0	0	0	603	903	0
430	2	0	0	0	0	0	0	200	300	0	0	0	0	0	0	0	200	903	0	0	0	0	0	0	0	603	903	0
430	3	0	0	0	0	0	0	200	300	0	0	0	0	0	0	0	200	903	0	0	0	0	0	0	0	603	903	0
430	4	0	0	0	0	0	0	200	300	0	0	0	0	0	0	0	200	903	0	0	0	0	0	0	0	603	903	0
430	5	0	0	0	0	0	0	200	300	0	0	0	0	0	0	0	200	903	0	0	0	0	0	0	0	603	903	0
430	6	0	0	0	0	0	0	200	300	0	0	0	0	0	0	0	200	903	0	0	0	0	0	0	0	603	903	0
430	7	0	0	0	0	0	0	200	300	0	0	0	0	0	0	0	200	903	0	0	0	0	0	0	0	603	903	0
430	8	0	0	0	0	0	0	200	300	0	0	0	0	0	0	0	200	903	0	0	0	0	0	0	0	603	903	0
430	9	0	0	0	0	0	0	200	300	0	0	0	0	0	0	0	200	903	0	0	0	0	0	0	0	603	903	0
431	0	0	0	0	0	0	0	200	300	0	0	0	0	0	0	0	200	903	0	0	0	0	0	0	0	603	903	0
431	1	0	0	0	0	0	0	200	300	0	0	0	0	0	0	0	200	903	0	0	0	0	0	0	0	603	903	0
431	2	0	0	0	0	0	0	200	300	0	0	0	0	0	0	0	200	903	0	0	0	0	0	0	0	603	903	0
431	3	0	0	0	0	0	0	200	300	0	0	0	0	0	0	0	200	903	0	0	0	0	0	0	0	603	903	0
431	4	0	0	0	0	0	0	200	300	0	0	0	0	0	0	0	200	903	0	0	0	0	0	0	0	603	903	0
431	5	0	0	0	0	0	0	200	300	0	0	0	0	0	0	0	200	903	0	0	0	0	0	0	0	603	903	0
431	6	0	0	0	0	0	0	200	300	0	0	0	0	0	0	0	200	903	0	0	0	0	0	0	0	603	903	0
431	7	0	0	0	0	0	0	200	300	0	0	0	0	0	0	0	200	903	0	0	0	0	0	0	0	603	903	0
431	8	0	0	0	0	0	0	200	300	0	0	0	0	0	0	0	200	903	0	0	0	0	0	0	0	603	903	0
431	9	0	0	0	0	0	0	200	300	0	0	0	0	0	0	0	200	903	0	0	0	0	0	0	0	603	903	0
432	0	0	0	0	0	0	0	200	300	0	0	0	0	0	0	0	200	903	0	0	0	0	0	0	0	603	903	0
432	1	0	0	0	0	0	0	200	300	0	0	0	0	0	0	0	200	903	0	0	0	0	0	0	0	603	903	0
432	2	0	0	0	0	0	0	200	300	0	0	0	0	0	0	0	200	903	0	0	0	0	0	0	0	603	903	0
432	3	0	0	0	0	0	0	200	300	0	0	0	0	0	0	0	200	903	0	0	0	0	0	0	0	603	903	0
432	4	0	0	0	0	0	0	200	300	0	0	0	0	0	0	0	200	903	0	0	0	0	0	0	0	603	903	0
432	5	0	0	0	0	0	0	200	300	0	0	0	0	0	0	0	200	903	0	0	0	0	0	0	0	603	903	0
432	6	0	0	0	0	0	0	200	300	0	0	0	0	0	0	0	200	903	0	0	0	0	0	0	0	603	903	0
432	7	0	0	0	0	0	0	200	300	0	0	0	0	0	0	0	200	903	0	0	0	0	0	0	0	603	903	0
432	8	0	0	0	0	0	0	200	300	0	0	0	0	0	0	0	200	903	0	0	0	0	0	0	0	603	903	0
432	9	0	0	0	0	0	0	200	300	0	0	0	0	0	0	0	200	903	0	0	0	0	0	0	0	603	903	0
433	0	0	0	0	0	0	0	200	300	0	0	0	0	0	0	0	200	903	0	0	0	0	0	0	0	603	903	0
433	1	0	0	0	0	0	0	200	300	0	0	0	0	0	0	0	200	903	0	0	0	0	0	0	0	603	903	0
433	2	0	0	0	0	0	0	200	300	0	0	0	0	0	0	0	200	903	0	0	0	0	0	0	0	603	903	0
433	3	0	0	0	0	0	0	200	300	0	0	0	0	0	0	0	200	903	0	0	0	0	0	0	0	603	903	0
433	4	0	0	0	0	0	0	200	300	0	0	0	0	0	0	0	200	903	0	0	0	0	0	0	0	603	903	0
433	5	0	0	0	0	0	0	200	300	0	0	0	0	0	0	0	200	903	0	0	0	0	0	0	0	603	903	0
433	6	0	0	0	0	0	0	200	300	0	0	0	0	0	0	0	200	903	0	0	0	0	0	0	0	603	903	0
433	7	0	0	0	0	0	0	200	300	0	0	0	0	0	0	0	200	903	0	0	0	0	0	0	0	603	903	0
433	8	0	0	0	0	0	0	200	300	0	0	0	0	0	0	0	200	903	0	0	0	0	0	0	0	603	903	0
433	9	0	0	0	0	0	0	200	300	0	0	0	0	0	0	0	200	903	0	0	0	0	0	0	0	603	903	0
434	0	0	0	0	0	0	0	200	300	0	0	0	0	0	0	0	200	903	0	0	0	0	0	0	0	603	903	0
434	1	0	0	0	0	0	0	200	300	0	0	0	0	0	0	0	200	903	0	0	0	0	0	0	0	603	903	0
434	2	0	0	0	0	0	0	200	300	0	0	0	0	0	0	0	200	903	0	0	0	0	0	0	0	603	903	0
434	3	0	0	0	0	0	0	200	300	0	0	0	0	0	0	0	200	903	0	0	0	0	0	0	0	603	903	0
434	4	0	0	0	0	0	0	200	300	0	0	0	0	0	0	0	200	903	0	0	0	0	0	0	0	603	903	0
434	5	0	0	0	0	0	0	200	300	0	0	0	0	0	0	0	200	903	0	0	0	0	0	0	0	603	903	0
434	6	0	0	0	0	0	0	200	300	0	0	0	0	0	0	0	200	903	0	0	0	0	0	0	0	603	903	0
434	7	0	0	0	0	0	0	200	300	0	0	0	0	0	0	0	200	903	0	0	0	0	0	0	0	603	903	0
434	8	0	0	0	0	0	0	200	300	0	0	0	0	0	0	0	200	903	0	0	0	0	0	0	0	603	903	0
434	9	0	0	0	0	0	0	200	300	0	0	0	0	0	0	0	200	903	0	0	0	0	0	0	0	603	903	0
435	0	0	0	0	0	0	0	200	300	0	0	0	0	0	0	0	200	903	0	0	0	0	0	0	0	603	903	0
435	1	0	0	0	0	0	0	200	300	0	0	0	0	0	0	0	200	903	0	0	0	0	0	0	0	603	903	0
435	2	0	0	0	0	0	0	200	300	0	0	0	0	0	0	0	200	903	0	0	0	0	0	0	0	603	903	0
435	3	0	0	0	0	0	0	200	300	0	0	0	0	0	0	0	200	903	0	0	0	0	0	0	0	603	903	0
435	4	0	0	0	0	0	0	200	300	0	0	0	0	0	0	0	200	903	0	0	0	0	0	0	0	603	903	0
435	5	0	0	0	0	0	0	200	300	0	0	0	0	0	0	0	200	903	0	0	0	0	0	0	0	603	903	0
435	6	0	0	0	0	0	0	200	300	0	0	0	0	0	0	0	200	903	0	0	0	0	0	0	0	603	903	0
435	7	0	0	0	0	0	0	200	300	0	0	0	0	0	0	0	200	903	0	0	0	0	0	0	0	603	903	0
435	8	0	0	0	0	0	0	200	300	0	0	0	0	0	0	0	200	903	0	0	0	0	0	0	0	603	903	0
435	9	0	0	0	0	0	0	200	300	0	0	0	0	0	0	0	200	903	0	0	0	0	0	0	0	603	903	0
436	0	0	0	0	0	0	0	200	300	0	0	0	0	0	0	0	200	903	0	0	0	0	0	0	0	603	903	0
436	1	0	0	0	0	0	0	200	300	0	0	0	0	0	0	0	200	903	0	0	0	0	0	0	0	603	903	0
436	2	0	0	0	0	0	0	200	300	0	0	0	0	0	0	0	200	903	0	0	0	0	0	0	0	603	903	0
436	3	0	0	0	0	0	0	200	300	0	0	0	0	0	0	0	200	903	0	0	0	0	0	0	0	603	903	0
436	4	0	0	0	0	0	0	200	300	0	0	0	0	0	0	0	200	903	0	0	0	0	0	0	0	603	903	0
436	5	0	0	0	0	0	0	200	300	0	0	0	0	0	0	0	200	903	0	0	0	0	0	0	0	603	903	0
436	6	0	0	0	0	0	0	200	300	0	0	0	0	0	0	0	200	903	0	0	0	0	0	0	0	603	903	0
436	7	0	0	0	0	0	0	200	300	0	0	0	0	0	0	0	200	903	0	0	0	0	0	0	0	603	903	0
436	8	0	0	0	0	0	0	200	300	0	0	0	0	0	0	0	200	903	0	0	0	0	0	0	0	603	903	0
436	9	0	0	0	0	0	0	200	300	0	0	0	0	0	0	0	200	903	0	0	0	0	0	0	0	603	903	0
437	0	0	0	0	0	0	0	200	300	0	0	0	0	0	0	0	200	903	0	0	0	0	0	0	0	603	903	0
437	1	0	0	0	0	0	0	200	300	0	0	0	0	0	0	0	200	903	0	0	0	0	0	0	0	603	903	0
437	2	0	0	0	0	0	0	200	300	0	0	0	0	0	0	0	200	903	0	0	0	0	0	0	0	603	903	0
437	3	0	0	0	0	0	0	200	300	0	0	0	0	0	0	0	200	903	0	0	0	0	0	0	0	603	903	0
437	4	0	0	0	0	0	0	200	300	0	0	0	0	0	0	0	200	903	0	0	0	0	0	0	0	603	903	0
437	5	0	0	0	0	0	0	200	300	0	0	0	0	0	0	0	200	903	0	0	0	0	0	0	0	603	903	0
437	6	0	0	0	0	0	0	200	300	0	0	0	0	0	0	0	200	903	0	0	0	0	0	0	0	603	903	0
437	7	0	0	0	0	0	0	200	300	0	0	0	0	0	0	0	200	903	0	0	0	0	0	0	0	603	903	0
437	8	0	0	0	0	0	0	200	300	0	0	0	0	0	0	0	200	903	0	0	0	0	0	0	0	603	903	0
437	9	0	0	0	0	0	0	200	300	0	0	0	0	0	0	0	200	903	0	0	0	0	0	0	0	603	903	0
438	0	0	0	0	0	0	0	200	300	0	0	0	0	0	0	0	200	903	0	0	0	0	0	0	0	603	903	0
438	1	0	0	0	0	0	0	200	300	0	0	0	0	0	0	0	200	903	0	0	0	0	0	0	0	603	903	0
438	2	0	0	0	0	0	0	200	300	0	0	0	0	0	0	0	200	903	0	0	0	0	0	0	0	603	903	0
438	3	0	0	0	0	0	0	200	300	0	0	0	0	0	0	0	200	903	0	0	0	0	0	0	0	603	903	0
438	4	0	0	0	0	0	0	200	300	0	0	0	0	0	0	0	200	903	0	0	0	0	0	0	0	603	903	0
438	5	0	0	0	0	0	0	200	300	0	0	0	0	0	0	0	200	903	0	0	0	0	0	0	0	603	903	0
438	6	0	0	0	0	0	0	200	300	0	0	0	0	0	0	0	200	903	0	0	0	0	0	0	0	603	903	0
438	7	0	0	0	0	0	0	200	300	0	0	0	0	0	0	0	200	903	0	0	0	0	0	0	0	603	903	0
438	8	0	0	0	0	0	0	200	300	0	0	0	0	0	0	0	200	903	0	0	0	0	0	0	0	603	903	0
438	9	0	0	0	0	0	0	200	300	0	0	0	0	0	0	0	200	903	0	0	0	0	0	0	0	603	903	0
439	0	0	0	0	0	0	0	200	300	0	0	0	0	0	0	0	200	903	0	0	0	0	0	0	0	603	903	0
439	1	0	0	0	0	0	0	200	300	0	0	0	0	0	0	0	200	903	0	0	0	0	0	0	0	603	903	0
439	2	0	0	0	0	0	0	200	300	0	0	0	0	0	0	0	200	903	0	0	0	0	0	0	0	603	903	0
439	3	0	0	0	0	0	0	200	300	0	0	0	0	0	0	0	200	903	0	0	0	0	0	0	0	603	903	0
439	4	0	0	0	0	0	0	200	300	0	0	0	0	0	0	0	200	903	0	0	0	0	0	0	0	603	903	0
439	5	0	0	0	0	0	0	200	300	0	0	0	0	0	0	0	200	903	0	0	0	0	0	0	0	603	903	0
439	6	0	0	0	0	0	0	200	300	0	0	0	0	0	0	0	200	903	0	0	0	0	0	0	0	603	903	0
439	7	0	0	0	0	0	0	200	300	0	0	0	0	0	0	0	200	903	0	0	0	0	0	0	0	603	903	0
439	8	0	0	0	0	0	0	200	300	0	0	0	0	0	0	0	200	903	0	0	0	0	0	0	0	603	903	0
439	9	0	0	0	0	0	0	200	300	0	0	0	0	0	0	0	200	903	0	0	0	0	0	0	0	603	903	0
440	0	0	0	0	0	0	0	200	300	0	0	0	0	0	0	0	200	903	0	0	0	0	0	0	0	603	903	0
440	1	0	0	0	0	0	0	200	300	0	0	0	0	0	0	0	200	903	0	0	0	0	0	0	0	603	903	0
440	2	0	0	0	0	0	0	200	300	0	0	0	0	0	0	0	200	903	0	0	0	0	0	0	0	603	903	0
440	3	0	0	0	0	0	0	200	300	0	0	0	0	0	0	0	200	903	0	0	0	0	0	0	0	603	903	0
440	4	0	0	0	0	0	0	200	300	0	0	0	0	0	0	0	200	903	0	0	0	0	0	0	0	603	903	0
440	5	0	0	0	0	0	0	200	300	0	0	0	0	0	0	0	200	903	0	0	0	0	0	0	0	603	903	0
440	6	0	0	0	0	0	0	200	300	0	0	0	0	0	0	0	200	903	0	0	0	0	0	0	0	603	903	0
440	7	0	0	0	0	0	0	200	300	0	0	0	0	0	0	0	200	903	0	0	0	0	0	0	0	603	903	0
440	8	0	0	0	0	0	0	200	300	0	0	0	0	0	0	0	200	903	0	0	0	0	0	0	0	603	903	0
440	9	0	0	0	0	0	0	200	300	0	0	0	0	0	0	0	200	903	0	0	0	0	0	0	0	603	903	0
441	0	0	0	0	0	0	0	200	300	0	0	0	0	0	0	0	200	903	0	0	0	0	0	0	0	603	903	0
441	1	0	0	0	0	0	0	200	300	0	0	0	0	0	0	0	200	903	0	0	0	0	0	0	0	603	903	0
441	2	0	0	0	0	0	0	200	300	0	0	0	0	0	0	0	200	903	0	0	0	0	0	0	0	603	903	0
441	3	0	0	0	0	0	0	200	300	0	0	0	0	0	0	0	200	903	0	0	0	0	0	0	0	603	903	0
441	4	0	0	0	0	0	0	200	300	0	0	0	0	0	0	0	200	903	0	0	0	0	0	0	0	603	903	0
441	5	0	0	0	0	0	0	200	300	0	0	0	0	0	0	0	200	903	0	0	0	0	0	0	0	603	903	0
441	6	0	0	0	0	0	0	200	300	0	0	0	0	0	0	0	200	903	0	0	0	0	0	0	0	603	903	0
441	7	0	0	0	0	0	0	200	300	0	0	0	0	0	0	0	200	903	0	0	0	0	0	0	0	603	903	0
441	8	0	0	0	0	0	0	200	300	0	0	0	0	0	0	0	200	903	0	0	0	0	0	0	0	603	903	0
441	9	0	0	0	0	0	0	200	300	0	0	0	0	0	0	0	200	903	0	0	0	0	0	0	0	603	903	0
442	0	0	0	0	0	0	0	200	300	0	0	0	0	0	0	0	200	903	0	0	0	0	0	0	0	603	903	0
442	1	0	0	0	0	0	0	200	300	0	0	0	0	0	0	0	200	903	0	0	0	0	0	0	0	603	903	0
442	2	0	0	0	0	0	0	200	300	0	0	0	0	0	0	0	200	903	0	0	0	0	0	0	0	603	903	0
442	3	0	0	0	0	0	0	200	300	0	0	0	0	0	0	0	200	903	0	0	0	0	0	0	0	603	903	0
442	4	0	0	0	0	0	0	200	300	0	0	0	0	0	0	0	200	903	0	0	0	0	0	0	0	603	903	0
442	5	0	0	0	0	0	0	200	300	0	0	0	0	0	0	0	200	903	0	0	0	0	0	0	0	603	903	0
442	6	0	0	0	0	0	0	200	300	0	0	0	0	0	0	0	200	903	0	0	0	0	0	0	0	603	903	0
442	7	0	0	0	0	0	0	200	300	0	0	0	0	0	0	0	200	903	0	0	0	0	0	0	0	603	903	0
442	8	0	0	0	0	0	0	200	300	0	0	0	0	0	0	0	200	903	0	0	0	0	0	0	0	603	903	0
442	9	0	0	0	0	0	0	200	300	0	0	0	0	0	0	0	200	903	0	0	0	0	0	0	0	603	903	0
443	0	0	0	0	0	0	0	200	300	0	0	0	0	0	0	0	200	903	0	0	0	0	0	0	0	603	903	0
443	1	0	0	0	0	0	0	200	300	0	0	0	0	0	0	0	200	903	0	0	0	0	0	0	0	603	903	0
443	2	0	0	0	0	0	0	200	300	0	0	0	0	0	0	0	200	903	0	0	0	0	0	0	0	603	903	0
443	3	0	0	0	0	0	0	200	300	0	0	0	0	0	0	0	200	903	0	0	0	0	0	0	0	603	903	0
443	4	0	0	0	0	0	0	200	300	0	0	0	0	0	0	0	200	903	0	0	0	0	0	0	0	603	903	0
443	5	0	0	0	0	0	0	200	300	0	0	0	0	0	0	0	200	903	0	0	0	0	0	0	0	603	903	0
443	6	0	0	0	0	0	0	200	300	0	0	0	0	0	0	0	200	903	0	0	0	0	0	0	0	603	903	0
443	7	0	0	0	0	0	0	200	300	0	0	0	0	0	0	0	200	903	0	0	0	0	0	0	0	603	903	0
443	8	0	0	0	0	0	0	200	300	0	0	0	0	0	0	0	200	903	0	0	0	0	0	0	0	603	903	0
443	9	0	0	0	0	0	0	200	300	0	0	0	0	0	0	0	200	903	0	0	0	0	0	0	0	603	903	0
444	0	0	0	0	0	0	0	200	300	0	0	0	0	0	0	0	200	903	0	0	0	0	0	0	0	603	903	0
444	1	0	0	0	0	0	0	200	300	0	0	0	0	0	0	0	200	903	0	0	0	0	0	0	0	603	903	0
444	2	0	0	0	0	0	0	200	300	0	0	0	0	0	0	0	200	903	0	0	0	0	0	0	0	603	903	0
444	3	0	0	0	0	0	0	200	300	0	0	0	0	0	0	0	200	903	0	0	0	0	0	0	0	603	903	0
444	4	0	0	0	0	0	0	200	300	0	0	0	0	0	0	0	200	903	0	0	0	0	0	0	0	603	903	0
444	5	0	0	0	0	0	0	200	300	0	0	0	0	0	0	0	200	903	0	0	0	0	0	0	0	603	903	0
444	6	0	0	0	0	0	0	200	300	0	0	0	0	0	0	0	200	903	0	0	0	0	0	0	0	603	903	0
444	7	0	0	0	0	0	0	200	300	0	0	0	0	0	0	0	200	903	0	0	0	0	0	0	0	603	903	0
444	8	0	0	0	0	0	0	200	300	0	0	0	0	0	0	0	200	903	0	0	0	0	0	0	0	603	903	0
444	9	0	0	0	0	0	0	200	300	0	0	0	0	0	0	0	200	903	0	0	0	0	0	0	0	603	903	0
445	0	0	0	0	0	0	0	200	300	0	0	0	0	0	0	0	200	903	0	0	0	0	0	0	0	603	903	0
445	1	0	0	0	0	0	0	200	300	0	0	0	0	0	0	0	200	903	0	0	0	0	0	0	0	603	903	0
445	2	0	0	0	0	0	0	200	300	0	0	0	0	0	0	0	200	903	0	0	0	0	0	0	0	603	903	0
445	3	0	0	0	0	0	0	200	300	0	0	0	0	0	0	0	200	903	0	0	0	0	0	0	0	603	903	0
445	4	0	0	0	0	0	0	200	300	0	0	0	0	0	0	0	200	903	0	0	0	0	0	0	0	603	903	0
445	5	0	0	0	0	0	0	200	300	0	0	0	0	0	0	0	200	903	0	0	0	0	0	0	0	603	903	0
445	6	0	0	0	0	0	0	200	300	0	0	0	0	0	0	0	200	903	0	0	0	0	0	0	0	603	903	0
445	7	0	0	0	0	0	0	200	300	0	0	0	0	0	0	0	200	903	0	0	0	0	0	0	0	603	903	0
445	8	0	0	0	0	0	0	200	300	0	0	0	0	0	0	0	200	903	0	0	0	0	0	0	0	603	903	0
445	9	0	0	0	0	0	0	200	300	0	0	0	0	0	0	0	200	903	0	0	0	0	0	0	0	603	903	0
446	0	0	0	0	0	0	0	200	300	0	0	0	0	0	0	0	200	903	0	0	0	0	0	0	0	603	903	0
446	1	0	0	0	0	0	0	200	300	0	0	0	0	0	0	0	200	903	0	0	0	0	0	0	0	603	903	0
446	2	0	0	0	0	0	0	200	300	0	0	0	0	0	0	0	200	903	0	0	0	0	0	0	0	603	903	0
446	3	0	0	0	0	0	0	200	300	0	0	0	0	0	0	0	200	903	0	0	0	0	0	0	0	603	903	0
446	4	0	0	0	0	0	0	200	300	0	0	0	0	0	0	0	200	903	0	0	0	0	0	0	0	603	903	0
446	5	0	0	0	0	0	0	200	300	0	0	0	0	0	0	0	200	903	0	0	0	0	0	0	0	603	903	0
446	6	0	0	0	0	0	0	200	300	0	0	0	0	0	0	0	200	903	0	0	0	0	0	0	0	603	903	0
446	7	0	0	0	0	0	0	200	300	0	0	0	0	0	0	0	200	903	0	0	0	0	0	0	0	603	903	0
446	8	0	0	0	0	0	0	200	300	0	0	0	0	0	0	0	200	903	0	0	0	0	0	0	0	603	903	0
446	9	0	0	0	0	0	0	200	300	0	0	0	0	0	0	0	200	903	0	0	0	0	0	0	0	603	903	0
447	0	0	0	0	0	0	0	200	300	0	0	0	0	0	0	0	200	903	0	0	0	0	0	0	0	603	903	0
447	1	0	0	0	0	0	0	200	300	0	0	0	0	0	0	0	200	903	0	0	0	0	0	0	0	603	903	0
447	2	0	0	0	0	0	0	200	300	0	0	0	0	0	0	0	200	903	0	0	0	0	0	0	0	603	903	0
447	3	0	0	0	0	0	0	200	300	0	0	0	0	0	0	0	200	903	0	0	0	0	0	0	0	603	903	0
447	4	0	0	0	0	0	0	200	300	0	0	0	0	0	0	0	200	903	0	0	0	0	0	0	0	603	903	0
447	5	0	0	0	0	0	0	200	300	0	0	0	0	0	0	0	200	903	0	0	0	0	0	0	0	603	903	0
447	6	0	0	0	0	0	0	200	300	0	0	0	0	0	0	0	200	903	0	0	0	0	0	0	0	603	903	0
447	7	0	0	0	0	0	0	200	300	0	0	0	0	0	0	0	200	903	0	0	0	0	0	0	0	603	903	0
447	8	0	0	0	0	0	0	200	300	0	0	0	0	0	0	0	200	903	0	0	0	0	0	0	0	603	903	0
447	9	0	0	0	0	0	0	200	300	0	0	0	0	0	0	0	200	903	0	0	0	0	0	0	0	603	903	0
448	0	0	0	0	0	0	0	200	300	0	0	0	0	0	0	0	200	903	0	0	0	0	0	0	0	603	903	0
448	1	0	0	0	0	0	0	200	300	0	0	0	0	0	0	0	200	903	0	0	0	0	0	0	0	603	903	0
448	2	0	0	0	0	0	0	200	300	0	0	0	0	0	0	0	200	903	0	0	0	0	0	0	0	603	903	0
448	3	0	0	0	0	0	0	200	300	0	0	0	0	0	0	0	200	903	0	0	0	0	0	0	0	603	903	0
448	4	0	0	0	0	0	0	200	300	0	0	0	0	0	0	0	200	903	0	0	0	0	0	0	0	603	903	0
448	5	0	0	0	0	0	0	200	300	0	0	0	0	0	0	0	200	903	0	0	0	0	0	0	0	603	903	0
448	6	0	0	0	0	0	0	200	300	0	0	0	0	0	0	0	200	903	0	0	0	0	0	0	0	603	903	0
448	7	0	0	0	0	0	0	200	300	0	0	0	0	0	0	0	200	903	0	0	0	0	0	0	0	603	903	0
448	8	0	0	0	0	0	0	200	300	0	0	0	0	0	0	0	200	903	0	0	0	0	0	0	0	603	903	0
448	9	0	0	0	0	0	0	200	300	0	0	0	0	0	0	0	200	903	0	0	0	0	0	0	0	603	903	0
449	0	0	0	0	0	0	0	200	300	0	0	0	0	0	0	0	200	903	0	0	0	0	0	0	0	603	903	0
449	1	0	0	0	0	0	0	200	300	0	0	0	0	0	0	0	200	903	0	0	0	0	0	0	0	603	903	0
449	2	0	0	0	0	0	0	200	300	0	0	0	0	0	0	0	200	903	0	0	0	0	0	0	0	603	903	0
449	3	0	0	0	0	0	0	200	300	0	0	0	0	0	0	0	200	903	0	0	0	0	0	0	0	603	903	0
449	4	0	0	0	0	0	0	200	300	0	0	0	0	0	0	0	200	903	0	0	0	0	0	0	0	603	903	0
449	5	0	0	0	0	0	0	200	300	0	0	0	0	0	0	0	200	903	0	0	0	0	0	0	0	603	903	0
449	6	0	0	0	0	0	0	200	300	0	0	0	0	0	0	0	200	903	0	0	0	0	0	0	0	603	903	0
449	7	0	0	0	0	0	0	200	300	0	0	0	0	0	0	0	200	903	0	0	0	0	0	0	0	603	903	0
449	8	0	0	0	0	0	0	200	300	0	0	0	0	0	0	0	200	903	0	0	0	0	0	0	0	603	903	0
449	9	0	0	0	0	0	0	200	300	0	0	0	0	0	0	0	200	903	0	0	0	0	0	0	0	603	903	0
450	0	0	0	0	0	0	0	200	300	0	0	0	0	0	0	0	200	903	0	0	0	0	0	0	0	603	903	0
450	1	0	0	0	0	0	0	200	300	0	0	0	0	0	0	0	200	903	0	0	0	0	0	0	0	603	903	0
450	2	0	0	0	0	0	0	200	300	0	0	0	0	0	0	0	200	903	0	0	0	0	0	0	0	603	903	0
450	3	0	0	0	0	0	0	200	300	0	0	0	0	0	0	0	200	903	0	0	0	0	0	0	0	603	903	0
450	4	0	0	0	0	0	0	200	300	0	0	0	0	0	0	0	200	903	0	0	0	0	0	0	0	603	903	0
450	5	0	0	0	0	0	0	200	300	0	0	0	0	0	0	0	200	903	0	0	0	0	0	0	0	603	903	0
450	6	0	0	0	0	0	0	200	300	0	0	0	0	0	0	0	200	903	0	0	0	0	0	0	0	603	903	0
450	7	0	0	0	0	0	0	200	300	0	0	0	0	0	0	0	200	903	0	0	0	0	0	0	0	603	903	0
450	8	0	0	0	0	0	0	200	300	0	0	0	0	0	0	0	200	903	0	0	0	0	0	0	0	603	903	0
450	9	0	0	0	0	0	0	200	300	0	0	0	0	0	0	0	200	903	0	0	0	0	0	0	0	603	903	0
451	0	0	0	0	0	0	0	200	300	0	0	0	0	0	0	0	200	903	0	0	0	0	0	0	0	603	903	0
451	1	0	0	0	0	0	0	200	300	0	0	0	0	0	0	0	200	903	0	0	0	0	0	0	0	603	903	0
451	2	0	0	0	0	0	0	200	300	0	0	0	0	0	0	0	200	903	0	0	0	0	0	0	0	603	903	0
451	3	0	0	0	0	0	0	200	300	0	0	0	0	0	0	0	200	903	0	0	0	0	0	0	0	603	903	0
451	4	0	0	0	0	0	0	200	300	0	0	0	0	0	0	0	200	903	0	0	0	0	0	0	0	603	903	0
451	5	0	0	0	0	0	0	200	300	0	0	0	0	0	0	0	200	903	0	0	0	0	0	0	0	603	903	0
451	6	0	0	0	0	0	0	200	300	0	0	0	0	0	0	0	200	903	0	0	0	0	0	0	0	603	903	0
451	7	0	0	0	0	0	0	200	300	0	0	0	0	0	0	0	200	903	0	0	0	0	0	0	0	603	903	0
451	8	0	0	0	0	0	0	200	300	0	0	0	0	0	0	0	200	903	0	0	0	0	0	0	0	603	903	0
451	9	0	0	0	0	0	0	200	300	0	0	0	0	0	0	0	200	903	0	0	0	0	0	0	0	603	903	0
452	0	0	0	0	0	0	0	200	300	0	0	0	0	0	0	0	200	903	0	0	0	0	0	0	0	603	903	0
452	1	0	0	0	0	0	0	200	300	0	0	0	0	0	0	0	200	903	0	0	0	0	0	0	0	603	903	0
452	2	0	0	0	0	0	0	200	300	0	0	0	0	0	0	0	200	903	0	0	0	0	0	0	0	603	903	0
452	3	0	0	0	0	0	0	200	300	0	0	0	0	0	0	0	200	903	0	0	0	0	0	0	0	603	903	0
452	4	0	0	0	0	0	0	200	300	0	0	0	0	0	0	0	200	903	0	0	0	0	0	0	0	603	903	0
452	5	0	0	0	0	0	0	200	300	0	0	0	0	0	0	0	200	903	0	0	0	0	0	0	0	603	903	0
452	6	0	0	0	0	0	0	200	300	0	0	0	0	0	0	0	200	903	0	0	0	0	0	0	0	603	903	0
452	7	0	0	0	0	0	0	200	300	0	0	0	0	0	0	0	200	903	0	0	0	0	0	0	0	603	903	0
452	8	0	0	0	0	0	0	200	300	0	0	0	0	0	0	0	200	903	0	0	0	0	0	0	0	603	903	0
452	9	0	0	0	0	0	0	200	300	0	0	0	0	0	0	0	200	903	0	0	0	0	0	0	0	603	903	0
453	0	0	0	0	0	0	0	200	300	0	0	0	0	0	0	0	200	903	0	0	0	0	0	0	0	603	903	0
453	1	0	0	0	0	0	0	200	300	0	0	0	0	0	0	0	200	903	0	0	0	0	0	0	0	603	903	0
453	2	0	0	0	0	0	0	200	300	0	0	0	0	0	0	0	200	903	0	0	0	0	0	0	0	603	903	0
453	3	0	0	0	0	0	0	200	300	0	0	0	0	0	0	0	200	903	0	0	0	0	0	0	0	603	903	0
453	4	0	0	0	0	0	0	200	300	0	0	0	0	0	0	0	200	903	0	0	0	0	0	0	0	603	903	0
453	5	0	0	0	0	0	0	200	300	0	0	0	0	0	0	0	200	903	0	0	0	0	0	0	0	603	903	0
453	6	0	0	0	0	0	0	200	300	0	0	0	0	0	0	0	200	903	0	0	0	0	0	0	0	603	903	0
453	7	0	0	0	0	0	0	200	300	0	0	0	0	0	0	0	200	903	0	0	0	0	0	0	0	603	903	0
453	8	0	0	0	0	0	0	200	300	0	0	0	0	0	0	0	200	903	0	0	0	0	0	0	0	603	903	0
453	9	0	0	0	0	0	0	200	300	0	0	0	0	0	0	0	200	903	0	0	0	0	0	0	0	603	903	0
454	0	0	0	0	0	0	0	200	300	0	0	0	0	0	0	0	200	903	0	0	0	0	0	0	0	603	903	0
454	1	0	0	0	0	0	0	200	300	0	0	0	0	0	0	0	200	903	0	0	0	0	0	0	0	603	903	0
454	2	0	0	0	0	0	0	200	300	0	0	0	0	0	0	0	200	903	0	0	0	0	0	0	0	603	903	0
454	3	0	0	0	0	0	0	200	300	0	0	0	0	0	0	0	200	903	0	0	0	0	0	0	0	603	903	0
454	4	0	0	0	0	0	0	200	300	0	0	0	0	0	0	0	200	903	0	0	0	0	0	0	0	603	903	0
454	5	0	0	0	0	0	0	200	300	0	0	0	0	0	0	0	200	903	0	0	0	0	0	0	0	603	903	0
454	6	0	0	0	0	0	0	200	300	0	0	0	0	0	0	0	200	903	0	0	0	0	0	0	0	603	903	0
454	7	0	0	0	0	0	0	200	300	0	0	0	0	0	0	0	200	903	0	0	0	0	0	0	0	603	903	0
454	8	0	0	0	0	0	0	200	300	0	0	0	0	0	0	0	200	903	0	0	0	0	0	0	0	603	903	0
454	9	0	0	0	0	0	0	200	300	0	0	0	0	0	0	0	200	903	0	0	0	0	0	0	0	603	903	0
455	0	0	0	0	0	0	0	200	300	0	0	0	0	0	0	0	200	903	0	0	0	0	0	0	0	603	903	0
455	1	0	0	0	0	0	0	200	300	0	0	0	0	0	0	0	200	903	0	0	0	0	0	0	0	603	903	0
455	2	0	0	0	0	0	0	200	300	0	0	0	0	0	0	0	200	903	0	0	0	0	0	0	0	603	903	0
455	3	0	0	0	0	0	0	200	300	0	0	0	0	0	0	0	200	903	0	0	0	0	0	0	0	603	903	0
455	4	0	0	0	0	0	0	200	300	0	0	0	0	0	0	0	200	903	0	0	0	0	0	0	0	603	903	0
455	5	0	0	0	0	0	0	200	300	0	0	0	0	0	0	0	200	903	0	0	0	0	0	0	0	603	903	0
455	6	0	0	0	0	0	0	200	300	0	0	0	0	0	0	0	200	903	0	0	0	0	0	0	0	603	903	0
455	7	0	0	0	0	0	0	200	300	0	0	0	0	0	0	0	200	903	0	0	0	0	0	0	0	603	903	0
455	8	0	0	0	0	0	0	200	300	0	0	0	0	0	0	0	200	903	0	0	0	0	0	0	0	603	903	0
455	9	0	0	0	0	0	0	200	300	0	0	0	0	0	0	0	200	903	0	0	0	0	0	0	0	603	903	0
456	0	0	0	0	0	0	0	200	300	0	0	0	0	0	0	0	200	903	0	0	0	0	0	0	0	603	903	0
456	1	0	0	0	0	0	0	200	300	0	0	0	0	0	0	0	200	903	0	0	0	0	0	0	0	603	903	0
456	2	0	0	0	0	0	0	200	300	0	0	0	0	0	0	0	200	903	0	0	0	0	0	0	0	603	903	0
456	3	0	0	0	0	0	0	200	300	0	0	0	0	0	0	0	200	903	0	0	0	0	0	0	0	603	903	0
456	4	0	0	0	0	0	0	200	300	0	0	0	0	0	0	0	200	903	0	0	0	0	0	0	0	603	903	0
456	5	0	0	0	0	0	0	200	300	0	0	0	0	0	0	0	200	903	0	0	0	0	0	0	0	603	903	0
456	6	0	0	0	0	0	0	200	300	0	0	0	0	0	0	0	200	903	0	0	0	0	0	0	0	603	903	0
456	7	0	0	0	0	0	0	200	300	0	0	0	0	0	0	0	200	903	0	0	0	0	0	0	0	603	903	0
456	8	0	0	0	0	0	0	200	300	0	0	0	0	0	0	0	200	903	0	0	0	0	0	0	0	603	903	0
456	9	0	0	0	0	0	0	200	300	0	0	0	0	0	0	0	200	903	0	0	0	0	0	0	0	603	903	0
457	0	0	0	0	0	0	0	200	300	0	0	0	0	0	0	0	200	903	0	0	0	0	0	0	0	603	903	0
457	1	0	0	0	0	0	0	200	300	0	0	0	0	0	0	0	200	903	0	0	0	0	0	0	0	603	903	0
457	2	0	0	0	0	0	0	200	300	0	0	0	0	0	0	0	200	903	0	0	0	0	0	0	0	603	903	0
457	3	0	0	0	0	0	0	200	300	0	0	0	0	0	0	0	200	903	0	0	0	0	0	0	0	603	903	0
457	4	0	0	0	0	0	0	200	300	0	0	0	0	0	0	0	200	903	0	0	0	0	0	0	0	603	903	0
457	5	0	0	0	0	0	0	200	300	0	0	0	0	0	0	0	200	903	0	0	0	0	0	0	0	603	903	0
457	6	0	0	0	0	0	0	200	300	0	0	0	0	0	0	0	200	903	0	0	0	0	0	0	0	603	903	0
457	7	0	0	0	0	0	0	200	300	0	0	0	0	0	0	0	200	903	0	0	0	0	0	0	0	603	903	0
457	8	0	0	0	0	0	0	200	300	0	0	0	0	0	0	0	200	903	0	0	0	0	0	0	0	603	903	0
457	9	0	0	0	0	0	0	200	300	0	0	0	0	0	0	0	200	903	0	0	0	0	0	0	0	603	903	0
458	0	0	0	0	0	0	0	200	300	0	0	0	0	0	0	0	200	903	0	0	0	0	0	0	0	603	903	0
458	1	0	0	0	0	0	0	200	300	0	0	0	0	0	0	0	200	903	0	0	0	0	0	0	0	603	903	0
458	2	0	0	0	0	0	0	200	300	0	0	0	0	0	0	0	200	903	0	0	0	0	0	0	0	603	903	0
458	3	0	0	0	0	0	0	200	300	0	0	0	0	0	0	0	200	903	0	0	0	0	0	0	0	603	903	0
458	4	0	0	0	0	0	0	200	300	0	0	0	0	0	0	0	200	903	0	0	0	0	0	0	0	603	903	0
458	5	0	0	0	0	0	0	200	300	0	0	0	0	0	0	0	200	903	0	0	0	0	0	0	0	603	903	0
458	6	0	0	0	0	0	0	200	300	0	0	0	0	0	0	0	200	903	0	0	0	0	0	0	0	603	903	0
458	7	0	0	0	0	0	0	200	300	0	0	0	0	0	0	0	200	903	0	0	0	0	0	0	0	603	903	0
458	8	0	0	0	0	0	0	200	300	0	0	0	0	0	0	0	200	903	0	0	0	0	0	0	0	603	903	0
458	9	0	0	0	0	0	0	200	300	0	0	0	0	0	0	0	200	903	0	0	0	0	0	0	0	603	903	0
459	0	0	0	0	0	0	0	200	300	0	0	0	0	0	0	0	200	903	0	0	0	0	0	0	0	603	903	0
459	1	0	0	0	0	0	0	200	300	0	0	0	0	0	0	0	200	903	0	0	0	0	0	0	0	603	903	0
459	2	0	0	0	0	0	0	200	300	0	0	0	0	0	0	0	200	903	0	0	0	0	0	0	0	603	903	0
459	3	0	0	0	0	0	0	200	300	0	0	0	0	0	0	0	200	903	0	0	0	0	0	0	0	603	903	0
459	4	0	0	0	0	0	0	200	300	0	0	0	0	0	0	0	200	903	0	0	0	0	0	0	0	603	903	0
459	5	0	0	0	0	0	0	200	300	0	0	0	0	0	0	0	200	903	0	0	0	0	0	0	0	603	903	0
459	6	0	0	0	0	0	0	200	300	0	0	0	0	0	0	0	200	903	0	0	0	0	0	0	0	603	903	0
459	7	0	0	0	0	0	0	200	300	0	0	0	0	0	0	0	200	903	0	0	0	0	0	0	0	603	903	0
459	8	0	0	0	0	0	0	200	300	0	0	0	0	0	0	0	200	903	0	0	0	0	0	0	0	603	903	0
459	9	0	0	0	0	0	0	200	300	0	0	0	0	0	0	0	200	903	0	0	0	0	0	0	0	603	903	0
460	0	0	0	0	0	0	0	200	300	0	0	0	0	0	0	0	200	903	0	0	0	0	0	0	0	603	903	0
460	1	0	0	0	0	0	0	200	300	0	0	0	0	0	0	0	200	903	0	0	0	0	0	0	0	603	903	0
460	2	0	0	0	0	0	0	200	300	0	0	0	0	0	0	0	200	903	0	0	0	0	0	0	0	603	903	0
460	3	0	0	0	0	0	0	200	300	0	0	0	0	0	0	0	200	903	0	0	0	0	0	0	0	603	903	0
460	4	0	0	0	0	0	0	200	300	0	0	0	0	0	0	0	200	903	0	0	0	0	0	0	0	603	903	0
460	5	0	0	0	0	0	0	200	300	0	0	0	0	0	0	0	200	903	0	0	0	0	0	0	0	603	903	0
460	6	0	0	0	0	0	0	200	300	0	0	0	0	0	0	0	200	903	0	0	0	0	0	0	0	603	903	0
460	7	0	0	0	0	0	0	200	300	0	0	0	0	0	0	0	200	903	0	0	0	0	0	0	0	603	903	0
460	8	0	0	0	0	0	0	200	300	0	0	0	0	0	0	0	200	903	0	0	0	0	0	0	0	603	903	0
460	9	0	0	0	0	0	0	200	300	0	0	0	0	0	0	0	200	903	0	0	0	0	0	0	0	603	903	0
461	0	0	0	0	0	0	0	200	300	0	0	0	0	0	0	0	200	903	0	0	0	0	0	0	0	603	903	0
461	1	0	0	0	0	0	0	200	300	0	0	0	0	0	0	0	200	903	0	0	0	0	0	0	0	603	903	0
461	2	0	0	0	0	0	0	200	300	0	0	0	0	0	0	0	200	903	0	0	0	0	0	0	0	603	903	0
461	3	0	0	0	0	0	0	200	300	0	0	0	0	0	0	0	200	903	0	0	0	0	0	0	0	603	903	0
461	4	0	0	0	0	0	0	200	300	0	0	0	0	0	0	0	200	903	0	0	0	0	0	0	0	603	903	0
461	5	0	0	0	0	0	0	200	300	0	0	0	0	0	0	0	200	903	0	0	0	0	0	0	0	603	903	0
461	6	0	0	0	0	0	0	200	300	0	0	0	0	0	0	0	200	903	0	0	0	0	0	0	0	603	903	0
461	7	0	0	0	0	0	0	200	300	0	0	0	0	0	0	0	200	903	0	0	0	0	0	0	0	603	903	0
461	8	0	0	0	0	0	0	200	300	0	0	0	0	0	0	0	200	903	0	0	0	0	0	0	0	603	903	0
461	9	0	0	0	0	0	0	200	300	0	0	0	0	0	0	0	200	903	0	0	0	0	0	0	0	603	903	0
462	0	0	0	0	0	0	0	200	300	0	0	0	0	0	0	0	200	903	0	0	0	0	0	0	0	603	903	0
462	1	0	0	0	0	0	0	200	300	0	0	0	0	0	0	0	200	903	0	0	0	0	0	0	0	603	903	0
462	2	0	0	0	0	0	0	200	300	0	0	0	0	0	0	0	200	903	0	0	0	0	0	0	0	603	903	0
462	3	0	0	0	0	0	0	200	300	0	0	0	0	0	0	0	200	903	0	0	0	0	0	0	0	603	903	0
462	4	0	0	0	0	0	0	200	300	0	0	0	0	0	0	0	200	903	0	0	0	0	0	0	0	603	903	0
462	5	0	0	0	0	0	0	200	300	0	0	0	0	0	0	0	200	903	0	0	0	0	0	0	0	603	903	0
462	6	0	0	0	0	0	0	200	300	0	0	0	0	0	0	0	200	903	0	0	0	0	0	0	0	603	903	0
462	7	0	0	0	0	0	0	200	300	0	0	0	0	0	0	0	200	903	0	0	0	0	0	0	0	603	903	0
462	8	0	0	0	0	0	0	200	300	0	0	0	0	0	0	0	200	903	0	0	0	0	0	0	0	603	903	0
462	9	0	0	0	0	0	0	200	300	0	0	0	0	0	0	0	200	903	0	0	0	0	0	0	0	603	903	0
463	0	0	0	0	0	0	0	200	300	0	0	0	0	0	0	0	200	903	0	0	0	0	0	0	0	603	903	0
463	1	0	0	0	0	0	0	200	300	0	0	0	0	0	0	0	200	903	0	0	0	0	0	0	0	603	903	0
463	2	0	0	0	0	0	0	200	300	0	0	0	0	0	0	0	200	903	0	0	0	0	0	0	0	603	903	0
463	3	0	0	0	0	0	0	200	300	0	0	0	0	0	0	0	200	903	0	0	0	0	0	0	0	603	903	0
463	4	0	0	0	0	0	0	200	300	0	0	0	0	0	0	0	200	903	0	0	0	0	0	0	0	603	903	0
463	5	0	0	0	0	0	0	200	300	0	0	0	0	0	0	0	200	903	0	0	0	0	0	0	0	603	903	0
463	6	0	0	0	0	0	0	200	300	0	0	0	0	0	0	0	200	903	0	0	0	0	0	0	0	603	903	0
463	7	0	0	0	0	0	0	200	300	0	0	0	0	0	0	0	200	903	0	0	0	0	0	0	0	603	903	0
463	8	0	0	0	0	0	0	200	300	0	0	0	0	0	0	0	200	903	0	0	0	0	0	0	0	603	903	0
463	9	0	0	0	0	0	0	200	300	0	0	0	0	0	0	0	200	903	0	0	0	0	0	0	0	603	903	0
464	0	0	0	0	0	0	0	200	300	0	0	0	0	0	0	0	200	903	0	0	0	0	0	0	0	603	903	0
464	1	0	0	0	0	0	0	200	300	0	0	0	0	0	0	0	200	903	0	0	0	0	0	0	0	603	903	0
464	2	0	0	0	0	0	0	200	300	0	0	0	0	0	0	0	200	903	0	0	0	0	0	0	0	603	903	0
464	3	0	0	0	0	0	0	200	300	0	0	0	0	0	0	0	200	903	0	0	0	0	0	0	0	603	903	0
464	4	0	0	0	0	0	0	200	300	0	0	0	0	0	0	0	200	903	0	0	0	0	0	0	0	603	903	0
464	5	0	0	0	0	0	0	200	300	0	0	0	0	0	0	0	200	903	0	0	0	0	0	0	0	603	903	0
464	6	0	0	0	0	0	0	200	300	0	0	0	0	0	0	0	200	903	0	0	0	0	0	0	0	603	903	0
464	7	0	0	0	0	0	0	200	300	0	0	0	0	0	0	0	200	903	0	0	0	0	0	0	0	603	903	0
464	8	0	0	0	0	0	0	200	300	0	0	0	0	0	0	0	200	903	0	0	0	0	0	0	0	603	903	0
464	9	0	0	0	0	0	0	200	300	0	0	0	0	0	0	0	200	903	0	0	0	0	0	0	0	603	903	0
465	0	0	0	0	0	0	0	200	300	0	0	0	0	0	0	0	200	903	0	0	0	0	0	0	0	603	903	0
465	1	0	0	0	0	0	0	200	300	0	0	0	0	0	0	0	200	903	0	0	0	0	0	0	0	603	903	0
465	2	0	0	0	0	0	0	200	300	0	0	0	0	0	0	0	200	903	0	0	0	0	0	0	0	603	903	0
465	3	0	0	0	0	0	0	200	300	0	0	0	0	0	0	0	200	903	0	0	0	0	0	0	0	603	903	0
465	4	0	0	0	0	0	0	200	300	0	0	0	0	0	0	0	200	903	0	0	0	0	0	0	0	603	903	0
465	5	0	0	0	0	0	0	200	300	0	0	0	0	0	0	0	200	903	0	0	0	0	0	0	0	603	903	0
465	6	0	0	0	0	0	0	200	300	0	0	0	0	0	0	0	200	903	0	0	0	0	0	0	0	603	903	0
465	7	0	0	0	0	0	0	200	300	0	0	0	0	0	0	0	200	903	0	0	0	0	0	0	0	603	903	0
465	8	0	0	0	0	0	0	200	300	0	0	0	0	0	0	0	200	903	0	0	0	0	0	0	0	603	903	0
465	9	0	0	0	0	0	0	200	300	0	0	0	0	0	0	0	200	903	0	0	0	0	0	0	0	603	903	0
466	0	0	0	0	0	0	0	200	300	0	0	0	0	0	0	0	200	903	0	0	0	0	0	0	0	603	903	0
466	1	0	0	0	0	0	0	200	300	0	0	0	0	0	0	0	200	903	0	0	0	0	0	0	0	603	903	0
466	2	0	0	0	0	0	0	200	300	0	0	0	0	0	0	0	200	903	0	0	0	0	0	0	0	603	903	0
466	3	0	0	0	0	0	0	200	300	0	0	0	0	0	0	0	200	903	0	0	0	0	0	0	0	603	903	0
466	4	0	0	0	0	0	0	200	300	0	0	0	0	0	0	0	200	903	0	0	0	0	0	0	0	603	903	0
466	5	0	0	0	0	0	0	200	300	0	0	0	0	0	0	0	200	903	0	0	0	0	0	0	0	603	903	0
466	6	0	0	0	0	0	0	200	300	0	0	0	0	0	0	0	200	903	0	0	0	0	0	0	0	603	903	0
466	7	0	0	0	0	0	0	200	300	0	0	0	0	0	0	0	200	903	0	0	0	0	0	0	0	603	903	0
466	8	0	0	0	0	0	0	200	300	0	0	0	0	0	0	0	200	903	0	0	0	0	0	0	0	603	903	0
466	9	0	0	0	0	0	0	200	300	0	0	0	0	0	0	0	200	903	0	0	0	0	0	0	0	603	903	0
467	0	0	0	0	0	0	0	200	300	0	0	0	0	0	0	0	200	903	0	0	0	0	0	0	0	603	903	0
467	1	0	0	0	0	0	0	200	300	0	0	0	0	0	0	0	200	903	0	0	0	0	0	0	0	603	903	0
467	2	0	0	0	0	0	0	200	300	0	0	0	0	0	0	0	200	903	0	0	0	0	0	0	0	603	903	0
467	3	0	0	0	0	0	0	200	300	0	0	0	0	0	0	0	200	903	0	0	0	0	0	0	0	603	903	0
467	4	0	0	0	0	0	0	200	300	0	0	0	0	0	0	0	200	903	0	0	0	0	0	0	0	603	903	0
467	5	0	0	0	0	0	0	200	300	0	0	0	0	0	0	0	200	903	0	0	0	0	0	0	0	603	903	0
467	6	0	0	0	0	0	0	200	300	0	0	0	0	0	0	0	200	903	0	0	0	0	0	0	0	603	903	0
467	7	0	0	0	0	0	0	200	300	0	0	0	0	0	0	0	200	903	0	0	0	0	0	0	0	603	903	0
467	8	0	0	0	0	0	0	200	300	0	0	0	0	0	0	0	200	903	0	0	0	0	0	0	0	603	903	0
467	9	0	0	0	0	0	0	200	300	0	0	0	0	0	0	0	200	903	0	0	0	0	0	0	0	603	903	0
468	0	0	0	0	0	0	0	200	300	0	0	0	0	0	0	0	200	903	0	0	0	0	0	0	0	603	903	0
468	1	0	0	0	0	0	0	200	300	0	0	0	0	0	0	0	200	903	0	0	0	0	0	0	0	603	903	0
468	2	0	0	0	0	0	0	200	300	0	0	0	0	0	0	0	200	903	0	0	0	0	0	0	0	603	903	0
468	3	0	0	0	0	0	0	200	300	0	0	0	0	0	0	0	200	903	0	0	0	0	0	0	0	603	903	0
468	4	0	0	0	0	0	0	200	300	0	0	0	0	0	0	0	200	903	0	0	0	0	0	0	0	603	903	0
468	5	0	0	0	0	0	0	200	300	0	0	0	0	0	0	0	200	903	0	0	0	0	0	0	0	603	903	0
468	6	0	0	0	0	0	0	200	300	0	0	0	0	0	0	0	200	903	0	0	0	0	0	0	0	603	903	0
468	7	0	0	0	0	0	0	200	300	0	0	0	0	0	0	0	200	903	0	0	0	0	0	0	0	603	903	0
468	8	0	0	0	0	0	0	200	300	0	0	0	0	0	0	0	200	903	0	0	0	0	0	0	0	603	903	0
468	9	0	0	0	0	0	0	200	300	0	0	0	0	0	0	0	200	903	0	0	0	0	0	0	0	603	903	0
469	0	0	0	0	0	0	0	200	300	0	0	0	0	0	0	0	200	903	0	0	0	0	0	0	0	603	903	0
469	1	0	0	0	0	0	0	200	300	0	0	0	0	0	0	0	200	903	0	0	0	0	0	0	0	603	903	0
469	2	0	0	0	0	0	0	200	300	0	0	0	0	0	0	0	200	903	0	0	0	0	0	0	0	603	903	0
469	3	0	0	0	0	0	0	200	300	0	0	0	0	0	0	0	200	903	0	0	0	0	0	0	0	603	903	0
469	4	0	0	0	0	0	0	200	300	0	0	0	0	0	0	0	200	903	0	0	0	0	0	0	0	603	903	0
469	5	0	0	0	0	0	0	200	300	0	0	0	0	0	0	0	200	903	0	0	0	0	0	0	0	603	903	0
469	6	0	0	0	0	0	0	200	300	0	0	0	0	0	0	0	200	903	0	0	0	0	0	0	0	603	903	0
469	7	0	0	0	0	0	0	200	300	0	0	0	0	0	0	0	200	903	0	0	0	0	0	0	0	603	903	0
469	8	0	0	0	0	0	0	200	300	0	0	0	0	0	0	0	200	903	0	0	0	0	0	0	0	603	903	0
469	9	0	0	0	0	0	0	200	300	0	0	0	0	0	0	0	200	903	0	0	0	0	0	0	0	603	903	0
470	0	0	0	0	0	0	0	200	300	0	0	0	0	0	0	0	200	903	0	0	0	0	0	0	0	603	903	0
470	1	0	0	0	0	0	0	200	300	0	0	0	0	0	0	0	200	903	0	0	0	0	0	0	0	603	903	0
470	2	0	0	0	0	0	0	200	300	0	0	0	0	0	0	0	200	903	0	0	0	0	0	0	0	603	903	0
470	3	0	0	0	0	0	0	200	300	0	0	0	0	0	0	0	200	903	0	0	0	0	0	0	0	603	903	0
470	4	0	0	0	0	0	0	200	300	0	0	0	0	0	0	0	200	903	0	0	0	0	0	0	0	603	903	0
470	5	0	0	0	0	0	0	200	300	0	0	0	0	0	0	0	200	903	0	0	0	0	0	0	0	603	903	0
470	6	0	0	0	0	0	0	200	300	0	0	0	0	0	0	0	200	903	0	0	0	0	0	0	0	603	903	0
470	7	0	0	0	0	0	0	200	300	0	0	0	0	0	0	0	200	903	0	0	0	0	0	0	0	603	903	0
470	8	0	0	0	0	0	0	200	300	0	0	0	0	0	0	0	200	903	0	0	0	0	0	0	0	603	903	0
470	9	0	0	0	0	0	0	200	300	0	0	0	0	0	0	0	200	903	0	0	0	0	0	0	0	603	903	0
471	0	0	0	0	0	0	0	200	300	0	0	0	0	0	0	0	200	903	0	0	0	0	0	0	0	603	903	0
471	1	0	0	0	0	0	0	200	300	0	0	0	0	0	0	0	200	903	0	0	0	0	0	0	0	603	903	0
471	2	0	0	0	0	0	0	200	300	0	0	0	0	0	0	0	200	903	0	0	0	0	0	0	0	603	903	0
471	3	0	0	0	0	0	0	200	300	0	0	0	0	0	0	0	200	903	0	0	0	0	0	0	0	603	903	0
471	4	0	0	0	0	0	0	200	300	0	0	0	0	0	0	0	200	903	0	0	0	0	0	0	0	603	903	0
471	5	0	0	0	0	0	0	200	300	0	0	0	0	0	0	0	200	903	0	0	0	0	0	0	0	603	903	0
471	6	0	0	0	0	0	0	200	300	0	0	0	0	0	0	0	200	903	0	0	0	0	0	0	0	603	903	0
471	7	0	0	0	0	0	0	200	300	0	0	0	0	0	0	0	200	903	0	0	0	0	0	0	0	603	903	0
471	8	0	0	0	0	0	0	200	300	0	0	0	0	0	0	0	200	903	0	0	0	0	0	0	0	603	903	0
471	9	0	0	0	0	0	0	200	300	0	0	0	0	0	0	0	200	903	0	0	0	0	0	0	0	603	903	0
472	0	0	0	0	0	0	0	200	300	0	0	0	0	0	0	0	200	903	0	0	0	0	0	0	0	603	903	0
472	1	0	0	0	0	0	0	200	300	0	0	0	0	0	0	0	200	903	0	0	0	0	0	0	0	603	903	0
472	2	0	0	0	0	0	0	200	300	0	0	0	0	0	0	0	200	903	0	0	0	0	0	0	0	603	903	0
472	3	0	0	0	0	0	0	200	300	0	0	0	0	0	0	0	200	903	0	0	0	0	0	0	0	603	903	0
472	4	0	0	0	0	0	0	200	300	0	0	0	0	0	0	0	200	903	0	0	0	0	0	0	0	603	903	0
472	5	0	0	0	0	0	0	200	300	0	0	0	0	0	0	0	200	903	0	0	0	0	0	0	0	603	903	0
472	6	0	0	0	0	0	0	200	300	0	0	0	0	0	0	0	200	903	0	0	0	0	0	0	0	603	903	0
472	7	0	0	0	0	0	0	200	300	0	0	0	0	0	0	0	200	903	0	0	0	0	0	0	0	603	903	0
472	8	0	0	0	0	0	0	200	300	0	0	0	0	0	0	0	200	903	0	0	0	0	0	0	0	603	903	0
472	9	0	0	0	0	0	0	200	300	0	0	0	0	0	0	0	200	903	0	0	0	0	0	0	0	603	903	0
473	0	0	0	0	0	0	0	200	300	0	0	0	0	0	0	0	200	903	0	0	0	0	0	0	0	603	903	0
473	1	0	0	0	0	0	0	200	300	0	0	0	0	0	0	0	200	903	0	0	0	0	0	0	0	603	903	0
473	2	0	0	0	0	0	0	200	300	0	0	0	0	0	0	0	200	903	0	0	0	0	0	0	0	603	903	0
473	3	0	0	0	0	0	0	200	300	0	0	0	0	0	0	0	200	903	0	0	0	0	0	0	0	603	903	0
473	4	0	0	0	0	0	0	200	300	0	0	0	0	0	0	0	200	903	0	0	0	0	0	0	0	603	903	0
473	5	0	0	0	0	0	0	200	300	0	0	0	0	0	0	0	200	903	0	0	0	0	0	0	0	603	903	0
473	6	0	0	0	0	0	0	200	300	0	0	0	0	0	0	0	200	903	0	0	0	0	0	0	0	603	903	0
473	7	0	0	0	0	0	0	200	300	0	0	0	0	0	0	0	200	903	0	0	0	0	0	0	0	603	903	0
473	8	0	0	0	0	0	0	200	300	0	0	0	0	0	0	0	200	903	0	0	0	0	0	0	0	603	903	0
473	9	0	0	0	0	0	0	200	300	0	0	0	0	0	0	0	200	903	0	0	0	0	0	0	0	603	903	0
474	0	0	0	0	0	0	0	200	300	0	0	0	0	0	0	0	200	903	0	0	0	0	0	0	0	603	903	0
474	1	0	0	0	0	0	0	200	300	0	0	0	0	0	0	0	200	903	0	0	0	0	0	0	0	603	903	0
474	2	0	0	0	0	0	0	200	300	0	0	0	0	0	0	0	200	903	0	0	0	0	0	0	0	603	903	0
474	3	0	0	0	0	0	0	200	300	0	0	0	0	0	0	0	200	903	0	0	0	0	0	0	0	603	903	0
474	4	0	0	0	0	0	0	200	300	0	0	0	0	0	0	0	200	903	0	0	0	0	0	0	0	603	903	0
474	5	0	0	0	0	0	0	200	300	0	0	0	0	0	0	0	200	903	0	0	0	0	0	0	0	603	903	0
474	6	0	0	0	0	0	0	200	300	0	0	0	0	0	0	0	200	903	0	0	0	0	0	0	0	603	903	0
474	7	0	0	0	0	0	0	200	300	0	0	0	0	0	0	0	200	903	0	0	0	0	0	0	0	603	903	0
474	8	0	0	0	0	0	0	200	300	0	0	0	0	0	0	0	200	903	0	0	0	0	0	0	0	603	903	0
474	9	0	0	0	0	0	0	200	300	0	0	0	0	0	0	0	200	903	0	0	0	0	0	0	0	603	903	0
475	0	0	0	0	0	0	0	200	300	0	0	0	0	0	0	0	200	903	0	0	0	0	0	0	0	603	903	0
475	1	0	0	0	0	0	0	200	300	0	0	0	0	0	0	0	200	903	0	0	0	0	0	0	0	603	903	0
475	2	0	0	0	0	0	0	200	300	0	0	0	0	0	0	0	200	903	0	0	0	0	0	0	0	603	903	0
475	3	0	0	0	0	0	0	200	300	0	0	0	0	0	0	0	200	903	0	0	0	0	0	0	0	603	903	0
475	4	0	0	0	0	0	0	200	300	0	0	0	0	0	0	0	200	903	0	0	0	0	0	0	0	603	903	0
475	5	0	0	0	0	0	0	200	300	0	0	0	0	0	0	0	200	903	0	0	0	0	0	0	0	603	903	0
475	6	0	0	0	0	0	0	200	300	0	0	0	0	0	0	0	200	903	0	0	0	0	0	0	0	603	903	0
475	7	0	0	0	0	0	0	200	300	0	0	0	0	0	0	0	200	903	0	0	0	0	0	0	0	603	903	0
475	8	0	0	0	0	0	0	200	300	0	0	0	0	0	0	0	200	903	0	0	0	0	0	0	0	603	903	0
475	9	0	0	0	0	0	0	200	300	0	0	0	0	0	0	0	200	903	0	0	0	0	0	0	0	603	903	0
476	0	0	0	0	0	0	0	200	300	0	0	0	0	0	0	0	200	903	0	0	0	0	0	0	0	603	903	0
476	1	0	0	0	0	0	0	200	300	0	0	0	0	0	0	0	200	903	0	0	0	0	0	0	0	603	903	0
476	2	0	0	0	0	0	0	200	300	0	0	0	0	0	0	0	200	903	0	0	0	0	0	0	0	603	903	0
476	3	0	0	0	0	0	0	200	300	0	0	0	0	0	0	0	200	903	0	0	0	0	0	0	0	603	903	0
476	4	0	0	0	0	0	0	200	300	0	0	0	0	0	0	0	200	903	0	0	0	0	0	0	0	603	903	0
476	5	0	0	0	0	0	0	200	300	0	0	0	0	0	0	0	200	903	0	0	0	0	0	0	0	603	903	0
476	6	0	0	0	0	0	0	200	300	0	0	0	0	0	0	0	200	903	0	0	0	0	0	0	0	603	903	0
476	7	0	0	0	0	0	0	200	300	0	0	0	0	0	0	0	200	903	0	0	0	0	0	0	0	603	903	0
476	8	0	0	0	0	0	0	200	300	0	0	0	0	0	0	0	200	903	0	0	0	0	0	0	0	603	903	0
476	9	0	0	0	0	0	0	200	300	0	0	0	0	0	0	0	200	903	0	0	0	0	0	0	0	603	903	0
477	0	0	0	0	0	0	0	200	300	0	0	0	0	0	0	0	200	903	0	0	0	0	0	0	0	603	903	0
477	1	0	0	0	0	0	0	200	300	0	0	0	0	0	0	0	200	903	0	0	0	0	0	0	0	603	903	0
477	2	0	0	0	0	0	0	200	300	0	0	0	0	0	0	0	200	903	0	0	0	0	0	0	0	603	903	0
477	3	0	0	0	0	0	0	200	300	0	0	0	0	0	0	0	200	903	0	0	0	0	0	0	0	603	903	0
477	4	0	0	0	0	0	0	200	300	0	0	0	0	0	0	0	200	903	0	0	0	0	0	0	0	603	903	0
477	5	0	0	0	0	0	0	200	300	0	0	0	0	0	0	0	200	903	0	0	0	0	0	0	0	603	903	0
477	6	0	0	0	0	0	0	200	300	0	0	0	0	0	0	0	200	903	0	0	0	0	0	0	0	603	903	0
477	7	0	0	0	0	0	0	200	300	0	0	0	0	0	0	0	200	903	0	0	0	0	0	0	0	603	903	0
477	8	0	0	0	0	0	0	200	300	0	0	0	0	0	0	0	200	903	0	0	0	0	0	0	0	603	903	0
477	9	0	0	0	0	0	0	200	300	0	0	0	0	0	0	0	200	903	0	0	0	0	0	0	0	603	903	0
478	0	0	0	0	0	0	0	200	300	0	0	0	0	0	0	0	200	903	0	0	0	0	0	0	0	603	903	0
478	1	0	0	0	0	0	0	200	300	0	0	0	0	0	0	0	200	903	0	0	0	0	0	0	0	603	903	0
478	2	0	0	0	0	0	0	200	300	0	0	0	0	0	0	0	200	903	0	0	0	0	0	0	0	603	903	0
478	3	0	0	0	0	0	0	200	300	0	0	0	0	0	0	0	200	903	0	0	0	0	0	0	0	603	903	0
478	4	0	0	0	0	0	0	200	300	0	0	0	0	0	0	0	200	903	0	0	0	0	0	0	0	603	903	0
478	5	0	0	0	0	0	0	200	300	0	0	0	0	0	0	0	200	903	0	0	0	0	0	0	0	603	903	0
478	6	0	0	0	0	0	0	200	300	0	0	0	0	0	0	0	200	903	0	0	0	0	0	0	0	603	903	0
478	7	0	0	0	0	0	0	200	300	0	0	0	0	0	0	0	200	903	0	0	0	0	0	0	0	603	903	0
478	8	0	0	0	0	0	0	200	300	0	0	0	0	0	0	0	200	903	0	0	0	0	0	0	0	603	903	0
478	9	0	0	0	0	0	0	200	300	0	0	0	0	0	0	0	200	903	0	0	0	0	0	0	0	603	903	0
479	0	0	0	0	0	0	0	200	300	0	0	0	0	0	0	0	200	903	0	0	0	0	0	0	0	603	903	0
479	1	0	0	0	0	0	0	200	300	0	0	0	0	0	0	0	200	903	0	0	0	0	0	0	0	603	903	0
479	2	0	0	0	0	0	0	200	300	0	0	0	0	0	0	0	200	903	0	0	0	0	0	0	0	603	903	0
479	3	0	0	0	0	0	0	200	300	0	0	0	0	0	0	0	200	903	0	0	0	0	0	0	0	603	903	0
479	4	0	0	0	0	0	0	200	300	0	0	0	0	0	0	0	200	903	0	0	0	0	0	0	0	603	903	0
479	5	0	0	0	0	0	0	200	300	0	0	0	0	0	0	0	200	903	0	0	0	0	0	0	0	603	903	0
479	6	0	0	0	0	0	0	200	300	0	0	0	0	0	0	0	200	903	0	0	0	0	0	0	0	603	903	0
479	7	0	0	0	0	0	0	200	300	0	0	0	0	0	0	0	200	903	0	0	0	0	0	0	0	603	903	0
479	8	0	0	0	0	0	0	200	300	0	0	0	0	0	0	0	200	903	0	0	0	0	0	0	0	603	903	0
479	9	0	0	0	0	0	0	200	300	0	0	0	0	0	0	0	200	903	0	0	0	0	0	0	0	603	903	0
480	0	0	0	0	0	0	0	200	300	0	0	0	0	0	0	0	200	903	0	0	0	0	0	0	0	603	903	0
480	1	0	0	0	0	0	0	200	300	0	0	0	0	0	0	0	200	903	0	0	0	0	0	0	0	603	903	0
480	2	0	0	0	0	0	0	200	300	0	0	0	0	0	0	0	200	903	0	0	0	0	0	0	0	603	903	0
480	3	0	0	0	0	0	0	200	300	0	0	0	0	0	0	0	200	903	0	0	0	0	0	0	0	603	903	0
480	4	0	0	0	0	0	0	200	300	0	0	0	0	0	0	0	200	903	0	0	0	0	0	0	0	603	903	0
480	5	0	0	0	0	0	0	200	300	0	0	0	0	0	0	0	200	903	0	0	0	0	0	0	0	603	903	0
480	6	0	0	0	0	0	0	200	300	0	0	0	0	0	0	0	200	903	0	0	0	0	0	0	0	603	903	0
480	7	0	0	0	0	0	0	200	300	0	0	0	0	0	0	0	200	903	0	0	0	0	0	0	0	603	903	0
480	8	0	0	0	0	0	0	200	300	0	0	0	0	0	0	0	200	903	0	0	0	0	0	0	0	603	903	0
480	9	0	0	0	0	0	0	200	300	0	0	0	0	0	0	0	200	903	0	0	0	0	0	0	0	603	903	0
481	0	0	0	0	0	0	0	200	300	0	0	0	0	0	0	0	200	903	0	0	0	0	0	0	0	603	903	0
481	1	0	0	0	0	0	0	200	300	0	0	0	0	0	0	0	200	903	0	0	0	0	0	0	0	603	903	0
481	2	0	0	0	0	0	0	200	300	0	0	0	0	0	0	0	200	903	0	0	0	0	0	0	0	603	903	0
481	3	0	0	0	0	0	0	200	300	0	0	0	0	0	0	0	200	903	0	0	0	0	0	0	0	603	903	0
481	4	0	0	0	0	0	0	200	300	0	0	0	0	0	0	0	200	903	0	0	0	0	0	0	0	603	903	0
481	5	0	0	0	0	0	0	200	300	0	0	0	0	0	0	0	200	903	0	0	0	0	0	0	0	603	903	0
481	6	0	0	0	0	0	0	200	300	0	0	0	0	0	0	0	200	903	0	0	0	0	0	0	0	603	903	0
481	7	0	0	0	0	0	0	200	300	0	0	0	0	0	0	0	200	903	0	0	0	0	0	0	0	603	903	0
481	8	0	0	0	0	0	0	200	300	0	0	0	0	0	0	0	200	903	0	0	0	0	0	0	0	603	903	0
481	9	0	0	0	0	0	0	200	300	0	0	0	0	0	0	0	200	903	0	0	0	0	0	0	0	603	903	0
482	0	0	0	0	0	0	0	200	300	0	0	0	0	0	0	0	200	903	0	0	0	0	0	0	0	603	903	0
482	1	0	0	0	0	0	0	200	300	0	0	0	0	0	0	0	200	903	0	0	0	0	0	0	0	603	903	0
482	2	0	0	0	0	0	0	200	300	0	0	0	0	0	0	0	200	903	0	0	0	0	0	0	0	603	903	0
482	3	0	0	0	0	0	0	200	300	0	0	0	0	0	0	0	200	903	0	0	0	0	0	0	0	603	903	0
482	4	0	0	0	0	0	0	200	300	0	0	0	0	0	0	0	200	903	0	0	0	0	0	0	0	603	903	0
482	5	0	0	0	0	0	0	200	300	0	0	0	0	0	0	0	200	903	0	0	0	0	0	0	0	603	903	0
482	6	0	0	0	0	0	0	200	300	0	0	0	0	0	0	0	200	903	0	0	0	0	0	0	0	603	903	0
482	7	0	0	0	0	0	0	200	300	0	0	0	0	0	0	0	200	903	0	0	0	0	0	0	0	603	903	0
482	8	0	0	0	0	0	0	200	300	0	0	0	0	0	0	0	200	903	0	0	0	0	0	0	0	603	903	0
482	9	0	0	0	0	0	0	200	300	0	0	0	0	0	0	0	200	903	0	0	0	0	0	0	0	603	903	0
483	0	0	0	0	0	0	0	200	300	0	0	0	0	0	0	0	200	903	0	0	0	0	0	0	0	603	903	0
483	1	0	0	0	0	0	0	200	300	0	0	0	0	0	0	0	200	903	0	0	0	0	0	0	0	603	903	0
483	2	0	0	0	0	0	0	200	300	0	0	0	0	0	0	0	200	903	0	0	0	0	0	0	0	603	903	0
483	3	0	0	0	0	0	0	200	300	0	0	0	0	0	0	0	200	903	0	0	0	0	0	0	0	603	903	0
483	4	0	0	0	0	0	0	200	300	0	0	0	0	0	0	0	200	903	0	0	0	0	0	0	0	603	903	0
483	5	0	0	0	0	0	0	200	300	0	0	0	0	0	0	0	200	903	0	0	0	0	0	0	0	603	903	0
483	6	0	0	0	0	0	0	200	300	0	0	0	0	0	0	0	200	903	0	0	0	0	0	0	0	603	903	0
483	7	0	0	0	0	0	0	200	300	0	0	0	0	0	0	0	200	903	0	0	0	0	0	0	0	603	903	0
483	8	0	0	0	0	0	0	200	300	0	0	0	0	0	0	0	200	903	0	0	0	0	0	0	0	603	903	0
483	9	0	0	0	0	0	0	200	300	0	0	0	0	0	0	0	200	903	0	0	0	0	0	0	0	603	903	0
484	0	0	0	0	0	0	0	200	300	0	0	0	0	0	0	0	200	903	0	0	0	0	0	0	0	603	903	0
484	1	0	0	0	0	0	0	200	300	0	0	0	0	0	0	0	200	903	0	0	0	0	0	0	0	603	903	0
484	2	0	0	0	0	0	0	200	300	0	0	0	0	0	0	0	200	903	0	0	0	0	0	0	0	603	903	0
484	3	0	0	0	0	0	0	200	300	0	0	0	0	0	0	0	200	903	0	0	0	0	0	0	0	603	903	0
484	4	0	0	0	0	0	0	200	300	0	0	0	0	0	0	0	200	903	0	0	0	0	0	0	0	603	903	0
484	5	0	0	0	0	0	0	200	300	0	0	0	0	0	0	0	200	903	0	0	0	0	0	0	0	603	903	0
484	6	0	0	0	0	0	0	200	300	0	0	0	0	0	0	0	200	903	0	0	0	0	0	0	0	603	903	0
484	7	0	0	0	0	0	0	200	300	0	0	0	0	0	0	0	200	903	0	0	0	0	0	0	0	603	903	0
484	8	0	0	0	0	0	0	200	300	0	0	0	0	0	0	0	200	903	0	0	0	0	0	0	0	603	903	0
484	9	0	0	0	0	0	0	200	300	0	0	0	0	0	0	0	200	903	0	0	0	0	0	0	0	603	903	0
485	0	0	0	0	0	0	0	200	300	0	0	0	0	0	0	0	200	903	0	0	0	0	0	0	0	603	903	0
485	1	0	0	0	0	0	0	200	300	0	0	0	0	0	0	0	200	903	0	0	0	0	0	0	0	603	903	0
485	2	0	0	0	0	0	0	200	300	0	0	0	0	0	0	0	200	903	0	0	0	0	0	0	0	603	903	0
485	3	0	0	0	0	0	0	200	300	0	0	0	0	0	0	0	200	903	0	0	0	0	0	0	0	603	903	0
485	4	0	0	0	0	0	0	200	300	0	0	0	0	0	0	0	200	903	0	0	0	0	0	0	0	603	903	0
485	5	0	0	0	0	0	0	200	300	0	0	0	0	0	0	0	200	903	0	0	0	0	0	0	0	603	903	0
485	6	0	0	0	0	0	0	200	300	0	0	0	0	0	0	0	200	903	0	0	0	0	0	0	0	603	903	0
485	7	0	0	0	0	0	0	200	300	0	0	0	0	0	0	0	200	903	0	0	0	0	0	0	0	603	903	0
485	8	0	0	0	0	0	0	200	300	0	0	0	0	0	0	0	200	903	0	0	0	0	0	0	0	603	903	0
485	9	0	0	0	0	0	0	200	300	0	0	0	0	0	0	0	200	903	0	0	0	0	0	0	0	603	903	0
486	0	0	0	0	0	0	0	200	300	0	0	0	0	0	0	0	200	903	0	0	0	0	0	0	0	603	903	0
486	1	0	0	0	0	0	0	200	300	0	0	0	0	0	0	0	200	903	0	0	0	0	0	0	0	603	903	0
486	2	0	0	0	0	0	0	200	300	0	0	0	0	0	0	0	200	903	0	0	0	0	0	0	0	603	903	0
486	3	0	0	0	0	0	0	200	300	0	0	0	0	0	0	0	200	903	0	0	0	0	0	0	0	603	903	0
486	4	0	0	0	0	0	0	200	300	0	0	0	0	0	0	0	200	903	0	0	0	0	0	0	0	603	903	0
486	5	0	0	0	0	0	0	200	300	0	0	0	0	0	0	0	200	903	0	0	0	0	0	0	0	603	903	0
486	6	0	0	0	0	0	0	200	300	0	0	0	0	0	0	0	200	903	0	0	0	0	0	0	0	603	903	0
486	7	0	0	0	0	0	0	200	300	0	0	0	0	0	0	0	200	903	0	0	0	0	0	0	0	603	903	0
486	8	0	0	0	0	0	0	200	300	0	0	0	0	0	0	0	200	903	0	0	0	0	0	0	0	603	903	0
486	9	0	0	0	0	0	0	200	300	0	0	0	0	0	0	0	200	903	0	0	0	0	0	0	0	603	903	0
487	0	0	0	0	0	0	0	200	300	0	0	0	0	0	0	0	200	903	0	0	0	0	0	0	0	603	903	0
487	1	0	0	0	0	0	0	200	300	0	0	0	0	0	0	0	200	903	0	0	0	0	0	0	0	603	903	0
487	2	0	0	0	0	0	0	200	300	0	0	0	0	0	0	0	200	903	0	0	0	0	0	0	0	603	903	0
487	3	0	0	0	0	0	0	200	300	0	0	0	0	0	0	0	200	903	0	0	0	0	0	0	0	603	903	0
487	4	0	0	0	0	0	0	200	300	0	0	0	0	0	0	0	200	903	0	0	0	0	0	0	0	603	903	0
487	5	0	0	0	0	0	0	200	300	0	0	0	0	0	0	0	200	903	0	0	0	0	0	0	0	603	903	0
487	6	0	0	0	0	0	0	200	300	0	0	0	0	0	0	0	200	903	0	0	0	0	0	0	0	603	903	0
487	7	0	0	0	0	0	0	200	300	0	0	0	0	0	0	0	200	903	0	0	0	0	0	0	0	603	903	0
487	8	0	0	0	0	0	0	200	300	0	0	0	0	0	0	0	200	903	0	0	0	0	0	0	0	603	903	0
487	9	0	0	0	0	0	0	200	300	0	0	0	0	0	0	0	200	903	0	0	0	0	0	0	0	603	903	0
488	0	0	0	0	0	0	0	200	300	0	0	0	0	0	0	0	200	903	0	0	0	0	0	0	0	603	903	0
488	1	0	0	0	0	0	0	200	300	0	0	0	0	0	0	0	200	903	0	0	0	0	0	0	0	603	903	0
488	2	0	0	0	0	0	0	200	300	0	0	0	0	0	0	0	200	903	0	0	0	0	0	0	0	603	903	0
488	3	0	0	0	0	0	0	200	300	0	0	0	0	0	0	0	200	903	0	0	0	0	0	0	0	603	903	0
488	4	0	0	0	0	0	0	200	300	0	0	0	0	0	0	0	200	903	0	0	0	0	0	0	0	603	903	0
488	5	0	0	0	0	0	0	200	300	0	-3.60245	-11.1157	-29.6587	-5946.73	-916.059	1083.76	169.113	1103.51	0	0	0	0	0	0	0	603	903	0
488	6	0	0	0	0	0	0	200	300	0	-2.9921	-7.6062	-35.1519	-6404.5	-1526.41	763.321	156.577	1085.19	0	0	0	0	0	0	0	603	903	0
488	7	0	0	0	0	0	0	200	300	0	-1.46622	-1.80786	-36.3726	-6953.82	-1160.2	534.44	168.102	1094.18	0	0	0	0	0	0	0	603	903	0
488	8	0	0	0	0	0	0	200	300	0	-0.398101	-1.50269	-39.4244	-8876.42	-1526.41	259.781	161.283	1128.15	0	0	0	0	0	0	0	603	903	0
488	9	0	0	0	0	0	0	200	300	0	2.19589	0.938718	-47.6641	-9883.5	-1892.62	-335.312	160.293	1110.36	0	0	0	0	0	0	0	603	903	0
489	0	0	0	0	0	0	0	200	300	0	2.19589	5.97412	-56.209	-10799	-2380.9	-930.404	157.642	1095.12	0	0	0	0	0	0	0	603	903	0
489	1	0	0	0	0	0	0	200	300	0	0.670014	7.65259	-64.1436	-13179.4	-2441.94	-335.312	161.93	1108.47	0	0	0	0	0	0	0	603	903	0
489	2	0	0	0	0	0	0	200	300	0	3.56918	8.7207	-69.0264	-14918.9	-2441.94	-793.075	164.623	1119.13	0	0	0	0	0	0	0	603	903	0
489	3	0	0	0	0	0	0	200	300	0	3.4166	9.9414	-77.2662	-16017.5	-2625.04	-1296.62	166.026	1110.3	0	0	0	0	0	0	0	603	903	0
489	4	0	0	0	0	0	0	200	300	0	0.517426	9.78882	-89.168	-17665.5	-3113.32	-793.075	165.085	1101.11	0	0	0	0	0	0	0	603	903	0
489	5	0	0	0	0	0	0	200	300	0	2.19589	9.48364	-96.4922	-19313.4	-3296.43	-701.523	165.837	1103.16	0	0	0	0	0	0	0	603	903	0
489	6	0	0	0	0	0	0	200	300	0	4.33212	10.7043	-105.953	-20595.2	-3601.61	-884.628	166.007	1097.38	0	0	0	0	0	0	0	603	903	0
489	7	0	0	0	0	0	0	200	300	0	3.87436	11.4673	-113.582	-23250.2	-4456.1	-1113.51	160.768	1107.7	0	0	0	0	0	0	0	603	903	0
489	8	0	0	0	0	0	0	200	300	0	5.09506	11.3147	-120.906	-24623.5	-4272.99	-1205.06	164.659	1106.66	0	0	0	0	0	0	0	603	903	0
489	9	0	0	0	0	0	0	200	300	0	5.24765	11.0095	-128.841	-25264.4	-4517.13	-1342.39	164.94	1099.09	0	0	0	0	0	0	0	603	903	0
490	0	0	0	0	0	0	0	200	300	0	5.55283	12.9932	-135.555	-27461.6	-4761.27	-1708.6	164.876	1105.59	0	0	0	0	0	0	0	603	903	0
490	1	0	0	0	0	0	0	200	300	0	9.82529	16.0449	-138.301	-28743.4	-4700.24	-2029.04	166.015	1110.83	0	0	0	0	0	0	0	603	903	0
490	2	0	0	0	0	0	0	200	300	0	8.60458	14.6716	-147.762	-29384.2	-4822.31	-2532.58	167.364	1101.86	0	0	0	0	0	0	0	603	903	0
490	3	0	0	0	0	0	0	200	300	0	8.14682	11.7725	-153.255	-30574.4	-5737.84	-2212.14	162.56	1102.5	0	0	0	0	0	0	0	603	903	0
490	4	0	0	0	0	0	0	200	300	0	10.2831	13.2983	-158.138	-31947.7	-5432.66	-2395.25	165.646	1105.02	0	0	0	0	0	0	0	603	903	0
490	5	0	0	0	0	0	0	200	300	0	10.2831	10.2466	-163.326	-32130.8	-5310.59	-2441.02	167.485	1099.73	0	0	0	0	0	0	0	603	903	0
490	6	0	0	0	0	0	0	200	300	0	9.6727	6.73706	-166.988	-33412.6	-5798.87	-2257.92	165.274	1103.09	0	0	0	0	0	0	0	603	903	0
490	7	0	0	0	0	0	0	200	300	0	8.60458	5.51635	-169.124	-34419.6	-5432.66	-2303.7	167.878	1106.52	0	0	0	0	0	0	0	603	903	0
490	8	0	0	0	0	0	0	200	300	0	9.21494	2.76977	-173.091	-34602.8	-5554.73	-2486.8	167.909	1102.91	0	0	0	0	0	0	0	603	903	0
490	9	0	0	0	0	0	0	200	300	0	12.2667	-1.50269	-180.11	-35335.2	-6165.08	-2074.81	165.771	1099.19	0	0	0	0	0	0	0	603	903	0
491	0	0	0	0	0	0	0	200	300	0	9.52011	-4.24927	-183.467	-35884.5	-5737.84	-2074.81	168.726	1098.59	0	0	0	0	0	0	0	603	903	0
491	1	0	0	0	0	0	0	200	300	0	9.21494	-6.08033	-188.655	-37349.3	-6165.08	-2029.04	167.321	1100.98	0	0	0	0	0	0	0	603	903	0
491	2	0	0	0	0	0	0	200	300	0	9.97787	-10.0476	-192.012	-38722.6	-6409.22	-1845.93	166.621	1104.67	0	0	0	0	0	0	0	603	903	0
491	3	0	0	0	0	0	0	200	300	0	9.6727	-13.252	-196.895	-38631.1	-6043.01	-1617.05	169.308	1099.2	0	0	0	0	0	0	0	603	903	0
491	4	0	0	0	0	0	0	200	300	0	9.36752	-16.1511	-201.778	-39821.2	-6226.12	-2074.81	169.144	1100.35	0	0	0	0	0	0	0	603	903	0
491	5	0	0	0	0	0	0	200	300	0	12.5719	-18.7451	-205.745	-40279	-6714.4	-1891.71	167.365	1098.77	0	0	0	0	0	0	0	603	903	0
491	6	0	0	0	0	0	0	200	300	0	10.4356	-22.1021	-212.764	-41194.5	-7141.65	-1571.27	166.434	1096.62	0	0	0	0	0	0	0	603	903	0
491	7	0	0	0	0	0	0	200	300	0	11.3512	-26.3745	-216.426	-42659.4	-6714.4	-1845.93	168.976	1100.11	0	0	0	0	0	0	0	603	903	0
491	8	0	0	0	0	0	0	200	300	0	11.046	-28.2056	-222.225	-43300.2	-7324.75	-1159.29	167.039	1097.85	0	0	0	0	0	0	0	603	903	0
491	9	0	0	0	0	0	0	200	300	0	10.2831	-32.7832	-228.328	-44856.7	-7385.79	-1205.06	167.653	1099.46	0	0	0	0	0	0	0	603	903	0
492	0	0	0	0	0	0	0	200	300	0	11.6563	-35.835	-234.432	-46046.8	-7019.58	-1937.48	170.057	1099.42	0	0	0	0	0	0	0	603	903	0
492	1	0	0	0	0	0	0	200	300	0	13.1822	-35.5298	-240.23	-46779.3	-7446.82	-1662.83	169.001	1097.73	0	0	0	0	0	0	0	603	903	0
492	2	0	0	0	0	0	0	200	300	0	11.046	-38.8867	-248.165	-48152.6	-7324.75	-1021.96	170.484	1097.03	0	0	0	0	0	0	0	603	903	0
492	3	0	0	0	0	0	0	200	300	0	12.5719	-41.9385	-251.216	-48701.9	-7446.82	-1159.29	170.357	1096.86	0	0	0	0	0	0	0	603	903	0
492	4	0	0	0	0	0	0	200	300	0	13.1822	-43.4644	-259.456	-49708.9	-8240.28	-1250.84	168.24	1094.59	0	0	0	0	0	0	0	603	903	0
492	5	0	0	0	0	0	0	200	300	0	12.2667	-43.7695	-262.203	-51265.3	-8179.24	-1021.96	168.806	1098.52	0	0	0	0	0	0	0	603	903	0
492	6	0	0	0	0	0	0	200	300	0	12.877	-46.5161	-269.527	-51631.6	-7935.1	-1113.51	170.559	1094.56	0	0	0	0	0	0	0	603	903	0
492	7	0	0	0	0	0	0	200	300	0	13.3348	-48.042	-271.968	-52089.3	-8362.35	-1067.73	169.253	1094.53	0	0	0	0	0	0	0	603	903	0
492	8	0	0	0	0	0	0	200	300	0	12.1141	-48.4998	-278.377	-53554.2	-8728.56	-655.746	168.645	1095.38	0	0	0	0	0	0	0	603	903	0
492	9	0	0	0	0	0	0	200	300	0	16.0814	-47.8894	-285.091	-54286.6	-8301.31	-1021.96	170.882	1093.42	0	0	0	0	0	0	0	603	903	0
493	0	0	0	0	0	0	0	200	300	0	13.64	-49.7205	-290.279	-54286.6	-9033.74	-793.075	168.879	1090.02	0	0	0	0	0	0	0	603	903	0
493	1	0	0	0	0	0	0	200	300	0	11.3512	-50.4834	-298.519	-57124.7	-9216.84	-381.088	169.125	1094.36	0	0	0	0	0	0	0	603	903	0
493	2	0	0	0	0	0	0	200	300	0	13.3348	-49.7205	-311.336	-58772.7	-9399.95	-701.523	169.808	1091.78	0	0	0	0	0	0	0	603	903	0
493	3	0	0	0	0	0	0	200	300	0	17.3021	-50.3308	-321.712	-60146	-9644.09	-1205.06	170.023	1089.96	0	0	0	0	0	0	0	603	903	0
493	4	0	0	0	0	0	0	200	300	0	16.234	-51.5515	-328.731	-61702.4	-10193.4	-1067.73	168.992	1090.7	0	0	0	0	0	0	0	603	903	0
493	5	0	0	0	0	0	0	200	300	0	14.5555	-53.23	-339.107	-63350.3	-9644.09	-976.181	171.56	1089.82	0	0	0	0	0	0	0	603	903	0
493	6	0	0	0	0	0	0	200	300	0	16.0814	-53.6877	-347.957	-64265.8	-10681.7	-838.852	169.302	1087.69	0	0	0	0	0	0	0	603	903	0
493	7	0	0	0	0	0	0	200	300	0	15.9288	-54.2981	-357.112	-66371.6	-10803.8	-564.193	169.747	1088.86	0	0	0	0	0	0	0	603	903	0
493	8	0	0	0	0	0	0	200	300	0	15.3185	-56.4343	-363.216	-67378.6	-11170	-518.417	169.247	1088.51	0	0	0	0	0	0	0	603	903	0
493	9	0	0	0	0	0	0	200	300	0	14.4029	-57.3499	-369.014	-67927.9	-11658.2	-655.746	168.407	1087.08	0	0	0	0	0	0	0	603	903	0
494	0	0	0	0	0	0	0	200	300	0	13.4874	-58.1128	-375.423	-69118.1	-11475.1	259.781	169.434	1087.11	0	0	0	0	0	0	0	603	903	0
494	1	0	0	0	0	0	0	200	300	0	13.1822	-61.1646	-382.137	-70033.7	-11353.1	30.8993	170.291	1086.27	0	0	0	0	0	0	0	603	903	0
494	2	0	0	0	0	0	0	200	300	0	12.877	-62.0801	-385.799	-69942.1	-12207.6	-60.6534	168.358	1084.29	0	0	0	0	0	0	0	603	903	0
494	3	0	0	0	0	0	0	200	300	0	10.4356	-62.3853	-390.377	-71407	-12329.6	580.216	168.416	1085.92	0	0	0	0	0	0	0	603	903	0
494	4	0	0	0	0	0	0	200	300	0	9.6727	-65.8948	-394.649	-71864.7	-12207.6	1037.98	169.067	1085.1	0	0	0	0	0	0	0	603	903	0
494	5	0	0	0	0	0	0	200	300	0	10.1305	-67.8784	-398.006	-71956.2	-12756.9	1129.53	167.948	1083.79	0	0	0	0	0	0	0	603	903	0
494	6	0	0	0	0	0	0	200	300	0	8.14682	-68.3362	-400.753	-72871.8	-12817.9	1449.97	168.015	1084.84	0	0	0	0	0	0	0	603	903	0
494	7	0	0	0	0	0	0	200	300	0	5.858	-70.3198	-404.72	-73604.2	-12512.7	1449.97	169.083	1084.86	0	0	0	0	0	0	0	603	903	0
494	8	0	0	0	0	0	0	200	300	0	7.99423	-71.6931	-404.72	-73054.9	-13062.1	1495.74	167.726	1083.51	0	0	0	0	0	0	0	603	903	0
494	9	0	0	0	0	0	0	200	300	0	6.46835	-72.9138	-411.434	-73512.6	-12634.8	1770.4	169.291	1081.67	0	0	0	0	0	0	0	603	903	0
495	0	0	0	0	0	0	0	200	300	0	4.02695	-75.2026	-414.18	-73604.2	-13001	2045.06	168.61	1080.71	0	0	0	0	0	0	0	603	903	0
495	1	0	0	0	0	0	0	200	300	0	5.40024	-74.8975	-414.485	-74245.1	-13916.5	2136.61	166.425	1082.13	0	0	0	0	0	0	0	603	903	0
495	2	0	0	0	0	0	0	200	300	0	5.09506	-77.1863	-419.368	-75069.1	-13123.1	2548.6	168.707	1082.01	0	0	0	0	0	0	0	603	903	0
495	3	0	0	0	0	0	0	200	300	0	2.19589	-78.1018	-420.589	-75069.1	-13245.2	2731.7	168.508	1081.49	0	0	0	0	0	0	0	603	903	0
495	4	0	0	0	0	0	0	200	300	0	2.19589	-78.1018	-422.42	-74977.5	-13977.6	2594.38	166.911	1080.5	0	0	0	0	0	0	0	603	903	0
495	5	0	0	0	0	0	0	200	300	0	1.73813	-80.6958	-424.861	-75526.8	-13367.2	2914.81	168.537	1080.77	0	0	0	0	0	0	0	603	903	0
495	6	0	0	0	0	0	0	200	300	0	0.21225	-80.6958	-428.218	-75618.4	-13733.4	2869.03	167.929	1079.59	0	0	0	0	0	0	0	603	903	0
495	7	0	0	0	0	0	0	200	300	0	0.517426	-79.6277	-430.965	-75435.3	-14221.7	3143.69	167	1078.04	0	0	0	0	0	0	0	603	903	0
495	8	0	0	0	0	0	0	200	300	0	-1.46622	-82.9846	-433.711	-76167.7	-13916.5	3784.56	167.913	1078.62	0	0	0	0	0	0	0	603	903	0
495	9	0	0	0	0	0	0	200	300	0	-2.38174	-84.3579	-435.543	-75801.5	-13916.5	3830.34	168.048	1077.04	0	0	0	0	0	0	0	603	903	0
496	0	0	0	0	0	0	0	200	300	0	-1.77139	-82.3743	-437.374	-76350.8	-14465.9	3876.11	166.926	1077.57	0	0	0	0	0	0	0	603	903	0
496	1	0	0	0	0	0	0	200	300	0	-3.90762	-85.2734	-438.289	-76625.5	-14160.7	4059.22	167.691	1077.83	0	0	0	0	0	0	0	603	903	0
496	2	0	0	0	0	0	0	200	300	0	-5.28091	-85.426	-441.036	-75984.6	-14221.7	4242.33	167.754	1075.29	0	0	0	0	0	0	0	603	903	0
496	3	0	0	0	0	0	0	200	300	0	-4.97574	-85.426	-443.477	-76350.8	-14710	4333.88	166.83	1075.16	0	0	0	0	0	0	0	603	903	0
496	4	0	0	0	0	0	0	200	300	0	-6.34903	-86.4941	-445.613	-77632.5	-14649	4562.76	167.126	1077.22	0	0	0	0	0	0	0	603	903	0
496	5	0	0	0	0	0	0	200	300	0	-6.80679	-87.2571	-446.834	-77632.5	-14832.1	4791.64	166.806	1076.74	0	0	0	0	0	0	0	603	903	0
496	6	0	0	0	0	0	0	200	300	0	-6.95938	-88.783	-450.496	-77266.3	-15198.3	4928.97	166.263	1074.51	0	0	0	0	0	0	0	603	903	0
496	7	0	0	0	0	0	0	200	300	0	-8.18008	-89.5459	-452.632	-77907.2	-14771	5295.18	167.366	1075.12	0	0	0	0	0	0	0	603	903	0
496	8	0	0	0	0	0	0	200	300	0	-6.19644	-89.5459	-456.905	-78731.2	-14832.1	5203.63	167.538	1075.31	0	0	0	0	0	0	0	603	903	0
496	9	0	0	0	0	0	0	200	300	0	-7.41714	-91.5295	-460.262	-78822.7	-15564.5	5112.08	166.183	1074.26	0	0	0	0	0	0	0	603	903	0
497	0	0	0	0	0	0	0	200	300	0	-8.48526	-91.5295	-460.567	-79372	-15503.5	5386.73	166.338	1075.34	0	0	0	0	0	0	0	603	903	0
497	1	0	0	0	0	0	0	200	300	0	-9.70596	-93.0554	-467.281	-79280.5	-15503.5	5752.95	166.822	1072.66	0	0	0	0	0	0	0	603	903	0
497	2	0	0	0	0	0	0	200	300	0	-9.40079	-93.8184	-472.774	-79372	-16052.8	5844.5	166.046	1070.89	0	0	0	0	0	0	0	603	903	0
497	3	0	0	0	0	0	0	200	300	0	-6.80679	-95.0391	-475.215	-80470.7	-15747.6	5890.27	166.862	1072.34	0	0	0	0	0	0	0	603	903	0
497	4	0	0	0	0	0	0	200	300	0	-11.0793	-95.802	-478.878	-81294.6	-16174.8	6164.93	166.223	1072.76	0	0	0	0	0	0	0	603	903	0
497	5	0	0	0	0	0	0	200	300	0	-11.6896	-97.6331	-483.15	-80745.3	-16724.2	6256.49	165.385	1070.12	0	0	0	0	0	0	0	603	903	0
497	6	0	0	0	0	0	0	200	300	0	-10.9267	-97.7856	-488.033	-81477.7	-16296.9	6393.81	166.607	1069.95	0	0	0	0	0	0	0	603	903	0
497	7	0	0	0	0	0	0	200	300	0	-11.0793	-99.4641	-493.221	-82118.6	-17090.4	6943.13	165.349	1069.49	0	0	0	0	0	0	0	603	903	0
497	8	0	0	0	0	0	0	200	300	0	-12.9103	-100.685	-495.662	-82759.5	-17639.7	6943.13	164.412	1069.97	0	0	0	0	0	0	0	603	903	0
497	9	0	0	0	0	0	0	200	300	0	-12.4525	-102.821	-501.461	-82484.8	-17395.6	7172.01	165.31	1067.49	0	0	0	0	0	0	0	603	903	0
498	0	0	0	0	0	0	0	200	300	0	-13.0629	-102.974	-507.869	-83675	-17944.9	7629.78	164.666	1067.76	0	0	0	0	0	0	0	603	903	0
498	1	0	0	0	0	0	0	200	300	0	-14.2836	-104.194	-510.005	-83675	-17822.8	7584	165.054	1067.07	0	0	0	0	0	0	0	603	903	0
498	2	0	0	0	0	0	0	200	300	0	-13.6732	-105.415	-513.973	-84041.2	-18066.9	7538.22	164.848	1066.51	0	0	0	0	0	0	0	603	903	0
498	3	0	0	0	0	0	0	200	300	0	-13.3681	-108.162	-517.635	-83949.7	-18433.1	7812.88	164.39	1065.18	0	0	0	0	0	0	0	603	903	0
498	4	0	0	0	0	0	0	200	300	0	-14.5888	-107.551	-522.518	-84956.8	-18555.2	7538.22	164.489	1065.59	0	0	0	0	0	0	0	603	903	0
498	5	0	0	0	0	0	0	200	300	0	-14.2836	-109.993	-524.959	-85231.4	-18677.3	7995.99	164.421	1065.36	0	0	0	0	0	0	0	603	903	0
498	6	0	0	0	0	0	0	200	300	0	-13.2155	-111.366	-531.063	-85689.2	-19348.7	7812.88	163.566	1064.35	0	0	0	0	0	0	0	603	903	0
498	7	0	0	0	0	0	0	200	300	0	-14.894	-110.603	-535.03	-86696.2	-19165.6	8179.09	164.179	1065.04	0	0	0	0	0	0	0	603	903	0
498	8	0	0	0	0	0	0	200	300	0	-15.0465	-112.434	-540.523	-86787.8	-19165.6	8270.65	164.543	1063.56	0	0	0	0	0	0	0	603	903	0
498	9	0	0	0	0	0	0	200	300	0	-15.0465	-114.265	-544.185	-87154	-19898	8362.2	163.435	1063.16	0	0	0	0	0	0	0	603	903	0
499	0	0	0	0	0	0	0	200	300	0	-15.5043	-114.113	-549.983	-87886.4	-20020.1	8591.08	163.599	1062.8	0	0	0	0	0	0	0	603	903	0
499	1	0	0	0	0	0	0	200	300	0	-16.1147	-115.181	-555.477	-88161.1	-20020.1	8636.86	163.959	1061.71	0	0	0	0	0	0	0	603	903	0
499	2	0	0	0	0	0	0	200	300	0	-15.6569	-115.333	-557.918	-88893.5	-20813.5	8957.29	162.694	1062.33	0	0	0	0	0	0	0	603	903	0
499	3	0	0	0	0	0	0	200	300	0	-16.8776	-117.164	-564.937	-88618.9	-20935.6	8819.96	162.942	1059.86	0	0	0	0	0	0	0	603	903	0
499	4	0	0	0	0	0	0	200	300	0	-17.4879	-118.69	-569.21	-89442.8	-20508.3	9415.06	163.971	1060.14	0	0	0	0	0	0	0	603	903	0
499	5	0	0	0	0	0	0	200	300	0	-17.6405	-117.469	-572.872	-89992.1	-21179.7	9048.85	163.029	1060.09	0	0	0	0	0	0	0	603	903	0
499	6	0	0	0	0	0	0	200	300	0	-19.1664	-118.69	-578.365	-90633	-21484.9	8957.29	162.852	1059.71	0	0	0	0	0	0	0	603	903	0
499	7	0	0	0	0	0	0	200	300	0	-19.7768	-119.148	-583.248	-90999.2	-21301.8	9094.62	163.477	1059.02	0	0	0	0	0	0	0	603	903	0
499	8	0	0	0	0	0	0	200	300	0	-19.1664	-120.216	-588.13	-91365.4	-22217.3	9643.94	162.224	1058.35	0	0	0	0	0	0	0	603	903	0
499	9	0	0	0	0	0	0	200	300	0	-19.7768	-120.979	-590.877	-92372.5	-21851.1	9552.39	163.019	1059.33	0	0	0	0	0	0	0	603	903	0
500	0	0	0	0	0	0	0	200	300	0	-20.3871	-122.2	-596.37	-92921.8	-22339.4	9598.16	162.541	1058.81	0	0	0	0	0	0	0	603	903	0
500	1	0	0	0	0	0	0	200	300	0	-20.3871	-121.895	-599.727	-93105	-22888.7	9643.94	161.835	1058.25	0	0	0	0	0	0	0	603	903	0
500	2	0	0	0	0	0	0	200	300	0	-20.9975	-122.963	-602.779	-93196.5	-22278.4	9781.27	163.041	1057.61	0	0	0	0	0	0	0	603	903	0
500	3	0	0	0	0	0	0	200	300	0	-22.2182	-123.268	-609.188	-94020.5	-22400.4	9689.71	163.229	1057.34	0	0	0	0	0	0	0	603	903	0
500	4	0	0	0	0	0	0	200	300	0	-22.5233	-122.2	-612.85	-93837.4	-23010.8	9918.6	162.453	1056.12	0	0	0	0	0	0	0	603	903	0
500	5	0	0	0	0	0	0	200	300	0	-20.2345	-124.031	-618.953	-94844.5	-23316	9827.04	162.33	1056.23	0	0	0	0	0	0	0	603	903	0
500	6	0	0	0	0	0	0	200	300	0	-23.4389	-125.099	-623.836	-95393.8	-23560.1	10239	162.234	1055.91	0	0	0	0	0	0	0	603	903	0
500	7	0	0	0	0	0	0	200	300	0	-23.5915	-125.404	-629.024	-94661.3	-24109.4	9918.6	161.672	1053.49	0	0	0	0	0	0	0	603	903	0
500	8	0	0	0	0	0	0	200	300	0	-22.2182	-126.32	-634.212	-96034.6	-23743.2	10284.8	162.563	1054.42	0	0	0	0	0	0	0	603	903	0
500	9	0	0	0	0	0	0	200	300	0	-22.3708	-126.625	-637.874	-97041.7	-24109.4	10467.9	162.204	1055.13	0	0	0	0	0	0	0	603	903	0
501	0	0	0	0	0	0	0	200	300	0	-22.5233	-127.235	-642.757	-97224.8	-24902.9	10101.7	161.256	1054.26	0	0	0	0	0	0	0	603	903	0
501	1	0	0	0	0	0	0	200	300	0	-23.2863	-126.625	-649.166	-96950.1	-24353.6	10101.7	162.485	1052.35	0	0	0	0	0	0	0	603	903	0
501	2	0	0	0	0	0	0	200	300	0	-22.0656	-128.151	-651.607	-97407.9	-25086	10330.6	161.501	1052.49	0	0	0	0	0	0	0	603	903	0
501	3	0	0	0	0	0	0	200	300	0	-22.8285	-128.151	-655.574	-98415	-25696.3	10239	160.803	1053.12	0	0	0	0	0	0	0	603	903	0
501	4	0	0	0	0	0	0	200	300	0	-23.2863	-129.371	-658.931	-98506.6	-25208.1	10513.7	161.744	1052.49	0	0	0	0	0	0	0	603	903	0
501	5	0	0	0	0	0	0	200	300	0	-22.5233	-128.914	-662.593	-98689.6	-25818.4	10696.8	161.034	1051.94	0	0	0	0	0	0	0	603	903	0
501	6	0	0	0	0	0	0	200	300	0	-23.4389	-129.982	-668.086	-99422.1	-25818.4	10513.7	161.355	1051.82	0	0	0	0	0	0	0	603	903	0
501	7	0	0	0	0	0	0	200	300	0	-23.8966	-130.745	-670.833	-99788.3	-25391.2	10971.5	162.15	1051.75	0	0	0	0	0	0	0	603	903	0
501	8	0	0	0	0	0	0	200	300	0	-23.1337	-128.456	-672.664	-99239	-26795	10559.5	160.166	1050.53	0	0	0	0	0	0	0	603	903	0
501	9	0	0	0	0	0	0	200	300	0	-23.5915	-130.897	-679.683	-100246	-26733.9	10834.1	160.667	1050.49	0	0	0	0	0	0	0	603	903	0
502	0	0	0	0	0	0	0	200	300	0	-24.0492	-132.423	-682.43	-100887	-26550.8	10925.7	161.094	1050.83	0	0	0	0	0	0	0	603	903	0
502	1	0	0	0	0	0	0	200	300	0	-21.6078	-130.745	-688.228	-100978	-26856	11154.6	160.978	1049.72	0	0	0	0	0	0	0	603	903	0
502	2	0	0	0	0	0	0	200	300	0	-24.3544	-131.965	-690.975	-101802	-26795	11063	161.221	1050.33	0	0	0	0	0	0	0	603	903	0
502	3	0	0	0	0	0	0	200	300	0	-24.6596	-131.202	-691.28	-102169	-27100.1	10925.7	160.797	1050.8	0	0	0	0	0	0	0	603	903	0
502	4	0	0	0	0	0	0	200	300	0	-25.1173	-131.202	-697.689	-101802	-27100.1	10925.7	161.157	1048.91	0	0	0	0	0	0	0	603	903	0
502	5	0	0	0	0	0	0	200	300	0	-22.9811	-129.371	-699.214	-101894	-27344.3	10834.1	160.893	1048.73	0	0	0	0	0	0	0	603	903	0
502	6	0	0	0	0	0	0	200	300	0	-26.338	-130.897	-703.487	-101711	-27527.4	11108.8	160.87	1047.58	0	0	0	0	0	0	0	603	903	0
502	7	0	0	0	0	0	0	200	300	0	-25.7277	-131.355	-706.233	-102718	-28320.8	11063	159.899	1048.44	0	0	0	0	0	0	0	603	903	0
502	8	0	0	0	0	0	0	200	300	0	-23.4389	-131.355	-706.539	-102901	-27893.6	10742.6	160.521	1048.64	0	0	0	0	0	0	0	603	903	0
502	9	0	0	0	0	0	0	200	300	0	-27.2536	-131.813	-710.506	-102443	-28198.8	11383.4	160.312	1047.18	0	0	0	0	0	0	0	603	903	0
503	0	0	0	0	0	0	0	200	300	0	-27.101	-131.813	-714.168	-103450	-28320.8	10925.7	160.344	1047.85	0	0	0	0	0	0	0	603	903	0
503	1	0	0	0	0	0	0	200	300	0	-25.8803	-130.745	-716.304	-103267	-28259.8	11017.2	160.548	1047.17	0	0	0	0	0	0	0	603	903	0
503	2	0	0	0	0	0	0	200	300	0	-27.7113	-129.982	-719.966	-103634	-28809.1	11475	159.985	1046.94	0	0	0	0	0	0	0	603	903	0
503	3	0	0	0	0	0	0	200	300	0	-27.7113	-131.05	-723.628	-103725	-29114.3	11246.1	159.766	1046.34	0	0	0	0	0	0	0	603	903	0
503	4	0	0	0	0	0	0	200	300	0	-27.5587	-130.134	-723.934	-104091	-28320.8	11429.2	160.879	1046.79	0	0	0	0	0	0	0	603	903	0
503	5	0	0	0	0	0	0	200	300	0	-28.932	-129.677	-727.596	-104824	-29297.4	11475	159.734	1047.07	0	0	0	0	0	0	0	603	903	0
503	6	0	0	0	0	0	0	200	300	0	-29.2372	-130.134	-729.427	-104457	-29663.6	11429.2	159.333	1046.2	0	0	0	0	0	0	0	603	903	0
503	7	0	0	0	0	0	0	200	300	0	-28.3217	-129.371	-731.563	-104549	-28870.2	11429.2	160.536	1045.91	0	0	0	0	0	0	0	603	903	0
503	8	0	0	0	0	0	0	200	300	0	-30.4579	-129.524	-734.92	-104457	-29663.6	11337.7	159.637	1045.13	0	0	0	0	0	0	0	603	903	0
503	9	0	0	0	0	0	0	200	300	0	-30.3053	-129.524	-736.751	-104641	-29480.5	11429.2	159.986	1045.03	0	0	0	0	0	0	0	603	903	0
504	0	0	0	0	0	0	0	200	300	0	-29.2372	-127.693	-741.939	-105098	-29846.7	11520.8	159.772	1044.65	0	0	0	0	0	0	0	603	903	0
504	1	0	0	0	0	0	0	200	300	0	-30.9157	-129.066	-744.991	-105831	-30335	11612.3	159.281	1045.06	0	0	0	0	0	0	0	603	903	0
504	2	0	0	0	0	0	0	200	300	0	-31.9838	-129.524	-748.653	-105739	-30090.9	11383.4	159.807	1044.24	0	0	0	0	0	0	0	603	903	0
504	3	0	0	0	0	0	0	200	300	0	-31.8312	-128.608	-751.399	-106197	-30090.9	11566.5	159.954	1044.33	0	0	0	0	0	0	0	603	903	0
504	4	0	0	0	0	0	0	200	300	0	-33.5097	-128.761	-754.451	-107021	-30518.1	11612.3	159.549	1044.85	0	0	0	0	0	0	0	603	903	0
504	5	0	0	0	0	0	0	200	300	0	-33.9674	-127.083	-758.113	-106197	-30762.2	11841.2	159.423	1043.08	0	0	0	0	0	0	0	603	903	0
504	6	0	0	0	0	0	0	200	300	0	-34.5778	-128.303	-762.996	-106105	-30884.3	11749.7	159.522	1042.06	0	0	0	0	0	0	0	603	903	0
504	7	0	0	0	0	0	0	200	300	0	-35.6459	-129.829	-764.522	-106746	-31555.7	11932.8	158.725	1042.62	0	0	0	0	0	0	0	603	903	0
504	8	0	0	0	0	0	0	200	300	0	-35.0356	-127.998	-766.963	-107387	-31616.7	11795.4	158.777	1043.02	0	0	0	0	0	0	0	603	903	0
504	9	0	0	0	0	0	0	200	300	0	-34.12	-129.066	-770.626	-107204	-31616.7	11887	158.973	1042.11	0	0	0	0	0	0	0	603	903	0
505	0	0	0	0	0	0	0	200	300	0	-35.0356	-130.439	-771.236	-107479	-31860.9	11887	158.689	1042.36	0	0	0	0	0	0	0	603	903	0
505	1	0	0	0	0	0	0	200	300	0	-35.1881	-128.914	-773.982	-107753	-31555.7	11887	159.229	1042.22	0	0	0	0	0	0	0	603	903	0
505	2	0	0	0	0	0	0	200	300	0	-33.0519	-128.151	-776.119	-107662	-31494.7	11612.3	159.42	1041.72	0	0	0	0	0	0	0	603	903	0
505	3	0	0	0	0	0	0	200	300	0	-33.0519	-126.93	-776.729	-108120	-32105	11795.4	158.666	1042.2	0	0	0	0	0	0	0	603	903	0
505	4	0	0	0	0	0	0	200	300	0	-32.5941	-127.083	-780.086	-108120	-31921.9	11841.2	159.079	1041.6	0	0	0	0	0	0	0	603	903	0
505	5	0	0	0	0	0	0	200	300	0	-32.4416	-125.099	-781.917	-107753	-32532.3	11749.7	158.394	1040.81	0	0	0	0	0	0	0	603	903	0
505	6	0	0	0	0	0	0	200	300	0	-31.9838	-125.404	-783.138	-108211	-32471.2	11795.4	158.537	1041.18	0	0	0	0	0	0	0	603	903	0
505	7	0	0	0	0	0	0	200	300	0	-32.5941	-124.794	-785.274	-108303	-32227.1	11475	158.961	1040.92	0	0	0	0	0	0	0	603	903	0
505	8	0	0	0	0	0	0	200	300	0	-31.526	-124.489	-785.884	-107845	-32715.4	11383.4	158.371	1040.23	0	0	0	0	0	0	0	603	903	0
505	9	0	0	0	0	0	0	200	300	0	-32.8993	-122.505	-788.021	-108577	-32715.4	11520.8	158.484	1040.78	0	0	0	0	0	0	0	603	903	0
506	0	0	0	0	0	0	0	200	300	0	-33.0519	-122.963	-788.631	-108303	-32288.1	11520.8	159.058	1040.33	0	0	0	0	0	0	0	603	903	0
506	1	0	0	0	0	0	0	200	300	0	-33.6623	-122.505	-792.598	-108120	-33020.6	11475	158.339	1039.41	0	0	0	0	0	0	0	603	903	0
506	2	0	0	0	0	0	0	200	300	0	-32.7467	-121.437	-794.734	-108394	-33386.8	11520.8	157.99	1039.39	0	0	0	0	0	0	0	603	903	0
506	3	0	0	0	0	0	0	200	300	0	-34.12	-121.284	-796.871	-108760	-32654.3	11612.3	159.022	1039.48	0	0	0	0	0	0	0	603	903	0
506	4	0	0	0	0	0	0	200	300	0	-35.0356	-121.895	-797.481	-108669	-33264.7	11291.9	158.288	1039.27	0	0	0	0	0	0	0	603	903	0
506	5	0	0	0	0	0	0	200	300	0	-34.4252	-118.843	-795.955	-108852	-33264.7	11383.4	158.208	1039.76	0	0	0	0	0	0	0	603	903	0
506	6	0	0	0	0	0	0	200	300	0	-35.4933	-120.521	-801.753	-108577	-33142.6	11291.9	158.662	1038.42	0	0	0	0	0	0	0	603	903	0
506	7	0	0	0	0	0	0	200	300	0	-35.4933	-120.369	-802.974	-108760	-33753	11475	157.965	1038.45	0	0	0	0	0	0	0	603	903	0
506	8	0	0	0	0	0	0	200	300	0	-35.0356	-118.995	-806.636	-108852	-34119.2	11520.8	157.702	1037.95	0	0	0	0	0	0	0	603	903	0
506	9	0	0	0	0	0	0	200	300	0	-36.4088	-119.758	-806.636	-109218	-33569.9	11429.2	158.383	1038.4	0	0	0	0	0	0	0	603	903	0
507	0	0	0	0	0	0	0	200	300	0	-36.5614	-118.232	-805.416	-109218	-34058.2	11475	157.714	1038.6	0	0	0	0	0	0	0	603	903	0
507	1	0	0	0	0	0	0	200	300	0	-35.9511	-117.622	-808.467	-108852	-34119.2	11246.1	157.798	1037.64	0	0	0	0	0	0	0	603	903	0
507	2	0	0	0	0	0	0	200	300	0	-37.6295	-117.622	-809.383	-108852	-33814	11429.2	158.222	1037.49	0	0	0	0	0	0	0	603	903	0
507	3	0	0	0	0	0	0	200	300	0	-37.9347	-116.249	-810.298	-108394	-34180.2	11383.4	157.818	1036.77	0	0	0	0	0	0	0	603	903	0
507	4	0	0	0	0	0	0	200	300	0	-36.4088	-116.096	-811.824	-108211	-34180.2	11246.1	157.897	1036.29	0	0	0	0	0	0	0	603	903	0
507	5	0	0	0	0	0	0	200	300	0	-36.8666	-115.028	-810.298	-108760	-34485.4	11383.4	157.441	1037.22	0	0	0	0	0	0	0	603	903	0
507	6	0	0	0	0	0	0	200	300	0	-37.9347	-115.181	-813.35	-109035	-34912.6	11429.2	157.076	1037.06	0	0	0	0	0	0	0	603	903	0
507	7	0	0	0	0	0	0	200	300	0	-37.6295	-115.028	-814.571	-108211	-34363.3	11520.8	157.814	1035.84	0	0	0	0	0	0	0	603	903	0
507	8	0	0	0	0	0	0	200	300	0	-38.2399	-115.181	-813.35	-108394	-34546.4	11429.2	157.526	1036.27	0	0	0	0	0	0	0	603	903	0
507	9	0	0	0	0	0	0	200	300	0	-37.9347	-113.044	-814.571	-108394	-35034.7	11246.1	156.99	1036.07	0	0	0	0	0	0	0	603	903	0
508	0	0	0	0	0	0	0	200	300	0	-36.8666	-113.197	-817.317	-108120	-34607.5	11108.8	157.657	1035.29	0	0	0	0	0	0	0	603	903	0
508	1	0	0	0	0	0	0	200	300	0	-37.7821	-112.434	-817.623	-107570	-34668.5	11246.1	157.598	1034.56	0	0	0	0	0	0	0	603	903	0
508	2	0	0	0	0	0	0	200	300	0	-38.6977	-112.129	-817.928	-107112	-34546.4	11429.2	157.763	1033.96	0	0	0	0	0	0	0	603	903	0
508	3	0	0	0	0	0	0	200	300	0	-38.5451	-111.824	-819.454	-107753	-35400.9	11658.1	156.799	1034.49	0	0	0	0	0	0	0	603	903	0
508	4	0	0	0	0	0	0	200	300	0	-37.477	-112.434	-820.369	-107845	-35095.8	11291.9	157.22	1034.46	0	0	0	0	0	0	0	603	903	0
508	5	0	0	0	0	0	0	200	300	0	-39.6132	-110.756	-821.59	-107845	-35523	11246.1	156.763	1034.26	0	0	0	0	0	0	0	603	903	0
508	6	0	0	0	0	0	0	200	300	0	-39.7658	-110.603	-821.895	-107753	-35217.8	11246.1	157.15	1034.1	0	0	0	0	0	0	0	603	903	0
508	7	0	0	0	0	0	0	200	300	0	-38.2399	-108.772	-821.895	-107204	-35278.9	10879.9	157.076	1033.44	0	0	0	0	0	0	0	603	903	0
508	8	0	0	0	0	0	0	200	300	0	-38.6977	-108.772	-823.726	-107662	-35828.2	11108.8	156.505	1033.7	0	0	0	0	0	0	0	603	903	0
508	9	0	0	0	0	0	0	200	300	0	-39.0028	-109.382	-822.505	-107387	-35767.1	11200.3	156.514	1033.56	0	0	0	0	0	0	0	603	903	0
509	0	0	0	0	0	0	0	200	300	0	-39.0028	-108.009	-823.726	-106838	-35828.2	11108.8	156.505	1032.7	0	0	0	0	0	0	0	603	903	0
509	1	0	0	0	0	0	0	200	300	0	-39.1554	-108.925	-825.252	-107021	-36011.3	11246.1	156.363	1032.68	0	0	0	0	0	0	0	603	903	0
509	2	0	0	0	0	0	0	200	300	0	-39.7658	-108.467	-823.116	-107112	-35462	11063	156.917	1033.13	0	0	0	0	0	0	0	603	903	0
509	3	0	0	0	0	0	0	200	300	0	-39.1554	-106.025	-822.2	-105648	-36194.4	10834.1	155.979	1031.49	0	0	0	0	0	0	0	603	903	0
509	4	0	0	0	0	0	0	200	300	0	-39.4606	-106.941	-824.642	-106655	-36133.4	10971.5	156.183	1032.33	0	0	0	0	0	0	0	603	903	0
509	5	0	0	0	0	0	0	200	300	0	-38.3925	-106.788	-823.726	-105922	-36011.3	10925.7	156.282	1031.59	0	0	0	0	0	0	0	603	903	0
509	6	0	0	0	0	0	0	200	300	0	-39.1554	-104.805	-824.336	-105831	-36682.7	10971.5	155.5	1031.38	0	0	0	0	0	0	0	603	903	0
509	7	0	0	0	0	0	0	200	300	0	-39.0028	-105.568	-824.031	-105098	-37170.9	11154.6	154.891	1030.54	0	0	0	0	0	0	0	603	903	0
509	8	0	0	0	0	0	0	200	300	0	-40.2235	-103.889	-822.2	-105556	-36255.4	11063	155.904	1031.38	0	0	0	0	0	0	0	603	903	0
509	9	0	0	0	0	0	0	200	300	0	-40.2235	-103.584	-823.116	-104824	-36560.6	11063	155.583	1030.35	0	0	0	0	0	0	0	603	903	0
510	0	0	0	0	0	0	0	200	300	0	-39.7658	-103.584	-823.116	-104457	-36682.7	10742.6	155.434	1029.91	0	0	0	0	0	0	0	603	903	0
510	1	0	0	0	0	0	0	200	300	0	-40.5287	-102.058	-821.895	-104549	-36499.6	10651	155.591	1030.2	0	0	0	0	0	0	0	603	903	0
510	2	0	0	0	0	0	0	200	300	0	-40.8339	-102.516	-823.116	-104000	-37293	10651	154.693	1029.35	0	0	0	0	0	0	0	603	903	0
510	3	0	0	0	0	0	0	200	300	0	-37.7821	-102.058	-822.505	-103725	-36743.7	10971.5	155.327	1029.11	0	0	0	0	0	0	0	603	903	0
510	4	0	0	0	0	0	0	200	300	0	-40.6813	-100.38	-819.148	-103359	-36743.7	11017.2	155.144	1029.18	0	0	0	0	0	0	0	603	903	0
510	5	0	0	0	0	0	0	200	300	0	-40.9865	-101.6	-821.59	-103176	-37109.9	10879.9	154.832	1028.58	0	0	0	0	0	0	0	603	903	0
510	6	0	0	0	0	0	0	200	300	0	-40.2235	-98.7012	-816.707	-103267	-36804.7	10376.4	154.935	1029.44	0	0	0	0	0	0	0	603	903	0
510	7	0	0	0	0	0	0	200	300	0	-41.5968	-99.7693	-820.369	-103176	-36926.8	10513.7	154.988	1028.77	0	0	0	0	0	0	0	603	903	0
510	8	0	0	0	0	0	0	200	300	0	-41.7494	-100.227	-819.759	-101894	-37537.2	10467.9	154.21	1027.3	0	0	0	0	0	0	0	603	903	0
510	9	0	0	0	0	0	0	200	300	0	-39.9184	-98.7012	-817.623	-101619	-37232	10651	154.463	1027.29	0	0	0	0	0	0	0	603	903	0
511	0	0	0	0	0	0	0	200	300	0	-40.6813	-97.9382	-818.843	-102169	-37781.3	10696.8	153.86	1027.77	0	0	0	0	0	0	0	603	903	0
511	1	0	0	0	0	0	0	200	300	0	-40.8339	-98.5486	-817.012	-101894	-37903.4	11017.2	153.607	1027.72	0	0	0	0	0	0	0	603	903	0
511	2	0	0	0	0	0	0	200	300	0	-40.071	-97.6331	-817.317	-101070	-37415.1	10879.9	154.222	1026.66	0	0	0	0	0	0	0	603	903	0
511	3	0	0	0	0	0	0	200	300	0	-40.8339	-96.1072	-815.486	-100978	-38147.5	10605.2	153.221	1026.83	0	0	0	0	0	0	0	603	903	0
511	4	0	0	0	0	0	0	200	300	0	-39.0028	-97.3279	-814.876	-100795	-37964.4	10559.5	153.411	1026.69	0	0	0	0	0	0	0	603	903	0
511	5	0	0	0	0	0	0	200	300	0	-40.071	-96.2598	-814.266	-99788.3	-37415.1	10422.1	154.051	1025.55	0	0	0	0	0	0	0	603	903	0
511	6	0	0	0	0	0	0	200	300	0	-40.3761	-95.802	-815.181	-99605.2	-38147.5	10605.2	153.204	1025.19	0	0	0	0	0	0	0	603	903	0
511	7	0	0	0	0	0	0	200	300	0	-40.8339	-95.802	-812.435	-99696.8	-37659.2	10651	153.646	1025.71	0	0	0	0	0	0	0	603	903	0
511	8	0	0	0	0	0	0	200	300	0	-40.071	-93.9709	-811.214	-98872.8	-37964.4	10696.8	153.201	1024.88	0	0	0	0	0	0	0	603	903	0
511	9	0	0	0	0	0	0	200	300	0	-40.3761	-95.0391	-811.519	-98781.2	-38330.6	10696.8	152.767	1024.72	0	0	0	0	0	0	0	603	903	0
512	0	0	0	0	0	0	0	200	300	0	-41.1391	-95.0391	-809.993	-98598.1	-37720.3	10559.5	153.431	1024.73	0	0	0	0	0	0	0	603	903	0
512	1	0	0	0	0	0	0	200	300	0	-40.9865	-93.3606	-810.604	-97682.6	-37659.2	10467.9	153.542	1023.51	0	0	0	0	0	0	0	603	903	0
512	2	0	0	0	0	0	0	200	300	0	-40.2235	-93.5132	-808.773	-97041.7	-38574.8	10330.6	152.305	1022.99	0	0	0	0	0	0	0	603	903	0
512	3	0	0	0	0	0	0	200	300	0	-40.8339	-91.6821	-806.331	-97407.9	-37659.2	10467.9	153.296	1023.8	0	0	0	0	0	0	0	603	903	0
512	4	0	0	0	0	0	0	200	300	0	-40.5287	-91.377	-807.247	-96492.4	-38513.7	10284.8	152.29	1022.53	0	0	0	0	0	0	0	603	903	0
512	5	0	0	0	0	0	0	200	300	0	-40.2235	-90.7666	-802.974	-96400.9	-38452.7	10193.3	152.112	1023.05	0	0	0	0	0	0	0	603	903	0
512	6	0	0	0	0	0	0	200	300	0	-40.8339	-90.9192	-804.195	-96400.9	-37964.4	10605.2	152.792	1022.87	0	0	0	0	0	0	0	603	903	0
512	7	0	0	0	0	0	0	200	300	0	-40.2235	-90.0037	-802.974	-95668.4	-38513.7	10101.7	152.036	1022.14	0	0	0	0	0	0	0	603	903	0
512	8	0	0	0	0	0	0	200	300	0	-40.2235	-90.3088	-800.838	-93928.9	-38574.8	10147.5	151.832	1020.29	0	0	0	0	0	0	0	603	903	0
512	9	0	0	0	0	0	0	200	300	0	-41.2917	-88.3252	-799.922	-95210.7	-38269.6	10147.5	152.158	1022.02	0	0	0	0	0	0	0	603	903	0
513	0	0	0	0	0	0	0	200	300	0	-41.1391	-89.3933	-800.228	-94112	-38635.8	10193.3	151.719	1020.61	0	0	0	0	0	0	0	603	903	0
513	1	0	0	0	0	0	0	200	300	0	-40.2235	-88.1726	-795.65	-93654.2	-38696.8	10055.9	151.365	1020.71	0	0	0	0	0	0	0	603	903	0
513	2	0	0	0	0	0	0	200	300	0	-41.4442	-88.02	-796.565	-94295.1	-38208.5	10147.5	152.033	1021.38	0	0	0	0	0	0	0	603	903	0
513	3	0	0	0	0	0	0	200	300	0	-41.7494	-88.1726	-794.124	-93471.2	-38941	10193.3	150.964	1020.7	0	0	0	0	0	0	0	603	903	0
513	4	0	0	0	0	0	0	200	300	0	-38.8503	-86.9519	-793.209	-92647.2	-38757.9	10055.9	151.138	1019.8	0	0	0	0	0	0	0	603	903	0
513	5	0	0	0	0	0	0	200	300	0	-41.5968	-86.7993	-789.546	-92372.5	-38269.6	9964.37	151.53	1019.99	0	0	0	0	0	0	0	603	903	0
513	6	0	0	0	0	0	0	200	300	0	-41.2917	-85.5786	-790.767	-91640.1	-38269.6	10193.3	151.605	1018.89	0	0	0	0	0	0	0	603	903	0
513	7	0	0	0	0	0	0	200	300	0	-40.071	-84.2053	-788.631	-91365.4	-38208.5	9827.04	151.551	1018.85	0	0	0	0	0	0	0	603	903	0
513	8	0	0	0	0	0	0	200	300	0	-40.071	-85.426	-788.631	-91365.4	-38391.7	10147.5	151.319	1018.85	0	0	0	0	0	0	0	603	903	0
513	9	0	0	0	0	0	0	200	300	0	-39.7658	-85.1208	-786.19	-91090.8	-39002	9918.6	150.391	1018.86	0	0	0	0	0	0	0	603	903	0
514	0	0	0	0	0	0	0	200	300	0	-40.2235	-83.9001	-784.664	-90266.8	-38269.6	9689.71	151.228	1018.04	0	0	0	0	0	0	0	603	903	0
514	1	0	0	0	0	0	0	200	300	0	-40.3761	-84.0527	-783.443	-90449.9	-38086.5	9781.27	151.386	1018.45	0	0	0	0	0	0	0	603	903	0
514	2	0	0	0	0	0	0	200	300	0	-41.1391	-82.6794	-781.002	-89717.5	-38757.9	9781.27	150.374	1017.87	0	0	0	0	0	0	0	603	903	0
514	3	0	0	0	0	0	0	200	300	0	-40.8339	-82.0691	-781.002	-88618.9	-38391.7	9689.71	150.843	1016.47	0	0	0	0	0	0	0	603	903	0
514	4	0	0	0	0	0	0	200	300	0	-39.7658	-82.6794	-777.339	-88435.7	-38879.9	9872.82	149.983	1016.77	0	0	0	0	0	0	0	603	903	0
514	5	0	0	0	0	0	0	200	300	0	-40.8339	-80.8484	-776.424	-88527.3	-39124.1	9369.28	149.61	1017.02	0	0	0	0	0	0	0	603	903	0
514	6	0	0	0	0	0	0	200	300	0	-39.7658	-81.4587	-775.508	-87611.8	-38391.7	9552.39	150.495	1015.97	0	0	0	0	0	0	0	603	903	0
514	7	0	0	0	0	0	0	200	300	0	-40.3761	-81.3062	-773.067	-86513.2	-39124.1	9643.94	149.391	1014.91	0	0	0	0	0	0	0	603	903	0
514	8	0	0	0	0	0	0	200	300	0	-41.7494	-79.4751	-771.846	-86879.4	-38147.5	9506.61	150.576	1015.56	0	0	0	0	0	0	0	603	903	0
514	9	0	0	0	0	0	0	200	300	0	-40.5287	-80.238	-769.1	-86146.9	-38330.6	9323.5	150.162	1015.01	0	0	0	0	0	0	0	603	903	0
515	0	0	0	0	0	0	0	200	300	0	-40.3761	-78.1018	-768.489	-85597.6	-38941	9231.95	149.328	1014.38	0	0	0	0	0	0	0	603	903	0
515	1	0	0	0	0	0	0	200	300	0	-41.1391	-77.7966	-766.658	-84865.2	-38208.5	9323.5	150.162	1013.7	0	0	0	0	0	0	0	603	903	0
515	2	0	0	0	0	0	0	200	300	0	-40.5287	-76.5759	-762.386	-84682.1	-38452.7	9186.17	149.563	1014.08	0	0	0	0	0	0	0	603	903	0
515	3	0	0	0	0	0	0	200	300	0	-39.1554	-76.7285	-762.081	-84224.3	-39063	9277.73	148.742	1013.52	0	0	0	0	0	0	0	603	903	0
515	4	0	0	0	0	0	0	200	300	0	-40.8339	-76.1182	-756.282	-84407.4	-38269.6	9231.95	149.398	1014.61	0	0	0	0	0	0	0	603	903	0
515	5	0	0	0	0	0	0	200	300	0	-40.8339	-76.5759	-757.808	-83491.9	-38452.7	9048.85	149.258	1013.18	0	0	0	0	0	0	0	603	903	0
515	6	0	0	0	0	0	0	200	300	0	-40.071	-73.9819	-756.587	-83034.1	-38635.8	9094.62	148.934	1012.75	0	0	0	0	0	0	0	603	903	0
515	7	0	0	0	0	0	0	200	300	0	-40.9865	-75.05	-755.672	-82576.4	-38391.7	8911.52	149.195	1012.28	0	0	0	0	0	0	0	603	903	0
515	8	0	0	0	0	0	0	200	300	0	-41.1391	-73.6768	-752.62	-81752.4	-38086.5	8911.52	149.395	1011.62	0	0	0	0	0	0	0	603	903	0
515	9	0	0	0	0	0	0	200	300	0	-39.6132	-73.5242	-752.01	-81477.7	-39124.1	8911.52	147.974	1011.35	0	0	0	0	0	0	0	603	903	0
516	0	0	0	0	0	0	0	200	300	0	-41.1391	-74.4397	-748.958	-81660.9	-38208.5	9003.07	148.984	1012.03	0	0	0	0	0	0	0	603	903	0
516	1	0	0	0	0	0	0	200	300	0	-40.8339	-72.9138	-747.737	-81386.2	-38574.8	9094.62	148.411	1011.84	0	0	0	0	0	0	0	603	903	0
516	2	0	0	0	0	0	0	200	300	0	-40.071	-71.8457	-746.211	-80287.6	-38513.7	8865.74	148.388	1010.59	0	0	0	0	0	0	0	603	903	0
516	3	0	0	0	0	0	0	200	300	0	-40.8339	-71.3879	-742.549	-80196	-38025.4	8682.63	148.791	1011	0	0	0	0	0	0	0	603	903	0
516	4	0	0	0	0	0	0	200	300	0	-41.4442	-70.0146	-740.108	-79280.5	-38574.8	8728.41	147.88	1010.12	0	0	0	0	0	0	0	603	903	0
516	5	0	0	0	0	0	0	200	300	0	-39.6132	-70.625	-739.803	-78822.7	-38757.9	9094.62	147.611	1009.55	0	0	0	0	0	0	0	603	903	0
516	6	0	0	0	0	0	0	200	300	0	-40.9865	-69.7095	-737.972	-79097.4	-37903.4	8636.86	148.638	1010.18	0	0	0	0	0	0	0	603	903	0
516	7	0	0	0	0	0	0	200	300	0	-41.1391	-68.031	-735.53	-78090.3	-39002	8499.53	146.974	1009.17	0	0	0	0	0	0	0	603	903	0
516	8	0	0	0	0	0	0	200	300	0	-39.9184	-68.1836	-734.004	-77541	-38635.8	8545.31	147.363	1008.64	0	0	0	0	0	0	0	603	903	0
516	9	0	0	0	0	0	0	200	300	0	-40.2235	-68.1836	-729.427	-77357.9	-38086.5	8591.08	147.786	1009.05	0	0	0	0	0	0	0	603	903	0
517	0	0	0	0	0	0	0	200	300	0	-40.071	-66.6577	-728.206	-76900.1	-38513.7	8453.75	147.112	1008.6	0	0	0	0	0	0	0	603	903	0
517	1	0	0	0	0	0	0	200	300	0	-40.071	-66.8103	-725.765	-75618.4	-38208.5	8499.53	147.354	1007.19	0	0	0	0	0	0	0	603	903	0
517	2	0	0	0	0	0	0	200	300	0	-40.071	-65.2844	-723.323	-76167.7	-38147.5	8316.42	147.261	1008.3	0	0	0	0	0	0	0	603	903	0
517	3	0	0	0	0	0	0	200	300	0	-39.0028	-65.1318	-722.408	-75526.8	-38757.9	8545.31	146.349	1007.55	0	0	0	0	0	0	0	603	903	0
517	4	0	0	0	0	0	0	200	300	0	-40.3761	-64.8267	-721.187	-75252.1	-38025.4	8453.75	147.274	1007.34	0	0	0	0	0	0	0	603	903	0
517	5	0	0	0	0	0	0	200	300	0	-39.7658	-63.606	-715.999	-74977.5	-37903.4	8453.75	147.062	1007.72	0	0	0	0	0	0	0	603	903	0
517	6	0	0	0	0	0	0	200	300	0	-40.8339	-63.4534	-714.473	-74428.2	-37903.4	8407.98	146.949	1007.17	0	0	0	0	0	0	0	603	903	0
517	7	0	0	0	0	0	0	200	300	0	-40.3761	-63.606	-711.421	-73329.6	-37842.3	8316.42	146.807	1006.07	0	0	0	0	0	0	0	603	903	0
517	8	0	0	0	0	0	0	200	300	0	-40.3761	-62.2327	-709.285	-72963.4	-37659.2	8453.75	146.905	1005.87	0	0	0	0	0	0	0	603	903	0
517	9	0	0	0	0	0	0	200	300	0	-40.5287	-62.2327	-708.37	-72597.1	-37903.4	8362.2	146.492	1005.48	0	0	0	0	0	0	0	603	903	0
518	0	0	0	0	0	0	0	200	300	0	-40.6813	-61.012	-704.708	-72139.4	-37842.3	8133.32	146.301	1005.37	0	0	0	0	0	0	0	603	903	0
518	1	0	0	0	0	0	0	200	300	0	-39.7658	-59.4861	-699.214	-72139.4	-37720.3	8179.09	146.053	1006.17	0	0	0	0	0	0	0	603	903	0
518	2	0	0	0	0	0	0	200	300	0	-41.2917	-61.012	-702.266	-71590	-38147.5	7950.21	145.679	1004.94	0	0	0	0	0	0	0	603	903	0
518	3	0	0	0	0	0	0	200	300	0	-40.8339	-60.8594	-697.383	-70766.1	-37415.1	7995.99	146.349	1004.47	0	0	0	0	0	0	0	603	903	0
518	4	0	0	0	0	0	0	200	300	0	-38.0873	-58.5706	-695.247	-70491.4	-37537.2	8041.76	146.009	1004.39	0	0	0	0	0	0	0	603	903	0
518	5	0	0	0	0	0	0	200	300	0	-40.5287	-58.1128	-693.721	-69209.7	-37781.3	7904.44	145.538	1002.77	0	0	0	0	0	0	0	603	903	0
518	6	0	0	0	0	0	0	200	300	0	-40.6813	-57.8076	-689.754	-69118.1	-37476.1	7950.21	145.667	1003.21	0	0	0	0	0	0	0	603	903	0
518	7	0	0	0	0	0	0	200	300	0	-39.1554	-56.7395	-690.059	-68935	-37781.3	7812.88	145.249	1002.9	0	0	0	0	0	0	0	603	903	0
518	8	0	0	0	0	0	0	200	300	0	-40.071	-55.5188	-688.228	-68660.4	-37781.3	7858.66	145.104	1002.76	0	0	0	0	0	0	0	603	903	0
518	9	0	0	0	0	0	0	200	300	0	-40.5287	-55.5188	-684.566	-68477.3	-37109.9	7629.78	145.791	1003.03	0	0	0	0	0	0	0	603	903	0
519	0	0	0	0	0	0	0	200	300	0	-38.3925	-56.2817	-682.43	-67927.9	-37415.1	7355.12	145.174	1002.54	0	0	0	0	0	0	0	603	903	0
519	1	0	0	0	0	0	0	200	300	0	-40.071	-54.4507	-679.988	-67561.7	-37048.9	7584	145.515	1002.36	0	0	0	0	0	0	0	603	903	0
519	2	0	0	0	0	0	0	200	300	0	-40.071	-53.8403	-678.157	-66646.2	-36926.8	7446.67	145.548	1001.28	0	0	0	0	0	0	0	603	903	0
519	3	0	0	0	0	0	0	200	300	0	-39.0028	-53.3826	-676.326	-66554.6	-37598.2	7309.34	144.408	1001.41	0	0	0	0	0	0	0	603	903	0
519	4	0	0	0	0	0	0	200	300	0	-39.4606	-53.0774	-672.969	-66554.6	-37109.9	7400.9	144.856	1001.9	0	0	0	0	0	0	0	603	903	0
519	5	0	0	0	0	0	0	200	300	0	-39.308	-51.0938	-672.664	-66280	-36682.7	7263.57	145.467	1001.53	0	0	0	0	0	0	0	603	903	0
519	6	0	0	0	0	0	0	200	300	0	-38.3925	-52.3145	-670.223	-65181.4	-36743.7	7263.57	145.177	1000.25	0	0	0	0	0	0	0	603	903	0
519	7	0	0	0	0	0	0	200	300	0	-38.5451	-50.3308	-667.476	-65456	-36438.5	7172.01	145.408	1001.07	0	0	0	0	0	0	0	603	903	0
519	8	0	0	0	0	0	0	200	300	0	-38.5451	-50.0256	-664.119	-64815.2	-36316.5	6851.58	145.316	1000.6	0	0	0	0	0	0	0	603	903	0
519	9	0	0	0	0	0	0	200	300	0	-38.2399	-49.4153	-662.593	-63991.2	-36926.8	6714.25	144.269	999.577	0	0	0	0	0	0	0	603	903	0
520	0	0	0	0	0	0	0	200	300	0	-38.5451	-46.9739	-657.711	-63716.5	-36621.6	7034.68	144.32	999.876	0	0	0	0	0	0	0	603	903	0
520	1	0	0	0	0	0	0	200	300	0	-38.2399	-47.8894	-658.626	-63808.1	-36743.7	6897.35	144.212	999.881	0	0	0	0	0	0	0	603	903	0
520	2	0	0	0	0	0	0	200	300	0	-37.477	-46.6687	-655.879	-63075.6	-36804.7	6805.8	143.885	999.17	0	0	0	0	0	0	0	603	903	0
520	3	0	0	0	0	0	0	200	300	0	-37.3244	-46.2109	-654.659	-63075.6	-36072.3	6714.25	144.899	999.349	0	0	0	0	0	0	0	603	903	0
520	4	0	0	0	0	0	0	200	300	0	-38.6977	-46.0584	-650.691	-62434.8	-36377.5	6668.47	144.094	998.951	0	0	0	0	0	0	0	603	903	0
520	5	0	0	0	0	0	0	200	300	0	-37.6295	-44.5325	-649.166	-61519.3	-36255.4	6576.92	144.151	997.767	0	0	0	0	0	0	0	603	903	0
520	6	0	0	0	0	0	0	200	300	0	-37.1718	-44.0747	-648.555	-61702.4	-36011.3	6805.8	144.475	998.138	0	0	0	0	0	0	0	603	903	0
520	7	0	0	0	0	0	0	200	300	0	-38.0873	-43.9221	-644.588	-61244.6	-36377.5	6531.14	143.565	998.014	0	0	0	0	0	0	0	603	903	0
520	8	0	0	0	0	0	0	200	300	0	-36.714	-43.0066	-644.283	-60786.8	-35828.2	6439.59	144.391	997.348	0	0	0	0	0	0	0	603	903	0
520	9	0	0	0	0	0	0	200	300	0	-36.2563	-43.3118	-641.536	-60695.3	-35706.1	6485.37	144.343	997.609	0	0	0	0	0	0	0	603	903	0
521	0	0	0	0	0	0	0	200	300	0	-37.477	-41.9385	-638.484	-59962.8	-36072.3	6256.49	143.503	996.914	0	0	0	0	0	0	0	603	903	0
521	1	0	0	0	0	0	0	200	300	0	-36.5614	-41.6333	-635.433	-59779.7	-35462	6348.04	144.192	997.077	0	0	0	0	0	0	0	603	903	0
521	2	0	0	0	0	0	0	200	300	0	-35.1881	-40.7178	-632.381	-59230.4	-35645.1	6073.38	143.634	996.663	0	0	0	0	0	0	0	603	903	0
521	3	0	0	0	0	0	0	200	300	0	-37.3244	-38.5815	-628.719	-58772.7	-35645.1	6210.71	143.305	996.48	0	0	0	0	0	0	0	603	903	0
521	4	0	0	0	0	0	0	200	300	0	-34.883	-39.0393	-629.634	-58406.5	-35462	6027.6	143.678	995.763	0	0	0	0	0	0	0	603	903	0
521	5	0	0	0	0	0	0	200	300	0	-33.9674	-38.2764	-624.141	-58589.6	-35462	5981.83	143.183	996.872	0	0	0	0	0	0	0	603	903	0
521	6	0	0	0	0	0	0	200	300	0	-33.9674	-38.1238	-625.972	-58131.8	-35523	6027.6	143.251	995.866	0	0	0	0	0	0	0	603	903	0
521	7	0	0	0	0	0	0	200	300	0	-34.5778	-37.9712	-623.836	-57490.9	-34973.7	5981.83	143.938	995.157	0	0	0	0	0	0	0	603	903	0
521	8	0	0	0	0	0	0	200	300	0	-34.2726	-36.1401	-620.479	-56575.4	-34912.6	5844.5	143.733	994.18	0	0	0	0	0	0	0	603	903	0
521	9	0	0	0	0	0	0	200	300	0	-35.1881	-35.835	-618.953	-56941.6	-35523	5752.95	142.608	994.997	0	0	0	0	0	0	0	603	903	0
522	0	0	0	0	0	0	0	200	300	0	-35.0356	-34.9194	-618.038	-56300.7	-34851.6	5615.62	143.609	994.096	0	0	0	0	0	0	0	603	903	0
522	1	0	0	0	0	0	0	200	300	0	-33.5097	-34.6143	-615.596	-56117.6	-35462	5524.06	142.394	994.16	0	0	0	0	0	0	0	603	903	0
522	2	0	0	0	0	0	0	200	300	0	-34.5778	-35.3772	-614.07	-56117.6	-35217.8	5569.84	142.649	994.386	0	0	0	0	0	0	0	603	903	0
522	3	0	0	0	0	0	0	200	300	0	-33.5097	-33.8513	-611.019	-55385.2	-34607.5	5752.95	143.361	993.644	0	0	0	0	0	0	0	603	903	0
522	4	0	0	0	0	0	0	200	300	0	-32.1364	-32.478	-610.103	-55019	-34973.7	5295.18	142.676	993.18	0	0	0	0	0	0	0	603	903	0
522	5	0	0	0	0	0	0	200	300	0	-34.12	-32.7832	-606.746	-54011.9	-34973.7	5112.08	142.359	992.019	0	0	0	0	0	0	0	603	903	0
522	6	0	0	0	0	0	0	200	300	0	-33.3571	-32.3254	-605.22	-54286.6	-34546.4	5066.3	142.919	992.697	0	0	0	0	0	0	0	603	903	0
522	7	0	0	0	0	0	0	200	300	0	-30.9157	-31.4099	-604.915	-53737.3	-34729.5	5112.08	142.588	991.834	0	0	0	0	0	0	0	603	903	0
522	8	0	0	0	0	0	0	200	300	0	-32.8993	-30.9522	-600.948	-53920.4	-34485.4	5020.52	142.615	992.726	0	0	0	0	0	0	0	603	903	0
522	9	0	0	0	0	0	0	200	300	0	-32.289	-30.0366	-600.337	-53554.2	-34241.3	5386.73	142.963	992.207	0	0	0	0	0	0	0	603	903	0
523	0	0	0	0	0	0	0	200	300	0	-30.3053	-29.2737	-597.896	-53004.8	-34302.3	4837.42	142.628	991.652	0	0	0	0	0	0	0	603	903	0
523	1	0	0	0	0	0	0	200	300	0	-33.2045	-28.6633	-594.539	-52547.1	-34180.2	4928.97	142.51	991.383	0	0	0	0	0	0	0	603	903	0
523	2	0	0	0	0	0	0	200	300	0	-32.5941	-28.6633	-593.929	-52364	-33508.8	4791.64	143.581	991.165	0	0	0	0	0	0	0	603	903	0
523	3	0	0	0	0	0	0	200	300	0	-29.3898	-27.5952	-591.487	-51723.1	-34119.2	4608.54	142.316	990.446	0	0	0	0	0	0	0	603	903	0
523	4	0	0	0	0	0	0	200	300	0	-31.6786	-25.6116	-590.572	-51631.6	-34119.2	4379.65	142.227	990.426	0	0	0	0	0	0	0	603	903	0
523	5	0	0	0	0	0	0	200	300	0	-31.8312	-26.2219	-589.351	-51173.8	-33569.9	4654.31	143.039	989.831	0	0	0	0	0	0	0	603	903	0
523	6	0	0	0	0	0	0	200	300	0	-30.3053	-25.7642	-583.553	-50990.7	-33875.1	4516.98	141.95	990.38	0	0	0	0	0	0	0	603	903	0
523	7	0	0	0	0	0	0	200	300	0	-30.3053	-25.0012	-585.384	-51082.2	-33630.9	4425.43	142.549	990.263	0	0	0	0	0	0	0	603	903	0
523	8	0	0	0	0	0	0	200	300	0	-29.695	-24.3909	-581.417	-50899.1	-33325.7	4471.21	142.682	990.543	0	0	0	0	0	0	0	603	903	0
523	9	0	0	0	0	0	0	200	300	0	-29.3898	-23.6279	-579.28	-49159.6	-33569.9	4196.55	142.049	987.863	0	0	0	0	0	0	0	603	903	0
524	0	0	0	0	0	0	0	200	300	0	-29.8476	-23.4753	-579.891	-50166.7	-33447.8	3967.67	142.32	989.511	0	0	0	0	0	0	0	603	903	0
524	1	0	0	0	0	0	0	200	300	0	-29.695	-22.4072	-576.839	-49892	-33325.7	4150.77	142.227	989.492	0	0	0	0	0	0	0	603	903	0
524	2	0	0	0	0	0	0	200	300	0	-28.3217	-21.6443	-574.703	-49251.2	-33753	3967.67	141.269	988.699	0	0	0	0	0	0	0	603	903	0
524	3	0	0	0	0	0	0	200	300	0	-28.6269	-21.3391	-573.787	-49342.7	-32776.4	4059.22	142.877	988.995	0	0	0	0	0	0	0	603	903	0
524	4	0	0	0	0	0	0	200	300	0	-28.1691	-21.9495	-571.651	-49159.6	-32959.5	3921.89	142.343	988.996	0	0	0	0	0	0	0	603	903	0
524	5	0	0	0	0	0	0	200	300	0	-28.6269	-20.4236	-569.82	-48427.2	-33142.6	3921.89	141.837	987.987	0	0	0	0	0	0	0	603	903	0
524	6	0	0	0	0	0	0	200	300	0	-28.0165	-19.6606	-566.768	-48518.8	-32776.4	3830.34	142.17	988.606	0	0	0	0	0	0	0	603	903	0
524	7	0	0	0	0	0	0	200	300	0	-28.4743	-18.5925	-565.853	-47694.8	-33020.6	3693.01	141.645	987.288	0	0	0	0	0	0	0	603	903	0
524	8	0	0	0	0	0	0	200	300	0	-27.8639	-18.1348	-565.547	-47420.1	-32593.3	3647.23	142.369	986.848	0	0	0	0	0	0	0	603	903	0
524	9	0	0	0	0	0	0	200	300	0	-27.2536	-18.1348	-559.749	-47694.8	-32593.3	3647.23	141.772	988.208	0	0	0	0	0	0	0	603	903	0
525	0	0	0	0	0	0	0	200	300	0	-27.8639	-16.9141	-560.054	-47237	-32654.3	3464.13	141.694	987.344	0	0	0	0	0	0	0	603	903	0
525	1	0	0	0	0	0	0	200	300	0	-28.1691	-16.4563	-558.528	-47053.9	-32715.4	3509.9	141.426	987.246	0	0	0	0	0	0	0	603	903	0
525	2	0	0	0	0	0	0	200	300	0	-27.101	-16.7615	-556.697	-46596.1	-32166.1	3555.68	142.22	986.701	0	0	0	0	0	0	0	603	903	0
525	3	0	0	0	0	0	0	200	300	0	-28.7794	-15.5408	-555.477	-45863.7	-32044	3097.92	142.313	985.566	0	0	0	0	0	0	0	603	903	0
525	4	0	0	0	0	0	0	200	300	0	-28.1691	-14.6252	-554.256	-45863.7	-32532.3	3464.13	141.305	985.748	0	0	0	0	0	0	0	603	903	0
525	5	0	0	0	0	0	0	200	300	0	-24.3544	-14.4727	-551.509	-45589.1	-32288.1	3143.69	141.455	985.662	0	0	0	0	0	0	0	603	903	0
525	6	0	0	0	0	0	0	200	300	0	-27.2536	-13.4045	-550.594	-45680.6	-32898.5	3052.14	140.249	985.966	0	0	0	0	0	0	0	603	903	0
525	7	0	0	0	0	0	0	200	300	0	-27.5587	-12.9468	-549.678	-45222.9	-32410.2	3097.92	141.038	985.271	0	0	0	0	0	0	0	603	903	0
525	8	0	0	0	0	0	0	200	300	0	-23.5915	-12.1838	-544.185	-44948.2	-31677.8	3143.69	141.789	985.597	0	0	0	0	0	0	0	603	903	0
525	9	0	0	0	0	0	0	200	300	0	-27.2536	-11.7261	-546.627	-44765.1	-32227.1	2777.48	141.044	984.893	0	0	0	0	0	0	0	603	903	0
526	0	0	0	0	0	0	0	200	300	0	-27.101	-11.7261	-544.185	-44490.4	-32227.1	2640.15	140.779	984.756	0	0	0	0	0	0	0	603	903	0
526	1	0	0	0	0	0	0	200	300	0	-24.3544	-10.3528	-542.354	-44398.9	-31921.9	2548.6	141.142	984.863	0	0	0	0	0	0	0	603	903	0
526	2	0	0	0	0	0	0	200	300	0	-26.9484	-9.89502	-542.354	-43758	-32288.1	2640.15	140.467	983.682	0	0	0	0	0	0	0	603	903	0
526	3	0	0	0	0	0	0	200	300	0	-26.6432	-8.82691	-539.607	-43758	-31799.8	2685.93	141.069	984.092	0	0	0	0	0	0	0	603	903	0
526	4	0	0	0	0	0	0	200	300	0	-23.744	-8.52173	-538.387	-43849.6	-31921.9	2960.59	140.708	984.446	0	0	0	0	0	0	0	603	903	0
526	5	0	0	0	0	0	0	200	300	0	-26.6432	-7.91138	-536.556	-43117.1	-31983	2502.82	140.392	983.359	0	0	0	0	0	0	0	603	903	0
526	6	0	0	0	0	0	0	200	300	0	-27.101	-7.45362	-534.725	-43117.1	-31372.6	2319.72	141.329	983.634	0	0	0	0	0	0	0	603	903	0
526	7	0	0	0	0	0	0	200	300	0	-26.1855	-7.45362	-534.114	-42934	-31860.9	2228.16	140.348	983.384	0	0	0	0	0	0	0	603	903	0
526	8	0	0	0	0	0	0	200	300	0	-25.8803	-6.84326	-533.504	-43117.1	-31983	2228.16	140.051	983.819	0	0	0	0	0	0	0	603	903	0
526	9	0	0	0	0	0	0	200	300	0	-26.6432	-5.46997	-531.063	-43025.6	-31067.4	2182.39	141.5	984.018	0	0	0	0	0	0	0	603	903	0
527	0	0	0	0	0	0	0	200	300	0	-24.9648	-5.92774	-530.757	-42659.4	-31983	2273.94	139.741	983.375	0	0	0	0	0	0	0	603	903	0
527	1	0	0	0	0	0	0	200	300	0	-26.1855	-4.85962	-528.926	-42750.9	-31799.8	2090.84	139.878	983.826	0	0	0	0	0	0	0	603	903	0
527	2	0	0	0	0	0	0	200	300	0	-25.4225	-5.01221	-526.485	-42476.3	-31128.5	2365.49	140.875	983.679	0	0	0	0	0	0	0	603	903	0
527	3	0	0	0	0	0	0	200	300	0	-25.1173	-3.63892	-526.79	-42018.5	-31799.8	2090.84	139.635	982.763	0	0	0	0	0	0	0	603	903	0
527	4	0	0	0	0	0	0	200	300	0	-24.0492	-3.79151	-524.959	-41743.9	-31555.7	1770.4	139.889	982.518	0	0	0	0	0	0	0	603	903	0
527	5	0	0	0	0	0	0	200	300	0	-26.1855	-2.11304	-523.738	-41469.2	-31128.5	2090.84	140.565	982.179	0	0	0	0	0	0	0	603	903	0
527	6	0	0	0	0	0	0	200	300	0	-24.3544	-2.87598	-523.433	-41469.2	-31799.8	1724.63	139.248	982.225	0	0	0	0	0	0	0	603	903	0
527	7	0	0	0	0	0	0	200	300	0	-23.8966	-0.892337	-520.992	-41286.1	-31921.9	1587.3	138.729	982.245	0	0	0	0	0	0	0	603	903	0
527	8	0	0	0	0	0	0	200	300	0	-24.8122	-0.739749	-518.856	-41286.1	-31128.5	1678.85	140.006	982.572	0	0	0	0	0	0	0	603	903	0
527	9	0	0	0	0	0	0	200	300	0	-24.2018	-0.587161	-519.466	-39912.8	-31616.7	1633.07	139.136	979.834	0	0	0	0	0	0	0	603	903	0
528	0	0	0	0	0	0	0	200	300	0	-24.2018	0.328366	-518.856	-41194.5	-31128.5	1633.07	140.006	982.395	0	0	0	0	0	0	0	603	903	0
528	1	0	0	0	0	0	0	200	300	0	-22.9811	1.24389	-516.719	-40828.3	-30884.3	1266.86	140.23	982.015	0	0	0	0	0	0	0	603	903	0
528	2	0	0	0	0	0	0	200	300	0	-23.8966	1.70166	-516.414	-39546.6	-31555.7	1221.09	138.895	979.579	0	0	0	0	0	0	0	603	903	0
528	3	0	0	0	0	0	0	200	300	0	-23.744	2.00683	-515.804	-40095.9	-31311.6	1312.64	139.296	980.735	0	0	0	0	0	0	0	603	903	0
528	4	0	0	0	0	0	0	200	300	0	-24.3544	1.39648	-513.973	-40004.4	-30884.3	1129.53	139.911	980.834	0	0	0	0	0	0	0	603	903	0
528	5	0	0	0	0	0	0	200	300	0	-23.744	3.07495	-513.362	-39455	-31677.8	1266.86	138.294	979.856	0	0	0	0	0	0	0	603	903	0
528	6	0	0	0	0	0	0	200	300	0	-22.3708	3.53271	-513.057	-39180.4	-31433.6	1221.09	138.733	979.367	0	0	0	0	0	0	0	603	903	0
528	7	0	0	0	0	0	0	200	300	0	-24.3544	4.14306	-511.226	-38264.9	-30762.2	1083.76	139.827	977.849	0	0	0	0	0	0	0	603	903	0
528	8	0	0	0	0	0	0	200	300	0	-24.507	4.60083	-511.836	-38814.2	-31128.5	1037.98	139.183	978.833	0	0	0	0	0	0	0	603	903	0
528	9	0	0	0	0	0	0	200	300	0	-23.5915	4.14306	-511.226	-38448	-30823.3	946.427	139.707	978.207	0	0	0	0	0	0	0	603	903	0
529	0	0	0	0	0	0	0	200	300	0	-22.5233	5.82153	-510.311	-39271.9	-30945.4	671.769	139.36	979.957	0	0	0	0	0	0	0	603	903	0
529	1	0	0	0	0	0	0	200	300	0	-23.5915	5.66894	-508.785	-38631.1	-31433.6	1037.98	138.218	978.928	0	0	0	0	0	0	0	603	903	0
529	2	0	0	0	0	0	0	200	300	0	-23.5915	6.73706	-508.48	-38356.4	-31128.5	580.216	138.781	978.434	0	0	0	0	0	0	0	603	903	0
529	3	0	0	0	0	0	0	200	300	0	-23.1337	7.04223	-508.48	-38722.6	-30579.1	809.098	139.862	979.154	0	0	0	0	0	0	0	603	903	0
529	4	0	0	0	0	0	0	200	300	0	-24.3544	7.34741	-508.174	-38539.5	-31189.5	534.44	138.624	978.839	0	0	0	0	0	0	0	603	903	0
529	5	0	0	0	0	0	0	200	300	0	-23.2863	8.56811	-504.512	-37715.5	-31250.5	488.663	138.058	977.756	0	0	0	0	0	0	0	603	903	0
529	6	0	0	0	0	0	0	200	300	0	-23.8966	8.7207	-506.954	-38173.3	-30823.3	305.558	139.199	978.299	0	0	0	0	0	0	0	603	903	0
529	7	0	0	0	0	0	0	200	300	0	-24.0492	9.48364	-506.038	-37898.6	-31433.6	442.887	137.883	977.893	0	0	0	0	0	0	0	603	903	0
529	8	0	0	0	0	0	0	200	300	0	-22.6759	9.48364	-505.733	-37532.4	-31372.6	351.334	137.966	977.214	0	0	0	0	0	0	0	603	903	0
529	9	0	0	0	0	0	0	200	300	0	-22.8285	10.094	-505.428	-37807.1	-30762.2	214.005	139.136	977.802	0	0	0	0	0	0	0	603	903	0
530	0	0	0	0	0	0	0	200	300	0	-23.744	10.7043	-504.512	-38081.8	-31311.6	76.6757	137.937	978.482	0	0	0	0	0	0	0	603	903	0
530	1	0	0	0	0	0	0	200	300	0	-23.1337	11.4673	-503.902	-36342.2	-31189.5	122.452	138.104	975.122	0	0	0	0	0	0	0	603	903	0
530	2	0	0	0	0	0	0	200	300	0	-23.1337	11.6199	-504.817	-37440.9	-30762.2	-14.877	139.063	977.167	0	0	0	0	0	0	0	603	903	0
530	3	0	0	0	0	0	0	200	300	0	-22.0656	12.5354	-504.512	-36800	-31555.7	-60.6534	137.453	975.942	0	0	0	0	0	0	0	603	903	0
530	4	0	0	0	0	0	0	200	300	0	-22.3708	13.2983	-505.428	-36159.1	-31433.6	-335.312	137.808	974.542	0	0	0	0	0	0	0	603	903	0
530	5	0	0	0	0	0	0	200	300	0	-22.8285	12.688	-503.292	-37532.4	-30762.2	-289.535	138.878	977.574	0	0	0	0	0	0	0	603	903	0
530	6	0	0	0	0	0	0	200	300	0	-22.5233	13.4509	-504.207	-37166.2	-31189.5	-197.982	138.141	976.712	0	0	0	0	0	0	0	603	903	0
530	7	0	0	0	0	0	0	200	300	0	-23.1337	13.7561	-504.512	-36342.2	-30457.1	-60.6534	139.631	975.034	0	0	0	0	0	0	0	603	903	0
530	8	0	0	0	0	0	0	200	300	0	-23.2863	14.0613	-503.597	-36891.6	-30762.2	-472.641	138.915	976.256	0	0	0	0	0	0	0	603	903	0
530	9	0	0	0	0	0	0	200	300	0	-23.8966	15.282	-504.207	-36708.5	-31494.7	-655.746	137.536	975.804	0	0	0	0	0	0	0	603	903	0
531	0	0	0	0	0	0	0	200	300	0	-23.5915	14.6716	-505.428	-35976	-31006.4	-518.417	138.653	974.179	0	0	0	0	0	0	0	603	903	0
531	1	0	0	0	0	0	0	200	300	0	-22.9811	16.1975	-505.733	-35976	-30884.3	-564.193	138.932	974.136	0	0	0	0	0	0	0	603	903	0
531	2	0	0	0	0	0	0	200	300	0	-24.0492	16.6553	-505.733	-36067.6	-31128.5	-609.97	138.449	974.318	0	0	0	0	0	0	0	603	903	0
531	3	0	0	0	0	0	0	200	300	0	-24.0492	16.8079	-505.123	-36250.7	-30762.2	-472.641	139.099	974.766	0	0	0	0	0	0	0	603	903	0
531	4	0	0	0	0	0	0	200	300	0	-23.4389	15.282	-505.428	-35884.5	-31006.4	-793.075	138.653	973.998	0	0	0	0	0	0	0	603	903	0
531	5	0	0	0	0	0	0	200	300	0	-24.3544	17.7234	-506.648	-36250.7	-31555.7	-930.404	137.717	974.55	0	0	0	0	0	0	0	603	903	0
531	6	0	0	0	0	0	0	200	300	0	-24.507	17.5708	-506.038	-35792.9	-30945.4	-976.181	138.848	973.732	0	0	0	0	0	0	0	603	903	0
531	7	0	0	0	0	0	0	200	300	0	-23.5915	19.0967	-508.48	-35426.7	-30945.4	-1205.06	139.141	972.672	0	0	0	0	0	0	0	603	903	0
531	8	0	0	0	0	0	0	200	300	0	-22.9811	18.6389	-508.48	-36067.6	-31799.8	-1113.51	137.461	973.932	0	0	0	0	0	0	0	603	903	0
531	9	0	0	0	0	0	0	200	300	0	-23.5915	19.8596	-508.48	-35976	-31006.4	-1250.84	139.021	973.752	0	0	0	0	0	0	0	603	903	0
532	0	0	0	0	0	0	0	200	300	0	-23.1337	20.0122	-509.7	-35701.4	-31250.5	-1113.51	138.688	973.044	0	0	0	0	0	0	0	603	903	0
532	1	0	0	0	0	0	0	200	300	0	-23.2863	20.6226	-510.005	-35335.2	-31250.5	-1296.62	138.725	972.284	0	0	0	0	0	0	0	603	903	0
532	2	0	0	0	0	0	0	200	300	0	-24.0492	21.8433	-510.311	-35609.8	-31250.5	-1571.27	138.762	972.781	0	0	0	0	0	0	0	603	903	0
532	3	0	0	0	0	0	0	200	300	0	-24.6596	21.8433	-513.057	-35701.4	-31433.6	-1525.5	138.733	972.586	0	0	0	0	0	0	0	603	903	0
532	4	0	0	0	0	0	0	200	300	0	-22.0656	22.6062	-512.752	-35243.6	-32044	-1479.72	137.506	971.734	0	0	0	0	0	0	0	603	903	0
532	5	0	0	0	0	0	0	200	300	0	-24.6596	23.3691	-514.888	-35701.4	-31494.7	-1708.6	138.832	972.338	0	0	0	0	0	0	0	603	903	0
532	6	0	0	0	0	0	0	200	300	0	-24.3544	22.9114	-515.193	-35426.7	-31677.8	-1388.17	138.513	971.764	0	0	0	0	0	0	0	603	903	0
532	7	0	0	0	0	0	0	200	300	0	-23.4389	24.7424	-515.193	-35518.3	-31799.8	-1754.38	138.276	971.942	0	0	0	0	0	0	0	603	903	0
532	8	0	0	0	0	0	0	200	300	0	-24.6596	24.7424	-516.414	-35792.9	-31433.6	-1754.38	139.131	972.311	0	0	0	0	0	0	0	603	903	0
532	9	0	0	0	0	0	0	200	300	0	-23.744	25.0476	-517.635	-35609.8	-31677.8	-1891.71	138.803	971.793	0	0	0	0	0	0	0	603	903	0
533	0	0	0	0	0	0	0	200	300	0	-23.744	26.2683	-518.245	-35335.2	-32471.2	-1937.48	137.344	971.182	0	0	0	0	0	0	0	603	903	0
533	1	0	0	0	0	0	0	200	300	0	-23.8966	26.1157	-521.297	-35518.3	-31921.9	-2166.37	138.764	971.134	0	0	0	0	0	0	0	603	903	0
533	2	0	0	0	0	0	0	200	300	0	-24.8122	26.2683	-521.602	-35609.8	-32105	-2029.04	138.449	971.27	0	0	0	0	0	0	0	603	903	0
533	3	0	0	0	0	0	0	200	300	0	-23.744	27.3364	-523.433	-35152.1	-32349.2	-1937.48	138.198	970.157	0	0	0	0	0	0	0	603	903	0
533	4	0	0	0	0	0	0	200	300	0	-24.3544	27.0312	-524.349	-35152.1	-32105	-2166.37	138.772	970.04	0	0	0	0	0	0	0	603	903	0
533	5	0	0	0	0	0	0	200	300	0	-25.7277	28.2519	-524.349	-36250.7	-32044	-2257.92	138.888	972.135	0	0	0	0	0	0	0	603	903	0
533	6	0	0	0	0	0	0	200	300	0	-25.4225	29.1675	-524.044	-35060.5	-32837.5	-2349.47	137.338	969.904	0	0	0	0	0	0	0	603	903	0
533	7	0	0	0	0	0	0	200	300	0	-25.2699	29.7778	-527.095	-34969	-32349.2	-2486.8	138.628	969.343	0	0	0	0	0	0	0	603	903	0
533	8	0	0	0	0	0	0	200	300	0	-25.2699	28.8623	-528.316	-35335.2	-32776.4	-2486.8	137.961	969.883	0	0	0	0	0	0	0	603	903	0
533	9	0	0	0	0	0	0	200	300	0	-25.2699	30.6934	-532.283	-34969	-33447.8	-2715.68	137.162	968.696	0	0	0	0	0	0	0	603	903	0
534	0	0	0	0	0	0	0	200	300	0	-24.9648	29.7778	-531.673	-34969	-32898.5	-2624.13	138.123	968.772	0	0	0	0	0	0	0	603	903	0
534	1	0	0	0	0	0	0	200	300	0	-25.5751	31.6089	-535.03	-35060.5	-33386.8	-2624.13	137.598	968.53	0	0	0	0	0	0	0	603	903	0
534	2	0	0	0	0	0	0	200	300	0	-26.6432	30.3882	-535.945	-35518.3	-33264.7	-2715.68	137.933	969.272	0	0	0	0	0	0	0	603	903	0
534	3	0	0	0	0	0	0	200	300	0	-26.0329	32.8296	-535.945	-35243.6	-32898.5	-2669.91	138.616	968.76	0	0	0	0	0	0	0	603	903	0
534	4	0	0	0	0	0	0	200	300	0	-24.3544	33.2873	-537.166	-34877.4	-33997.1	-3036.12	136.71	967.929	0	0	0	0	0	0	0	603	903	0
534	5	0	0	0	0	0	0	200	300	0	-26.338	33.5925	-541.133	-34877.4	-33814	-3081.89	137.513	967.453	0	0	0	0	0	0	0	603	903	0
534	6	0	0	0	0	0	0	200	300	0	-26.6432	34.8132	-543.27	-35060.5	-33569.9	-3127.67	138.208	967.536	0	0	0	0	0	0	0	603	903	0
534	7	0	0	0	0	0	0	200	300	0	-25.5751	34.6606	-544.49	-35152.1	-34424.4	-3036.12	136.777	967.56	0	0	0	0	0	0	0	603	903	0
534	8	0	0	0	0	0	0	200	300	0	-26.338	35.7288	-545.406	-35609.8	-33997.1	-3310.78	137.666	968.291	0	0	0	0	0	0	0	603	903	0
534	9	0	0	0	0	0	0	200	300	0	-26.1855	36.1865	-548.152	-35518.3	-33936.1	-3219.22	138.09	967.796	0	0	0	0	0	0	0	603	903	0
535	0	0	0	0	0	0	0	200	300	0	-26.7958	36.0339	-548.152	-34969	-34607.5	-3173.45	136.865	966.794	0	0	0	0	0	0	0	603	903	0
535	1	0	0	0	0	0	0	200	300	0	-26.7958	37.7124	-550.594	-34694.3	-34668.5	-3402.33	137.034	966.013	0	0	0	0	0	0	0	603	903	0
535	2	0	0	0	0	0	0	200	300	0	-27.7113	37.7124	-553.035	-34785.9	-34668.5	-3722.76	137.312	965.9	0	0	0	0	0	0	0	603	903	0
535	3	0	0	0	0	0	0	200	300	0	-27.101	37.865	-554.866	-34969	-35278.9	-3539.66	136.419	966.022	0	0	0	0	0	0	0	603	903	0
535	4	0	0	0	0	0	0	200	300	0	-26.6432	39.5435	-558.834	-35060.5	-34851.6	-3676.99	137.635	965.739	0	0	0	0	0	0	0	603	903	0
535	5	0	0	0	0	0	0	200	300	0	-28.0165	38.7805	-560.054	-35609.8	-34546.4	-3539.66	138.316	966.583	0	0	0	0	0	0	0	603	903	0
535	6	0	0	0	0	0	0	200	300	0	-28.7794	40.7642	-561.885	-35609.8	-35339.9	-3997.42	137.105	966.376	0	0	0	0	0	0	0	603	903	0
535	7	0	0	0	0	0	0	200	300	0	-27.7113	40.9167	-564.022	-34328.1	-35462	-4134.75	137.127	963.863	0	0	0	0	0	0	0	603	903	0
535	8	0	0	0	0	0	0	200	300	0	-28.4743	41.2219	-565.853	-35518.3	-34912.6	-4226.3	138.301	965.77	0	0	0	0	0	0	0	603	903	0
535	9	0	0	0	0	0	0	200	300	0	-29.0846	41.9849	-568.294	-34969	-36011.3	-4180.53	136.633	964.533	0	0	0	0	0	0	0	603	903	0
536	0	0	0	0	0	0	0	200	300	0	-28.6269	42.4426	-571.041	-35060.5	-35889.2	-4363.63	137.151	964.398	0	0	0	0	0	0	0	603	903	0
536	1	0	0	0	0	0	0	200	300	0	-28.0165	42.7478	-571.956	-35792.9	-35645.1	-4043.2	137.679	965.58	0	0	0	0	0	0	0	603	903	0
536	2	0	0	0	0	0	0	200	300	0	-30.0002	44.4263	-575.923	-35609.8	-35706.1	-4363.63	138.002	964.831	0	0	0	0	0	0	0	603	903	0
536	3	0	0	0	0	0	0	200	300	0	-30.4579	44.1211	-578.06	-34877.4	-36133.4	-4409.41	137.492	963.335	0	0	0	0	0	0	0	603	903	0
536	4	0	0	0	0	0	0	200	300	0	-29.5424	45.4944	-578.975	-34694.3	-35828.2	-4363.63	138.118	962.924	0	0	0	0	0	0	0	603	903	0
536	5	0	0	0	0	0	0	200	300	0	-30.7631	46.7151	-582.332	-35243.6	-36316.5	-4729.84	137.636	963.522	0	0	0	0	0	0	0	603	903	0
536	6	0	0	0	0	0	0	200	300	0	-31.3734	46.2573	-583.858	-34877.4	-36987.8	-4821.4	136.649	962.736	0	0	0	0	0	0	0	603	903	0
536	7	0	0	0	0	0	0	200	300	0	-29.5424	47.3254	-586.299	-34694.3	-36560.6	-4729.84	137.642	962.175	0	0	0	0	0	0	0	603	903	0
536	8	0	0	0	0	0	0	200	300	0	-31.6786	47.7832	-587.52	-34602.8	-36499.6	-4592.51	137.875	961.896	0	0	0	0	0	0	0	603	903	0
536	9	0	0	0	0	0	0	200	300	0	-31.9838	47.9358	-590.267	-34511.2	-37109.9	-4592.51	137.13	961.467	0	0	0	0	0	0	0	603	903	0
537	0	0	0	0	0	0	0	200	300	0	-30.3053	48.0884	-591.487	-34785.9	-37537.2	-5050.28	136.538	961.811	0	0	0	0	0	0	0	603	903	0
537	1	0	0	0	0	0	0	200	300	0	-33.0519	49.6143	-595.76	-33778.8	-37170.9	-5187.61	137.607	959.699	0	0	0	0	0	0	0	603	903	0
537	2	0	0	0	0	0	0	200	300	0	-33.8148	51.1401	-596.37	-34328.1	-37415.1	-5187.61	137.262	960.562	0	0	0	0	0	0	0	603	903	0
537	3	0	0	0	0	0	0	200	300	0	-32.8993	51.5979	-603.084	-34419.6	-38208.5	-5233.38	136.645	960.073	0	0	0	0	0	0	0	603	903	0
537	4	0	0	0	0	0	0	200	300	0	-32.8993	50.2246	-604.915	-34969	-37842.3	-5462.27	137.442	960.808	0	0	0	0	0	0	0	603	903	0
537	5	0	0	0	0	0	0	200	300	0	-33.3571	52.5134	-604.305	-34236.5	-38330.6	-5187.61	136.571	959.654	0	0	0	0	0	0	0	603	903	0
537	6	0	0	0	0	0	0	200	300	0	-32.8993	52.666	-605.22	-34602.8	-38147.5	-4958.73	136.969	960.174	0	0	0	0	0	0	0	603	903	0
537	7	0	0	0	0	0	0	200	300	0	-33.8148	53.2764	-609.188	-34877.4	-38025.4	-5324.94	137.58	960.252	0	0	0	0	0	0	0	603	903	0
537	8	0	0	0	0	0	0	200	300	0	-34.7304	53.2764	-610.713	-34694.3	-38696.8	-5553.82	136.637	959.81	0	0	0	0	0	0	0	603	903	0
537	9	0	0	0	0	0	0	200	300	0	-33.8148	54.8022	-615.901	-34419.6	-39185.1	-5645.37	136.378	958.885	0	0	0	0	0	0	0	603	903	0
538	0	0	0	0	0	0	0	200	300	0	-34.12	55.5652	-618.038	-34419.6	-38757.9	-5691.15	137.289	958.692	0	0	0	0	0	0	0	603	903	0
538	1	0	0	0	0	0	0	200	300	0	-35.3407	56.9385	-621.7	-34419.6	-39307.2	-5370.71	136.775	958.364	0	0	0	0	0	0	0	603	903	0
538	2	0	0	0	0	0	0	200	300	0	-34.2726	56.7859	-621.7	-34328.1	-39734.4	-5645.37	136.087	958.217	0	0	0	0	0	0	0	603	903	0
538	3	0	0	0	0	0	0	200	300	0	-35.0356	58.1592	-624.141	-34419.6	-39185.1	-5874.25	137.218	958.147	0	0	0	0	0	0	0	603	903	0
538	4	0	0	0	0	0	0	200	300	0	-36.2563	58.1592	-627.803	-34419.6	-39856.5	-5828.48	136.514	957.826	0	0	0	0	0	0	0	603	903	0
538	5	0	0	0	0	0	0	200	300	0	-35.3407	58.9221	-629.94	-33504.1	-39978.6	-6057.36	136.536	956.186	0	0	0	0	0	0	0	603	903	0
538	6	0	0	0	0	0	0	200	300	0	-35.7985	60.2954	-632.076	-34145	-40100.6	-6011.58	136.557	957.02	0	0	0	0	0	0	0	603	903	0
538	7	0	0	0	0	0	0	200	300	0	-35.4933	60.7532	-635.128	-34602.8	-40466.8	-6286.24	136.285	957.482	0	0	0	0	0	0	0	603	903	0
538	8	0	0	0	0	0	0	200	300	0	-35.7985	61.8213	-636.959	-34053.4	-40955.1	-6286.24	135.702	956.463	0	0	0	0	0	0	0	603	903	0
538	9	0	0	0	0	0	0	200	300	0	-36.1037	62.7368	-640.926	-34419.6	-40650	-6148.91	136.576	956.703	0	0	0	0	0	0	0	603	903	0
539	0	0	0	0	0	0	0	200	300	0	-38.0873	62.4316	-642.452	-34236.5	-41077.2	-6148.91	136.062	956.29	0	0	0	0	0	0	0	603	903	0
539	1	0	0	0	0	0	0	200	300	0	-37.3244	62.4316	-644.588	-34053.4	-41199.3	-6652.45	136.084	955.83	0	0	0	0	0	0	0	603	903	0
539	2	0	0	0	0	0	0	200	300	0	-37.1718	63.9575	-647.945	-33870.3	-40955.1	-6881.33	136.792	955.274	0	0	0	0	0	0	0	603	903	0
539	3	0	0	0	0	0	0	200	300	0	-38.6977	64.4153	-647.029	-34145	-41626.5	-6698.23	135.665	955.772	0	0	0	0	0	0	0	603	903	0
539	4	0	0	0	0	0	0	200	300	0	-38.6977	66.2463	-654.048	-32680.1	-41931.7	-6652.45	135.889	952.966	0	0	0	0	0	0	0	603	903	0
539	5	0	0	0	0	0	0	200	300	0	-37.1718	66.5515	-654.964	-32954.8	-41626.5	-6652.45	136.445	953.315	0	0	0	0	0	0	0	603	903	0
539	6	0	0	0	0	0	0	200	300	0	-39.308	67.3145	-657.1	-33229.4	-42175.8	-6286.24	135.815	953.57	0	0	0	0	0	0	0	603	903	0
539	7	0	0	0	0	0	0	200	300	0	-40.3761	67.467	-662.288	-33137.9	-42297.9	-6835.56	136.134	953.036	0	0	0	0	0	0	0	603	903	0
539	8	0	0	0	0	0	0	200	300	0	-39.308	68.6877	-662.593	-32497	-41992.7	-7018.66	136.624	952.045	0	0	0	0	0	0	0	603	903	0
539	9	0	0	0	0	0	0	200	300	0	-40.9865	69.9084	-666.561	-32405.5	-42542	-7110.21	136.177	951.616	0	0	0	0	0	0	0	603	903	0
540	0	0	0	0	0	0	0	200	300	0	-40.8339	69.7559	-667.171	-31947.7	-42847.2	-7110.21	135.778	950.885	0	0	0	0	0	0	0	603	903	0
540	1	0	0	0	0	0	0	200	300	0	-39.4606	71.1292	-670.528	-31764.6	-42786.2	-7201.77	136.19	950.373	0	0	0	0	0	0	0	603	903	0
540	2	0	0	0	0	0	0	200	300	0	-42.0546	71.5869	-672.359	-31673.1	-43396.5	-7018.66	135.456	950.107	0	0	0	0	0	0	0	603	903	0
540	3	0	0	0	0	0	0	200	300	0	-42.0546	71.2817	-675.106	-31581.5	-43579.6	-7155.99	135.448	949.78	0	0	0	0	0	0	0	603	903	0
540	4	0	0	0	0	0	0	200	300	0	-41.5968	72.5024	-676.631	-31306.8	-43396.5	-7476.43	135.864	949.269	0	0	0	0	0	0	0	603	903	0
540	5	0	0	0	0	0	0	200	300	0	-43.4279	73.418	-679.683	-31581.5	-44067.9	-7384.87	135.164	949.465	0	0	0	0	0	0	0	603	903	0
540	6	0	0	0	0	0	0	200	300	0	-43.2753	74.1809	-679.988	-30482.9	-44251	-7751.08	134.924	947.829	0	0	0	0	0	0	0	603	903	0
540	7	0	0	0	0	0	0	200	300	0	-43.2753	74.7913	-680.599	-30482.9	-43640.7	-7659.53	135.879	947.788	0	0	0	0	0	0	0	603	903	0
540	8	0	0	0	0	0	0	200	300	0	-44.3434	75.4016	-687.618	-30208.2	-44678.3	-7384.87	135.025	946.932	0	0	0	0	0	0	0	603	903	0
540	9	0	0	0	0	0	0	200	300	0	-44.0382	77.3853	-688.838	-29842	-45349.7	-7613.75	134.165	946.322	0	0	0	0	0	0	0	603	903	0
541	0	0	0	0	0	0	0	200	300	0	-41.4442	76.6223	-690.059	-29658.9	-44678.3	-7384.87	135.254	945.98	0	0	0	0	0	0	0	603	903	0
541	1	0	0	0	0	0	0	200	300	0	-45.1064	77.6904	-692.195	-29109.6	-45166.6	-7476.43	134.749	945.054	0	0	0	0	0	0	0	603	903	0
541	2	0	0	0	0	0	0	200	300	0	-46.0219	77.6904	-693.721	-28926.5	-45471.7	-7659.53	134.452	944.698	0	0	0	0	0	0	0	603	903	0
541	3	0	0	0	0	0	0	200	300	0	-43.1227	78.4534	-694.332	-28743.4	-45349.7	-7888.41	134.686	944.397	0	0	0	0	0	0	0	603	903	0
541	4	0	0	0	0	0	0	200	300	0	-45.8693	80.2844	-697.994	-28194.1	-45593.8	-7888.41	134.679	943.393	0	0	0	0	0	0	0	603	903	0
541	5	0	0	0	0	0	0	200	300	0	-46.7848	79.9792	-700.74	-27736.3	-46082.1	-7522.2	134.238	942.581	0	0	0	0	0	0	0	603	903	0
541	6	0	0	0	0	0	0	200	300	0	-43.7331	80.5896	-701.351	-27736.3	-45960	-7934.19	134.469	942.547	0	0	0	0	0	0	0	603	903	0
541	7	0	0	0	0	0	0	200	300	0	-46.0219	81.5051	-705.013	-26820.8	-46814.5	-7934.19	133.598	941.043	0	0	0	0	0	0	0	603	903	0
541	8	0	0	0	0	0	0	200	300	0	-46.1745	80.5896	-704.708	-27003.9	-46509.3	-7796.86	134.002	941.319	0	0	0	0	0	0	0	603	903	0
541	9	0	0	0	0	0	0	200	300	0	-46.1745	81.9629	-708.065	-26729.2	-46387.3	-8025.74	134.487	940.75	0	0	0	0	0	0	0	603	903	0
542	0	0	0	0	0	0	0	200	300	0	-46.7848	82.2681	-710.201	-26363	-46936.6	-8117.3	133.911	940.121	0	0	0	0	0	0	0	603	903	0
542	1	0	0	0	0	0	0	200	300	0	-47.8529	82.5732	-710.201	-26088.3	-47241.8	-8208.85	133.481	939.734	0	0	0	0	0	0	0	603	903	0
542	2	0	0	0	0	0	0	200	300	0	-46.4796	84.2517	-714.473	-24715	-47119.7	-8346.18	134.05	937.592	0	0	0	0	0	0	0	603	903	0
542	3	0	0	0	0	0	0	200	300	0	-46.3271	83.7939	-715.694	-25447.5	-48096.2	-8346.18	132.798	938.556	0	0	0	0	0	0	0	603	903	0
542	4	0	0	0	0	0	0	200	300	0	-45.7167	85.0146	-714.778	-25355.9	-47852.1	-8437.73	133.053	938.474	0	0	0	0	0	0	0	603	903	0
542	5	0	0	0	0	0	0	200	300	0	-46.9374	85.1672	-719.966	-23982.6	-47669	-8346.18	133.79	936.311	0	0	0	0	0	0	0	603	903	0
542	6	0	0	0	0	0	0	200	300	0	-47.5478	83.4888	-721.797	-24715	-48279.3	-8483.5	133.112	937.241	0	0	0	0	0	0	0	603	903	0
542	7	0	0	0	0	0	0	200	300	0	-48.6159	86.8457	-722.103	-24165.7	-48401.4	-8163.07	132.972	936.466	0	0	0	0	0	0	0	603	903	0
542	8	0	0	0	0	0	0	200	300	0	-49.684	86.8457	-724.849	-23158.7	-48279.3	-8620.83	133.394	934.95	0	0	0	0	0	0	0	603	903	0
542	9	0	0	0	0	0	0	200	300	0	-48.1581	86.5405	-726.985	-23158.7	-48523.5	-8620.83	133.254	934.856	0	0	0	0	0	0	0	603	903	0
543	0	0	0	0	0	0	0	200	300	0	-49.0736	87.7612	-728.206	-22884	-48950.7	-8391.95	132.779	934.425	0	0	0	0	0	0	0	603	903	0
543	1	0	0	0	0	0	0	200	300	0	-48.3107	87.1509	-730.342	-22060	-49072.8	-8620.83	132.808	933.205	0	0	0	0	0	0	0	603	903	0
543	2	0	0	0	0	0	0	200	300	0	-48.9211	88.5242	-732.479	-22243.1	-49011.8	-8529.28	133.088	933.367	0	0	0	0	0	0	0	603	903	0
543	3	0	0	0	0	0	0	200	300	0	-50.5995	89.2871	-734.004	-21419.1	-49316.9	-8071.52	132.811	932.181	0	0	0	0	0	0	0	603	903	0
543	4	0	0	0	0	0	0	200	300	0	-49.3788	89.5923	-736.446	-20686.7	-49133.8	-8712.39	133.283	931.09	0	0	0	0	0	0	0	603	903	0
543	5	0	0	0	0	0	0	200	300	0	-49.5314	90.5078	-735.836	-20686.7	-49378	-8803.94	132.895	931.113	0	0	0	0	0	0	0	603	903	0
543	6	0	0	0	0	0	0	200	300	0	-50.2943	90.9656	-739.803	-20320.5	-49988.3	-8620.83	132.43	930.467	0	0	0	0	0	0	0	603	903	0
543	7	0	0	0	0	0	0	200	300	0	-49.2262	90.05	-741.023	-19130.3	-49805.2	-8758.16	132.789	928.816	0	0	0	0	0	0	0	603	903	0
543	8	0	0	0	0	0	0	200	300	0	-49.8366	91.5759	-741.939	-19313.4	-50171.4	-8666.61	132.378	929.031	0	0	0	0	0	0	0	603	903	0
543	9	0	0	0	0	0	0	200	300	0	-51.2099	90.6604	-743.16	-19038.8	-50415.6	-8620.83	132.161	928.619	0	0	0	0	0	0	0	603	903	0
544	0	0	0	0	0	0	0	200	300	0	-50.1418	91.4233	-744.686	-18031.7	-50232.5	-8758.16	132.545	927.214	0	0	0	0	0	0	0	603	903	0
544	1	0	0	0	0	0	0	200	300	0	-50.2943	91.8811	-745.906	-17848.6	-50720.8	-8529.28	132.001	926.929	0	0	0	0	0	0	0	603	903	0
544	2	0	0	0	0	0	0	200	300	0	-50.4469	90.813	-747.737	-17116.2	-50964.9	-8941.27	131.841	925.891	0	0	0	0	0	0	0	603	903	0
544	3	0	0	0	0	0	0	200	300	0	-50.4469	93.1018	-749.874	-16475.3	-50781.8	-8987.04	132.28	924.971	0	0	0	0	0	0	0	603	903	0
544	4	0	0	0	0	0	0	200	300	0	-50.4469	92.644	-747.737	-16292.2	-51148	-8941.27	131.596	924.789	0	0	0	0	0	0	0	603	903	0
544	5	0	0	0	0	0	0	200	300	0	-50.1418	92.9492	-752.01	-16017.5	-51697.3	-8758.16	131.254	924.3	0	0	0	0	0	0	0	603	903	0
544	6	0	0	0	0	0	0	200	300	0	-51.2099	93.407	-755.062	-15010.5	-51209	-8437.73	132.179	922.88	0	0	0	0	0	0	0	603	903	0
544	7	0	0	0	0	0	0	200	300	0	-51.9728	93.7122	-755.062	-15285.1	-51575.2	-8803.94	131.694	923.244	0	0	0	0	0	0	0	603	903	0
544	8	0	0	0	0	0	0	200	300	0	-52.1254	94.9329	-755.367	-14644.2	-51758.4	-8987.04	131.479	922.387	0	0	0	0	0	0	0	603	903	0
544	9	0	0	0	0	0	0	200	300	0	-49.0736	94.9329	-756.893	-13637.2	-51819.4	-8987.04	131.537	921.017	0	0	0	0	0	0	0	603	903	0
545	0	0	0	0	0	0	0	200	300	0	-51.9728	94.9329	-757.198	-12447	-52063.5	-9032.82	131.242	919.438	0	0	0	0	0	0	0	603	903	0
545	1	0	0	0	0	0	0	200	300	0	-51.9728	93.2544	-756.282	-12813.2	-52551.8	-8941.27	130.513	919.942	0	0	0	0	0	0	0	603	903	0
545	2	0	0	0	0	0	0	200	300	0	-50.9047	95.5432	-761.165	-12447	-52429.7	-8849.72	131.119	919.353	0	0	0	0	0	0	0	603	903	0
545	3	0	0	0	0	0	0	200	300	0	-51.9728	96.3062	-762.081	-11623	-52429.7	-8895.49	131.202	918.252	0	0	0	0	0	0	0	603	903	0
545	4	0	0	0	0	0	0	200	300	0	-52.8883	97.0691	-764.217	-11806.1	-52490.8	-8895.49	131.314	918.449	0	0	0	0	0	0	0	603	903	0
545	5	0	0	0	0	0	0	200	300	0	-53.6513	96.9165	-764.522	-10799	-52795.9	-9124.37	130.943	917.125	0	0	0	0	0	0	0	603	903	0
545	6	0	0	0	0	0	0	200	300	0	-50.5995	98.4424	-766.048	-10432.8	-53040.1	-9307.48	130.761	916.619	0	0	0	0	0	0	0	603	903	0
545	7	0	0	0	0	0	0	200	300	0	-52.8883	98.2898	-768.794	-10249.7	-53223.2	-9170.15	130.771	916.332	0	0	0	0	0	0	0	603	903	0
545	8	0	0	0	0	0	0	200	300	0	-53.1935	98.9001	-769.71	-9425.74	-53406.3	-9170.15	130.615	915.246	0	0	0	0	0	0	0	603	903	0
545	9	0	0	0	0	0	0	200	300	0	-51.8202	99.8157	-771.846	-9334.19	-53467.3	-9124.37	130.728	915.093	0	0	0	0	0	0	0	603	903	0
546	0	0	0	0	0	0	0	200	300	0	-52.4306	98.7476	-773.372	-9242.63	-53406.3	-9078.6	130.944	914.951	0	0	0	0	0	0	0	603	903	0
546	1	0	0	0	0	0	0	200	300	0	-53.0409	100.884	-773.982	-8876.42	-53589.4	-9078.6	130.761	914.469	0	0	0	0	0	0	0	603	903	0
546	2	0	0	0	0	0	0	200	300	0	-52.1254	100.884	-772.762	-7869.34	-53833.5	-9444.81	130.336	913.183	0	0	0	0	0	0	0	603	903	0
546	3	0	0	0	0	0	0	200	300	0	-52.278	101.799	-776.424	-8144	-53772.5	-9582.14	130.743	913.489	0	0	0	0	0	0	0	603	903	0
546	4	0	0	0	0	0	0	200	300	0	-53.0409	103.173	-778.255	-7686.24	-54138.7	-9444.81	130.436	912.876	0	0	0	0	0	0	0	603	903	0
546	5	0	0	0	0	0	0	200	300	0	-52.4306	102.867	-780.086	-6679.16	-54199.8	-9170.15	130.521	911.562	0	0	0	0	0	0	0	603	903	0
546	6	0	0	0	0	0	0	200	300	0	-51.8202	104.088	-780.391	-7136.92	-54566	-9353.26	130.079	912.145	0	0	0	0	0	0	0	603	903	0
546	7	0	0	0	0	0	0	200	300	0	-53.9565	105.004	-782.222	-6770.71	-54138.7	-9582.14	130.789	911.656	0	0	0	0	0	0	0	603	903	0
546	8	0	0	0	0	0	0	200	300	0	-52.8883	104.851	-781.612	-5763.63	-54260.8	-9673.69	130.578	910.374	0	0	0	0	0	0	0	603	903	0
546	9	0	0	0	0	0	0	200	300	0	-52.4306	106.53	-783.138	-5488.97	-54688	-9765.24	130.168	910.009	0	0	0	0	0	0	0	603	903	0
547	0	0	0	0	0	0	0	200	300	0	-53.1935	106.53	-784.969	-5397.42	-54688	-9582.14	130.331	909.876	0	0	0	0	0	0	0	603	903	0
547	1	0	0	0	0	0	0	200	300	0	-53.1935	106.072	-782.833	-4756.55	-54810.1	-10039.9	129.985	909.076	0	0	0	0	0	0	0	603	903	0
547	2	0	0	0	0	0	0	200	300	0	-50.1418	108.513	-787.41	-4390.34	-55298.4	-10085.7	129.772	908.576	0	0	0	0	0	0	0	603	903	0
547	3	0	0	0	0	0	0	200	300	0	-52.8883	106.835	-789.852	-4024.13	-54810.1	-9765.24	130.607	908.095	0	0	0	0	0	0	0	603	903	0
547	4	0	0	0	0	0	0	200	300	0	-52.4306	109.734	-788.326	-4481.89	-54810.1	-9856.8	130.473	908.685	0	0	0	0	0	0	0	603	903	0
547	5	0	0	0	0	0	0	200	300	0	-51.8202	110.497	-786.8	-3566.36	-55542.5	-9902.57	129.407	907.533	0	0	0	0	0	0	0	603	903	0
547	6	0	0	0	0	0	0	200	300	0	-51.9728	111.107	-789.852	-3291.71	-55054.2	-10223	130.298	907.167	0	0	0	0	0	0	0	603	903	0
547	7	0	0	0	0	0	0	200	300	0	-52.8883	112.175	-792.903	-2559.28	-55176.3	-10314.6	130.412	906.228	0	0	0	0	0	0	0	603	903	0
547	8	0	0	0	0	0	0	200	300	0	-50.9047	112.48	-792.598	-2101.52	-55725.6	-10406.1	129.692	905.651	0	0	0	0	0	0	0	603	903	0
547	9	0	0	0	0	0	0	200	300	0	-51.2099	114.617	-792.903	-2467.73	-55420.5	-10406.1	130.104	906.112	0	0	0	0	0	0	0	603	903	0
548	0	0	0	0	0	0	0	200	300	0	-49.9892	114.159	-795.65	-2193.07	-55359.4	-10314.6	130.422	905.756	0	0	0	0	0	0	0	603	903	0
548	1	0	0	0	0	0	0	200	300	0	-50.5995	114.159	-795.65	-911.334	-56030.8	-10314.6	129.579	904.145	0	0	0	0	0	0	0	603	903	0
548	2	-5.10927	-6.25656	-15.34	-1536.53	1178.21	-95.994	276.807	400.165	0	-51.3625	115.685	-795.04	-1369.1	-55298.4	-10451.9	130.446	904.722	0	0	0	0	0	0	0	603	903	0
548	3	-5.56703	-12.6653	-25.7159	-1353.42	2276.84	-645.311	288.538	352.63	0	-51.2099	115.99	-792.598	-1094.44	-55603.6	-10680.8	129.846	904.381	0	0	0	0	0	0	0	603	903	0
548	4	-3.73598	-12.9704	-26.9366	-1353.42	2215.81	-645.311	282.26	350.245	0	-49.9892	116.753	-796.565	-453.571	-55725.6	-10497.7	130.043	903.569	0	0	0	0	0	0	0	603	903	0
548	5	-1.44716	-10.3764	-27.2418	-1902.74	2643.06	-507.981	297.022	369.846	0	-49.9892	118.737	-798.091	-178.912	-55542.5	-10955.4	130.406	903.224	0	0	0	0	0	0	0	603	903	0
548	6	-3.27821	-10.3764	-28.1573	-2360.5	2643.06	-965.745	293.867	383.833	0	-49.9892	119.652	-799.312	-178.912	-55664.6	-10680.8	130.359	903.224	0	0	0	0	0	0	0	603	903	0
548	7	-5.26186	-10.3764	-35.4816	-2726.72	3009.27	-462.205	284.812	376.849	0	-48.9211	121.178	-798.397	278.851	-56397	-10955.4	129.362	902.651	0	0	0	0	0	0	0	603	903	0
548	8	-4.95668	-4.73068	-48.2989	-3276.03	4168.94	590.651	286.315	367.828	0	-46.7848	121.941	-798.397	187.299	-55725.6	-11092.8	130.203	902.765	0	0	0	0	0	0	0	603	903	0
548	9	-4.6515	3.0513	-58.6749	-3825.35	4779.29	1002.64	281.454	365.196	0	-49.684	122.399	-798.091	736.615	-55664.6	-11138.5	130.253	902.077	0	0	0	0	0	0	0	603	903	0
549	0	-5.10927	8.84964	-64.4733	-5015.53	5877.92	1185.74	291.168	377.792	0	-48.9211	124.993	-799.312	1011.27	-56152.9	-11504.7	129.748	901.735	0	0	0	0	0	0	0	603	903	0
549	1	-8.16103	9.3074	-75.1544	-5381.74	6549.31	1597.73	287.145	371.609	0	-47.2426	124.84	-798.702	1743.7	-55542.5	-11413.2	130.459	900.817	0	0	0	0	0	0	0	603	903	0
549	2	-7.70326	10.2229	-86.7511	-6205.72	7037.59	1735.06	281.124	371.535	0	-46.4796	126.061	-799.312	1560.59	-55603.6	-11550.5	130.436	901.048	0	0	0	0	0	0	0	603	903	0
549	3	-7.09291	12.5117	-95.6012	-6022.61	7708.97	1597.73	280.637	362.997	0	-46.0219	127.434	-800.533	1926.8	-56397	-11459	129.551	900.593	0	0	0	0	0	0	0	603	903	0
549	4	-6.48256	11.7488	-101.705	-6663.48	8502.43	2101.27	283.599	365.518	0	-45.8693	127.739	-801.753	1926.8	-55725.6	-11596.3	130.495	900.597	0	0	0	0	0	0	0	603	903	0
549	5	-6.48256	11.5962	-105.367	-7395.9	9173.82	2101.27	287.066	370.192	0	-45.5641	129.113	-799.922	1926.8	-55664.6	-11413.2	130.413	900.591	0	0	0	0	0	0	0	603	903	0
549	6	-8.61879	13.885	-118.184	-7945.22	9784.17	2238.6	282.787	367.227	0	-46.1745	130.333	-799.922	2201.46	-55908.7	-11825.2	130.107	900.248	0	0	0	0	0	0	0	603	903	0
549	7	-9.38173	15.1057	-126.119	-8494.54	10272.5	2559.04	281.451	367.353	0	-44.9538	130.486	-797.176	2659.22	-55298.4	-12191.4	130.632	899.664	0	0	0	0	0	0	0	603	903	0
549	8	-11.2128	17.8523	-134.359	-9501.62	11371.1	2925.25	284.632	370.718	0	-45.1064	130.181	-798.091	2476.12	-55359.4	-11825.2	130.635	899.898	0	0	0	0	0	0	0	603	903	0
549	9	-12.7387	19.3782	-140.157	-8860.75	11676.3	3016.8	283.309	363.22	0	-45.4115	132.164	-798.702	3116.99	-55847.7	-12054.1	130.077	899.097	0	0	0	0	0	0	0	603	903	0
550	0	-13.5016	21.667	-148.702	-10325.6	12530.8	3199.91	284.268	369.438	0	-44.9538	133.843	-792.903	3025.43	-55115.3	-12145.6	130.489	899.184	0	0	0	0	0	0	0	603	903	0
550	1	-15.943	21.667	-156.331	-10874.9	12713.9	3520.34	281.326	369.563	0	-43.2753	135.063	-796.26	3208.54	-55298.4	-11733.6	130.552	898.97	0	0	0	0	0	0	0	603	903	0
550	2	-18.0792	20.4463	-162.13	-10783.4	13263.2	3199.91	281.806	366.511	0	-44.9538	134.606	-794.429	3300.09	-55298.4	-12282.9	130.392	898.846	0	0	0	0	0	0	0	603	903	0
550	3	-18.537	19.2256	-166.097	-11241.1	14239.7	3291.46	285.732	367.678	0	-44.6486	136.437	-792.598	4032.51	-54627	-12374.5	131.079	897.912	0	0	0	0	0	0	0	603	903	0
550	4	-18.0792	18.9204	-171.895	-11790.4	14300.8	3291.46	283.195	368.591	0	-43.5805	136.284	-792.293	4398.73	-54504.9	-12237.2	131.206	897.448	0	0	0	0	0	0	0	603	903	0
550	5	-18.2318	15.8687	-177.083	-11241.1	14728	3108.35	283.17	363.479	0	-43.5805	137.963	-789.546	4856.49	-54932.2	-12511.8	130.426	896.849	0	0	0	0	0	0	0	603	903	0
550	6	-18.0792	12.054	-182.271	-12065.1	15094.2	2604.81	282.812	366.193	0	-43.2753	139.031	-789.852	4948.04	-54566	-12420.3	130.916	896.735	0	0	0	0	0	0	0	603	903	0
550	7	-18.6896	11.1385	-187.154	-11607.3	15460.4	2742.14	282.608	362.02	0	-42.3598	138.115	-787.715	4948.04	-54504.9	-12374.5	130.806	896.719	0	0	0	0	0	0	0	603	903	0
550	8	-18.6896	8.39188	-191.426	-12431.3	15582.5	2375.93	281.402	364.94	0	-42.9701	139.489	-784.664	4856.49	-54627	-12511.8	130.382	896.811	0	0	0	0	0	0	0	603	903	0
550	9	-18.6896	5.79788	-196.004	-12339.8	16009.8	1918.17	281.681	362.957	0	-41.1391	140.709	-782.222	5314.25	-53650.4	-12511.8	131.413	896.206	0	0	0	0	0	0	0	603	903	0
551	0	-17.9267	1.8306	-200.887	-12522.9	16864.2	1872.39	283.949	362.338	0	-40.8339	141.32	-779.781	5863.57	-54138.7	-12740.7	130.572	895.481	0	0	0	0	0	0	0	603	903	0
551	1	-16.8585	-1.83151	-205.77	-12614.4	16925.3	1551.96	282.254	361.304	0	-40.9865	142.693	-776.729	6138.23	-54016.7	-12328.7	130.456	895.097	0	0	0	0	0	0	0	603	903	0
551	2	-17.0111	-3.50998	-210.652	-13529.9	17413.6	1231.52	282.665	364.229	0	-42.8175	141.167	-771.236	6412.89	-53162.2	-12832.3	131.069	894.685	0	0	0	0	0	0	0	603	903	0
551	3	-18.2318	-7.17209	-216.451	-12980.6	17291.5	727.981	279.886	359.97	0	-39.9184	143.456	-772.457	6229.78	-53528.4	-12694.9	130.704	894.935	0	0	0	0	0	0	0	603	903	0
551	4	-18.2318	-11.4446	-222.249	-13346.8	17474.6	956.862	278.626	360.053	0	-38.8503	142.998	-767.879	6321.33	-53650.4	-12740.7	130.132	894.768	0	0	0	0	0	0	0	603	903	0
551	5	-17.9267	-13.2756	-221.334	-14079.3	17901.8	590.651	280.882	363.611	0	-40.8339	144.524	-766.963	6504.44	-52918	-12786.5	131.003	894.519	0	0	0	0	0	0	0	603	903	0
551	6	-17.9267	-16.1748	-231.71	-13529.9	18268.1	361.77	278.84	358.392	0	-40.9865	144.829	-760.25	7053.75	-52979.1	-12557.6	130.314	893.722	0	0	0	0	0	0	0	603	903	0
551	7	-18.3844	-19.8369	-235.067	-14170.8	19183.6	224.441	281.609	360.284	0	-38.5451	145.592	-760.86	7328.41	-52368.7	-12832.3	131.172	893.368	0	0	0	0	0	0	0	603	903	0
551	8	-18.6896	-23.499	-239.644	-14537	19122.5	-187.547	279.796	360.661	0	-39.6132	144.066	-753.841	7053.75	-52124.6	-12511.8	130.855	893.643	0	0	0	0	0	0	0	603	903	0
551	9	-19.9103	-24.2619	-244.832	-13804.6	19671.9	-462.205	280.348	356.384	0	-38.6977	147.423	-752.62	7694.62	-52002.5	-13015.4	130.905	892.776	0	0	0	0	0	0	0	603	903	0
552	0	-17.9267	-25.7878	-246.358	-14262.4	20038.1	-279.099	281.337	357.893	0	-37.6295	146.508	-750.484	7969.28	-52246.6	-12878	130.383	892.381	0	0	0	0	0	0	0	603	903	0
552	1	-18.0792	-27.7715	-253.682	-14262.4	20099.1	-462.205	279.229	356.221	0	-38.3925	147.271	-745.296	8152.39	-51392.1	-12786.5	131.045	892.062	0	0	0	0	0	0	0	603	903	0
552	2	-18.0792	-30.6706	-257.344	-14720.1	20709.5	-1057.3	280.474	357.2	0	-37.9347	148.186	-741.634	8243.94	-51453.2	-12740.7	130.622	891.884	0	0	0	0	0	0	0	603	903	0
552	3	-17.3163	-30.9758	-262.532	-15727.2	20526.4	-965.745	278.186	359.906	0	-36.2563	148.186	-737.667	8427.04	-51025.9	-12878	130.828	891.576	0	0	0	0	0	0	0	603	903	0
552	4	-16.5534	-31.8913	-269.246	-14994.8	21686	-782.64	280.543	355.692	0	-37.3244	149.102	-733.089	8518.6	-50537.6	-12969.6	131.062	891.38	0	0	0	0	0	0	0	603	903	0
552	5	-18.3844	-33.875	-277.181	-14994.8	22235.3	-1423.51	280.22	354.097	0	-37.1718	149.102	-728.206	8884.81	-50354.5	-13015.4	130.851	890.799	0	0	0	0	0	0	0	603	903	0
552	6	-20.9784	-33.7224	-285.421	-15818.8	22784.7	-1377.73	279.828	355.423	0	-35.4933	149.407	-725.46	9525.68	-50049.4	-13061.1	131.01	889.87	0	0	0	0	0	0	0	603	903	0
552	7	-22.0465	-36.3164	-293.66	-14994.8	23150.9	-1515.06	278.836	351.062	0	-34.5778	149.559	-719.051	9251.02	-48950.7	-13152.7	131.923	890.134	0	0	0	0	0	0	0	603	903	0
552	8	-22.1991	-37.9948	-299.459	-16368.1	23334	-1606.61	277.921	354.659	0	-32.8993	150.78	-716.915	9342.57	-49622.1	-12969.6	130.784	889.968	0	0	0	0	0	0	0	603	903	0
552	9	-22.5043	-38.3	-306.478	-16459.6	24371.6	-1927.05	279.522	353.706	0	-34.12	151.238	-711.421	9983.44	-49011.8	-12832.3	131.107	888.967	0	0	0	0	0	0	0	603	903	0
553	0	-20.5206	-40.1311	-317.769	-16642.7	24676.7	-1560.84	277.656	352.374	0	-33.6623	151.085	-707.149	9617.23	-47974.2	-12878	132.158	889.4	0	0	0	0	0	0	0	603	903	0
553	1	-21.7413	-40.7414	-326.314	-16185	25470.2	-2110.15	278.054	349.599	0	-34.12	151.696	-701.961	9891.89	-48157.3	-13152.7	131.396	888.908	0	0	0	0	0	0	0	603	903	0
553	2	-22.6569	-41.8095	-332.418	-16734.3	26385.7	-2247.48	279.375	350.341	0	-33.5097	149.865	-696.468	10349.7	-48157.3	-13198.5	130.855	888.14	0	0	0	0	0	0	0	603	903	0
553	3	-22.5043	-43.0302	-339.131	-17283.6	26568.8	-2201.71	278.344	350.964	0	-30.1527	152.001	-693.721	10624.3	-47119.7	-13290	132.077	887.685	0	0	0	0	0	0	0	603	903	0
553	4	-20.6732	-43.3354	-341.878	-17649.8	27118.2	-2613.69	279.321	351.626	0	-32.5941	152.153	-686.702	10990.5	-47180.7	-13015.4	131.294	886.995	0	0	0	0	0	0	0	603	903	0
553	5	-22.0465	-46.3872	-355.611	-17375.2	27850.6	-2842.58	278.318	348.86	0	-32.4416	152.458	-683.956	10899	-47058.6	-13015.4	131.196	887.065	0	0	0	0	0	0	0	603	903	0
553	6	-20.6732	-48.0656	-363.24	-18382.2	28766.1	-3117.23	279.193	350.606	0	-30.4579	151.543	-676.326	11082.1	-45837.9	-12878	132.225	886.614	0	0	0	0	0	0	0	603	903	0
553	7	-18.6896	-49.2863	-372.396	-18199.1	29437.5	-2934.13	279.049	348.87	0	-30.9157	152.611	-671.749	10807.4	-46265.2	-12969.6	131.127	886.911	0	0	0	0	0	0	0	603	903	0
553	8	-17.0111	-49.8967	-378.499	-17832.9	30475.1	-3483.45	280.516	347.115	0	-31.0683	151.848	-665.95	11082.1	-45105.5	-12923.8	132.269	886.359	0	0	0	0	0	0	0	603	903	0
553	9	-14.4171	-51.4226	-385.213	-18199.1	31268.5	-3575	281.172	347.244	0	-30.1527	152.153	-659.236	11906.1	-44495.2	-13244.2	132.505	884.94	0	0	0	0	0	0	0	603	903	0
554	0	-15.4852	-53.5588	-390.706	-18199.1	31451.7	-3849.66	280.5	346.58	0	-29.8476	153.221	-654.659	11814.5	-44617.2	-13198.5	131.847	884.953	0	0	0	0	0	0	0	603	903	0
554	1	-13.5016	-56.6106	-398.03	-18290.7	31878.9	-3986.99	280.092	345.953	0	-29.5424	150.78	-647.335	11906.1	-44067.9	-13061.1	131.924	884.608	0	0	0	0	0	0	0	603	903	0
554	2	-12.1283	-56.9157	-404.744	-18931.5	32733.4	-4170.09	280.874	346.774	0	-27.8639	153.069	-641.841	11997.6	-43396.5	-12923.8	132.387	884.308	0	0	0	0	0	0	0	603	903	0
554	3	-11.6705	-59.052	-413.289	-18565.3	33709.9	-4353.2	281.565	344.921	0	-27.8639	152.306	-636.653	12089.2	-42786.2	-12878	132.795	884.011	0	0	0	0	0	0	0	603	903	0
554	4	-9.38173	-61.4934	-418.172	-18931.5	34442.4	-4353.2	282.364	345.272	0	-28.0165	152.306	-629.024	12180.7	-42542	-12832.3	132.368	883.636	0	0	0	0	0	0	0	603	903	0
554	5	-8.16103	-63.1718	-426.107	-19297.8	34747.5	-4398.97	281.547	345.289	0	-26.4906	152.611	-622.31	12272.3	-42114.8	-12878	132.325	883.279	0	0	0	0	0	0	0	603	903	0
554	6	-7.2455	-65.1555	-432.515	-18656.9	35785.1	-4673.63	282.737	343.136	0	-26.0329	152.153	-616.207	12730	-41870.7	-13061.1	132.051	882.341	0	0	0	0	0	0	0	603	903	0
554	7	-6.02479	-66.9865	-439.534	-18748.4	36151.4	-4856.74	282.249	342.655	0	-24.3544	152.458	-610.103	13187.8	-40955.1	-12878	132.872	881.384	0	0	0	0	0	0	0	603	903	0
554	8	-4.19374	-67.5969	-448.69	-18840	36822.7	-4765.18	282.067	341.989	0	-24.3544	152.611	-602.779	13187.8	-40894.1	-12649.2	132.157	881.122	0	0	0	0	0	0	0	603	903	0
554	9	-4.04115	-70.0383	-452.657	-18565.3	36883.8	-4948.29	281.483	341.014	0	-23.744	151.39	-595.455	13004.7	-40588.9	-12603.4	131.835	881.16	0	0	0	0	0	0	0	603	903	0
555	0	-2.66786	-70.8012	-459.981	-18931.5	37738.3	-5131.4	282.043	341.157	0	-24.3544	149.712	-586.605	13004.7	-39612.4	-12282.9	132.472	880.831	0	0	0	0	0	0	0	603	903	0
555	1	-1.44716	-72.0219	-465.779	-18473.8	38592.8	-4994.07	282.856	339.662	0	-23.2863	148.949	-582.027	13828.7	-39246.1	-12374.5	132.57	879.241	0	0	0	0	0	0	0	603	903	0
555	2	0.536485	-74.4633	-470.967	-18382.2	39203.1	-4994.07	283.24	339.031	0	-22.6759	149.407	-572.261	13370.9	-38635.8	-12237.2	132.486	879.635	0	0	0	0	0	0	0	603	903	0
555	3	2.97789	-75.0737	-475.24	-18840	39996.6	-5406.05	284.161	339.643	0	-22.8285	148.644	-568.599	13645.6	-37964.4	-12466	133.232	879.002	0	0	0	0	0	0	0	603	903	0
555	4	2.36754	-76.2944	-482.259	-17924.5	40362.8	-5634.94	283.695	337.168	0	-19.0138	147.118	-561.58	14103.3	-37720.3	-12511.8	132.832	877.886	0	0	0	0	0	0	0	603	903	0
555	5	3.58824	-77.3625	-489.583	-17832.9	41034.2	-5680.71	283.815	336.425	0	-19.9294	146.965	-554.561	13828.7	-37720.3	-12282.9	131.982	878.064	0	0	0	0	0	0	0	603	903	0
555	6	4.65636	-77.9729	-497.823	-18107.6	41949.7	-5589.16	284.266	336.374	0	-21.1501	145.745	-548.763	13828.7	-36743.7	-12191.4	133.043	877.8	0	0	0	0	0	0	0	603	903	0
555	7	5.26671	-81.1772	-505.147	-17741.4	42132.8	-5955.37	283.407	335.121	0	-18.2509	144.371	-538.692	14286.4	-36194.4	-11825.2	132.811	876.479	0	0	0	0	0	0	0	603	903	0
555	8	7.70812	-83.0083	-508.199	-18016	43170.4	-6046.92	284.948	335.451	0	-18.4035	144.677	-532.283	14652.6	-35889.2	-11962.5	132.575	875.472	0	0	0	0	0	0	0	603	903	0
555	9	9.08141	-84.229	-514.913	-18016	43841.8	-5818.04	285.144	334.988	0	-19.0138	143.914	-522.823	14378	-35034.7	-12237.2	132.989	875.499	0	0	0	0	0	0	0	603	903	0
556	0	8.31847	-84.3816	-522.847	-17100.5	44818.3	-6367.36	285.72	332.707	0	-17.9457	142.998	-512.142	14652.6	-34424.4	-11962.5	132.784	874.39	0	0	0	0	0	0	0	603	903	0
556	1	9.08141	-87.8911	-531.697	-17008.9	45672.8	-6825.12	285.9	331.99	0	-15.6569	142.388	-508.174	15018.8	-34363.3	-11779.4	132.379	873.445	0	0	0	0	0	0	0	603	903	0
556	2	10.7599	-89.5695	-539.937	-16551.2	46283.2	-7054	285.72	330.654	0	-16.725	140.251	-499.935	14561.1	-33325.7	-11687.9	133.34	873.874	0	0	0	0	0	0	0	603	903	0
556	3	12.7435	-91.5532	-543.294	-16185	46954.6	-7054	286.426	329.79	0	-15.1991	140.557	-492	14652.6	-33020.6	-11230.1	132.885	873.218	0	0	0	0	0	0	0	603	903	0
556	4	14.2694	-92.1635	-551.534	-16001.9	47687	-7557.54	286.463	329.013	0	-12.7577	138.115	-484.065	14744.2	-32593.3	-11138.5	132.668	872.541	0	0	0	0	0	0	0	603	903	0
556	5	15.1849	-93.6894	-557.943	-15910.3	48663.6	-7054	287.22	328.516	0	-15.0465	136.132	-475.215	14652.6	-31494.7	-11092.8	133.725	872.166	0	0	0	0	0	0	0	603	903	0
556	6	15.9479	-96.436	-565.572	-15910.3	48907.7	-7923.75	286.475	328.131	0	-13.6732	134.911	-467.891	14927.3	-31128.5	-11138.5	133.471	871.097	0	0	0	0	0	0	0	603	903	0
556	7	16.5582	-97.6567	-570.455	-15452.5	49151.9	-8152.64	286.163	327.088	0	-11.2318	133.232	-461.177	15201.9	-31372.6	-11047	131.973	870.037	0	0	0	0	0	0	0	603	903	0
556	8	16.8634	-100.098	-575.338	-14262.4	50311.5	-8473.07	287.447	324.79	0	-12.9103	130.181	-453.243	15201.9	-30212.9	-11092.8	133.341	869.46	0	0	0	0	0	0	0	603	903	0
556	9	18.9996	-102.082	-581.441	-14994.8	50372.6	-8518.85	286.634	325.789	0	-11.9948	129.875	-445.613	15110.4	-29602.6	-10497.7	133.569	869.091	0	0	0	0	0	0	0	603	903	0
557	0	18.0841	-103.15	-588.155	-14994.8	50738.8	-8701.95	286.268	325.495	0	-10.4689	127.587	-437.068	15110.4	-29053.3	-10223	133.527	868.428	0	0	0	0	0	0	0	603	903	0
557	1	18.5419	-105.134	-592.733	-14537	51532.2	-9068.16	286.94	324.525	0	-9.2482	126.671	-427.303	15110.4	-28137.7	-9902.57	134.15	867.638	0	0	0	0	0	0	0	603	903	0
557	2	18.847	-106.354	-596.7	-14445.5	52264.6	-8930.83	287.59	324.209	0	-10.1637	124.535	-416.316	15293.5	-27893.6	-9948.35	132.999	866.265	0	0	0	0	0	0	0	603	903	0
557	3	19.1522	-108.033	-601.583	-13438.4	52875	-9617.48	287.893	322.338	0	-8.48526	123.314	-410.823	15110.4	-28015.7	-9673.69	131.806	866.219	0	0	0	0	0	0	0	603	903	0
557	4	19.4574	-109.864	-605.245	-12980.6	53302.2	-9571.7	288.067	321.447	0	-9.2482	122.094	-402.278	15293.5	-26550.8	-9811.02	133.999	864.983	0	0	0	0	0	0	0	603	903	0
557	5	21.441	-111.084	-608.297	-12980.6	53607.4	-10075.2	288.127	321.339	0	-7.26456	119.194	-394.344	15934.4	-26245.6	-9765.24	133.445	862.593	0	0	0	0	0	0	0	603	903	0
557	6	18.9996	-113.068	-614.095	-12339.8	53729.5	-10121	287.494	320.094	0	-5.73868	117.974	-386.714	14927.3	-26367.7	-9261.7	131.816	864.4	0	0	0	0	0	0	0	603	903	0
557	7	19.9151	-113.831	-616.231	-12980.6	54278.8	-10166.8	288.082	321.065	0	-6.50162	114.922	-379.39	14835.7	-25024.9	-8987.04	134.039	863.896	0	0	0	0	0	0	0	603	903	0
557	8	20.9833	-114.289	-619.893	-12339.8	54461.9	-10349.9	287.857	319.906	0	-6.95938	112.48	-369.625	14835.7	-24658.7	-8712.39	133.287	862.863	0	0	0	0	0	0	0	603	903	0
557	9	21.441	-115.357	-622.335	-10874.9	55011.2	-10441.5	288.395	317.474	0	-4.82315	111.718	-361.385	15201.9	-24475.6	-8849.72	132.273	860.934	0	0	0	0	0	0	0	603	903	0
558	0	22.6617	-116.578	-622.64	-11882	55560.5	-10670.3	289.234	319.083	0	-4.2128	109.124	-351.924	14835.7	-23499.1	-8803.94	133.227	860.844	0	0	0	0	0	0	0	603	903	0
558	1	22.6617	-115.967	-625.081	-11332.7	55743.6	-10807.7	289.178	318.13	0	-4.36539	107.14	-343.685	14652.6	-22949.8	-8483.5	133.224	860.366	0	0	0	0	0	0	0	603	903	0
558	2	22.3566	-117.188	-629.354	-10325.6	56293	-10441.5	289.446	316.407	0	-3.29727	103.63	-333.614	15201.9	-22949.8	-8254.62	131.209	857.433	0	0	0	0	0	0	0	603	903	0
558	3	23.2721	-118.561	-633.626	-10508.7	56537.1	-10578.8	289.228	316.585	0	-2.9921	104.698	-327.815	14469.5	-21362.8	-8163.07	134.833	858.861	0	0	0	0	0	0	0	603	903	0
558	4	23.8824	-119.935	-637.593	-9959.38	56781.2	-11128.1	289.056	315.62	0	-1.92398	102.715	-318.355	14103.3	-21301.8	-7522.2	133.088	858.699	0	0	0	0	0	0	0	603	903	0
558	5	26.1712	-120.545	-640.34	-9867.83	57452.6	-10990.8	289.722	315.41	0	-2.38174	100.884	-310.726	14561.1	-21118.7	-7522.2	132.034	856.139	0	0	0	0	0	0	0	603	903	0
558	6	26.7816	-120.24	-642.781	-9776.28	57635.7	-11311.2	289.666	315.209	0	-2.38174	99.0527	-300.35	14103.3	-20447.3	-7613.75	131.922	856.044	0	0	0	0	0	0	0	603	903	0
558	7	26.629	-121.003	-646.443	-8952.3	58246.1	-11265.4	290.102	313.849	0	-0.398101	99.8157	-294.246	13645.6	-19714.9	-7567.98	132.999	856.625	0	0	0	0	0	0	0	603	903	0
558	8	27.392	-121.918	-649.8	-8494.54	58490.2	-10899.2	290.013	313.073	0	-1.46622	98.1372	-287.532	14378	-19409.7	-7384.87	132.496	852.995	0	0	0	0	0	0	0	603	903	0
558	9	28.4601	-122.834	-652.547	-8586.09	58978.5	-11540.1	290.382	313.158	0	-1.31363	94.9329	-277.461	13096.2	-19226.6	-7201.77	130.705	855.8	0	0	0	0	0	0	0	603	903	0
559	0	29.0704	-123.444	-654.073	-7945.22	59039.5	-11311.2	290.264	312.147	0	-1.31363	92.9492	-268.306	13004.7	-18433.1	-6881.33	131.298	854.531	0	0	0	0	0	0	0	603	903	0
559	1	31.0541	-123.902	-659.566	-7945.22	59344.7	-11631.6	289.975	312.046	0	-1.31363	90.5078	-260.066	13370.9	-17883.8	-6744	131.234	851.587	0	0	0	0	0	0	0	603	903	0
559	2	31.5118	-124.817	-663.839	-7212.8	60077.1	-10990.8	290.5	310.865	0	-0.855865	88.0664	-253.047	12821.6	-16907.3	-6515.12	133.185	852.331	0	0	0	0	0	0	0	603	903	0
559	3	31.6644	-125.428	-666.89	-7212.8	60382.3	-11814.7	290.543	310.816	0	-1.92398	86.5405	-245.113	12546.9	-16419	-6469.35	133.015	851.812	0	0	0	0	0	0	0	603	903	0
559	4	32.2748	-126.191	-669.026	-6846.59	60809.6	-11860.5	290.893	310.234	0	-1.16104	83.6414	-237.178	12821.6	-16419	-6423.57	130.774	848.941	0	0	0	0	0	0	0	603	903	0
559	5	33.0377	-126.191	-670.247	-6755.04	61175.8	-11860.5	291.273	310.078	0	-1.16104	83.1836	-228.328	12455.4	-15503.5	-6194.69	132.1	848.45	0	0	0	0	0	0	0	603	903	0
559	6	33.4955	-127.259	-677.266	-5931.06	61542	-11860.5	290.868	308.757	0	-1.77139	80.437	-223.751	11997.6	-15076.2	-5965.81	132.62	849.38	0	0	0	0	0	0	0	603	903	0
559	7	35.3265	-128.327	-682.454	-6114.17	62274.4	-11860.5	291.251	308.959	0	-1.46622	77.843	-213.68	11631.4	-14832.1	-5736.92	130.587	848.566	0	0	0	0	0	0	0	603	903	0
559	8	36.3946	-129.242	-684.59	-6022.61	62274.4	-11997.9	290.966	308.797	0	0.364838	77.2327	-205.745	11631.4	-14099.7	-5599.59	131.47	846.467	0	0	0	0	0	0	0	603	903	0
559	9	36.8524	-128.937	-689.778	-5290.19	63312	-11814.7	291.786	307.669	0	-2.38174	75.5542	-200.252	10258.1	-13672.4	-5141.83	131.724	851.774	0	0	0	0	0	0	0	603	903	0
560	0	38.9886	-129.242	-692.525	-5198.64	63617.2	-11631.6	291.863	307.507	0	-1.77139	73.418	-193.843	11265.2	-13550.3	-5416.49	130.096	844.885	0	0	0	0	0	0	0	603	903	0
560	1	40.3619	-130.311	-694.356	-5015.53	64105.5	-12043.6	292.324	307.223	0	-1.00845	72.0447	-187.74	10990.5	-12512.7	-5233.38	133.351	844.459	0	0	0	0	0	0	0	603	903	0
560	2	40.5145	-131.379	-700.154	-3550.69	64532.7	-12226.7	292.169	305.071	0	-1.77139	69.4507	-180.416	10258.1	-12268.6	-5096.05	131.998	846.142	0	0	0	0	0	0	0	603	903	0
560	3	40.9723	-131.989	-704.732	-4374.66	65021	-12043.6	292.263	306.208	0	-2.07657	68.23	-172.786	10166.5	-12390.7	-5141.83	128.289	844.161	0	0	0	0	0	0	0	603	903	0
560	4	41.8878	-132.142	-709.31	-3733.8	65570.3	-12226.7	292.442	305.264	0	-0.703277	64.1101	-166.683	9525.68	-11414.1	-4775.62	131.522	845.852	0	0	0	0	0	0	0	603	903	0
560	5	42.6507	-133.21	-712.361	-3001.37	66058.6	-12135.2	292.732	304.213	0	-1.77139	61.2109	-159.053	9525.68	-10986.9	-4363.63	130.923	843.11	0	0	0	0	0	0	0	603	903	0
560	6	43.2611	-134.125	-718.16	-3459.14	66668.9	-11952.1	292.833	304.817	0	-3.29727	57.7014	-150.814	9342.57	-11108.9	-4272.08	126.34	841.052	0	0	0	0	0	0	0	603	903	0
560	7	43.2611	-134.125	-721.517	-2543.61	67462.4	-12364.1	293.501	303.525	0	-2.38174	56.3281	-145.626	8976.36	-10071.3	-4272.08	130.841	841.36	0	0	0	0	0	0	0	603	903	0
560	8	43.7189	-134.583	-726.094	-2177.4	67340.3	-12409.8	292.743	302.999	0	-0.245513	54.1919	-138.606	9067.92	-9888.23	-4134.75	128.66	837.578	0	0	0	0	0	0	0	603	903	0
560	9	43.8714	-135.193	-731.282	-1536.53	68316.9	-12730.3	293.421	302.101	0	-3.60245	53.2764	-135.86	8793.26	-10010.3	-3905.87	126.319	838.277	0	0	0	0	0	0	0	603	903	0
561	0	44.9396	-135.804	-737.386	-1536.53	68072.8	-12501.4	292.316	302.084	0	-3.14468	48.8513	-130.672	8518.6	-9094.77	-3676.99	130.4	837.809	0	0	0	0	0	0	0	603	903	0
561	1	42.6507	-137.024	-741.353	-1353.42	68561	-12730.3	292.481	301.826	0	-1.92398	48.6987	-123.043	7969.28	-9033.74	-3631.21	126.58	838.232	0	0	0	0	0	0	0	603	903	0
561	2	43.7189	-137.024	-745.931	-2360.5	69293.5	-12684.5	292.895	303.165	0	-2.22916	45.9521	-116.023	7236.86	-9033.74	-3539.66	122.139	840.626	0	0	0	0	0	0	0	603	903	0
561	3	43.5663	-137.635	-749.593	-987.213	69415.5	-12821.8	292.604	301.317	0	-2.38174	43.5107	-112.972	7419.97	-7996.14	-3036.12	129.22	837.32	0	0	0	0	0	0	0	603	903	0
561	4	43.1085	-136.719	-752.645	-437.897	70392.1	-13188	293.526	300.582	0	-3.29727	42.5952	-109.31	7877.73	-7752	-3310.78	129.082	830.932	0	0	0	0	0	0	0	603	903	0
561	5	42.8033	-137.787	-755.086	-621.002	70392.1	-12913.4	293.224	300.822	0	-2.9921	39.0857	-101.985	6687.54	-7629.93	-2990.34	125.186	837.427	0	0	0	0	0	0	0	603	903	0
561	6	41.8878	-138.55	-759.969	111.42	70880.4	-13233.8	293.267	299.853	0	-4.36539	37.102	-98.9336	6595.99	-7202.68	-2990.34	127.197	836.329	0	0	0	0	0	0	0	603	903	0
561	7	41.43	-138.092	-765.157	386.078	71368.7	-13142.3	293.273	299.495	0	-3.75503	34.6606	-95.5767	6870.65	-7202.68	-2853.01	124.64	831.114	0	0	0	0	0	0	0	603	903	0
561	8	41.43	-138.55	-769.734	569.184	71551.8	-13050.7	292.956	299.261	0	-3.44986	30.5408	-90.0835	6138.23	-6836.47	-2624.13	124.11	834.861	0	0	0	0	0	0	0	603	903	0
561	9	42.0404	-139.008	-772.786	1026.95	71979	-13004.9	293.142	298.671	0	-4.2128	29.9304	-84.8956	5863.57	-6409.22	-2257.92	124.505	833.932	0	0	0	0	0	0	0	603	903	0
562	0	42.8033	-138.855	-772.176	1210.05	72162.1	-13279.6	293.453	298.433	0	-4.06021	28.4045	-80.3179	5955.12	-6226.12	-2257.92	122.482	828.856	0	0	0	0	0	0	0	603	903	0
562	1	42.8033	-139.161	-777.669	1301.61	72894.5	-13188	293.735	298.326	0	-1.31363	26.4209	-74.8248	5497.36	-5920.94	-2395.25	120.869	829.53	0	0	0	0	0	0	0	603	903	0
562	2	42.0404	-139.466	-781.026	1942.47	73138.7	-13050.7	293.644	297.513	0	-4.36539	24.1321	-72.6885	5039.59	-5249.56	-2349.47	127.78	833.669	0	0	0	0	0	0	0	603	903	0
562	3	42.4982	-139.161	-784.383	2034.03	73260.7	-13233.8	293.399	297.407	0	-4.51797	24.1321	-69.0264	5405.81	-5493.7	-2074.81	120.412	824.685	0	0	0	0	0	0	0	603	903	0
562	4	42.0404	-138.398	-787.74	2125.58	73626.9	-12455.6	293.466	297.302	0	-2.83951	23.2165	-63.8384	5039.59	-5005.42	-2120.59	121.592	824.057	0	0	0	0	0	0	0	603	903	0
562	5	42.8033	-139.466	-788.045	2858	73871.1	-13188	293.74	296.373	0	-3.44986	20.7751	-57.7349	4124.07	-4883.34	-1708.6	115.418	831.569	0	0	0	0	0	0	0	603	903	0
562	6	43.8714	-139.618	-794.454	2491.79	74664.5	-13096.5	293.982	296.864	0	-4.2128	18.3337	-57.4297	4124.07	-4639.2	-1433.94	119.219	831.189	0	0	0	0	0	0	0	603	903	0
562	7	44.9396	-138.398	-796.285	3041.11	74725.6	-12547.2	293.843	296.181	0	-3.75503	16.0449	-54.378	4307.17	-4028.85	-1433.94	125.91	823.792	0	0	0	0	0	0	0	603	903	0
562	8	44.024	-138.398	-799.031	3041.11	74908.7	-13096.5	293.749	296.194	0	-3.44986	15.8923	-52.2417	3666.3	-4089.89	-1342.39	121.712	832.82	0	0	0	0	0	0	0	603	903	0
562	9	44.3292	-138.245	-800.862	4048.19	74847.6	-13096.5	293.459	294.945	0	-4.67056	15.282	-48.2745	3666.3	-3967.82	-1571.27	117.807	827.053	0	0	0	0	0	0	0	603	903	0
563	0	44.6344	-137.024	-803.304	3865.08	75030.8	-13004.9	293.403	295.189	0	-3.44986	15.1294	-41.2554	3208.54	-3540.57	-1662.83	114.179	825.227	0	0	0	0	0	0	0	603	903	0
563	1	45.5499	-137.33	-809.102	4414.4	75824.2	-12867.6	293.714	294.544	0	-3.75503	14.519	-42.4761	2659.22	-3418.5	-1296.62	119.519	840.395	0	0	0	0	0	0	0	603	903	0
563	2	45.3973	-136.567	-811.849	3956.64	76129.4	-13050.7	293.773	295.126	0	-4.82315	13.1457	-39.1192	2476.12	-3174.36	-1342.39	118.854	839.703	0	0	0	0	0	0	0	603	903	0
563	3	46.9232	-138.245	-813.069	4414.4	76068.4	-12638.7	293.557	294.571	0	-2.38174	12.8406	-34.5416	2476.12	-2808.15	-1250.84	118.702	831.315	0	0	0	0	0	0	0	603	903	0
563	4	46.9232	-136.109	-815.816	4231.29	76495.6	-12913.4	293.766	294.813	0	-2.53433	10.5518	-30.2691	1560.59	-2197.8	-1342.39	127.391	851.443	0	0	0	0	0	0	0	603	903	0
563	5	47.8387	-136.109	-813.069	4689.06	76678.7	-12684.5	294.308	294.233	0	-3.90762	11.1621	-28.1329	2018.35	-2441.94	-1205.06	113.2	831.256	0	0	0	0	0	0	0	603	903	0
563	6	46.618	-135.499	-819.478	5146.82	77289.1	-12730.3	294.315	293.719	0	-3.14468	9.33105	-27.8277	2293.01	-2014.69	-1159.29	127.601	820.6	0	0	0	0	0	0	0	603	903	0
563	7	46.618	-136.261	-821.004	5238.37	77289.1	-12959.2	294.14	293.62	0	-1.46622	8.41552	-25.3863	1377.48	-1770.55	-1021.96	130.256	848.739	0	0	0	0	0	0	0	603	903	0
563	8	46.618	-134.583	-823.14	5421.48	77411.1	-12821.8	294.044	293.414	0	-2.22916	9.17846	-19.2828	1377.48	-2136.76	-884.628	89.188	831.564	0	0	0	0	0	0	0	603	903	0
563	9	47.0758	-134.43	-824.971	5696.14	77594.2	-12684.5	294.057	293.095	0	-1.77139	7.19482	-20.1983	1377.48	-1587.45	-609.97	121.407	834.802	0	0	0	0	0	0	0	603	903	0
564	0	48.1439	-133.82	-826.802	5787.69	77960.5	-12547.2	294.292	293	0	-1.46622	4.75342	-18.3672	1102.83	-1282.27	-197.982	130.187	842.957	0	0	0	0	0	0	0	603	903	0
564	1	47.2284	-134.278	-827.108	5970.79	78082.5	-12867.6	294.404	292.781	0	0	0	0	0	0	0	200	903	0	0	0	0	0	0	0	603	903	0
564	2	47.0758	-133.362	-828.633	5604.58	78082.5	-12089.4	294.23	293.236	0	0	0	0	0	0	0	200	903	0	0	0	0	0	0	0	603	903	0
564	3	47.0758	-132.142	-830.77	6337.01	78204.6	-12867.6	294.135	292.372	0	0	0	0	0	0	0	200	903	0	0	0	0	0	0	0	603	903	0
564	4	46.9232	-131.836	-829.854	6977.88	79181.2	-12364.1	295.416	291.591	0	0	0	0	0	0	0	200	903	0	0	0	0	0	0	0	603	903	0
564	5	47.6861	-131.531	-834.432	6703.22	78387.7	-12684.5	293.941	291.967	0	0	0	0	0	0	0	200	903	0	0	0	0	0	0	0	603	903	0
564	6	46.9232	-130.768	-835.652	7069.43	78692.9	-12501.4	294.169	291.54	0	0	0	0	0	0	0	200	903	0	0	0	0	0	0	0	603	903	0
564	7	47.6861	-131.073	-837.484	7160.98	78998	-12409.8	294.328	291.449	0	0	0	0	0	0	0	200	903	0	0	0	0	0	0	0	603	903	0
564	8	47.6861	-129.7	-839.009	6794.77	79242.2	-12272.5	294.447	291.901	0	0	0	0	0	0	0	200	903	0	0	0	0	0	0	0	603	903	0
564	9	48.9068	-128.937	-843.587	7527.19	79608.4	-12272.5	294.369	291.077	0	0	0	0	0	0	0	200	903	0	0	0	0	0	0	0	603	903	0
565	0	48.4491	-129.09	-843.587	7252.53	79608.4	-12409.8	294.369	291.403	0	0	0	0	0	0	0	200	903	0	0	0	0	0	0	0	603	903	0
565	1	47.6861	-128.632	-846.028	7710.3	79852.5	-12226.7	294.385	290.887	0	0	0	0	0	0	0	200	903	0	0	0	0	0	0	0	603	903	0
565	2	47.6861	-127.717	-847.859	8442.72	79791.5	-12318.3	294.109	290.042	0	0	0	0	0	0	0	200	903	0	0	0	0	0	0	0	603	903	0
565	3	47.9913	-127.717	-849.385	8168.06	79852.5	-11448.5	294.012	290.384	0	0	0	0	0	0	0	200	903	0	0	0	0	0	0	0	603	903	0
565	4	48.2965	-126.954	-846.334	8717.38	80157.7	-11814.7	294.712	289.7	0	0	0	0	0	0	0	200	903	0	0	0	0	0	0	0	603	903	0
565	5	46.7706	-126.496	-852.132	8534.27	80462.9	-11997.9	294.425	289.985	0	0	0	0	0	0	0	200	903	0	0	0	0	0	0	0	603	903	0
565	6	46.7706	-125.275	-852.132	8900.48	80585	-12089.4	294.569	289.555	0	0	0	0	0	0	0	200	903	0	0	0	0	0	0	0	603	903	0
565	7	46.9232	-124.36	-854.268	8992.04	80646	-11814.7	294.404	289.474	0	0	0	0	0	0	0	200	903	0	0	0	0	0	0	0	603	903	0
565	8	46.7706	-124.054	-855.794	9999.12	80768.1	-11952.1	294.378	288.316	0	0	0	0	0	0	0	200	903	0	0	0	0	0	0	0	603	903	0
565	9	45.8551	-123.597	-856.099	9266.7	80951.2	-11952.1	294.558	289.176	0	0	0	0	0	0	0	200	903	0	0	0	0	0	0	0	603	903	0
566	0	46.7706	-122.529	-853.963	9358.25	80707	-11723.2	294.509	289.041	0	0	0	0	0	0	0	200	903	0	0	0	0	0	0	0	603	903	0
566	1	46.9232	-122.071	-856.099	8900.48	81073.2	-11723.2	294.701	289.603	0	0	0	0	0	0	0	200	903	0	0	0	0	0	0	0	603	903	0
566	2	45.7025	-122.071	-857.015	9449.8	81256.3	-11494.3	294.813	288.974	0	0	0	0	0	0	0	200	903	0	0	0	0	0	0	0	603	903	0
566	3	45.3973	-120.697	-857.93	9999.12	81500.5	-11723.2	294.997	288.345	0	0	0	0	0	0	0	200	903	0	0	0	0	0	0	0	603	903	0
566	4	44.6344	-119.477	-858.235	10090.7	81134.3	-11723.2	294.536	288.243	0	0	0	0	0	0	0	200	903	0	0	0	0	0	0	0	603	903	0
566	5	44.4818	-119.019	-856.099	10456.9	81195.3	-11723.2	294.843	287.785	0	0	0	0	0	0	0	200	903	0	0	0	0	0	0	0	603	903	0
566	6	44.9396	-119.324	-860.372	10731.5	81195.3	-11265.4	294.372	287.527	0	0	0	0	0	0	0	200	903	0	0	0	0	0	0	0	603	903	0
566	7	44.9396	-117.188	-859.456	10548.4	81378.4	-11448.5	294.686	287.727	0	0	0	0	0	0	0	200	903	0	0	0	0	0	0	0	603	903	0
566	8	45.0921	-116.883	-860.067	10640	81439.4	-11219.7	294.69	287.629	0	0	0	0	0	0	0	200	903	0	0	0	0	0	0	0	603	903	0
566	9	44.4818	-116.272	-859.761	11189.3	81195.3	-11128.1	294.439	286.986	0	0	0	0	0	0	0	200	903	0	0	0	0	0	0	0	603	903	0
567	0	44.787	-114.899	-859.151	10731.5	81561.5	-11082.3	294.933	287.509	0	0	0	0	0	0	0	200	903	0	0	0	0	0	0	0	603	903	0
567	1	45.0921	-114.289	-862.813	11830.2	82049.8	-10990.8	295.096	286.289	0	0	0	0	0	0	0	200	903	0	0	0	0	0	0	0	603	903	0
567	2	44.1766	-113.984	-862.813	11189.3	81378.4	-11173.9	294.318	287.032	0	0	0	0	0	0	0	200	903	0	0	0	0	0	0	0	603	903	0
567	3	43.7189	-113.526	-862.508	11189.3	81622.6	-10853.4	294.634	287.027	0	0	0	0	0	0	0	200	903	0	0	0	0	0	0	0	603	903	0
567	4	44.024	-112.915	-862.813	12013.3	81561.5	-10578.8	294.53	286.077	0	0	0	0	0	0	0	200	903	0	0	0	0	0	0	0	603	903	0
567	5	44.3292	-111.847	-860.677	11372.4	81317.4	-10487.2	294.481	286.787	0	0	0	0	0	0	0	200	903	0	0	0	0	0	0	0	603	903	0
567	6	42.9559	-111.39	-862.203	12013.3	81805.7	-10807.7	294.88	286.067	0	0	0	0	0	0	0	200	903	0	0	0	0	0	0	0	603	903	0
567	7	43.4137	-110.322	-861.287	12562.6	82232.9	-10304.1	295.477	285.414	0	0	0	0	0	0	0	200	903	0	0	0	0	0	0	0	603	903	0
567	8	42.8033	-109.711	-860.067	12287.9	81805.7	-10761.9	295.116	285.713	0	0	0	0	0	0	0	200	903	0	0	0	0	0	0	0	603	903	0
567	9	42.8033	-108.49	-861.287	12837.3	81561.5	-10670.3	294.697	285.095	0	0	0	0	0	0	0	200	903	0	0	0	0	0	0	0	603	903	0
568	0	42.4982	-108.338	-860.677	12837.3	81439.4	-10395.7	294.623	285.085	0	0	0	0	0	0	0	200	903	0	0	0	0	0	0	0	603	903	0
568	1	42.193	-107.88	-857.93	12837.3	81500.5	-10578.8	294.997	285.037	0	0	0	0	0	0	0	200	903	0	0	0	0	0	0	0	603	903	0
568	2	42.8033	-106.507	-857.625	12654.1	81683.6	-10075.2	295.244	285.245	0	0	0	0	0	0	0	200	903	0	0	0	0	0	0	0	603	903	0
568	3	42.6507	-105.744	-857.015	13203.5	81805.7	-10166.8	295.454	284.594	0	0	0	0	0	0	0	200	903	0	0	0	0	0	0	0	603	903	0
568	4	42.3456	-106.049	-856.099	13203.5	81622.6	-10121	295.342	284.577	0	0	0	0	0	0	0	200	903	0	0	0	0	0	0	0	603	903	0
568	5	41.8878	-104.523	-854.573	14210.5	81622.6	-10304.1	295.513	283.371	0	0	0	0	0	0	0	200	903	0	0	0	0	0	0	0	603	903	0
568	6	42.4982	-103.913	-853.963	14119	81500.5	-10121	295.438	283.467	0	0	0	0	0	0	0	200	903	0	0	0	0	0	0	0	603	903	0
568	7	42.0404	-102.845	-852.437	14851.4	81317.4	-9983.69	295.394	282.578	0	0	0	0	0	0	0	200	903	0	0	0	0	0	0	0	603	903	0
568	8	42.4982	-102.692	-851.827	14302.1	81378.4	-9663.26	295.534	283.21	0	0	0	0	0	0	0	200	903	0	0	0	0	0	0	0	603	903	0
568	9	42.4982	-102.387	-849.996	14302.1	81195.3	-9754.81	295.524	283.174	0	0	0	0	0	0	0	200	903	0	0	0	0	0	0	0	603	903	0
569	0	41.7352	-100.861	-849.08	13478.1	81317.4	-9800.59	295.771	284.126	0	0	0	0	0	0	0	200	903	0	0	0	0	0	0	0	603	903	0
569	1	42.9559	-100.098	-847.249	14851.4	81073.2	-9663.26	295.69	282.471	0	0	0	0	0	0	0	200	903	0	0	0	0	0	0	0	603	903	0
569	2	42.0404	-99.7929	-848.775	14759.9	81378.4	-9846.36	295.878	282.61	0	0	0	0	0	0	0	200	903	0	0	0	0	0	0	0	603	903	0
569	3	41.5826	-98.7248	-847.249	15034.5	81195.3	-9480.15	295.834	282.255	0	0	0	0	0	0	0	200	903	0	0	0	0	0	0	0	603	903	0
569	4	41.2775	-99.4878	-846.028	15309.2	80829.1	-9388.6	295.539	281.905	0	0	0	0	0	0	0	200	903	0	0	0	0	0	0	0	603	903	0
569	5	41.5826	-97.8093	-844.197	15034.5	80707	-9434.38	295.602	282.191	0	0	0	0	0	0	0	200	903	0	0	0	0	0	0	0	603	903	0
569	6	41.1249	-96.7412	-839.925	15034.5	80462.9	-9251.27	295.798	282.1	0	0	0	0	0	0	0	200	903	0	0	0	0	0	0	0	603	903	0
569	7	41.5826	-95.0627	-841.146	15858.5	80951.2	-9205.49	296.239	281.147	0	0	0	0	0	0	0	200	903	0	0	0	0	0	0	0	603	903	0
569	8	40.6671	-94.9101	-838.704	15583.8	80401.9	-8930.83	295.864	281.419	0	0	0	0	0	0	0	200	903	0	0	0	0	0	0	0	603	903	0
569	9	40.5145	-94.9101	-836.263	16133.2	80401.9	-9388.6	296.144	280.708	0	0	0	0	0	0	0	200	903	0	0	0	0	0	0	0	603	903	0
570	0	40.6671	-93.5368	-835.958	16224.7	80462.9	-8930.83	296.252	280.592	0	0	0	0	0	0	0	200	903	0	0	0	0	0	0	0	603	903	0
570	1	41.8878	-92.9265	-832.906	16224.7	79913.6	-8747.73	295.946	280.52	0	0	0	0	0	0	0	200	903	0	0	0	0	0	0	0	603	903	0
570	2	41.5826	-91.7058	-832.601	16316.3	80340.8	-8930.83	296.494	280.403	0	0	0	0	0	0	0	200	903	0	0	0	0	0	0	0	603	903	0
570	3	40.8197	-91.4006	-827.718	16774	79364.2	-8152.64	295.883	279.735	0	0	0	0	0	0	0	200	903	0	0	0	0	0	0	0	603	903	0
570	4	40.6671	-89.8747	-827.413	16682.5	79852.5	-8656.18	296.509	279.838	0	0	0	0	0	0	0	200	903	0	0	0	0	0	0	0	603	903	0
570	5	40.3619	-88.8066	-825.276	17323.3	79974.6	-8610.4	296.906	279.009	0	0	0	0	0	0	0	200	903	0	0	0	0	0	0	0	603	903	0
570	6	40.5145	-88.5014	-823.445	17689.5	79730.5	-8701.95	296.825	278.518	0	0	0	0	0	0	0	200	903	0	0	0	0	0	0	0	603	903	0
570	7	40.0567	-87.2807	-823.751	17323.3	79669.4	-8518.85	296.715	278.97	0	0	0	0	0	0	0	200	903	0	0	0	0	0	0	0	603	903	0
570	8	39.9042	-86.823	-821.614	17689.5	79364.2	-8610.4	296.596	278.47	0	0	0	0	0	0	0	200	903	0	0	0	0	0	0	0	603	903	0
570	9	40.6671	-85.9074	-819.783	17323.3	79242.2	-8152.64	296.662	278.868	0	0	0	0	0	0	0	200	903	0	0	0	0	0	0	0	603	903	0
571	0	40.6671	-85.1445	-821.614	17598	79425.3	-8061.08	296.67	278.581	0	0	0	0	0	0	0	200	903	0	0	0	0	0	0	0	603	903	0
571	1	40.5145	-84.3816	-817.647	18055.8	79242.2	-8335.74	296.915	277.917	0	0	0	0	0	0	0	200	903	0	0	0	0	0	0	0	603	903	0
571	2	40.0567	-82.3979	-815.206	18055.8	78998	-7786.42	296.906	277.851	0	0	0	0	0	0	0	200	903	0	0	0	0	0	0	0	603	903	0
571	3	39.9042	-81.9402	-813.069	18605.1	78692.9	-8289.97	296.785	277.118	0	0	0	0	0	0	0	200	903	0	0	0	0	0	0	0	603	903	0
571	4	40.3619	-81.635	-811.849	18788.2	78570.8	-7923.75	296.78	276.858	0	0	0	0	0	0	0	200	903	0	0	0	0	0	0	0	603	903	0
571	5	40.2093	-80.2617	-807.881	18147.3	78570.8	-7786.42	297.255	277.537	0	0	0	0	0	0	0	200	903	0	0	0	0	0	0	0	603	903	0
571	6	39.9042	-80.4143	-807.881	18879.7	78204.6	-7649.1	296.802	276.631	0	0	0	0	0	0	0	200	903	0	0	0	0	0	0	0	603	903	0
571	7	39.599	-79.1936	-806.356	18238.9	77655.3	-7511.77	296.304	277.381	0	0	0	0	0	0	0	200	903	0	0	0	0	0	0	0	603	903	0
571	8	40.3619	-79.1936	-804.525	18696.6	78082.5	-7420.21	297.054	276.761	0	0	0	0	0	0	0	200	903	0	0	0	0	0	0	0	603	903	0
571	9	39.599	-77.5151	-802.388	19154.4	78509.8	-7328.66	297.845	276.128	0	0	0	0	0	0	0	200	903	0	0	0	0	0	0	0	603	903	0
572	0	40.0567	-76.447	-800.252	18513.5	77716.3	-7145.56	297.115	276.865	0	0	0	0	0	0	0	200	903	0	0	0	0	0	0	0	603	903	0
572	1	40.3619	-76.1418	-797.811	19245.9	77533.2	-7374.44	297.182	275.877	0	0	0	0	0	0	0	200	903	0	0	0	0	0	0	0	603	903	0
572	2	39.4464	-76.5996	-794.454	19612.2	77350.1	-7328.66	297.363	275.314	0	0	0	0	0	0	0	200	903	0	0	0	0	0	0	0	603	903	0
572	3	39.7516	-74.1582	-792.623	19337.5	77228	-7054	297.434	275.603	0	0	0	0	0	0	0	200	903	0	0	0	0	0	0	0	603	903	0
572	4	40.0567	-73.853	-789.266	19337.5	77167	-7008.23	297.771	275.499	0	0	0	0	0	0	0	200	903	0	0	0	0	0	0	0	603	903	0
572	5	39.4464	-73.0901	-784.993	19062.8	77167	-7008.23	298.303	275.716	0	0	0	0	0	0	0	200	903	0	0	0	0	0	0	0	603	903	0
572	6	40.9723	-73.2426	-784.383	19703.7	76800.8	-6825.12	297.912	274.88	0	0	0	0	0	0	0	200	903	0	0	0	0	0	0	0	603	903	0
572	7	39.9042	-70.6487	-781.636	19978.4	77044.9	-6870.9	298.569	274.44	0	0	0	0	0	0	0	200	903	0	0	0	0	0	0	0	603	903	0
572	8	40.2093	-70.6487	-779.805	20161.5	76251.5	-6642.02	297.783	274.146	0	0	0	0	0	0	0	200	903	0	0	0	0	0	0	0	603	903	0
572	9	39.7516	-68.9702	-775.228	19978.4	76434.6	-6687.79	298.596	274.229	0	0	0	0	0	0	0	200	903	0	0	0	0	0	0	0	603	903	0
573	0	40.6671	-68.8176	-776.143	19978.4	75458	-6458.91	297.222	274.259	0	0	0	0	0	0	0	200	903	0	0	0	0	0	0	0	603	903	0
573	1	39.7516	-67.2917	-774.617	19429.1	75946.3	-6321.58	298.044	274.918	0	0	0	0	0	0	0	200	903	0	0	0	0	0	0	0	603	903	0
573	2	40.0567	-66.071	-770.955	20436.1	75580.1	-6275.8	298.034	273.492	0	0	0	0	0	0	0	200	903	0	0	0	0	0	0	0	603	903	0
573	3	39.599	-66.2236	-764.241	20619.2	75763.2	-6367.36	299.135	273.02	0	0	0	0	0	0	0	200	903	0	0	0	0	0	0	0	603	903	0
573	4	38.9886	-65.0029	-765.767	20527.7	75335.9	-6184.25	298.38	273.193	0	0	0	0	0	0	0	200	903	0	0	0	0	0	0	0	603	903	0
573	5	38.5309	-64.24	-764.547	20619.2	74908.7	-6275.8	297.978	273.031	0	0	0	0	0	0	0	200	903	0	0	0	0	0	0	0	603	903	0
573	6	39.7516	-63.9348	-762.41	20527.7	74847.6	-5909.59	298.172	273.075	0	0	0	0	0	0	0	200	903	0	0	0	0	0	0	0	603	903	0
573	7	39.9042	-62.4089	-759.053	20253	74664.5	-5772.26	298.365	273.318	0	0	0	0	0	0	0	200	903	0	0	0	0	0	0	0	603	903	0
573	8	38.836	-61.7986	-754.781	20802.3	74603.5	-5863.82	298.841	272.439	0	0	0	0	0	0	0	200	903	0	0	0	0	0	0	0	603	903	0
573	9	38.9886	-61.4934	-752.95	20344.6	74359.4	-5634.94	298.757	272.98	0	0	0	0	0	0	0	200	903	0	0	0	0	0	0	0	603	903	0
574	0	38.5309	-59.5097	-750.508	21077	73932.1	-5497.61	298.509	271.916	0	0	0	0	0	0	0	200	903	0	0	0	0	0	0	0	603	903	0
574	1	39.9042	-58.4416	-747.762	21351.7	74115.2	-5543.38	299.116	271.446	0	0	0	0	0	0	0	200	903	0	0	0	0	0	0	0	603	903	0
574	2	38.9886	-57.5261	-746.541	20985.4	73443.8	-5543.38	298.379	271.89	0	0	0	0	0	0	0	200	903	0	0	0	0	0	0	0	603	903	0
574	3	38.2257	-56.9157	-743.184	21077	73504.9	-5406.05	298.905	271.64	0	0	0	0	0	0	0	200	903	0	0	0	0	0	0	0	603	903	0
574	4	38.5309	-56.7632	-741.353	21260.1	72955.6	-5222.95	298.409	271.323	0	0	0	0	0	0	0	200	903	0	0	0	0	0	0	0	603	903	0
574	5	40.2093	-54.9321	-741.964	20527.7	72955.6	-5039.84	298.328	272.333	0	0	0	0	0	0	0	200	903	0	0	0	0	0	0	0	603	903	0
574	6	39.1412	-54.3217	-737.691	21901	72894.5	-4810.96	298.814	270.311	0	0	0	0	0	0	0	200	903	0	0	0	0	0	0	0	603	903	0
574	7	38.3783	-53.864	-734.029	21077	72589.4	-5039.84	298.892	271.286	0	0	0	0	0	0	0	200	903	0	0	0	0	0	0	0	603	903	0
574	8	38.836	-52.6433	-732.198	21260.1	72345.2	-4765.18	298.806	270.964	0	0	0	0	0	0	0	200	903	0	0	0	0	0	0	0	603	903	0
574	9	38.836	-52.3381	-726.4	21717.9	72040	-4490.53	299.174	270.102	0	0	0	0	0	0	0	200	903	0	0	0	0	0	0	0	603	903	0
575	0	39.2938	-52.0329	-727.01	21351.7	72040	-4490.53	299.091	270.631	0	0	0	0	0	0	0	200	903	0	0	0	0	0	0	0	603	903	0
575	1	38.836	-51.5752	-725.179	21351.7	71307.6	-4627.86	298.331	270.557	0	0	0	0	0	0	0	200	903	0	0	0	0	0	0	0	603	903	0
575	2	38.9886	-50.507	-722.737	21901	71429.7	-4170.09	298.832	269.697	0	0	0	0	0	0	0	200	903	0	0	0	0	0	0	0	603	903	0
575	3	38.836	-48.676	-719.991	21351.7	71429.7	-4170.09	299.209	270.345	0	0	0	0	0	0	0	200	903	0	0	0	0	0	0	0	603	903	0
575	4	38.836	-47.3027	-716.634	21260.1	71429.7	-4307.42	299.674	270.333	0	0	0	0	0	0	0	200	903	0	0	0	0	0	0	0	603	903	0
575	5	38.3783	-47.4553	-713.582	22175.6	70758.3	-4124.32	299.159	268.923	0	0	0	0	0	0	0	200	903	0	0	0	0	0	0	0	603	903	0
575	6	37.6153	-46.3872	-712.056	21901	70514.2	-4170.09	299.029	269.243	0	0	0	0	0	0	0	200	903	0	0	0	0	0	0	0	603	903	0
575	7	37.6153	-45.3191	-707.784	22450.3	70331	-3529.22	299.368	268.281	0	0	0	0	0	0	0	200	903	0	0	0	0	0	0	0	603	903	0
575	8	37.9205	-46.082	-704.427	22450.3	70209	-3895.43	299.668	268.13	0	0	0	0	0	0	0	200	903	0	0	0	0	0	0	0	603	903	0
575	9	39.7516	-44.0984	-704.427	21809.4	69720.7	-3575	298.975	269.04	0	0	0	0	0	0	0	200	903	0	0	0	0	0	0	0	603	903	0
576	0	38.0731	-43.3354	-701.07	22267.2	69781.7	-3849.66	299.536	268.238	0	0	0	0	0	0	0	200	903	0	0	0	0	0	0	0	603	903	0
576	1	38.3783	-42.5725	-698.934	22908.1	69415.5	-3758.1	299.316	267.224	0	0	0	0	0	0	0	200	903	0	0	0	0	0	0	0	603	903	0
576	2	37.6153	-41.657	-696.187	22358.7	69537.6	-3575	299.883	267.884	0	0	0	0	0	0	0	200	903	0	0	0	0	0	0	0	603	903	0
576	3	38.5309	-41.3518	-697.103	22999.6	69110.3	-3712.33	299.139	267.007	0	0	0	0	0	0	0	200	903	0	0	0	0	0	0	0	603	903	0
576	4	37.7679	-41.3518	-693.441	22267.2	68744.1	-3025.68	299.135	267.889	0	0	0	0	0	0	0	200	903	0	0	0	0	0	0	0	603	903	0
576	5	37.1576	-40.7414	-690.389	22267.2	68561	-3483.45	299.308	267.747	0	0	0	0	0	0	0	200	903	0	0	0	0	0	0	0	603	903	0
576	6	37.3102	-39.9785	-688.558	22908.1	68377.9	-3208.79	299.306	266.73	0	0	0	0	0	0	0	200	903	0	0	0	0	0	0	0	603	903	0
576	7	37.4628	-38.9104	-685.811	22816.5	68439	-3025.68	299.793	266.731	0	0	0	0	0	0	0	200	903	0	0	0	0	0	0	0	603	903	0
576	8	37.4628	-38.9104	-680.928	22724.9	68011.7	-3346.12	299.881	266.627	0	0	0	0	0	0	0	200	903	0	0	0	0	0	0	0	603	903	0
576	9	36.3946	-37.6897	-680.928	23548.9	67462.4	-3117.23	299.074	265.416	0	0	0	0	0	0	0	200	903	0	0	0	0	0	0	0	603	903	0
577	0	36.0895	-36.7741	-678.792	22999.6	67523.4	-3117.23	299.476	266.117	0	0	0	0	0	0	0	200	903	0	0	0	0	0	0	0	603	903	0
577	1	36.0895	-35.5534	-677.571	23091.2	66546.9	-2430.59	298.214	265.921	0	0	0	0	0	0	0	200	903	0	0	0	0	0	0	0	603	903	0
577	2	36.8524	-35.4008	-672.994	23548.9	67218.3	-2796.8	299.879	265.009	0	0	0	0	0	0	0	200	903	0	0	0	0	0	0	0	603	903	0
577	3	36.0895	-34.4853	-669.942	23091.2	66607.9	-2567.92	299.423	265.533	0	0	0	0	0	0	0	200	903	0	0	0	0	0	0	0	603	903	0
577	4	35.6317	-33.112	-667.806	23274.3	66730	-2796.8	299.924	265.148	0	0	0	0	0	0	0	200	903	0	0	0	0	0	0	0	603	903	0
577	5	35.6317	-32.8069	-665.059	24006.7	66668.9	-2567.92	300.245	263.903	0	0	0	0	0	0	0	200	903	0	0	0	0	0	0	0	603	903	0
577	6	35.9369	-31.7387	-662.313	23457.4	66180.7	-2567.92	299.924	264.583	0	0	0	0	0	0	0	200	903	0	0	0	0	0	0	0	603	903	0
577	7	35.4791	-31.281	-660.787	23915.1	65997.6	-2430.59	299.877	263.808	0	0	0	0	0	0	0	200	903	0	0	0	0	0	0	0	603	903	0
577	8	35.0213	-31.1284	-658.04	23274.3	65692.4	-2155.93	299.83	264.631	0	0	0	0	0	0	0	200	903	0	0	0	0	0	0	0	603	903	0
577	9	35.1739	-30.2129	-656.209	23732	65204.1	-2201.71	299.365	263.835	0	0	0	0	0	0	0	200	903	0	0	0	0	0	0	0	603	903	0
578	0	34.7162	-30.2129	-654.378	23548.9	65265.1	-2064.38	299.736	264.013	0	0	0	0	0	0	0	200	903	0	0	0	0	0	0	0	603	903	0
578	1	35.3265	-29.2973	-653.157	23732	65021	-2018.6	299.549	263.666	0	0	0	0	0	0	0	200	903	0	0	0	0	0	0	0	603	903	0
578	2	34.2584	-29.4499	-650.716	23732	64960	-1881.27	299.828	263.529	0	0	0	0	0	0	0	200	903	0	0	0	0	0	0	0	603	903	0
578	3	34.1058	-28.2292	-647.969	24189.8	64471.7	-2201.71	299.498	262.668	0	0	0	0	0	0	0	200	903	0	0	0	0	0	0	0	603	903	0
578	4	33.9532	-26.7033	-645.833	24830.7	64593.7	-1927.05	300.016	261.553	0	0	0	0	0	0	0	200	903	0	0	0	0	0	0	0	603	903	0
578	5	33.4955	-26.5508	-645.223	24739.1	64105.5	-1698.17	299.354	261.658	0	0	0	0	0	0	0	200	903	0	0	0	0	0	0	0	603	903	0
578	6	33.3429	-29.1447	-641.866	25013.8	63617.2	-1789.72	299.113	261.03	0	0	0	0	0	0	0	200	903	0	0	0	0	0	0	0	603	903	0
578	7	33.6481	-25.7878	-638.204	24189.8	63678.2	-1606.61	299.777	262.097	0	0	0	0	0	0	0	200	903	0	0	0	0	0	0	0	603	903	0
578	8	33.0377	-25.6352	-637.899	24922.2	63373	-1377.73	299.347	260.931	0	0	0	0	0	0	0	200	903	0	0	0	0	0	0	0	603	903	0
578	9	32.4274	-24.8723	-634.847	24556	62945.8	-1652.39	299.151	261.32	0	0	0	0	0	0	0	200	903	0	0	0	0	0	0	0	603	903	0
579	0	31.5118	-24.1093	-631.49	24281.3	63067.9	-1560.84	299.872	261.549	0	0	0	0	0	0	0	200	903	0	0	0	0	0	0	0	603	903	0
579	1	31.5118	-23.8042	-629.659	25196.9	62762.7	-1377.73	299.677	259.983	0	0	0	0	0	0	0	200	903	0	0	0	0	0	0	0	603	903	0
579	2	33.0377	-22.8886	-628.133	24830.7	62701.7	-1286.18	299.822	260.469	0	0	0	0	0	0	0	200	903	0	0	0	0	0	0	0	603	903	0
579	3	31.2066	-22.1257	-624.776	25105.3	62152.3	-1194.63	299.479	259.817	0	0	0	0	0	0	0	200	903	0	0	0	0	0	0	0	603	903	0
579	4	30.5963	-22.5835	-623.555	25288.4	61969.2	-1240.4	299.381	259.445	0	0	0	0	0	0	0	200	903	0	0	0	0	0	0	0	603	903	0
579	5	30.5963	-20.905	-620.809	25380	61969.2	-1423.51	299.82	259.118	0	0	0	0	0	0	0	200	903	0	0	0	0	0	0	0	603	903	0
579	6	31.9696	-20.2946	-618.367	25471.5	61725.1	-691.087	299.819	258.808	0	0	0	0	0	0	0	200	903	0	0	0	0	0	0	0	603	903	0
579	7	30.9015	-22.1257	-616.841	25563.1	61419.9	-1011.52	299.572	258.558	0	0	0	0	0	0	0	200	903	0	0	0	0	0	0	0	603	903	0
579	8	30.4437	-19.2265	-614.095	25471.5	61358.9	-919.969	299.918	258.522	0	0	0	0	0	0	0	200	903	0	0	0	0	0	0	0	603	903	0
579	9	30.5963	-19.5317	-612.569	25746.2	61175.8	-919.969	299.868	257.97	0	0	0	0	0	0	0	200	903	0	0	0	0	0	0	0	603	903	0
580	0	29.9859	-19.3791	-612.874	26295.5	60931.6	-965.745	299.42	257.095	0	0	0	0	0	0	0	200	903	0	0	0	0	0	0	0	603	903	0
580	1	30.7489	-18.6162	-610.128	25929.3	60687.5	-828.416	299.467	257.502	0	0	0	0	0	0	0	200	903	0	0	0	0	0	0	0	603	903	0
580	2	29.8334	-18.6162	-608.297	26112.4	60687.5	-645.311	299.766	257.073	0	0	0	0	0	0	0	200	903	0	0	0	0	0	0	0	603	903	0
580	3	29.0704	-17.7007	-605.855	25380	60565.4	-599.534	299.967	258.109	0	0	0	0	0	0	0	200	903	0	0	0	0	0	0	0	603	903	0
580	4	29.6808	-16.7851	-600.362	26020.8	60443.4	-553.758	300.678	256.658	0	0	0	0	0	0	0	200	903	0	0	0	0	0	0	0	603	903	0
580	5	28.9178	-16.48	-600.972	26753.3	59894	-599.534	299.662	255.483	0	0	0	0	0	0	0	200	903	0	0	0	0	0	0	0	603	903	0
580	6	28.6127	-16.1748	-599.446	26570.2	59772	-507.981	299.712	255.676	0	0	0	0	0	0	0	200	903	0	0	0	0	0	0	0	603	903	0
580	7	28.6127	-15.4118	-597.005	25929.3	59955.1	-599.534	300.426	256.568	0	0	0	0	0	0	0	200	903	0	0	0	0	0	0	0	603	903	0
580	8	28.1549	-15.5644	-595.174	26478.6	59039.5	-324.876	299.197	255.511	0	0	0	0	0	0	0	200	903	0	0	0	0	0	0	0	603	903	0
580	9	28.7652	-14.1911	-590.291	26478.6	59283.7	-370.652	300.431	255.143	0	0	0	0	0	0	0	200	903	0	0	0	0	0	0	0	603	903	0
581	0	28.9178	-13.5808	-589.376	26844.8	58551.3	-141.77	299.345	254.452	0	0	0	0	0	0	0	200	903	0	0	0	0	0	0	0	603	903	0
581	1	27.8497	-13.7334	-587.545	26661.7	59100.6	-279.099	300.589	254.622	0	0	0	0	0	0	0	200	903	0	0	0	0	0	0	0	603	903	0
581	2	26.629	-12.6653	-584.188	27119.5	58551.3	315.993	300.227	253.577	0	0	0	0	0	0	0	200	903	0	0	0	0	0	0	0	603	903	0
581	3	26.9342	-11.9023	-580.526	27119.5	58490.2	-141.77	300.754	253.285	0	0	0	0	0	0	0	200	903	0	0	0	0	0	0	0	603	903	0
581	4	27.392	-13.5808	-581.136	27577.2	58368.2	178.664	300.438	252.546	0	0	0	0	0	0	0	200	903	0	0	0	0	0	0	0	603	903	0
581	5	26.9342	-11.4446	-579.61	26844.8	57635.7	-50.2177	299.439	253.685	0	0	0	0	0	0	0	200	903	0	0	0	0	0	0	0	603	903	0
581	6	27.2394	-10.9868	-577.169	26936.4	58001.9	178.664	300.494	253.33	0	0	0	0	0	0	0	200	903	0	0	0	0	0	0	0	603	903	0
581	7	26.7816	-10.8342	-571.981	26478.6	57818.8	224.441	301.085	253.707	0	0	0	0	0	0	0	200	903	0	0	0	0	0	0	0	603	903	0
581	8	27.2394	-9.6135	-574.422	27394.1	57757.8	315.993	300.549	252.31	0	0	0	0	0	0	0	200	903	0	0	0	0	0	0	0	603	903	0
581	9	26.1712	-9.91867	-573.201	27943.5	57696.8	178.664	300.657	251.25	0	0	0	0	0	0	0	200	903	0	0	0	0	0	0	0	603	903	0
582	0	25.7135	-9.6135	-571.37	27302.6	56781.2	178.664	299.377	252.216	0	0	0	0	0	0	0	200	903	0	0	0	0	0	0	0	603	903	0
582	1	25.2557	-9.30832	-566.182	27394.1	57147.5	361.77	300.935	251.616	0	0	0	0	0	0	0	200	903	0	0	0	0	0	0	0	603	903	0
582	2	24.9505	-8.54538	-568.013	27943.5	56903.3	727.981	300.18	250.805	0	0	0	0	0	0	0	200	903	0	0	0	0	0	0	0	603	903	0
582	3	24.798	-8.2402	-566.793	27394.1	56903.3	636.428	300.395	251.668	0	0	0	0	0	0	0	200	903	0	0	0	0	0	0	0	603	903	0
582	4	24.798	-8.69797	-564.046	27760.3	57025.4	544.875	301.101	250.784	0	0	0	0	0	0	0	200	903	0	0	0	0	0	0	0	603	903	0
582	5	24.1876	-7.78244	-563.741	27943.5	56659.2	1185.74	300.506	250.432	0	0	0	0	0	0	0	200	903	0	0	0	0	0	0	0	603	903	0
582	6	25.1031	-7.17209	-558.248	28218.1	56537.1	499.099	301.276	249.452	0	0	0	0	0	0	0	200	903	0	0	0	0	0	0	0	603	903	0
582	7	24.3402	-5.49362	-558.858	28126.6	56476.1	682.204	301.056	249.671	0	0	0	0	0	0	0	200	903	0	0	0	0	0	0	0	603	903	0
582	8	23.8824	-6.56174	-558.248	28584.3	56048.8	1094.19	300.401	248.796	0	0	0	0	0	0	0	200	903	0	0	0	0	0	0	0	603	903	0
582	9	23.4247	-6.25656	-555.501	28126.6	55804.7	819.533	300.458	249.367	0	0	0	0	0	0	0	200	903	0	0	0	0	0	0	0	603	903	0
583	0	23.5773	-4.73068	-552.755	27943.5	55987.8	819.533	301.289	249.447	0	0	0	0	0	0	0	200	903	0	0	0	0	0	0	0	603	903	0
583	1	24.798	-5.18845	-553.67	28767.4	55865.7	1048.42	300.901	248.042	0	0	0	0	0	0	0	200	903	0	0	0	0	0	0	0	603	903	0
583	2	23.7298	-4.73068	-550.923	28309.7	55438.5	1048.42	300.628	248.614	0	0	0	0	0	0	0	200	903	0	0	0	0	0	0	0	603	903	0
583	3	22.9669	-3.96774	-548.177	28859	55560.5	1094.19	301.355	247.355	0	0	0	0	0	0	0	200	903	0	0	0	0	0	0	0	603	903	0
583	4	23.1195	-4.12033	-547.872	29133.6	55560.5	911.086	301.412	246.824	0	0	0	0	0	0	0	200	903	0	0	0	0	0	0	0	603	903	0
583	5	24.035	-2.74704	-548.482	28675.9	54461.9	1185.74	299.296	247.718	0	0	0	0	0	0	0	200	903	0	0	0	0	0	0	0	603	903	0
583	6	22.8143	-3.05222	-547.261	29316.7	55072.3	1277.3	300.632	246.43	0	0	0	0	0	0	0	200	903	0	0	0	0	0	0	0	603	903	0
583	7	22.6617	-3.2048	-546.651	29225.2	54706.1	1323.07	300.075	246.538	0	0	0	0	0	0	0	200	903	0	0	0	0	0	0	0	603	903	0
583	8	22.3566	-1.9841	-543.904	28859	54767.1	1323.07	300.693	246.941	0	0	0	0	0	0	0	200	903	0	0	0	0	0	0	0	603	903	0
583	9	22.8143	-2.89963	-542.379	29866.1	55011.2	1643.51	301.426	244.935	0	0	0	0	0	0	0	200	903	0	0	0	0	0	0	0	603	903	0
584	0	20.8307	-1.22116	-538.106	29316.7	54584	1506.18	301.437	245.519	0	0	0	0	0	0	0	200	903	0	0	0	0	0	0	0	603	903	0
584	1	20.5255	-1.67893	-540.853	29683	54645	1414.63	301.035	245.118	0	0	0	0	0	0	0	200	903	0	0	0	0	0	0	0	603	903	0
584	2	20.8307	-1.37375	-539.632	29866.1	54889.2	1643.51	301.716	244.655	0	0	0	0	0	0	0	200	903	0	0	0	0	0	0	0	603	903	0
584	3	20.8307	-0.000459142	-537.801	29683	54217.8	1551.96	300.814	244.807	0	0	0	0	0	0	0	200	903	0	0	0	0	0	0	0	603	903	0
584	4	20.9833	0.609892	-537.496	30232.3	54522.9	2009.72	301.439	243.753	0	0	0	0	0	0	0	200	903	0	0	0	0	0	0	0	603	903	0
584	5	22.204	0.152129	-534.139	30323.8	53912.6	1918.17	300.934	243.229	0	0	0	0	0	0	0	200	903	0	0	0	0	0	0	0	603	903	0
584	6	20.6781	1.52542	-533.528	29683	54278.8	1780.84	301.736	244.365	0	0	0	0	0	0	0	200	903	0	0	0	0	0	0	0	603	903	0
584	7	20.6781	1.8306	-530.782	30690	53241.2	1735.06	300.307	242.18	0	0	0	0	0	0	0	200	903	0	0	0	0	0	0	0	603	903	0
584	8	20.3729	0.76248	-531.087	30873.1	54034.7	2421.71	301.744	241.868	0	0	0	0	0	0	0	200	903	0	0	0	0	0	0	0	603	903	0
584	9	20.5255	2.59353	-528.34	30873.1	54034.7	1963.94	302.272	241.566	0	0	0	0	0	0	0	200	903	0	0	0	0	0	0	0	603	903	0
585	0	21.1358	2.13577	-529.866	31056.2	53729.5	1963.94	301.402	241.389	0	0	0	0	0	0	0	200	903	0	0	0	0	0	0	0	603	903	0
585	1	20.6781	2.28836	-528.035	30506.9	53790.5	2192.82	301.869	242.226	0	0	0	0	0	0	0	200	903	0	0	0	0	0	0	0	603	903	0
585	2	20.9833	3.50906	-526.815	30506.9	53912.6	2101.27	302.337	242.092	0	0	0	0	0	0	0	200	903	0	0	0	0	0	0	0	603	903	0
585	3	20.5255	3.35647	-525.594	31147.8	53729.5	2284.38	302.226	240.738	0	0	0	0	0	0	0	200	903	0	0	0	0	0	0	0	603	903	0
585	4	21.1358	3.20389	-524.678	30873.1	53912.6	2101.27	302.754	241.158	0	0	0	0	0	0	0	200	903	0	0	0	0	0	0	0	603	903	0
585	5	20.3729	4.272	-524.373	31697.1	53302.2	2238.6	301.649	239.552	0	0	0	0	0	0	0	200	903	0	0	0	0	0	0	0	603	903	0
585	6	20.2203	4.11941	-524.068	31880.2	53607.4	2284.38	302.291	239.168	0	0	0	0	0	0	0	200	903	0	0	0	0	0	0	0	603	903	0
585	7	20.0677	4.72977	-523.152	31788.7	53241.2	2375.93	301.77	239.236	0	0	0	0	0	0	0	200	903	0	0	0	0	0	0	0	603	903	0
585	8	21.441	4.88235	-522.237	31971.8	52997.1	2650.59	301.481	238.779	0	0	0	0	0	0	0	200	903	0	0	0	0	0	0	0	603	903	0
585	9	19.9151	4.42459	-522.237	31880.2	53363.3	2467.48	302.182	238.954	0	0	0	0	0	0	0	200	903	0	0	0	0	0	0	0	603	903	0
586	0	19.61	5.79788	-521.627	31330.9	52814	2513.26	301.249	239.936	0	0	0	0	0	0	0	200	903	0	0	0	0	0	0	0	603	903	0
586	1	19.61	5.95047	-519.796	32704.2	53424.3	2421.71	302.78	237.083	0	0	0	0	0	0	0	200	903	0	0	0	0	0	0	0	603	903	0
586	2	18.847	6.25564	-518.88	32063.3	53058.1	2604.81	302.255	238.207	0	0	0	0	0	0	0	200	903	0	0	0	0	0	0	0	603	903	0
586	3	18.9996	5.64529	-518.27	32429.5	52936	2650.59	302.14	237.427	0	0	0	0	0	0	0	200	903	0	0	0	0	0	0	0	603	903	0
586	4	20.0677	6.56082	-516.744	32704.2	53119.1	2513.26	302.796	236.711	0	0	0	0	0	0	0	200	903	0	0	0	0	0	0	0	603	903	0
586	5	19.3048	6.25564	-514.302	32704.2	52691.9	2833.69	302.453	236.411	0	0	0	0	0	0	0	200	903	0	0	0	0	0	0	0	603	903	0
586	6	19.1522	7.93411	-514.302	32978.9	52936	2925.25	302.928	235.877	0	0	0	0	0	0	0	200	903	0	0	0	0	0	0	0	603	903	0
586	7	19.3048	7.78152	-510.945	33253.5	52997.1	2879.47	303.724	234.918	0	0	0	0	0	0	0	200	903	0	0	0	0	0	0	0	603	903	0
586	8	19.4574	8.54446	-513.082	32521.1	52691.9	2742.14	302.697	236.616	0	0	0	0	0	0	0	200	903	0	0	0	0	0	0	0	603	903	0
586	9	18.6944	8.54446	-511.251	33894.4	52752.9	2925.25	303.184	233.703	0	0	0	0	0	0	0	200	903	0	0	0	0	0	0	0	603	903	0
587	0	19.3048	7.93411	-511.861	33985.9	52569.8	3108.35	302.703	233.603	0	0	0	0	0	0	0	200	903	0	0	0	0	0	0	0	603	903	0
587	1	19.1522	9.45999	-511.251	33436.6	52691.9	3016.8	303.065	234.598	0	0	0	0	0	0	0	200	903	0	0	0	0	0	0	0	603	903	0
587	2	18.9996	9.45999	-511.861	33894.4	52264.6	3245.68	302.107	233.782	0	0	0	0	0	0	0	200	903	0	0	0	0	0	0	0	603	903	0
587	3	19.4574	9.61258	-511.861	33253.5	52142.6	3154.13	301.869	235.034	0	0	0	0	0	0	0	200	903	0	0	0	0	0	0	0	603	903	0
587	4	19.61	10.3755	-511.861	33528.2	52691.9	3337.23	302.942	234.498	0	0	0	0	0	0	0	200	903	0	0	0	0	0	0	0	603	903	0
587	5	18.9996	10.5281	-510.64	34352.1	52447.8	3291.46	302.71	232.727	0	0	0	0	0	0	0	200	903	0	0	0	0	0	0	0	603	903	0
587	6	18.847	10.8333	-506.368	34169	52386.7	3291.46	303.456	232.521	0	0	0	0	0	0	0	200	903	0	0	0	0	0	0	0	603	903	0
587	7	18.3893	11.4436	-510.03	34443.7	52142.6	3337.23	302.234	232.467	0	0	0	0	0	0	0	200	903	0	0	0	0	0	0	0	603	903	0
587	8	17.9315	11.1385	-510.945	35359.2	52691.9	3428.79	303.126	230.796	0	0	0	0	0	0	0	200	903	0	0	0	0	0	0	0	603	903	0
587	9	18.5419	11.4436	-510.945	34535.2	52691.9	3611.89	303.126	232.409	0	0	0	0	0	0	0	200	903	0	0	0	0	0	0	0	603	903	0
588	0	18.3893	10.2229	-510.335	34993	52447.8	3703.45	302.771	231.431	0	0	0	0	0	0	0	200	903	0	0	0	0	0	0	0	603	903	0
588	1	18.9996	12.2066	-508.504	35176.1	52630.9	3611.89	303.501	230.824	0	0	0	0	0	0	0	200	903	0	0	0	0	0	0	0	603	903	0
588	2	18.3893	12.2066	-508.199	35176.1	52691.9	3611.89	303.684	230.783	0	0	0	0	0	0	0	200	903	0	0	0	0	0	0	0	603	903	0
588	3	18.2367	12.5117	-509.114	35359.2	52875	4115.43	303.857	230.548	0	0	0	0	0	0	0	200	903	0	0	0	0	0	0	0	603	903	0
588	4	18.3893	13.2747	-505.452	36457.9	52875	3795	304.609	227.871	0	0	0	0	0	0	0	200	903	0	0	0	0	0	0	0	603	903	0
588	5	18.6944	13.1221	-508.809	35817	52569.8	3795	303.319	229.606	0	0	0	0	0	0	0	200	903	0	0	0	0	0	0	0	603	903	0
588	6	18.9996	14.3428	-509.725	35725.4	52814	3978.1	303.613	229.912	0	0	0	0	0	0	0	200	903	0	0	0	0	0	0	0	603	903	0
588	7	18.9996	13.4273	-509.42	36641	52997.1	3932.33	304.034	228.073	0	0	0	0	0	0	0	200	903	0	0	0	0	0	0	0	603	903	0
588	8	19.1522	14.648	-509.114	36457.9	53180.2	4481.64	304.456	228.39	0	0	0	0	0	0	0	200	903	0	0	0	0	0	0	0	603	903	0
588	9	20.0677	14.1902	-509.114	36732.5	53119.1	3932.33	304.336	227.85	0	0	0	0	0	0	0	200	903	0	0	0	0	0	0	0	603	903	0
589	0	18.6944	14.9532	-510.335	37556.5	52997.1	4023.88	303.848	226.408	0	0	0	0	0	0	0	200	903	0	0	0	0	0	0	0	603	903	0
589	1	18.847	15.2583	-512.166	36915.6	52814	4298.54	303.119	227.923	0	0	0	0	0	0	0	200	903	0	0	0	0	0	0	0	603	903	0
589	2	19.4574	15.1057	-511.861	37190.3	52997.1	4161.21	303.538	227.343	0	0	0	0	0	0	0	200	903	0	0	0	0	0	0	0	603	903	0
589	3	18.9996	16.3264	-506.673	38014.2	53485.3	4298.54	305.562	224.973	0	0	0	0	0	0	0	200	903	0	0	0	0	0	0	0	603	903	0
589	4	18.847	16.0213	-512.471	37556.5	53851.6	4710.52	305.082	226.715	0	0	0	0	0	0	0	200	903	0	0	0	0	0	0	0	603	903	0
589	5	18.3893	16.3264	-512.471	37464.9	53607.4	4435.87	304.606	226.894	0	0	0	0	0	0	0	200	903	0	0	0	0	0	0	0	603	903	0
589	6	18.9996	16.7842	-513.692	38563.6	53790.5	4481.64	304.714	224.929	0	0	0	0	0	0	0	200	903	0	0	0	0	0	0	0	603	903	0
589	7	20.5255	17.242	-513.387	38655.1	53424.3	4481.64	304.063	224.706	0	0	0	0	0	0	0	200	903	0	0	0	0	0	0	0	603	903	0
589	8	18.9996	17.5471	-514.608	39753.8	53912.6	4527.42	304.764	222.749	0	0	0	0	0	0	0	200	903	0	0	0	0	0	0	0	603	903	0
589	9	18.2367	17.3946	-513.997	39479.1	53729.5	4573.2	304.533	223.192	0	0	0	0	0	0	0	200	903	0	0	0	0	0	0	0	603	903	0
590	0	18.9996	18.1575	-512.471	39204.4	54217.8	4893.63	305.797	223.499	0	0	0	0	0	0	0	200	903	0	0	0	0	0	0	0	603	903	0
590	1	20.2203	19.073	-517.049	39662.2	54400.9	4893.63	305.214	223.291	0	0	0	0	0	0	0	200	903	0	0	0	0	0	0	0	603	903	0
590	2	19.4574	17.5471	-517.659	40120	54584	5076.74	305.444	222.497	0	0	0	0	0	0	0	200	903	0	0	0	0	0	0	0	603	903	0
590	3	19.1522	19.5308	-516.744	39845.3	54645	5030.96	305.749	222.892	0	0	0	0	0	0	0	200	903	0	0	0	0	0	0	0	603	903	0
590	4	19.1522	19.6834	-516.133	40760.8	54522.9	4802.08	305.637	221.027	0	0	0	0	0	0	0	200	903	0	0	0	0	0	0	0	603	903	0
590	5	20.2203	19.5308	-520.406	41127	55133.3	5122.51	305.943	220.971	0	0	0	0	0	0	0	200	903	0	0	0	0	0	0	0	603	903	0
590	6	19.7626	20.2937	-521.321	41127	54584	5122.51	304.703	221.11	0	0	0	0	0	0	0	200	903	0	0	0	0	0	0	0	603	903	0
590	7	19.3048	19.5308	-522.542	41584.8	55011.2	5442.95	305.276	220.418	0	0	0	0	0	0	0	200	903	0	0	0	0	0	0	0	603	903	0
590	8	19.9151	20.2937	-524.068	41218.6	55316.4	5397.17	305.552	221.349	0	0	0	0	0	0	0	200	903	0	0	0	0	0	0	0	603	903	0
590	9	19.61	21.3618	-524.678	41493.3	55499.5	5580.28	305.778	220.917	0	0	0	0	0	0	0	200	903	0	0	0	0	0	0	0	603	903	0
591	0	19.3048	21.3618	-525.594	42866.6	55682.6	5900.71	305.942	218.442	0	0	0	0	0	0	0	200	903	0	0	0	0	0	0	0	603	903	0
591	1	19.3048	21.667	-525.899	42225.7	55804.7	5488.72	306.113	219.708	0	0	0	0	0	0	0	200	903	0	0	0	0	0	0	0	603	903	0
591	2	20.0677	21.667	-524.373	42958.1	55865.7	5488.72	306.538	218.077	0	0	0	0	0	0	0	200	903	0	0	0	0	0	0	0	603	903	0
591	3	19.1522	21.667	-528.34	43690.5	55743.6	5580.28	305.507	217.306	0	0	0	0	0	0	0	200	903	0	0	0	0	0	0	0	603	903	0
591	4	19.7626	22.8877	-529.561	43049.7	56293	5809.16	306.301	218.707	0	0	0	0	0	0	0	200	903	0	0	0	0	0	0	0	603	903	0
591	5	20.0677	23.0403	-529.561	43873.6	56231.9	5900.71	306.186	217.151	0	0	0	0	0	0	0	200	903	0	0	0	0	0	0	0	603	903	0
[truncated: 794 more rows]
