# Supplementary material for: The Effects of an Extemporaneous Speech Dual-task on Older Adult Gait Control
Source: Research Square preprint supplement (doi:10.21203/rs.3.rs-7674245/v1), 2025-11-18
Supplement: Supplementary file 201 [file Over8ground9.xlsx]

## Sheet: Sheet1
Trajectories
		08:LFHD			08:RFHD			08:LBHD			08:RBHD			08:C7			08:T10			08:CLAV			08:STRN			08:RBAK			08:LSHO			08:LUPA			08:LELB			08:LFRM			08:LWRA			08:LWRB			08:LFIN
Frame	Sub Frame	X	Y	Z	X	Y	Z	X	Y	Z	X	Y	Z	X	Y	Z	X	Y	Z	X	Y	Z	X	Y	Z	X	Y	Z	X	Y	Z	X	Y	Z	X	Y	Z	X	Y	Z	X	Y	Z	X	Y	Z	X	Y	Z
		mm	mm	mm	mm	mm	mm	mm	mm	mm	mm	mm	mm	mm	mm	mm	mm	mm	mm	mm	mm	mm	mm	mm	mm	mm	mm	mm	mm	mm	mm	mm	mm	mm	mm	mm	mm	mm	mm	mm	mm	mm	mm	mm	mm	mm	mm	mm	mm
369	0	226.382	2420.45	1658.74	137.679	2431.08	1653.37	236.743	2611.91	1686.67	124.532	2603.7	1677.5	187.604	2654.92	1532.74	213.018	2742.18	1272.72	202.19	2515.02	1441.46	194.319	2457.38	1237.12	124.087	2745.53	1325.87	381.432	2583.5	1490.74	463.957	2598.9	1300.22	475.387	2601.95	1143.67	480.231	2500.87	1000.68	425.67	2465.62	916.992	487.028	2492.99	901.554	470.984	2433.45	859.484
370	0	225.844	2408.56	1661.83	137.251	2419.28	1656.66	236.152	2600.2	1689.53	123.842	2591.96	1680.54	186.567	2642.75	1535.29	211.597	2729.79	1275.43	201.815	2502.93	1444.56	194.432	2444.8	1240.6	123.23	2733.26	1328.74	380.641	2572.01	1493.63	463.759	2589.22	1303.05	470.627	2592.27	1143.89	480.525	2493.56	1002.93	425.774	2459.17	919.232	487.464	2486.49	903.662	471.193	2427.93	860.662
371	0	225.705	2396.89	1665.04	136.872	2407.5	1659.95	235.695	2588.52	1692.63	123.45	2580.26	1683.83	186.772	2631.73	1539.15	210.193	2717.17	1278.12	201.423	2490.85	1447.5	194.332	2432.3	1243.9	122.487	2720.91	1331.73	380.517	2560.81	1496.41	463.274	2579.94	1305.8	470.258	2583.48	1147.24	480.568	2486.05	1005.34	425.88	2452.67	921.025	487.866	2480.09	906	472.221	2422.87	862.429
372	0	225.259	2385.16	1668.18	136.414	2395.51	1662.73	235.272	2576.73	1695.8	122.998	2568.53	1687.09	186.042	2619.73	1542	208.885	2704.68	1280.96	201.042	2478.89	1450.73	194.173	2419.94	1246.75	121.492	2708.6	1334.59	380.099	2549.32	1499.72	462.418	2570.04	1309.74	470.239	2574.86	1151.15	480.598	2478.67	1007.93	426.072	2446.14	922.937	488.045	2473.59	908.649	471.661	2416.19	863.977
373	0	224.978	2373.37	1671.11	136.174	2383.67	1665.89	234.947	2564.94	1698.57	122.364	2556.62	1689.96	185.325	2607.68	1544.74	207.653	2692.79	1284.08	200.898	2466.96	1454.04	193.88	2407.57	1249.91	120.491	2696.34	1337.52	379.823	2538	1502.37	461.95	2560.47	1312.64	470.247	2566.31	1154.03	480.796	2471.47	1010.6	426.512	2439.58	925.305	488.002	2467.17	910.983	472.483	2410.75	866.161
374	0	224.954	2361.75	1674.09	136.093	2372.07	1668.84	234.665	2553.39	1701.23	122.08	2544.99	1693.03	184.34	2595.73	1547.02	206.505	2681.1	1287.16	200.435	2454.99	1456.99	193.169	2395.22	1252.76	119.596	2684.23	1340.32	379.498	2526.72	1505.23	462.749	2552.01	1315.13	473.806	2558.06	1160.12	481.106	2464.41	1012.99	426.773	2432.77	927.576	488.364	2461.14	913.424	472.674	2404.37	867.509
375	0	224.811	2350.11	1676.75	136.067	2360.22	1671.61	234.163	2541.73	1704.02	121.881	2533.36	1695.75	184.307	2584.26	1550.02	205.607	2668.94	1289.4	199.81	2442.88	1459.77	193.192	2383.57	1255.1	118.718	2672.1	1342.79	379.119	2515.33	1508.13	461.375	2541.72	1318.76	470.144	2549.53	1161.03	481.159	2456.93	1015.23	427.245	2426.12	929.227	488.191	2454.36	915.833	473.324	2398.51	869.559
376	0	224.997	2338.41	1679.34	135.947	2348.37	1674.42	233.743	2529.83	1706.44	121.765	2521.55	1698.32	183.853	2572.39	1552.53	204.594	2656.86	1291.61	199.86	2431.17	1462.44	192.982	2371.66	1258.04	117.838	2659.97	1345.36	378.527	2504.01	1510.94	460.743	2532.19	1321.52	469.813	2541.08	1163.99	480.887	2449.56	1017.15	427.894	2419.32	931.663	488.616	2448.35	918.225	473.852	2392.28	871.465
377	0	225.192	2326.78	1681.83	135.981	2336.41	1677.03	233.678	2518.49	1708.72	121.592	2509.78	1700.67	183.461	2560.65	1555.05	203.621	2644.98	1293.78	201.622	2420.92	1464.78	192.641	2359.82	1260.98	117.079	2648.01	1347.53	377.394	2492.31	1513.48	460.248	2522.76	1324.26	469.765	2532.8	1166.67	480.72	2442.18	1019.06	428.523	2412.22	934.255	488.718	2442.21	919.986	474.755	2386.39	873.24
378	0	225.193	2314.92	1684.16	136.011	2324.59	1679.24	233.465	2506.79	1710.91	121.455	2497.88	1702.9	183.008	2548.57	1557.12	202.561	2632.75	1295.94	201.053	2408.84	1466.93	192.456	2348.18	1263.05	116.278	2636.01	1349.71	377	2480.89	1515.85	459.871	2513.01	1326.83	469.436	2524.34	1169.53	480.92	2434.85	1021.1	429.018	2404.96	936.155	488.929	2436.26	922.341	475.142	2379.62	874.661
379	0	225.046	2303.13	1685.93	136.334	2312.72	1681.23	233.08	2494.74	1712.87	121.324	2485.94	1704.92	182.502	2536.54	1558.93	201.5	2620.65	1298.05	200.887	2396.82	1468.95	192.397	2336.6	1264.56	115.315	2623.87	1351.88	376.909	2469.55	1517.81	459.569	2503.41	1329.41	469.277	2515.99	1172.45	481.504	2427.74	1023.11	429.685	2397.55	937.631	489.328	2429.66	924.277	476.011	2373.21	876.481
380	0	225.365	2291.33	1687.65	136.383	2300.67	1683	233.041	2482.93	1714.6	121.15	2473.93	1706.79	182.04	2524.58	1560.88	200.298	2608.59	1300.14	200.662	2384.87	1470.53	192.4	2324.85	1266.67	114.549	2611.72	1353.82	377.055	2458.36	1519.53	458.98	2493.4	1331.61	469.509	2507.49	1174.49	481.67	2420.35	1024.8	429.713	2388.5	939.855	489.471	2422.95	926.118	476.783	2366.62	878.043
381	0	225.415	2279.38	1689.04	136.553	2288.69	1684.58	233.095	2471.18	1715.95	121.229	2462.02	1708.52	181.605	2512.9	1562.6	199.225	2596.24	1301.77	200.831	2372.85	1472.22	192.208	2312.86	1267.94	113.763	2599.54	1355.66	376.837	2446.85	1521.05	458.877	2483.78	1333.46	468.967	2498.94	1176.36	482.046	2412.8	1026.51	426.834	2378.55	940.44	489.852	2416.25	927.74	477.644	2359.77	879.286
382	0	225.837	2267.46	1690.26	136.801	2276.58	1685.75	233.102	2459.19	1717.07	121.238	2449.92	1709.87	181.611	2500.63	1563.72	198.324	2584.17	1303.23	200.704	2360.79	1473.4	192.542	2301.1	1269.12	113.039	2587.43	1357.12	376.497	2435.13	1522.53	458.731	2473.83	1335.29	468.709	2490.33	1178.21	482.44	2405.01	1028.03	430.693	2375.15	940.365	490.048	2409.39	928.958	478.457	2352.63	880.386
383	0	226.27	2255.47	1691.18	137.307	2264.58	1686.73	233.004	2446.99	1717.98	121.404	2437.84	1710.89	181.29	2488.3	1564.17	197.429	2572.33	1304.54	201.059	2348.63	1474.62	192.4	2289.11	1269.85	112.304	2575.22	1358.14	375.896	2423.21	1523.69	458.393	2463.98	1336.85	468.431	2481.81	1180.29	482.593	2397.06	1029.11	431.005	2366.73	940.653	490.188	2402.04	930.49	479.269	2345.49	881.376
384	0	226.66	2243.29	1691.68	137.423	2252.17	1687.26	232.964	2434.84	1718.25	121.391	2425.52	1711.17	180.618	2475.8	1564.99	196.577	2560.19	1305.07	200.977	2336.38	1475.07	192.804	2277.19	1270.62	111.507	2562.99	1358.95	376.55	2411.84	1523.75	458.181	2453.89	1337.84	468.436	2472.88	1181.15	482.934	2389.1	1029.55	431.876	2358.73	941.393	490.348	2394.85	930.46	480.47	2338.6	881.81
385	0	226.84	2231.15	1691.49	137.644	2239.75	1687.5	233.046	2422.77	1718.21	121.513	2413.17	1711.23	180.358	2463.38	1564.85	195.859	2548.07	1305.41	200.617	2324.13	1474.84	192.337	2264.6	1270.45	111.002	2550.77	1359.07	375.164	2399.39	1524.51	457.814	2443.64	1338.62	468.782	2464.03	1181.93	483.72	2381.5	1029.9	430.023	2346.25	943.326	490.172	2387.09	931.085	481.235	2331.03	881.78
386	0	227.137	2218.76	1691.56	138.102	2227.42	1687.47	233.155	2410.52	1717.94	121.731	2400.78	1711.09	180.382	2451.28	1564.66	195.13	2535.54	1305.18	200.856	2311.77	1475.08	192.367	2252.27	1269.85	110.403	2538.39	1359.13	375.406	2387.58	1524.39	457.702	2433.72	1338.98	469.531	2454.56	1184.14	484.045	2373.03	1029.91	431.023	2337.67	943.417	490.757	2379.94	931.121	482.235	2323.54	881.532
387	0	227.557	2206.33	1690.89	138.552	2214.89	1687.13	233.346	2398.2	1717.31	121.919	2388.24	1710.42	180.367	2438.79	1564.34	194.6	2523.13	1304.56	201.118	2299.3	1474.66	193.188	2240.35	1269.69	110.079	2526.01	1358.69	375.25	2375.51	1524.1	457.184	2423.05	1339.05	469.007	2445.23	1184.19	484.292	2364.39	1029.6	431.788	2329.07	942.925	491.096	2371.92	930.823	483.048	2315.72	880.969
388	0	228.111	2193.82	1690.17	139.002	2202.31	1686.5	233.563	2385.6	1716.25	122.224	2375.61	1709.71	179.981	2426.1	1563.69	193.99	2511.03	1304.18	201.4	2286.72	1473.92	193.629	2227.92	1269.02	109.655	2513.61	1358.17	375.438	2363.5	1523.25	456.928	2412.63	1338.67	469.019	2435.89	1184.02	484.721	2355.78	1029.04	432.55	2320.23	942.288	491.307	2363.64	930.331	484.13	2307.74	880.263
389	0	228.616	2181.28	1688.99	139.489	2189.69	1685.48	233.983	2372.92	1714.87	122.538	2362.93	1708.73	180.214	2413.31	1562.93	193.888	2498.61	1303.23	201.61	2273.96	1472.61	194.293	2215.64	1267.77	109.576	2501.09	1357.31	375.534	2351.28	1522.11	456.912	2402.04	1338.12	468.475	2426.27	1183.05	485.399	2346.99	1028.18	433.702	2311.45	941.117	491.832	2355.4	929.613	484.949	2299.07	879.078
390	0	229.286	2168.51	1687.76	140.057	2176.83	1684.1	234.593	2360.34	1713.37	122.914	2350.06	1707.2	180.348	2400.44	1561.32	193.637	2486.44	1302.32	201.69	2261.22	1471.13	194.961	2203.38	1265.92	109.286	2488.49	1356.37	376.309	2339.17	1520.47	456.676	2391.07	1337.24	467.679	2416.36	1181.77	485.82	2337.81	1027.07	434.651	2301.46	940.068	492.239	2346.9	928.254	486.025	2290.58	877.94
391	0	229.633	2155.68	1686.02	140.531	2163.82	1682.47	234.961	2347.6	1711.56	123.464	2337.13	1705.49	180.596	2387.85	1559.57	193.628	2473.82	1300.62	201.792	2248.39	1469.35	194.751	2190.4	1263.77	109.197	2475.84	1355.02	375.378	2325.86	1519.59	456.586	2380.16	1336.01	467.93	2406.18	1180.94	486.077	2328.3	1025.55	435.562	2292.93	938.113	492.83	2338.02	926.976	486.402	2281.83	876.021
392	0	230.498	2142.79	1684.02	141.149	2150.8	1680.64	235.517	2334.7	1709.13	124.099	2324.28	1703.52	180.644	2374.83	1557.88	193.639	2461.19	1298.89	202.049	2235.36	1467.2	195.273	2177.76	1261.55	109.378	2463.11	1353.23	376	2313.61	1517.33	456.406	2368.97	1334.21	468.325	2395.83	1179.99	486.578	2318.78	1023.73	436.578	2283.61	935.982	493.603	2329.16	925.325	487.54	2273.02	873.743
393	0	231.31	2129.78	1681.81	142.074	2137.78	1678.63	236.307	2321.88	1706.62	124.696	2311.17	1700.82	180.761	2361.47	1555.62	194.027	2448.3	1296.7	202.291	2222.26	1464.7	195.748	2165.11	1259.11	109.684	2450.24	1350.99	376.737	2301.2	1515.06	456.312	2357.51	1332.17	468.232	2384.97	1178.4	487.151	2309.13	1021.59	437.318	2273.76	933.791	494.123	2320.15	923.19	488.656	2264.17	871.447
394	0	232.086	2116.71	1679.33	142.894	2124.57	1676.27	236.958	2308.79	1703.91	125.547	2298.06	1698.5	181.784	2348.85	1552.73	194.665	2435.31	1294.25	203.07	2209.25	1462.21	196.248	2152.52	1256.41	110.1	2437.21	1348.49	376.243	2287.8	1512.97	456.107	2345.72	1330.12	468.238	2374.11	1176.65	487.683	2299.18	1019.14	438.155	2263.04	931.703	494.345	2310.45	920.872	489.447	2254.9	868.789
395	0	233.078	2103.48	1676.83	143.94	2111.32	1674.08	237.75	2295.65	1701.02	126.395	2284.84	1695.69	181.712	2335.11	1550.41	195.308	2422.26	1291.53	203.65	2195.94	1459.49	196.62	2139.53	1253.47	110.566	2424.1	1345.97	376.583	2274.9	1510.18	456.039	2333.62	1327.65	467.826	2362.83	1174.09	488.215	2289.01	1016.29	439.212	2252.59	928.255	495.601	2301.1	918.345	490.643	2245.6	865.891
396	0	234.026	2090.18	1674.16	144.797	2098.01	1671.06	238.747	2282.51	1698.14	127.314	2271.5	1692.8	182.38	2321.82	1547.51	196.121	2409.27	1288.98	203.964	2182.53	1456.35	197.241	2126.75	1250.1	111.101	2411.01	1343.36	376.87	2261.72	1507.65	456.076	2321.23	1325.21	468.128	2351.64	1172.15	488.927	2278.52	1013.79	440.182	2243.51	925.268	496.151	2291.17	915.562	491.613	2235.98	863.299
397	0	235.187	2076.84	1671.22	146.048	2084.75	1668.4	239.643	2269.06	1694.94	128.234	2258.18	1690.04	182.946	2308.38	1544.9	196.898	2395.92	1285.97	204.524	2168.92	1453.27	197.77	2113.68	1247	111.675	2397.56	1340.56	377.103	2248.54	1504.38	456.606	2309.04	1322.35	469.02	2340.39	1170.34	489.488	2267.69	1010.8	440.847	2232.75	922.581	497.655	2281.78	913.385	492.918	2226.2	860.284
398	0	236.438	2063.51	1668.29	147.175	2071.14	1665.69	240.808	2255.72	1691.72	129.322	2244.66	1687.04	183.879	2294.89	1541.8	197.637	2382.79	1283.25	204.976	2155.34	1449.89	198.386	2100.63	1243.93	112.351	2384.16	1337.55	377.533	2235.25	1501.42	457.141	2296.79	1319.18	468.523	2328.11	1167.06	490.1	2256.6	1007.57	442.125	2222.17	918.932	497.934	2270.86	909.973	494.229	2216.1	856.673
399	0	237.603	2049.9	1665.66	148.442	2057.73	1662.96	242.071	2242.19	1688.73	130.537	2231.23	1684.14	184.914	2281.56	1538.94	198.252	2369.44	1280.05	205.468	2141.44	1446.75	198.906	2087.33	1240.58	112.98	2370.56	1334.87	375.991	2220.92	1496.03	457.412	2283.8	1316.1	468.63	2315.91	1164.11	490.972	2245.6	1004.25	443.657	2211.44	916.141	498.624	2260.3	906.912	495.48	2206.11	853.087
400	0	238.916	2036.18	1662.91	149.835	2044.05	1660.3	243.437	2228.64	1685.72	132.036	2217.67	1681.14	185.759	2267.79	1535.87	199.284	2355.62	1276.85	206.176	2127.55	1443.75	199.532	2073.79	1237.47	113.816	2356.88	1331.86	377.867	2207.16	1494.72	457.755	2270.78	1313.23	468.772	2303.41	1161.31	491.943	2234.42	1000.93	444.613	2200.27	911.921	499.672	2249.52	903.632	496.851	2195.71	849.284
401	0	240.308	2022.67	1660.09	151.174	2030.39	1657.62	244.742	2215.02	1682.45	133.495	2204.05	1677.89	186.846	2254.05	1532.94	199.793	2342.05	1273.51	207.234	2113.76	1440.9	200.027	2060.16	1234.3	114.584	2343.08	1328.97	378.55	2193.72	1490.64	458.225	2257.31	1309.78	469.339	2290.84	1158.38	492.752	2222.71	997.454	447.392	2192.21	905.56	500.49	2238.58	900.035	497.958	2184.8	845.534
402	0	241.888	2008.97	1657.41	152.407	2016.58	1655.17	246.459	2201.39	1679.38	135.061	2190.49	1675.08	187.952	2240.14	1529.96	200.493	2328.32	1270.79	208.183	2099.66	1437.59	200.658	2046.27	1231.59	115.523	2329.17	1325.82	379.783	2180.12	1487.08	459.025	2244.31	1306.05	469.639	2277.86	1155.07	493.682	2210.89	993.703	446.927	2178.04	904.023	501.333	2227.44	896.34	499.279	2174.11	841.556
403	0	243.423	1995.15	1655.03	153.863	2002.75	1652.69	248.107	2187.77	1676.45	136.782	2176.77	1672.32	189.446	2226.27	1527.39	200.754	2314.22	1267.81	209.356	2085.68	1434.88	201.225	2032.12	1228.55	116.305	2315.05	1323.35	381.211	2164.64	1484.8	459.718	2230.41	1302.86	469.846	2264.24	1151.84	494.461	2198.67	990.101	448.384	2165.47	900.504	502.496	2215.78	892.952	500.647	2162.75	837.678
404	0	244.983	1981.28	1652.95	155.635	1988.94	1650.55	249.937	2173.86	1673.83	138.527	2162.93	1670.04	191.15	2212.05	1524.73	201.293	2300	1265.58	210.74	2071.5	1432.42	202.154	2018.14	1226.15	116.935	2300.51	1321.19	382.678	2152.67	1481.55	459.805	2216.09	1299.67	470.162	2250.35	1148.97	495.417	2185.94	987.068	449.528	2153.36	896.402	503.449	2203.87	889.814	502.045	2151.3	834.02
405	0	247.031	1967.48	1650.99	157.44	1975.02	1648.86	251.736	2159.99	1671.32	140.323	2149.09	1667.85	194.745	2198.6	1522.09	201.637	2285.81	1263.76	212.404	2057.3	1430.22	203.219	2003.81	1224.22	117.824	2286.05	1319.16	383.873	2138.09	1478.79	460.593	2202.37	1296.19	470.844	2236.38	1145.92	496.222	2172.99	983.551	450.462	2141.95	892.228	504.632	2191.81	886.543	503.365	2139.61	830.424
406	0	249.048	1953.58	1649.04	159.347	1961.05	1647.21	253.755	2146.26	1668.79	142.293	2135.25	1665.68	193.943	2183.35	1520.59	202.383	2271.39	1261.37	213.99	2043.11	1427.71	204.202	1989.32	1222.26	118.756	2271.4	1317.22	385.559	2124.1	1476.1	461.288	2187.88	1292.88	471.188	2221.98	1142.87	497.267	2160	980.157	454.054	2132.36	887.197	505.72	2179.37	883.363	504.683	2127.7	826.561
407	0	250.931	1939.6	1647.3	161.422	1947.15	1645.39	255.833	2132.39	1666.44	144.34	2121.43	1663.45	196.854	2169.53	1518.24	202.962	2256.44	1259.16	215.525	2028.61	1425.53	205.606	1974.85	1220.02	119.809	2256.6	1314.94	387.599	2110.15	1473.61	462.46	2173.7	1289.94	471.508	2207.27	1139.52	498.213	2146.51	977.029	452.933	2116.34	884.932	506.939	2166.74	880.071	505.941	2115.47	823.049
408	0	252.851	1925.43	1646.31	163.21	1933.08	1644	257.902	2118.42	1664.82	146.567	2107.47	1661.61	199.919	2155.2	1516.32	203.964	2241.75	1257.15	217.174	2014.18	1423.88	207.204	1960.06	1218.5	120.96	2241.93	1313.18	389.585	2096.29	1471.22	463.497	2159.23	1286.93	472.071	2192.6	1136.66	499.017	2132.78	973.967	454.503	2103.12	882.055	507.764	2153.71	877.184	507.193	2102.97	819.702
409	0	254.968	1911.46	1645.57	165.351	1919.15	1643.58	260.157	2104.5	1663.6	148.765	2093.54	1660.47	200.334	2141.03	1515.28	204.99	2226.88	1255.31	218.984	1999.79	1422.62	208.32	1944.67	1218.12	122.447	2227.03	1311.71	391.707	2082.36	1468.97	464.408	2144.51	1284	472.65	2177.6	1134	499.861	2118.74	970.97	456.198	2089.01	879.858	508.744	2140.42	874.329	508.218	2090.14	816.42
410	0	256.453	1897.03	1644.93	167.557	1905.11	1643.22	262.591	2090.46	1662.59	151.166	2079.6	1659.81	203.206	2126.97	1514.09	206.058	2211.69	1254.26	221.477	1985.66	1421.9	210.378	1929.41	1217.87	124.117	2212.1	1310.79	393.79	2068.35	1467.23	465.767	2129.81	1281.45	473.513	2162.37	1131.75	500.822	2104.47	968.44	455.798	2076.07	874.54	509.813	2126.67	872.036	509.276	2076.8	813.491
411	0	259.37	1883.38	1645.02	169.458	1891.15	1642.81	264.895	2076.29	1662.14	153.391	2065.68	1659.41	205.087	2112.47	1513.51	207.186	2196.61	1253.48	223.103	1971.04	1421.51	212.227	1913.96	1217.66	125.879	2197.13	1310.02	395.935	2054.15	1466.18	467.08	2114.63	1279.58	474.273	2146.72	1130.01	501.695	2089.71	966.802	456.935	2061.95	872.441	510.74	2112.51	870.221	510.065	2062.96	811.306
412	0	260.434	1868.87	1645.18	171.589	1877.22	1643.31	267.362	2062.31	1662.05	155.768	2051.77	1659.11	207.082	2098.1	1513.46	207.894	2181.37	1252.6	225.543	1956.75	1421.75	214.353	1898.51	1218.06	127.323	2182.24	1309.7	398.146	2040.35	1465.25	468.492	2099.39	1278.25	475.105	2130.97	1128.75	502.618	2074.76	965.166	457.683	2047.21	870.807	511.549	2097.88	868.849	510.935	2049.02	809.721
413	0	262.516	1854.89	1645.76	173.705	1863.37	1643.93	269.754	2048.43	1662.1	158.082	2037.96	1659.41	209.155	2083.88	1513.17	209.029	2166.4	1252.37	227.636	1942.28	1421.82	216.271	1882.81	1218.44	129.102	2167.41	1309.27	400.415	2026.37	1464.58	470.186	2084.35	1277.19	475.978	2115.09	1127.61	503.556	2059.48	964.103	458.637	2032.24	869.569	512.434	2082.94	867.805	511.745	2034.45	807.877
414	0	264.623	1841.04	1646.83	175.936	1849.54	1645.05	272.201	2034.44	1662.62	160.476	2024.22	1659.97	211.358	2069.65	1513.73	210.321	2151.6	1252.38	229.679	1927.76	1422.71	218.341	1867.13	1219.6	130.735	2152.38	1309.57	402.593	2012.38	1464.76	471.939	2069.18	1276.2	476.653	2098.93	1126.94	504.484	2043.83	963.421	459.3	2016.65	868.811	513.444	2067.46	867.003	512.45	2019.38	806.781
415	0	266.788	1827.21	1648.29	178.023	1835.91	1646.42	274.626	2020.63	1663.19	162.88	2010.6	1660.84	213.714	2055.58	1514.17	211.595	2136.5	1252.9	231.875	1913.56	1423.83	220.1	1851.39	1220.79	132.242	2137.37	1310.06	404.576	1998.52	1464.63	473.211	2053.39	1276.07	477.779	2082.79	1126.7	505.2	2027.54	963.157	459.569	2000.66	868.811	514.483	2051.65	867.023	512.915	2003.67	806.131
416	0	268.67	1813.37	1649.97	179.98	1822.24	1648.04	276.946	2007.12	1664.18	165.066	1997.07	1661.73	215.148	2041.31	1515.22	212.529	2122	1253.49	233.615	1899.2	1424.73	222.154	1836.14	1223	133.755	2122.76	1310.95	406.605	1984.51	1465.16	474.762	2038.29	1275.92	478.765	2066.65	1126.64	505.831	2011.16	963.13	459.939	1984.59	868.726	515.152	2035.04	866.876	513.205	1987.58	805.747
417	0	270.64	1799.7	1651.87	182.054	1808.72	1650.1	279.002	1993.51	1664.89	167.334	1983.69	1662.78	217.033	2027.15	1516.59	213.864	2107.64	1254.26	235.512	1884.98	1426.46	223.879	1821.01	1224.7	135.091	2108.57	1312.32	408.394	1970.43	1465.9	476.264	2022.98	1276.1	479.893	2050.58	1126.54	506.684	1994.57	963.492	460.764	1967.74	868.905	515.566	2018.07	867.029	513.425	1970.87	805.617
418	0	272.322	1786.16	1653.54	183.966	1795.18	1651.86	280.998	1980.11	1665.94	169.452	1970.26	1663.97	218.628	2013.25	1518.09	215.242	2093.77	1255.56	237.203	1870.94	1428.04	225.359	1806.27	1226.05	136.569	2094.66	1313.6	410.148	1956.23	1467.19	477.911	2007.65	1276.59	481.06	2034.24	1127.01	507.381	1977.5	964.053	461.035	1950.55	870.292	516.301	2000.68	867.512	513.455	1953.49	806.02
419	0	274.075	1772.61	1655.77	185.777	1781.84	1653.98	282.931	1966.71	1667.23	171.274	1956.9	1665.35	220.64	1999.64	1519.49	216.794	2079.82	1256.94	238.597	1857.14	1429.67	226.84	1792.25	1227.7	137.757	2081.02	1315.45	411.749	1942.02	1468.42	479.592	1992.92	1277.64	482.423	2017.88	1127.86	508.137	1959.99	965.059	461.175	1932.78	871.678	516.993	1982.6	868.43	513.401	1935.45	806.921
420	0	275.838	1759.52	1657.5	187.558	1768.58	1656.25	284.677	1953.54	1668.56	173.002	1943.61	1667	221.854	1986.12	1521.44	218.317	2066.47	1258.79	239.422	1843.25	1431.3	228.003	1778.69	1229.25	138.965	2067.57	1317.16	413.306	1927.83	1470.01	481.122	1977.51	1278.73	484.018	2001.44	1128.92	508.819	1942.32	966.37	461.383	1915.28	872.952	517.776	1964.32	869.636	513.406	1917.02	808.2
421	0	277.354	1746.09	1659.45	189.246	1755.4	1658.36	286.267	1940.33	1670.12	174.638	1930.8	1669.23	223.506	1972.82	1523.32	220.095	2053.17	1260.91	240.477	1829.77	1433.35	229.048	1765.52	1230.93	140.165	2054.44	1319.25	414.522	1913.74	1471.81	482.683	1961.99	1280.21	485.681	1984.95	1130.16	509.514	1924.42	968.062	461.448	1897.18	874.78	518.343	1945.39	871.154	513.153	1897.75	809.988
422	0	278.756	1733.09	1661.47	190.618	1742.33	1660.58	287.603	1927.18	1672.06	175.913	1917.35	1671.34	224.767	1959.74	1525.26	221.417	2039.65	1263.05	241.05	1816.43	1435.82	229.682	1752.53	1232.75	141.63	2041.55	1321.35	415.793	1899.88	1473.72	484.169	1946.36	1282.05	487.437	1968.23	1131.72	510.071	1906.06	969.889	461.521	1878.64	877.063	519.013	1926.09	872.818	512.884	1878.1	812.07
423	0	279.844	1720.13	1663.64	191.863	1729.26	1662.89	288.893	1914.45	1674.3	176.986	1904.39	1673.72	225.729	1946.93	1527.62	222.752	2026.64	1265.22	241.442	1803.32	1437.77	230.126	1739.74	1234.69	143.011	2028.84	1323.51	416.699	1886.06	1476.03	485.743	1930.78	1283.77	489.133	1951.46	1133.42	510.556	1887.52	972.088	461.192	1859.92	879.515	519.379	1906.48	874.772	512.438	1857.92	814.382
424	0	281.076	1707.2	1665.96	193.091	1716.43	1665.38	289.948	1901.63	1676.34	178.091	1891.46	1676.05	227.029	1934.27	1529.8	224.631	2014.09	1267.3	241.958	1790.42	1440.33	230.231	1726.9	1236.83	144.672	2016.15	1325.46	417.553	1872.45	1478.12	487.284	1915.13	1285.64	490.917	1934.77	1134.72	511.048	1868.93	974.112	461.787	1840.6	883.477	519.953	1886.54	876.617	512.167	1837.5	816.925
425	0	281.773	1694.4	1668.68	194.052	1703.71	1667.89	290.694	1888.84	1678.81	179.052	1878.9	1678.58	227.515	1921.55	1532.17	225.998	2000.87	1269.49	242.381	1777.52	1442.67	229.836	1714	1239.11	146.365	2003.67	1327.65	418.251	1859	1480.74	488.847	1899.49	1287.7	492.652	1917.82	1136.53	511.438	1849.78	976.603	461.12	1821.42	886.255	520.469	1866.33	878.699	511.861	1816.54	819.917
426	0	282.19	1681.65	1671	194.761	1691.05	1670.49	291.602	1876.37	1681.27	179.82	1866.3	1681.4	228.648	1909.02	1534.68	227.784	1988.7	1271.89	242.703	1764.92	1445.39	229.28	1701.22	1241.91	148.195	1991.25	1329.83	419.109	1845.9	1483.17	490.227	1883.74	1289.82	494.434	1900.95	1138.59	511.809	1830.66	979.379	460.413	1802.05	889.14	520.968	1845.73	881.328	511.264	1795.17	823.162
427	0	282.987	1669.15	1674.03	195.437	1678.62	1673.44	291.945	1863.74	1683.93	180.33	1853.67	1684.07	229.263	1896.58	1537.36	229.066	1975.71	1274.27	242.906	1752.44	1448.36	228.529	1688.64	1244.99	149.951	1979.05	1332.13	419.619	1833.12	1486	491.499	1868.29	1292.24	496.077	1884.16	1140.47	511.979	1811.4	982.267	460.205	1782.46	892.406	521.034	1825	884.024	511.031	1773.88	826.802
428	0	283.445	1656.71	1677	195.464	1665.91	1676.3	292.45	1851.52	1686.59	180.757	1841.23	1686.75	230.282	1884.14	1539.95	230.943	1963.61	1277.16	243.293	1740.1	1451.54	227.873	1676.03	1247.9	151.575	1966.92	1334.53	420.178	1819.97	1488.79	492.727	1852.67	1294.65	497.737	1867.29	1142.73	512.271	1792.13	985.303	459.819	1762.63	896.274	521.352	1804.09	886.953	510.803	1752.21	830.949
429	0	283.634	1644.38	1679.8	195.992	1653.63	1679.12	292.589	1839.09	1689.31	181.029	1828.86	1689.32	231.003	1871.74	1542.64	232.539	1950.9	1279.94	242.997	1727.99	1454.35	228.447	1663.99	1250.22	153.292	1954.88	1337.22	420.842	1806.96	1491.75	493.897	1837.12	1297.35	499.223	1850.24	1145.13	512.414	1772.51	988.882	459.546	1742.56	900.484	521.649	1782.87	890.29	510.342	1730.2	835.382
430	0	283.914	1632.35	1682.5	196.104	1641.51	1681.91	292.901	1826.96	1692.07	181.315	1816.63	1692.02	231.523	1859.21	1545.33	234.089	1938.65	1282.5	243.262	1715.63	1457.26	228.284	1651.36	1253.16	155.003	1942.78	1339.89	421.32	1794.03	1494.8	494.968	1821.79	1300.33	500.913	1833.5	1147.62	512.631	1753.11	992.502	459.534	1722.65	904.942	521.785	1761.78	893.881	509.912	1708.21	840.079
431	0	283.799	1620.02	1685.61	196.068	1629.35	1684.74	292.958	1814.75	1694.78	181.452	1804.49	1694.55	232.812	1847.17	1547.86	235.582	1926.41	1285.35	243.529	1703.27	1460.19	227.819	1638.51	1256.72	156.395	1930.67	1342.74	421.787	1780.9	1497.6	496.043	1806.62	1303.13	502.385	1816.58	1150.42	512.796	1733.59	996.383	459.348	1702.42	909.489	522.037	1740.54	897.466	509.443	1686.14	844.939
432	0	283.758	1607.82	1688.73	196.047	1617.4	1687.24	293.109	1802.62	1697.44	181.48	1792.59	1696.91	233.313	1834.82	1550.52	236.922	1913.97	1288.31	243.633	1690.9	1462.95	228.012	1626.32	1259.58	157.781	1918.71	1345.22	422.275	1767.79	1500.8	496.799	1791.43	1306.19	503.778	1799.7	1153.12	513.037	1714.14	1000.46	458.825	1682.05	914.2	522.14	1719.43	901.448	509.226	1664.1	850.414
433	0	283.822	1595.81	1691.66	196.086	1605.38	1689.99	293.144	1790.53	1699.84	181.548	1780.67	1698.9	234.005	1822.66	1552.8	238.486	1901.96	1290.69	243.765	1678.66	1465.59	228.011	1614.09	1261.99	159.098	1906.64	1347.58	422.65	1754.78	1503.64	497.511	1776.53	1309.13	505.364	1783.15	1155.61	513.14	1694.78	1004.33	458.565	1661.7	918.738	521.891	1698.2	905.547	508.675	1641.9	855.721
434	0	283.679	1583.74	1694.44	195.997	1593.45	1692.52	293.137	1778.64	1701.95	181.608	1768.89	1700.93	234.379	1810.3	1555.11	239.528	1889.66	1292.94	243.863	1666.36	1468.23	228.042	1601.95	1264.64	160.066	1894.68	1349.69	423.054	1741.87	1506.18	498.381	1762.07	1311.5	506.667	1766.72	1157.98	513.698	1675.83	1008.36	458.237	1641.3	923.827	521.918	1677.14	909.216	508.174	1619.99	860.829
435	0	283.515	1571.77	1696.78	195.851	1581.5	1694.84	293.216	1766.67	1703.63	181.569	1757.03	1702.59	235.108	1798.21	1557.06	240.627	1877.42	1294.83	244.176	1654.13	1470.25	228.168	1589.95	1266.69	161.342	1882.72	1351.65	423.356	1728.74	1508.46	499.176	1747.44	1313.92	507.848	1750.28	1160.05	513.904	1656.64	1011.97	458.069	1620.88	928.094	521.433	1656.19	912.884	507.659	1597.97	865.961
436	0	283.32	1559.83	1698.88	195.803	1569.75	1696.69	293.213	1754.78	1705.34	181.707	1745.25	1703.76	235.801	1786.1	1558.84	241.981	1865.39	1296.66	244.242	1641.81	1472.02	228.29	1578.05	1268.31	162.323	1870.7	1353.33	423.612	1715.46	1510.69	499.91	1732.94	1316.28	509.156	1733.84	1162.19	514.284	1637.65	1015.54	457.648	1600.42	933.078	521.402	1635.08	916.544	507.265	1576.19	871.09
437	0	282.975	1547.85	1700.82	195.645	1558.01	1698.33	293.27	1742.67	1706.82	181.697	1733.4	1705.07	236.404	1773.84	1560.2	242.809	1852.89	1298.13	244.375	1629.66	1473.85	228.202	1566.17	1270.16	163.517	1858.71	1354.97	423.969	1702.42	1512.69	500.553	1718.5	1318.25	510.602	1717.53	1164.05	514.519	1618.56	1018.99	457.56	1579.98	938.217	521.189	1614.28	920.057	506.548	1554.16	876.234
438	0	282.668	1535.79	1702.36	195.517	1546.04	1700.06	293.356	1730.69	1707.7	181.794	1721.52	1706.12	237.48	1761.79	1561.43	244.028	1840.77	1299.4	244.427	1617.36	1475.42	228.149	1554.3	1271.52	164.379	1846.62	1356.48	424.105	1689.17	1514.29	501.272	1703.99	1319.89	511.965	1701.11	1165.63	514.793	1599.57	1022.3	457.305	1559.87	942.908	520.556	1593.35	923.402	505.869	1532.26	881.219
439	0	282.656	1523.76	1703.73	195.387	1534.19	1701.12	293.536	1718.58	1708.79	181.876	1709.58	1706.87	237.4	1749.23	1562.7	244.963	1828.72	1300.45	244.386	1605	1476.44	228.137	1542.46	1272.47	165.48	1834.66	1357.37	424.602	1675.66	1515.8	502.051	1689.48	1321.68	513.209	1684.83	1167	515.085	1580.63	1025.55	457.02	1539.5	947.347	520.93	1573.26	926.833	505.246	1510.42	886.226
440	0	282.413	1511.64	1704.74	195.075	1522.21	1701.98	293.65	1706.45	1709.39	181.926	1697.45	1707.4	237.943	1737.05	1563.13	245.832	1816.22	1301.49	244.38	1592.69	1476.92	227.947	1530.43	1272.92	166.437	1822.64	1358.22	424.8	1662.3	1516.99	502.738	1675.03	1322.94	514.517	1668.71	1168.12	515.324	1561.67	1028.64	456.819	1519.1	950.825	520.001	1551.75	930.178	504.456	1488.57	891.013
441	0	282.15	1499.57	1705.52	194.901	1510.31	1702.55	293.719	1694.38	1709.5	181.999	1685.82	1707.25	238.237	1724.57	1563.68	246.92	1804.11	1301.53	244.33	1580.35	1477.5	227.786	1518.35	1273.36	167.401	1810.54	1358.45	424.829	1649.02	1517.62	503.395	1660.47	1323.59	515.707	1652.65	1168.71	515.405	1542.81	1031.27	456.423	1498.81	954.832	519.732	1530.9	932.839	503.761	1467	895.396
442	0	281.99	1487.26	1705.94	194.571	1498.22	1702.54	293.823	1682.12	1709.09	182.166	1673.74	1706.98	238.917	1712.32	1563.68	247.868	1791.91	1301.54	244.442	1568.05	1477.55	227.488	1506.05	1273.48	168.127	1798.58	1358.7	424.891	1636.11	1517.44	504.125	1645.97	1323.85	517.083	1636.74	1168.75	515.847	1524.17	1033.57	456.135	1478.54	958.709	518.915	1510.13	935.415	503.047	1445.45	899.533
443	0	281.651	1474.99	1705.75	194.596	1486.14	1702.59	293.692	1669.9	1708.67	182.344	1661.66	1706.4	239.385	1699.86	1563.19	248.734	1779.44	1301.29	244.26	1555.54	1477.23	227.128	1493.79	1273.22	169.353	1786.34	1357.96	425.015	1622.77	1517.21	504.849	1631.38	1323.75	518.244	1620.65	1168.71	515.725	1505.33	1035.54	455.687	1458.41	962.346	518.632	1489.31	937.728	502.263	1424.05	903.604
444	0	281.363	1462.72	1705.48	194.314	1474	1702.19	293.803	1657.44	1708.09	182.55	1649.66	1705.9	239.774	1687.39	1562.66	249.519	1767.15	1300.66	244.192	1543.07	1476.61	226.657	1481.39	1272.69	170.003	1774.19	1357.54	425.299	1609.23	1516.97	505.582	1616.67	1323.7	519.463	1604.61	1168.53	515.997	1486.8	1037.48	455.359	1438.6	965.519	518.024	1468.81	940.285	501.474	1402.69	907.658
445	0	281.03	1450.25	1704.69	193.976	1461.66	1701.45	293.994	1645.02	1707.1	182.495	1637.44	1704.66	240.093	1674.83	1561.81	249.777	1754.52	1299.62	244.041	1530.6	1475.75	226.375	1468.91	1271.75	170.703	1762.01	1356.82	425.267	1596.25	1515.96	506.157	1601.99	1323.09	520.393	1588.54	1167.76	516.12	1468.02	1039.64	454.815	1418.8	968.827	517.512	1448.26	942.269	500.872	1381.91	911.471
446	0	280.684	1437.7	1703.67	193.739	1449.35	1700.42	294.008	1632.44	1705.71	182.564	1625.03	1703.28	240.417	1662.15	1560.59	249.912	1741.84	1298.22	243.858	1518.01	1474.31	225.81	1456.48	1270.46	171.388	1749.87	1355.62	425.473	1582.78	1514.86	506.646	1587.45	1321.97	521.365	1572.73	1166.56	516.101	1449.67	1040.84	454.455	1399.07	971.106	517.066	1427.67	944.006	499.81	1360.58	914.923
447	0	280.447	1425.18	1702.23	193.433	1436.93	1698.99	293.846	1619.67	1703.86	182.492	1612.75	1701.33	240.52	1649.45	1559.11	250.302	1729.56	1296.71	243.512	1505.34	1472.69	225.398	1444.09	1268.61	171.858	1737.54	1354.18	425.212	1569.61	1513.14	507.188	1572.67	1320.63	522.277	1556.66	1165.38	516.132	1431.34	1041.97	453.803	1379.61	973.309	516.181	1407.42	945.543	498.896	1339.86	917.946
448	0	279.921	1412.39	1700.76	192.826	1424.33	1697.17	293.974	1607.03	1702.14	182.475	1600.17	1699.56	240.499	1636.62	1557.28	250.938	1717.46	1294.09	243.404	1492.75	1470.73	224.897	1431.65	1266.87	172.316	1725.16	1352.59	425.409	1556.33	1511.46	507.554	1558.11	1319.08	523.233	1540.84	1163.86	515.978	1413.14	1042.74	453.236	1360.52	975.595	515.704	1387.29	946.826	497.908	1319.18	920.787
449	0	279.444	1399.56	1698.77	192.497	1411.65	1695.26	293.629	1594.12	1699.59	182.285	1587.54	1697.03	240.685	1623.73	1555.45	251.083	1705.16	1292.29	243.011	1479.88	1468.83	224.335	1419.08	1264.94	172.607	1712.64	1350.67	425.095	1543.39	1509.14	507.814	1543.7	1317.04	524.059	1524.97	1161.93	515.825	1395.12	1043.3	452.369	1341.42	977.933	515.358	1367.48	947.818	497.432	1298.69	923.946
450	0	278.822	1386.61	1696.36	191.893	1398.84	1692.78	293.473	1581.09	1697.21	182.132	1574.59	1694.67	240.5	1610.86	1552.84	250.76	1692.45	1290.91	242.702	1467.17	1466.32	223.843	1406.61	1262.03	172.673	1700.13	1348.28	424.724	1529.94	1506.65	507.841	1529.05	1314.78	524.703	1509.15	1159.73	515.547	1377.25	1043.36	451.751	1322.71	978.991	514.53	1347.56	948.658	496.484	1278.51	926.543
451	0	278.298	1373.6	1693.81	191.248	1385.97	1690.07	293.197	1568.08	1694.55	181.765	1561.86	1691.73	240.286	1597.77	1550.39	250.73	1680.02	1288.39	242.392	1454.25	1463.46	223.435	1393.95	1258.87	172.292	1687.22	1345.83	424.689	1516.61	1504.28	507.895	1514.78	1312.31	525.112	1493.25	1157.4	515.152	1359.46	1043.46	450.892	1304.1	980.284	513.887	1328.12	949.204	496.1	1259.11	928.956
452	0	277.562	1360.38	1690.91	190.53	1372.9	1687.25	292.578	1554.79	1691.29	181.347	1548.79	1688.46	240.028	1584.71	1547.56	250.401	1667.39	1285.75	241.824	1441.09	1460.31	223.091	1381.41	1255.84	171.906	1674.26	1343.27	424.153	1503.49	1501.21	507.802	1500.48	1309.75	525.512	1477.57	1154.76	514.832	1341.95	1043.18	450.261	1285.9	981.143	513.107	1308.85	949.59	494.569	1239.15	931.083
453	0	276.779	1347.06	1687.76	189.788	1359.73	1684.02	292.134	1541.58	1688.21	180.888	1535.78	1685.48	239.479	1571.49	1544.73	250.715	1656.11	1283.66	241.211	1427.92	1457.15	222.826	1368.81	1252.19	172.302	1662.03	1340.89	423.57	1490.13	1498.11	507.459	1486.37	1306.64	525.803	1461.94	1152.17	514.363	1324.61	1042.62	449.244	1267.65	981.73	512.057	1290.1	949.107	493.447	1219.88	932.733
454	0	275.819	1333.81	1684.21	188.938	1346.45	1680.53	291.465	1528.08	1684.9	180.182	1522.48	1681.96	238.925	1558.29	1541.69	250.235	1643.12	1280.69	240.574	1414.71	1453.77	222.509	1356.18	1248.63	171.816	1648.96	1337.85	423.157	1476.91	1495.01	506.939	1472.24	1303.68	526.045	1446.34	1149.44	513.779	1307.34	1042.16	448.428	1249.85	982.087	511.147	1271.42	948.839	492.406	1201.17	934.059
455	0	274.756	1320.21	1680.94	187.884	1333.05	1676.98	291.048	1514.5	1681.56	179.432	1509.1	1678.46	238.574	1545.12	1538.34	249.436	1629.9	1277.32	240.254	1401.67	1450.51	221.936	1343.15	1245.53	170.962	1635.64	1334.57	422.297	1463.5	1491.41	506.493	1458.2	1300.62	525.913	1430.68	1146.65	513.122	1290.42	1041.24	447.65	1232.37	982.169	510.193	1253.07	949.337	491.715	1182.41	935.735
456	0	273.701	1306.69	1676.97	186.874	1319.56	1673.28	289.888	1500.88	1677.8	178.868	1495.64	1674.72	237.793	1531.91	1534.6	248.531	1616.61	1273.34	239.598	1388.37	1446.77	221.374	1330.09	1241.54	169.976	1622.3	1330.63	421.572	1450.22	1488.01	505.684	1444.47	1297.04	525.859	1415.75	1143.18	512.714	1273.78	1039.98	446.732	1214.93	981.832	508.87	1234.48	948.009	490.927	1164.44	936.758
457	0	272.571	1292.91	1673.31	185.741	1305.97	1669.4	289.055	1487.26	1674.12	177.88	1482.14	1670.74	236.923	1518.63	1530.85	247.527	1603.06	1269.14	238.579	1374.75	1442.95	220.902	1316.95	1237.56	168.996	1608.85	1326.44	420.733	1437.02	1484.17	504.921	1430.8	1293.38	525.243	1400.48	1139.63	511.92	1257.46	1038.19	445.837	1197.79	981.073	508.548	1217.54	947.251	490.149	1146.81	936.552
458	0	271.25	1279.15	1669.56	184.298	1292.17	1665.55	287.695	1473.33	1670.55	176.742	1468.46	1667.05	236.045	1505.3	1527.2	246.449	1589.39	1265.46	237.832	1361.18	1439.52	220.279	1303.54	1233.75	167.916	1595.15	1322.52	419.69	1423.62	1480.59	503.708	1416.91	1289.81	524.877	1385.39	1136.57	511.128	1241.27	1036.48	445.076	1181.15	980.205	507.649	1200.41	946.027	489.021	1129.35	936.761
459	0	269.697	1265.1	1666.04	182.894	1278.35	1661.8	286.542	1459.35	1667.16	175.506	1454.54	1663.49	234.884	1491.72	1523.44	245.56	1575.65	1261.74	236.224	1347.09	1435.84	219.407	1289.56	1230.59	166.771	1581.24	1318.92	418.639	1410.19	1476.83	502.637	1403.17	1286.28	524.208	1370.38	1133.46	509.792	1225.32	1034.61	444.196	1164.69	979.266	506.604	1183.41	944.634	488.103	1112.3	936.614
460	0	268.199	1251.08	1662.43	181.367	1264.38	1657.93	285.446	1445.39	1663.85	174.208	1440.58	1660.11	233.567	1477.9	1519.95	244.566	1561.63	1257.94	235.074	1333.11	1432.44	218.801	1275.4	1226.97	165.646	1567.24	1315.32	417.443	1396.54	1473.5	501.074	1389.41	1282.81	523.481	1355.71	1130.24	509.401	1209.73	1032.61	443.356	1148.56	977.828	505.683	1167.12	943.016	487.282	1095.97	935.859
461	0	266.598	1236.97	1659	179.762	1250.27	1654.46	284.226	1431.25	1660.55	172.639	1426.52	1656.46	232.103	1463.79	1516.48	243.715	1547.57	1254.6	234.371	1319.17	1429.19	217.935	1260.81	1223.61	164.419	1553.16	1311.48	416.188	1382.67	1470.22	499.701	1375.8	1279.4	522.464	1340.98	1127.22	508.376	1194.26	1030.69	442.47	1132.79	976.344	504.683	1151.1	941.256	486.78	1079.97	934.795
462	0	264.855	1222.74	1655.71	177.972	1236.05	1651.03	282.433	1416.96	1657.4	171.132	1412.39	1652.99	230.598	1449.55	1513.17	242.642	1533.16	1251.45	233.023	1304.69	1425.95	216.867	1246.02	1220.58	163.54	1539.17	1308.27	414.878	1368.67	1467.16	498.172	1362.32	1276.2	521.439	1326.6	1124.26	507.501	1179.21	1028.45	441.673	1117.37	974.523	503.933	1135.7	939.372	486.135	1064.39	933.711
463	0	262.987	1208.29	1652.52	176.21	1221.68	1648	280.713	1402.58	1654.17	169.37	1398.02	1649.86	229.205	1435.05	1510.08	241.597	1518.68	1248.35	231.591	1290.12	1422.96	215.925	1231.24	1217.59	162.345	1524.68	1305.25	413.447	1354.5	1464.15	496.363	1348.57	1273.18	520.249	1312.35	1121.33	506.619	1164.49	1026.2	440.901	1102.27	972.459	502.984	1120.6	937.259	485.252	1049.33	932.041
464	0	261.235	1193.7	1649.94	174.413	1207.2	1645.17	278.772	1387.96	1651.36	167.468	1383.42	1646.93	227.413	1420.38	1507.2	240.433	1504.01	1245.83	230.025	1275.29	1420.13	214.751	1216.36	1214.49	160.99	1509.97	1302.41	411.856	1339.73	1461.49	494.518	1334.79	1270.42	518.912	1298.04	1118.74	505.689	1150.01	1023.92	440.114	1087.56	970.291	501.734	1105.92	935.266	484.699	1034.7	930.043
465	0	259.217	1179.18	1647.16	172.454	1192.52	1642.34	277.071	1373.42	1648.74	165.741	1368.84	1644.32	225.518	1405.5	1504.58	239.255	1488.87	1243.02	228.358	1260.38	1417.41	213.587	1201.4	1211.56	159.387	1494.61	1299.26	410.031	1324.75	1459.3	492.59	1320.85	1268.11	517.527	1283.81	1116.65	504.727	1135.88	1021.55	439.417	1073.27	967.666	501.28	1091.6	932.924	484.131	1020.43	927.751
466	0	257.201	1164.28	1645.02	170.497	1177.75	1640.04	275.059	1358.71	1646.26	163.614	1354.03	1641.67	223.284	1390.51	1502.16	237.7	1473.72	1240.46	226.497	1245.28	1414.94	212.114	1186.2	1209.51	158.298	1479.8	1296.64	408.111	1309.7	1457.13	490.61	1306.87	1265.58	516.056	1270	1114.26	503.946	1122.13	1019.04	438.712	1059.31	965.33	500.499	1078.11	930.146	483.612	1006.8	925.104
467	0	255.34	1149.44	1643.27	168.492	1162.67	1638.35	272.526	1343.76	1643.97	161.513	1339.09	1639.37	221.335	1375.51	1500.16	236.076	1458.35	1237.91	224.534	1229.98	1413.03	210.781	1171.06	1207.37	156.719	1464.54	1294.2	406.179	1294.54	1455.11	488.697	1292.81	1263.63	514.363	1256.21	1112.26	503.333	1108.86	1016.3	438.231	1045.92	962.363	499.388	1065.01	927.267	483.23	993.599	921.998
468	0	253.129	1134.38	1641.85	166.389	1147.55	1636.99	269.969	1328.74	1642.58	159.269	1323.88	1637.99	219.404	1360.46	1498.42	234.713	1442.56	1236.26	222.674	1214.69	1411.24	209.16	1155.64	1205.3	154.695	1448.81	1291.83	404.292	1279.22	1454.12	486.832	1278.02	1262.42	512.455	1242.27	1110.76	502.127	1095.41	1013.67	437.501	1032.64	959.041	499.189	1052.55	924.271	483.196	981.052	918.768
469	0	251.051	1119.25	1640.85	164.153	1132.31	1635.79	267.979	1313.75	1641.53	156.786	1308.7	1636.75	216.881	1344.87	1497.6	233.692	1426.91	1235.33	220.698	1199.24	1410.18	207.498	1140.04	1204.69	153.675	1433.69	1290.88	402.497	1263.67	1453.45	484.991	1263.08	1261.82	510.593	1228.59	1109.99	501.033	1082.49	1011.22	436.957	1020.09	955.747	498.596	1040.56	921.525	482.756	969.1	915.286
470	0	248.728	1104	1640.34	161.917	1116.97	1635.08	265.403	1298.55	1640.88	154.26	1293.28	1635.97	214.802	1329.52	1496.81	233.16	1411.67	1235.06	218.769	1183.85	1409.61	205.838	1124.34	1204	151.879	1418.25	1290.17	400.622	1248.13	1453.18	483.18	1248.27	1261.85	508.505	1214.76	1109.71	500.146	1070.17	1008.93	436.44	1008.02	952.762	497.922	1029.05	918.728	482.846	957.739	911.61
471	0	246.445	1088.71	1640.08	159.747	1101.69	1634.85	262.803	1283.22	1640.71	151.872	1278.01	1635.73	212.823	1314.2	1496.64	232.161	1395.47	1234.65	216.816	1168.31	1409.55	204.301	1108.5	1204.29	150.235	1402.83	1290	398.165	1232.09	1453.91	481.422	1232.73	1262.52	506.486	1201.18	1110.06	499.042	1057.77	1007.14	435.949	996.376	949.772	497.306	1018.4	916.441	482.695	947.009	907.891
472	0	244.016	1073.35	1640.42	157.405	1086.31	1634.99	261.395	1268.37	1641.07	149.266	1262.53	1635.96	210.648	1298.93	1497.01	231.525	1380.4	1235.31	215.078	1152.92	1410.34	202.613	1092.53	1204.56	148.832	1387.59	1290.22	396.084	1216.13	1454.77	479.898	1217.26	1263.83	504.359	1187.7	1110.74	498.102	1045.99	1005.19	435.66	985.32	946.422	497.138	1008.06	913.866	482.681	936.836	904.234
473	0	241.701	1058.12	1641.01	154.959	1070.96	1635.18	258.45	1252.86	1642.12	146.911	1247.25	1636.57	208.92	1283.91	1497.78	230.429	1364.93	1235.97	213.197	1137.7	1411.1	200.943	1076.66	1205.68	147.389	1372.42	1290.68	394.073	1200.47	1456.09	478.164	1201.56	1265.4	502.261	1174.21	1111.88	497.071	1034.64	1003.5	435.277	974.649	943.333	496.82	998.46	911.495	482.788	927.408	900.397
474	0	239.282	1042.85	1641.73	152.615	1055.73	1635.86	255.439	1237.52	1643.2	144.521	1231.88	1637.44	207.303	1269.04	1498.6	229.373	1349.43	1236.68	211.151	1122.6	1412.19	199.444	1061.06	1207.06	145.87	1357.18	1291.65	392.139	1184.8	1457.61	476.83	1185.67	1267.31	500.118	1160.82	1113.33	496.273	1023.59	1002.3	435.141	964.824	940.347	496.607	989.412	909.242	483.1	918.57	896.532
475	0	236.724	1027.54	1642.84	150.305	1040.54	1636.9	253.387	1222.24	1645.31	142.229	1216.83	1638.64	205.54	1254.27	1500.05	228.399	1334.09	1237.79	209.156	1107.66	1413.54	197.735	1045.62	1208.97	144.83	1342.23	1292.92	390.32	1169.55	1459.54	475.539	1169.91	1269.8	498.14	1147.64	1115.27	495.329	1012.77	1001.17	434.896	955.312	937.387	496.671	980.958	907.548	483.247	910.268	892.641
476	0	234.498	1012.49	1644.31	148.033	1025.6	1638.07	251.023	1207.2	1647.25	139.976	1201.78	1640.31	203.624	1239.64	1501.6	227.233	1319.05	1239.38	207.353	1092.94	1415.35	196.202	1030.65	1210.89	143.195	1327.37	1293.93	388.442	1154.48	1461.71	474.2	1154.08	1272.5	496.232	1134.71	1117.47	494.299	1002.13	1000.15	434.56	946.262	934.76	496.712	972.78	905.942	483.288	902.434	888.861
477	0	232.2	997.541	1645.76	145.798	1010.82	1639.07	248.834	1192.4	1649.25	137.842	1186.98	1642.12	202.167	1225.2	1503.44	225.969	1304.05	1240.82	205.695	1078.44	1417.53	194.769	1015.83	1213.5	141.808	1312.66	1295.46	386.676	1139.95	1463.8	473.006	1138.71	1275.05	494.415	1121.91	1119.78	493.221	992.231	999.081	434.283	937.696	932.82	496.678	964.902	904.482	483.352	895.142	885.098
478	0	230.084	982.901	1647.34	144.035	996.261	1640.55	247.024	1177.88	1651.74	135.934	1172.43	1644	200.632	1211.03	1505.46	224.513	1289.5	1242.61	204.185	1064.14	1419.77	193.611	1001.26	1215.92	140.207	1297.97	1297.21	385.076	1125.71	1466.22	472.008	1123.51	1278.04	492.761	1109.26	1122.3	492.414	982.393	998.7	434.061	929.51	930.761	496.811	957.298	903.628	483.506	888.237	881.848
479	0	228.069	968.291	1649.25	141.874	981.896	1642.08	245.29	1163.45	1654.33	134.211	1158.04	1646.38	198.961	1197.1	1507.52	223.13	1275.25	1244.88	202.822	1049.96	1421.89	192.538	986.788	1218.22	138.476	1283.49	1299.33	383.842	1111.87	1468.88	471.264	1108.85	1281.33	491.278	1096.68	1125.36	491.315	972.685	998.914	434.171	921.835	928.049	497.102	949.727	903.257	483.268	881.454	878.844
480	0	226.413	954.325	1651.08	140.239	967.912	1644.25	243.632	1149.21	1656.9	132.756	1143.94	1649.04	197.722	1183.4	1509.89	221.558	1261.28	1247.19	201.929	1036.35	1423.89	191.604	972.447	1220.89	136.937	1269.3	1301.81	382.607	1098.45	1471.78	470.399	1094.72	1284.6	490.044	1084.52	1128.37	490.973	963.281	999.307	433.985	914.483	926.726	497.339	942.494	903.227	482.837	875.055	876.11
481	0	224.89	940.356	1653.29	138.797	954.071	1646.02	242.267	1135.2	1659.52	131.12	1130.03	1651.45	196.22	1169.77	1512.34	219.957	1247.62	1249.67	201.252	1022.72	1426.37	190.956	958.391	1223.72	135.12	1255.26	1304.42	381.485	1085.2	1474.59	469.582	1081.54	1287.57	489.042	1072.67	1131.35	490.315	954.07	999.942	433.785	907.339	925.515	497.622	935.255	903.259	482.627	868.924	873.498
482	0	223.469	927.386	1654.9	137.446	940.361	1648.32	241.151	1121.58	1662.41	129.965	1116.41	1653.98	195.094	1156.26	1514.75	218.243	1234.06	1252.34	200.469	1009.22	1429.02	190.477	944.513	1226.35	133.341	1241.5	1306.92	380.553	1072.26	1477.21	468.713	1069.02	1290.55	487.849	1060.97	1134.17	489.768	945.269	1000.52	433.609	900.528	924.615	498.302	928.643	903.762	482.43	863.081	871.424
483	0	222.416	913.937	1657.56	136.237	927.072	1650.98	240.233	1108.21	1665.32	129.005	1103.12	1656.83	193.89	1142.93	1517.48	216.694	1220.72	1254.99	199.963	995.908	1431.64	190.047	930.832	1229.15	131.647	1227.94	1309.38	379.707	1059.55	1480.11	467.94	1057.29	1293.17	486.943	1049.86	1137.11	489.123	936.443	1001.63	432.805	893.014	924.555	498.242	921.261	904.413	482.093	857.415	869.811
484	0	221.512	900.786	1660.16	135.537	913.888	1653.65	239.473	1094.96	1668.13	128.201	1089.92	1659.28	193.006	1129.74	1520.27	214.984	1207.35	1257.38	199.426	982.674	1434.58	189.787	917.388	1232.2	130.034	1214.48	1312.22	378.936	1046.95	1483.09	467.169	1046.08	1295.89	486.124	1039.23	1139.89	488.603	928.042	1002.76	432.754	887.916	922.098	498.564	914.536	905.374	481.806	851.945	868.52
485	0	221.007	887.722	1663.15	134.754	900.844	1656.63	238.716	1081.95	1670.98	127.494	1076.92	1662.29	192.029	1116.71	1523.07	213.436	1194.37	1260.19	199.007	969.527	1437.38	189.736	904.134	1234.84	128.488	1201.28	1315.05	378.359	1034.63	1485.93	466.381	1035.33	1298.47	485.431	1029.09	1142.78	488.194	919.989	1004.26	432.43	881.927	922.215	498.994	907.868	906.698	481.557	846.734	867.64
486	0	220.559	874.47	1666.63	134.293	887.937	1659.52	238.252	1069.04	1674.13	127.028	1063.99	1665.47	191.168	1103.86	1526.1	212.214	1181.38	1263.14	198.839	956.648	1440.43	189.758	891.058	1237.73	127.068	1188.11	1318.49	377.846	1022.42	1489.02	465.726	1025.08	1301.33	484.853	1019.43	1145.86	487.769	912.083	1006.02	431.78	875.934	922.805	499.003	901.645	908.375	481.218	841.553	867.468
487	0	220.132	861.748	1669.74	134.075	875.262	1662.84	237.913	1056.4	1677.4	126.745	1051.2	1668.84	190.499	1091.13	1529.27	210.765	1168.54	1266.18	198.568	943.763	1443.7	189.932	878.232	1240.95	125.802	1175.25	1321.59	377.37	1010.32	1492.21	465.046	1014.96	1304.3	484.338	1010.24	1149.03	486.963	904.636	1007.63	431.335	870.284	923.697	499.491	895.057	910.227	479.921	835.893	867.225
488	0	220.106	849.294	1672.88	134.031	862.518	1666.23	237.736	1043.81	1680.64	126.322	1038.52	1672.1	189.686	1078.38	1532.46	209.615	1155.73	1269.47	198.441	931.065	1447.06	190.3	865.557	1244.11	124.283	1162.4	1324.95	377.06	998.438	1495.5	464.629	1005.33	1307.36	483.82	1001.28	1152.32	487.062	897.443	1009.74	431.245	864.589	925.028	499.506	889.052	912.524	479.302	831.195	867.07
489	0	220.38	836.902	1676.26	134.143	849.862	1669.7	237.643	1031.28	1683.94	126.274	1026	1675.62	189.198	1065.74	1535.99	208.327	1142.98	1272.88	198.385	918.457	1450.51	190.57	853.013	1247.26	123.31	1149.65	1328.49	376.674	986.535	1498.8	464.225	995.676	1310.67	483.359	992.7	1155.76	486.986	890.495	1012.11	430.891	858.893	926.746	499.886	882.977	914.576	479.141	826.481	867.805
490	0	220.526	824.787	1679.4	134.175	837.4	1673.33	237.615	1019	1687.19	126.368	1013.5	1679.42	188.605	1053.19	1539.33	207.216	1130.4	1276.03	198.328	905.863	1453.89	190.705	840.666	1250.64	122.217	1137.01	1331.84	376.408	974.638	1502.28	464.083	986.331	1314.13	483.013	984.501	1159.23	486.828	883.776	1014.57	430.781	853.481	928.853	499.866	877.099	917.199	478.803	821.256	869.527
491	0	220.893	812.538	1682.73	134.642	824.981	1676.78	237.652	1006.81	1690.42	126.217	1001.02	1682.58	188.016	1040.66	1542.51	206.123	1117.8	1279.15	198.341	893.424	1457.29	190.794	828.391	1253.93	120.998	1124.18	1334.96	376.166	962.912	1505.69	463.949	977.126	1317.6	482.758	976.591	1162.74	486.996	877.399	1016.98	430.807	847.736	930.914	500.062	871.702	919.536	478.84	816.437	871.02
492	0	221.339	800.21	1685.96	134.987	812.569	1680.31	237.527	994.662	1693.43	126.124	988.516	1685.94	187.643	1028.28	1545.84	204.874	1105.14	1282.31	198.29	880.985	1460.71	190.776	816.179	1257.23	119.856	1111.34	1338.4	375.945	951.321	1508.79	463.693	967.849	1321.06	482.349	968.732	1166.1	487.156	871.097	1019.36	431.172	842.159	933.017	500.117	866.346	921.867	479.034	811.426	872.859
493	0	221.864	788.202	1689.12	135.389	800.275	1683.75	237.885	982.555	1696.46	126.323	976.16	1689.25	187.13	1015.77	1549.26	204.427	1092.99	1285.78	198.307	868.556	1464.01	190.698	804.078	1260.45	118.949	1098.59	1341.54	375.636	939.717	1512.01	463.581	958.764	1324.35	482.157	961.074	1169.55	487.32	864.873	1021.78	431.235	836.243	935.297	500.164	861.183	924.356	479.35	806.468	874.671
494	0	222.575	776.053	1692.28	136.044	787.951	1687.1	238.042	970.444	1699.29	126.593	963.856	1692.36	186.678	1003.42	1552.06	202.864	1080.09	1288.33	198.451	856.27	1467.18	190.549	792.022	1263.68	118.236	1086.01	1344.62	375.531	927.982	1515.09	463.433	949.754	1327.6	481.909	953.514	1172.89	487.678	858.765	1024.27	431.599	830.26	937.723	500.276	856.022	926.656	480.056	801.681	876.543
495	0	223.29	763.973	1695.1	136.798	775.568	1690.18	238.118	958.474	1701.76	126.704	951.495	1695.23	186.434	991.045	1554.76	202.439	1068.02	1291.62	198.484	843.887	1470.23	190.397	779.86	1266.63	117.049	1073.21	1347.67	375.418	916.466	1517.68	463.284	940.87	1330.55	481.629	946.054	1175.84	488.125	852.622	1026.56	432.096	824.06	939.825	500.274	851.156	928.596	480.751	796.574	878.322
496	0	224.067	751.975	1697.65	137.461	763.214	1693.01	238.286	946.461	1704.18	126.84	939.151	1697.83	186.094	978.674	1557.31	201.523	1055.56	1294.01	198.461	831.517	1472.93	190.255	767.797	1269.19	115.986	1060.66	1350.05	375.346	904.821	1520.31	462.97	931.693	1333.24	481.453	938.583	1178.71	488.432	846.543	1028.49	432.889	817.795	941.664	500.175	846.059	930.597	481.595	791.329	880.355
497	0	224.909	739.999	1700.17	138.24	750.839	1695.75	238.416	934.459	1706.33	127.004	926.667	1700.29	185.812	966.301	1559.61	200.694	1043.12	1296.14	198.431	819.178	1475.24	190.056	755.615	1271.43	115.136	1048.04	1352.29	375.266	893.024	1522.61	462.762	922.616	1335.94	481.057	931.018	1181.29	488.961	840.379	1030.55	434.406	811.417	943.433	499.965	841.149	932.446	482.731	786.173	882.169
498	0	225.656	727.835	1702.53	138.926	738.485	1698.1	238.588	922.408	1708.22	127.257	914.301	1702.57	185.657	953.768	1561.67	200.049	1030.71	1298.56	198.635	806.885	1477.6	189.856	743.242	1273.82	114.212	1035.36	1354.77	375.133	881.233	1524.53	462.464	913.493	1338.22	480.801	923.349	1183.86	489.358	834.125	1032.21	435.036	804.596	945.408	500.245	835.809	934.05	484.214	780.725	884.01
499	0	226.481	715.768	1704.32	139.677	726.069	1700.07	238.872	910.35	1709.97	127.285	901.755	1704.42	185.203	941.292	1563.74	199.418	1018.23	1300.51	198.648	794.465	1479.49	189.668	730.708	1275.76	113.503	1022.84	1356.83	375.078	869.362	1526.4	462.203	904.076	1340.26	480.441	915.449	1186.17	489.715	827.603	1033.89	435.832	797.812	947.076	500.17	830.477	935.43	485.489	775.57	884.987
500	0	227.366	703.624	1705.83	140.568	713.673	1701.98	239.13	898.3	1711.26	127.676	889.322	1706.16	185.098	928.82	1565.23	198.9	1005.8	1302.46	198.896	782.079	1481.18	189.629	718.301	1277.34	112.604	1010.18	1358.39	375.071	857.419	1527.85	461.942	894.71	1342.17	480.331	907.665	1188.33	490.185	820.986	1035.23	436.496	790.765	948.16	500.164	824.858	936.87	486.111	769.428	886.456
501	0	228.287	691.393	1707.11	141.394	701.279	1703.33	239.399	886.112	1712.6	127.881	876.872	1707.49	185.329	916.323	1566.4	198.563	993.469	1304.19	198.981	769.636	1482.34	189.6	705.759	1278.72	112.221	997.789	1360.05	375.077	845.494	1529.08	461.742	885.125	1344.07	479.995	899.56	1190.19	490.639	813.701	1036.53	437.472	783.787	949.45	500.323	819.282	938.016	486.914	763.767	886.887
502	0	229.152	679.22	1708.03	142.231	688.69	1704.42	239.715	873.951	1713.23	128.253	864.245	1708.52	184.908	903.772	1567.59	198.05	980.966	1305.08	199.135	757.177	1483.21	189.593	693.083	1279.9	111.433	984.996	1361.08	375.149	833.332	1529.79	461.47	875.352	1345.16	479.822	891.579	1191.58	490.778	807.183	1036.86	438.153	776.307	950.333	500.02	813.458	938.785	488.011	757.51	887.822
503	0	230.063	666.985	1708.44	143.015	676.069	1705.07	240.106	861.679	1713.38	128.538	851.673	1708.89	184.873	891.259	1567.95	197.75	968.34	1306.05	199.377	744.783	1483.88	189.586	680.575	1280.15	111.037	972.361	1361.82	375.066	821.167	1530.29	461.266	865.57	1346.25	479.436	883.142	1192.7	491.169	800.086	1037.22	437.864	765.991	952.228	500.067	807.249	939.241	488.912	751.267	888.215
504	0	230.937	654.526	1708.61	143.74	663.478	1705.34	240.315	849.376	1713.52	128.836	839.004	1709.27	185.098	878.454	1568.47	197.65	955.952	1306.3	199.531	732.227	1484.12	189.742	668.05	1280.58	110.597	959.685	1362.31	375.203	808.991	1530.17	461.114	855.467	1346.79	479.097	874.601	1193.46	491.616	792.863	1037.38	438.989	758.237	952.567	500.181	800.904	939.303	489.92	744.912	887.987
505	0	231.773	642.065	1708.4	144.558	650.733	1705.36	240.616	836.989	1713.14	129.254	826.288	1709.01	185.076	865.794	1568.18	197.44	943.419	1306.07	199.706	719.654	1483.9	189.942	655.696	1279.96	109.646	946.17	1361.47	375.292	796.705	1529.83	460.901	845.329	1346.84	478.781	866.085	1193.64	492.03	785.293	1037.14	439.288	749.849	951.046	500.31	794.301	939.024	490.826	738.288	887.55
506	0	232.613	629.56	1707.7	145.446	637.91	1704.9	240.779	824.5	1712.3	129.699	813.384	1708.43	185.127	852.919	1567.92	197.199	930.773	1305.41	199.755	706.88	1483.14	190.154	642.953	1279.55	109.438	933.527	1360.62	375.378	784.378	1528.87	460.536	834.752	1346.17	478.108	857.063	1193.31	492.43	777.606	1036.37	440.135	741.896	950.126	500.566	787.257	938.125	491.693	731.518	886.494
507	0	233.542	616.918	1706.71	146.272	625.146	1704.06	241.407	811.842	1711.3	130.152	800.579	1707.36	185.469	840.179	1566.69	197.284	918.313	1304.56	200.219	694.319	1482.49	190.249	630.063	1278.83	109.35	920.585	1360	375.58	771.925	1527.85	460.601	824.274	1345.88	477.738	847.879	1192.94	492.873	769.701	1035.52	441.799	736.235	947.919	500.715	780.035	937.281	492.603	724.226	885.345
508	0	234.463	604.142	1705.68	147.203	612.226	1703.15	241.841	799.146	1710.01	130.592	787.535	1706.43	185.507	827.258	1565.63	197.548	905.547	1303.62	200.446	681.454	1481.14	190.727	617.555	1277.28	109.454	907.919	1358.98	375.851	759.159	1526.77	460.456	813.345	1345.37	477.477	838.428	1192.49	493.45	761.262	1034.6	442.1	725.214	948.401	501.045	772.457	936.335	493.728	717.046	883.928
509	0	235.29	591.315	1704.01	148.014	599.243	1701.47	242.41	786.28	1708.51	131.027	774.439	1704.94	185.67	814.256	1564.16	197.985	892.875	1302.67	200.807	668.651	1479.61	190.744	604.304	1275.98	109.714	894.93	1357.86	376.125	746.525	1525.23	460.496	802.273	1344.09	477.165	828.651	1191.66	493.916	752.658	1033.19	442.944	716.618	946.087	501.685	764.69	934.992	494.643	709.358	882.178
510	0	236.167	578.381	1702	148.88	586.11	1699.77	243.019	773.372	1706.64	131.522	761.293	1703.2	186.123	801.235	1562.27	198.205	879.991	1300.91	201.222	655.653	1477.78	190.546	590.933	1275.66	110.055	882.018	1356.29	376.323	733.671	1523.22	460.314	790.776	1342.49	476.723	818.307	1190.38	494.297	743.599	1031.14	443.506	707.833	943.918	501.998	756.411	933.354	495.699	701.483	879.811
511	0	237.164	565.3	1699.96	149.785	572.82	1697.83	243.69	760.311	1704.41	132.126	748.115	1701.24	186.551	788.122	1560.08	198.694	867.037	1298.81	201.501	642.517	1475.4	191.86	580.395	1269.74	110.229	869.088	1354.03	376.746	720.828	1520.97	460.342	779.202	1340.67	476.736	808.034	1188.84	494.89	734.569	1029.05	444.83	698.815	941.504	502.587	748.179	931.09	496.73	693.004	877.583
512	0	238.125	552.143	1697.49	150.671	559.574	1695.44	244.546	747.13	1701.86	132.879	734.778	1698.77	186.862	774.942	1557.67	199.308	854.084	1296.27	201.935	629.339	1472.95	190.885	565.153	1270.41	110.68	856.102	1351.53	377.243	707.879	1518.43	460.358	767.475	1338.27	476.025	797.066	1186.41	495.388	725.086	1026.39	445.628	689.516	938.522	503.125	739.518	928.596	497.437	684.714	874.132
513	0	239.295	538.926	1694.85	151.8	546.231	1692.92	245.097	733.886	1698.89	133.653	721.41	1695.97	187.266	761.596	1554.87	199.973	840.9	1293.18	202.511	616.054	1470.22	192.349	553.198	1265.87	111.093	842.882	1348.53	377.674	694.836	1515.53	460.305	755.518	1335.56	476.045	786.221	1183.98	495.912	715.301	1023.42	446.743	679.763	935.453	503.736	730.564	925.746	498.551	676.141	870.611
514	0	240.26	525.532	1691.93	152.832	532.76	1690.14	246.204	720.502	1695.97	134.507	707.932	1693.16	188.094	748.168	1551.93	200.971	827.656	1290.38	203.147	602.593	1467.23	193.349	541.023	1262.22	111.963	829.725	1345.68	378.354	681.798	1512.48	460.318	743.212	1332.73	475.753	774.6	1181.35	496.609	705.331	1020.11	447.739	669.869	931.828	504.515	721.444	922.566	499.805	667.389	867.154
515	0	241.446	512.052	1688.94	153.998	519.26	1687.14	247.04	707.125	1692.71	135.518	694.354	1690.16	188.647	734.707	1548.92	201.847	814.288	1287.53	203.759	589.104	1464.07	193.692	528.249	1258.12	112.631	816.493	1342.6	378.953	668.434	1509.33	460.18	730.805	1329.87	475.574	762.769	1178.54	497.34	695.004	1016.9	448.897	659.846	928.17	505.396	711.846	919.543	501.129	658.323	863.413
516	0	242.752	498.599	1685.74	155.206	505.619	1684.01	248.306	693.554	1689.66	136.539	680.73	1686.95	189.554	721.073	1545.72	202.733	800.816	1284.16	204.541	575.494	1460.85	194.119	514.64	1254.87	114.293	803.489	1340.6	379.655	654.965	1506.08	460.358	718.057	1326.61	475.333	750.397	1175.54	497.869	683.901	1013.46	449.622	649.357	924.248	506.297	702.042	916.092	502.299	648.847	859.564
517	0	244.077	484.881	1682.52	156.466	491.772	1680.95	249.442	679.826	1686.41	137.655	666.942	1683.75	190.424	707.363	1542.62	203.748	787.265	1281.06	205.456	561.791	1457.66	194.78	501.529	1251.12	115.048	790.196	1337.1	380.397	641.476	1502.65	460.911	704.876	1323.12	475.197	737.813	1172.31	498.846	673.168	1009.6	452.489	644.292	917.305	507.254	691.798	912.746	503.8	639.281	855.449
518	0	245.488	471.034	1679.49	157.816	477.917	1677.98	250.634	666.016	1683.18	138.999	653.048	1680.85	191.038	693.591	1539.58	204.476	773.495	1277.9	206.29	547.904	1454.16	195.557	488.122	1247.74	116.18	776.57	1334.48	381.483	627.804	1499.38	461.275	691.321	1319.75	475.151	724.603	1169.21	499.533	661.313	1006.09	452.58	627.974	915.918	508.326	681.047	909.381	505.29	629.34	851.548
519	0	247.043	457.137	1676.38	159.29	463.954	1674.89	251.93	652.123	1679.98	140.254	639.13	1677.92	192.313	679.688	1536.37	205.197	759.724	1274.79	207.265	533.964	1450.93	196.275	474.489	1244.35	117.281	763.033	1331.54	382.566	614.079	1496.13	461.832	677.774	1316.3	475.327	711.417	1165.77	500.6	649.802	1002.42	455.227	622.205	909.424	509.626	670.239	905.845	506.834	618.954	847.635
520	0	248.475	443.099	1673.35	160.965	449.972	1671.94	253.446	638.22	1676.95	141.65	625.015	1674.76	193.439	665.593	1533.56	205.722	745.729	1271.88	208.432	519.947	1447.77	196.939	460.604	1241.08	118.405	749.303	1328.75	383.722	600.24	1492.64	462.439	663.858	1312.71	475.386	697.764	1162.36	501.538	637.697	998.544	456.476	610.712	904.943	510.879	659	902.251	508.33	608.314	843.234
521	0	250.032	429.002	1670.21	162.528	435.861	1668.95	255.045	624.155	1673.87	143.287	610.926	1671.88	194.848	651.441	1530.37	206.187	731.762	1268.67	209.81	505.748	1444.81	197.794	446.582	1237.87	119.336	735.293	1325.72	384.895	586.394	1489.29	462.811	649.884	1308.98	475.425	683.83	1158.85	502.38	625.096	994.632	457.719	598.95	900.45	512.041	647.231	898.66	509.752	597.31	838.765
522	0	251.881	414.846	1667.61	164.097	421.584	1666.3	256.592	609.991	1670.69	144.883	596.737	1668.74	196.094	637.085	1527.6	206.442	717.532	1265.56	211.131	491.38	1441.76	198.85	432.432	1235	120.32	721.123	1322.95	386.384	572.41	1485.83	463.844	635.664	1305.33	475.719	669.83	1155.3	503.381	612.345	990.878	459.214	586.589	896.566	513.408	635.209	895.059	511.325	585.852	834.801
523	0	253.58	400.583	1664.88	165.807	407.288	1663.8	258.319	595.725	1667.84	146.629	582.461	1666.02	197.561	622.664	1524.77	206.933	703.249	1262.82	212.658	476.928	1438.94	200.172	418.113	1232.3	121.331	706.82	1320.38	387.81	558.303	1482.7	464.628	621.309	1301.51	475.992	655.632	1151.73	504.474	599.229	987.492	460.754	574.049	892.721	514.732	622.748	891.553	512.903	574.096	830.711
524	0	255.361	386.268	1662.49	167.601	392.958	1661.3	260.232	581.429	1665.16	148.473	568.17	1663.41	198.727	608.161	1522.27	207.4	688.649	1260.2	214.333	462.36	1436.28	201.36	403.625	1229.66	122.185	691.987	1318.12	389.529	544.154	1479.56	465.452	606.753	1298.09	476.25	641.076	1148.43	505.439	585.659	983.938	462.087	561.036	888.921	515.961	609.732	888.19	514.466	561.854	826.924
525	0	257.098	371.852	1660.06	169.412	378.589	1659.15	261.977	566.984	1662.6	150.415	553.763	1660.76	200.741	593.582	1519.82	208.053	673.969	1257.74	216.085	447.735	1433.63	202.799	389.01	1227.34	123.154	677.329	1316.13	391.215	529.796	1476.74	466.618	592.239	1294.76	476.817	626.474	1145.26	506.55	571.844	980.699	463.566	547.669	885.411	517.423	596.578	885.13	515.864	548.941	823.439
526	0	258.918	357.334	1658.06	171.191	364.214	1656.9	264.122	552.416	1660.46	152.436	539.387	1658.64	202.153	579.169	1517.66	208.909	659.217	1255.62	217.945	433.029	1431.33	204.427	374.222	1225.2	124.095	662.332	1314.11	393.155	515.52	1474.07	467.778	577.62	1291.74	477.71	611.937	1142.32	507.683	557.761	977.868	464.952	534.025	882.188	518.65	582.67	882.355	517.379	535.804	820.255
527	0	260.743	342.754	1656.4	172.999	349.728	1655.23	266.285	537.8	1658.7	154.506	524.932	1657.03	204.504	564.518	1515.93	209.924	644.203	1253.67	220.011	418.26	1429.54	206.207	359.352	1223.04	125.237	647.227	1312.27	395.002	500.998	1471.6	469.134	562.947	1288.82	478.292	596.863	1139.54	508.688	543.269	974.738	466.253	519.907	878.851	519.888	568.638	879.524	518.674	521.954	817.028
528	0	262.552	328.013	1655.33	174.783	335.098	1654.02	268.395	523.09	1657.63	156.512	510.347	1655.72	206.676	549.964	1514.46	210.942	628.967	1252.07	222.008	403.426	1428.02	208.052	344.316	1221.56	126.499	632.089	1310.76	397.156	486.634	1469.44	470.39	548.179	1286.22	479.108	581.802	1136.76	509.779	528.607	972.023	467.303	505.313	876.075	521.042	554.328	877.021	520.021	507.923	814.175
529	0	264.442	313.274	1654.65	176.57	320.518	1653.27	270.719	508.317	1656.79	158.853	495.819	1654.64	208.809	535.315	1513.38	211.736	613.725	1250.69	224	388.654	1426.91	209.797	328.742	1221.1	127.917	616.846	1309.89	399.307	472.381	1467.67	471.68	533.476	1283.95	480.114	566.462	1134.66	510.994	513.767	969.866	468.66	490.439	874.123	522.001	539.51	874.693	521.277	493.352	811.977
530	0	266.405	298.505	1654.27	178.414	305.99	1652.67	272.961	493.506	1656.19	161.139	481.403	1654.16	210.679	520.566	1512.74	212.554	598.507	1249.7	226.205	373.975	1426.37	211.779	313.462	1220.88	129.415	601.835	1308.96	401.438	458.277	1466.08	473.381	518.547	1282	481.181	551.089	1132.6	512.078	498.441	968.049	469.804	475.2	872.239	523.069	524.373	872.699	522.36	478.243	809.999
531	0	268.114	283.787	1653.95	180.328	291.492	1652.61	275.355	478.673	1656.04	163.558	466.95	1653.88	212.594	505.901	1512.18	213.098	583.331	1248.91	228.369	359.199	1426.38	213.823	298.201	1220.82	130.948	586.693	1308.46	403.443	444.127	1464.98	474.732	503.488	1280.34	482.102	535.452	1130.92	513.128	482.923	966.33	470.772	459.462	870.545	524.016	508.698	871.126	523.312	462.344	808.36
532	0	269.873	268.983	1654.36	182.18	277.052	1652.82	277.611	464.006	1656.22	165.847	452.624	1654.12	214.435	491.097	1512.14	213.796	568.202	1248.64	230.604	344.545	1426.7	215.96	282.503	1221.4	132.538	571.572	1308.39	405.392	430.116	1464.25	476.294	488.508	1279.01	483.282	519.653	1129.56	514.124	466.819	965.102	471.663	443.269	869.439	524.969	492.581	869.748	524.581	446.538	806.801
533	0	271.744	254.465	1655.08	183.914	262.665	1653.48	279.84	449.383	1656.73	168.062	438.37	1654.58	216.339	476.639	1512.62	214.701	553.49	1248.97	232.749	329.865	1427.21	217.624	265.637	1222.74	133.725	556.371	1308.66	407.468	416.291	1464.11	477.846	473.422	1278.43	484.306	503.69	1128.73	515.27	450.443	964.715	472.748	426.472	869.015	525.937	475.941	869.043	525.163	429.606	806.316
534	0	273.472	239.899	1656.09	185.616	248.234	1654.29	282.293	434.823	1657.55	170.572	424.062	1654.82	218.237	461.977	1513.14	215.417	538.854	1249.8	234.922	315.208	1428	220.225	250.714	1223.58	134.885	541.293	1309.42	409.36	402.343	1464.23	479.241	458.391	1277.9	485.447	487.701	1128.21	516.181	433.647	964.169	473.528	409.544	868.779	527.113	459.04	868.965	525.781	412.073	805.978
535	0	275.219	225.55	1657.32	187.335	234.052	1655.56	284.439	420.42	1658.39	172.387	409.864	1656.15	220.123	447.335	1514.1	215.861	524.498	1250.63	236.916	300.643	1428.97	222.326	235.081	1224.91	135.711	526.404	1310.6	411.221	388.49	1464.53	480.646	443.423	1277.68	486.651	471.79	1127.83	517.014	416.534	964.309	474.229	392.018	868.852	527.902	441.469	868.597	526.428	394.376	805.89
536	0	276.889	211.3	1658.64	189.031	220.011	1656.87	286.45	406.236	1659.1	174.566	395.707	1656.56	221.726	433.031	1515.22	216.402	510.226	1251.63	238.703	286.286	1429.89	224.474	219.737	1226.28	136.427	511.779	1311.86	412.895	374.673	1465.16	481.994	428.401	1277.81	488.03	455.719	1127.73	517.932	399.352	964.533	474.911	374.038	869.501	528.712	423.531	868.721	527.069	376.105	806.243
537	0	278.452	197.267	1659.95	190.647	206.126	1658.13	288.342	392.169	1660.01	176.315	381.969	1657.95	223.175	418.734	1516.5	217.143	496.252	1252.91	240.555	272.088	1431	226.372	204.978	1227.5	136.926	497.296	1313.41	414.44	360.97	1465.75	483.59	413.691	1277.96	489.345	439.494	1127.79	518.695	381.701	964.879	475.411	355.84	870.3	529.402	405.172	868.885	527.334	357.133	806.915
538	0	279.868	183.431	1661.06	192.083	192.217	1659.58	290.044	378.14	1661.2	178.115	368.225	1659.17	224.545	404.826	1517.67	217.808	482.337	1254.29	242.228	258.031	1432.39	228.081	190.727	1228.49	137.341	483.089	1315.01	415.739	347.034	1466.65	484.682	398.658	1278.27	490.699	423.245	1127.86	519.364	363.849	965.415	475.658	337.428	870.99	529.627	386.045	869.105	527.504	337.67	807.613
539	0	281.354	169.705	1662.54	193.471	178.502	1661.24	291.551	364.353	1662.58	179.594	354.517	1660.52	225.709	391.193	1519.23	218.527	468.345	1255.58	243.469	244.255	1433.65	229.616	177.027	1229.74	137.812	469.173	1316.64	417.075	333.356	1467.66	486.007	383.777	1278.84	492.286	406.98	1128.36	520.063	345.868	966.211	475.841	318.582	872.268	530.145	366.975	869.678	527.604	317.893	808.902
540	0	282.692	155.991	1664.17	194.754	164.952	1662.77	292.901	350.75	1664.12	181.029	340.87	1662.22	226.872	377.771	1520.83	219.684	454.775	1257.15	244.579	230.824	1435.06	230.898	163.93	1230.99	138.484	455.638	1318.36	418.345	319.729	1469.05	487.069	368.965	1279.45	493.806	390.52	1128.7	520.679	327.477	967.41	476.455	300.103	874.024	530.471	347.397	870.424	527.721	297.712	810.493
541	0	283.885	142.485	1665.84	195.841	151.48	1664.4	294.19	337.284	1665.99	182.398	327.415	1663.95	228.007	364.527	1522.38	220.878	441.359	1258.89	245.553	217.518	1436.55	231.846	151.169	1232.1	139.478	442.201	1320.03	419.423	306.264	1470.38	488.636	353.785	1280.19	495.37	373.778	1129.36	521.242	309.028	968.399	476.357	280.854	875.505	530.861	327.643	871.358	527.558	277.138	812.126
542	0	284.706	129.072	1667.45	196.761	138.098	1666.3	295.346	323.913	1668.1	183.243	314.177	1666.26	228.756	351.376	1524.09	221.854	428.101	1260.45	246.332	204.376	1438.48	232.436	138.732	1233.6	140.386	429.069	1321.72	420.295	292.953	1471.92	489.863	338.437	1281.13	496.993	357.081	1130.05	521.411	289.856	969.675	475.683	261.062	877.433	530.986	307.374	872.539	527.573	256.688	813.701
543	0	285.623	115.953	1669.16	197.659	124.948	1668.12	296.048	310.677	1670.04	184.299	301.028	1668.26	229.906	338.47	1526.07	222.763	415	1262.53	246.785	191.816	1440.22	232.905	126.358	1235.56	141.569	416.055	1323.55	421.143	279.902	1473.5	491.212	323.048	1282.16	498.533	339.969	1130.97	522.174	271.226	971.179	475.281	241.263	879.493	531.254	286.984	873.945	526.938	235.107	816.087
544	0	286.448	102.83	1671.29	198.388	111.817	1670.06	296.813	297.551	1672.53	184.908	287.9	1670.73	230.759	325.623	1528.66	223.777	402.255	1264.66	247.441	178.9	1442.42	233.191	114.014	1237.61	142.829	403.349	1325.36	421.982	266.883	1475.45	492.591	307.538	1283.4	500.224	322.834	1132.11	522.268	251.66	973.176	474.832	221.45	881.967	531.583	266.379	875.577	526.327	213.646	818.641
545	0	287.057	89.8444	1673.41	199.057	98.8414	1672.38	297.435	284.666	1675.15	185.432	274.798	1673.37	231.26	312.87	1530.75	225.436	390.175	1267.4	247.97	166.217	1444.85	233.154	101.564	1239.94	144.078	390.701	1327.52	422.647	254.014	1477.39	493.792	292.021	1284.63	501.634	305.45	1133.27	522.128	231.912	975.19	474.192	201.355	884.365	531.627	245.377	877.379	525.546	191.698	821.315
546	0	287.642	76.926	1675.98	199.951	86.2919	1674.32	297.864	271.867	1677.76	186.018	261.981	1675.96	231.967	300.32	1533.27	225.998	376.909	1269.31	248.262	153.918	1447.34	233.169	89.0841	1242.5	145.41	378.16	1329.73	423.228	241.352	1479.52	495.029	276.279	1286.11	503.292	287.922	1134.79	522.161	212.075	977.451	473.31	181.25	887.27	531.499	224.07	879.483	524.782	169.89	824.289
547	0	288.121	64.3749	1678.5	200.168	73.3895	1677.11	298.135	258.995	1680.65	186.496	249.241	1678.68	232.673	287.7	1535.84	227.272	364.443	1272.07	248.715	141.456	1450.09	233.159	76.5628	1245.54	146.114	365.497	1331.46	423.843	228.719	1482.16	496.185	260.522	1288.09	504.847	270.203	1136.74	522.098	192.174	980.333	472.613	161.058	890.754	531.485	202.647	881.999	523.966	147.599	828.246
548	0	288.56	51.57	1681.26	200.534	60.8132	1679.32	298.404	246.398	1683.54	186.712	236.527	1681.49	232.904	275.305	1538.48	228.168	351.588	1274.59	248.987	128.96	1452.85	232.951	63.9473	1248.37	147.446	353.142	1333.98	424.428	216.185	1484.77	497.317	244.709	1290.25	506.344	252.952	1138.8	521.784	171.9	983.562	471.613	140.636	894.222	531.466	180.969	885.072	523.068	125.999	832.043
549	0	288.647	39.1025	1683.59	200.808	48.2501	1681.88	298.763	233.945	1686.61	186.713	223.92	1684.34	233.88	262.72	1541.25	229.245	339.058	1277.26	249.258	116.661	1455.56	232.753	51.3192	1251.11	149.195	341.078	1337.25	424.774	203.426	1487.43	498.127	228.976	1292.55	507.199	235.306	1140.62	521.376	151.716	986.761	470.362	120.084	897.879	531.275	159.306	888.307	521.684	103.552	836.116
550	0	288.781	26.7024	1686.3	200.938	35.7833	1684.39	298.777	221.476	1689.34	187.014	211.488	1686.74	234.181	250.545	1543.78	230.332	326.628	1279.81	249.622	104.352	1458.43	232.77	38.7016	1254.05	150.269	328.861	1339.77	425.253	190.768	1490.21	498.859	213.465	1295	507.862	217.574	1142.83	520.996	131.764	990.193	469.373	99.6759	902.109	530.953	137.579	891.887	520.35	81.1719	840.659
551	0	289.048	14.2863	1689.27	201.028	23.4937	1686.99	298.858	209.1	1692.1	187.206	199.192	1689.41	234.812	238.146	1546.21	231.406	314.121	1282.4	249.811	91.9285	1461.08	232.842	25.9731	1257.01	151.49	316.608	1342.21	425.672	177.97	1493.04	499.693	198.071	1297.77	509.637	200.854	1145.65	520.826	111.858	994.336	468.456	79.0167	906.853	530.584	115.713	895.767	519.166	58.7712	845.623
552	0	288.999	2.06535	1691.71	200.986	11.1481	1689.46	298.915	196.922	1694.55	187.067	186.833	1691.67	236.157	225.889	1548.36	232.403	301.721	1284.73	249.976	79.6051	1463.69	232.979	13.5672	1259.56	152.402	304.354	1344.53	426.046	165.145	1495.97	500.373	182.827	1300.55	510.711	183.796	1148.41	520.341	91.7728	998.475	467.507	57.6549	911.97	530.397	93.6631	899.911	517.803	36.4815	850.572
553	0	288.969	-10.1373	1694.16	201.06	-0.978208	1691.81	298.942	184.677	1697.11	187.1	174.627	1693.99	236.109	213.581	1550.81	234.122	289.874	1287.83	250.163	67.2312	1466.17	233.066	1.121	1262.01	153.446	292.029	1346.96	426.234	152.053	1498.63	501.039	167.727	1303.27	511.038	166.292	1150.57	519.675	71.8127	1002.4	465.999	37.7173	916.985	529.805	71.9468	904.096	516.128	13.8255	855.937
554	0	288.944	-22.4336	1696.62	200.898	-13.2353	1694.01	298.905	172.402	1699.35	187.173	162.527	1696.22	236.496	201.215	1552.88	234.342	276.809	1289.27	250.23	54.6467	1468.47	233.249	-11.2838	1264.3	154.331	279.759	1349.11	426.518	138.931	1501.1	501.667	152.637	1305.9	511.946	149.332	1152.89	519.296	52.1199	1006.42	464.882	17.0564	921.753	528.948	50.0877	908.131	514.748	-8.53469	861.336
555	0	288.74	-34.595	1698.72	200.801	-25.3206	1696.08	298.91	160.278	1701.1	187.113	150.311	1697.71	237.028	188.899	1554.8	236.773	265.915	1292.14	250.201	42.1799	1470.44	233.422	-23.399	1266.3	155.266	267.475	1350.89	426.779	125.713	1503.47	502.332	137.89	1308.45	513.426	132.896	1155.48	518.971	32.7303	1010.48	463.944	-3.62221	926.699	527.996	28.6901	912.324	513.182	-30.705	866.464
556	0	288.54	-46.8367	1700.6	200.601	-37.527	1697.97	298.812	148.011	1702.66	187.24	138.212	1699.32	237.466	176.387	1556.2	236.197	251.941	1292.83	250.253	29.5864	1472.2	233.365	-35.7028	1267.98	156.253	255.271	1352.39	426.942	112.465	1505.54	502.739	122.921	1310.51	514.405	116.346	1157.4	518.442	13.1708	1014.16	462.576	-24.031	931.365	526.884	7.22244	916.369	511.172	-53.263	871.996
557	0	288.456	-59.0562	1702.26	200.508	-49.6513	1699.61	298.881	135.793	1704.04	187.167	126.004	1700.52	237.991	164.006	1557.67	237.031	239.327	1294.1	250.364	17.0141	1473.75	233.464	-47.845	1269.48	157.217	242.974	1353.72	427.16	99.0416	1507.37	503.458	108.295	1312.43	515.402	99.8334	1159.07	517.978	-6.0237	1017.78	461.218	-44.5949	936.434	526.23	-14.137	919.989	509.92	-75.3821	877.415
558	0	288.317	-71.3463	1703.93	200.194	-61.9126	1700.87	298.872	123.543	1705.11	187.159	113.92	1701.59	238.357	151.32	1558.63	238.933	227.915	1295.9	250.12	4.22603	1475.12	233.527	-59.9934	1270.82	157.969	230.654	1354.81	427.385	85.6042	1509.04	504.052	93.6108	1314.36	516.532	83.5391	1160.71	517.952	-25.4165	1021.85	460.629	-65.3564	941.412	525.046	-35.3731	923.838	508.064	-97.5421	882.82
559	0	288.001	-83.5356	1704.97	199.943	-74.0122	1701.98	298.872	111.172	1705.84	187.138	101.688	1702.14	238.753	138.798	1559.44	240.016	215.623	1297.04	250.13	-8.08824	1475.89	233.305	-72.2896	1271.55	158.785	218.336	1355.73	427.456	72.0248	1510.16	504.633	78.7936	1315.7	517.679	67.3154	1161.99	517.139	-44.348	1024.94	458.759	-85.8583	946.154	523.609	-56.3661	927.505	506.271	-119.606	887.834
560	0	287.729	-96.0662	1705.76	199.591	-86.3614	1702.67	298.891	98.8625	1706.24	187.071	89.4741	1702.68	239.256	126.119	1560.04	240.615	202.857	1297.04	249.972	-20.5305	1476.39	233.072	-84.5643	1271.89	159.693	205.932	1356.32	427.551	58.3828	1510.95	505.137	64.1318	1316.67	518.245	50.7773	1162.69	516.849	-63.3399	1028.13	457.87	-106.38	950.313	522.513	-77.6748	930.83	504.4	-141.666	892.881
561	0	287.335	-108.454	1706.2	199.328	-98.6343	1702.94	298.738	86.3409	1706.15	187.119	77.1702	1702.31	239.53	113.42	1560.04	241.541	190.483	1297.34	249.845	-33.4227	1476.47	232.778	-96.9526	1272.03	160.676	193.595	1356.31	427.555	44.7594	1511.35	505.78	49.5926	1317.24	519.746	34.9987	1163.24	516.654	-82.0111	1030.86	456.553	-126.678	954.851	520.76	-98.4845	933.811	502.71	-163.4	897.914
562	0	286.771	-120.513	1705.99	198.968	-111.075	1702.94	298.706	73.9665	1705.67	187.095	64.8351	1701.8	239.852	100.641	1560.11	242.294	177.932	1297.22	249.684	-46.2798	1476.34	232.604	-109.328	1271.84	161.643	181.405	1355.73	427.629	31.0644	1511.47	506.293	34.8524	1317.69	520.362	18.5762	1163.26	516.12	-100.802	1033.54	455.234	-146.844	958.975	519.876	-119.453	936.79	500.972	-185.083	902.842
563	0	286.396	-133.142	1705.67	198.576	-123.484	1702.54	298.627	61.2563	1705.1	186.975	52.4129	1701.06	239.783	87.8292	1559.35	243.006	165.341	1296.85	249.519	-59.088	1475.75	232.101	-121.792	1271.13	162.358	168.811	1355.21	427.631	17.5175	1511.15	506.833	20.2031	1317.55	521.302	2.63225	1163	515.238	-119.559	1035.69	454.07	-166.936	962.998	518.241	-140.247	939.431	499.164	-206.526	907.135
564	0	285.851	-145.884	1705	198.068	-136.061	1701.71	298.658	48.5722	1704.23	186.874	39.9099	1700.36	240.261	74.9426	1558.66	243.603	152.768	1296.23	249.291	-71.9586	1474.9	231.586	-134.285	1270.21	162.923	156.306	1354.43	427.48	3.91133	1510.4	507.334	5.39655	1317.16	522.279	-13.249	1162.45	515.019	-138.153	1037.71	452.536	-186.841	966.502	516.542	-160.627	941.838	497.255	-227.912	911.533
565	0	285.359	-158.663	1704.07	197.783	-148.547	1700.65	298.37	35.7553	1702.83	186.854	27.3228	1698.89	240.22	62.0896	1557.4	244.12	140.374	1295.21	248.878	-84.8022	1473.66	231.196	-146.712	1268.8	163.534	143.879	1353.31	427.423	-9.75482	1509.47	507.906	-9.23832	1316.51	523.212	-29.2812	1161.71	514.426	-156.593	1039.59	451.285	-206.794	970.336	515.914	-181.174	944.352	495.557	-249.061	915.851
566	0	284.93	-171.522	1702.59	197.176	-161.406	1699.32	298.443	22.8683	1701.64	186.685	14.5654	1697.17	240.412	49.1915	1555.84	244.642	127.901	1294.06	248.762	-96.9402	1471.56	230.581	-159.333	1267.14	164.044	131.225	1351.9	427.24	-23.3229	1508.12	508.244	-24.0298	1315.3	524.198	-45.0525	1160.58	513.859	-174.871	1041.2	450.377	-226.423	973.356	513.789	-201.612	946.635	493.673	-270.087	919.905
567	0	284.155	-184.528	1700.5	196.649	-174.279	1697.34	298.17	9.866	1699.66	186.46	1.74355	1695.47	240.29	36.2833	1554.41	244.98	115.344	1292.33	248.395	-108.708	1469.11	229.988	-171.903	1264.93	164.503	118.673	1350.08	426.958	-36.794	1506.21	508.551	-38.8839	1313.76	524.81	-60.9373	1158.97	512.697	-193.187	1042.09	448.496	-245.633	976.054	512.509	-221.893	948.287	491.929	-290.769	923.247
568	0	283.718	-197.672	1698.81	196.032	-187.193	1695.42	297.876	-3.36434	1697.64	186.096	-11.174	1693.39	239.914	23.1243	1552.05	245.016	102.835	1290.43	247.91	-122.029	1466.97	229.516	-184.594	1262.87	164.73	106.02	1348.1	426.763	-50.2269	1504.17	508.867	-53.4388	1312.01	525.451	-76.5981	1157.09	512.085	-211.153	1043.31	447.586	-264.82	978.829	512.168	-241.826	949.952	490.104	-311.191	926.893
569	0	283.302	-211.002	1696.63	195.412	-200.205	1693.08	297.481	-16.5351	1695.09	185.864	-24.1613	1691.15	240.041	10.0372	1550.19	244.948	90.0247	1288.01	247.509	-134.945	1464.63	228.922	-197.303	1260.43	164.818	93.4108	1345.66	426.457	-63.6619	1501.88	509.089	-67.9482	1310.05	526.069	-92.3581	1155.02	511.464	-228.993	1044.17	446.218	-283.688	981.009	511.081	-261.565	951.69	488.283	-331.522	930.512
570	0	282.293	-224.131	1693.56	194.68	-213.438	1690.14	297.259	-29.8308	1692.74	185.472	-37.3967	1688.5	239.912	-2.90603	1547.47	244.742	77.0859	1285.7	246.951	-147.879	1461.71	228.267	-210.114	1257.51	164.78	80.5762	1343.01	426.03	-77.129	1499.18	509.025	-82.4983	1307.52	526.606	-107.965	1152.85	510.58	-246.808	1044.34	444.723	-302.184	982.878	509.346	-281.254	952.678	486.492	-351.795	933.78
571	0	281.433	-237.712	1690.77	193.754	-226.81	1687.24	296.596	-43.3243	1689.93	184.773	-50.6327	1685.6	238.829	-16.3127	1544.67	244.44	64.2117	1282.79	246.225	-161.049	1458.75	227.442	-223.097	1254.45	164.685	67.7735	1340.15	425.458	-90.6105	1496.3	508.782	-96.9139	1304.67	526.885	-123.473	1150.32	509.699	-264.325	1044.43	443.25	-320.507	984.299	507.982	-300.667	953.526	484.851	-371.262	936.576
572	0	280.597	-251.196	1687.43	192.879	-240.104	1684.11	295.977	-56.9683	1686.97	184.272	-63.9645	1682.7	239.099	-29.2949	1541.92	243.879	50.9776	1279.93	245.475	-174.184	1455.65	226.884	-236.104	1251.37	164.395	54.7754	1337.05	425.021	-103.93	1493.34	508.459	-111.212	1301.91	527.125	-138.831	1147.61	508.908	-281.62	1044.52	441.876	-338.507	985.562	506.544	-319.82	954.159	483.1	-390.571	938.959
573	0	279.594	-264.851	1684.06	191.871	-253.644	1680.79	295.361	-70.5155	1683.77	183.624	-77.3751	1679.62	238.129	-42.4538	1538.99	243.104	37.56	1276.49	244.815	-187.194	1452.63	226.205	-249.41	1248.15	163.928	41.5258	1333.68	424.404	-117.316	1490.09	508.103	-125.419	1298.81	527.102	-154.26	1144.69	507.983	-298.672	1044.02	440.509	-356.271	986.525	505.156	-338.523	954.647	481.625	-409.367	941.285
574	0	278.293	-278.622	1680.56	190.744	-267.22	1677.43	294.462	-84.315	1680.7	182.779	-91.0865	1676.42	237.442	-55.8244	1535.34	242.634	24.3309	1273.02	243.977	-200.602	1449.25	225.552	-262.916	1244.95	163.451	28.1842	1330.01	423.602	-130.702	1486.91	507.452	-139.289	1295.44	526.967	-169.575	1141.65	506.873	-315.559	1043.42	439.039	-373.757	987.173	503.795	-357.038	954.955	479.966	-427.997	943.132
575	0	277.213	-292.433	1677.1	189.618	-280.925	1673.66	293.485	-98.145	1677.52	181.766	-104.736	1673.2	236.444	-69.2051	1531.9	241.747	10.6493	1269.26	243.142	-214.117	1446.02	224.91	-276.643	1241.69	162.805	14.706	1326.2	422.836	-144.139	1483.51	506.764	-153.261	1292.16	526.654	-184.724	1138.67	505.874	-332.169	1042.56	437.632	-390.986	987.42	501.821	-375.191	954.85	478.331	-446.216	944.91
576	0	275.928	-306.343	1673.43	188.296	-294.678	1670.05	292.441	-112.102	1674.26	180.753	-118.45	1669.73	235.631	-82.7681	1528.3	240.991	-3.03169	1265.69	242.225	-227.636	1442.6	224.27	-290.549	1238.47	162.134	0.986284	1322.42	422.075	-157.658	1480.15	505.733	-166.977	1288.58	526.262	-199.787	1135.47	504.922	-348.489	1041.53	436.372	-407.826	987.419	500.482	-392.906	954.422	476.935	-463.982	946.472
577	0	274.377	-320.368	1669.71	186.868	-308.525	1666.18	291.171	-126.097	1670.93	179.473	-132.341	1666.3	235.063	-96.6172	1524.89	240.141	-17.018	1261.9	241.169	-241.435	1439.03	223.427	-304.621	1234.93	161.371	-12.8266	1318.4	421.02	-171.258	1476.55	504.484	-180.511	1284.96	525.405	-214.852	1132.29	503.626	-364.68	1040.03	434.953	-424.42	986.857	499.039	-410.202	953.662	475.545	-481.369	947.625
578	0	272.74	-334.585	1666.11	185.253	-322.607	1662.39	289.891	-140.111	1667.76	178.108	-146.341	1662.75	233.35	-110.352	1521.16	239.061	-31.3051	1257.83	240.178	-255.357	1435.54	222.717	-318.822	1231.49	160.469	-26.8667	1314.8	419.92	-184.963	1473.11	503.13	-194.032	1281.04	524.509	-229.683	1128.75	502.493	-380.465	1038.32	433.58	-440.661	986.298	497.6	-427.117	952.393	474.398	-498.342	948.556
579	0	271.174	-348.71	1662.67	183.911	-336.365	1658.72	288.437	-154.323	1664.3	176.673	-160.388	1659.28	232.168	-124.294	1517.67	238.424	-45.3355	1254.29	239.109	-269.446	1432.36	222.025	-333.22	1228.29	159.618	-40.7806	1310.93	418.931	-198.874	1469.84	501.839	-207.504	1277.66	523.555	-244.151	1125.36	501.459	-395.878	1036.55	432.456	-456.583	985.414	496.07	-443.437	950.94	473.487	-514.672	949.229
580	0	269.592	-362.944	1659.46	181.915	-350.677	1655.44	286.869	-168.601	1661.07	175.108	-174.533	1655.91	231.476	-138.562	1514.29	237.549	-59.8108	1250.77	237.911	-283.707	1429.06	221.195	-347.749	1225.06	158.65	-55.2317	1307.46	417.822	-212.819	1466.75	500.313	-221.041	1274.22	522.521	-258.687	1122.31	500.321	-410.977	1034.54	431.287	-472.261	984.027	494.699	-459.439	949.546	472.458	-530.655	949.284
581	0	267.616	-377.51	1656.14	180.381	-364.82	1651.71	285.11	-182.943	1658.16	173.419	-188.924	1652.63	229.562	-152.931	1510.83	237.026	-74.3485	1247.84	236.645	-298.233	1425.67	220.207	-362.42	1221.68	157.582	-69.4342	1304.31	416.42	-227.278	1463.49	498.521	-234.615	1270.63	521.174	-273.124	1119.31	499.047	-425.955	1032.24	430.035	-487.637	982.517	492.572	-474.672	947.53	471.564	-546.21	949.054
582	0	265.675	-391.932	1653.04	178.497	-379.222	1648.29	283.478	-197.544	1655.44	171.647	-203.375	1649.37	228.035	-167.54	1507.85	236.09	-89.2209	1244.59	235.095	-312.869	1422.33	219.122	-377.068	1218.48	156.559	-84.0003	1301.07	414.989	-241.866	1460.54	496.691	-248.321	1267.46	519.88	-287.245	1116.24	497.774	-440.698	1029.75	428.756	-502.734	980.744	491.496	-490.155	945.52	470.693	-561.391	948.22
583	0	263.713	-406.544	1650.07	176.644	-393.654	1645.38	281.613	-212.107	1652.47	169.869	-217.839	1646.33	226.425	-182.181	1504.74	235.322	-104.293	1241.5	233.706	-327.624	1419.51	217.968	-391.876	1215.6	155.313	-98.8786	1297.92	413.616	-256.845	1457.83	495.007	-262.098	1264.51	518.314	-301.407	1113.27	496.584	-455.062	1027.3	427.616	-517.536	978.742	489.693	-504.584	943.441	470.008	-576.051	947.408
584	0	261.642	-421.266	1647.38	174.573	-408.354	1642.38	279.83	-226.832	1649.64	168.108	-232.479	1643.31	224.92	-196.992	1501.91	234.605	-119.503	1238.82	232.135	-342.512	1416.66	216.534	-406.597	1212.69	154.317	-113.929	1294.78	412.033	-271.769	1455.06	493.214	-276.009	1261.46	516.422	-315.256	1110.36	495.256	-469.292	1024.58	426.538	-532.081	976.594	488.637	-519.259	940.753	469.348	-590.339	946.017
585	0	259.642	-436.129	1644.85	172.262	-423.292	1639.9	277.769	-241.704	1647.03	166.084	-247.225	1640.75	222.998	-211.97	1499.07	233.523	-135.141	1235.76	230.289	-357.61	1413.97	214.83	-421.681	1210.14	153.281	-128.959	1291.58	410.264	-286.896	1452.47	491.28	-290.263	1258.78	514.782	-328.887	1107.6	493.94	-483.152	1021.73	425.397	-546.422	974.184	486.749	-532.93	937.944	468.661	-604.37	943.932
586	0	257.681	-451.178	1642.94	170.347	-438.123	1637.71	275.816	-256.664	1644.95	164.119	-262.108	1638.44	220.946	-226.905	1496.63	232.346	-150.72	1233.06	228.486	-372.883	1411.7	213.139	-436.892	1207.83	152.003	-144.714	1288.51	408.485	-302.141	1450.33	489.302	-304.472	1256.51	512.279	-342.809	1104.69	492.641	-496.775	1018.91	424.406	-560.424	971.53	485.673	-546.765	934.781	468.156	-618.003	941.825
587	0	255.558	-466.26	1641.45	168.604	-452.928	1636.04	273.636	-271.775	1643.21	162.168	-277.092	1636.87	218.989	-241.855	1494.97	231.022	-166.566	1231.01	226.697	-388.201	1409.85	211.343	-452.574	1206.36	150.802	-160.288	1286.31	406.655	-317.459	1448.55	487.513	-319.055	1254.85	510.45	-356.161	1102.76	491.318	-510.177	1016.15	423.449	-574.105	968.67	484.039	-559.735	931.883	467.747	-631.14	939.164
588	0	253.238	-481.474	1640.18	166.396	-468.154	1634.81	271.725	-286.971	1642.3	160.021	-292.318	1635.54	217.062	-257.31	1493.43	229.787	-182.455	1229.39	224.807	-403.731	1408.59	209.598	-468.658	1205.38	149.693	-175.95	1284.88	404.724	-333.06	1447.24	485.668	-334.109	1253.7	507.846	-369.835	1101.03	489.893	-523.43	1013.4	422.356	-587.454	965.637	483.34	-572.595	928.985	467.15	-643.891	936.27
589	0	251.17	-496.873	1639.61	164.066	-483.536	1634.1	269.765	-302.206	1641.6	158.134	-307.554	1634.61	215.424	-272.781	1492.45	229.101	-198.293	1228.46	222.893	-419.259	1407.79	207.831	-484.927	1204.95	148.308	-191.638	1283.97	403.046	-348.773	1446.47	483.678	-349.291	1253.29	505.298	-383.226	1099.79	488.559	-536.267	1010.62	421.681	-600.2	962.618	481.832	-584.51	925.778	466.601	-656.366	932.782
590	0	249.103	-512.087	1639.37	161.925	-498.719	1633.82	267.643	-317.505	1640.88	156.038	-322.788	1634.11	213.556	-288.425	1491.7	228.538	-214.149	1227.81	221.195	-434.648	1407.44	206.331	-501.316	1205.06	147.084	-207.325	1283.05	401.46	-364.564	1446.51	482.018	-364.79	1253.48	502.796	-396.487	1099.14	487.396	-548.591	1008.35	420.752	-612.686	959.705	480.912	-596.112	922.705	466.377	-667.94	929.287
591	0	246.929	-527.444	1639.29	160.071	-513.872	1633.66	265.489	-332.808	1640.68	154.011	-338.114	1633.84	212.017	-303.853	1491.62	227.964	-229.356	1227.87	219.384	-450.266	1407.3	204.54	-517.681	1205.24	145.96	-222.845	1282.62	399.794	-380.647	1446.7	480.174	-380.531	1253.92	499.891	-409.82	1098.71	485.95	-560.859	1006.02	420.111	-624.833	956.303	480.119	-607.089	919.997	466.227	-679.008	925.542
592	0	244.745	-542.82	1639.57	157.943	-529.276	1633.84	263.426	-348.191	1641.01	151.948	-353.491	1634.07	210.535	-319.308	1492.08	227.327	-245.674	1228.16	217.356	-465.782	1407.39	202.648	-534.057	1205.62	144.833	-238.24	1283.12	398.048	-397.066	1447.17	478.377	-396.319	1254.49	497.865	-422.788	1099.29	484.685	-572.874	1003.79	419.432	-636.381	953.042	479.303	-617.519	917.224	466.226	-689.713	921.505
593	0	242.549	-558.195	1640.22	155.575	-544.722	1634.55	261.505	-363.554	1641.78	149.923	-368.751	1634.41	209.099	-334.721	1492.48	226.311	-261.263	1228.8	215.592	-481.168	1407.87	200.886	-550.129	1206.6	143.84	-253.411	1283.64	396.442	-413.335	1448.16	476.662	-412.131	1255.73	495.401	-435.959	1099.92	483.618	-584.179	1001.58	418.882	-647.471	949.833	479.203	-627.491	914.321	466.257	-699.659	917.41
594	0	240.573	-573.451	1641.1	153.776	-559.732	1635.23	259.561	-378.86	1642.7	147.88	-384.038	1635.22	207.723	-350.059	1493.34	225.456	-276.316	1229.62	213.766	-496.464	1408.77	199.085	-565.916	1207.6	142.914	-268.666	1284.44	394.873	-429.565	1449.41	475.149	-427.893	1257.12	493.129	-448.971	1100.83	482.835	-595.3	999.791	418.569	-658.128	946.523	478.211	-636.849	911.14	466.32	-709.216	913.458
595	0	238.434	-588.892	1642.11	151.478	-575.098	1636.23	257.722	-394.108	1644.05	145.885	-399.204	1636.23	206.536	-365.152	1495.01	224.655	-292.177	1230.6	212.057	-511.646	1409.81	197.355	-581.385	1208.76	142.075	-283.827	1285.15	393.168	-445.614	1450.78	473.623	-443.671	1258.75	490.7	-462.048	1102	481.981	-606.163	997.756	418.177	-668.321	943.138	477.511	-645.735	908.339	466.428	-718.286	908.903
596	0	236.501	-604.188	1643.43	149.57	-590.235	1637.14	255.859	-409.215	1645.48	144.123	-414.289	1637.58	205.332	-380.201	1496.41	223.749	-307.01	1231.91	210.77	-526.645	1411.13	195.689	-596.497	1210.34	141.037	-299.078	1286.54	391.745	-461.353	1452.69	472.295	-459.169	1260.83	488.212	-475.025	1103.39	481.019	-616.689	996.153	417.898	-678.027	940.074	476.992	-654.161	905.41	466.503	-726.803	904.616
597	0	234.647	-619.134	1644.76	147.761	-605.124	1638.2	254.041	-424.318	1647.1	142.544	-429.167	1639.08	203.663	-394.819	1497.39	222.731	-321.688	1233.21	209.509	-541.434	1412.73	194.404	-611.379	1211.96	139.767	-314.003	1287.6	390.387	-476.516	1454.58	471.397	-474.551	1262.99	486.378	-487.99	1105.36	480.316	-626.924	994.444	418.018	-687.186	936.578	476.827	-662.287	902.985	466.695	-734.877	900.412
598	0	232.776	-634.099	1645.93	146.097	-619.947	1639.43	252.598	-439.245	1649.34	140.896	-443.963	1640.89	202.696	-409.239	1499.36	221.59	-335.642	1235.23	208.264	-556.036	1414.3	193.394	-625.992	1213.69	138.464	-328.859	1289.39	389.161	-491.323	1456.77	470.4	-489.663	1265.46	484.719	-500.662	1107.59	479.397	-636.699	992.851	417.801	-696.192	933.367	476.755	-670.104	901.067	466.903	-742.741	896.235
599	0	231.017	-649.026	1647.44	144.671	-634.51	1640.73	251.162	-454.071	1651.55	139.441	-458.701	1642.8	202.211	-423.754	1501.43	220.628	-350.736	1237.09	207.319	-570.418	1416.08	192.527	-640.481	1215.51	137.089	-343.352	1291.36	388.188	-505.799	1458.97	469.55	-504.417	1267.85	482.961	-513.582	1109.8	478.623	-646.752	991.529	417.631	-704.89	930.24	476.902	-677.687	899.118	466.945	-750.351	892.045
600	0	229.556	-663.784	1649.23	143.24	-649.041	1642.21	249.992	-468.679	1654.23	138.177	-473.2	1644.86	200.837	-437.696	1503.49	219.038	-364.317	1239.19	206.167	-584.499	1418.13	192.154	-654.551	1217.6	135.478	-357.571	1293.49	387.18	-519.68	1461.36	468.824	-518.719	1270.32	481.189	-526.341	1112.03	478.054	-656.619	990.86	417.49	-713.144	927.391	477.109	-685.072	897.412	466.962	-757.556	888.073
601	0	228.316	-678.255	1651.14	142.009	-663.278	1644.03	248.837	-483.181	1656.53	137.161	-487.452	1647.17	200.094	-451.716	1505.66	217.74	-378.129	1241.73	205.764	-598.275	1420.32	192.1	-668.384	1219.81	134.073	-371.541	1295.97	386.757	-533.185	1463.89	468.221	-532.205	1272.97	480.154	-538.975	1114.71	477.63	-666.035	990.389	417.454	-721.112	924.921	477.682	-692.33	896.125	467.358	-764.412	884.364
602	0	227.103	-692.639	1653.16	140.856	-677.42	1645.75	247.928	-497.414	1659.49	136.142	-501.588	1649.82	199.264	-465.664	1508.96	216.376	-391.798	1244.09	205.745	-612.057	1422.56	191.908	-681.978	1222.15	132.718	-385.348	1298.58	386.002	-546.564	1466.4	467.507	-545.263	1275.39	478.87	-551.502	1117.2	477.031	-675.674	990.194	417.348	-728.811	922.451	477.684	-699.378	894.942	467.27	-771.007	880.086
603	0	226.082	-706.701	1655.13	139.974	-691.368	1647.79	247.25	-511.555	1662.38	135.37	-515.572	1652.28	198.631	-479.223	1511.24	214.835	-405.31	1246.52	205.507	-625.576	1425.08	191.899	-695.182	1224.48	131.235	-398.815	1301.32	385.694	-559.689	1469.08	466.875	-557.721	1277.88	477.834	-563.912	1119.85	476.756	-684.854	990.159	417.408	-736.25	920.356	478.615	-706.104	894.4	467.308	-777.243	876.319
604	0	225.25	-720.682	1657.47	139.157	-705.079	1650.02	246.35	-525.463	1664.87	134.912	-529.31	1655.12	198.013	-492.511	1513.82	213.749	-418.526	1249.21	205.361	-638.972	1427.65	191.854	-708.241	1226.99	130.238	-412.069	1304.01	385.426	-572.606	1471.85	466.277	-569.768	1280.25	476.93	-575.796	1122.54	476.486	-693.902	990.266	417.509	-743.362	918.736	479.42	-712.997	894.202	467.053	-783.241	872.919
605	0	224.664	-734.413	1660.04	138.589	-718.693	1652.55	246.136	-539.172	1668.25	134.389	-542.852	1658.15	197.817	-505.945	1516.75	212.664	-431.565	1251.9	205.34	-652.218	1430.44	191.934	-721.105	1229.58	129.19	-425.306	1306.99	385.247	-585.334	1474.71	465.706	-581.506	1282.61	476.21	-587.484	1125.27	476.194	-702.847	990.892	417.69	-750.278	917.536	480.013	-719.601	894.107	467.028	-789.056	869.81
606	0	224.149	-748.127	1662.78	138.184	-732.161	1655.26	245.908	-552.738	1671.68	134.11	-556.383	1661.13	197.66	-519.065	1520.09	211.687	-444.623	1254.93	205.397	-665.364	1433.44	192.11	-733.878	1232.35	128.32	-438.357	1310.26	385.083	-598.239	1477.58	465.128	-592.878	1285.12	475.806	-598.285	1128.34	476.156	-711.376	991.703	417.812	-757.252	916.575	480.602	-726.169	894.487	466.877	-794.408	867.15
607	0	223.873	-761.436	1665.53	138.005	-745.368	1658.02	245.801	-566.135	1675	134.022	-569.674	1664.59	197.432	-532.217	1523.37	210.903	-457.412	1258.28	205.445	-678.289	1436.61	192.365	-746.451	1235.35	127.733	-451.309	1313.86	385.071	-610.874	1480.64	464.612	-604.232	1287.82	474.99	-609.867	1131.38	476.131	-719.717	992.768	417.139	-763.531	915.494	481.451	-732.358	895.389	466.824	-799.593	864.854
608	0	223.901	-774.865	1668.86	137.887	-758.466	1661.2	245.796	-579.324	1678.36	134.09	-582.772	1668.18	197.224	-545.121	1526.38	210.138	-470.285	1261.77	205.663	-691.087	1439.95	192.806	-759.011	1238.57	127.154	-464.243	1317.42	385.334	-623.452	1484.06	464.391	-615.281	1290.97	474.775	-620.535	1134.9	475.871	-727.966	994.515	417.547	-769.638	915.583	481.819	-738.597	896.187	467.049	-804.526	863.187
609	0	223.94	-787.973	1671.8	137.961	-771.515	1664.56	246.086	-592.421	1682.06	134.27	-595.929	1671.6	197.308	-558.009	1529.9	209.45	-482.962	1265.52	205.779	-703.836	1443.27	193.107	-771.536	1241.61	126.831	-476.943	1321.04	385.339	-635.93	1487.21	464.007	-626.368	1293.85	474.393	-630.883	1138.19	476.191	-735.841	996.192	417.807	-775.844	915.948	483.055	-744.637	897.949	466.967	-809.402	861.993
610	0	223.904	-801.508	1675.07	138.091	-784.356	1667.58	246.425	-605.412	1685.64	134.745	-608.844	1675.15	197.827	-571.105	1533.65	208.708	-495.587	1268.96	205.957	-716.688	1446.57	193.314	-784.048	1244.63	126.539	-489.828	1324.62	385.432	-648.411	1490.44	464.079	-637.331	1297.01	474.028	-641.043	1141.62	476.102	-743.562	997.646	417.886	-781.946	916.683	484.064	-750.744	899.758	466.831	-814.661	861.23
611	0	224.211	-814.441	1678.11	138.494	-797.155	1670.71	246.835	-618.24	1688.99	135.06	-621.673	1678.7	197.579	-583.566	1536.86	207.963	-508.23	1272.32	205.958	-729.137	1449.98	193.574	-796.518	1247.73	126.23	-502.611	1327.95	385.579	-660.856	1493.51	464.104	-648.196	1300.04	473.915	-650.696	1144.95	476.371	-751.04	999.419	418.233	-787.901	917.5	484.745	-756.643	901.473	466.599	-818.672	859.708
612	0	224.719	-827.26	1681.25	138.979	-809.973	1674.11	247.203	-630.954	1691.78	135.437	-634.404	1681.82	197.796	-596.22	1539.8	207.242	-520.903	1275.33	206.476	-741.884	1453.25	193.647	-809.077	1251.01	125.917	-515.41	1331.24	385.794	-673.214	1496.68	464.325	-658.889	1303.21	473.786	-660.209	1148.09	476.889	-758.471	1001.75	418.693	-793.859	918.677	485.686	-762.276	903.378	467.107	-823.155	859.567
613	0	225.213	-840.041	1684.17	139.486	-822.653	1677.17	247.624	-643.672	1694.83	135.979	-647.085	1685.17	197.969	-608.897	1542.97	206.593	-533.521	1278.1	206.615	-754.541	1456.36	193.498	-821.609	1254.12	125.503	-528.251	1334.25	385.865	-685.558	1499.49	464.58	-669.692	1306.07	473.657	-669.594	1150.99	477.208	-765.865	1003.52	419.622	-799.776	919.825	486.463	-768.591	905.039	467.192	-827.88	859.519
614	0	225.932	-852.725	1686.89	140.065	-835.274	1679.93	248.424	-656.277	1697.99	136.605	-659.794	1688.1	198.13	-621.504	1545.73	205.845	-546.144	1280.7	206.869	-767.141	1459.37	193.368	-834.199	1256.98	125.114	-541.017	1337.24	385.993	-697.839	1502.18	464.725	-680.367	1308.77	473.504	-678.778	1153.86	477.608	-773.089	1005.26	419.615	-806.051	921.007	487.286	-774.364	907.085	467.628	-832.369	859.35
615	0	226.604	-865.312	1689.62	140.807	-847.938	1682.81	248.968	-668.825	1700.45	137.345	-672.396	1691.08	198.487	-634.063	1548.72	205.488	-558.628	1283.78	207.251	-779.594	1462.28	193.363	-846.572	1259.82	124.806	-553.85	1340.15	386.489	-709.955	1504.81	465.225	-690.916	1311.52	473.548	-687.664	1156.64	478.123	-780.174	1007.06	420.229	-812.277	922.397	488.057	-780.463	908.834	468.172	-837.425	859.832
616	0	227.435	-877.983	1692.07	141.541	-860.528	1685.62	249.481	-681.39	1702.7	138.006	-685.034	1693.77	198.878	-646.723	1550.97	205.163	-571.252	1286.87	207.554	-792.101	1464.79	193.313	-859.097	1262.39	124.5	-566.668	1343.03	386.706	-722.23	1507.22	465.496	-701.432	1314.01	473.674	-696.475	1159.45	478.589	-787.392	1008.75	420.78	-818.74	923.707	488.105	-786.198	910.661	468.704	-842.714	860.614
617	0	228.176	-890.635	1694.17	142.434	-873.209	1687.66	250.304	-693.843	1705.18	138.73	-697.712	1696.21	199.3	-659.552	1553.86	204.503	-583.846	1288.96	207.888	-804.633	1467.06	193.298	-871.529	1264.6	124.179	-579.462	1345.57	386.921	-734.538	1509.17	465.78	-712.032	1316.25	473.913	-705.166	1161.83	479.062	-794.611	1010.19	421.347	-825.34	924.787	488.49	-792.389	912.043	469.313	-848.093	861.009
618	0	229.266	-903.125	1696.16	143.375	-885.778	1690.12	251.187	-706.343	1707.15	139.581	-710.43	1698.3	199.413	-672.125	1555.59	204.223	-596.411	1291.13	208.255	-817.188	1469.23	193.452	-883.937	1266.66	123.847	-592.335	1347.86	387.367	-746.804	1511.16	466.201	-722.227	1318.38	473.629	-713.917	1163.59	479.701	-801.718	1011.57	422.204	-831.988	925.74	489.437	-798.739	913.488	470.196	-853.642	861.76
619	0	230.26	-915.758	1697.91	144.237	-898.429	1691.79	251.74	-718.873	1708.37	140.311	-723.035	1700.11	199.513	-684.818	1557.23	203.855	-609.17	1293.25	208.705	-829.749	1471.03	193.832	-896.037	1268.29	123.653	-605.101	1349.91	387.841	-758.973	1512.67	466.669	-732.463	1320.15	474.109	-722.56	1165.65	480.132	-808.859	1012.71	423.083	-838.76	926.887	490.046	-804.484	914.48	471.309	-859.133	862.303
620	0	231.044	-928.509	1699.22	145.274	-911.092	1693.37	252.711	-731.395	1709.91	140.966	-735.759	1701.42	200.064	-697.582	1558.89	203.379	-621.819	1294.37	209.111	-842.421	1472.24	193.82	-908.761	1269.62	123.366	-617.897	1351.49	388.125	-771.308	1513.68	467.007	-742.764	1321.47	474.293	-730.975	1167.32	480.755	-816.142	1013.55	423.688	-845.831	927.345	490.488	-810.657	915.345	472.125	-865.195	862.54
[truncated: 69 more columns]

## Sheet: Sheet2
Devices
		025370 - Force			025370 - Moment			025370 - CoP			027571 - Force			027571 - Moment			027571 - CoP			037720 - Force			037720 - Moment			037720 - CoP
Frame	Sub Frame	Fx	Fy	Fz	Mx	My	Mz	Cx	Cy	Cz	Fx	Fy	Fz	Mx	My	Mz	Cx	Cy	Cz	Fx	Fy	Fz	Mx	My	Mz	Cx	Cy	Cz
		N	N	N	N.mm	N.mm	N.mm	mm	mm	mm	N	N	N	N.mm	N.mm	N.mm	mm	mm	mm	N	N	N	N.mm	N.mm	N.mm	mm	mm	mm
369	0	0	0	0	0	0	0	200	300	0	0	0	0	0	0	0	200	903	0	0	0	0	0	0	0	603	903	0
369	1	0	0	0	0	0	0	200	300	0	0	0	0	0	0	0	200	903	0	0	0	0	0	0	0	603	903	0
369	2	0	0	0	0	0	0	200	300	0	0	0	0	0	0	0	200	903	0	0	0	0	0	0	0	603	903	0
369	3	0	0	0	0	0	0	200	300	0	0	0	0	0	0	0	200	903	0	0	0	0	0	0	0	603	903	0
369	4	0	0	0	0	0	0	200	300	0	0	0	0	0	0	0	200	903	0	0	0	0	0	0	0	603	903	0
369	5	0	0	0	0	0	0	200	300	0	0	0	0	0	0	0	200	903	0	0	0	0	0	0	0	603	903	0
369	6	0	0	0	0	0	0	200	300	0	0	0	0	0	0	0	200	903	0	0	0	0	0	0	0	603	903	0
369	7	0	0	0	0	0	0	200	300	0	0	0	0	0	0	0	200	903	0	0	0	0	0	0	0	603	903	0
369	8	0	0	0	0	0	0	200	300	0	0	0	0	0	0	0	200	903	0	0	0	0	0	0	0	603	903	0
369	9	0	0	0	0	0	0	200	300	0	0	0	0	0	0	0	200	903	0	0	0	0	0	0	0	603	903	0
370	0	0	0	0	0	0	0	200	300	0	0	0	0	0	0	0	200	903	0	0	0	0	0	0	0	603	903	0
370	1	0	0	0	0	0	0	200	300	0	0	0	0	0	0	0	200	903	0	0	0	0	0	0	0	603	903	0
370	2	0	0	0	0	0	0	200	300	0	0	0	0	0	0	0	200	903	0	0	0	0	0	0	0	603	903	0
370	3	0	0	0	0	0	0	200	300	0	0	0	0	0	0	0	200	903	0	0	0	0	0	0	0	603	903	0
370	4	0	0	0	0	0	0	200	300	0	0	0	0	0	0	0	200	903	0	0	0	0	0	0	0	603	903	0
370	5	0	0	0	0	0	0	200	300	0	0	0	0	0	0	0	200	903	0	0	0	0	0	0	0	603	903	0
370	6	0	0	0	0	0	0	200	300	0	0	0	0	0	0	0	200	903	0	0	0	0	0	0	0	603	903	0
370	7	0	0	0	0	0	0	200	300	0	0	0	0	0	0	0	200	903	0	0	0	0	0	0	0	603	903	0
370	8	0	0	0	0	0	0	200	300	0	0	0	0	0	0	0	200	903	0	0	0	0	0	0	0	603	903	0
370	9	0	0	0	0	0	0	200	300	0	0	0	0	0	0	0	200	903	0	0	0	0	0	0	0	603	903	0
371	0	0	0	0	0	0	0	200	300	0	0	0	0	0	0	0	200	903	0	0	0	0	0	0	0	603	903	0
371	1	0	0	0	0	0	0	200	300	0	0	0	0	0	0	0	200	903	0	0	0	0	0	0	0	603	903	0
371	2	0	0	0	0	0	0	200	300	0	0	0	0	0	0	0	200	903	0	0	0	0	0	0	0	603	903	0
371	3	0	0	0	0	0	0	200	300	0	0	0	0	0	0	0	200	903	0	0	0	0	0	0	0	603	903	0
371	4	0	0	0	0	0	0	200	300	0	0	0	0	0	0	0	200	903	0	0	0	0	0	0	0	603	903	0
371	5	0	0	0	0	0	0	200	300	0	0	0	0	0	0	0	200	903	0	0	0	0	0	0	0	603	903	0
371	6	0	0	0	0	0	0	200	300	0	0	0	0	0	0	0	200	903	0	0	0	0	0	0	0	603	903	0
371	7	0	0	0	0	0	0	200	300	0	0	0	0	0	0	0	200	903	0	0	0	0	0	0	0	603	903	0
371	8	0	0	0	0	0	0	200	300	0	0	0	0	0	0	0	200	903	0	0	0	0	0	0	0	603	903	0
371	9	0	0	0	0	0	0	200	300	0	0	0	0	0	0	0	200	903	0	0	0	0	0	0	0	603	903	0
372	0	0	0	0	0	0	0	200	300	0	0	0	0	0	0	0	200	903	0	0	0	0	0	0	0	603	903	0
372	1	0	0	0	0	0	0	200	300	0	0	0	0	0	0	0	200	903	0	0	0	0	0	0	0	603	903	0
372	2	0	0	0	0	0	0	200	300	0	0	0	0	0	0	0	200	903	0	0	0	0	0	0	0	603	903	0
372	3	0	0	0	0	0	0	200	300	0	0	0	0	0	0	0	200	903	0	0	0	0	0	0	0	603	903	0
372	4	0	0	0	0	0	0	200	300	0	0	0	0	0	0	0	200	903	0	0	0	0	0	0	0	603	903	0
372	5	0	0	0	0	0	0	200	300	0	0	0	0	0	0	0	200	903	0	0	0	0	0	0	0	603	903	0
372	6	0	0	0	0	0	0	200	300	0	0	0	0	0	0	0	200	903	0	0	0	0	0	0	0	603	903	0
372	7	0	0	0	0	0	0	200	300	0	0	0	0	0	0	0	200	903	0	0	0	0	0	0	0	603	903	0
372	8	0	0	0	0	0	0	200	300	0	0	0	0	0	0	0	200	903	0	0	0	0	0	0	0	603	903	0
372	9	0	0	0	0	0	0	200	300	0	0	0	0	0	0	0	200	903	0	0	0	0	0	0	0	603	903	0
373	0	0	0	0	0	0	0	200	300	0	0	0	0	0	0	0	200	903	0	0	0	0	0	0	0	603	903	0
373	1	0	0	0	0	0	0	200	300	0	0	0	0	0	0	0	200	903	0	0	0	0	0	0	0	603	903	0
373	2	0	0	0	0	0	0	200	300	0	0	0	0	0	0	0	200	903	0	0	0	0	0	0	0	603	903	0
373	3	0	0	0	0	0	0	200	300	0	0	0	0	0	0	0	200	903	0	0	0	0	0	0	0	603	903	0
373	4	0	0	0	0	0	0	200	300	0	0	0	0	0	0	0	200	903	0	0	0	0	0	0	0	603	903	0
373	5	0	0	0	0	0	0	200	300	0	0	0	0	0	0	0	200	903	0	0	0	0	0	0	0	603	903	0
373	6	0	0	0	0	0	0	200	300	0	0	0	0	0	0	0	200	903	0	0	0	0	0	0	0	603	903	0
373	7	0	0	0	0	0	0	200	300	0	0	0	0	0	0	0	200	903	0	0	0	0	0	0	0	603	903	0
373	8	0	0	0	0	0	0	200	300	0	0	0	0	0	0	0	200	903	0	0	0	0	0	0	0	603	903	0
373	9	0	0	0	0	0	0	200	300	0	0	0	0	0	0	0	200	903	0	0	0	0	0	0	0	603	903	0
374	0	0	0	0	0	0	0	200	300	0	0	0	0	0	0	0	200	903	0	0	0	0	0	0	0	603	903	0
374	1	0	0	0	0	0	0	200	300	0	0	0	0	0	0	0	200	903	0	0	0	0	0	0	0	603	903	0
374	2	0	0	0	0	0	0	200	300	0	0	0	0	0	0	0	200	903	0	0	0	0	0	0	0	603	903	0
374	3	0	0	0	0	0	0	200	300	0	0	0	0	0	0	0	200	903	0	0	0	0	0	0	0	603	903	0
374	4	0	0	0	0	0	0	200	300	0	0	0	0	0	0	0	200	903	0	0	0	0	0	0	0	603	903	0
374	5	0	0	0	0	0	0	200	300	0	0	0	0	0	0	0	200	903	0	0	0	0	0	0	0	603	903	0
374	6	0	0	0	0	0	0	200	300	0	0	0	0	0	0	0	200	903	0	0	0	0	0	0	0	603	903	0
374	7	0	0	0	0	0	0	200	300	0	0	0	0	0	0	0	200	903	0	0	0	0	0	0	0	603	903	0
374	8	0	0	0	0	0	0	200	300	0	0	0	0	0	0	0	200	903	0	0	0	0	0	0	0	603	903	0
374	9	0	0	0	0	0	0	200	300	0	0	0	0	0	0	0	200	903	0	0	0	0	0	0	0	603	903	0
375	0	0	0	0	0	0	0	200	300	0	0	0	0	0	0	0	200	903	0	0	0	0	0	0	0	603	903	0
375	1	0	0	0	0	0	0	200	300	0	0	0	0	0	0	0	200	903	0	0	0	0	0	0	0	603	903	0
375	2	0	0	0	0	0	0	200	300	0	0	0	0	0	0	0	200	903	0	0	0	0	0	0	0	603	903	0
375	3	0	0	0	0	0	0	200	300	0	0	0	0	0	0	0	200	903	0	0	0	0	0	0	0	603	903	0
375	4	0	0	0	0	0	0	200	300	0	0	0	0	0	0	0	200	903	0	0	0	0	0	0	0	603	903	0
375	5	0	0	0	0	0	0	200	300	0	0	0	0	0	0	0	200	903	0	0	0	0	0	0	0	603	903	0
375	6	0	0	0	0	0	0	200	300	0	0	0	0	0	0	0	200	903	0	0	0	0	0	0	0	603	903	0
375	7	0	0	0	0	0	0	200	300	0	0	0	0	0	0	0	200	903	0	0	0	0	0	0	0	603	903	0
375	8	0	0	0	0	0	0	200	300	0	0	0	0	0	0	0	200	903	0	0	0	0	0	0	0	603	903	0
375	9	0	0	0	0	0	0	200	300	0	0	0	0	0	0	0	200	903	0	0	0	0	0	0	0	603	903	0
376	0	0	0	0	0	0	0	200	300	0	0	0	0	0	0	0	200	903	0	0	0	0	0	0	0	603	903	0
376	1	0	0	0	0	0	0	200	300	0	0	0	0	0	0	0	200	903	0	0	0	0	0	0	0	603	903	0
376	2	0	0	0	0	0	0	200	300	0	0	0	0	0	0	0	200	903	0	0	0	0	0	0	0	603	903	0
376	3	0	0	0	0	0	0	200	300	0	0	0	0	0	0	0	200	903	0	0	0	0	0	0	0	603	903	0
376	4	0	0	0	0	0	0	200	300	0	0	0	0	0	0	0	200	903	0	0	0	0	0	0	0	603	903	0
376	5	0	0	0	0	0	0	200	300	0	0	0	0	0	0	0	200	903	0	0	0	0	0	0	0	603	903	0
376	6	0	0	0	0	0	0	200	300	0	0	0	0	0	0	0	200	903	0	0	0	0	0	0	0	603	903	0
376	7	0	0	0	0	0	0	200	300	0	0	0	0	0	0	0	200	903	0	0	0	0	0	0	0	603	903	0
376	8	0	0	0	0	0	0	200	300	0	0	0	0	0	0	0	200	903	0	0	0	0	0	0	0	603	903	0
376	9	0	0	0	0	0	0	200	300	0	0	0	0	0	0	0	200	903	0	0	0	0	0	0	0	603	903	0
377	0	0	0	0	0	0	0	200	300	0	0	0	0	0	0	0	200	903	0	0	0	0	0	0	0	603	903	0
377	1	0	0	0	0	0	0	200	300	0	0	0	0	0	0	0	200	903	0	0	0	0	0	0	0	603	903	0
377	2	0	0	0	0	0	0	200	300	0	0	0	0	0	0	0	200	903	0	0	0	0	0	0	0	603	903	0
377	3	0	0	0	0	0	0	200	300	0	0	0	0	0	0	0	200	903	0	0	0	0	0	0	0	603	903	0
377	4	0	0	0	0	0	0	200	300	0	0	0	0	0	0	0	200	903	0	0	0	0	0	0	0	603	903	0
377	5	0	0	0	0	0	0	200	300	0	0	0	0	0	0	0	200	903	0	0	0	0	0	0	0	603	903	0
377	6	0	0	0	0	0	0	200	300	0	0	0	0	0	0	0	200	903	0	0	0	0	0	0	0	603	903	0
377	7	0	0	0	0	0	0	200	300	0	0	0	0	0	0	0	200	903	0	0	0	0	0	0	0	603	903	0
377	8	0	0	0	0	0	0	200	300	0	0	0	0	0	0	0	200	903	0	0	0	0	0	0	0	603	903	0
377	9	0	0	0	0	0	0	200	300	0	0	0	0	0	0	0	200	903	0	0	0	0	0	0	0	603	903	0
378	0	0	0	0	0	0	0	200	300	0	0	0	0	0	0	0	200	903	0	0	0	0	0	0	0	603	903	0
378	1	0	0	0	0	0	0	200	300	0	0	0	0	0	0	0	200	903	0	0	0	0	0	0	0	603	903	0
378	2	0	0	0	0	0	0	200	300	0	0	0	0	0	0	0	200	903	0	0	0	0	0	0	0	603	903	0
378	3	0	0	0	0	0	0	200	300	0	0	0	0	0	0	0	200	903	0	0	0	0	0	0	0	603	903	0
378	4	0	0	0	0	0	0	200	300	0	0	0	0	0	0	0	200	903	0	0	0	0	0	0	0	603	903	0
378	5	0	0	0	0	0	0	200	300	0	0	0	0	0	0	0	200	903	0	0	0	0	0	0	0	603	903	0
378	6	0	0	0	0	0	0	200	300	0	0	0	0	0	0	0	200	903	0	0	0	0	0	0	0	603	903	0
378	7	0	0	0	0	0	0	200	300	0	0	0	0	0	0	0	200	903	0	0	0	0	0	0	0	603	903	0
378	8	0	0	0	0	0	0	200	300	0	0	0	0	0	0	0	200	903	0	0	0	0	0	0	0	603	903	0
378	9	0	0	0	0	0	0	200	300	0	0	0	0	0	0	0	200	903	0	0	0	0	0	0	0	603	903	0
379	0	0	0	0	0	0	0	200	300	0	0	0	0	0	0	0	200	903	0	0	0	0	0	0	0	603	903	0
379	1	0	0	0	0	0	0	200	300	0	0	0	0	0	0	0	200	903	0	0	0	0	0	0	0	603	903	0
379	2	0	0	0	0	0	0	200	300	0	0	0	0	0	0	0	200	903	0	0	0	0	0	0	0	603	903	0
379	3	0	0	0	0	0	0	200	300	0	0	0	0	0	0	0	200	903	0	0	0	0	0	0	0	603	903	0
379	4	0	0	0	0	0	0	200	300	0	0	0	0	0	0	0	200	903	0	0	0	0	0	0	0	603	903	0
379	5	0	0	0	0	0	0	200	300	0	0	0	0	0	0	0	200	903	0	0	0	0	0	0	0	603	903	0
379	6	0	0	0	0	0	0	200	300	0	0	0	0	0	0	0	200	903	0	0	0	0	0	0	0	603	903	0
379	7	0	0	0	0	0	0	200	300	0	0	0	0	0	0	0	200	903	0	0	0	0	0	0	0	603	903	0
379	8	0	0	0	0	0	0	200	300	0	0	0	0	0	0	0	200	903	0	0	0	0	0	0	0	603	903	0
379	9	0	0	0	0	0	0	200	300	0	0	0	0	0	0	0	200	903	0	0	0	0	0	0	0	603	903	0
380	0	0	0	0	0	0	0	200	300	0	0	0	0	0	0	0	200	903	0	0	0	0	0	0	0	603	903	0
380	1	0	0	0	0	0	0	200	300	0	0	0	0	0	0	0	200	903	0	0	0	0	0	0	0	603	903	0
380	2	0	0	0	0	0	0	200	300	0	0	0	0	0	0	0	200	903	0	0	0	0	0	0	0	603	903	0
380	3	0	0	0	0	0	0	200	300	0	0	0	0	0	0	0	200	903	0	0	0	0	0	0	0	603	903	0
380	4	0	0	0	0	0	0	200	300	0	0	0	0	0	0	0	200	903	0	0	0	0	0	0	0	603	903	0
380	5	0	0	0	0	0	0	200	300	0	0	0	0	0	0	0	200	903	0	0	0	0	0	0	0	603	903	0
380	6	0	0	0	0	0	0	200	300	0	0	0	0	0	0	0	200	903	0	0	0	0	0	0	0	603	903	0
380	7	0	0	0	0	0	0	200	300	0	0	0	0	0	0	0	200	903	0	0	0	0	0	0	0	603	903	0
380	8	0	0	0	0	0	0	200	300	0	0	0	0	0	0	0	200	903	0	0	0	0	0	0	0	603	903	0
380	9	0	0	0	0	0	0	200	300	0	0	0	0	0	0	0	200	903	0	0	0	0	0	0	0	603	903	0
381	0	0	0	0	0	0	0	200	300	0	0	0	0	0	0	0	200	903	0	0	0	0	0	0	0	603	903	0
381	1	0	0	0	0	0	0	200	300	0	0	0	0	0	0	0	200	903	0	0	0	0	0	0	0	603	903	0
381	2	0	0	0	0	0	0	200	300	0	0	0	0	0	0	0	200	903	0	0	0	0	0	0	0	603	903	0
381	3	0	0	0	0	0	0	200	300	0	0	0	0	0	0	0	200	903	0	0	0	0	0	0	0	603	903	0
381	4	0	0	0	0	0	0	200	300	0	0	0	0	0	0	0	200	903	0	0	0	0	0	0	0	603	903	0
381	5	0	0	0	0	0	0	200	300	0	0	0	0	0	0	0	200	903	0	0	0	0	0	0	0	603	903	0
381	6	0	0	0	0	0	0	200	300	0	0	0	0	0	0	0	200	903	0	0	0	0	0	0	0	603	903	0
381	7	0	0	0	0	0	0	200	300	0	0	0	0	0	0	0	200	903	0	0	0	0	0	0	0	603	903	0
381	8	0	0	0	0	0	0	200	300	0	0	0	0	0	0	0	200	903	0	0	0	0	0	0	0	603	903	0
381	9	0	0	0	0	0	0	200	300	0	0	0	0	0	0	0	200	903	0	0	0	0	0	0	0	603	903	0
382	0	0	0	0	0	0	0	200	300	0	0	0	0	0	0	0	200	903	0	0	0	0	0	0	0	603	903	0
382	1	0	0	0	0	0	0	200	300	0	0	0	0	0	0	0	200	903	0	0	0	0	0	0	0	603	903	0
382	2	0	0	0	0	0	0	200	300	0	0	0	0	0	0	0	200	903	0	0	0	0	0	0	0	603	903	0
382	3	0	0	0	0	0	0	200	300	0	0	0	0	0	0	0	200	903	0	0	0	0	0	0	0	603	903	0
382	4	0	0	0	0	0	0	200	300	0	0	0	0	0	0	0	200	903	0	0	0	0	0	0	0	603	903	0
382	5	0	0	0	0	0	0	200	300	0	0	0	0	0	0	0	200	903	0	0	0	0	0	0	0	603	903	0
382	6	0	0	0	0	0	0	200	300	0	0	0	0	0	0	0	200	903	0	0	0	0	0	0	0	603	903	0
382	7	0	0	0	0	0	0	200	300	0	0	0	0	0	0	0	200	903	0	0	0	0	0	0	0	603	903	0
382	8	0	0	0	0	0	0	200	300	0	0	0	0	0	0	0	200	903	0	0	0	0	0	0	0	603	903	0
382	9	0	0	0	0	0	0	200	300	0	0	0	0	0	0	0	200	903	0	0	0	0	0	0	0	603	903	0
383	0	0	0	0	0	0	0	200	300	0	0	0	0	0	0	0	200	903	0	0	0	0	0	0	0	603	903	0
383	1	0	0	0	0	0	0	200	300	0	0	0	0	0	0	0	200	903	0	0	0	0	0	0	0	603	903	0
383	2	0	0	0	0	0	0	200	300	0	0	0	0	0	0	0	200	903	0	0	0	0	0	0	0	603	903	0
383	3	0	0	0	0	0	0	200	300	0	0	0	0	0	0	0	200	903	0	0	0	0	0	0	0	603	903	0
383	4	0	0	0	0	0	0	200	300	0	0	0	0	0	0	0	200	903	0	0	0	0	0	0	0	603	903	0
383	5	0	0	0	0	0	0	200	300	0	0	0	0	0	0	0	200	903	0	0	0	0	0	0	0	603	903	0
383	6	0	0	0	0	0	0	200	300	0	0	0	0	0	0	0	200	903	0	0	0	0	0	0	0	603	903	0
383	7	0	0	0	0	0	0	200	300	0	0	0	0	0	0	0	200	903	0	0	0	0	0	0	0	603	903	0
383	8	0	0	0	0	0	0	200	300	0	0	0	0	0	0	0	200	903	0	0	0	0	0	0	0	603	903	0
383	9	0	0	0	0	0	0	200	300	0	0	0	0	0	0	0	200	903	0	0	0	0	0	0	0	603	903	0
384	0	0	0	0	0	0	0	200	300	0	0	0	0	0	0	0	200	903	0	0	0	0	0	0	0	603	903	0
384	1	0	0	0	0	0	0	200	300	0	0	0	0	0	0	0	200	903	0	0	0	0	0	0	0	603	903	0
384	2	0	0	0	0	0	0	200	300	0	0	0	0	0	0	0	200	903	0	0	0	0	0	0	0	603	903	0
384	3	0	0	0	0	0	0	200	300	0	0	0	0	0	0	0	200	903	0	0	0	0	0	0	0	603	903	0
384	4	0	0	0	0	0	0	200	300	0	0	0	0	0	0	0	200	903	0	0	0	0	0	0	0	603	903	0
384	5	0	0	0	0	0	0	200	300	0	0	0	0	0	0	0	200	903	0	0	0	0	0	0	0	603	903	0
384	6	0	0	0	0	0	0	200	300	0	0	0	0	0	0	0	200	903	0	0	0	0	0	0	0	603	903	0
384	7	0	0	0	0	0	0	200	300	0	0	0	0	0	0	0	200	903	0	0	0	0	0	0	0	603	903	0
384	8	0	0	0	0	0	0	200	300	0	0	0	0	0	0	0	200	903	0	0	0	0	0	0	0	603	903	0
384	9	0	0	0	0	0	0	200	300	0	0	0	0	0	0	0	200	903	0	0	0	0	0	0	0	603	903	0
385	0	0	0	0	0	0	0	200	300	0	0	0	0	0	0	0	200	903	0	0	0	0	0	0	0	603	903	0
385	1	0	0	0	0	0	0	200	300	0	0	0	0	0	0	0	200	903	0	0	0	0	0	0	0	603	903	0
385	2	0	0	0	0	0	0	200	300	0	0	0	0	0	0	0	200	903	0	0	0	0	0	0	0	603	903	0
385	3	0	0	0	0	0	0	200	300	0	0	0	0	0	0	0	200	903	0	0	0	0	0	0	0	603	903	0
385	4	0	0	0	0	0	0	200	300	0	0	0	0	0	0	0	200	903	0	0	0	0	0	0	0	603	903	0
385	5	0	0	0	0	0	0	200	300	0	0	0	0	0	0	0	200	903	0	0	0	0	0	0	0	603	903	0
385	6	0	0	0	0	0	0	200	300	0	0	0	0	0	0	0	200	903	0	0	0	0	0	0	0	603	903	0
385	7	0	0	0	0	0	0	200	300	0	0	0	0	0	0	0	200	903	0	0	0	0	0	0	0	603	903	0
385	8	0	0	0	0	0	0	200	300	0	0	0	0	0	0	0	200	903	0	0	0	0	0	0	0	603	903	0
385	9	0	0	0	0	0	0	200	300	0	0	0	0	0	0	0	200	903	0	0	0	0	0	0	0	603	903	0
386	0	0	0	0	0	0	0	200	300	0	0	0	0	0	0	0	200	903	0	0	0	0	0	0	0	603	903	0
386	1	0	0	0	0	0	0	200	300	0	0	0	0	0	0	0	200	903	0	0	0	0	0	0	0	603	903	0
386	2	0	0	0	0	0	0	200	300	0	0	0	0	0	0	0	200	903	0	0	0	0	0	0	0	603	903	0
386	3	0	0	0	0	0	0	200	300	0	0	0	0	0	0	0	200	903	0	0	0	0	0	0	0	603	903	0
386	4	0	0	0	0	0	0	200	300	0	0	0	0	0	0	0	200	903	0	0	0	0	0	0	0	603	903	0
386	5	0	0	0	0	0	0	200	300	0	0	0	0	0	0	0	200	903	0	0	0	0	0	0	0	603	903	0
386	6	0	0	0	0	0	0	200	300	0	0	0	0	0	0	0	200	903	0	0	0	0	0	0	0	603	903	0
386	7	0	0	0	0	0	0	200	300	0	0	0	0	0	0	0	200	903	0	0	0	0	0	0	0	603	903	0
386	8	0	0	0	0	0	0	200	300	0	0	0	0	0	0	0	200	903	0	0	0	0	0	0	0	603	903	0
386	9	0	0	0	0	0	0	200	300	0	0	0	0	0	0	0	200	903	0	0	0	0	0	0	0	603	903	0
387	0	0	0	0	0	0	0	200	300	0	0	0	0	0	0	0	200	903	0	0	0	0	0	0	0	603	903	0
387	1	0	0	0	0	0	0	200	300	0	0	0	0	0	0	0	200	903	0	0	0	0	0	0	0	603	903	0
387	2	0	0	0	0	0	0	200	300	0	0	0	0	0	0	0	200	903	0	0	0	0	0	0	0	603	903	0
387	3	0	0	0	0	0	0	200	300	0	0	0	0	0	0	0	200	903	0	0	0	0	0	0	0	603	903	0
387	4	0	0	0	0	0	0	200	300	0	0	0	0	0	0	0	200	903	0	0	0	0	0	0	0	603	903	0
387	5	0	0	0	0	0	0	200	300	0	0	0	0	0	0	0	200	903	0	0	0	0	0	0	0	603	903	0
387	6	0	0	0	0	0	0	200	300	0	0	0	0	0	0	0	200	903	0	0	0	0	0	0	0	603	903	0
387	7	0	0	0	0	0	0	200	300	0	0	0	0	0	0	0	200	903	0	0	0	0	0	0	0	603	903	0
387	8	0	0	0	0	0	0	200	300	0	0	0	0	0	0	0	200	903	0	0	0	0	0	0	0	603	903	0
387	9	0	0	0	0	0	0	200	300	0	0	0	0	0	0	0	200	903	0	0	0	0	0	0	0	603	903	0
388	0	0	0	0	0	0	0	200	300	0	0	0	0	0	0	0	200	903	0	0	0	0	0	0	0	603	903	0
388	1	0	0	0	0	0	0	200	300	0	0	0	0	0	0	0	200	903	0	0	0	0	0	0	0	603	903	0
388	2	0	0	0	0	0	0	200	300	0	0	0	0	0	0	0	200	903	0	0	0	0	0	0	0	603	903	0
388	3	0	0	0	0	0	0	200	300	0	0	0	0	0	0	0	200	903	0	0	0	0	0	0	0	603	903	0
388	4	0	0	0	0	0	0	200	300	0	0	0	0	0	0	0	200	903	0	0	0	0	0	0	0	603	903	0
388	5	0	0	0	0	0	0	200	300	0	0	0	0	0	0	0	200	903	0	0	0	0	0	0	0	603	903	0
388	6	0	0	0	0	0	0	200	300	0	0	0	0	0	0	0	200	903	0	0	0	0	0	0	0	603	903	0
388	7	0	0	0	0	0	0	200	300	0	0	0	0	0	0	0	200	903	0	0	0	0	0	0	0	603	903	0
388	8	0	0	0	0	0	0	200	300	0	0	0	0	0	0	0	200	903	0	0	0	0	0	0	0	603	903	0
388	9	0	0	0	0	0	0	200	300	0	0	0	0	0	0	0	200	903	0	0	0	0	0	0	0	603	903	0
389	0	0	0	0	0	0	0	200	300	0	0	0	0	0	0	0	200	903	0	0	0	0	0	0	0	603	903	0
389	1	0	0	0	0	0	0	200	300	0	0	0	0	0	0	0	200	903	0	0	0	0	0	0	0	603	903	0
389	2	0	0	0	0	0	0	200	300	0	0	0	0	0	0	0	200	903	0	0	0	0	0	0	0	603	903	0
389	3	0	0	0	0	0	0	200	300	0	0	0	0	0	0	0	200	903	0	0	0	0	0	0	0	603	903	0
389	4	0	0	0	0	0	0	200	300	0	0	0	0	0	0	0	200	903	0	0	0	0	0	0	0	603	903	0
389	5	0	0	0	0	0	0	200	300	0	0	0	0	0	0	0	200	903	0	0	0	0	0	0	0	603	903	0
389	6	0	0	0	0	0	0	200	300	0	0	0	0	0	0	0	200	903	0	0	0	0	0	0	0	603	903	0
389	7	0	0	0	0	0	0	200	300	0	0	0	0	0	0	0	200	903	0	0	0	0	0	0	0	603	903	0
389	8	0	0	0	0	0	0	200	300	0	0	0	0	0	0	0	200	903	0	0	0	0	0	0	0	603	903	0
389	9	0	0	0	0	0	0	200	300	0	0	0	0	0	0	0	200	903	0	0	0	0	0	0	0	603	903	0
390	0	0	0	0	0	0	0	200	300	0	0	0	0	0	0	0	200	903	0	0	0	0	0	0	0	603	903	0
390	1	0	0	0	0	0	0	200	300	0	0	0	0	0	0	0	200	903	0	0	0	0	0	0	0	603	903	0
390	2	0	0	0	0	0	0	200	300	0	0	0	0	0	0	0	200	903	0	0	0	0	0	0	0	603	903	0
390	3	0	0	0	0	0	0	200	300	0	0	0	0	0	0	0	200	903	0	0	0	0	0	0	0	603	903	0
390	4	0	0	0	0	0	0	200	300	0	0	0	0	0	0	0	200	903	0	0	0	0	0	0	0	603	903	0
390	5	0	0	0	0	0	0	200	300	0	0	0	0	0	0	0	200	903	0	0	0	0	0	0	0	603	903	0
390	6	0	0	0	0	0	0	200	300	0	0	0	0	0	0	0	200	903	0	0	0	0	0	0	0	603	903	0
390	7	0	0	0	0	0	0	200	300	0	0	0	0	0	0	0	200	903	0	0	0	0	0	0	0	603	903	0
390	8	0	0	0	0	0	0	200	300	0	0	0	0	0	0	0	200	903	0	0	0	0	0	0	0	603	903	0
390	9	0	0	0	0	0	0	200	300	0	0	0	0	0	0	0	200	903	0	0	0	0	0	0	0	603	903	0
391	0	0	0	0	0	0	0	200	300	0	0	0	0	0	0	0	200	903	0	0	0	0	0	0	0	603	903	0
391	1	0	0	0	0	0	0	200	300	0	0	0	0	0	0	0	200	903	0	0	0	0	0	0	0	603	903	0
391	2	0	0	0	0	0	0	200	300	0	0	0	0	0	0	0	200	903	0	0	0	0	0	0	0	603	903	0
391	3	0	0	0	0	0	0	200	300	0	0	0	0	0	0	0	200	903	0	0	0	0	0	0	0	603	903	0
391	4	0	0	0	0	0	0	200	300	0	0	0	0	0	0	0	200	903	0	0	0	0	0	0	0	603	903	0
391	5	0	0	0	0	0	0	200	300	0	0	0	0	0	0	0	200	903	0	0	0	0	0	0	0	603	903	0
391	6	0	0	0	0	0	0	200	300	0	0	0	0	0	0	0	200	903	0	0	0	0	0	0	0	603	903	0
391	7	0	0	0	0	0	0	200	300	0	0	0	0	0	0	0	200	903	0	0	0	0	0	0	0	603	903	0
391	8	0	0	0	0	0	0	200	300	0	0	0	0	0	0	0	200	903	0	0	0	0	0	0	0	603	903	0
391	9	0	0	0	0	0	0	200	300	0	0	0	0	0	0	0	200	903	0	0	0	0	0	0	0	603	903	0
392	0	0	0	0	0	0	0	200	300	0	0	0	0	0	0	0	200	903	0	0	0	0	0	0	0	603	903	0
392	1	0	0	0	0	0	0	200	300	0	0	0	0	0	0	0	200	903	0	0	0	0	0	0	0	603	903	0
392	2	0	0	0	0	0	0	200	300	0	0	0	0	0	0	0	200	903	0	0	0	0	0	0	0	603	903	0
392	3	0	0	0	0	0	0	200	300	0	0	0	0	0	0	0	200	903	0	0	0	0	0	0	0	603	903	0
392	4	0	0	0	0	0	0	200	300	0	0	0	0	0	0	0	200	903	0	0	0	0	0	0	0	603	903	0
392	5	0	0	0	0	0	0	200	300	0	0	0	0	0	0	0	200	903	0	0	0	0	0	0	0	603	903	0
392	6	0	0	0	0	0	0	200	300	0	0	0	0	0	0	0	200	903	0	0	0	0	0	0	0	603	903	0
392	7	0	0	0	0	0	0	200	300	0	0	0	0	0	0	0	200	903	0	0	0	0	0	0	0	603	903	0
392	8	0	0	0	0	0	0	200	300	0	0	0	0	0	0	0	200	903	0	0	0	0	0	0	0	603	903	0
392	9	0	0	0	0	0	0	200	300	0	0	0	0	0	0	0	200	903	0	0	0	0	0	0	0	603	903	0
393	0	0	0	0	0	0	0	200	300	0	0	0	0	0	0	0	200	903	0	0	0	0	0	0	0	603	903	0
393	1	0	0	0	0	0	0	200	300	0	0	0	0	0	0	0	200	903	0	0	0	0	0	0	0	603	903	0
393	2	0	0	0	0	0	0	200	300	0	0	0	0	0	0	0	200	903	0	0	0	0	0	0	0	603	903	0
393	3	0	0	0	0	0	0	200	300	0	0	0	0	0	0	0	200	903	0	0	0	0	0	0	0	603	903	0
393	4	0	0	0	0	0	0	200	300	0	0	0	0	0	0	0	200	903	0	0	0	0	0	0	0	603	903	0
393	5	0	0	0	0	0	0	200	300	0	0	0	0	0	0	0	200	903	0	0	0	0	0	0	0	603	903	0
393	6	0	0	0	0	0	0	200	300	0	0	0	0	0	0	0	200	903	0	0	0	0	0	0	0	603	903	0
393	7	0	0	0	0	0	0	200	300	0	0	0	0	0	0	0	200	903	0	0	0	0	0	0	0	603	903	0
393	8	0	0	0	0	0	0	200	300	0	0	0	0	0	0	0	200	903	0	0	0	0	0	0	0	603	903	0
393	9	0	0	0	0	0	0	200	300	0	0	0	0	0	0	0	200	903	0	0	0	0	0	0	0	603	903	0
394	0	0	0	0	0	0	0	200	300	0	0	0	0	0	0	0	200	903	0	0	0	0	0	0	0	603	903	0
394	1	0	0	0	0	0	0	200	300	0	0	0	0	0	0	0	200	903	0	0	0	0	0	0	0	603	903	0
394	2	0	0	0	0	0	0	200	300	0	0	0	0	0	0	0	200	903	0	0	0	0	0	0	0	603	903	0
394	3	0	0	0	0	0	0	200	300	0	0	0	0	0	0	0	200	903	0	0	0	0	0	0	0	603	903	0
394	4	0	0	0	0	0	0	200	300	0	0	0	0	0	0	0	200	903	0	0	0	0	0	0	0	603	903	0
394	5	0	0	0	0	0	0	200	300	0	0	0	0	0	0	0	200	903	0	0	0	0	0	0	0	603	903	0
394	6	0	0	0	0	0	0	200	300	0	0	0	0	0	0	0	200	903	0	0	0	0	0	0	0	603	903	0
394	7	0	0	0	0	0	0	200	300	0	0	0	0	0	0	0	200	903	0	0	0	0	0	0	0	603	903	0
394	8	0	0	0	0	0	0	200	300	0	0	0	0	0	0	0	200	903	0	0	0	0	0	0	0	603	903	0
394	9	0	0	0	0	0	0	200	300	0	0	0	0	0	0	0	200	903	0	0	0	0	0	0	0	603	903	0
395	0	0	0	0	0	0	0	200	300	0	0	0	0	0	0	0	200	903	0	0	0	0	0	0	0	603	903	0
395	1	0	0	0	0	0	0	200	300	0	0	0	0	0	0	0	200	903	0	0	0	0	0	0	0	603	903	0
395	2	0	0	0	0	0	0	200	300	0	0	0	0	0	0	0	200	903	0	0	0	0	0	0	0	603	903	0
395	3	0	0	0	0	0	0	200	300	0	0	0	0	0	0	0	200	903	0	0	0	0	0	0	0	603	903	0
395	4	0	0	0	0	0	0	200	300	0	0	0	0	0	0	0	200	903	0	0	0	0	0	0	0	603	903	0
395	5	0	0	0	0	0	0	200	300	0	0	0	0	0	0	0	200	903	0	0	0	0	0	0	0	603	903	0
395	6	0	0	0	0	0	0	200	300	0	0	0	0	0	0	0	200	903	0	0	0	0	0	0	0	603	903	0
395	7	0	0	0	0	0	0	200	300	0	0	0	0	0	0	0	200	903	0	0	0	0	0	0	0	603	903	0
395	8	0	0	0	0	0	0	200	300	0	0	0	0	0	0	0	200	903	0	0	0	0	0	0	0	603	903	0
395	9	0	0	0	0	0	0	200	300	0	0	0	0	0	0	0	200	903	0	0	0	0	0	0	0	603	903	0
396	0	0	0	0	0	0	0	200	300	0	0	0	0	0	0	0	200	903	0	0	0	0	0	0	0	603	903	0
396	1	0	0	0	0	0	0	200	300	0	0	0	0	0	0	0	200	903	0	0	0	0	0	0	0	603	903	0
396	2	0	0	0	0	0	0	200	300	0	0	0	0	0	0	0	200	903	0	0	0	0	0	0	0	603	903	0
396	3	0	0	0	0	0	0	200	300	0	0	0	0	0	0	0	200	903	0	0	0	0	0	0	0	603	903	0
396	4	0	0	0	0	0	0	200	300	0	0	0	0	0	0	0	200	903	0	0	0	0	0	0	0	603	903	0
396	5	0	0	0	0	0	0	200	300	0	0	0	0	0	0	0	200	903	0	0	0	0	0	0	0	603	903	0
396	6	0	0	0	0	0	0	200	300	0	0	0	0	0	0	0	200	903	0	0	0	0	0	0	0	603	903	0
396	7	0	0	0	0	0	0	200	300	0	0	0	0	0	0	0	200	903	0	0	0	0	0	0	0	603	903	0
396	8	0	0	0	0	0	0	200	300	0	0	0	0	0	0	0	200	903	0	0	0	0	0	0	0	603	903	0
396	9	0	0	0	0	0	0	200	300	0	0	0	0	0	0	0	200	903	0	0	0	0	0	0	0	603	903	0
397	0	0	0	0	0	0	0	200	300	0	0	0	0	0	0	0	200	903	0	0	0	0	0	0	0	603	903	0
397	1	0	0	0	0	0	0	200	300	0	0	0	0	0	0	0	200	903	0	0	0	0	0	0	0	603	903	0
397	2	0	0	0	0	0	0	200	300	0	0	0	0	0	0	0	200	903	0	0	0	0	0	0	0	603	903	0
397	3	0	0	0	0	0	0	200	300	0	0	0	0	0	0	0	200	903	0	0	0	0	0	0	0	603	903	0
397	4	0	0	0	0	0	0	200	300	0	0	0	0	0	0	0	200	903	0	0	0	0	0	0	0	603	903	0
397	5	0	0	0	0	0	0	200	300	0	0	0	0	0	0	0	200	903	0	0	0	0	0	0	0	603	903	0
397	6	0	0	0	0	0	0	200	300	0	0	0	0	0	0	0	200	903	0	0	0	0	0	0	0	603	903	0
397	7	0	0	0	0	0	0	200	300	0	0	0	0	0	0	0	200	903	0	0	0	0	0	0	0	603	903	0
397	8	0	0	0	0	0	0	200	300	0	0	0	0	0	0	0	200	903	0	0	0	0	0	0	0	603	903	0
397	9	0	0	0	0	0	0	200	300	0	0	0	0	0	0	0	200	903	0	0	0	0	0	0	0	603	903	0
398	0	0	0	0	0	0	0	200	300	0	0	0	0	0	0	0	200	903	0	0	0	0	0	0	0	603	903	0
398	1	0	0	0	0	0	0	200	300	0	0	0	0	0	0	0	200	903	0	0	0	0	0	0	0	603	903	0
398	2	0	0	0	0	0	0	200	300	0	0	0	0	0	0	0	200	903	0	0	0	0	0	0	0	603	903	0
398	3	0	0	0	0	0	0	200	300	0	0	0	0	0	0	0	200	903	0	0	0	0	0	0	0	603	903	0
398	4	0	0	0	0	0	0	200	300	0	0	0	0	0	0	0	200	903	0	0	0	0	0	0	0	603	903	0
398	5	0	0	0	0	0	0	200	300	0	0	0	0	0	0	0	200	903	0	0	0	0	0	0	0	603	903	0
398	6	0	0	0	0	0	0	200	300	0	0	0	0	0	0	0	200	903	0	0	0	0	0	0	0	603	903	0
398	7	0	0	0	0	0	0	200	300	0	0	0	0	0	0	0	200	903	0	0	0	0	0	0	0	603	903	0
398	8	0	0	0	0	0	0	200	300	0	0	0	0	0	0	0	200	903	0	0	0	0	0	0	0	603	903	0
398	9	0	0	0	0	0	0	200	300	0	0	0	0	0	0	0	200	903	0	0	0	0	0	0	0	603	903	0
399	0	0	0	0	0	0	0	200	300	0	0	0	0	0	0	0	200	903	0	0	0	0	0	0	0	603	903	0
399	1	0	0	0	0	0	0	200	300	0	0	0	0	0	0	0	200	903	0	0	0	0	0	0	0	603	903	0
399	2	0	0	0	0	0	0	200	300	0	0	0	0	0	0	0	200	903	0	0	0	0	0	0	0	603	903	0
399	3	0	0	0	0	0	0	200	300	0	0	0	0	0	0	0	200	903	0	0	0	0	0	0	0	603	903	0
399	4	0	0	0	0	0	0	200	300	0	0	0	0	0	0	0	200	903	0	0	0	0	0	0	0	603	903	0
399	5	0	0	0	0	0	0	200	300	0	0	0	0	0	0	0	200	903	0	0	0	0	0	0	0	603	903	0
399	6	0	0	0	0	0	0	200	300	0	0	0	0	0	0	0	200	903	0	0	0	0	0	0	0	603	903	0
399	7	0	0	0	0	0	0	200	300	0	0	0	0	0	0	0	200	903	0	0	0	0	0	0	0	603	903	0
399	8	0	0	0	0	0	0	200	300	0	0	0	0	0	0	0	200	903	0	0	0	0	0	0	0	603	903	0
399	9	0	0	0	0	0	0	200	300	0	0	0	0	0	0	0	200	903	0	0	0	0	0	0	0	603	903	0
400	0	0	0	0	0	0	0	200	300	0	0	0	0	0	0	0	200	903	0	0	0	0	0	0	0	603	903	0
400	1	0	0	0	0	0	0	200	300	0	0	0	0	0	0	0	200	903	0	0	0	0	0	0	0	603	903	0
400	2	0	0	0	0	0	0	200	300	0	0	0	0	0	0	0	200	903	0	0	0	0	0	0	0	603	903	0
400	3	0	0	0	0	0	0	200	300	0	0	0	0	0	0	0	200	903	0	0	0	0	0	0	0	603	903	0
400	4	0	0	0	0	0	0	200	300	0	0	0	0	0	0	0	200	903	0	0	0	0	0	0	0	603	903	0
400	5	0	0	0	0	0	0	200	300	0	0	0	0	0	0	0	200	903	0	0	0	0	0	0	0	603	903	0
400	6	0	0	0	0	0	0	200	300	0	0	0	0	0	0	0	200	903	0	0	0	0	0	0	0	603	903	0
400	7	0	0	0	0	0	0	200	300	0	0	0	0	0	0	0	200	903	0	0	0	0	0	0	0	603	903	0
400	8	0	0	0	0	0	0	200	300	0	0	0	0	0	0	0	200	903	0	0	0	0	0	0	0	603	903	0
400	9	0	0	0	0	0	0	200	300	0	0	0	0	0	0	0	200	903	0	0	0	0	0	0	0	603	903	0
401	0	0	0	0	0	0	0	200	300	0	0	0	0	0	0	0	200	903	0	0	0	0	0	0	0	603	903	0
401	1	0	0	0	0	0	0	200	300	0	0	0	0	0	0	0	200	903	0	0	0	0	0	0	0	603	903	0
401	2	0	0	0	0	0	0	200	300	0	0	0	0	0	0	0	200	903	0	0	0	0	0	0	0	603	903	0
401	3	0	0	0	0	0	0	200	300	0	0	0	0	0	0	0	200	903	0	0	0	0	0	0	0	603	903	0
401	4	0	0	0	0	0	0	200	300	0	0	0	0	0	0	0	200	903	0	0	0	0	0	0	0	603	903	0
401	5	0	0	0	0	0	0	200	300	0	0	0	0	0	0	0	200	903	0	0	0	0	0	0	0	603	903	0
401	6	0	0	0	0	0	0	200	300	0	0	0	0	0	0	0	200	903	0	0	0	0	0	0	0	603	903	0
401	7	0	0	0	0	0	0	200	300	0	0	0	0	0	0	0	200	903	0	0	0	0	0	0	0	603	903	0
401	8	0	0	0	0	0	0	200	300	0	0	0	0	0	0	0	200	903	0	0	0	0	0	0	0	603	903	0
401	9	0	0	0	0	0	0	200	300	0	0	0	0	0	0	0	200	903	0	0	0	0	0	0	0	603	903	0
402	0	0	0	0	0	0	0	200	300	0	0	0	0	0	0	0	200	903	0	0	0	0	0	0	0	603	903	0
402	1	0	0	0	0	0	0	200	300	0	0	0	0	0	0	0	200	903	0	0	0	0	0	0	0	603	903	0
402	2	0	0	0	0	0	0	200	300	0	0	0	0	0	0	0	200	903	0	0	0	0	0	0	0	603	903	0
402	3	0	0	0	0	0	0	200	300	0	0	0	0	0	0	0	200	903	0	0	0	0	0	0	0	603	903	0
402	4	0	0	0	0	0	0	200	300	0	0	0	0	0	0	0	200	903	0	0	0	0	0	0	0	603	903	0
402	5	0	0	0	0	0	0	200	300	0	0	0	0	0	0	0	200	903	0	0	0	0	0	0	0	603	903	0
402	6	0	0	0	0	0	0	200	300	0	0	0	0	0	0	0	200	903	0	0	0	0	0	0	0	603	903	0
402	7	0	0	0	0	0	0	200	300	0	0	0	0	0	0	0	200	903	0	0	0	0	0	0	0	603	903	0
402	8	0	0	0	0	0	0	200	300	0	0	0	0	0	0	0	200	903	0	0	0	0	0	0	0	603	903	0
402	9	0	0	0	0	0	0	200	300	0	0	0	0	0	0	0	200	903	0	0	0	0	0	0	0	603	903	0
403	0	0	0	0	0	0	0	200	300	0	0	0	0	0	0	0	200	903	0	0	0	0	0	0	0	603	903	0
403	1	0	0	0	0	0	0	200	300	0	0	0	0	0	0	0	200	903	0	0	0	0	0	0	0	603	903	0
403	2	0	0	0	0	0	0	200	300	0	0	0	0	0	0	0	200	903	0	0	0	0	0	0	0	603	903	0
403	3	0	0	0	0	0	0	200	300	0	0	0	0	0	0	0	200	903	0	0	0	0	0	0	0	603	903	0
403	4	0	0	0	0	0	0	200	300	0	0	0	0	0	0	0	200	903	0	0	0	0	0	0	0	603	903	0
403	5	0	0	0	0	0	0	200	300	0	0	0	0	0	0	0	200	903	0	0	0	0	0	0	0	603	903	0
403	6	0	0	0	0	0	0	200	300	0	0	0	0	0	0	0	200	903	0	0	0	0	0	0	0	603	903	0
403	7	0	0	0	0	0	0	200	300	0	0	0	0	0	0	0	200	903	0	0	0	0	0	0	0	603	903	0
403	8	0	0	0	0	0	0	200	300	0	0	0	0	0	0	0	200	903	0	0	0	0	0	0	0	603	903	0
403	9	0	0	0	0	0	0	200	300	0	0	0	0	0	0	0	200	903	0	0	0	0	0	0	0	603	903	0
404	0	0	0	0	0	0	0	200	300	0	0	0	0	0	0	0	200	903	0	0	0	0	0	0	0	603	903	0
404	1	0	0	0	0	0	0	200	300	0	0	0	0	0	0	0	200	903	0	0	0	0	0	0	0	603	903	0
404	2	0	0	0	0	0	0	200	300	0	0	0	0	0	0	0	200	903	0	0	0	0	0	0	0	603	903	0
404	3	0	0	0	0	0	0	200	300	0	0	0	0	0	0	0	200	903	0	0	0	0	0	0	0	603	903	0
404	4	0	0	0	0	0	0	200	300	0	0	0	0	0	0	0	200	903	0	0	0	0	0	0	0	603	903	0
404	5	0	0	0	0	0	0	200	300	0	0	0	0	0	0	0	200	903	0	0	0	0	0	0	0	603	903	0
404	6	0	0	0	0	0	0	200	300	0	0	0	0	0	0	0	200	903	0	0	0	0	0	0	0	603	903	0
404	7	0	0	0	0	0	0	200	300	0	0	0	0	0	0	0	200	903	0	0	0	0	0	0	0	603	903	0
404	8	0	0	0	0	0	0	200	300	0	0	0	0	0	0	0	200	903	0	0	0	0	0	0	0	603	903	0
404	9	0	0	0	0	0	0	200	300	0	0	0	0	0	0	0	200	903	0	0	0	0	0	0	0	603	903	0
405	0	0	0	0	0	0	0	200	300	0	0	0	0	0	0	0	200	903	0	0	0	0	0	0	0	603	903	0
405	1	0	0	0	0	0	0	200	300	0	0	0	0	0	0	0	200	903	0	0	0	0	0	0	0	603	903	0
405	2	0	0	0	0	0	0	200	300	0	0	0	0	0	0	0	200	903	0	0	0	0	0	0	0	603	903	0
405	3	0	0	0	0	0	0	200	300	0	0	0	0	0	0	0	200	903	0	0	0	0	0	0	0	603	903	0
405	4	0	0	0	0	0	0	200	300	0	0	0	0	0	0	0	200	903	0	0	0	0	0	0	0	603	903	0
405	5	0	0	0	0	0	0	200	300	0	0	0	0	0	0	0	200	903	0	0	0	0	0	0	0	603	903	0
405	6	0	0	0	0	0	0	200	300	0	0	0	0	0	0	0	200	903	0	0	0	0	0	0	0	603	903	0
405	7	0	0	0	0	0	0	200	300	0	0	0	0	0	0	0	200	903	0	0	0	0	0	0	0	603	903	0
405	8	0	0	0	0	0	0	200	300	0	0	0	0	0	0	0	200	903	0	0	0	0	0	0	0	603	903	0
405	9	0	0	0	0	0	0	200	300	0	0	0	0	0	0	0	200	903	0	0	0	0	0	0	0	603	903	0
406	0	0	0	0	0	0	0	200	300	0	0	0	0	0	0	0	200	903	0	0	0	0	0	0	0	603	903	0
406	1	0	0	0	0	0	0	200	300	0	0	0	0	0	0	0	200	903	0	0	0	0	0	0	0	603	903	0
406	2	0	0	0	0	0	0	200	300	0	0	0	0	0	0	0	200	903	0	0	0	0	0	0	0	603	903	0
406	3	0	0	0	0	0	0	200	300	0	0	0	0	0	0	0	200	903	0	0	0	0	0	0	0	603	903	0
406	4	0	0	0	0	0	0	200	300	0	0	0	0	0	0	0	200	903	0	0	0	0	0	0	0	603	903	0
406	5	0	0	0	0	0	0	200	300	0	0	0	0	0	0	0	200	903	0	0	0	0	0	0	0	603	903	0
406	6	0	0	0	0	0	0	200	300	0	0	0	0	0	0	0	200	903	0	0	0	0	0	0	0	603	903	0
406	7	0	0	0	0	0	0	200	300	0	0	0	0	0	0	0	200	903	0	0	0	0	0	0	0	603	903	0
406	8	0	0	0	0	0	0	200	300	0	0	0	0	0	0	0	200	903	0	0	0	0	0	0	0	603	903	0
406	9	0	0	0	0	0	0	200	300	0	0	0	0	0	0	0	200	903	0	0	0	0	0	0	0	603	903	0
407	0	0	0	0	0	0	0	200	300	0	0	0	0	0	0	0	200	903	0	0	0	0	0	0	0	603	903	0
407	1	0	0	0	0	0	0	200	300	0	0	0	0	0	0	0	200	903	0	0	0	0	0	0	0	603	903	0
407	2	0	0	0	0	0	0	200	300	0	0	0	0	0	0	0	200	903	0	0	0	0	0	0	0	603	903	0
407	3	0	0	0	0	0	0	200	300	0	0	0	0	0	0	0	200	903	0	0	0	0	0	0	0	603	903	0
407	4	0	0	0	0	0	0	200	300	0	0	0	0	0	0	0	200	903	0	0	0	0	0	0	0	603	903	0
407	5	0	0	0	0	0	0	200	300	0	0	0	0	0	0	0	200	903	0	0	0	0	0	0	0	603	903	0
407	6	0	0	0	0	0	0	200	300	0	0	0	0	0	0	0	200	903	0	0	0	0	0	0	0	603	903	0
407	7	0	0	0	0	0	0	200	300	0	0	0	0	0	0	0	200	903	0	0	0	0	0	0	0	603	903	0
407	8	0	0	0	0	0	0	200	300	0	0	0	0	0	0	0	200	903	0	0	0	0	0	0	0	603	903	0
407	9	0	0	0	0	0	0	200	300	0	0	0	0	0	0	0	200	903	0	0	0	0	0	0	0	603	903	0
408	0	0	0	0	0	0	0	200	300	0	0	0	0	0	0	0	200	903	0	0	0	0	0	0	0	603	903	0
408	1	0	0	0	0	0	0	200	300	0	0	0	0	0	0	0	200	903	0	0	0	0	0	0	0	603	903	0
408	2	0	0	0	0	0	0	200	300	0	0	0	0	0	0	0	200	903	0	0	0	0	0	0	0	603	903	0
408	3	0	0	0	0	0	0	200	300	0	0	0	0	0	0	0	200	903	0	0	0	0	0	0	0	603	903	0
408	4	0	0	0	0	0	0	200	300	0	0	0	0	0	0	0	200	903	0	0	0	0	0	0	0	603	903	0
408	5	0	0	0	0	0	0	200	300	0	0	0	0	0	0	0	200	903	0	0	0	0	0	0	0	603	903	0
408	6	0	0	0	0	0	0	200	300	0	0	0	0	0	0	0	200	903	0	0	0	0	0	0	0	603	903	0
408	7	0	0	0	0	0	0	200	300	0	0	0	0	0	0	0	200	903	0	0	0	0	0	0	0	603	903	0
408	8	0	0	0	0	0	0	200	300	0	0	0	0	0	0	0	200	903	0	0	0	0	0	0	0	603	903	0
408	9	0	0	0	0	0	0	200	300	0	0	0	0	0	0	0	200	903	0	0	0	0	0	0	0	603	903	0
409	0	0	0	0	0	0	0	200	300	0	0	0	0	0	0	0	200	903	0	0	0	0	0	0	0	603	903	0
409	1	0	0	0	0	0	0	200	300	0	0	0	0	0	0	0	200	903	0	0	0	0	0	0	0	603	903	0
409	2	0	0	0	0	0	0	200	300	0	0	0	0	0	0	0	200	903	0	0	0	0	0	0	0	603	903	0
409	3	0	0	0	0	0	0	200	300	0	0	0	0	0	0	0	200	903	0	0	0	0	0	0	0	603	903	0
409	4	0	0	0	0	0	0	200	300	0	0	0	0	0	0	0	200	903	0	0	0	0	0	0	0	603	903	0
409	5	0	0	0	0	0	0	200	300	0	0	0	0	0	0	0	200	903	0	0	0	0	0	0	0	603	903	0
409	6	0	0	0	0	0	0	200	300	0	0	0	0	0	0	0	200	903	0	0	0	0	0	0	0	603	903	0
409	7	0	0	0	0	0	0	200	300	0	0	0	0	0	0	0	200	903	0	0	0	0	0	0	0	603	903	0
409	8	0	0	0	0	0	0	200	300	0	0	0	0	0	0	0	200	903	0	0	0	0	0	0	0	603	903	0
409	9	0	0	0	0	0	0	200	300	0	0	0	0	0	0	0	200	903	0	0	0	0	0	0	0	603	903	0
410	0	0	0	0	0	0	0	200	300	0	0	0	0	0	0	0	200	903	0	0	0	0	0	0	0	603	903	0
410	1	0	0	0	0	0	0	200	300	0	0	0	0	0	0	0	200	903	0	0	0	0	0	0	0	603	903	0
410	2	0	0	0	0	0	0	200	300	0	0	0	0	0	0	0	200	903	0	0	0	0	0	0	0	603	903	0
410	3	0	0	0	0	0	0	200	300	0	0	0	0	0	0	0	200	903	0	0	0	0	0	0	0	603	903	0
410	4	0	0	0	0	0	0	200	300	0	0	0	0	0	0	0	200	903	0	0	0	0	0	0	0	603	903	0
410	5	0	0	0	0	0	0	200	300	0	0	0	0	0	0	0	200	903	0	0	0	0	0	0	0	603	903	0
410	6	0	0	0	0	0	0	200	300	0	0	0	0	0	0	0	200	903	0	0	0	0	0	0	0	603	903	0
410	7	0	0	0	0	0	0	200	300	0	0	0	0	0	0	0	200	903	0	0	0	0	0	0	0	603	903	0
410	8	0	0	0	0	0	0	200	300	0	0	0	0	0	0	0	200	903	0	0	0	0	0	0	0	603	903	0
410	9	0	0	0	0	0	0	200	300	0	0	0	0	0	0	0	200	903	0	0	0	0	0	0	0	603	903	0
411	0	0	0	0	0	0	0	200	300	0	0	0	0	0	0	0	200	903	0	0	0	0	0	0	0	603	903	0
411	1	0	0	0	0	0	0	200	300	0	0	0	0	0	0	0	200	903	0	0	0	0	0	0	0	603	903	0
411	2	0	0	0	0	0	0	200	300	0	0	0	0	0	0	0	200	903	0	0	0	0	0	0	0	603	903	0
411	3	0	0	0	0	0	0	200	300	0	0	0	0	0	0	0	200	903	0	0	0	0	0	0	0	603	903	0
411	4	0	0	0	0	0	0	200	300	0	0	0	0	0	0	0	200	903	0	0	0	0	0	0	0	603	903	0
411	5	0	0	0	0	0	0	200	300	0	0	0	0	0	0	0	200	903	0	0	0	0	0	0	0	603	903	0
411	6	0	0	0	0	0	0	200	300	0	0	0	0	0	0	0	200	903	0	0	0	0	0	0	0	603	903	0
411	7	0	0	0	0	0	0	200	300	0	0	0	0	0	0	0	200	903	0	0	0	0	0	0	0	603	903	0
411	8	0	0	0	0	0	0	200	300	0	0	0	0	0	0	0	200	903	0	0	0	0	0	0	0	603	903	0
411	9	0	0	0	0	0	0	200	300	0	0	0	0	0	0	0	200	903	0	0	0	0	0	0	0	603	903	0
412	0	0	0	0	0	0	0	200	300	0	0	0	0	0	0	0	200	903	0	0	0	0	0	0	0	603	903	0
412	1	0	0	0	0	0	0	200	300	0	0	0	0	0	0	0	200	903	0	0	0	0	0	0	0	603	903	0
412	2	0	0	0	0	0	0	200	300	0	0	0	0	0	0	0	200	903	0	0	0	0	0	0	0	603	903	0
412	3	0	0	0	0	0	0	200	300	0	0	0	0	0	0	0	200	903	0	0	0	0	0	0	0	603	903	0
412	4	0	0	0	0	0	0	200	300	0	0	0	0	0	0	0	200	903	0	0	0	0	0	0	0	603	903	0
412	5	0	0	0	0	0	0	200	300	0	0	0	0	0	0	0	200	903	0	0	0	0	0	0	0	603	903	0
412	6	0	0	0	0	0	0	200	300	0	0	0	0	0	0	0	200	903	0	0	0	0	0	0	0	603	903	0
412	7	0	0	0	0	0	0	200	300	0	0	0	0	0	0	0	200	903	0	0	0	0	0	0	0	603	903	0
412	8	0	0	0	0	0	0	200	300	0	0	0	0	0	0	0	200	903	0	0	0	0	0	0	0	603	903	0
412	9	0	0	0	0	0	0	200	300	0	0	0	0	0	0	0	200	903	0	0	0	0	0	0	0	603	903	0
413	0	0	0	0	0	0	0	200	300	0	0	0	0	0	0	0	200	903	0	0	0	0	0	0	0	603	903	0
413	1	0	0	0	0	0	0	200	300	0	0	0	0	0	0	0	200	903	0	0	0	0	0	0	0	603	903	0
413	2	0	0	0	0	0	0	200	300	0	0	0	0	0	0	0	200	903	0	0	0	0	0	0	0	603	903	0
413	3	0	0	0	0	0	0	200	300	0	0	0	0	0	0	0	200	903	0	0	0	0	0	0	0	603	903	0
413	4	0	0	0	0	0	0	200	300	0	0	0	0	0	0	0	200	903	0	0	0	0	0	0	0	603	903	0
413	5	0	0	0	0	0	0	200	300	0	0	0	0	0	0	0	200	903	0	0	0	0	0	0	0	603	903	0
413	6	0	0	0	0	0	0	200	300	0	0	0	0	0	0	0	200	903	0	0	0	0	0	0	0	603	903	0
413	7	0	0	0	0	0	0	200	300	0	0	0	0	0	0	0	200	903	0	0	0	0	0	0	0	603	903	0
413	8	0	0	0	0	0	0	200	300	0	0	0	0	0	0	0	200	903	0	0	0	0	0	0	0	603	903	0
413	9	0	0	0	0	0	0	200	300	0	0	0	0	0	0	0	200	903	0	0	0	0	0	0	0	603	903	0
414	0	0	0	0	0	0	0	200	300	0	0	0	0	0	0	0	200	903	0	0	0	0	0	0	0	603	903	0
414	1	0	0	0	0	0	0	200	300	0	0	0	0	0	0	0	200	903	0	0	0	0	0	0	0	603	903	0
414	2	0	0	0	0	0	0	200	300	0	0	0	0	0	0	0	200	903	0	0	0	0	0	0	0	603	903	0
414	3	0	0	0	0	0	0	200	300	0	0	0	0	0	0	0	200	903	0	0	0	0	0	0	0	603	903	0
414	4	0	0	0	0	0	0	200	300	0	0	0	0	0	0	0	200	903	0	0	0	0	0	0	0	603	903	0
414	5	0	0	0	0	0	0	200	300	0	0	0	0	0	0	0	200	903	0	0	0	0	0	0	0	603	903	0
414	6	0	0	0	0	0	0	200	300	0	0	0	0	0	0	0	200	903	0	0	0	0	0	0	0	603	903	0
414	7	0	0	0	0	0	0	200	300	0	0	0	0	0	0	0	200	903	0	0	0	0	0	0	0	603	903	0
414	8	0	0	0	0	0	0	200	300	0	0	0	0	0	0	0	200	903	0	0	0	0	0	0	0	603	903	0
414	9	0	0	0	0	0	0	200	300	0	0	0	0	0	0	0	200	903	0	0	0	0	0	0	0	603	903	0
415	0	0	0	0	0	0	0	200	300	0	0	0	0	0	0	0	200	903	0	0	0	0	0	0	0	603	903	0
415	1	0	0	0	0	0	0	200	300	0	0	0	0	0	0	0	200	903	0	0	0	0	0	0	0	603	903	0
415	2	0	0	0	0	0	0	200	300	0	0	0	0	0	0	0	200	903	0	0	0	0	0	0	0	603	903	0
415	3	0	0	0	0	0	0	200	300	0	0	0	0	0	0	0	200	903	0	0	0	0	0	0	0	603	903	0
415	4	0	0	0	0	0	0	200	300	0	0	0	0	0	0	0	200	903	0	0	0	0	0	0	0	603	903	0
415	5	0	0	0	0	0	0	200	300	0	0	0	0	0	0	0	200	903	0	0	0	0	0	0	0	603	903	0
415	6	0	0	0	0	0	0	200	300	0	0	0	0	0	0	0	200	903	0	0	0	0	0	0	0	603	903	0
415	7	0	0	0	0	0	0	200	300	0	0	0	0	0	0	0	200	903	0	0	0	0	0	0	0	603	903	0
415	8	0	0	0	0	0	0	200	300	0	0	0	0	0	0	0	200	903	0	0	0	0	0	0	0	603	903	0
415	9	0	0	0	0	0	0	200	300	0	0	0	0	0	0	0	200	903	0	0	0	0	0	0	0	603	903	0
416	0	0	0	0	0	0	0	200	300	0	0	0	0	0	0	0	200	903	0	0	0	0	0	0	0	603	903	0
416	1	0	0	0	0	0	0	200	300	0	0	0	0	0	0	0	200	903	0	0	0	0	0	0	0	603	903	0
416	2	0	0	0	0	0	0	200	300	0	0	0	0	0	0	0	200	903	0	0	0	0	0	0	0	603	903	0
416	3	0	0	0	0	0	0	200	300	0	0	0	0	0	0	0	200	903	0	0	0	0	0	0	0	603	903	0
416	4	0	0	0	0	0	0	200	300	0	0	0	0	0	0	0	200	903	0	0	0	0	0	0	0	603	903	0
416	5	0	0	0	0	0	0	200	300	0	0	0	0	0	0	0	200	903	0	0	0	0	0	0	0	603	903	0
416	6	0	0	0	0	0	0	200	300	0	0	0	0	0	0	0	200	903	0	0	0	0	0	0	0	603	903	0
416	7	0	0	0	0	0	0	200	300	0	0	0	0	0	0	0	200	903	0	0	0	0	0	0	0	603	903	0
416	8	0	0	0	0	0	0	200	300	0	0	0	0	0	0	0	200	903	0	0	0	0	0	0	0	603	903	0
416	9	0	0	0	0	0	0	200	300	0	0	0	0	0	0	0	200	903	0	0	0	0	0	0	0	603	903	0
417	0	0	0	0	0	0	0	200	300	0	0	0	0	0	0	0	200	903	0	0	0	0	0	0	0	603	903	0
417	1	0	0	0	0	0	0	200	300	0	0	0	0	0	0	0	200	903	0	0	0	0	0	0	0	603	903	0
417	2	0	0	0	0	0	0	200	300	0	0	0	0	0	0	0	200	903	0	0	0	0	0	0	0	603	903	0
417	3	0	0	0	0	0	0	200	300	0	0	0	0	0	0	0	200	903	0	0	0	0	0	0	0	603	903	0
417	4	0	0	0	0	0	0	200	300	0	0	0	0	0	0	0	200	903	0	0	0	0	0	0	0	603	903	0
417	5	0	0	0	0	0	0	200	300	0	0	0	0	0	0	0	200	903	0	0	0	0	0	0	0	603	903	0
417	6	0	0	0	0	0	0	200	300	0	0	0	0	0	0	0	200	903	0	0	0	0	0	0	0	603	903	0
417	7	0	0	0	0	0	0	200	300	0	0	0	0	0	0	0	200	903	0	0	0	0	0	0	0	603	903	0
417	8	0	0	0	0	0	0	200	300	0	0	0	0	0	0	0	200	903	0	0	0	0	0	0	0	603	903	0
417	9	0	0	0	0	0	0	200	300	0	0	0	0	0	0	0	200	903	0	0	0	0	0	0	0	603	903	0
418	0	0	0	0	0	0	0	200	300	0	0	0	0	0	0	0	200	903	0	0	0	0	0	0	0	603	903	0
418	1	0	0	0	0	0	0	200	300	0	0	0	0	0	0	0	200	903	0	0	0	0	0	0	0	603	903	0
418	2	0	0	0	0	0	0	200	300	0	0	0	0	0	0	0	200	903	0	0	0	0	0	0	0	603	903	0
418	3	0	0	0	0	0	0	200	300	0	0	0	0	0	0	0	200	903	0	0	0	0	0	0	0	603	903	0
418	4	0	0	0	0	0	0	200	300	0	0	0	0	0	0	0	200	903	0	0	0	0	0	0	0	603	903	0
418	5	0	0	0	0	0	0	200	300	0	0	0	0	0	0	0	200	903	0	0	0	0	0	0	0	603	903	0
418	6	0	0	0	0	0	0	200	300	0	0	0	0	0	0	0	200	903	0	0	0	0	0	0	0	603	903	0
418	7	0	0	0	0	0	0	200	300	0	0	0	0	0	0	0	200	903	0	0	0	0	0	0	0	603	903	0
418	8	0	0	0	0	0	0	200	300	0	0	0	0	0	0	0	200	903	0	0	0	0	0	0	0	603	903	0
418	9	0	0	0	0	0	0	200	300	0	0	0	0	0	0	0	200	903	0	0	0	0	0	0	0	603	903	0
419	0	0	0	0	0	0	0	200	300	0	0	0	0	0	0	0	200	903	0	0	0	0	0	0	0	603	903	0
419	1	0	0	0	0	0	0	200	300	0	0	0	0	0	0	0	200	903	0	0	0	0	0	0	0	603	903	0
419	2	0	0	0	0	0	0	200	300	0	0	0	0	0	0	0	200	903	0	0	0	0	0	0	0	603	903	0
419	3	0	0	0	0	0	0	200	300	0	0	0	0	0	0	0	200	903	0	0	0	0	0	0	0	603	903	0
419	4	0	0	0	0	0	0	200	300	0	0	0	0	0	0	0	200	903	0	0	0	0	0	0	0	603	903	0
419	5	0	0	0	0	0	0	200	300	0	0	0	0	0	0	0	200	903	0	0	0	0	0	0	0	603	903	0
419	6	0	0	0	0	0	0	200	300	0	0	0	0	0	0	0	200	903	0	0	0	0	0	0	0	603	903	0
419	7	0	0	0	0	0	0	200	300	0	0	0	0	0	0	0	200	903	0	0	0	0	0	0	0	603	903	0
419	8	0	0	0	0	0	0	200	300	0	0	0	0	0	0	0	200	903	0	0	0	0	0	0	0	603	903	0
419	9	0	0	0	0	0	0	200	300	0	0	0	0	0	0	0	200	903	0	0	0	0	0	0	0	603	903	0
420	0	0	0	0	0	0	0	200	300	0	0	0	0	0	0	0	200	903	0	0	0	0	0	0	0	603	903	0
420	1	0	0	0	0	0	0	200	300	0	0	0	0	0	0	0	200	903	0	0	0	0	0	0	0	603	903	0
420	2	0	0	0	0	0	0	200	300	0	0	0	0	0	0	0	200	903	0	0	0	0	0	0	0	603	903	0
420	3	0	0	0	0	0	0	200	300	0	0	0	0	0	0	0	200	903	0	0	0	0	0	0	0	603	903	0
420	4	0	0	0	0	0	0	200	300	0	0	0	0	0	0	0	200	903	0	0	0	0	0	0	0	603	903	0
420	5	0	0	0	0	0	0	200	300	0	0	0	0	0	0	0	200	903	0	0	0	0	0	0	0	603	903	0
420	6	0	0	0	0	0	0	200	300	0	0	0	0	0	0	0	200	903	0	0	0	0	0	0	0	603	903	0
420	7	0	0	0	0	0	0	200	300	0	0	0	0	0	0	0	200	903	0	0	0	0	0	0	0	603	903	0
420	8	0	0	0	0	0	0	200	300	0	0	0	0	0	0	0	200	903	0	0	0	0	0	0	0	603	903	0
420	9	0	0	0	0	0	0	200	300	0	0	0	0	0	0	0	200	903	0	0	0	0	0	0	0	603	903	0
421	0	0	0	0	0	0	0	200	300	0	0	0	0	0	0	0	200	903	0	0	0	0	0	0	0	603	903	0
421	1	0	0	0	0	0	0	200	300	0	0	0	0	0	0	0	200	903	0	0	0	0	0	0	0	603	903	0
421	2	0	0	0	0	0	0	200	300	0	0	0	0	0	0	0	200	903	0	0	0	0	0	0	0	603	903	0
421	3	0	0	0	0	0	0	200	300	0	0	0	0	0	0	0	200	903	0	0	0	0	0	0	0	603	903	0
421	4	0	0	0	0	0	0	200	300	0	0	0	0	0	0	0	200	903	0	0	0	0	0	0	0	603	903	0
421	5	0	0	0	0	0	0	200	300	0	0	0	0	0	0	0	200	903	0	0	0	0	0	0	0	603	903	0
421	6	0	0	0	0	0	0	200	300	0	0	0	0	0	0	0	200	903	0	0	0	0	0	0	0	603	903	0
421	7	0	0	0	0	0	0	200	300	0	0	0	0	0	0	0	200	903	0	0	0	0	0	0	0	603	903	0
421	8	0	0	0	0	0	0	200	300	0	0	0	0	0	0	0	200	903	0	0	0	0	0	0	0	603	903	0
421	9	0	0	0	0	0	0	200	300	0	0	0	0	0	0	0	200	903	0	0	0	0	0	0	0	603	903	0
422	0	0	0	0	0	0	0	200	300	0	0	0	0	0	0	0	200	903	0	0	0	0	0	0	0	603	903	0
422	1	0	0	0	0	0	0	200	300	0	0	0	0	0	0	0	200	903	0	0	0	0	0	0	0	603	903	0
422	2	0	0	0	0	0	0	200	300	0	0	0	0	0	0	0	200	903	0	0	0	0	0	0	0	603	903	0
422	3	0	0	0	0	0	0	200	300	0	0	0	0	0	0	0	200	903	0	0	0	0	0	0	0	603	903	0
422	4	0	0	0	0	0	0	200	300	0	0	0	0	0	0	0	200	903	0	0	0	0	0	0	0	603	903	0
422	5	0	0	0	0	0	0	200	300	0	0	0	0	0	0	0	200	903	0	0	0	0	0	0	0	603	903	0
422	6	0	0	0	0	0	0	200	300	0	0	0	0	0	0	0	200	903	0	0	0	0	0	0	0	603	903	0
422	7	0	0	0	0	0	0	200	300	0	0	0	0	0	0	0	200	903	0	0	0	0	0	0	0	603	903	0
422	8	0	0	0	0	0	0	200	300	0	0	0	0	0	0	0	200	903	0	0	0	0	0	0	0	603	903	0
422	9	0	0	0	0	0	0	200	300	0	0	0	0	0	0	0	200	903	0	0	0	0	0	0	0	603	903	0
423	0	0	0	0	0	0	0	200	300	0	0	0	0	0	0	0	200	903	0	0	0	0	0	0	0	603	903	0
423	1	0	0	0	0	0	0	200	300	0	0	0	0	0	0	0	200	903	0	0	0	0	0	0	0	603	903	0
423	2	0	0	0	0	0	0	200	300	0	0	0	0	0	0	0	200	903	0	0	0	0	0	0	0	603	903	0
423	3	0	0	0	0	0	0	200	300	0	0	0	0	0	0	0	200	903	0	0	0	0	0	0	0	603	903	0
423	4	0	0	0	0	0	0	200	300	0	0	0	0	0	0	0	200	903	0	0	0	0	0	0	0	603	903	0
423	5	0	0	0	0	0	0	200	300	0	0	0	0	0	0	0	200	903	0	0	0	0	0	0	0	603	903	0
423	6	0	0	0	0	0	0	200	300	0	0	0	0	0	0	0	200	903	0	0	0	0	0	0	0	603	903	0
423	7	0	0	0	0	0	0	200	300	0	0	0	0	0	0	0	200	903	0	0	0	0	0	0	0	603	903	0
423	8	0	0	0	0	0	0	200	300	0	0	0	0	0	0	0	200	903	0	0	0	0	0	0	0	603	903	0
423	9	0	0	0	0	0	0	200	300	0	0	0	0	0	0	0	200	903	0	0	0	0	0	0	0	603	903	0
424	0	0	0	0	0	0	0	200	300	0	0	0	0	0	0	0	200	903	0	0	0	0	0	0	0	603	903	0
424	1	0	0	0	0	0	0	200	300	0	0	0	0	0	0	0	200	903	0	0	0	0	0	0	0	603	903	0
424	2	0	0	0	0	0	0	200	300	0	0	0	0	0	0	0	200	903	0	0	0	0	0	0	0	603	903	0
424	3	0	0	0	0	0	0	200	300	0	0	0	0	0	0	0	200	903	0	0	0	0	0	0	0	603	903	0
424	4	0	0	0	0	0	0	200	300	0	0	0	0	0	0	0	200	903	0	0	0	0	0	0	0	603	903	0
424	5	0	0	0	0	0	0	200	300	0	0	0	0	0	0	0	200	903	0	0	0	0	0	0	0	603	903	0
424	6	0	0	0	0	0	0	200	300	0	0	0	0	0	0	0	200	903	0	0	0	0	0	0	0	603	903	0
424	7	0	0	0	0	0	0	200	300	0	0	0	0	0	0	0	200	903	0	0	0	0	0	0	0	603	903	0
424	8	0	0	0	0	0	0	200	300	0	0	0	0	0	0	0	200	903	0	0	0	0	0	0	0	603	903	0
424	9	0	0	0	0	0	0	200	300	0	0	0	0	0	0	0	200	903	0	0	0	0	0	0	0	603	903	0
425	0	0	0	0	0	0	0	200	300	0	0	0	0	0	0	0	200	903	0	0	0	0	0	0	0	603	903	0
425	1	0	0	0	0	0	0	200	300	0	0	0	0	0	0	0	200	903	0	0	0	0	0	0	0	603	903	0
425	2	0	0	0	0	0	0	200	300	0	0	0	0	0	0	0	200	903	0	0	0	0	0	0	0	603	903	0
425	3	0	0	0	0	0	0	200	300	0	0	0	0	0	0	0	200	903	0	0	0	0	0	0	0	603	903	0
425	4	0	0	0	0	0	0	200	300	0	0	0	0	0	0	0	200	903	0	0	0	0	0	0	0	603	903	0
425	5	0	0	0	0	0	0	200	300	0	0	0	0	0	0	0	200	903	0	0	0	0	0	0	0	603	903	0
425	6	0	0	0	0	0	0	200	300	0	0	0	0	0	0	0	200	903	0	0	0	0	0	0	0	603	903	0
425	7	0	0	0	0	0	0	200	300	0	0	0	0	0	0	0	200	903	0	0	0	0	0	0	0	603	903	0
425	8	0	0	0	0	0	0	200	300	0	0	0	0	0	0	0	200	903	0	0	0	0	0	0	0	603	903	0
425	9	0	0	0	0	0	0	200	300	0	0	0	0	0	0	0	200	903	0	0	0	0	0	0	0	603	903	0
426	0	0	0	0	0	0	0	200	300	0	0	0	0	0	0	0	200	903	0	0	0	0	0	0	0	603	903	0
426	1	0	0	0	0	0	0	200	300	0	0	0	0	0	0	0	200	903	0	0	0	0	0	0	0	603	903	0
426	2	0	0	0	0	0	0	200	300	0	0	0	0	0	0	0	200	903	0	0	0	0	0	0	0	603	903	0
426	3	0	0	0	0	0	0	200	300	0	0	0	0	0	0	0	200	903	0	0	0	0	0	0	0	603	903	0
426	4	0	0	0	0	0	0	200	300	0	0	0	0	0	0	0	200	903	0	0	0	0	0	0	0	603	903	0
426	5	0	0	0	0	0	0	200	300	0	0	0	0	0	0	0	200	903	0	0	0	0	0	0	0	603	903	0
426	6	0	0	0	0	0	0	200	300	0	0	0	0	0	0	0	200	903	0	0	0	0	0	0	0	603	903	0
426	7	0	0	0	0	0	0	200	300	0	0	0	0	0	0	0	200	903	0	0	0	0	0	0	0	603	903	0
426	8	0	0	0	0	0	0	200	300	0	0	0	0	0	0	0	200	903	0	0	0	0	0	0	0	603	903	0
426	9	0	0	0	0	0	0	200	300	0	0	0	0	0	0	0	200	903	0	0	0	0	0	0	0	603	903	0
427	0	0	0	0	0	0	0	200	300	0	0	0	0	0	0	0	200	903	0	0	0	0	0	0	0	603	903	0
427	1	0	0	0	0	0	0	200	300	0	0	0	0	0	0	0	200	903	0	0	0	0	0	0	0	603	903	0
427	2	0	0	0	0	0	0	200	300	0	0	0	0	0	0	0	200	903	0	0	0	0	0	0	0	603	903	0
427	3	0	0	0	0	0	0	200	300	0	0	0	0	0	0	0	200	903	0	0	0	0	0	0	0	603	903	0
427	4	0	0	0	0	0	0	200	300	0	0	0	0	0	0	0	200	903	0	0	0	0	0	0	0	603	903	0
427	5	0	0	0	0	0	0	200	300	0	0	0	0	0	0	0	200	903	0	0	0	0	0	0	0	603	903	0
427	6	0	0	0	0	0	0	200	300	0	0	0	0	0	0	0	200	903	0	0	0	0	0	0	0	603	903	0
427	7	0	0	0	0	0	0	200	300	0	0	0	0	0	0	0	200	903	0	0	0	0	0	0	0	603	903	0
427	8	0	0	0	0	0	0	200	300	0	0	0	0	0	0	0	200	903	0	0	0	0	0	0	0	603	903	0
427	9	0	0	0	0	0	0	200	300	0	0	0	0	0	0	0	200	903	0	0	0	0	0	0	0	603	903	0
428	0	0	0	0	0	0	0	200	300	0	0	0	0	0	0	0	200	903	0	0	0	0	0	0	0	603	903	0
428	1	0	0	0	0	0	0	200	300	0	0	0	0	0	0	0	200	903	0	0	0	0	0	0	0	603	903	0
428	2	0	0	0	0	0	0	200	300	0	0	0	0	0	0	0	200	903	0	0	0	0	0	0	0	603	903	0
428	3	0	0	0	0	0	0	200	300	0	0	0	0	0	0	0	200	903	0	0	0	0	0	0	0	603	903	0
428	4	0	0	0	0	0	0	200	300	0	0	0	0	0	0	0	200	903	0	0	0	0	0	0	0	603	903	0
428	5	0	0	0	0	0	0	200	300	0	0	0	0	0	0	0	200	903	0	0	0	0	0	0	0	603	903	0
428	6	0	0	0	0	0	0	200	300	0	0	0	0	0	0	0	200	903	0	0	0	0	0	0	0	603	903	0
428	7	0	0	0	0	0	0	200	300	0	0	0	0	0	0	0	200	903	0	0	0	0	0	0	0	603	903	0
428	8	0	0	0	0	0	0	200	300	0	0	0	0	0	0	0	200	903	0	0	0	0	0	0	0	603	903	0
428	9	0	0	0	0	0	0	200	300	0	0	0	0	0	0	0	200	903	0	0	0	0	0	0	0	603	903	0
429	0	0	0	0	0	0	0	200	300	0	0	0	0	0	0	0	200	903	0	0	0	0	0	0	0	603	903	0
429	1	0	0	0	0	0	0	200	300	0	0	0	0	0	0	0	200	903	0	0	0	0	0	0	0	603	903	0
429	2	0	0	0	0	0	0	200	300	0	0	0	0	0	0	0	200	903	0	0	0	0	0	0	0	603	903	0
429	3	0	0	0	0	0	0	200	300	0	0	0	0	0	0	0	200	903	0	0	0	0	0	0	0	603	903	0
429	4	0	0	0	0	0	0	200	300	0	0	0	0	0	0	0	200	903	0	0	0	0	0	0	0	603	903	0
429	5	0	0	0	0	0	0	200	300	0	0	0	0	0	0	0	200	903	0	0	0	0	0	0	0	603	903	0
429	6	0	0	0	0	0	0	200	300	0	0	0	0	0	0	0	200	903	0	0	0	0	0	0	0	603	903	0
429	7	0	0	0	0	0	0	200	300	0	0	0	0	0	0	0	200	903	0	0	0	0	0	0	0	603	903	0
429	8	0	0	0	0	0	0	200	300	0	0	0	0	0	0	0	200	903	0	0	0	0	0	0	0	603	903	0
429	9	0	0	0	0	0	0	200	300	0	0	0	0	0	0	0	200	903	0	0	0	0	0	0	0	603	903	0
430	0	0	0	0	0	0	0	200	300	0	0	0	0	0	0	0	200	903	0	0	0	0	0	0	0	603	903	0
430	1	0	0	0	0	0	0	200	300	0	0	0	0	0	0	0	200	903	0	0	0	0	0	0	0	603	903	0
430	2	0	0	0	0	0	0	200	300	0	0	0	0	0	0	0	200	903	0	0	0	0	0	0	0	603	903	0
430	3	0	0	0	0	0	0	200	300	0	0	0	0	0	0	0	200	903	0	0	0	0	0	0	0	603	903	0
430	4	0	0	0	0	0	0	200	300	0	0	0	0	0	0	0	200	903	0	0	0	0	0	0	0	603	903	0
430	5	0	0	0	0	0	0	200	300	0	0	0	0	0	0	0	200	903	0	0	0	0	0	0	0	603	903	0
430	6	0	0	0	0	0	0	200	300	0	0	0	0	0	0	0	200	903	0	0	0	0	0	0	0	603	903	0
430	7	0	0	0	0	0	0	200	300	0	0	0	0	0	0	0	200	903	0	0	0	0	0	0	0	603	903	0
430	8	0	0	0	0	0	0	200	300	0	0	0	0	0	0	0	200	903	0	0	0	0	0	0	0	603	903	0
430	9	0	0	0	0	0	0	200	300	0	0	0	0	0	0	0	200	903	0	0	0	0	0	0	0	603	903	0
431	0	0	0	0	0	0	0	200	300	0	0	0	0	0	0	0	200	903	0	0	0	0	0	0	0	603	903	0
431	1	0	0	0	0	0	0	200	300	0	0	0	0	0	0	0	200	903	0	0	0	0	0	0	0	603	903	0
431	2	0	0	0	0	0	0	200	300	0	0	0	0	0	0	0	200	903	0	0	0	0	0	0	0	603	903	0
431	3	0	0	0	0	0	0	200	300	0	0	0	0	0	0	0	200	903	0	0	0	0	0	0	0	603	903	0
431	4	0	0	0	0	0	0	200	300	0	0	0	0	0	0	0	200	903	0	0	0	0	0	0	0	603	903	0
431	5	0	0	0	0	0	0	200	300	0	0	0	0	0	0	0	200	903	0	0	0	0	0	0	0	603	903	0
431	6	0	0	0	0	0	0	200	300	0	0	0	0	0	0	0	200	903	0	0	0	0	0	0	0	603	903	0
431	7	0	0	0	0	0	0	200	300	0	0	0	0	0	0	0	200	903	0	0	0	0	0	0	0	603	903	0
431	8	0	0	0	0	0	0	200	300	0	0	0	0	0	0	0	200	903	0	0	0	0	0	0	0	603	903	0
431	9	0	0	0	0	0	0	200	300	0	0	0	0	0	0	0	200	903	0	0	0	0	0	0	0	603	903	0
432	0	0	0	0	0	0	0	200	300	0	0	0	0	0	0	0	200	903	0	0	0	0	0	0	0	603	903	0
432	1	0	0	0	0	0	0	200	300	0	0	0	0	0	0	0	200	903	0	0	0	0	0	0	0	603	903	0
432	2	0	0	0	0	0	0	200	300	0	0	0	0	0	0	0	200	903	0	0	0	0	0	0	0	603	903	0
432	3	0	0	0	0	0	0	200	300	0	0	0	0	0	0	0	200	903	0	0	0	0	0	0	0	603	903	0
432	4	0	0	0	0	0	0	200	300	0	0	0	0	0	0	0	200	903	0	0	0	0	0	0	0	603	903	0
432	5	0	0	0	0	0	0	200	300	0	0	0	0	0	0	0	200	903	0	0	0	0	0	0	0	603	903	0
432	6	0	0	0	0	0	0	200	300	0	0	0	0	0	0	0	200	903	0	0	0	0	0	0	0	603	903	0
432	7	0	0	0	0	0	0	200	300	0	0	0	0	0	0	0	200	903	0	0	0	0	0	0	0	603	903	0
432	8	0	0	0	0	0	0	200	300	0	0	0	0	0	0	0	200	903	0	0	0	0	0	0	0	603	903	0
432	9	0	0	0	0	0	0	200	300	0	0	0	0	0	0	0	200	903	0	0	0	0	0	0	0	603	903	0
433	0	0	0	0	0	0	0	200	300	0	0	0	0	0	0	0	200	903	0	0	0	0	0	0	0	603	903	0
433	1	0	0	0	0	0	0	200	300	0	0	0	0	0	0	0	200	903	0	0	0	0	0	0	0	603	903	0
433	2	0	0	0	0	0	0	200	300	0	0	0	0	0	0	0	200	903	0	0	0	0	0	0	0	603	903	0
433	3	0	0	0	0	0	0	200	300	0	0	0	0	0	0	0	200	903	0	0	0	0	0	0	0	603	903	0
433	4	0	0	0	0	0	0	200	300	0	0	0	0	0	0	0	200	903	0	0	0	0	0	0	0	603	903	0
433	5	0	0	0	0	0	0	200	300	0	0	0	0	0	0	0	200	903	0	0	0	0	0	0	0	603	903	0
433	6	0	0	0	0	0	0	200	300	0	0	0	0	0	0	0	200	903	0	0	0	0	0	0	0	603	903	0
433	7	0	0	0	0	0	0	200	300	0	0	0	0	0	0	0	200	903	0	0	0	0	0	0	0	603	903	0
433	8	0	0	0	0	0	0	200	300	0	0	0	0	0	0	0	200	903	0	0	0	0	0	0	0	603	903	0
433	9	0	0	0	0	0	0	200	300	0	0	0	0	0	0	0	200	903	0	0	0	0	0	0	0	603	903	0
434	0	0	0	0	0	0	0	200	300	0	0	0	0	0	0	0	200	903	0	0	0	0	0	0	0	603	903	0
434	1	0	0	0	0	0	0	200	300	0	0	0	0	0	0	0	200	903	0	0	0	0	0	0	0	603	903	0
434	2	0	0	0	0	0	0	200	300	0	0	0	0	0	0	0	200	903	0	0	0	0	0	0	0	603	903	0
434	3	0	0	0	0	0	0	200	300	0	0	0	0	0	0	0	200	903	0	0	0	0	0	0	0	603	903	0
434	4	0	0	0	0	0	0	200	300	0	0	0	0	0	0	0	200	903	0	0	0	0	0	0	0	603	903	0
434	5	0	0	0	0	0	0	200	300	0	0	0	0	0	0	0	200	903	0	0	0	0	0	0	0	603	903	0
434	6	0	0	0	0	0	0	200	300	0	0	0	0	0	0	0	200	903	0	0	0	0	0	0	0	603	903	0
434	7	0	0	0	0	0	0	200	300	0	0	0	0	0	0	0	200	903	0	0	0	0	0	0	0	603	903	0
434	8	0	0	0	0	0	0	200	300	0	0	0	0	0	0	0	200	903	0	0	0	0	0	0	0	603	903	0
434	9	0	0	0	0	0	0	200	300	0	0	0	0	0	0	0	200	903	0	0	0	0	0	0	0	603	903	0
435	0	0	0	0	0	0	0	200	300	0	0	0	0	0	0	0	200	903	0	0	0	0	0	0	0	603	903	0
435	1	0	0	0	0	0	0	200	300	0	0	0	0	0	0	0	200	903	0	0	0	0	0	0	0	603	903	0
435	2	0	0	0	0	0	0	200	300	0	0	0	0	0	0	0	200	903	0	0	0	0	0	0	0	603	903	0
435	3	0	0	0	0	0	0	200	300	0	0	0	0	0	0	0	200	903	0	0	0	0	0	0	0	603	903	0
435	4	0	0	0	0	0	0	200	300	0	0	0	0	0	0	0	200	903	0	0	0	0	0	0	0	603	903	0
435	5	0	0	0	0	0	0	200	300	0	0	0	0	0	0	0	200	903	0	0	0	0	0	0	0	603	903	0
435	6	0	0	0	0	0	0	200	300	0	0	0	0	0	0	0	200	903	0	0	0	0	0	0	0	603	903	0
435	7	0	0	0	0	0	0	200	300	0	0	0	0	0	0	0	200	903	0	0	0	0	0	0	0	603	903	0
435	8	0	0	0	0	0	0	200	300	0	0	0	0	0	0	0	200	903	0	0	0	0	0	0	0	603	903	0
435	9	0	0	0	0	0	0	200	300	0	0	0	0	0	0	0	200	903	0	0	0	0	0	0	0	603	903	0
436	0	0	0	0	0	0	0	200	300	0	0	0	0	0	0	0	200	903	0	0	0	0	0	0	0	603	903	0
436	1	0	0	0	0	0	0	200	300	0	0	0	0	0	0	0	200	903	0	0	0	0	0	0	0	603	903	0
436	2	0	0	0	0	0	0	200	300	0	0	0	0	0	0	0	200	903	0	0	0	0	0	0	0	603	903	0
436	3	0	0	0	0	0	0	200	300	0	0	0	0	0	0	0	200	903	0	0	0	0	0	0	0	603	903	0
436	4	0	0	0	0	0	0	200	300	0	0	0	0	0	0	0	200	903	0	0	0	0	0	0	0	603	903	0
436	5	0	0	0	0	0	0	200	300	0	0	0	0	0	0	0	200	903	0	0	0	0	0	0	0	603	903	0
436	6	0	0	0	0	0	0	200	300	0	0	0	0	0	0	0	200	903	0	0	0	0	0	0	0	603	903	0
436	7	0	0	0	0	0	0	200	300	0	0	0	0	0	0	0	200	903	0	0	0	0	0	0	0	603	903	0
436	8	0	0	0	0	0	0	200	300	0	0	0	0	0	0	0	200	903	0	0	0	0	0	0	0	603	903	0
436	9	0	0	0	0	0	0	200	300	0	0	0	0	0	0	0	200	903	0	0	0	0	0	0	0	603	903	0
437	0	0	0	0	0	0	0	200	300	0	0	0	0	0	0	0	200	903	0	0	0	0	0	0	0	603	903	0
437	1	0	0	0	0	0	0	200	300	0	0	0	0	0	0	0	200	903	0	0	0	0	0	0	0	603	903	0
437	2	0	0	0	0	0	0	200	300	0	0	0	0	0	0	0	200	903	0	0	0	0	0	0	0	603	903	0
437	3	0	0	0	0	0	0	200	300	0	0	0	0	0	0	0	200	903	0	0	0	0	0	0	0	603	903	0
437	4	0	0	0	0	0	0	200	300	0	0	0	0	0	0	0	200	903	0	0	0	0	0	0	0	603	903	0
437	5	0	0	0	0	0	0	200	300	0	0	0	0	0	0	0	200	903	0	0	0	0	0	0	0	603	903	0
437	6	0	0	0	0	0	0	200	300	0	0	0	0	0	0	0	200	903	0	0	0	0	0	0	0	603	903	0
437	7	0	0	0	0	0	0	200	300	0	0	0	0	0	0	0	200	903	0	0	0	0	0	0	0	603	903	0
437	8	0	0	0	0	0	0	200	300	0	0	0	0	0	0	0	200	903	0	0	0	0	0	0	0	603	903	0
437	9	0	0	0	0	0	0	200	300	0	0	0	0	0	0	0	200	903	0	0	0	0	0	0	0	603	903	0
438	0	0	0	0	0	0	0	200	300	0	0	0	0	0	0	0	200	903	0	0	0	0	0	0	0	603	903	0
438	1	0	0	0	0	0	0	200	300	0	0	0	0	0	0	0	200	903	0	0	0	0	0	0	0	603	903	0
438	2	0	0	0	0	0	0	200	300	0	0	0	0	0	0	0	200	903	0	0	0	0	0	0	0	603	903	0
438	3	0	0	0	0	0	0	200	300	0	0	0	0	0	0	0	200	903	0	0	0	0	0	0	0	603	903	0
438	4	0	0	0	0	0	0	200	300	0	0	0	0	0	0	0	200	903	0	0	0	0	0	0	0	603	903	0
438	5	0	0	0	0	0	0	200	300	0	0	0	0	0	0	0	200	903	0	0	0	0	0	0	0	603	903	0
438	6	0	0	0	0	0	0	200	300	0	0	0	0	0	0	0	200	903	0	0	0	0	0	0	0	603	903	0
438	7	0	0	0	0	0	0	200	300	0	0	0	0	0	0	0	200	903	0	0	0	0	0	0	0	603	903	0
438	8	0	0	0	0	0	0	200	300	0	0	0	0	0	0	0	200	903	0	0	0	0	0	0	0	603	903	0
438	9	0	0	0	0	0	0	200	300	0	0	0	0	0	0	0	200	903	0	0	0	0	0	0	0	603	903	0
439	0	0	0	0	0	0	0	200	300	0	0	0	0	0	0	0	200	903	0	0	0	0	0	0	0	603	903	0
439	1	0	0	0	0	0	0	200	300	0	0	0	0	0	0	0	200	903	0	0	0	0	0	0	0	603	903	0
439	2	0	0	0	0	0	0	200	300	0	0	0	0	0	0	0	200	903	0	0	0	0	0	0	0	603	903	0
439	3	0	0	0	0	0	0	200	300	0	0	0	0	0	0	0	200	903	0	0	0	0	0	0	0	603	903	0
439	4	0	0	0	0	0	0	200	300	0	0	0	0	0	0	0	200	903	0	0	0	0	0	0	0	603	903	0
439	5	0	0	0	0	0	0	200	300	0	0	0	0	0	0	0	200	903	0	0	0	0	0	0	0	603	903	0
439	6	0	0	0	0	0	0	200	300	0	0	0	0	0	0	0	200	903	0	0	0	0	0	0	0	603	903	0
439	7	0	0	0	0	0	0	200	300	0	0	0	0	0	0	0	200	903	0	0	0	0	0	0	0	603	903	0
439	8	0	0	0	0	0	0	200	300	0	0	0	0	0	0	0	200	903	0	0	0	0	0	0	0	603	903	0
439	9	0	0	0	0	0	0	200	300	0	0	0	0	0	0	0	200	903	0	0	0	0	0	0	0	603	903	0
440	0	0	0	0	0	0	0	200	300	0	0	0	0	0	0	0	200	903	0	0	0	0	0	0	0	603	903	0
440	1	0	0	0	0	0	0	200	300	0	0	0	0	0	0	0	200	903	0	0	0	0	0	0	0	603	903	0
440	2	0	0	0	0	0	0	200	300	0	0	0	0	0	0	0	200	903	0	0	0	0	0	0	0	603	903	0
440	3	0	0	0	0	0	0	200	300	0	0	0	0	0	0	0	200	903	0	0	0	0	0	0	0	603	903	0
440	4	0	0	0	0	0	0	200	300	0	0	0	0	0	0	0	200	903	0	0	0	0	0	0	0	603	903	0
440	5	0	0	0	0	0	0	200	300	0	0	0	0	0	0	0	200	903	0	0	0	0	0	0	0	603	903	0
440	6	0	0	0	0	0	0	200	300	0	0	0	0	0	0	0	200	903	0	0	0	0	0	0	0	603	903	0
440	7	0	0	0	0	0	0	200	300	0	0	0	0	0	0	0	200	903	0	0	0	0	0	0	0	603	903	0
440	8	0	0	0	0	0	0	200	300	0	0	0	0	0	0	0	200	903	0	0	0	0	0	0	0	603	903	0
440	9	0	0	0	0	0	0	200	300	0	0	0	0	0	0	0	200	903	0	0	0	0	0	0	0	603	903	0
441	0	0	0	0	0	0	0	200	300	0	0	0	0	0	0	0	200	903	0	0	0	0	0	0	0	603	903	0
441	1	0	0	0	0	0	0	200	300	0	0	0	0	0	0	0	200	903	0	0	0	0	0	0	0	603	903	0
441	2	0	0	0	0	0	0	200	300	0	0	0	0	0	0	0	200	903	0	0	0	0	0	0	0	603	903	0
441	3	0	0	0	0	0	0	200	300	0	0	0	0	0	0	0	200	903	0	0	0	0	0	0	0	603	903	0
441	4	0	0	0	0	0	0	200	300	0	0	0	0	0	0	0	200	903	0	0	0	0	0	0	0	603	903	0
441	5	0	0	0	0	0	0	200	300	0	0	0	0	0	0	0	200	903	0	0	0	0	0	0	0	603	903	0
441	6	0	0	0	0	0	0	200	300	0	0	0	0	0	0	0	200	903	0	0	0	0	0	0	0	603	903	0
441	7	0	0	0	0	0	0	200	300	0	0	0	0	0	0	0	200	903	0	0	0	0	0	0	0	603	903	0
441	8	0	0	0	0	0	0	200	300	0	0	0	0	0	0	0	200	903	0	0	0	0	0	0	0	603	903	0
441	9	0	0	0	0	0	0	200	300	0	0	0	0	0	0	0	200	903	0	0	0	0	0	0	0	603	903	0
442	0	0	0	0	0	0	0	200	300	0	0	0	0	0	0	0	200	903	0	0	0	0	0	0	0	603	903	0
442	1	0	0	0	0	0	0	200	300	0	0	0	0	0	0	0	200	903	0	0	0	0	0	0	0	603	903	0
442	2	0	0	0	0	0	0	200	300	0	0	0	0	0	0	0	200	903	0	0	0	0	0	0	0	603	903	0
442	3	0	0	0	0	0	0	200	300	0	0	0	0	0	0	0	200	903	0	0	0	0	0	0	0	603	903	0
442	4	0	0	0	0	0	0	200	300	0	0	0	0	0	0	0	200	903	0	0	0	0	0	0	0	603	903	0
442	5	0	0	0	0	0	0	200	300	0	0	0	0	0	0	0	200	903	0	0	0	0	0	0	0	603	903	0
442	6	0	0	0	0	0	0	200	300	0	0	0	0	0	0	0	200	903	0	0	0	0	0	0	0	603	903	0
442	7	0	0	0	0	0	0	200	300	0	0	0	0	0	0	0	200	903	0	0	0	0	0	0	0	603	903	0
442	8	0	0	0	0	0	0	200	300	0	0	0	0	0	0	0	200	903	0	0	0	0	0	0	0	603	903	0
442	9	0	0	0	0	0	0	200	300	0	0	0	0	0	0	0	200	903	0	0	0	0	0	0	0	603	903	0
443	0	0	0	0	0	0	0	200	300	0	0	0	0	0	0	0	200	903	0	0	0	0	0	0	0	603	903	0
443	1	0	0	0	0	0	0	200	300	0	0	0	0	0	0	0	200	903	0	0	0	0	0	0	0	603	903	0
443	2	0	0	0	0	0	0	200	300	0	0	0	0	0	0	0	200	903	0	0	0	0	0	0	0	603	903	0
443	3	0	0	0	0	0	0	200	300	0	0	0	0	0	0	0	200	903	0	0	0	0	0	0	0	603	903	0
443	4	0	0	0	0	0	0	200	300	0	0	0	0	0	0	0	200	903	0	0	0	0	0	0	0	603	903	0
443	5	0	0	0	0	0	0	200	300	0	0	0	0	0	0	0	200	903	0	0	0	0	0	0	0	603	903	0
443	6	0	0	0	0	0	0	200	300	0	0	0	0	0	0	0	200	903	0	0	0	0	0	0	0	603	903	0
443	7	0	0	0	0	0	0	200	300	0	0	0	0	0	0	0	200	903	0	0	0	0	0	0	0	603	903	0
443	8	0	0	0	0	0	0	200	300	0	0	0	0	0	0	0	200	903	0	0	0	0	0	0	0	603	903	0
443	9	0	0	0	0	0	0	200	300	0	0	0	0	0	0	0	200	903	0	0	0	0	0	0	0	603	903	0
444	0	0	0	0	0	0	0	200	300	0	0	0	0	0	0	0	200	903	0	0	0	0	0	0	0	603	903	0
444	1	0	0	0	0	0	0	200	300	0	0	0	0	0	0	0	200	903	0	0	0	0	0	0	0	603	903	0
444	2	0	0	0	0	0	0	200	300	0	0	0	0	0	0	0	200	903	0	0	0	0	0	0	0	603	903	0
444	3	0	0	0	0	0	0	200	300	0	0	0	0	0	0	0	200	903	0	0	0	0	0	0	0	603	903	0
444	4	0	0	0	0	0	0	200	300	0	0	0	0	0	0	0	200	903	0	0	0	0	0	0	0	603	903	0
444	5	0	0	0	0	0	0	200	300	0	0	0	0	0	0	0	200	903	0	0	0	0	0	0	0	603	903	0
444	6	0	0	0	0	0	0	200	300	0	0	0	0	0	0	0	200	903	0	0	0	0	0	0	0	603	903	0
444	7	0	0	0	0	0	0	200	300	0	0	0	0	0	0	0	200	903	0	0	0	0	0	0	0	603	903	0
444	8	0	0	0	0	0	0	200	300	0	0	0	0	0	0	0	200	903	0	0	0	0	0	0	0	603	903	0
444	9	0	0	0	0	0	0	200	300	0	0	0	0	0	0	0	200	903	0	0	0	0	0	0	0	603	903	0
445	0	0	0	0	0	0	0	200	300	0	0	0	0	0	0	0	200	903	0	0	0	0	0	0	0	603	903	0
445	1	0	0	0	0	0	0	200	300	0	0	0	0	0	0	0	200	903	0	0	0	0	0	0	0	603	903	0
445	2	0	0	0	0	0	0	200	300	0	0	0	0	0	0	0	200	903	0	0	0	0	0	0	0	603	903	0
445	3	0	0	0	0	0	0	200	300	0	0	0	0	0	0	0	200	903	0	0	0	0	0	0	0	603	903	0
445	4	0	0	0	0	0	0	200	300	0	0	0	0	0	0	0	200	903	0	0	0	0	0	0	0	603	903	0
445	5	0	0	0	0	0	0	200	300	0	0	0	0	0	0	0	200	903	0	0	0	0	0	0	0	603	903	0
445	6	0	0	0	0	0	0	200	300	0	0	0	0	0	0	0	200	903	0	0	0	0	0	0	0	603	903	0
445	7	0	0	0	0	0	0	200	300	0	0	0	0	0	0	0	200	903	0	0	0	0	0	0	0	603	903	0
445	8	0	0	0	0	0	0	200	300	0	0	0	0	0	0	0	200	903	0	0	0	0	0	0	0	603	903	0
445	9	0	0	0	0	0	0	200	300	0	0	0	0	0	0	0	200	903	0	0	0	0	0	0	0	603	903	0
446	0	0	0	0	0	0	0	200	300	0	0	0	0	0	0	0	200	903	0	0	0	0	0	0	0	603	903	0
446	1	0	0	0	0	0	0	200	300	0	0	0	0	0	0	0	200	903	0	0	0	0	0	0	0	603	903	0
446	2	0	0	0	0	0	0	200	300	0	0	0	0	0	0	0	200	903	0	0	0	0	0	0	0	603	903	0
446	3	0	0	0	0	0	0	200	300	0	0	0	0	0	0	0	200	903	0	0	0	0	0	0	0	603	903	0
446	4	0	0	0	0	0	0	200	300	0	0	0	0	0	0	0	200	903	0	0	0	0	0	0	0	603	903	0
446	5	0	0	0	0	0	0	200	300	0	0	0	0	0	0	0	200	903	0	0	0	0	0	0	0	603	903	0
446	6	0	0	0	0	0	0	200	300	0	0	0	0	0	0	0	200	903	0	0	0	0	0	0	0	603	903	0
446	7	0	0	0	0	0	0	200	300	0	0	0	0	0	0	0	200	903	0	0	0	0	0	0	0	603	903	0
446	8	0	0	0	0	0	0	200	300	0	0	0	0	0	0	0	200	903	0	0	0	0	0	0	0	603	903	0
446	9	0	0	0	0	0	0	200	300	0	0	0	0	0	0	0	200	903	0	0	0	0	0	0	0	603	903	0
447	0	0	0	0	0	0	0	200	300	0	0	0	0	0	0	0	200	903	0	0	0	0	0	0	0	603	903	0
447	1	0	0	0	0	0	0	200	300	0	0	0	0	0	0	0	200	903	0	0	0	0	0	0	0	603	903	0
447	2	0	0	0	0	0	0	200	300	0	0	0	0	0	0	0	200	903	0	0	0	0	0	0	0	603	903	0
447	3	0	0	0	0	0	0	200	300	0	0	0	0	0	0	0	200	903	0	0	0	0	0	0	0	603	903	0
447	4	0	0	0	0	0	0	200	300	0	0	0	0	0	0	0	200	903	0	0	0	0	0	0	0	603	903	0
447	5	0	0	0	0	0	0	200	300	0	0	0	0	0	0	0	200	903	0	0	0	0	0	0	0	603	903	0
447	6	0	0	0	0	0	0	200	300	0	0	0	0	0	0	0	200	903	0	0	0	0	0	0	0	603	903	0
447	7	0	0	0	0	0	0	200	300	0	0	0	0	0	0	0	200	903	0	0	0	0	0	0	0	603	903	0
447	8	0	0	0	0	0	0	200	300	0	0	0	0	0	0	0	200	903	0	0	0	0	0	0	0	603	903	0
447	9	0	0	0	0	0	0	200	300	0	0	0	0	0	0	0	200	903	0	0	0	0	0	0	0	603	903	0
448	0	0	0	0	0	0	0	200	300	0	0	0	0	0	0	0	200	903	0	0	0	0	0	0	0	603	903	0
448	1	0	0	0	0	0	0	200	300	0	0	0	0	0	0	0	200	903	0	0	0	0	0	0	0	603	903	0
448	2	0	0	0	0	0	0	200	300	0	0	0	0	0	0	0	200	903	0	0	0	0	0	0	0	603	903	0
448	3	0	0	0	0	0	0	200	300	0	0	0	0	0	0	0	200	903	0	0	0	0	0	0	0	603	903	0
448	4	0	0	0	0	0	0	200	300	0	0	0	0	0	0	0	200	903	0	0	0	0	0	0	0	603	903	0
448	5	0	0	0	0	0	0	200	300	0	0	0	0	0	0	0	200	903	0	0	0	0	0	0	0	603	903	0
448	6	0	0	0	0	0	0	200	300	0	0	0	0	0	0	0	200	903	0	0	0	0	0	0	0	603	903	0
448	7	0	0	0	0	0	0	200	300	0	0	0	0	0	0	0	200	903	0	0	0	0	0	0	0	603	903	0
448	8	0	0	0	0	0	0	200	300	0	0	0	0	0	0	0	200	903	0	0	0	0	0	0	0	603	903	0
448	9	0	0	0	0	0	0	200	300	0	0	0	0	0	0	0	200	903	0	0	0	0	0	0	0	603	903	0
449	0	0	0	0	0	0	0	200	300	0	0	0	0	0	0	0	200	903	0	0	0	0	0	0	0	603	903	0
449	1	0	0	0	0	0	0	200	300	0	0	0	0	0	0	0	200	903	0	0	0	0	0	0	0	603	903	0
449	2	0	0	0	0	0	0	200	300	0	0	0	0	0	0	0	200	903	0	0	0	0	0	0	0	603	903	0
449	3	0	0	0	0	0	0	200	300	0	0	0	0	0	0	0	200	903	0	0	0	0	0	0	0	603	903	0
449	4	0	0	0	0	0	0	200	300	0	0	0	0	0	0	0	200	903	0	0	0	0	0	0	0	603	903	0
449	5	0	0	0	0	0	0	200	300	0	0	0	0	0	0	0	200	903	0	0	0	0	0	0	0	603	903	0
449	6	0	0	0	0	0	0	200	300	0	0	0	0	0	0	0	200	903	0	0	0	0	0	0	0	603	903	0
449	7	0	0	0	0	0	0	200	300	0	0	0	0	0	0	0	200	903	0	0	0	0	0	0	0	603	903	0
449	8	0	0	0	0	0	0	200	300	0	0	0	0	0	0	0	200	903	0	0	0	0	0	0	0	603	903	0
449	9	0	0	0	0	0	0	200	300	0	0	0	0	0	0	0	200	903	0	0	0	0	0	0	0	603	903	0
450	0	0	0	0	0	0	0	200	300	0	0	0	0	0	0	0	200	903	0	0	0	0	0	0	0	603	903	0
450	1	0	0	0	0	0	0	200	300	0	0	0	0	0	0	0	200	903	0	0	0	0	0	0	0	603	903	0
450	2	0	0	0	0	0	0	200	300	0	0	0	0	0	0	0	200	903	0	0	0	0	0	0	0	603	903	0
450	3	0	0	0	0	0	0	200	300	0	0	0	0	0	0	0	200	903	0	0	0	0	0	0	0	603	903	0
450	4	0	0	0	0	0	0	200	300	0	0	0	0	0	0	0	200	903	0	0	0	0	0	0	0	603	903	0
450	5	0	0	0	0	0	0	200	300	0	0	0	0	0	0	0	200	903	0	0	0	0	0	0	0	603	903	0
450	6	0	0	0	0	0	0	200	300	0	0	0	0	0	0	0	200	903	0	0	0	0	0	0	0	603	903	0
450	7	0	0	0	0	0	0	200	300	0	0	0	0	0	0	0	200	903	0	0	0	0	0	0	0	603	903	0
450	8	0	0	0	0	0	0	200	300	0	0	0	0	0	0	0	200	903	0	0	0	0	0	0	0	603	903	0
450	9	0	0	0	0	0	0	200	300	0	0	0	0	0	0	0	200	903	0	0	0	0	0	0	0	603	903	0
451	0	0	0	0	0	0	0	200	300	0	0	0	0	0	0	0	200	903	0	0	0	0	0	0	0	603	903	0
451	1	0	0	0	0	0	0	200	300	0	0	0	0	0	0	0	200	903	0	0	0	0	0	0	0	603	903	0
451	2	0	0	0	0	0	0	200	300	0	0	0	0	0	0	0	200	903	0	0	0	0	0	0	0	603	903	0
451	3	0	0	0	0	0	0	200	300	0	0	0	0	0	0	0	200	903	0	0	0	0	0	0	0	603	903	0
451	4	0	0	0	0	0	0	200	300	0	0	0	0	0	0	0	200	903	0	0	0	0	0	0	0	603	903	0
451	5	0	0	0	0	0	0	200	300	0	0	0	0	0	0	0	200	903	0	0	0	0	0	0	0	603	903	0
451	6	0	0	0	0	0	0	200	300	0	0	0	0	0	0	0	200	903	0	0	0	0	0	0	0	603	903	0
451	7	0	0	0	0	0	0	200	300	0	0	0	0	0	0	0	200	903	0	0	0	0	0	0	0	603	903	0
451	8	0	0	0	0	0	0	200	300	0	0	0	0	0	0	0	200	903	0	0	0	0	0	0	0	603	903	0
451	9	0	0	0	0	0	0	200	300	0	0	0	0	0	0	0	200	903	0	0	0	0	0	0	0	603	903	0
452	0	0	0	0	0	0	0	200	300	0	0	0	0	0	0	0	200	903	0	0	0	0	0	0	0	603	903	0
452	1	0	0	0	0	0	0	200	300	0	0	0	0	0	0	0	200	903	0	0	0	0	0	0	0	603	903	0
452	2	0	0	0	0	0	0	200	300	0	0	0	0	0	0	0	200	903	0	0	0	0	0	0	0	603	903	0
452	3	0	0	0	0	0	0	200	300	0	0	0	0	0	0	0	200	903	0	0	0	0	0	0	0	603	903	0
452	4	0	0	0	0	0	0	200	300	0	0	0	0	0	0	0	200	903	0	0	0	0	0	0	0	603	903	0
452	5	0	0	0	0	0	0	200	300	0	0	0	0	0	0	0	200	903	0	0	0	0	0	0	0	603	903	0
452	6	0	0	0	0	0	0	200	300	0	0	0	0	0	0	0	200	903	0	0	0	0	0	0	0	603	903	0
452	7	0	0	0	0	0	0	200	300	0	0	0	0	0	0	0	200	903	0	0	0	0	0	0	0	603	903	0
452	8	0	0	0	0	0	0	200	300	0	0	0	0	0	0	0	200	903	0	0	0	0	0	0	0	603	903	0
452	9	0	0	0	0	0	0	200	300	0	0	0	0	0	0	0	200	903	0	0	0	0	0	0	0	603	903	0
453	0	0	0	0	0	0	0	200	300	0	0	0	0	0	0	0	200	903	0	0	0	0	0	0	0	603	903	0
453	1	0	0	0	0	0	0	200	300	0	0	0	0	0	0	0	200	903	0	0	0	0	0	0	0	603	903	0
453	2	0	0	0	0	0	0	200	300	0	0	0	0	0	0	0	200	903	0	0	0	0	0	0	0	603	903	0
453	3	0	0	0	0	0	0	200	300	0	0	0	0	0	0	0	200	903	0	0	0	0	0	0	0	603	903	0
453	4	0	0	0	0	0	0	200	300	0	0	0	0	0	0	0	200	903	0	0	0	0	0	0	0	603	903	0
453	5	0	0	0	0	0	0	200	300	0	0	0	0	0	0	0	200	903	0	0	0	0	0	0	0	603	903	0
453	6	0	0	0	0	0	0	200	300	0	0	0	0	0	0	0	200	903	0	0	0	0	0	0	0	603	903	0
453	7	0	0	0	0	0	0	200	300	0	0	0	0	0	0	0	200	903	0	0	0	0	0	0	0	603	903	0
453	8	0	0	0	0	0	0	200	300	0	0	0	0	0	0	0	200	903	0	0	0	0	0	0	0	603	903	0
453	9	0	0	0	0	0	0	200	300	0	0	0	0	0	0	0	200	903	0	0	0	0	0	0	0	603	903	0
454	0	0	0	0	0	0	0	200	300	0	0	0	0	0	0	0	200	903	0	0	0	0	0	0	0	603	903	0
454	1	0	0	0	0	0	0	200	300	0	0	0	0	0	0	0	200	903	0	0	0	0	0	0	0	603	903	0
454	2	0	0	0	0	0	0	200	300	0	0	0	0	0	0	0	200	903	0	0	0	0	0	0	0	603	903	0
454	3	0	0	0	0	0	0	200	300	0	0	0	0	0	0	0	200	903	0	0	0	0	0	0	0	603	903	0
454	4	0	0	0	0	0	0	200	300	0	0	0	0	0	0	0	200	903	0	0	0	0	0	0	0	603	903	0
454	5	0	0	0	0	0	0	200	300	0	0	0	0	0	0	0	200	903	0	0	0	0	0	0	0	603	903	0
454	6	0	0	0	0	0	0	200	300	0	0	0	0	0	0	0	200	903	0	0	0	0	0	0	0	603	903	0
454	7	0	0	0	0	0	0	200	300	0	0	0	0	0	0	0	200	903	0	0	0	0	0	0	0	603	903	0
454	8	0	0	0	0	0	0	200	300	0	0	0	0	0	0	0	200	903	0	0	0	0	0	0	0	603	903	0
454	9	0	0	0	0	0	0	200	300	0	0	0	0	0	0	0	200	903	0	0	0	0	0	0	0	603	903	0
455	0	0	0	0	0	0	0	200	300	0	0	0	0	0	0	0	200	903	0	0	0	0	0	0	0	603	903	0
455	1	0	0	0	0	0	0	200	300	0	0	0	0	0	0	0	200	903	0	0	0	0	0	0	0	603	903	0
455	2	0	0	0	0	0	0	200	300	0	0	0	0	0	0	0	200	903	0	0	0	0	0	0	0	603	903	0
455	3	0	0	0	0	0	0	200	300	0	0	0	0	0	0	0	200	903	0	0	0	0	0	0	0	603	903	0
455	4	0	0	0	0	0	0	200	300	0	0	0	0	0	0	0	200	903	0	0	0	0	0	0	0	603	903	0
455	5	0	0	0	0	0	0	200	300	0	0	0	0	0	0	0	200	903	0	0	0	0	0	0	0	603	903	0
455	6	0	0	0	0	0	0	200	300	0	0	0	0	0	0	0	200	903	0	0	0	0	0	0	0	603	903	0
455	7	0	0	0	0	0	0	200	300	0	0	0	0	0	0	0	200	903	0	0	0	0	0	0	0	603	903	0
455	8	0	0	0	0	0	0	200	300	0	0	0	0	0	0	0	200	903	0	0	0	0	0	0	0	603	903	0
455	9	0	0	0	0	0	0	200	300	0	0	0	0	0	0	0	200	903	0	0	0	0	0	0	0	603	903	0
456	0	0	0	0	0	0	0	200	300	0	0	0	0	0	0	0	200	903	0	0	0	0	0	0	0	603	903	0
456	1	0	0	0	0	0	0	200	300	0	0	0	0	0	0	0	200	903	0	0	0	0	0	0	0	603	903	0
456	2	0	0	0	0	0	0	200	300	0	0	0	0	0	0	0	200	903	0	0	0	0	0	0	0	603	903	0
456	3	0	0	0	0	0	0	200	300	0	0	0	0	0	0	0	200	903	0	0	0	0	0	0	0	603	903	0
456	4	0	0	0	0	0	0	200	300	0	0	0	0	0	0	0	200	903	0	0	0	0	0	0	0	603	903	0
456	5	0	0	0	0	0	0	200	300	0	0	0	0	0	0	0	200	903	0	0	0	0	0	0	0	603	903	0
456	6	0	0	0	0	0	0	200	300	0	0	0	0	0	0	0	200	903	0	0	0	0	0	0	0	603	903	0
456	7	0	0	0	0	0	0	200	300	0	0	0	0	0	0	0	200	903	0	0	0	0	0	0	0	603	903	0
456	8	0	0	0	0	0	0	200	300	0	0	0	0	0	0	0	200	903	0	0	0	0	0	0	0	603	903	0
456	9	0	0	0	0	0	0	200	300	0	0	0	0	0	0	0	200	903	0	0	0	0	0	0	0	603	903	0
457	0	0	0	0	0	0	0	200	300	0	0	0	0	0	0	0	200	903	0	0	0	0	0	0	0	603	903	0
457	1	0	0	0	0	0	0	200	300	0	0	0	0	0	0	0	200	903	0	0	0	0	0	0	0	603	903	0
457	2	0	0	0	0	0	0	200	300	0	0	0	0	0	0	0	200	903	0	0	0	0	0	0	0	603	903	0
457	3	0	0	0	0	0	0	200	300	0	0	0	0	0	0	0	200	903	0	0	0	0	0	0	0	603	903	0
457	4	0	0	0	0	0	0	200	300	0	0	0	0	0	0	0	200	903	0	0	0	0	0	0	0	603	903	0
457	5	0	0	0	0	0	0	200	300	0	0	0	0	0	0	0	200	903	0	0	0	0	0	0	0	603	903	0
457	6	0	0	0	0	0	0	200	300	0	0	0	0	0	0	0	200	903	0	0	0	0	0	0	0	603	903	0
457	7	0	0	0	0	0	0	200	300	0	0	0	0	0	0	0	200	903	0	0	0	0	0	0	0	603	903	0
457	8	0	0	0	0	0	0	200	300	0	0	0	0	0	0	0	200	903	0	0	0	0	0	0	0	603	903	0
457	9	0	0	0	0	0	0	200	300	0	0	0	0	0	0	0	200	903	0	0	0	0	0	0	0	603	903	0
458	0	0	0	0	0	0	0	200	300	0	0	0	0	0	0	0	200	903	0	0	0	0	0	0	0	603	903	0
458	1	0	0	0	0	0	0	200	300	0	0	0	0	0	0	0	200	903	0	0	0	0	0	0	0	603	903	0
458	2	0	0	0	0	0	0	200	300	0	0	0	0	0	0	0	200	903	0	0	0	0	0	0	0	603	903	0
458	3	0	0	0	0	0	0	200	300	0	0	0	0	0	0	0	200	903	0	0	0	0	0	0	0	603	903	0
458	4	0	0	0	0	0	0	200	300	0	0	0	0	0	0	0	200	903	0	0	0	0	0	0	0	603	903	0
458	5	0	0	0	0	0	0	200	300	0	0	0	0	0	0	0	200	903	0	0	0	0	0	0	0	603	903	0
458	6	0	0	0	0	0	0	200	300	0	0	0	0	0	0	0	200	903	0	0	0	0	0	0	0	603	903	0
458	7	0	0	0	0	0	0	200	300	0	0	0	0	0	0	0	200	903	0	0	0	0	0	0	0	603	903	0
458	8	0	0	0	0	0	0	200	300	0	0	0	0	0	0	0	200	903	0	0	0	0	0	0	0	603	903	0
458	9	0	0	0	0	0	0	200	300	0	0	0	0	0	0	0	200	903	0	0	0	0	0	0	0	603	903	0
459	0	0	0	0	0	0	0	200	300	0	0	0	0	0	0	0	200	903	0	0	0	0	0	0	0	603	903	0
459	1	0	0	0	0	0	0	200	300	0	0	0	0	0	0	0	200	903	0	0	0	0	0	0	0	603	903	0
459	2	0	0	0	0	0	0	200	300	0	0	0	0	0	0	0	200	903	0	0	0	0	0	0	0	603	903	0
459	3	0	0	0	0	0	0	200	300	0	0	0	0	0	0	0	200	903	0	0	0	0	0	0	0	603	903	0
459	4	0	0	0	0	0	0	200	300	0	0	0	0	0	0	0	200	903	0	0	0	0	0	0	0	603	903	0
459	5	0	0	0	0	0	0	200	300	0	0	0	0	0	0	0	200	903	0	0	0	0	0	0	0	603	903	0
459	6	0	0	0	0	0	0	200	300	0	0	0	0	0	0	0	200	903	0	0	0	0	0	0	0	603	903	0
459	7	0	0	0	0	0	0	200	300	0	0	0	0	0	0	0	200	903	0	0	0	0	0	0	0	603	903	0
459	8	0	0	0	0	0	0	200	300	0	0	0	0	0	0	0	200	903	0	0	0	0	0	0	0	603	903	0
459	9	0	0	0	0	0	0	200	300	0	0	0	0	0	0	0	200	903	0	0	0	0	0	0	0	603	903	0
460	0	0	0	0	0	0	0	200	300	0	0	0	0	0	0	0	200	903	0	0	0	0	0	0	0	603	903	0
460	1	0	0	0	0	0	0	200	300	0	0	0	0	0	0	0	200	903	0	0	0	0	0	0	0	603	903	0
460	2	0	0	0	0	0	0	200	300	0	0	0	0	0	0	0	200	903	0	0	0	0	0	0	0	603	903	0
460	3	0	0	0	0	0	0	200	300	0	0	0	0	0	0	0	200	903	0	0	0	0	0	0	0	603	903	0
460	4	0	0	0	0	0	0	200	300	0	0	0	0	0	0	0	200	903	0	0	0	0	0	0	0	603	903	0
460	5	0	0	0	0	0	0	200	300	0	0	0	0	0	0	0	200	903	0	0	0	0	0	0	0	603	903	0
460	6	0	0	0	0	0	0	200	300	0	0	0	0	0	0	0	200	903	0	0	0	0	0	0	0	603	903	0
460	7	0	0	0	0	0	0	200	300	0	0	0	0	0	0	0	200	903	0	0	0	0	0	0	0	603	903	0
460	8	0	0	0	0	0	0	200	300	0	0	0	0	0	0	0	200	903	0	0	0	0	0	0	0	603	903	0
460	9	0	0	0	0	0	0	200	300	0	0	0	0	0	0	0	200	903	0	0	0	0	0	0	0	603	903	0
461	0	0	0	0	0	0	0	200	300	0	0	0	0	0	0	0	200	903	0	0	0	0	0	0	0	603	903	0
461	1	0	0	0	0	0	0	200	300	0	0	0	0	0	0	0	200	903	0	0	0	0	0	0	0	603	903	0
461	2	0	0	0	0	0	0	200	300	0	0	0	0	0	0	0	200	903	0	0	0	0	0	0	0	603	903	0
461	3	0	0	0	0	0	0	200	300	0	0	0	0	0	0	0	200	903	0	0	0	0	0	0	0	603	903	0
461	4	0	0	0	0	0	0	200	300	0	0	0	0	0	0	0	200	903	0	0	0	0	0	0	0	603	903	0
461	5	0	0	0	0	0	0	200	300	0	0	0	0	0	0	0	200	903	0	0	0	0	0	0	0	603	903	0
461	6	0	0	0	0	0	0	200	300	0	0	0	0	0	0	0	200	903	0	0	0	0	0	0	0	603	903	0
461	7	0	0	0	0	0	0	200	300	0	0	0	0	0	0	0	200	903	0	0	0	0	0	0	0	603	903	0
461	8	0	0	0	0	0	0	200	300	0	0	0	0	0	0	0	200	903	0	0	0	0	0	0	0	603	903	0
461	9	0	0	0	0	0	0	200	300	0	0	0	0	0	0	0	200	903	0	0	0	0	0	0	0	603	903	0
462	0	0	0	0	0	0	0	200	300	0	0	0	0	0	0	0	200	903	0	0	0	0	0	0	0	603	903	0
462	1	0	0	0	0	0	0	200	300	0	0	0	0	0	0	0	200	903	0	0	0	0	0	0	0	603	903	0
462	2	0	0	0	0	0	0	200	300	0	0	0	0	0	0	0	200	903	0	0	0	0	0	0	0	603	903	0
462	3	0	0	0	0	0	0	200	300	0	0	0	0	0	0	0	200	903	0	0	0	0	0	0	0	603	903	0
462	4	0	0	0	0	0	0	200	300	0	0	0	0	0	0	0	200	903	0	0	0	0	0	0	0	603	903	0
462	5	0	0	0	0	0	0	200	300	0	0	0	0	0	0	0	200	903	0	0	0	0	0	0	0	603	903	0
462	6	0	0	0	0	0	0	200	300	0	0	0	0	0	0	0	200	903	0	0	0	0	0	0	0	603	903	0
462	7	0	0	0	0	0	0	200	300	0	0	0	0	0	0	0	200	903	0	0	0	0	0	0	0	603	903	0
462	8	0	0	0	0	0	0	200	300	0	0	0	0	0	0	0	200	903	0	0	0	0	0	0	0	603	903	0
462	9	0	0	0	0	0	0	200	300	0	0	0	0	0	0	0	200	903	0	0	0	0	0	0	0	603	903	0
463	0	0	0	0	0	0	0	200	300	0	0	0	0	0	0	0	200	903	0	0	0	0	0	0	0	603	903	0
463	1	0	0	0	0	0	0	200	300	0	0	0	0	0	0	0	200	903	0	0	0	0	0	0	0	603	903	0
463	2	0	0	0	0	0	0	200	300	0	0	0	0	0	0	0	200	903	0	0	0	0	0	0	0	603	903	0
463	3	0	0	0	0	0	0	200	300	0	0	0	0	0	0	0	200	903	0	0	0	0	0	0	0	603	903	0
463	4	0	0	0	0	0	0	200	300	0	0	0	0	0	0	0	200	903	0	0	0	0	0	0	0	603	903	0
463	5	0	0	0	0	0	0	200	300	0	0	0	0	0	0	0	200	903	0	0	0	0	0	0	0	603	903	0
463	6	0	0	0	0	0	0	200	300	0	0	0	0	0	0	0	200	903	0	0	0	0	0	0	0	603	903	0
463	7	0	0	0	0	0	0	200	300	0	0	0	0	0	0	0	200	903	0	0	0	0	0	0	0	603	903	0
463	8	0	0	0	0	0	0	200	300	0	0	0	0	0	0	0	200	903	0	0	0	0	0	0	0	603	903	0
463	9	0	0	0	0	0	0	200	300	0	0	0	0	0	0	0	200	903	0	0	0	0	0	0	0	603	903	0
464	0	0	0	0	0	0	0	200	300	0	0	0	0	0	0	0	200	903	0	0	0	0	0	0	0	603	903	0
464	1	0	0	0	0	0	0	200	300	0	0	0	0	0	0	0	200	903	0	0	0	0	0	0	0	603	903	0
464	2	0	0	0	0	0	0	200	300	0	0	0	0	0	0	0	200	903	0	0	0	0	0	0	0	603	903	0
464	3	0	0	0	0	0	0	200	300	0	0	0	0	0	0	0	200	903	0	0	0	0	0	0	0	603	903	0
464	4	0	0	0	0	0	0	200	300	0	0	0	0	0	0	0	200	903	0	0	0	0	0	0	0	603	903	0
464	5	0	0	0	0	0	0	200	300	0	0	0	0	0	0	0	200	903	0	0	0	0	0	0	0	603	903	0
464	6	0	0	0	0	0	0	200	300	0	0	0	0	0	0	0	200	903	0	0	0	0	0	0	0	603	903	0
464	7	0	0	0	0	0	0	200	300	0	0	0	0	0	0	0	200	903	0	0	0	0	0	0	0	603	903	0
464	8	0	0	0	0	0	0	200	300	0	-1.46622	-7.6062	-20.8086	-2009.97	-610.883	442.887	170.643	999.593	0	0	0	0	0	0	0	603	903	0
464	9	0	0	0	0	0	0	200	300	0	-2.38174	-11.2683	-34.8467	-2467.73	-793.988	625.992	177.215	973.817	0	0	0	0	0	0	0	603	903	0
465	0	0	0	0	0	0	0	200	300	0	-1.00845	-5.46997	-38.814	-2742.39	-1587.45	214.005	159.101	973.655	0	0	0	0	0	0	0	603	903	0
465	1	0	0	0	0	0	0	200	300	0	-1.77139	0.328366	-42.4761	-3566.36	-1160.2	-14.877	172.686	986.962	0	0	0	0	0	0	0	603	903	0
465	2	0	0	0	0	0	0	200	300	0	0.517426	0.480954	-48.5796	-3841.02	-1648.48	-60.6534	166.066	982.067	0	0	0	0	0	0	0	603	903	0
465	3	0	0	0	0	0	0	200	300	0	2.95883	2.15942	-58.9556	-4390.34	-2197.8	-289.535	162.721	977.469	0	0	0	0	0	0	0	603	903	0
465	4	0	0	0	0	0	0	200	300	0	0.21225	7.19482	-70.5523	-5305.87	-2502.97	-335.312	164.523	978.205	0	0	0	0	0	0	0	603	903	0
465	5	0	0	0	0	0	0	200	300	0	0.21225	7.34741	-78.792	-6587.6	-2502.97	-243.759	168.233	986.608	0	0	0	0	0	0	0	603	903	0
465	6	0	0	0	0	0	0	200	300	0	4.6373	8.41552	-86.4214	-6862.26	-2869.18	-289.535	166.8	982.405	0	0	0	0	0	0	0	603	903	0
465	7	0	0	0	0	0	0	200	300	0	2.50107	10.094	-99.544	-7228.47	-2625.04	-976.181	173.629	975.616	0	0	0	0	0	0	0	603	903	0
465	8	0	0	0	0	0	0	200	300	0	1.73813	9.48364	-107.479	-7594.69	-3601.61	-701.523	166.49	973.662	0	0	0	0	0	0	0	603	903	0
465	9	0	0	0	0	0	0	200	300	0	3.87436	6.73706	-114.498	-8693.32	-3479.54	-747.299	169.61	978.926	0	0	0	0	0	0	0	603	903	0
466	0	0	0	0	0	0	0	200	300	0	6.16318	6.43188	-120.296	-9608.84	-3601.61	-701.523	170.06	982.877	0	0	0	0	0	0	0	603	903	0
466	1	0	0	0	0	0	0	200	300	0	5.55283	7.19482	-130.977	-9975.05	-4028.85	-243.759	169.24	979.159	0	0	0	0	0	0	0	603	903	0
466	2	0	0	0	0	0	0	200	300	0	5.40024	5.36377	-139.522	-9975.05	-3845.75	-609.97	172.436	974.495	0	0	0	0	0	0	0	603	903	0
466	3	0	0	0	0	0	0	200	300	0	6.16318	7.04223	-148.067	-11256.8	-4700.24	-1067.73	168.256	979.025	0	0	0	0	0	0	0	603	903	0
466	4	0	0	0	0	0	0	200	300	0	8.29941	9.63623	-153.865	-11531.5	-4822.31	-1067.73	168.659	977.945	0	0	0	0	0	0	0	603	903	0
466	5	0	0	0	0	0	0	200	300	0	9.21494	10.2466	-162.41	-11806.1	-4944.38	-838.852	169.556	975.693	0	0	0	0	0	0	0	603	903	0
466	6	0	0	0	0	0	0	200	300	0	7.53647	5.51635	-170.65	-12447	-5371.63	-1250.84	168.523	975.939	0	0	0	0	0	0	0	603	903	0
466	7	0	0	0	0	0	0	200	300	0	7.99423	5.21118	-176.753	-12813.2	-5005.42	-793.075	171.681	975.492	0	0	0	0	0	0	0	603	903	0
466	8	0	0	0	0	0	0	200	300	0	11.1986	5.82153	-180.721	-13087.9	-5188.52	-1159.29	171.29	975.42	0	0	0	0	0	0	0	603	903	0
466	9	0	0	0	0	0	0	200	300	0	10.7408	1.24389	-184.688	-13728.7	-5371.63	-884.628	170.915	977.335	0	0	0	0	0	0	0	603	903	0
467	0	0	0	0	0	0	0	200	300	0	9.97787	-3.63892	-189.876	-13637.2	-5554.73	-884.628	170.745	974.821	0	0	0	0	0	0	0	603	903	0
467	1	0	0	0	0	0	0	200	300	0	10.7408	-4.09668	-196.59	-13820.3	-5737.84	-793.075	170.813	973.3	0	0	0	0	0	0	0	603	903	0
467	2	0	0	0	0	0	0	200	300	0	10.8934	-6.3855	-196.285	-14461.1	-5676.8	-930.405	171.079	976.674	0	0	0	0	0	0	0	603	903	0
467	3	0	0	0	0	0	0	200	300	0	11.6563	-11.4209	-200.862	-14644.2	-5432.66	-564.193	172.953	975.907	0	0	0	0	0	0	0	603	903	0
467	4	0	0	0	0	0	0	200	300	0	12.7245	-13.4045	-202.999	-14735.8	-5859.91	-701.523	171.133	975.591	0	0	0	0	0	0	0	603	903	0
467	5	0	0	0	0	0	0	200	300	0	10.4356	-15.5408	-210.628	-14644.2	-5676.8	-655.746	173.048	972.527	0	0	0	0	0	0	0	603	903	0
467	6	0	0	0	0	0	0	200	300	0	11.6563	-19.9658	-218.257	-14644.2	-5554.73	-335.312	174.55	970.096	0	0	0	0	0	0	0	603	903	0
467	7	0	0	0	0	0	0	200	300	0	15.1659	-23.3228	-219.173	-14918.9	-6043.01	-289.535	172.428	971.069	0	0	0	0	0	0	0	603	903	0
467	8	0	0	0	0	0	0	200	300	0	12.1141	-25.6116	-223.751	-15651.3	-6165.08	-426.864	172.447	972.95	0	0	0	0	0	0	0	603	903	0
467	9	0	0	0	0	0	0	200	300	0	12.2667	-29.884	-228.633	-15468.2	-6226.12	-60.6534	172.768	970.655	0	0	0	0	0	0	0	603	903	0
468	0	0	0	0	0	0	0	200	300	0	13.4874	-33.3936	-233.516	-15376.7	-6104.05	168.228	173.86	968.848	0	0	0	0	0	0	0	603	903	0
468	1	0	0	0	0	0	0	200	300	0	12.7245	-36.4453	-240.23	-16109.1	-6165.08	-106.43	174.337	970.057	0	0	0	0	0	0	0	603	903	0
468	2	0	0	0	0	0	0	200	300	0	13.3348	-39.6497	-245.418	-15376.7	-6165.08	259.781	174.879	965.655	0	0	0	0	0	0	0	603	903	0
468	3	0	0	0	0	0	0	200	300	0	14.8607	-43.6169	-250.911	-16292.2	-6470.26	351.334	174.213	967.932	0	0	0	0	0	0	0	603	903	0
468	4	0	0	0	0	0	0	200	300	0	14.7081	-46.9739	-257.625	-17024.6	-6531.29	442.887	174.648	969.083	0	0	0	0	0	0	0	603	903	0
468	5	0	0	0	0	0	0	200	300	0	13.3348	-48.4998	-264.339	-17207.7	-6836.47	580.216	174.137	968.097	0	0	0	0	0	0	0	603	903	0
468	6	0	0	0	0	0	0	200	300	0	14.4029	-50.9412	-270.137	-17299.3	-6714.4	671.769	175.145	967.039	0	0	0	0	0	0	0	603	903	0
468	7	0	0	0	0	0	0	200	300	0	15.9288	-54.4507	-276.546	-17665.5	-6958.54	580.216	174.838	966.879	0	0	0	0	0	0	0	603	903	0
468	8	0	0	0	0	0	0	200	300	0	13.7926	-55.061	-280.208	-18031.7	-7080.61	1129.53	174.731	967.351	0	0	0	0	0	0	0	603	903	0
468	9	0	0	0	0	0	0	200	300	0	13.9452	-56.1292	-288.448	-17757	-7324.75	1037.98	174.606	964.561	0	0	0	0	0	0	0	603	903	0
469	0	0	0	0	0	0	0	200	300	0	13.9452	-59.4861	-292.11	-18581	-7996.14	1129.53	172.626	966.61	0	0	0	0	0	0	0	603	903	0
469	1	0	0	0	0	0	0	200	300	0	13.3348	-60.5542	-298.213	-18947.2	-7446.82	1404.19	175.029	966.536	0	0	0	0	0	0	0	603	903	0
469	2	0	0	0	0	0	0	200	300	0	13.4874	-62.3853	-301.265	-18672.6	-8179.24	1495.74	172.85	964.981	0	0	0	0	0	0	0	603	903	0
469	3	0	0	0	0	0	0	200	300	0	11.9615	-62.9956	-312.862	-19221.9	-8179.24	1266.86	173.857	964.439	0	0	0	0	0	0	0	603	903	0
469	4	0	0	0	0	0	0	200	300	0	15.1659	-62.2327	-326.29	-19862.8	-8667.52	1358.41	173.436	963.875	0	0	0	0	0	0	0	603	903	0
469	5	0	0	0	0	0	0	200	300	0	20.8116	-62.9956	-340.633	-20045.9	-8728.56	1312.64	174.375	961.849	0	0	0	0	0	0	0	603	903	0
469	6	0	0	0	0	0	0	200	300	0	20.8116	-65.8948	-352.23	-20869.8	-9094.77	1404.19	174.179	962.251	0	0	0	0	0	0	0	603	903	0
469	7	0	0	0	0	0	0	200	300	0	18.9806	-68.6414	-361.08	-21052.9	-8850.63	1999.28	175.488	961.306	0	0	0	0	0	0	0	603	903	0
469	8	0	0	0	0	0	0	200	300	0	18.5228	-69.4043	-373.287	-20503.6	-9216.84	1770.4	175.309	957.927	0	0	0	0	0	0	0	603	903	0
469	9	0	0	0	0	0	0	200	300	0	20.659	-70.3198	-385.189	-21419.1	-9522.02	1816.18	175.28	958.607	0	0	0	0	0	0	0	603	903	0
470	0	0	0	0	0	0	0	200	300	0	21.2694	-72.1509	-394.954	-22426.2	-10071.3	2136.61	174.5	959.782	0	0	0	0	0	0	0	603	903	0
470	1	0	0	0	0	0	0	200	300	0	18.5228	-74.5923	-403.499	-21419.1	-10559.6	2319.72	173.83	956.084	0	0	0	0	0	0	0	603	903	0
470	2	0	0	0	0	0	0	200	300	0	17.1495	-74.5923	-411.739	-22517.8	-10620.7	2182.39	174.205	957.69	0	0	0	0	0	0	0	603	903	0
470	3	0	0	0	0	0	0	200	300	0	17.6073	-76.2708	-420.894	-22517.8	-10559.6	2823.26	174.911	956.5	0	0	0	0	0	0	0	603	903	0
470	4	0	0	0	0	0	0	200	300	0	16.5392	-77.7966	-426.387	-22975.5	-10681.7	2685.93	174.948	956.884	0	0	0	0	0	0	0	603	903	0
470	5	0	0	0	0	0	0	200	300	0	15.1659	-78.8647	-431.88	-22792.4	-11353.1	2594.38	173.712	955.775	0	0	0	0	0	0	0	603	903	0
470	6	0	0	0	0	0	0	200	300	0	13.4874	-81.001	-440.425	-22884	-11475.1	2960.59	173.945	954.959	0	0	0	0	0	0	0	603	903	0
470	7	0	0	0	0	0	0	200	300	0	15.7762	-83.7476	-447.75	-22517.8	-11536.2	3281.02	174.235	953.291	0	0	0	0	0	0	0	603	903	0
470	8	0	0	0	0	0	0	200	300	0	16.8443	-83.7476	-452.327	-22975.5	-12390.7	3097.92	172.607	953.794	0	0	0	0	0	0	0	603	903	0
470	9	0	0	0	0	0	0	200	300	0	13.1822	-85.5786	-457.515	-22700.9	-11902.4	3235.24	173.985	952.618	0	0	0	0	0	0	0	603	903	0
471	0	0	0	0	0	0	0	200	300	0	13.4874	-88.3252	-461.177	-22609.3	-11902.4	3372.57	174.191	952.025	0	0	0	0	0	0	0	603	903	0
471	1	0	0	0	0	0	0	200	300	0	14.0977	-88.02	-467.281	-22975.5	-12390.7	3143.69	173.483	952.169	0	0	0	0	0	0	0	603	903	0
471	2	0	0	0	0	0	0	200	300	0	12.4193	-90.1562	-471.248	-22792.4	-12634.8	3464.13	173.189	951.366	0	0	0	0	0	0	0	603	903	0
471	3	0	0	0	0	0	0	200	300	0	11.3512	-92.1399	-476.436	-23341.8	-12756.9	3601.46	173.224	951.992	0	0	0	0	0	0	0	603	903	0
471	4	0	0	0	0	0	0	200	300	0	12.7245	-93.5132	-480.403	-22884	-12756.9	3555.68	173.445	950.635	0	0	0	0	0	0	0	603	903	0
471	5	0	0	0	0	0	0	200	300	0	11.8089	-93.9709	-485.286	-23341.8	-12756.9	3647.23	173.713	951.099	0	0	0	0	0	0	0	603	903	0
471	6	0	0	0	0	0	0	200	300	0	10.2831	-95.1917	-487.422	-22609.3	-13489.3	3738.78	172.325	949.385	0	0	0	0	0	0	0	603	903	0
471	7	0	0	0	0	0	0	200	300	0	9.52011	-96.4124	-491.085	-22243.1	-12817.9	3693.01	173.899	948.294	0	0	0	0	0	0	0	603	903	0
471	8	0	0	0	0	0	0	200	300	0	8.90976	-98.2434	-495.662	-22151.6	-13367.2	3921.89	173.032	947.691	0	0	0	0	0	0	0	603	903	0
471	9	0	0	0	0	0	0	200	300	0	7.84164	-98.396	-496.883	-22609.3	-13672.4	3967.67	172.484	948.502	0	0	0	0	0	0	0	603	903	0
472	0	0	0	0	0	0	0	200	300	0	7.68906	-98.396	-498.104	-22243.1	-13184.1	3830.34	173.531	947.656	0	0	0	0	0	0	0	603	903	0
472	1	0	0	0	0	0	0	200	300	0	5.24765	-101.6	-502.376	-22243.1	-13916.5	3967.67	172.299	947.276	0	0	0	0	0	0	0	603	903	0
472	2	0	0	0	0	0	0	200	300	0	4.02695	-102.363	-507.869	-21693.8	-13733.4	4105	172.959	945.715	0	0	0	0	0	0	0	603	903	0
472	3	0	0	0	0	0	0	200	300	0	5.24765	-101.906	-509.7	-21144.5	-14099.7	4059.22	172.337	944.484	0	0	0	0	0	0	0	603	903	0
472	4	0	0	0	0	0	0	200	300	0	4.78989	-105.262	-517.024	-21693.8	-14465.9	4013.44	172.021	944.959	0	0	0	0	0	0	0	603	903	0
472	5	0	0	0	0	0	0	200	300	0	4.6373	-106.636	-519.771	-21510.7	-14465.9	4379.65	172.169	944.385	0	0	0	0	0	0	0	603	903	0
472	6	0	0	0	0	0	0	200	300	0	2.34848	-106.483	-523.738	-20595.2	-14282.8	4150.77	172.729	942.323	0	0	0	0	0	0	0	603	903	0
472	7	0	0	0	0	0	0	200	300	0	1.28037	-109.077	-527.706	-20961.4	-14526.9	4288.1	172.472	942.722	0	0	0	0	0	0	0	603	903	0
472	8	0	0	0	0	0	0	200	300	0	1.89072	-110.908	-529.537	-20778.3	-14221.7	4471.21	173.143	942.239	0	0	0	0	0	0	0	603	903	0
472	9	0	0	0	0	0	0	200	300	0	-0.0929256	-109.993	-534.725	-20137.4	-15137.3	4516.98	171.692	940.659	0	0	0	0	0	0	0	603	903	0
473	0	0	0	0	0	0	0	200	300	0	-0.550689	-111.671	-539.607	-20686.7	-15686.6	4425.43	170.93	941.337	0	0	0	0	0	0	0	603	903	0
473	1	0	0	0	0	0	0	200	300	0	-0.703277	-113.96	-541.744	-20595.2	-15198.3	4928.97	171.946	941.016	0	0	0	0	0	0	0	603	903	0
473	2	0	0	0	0	0	0	200	300	0	-3.75503	-115.181	-549.678	-19588.1	-15930.7	5020.52	171.018	938.636	0	0	0	0	0	0	0	603	903	0
473	3	0	0	0	0	0	0	200	300	0	-5.12833	-115.944	-552.73	-20229	-15808.6	4837.42	171.399	939.598	0	0	0	0	0	0	0	603	903	0
473	4	0	0	0	0	0	0	200	300	0	-3.90762	-115.638	-554.561	-19862.8	-15930.7	5203.63	171.273	938.817	0	0	0	0	0	0	0	603	903	0
473	5	0	0	0	0	0	0	200	300	0	-5.12833	-116.554	-559.749	-19221.9	-15930.7	5066.3	171.54	937.34	0	0	0	0	0	0	0	603	903	0
473	6	0	0	0	0	0	0	200	300	0	-7.26456	-116.859	-563.106	-18947.2	-16602.1	5295.18	170.517	936.648	0	0	0	0	0	0	0	603	903	0
473	7	0	0	0	0	0	0	200	300	0	-9.55338	-118.995	-567.073	-18947.2	-16480	5615.62	170.938	936.412	0	0	0	0	0	0	0	603	903	0
473	8	0	0	0	0	0	0	200	300	0	-8.94302	-120.674	-571.041	-18581	-16968.3	5707.17	170.285	935.539	0	0	0	0	0	0	0	603	903	0
473	9	0	0	0	0	0	0	200	300	0	-8.48526	-121.437	-573.787	-18855.7	-16541.1	5432.51	171.172	935.862	0	0	0	0	0	0	0	603	903	0
474	0	0	0	0	0	0	0	200	300	0	-10.9267	-121.437	-575.008	-18031.7	-17456.6	5707.17	169.641	934.359	0	0	0	0	0	0	0	603	903	0
474	1	0	0	0	0	0	0	200	300	0	-11.6896	-122.963	-579.586	-17757	-17395.6	5569.84	169.986	933.638	0	0	0	0	0	0	0	603	903	0
474	2	0	0	0	0	0	0	200	300	0	-9.55338	-125.251	-582.332	-17940.1	-17517.6	5844.5	169.918	933.807	0	0	0	0	0	0	0	603	903	0
474	3	0	0	0	0	0	0	200	300	0	-11.0793	-124.946	-586.605	-17116.2	-17883.8	6210.71	169.513	932.178	0	0	0	0	0	0	0	603	903	0
474	4	0	0	0	0	0	0	200	300	0	-12.4525	-126.472	-588.741	-16841.5	-17517.6	5981.83	170.246	931.606	0	0	0	0	0	0	0	603	903	0
474	5	0	0	0	0	0	0	200	300	0	-11.0793	-128.608	-591.182	-17116.2	-17700.7	5752.95	170.059	931.952	0	0	0	0	0	0	0	603	903	0
474	6	0	0	0	0	0	0	200	300	0	-11.3844	-128.761	-594.844	-16933.1	-18311.1	6210.71	169.217	931.466	0	0	0	0	0	0	0	603	903	0
474	7	0	0	0	0	0	0	200	300	0	-11.2318	-129.066	-596.065	-16200.6	-18128	6348.04	169.587	930.179	0	0	0	0	0	0	0	603	903	0
474	8	0	0	0	0	0	0	200	300	0	-11.6896	-131.66	-601.863	-15559.8	-18555.2	6439.59	169.17	928.853	0	0	0	0	0	0	0	603	903	0
474	9	0	0	0	0	0	0	200	300	0	-11.8422	-133.339	-605.22	-16109.1	-18677.3	6805.8	169.14	929.617	0	0	0	0	0	0	0	603	903	0
475	0	0	0	0	0	0	0	200	300	0	-13.8258	-134.254	-609.798	-15651.3	-18250	6851.58	170.072	928.666	0	0	0	0	0	0	0	603	903	0
475	1	0	0	0	0	0	0	200	300	0	-14.131	-134.559	-610.408	-15102	-19043.5	6531.14	168.802	927.741	0	0	0	0	0	0	0	603	903	0
475	2	0	0	0	0	0	0	200	300	0	-13.6732	-135.17	-612.85	-15010.5	-19165.6	6714.25	168.727	927.493	0	0	0	0	0	0	0	603	903	0
475	3	0	0	0	0	0	0	200	300	0	-14.894	-137.764	-618.648	-14918.9	-19165.6	6851.58	169.02	927.115	0	0	0	0	0	0	0	603	903	0
475	4	0	0	0	0	0	0	200	300	0	-14.7414	-138.527	-622.31	-14644.2	-19409.7	6851.58	168.81	926.532	0	0	0	0	0	0	0	603	903	0
475	5	0	0	0	0	0	0	200	300	0	-13.9784	-139.137	-624.446	-14735.8	-19226.6	7172.01	169.21	926.598	0	0	0	0	0	0	0	603	903	0
475	6	0	0	0	0	0	0	200	300	0	-16.2672	-140.358	-628.414	-14827.4	-19531.8	7034.68	168.919	926.595	0	0	0	0	0	0	0	603	903	0
475	7	0	0	0	0	0	0	200	300	0	-16.4198	-140.205	-635.128	-13637.2	-20081.1	6805.8	168.383	924.472	0	0	0	0	0	0	0	603	903	0
475	8	0	0	0	0	0	0	200	300	0	-16.1147	-141.884	-640.926	-12721.6	-19837	7126.24	169.05	922.849	0	0	0	0	0	0	0	603	903	0
475	9	0	0	0	0	0	0	200	300	0	-17.3354	-143.409	-644.893	-13454.1	-20691.4	7263.57	167.915	923.862	0	0	0	0	0	0	0	603	903	0
476	0	0	0	0	0	0	0	200	300	0	-17.6405	-142.799	-649.166	-13362.5	-20996.6	7263.57	167.656	923.584	0	0	0	0	0	0	0	603	903	0
476	1	0	0	0	0	0	0	200	300	0	-17.3354	-143.104	-655.574	-12904.7	-20569.4	7858.66	168.624	922.685	0	0	0	0	0	0	0	603	903	0
476	2	0	0	0	0	0	0	200	300	0	-17.0302	-147.072	-660.457	-12721.6	-21423.9	7584	167.562	922.262	0	0	0	0	0	0	0	603	903	0
476	3	0	0	0	0	0	0	200	300	0	-17.6405	-146.766	-665.645	-12355.4	-21240.8	7263.57	168.09	921.562	0	0	0	0	0	0	0	603	903	0
476	4	0	0	0	0	0	0	200	300	0	-19.319	-147.224	-671.749	-11439.9	-21668	7538.23	167.744	920.03	0	0	0	0	0	0	0	603	903	0
476	5	0	0	0	0	0	0	200	300	0	-19.0138	-148.445	-676.021	-11623	-21790.1	7492.45	167.767	920.193	0	0	0	0	0	0	0	603	903	0
476	6	0	0	0	0	0	0	200	300	0	-19.0138	-148.14	-679.683	-12080.8	-22156.3	7538.23	167.402	920.774	0	0	0	0	0	0	0	603	903	0
476	7	0	0	0	0	0	0	200	300	0	-20.6923	-149.36	-687.618	-11073.7	-22583.5	7721.33	167.157	919.104	0	0	0	0	0	0	0	603	903	0
476	8	0	0	0	0	0	0	200	300	0	-21.4552	-150.428	-691.28	-10249.7	-22583.5	7904.44	167.331	917.827	0	0	0	0	0	0	0	603	903	0
476	9	0	0	0	0	0	0	200	300	0	-21.4552	-150.886	-697.078	-10799	-22461.5	7675.55	167.778	918.492	0	0	0	0	0	0	0	603	903	0
477	0	0	0	0	0	0	0	200	300	0	-20.9975	-151.649	-703.487	-10341.3	-23621.1	7812.88	166.423	917.7	0	0	0	0	0	0	0	603	903	0
477	1	0	0	0	0	0	0	200	300	0	-21.6078	-150.581	-706.844	-9700.4	-24048.4	7858.66	165.978	916.724	0	0	0	0	0	0	0	603	903	0
477	2	0	0	0	0	0	0	200	300	0	-21.913	-152.565	-713.558	-10158.2	-23560.1	7675.55	166.982	917.236	0	0	0	0	0	0	0	603	903	0
477	3	0	0	0	0	0	0	200	300	0	-22.9811	-154.548	-717.83	-9791.95	-23987.3	8133.32	166.584	916.641	0	0	0	0	0	0	0	603	903	0
477	4	0	0	0	0	0	0	200	300	0	-22.8285	-152.717	-721.492	-8876.42	-23804.2	8133.32	167.007	915.303	0	0	0	0	0	0	0	603	903	0
477	5	0	0	0	0	0	0	200	300	0	-23.744	-153.938	-727.291	-9151.08	-24109.4	7950.21	166.85	915.582	0	0	0	0	0	0	0	603	903	0
477	6	0	0	0	0	0	0	200	300	0	-25.2699	-155.159	-733.089	-8876.42	-24780.8	7904.44	166.197	915.108	0	0	0	0	0	0	0	603	903	0
477	7	0	0	0	0	0	0	200	300	0	-25.1173	-154.701	-737.361	-8418.66	-24719.8	7812.88	166.475	914.417	0	0	0	0	0	0	0	603	903	0
477	8	0	0	0	0	0	0	200	300	0	-24.9648	-154.243	-741.939	-8418.66	-25147	7858.66	166.106	914.347	0	0	0	0	0	0	0	603	903	0
477	9	0	0	0	0	0	0	200	300	0	-26.9484	-156.227	-744.38	-8144	-24719.8	7904.44	166.792	913.941	0	0	0	0	0	0	0	603	903	0
478	0	0	0	0	0	0	0	200	300	0	-26.338	-156.227	-749.263	-7960.9	-25330.1	8087.54	166.193	913.625	0	0	0	0	0	0	0	603	903	0
478	1	0	0	0	0	0	0	200	300	0	-25.4225	-155.464	-755.367	-7686.24	-26184.6	7721.33	165.335	913.176	0	0	0	0	0	0	0	603	903	0
478	2	0	0	0	0	0	0	200	300	0	-27.2536	-155.464	-755.367	-7686.24	-25879.4	7858.66	165.739	913.176	0	0	0	0	0	0	0	603	903	0
478	3	0	0	0	0	0	0	200	300	0	-27.101	-157.448	-762.386	-7045.37	-26367.7	8087.54	165.414	912.241	0	0	0	0	0	0	0	603	903	0
478	4	0	0	0	0	0	0	200	300	0	-24.6596	-155.006	-765.743	-6587.6	-26611.9	8133.32	165.247	911.603	0	0	0	0	0	0	0	603	903	0
478	5	0	0	0	0	0	0	200	300	0	-27.7113	-156.379	-768.184	-6038.29	-26001.5	8087.54	166.152	910.861	0	0	0	0	0	0	0	603	903	0
478	6	0	0	0	0	0	0	200	300	0	-27.7113	-156.685	-772.457	-6038.29	-26856	8179.09	165.233	910.817	0	0	0	0	0	0	0	603	903	0
478	7	0	0	0	0	0	0	200	300	0	-27.4062	-157.448	-775.814	-5580.52	-26978.1	8133.32	165.226	910.193	0	0	0	0	0	0	0	603	903	0
478	8	0	0	0	0	0	0	200	300	0	-27.7113	-156.837	-779.781	-5488.97	-27527.4	8041.76	164.699	910.039	0	0	0	0	0	0	0	603	903	0
478	9	0	0	0	0	0	0	200	300	0	-30.0002	-158.058	-784.969	-4756.55	-27771.5	8041.76	164.621	909.06	0	0	0	0	0	0	0	603	903	0
479	0	0	0	0	0	0	0	200	300	0	-29.8476	-160.347	-786.19	-4939.65	-27710.5	8362.2	164.753	909.283	0	0	0	0	0	0	0	603	903	0
479	1	0	0	0	0	0	0	200	300	0	-30.1527	-157.448	-788.021	-4390.34	-28137.7	8087.54	164.293	908.571	0	0	0	0	0	0	0	603	903	0
479	2	0	0	0	0	0	0	200	300	0	-30.7631	-158.363	-791.683	-4207.23	-27893.6	8087.54	164.767	908.314	0	0	0	0	0	0	0	603	903	0
479	3	0	0	0	0	0	0	200	300	0	-29.695	-160.499	-793.819	-3932.57	-27832.6	8224.87	164.938	907.954	0	0	0	0	0	0	0	603	903	0
479	4	0	0	0	0	0	0	200	300	0	-30.0002	-159.431	-797.786	-3749.47	-28381.9	8179.09	164.424	907.7	0	0	0	0	0	0	0	603	903	0
479	5	0	0	0	0	0	0	200	300	0	-28.932	-159.431	-798.702	-3383.26	-28259.8	8270.65	164.618	907.236	0	0	0	0	0	0	0	603	903	0
479	6	0	0	0	0	0	0	200	300	0	-29.2372	-158.363	-795.04	-3291.71	-28137.7	8362.2	164.608	907.14	0	0	0	0	0	0	0	603	903	0
479	7	0	0	0	0	0	0	200	300	0	-28.6269	-158.21	-801.143	-3474.81	-28565	8087.54	164.345	907.337	0	0	0	0	0	0	0	603	903	0
479	8	0	0	0	0	0	0	200	300	0	-30.0002	-154.701	-802.364	-2833.94	-28565	8224.87	164.399	906.532	0	0	0	0	0	0	0	603	903	0
479	9	0	0	0	0	0	0	200	300	0	-31.0683	-155.464	-802.974	-2376.18	-28565	8041.76	164.426	905.959	0	0	0	0	0	0	0	603	903	0
480	0	0	0	0	0	0	0	200	300	0	-25.5751	-155.159	-806.026	-2193.07	-28687.1	8041.76	164.409	905.721	0	0	0	0	0	0	0	603	903	0
480	1	0	0	0	0	0	0	200	300	0	-29.5424	-155.159	-807.247	-2193.07	-28931.2	8133.32	164.161	905.717	0	0	0	0	0	0	0	603	903	0
480	2	0	0	0	0	0	0	200	300	0	-31.6786	-153.938	-808.773	-1826.86	-29236.4	7995.99	163.851	905.259	0	0	0	0	0	0	0	603	903	0
480	3	0	0	0	0	0	0	200	300	0	-30.4579	-153.785	-811.824	-1277.55	-28931.2	7995.99	164.363	904.574	0	0	0	0	0	0	0	603	903	0
480	4	0	0	0	0	0	0	200	300	0	-31.2209	-153.48	-813.045	-1552.2	-29419.5	7812.88	163.816	904.909	0	0	0	0	0	0	0	603	903	0
480	5	0	0	0	0	0	0	200	300	0	-31.8312	-151.954	-816.707	-636.676	-29480.5	7538.23	163.903	903.78	0	0	0	0	0	0	0	603	903	0
480	6	0	0	0	0	0	0	200	300	0	-32.5941	-152.26	-819.759	-728.229	-29480.5	7858.66	164.038	903.888	0	0	0	0	0	0	0	603	903	0
480	7	0	0	0	0	0	0	200	300	0	-31.8312	-152.717	-818.843	-1002.89	-30396	7767.11	162.879	904.225	0	0	0	0	0	0	0	603	903	0
480	8	0	0	0	0	0	0	200	300	0	-34.2726	-152.412	-824.336	-636.676	-29907.8	8087.54	163.719	903.772	0	0	0	0	0	0	0	603	903	0
480	9	0	0	0	0	0	0	200	300	0	-34.12	-151.039	-822.2	553.51	-29846.7	7584	163.699	902.327	0	0	0	0	0	0	0	603	903	0
481	0	0	0	0	0	0	0	200	300	0	-35.1881	-151.649	-828.914	1102.83	-30701.2	7675.55	162.962	901.67	0	0	0	0	0	0	0	603	903	0
481	1	0	0	0	0	0	0	200	300	0	-35.6459	-152.412	-829.219	553.51	-30518.1	7538.23	163.197	902.333	0	0	0	0	0	0	0	603	903	0
481	2	0	0	0	0	0	0	200	300	0	-35.7985	-151.344	-832.881	828.168	-30640.2	7263.57	163.212	902.006	0	0	0	0	0	0	0	603	903	0
481	3	0	0	0	0	0	0	200	300	0	-34.883	-150.581	-833.797	919.721	-30945.4	7492.45	162.886	901.897	0	0	0	0	0	0	0	603	903	0
481	4	0	0	0	0	0	0	200	300	0	-37.0192	-151.954	-838.375	1469.04	-30518.1	7767.11	163.598	901.248	0	0	0	0	0	0	0	603	903	0
481	5	0	0	0	0	0	0	200	300	0	-37.0192	-150.276	-838.069	1560.59	-31189.5	7446.67	162.784	901.138	0	0	0	0	0	0	0	603	903	0
481	6	0	0	0	0	0	0	200	300	0	-35.9511	-149.055	-841.121	1926.8	-31555.7	7538.23	162.484	900.709	0	0	0	0	0	0	0	603	903	0
481	7	0	0	0	0	0	0	200	300	0	-36.8666	-149.055	-843.868	1652.14	-31189.5	7217.79	163.04	901.042	0	0	0	0	0	0	0	603	903	0
481	8	0	0	0	0	0	0	200	300	0	-36.4088	-147.682	-842.647	1926.8	-31860.9	7355.12	162.19	900.713	0	0	0	0	0	0	0	603	903	0
481	9	0	0	0	0	0	0	200	300	0	-35.9511	-146.919	-846.919	1926.8	-31311.6	7355.12	163.029	900.725	0	0	0	0	0	0	0	603	903	0
482	0	0	0	0	0	0	0	200	300	0	-37.6295	-147.682	-848.14	2018.35	-31494.7	7446.67	162.866	900.62	0	0	0	0	0	0	0	603	903	0
482	1	0	0	0	0	0	0	200	300	0	-36.8666	-145.393	-847.835	2293.01	-31921.9	7355.12	162.349	900.295	0	0	0	0	0	0	0	603	903	0
482	2	0	0	0	0	0	0	200	300	0	-35.4933	-144.478	-850.582	2750.78	-31738.8	7217.79	162.686	899.766	0	0	0	0	0	0	0	603	903	0
482	3	0	0	0	0	0	0	200	300	0	-36.1037	-143.715	-850.276	2842.33	-32044	7126.24	162.313	899.657	0	0	0	0	0	0	0	603	903	0
482	4	0	0	0	0	0	0	200	300	0	-35.4933	-143.409	-851.802	2842.33	-32166.1	7538.23	162.238	899.663	0	0	0	0	0	0	0	603	903	0
482	5	0	0	0	0	0	0	200	300	0	-36.2563	-142.341	-849.361	3208.54	-31921.9	7217.79	162.417	899.222	0	0	0	0	0	0	0	603	903	0
482	6	0	0	0	0	0	0	200	300	0	-36.5614	-142.341	-853.023	3300.09	-32593.3	6988.91	161.791	899.131	0	0	0	0	0	0	0	603	903	0
482	7	0	0	0	0	0	0	200	300	0	-38.0873	-140.968	-853.633	3666.3	-31860.9	7126.24	162.676	898.705	0	0	0	0	0	0	0	603	903	0
482	8	0	0	0	0	0	0	200	300	0	-35.3407	-141.273	-855.77	4124.07	-32105	6943.13	162.484	898.181	0	0	0	0	0	0	0	603	903	0
482	9	0	0	0	0	0	0	200	300	0	-37.477	-140.815	-857.295	5039.6	-32776.4	7309.34	161.768	897.122	0	0	0	0	0	0	0	603	903	0
483	0	0	0	0	0	0	0	200	300	0	-38.3925	-138.527	-858.211	4307.17	-32227.1	6988.91	162.449	897.981	0	0	0	0	0	0	0	603	903	0
483	1	0	0	0	0	0	0	200	300	0	-38.0873	-139.747	-858.211	4490.28	-32654.3	7263.57	161.951	897.768	0	0	0	0	0	0	0	603	903	0
483	2	0	0	0	0	0	0	200	300	0	-37.6295	-139.29	-857.601	4490.28	-33020.6	6805.8	161.497	897.764	0	0	0	0	0	0	0	603	903	0
483	3	0	0	0	0	0	0	200	300	0	-39.0028	-137.001	-857.295	5314.25	-32776.4	6485.37	161.768	896.801	0	0	0	0	0	0	0	603	903	0
483	4	0	0	0	0	0	0	200	300	0	-39.7658	-137.458	-860.042	5039.6	-33142.6	6668.47	161.464	897.14	0	0	0	0	0	0	0	603	903	0
483	5	0	0	0	0	0	0	200	300	0	-36.4088	-137.306	-860.652	5680.46	-32898.5	6760.03	161.775	896.4	0	0	0	0	0	0	0	603	903	0
483	6	0	0	0	0	0	0	200	300	0	-39.9184	-135.322	-860.958	5222.7	-32837.5	6714.25	161.859	896.934	0	0	0	0	0	0	0	603	903	0
483	7	0	0	0	0	0	0	200	300	0	-39.1554	-134.712	-859.737	5588.91	-33020.6	6714.25	161.592	896.499	0	0	0	0	0	0	0	603	903	0
483	8	0	0	0	0	0	0	200	300	0	-38.6977	-133.949	-857.295	5680.46	-32776.4	6622.7	161.768	896.374	0	0	0	0	0	0	0	603	903	0
483	9	0	0	0	0	0	0	200	300	0	-39.0028	-132.728	-858.211	6138.23	-33325.7	6256.49	161.168	895.848	0	0	0	0	0	0	0	603	903	0
484	0	0	0	0	0	0	0	200	300	0	-40.9865	-131.508	-861.263	6321.33	-33020.6	6531.14	161.66	895.66	0	0	0	0	0	0	0	603	903	0
484	1	0	0	0	0	0	0	200	300	0	-38.3925	-131.355	-858.821	7145.31	-33020.6	6393.81	161.551	894.68	0	0	0	0	0	0	0	603	903	0
484	2	0	0	0	0	0	0	200	300	0	-38.2399	-130.439	-859.432	6504.44	-33691.9	6668.47	160.797	895.432	0	0	0	0	0	0	0	603	903	0
484	3	0	0	0	0	0	0	200	300	0	-40.3761	-130.592	-857.295	6595.99	-33142.6	6256.49	161.34	895.306	0	0	0	0	0	0	0	603	903	0
484	4	0	0	0	0	0	0	200	300	0	-39.6132	-129.829	-856.99	7053.76	-33142.6	6485.37	161.327	894.769	0	0	0	0	0	0	0	603	903	0
484	5	0	0	0	0	0	0	200	300	0	-39.9184	-128.761	-857.601	6870.65	-33447.8	6393.81	160.998	894.989	0	0	0	0	0	0	0	603	903	0
484	6	0	0	0	0	0	0	200	300	0	-41.1391	-128.456	-856.99	7877.73	-33447.8	6210.71	160.971	893.808	0	0	0	0	0	0	0	603	903	0
484	7	0	0	0	0	0	0	200	300	0	-39.7658	-126.777	-857.906	7877.73	-33753	6119.16	160.657	893.818	0	0	0	0	0	0	0	603	903	0
484	8	0	0	0	0	0	0	200	300	0	-39.9184	-126.93	-859.127	7511.52	-33753	6302.26	160.712	894.257	0	0	0	0	0	0	0	603	903	0
484	9	0	0	0	0	0	0	200	300	0	-40.8339	-125.709	-854.854	7511.52	-33203.7	6210.71	161.159	894.213	0	0	0	0	0	0	0	603	903	0
485	0	0	0	0	0	0	0	200	300	0	-40.8339	-124.794	-854.244	8427.04	-33630.9	6027.6	160.631	893.135	0	0	0	0	0	0	0	603	903	0
485	1	0	0	0	0	0	0	200	300	0	-40.6813	-124.641	-854.854	8335.49	-32959.5	6027.6	161.444	893.249	0	0	0	0	0	0	0	603	903	0
485	2	0	0	0	0	0	0	200	300	0	-41.1391	-123.42	-853.328	8335.49	-33508.8	5981.83	160.732	893.232	0	0	0	0	0	0	0	603	903	0
485	3	0	0	0	0	0	0	200	300	0	-41.1391	-121.437	-853.939	8610.15	-33508.8	5661.39	160.76	892.917	0	0	0	0	0	0	0	603	903	0
485	4	0	0	0	0	0	0	200	300	0	-37.7821	-121.895	-851.802	8793.26	-33386.8	5890.27	160.805	892.677	0	0	0	0	0	0	0	603	903	0
485	5	0	0	0	0	0	0	200	300	0	-41.902	-122.047	-849.056	8976.36	-33081.6	5752.95	161.037	892.428	0	0	0	0	0	0	0	603	903	0
485	6	0	0	0	0	0	0	200	300	0	-41.902	-119.453	-850.887	9251.02	-33630.9	5798.72	160.475	892.128	0	0	0	0	0	0	0	603	903	0
485	7	0	0	0	0	0	0	200	300	0	-39.9184	-118.538	-848.751	9983.44	-33691.9	5707.17	160.304	891.238	0	0	0	0	0	0	0	603	903	0
485	8	0	0	0	0	0	0	200	300	0	-40.6813	-117.622	-845.699	9891.89	-33753	5661.39	160.089	891.303	0	0	0	0	0	0	0	603	903	0
485	9	0	0	0	0	0	0	200	300	0	-40.9865	-116.707	-847.53	10166.5	-34302.3	5569.84	159.527	891.005	0	0	0	0	0	0	0	603	903	0
486	0	0	0	0	0	0	0	200	300	0	-39.6132	-116.859	-846.614	9800.34	-32959.5	5432.51	161.069	891.424	0	0	0	0	0	0	0	603	903	0
486	1	0	0	0	0	0	0	200	300	0	-41.4442	-114.723	-844.783	10075	-33753	5340.96	160.045	891.074	0	0	0	0	0	0	0	603	903	0
486	2	0	0	0	0	0	0	200	300	0	-40.8339	-113.502	-843.563	9983.44	-33691.9	5340.96	160.06	891.165	0	0	0	0	0	0	0	603	903	0
486	3	0	0	0	0	0	0	200	300	0	-39.0028	-111.519	-841.732	10532.8	-33508.8	5478.29	160.191	890.487	0	0	0	0	0	0	0	603	903	0
486	4	0	0	0	0	0	0	200	300	0	-41.5968	-111.519	-839.9	10349.7	-33814	5340.96	159.74	890.678	0	0	0	0	0	0	0	603	903	0
486	5	0	0	0	0	0	0	200	300	0	-40.9865	-111.213	-840.206	10899	-33386.8	5295.18	160.264	890.028	0	0	0	0	0	0	0	603	903	0
486	6	0	0	0	0	0	0	200	300	0	-39.7658	-111.061	-838.069	10899	-33447.8	5478.29	160.089	889.995	0	0	0	0	0	0	0	603	903	0
486	7	0	0	0	0	0	0	200	300	0	-39.6132	-109.84	-835.323	10715.9	-33508.8	5203.63	159.885	890.172	0	0	0	0	0	0	0	603	903	0
486	8	0	0	0	0	0	0	200	300	0	-41.2917	-108.162	-831.05	11265.2	-33325.7	5020.52	159.899	889.445	0	0	0	0	0	0	0	603	903	0
486	9	0	0	0	0	0	0	200	300	0	-39.4606	-108.314	-833.187	11814.5	-33569.9	4837.42	159.709	888.82	0	0	0	0	0	0	0	603	903	0
487	0	0	0	0	0	0	0	200	300	0	-39.4606	-107.246	-831.966	11722.9	-33630.9	4928.97	159.577	888.909	0	0	0	0	0	0	0	603	903	0
487	1	0	0	0	0	0	0	200	300	0	-40.3761	-106.788	-831.661	11631.4	-33569.9	4883.19	159.635	889.014	0	0	0	0	0	0	0	603	903	0
487	2	0	0	0	0	0	0	200	300	0	-40.2235	-106.483	-827.999	12180.7	-33508.8	5203.63	159.53	888.289	0	0	0	0	0	0	0	603	903	0
487	3	0	0	0	0	0	0	200	300	0	-39.0028	-104.042	-825.557	12089.2	-33508.8	4700.09	159.411	888.356	0	0	0	0	0	0	0	603	903	0
487	4	0	0	0	0	0	0	200	300	0	-39.6132	-104.5	-825.252	11997.6	-33142.6	4516.98	159.839	888.462	0	0	0	0	0	0	0	603	903	0
487	5	0	0	0	0	0	0	200	300	0	-39.6132	-103.279	-823.116	12363.8	-33447.8	4516.98	159.364	887.979	0	0	0	0	0	0	0	603	903	0
487	6	0	0	0	0	0	0	200	300	0	-38.8503	-102.363	-823.116	12455.4	-33447.8	4700.09	159.364	887.868	0	0	0	0	0	0	0	603	903	0
487	7	0	0	0	0	0	0	200	300	0	-39.308	-101.906	-820.674	12089.2	-32898.5	4608.54	159.913	888.269	0	0	0	0	0	0	0	603	903	0
487	8	0	0	0	0	0	0	200	300	0	-38.6977	-101.143	-817.623	12638.5	-33081.6	4425.43	159.539	887.542	0	0	0	0	0	0	0	603	903	0
487	9	0	0	0	0	0	0	200	300	0	-38.0873	-99.3115	-815.792	12913.1	-32776.4	4379.65	159.823	887.171	0	0	0	0	0	0	0	603	903	0
488	0	0	0	0	0	0	0	200	300	0	-37.7821	-98.8538	-813.961	12913.1	-32715.4	4425.43	159.807	887.135	0	0	0	0	0	0	0	603	903	0
488	1	0	0	0	0	0	0	200	300	0	-38.3925	-97.9382	-809.078	13462.4	-32715.4	4333.88	159.565	886.361	0	0	0	0	0	0	0	603	903	0
488	2	0	0	0	0	0	0	200	300	0	-37.6295	-97.6331	-811.519	13096.2	-32471.2	4288.1	159.987	886.862	0	0	0	0	0	0	0	603	903	0
488	3	0	0	0	0	0	0	200	300	0	-36.8666	-95.802	-808.162	13096.2	-32959.5	4379.65	159.217	886.795	0	0	0	0	0	0	0	603	903	0
488	4	0	0	0	0	0	0	200	300	0	-36.4088	-95.3442	-804.805	13279.3	-32898.5	4150.77	159.122	886.5	0	0	0	0	0	0	0	603	903	0
488	5	0	0	0	0	0	0	200	300	0	-37.0192	-94.5813	-803.279	14286.4	-32776.4	4150.77	159.197	885.215	0	0	0	0	0	0	0	603	903	0
488	6	0	0	0	0	0	0	200	300	0	-37.1718	-94.4287	-799.617	13920.2	-32715.4	4150.77	159.086	885.591	0	0	0	0	0	0	0	603	903	0
488	7	0	0	0	0	0	0	200	300	0	-35.1881	-92.5977	-799.007	13828.7	-32715.4	4105	159.055	885.693	0	0	0	0	0	0	0	603	903	0
488	8	0	0	0	0	0	0	200	300	0	-36.2563	-92.9028	-797.176	14469.5	-32288.1	3921.89	159.497	884.849	0	0	0	0	0	0	0	603	903	0
488	9	0	0	0	0	0	0	200	300	0	-36.1037	-91.9873	-794.734	14011.8	-32471.2	3876.11	159.142	885.369	0	0	0	0	0	0	0	603	903	0
489	0	0	0	0	0	0	0	200	300	0	-36.8666	-90.4614	-792.903	13645.6	-31555.7	3738.78	160.202	885.79	0	0	0	0	0	0	0	603	903	0
489	1	0	0	0	0	0	0	200	300	0	-35.1881	-90.1562	-789.852	14286.4	-31983	3738.78	159.508	884.913	0	0	0	0	0	0	0	603	903	0
489	2	0	0	0	0	0	0	200	300	0	-36.1037	-88.6304	-786.19	14469.5	-31921.9	3555.68	159.397	884.595	0	0	0	0	0	0	0	603	903	0
489	3	0	0	0	0	0	0	200	300	0	-36.5614	-88.02	-784.664	14835.7	-31921.9	3601.46	159.318	884.093	0	0	0	0	0	0	0	603	903	0
489	4	0	0	0	0	0	0	200	300	0	-34.12	-85.5786	-783.138	14927.3	-31983	3921.89	159.16	883.939	0	0	0	0	0	0	0	603	903	0
489	5	0	0	0	0	0	0	200	300	0	-34.4252	-86.189	-778.255	14652.6	-32044	3601.46	158.826	884.172	0	0	0	0	0	0	0	603	903	0
489	6	0	0	0	0	0	0	200	300	0	-35.9511	-84.9683	-777.034	14652.6	-31677.8	4059.22	159.232	884.143	0	0	0	0	0	0	0	603	903	0
489	7	0	0	0	0	0	0	200	300	0	-35.3407	-85.7312	-773.372	15202	-31921.9	3509.9	158.724	883.343	0	0	0	0	0	0	0	603	903	0
489	8	0	0	0	0	0	0	200	300	0	-34.4252	-84.2053	-771.846	15842.8	-32044	3601.46	158.484	882.474	0	0	0	0	0	0	0	603	903	0
489	9	0	0	0	0	0	0	200	300	0	-34.883	-83.7476	-767.269	15659.7	-31250.5	3464.13	159.27	882.59	0	0	0	0	0	0	0	603	903	0
490	0	0	0	0	0	0	0	200	300	0	-34.5778	-82.832	-766.963	15568.2	-31983	3738.78	158.299	882.702	0	0	0	0	0	0	0	603	903	0
490	1	0	0	0	0	0	0	200	300	0	-34.12	-81.1536	-763.607	16209	-31067.4	3647.23	159.315	881.773	0	0	0	0	0	0	0	603	903	0
490	2	0	0	0	0	0	0	200	300	0	-35.0356	-80.8484	-760.86	15751.3	-30945.4	3418.35	159.328	882.298	0	0	0	0	0	0	0	603	903	0
490	3	0	0	0	0	0	0	200	300	0	-34.4252	-80.238	-760.25	15751.3	-31128.5	3509.9	159.055	882.281	0	0	0	0	0	0	0	603	903	0
490	4	0	0	0	0	0	0	200	300	0	-32.4416	-79.0173	-757.503	16117.5	-31250.5	3326.8	158.745	881.723	0	0	0	0	0	0	0	603	903	0
490	5	0	0	0	0	0	0	200	300	0	-33.3571	-78.2544	-755.672	15751.3	-31616.7	3372.57	158.161	882.156	0	0	0	0	0	0	0	603	903	0
490	6	0	0	0	0	0	0	200	300	0	-33.3571	-77.7966	-751.705	15934.4	-31311.6	3372.57	158.346	881.802	0	0	0	0	0	0	0	603	903	0
490	7	0	0	0	0	0	0	200	300	0	-33.0519	-76.2708	-750.789	16666.8	-30762.2	3097.92	159.027	880.801	0	0	0	0	0	0	0	603	903	0
490	8	0	0	0	0	0	0	200	300	0	-33.2045	-75.9656	-748.043	16483.7	-31189.5	3097.92	158.305	880.964	0	0	0	0	0	0	0	603	903	0
490	9	0	0	0	0	0	0	200	300	0	-32.5941	-75.5078	-744.686	16758.3	-30518.1	3189.47	159.019	880.496	0	0	0	0	0	0	0	603	903	0
491	0	0	0	0	0	0	0	200	300	0	-29.8476	-73.219	-743.77	16758.3	-30823.3	2914.81	158.558	880.468	0	0	0	0	0	0	0	603	903	0
491	1	0	0	0	0	0	0	200	300	0	-31.6786	-73.0664	-741.023	15842.8	-31311.6	2960.59	157.746	881.62	0	0	0	0	0	0	0	603	903	0
491	2	0	0	0	0	0	0	200	300	0	-31.6786	-71.5405	-736.141	16941.4	-30274	2731.7	158.875	879.986	0	0	0	0	0	0	0	603	903	0
491	3	0	0	0	0	0	0	200	300	0	-30.6105	-71.0828	-737.361	16941.4	-30518.1	2914.81	158.612	880.024	0	0	0	0	0	0	0	603	903	0
491	4	0	0	0	0	0	0	200	300	0	-32.1364	-71.3879	-734.31	16849.9	-30396	2685.93	158.606	880.053	0	0	0	0	0	0	0	603	903	0
491	5	0	0	0	0	0	0	200	300	0	-31.526	-69.0991	-729.427	17582.3	-29968.8	2777.48	158.915	878.896	0	0	0	0	0	0	0	603	903	0
491	6	0	0	0	0	0	0	200	300	0	-31.2209	-68.1836	-729.427	17582.3	-30151.9	2823.26	158.664	878.896	0	0	0	0	0	0	0	603	903	0
491	7	0	0	0	0	0	0	200	300	0	-30.9157	-67.5732	-727.596	17399.2	-29968.8	2869.03	158.811	879.087	0	0	0	0	0	0	0	603	903	0
491	8	0	0	0	0	0	0	200	300	0	-31.0683	-67.2681	-723.323	17216.1	-29785.7	2869.03	158.821	879.199	0	0	0	0	0	0	0	603	903	0
491	9	0	0	0	0	0	0	200	300	0	-29.8476	-65.8948	-721.187	17857	-30212.9	2685.93	158.107	878.239	0	0	0	0	0	0	0	603	903	0
492	0	0	0	0	0	0	0	200	300	0	-30.6105	-65.2844	-720.577	17399.2	-29663.6	2594.38	158.833	878.854	0	0	0	0	0	0	0	603	903	0
492	1	0	0	0	0	0	0	200	300	0	-29.695	-64.8267	-714.473	17948.5	-29968.8	2411.27	158.055	877.879	0	0	0	0	0	0	0	603	903	0
492	2	0	0	0	0	0	0	200	300	0	-29.5424	-63.7585	-714.168	18497.8	-29968.8	2502.82	158.037	877.099	0	0	0	0	0	0	0	603	903	0
492	3	0	0	0	0	0	0	200	300	0	-29.2372	-63.3008	-711.727	17948.5	-29236.4	2548.6	158.922	877.782	0	0	0	0	0	0	0	603	903	0
492	4	0	0	0	0	0	0	200	300	0	-29.5424	-62.843	-709.59	18497.8	-29602.6	2777.48	158.282	876.932	0	0	0	0	0	0	0	603	903	0
492	5	0	0	0	0	0	0	200	300	0	-28.0165	-61.9275	-705.318	18406.3	-30090.9	2548.6	157.337	876.904	0	0	0	0	0	0	0	603	903	0
492	6	0	0	0	0	0	0	200	300	0	-28.932	-61.6223	-703.182	18131.6	-29236.4	2136.61	158.423	877.215	0	0	0	0	0	0	0	603	903	0
492	7	0	0	0	0	0	0	200	300	0	-28.4743	-60.4016	-701.045	18497.8	-29236.4	2273.94	158.296	876.614	0	0	0	0	0	0	0	603	903	0
492	8	0	0	0	0	0	0	200	300	0	-27.2536	-59.9439	-699.214	18589.4	-29114.3	2228.16	158.361	876.414	0	0	0	0	0	0	0	603	903	0
492	9	0	0	0	0	0	0	200	300	0	-28.4743	-59.7913	-697.383	18406.3	-28687.1	2319.72	158.865	876.607	0	0	0	0	0	0	0	603	903	0
493	0	0	0	0	0	0	0	200	300	0	-27.8639	-58.7231	-694.332	18864.1	-29358.4	2411.27	157.717	875.831	0	0	0	0	0	0	0	603	903	0
493	1	0	0	0	0	0	0	200	300	0	-27.5587	-57.8076	-692.195	18955.6	-28992.2	2365.49	158.116	875.615	0	0	0	0	0	0	0	603	903	0
493	2	0	0	0	0	0	0	200	300	0	-28.0165	-56.8921	-689.144	18955.6	-29175.3	2090.84	157.664	875.494	0	0	0	0	0	0	0	603	903	0
493	3	0	0	0	0	0	0	200	300	0	-26.6432	-55.6714	-687.313	19321.8	-28992.2	2090.84	157.818	874.888	0	0	0	0	0	0	0	603	903	0
493	4	0	0	0	0	0	0	200	300	0	-26.338	-56.4343	-685.787	19321.8	-28687.1	2045.06	158.169	874.825	0	0	0	0	0	0	0	603	903	0
493	5	0	0	0	0	0	0	200	300	0	-26.6432	-55.824	-681.514	19321.8	-29236.4	2319.72	157.101	874.649	0	0	0	0	0	0	0	603	903	0
493	6	0	0	0	0	0	0	200	300	0	-26.6432	-54.2981	-679.988	19962.7	-28565	1999.28	157.992	873.643	0	0	0	0	0	0	0	603	903	0
493	7	0	0	0	0	0	0	200	300	0	-24.3544	-54.2981	-677.242	19871.1	-28259.8	2090.84	158.272	873.659	0	0	0	0	0	0	0	603	903	0
493	8	0	0	0	0	0	0	200	300	0	-26.338	-52.6196	-671.749	19688	-28137.7	2319.72	158.113	873.691	0	0	0	0	0	0	0	603	903	0
493	9	0	0	0	0	0	0	200	300	0	-25.7277	-52.7722	-673.274	20420.5	-28320.8	2045.06	157.936	872.67	0	0	0	0	0	0	0	603	903	0
494	0	0	0	0	0	0	0	200	300	0	-25.5751	-52.3145	-670.833	20512	-28320.8	1907.73	157.783	872.423	0	0	0	0	0	0	0	603	903	0
494	1	0	0	0	0	0	0	200	300	0	-26.1855	-51.0938	-666.866	19962.7	-28320.8	1861.95	157.531	873.065	0	0	0	0	0	0	0	603	903	0
494	2	0	0	0	0	0	0	200	300	0	-25.5751	-50.1782	-665.34	20054.2	-28015.7	1770.4	157.893	872.859	0	0	0	0	0	0	0	603	903	0
494	3	0	0	0	0	0	0	200	300	0	-24.0492	-49.7205	-660.152	21244.4	-28381.9	1541.52	157.007	870.819	0	0	0	0	0	0	0	603	903	0
494	4	0	0	0	0	0	0	200	300	0	-25.8803	-49.2627	-660.152	20878.2	-28015.7	1861.95	157.562	871.374	0	0	0	0	0	0	0	603	903	0
494	5	0	0	0	0	0	0	200	300	0	-25.2699	-49.2627	-658.016	20786.7	-27954.6	1816.18	157.517	871.41	0	0	0	0	0	0	0	603	903	0
494	6	0	0	0	0	0	0	200	300	0	-23.8966	-47.7368	-655.879	21152.9	-28442.9	1633.07	156.634	870.749	0	0	0	0	0	0	0	603	903	0
494	7	0	0	0	0	0	0	200	300	0	-23.8966	-47.7368	-652.217	20603.6	-27771.5	1633.07	157.42	871.41	0	0	0	0	0	0	0	603	903	0
494	8	0	0	0	0	0	0	200	300	0	-24.8122	-47.7368	-648.555	20969.8	-27771.5	1633.07	157.179	870.667	0	0	0	0	0	0	0	603	903	0
494	9	0	0	0	0	0	0	200	300	0	-25.4225	-46.0584	-647.945	21610.6	-27893.6	1495.74	156.951	869.647	0	0	0	0	0	0	0	603	903	0
495	0	0	0	0	0	0	0	200	300	0	-23.5915	-45.7532	-645.809	22068.4	-27710.5	1541.52	157.092	868.828	0	0	0	0	0	0	0	603	903	0
495	1	0	0	0	0	0	0	200	300	0	-24.6596	-44.9902	-643.672	21519.1	-27588.4	1587.3	157.139	869.568	0	0	0	0	0	0	0	603	903	0
495	2	0	0	0	0	0	0	200	300	0	-23.8966	-44.5325	-640.01	21702.2	-28015.7	1678.85	156.226	869.091	0	0	0	0	0	0	0	603	903	0
495	3	0	0	0	0	0	0	200	300	0	-23.4389	-43.7695	-637.874	21610.6	-27283.2	1312.64	157.228	869.121	0	0	0	0	0	0	0	603	903	0
495	4	0	0	0	0	0	0	200	300	0	-24.507	-43.7695	-636.348	21885.3	-27588.4	1266.86	156.646	868.608	0	0	0	0	0	0	0	603	903	0
495	5	0	0	0	0	0	0	200	300	0	-24.3544	-42.2437	-631.465	21976.8	-27405.3	1358.41	156.6	868.197	0	0	0	0	0	0	0	603	903	0
495	6	0	0	0	0	0	0	200	300	0	-22.3708	-42.2437	-632.381	22434.6	-27344.3	1037.98	156.76	867.524	0	0	0	0	0	0	0	603	903	0
495	7	0	0	0	0	0	0	200	300	0	-23.2863	-40.7178	-629.634	21702.2	-28015.7	1037.98	155.505	868.532	0	0	0	0	0	0	0	603	903	0
495	8	0	0	0	0	0	0	200	300	0	-23.2863	-41.023	-627.193	22343.1	-27344.3	1129.53	156.402	867.376	0	0	0	0	0	0	0	603	903	0
495	9	0	0	0	0	0	0	200	300	0	-22.3708	-40.4126	-625.972	22526.2	-26978.1	1404.19	156.902	867.014	0	0	0	0	0	0	0	603	903	0
496	0	0	0	0	0	0	0	200	300	0	-23.744	-39.9548	-622.31	22068.4	-27222.2	1037.98	156.256	867.538	0	0	0	0	0	0	0	603	903	0
496	1	0	0	0	0	0	0	200	300	0	-23.2863	-38.8867	-619.258	23167	-26856	992.203	156.632	865.589	0	0	0	0	0	0	0	603	903	0
496	2	0	0	0	0	0	0	200	300	0	-22.5233	-37.666	-618.343	22800.8	-27222.2	1083.76	155.976	866.126	0	0	0	0	0	0	0	603	903	0
496	3	0	0	0	0	0	0	200	300	0	-23.1337	-37.666	-614.681	22709.3	-27527.4	1037.98	155.217	866.055	0	0	0	0	0	0	0	603	903	0
496	4	0	0	0	0	0	0	200	300	0	-23.2863	-36.7505	-613.155	22434.6	-26856	946.427	156.2	866.411	0	0	0	0	0	0	0	603	903	0
496	5	0	0	0	0	0	0	200	300	0	-22.8285	-35.3772	-609.493	23533.2	-26856	854.874	155.937	864.389	0	0	0	0	0	0	0	603	903	0
496	6	0	0	0	0	0	0	200	300	0	-22.8285	-36.2927	-607.662	23075.5	-26672.9	809.098	156.106	865.026	0	0	0	0	0	0	0	603	903	0
496	7	0	0	0	0	0	0	200	300	0	-22.3708	-34.7668	-605.525	23624.8	-26672.9	809.098	155.951	863.985	0	0	0	0	0	0	0	603	903	0
496	8	0	0	0	0	0	0	200	300	0	-22.2182	-34.6143	-603.694	23441.7	-27039.1	717.545	155.211	864.17	0	0	0	0	0	0	0	603	903	0
496	9	0	0	0	0	0	0	200	300	0	-21.3026	-33.8513	-600.948	23075.5	-26611.9	809.098	155.717	864.602	0	0	0	0	0	0	0	603	903	0
497	0	0	0	0	0	0	0	200	300	0	-23.2863	-33.0884	-599.117	22983.9	-26550.8	809.098	155.683	864.637	0	0	0	0	0	0	0	603	903	0
497	1	0	0	0	0	0	0	200	300	0	-22.9811	-32.7832	-597.286	23716.3	-26733.9	717.545	155.241	863.293	0	0	0	0	0	0	0	603	903	0
497	2	0	0	0	0	0	0	200	300	0	-21.7604	-32.1729	-594.539	23991	-26367.7	671.769	155.65	862.648	0	0	0	0	0	0	0	603	903	0
497	3	0	0	0	0	0	0	200	300	0	-21.7604	-30.9522	-594.234	23899.5	-26489.8	534.44	155.422	862.781	0	0	0	0	0	0	0	603	903	0
497	4	0	0	0	0	0	0	200	300	0	-21.913	-30.9522	-591.793	23991	-26856	763.321	154.619	862.461	0	0	0	0	0	0	0	603	903	0
497	5	0	0	0	0	0	0	200	300	0	-21.1501	-30.0366	-587.52	23899.5	-26184.6	442.887	155.432	862.321	0	0	0	0	0	0	0	603	903	0
497	6	0	0	0	0	0	0	200	300	0	-21.3026	-29.5789	-586.91	23991	-26489.8	534.44	154.866	862.123	0	0	0	0	0	0	0	603	903	0
497	7	0	0	0	0	0	0	200	300	0	-22.3708	-29.2737	-585.079	23899.5	-26245.6	305.558	155.142	862.152	0	0	0	0	0	0	0	603	903	0
497	8	0	0	0	0	0	0	200	300	0	-21.7604	-28.5107	-581.722	24723.4	-25940.5	259.781	155.407	860.5	0	0	0	0	0	0	0	603	903	0
497	9	0	0	0	0	0	0	200	300	0	-20.9975	-27.7478	-581.111	24631.9	-26367.7	168.228	154.625	860.612	0	0	0	0	0	0	0	603	903	0
498	0	0	0	0	0	0	0	200	300	0	-22.0656	-28.053	-578.365	24265.7	-26428.8	305.558	154.304	861.044	0	0	0	0	0	0	0	603	903	0
498	1	0	0	0	0	0	0	200	300	0	-21.913	-27.4426	-576.534	24631.9	-25696.3	397.11	155.43	860.276	0	0	0	0	0	0	0	603	903	0
498	2	0	0	0	0	0	0	200	300	0	-20.6923	-26.5271	-575.313	24815	-26184.6	259.781	154.486	859.867	0	0	0	0	0	0	0	603	903	0
498	3	0	0	0	0	0	0	200	300	0	-21.913	-26.0693	-572.566	23899.5	-25574.3	259.781	155.334	861.259	0	0	0	0	0	0	0	603	903	0
498	4	0	0	0	0	0	0	200	300	0	-21.6078	-24.5435	-570.125	24723.4	-25696.3	76.6757	154.929	859.635	0	0	0	0	0	0	0	603	903	0
498	5	0	0	0	0	0	0	200	300	0	-19.9294	-23.7805	-569.515	25272.7	-25696.3	-152.206	154.88	858.624	0	0	0	0	0	0	0	603	903	0
498	6	0	0	0	0	0	0	200	300	0	-21.3026	-23.9331	-567.073	24631.9	-25574.3	-60.6534	154.901	859.563	0	0	0	0	0	0	0	603	903	0
498	7	0	0	0	0	0	0	200	300	0	-20.8449	-23.3228	-564.937	25272.7	-26062.5	122.452	153.866	858.265	0	0	0	0	0	0	0	603	903	0
498	8	0	0	0	0	0	0	200	300	0	-19.319	-22.4072	-561.58	25089.6	-25513.2	30.8993	154.569	858.323	0	0	0	0	0	0	0	603	903	0
498	9	0	0	0	0	0	0	200	300	0	-20.9975	-21.9495	-560.054	25822.1	-25635.3	-289.535	154.227	856.894	0	0	0	0	0	0	0	603	903	0
499	0	0	0	0	0	0	0	200	300	0	-20.9975	-21.4917	-559.444	25547.4	-25452.2	-197.982	154.504	857.334	0	0	0	0	0	0	0	603	903	0
499	1	0	0	0	0	0	0	200	300	0	-19.319	-21.3391	-557.613	25364.3	-25879.4	-60.6534	153.589	857.513	0	0	0	0	0	0	0	603	903	0
499	2	0	0	0	0	0	0	200	300	0	-21.3026	-20.5762	-556.087	24998.1	-25391.2	-289.535	154.34	858.046	0	0	0	0	0	0	0	603	903	0
499	3	0	0	0	0	0	0	200	300	0	-20.9975	-19.9658	-552.73	25455.9	-25513.2	122.452	153.841	856.945	0	0	0	0	0	0	0	603	903	0
499	4	0	0	0	0	0	0	200	300	0	-20.3871	-19.0503	-548.152	25089.6	-25147	-381.088	154.124	857.229	0	0	0	0	0	0	0	603	903	0
499	5	0	0	0	0	0	0	200	300	0	-20.0819	-18.5925	-548.458	25455.9	-25086	-472.641	154.261	856.586	0	0	0	0	0	0	0	603	903	0
499	6	0	0	0	0	0	0	200	300	0	-19.7768	-18.2874	-546.932	25730.5	-24902.9	-381.088	154.468	855.955	0	0	0	0	0	0	0	603	903	0
499	7	0	0	0	0	0	0	200	300	0	-19.7768	-17.9822	-547.237	25822.1	-25086	-243.759	154.159	855.814	0	0	0	0	0	0	0	603	903	0
499	8	0	0	0	0	0	0	200	300	0	-19.6242	-17.0667	-543.88	25639	-25330.1	-472.641	153.427	855.859	0	0	0	0	0	0	0	603	903	0
499	9	0	0	0	0	0	0	200	300	0	-19.6242	-16.1511	-541.744	25272.7	-25452.2	-381.088	153.018	856.349	0	0	0	0	0	0	0	603	903	0
500	0	0	0	0	0	0	0	200	300	0	-19.9294	-15.9985	-540.523	25913.6	-25147	-289.535	153.477	855.058	0	0	0	0	0	0	0	603	903	0
500	1	0	0	0	0	0	0	200	300	0	-20.0819	-15.846	-538.387	26096.7	-25269.1	-609.97	153.065	854.528	0	0	0	0	0	0	0	603	903	0
500	2	0	0	0	0	0	0	200	300	0	-20.3871	-15.083	-538.692	26096.7	-25452.2	-701.523	152.752	854.555	0	0	0	0	0	0	0	603	903	0
500	3	0	0	0	0	0	0	200	300	0	-20.6923	-14.4727	-535.64	26096.7	-24963.9	-747.299	153.394	854.279	0	0	0	0	0	0	0	603	903	0
500	4	0	0	0	0	0	0	200	300	0	-19.1664	-13.4045	-531.063	25730.5	-25269.1	-243.759	152.418	854.549	0	0	0	0	0	0	0	603	903	0
500	5	0	0	0	0	0	0	200	300	0	-20.5397	-13.5571	-533.199	25639	-24719.8	-655.746	153.639	854.915	0	0	0	0	0	0	0	603	903	0
500	6	0	0	0	0	0	0	200	300	0	-19.1664	-12.7942	-530.452	26096.7	-24780.8	-930.405	153.284	853.803	0	0	0	0	0	0	0	603	903	0
500	7	0	0	0	0	0	0	200	300	0	-19.6242	-12.1838	-529.232	26920.7	-24963.9	-884.628	152.83	852.133	0	0	0	0	0	0	0	603	903	0
500	8	0	0	0	0	0	0	200	300	0	-19.7768	-11.2683	-529.537	26188.3	-24719.8	-930.405	153.318	853.545	0	0	0	0	0	0	0	603	903	0
500	9	0	0	0	0	0	0	200	300	0	-19.0138	-10.8105	-526.18	26371.4	-24902.9	-930.405	152.672	852.881	0	0	0	0	0	0	0	603	903	0
501	0	0	0	0	0	0	0	200	300	0	-19.0138	-10.2002	-524.959	26279.8	-25024.9	-838.852	152.33	852.939	0	0	0	0	0	0	0	603	903	0
501	1	0	0	0	0	0	0	200	300	0	-19.7768	-10.658	-523.128	25822.1	-24536.7	-884.628	153.096	853.639	0	0	0	0	0	0	0	603	903	0
501	2	0	0	0	0	0	0	200	300	0	-20.5397	-9.43726	-522.518	26646	-24963.9	-976.181	152.224	852.005	0	0	0	0	0	0	0	603	903	0
501	3	0	0	0	0	0	0	200	300	0	-19.319	-9.13208	-520.687	27378.5	-25024.9	-1433.94	151.939	850.419	0	0	0	0	0	0	0	603	903	0
501	4	0	0	0	0	0	0	200	300	0	-20.0819	-8.21656	-520.381	26646	-24719.8	-1159.29	152.497	851.795	0	0	0	0	0	0	0	603	903	0
501	5	0	0	0	0	0	0	200	300	0	-19.319	-8.52173	-517.94	26646	-25147	-1067.73	151.448	851.554	0	0	0	0	0	0	0	603	903	0
501	6	0	0	0	0	0	0	200	300	0	-17.6405	-6.99585	-517.635	26737.6	-24536.7	-1296.62	152.599	851.347	0	0	0	0	0	0	0	603	903	0
501	7	0	0	0	0	0	0	200	300	0	-19.9294	-7.45362	-516.719	27012.2	-24536.7	-1250.84	152.515	850.724	0	0	0	0	0	0	0	603	903	0
501	8	0	0	0	0	0	0	200	300	0	-20.5397	-6.69068	-514.583	27378.5	-24658.7	-1250.84	152.08	849.795	0	0	0	0	0	0	0	603	903	0
501	9	0	0	0	0	0	0	200	300	0	-18.4035	-6.08033	-514.583	27378.5	-24597.7	-1388.17	152.199	849.795	0	0	0	0	0	0	0	603	903	0
502	0	0	0	0	0	0	0	200	300	0	-19.1664	-5.1648	-512.142	27286.9	-25147	-1571.27	150.898	849.72	0	0	0	0	0	0	0	603	903	0
502	1	0	0	0	0	0	0	200	300	0	-20.0819	-4.85962	-511.226	26646	-24963.9	-1571.27	151.169	850.878	0	0	0	0	0	0	0	603	903	0
502	2	0	0	0	0	0	0	200	300	0	-18.2509	-5.01221	-509.395	27378.5	-24719.8	-1342.39	151.472	849.253	0	0	0	0	0	0	0	603	903	0
502	3	0	0	0	0	0	0	200	300	0	-19.6242	-3.48633	-509.395	27195.4	-24902.9	-1525.5	151.113	849.612	0	0	0	0	0	0	0	603	903	0
502	4	0	0	0	0	0	0	200	300	0	-18.8612	-3.02857	-509.395	27470	-24475.6	-1571.27	151.952	849.073	0	0	0	0	0	0	0	603	903	0
502	5	0	0	0	0	0	0	200	300	0	-18.8612	-2.87598	-507.869	27103.8	-24658.7	-1754.38	151.447	849.632	0	0	0	0	0	0	0	603	903	0
502	6	0	0	0	0	0	0	200	300	0	-18.7086	-1.80786	-505.733	27103.8	-25086	-1525.5	150.397	849.407	0	0	0	0	0	0	0	603	903	0
502	7	0	0	0	0	0	0	200	300	0	-17.4879	-1.80786	-506.648	27286.9	-24536.7	-1845.93	151.571	849.142	0	0	0	0	0	0	0	603	903	0
502	8	0	0	0	0	0	0	200	300	0	-19.319	-1.50269	-502.986	27378.5	-24292.5	-1800.16	151.703	848.568	0	0	0	0	0	0	0	603	903	0
502	9	0	0	0	0	0	0	200	300	0	-19.4716	-1.19751	-504.512	27653.1	-24902.9	-1754.38	150.64	848.188	0	0	0	0	0	0	0	603	903	0
503	0	0	0	0	0	0	0	200	300	0	-20.2345	0.328366	-502.986	27927.8	-24719.8	-1937.48	150.854	847.476	0	0	0	0	0	0	0	603	903	0
503	1	0	0	0	0	0	0	200	300	0	-18.5561	0.480954	-503.292	27836.2	-25086	-2029.04	150.156	847.692	0	0	0	0	0	0	0	603	903	0
503	2	0	0	0	0	0	0	200	300	0	-18.7086	0.175778	-502.071	27836.2	-24902.9	-1937.48	150.4	847.557	0	0	0	0	0	0	0	603	903	0
503	3	0	0	0	0	0	0	200	300	0	-18.4035	0.480954	-501.766	27744.7	-24719.8	-1754.38	150.734	847.706	0	0	0	0	0	0	0	603	903	0
503	4	0	0	0	0	0	0	200	300	0	-19.1664	1.09131	-500.545	28477.1	-24841.8	-1937.48	150.37	846.108	0	0	0	0	0	0	0	603	903	0
503	5	0	0	0	0	0	0	200	300	0	-18.5561	1.70166	-499.324	28110.9	-24658.7	-2257.92	150.616	846.702	0	0	0	0	0	0	0	603	903	0
503	6	0	0	0	0	0	0	200	300	0	-19.4716	2.31201	-499.324	28202.4	-24902.9	-2532.58	150.127	846.519	0	0	0	0	0	0	0	603	903	0
503	7	0	0	0	0	0	0	200	300	0	-19.0138	2.76977	-499.629	28751.8	-25269.1	-2303.7	149.424	845.454	0	0	0	0	0	0	0	603	903	0
503	8	0	0	0	0	0	0	200	300	0	-19.1664	3.07495	-499.629	28843.3	-24902.9	-2212.14	150.157	845.271	0	0	0	0	0	0	0	603	903	0
503	9	0	0	0	0	0	0	200	300	0	-20.0819	2.31201	-498.714	28019.3	-24536.7	-2074.81	150.8	846.817	0	0	0	0	0	0	0	603	903	0
504	0	0	0	0	0	0	0	200	300	0	-19.9294	4.44824	-498.104	29484.2	-25208.1	-2441.02	149.392	843.807	0	0	0	0	0	0	0	603	903	0
504	1	0	0	0	0	0	0	200	300	0	-19.0138	4.44824	-497.798	29209.5	-24963.9	-2395.25	149.851	844.323	0	0	0	0	0	0	0	603	903	0
504	2	0	0	0	0	0	0	200	300	0	-19.9294	4.14306	-498.409	28660.2	-25086	-2807.24	149.668	845.497	0	0	0	0	0	0	0	603	903	0
504	3	0	0	0	0	0	0	200	300	0	-19.4716	5.51635	-495.967	29026.4	-25269.1	-2349.47	149.051	844.475	0	0	0	0	0	0	0	603	903	0
504	4	0	0	0	0	0	0	200	300	0	-18.8612	5.21118	-498.104	29118	-24963.9	-2486.8	149.882	844.542	0	0	0	0	0	0	0	603	903	0
504	5	0	0	0	0	0	0	200	300	0	-19.7768	5.66894	-495.052	29118	-25452.2	-2486.8	148.587	844.182	0	0	0	0	0	0	0	603	903	0
504	6	0	0	0	0	0	0	200	300	0	-20.0819	7.04223	-494.747	29209.5	-25330.1	-2212.14	148.802	843.961	0	0	0	0	0	0	0	603	903	0
504	7	0	0	0	0	0	0	200	300	0	-19.4716	6.58447	-494.441	30216.6	-24963.9	-2669.91	149.511	841.887	0	0	0	0	0	0	0	603	903	0
504	8	0	0	0	0	0	0	200	300	0	-19.319	7.19482	-495.967	29850.4	-25696.3	-2807.24	148.189	842.814	0	0	0	0	0	0	0	603	903	0
504	9	0	0	0	0	0	0	200	300	0	-17.3354	7.19482	-495.662	29667.3	-25208.1	-2715.68	149.143	843.146	0	0	0	0	0	0	0	603	903	0
505	0	0	0	0	0	0	0	200	300	0	-18.7086	7.5	-495.052	30399.7	-25208.1	-2853.01	149.08	841.593	0	0	0	0	0	0	0	603	903	0
505	1	0	0	0	0	0	0	200	300	0	-19.1664	8.26294	-494.747	29758.8	-25574.3	-2715.68	148.308	842.85	0	0	0	0	0	0	0	603	903	0
505	2	0	0	0	0	0	0	200	300	0	-19.9294	9.48364	-494.747	30399.7	-25574.3	-3127.67	148.308	841.555	0	0	0	0	0	0	0	603	903	0
505	3	0	0	0	0	0	0	200	300	0	-19.4716	9.33105	-495.967	30949	-25940.5	-2944.56	147.697	840.599	0	0	0	0	0	0	0	603	903	0
505	4	0	0	0	0	0	0	200	300	0	-19.1664	9.78882	-493.831	30216.6	-25757.4	-2853.01	147.842	841.812	0	0	0	0	0	0	0	603	903	0
505	5	0	0	0	0	0	0	200	300	0	-19.4716	10.2466	-496.578	30399.7	-25452.2	-2898.79	148.745	841.782	0	0	0	0	0	0	0	603	903	0
505	6	0	0	0	0	0	0	200	300	0	-19.6242	9.02588	-495.967	30857.5	-25818.4	-3219.22	147.943	840.783	0	0	0	0	0	0	0	603	903	0
505	7	0	0	0	0	0	0	200	300	0	-19.9294	11.4673	-495.967	30674.4	-25818.4	-3402.33	147.943	841.152	0	0	0	0	0	0	0	603	903	0
505	8	0	0	0	0	0	0	200	300	0	-20.0819	11.0095	-497.798	31040.6	-25757.4	-3448.1	148.257	840.644	0	0	0	0	0	0	0	603	903	0
505	9	0	0	0	0	0	0	200	300	0	-19.4716	11.6199	-497.188	31773	-26367.7	-3265	146.966	839.095	0	0	0	0	0	0	0	603	903	0
506	0	0	0	0	0	0	0	200	300	0	-19.6242	11.3147	-497.493	32505.4	-25879.4	-3219.22	147.98	837.662	0	0	0	0	0	0	0	603	903	0
506	1	0	0	0	0	0	0	200	300	0	-20.2345	12.0776	-498.714	31315.2	-26367.7	-3081.89	147.129	840.208	0	0	0	0	0	0	0	603	903	0
506	2	0	0	0	0	0	0	200	300	0	-20.3871	12.3828	-498.409	31773	-26306.7	-3402.33	147.219	839.251	0	0	0	0	0	0	0	603	903	0
506	3	0	0	0	0	0	0	200	300	0	-19.4716	13.4509	-499.629	32413.9	-26184.6	-3676.99	147.592	838.124	0	0	0	0	0	0	0	603	903	0
506	4	0	0	0	0	0	0	200	300	0	-20.5397	13.4509	-500.24	31773	-26001.5	-3722.76	148.022	839.484	0	0	0	0	0	0	0	603	903	0
506	5	0	0	0	0	0	0	200	300	0	-19.7768	13.6035	-501.155	32322.3	-26428.8	-3768.54	147.264	838.504	0	0	0	0	0	0	0	603	903	0
506	6	0	0	0	0	0	0	200	300	0	-19.6242	14.3665	-501.766	33054.7	-26184.6	-3585.43	147.815	837.123	0	0	0	0	0	0	0	603	903	0
506	7	0	0	0	0	0	0	200	300	0	-20.6923	14.3665	-502.681	32230.8	-26672.9	-3356.55	146.939	838.882	0	0	0	0	0	0	0	603	903	0
506	8	0	0	0	0	0	0	200	300	0	-21.4552	15.1294	-501.461	32688.5	-26245.6	-3814.32	147.662	837.813	0	0	0	0	0	0	0	603	903	0
506	9	0	0	0	0	0	0	200	300	0	-20.2345	16.0449	-503.292	33146.3	-26917	-3814.32	146.518	837.141	0	0	0	0	0	0	0	603	903	0
507	0	0	0	0	0	0	0	200	300	0	-21.6078	15.8923	-503.902	32963.2	-26856	-4043.2	146.704	837.584	0	0	0	0	0	0	0	603	903	0
507	1	0	0	0	0	0	0	200	300	0	-20.5397	16.9604	-504.817	33512.5	-26611.9	-3722.76	147.284	836.615	0	0	0	0	0	0	0	603	903	0
507	2	0	0	0	0	0	0	200	300	0	-19.9294	16.3501	-505.428	33970.3	-27466.4	-3814.32	145.657	835.789	0	0	0	0	0	0	0	603	903	0
507	3	0	0	0	0	0	0	200	300	0	-20.5397	17.113	-507.259	33054.7	-26672.9	-3905.87	147.418	837.837	0	0	0	0	0	0	0	603	903	0
507	4	0	0	0	0	0	0	200	300	0	-21.3026	18.0286	-506.648	33970.3	-26856	-4272.08	146.993	835.951	0	0	0	0	0	0	0	603	903	0
507	5	0	0	0	0	0	0	200	300	0	-19.6242	17.876	-508.785	34428	-27405.3	-4180.53	146.136	835.333	0	0	0	0	0	0	0	603	903	0
507	6	0	0	0	0	0	0	200	300	0	-20.9975	17.876	-510.616	34885.8	-27100.1	-4043.2	146.927	834.679	0	0	0	0	0	0	0	603	903	0
507	7	0	0	0	0	0	0	200	300	0	-21.1501	17.7234	-511.531	34885.8	-27588.4	-4043.2	146.067	834.801	0	0	0	0	0	0	0	603	903	0
507	8	0	0	0	0	0	0	200	300	0	-20.5397	18.7915	-513.668	34885.8	-27405.3	-4134.75	146.648	835.085	0	0	0	0	0	0	0	603	903	0
507	9	0	0	0	0	0	0	200	300	0	-22.3708	19.2493	-512.752	34702.7	-27222.2	-4546.74	146.91	835.321	0	0	0	0	0	0	0	603	903	0
508	0	0	0	0	0	0	0	200	300	0	-21.7604	19.707	-511.226	35709.8	-27710.5	-4638.29	145.796	833.149	0	0	0	0	0	0	0	603	903	0
508	1	0	0	0	0	0	0	200	300	0	-22.0656	19.8596	-516.414	35709.8	-27405.3	-4500.96	146.932	833.851	0	0	0	0	0	0	0	603	903	0
508	2	0	0	0	0	0	0	200	300	0	-22.3708	19.8596	-516.719	35801.3	-27771.5	-4363.63	146.254	833.714	0	0	0	0	0	0	0	603	903	0
508	3	0	0	0	0	0	0	200	300	0	-22.0656	21.9958	-516.719	36167.5	-28320.8	-4684.07	145.191	833.005	0	0	0	0	0	0	0	603	903	0
508	4	0	0	0	0	0	0	200	300	0	-21.6078	20.6226	-519.771	35984.4	-27832.6	-5233.38	146.452	833.769	0	0	0	0	0	0	0	603	903	0
508	5	0	0	0	0	0	0	200	300	0	-22.9811	22.301	-520.076	36076	-28320.8	-4821.4	145.545	833.633	0	0	0	0	0	0	0	603	903	0
508	6	0	0	0	0	0	0	200	300	0	-23.1337	22.4536	-522.823	36442.2	-28198.8	-4729.84	146.064	833.297	0	0	0	0	0	0	0	603	903	0
508	7	0	0	0	0	0	0	200	300	0	-22.0656	22.6062	-522.823	37357.7	-28137.7	-5050.28	146.181	831.546	0	0	0	0	0	0	0	603	903	0
508	8	0	0	0	0	0	0	200	300	0	-22.6759	24.1321	-523.738	37174.6	-28748.1	-5004.5	145.11	832.021	0	0	0	0	0	0	0	603	903	0
508	9	0	0	0	0	0	0	200	300	0	-22.6759	23.5217	-523.738	36716.9	-28565	-5141.83	145.459	832.895	0	0	0	0	0	0	0	603	903	0
509	0	0	0	0	0	0	0	200	300	0	-22.3708	24.2847	-526.18	37723.9	-28259.8	-5141.83	146.292	831.306	0	0	0	0	0	0	0	603	903	0
509	1	0	0	0	0	0	0	200	300	0	-23.2863	23.9795	-529.232	37998.6	-28687.1	-5416.49	145.795	831.201	0	0	0	0	0	0	0	603	903	0
509	2	0	0	0	0	0	0	200	300	0	-21.6078	25.3528	-531.673	38364.8	-28442.9	-5462.27	146.503	830.841	0	0	0	0	0	0	0	603	903	0
509	3	0	0	0	0	0	0	200	300	0	-23.2863	25.658	-532.283	38181.7	-29236.4	-5462.27	145.074	831.268	0	0	0	0	0	0	0	603	903	0
509	4	0	0	0	0	0	0	200	300	0	-23.4389	26.7261	-535.335	38364.8	-29480.5	-5736.92	144.931	831.335	0	0	0	0	0	0	0	603	903	0
509	5	0	0	0	0	0	0	200	300	0	-22.6759	26.1157	-535.945	38639.4	-28687.1	-5508.04	146.474	830.904	0	0	0	0	0	0	0	603	903	0
509	6	0	0	0	0	0	0	200	300	0	-23.5915	26.8787	-534.725	38639.4	-29663.6	-5279.16	144.525	830.74	0	0	0	0	0	0	0	603	903	0
509	7	0	0	0	0	0	0	200	300	0	-23.8966	28.0994	-538.692	39646.5	-29297.4	-5736.92	145.614	829.402	0	0	0	0	0	0	0	603	903	0
509	8	0	0	0	0	0	0	200	300	0	-23.744	27.1838	-539.913	39555	-29480.5	-5874.25	145.398	829.738	0	0	0	0	0	0	0	603	903	0
509	9	0	0	0	0	0	0	200	300	0	-24.0492	29.1675	-542.659	40562.1	-29724.7	-6057.36	145.224	828.253	0	0	0	0	0	0	0	603	903	0
510	0	0	0	0	0	0	0	200	300	0	-23.8966	29.3201	-544.795	40012.8	-29968.8	-6011.58	144.991	829.555	0	0	0	0	0	0	0	603	903	0
510	1	0	0	0	0	0	0	200	300	0	-25.1173	29.0149	-546.627	40287.4	-30029.8	-6194.69	145.063	829.298	0	0	0	0	0	0	0	603	903	0
510	2	0	0	0	0	0	0	200	300	0	-24.6596	30.2356	-547.237	41019.8	-29968.8	-6057.36	145.236	828.042	0	0	0	0	0	0	0	603	903	0
510	3	0	0	0	0	0	0	200	300	0	-25.2699	30.8459	-548.763	41386	-29968.8	-6148.91	145.388	827.583	0	0	0	0	0	0	0	603	903	0
510	4	0	0	0	0	0	0	200	300	0	-26.0329	31.3037	-551.204	40836.7	-30762.2	-6423.57	144.191	828.914	0	0	0	0	0	0	0	603	903	0
510	5	0	0	0	0	0	0	200	300	0	-26.6432	30.9985	-554.256	41660.7	-31006.4	-6332.02	144.058	827.835	0	0	0	0	0	0	0	603	903	0
510	6	0	0	0	0	0	0	200	300	0	-24.6596	32.0666	-556.392	42026.9	-30579.1	-6240.46	145.04	827.465	0	0	0	0	0	0	0	603	903	0
510	7	0	0	0	0	0	0	200	300	0	-26.7958	32.3718	-557.918	42576.2	-30945.4	-6652.45	144.534	826.687	0	0	0	0	0	0	0	603	903	0
510	8	0	0	0	0	0	0	200	300	0	-27.4062	33.8977	-560.97	43308.6	-30518.1	-6606.68	145.598	825.797	0	0	0	0	0	0	0	603	903	0
510	9	0	0	0	0	0	0	200	300	0	-26.7958	33.7451	-561.885	43583.3	-30884.3	-7110.22	145.034	825.434	0	0	0	0	0	0	0	603	903	0
511	0	0	0	0	0	0	0	200	300	0	-26.0329	34.8132	-559.139	43308.6	-31311.6	-7110.22	144	825.544	0	0	0	0	0	0	0	603	903	0
511	1	0	0	0	0	0	0	200	300	0	-26.9484	35.5762	-565.547	43858	-31860.9	-7064.44	143.664	825.451	0	0	0	0	0	0	0	603	903	0
511	2	0	0	0	0	0	0	200	300	0	-25.5751	35.1184	-568.904	44407.3	-31433.6	-6927.11	144.747	824.942	0	0	0	0	0	0	0	603	903	0
511	3	0	0	0	0	0	0	200	300	0	-27.5587	35.5762	-569.82	44773.5	-31860.9	-7018.66	144.086	824.425	0	0	0	0	0	0	0	603	903	0
511	4	0	0	0	0	0	0	200	300	0	-28.7794	37.102	-572.261	44224.2	-31372.6	-7339.1	145.178	825.72	0	0	0	0	0	0	0	603	903	0
511	5	0	0	0	0	0	0	200	300	0	-28.932	36.9495	-573.482	45872.1	-32044	-7705.31	144.124	823.011	0	0	0	0	0	0	0	603	903	0
511	6	0	0	0	0	0	0	200	300	0	-28.1691	38.4753	-576.229	45780.6	-32044	-7155.99	144.39	823.551	0	0	0	0	0	0	0	603	903	0
511	7	0	0	0	0	0	0	200	300	0	-28.6269	38.6279	-575.618	45689	-32654.3	-7659.53	143.271	823.626	0	0	0	0	0	0	0	603	903	0
511	8	0	0	0	0	0	0	200	300	0	-29.0846	38.4753	-581.111	46421.4	-32410.2	-7705.31	144.227	823.116	0	0	0	0	0	0	0	603	903	0
511	9	0	0	0	0	0	0	200	300	0	-29.2372	40.1538	-582.637	46879.2	-32227.1	-7796.86	144.688	822.54	0	0	0	0	0	0	0	603	903	0
512	0	0	0	0	0	0	0	200	300	0	-28.932	39.696	-582.637	46787.7	-32593.3	-7751.08	144.059	822.697	0	0	0	0	0	0	0	603	903	0
512	1	0	0	0	0	0	0	200	300	0	-28.932	40.6116	-587.215	47337	-32776.4	-8117.3	144.183	822.387	0	0	0	0	0	0	0	603	903	0
512	2	0	0	0	0	0	0	200	300	0	-29.8476	40.1538	-589.351	48801.8	-33081.6	-7979.97	143.868	820.194	0	0	0	0	0	0	0	603	903	0
512	3	0	0	0	0	0	0	200	300	0	-29.695	41.2219	-594.234	48069.4	-33386.8	-8483.5	143.815	822.107	0	0	0	0	0	0	0	603	903	0
512	4	0	0	0	0	0	0	200	300	0	-31.2209	41.0693	-594.234	48252.5	-32959.5	-8117.3	144.534	821.799	0	0	0	0	0	0	0	603	903	0
512	5	0	0	0	0	0	0	200	300	0	-31.0683	43.053	-596.981	49076.5	-33630.9	-8666.61	143.665	820.792	0	0	0	0	0	0	0	603	903	0
512	6	0	0	0	0	0	0	200	300	0	-31.0683	43.3582	-598.812	49259.6	-33447.8	-8666.61	144.143	820.738	0	0	0	0	0	0	0	603	903	0
512	7	0	0	0	0	0	0	200	300	0	-32.5941	44.4263	-601.863	48984.9	-33814	-8712.39	143.818	821.611	0	0	0	0	0	0	0	603	903	0
512	8	0	0	0	0	0	0	200	300	0	-31.9838	44.7314	-605.831	50724.4	-34302.3	-8849.72	143.38	819.273	0	0	0	0	0	0	0	603	903	0
512	9	0	0	0	0	0	0	200	300	0	-29.8476	45.1892	-606.746	50816	-34058.2	-8941.27	143.868	819.248	0	0	0	0	0	0	0	603	903	0
513	0	0	0	0	0	0	0	200	300	0	-32.5941	45.7996	-607.662	51182.2	-34607.5	-9032.82	143.048	818.772	0	0	0	0	0	0	0	603	903	0
513	1	0	0	0	0	0	0	200	300	0	-33.2045	46.1047	-608.577	51456.8	-34851.6	-9078.6	142.733	818.447	0	0	0	0	0	0	0	603	903	0
513	2	0	0	0	0	0	0	200	300	0	-32.289	46.8677	-612.544	52189.2	-34424.4	-9307.48	143.801	817.799	0	0	0	0	0	0	0	603	903	0
513	3	0	0	0	0	0	0	200	300	0	-33.2045	45.647	-614.07	52647	-35034.7	-9353.26	142.947	817.266	0	0	0	0	0	0	0	603	903	0
513	4	0	0	0	0	0	0	200	300	0	-33.3571	48.5461	-620.174	52555.5	-34851.6	-8941.27	143.803	818.257	0	0	0	0	0	0	0	603	903	0
513	5	0	0	0	0	0	0	200	300	0	-32.5941	48.0884	-620.174	53654.1	-34912.7	-9353.26	143.705	816.485	0	0	0	0	0	0	0	603	903	0
513	6	0	0	0	0	0	0	200	300	0	-33.2045	49.3091	-624.752	53471	-35462	-9124.37	143.238	817.412	0	0	0	0	0	0	0	603	903	0
513	7	0	0	0	0	0	0	200	300	0	-33.0519	48.6987	-624.752	54203.4	-35217.8	-9673.69	143.629	816.24	0	0	0	0	0	0	0	603	903	0
513	8	0	0	0	0	0	0	200	300	0	-34.2726	51.1401	-628.719	54935.8	-35706.1	-9353.26	143.208	815.623	0	0	0	0	0	0	0	603	903	0
513	9	0	0	0	0	0	0	200	300	0	-33.9674	51.1401	-632.991	55210.5	-35645.1	-10039.9	143.688	815.779	0	0	0	0	0	0	0	603	903	0
514	0	0	0	0	0	0	0	200	300	0	-36.1037	51.7505	-634.517	55118.9	-35950.2	-9811.02	143.342	816.133	0	0	0	0	0	0	0	603	903	0
514	1	0	0	0	0	0	0	200	300	0	-36.8666	52.5134	-635.128	56126	-36072.3	-9902.57	143.205	814.63	0	0	0	0	0	0	0	603	903	0
514	2	0	0	0	0	0	0	200	300	0	-35.3407	52.9712	-639.095	56675.3	-36316.5	-10131.5	143.175	814.319	0	0	0	0	0	0	0	603	903	0
514	3	0	0	0	0	0	0	200	300	0	-37.1718	52.9712	-640.315	57041.6	-36621.6	-10451.9	142.807	813.917	0	0	0	0	0	0	0	603	903	0
514	4	0	0	0	0	0	0	200	300	0	-36.8666	54.9548	-644.893	57957.1	-36865.8	-10451.9	142.834	813.129	0	0	0	0	0	0	0	603	903	0
514	5	0	0	0	0	0	0	200	300	0	-35.9511	54.6497	-647.64	58414.8	-36682.7	-10497.7	143.359	812.804	0	0	0	0	0	0	0	603	903	0
514	6	0	0	0	0	0	0	200	300	0	-37.1718	55.7178	-648.25	58414.8	-37720.3	-10589.2	141.812	812.888	0	0	0	0	0	0	0	603	903	0
514	7	0	0	0	0	0	0	200	300	0	-37.6295	56.3281	-651.607	59421.9	-37598.2	-10863.9	142.299	811.807	0	0	0	0	0	0	0	603	903	0
514	8	0	0	0	0	0	0	200	300	0	-37.0192	56.1755	-653.438	59788.1	-37293	-10406.1	142.928	811.502	0	0	0	0	0	0	0	603	903	0
514	9	0	0	0	0	0	0	200	300	0	-38.3925	58.0066	-656.49	59513.5	-37781.3	-11092.8	142.45	812.346	0	0	0	0	0	0	0	603	903	0
515	0	0	0	0	0	0	0	200	300	0	-38.0873	57.854	-657.711	61253	-37781.3	-11138.5	142.556	809.869	0	0	0	0	0	0	0	603	903	0
515	1	0	0	0	0	0	0	200	300	0	-36.8666	58.6169	-662.593	61436.1	-38147.5	-11138.5	142.427	810.279	0	0	0	0	0	0	0	603	903	0
515	2	0	0	0	0	0	0	200	300	0	-38.2399	59.0747	-664.424	61161.4	-38513.7	-11092.8	142.034	810.948	0	0	0	0	0	0	0	603	903	0
515	3	0	0	0	0	0	0	200	300	0	-39.308	60.7532	-668.392	62443.2	-38086.5	-11184.3	143.018	809.577	0	0	0	0	0	0	0	603	903	0
515	4	0	0	0	0	0	0	200	300	0	-37.0192	61.0583	-669.612	63267.1	-38879.9	-11367.4	141.937	808.517	0	0	0	0	0	0	0	603	903	0
515	5	0	0	0	0	0	0	200	300	0	-40.2235	62.5842	-673.885	63175.6	-39002	-11825.2	142.124	809.252	0	0	0	0	0	0	0	603	903	0
515	6	0	0	0	0	0	0	200	300	0	-39.308	62.7368	-676.631	64274.2	-39063	-11779.4	142.268	808.009	0	0	0	0	0	0	0	603	903	0
515	7	0	0	0	0	0	0	200	300	0	-37.0192	64.1101	-677.852	64732	-39246.1	-11642.1	142.102	807.504	0	0	0	0	0	0	0	603	903	0
515	8	0	0	0	0	0	0	200	300	0	-39.9184	64.4153	-682.43	64457.3	-39429.3	-11962.5	142.222	808.547	0	0	0	0	0	0	0	603	903	0
515	9	0	0	0	0	0	0	200	300	0	-40.5287	63.4998	-684.871	65739.1	-39368.2	-11916.7	142.517	807.013	0	0	0	0	0	0	0	603	903	0
516	0	0	0	0	0	0	0	200	300	0	-37.477	65.7886	-685.176	66837.7	-39978.6	-12054.1	141.652	805.452	0	0	0	0	0	0	0	603	903	0
516	1	0	0	0	0	0	0	200	300	0	-41.902	67.1619	-688.533	66563	-39795.5	-11642.1	142.203	806.326	0	0	0	0	0	0	0	603	903	0
516	2	0	0	0	0	0	0	200	300	0	-41.2917	67.1619	-690.669	67844.8	-40466.9	-12191.4	141.409	804.77	0	0	0	0	0	0	0	603	903	0
516	3	0	0	0	0	0	0	200	300	0	-37.9347	68.3826	-692.806	68302.6	-41016.2	-12511.8	140.797	804.412	0	0	0	0	0	0	0	603	903	0
516	4	0	0	0	0	0	0	200	300	0	-41.902	69.1455	-694.637	68760.3	-40650	-12603.4	141.48	804.013	0	0	0	0	0	0	0	603	903	0
516	5	0	0	0	0	0	0	200	300	0	-42.9701	68.9929	-697.689	69767.4	-40833.1	-12328.7	141.474	803.002	0	0	0	0	0	0	0	603	903	0
516	6	0	0	0	0	0	0	200	300	0	-39.9184	69.2981	-700.74	70225.1	-40894.1	-12832.3	141.642	802.784	0	0	0	0	0	0	0	603	903	0
516	7	0	0	0	0	0	0	200	300	0	-42.5124	70.824	-704.097	70316.7	-40711	-12466	142.18	803.132	0	0	0	0	0	0	0	603	903	0
516	8	0	0	0	0	0	0	200	300	0	-42.6649	71.2817	-705.928	71506.9	-41870.7	-12923.8	140.687	801.705	0	0	0	0	0	0	0	603	903	0
516	9	0	0	0	0	0	0	200	300	0	-40.5287	72.655	-708.37	71690	-41443.4	-12511.8	141.495	801.796	0	0	0	0	0	0	0	603	903	0
517	0	0	0	0	0	0	0	200	300	0	-43.2753	72.3499	-712.337	71964.7	-41748.6	-12923.8	141.392	801.974	0	0	0	0	0	0	0	603	903	0
517	1	0	0	0	0	0	0	200	300	0	-44.0382	72.655	-712.032	73338	-41687.6	-13198.5	141.453	800.002	0	0	0	0	0	0	0	603	903	0
517	2	0	0	0	0	0	0	200	300	0	-41.4442	74.7913	-715.999	73704.2	-41931.7	-13381.6	141.436	800.061	0	0	0	0	0	0	0	603	903	0
517	3	0	0	0	0	0	0	200	300	0	-43.7331	74.6387	-719.356	73795.7	-42786.2	-13518.9	140.522	800.414	0	0	0	0	0	0	0	603	903	0
517	4	0	0	0	0	0	0	200	300	0	-43.4279	75.8594	-720.272	75169	-43091.4	-13427.4	140.173	798.638	0	0	0	0	0	0	0	603	903	0
517	5	0	0	0	0	0	0	200	300	0	-43.5805	76.3171	-723.628	75718.3	-42297.9	-13702	141.547	798.363	0	0	0	0	0	0	0	603	903	0
517	6	0	0	0	0	0	0	200	300	0	-44.6486	76.012	-724.544	76267.6	-43030.3	-13381.6	140.61	797.737	0	0	0	0	0	0	0	603	903	0
517	7	0	0	0	0	0	0	200	300	0	-44.6486	77.2327	-726.375	76633.9	-43030.3	-13564.7	140.76	797.498	0	0	0	0	0	0	0	603	903	0
517	8	0	0	0	0	0	0	200	300	0	-44.3434	76.7749	-726.375	77732.5	-43274.5	-13839.3	140.424	795.986	0	0	0	0	0	0	0	603	903	0
517	9	0	0	0	0	0	0	200	300	0	-44.1908	78.1482	-730.953	78098.7	-43640.7	-14114	140.296	796.155	0	0	0	0	0	0	0	603	903	0
518	0	0	0	0	0	0	0	200	300	0	-44.9538	78.7585	-733.699	78464.9	-43579.6	-14022.4	140.603	796.056	0	0	0	0	0	0	0	603	903	0
518	1	0	0	0	0	0	0	200	300	0	-44.8012	78.9111	-736.751	79288.9	-44129	-13885.1	140.103	795.38	0	0	0	0	0	0	0	603	903	0
518	2	0	0	0	0	0	0	200	300	0	-45.4115	79.0637	-738.582	80112.8	-43945.9	-13976.7	140.5	794.532	0	0	0	0	0	0	0	603	903	0
518	3	0	0	0	0	0	0	200	300	0	-45.1064	80.5896	-739.498	80479	-43701.7	-14114	140.904	794.171	0	0	0	0	0	0	0	603	903	0
518	4	0	0	0	0	0	0	200	300	0	-45.1064	80.437	-742.549	81577.7	-44556.2	-14251.3	139.996	793.138	0	0	0	0	0	0	0	603	903	0
518	5	0	0	0	0	0	0	200	300	0	-45.7167	79.8267	-740.718	82584.8	-44739.3	-14342.9	139.6	791.507	0	0	0	0	0	0	0	603	903	0
518	6	0	0	0	0	0	0	200	300	0	-46.0219	81.8103	-747.737	82127	-44495.2	-14297.1	140.494	793.166	0	0	0	0	0	0	0	603	903	0
518	7	0	0	0	0	0	0	200	300	0	-46.4796	81.0474	-749.568	83591.9	-45166.6	-14342.9	139.743	791.48	0	0	0	0	0	0	0	603	903	0
518	8	0	0	0	0	0	0	200	300	0	-44.0382	83.3362	-749.263	83866.5	-44800.3	-14342.9	140.207	791.068	0	0	0	0	0	0	0	603	903	0
518	9	0	0	0	0	0	0	200	300	0	-46.7848	84.5569	-751.705	84782.1	-44922.4	-14571.8	140.239	790.214	0	0	0	0	0	0	0	603	903	0
519	0	0	0	0	0	0	0	200	300	0	-46.6322	83.6414	-753.231	85789.1	-45410.7	-14251.3	139.712	789.105	0	0	0	0	0	0	0	603	903	0
519	1	0	0	0	0	0	0	200	300	0	-45.7167	84.2517	-755.672	86155.3	-45532.8	-14434.4	139.745	788.988	0	0	0	0	0	0	0	603	903	0
519	2	0	0	0	0	0	0	200	300	0	-46.3271	84.4043	-758.724	86704.6	-45837.9	-14251.3	139.585	788.723	0	0	0	0	0	0	0	603	903	0
519	3	0	0	0	0	0	0	200	300	0	-46.3271	84.4043	-758.113	87162.4	-46204.2	-14526	139.054	788.027	0	0	0	0	0	0	0	603	903	0
519	4	0	0	0	0	0	0	200	300	0	-45.8693	85.9302	-760.25	87986.4	-45715.9	-14526	139.867	787.266	0	0	0	0	0	0	0	603	903	0
519	5	0	0	0	0	0	0	200	300	0	-45.7167	85.625	-762.386	88718.8	-46509.3	-14938	138.995	786.63	0	0	0	0	0	0	0	603	903	0
519	6	0	0	0	0	0	0	200	300	0	-47.3952	87.1509	-764.217	89451.2	-46021.1	-14617.5	139.78	785.951	0	0	0	0	0	0	0	603	903	0
519	7	0	0	0	0	0	0	200	300	0	-45.8693	87.7612	-767.269	90092.1	-46448.3	-14754.9	139.463	785.581	0	0	0	0	0	0	0	603	903	0
519	8	0	0	0	0	0	0	200	300	0	-45.7167	87.4561	-767.879	90458.3	-47119.7	-14800.6	138.637	785.197	0	0	0	0	0	0	0	603	903	0
519	9	0	0	0	0	0	0	200	300	0	-45.4115	88.9819	-770.32	91282.3	-46509.3	-14800.6	139.623	784.501	0	0	0	0	0	0	0	603	903	0
520	0	0	0	0	0	0	0	200	300	0	-45.4115	89.4397	-770.626	92747.1	-47180.7	-14892.2	138.776	782.647	0	0	0	0	0	0	0	603	903	0
520	1	0	0	0	0	0	0	200	300	0	-45.8693	89.1345	-773.982	92197.8	-46997.6	-15075.3	139.278	783.879	0	0	0	0	0	0	0	603	903	0
520	2	0	0	0	0	0	0	200	300	0	-46.6322	89.8975	-776.119	93571.1	-46814.5	-14938	139.681	782.437	0	0	0	0	0	0	0	603	903	0
520	3	0	0	0	0	0	0	200	300	0	-45.8693	91.2708	-779.476	94120.4	-47302.8	-15441.5	139.315	782.252	0	0	0	0	0	0	0	603	903	0
520	4	0	0	0	0	0	0	200	300	0	-45.8693	91.1182	-776.119	93845.8	-47546.9	-14800.6	138.738	782.083	0	0	0	0	0	0	0	603	903	0
520	5	0	0	0	0	0	0	200	300	0	-46.4796	92.7966	-781.917	94395.1	-47058.6	-15487.3	139.816	782.277	0	0	0	0	0	0	0	603	903	0
520	6	0	0	0	0	0	0	200	300	0	-44.3434	91.7285	-779.476	96043	-48035.2	-15258.4	138.375	779.785	0	0	0	0	0	0	0	603	903	0
520	7	0	0	0	0	0	0	200	300	0	-45.8693	94.9329	-783.748	96683.9	-47302.8	-15350	139.645	779.639	0	0	0	0	0	0	0	603	903	0
520	8	0	0	0	0	0	0	200	300	0	-46.3271	94.1699	-785.274	97233.2	-47669	-14892.2	139.296	779.179	0	0	0	0	0	0	0	603	903	0
520	9	0	0	0	0	0	0	200	300	0	-45.4115	94.7803	-788.326	97965.6	-48401.4	-15258.4	138.602	778.73	0	0	0	0	0	0	0	603	903	0
521	0	0	0	0	0	0	0	200	300	0	-44.9538	96.4587	-790.462	98240.3	-47791.1	-15441.5	139.54	778.718	0	0	0	0	0	0	0	603	903	0
521	1	0	0	0	0	0	0	200	300	0	-46.3271	96.3062	-791.988	98698.1	-48035.2	-15533.1	139.349	778.379	0	0	0	0	0	0	0	603	903	0
521	2	0	0	0	0	0	0	200	300	0	-45.8693	98.1372	-791.683	99613.6	-48401.4	-15624.6	138.863	777.175	0	0	0	0	0	0	0	603	903	0
521	3	0	0	0	0	0	0	200	300	0	-45.1064	98.4424	-796.565	100804	-48340.4	-15578.8	139.314	776.452	0	0	0	0	0	0	0	603	903	0
521	4	0	0	0	0	0	0	200	300	0	-45.7167	96.4587	-799.007	100529	-48889.7	-15533.1	138.812	777.182	0	0	0	0	0	0	0	603	903	0
521	5	0	0	0	0	0	0	200	300	0	-44.3434	99.6631	-798.702	100712	-49072.8	-15578.8	138.559	776.905	0	0	0	0	0	0	0	603	903	0
521	6	0	0	0	0	0	0	200	300	0	-44.8012	101.189	-802.364	101811	-48706.6	-15578.8	139.296	776.111	0	0	0	0	0	0	0	603	903	0
521	7	0	0	0	0	0	0	200	300	0	-46.1745	101.647	-802.059	101628	-49011.8	-15716.2	138.893	776.291	0	0	0	0	0	0	0	603	903	0
521	8	0	0	0	0	0	0	200	300	0	-46.3271	102.562	-803.89	103184	-48889.7	-15807.7	139.184	774.644	0	0	0	0	0	0	0	603	903	0
521	9	0	0	0	0	0	0	200	300	0	-42.9701	102.562	-808.467	103459	-49072.8	-15533.1	139.301	775.031	0	0	0	0	0	0	0	603	903	0
522	0	0	0	0	0	0	0	200	300	0	-44.8012	103.936	-806.941	103825	-49744.2	-15807.7	138.355	774.335	0	0	0	0	0	0	0	603	903	0
522	1	0	0	0	0	0	0	200	300	0	-45.4115	105.461	-810.604	104466	-49072.8	-16357	139.461	774.126	0	0	0	0	0	0	0	603	903	0
522	2	0	0	0	0	0	0	200	300	0	-43.8857	105.614	-809.383	105015	-49378	-15807.7	138.993	773.253	0	0	0	0	0	0	0	603	903	0
522	3	0	0	0	0	0	0	200	300	0	-43.7331	106.987	-813.045	105565	-49683.2	-15990.8	138.892	773.162	0	0	0	0	0	0	0	603	903	0
522	4	0	0	0	0	0	0	200	300	0	-44.8012	107.903	-816.097	105473	-49439	-15853.5	139.42	773.759	0	0	0	0	0	0	0	603	903	0
522	5	0	0	0	0	0	0	200	300	0	-43.2753	108.513	-816.097	106663	-49927.3	-16219.7	138.822	772.301	0	0	0	0	0	0	0	603	903	0
522	6	0	0	0	0	0	0	200	300	0	-43.1227	109.886	-817.623	106388	-50171.4	-15761.9	138.637	772.881	0	0	0	0	0	0	0	603	903	0
522	7	0	0	0	0	0	0	200	300	0	-44.3434	110.497	-819.148	106846	-49316.9	-16219.7	139.795	772.564	0	0	0	0	0	0	0	603	903	0
522	8	0	0	0	0	0	0	200	300	0	-42.6649	112.175	-820.064	107396	-49988.3	-16265.5	139.043	772.04	0	0	0	0	0	0	0	603	903	0
522	9	0	0	0	0	0	0	200	300	0	-42.9701	113.396	-823.726	108403	-49622.1	-16128.2	139.759	771.4	0	0	0	0	0	0	0	603	903	0
523	0	0	0	0	0	0	0	200	300	0	-41.2917	114.006	-826.168	108860	-49683.2	-16128.2	139.863	771.234	0	0	0	0	0	0	0	603	903	0
523	1	0	0	0	0	0	0	200	300	0	-41.4442	116.295	-823.726	109410	-50476.6	-16219.7	138.722	770.177	0	0	0	0	0	0	0	603	903	0
523	2	0	0	0	0	0	0	200	300	0	-41.4442	116.6	-826.168	108952	-49866.3	-16402.8	139.641	771.124	0	0	0	0	0	0	0	603	903	0
523	3	0	0	0	0	0	0	200	300	0	-42.3598	114.922	-829.83	109776	-49927.3	-16082.4	139.834	770.713	0	0	0	0	0	0	0	603	903	0
523	4	0	0	0	0	0	0	200	300	0	-40.6813	119.194	-828.304	110508	-50476.6	-16631.7	139.06	769.585	0	0	0	0	0	0	0	603	903	0
523	5	0	0	0	0	0	0	200	300	0	-40.071	119.5	-827.999	111790	-50171.4	-16494.4	139.406	767.988	0	0	0	0	0	0	0	603	903	0
523	6	0	0	0	0	0	0	200	300	0	-41.2917	121.331	-830.135	110966	-50659.7	-16448.6	138.974	769.328	0	0	0	0	0	0	0	603	903	0
523	7	0	0	0	0	0	0	200	300	0	-40.2235	120.568	-829.219	111424	-50537.7	-16494.4	139.054	768.628	0	0	0	0	0	0	0	603	903	0
523	8	0	0	0	0	0	0	200	300	0	-39.0028	123.772	-833.492	111607	-49927.3	-16448.6	140.099	769.097	0	0	0	0	0	0	0	603	903	0
523	9	0	0	0	0	0	0	200	300	0	-41.4442	125.298	-831.356	111607	-50415.6	-16860.6	139.357	768.753	0	0	0	0	0	0	0	603	903	0
524	0	0	0	0	0	0	0	200	300	0	-40.8339	126.519	-835.018	112797	-50415.6	-16402.8	139.623	767.916	0	0	0	0	0	0	0	603	903	0
524	1	0	0	0	0	0	0	200	300	0	-36.714	127.434	-836.849	113163	-50171.4	-16952.1	140.047	767.774	0	0	0	0	0	0	0	603	903	0
524	2	0	0	0	0	0	0	200	300	0	-39.6132	128.502	-834.712	112431	-50964.9	-16723.3	138.943	768.306	0	0	0	0	0	0	0	603	903	0
524	3	0	0	0	0	0	0	200	300	0	-39.9184	129.57	-836.544	113255	-50049.4	-16769	140.171	767.616	0	0	0	0	0	0	0	603	903	0
524	4	0	0	0	0	0	0	200	300	0	-36.5614	129.875	-835.628	113896	-50232.5	-16769	139.887	766.7	0	0	0	0	0	0	0	603	903	0
524	5	0	0	0	0	0	0	200	300	0	-39.4606	132.012	-835.323	113804	-50415.6	-16402.8	139.645	766.76	0	0	0	0	0	0	0	603	903	0
524	6	0	0	0	0	0	0	200	300	0	-39.0028	132.317	-835.018	114903	-50171.4	-17089.5	139.916	765.395	0	0	0	0	0	0	0	603	903	0
524	7	0	0	0	0	0	0	200	300	0	-35.4933	134.148	-836.238	114537	-50598.7	-17181	139.493	766.033	0	0	0	0	0	0	0	603	903	0
524	8	0	0	0	0	0	0	200	300	0	-38.0873	134.453	-835.018	113804	-50720.8	-17089.5	139.258	766.71	0	0	0	0	0	0	0	603	903	0
524	9	0	0	0	0	0	0	200	300	0	-38.3925	136.132	-837.154	114628	-49866.3	-17089.5	140.434	766.074	0	0	0	0	0	0	0	603	903	0
525	0	0	0	0	0	0	0	200	300	0	-35.1881	136.742	-835.018	115178	-50232.5	-16723.3	139.843	765.066	0	0	0	0	0	0	0	603	903	0
525	1	0	0	0	0	0	0	200	300	0	-38.5451	139.031	-835.628	114903	-49866.3	-17135.2	140.325	765.495	0	0	0	0	0	0	0	603	903	0
525	2	-8.00844	-2.28928	-15.0348	2125.58	1117.18	-462.205	274.306	158.623	0	-36.5614	139.489	-835.323	115635	-50110.4	-17181	140.011	764.568	0	0	0	0	0	0	0	603	903	0
525	3	-13.9594	0.457305	-35.7867	3315.77	2948.23	-828.416	282.383	207.347	0	-35.1881	141.32	-832.576	115269	-50232.5	-17364.1	139.666	764.551	0	0	0	0	0	0	0	603	903	0
525	4	-7.55067	4.272	-48.6041	4780.61	3619.62	682.204	274.471	201.642	0	-36.5614	142.083	-833.187	115544	-49866.3	-17226.8	140.15	764.323	0	0	0	0	0	0	0	603	903	0
525	5	-1.14198	13.4273	-53.4869	4689.06	4046.86	1780.84	275.661	212.333	0	-36.1037	142.235	-831.05	115635	-50049.4	-16952.1	139.776	763.856	0	0	0	0	0	0	0	603	903	0
525	6	-8.77138	20.5989	-53.7921	5421.48	4718.25	636.428	287.713	199.214	0	-35.6459	143.761	-831.356	116276	-49988.3	-17226.8	139.871	763.137	0	0	0	0	0	0	0	603	903	0
525	7	-13.9594	18.3101	-64.7784	6886.32	5450.67	865.31	284.143	193.694	0	-35.9511	144.677	-829.83	115635	-49561.1	-17135.2	140.276	763.652	0	0	0	0	0	0	0	603	903	0
525	8	-11.6705	19.5308	-78.5114	6886.32	5633.78	1963.94	271.758	212.289	0	-35.3407	146.05	-826.473	115727	-49805.2	-16769	139.738	762.975	0	0	0	0	0	0	0	603	903	0
525	9	-12.5861	27.1602	-89.1925	8992.04	6732.41	1597.73	275.482	199.184	0	-33.6623	144.829	-825.862	116368	-50110.4	-17181	139.324	762.096	0	0	0	0	0	0	0	603	903	0
526	0	-10.9076	30.5171	-94.9908	9724.46	7831.04	1277.3	282.44	197.627	0	-33.5097	147.118	-827.693	115635	-49133.8	-17409.9	140.638	763.292	0	0	0	0	0	0	0	603	903	0
526	1	-8.77138	26.5498	-103.841	10365.3	8014.15	2650.59	277.177	200.181	0	-34.5778	146.508	-824.031	115818	-49255.9	-17181	140.226	762.449	0	0	0	0	0	0	0	603	903	0
526	2	-11.8231	29.2964	-116.658	11372.4	8746.57	2238.6	274.976	202.515	0	-33.0519	148.949	-823.116	115727	-48706.6	-17226.8	140.827	762.404	0	0	0	0	0	0	0	603	903	0
526	3	-13.6542	30.8223	-124.593	12562.6	9540.03	1368.85	276.57	199.171	0	-33.0519	150.17	-821.59	116002	-48706.6	-17089.5	140.717	761.809	0	0	0	0	0	0	0	603	903	0
526	4	-9.99208	28.3809	-129.171	13203.5	10272.5	2192.83	279.526	197.783	0	-33.3571	151.696	-819.759	116276	-49133.8	-17272.6	140.063	761.158	0	0	0	0	0	0	0	603	903	0
526	5	-10.9076	25.6343	-133.748	14027.4	10699.7	2375.93	279.999	195.121	0	-32.5941	151.543	-818.843	116093	-48645.6	-17272.6	140.592	761.223	0	0	0	0	0	0	0	603	903	0
526	6	-13.1964	25.9395	-141.683	14851.4	11310	1277.3	279.827	195.178	0	-30.4579	151.696	-815.486	116002	-48401.4	-17135.2	140.647	760.752	0	0	0	0	0	0	0	603	903	0
526	7	-11.6705	25.024	-149.007	15126.1	12225.6	1643.51	282.047	198.487	0	-32.5941	153.527	-811.824	115452	-48401.4	-17226.8	140.379	760.787	0	0	0	0	0	0	0	603	903	0
526	8	-12.8912	22.7351	-156.026	15583.8	12103.5	1826.61	277.574	200.12	0	-32.7467	154.442	-809.078	115727	-47669	-16814.8	141.082	759.965	0	0	0	0	0	0	0	603	903	0
526	9	-19.7577	21.2093	-160.604	16957.1	13141.1	727.981	281.823	194.416	0	-30.0002	153.984	-807.857	116093	-48401.4	-17226.8	140.087	759.295	0	0	0	0	0	0	0	603	903	0
527	0	-16.8585	20.7515	-165.792	16590.9	13019	87.1114	278.527	199.929	0	-31.3734	155.815	-804.5	115727	-47974.2	-17181	140.368	759.151	0	0	0	0	0	0	0	603	903	0
527	1	-15.0275	16.9368	-171.59	17323.3	12897	1002.64	275.161	199.042	0	-30.7631	156.121	-802.974	115452	-47363.8	-17272.6	141.015	759.219	0	0	0	0	0	0	0	603	903	0
527	2	-17.9267	12.054	-174.031	17689.6	13629.4	453.322	278.316	198.354	0	-29.5424	155.815	-799.312	115452	-47791.1	-16906.4	140.21	758.561	0	0	0	0	0	0	0	603	903	0
527	3	-17.7741	9.3074	-175.252	17598	13446.3	-416.429	276.725	199.585	0	-30.6105	157.799	-797.786	114720	-46997.6	-17409.9	141.09	759.202	0	0	0	0	0	0	0	603	903	0
527	4	-15.943	6.71341	-177.083	18513.5	13690.4	-187.547	277.311	195.453	0	-31.0683	158.104	-792.903	114628	-47119.7	-17318.3	140.573	758.432	0	0	0	0	0	0	0	603	903	0
527	5	-17.0111	3.96683	-182.881	18696.6	14361.8	-279.099	278.531	197.766	0	-28.3217	158.867	-785.884	114354	-47180.7	-17455.7	139.965	757.491	0	0	0	0	0	0	0	603	903	0
527	6	-17.7741	-0.763399	-185.628	19062.8	13690.4	-1423.51	273.752	197.306	0	-28.1691	159.02	-786.8	114170	-46936.6	-16860.6	140.345	757.893	0	0	0	0	0	0	0	603	903	0
527	7	-16.8585	-4.42551	-187.154	19978.4	14544.9	-1377.73	277.716	193.252	0	-28.7794	157.799	-784.358	113804	-46631.4	-16860.6	140.548	757.908	0	0	0	0	0	0	0	603	903	0
527	8	-17.4689	-5.03586	-189.901	20253	14605.9	-1057.3	276.914	193.349	0	-28.6269	159.783	-778.255	113621	-46204.2	-17043.7	140.631	757.005	0	0	0	0	0	0	0	603	903	0
527	9	-18.537	-7.93503	-194.173	20344.6	14850.1	-2201.71	276.479	195.224	0	-27.7113	161.003	-774.593	113072	-45654.8	-16448.6	141.06	757.024	0	0	0	0	0	0	0	603	903	0
528	0	-17.7741	-15.1067	-196.92	21443.2	15277.3	-2293.26	277.582	191.107	0	-28.1691	160.698	-770.626	112980	-45837.9	-17135.2	140.519	756.392	0	0	0	0	0	0	0	603	903	0
528	1	-18.0792	-13.886	-203.328	22267.2	15399.4	-1972.83	275.737	190.487	0	-28.4743	161.461	-766.963	113255	-45410.7	-17089.5	140.792	755.333	0	0	0	0	0	0	0	603	903	0
528	2	-17.9267	-15.8696	-209.432	23365.8	15887.7	-2705.25	275.861	188.432	0	-25.1173	161.156	-763.301	112797	-45349.7	-16814.8	140.587	755.225	0	0	0	0	0	0	0	603	903	0
528	3	-17.7741	-21.0576	-211.873	22725	15582.5	-3163.01	273.546	192.743	0	-26.4906	161.156	-757.198	112065	-45288.6	-16402.8	140.189	755.001	0	0	0	0	0	0	0	603	903	0
528	4	-18.8422	-23.6516	-216.146	23365.8	15948.7	-2888.35	273.787	191.898	0	-26.4906	162.834	-753.536	111882	-44312.1	-16860.6	141.194	754.524	0	0	0	0	0	0	0	603	903	0
528	5	-19.7577	-23.6516	-221.334	24556	16742.2	-3208.79	275.642	189.054	0	-25.8803	162.377	-746.517	111424	-44678.3	-16540.2	140.151	753.742	0	0	0	0	0	0	0	603	903	0
528	6	-17.0111	-25.4826	-227.742	25105.3	16681.1	-3712.33	273.246	189.764	0	-25.7277	162.529	-744.686	110783	-44067.9	-16585.9	140.823	754.235	0	0	0	0	0	0	0	603	903	0
528	7	-17.9267	-28.9922	-232.625	26112.4	17291.5	-3529.22	274.332	187.749	0	-22.8285	162.987	-740.108	110508	-43579.6	-16631.7	141.117	753.686	0	0	0	0	0	0	0	603	903	0
528	8	-19.7577	-30.6706	-239.034	26753.3	17779.8	-3941.21	274.382	188.077	0	-24.0492	162.987	-735.53	108952	-43945.9	-16448.6	140.253	754.873	0	0	0	0	0	0	0	603	903	0
528	9	-18.2318	-32.5017	-243.917	26478.6	17901.8	-4353.2	273.393	191.444	0	-24.3544	162.682	-729.122	109227	-42603.1	-16265.5	141.569	753.194	0	0	0	0	0	0	0	603	903	0
529	0	-17.7741	-34.3327	-249.715	27485.7	18756.3	-4261.65	275.111	189.932	0	-24.507	161.614	-723.323	109044	-42481	-16265.5	141.27	752.247	0	0	0	0	0	0	0	603	903	0
529	1	-18.537	-36.0112	-252.767	28492.8	18878.4	-4124.32	274.687	187.276	0	-23.4389	163.292	-720.272	109318	-42664.1	-16128.2	140.767	751.227	0	0	0	0	0	0	0	603	903	0
529	2	-19.2999	-36.9267	-257.955	30140.7	19549.8	-4673.63	275.788	183.155	0	-22.6759	163.597	-714.473	107579	-42236.9	-16128.2	140.884	752.429	0	0	0	0	0	0	0	603	903	0
529	3	-17.6215	-39.063	-269.551	30598.5	19671.9	-4261.65	272.98	186.484	0	-23.4389	163.445	-708.98	107579	-41992.7	-16265.5	140.77	751.263	0	0	0	0	0	0	0	603	903	0
529	4	-19.9103	-38.7578	-279.622	30964.7	20343.2	-4490.53	272.753	189.262	0	-22.0656	163.445	-703.792	107121	-41809.6	-15807.7	140.594	750.795	0	0	0	0	0	0	0	603	903	0
529	5	-23.4198	-40.7414	-287.862	33070.4	21197.7	-5863.82	273.639	185.117	0	-21.4552	164.513	-697.689	106480	-40894.1	-15761.9	141.386	750.382	0	0	0	0	0	0	0	603	903	0
529	6	-23.2672	-43.7932	-297.017	33711.3	21197.7	-6001.15	271.369	186.501	0	-22.0656	163.903	-691.585	105473	-41016.2	-16082.4	140.693	750.491	0	0	0	0	0	0	0	603	903	0
529	7	-24.6405	-45.7768	-305.257	34993	22235.3	-5772.27	272.841	185.365	0	-21.3026	162.682	-685.482	105839	-40100.6	-15578.8	141.5	748.599	0	0	0	0	0	0	0	603	903	0
529	8	-26.0138	-46.6924	-313.802	37281.8	22235.3	-6596.24	270.858	181.193	0	-21.1501	163.75	-680.599	105198	-39856.5	-15166.9	141.439	748.433	0	0	0	0	0	0	0	603	903	0
529	9	-23.5724	-48.8286	-322.957	37648	23334	-7145.56	272.251	183.427	0	-20.2345	162.682	-672.664	104008	-39734.4	-15395.7	140.93	748.379	0	0	0	0	0	0	0	603	903	0
530	0	-24.9457	-50.9648	-332.723	39387.6	24310.5	-6870.9	273.065	181.621	0	-19.7768	161.461	-667.171	103550	-39185.1	-15350	141.267	747.792	0	0	0	0	0	0	0	603	903	0
530	1	-25.4035	-52.7959	-341.573	40577.7	24249.5	-6733.57	270.994	181.203	0	-19.319	161.766	-661.373	103001	-39063	-15212.6	140.936	747.262	0	0	0	0	0	0	0	603	903	0
530	2	-26.6242	-52.1855	-350.423	41676.4	25653.3	-7694.87	273.207	181.068	0	-18.0983	162.529	-656.185	101994	-38757.9	-15166.9	140.935	747.565	0	0	0	0	0	0	0	603	903	0
530	3	-25.7086	-55.0847	-360.494	43599	26080.6	-7557.54	272.347	179.058	0	-18.8612	160.851	-647.945	101353	-37903.4	-15075.3	141.502	746.578	0	0	0	0	0	0	0	603	903	0
530	4	-24.4879	-57.2209	-366.902	44239.8	26874	-7649.1	273.246	179.423	0	-16.2672	161.156	-643.367	100438	-38086.5	-14983.7	140.801	746.888	0	0	0	0	0	0	0	603	903	0
530	5	-23.2672	-58.4416	-377.278	45246.9	27484.4	-8244.19	272.849	180.07	0	-15.9621	160.393	-636.959	99979.8	-37048.9	-14342.9	141.835	746.036	0	0	0	0	0	0	0	603	903	0
530	6	-22.1991	-60.1201	-383.992	46711.8	28155.8	-8381.52	273.324	178.352	0	-15.9621	160.24	-628.414	99064.3	-36438.5	-14617.5	142.015	745.358	0	0	0	0	0	0	0	603	903	0
530	7	-22.6569	-60.883	-394.063	47352.6	28888.2	-7649.1	273.309	179.835	0	-13.2155	159.325	-622.615	99064.3	-36560.6	-14800.6	141.279	743.89	0	0	0	0	0	0	0	603	903	0
530	8	-21.4362	-62.5615	-404.134	49824.6	29559.6	-8381.52	273.143	176.713	0	-15.8095	158.104	-617.427	98240.3	-35889.2	-14526	141.873	743.888	0	0	0	0	0	0	0	603	903	0
530	9	-18.2318	-64.8503	-411.763	50740.1	30658.2	-8381.52	274.456	176.774	0	-15.3517	159.325	-608.577	96409.2	-35767.1	-14480.2	141.228	744.583	0	0	0	0	0	0	0	603	903	0
531	0	-17.7741	-65.1555	-419.698	51655.6	31390.6	-7877.98	274.793	176.922	0	-14.4362	157.494	-601.863	96134.6	-35339.9	-14159.8	141.283	743.272	0	0	0	0	0	0	0	603	903	0
531	1	-14.7223	-68.2072	-428.548	52571.1	31695.8	-7877.98	273.961	177.327	0	-13.0629	156.273	-593.624	95310.6	-34241.3	-13702	142.318	742.443	0	0	0	0	0	0	0	603	903	0
531	2	-15.6378	-69.2754	-438.924	53761.3	32489.2	-8381.52	274.02	177.516	0	-13.0629	155.358	-585.994	93754.2	-34302.3	-13702	141.463	743.008	0	0	0	0	0	0	0	603	903	0
531	3	-16.2482	-69.1228	-446.859	56233.3	33343.7	-8152.64	274.618	174.159	0	-10.1637	154.137	-578.67	93388	-33386.8	-13610.5	142.304	741.616	0	0	0	0	0	0	0	603	903	0
531	4	-16.4008	-71.7168	-455.098	57423.4	34259.3	-8335.74	275.279	173.822	0	-11.8422	152.458	-571.041	93479.6	-32898.5	-13564.7	142.389	739.3	0	0	0	0	0	0	0	603	903	0
531	5	-14.8749	-74.3108	-461.507	58430.5	34686.5	-8518.85	275.159	173.392	0	-11.2318	152.153	-565.547	91740.1	-32898.5	-13381.6	141.829	740.785	0	0	0	0	0	0	0	603	903	0
531	6	-14.7223	-74.6159	-466.39	59712.3	34686.5	-8244.19	274.372	171.969	0	-10.4689	150.933	-557.613	90824.5	-32227.1	-13015.4	142.205	740.119	0	0	0	0	0	0	0	603	903	0
531	7	-14.112	-78.4306	-475.24	60902.4	35724.1	-8061.08	275.171	171.849	0	-10.0111	149.559	-549.373	90183.7	-32166.1	-12740.7	141.45	738.843	0	0	0	0	0	0	0	603	903	0
531	8	-12.4335	-79.041	-481.343	61360.2	36090.3	-8381.52	274.978	172.523	0	-8.63785	147.881	-541.439	89725.9	-31799.8	-12557.6	141.268	737.282	0	0	0	0	0	0	0	603	903	0
531	9	-13.1964	-80.2617	-487.447	63008.2	37127.9	-8106.86	276.168	170.738	0	-10.4689	146.66	-533.809	88261	-30701.2	-12740.7	142.487	737.658	0	0	0	0	0	0	0	603	903	0
532	0	-11.8231	-82.7031	-494.771	64747.6	37311	-8289.97	275.411	169.136	0	-9.70596	145.897	-526.79	87620.2	-30640.2	-12099.8	141.836	736.672	0	0	0	0	0	0	0	603	903	0
532	1	-10.6024	-83.3134	-501.79	64656.1	38348.6	-8198.41	276.424	171.149	0	-8.0275	145.134	-518.856	86796.2	-29846.7	-12191.4	142.476	735.716	0	0	0	0	0	0	0	603	903	0
532	2	-9.38173	-85.2971	-507.283	66304	38470.7	-8106.86	275.837	169.296	0	-8.63785	142.693	-510.921	84598.9	-29480.5	-11504.7	142.299	737.419	0	0	0	0	0	0	0	603	903	0
532	3	-8.16103	-86.06	-513.387	67036.5	39020	-7694.87	276.005	169.423	0	-5.89127	141.93	-502.071	83774.9	-28931.2	-11733.6	142.376	736.141	0	0	0	0	0	0	0	603	903	0
532	4	-3.73598	-86.5178	-516.133	67952	39996.6	-8061.08	277.493	168.344	0	-7.41714	139.794	-493.221	83134.1	-28442.9	-11550.5	142.332	734.447	0	0	0	0	0	0	0	603	903	0
532	5	-3.4308	-88.1963	-525.899	69783	40545.9	-7923.75	277.098	167.307	0	-8.0275	138.268	-484.981	81943.9	-27710.5	-11275.9	142.863	734.037	0	0	0	0	0	0	0	603	903	0
532	6	-4.80409	-89.2644	-535.054	71156.4	41278.3	-7465.99	277.148	167.011	0	-6.34903	137.2	-478.267	81119.9	-27527.4	-10863.9	142.443	733.388	0	0	0	0	0	0	0	603	903	0
532	7	-3.73598	-90.9428	-544.82	72438.1	41522.4	-7740.65	276.213	167.042	0	-4.06021	135.369	-470.638	80021.3	-27283.2	-10772.3	142.029	732.973	0	0	0	0	0	0	0	603	903	0
532	8	-2.36269	-93.6894	-550.618	74543.8	41705.6	-7832.2	275.743	164.618	0	-6.34903	133.08	-459.346	78648	-26978.1	-10635	141.269	731.783	0	0	0	0	0	0	0	603	903	0
532	9	-1.29457	-94.2998	-558.553	76008.6	43292.5	-7465.99	277.508	163.919	0	-5.4335	133.08	-452.327	77640.9	-26367.7	-10451.9	141.707	731.352	0	0	0	0	0	0	0	603	903	0
533	0	-0.0738669	-95.5205	-564.351	77748.2	43841.8	-7603.32	277.685	162.234	0	-4.2128	130.791	-445.308	76176.1	-25452.2	-10223	142.844	731.936	0	0	0	0	0	0	0	603	903	0
533	1	1.75719	-99.03	-571.37	79029.9	44818.3	-7969.53	278.44	161.684	0	-3.60245	128.655	-433.711	75626.8	-25513.2	-9902.57	141.175	728.629	0	0	0	0	0	0	0	603	903	0
533	2	2.67272	-98.2671	-579	79396.1	44818.3	-7511.77	277.407	162.874	0	-2.38174	127.281	-427.913	73887.2	-24719.8	-9948.35	142.232	730.331	0	0	0	0	0	0	0	603	903	0
533	3	3.28307	-100.861	-585.408	81044.1	45428.7	-7557.54	277.602	161.56	0	-2.68692	125.603	-419.368	72056.2	-23926.3	-9215.93	142.947	731.179	0	0	0	0	0	0	0	603	903	0
533	4	5.11412	-101.471	-591.817	81410.3	46039.1	-7786.43	277.793	162.44	0	-2.38174	124.382	-408.382	70957.6	-23804.2	-9261.7	141.711	729.247	0	0	0	0	0	0	0	603	903	0
533	5	8.01329	-102.54	-599.752	83424.4	47137.7	-7328.66	278.595	160.902	0	-2.07657	122.094	-399.227	70316.7	-22766.6	-9353.26	142.973	726.868	0	0	0	0	0	0	0	603	903	0
533	6	8.62364	-103.913	-607.686	84706.2	47626	-7465.99	278.373	160.609	0	-2.53433	119.194	-390.682	68302.6	-22278.4	-8987.04	142.976	728.171	0	0	0	0	0	0	0	603	903	0
533	7	10.4547	-105.896	-613.79	85987.9	48053.2	-7465.99	278.289	159.907	0	-1.00845	121.331	-382.747	67661.7	-22461.5	-8803.94	141.315	726.221	0	0	0	0	0	0	0	603	903	0
533	8	10.6073	-105.286	-618.672	87727.4	48541.5	-7603.32	278.461	158.201	0	1.73813	119.347	-374.202	66105.3	-21668	-8666.61	142.095	726.343	0	0	0	0	0	0	0	603	903	0
533	9	11.9806	-106.965	-623.25	88459.8	49151.9	-6962.45	278.864	158.067	0	-0.245513	117.516	-366.268	65098.2	-21607	-8208.85	141.008	725.266	0	0	0	0	0	0	0	603	903	0
534	0	14.2694	-108.796	-630.574	89192.2	50067.4	-6962.45	279.4	158.554	0	-1.00845	115.99	-357.723	64091.1	-20935.6	-8071.52	141.475	723.836	0	0	0	0	0	0	0	603	903	0
534	1	13.5065	-108.49	-633.931	90931.8	49823.2	-7054	278.594	156.559	0	0.517426	113.243	-351.009	62626.3	-20142.1	-7888.41	142.616	724.582	0	0	0	0	0	0	0	603	903	0
534	2	13.8116	-110.169	-636.068	91664.2	50311.5	-6550.46	279.098	155.889	0	0.21225	110.955	-341.854	62351.6	-19959	-7888.41	141.615	720.607	0	0	0	0	0	0	0	603	903	0
534	3	15.4901	-110.016	-640.34	91847.3	50982.9	-7237.11	279.618	156.565	0	0.0596623	109.734	-333.614	60154.4	-19165.6	-7476.43	142.552	722.689	0	0	0	0	0	0	0	603	903	0
534	4	15.1849	-111.542	-644.002	93495.2	50738.8	-7191.33	278.787	154.822	0	-0.0929256	103.478	-321.102	58414.8	-18982.5	-7430.65	140.883	721.08	0	0	0	0	0	0	0	603	903	0
534	5	17.016	-112.153	-645.833	93312.1	51532.2	-7099.78	279.792	155.517	0	0.670014	101.799	-316.524	57774	-18494.2	-7201.77	141.571	720.474	0	0	0	0	0	0	0	603	903	0
534	6	17.1686	-113.068	-647.054	93861.4	51532.2	-7191.33	279.641	154.94	0	-0.550689	100.731	-308.284	56126	-17578.7	-6789.78	142.979	720.941	0	0	0	0	0	0	0	603	903	0
534	7	16.4056	-113.984	-649.495	95234.7	52142.6	-7374.44	280.282	153.371	0	-2.07657	100.426	-298.213	54661.2	-17395.6	-6835.56	141.667	719.705	0	0	0	0	0	0	0	603	903	0
534	8	17.3212	-115.509	-651.937	95509.4	52020.5	-7145.56	279.794	153.499	0	0.822602	98.1372	-289.058	53837.2	-17273.5	-6881.33	140.242	716.75	0	0	0	0	0	0	0	603	903	0
534	9	18.0841	-115.204	-654.378	96608	52081.5	-7282.89	279.589	152.367	0	0.517426	97.0691	-281.124	52189.2	-16907.3	-6789.78	139.858	717.355	0	0	0	0	0	0	0	603	903	0
535	0	18.6944	-116.425	-652.852	97065.8	52569.8	-7465.99	280.523	151.32	0	-1.00845	95.6958	-273.494	50175.1	-16296.9	-6652.45	140.412	719.541	0	0	0	0	0	0	0	603	903	0
535	1	20.3729	-116.578	-658.04	97065.8	52691.9	-7511.77	280.074	152.493	0	-1.16104	94.9329	-261.287	49717.3	-15808.6	-6240.46	139.497	712.721	0	0	0	0	0	0	0	603	903	0
535	2	21.441	-117.341	-659.261	98072.8	52997.1	-7099.78	280.389	151.238	0	0.21225	92.0337	-256.71	48801.8	-14954.1	-6194.69	141.747	712.895	0	0	0	0	0	0	0	603	903	0
535	3	21.5936	-118.103	-660.482	98164.4	53180.2	-7511.77	280.517	151.374	0	-0.703277	88.3716	-247.859	47062.3	-15076.2	-6194.69	139.174	713.125	0	0	0	0	0	0	0	603	903	0
535	4	21.8988	-119.019	-662.313	98713.7	53607.4	-7328.66	280.94	150.956	0	-1.31363	89.4397	-241.146	45872.1	-14099.7	-6057.36	141.531	712.774	0	0	0	0	0	0	0	603	903	0
535	5	23.4247	-120.087	-663.533	99720.8	53485.4	-7282.89	280.607	149.712	0	0.670014	85.1672	-235.042	44315.7	-14282.8	-5736.92	139.233	714.456	0	0	0	0	0	0	0	603	903	0
535	6	24.035	-120.087	-666.28	99537.7	53424.3	-7237.11	280.183	150.607	0	-1.16104	81.9629	-226.497	42850.9	-13550.3	-5553.82	140.174	713.811	0	0	0	0	0	0	0	603	903	0
535	7	24.4928	-120.697	-667.501	100179	53790.5	-6870.9	280.585	149.92	0	-1.77139	80.7422	-219.173	41569.1	-13001	-5599.6	140.681	713.336	0	0	0	0	0	0	0	603	903	0
535	8	24.4928	-121.308	-669.026	101094	54095.7	-7282.89	280.857	148.894	0	-0.550689	77.0801	-210.628	40562.1	-12695.8	-5096.06	139.724	710.423	0	0	0	0	0	0	0	603	903	0
535	9	24.798	-121.308	-670.247	101552	54461.9	-7328.66	281.257	148.486	0	-0.398101	73.5706	-203.304	39280.3	-12634.8	-5462.27	137.853	709.79	0	0	0	0	0	0	0	603	903	0
536	0	25.4083	-121.766	-669.942	102284	54278.8	-7145.56	281.02	147.324	0	-0.398101	71.7395	-197.811	37998.6	-11719.3	-5279.16	140.755	710.904	0	0	0	0	0	0	0	603	903	0
536	1	25.8661	-121.766	-675.13	103658	54889.2	-7008.23	281.302	146.463	0	-1.16104	71.1292	-190.181	37174.6	-11963.4	-4821.4	137.095	707.531	0	0	0	0	0	0	0	603	903	0
536	2	26.1712	-123.291	-680.013	103200	55072.3	-7374.44	280.987	148.238	0	-1.46622	67.7722	-182.857	35252	-11047.9	-4821.4	139.582	710.216	0	0	0	0	0	0	0	603	903	0
536	3	27.6971	-124.817	-680.928	103841	55255.4	-7511.77	281.147	147.501	0	-3.29727	65.9412	-176.143	34611.1	-11231	-4775.62	136.239	706.506	0	0	0	0	0	0	0	603	903	0
536	4	28.4601	-125.123	-685.201	104848	55560.5	-7099.78	281.087	146.982	0	-2.38174	64.4153	-170.345	33604.1	-10681.7	-4912.95	137.294	705.729	0	0	0	0	0	0	0	603	903	0
536	5	28.3075	-124.817	-688.558	106129	56109.9	-7282.89	281.489	145.867	0	-2.38174	62.279	-164.852	32322.3	-10315.5	-4638.29	137.426	706.931	0	0	0	0	0	0	0	603	903	0
536	6	29.3756	-126.801	-690.694	108235	56781.2	-6779.35	282.209	143.295	0	-2.07657	59.0747	-159.053	31498.3	-10193.4	-4500.96	135.912	704.964	0	0	0	0	0	0	0	603	903	0
536	7	29.9859	-128.327	-696.492	108144	56842.3	-6962.45	281.612	144.731	0	-2.53433	56.4807	-152.339	30857.5	-9522.02	-4317.86	137.495	700.443	0	0	0	0	0	0	0	603	903	0
536	8	30.4437	-128.785	-699.239	109700	57025.4	-6825.12	281.554	143.115	0	-3.29727	54.8022	-146.846	28751.8	-9094.77	-3951.65	138.066	707.205	0	0	0	0	0	0	0	603	903	0
536	9	31.3592	-129.853	-704.122	110249	57513.7	-7237.11	281.681	143.423	0	-3.90762	51.2927	-141.963	28019.3	-8789.59	-3860.09	138.086	705.63	0	0	0	0	0	0	0	603	903	0
537	0	32.1222	-130.463	-707.784	110616	58124	-6825.12	282.121	143.716	0	-3.14468	49.3091	-134.029	27378.5	-8850.63	-4134.75	133.965	698.727	0	0	0	0	0	0	0	603	903	0
537	1	32.2748	-130.768	-711.446	112813	58612.3	-6779.35	282.385	141.432	0	-1.92398	48.6987	-130.672	25913.6	-8362.35	-3814.32	136.005	704.69	0	0	0	0	0	0	0	603	903	0
537	2	33.0377	-131.836	-719.075	113545	59039.6	-7054	282.105	142.095	0	-3.60245	46.1047	-126.094	24815	-8423.38	-3905.87	133.198	706.203	0	0	0	0	0	0	0	603	903	0
537	3	33.8006	-132.447	-722.737	114186	59161.6	-6825.12	281.858	142.009	0	-4.06021	42.4426	-119.686	24082.6	-7446.82	-3539.66	137.78	701.785	0	0	0	0	0	0	0	603	903	0
537	4	35.1739	-133.82	-727.315	115834	59955.1	-6458.91	282.433	140.737	0	-3.90762	39.0857	-115.718	23258.6	-7446.82	-3676.99	135.647	702.007	0	0	0	0	0	0	0	603	903	0
537	5	35.7843	-135.041	-731.588	115926	59649.9	-6733.57	281.535	141.542	0	-4.06021	34.9658	-110.53	21885.3	-7019.58	-3310.78	136.492	704.997	0	0	0	0	0	0	0	603	903	0
537	6	35.9369	-134.43	-736.776	118031	60870.6	-6733.57	282.618	139.8	0	-2.38174	35.4236	-105.648	21519.1	-7507.86	-3310.78	128.935	699.312	0	0	0	0	0	0	0	603	903	0
537	7	35.6317	-134.888	-742.574	119405	61175.8	-6642.02	282.383	139.202	0	-3.75503	34.2029	-102.291	20695.1	-6775.44	-3493.88	133.763	700.683	0	0	0	0	0	0	0	603	903	0
537	8	37.7679	-135.193	-748.067	119588	61419.9	-6458.91	282.105	140.138	0	-3.75503	32.3718	-95.2715	19413.4	-6470.26	-3127.67	132.086	699.231	0	0	0	0	0	0	0	603	903	0
537	9	37.1576	-136.567	-753.56	120961	61725.1	-6550.46	281.911	139.481	0	-4.2128	30.9985	-91.9146	18772.5	-6165.08	-2944.56	132.926	698.762	0	0	0	0	0	0	0	603	903	0
538	0	37.7679	-136.109	-756.307	121053	62213.4	-6367.36	282.259	139.942	0	-4.51797	30.5408	-86.4214	17765.4	-5798.87	-3036.12	132.9	697.433	0	0	0	0	0	0	0	603	903	0
538	1	38.0731	-135.651	-761.8	122792	62640.6	-6504.69	282.227	138.813	0	-2.9921	29.1675	-80.0127	16941.4	-5310.59	-2990.34	133.628	691.266	0	0	0	0	0	0	0	603	903	0
538	2	37.7679	-136.719	-766.378	123708	63434.1	-6504.69	282.771	138.581	0	-3.60245	26.1157	-77.5713	16209	-4883.35	-2898.79	137.047	694.044	0	0	0	0	0	0	0	603	903	0
538	3	37.6153	-136.719	-771.871	125356	63556.2	-6504.69	282.34	137.595	0	-3.75503	22.1484	-76.0455	16025.9	-5127.49	-2441.02	132.573	692.259	0	0	0	0	0	0	0	603	903	0
538	4	38.836	-136.261	-774.617	125539	64166.5	-6504.69	282.836	137.935	0	-3.75503	21.3855	-69.3316	15293.5	-4517.13	-2395.25	134.847	682.415	0	0	0	0	0	0	0	603	903	0
538	5	37.4628	-137.482	-780.11	126729	64166.5	-6184.25	282.253	137.55	0	-2.22916	19.5544	-69.6368	14286.4	-4639.2	-2029.04	133.38	697.844	0	0	0	0	0	0	0	603	903	0
538	6	37.005	-136.872	-785.298	127828	65143.1	-6596.24	282.953	137.224	0	-4.2128	16.5027	-64.4488	13279.3	-4089.89	-1937.48	136.54	696.955	0	0	0	0	0	0	0	603	903	0
538	7	37.6153	-136.872	-789.571	129659	65143.1	-6458.91	282.504	135.786	0	-2.83951	18.7915	-61.0918	12730	-4334.03	-2395.25	129.057	694.625	0	0	0	0	0	0	0	603	903	0
538	8	37.6153	-137.33	-795.369	131123	66180.7	-6321.58	283.207	135.142	0	-3.90762	17.876	-59.566	12272.3	-3601.61	-2257.92	139.536	696.972	0	0	0	0	0	0	0	603	903	0
538	9	38.836	-137.635	-799.337	131398	65936.5	-6642.02	282.489	135.616	0	-1.6188	15.8923	-55.2935	11722.9	-3479.54	-2074.81	137.072	690.987	0	0	0	0	0	0	0	603	903	0
539	0	38.6835	-138.092	-803.914	131398	66607.9	-6413.13	282.854	136.552	0	-2.68692	14.8242	-51.021	10624.3	-3723.68	-1800.16	127.017	694.766	0	0	0	0	0	0	0	603	903	0
539	1	38.2257	-138.703	-807.271	132954	67096.2	-6092.7	283.115	135.304	0	-2.9921	14.519	-48.8848	9891.89	-3113.32	-1708.6	136.313	700.649	0	0	0	0	0	0	0	603	903	0
539	2	38.836	-138.092	-812.459	135060	67340.3	-6367.36	282.885	133.764	0	-2.53433	11.7725	-44.3072	9342.58	-3174.36	-1845.93	128.356	692.141	0	0	0	0	0	0	0	603	903	0
539	3	38.6835	-138.703	-816.426	136067	68072.8	-6596.24	283.379	133.338	0	-2.83951	10.5518	-40.6451	9159.47	-3174.36	-1708.6	121.9	677.647	0	0	0	0	0	0	0	603	903	0
539	4	37.9205	-138.245	-819.783	136708	67950.7	-6779.35	282.889	133.239	0	-2.9921	9.78882	-41.8658	8610.15	-2625.04	-1617.05	137.299	697.339	0	0	0	0	0	0	0	603	903	0
539	5	39.2938	-137.94	-824.666	137715	68805.2	-6687.79	283.434	133.005	0	-2.68692	8.11035	-37.5933	7603.07	-2747.11	-1571.27	126.925	700.755	0	0	0	0	0	0	0	603	903	0
539	6	38.836	-139.008	-826.497	137441	68622.1	-6596.24	283.028	133.707	0	-2.53433	5.21118	-34.2364	7328.41	-2075.73	-1342.39	139.371	688.947	0	0	0	0	0	0	0	603	903	0
539	7	38.5309	-138.855	-830.464	138814	68927.2	-6046.92	282.998	132.848	0	-2.68692	4.29565	-31.795	6138.23	-2136.76	-1250.84	132.796	709.944	0	0	0	0	0	0	0	603	903	0
539	8	38.6835	-138.398	-833.516	139363	69903.8	-6642.02	283.866	132.801	0	-3.60245	2.61718	-29.6587	6412.89	-2014.69	-1159.29	132.071	686.778	0	0	0	0	0	0	0	603	903	0
539	9	38.6835	-137.94	-837.178	140279	69537.6	-6550.46	283.062	132.439	0	-2.9921	1.39648	-27.5225	6321.33	-2136.76	-793.075	122.363	673.321	0	0	0	0	0	0	0	603	903	0
540	0	38.6835	-137.94	-839.62	141011	70086.9	-6367.36	283.475	132.054	0	-1.77139	-0.739749	-26.607	5039.6	-1831.59	-609.97	131.161	713.591	0	0	0	0	0	0	0	603	903	0
540	1	38.836	-137.787	-842.366	141927	69964.8	-6733.57	283.058	131.514	0	-3.60245	-1.65528	-22.9449	4673.38	-2014.69	-701.523	112.194	699.321	0	0	0	0	0	0	0	603	903	0
540	2	39.599	-137.024	-844.503	142018	70148	-6367.36	283.064	131.832	0	-3.75503	-3.02857	-22.0293	4032.52	-1343.3	-518.417	139.022	719.948	0	0	0	0	0	0	0	603	903	0
540	3	39.4464	-136.109	-846.334	143025	70575.2	-6321.58	283.389	131.006	0	-2.9921	-5.92774	-18.9776	4490.28	-1282.27	-701.523	132.432	666.391	0	0	0	0	0	0	0	603	903	0
540	4	39.1412	-135.956	-848.775	143758	70880.4	-6138.48	283.509	130.629	0	-4.82315	-6.23291	-18.3672	3574.75	-1099.16	-426.864	140.156	708.374	0	0	0	0	0	0	0	603	903	0
540	5	39.599	-135.346	-850.606	143666	70819.3	-6184.25	283.258	131.101	0	-3.75503	-7.30103	-18.3672	4215.62	-1099.16	-289.535	140.156	673.482	0	0	0	0	0	0	0	603	903	0
540	6	39.599	-135.346	-848.775	144582	70758.3	-6138.48	283.365	129.658	0	-3.44986	-10.9631	-18.9776	3666.3	-1099.16	-243.759	142.081	709.809	0	0	0	0	0	0	0	603	903	0
540	7	40.5145	-135.041	-853.047	144307	70636.2	-5406.05	282.805	130.834	0	-3.14468	-11.7261	-15.9258	3116.99	-1221.23	76.6757	123.317	707.281	0	0	0	0	0	0	0	603	903	0
540	8	39.599	-133.82	-856.71	144399	71612.8	-6184.25	283.591	131.45	0	0	0	0	0	0	0	200	903	0	0	0	0	0	0	0	603	903	0
540	9	40.2093	-132.905	-857.32	145772	70880.4	-5634.94	282.677	129.968	0	0	0	0	0	0	0	200	903	0	0	0	0	0	0	0	603	903	0
541	0	40.0567	-131.989	-858.235	145497	71673.8	-5634.94	283.513	130.469	0	0	0	0	0	0	0	200	903	0	0	0	0	0	0	0	603	903	0
541	1	40.3619	-131.684	-858.846	146870	71551.8	-5497.61	283.312	128.991	0	0	0	0	0	0	0	200	903	0	0	0	0	0	0	0	603	903	0
541	2	42.0404	-132.142	-858.235	146962	71490.7	-5085.62	283.3	128.763	0	0	0	0	0	0	0	200	903	0	0	0	0	0	0	0	603	903	0
541	3	41.7352	-130.616	-860.372	146504	71856.9	-5039.84	283.518	129.72	0	0	0	0	0	0	0	200	903	0	0	0	0	0	0	0	603	903	0
541	4	42.4982	-129.7	-862.508	147420	71979	-4810.96	283.453	129.08	0	0	0	0	0	0	0	200	903	0	0	0	0	0	0	0	603	903	0
541	5	42.4982	-129.7	-862.813	147511	72284.2	-4994.07	283.777	129.034	0	0	0	0	0	0	0	200	903	0	0	0	0	0	0	0	603	903	0
541	6	42.193	-129.242	-863.423	147786	72223.1	-4490.53	283.647	128.837	0	0	0	0	0	0	0	200	903	0	0	0	0	0	0	0	603	903	0
541	7	43.7189	-129.09	-865.56	148518	72589.4	-4536.3	283.864	128.413	0	0	0	0	0	0	0	200	903	0	0	0	0	0	0	0	603	903	0
541	8	44.1766	-128.785	-866.475	148610	72467.3	-4124.32	283.635	128.489	0	0	0	0	0	0	0	200	903	0	0	0	0	0	0	0	603	903	0
541	9	43.7189	-127.717	-867.696	149251	72772.5	-4444.75	283.869	127.992	0	0	0	0	0	0	0	200	903	0	0	0	0	0	0	0	603	903	0
542	0	44.9396	-127.259	-868.917	149983	73260.7	-4032.76	284.313	127.39	0	0	0	0	0	0	0	200	903	0	0	0	0	0	0	0	603	903	0
542	1	44.024	-126.496	-870.137	149526	72833.5	-4032.76	283.703	128.159	0	0	0	0	0	0	0	200	903	0	0	0	0	0	0	0	603	903	0
542	2	44.9396	-126.191	-871.968	151173	73443.8	-4170.09	284.228	126.63	0	0	0	0	0	0	0	200	903	0	0	0	0	0	0	0	603	903	0
542	3	44.024	-125.885	-875.63	151357	73504.9	-3803.88	283.945	127.146	0	0	0	0	0	0	0	200	903	0	0	0	0	0	0	0	603	903	0
542	4	45.3973	-124.817	-876.546	151173	73626.9	-3437.67	283.997	127.535	0	0	0	0	0	0	0	200	903	0	0	0	0	0	0	0	603	903	0
542	5	45.2447	-124.512	-879.293	152089	74054.2	-3437.67	284.22	127.033	0	0	0	0	0	0	0	200	903	0	0	0	0	0	0	0	603	903	0
542	6	45.7025	-123.597	-877.462	152089	73871.1	-3666.55	284.187	126.672	0	0	0	0	0	0	0	200	903	0	0	0	0	0	0	0	603	903	0
542	7	43.8714	-122.986	-879.293	151997	74420.4	-3483.45	284.637	127.137	0	0	0	0	0	0	0	200	903	0	0	0	0	0	0	0	603	903	0
542	8	43.8714	-122.681	-880.513	153188	73810.1	-3346.12	283.826	126.025	0	0	0	0	0	0	0	200	903	0	0	0	0	0	0	0	603	903	0
542	9	43.7189	-120.697	-882.65	153096	74359.4	-3208.79	284.246	126.549	0	0	0	0	0	0	0	200	903	0	0	0	0	0	0	0	603	903	0
543	0	43.8714	-121.155	-882.955	154469	74237.3	-3254.56	284.078	125.054	0	0	0	0	0	0	0	200	903	0	0	0	0	0	0	0	603	903	0
543	1	44.9396	-120.392	-883.26	154378	74420.4	-2888.35	284.257	125.218	0	0	0	0	0	0	0	200	903	0	0	0	0	0	0	0	603	903	0
543	2	43.8714	-119.172	-884.481	154012	74603.5	-3025.68	284.347	125.873	0	0	0	0	0	0	0	200	903	0	0	0	0	0	0	0	603	903	0
543	3	42.6507	-118.561	-883.565	155110	74481.4	-3346.12	284.297	124.45	0	0	0	0	0	0	0	200	903	0	0	0	0	0	0	0	603	903	0
543	4	42.9559	-117.951	-884.175	154836	75030.8	-3163.01	284.86	124.881	0	0	0	0	0	0	0	200	903	0	0	0	0	0	0	0	603	903	0
543	5	42.6507	-118.256	-882.955	155019	74176.3	-2842.58	284.009	124.432	0	0	0	0	0	0	0	200	903	0	0	0	0	0	0	0	603	903	0
543	6	43.4137	-116.578	-885.396	155568	74725.6	-3117.23	284.398	124.296	0	0	0	0	0	0	0	200	903	0	0	0	0	0	0	0	603	903	0
543	7	43.1085	-116.12	-885.396	155110	74420.4	-2430.59	284.053	124.813	0	0	0	0	0	0	0	200	903	0	0	0	0	0	0	0	603	903	0
543	8	42.3456	-113.831	-886.006	155385	74481.4	-2796.8	284.064	124.623	0	0	0	0	0	0	0	200	903	0	0	0	0	0	0	0	603	903	0
543	9	41.5826	-113.678	-885.091	155751	74603.5	-2751.02	284.289	124.028	0	0	0	0	0	0	0	200	903	0	0	0	0	0	0	0	603	903	0
544	0	42.0404	-112.153	-885.091	155202	74420.4	-2659.47	284.082	124.649	0	0	0	0	0	0	0	200	903	0	0	0	0	0	0	0	603	903	0
544	1	42.0404	-110.016	-885.701	156117	74725.6	-2522.14	284.369	123.736	0	0	0	0	0	0	0	200	903	0	0	0	0	0	0	0	603	903	0
544	2	41.5826	-110.474	-885.396	155110	73993.2	-2384.81	283.571	124.813	0	0	0	0	0	0	0	200	903	0	0	0	0	0	0	0	603	903	0
544	3	41.5826	-109.406	-884.175	155293	74176.3	-1972.83	283.893	124.364	0	0	0	0	0	0	0	200	903	0	0	0	0	0	0	0	603	903	0
544	4	42.193	-108.338	-883.26	155660	74420.4	-2018.6	284.257	123.767	0	0	0	0	0	0	0	200	903	0	0	0	0	0	0	0	603	903	0
544	5	42.3456	-107.422	-883.26	155202	74298.3	-2064.38	284.118	124.285	0	0	0	0	0	0	0	200	903	0	0	0	0	0	0	0	603	903	0
544	6	42.9559	-105.896	-880.818	156392	74176.3	-1972.83	284.213	122.447	0	0	0	0	0	0	0	200	903	0	0	0	0	0	0	0	603	903	0
544	7	40.6671	-106.354	-881.124	156209	74420.4	-1743.94	284.461	122.716	0	0	0	0	0	0	0	200	903	0	0	0	0	0	0	0	603	903	0
544	8	41.7352	-105.591	-880.513	155202	74298.3	-1515.06	284.381	123.737	0	0	0	0	0	0	0	200	903	0	0	0	0	0	0	0	603	903	0
544	9	41.43	-104.828	-880.818	156026	74176.3	-1057.3	284.213	122.863	0	0	0	0	0	0	0	200	903	0	0	0	0	0	0	0	603	903	0
545	0	41.43	-103.302	-877.462	155385	74176.3	-1331.96	284.535	122.915	0	0	0	0	0	0	0	200	903	0	0	0	0	0	0	0	603	903	0
545	1	41.2775	-102.387	-877.462	155476	74237.3	-1377.73	284.605	122.811	0	0	0	0	0	0	0	200	903	0	0	0	0	0	0	0	603	903	0
545	2	41.5826	-102.082	-876.241	155934	73749	-1469.29	284.165	122.042	0	0	0	0	0	0	0	200	903	0	0	0	0	0	0	0	603	903	0
545	3	40.9723	-101.014	-871.968	155019	73749	-1286.18	284.578	122.22	0	0	0	0	0	0	0	200	903	0	0	0	0	0	0	0	603	903	0
545	4	41.5826	-99.9455	-871.053	155202	73382.8	-874.192	284.246	121.823	0	0	0	0	0	0	0	200	903	0	0	0	0	0	0	0	603	903	0
545	5	42.0404	-99.6404	-869.527	155476	73749	-782.64	284.815	121.194	0	0	0	0	0	0	0	200	903	0	0	0	0	0	0	0	603	903	0
545	6	40.9723	-98.1145	-866.78	154561	73565.9	-828.416	284.873	121.684	0	0	0	0	0	0	0	200	903	0	0	0	0	0	0	0	603	903	0
545	7	41.1249	-97.6567	-860.982	154378	73199.7	-919.969	285.019	120.696	0	0	0	0	0	0	0	200	903	0	0	0	0	0	0	0	603	903	0
545	8	40.5145	-97.3515	-861.898	154286	73260.7	-828.416	284.999	120.992	0	0	0	0	0	0	0	200	903	0	0	0	0	0	0	0	603	903	0
545	9	40.9723	-96.1308	-860.677	153462	72528.3	-782.64	284.269	121.696	0	0	0	0	0	0	0	200	903	0	0	0	0	0	0	0	603	903	0
546	0	39.9042	-95.5205	-859.456	154103	72772.5	-645.311	284.673	120.697	0	0	0	0	0	0	0	200	903	0	0	0	0	0	0	0	603	903	0
546	1	40.5145	-93.9946	-855.184	153188	72589.4	-507.981	284.882	120.872	0	0	0	0	0	0	0	200	903	0	0	0	0	0	0	0	603	903	0
546	2	40.0567	-93.2317	-853.658	153828	72284.2	-324.876	284.676	119.801	0	0	0	0	0	0	0	200	903	0	0	0	0	0	0	0	603	903	0
546	3	39.7516	-92.7739	-851.522	154103	72040	-324.876	284.602	119.026	0	0	0	0	0	0	0	200	903	0	0	0	0	0	0	0	603	903	0
546	4	38.9886	-91.7058	-849.385	152547	71612.8	-507.981	284.311	120.403	0	0	0	0	0	0	0	200	903	0	0	0	0	0	0	0	603	903	0
546	5	40.3619	-91.0954	-847.859	151265	71795.9	-50.2177	284.679	121.592	0	0	0	0	0	0	0	200	903	0	0	0	0	0	0	0	603	903	0
546	6	40.5145	-90.3325	-846.028	151723	71612.8	132.888	284.646	120.665	0	0	0	0	0	0	0	200	903	0	0	0	0	0	0	0	603	903	0
546	7	40.0567	-88.8066	-843.282	151173	71490.7	-50.2177	284.777	120.732	0	0	0	0	0	0	0	200	903	0	0	0	0	0	0	0	603	903	0
546	8	39.9042	-87.8911	-840.535	152272	71490.7	87.1114	285.054	118.839	0	0	0	0	0	0	0	200	903	0	0	0	0	0	0	0	603	903	0
546	9	39.2938	-86.823	-839.315	151631	70514.2	87.1114	284.014	119.339	0	0	0	0	0	0	0	200	903	0	0	0	0	0	0	0	603	903	0
547	0	39.7516	-86.3652	-830.159	151173	70758.3	315.993	285.235	117.898	0	0	0	0	0	0	0	200	903	0	0	0	0	0	0	0	603	903	0
547	1	39.2938	-85.6023	-835.042	150990	70697.3	315.993	284.663	119.182	0	0	0	0	0	0	0	200	903	0	0	0	0	0	0	0	603	903	0
547	2	39.599	-83.9238	-832.296	150349	70392.1	1094.19	284.576	119.356	0	0	0	0	0	0	0	200	903	0	0	0	0	0	0	0	603	903	0
547	3	38.836	-82.7031	-830.159	150349	70392.1	773.757	284.793	118.891	0	0	0	0	0	0	0	200	903	0	0	0	0	0	0	0	603	903	0
547	4	38.3783	-82.3979	-827.108	150349	70025.9	590.651	284.664	118.223	0	0	0	0	0	0	0	200	903	0	0	0	0	0	0	0	603	903	0
547	5	38.2257	-80.872	-825.276	149526	70086.9	773.757	284.925	118.818	0	0	0	0	0	0	0	200	903	0	0	0	0	0	0	0	603	903	0
547	6	39.4464	-80.7195	-822.53	149251	69476.6	956.862	284.467	118.547	0	0	0	0	0	0	0	200	903	0	0	0	0	0	0	0	603	903	0
547	7	38.3783	-78.8884	-818.868	148793	69476.6	1231.52	284.845	118.294	0	0	0	0	0	0	0	200	903	0	0	0	0	0	0	0	603	903	0
547	8	37.9205	-77.8203	-814.595	148610	69476.6	911.086	285.29	117.566	0	0	0	0	0	0	0	200	903	0	0	0	0	0	0	0	603	903	0
547	9	37.3102	-77.3625	-811.544	148427	69110.3	956.862	285.159	117.106	0	0	0	0	0	0	0	200	903	0	0	0	0	0	0	0	603	903	0
548	0	37.6153	-76.1418	-807.271	147694	69049.3	1094.19	285.534	117.045	0	0	0	0	0	0	0	200	903	0	0	0	0	0	0	0	603	903	0
548	1	36.3946	-74.6159	-807.881	148518	68500	1139.97	284.79	116.163	0	0	0	0	0	0	0	200	903	0	0	0	0	0	0	0	603	903	0
548	2	37.6153	-74.3108	-804.83	147694	68744.1	1277.3	285.415	116.49	0	0	0	0	0	0	0	200	903	0	0	0	0	0	0	0	603	903	0
548	3	37.4628	-73.2426	-802.083	146413	68255.9	1185.74	285.098	117.459	0	0	0	0	0	0	0	200	903	0	0	0	0	0	0	0	603	903	0
548	4	36.6998	-72.7849	-798.726	145955	67767.6	1551.96	284.845	117.265	0	0	0	0	0	0	0	200	903	0	0	0	0	0	0	0	603	903	0
548	5	37.005	-72.4797	-793.843	145772	67767.6	1048.42	285.366	116.372	0	0	0	0	0	0	0	200	903	0	0	0	0	0	0	0	603	903	0
548	6	37.4628	-70.1909	-793.843	145406	67340.3	1368.85	284.828	116.833	0	0	0	0	0	0	0	200	903	0	0	0	0	0	0	0	603	903	0
548	7	36.0895	-70.0383	-792.623	145497	67401.4	1323.07	285.036	116.436	0	0	0	0	0	0	0	200	903	0	0	0	0	0	0	0	603	903	0
548	8	35.1739	-68.2072	-788.35	144307	66852	1506.18	284.8	116.951	0	0	0	0	0	0	0	200	903	0	0	0	0	0	0	0	603	903	0
548	9	36.2421	-67.2917	-784.993	144490	66485.8	1643.51	284.696	115.935	0	0	0	0	0	0	0	200	903	0	0	0	0	0	0	0	603	903	0
549	0	35.1739	-67.2917	-782.552	143117	66668.9	1551.96	285.194	117.115	0	0	0	0	0	0	0	200	903	0	0	0	0	0	0	0	603	903	0
549	1	36.6998	-66.9865	-777.974	143117	66119.6	1643.51	284.989	116.039	0	0	0	0	0	0	0	200	903	0	0	0	0	0	0	0	603	903	0
549	2	35.1739	-65.4607	-777.059	143300	66424.8	1643.51	285.482	115.587	0	0	0	0	0	0	0	200	903	0	0	0	0	0	0	0	603	903	0
549	3	34.8688	-65.6133	-774.007	142293	65692.4	1826.61	284.873	116.161	0	0	0	0	0	0	0	200	903	0	0	0	0	0	0	0	603	903	0
549	4	34.2584	-63.6296	-770.345	142293	65326.2	1735.06	284.801	115.287	0	0	0	0	0	0	0	200	903	0	0	0	0	0	0	0	603	903	0
549	5	33.8006	-63.3244	-767.903	142110	65387.2	1872.39	285.15	114.938	0	0	0	0	0	0	0	200	903	0	0	0	0	0	0	0	603	903	0
549	6	35.9369	-61.646	-763.936	141103	64837.9	2101.27	284.873	115.295	0	0	0	0	0	0	0	200	903	0	0	0	0	0	0	0	603	903	0
549	7	33.4955	-61.0356	-759.969	139455	64960	1872.39	285.477	116.499	0	0	0	0	0	0	0	200	903	0	0	0	0	0	0	0	603	903	0
549	8	33.0377	-60.883	-756.307	140187	64227.5	2009.72	284.923	114.642	0	0	0	0	0	0	0	200	903	0	0	0	0	0	0	0	603	903	0
549	9	32.7325	-59.052	-752.339	139455	64227.5	2284.38	285.37	114.639	0	0	0	0	0	0	0	200	903	0	0	0	0	0	0	0	603	903	0
550	0	32.8851	-59.9675	-748.067	138997	63678.2	1963.94	285.124	114.192	0	0	0	0	0	0	0	200	903	0	0	0	0	0	0	0	603	903	0
550	1	33.0377	-58.1364	-747.762	137807	63434.1	2009.72	284.832	115.708	0	0	0	0	0	0	0	200	903	0	0	0	0	0	0	0	603	903	0
550	2	33.4955	-57.0683	-742.879	138539	63678.2	2147.05	285.718	113.51	0	0	0	0	0	0	0	200	903	0	0	0	0	0	0	0	603	903	0
550	3	32.7325	-57.2209	-740.438	137349	63006.8	1918.17	285.094	114.503	0	0	0	0	0	0	0	200	903	0	0	0	0	0	0	0	603	903	0
550	4	31.9696	-56.1528	-736.165	137257	62884.8	1872.39	285.422	113.551	0	0	0	0	0	0	0	200	903	0	0	0	0	0	0	0	603	903	0
550	5	32.1222	-55.5424	-735.25	136891	62457.5	1963.94	284.947	113.817	0	0	0	0	0	0	0	200	903	0	0	0	0	0	0	0	603	903	0
550	6	32.2748	-55.2373	-731.893	136067	62213.4	2192.83	285.003	114.089	0	0	0	0	0	0	0	200	903	0	0	0	0	0	0	0	603	903	0
550	7	32.1222	-53.7114	-729.146	135701	61908.2	2467.48	284.905	113.891	0	0	0	0	0	0	0	200	903	0	0	0	0	0	0	0	603	903	0
550	8	31.5118	-53.2536	-724.568	135701	61481	2009.72	284.852	112.715	0	0	0	0	0	0	0	200	903	0	0	0	0	0	0	0	603	903	0
550	9	31.3592	-53.101	-720.601	134236	61175.8	2192.83	284.895	113.716	0	0	0	0	0	0	0	200	903	0	0	0	0	0	0	0	603	903	0
551	0	30.7489	-51.8803	-718.16	134419	60809.6	2101.27	284.674	112.828	0	0	0	0	0	0	0	200	903	0	0	0	0	0	0	0	603	903	0
551	1	30.7489	-51.8803	-715.108	135243	60809.6	2147.05	285.035	110.877	0	0	0	0	0	0	0	200	903	0	0	0	0	0	0	0	603	903	0
551	2	30.5963	-50.8122	-711.141	132863	60077.1	2238.6	284.48	113.169	0	0	0	0	0	0	0	200	903	0	0	0	0	0	0	0	603	903	0
551	3	30.5963	-52.3381	-708.089	133412	60077.1	2467.48	284.844	111.588	0	0	0	0	0	0	0	200	903	0	0	0	0	0	0	0	603	903	0
551	4	31.0541	-50.2019	-702.596	132039	60199.2	2330.15	285.681	112.07	0	0	0	0	0	0	0	200	903	0	0	0	0	0	0	0	603	903	0
551	5	29.5282	-50.6596	-699.544	131947	59588.9	2101.27	285.182	111.381	0	0	0	0	0	0	0	200	903	0	0	0	0	0	0	0	603	903	0
551	6	29.5282	-48.8286	-697.103	131673	59649.9	2513.26	285.568	111.114	0	0	0	0	0	0	0	200	903	0	0	0	0	0	0	0	603	903	0
551	7	28.9178	-48.9812	-694.051	130483	58978.5	2330.15	284.977	111.999	0	0	0	0	0	0	0	200	903	0	0	0	0	0	0	0	603	903	0
551	8	29.0704	-46.9975	-690.999	130666	59161.6	2375.93	285.617	110.903	0	0	0	0	0	0	0	200	903	0	0	0	0	0	0	0	603	903	0
551	9	29.0704	-47.4553	-683.98	130116	58917.5	2375.93	286.139	109.766	0	0	0	0	0	0	0	200	903	0	0	0	0	0	0	0	603	903	0
552	0	30.2911	-45.7768	-684.896	129018	58307.1	2375.93	285.133	111.624	0	0	0	0	0	0	0	200	903	0	0	0	0	0	0	0	603	903	0
552	1	28.6127	-45.9294	-680.318	129567	58429.2	2330.15	285.885	109.549	0	0	0	0	0	0	0	200	903	0	0	0	0	0	0	0	603	903	0
552	2	28.4601	-45.6242	-676.656	128194	57696.8	2330.15	285.268	110.548	0	0	0	0	0	0	0	200	903	0	0	0	0	0	0	0	603	903	0
552	3	28.6127	-44.2509	-674.214	128011	57635.7	2467.48	285.486	110.134	0	0	0	0	0	0	0	200	903	0	0	0	0	0	0	0	603	903	0
552	4	28.6127	-44.8613	-670.552	126729	57086.4	2742.14	285.133	111.008	0	0	0	0	0	0	0	200	903	0	0	0	0	0	0	0	603	903	0
552	5	29.0704	-43.9458	-669.026	126729	57269.5	2421.71	285.601	110.577	0	0	0	0	0	0	0	200	903	0	0	0	0	0	0	0	603	903	0
552	6	28.1549	-42.7251	-664.449	126820	56964.4	2284.38	285.732	109.134	0	0	0	0	0	0	0	200	903	0	0	0	0	0	0	0	603	903	0
552	7	27.2394	-43.3354	-661.702	126637	56354	2604.81	285.165	108.619	0	0	0	0	0	0	0	200	903	0	0	0	0	0	0	0	603	903	0
552	8	27.8497	-41.9621	-659.261	125264	56170.9	2467.48	285.203	109.993	0	0	0	0	0	0	0	200	903	0	0	0	0	0	0	0	603	903	0
552	9	27.0868	-41.3518	-652.242	125447	56170.9	2238.6	286.12	107.668	0	0	0	0	0	0	0	200	903	0	0	0	0	0	0	0	603	903	0
553	0	26.9342	-41.3518	-651.937	124165	55865.7	2284.38	285.692	109.544	0	0	0	0	0	0	0	200	903	0	0	0	0	0	0	0	603	903	0
553	1	25.5609	-39.9785	-648.275	123708	55682.6	2330.15	285.894	109.174	0	0	0	0	0	0	0	200	903	0	0	0	0	0	0	0	603	903	0
553	2	26.0187	-40.5888	-644.918	124074	55560.5	2330.15	286.151	107.613	0	0	0	0	0	0	0	200	903	0	0	0	0	0	0	0	603	903	0
553	3	25.5609	-39.5207	-643.087	123250	55194.3	2330.15	285.827	108.346	0	0	0	0	0	0	0	200	903	0	0	0	0	0	0	0	603	903	0
553	4	25.4083	-38.9104	-640.645	123250	54645	2421.71	285.297	107.616	0	0	0	0	0	0	0	200	903	0	0	0	0	0	0	0	603	903	0
553	5	25.5609	-39.2155	-633.321	122701	53912.6	2787.92	285.127	106.258	0	0	0	0	0	0	0	200	903	0	0	0	0	0	0	0	603	903	0
553	6	25.5609	-38.4526	-630.88	121419	54034.7	2467.48	285.65	107.54	0	0	0	0	0	0	0	200	903	0	0	0	0	0	0	0	603	903	0
553	7	25.2557	-37.6897	-627.217	121877	54156.7	2513.26	286.344	105.687	0	0	0	0	0	0	0	200	903	0	0	0	0	0	0	0	603	903	0
553	8	24.798	-37.5371	-625.692	120870	53973.6	2421.71	286.262	106.823	0	0	0	0	0	0	0	200	903	0	0	0	0	0	0	0	603	903	0
553	9	24.4928	-37.9948	-622.945	120870	53546.4	2421.71	285.957	105.971	0	0	0	0	0	0	0	200	903	0	0	0	0	0	0	0	603	903	0
554	0	24.035	-36.6216	-619.283	120412	53241.2	2513.26	285.972	105.563	0	0	0	0	0	0	0	200	903	0	0	0	0	0	0	0	603	903	0
554	1	24.1876	-36.6216	-613.179	119313	52814	2421.71	286.131	105.419	0	0	0	0	0	0	0	200	903	0	0	0	0	0	0	0	603	903	0
554	2	24.1876	-35.0957	-613.79	119588	53180.2	2559.04	286.642	105.165	0	0	0	0	0	0	0	200	903	0	0	0	0	0	0	0	603	903	0
554	3	24.035	-35.706	-610.128	119679	52752.9	2467.48	286.462	103.845	0	0	0	0	0	0	0	200	903	0	0	0	0	0	0	0	603	903	0
554	4	23.5773	-34.1801	-607.381	118764	52386.7	2650.59	286.25	104.466	0	0	0	0	0	0	0	200	903	0	0	0	0	0	0	0	603	903	0
554	5	23.7298	-34.1801	-605.55	118855	52447.8	2559.04	286.612	103.723	0	0	0	0	0	0	0	200	903	0	0	0	0	0	0	0	603	903	0
554	6	23.1195	-34.6379	-601.888	117665	51776.4	2467.48	286.023	104.507	0	0	0	0	0	0	0	200	903	0	0	0	0	0	0	0	603	903	0
554	7	23.2721	-33.7224	-599.141	117207	52081.5	2650.59	286.927	104.374	0	0	0	0	0	0	0	200	903	0	0	0	0	0	0	0	603	903	0
554	8	23.5773	-33.5698	-594.258	117116	51410.2	2742.14	286.511	102.921	0	0	0	0	0	0	0	200	903	0	0	0	0	0	0	0	603	903	0
554	9	23.8824	-33.112	-592.733	116658	51776.4	2604.81	287.352	103.186	0	0	0	0	0	0	0	200	903	0	0	0	0	0	0	0	603	903	0
555	0	23.5773	-32.0439	-592.427	116567	51105	2513.26	286.264	103.239	0	0	0	0	0	0	0	200	903	0	0	0	0	0	0	0	603	903	0
555	1	22.6617	-32.0439	-589.07	116383	50677.7	2513.26	286.03	102.429	0	0	0	0	0	0	0	200	903	0	0	0	0	0	0	0	603	903	0
555	2	22.3566	-31.4336	-586.934	115376	50860.8	2513.26	286.655	103.425	0	0	0	0	0	0	0	200	903	0	0	0	0	0	0	0	603	903	0
555	3	21.7462	-30.6706	-583.577	115376	50555.7	2559.04	286.631	102.295	0	0	0	0	0	0	0	200	903	0	0	0	0	0	0	0	603	903	0
555	4	21.441	-32.1965	-580.831	115193	50677.7	2650.59	287.25	101.675	0	0	0	0	0	0	0	200	903	0	0	0	0	0	0	0	603	903	0
555	5	21.5936	-29.9077	-573.506	114644	50372.6	2559.04	287.833	100.1	0	0	0	0	0	0	0	200	903	0	0	0	0	0	0	0	603	903	0
555	6	21.441	-30.2129	-576.253	114552	50006.3	2604.81	286.778	101.212	0	0	0	0	0	0	0	200	903	0	0	0	0	0	0	0	603	903	0
555	7	20.2203	-30.2129	-573.201	113454	49518.1	2513.26	286.389	102.07	0	0	0	0	0	0	0	200	903	0	0	0	0	0	0	0	603	903	0
555	8	20.8307	-29.9077	-569.539	113179	49579.1	2650.59	287.051	101.28	0	0	0	0	0	0	0	200	903	0	0	0	0	0	0	0	603	903	0
555	9	20.8307	-29.9077	-566.487	113362	49457	2696.37	287.305	99.8858	0	0	0	0	0	0	0	200	903	0	0	0	0	0	0	0	603	903	0
556	0	20.8307	-28.8396	-565.267	112538	49212.9	2559.04	287.061	100.911	0	0	0	0	0	0	0	200	903	0	0	0	0	0	0	0	603	903	0
556	1	21.7462	-28.3818	-560.689	112447	49029.8	2696.37	287.446	99.4492	0	0	0	0	0	0	0	200	903	0	0	0	0	0	0	0	603	903	0
556	2	19.7626	-28.5344	-558.248	112538	48114.3	2650.59	286.188	98.4081	0	0	0	0	0	0	0	200	903	0	0	0	0	0	0	0	603	903	0
556	3	18.847	-28.3818	-555.501	111897	48419.4	2559.04	287.164	98.5651	0	0	0	0	0	0	0	200	903	0	0	0	0	0	0	0	603	903	0
556	4	19.61	-27.3137	-552.449	111714	48358.4	2467.48	287.535	97.7838	0	0	0	0	0	0	0	200	903	0	0	0	0	0	0	0	603	903	0
556	5	19.7626	-29.6025	-550.008	111531	48358.4	2513.26	287.923	97.2191	0	0	0	0	0	0	0	200	903	0	0	0	0	0	0	0	603	903	0
556	6	18.6944	-27.1611	-546.651	110982	48480.5	2650.59	288.686	96.9787	0	0	0	0	0	0	0	200	903	0	0	0	0	0	0	0	603	903	0
556	7	19.1522	-28.3818	-545.125	111440	47626	2559.04	287.367	95.5707	0	0	0	0	0	0	0	200	903	0	0	0	0	0	0	0	603	903	0
556	8	18.0841	-27.4663	-543.294	109975	47320.8	2513.26	287.1	97.5779	0	0	0	0	0	0	0	200	903	0	0	0	0	0	0	0	603	903	0
556	9	18.9996	-27.924	-539.937	109517	47259.8	2559.04	287.528	97.1672	0	0	0	0	0	0	0	200	903	0	0	0	0	0	0	0	603	903	0
557	0	19.1522	-26.8559	-537.801	109975	47442.9	2467.48	288.216	95.5103	0	0	0	0	0	0	0	200	903	0	0	0	0	0	0	0	603	903	0
557	1	20.2203	-26.8559	-535.97	109059	46832.5	2559.04	287.379	96.5199	0	0	0	0	0	0	0	200	903	0	0	0	0	0	0	0	603	903	0
557	2	18.5419	-26.3982	-532.003	109242	46832.5	2604.81	288.031	94.6583	0	0	0	0	0	0	0	200	903	0	0	0	0	0	0	0	603	903	0
557	3	17.6263	-26.8559	-532.003	108876	46710.4	2284.38	287.801	95.3467	0	0	0	0	0	0	0	200	903	0	0	0	0	0	0	0	603	903	0
557	4	17.7789	-26.093	-529.561	107961	46100.1	2284.38	287.053	96.1321	0	0	0	0	0	0	0	200	903	0	0	0	0	0	0	0	603	903	0
557	5	17.6263	-26.2456	-526.509	108601	46405.3	2513.26	288.138	93.7332	0	0	0	0	0	0	0	200	903	0	0	0	0	0	0	0	603	903	0
557	6	17.9315	-26.2456	-520.101	107320	46100.1	2559.04	288.637	93.6559	0	0	0	0	0	0	0	200	903	0	0	0	0	0	0	0	603	903	0
557	7	17.1686	-25.6352	-522.237	106953	46100.1	2696.37	288.274	95.2012	0	0	0	0	0	0	0	200	903	0	0	0	0	0	0	0	603	903	0
557	8	16.1004	-26.2456	-519.796	106587	45611.8	2467.48	287.75	94.9438	0	0	0	0	0	0	0	200	903	0	0	0	0	0	0	0	603	903	0
557	9	15.6427	-25.9404	-516.439	106221	45489.7	2055.5	288.084	94.3201	0	0	0	0	0	0	0	200	903	0	0	0	0	0	0	0	603	903	0
558	0	16.5582	-26.2456	-514.302	106038	45428.7	2513.26	288.331	93.8218	0	0	0	0	0	0	0	200	903	0	0	0	0	0	0	0	603	903	0
558	1	16.253	-25.6352	-512.166	106313	45123.5	2787.92	288.103	92.4255	0	0	0	0	0	0	0	200	903	0	0	0	0	0	0	0	603	903	0
558	2	17.6263	-25.0249	-507.283	105489	45428.7	2375.93	289.553	92.0518	0	0	0	0	0	0	0	200	903	0	0	0	0	0	0	0	603	903	0
558	3	16.1004	-25.1775	-504.842	105763	44024.9	2330.15	287.205	90.5022	0	0	0	0	0	0	0	200	903	0	0	0	0	0	0	0	603	903	0
558	4	14.8797	-25.1775	-503.316	105855	44757.3	2192.83	288.925	89.6851	0	0	0	0	0	0	0	200	903	0	0	0	0	0	0	0	603	903	0
558	5	14.422	-25.4826	-501.18	104482	44330.1	2238.6	288.451	91.5288	0	0	0	0	0	0	0	200	903	0	0	0	0	0	0	0	603	903	0
558	6	14.7272	-24.8723	-498.433	104665	44452.1	2375.93	289.184	90.0127	0	0	0	0	0	0	0	200	903	0	0	0	0	0	0	0	603	903	0
558	7	15.0323	-25.4826	-492.94	104939	44391.1	2559.04	290.054	87.1155	0	0	0	0	0	0	0	200	903	0	0	0	0	0	0	0	603	903	0
558	8	15.7953	-24.5671	-494.161	103658	44024.9	2192.83	289.09	90.2351	0	0	0	0	0	0	0	200	903	0	0	0	0	0	0	0	603	903	0
558	9	14.2694	-26.3982	-492.025	104665	44024.9	2238.6	289.477	87.2776	0	0	0	0	0	0	0	200	903	0	0	0	0	0	0	0	603	903	0
559	0	14.422	-24.8723	-490.499	103108	43231.4	1963.94	288.138	89.7889	0	0	0	0	0	0	0	200	903	0	0	0	0	0	0	0	603	903	0
559	1	14.5746	-24.7197	-488.057	102925	43658.7	2147.05	289.454	89.1125	0	0	0	0	0	0	0	200	903	0	0	0	0	0	0	0	603	903	0
559	2	14.5746	-24.5671	-486.531	102376	43658.7	2330.15	289.735	89.5802	0	0	0	0	0	0	0	200	903	0	0	0	0	0	0	0	603	903	0
559	3	15.4901	-24.5671	-484.7	102467	43597.6	1872.39	289.948	88.5964	0	0	0	0	0	0	0	200	903	0	0	0	0	0	0	0	603	903	0
559	4	14.1168	-23.8042	-483.174	102193	43353.5	2055.5	289.726	88.4972	0	0	0	0	0	0	0	200	903	0	0	0	0	0	0	0	603	903	0
559	5	13.659	-24.7197	-481.038	102834	42926.3	2101.27	289.237	86.2257	0	0	0	0	0	0	0	200	903	0	0	0	0	0	0	0	603	903	0
559	6	14.1168	-23.9568	-479.207	102651	43170.4	2101.27	290.087	85.791	0	0	0	0	0	0	0	200	903	0	0	0	0	0	0	0	603	903	0
559	7	14.1168	-23.8042	-477.986	102193	42926.3	2101.27	289.806	86.2016	0	0	0	0	0	0	0	200	903	0	0	0	0	0	0	0	603	903	0
559	8	14.1168	-26.093	-475.24	102010	42987.3	2375.93	290.454	85.3513	0	0	0	0	0	0	0	200	903	0	0	0	0	0	0	0	603	903	0
559	9	12.5909	-23.499	-471.883	101003	42682.1	2375.93	290.451	85.9585	0	0	0	0	0	0	0	200	903	0	0	0	0	0	0	0	603	903	0
560	0	13.2013	-25.0249	-473.409	102376	42743.2	1872.39	290.288	83.7476	0	0	0	0	0	0	0	200	903	0	0	0	0	0	0	0	603	903	0
560	1	12.5909	-24.2619	-473.409	100819	42438	1963.94	289.643	87.0351	0	0	0	0	0	0	0	200	903	0	0	0	0	0	0	0	603	903	0
560	2	12.5909	-23.1938	-471.883	100362	42315.9	1872.39	289.675	87.3166	0	0	0	0	0	0	0	200	903	0	0	0	0	0	0	0	603	903	0
560	3	12.7435	-23.6516	-469.747	101369	42621.1	2238.6	290.732	84.2055	0	0	0	0	0	0	0	200	903	0	0	0	0	0	0	0	603	903	0
560	4	12.8961	-23.1938	-466.695	101003	42438	2192.83	290.933	83.5791	0	0	0	0	0	0	0	200	903	0	0	0	0	0	0	0	603	903	0
560	5	14.1168	-23.1938	-463.948	100819	42499	2101.27	291.603	82.6925	0	0	0	0	0	0	0	200	903	0	0	0	0	0	0	0	603	903	0
560	6	13.8116	-25.4826	-463.338	100636	42254.9	1918.17	291.197	82.8015	0	0	0	0	0	0	0	200	903	0	0	0	0	0	0	0	603	903	0
560	7	12.2858	-22.8886	-461.812	100087	42193.8	2009.72	291.366	83.2733	0	0	0	0	0	0	0	200	903	0	0	0	0	0	0	0	603	903	0
560	8	12.5909	-22.5835	-460.897	100453	42315.9	2604.81	291.812	82.0482	0	0	0	0	0	0	0	200	903	0	0	0	0	0	0	0	603	903	0
560	9	13.3539	-23.6516	-457.845	99720.8	42315.9	2421.71	292.424	82.1952	0	0	0	0	0	0	0	200	903	0	0	0	0	0	0	0	603	903	0
561	0	12.4383	-23.6516	-456.929	99537.7	42193.8	2238.6	292.342	82.1595	0	0	0	0	0	0	0	200	903	0	0	0	0	0	0	0	603	903	0
561	1	12.2858	-23.3464	-452.657	100179	42193.8	2101.27	293.214	78.6876	0	0	0	0	0	0	0	200	903	0	0	0	0	0	0	0	603	903	0
561	2	13.8116	-23.3464	-456.319	99354.6	42376.9	2330.15	292.867	82.2694	0	0	0	0	0	0	0	200	903	0	0	0	0	0	0	0	603	903	0
561	3	13.3539	-22.8886	-454.183	99995.5	41644.5	2650.59	291.691	79.8343	0	0	0	0	0	0	0	200	903	0	0	0	0	0	0	0	603	903	0
561	4	13.5065	-24.1093	-452.962	99629.3	42071.8	2238.6	292.881	80.0494	0	0	0	0	0	0	0	200	903	0	0	0	0	0	0	0	603	903	0
561	5	13.659	-22.5835	-449.91	99171.5	42315.9	2192.83	294.054	79.575	0	0	0	0	0	0	0	200	903	0	0	0	0	0	0	0	603	903	0
561	6	13.659	-23.1938	-449.3	99995.5	41766.6	2147.05	292.959	77.4416	0	0	0	0	0	0	0	200	903	0	0	0	0	0	0	0	603	903	0
561	7	13.659	-23.9568	-447.774	98896.8	42254.9	2192.83	294.367	79.1367	0	0	0	0	0	0	0	200	903	0	0	0	0	0	0	0	603	903	0
561	8	13.8116	-23.3464	-446.553	99079.9	41705.6	2055.5	293.394	78.123	0	0	0	0	0	0	0	200	903	0	0	0	0	0	0	0	603	903	0
561	9	15.6427	-23.9568	-448.69	99171.5	42010.7	2238.6	293.63	78.9753	0	0	0	0	0	0	0	200	903	0	0	0	0	0	0	0	603	903	0
562	0	13.2013	-24.4145	-447.164	98805.3	41644.5	2284.38	293.13	79.0401	0	0	0	0	0	0	0	200	903	0	0	0	0	0	0	0	603	903	0
562	1	13.659	-24.1093	-444.722	98713.7	41949.7	2559.04	294.328	78.0329	0	0	0	0	0	0	0	200	903	0	0	0	0	0	0	0	603	903	0
562	2	13.0487	-23.9568	-443.807	99171.5	41949.7	2513.26	294.522	76.5436	0	0	0	0	0	0	0	200	903	0	0	0	0	0	0	0	603	903	0
562	3	13.5065	-24.4145	-443.196	98256	41766.6	2055.5	294.239	78.3015	0	0	0	0	0	0	0	200	903	0	0	0	0	0	0	0	603	903	0
562	4	13.2013	-23.6516	-439.839	98988.4	41461.4	2284.38	294.265	74.9443	0	0	0	0	0	0	0	200	903	0	0	0	0	0	0	0	603	903	0
562	5	12.7435	-24.4145	-438.008	98896.8	41644.5	2147.05	295.077	74.2125	0	0	0	0	0	0	0	200	903	0	0	0	0	0	0	0	603	903	0
562	6	13.0487	-23.3464	-439.839	98622.2	41766.6	2513.26	294.959	75.7769	0	0	0	0	0	0	0	200	903	0	0	0	0	0	0	0	603	903	0
562	7	12.8961	-23.499	-439.839	98805.3	41339.3	2147.05	293.987	75.3606	0	0	0	0	0	0	0	200	903	0	0	0	0	0	0	0	603	903	0
562	8	12.4383	-24.8723	-438.619	98896.8	41583.5	2192.83	294.806	74.5267	0	0	0	0	0	0	0	200	903	0	0	0	0	0	0	0	603	903	0
562	9	11.9806	-23.1938	-438.619	97981.3	41827.6	2192.83	295.362	76.614	0	0	0	0	0	0	0	200	903	0	0	0	0	0	0	0	603	903	0
563	0	12.5909	-23.3464	-437.093	98988.4	41766.6	2238.6	295.555	73.5301	0	0	0	0	0	0	0	200	903	0	0	0	0	0	0	0	603	903	0
563	1	14.1168	-26.3982	-435.262	98805.3	41705.6	2284.38	295.817	72.9981	0	0	0	0	0	0	0	200	903	0	0	0	0	0	0	0	603	903	0
563	2	12.5909	-23.9568	-434.957	97889.8	41827.6	2238.6	296.165	74.9436	0	0	0	0	0	0	0	200	903	0	0	0	0	0	0	0	603	903	0
563	3	12.1332	-23.6516	-434.041	98713.7	41949.7	2375.93	296.649	72.5706	0	0	0	0	0	0	0	200	903	0	0	0	0	0	0	0	603	903	0
563	4	12.4383	-24.4145	-433.736	99354.6	42315.9	2375.93	297.561	70.933	0	0	0	0	0	0	0	200	903	0	0	0	0	0	0	0	603	903	0
563	5	12.7435	-23.8042	-430.379	98622.2	41766.6	2238.6	297.046	70.8481	0	0	0	0	0	0	0	200	903	0	0	0	0	0	0	0	603	903	0
563	6	13.659	-23.8042	-434.651	99079.9	42071.8	2238.6	296.794	72.0474	0	0	0	0	0	0	0	200	903	0	0	0	0	0	0	0	603	903	0
563	7	13.659	-25.1775	-431.905	98256	41583.5	2238.6	296.279	72.5055	0	0	0	0	0	0	0	200	903	0	0	0	0	0	0	0	603	903	0
563	8	12.7435	-24.7197	-431.905	98347.5	42254.9	2513.26	297.834	72.2936	0	0	0	0	0	0	0	200	903	0	0	0	0	0	0	0	603	903	0
563	9	12.8961	-24.4145	-431.905	97706.6	42071.8	2284.38	297.41	73.7774	0	0	0	0	0	0	0	200	903	0	0	0	0	0	0	0	603	903	0
564	0	12.8961	-23.9568	-430.989	98896.8	42315.9	2238.6	298.183	70.5353	0	0	0	0	0	0	0	200	903	0	0	0	0	0	0	0	603	903	0
564	1	13.3539	-24.4145	-431.905	98988.4	42071.8	2147.05	297.41	70.8097	0	0	0	0	0	0	0	200	903	0	0	0	0	0	0	0	603	903	0
564	2	14.422	-25.1775	-430.989	99446.1	42071.8	2101.27	297.617	69.2608	0	0	0	0	0	0	0	200	903	0	0	0	0	0	0	0	603	903	0
564	3	13.9642	-24.7197	-431.6	99171.5	42376.9	2375.93	298.186	70.2235	0	0	0	0	0	0	0	200	903	0	0	0	0	0	0	0	603	903	0
564	4	13.9642	-24.2619	-430.074	99629.3	42193.8	2604.81	298.108	68.3438	0	0	0	0	0	0	0	200	903	0	0	0	0	0	0	0	603	903	0
564	5	13.2013	-26.093	-430.074	99537.7	42621.1	2421.71	299.102	68.5568	0	0	0	0	0	0	0	200	903	0	0	0	0	0	0	0	603	903	0
564	6	13.659	-24.4145	-431.295	99171.5	42499	2421.71	298.538	70.0609	0	0	0	0	0	0	0	200	903	0	0	0	0	0	0	0	603	903	0
564	7	13.5065	-24.8723	-425.191	99995.5	42315.9	2284.38	299.522	64.8223	0	0	0	0	0	0	0	200	903	0	0	0	0	0	0	0	603	903	0
564	8	13.2013	-25.0249	-430.989	99079.9	42376.9	2513.26	298.325	70.1105	0	0	0	0	0	0	0	200	903	0	0	0	0	0	0	0	603	903	0
564	9	12.2858	-24.5671	-430.379	99263.1	42193.8	2284.38	298.039	69.359	0	0	0	0	0	0	0	200	903	0	0	0	0	0	0	0	603	903	0
565	0	13.3539	-24.5671	-429.158	99629.3	43048.3	2650.59	300.309	67.8496	0	0	0	0	0	0	0	200	903	0	0	0	0	0	0	0	603	903	0
565	1	12.7435	-24.2619	-431.905	99629.3	42560	2330.15	298.54	69.3259	0	0	0	0	0	0	0	200	903	0	0	0	0	0	0	0	603	903	0
565	2	12.7435	-23.8042	-430.989	99354.6	42743.2	2467.48	299.175	69.4732	0	0	0	0	0	0	0	200	903	0	0	0	0	0	0	0	603	903	0
565	3	13.659	-24.5671	-429.464	100453	43048.3	2375.93	300.237	66.096	0	0	0	0	0	0	0	200	903	0	0	0	0	0	0	0	603	903	0
565	4	13.9642	-23.6516	-428.243	100179	42743.2	2421.71	299.811	66.0707	0	0	0	0	0	0	0	200	903	0	0	0	0	0	0	0	603	903	0
565	5	13.0487	-23.6516	-428.853	100545	43292.5	2559.04	300.949	65.5497	0	0	0	0	0	0	0	200	903	0	0	0	0	0	0	0	603	903	0
565	6	13.2013	-25.33	-429.464	100453	43170.4	2650.59	300.522	66.096	0	0	0	0	0	0	0	200	903	0	0	0	0	0	0	0	603	903	0
565	7	12.7435	-23.3464	-428.243	100179	43536.6	2513.26	301.663	66.0707	0	0	0	0	0	0	0	200	903	0	0	0	0	0	0	0	603	903	0
565	8	12.7435	-24.8723	-427.327	101094	43231.4	2787.92	301.167	63.427	0	0	0	0	0	0	0	200	903	0	0	0	0	0	0	0	603	903	0
565	9	13.0487	-24.7197	-426.717	100362	43231.4	2650.59	301.312	64.805	0	0	0	0	0	0	0	200	903	0	0	0	0	0	0	0	603	903	0
566	0	13.2013	-23.6516	-427.938	100728	43658.7	2559.04	302.021	64.6202	0	0	0	0	0	0	0	200	903	0	0	0	0	0	0	0	603	903	0
566	1	14.1168	-23.499	-427.938	101277	43780.8	2513.26	302.306	63.3366	0	0	0	0	0	0	0	200	903	0	0	0	0	0	0	0	603	903	0
566	2	13.3539	-23.499	-427.938	100636	43963.9	2650.59	302.734	64.8341	0	0	0	0	0	0	0	200	903	0	0	0	0	0	0	0	603	903	0
566	3	13.5065	-22.8886	-428.243	101735	43597.6	2513.26	301.806	62.4363	0	0	0	0	0	0	0	200	903	0	0	0	0	0	0	0	603	903	0
566	4	13.3539	-23.6516	-428.548	101827	44085.9	2421.71	302.873	62.3918	0	0	0	0	0	0	0	200	903	0	0	0	0	0	0	0	603	903	0
566	5	15.1849	-23.3464	-431.295	100728	43963.9	2650.59	301.935	66.4522	0	0	0	0	0	0	0	200	903	0	0	0	0	0	0	0	603	903	0
566	6	14.2694	-22.5835	-429.769	101918	44085.9	2925.25	302.581	62.8536	0	0	0	0	0	0	0	200	903	0	0	0	0	0	0	0	603	903	0
566	7	13.9642	-22.7361	-429.769	101369	44330.1	2971.02	303.149	64.1319	0	0	0	0	0	0	0	200	903	0	0	0	0	0	0	0	603	903	0
566	8	13.659	-22.4309	-428.243	101369	44024.9	2650.59	302.804	63.2914	0	0	0	0	0	0	0	200	903	0	0	0	0	0	0	0	603	903	0
566	9	13.8116	-23.8042	-428.853	100728	44269	2787.92	303.227	65.1226	0	0	0	0	0	0	0	200	903	0	0	0	0	0	0	0	603	903	0
567	0	14.2694	-23.3464	-424.581	101643	44330.1	3016.8	304.409	60.6029	0	0	0	0	0	0	0	200	903	0	0	0	0	0	0	0	603	903	0
567	1	13.659	-22.2783	-429.464	101460	44391.1	2879.47	303.364	63.751	0	0	0	0	0	0	0	200	903	0	0	0	0	0	0	0	603	903	0
567	2	13.8116	-23.0412	-429.464	102467	44879.4	3383.01	304.501	61.4061	0	0	0	0	0	0	0	200	903	0	0	0	0	0	0	0	603	903	0
567	3	13.5065	-21.9731	-427.938	101735	44452.1	2925.25	303.875	62.2669	0	0	0	0	0	0	0	200	903	0	0	0	0	0	0	0	603	903	0
567	4	13.2013	-21.9731	-427.022	102559	44879.4	3245.68	305.099	59.8275	0	0	0	0	0	0	0	200	903	0	0	0	0	0	0	0	603	903	0
567	5	12.8961	-22.7361	-427.938	102834	44574.2	2833.69	304.161	59.6996	0	0	0	0	0	0	0	200	903	0	0	0	0	0	0	0	603	903	0
567	6	13.9642	-21.8205	-427.632	101918	44879.4	3016.8	304.949	61.669	0	0	0	0	0	0	0	200	903	0	0	0	0	0	0	0	603	903	0
567	7	15.4901	-21.9731	-427.632	102651	45001.5	3199.91	305.234	59.9562	0	0	0	0	0	0	0	200	903	0	0	0	0	0	0	0	603	903	0
567	8	14.7272	-22.1257	-424.886	101827	44696.3	3016.8	305.196	60.3438	0	0	0	0	0	0	0	200	903	0	0	0	0	0	0	0	603	903	0
567	9	13.2013	-21.2102	-424.581	101827	45245.6	2971.02	306.565	60.1716	0	0	0	0	0	0	0	200	903	0	0	0	0	0	0	0	603	903	0
568	0	12.8961	-21.9731	-424.581	101552	44391.1	2787.92	304.553	60.8184	0	0	0	0	0	0	0	200	903	0	0	0	0	0	0	0	603	903	0
568	1	13.0487	-21.5154	-424.276	102467	45123.5	3016.8	306.354	58.4886	0	0	0	0	0	0	0	200	903	0	0	0	0	0	0	0	603	903	0
568	2	13.0487	-20.7524	-422.75	102467	44757.3	3291.46	305.872	57.6169	0	0	0	0	0	0	0	200	903	0	0	0	0	0	0	0	603	903	0
568	3	14.422	-21.2102	-423.665	103200	44574.2	3199.91	305.211	56.4119	0	0	0	0	0	0	0	200	903	0	0	0	0	0	0	0	603	903	0
568	4	13.3539	-21.0576	-423.97	102559	45306.6	3062.58	306.863	58.0988	0	0	0	0	0	0	0	200	903	0	0	0	0	0	0	0	603	903	0
568	5	13.8116	-20.2946	-423.36	103383	44879.4	3016.8	306.008	55.8037	0	0	0	0	0	0	0	200	903	0	0	0	0	0	0	0	603	903	0
[truncated: 524 more rows]
