# Supplementary material for: The Effects of an Extemporaneous Speech Dual-task on Older Adult Gait Control
Source: Research Square preprint supplement (doi:10.21203/rs.3.rs-7674245/v1), 2025-11-18
Supplement: Supplementary file 203 [file Over9ground01.xlsx]

## Sheet: Sheet1
Trajectories
		09:LFHD			09:RFHD			09:LBHD			09:RBHD			09:C7			09:T10			09:CLAV			09:STRN			09:RBAK			09:LSHO			09:LUPA			09:LELB			09:LFRM			09:LWRA			09:LWRB			09:LFIN
Frame	Sub Frame	X	Y	Z	X	Y	Z	X	Y	Z	X	Y	Z	X	Y	Z	X	Y	Z	X	Y	Z	X	Y	Z	X	Y	Z	X	Y	Z	X	Y	Z	X	Y	Z	X	Y	Z	X	Y	Z	X	Y	Z	X	Y	Z
		mm	mm	mm	mm	mm	mm	mm	mm	mm	mm	mm	mm	mm	mm	mm	mm	mm	mm	mm	mm	mm	mm	mm	mm	mm	mm	mm	mm	mm	mm	mm	mm	mm	mm	mm	mm	mm	mm	mm	mm	mm	mm	mm	mm	mm	mm	mm	mm
460	0	278.952	1377.91	1657.17	181.734	1373.56	1656.96	295.056	1531.46	1693.92	150.276	1520.24	1689.76	232.882	1590.59	1528.3	251.014	1658.61	1271.97	222.267	1442.02	1442.61	219.984	1361.58	1232.99	184.27	1665.5	1332.32	411.457	1491.54	1484.02	490.813	1513.01	1254.36	506.208	1523.13	1152.21	521.673	1429.82	1002.99	477.746	1381.59	934.997	534.602	1422.72	923.377	526.757	1360.52	872.737
461	0	278.781	1363.71	1655.63	181.621	1359.74	1655.27	295.389	1516.9	1693.64	150.585	1506.21	1689.04	233.657	1577.21	1528	252.492	1646.25	1271.85	222.549	1429.16	1441.78	220.153	1349.5	1232.47	185.989	1653.14	1331.94	411.999	1477.67	1483.9	492.08	1496.42	1254.35	507.825	1504.46	1151.71	521.523	1406.45	1005.32	476.891	1356.24	939.388	534.354	1396.7	926.21	525.089	1332.64	877.658
462	0	278.771	1349.31	1653.69	181.69	1345.84	1653.08	295.764	1502.41	1692.86	151.146	1492.14	1687.88	234.923	1564.16	1527.45	253.768	1633.8	1271.43	223.076	1416.44	1440.72	220.407	1337.52	1231.32	187.519	1640.55	1331.34	412.533	1464.05	1483.22	493.197	1479.78	1253.76	509.475	1485.59	1151.05	521.623	1383.13	1007.44	475.798	1330.94	943.522	533.151	1370.73	928.281	523.409	1305.15	882.2
463	0	278.746	1335.39	1651.39	181.76	1331.92	1650.58	296.152	1487.84	1691.92	151.394	1478.02	1686.45	235.576	1550.58	1526.53	254.763	1621.28	1270.68	223.439	1403.65	1439.24	220.76	1325.43	1229.78	188.991	1628.04	1330.63	412.982	1450.43	1482.14	494.244	1463.11	1252.96	510.816	1466.8	1150.06	520.92	1359.63	1009.21	474.613	1305.95	947.548	532.374	1344.94	930.541	521.5	1277.78	886.785
464	0	278.961	1321.22	1649.02	181.746	1317.94	1648.14	296.584	1473.4	1690.68	151.797	1464	1684.93	236.54	1537.54	1525.47	255.58	1608.89	1269.81	223.722	1390.7	1437.57	221.289	1313.33	1227.98	190.202	1615.47	1329.6	413.239	1436.84	1480.86	495.083	1446.65	1251.72	512.012	1447.74	1149.03	520.625	1336.47	1011.09	473.399	1281.19	951.419	531.126	1319.2	932.87	519.42	1250.78	891.326
465	0	278.586	1306.89	1646.38	181.933	1304.09	1645.13	296.949	1458.86	1688.94	152.22	1449.76	1682.95	237.062	1524.26	1523.78	256.168	1596.51	1268.34	224.066	1377.85	1435.53	221.381	1300.53	1225.95	191.185	1602.9	1328.05	413.509	1423.36	1479.12	495.853	1430.02	1250.17	512.923	1428.56	1147.37	519.818	1313.43	1012.55	471.895	1256.71	955.149	529.774	1293.7	934.919	517.387	1224.17	895.661
466	0	279.027	1292.8	1643.33	182.44	1290.3	1642.11	297.338	1444.42	1686.91	152.802	1435.63	1681.06	237.821	1511.32	1522.05	256.407	1583.93	1266.61	224.631	1364.97	1433.39	222.085	1287.69	1223.66	191.864	1590.2	1326.26	413.874	1410.08	1477.11	496.632	1413.12	1248.68	513.812	1409.5	1145.53	519.354	1290.48	1013.99	470.745	1232.67	958.554	528.571	1268.66	936.792	515.468	1197.97	899.956
467	0	279.544	1279.02	1640.48	182.828	1276.52	1639.04	297.887	1430.13	1685.05	153.241	1421.42	1678.92	238.184	1498.07	1520.24	256.67	1571.4	1264.97	225.275	1352.18	1431.24	222.724	1274.61	1221.28	192.461	1577.53	1324.55	414.17	1396.71	1475.19	497.206	1396.21	1247.19	514.664	1390.12	1144.11	518.765	1267.81	1015.61	469.69	1209.31	961.915	527.379	1243.83	939.056	513.43	1172.32	904.114
468	0	279.573	1264.96	1637.31	182.974	1262.62	1635.81	298.411	1415.66	1683.27	153.493	1407.31	1677.13	238.465	1484.88	1518.52	256.585	1558.79	1263.31	225.258	1339.21	1428.66	223.202	1261.11	1218.99	192.579	1564.53	1322.78	414.303	1383.49	1473.17	497.424	1379.43	1245.7	515.267	1370.77	1142.89	517.659	1245.28	1017.19	467.793	1185.86	965.237	526.04	1219.25	941.459	511.021	1146.86	908.488
469	0	279.726	1250.89	1633.94	183.086	1248.61	1632.42	298.773	1401.49	1680.98	153.804	1393.13	1674.84	238.718	1471.73	1516.69	256.386	1546.02	1261.26	225.331	1325.96	1426.2	223.599	1247.49	1216.43	192.77	1551.75	1320.95	414.304	1370.39	1470.75	497.718	1362.25	1244.03	515.861	1351.67	1141.39	516.442	1223.03	1018.31	466.003	1162.98	968.129	524.647	1195.3	943.175	509.207	1122.35	912.449
470	0	280.078	1237.35	1630.57	183.515	1235.02	1629.26	299.014	1387.2	1678.68	154.063	1379.03	1672.76	238.795	1458.63	1514.42	255.872	1532.94	1258.88	225.729	1312.99	1423.57	224.204	1234.07	1213.76	192.599	1538.6	1318.78	414.52	1357.54	1468.28	497.686	1345.33	1242.14	516.234	1332.53	1139.99	515.556	1201.3	1019.73	464.382	1140.78	970.923	522.898	1171.48	944.853	506.628	1097.92	916.236
471	0	280.284	1223.58	1627.32	183.694	1221.22	1626.07	299.439	1373.31	1676.42	154.231	1365.01	1670.38	238.715	1445.5	1512.2	255.068	1519.57	1256.51	226.002	1299.84	1421.2	224.906	1220.9	1211.13	192.131	1525.41	1316.34	414.559	1344.73	1465.79	497.491	1328.58	1240.65	516.574	1313.89	1138.88	514.543	1180.15	1021.19	462.471	1118.84	973.645	521.798	1148.59	947.27	504.43	1074.38	920.254
472	0	280.523	1210.28	1624.36	183.895	1207.66	1623.2	299.352	1359.5	1674.05	154.302	1351.22	1668.24	238.377	1432.41	1509.61	254.293	1506.34	1253.85	225.926	1286.56	1418.73	225.309	1207.45	1208.6	191.634	1512.2	1313.87	414.813	1332.2	1463.54	497.196	1312.13	1239.11	516.332	1295.25	1137.45	513.015	1159.06	1022.63	460.768	1097.67	976.292	520.25	1125.95	949.604	502.188	1051.49	924.25
473	0	280.488	1196.73	1621.35	184.05	1194.07	1620.29	299.383	1345.79	1671.43	154.501	1337.49	1665.84	238.266	1419.48	1506.96	253.573	1492.8	1250.93	225.904	1273.25	1416.33	225.806	1193.98	1206.23	191.02	1498.87	1311	414.268	1319.04	1460.85	496.518	1295.83	1237.19	515.93	1277.11	1135.97	511.817	1138.77	1024.04	458.919	1076.9	978.926	519.154	1103.93	951.908	500.001	1029.2	927.932
474	0	280.637	1183.36	1618.56	184.022	1180.58	1617.65	299.144	1332.3	1668.8	154.466	1323.77	1663.34	237.772	1406.17	1504.09	253.017	1479.22	1247.91	225.754	1259.85	1413.98	225.972	1180.37	1203.95	190.257	1485.25	1307.94	414.069	1306.11	1458.41	495.734	1279.78	1235.28	515.445	1259.66	1134.47	510.69	1119.11	1025.34	457.129	1056.78	981.291	519.237	1083.37	954.84	497.981	1007.67	931.57
475	0	280.279	1169.86	1615.95	183.675	1167.02	1615.04	299.097	1318.83	1666.53	154.252	1310.24	1661.07	237.479	1393.11	1501.7	252.444	1465.31	1245.14	225.113	1246.2	1411.77	226.065	1166.6	1201.92	189.722	1471.73	1305.16	413.395	1292.98	1456.02	494.879	1264.26	1233.51	514.892	1242.72	1133.27	509.271	1100.05	1026.72	455.083	1037.17	983.535	516.544	1062.57	956.381	495.967	986.968	935.221
476	0	279.7	1156.39	1613.57	183.31	1153.6	1612.85	298.574	1305.36	1664.18	153.961	1296.9	1659.09	236.712	1379.45	1499	251.857	1451.15	1242.46	224.807	1232.6	1409.7	225.724	1152.67	1200.03	189.2	1457.92	1302.49	412.749	1279.63	1454.01	494.148	1248.89	1231.95	514.185	1226.33	1132.1	507.999	1081.74	1028.03	453.541	1018.51	985.84	514.763	1042.74	958.13	494.079	966.945	938.827
477	0	279.425	1143.11	1611.49	182.909	1140.2	1610.71	298.204	1291.98	1662.32	153.31	1283.34	1657.03	236.352	1366.33	1497.07	251.471	1436.92	1240.16	224.319	1218.88	1407.71	225.647	1138.78	1198.23	189.223	1444.17	1300.19	412.2	1266.12	1452.39	493.155	1233.82	1230.68	513.534	1210.35	1131.22	506.979	1064.14	1029.28	452.026	1000.42	988.08	513.978	1024.05	960.432	492.642	948.063	942.056
478	0	279.209	1129.92	1609.79	182.369	1126.93	1609.04	297.644	1278.52	1660.66	152.763	1269.95	1655.63	235.626	1352.86	1495.12	251.411	1422.54	1238.14	223.939	1205.35	1406.11	225.057	1124.5	1196.82	188.71	1429.91	1298.04	411.674	1252.31	1451.26	492.627	1219.2	1229.88	512.883	1195	1130.67	505.688	1047.24	1030.28	450.622	983.042	990.092	512.47	1006.25	962.195	491.089	929.811	945.235
479	0	278.132	1116.42	1608.03	181.521	1113.49	1607.32	296.84	1265.01	1659.08	151.904	1256.58	1654.14	234.546	1339.2	1493.45	251.161	1407.87	1236.11	223.11	1191.58	1404.69	224.207	1109.95	1195.67	188.725	1415.88	1296.02	410.676	1238.28	1450.07	491.155	1204.85	1228.47	512.604	1180.17	1130.2	504.453	1030.84	1031.28	449.239	966.399	992	511.168	988.838	963.878	489.643	912.261	948.051
480	0	276.998	1102.91	1606.3	180.446	1099.89	1605.87	296.085	1251.72	1657.74	150.887	1243.01	1652.65	233.775	1325.86	1491.73	250.889	1393.24	1233.92	221.88	1177.55	1403.42	223.154	1095.24	1194.68	188.126	1401.45	1293.69	409.61	1224.33	1448.76	490.383	1191.09	1227.27	511.493	1165.62	1129.12	503.215	1015.27	1031.77	447.968	950.398	993.452	509.46	972.373	964.489	488.399	895.704	950.483
481	0	276.263	1089.62	1605.24	179.64	1086.46	1604.66	295.203	1238.35	1656.66	149.649	1229.5	1651.98	232.562	1312.43	1490.08	250.592	1378.26	1232.09	220.897	1163.72	1402.48	222.055	1080.5	1193.97	187.94	1387.05	1291.92	408.411	1210.53	1447.9	489.322	1177.5	1226.3	510.442	1151.6	1128.32	502.397	1000.48	1032.23	446.981	935.169	994.692	507.886	956.907	964.985	487.438	879.955	952.633
482	0	275.181	1076.15	1604.44	178.52	1072.81	1603.99	293.75	1224.83	1655.84	148.532	1215.83	1651.24	231.114	1299.01	1488.75	250.085	1363.2	1230.5	219.726	1149.74	1401.85	220.963	1065.58	1193.74	187.162	1372.3	1289.88	407.18	1196.78	1447.46	488.408	1164.12	1225.74	509.525	1138	1127.82	501.32	986.045	1032.62	445.966	920.524	995.619	507.219	942.337	966.097	486.489	865.002	954.407
483	0	274.084	1062.67	1604.05	177.4	1059.15	1603.76	292.178	1211.53	1655.22	147.178	1202.01	1650.78	229.53	1285.4	1487.53	249.478	1348.21	1228.96	218.316	1135.61	1401.72	219.862	1050.56	1193.84	186.176	1357.38	1287.87	405.863	1183.05	1447.16	487.495	1151.04	1225.36	508.272	1124.62	1127.04	500.53	972.426	1032.75	445.124	906.771	996.026	506.611	928.421	966.475	485.816	850.933	955.673
484	0	273.257	1049.18	1603.83	176.126	1045.27	1603.6	290.341	1197.96	1654.89	145.6	1188.03	1650.62	227.958	1271.69	1486.6	248.953	1333.27	1227.79	216.889	1121.37	1401.82	218.726	1035.31	1194.17	185.194	1342.64	1286.37	404.494	1169.27	1447.12	486.404	1138.05	1224.94	507.162	1111.83	1126.51	499.79	959.563	1032.29	444.473	893.81	995.89	505.482	915.558	965.861	485.359	837.82	956.189
485	0	271.726	1035.4	1604.05	174.619	1031.2	1603.81	288.495	1184.19	1655.31	143.752	1173.91	1650.72	227.368	1259.04	1486.7	248.212	1318.55	1227.54	215.513	1107.09	1402.09	218.001	1020	1194.78	184.211	1327.9	1285.61	403.362	1155.5	1447.73	485.483	1125.28	1225.21	505.984	1099.19	1126.62	498.96	947.242	1031.96	443.727	881.414	995.462	504.608	903.421	965.363	484.897	825.484	956.555
486	0	269.678	1021.14	1605.09	172.886	1016.98	1604.36	286.563	1170.16	1656.5	141.791	1159.67	1651.38	224.763	1243.67	1487.38	247.505	1304.1	1228.27	214.406	1092.96	1402.94	217.262	1004.69	1195.72	183.47	1313.41	1286.04	401.82	1141.19	1448.96	484.481	1112.3	1226.28	504.931	1086.78	1127.65	498.155	935.585	1031.65	443.045	869.854	995.158	503.705	891.946	964.62	484.563	814.178	956.363
487	0	267.84	1006.93	1606.04	171.005	1002.66	1604.95	284.498	1155.84	1657.87	139.523	1145.26	1652.31	224.469	1230.49	1488.9	246.801	1289.89	1229.48	213.227	1078.86	1403.92	217.006	989.64	1196.85	182.936	1299.11	1286.77	400.698	1127.17	1450.52	483.589	1099.3	1227.58	504.095	1074.66	1128.83	497.289	924.571	1030.79	442.813	859.435	993.788	503.276	881.599	963.549	484.397	803.794	955.413
488	0	266.335	992.74	1607.24	169.383	988.605	1605.67	282.784	1141.36	1659.77	137.474	1130.97	1653.33	222.361	1215.1	1490.03	246.487	1276.13	1231.29	212.577	1064.93	1405.06	217.308	975.347	1197.87	182.139	1285.01	1287.92	400.019	1112.97	1452.76	482.65	1086.38	1229.22	503.144	1062.89	1130.31	496.745	914.306	1030	442.495	849.67	992.203	503.003	872.199	962.25	484.362	794.414	953.911
489	0	264.183	978.379	1608.41	167.638	974.63	1606.18	280.77	1126.68	1661.54	135.529	1116.73	1654.15	221.482	1200.88	1491.99	246.325	1262.6	1233.5	212.209	1051.1	1406.36	217.486	961.107	1199.21	182.079	1271.29	1289.8	399.281	1098.85	1455.21	482.112	1073.45	1231.58	502.613	1051.49	1132.35	496.163	904.506	1029.27	441.966	840.563	990.281	502.74	863.767	961.049	484.51	785.837	952.013
490	0	262.25	963.958	1609.53	165.729	960.58	1606.35	279.074	1111.95	1663.65	133.878	1102.58	1654.76	220.571	1186.82	1493.78	246.157	1249.27	1235.81	211.96	1037.48	1407.71	217.691	947.198	1200.71	182.115	1257.96	1291.73	398.559	1084.94	1457.59	480.761	1060.34	1233.47	501.56	1040.19	1134	495.418	895.128	1028.61	441.445	832.005	988.373	502.191	855.717	959.535	484.323	777.956	949.578
491	0	260.418	949.429	1610.43	164.057	946.633	1606.48	277.489	1097.19	1665.47	132.561	1088.52	1655.52	219.626	1172.91	1495.22	245.967	1236.3	1237.92	211.917	1023.9	1408.85	217.994	933.841	1202.21	181.732	1244.37	1293.38	397.824	1071.35	1459.6	479.94	1047.48	1235.22	501.18	1029.19	1135.85	494.875	886.395	1027.62	440.981	824.032	985.669	501.449	847.996	957.692	484.07	770.708	946.2
492	0	259.251	935.317	1611.37	162.71	932.654	1606.85	276.34	1082.56	1667.24	131.574	1074.23	1656.1	219.32	1160.25	1496.86	245.602	1223.39	1239.86	212.241	1010.67	1410.4	218.631	921.022	1203.65	180.985	1230.96	1294.9	397.491	1058.44	1461.71	479.112	1034.82	1236.9	500.397	1018.46	1137.36	494.378	877.923	1026.58	440.754	816.687	982.862	501.828	841.147	955.811	483.913	764.175	942.31
493	0	258.478	921.19	1612.33	162.107	918.941	1607.58	275.358	1067.95	1669.4	130.877	1060	1657.68	218.582	1146.78	1498.72	244.962	1210.72	1241.89	212.358	997.435	1411.98	219.292	908.521	1205.2	180.712	1217.99	1296.95	397.223	1045.93	1463.87	478.396	1022.34	1238.81	500.113	1008.04	1139.16	494.326	869.933	1025.69	440.476	809.673	980.099	502.324	834.746	954.293	483.739	758.267	938.045
494	0	257.896	907.193	1613.2	161.584	904.99	1608.2	274.801	1053.5	1671.46	130.384	1045.66	1659.27	218.14	1133.84	1500.63	244.347	1198.22	1243.96	212.563	984.457	1413.74	219.994	896.115	1207.03	179.609	1204.84	1298.7	397.23	1033.69	1466.04	477.883	1010.23	1240.93	499.507	998.005	1140.76	493.935	862.247	1024.4	440.413	803.311	976.979	501.822	828.474	951.899	483.269	752.815	933.221
495	0	258.203	893.623	1614.09	161.838	891.217	1609.1	274.723	1039.43	1673.5	130.119	1031.49	1661.5	217.546	1120.87	1502.75	243.116	1185.31	1245.93	213.281	971.886	1415.9	220.962	883.952	1208.83	178.802	1192.1	1300.84	397.42	1021.92	1468.15	477.576	998.572	1242.89	499.206	988.117	1142.48	494.111	855.095	1023.04	440.645	797.348	973.879	502.89	823.001	950.267	483.185	748.047	928.079
496	0	258.869	880.144	1615.26	162.26	877.476	1610.28	274.846	1025.43	1675.69	130.356	1017.2	1663.86	217.235	1108.09	1505.23	242.183	1172.71	1248.14	213.399	959.172	1417.99	221.919	871.687	1210.86	177.695	1179.19	1303.26	397.649	1010.44	1470.22	477.326	987.441	1244.89	499.471	978.862	1144.52	494.344	848.258	1021.72	441.181	792.318	970.192	504.306	817.99	948.69	482.992	743.827	922.858
497	0	259.393	866.669	1616.35	162.957	863.606	1611.65	275.021	1011.73	1677.9	130.435	1002.82	1666.62	217.024	1095.41	1507.86	241.406	1160.42	1250.66	213.876	946.76	1420.31	222.64	859.194	1213.06	176.639	1166.53	1305.67	398.182	999.12	1472.26	477.181	976.895	1246.55	499.247	970.034	1146.02	494.623	842.075	1020.05	441.393	787.271	966.941	505.086	813.23	946.516	482.999	740.431	917.308
498	0	260.108	853.211	1617.49	163.905	849.955	1613.26	275.639	997.896	1680.04	130.99	988.642	1669.53	216.45	1082.63	1510.25	239.889	1147.76	1252.86	213.874	934.132	1422.73	223.436	846.575	1215.37	175.244	1153.78	1308.13	398.064	987.403	1473.82	477.471	967.353	1247.96	498.461	961.633	1146.99	495.202	836.322	1018.55	442.223	782.983	963.658	505.505	808.717	943.88	482.905	737.339	911.748
499	0	261.881	840.093	1619.03	165.229	836.291	1615.21	276.727	984.363	1682.28	132.049	974.513	1672.21	216.089	1069.97	1512.79	238.376	1135.25	1255.33	213.939	921.42	1425.24	224.328	834.007	1217.92	173.847	1141.07	1310.64	398.759	976.47	1475.44	477.798	958.199	1249.19	497.997	953.576	1147.97	496.168	831.167	1016.95	443.228	779.057	960.341	507.276	805.231	942.177	483.482	735.163	906.333
500	0	263.164	827.091	1620.46	166.355	822.754	1617.17	277.621	970.874	1684.33	133.012	960.624	1675.03	215.655	1057.02	1515.27	236.429	1122.43	1257.49	214.284	908.924	1427.72	225.039	821.542	1220.42	172.198	1128.14	1313.33	399.185	965.081	1476.99	478.049	949.723	1250.41	498.166	946.238	1149.08	497.197	826.555	1015.37	444.318	775.598	957.206	509.501	802.185	940.959	484.297	733.623	901.215
501	0	264.085	813.929	1621.78	167.516	809.21	1619.13	278.669	957.479	1686.2	134.027	946.701	1677.66	214.947	1043.93	1517.35	235.074	1109.98	1259.78	214.679	896.677	1429.99	225.35	809.025	1223	170.593	1115.33	1315.76	398.955	953.523	1478.08	478.288	941.763	1251.2	497.011	938.989	1149.35	498.025	822.294	1013.67	445.709	772.713	954.153	510.697	799.661	938.882	485.383	732.582	896.208
502	0	265.223	800.889	1622.95	168.568	795.86	1620.86	279.538	944.228	1687.55	134.909	933.046	1680.08	214.754	1031.1	1519.56	233.35	1097.07	1261.63	214.882	883.884	1432.02	225.505	796.518	1225.28	168.884	1102.3	1318.11	398.815	941.951	1478.79	477.844	934.274	1251.35	496.373	932.25	1149.76	499.028	818.528	1011.72	447.185	770.031	950.957	511.406	797.629	935.733	486.803	732.004	891.238
503	0	266.365	787.993	1624.18	169.808	782.495	1622.61	280.569	931.2	1689.19	135.981	919.331	1682.29	214.146	1018.03	1521.73	231.832	1084.39	1263.57	215.272	871.115	1433.9	225.784	784.182	1227.39	167.092	1089.02	1320.6	398.926	930.653	1479.88	477.624	927.118	1251.75	495.763	925.749	1150.35	500.092	815.184	1010.1	448.827	767.52	947.978	513.22	796.274	933.732	488.883	732.037	886.677
504	0	267.54	774.923	1625.51	170.742	769.177	1624.31	281.471	918.08	1690.68	136.613	905.704	1684.52	213.77	1005.14	1523.79	230.134	1071.4	1265.54	215.406	858.229	1435.52	225.734	771.741	1229.39	165.285	1075.87	1323.03	398.977	919.243	1480.97	477.365	920.022	1252.44	495.061	919.662	1151.19	501.208	812.159	1008.65	450.233	765.441	944.472	514.869	795.248	931.948	491.022	732.151	882.519
505	0	268.377	761.965	1626.38	171.765	755.845	1625.74	282.327	905.102	1691.78	137.293	892.396	1686.51	213.257	992.106	1525.38	228.791	1058.56	1266.92	215.485	845.357	1436.81	225.723	759.187	1231.12	163.378	1062.63	1324.76	398.803	907.874	1481.43	477.023	913.182	1252.68	494.417	913.835	1151.45	502.117	809.507	1006.74	452.154	763.663	941.37	516.321	794.73	929.416	493.552	732.775	878.269
506	0	269.16	748.993	1627.01	172.751	742.647	1626.85	282.917	892.191	1692.27	138.158	878.775	1687.7	212.747	979.005	1526.55	227.235	1045.5	1267.98	215.679	832.558	1437.79	225.797	746.658	1232.47	161.566	1049.34	1326.24	399.033	896.54	1481.57	476.54	906.318	1252.49	493.528	908.286	1151.37	503.287	807.33	1004.65	454.229	762.172	938.026	518.061	794.676	926.906	496.13	733.685	873.668
507	0	270.468	736.13	1627.53	173.793	729.229	1627.57	283.536	879.174	1692.98	139.469	865.281	1688.49	212.309	966.067	1527.57	225.856	1032.7	1268.94	216.021	819.624	1438.44	225.579	734.049	1233.42	159.763	1036.21	1327.44	399.059	885.324	1481.59	476.098	899.653	1252.37	492.773	902.978	1151.37	504.412	805.307	1002.56	456.395	761.061	934.481	519.659	795.333	924.61	499.019	734.663	869.727
508	0	271.034	723.024	1627.69	174.516	715.913	1628.06	283.931	866.254	1693.2	139.156	851.861	1689.21	211.406	952.869	1527.88	224.553	1019.72	1269.5	216.054	806.686	1438.79	225.267	721.442	1233.95	157.681	1022.89	1328.22	398.623	873.693	1481.05	475.011	892.583	1251.56	491.445	897.636	1150.78	505.308	803.614	1000.1	458.403	759.868	930.962	520.11	794.964	921.617	501.731	735.734	865.9
509	0	271.711	709.993	1627.22	175.359	702.392	1627.9	284.255	853.359	1692.75	139.6	838.335	1689.39	210.693	939.851	1527.72	223.278	1007.07	1269.22	216.015	793.782	1438.73	224.912	708.778	1233.84	156.057	1009.81	1328.19	398.441	862.275	1479.95	474.126	885.672	1250.36	490.173	892.44	1149.59	506.23	802.179	997.237	460.151	758.854	927.093	521.026	795.514	918.243	504.722	737.21	861.713
510	0	272.664	697.187	1626.69	176.396	689.001	1627.48	284.491	840.343	1692.05	140.071	824.599	1688.99	210.238	926.893	1527.22	222.083	994.335	1268.58	216.262	780.872	1438.21	224.826	696.661	1233.31	154.366	996.755	1327.91	398.676	850.887	1478.85	473.283	878.654	1249.08	488.86	887.266	1148.25	507.376	800.895	994.322	462.644	758.254	923.148	522.802	796.679	915.44	508.106	738.883	857.831
511	0	273.678	684.305	1625.77	177.171	675.541	1626.74	284.667	827.25	1691.27	140.415	810.869	1688.49	209.512	913.598	1526.68	220.874	981.565	1268.04	216.397	767.942	1437.49	224.57	684.332	1232.48	152.835	983.662	1327.49	398.717	839.357	1477.68	472.435	871.524	1247.98	487.413	881.884	1147.11	508.536	799.807	991.722	464.82	757.759	919.298	524.107	797.88	912.723	511.299	740.662	854.154
512	0	274.39	671.147	1624.52	177.894	661.941	1625.53	284.897	814.068	1690.34	140.754	797.15	1687.75	208.771	900.384	1525.84	219.723	968.851	1267.33	216.304	755.053	1436.56	224.209	672.177	1230.91	151.477	970.602	1326.95	398.516	827.457	1476.12	471.543	864.067	1246.68	486.027	876.451	1145.98	509.184	798.582	988.844	467.03	757.31	915.42	525.246	799.101	909.839	514.32	742.504	850.432
513	0	275.067	657.838	1622.82	178.583	648.471	1624.02	285.173	800.785	1689.18	140.956	783.285	1686.85	208.553	887.379	1524.98	218.914	956.184	1266.3	216.492	742.067	1435.12	223.836	659.105	1229.37	150.508	957.747	1326.13	398.407	815.518	1474.19	470.543	856.429	1245.03	484.617	870.902	1144.7	509.846	797.437	985.904	469.149	756.995	911.183	525.935	800.366	906.642	517.211	744.719	846.535
514	0	275.706	644.491	1620.87	179.364	634.947	1622.07	285.54	787.327	1688.03	141.041	769.281	1685.55	208.261	874.194	1524.07	218.427	943.553	1265.34	216.443	729.1	1433.5	223.777	646.04	1227.31	149.62	944.703	1325.33	398.465	803.42	1472.33	469.8	848.617	1243.59	483.237	864.974	1143.63	510.494	796.435	983.155	471.067	756.499	907.036	526.792	801.872	904.072	520.152	747.032	842.82
515	0	276.234	631.102	1618.79	179.965	621.252	1619.88	285.793	773.681	1686.55	141.385	755.278	1683.85	207.944	860.907	1522.78	218.318	930.936	1263.95	216.343	716.301	1431.8	223.48	632.678	1225.47	149.022	931.734	1324.13	398.531	791.079	1470.48	468.749	840.597	1242.2	481.686	858.799	1142.58	510.829	795.192	980.547	473.34	756.387	903.38	527.376	803.433	901.404	523.055	749.439	839.594
516	0	276.856	617.788	1616.29	180.553	607.631	1617.52	286.032	759.968	1684.62	141.796	741.258	1682.27	207.626	847.651	1520.95	218.682	918.116	1262.21	216.423	703.237	1429.83	223.333	619.277	1223.18	148.782	919.067	1322.43	398.568	778.568	1468.21	467.843	832.425	1240.34	480.087	852.415	1141.06	511.215	793.785	977.875	476.281	755.264	900.598	527.599	804.952	898.735	525.758	752.009	836.033
517	0	277.538	604.383	1613.66	181.182	593.984	1614.95	286.34	746.132	1682.52	142.376	727.074	1680.06	207.781	834.555	1519.22	219.113	905.223	1260.41	216.624	690.394	1427.79	223.349	606.129	1220.88	148.767	906.321	1320.67	399.045	765.969	1466.13	467.241	824.401	1238.98	478.672	846.057	1139.76	511.737	792.376	975.572	477.634	754.617	896.511	527.538	806.338	896.81	528.518	754.78	833.185
518	0	277.951	590.925	1610.8	181.758	580.332	1612.16	286.775	732.44	1680.2	143.048	713.043	1677.89	207.974	821.45	1517.16	219.881	892.194	1258.57	216.749	677.413	1425.51	223.475	593.436	1218.25	149.116	893.51	1318.79	399.288	752.99	1463.92	466.722	815.926	1237.57	477.524	839.401	1138.67	511.703	790.699	973.197	479.33	753.774	893.371	527.264	806.983	894.763	531.262	756.94	830.714
519	0	278.084	577.123	1607.63	181.941	566.64	1609.28	287.163	718.565	1677.67	143.198	699.247	1675.48	208.043	808.305	1514.73	220.778	879.248	1256.49	216.706	664.209	1423.24	223.001	580.125	1215.95	149.778	880.655	1316.65	399.42	739.736	1461.42	465.722	806.912	1235.83	476.013	832.22	1137.39	511.285	788.084	970.827	480.995	752.768	890.505	526.943	807.025	893.035	532.363	759.368	827.316
520	0	278.195	563.403	1604.21	182.174	553.053	1606.07	287.666	704.622	1675.19	143.666	685.289	1673.02	208.697	795.082	1512.67	221.767	866.061	1253.98	216.893	651.262	1420.89	222.928	566.98	1213.43	150.57	867.839	1314.18	399.588	726.22	1458.83	465.369	797.717	1234.56	475.193	824.887	1136.6	511.441	785.083	969.193	481.733	751.03	886.867	526.751	806.548	891.98	533.358	760.981	824.257
521	0	278.923	550.094	1601.33	182.731	539.495	1602.89	288.169	690.674	1672.52	144.25	671.438	1670.55	209.467	782.096	1510.27	223.008	852.938	1251.82	217.399	638.127	1418.44	223.051	553.95	1211.23	150.977	854.735	1311.34	400.476	712.768	1456.92	465.537	788.004	1233.79	474.529	816.865	1136.19	511.769	781.431	968.225	483.013	748.477	884.605	526.977	805.196	891.542	535.318	762.791	822.708
522	0	279.165	536.246	1598.52	183.083	526.052	1599.95	288.761	676.65	1670.36	144.825	657.714	1668.14	210.506	769.031	1508.35	224.243	839.521	1249.6	217.704	624.877	1416.05	223.012	540.115	1209.36	152.247	841.688	1309.16	401.334	699.091	1455.09	466.241	777.79	1233.59	473.816	807.688	1136	512.883	777.294	968.046	484.865	745.616	883.371	526.942	802.952	891.622	536.174	763.235	821.107
523	0	279.793	522.645	1595.56	183.318	512.653	1597.12	289.44	662.649	1667.94	145.327	643.818	1665.67	211.413	755.88	1505.85	225.662	825.921	1247.04	218.04	611.613	1413.74	223.018	526.763	1207.49	154.058	828.667	1307.22	402.117	685.136	1453.09	466.624	766.837	1232.9	473.717	798.52	1135.78	513.944	772.203	967.589	486.394	742.03	881.741	527.834	800.029	891.969	536.986	762.888	819.553
524	0	280.221	508.976	1592.59	183.816	499.116	1594.21	290.409	648.691	1665.67	146.177	630.357	1663.51	212.577	742.57	1503.49	227.284	812.116	1244.48	218.663	598.31	1411.68	223.119	513.057	1205.64	155.692	815.252	1304.56	403.005	671.104	1450.88	467.451	755.411	1232	473.961	788.609	1135.29	515.025	766.184	966.919	487.803	737.438	879.975	529.019	796.088	892.138	537.76	761.445	817.801
525	0	280.85	495.298	1590.07	184.471	485.691	1591.62	291.343	634.8	1663.43	146.934	616.731	1661.39	214.027	729.438	1501.25	228.748	798.142	1242.04	219.223	584.885	1409.46	223.292	499.456	1203.76	157.197	801.744	1301.9	404.138	656.998	1448.84	468.445	743.416	1231.18	474.692	778.031	1135.09	516.507	759.537	966.524	489.287	732.246	878.563	530.279	790.947	892.376	538.506	759.026	816.32
526	0	281.483	481.475	1587.82	185.013	472.264	1589.45	292.515	621.011	1661.48	148.141	603.34	1659.35	215.605	716.078	1499	230.105	783.939	1239.4	219.995	571.255	1407.72	223.477	485.842	1202.19	158.864	788.142	1299.48	404.989	642.515	1446.6	469.626	730.822	1229.94	475.5	766.82	1134.34	518.018	751.875	965.961	491.039	726.078	877.538	532.109	784.984	892.641	539.099	755.293	814.75
527	0	282.158	467.769	1585.88	186.031	458.798	1587.75	293.747	607.318	1659.16	149.496	589.932	1657.49	217.126	702.573	1496.62	231.505	769.793	1236.86	221.014	557.404	1405.92	223.905	471.896	1200.44	160.489	774.387	1296.98	406.21	628.211	1444.32	470.49	717.703	1228.15	476.665	754.988	1133.22	519.66	743.352	964.915	493.263	719.58	876.47	534.018	777.665	892.168	539.832	750.085	812.794
528	0	283.543	454.233	1583.97	187.253	445.308	1586.25	295.304	593.769	1657.08	151.218	576.617	1655.8	218.915	688.971	1494.64	232.916	755.564	1234.48	222.027	543.622	1404.17	224.584	458.026	1198.91	162.125	760.488	1294.65	407.708	613.92	1442.14	472.428	704.396	1226.65	478.321	742.817	1132.06	522.229	734.245	964.221	495.716	712.07	875.505	536.626	769.622	891.702	541.305	744.041	811.411
529	0	284.721	440.616	1582.71	188.268	431.759	1585.11	297.075	580.287	1655.4	152.876	563.321	1654.43	220.624	675.196	1492.81	234.191	741.122	1232.63	223.03	529.661	1402.68	225.23	443.581	1197.58	163.697	746.488	1292.9	409.115	599.378	1440.19	474.076	690.464	1225.19	479.993	729.731	1131.09	524.486	723.939	963.583	498.186	703.591	874.795	539.318	760.261	891.622	542.961	736.579	810.277
530	0	285.885	426.902	1581.66	189.332	418.254	1584.36	298.848	566.756	1654.01	154.527	550.088	1653.42	222.415	661.35	1491.38	235.34	726.597	1231.16	223.942	515.61	1401.49	225.714	428.869	1196.44	165.084	732.367	1291.44	410.254	584.678	1438.41	475.201	675.83	1223.54	481.677	715.96	1130.03	526.463	712.349	962.692	500.038	693.65	873.385	542.056	749.851	891.381	544.297	727.25	808.974
531	0	287.022	412.86	1580.86	190.529	404.71	1583.97	300.738	553.067	1653.08	156.234	536.931	1653.02	224.396	647.524	1490.46	236.432	711.997	1229.9	225.214	501.413	1400.55	226.572	414.064	1195.6	166.513	718.11	1290.41	411.603	570.026	1436.82	477.05	661.009	1222.28	483.747	701.841	1129.24	528.674	699.989	962.059	502.589	683.191	872.362	545.044	738.417	891.433	546.302	716.778	808.133
532	0	288.891	399.101	1581.01	192.064	391.277	1584.23	302.888	539.271	1652.71	158.23	523.629	1653.1	226.402	633.623	1490.02	237.513	697.2	1229.11	226.633	487.178	1400.07	227.751	399.077	1195.13	168.073	703.765	1289.99	413.492	555.637	1435.92	479.083	646.117	1221.49	485.871	687.024	1128.59	531.392	686.843	961.885	505.591	671.044	872.022	548.299	726.34	891.603	549.564	705.551	808.348
533	0	290.187	385.16	1581.46	193.596	377.663	1584.95	305.203	525.587	1652.73	160.363	510.263	1653.34	228.455	619.54	1489.67	238.934	682.389	1228.61	227.918	472.858	1400.09	228.788	383.98	1195.17	169.619	689.318	1289.61	415.142	541.111	1435.23	480.954	630.673	1220.64	487.979	671.902	1127.78	533.942	672.84	961.687	508.216	657.735	871.33	550.767	712.511	891.542	552.373	692.543	808.113
534	0	291.808	371.175	1582.17	195.199	363.938	1586.16	307.385	511.868	1652.63	162.658	497.149	1654.11	230.406	605.382	1489.63	240.362	667.445	1228.21	229.363	458.528	1400.5	229.714	368.821	1195.48	171.264	674.809	1289.35	416.823	526.513	1434.74	482.703	615.138	1219.74	489.81	656.099	1126.83	535.98	657.681	961.207	510.304	643.939	870.484	553.187	697.837	891.214	555.508	678.28	807.909
535	0	293.451	357.145	1583.19	196.879	350.078	1587.49	309.667	498.16	1652.78	164.865	483.751	1654.8	232.173	591.079	1489.79	241.88	652.753	1228.22	230.759	444.136	1401.02	230.71	353.662	1196.05	172.94	660.376	1289.5	418.327	511.719	1434.53	484.121	599.204	1218.94	491.622	639.917	1126.08	538.129	641.661	960.674	513.005	628.051	869.825	555.948	682.113	891.245	558.794	662.5	807.801
536	0	295.247	343.045	1584.56	198.747	336.182	1589.43	311.782	484.284	1653.28	167.232	470.18	1656	233.769	576.819	1490.46	243.312	638.138	1228.74	231.958	429.747	1401.95	231.526	338.763	1196.82	174.397	646.054	1290.14	419.635	497.005	1434.68	485.512	582.962	1218.44	493.425	623.237	1125.64	540.022	624.688	960.249	515.513	611.065	869.876	558.358	664.995	891.02	562.033	645.271	807.82
537	0	296.765	328.858	1586.13	200.527	322.077	1591.25	314.15	470.556	1654.14	169.379	456.401	1657.44	235.13	562.409	1491.48	244.974	623.91	1230.07	232.962	415.443	1403.23	231.965	324.091	1197.76	175.945	631.84	1291.4	420.461	482.199	1435.07	486.709	566.451	1218.11	494.907	606.234	1125.22	541.81	606.693	959.936	517.521	593.148	869.807	560.863	646.979	891.026	565.013	626.426	807.818
538	0	298.882	315.147	1587.63	202.626	308.208	1593.29	316.238	456.908	1654.74	171.55	442.735	1659.19	236.167	548.136	1492.83	246.17	609.966	1231.2	233.903	401.305	1404.54	232.695	310.302	1198.66	177.233	617.696	1292.98	421.316	467.778	1435.95	488.127	549.811	1218.17	496.688	589.06	1125.12	543.95	587.918	960.005	519.333	574.077	869.441	562.899	627.251	890.563	568.463	606.441	808.331
539	0	301.065	301.572	1589.01	204.67	294.313	1595.21	318.091	443.437	1655.57	173.656	429.066	1660.95	236.866	533.82	1494.13	247.249	596.197	1232.89	234.912	387.382	1405.73	233.293	296.597	1199.52	178.173	603.734	1294.76	422.241	453.779	1437.37	489.482	533.308	1218.78	498.32	571.433	1125.41	546.051	568.493	960.492	521.763	553.95	869.922	565.15	606.714	890.711	572.089	585.318	809.359
540	0	302.661	288.138	1590.26	206.408	280.516	1597.02	319.761	430.109	1656.63	175.279	415.314	1662.65	237.654	519.858	1496.01	248.011	582.739	1234.8	235.688	373.491	1407.08	233.792	282.96	1200.75	178.749	589.914	1296.71	422.899	439.839	1439.1	490.915	516.648	1219.67	500.086	553.806	1125.94	548.067	548.271	961.279	523.681	532.466	870.448	567.578	585.452	891.195	575.259	562.77	810.511
541	0	303.948	274.699	1591.37	207.843	266.716	1598.36	321.028	416.839	1657.73	176.521	401.478	1664.37	238.33	506.213	1497.63	248.626	569.401	1236.51	236.282	359.728	1408.37	234.187	269.983	1201.67	179.26	576.531	1298.62	423.159	425.747	1440.67	491.844	499.609	1220.35	501.83	536.037	1126.61	549.46	527.059	961.566	524.957	510.008	870.357	569.678	563.221	891.233	577.827	538.719	811.482
542	0	305.233	261.412	1592.51	209.262	253.157	1599.96	322.25	403.508	1659.17	177.453	387.683	1666.16	239.084	492.77	1499.11	249.304	556.338	1237.85	236.673	346.379	1409.52	234.736	257.39	1202.69	180.101	563.346	1300.28	423.703	412.214	1442.28	492.808	482.706	1220.67	503.696	518.104	1126.69	551.139	505.602	961.724	526.257	487.033	870.349	571.573	540.169	890.83	580.816	514.08	811.612
543	0	306.338	248.056	1593.77	210.14	239.636	1601.18	323.04	390.096	1660.49	178.236	374.078	1667.91	239.747	479.499	1500.59	250.246	543.223	1239.32	237.09	333.065	1410.8	235.465	244.994	1203.77	180.845	550.318	1301.58	424.249	398.629	1443.88	494.096	465.993	1221.58	505.547	500.032	1127.09	552.784	483.789	962.091	528.028	463.639	871.457	573.519	516.455	890.687	583.168	488.532	812.55
544	0	306.928	234.701	1595.31	210.641	226.251	1602.63	323.46	376.625	1662.23	178.938	360.272	1669	240.352	466.447	1501.94	250.993	530.058	1240.56	237.437	320.051	1412.46	235.57	232.565	1205.18	181.683	537.277	1302.95	424.764	385.062	1445.52	495.166	449.19	1222.3	507.225	481.712	1127.26	554.143	461.453	962.531	528.909	439.434	872.415	574.665	492.336	890.026	585.455	462.098	814.323
545	0	307.539	221.912	1596.87	210.864	212.794	1604.02	323.485	363.234	1663.76	179.111	347.06	1670.74	241.103	453.306	1503.43	251.895	516.834	1241.9	237.885	307.309	1414.14	235.749	219.787	1206.45	182.815	524.396	1304.16	425.063	371.485	1447.07	496.02	432.284	1222.96	508.773	463.202	1127.38	555.45	438.919	962.83	529.644	415.009	873.449	576.064	467.568	889.737	587.292	435.237	815.637
546	0	307.422	208.425	1598.36	210.96	199.659	1605.36	323.43	349.808	1665.54	179.006	333.533	1672.17	241.579	440.172	1504.65	253.101	503.729	1243.47	237.907	294.217	1415.6	235.876	207.213	1207.65	183.484	511.34	1304.78	425.436	357.728	1448.48	496.972	415.369	1223.69	510.766	444.747	1127.71	556.233	415.833	963.208	530.701	390.127	874.987	576.903	442.353	889.204	588.324	407.096	817.1
547	0	306.949	194.991	1600	210.48	186.512	1606.86	323.207	336.371	1667.76	178.746	320.363	1674.01	242.285	427.203	1506.83	254.298	490.793	1245.39	237.813	281.326	1417.29	235.878	193.962	1209.18	185.006	498.794	1306.54	425.694	344.065	1450.29	497.996	398.563	1224.93	512.678	426.395	1128.67	557.293	392.696	964.346	530.783	364.27	876.803	577.776	416.692	889.378	589.139	378.54	819.355
548	0	306.208	181.647	1602.05	209.834	173.238	1608.37	322.613	322.876	1670.18	178.073	307.052	1675.55	242.747	413.952	1508.84	255.57	477.957	1247.64	237.898	268.377	1419.25	235.59	180.763	1211.02	186.914	486.33	1309.24	425.86	330.053	1452.5	498.647	381.276	1226.47	514.12	407.507	1129.65	557.126	368.448	965.516	530.934	337.999	879.586	578.552	390.724	890.328	589.186	349.951	821.863
549	0	305.63	168.263	1604.05	209.051	160.236	1609.99	322.073	309.424	1672.62	177.313	293.84	1677.24	243.305	400.672	1510.99	256.994	465.236	1249.91	237.735	255.58	1420.82	235.621	167.562	1212.97	188.599	473.883	1311.54	426.147	315.936	1454.61	499.601	364.305	1228.31	515.983	388.955	1130.88	558.27	344.7	968.044	531.042	312.207	882.807	578.78	364.469	891.523	589.037	320.837	824.669
550	0	304.959	155.192	1606.22	208.376	147.101	1611.39	321.357	295.95	1675.02	176.531	280.917	1679	243.594	387.422	1513.15	258.38	452.676	1252.18	237.967	242.57	1422.5	235.668	154.054	1214.83	190.312	461.229	1313.39	426.651	301.997	1457.08	501.234	347.888	1230.49	517.206	369.433	1132.34	558.357	320.609	970.314	530.751	286.201	886.11	579.091	338.121	893.467	588.786	291.804	828.124
551	0	303.902	141.698	1608.2	207.224	134.221	1613.1	320.477	282.376	1677.38	175.442	268.095	1680.39	244.405	374.213	1515.06	259.87	439.899	1254.29	237.856	229.717	1424.26	235.726	140.93	1216.76	192.05	448.603	1315.34	426.835	287.799	1459.5	502.221	331.014	1232.69	518.6	350.126	1133.87	558.363	296.47	972.932	529.827	259.915	889.964	577.807	311.23	894.943	587.823	262.398	832.192
552	0	302.667	128.296	1610.1	206.027	121.066	1614.26	319.355	268.821	1679.38	174.279	255.164	1681.59	245.055	360.931	1516.52	261.301	427.129	1256.18	237.804	216.691	1425.58	235.561	128.049	1218.34	193.801	435.979	1316.72	426.788	273.503	1461.74	502.841	313.864	1234.53	519.713	331.393	1135.49	557.642	272.062	975.46	528.549	233.103	894.201	576.967	284.268	896.852	586.253	232.807	836.371
553	0	301.528	114.722	1611.71	204.797	108.236	1615.27	318.383	255.453	1681.1	173.65	242.177	1682.13	245.815	347.796	1517.9	262.703	414.354	1257.46	237.906	203.681	1426.76	235.759	115.785	1219.81	195.623	423.186	1317.94	427.001	259.12	1463.73	503.53	296.602	1236.14	521.038	312.263	1136.94	557.097	247.53	978.042	527.114	206.374	898.544	576.742	256.982	899.391	584.267	203.18	840.607
554	0	300.426	101.538	1613.26	203.786	95.1426	1616.08	317.441	241.969	1682.67	172.424	229.49	1682.76	246.423	334.528	1518.77	264.329	401.455	1258.62	238.066	190.611	1427.76	236.003	103.403	1220.78	197.459	410.483	1318.77	427.281	244.675	1465.81	504.439	279.528	1237.88	522.265	293.287	1138.32	556.288	223.088	980.95	525.249	179.659	903.168	575.874	229.873	903.107	582.097	173.708	845.36
555	0	299.364	88.0117	1614.76	202.444	82.2203	1616.97	316.468	228.642	1684.03	171.799	216.645	1683.05	247.212	321.153	1519.68	266.127	388.59	1259.66	238.141	177.467	1428.5	236.058	91.014	1221.83	199.343	397.673	1319.51	427.504	230.289	1467.71	505.208	262.183	1239.41	523.246	274.131	1139.59	555.609	198.723	984.109	523.088	152.881	908.268	575	202.527	906.161	579.379	144.191	850.215
556	0	298.399	74.6908	1615.91	201.571	69.2635	1617.55	315.662	215.242	1685.07	170.984	204.003	1683.29	247.855	307.702	1520.16	267.763	375.526	1260.17	238.196	164.366	1428.95	236.397	78.6211	1222.61	201.316	384.686	1319.83	427.617	215.701	1469.12	505.999	244.768	1240.74	524.392	255.196	1140.59	554.574	174.093	987.17	520.887	126.295	913.362	573.317	175.071	909.033	576.558	114.885	855.137
557	0	297.412	61.4574	1616.76	200.688	56.4529	1617.82	314.767	201.839	1685.83	170.078	191.317	1683.29	248.566	294.259	1520.54	269.519	362.606	1260.86	238.455	151.176	1429.04	236.808	66.1014	1222.92	203.267	371.701	1320.06	427.92	201.175	1470.47	507.178	227.517	1242.29	525.512	236.189	1141.5	553.545	149.55	990.296	518.368	99.553	918.358	571.465	147.805	911.82	573.321	85.625	859.931
558	0	296.596	47.979	1617.56	199.632	43.4416	1617.83	314.16	188.376	1686.7	169.352	178.552	1682.86	249.27	280.767	1520.88	271.308	349.394	1261.32	238.583	137.849	1428.83	236.89	53.5175	1222.92	205.32	358.677	1320.46	428.11	186.58	1471.61	508.09	210.016	1243.46	526.6	216.973	1142.56	552.058	125.021	993.284	515.657	73.141	923.391	569.366	120.546	914.921	569.838	56.5815	864.999
559	0	295.266	34.2201	1617.58	198.54	30.2489	1617.47	313.57	175.014	1687.07	168.66	165.901	1682.33	250.186	267.28	1520.93	273.208	336.399	1261.9	238.615	124.595	1428.35	237.259	41.1386	1222.07	207.276	345.62	1320.45	428.012	171.705	1472.17	508.625	192.175	1244.02	528.125	197.99	1143.35	550.501	100.553	996.07	512.586	46.7398	928.307	565.142	92.7577	916.404	565.786	27.5812	869.775
560	0	294.37	20.8543	1617.41	197.77	17.2553	1616.99	313.072	161.582	1686.92	167.497	153.195	1681.75	250.908	253.668	1520.38	274.687	323.322	1261.7	238.971	111.342	1427.58	237.776	28.6771	1221.02	209.225	332.526	1319.98	428.223	157.062	1472.24	509.511	174.569	1244.17	528.993	178.68	1143.35	549.077	76.3043	998.637	509.698	21.0068	933.175	564.188	65.9867	919.96	561.91	-0.990844	874.673
561	0	294.216	7.62278	1617.48	197.166	4.14826	1616.31	312.695	148.258	1686.42	167.464	140.254	1680.35	251.546	240.136	1519.66	275.682	310.365	1261.11	239.22	98.0578	1426.35	238.51	16.8139	1219.61	210.897	319.321	1319.03	428.466	142.505	1472.03	511.015	157.618	1244.52	529.451	158.989	1142.7	547.626	52.2777	1001.13	506.669	-4.36022	937.677	561.929	39.2346	922.956	557.798	-29.279	879.619
562	0	293.46	-6.05786	1616.96	196.499	-9.05883	1615.18	312.09	134.712	1685.55	167.078	127.3	1678.69	251.986	226.434	1518.43	276.591	297.477	1260.34	239.361	84.9645	1424.99	239.059	4.41961	1217.82	212.303	305.98	1317.74	428.447	127.901	1471.42	511.842	139.878	1244.31	530.202	139.446	1142.17	545.872	28.3658	1003.49	503.303	-29.7101	942.493	559.265	12.4383	925.927	553.409	-57.2343	884.715
563	0	292.725	-19.6504	1615.94	196.185	-22.0783	1613.93	311.681	121.197	1684.44	167.127	114.319	1677.13	252.446	212.921	1517.07	277.13	284.73	1259.22	239.755	71.3569	1423.46	239.581	-8.31553	1215.87	213.596	292.747	1316.31	428.26	113.275	1470.32	511.652	121.628	1243.16	530.84	119.762	1141.39	543.984	4.42694	1005.72	499.807	-54.5484	946.845	556.585	-13.8259	928.716	548.863	-84.7756	889.698
564	0	292.369	-32.9246	1614.74	196.026	-35.0347	1612.59	311.465	107.693	1683.23	166.546	101.212	1675.52	252.839	199.389	1515.57	277.533	272.118	1257.97	240.026	57.939	1421.51	240.194	-21.5356	1213.67	214.456	279.356	1314.72	428.269	98.9634	1469.22	511.824	103.344	1242.07	531.639	100.212	1140.71	541.919	-19.0829	1007.66	496.437	-78.8767	950.967	553.405	-39.9343	931.382	544.221	-112.055	894.54
565	0	291.957	-46.3053	1613.26	195.271	-48.4304	1610.73	311.275	94.1473	1681.89	166.51	87.9573	1673.75	253.049	185.702	1514.08	277.616	259.529	1256.81	240.134	44.4682	1419.67	240.806	-35.1364	1211.44	215.199	265.994	1313.39	428.121	84.7655	1467.87	512.491	85.6454	1241.7	532.217	80.6713	1140.07	539.824	-42.4872	1009.79	492.951	-102.759	955.233	550.933	-65.7692	934.158	539.6	-138.696	899.674
566	0	291.719	-59.7515	1611.75	195.351	-61.5407	1609.23	311.144	80.7016	1680.46	166.345	74.9747	1672.3	253.056	172.229	1512.57	277.203	246.91	1255.6	240.273	31.0513	1417.77	241.489	-49.0611	1209.56	215.432	252.567	1311.79	427.97	70.7332	1466.66	512.475	67.523	1240.9	532.531	60.9137	1139.46	537.497	-65.4236	1012.04	489.337	-126.279	959.366	546.61	-91.4966	935.879	534.902	-164.773	904.777
567	0	291.789	-72.8009	1610	194.891	-74.9622	1607.19	311.115	67.3482	1678.69	166.164	61.7208	1670.41	253.029	158.63	1510.89	276.737	234.084	1253.98	240.36	17.6704	1415.81	242.092	-62.9155	1207.33	215.401	239.061	1310.08	427.923	56.9546	1465.19	512.558	49.7267	1240.24	532.761	41.4644	1138.83	535.587	-87.898	1014.36	485.548	-149.356	963.051	544.919	-115.801	939.673	530.229	-190.218	909.651
568	0	291.63	-86.1662	1607.97	194.968	-88.1378	1605.3	311.333	54.2058	1677.01	166.286	48.3729	1668.45	252.866	145.234	1508.95	275.882	221.073	1252.32	240.337	4.12236	1413.49	242.742	-76.7447	1204.94	215.243	225.744	1308.43	427.723	43.4176	1463.51	512.384	31.9172	1239.42	533.129	22.2421	1138.33	533.232	-110.295	1016.5	482.326	-171.64	966.915	540.757	-140.756	941.747	525.53	-215.068	914.483
569	0	291.481	-99.4838	1605.86	194.655	-101.451	1603.16	311.292	40.9029	1674.97	165.929	35.2314	1666.57	252.637	131.787	1506.93	274.96	207.721	1250.33	240.114	-9.40534	1411.26	243.279	-90.3553	1202.61	214.602	212.039	1306.38	427.309	29.8937	1461.75	511.81	14.3238	1238.48	533.268	3.53152	1137.95	530.833	-131.993	1018.85	479.13	-193.369	970.745	539.319	-164.205	945.689	520.957	-239.269	919.454
570	0	291.333	-112.576	1603.79	194.39	-114.792	1601.1	311.079	27.9169	1672.64	165.741	22.1393	1664.65	252.184	118.468	1504.54	273.908	193.967	1247.8	239.999	-23.0533	1409.13	243.659	-104.048	1200.41	213.866	198.64	1304.08	426.723	16.4682	1459.76	510.56	-3.18079	1236.98	532.983	-15.087	1137.22	528.516	-153.212	1020.98	475.891	-214.653	974.391	536.473	-187.797	948.396	516.548	-262.845	924.147
571	0	291.292	-125.652	1601.53	194.582	-127.903	1599.36	310.979	14.8792	1670.27	165.782	8.9534	1662.54	251.777	105.144	1502.17	272.688	179.904	1245.04	239.685	-36.7241	1406.94	243.977	-117.81	1198.22	212.635	184.511	1301.32	426.314	3.14196	1457.62	509.8	-19.9762	1235.5	532.206	-33.1202	1135.99	526.423	-173.764	1022.95	472.904	-235.389	977.629	534.13	-210.266	951.373	512.692	-285.595	928.68
572	0	291.57	-138.401	1600.03	194.85	-141.039	1597.85	311.053	2.11668	1668.14	165.875	-4.31943	1660.65	250.96	91.7128	1499.62	271.657	165.58	1242.23	239.222	-50.3408	1404.87	243.983	-131.724	1196.62	211.692	170.871	1298.84	426.054	-9.93627	1455.9	509.12	-35.9686	1234.25	531.023	-50.9641	1134.59	524.459	-193.596	1024.9	470.296	-255.348	980.765	533.585	-231.473	955.791	509.343	-307.473	933.448
573	0	291.5	-151.336	1598.42	194.598	-154.178	1596.56	310.564	-10.6974	1665.88	165.731	-17.4853	1658.86	250.236	78.3733	1497.38	270.699	151.163	1239.68	238.671	-64.1524	1403.13	243.893	-145.707	1195.23	210.759	156.863	1296.37	425.443	-23.0831	1454.03	508	-51.6649	1232.84	530.862	-68.0113	1134	522.407	-212.928	1026.81	467.782	-274.876	983.962	531.386	-252.112	958.612	506.019	-328.604	937.758
574	0	291.336	-164.24	1596.96	194.299	-167.476	1595.34	310.223	-23.282	1663.71	164.975	-30.3213	1657.36	249.506	64.8211	1494.89	269.719	136.546	1236.83	237.877	-77.9669	1401.18	243.259	-159.786	1193.49	209.671	142.615	1293.62	424.693	-36.4863	1452.19	506.539	-67.0709	1230.88	529.764	-84.4995	1132.59	520.508	-231.406	1028.25	465.496	-293.842	986.81	528.882	-272.428	960.812	503.112	-348.859	941.686
575	0	290.92	-177.277	1595.37	193.966	-180.664	1594.08	309.747	-35.7837	1661.71	164.597	-43.4536	1655.39	248.669	51.2706	1492.77	268.92	122.249	1234.57	237.136	-91.871	1399.4	242.596	-174.014	1191.95	208.817	128.484	1291.39	423.813	-50.1801	1450.28	505.162	-81.8721	1229	527.945	-100.314	1130.83	518.808	-249.338	1029.68	463.373	-312.102	989.14	526.853	-291.675	962.735	500.794	-368.262	945.345
576	0	290.444	-190.338	1594.46	193.621	-193.769	1593.31	309.351	-48.21	1660.26	163.758	-56.1323	1654.07	247.682	37.6314	1490.83	268.117	107.563	1232.35	236.136	-105.634	1397.88	241.665	-188.319	1190.42	208.001	114.153	1289.19	423.112	-63.8036	1448.95	504.166	-96.0997	1227.52	526.89	-115.922	1129.73	517.002	-266.52	1030.73	461.635	-329.655	991.287	524.627	-309.921	964.303	498.634	-386.781	948.615
577	0	289.879	-203.197	1593.95	192.727	-207.095	1592.63	308.421	-60.6557	1658.67	162.948	-68.948	1652.62	246.578	23.9117	1488.93	267.519	92.8965	1230.23	235.033	-119.657	1396.35	240.415	-202.919	1189.12	207.273	99.843	1287.12	421.926	-77.738	1447.29	502.945	-109.935	1225.91	526.082	-131.017	1128.65	515.372	-282.977	1031.5	459.936	-346.606	993.103	522.858	-327.339	965.583	497.085	-404.426	951.588
578	0	289.112	-215.986	1593.31	192.169	-220.143	1592.32	307.566	-73.0179	1657.42	162.208	-81.9476	1651.16	245.536	10.3412	1487.17	266.996	78.2386	1228.16	233.933	-133.703	1395.23	239.168	-217.941	1188.26	206.588	85.2913	1284.92	421.019	-91.5647	1445.94	501.983	-123.255	1224.3	525.051	-145.607	1127.32	513.978	-298.772	1031.62	458.62	-362.905	994.283	521.56	-343.418	966.39	496.097	-421.144	954.179
579	0	288.197	-228.886	1593.04	191.143	-233.254	1592.09	306.289	-85.5465	1656.28	160.475	-94.4909	1650.46	244.347	-3.32803	1485.65	266.414	63.1793	1226.28	232.689	-147.787	1394.13	237.759	-233.205	1187.45	205.991	70.7823	1283.06	419.944	-105.446	1444.65	501.141	-136.332	1222.96	523.172	-159.741	1125.61	512.767	-313.583	1031.54	457.443	-378.362	994.931	520.303	-358.823	966.848	495.424	-436.915	955.933
580	0	286.924	-242.073	1593.32	189.983	-246.366	1592.21	304.763	-98.1112	1655.69	158.923	-107.453	1649.62	243.177	-16.9725	1484.54	265.722	48.0691	1224.84	231.302	-161.916	1393.69	236.008	-248.517	1187.24	205.179	56.0913	1281.42	418.651	-119.502	1443.96	499.795	-149.357	1221.79	521.782	-173.514	1124.5	511.658	-328.015	1031.22	456.539	-393.028	995.336	518.962	-373.346	966.682	494.868	-451.781	957.282
581	0	285.117	-255.119	1593.69	188.012	-259.832	1592.39	302.477	-110.999	1655.09	157.853	-120.671	1649.1	241.716	-30.8283	1483.38	264.831	32.8178	1223.62	229.857	-176.134	1393.61	234.285	-263.86	1187.2	204.437	41.1949	1279.84	417.238	-133.809	1443.17	498.177	-162.541	1220.45	520.194	-186.895	1123.48	510.428	-341.713	1030.25	455.738	-407.067	995.201	517.539	-387.351	965.722	494.659	-465.689	957.968
582	0	283.594	-268.196	1594.65	186.765	-272.995	1593.12	300.421	-123.752	1654.9	155.435	-133.491	1648.94	240.372	-44.7652	1482.55	264.25	17.418	1222.53	228.547	-190.423	1393.55	232.735	-279.249	1187.32	203.735	26.3789	1278.52	416.029	-147.973	1442.7	497.064	-175.304	1219.62	518.823	-199.933	1122.61	509.64	-354.533	1028.99	455.084	-420.388	994.239	516.497	-400.125	964.288	494.803	-478.694	957.927
583	0	281.938	-281.323	1596.08	185.164	-286.14	1594.3	298.418	-136.376	1655.36	153.364	-146.357	1648.77	239.094	-58.8368	1482.19	263.603	2.26979	1221.95	227.247	-204.815	1393.79	231.467	-294.568	1188.08	203.151	11.4803	1277.64	415.099	-162.022	1443.04	496.186	-187.819	1219.46	517.368	-212.59	1121.93	509.085	-366.617	1027.84	454.864	-432.723	993.174	515.847	-411.757	962.929	495.22	-490.718	957.556
584	0	279.804	-294.643	1598.01	183.007	-299.48	1595.75	295.804	-149.296	1656.06	151.322	-159.335	1648.76	238.001	-72.8464	1482.6	263.284	-12.2322	1222.24	225.986	-219.11	1394.45	230.324	-310.144	1189.26	202.852	-3.10374	1277.7	413.971	-176.455	1443.83	495.135	-200.515	1219.91	515.836	-224.91	1121.84	508.225	-378.166	1026.51	454.114	-444.37	991.548	515.549	-422.459	961.662	495.518	-501.785	956.508
585	0	277.542	-307.984	1600	180.771	-312.822	1597.22	293.404	-162.195	1657.28	148.501	-172.238	1648.85	236.992	-86.9298	1483.37	263.028	-26.3262	1223.28	224.883	-233.38	1395.26	229.387	-325.661	1190.43	202.36	-17.6095	1278	412.762	-190.952	1444.97	493.967	-213.397	1220.53	514.61	-236.817	1122.45	507.488	-389.13	1025.14	453.833	-454.975	989.302	514.83	-432.607	959.676	495.959	-511.947	954.837
586	0	275.42	-321.523	1602.19	178.725	-326.252	1598.53	291.136	-175.097	1658.93	146.307	-185.308	1649.2	235.991	-101.077	1484.41	262.834	-39.8539	1224.58	224.002	-247.488	1396.28	228.925	-340.709	1191.68	202.02	-31.9908	1278.7	411.97	-205.371	1446.59	492.859	-226.343	1221.46	513.426	-248.487	1123.11	506.784	-399.441	1023.62	453.556	-465.06	986.864	514.077	-442.184	957.146	496.53	-521.192	952.429
587	0	272.948	-335.022	1604.34	176.377	-339.359	1599.83	288.876	-188.202	1660.67	143.55	-198.191	1649.16	235.194	-115.047	1485.7	262.745	-53.0256	1226.23	223.323	-261.484	1397.46	228.641	-355.148	1193	201.837	-46.0784	1279.81	411.176	-219.643	1448.74	491.851	-239.243	1222.92	512.494	-259.95	1124.52	506.152	-409.104	1022.28	453.175	-474.304	984.192	513.908	-450.543	955.193	496.928	-529.593	949.554
588	0	270.651	-348.459	1606.43	174.077	-352.63	1600.91	286.397	-201.466	1662.31	141.496	-210.744	1649.41	234.644	-128.758	1486.97	262.442	-66.3519	1227.66	222.746	-275.2	1398.8	228.505	-368.9	1194.32	201.885	-59.922	1280.95	410.301	-233.975	1450.55	490.933	-252.254	1224.59	511.749	-271.195	1125.99	505.575	-418.383	1020.71	452.936	-482.867	981.264	513.462	-458.33	952.794	497.258	-537.232	946.055
589	0	268.939	-361.825	1608.52	172.237	-365.834	1601.91	284.637	-214.686	1664.29	139.642	-223.705	1649.72	234.223	-142.326	1488.22	262.656	-79.3453	1229.53	222.753	-288.755	1399.97	228.772	-382.009	1195.76	202.123	-73.6165	1282.05	409.993	-247.698	1452.74	490.29	-265.408	1226.26	511.104	-282.333	1127.39	505.326	-427.197	1019.18	452.752	-490.829	977.913	513.702	-465.431	950.379	497.658	-544.093	941.917
590	0	267.274	-375.282	1610.38	170.893	-378.664	1603.13	282.899	-228.014	1666.18	138.155	-236.919	1650.25	233.829	-155.485	1489.51	262.573	-92.3112	1231.17	222.665	-302.085	1401.22	229.207	-394.976	1197.24	202.395	-86.9299	1283.43	409.641	-261.003	1454.9	489.834	-278.274	1228.16	510.472	-293.414	1128.88	505.036	-435.608	1017.37	452.672	-498.133	974.336	513.441	-472.034	947.406	497.952	-550.5	937.189
591	0	265.819	-388.479	1612.13	169.494	-391.615	1604.24	281.311	-241.493	1668.07	136.857	-249.728	1651.11	233.45	-168.565	1490.83	262.081	-105.558	1232.58	222.623	-315.166	1402.72	229.663	-407.944	1198.86	202.435	-100.11	1284.75	409.128	-274.186	1456.76	489.162	-291.415	1229.87	510.345	-304.096	1130.72	504.863	-443.651	1015.65	452.479	-505.094	970.579	513.73	-478.234	944.845	497.871	-556.317	931.724
592	0	264.741	-401.643	1613.76	168.286	-404.748	1605.31	279.965	-254.973	1669.84	135.868	-262.913	1652.72	233.086	-181.448	1492.36	261.782	-118.578	1234.24	222.825	-328.07	1404.52	230.159	-420.888	1200.52	201.935	-113.392	1285.96	408.907	-287.157	1458.65	488.052	-304.786	1231.01	509.916	-314.881	1132.36	504.953	-451.23	1013.89	452.462	-511.273	966.611	514.067	-484.119	942.223	497.808	-561.456	925.941
593	0	264.172	-414.505	1615.26	167.882	-417.572	1606.58	279.242	-268.116	1671.74	135.422	-276.176	1653.88	232.694	-194.259	1494.03	261.093	-131.649	1235.94	223.035	-340.796	1406.35	230.944	-433.845	1202.46	201.509	-126.278	1287.54	408.931	-299.315	1460.71	488.282	-316.99	1233.28	508.411	-326.454	1132.61	505.203	-458.562	1011.96	452.703	-517.14	962.441	514.837	-489.356	939.758	497.64	-566.148	919.772
594	0	264.103	-427.309	1617.1	167.595	-430.543	1608.17	279.154	-280.873	1674.14	134.66	-288.796	1656.11	232.276	-206.937	1495.85	260.262	-144.655	1237.94	223.116	-353.462	1408.14	231.854	-446.9	1204.76	200.737	-139.273	1289.3	409.173	-311.232	1462.84	488.338	-328.985	1235.56	510.143	-335.881	1136.11	505.455	-465.509	1010.18	453.036	-522.333	958.227	515.419	-494.258	936.719	497.617	-569.731	913.374
595	0	264.064	-440.077	1619.16	167.603	-443.141	1610.31	279.036	-293.737	1676.28	134.867	-301.859	1658.15	232.091	-219.45	1497.88	259.19	-157.5	1239.65	223.241	-366.111	1410.4	232.715	-459.945	1207.11	200.072	-152.022	1291.15	409.525	-323.103	1464.97	488.883	-340.524	1237.66	509.559	-346.35	1137.21	505.978	-472.034	1008.45	453.431	-526.913	954.041	516.404	-498.719	934.287	497.312	-573.064	906.891
596	0	264.089	-452.859	1620.99	167.671	-456.026	1612.48	279.14	-306.559	1678.29	134.703	-314.37	1660.77	231.674	-232.048	1499.75	258.072	-170.201	1241.54	223.333	-378.725	1412.49	233.691	-472.949	1209.56	199.165	-164.802	1292.96	409.542	-334.834	1466.36	489.106	-351.677	1239.23	509.919	-356.019	1138.78	506.663	-478.298	1006.57	453.914	-531.032	949.822	517.464	-502.945	931.52	497.168	-575.864	900.284
597	0	264.406	-465.411	1623.21	167.924	-468.637	1614.95	279.884	-319.024	1680.52	135.336	-327.073	1663.1	231.405	-244.619	1501.77	256.857	-182.868	1243.28	223.462	-391.411	1414.67	234.453	-485.738	1211.6	198.306	-177.514	1295	409.886	-346.601	1467.96	489.694	-362.268	1240.66	510.33	-365.586	1140.13	507.353	-484.112	1004.53	454.786	-534.565	945.494	518.648	-506.923	928.896	497.073	-577.866	893.817
598	0	264.629	-478.004	1625.33	168.241	-481.252	1617.57	280.443	-331.423	1682.5	135.686	-339.646	1665.47	230.968	-257.372	1503.78	255.452	-195.78	1245.05	223.55	-404.063	1416.94	235.004	-498.402	1213.74	197.072	-190.375	1297	410.057	-358.197	1469.38	489.993	-372.545	1241.86	510.514	-374.696	1141.5	508.114	-489.593	1002.76	455.415	-537.916	941.484	519.933	-510.366	926.447	497.045	-579.371	887.35
599	0	265.02	-490.549	1627.65	168.494	-493.857	1620.06	280.635	-343.869	1683.89	135.813	-351.913	1667.92	230.572	-270.104	1505.76	254.288	-208.533	1246.75	223.632	-416.811	1418.94	235.509	-510.948	1215.82	195.636	-203.258	1299.03	410.04	-370.113	1470.41	490.233	-382.355	1242.56	510.475	-383.665	1142.28	509.042	-494.837	1000.8	456.239	-540.859	937.677	521.271	-513.483	924.038	497.307	-580.243	881.245
600	0	265.562	-502.81	1629.77	169.057	-506.337	1622.84	281.493	-355.942	1685.51	136.792	-364.224	1670.03	230.086	-282.971	1507.27	253.127	-221.459	1248.17	223.846	-429.675	1420.87	235.986	-523.351	1217.7	194.318	-216.176	1300.89	410.363	-381.891	1471.39	490.981	-391.192	1243.5	510.046	-392.336	1142.65	510.115	-499.479	999.003	457.427	-543.105	934.086	522.824	-516.346	921.585	497.562	-580.563	875.138
601	0	266.308	-515.009	1632.14	169.728	-518.665	1625.56	282.287	-367.933	1686.83	137.455	-376.352	1672.09	229.891	-295.703	1508.94	251.967	-234.534	1249.46	223.916	-442.591	1422.58	236.353	-535.759	1219.54	192.83	-229.235	1302.61	410.504	-393.605	1472.28	491.556	-399.795	1244.41	510.125	-400.342	1143.3	511.183	-503.495	997.074	458.594	-545.267	930.598	524.612	-518.68	919.676	498.265	-580.5	869.549
602	0	266.731	-527.295	1634.2	170.146	-530.949	1628.08	283.087	-379.803	1688.17	138.004	-388.472	1673.91	229.397	-308.592	1510.19	250.851	-247.714	1250.8	223.933	-455.569	1424.18	236.444	-548.297	1221.15	191.276	-242.365	1304.26	410.498	-405.631	1473.02	491.627	-408.395	1244.84	510.332	-407.882	1143.99	511.888	-507.577	995.462	459.662	-547.238	927.227	526.185	-520.805	917.549	499.199	-580.181	864.371
603	0	267.201	-539.623	1636.05	170.547	-543.554	1630.24	283.337	-391.894	1688.78	138.783	-400.975	1675.06	229.16	-321.432	1511.51	249.798	-260.737	1251.78	224.026	-468.567	1425.42	236.354	-560.873	1222.36	189.668	-255.278	1305.8	410.388	-417.936	1473.31	491.212	-417.195	1244.57	509.968	-415.309	1144.22	512.525	-511.48	993.438	460.725	-548.928	923.695	527.41	-522.734	915.185	500.328	-579.559	859.409
604	0	267.792	-551.861	1637.48	171.26	-556.01	1632.21	284.413	-403.565	1689.79	139.199	-412.949	1676.45	228.867	-334.394	1512.46	248.979	-273.757	1252.63	224.142	-481.646	1426.38	236.179	-573.503	1222.9	188.048	-268.667	1306.91	410.537	-429.851	1473.58	491.362	-425.425	1244.71	509.715	-422.35	1144.32	513.461	-514.982	991.52	462.152	-550.398	920.067	528.883	-524.078	913.068	501.811	-578.802	854.521
605	0	268.545	-564.06	1638.9	171.768	-568.771	1633.95	285.006	-415.344	1690.09	139.725	-425.172	1677.52	228.594	-347.353	1513.19	248.004	-287.283	1253.03	224.173	-494.712	1427.09	236.084	-586.158	1223.73	186.631	-281.834	1308.01	410.653	-441.893	1473.71	491.172	-433.672	1244.56	509.483	-429.307	1144.36	514.103	-518.17	989.35	463.605	-551.495	916.777	530.377	-525.052	910.955	503.604	-577.8	850.127
606	0	269.559	-576.295	1640.3	172.753	-581.073	1635.62	285.481	-427.285	1689.99	140.183	-437.718	1678.1	228.214	-360.423	1513.29	247.099	-300.331	1253.13	224.218	-507.829	1427.56	235.723	-598.909	1223.92	185.009	-295.178	1308.41	410.709	-454.158	1473.47	490.931	-442.056	1244.13	508.8	-436.001	1143.85	515.042	-520.955	987.378	465.071	-552.93	913.43	531.71	-525.794	908.743	505.81	-576.462	846.175
607	0	270.525	-588.634	1641.02	173.626	-593.835	1636.72	285.873	-439.181	1689.43	141.128	-450.223	1678.18	227.684	-373.672	1513.1	246.329	-313.797	1252.7	224.258	-521.06	1427.52	235.384	-611.765	1223.63	183.513	-308.452	1308.46	410.796	-466.505	1472.72	490.274	-450.616	1242.93	507.992	-442.598	1142.95	515.818	-523.547	984.75	466.643	-553.876	909.799	533.134	-526.199	906.084	508.095	-575.371	842.086
608	0	271.467	-601.013	1641.35	174.705	-606.675	1637.54	286.534	-450.982	1688.85	141.273	-462.715	1678.08	227.451	-386.844	1512.76	245.566	-327.255	1252.26	224.293	-534.271	1427.11	234.908	-624.508	1222.92	182.009	-321.803	1308.37	410.777	-478.978	1471.57	489.751	-458.993	1241.84	507.037	-448.982	1141.95	516.659	-526.011	982.146	468.269	-555.255	905.91	534.53	-526.44	903.458	510.57	-574.282	838.211
609	0	272.502	-613.586	1641.65	175.709	-619.633	1638.29	286.999	-463.066	1687.86	141.856	-475.621	1677.78	226.972	-400.214	1512.21	245.005	-340.724	1251.68	224.25	-547.588	1426.52	234.174	-637.322	1221.76	180.616	-335.06	1308.1	410.746	-491.595	1470.37	488.981	-467.66	1240.51	505.894	-455.326	1140.87	517.504	-528.16	979.687	469.932	-556.202	902.441	535.741	-526.26	901.148	513.043	-573.165	834.539
610	0	273.76	-626.236	1641.62	176.782	-632.972	1638.61	286.81	-475.628	1685.83	142.577	-488.709	1677.12	226.485	-413.508	1511.27	244.174	-354.475	1250.65	224.174	-560.901	1425.65	233.505	-649.937	1220.17	179.339	-348.177	1307.48	410.518	-504.371	1468.44	487.582	-476.795	1238.23	504.606	-461.652	1139.47	518.261	-530.296	976.884	472.075	-557.697	899.065	536.889	-525.926	898.09	515.955	-571.928	830.898
611	0	275.082	-638.787	1641.25	178.246	-645.979	1638.73	287.906	-487.519	1684.87	143.257	-501.862	1676.36	225.908	-427.28	1510.27	243.565	-368.325	1249.55	224.235	-574.306	1424.37	232.85	-662.542	1218.19	178.16	-361.375	1306.81	410.65	-517.044	1466.7	487.349	-484.747	1236.98	503.134	-467.93	1137.83	518.981	-532.174	973.805	473.982	-558.802	895.027	538.114	-525.339	895.405	519.147	-571.101	827.592
612	0	276.404	-651.427	1640.69	179.549	-659.201	1638.6	288.374	-500.041	1683.13	143.784	-514.998	1675.49	225.423	-441.098	1509.26	243.157	-381.486	1248.87	224.172	-587.728	1422.81	232.2	-675.072	1216.03	177.04	-374.468	1305.96	410.759	-529.697	1464.79	486.406	-493.327	1235.12	501.692	-474.229	1136.49	519.907	-533.808	971.413	476.176	-559.851	891.514	539.244	-524.864	893.511	522.149	-569.823	824.454
613	0	277.459	-664.42	1639.9	180.569	-672.681	1638.12	289.009	-512.712	1681.39	144.204	-528.209	1674.33	225.299	-454.76	1508.16	242.739	-394.772	1247.9	224.117	-601.18	1421.27	231.379	-688.039	1213.57	176	-387.678	1305	410.716	-542.592	1462.53	485.503	-501.912	1233.15	499.988	-480.803	1135.04	520.633	-535.826	968.858	478.145	-560.954	888.122	539.909	-524.34	890.912	525.476	-568.736	821.653
614	0	278.436	-677.735	1638.54	181.547	-686.309	1637.16	289.587	-525.504	1679.36	144.889	-541.837	1672.87	225.257	-468.406	1506.6	242.454	-408.056	1246.33	224.161	-614.634	1419.36	230.576	-701.331	1210.82	175.327	-400.763	1303.88	410.563	-555.836	1459.58	484.416	-510.555	1230.77	498.208	-487.576	1133.2	521.205	-537.745	966.236	479.977	-562.682	884.188	540.717	-523.544	888.832	528.432	-567.642	818.62
615	0	279.503	-690.897	1637.15	182.731	-699.798	1636.01	290.316	-538.631	1677.17	145.547	-555.186	1671.22	225.154	-482.238	1504.76	242.827	-420.882	1244.92	224.287	-628.178	1417.18	229.922	-714.827	1208.18	174.884	-414.046	1302.61	411.095	-568.416	1457.2	483.609	-519.081	1228.48	496.398	-494.699	1131.26	521.7	-540.15	963.57	481.391	-564.679	879.75	541.132	-522.984	886.581	531.345	-566.508	815.683
616	0	280.488	-704.322	1635.5	183.707	-713.397	1634.69	291.28	-551.638	1675.22	146.239	-568.797	1669.42	225.299	-495.937	1503.09	243.091	-433.675	1243.43	224.43	-641.709	1415.09	229.078	-728.466	1205.66	174.834	-427.271	1301.24	411.667	-581.209	1454.92	483.009	-527.631	1226.66	494.661	-502.134	1129.46	522.053	-542.58	961.3	483.514	-566.151	876.927	541.22	-522.709	884.505	534.146	-565.428	813.289
617	0	281.437	-717.706	1633.85	184.552	-726.964	1633.46	291.545	-565.17	1672.45	147.067	-582.329	1667.65	225.665	-509.608	1501.12	243.671	-446.612	1241.38	224.57	-655.185	1412.92	228.221	-741.994	1203.09	174.846	-440.596	1299.42	412.078	-594.559	1452.23	482.524	-536.262	1224.86	492.94	-509.826	1127.59	522.321	-545.356	959.211	485.2	-568.222	874.028	541.204	-522.431	882.9	536.934	-564.377	811.201
618	0	282.227	-731.215	1631.62	185.413	-740.626	1631.47	292.556	-578.476	1670.2	148.326	-596.225	1665.49	225.937	-523.426	1498.84	244.288	-459.861	1238.88	224.925	-668.777	1410.51	227.687	-755.28	1200.41	174.993	-454.076	1297.3	412.777	-607.853	1449.56	481.786	-545.515	1222.8	491.208	-518.128	1125.77	522.533	-548.447	957.175	487.068	-570.455	871.204	540.9	-522.777	881.593	539.396	-563.63	809.079
619	0	282.862	-744.85	1629.22	186.121	-754.355	1629.41	293.496	-591.971	1667.95	148.76	-609.887	1663.43	226.506	-537.042	1496.63	245.495	-473.12	1236.81	225.259	-682.359	1408.08	227.283	-768.466	1197.84	175.671	-467.588	1295.29	413.347	-621.262	1446.84	481.115	-555.154	1220.89	489.491	-526.911	1124.01	522.689	-552.106	955.451	488.66	-573.112	868.606	540.477	-523.924	880.38	541.504	-563.124	807.304
620	0	283.503	-758.53	1627.01	186.591	-768.14	1627.07	294.054	-605.578	1665.54	149.22	-623.326	1661.29	227.607	-550.326	1494.61	246.765	-486.471	1234.91	225.577	-695.992	1405.91	226.679	-781.784	1195.57	176.197	-481.176	1293.02	413.952	-635.002	1444.5	480.611	-565.34	1219.37	488.049	-536.151	1122.75	522.669	-556.319	954.206	489.951	-576.383	866.464	540.009	-525.683	879.897	543.145	-563.048	805.852
621	0	284.367	-772.24	1624.7	187.238	-781.842	1624.63	294.573	-619.438	1663.06	150.094	-637.054	1659.01	228.473	-563.866	1492.45	247.854	-500.133	1232.7	226.057	-709.523	1403.66	226.259	-795.454	1193.43	176.854	-494.88	1290.66	414.565	-648.97	1441.83	480.303	-575.946	1217.97	487.163	-545.724	1121.83	522.82	-561.447	953.058	490.769	-580.773	863.834	539.772	-528.412	879.684	544.55	-563.579	804.506
622	0	285.141	-785.773	1622.18	188.356	-795.247	1622.41	296.154	-632.703	1661.43	151.16	-650.732	1656.83	229.584	-577.306	1490.08	249.051	-513.988	1230.25	226.817	-723.132	1401.47	226.302	-809.212	1191.85	177.933	-508.617	1288.33	415.969	-662.621	1439.74	480.359	-587.128	1216.54	486.633	-555.804	1120.66	523.228	-567.196	952.085	493.025	-585.064	863.299	539.668	-532.041	879.516	545.747	-564.589	803.323
623	0	286.183	-799.477	1620.22	189.25	-808.737	1620.49	297.135	-646.325	1659.33	151.909	-664.291	1655.08	230.952	-590.828	1487.78	250.125	-528.051	1227.69	227.6	-736.867	1399.66	226.425	-823.146	1190.47	179.201	-522.392	1285.67	416.983	-676.581	1437.48	480.643	-599.237	1214.96	485.696	-566.859	1119.28	523.943	-573.782	951.407	494.671	-590.677	861.842	539.906	-536.827	879.62	546.581	-566.315	802.123
624	0	287.115	-812.934	1618.36	190.295	-822.286	1618.65	298.238	-660.039	1657.38	153.142	-677.768	1653.02	232.529	-604.124	1485.61	251.223	-542.369	1225.05	228.399	-750.669	1397.98	226.618	-837.208	1188.98	180.599	-536.173	1283.46	418.036	-690.833	1435.36	481.141	-611.93	1213.54	485.467	-578.291	1118.37	524.943	-581.462	951.117	494.417	-596.951	859.8	540.521	-542.815	880.077	547.06	-569.089	800.952
625	0	288.247	-826.668	1616.7	191.277	-835.887	1616.97	299.464	-673.589	1655.41	154.351	-691.127	1651.23	233.884	-617.958	1483.29	252.433	-556.791	1222.87	229.33	-764.669	1396.08	227.094	-851.341	1187.44	182.086	-550.134	1281.46	419.027	-705.311	1433.13	481.884	-625.223	1211.95	485.599	-590.3	1117.45	525.863	-590.196	950.42	498.2	-603.446	861.117	541.602	-550.16	880.527	547.238	-573.019	799.717
626	0	289.626	-840.116	1615.37	192.708	-849.318	1615.85	301.108	-686.756	1653.57	155.798	-704.446	1649.77	235.366	-631.865	1481.36	253.438	-571.349	1220.73	230.399	-778.818	1394.53	227.726	-865.491	1185.89	183.693	-564.281	1279.48	420.184	-719.761	1431.03	482.7	-638.747	1210.34	486.054	-602.881	1116.22	527.025	-600.068	949.519	497.692	-612.513	857.794	542.912	-558.862	880.622	547.388	-578.147	798.326
627	0	291.193	-853.648	1614.5	194.067	-862.763	1615.17	302.713	-700.044	1651.61	157.607	-717.693	1648.06	237.184	-645.672	1479.85	254.693	-585.868	1219.04	231.37	-792.877	1393.03	228.354	-880.006	1184.47	185.069	-578.535	1277.58	421.499	-734.287	1429.21	483.872	-652.825	1208.77	486.735	-615.924	1115.08	528.947	-610.67	949.211	500.492	-620.743	858.722	544.983	-568.265	881.062	547.666	-584.341	797.278
628	0	292.85	-866.978	1613.82	195.757	-875.674	1614.93	304.549	-713.259	1649.76	159.35	-730.335	1646.91	238.831	-659.473	1478.19	255.61	-600.562	1217.22	232.418	-807.162	1391.86	229.298	-894.63	1183.6	186.603	-592.839	1275.93	422.842	-748.881	1427.38	485.147	-666.968	1207.28	486.54	-630.444	1112.68	530.77	-622.158	948.607	500.36	-631.241	856.043	547.074	-579.165	880.986	547.829	-591.974	796.11
629	0	294.875	-880.183	1613.5	197.514	-889.184	1615.16	306.725	-726.306	1648.28	161.378	-743.377	1646.12	240.622	-673.119	1477.08	256.515	-615.447	1215.7	233.749	-821.523	1390.84	230.485	-909.706	1182.77	188.107	-607.172	1274.6	424.348	-763.404	1425.93	486.389	-681.536	1205.78	489.31	-643.418	1112.68	532.608	-634.509	947.811	502.272	-642.294	855.5	549.635	-590.784	880.983	548.525	-600.971	795.18
630	0	296.623	-893.751	1613.71	199.244	-902.374	1615.94	309.154	-739.461	1647.32	163.689	-756.435	1645.9	242.369	-687.471	1476.33	257.661	-630.263	1214.64	235.024	-835.961	1390.36	231.746	-925.092	1182.41	189.671	-621.761	1273.79	425.816	-778.018	1424.76	487.904	-696.391	1204.5	490.428	-658.254	1111.07	534.647	-647.702	947.13	505.709	-653.651	856.446	552.3	-603.59	880.798	548.789	-611.09	794.666
631	0	298.304	-907.249	1614.55	200.829	-915.647	1617.09	311.552	-752.637	1646.66	165.772	-768.949	1645.98	244.091	-701.768	1475.83	258.466	-645.491	1213.96	236.212	-850.443	1390.35	232.802	-940.591	1182.37	191.088	-636.413	1273.03	427.155	-792.576	1423.71	489.369	-711.511	1203.55	492.268	-672.942	1110.36	536.537	-661.858	946.526	507.525	-666.661	856.03	554.596	-617.483	880.335	550.292	-623.07	794.578
632	0	300.078	-920.849	1615.57	202.586	-928.709	1618.87	313.99	-765.857	1645.91	168.425	-781.562	1646.25	245.782	-716.207	1475.43	259.509	-660.78	1213.47	237.624	-864.934	1390.73	234.165	-956.01	1182.6	192.726	-651.223	1272.91	428.796	-807.28	1423.06	490.963	-726.857	1202.77	493.454	-688.641	1109.08	538.809	-676.823	946.192	508.275	-680.902	854.783	557.264	-632.217	880.371	550.984	-636.496	793.517
633	0	301.828	-934.102	1617.11	204.651	-941.706	1621.21	316.569	-779.047	1645.35	171.06	-794.287	1647.01	247.424	-730.564	1475.57	260.406	-676.142	1213.44	239.012	-879.569	1391.41	235.642	-971.427	1183.23	194.154	-666.09	1273.02	430.057	-822.287	1422.41	492.624	-742.514	1202.2	496.034	-703.541	1109.23	540.525	-692.435	945.574	510.416	-695.853	855.125	559.646	-648.355	879.555	552.69	-651.836	793.276
634	0	303.999	-947.716	1619.55	206.459	-954.762	1624.18	319.273	-792.151	1645.18	173.808	-806.872	1648	249.113	-744.884	1476.01	261.134	-691.437	1213.7	240.197	-894.065	1392.49	236.884	-986.73	1184.5	195.429	-681.015	1273.45	431.59	-836.754	1422.91	494.324	-758.225	1202.32	497.934	-719.15	1109.09	542.326	-708.811	945.605	512.51	-712.293	855.282	562.026	-665.003	879.448	554.246	-668.354	793.007
635	0	305.832	-961.083	1622.09	208.337	-967.836	1627.63	321.708	-805.495	1645.14	176.686	-819.434	1649.21	250.177	-759.58	1476.93	262.133	-706.613	1214.83	241.197	-908.559	1393.96	237.768	-1002.2	1185.9	196.565	-695.698	1274.55	432.694	-851.413	1423.51	495.731	-773.954	1202.74	498.901	-735.913	1108.52	544.205	-725.969	945.965	512.931	-730.167	853.736	563.897	-682.659	879.444	556.224	-686.256	792.858
636	0	307.597	-974.638	1624.86	210.24	-980.921	1631.01	323.996	-818.745	1645.15	178.57	-832.07	1650.69	250.958	-774.177	1478.04	263.034	-721.031	1216.28	242.155	-922.978	1395.6	238.578	-1017.43	1187.33	197.413	-710.374	1276.13	433.474	-865.975	1424.38	496.862	-789.821	1203.18	500.92	-752.103	1109.15	545.77	-743.98	945.787	516.02	-748.137	855.903	565.995	-701.341	879.405	558.749	-705.963	792.733
637	0	309.511	-987.635	1627.24	212.179	-994.073	1634.44	326.358	-831.712	1645.4	181.776	-844.722	1651.86	251.179	-789.495	1479.32	263.828	-735.387	1218.07	243.062	-937.277	1397.31	239.252	-1032.15	1188.86	198.127	-724.8	1278.04	434.148	-880.316	1425.65	497.955	-805.691	1204.11	502.465	-768.766	1109.81	547.45	-762.675	946.373	517.619	-767.772	855.803	568.241	-720.819	879.754	561.395	-727.031	793.107
638	0	311.245	-1000.88	1629.7	213.767	-1007.12	1637.68	328.319	-844.536	1645.6	183.188	-857.284	1653.44	251.795	-803.446	1481.22	264.486	-748.917	1220.1	243.747	-951.375	1399.07	239.77	-1046.35	1190.38	198.471	-739	1280.31	434.657	-894.55	1427.38	498.88	-821.779	1205.19	504.495	-785.129	1111.33	549.083	-781.898	947.155	518.684	-788.61	855.374	569.969	-741.113	879.997	563.704	-748.774	793.537
639	0	312.97	-1013.73	1632.32	215.371	-1020	1640.8	329.943	-857.245	1645.81	184.35	-870.026	1654.87	252.796	-817.148	1483.29	264.963	-762.628	1221.63	244.332	-965.257	1400.64	240.259	-1060.11	1191.81	198.619	-752.904	1282.09	435.176	-908.486	1429.16	499.902	-837.864	1206.29	505.796	-802.189	1111.92	550.787	-801.68	947.967	521.065	-809.483	857.133	571.822	-762.141	880.154	566.804	-772.152	794.304
640	0	314.333	-1026.77	1634.54	217.097	-1032.73	1643.79	331.416	-869.845	1646.5	185.68	-882.973	1656.44	253.811	-830.864	1485.21	265.407	-775.73	1223.14	244.908	-978.875	1402.28	240.868	-1073.34	1193.23	198.798	-766.424	1284.14	435.706	-922.322	1430.82	500.87	-854.247	1207.27	507.56	-819.134	1112.81	552.268	-822.077	948.472	523.929	-832.01	858.057	573.371	-784.114	879.932	569.513	-796.716	794.54
641	0	315.429	-1039.47	1637	218.232	-1045.48	1646.52	332.344	-882.582	1647.4	186.715	-895.703	1657.83	254.679	-844.301	1486.46	265.746	-789.001	1224.66	245.289	-992.299	1403.96	241.126	-1086.57	1194.73	198.84	-779.819	1285.71	436.099	-935.88	1432.56	501.766	-870.339	1208.44	509.658	-835.896	1114.03	553.603	-842.92	949.053	524.354	-854.232	858.342	574.876	-806.49	879.679	572.244	-822.138	795.188
642	0	316.058	-1052.31	1639.34	218.693	-1058.55	1648.79	332.818	-895.359	1648.67	187.187	-908.392	1659.28	254.889	-857.798	1487.89	266.276	-802.373	1226.1	245.345	-1005.64	1405.78	240.478	-1100.02	1196.18	199.5	-792.888	1287.45	436.218	-949.828	1434	502.468	-886.925	1209.4	510.315	-854.123	1113.66	554.609	-864.218	949.473	524.261	-877.44	858.392	576.074	-829.342	879.422	574.849	-848.314	796.268
643	0	316.334	-1065.23	1641.46	219.128	-1071.29	1651	333.059	-908.085	1650.1	187.606	-921.09	1660.82	255.541	-871.889	1488.64	267.034	-815.807	1227.69	245.716	-1018.65	1407.59	241.311	-1111.95	1197.44	200.295	-806.043	1288.85	436.401	-963.792	1435.38	503.409	-903.142	1210.56	512.688	-871.031	1115.13	555.6	-885.942	949.771	524.909	-901.262	859.246	577.216	-852.807	879.081	576.801	-875.365	796.822
644	0	316.809	-1077.79	1643.95	219.512	-1083.94	1653.26	333.321	-920.604	1651.85	188.169	-933.744	1662.18	258.469	-882.957	1491.45	267.822	-829.243	1229.09	245.895	-1031.7	1409.44	241.255	-1124.93	1198.94	201.669	-819.079	1290.48	437.038	-977.337	1437.32	504.481	-919.539	1211.88	514.197	-888.744	1115.51	556.712	-907.734	950.462	525.804	-925.353	860.373	578.241	-876.76	878.824	578.81	-902.727	798.224
645	0	316.875	-1090.2	1646.55	219.613	-1096.43	1655.6	332.876	-933.33	1653.43	187.615	-946.412	1663.82	257.482	-896.991	1492.36	268.717	-842.681	1230.77	246.015	-1044.65	1411.41	241.209	-1137.61	1200.83	202.828	-832.135	1291.74	437.47	-991.026	1439.43	505.54	-935.827	1213.32	515.879	-906.452	1116.46	557.724	-929.995	951.616	527.174	-949.221	862.781	579.017	-901.247	878.753	580.633	-930.698	800.401
646	0	316.698	-1102.8	1649.16	219.381	-1109.16	1657.86	332.934	-945.617	1655.82	187.854	-958.866	1665.52	256.679	-911.07	1493.8	269.869	-855.999	1232.58	245.936	-1057.58	1413.37	240.801	-1150.7	1202.65	204.279	-845.152	1293.59	437.601	-1004.78	1441.19	506.418	-952.136	1215.05	517.428	-924.403	1117.11	558.498	-952.53	952.696	526.535	-974.978	863.47	579.824	-925.965	879.171	581.954	-959.229	802.705
647	0	316.218	-1115.47	1651.36	218.901	-1121.73	1659.99	332.273	-958.271	1657.68	187.278	-971.529	1667.07	258.213	-922.954	1496.04	271.121	-869.154	1234.35	245.968	-1070.37	1415.27	240.418	-1163.79	1204.41	205.831	-858.122	1295.21	437.835	-1018.9	1443.26	507.324	-968.578	1216.4	519.511	-941.982	1118.79	558.957	-975.505	953.845	526.887	-1000.68	865.464	580.312	-951.176	879.59	582.85	-988.031	805.123
648	0	315.779	-1128.06	1654.04	218.405	-1134.41	1662.03	331.868	-970.709	1659.92	186.419	-984.076	1668.48	259.17	-935.191	1498.51	272.628	-882.206	1236.38	246.02	-1083.42	1417.22	240.106	-1176.92	1206.39	207.337	-871.138	1297.02	437.903	-1032.89	1445.22	508.199	-985.059	1218.24	521.186	-959.941	1120.13	559.508	-998.532	955.717	526.816	-1026.3	868.031	580.81	-976.511	880.885	583.464	-1017.02	808.689
649	0	315.243	-1140.61	1656.69	217.76	-1146.83	1664.21	331.219	-983.131	1662.08	185.537	-996.7	1669.81	260.331	-947.421	1501.02	274.105	-895.216	1238.35	245.945	-1096.38	1419.08	239.59	-1190.13	1208.49	209.146	-884.061	1298.81	438.123	-1046.8	1447.48	509.215	-1001.47	1220.24	522.701	-978.08	1121.56	559.851	-1021.74	957.916	526.704	-1051.93	871.075	580.907	-1002.25	882.223	583.768	-1046.27	812.433
650	0	314.56	-1153.14	1659.19	217.007	-1159.53	1666.05	330.344	-995.724	1663.68	184.696	-1009.2	1670.9	262.564	-958.872	1502.23	275.61	-908.164	1239.87	245.975	-1109.37	1420.69	239.207	-1203.03	1210.29	210.644	-897.087	1300.06	438.258	-1060.75	1449.54	510.199	-1017.88	1222.16	524.325	-996.208	1123.12	560.021	-1045.26	959.914	526.599	-1077.72	875.049	580.98	-1028.16	883.849	583.789	-1075.65	816.497
651	0	313.908	-1165.72	1661.41	216.532	-1171.94	1667.95	329.686	-1008.27	1665.25	184.613	-1021.87	1671.37	262.408	-971.76	1503.24	277.003	-921.204	1241.3	246.09	-1122.46	1422.08	239.01	-1215.84	1211.92	212.179	-910.116	1301.19	438.474	-1074.85	1451.53	511.149	-1034.62	1223.79	525.718	-1014.68	1124.25	560.228	-1068.74	962.293	526.633	-1103.27	879.256	580.668	-1054.34	885.209	583.341	-1104.57	820.569
652	0	313.125	-1178.16	1663.66	215.68	-1184.18	1669.6	328.901	-1020.84	1666.6	183.492	-1034.08	1672.17	261.945	-986.355	1503.86	278.267	-934.376	1242.37	246.098	-1135.66	1423.43	238.796	-1228.48	1213.26	213.718	-923.268	1302.32	438.673	-1088.84	1453.63	512.076	-1051.18	1225.65	527.538	-1032.86	1126.04	560.142	-1092.42	964.909	526.136	-1128.72	883.528	579.848	-1081.01	886.857	582.602	-1133.7	825.229
653	0	312.061	-1190.89	1665.52	214.807	-1196.63	1670.77	328.006	-1033.55	1667.48	182.756	-1046.52	1672.26	261.538	-1002.31	1504.13	279.7	-947.516	1243.41	246.02	-1148.83	1424.37	238.423	-1241.18	1214.22	215.043	-936.426	1302.98	438.626	-1103.22	1455.38	512.998	-1068.02	1227.28	529.028	-1051.3	1127.61	560.047	-1116.31	967.533	524.984	-1155.06	887.553	578.121	-1108.76	887.834	581.457	-1162.73	829.75
654	0	311.246	-1203.71	1667.1	213.913	-1209.29	1671.69	327.334	-1046.24	1668.29	182.215	-1059.09	1672.14	261.007	-1017.99	1504.7	281.108	-960.723	1244.19	246.152	-1162.15	1425.07	238.369	-1253.75	1214.83	216.465	-949.742	1303.47	438.601	-1117.47	1456.8	513.871	-1084.89	1228.57	529.931	-1070.23	1128.2	559.869	-1140.14	970.142	523.984	-1181.27	891.835	579.483	-1133.41	892.627	580.122	-1191.64	834.351
655	0	310.455	-1216.53	1668.46	213.311	-1221.68	1672.9	326.855	-1058.93	1668.85	181.56	-1071.79	1671.76	261.183	-1031.45	1504.89	282.268	-974.026	1244.77	246.238	-1175.38	1425.47	238.642	-1266.11	1215.23	217.833	-963.013	1303.79	438.774	-1131.77	1458.24	515.023	-1101.64	1229.99	531.674	-1088.52	1129.48	559.764	-1163.9	972.93	523.264	-1206.99	896.39	578.569	-1160.46	894.473	578.699	-1220.25	838.942
656	0	309.728	-1229.3	1669.61	212.339	-1234.43	1673.45	326.384	-1071.79	1669.18	181.303	-1084.33	1671.41	261.706	-1044.31	1505.35	283.436	-987.256	1245.29	246.298	-1188.85	1425.59	238.781	-1278.58	1215.27	219.058	-976.38	1303.97	438.883	-1145.94	1459.48	516.013	-1118.51	1231.26	533.05	-1107	1130.31	559.601	-1187.73	975.808	522.359	-1232.68	901.112	577.199	-1187.29	896.639	576.937	-1248.67	843.89
657	0	308.873	-1242.18	1670.4	211.501	-1247.33	1673.73	325.466	-1085.01	1668.85	180.642	-1097.13	1670.77	262.224	-1057.36	1505.53	284.442	-1000.37	1245.47	246.374	-1202.22	1425.53	239.099	-1290.89	1214.89	220.392	-989.712	1303.97	438.839	-1160.29	1460.33	517.032	-1135.43	1232.25	534.663	-1125.95	1131.49	559.342	-1211.51	978.602	521.14	-1258.47	905.81	577.016	-1213.52	899.924	574.901	-1276.9	848.571
658	0	308.225	-1255.33	1670.64	210.753	-1260.22	1673.58	325.218	-1098.06	1668.46	180.073	-1110.04	1669.33	262.674	-1070.77	1505.37	285.5	-1013.41	1245.39	246.602	-1215.76	1425.09	239.761	-1302.82	1213.61	221.565	-1002.98	1303.62	438.846	-1174.67	1460.65	517.851	-1152.67	1232.51	536.036	-1144.92	1131.69	558.893	-1235.33	980.87	519.766	-1284.05	909.986	576.291	-1239.84	902.531	572.75	-1305.03	852.795
659	0	307.498	-1268.55	1670.69	210.121	-1273.19	1673.22	324.885	-1111.14	1667.81	179.412	-1123.11	1668.3	263.406	-1084.03	1505	286.515	-1026.17	1245.34	246.665	-1229.19	1424.32	240.393	-1314.99	1212.35	222.739	-1016.42	1303.04	438.724	-1188.95	1460.74	518.843	-1169.74	1232.85	537.122	-1164.17	1131.37	558.467	-1259.14	983.144	518.229	-1309.38	914.005	575.305	-1266.24	904.907	570.364	-1332.68	857.11
660	0	306.818	-1281.82	1670.47	209.397	-1286.43	1672.55	324.534	-1124.43	1666.92	179.225	-1136.09	1666.8	263.465	-1097.85	1504.03	287.279	-1039.18	1244.76	246.793	-1242.76	1423.36	241.063	-1327.4	1210.58	223.642	-1029.86	1302.24	438.516	-1203.43	1460.31	519.692	-1187.12	1232.83	538.553	-1183.23	1131.46	557.849	-1282.8	985.327	516.466	-1334.6	918.112	574.228	-1292.33	907.513	567.745	-1360.3	861.313
661	0	306.455	-1295.19	1669.84	208.971	-1299.73	1671.58	324.01	-1138.03	1665.49	178.768	-1149.44	1665.2	262.829	-1112.48	1502.5	287.85	-1052.32	1243.75	246.955	-1256.24	1422.17	241.73	-1340.17	1208.65	224.357	-1043.22	1300.96	438.309	-1217.5	1459.76	520.572	-1204.41	1232.41	539.678	-1202.57	1131.02	557.323	-1306.45	987.417	514.906	-1359.36	922.169	573.16	-1318.53	909.89	565.213	-1387.36	865.525
662	0	306.168	-1308.66	1668.89	208.747	-1313.02	1670.6	323.906	-1151.42	1664.2	178.389	-1162.83	1663.95	262.133	-1126.83	1501.16	288.121	-1065.29	1242.83	247.199	-1269.7	1420.73	242.627	-1353.33	1206.76	225.015	-1056.68	1299.7	438.066	-1231.54	1458.72	521.341	-1221.81	1232.08	540.768	-1221.98	1130.47	556.812	-1329.8	989.386	513.197	-1383.87	925.987	571.893	-1344.25	912.063	562.419	-1414.42	869.591
663	0	306.058	-1322.23	1667.88	208.477	-1326.54	1669.27	323.819	-1164.87	1662.86	178.411	-1176.3	1662.13	262.561	-1140.3	1499.96	287.799	-1078.35	1241.62	247.321	-1283.2	1419.24	243.521	-1366.78	1204.92	225.349	-1069.97	1298.5	437.939	-1245.29	1457.9	521.947	-1239.29	1231.6	542.072	-1241.11	1130.22	555.954	-1352.93	991.532	511.381	-1407.9	929.788	570.303	-1369.63	914.526	559.536	-1440.76	873.982
664	0	305.825	-1335.82	1666.35	208.228	-1340.2	1667.56	323.506	-1178.43	1661.07	178.396	-1189.95	1660.32	262.17	-1154.23	1498.53	287.007	-1091.36	1240.26	247.206	-1296.67	1417.39	244.189	-1380.88	1202.77	225.324	-1083.36	1297.03	437.177	-1259.29	1456.09	522.172	-1256.96	1230.96	543.052	-1260.3	1130.05	555.073	-1375.86	993.731	509.314	-1431.6	933.454	569.303	-1394.88	917.322	556.515	-1466.8	878.114
665	0	305.694	-1349.38	1664.4	208.156	-1353.87	1665.67	323.557	-1191.96	1659.67	177.883	-1203.68	1658.51	261.982	-1167.71	1496.63	285.939	-1104.29	1238.69	247.268	-1310.25	1415.42	245.258	-1394.92	1200.74	225.059	-1096.65	1295.38	436.799	-1272.83	1454.66	522.249	-1274.65	1229.93	543.8	-1279.3	1129.58	553.956	-1398.51	995.619	507.127	-1455.29	936.863	567.923	-1419.42	920.058	553.605	-1492.24	882.379
666	0	305.714	-1363	1662.34	208.236	-1367.54	1663.66	323.476	-1205.46	1657.67	177.966	-1217.25	1656.78	262.003	-1180.91	1496	284.635	-1117.34	1237.06	247.297	-1323.81	1413.39	246.202	-1408.78	1198.7	224.632	-1110.13	1293.67	436.667	-1286.24	1453.25	522.375	-1291.78	1229.36	544.269	-1298.02	1128.95	552.779	-1420.38	997.501	505.337	-1477.96	940.294	566.574	-1443.79	922.678	550.793	-1517.2	886.599
667	0	305.84	-1376.62	1660.21	208.317	-1381.2	1661.59	323.214	-1219.15	1655.67	177.472	-1230.96	1655.07	262.046	-1194.02	1494.08	283.51	-1130.31	1235.36	247.213	-1337.33	1411.29	247.151	-1422.56	1196.63	223.815	-1123.71	1291.87	436.383	-1299.35	1451.69	522.204	-1308.88	1228.57	544.598	-1316.5	1128.42	551.807	-1442.04	999.656	503.495	-1500.2	943.778	565.331	-1467.56	925.493	548.194	-1541.43	890.992
668	0	305.946	-1389.94	1658.07	208.297	-1394.87	1659.39	323.327	-1232.56	1653.9	177.636	-1244.36	1653.16	261.675	-1207.85	1491.92	282.375	-1143.43	1233.37	247.074	-1350.87	1409.14	248.003	-1436.3	1194.62	222.863	-1137.33	1289.85	435.868	-1312.44	1449.85	521.855	-1325.7	1227.54	544.688	-1334.57	1127.76	550.746	-1463.25	1001.74	501.615	-1521.9	947.156	564.135	-1490.64	928.281	545.541	-1565.04	895.222
669	0	305.919	-1403.54	1655.6	208.495	-1408.39	1657.24	322.991	-1246.01	1651.64	177.661	-1258.3	1651.31	260.897	-1221.68	1489.07	281.134	-1156.75	1231.22	246.869	-1364.35	1406.95	248.739	-1450.14	1192.68	221.556	-1151.17	1287.4	435.432	-1325.49	1447.71	521.364	-1342.12	1226.17	544.497	-1352.24	1126.7	549.566	-1483.78	1003.57	499.996	-1543.09	950.365	562.85	-1513.27	930.771	543.284	-1588.06	899.429
670	0	305.998	-1416.89	1653.11	208.454	-1421.98	1655.01	322.548	-1259.29	1649.22	177.053	-1271.92	1649.36	261.128	-1231.9	1486.92	279.799	-1170.39	1228.82	246.462	-1378.02	1404.94	249.077	-1464.23	1191.01	220.383	-1164.88	1285.21	434.765	-1338.47	1445.72	520.554	-1358.07	1224.83	544.071	-1369.66	1125.69	548.398	-1503.82	1005.41	498.381	-1563.8	953.455	561.844	-1535.28	933.535	541.13	-1610.34	903.704
671	0	305.76	-1430.08	1650.93	208.346	-1435.48	1652.79	322.13	-1272.64	1647.37	176.782	-1285.41	1647.62	260.168	-1245.98	1484.24	278.143	-1184.38	1226.34	245.902	-1391.52	1403.06	248.573	-1478.94	1189.45	219.262	-1178.6	1282.95	433.568	-1351.73	1443.31	519.595	-1373.66	1223.34	543.579	-1386.35	1124.92	547.207	-1523.16	1007.22	496.894	-1583.79	956.579	560.57	-1556.03	936.125	539.125	-1631.99	907.815
672	0	305.768	-1443.16	1648.84	208.351	-1448.83	1650.82	321.744	-1285.49	1645.36	176.272	-1298.86	1645.59	259.559	-1258.48	1482.39	276.751	-1198.46	1223.83	245.482	-1405.19	1401.23	248.226	-1493.56	1188.12	217.867	-1192.59	1280.63	433.125	-1364.55	1441.63	518.556	-1388.66	1221.72	542.861	-1402.66	1123.68	546.103	-1541.93	1008.92	495.67	-1603.23	959.444	559.627	-1576.53	938.626	537.835	-1652.79	911.858
673	0	305.583	-1456.09	1646.81	208.2	-1462.07	1649.07	320.968	-1298.43	1643.18	175.698	-1312.16	1644.05	258.779	-1271.66	1480.65	275.513	-1212.94	1221.34	244.951	-1418.86	1399.42	249.56	-1505.88	1186.69	216.408	-1206.71	1278.08	433.249	-1376.69	1440.74	517.827	-1402.84	1220.29	541.798	-1418.5	1122.27	545.13	-1559.83	1010.29	494.668	-1622.04	962.057	558.822	-1595.93	941.089	536.65	-1672.57	915.7
674	0	305.078	-1469.04	1645.19	207.762	-1475.18	1647.56	320.6	-1311.23	1641.59	174.851	-1325.43	1642.1	258.192	-1283.75	1479.14	274.454	-1227.58	1219.08	244.174	-1432.53	1397.86	248.984	-1520.14	1185.33	215.294	-1220.76	1275.96	432.52	-1389.7	1439.31	516.862	-1416.84	1218.9	540.891	-1433.73	1121.04	543.985	-1577.07	1011.51	493.646	-1640.14	964.524	557.55	-1614.36	942.901	535.602	-1691.52	919.342
675	0	304.458	-1481.79	1643.71	207.03	-1488.28	1646.01	319.054	-1323.97	1639.58	173.676	-1338.53	1640.36	256.933	-1297.24	1476.95	273.666	-1242.27	1216.59	243.532	-1446.38	1396.43	248.122	-1534.58	1184.14	214.053	-1235.12	1273.44	431.298	-1403.38	1437.24	515.673	-1430.47	1217.2	539.922	-1448.46	1119.89	542.855	-1593.57	1012.41	492.683	-1657.73	966.579	556.682	-1631.97	944.548	535.147	-1709.85	922.7
676	0	303.769	-1494.43	1642.39	206.385	-1501.4	1644.58	318.107	-1336.54	1638.11	172.56	-1351.64	1638.59	255.508	-1311.04	1474.99	272.912	-1256.87	1214.4	242.696	-1460.09	1394.99	247.084	-1549.28	1182.81	213.167	-1249.47	1271.42	430.012	-1416.97	1435.25	514.571	-1443.91	1215.32	538.622	-1462.89	1118.34	541.826	-1609.42	1012.87	491.971	-1674.45	968.302	555.695	-1648.72	945.711	534.776	-1727.14	925.567
677	0	302.768	-1507.22	1641.12	205.353	-1514.31	1643.61	316.556	-1349.24	1636.41	171.387	-1364.75	1637.06	254.05	-1324.74	1472.74	271.997	-1271.6	1212.3	241.758	-1473.93	1393.83	245.831	-1564.04	1182.14	212.123	-1263.83	1269.2	429.257	-1430.11	1434.01	513.43	-1456.76	1213.83	537.39	-1476.82	1116.76	541.019	-1624.65	1013.15	491.384	-1690.54	969.551	554.622	-1664.55	946.327	534.687	-1743.56	928.062
678	0	301.703	-1519.81	1640.67	204.297	-1527.23	1642.9	314.921	-1361.98	1635.21	169.779	-1377.87	1635.83	252.459	-1338.9	1470.77	271.116	-1286.29	1210.48	240.673	-1487.85	1393.05	244.444	-1578.9	1181.82	211.103	-1278.22	1267.45	427.908	-1443.53	1432.71	512.349	-1469.55	1212.4	536.202	-1490.39	1115.6	540.272	-1639.2	1013.28	490.892	-1705.85	970.552	553.909	-1679.67	946.754	534.795	-1758.95	930.218
679	0	300.463	-1532.46	1640.18	203.06	-1540.19	1642.53	312.895	-1374.79	1634.27	168.351	-1390.81	1635.13	250.984	-1352.96	1469.46	270.234	-1301.24	1208.95	239.599	-1501.57	1392.4	242.979	-1593.9	1181.69	209.921	-1292.73	1265.76	426.994	-1456.92	1431.95	511.249	-1482.01	1211.29	534.681	-1503.58	1114.27	539.336	-1652.89	1012.69	490.532	-1720.33	971.212	552.946	-1693.56	946.665	535.095	-1773.47	931.946
680	0	298.977	-1545.39	1640.21	201.594	-1553.22	1642.34	311.355	-1387.36	1634.3	166.205	-1404.2	1634.96	249.603	-1365.94	1469.07	269.282	-1316.33	1207.83	238.353	-1515.53	1392.37	241.487	-1609.03	1181.93	208.765	-1307.37	1264.48	425.84	-1470.21	1431.39	510.029	-1494.6	1210.34	533.192	-1516.55	1113.27	538.495	-1665.97	1011.8	490.253	-1734.03	971.095	552.087	-1706.94	946.007	535.46	-1787.07	932.936
681	0	297.17	-1558.2	1640.55	199.726	-1566.29	1642.42	309.22	-1400.21	1634.56	164.346	-1417.03	1634.78	247.224	-1382.7	1468.4	268.57	-1331.44	1207.25	237.147	-1529.52	1392.64	239.949	-1624.21	1182.56	207.773	-1322.05	1263.81	425.08	-1483.23	1431.7	508.724	-1506.72	1209.98	531.492	-1529.03	1112.76	537.616	-1678.18	1011	489.892	-1746.79	970.79	550.979	-1719.2	944.97	535.9	-1799.65	933.69
682	0	295.052	-1571.36	1641.2	197.62	-1579.41	1642.71	307.257	-1413.06	1635.55	162.146	-1430.17	1634.9	245.794	-1396.03	1469.19	267.88	-1346.41	1207.45	236.033	-1543.34	1393.25	238.594	-1639.7	1183.63	206.861	-1336.74	1263.63	423.59	-1497.54	1431.69	507.469	-1519.08	1209.99	529.764	-1541.05	1112.6	536.58	-1689.72	1010.07	489.42	-1758.88	969.977	550.14	-1730.49	943.936	536.293	-1811.23	933.739
683	0	292.949	-1584.67	1642.21	195.468	-1592.64	1643.25	304.745	-1426.52	1636.23	159.614	-1443.36	1635.45	244.305	-1409.15	1469.76	267.258	-1361.04	1207.96	235.138	-1557.09	1394.18	237.725	-1655.01	1185.1	206.009	-1351.35	1263.89	423.009	-1510.49	1433.01	506.217	-1531.34	1210.12	528.258	-1552.99	1112.8	535.775	-1700.86	1008.85	489.01	-1770.07	968.89	549.165	-1740.94	942.571	536.743	-1821.57	933.343
684	0	290.537	-1597.93	1643.49	193.315	-1605.78	1643.97	302.849	-1439.76	1638.12	158.025	-1456.78	1635.96	243.034	-1423.07	1471.09	267.098	-1375.08	1209.25	234.455	-1570.78	1395.32	237.149	-1669.98	1186.9	205.523	-1365.67	1264.6	422.17	-1524.31	1434.14	504.812	-1543.6	1211.13	526.773	-1564.67	1113.3	534.851	-1711.27	1007.94	488.6	-1780.38	967.478	548.28	-1750.63	940.916	537.262	-1831.14	932.322
685	0	288.166	-1611.5	1645.03	190.96	-1619.03	1644.58	300.862	-1453.34	1640.01	156.005	-1470.02	1636.63	241.689	-1437.16	1471.77	266.838	-1388.46	1210.73	233.895	-1584.16	1396.84	236.75	-1684.37	1188.79	205.182	-1379.71	1265.53	422.08	-1537.12	1436.65	503.815	-1556.03	1212.47	525.24	-1575.83	1114.22	533.843	-1720.88	1007.08	488.172	-1789.42	965.781	547.193	-1759.25	939.525	537.549	-1839.54	930.92
686	0	285.824	-1625.19	1646.31	188.548	-1632.48	1644.83	298.96	-1466.73	1642.16	154.331	-1483.25	1637.14	242.798	-1447.65	1473.36	266.462	-1401.58	1211.99	233.513	-1597.52	1398.3	236.623	-1697.97	1190.43	205.164	-1393.3	1266.88	421.4	-1550.48	1438.45	502.606	-1568.45	1213.82	524.091	-1586.74	1115.82	532.805	-1730.14	1006.14	487.393	-1798.14	963.892	546.061	-1766.95	938.069	537.518	-1847.31	928.766
687	0	283.798	-1638.99	1647.68	186.552	-1645.8	1645.08	297.527	-1480.39	1644.43	152.862	-1496.53	1637.72	242.709	-1459.83	1474.43	266.505	-1414.55	1213.58	233.361	-1610.62	1399.66	236.769	-1710.92	1192	205.218	-1406.71	1268.1	420.876	-1563.65	1440.42	501.466	-1580.93	1215.42	522.79	-1597.23	1117.15	531.609	-1738.83	1005.12	486.614	-1806.35	961.676	544.997	-1774.35	936.318	537.365	-1854.47	925.951
688	0	282.084	-1652.84	1648.85	184.899	-1659.29	1645.5	296.574	-1494.35	1646.93	151.793	-1509.81	1638.94	242.11	-1472.59	1476.18	266.517	-1427.29	1215.23	233.404	-1623.53	1401.16	237.087	-1723.36	1193.72	205.158	-1419.81	1269.39	420.567	-1575.93	1442.69	500.652	-1593.33	1217.23	522.077	-1607.98	1119.03	530.634	-1747.06	1004.33	485.896	-1813.89	959.271	544.285	-1781.16	934.69	537.067	-1860.82	922.505
689	0	280.862	-1666.35	1650.05	183.7	-1672.62	1646.15	295.739	-1507.76	1649.4	151.131	-1523.08	1640.23	241.971	-1484.41	1477.48	265.972	-1439.83	1216.62	233.456	-1636.26	1402.8	237.593	-1735.71	1195.74	204.897	-1432.5	1270.84	420.217	-1588	1444.91	499.811	-1605.23	1219.15	521.168	-1618.2	1120.59	529.886	-1755.15	1003.42	485.155	-1820.9	956.824	543.222	-1787.17	932.824	536.905	-1866.53	919.002
690	0	280.14	-1679.9	1651.28	182.978	-1685.88	1646.81	295.187	-1521.27	1651.74	150.699	-1536.23	1642.21	241.31	-1496.81	1479.48	265.46	-1452.26	1218.22	233.559	-1648.85	1404.38	238.276	-1747.93	1197.63	204.395	-1445.18	1272.12	420.032	-1599.5	1446.96	499.193	-1617.16	1221.02	520.516	-1628.07	1122.5	529.281	-1762.51	1002.22	484.522	-1827.55	954.084	542.536	-1792.98	930.587	535.959	-1872.01	914.528
691	0	279.882	-1693.37	1652.05	182.728	-1699.09	1647.78	295.193	-1535.01	1654.1	150.551	-1549.35	1644.29	240.756	-1509.38	1481.01	264.532	-1464.65	1219.66	233.787	-1661.18	1406.13	238.96	-1760.36	1199.58	203.33	-1457.68	1273.5	420.088	-1610.71	1448.93	498.707	-1628.48	1222.87	519.646	-1637.99	1123.53	528.821	-1769.92	1001.05	483.958	-1833.59	951.025	542.017	-1798.66	928.467	535.29	-1876.99	909.819
692	0	279.762	-1706.45	1653	182.604	-1712.2	1648.86	295.476	-1548	1656.44	150.709	-1562.43	1646.53	240.347	-1521.14	1483.26	263.335	-1477.02	1221.34	233.852	-1673.62	1407.96	239.775	-1772.77	1201.66	202.363	-1470.13	1275.24	420.125	-1621.59	1450.83	498.393	-1639.41	1224.56	519.281	-1647.23	1125.24	528.507	-1776.67	999.938	483.408	-1839.25	948.066	541.877	-1803.87	926.798	534.027	-1881.58	904.546
693	0	279.917	-1719.63	1654.07	182.776	-1725.29	1650.03	295.78	-1561.12	1658.72	150.836	-1575.41	1648.98	239.587	-1533.45	1484.52	261.701	-1489.32	1222.84	233.838	-1685.78	1409.85	240.653	-1785.42	1203.97	200.842	-1482.62	1276.81	419.883	-1632.82	1452.07	498.159	-1649.87	1225.91	518.907	-1655.96	1126.71	528.134	-1783.01	998.573	482.853	-1844.44	944.907	541.721	-1808.52	925.015	532.823	-1885.71	899.045
694	0	280.394	-1732.67	1655.14	183.265	-1738.16	1651.68	296.221	-1574.41	1660.99	151.11	-1588.15	1651.82	238.817	-1545.9	1486.62	260.26	-1501.63	1224.58	234.113	-1698.04	1411.81	241.814	-1797.92	1205.96	199.418	-1494.98	1278.55	420.247	-1643.28	1453.62	498.083	-1659.73	1226.77	518.329	-1665.07	1127.27	528.111	-1789.21	996.883	482.651	-1849.24	941.701	541.709	-1813.18	922.67	531.678	-1889.27	893.228
695	0	280.952	-1745.25	1656.52	183.838	-1750.79	1653.68	296.854	-1587.07	1662.85	151.98	-1601.04	1654.62	238.237	-1558.49	1488.28	258.267	-1514.02	1226.04	234.355	-1710.31	1413.84	242.996	-1810.46	1208.1	198.094	-1507.46	1280.53	420.639	-1653.76	1454.95	498.375	-1669	1227.89	517.986	-1673.48	1127.78	528.292	-1794.95	995.161	482.425	-1853.57	938.347	541.82	-1817.45	920.231	530.432	-1892.24	887.296
696	0	281.551	-1758	1658.15	184.491	-1763.36	1655.71	297.531	-1599.8	1664.82	152.663	-1613.55	1657.16	237.716	-1570.8	1490.16	256.486	-1526.19	1227.97	234.523	-1722.45	1415.88	244.024	-1822.77	1210.38	196.527	-1519.6	1282.82	420.996	-1664.59	1456.24	498.59	-1677.74	1228.81	517.68	-1681.47	1128.53	528.293	-1800.05	993.534	482.195	-1857.43	935.263	542.284	-1821.41	918.548	529.063	-1894.4	881.656
697	0	282.219	-1770.45	1659.81	184.949	-1776	1657.71	298.301	-1612.24	1666.93	153.288	-1626.27	1659.67	237.351	-1583.16	1492.1	254.795	-1538.66	1229.93	234.728	-1734.81	1417.93	245.035	-1835.06	1212.29	194.91	-1531.89	1284.91	421.085	-1675.55	1457.2	498.749	-1686.19	1229.46	517.135	-1688.89	1129.05	528.465	-1805.03	991.701	481.913	-1860.91	932.05	542.184	-1824.39	916.03	527.824	-1896.21	876.199
698	0	282.732	-1783.08	1661.31	185.518	-1788.55	1659.5	298.824	-1624.72	1668.51	153.84	-1638.61	1661.92	234.766	-1597.53	1493.55	253.093	-1550.93	1231.62	235.102	-1747.04	1419.5	245.922	-1847.2	1213.93	193.41	-1544.22	1287.12	421.014	-1686.8	1457.7	498.718	-1694.33	1229.75	516.723	-1696.42	1129.74	528.33	-1809.31	989.677	481.724	-1863.99	928.711	542.412	-1827.45	913.929	526.668	-1897.55	870.471
699	0	283.247	-1795.27	1662.6	186.226	-1800.83	1661.49	299.382	-1637.22	1669.89	154.092	-1651.02	1664.16	234.936	-1608.84	1495.58	251.523	-1563.42	1233.56	235.238	-1759.57	1421.34	246.863	-1859.04	1215.7	191.651	-1556.69	1289.13	421.056	-1697.83	1458.46	498.798	-1701.87	1230.44	516.287	-1703.72	1129.88	528.248	-1813.6	988.032	481.594	-1866.45	925.525	542.453	-1829.95	911.667	525.835	-1898.13	865.262
700	0	283.778	-1807.71	1664.22	186.486	-1813.2	1663.42	299.885	-1649.36	1671.43	154.557	-1663.34	1665.88	233.985	-1622.03	1497.29	249.722	-1575.96	1234.82	235.397	-1772.03	1422.95	247.639	-1870.92	1217.36	189.696	-1569.36	1291.03	421.054	-1708.92	1459.08	498.518	-1709.33	1230.86	515.83	-1710.93	1130.29	528.052	-1817.26	986.134	481.337	-1868.9	922.316	542.372	-1831.87	909.427	524.929	-1898.52	860.477
701	0	284.302	-1819.88	1665.5	187.153	-1825.47	1665.07	300.163	-1661.7	1672.38	154.991	-1675.59	1667.64	234.222	-1633.34	1498.41	248.24	-1588.44	1236.1	235.741	-1784.41	1424.24	248.368	-1882.86	1218.75	187.86	-1582.06	1292.72	421.45	-1719.99	1459.92	498.284	-1716.79	1230.92	515.057	-1717.44	1130.28	527.852	-1820.77	984.181	481.43	-1870.37	918.87	542.671	-1833.71	907.319	524.31	-1898.5	855.83
702	0	284.725	-1832.06	1666.55	187.532	-1837.78	1666.51	300.582	-1674.03	1673.1	155.301	-1687.96	1668.97	233.396	-1646.81	1500.09	246.812	-1600.95	1237.28	236.073	-1796.95	1425.42	248.824	-1894.66	1219.84	186.354	-1594.91	1294.33	421.409	-1731.19	1460	497.788	-1724.2	1230.89	514.294	-1724.19	1130.23	527.338	-1823.97	982.078	481.102	-1872	915.269	542.144	-1834.95	904.436	523.918	-1898.07	851.228
703	0	285.01	-1844.46	1667.53	187.802	-1850.15	1667.69	300.786	-1686.19	1673.64	155.614	-1700.4	1669.85	232.973	-1659.32	1500.85	245.62	-1613.5	1238.1	236.17	-1809.48	1426.27	249.08	-1906.78	1220.75	184.556	-1607.81	1295.41	421.416	-1742.52	1460.09	497.223	-1731.89	1230.73	513.624	-1730.21	1130.06	526.952	-1826.9	979.893	480.786	-1873.23	911.842	541.751	-1835.66	901.935	523.674	-1897.42	846.898
704	0	285.283	-1856.85	1668	188.118	-1862.78	1668.33	300.99	-1698.64	1673.83	155.789	-1712.97	1670.3	231.729	-1673.57	1500.94	244.339	-1626.12	1238.63	236.331	-1822.11	1426.76	249.178	-1919.17	1221.16	182.803	-1620.72	1296.2	420.853	-1754.7	1458.54	496.033	-1739	1230.41	512.741	-1736.43	1129.74	526.18	-1829.47	977.318	480.469	-1874.26	908.243	541.56	-1836.35	899.692	523.418	-1896.7	842.624
705	0	285.737	-1869.43	1668.38	188.455	-1875.38	1668.85	301.228	-1710.92	1674.05	155.933	-1725.43	1670.42	232.291	-1684.63	1500.54	243.309	-1638.77	1238.85	236.555	-1834.67	1427.05	249.269	-1931.44	1221.39	181.308	-1633.65	1296.71	420.876	-1766.14	1458.24	495.492	-1747.32	1229.52	511.469	-1742.43	1128.87	525.528	-1831.85	974.601	480.314	-1875.08	904.399	541.157	-1836.78	896.604	523.566	-1895.81	838.336
706	0	286.267	-1881.89	1668.62	189.045	-1887.89	1669.27	301.36	-1723.51	1673.49	156.452	-1738.29	1670.54	231.493	-1698.18	1501.1	242.438	-1651.51	1239.04	236.761	-1847.34	1427.01	249.318	-1943.91	1221.54	179.809	-1646.43	1296.86	421.298	-1777.47	1457.77	494.505	-1755.31	1228.47	510.156	-1748.43	1127.77	525.048	-1834	971.891	480.169	-1876.37	900.693	540.602	-1836.94	893.764	523.945	-1894.73	834.118
707	0	286.677	-1894.29	1668.31	189.645	-1900.52	1669.33	301.345	-1736.07	1673.07	156.518	-1751.11	1670.21	231.204	-1710.84	1501.03	241.26	-1664.31	1238.68	236.836	-1860.02	1426.71	249.08	-1956.32	1221.01	178.524	-1659.32	1296.9	421.3	-1789.15	1456.94	493.693	-1763.42	1227.46	508.477	-1754.3	1126.85	524.435	-1835.91	969.381	480.169	-1876.79	897.119	540.031	-1836.56	890.958	524.238	-1893.31	830.24
708	0	287.19	-1907.09	1667.64	190.058	-1913.62	1668.65	301.507	-1748.71	1672.29	156.529	-1764.04	1669.87	231.504	-1722.8	1500.15	240.353	-1677.23	1238.11	236.973	-1872.72	1426	248.829	-1968.83	1220.19	177.364	-1671.97	1296.74	421.241	-1801.05	1455.59	492.519	-1771.41	1226.02	506.543	-1760.41	1125.32	523.714	-1837.59	966.529	480.137	-1877.53	893.172	539.495	-1836.12	888.092	524.605	-1891.94	826.074
709	0	287.841	-1919.95	1666.65	190.644	-1926.76	1667.83	301.599	-1761.53	1671.31	156.663	-1777.35	1669.06	231.519	-1734.86	1499.76	239.724	-1689.94	1237.53	237.03	-1885.61	1424.94	248.462	-1981.22	1218.78	176.324	-1684.53	1296.13	421.098	-1813.3	1453.99	491.244	-1779.42	1224.8	504.973	-1766.24	1124.16	523.02	-1839.32	963.518	479.793	-1878.54	888.704	538.833	-1835.58	884.989	525.097	-1890.56	822.022
710	0	288.435	-1932.88	1665.19	191.246	-1940.05	1666.74	301.718	-1774.4	1670.08	156.537	-1790.7	1668.34	230.83	-1748.94	1499.12	239.463	-1702.64	1236.85	237.047	-1898.41	1423.62	247.945	-1993.46	1217.06	175.607	-1697.13	1295.36	421.188	-1825.27	1452.3	489.994	-1787.47	1223.25	502.77	-1772.15	1122.82	522.245	-1840.97	960.671	479.85	-1879.12	884.724	538.035	-1834.94	882.307	526.011	-1889.21	818.326
711	0	289.073	-1946.05	1663.68	191.95	-1953.44	1665.42	301.786	-1787.49	1668.58	156.894	-1804.28	1667.17	230.264	-1762.1	1497.81	239.559	-1714.9	1235.78	236.998	-1911.36	1422.2	247.472	-2005.76	1215.02	174.931	-1709.73	1294.24	421.267	-1837.7	1450.31	488.69	-1795.43	1221.41	500.69	-1778.4	1121.3	521.394	-1842.5	957.787	478.872	-1880.68	880.23	537.158	-1834.1	879.477	526.654	-1887.23	814.571
712	0	289.756	-1959.06	1661.71	192.731	-1967.01	1664	301.86	-1800.67	1666.97	156.908	-1818.01	1666.02	229.942	-1775.69	1496.08	239.708	-1727.29	1234.23	237.108	-1924.16	1420.39	247.041	-2018	1212.64	174.578	-1722.06	1293.05	421.39	-1850.12	1448.37	487.503	-1803.79	1219.55	498.392	-1784.74	1119.5	520.611	-1844.35	954.798	479.081	-1881.23	876.385	535.978	-1833.34	876.439	527.411	-1885.41	811.058
713	0	290.437	-1972.43	1659.48	193.456	-1980.69	1662.07	302.1	-1814.25	1665.06	157.306	-1831.86	1664.55	229.964	-1788.73	1494.5	240.884	-1739.17	1232.69	237.108	-1937.02	1418.48	246.549	-2030.7	1210.19	174.552	-1734.42	1291.64	421.937	-1862.59	1446.46	486.391	-1812.13	1217.44	496.361	-1791.79	1117.91	519.771	-1846.19	951.923	479.812	-1881.68	872.858	534.816	-1832.66	873.524	528.14	-1883.43	807.405
714	0	290.845	-1986.17	1657.3	193.893	-1994.6	1659.89	302.287	-1827.85	1663.39	157.792	-1845.91	1662.99	230.171	-1801.73	1492.1	241.974	-1751.36	1231.12	237.057	-1950.04	1416.39	245.87	-2043.69	1207.71	174.807	-1746.91	1290.09	422.085	-1875.53	1444.1	485.329	-1820.61	1215.95	493.852	-1798.89	1116.36	518.802	-1848.28	949.469	480.193	-1883.16	868.991	533.566	-1832.18	871.333	528.662	-1881.48	804.273
715	0	291.268	-2000.13	1654.51	194.358	-2008.63	1657.19	302.373	-1841.63	1661.54	157.953	-1859.9	1661.16	230.622	-1815.18	1490.17	243.653	-1763.43	1230.04	237.035	-1962.92	1414.13	245.199	-2057.09	1205.1	175.3	-1759.2	1288.62	422.085	-1889.16	1441.2	484.295	-1829.38	1214.63	491.825	-1806.49	1115.21	517.671	-1850.76	947.18	479.611	-1884.6	865.152	532.118	-1831.55	869.711	528.98	-1879.95	800.759
716	0	291.718	-2013.91	1651.65	194.987	-2022.5	1654.54	302.797	-1855.61	1659.72	158.416	-1874.08	1659.23	231.299	-1827.8	1489.19	245.041	-1775.78	1228.22	237.231	-1975.98	1411.68	244.593	-2070.16	1202.79	175.99	-1771.79	1286.75	422.759	-1902.05	1439.51	483.225	-1838.68	1212.93	489.691	-1814.33	1114.03	516.744	-1853.52	945.227	479.786	-1886.22	862.38	530.162	-1831.52	867.516	529.379	-1877.95	798.134
717	0	292.148	-2027.81	1648.73	195.331	-2036.42	1651.61	303.191	-1869.55	1657.95	158.338	-1887.93	1657.62	234.01	-1838.91	1488.1	246.259	-1788.31	1226.41	237.365	-1989.11	1409.26	244.081	-2083.31	1200.55	176.885	-1784.25	1284.92	423.331	-1915.47	1437.47	482.308	-1848.43	1211.53	487.38	-1823.02	1112.45	515.8	-1856.79	943.634	482.095	-1886.69	862.029	528.562	-1832.39	866.431	529.514	-1876.38	796.171
718	0	292.487	-2041.29	1645.58	195.67	-2050.4	1648.44	303.574	-1883.65	1656.17	158.786	-1901.85	1655.81	233.68	-1852.96	1486.11	247.497	-1800.83	1224.41	237.582	-2002.16	1406.92	243.537	-2096.12	1198.35	177.974	-1797	1282.96	423.998	-1929.19	1435.77	481.738	-1858.68	1210.39	486.179	-1831.74	1112.25	515.104	-1860.6	942.508	482.037	-1889.19	859.711	527.329	-1833.77	866.08	529.604	-1874.88	794.54
719	0	292.908	-2055.37	1642.55	196.014	-2064.4	1645.41	304.29	-1897.82	1654.48	159.343	-1915.9	1653.9	235.903	-1865.08	1483.51	248.71	-1813.95	1222.36	237.895	-2015.38	1404.46	243.036	-2109.01	1196.11	179.324	-1809.92	1280.77	424.74	-1943.13	1433.61	481.486	-1869.51	1209.19	484.882	-1841.11	1111.24	514.533	-1865.3	941.463	482.214	-1892.51	857.727	526.243	-1836.46	865.588	529.014	-1873.99	792.7
720	0	293.329	-2069.52	1639.58	196.47	-2078.32	1642.37	304.936	-1912.15	1652.57	160.039	-1930.03	1651.89	236.068	-1879.69	1481.14	250.214	-1827.25	1220.26	238.347	-2028.78	1402.13	242.676	-2121.97	1193.86	180.768	-1822.95	1278.53	425.532	-1957.15	1431.37	481.377	-1880.84	1207.75	483.879	-1850.98	1110.37	513.906	-1870.23	940.668	481.658	-1896.17	855.276	525.804	-1840.33	865.401	528.275	-1874.36	790.492
721	0	293.891	-2083.61	1636.78	197.071	-2092.26	1639.78	306.216	-1926.12	1651.06	161.112	-1943.95	1650.04	237.473	-1892.93	1479.03	251.279	-1840.89	1217.72	238.802	-2042.2	1399.98	242.407	-2135.07	1191.86	182.193	-1836.08	1276.34	426.336	-1971.42	1428.77	481.49	-1892.39	1206.48	483.591	-1861.18	1109.83	514.035	-1876.7	939.815	481.862	-1901.34	853.545	525.421	-1844.82	865.303	527.39	-1875.34	788.443
722	0	294.83	-2097.67	1634.13	197.8	-2106.35	1637.06	307.066	-1940.27	1649.15	162.316	-1957.93	1648.22	239.011	-1905.88	1476.78	252.532	-1854.61	1215.42	239.452	-2055.58	1398.09	242.398	-2148.54	1190.05	183.72	-1849.54	1274.14	426.948	-1986.32	1426.22	482.344	-1904.77	1204.96	483.371	-1871.77	1108.86	514.416	-1883.82	938.643	482.21	-1906.79	852.303	525.812	-1850.71	865.061	526.757	-1877.93	786.751
723	0	295.975	-2111.59	1631.9	199.082	-2119.99	1635.17	308.695	-1954.42	1647.36	163.601	-1971.65	1646.52	240.622	-1919.38	1474.95	253.468	-1868.6	1213.49	240.162	-2069.2	1396.17	242.613	-2162.08	1188.35	184.975	-1863.07	1272.09	428.312	-2000.22	1424.17	482.866	-1917.28	1203.07	483.898	-1883.55	1107.79	514.967	-1892.29	937.536	482.885	-1913.25	850.91	526.597	-1857.58	864.735	525.826	-1881.72	784.462
724	0	297.347	-2125.47	1629.96	200.457	-2133.74	1633.36	310.31	-1968.45	1645.31	165.485	-1985.45	1645.54	241.417	-1934.04	1472.86	254.551	-1882.41	1211.94	240.975	-2082.87	1394.5	243.057	-2175.88	1186.69	186.577	-1876.53	1270.62	429.56	-2014.67	1422.33	483.883	-1930.72	1201.64	484.537	-1895.81	1106.48	515.883	-1901.54	936.46	483.459	-1921.31	848.065	527.726	-1865.49	864.415	525.008	-1886.9	782.698
725	0	299.026	-2139.46	1627.98	201.918	-2147.48	1631.8	312.074	-1982.36	1643.82	166.976	-1999.15	1644.37	243.399	-1947.29	1471.66	255.382	-1896.42	1210.48	241.718	-2096.64	1392.93	243.579	-2189.69	1185.24	187.538	-1889.78	1269.18	430.466	-2029.18	1420.27	484.984	-1944.17	1200.31	485.655	-1908.36	1105.62	517.177	-1911.53	935.913	484.196	-1929.21	846.802	529.258	-1874.27	864.328	524.321	-1893.1	781.434
726	0	300.574	-2153.43	1626.11	203.592	-2161.29	1630.35	313.952	-1996.16	1642.67	168.857	-2012.98	1643.34	244.817	-1961.03	1470.87	255.599	-1910.54	1208.97	242.647	-2110.45	1391.63	244.331	-2203.81	1183.71	188.65	-1903.18	1268.25	431.342	-2044.09	1418.26	486.285	-1958.34	1199.02	486.708	-1921.49	1104.52	518.378	-1922.27	935.075	484.918	-1937.96	845.693	531.007	-1884.2	863.838	523.99	-1901.04	780.409
727	0	302.344	-2167.13	1624.54	205.28	-2175.02	1629.2	316.021	-2010.08	1641.19	171.237	-2026.65	1642.48	246.834	-1974.5	1469.74	256.604	-1924.61	1207.9	243.732	-2124.47	1390.52	245.381	-2217.9	1182.64	190.048	-1917.15	1267.18	433.003	-2058.29	1416.85	487.369	-1972.57	1197.29	488.168	-1935.37	1103.22	519.611	-1934.11	934.031	485.794	-1947.93	844.916	533.281	-1895.56	863.599	523.927	-1910.48	779.205
728	0	304.202	-2180.95	1623.73	207.325	-2188.57	1628.61	318.402	-2023.97	1640.24	173.393	-2040.06	1642.47	248.644	-1988.22	1469.33	257.479	-1938.88	1206.83	244.999	-2138.37	1389.84	246.546	-2231.99	1182.1	191.313	-1930.97	1266.49	434.678	-2072.22	1416.14	489.015	-1987.48	1196.11	490.006	-1949.34	1102.23	521.094	-1946.86	933.261	484.107	-1956.31	846.313	535.443	-1907.82	863.138	524.219	-1921.33	778.266
729	0	306.307	-2194.78	1623	209.276	-2201.96	1628.36	320.961	-2037.8	1639.89	175.669	-2053.52	1642.36	250.627	-2002.09	1468.64	258.147	-1953.55	1205.85	246.348	-2152.24	1389.71	247.774	-2246.33	1181.98	192.641	-1945.06	1265.85	436.225	-2086.53	1415.36	490.746	-2002.34	1195.32	491.876	-1963.65	1101.74	522.712	-1960.39	932.946	485.071	-1968.1	846.106	537.616	-1920.86	863.014	525.014	-1933.27	777.678
730	0	308.275	-2208.66	1622.83	211.112	-2215.63	1628.42	323.592	-2051.8	1639.7	178.405	-2066.74	1642.99	253.361	-2015.14	1468.52	259.15	-1968.15	1204.98	247.799	-2166.27	1389.82	249.076	-2260.95	1182.09	194.233	-1958.93	1265.52	438.224	-2100.95	1414.42	492.465	-2017.33	1194.49	493.927	-1978.54	1101.07	524.194	-1974.7	932.177	485.94	-1981.35	845.433	539.479	-1934.96	862.452	526.373	-1946.91	777.2
731	0	310.277	-2222.56	1622.78	213.388	-2228.89	1628.97	326.356	-2065.68	1639.69	181.023	-2080.32	1643.67	254.66	-2030.12	1467.96	260.876	-1982.9	1204.89	249.291	-2180.24	1390.28	250.138	-2275.91	1182.88	196.336	-1973.06	1265.52	439.926	-2115.68	1414.28	494.273	-2032.54	1194.02	495.699	-1993.48	1100.45	526.067	-1989.83	931.883	487.51	-1995.84	845.182	541.505	-1950.09	862.118	528.172	-1961.89	777.11
732	0	312.329	-2236.32	1623.19	215.358	-2242.45	1629.93	329.104	-2079.6	1640.1	184.169	-2093.72	1644.58	257.344	-2042.14	1468.66	262.627	-1997.6	1205.45	250.63	-2194.35	1391.11	250.894	-2290.96	1183.99	198.395	-1986.61	1265.93	441.499	-2130.47	1414.26	495.929	-2047.62	1193.92	497.796	-2008.73	1100.64	527.794	-2005.55	931.754	489.246	-2011.32	845.309	543.582	-1965.96	862.223	530.349	-1977.97	776.964
733	0	314.562	-2250.2	1623.97	217.618	-2256	1631.23	331.882	-2093.64	1640.7	186.113	-2107.12	1645.99	259.107	-2056.65	1469.26	264.592	-2012.34	1206.02	251.911	-2208.3	1392.3	251.423	-2305.83	1185.23	201.32	-1999.92	1266.83	443.017	-2145.58	1413.9	497.904	-2063.18	1194.54	499.655	-2024.43	1100.75	529.857	-2021.96	932.104	491.113	-2027.78	845.405	545.737	-1982.74	862.368	533.151	-1995.59	777.54
734	0	316.95	-2264.13	1625.23	220.002	-2269.69	1632.97	334.668	-2107.57	1641.4	187.59	-2119.86	1648.41	261.063	-2069.76	1470.47	266.582	-2026.56	1207.28	253.254	-2222.24	1393.66	251.722	-2320.32	1186.53	203.022	-2013.93	1267.81	444.374	-2160.03	1415.25	499.396	-2078.87	1194.6	501.701	-2040.51	1100.86	531.815	-2039.21	932.127	493.906	-2045.88	845.777	548.035	-2000.74	862.199	536.035	-2014.39	777.579
735	0	319.25	-2277.79	1626.68	222.511	-2283.38	1634.94	337.132	-2121.44	1642.09	190.142	-2133.46	1650.38	262.338	-2086.01	1471.91	268.864	-2040.35	1209.04	254.386	-2236.08	1395.29	251.823	-2334.34	1187.87	205.091	-2027.52	1269.61	445.535	-2174.74	1416.24	501.125	-2094.95	1195.32	503.4	-2057	1101.11	533.875	-2057.24	932.392	496.233	-2064.87	845.753	550.071	-2019.29	862.044	539.171	-2034.44	777.786
736	0	321.4	-2291.52	1627.73	224.899	-2297.11	1636.54	339.443	-2135.29	1643.06	194.23	-2147.91	1651.59	264.269	-2098.23	1474.26	270.415	-2053.83	1211.11	255.332	-2249.81	1396.86	251.79	-2347.91	1189.1	206.254	-2043.18	1271.35	446.462	-2189.22	1417.68	502.668	-2111.02	1196.27	505.38	-2073.58	1102.02	536.111	-2075.66	933.119	498.418	-2084.37	846.341	552.779	-2038.92	862.62	542.809	-2055.57	778.938
737	0	323.462	-2305.14	1628.26	227.148	-2310.94	1637.75	341.637	-2148.76	1643.87	194.595	-2160.97	1653.84	265.736	-2110.93	1475.64	272.12	-2066.88	1212.69	256.058	-2263.59	1398.1	251.679	-2361.22	1190.16	207.463	-2056.51	1273.87	447.011	-2203.92	1418.75	504.201	-2127.35	1197.3	507.604	-2090.53	1102.99	538.566	-2095.12	933.969	501.463	-2105.02	847.289	555.168	-2059.1	862.915	546.528	-2077.64	779.664
738	0	325.679	-2319.17	1629.06	229.209	-2324.82	1639.07	343.454	-2162.51	1644.73	198.353	-2175.65	1655.07	266.34	-2125.55	1477.22	273.13	-2079.9	1214.37	256.809	-2277.05	1399.31	251.695	-2374.27	1191.25	208.019	-2069.87	1275.21	447.544	-2217.92	1420.12	505.571	-2143.9	1197.83	509.356	-2107.62	1102.99	540.925	-2115.38	934.317	504.272	-2126.81	847.676	557.567	-2080.52	862.64	549.775	-2100.93	780.105
739	0	327.254	-2332.63	1629.63	230.972	-2338.62	1640.25	345.303	-2176.2	1645.82	199.825	-2189.67	1657.17	267.893	-2138.17	1479.1	274.395	-2092.34	1215.71	257.39	-2290.2	1400.61	251.662	-2387.11	1192.63	208.621	-2082.68	1276.68	448.604	-2231.47	1421.5	506.842	-2160.45	1198.36	511.515	-2125.15	1103.3	543.132	-2135.96	934.464	507.087	-2149.34	848.17	560.029	-2102.56	862.396	553.258	-2125.08	780.66
740	0	328.627	-2346.28	1630.48	232.29	-2352.39	1641.19	346.364	-2190	1647.19	201.693	-2203.63	1658.66	268.479	-2151.58	1480.11	275.226	-2105.34	1217.01	257.792	-2303.19	1402.01	251.717	-2399.68	1193.99	209.191	-2095.5	1278.12	449.184	-2245.11	1423.1	508.401	-2177.13	1198.97	513.876	-2142.91	1103.62	545.391	-2157.05	934.927	509.537	-2172.13	848.812	562.472	-2125.29	862.172	556.606	-2149.83	781.168
741	0	329.55	-2359.98	1631.23	233.387	-2366.06	1641.91	347.631	-2203.88	1649.17	202.686	-2217.69	1660.46	269.298	-2165.19	1481.09	276.474	-2117.76	1218.62	258.306	-2316.03	1403.4	251.858	-2412.23	1195.25	210.405	-2107.88	1280.03	449.854	-2258.72	1424.48	509.716	-2193.85	1199.25	516.005	-2160.72	1103.55	547.836	-2179.13	935.034	511.963	-2195.69	849.351	564.84	-2148.47	861.843	559.7	-2175.6	781.898
742	0	330.116	-2373.63	1631.83	234.107	-2379.95	1642.72	348.244	-2217.71	1650.78	203.499	-2231.63	1662.4	270.574	-2178.01	1482.78	276.966	-2130.76	1219.45	258.692	-2328.8	1404.84	251.979	-2424.48	1196.46	211.418	-2120.35	1280.68	450.438	-2272	1425.97	511.148	-2210.76	1199.91	518.206	-2178.89	1103.84	549.814	-2201.25	935.388	514.199	-2219.37	850.077	566.821	-2172.24	861.121	562.791	-2202.12	782.881
743	0	330.339	-2387.3	1632.65	234.205	-2393.42	1643.11	348.639	-2231.79	1652.93	204.027	-2245.37	1664.16	271.499	-2191.14	1484.76	278.234	-2143.66	1221.6	258.99	-2341.48	1406.41	252.043	-2436.87	1197.73	212.934	-2133.09	1283.06	450.834	-2285.74	1426.97	512.569	-2227.51	1200.74	520.313	-2197.11	1103.99	551.734	-2223.74	936.052	516.275	-2243.85	851.302	569.132	-2196.73	861.572	565.521	-2229.5	784.183
744	0	330.544	-2401.17	1633.54	234.31	-2407.21	1643.7	348.872	-2245.43	1655.3	204.413	-2258.84	1665.79	272.635	-2203.62	1486.72	278.957	-2156.8	1223.11	259.285	-2354.09	1407.91	252.096	-2449.29	1199.01	214.46	-2145.53	1284.64	451.037	-2299.51	1428.44	513.862	-2244.44	1201.99	522.822	-2215.67	1104.66	553.7	-2246.54	937.237	518.232	-2268.51	852.906	571.327	-2221.71	861.814	568.048	-2256.68	786.251
745	0	330.494	-2414.83	1634.38	234.4	-2420.57	1644.64	348.943	-2259.32	1657.61	204.095	-2272.56	1667.74	272.543	-2217.52	1487.98	280.021	-2169.85	1225.1	259.651	-2366.51	1409.57	252.086	-2461.76	1200.5	215.97	-2158.06	1286.53	451.813	-2312.08	1431.07	515.377	-2261.58	1202.82	525.064	-2234.57	1105.13	555.406	-2270.07	938.054	520.435	-2297.63	852.246	573.196	-2247.14	862.013	570.3	-2285.1	788.135
746	0	330.232	-2428.35	1635.51	234.041	-2434.02	1645.31	348.521	-2273.17	1659.94	203.898	-2286.1	1669.63	273.46	-2230.35	1489.97	281.16	-2182.49	1227.12	259.993	-2379.06	1411.19	251.997	-2474.28	1202.12	217.487	-2170.48	1288.24	452.309	-2325.51	1432.53	516.715	-2278.75	1204.2	527.253	-2253.44	1105.52	556.794	-2293.64	939.262	521.022	-2319.99	855.299	575.115	-2273.27	863.194	572.191	-2313.75	790.746
747	0	329.8	-2441.99	1636.63	233.397	-2447.44	1645.82	348.413	-2286.99	1662.44	203.88	-2299.99	1671.25	274.012	-2243.05	1492.19	282.685	-2194.84	1229.43	260.067	-2391.59	1412.8	251.914	-2486.74	1203.69	219.238	-2182.85	1289.96	452.503	-2338.91	1434.49	518.027	-2295.78	1205.97	529.567	-2272.44	1106.64	558.498	-2317.59	941.581	522.211	-2345.54	858.044	576.7	-2299.06	864.4	573.888	-2342.49	794.382
748	0	329.342	-2455.58	1637.4	233.188	-2460.81	1646.1	348.008	-2300.69	1664.78	203.001	-2313.83	1672.67	274.347	-2256.28	1493.75	284.237	-2207.3	1231.27	260.36	-2404.2	1414.16	251.922	-2499.25	1204.97	220.676	-2195.26	1291.58	452.062	-2352.96	1436.01	519.451	-2312.81	1207.59	531.64	-2291.59	1108.04	559.876	-2341.58	943.761	523.163	-2371.35	860.562	578.424	-2325.59	866.448	575.161	-2371.16	798.175
749	0	328.691	-2469.16	1638.34	232.589	-2474.36	1646.5	347.802	-2314.51	1667.11	203.046	-2327.76	1673.68	274.613	-2269.43	1495.16	285.435	-2219.84	1232.69	260.625	-2416.92	1415.44	251.969	-2511.48	1206.18	222.286	-2207.82	1293.09	452.853	-2366	1437.97	520.639	-2329.88	1209.24	533.952	-2310.68	1109.53	560.867	-2365.42	946.209	524.04	-2397.5	863.999	579.791	-2352.25	868.544	576.287	-2400.54	801.947
750	0	328.137	-2482.66	1639.42	232.215	-2487.64	1646.71	347.197	-2328.34	1669	202.591	-2341.05	1675.18	275.334	-2282.25	1496.74	286.901	-2232.1	1234.34	260.857	-2429.6	1416.6	252.023	-2523.59	1207.34	223.97	-2220	1294.72	453.177	-2379.27	1440.25	521.895	-2346.93	1211.32	535.746	-2329.86	1110.91	562.077	-2389.83	949.118	524.724	-2423.54	868.31	581.103	-2378.99	871.087	577.367	-2430.02	806.663
751	0	327.834	-2496.31	1640.63	231.581	-2501.23	1647.17	346.648	-2342.05	1670.91	202.322	-2354.34	1675.34	275.452	-2295.23	1497.93	287.977	-2244.57	1235.72	261.206	-2442.29	1417.53	252.297	-2535.53	1208.26	225.093	-2232.66	1295.66	453.665	-2392.58	1441.99	523.189	-2363.72	1213.46	538.048	-2348.65	1113.22	563.323	-2414.16	952.544	525.377	-2449.68	872.959	582.391	-2405.9	874.535	577.893	-2459.09	811.726
752	0	327.373	-2509.78	1640.95	231.136	-2514.7	1647.16	346.203	-2355.74	1672.52	201.884	-2367.51	1676.2	276.216	-2307.92	1499.07	288.553	-2257.06	1236.6	261.518	-2455.15	1418.32	252.701	-2547.41	1208.96	226.153	-2245.21	1296.95	453.899	-2405.79	1444.07	524.44	-2380.52	1215.33	539.398	-2367.41	1114.21	564.303	-2438.29	956.143	526.059	-2475.9	877.707	583.587	-2432.88	877.921	578.455	-2488.74	816.719
753	0	326.98	-2523.37	1641.44	230.651	-2528.17	1646.89	345.94	-2369.59	1674	201.315	-2381.07	1676.66	276.659	-2320.77	1500.64	289.76	-2269.21	1238.14	261.796	-2468.04	1418.74	253.194	-2559.31	1209.57	227.071	-2257.74	1297.61	454.148	-2419.12	1445.92	525.517	-2397.08	1217.01	541.713	-2386.15	1116.35	565.397	-2462.33	959.536	526.573	-2502.25	882.734	584.345	-2459.78	881.426	578.68	-2517.59	822.384
754	0	326.593	-2536.96	1641.79	230.288	-2541.55	1646.55	345.442	-2383.24	1675.04	200.998	-2394.66	1676.63	276.97	-2334.22	1500.96	290.429	-2281.52	1239.08	262.179	-2480.79	1418.89	253.679	-2571.29	1209.85	227.968	-2270.54	1298.23	453.93	-2432.58	1446.78	526.981	-2413.62	1218.99	543.425	-2404.63	1117.88	566.578	-2486.46	963.415	527.313	-2529.02	887.906	585.253	-2486.53	885.236	578.819	-2546.43	828.086
755	0	326.406	-2550.34	1641.39	230.11	-2555.12	1645.93	345.052	-2396.72	1675.88	200.644	-2408.28	1676.49	277.624	-2346.83	1501.87	291.166	-2293.88	1239.76	262.712	-2493.62	1418.92	254.245	-2583.43	1209.63	228.658	-2283.34	1298.92	454.105	-2446.09	1447.55	528.261	-2429.98	1220.42	545.147	-2423.18	1119.16	566.968	-2509.46	967.229	527.541	-2554.86	892.849	585.919	-2513.07	889.036	578.854	-2574.9	834.046
756	0	326.281	-2564.04	1641.13	229.94	-2568.67	1645.17	345.078	-2410.58	1676.03	200.664	-2421.71	1675.85	278.032	-2359.58	1502.07	291.722	-2306.45	1239.99	263.26	-2506.54	1418.58	254.998	-2595.5	1209.47	229.726	-2295.96	1299	454.569	-2458.8	1448.58	529.502	-2446.31	1221.09	546.675	-2441.66	1119.73	568.31	-2533.69	970.521	528.027	-2580.73	898.226	586.488	-2539.72	892.455	578.93	-2603.25	839.527
757	0	326.356	-2577.67	1640.76	229.938	-2582.17	1644.33	345.001	-2424.41	1675.68	200.333	-2435.4	1675.57	278.56	-2372.6	1501.78	292.225	-2318.96	1239.94	263.71	-2519.51	1418.13	255.626	-2607.56	1208.79	230.066	-2308.86	1298.97	454.819	-2471.68	1448.78	530.666	-2462.41	1221.66	548.903	-2459.79	1120.53	569.007	-2556.79	973.467	528.312	-2606.4	903.696	587.429	-2566.34	896.232	578.81	-2631.37	845.328
758	0	326.336	-2590.97	1639.72	230.018	-2595.76	1643.23	345.082	-2437.77	1675.47	200.859	-2449.12	1674.79	278.139	-2386.43	1501.11	292.577	-2331.28	1239.65	264.205	-2532.36	1417.19	256.369	-2619.72	1207.91	230.756	-2321.5	1298.38	455.186	-2484.86	1448.4	532.15	-2478.46	1222.09	550.71	-2477.73	1121.15	569.771	-2579.74	976.883	528.504	-2631.79	908.935	587.545	-2592.03	899.781	578.601	-2658.95	851.271
759	0	326.639	-2604.82	1638.39	230.214	-2609.41	1641.84	345.195	-2451.73	1674.57	200.739	-2462.84	1673.72	277.978	-2399.76	1500.12	292.813	-2343.61	1238.82	264.733	-2545.45	1415.92	257.334	-2631.94	1206.46	231.359	-2334.29	1298.18	455.26	-2498	1447.59	533.3	-2494.32	1222.15	552.544	-2495.86	1121.35	570.224	-2602.53	979.69	528.753	-2656.94	914.139	587.617	-2617.35	903.165	577.481	-2684.85	857.363
760	0	326.866	-2618.48	1636.79	230.47	-2623.03	1640.18	345.779	-2465.23	1673.53	201.017	-2476.59	1672.52	278.175	-2413.25	1498.99	293.182	-2355.95	1238.08	265.226	-2558.52	1414.46	258.296	-2644.21	1204.72	231.574	-2347.18	1296.9	455.299	-2510.93	1446.58	534.573	-2510.2	1221.81	554.6	-2513.77	1121.24	571.041	-2625.4	982.689	528.791	-2681.52	919.094	587.091	-2645.01	904.245	577.935	-2713.27	863.487
761	0	327.203	-2632.04	1635.21	230.841	-2636.72	1638.5	346.058	-2479.02	1672.22	201.324	-2490.28	1671.19	278.02	-2426.56	1497.77	293.152	-2368.04	1237.15	265.716	-2571.38	1412.9	259.18	-2656.6	1202.86	231.922	-2359.83	1295.52	455.557	-2523.67	1445.09	535.726	-2526	1221.51	556.258	-2531.6	1120.95	571.407	-2647.57	985.767	528.701	-2705.61	924.28	588.026	-2667.89	910.175	576.921	-2738.92	869.756
762	0	327.684	-2645.63	1633.31	231.291	-2650.36	1636.78	346.389	-2492.6	1670.69	201.762	-2504	1669.8	277.845	-2439.86	1496.52	293.172	-2380.59	1235.92	266.172	-2584.37	1411.13	260.179	-2669.19	1200.76	231.852	-2372.43	1295.01	455.911	-2536.26	1444.01	537.073	-2541.62	1221.07	557.417	-2549.38	1120.3	571.997	-2669.75	988.541	528.608	-2729.22	929.191	588.351	-2692.79	913.482	576.041	-2764.28	875.869
[truncated: 69 more columns]

## Sheet: Sheet2
Devices
		025370 - Force			025370 - Moment			025370 - CoP			027571 - Force			027571 - Moment			027571 - CoP			037720 - Force			037720 - Moment			037720 - CoP
Frame	Sub Frame	Fx	Fy	Fz	Mx	My	Mz	Cx	Cy	Cz	Fx	Fy	Fz	Mx	My	Mz	Cx	Cy	Cz	Fx	Fy	Fz	Mx	My	Mz	Cx	Cy	Cz
		N	N	N	N.mm	N.mm	N.mm	mm	mm	mm	N	N	N	N.mm	N.mm	N.mm	mm	mm	mm	N	N	N	N.mm	N.mm	N.mm	mm	mm	mm
460	0	0	0	0	0	0	0	200	300	0	0	0	0	0	0	0	200	903	0	0	0	0	0	0	0	603	903	0
460	1	0	0	0	0	0	0	200	300	0	0	0	0	0	0	0	200	903	0	0	0	0	0	0	0	603	903	0
460	2	0	0	0	0	0	0	200	300	0	0	0	0	0	0	0	200	903	0	0	0	0	0	0	0	603	903	0
460	3	0	0	0	0	0	0	200	300	0	0	0	0	0	0	0	200	903	0	0	0	0	0	0	0	603	903	0
460	4	0	0	0	0	0	0	200	300	0	0	0	0	0	0	0	200	903	0	0	0	0	0	0	0	603	903	0
460	5	0	0	0	0	0	0	200	300	0	0	0	0	0	0	0	200	903	0	0	0	0	0	0	0	603	903	0
460	6	0	0	0	0	0	0	200	300	0	0	0	0	0	0	0	200	903	0	0	0	0	0	0	0	603	903	0
460	7	0	0	0	0	0	0	200	300	0	0	0	0	0	0	0	200	903	0	0	0	0	0	0	0	603	903	0
460	8	0	0	0	0	0	0	200	300	0	0	0	0	0	0	0	200	903	0	0	0	0	0	0	0	603	903	0
460	9	0	0	0	0	0	0	200	300	0	0	0	0	0	0	0	200	903	0	0	0	0	0	0	0	603	903	0
461	0	0	0	0	0	0	0	200	300	0	0	0	0	0	0	0	200	903	0	0	0	0	0	0	0	603	903	0
461	1	0	0	0	0	0	0	200	300	0	0	0	0	0	0	0	200	903	0	0	0	0	0	0	0	603	903	0
461	2	0	0	0	0	0	0	200	300	0	0	0	0	0	0	0	200	903	0	0	0	0	0	0	0	603	903	0
461	3	0	0	0	0	0	0	200	300	0	0	0	0	0	0	0	200	903	0	0	0	0	0	0	0	603	903	0
461	4	0	0	0	0	0	0	200	300	0	0	0	0	0	0	0	200	903	0	0	0	0	0	0	0	603	903	0
461	5	0	0	0	0	0	0	200	300	0	0	0	0	0	0	0	200	903	0	0	0	0	0	0	0	603	903	0
461	6	0	0	0	0	0	0	200	300	0	0	0	0	0	0	0	200	903	0	0	0	0	0	0	0	603	903	0
461	7	0	0	0	0	0	0	200	300	0	0	0	0	0	0	0	200	903	0	0	0	0	0	0	0	603	903	0
461	8	0	0	0	0	0	0	200	300	0	0	0	0	0	0	0	200	903	0	0	0	0	0	0	0	603	903	0
461	9	0	0	0	0	0	0	200	300	0	0	0	0	0	0	0	200	903	0	0	0	0	0	0	0	603	903	0
462	0	0	0	0	0	0	0	200	300	0	0	0	0	0	0	0	200	903	0	0	0	0	0	0	0	603	903	0
462	1	0	0	0	0	0	0	200	300	0	0	0	0	0	0	0	200	903	0	0	0	0	0	0	0	603	903	0
462	2	0	0	0	0	0	0	200	300	0	0	0	0	0	0	0	200	903	0	0	0	0	0	0	0	603	903	0
462	3	0	0	0	0	0	0	200	300	0	0	0	0	0	0	0	200	903	0	0	0	0	0	0	0	603	903	0
462	4	0	0	0	0	0	0	200	300	0	0	0	0	0	0	0	200	903	0	0	0	0	0	0	0	603	903	0
462	5	0	0	0	0	0	0	200	300	0	0	0	0	0	0	0	200	903	0	0	0	0	0	0	0	603	903	0
462	6	0	0	0	0	0	0	200	300	0	0	0	0	0	0	0	200	903	0	0	0	0	0	0	0	603	903	0
462	7	0	0	0	0	0	0	200	300	0	0	0	0	0	0	0	200	903	0	0	0	0	0	0	0	603	903	0
462	8	0	0	0	0	0	0	200	300	0	0	0	0	0	0	0	200	903	0	0	0	0	0	0	0	603	903	0
462	9	0	0	0	0	0	0	200	300	0	0	0	0	0	0	0	200	903	0	0	0	0	0	0	0	603	903	0
463	0	0	0	0	0	0	0	200	300	0	0	0	0	0	0	0	200	903	0	0	0	0	0	0	0	603	903	0
463	1	0	0	0	0	0	0	200	300	0	0	0	0	0	0	0	200	903	0	0	0	0	0	0	0	603	903	0
463	2	0	0	0	0	0	0	200	300	0	0	0	0	0	0	0	200	903	0	0	0	0	0	0	0	603	903	0
463	3	0	0	0	0	0	0	200	300	0	0	0	0	0	0	0	200	903	0	0	0	0	0	0	0	603	903	0
463	4	0	0	0	0	0	0	200	300	0	0	0	0	0	0	0	200	903	0	0	0	0	0	0	0	603	903	0
463	5	0	0	0	0	0	0	200	300	0	0	0	0	0	0	0	200	903	0	0	0	0	0	0	0	603	903	0
463	6	0	0	0	0	0	0	200	300	0	0	0	0	0	0	0	200	903	0	0	0	0	0	0	0	603	903	0
463	7	0	0	0	0	0	0	200	300	0	0	0	0	0	0	0	200	903	0	0	0	0	0	0	0	603	903	0
463	8	0	0	0	0	0	0	200	300	0	0	0	0	0	0	0	200	903	0	0	0	0	0	0	0	603	903	0
463	9	0	0	0	0	0	0	200	300	0	0	0	0	0	0	0	200	903	0	0	0	0	0	0	0	603	903	0
464	0	0	0	0	0	0	0	200	300	0	0	0	0	0	0	0	200	903	0	0	0	0	0	0	0	603	903	0
464	1	0	0	0	0	0	0	200	300	0	0	0	0	0	0	0	200	903	0	0	0	0	0	0	0	603	903	0
464	2	0	0	0	0	0	0	200	300	0	0	0	0	0	0	0	200	903	0	0	0	0	0	0	0	603	903	0
464	3	0	0	0	0	0	0	200	300	0	0	0	0	0	0	0	200	903	0	0	0	0	0	0	0	603	903	0
464	4	0	0	0	0	0	0	200	300	0	0	0	0	0	0	0	200	903	0	0	0	0	0	0	0	603	903	0
464	5	0	0	0	0	0	0	200	300	0	0	0	0	0	0	0	200	903	0	0	0	0	0	0	0	603	903	0
464	6	0	0	0	0	0	0	200	300	0	0	0	0	0	0	0	200	903	0	0	0	0	0	0	0	603	903	0
464	7	0	0	0	0	0	0	200	300	0	0	0	0	0	0	0	200	903	0	0	0	0	0	0	0	603	903	0
464	8	0	0	0	0	0	0	200	300	0	0	0	0	0	0	0	200	903	0	0	0	0	0	0	0	603	903	0
464	9	0	0	0	0	0	0	200	300	0	0	0	0	0	0	0	200	903	0	0	0	0	0	0	0	603	903	0
465	0	0	0	0	0	0	0	200	300	0	0	0	0	0	0	0	200	903	0	0	0	0	0	0	0	603	903	0
465	1	0	0	0	0	0	0	200	300	0	0	0	0	0	0	0	200	903	0	0	0	0	0	0	0	603	903	0
465	2	0	0	0	0	0	0	200	300	0	0	0	0	0	0	0	200	903	0	0	0	0	0	0	0	603	903	0
465	3	0	0	0	0	0	0	200	300	0	0	0	0	0	0	0	200	903	0	0	0	0	0	0	0	603	903	0
465	4	0	0	0	0	0	0	200	300	0	0	0	0	0	0	0	200	903	0	0	0	0	0	0	0	603	903	0
465	5	0	0	0	0	0	0	200	300	0	0	0	0	0	0	0	200	903	0	0	0	0	0	0	0	603	903	0
465	6	0	0	0	0	0	0	200	300	0	0	0	0	0	0	0	200	903	0	0	0	0	0	0	0	603	903	0
465	7	0	0	0	0	0	0	200	300	0	0	0	0	0	0	0	200	903	0	0	0	0	0	0	0	603	903	0
465	8	0	0	0	0	0	0	200	300	0	0	0	0	0	0	0	200	903	0	0	0	0	0	0	0	603	903	0
465	9	0	0	0	0	0	0	200	300	0	0	0	0	0	0	0	200	903	0	0	0	0	0	0	0	603	903	0
466	0	0	0	0	0	0	0	200	300	0	0	0	0	0	0	0	200	903	0	0	0	0	0	0	0	603	903	0
466	1	0	0	0	0	0	0	200	300	0	0	0	0	0	0	0	200	903	0	0	0	0	0	0	0	603	903	0
466	2	0	0	0	0	0	0	200	300	0	0	0	0	0	0	0	200	903	0	0	0	0	0	0	0	603	903	0
466	3	0	0	0	0	0	0	200	300	0	0	0	0	0	0	0	200	903	0	0	0	0	0	0	0	603	903	0
466	4	0	0	0	0	0	0	200	300	0	0	0	0	0	0	0	200	903	0	0	0	0	0	0	0	603	903	0
466	5	0	0	0	0	0	0	200	300	0	0	0	0	0	0	0	200	903	0	0	0	0	0	0	0	603	903	0
466	6	0	0	0	0	0	0	200	300	0	0	0	0	0	0	0	200	903	0	0	0	0	0	0	0	603	903	0
466	7	0	0	0	0	0	0	200	300	0	0	0	0	0	0	0	200	903	0	0	0	0	0	0	0	603	903	0
466	8	0	0	0	0	0	0	200	300	0	0	0	0	0	0	0	200	903	0	0	0	0	0	0	0	603	903	0
466	9	0	0	0	0	0	0	200	300	0	0	0	0	0	0	0	200	903	0	0	0	0	0	0	0	603	903	0
467	0	0	0	0	0	0	0	200	300	0	0	0	0	0	0	0	200	903	0	0	0	0	0	0	0	603	903	0
467	1	0	0	0	0	0	0	200	300	0	0	0	0	0	0	0	200	903	0	0	0	0	0	0	0	603	903	0
467	2	0	0	0	0	0	0	200	300	0	0	0	0	0	0	0	200	903	0	0	0	0	0	0	0	603	903	0
467	3	0	0	0	0	0	0	200	300	0	0	0	0	0	0	0	200	903	0	0	0	0	0	0	0	603	903	0
467	4	0	0	0	0	0	0	200	300	0	0	0	0	0	0	0	200	903	0	0	0	0	0	0	0	603	903	0
467	5	0	0	0	0	0	0	200	300	0	0	0	0	0	0	0	200	903	0	0	0	0	0	0	0	603	903	0
467	6	0	0	0	0	0	0	200	300	0	0	0	0	0	0	0	200	903	0	0	0	0	0	0	0	603	903	0
467	7	0	0	0	0	0	0	200	300	0	0	0	0	0	0	0	200	903	0	0	0	0	0	0	0	603	903	0
467	8	0	0	0	0	0	0	200	300	0	0	0	0	0	0	0	200	903	0	0	0	0	0	0	0	603	903	0
467	9	0	0	0	0	0	0	200	300	0	0	0	0	0	0	0	200	903	0	0	0	0	0	0	0	603	903	0
468	0	0	0	0	0	0	0	200	300	0	0	0	0	0	0	0	200	903	0	0	0	0	0	0	0	603	903	0
468	1	0	0	0	0	0	0	200	300	0	0	0	0	0	0	0	200	903	0	0	0	0	0	0	0	603	903	0
468	2	0	0	0	0	0	0	200	300	0	0	0	0	0	0	0	200	903	0	0	0	0	0	0	0	603	903	0
468	3	0	0	0	0	0	0	200	300	0	0	0	0	0	0	0	200	903	0	0	0	0	0	0	0	603	903	0
468	4	0	0	0	0	0	0	200	300	0	0	0	0	0	0	0	200	903	0	0	0	0	0	0	0	603	903	0
468	5	0	0	0	0	0	0	200	300	0	0	0	0	0	0	0	200	903	0	0	0	0	0	0	0	603	903	0
468	6	0	0	0	0	0	0	200	300	0	0	0	0	0	0	0	200	903	0	0	0	0	0	0	0	603	903	0
468	7	0	0	0	0	0	0	200	300	0	0	0	0	0	0	0	200	903	0	0	0	0	0	0	0	603	903	0
468	8	0	0	0	0	0	0	200	300	0	0	0	0	0	0	0	200	903	0	0	0	0	0	0	0	603	903	0
468	9	0	0	0	0	0	0	200	300	0	0	0	0	0	0	0	200	903	0	0	0	0	0	0	0	603	903	0
469	0	0	0	0	0	0	0	200	300	0	0	0	0	0	0	0	200	903	0	0	0	0	0	0	0	603	903	0
469	1	0	0	0	0	0	0	200	300	0	0	0	0	0	0	0	200	903	0	0	0	0	0	0	0	603	903	0
469	2	0	0	0	0	0	0	200	300	0	0	0	0	0	0	0	200	903	0	0	0	0	0	0	0	603	903	0
469	3	0	0	0	0	0	0	200	300	0	0	0	0	0	0	0	200	903	0	0	0	0	0	0	0	603	903	0
469	4	0	0	0	0	0	0	200	300	0	0	0	0	0	0	0	200	903	0	0	0	0	0	0	0	603	903	0
469	5	0	0	0	0	0	0	200	300	0	0	0	0	0	0	0	200	903	0	0	0	0	0	0	0	603	903	0
469	6	0	0	0	0	0	0	200	300	0	0	0	0	0	0	0	200	903	0	0	0	0	0	0	0	603	903	0
469	7	0	0	0	0	0	0	200	300	0	0	0	0	0	0	0	200	903	0	0	0	0	0	0	0	603	903	0
469	8	0	0	0	0	0	0	200	300	0	0	0	0	0	0	0	200	903	0	0	0	0	0	0	0	603	903	0
469	9	0	0	0	0	0	0	200	300	0	0	0	0	0	0	0	200	903	0	0	0	0	0	0	0	603	903	0
470	0	0	0	0	0	0	0	200	300	0	0	0	0	0	0	0	200	903	0	0	0	0	0	0	0	603	903	0
470	1	0	0	0	0	0	0	200	300	0	0	0	0	0	0	0	200	903	0	0	0	0	0	0	0	603	903	0
470	2	0	0	0	0	0	0	200	300	0	0	0	0	0	0	0	200	903	0	0	0	0	0	0	0	603	903	0
470	3	0	0	0	0	0	0	200	300	0	0	0	0	0	0	0	200	903	0	0	0	0	0	0	0	603	903	0
470	4	0	0	0	0	0	0	200	300	0	0	0	0	0	0	0	200	903	0	0	0	0	0	0	0	603	903	0
470	5	0	0	0	0	0	0	200	300	0	0	0	0	0	0	0	200	903	0	0	0	0	0	0	0	603	903	0
470	6	0	0	0	0	0	0	200	300	0	0	0	0	0	0	0	200	903	0	0	0	0	0	0	0	603	903	0
470	7	0	0	0	0	0	0	200	300	0	0	0	0	0	0	0	200	903	0	0	0	0	0	0	0	603	903	0
470	8	0	0	0	0	0	0	200	300	0	0	0	0	0	0	0	200	903	0	0	0	0	0	0	0	603	903	0
470	9	0	0	0	0	0	0	200	300	0	0	0	0	0	0	0	200	903	0	0	0	0	0	0	0	603	903	0
471	0	0	0	0	0	0	0	200	300	0	0	0	0	0	0	0	200	903	0	0	0	0	0	0	0	603	903	0
471	1	0	0	0	0	0	0	200	300	0	0	0	0	0	0	0	200	903	0	0	0	0	0	0	0	603	903	0
471	2	0	0	0	0	0	0	200	300	0	0	0	0	0	0	0	200	903	0	0	0	0	0	0	0	603	903	0
471	3	0	0	0	0	0	0	200	300	0	0	0	0	0	0	0	200	903	0	0	0	0	0	0	0	603	903	0
471	4	0	0	0	0	0	0	200	300	0	0	0	0	0	0	0	200	903	0	0	0	0	0	0	0	603	903	0
471	5	0	0	0	0	0	0	200	300	0	0	0	0	0	0	0	200	903	0	0	0	0	0	0	0	603	903	0
471	6	0	0	0	0	0	0	200	300	0	0	0	0	0	0	0	200	903	0	0	0	0	0	0	0	603	903	0
471	7	0	0	0	0	0	0	200	300	0	0	0	0	0	0	0	200	903	0	0	0	0	0	0	0	603	903	0
471	8	0	0	0	0	0	0	200	300	0	0	0	0	0	0	0	200	903	0	0	0	0	0	0	0	603	903	0
471	9	0	0	0	0	0	0	200	300	0	0	0	0	0	0	0	200	903	0	0	0	0	0	0	0	603	903	0
472	0	0	0	0	0	0	0	200	300	0	0	0	0	0	0	0	200	903	0	0	0	0	0	0	0	603	903	0
472	1	0	0	0	0	0	0	200	300	0	0	0	0	0	0	0	200	903	0	0	0	0	0	0	0	603	903	0
472	2	0	0	0	0	0	0	200	300	0	0	0	0	0	0	0	200	903	0	0	0	0	0	0	0	603	903	0
472	3	0	0	0	0	0	0	200	300	0	0	0	0	0	0	0	200	903	0	0	0	0	0	0	0	603	903	0
472	4	0	0	0	0	0	0	200	300	0	0	0	0	0	0	0	200	903	0	0	0	0	0	0	0	603	903	0
472	5	0	0	0	0	0	0	200	300	0	0	0	0	0	0	0	200	903	0	0	0	0	0	0	0	603	903	0
472	6	0	0	0	0	0	0	200	300	0	0	0	0	0	0	0	200	903	0	0	0	0	0	0	0	603	903	0
472	7	0	0	0	0	0	0	200	300	0	0	0	0	0	0	0	200	903	0	0	0	0	0	0	0	603	903	0
472	8	0	0	0	0	0	0	200	300	0	0	0	0	0	0	0	200	903	0	0	0	0	0	0	0	603	903	0
472	9	0	0	0	0	0	0	200	300	0	0	0	0	0	0	0	200	903	0	0	0	0	0	0	0	603	903	0
473	0	0	0	0	0	0	0	200	300	0	0	0	0	0	0	0	200	903	0	0	0	0	0	0	0	603	903	0
473	1	0	0	0	0	0	0	200	300	0	0	0	0	0	0	0	200	903	0	0	0	0	0	0	0	603	903	0
473	2	0	0	0	0	0	0	200	300	0	0	0	0	0	0	0	200	903	0	0	0	0	0	0	0	603	903	0
473	3	0	0	0	0	0	0	200	300	0	0	0	0	0	0	0	200	903	0	0	0	0	0	0	0	603	903	0
473	4	0	0	0	0	0	0	200	300	0	0	0	0	0	0	0	200	903	0	0	0	0	0	0	0	603	903	0
473	5	0	0	0	0	0	0	200	300	0	0	0	0	0	0	0	200	903	0	0	0	0	0	0	0	603	903	0
473	6	0	0	0	0	0	0	200	300	0	0	0	0	0	0	0	200	903	0	0	0	0	0	0	0	603	903	0
473	7	0	0	0	0	0	0	200	300	0	0	0	0	0	0	0	200	903	0	0	0	0	0	0	0	603	903	0
473	8	0	0	0	0	0	0	200	300	0	0	0	0	0	0	0	200	903	0	0	0	0	0	0	0	603	903	0
473	9	0	0	0	0	0	0	200	300	0	0	0	0	0	0	0	200	903	0	0	0	0	0	0	0	603	903	0
474	0	0	0	0	0	0	0	200	300	0	0	0	0	0	0	0	200	903	0	0	0	0	0	0	0	603	903	0
474	1	0	0	0	0	0	0	200	300	0	0	0	0	0	0	0	200	903	0	0	0	0	0	0	0	603	903	0
474	2	0	0	0	0	0	0	200	300	0	0	0	0	0	0	0	200	903	0	0	0	0	0	0	0	603	903	0
474	3	0	0	0	0	0	0	200	300	0	0	0	0	0	0	0	200	903	0	0	0	0	0	0	0	603	903	0
474	4	0	0	0	0	0	0	200	300	0	0	0	0	0	0	0	200	903	0	0	0	0	0	0	0	603	903	0
474	5	0	0	0	0	0	0	200	300	0	0	0	0	0	0	0	200	903	0	0	0	0	0	0	0	603	903	0
474	6	0	0	0	0	0	0	200	300	0	0	0	0	0	0	0	200	903	0	0	0	0	0	0	0	603	903	0
474	7	0	0	0	0	0	0	200	300	0	0	0	0	0	0	0	200	903	0	0	0	0	0	0	0	603	903	0
474	8	0	0	0	0	0	0	200	300	0	0	0	0	0	0	0	200	903	0	0	0	0	0	0	0	603	903	0
474	9	0	0	0	0	0	0	200	300	0	0	0	0	0	0	0	200	903	0	0	0	0	0	0	0	603	903	0
475	0	0	0	0	0	0	0	200	300	0	0	0	0	0	0	0	200	903	0	0	0	0	0	0	0	603	903	0
475	1	0	0	0	0	0	0	200	300	0	0	0	0	0	0	0	200	903	0	0	0	0	0	0	0	603	903	0
475	2	0	0	0	0	0	0	200	300	0	0	0	0	0	0	0	200	903	0	0	0	0	0	0	0	603	903	0
475	3	0	0	0	0	0	0	200	300	0	0	0	0	0	0	0	200	903	0	0	0	0	0	0	0	603	903	0
475	4	0	0	0	0	0	0	200	300	0	0	0	0	0	0	0	200	903	0	0	0	0	0	0	0	603	903	0
475	5	0	0	0	0	0	0	200	300	0	0	0	0	0	0	0	200	903	0	0	0	0	0	0	0	603	903	0
475	6	0	0	0	0	0	0	200	300	0	0	0	0	0	0	0	200	903	0	0	0	0	0	0	0	603	903	0
475	7	0	0	0	0	0	0	200	300	0	0	0	0	0	0	0	200	903	0	0	0	0	0	0	0	603	903	0
475	8	0	0	0	0	0	0	200	300	0	0	0	0	0	0	0	200	903	0	0	0	0	0	0	0	603	903	0
475	9	0	0	0	0	0	0	200	300	0	0	0	0	0	0	0	200	903	0	0	0	0	0	0	0	603	903	0
476	0	0	0	0	0	0	0	200	300	0	0	0	0	0	0	0	200	903	0	0	0	0	0	0	0	603	903	0
476	1	0	0	0	0	0	0	200	300	0	0	0	0	0	0	0	200	903	0	0	0	0	0	0	0	603	903	0
476	2	0	0	0	0	0	0	200	300	0	0	0	0	0	0	0	200	903	0	0	0	0	0	0	0	603	903	0
476	3	0	0	0	0	0	0	200	300	0	0	0	0	0	0	0	200	903	0	0	0	0	0	0	0	603	903	0
476	4	0	0	0	0	0	0	200	300	0	0	0	0	0	0	0	200	903	0	0	0	0	0	0	0	603	903	0
476	5	0	0	0	0	0	0	200	300	0	0	0	0	0	0	0	200	903	0	0	0	0	0	0	0	603	903	0
476	6	0	0	0	0	0	0	200	300	0	0	0	0	0	0	0	200	903	0	0	0	0	0	0	0	603	903	0
476	7	0	0	0	0	0	0	200	300	0	0	0	0	0	0	0	200	903	0	0	0	0	0	0	0	603	903	0
476	8	0	0	0	0	0	0	200	300	0	0	0	0	0	0	0	200	903	0	0	0	0	0	0	0	603	903	0
476	9	0	0	0	0	0	0	200	300	0	0	0	0	0	0	0	200	903	0	0	0	0	0	0	0	603	903	0
477	0	0	0	0	0	0	0	200	300	0	0	0	0	0	0	0	200	903	0	0	0	0	0	0	0	603	903	0
477	1	0	0	0	0	0	0	200	300	0	0	0	0	0	0	0	200	903	0	0	0	0	0	0	0	603	903	0
477	2	0	0	0	0	0	0	200	300	0	0	0	0	0	0	0	200	903	0	0	0	0	0	0	0	603	903	0
477	3	0	0	0	0	0	0	200	300	0	0	0	0	0	0	0	200	903	0	0	0	0	0	0	0	603	903	0
477	4	0	0	0	0	0	0	200	300	0	0	0	0	0	0	0	200	903	0	0	0	0	0	0	0	603	903	0
477	5	0	0	0	0	0	0	200	300	0	0	0	0	0	0	0	200	903	0	0	0	0	0	0	0	603	903	0
477	6	0	0	0	0	0	0	200	300	0	0	0	0	0	0	0	200	903	0	0	0	0	0	0	0	603	903	0
477	7	0	0	0	0	0	0	200	300	0	0	0	0	0	0	0	200	903	0	0	0	0	0	0	0	603	903	0
477	8	0	0	0	0	0	0	200	300	0	0	0	0	0	0	0	200	903	0	0	0	0	0	0	0	603	903	0
477	9	0	0	0	0	0	0	200	300	0	0	0	0	0	0	0	200	903	0	0	0	0	0	0	0	603	903	0
478	0	0	0	0	0	0	0	200	300	0	0	0	0	0	0	0	200	903	0	0	0	0	0	0	0	603	903	0
478	1	0	0	0	0	0	0	200	300	0	0	0	0	0	0	0	200	903	0	0	0	0	0	0	0	603	903	0
478	2	0	0	0	0	0	0	200	300	0	0	0	0	0	0	0	200	903	0	0	0	0	0	0	0	603	903	0
478	3	0	0	0	0	0	0	200	300	0	0	0	0	0	0	0	200	903	0	0	0	0	0	0	0	603	903	0
478	4	0	0	0	0	0	0	200	300	0	0	0	0	0	0	0	200	903	0	0	0	0	0	0	0	603	903	0
478	5	0	0	0	0	0	0	200	300	0	0	0	0	0	0	0	200	903	0	0	0	0	0	0	0	603	903	0
478	6	0	0	0	0	0	0	200	300	0	0	0	0	0	0	0	200	903	0	0	0	0	0	0	0	603	903	0
478	7	0	0	0	0	0	0	200	300	0	0	0	0	0	0	0	200	903	0	0	0	0	0	0	0	603	903	0
478	8	0	0	0	0	0	0	200	300	0	-0.613861	-12.728	-16.8862	-1906.77	-70.7556	592.024	195.81	1015.92	0	0	0	0	0	0	0	603	903	0
478	9	0	0	0	0	0	0	200	300	0	-2.29233	-10.5917	-18.4121	-2272.98	-9.7204	500.472	199.472	1026.45	0	0	0	0	0	0	0	603	903	0
479	0	0	0	0	0	0	0	200	300	0	0	0	0	0	0	0	200	903	0	0	0	0	0	0	0	603	903	0
479	1	0	0	0	0	0	0	200	300	0	0	0	0	0	0	0	200	903	0	0	0	0	0	0	0	603	903	0
479	2	0	0	0	0	0	0	200	300	0	-3.66562	-10.7443	-19.3276	-2364.53	51.3148	408.919	202.655	1025.34	0	0	0	0	0	0	0	603	903	0
479	3	0	0	0	0	0	0	200	300	0	-5.1915	-7.38739	-23.2949	-1815.21	-314.896	729.354	186.482	980.923	0	0	0	0	0	0	0	603	903	0
479	4	0	0	0	0	0	0	200	300	0	-4.73373	-4.18304	-22.3794	-3096.95	661.666	408.919	229.566	1041.38	0	0	0	0	0	0	0	603	903	0
479	5	0	0	0	0	0	0	200	300	0	-2.13974	-1.74164	-22.6846	-3554.72	295.455	637.801	213.025	1059.7	0	0	0	0	0	0	0	603	903	0
479	6	0	0	0	0	0	0	200	300	0	-4.88632	1.31012	-32.7554	-3920.93	295.455	592.024	209.02	1022.7	0	0	0	0	0	0	0	603	903	0
479	7	0	0	0	0	0	0	200	300	0	-9.0062	3.90411	-42.8262	-4470.25	600.631	592.024	214.025	1007.38	0	0	0	0	0	0	0	603	903	0
479	8	0	0	0	0	0	0	200	300	0	-5.64926	3.14117	-48.3193	-4561.8	356.491	592.024	207.378	997.409	0	0	0	0	0	0	0	603	903	0
479	9	0	0	0	0	0	0	200	300	0	-1.52939	2.37823	-55.6435	-5751.98	478.561	683.577	208.6	1006.37	0	0	0	0	0	0	0	603	903	0
480	0	0	0	0	0	0	0	200	300	0	-4.27597	3.29376	-61.7471	-6209.75	600.631	546.248	209.727	1003.57	0	0	0	0	0	0	0	603	903	0
480	1	0	0	0	0	0	0	200	300	0	-6.56479	2.22565	-66.935	-6667.51	600.631	408.919	208.973	1002.61	0	0	0	0	0	0	0	603	903	0
480	2	0	0	0	0	0	0	200	300	0	-5.1915	0.547179	-71.5127	-6942.17	1027.88	546.248	214.373	1000.08	0	0	0	0	0	0	0	603	903	0
480	3	0	0	0	0	0	0	200	300	0	-2.5975	2.37823	-80.668	-7399.93	905.807	408.919	211.229	994.733	0	0	0	0	0	0	0	603	903	0
480	4	0	0	0	0	0	0	200	300	0	-1.98715	3.75153	-90.7388	-8590.12	1088.91	271.59	212.001	997.669	0	0	0	0	0	0	0	603	903	0
480	5	0	0	0	0	0	0	200	300	0	-3.20785	3.59894	-101.725	-9414.09	1394.09	-140.398	213.704	995.544	0	0	0	0	0	0	0	603	903	0
480	6	0	0	0	0	0	0	200	300	0	0.912018	5.73517	-111.186	-10146.5	1638.23	-3.06848	214.734	994.258	0	0	0	0	0	0	0	603	903	0
480	7	0	0	0	0	0	0	200	300	0	2.59048	10.0076	-120.341	-10878.9	1394.09	-277.727	211.585	993.401	0	0	0	0	0	0	0	603	903	0
480	8	0	0	0	0	0	0	200	300	0	4.57413	10.0076	-128.275	-11611.4	2187.55	-598.161	217.054	993.519	0	0	0	0	0	0	0	603	903	0
480	9	0	0	0	0	0	0	200	300	0	6.40518	7.71881	-142.924	-12343.8	2187.55	-552.385	215.306	989.366	0	0	0	0	0	0	0	603	903	0
481	0	0	0	0	0	0	0	200	300	0	7.4733	10.9232	-152.079	-13167.8	2187.55	-872.819	214.384	989.585	0	0	0	0	0	0	0	603	903	0
481	1	0	0	0	0	0	0	200	300	0	9.45694	12.9068	-158.488	-14083.3	2675.83	-1010.15	216.883	991.86	0	0	0	0	0	0	0	603	903	0
481	2	0	0	0	0	0	0	200	300	0	12.3561	9.85504	-168.864	-14724.1	2675.83	-964.372	215.846	990.195	0	0	0	0	0	0	0	603	903	0
481	3	0	0	0	0	0	0	200	300	0	14.7975	8.02399	-178.019	-14815.7	3347.21	-1239.03	218.803	986.225	0	0	0	0	0	0	0	603	903	0
481	4	0	0	0	0	0	0	200	300	0	13.4242	8.78693	-185.648	-15914.3	2858.93	-1696.79	215.4	988.723	0	0	0	0	0	0	0	603	903	0
481	5	0	0	0	0	0	0	200	300	0	13.5768	6.95587	-192.973	-16555.2	3347.21	-1513.69	217.346	988.791	0	0	0	0	0	0	0	603	903	0
481	6	0	0	0	0	0	0	200	300	0	16.476	5.12482	-201.212	-16738.3	4201.71	-1559.47	220.882	986.187	0	0	0	0	0	0	0	603	903	0
481	7	0	0	0	0	0	0	200	300	0	19.5277	2.07306	-211.283	-16280.5	4262.74	-2017.23	220.176	980.056	0	0	0	0	0	0	0	603	903	0
481	8	0	0	0	0	0	0	200	300	0	21.5114	-0.0631721	-220.744	-17745.4	5117.23	-1925.68	223.182	983.389	0	0	0	0	0	0	0	603	903	0
481	9	0	0	0	0	0	0	200	300	0	20.7484	-4.64081	-228.373	-18660.9	4751.02	-2017.23	220.804	984.712	0	0	0	0	0	0	0	603	903	0
482	0	0	0	0	0	0	0	200	300	0	21.8166	-7.53998	-236.308	-18569.4	5300.34	-2108.78	222.43	981.581	0	0	0	0	0	0	0	603	903	0
482	1	0	0	0	0	0	0	200	300	0	20.7484	-9.52362	-243.632	-19027.1	5178.27	-1696.79	221.255	981.098	0	0	0	0	0	0	0	603	903	0
482	2	0	0	0	0	0	0	200	300	0	22.2743	-14.4064	-251.872	-19118.7	6093.8	-1879.9	224.194	978.906	0	0	0	0	0	0	0	603	903	0
482	3	0	0	0	0	0	0	200	300	0	23.8002	-18.2211	-259.501	-19942.7	5422.41	-2108.78	220.896	979.85	0	0	0	0	0	0	0	603	903	0
482	4	0	0	0	0	0	0	200	300	0	23.0373	-22.341	-267.741	-19759.6	5849.66	-2154.56	221.848	976.801	0	0	0	0	0	0	0	603	903	0
482	5	0	0	0	0	0	0	200	300	0	23.8002	-27.0712	-277.811	-20766.6	5971.73	-1879.9	221.496	977.751	0	0	0	0	0	0	0	603	903	0
482	6	0	0	0	0	0	0	200	300	0	25.3261	-31.3437	-282.084	-20766.6	6032.76	-2337.66	221.386	976.619	0	0	0	0	0	0	0	603	903	0
482	7	0	0	0	0	0	0	200	300	0	26.852	-33.9377	-287.882	-20949.7	6643.11	-2474.99	223.076	975.772	0	0	0	0	0	0	0	603	903	0
482	8	0	0	0	0	0	0	200	300	0	25.6313	-38.3627	-298.563	-21682.2	6887.25	-2429.22	223.068	975.622	0	0	0	0	0	0	0	603	903	0
482	9	0	0	0	0	0	0	200	300	0	25.3261	-43.2455	-306.803	-21682.2	7253.46	-2383.44	223.642	973.671	0	0	0	0	0	0	0	603	903	0
483	0	0	0	0	0	0	0	200	300	0	26.852	-47.9758	-318.095	-22506.1	7070.36	-2795.43	222.227	973.753	0	0	0	0	0	0	0	603	903	0
483	1	0	0	0	0	0	0	200	300	0	28.2253	-50.8749	-328.165	-21956.8	7436.57	-2566.54	222.661	969.908	0	0	0	0	0	0	0	603	903	0
483	2	0	0	0	0	0	0	200	300	0	29.2934	-54.537	-338.236	-22506.1	7741.75	-2703.87	222.889	969.54	0	0	0	0	0	0	0	603	903	0
483	3	0	0	0	0	0	0	200	300	0	30.3615	-58.6569	-350.749	-23147	7863.82	-2703.87	222.42	968.993	0	0	0	0	0	0	0	603	903	0
483	4	0	0	0	0	0	0	200	300	0	31.7348	-59.2673	-359.599	-23330.1	7802.78	-2566.54	221.699	967.878	0	0	0	0	0	0	0	603	903	0
483	5	0	0	0	0	0	0	200	300	0	29.9037	-62.4716	-372.416	-23055.5	7924.85	-2932.76	221.28	964.908	0	0	0	0	0	0	0	603	903	0
483	6	0	0	0	0	0	0	200	300	0	32.9555	-65.676	-380.961	-23787.9	8474.17	-2383.44	222.244	965.442	0	0	0	0	0	0	0	603	903	0
483	7	0	0	0	0	0	0	200	300	0	32.8029	-66.8967	-392.863	-24337.2	8779.34	-2749.65	222.347	964.948	0	0	0	0	0	0	0	603	903	0
483	8	0	0	0	0	0	0	200	300	0	33.1081	-68.4225	-405.07	-24520.3	8718.31	-2658.1	221.523	963.534	0	0	0	0	0	0	0	603	903	0
483	9	0	0	0	0	0	0	200	300	0	34.1762	-69.9484	-417.887	-24428.7	8657.27	-2841.2	220.717	961.458	0	0	0	0	0	0	0	603	903	0
484	0	0	0	0	0	0	0	200	300	0	34.4814	-72.3898	-430.094	-24062.5	9267.63	-2474.99	221.548	958.947	0	0	0	0	0	0	0	603	903	0
484	1	0	0	0	0	0	0	200	300	0	34.0236	-72.695	-441.996	-24703.4	9023.49	-2795.43	220.415	958.891	0	0	0	0	0	0	0	603	903	0
484	2	0	0	0	0	0	0	200	300	0	33.5658	-74.3735	-455.119	-24978.1	9084.52	-2795.43	219.961	957.883	0	0	0	0	0	0	0	603	903	0
484	3	0	0	0	0	0	0	200	300	0	35.8546	-75.7468	-466.41	-25344.3	9450.73	-2520.77	220.263	957.339	0	0	0	0	0	0	0	603	903	0
484	4	0	0	0	0	0	0	200	300	0	32.6503	-76.9675	-478.312	-24703.4	9450.73	-2658.1	219.759	954.647	0	0	0	0	0	0	0	603	903	0
484	5	0	0	0	0	0	0	200	300	0	33.1081	-78.3408	-489.603	-25161.2	9328.66	-2520.77	219.054	954.391	0	0	0	0	0	0	0	603	903	0
484	6	0	0	0	0	0	0	200	300	0	33.1081	-82.4606	-495.707	-25710.5	9511.77	-2337.66	219.188	954.866	0	0	0	0	0	0	0	603	903	0
484	7	0	0	0	0	0	0	200	300	0	31.7348	-83.3762	-506.999	-24611.9	9572.8	-2566.54	218.881	951.544	0	0	0	0	0	0	0	603	903	0
484	8	0	0	0	0	0	0	200	300	0	31.5822	-83.9865	-517.069	-25710.5	9511.77	-2703.87	218.396	952.724	0	0	0	0	0	0	0	603	903	0
484	9	0	0	0	0	0	0	200	300	0	32.4977	-87.6486	-525.614	-25069.6	10000	-2566.54	219.025	950.696	0	0	0	0	0	0	0	603	903	0
485	0	0	0	0	0	0	0	200	300	0	30.5141	-90.5478	-531.413	-25069.6	9755.91	-2566.54	218.358	950.175	0	0	0	0	0	0	0	603	903	0
485	1	0	0	0	0	0	0	200	300	0	29.446	-91.3107	-539.652	-25527.4	10061.1	-2429.22	218.644	950.303	0	0	0	0	0	0	0	603	903	0
485	2	0	0	0	0	0	0	200	300	0	27.6149	-92.684	-547.892	-25161.2	9755.91	-2429.22	217.806	948.924	0	0	0	0	0	0	0	603	903	0
485	3	0	0	0	0	0	0	200	300	0	27.0045	-97.2617	-554.606	-25161.2	10000	-2474.99	218.031	948.368	0	0	0	0	0	0	0	603	903	0
485	4	0	0	0	0	0	0	200	300	0	26.2416	-98.0246	-564.677	-24978.1	9694.87	-2566.54	217.169	947.234	0	0	0	0	0	0	0	603	903	0
485	5	0	0	0	0	0	0	200	300	0	25.7838	-100.161	-568.644	-24703.4	9450.73	-2520.77	216.62	946.443	0	0	0	0	0	0	0	603	903	0
485	6	0	0	0	0	0	0	200	300	0	24.258	-100.924	-576.579	-24611.9	10061.1	-2383.44	217.45	945.686	0	0	0	0	0	0	0	603	903	0
485	7	0	0	0	0	0	0	200	300	0	21.8166	-102.907	-587.565	-24245.6	9450.73	-2612.32	216.085	944.265	0	0	0	0	0	0	0	603	903	0
485	8	0	0	0	0	0	0	200	300	0	20.5959	-105.654	-595.5	-24154.1	9389.7	-2520.77	215.768	943.561	0	0	0	0	0	0	0	603	903	0
485	9	0	0	0	0	0	0	200	300	0	17.5441	-105.654	-600.688	-23604.8	9023.49	-2703.87	215.022	942.296	0	0	0	0	0	0	0	603	903	0
486	0	0	0	0	0	0	0	200	300	0	16.1708	-110.689	-609.232	-23238.6	9206.59	-2612.32	215.112	941.144	0	0	0	0	0	0	0	603	903	0
486	1	0	0	0	0	0	0	200	300	0	13.4242	-109.926	-614.115	-22963.9	8962.45	-2520.77	214.594	940.394	0	0	0	0	0	0	0	603	903	0
486	2	0	0	0	0	0	0	200	300	0	8.23624	-110.995	-622.05	-22780.8	8596.24	-2520.77	213.819	939.622	0	0	0	0	0	0	0	603	903	0
486	3	0	0	0	0	0	0	200	300	0	7.93106	-115.114	-626.627	-21865.3	8779.34	-2520.77	214.01	937.894	0	0	0	0	0	0	0	603	903	0
486	4	0	0	0	0	0	0	200	300	0	7.62589	-118.166	-629.069	-21682.2	8718.31	-2566.54	213.859	937.467	0	0	0	0	0	0	0	603	903	0
486	5	0	0	0	0	0	0	200	300	0	5.33707	-118.166	-634.562	-21499.1	8168.99	-2154.56	212.873	936.88	0	0	0	0	0	0	0	603	903	0
486	6	0	0	0	0	0	0	200	300	0	4.11636	-120.913	-638.834	-21407.5	7985.89	-2383.44	212.501	936.51	0	0	0	0	0	0	0	603	903	0
486	7	0	0	0	0	0	0	200	300	0	6.10001	-123.659	-643.717	-20766.6	8352.1	-2154.56	212.975	935.261	0	0	0	0	0	0	0	603	903	0
486	8	0	0	0	0	0	0	200	300	0	3.35342	-124.88	-646.769	-20400.4	7985.89	-1925.68	212.347	934.542	0	0	0	0	0	0	0	603	903	0
486	9	0	0	0	0	0	0	200	300	0	3.04825	-125.796	-648.6	-20034.2	7558.64	-2063	211.654	933.888	0	0	0	0	0	0	0	603	903	0
487	0	0	0	0	0	0	0	200	300	0	2.28531	-126.711	-648.905	-20308.9	7741.75	-1788.35	211.93	934.297	0	0	0	0	0	0	0	603	903	0
487	1	0	0	0	0	0	0	200	300	0	1.36978	-127.627	-651.652	-19668	7741.75	-1467.91	211.88	933.182	0	0	0	0	0	0	0	603	903	0
487	2	0	0	0	0	0	0	200	300	0	1.36978	-126.253	-654.398	-19301.8	7924.85	-1513.69	212.11	932.496	0	0	0	0	0	0	0	603	903	0
487	3	0	0	0	0	0	0	200	300	0	1.67496	-127.169	-655.619	-18752.5	7558.64	-1467.91	211.529	931.603	0	0	0	0	0	0	0	603	903	0
487	4	0	0	0	0	0	0	200	300	0	2.4379	-127.779	-653.788	-18569.4	7436.57	-1284.81	211.375	931.403	0	0	0	0	0	0	0	603	903	0
487	5	0	0	0	0	0	0	200	300	0	1.06461	-126.253	-654.093	-18752.5	7436.57	-1284.81	211.369	931.669	0	0	0	0	0	0	0	603	903	0
487	6	0	0	0	0	0	0	200	300	0	0.149079	-124.88	-655.009	-17562.3	7802.78	-1239.03	211.912	929.812	0	0	0	0	0	0	0	603	903	0
487	7	0	0	0	0	0	0	200	300	0	1.21719	-125.49	-655.924	-17562.3	7131.39	-1193.25	210.872	929.775	0	0	0	0	0	0	0	603	903	0
487	8	0	0	0	0	0	0	200	300	0	2.28531	-127.016	-656.84	-17196.1	7131.39	-918.596	210.857	929.18	0	0	0	0	0	0	0	603	903	0
487	9	0	0	0	0	0	0	200	300	0	0.75943	-126.406	-655.314	-17287.6	6704.15	-918.596	210.23	929.381	0	0	0	0	0	0	0	603	903	0
488	0	0	0	0	0	0	0	200	300	0	-0.766449	-126.101	-655.009	-16921.4	7009.32	-735.49	210.701	928.834	0	0	0	0	0	0	0	603	903	0
488	1	0	0	0	0	0	0	200	300	0	-0.308685	-126.253	-654.398	-17196.1	6460.01	-735.49	209.872	929.278	0	0	0	0	0	0	0	603	903	0
488	2	0	0	0	0	0	0	200	300	0	-0.613861	-127.474	-657.145	-16005.9	6765.18	-781.267	210.295	927.357	0	0	0	0	0	0	0	603	903	0
488	3	0	0	0	0	0	0	200	300	0	0.149079	-128.847	-657.145	-15639.7	6398.97	-415.056	209.738	926.799	0	0	0	0	0	0	0	603	903	0
488	4	0	0	0	0	0	0	200	300	0	-1.98715	-129.915	-656.229	-16280.5	6276.9	-598.161	209.565	927.809	0	0	0	0	0	0	0	603	903	0
488	5	0	0	0	0	0	0	200	300	0	-4.27597	-130.678	-655.619	-15365	6032.76	-231.95	209.202	926.436	0	0	0	0	0	0	0	603	903	0
488	6	0	0	0	0	0	0	200	300	0	-5.64926	-130.221	-657.45	-14815.7	6215.87	-186.174	209.455	925.535	0	0	0	0	0	0	0	603	903	0
488	7	0	0	0	0	0	0	200	300	0	-6.56479	-132.509	-656.229	-13900.2	5971.73	-231.95	209.1	924.182	0	0	0	0	0	0	0	603	903	0
488	8	0	0	0	0	0	0	200	300	0	-7.32773	-131.594	-658.366	-14174.8	5971.73	-277.727	209.071	924.53	0	0	0	0	0	0	0	603	903	0
488	9	0	0	0	0	0	0	200	300	0	-10.3795	-133.425	-658.671	-13991.7	5788.62	-323.503	208.788	924.242	0	0	0	0	0	0	0	603	903	0
489	0	0	0	0	0	0	0	200	300	0	-11.1424	-133.73	-660.502	-13808.6	5788.62	-140.398	208.764	923.906	0	0	0	0	0	0	0	603	903	0
489	1	0	0	0	0	0	0	200	300	0	-13.4312	-135.409	-663.249	-13076.2	5483.45	-231.95	208.268	922.715	0	0	0	0	0	0	0	603	903	0
489	2	0	0	0	0	0	0	200	300	0	-14.1942	-136.324	-666.3	-12984.6	5300.34	-231.95	207.955	922.488	0	0	0	0	0	0	0	603	903	0
489	3	0	0	0	0	0	0	200	300	0	-15.5675	-137.087	-667.216	-12618.4	4995.16	180.037	207.487	921.912	0	0	0	0	0	0	0	603	903	0
489	4	0	0	0	0	0	0	200	300	0	-18.1615	-137.24	-668.742	-12343.8	4995.16	-323.503	207.47	921.458	0	0	0	0	0	0	0	603	903	0
489	5	0	0	0	0	0	0	200	300	0	-17.7037	-136.172	-670.268	-12160.7	4934.13	-323.503	207.361	921.143	0	0	0	0	0	0	0	603	903	0
489	6	0	0	0	0	0	0	200	300	0	-22.7391	-138.46	-675.456	-11611.4	4628.95	-186.174	206.853	920.19	0	0	0	0	0	0	0	603	903	0
489	7	0	0	0	0	0	0	200	300	0	-22.7391	-139.986	-676.371	-11245.1	4628.95	-94.6212	206.844	919.626	0	0	0	0	0	0	0	603	903	0
489	8	0	0	0	0	0	0	200	300	0	-24.4176	-141.207	-678.812	-11062	4689.99	-48.8449	206.909	919.296	0	0	0	0	0	0	0	603	903	0
489	9	0	0	0	0	0	0	200	300	0	-26.4012	-141.207	-681.559	-11245.1	4445.85	-94.6212	206.523	919.499	0	0	0	0	0	0	0	603	903	0
490	0	0	0	0	0	0	0	200	300	0	-27.0116	-141.817	-684.611	-9505.64	4384.81	-231.95	206.405	916.885	0	0	0	0	0	0	0	603	903	0
490	1	0	0	0	0	0	0	200	300	0	-26.7064	-142.428	-684.306	-9780.3	4201.71	546.248	206.14	917.292	0	0	0	0	0	0	0	603	903	0
490	2	0	0	0	0	0	0	200	300	0	-27.6219	-143.038	-690.714	-9963.41	4445.85	88.4843	206.437	917.425	0	0	0	0	0	0	0	603	903	0
490	3	0	0	0	0	0	0	200	300	0	-28.8426	-143.343	-691.935	-10329.6	4323.78	180.037	206.249	917.929	0	0	0	0	0	0	0	603	903	0
490	4	0	0	0	0	0	0	200	300	0	-27.1642	-143.038	-694.376	-10512.7	3896.53	271.59	205.612	918.14	0	0	0	0	0	0	0	603	903	0
490	5	0	0	0	0	0	0	200	300	0	-29.3004	-143.496	-698.344	-9597.2	4079.64	408.919	205.842	916.743	0	0	0	0	0	0	0	603	903	0
490	6	0	0	0	0	0	0	200	300	0	-28.3849	-143.496	-700.785	-9322.54	4201.71	500.472	205.996	916.303	0	0	0	0	0	0	0	603	903	0
490	7	0	0	0	0	0	0	200	300	0	-29.1478	-142.275	-705.058	-9505.64	4140.67	592.024	205.873	916.482	0	0	0	0	0	0	0	603	903	0
490	8	0	0	0	0	0	0	200	300	0	-29.3004	-143.496	-704.447	-9688.75	3835.5	454.695	205.445	916.754	0	0	0	0	0	0	0	603	903	0
490	9	0	0	0	0	0	0	200	300	0	-29.3004	-142.58	-707.194	-9139.43	3957.57	729.354	205.596	915.924	0	0	0	0	0	0	0	603	903	0
491	0	0	0	0	0	0	0	200	300	0	-28.8426	-142.275	-709.635	-8773.22	4201.71	820.906	205.921	915.363	0	0	0	0	0	0	0	603	903	0
491	1	0	0	0	0	0	0	200	300	0	-26.5538	-142.885	-712.077	-8956.33	3957.57	683.577	205.558	915.578	0	0	0	0	0	0	0	603	903	0
491	2	0	0	0	0	0	0	200	300	0	-28.5374	-142.275	-714.823	-8956.33	3652.39	912.459	205.11	915.529	0	0	0	0	0	0	0	603	903	0
491	3	0	0	0	0	0	0	200	300	0	-29.9107	-141.36	-717.875	-8956.33	3713.42	775.13	205.173	915.476	0	0	0	0	0	0	0	603	903	0
491	4	0	0	0	0	0	0	200	300	0	-30.0633	-139.986	-720.622	-8773.22	4018.6	1004.01	205.577	915.175	0	0	0	0	0	0	0	603	903	0
491	5	0	0	0	0	0	0	200	300	0	-26.859	-140.749	-722.758	-8590.12	3957.57	1004.01	205.476	914.885	0	0	0	0	0	0	0	603	903	0
491	6	0	0	0	0	0	0	200	300	0	-29.453	-141.512	-725.504	-8132.35	3652.39	912.459	205.034	914.209	0	0	0	0	0	0	0	603	903	0
491	7	0	0	0	0	0	0	200	300	0	-28.8426	-140.749	-725.504	-8315.46	3713.42	820.906	205.118	914.462	0	0	0	0	0	0	0	603	903	0
491	8	0	0	0	0	0	0	200	300	0	-29.9107	-140.444	-729.167	-8315.46	3896.53	958.235	205.344	914.404	0	0	0	0	0	0	0	603	903	0
491	9	0	0	0	0	0	0	200	300	0	-30.8263	-139.529	-732.523	-7949.25	3957.57	820.906	205.403	913.852	0	0	0	0	0	0	0	603	903	0
492	0	0	0	0	0	0	0	200	300	0	-28.8426	-139.986	-732.829	-7125.27	3469.28	958.235	204.734	912.723	0	0	0	0	0	0	0	603	903	0
492	1	0	0	0	0	0	0	200	300	0	-28.8426	-137.545	-738.017	-7308.38	3713.42	1095.56	205.032	912.903	0	0	0	0	0	0	0	603	903	0
492	2	0	0	0	0	0	0	200	300	0	-30.6737	-139.376	-738.932	-7857.7	3957.57	820.906	205.356	913.634	0	0	0	0	0	0	0	603	903	0
492	3	0	0	0	0	0	0	200	300	0	-30.6737	-137.545	-741.068	-7399.93	3896.53	1004.01	205.258	912.985	0	0	0	0	0	0	0	603	903	0
492	4	0	0	0	0	0	0	200	300	0	-29.1478	-136.935	-744.425	-7674.59	3774.46	820.906	205.07	913.31	0	0	0	0	0	0	0	603	903	0
492	5	0	0	0	0	0	0	200	300	0	-27.0116	-137.24	-746.256	-7125.27	4140.67	820.906	205.549	912.548	0	0	0	0	0	0	0	603	903	0
492	6	0	0	0	0	0	0	200	300	0	-27.9271	-135.103	-747.782	-7766.14	4079.64	1004.01	205.456	913.386	0	0	0	0	0	0	0	603	903	0
492	7	0	0	0	0	0	0	200	300	0	-29.9107	-135.866	-749.613	-7766.14	4079.64	775.13	205.442	913.36	0	0	0	0	0	0	0	603	903	0
492	8	0	0	0	0	0	0	200	300	0	-30.3685	-133.883	-751.444	-7399.93	3774.46	912.459	205.023	912.848	0	0	0	0	0	0	0	603	903	0
492	9	0	0	0	0	0	0	200	300	0	-29.453	-133.12	-754.801	-6759.06	3591.35	1095.56	204.758	911.955	0	0	0	0	0	0	0	603	903	0
493	0	0	0	0	0	0	0	200	300	0	-28.5374	-132.509	-756.938	-7857.7	4079.64	912.459	205.39	913.381	0	0	0	0	0	0	0	603	903	0
493	1	0	0	0	0	0	0	200	300	0	-29.7581	-132.052	-756.938	-7399.93	4140.67	1095.56	205.47	912.776	0	0	0	0	0	0	0	603	903	0
493	2	0	0	0	0	0	0	200	300	0	-27.6219	-131.441	-760.6	-7491.49	3835.5	1049.79	205.043	912.849	0	0	0	0	0	0	0	603	903	0
493	3	0	0	0	0	0	0	200	300	0	-28.8426	-129.305	-760.294	-7674.59	3957.57	1370.22	205.205	913.094	0	0	0	0	0	0	0	603	903	0
493	4	0	0	0	0	0	0	200	300	0	-27.0116	-129	-763.651	-7216.83	4384.81	1278.67	205.742	912.451	0	0	0	0	0	0	0	603	903	0
493	5	0	0	0	0	0	0	200	300	0	-26.859	-127.779	-764.262	-7216.83	4140.67	1095.56	205.418	912.443	0	0	0	0	0	0	0	603	903	0
493	6	0	0	0	0	0	0	200	300	0	-28.3849	-126.253	-763.346	-7583.04	3957.57	1324.45	205.185	912.934	0	0	0	0	0	0	0	603	903	0
493	7	0	0	0	0	0	0	200	300	0	-26.7064	-125.948	-764.872	-7674.59	4140.67	1095.56	205.414	913.034	0	0	0	0	0	0	0	603	903	0
493	8	0	0	0	0	0	0	200	300	0	-27.7745	-123.812	-766.398	-7308.38	4201.71	1095.56	205.482	912.536	0	0	0	0	0	0	0	603	903	0
493	9	0	0	0	0	0	0	200	300	0	-25.7909	-123.202	-768.839	-6942.17	4323.78	1370.22	205.624	912.029	0	0	0	0	0	0	0	603	903	0
494	0	0	0	0	0	0	0	200	300	0	-25.4857	-123.049	-769.145	-7583.04	4079.64	1004.01	205.304	912.859	0	0	0	0	0	0	0	603	903	0
494	1	0	0	0	0	0	0	200	300	0	-26.859	-118.929	-770.06	-7949.25	4201.71	1049.79	205.456	913.323	0	0	0	0	0	0	0	603	903	0
494	2	0	0	0	0	0	0	200	300	0	-25.0279	-119.997	-770.67	-7766.14	4201.71	958.235	205.452	913.077	0	0	0	0	0	0	0	603	903	0
494	3	0	0	0	0	0	0	200	300	0	-26.096	-118.166	-772.501	-7399.93	4384.81	1049.79	205.676	912.579	0	0	0	0	0	0	0	603	903	0
494	4	0	0	0	0	0	0	200	300	0	-24.5702	-116.64	-773.722	-7674.59	4018.6	958.235	205.194	912.919	0	0	0	0	0	0	0	603	903	0
494	5	0	0	0	0	0	0	200	300	0	-24.4176	-116.03	-771.586	-7491.49	4201.71	1004.01	205.446	912.709	0	0	0	0	0	0	0	603	903	0
494	6	0	0	0	0	0	0	200	300	0	-25.4857	-115.725	-776.164	-7125.27	4689.99	866.683	206.043	912.18	0	0	0	0	0	0	0	603	903	0
494	7	0	0	0	0	0	0	200	300	0	-25.6383	-113.894	-775.858	-7674.59	4445.85	912.459	205.73	912.892	0	0	0	0	0	0	0	603	903	0
494	8	0	0	0	0	0	0	200	300	0	-25.0279	-112.215	-776.164	-7491.49	4384.81	912.459	205.649	912.652	0	0	0	0	0	0	0	603	903	0
494	9	0	0	0	0	0	0	200	300	0	-24.4176	-110.689	-777.995	-8132.35	4384.81	820.906	205.636	913.453	0	0	0	0	0	0	0	603	903	0
495	0	0	0	0	0	0	0	200	300	0	-23.0443	-109.011	-779.215	-7583.04	4567.92	912.459	205.862	912.732	0	0	0	0	0	0	0	603	903	0
495	1	0	0	0	0	0	0	200	300	0	-24.4176	-109.011	-779.826	-8223.91	4567.92	958.235	205.858	913.546	0	0	0	0	0	0	0	603	903	0
495	2	0	0	0	0	0	0	200	300	0	-24.1124	-107.332	-778.3	-7857.7	4689.99	1095.56	206.026	913.096	0	0	0	0	0	0	0	603	903	0
495	3	0	0	0	0	0	0	200	300	0	-22.2813	-107.485	-779.826	-7308.38	4384.81	683.577	205.623	912.372	0	0	0	0	0	0	0	603	903	0
495	4	0	0	0	0	0	0	200	300	0	-22.7391	-103.976	-780.131	-7766.14	4751.02	866.683	206.09	912.955	0	0	0	0	0	0	0	603	903	0
495	5	0	0	0	0	0	0	200	300	0	-23.502	-102.755	-780.131	-8315.46	4751.02	729.354	206.09	913.659	0	0	0	0	0	0	0	603	903	0
495	6	0	0	0	0	0	0	200	300	0	-21.3658	-102.144	-781.046	-8132.35	4689.99	454.695	206.005	913.412	0	0	0	0	0	0	0	603	903	0
495	7	0	0	0	0	0	0	200	300	0	-21.5184	-99.8557	-781.657	-8132.35	4689.99	683.577	206	913.404	0	0	0	0	0	0	0	603	903	0
495	8	0	0	0	0	0	0	200	300	0	-21.671	-100.161	-779.521	-8132.35	4751.02	546.248	206.095	913.433	0	0	0	0	0	0	0	603	903	0
495	9	0	0	0	0	0	0	200	300	0	-21.0606	-97.5668	-779.826	-8681.67	4873.09	683.577	206.249	914.133	0	0	0	0	0	0	0	603	903	0
496	0	0	0	0	0	0	0	200	300	0	-22.5865	-96.4987	-780.131	-8773.22	4445.85	729.354	205.699	914.246	0	0	0	0	0	0	0	603	903	0
496	1	0	0	0	0	0	0	200	300	0	-22.1288	-96.3461	-776.774	-7857.7	4751.02	546.248	206.116	913.116	0	0	0	0	0	0	0	603	903	0
496	2	0	0	0	0	0	0	200	300	0	-20.9081	-94.9728	-778.91	-8223.91	4751.02	592.024	206.1	913.558	0	0	0	0	0	0	0	603	903	0
496	3	0	0	0	0	0	0	200	300	0	-21.3658	-93.1418	-776.469	-8498.56	4873.09	592.024	206.276	913.945	0	0	0	0	0	0	0	603	903	0
496	4	0	0	0	0	0	0	200	300	0	-22.1288	-91.1581	-774.638	-8773.22	4445.85	500.472	205.739	914.326	0	0	0	0	0	0	0	603	903	0
496	5	0	0	0	0	0	0	200	300	0	-20.1451	-89.4797	-774.333	-8864.77	4873.09	592.024	206.293	914.448	0	0	0	0	0	0	0	603	903	0
496	6	0	0	0	0	0	0	200	300	0	-21.3658	-89.0219	-768.534	-8681.67	4751.02	637.801	206.182	914.296	0	0	0	0	0	0	0	603	903	0
496	7	0	0	0	0	0	0	200	300	0	-21.0606	-88.8693	-771.281	-8498.56	4689.99	546.248	206.081	914.019	0	0	0	0	0	0	0	603	903	0
496	8	0	0	0	0	0	0	200	300	0	-20.6029	-86.4279	-768.229	-8864.77	4567.92	637.801	205.946	914.539	0	0	0	0	0	0	0	603	903	0
496	9	0	0	0	0	0	0	200	300	0	-21.3658	-84.7495	-766.398	-9139.43	4689.99	454.695	206.12	914.925	0	0	0	0	0	0	0	603	903	0
497	0	0	0	0	0	0	0	200	300	0	-21.671	-83.9865	-765.788	-8498.56	4934.13	408.919	206.443	914.098	0	0	0	0	0	0	0	603	903	0
497	1	0	0	0	0	0	0	200	300	0	-19.9925	-83.2236	-763.651	-8498.56	4262.74	408.919	205.582	914.129	0	0	0	0	0	0	0	603	903	0
497	2	0	0	0	0	0	0	200	300	0	-19.9925	-80.1718	-760.6	-8498.56	4445.85	363.142	205.845	914.174	0	0	0	0	0	0	0	603	903	0
497	3	0	0	0	0	0	0	200	300	0	-20.1451	-80.1718	-757.548	-8773.22	4751.02	88.4843	206.272	914.581	0	0	0	0	0	0	0	603	903	0
497	4	0	0	0	0	0	0	200	300	0	-22.1288	-78.0356	-755.106	-8498.56	4567.92	42.7079	206.049	914.255	0	0	0	0	0	0	0	603	903	0
497	5	0	0	0	0	0	0	200	300	0	-21.0606	-77.1201	-752.36	-7949.25	4689.99	454.695	206.234	913.566	0	0	0	0	0	0	0	603	903	0
497	6	0	0	0	0	0	0	200	300	0	-20.6029	-76.6623	-749.308	-8407.01	4506.88	-186.174	206.015	914.22	0	0	0	0	0	0	0	603	903	0
497	7	0	0	0	0	0	0	200	300	0	-20.2977	-74.3735	-742.899	-8132.35	4689.99	180.037	206.313	913.947	0	0	0	0	0	0	0	603	903	0
497	8	0	0	0	0	0	0	200	300	0	-21.5184	-73.1528	-741.984	-8132.35	4506.88	88.4843	206.074	913.96	0	0	0	0	0	0	0	603	903	0
497	9	0	0	0	0	0	0	200	300	0	-21.3658	-71.9321	-740.153	-8590.12	4384.81	-94.6212	205.924	914.606	0	0	0	0	0	0	0	603	903	0
498	0	0	0	0	0	0	0	200	300	0	-21.8236	-70.864	-738.017	-8315.46	4445.85	42.7079	206.024	914.267	0	0	0	0	0	0	0	603	903	0
498	1	0	0	0	0	0	0	200	300	0	-20.4503	-70.101	-733.439	-8681.67	4018.6	-48.8449	205.479	914.837	0	0	0	0	0	0	0	603	903	0
498	2	0	0	0	0	0	0	200	300	0	-20.7555	-69.0329	-728.861	-8864.77	4384.81	42.7079	206.016	915.162	0	0	0	0	0	0	0	603	903	0
498	3	0	0	0	0	0	0	200	300	0	-21.8236	-67.507	-726.725	-8773.22	4323.78	-140.398	205.95	915.072	0	0	0	0	0	0	0	603	903	0
498	4	0	0	0	0	0	0	200	300	0	-21.3658	-65.676	-720.011	-8132.35	4323.78	-3.06848	206.005	914.295	0	0	0	0	0	0	0	603	903	0
498	5	0	0	0	0	0	0	200	300	0	-20.2977	-64.4553	-720.011	-8315.46	4445.85	-231.95	206.175	914.549	0	0	0	0	0	0	0	603	903	0
498	6	0	0	0	0	0	0	200	300	0	-18.6192	-64.3027	-716.654	-8498.56	4567.92	-231.95	206.374	914.859	0	0	0	0	0	0	0	603	903	0
498	7	0	0	0	0	0	0	200	300	0	-20.2977	-63.2346	-712.382	-8773.22	3896.53	-186.174	205.47	915.315	0	0	0	0	0	0	0	603	903	0
498	8	0	0	0	0	0	0	200	300	0	-21.0606	-62.1664	-708.109	-8590.12	4079.64	-48.8449	205.761	915.131	0	0	0	0	0	0	0	603	903	0
498	9	0	0	0	0	0	0	200	300	0	-21.3658	-60.488	-705.973	-8681.67	4384.81	-48.8449	206.211	915.297	0	0	0	0	0	0	0	603	903	0
499	0	0	0	0	0	0	0	200	300	0	-19.9925	-60.1828	-699.87	-8315.46	4201.71	-48.8449	206.004	914.882	0	0	0	0	0	0	0	603	903	0
499	1	0	0	0	0	0	0	200	300	0	-20.4503	-59.4199	-697.428	-8590.12	3835.5	-231.95	205.499	915.317	0	0	0	0	0	0	0	603	903	0
499	2	0	0	0	0	0	0	200	300	0	-20.2977	-57.894	-693.156	-8407.01	4506.88	-460.832	206.502	915.129	0	0	0	0	0	0	0	603	903	0
499	3	0	0	0	0	0	0	200	300	0	-20.9081	-55.7578	-689.799	-8315.46	4201.71	-186.174	206.091	915.055	0	0	0	0	0	0	0	603	903	0
499	4	0	0	0	0	0	0	200	300	0	-21.5184	-54.9948	-687.052	-8132.35	3896.53	-689.714	205.671	914.837	0	0	0	0	0	0	0	603	903	0
499	5	0	0	0	0	0	0	200	300	0	-20.4503	-54.537	-682.475	-7674.59	3957.57	-415.056	205.799	914.245	0	0	0	0	0	0	0	603	903	0
499	6	0	0	0	0	0	0	200	300	0	-20.4503	-53.3163	-679.423	-8040.8	4018.6	-460.832	205.915	914.835	0	0	0	0	0	0	0	603	903	0
499	7	0	0	0	0	0	0	200	300	0	-21.9762	-51.9431	-674.54	-7857.7	4140.67	-552.385	206.139	914.649	0	0	0	0	0	0	0	603	903	0
499	8	0	0	0	0	0	0	200	300	0	-20.6029	-50.4172	-670.573	-8315.46	3957.57	-735.49	205.902	915.401	0	0	0	0	0	0	0	603	903	0
499	9	0	0	0	0	0	0	200	300	0	-21.671	-49.5016	-668.131	-7399.93	3774.46	-598.161	205.649	914.076	0	0	0	0	0	0	0	603	903	0
500	0	0	0	0	0	0	0	200	300	0	-21.5184	-47.9758	-664.774	-7857.7	4140.67	-643.938	206.229	914.82	0	0	0	0	0	0	0	603	903	0
500	1	0	0	0	0	0	0	200	300	0	-21.3658	-46.7551	-659.281	-7674.59	4140.67	-643.938	206.281	914.641	0	0	0	0	0	0	0	603	903	0
500	2	0	0	0	0	0	0	200	300	0	-22.5865	-46.6025	-654.704	-7583.04	3652.39	-460.832	205.579	914.582	0	0	0	0	0	0	0	603	903	0
500	3	0	0	0	0	0	0	200	300	0	-22.5865	-45.3818	-651.347	-7308.38	3896.53	-186.174	205.982	914.22	0	0	0	0	0	0	0	603	903	0
500	4	0	0	0	0	0	0	200	300	0	-21.2132	-44.1611	-647.074	-7308.38	3469.28	-552.385	205.361	914.295	0	0	0	0	0	0	0	603	903	0
500	5	0	0	0	0	0	0	200	300	0	-21.9762	-44.0085	-642.497	-7216.83	3835.5	-598.161	205.97	914.233	0	0	0	0	0	0	0	603	903	0
500	6	0	0	0	0	0	0	200	300	0	-22.8917	-42.33	-639.75	-7674.59	3469.28	-827.043	205.423	914.996	0	0	0	0	0	0	0	603	903	0
500	7	0	0	0	0	0	0	200	300	0	-21.5184	-41.8723	-635.172	-7216.83	3591.35	-827.043	205.654	914.362	0	0	0	0	0	0	0	603	903	0
500	8	0	0	0	0	0	0	200	300	0	-22.1288	-40.6516	-630.29	-6667.51	3774.46	-735.49	205.988	913.578	0	0	0	0	0	0	0	603	903	0
500	9	0	0	0	0	0	0	200	300	0	-21.9762	-39.5834	-627.848	-7033.72	3408.25	-827.043	205.428	914.203	0	0	0	0	0	0	0	603	903	0
501	0	0	0	0	0	0	0	200	300	0	-22.4339	-39.736	-625.102	-6942.17	3469.28	-598.161	205.55	914.106	0	0	0	0	0	0	0	603	903	0
501	1	0	0	0	0	0	0	200	300	0	-23.502	-38.5153	-618.998	-7399.93	3652.39	-781.267	205.9	914.955	0	0	0	0	0	0	0	603	903	0
501	2	0	0	0	0	0	0	200	300	0	-23.6546	-38.6679	-616.862	-6575.96	3591.35	-781.267	205.822	913.66	0	0	0	0	0	0	0	603	903	0
501	3	0	0	0	0	0	0	200	300	0	-22.2813	-37.2946	-611.979	-6392.85	3408.25	-781.267	205.569	913.446	0	0	0	0	0	0	0	603	903	0
501	4	0	0	0	0	0	0	200	300	0	-22.2813	-36.0739	-608.927	-6301.3	3164.11	-964.372	205.196	913.348	0	0	0	0	0	0	0	603	903	0
501	5	0	0	0	0	0	0	200	300	0	-23.0443	-35.9213	-605.265	-6484.41	3469.28	-277.727	205.732	913.713	0	0	0	0	0	0	0	603	903	0
501	6	0	0	0	0	0	0	200	300	0	-23.8072	-35.1584	-600.993	-6484.41	3164.11	-781.267	205.265	913.789	0	0	0	0	0	0	0	603	903	0
501	7	0	0	0	0	0	0	200	300	0	-23.8072	-34.7006	-597.941	-6209.75	2858.93	-781.267	204.781	913.385	0	0	0	0	0	0	0	603	903	0
501	8	0	0	0	0	0	0	200	300	0	-22.7391	-33.7851	-593.668	-5935.09	2675.83	-643.938	204.507	912.997	0	0	0	0	0	0	0	603	903	0
501	9	0	0	0	0	0	0	200	300	0	-23.0443	-32.717	-592.143	-6026.64	2919.97	-735.49	204.931	913.178	0	0	0	0	0	0	0	603	903	0
502	0	0	0	0	0	0	0	200	300	0	-24.4176	-31.8015	-587.26	-5568.88	2675.83	-827.043	204.556	912.483	0	0	0	0	0	0	0	603	903	0
502	1	0	0	0	0	0	0	200	300	0	-24.265	-31.8015	-583.598	-5568.88	2553.76	-872.819	204.376	912.542	0	0	0	0	0	0	0	603	903	0
502	2	0	0	0	0	0	0	200	300	0	-23.6546	-29.9704	-576.273	-5385.77	2736.86	-1147.48	204.749	912.346	0	0	0	0	0	0	0	603	903	0
502	3	0	0	0	0	0	0	200	300	0	-22.7391	-30.5807	-575.663	-4928.01	2614.79	-964.372	204.542	911.561	0	0	0	0	0	0	0	603	903	0
502	4	0	0	0	0	0	0	200	300	0	-24.8753	-29.2075	-574.442	-5294.22	2675.83	-918.596	204.658	912.216	0	0	0	0	0	0	0	603	903	0
502	5	0	0	0	0	0	0	200	300	0	-24.5702	-28.9023	-570.17	-5111.11	2431.69	-872.819	204.265	911.964	0	0	0	0	0	0	0	603	903	0
502	6	0	0	0	0	0	0	200	300	0	-25.0279	-28.2919	-566.508	-4744.9	2248.58	-1055.93	203.969	911.376	0	0	0	0	0	0	0	603	903	0
502	7	0	0	0	0	0	0	200	300	0	-23.9598	-27.529	-560.099	-4836.46	2492.72	-1010.15	204.451	911.635	0	0	0	0	0	0	0	603	903	0
502	8	0	0	0	0	0	0	200	300	0	-24.1124	-27.8342	-559.794	-4928.01	2065.48	-1101.7	203.69	911.803	0	0	0	0	0	0	0	603	903	0
502	9	0	0	0	0	0	0	200	300	0	-25.0279	-25.3928	-557.353	-4287.14	1882.37	-1330.58	203.377	910.692	0	0	0	0	0	0	0	603	903	0
503	0	0	0	0	0	0	0	200	300	0	-22.8917	-25.0876	-555.827	-4378.69	2431.69	-1010.15	204.375	910.878	0	0	0	0	0	0	0	603	903	0
503	1	0	0	0	0	0	0	200	300	0	-23.6546	-24.6298	-550.944	-4104.03	2492.72	-872.819	204.524	910.449	0	0	0	0	0	0	0	603	903	0
503	2	0	0	0	0	0	0	200	300	0	-24.1124	-25.2402	-548.197	-4012.48	2248.58	-918.596	204.102	910.319	0	0	0	0	0	0	0	603	903	0
503	3	0	0	0	0	0	0	200	300	0	-23.8072	-23.1039	-545.146	-4561.8	2126.51	-964.372	203.901	911.368	0	0	0	0	0	0	0	603	903	0
503	4	0	0	0	0	0	0	200	300	0	-25.0279	-23.5617	-543.009	-3829.38	2370.65	-1010.15	204.366	910.052	0	0	0	0	0	0	0	603	903	0
503	5	0	0	0	0	0	0	200	300	0	-25.1805	-22.7988	-541.178	-4195.59	2248.58	-964.372	204.155	910.753	0	0	0	0	0	0	0	603	903	0
503	6	0	0	0	0	0	0	200	300	0	-23.9598	-22.0358	-537.821	-3646.27	2065.48	-918.596	203.84	909.78	0	0	0	0	0	0	0	603	903	0
503	7	0	0	0	0	0	0	200	300	0	-23.6546	-21.2729	-532.328	-3554.72	2126.51	-1101.7	203.995	909.678	0	0	0	0	0	0	0	603	903	0
503	8	0	0	0	0	0	0	200	300	0	-23.502	-20.6625	-533.244	-3829.38	1943.4	-1055.93	203.645	910.181	0	0	0	0	0	0	0	603	903	0
503	9	0	0	0	0	0	0	200	300	0	-24.5702	-19.747	-532.023	-3554.72	1943.4	-964.372	203.653	909.682	0	0	0	0	0	0	0	603	903	0
504	0	0	0	0	0	0	0	200	300	0	-24.8753	-19.1367	-528.666	-3371.61	1638.23	-1055.93	203.099	909.378	0	0	0	0	0	0	0	603	903	0
504	1	0	0	0	0	0	0	200	300	0	-23.9598	-18.5263	-524.088	-2547.64	1760.3	-1055.93	203.359	907.861	0	0	0	0	0	0	0	603	903	0
504	2	0	0	0	0	0	0	200	300	0	-23.502	-17.7634	-519.816	-2730.74	1760.3	-1101.7	203.386	908.253	0	0	0	0	0	0	0	603	903	0
504	3	0	0	0	0	0	0	200	300	0	-24.8753	-17.153	-520.731	-3096.95	1882.37	-1055.93	203.615	908.947	0	0	0	0	0	0	0	603	903	0
504	4	0	0	0	0	0	0	200	300	0	-21.9762	-16.6953	-519.816	-2456.08	1699.26	-964.372	203.269	907.725	0	0	0	0	0	0	0	603	903	0
504	5	0	0	0	0	0	0	200	300	0	-24.5702	-15.7797	-517.68	-2456.08	1272.02	-1239.03	202.457	907.744	0	0	0	0	0	0	0	603	903	0
504	6	0	0	0	0	0	0	200	300	0	-23.3495	-16.2375	-511.881	-2181.43	1638.23	-1055.93	203.2	907.262	0	0	0	0	0	0	0	603	903	0
504	7	0	0	0	0	0	0	200	300	0	-23.9598	-14.8642	-512.492	-1906.77	1394.09	-1193.25	202.72	906.721	0	0	0	0	0	0	0	603	903	0
504	8	0	0	0	0	0	0	200	300	0	-23.3495	-14.7116	-510.966	-2181.43	1210.98	-1055.93	202.37	907.269	0	0	0	0	0	0	0	603	903	0
504	9	0	0	0	0	0	0	200	300	0	-25.0279	-14.1013	-507.914	-1906.77	1333.05	-872.819	202.625	906.754	0	0	0	0	0	0	0	603	903	0
505	0	0	0	0	0	0	0	200	300	0	-25.6383	-13.4909	-507.609	-1174.35	1210.98	-1193.25	202.386	905.313	0	0	0	0	0	0	0	603	903	0
505	1	0	0	0	0	0	0	200	300	0	-23.9598	-14.4064	-507.609	-899.687	1272.02	-1010.15	202.506	904.772	0	0	0	0	0	0	0	603	903	0
505	2	0	0	0	0	0	0	200	300	0	-21.8236	-12.8806	-502.421	-1174.35	966.842	-1284.81	201.924	905.337	0	0	0	0	0	0	0	603	903	0
505	3	0	0	0	0	0	0	200	300	0	-24.265	-11.965	-499.979	-899.687	783.737	-964.372	201.568	904.799	0	0	0	0	0	0	0	603	903	0
505	4	0	0	0	0	0	0	200	300	0	-25.1805	-11.0495	-499.979	-991.24	905.807	-1330.58	201.812	904.983	0	0	0	0	0	0	0	603	903	0
505	5	0	0	0	0	0	0	200	300	0	-25.0279	-10.8969	-499.064	-899.687	1088.91	-1101.7	202.182	904.803	0	0	0	0	0	0	0	603	903	0
505	6	0	0	0	0	0	0	200	300	0	-23.3495	-11.6599	-497.538	-533.477	783.737	-1284.81	201.575	904.072	0	0	0	0	0	0	0	603	903	0
505	7	0	0	0	0	0	0	200	300	0	-23.8072	-9.98139	-495.707	-625.029	966.842	-1055.93	201.95	904.261	0	0	0	0	0	0	0	603	903	0
505	8	0	0	0	0	0	0	200	300	0	-25.1805	-9.21845	-492.045	-533.477	722.701	-1284.81	201.469	904.084	0	0	0	0	0	0	0	603	903	0
505	9	0	0	0	0	0	0	200	300	0	-25.0279	-9.21845	-492.96	-258.818	783.737	-1284.81	201.59	903.525	0	0	0	0	0	0	0	603	903	0
506	0	0	0	0	0	0	0	200	300	0	-23.6546	-8.45551	-490.214	473.604	600.631	-1055.93	201.225	902.034	0	0	0	0	0	0	0	603	903	0
506	1	0	0	0	0	0	0	200	300	0	-23.0443	-8.76068	-489.603	198.946	783.737	-1055.93	201.601	902.594	0	0	0	0	0	0	0	603	903	0
506	2	0	0	0	0	0	0	200	300	0	-24.1124	-8.15033	-488.383	382.051	966.842	-964.372	201.98	902.218	0	0	0	0	0	0	0	603	903	0
506	3	0	0	0	0	0	0	200	300	0	-25.0279	-7.38739	-486.247	565.156	478.561	-1055.93	200.984	901.838	0	0	0	0	0	0	0	603	903	0
506	4	0	0	0	0	0	0	200	300	0	-24.4176	-7.38739	-485.636	839.815	356.491	-872.819	200.734	901.271	0	0	0	0	0	0	0	603	903	0
506	5	0	0	0	0	0	0	200	300	0	-23.3495	-6.77704	-485.941	1114.47	539.596	-1284.81	201.11	900.707	0	0	0	0	0	0	0	603	903	0
506	6	0	0	0	0	0	0	200	300	0	-24.4176	-7.2348	-484.11	1114.47	600.631	-1101.7	201.241	900.698	0	0	0	0	0	0	0	603	903	0
506	7	0	0	0	0	0	0	200	300	0	-25.0279	-6.0141	-481.669	1114.47	295.455	-1284.81	200.613	900.686	0	0	0	0	0	0	0	603	903	0
506	8	0	0	0	0	0	0	200	300	0	-24.8753	-5.40375	-481.059	1938.45	112.35	-1239.03	200.234	898.97	0	0	0	0	0	0	0	603	903	0
506	9	0	0	0	0	0	0	200	300	0	-23.6546	-5.09857	-480.448	2121.55	173.385	-1330.58	200.361	898.584	0	0	0	0	0	0	0	603	903	0
507	0	0	0	0	0	0	0	200	300	0	-22.1288	-5.25116	-479.838	1755.34	356.491	-1422.14	200.743	899.342	0	0	0	0	0	0	0	603	903	0
507	1	0	0	0	0	0	0	200	300	0	-23.502	-4.18304	-478.312	2213.11	173.385	-1559.47	200.363	898.373	0	0	0	0	0	0	0	603	903	0
507	2	0	0	0	0	0	0	200	300	0	-25.0279	-4.18304	-476.176	2396.21	-70.7556	-1147.48	199.851	897.968	0	0	0	0	0	0	0	603	903	0
507	3	0	0	0	0	0	0	200	300	0	-24.8753	-4.33563	-476.176	2853.98	173.385	-1467.91	200.364	897.007	0	0	0	0	0	0	0	603	903	0
507	4	0	0	0	0	0	0	200	300	0	-23.8072	-3.72528	-476.176	3494.84	112.35	-1651.02	200.236	895.661	0	0	0	0	0	0	0	603	903	0
507	5	0	0	0	0	0	0	200	300	0	-23.502	-4.03046	-475.565	3861.06	-131.791	-1467.91	199.723	894.881	0	0	0	0	0	0	0	603	903	0
507	6	0	0	0	0	0	0	200	300	0	-23.9598	-3.42011	-474.65	3769.5	-375.931	-1513.69	199.208	895.058	0	0	0	0	0	0	0	603	903	0
507	7	0	0	0	0	0	0	200	300	0	-22.8917	-2.50458	-473.124	3952.61	-70.7556	-1376.36	199.85	894.646	0	0	0	0	0	0	0	603	903	0
507	8	0	0	0	0	0	0	200	300	0	-24.265	-3.26752	-471.903	3861.06	-70.7556	-1605.24	199.85	894.818	0	0	0	0	0	0	0	603	903	0
507	9	0	0	0	0	0	0	200	300	0	-23.502	-2.50458	-472.514	4044.16	-192.826	-1513.69	199.592	894.441	0	0	0	0	0	0	0	603	903	0
508	0	0	0	0	0	0	0	200	300	0	-23.0443	-2.80975	-473.124	4044.16	-70.7556	-1330.58	199.85	894.452	0	0	0	0	0	0	0	603	903	0
508	1	0	0	0	0	0	0	200	300	0	-23.6546	-1.89423	-470.377	4501.92	-9.7204	-1422.14	199.979	893.429	0	0	0	0	0	0	0	603	903	0
508	2	0	0	0	0	0	0	200	300	0	-23.3495	-1.43646	-472.208	4410.37	-192.826	-1330.58	199.592	893.66	0	0	0	0	0	0	0	603	903	0
508	3	0	0	0	0	0	0	200	300	0	-21.9762	-1.28388	-471.293	4685.03	-253.861	-1559.47	199.461	893.059	0	0	0	0	0	0	0	603	903	0
508	4	0	0	0	0	0	0	200	300	0	-22.2813	-0.826112	-468.241	4685.03	-131.791	-1605.24	199.719	892.994	0	0	0	0	0	0	0	603	903	0
508	5	0	0	0	0	0	0	200	300	0	-22.7391	-1.43646	-471.293	5692.11	-9.7204	-1513.69	199.979	890.922	0	0	0	0	0	0	0	603	903	0
508	6	0	0	0	0	0	0	200	300	0	-20.6029	-1.13129	-470.683	4959.69	-253.861	-1330.58	199.461	892.463	0	0	0	0	0	0	0	603	903	0
508	7	0	0	0	0	0	0	200	300	0	-22.1288	0.547179	-471.903	5600.56	-314.896	-1605.24	199.333	891.132	0	0	0	0	0	0	0	603	903	0
508	8	0	0	0	0	0	0	200	300	0	-20.6029	0.242004	-472.208	5783.66	-192.826	-1605.24	199.592	890.752	0	0	0	0	0	0	0	603	903	0
508	9	0	0	0	0	0	0	200	300	0	-19.8399	-0.826112	-469.767	5875.21	173.385	-1879.9	200.369	890.493	0	0	0	0	0	0	0	603	903	0
509	0	0	0	0	0	0	0	200	300	0	-20.9081	0.699767	-472.514	6332.98	-375.931	-1788.35	199.204	889.597	0	0	0	0	0	0	0	603	903	0
509	1	0	0	0	0	0	0	200	300	0	-19.8399	1.00494	-471.293	6516.08	-375.931	-1696.79	199.202	889.174	0	0	0	0	0	0	0	603	903	0
509	2	0	0	0	0	0	0	200	300	0	-19.9925	1.76788	-471.903	6607.64	-375.931	-1879.9	199.203	888.998	0	0	0	0	0	0	0	603	903	0
509	3	0	0	0	0	0	0	200	300	0	-19.2296	2.07306	-473.429	7156.95	-436.967	-1971.45	199.077	887.883	0	0	0	0	0	0	0	603	903	0
509	4	0	0	0	0	0	0	200	300	0	-17.8563	2.22565	-474.04	6699.19	-742.142	-1925.68	198.434	888.868	0	0	0	0	0	0	0	603	903	0
509	5	0	0	0	0	0	0	200	300	0	-18.9244	0.699767	-474.955	7431.61	-498.002	-2017.23	198.951	887.353	0	0	0	0	0	0	0	603	903	0
509	6	0	0	0	0	0	0	200	300	0	-18.6192	2.98859	-473.734	7706.27	-314.896	-2017.23	199.335	886.733	0	0	0	0	0	0	0	603	903	0
509	7	0	0	0	0	0	0	200	300	0	-17.0934	3.59894	-474.04	8530.25	51.3148	-1925.68	200.108	885.005	0	0	0	0	0	0	0	603	903	0
509	8	0	0	0	0	0	0	200	300	0	-16.7882	4.20929	-475.565	8255.59	-559.037	-2063	198.824	885.641	0	0	0	0	0	0	0	603	903	0
509	9	0	0	0	0	0	0	200	300	0	-17.8563	4.0567	-476.481	8347.14	173.385	-2017.23	200.364	885.482	0	0	0	0	0	0	0	603	903	0
510	0	0	0	0	0	0	0	200	300	0	-16.0252	3.29376	-477.396	8713.35	-375.931	-1788.35	199.213	884.748	0	0	0	0	0	0	0	603	903	0
510	1	0	0	0	0	0	0	200	300	0	-16.9408	4.51446	-478.312	9262.67	-436.967	-1696.79	199.086	883.635	0	0	0	0	0	0	0	603	903	0
510	2	0	0	0	0	0	0	200	300	0	-15.1097	4.97223	-478.007	9720.43	-620.072	-2017.23	198.703	882.665	0	0	0	0	0	0	0	603	903	0
510	3	0	0	0	0	0	0	200	300	0	-14.6519	5.58258	-480.448	9262.67	-131.791	-2154.56	199.726	883.721	0	0	0	0	0	0	0	603	903	0
510	4	0	0	0	0	0	0	200	300	0	-15.1097	5.42999	-481.364	9628.88	-192.826	-2017.23	199.599	882.997	0	0	0	0	0	0	0	603	903	0
510	5	0	0	0	0	0	0	200	300	0	-14.9571	6.04034	-482.279	9903.54	-681.107	-2063	198.588	882.465	0	0	0	0	0	0	0	603	903	0
510	6	0	0	0	0	0	0	200	300	0	-13.1261	6.34552	-481.669	10361.3	-498.002	-2108.78	198.966	881.489	0	0	0	0	0	0	0	603	903	0
510	7	0	0	0	0	0	0	200	300	0	-11.6002	6.6507	-484.415	10452.9	-192.826	-2154.56	199.602	881.422	0	0	0	0	0	0	0	603	903	0
510	8	0	0	0	0	0	0	200	300	0	-12.3631	6.80328	-486.552	10819.1	-253.861	-2383.44	199.478	880.764	0	0	0	0	0	0	0	603	903	0
510	9	0	0	0	0	0	0	200	300	0	-12.5157	7.56622	-488.688	10544.4	-498.002	-2291.89	198.981	881.423	0	0	0	0	0	0	0	603	903	0
511	0	0	0	0	0	0	0	200	300	0	-12.6683	7.26105	-488.993	11276.8	-314.896	-2154.56	199.356	879.939	0	0	0	0	0	0	0	603	903	0
511	1	0	0	0	0	0	0	200	300	0	-11.1424	7.8714	-489.603	12100.8	-314.896	-2291.89	199.357	878.284	0	0	0	0	0	0	0	603	903	0
511	2	0	0	0	0	0	0	200	300	0	-9.15878	8.48175	-491.74	11459.9	-681.107	-2429.22	198.615	879.695	0	0	0	0	0	0	0	603	903	0
511	3	0	0	0	0	0	0	200	300	0	-9.61655	7.71881	-493.571	11643	-70.7556	-2291.89	199.857	879.411	0	0	0	0	0	0	0	603	903	0
511	4	0	0	0	0	0	0	200	300	0	-10.8372	8.63434	-494.791	11917.7	-314.896	-2291.89	199.364	878.914	0	0	0	0	0	0	0	603	903	0
511	5	0	0	0	0	0	0	200	300	0	-10.8372	8.63434	-496.928	12650.1	-498.002	-2200.33	198.998	877.543	0	0	0	0	0	0	0	603	903	0
511	6	0	0	0	0	0	0	200	300	0	-9.15878	9.70245	-499.064	12833.2	-375.931	-2291.89	199.247	877.285	0	0	0	0	0	0	0	603	903	0
511	7	0	0	0	0	0	0	200	300	0	-9.31137	8.32916	-499.064	13291	-192.826	-2200.33	199.614	876.368	0	0	0	0	0	0	0	603	903	0
511	8	0	0	0	0	0	0	200	300	0	-9.31137	10.0076	-502.421	13931.9	-1047.32	-2108.78	197.915	875.271	0	0	0	0	0	0	0	603	903	0
511	9	0	0	0	0	0	0	200	300	0	-9.92172	10.0076	-504.557	13657.2	-742.142	-2291.89	198.529	875.932	0	0	0	0	0	0	0	603	903	0
512	0	0	0	0	0	0	0	200	300	0	-8.70102	10.4654	-505.167	14115	-681.107	-2474.99	198.652	875.059	0	0	0	0	0	0	0	603	903	0
512	1	0	0	0	0	0	0	200	300	0	-8.39584	10.3128	-505.473	14755.8	-1047.32	-2154.56	197.928	873.808	0	0	0	0	0	0	0	603	903	0
512	2	0	0	0	0	0	0	200	300	0	-7.6329	11.2283	-508.219	14847.4	-1108.35	-2429.22	197.819	873.786	0	0	0	0	0	0	0	603	903	0
512	3	0	0	0	0	0	0	200	300	0	-8.54843	12.449	-510.966	14664.3	-1474.56	-2520.77	197.114	874.301	0	0	0	0	0	0	0	603	903	0
512	4	0	0	0	0	0	0	200	300	0	-8.24326	11.0757	-512.187	15671.4	-864.213	-2474.99	198.313	872.403	0	0	0	0	0	0	0	603	903	0
512	5	0	0	0	0	0	0	200	300	0	-6.25961	10.9232	-512.187	15854.5	-986.283	-2383.44	198.074	872.046	0	0	0	0	0	0	0	603	903	0
512	6	0	0	0	0	0	0	200	300	0	-7.93808	12.449	-514.018	16403.8	-925.248	-2703.87	198.2	871.087	0	0	0	0	0	0	0	603	903	0
512	7	0	0	0	0	0	0	200	300	0	-7.78549	12.7542	-515.849	16129.1	-986.283	-2566.54	198.088	871.733	0	0	0	0	0	0	0	603	903	0
512	8	0	0	0	0	0	0	200	300	0	-7.93808	13.0594	-518.9	16678.4	-925.248	-2841.2	198.217	870.858	0	0	0	0	0	0	0	603	903	0
512	9	0	0	0	0	0	0	200	300	0	-7.02255	12.449	-520.121	17594	-1291.46	-2658.1	197.517	869.173	0	0	0	0	0	0	0	603	903	0
513	0	0	0	0	0	0	0	200	300	0	-6.86996	13.3646	-522.868	17502.4	-1291.46	-2566.54	197.53	869.526	0	0	0	0	0	0	0	603	903	0
513	1	0	0	0	0	0	0	200	300	0	-4.73373	13.5171	-524.394	17685.5	-803.178	-2566.54	198.468	869.274	0	0	0	0	0	0	0	603	903	0
513	2	0	0	0	0	0	0	200	300	0	-5.95444	14.2801	-525.004	17868.6	-1108.35	-2703.87	197.889	868.965	0	0	0	0	0	0	0	603	903	0
513	3	0	0	0	0	0	0	200	300	0	-7.02255	14.5853	-528.971	18509.5	-1413.53	-2474.99	197.328	868.009	0	0	0	0	0	0	0	603	903	0
513	4	0	0	0	0	0	0	200	300	0	-7.17514	15.043	-528.361	18967.3	-1474.56	-2200.33	197.209	867.102	0	0	0	0	0	0	0	603	903	0
513	5	0	0	0	0	0	0	200	300	0	-7.17514	14.4327	-532.633	18967.3	-1169.39	-2795.43	197.805	867.39	0	0	0	0	0	0	0	603	903	0
513	6	0	0	0	0	0	0	200	300	0	-7.02255	14.8904	-534.464	19058.8	-1352.49	-2749.65	197.469	867.34	0	0	0	0	0	0	0	603	903	0
513	7	0	0	0	0	0	0	200	300	0	-7.78549	15.3482	-534.464	19882.8	-1718.71	-2703.87	196.784	865.799	0	0	0	0	0	0	0	603	903	0
513	8	0	0	0	0	0	0	200	300	0	-6.56479	15.6534	-533.854	20615.2	-1718.71	-2200.33	196.781	864.384	0	0	0	0	0	0	0	603	903	0
513	9	0	0	0	0	0	0	200	300	0	-6.71738	15.6534	-539.652	20798.3	-1779.74	-2749.65	196.702	864.46	0	0	0	0	0	0	0	603	903	0
514	0	0	0	0	0	0	0	200	300	0	-7.6329	15.3482	-542.094	20706.8	-1657.67	-2658.1	196.942	864.802	0	0	0	0	0	0	0	603	903	0
514	1	0	0	0	0	0	0	200	300	0	-5.49667	16.1111	-541.178	21164.5	-1413.53	-2612.32	197.388	863.892	0	0	0	0	0	0	0	603	903	0
514	2	0	0	0	0	0	0	200	300	0	-8.39584	16.8741	-543.925	21805.4	-2023.88	-2749.65	196.279	862.911	0	0	0	0	0	0	0	603	903	0
514	3	0	0	0	0	0	0	200	300	0	-7.48032	17.0267	-546.366	22080	-2145.95	-2841.2	196.072	862.588	0	0	0	0	0	0	0	603	903	0
514	4	0	0	0	0	0	0	200	300	0	-7.32773	16.7215	-546.977	23178.7	-1840.78	-2932.76	196.635	860.624	0	0	0	0	0	0	0	603	903	0
514	5	0	0	0	0	0	0	200	300	0	-8.54843	17.0267	-550.944	22995.6	-2084.92	-2658.1	196.216	861.261	0	0	0	0	0	0	0	603	903	0
514	6	0	0	0	0	0	0	200	300	0	-6.56479	17.637	-550.333	22995.6	-2206.99	-2886.98	195.99	861.215	0	0	0	0	0	0	0	603	903	0
514	7	0	0	0	0	0	0	200	300	0	-9.31137	18.4	-553.385	23636.4	-2451.13	-2795.43	195.571	860.288	0	0	0	0	0	0	0	603	903	0
514	8	0	0	0	0	0	0	200	300	0	-8.24326	18.7051	-555.827	24094.2	-2390.09	-2841.2	195.7	859.652	0	0	0	0	0	0	0	603	903	0
514	9	0	0	0	0	0	0	200	300	0	-8.70102	18.4	-557.658	24826.6	-2512.16	-2886.98	195.495	858.481	0	0	0	0	0	0	0	603	903	0
515	0	0	0	0	0	0	0	200	300	0	-9.92172	19.1629	-560.099	25101.3	-2939.41	-2841.2	194.752	858.184	0	0	0	0	0	0	0	603	903	0
515	1	0	0	0	0	0	0	200	300	0	-9.76913	18.7051	-560.709	25284.4	-2817.34	-2978.53	194.975	857.906	0	0	0	0	0	0	0	603	903	0
515	2	0	0	0	0	0	0	200	300	0	-7.32773	19.6207	-562.541	25833.7	-2634.23	-2841.2	195.317	857.077	0	0	0	0	0	0	0	603	903	0
515	3	0	0	0	0	0	0	200	300	0	-9.61655	20.0784	-565.287	26749.2	-2817.34	-2566.54	195.016	855.68	0	0	0	0	0	0	0	603	903	0
515	4	0	0	0	0	0	0	200	300	0	-9.61655	20.0784	-565.897	26566.1	-3000.44	-2978.53	194.698	856.055	0	0	0	0	0	0	0	603	903	0
515	5	0	0	0	0	0	0	200	300	0	-11.1424	19.7733	-568.339	26749.2	-3183.55	-3207.41	194.399	855.934	0	0	0	0	0	0	0	603	903	0
515	6	0	0	0	0	0	0	200	300	0	-11.7528	20.0784	-569.56	27847.9	-3183.55	-2932.76	194.411	854.106	0	0	0	0	0	0	0	603	903	0
515	7	0	0	0	0	0	0	200	300	0	-10.9898	21.4517	-572.001	28305.6	-3427.69	-3024.31	194.008	853.515	0	0	0	0	0	0	0	603	903	0
515	8	0	0	0	0	0	0	200	300	0	-9.76913	21.9095	-575.663	28122.5	-3183.55	-3298.97	194.47	854.148	0	0	0	0	0	0	0	603	903	0
515	9	0	0	0	0	0	0	200	300	0	-12.2105	21.6043	-575.968	28488.7	-3488.72	-3161.64	193.943	853.538	0	0	0	0	0	0	0	603	903	0
516	0	0	0	0	0	0	0	200	300	0	-13.1261	20.0784	-580.546	28397.2	-3427.69	-3115.86	194.096	854.085	0	0	0	0	0	0	0	603	903	0
516	1	0	0	0	0	0	0	200	300	0	-13.889	21.9095	-579.63	29953.6	-3549.76	-3024.31	193.876	851.323	0	0	0	0	0	0	0	603	903	0
516	2	0	0	0	0	0	0	200	300	0	-13.1261	22.825	-582.072	30228.2	-3915.97	-2749.65	193.272	851.068	0	0	0	0	0	0	0	603	903	0
516	3	0	0	0	0	0	0	200	300	0	-12.9735	23.1302	-585.734	30411.3	-4038.04	-3161.64	193.106	851.08	0	0	0	0	0	0	0	603	903	0
516	4	0	0	0	0	0	0	200	300	0	-14.4994	22.6724	-585.429	30502.9	-4099.08	-3253.19	192.998	850.897	0	0	0	0	0	0	0	603	903	0
516	5	0	0	0	0	0	0	200	300	0	-13.1261	21.4517	-589.091	30869.1	-3977.01	-3070.08	193.249	850.599	0	0	0	0	0	0	0	603	903	0
516	6	0	0	0	0	0	0	200	300	0	-15.2623	23.4354	-590.922	31418.4	-4404.25	-3070.08	192.547	849.832	0	0	0	0	0	0	0	603	903	0
516	7	0	0	0	0	0	0	200	300	0	-15.2623	23.7405	-592.753	32150.8	-4404.25	-3207.41	192.57	848.76	0	0	0	0	0	0	0	603	903	0
516	8	0	0	0	0	0	0	200	300	0	-14.9571	24.6561	-594.889	32425.5	-4526.32	-3070.08	192.391	848.493	0	0	0	0	0	0	0	603	903	0
516	9	0	0	0	0	0	0	200	300	0	-16.483	24.5035	-597.636	32791.7	-4709.43	-3024.31	192.12	848.131	0	0	0	0	0	0	0	603	903	0
517	0	0	0	0	0	0	0	200	300	0	-16.3304	23.588	-600.382	33341	-4953.57	-3115.86	191.749	847.467	0	0	0	0	0	0	0	603	903	0
517	1	0	0	0	0	0	0	200	300	0	-15.5675	25.2664	-599.467	33707.3	-4892.53	-3344.74	191.839	846.771	0	0	0	0	0	0	0	603	903	0
517	2	0	0	0	0	0	0	200	300	0	-15.8727	25.8768	-602.824	34348.1	-4953.57	-2978.53	191.783	846.021	0	0	0	0	0	0	0	603	903	0
517	3	0	0	0	0	0	0	200	300	0	-17.8563	26.4871	-605.57	34989	-4953.57	-3253.19	191.82	845.221	0	0	0	0	0	0	0	603	903	0
517	4	0	0	0	0	0	0	200	300	0	-16.3304	26.0294	-606.791	35080.5	-5319.78	-3436.3	191.233	845.187	0	0	0	0	0	0	0	603	903	0
517	5	0	0	0	0	0	0	200	300	0	-17.2459	26.6397	-607.707	35721.4	-5869.1	-3344.74	190.342	844.219	0	0	0	0	0	0	0	603	903	0
517	6	0	0	0	0	0	0	200	300	0	-17.3985	26.3345	-610.148	36453.8	-5441.85	-3344.74	191.081	843.254	0	0	0	0	0	0	0	603	903	0
517	7	0	0	0	0	0	0	200	300	0	-18.1615	28.4708	-612.895	36453.8	-5991.17	-3573.62	190.225	843.522	0	0	0	0	0	0	0	603	903	0
517	8	0	0	0	0	0	0	200	300	0	-19.6873	28.013	-615.641	37003.2	-5869.1	-3207.41	190.467	842.895	0	0	0	0	0	0	0	603	903	0
517	9	0	0	0	0	0	0	200	300	0	-19.6873	27.7078	-615.946	37369.4	-5624.95	-3344.74	190.868	842.33	0	0	0	0	0	0	0	603	903	0
518	0	0	0	0	0	0	0	200	300	0	-19.9925	28.4708	-618.083	38651.1	-5869.1	-3756.73	190.504	840.466	0	0	0	0	0	0	0	603	903	0
518	1	0	0	0	0	0	0	200	300	0	-19.3822	29.3863	-618.388	38742.6	-6174.27	-3527.85	190.016	840.349	0	0	0	0	0	0	0	603	903	0
518	2	0	0	0	0	0	0	200	300	0	-19.9925	27.8604	-620.524	38742.6	-6357.38	-3756.73	189.755	840.565	0	0	0	0	0	0	0	603	903	0
518	3	0	0	0	0	0	0	200	300	0	-21.2132	30.1492	-624.796	39475.1	-6235.31	-3573.62	190.02	839.819	0	0	0	0	0	0	0	603	903	0
518	4	0	0	0	0	0	0	200	300	0	-21.2132	30.1492	-626.933	39475.1	-6418.41	-3527.85	189.762	840.035	0	0	0	0	0	0	0	603	903	0
518	5	0	0	0	0	0	0	200	300	0	-20.7555	30.3018	-627.238	40573.7	-6113.24	-3482.07	190.254	838.314	0	0	0	0	0	0	0	603	903	0
518	6	0	0	0	0	0	0	200	300	0	-20.2977	31.5225	-629.374	41306.1	-6723.59	-3894.06	189.317	837.37	0	0	0	0	0	0	0	603	903	0
518	7	0	0	0	0	0	0	200	300	0	-20.7555	30.607	-627.848	41306.1	-6479.45	-3619.4	189.68	837.21	0	0	0	0	0	0	0	603	903	0
518	8	0	0	0	0	0	0	200	300	0	-21.8236	31.9803	-629.984	41580.8	-6967.73	-3665.18	188.94	836.997	0	0	0	0	0	0	0	603	903	0
518	9	0	0	0	0	0	0	200	300	0	-22.5865	31.3699	-636.393	42587.9	-7089.8	-3985.61	188.859	836.079	0	0	0	0	0	0	0	603	903	0
519	0	0	0	0	0	0	0	200	300	0	-20.9081	32.5906	-637.003	43320.3	-6967.73	-3665.18	189.062	834.994	0	0	0	0	0	0	0	603	903	0
519	1	0	0	0	0	0	0	200	300	0	-21.5184	32.5906	-639.75	43869.6	-7089.8	-3665.18	188.918	834.427	0	0	0	0	0	0	0	603	903	0
519	2	0	0	0	0	0	0	200	300	0	-22.5865	33.9639	-641.581	43869.6	-7272.9	-3756.73	188.664	834.623	0	0	0	0	0	0	0	603	903	0
519	3	0	0	0	0	0	0	200	300	0	-22.8917	33.5062	-643.412	43961.2	-7578.08	-3848.28	188.222	834.675	0	0	0	0	0	0	0	603	903	0
519	4	0	0	0	0	0	0	200	300	0	-23.1969	34.1165	-644.633	45151.3	-7456.01	-3665.18	188.434	832.958	0	0	0	0	0	0	0	603	903	0
519	5	0	0	0	0	0	0	200	300	0	-22.2813	35.032	-647.074	45517.5	-7578.08	-3665.18	188.289	832.656	0	0	0	0	0	0	0	603	903	0
519	6	0	0	0	0	0	0	200	300	0	-23.0443	36.1002	-650.736	45334.4	-7822.22	-3848.28	187.979	833.334	0	0	0	0	0	0	0	603	903	0
519	7	0	0	0	0	0	0	200	300	0	-23.1969	33.8113	-648.295	46799.3	-7883.26	-3939.84	187.84	830.812	0	0	0	0	0	0	0	603	903	0
519	8	0	0	0	0	0	0	200	300	0	-24.1124	35.3372	-654.704	46341.5	-7944.29	-4077.17	187.866	832.218	0	0	0	0	0	0	0	603	903	0
519	9	0	0	0	0	0	0	200	300	0	-22.7391	36.2527	-655.314	47623.3	-8249.47	-3985.61	187.411	830.328	0	0	0	0	0	0	0	603	903	0
520	0	0	0	0	0	0	0	200	300	0	-21.3658	36.7105	-657.755	48081	-8432.57	-4077.17	187.18	829.901	0	0	0	0	0	0	0	603	903	0
520	1	0	0	0	0	0	0	200	300	0	-23.9598	38.0838	-659.586	48355.7	-8371.54	-4214.49	187.308	829.688	0	0	0	0	0	0	0	603	903	0
520	2	0	0	0	0	0	0	200	300	0	-24.4176	37.1683	-661.112	48630.3	-8737.75	-4306.05	186.783	829.442	0	0	0	0	0	0	0	603	903	0
520	3	0	0	0	0	0	0	200	300	0	-25.0279	38.2364	-661.112	49454.3	-8371.54	-4122.94	187.337	828.195	0	0	0	0	0	0	0	603	903	0
520	4	0	0	0	0	0	0	200	300	0	-24.1124	39.6097	-662.943	50461.4	-9226.03	-4122.94	186.083	826.883	0	0	0	0	0	0	0	603	903	0
520	5	0	0	0	0	0	0	200	300	0	-24.5702	37.626	-665.08	51102.3	-8737.75	-4306.05	186.862	826.164	0	0	0	0	0	0	0	603	903	0
520	6	0	0	0	0	0	0	200	300	0	-25.0279	40.22	-668.437	51010.7	-8737.75	-4351.82	186.928	826.687	0	0	0	0	0	0	0	603	903	0
520	7	0	0	0	0	0	0	200	300	0	-27.0116	40.0674	-669.962	51376.9	-9164.99	-4489.15	186.32	826.314	0	0	0	0	0	0	0	603	903	0
520	8	0	0	0	0	0	0	200	300	0	-26.2486	40.3726	-671.793	52109.3	-9287.06	-4397.6	186.176	825.433	0	0	0	0	0	0	0	603	903	0
520	9	0	0	0	0	0	0	200	300	0	-25.9435	41.2881	-672.404	52200.9	-9164.99	-4489.15	186.37	825.367	0	0	0	0	0	0	0	603	903	0
521	0	0	0	0	0	0	0	200	300	0	-25.6383	42.0511	-674.235	52933.3	-9287.06	-4443.38	186.226	824.491	0	0	0	0	0	0	0	603	903	0
521	1	0	0	0	0	0	0	200	300	0	-26.7064	42.2037	-676.371	53116.4	-9775.35	-4443.38	185.547	824.469	0	0	0	0	0	0	0	603	903	0
521	2	0	0	0	0	0	0	200	300	0	-27.0116	42.6614	-676.981	53482.6	-9531.21	-4351.82	185.921	823.998	0	0	0	0	0	0	0	603	903	0
521	3	0	0	0	0	0	0	200	300	0	-25.9435	44.0347	-676.981	54215.1	-9409.13	-3939.84	186.101	822.917	0	0	0	0	0	0	0	603	903	0
521	4	0	0	0	0	0	0	200	300	0	-26.4012	41.4407	-680.338	55222.1	-9531.21	-4489.15	185.99	821.831	0	0	0	0	0	0	0	603	903	0
521	5	0	0	0	0	0	0	200	300	0	-27.1642	44.0347	-682.78	55222.1	-9836.38	-4580.71	185.594	822.122	0	0	0	0	0	0	0	603	903	0
521	6	0	0	0	0	0	0	200	300	0	-28.2323	43.7296	-684.611	55771.5	-9775.35	-4626.48	185.721	821.536	0	0	0	0	0	0	0	603	903	0
521	7	0	0	0	0	0	0	200	300	0	-27.7745	44.3399	-685.832	56137.7	-9531.21	-4809.59	186.103	821.147	0	0	0	0	0	0	0	603	903	0
521	8	0	0	0	0	0	0	200	300	0	-26.859	45.1028	-687.663	57053.2	-9958.45	-4718.03	185.518	820.033	0	0	0	0	0	0	0	603	903	0
521	9	0	0	0	0	0	0	200	300	0	-27.0116	45.7132	-689.799	57694.1	-10202.6	-4718.03	185.209	819.361	0	0	0	0	0	0	0	603	903	0
522	0	0	0	0	0	0	0	200	300	0	-28.2323	45.2554	-688.578	57327.9	-9897.42	-4946.92	185.626	819.745	0	0	0	0	0	0	0	603	903	0
522	1	0	0	0	0	0	0	200	300	0	-26.859	45.5606	-692.851	58334.9	-10141.6	-4443.38	185.363	818.805	0	0	0	0	0	0	0	603	903	0
522	2	0	0	0	0	0	0	200	300	0	-28.3849	46.4761	-694.071	58884.3	-10507.8	-4946.92	184.861	818.161	0	0	0	0	0	0	0	603	903	0
522	3	0	0	0	0	0	0	200	300	0	-28.3849	47.6968	-697.123	59616.7	-10568.8	-4763.81	184.839	817.482	0	0	0	0	0	0	0	603	903	0
522	4	0	0	0	0	0	0	200	300	0	-27.7745	48.002	-698.344	59342	-10446.7	-4809.59	185.041	818.025	0	0	0	0	0	0	0	603	903	0
522	5	0	0	0	0	0	0	200	300	0	-29.1478	47.5443	-701.701	59891.3	-10446.7	-4946.92	185.112	817.648	0	0	0	0	0	0	0	603	903	0
522	6	0	0	0	0	0	0	200	300	0	-28.3849	47.0865	-701.701	60349.1	-11179.2	-4855.36	184.068	816.996	0	0	0	0	0	0	0	603	903	0
522	7	0	0	0	0	0	0	200	300	0	-27.1642	48.765	-704.142	61722.4	-10935	-4443.38	184.47	815.344	0	0	0	0	0	0	0	603	903	0
522	8	0	0	0	0	0	0	200	300	0	-26.4012	50.2908	-705.363	61997.1	-10812.9	-4992.69	184.67	815.106	0	0	0	0	0	0	0	603	903	0
522	9	0	0	0	0	0	0	200	300	0	-28.0797	51.2064	-708.72	62271.7	-11179.2	-5130.02	184.226	815.135	0	0	0	0	0	0	0	603	903	0
523	0	0	0	0	0	0	0	200	300	0	-29.9107	50.2908	-710.246	62454.8	-10935	-4992.69	184.604	815.066	0	0	0	0	0	0	0	603	903	0
523	1	0	0	0	0	0	0	200	300	0	-29.7581	51.2064	-711.771	62363.3	-10935	-5084.25	184.637	815.383	0	0	0	0	0	0	0	603	903	0
523	2	0	0	0	0	0	0	200	300	0	-28.5374	51.0538	-711.466	63645	-10874	-5130.02	184.716	813.544	0	0	0	0	0	0	0	603	903	0
523	3	0	0	0	0	0	0	200	300	0	-28.69	52.5797	-714.823	64652.1	-11240.2	-4946.92	184.276	812.555	0	0	0	0	0	0	0	603	903	0
523	4	0	0	0	0	0	0	200	300	0	-30.3685	53.9529	-718.791	64469	-11301.2	-5267.35	184.277	813.309	0	0	0	0	0	0	0	603	903	0
523	5	0	0	0	0	0	0	200	300	0	-27.1642	54.5633	-720.316	65018.3	-11240.2	-5267.35	184.395	812.737	0	0	0	0	0	0	0	603	903	0
523	6	0	0	0	0	0	0	200	300	0	-30.8263	55.3262	-721.232	65476	-11484.3	-5267.35	184.077	812.216	0	0	0	0	0	0	0	603	903	0
523	7	0	0	0	0	0	0	200	300	0	-29.6056	56.3943	-721.842	66116.9	-11484.3	-5038.47	184.09	811.405	0	0	0	0	0	0	0	603	903	0
523	8	0	0	0	0	0	0	200	300	0	-29.453	56.6995	-721.232	66116.9	-11484.3	-5084.25	184.077	811.328	0	0	0	0	0	0	0	603	903	0
523	9	0	0	0	0	0	0	200	300	0	-30.3685	58.378	-726.42	66483.1	-11118.1	-5358.9	184.695	811.478	0	0	0	0	0	0	0	603	903	0
524	0	0	0	0	0	0	0	200	300	0	-30.3685	58.2254	-730.692	67581.8	-11362.3	-5358.9	184.45	810.51	0	0	0	0	0	0	0	603	903	0
524	1	0	0	0	0	0	0	200	300	0	-29.453	58.2254	-731.303	67032.4	-11545.4	-5313.13	184.213	811.338	0	0	0	0	0	0	0	603	903	0
524	2	0	0	0	0	0	0	200	300	0	-29.1478	59.7513	-732.218	68131.1	-11728.5	-5267.35	183.982	809.953	0	0	0	0	0	0	0	603	903	0
524	3	0	0	0	0	0	0	200	300	0	-29.7581	60.8194	-735.27	68497.3	-11484.3	-5221.57	184.381	809.841	0	0	0	0	0	0	0	603	903	0
524	4	0	0	0	0	0	0	200	300	0	-29.6056	60.6668	-738.017	68588.8	-11606.4	-5313.13	184.274	810.063	0	0	0	0	0	0	0	603	903	0
524	5	0	0	0	0	0	0	200	300	0	-29.9107	59.5987	-739.237	69687.5	-11850.5	-5313.13	183.969	808.731	0	0	0	0	0	0	0	603	903	0
524	6	0	0	0	0	0	0	200	300	0	-28.69	62.0401	-741.374	69870.6	-12338.8	-5358.9	183.357	808.755	0	0	0	0	0	0	0	603	903	0
524	7	0	0	0	0	0	0	200	300	0	-29.3004	63.1082	-742.594	69779	-11728.5	-5450.46	184.206	809.033	0	0	0	0	0	0	0	603	903	0
524	8	0	0	0	0	0	0	200	300	0	-28.9952	63.566	-744.73	71060.8	-11972.6	-5175.8	183.924	807.582	0	0	0	0	0	0	0	603	903	0
524	9	0	0	0	0	0	0	200	300	0	-27.4693	63.4134	-746.867	70694.5	-12033.6	-5267.35	183.888	808.345	0	0	0	0	0	0	0	603	903	0
525	0	0	0	0	0	0	0	200	300	0	-29.6056	62.6505	-745.341	71976.3	-11911.6	-5221.57	184.019	806.432	0	0	0	0	0	0	0	603	903	0
525	1	0	0	0	0	0	0	200	300	0	-28.3849	64.7867	-749.613	71976.3	-11789.5	-5313.13	184.273	806.982	0	0	0	0	0	0	0	603	903	0
525	2	0	0	0	0	0	0	200	300	0	-28.2323	66.6177	-749.613	71793.2	-12155.7	-5450.46	183.784	807.226	0	0	0	0	0	0	0	603	903	0
525	3	0	0	0	0	0	0	200	300	0	-28.69	67.8384	-752.97	72983.4	-12460.9	-5267.35	183.451	806.073	0	0	0	0	0	0	0	603	903	0
525	4	0	0	0	0	0	0	200	300	0	-28.9952	67.3807	-752.97	73074.9	-11972.6	-5221.57	184.1	805.951	0	0	0	0	0	0	0	603	903	0
525	5	0	0	0	0	0	0	200	300	0	-28.3849	68.2962	-752.97	73441.2	-12033.6	-5450.46	184.018	805.465	0	0	0	0	0	0	0	603	903	0
525	6	0	0	0	0	0	0	200	300	0	-28.69	69.8221	-754.801	74173.6	-12644	-5313.13	183.249	804.731	0	0	0	0	0	0	0	603	903	0
525	7	0	0	0	0	0	0	200	300	0	-28.3849	69.2117	-755.106	74265.1	-12277.8	-5221.57	183.74	804.65	0	0	0	0	0	0	0	603	903	0
525	8	0	0	0	0	0	0	200	300	0	-29.9107	71.5005	-756.632	74539.8	-12155.7	-5404.68	183.934	804.485	0	0	0	0	0	0	0	603	903	0
525	9	0	0	0	0	0	0	200	300	0	-29.9107	71.348	-758.463	75638.4	-12216.8	-5679.34	183.893	803.274	0	0	0	0	0	0	0	603	903	0
526	0	0	0	0	0	0	0	200	300	0	-28.2323	71.9583	-758.158	75272.2	-12705	-5725.11	183.242	803.717	0	0	0	0	0	0	0	603	903	0
526	1	0	0	0	0	0	0	200	300	0	-28.8426	73.4842	-758.158	76737.1	-12583	-5770.89	183.403	801.785	0	0	0	0	0	0	0	603	903	0
526	2	0	0	0	0	0	0	200	300	0	-29.453	74.3997	-760.6	75821.5	-12216.8	-5542.01	183.938	803.314	0	0	0	0	0	0	0	603	903	0
526	3	0	0	0	0	0	0	200	300	0	-29.7581	74.5523	-759.379	76187.7	-12521.9	-5313.13	183.51	802.671	0	0	0	0	0	0	0	603	903	0
526	4	0	0	0	0	0	0	200	300	0	-29.453	74.8575	-761.21	77011.7	-12521.9	-5450.46	183.55	801.83	0	0	0	0	0	0	0	603	903	0
526	5	0	0	0	0	0	0	200	300	0	-28.69	75.3152	-760.294	77103.3	-12338.8	-5679.34	183.771	801.588	0	0	0	0	0	0	0	603	903	0
526	6	0	0	0	0	0	0	200	300	0	-27.3167	76.5359	-761.21	77469.5	-12277.8	-5542.01	183.871	801.229	0	0	0	0	0	0	0	603	903	0
526	7	0	0	0	0	0	0	200	300	0	-28.3849	77.2989	-761.82	77469.5	-12888.1	-5679.34	183.082	801.31	0	0	0	0	0	0	0	603	903	0
526	8	0	0	0	0	0	0	200	300	0	-30.0633	77.1463	-763.651	77744.1	-12644	-5542.01	183.443	801.194	0	0	0	0	0	0	0	603	903	0
526	9	0	0	0	0	0	0	200	300	0	-30.5211	78.5196	-763.041	78110.3	-12399.9	-5725.11	183.749	800.633	0	0	0	0	0	0	0	603	903	0
527	0	0	0	0	0	0	0	200	300	0	-29.1478	77.4515	-761.21	78659.7	-12399.9	-5496.23	183.71	799.665	0	0	0	0	0	0	0	603	903	0
527	1	0	0	0	0	0	0	200	300	0	-28.9952	79.7403	-765.177	78476.5	-12766.1	-5496.23	183.316	800.44	0	0	0	0	0	0	0	603	903	0
527	2	0	0	0	0	0	0	200	300	0	-29.9107	80.8084	-765.177	78751.2	-13193.3	-5450.46	182.758	800.081	0	0	0	0	0	0	0	603	903	0
527	3	0	0	0	0	0	0	200	300	0	-29.1478	81.1136	-764.872	79300.5	-12583	-5267.35	183.549	799.322	0	0	0	0	0	0	0	603	903	0
527	4	0	0	0	0	0	0	200	300	0	-30.5211	82.0291	-764.262	79575.2	-12399.9	-5496.23	183.775	798.88	0	0	0	0	0	0	0	603	903	0
527	5	0	0	0	0	0	0	200	300	0	-29.1478	83.555	-762.125	79666.7	-12827.1	-5358.9	183.169	798.468	0	0	0	0	0	0	0	603	903	0
527	6	0	0	0	0	0	0	200	300	0	-29.9107	81.4188	-764.567	80216	-12888.1	-5450.46	183.143	798.083	0	0	0	0	0	0	0	603	903	0
527	7	0	0	0	0	0	0	200	300	0	-30.0633	85.386	-765.482	80307.6	-12644	-5175.8	183.482	798.089	0	0	0	0	0	0	0	603	903	0
527	8	0	0	0	0	0	0	200	300	0	-31.1314	85.0809	-765.177	80124.5	-12827.1	-5496.23	183.236	798.286	0	0	0	0	0	0	0	603	903	0
527	9	0	0	0	0	0	0	200	300	0	-31.5892	86.149	-763.957	81223.1	-12888.1	-5679.34	183.13	796.681	0	0	0	0	0	0	0	603	903	0
528	0	0	0	0	0	0	0	200	300	0	-30.5211	87.8275	-763.957	81131.6	-13315.4	-5542.01	182.57	796.801	0	0	0	0	0	0	0	603	903	0
528	1	0	0	0	0	0	0	200	300	0	-30.5211	88.2852	-764.567	81589.4	-12827.1	-5130.02	183.223	796.287	0	0	0	0	0	0	0	603	903	0
528	2	0	0	0	0	0	0	200	300	0	-32.5047	88.2852	-761.515	81131.6	-12888.1	-5679.34	183.076	796.46	0	0	0	0	0	0	0	603	903	0
528	3	-6.44109	-10.0533	-14.9112	-1067.78	1641.29	-766.8	310.071	371.609	0	-31.1314	86.9119	-763.957	81497.8	-13254.4	-5542.01	182.65	796.321	0	0	0	0	0	0	0	603	903	0
528	4	-4.91521	-13.7154	-19.4888	-518.465	1824.39	-1041.46	293.612	326.603	0	-32.8099	89.0482	-762.125	82321.8	-13254.4	-5542.01	182.609	794.984	0	0	0	0	0	0	0	603	903	0
528	5	0.883132	-10.6636	-14.606	-701.57	1824.39	-80.1548	324.907	348.033	0	-31.7418	91.0318	-762.431	81497.8	-13010.2	-5679.34	182.936	796.108	0	0	0	0	0	0	0	603	903	0
528	6	-2.32121	-7.30667	-10.9439	-1433.99	1824.39	-492.142	366.704	431.031	0	-31.8944	92.0999	-762.431	82688	-13010.2	-5358.9	182.936	794.547	0	0	0	0	0	0	0	603	903	0
528	7	-5.67815	-8.83255	-9.7232	-152.254	1641.29	-1361.89	368.801	315.659	0	-33.4203	92.8629	-762.125	81864	-13376.4	-5679.34	182.449	795.585	0	0	0	0	0	0	0	603	903	0
528	8	-5.98332	-13.868	-16.7422	-1525.55	1763.36	-492.142	305.324	391.12	0	-33.1151	93.6258	-759.684	82138.6	-13071.2	-5450.46	182.794	794.878	0	0	0	0	0	0	0	603	903	0
528	9	-0.490159	-13.105	-19.4888	-976.228	1946.46	57.1744	299.876	350.092	0	-33.2677	96.0672	-756.938	82596.4	-13498.5	-5130.02	182.167	793.881	0	0	0	0	0	0	0	603	903	0
529	0	0.883132	-11.274	-18.5733	-610.017	2007.5	-1270.34	308.085	332.844	0	-32.8099	94.9991	-758.158	82321.8	-12766.1	-5404.68	183.162	794.419	0	0	0	0	0	0	0	603	903	0
529	1	-1.10051	-12.9524	-17.0474	-1433.99	2556.82	-904.13	349.983	384.118	0	-32.1996	99.2715	-758.158	83145.7	-13254.4	-5450.46	182.518	793.332	0	0	0	0	0	0	0	603	903	0
529	2	0.272781	-15.5464	-20.4044	-1800.2	2068.54	-583.695	301.377	388.226	0	-32.9625	99.7293	-756.022	82138.6	-13437.5	-5496.23	182.226	794.354	0	0	0	0	0	0	0	603	903	0
529	3	-1.2531	-14.4783	-26.2027	-1891.76	2373.71	-1270.34	290.59	372.197	0	-33.2677	101.255	-753.886	82047.1	-12766.1	-5404.68	183.066	794.168	0	0	0	0	0	0	0	603	903	0
529	4	2.71419	-13.5628	-27.1182	-1891.76	3289.24	-1545	321.293	369.76	0	-33.1151	102.934	-751.75	82596.4	-12644	-5404.68	183.181	793.128	0	0	0	0	0	0	0	603	903	0
529	5	7.597	-14.0205	-29.5596	-1983.31	3289.24	-1041.46	311.275	367.095	0	-32.047	104.154	-752.055	82321.8	-13193.3	-5633.56	182.457	793.538	0	0	0	0	0	0	0	603	903	0
529	6	4.24007	-11.5791	-35.358	-2257.97	4326.84	-766.8	322.372	363.86	0	-30.0633	105.985	-749.308	82047.1	-12766.1	-5450.46	182.963	793.503	0	0	0	0	0	0	0	603	903	0
529	7	2.40901	-6.39114	-44.5132	-2074.86	4326.84	-766.8	297.203	346.612	0	-32.5047	106.596	-748.698	82138.6	-12705	-5542.01	183.031	793.291	0	0	0	0	0	0	0	603	903	0
529	8	3.32454	-3.64456	-49.0909	-3081.94	4998.22	-171.707	301.816	362.78	0	-33.7254	108.274	-745.646	81864	-13193.3	-5450.46	182.306	793.211	0	0	0	0	0	0	0	603	903	0
529	9	-0.184983	-4.10232	-53.3633	-3265.05	5974.79	194.503	311.964	361.185	0	-32.9625	109.19	-744.73	82504.9	-13193.3	-5496.23	182.284	792.215	0	0	0	0	0	0	0	603	903	0
530	0	1.03572	-3.1868	-60.9927	-3173.49	6585.14	-217.484	307.966	352.031	0	-31.5892	110.868	-743.205	81680.9	-13132.3	-5130.02	182.33	793.096	0	0	0	0	0	0	0	603	903	0
530	1	2.10384	-2.27127	-72.2842	-3448.15	7317.56	286.056	301.233	347.703	0	-30.5211	112.242	-739.542	82230.2	-12888.1	-5496.23	182.573	791.809	0	0	0	0	0	0	0	603	903	0
530	2	3.01936	0.017548	-77.4722	-3722.81	7500.66	514.938	296.817	348.054	0	-31.4366	113.004	-736.491	81955.6	-13010.2	-5404.68	182.335	791.722	0	0	0	0	0	0	0	603	903	0
530	3	-2.93157	0.322724	-85.1016	-3905.92	8355.16	377.609	298.179	345.897	0	-32.3521	114.378	-732.218	81406.2	-13437.5	-5450.46	181.648	791.823	0	0	0	0	0	0	0	603	903	0
530	4	-4.30486	1.39084	-89.3741	-4272.13	9392.76	286.056	305.095	347.801	0	-33.2677	115.598	-733.744	81223.1	-12705	-5358.9	182.685	792.303	0	0	0	0	0	0	0	603	903	0
530	5	-1.86345	5.51071	-100.055	-4272.13	10369.3	1155.81	303.636	342.698	0	-31.284	117.124	-731.608	81864	-12766.1	-5496.23	182.551	791.104	0	0	0	0	0	0	0	603	903	0
530	6	-2.62639	5.05295	-108.905	-4455.23	10857.6	1338.91	299.698	340.909	0	-30.9789	117.277	-728.861	81772.4	-13498.5	-5267.35	181.48	790.808	0	0	0	0	0	0	0	603	903	0
530	7	-3.08415	6.884	-118.061	-4455.23	11773.1	1110.03	299.721	337.737	0	-30.6737	118.65	-723.979	81040	-13315.4	-5542.01	181.608	791.063	0	0	0	0	0	0	0	603	903	0
530	8	-5.83074	11.6142	-126.911	-5187.65	12322.4	2162.89	297.095	340.876	0	-32.3521	119.718	-722.453	80765.4	-12460.9	-5221.57	182.752	791.207	0	0	0	0	0	0	0	603	903	0
530	9	-7.5092	15.2763	-137.287	-5920.08	13665.2	2345.99	299.538	343.122	0	-32.6573	121.092	-718.791	81040	-12705	-5404.68	182.324	790.255	0	0	0	0	0	0	0	603	903	0
531	0	-10.8661	16.0393	-147.357	-6103.18	14702.8	2117.11	299.776	341.418	0	-31.284	121.092	-712.992	81131.6	-13132.3	-5404.68	181.581	789.21	0	0	0	0	0	0	0	603	903	0
531	1	-9.79802	15.1237	-154.071	-6560.94	15252.1	2391.77	298.994	342.584	0	-29.453	119.413	-712.382	80856.9	-12949.2	-5358.9	181.823	789.498	0	0	0	0	0	0	0	603	903	0
531	2	-8.27214	17.5652	-163.837	-6835.6	16167.7	2849.53	298.681	341.722	0	-30.2159	122.312	-708.109	80399.2	-12399.9	-5496.23	182.489	789.459	0	0	0	0	0	0	0	603	903	0
531	3	-9.03508	18.6333	-172.687	-7934.24	16655.9	2437.55	296.452	345.946	0	-30.3685	123.991	-704.447	80490.7	-12521.9	-5587.79	182.224	788.739	0	0	0	0	0	0	0	603	903	0
531	4	-12.2394	17.4126	-181.537	-7384.92	17937.7	2529.1	298.81	340.68	0	-29.7581	124.906	-702.006	80124.5	-12644	-5496.23	181.989	788.863	0	0	0	0	0	0	0	603	903	0
531	5	-13.4601	16.9548	-187.03	-8117.34	18242.9	3032.64	297.54	343.401	0	-29.1478	124.906	-698.954	79758.3	-12521.9	-5633.56	182.085	788.889	0	0	0	0	0	0	0	603	903	0
531	6	-13.155	17.7177	-192.218	-8208.89	19158.4	2254.44	299.67	342.706	0	-28.5374	125.211	-693.766	79392.1	-12094.7	-5404.68	182.567	788.564	0	0	0	0	0	0	0	603	903	0
531	7	-11.1713	16.497	-199.543	-8300.45	19402.5	2574.88	297.235	341.597	0	-28.8426	126.89	-686.747	79300.5	-12155.7	-5679.34	182.3	787.527	0	0	0	0	0	0	0	603	903	0
531	8	-11.6291	14.666	-208.087	-8117.34	20073.9	2529.1	296.469	339.009	0	-27.7745	125.974	-682.169	78659.7	-12277.8	-5542.01	182.002	787.692	0	0	0	0	0	0	0	603	903	0
531	9	-10.7135	12.6823	-212.055	-8025.79	20989.4	2391.77	298.981	337.848	0	-26.859	128.416	-681.864	79117.4	-12399.9	-5542.01	181.815	786.969	0	0	0	0	0	0	0	603	903	0
532	0	-14.5282	11.7668	-219.684	-8208.89	20806.3	1201.58	294.71	337.367	0	-25.1805	128.568	-677.287	78385	-11606.4	-5496.23	182.863	787.266	0	0	0	0	0	0	0	603	903	0
532	1	-14.986	9.32541	-222.431	-8483.55	21355.7	1842.45	296.01	338.14	0	-25.9435	129.179	-670.268	77744.1	-11789.5	-5587.79	182.411	787.01	0	0	0	0	0	0	0	603	903	0
532	2	-14.8334	5.6633	-227.924	-8483.55	22271.2	1522.02	297.713	337.221	0	-25.3331	131.01	-666.3	77469.5	-11911.6	-5221.57	182.123	786.732	0	0	0	0	0	0	0	603	903	0
532	3	-13.155	1.69601	-232.807	-8025.79	22698.4	835.373	297.499	334.474	0	-25.0279	130.857	-662.028	77011.7	-11728.5	-5175.8	182.284	786.673	0	0	0	0	0	0	0	603	903	0
532	4	-13.7653	0.017548	-241.962	-8575.11	22942.6	423.385	294.819	335.44	0	-23.8072	130.705	-657.755	77011.7	-11484.3	-5175.8	182.54	785.917	0	0	0	0	0	0	0	603	903	0
532	5	-16.0541	-3.1868	-247.15	-7842.68	23919.1	469.162	296.78	331.733	0	-22.1288	129.942	-651.347	76828.6	-11423.3	-5084.25	182.462	785.047	0	0	0	0	0	0	0	603	903	0
532	6	-15.7489	-6.84891	-253.253	-7751.13	24163.3	-125.931	295.411	330.606	0	-22.4339	131.62	-645.548	75913.1	-11545.4	-4855.36	182.115	785.405	0	0	0	0	0	0	0	603	903	0
532	7	-19.1059	-9.90067	-257.526	-7384.92	24224.3	-629.471	294.065	328.676	0	-19.9925	132.993	-640.36	75546.8	-11179.2	-5130.02	182.542	785.025	0	0	0	0	0	0	0	603	903	0
532	8	-17.58	-11.8843	-264.545	-7384.92	25078.8	-537.919	294.8	327.916	0	-21.8236	133.604	-635.783	75272.2	-11240.2	-4901.14	182.321	784.607	0	0	0	0	0	0	0	603	903	0
532	9	-17.8852	-17.6826	-271.564	-7201.81	25628.1	-1224.56	294.372	326.52	0	-18.4666	133.604	-629.374	75089.1	-10812.9	-4946.92	182.82	783.693	0	0	0	0	0	0	0	603	903	0
533	0	-18.8007	-21.9551	-272.785	-6835.6	26238.5	-1682.33	296.187	325.059	0	-18.6192	134.062	-622.355	73715.8	-11118.1	-4946.92	182.135	784.554	0	0	0	0	0	0	0	603	903	0
533	1	-20.9369	-24.5491	-286.212	-7384.92	27154	-2002.76	294.874	325.802	0	-19.3822	135.435	-616.251	73532.7	-11179.2	-5038.47	181.859	783.677	0	0	0	0	0	0	0	603	903	0
533	2	-21.3947	-28.2112	-293.537	-6835.6	28130.6	-2460.53	295.833	323.287	0	-18.3141	134.367	-610.758	73441.2	-10690.9	-4809.59	182.496	782.754	0	0	0	0	0	0	0	603	903	0
533	3	-21.6999	-35.2303	-301.471	-6560.94	28924	-3055.62	295.943	321.763	0	-16.483	135.893	-605.265	73074.9	-10996	-4992.69	181.833	782.268	0	0	0	0	0	0	0	603	903	0
533	4	-20.9369	-35.8406	-306.964	-6560.94	29534.4	-3238.72	296.214	321.374	0	-13.4312	136.045	-599.467	72159.4	-10507.8	-5084.25	182.471	782.627	0	0	0	0	0	0	0	603	903	0
533	5	-20.3266	-38.282	-319.171	-6560.94	30205.7	-3650.71	294.638	320.556	0	-15.4149	136.35	-592.448	71243.9	-10751.9	-4855.36	181.852	782.747	0	0	0	0	0	0	0	603	903	0
533	6	-21.8525	-41.4864	-328.937	-5462.31	31487.5	-4016.92	295.725	316.606	0	-15.1097	137.724	-585.124	70511.5	-10019.5	-4763.81	182.876	782.493	0	0	0	0	0	0	0	603	903	0
533	7	-20.174	-44.9959	-337.177	-6652.5	31853.7	-4337.36	294.472	319.73	0	-15.7201	137.876	-579.325	70786.1	-10385.7	-4397.6	182.073	780.813	0	0	0	0	0	0	0	603	903	0
533	8	-22.0051	-48.3528	-341.144	-6286.29	33196.5	-4612.02	297.309	318.427	0	-12.8209	136.808	-571.085	70145.3	-9897.42	-4672.26	182.669	780.172	0	0	0	0	0	0	0	603	903	0
533	9	-20.3266	-50.1839	-355.182	-5920.08	34234.1	-5161.33	296.385	316.668	0	-11.1424	136.503	-564.677	69229.7	-9531.21	-5038.47	183.121	780.399	0	0	0	0	0	0	0	603	903	0
534	0	-20.3266	-52.3201	-367.389	-5828.52	35149.6	-5344.44	295.674	315.865	0	-11.4476	137.724	-555.827	68497.3	-9103.96	-4534.93	183.621	779.765	0	0	0	0	0	0	0	603	903	0
534	1	-19.8688	-54.9141	-376.85	-5004.55	36248.2	-5298.66	296.188	313.28	0	-11.295	138.487	-550.028	67398.6	-9592.24	-4580.71	182.56	780.463	0	0	0	0	0	0	0	603	903	0
534	2	-20.3266	-56.8977	-388.141	-4913	37652	-5847.98	297.006	312.658	0	-10.9898	138.487	-542.399	66940.9	-9348.1	-4672.26	182.765	779.584	0	0	0	0	0	0	0	603	903	0
534	3	-20.3266	-57.2029	-396.381	-4729.89	38567.6	-6031.08	297.299	311.933	0	-9.0062	138.029	-533.549	66208.5	-9103.96	-4580.71	182.937	778.909	0	0	0	0	0	0	0	603	903	0
534	4	-19.2585	-58.8814	-406.147	-4455.23	39483.1	-6122.64	297.214	310.97	0	-8.39584	137.876	-526.53	65659.1	-8798.78	-4351.82	183.289	778.298	0	0	0	0	0	0	0	603	903	0
534	5	-17.58	-61.3228	-416.828	-3997.47	39727.2	-6305.74	295.309	309.59	0	-8.39584	137.724	-516.764	64652.1	-8859.82	-3939.84	182.855	777.891	0	0	0	0	0	0	0	603	903	0
534	6	-17.8852	-62.8487	-427.204	-3265.05	41375.2	-6443.07	296.851	307.643	0	-6.10703	136.808	-509.44	63645	-8859.82	-4260.27	182.609	778.069	0	0	0	0	0	0	0	603	903	0
534	7	-19.5636	-63.9168	-436.359	-3631.26	42718	-6900.83	297.896	308.322	0	-7.32773	137.876	-502.116	62912.6	-8249.47	-4260.27	183.571	777.705	0	0	0	0	0	0	0	603	903	0
534	8	-19.2585	-64.3745	-445.514	-3631.26	43633.5	-6031.08	297.94	308.151	0	-5.34409	136.808	-493.266	62180.2	-8432.57	-4214.49	182.905	776.942	0	0	0	0	0	0	0	603	903	0
534	9	-19.4111	-64.222	-455.585	-2898.84	44243.8	-6717.73	297.114	306.363	0	-4.42856	135.893	-483.805	60715.3	-8188.43	-3848.28	183.075	777.505	0	0	0	0	0	0	0	603	903	0
535	0	-17.1222	-64.8323	-468.402	-1708.65	45891.8	-6305.74	297.975	303.648	0	-3.81821	136.198	-475.26	59525.1	-8127.4	-3710.95	182.899	777.753	0	0	0	0	0	0	0	603	903	0
535	1	-15.7489	-65.5952	-483.661	-1067.78	47478.7	-6443.07	298.165	302.208	0	-2.44492	135.13	-468.546	58792.7	-7517.05	-3482.07	183.957	777.521	0	0	0	0	0	0	0	603	903	0
535	2	-12.392	-68.3418	-490.68	-701.57	48943.5	-6717.73	299.746	301.43	0	-1.07162	133.909	-459.696	58609.6	-7517.05	-3710.95	183.648	775.504	0	0	0	0	0	0	0	603	903	0
535	3	-10.561	-70.9358	-506.244	30.8518	50164.2	-6855.06	299.091	299.939	0	1.82755	132.993	-448.405	57694.1	-7517.05	-3390.52	183.236	774.335	0	0	0	0	0	0	0	603	903	0
535	4	-8.88249	-71.3936	-512.958	671.721	51079.8	-6397.29	299.579	298.69	0	0.149079	133.299	-435.282	55954.6	-7272.9	-3390.52	183.292	774.452	0	0	0	0	0	0	0	603	903	0
535	5	-5.83074	-72.4617	-524.555	1221.04	51568.1	-6671.95	298.308	297.672	0	0.149079	132.231	-428.568	54672.8	-7028.76	-3436.3	183.599	775.429	0	0	0	0	0	0	0	603	903	0
535	6	-3.23674	-75.9712	-534.015	1587.25	52910.8	-7404.38	299.081	297.028	0	1.67496	131.925	-420.634	54398.2	-6845.66	-2795.43	183.725	773.676	0	0	0	0	0	0	0	603	903	0
535	7	-0.947922	-81.617	-542.865	2228.12	54192.6	-7175.49	299.827	295.896	0	2.89566	129.484	-411.478	53024.9	-6784.62	-3253.19	183.512	774.136	0	0	0	0	0	0	0	603	903	0
535	8	1.3409	-83.7532	-549.579	2685.88	55291.2	-7358.6	300.606	295.113	0	3.35342	129.789	-401.103	51743.1	-6540.48	-3115.86	183.694	773.998	0	0	0	0	0	0	0	603	903	0
535	9	2.86677	-86.9576	-557.514	3326.75	56023.6	-7679.03	300.488	294.033	0	3.04825	129.331	-387.98	50369.9	-6418.41	-2932.76	183.457	773.174	0	0	0	0	0	0	0	603	903	0
536	0	2.71419	-89.399	-562.702	3143.64	56511.9	-8228.35	300.43	294.413	0	4.11636	126.89	-380.656	49820.5	-5624.95	-2841.2	185.223	772.119	0	0	0	0	0	0	0	603	903	0
536	1	3.93489	-93.6714	-570.026	3509.86	57244.3	-8045.24	300.424	293.843	0	5.79483	128.111	-372.111	49545.9	-6418.41	-2795.43	182.751	769.852	0	0	0	0	0	0	0	603	903	0
536	2	4.54524	-95.5025	-573.383	4059.17	58037.8	-8411.45	301.22	292.921	0	7.62589	125.822	-362.65	47897.9	-5197.71	-2383.44	185.667	770.923	0	0	0	0	0	0	0	603	903	0
536	3	5.46077	-95.9602	-582.233	4242.28	58587.1	-8731.89	300.625	292.714	0	5.79483	123.991	-350.443	46066.9	-5685.99	-2474.99	183.775	771.547	0	0	0	0	0	0	0	603	903	0
536	4	3.7823	-99.1646	-587.116	4700.04	59197.5	-8365.68	300.828	291.995	0	5.18448	122.465	-339.152	45151.3	-5930.13	-2566.54	182.515	769.87	0	0	0	0	0	0	0	603	903	0
536	5	6.3763	-100.538	-587.726	5615.57	59319.5	-8914.99	300.931	290.445	0	5.18448	118.65	-328.471	44327.4	-5624.95	-2429.22	182.875	768.049	0	0	0	0	0	0	0	603	903	0
536	6	4.85042	-99.4698	-593.83	5798.68	59563.7	-9052.32	300.304	290.235	0	5.48965	117.735	-319.315	42313.2	-4953.57	-2566.54	184.487	770.488	0	0	0	0	0	0	0	603	903	0
536	7	5.46077	-99.9275	-595.661	5615.57	60051.9	-9281.2	300.816	290.573	0	5.64224	114.073	-308.024	42130.1	-4892.53	-2337.66	184.116	766.225	0	0	0	0	0	0	0	603	903	0
536	8	6.3763	-101.453	-600.849	6256.44	60357.1	-9189.65	300.453	289.587	0	6.25259	110.868	-297.953	40390.6	-4953.57	-2337.66	183.375	767.44	0	0	0	0	0	0	0	603	903	0
536	9	5.61336	-102.827	-603.595	6347.99	60479.2	-9189.65	300.198	289.483	0	4.72672	109.037	-287.272	39566.6	-4648.39	-2063	183.819	765.268	0	0	0	0	0	0	0	603	903	0
537	0	5.15559	-99.9275	-606.037	6622.65	60845.4	-9052.32	300.399	289.072	0	5.03189	106.291	-279.643	38468	-4404.25	-2108.78	184.25	765.439	0	0	0	0	0	0	0	603	903	0
537	1	5.76594	-99.9275	-604.816	7263.52	61150.6	-9326.98	301.106	287.991	0	5.48965	101.866	-268.351	36911.6	-4343.22	-1971.45	183.815	765.45	0	0	0	0	0	0	0	603	903	0
537	2	3.01936	-100.385	-604.816	7812.84	60906.4	-9647.42	300.702	287.082	0	6.55777	98.8138	-256.449	36087.6	-4282.18	-1651.02	183.302	762.28	0	0	0	0	0	0	0	603	903	0
537	3	3.32454	-100.233	-608.478	8087.49	61150.6	-9235.43	300.498	286.709	0	5.03189	96.8301	-244.853	34531.2	-4160.11	-1788.35	183.01	761.971	0	0	0	0	0	0	0	603	903	0
537	4	3.62971	-98.8594	-613.361	8270.6	61455.8	-9372.76	300.195	286.516	0	4.72672	90.7266	-236.002	33249.5	-3732.86	-1559.47	184.183	762.114	0	0	0	0	0	0	0	603	903	0
537	5	2.25642	-99.3172	-614.887	8636.81	60967.5	-9464.31	299.152	285.954	0	4.72672	89.2007	-226.237	32425.5	-3671.83	-1284.81	183.77	759.675	0	0	0	0	0	0	0	603	903	0
537	6	3.17195	-100.996	-611.225	9094.58	61455.8	-9738.97	300.545	285.121	0	5.33707	84.7757	-219.523	31510	-3732.86	-1376.36	182.996	759.462	0	0	0	0	0	0	0	603	903	0
537	7	1.3409	-100.843	-614.276	9369.23	61638.9	-9189.65	300.344	284.748	0	5.33707	80.8084	-209.757	29953.6	-3793.9	-1330.58	181.913	760.199	0	0	0	0	0	0	0	603	903	0
537	8	1.3409	-100.385	-614.887	9094.58	61028.5	-9967.85	299.252	285.209	0	5.94742	78.0618	-199.992	28763.4	-3122.51	-1193.25	184.387	759.177	0	0	0	0	0	0	0	603	903	0
537	9	1.64607	-101.301	-617.023	9735.44	61760.9	-9876.3	300.095	284.222	0	4.26895	73.7894	-192.973	27756.3	-3305.62	-1376.36	182.87	759.164	0	0	0	0	0	0	0	603	903	0
538	0	1.03572	-103.284	-617.023	9918.55	62249.2	-10334.1	300.886	283.925	0	3.6586	69.3643	-186.259	27115.4	-3183.55	-964.372	182.908	757.421	0	0	0	0	0	0	0	603	903	0
538	1	0.883132	-103.895	-619.77	10376.3	62249.2	-10242.5	300.439	283.258	0	5.33707	66.16	-175.578	25833.7	-3122.51	-781.267	182.216	755.865	0	0	0	0	0	0	0	603	903	0
538	2	0.730544	-103.437	-618.854	10467.9	62127.1	-10608.7	300.391	283.085	0	5.64224	63.7186	-167.948	24918.2	-2878.37	-689.714	182.862	754.632	0	0	0	0	0	0	0	603	903	0
538	3	0.883132	-104.658	-619.464	10559.4	62127.1	-10791.8	300.292	282.954	0	6.40518	60.0565	-160.624	23819.6	-2756.3	-460.832	182.84	754.706	0	0	0	0	0	0	0	603	903	0
538	4	2.25642	-106.641	-620.075	10101.7	62188.2	-10562.9	300.291	283.709	0	3.35342	55.784	-151.774	22629.4	-3061.48	-689.714	179.829	753.901	0	0	0	0	0	0	0	603	903	0
538	5	3.17195	-106.336	-623.127	10834.1	62676.5	-10700.3	300.584	282.613	0	2.59048	51.0538	-145.976	22537.8	-2817.34	-552.385	180.7	748.606	0	0	0	0	0	0	0	603	903	0
538	6	3.01936	-106.031	-624.042	11383.4	62920.6	-10791.8	300.828	281.759	0	3.81119	47.6968	-138.041	20981.4	-2939.41	-460.832	178.706	751.006	0	0	0	0	0	0	0	603	903	0
538	7	5.00301	-107.252	-624.652	11658.1	62981.6	-10608.7	300.827	281.337	0	3.81119	45.408	-129.801	20065.9	-2512.16	-323.503	180.646	748.411	0	0	0	0	0	0	0	603	903	0
538	8	5.15559	-107.557	-623.737	11658.1	63347.8	-10746	301.562	281.309	0	2.74307	41.5933	-123.087	18417.9	-2512.16	-460.832	179.59	753.367	0	0	0	0	0	0	0	603	903	0
538	9	6.52888	-107.404	-628.62	12298.9	63530.9	-10517.2	301.064	280.435	0	1.67496	37.3209	-117.289	18601	-2634.23	-369.28	177.541	744.409	0	0	0	0	0	0	0	603	903	0
539	0	8.51253	-107.862	-633.808	13031.3	63775.1	-9922.07	300.622	279.44	0	3.35342	35.1846	-109.049	16770	-2329.06	-3.06848	178.642	749.216	0	0	0	0	0	0	0	603	903	0
539	1	9.27547	-109.541	-636.249	13214.4	63775.1	-10837.6	300.236	279.231	0	2.13272	32.7432	-103.556	16312.2	-1901.81	-231.95	181.635	745.479	0	0	0	0	0	0	0	603	903	0
539	2	10.191	-110.151	-638.996	13122.9	64751.6	-10517.2	301.333	279.463	0	2.59048	30.607	-97.4526	15305.2	-2268.02	-94.6212	176.727	745.948	0	0	0	0	0	0	0	603	903	0
539	3	11.1065	-110.151	-640.827	13306	65239.9	-10654.5	301.806	279.236	0	1.98013	28.3182	-91.0439	14115	-2145.95	-231.95	176.43	747.965	0	0	0	0	0	0	0	603	903	0
539	4	12.785	-110.914	-642.963	13489.1	65362	-10242.5	301.658	279.02	0	0.912018	26.9449	-84.3301	13565.6	-1840.78	-140.398	178.172	742.136	0	0	0	0	0	0	0	603	903	0
539	5	15.9893	-112.745	-648.151	14404.6	66033.4	-10105.2	301.88	277.776	0	1.36978	26.4871	-78.5317	12833.2	-1840.78	-277.727	176.56	739.585	0	0	0	0	0	0	0	603	903	0
539	6	15.2264	-113.203	-652.118	14496.2	66033.4	-10562.9	301.26	277.771	0	2.13272	23.588	-73.6489	11917.7	-1718.71	-94.6212	176.664	741.182	0	0	0	0	0	0	0	603	903	0
539	7	15.6842	-113.203	-655.475	15228.6	66826.8	-10974.9	301.952	276.767	0	1.52237	22.825	-66.3247	10727.5	-1047.32	-186.174	184.209	741.258	0	0	0	0	0	0	0	603	903	0
539	8	18.1256	-113.813	-657.001	15594.8	66765.8	-10562.9	301.622	276.264	0	0.149079	19.7733	-63.2729	9354.22	-1291.46	-231.95	179.589	755.161	0	0	0	0	0	0	0	603	903	0
539	9	16.4471	-113.966	-660.053	15961	67559.3	-10700.3	302.354	275.819	0	0.149079	17.9422	-56.5591	8804.91	-1535.6	-3.06848	172.85	747.324	0	0	0	0	0	0	0	603	903	0
540	0	17.8204	-114.729	-663.715	16144.1	67620.3	-10517.2	301.882	275.676	0	-0.156097	16.2637	-51.3711	8621.8	-1657.67	-231.95	167.731	735.166	0	0	0	0	0	0	0	603	903	0
540	1	19.3463	-116.102	-669.513	16601.9	67620.3	-10974.9	300.999	275.203	0	1.06461	15.3482	-48.9297	8072.48	-1352.49	-140.398	172.358	738.019	0	0	0	0	0	0	0	603	903	0
540	2	19.0411	-115.186	-674.091	17059.7	68902	-10837.6	302.215	274.692	0	-0.00350934	11.8387	-44.9624	7248.51	-925.248	88.4843	179.422	741.787	0	0	0	0	0	0	0	603	903	0
540	3	18.7359	-115.339	-675.617	17059.7	68963.1	-11203.8	302.074	274.749	0	-0.308685	10.1602	-40.9951	6607.64	-681.107	42.7079	183.386	741.819	0	0	0	0	0	0	0	603	903	0
540	4	19.3463	-114.881	-678.058	17425.9	69512.4	-11158	302.517	274.3	0	2.74307	9.39728	-36.4175	5692.11	-1352.49	271.59	162.861	746.698	0	0	0	0	0	0	0	603	903	0
540	5	18.7359	-115.034	-679.584	17792.1	69207.2	-11020.7	301.838	273.819	0	-0.156097	8.17657	-35.1968	5783.66	-742.142	134.261	178.914	738.676	0	0	0	0	0	0	0	603	903	0
540	6	20.567	-115.034	-685.382	18066.7	69756.5	-10837.6	301.778	273.64	0	-0.461273	6.49811	-32.7554	5142.79	-864.213	-3.06848	173.616	745.994	0	0	0	0	0	0	0	603	903	0
540	7	21.0247	-114.729	-689.655	18341.4	70366.9	-11112.3	302.032	273.405	0	-0.156097	4.81964	-29.3984	5051.24	-559.037	225.813	180.984	731.18	0	0	0	0	0	0	0	603	903	0
540	8	21.0247	-114.271	-692.096	18707.6	70794.1	-11066.5	302.289	272.97	0	-0.919037	4.66705	-25.7363	3769.5	-559.037	88.4843	178.278	756.534	0	0	0	0	0	0	0	603	903	0
540	9	21.0247	-114.729	-695.758	19165.4	70733.1	-10883.4	301.663	272.454	0	0.301666	4.66705	-24.8208	3769.5	-681.107	-140.398	172.559	751.131	0	0	0	0	0	0	0	603	903	0
541	0	21.7877	-114.423	-698.505	18616.1	71709.6	-10929.2	302.662	273.349	0	-0.766449	2.68341	-19.938	3403.29	-498.002	180.037	175.022	732.306	0	0	0	0	0	0	0	603	903	0
541	1	22.5506	-113.966	-700.336	18890.7	71709.6	-11158	302.393	273.026	0	-0.308685	0.0894158	-19.6328	3037.08	-436.967	271.59	177.743	748.306	0	0	0	0	0	0	0	603	903	0
541	2	24.2291	-113.66	-703.998	19165.4	71892.8	-10791.8	302.121	272.776	0	0	0	0	0	0	0	200	903	0	0	0	0	0	0	0	603	903	0
541	3	23.7713	-114.118	-709.491	19623.1	72442.1	-11112.3	302.104	272.342	0	0	0	0	0	0	0	200	903	0	0	0	0	0	0	0	603	903	0
541	4	23.4661	-113.813	-710.407	20264	73052.4	-10334.1	302.832	271.475	0	0	0	0	0	0	0	200	903	0	0	0	0	0	0	0	603	903	0
541	5	24.3817	-113.813	-711.933	20355.6	73479.7	-10562.9	303.212	271.408	0	0	0	0	0	0	0	200	903	0	0	0	0	0	0	0	603	903	0
541	6	25.1446	-113.355	-714.069	20080.9	73479.7	-10883.4	302.903	271.878	0	0	0	0	0	0	0	200	903	0	0	0	0	0	0	0	603	903	0
541	7	25.6024	-113.05	-718.647	20721.8	73784.8	-10929.2	302.672	271.166	0	0	0	0	0	0	0	200	903	0	0	0	0	0	0	0	603	903	0
541	8	25.755	-113.05	-723.529	20355.6	73967.9	-10746	302.232	271.866	0	0	0	0	0	0	0	200	903	0	0	0	0	0	0	0	603	903	0
541	9	26.5179	-113.05	-725.666	20630.2	74761.4	-10517.2	303.025	271.571	0	0	0	0	0	0	0	200	903	0	0	0	0	0	0	0	603	903	0
542	0	26.3653	-112.135	-725.971	21088	75249.7	-10700.3	303.654	270.952	0	0	0	0	0	0	0	200	903	0	0	0	0	0	0	0	603	903	0
542	1	27.1283	-111.829	-729.023	21362.6	75127.6	-10654.5	303.053	270.697	0	0	0	0	0	0	0	200	903	0	0	0	0	0	0	0	603	903	0
542	2	28.1964	-111.524	-732.685	21820.4	75127.6	-10242.5	302.538	270.219	0	0	0	0	0	0	0	200	903	0	0	0	0	0	0	0	603	903	0
542	3	29.2645	-110.914	-737.873	21820.4	75493.9	-10242.5	302.313	270.428	0	0	0	0	0	0	0	200	903	0	0	0	0	0	0	0	603	903	0
542	4	28.1964	-109.998	-739.093	22369.7	76165.2	-10151	303.052	269.734	0	0	0	0	0	0	0	200	903	0	0	0	0	0	0	0	603	903	0
542	5	28.1964	-110.151	-740.924	22369.7	75982.1	-10379.8	302.55	269.808	0	0	0	0	0	0	0	200	903	0	0	0	0	0	0	0	603	903	0
542	6	29.4171	-109.388	-743.366	23010.6	76592.5	-10105.2	303.035	269.045	0	0	0	0	0	0	0	200	903	0	0	0	0	0	0	0	603	903	0
542	7	27.586	-108.93	-744.281	22735.9	76531.4	-10013.6	302.826	269.452	0	0	0	0	0	0	0	200	903	0	0	0	0	0	0	0	603	903	0
542	8	28.8067	-108.015	-747.028	22461.3	76897.6	-10151	302.938	269.932	0	0	0	0	0	0	0	200	903	0	0	0	0	0	0	0	603	903	0
542	9	28.5015	-106.947	-751.3	23285.3	77324.9	-10151	302.921	269.007	0	0	0	0	0	0	0	200	903	0	0	0	0	0	0	0	603	903	0
543	0	28.5015	-105.726	-750.385	23468.4	77141.8	-9693.19	302.803	268.725	0	0	0	0	0	0	0	200	903	0	0	0	0	0	0	0	603	903	0
543	1	28.349	-105.726	-755.268	23468.4	77691.1	-9601.64	302.866	268.927	0	0	0	0	0	0	0	200	903	0	0	0	0	0	0	0	603	903	0
543	2	27.8912	-105.268	-755.573	23834.6	77752.1	-9967.85	302.905	268.455	0	0	0	0	0	0	0	200	903	0	0	0	0	0	0	0	603	903	0
543	3	27.586	-103.132	-758.93	23834.6	77813.2	-9647.42	302.53	268.595	0	0	0	0	0	0	0	200	903	0	0	0	0	0	0	0	603	903	0
543	4	28.1964	-103.284	-760.15	24200.8	78362.5	-8960.77	303.088	268.163	0	0	0	0	0	0	0	200	903	0	0	0	0	0	0	0	603	903	0
543	5	28.0438	-101.759	-764.118	23926.1	78545.6	-9510.09	302.793	268.688	0	0	0	0	0	0	0	200	903	0	0	0	0	0	0	0	603	903	0
543	6	27.1283	-100.996	-765.644	23651.5	78667.7	-9326.98	302.747	269.109	0	0	0	0	0	0	0	200	903	0	0	0	0	0	0	0	603	903	0
543	7	28.8067	-100.08	-766.864	23743	78911.8	-9098.1	302.902	269.039	0	0	0	0	0	0	0	200	903	0	0	0	0	0	0	0	603	903	0
543	8	27.7386	-99.7749	-767.169	24109.2	78972.8	-9052.32	302.941	268.574	0	0	0	0	0	0	0	200	903	0	0	0	0	0	0	0	603	903	0
543	9	28.0438	-98.2491	-768.39	24109.2	79033.9	-9143.88	302.856	268.624	0	0	0	0	0	0	0	200	903	0	0	0	0	0	0	0	603	903	0
544	0	28.349	-97.9439	-772.357	24292.3	79766.3	-8960.77	303.276	268.548	0	0	0	0	0	0	0	200	903	0	0	0	0	0	0	0	603	903	0
544	1	28.1964	-96.2654	-771.747	25207.9	79644.2	-8731.89	303.2	267.337	0	0	0	0	0	0	0	200	903	0	0	0	0	0	0	0	603	903	0
544	2	27.586	-95.0447	-775.714	24567	79156	-8548.78	302.043	268.33	0	0	0	0	0	0	0	200	903	0	0	0	0	0	0	0	603	903	0
544	3	27.4334	-94.7395	-776.02	24567	80010.5	-8457.23	303.104	268.342	0	0	0	0	0	0	0	200	903	0	0	0	0	0	0	0	603	903	0
544	4	27.8912	-93.6714	-776.935	24750.1	79949.4	-8548.78	302.904	268.144	0	0	0	0	0	0	0	200	903	0	0	0	0	0	0	0	603	903	0
544	5	27.7386	-93.6714	-777.24	24750.1	80315.6	-8091.02	303.334	268.156	0	0	0	0	0	0	0	200	903	0	0	0	0	0	0	0	603	903	0
544	6	28.0438	-92.2981	-781.513	24933.2	80071.5	-7907.92	302.457	268.096	0	0	0	0	0	0	0	200	903	0	0	0	0	0	0	0	603	903	0
544	7	27.1283	-90.6197	-782.123	25207.9	80681.8	-8228.35	303.157	267.77	0	0	0	0	0	0	0	200	903	0	0	0	0	0	0	0	603	903	0
544	8	28.1964	-89.8567	-781.818	25207.9	80437.7	-7953.69	302.885	267.757	0	0	0	0	0	0	0	200	903	0	0	0	0	0	0	0	603	903	0
544	9	27.4334	-89.2464	-780.597	25757.2	80376.7	-7495.93	302.968	267.003	0	0	0	0	0	0	0	200	903	0	0	0	0	0	0	0	603	903	0
545	0	27.8912	-88.9412	-783.954	25848.7	80742.9	-7724.81	302.994	267.028	0	0	0	0	0	0	0	200	903	0	0	0	0	0	0	0	603	903	0
545	1	27.7386	-87.5679	-786.396	26031.8	81109.1	-7450.15	303.14	266.897	0	0	0	0	0	0	0	200	903	0	0	0	0	0	0	0	603	903	0
545	2	27.8912	-86.805	-783.344	25940.3	80864.9	-7312.82	303.23	266.885	0	0	0	0	0	0	0	200	903	0	0	0	0	0	0	0	603	903	0
545	3	27.2808	-87.1101	-787.006	26031.8	81292.2	-7312.82	303.293	266.923	0	0	0	0	0	0	0	200	903	0	0	0	0	0	0	0	603	903	0
545	4	26.3653	-85.4317	-785.175	26672.7	80620.8	-7175.49	302.679	266.03	0	0	0	0	0	0	0	200	903	0	0	0	0	0	0	0	603	903	0
545	5	26.3653	-84.211	-784.259	25665.6	80742.9	-7129.72	302.954	267.274	0	0	0	0	0	0	0	200	903	0	0	0	0	0	0	0	603	903	0
545	6	27.2808	-83.1429	-785.785	26489.6	81231.2	-7038.16	303.376	266.289	0	0	0	0	0	0	0	200	903	0	0	0	0	0	0	0	603	903	0
545	7	27.4334	-81.9221	-787.921	26489.6	80926	-6717.73	302.708	266.38	0	0	0	0	0	0	0	200	903	0	0	0	0	0	0	0	603	903	0
545	8	27.586	-81.3118	-786.701	26489.6	81048	-6626.18	303.023	266.328	0	0	0	0	0	0	0	200	903	0	0	0	0	0	0	0	603	903	0
545	9	26.5179	-80.0911	-786.701	26581.2	80559.7	-6809.28	302.402	266.212	0	0	0	0	0	0	0	200	903	0	0	0	0	0	0	0	603	903	0
546	0	27.1283	-79.1756	-784.259	26764.3	80681.8	-6397.29	302.876	265.873	0	0	0	0	0	0	0	200	903	0	0	0	0	0	0	0	603	903	0
546	1	27.586	-77.4971	-781.513	27405.1	80742.9	-6259.96	303.316	264.933	0	0	0	0	0	0	0	200	903	0	0	0	0	0	0	0	603	903	0
546	2	27.7386	-76.429	-783.649	26672.7	80926	-6076.86	303.268	265.963	0	0	0	0	0	0	0	200	903	0	0	0	0	0	0	0	603	903	0
546	3	27.7386	-75.9712	-781.818	26855.8	80559.7	-6076.86	303.042	265.65	0	0	0	0	0	0	0	200	903	0	0	0	0	0	0	0	603	903	0
546	4	27.7386	-75.0557	-780.597	26581.2	80681.8	-5893.75	303.359	265.948	0	0	0	0	0	0	0	200	903	0	0	0	0	0	0	0	603	903	0
546	5	28.1964	-74.4453	-774.799	26764.3	80254.6	-5664.87	303.581	265.457	0	0	0	0	0	0	0	200	903	0	0	0	0	0	0	0	603	903	0
546	6	26.9757	-72.3091	-774.494	26855.8	80010.5	-5527.54	303.307	265.325	0	0	0	0	0	0	0	200	903	0	0	0	0	0	0	0	603	903	0
546	7	28.349	-71.6988	-774.494	26947.4	80071.5	-5527.54	303.386	265.206	0	0	0	0	0	0	0	200	903	0	0	0	0	0	0	0	603	903	0
546	8	28.9593	-70.7832	-772.357	26855.8	80010.5	-5435.99	303.593	265.229	0	0	0	0	0	0	0	200	903	0	0	0	0	0	0	0	603	903	0
546	9	28.349	-68.9522	-764.728	26489.6	79949.4	-4978.23	304.546	265.361	0	0	0	0	0	0	0	200	903	0	0	0	0	0	0	0	603	903	0
547	0	27.1283	-68.4944	-769.001	26398	79094.9	-4474.69	302.854	265.672	0	0	0	0	0	0	0	200	903	0	0	0	0	0	0	0	603	903	0
547	1	28.0438	-67.7315	-766.254	27038.9	79217	-4978.23	303.382	264.713	0	0	0	0	0	0	0	200	903	0	0	0	0	0	0	0	603	903	0
547	2	28.8067	-66.8159	-763.507	26672.7	78850.8	-4657.79	303.274	265.066	0	0	0	0	0	0	0	200	903	0	0	0	0	0	0	0	603	903	0
547	3	28.8067	-65.7478	-759.235	26947.4	78850.8	-3971.15	303.856	264.507	0	0	0	0	0	0	0	200	903	0	0	0	0	0	0	0	603	903	0
547	4	28.6541	-65.7478	-756.794	26855.8	78728.7	-4062.7	304.029	264.514	0	0	0	0	0	0	0	200	903	0	0	0	0	0	0	0	603	903	0
547	5	27.8912	-63.3064	-754.962	26581.2	78240.4	-4612.02	303.635	264.791	0	0	0	0	0	0	0	200	903	0	0	0	0	0	0	0	603	903	0
547	6	28.8067	-63.3064	-751.3	27588.2	77813.2	-3925.37	303.571	263.279	0	0	0	0	0	0	0	200	903	0	0	0	0	0	0	0	603	903	0
547	7	27.4334	-62.3909	-746.723	27038.9	77202.8	-3971.15	303.389	263.79	0	0	0	0	0	0	0	200	903	0	0	0	0	0	0	0	603	903	0
547	8	28.0438	-61.1702	-743.366	27313.6	77202.8	-3650.71	303.856	263.257	0	0	0	0	0	0	0	200	903	0	0	0	0	0	0	0	603	903	0
547	9	28.8067	-61.0176	-742.145	27038.9	77141.8	-3971.15	303.944	263.567	0	0	0	0	0	0	0	200	903	0	0	0	0	0	0	0	603	903	0
548	0	29.2645	-60.2547	-735.736	27679.8	76775.6	-3879.59	304.352	262.378	0	0	0	0	0	0	0	200	903	0	0	0	0	0	0	0	603	903	0
548	1	27.586	-59.3391	-736.042	27313.6	75982.1	-3604.93	303.231	262.891	0	0	0	0	0	0	0	200	903	0	0	0	0	0	0	0	603	903	0
548	2	28.349	-58.5762	-730.243	27222	75921.1	-3376.05	303.967	262.722	0	0	0	0	0	0	0	200	903	0	0	0	0	0	0	0	603	903	0
548	3	29.4171	-57.6607	-725.36	27222	75676.9	-3696.49	304.33	262.471	0	0	0	0	0	0	0	200	903	0	0	0	0	0	0	0	603	903	0
548	4	28.5015	-56.7451	-721.698	27313.6	75615.9	-3421.83	304.775	262.154	0	0	0	0	0	0	0	200	903	0	0	0	0	0	0	0	603	903	0
548	5	28.349	-55.8296	-720.172	27588.2	75310.7	-3147.17	304.573	261.692	0	0	0	0	0	0	0	200	903	0	0	0	0	0	0	0	603	903	0
548	6	28.5015	-54.6089	-716.815	26489.6	74944.5	-3238.72	304.552	263.045	0	0	0	0	0	0	0	200	903	0	0	0	0	0	0	0	603	903	0
548	7	28.1964	-54.3037	-711.322	27130.5	74334.2	-3009.84	304.501	261.859	0	0	0	0	0	0	0	200	903	0	0	0	0	0	0	0	603	903	0
548	8	28.1964	-53.3882	-706.134	26672.7	73723.8	-2872.51	304.405	262.227	0	0	0	0	0	0	0	200	903	0	0	0	0	0	0	0	603	903	0
548	9	28.9593	-52.0149	-701.862	26672.7	73662.8	-2552.08	304.953	261.997	0	0	0	0	0	0	0	200	903	0	0	0	0	0	0	0	603	903	0
549	0	30.9429	-52.0149	-700.336	26672.7	73418.6	-2826.74	304.833	261.914	0	0	0	0	0	0	0	200	903	0	0	0	0	0	0	0	603	903	0
549	1	29.2645	-50.0313	-696.674	26947.4	73296.6	-2414.75	305.209	261.32	0	0	0	0	0	0	0	200	903	0	0	0	0	0	0	0	603	903	0
549	2	29.1119	-48.9632	-692.096	26764.3	72625.2	-2414.75	304.935	261.329	0	0	0	0	0	0	0	200	903	0	0	0	0	0	0	0	603	903	0
549	3	29.2645	-47.8951	-687.213	26581.2	72136.9	-2414.75	304.97	261.32	0	0	0	0	0	0	0	200	903	0	0	0	0	0	0	0	603	903	0
549	4	29.1119	-47.7425	-681.11	26672.7	71831.7	-2094.31	305.463	260.839	0	0	0	0	0	0	0	200	903	0	0	0	0	0	0	0	603	903	0
549	5	29.7222	-48.2002	-679.584	26489.6	71770.7	-2002.76	305.61	261.021	0	0	0	0	0	0	0	200	903	0	0	0	0	0	0	0	603	903	0
549	6	30.18	-45.7588	-676.227	26581.2	71160.3	-1865.43	305.231	260.692	0	0	0	0	0	0	0	200	903	0	0	0	0	0	0	0	603	903	0
549	7	29.7222	-45.3011	-669.513	26855.8	70794.1	-1773.88	305.74	259.888	0	0	0	0	0	0	0	200	903	0	0	0	0	0	0	0	603	903	0
549	8	29.5697	-44.5381	-668.903	26947.4	70550	-1545	305.471	259.714	0	0	0	0	0	0	0	200	903	0	0	0	0	0	0	0	603	903	0
549	9	29.1119	-43.7752	-661.579	26947.4	69939.6	-1682.33	305.716	259.268	0	0	0	0	0	0	0	200	903	0	0	0	0	0	0	0	603	903	0
550	0	31.5533	-42.4019	-660.053	27130.5	69634.5	-1453.45	305.498	258.897	0	0	0	0	0	0	0	200	903	0	0	0	0	0	0	0	603	903	0
550	1	29.8748	-43.3174	-654.254	27313.6	69451.3	-1270.34	306.153	258.252	0	0	0	0	0	0	0	200	903	0	0	0	0	0	0	0	603	903	0
550	2	30.18	-42.5545	-653.034	27038.9	69207.2	-1361.89	305.978	258.595	0	0	0	0	0	0	0	200	903	0	0	0	0	0	0	0	603	903	0
550	3	28.8067	-42.0967	-648.151	27038.9	68230.6	-1270.34	305.27	258.283	0	0	0	0	0	0	0	200	903	0	0	0	0	0	0	0	603	903	0
550	4	29.7222	-41.1812	-644.489	27038.9	68169.6	-1087.24	305.773	258.046	0	0	0	0	0	0	0	200	903	0	0	0	0	0	0	0	603	903	0
550	5	29.7222	-41.6389	-639.301	26947.4	68047.5	-949.906	306.441	257.849	0	0	0	0	0	0	0	200	903	0	0	0	0	0	0	0	603	903	0
550	6	28.9593	-39.8079	-633.503	27130.5	67742.4	-721.024	306.933	257.174	0	0	0	0	0	0	0	200	903	0	0	0	0	0	0	0	603	903	0
550	7	30.18	-39.3501	-632.587	26581.2	66948.9	-766.8	305.834	257.98	0	0	0	0	0	0	0	200	903	0	0	0	0	0	0	0	603	903	0
550	8	30.0274	-38.1294	-630.451	26398	67193	-904.13	306.579	258.128	0	0	0	0	0	0	0	200	903	0	0	0	0	0	0	0	603	903	0
550	9	30.6378	-37.8242	-621.601	26764.3	66399.6	-537.919	306.82	256.943	0	0	0	0	0	0	0	200	903	0	0	0	0	0	0	0	603	903	0
551	0	29.4171	-37.5191	-622.821	26581.2	65972.3	-537.919	305.925	257.321	0	0	0	0	0	0	0	200	903	0	0	0	0	0	0	0	603	903	0
551	1	29.5697	-35.9932	-616.718	27771.3	65728.2	-583.695	306.577	254.969	0	0	0	0	0	0	0	200	903	0	0	0	0	0	0	0	603	903	0
551	2	30.7904	-35.9932	-613.361	26855.8	65545.1	-492.142	306.862	256.215	0	0	0	0	0	0	0	200	903	0	0	0	0	0	0	0	603	903	0
551	3	30.9429	-35.0777	-610.919	26764.3	65484.1	-400.589	307.189	256.19	0	0	0	0	0	0	0	200	903	0	0	0	0	0	0	0	603	903	0
551	4	30.7904	-34.1621	-608.173	26947.4	64873.7	-171.707	306.67	255.691	0	0	0	0	0	0	0	200	903	0	0	0	0	0	0	0	603	903	0
551	5	30.0274	-34.7725	-605.426	27038.9	64629.6	-400.589	306.751	255.339	0	0	0	0	0	0	0	200	903	0	0	0	0	0	0	0	603	903	0
551	6	31.0955	-32.7888	-600.544	27222	64568.5	-34.3784	307.517	254.671	0	0	0	0	0	0	0	200	903	0	0	0	0	0	0	0	603	903	0
551	7	30.4852	-32.3311	-597.187	26855.8	64263.4	-125.931	307.61	255.029	0	0	0	0	0	0	0	200	903	0	0	0	0	0	0	0	603	903	0
551	8	30.9429	-31.7207	-594.44	27496.7	63714.1	148.727	307.183	253.744	0	0	0	0	0	0	0	200	903	0	0	0	0	0	0	0	603	903	0
551	9	30.9429	-31.263	-591.693	27313.6	63714.1	194.503	307.681	253.838	0	0	0	0	0	0	0	200	903	0	0	0	0	0	0	0	603	903	0
552	0	30.7904	-31.1104	-588.336	27588.2	63286.8	102.951	307.569	253.108	0	0	0	0	0	0	0	200	903	0	0	0	0	0	0	0	603	903	0
552	1	29.7222	-30.5	-586.811	27679.8	63042.7	240.28	307.433	252.83	0	0	0	0	0	0	0	200	903	0	0	0	0	0	0	0	603	903	0
552	2	30.7904	-30.8052	-581.928	27862.9	62859.6	560.714	308.02	252.12	0	0	0	0	0	0	0	200	903	0	0	0	0	0	0	0	603	903	0
552	3	30.3326	-30.5	-578.571	28229.1	62737.5	469.162	308.435	251.209	0	0	0	0	0	0	0	200	903	0	0	0	0	0	0	0	603	903	0
552	4	30.7904	-29.8897	-575.824	28137.5	62371.3	286.056	308.317	251.135	0	0	0	0	0	0	0	200	903	0	0	0	0	0	0	0	603	903	0
552	5	31.5533	-29.8897	-574.604	27954.4	62066.1	789.596	308.016	251.35	0	0	0	0	0	0	0	200	903	0	0	0	0	0	0	0	603	903	0
552	6	30.0274	-29.1267	-572.467	28046	61822	652.267	307.992	251.009	0	0	0	0	0	0	0	200	903	0	0	0	0	0	0	0	603	903	0
552	7	30.0274	-28.3638	-567.585	28137.5	61638.9	1155.81	308.599	250.426	0	0	0	0	0	0	0	200	903	0	0	0	0	0	0	0	603	903	0
552	8	30.18	-29.8897	-565.143	28046	61272.6	835.373	308.42	250.374	0	0	0	0	0	0	0	200	903	0	0	0	0	0	0	0	603	903	0
552	9	31.0955	-27.7534	-563.312	29053.1	61150.6	1155.81	308.555	248.425	0	0	0	0	0	0	0	200	903	0	0	0	0	0	0	0	603	903	0
553	0	31.2481	-27.6009	-562.091	28046	60662.3	743.82	307.923	250.104	0	0	0	0	0	0	0	200	903	0	0	0	0	0	0	0	603	903	0
553	1	30.9429	-26.9905	-559.955	28229.1	60601.3	743.82	308.225	249.587	0	0	0	0	0	0	0	200	903	0	0	0	0	0	0	0	603	903	0
553	2	30.3326	-26.3802	-558.124	28229.1	60601.3	1064.25	308.58	249.421	0	0	0	0	0	0	0	200	903	0	0	0	0	0	0	0	603	903	0
553	3	30.3326	-25.1595	-553.546	28503.8	60174	972.702	308.706	248.507	0	0	0	0	0	0	0	200	903	0	0	0	0	0	0	0	603	903	0
553	4	30.6378	-24.8543	-552.631	28961.5	59990.9	1247.36	308.555	247.593	0	0	0	0	0	0	0	200	903	0	0	0	0	0	0	0	603	903	0
553	5	30.9429	-24.2439	-548.969	28961.5	59685.7	972.702	308.723	247.244	0	0	0	0	0	0	0	200	903	0	0	0	0	0	0	0	603	903	0
553	6	30.9429	-23.9388	-548.969	28778.4	59685.7	1338.91	308.723	247.577	0	0	0	0	0	0	0	200	903	0	0	0	0	0	0	0	603	903	0
553	7	30.3326	-23.3284	-545.917	28778.4	59563.7	1613.57	309.108	247.284	0	0	0	0	0	0	0	200	903	0	0	0	0	0	0	0	603	903	0
553	8	30.0274	-22.2603	-544.696	28961.5	59380.6	1430.47	309.016	246.83	0	0	0	0	0	0	0	200	903	0	0	0	0	0	0	0	603	903	0
553	9	30.18	-23.6336	-540.119	29144.6	58892.3	1338.91	309.036	246.04	0	0	0	0	0	0	0	200	903	0	0	0	0	0	0	0	603	903	0
554	0	31.0955	-21.4973	-538.288	29053.1	58831.2	1522.02	309.293	246.027	0	0	0	0	0	0	0	200	903	0	0	0	0	0	0	0	603	903	0
554	1	32.0111	-21.0396	-537.677	29693.9	59014.3	1750.9	309.758	244.774	0	0	0	0	0	0	0	200	903	0	0	0	0	0	0	0	603	903	0
554	2	30.7904	-20.887	-535.846	29877	58404	1659.35	308.994	244.243	0	0	0	0	0	0	0	200	903	0	0	0	0	0	0	0	603	903	0
554	3	30.7904	-20.5818	-534.32	30060.2	58709.2	1842.45	309.876	243.741	0	0	0	0	0	0	0	200	903	0	0	0	0	0	0	0	603	903	0
554	4	32.0111	-20.4292	-529.743	29877	58404	1888.23	310.25	243.601	0	0	0	0	0	0	0	200	903	0	0	0	0	0	0	0	603	903	0
554	5	30.6378	-20.4292	-529.132	30426.4	58220.9	1979.78	310.031	242.498	0	0	0	0	0	0	0	200	903	0	0	0	0	0	0	0	603	903	0
554	6	31.0955	-20.1241	-527.607	30060.2	58220.9	1934.01	310.349	243.025	0	0	0	0	0	0	0	200	903	0	0	0	0	0	0	0	603	903	0
554	7	31.5533	-19.5137	-527.607	30334.8	58159.9	2025.56	310.233	242.505	0	0	0	0	0	0	0	200	903	0	0	0	0	0	0	0	603	903	0
554	8	31.0955	-19.3611	-523.334	30060.2	57671.6	2254.44	310.2	242.56	0	0	0	0	0	0	0	200	903	0	0	0	0	0	0	0	603	903	0
554	9	30.7904	-18.5982	-523.944	30334.8	57427.4	2483.32	309.606	242.103	0	0	0	0	0	0	0	200	903	0	0	0	0	0	0	0	603	903	0
555	0	30.18	-19.9715	-521.198	30609.5	57427.4	2300.22	310.184	241.271	0	0	0	0	0	0	0	200	903	0	0	0	0	0	0	0	603	903	0
555	1	30.6378	-18.1404	-520.282	31433.4	57732.6	2345.99	310.964	239.584	0	0	0	0	0	0	0	200	903	0	0	0	0	0	0	0	603	903	0
555	2	30.7904	-18.4456	-518.146	30792.6	57549.5	2849.53	311.068	240.572	0	0	0	0	0	0	0	200	903	0	0	0	0	0	0	0	603	903	0
555	3	30.4852	-17.0723	-519.367	30334.8	56756	2620.65	309.279	241.593	0	0	0	0	0	0	0	200	903	0	0	0	0	0	0	0	603	903	0
555	4	29.7222	-16.4619	-519.062	30609.5	57122.3	2666.43	310.049	241.029	0	0	0	0	0	0	0	200	903	0	0	0	0	0	0	0	603	903	0
555	5	30.9429	-17.3775	-513.874	30517.9	56695	2712.2	310.329	240.612	0	0	0	0	0	0	0	200	903	0	0	0	0	0	0	0	603	903	0
555	6	30.0274	-16.6145	-514.179	31250.3	57061.2	2666.43	310.975	239.223	0	0	0	0	0	0	0	200	903	0	0	0	0	0	0	0	603	903	0
555	7	30.18	-15.2412	-511.432	31525	56572.9	2757.98	310.617	238.359	0	0	0	0	0	0	0	200	903	0	0	0	0	0	0	0	603	903	0
555	8	30.4852	-14.7835	-513.874	31525	56756	2757.98	310.447	238.652	0	0	0	0	0	0	0	200	903	0	0	0	0	0	0	0	603	903	0
555	9	29.8748	-13.868	-512.653	31433.4	56572.9	2986.86	310.353	238.685	0	0	0	0	0	0	0	200	903	0	0	0	0	0	0	0	603	903	0
556	0	29.5697	-13.2576	-511.432	31891.2	55779.5	3078.42	309.065	237.643	0	0	0	0	0	0	0	200	903	0	0	0	0	0	0	0	603	903	0
556	1	30.0274	-13.2576	-508.991	32074.3	56389.8	3078.42	310.788	236.985	0	0	0	0	0	0	0	200	903	0	0	0	0	0	0	0	603	903	0
556	2	29.5697	-14.3257	-507.465	32165.9	56389.8	3032.64	311.121	236.615	0	0	0	0	0	0	0	200	903	0	0	0	0	0	0	0	603	903	0
556	3	29.4171	-12.4947	-507.465	32440.5	56450.9	3261.52	311.241	236.073	0	0	0	0	0	0	0	200	903	0	0	0	0	0	0	0	603	903	0
556	4	29.8748	-12.0369	-507.465	32989.8	56511.9	3261.52	311.361	234.991	0	0	0	0	0	0	0	200	903	0	0	0	0	0	0	0	603	903	0
556	5	29.4171	-11.274	-501.972	33356	56267.8	3398.85	312.094	233.55	0	0	0	0	0	0	0	200	903	0	0	0	0	0	0	0	603	903	0
556	6	28.1964	-11.274	-507.16	33447.6	55901.6	3307.3	310.225	234.049	0	0	0	0	0	0	0	200	903	0	0	0	0	0	0	0	603	903	0
556	7	28.6541	-11.7317	-503.803	33539.2	56023.6	3581.96	311.201	233.428	0	0	0	0	0	0	0	200	903	0	0	0	0	0	0	0	603	903	0
556	8	29.7222	-11.274	-504.413	34180	56206.7	3353.07	311.43	232.238	0	0	0	0	0	0	0	200	903	0	0	0	0	0	0	0	603	903	0
556	9	28.6541	-11.1214	-503.192	33356	56267.8	3902.39	311.822	233.711	0	0	0	0	0	0	0	200	903	0	0	0	0	0	0	0	603	903	0
557	0	28.9593	-10.511	-504.413	34454.7	56145.7	3765.06	311.309	231.694	0	0	0	0	0	0	0	200	903	0	0	0	0	0	0	0	603	903	0
557	1	27.8912	-10.3584	-504.108	34729.3	55901.6	3719.28	310.892	231.107	0	0	0	0	0	0	0	200	903	0	0	0	0	0	0	0	603	903	0
557	2	28.349	-9.59549	-500.751	34637.8	56145.7	3856.61	312.123	230.828	0	0	0	0	0	0	0	200	903	0	0	0	0	0	0	0	603	903	0
557	3	27.1283	-9.29031	-501.667	34454.7	56267.8	3856.61	312.162	231.32	0	0	0	0	0	0	0	200	903	0	0	0	0	0	0	0	603	903	0
557	4	27.8912	-8.37479	-501.667	35187.1	56023.6	3902.39	311.675	229.86	0	0	0	0	0	0	0	200	903	0	0	0	0	0	0	0	603	903	0
557	5	28.5015	-10.511	-503.498	35278.7	56084.7	3948.17	311.39	229.933	0	0	0	0	0	0	0	200	903	0	0	0	0	0	0	0	603	903	0
557	6	27.586	-8.67996	-500.446	34363.1	55779.5	4222.83	311.46	231.335	0	0	0	0	0	0	0	200	903	0	0	0	0	0	0	0	603	903	0
557	7	26.8231	-8.52737	-504.108	35187.1	55901.6	4085.5	310.892	230.199	0	0	0	0	0	0	0	200	903	0	0	0	0	0	0	0	603	903	0
557	8	26.0601	-8.06961	-501.667	35187.1	55901.6	4085.5	311.432	229.86	0	0	0	0	0	0	0	200	903	0	0	0	0	0	0	0	603	903	0
557	9	27.4334	-8.37479	-501.972	35553.3	56145.7	4360.15	311.85	229.173	0	0	0	0	0	0	0	200	903	0	0	0	0	0	0	0	603	903	0
558	0	26.5179	-7.61185	-501.667	36011.1	55779.5	4222.83	311.188	228.217	0	0	0	0	0	0	0	200	903	0	0	0	0	0	0	0	603	903	0
558	1	26.0601	-5.78079	-504.108	36743.5	56084.7	4543.26	311.255	227.112	0	0	0	0	0	0	0	200	903	0	0	0	0	0	0	0	603	903	0
558	2	25.1446	-6.69632	-504.108	36285.7	55779.5	4360.15	310.65	228.02	0	0	0	0	0	0	0	200	903	0	0	0	0	0	0	0	603	903	0
558	3	25.1446	-5.93338	-505.023	36651.9	55840.5	4314.38	310.57	227.425	0	0	0	0	0	0	0	200	903	0	0	0	0	0	0	0	603	903	0
558	4	23.7713	-5.78079	-503.803	37018.2	56084.7	4405.93	311.323	226.523	0	0	0	0	0	0	0	200	903	0	0	0	0	0	0	0	603	903	0
558	5	24.8394	-5.47562	-505.329	37201.3	56450.9	4405.93	311.711	226.382	0	0	0	0	0	0	0	200	903	0	0	0	0	0	0	0	603	903	0
558	6	25.6024	-5.17044	-504.718	37659	56145.7	4543.26	311.242	225.386	0	0	0	0	0	0	0	200	903	0	0	0	0	0	0	0	603	903	0
558	7	24.0765	-6.23856	-505.634	38391.5	55962.6	4589.04	310.678	224.073	0	0	0	0	0	0	0	200	903	0	0	0	0	0	0	0	603	903	0
558	8	23.7713	-5.6282	-507.16	38025.2	55657.4	4634.81	309.743	225.023	0	0	0	0	0	0	0	200	903	0	0	0	0	0	0	0	603	903	0
558	9	23.161	-3.33939	-505.023	38574.6	56084.7	4589.04	311.054	223.618	0	0	0	0	0	0	0	200	903	0	0	0	0	0	0	0	603	903	0
559	0	22.5506	-4.10232	-503.498	39123.9	56450.9	4863.69	312.117	222.296	0	0	0	0	0	0	0	200	903	0	0	0	0	0	0	0	603	903	0
559	1	23.0084	-4.10232	-505.329	39581.6	56634	4726.37	312.074	221.672	0	0	0	0	0	0	0	200	903	0	0	0	0	0	0	0	603	903	0
559	2	22.8558	-3.33939	-509.296	40039.4	56206.7	4543.26	310.362	221.383	0	0	0	0	0	0	0	200	903	0	0	0	0	0	0	0	603	903	0
559	3	21.1773	-3.1868	-505.329	40130.9	56145.7	4817.92	311.107	220.584	0	0	0	0	0	0	0	200	903	0	0	0	0	0	0	0	603	903	0
559	4	21.4825	-4.25491	-510.517	40680.3	56511.9	5138.35	310.696	220.316	0	0	0	0	0	0	0	200	903	0	0	0	0	0	0	0	603	903	0
559	5	21.0247	-4.10232	-508.38	40497.2	56695	5001.02	311.521	220.341	0	0	0	0	0	0	0	200	903	0	0	0	0	0	0	0	603	903	0
559	6	22.398	-3.94974	-509.906	41229.6	56756	4817.92	311.307	219.143	0	0	0	0	0	0	0	200	903	0	0	0	0	0	0	0	603	903	0
559	7	22.2454	-5.17044	-512.348	41504.3	57183.3	4955.25	311.61	218.992	0	0	0	0	0	0	0	200	903	0	0	0	0	0	0	0	603	903	0
559	8	22.7032	-2.88162	-515.094	41778.9	57061.2	5321.46	310.778	218.891	0	0	0	0	0	0	0	200	903	0	0	0	0	0	0	0	603	903	0
559	9	22.0928	-0.897979	-515.705	41962	57366.4	5275.68	311.239	218.632	0	0	0	0	0	0	0	200	903	0	0	0	0	0	0	0	603	903	0
560	0	23.0084	-3.49197	-516.01	42236.7	57671.6	5092.58	311.764	218.148	0	0	0	0	0	0	0	200	903	0	0	0	0	0	0	0	603	903	0
560	1	22.2454	-2.11868	-513.568	43152.2	57366.4	5413.01	311.702	215.976	0	0	0	0	0	0	0	200	903	0	0	0	0	0	0	0	603	903	0
560	2	21.6351	-1.96609	-514.789	42145.1	57610.5	5641.89	311.911	218.131	0	0	0	0	0	0	0	200	903	0	0	0	0	0	0	0	603	903	0
560	3	22.2454	-2.27127	-516.925	42511.3	57610.5	5321.46	311.448	217.761	0	0	0	0	0	0	0	200	903	0	0	0	0	0	0	0	603	903	0
560	4	19.804	-2.11868	-519.672	42511.3	57732.6	5458.79	311.094	218.196	0	0	0	0	0	0	0	200	903	0	0	0	0	0	0	0	603	903	0
560	5	19.0411	-0.592804	-521.503	43060.6	58037.8	5504.56	311.289	217.43	0	0	0	0	0	0	0	200	903	0	0	0	0	0	0	0	603	903	0
560	6	20.2618	0.6279	-521.808	44342.4	57549.5	5779.22	310.289	215.022	0	0	0	0	0	0	0	200	903	0	0	0	0	0	0	0	603	903	0
560	7	18.2782	1.08566	-521.808	43884.6	58159.9	5779.22	311.458	215.899	0	0	0	0	0	0	0	200	903	0	0	0	0	0	0	0	603	903	0
560	8	17.6678	0.780487	-523.944	43976.2	58281.9	5733.45	311.237	216.067	0	0	0	0	0	0	0	200	903	0	0	0	0	0	0	0	603	903	0
560	9	17.973	0.933075	-526.386	44159.3	58159.9	5596.12	310.489	216.109	0	0	0	0	0	0	0	200	903	0	0	0	0	0	0	0	603	903	0
561	0	17.21	0.6279	-524.86	44983.3	58648.1	5641.89	311.741	214.295	0	0	0	0	0	0	0	200	903	0	0	0	0	0	0	0	603	903	0
561	1	15.379	2.91672	-528.827	45257.9	58587.1	6099.66	310.787	214.418	0	0	0	0	0	0	0	200	903	0	0	0	0	0	0	0	603	903	0
561	2	15.9893	2.45895	-529.438	46173.4	58404	5733.45	310.313	212.788	0	0	0	0	0	0	0	200	903	0	0	0	0	0	0	0	603	903	0
561	3	16.2945	2.76413	-530.353	46356.5	58831.2	6008.1	310.928	212.593	0	0	0	0	0	0	0	200	903	0	0	0	0	0	0	0	603	903	0
561	4	17.3626	3.83225	-537.372	46997.4	58892.3	5962.33	309.593	212.542	0	0	0	0	0	0	0	200	903	0	0	0	0	0	0	0	603	903	0
561	5	16.4471	3.06931	-536.457	47638.3	59563.7	6236.99	311.032	211.198	0	0	0	0	0	0	0	200	903	0	0	0	0	0	0	0	603	903	0
561	6	15.0738	3.06931	-538.288	47912.9	59807.8	5962.33	311.108	210.99	0	0	0	0	0	0	0	200	903	0	0	0	0	0	0	0	603	903	0
561	7	15.6842	3.52707	-537.372	48279.2	60235.1	6374.31	312.092	210.157	0	0	0	0	0	0	0	200	903	0	0	0	0	0	0	0	603	903	0
561	8	15.5316	4.13742	-540.119	48553.8	60051.9	6282.76	311.183	210.105	0	0	0	0	0	0	0	200	903	0	0	0	0	0	0	0	603	903	0
561	9	15.6842	2.76413	-541.645	49194.7	60479.2	6236.99	311.658	209.175	0	0	0	0	0	0	0	200	903	0	0	0	0	0	0	0	603	903	0
562	0	16.1419	4.29001	-543.781	49835.5	60845.4	6191.21	311.893	208.354	0	0	0	0	0	0	0	200	903	0	0	0	0	0	0	0	603	903	0
562	1	15.6842	5.05295	-546.527	49194.7	60906.4	6420.09	311.443	209.987	0	0	0	0	0	0	0	200	903	0	0	0	0	0	0	0	603	903	0
562	2	15.6842	5.51071	-545.612	49469.3	61272.6	6008.1	312.301	209.332	0	0	0	0	0	0	0	200	903	0	0	0	0	0	0	0	603	903	0
562	3	14.9212	5.81589	-545.307	49927.1	61272.6	6511.64	312.364	208.442	0	0	0	0	0	0	0	200	903	0	0	0	0	0	0	0	603	903	0
562	4	15.8367	5.51071	-550.8	50018.6	61394.7	6694.75	311.465	209.189	0	0	0	0	0	0	0	200	903	0	0	0	0	0	0	0	603	903	0
562	5	15.8367	6.884	-554.157	51483.5	61883	6511.64	311.671	207.096	0	0	0	0	0	0	0	200	903	0	0	0	0	0	0	0	603	903	0
562	6	15.2264	7.18918	-556.293	51300.4	61944	6511.64	311.351	207.782	0	0	0	0	0	0	0	200	903	0	0	0	0	0	0	0	603	903	0
562	7	15.5316	7.64694	-554.462	51391.9	62310.2	6694.75	312.38	207.312	0	0	0	0	0	0	0	200	903	0	0	0	0	0	0	0	603	903	0
562	8	14.616	8.40988	-558.124	52032.8	62066.1	6465.87	311.205	206.772	0	0	0	0	0	0	0	200	903	0	0	0	0	0	0	0	603	903	0
562	9	15.379	7.49435	-560.565	52215.9	62432.3	6694.75	311.374	206.851	0	0	0	0	0	0	0	200	903	0	0	0	0	0	0	0	603	903	0
563	0	16.5997	8.40988	-564.838	52582.1	62920.6	6969.41	311.396	206.908	0	0	0	0	0	0	0	200	903	0	0	0	0	0	0	0	603	903	0
563	1	15.6842	9.17282	-564.838	53680.8	63225.8	6923.63	311.936	204.963	0	0	0	0	0	0	0	200	903	0	0	0	0	0	0	0	603	903	0
563	2	14.1583	9.478	-568.805	54047	63469.9	6832.08	311.585	204.982	0	0	0	0	0	0	0	200	903	0	0	0	0	0	0	0	603	903	0
563	3	15.0738	9.78317	-568.805	54687.8	63469.9	7244.07	311.585	203.855	0	0	0	0	0	0	0	200	903	0	0	0	0	0	0	0	603	903	0
563	4	15.2264	9.78317	-570.331	54962.5	63897.2	7060.96	312.035	203.631	0	0	0	0	0	0	0	200	903	0	0	0	0	0	0	0	603	903	0
563	5	15.5316	9.63058	-573.688	55694.9	64324.4	7152.51	312.124	202.918	0	0	0	0	0	0	0	200	903	0	0	0	0	0	0	0	603	903	0
563	6	15.6842	9.63058	-576.129	54779.4	64019.2	7106.74	311.12	204.918	0	0	0	0	0	0	0	200	903	0	0	0	0	0	0	0	603	903	0
563	7	16.1419	10.5461	-578.876	56518.9	64690.6	7152.51	311.752	202.364	0	0	0	0	0	0	0	200	903	0	0	0	0	0	0	0	603	903	0
563	8	14.4635	10.6987	-579.792	56885.1	64690.6	7152.51	311.576	201.887	0	0	0	0	0	0	0	200	903	0	0	0	0	0	0	0	603	903	0
563	9	15.2264	10.8513	-581.012	57342.9	64995.8	7244.07	311.866	201.305	0	0	0	0	0	0	0	200	903	0	0	0	0	0	0	0	603	903	0
564	0	15.9893	11.0039	-582.843	57709.1	65545.1	7289.84	312.457	200.987	0	0	0	0	0	0	0	200	903	0	0	0	0	0	0	0	603	903	0
564	1	15.6842	11.7668	-581.317	58624.6	65789.2	7289.84	313.173	199.152	0	0	0	0	0	0	0	200	903	0	0	0	0	0	0	0	603	903	0
564	2	16.2945	12.2246	-588.947	59357	65911.3	7381.39	311.914	199.215	0	0	0	0	0	0	0	200	903	0	0	0	0	0	0	0	603	903	0
564	3	15.5316	12.5298	-590.473	58624.6	66094.4	7472.95	311.935	200.716	0	0	0	0	0	0	0	200	903	0	0	0	0	0	0	0	603	903	0
564	4	18.2782	12.8349	-589.557	59357	66521.7	7656.05	312.833	199.319	0	0	0	0	0	0	0	200	903	0	0	0	0	0	0	0	603	903	0
564	5	15.8367	13.4453	-591.388	59540.1	66887.9	7335.62	313.103	199.321	0	0	0	0	0	0	0	200	903	0	0	0	0	0	0	0	603	903	0
564	6	17.21	14.2082	-592.609	60272.6	67437.2	7610.28	313.797	198.293	0	0	0	0	0	0	0	200	903	0	0	0	0	0	0	0	603	903	0
564	7	17.21	14.666	-596.576	61371.2	67193	7884.93	312.631	197.128	0	0	0	0	0	0	0	200	903	0	0	0	0	0	0	0	603	903	0
564	8	17.6678	14.9712	-595.966	60821.9	66948.9	7976.49	312.337	197.944	0	0	0	0	0	0	0	200	903	0	0	0	0	0	0	0	603	903	0
564	9	17.21	15.7341	-600.238	61554.3	67803.4	7930.71	312.961	197.45	0	0	0	0	0	0	0	200	903	0	0	0	0	0	0	0	603	903	0
565	0	17.6678	15.4289	-600.849	61920.5	68474.8	7976.49	313.963	196.945	0	0	0	0	0	0	0	200	903	0	0	0	0	0	0	0	603	903	0
565	1	18.2782	15.8867	-602.68	62378.3	68657.9	8022.27	313.921	196.498	0	0	0	0	0	0	0	200	903	0	0	0	0	0	0	0	603	903	0
565	2	19.3463	14.3608	-603.29	62927.6	68535.8	8113.82	313.603	195.693	0	0	0	0	0	0	0	200	903	0	0	0	0	0	0	0	603	903	0
565	3	19.1937	16.9548	-607.257	63568.4	68352.7	8663.13	312.56	195.319	0	0	0	0	0	0	0	200	903	0	0	0	0	0	0	0	603	903	0
565	4	17.973	17.4126	-608.783	63934.7	69146.2	8205.37	313.581	194.98	0	0	0	0	0	0	0	200	903	0	0	0	0	0	0	0	603	903	0
565	5	19.1937	17.4126	-610.004	64941.7	69512.4	8159.59	313.954	193.539	0	0	0	0	0	0	0	200	903	0	0	0	0	0	0	0	603	903	0
565	6	19.0411	17.5652	-611.225	65216.4	69756.5	8525.81	314.126	193.302	0	0	0	0	0	0	0	200	903	0	0	0	0	0	0	0	603	903	0
565	7	20.4144	17.7177	-613.056	65765.7	69817.6	8708.91	313.885	192.725	0	0	0	0	0	0	0	200	903	0	0	0	0	0	0	0	603	903	0
565	8	20.567	16.8022	-613.666	66406.6	70061.7	8480.03	314.169	191.787	0	0	0	0	0	0	0	200	903	0	0	0	0	0	0	0	603	903	0
565	9	20.7196	18.3281	-618.549	66223.5	70550	8800.46	314.057	192.937	0	0	0	0	0	0	0	200	903	0	0	0	0	0	0	0	603	903	0
566	0	21.0247	18.6333	-620.99	67230.6	70794.1	8892.02	314.002	191.737	0	0	0	0	0	0	0	200	903	0	0	0	0	0	0	0	603	903	0
566	1	21.7877	19.091	-619.159	67871.4	70855.2	8708.91	314.438	190.381	0	0	0	0	0	0	0	200	903	0	0	0	0	0	0	0	603	903	0
566	2	21.3299	19.3962	-622.211	68420.7	71099.3	9120.9	314.269	190.036	0	0	0	0	0	0	0	200	903	0	0	0	0	0	0	0	603	903	0
566	3	23.0084	19.2436	-624.652	68603.9	71099.3	8983.57	313.822	190.173	0	0	0	0	0	0	0	200	903	0	0	0	0	0	0	0	603	903	0
566	4	23.6187	20.4643	-628.62	69519.4	71953.8	9120.9	314.463	189.41	0	0	0	0	0	0	0	200	903	0	0	0	0	0	0	0	603	903	0
566	5	22.8558	20.4643	-629.23	68970.1	71831.7	9578.66	314.158	190.39	0	0	0	0	0	0	0	200	903	0	0	0	0	0	0	0	603	903	0
566	6	22.7032	21.0747	-630.451	69794.1	72625.2	9349.78	315.196	189.295	0	0	0	0	0	0	0	200	903	0	0	0	0	0	0	0	603	903	0
566	7	23.4661	21.2273	-631.061	70343.4	72014.8	9212.45	314.117	188.532	0	0	0	0	0	0	0	200	903	0	0	0	0	0	0	0	603	903	0
566	8	23.161	21.9902	-628.315	70801.1	72503.1	9258.23	315.393	187.316	0	0	0	0	0	0	0	200	903	0	0	0	0	0	0	0	603	903	0
566	9	24.5343	22.7531	-633.197	71350.4	72991.4	9395.56	315.274	187.317	0	0	0	0	0	0	0	200	903	0	0	0	0	0	0	0	603	903	0
567	0	24.6868	23.0583	-637.165	71991.3	72808.3	9258.23	314.269	187.013	0	0	0	0	0	0	0	200	903	0	0	0	0	0	0	0	603	903	0
567	1	24.8394	23.3635	-638.385	71899.8	73296.6	9532.89	314.816	187.373	0	0	0	0	0	0	0	200	903	0	0	0	0	0	0	0	603	903	0
567	2	24.3817	23.5161	-639.606	72906.8	73235.5	9624.44	314.501	186.013	0	0	0	0	0	0	0	200	903	0	0	0	0	0	0	0	603	903	0
567	3	24.8394	24.4316	-639.911	73639.2	73540.7	9761.77	314.923	184.923	0	0	0	0	0	0	0	200	903	0	0	0	0	0	0	0	603	903	0
567	4	25.1446	21.9902	-641.742	74005.5	73906.9	9715.99	315.166	184.68	0	0	0	0	0	0	0	200	903	0	0	0	0	0	0	0	603	903	0
567	5	26.3653	25.042	-642.658	74737.9	73845.9	9715.99	314.907	183.705	0	0	0	0	0	0	0	200	903	0	0	0	0	0	0	0	603	903	0
567	6	26.3653	25.8049	-645.404	75653.4	74395.2	9990.65	315.269	182.781	0	0	0	0	0	0	0	200	903	0	0	0	0	0	0	0	603	903	0
567	7	25.755	25.9575	-647.541	76019.6	74212.1	10128	314.606	182.603	0	0	0	0	0	0	0	200	903	0	0	0	0	0	0	0	603	903	0
567	8	25.9075	26.873	-649.982	76385.9	74700.4	10219.5	314.927	182.48	0	0	0	0	0	0	0	200	903	0	0	0	0	0	0	0	603	903	0
567	9	26.6705	27.3308	-648.151	77026.7	75005.6	10082.2	315.722	181.159	0	0	0	0	0	0	0	200	903	0	0	0	0	0	0	0	603	903	0
568	0	27.1283	27.0256	-651.203	77118.3	75249.7	10311.1	315.555	181.576	0	0	0	0	0	0	0	200	903	0	0	0	0	0	0	0	603	903	0
568	1	28.1964	27.4834	-653.339	77576	75371.8	10494.2	315.364	181.262	0	0	0	0	0	0	0	200	903	0	0	0	0	0	0	0	603	903	0
568	2	27.2808	28.5515	-656.086	78400	75554.9	10219.5	315.16	180.503	0	0	0	0	0	0	0	200	903	0	0	0	0	0	0	0	603	903	0
568	3	26.0601	27.0256	-659.137	78766.2	75921.1	10585.7	315.182	180.501	0	0	0	0	0	0	0	200	903	0	0	0	0	0	0	0	603	903	0
568	4	28.1964	29.467	-657.917	79040.9	75615.9	10631.5	314.932	179.862	0	0	0	0	0	0	0	200	903	0	0	0	0	0	0	0	603	903	0
568	5	26.5179	29.9248	-658.222	79590.2	76409.4	10814.6	316.085	179.083	0	0	0	0	0	0	0	200	903	0	0	0	0	0	0	0	603	903	0
568	6	27.586	30.8403	-662.494	79681.8	76653.5	10860.4	315.704	179.725	0	0	0	0	0	0	0	200	903	0	0	0	0	0	0	0	603	903	0
568	7	27.7386	30.8403	-666.156	80597.3	76592.5	11135.1	314.977	179.011	0	0	0	0	0	0	0	200	903	0	0	0	0	0	0	0	603	903	0
568	8	26.9757	31.7558	-664.63	80963.5	76165.2	11089.3	314.598	178.183	0	0	0	0	0	0	0	200	903	0	0	0	0	0	0	0	603	903	0
568	9	27.2808	32.8239	-671.955	82062.1	77080.8	11455.5	314.711	177.876	0	0	0	0	0	0	0	200	903	0	0	0	0	0	0	0	603	903	0
569	0	26.3653	33.1291	-671.344	81970.5	77508	11226.6	315.452	177.901	0	0	0	0	0	0	0	200	903	0	0	0	0	0	0	0	603	903	0
569	1	27.1283	34.1972	-673.786	82611.4	77752.1	11226.6	315.396	177.392	0	0	0	0	0	0	0	200	903	0	0	0	0	0	0	0	603	903	0
569	2	27.2808	34.5024	-675.617	82886.1	77996.3	11363.9	315.445	177.318	0	0	0	0	0	0	0	200	903	0	0	0	0	0	0	0	603	903	0
569	3	27.1283	34.0446	-679.889	83160.7	78057.3	11547	314.809	177.685	0	0	0	0	0	0	0	200	903	0	0	0	0	0	0	0	603	903	0
569	4	25.6024	36.1809	-681.415	84076.3	78301.5	11592.8	314.91	176.615	0	0	0	0	0	0	0	200	903	0	0	0	0	0	0	0	603	903	0
569	5	27.1283	36.9438	-681.72	85266.4	78545.6	11684.4	315.217	174.925	0	0	0	0	0	0	0	200	903	0	0	0	0	0	0	0	603	903	0
569	6	26.5179	37.249	-684.772	85907.3	78911.8	11775.9	315.238	174.546	0	0	0	0	0	0	0	200	903	0	0	0	0	0	0	0	603	903	0
569	7	26.3653	38.4697	-686.908	86456.6	79217	11775.9	315.324	174.137	0	0	0	0	0	0	0	200	903	0	0	0	0	0	0	0	603	903	0
569	8	27.7386	39.6904	-689.655	86731.3	79278	11821.7	314.953	174.24	0	0	0	0	0	0	0	200	903	0	0	0	0	0	0	0	603	903	0
569	9	26.8231	38.4697	-689.044	87006	79644.2	11959	315.587	173.73	0	0	0	0	0	0	0	200	903	0	0	0	0	0	0	0	603	903	0
570	0	25.6024	39.843	-694.843	88196.1	79705.2	12004.8	314.71	173.07	0	0	0	0	0	0	0	200	903	0	0	0	0	0	0	0	603	903	0
570	1	24.992	39.9956	-694.232	88379.3	80193.5	12371	315.514	172.695	0	0	0	0	0	0	0	200	903	0	0	0	0	0	0	0	603	903	0
570	2	26.3653	41.9792	-696.064	88562.3	80437.7	12096.4	315.561	172.767	0	0	0	0	0	0	0	200	903	0	0	0	0	0	0	0	603	903	0
570	3	26.0601	41.0637	-698.2	89752.5	79949.4	12187.9	314.508	171.451	0	0	0	0	0	0	0	200	903	0	0	0	0	0	0	0	603	903	0
570	4	26.0601	42.5896	-701.862	90576.5	80376.7	12416.8	314.519	170.948	0	0	0	0	0	0	0	200	903	0	0	0	0	0	0	0	603	903	0
570	5	24.8394	43.6577	-703.998	89752.5	80987	12508.3	315.039	172.51	0	0	0	0	0	0	0	200	903	0	0	0	0	0	0	0	603	903	0
570	6	24.8394	43.9629	-705.524	90118.7	81170.1	12462.6	315.049	172.267	0	0	0	0	0	0	0	200	903	0	0	0	0	0	0	0	603	903	0
570	7	24.8394	45.4887	-706.44	90576.5	81292.2	12645.7	315.073	171.784	0	0	0	0	0	0	0	200	903	0	0	0	0	0	0	0	603	903	0
570	8	24.8394	45.4887	-709.186	91309	81658.4	12737.2	315.144	171.248	0	0	0	0	0	0	0	200	903	0	0	0	0	0	0	0	603	903	0
570	9	25.1446	47.0146	-707.66	91492	81658.4	12599.9	315.392	170.712	0	0	0	0	0	0	0	200	903	0	0	0	0	0	0	0	603	903	0
571	0	24.5343	47.3198	-714.374	91949.8	81536.3	12874.6	314.137	171.286	0	0	0	0	0	0	0	200	903	0	0	0	0	0	0	0	603	903	0
571	1	24.3817	47.9301	-714.679	92316	81902.5	13011.9	314.6	170.829	0	0	0	0	0	0	0	200	903	0	0	0	0	0	0	0	603	903	0
571	2	23.7713	48.6931	-717.426	92865.4	82329.8	13149.2	314.757	170.558	0	0	0	0	0	0	0	200	903	0	0	0	0	0	0	0	603	903	0
571	3	23.3136	48.0827	-717.121	93231.6	82512.9	13103.4	315.061	169.992	0	0	0	0	0	0	0	200	903	0	0	0	0	0	0	0	603	903	0
571	4	24.0765	50.3716	-719.562	94330.2	82634.9	13378.1	314.841	168.906	0	0	0	0	0	0	0	200	903	0	0	0	0	0	0	0	603	903	0
571	5	24.6868	50.9819	-721.698	94879.5	82390.8	13973.2	314.162	168.533	0	0	0	0	0	0	0	200	903	0	0	0	0	0	0	0	603	903	0
571	6	23.6187	51.8974	-724.445	95428.8	82696	13195	314.151	168.273	0	0	0	0	0	0	0	200	903	0	0	0	0	0	0	0	603	903	0
571	7	22.5506	52.3552	-724.75	95245.7	83062.2	13469.7	314.608	168.581	0	0	0	0	0	0	0	200	903	0	0	0	0	0	0	0	603	903	0
571	8	23.6187	52.3552	-726.276	96252.8	83306.4	13607	314.703	167.471	0	0	0	0	0	0	0	200	903	0	0	0	0	0	0	0	603	903	0
571	9	21.7877	53.4233	-725.971	95795	83306.4	13652.8	314.752	168.046	0	0	0	0	0	0	0	200	903	0	0	0	0	0	0	0	603	903	0
572	0	22.7032	54.1862	-727.191	96619	83184.3	13652.8	314.391	167.134	0	0	0	0	0	0	0	200	903	0	0	0	0	0	0	0	603	903	0
572	1	22.398	55.2544	-731.159	97259.9	83184.3	13881.6	313.771	166.978	0	0	0	0	0	0	0	200	903	0	0	0	0	0	0	0	603	903	0
572	2	20.8721	55.7121	-730.854	97534.5	83245.3	14064.7	313.901	166.547	0	0	0	0	0	0	0	200	903	0	0	0	0	0	0	0	603	903	0
572	3	21.9403	55.1018	-732.99	97809.2	83794.6	13927.4	314.319	166.561	0	0	0	0	0	0	0	200	903	0	0	0	0	0	0	0	603	903	0
572	4	20.8721	57.3906	-732.074	98907.8	83794.6	13927.4	314.462	164.894	0	0	0	0	0	0	0	200	903	0	0	0	0	0	0	0	603	903	0
572	5	22.0928	58.1535	-733.6	97900.8	83733.6	14202.1	314.141	166.548	0	0	0	0	0	0	0	200	903	0	0	0	0	0	0	0	603	903	0
572	6	21.9403	58.9165	-734.211	98541.6	83306.4	14202.1	313.464	165.786	0	0	0	0	0	0	0	200	903	0	0	0	0	0	0	0	603	903	0
572	7	22.398	60.1372	-736.957	99274	84038.8	14247.9	314.035	165.292	0	0	0	0	0	0	0	200	903	0	0	0	0	0	0	0	603	903	0
572	8	21.0247	60.2898	-737.567	99090.9	84343.9	14293.6	314.354	165.652	0	0	0	0	0	0	0	200	903	0	0	0	0	0	0	0	603	903	0
572	9	20.8721	61.3579	-736.652	99365.6	84282.9	14247.9	314.413	165.112	0	0	0	0	0	0	0	200	903	0	0	0	0	0	0	0	603	903	0
573	0	20.8721	62.7312	-737.262	100281	84588.1	14614.1	314.733	163.982	0	0	0	0	0	0	0	200	903	0	0	0	0	0	0	0	603	903	0
573	1	21.3299	63.3415	-738.483	100098	84282.9	14476.7	314.13	164.455	0	0	0	0	0	0	0	200	903	0	0	0	0	0	0	0	603	903	0
573	2	21.9403	63.9519	-740.924	100556	84527.1	14339.4	314.083	164.283	0	0	0	0	0	0	0	200	903	0	0	0	0	0	0	0	603	903	0
573	3	21.0247	64.4096	-739.704	101105	84649.1	14522.5	314.437	163.317	0	0	0	0	0	0	0	200	903	0	0	0	0	0	0	0	603	903	0
573	4	21.1773	65.1726	-742.755	101197	84343.9	14751.4	313.555	163.755	0	0	0	0	0	0	0	200	903	0	0	0	0	0	0	0	603	903	0
573	5	20.567	64.257	-740.619	101380	84710.1	14659.8	314.377	163.115	0	0	0	0	0	0	0	200	903	0	0	0	0	0	0	0	603	903	0
573	6	21.7877	66.3933	-740.619	101837	84710.1	14705.6	314.377	162.497	0	0	0	0	0	0	0	200	903	0	0	0	0	0	0	0	603	903	0
573	7	22.2454	66.851	-743.366	103028	84649.1	14888.7	313.873	161.404	0	0	0	0	0	0	0	200	903	0	0	0	0	0	0	0	603	903	0
573	8	22.8558	67.614	-738.178	103394	84954.3	14934.5	315.087	159.934	0	0	0	0	0	0	0	200	903	0	0	0	0	0	0	0	603	903	0
573	9	21.6351	67.9192	-745.807	103577	84771.2	14980.3	313.664	161.121	0	0	0	0	0	0	0	200	903	0	0	0	0	0	0	0	603	903	0
574	0	21.0247	68.0717	-743.671	103485	84832.2	15026	314.072	160.845	0	0	0	0	0	0	0	200	903	0	0	0	0	0	0	0	603	903	0
574	1	22.8558	67.9192	-744.586	103302	84771.2	15300.7	313.85	161.262	0	0	0	0	0	0	0	200	903	0	0	0	0	0	0	0	603	903	0
574	2	22.7032	69.1399	-744.892	104126	84343.9	15300.7	313.23	160.213	0	0	0	0	0	0	0	200	903	0	0	0	0	0	0	0	603	903	0
574	3	22.8558	70.0554	-747.333	104493	84893.3	15346.5	313.595	160.179	0	0	0	0	0	0	0	200	903	0	0	0	0	0	0	0	603	903	0
574	4	21.9403	69.9028	-747.028	104493	85076.3	15300.7	313.886	160.122	0	0	0	0	0	0	0	200	903	0	0	0	0	0	0	0	603	903	0
574	5	24.3817	71.2761	-744.892	104950	85137.4	15666.9	314.295	159.107	0	0	0	0	0	0	0	200	903	0	0	0	0	0	0	0	603	903	0
574	6	21.4825	72.039	-746.723	104493	84649.1	15712.7	313.361	160.065	0	0	0	0	0	0	0	200	903	0	0	0	0	0	0	0	603	903	0
574	7	22.8558	73.1071	-745.807	104767	84954.3	15300.7	313.909	159.525	0	0	0	0	0	0	0	200	903	0	0	0	0	0	0	0	603	903	0
574	8	23.161	74.0227	-747.028	105042	84893.3	15575.4	313.641	159.387	0	0	0	0	0	0	0	200	903	0	0	0	0	0	0	0	603	903	0
574	9	23.4661	74.3279	-747.333	105408	84832.2	15438	313.513	158.954	0	0	0	0	0	0	0	200	903	0	0	0	0	0	0	0	603	903	0
575	0	23.3136	76.0063	-748.554	105133	85076.3	15712.7	313.654	159.551	0	0	0	0	0	0	0	200	903	0	0	0	0	0	0	0	603	903	0
575	1	23.3136	77.0744	-745.197	105957	85137.4	15575.4	314.248	157.813	0	0	0	0	0	0	0	200	903	0	0	0	0	0	0	0	603	903	0
575	2	23.7713	77.227	-745.197	106049	84771.2	15850	313.757	157.69	0	0	0	0	0	0	0	200	903	0	0	0	0	0	0	0	603	903	0
575	3	25.1446	76.6167	-746.723	105866	84771.2	16033.1	313.524	158.226	0	0	0	0	0	0	0	200	903	0	0	0	0	0	0	0	603	903	0
575	4	24.992	78.9055	-743.671	105957	85259.5	15895.8	314.647	157.521	0	0	0	0	0	0	0	200	903	0	0	0	0	0	0	0	603	903	0
575	5	24.6868	79.5158	-746.723	107148	85015.3	15941.6	313.851	156.51	0	0	0	0	0	0	0	200	903	0	0	0	0	0	0	0	603	903	0
575	6	25.1446	80.1262	-745.197	106964	85198.4	16170.5	314.33	156.461	0	0	0	0	0	0	0	200	903	0	0	0	0	0	0	0	603	903	0
575	7	25.2972	81.0417	-741.23	107239	85259.5	16216.2	315.024	155.323	0	0	0	0	0	0	0	200	903	0	0	0	0	0	0	0	603	903	0
575	8	26.6705	80.7365	-743.061	107331	84771.2	16170.5	314.084	155.556	0	0	0	0	0	0	0	200	903	0	0	0	0	0	0	0	603	903	0
575	9	26.9757	82.8728	-743.976	106415	84710.1	15895.8	313.861	156.964	0	0	0	0	0	0	0	200	903	0	0	0	0	0	0	0	603	903	0
576	0	26.8231	83.0254	-737.873	107331	84588.1	16353.6	314.638	154.54	0	0	0	0	0	0	0	200	903	0	0	0	0	0	0	0	603	903	0
576	1	26.3653	84.7038	-743.366	107880	84832.2	16353.6	314.119	154.876	0	0	0	0	0	0	0	200	903	0	0	0	0	0	0	0	603	903	0
576	2	26.6705	86.2297	-741.23	107148	84527.1	17360.6	314.036	155.446	0	0	0	0	0	0	0	200	903	0	0	0	0	0	0	0	603	903	0
576	3	27.1283	85.6194	-739.398	107422	84343.9	16811.3	314.071	154.717	0	0	0	0	0	0	0	200	903	0	0	0	0	0	0	0	603	903	0
576	4	27.4334	87.9082	-738.788	107148	84099.8	16765.5	313.835	154.968	0	0	0	0	0	0	0	200	903	0	0	0	0	0	0	0	603	903	0
576	5	28.8067	89.1289	-737.873	106598	84099.8	17406.4	313.976	155.533	0	0	0	0	0	0	0	200	903	0	0	0	0	0	0	0	603	903	0
576	6	28.5015	89.7392	-736.957	106690	83977.7	17269.1	313.952	155.229	0	0	0	0	0	0	0	200	903	0	0	0	0	0	0	0	603	903	0
576	7	28.349	91.2651	-736.652	106415	84099.8	17223.3	314.165	155.542	0	0	0	0	0	0	0	200	903	0	0	0	0	0	0	0	603	903	0
576	8	29.5697	91.8755	-733.6	106507	83611.5	17360.6	313.974	154.816	0	0	0	0	0	0	0	200	903	0	0	0	0	0	0	0	603	903	0
576	9	28.0438	93.7065	-732.074	106324	83367.4	17452.2	313.878	154.764	0	0	0	0	0	0	0	200	903	0	0	0	0	0	0	0	603	903	0
577	0	29.4171	95.385	-731.769	106415	83306.4	17772.6	313.842	154.578	0	0	0	0	0	0	0	200	903	0	0	0	0	0	0	0	603	903	0
577	1	30.18	95.385	-731.769	105866	83184.3	17681.1	313.676	155.329	0	0	0	0	0	0	0	200	903	0	0	0	0	0	0	0	603	903	0
577	2	29.4171	96.9109	-727.497	106324	83184.3	17726.9	314.343	153.85	0	0	0	0	0	0	0	200	903	0	0	0	0	0	0	0	603	903	0
577	3	28.349	97.979	-726.886	106232	82757	17910	313.851	153.853	0	0	0	0	0	0	0	200	903	0	0	0	0	0	0	0	603	903	0
577	4	30.3326	97.3686	-725.055	106049	82757	17910	314.139	153.737	0	0	0	0	0	0	0	200	903	0	0	0	0	0	0	0	603	903	0
577	5	28.8067	100.42	-722.919	105225	82451.9	17910	314.054	154.444	0	0	0	0	0	0	0	200	903	0	0	0	0	0	0	0	603	903	0
577	6	30.0274	101.336	-720.783	106232	82329.8	18093.1	314.223	152.616	0	0	0	0	0	0	0	200	903	0	0	0	0	0	0	0	603	903	0
577	7	30.0274	102.099	-720.172	106232	82207.7	18276.2	314.15	152.491	0	0	0	0	0	0	0	200	903	0	0	0	0	0	0	0	603	903	0
577	8	30.0274	103.625	-714.679	105866	81780.4	18230.4	314.43	151.869	0	0	0	0	0	0	0	200	903	0	0	0	0	0	0	0	603	903	0
577	9	29.4171	103.472	-715.9	106232	81414.2	18367.7	313.723	151.611	0	0	0	0	0	0	0	200	903	0	0	0	0	0	0	0	603	903	0
578	0	29.8748	104.845	-711.933	105042	81231.2	18276.2	314.099	152.455	0	0	0	0	0	0	0	200	903	0	0	0	0	0	0	0	603	903	0
578	1	29.7222	105.456	-706.745	106140	81292.2	18413.5	315.023	149.818	0	0	0	0	0	0	0	200	903	0	0	0	0	0	0	0	603	903	0
578	2	30.0274	105.456	-707.355	105225	80498.7	18642.4	313.802	151.242	0	0	0	0	0	0	0	200	903	0	0	0	0	0	0	0	603	903	0
578	3	30.6378	105.151	-706.44	104950	80803.9	18688.2	314.382	151.438	0	0	0	0	0	0	0	200	903	0	0	0	0	0	0	0	603	903	0
578	4	30.6378	107.439	-699.726	104309	80132.5	18642.4	314.52	150.928	0	0	0	0	0	0	0	200	903	0	0	0	0	0	0	0	603	903	0
578	5	29.2645	108.355	-699.726	104218	79949.4	18550.8	314.258	151.059	0	0	0	0	0	0	0	200	903	0	0	0	0	0	0	0	603	903	0
578	6	30.18	108.813	-696.674	103577	80071.5	19237.5	314.934	151.326	0	0	0	0	0	0	0	200	903	0	0	0	0	0	0	0	603	903	0
578	7	29.1119	110.491	-692.707	103394	79094.9	18733.9	314.182	150.739	0	0	0	0	0	0	0	200	903	0	0	0	0	0	0	0	603	903	0
578	8	30.6378	111.254	-689.655	102753	79217	18825.5	314.865	151.008	0	0	0	0	0	0	0	200	903	0	0	0	0	0	0	0	603	903	0
578	9	30.3326	111.559	-687.824	102661	78545.6	18779.7	314.194	150.744	0	0	0	0	0	0	0	200	903	0	0	0	0	0	0	0	603	903	0
579	0	29.7222	112.017	-683.246	102387	78179.4	18917	314.423	150.146	0	0	0	0	0	0	0	200	903	0	0	0	0	0	0	0	603	903	0
579	1	29.5697	112.017	-681.415	102112	77569	19008.6	313.835	150.147	0	0	0	0	0	0	0	200	903	0	0	0	0	0	0	0	603	903	0
579	2	30.0274	113.848	-675.312	101837	77385.9	19008.6	314.593	149.199	0	0	0	0	0	0	0	200	903	0	0	0	0	0	0	0	603	903	0
579	3	28.6541	114.916	-670.429	102021	77263.8	19191.7	315.245	147.828	0	0	0	0	0	0	0	200	903	0	0	0	0	0	0	0	603	903	0
579	4	29.2645	115.221	-668.598	101380	76287.3	19329	314.1	148.37	0	0	0	0	0	0	0	200	903	0	0	0	0	0	0	0	603	903	0
579	5	29.1119	114.611	-666.767	101471	76043.1	19145.9	314.048	147.816	0	0	0	0	0	0	0	200	903	0	0	0	0	0	0	0	603	903	0
579	6	27.4334	115.679	-661.273	99457.1	75249.7	19100.1	313.795	149.598	0	0	0	0	0	0	0	200	903	0	0	0	0	0	0	0	603	903	0
579	7	27.4334	116.137	-659.748	100281	75005.6	19237.5	313.688	148.001	0	0	0	0	0	0	0	200	903	0	0	0	0	0	0	0	603	903	0
579	8	27.4334	116.747	-652.118	99731.8	74700.4	19374.8	314.55	147.065	0	0	0	0	0	0	0	200	903	0	0	0	0	0	0	0	603	903	0
579	9	27.7386	116.747	-647.846	99548.7	73784.8	19329	313.893	146.339	0	0	0	0	0	0	0	200	903	0	0	0	0	0	0	0	603	903	0
580	0	27.4334	117.205	-644.184	98907.8	72747.2	19283.2	312.929	146.46	0	0	0	0	0	0	0	200	903	0	0	0	0	0	0	0	603	903	0
580	1	26.6705	118.121	-641.132	97443	72869.3	19145.9	313.657	148.014	0	0	0	0	0	0	0	200	903	0	0	0	0	0	0	0	603	903	0
580	2	25.9075	119.036	-636.554	97168.3	72503.1	19329	313.899	147.353	0	0	0	0	0	0	0	200	903	0	0	0	0	0	0	0	603	903	0
580	3	25.755	119.189	-631.061	96527.5	71709.6	19008.6	313.633	147.039	0	0	0	0	0	0	0	200	903	0	0	0	0	0	0	0	603	903	0
580	4	24.8394	118.884	-624.958	95703.5	71038.3	19008.6	313.669	146.864	0	0	0	0	0	0	0	200	903	0	0	0	0	0	0	0	603	903	0
580	5	24.3817	120.257	-620.075	95428.8	70427.9	18596.6	313.58	146.101	0	0	0	0	0	0	0	200	903	0	0	0	0	0	0	0	603	903	0
580	6	24.3817	120.867	-612.751	95428.8	70000.7	19329	314.24	144.262	0	0	0	0	0	0	0	200	903	0	0	0	0	0	0	0	603	903	0
580	7	24.0765	120.715	-610.614	93872.4	69512.4	18962.8	313.84	146.266	0	0	0	0	0	0	0	200	903	0	0	0	0	0	0	0	603	903	0
580	8	22.7032	121.783	-606.037	94147.1	69024.1	18962.8	313.894	144.651	0	0	0	0	0	0	0	200	903	0	0	0	0	0	0	0	603	903	0
580	9	21.9403	121.02	-596.271	93414.6	68047.5	18688.2	314.122	143.335	0	0	0	0	0	0	0	200	903	0	0	0	0	0	0	0	603	903	0
581	0	21.7877	121.783	-593.83	92590.7	66948.9	18779.7	312.741	144.079	0	0	0	0	0	0	0	200	903	0	0	0	0	0	0	0	603	903	0
581	1	22.0928	120.257	-587.116	92316	66765.8	18871.3	313.718	142.764	0	0	0	0	0	0	0	200	903	0	0	0	0	0	0	0	603	903	0
581	2	22.0928	122.088	-583.148	91766.7	66399.6	18596.6	313.864	142.636	0	0	0	0	0	0	0	200	903	0	0	0	0	0	0	0	603	903	0
581	3	20.1092	122.698	-577.045	91217.4	65850.3	18550.8	314.116	141.923	0	0	0	0	0	0	0	200	903	0	0	0	0	0	0	0	603	903	0
581	4	18.7359	122.851	-571.552	90485	64629.6	18413.5	313.077	141.685	0	0	0	0	0	0	0	200	903	0	0	0	0	0	0	0	603	903	0
581	5	19.3463	122.546	-562.702	89477.9	64019.2	18550.8	313.771	140.985	0	0	0	0	0	0	0	200	903	0	0	0	0	0	0	0	603	903	0
581	6	17.21	122.088	-557.819	88379.3	63286.8	18322	313.454	141.563	0	0	0	0	0	0	0	200	903	0	0	0	0	0	0	0	603	903	0
581	7	18.4307	121.935	-551.715	87829.9	62798.5	18276.2	313.824	140.806	0	0	0	0	0	0	0	200	903	0	0	0	0	0	0	0	603	903	0
581	8	17.6678	121.478	-547.443	87097.5	61455.8	18276.2	312.26	140.901	0	0	0	0	0	0	0	200	903	0	0	0	0	0	0	0	603	903	0
581	9	16.9049	121.172	-540.729	85907.3	61394.7	18184.6	313.541	141.127	0	0	0	0	0	0	0	200	903	0	0	0	0	0	0	0	603	903	0
582	0	15.379	120.715	-533.71	85449.6	60418.2	17864.2	313.204	139.895	0	0	0	0	0	0	0	200	903	0	0	0	0	0	0	0	603	903	0
582	1	15.0738	121.02	-525.47	84167.8	59441.6	17726.9	313.121	139.824	0	0	0	0	0	0	0	200	903	0	0	0	0	0	0	0	603	903	0
582	2	14.0057	120.867	-516.925	83893.2	58831.2	17864.2	313.81	137.707	0	0	0	0	0	0	0	200	903	0	0	0	0	0	0	0	603	903	0
582	3	13.3953	120.257	-511.737	82611.4	58220.9	17681.1	313.771	138.567	0	0	0	0	0	0	0	200	903	0	0	0	0	0	0	0	603	903	0
582	4	12.6324	119.494	-508.38	81604.3	57427.4	17635.3	312.962	139.482	0	0	0	0	0	0	0	200	903	0	0	0	0	0	0	0	603	903	0
582	5	12.1746	119.952	-496.479	80139.5	56084.7	17406.4	312.965	138.584	0	0	0	0	0	0	0	200	903	0	0	0	0	0	0	0	603	903	0
582	6	10.4962	120.104	-492.511	78491.6	55108.1	17498	311.892	140.63	0	0	0	0	0	0	0	200	903	0	0	0	0	0	0	0	603	903	0
582	7	9.27547	119.494	-483.051	78033.8	54558.8	17177.5	312.946	138.456	0	0	0	0	0	0	0	200	903	0	0	0	0	0	0	0	603	903	0
582	8	10.9539	119.646	-474.811	76843.6	53765.3	17131.8	313.235	138.16	0	0	0	0	0	0	0	200	903	0	0	0	0	0	0	0	603	903	0
582	9	8.66511	119.646	-467.487	76019.6	52849.8	16765.5	313.051	137.387	0	0	0	0	0	0	0	200	903	0	0	0	0	0	0	0	603	903	0
583	0	8.05476	119.189	-460.773	74737.9	51446	16536.7	311.651	137.799	0	0	0	0	0	0	0	200	903	0	0	0	0	0	0	0	603	903	0
583	1	6.68147	119.341	-453.449	73822.4	50286.3	17040.2	310.897	137.198	0	0	0	0	0	0	0	200	903	0	0	0	0	0	0	0	603	903	0
583	2	5.61336	119.646	-444.294	72082.9	49859.1	16674	312.221	137.758	0	0	0	0	0	0	0	200	903	0	0	0	0	0	0	0	603	903	0
583	3	5.30818	118.731	-434.833	71350.4	49065.6	16353.6	312.838	135.913	0	0	0	0	0	0	0	200	903	0	0	0	0	0	0	0	603	903	0
583	4	5.30818	117.815	-425.983	69794.1	48089.1	16033.1	312.89	136.158	0	0	0	0	0	0	0	200	903	0	0	0	0	0	0	0	603	903	0
583	5	6.07112	115.984	-418.659	68695.4	47051.5	16033.1	312.386	135.915	0	0	0	0	0	0	0	200	903	0	0	0	0	0	0	0	603	903	0
583	6	4.08748	116.747	-410.114	67322.1	45708.7	15804.2	311.454	135.845	0	0	0	0	0	0	0	200	903	0	0	0	0	0	0	0	603	903	0
583	7	3.17195	116.29	-402.179	66589.7	44976.3	15666.9	311.831	134.428	0	0	0	0	0	0	0	200	903	0	0	0	0	0	0	0	603	903	0
583	8	4.39265	115.221	-392.414	65582.6	44426.9	15483.8	313.215	132.874	0	0	0	0	0	0	0	200	903	0	0	0	0	0	0	0	603	903	0
583	9	1.64607	114.153	-383.258	64392.4	43206.2	15438	312.734	131.987	0	0	0	0	0	0	0	200	903	0	0	0	0	0	0	0	603	903	0
584	0	1.64607	112.322	-374.713	62836	42046.6	14980.3	312.21	132.309	0	0	0	0	0	0	0	200	903	0	0	0	0	0	0	0	603	903	0
584	1	2.71419	111.407	-366.169	61645.9	41070	14705.6	312.161	131.646	0	0	0	0	0	0	0	200	903	0	0	0	0	0	0	0	603	903	0
584	2	1.79866	110.033	-358.234	60821.9	40093.4	14888.7	311.92	130.217	0	0	0	0	0	0	0	200	903	0	0	0	0	0	0	0	603	903	0
584	3	0.577956	107.592	-349.384	58166.9	39177.9	14659.8	312.134	133.516	0	0	0	0	0	0	0	200	903	0	0	0	0	0	0	0	603	903	0
584	4	1.49348	105.608	-337.177	56885.1	38140.3	14431	313.117	131.29	0	0	0	0	0	0	0	200	903	0	0	0	0	0	0	0	603	903	0
584	5	0.272781	104.235	-328.327	55511.8	36919.6	13973.2	312.448	130.925	0	0	0	0	0	0	0	200	903	0	0	0	0	0	0	0	603	903	0
584	6	1.49348	102.404	-317.34	54413.2	35637.9	14156.3	312.302	128.534	0	0	0	0	0	0	0	200	903	0	0	0	0	0	0	0	603	903	0
584	7	1.79866	100.878	-309.406	52765.2	34478.2	13652.8	311.434	129.463	0	0	0	0	0	0	0	200	903	0	0	0	0	0	0	0	603	903	0
584	8	0.577956	96.9109	-299.03	51208.8	33379.6	13195	311.626	128.75	0	0	0	0	0	0	0	200	903	0	0	0	0	0	0	0	603	903	0
584	9	-0.184983	95.8427	-289.875	49744	32525.1	13286.5	312.204	128.395	0	0	0	0	0	0	0	200	903	0	0	0	0	0	0	0	603	903	0
585	0	0.730544	93.7065	-277.668	48828.5	31426.5	12691.5	313.18	124.148	0	0	0	0	0	0	0	200	903	0	0	0	0	0	0	0	603	903	0
585	1	-0.642747	90.3496	-268.207	46173.4	30144.7	12554.1	312.393	127.844	0	0	0	0	0	0	0	200	903	0	0	0	0	0	0	0	603	903	0
585	2	0.272781	88.5185	-259.052	44708.6	28924	12050.6	311.653	127.415	0	0	0	0	0	0	0	200	903	0	0	0	0	0	0	0	603	903	0
585	3	0.730544	86.3823	-250.202	43426.8	28069.5	11730.2	312.188	126.433	0	0	0	0	0	0	0	200	903	0	0	0	0	0	0	0	603	903	0
585	4	-0.337571	84.5512	-241.962	42236.7	27093	11318.2	311.972	125.441	0	0	0	0	0	0	0	200	903	0	0	0	0	0	0	0	603	903	0
585	5	-0.947922	81.4995	-233.722	40314.1	26299.5	11089.3	312.525	127.513	0	0	0	0	0	0	0	200	903	0	0	0	0	0	0	0	603	903	0
585	6	0.272781	78.6003	-221.82	38757.7	25261.9	10585.7	313.884	125.275	0	0	0	0	0	0	0	200	903	0	0	0	0	0	0	0	603	903	0
585	7	-1.10051	75.8537	-211.75	37933.7	23797.1	10219.5	312.383	120.856	0	0	0	0	0	0	0	200	903	0	0	0	0	0	0	0	603	903	0
585	8	-0.184983	72.3442	-204.425	36194.2	23125.7	9761.77	313.125	122.947	0	0	0	0	0	0	0	200	903	0	0	0	0	0	0	0	603	903	0
585	9	1.95125	68.2243	-195.27	35004	22454.3	9258.23	314.991	120.741	0	0	0	0	0	0	0	200	903	0	0	0	0	0	0	0	603	903	0
586	0	0.883132	66.0881	-189.777	33722.3	21111.5	9258.23	311.244	122.306	0	0	0	0	0	0	0	200	903	0	0	0	0	0	0	0	603	903	0
586	1	-0.337571	63.7993	-180.927	32715.2	20806.3	8708.91	314.999	119.18	0	0	0	0	0	0	0	200	903	0	0	0	0	0	0	0	603	903	0
586	2	1.79866	60.7475	-170.551	31433.4	19707.7	8251.15	315.553	115.695	0	0	0	0	0	0	0	200	903	0	0	0	0	0	0	0	603	903	0
586	3	-0.0323951	56.9328	-162.006	29968.6	18120.8	7930.71	311.853	115.015	0	0	0	0	0	0	0	200	903	0	0	0	0	0	0	0	603	903	0
586	4	0.883132	52.813	-155.597	28320.7	18059.8	7518.72	316.067	117.987	0	0	0	0	0	0	0	200	903	0	0	0	0	0	0	0	603	903	0
586	5	1.64607	50.0664	-149.189	27588.2	17388.4	7106.74	316.553	115.078	0	0	0	0	0	0	0	200	903	0	0	0	0	0	0	0	603	903	0
586	6	1.64607	45.6413	-143.085	26489.6	16594.9	6694.75	315.979	114.868	0	0	0	0	0	0	0	200	903	0	0	0	0	0	0	0	603	903	0
586	7	0.577956	42.2844	-135.456	25116.3	16045.6	6282.76	318.456	114.579	0	0	0	0	0	0	0	200	903	0	0	0	0	0	0	0	603	903	0
586	8	2.10384	39.3852	-125.995	23743	14763.9	5962.33	317.178	111.556	0	0	0	0	0	0	0	200	903	0	0	0	0	0	0	0	603	903	0
586	9	0.120193	37.4016	-120.197	22552.8	14214.5	5825	318.26	112.368	0	0	0	0	0	0	0	200	903	0	0	0	0	0	0	0	603	903	0
587	0	0.730544	36.0283	-113.483	20721.8	13543.1	5504.56	319.341	117.402	0	0	0	0	0	0	0	200	903	0	0	0	0	0	0	0	603	903	0
587	1	1.79866	35.1128	-108.905	19897.8	12871.8	5275.68	318.192	117.293	0	0	0	0	0	0	0	200	903	0	0	0	0	0	0	0	603	903	0
587	2	0.883132	32.2136	-101.886	18982.3	12078.3	5046.8	318.547	113.692	0	0	0	0	0	0	0	200	903	0	0	0	0	0	0	0	603	903	0
587	3	0.272781	31.4507	-96.6983	17883.6	11040.7	5092.58	314.177	115.057	0	0	0	0	0	0	0	200	903	0	0	0	0	0	0	0	603	903	0
587	4	1.95125	29.6196	-87.2378	16235.7	10064.1	4543.26	315.364	113.892	0	0	0	0	0	0	0	200	903	0	0	0	0	0	0	0	603	903	0
587	5	0.272781	27.0256	-82.355	15045.5	9697.93	4360.15	317.758	117.309	0	0	0	0	0	0	0	200	903	0	0	0	0	0	0	0	603	903	0
587	6	1.03572	23.0583	-77.4722	14313.1	9392.76	4222.83	321.24	115.249	0	0	0	0	0	0	0	200	903	0	0	0	0	0	0	0	603	903	0
587	7	1.49348	20.9221	-73.8101	13214.4	8721.37	3719.28	318.16	120.967	0	0	0	0	0	0	0	200	903	0	0	0	0	0	0	0	603	903	0
587	8	2.25642	19.854	-67.0962	12207.4	8233.09	3490.4	322.706	118.062	0	0	0	0	0	0	0	200	903	0	0	0	0	0	0	0	603	903	0
587	9	0.730544	16.1919	-64.0445	11291.8	7378.59	3307.3	315.21	123.688	0	0	0	0	0	0	0	200	903	0	0	0	0	0	0	0	603	903	0
588	0	1.64607	15.2763	-57.0254	11017.2	6951.35	2941.09	321.899	106.802	0	0	0	0	0	0	0	200	903	0	0	0	0	0	0	0	603	903	0
588	1	0.730544	13.5979	-51.5323	9277.68	6463.07	2803.76	325.418	119.964	0	0	0	0	0	0	0	200	903	0	0	0	0	0	0	0	603	903	0
588	2	2.40901	11.9194	-48.7857	9094.58	5852.71	2712.2	319.968	113.581	0	0	0	0	0	0	0	200	903	0	0	0	0	0	0	0	603	903	0
588	3	2.40901	9.78317	-45.7339	7995.94	5608.57	2712.2	322.635	125.164	0	0	0	0	0	0	0	200	903	0	0	0	0	0	0	0	603	903	0
588	4	2.40901	6.12106	-40.8511	7904.39	4998.22	2529.1	322.352	106.507	0	0	0	0	0	0	0	200	903	0	0	0	0	0	0	0	603	903	0
588	5	1.49348	6.27365	-42.0718	7171.97	4876.15	1888.23	315.901	129.53	0	0	0	0	0	0	0	200	903	0	0	0	0	0	0	0	603	903	0
588	6	1.64607	4.74777	-36.8838	6622.65	4326.84	1705.12	317.31	120.446	0	0	0	0	0	0	0	200	903	0	0	0	0	0	0	0	603	903	0
588	7	1.79866	2.91672	-30.7803	6531.1	4204.77	1476.24	336.606	87.8159	0	0	0	0	0	0	0	200	903	0	0	0	0	0	0	0	603	903	0
588	8	3.62971	2.15378	-29.8648	5615.57	3960.63	1567.79	332.619	111.967	0	0	0	0	0	0	0	200	903	0	0	0	0	0	0	0	603	903	0
588	9	3.01936	1.54343	-28.0337	5432.46	3533.38	1155.81	326.04	106.217	0	0	0	0	0	0	0	200	903	0	0	0	0	0	0	0	603	903	0
589	0	2.40901	-0.440216	-27.1182	4791.6	3167.17	1064.25	316.791	123.307	0	0	0	0	0	0	0	200	903	0	0	0	0	0	0	0	603	903	0
589	1	2.10384	-1.05057	-24.6768	4608.49	2923.03	972.702	318.452	113.246	0	0	0	0	0	0	0	200	903	0	0	0	0	0	0	0	603	903	0
589	2	3.01936	-2.27127	-20.7095	4059.17	2861.99	881.149	338.197	103.995	0	0	0	0	0	0	0	200	903	0	0	0	0	0	0	0	603	903	0
589	3	2.10384	-2.72903	-16.1319	3509.86	2556.82	972.702	358.495	82.4275	0	0	0	0	0	0	0	200	903	0	0	0	0	0	0	0	603	903	0
589	4	3.17195	-3.94974	-17.6578	2960.54	2495.78	652.267	341.342	132.338	0	0	0	0	0	0	0	200	903	0	0	0	0	0	0	0	603	903	0
589	5	3.01936	-5.17044	-17.3526	3235.2	2129.57	423.385	322.724	113.561	0	0	0	0	0	0	0	200	903	0	0	0	0	0	0	0	603	903	0
589	6	3.32454	-7.45926	-14.3008	2594.33	1885.43	652.267	331.841	118.589	0	0	0	0	0	0	0	200	903	0	0	0	0	0	0	0	603	903	0
589	7	2.25642	-5.6282	-14.606	2045.01	1519.22	423.385	304.013	159.988	0	0	0	0	0	0	0	200	903	0	0	0	0	0	0	0	603	903	0
589	8	3.32454	-6.23856	-11.8594	1861.91	1946.46	286.056	364.128	143.002	0	0	0	0	0	0	0	200	903	0	0	0	0	0	0	0	603	903	0
589	9	2.40901	-7.00149	-10.0284	1495.7	1641.29	423.385	363.665	150.854	0	0	0	0	0	0	0	200	903	0	0	0	0	0	0	0	603	903	0
590	0	3.7823	-7.61185	-10.6387	1312.59	1397.15	789.596	331.327	176.621	0	0	0	0	0	0	0	200	903	0	0	0	0	0	0	0	603	903	0
590	1	3.62971	-7.15408	-10.3336	946.379	1153.01	102.951	311.579	208.417	0	0	0	0	0	0	0	200	903	0	0	0	0	0	0	0	603	903	0
590	2	2.40901	-7.45926	-8.80767	488.616	969.903	11.398	310.12	244.524	0	0	0	0	0	0	0	200	903	0	0	0	0	0	0	0	603	903	0
590	3	0	0	0	0	0	0	200	300	0	0	0	0	0	0	0	200	903	0	0	0	0	0	0	0	603	903	0
590	4	0	0	0	0	0	0	200	300	0	0	0	0	0	0	0	200	903	0	0	0	0	0	0	0	603	903	0
590	5	0	0	0	0	0	0	200	300	0	0	0	0	0	0	0	200	903	0	0	0	0	0	0	0	603	903	0
590	6	0	0	0	0	0	0	200	300	0	0	0	0	0	0	0	200	903	0	0	0	0	0	0	0	603	903	0
590	7	0	0	0	0	0	0	200	300	0	0	0	0	0	0	0	200	903	0	0	0	0	0	0	0	603	903	0
590	8	0	0	0	0	0	0	200	300	0	0	0	0	0	0	0	200	903	0	0	0	0	0	0	0	603	903	0
590	9	0	0	0	0	0	0	200	300	0	0	0	0	0	0	0	200	903	0	0	0	0	0	0	0	603	903	0
591	0	0	0	0	0	0	0	200	300	0	0	0	0	0	0	0	200	903	0	0	0	0	0	0	0	603	903	0
591	1	0	0	0	0	0	0	200	300	0	0	0	0	0	0	0	200	903	0	0	0	0	0	0	0	603	903	0
591	2	0	0	0	0	0	0	200	300	0	0	0	0	0	0	0	200	903	0	0	0	0	0	0	0	603	903	0
591	3	0	0	0	0	0	0	200	300	0	0	0	0	0	0	0	200	903	0	0	0	0	0	0	0	603	903	0
591	4	0	0	0	0	0	0	200	300	0	0	0	0	0	0	0	200	903	0	0	0	0	0	0	0	603	903	0
591	5	0	0	0	0	0	0	200	300	0	0	0	0	0	0	0	200	903	0	0	0	0	0	0	0	603	903	0
591	6	0	0	0	0	0	0	200	300	0	0	0	0	0	0	0	200	903	0	0	0	0	0	0	0	603	903	0
591	7	0	0	0	0	0	0	200	300	0	0	0	0	0	0	0	200	903	0	0	0	0	0	0	0	603	903	0
591	8	0	0	0	0	0	0	200	300	0	0	0	0	0	0	0	200	903	0	0	0	0	0	0	0	603	903	0
591	9	0	0	0	0	0	0	200	300	0	0	0	0	0	0	0	200	903	0	0	0	0	0	0	0	603	903	0
592	0	0	0	0	0	0	0	200	300	0	0	0	0	0	0	0	200	903	0	0	0	0	0	0	0	603	903	0
592	1	0	0	0	0	0	0	200	300	0	0	0	0	0	0	0	200	903	0	0	0	0	0	0	0	603	903	0
592	2	0	0	0	0	0	0	200	300	0	0	0	0	0	0	0	200	903	0	0	0	0	0	0	0	603	903	0
592	3	0	0	0	0	0	0	200	300	0	0	0	0	0	0	0	200	903	0	0	0	0	0	0	0	603	903	0
592	4	0	0	0	0	0	0	200	300	0	0	0	0	0	0	0	200	903	0	0	0	0	0	0	0	603	903	0
592	5	0	0	0	0	0	0	200	300	0	0	0	0	0	0	0	200	903	0	0	0	0	0	0	0	603	903	0
592	6	0	0	0	0	0	0	200	300	0	0	0	0	0	0	0	200	903	0	0	0	0	0	0	0	603	903	0
592	7	0	0	0	0	0	0	200	300	0	0	0	0	0	0	0	200	903	0	0	0	0	0	0	0	603	903	0
592	8	0	0	0	0	0	0	200	300	0	0	0	0	0	0	0	200	903	0	0	0	0	0	0	0	603	903	0
592	9	0	0	0	0	0	0	200	300	0	0	0	0	0	0	0	200	903	0	0	0	0	0	0	0	603	903	0
593	0	0	0	0	0	0	0	200	300	0	0	0	0	0	0	0	200	903	0	0	0	0	0	0	0	603	903	0
593	1	0	0	0	0	0	0	200	300	0	0	0	0	0	0	0	200	903	0	0	0	0	0	0	0	603	903	0
593	2	0	0	0	0	0	0	200	300	0	0	0	0	0	0	0	200	903	0	0	0	0	0	0	0	603	903	0
593	3	0	0	0	0	0	0	200	300	0	0	0	0	0	0	0	200	903	0	0	0	0	0	0	0	603	903	0
593	4	0	0	0	0	0	0	200	300	0	0	0	0	0	0	0	200	903	0	0	0	0	0	0	0	603	903	0
593	5	0	0	0	0	0	0	200	300	0	0	0	0	0	0	0	200	903	0	0	0	0	0	0	0	603	903	0
593	6	0	0	0	0	0	0	200	300	0	0	0	0	0	0	0	200	903	0	0	0	0	0	0	0	603	903	0
593	7	0	0	0	0	0	0	200	300	0	0	0	0	0	0	0	200	903	0	0	0	0	0	0	0	603	903	0
593	8	0	0	0	0	0	0	200	300	0	0	0	0	0	0	0	200	903	0	0	0	0	0	0	0	603	903	0
593	9	0	0	0	0	0	0	200	300	0	0	0	0	0	0	0	200	903	0	0	0	0	0	0	0	603	903	0
594	0	0	0	0	0	0	0	200	300	0	0	0	0	0	0	0	200	903	0	0	0	0	0	0	0	603	903	0
594	1	0	0	0	0	0	0	200	300	0	0	0	0	0	0	0	200	903	0	0	0	0	0	0	0	603	903	0
594	2	0	0	0	0	0	0	200	300	0	0	0	0	0	0	0	200	903	0	0	0	0	0	0	0	603	903	0
594	3	0	0	0	0	0	0	200	300	0	0	0	0	0	0	0	200	903	0	0	0	0	0	0	0	603	903	0
594	4	0	0	0	0	0	0	200	300	0	0	0	0	0	0	0	200	903	0	0	0	0	0	0	0	603	903	0
594	5	0	0	0	0	0	0	200	300	0	0	0	0	0	0	0	200	903	0	0	0	0	0	0	0	603	903	0
594	6	0	0	0	0	0	0	200	300	0	0	0	0	0	0	0	200	903	0	0	0	0	0	0	0	603	903	0
594	7	0	0	0	0	0	0	200	300	0	0	0	0	0	0	0	200	903	0	0	0	0	0	0	0	603	903	0
594	8	0	0	0	0	0	0	200	300	0	0	0	0	0	0	0	200	903	0	0	0	0	0	0	0	603	903	0
594	9	0	0	0	0	0	0	200	300	0	0	0	0	0	0	0	200	903	0	0	0	0	0	0	0	603	903	0
595	0	0	0	0	0	0	0	200	300	0	0	0	0	0	0	0	200	903	0	0	0	0	0	0	0	603	903	0
595	1	0	0	0	0	0	0	200	300	0	0	0	0	0	0	0	200	903	0	0	0	0	0	0	0	603	903	0
595	2	0	0	0	0	0	0	200	300	0	0	0	0	0	0	0	200	903	0	0	0	0	0	0	0	603	903	0
595	3	0	0	0	0	0	0	200	300	0	0	0	0	0	0	0	200	903	0	0	0	0	0	0	0	603	903	0
595	4	0	0	0	0	0	0	200	300	0	0	0	0	0	0	0	200	903	0	0	0	0	0	0	0	603	903	0
595	5	0	0	0	0	0	0	200	300	0	0	0	0	0	0	0	200	903	0	0	0	0	0	0	0	603	903	0
595	6	0	0	0	0	0	0	200	300	0	0	0	0	0	0	0	200	903	0	0	0	0	0	0	0	603	903	0
595	7	0	0	0	0	0	0	200	300	0	0	0	0	0	0	0	200	903	0	0	0	0	0	0	0	603	903	0
595	8	0	0	0	0	0	0	200	300	0	0	0	0	0	0	0	200	903	0	0	0	0	0	0	0	603	903	0
595	9	0	0	0	0	0	0	200	300	0	0	0	0	0	0	0	200	903	0	0	0	0	0	0	0	603	903	0
596	0	0	0	0	0	0	0	200	300	0	0	0	0	0	0	0	200	903	0	0	0	0	0	0	0	603	903	0
596	1	0	0	0	0	0	0	200	300	0	0	0	0	0	0	0	200	903	0	0	0	0	0	0	0	603	903	0
596	2	0	0	0	0	0	0	200	300	0	0	0	0	0	0	0	200	903	0	0	0	0	0	0	0	603	903	0
596	3	0	0	0	0	0	0	200	300	0	0	0	0	0	0	0	200	903	0	0	0	0	0	0	0	603	903	0
596	4	0	0	0	0	0	0	200	300	0	0	0	0	0	0	0	200	903	0	0	0	0	0	0	0	603	903	0
596	5	0	0	0	0	0	0	200	300	0	0	0	0	0	0	0	200	903	0	0	0	0	0	0	0	603	903	0
596	6	0	0	0	0	0	0	200	300	0	0	0	0	0	0	0	200	903	0	0	0	0	0	0	0	603	903	0
596	7	0	0	0	0	0	0	200	300	0	0	0	0	0	0	0	200	903	0	0	0	0	0	0	0	603	903	0
596	8	0	0	0	0	0	0	200	300	0	0	0	0	0	0	0	200	903	0	0	0	0	0	0	0	603	903	0
596	9	0	0	0	0	0	0	200	300	0	0	0	0	0	0	0	200	903	0	0	0	0	0	0	0	603	903	0
597	0	0	0	0	0	0	0	200	300	0	0	0	0	0	0	0	200	903	0	0	0	0	0	0	0	603	903	0
597	1	0	0	0	0	0	0	200	300	0	0	0	0	0	0	0	200	903	0	0	0	0	0	0	0	603	903	0
597	2	0	0	0	0	0	0	200	300	0	0	0	0	0	0	0	200	903	0	0	0	0	0	0	0	603	903	0
597	3	0	0	0	0	0	0	200	300	0	0	0	0	0	0	0	200	903	0	0	0	0	0	0	0	603	903	0
597	4	0	0	0	0	0	0	200	300	0	0	0	0	0	0	0	200	903	0	0	0	0	0	0	0	603	903	0
597	5	0	0	0	0	0	0	200	300	0	0	0	0	0	0	0	200	903	0	0	0	0	0	0	0	603	903	0
597	6	0	0	0	0	0	0	200	300	0	0	0	0	0	0	0	200	903	0	0	0	0	0	0	0	603	903	0
597	7	0	0	0	0	0	0	200	300	0	0	0	0	0	0	0	200	903	0	0	0	0	0	0	0	603	903	0
597	8	0	0	0	0	0	0	200	300	0	0	0	0	0	0	0	200	903	0	0	0	0	0	0	0	603	903	0
597	9	0	0	0	0	0	0	200	300	0	0	0	0	0	0	0	200	903	0	0	0	0	0	0	0	603	903	0
598	0	0	0	0	0	0	0	200	300	0	0	0	0	0	0	0	200	903	0	0	0	0	0	0	0	603	903	0
598	1	0	0	0	0	0	0	200	300	0	0	0	0	0	0	0	200	903	0	0	0	0	0	0	0	603	903	0
598	2	0	0	0	0	0	0	200	300	0	0	0	0	0	0	0	200	903	0	0	0	0	0	0	0	603	903	0
598	3	0	0	0	0	0	0	200	300	0	0	0	0	0	0	0	200	903	0	0	0	0	0	0	0	603	903	0
598	4	0	0	0	0	0	0	200	300	0	0	0	0	0	0	0	200	903	0	0	0	0	0	0	0	603	903	0
598	5	0	0	0	0	0	0	200	300	0	0	0	0	0	0	0	200	903	0	0	0	0	0	0	0	603	903	0
598	6	0	0	0	0	0	0	200	300	0	0	0	0	0	0	0	200	903	0	0	0	0	0	0	0	603	903	0
598	7	0	0	0	0	0	0	200	300	0	0	0	0	0	0	0	200	903	0	0	0	0	0	0	0	603	903	0
598	8	0	0	0	0	0	0	200	300	0	0	0	0	0	0	0	200	903	0	0	0	0	0	0	0	603	903	0
598	9	0	0	0	0	0	0	200	300	0	0	0	0	0	0	0	200	903	0	0	0	0	0	0	0	603	903	0
599	0	0	0	0	0	0	0	200	300	0	0	0	0	0	0	0	200	903	0	0	0	0	0	0	0	603	903	0
599	1	0	0	0	0	0	0	200	300	0	0	0	0	0	0	0	200	903	0	0	0	0	0	0	0	603	903	0
599	2	0	0	0	0	0	0	200	300	0	0	0	0	0	0	0	200	903	0	0	0	0	0	0	0	603	903	0
599	3	0	0	0	0	0	0	200	300	0	0	0	0	0	0	0	200	903	0	0	0	0	0	0	0	603	903	0
599	4	0	0	0	0	0	0	200	300	0	0	0	0	0	0	0	200	903	0	0	0	0	0	0	0	603	903	0
599	5	0	0	0	0	0	0	200	300	0	0	0	0	0	0	0	200	903	0	0	0	0	0	0	0	603	903	0
599	6	0	0	0	0	0	0	200	300	0	0	0	0	0	0	0	200	903	0	0	0	0	0	0	0	603	903	0
599	7	0	0	0	0	0	0	200	300	0	0	0	0	0	0	0	200	903	0	0	0	0	0	0	0	603	903	0
599	8	0	0	0	0	0	0	200	300	0	0	0	0	0	0	0	200	903	0	0	0	0	0	0	0	603	903	0
599	9	0	0	0	0	0	0	200	300	0	0	0	0	0	0	0	200	903	0	0	0	0	0	0	0	603	903	0
600	0	0	0	0	0	0	0	200	300	0	0	0	0	0	0	0	200	903	0	0	0	0	0	0	0	603	903	0
600	1	0	0	0	0	0	0	200	300	0	0	0	0	0	0	0	200	903	0	0	0	0	0	0	0	603	903	0
600	2	0	0	0	0	0	0	200	300	0	0	0	0	0	0	0	200	903	0	0	0	0	0	0	0	603	903	0
600	3	0	0	0	0	0	0	200	300	0	0	0	0	0	0	0	200	903	0	0	0	0	0	0	0	603	903	0
600	4	0	0	0	0	0	0	200	300	0	0	0	0	0	0	0	200	903	0	0	0	0	0	0	0	603	903	0
600	5	0	0	0	0	0	0	200	300	0	0	0	0	0	0	0	200	903	0	0	0	0	0	0	0	603	903	0
600	6	0	0	0	0	0	0	200	300	0	0	0	0	0	0	0	200	903	0	0	0	0	0	0	0	603	903	0
600	7	0	0	0	0	0	0	200	300	0	0	0	0	0	0	0	200	903	0	0	0	0	0	0	0	603	903	0
600	8	0	0	0	0	0	0	200	300	0	0	0	0	0	0	0	200	903	0	0	0	0	0	0	0	603	903	0
600	9	0	0	0	0	0	0	200	300	0	0	0	0	0	0	0	200	903	0	0	0	0	0	0	0	603	903	0
601	0	0	0	0	0	0	0	200	300	0	0	0	0	0	0	0	200	903	0	0	0	0	0	0	0	603	903	0
601	1	0	0	0	0	0	0	200	300	0	0	0	0	0	0	0	200	903	0	0	0	0	0	0	0	603	903	0
601	2	0	0	0	0	0	0	200	300	0	0	0	0	0	0	0	200	903	0	0	0	0	0	0	0	603	903	0
601	3	0	0	0	0	0	0	200	300	0	0	0	0	0	0	0	200	903	0	0	0	0	0	0	0	603	903	0
601	4	0	0	0	0	0	0	200	300	0	0	0	0	0	0	0	200	903	0	0	0	0	0	0	0	603	903	0
601	5	0	0	0	0	0	0	200	300	0	0	0	0	0	0	0	200	903	0	0	0	0	0	0	0	603	903	0
601	6	0	0	0	0	0	0	200	300	0	0	0	0	0	0	0	200	903	0	0	0	0	0	0	0	603	903	0
601	7	0	0	0	0	0	0	200	300	0	0	0	0	0	0	0	200	903	0	0	0	0	0	0	0	603	903	0
601	8	0	0	0	0	0	0	200	300	0	0	0	0	0	0	0	200	903	0	0	0	0	0	0	0	603	903	0
601	9	0	0	0	0	0	0	200	300	0	0	0	0	0	0	0	200	903	0	0	0	0	0	0	0	603	903	0
602	0	0	0	0	0	0	0	200	300	0	0	0	0	0	0	0	200	903	0	0	0	0	0	0	0	603	903	0
602	1	0	0	0	0	0	0	200	300	0	0	0	0	0	0	0	200	903	0	0	0	0	0	0	0	603	903	0
602	2	0	0	0	0	0	0	200	300	0	0	0	0	0	0	0	200	903	0	0	0	0	0	0	0	603	903	0
602	3	0	0	0	0	0	0	200	300	0	0	0	0	0	0	0	200	903	0	0	0	0	0	0	0	603	903	0
602	4	0	0	0	0	0	0	200	300	0	0	0	0	0	0	0	200	903	0	0	0	0	0	0	0	603	903	0
602	5	0	0	0	0	0	0	200	300	0	0	0	0	0	0	0	200	903	0	0	0	0	0	0	0	603	903	0
602	6	0	0	0	0	0	0	200	300	0	0	0	0	0	0	0	200	903	0	0	0	0	0	0	0	603	903	0
602	7	0	0	0	0	0	0	200	300	0	0	0	0	0	0	0	200	903	0	0	0	0	0	0	0	603	903	0
602	8	0	0	0	0	0	0	200	300	0	0	0	0	0	0	0	200	903	0	0	0	0	0	0	0	603	903	0
602	9	0	0	0	0	0	0	200	300	0	0	0	0	0	0	0	200	903	0	0	0	0	0	0	0	603	903	0
603	0	0	0	0	0	0	0	200	300	0	0	0	0	0	0	0	200	903	0	0	0	0	0	0	0	603	903	0
603	1	0	0	0	0	0	0	200	300	0	0	0	0	0	0	0	200	903	0	0	0	0	0	0	0	603	903	0
603	2	0	0	0	0	0	0	200	300	0	0	0	0	0	0	0	200	903	0	0	0	0	0	0	0	603	903	0
603	3	0	0	0	0	0	0	200	300	0	0	0	0	0	0	0	200	903	0	0	0	0	0	0	0	603	903	0
603	4	0	0	0	0	0	0	200	300	0	0	0	0	0	0	0	200	903	0	0	0	0	0	0	0	603	903	0
603	5	0	0	0	0	0	0	200	300	0	0	0	0	0	0	0	200	903	0	0	0	0	0	0	0	603	903	0
603	6	0	0	0	0	0	0	200	300	0	0	0	0	0	0	0	200	903	0	0	0	0	0	0	0	603	903	0
603	7	0	0	0	0	0	0	200	300	0	0	0	0	0	0	0	200	903	0	0	0	0	0	0	0	603	903	0
603	8	0	0	0	0	0	0	200	300	0	0	0	0	0	0	0	200	903	0	0	0	0	0	0	0	603	903	0
603	9	0	0	0	0	0	0	200	300	0	0	0	0	0	0	0	200	903	0	0	0	0	0	0	0	603	903	0
604	0	0	0	0	0	0	0	200	300	0	0	0	0	0	0	0	200	903	0	0	0	0	0	0	0	603	903	0
604	1	0	0	0	0	0	0	200	300	0	0	0	0	0	0	0	200	903	0	0	0	0	0	0	0	603	903	0
604	2	0	0	0	0	0	0	200	300	0	0	0	0	0	0	0	200	903	0	0	0	0	0	0	0	603	903	0
604	3	0	0	0	0	0	0	200	300	0	0	0	0	0	0	0	200	903	0	0	0	0	0	0	0	603	903	0
604	4	0	0	0	0	0	0	200	300	0	0	0	0	0	0	0	200	903	0	0	0	0	0	0	0	603	903	0
604	5	0	0	0	0	0	0	200	300	0	0	0	0	0	0	0	200	903	0	0	0	0	0	0	0	603	903	0
604	6	0	0	0	0	0	0	200	300	0	0	0	0	0	0	0	200	903	0	0	0	0	0	0	0	603	903	0
604	7	0	0	0	0	0	0	200	300	0	0	0	0	0	0	0	200	903	0	0	0	0	0	0	0	603	903	0
604	8	0	0	0	0	0	0	200	300	0	0	0	0	0	0	0	200	903	0	0	0	0	0	0	0	603	903	0
604	9	0	0	0	0	0	0	200	300	0	0	0	0	0	0	0	200	903	0	0	0	0	0	0	0	603	903	0
605	0	0	0	0	0	0	0	200	300	0	0	0	0	0	0	0	200	903	0	0	0	0	0	0	0	603	903	0
605	1	0	0	0	0	0	0	200	300	0	0	0	0	0	0	0	200	903	0	0	0	0	0	0	0	603	903	0
605	2	0	0	0	0	0	0	200	300	0	0	0	0	0	0	0	200	903	0	0	0	0	0	0	0	603	903	0
605	3	0	0	0	0	0	0	200	300	0	0	0	0	0	0	0	200	903	0	0	0	0	0	0	0	603	903	0
605	4	0	0	0	0	0	0	200	300	0	0	0	0	0	0	0	200	903	0	0	0	0	0	0	0	603	903	0
605	5	0	0	0	0	0	0	200	300	0	0	0	0	0	0	0	200	903	0	0	0	0	0	0	0	603	903	0
605	6	0	0	0	0	0	0	200	300	0	0	0	0	0	0	0	200	903	0	0	0	0	0	0	0	603	903	0
605	7	0	0	0	0	0	0	200	300	0	0	0	0	0	0	0	200	903	0	0	0	0	0	0	0	603	903	0
605	8	0	0	0	0	0	0	200	300	0	0	0	0	0	0	0	200	903	0	0	0	0	0	0	0	603	903	0
605	9	0	0	0	0	0	0	200	300	0	0	0	0	0	0	0	200	903	0	0	0	0	0	0	0	603	903	0
606	0	0	0	0	0	0	0	200	300	0	0	0	0	0	0	0	200	903	0	0	0	0	0	0	0	603	903	0
606	1	0	0	0	0	0	0	200	300	0	0	0	0	0	0	0	200	903	0	0	0	0	0	0	0	603	903	0
606	2	0	0	0	0	0	0	200	300	0	0	0	0	0	0	0	200	903	0	0	0	0	0	0	0	603	903	0
606	3	0	0	0	0	0	0	200	300	0	0	0	0	0	0	0	200	903	0	0	0	0	0	0	0	603	903	0
606	4	0	0	0	0	0	0	200	300	0	0	0	0	0	0	0	200	903	0	0	0	0	0	0	0	603	903	0
606	5	0	0	0	0	0	0	200	300	0	0	0	0	0	0	0	200	903	0	0	0	0	0	0	0	603	903	0
606	6	0	0	0	0	0	0	200	300	0	0	0	0	0	0	0	200	903	0	0	0	0	0	0	0	603	903	0
606	7	0	0	0	0	0	0	200	300	0	0	0	0	0	0	0	200	903	0	0	0	0	0	0	0	603	903	0
606	8	0	0	0	0	0	0	200	300	0	0	0	0	0	0	0	200	903	0	0	0	0	0	0	0	603	903	0
606	9	0	0	0	0	0	0	200	300	0	0	0	0	0	0	0	200	903	0	0	0	0	0	0	0	603	903	0
607	0	0	0	0	0	0	0	200	300	0	0	0	0	0	0	0	200	903	0	0	0	0	0	0	0	603	903	0
607	1	0	0	0	0	0	0	200	300	0	0	0	0	0	0	0	200	903	0	0	0	0	0	0	0	603	903	0
607	2	0	0	0	0	0	0	200	300	0	0	0	0	0	0	0	200	903	0	0	0	0	0	0	0	603	903	0
607	3	0	0	0	0	0	0	200	300	0	0	0	0	0	0	0	200	903	0	0	0	0	0	0	0	603	903	0
607	4	0	0	0	0	0	0	200	300	0	0	0	0	0	0	0	200	903	0	0	0	0	0	0	0	603	903	0
607	5	0	0	0	0	0	0	200	300	0	0	0	0	0	0	0	200	903	0	0	0	0	0	0	0	603	903	0
607	6	0	0	0	0	0	0	200	300	0	0	0	0	0	0	0	200	903	0	0	0	0	0	0	0	603	903	0
607	7	0	0	0	0	0	0	200	300	0	0	0	0	0	0	0	200	903	0	0	0	0	0	0	0	603	903	0
607	8	0	0	0	0	0	0	200	300	0	0	0	0	0	0	0	200	903	0	0	0	0	0	0	0	603	903	0
607	9	0	0	0	0	0	0	200	300	0	0	0	0	0	0	0	200	903	0	0	0	0	0	0	0	603	903	0
608	0	0	0	0	0	0	0	200	300	0	0	0	0	0	0	0	200	903	0	0	0	0	0	0	0	603	903	0
608	1	0	0	0	0	0	0	200	300	0	0	0	0	0	0	0	200	903	0	0	0	0	0	0	0	603	903	0
608	2	0	0	0	0	0	0	200	300	0	0	0	0	0	0	0	200	903	0	0	0	0	0	0	0	603	903	0
608	3	0	0	0	0	0	0	200	300	0	0	0	0	0	0	0	200	903	0	0	0	0	0	0	0	603	903	0
608	4	0	0	0	0	0	0	200	300	0	0	0	0	0	0	0	200	903	0	0	0	0	0	0	0	603	903	0
608	5	0	0	0	0	0	0	200	300	0	0	0	0	0	0	0	200	903	0	0	0	0	0	0	0	603	903	0
608	6	0	0	0	0	0	0	200	300	0	0	0	0	0	0	0	200	903	0	0	0	0	0	0	0	603	903	0
608	7	0	0	0	0	0	0	200	300	0	0	0	0	0	0	0	200	903	0	0	0	0	0	0	0	603	903	0
608	8	0	0	0	0	0	0	200	300	0	0	0	0	0	0	0	200	903	0	0	0	0	0	0	0	603	903	0
608	9	0	0	0	0	0	0	200	300	0	0	0	0	0	0	0	200	903	0	0	0	0	0	0	0	603	903	0
609	0	0	0	0	0	0	0	200	300	0	0	0	0	0	0	0	200	903	0	0	0	0	0	0	0	603	903	0
609	1	0	0	0	0	0	0	200	300	0	0	0	0	0	0	0	200	903	0	0	0	0	0	0	0	603	903	0
609	2	0	0	0	0	0	0	200	300	0	0	0	0	0	0	0	200	903	0	0	0	0	0	0	0	603	903	0
609	3	0	0	0	0	0	0	200	300	0	0	0	0	0	0	0	200	903	0	0	0	0	0	0	0	603	903	0
609	4	0	0	0	0	0	0	200	300	0	0	0	0	0	0	0	200	903	0	0	0	0	0	0	0	603	903	0
609	5	0	0	0	0	0	0	200	300	0	0	0	0	0	0	0	200	903	0	0	0	0	0	0	0	603	903	0
609	6	0	0	0	0	0	0	200	300	0	0	0	0	0	0	0	200	903	0	0	0	0	0	0	0	603	903	0
609	7	0	0	0	0	0	0	200	300	0	0	0	0	0	0	0	200	903	0	0	0	0	0	0	0	603	903	0
609	8	0	0	0	0	0	0	200	300	0	0	0	0	0	0	0	200	903	0	0	0	0	0	0	0	603	903	0
609	9	0	0	0	0	0	0	200	300	0	0	0	0	0	0	0	200	903	0	0	0	0	0	0	0	603	903	0
610	0	0	0	0	0	0	0	200	300	0	0	0	0	0	0	0	200	903	0	0	0	0	0	0	0	603	903	0
610	1	0	0	0	0	0	0	200	300	0	0	0	0	0	0	0	200	903	0	0	0	0	0	0	0	603	903	0
610	2	0	0	0	0	0	0	200	300	0	0	0	0	0	0	0	200	903	0	0	0	0	0	0	0	603	903	0
610	3	0	0	0	0	0	0	200	300	0	0	0	0	0	0	0	200	903	0	0	0	0	0	0	0	603	903	0
610	4	0	0	0	0	0	0	200	300	0	0	0	0	0	0	0	200	903	0	0	0	0	0	0	0	603	903	0
610	5	0	0	0	0	0	0	200	300	0	0	0	0	0	0	0	200	903	0	0	0	0	0	0	0	603	903	0
610	6	0	0	0	0	0	0	200	300	0	0	0	0	0	0	0	200	903	0	0	0	0	0	0	0	603	903	0
610	7	0	0	0	0	0	0	200	300	0	0	0	0	0	0	0	200	903	0	0	0	0	0	0	0	603	903	0
610	8	0	0	0	0	0	0	200	300	0	0	0	0	0	0	0	200	903	0	0	0	0	0	0	0	603	903	0
610	9	0	0	0	0	0	0	200	300	0	0	0	0	0	0	0	200	903	0	0	0	0	0	0	0	603	903	0
611	0	0	0	0	0	0	0	200	300	0	0	0	0	0	0	0	200	903	0	0	0	0	0	0	0	603	903	0
611	1	0	0	0	0	0	0	200	300	0	0	0	0	0	0	0	200	903	0	0	0	0	0	0	0	603	903	0
611	2	0	0	0	0	0	0	200	300	0	0	0	0	0	0	0	200	903	0	0	0	0	0	0	0	603	903	0
611	3	0	0	0	0	0	0	200	300	0	0	0	0	0	0	0	200	903	0	0	0	0	0	0	0	603	903	0
611	4	0	0	0	0	0	0	200	300	0	0	0	0	0	0	0	200	903	0	0	0	0	0	0	0	603	903	0
611	5	0	0	0	0	0	0	200	300	0	0	0	0	0	0	0	200	903	0	0	0	0	0	0	0	603	903	0
611	6	0	0	0	0	0	0	200	300	0	0	0	0	0	0	0	200	903	0	0	0	0	0	0	0	603	903	0
611	7	0	0	0	0	0	0	200	300	0	0	0	0	0	0	0	200	903	0	0	0	0	0	0	0	603	903	0
611	8	0	0	0	0	0	0	200	300	0	0	0	0	0	0	0	200	903	0	0	0	0	0	0	0	603	903	0
611	9	0	0	0	0	0	0	200	300	0	0	0	0	0	0	0	200	903	0	0	0	0	0	0	0	603	903	0
612	0	0	0	0	0	0	0	200	300	0	0	0	0	0	0	0	200	903	0	0	0	0	0	0	0	603	903	0
612	1	0	0	0	0	0	0	200	300	0	0	0	0	0	0	0	200	903	0	0	0	0	0	0	0	603	903	0
612	2	0	0	0	0	0	0	200	300	0	0	0	0	0	0	0	200	903	0	0	0	0	0	0	0	603	903	0
612	3	0	0	0	0	0	0	200	300	0	0	0	0	0	0	0	200	903	0	0	0	0	0	0	0	603	903	0
612	4	0	0	0	0	0	0	200	300	0	0	0	0	0	0	0	200	903	0	0	0	0	0	0	0	603	903	0
612	5	0	0	0	0	0	0	200	300	0	0	0	0	0	0	0	200	903	0	0	0	0	0	0	0	603	903	0
612	6	0	0	0	0	0	0	200	300	0	0	0	0	0	0	0	200	903	0	0	0	0	0	0	0	603	903	0
612	7	0	0	0	0	0	0	200	300	0	0	0	0	0	0	0	200	903	0	0	0	0	0	0	0	603	903	0
612	8	0	0	0	0	0	0	200	300	0	0	0	0	0	0	0	200	903	0	0	0	0	0	0	0	603	903	0
612	9	0	0	0	0	0	0	200	300	0	0	0	0	0	0	0	200	903	0	0	0	0	0	0	0	603	903	0
613	0	0	0	0	0	0	0	200	300	0	0	0	0	0	0	0	200	903	0	0	0	0	0	0	0	603	903	0
613	1	0	0	0	0	0	0	200	300	0	0	0	0	0	0	0	200	903	0	0	0	0	0	0	0	603	903	0
613	2	0	0	0	0	0	0	200	300	0	0	0	0	0	0	0	200	903	0	0	0	0	0	0	0	603	903	0
613	3	0	0	0	0	0	0	200	300	0	0	0	0	0	0	0	200	903	0	0	0	0	0	0	0	603	903	0
613	4	0	0	0	0	0	0	200	300	0	0	0	0	0	0	0	200	903	0	0	0	0	0	0	0	603	903	0
613	5	0	0	0	0	0	0	200	300	0	0	0	0	0	0	0	200	903	0	0	0	0	0	0	0	603	903	0
613	6	0	0	0	0	0	0	200	300	0	0	0	0	0	0	0	200	903	0	0	0	0	0	0	0	603	903	0
613	7	0	0	0	0	0	0	200	300	0	0	0	0	0	0	0	200	903	0	0	0	0	0	0	0	603	903	0
613	8	0	0	0	0	0	0	200	300	0	0	0	0	0	0	0	200	903	0	0	0	0	0	0	0	603	903	0
613	9	0	0	0	0	0	0	200	300	0	0	0	0	0	0	0	200	903	0	0	0	0	0	0	0	603	903	0
614	0	0	0	0	0	0	0	200	300	0	0	0	0	0	0	0	200	903	0	0	0	0	0	0	0	603	903	0
614	1	0	0	0	0	0	0	200	300	0	0	0	0	0	0	0	200	903	0	0	0	0	0	0	0	603	903	0
614	2	0	0	0	0	0	0	200	300	0	0	0	0	0	0	0	200	903	0	0	0	0	0	0	0	603	903	0
614	3	0	0	0	0	0	0	200	300	0	0	0	0	0	0	0	200	903	0	0	0	0	0	0	0	603	903	0
614	4	0	0	0	0	0	0	200	300	0	0	0	0	0	0	0	200	903	0	0	0	0	0	0	0	603	903	0
614	5	0	0	0	0	0	0	200	300	0	0	0	0	0	0	0	200	903	0	0	0	0	0	0	0	603	903	0
614	6	0	0	0	0	0	0	200	300	0	0	0	0	0	0	0	200	903	0	0	0	0	0	0	0	603	903	0
614	7	0	0	0	0	0	0	200	300	0	0	0	0	0	0	0	200	903	0	0	0	0	0	0	0	603	903	0
614	8	0	0	0	0	0	0	200	300	0	0	0	0	0	0	0	200	903	0	0	0	0	0	0	0	603	903	0
614	9	0	0	0	0	0	0	200	300	0	0	0	0	0	0	0	200	903	0	0	0	0	0	0	0	603	903	0
615	0	0	0	0	0	0	0	200	300	0	0	0	0	0	0	0	200	903	0	0	0	0	0	0	0	603	903	0
615	1	0	0	0	0	0	0	200	300	0	0	0	0	0	0	0	200	903	0	0	0	0	0	0	0	603	903	0
615	2	0	0	0	0	0	0	200	300	0	0	0	0	0	0	0	200	903	0	0	0	0	0	0	0	603	903	0
615	3	0	0	0	0	0	0	200	300	0	0	0	0	0	0	0	200	903	0	0	0	0	0	0	0	603	903	0
615	4	0	0	0	0	0	0	200	300	0	0	0	0	0	0	0	200	903	0	0	0	0	0	0	0	603	903	0
615	5	0	0	0	0	0	0	200	300	0	0	0	0	0	0	0	200	903	0	0	0	0	0	0	0	603	903	0
615	6	0	0	0	0	0	0	200	300	0	0	0	0	0	0	0	200	903	0	0	0	0	0	0	0	603	903	0
615	7	0	0	0	0	0	0	200	300	0	0	0	0	0	0	0	200	903	0	0	0	0	0	0	0	603	903	0
615	8	0	0	0	0	0	0	200	300	0	0	0	0	0	0	0	200	903	0	0	0	0	0	0	0	603	903	0
615	9	0	0	0	0	0	0	200	300	0	0	0	0	0	0	0	200	903	0	0	0	0	0	0	0	603	903	0
616	0	0	0	0	0	0	0	200	300	0	0	0	0	0	0	0	200	903	0	0	0	0	0	0	0	603	903	0
616	1	0	0	0	0	0	0	200	300	0	0	0	0	0	0	0	200	903	0	0	0	0	0	0	0	603	903	0
616	2	0	0	0	0	0	0	200	300	0	0	0	0	0	0	0	200	903	0	0	0	0	0	0	0	603	903	0
616	3	0	0	0	0	0	0	200	300	0	0	0	0	0	0	0	200	903	0	0	0	0	0	0	0	603	903	0
616	4	0	0	0	0	0	0	200	300	0	0	0	0	0	0	0	200	903	0	0	0	0	0	0	0	603	903	0
616	5	0	0	0	0	0	0	200	300	0	0	0	0	0	0	0	200	903	0	0	0	0	0	0	0	603	903	0
616	6	0	0	0	0	0	0	200	300	0	0	0	0	0	0	0	200	903	0	0	0	0	0	0	0	603	903	0
616	7	0	0	0	0	0	0	200	300	0	0	0	0	0	0	0	200	903	0	0	0	0	0	0	0	603	903	0
616	8	0	0	0	0	0	0	200	300	0	0	0	0	0	0	0	200	903	0	0	0	0	0	0	0	603	903	0
616	9	0	0	0	0	0	0	200	300	0	0	0	0	0	0	0	200	903	0	0	0	0	0	0	0	603	903	0
617	0	0	0	0	0	0	0	200	300	0	0	0	0	0	0	0	200	903	0	0	0	0	0	0	0	603	903	0
617	1	0	0	0	0	0	0	200	300	0	0	0	0	0	0	0	200	903	0	0	0	0	0	0	0	603	903	0
617	2	0	0	0	0	0	0	200	300	0	0	0	0	0	0	0	200	903	0	0	0	0	0	0	0	603	903	0
617	3	0	0	0	0	0	0	200	300	0	0	0	0	0	0	0	200	903	0	0	0	0	0	0	0	603	903	0
617	4	0	0	0	0	0	0	200	300	0	0	0	0	0	0	0	200	903	0	0	0	0	0	0	0	603	903	0
617	5	0	0	0	0	0	0	200	300	0	0	0	0	0	0	0	200	903	0	0	0	0	0	0	0	603	903	0
617	6	0	0	0	0	0	0	200	300	0	0	0	0	0	0	0	200	903	0	0	0	0	0	0	0	603	903	0
617	7	0	0	0	0	0	0	200	300	0	0	0	0	0	0	0	200	903	0	0	0	0	0	0	0	603	903	0
617	8	0	0	0	0	0	0	200	300	0	0	0	0	0	0	0	200	903	0	0	0	0	0	0	0	603	903	0
617	9	0	0	0	0	0	0	200	300	0	0	0	0	0	0	0	200	903	0	0	0	0	0	0	0	603	903	0
618	0	0	0	0	0	0	0	200	300	0	0	0	0	0	0	0	200	903	0	0	0	0	0	0	0	603	903	0
618	1	0	0	0	0	0	0	200	300	0	0	0	0	0	0	0	200	903	0	0	0	0	0	0	0	603	903	0
618	2	0	0	0	0	0	0	200	300	0	0	0	0	0	0	0	200	903	0	0	0	0	0	0	0	603	903	0
618	3	0	0	0	0	0	0	200	300	0	0	0	0	0	0	0	200	903	0	0	0	0	0	0	0	603	903	0
618	4	0	0	0	0	0	0	200	300	0	0	0	0	0	0	0	200	903	0	0	0	0	0	0	0	603	903	0
618	5	0	0	0	0	0	0	200	300	0	0	0	0	0	0	0	200	903	0	0	0	0	0	0	0	603	903	0
618	6	0	0	0	0	0	0	200	300	0	0	0	0	0	0	0	200	903	0	0	0	0	0	0	0	603	903	0
618	7	0	0	0	0	0	0	200	300	0	0	0	0	0	0	0	200	903	0	0	0	0	0	0	0	603	903	0
618	8	0	0	0	0	0	0	200	300	0	0	0	0	0	0	0	200	903	0	0	0	0	0	0	0	603	903	0
618	9	0	0	0	0	0	0	200	300	0	0	0	0	0	0	0	200	903	0	0	0	0	0	0	0	603	903	0
619	0	0	0	0	0	0	0	200	300	0	0	0	0	0	0	0	200	903	0	0	0	0	0	0	0	603	903	0
619	1	0	0	0	0	0	0	200	300	0	0	0	0	0	0	0	200	903	0	0	0	0	0	0	0	603	903	0
619	2	0	0	0	0	0	0	200	300	0	0	0	0	0	0	0	200	903	0	0	0	0	0	0	0	603	903	0
619	3	0	0	0	0	0	0	200	300	0	0	0	0	0	0	0	200	903	0	0	0	0	0	0	0	603	903	0
619	4	0	0	0	0	0	0	200	300	0	0	0	0	0	0	0	200	903	0	0	0	0	0	0	0	603	903	0
619	5	0	0	0	0	0	0	200	300	0	0	0	0	0	0	0	200	903	0	0	0	0	0	0	0	603	903	0
619	6	0	0	0	0	0	0	200	300	0	0	0	0	0	0	0	200	903	0	0	0	0	0	0	0	603	903	0
619	7	0	0	0	0	0	0	200	300	0	0	0	0	0	0	0	200	903	0	0	0	0	0	0	0	603	903	0
619	8	0	0	0	0	0	0	200	300	0	0	0	0	0	0	0	200	903	0	0	0	0	0	0	0	603	903	0
619	9	0	0	0	0	0	0	200	300	0	0	0	0	0	0	0	200	903	0	0	0	0	0	0	0	603	903	0
620	0	0	0	0	0	0	0	200	300	0	0	0	0	0	0	0	200	903	0	0	0	0	0	0	0	603	903	0
620	1	0	0	0	0	0	0	200	300	0	0	0	0	0	0	0	200	903	0	0	0	0	0	0	0	603	903	0
620	2	0	0	0	0	0	0	200	300	0	0	0	0	0	0	0	200	903	0	0	0	0	0	0	0	603	903	0
620	3	0	0	0	0	0	0	200	300	0	0	0	0	0	0	0	200	903	0	0	0	0	0	0	0	603	903	0
620	4	0	0	0	0	0	0	200	300	0	0	0	0	0	0	0	200	903	0	0	0	0	0	0	0	603	903	0
620	5	0	0	0	0	0	0	200	300	0	0	0	0	0	0	0	200	903	0	0	0	0	0	0	0	603	903	0
620	6	0	0	0	0	0	0	200	300	0	0	0	0	0	0	0	200	903	0	0	0	0	0	0	0	603	903	0
620	7	0	0	0	0	0	0	200	300	0	0	0	0	0	0	0	200	903	0	0	0	0	0	0	0	603	903	0
620	8	0	0	0	0	0	0	200	300	0	0	0	0	0	0	0	200	903	0	0	0	0	0	0	0	603	903	0
620	9	0	0	0	0	0	0	200	300	0	0	0	0	0	0	0	200	903	0	0	0	0	0	0	0	603	903	0
621	0	0	0	0	0	0	0	200	300	0	0	0	0	0	0	0	200	903	0	0	0	0	0	0	0	603	903	0
621	1	0	0	0	0	0	0	200	300	0	0	0	0	0	0	0	200	903	0	0	0	0	0	0	0	603	903	0
621	2	0	0	0	0	0	0	200	300	0	0	0	0	0	0	0	200	903	0	0	0	0	0	0	0	603	903	0
621	3	0	0	0	0	0	0	200	300	0	0	0	0	0	0	0	200	903	0	0	0	0	0	0	0	603	903	0
621	4	0	0	0	0	0	0	200	300	0	0	0	0	0	0	0	200	903	0	0	0	0	0	0	0	603	903	0
621	5	0	0	0	0	0	0	200	300	0	0	0	0	0	0	0	200	903	0	0	0	0	0	0	0	603	903	0
621	6	0	0	0	0	0	0	200	300	0	0	0	0	0	0	0	200	903	0	0	0	0	0	0	0	603	903	0
621	7	0	0	0	0	0	0	200	300	0	0	0	0	0	0	0	200	903	0	0	0	0	0	0	0	603	903	0
621	8	0	0	0	0	0	0	200	300	0	0	0	0	0	0	0	200	903	0	0	0	0	0	0	0	603	903	0
621	9	0	0	0	0	0	0	200	300	0	0	0	0	0	0	0	200	903	0	0	0	0	0	0	0	603	903	0
622	0	0	0	0	0	0	0	200	300	0	0	0	0	0	0	0	200	903	0	0	0	0	0	0	0	603	903	0
622	1	0	0	0	0	0	0	200	300	0	0	0	0	0	0	0	200	903	0	0	0	0	0	0	0	603	903	0
622	2	0	0	0	0	0	0	200	300	0	0	0	0	0	0	0	200	903	0	0	0	0	0	0	0	603	903	0
622	3	0	0	0	0	0	0	200	300	0	0	0	0	0	0	0	200	903	0	0	0	0	0	0	0	603	903	0
622	4	0	0	0	0	0	0	200	300	0	0	0	0	0	0	0	200	903	0	0	0	0	0	0	0	603	903	0
622	5	0	0	0	0	0	0	200	300	0	0	0	0	0	0	0	200	903	0	0	0	0	0	0	0	603	903	0
622	6	0	0	0	0	0	0	200	300	0	0	0	0	0	0	0	200	903	0	0	0	0	0	0	0	603	903	0
622	7	0	0	0	0	0	0	200	300	0	0	0	0	0	0	0	200	903	0	0	0	0	0	0	0	603	903	0
622	8	0	0	0	0	0	0	200	300	0	0	0	0	0	0	0	200	903	0	0	0	0	0	0	0	603	903	0
622	9	0	0	0	0	0	0	200	300	0	0	0	0	0	0	0	200	903	0	0	0	0	0	0	0	603	903	0
623	0	0	0	0	0	0	0	200	300	0	0	0	0	0	0	0	200	903	0	0	0	0	0	0	0	603	903	0
623	1	0	0	0	0	0	0	200	300	0	0	0	0	0	0	0	200	903	0	0	0	0	0	0	0	603	903	0
623	2	0	0	0	0	0	0	200	300	0	0	0	0	0	0	0	200	903	0	0	0	0	0	0	0	603	903	0
623	3	0	0	0	0	0	0	200	300	0	0	0	0	0	0	0	200	903	0	0	0	0	0	0	0	603	903	0
623	4	0	0	0	0	0	0	200	300	0	0	0	0	0	0	0	200	903	0	0	0	0	0	0	0	603	903	0
623	5	0	0	0	0	0	0	200	300	0	0	0	0	0	0	0	200	903	0	0	0	0	0	0	0	603	903	0
623	6	0	0	0	0	0	0	200	300	0	0	0	0	0	0	0	200	903	0	0	0	0	0	0	0	603	903	0
623	7	0	0	0	0	0	0	200	300	0	0	0	0	0	0	0	200	903	0	0	0	0	0	0	0	603	903	0
623	8	0	0	0	0	0	0	200	300	0	0	0	0	0	0	0	200	903	0	0	0	0	0	0	0	603	903	0
623	9	0	0	0	0	0	0	200	300	0	0	0	0	0	0	0	200	903	0	0	0	0	0	0	0	603	903	0
624	0	0	0	0	0	0	0	200	300	0	0	0	0	0	0	0	200	903	0	0	0	0	0	0	0	603	903	0
624	1	0	0	0	0	0	0	200	300	0	0	0	0	0	0	0	200	903	0	0	0	0	0	0	0	603	903	0
624	2	0	0	0	0	0	0	200	300	0	0	0	0	0	0	0	200	903	0	0	0	0	0	0	0	603	903	0
624	3	0	0	0	0	0	0	200	300	0	0	0	0	0	0	0	200	903	0	0	0	0	0	0	0	603	903	0
624	4	0	0	0	0	0	0	200	300	0	0	0	0	0	0	0	200	903	0	0	0	0	0	0	0	603	903	0
624	5	0	0	0	0	0	0	200	300	0	0	0	0	0	0	0	200	903	0	0	0	0	0	0	0	603	903	0
624	6	0	0	0	0	0	0	200	300	0	0	0	0	0	0	0	200	903	0	0	0	0	0	0	0	603	903	0
624	7	0	0	0	0	0	0	200	300	0	0	0	0	0	0	0	200	903	0	0	0	0	0	0	0	603	903	0
624	8	0	0	0	0	0	0	200	300	0	0	0	0	0	0	0	200	903	0	0	0	0	0	0	0	603	903	0
624	9	0	0	0	0	0	0	200	300	0	0	0	0	0	0	0	200	903	0	0	0	0	0	0	0	603	903	0
625	0	0	0	0	0	0	0	200	300	0	0	0	0	0	0	0	200	903	0	0	0	0	0	0	0	603	903	0
625	1	0	0	0	0	0	0	200	300	0	0	0	0	0	0	0	200	903	0	0	0	0	0	0	0	603	903	0
625	2	0	0	0	0	0	0	200	300	0	0	0	0	0	0	0	200	903	0	0	0	0	0	0	0	603	903	0
625	3	0	0	0	0	0	0	200	300	0	0	0	0	0	0	0	200	903	0	0	0	0	0	0	0	603	903	0
625	4	0	0	0	0	0	0	200	300	0	0	0	0	0	0	0	200	903	0	0	0	0	0	0	0	603	903	0
625	5	0	0	0	0	0	0	200	300	0	0	0	0	0	0	0	200	903	0	0	0	0	0	0	0	603	903	0
625	6	0	0	0	0	0	0	200	300	0	0	0	0	0	0	0	200	903	0	0	0	0	0	0	0	603	903	0
625	7	0	0	0	0	0	0	200	300	0	0	0	0	0	0	0	200	903	0	0	0	0	0	0	0	603	903	0
625	8	0	0	0	0	0	0	200	300	0	0	0	0	0	0	0	200	903	0	0	0	0	0	0	0	603	903	0
625	9	0	0	0	0	0	0	200	300	0	0	0	0	0	0	0	200	903	0	0	0	0	0	0	0	603	903	0
626	0	0	0	0	0	0	0	200	300	0	0	0	0	0	0	0	200	903	0	0	0	0	0	0	0	603	903	0
626	1	0	0	0	0	0	0	200	300	0	0	0	0	0	0	0	200	903	0	0	0	0	0	0	0	603	903	0
626	2	0	0	0	0	0	0	200	300	0	0	0	0	0	0	0	200	903	0	0	0	0	0	0	0	603	903	0
626	3	0	0	0	0	0	0	200	300	0	0	0	0	0	0	0	200	903	0	0	0	0	0	0	0	603	903	0
626	4	0	0	0	0	0	0	200	300	0	0	0	0	0	0	0	200	903	0	0	0	0	0	0	0	603	903	0
626	5	0	0	0	0	0	0	200	300	0	0	0	0	0	0	0	200	903	0	0	0	0	0	0	0	603	903	0
626	6	0	0	0	0	0	0	200	300	0	0	0	0	0	0	0	200	903	0	0	0	0	0	0	0	603	903	0
626	7	0	0	0	0	0	0	200	300	0	0	0	0	0	0	0	200	903	0	0	0	0	0	0	0	603	903	0
626	8	0	0	0	0	0	0	200	300	0	0	0	0	0	0	0	200	903	0	0	0	0	0	0	0	603	903	0
626	9	0	0	0	0	0	0	200	300	0	0	0	0	0	0	0	200	903	0	0	0	0	0	0	0	603	903	0
627	0	0	0	0	0	0	0	200	300	0	0	0	0	0	0	0	200	903	0	0	0	0	0	0	0	603	903	0
627	1	0	0	0	0	0	0	200	300	0	0	0	0	0	0	0	200	903	0	0	0	0	0	0	0	603	903	0
627	2	0	0	0	0	0	0	200	300	0	0	0	0	0	0	0	200	903	0	0	0	0	0	0	0	603	903	0
627	3	0	0	0	0	0	0	200	300	0	0	0	0	0	0	0	200	903	0	0	0	0	0	0	0	603	903	0
627	4	0	0	0	0	0	0	200	300	0	0	0	0	0	0	0	200	903	0	0	0	0	0	0	0	603	903	0
627	5	0	0	0	0	0	0	200	300	0	0	0	0	0	0	0	200	903	0	0	0	0	0	0	0	603	903	0
627	6	0	0	0	0	0	0	200	300	0	0	0	0	0	0	0	200	903	0	0	0	0	0	0	0	603	903	0
627	7	0	0	0	0	0	0	200	300	0	0	0	0	0	0	0	200	903	0	0	0	0	0	0	0	603	903	0
627	8	0	0	0	0	0	0	200	300	0	0	0	0	0	0	0	200	903	0	0	0	0	0	0	0	603	903	0
627	9	0	0	0	0	0	0	200	300	0	0	0	0	0	0	0	200	903	0	0	0	0	0	0	0	603	903	0
628	0	0	0	0	0	0	0	200	300	0	0	0	0	0	0	0	200	903	0	0	0	0	0	0	0	603	903	0
628	1	0	0	0	0	0	0	200	300	0	0	0	0	0	0	0	200	903	0	0	0	0	0	0	0	603	903	0
628	2	0	0	0	0	0	0	200	300	0	0	0	0	0	0	0	200	903	0	0	0	0	0	0	0	603	903	0
628	3	0	0	0	0	0	0	200	300	0	0	0	0	0	0	0	200	903	0	0	0	0	0	0	0	603	903	0
628	4	0	0	0	0	0	0	200	300	0	0	0	0	0	0	0	200	903	0	0	0	0	0	0	0	603	903	0
628	5	0	0	0	0	0	0	200	300	0	0	0	0	0	0	0	200	903	0	0	0	0	0	0	0	603	903	0
628	6	0	0	0	0	0	0	200	300	0	0	0	0	0	0	0	200	903	0	0	0	0	0	0	0	603	903	0
628	7	0	0	0	0	0	0	200	300	0	0	0	0	0	0	0	200	903	0	0	0	0	0	0	0	603	903	0
628	8	0	0	0	0	0	0	200	300	0	0	0	0	0	0	0	200	903	0	0	0	0	0	0	0	603	903	0
628	9	0	0	0	0	0	0	200	300	0	0	0	0	0	0	0	200	903	0	0	0	0	0	0	0	603	903	0
629	0	0	0	0	0	0	0	200	300	0	0	0	0	0	0	0	200	903	0	0	0	0	0	0	0	603	903	0
629	1	0	0	0	0	0	0	200	300	0	0	0	0	0	0	0	200	903	0	0	0	0	0	0	0	603	903	0
629	2	0	0	0	0	0	0	200	300	0	0	0	0	0	0	0	200	903	0	0	0	0	0	0	0	603	903	0
629	3	0	0	0	0	0	0	200	300	0	0	0	0	0	0	0	200	903	0	0	0	0	0	0	0	603	903	0
629	4	0	0	0	0	0	0	200	300	0	0	0	0	0	0	0	200	903	0	0	0	0	0	0	0	603	903	0
629	5	0	0	0	0	0	0	200	300	0	0	0	0	0	0	0	200	903	0	0	0	0	0	0	0	603	903	0
629	6	0	0	0	0	0	0	200	300	0	0	0	0	0	0	0	200	903	0	0	0	0	0	0	0	603	903	0
629	7	0	0	0	0	0	0	200	300	0	0	0	0	0	0	0	200	903	0	0	0	0	0	0	0	603	903	0
629	8	0	0	0	0	0	0	200	300	0	0	0	0	0	0	0	200	903	0	0	0	0	0	0	0	603	903	0
629	9	0	0	0	0	0	0	200	300	0	0	0	0	0	0	0	200	903	0	0	0	0	0	0	0	603	903	0
630	0	0	0	0	0	0	0	200	300	0	0	0	0	0	0	0	200	903	0	0	0	0	0	0	0	603	903	0
630	1	0	0	0	0	0	0	200	300	0	0	0	0	0	0	0	200	903	0	0	0	0	0	0	0	603	903	0
630	2	0	0	0	0	0	0	200	300	0	0	0	0	0	0	0	200	903	0	0	0	0	0	0	0	603	903	0
630	3	0	0	0	0	0	0	200	300	0	0	0	0	0	0	0	200	903	0	0	0	0	0	0	0	603	903	0
630	4	0	0	0	0	0	0	200	300	0	0	0	0	0	0	0	200	903	0	0	0	0	0	0	0	603	903	0
630	5	0	0	0	0	0	0	200	300	0	0	0	0	0	0	0	200	903	0	0	0	0	0	0	0	603	903	0
630	6	0	0	0	0	0	0	200	300	0	0	0	0	0	0	0	200	903	0	0	0	0	0	0	0	603	903	0
630	7	0	0	0	0	0	0	200	300	0	0	0	0	0	0	0	200	903	0	0	0	0	0	0	0	603	903	0
630	8	0	0	0	0	0	0	200	300	0	0	0	0	0	0	0	200	903	0	0	0	0	0	0	0	603	903	0
630	9	0	0	0	0	0	0	200	300	0	0	0	0	0	0	0	200	903	0	0	0	0	0	0	0	603	903	0
631	0	0	0	0	0	0	0	200	300	0	0	0	0	0	0	0	200	903	0	0	0	0	0	0	0	603	903	0
631	1	0	0	0	0	0	0	200	300	0	0	0	0	0	0	0	200	903	0	0	0	0	0	0	0	603	903	0
631	2	0	0	0	0	0	0	200	300	0	0	0	0	0	0	0	200	903	0	0	0	0	0	0	0	603	903	0
631	3	0	0	0	0	0	0	200	300	0	0	0	0	0	0	0	200	903	0	0	0	0	0	0	0	603	903	0
631	4	0	0	0	0	0	0	200	300	0	0	0	0	0	0	0	200	903	0	0	0	0	0	0	0	603	903	0
631	5	0	0	0	0	0	0	200	300	0	0	0	0	0	0	0	200	903	0	0	0	0	0	0	0	603	903	0
631	6	0	0	0	0	0	0	200	300	0	0	0	0	0	0	0	200	903	0	0	0	0	0	0	0	603	903	0
631	7	0	0	0	0	0	0	200	300	0	0	0	0	0	0	0	200	903	0	0	0	0	0	0	0	603	903	0
631	8	0	0	0	0	0	0	200	300	0	0	0	0	0	0	0	200	903	0	0	0	0	0	0	0	603	903	0
631	9	0	0	0	0	0	0	200	300	0	0	0	0	0	0	0	200	903	0	0	0	0	0	0	0	603	903	0
632	0	0	0	0	0	0	0	200	300	0	0	0	0	0	0	0	200	903	0	0	0	0	0	0	0	603	903	0
632	1	0	0	0	0	0	0	200	300	0	0	0	0	0	0	0	200	903	0	0	0	0	0	0	0	603	903	0
632	2	0	0	0	0	0	0	200	300	0	0	0	0	0	0	0	200	903	0	0	0	0	0	0	0	603	903	0
632	3	0	0	0	0	0	0	200	300	0	0	0	0	0	0	0	200	903	0	0	0	0	0	0	0	603	903	0
632	4	0	0	0	0	0	0	200	300	0	0	0	0	0	0	0	200	903	0	0	0	0	0	0	0	603	903	0
632	5	0	0	0	0	0	0	200	300	0	0	0	0	0	0	0	200	903	0	0	0	0	0	0	0	603	903	0
632	6	0	0	0	0	0	0	200	300	0	0	0	0	0	0	0	200	903	0	0	0	0	0	0	0	603	903	0
632	7	0	0	0	0	0	0	200	300	0	0	0	0	0	0	0	200	903	0	0	0	0	0	0	0	603	903	0
632	8	0	0	0	0	0	0	200	300	0	0	0	0	0	0	0	200	903	0	0	0	0	0	0	0	603	903	0
632	9	0	0	0	0	0	0	200	300	0	0	0	0	0	0	0	200	903	0	0	0	0	0	0	0	603	903	0
633	0	0	0	0	0	0	0	200	300	0	0	0	0	0	0	0	200	903	0	0	0	0	0	0	0	603	903	0
633	1	0	0	0	0	0	0	200	300	0	0	0	0	0	0	0	200	903	0	0	0	0	0	0	0	603	903	0
633	2	0	0	0	0	0	0	200	300	0	0	0	0	0	0	0	200	903	0	0	0	0	0	0	0	603	903	0
633	3	0	0	0	0	0	0	200	300	0	0	0	0	0	0	0	200	903	0	0	0	0	0	0	0	603	903	0
633	4	0	0	0	0	0	0	200	300	0	0	0	0	0	0	0	200	903	0	0	0	0	0	0	0	603	903	0
633	5	0	0	0	0	0	0	200	300	0	0	0	0	0	0	0	200	903	0	0	0	0	0	0	0	603	903	0
633	6	0	0	0	0	0	0	200	300	0	0	0	0	0	0	0	200	903	0	0	0	0	0	0	0	603	903	0
633	7	0	0	0	0	0	0	200	300	0	0	0	0	0	0	0	200	903	0	0	0	0	0	0	0	603	903	0
633	8	0	0	0	0	0	0	200	300	0	0	0	0	0	0	0	200	903	0	0	0	0	0	0	0	603	903	0
633	9	0	0	0	0	0	0	200	300	0	0	0	0	0	0	0	200	903	0	0	0	0	0	0	0	603	903	0
634	0	0	0	0	0	0	0	200	300	0	0	0	0	0	0	0	200	903	0	0	0	0	0	0	0	603	903	0
634	1	0	0	0	0	0	0	200	300	0	0	0	0	0	0	0	200	903	0	0	0	0	0	0	0	603	903	0
634	2	0	0	0	0	0	0	200	300	0	0	0	0	0	0	0	200	903	0	0	0	0	0	0	0	603	903	0
634	3	0	0	0	0	0	0	200	300	0	0	0	0	0	0	0	200	903	0	0	0	0	0	0	0	603	903	0
634	4	0	0	0	0	0	0	200	300	0	0	0	0	0	0	0	200	903	0	0	0	0	0	0	0	603	903	0
634	5	0	0	0	0	0	0	200	300	0	0	0	0	0	0	0	200	903	0	0	0	0	0	0	0	603	903	0
634	6	0	0	0	0	0	0	200	300	0	0	0	0	0	0	0	200	903	0	0	0	0	0	0	0	603	903	0
634	7	0	0	0	0	0	0	200	300	0	0	0	0	0	0	0	200	903	0	0	0	0	0	0	0	603	903	0
634	8	0	0	0	0	0	0	200	300	0	0	0	0	0	0	0	200	903	0	0	0	0	0	0	0	603	903	0
634	9	0	0	0	0	0	0	200	300	0	0	0	0	0	0	0	200	903	0	0	0	0	0	0	0	603	903	0
635	0	0	0	0	0	0	0	200	300	0	0	0	0	0	0	0	200	903	0	0	0	0	0	0	0	603	903	0
635	1	0	0	0	0	0	0	200	300	0	0	0	0	0	0	0	200	903	0	0	0	0	0	0	0	603	903	0
635	2	0	0	0	0	0	0	200	300	0	0	0	0	0	0	0	200	903	0	0	0	0	0	0	0	603	903	0
635	3	0	0	0	0	0	0	200	300	0	0	0	0	0	0	0	200	903	0	0	0	0	0	0	0	603	903	0
635	4	0	0	0	0	0	0	200	300	0	0	0	0	0	0	0	200	903	0	0	0	0	0	0	0	603	903	0
635	5	0	0	0	0	0	0	200	300	0	0	0	0	0	0	0	200	903	0	0	0	0	0	0	0	603	903	0
635	6	0	0	0	0	0	0	200	300	0	0	0	0	0	0	0	200	903	0	0	0	0	0	0	0	603	903	0
635	7	0	0	0	0	0	0	200	300	0	0	0	0	0	0	0	200	903	0	0	0	0	0	0	0	603	903	0
635	8	0	0	0	0	0	0	200	300	0	0	0	0	0	0	0	200	903	0	0	0	0	0	0	0	603	903	0
635	9	0	0	0	0	0	0	200	300	0	0	0	0	0	0	0	200	903	0	0	0	0	0	0	0	603	903	0
636	0	0	0	0	0	0	0	200	300	0	0	0	0	0	0	0	200	903	0	0	0	0	0	0	0	603	903	0
636	1	0	0	0	0	0	0	200	300	0	0	0	0	0	0	0	200	903	0	0	0	0	0	0	0	603	903	0
636	2	0	0	0	0	0	0	200	300	0	0	0	0	0	0	0	200	903	0	0	0	0	0	0	0	603	903	0
636	3	0	0	0	0	0	0	200	300	0	0	0	0	0	0	0	200	903	0	0	0	0	0	0	0	603	903	0
636	4	0	0	0	0	0	0	200	300	0	0	0	0	0	0	0	200	903	0	0	0	0	0	0	0	603	903	0
636	5	0	0	0	0	0	0	200	300	0	0	0	0	0	0	0	200	903	0	0	0	0	0	0	0	603	903	0
636	6	0	0	0	0	0	0	200	300	0	0	0	0	0	0	0	200	903	0	0	0	0	0	0	0	603	903	0
636	7	0	0	0	0	0	0	200	300	0	0	0	0	0	0	0	200	903	0	0	0	0	0	0	0	603	903	0
636	8	0	0	0	0	0	0	200	300	0	0	0	0	0	0	0	200	903	0	0	0	0	0	0	0	603	903	0
636	9	0	0	0	0	0	0	200	300	0	0	0	0	0	0	0	200	903	0	0	0	0	0	0	0	603	903	0
637	0	0	0	0	0	0	0	200	300	0	0	0	0	0	0	0	200	903	0	0	0	0	0	0	0	603	903	0
637	1	0	0	0	0	0	0	200	300	0	0	0	0	0	0	0	200	903	0	0	0	0	0	0	0	603	903	0
637	2	0	0	0	0	0	0	200	300	0	0	0	0	0	0	0	200	903	0	0	0	0	0	0	0	603	903	0
637	3	0	0	0	0	0	0	200	300	0	0	0	0	0	0	0	200	903	0	0	0	0	0	0	0	603	903	0
637	4	0	0	0	0	0	0	200	300	0	0	0	0	0	0	0	200	903	0	0	0	0	0	0	0	603	903	0
637	5	0	0	0	0	0	0	200	300	0	0	0	0	0	0	0	200	903	0	0	0	0	0	0	0	603	903	0
637	6	0	0	0	0	0	0	200	300	0	0	0	0	0	0	0	200	903	0	0	0	0	0	0	0	603	903	0
637	7	0	0	0	0	0	0	200	300	0	0	0	0	0	0	0	200	903	0	0	0	0	0	0	0	603	903	0
637	8	0	0	0	0	0	0	200	300	0	0	0	0	0	0	0	200	903	0	0	0	0	0	0	0	603	903	0
637	9	0	0	0	0	0	0	200	300	0	0	0	0	0	0	0	200	903	0	0	0	0	0	0	0	603	903	0
638	0	0	0	0	0	0	0	200	300	0	0	0	0	0	0	0	200	903	0	0	0	0	0	0	0	603	903	0
638	1	0	0	0	0	0	0	200	300	0	0	0	0	0	0	0	200	903	0	0	0	0	0	0	0	603	903	0
638	2	0	0	0	0	0	0	200	300	0	0	0	0	0	0	0	200	903	0	0	0	0	0	0	0	603	903	0
638	3	0	0	0	0	0	0	200	300	0	0	0	0	0	0	0	200	903	0	0	0	0	0	0	0	603	903	0
638	4	0	0	0	0	0	0	200	300	0	0	0	0	0	0	0	200	903	0	0	0	0	0	0	0	603	903	0
638	5	0	0	0	0	0	0	200	300	0	0	0	0	0	0	0	200	903	0	0	0	0	0	0	0	603	903	0
638	6	0	0	0	0	0	0	200	300	0	0	0	0	0	0	0	200	903	0	0	0	0	0	0	0	603	903	0
638	7	0	0	0	0	0	0	200	300	0	0	0	0	0	0	0	200	903	0	0	0	0	0	0	0	603	903	0
638	8	0	0	0	0	0	0	200	300	0	0	0	0	0	0	0	200	903	0	0	0	0	0	0	0	603	903	0
638	9	0	0	0	0	0	0	200	300	0	0	0	0	0	0	0	200	903	0	0	0	0	0	0	0	603	903	0
639	0	0	0	0	0	0	0	200	300	0	0	0	0	0	0	0	200	903	0	0	0	0	0	0	0	603	903	0
639	1	0	0	0	0	0	0	200	300	0	0	0	0	0	0	0	200	903	0	0	0	0	0	0	0	603	903	0
639	2	0	0	0	0	0	0	200	300	0	0	0	0	0	0	0	200	903	0	0	0	0	0	0	0	603	903	0
639	3	0	0	0	0	0	0	200	300	0	0	0	0	0	0	0	200	903	0	0	0	0	0	0	0	603	903	0
639	4	0	0	0	0	0	0	200	300	0	0	0	0	0	0	0	200	903	0	0	0	0	0	0	0	603	903	0
639	5	0	0	0	0	0	0	200	300	0	0	0	0	0	0	0	200	903	0	0	0	0	0	0	0	603	903	0
639	6	0	0	0	0	0	0	200	300	0	0	0	0	0	0	0	200	903	0	0	0	0	0	0	0	603	903	0
639	7	0	0	0	0	0	0	200	300	0	0	0	0	0	0	0	200	903	0	0	0	0	0	0	0	603	903	0
639	8	0	0	0	0	0	0	200	300	0	0	0	0	0	0	0	200	903	0	0	0	0	0	0	0	603	903	0
639	9	0	0	0	0	0	0	200	300	0	0	0	0	0	0	0	200	903	0	0	0	0	0	0	0	603	903	0
640	0	0	0	0	0	0	0	200	300	0	0	0	0	0	0	0	200	903	0	0	0	0	0	0	0	603	903	0
640	1	0	0	0	0	0	0	200	300	0	0	0	0	0	0	0	200	903	0	0	0	0	0	0	0	603	903	0
640	2	0	0	0	0	0	0	200	300	0	0	0	0	0	0	0	200	903	0	0	0	0	0	0	0	603	903	0
640	3	0	0	0	0	0	0	200	300	0	0	0	0	0	0	0	200	903	0	0	0	0	0	0	0	603	903	0
640	4	0	0	0	0	0	0	200	300	0	0	0	0	0	0	0	200	903	0	0	0	0	0	0	0	603	903	0
640	5	0	0	0	0	0	0	200	300	0	0	0	0	0	0	0	200	903	0	0	0	0	0	0	0	603	903	0
640	6	0	0	0	0	0	0	200	300	0	0	0	0	0	0	0	200	903	0	0	0	0	0	0	0	603	903	0
640	7	0	0	0	0	0	0	200	300	0	0	0	0	0	0	0	200	903	0	0	0	0	0	0	0	603	903	0
640	8	0	0	0	0	0	0	200	300	0	0	0	0	0	0	0	200	903	0	0	0	0	0	0	0	603	903	0
640	9	0	0	0	0	0	0	200	300	0	0	0	0	0	0	0	200	903	0	0	0	0	0	0	0	603	903	0
641	0	0	0	0	0	0	0	200	300	0	0	0	0	0	0	0	200	903	0	0	0	0	0	0	0	603	903	0
641	1	0	0	0	0	0	0	200	300	0	0	0	0	0	0	0	200	903	0	0	0	0	0	0	0	603	903	0
641	2	0	0	0	0	0	0	200	300	0	0	0	0	0	0	0	200	903	0	0	0	0	0	0	0	603	903	0
641	3	0	0	0	0	0	0	200	300	0	0	0	0	0	0	0	200	903	0	0	0	0	0	0	0	603	903	0
641	4	0	0	0	0	0	0	200	300	0	0	0	0	0	0	0	200	903	0	0	0	0	0	0	0	603	903	0
641	5	0	0	0	0	0	0	200	300	0	0	0	0	0	0	0	200	903	0	0	0	0	0	0	0	603	903	0
641	6	0	0	0	0	0	0	200	300	0	0	0	0	0	0	0	200	903	0	0	0	0	0	0	0	603	903	0
641	7	0	0	0	0	0	0	200	300	0	0	0	0	0	0	0	200	903	0	0	0	0	0	0	0	603	903	0
641	8	0	0	0	0	0	0	200	300	0	0	0	0	0	0	0	200	903	0	0	0	0	0	0	0	603	903	0
641	9	0	0	0	0	0	0	200	300	0	0	0	0	0	0	0	200	903	0	0	0	0	0	0	0	603	903	0
642	0	0	0	0	0	0	0	200	300	0	0	0	0	0	0	0	200	903	0	0	0	0	0	0	0	603	903	0
642	1	0	0	0	0	0	0	200	300	0	0	0	0	0	0	0	200	903	0	0	0	0	0	0	0	603	903	0
642	2	0	0	0	0	0	0	200	300	0	0	0	0	0	0	0	200	903	0	0	0	0	0	0	0	603	903	0
642	3	0	0	0	0	0	0	200	300	0	0	0	0	0	0	0	200	903	0	0	0	0	0	0	0	603	903	0
642	4	0	0	0	0	0	0	200	300	0	0	0	0	0	0	0	200	903	0	0	0	0	0	0	0	603	903	0
642	5	0	0	0	0	0	0	200	300	0	0	0	0	0	0	0	200	903	0	0	0	0	0	0	0	603	903	0
642	6	0	0	0	0	0	0	200	300	0	0	0	0	0	0	0	200	903	0	0	0	0	0	0	0	603	903	0
642	7	0	0	0	0	0	0	200	300	0	0	0	0	0	0	0	200	903	0	0	0	0	0	0	0	603	903	0
642	8	0	0	0	0	0	0	200	300	0	0	0	0	0	0	0	200	903	0	0	0	0	0	0	0	603	903	0
642	9	0	0	0	0	0	0	200	300	0	0	0	0	0	0	0	200	903	0	0	0	0	0	0	0	603	903	0
643	0	0	0	0	0	0	0	200	300	0	0	0	0	0	0	0	200	903	0	0	0	0	0	0	0	603	903	0
643	1	0	0	0	0	0	0	200	300	0	0	0	0	0	0	0	200	903	0	0	0	0	0	0	0	603	903	0
643	2	0	0	0	0	0	0	200	300	0	0	0	0	0	0	0	200	903	0	0	0	0	0	0	0	603	903	0
643	3	0	0	0	0	0	0	200	300	0	0	0	0	0	0	0	200	903	0	0	0	0	0	0	0	603	903	0
643	4	0	0	0	0	0	0	200	300	0	0	0	0	0	0	0	200	903	0	0	0	0	0	0	0	603	903	0
643	5	0	0	0	0	0	0	200	300	0	0	0	0	0	0	0	200	903	0	0	0	0	0	0	0	603	903	0
643	6	0	0	0	0	0	0	200	300	0	0	0	0	0	0	0	200	903	0	0	0	0	0	0	0	603	903	0
643	7	0	0	0	0	0	0	200	300	0	0	0	0	0	0	0	200	903	0	0	0	0	0	0	0	603	903	0
643	8	0	0	0	0	0	0	200	300	0	0	0	0	0	0	0	200	903	0	0	0	0	0	0	0	603	903	0
643	9	0	0	0	0	0	0	200	300	0	0	0	0	0	0	0	200	903	0	0	0	0	0	0	0	603	903	0
644	0	0	0	0	0	0	0	200	300	0	0	0	0	0	0	0	200	903	0	0	0	0	0	0	0	603	903	0
644	1	0	0	0	0	0	0	200	300	0	0	0	0	0	0	0	200	903	0	0	0	0	0	0	0	603	903	0
644	2	0	0	0	0	0	0	200	300	0	0	0	0	0	0	0	200	903	0	0	0	0	0	0	0	603	903	0
644	3	0	0	0	0	0	0	200	300	0	0	0	0	0	0	0	200	903	0	0	0	0	0	0	0	603	903	0
644	4	0	0	0	0	0	0	200	300	0	0	0	0	0	0	0	200	903	0	0	0	0	0	0	0	603	903	0
644	5	0	0	0	0	0	0	200	300	0	0	0	0	0	0	0	200	903	0	0	0	0	0	0	0	603	903	0
644	6	0	0	0	0	0	0	200	300	0	0	0	0	0	0	0	200	903	0	0	0	0	0	0	0	603	903	0
644	7	0	0	0	0	0	0	200	300	0	0	0	0	0	0	0	200	903	0	0	0	0	0	0	0	603	903	0
644	8	0	0	0	0	0	0	200	300	0	0	0	0	0	0	0	200	903	0	0	0	0	0	0	0	603	903	0
644	9	0	0	0	0	0	0	200	300	0	0	0	0	0	0	0	200	903	0	0	0	0	0	0	0	603	903	0
645	0	0	0	0	0	0	0	200	300	0	0	0	0	0	0	0	200	903	0	0	0	0	0	0	0	603	903	0
645	1	0	0	0	0	0	0	200	300	0	0	0	0	0	0	0	200	903	0	0	0	0	0	0	0	603	903	0
645	2	0	0	0	0	0	0	200	300	0	0	0	0	0	0	0	200	903	0	0	0	0	0	0	0	603	903	0
645	3	0	0	0	0	0	0	200	300	0	0	0	0	0	0	0	200	903	0	0	0	0	0	0	0	603	903	0
645	4	0	0	0	0	0	0	200	300	0	0	0	0	0	0	0	200	903	0	0	0	0	0	0	0	603	903	0
645	5	0	0	0	0	0	0	200	300	0	0	0	0	0	0	0	200	903	0	0	0	0	0	0	0	603	903	0
645	6	0	0	0	0	0	0	200	300	0	0	0	0	0	0	0	200	903	0	0	0	0	0	0	0	603	903	0
645	7	0	0	0	0	0	0	200	300	0	0	0	0	0	0	0	200	903	0	0	0	0	0	0	0	603	903	0
645	8	0	0	0	0	0	0	200	300	0	0	0	0	0	0	0	200	903	0	0	0	0	0	0	0	603	903	0
645	9	0	0	0	0	0	0	200	300	0	0	0	0	0	0	0	200	903	0	0	0	0	0	0	0	603	903	0
646	0	0	0	0	0	0	0	200	300	0	0	0	0	0	0	0	200	903	0	0	0	0	0	0	0	603	903	0
646	1	0	0	0	0	0	0	200	300	0	0	0	0	0	0	0	200	903	0	0	0	0	0	0	0	603	903	0
646	2	0	0	0	0	0	0	200	300	0	0	0	0	0	0	0	200	903	0	0	0	0	0	0	0	603	903	0
646	3	0	0	0	0	0	0	200	300	0	0	0	0	0	0	0	200	903	0	0	0	0	0	0	0	603	903	0
646	4	0	0	0	0	0	0	200	300	0	0	0	0	0	0	0	200	903	0	0	0	0	0	0	0	603	903	0
646	5	0	0	0	0	0	0	200	300	0	0	0	0	0	0	0	200	903	0	0	0	0	0	0	0	603	903	0
646	6	0	0	0	0	0	0	200	300	0	0	0	0	0	0	0	200	903	0	0	0	0	0	0	0	603	903	0
646	7	0	0	0	0	0	0	200	300	0	0	0	0	0	0	0	200	903	0	0	0	0	0	0	0	603	903	0
646	8	0	0	0	0	0	0	200	300	0	0	0	0	0	0	0	200	903	0	0	0	0	0	0	0	603	903	0
646	9	0	0	0	0	0	0	200	300	0	0	0	0	0	0	0	200	903	0	0	0	0	0	0	0	603	903	0
647	0	0	0	0	0	0	0	200	300	0	0	0	0	0	0	0	200	903	0	0	0	0	0	0	0	603	903	0
647	1	0	0	0	0	0	0	200	300	0	0	0	0	0	0	0	200	903	0	0	0	0	0	0	0	603	903	0
647	2	0	0	0	0	0	0	200	300	0	0	0	0	0	0	0	200	903	0	0	0	0	0	0	0	603	903	0
647	3	0	0	0	0	0	0	200	300	0	0	0	0	0	0	0	200	903	0	0	0	0	0	0	0	603	903	0
647	4	0	0	0	0	0	0	200	300	0	0	0	0	0	0	0	200	903	0	0	0	0	0	0	0	603	903	0
647	5	0	0	0	0	0	0	200	300	0	0	0	0	0	0	0	200	903	0	0	0	0	0	0	0	603	903	0
647	6	0	0	0	0	0	0	200	300	0	0	0	0	0	0	0	200	903	0	0	0	0	0	0	0	603	903	0
647	7	0	0	0	0	0	0	200	300	0	0	0	0	0	0	0	200	903	0	0	0	0	0	0	0	603	903	0
647	8	0	0	0	0	0	0	200	300	0	0	0	0	0	0	0	200	903	0	0	0	0	0	0	0	603	903	0
647	9	0	0	0	0	0	0	200	300	0	0	0	0	0	0	0	200	903	0	0	0	0	0	0	0	603	903	0
648	0	0	0	0	0	0	0	200	300	0	0	0	0	0	0	0	200	903	0	0	0	0	0	0	0	603	903	0
648	1	0	0	0	0	0	0	200	300	0	0	0	0	0	0	0	200	903	0	0	0	0	0	0	0	603	903	0
648	2	0	0	0	0	0	0	200	300	0	0	0	0	0	0	0	200	903	0	0	0	0	0	0	0	603	903	0
648	3	0	0	0	0	0	0	200	300	0	0	0	0	0	0	0	200	903	0	0	0	0	0	0	0	603	903	0
648	4	0	0	0	0	0	0	200	300	0	0	0	0	0	0	0	200	903	0	0	0	0	0	0	0	603	903	0
648	5	0	0	0	0	0	0	200	300	0	0	0	0	0	0	0	200	903	0	0	0	0	0	0	0	603	903	0
648	6	0	0	0	0	0	0	200	300	0	0	0	0	0	0	0	200	903	0	0	0	0	0	0	0	603	903	0
648	7	0	0	0	0	0	0	200	300	0	0	0	0	0	0	0	200	903	0	0	0	0	0	0	0	603	903	0
648	8	0	0	0	0	0	0	200	300	0	0	0	0	0	0	0	200	903	0	0	0	0	0	0	0	603	903	0
648	9	0	0	0	0	0	0	200	300	0	0	0	0	0	0	0	200	903	0	0	0	0	0	0	0	603	903	0
649	0	0	0	0	0	0	0	200	300	0	0	0	0	0	0	0	200	903	0	0	0	0	0	0	0	603	903	0
649	1	0	0	0	0	0	0	200	300	0	0	0	0	0	0	0	200	903	0	0	0	0	0	0	0	603	903	0
649	2	0	0	0	0	0	0	200	300	0	0	0	0	0	0	0	200	903	0	0	0	0	0	0	0	603	903	0
649	3	0	0	0	0	0	0	200	300	0	0	0	0	0	0	0	200	903	0	0	0	0	0	0	0	603	903	0
649	4	0	0	0	0	0	0	200	300	0	0	0	0	0	0	0	200	903	0	0	0	0	0	0	0	603	903	0
649	5	0	0	0	0	0	0	200	300	0	0	0	0	0	0	0	200	903	0	0	0	0	0	0	0	603	903	0
649	6	0	0	0	0	0	0	200	300	0	0	0	0	0	0	0	200	903	0	0	0	0	0	0	0	603	903	0
649	7	0	0	0	0	0	0	200	300	0	0	0	0	0	0	0	200	903	0	0	0	0	0	0	0	603	903	0
649	8	0	0	0	0	0	0	200	300	0	0	0	0	0	0	0	200	903	0	0	0	0	0	0	0	603	903	0
649	9	0	0	0	0	0	0	200	300	0	0	0	0	0	0	0	200	903	0	0	0	0	0	0	0	603	903	0
650	0	0	0	0	0	0	0	200	300	0	0	0	0	0	0	0	200	903	0	0	0	0	0	0	0	603	903	0
650	1	0	0	0	0	0	0	200	300	0	0	0	0	0	0	0	200	903	0	0	0	0	0	0	0	603	903	0
650	2	0	0	0	0	0	0	200	300	0	0	0	0	0	0	0	200	903	0	0	0	0	0	0	0	603	903	0
650	3	0	0	0	0	0	0	200	300	0	0	0	0	0	0	0	200	903	0	0	0	0	0	0	0	603	903	0
650	4	0	0	0	0	0	0	200	300	0	0	0	0	0	0	0	200	903	0	0	0	0	0	0	0	603	903	0
650	5	0	0	0	0	0	0	200	300	0	0	0	0	0	0	0	200	903	0	0	0	0	0	0	0	603	903	0
650	6	0	0	0	0	0	0	200	300	0	0	0	0	0	0	0	200	903	0	0	0	0	0	0	0	603	903	0
650	7	0	0	0	0	0	0	200	300	0	0	0	0	0	0	0	200	903	0	0	0	0	0	0	0	603	903	0
650	8	0	0	0	0	0	0	200	300	0	0	0	0	0	0	0	200	903	0	0	0	0	0	0	0	603	903	0
650	9	0	0	0	0	0	0	200	300	0	0	0	0	0	0	0	200	903	0	0	0	0	0	0	0	603	903	0
651	0	0	0	0	0	0	0	200	300	0	0	0	0	0	0	0	200	903	0	0	0	0	0	0	0	603	903	0
651	1	0	0	0	0	0	0	200	300	0	0	0	0	0	0	0	200	903	0	0	0	0	0	0	0	603	903	0
651	2	0	0	0	0	0	0	200	300	0	0	0	0	0	0	0	200	903	0	0	0	0	0	0	0	603	903	0
651	3	0	0	0	0	0	0	200	300	0	0	0	0	0	0	0	200	903	0	0	0	0	0	0	0	603	903	0
651	4	0	0	0	0	0	0	200	300	0	0	0	0	0	0	0	200	903	0	0	0	0	0	0	0	603	903	0
651	5	0	0	0	0	0	0	200	300	0	0	0	0	0	0	0	200	903	0	0	0	0	0	0	0	603	903	0
651	6	0	0	0	0	0	0	200	300	0	0	0	0	0	0	0	200	903	0	0	0	0	0	0	0	603	903	0
651	7	0	0	0	0	0	0	200	300	0	0	0	0	0	0	0	200	903	0	0	0	0	0	0	0	603	903	0
651	8	0	0	0	0	0	0	200	300	0	0	0	0	0	0	0	200	903	0	0	0	0	0	0	0	603	903	0
651	9	0	0	0	0	0	0	200	300	0	0	0	0	0	0	0	200	903	0	0	0	0	0	0	0	603	903	0
652	0	0	0	0	0	0	0	200	300	0	0	0	0	0	0	0	200	903	0	0	0	0	0	0	0	603	903	0
652	1	0	0	0	0	0	0	200	300	0	0	0	0	0	0	0	200	903	0	0	0	0	0	0	0	603	903	0
652	2	0	0	0	0	0	0	200	300	0	0	0	0	0	0	0	200	903	0	0	0	0	0	0	0	603	903	0
652	3	0	0	0	0	0	0	200	300	0	0	0	0	0	0	0	200	903	0	0	0	0	0	0	0	603	903	0
652	4	0	0	0	0	0	0	200	300	0	0	0	0	0	0	0	200	903	0	0	0	0	0	0	0	603	903	0
652	5	0	0	0	0	0	0	200	300	0	0	0	0	0	0	0	200	903	0	0	0	0	0	0	0	603	903	0
652	6	0	0	0	0	0	0	200	300	0	0	0	0	0	0	0	200	903	0	0	0	0	0	0	0	603	903	0
652	7	0	0	0	0	0	0	200	300	0	0	0	0	0	0	0	200	903	0	0	0	0	0	0	0	603	903	0
652	8	0	0	0	0	0	0	200	300	0	0	0	0	0	0	0	200	903	0	0	0	0	0	0	0	603	903	0
652	9	0	0	0	0	0	0	200	300	0	0	0	0	0	0	0	200	903	0	0	0	0	0	0	0	603	903	0
653	0	0	0	0	0	0	0	200	300	0	0	0	0	0	0	0	200	903	0	0	0	0	0	0	0	603	903	0
653	1	0	0	0	0	0	0	200	300	0	0	0	0	0	0	0	200	903	0	0	0	0	0	0	0	603	903	0
653	2	0	0	0	0	0	0	200	300	0	0	0	0	0	0	0	200	903	0	0	0	0	0	0	0	603	903	0
653	3	0	0	0	0	0	0	200	300	0	0	0	0	0	0	0	200	903	0	0	0	0	0	0	0	603	903	0
653	4	0	0	0	0	0	0	200	300	0	0	0	0	0	0	0	200	903	0	0	0	0	0	0	0	603	903	0
653	5	0	0	0	0	0	0	200	300	0	0	0	0	0	0	0	200	903	0	0	0	0	0	0	0	603	903	0
653	6	0	0	0	0	0	0	200	300	0	0	0	0	0	0	0	200	903	0	0	0	0	0	0	0	603	903	0
653	7	0	0	0	0	0	0	200	300	0	0	0	0	0	0	0	200	903	0	0	0	0	0	0	0	603	903	0
653	8	0	0	0	0	0	0	200	300	0	0	0	0	0	0	0	200	903	0	0	0	0	0	0	0	603	903	0
653	9	0	0	0	0	0	0	200	300	0	0	0	0	0	0	0	200	903	0	0	0	0	0	0	0	603	903	0
654	0	0	0	0	0	0	0	200	300	0	0	0	0	0	0	0	200	903	0	0	0	0	0	0	0	603	903	0
654	1	0	0	0	0	0	0	200	300	0	0	0	0	0	0	0	200	903	0	0	0	0	0	0	0	603	903	0
654	2	0	0	0	0	0	0	200	300	0	0	0	0	0	0	0	200	903	0	0	0	0	0	0	0	603	903	0
654	3	0	0	0	0	0	0	200	300	0	0	0	0	0	0	0	200	903	0	0	0	0	0	0	0	603	903	0
654	4	0	0	0	0	0	0	200	300	0	0	0	0	0	0	0	200	903	0	0	0	0	0	0	0	603	903	0
654	5	0	0	0	0	0	0	200	300	0	0	0	0	0	0	0	200	903	0	0	0	0	0	0	0	603	903	0
654	6	0	0	0	0	0	0	200	300	0	0	0	0	0	0	0	200	903	0	0	0	0	0	0	0	603	903	0
654	7	0	0	0	0	0	0	200	300	0	0	0	0	0	0	0	200	903	0	0	0	0	0	0	0	603	903	0
654	8	0	0	0	0	0	0	200	300	0	0	0	0	0	0	0	200	903	0	0	0	0	0	0	0	603	903	0
654	9	0	0	0	0	0	0	200	300	0	0	0	0	0	0	0	200	903	0	0	0	0	0	0	0	603	903	0
655	0	0	0	0	0	0	0	200	300	0	0	0	0	0	0	0	200	903	0	0	0	0	0	0	0	603	903	0
655	1	0	0	0	0	0	0	200	300	0	0	0	0	0	0	0	200	903	0	0	0	0	0	0	0	603	903	0
655	2	0	0	0	0	0	0	200	300	0	0	0	0	0	0	0	200	903	0	0	0	0	0	0	0	603	903	0
655	3	0	0	0	0	0	0	200	300	0	0	0	0	0	0	0	200	903	0	0	0	0	0	0	0	603	903	0
655	4	0	0	0	0	0	0	200	300	0	0	0	0	0	0	0	200	903	0	0	0	0	0	0	0	603	903	0
655	5	0	0	0	0	0	0	200	300	0	0	0	0	0	0	0	200	903	0	0	0	0	0	0	0	603	903	0
655	6	0	0	0	0	0	0	200	300	0	0	0	0	0	0	0	200	903	0	0	0	0	0	0	0	603	903	0
655	7	0	0	0	0	0	0	200	300	0	0	0	0	0	0	0	200	903	0	0	0	0	0	0	0	603	903	0
655	8	0	0	0	0	0	0	200	300	0	0	0	0	0	0	0	200	903	0	0	0	0	0	0	0	603	903	0
655	9	0	0	0	0	0	0	200	300	0	0	0	0	0	0	0	200	903	0	0	0	0	0	0	0	603	903	0
656	0	0	0	0	0	0	0	200	300	0	0	0	0	0	0	0	200	903	0	0	0	0	0	0	0	603	903	0
656	1	0	0	0	0	0	0	200	300	0	0	0	0	0	0	0	200	903	0	0	0	0	0	0	0	603	903	0
656	2	0	0	0	0	0	0	200	300	0	0	0	0	0	0	0	200	903	0	0	0	0	0	0	0	603	903	0
656	3	0	0	0	0	0	0	200	300	0	0	0	0	0	0	0	200	903	0	0	0	0	0	0	0	603	903	0
656	4	0	0	0	0	0	0	200	300	0	0	0	0	0	0	0	200	903	0	0	0	0	0	0	0	603	903	0
656	5	0	0	0	0	0	0	200	300	0	0	0	0	0	0	0	200	903	0	0	0	0	0	0	0	603	903	0
656	6	0	0	0	0	0	0	200	300	0	0	0	0	0	0	0	200	903	0	0	0	0	0	0	0	603	903	0
656	7	0	0	0	0	0	0	200	300	0	0	0	0	0	0	0	200	903	0	0	0	0	0	0	0	603	903	0
656	8	0	0	0	0	0	0	200	300	0	0	0	0	0	0	0	200	903	0	0	0	0	0	0	0	603	903	0
656	9	0	0	0	0	0	0	200	300	0	0	0	0	0	0	0	200	903	0	0	0	0	0	0	0	603	903	0
657	0	0	0	0	0	0	0	200	300	0	0	0	0	0	0	0	200	903	0	0	0	0	0	0	0	603	903	0
657	1	0	0	0	0	0	0	200	300	0	0	0	0	0	0	0	200	903	0	0	0	0	0	0	0	603	903	0
657	2	0	0	0	0	0	0	200	300	0	0	0	0	0	0	0	200	903	0	0	0	0	0	0	0	603	903	0
657	3	0	0	0	0	0	0	200	300	0	0	0	0	0	0	0	200	903	0	0	0	0	0	0	0	603	903	0
657	4	0	0	0	0	0	0	200	300	0	0	0	0	0	0	0	200	903	0	0	0	0	0	0	0	603	903	0
657	5	0	0	0	0	0	0	200	300	0	0	0	0	0	0	0	200	903	0	0	0	0	0	0	0	603	903	0
657	6	0	0	0	0	0	0	200	300	0	0	0	0	0	0	0	200	903	0	0	0	0	0	0	0	603	903	0
657	7	0	0	0	0	0	0	200	300	0	0	0	0	0	0	0	200	903	0	0	0	0	0	0	0	603	903	0
657	8	0	0	0	0	0	0	200	300	0	0	0	0	0	0	0	200	903	0	0	0	0	0	0	0	603	903	0
657	9	0	0	0	0	0	0	200	300	0	0	0	0	0	0	0	200	903	0	0	0	0	0	0	0	603	903	0
658	0	0	0	0	0	0	0	200	300	0	0	0	0	0	0	0	200	903	0	0	0	0	0	0	0	603	903	0
658	1	0	0	0	0	0	0	200	300	0	0	0	0	0	0	0	200	903	0	0	0	0	0	0	0	603	903	0
658	2	0	0	0	0	0	0	200	300	0	0	0	0	0	0	0	200	903	0	0	0	0	0	0	0	603	903	0
658	3	0	0	0	0	0	0	200	300	0	0	0	0	0	0	0	200	903	0	0	0	0	0	0	0	603	903	0
658	4	0	0	0	0	0	0	200	300	0	0	0	0	0	0	0	200	903	0	0	0	0	0	0	0	603	903	0
658	5	0	0	0	0	0	0	200	300	0	0	0	0	0	0	0	200	903	0	0	0	0	0	0	0	603	903	0
658	6	0	0	0	0	0	0	200	300	0	0	0	0	0	0	0	200	903	0	0	0	0	0	0	0	603	903	0
658	7	0	0	0	0	0	0	200	300	0	0	0	0	0	0	0	200	903	0	0	0	0	0	0	0	603	903	0
658	8	0	0	0	0	0	0	200	300	0	0	0	0	0	0	0	200	903	0	0	0	0	0	0	0	603	903	0
658	9	0	0	0	0	0	0	200	300	0	0	0	0	0	0	0	200	903	0	0	0	0	0	0	0	603	903	0
659	0	0	0	0	0	0	0	200	300	0	0	0	0	0	0	0	200	903	0	0	0	0	0	0	0	603	903	0
659	1	0	0	0	0	0	0	200	300	0	0	0	0	0	0	0	200	903	0	0	0	0	0	0	0	603	903	0
659	2	0	0	0	0	0	0	200	300	0	0	0	0	0	0	0	200	903	0	0	0	0	0	0	0	603	903	0
659	3	0	0	0	0	0	0	200	300	0	0	0	0	0	0	0	200	903	0	0	0	0	0	0	0	603	903	0
659	4	0	0	0	0	0	0	200	300	0	0	0	0	0	0	0	200	903	0	0	0	0	0	0	0	603	903	0
659	5	0	0	0	0	0	0	200	300	0	0	0	0	0	0	0	200	903	0	0	0	0	0	0	0	603	903	0
[truncated: 1,034 more rows]
