# Supplementary material for: The Effects of an Extemporaneous Speech Dual-task on Older Adult Gait Control
Source: Research Square preprint supplement (doi:10.21203/rs.3.rs-7674245/v1), 2025-11-18
Supplement: Supplementary file 205 [file Over9ground03.xlsx]

## Sheet: Sheet1
Trajectories
		09:LFHD			09:RFHD			09:LBHD			09:RBHD			09:C7			09:T10			09:CLAV			09:STRN			09:RBAK			09:LSHO			09:LUPA			09:LELB			09:LFRM			09:LWRA			09:LWRB			09:LFIN
Frame	Sub Frame	X	Y	Z	X	Y	Z	X	Y	Z	X	Y	Z	X	Y	Z	X	Y	Z	X	Y	Z	X	Y	Z	X	Y	Z	X	Y	Z	X	Y	Z	X	Y	Z	X	Y	Z	X	Y	Z	X	Y	Z	X	Y	Z
		mm	mm	mm	mm	mm	mm	mm	mm	mm	mm	mm	mm	mm	mm	mm	mm	mm	mm	mm	mm	mm	mm	mm	mm	mm	mm	mm	mm	mm	mm	mm	mm	mm	mm	mm	mm	mm	mm	mm	mm	mm	mm	mm	mm	mm	mm	mm	mm
407	0	125.377	-2143.88	1604.08	221.82	-2138.74	1599.99	108.949	-2295.42	1649.03	254.427	-2283.9	1636.55	164.319	-2353.1	1469.98	138.995	-2407.21	1209.71	172.054	-2203.98	1383.39	166.747	-2108.91	1178.97	201.251	-2416.27	1263.74	-11.3213	-2249.94	1440.2	-94.8121	-2193.05	1224.47	-116.005	-2166.05	1128.1	-118.143	-2031.3	1009.84	-71.981	-1972.82	953.386	-135.845	-2000.82	939.194	-122.584	-1926.47	914.244
408	0	124.925	-2128.62	1605.37	221.551	-2123.04	1601.45	109.09	-2279.6	1651.95	254.837	-2267.68	1639.6	164.817	-2339.07	1472.29	139.952	-2393.29	1211.83	172.058	-2190.04	1386.17	165.893	-2094.59	1181.63	202.582	-2402.15	1265.83	-11.5543	-2236.97	1442.2	-94.4714	-2182.05	1225.25	-115.721	-2157.41	1128.04	-118.266	-2026.62	1005.89	-71.8786	-1970.42	946.905	-135.934	-1998.38	934.245	-122.142	-1925.38	905.294
409	0	124.558	-2113.52	1606.93	221.089	-2107.72	1602.94	109.214	-2264.15	1655.11	254.597	-2251.76	1643	165.322	-2325.07	1475.09	141.067	-2379.53	1214.41	172.232	-2176.09	1389.26	165.035	-2080.45	1184.53	203.726	-2388.27	1268.14	-12.0936	-2224.14	1444.19	-94.0473	-2171.79	1226.07	-114.968	-2149.71	1127.95	-117.771	-2022.95	1001.89	-71.674	-1968.9	940.534	-136.075	-1996.74	929.556	-121.476	-1925.36	896.631
410	0	123.881	-2098.41	1608.85	220.407	-2092.33	1605.04	109.047	-2248.6	1658.52	254.663	-2235.74	1646.56	165.71	-2311.07	1478.44	142.147	-2365.99	1217.32	172.193	-2162.33	1392.69	164.387	-2066.56	1188.03	204.6	-2374.6	1271.25	-12.4773	-2211.25	1446.42	-93.5747	-2162.12	1226.74	-114.5	-2142.64	1128.2	-117.664	-2019.93	998.282	-71.2868	-1968.23	934.657	-136.038	-1996.07	925.049	-120.722	-1926.26	888.288
411	0	123.172	-2083.62	1611	219.878	-2077.07	1607.67	108.618	-2233.43	1661.88	254.371	-2220.19	1650.3	166.012	-2296.98	1481.9	143.342	-2352.28	1220.69	172.329	-2148.21	1396.48	163.498	-2052.73	1191.48	205.338	-2360.87	1274.95	-12.8857	-2198.14	1448.65	-93.4416	-2153.25	1227.53	-114.067	-2136.21	1128.2	-117.632	-2017.86	995.032	-71.0253	-1968.53	929.056	-136.227	-1996.15	920.776	-119.999	-1928.2	880.586
412	0	122.533	-2069.04	1613.03	219.307	-2062.01	1610.44	108.205	-2218.24	1665.39	253.756	-2204.93	1653.31	166.307	-2282.94	1485.51	144.529	-2338.61	1224.14	171.933	-2134.83	1399.42	162.938	-2039.35	1195.05	206.183	-2347.08	1278.62	-13.4712	-2185.17	1451.22	-93.2582	-2145.12	1228.12	-113.272	-2130.42	1128.48	-117.372	-2016.32	991.805	-70.7318	-1969.43	924.164	-136.057	-1996.91	916.825	-119.289	-1931.1	873.406
413	0	122.15	-2054.38	1615.64	218.764	-2047.22	1612.92	107.92	-2203.24	1668.68	253.808	-2189.84	1657.23	166.518	-2268.77	1489.09	145.687	-2324.77	1227.77	171.879	-2120.77	1402.77	162.503	-2025.89	1198.95	207.143	-2333.17	1282.27	-13.6046	-2171.86	1453.78	-93.1375	-2137.44	1229.06	-112.745	-2125.04	1129.15	-116.974	-2015.58	988.985	-70.3554	-1970.95	919.586	-135.673	-1998.69	913.221	-118.535	-1934.59	866.714
414	0	121.966	-2039.65	1618.4	218.494	-2032.93	1615.47	107.524	-2188.26	1672.17	253.531	-2174.73	1661.06	166.651	-2254.77	1492.61	146.585	-2310.89	1231.23	172.089	-2106.77	1406.79	162.117	-2012.57	1202.54	208.069	-2319.15	1286.03	-14.1168	-2158.44	1456.73	-93.2779	-2130.3	1230.23	-111.886	-2120.1	1129.82	-116.487	-2015.23	986.479	-70.007	-1973.04	915.238	-135.384	-2001.05	910.072	-117.951	-1938.78	861.018
415	0	121.775	-2025.03	1621.03	218.301	-2018.44	1618.48	107.062	-2173.54	1675.23	252.801	-2160.25	1664.33	166.663	-2240.68	1495.95	147.302	-2296.72	1234.51	171.795	-2092.86	1409.94	161.707	-1999.23	1206.25	208.994	-2305.01	1289.68	-14.3575	-2145.18	1459.11	-93.2655	-2123.37	1231.11	-111.304	-2115.48	1130.71	-116.152	-2015.59	984.14	-69.4325	-1975.56	911.852	-134.829	-2003.96	907	-117.378	-1943.69	855.568
416	0	121.902	-2010.59	1623.3	218.613	-2003.92	1621.28	106.708	-2158.84	1677.95	252.766	-2146.06	1667.43	166.741	-2226.65	1498.98	147.974	-2282.58	1237.33	171.688	-2078.69	1413.51	161.365	-1985.85	1209.65	209.946	-2290.8	1292.78	-14.9035	-2131.91	1461.64	-93.0295	-2116.66	1232.33	-110.296	-2111.32	1131.46	-115.574	-2016.32	981.847	-69.0316	-1978.54	908.325	-133.922	-2007.53	904.191	-116.695	-1949	850.509
417	0	121.903	-1996.21	1625.54	218.389	-1989.92	1623.34	106.35	-2144.27	1680.53	251.921	-2132.14	1670.14	166.793	-2212.6	1501.55	148.491	-2268.26	1240	171.677	-2064.79	1415.93	161.567	-1972.22	1213.23	210.967	-2276.58	1295.65	-14.9711	-2118.44	1463.7	-92.8793	-2109.84	1233.4	-109.586	-2106.83	1132.59	-114.993	-2017.33	979.754	-68.3844	-1981.8	905.375	-133.182	-2011.66	901.546	-116.217	-1954.62	846.147
418	0	121.851	-1981.81	1627.38	218.592	-1975.61	1625.58	105.99	-2129.79	1682.56	251.95	-2117.46	1672.96	166.784	-2198.39	1503.84	148.882	-2253.97	1242.2	171.562	-2050.61	1418.68	161.578	-1958.7	1215.82	211.959	-2262.21	1298.27	-15.4748	-2104.98	1465.61	-92.4245	-2102.92	1234.47	-108.305	-2102.86	1133.4	-114.311	-2018.57	977.962	-67.6604	-1985.19	902.286	-132.283	-2015.98	899.25	-115.485	-1960.59	841.927
419	0	121.927	-1967.46	1628.93	218.466	-1961.6	1627.1	105.634	-2115.28	1684.11	251.656	-2103.29	1674.83	166.935	-2184.08	1505.63	149.25	-2239.66	1244.01	171.405	-2036.53	1419.95	161.571	-1944.9	1217.74	212.96	-2247.78	1300.25	-15.4234	-2091.32	1466.82	-92.3222	-2095.72	1235.35	-107.617	-2098.69	1134.46	-113.669	-2019.84	976.061	-67.0074	-1988.73	899.43	-131.153	-2020.39	897.284	-114.777	-1966.66	837.904
420	0	121.86	-1953.15	1630.02	218.684	-1947.31	1628.54	105.287	-2101	1685.13	251.155	-2089.25	1676.25	167.108	-2169.7	1507	149.677	-2225.45	1245.34	171.361	-2022.22	1421.23	162.001	-1931.06	1219.49	214.074	-2233.31	1301.78	-15.695	-2077.55	1467.71	-91.9402	-2088.43	1235.99	-106.496	-2094.45	1135.27	-112.846	-2021.28	974.388	-66.3845	-1992.29	896.138	-129.842	-2024.85	895.15	-113.973	-1972.95	834.259
421	0	121.957	-1938.78	1630.71	218.256	-1933.28	1629.04	105.046	-2086.72	1685.56	251.024	-2075.13	1677.3	167.305	-2155.37	1507.86	150.03	-2211.37	1246.31	171.574	-2008.06	1421.77	162.245	-1917.15	1220.7	215.094	-2218.92	1303.08	-15.6068	-2063.58	1468.22	-91.449	-2081.01	1236.41	-105.774	-2090	1136.03	-111.997	-2022.77	972.78	-65.4571	-1995.9	894.222	-128.648	-2029.3	893.423	-113.036	-1979.3	830.807
422	0	121.657	-1924.45	1630.76	218.179	-1918.9	1629.79	104.713	-2072.67	1685.47	250.741	-2060.91	1677.79	167.381	-2140.96	1508.11	150.298	-2197.32	1246.7	171.869	-1993.84	1422.63	162.708	-1903.43	1221.27	216.08	-2204.63	1303.8	-15.8107	-2049.7	1467.98	-91	-2073.47	1236.77	-105.031	-2085.34	1136.32	-111.421	-2023.97	970.992	-64.7265	-1999.63	891.758	-127.834	-2033.34	891.801	-112.071	-1985.59	827.445
423	0	121.207	-1910.3	1630.49	218.199	-1904.2	1629.99	104.415	-2058.34	1684.84	250.442	-2046.61	1676.91	167.58	-2126.49	1507.85	150.704	-2183.42	1246.69	171.892	-1979.45	1422.08	163.2	-1889.81	1221.15	217.15	-2190.38	1304.04	-16.0144	-2035.55	1467.2	-90.6135	-2065.63	1236.52	-104.05	-2080.54	1136.71	-110.743	-2024.92	969.249	-64.3559	-2002.82	889.468	-127.036	-2037.25	890.715	-110.974	-1991.99	823.982
424	0	120.969	-1895.82	1629.75	217.803	-1889.77	1629.3	104.222	-2044.04	1683.78	250.07	-2032.04	1676.5	167.802	-2111.94	1507.37	151.008	-2169.7	1246.04	172.274	-1964.99	1421.49	163.87	-1876.76	1220.14	218.099	-2176.28	1303.72	-15.9957	-2021.27	1466.08	-90.2953	-2057.5	1236.27	-103.273	-2075.44	1136.86	-110.276	-2025.57	967.979	-63.7735	-2005.81	887.605	-126.316	-2040.92	889.429	-110.047	-1997.92	821.097
425	0	120.655	-1881.29	1628.4	217.493	-1875.15	1628.21	104.147	-2029.65	1682.38	249.963	-2017.35	1675.72	167.929	-2097.34	1506.35	151.354	-2155.91	1245.19	172.535	-1950.64	1420.34	164.462	-1863.74	1218.49	218.776	-2162.14	1303.01	-15.9944	-2006.56	1464.58	-90.0711	-2048.9	1235.83	-102.324	-2070	1136.83	-109.857	-2025.93	966.764	-63.5905	-2008.28	885.795	-125.854	-2043.86	888.623	-109.093	-2003.64	818.127
426	0	120.274	-1866.74	1626.51	217.02	-1860.38	1626.66	104.078	-2015.24	1680.44	249.698	-2002.45	1673.9	168	-2082.85	1504.89	151.56	-2142.04	1243.88	172.689	-1936.22	1418.46	165.235	-1850.54	1216.36	219.274	-2148.09	1301.91	-16.0984	-1992.11	1462.63	-89.7554	-2040.13	1234.93	-101.229	-2064.28	1136.42	-109.429	-2025.73	965.045	-63.5407	-2010.88	884.008	-125.554	-2046.57	887.78	-108.226	-2009.24	815.18
427	0	119.892	-1852.07	1624.23	216.667	-1845.57	1624.36	103.905	-2000.56	1678.11	249.562	-1987.51	1671.97	168.039	-2068.46	1502.84	151.628	-2128.25	1242.15	172.94	-1922.17	1415.82	165.907	-1836.95	1213.47	219.646	-2134.26	1300.2	-16.0857	-1977.33	1460.1	-89.6641	-2030.98	1233.71	-99.7427	-2058.17	1135.77	-109.22	-2025.41	963.567	-62.9523	-2012.26	882.252	-125.155	-2048.88	886.831	-107.611	-2014.35	812.491
428	0	119.604	-1837.33	1621.31	216.217	-1830.47	1621.58	103.854	-1985.62	1675.8	249.448	-1972.21	1669.65	168.028	-2054.08	1500.51	151.414	-2114.4	1240.14	173.107	-1907.83	1413.12	166.649	-1822.92	1210.25	219.784	-2120.53	1298.11	-16.1044	-1962.35	1457.49	-89.4506	-2021.29	1232.37	-98.2814	-2051.5	1135.07	-108.754	-2024.53	962.083	-62.9575	-2013.8	880.16	-125.028	-2050.58	886.207	-107.901	-2018.86	810.741
429	0	119.151	-1822.32	1618.2	215.776	-1815.33	1618.43	103.599	-1970.73	1673.2	249.343	-1956.67	1667.5	167.796	-2039.62	1498.16	150.565	-2100.18	1237.87	173.203	-1893.57	1410.2	167.482	-1808.16	1206.89	219.574	-2106.77	1295.81	-16.3786	-1947.06	1454.4	-89.0469	-2011.1	1230.9	-96.7414	-2043.81	1134.24	-108.769	-2023.07	960.787	-63.5774	-2014.53	878.37	-124.797	-2052	885.835	-107.217	-2023.78	808.239
430	0	118.744	-1807.32	1614.61	215.329	-1800.12	1614.86	103.445	-1955.25	1670.48	248.95	-1941.11	1664.4	167.638	-2025.12	1495.43	149.343	-2085.92	1235.17	173.196	-1879.26	1407.09	168.037	-1792.82	1203.21	219.118	-2092.8	1293.21	-16.5145	-1931.87	1451.39	-88.5459	-2000.4	1229.1	-95.0081	-2035.42	1133.1	-108.474	-2020.8	959.754	-64.4851	-2014.26	876.728	-124.718	-2052.76	885.835	-107.81	-2027.75	806.647
431	0	118.392	-1792.3	1610.75	214.917	-1784.89	1611.14	103.242	-1940.07	1667.41	248.779	-1925.5	1661.71	167.446	-2010.68	1492.47	147.886	-2071.47	1232.28	173.266	-1865.18	1403.83	168.959	-1777.03	1200.06	218.362	-2078.91	1290.23	-16.5494	-1916.73	1448.47	-87.8211	-1989.03	1227.18	-93.3832	-2026.28	1131.82	-108.607	-2018.08	958.767	-64.0281	-2014.24	875.25	-124.655	-2052.85	886.038	-108.672	-2031.16	805.573
432	0	117.819	-1777.09	1606.66	214.231	-1769.59	1606.93	102.878	-1924.4	1664.36	248.368	-1909.9	1658.6	167.105	-1996.15	1489.6	146.349	-2057.05	1229.42	173.163	-1850.83	1400.47	169.361	-1761.86	1196.31	217.352	-2064.61	1287.07	-16.9164	-1901.71	1445.39	-87.2248	-1977.25	1225.14	-91.7913	-2016.22	1130.63	-108.403	-2014.18	958.08	-65.0169	-2012.75	873.997	-124.911	-2051.98	886.708	-109.836	-2033.57	804.996
433	0	117.337	-1761.95	1602.54	213.687	-1754.48	1603.12	102.433	-1909.05	1660.96	248.056	-1894.25	1655.44	166.706	-1981.58	1486.51	144.834	-2042.09	1227.18	172.857	-1836.3	1397.01	169.748	-1747.07	1192.68	216.189	-2050.19	1283.85	-17.4318	-1886.79	1442.24	-86.603	-1964.9	1222.82	-90.5239	-2005.57	1129.27	-108.558	-2009.3	957.459	-66.2516	-2009.79	872.888	-125.442	-2049.86	887.779	-111.278	-2035.14	804.869
434	0	116.549	-1746.74	1598.25	213.102	-1739.37	1599.09	101.871	-1893.46	1657.63	247.243	-1878.58	1652.19	166.172	-1967.08	1483.31	143.64	-2027.84	1223.22	172.401	-1821.45	1393.58	169.761	-1732.78	1188.72	215.175	-2035.64	1280.41	-17.8562	-1871.91	1439.26	-86.1138	-1952.19	1220.39	-89.0997	-1994.21	1127.58	-108.88	-2003.4	956.83	-67.4007	-2006	871.848	-125.913	-2046.28	888.889	-112.602	-2035.2	805.044
435	0	116.119	-1731.28	1594.53	212.55	-1724.03	1595.22	101.322	-1877.78	1654.56	246.68	-1862.97	1649.17	165.453	-1952.34	1480.27	142.415	-2013.22	1220.13	172.037	-1806.62	1390.53	169.683	-1718.62	1184.8	214.131	-2020.92	1277.17	-18.3831	-1856.66	1436.61	-85.9027	-1939.09	1217.98	-88.0743	-1982.48	1126.12	-109.392	-1996.13	956.373	-68.7657	-2000.98	870.802	-126.822	-2041.13	889.687	-114.605	-2033.78	805.283
436	0	115.34	-1715.84	1590.8	211.928	-1708.58	1591.44	100.53	-1862.02	1651.53	245.934	-1847.06	1646.24	164.551	-1937.45	1477.25	141.343	-1998.53	1217.08	171.362	-1791.74	1387.15	169.413	-1704.25	1181.18	213.15	-2006.12	1274.11	-19.1856	-1841.41	1433.77	-85.8986	-1925.75	1215.71	-87.533	-1970.39	1124.58	-110.229	-1987.73	955.816	-70.371	-1994.4	869.928	-128.063	-2034.44	890.587	-116.037	-2031.09	805.176
437	0	114.383	-1700.37	1587.32	210.949	-1693.25	1588.05	99.4848	-1846.39	1648.66	244.861	-1831.53	1643.34	163.592	-1922.46	1474.44	140.629	-1983.7	1214.41	170.674	-1776.69	1384.12	168.827	-1689.32	1177.95	212.257	-1991.03	1271.33	-20.0015	-1826.31	1430.83	-86.0781	-1912.33	1213.2	-87.0688	-1957.8	1122.72	-111.415	-1978.13	954.826	-72.6116	-1986.38	868.927	-129.547	-2026.12	891.036	-117.679	-2026.6	805.056
438	0	113.212	-1685.02	1584.02	209.786	-1677.91	1584.99	98.3291	-1830.82	1645.78	243.949	-1815.94	1640.67	162.559	-1907.44	1471.8	140.232	-1968.65	1211.8	169.678	-1761.56	1381.31	167.875	-1673.97	1175.6	211.57	-1975.84	1268.68	-21.0779	-1811.14	1427.81	-86.2918	-1898.58	1210.64	-86.8797	-1944.59	1120.65	-112.746	-1967.33	953.632	-74.2852	-1977.07	867.617	-131.455	-2016.21	890.965	-119.34	-2020.27	804.913
439	0	111.922	-1669.57	1581.18	208.272	-1662.37	1582.14	96.9072	-1815.1	1643.37	242.329	-1800.06	1638.58	161.376	-1892.18	1469.56	139.995	-1953.4	1209.22	168.733	-1746.28	1379.07	166.836	-1658.54	1173.66	211.035	-1960.54	1266.33	-22.1459	-1796.2	1425.23	-86.7814	-1884.58	1208.23	-87.3693	-1930.98	1118.69	-114.543	-1955.4	952.302	-76.4508	-1966.56	866.213	-133.693	-2004.78	890.538	-121.099	-2012.29	804.324
440	0	110.327	-1654.19	1578.56	206.628	-1646.91	1579.82	95.2349	-1799.58	1641.04	240.745	-1784.57	1636.3	160.142	-1877.12	1467.49	139.919	-1938.03	1206.86	167.444	-1730.93	1376.93	165.404	-1643.01	1172.02	210.6	-1945.18	1264.34	-23.6001	-1781.17	1422.82	-87.5508	-1870.21	1205.93	-88.218	-1916.75	1116.69	-116.496	-1942.28	950.841	-79.0025	-1954.2	864.752	-136.541	-1991.85	890.052	-122.81	-2002.3	803.679
441	0	108.476	-1638.78	1576.25	205.288	-1631.2	1578.21	93.5869	-1784.04	1639.28	238.835	-1769.15	1634.69	158.804	-1861.87	1465.66	139.966	-1921.89	1204.89	166.07	-1715.51	1375.32	163.498	-1627.51	1170.55	210.225	-1929.38	1262.46	-24.9639	-1766.39	1420.81	-88.3594	-1855.37	1203.76	-89.398	-1901.78	1114.74	-118.792	-1928.09	949.225	-81.4644	-1940.56	863.15	-139.659	-1977.54	889.102	-125.123	-1990.38	802.883
442	0	106.413	-1623.58	1574.39	203.114	-1616.08	1576.25	91.642	-1768.53	1637.88	237.013	-1753.12	1634.07	157.379	-1846.82	1463.85	140.021	-1905.91	1202.81	164.654	-1699.98	1374.24	161.415	-1611.98	1169.44	209.88	-1913.67	1260.68	-26.4408	-1751.51	1419.16	-89.5875	-1840.02	1201.72	-90.8671	-1886.43	1113.02	-121.196	-1912.72	947.593	-83.9501	-1925.89	861.382	-142.187	-1962.26	887.765	-127.269	-1976.59	801.689
443	0	104.25	-1608.19	1573.27	201.094	-1600.7	1575.36	89.3255	-1753.13	1637.04	234.815	-1737.49	1633.73	155.683	-1831.81	1462.68	139.725	-1889.46	1201.21	163.102	-1684.44	1373.95	159.335	-1596.14	1169.16	209.286	-1897.59	1259.29	-28.1326	-1736.69	1417.81	-91.055	-1824.24	1200.21	-92.7874	-1870.52	1111.49	-123.834	-1896.38	946.322	-86.8482	-1909.5	859.692	-144.964	-1945.72	886.221	-129.753	-1960.76	800.263
444	0	102.078	-1592.94	1572.68	198.706	-1585.33	1575.26	86.9464	-1737.57	1636.71	232.285	-1722.14	1633.68	153.911	-1816.51	1461.86	139.197	-1873.32	1199.96	161.598	-1668.9	1374.1	157.254	-1579.77	1169.22	208.41	-1881.55	1258.38	-29.8782	-1721.67	1416.83	-92.7988	-1808.07	1198.81	-95.0313	-1853.98	1109.95	-126.628	-1879.06	944.548	-89.7999	-1891.57	858.194	-148.175	-1927.96	884.563	-132.78	-1943.09	798.656
445	0	99.8402	-1577.42	1572.63	196.303	-1570.1	1575.46	84.3858	-1722.02	1636.64	229.403	-1707.09	1633.85	152.255	-1801.23	1461.7	138.575	-1856.89	1199.22	159.669	-1653.19	1374.15	155.447	-1562.91	1169.77	207.326	-1865.15	1257.82	-31.4824	-1706.58	1416.07	-94.6448	-1791.55	1197.62	-97.3334	-1836.82	1108.61	-129.194	-1860.63	943.078	-92.8437	-1872.33	856.459	-151.059	-1908.97	882.765	-135.749	-1923.43	796.689
446	0	97.5426	-1562.03	1573.45	194.064	-1554.67	1576.42	81.8501	-1706.89	1636.81	227.237	-1691.42	1635.03	150.6	-1785.48	1461.86	137.669	-1840.33	1199.12	158.233	-1637.44	1375.26	154.015	-1545.79	1170.74	206.039	-1848.91	1257.71	-33.0503	-1691.02	1416.01	-96.5016	-1774.55	1197.08	-99.689	-1819	1107.59	-131.958	-1841.27	941.907	-95.4305	-1852.11	855.005	-153.837	-1889	880.825	-138.872	-1901.99	794.767
447	0	94.9077	-1546.67	1574.45	191.611	-1539.23	1578.02	79.1706	-1691.55	1637.43	224.378	-1676.15	1636.07	148.921	-1769.82	1462.53	136.567	-1824.16	1199.49	156.619	-1621.58	1376.15	152.634	-1528.51	1171.83	204.661	-1832.66	1258.34	-34.4433	-1675.58	1416	-98.4743	-1757	1196.83	-102.126	-1800.88	1106.77	-134.656	-1820.82	940.995	-98.6552	-1830.3	853.628	-156.47	-1867.93	879.076	-142.172	-1878.78	792.68
448	0	92.45	-1531.27	1576.02	188.88	-1523.7	1579.96	76.3884	-1676.4	1638.21	221.694	-1660.9	1637.81	147.458	-1753.99	1463.57	135.428	-1808.01	1200.5	155.267	-1605.79	1377.34	151.742	-1511.6	1173.05	203.437	-1816.64	1259.4	-35.6283	-1660.08	1416.51	-100.338	-1739.21	1196.6	-104.571	-1782.13	1106.06	-137.185	-1799.74	939.825	-101.995	-1807	852.325	-159.22	-1845.52	877.314	-145.706	-1853.92	790.635
449	0	89.8825	-1515.86	1577.55	186.388	-1508.22	1582.13	73.9355	-1661.33	1638.91	219.115	-1645.46	1639.7	146.143	-1738.27	1464.96	134.162	-1792.27	1201.81	154.045	-1590.03	1378.78	150.914	-1495.41	1174.26	202.38	-1800.88	1260.85	-36.7568	-1644.54	1417.05	-101.953	-1721.1	1196.47	-106.963	-1762.95	1105.38	-139.798	-1777.51	938.873	-104.518	-1783.4	850.99	-161.75	-1822.23	875.334	-149.266	-1827.47	788.725
450	0	87.3993	-1500.69	1579.08	184.054	-1492.69	1584.32	71.5602	-1646.07	1640.15	216.593	-1630.15	1641.58	145.032	-1722.67	1466.51	132.927	-1776.85	1203.47	152.884	-1574.44	1380.31	150.261	-1479.82	1175.17	201.457	-1785.24	1262.67	-37.5711	-1629.21	1418.08	-103.547	-1702.71	1196.49	-109.379	-1743.48	1105.01	-142.036	-1754.7	937.756	-106.89	-1758.72	849.841	-164.281	-1797.98	873.332	-152.727	-1799.92	786.837
451	0	85.092	-1485.56	1580.48	181.48	-1477.41	1586.29	69.1664	-1631.27	1640.81	213.393	-1615.7	1642.79	144.142	-1707.08	1468.2	132.053	-1761.86	1205.31	151.951	-1558.97	1381.88	149.695	-1464.85	1176.12	200.846	-1769.77	1264.8	-38.3046	-1614.01	1419.12	-105.176	-1684.08	1196.51	-111.794	-1723.6	1104.57	-144.349	-1730.97	937.053	-109.49	-1732.84	848.984	-166.731	-1772.62	871.538	-156.325	-1770.73	785.316
452	0	83.189	-1470.57	1581.6	179.321	-1462.01	1588.02	67.1734	-1616.13	1641.9	211.236	-1600.33	1644.81	143.428	-1691.73	1470.1	131.454	-1747.04	1207.05	151.02	-1543.72	1383.19	149.162	-1450.19	1177.17	200.521	-1754.74	1266.88	-38.8923	-1599.07	1420.47	-106.587	-1665.3	1196.86	-114.118	-1703.51	1104.1	-146.3	-1706.58	936.168	-112.207	-1705.75	848.055	-168.906	-1746.5	869.728	-159.526	-1740.56	784.094
453	0	81.2723	-1455.46	1583.03	177.569	-1446.63	1589.67	65.4951	-1601.08	1643.14	209.69	-1584.7	1647.14	142.84	-1677.23	1471.74	130.934	-1732.45	1208.76	150.344	-1528.86	1384.82	148.72	-1435.63	1178.55	200.296	-1740.07	1268.9	-39.5925	-1584.3	1422.13	-107.912	-1646.18	1197.47	-116.375	-1683.16	1104.02	-148.118	-1681.62	935.667	-113.85	-1678.76	847.363	-170.651	-1719.7	867.923	-162.824	-1709.35	783.17
454	0	79.7026	-1440.45	1584.34	175.922	-1431.56	1591.29	63.9015	-1585.54	1645.15	208.514	-1568.79	1649.73	141.955	-1662.27	1473.98	130.305	-1717.95	1210.82	149.696	-1514.2	1386.8	148.397	-1421.03	1180.23	199.745	-1725.61	1271.11	-40.3104	-1569.5	1423.99	-109.172	-1627.16	1198.07	-118.553	-1662.45	1103.91	-149.756	-1656.01	935.547	-115.35	-1650.81	847.287	-172.767	-1691.87	866.374	-165.303	-1677.4	782.886
455	0	78.5573	-1425.29	1585.72	174.698	-1416.39	1592.79	62.5378	-1570.24	1647.25	206.73	-1553.72	1651.74	141.08	-1647.63	1476.09	129.625	-1703.49	1212.96	149.094	-1499.73	1389.01	148.154	-1406.43	1182.09	198.922	-1711.3	1273.29	-40.7912	-1554.97	1425.8	-110.283	-1607.89	1198.95	-120.389	-1641.56	1103.87	-151.288	-1630.01	935.509	-116.996	-1622.09	847.699	-174.268	-1663.43	865.407	-167.832	-1644.44	783.405
456	0	77.6544	-1410.16	1587.14	173.951	-1401.2	1594.36	61.55	-1554.65	1649.47	205.675	-1538.47	1653.94	140.364	-1633.11	1478.3	129.083	-1688.93	1215.13	148.532	-1485.41	1391.25	148	-1392.03	1184.19	198.025	-1697.03	1275.48	-41.3544	-1540.43	1427.78	-111.289	-1588.58	1200.24	-122.259	-1620.57	1104.39	-152.433	-1603.51	935.886	-117.452	-1593.68	848.422	-175.458	-1634.43	864.708	-169.754	-1610.94	784.606
457	0	77.2352	-1394.99	1588.7	173.236	-1386.12	1595.94	60.8622	-1539.13	1651.98	204.948	-1522.92	1656.42	139.694	-1618.56	1480.93	128.337	-1674.46	1217.49	148.135	-1471.1	1393.83	147.898	-1378.07	1186.39	196.926	-1682.9	1277.85	-41.8542	-1525.86	1430.14	-112.111	-1569.49	1201.81	-124.653	-1599.49	1105.27	-153.481	-1576.66	936.877	-117.862	-1564.33	849.841	-176.049	-1605.14	864.52	-171.309	-1576.83	786.595
458	0	76.6877	-1379.73	1590.65	173.066	-1370.84	1597.89	60.3414	-1523.46	1654.71	204.691	-1507.4	1659.31	139.052	-1604.07	1483.77	127.522	-1660.04	1220.43	147.682	-1456.94	1396.37	148.07	-1364.28	1188.67	195.764	-1668.83	1280.55	-42.2461	-1511.12	1432.72	-113.111	-1550.35	1203.82	-126.521	-1578.29	1106.53	-154.405	-1549.5	938.572	-119.104	-1533.45	852.08	-177.02	-1575.14	864.805	-172.605	-1542.37	789.264
459	0	76.5445	-1364.5	1592.67	172.433	-1356.01	1599.29	60.0376	-1507.88	1657.53	204.353	-1491.89	1661.89	138.584	-1589.62	1486.8	126.635	-1645.82	1223.53	147.429	-1442.75	1399.06	148.301	-1350.54	1191.22	194.605	-1654.77	1283.5	-42.5483	-1496.58	1435.41	-113.997	-1531.45	1205.99	-128.31	-1557.15	1108.14	-155.189	-1522.16	940.727	-119.006	-1503.84	854.924	-177.565	-1544.78	865.88	-173.373	-1507.83	793.054
460	0	76.5949	-1349.19	1594.75	172.863	-1340.42	1601.74	59.9856	-1492.1	1660.57	204.525	-1476.31	1664.73	138.074	-1575.01	1489.88	125.635	-1631.83	1226.58	147.084	-1428.61	1401.78	148.517	-1336.69	1193.87	193.379	-1640.78	1286.56	-42.8663	-1481.72	1438.3	-114.887	-1512.69	1208.83	-129.689	-1536.04	1109.95	-155.782	-1494.51	943.564	-119.5	-1472.4	858.858	-177.823	-1514.34	867.777	-173.899	-1473.14	797.676
461	0	76.6133	-1333.96	1597.15	172.932	-1325.42	1603.63	59.9617	-1476.54	1663.73	204.475	-1460.89	1667.37	137.5	-1560.35	1493.08	124.503	-1617.77	1229.79	147.096	-1414.34	1404.78	148.956	-1322.47	1197.11	192	-1626.81	1289.82	-43.1206	-1466.82	1441.23	-115.73	-1494.25	1211.84	-131.225	-1514.96	1112.44	-156.486	-1466.96	947.063	-119.358	-1443.16	862.829	-178.012	-1483.38	870.519	-174.334	-1438.22	803.426
462	0	76.5321	-1318.66	1599.4	172.831	-1310.37	1605.28	60.0474	-1460.7	1666.75	204.432	-1445.54	1669.74	136.911	-1545.69	1496.08	123.379	-1603.58	1233.05	146.656	-1400.09	1407.34	149.308	-1308.18	1200.13	190.633	-1612.74	1292.98	-43.5028	-1451.99	1444.59	-116.736	-1475.82	1214.7	-132.676	-1493.81	1115.06	-156.912	-1439.49	951.116	-119.283	-1411.93	868.157	-178.06	-1452.4	873.946	-173.909	-1404.1	809.111
463	0	77.0382	-1303.19	1601.64	173.455	-1294.92	1607.29	60.4135	-1445.09	1669.74	204.48	-1430.12	1671.91	136.488	-1530.91	1498.97	122.491	-1589.34	1236.17	146.691	-1385.7	1410.07	149.745	-1294.02	1203.17	189.385	-1598.56	1295.9	-43.4478	-1436.94	1447.56	-117.554	-1457.59	1218.02	-133.993	-1472.77	1117.73	-157.141	-1411.75	955.543	-118.924	-1380.67	874.169	-177.845	-1421.32	877.786	-173.501	-1369.61	815.65
464	0	77.3266	-1287.83	1603.51	173.93	-1279.76	1608.93	60.5646	-1429.29	1672.48	204.982	-1414.61	1674.06	136.051	-1516.12	1501.63	121.607	-1575.1	1238.78	146.271	-1371.32	1412.05	149.808	-1280.15	1205.54	188.198	-1584.31	1298.54	-43.591	-1421.92	1450.55	-118.4	-1439.32	1221.05	-134.695	-1451.75	1120.24	-157.327	-1383.9	960.467	-118.71	-1349.49	880.715	-177.582	-1390.33	882.229	-172.886	-1335.62	822.698
465	0	77.611	-1272.49	1605.35	174.216	-1264.64	1610.35	60.746	-1413.76	1674.92	205.6	-1399.04	1676.11	135.57	-1501.39	1504.09	120.684	-1560.76	1241.39	146.014	-1356.78	1414.22	149.818	-1265.69	1207.71	187.016	-1570.01	1301.02	-43.841	-1406.84	1453.44	-119.225	-1421.2	1223.98	-135.977	-1430.76	1123.29	-157.591	-1356.22	965.51	-118.464	-1318.14	887.77	-177.108	-1359.44	887.14	-172.349	-1301.77	830.289
466	0	77.8281	-1257.22	1606.93	174.367	-1249.53	1611.33	60.9672	-1398.2	1676.9	205.526	-1383.97	1677.31	135.048	-1486.54	1505.98	119.933	-1546.43	1243.54	145.751	-1342.23	1415.98	150.111	-1252.2	1209.91	186.002	-1555.63	1303.17	-43.7509	-1391.97	1455.74	-120.156	-1403.12	1226.64	-136.961	-1409.94	1125.69	-157.649	-1328.68	970.594	-117.953	-1286.98	895.084	-176.745	-1328.4	892.093	-171.395	-1268.23	837.854
467	0	77.9383	-1241.93	1607.83	174.607	-1234.4	1612.15	61.1838	-1382.58	1678.28	205.537	-1368.81	1678.09	134.714	-1471.54	1507.4	119.248	-1531.96	1245.18	145.476	-1327.72	1417.14	150.318	-1239	1211.56	185.065	-1541.25	1304.76	-43.7618	-1377.05	1457.7	-120.738	-1384.99	1228.94	-137.899	-1389.22	1127.82	-157.342	-1301.23	975.567	-117.509	-1256.08	902.562	-176.035	-1297.59	897.125	-170.368	-1235.07	845.522
468	0	78.0803	-1226.53	1608.78	174.965	-1219.15	1612.87	61.1673	-1367.22	1679.41	205.656	-1353.73	1678.97	134.344	-1456.35	1508.61	118.543	-1517.53	1246.47	145.143	-1312.97	1417.85	150.558	-1225.55	1212.82	184.189	-1526.79	1305.96	-43.8142	-1362.12	1459.27	-121.443	-1366.91	1230.91	-138.897	-1368.5	1129.78	-157.531	-1273.55	980.82	-116.835	-1225.41	910.262	-175.207	-1266.7	902.42	-169.118	-1202.21	853.411
469	0	78.1244	-1211.19	1609.17	174.975	-1204.03	1613.01	61.0834	-1351.7	1679.97	205.72	-1338.15	1679.01	134.005	-1441.2	1509.33	117.781	-1503.14	1247.54	144.877	-1298.1	1418.27	151.059	-1212.11	1213.68	183.281	-1512.14	1307.02	-43.9265	-1346.93	1460.49	-122.19	-1348.89	1232.55	-139.751	-1347.76	1131.29	-157.315	-1246.4	985.924	-116.207	-1195.04	917.875	-174.343	-1236.35	907.83	-167.699	-1169.62	861.419
470	0	78.1123	-1195.85	1609.19	175.01	-1188.83	1612.78	61.0661	-1336.23	1680.15	205.66	-1323.12	1678.94	133.836	-1426.07	1509.47	117.189	-1488.72	1247.78	144.758	-1283.18	1418.22	150.816	-1198.5	1213.83	182.629	-1497.57	1307.25	-43.9914	-1332.01	1460.95	-122.902	-1330.76	1233.55	-140.501	-1327	1132.26	-156.968	-1219.44	990.819	-115.494	-1164.91	926.005	-173.388	-1206.07	913.279	-166.141	-1137.64	869.292
471	0	78.0224	-1180.52	1608.73	174.954	-1173.54	1612.29	61.0007	-1320.81	1679.7	205.438	-1308.06	1678.55	133.645	-1410.7	1509.19	116.561	-1474.37	1247.84	144.602	-1268.16	1417.62	150.829	-1184.68	1213.62	181.965	-1482.82	1307.09	-44.123	-1316.98	1460.91	-123.627	-1312.66	1234.2	-141.347	-1306.2	1132.78	-156.916	-1192.72	995.551	-114.632	-1135.47	933.514	-172.327	-1176.29	918.396	-164.636	-1106.04	877.293
472	0	77.8615	-1165.14	1607.76	174.966	-1158.17	1611.62	60.6121	-1305.58	1678.66	205.381	-1292.67	1677.69	133.517	-1395.28	1508.51	116.004	-1460.05	1247.49	144.442	-1253.24	1416.4	150.935	-1170.72	1212.84	181.382	-1468.1	1306.73	-44.0072	-1301.83	1460.53	-124.231	-1294.65	1234.25	-142.2	-1285.23	1133.31	-156.385	-1166.37	999.935	-113.623	-1106.67	940.726	-171.285	-1146.79	923.613	-163.132	-1075.01	885.145
473	0	77.6499	-1149.73	1606.41	174.567	-1142.83	1610.26	60.1043	-1290.15	1677.26	204.857	-1277.49	1676.09	133.497	-1379.98	1507.4	115.71	-1445.65	1246.75	144.152	-1238.16	1414.77	150.711	-1156.87	1211.23	181.006	-1453.33	1305.8	-43.7924	-1286.55	1459.46	-124.915	-1276.38	1234.15	-143.044	-1264.04	1133.25	-156.052	-1140.34	1004.02	-112.721	-1078.67	947.316	-169.736	-1117.95	928.003	-161.431	-1044.49	892.777
474	0	77.2652	-1134.3	1604.73	174.262	-1127.35	1608.62	59.8003	-1274.73	1675.44	204.48	-1262.26	1674.47	133.551	-1364.69	1506.03	115.763	-1431.3	1245.43	144.192	-1222.93	1412.82	150.545	-1143.05	1209.35	180.923	-1438.5	1304.55	-43.7814	-1271.48	1458.02	-125.358	-1258.08	1233.34	-143.933	-1242.81	1133.06	-155.663	-1114.66	1007.77	-111.696	-1051	953.918	-168.886	-1089.57	932.627	-159.826	-1014.77	900.321
475	0	76.9398	-1118.79	1602.74	174.1	-1111.91	1606.62	59.555	-1259.4	1673.27	204.09	-1246.71	1672.59	133.975	-1349.32	1504.3	116.214	-1416.89	1243.92	143.978	-1207.86	1410.36	150.202	-1129.09	1206.78	181.002	-1423.75	1302.88	-43.4575	-1256.51	1456.49	-125.797	-1239.64	1232.5	-144.628	-1221.51	1132.43	-155.025	-1089.35	1011.19	-110.514	-1024.08	959.984	-167.705	-1061.6	936.929	-158.34	-985.647	907.798
476	0	76.6275	-1103.43	1600.3	173.808	-1096.38	1604.44	59.0951	-1243.85	1670.94	203.833	-1231.06	1670.53	134.291	-1334.01	1502.48	116.993	-1402.35	1242.26	143.911	-1192.77	1407.93	149.946	-1114.85	1203.97	181.31	-1408.88	1301.17	-43.1089	-1241.53	1454.47	-126.15	-1220.85	1231.64	-144.859	-1199.8	1131.98	-154.358	-1064.38	1014.39	-109.437	-997.898	965.67	-166.815	-1034.39	941.147	-156.846	-957.295	914.926
477	0	76.285	-1088.14	1597.52	173.119	-1080.93	1601.7	58.724	-1228.39	1668.27	203.964	-1215.42	1668.37	134.666	-1318.77	1500	118.086	-1387.68	1240.16	144.047	-1177.67	1405.07	149.524	-1100.24	1200.4	181.812	-1394.05	1299.08	-42.778	-1226.64	1451.98	-126.462	-1201.81	1230.37	-145.34	-1178.36	1131.09	-153.674	-1039.76	1017.13	-108.437	-972.357	970.371	-165.973	-1007.7	944.718	-155.639	-929.685	921.516
478	0	75.9964	-1072.76	1594.52	173.271	-1065.32	1598.99	58.6168	-1212.96	1665.33	203.41	-1199.97	1665.53	135.243	-1303.49	1497.59	119.317	-1372.85	1237.8	143.999	-1162.69	1402.33	149.149	-1085.1	1197.18	182.638	-1379.2	1296.9	-42.6817	-1211.94	1449.31	-126.61	-1182.58	1229.25	-145.884	-1157.16	1130.52	-153.215	-1015.61	1019.83	-107.494	-947.337	975.102	-165.131	-981.595	948.397	-154.424	-902.974	927.954
479	0	75.608	-1057.71	1591.38	172.96	-1049.77	1596.1	58.5143	-1197.62	1662.39	203.304	-1184.03	1662.69	135.813	-1288.25	1495.02	120.644	-1357.88	1235.12	144.26	-1147.64	1399.55	148.874	-1069.21	1193.87	183.583	-1364.37	1294.55	-42.0135	-1197.08	1446.69	-126.479	-1163.36	1227.98	-146.111	-1136.24	1129.88	-152.502	-992.043	1022.41	-106.406	-923.014	979.502	-164.62	-956.12	952.098	-153.335	-876.906	934.075
480	0	75.6329	-1042.31	1587.85	172.595	-1034.47	1592.84	58.5776	-1182.37	1659.43	203.304	-1168.39	1660.01	136.503	-1273.06	1492.47	122.029	-1342.55	1232.65	144.447	-1132.55	1396.56	148.508	-1053.2	1190.63	184.684	-1349.46	1292.17	-41.5321	-1182.23	1443.9	-126.066	-1144.18	1226.7	-145.627	-1115.4	1128.79	-151.762	-968.975	1024.74	-105.455	-899.429	983.435	-163.977	-931.411	955.388	-152.433	-851.888	939.766
481	0	75.7379	-1027.19	1584.56	172.599	-1018.98	1589.36	58.8773	-1167.1	1656.41	203.816	-1152.77	1657.14	137.318	-1258.05	1489.88	123.526	-1327.23	1229.88	144.795	-1117.49	1393.57	148.242	-1037.03	1187.3	186.093	-1334.44	1289.58	-40.8039	-1167.27	1441.08	-125.345	-1125.15	1225.17	-145.297	-1095.1	1127.87	-150.877	-946.413	1026.82	-104.561	-876.605	986.617	-163.349	-907.317	958.601	-151.605	-827.694	944.781
482	0	76.1655	-1012.16	1581.23	173.07	-1003.72	1586.17	59.4829	-1151.79	1653.38	204.363	-1137.28	1654.51	138.146	-1242.87	1486.91	125.043	-1311.87	1226.88	145.314	-1102.32	1390.61	148.195	-1021.19	1183.84	187.446	-1319.36	1286.79	-40.0278	-1152.33	1438.18	-124.471	-1106.34	1223.99	-145.094	-1075.16	1127.36	-150.228	-924.85	1028.72	-103.678	-854.584	989.663	-162.795	-884.285	961.533	-151.039	-804.523	949.615
483	0	76.4979	-997.11	1578.27	173.698	-988.504	1583.36	60.12	-1136.65	1650.68	204.886	-1122.04	1651.59	138.938	-1227.67	1484.13	126.41	-1296.46	1223.84	145.931	-1087.09	1387.77	148.163	-1005.71	1180.58	188.694	-1304.4	1284.14	-39.1146	-1137.29	1435.92	-123.172	-1087.91	1222.3	-144.714	-1056.03	1126.36	-149.393	-903.856	1030.57	-102.969	-833.169	992.528	-162.583	-862.353	964.147	-150.506	-782.368	953.871
484	0	77.4231	-982	1575.28	174.442	-973.403	1580.43	60.967	-1121.55	1647.8	205.727	-1106.91	1648.63	139.705	-1212.48	1481.26	127.793	-1281.04	1221.02	146.591	-1071.78	1384.91	148.191	-990.283	1177.52	189.629	-1289.44	1281.37	-38.3538	-1122.07	1433.44	-122.106	-1069.74	1220.95	-144.021	-1037.49	1125.36	-148.934	-883.861	1031.85	-102.578	-812.809	994.615	-162.163	-841.173	966.083	-150.328	-761.305	957.437
485	0	78.6201	-966.956	1572.92	175.595	-958.208	1577.97	62.1754	-1106.34	1645.43	206.789	-1091.9	1645.74	140.72	-1197.23	1478.51	128.943	-1265.54	1217.96	147.465	-1056.39	1382.32	148.3	-974.828	1174.77	190.721	-1274.02	1278.54	-37.3362	-1106.5	1431.14	-120.933	-1052.26	1219.47	-143.519	-1019.42	1124.42	-148.353	-864.717	1032.77	-102.261	-793.227	996.258	-161.948	-821.287	967.738	-150.272	-741.18	960.503
486	0	79.9956	-951.772	1570.83	177.134	-943.038	1575.67	63.5398	-1091.37	1643.09	208.152	-1076.83	1643.54	141.673	-1181.82	1475.87	129.908	-1249.7	1215.23	148.463	-1040.88	1379.9	149.009	-959.13	1172.62	191.737	-1258.06	1275.83	-36.2507	-1090.87	1429.38	-119.782	-1035.14	1218.14	-142.743	-1001.99	1123.4	-147.755	-846.489	1033.21	-102.105	-774.519	997.455	-161.618	-802.414	968.719	-150.406	-722.077	962.966
487	0	81.6343	-936.607	1569.23	178.776	-928.073	1573.75	65.2406	-1076.24	1641.14	209.83	-1062.06	1641.14	142.805	-1166.38	1473.49	130.459	-1233.68	1212.7	149.614	-1025.32	1377.85	150.186	-943.051	1171.16	192.337	-1242.2	1273.26	-35.1844	-1075.1	1427.73	-118.575	-1018.62	1216.36	-141.953	-985.115	1122.14	-147.376	-828.88	1033.06	-101.95	-756.568	998.11	-161.331	-784.411	968.911	-151.01	-704.136	964.65
488	0	83.6514	-921.307	1567.74	180.727	-912.954	1572.1	67.0631	-1061.71	1639.21	212.416	-1047.45	1639.3	143.855	-1150.97	1471.18	130.767	-1217.35	1210.39	150.797	-1009.67	1375.9	151.384	-926.971	1169.83	192.808	-1226.28	1270.68	-33.9226	-1059.14	1426.17	-117.708	-1002.72	1214.97	-141.179	-968.618	1120.87	-147.028	-812.236	1032.24	-101.976	-739.435	997.957	-161.145	-767.559	968.221	-151.395	-687.226	965.364
489	0	85.7994	-906.107	1566.89	183.14	-897.897	1570.99	69.1522	-1046.75	1637.64	213.957	-1032.89	1637.31	145.187	-1135.55	1468.98	130.917	-1200.69	1207.76	152.325	-993.822	1374.46	152.912	-910.858	1168.71	193.352	-1210.26	1268.27	-32.485	-1043.15	1424.8	-116.946	-987.147	1213.49	-140.188	-952.565	1119.41	-146.699	-796.175	1031	-102.144	-723.113	996.984	-160.644	-751.595	966.902	-152.331	-671.345	965.162
490	0	87.9949	-890.876	1566.21	185.208	-882.999	1569.93	71.3313	-1031.78	1636.5	216.21	-1018.08	1635.66	146.574	-1120.02	1467.18	131.027	-1183.77	1205.72	153.92	-977.927	1373.16	154.641	-894.598	1167.78	193.638	-1194.07	1265.96	-31.0083	-1027.01	1423.65	-116.377	-971.821	1212.26	-139.277	-936.999	1118.09	-146.614	-780.917	1029.24	-102.151	-707.587	995.533	-160.546	-736.391	965.007	-153.09	-656.334	964.091
491	0	90.3986	-875.663	1565.8	187.5	-867.969	1569.3	73.6835	-1016.89	1635.65	218.519	-1003.39	1634.53	148.043	-1104.54	1465.7	131.224	-1167.05	1204.02	155.654	-962.043	1372.03	156.691	-877.945	1167.06	193.913	-1177.78	1263.96	-29.4369	-1010.78	1422.58	-115.58	-956.594	1210.9	-138.045	-921.828	1116.79	-146.312	-766.247	1026.95	-102.437	-692.82	992.831	-160.416	-722.292	962.48	-153.781	-642.133	961.839
492	0	92.8255	-860.498	1566.07	190.161	-852.758	1569.42	76.3694	-1001.97	1635.53	221.327	-988.504	1634.08	149.771	-1088.85	1464.68	131.545	-1150.02	1202.75	157.468	-946.052	1371.55	158.707	-861.008	1166.88	194.534	-1161.2	1262.29	-27.7972	-994.573	1421.99	-114.563	-941.595	1209.99	-136.998	-906.954	1115.8	-145.944	-752.221	1024.51	-102.263	-678.868	989.619	-160.123	-708.907	959.952	-154.34	-628.855	958.672
493	0	95.3986	-845.2	1567.13	192.864	-837.515	1570.01	79.0957	-986.784	1635.92	224.162	-973.379	1634.05	151.528	-1072.94	1464.12	131.94	-1133.18	1202.14	159.424	-930.032	1371.61	160.619	-843.776	1167.3	195.25	-1144.58	1261.17	-26.2792	-978.217	1422	-113.292	-927	1209.4	-135.555	-892.582	1114.79	-145.573	-738.862	1021.88	-102.487	-665.729	986.178	-160.056	-696.282	956.834	-154.807	-616.469	954.703
494	0	98.1106	-829.897	1568.61	195.66	-822.313	1571.23	81.8974	-972.033	1636.74	227.045	-958.873	1633.66	153.089	-1057.12	1464.18	132.142	-1116.62	1202.13	161.031	-913.923	1371.77	162.481	-826.189	1168.24	195.845	-1127.98	1260.6	-24.729	-961.845	1422.34	-112.189	-912.356	1209.19	-134.04	-878.746	1113.83	-145.252	-726.312	1019.26	-102.577	-653.624	982.137	-160.152	-684.84	953.575	-155.172	-605.08	949.809
495	0	100.845	-814.592	1570.45	197.44	-808.031	1571.59	84.6907	-957.342	1637.41	229.785	-944.269	1633.98	154.47	-1041.38	1464.45	132.448	-1100.3	1202.54	162.819	-897.888	1372.31	164.161	-808.56	1169.38	196.521	-1111.33	1260.41	-23.185	-945.247	1423.27	-111.051	-898.144	1209	-132.607	-865.366	1113.48	-144.793	-714.514	1016.37	-102.273	-642.352	977.607	-160.181	-674.362	950.012	-155.31	-594.787	944.01
496	0	103.786	-799.2	1572.72	201.372	-792.101	1574.09	88.0567	-942.292	1638.88	232.828	-929.673	1634.27	155.871	-1025.48	1465.41	132.781	-1084.46	1203.44	164.315	-881.824	1373.24	165.352	-791.075	1170.58	197.296	-1094.89	1260.77	-21.713	-928.679	1424.62	-109.665	-883.947	1209.52	-131.288	-852.145	1113.5	-144.191	-703.477	1013.31	-102.064	-632.255	972.398	-160.029	-665.072	946.031	-155.23	-585.664	937.566
497	0	106.709	-783.594	1575.31	203.841	-777.622	1575.2	91.0213	-927.063	1640.68	236.03	-914.735	1634.93	157.005	-1009.69	1466.54	132.961	-1069.27	1205.01	165.576	-865.931	1374.51	166.388	-774.201	1171.84	197.758	-1078.9	1261.66	-20.4906	-912.142	1426.45	-108.389	-869.772	1210.29	-130.308	-839.347	1114.18	-143.5	-693.205	1010.47	-101.622	-623.16	967.173	-159.68	-656.579	941.999	-154.773	-577.625	930.759
498	0	110.019	-768.132	1577.72	206.863	-762.588	1576.76	93.899	-911.805	1642.64	238.819	-900.3	1635.41	157.905	-994.205	1468.08	133.087	-1054.66	1206.83	166.348	-850.448	1375.52	166.936	-758.059	1172.86	197.777	-1063.78	1263.08	-19.3892	-896.038	1428.41	-107.189	-855.531	1211.43	-129.154	-826.548	1114.95	-142.766	-683.711	1007.29	-100.812	-614.966	961.246	-159.347	-649.061	937.851	-154.138	-570.673	923.375
499	0	112.611	-752.617	1579.81	209.421	-747.957	1577.63	96.377	-896.475	1644.61	241.266	-886.029	1635.72	158.616	-978.876	1469.7	133.36	-1040.04	1208.52	166.684	-835.256	1376.59	167.584	-742.767	1173.76	197.797	-1048.99	1264.65	-18.5016	-880.425	1430.38	-105.899	-841.292	1212.73	-128.038	-814.07	1115.98	-141.474	-674.79	1003.96	-99.6485	-607.963	954.957	-158.704	-642.492	933.223	-153.027	-564.718	915.628
500	0	115.021	-737.236	1581.74	212.086	-733.152	1578.74	98.5765	-880.897	1647.09	243.133	-871.467	1636.25	159.305	-963.937	1471.41	133.741	-1025.7	1210.41	167.032	-820.327	1377.96	167.782	-728.016	1174.85	198.045	-1034.1	1266.39	-17.6049	-865.144	1432.4	-104.682	-827.145	1214.11	-126.806	-801.956	1116.98	-140.441	-666.504	1000.8	-98.4004	-601.976	948.336	-158.172	-636.633	928.923	-151.668	-559.833	907.443
501	0	117.636	-722.006	1583.92	214.156	-718.486	1579.94	100.377	-865.428	1649.61	244.979	-856.728	1637.53	159.84	-949.233	1473.28	134.017	-1011.48	1212.48	166.981	-805.862	1379.85	167.868	-713.548	1176.4	197.978	-1019.86	1268.47	-17.1911	-850.57	1434.62	-103.666	-812.95	1215.6	-126.403	-790.354	1118.78	-139.286	-658.84	997.704	-96.9953	-596.672	942.206	-157.391	-631.398	924.683	-150.002	-555.76	899.432
502	0	118.954	-706.98	1585.61	215.236	-704.249	1580.79	101.715	-850.054	1652.12	246.521	-841.886	1639.23	160.314	-934.974	1475.4	134.623	-997.082	1214.82	166.711	-791.535	1381.84	167.753	-699.322	1178.37	198.464	-1005.39	1270.58	-16.7946	-836.425	1436.72	-102.65	-799.334	1217.4	-125.347	-779.137	1120.01	-137.89	-651.75	994.778	-95.5046	-592.179	936.164	-156.717	-626.658	920.892	-148.166	-552.586	891.279
503	0	120.161	-692.141	1587.31	216.586	-689.513	1582.17	102.915	-834.7	1654.87	247.517	-827.081	1641.37	160.933	-920.697	1477.77	135.476	-982.894	1217.1	166.748	-777.355	1384.14	167.561	-685.233	1180.81	199.552	-990.936	1272.66	-16.5617	-822.747	1438.92	-101.745	-786.18	1219.15	-124.197	-768.318	1121.21	-136.759	-645.38	991.916	-93.9767	-588.571	930.371	-155.924	-622.665	917.257	-145.767	-550.21	883.235
504	0	120.939	-677.561	1589.16	217.639	-674.882	1584.29	103.685	-819.528	1657.64	248.696	-811.949	1644.18	161.478	-906.623	1480.36	136.421	-968.788	1219.46	166.85	-763.305	1386.85	167.319	-671.272	1183.73	200.732	-976.673	1275.01	-16.6362	-809.454	1441.26	-100.872	-773.594	1220.73	-122.709	-758.228	1121.94	-135.439	-639.54	989.355	-92.382	-585.624	925.057	-155.226	-619.046	914.05	-143.443	-548.631	875.711
505	0	121.377	-663.073	1591.45	217.76	-660.566	1586.29	103.921	-804.51	1660.58	248.45	-797.276	1647.01	161.866	-892.722	1483.25	137.268	-954.989	1222.13	166.86	-749.386	1389.85	166.766	-657.484	1186.76	201.701	-962.562	1277.7	-16.9195	-796.418	1443.68	-100.178	-761.772	1222.39	-121.671	-748.773	1122.85	-134.25	-634.481	986.983	-90.6933	-583.421	920.196	-154.353	-616.064	911.054	-140.98	-547.934	868.523
506	0	121.505	-648.659	1593.86	218.091	-645.948	1589.11	103.875	-789.776	1663.61	248.635	-782.47	1650.31	162.287	-879.021	1486.2	138.363	-941.193	1225.13	167.078	-735.556	1393.12	166.298	-643.825	1189.84	202.697	-948.625	1280.69	-17.1987	-783.449	1445.92	-99.61	-750.853	1223.82	-120.772	-740.18	1123.87	-133.164	-630.024	984.662	-88.9805	-581.77	915.815	-153.507	-613.596	908.269	-138.601	-547.973	861.811
507	0	121.441	-634.342	1596.53	218.015	-631.608	1591.97	103.997	-775.069	1666.93	248.524	-768.017	1653.83	162.773	-864.866	1489.55	139.759	-927.441	1228.31	167.507	-721.775	1396.76	165.844	-630.317	1193.15	203.944	-934.629	1284.11	-17.4625	-770.357	1448.42	-99.0426	-740.46	1225.2	-119.024	-732.095	1124.33	-131.767	-626.147	982.748	-87.358	-580.782	911.857	-152.431	-611.888	905.845	-136.187	-548.737	855.583
508	0	121.348	-620.159	1599.36	218.057	-617.268	1595.16	103.83	-760.626	1670.17	248.673	-753.34	1657.72	163.266	-850.852	1493.11	141.277	-913.613	1231.73	167.905	-708.02	1400.3	165.286	-616.834	1196.24	205.147	-920.73	1287.73	-17.7305	-757.224	1451	-98.3708	-730.838	1226.6	-118.056	-724.756	1125.91	-130.537	-622.768	981.035	-85.7075	-580.268	908.48	-150.987	-610.664	903.769	-133.837	-550.123	850.328
509	0	121.118	-606.106	1602.17	217.931	-603.023	1598.48	103.365	-746.239	1673.38	248.348	-739.048	1661.48	163.655	-836.89	1496.66	142.797	-899.822	1235.22	168.175	-694.171	1403.8	164.658	-603.359	1199.42	206.314	-906.82	1291.39	-17.6524	-743.809	1453.57	-97.6307	-721.799	1227.91	-116.757	-717.68	1126.97	-129.111	-620.414	979.56	-83.9041	-580.082	905.727	-149.58	-610.115	901.998	-131.528	-551.886	845.783
510	0	120.952	-592.176	1605.13	217.384	-589.266	1601.55	103.105	-732.313	1676.38	247.756	-724.863	1664.9	164.098	-822.78	1499.98	144.201	-885.97	1238.55	168.605	-680.223	1406.99	164.246	-589.906	1202.64	207.685	-892.721	1294.96	-17.5906	-730.443	1455.89	-96.8185	-713.199	1229.05	-115.254	-711.301	1128.18	-127.711	-618.143	978.192	-82.3285	-580.283	903.142	-148.149	-609.879	900.316	-129.468	-554.144	841.733
511	0	120.732	-578.227	1608.01	217.941	-574.953	1605.34	102.832	-718.329	1679.34	247.584	-710.799	1668.42	164.499	-808.762	1503.02	145.738	-871.906	1241.56	168.812	-666.348	1410.17	163.654	-576.487	1205.82	209.156	-878.668	1298.19	-17.4936	-717.033	1458.32	-96.0227	-704.93	1230.39	-113.612	-705.117	1129.18	-126.247	-616.321	977.13	-80.6266	-580.422	901.541	-146.525	-610.228	899.006	-127.623	-556.588	838.377
512	0	120.653	-564.492	1610.8	217.376	-561.272	1608.15	102.443	-704.653	1681.67	247.266	-697.186	1671.64	164.795	-794.779	1505.83	146.801	-857.805	1244.38	169.192	-652.263	1413	163.316	-563.062	1208.97	210.515	-864.483	1301.29	-17.4389	-703.636	1460.34	-95.3003	-696.97	1231.62	-112.65	-699.379	1130.81	-124.8	-614.9	976.17	-79.0653	-581.258	899.616	-144.846	-610.996	897.996	-125.812	-559.275	835.486
513	0	120.382	-550.827	1613.39	216.909	-547.702	1611	102.069	-691.207	1683.73	246.875	-683.471	1674.26	165.182	-780.757	1508.23	147.77	-843.77	1246.73	169.419	-638.209	1415.43	163.092	-549.655	1211.7	212.051	-850.124	1304.12	-17.2882	-690.276	1462.26	-94.4492	-688.735	1232.51	-110.846	-693.845	1131.75	-123.146	-613.566	975.054	-77.4665	-581.895	897.884	-143.258	-611.929	897.009	-124.438	-562.286	832.964
514	0	120.421	-537.153	1615.67	217.245	-533.76	1613.79	102.136	-677.699	1685.61	247.003	-669.994	1676.86	165.708	-766.545	1510.31	149.163	-829.436	1248.85	169.731	-624.028	1417.56	163.061	-536.297	1214.16	213.597	-835.711	1306.4	-17.1426	-676.885	1463.82	-93.3581	-681.288	1233.52	-109.77	-688.597	1133.05	-121.506	-612.567	974.275	-75.7847	-582.585	896.373	-141.164	-613.253	896.065	-122.692	-565.087	830.746
515	0	120.796	-523.537	1617.81	217.196	-520.017	1616.27	101.992	-664.317	1687.04	247.134	-656.345	1678.94	166.248	-752.417	1512.06	150.124	-815.702	1250.51	170.065	-609.886	1419.45	162.956	-522.875	1216.3	215.29	-821.137	1308.42	-16.9841	-663.509	1465.1	-92.4392	-673.625	1234.43	-108.352	-683.413	1134.18	-119.828	-611.699	973.456	-73.9396	-583.189	895.035	-139.051	-614.706	894.952	-121.015	-568.023	828.659
516	0	120.264	-510.069	1619.42	217.107	-506.231	1618.29	101.826	-651.217	1688.01	246.776	-642.954	1680.33	166.671	-738.275	1513.23	151.016	-801.628	1251.59	170.359	-595.697	1420.75	163.083	-509.336	1217.83	216.798	-806.723	1309.9	-16.9513	-650.1	1465.82	-91.5943	-666.023	1234.96	-107.012	-678.219	1134.93	-118.174	-610.901	972.353	-72.2466	-583.992	893.521	-137.003	-616.136	893.85	-119.311	-570.8	826.746
517	0	120.665	-496.477	1620.61	216.734	-492.636	1619.56	101.857	-638.223	1688.35	246.59	-629.494	1681.15	167.15	-724.116	1513.86	152.039	-787.467	1252.29	170.835	-581.568	1421.5	163.32	-495.619	1218.88	218.367	-792.285	1310.84	-16.6248	-636.552	1466.02	-90.6572	-658.379	1235.12	-105.668	-673.042	1135.5	-116.371	-610.191	970.99	-70.6268	-584.875	891.633	-134.863	-617.754	892.812	-117.431	-573.583	824.626
518	0	120.184	-482.996	1621.24	216.489	-479.047	1620.35	102.163	-624.969	1688.48	246.777	-615.775	1681.45	167.821	-709.838	1514.03	153.298	-773.317	1252.35	171.344	-567.414	1421.82	163.696	-481.7	1219.55	220.041	-777.773	1311.29	-16.3575	-622.919	1465.75	-89.7371	-650.654	1235.26	-104.322	-667.78	1135.99	-114.794	-609.466	969.586	-69.0123	-585.175	890.332	-132.475	-619.454	891.597	-115.552	-576.259	822.955
519	0	120.148	-469.549	1621.65	216.798	-464.995	1621.25	102.431	-611.835	1688.09	247.099	-602.09	1681.54	168.294	-695.608	1513.76	154.357	-759.205	1252.49	171.783	-553.224	1421.63	164.079	-467.644	1219.69	221.409	-763.39	1311.3	-16.191	-609.177	1465.22	-88.9784	-642.913	1235.07	-102.953	-662.5	1136.14	-113.022	-608.531	968.357	-67.4858	-585.884	888.933	-130.128	-620.97	890.301	-113.68	-578.699	820.86
520	0	120.076	-455.956	1621.53	216.32	-451.276	1621.11	102.658	-598.612	1687.28	247.951	-588.386	1681.27	168.81	-681.306	1512.99	155.494	-745.008	1251.89	172.375	-538.819	1420.92	164.652	-453.437	1219.27	222.626	-749.062	1310.98	-15.9404	-595.233	1464.01	-88.1963	-635.052	1234.62	-101.382	-657.09	1136.15	-111.438	-607.589	967.09	-65.2867	-585.85	887.368	-128.127	-622.293	889.133	-111.785	-581.178	818.934
521	0	119.906	-442.325	1620.9	216.436	-437.223	1620.72	103.139	-585.413	1685.89	247.978	-574.805	1680.01	169.301	-667.094	1511.78	156.354	-730.807	1250.77	172.972	-524.551	1419.63	165.277	-439.172	1218.09	223.764	-734.797	1309.96	-15.45	-581.134	1462.24	-87.4642	-627.143	1233.92	-99.701	-651.458	1135.92	-109.828	-606.515	965.444	-63.911	-586.117	885.423	-125.759	-623.516	887.706	-109.791	-583.5	816.766
522	0	119.865	-428.633	1620.03	216.622	-423.159	1620.16	103.589	-572.133	1684.19	248.458	-560.949	1678.64	169.799	-652.862	1510.23	157.165	-716.576	1249.4	173.644	-510.3	1418.16	166.053	-424.951	1216.52	224.605	-720.761	1308.54	-15.2806	-566.858	1460.21	-86.5696	-619.081	1232.99	-97.9308	-645.644	1135.44	-108.335	-605.257	963.806	-62.3768	-586.011	883.575	-123.67	-624.332	886.399	-107.947	-585.612	814.552
523	0	120.064	-414.775	1618.72	216.613	-409.064	1618.85	104.01	-558.573	1682.46	248.762	-546.818	1676.76	169.992	-638.554	1508.25	157.417	-702.414	1247.67	174.137	-496.093	1416.03	166.833	-410.914	1214.21	225.034	-706.825	1306.81	-15.0007	-552.377	1457.78	-85.852	-610.639	1231.84	-96.1348	-639.437	1134.76	-106.497	-603.692	962.118	-61.0237	-585.566	881.836	-121.887	-625.018	885.161	-106.402	-587.584	812.458
524	0	120.15	-400.728	1616.91	216.665	-394.827	1617.01	104.362	-544.913	1680.03	249.06	-532.651	1674.62	170.24	-624.312	1506.07	157.14	-688.309	1245.45	174.753	-481.618	1413.8	167.79	-396.888	1211.27	225.218	-692.819	1304.73	-14.803	-537.848	1455.12	-85.0214	-601.811	1230.47	-94.2553	-632.71	1133.93	-105.403	-601.598	960.483	-59.9397	-584.848	879.727	-119.811	-625.247	884.024	-104.599	-589.434	810.155
525	0	120.405	-386.57	1614.67	216.946	-380.522	1614.93	105.025	-530.732	1677.79	249.617	-518.543	1672.24	170.695	-609.737	1503.66	156.614	-673.891	1243.18	175.245	-467.331	1411.23	168.718	-382.839	1207.92	225.268	-678.81	1302.32	-14.6549	-523.238	1452.3	-84.0766	-592.53	1229.19	-92.0438	-625.636	1132.8	-104.024	-599.281	958.988	-59.0814	-583.563	877.97	-118.033	-625.091	882.998	-103.032	-591.02	808.236
526	0	120.976	-372.26	1612.47	217.118	-366.168	1612.4	105.499	-516.551	1675.17	250.092	-504.038	1669.66	171.033	-595.248	1501.13	155.561	-659.407	1240.57	175.403	-453.033	1408.38	169.6	-368.639	1204.46	224.911	-664.834	1299.56	-14.5708	-508.367	1449.58	-83.0563	-582.686	1227.81	-90.0207	-617.731	1131.85	-102.539	-596.325	957.682	-57.14	-582.608	875.96	-116.066	-624.621	882.143	-101.678	-592.342	806.266
527	0	120.912	-357.915	1609.49	217.417	-351.788	1609.48	105.904	-502.216	1672.44	250.355	-489.35	1666.93	171.198	-580.826	1498.34	154.417	-644.774	1238.01	175.666	-438.692	1405.49	170.454	-353.954	1200.9	224.234	-650.663	1296.67	-14.4505	-493.58	1446.77	-82.0759	-572.368	1226.25	-87.8839	-608.873	1130.93	-101.337	-592.744	956.505	-56.542	-580.657	874.298	-114.485	-623.413	881.557	-100.419	-593.326	804.733
528	0	121.36	-343.548	1606.21	217.643	-337.246	1606.08	106.23	-487.578	1669.6	250.781	-475.038	1663.83	171.354	-566.35	1495.33	153.361	-630.084	1234.96	175.907	-424.372	1402.41	171.303	-339.061	1197.33	223.548	-636.453	1293.48	-14.3732	-478.683	1443.9	-80.9889	-561.366	1224.57	-85.6909	-599.48	1129.73	-100.065	-588.51	955.089	-55.4946	-578.109	872.784	-113.1	-621.61	881.317	-99.2587	-593.867	803.211
529	0	121.397	-329.075	1602.98	218.092	-322.751	1602.82	106.639	-472.979	1666.55	251.081	-460.321	1660.62	171.498	-551.922	1492.18	152.312	-615.393	1231.85	175.827	-409.872	1399.35	172.137	-324.001	1193.83	222.857	-622.115	1289.96	-14.5015	-464.139	1441.28	-79.7387	-549.662	1222.78	-83.5374	-589.34	1128.42	-98.9578	-583.478	954.135	-54.7157	-575.163	871.067	-111.685	-619.031	881.226	-98.2282	-593.921	801.879
530	0	121.505	-314.475	1599.71	218.282	-308.269	1599.29	106.93	-458.303	1663.73	251.287	-445.644	1657.54	171.456	-537.569	1489.15	151.212	-600.617	1228.67	175.733	-395.396	1396.29	172.833	-308.873	1190.46	222.098	-607.716	1286.62	-14.6027	-449.24	1438.5	-78.5699	-537.222	1220.7	-81.3476	-578.441	1127.19	-98.0744	-577.574	953.552	-54.1353	-571.021	869.816	-110.775	-615.379	881.47	-97.3413	-593.293	800.708
531	0	121.713	-299.86	1596.43	218.291	-293.791	1595.72	106.986	-443.404	1661.1	251.475	-430.984	1654.65	171.08	-523.202	1486.09	150.385	-585.829	1225.41	175.528	-380.788	1393.22	173.336	-293.763	1187.09	221.415	-593.032	1283.25	-14.9253	-434.453	1435.99	-77.7508	-524.271	1218.63	-79.3763	-566.711	1125.85	-97.347	-570.594	952.671	-54.1521	-566.111	868.652	-110.107	-610.53	881.974	-96.84	-592.044	799.759
532	0	122.056	-285.264	1593.48	218.479	-279.327	1592.73	106.938	-428.736	1658.33	251.293	-416.314	1651.57	170.724	-508.694	1482.93	149.878	-570.703	1222.34	175.377	-365.998	1390.2	173.698	-278.712	1184	220.833	-578.266	1279.87	-15.2384	-419.556	1433.22	-77.0824	-510.992	1216.37	-77.5097	-554.586	1124.19	-96.966	-562.629	951.866	-54.2161	-560.384	867.299	-110.062	-604.383	882.352	-96.3067	-589.864	798.895
533	0	121.476	-270.519	1590.82	218.175	-264.84	1590.03	106.66	-413.909	1655.77	250.989	-401.84	1648.87	170.106	-493.956	1480.1	149.406	-555.639	1219.11	175.065	-351.137	1387.56	173.824	-263.535	1181.3	220.163	-563.221	1276.9	-15.5906	-404.615	1430.58	-76.4481	-497.377	1214.03	-75.8885	-541.749	1122.36	-96.7884	-553.58	951.039	-54.2255	-553.282	865.757	-110.158	-597.311	882.688	-96.3183	-586.709	798.27
534	0	121.051	-255.833	1588.76	218.044	-250.159	1588.03	105.994	-399.502	1653.29	250.449	-387.387	1646.54	169.402	-479.164	1477.48	149.16	-540.202	1216.46	174.815	-336.08	1385.3	173.865	-248.304	1179.27	219.52	-548.167	1274.08	-16.2452	-389.374	1427.85	-76.4142	-483.369	1211.83	-74.848	-528.398	1120.46	-97.2829	-543.622	949.964	-55.3402	-545.173	864.44	-110.954	-588.807	882.808	-96.4732	-582.341	797.511
535	0	120.66	-241.117	1586.93	217.375	-235.595	1586.3	105.078	-385.044	1650.85	249.646	-373.133	1644.37	168.554	-464.13	1474.96	149.125	-524.648	1213.86	174.431	-320.832	1383.21	173.622	-232.932	1177.43	219.047	-532.94	1271.75	-16.7599	-374.24	1424.97	-75.8639	-468.868	1208.91	-74.0627	-514.501	1118.28	-97.9283	-532.594	948.631	-56.5475	-535.597	862.861	-111.837	-579.092	882.746	-96.1755	-576.79	796.632
536	0	120.104	-226.346	1585.71	216.562	-221.065	1585.2	104.026	-370.672	1648.84	248.425	-358.994	1642.54	167.635	-449.129	1472.99	149.453	-508.818	1211.47	173.787	-305.613	1381.32	173.235	-217.413	1175.89	218.917	-517.379	1269.49	-17.5589	-358.875	1422.49	-75.6056	-454.088	1206.57	-73.457	-500.022	1116.06	-98.7061	-520.666	947.308	-57.6672	-525.111	861.217	-113.158	-568.069	882.493	-96.8456	-569.56	796.315
537	0	119.025	-211.714	1584.84	215.6	-206.566	1584.8	102.54	-356.352	1646.93	246.915	-344.841	1641.25	166.609	-433.876	1471.23	149.766	-492.721	1209.53	173.186	-290.021	1379.93	172.42	-201.801	1174.71	218.723	-501.669	1267.65	-18.4132	-343.513	1420.11	-75.2797	-438.528	1203.79	-73.1731	-484.905	1113.9	-99.887	-507.659	946.066	-59.2169	-513.556	859.749	-114.816	-556.043	882.099	-97.9826	-560.68	795.938
538	0	117.944	-197.029	1584.52	214.494	-192.162	1585.02	100.586	-342.202	1645.45	245.074	-331.032	1640.55	165.445	-418.67	1469.67	150.215	-476.486	1207.71	172.323	-274.353	1378.83	171.56	-185.873	1173.85	218.487	-485.781	1266.26	-19.3235	-328.273	1418.26	-75.2921	-422.853	1201.38	-73.454	-469.283	1111.88	-101.345	-493.676	944.807	-61.5991	-500.84	858.365	-116.65	-542.625	881.761	-99.3973	-550.03	795.489
539	0	116.21	-182.363	1584.75	213.266	-177.8	1585.78	98.583	-327.882	1644.3	243.123	-317.265	1640.18	164.582	-403.224	1468.45	150.565	-460.041	1206.21	171.608	-258.512	1378.29	170.509	-169.649	1173.44	218.428	-469.775	1264.96	-20.2513	-312.9	1416.56	-75.4112	-406.774	1199.19	-73.8136	-453.186	1110.09	-102.894	-478.922	943.546	-63.939	-486.685	856.772	-118.804	-528.076	881.11	-101.09	-537.61	794.842
540	0	115.134	-167.627	1585.78	212.064	-163.402	1587.62	96.3425	-313.729	1643.57	240.876	-303.639	1640.75	163.488	-387.783	1467.89	150.901	-443.403	1205.04	170.882	-242.71	1378.4	169.436	-153.06	1173.56	218.282	-453.508	1264.2	-21.3324	-297.605	1415.56	-76.1864	-390.449	1197.8	-74.338	-436.729	1108.64	-104.543	-462.954	942.481	-65.5887	-471.221	855.757	-121.065	-512.404	880.448	-103.304	-523.384	794.325
541	0	113.622	-152.83	1587.39	210.322	-149.166	1589.61	93.7455	-299.474	1643.46	238.7	-290.002	1641.69	162.268	-372.226	1467.65	151.028	-426.799	1204.69	169.894	-226.752	1379.03	168.676	-136.058	1174.44	217.98	-437.142	1263.92	-22.2437	-282.124	1414.85	-76.7758	-373.795	1196.64	-75.3365	-419.978	1107.48	-105.943	-446.19	941.592	-67.7772	-454.628	854.848	-123.142	-495.581	879.921	-105.887	-507.157	793.767
542	0	112.086	-138.202	1589.45	208.843	-134.692	1592.52	91.3633	-285.403	1643.57	236.477	-276.463	1643.18	161.295	-356.518	1468.05	151.059	-410.276	1204.68	169.063	-210.778	1380.02	167.874	-119.049	1175.27	218.004	-420.247	1264.05	-23.1602	-266.54	1414.63	-77.6008	-356.872	1196.11	-76.388	-402.723	1106.64	-107.966	-428.298	941.092	-70.08	-436.535	854.047	-125.292	-477.564	879.376	-108.589	-489.174	793.341
543	0	110.569	-123.458	1591.99	207.284	-120.31	1595.85	89.0778	-271.215	1644.04	234.445	-262.812	1645.14	160.511	-340.803	1468.93	151.058	-393.935	1205.28	168.202	-194.707	1381.39	167.436	-101.85	1176.7	217.977	-403.657	1264.81	-23.7632	-250.809	1415.02	-78.4532	-339.838	1195.91	-77.4772	-385.193	1106.2	-109.746	-409.554	940.724	-71.6907	-417.91	853.463	-127.264	-458.352	878.711	-111.45	-469.073	793.005
544	0	108.521	-108.93	1594.87	205.505	-105.843	1599.49	86.7167	-257.24	1644.79	232.267	-248.894	1647.16	159.842	-324.922	1470.37	150.711	-377.86	1206.54	167.823	-178.799	1382.96	167.135	-84.8534	1178.31	217.768	-387.373	1266.19	-24.1989	-235.195	1415.69	-79.0922	-322.422	1195.93	-78.8326	-367.091	1106.1	-111.686	-389.833	940.615	-74.5302	-396.915	852.578	-129.504	-437.927	877.974	-114.854	-447.406	791.896
545	0	107.195	-94.355	1597.87	203.599	-91.4743	1603.29	84.4122	-243.402	1645.7	229.732	-235.194	1649.2	159.373	-309.257	1472.08	150.254	-362.07	1208.5	167.353	-162.922	1384.98	166.911	-68.3078	1179.83	217.441	-371.337	1268.11	-24.505	-219.618	1416.79	-79.9409	-304.955	1196.41	-80.4321	-348.803	1106.41	-113.593	-369.396	940.313	-76.9299	-375.142	852.349	-131.715	-416.531	877.323	-118.199	-423.977	791.075
546	0	105.477	-80.0571	1600.85	202.015	-76.9204	1607.04	82.8197	-229.497	1646.63	227.958	-221.445	1651.28	159.263	-293.639	1473.89	149.972	-346.754	1210.35	166.98	-147.23	1386.93	167.126	-52.1727	1181.59	217.697	-355.323	1270.48	-24.1764	-204.283	1418.08	-80.8395	-287.289	1197.19	-82.0677	-330.279	1106.58	-115.432	-347.95	940.169	-78.9057	-352.155	852.24	-133.902	-393.979	876.527	-121.424	-398.956	790.033
547	0	104.21	-65.8351	1603.64	200.631	-62.5453	1610.44	81.4815	-215.754	1647.56	226.159	-207.337	1652.99	159.413	-278.158	1475.97	149.949	-331.533	1212.32	166.687	-131.755	1388.92	167.02	-36.56	1183.25	218.298	-339.788	1272.68	-24.1543	-189.135	1420.12	-81.5764	-269.507	1198.3	-83.6082	-311.417	1107.24	-117.314	-325.69	940.486	-80.888	-328.285	852.115	-135.921	-370.427	875.713	-124.758	-372.358	789.426
548	0	102.952	-51.8541	1606.3	199.508	-48.3	1613.74	80.5595	-202.238	1648.65	225.993	-193.398	1655.79	159.654	-263.123	1477.93	150.133	-316.802	1214.37	166.505	-116.487	1390.88	167.149	-21.3758	1185.02	218.985	-324.42	1274.98	-23.9342	-174.223	1422.4	-82.472	-251.584	1199.71	-85.3072	-292.264	1108	-118.831	-302.855	940.753	-83.2826	-303.472	852.174	-137.978	-345.876	875.013	-128.109	-344.604	788.924
549	0	102.197	-37.83	1608.87	198.546	-34.0247	1616.76	79.9955	-188.675	1650	225.145	-179.592	1657.59	159.667	-248.468	1479.88	150.223	-302.049	1216.33	166.499	-101.602	1392.65	167.177	-6.73532	1186.61	219.588	-309.536	1276.95	-23.7841	-159.52	1424.77	-83.5729	-233.688	1201.32	-87.2199	-272.969	1109.29	-120.827	-279.287	941.01	-85.26	-277.419	853.003	-139.85	-320.661	874.266	-131.409	-315.594	788.699
550	0	101.961	-23.7218	1611.7	198.263	-19.8946	1619.75	79.8852	-174.936	1651.74	224.698	-165.722	1659.45	159.878	-234.086	1481.77	150.307	-287.366	1217.91	166.819	-86.8797	1394.81	167.261	7.85681	1188.54	219.952	-294.974	1278.87	-23.6011	-144.91	1427.08	-84.3458	-215.655	1202.74	-89.1051	-253.694	1110.12	-122.35	-255.288	941.447	-87.1589	-250.733	853.411	-141.645	-294.671	873.4	-134.296	-285.589	788.546
551	0	101.94	-9.69033	1614.79	198.311	-5.84614	1622.71	80.0975	-161.22	1653.79	225.077	-151.795	1661.67	160.051	-219.856	1483.65	150.4	-272.763	1219.76	167.055	-72.3919	1397.09	167.591	22.1053	1190.83	219.915	-280.631	1280.81	-23.407	-130.332	1429.82	-84.9563	-197.345	1204.09	-90.8368	-233.881	1111.05	-123.863	-230.72	941.921	-89.3029	-224.001	853.791	-143.42	-267.997	872.803	-137.113	-254.567	789.189
552	0	102.218	4.24222	1617.82	198.913	8.10152	1625.79	80.648	-147.329	1656.17	225.633	-138.116	1663.89	160.188	-205.629	1485.91	150.198	-258.052	1222.01	167.19	-58.1334	1399.69	167.745	36.1823	1193.09	219.434	-266.219	1282.74	-23.2684	-115.872	1432.46	-85.8002	-179.118	1205.99	-92.533	-214.109	1111.89	-125.27	-205.78	942.821	-90.2744	-196.194	854.87	-144.542	-240.954	872.522	-139.719	-222.859	790.295
553	0	103.093	18.256	1621.08	199.874	21.9709	1628.76	81.582	-133.527	1658.63	226.49	-124.471	1665.97	160.42	-191.458	1488.35	149.901	-243.235	1224.38	167.734	-43.733	1402.12	168.14	50.0861	1195.18	218.823	-252.071	1284.79	-22.9759	-101.164	1435.15	-86.6873	-160.74	1208.02	-94.5085	-194.317	1113.25	-126.585	-180.375	944.058	-91.7474	-167.612	856.711	-145.885	-212.991	872.46	-142.076	-190.453	791.859
554	0	104.421	32.2311	1624.55	201.363	35.8431	1632.05	82.8436	-119.682	1661.4	227.91	-110.749	1668.17	160.843	-177.004	1490.83	149.554	-228.706	1226.85	168.217	-29.5259	1404.71	168.671	63.9582	1197.45	218.135	-237.886	1287.08	-22.4238	-86.2804	1437.97	-87.3051	-142.297	1210.38	-96.2545	-174.262	1114.6	-127.677	-154.617	945.722	-92.1725	-138.766	858.769	-147.093	-184.907	872.844	-144.077	-157.522	794.29
555	0	105.759	46.2291	1628.42	202.88	49.5878	1635.41	84.2223	-105.91	1664.35	229.007	-97.1156	1670.28	161.173	-162.477	1493.52	148.829	-214.218	1229.71	168.622	-15.3079	1407.52	169.377	77.7834	1199.83	217.201	-223.71	1289.65	-21.8902	-71.4775	1441.03	-88.2393	-124.043	1213.11	-98.0025	-153.964	1116.52	-128.744	-128.558	947.785	-93.4319	-109.769	861.306	-147.829	-155.959	873.701	-145.842	-124.198	797.527
556	0	108.053	60.2787	1632.38	204.535	63.245	1638.72	85.6652	-92.1881	1667.35	230.828	-83.8737	1672.8	161.538	-148.17	1496.33	147.926	-200.082	1232.73	169.152	-1.07936	1410.46	170.099	91.7487	1202.38	216.083	-209.833	1292.34	-21.3414	-56.5356	1444.21	-88.8142	-105.508	1215.77	-99.7528	-133.533	1118.68	-129.671	-102.255	950.274	-94.3708	-80.281	865.065	-148.732	-126.89	875.19	-147.203	-90.6171	801.529
557	0	109.919	74.3154	1636.37	206.618	76.9609	1642.09	87.5227	-78.3601	1670.33	232.563	-70.4917	1674.68	162.066	-133.82	1499.1	147.185	-186.048	1235.76	169.912	13.1906	1413.11	170.898	106.022	1204.99	215.285	-195.946	1295.2	-20.6486	-41.3821	1447.54	-89.5655	-87.2737	1218.82	-101.217	-113.067	1120.84	-130.407	-75.7815	953.172	-94.6554	-50.3772	869.11	-149.125	-97.4138	877.154	-148.19	-56.8456	806.198
558	0	111.944	88.4315	1640.42	208.851	90.6223	1645.44	89.5243	-64.4869	1673.38	234.587	-57.0715	1676.66	162.835	-119.259	1502.05	146.525	-172.016	1238.68	170.685	27.4919	1415.82	171.825	120.288	1207.82	214.513	-182.02	1297.98	-19.7546	-26.2138	1451.04	-90.0334	-68.77	1222.13	-102.552	-92.421	1123.32	-130.944	-48.9639	956.764	-95.0462	-20.6183	873.789	-149.311	-67.6212	879.923	-148.871	-23.081	811.67
559	0	113.962	102.269	1644.33	211.092	104.205	1648.78	91.5437	-50.7242	1676.25	236.843	-43.6587	1678.7	163.359	-104.627	1504.82	145.782	-157.854	1241.68	171.378	41.7934	1418.45	172.696	134.63	1210.68	213.722	-167.966	1300.75	-18.8687	-11.0364	1454.55	-90.6244	-50.3939	1225.57	-103.912	-71.614	1126.17	-131.485	-21.9908	960.893	-95.1181	9.55577	879.211	-149.518	-37.6042	883.193	-149.38	10.684	818.006
560	0	116.276	116.141	1648.05	213.005	117.576	1651.62	93.2114	-37.1622	1678.66	238.566	-30.5897	1679.98	163.784	-90.1886	1506.95	145.202	-143.82	1244.43	172.058	56.2111	1420.78	173.432	148.836	1213.24	212.932	-153.899	1303.09	-18.0268	4.09191	1457.96	-91.1525	-31.8271	1228.88	-105.213	-50.6624	1129.05	-131.952	5.32812	965.221	-94.9329	39.8186	885.255	-149.765	-7.27608	887.115	-149.713	44.2561	824.763
561	0	118.078	130.076	1651.62	215.425	131.116	1654.47	95.1931	-23.395	1680.93	240.449	-17.4449	1681.11	164.348	-75.6856	1509.05	144.883	-129.71	1246.55	172.825	70.6154	1422.82	174.114	162.789	1215.51	212.479	-139.837	1305.14	-17.1373	19.2944	1461.28	-91.7928	-13.4458	1232.13	-106.499	-29.7505	1131.9	-132.29	32.56	969.852	-94.9151	69.9218	891.384	-149.674	23.1496	891.236	-149.455	77.5915	831.446
562	0	120.593	143.877	1654.79	217.718	144.746	1657.02	97.0445	-9.74516	1682.72	241.873	-4.30637	1681.62	164.899	-61.3523	1510.86	144.587	-115.56	1248.35	173.576	85.0372	1424.5	174.845	176.538	1217.6	212.059	-125.717	1306.91	-16.121	34.5082	1464.22	-92.0768	5.28269	1235.13	-107.693	-8.76368	1134.49	-132.441	60.0124	974.609	-94.9668	99.7006	897.798	-149.603	53.6674	895.633	-149.02	110.88	838.565
563	0	122.264	157.724	1657.48	219.568	158.126	1658.96	98.6438	3.83452	1684.17	243.797	8.93838	1682.24	164.923	-47.3875	1512.15	144.519	-101.253	1250.2	174.461	99.5869	1425.84	175.441	190.139	1219.11	211.66	-111.399	1308.31	-15.1903	49.6931	1466.6	-92.5255	23.9191	1237.82	-108.841	12.2341	1136.95	-132.568	87.4407	979.337	-94.6445	129.874	904.234	-149.536	84.4594	900.253	-148.375	143.951	845.742
564	0	124.383	171.602	1659.68	221.482	171.579	1660.72	100.244	17.3023	1684.98	245.36	22.1175	1682.41	166.238	-30.8542	1513.75	144.517	-87.0207	1251.24	175.112	114.241	1426.78	176.057	203.763	1220.17	211.506	-97.0537	1309.43	-14.0507	64.8291	1468.82	-92.9975	42.5603	1240.24	-109.916	33.2059	1139.08	-132.424	114.991	984.009	-94.2028	160.049	910.987	-149.408	115.216	904.893	-147.467	176.824	852.72
565	0	126.06	185.358	1661.61	223.245	185.123	1662.04	101.829	31.0733	1685.67	247.103	35.5249	1682.35	164.025	-20.8213	1514.59	144.665	-72.698	1252.02	176.062	128.858	1427.31	176.783	217.483	1221	211.377	-82.5321	1309.88	-13.0581	79.8792	1470.24	-93.1035	61.4419	1242.05	-111.07	54.2148	1140.84	-132.679	142.31	988.988	-93.4735	190.082	917.838	-148.836	145.844	909.451	-146.312	209.509	859.889
566	0	127.805	199.141	1663.04	225.071	198.722	1663.11	103.117	44.7891	1685.69	248.405	48.8166	1681.79	167.347	-1.68016	1514.3	144.671	-58.4359	1252.41	176.827	143.611	1427.53	177.466	231.145	1221.35	211.177	-68.0133	1310.02	-12.0736	95.0237	1471.37	-93.4332	80.2619	1243.6	-112.2	75.1368	1142.32	-132.521	169.585	993.52	-92.6651	219.915	924.649	-148.353	176.438	914.287	-144.982	241.754	866.867
567	0	129.322	213.055	1663.86	226.261	212.259	1663.49	104.111	58.3449	1685.03	249.24	62.0471	1680.6	167.756	12.7624	1513.8	144.471	-44.1365	1252.25	177.344	158.303	1427.12	178.184	245.021	1221.23	210.957	-53.485	1309.73	-11.0625	110.092	1471.7	-93.8048	99.0244	1244.64	-113.204	96.2825	1143.36	-132.44	196.652	997.767	-91.8651	249.353	931.033	-148.132	206.711	919.056	-143.607	273.837	873.709
568	0	130.424	226.992	1664.44	227.576	225.948	1663.68	105.167	72.1424	1684.01	250.926	75.6085	1679.6	168.478	27.5201	1512.92	144.348	-29.9062	1251.56	178.189	172.981	1426.41	178.747	258.652	1220.44	210.957	-38.9736	1309.02	-10.2457	125.171	1471.7	-94.1679	117.76	1245.26	-114.25	117.415	1143.83	-132.201	223.398	1001.94	-90.9975	278.428	937.64	-147.217	236.781	923.702	-141.939	305.469	880.759
569	0	131.625	241.03	1664.55	229.191	239.877	1663.96	106.313	86.1133	1682.66	252.067	89.3594	1678.15	169.382	42.3587	1511.64	144.244	-15.7875	1250.73	178.956	187.838	1425.38	179.272	272.119	1219.37	211.241	-24.351	1308.02	-9.28326	140.202	1471.51	-94.585	136.483	1245.44	-115.21	138.614	1144.08	-131.938	250.029	1005.97	-90.0602	307.114	944.168	-146.949	266.191	928.308	-140.092	336.627	887.799
570	0	132.706	254.977	1664.14	230.261	253.8	1663.55	107.107	99.9785	1681	252.607	103.117	1676.3	170.441	57.2508	1510.24	144.439	-1.77933	1249.83	179.762	202.706	1423.97	179.731	285.591	1217.67	211.487	-9.83034	1306.72	-8.16352	155.224	1470.78	-94.9635	155.409	1245.52	-116.27	159.964	1144.14	-131.536	276.36	1009.78	-88.8646	335.399	950.573	-146.087	295.528	932.735	-138.147	367.569	894.876
571	0	133.563	269	1663.33	230.945	267.707	1662.51	107.89	113.929	1678.89	253.327	116.992	1674.01	171.71	72.3287	1508.47	145.02	12.2686	1248.56	180.538	217.398	1422.2	179.959	298.956	1215.29	212.084	4.69179	1305.2	-7.10436	170.15	1469.43	-95.064	174.199	1245.08	-117.129	181.365	1144.04	-131.026	302.523	1013.32	-87.1836	363.38	956.362	-145.384	324.758	937.223	-136.192	397.794	901.795
572	0	134.465	283.223	1662.14	231.915	281.902	1661.36	108.725	127.929	1676.54	254.315	131.089	1671.79	171.805	85.7994	1506.86	146.2	26.2668	1246.87	181.423	232.227	1420.18	180.256	312.572	1212.47	212.964	19.2693	1303.42	-5.91292	184.97	1467.94	-95.2007	193.109	1244.56	-117.886	202.68	1143.59	-130.32	328.403	1016.64	-85.7304	390.515	961.96	-144.381	353.158	941.692	-134.001	427.396	908.496
573	0	135.182	297.51	1660.65	232.848	296.323	1659.99	109.672	142.123	1674.04	255.168	145.4	1669.35	174.531	102.267	1503.84	147.714	40.3982	1244.9	181.991	246.948	1417.96	180.573	326.772	1209.7	214.064	33.652	1301.26	-4.63755	199.426	1465.96	-95.1318	211.955	1243.86	-118.368	224.083	1143.39	-129.614	353.798	1020.08	-84.0687	417.095	967.612	-143.171	381.299	946.078	-131.787	456.528	915.487
574	0	136.429	311.715	1658.88	233.347	310.601	1658.06	110.533	156.269	1671.28	255.944	159.59	1666.8	175.943	116.798	1501.79	149.609	54.6519	1242.77	182.785	261.468	1415.6	180.883	342.02	1206.7	215.547	47.9624	1299.35	-3.24256	213.814	1463.97	-94.7194	230.757	1243.21	-118.978	245.076	1143.22	-128.667	378.748	1023.37	-82.4356	443.082	973.073	-141.811	408.847	950.696	-129.764	484.743	922.492
575	0	136.713	325.917	1656.78	234.349	324.991	1656.2	111.545	170.438	1668.63	256.897	173.942	1664.15	177.639	131.661	1499	151.935	68.8736	1240.57	183.841	276.156	1413.13	181.331	358.085	1203.87	217.433	62.3445	1297.27	-1.74453	228.088	1461.98	-94.1016	249.367	1242.48	-118.998	266.075	1143.08	-127.429	403.173	1026.87	-80.7206	468.365	978.469	-140.741	435.507	955.112	-127.502	512.207	929.407
576	0	137.675	340.305	1654.71	235.256	339.45	1654.07	112.803	184.623	1665.92	258.706	188.974	1661.83	177.238	144.121	1497.67	154.287	83.5643	1238.34	184.837	290.87	1410.61	181.894	374.354	1201.24	219.509	76.9554	1294.87	-0.244473	242.309	1459.75	-93.417	267.816	1241.87	-118.96	286.706	1142.85	-126.289	427.079	1030.43	-78.9867	492.996	983.872	-139.347	461.624	959.969	-125.389	538.925	936.423
577	0	138.546	354.348	1652.48	236.235	353.948	1652.06	114.164	198.813	1663.31	260.191	203.462	1659.57	178.3	158.426	1495.28	156.678	98.334	1235.82	185.943	305.457	1408.31	182.278	390.353	1198.98	221.733	91.4284	1292.52	1.28162	256.342	1457.81	-92.4121	285.868	1241.15	-118.578	307.114	1143.07	-124.939	450.134	1034.12	-77.1472	517.047	989.258	-138.143	486.837	964.692	-123.46	564.546	943.428
578	0	139.346	368.511	1650.19	237.087	368.211	1649.88	115.394	212.814	1660.59	260.775	217.247	1656.58	178.44	169.924	1493.34	159.059	113.303	1232.97	187.141	320.247	1405.78	182.591	405.888	1196.58	223.975	106.099	1290.09	2.68103	270.555	1455.82	-91.4179	303.588	1240.27	-118.132	326.792	1143.04	-123.555	472.737	1037.83	-75.5901	540.13	994.333	-136.829	511.33	969.596	-121.598	589.404	950.281
579	0	141.156	382.555	1647.97	238.413	382.51	1647.67	117.057	226.632	1657.94	263.022	232.042	1654.61	180.219	184.354	1490.83	161.554	128.661	1230.27	188.35	334.924	1403.4	182.987	420.88	1193.94	226.258	120.916	1287.65	4.24694	284.66	1453.69	-90.0735	320.926	1239.34	-117.532	345.789	1142.72	-122.145	494.427	1041.24	-73.7109	562.599	999.496	-135.522	534.916	974.486	-119.643	613.371	957.006
580	0	141.896	396.517	1645.85	239.928	396.87	1645.69	119.071	240.731	1655.62	264.776	246.49	1652.12	182.62	198.977	1488.05	163.931	144.154	1227.49	190.02	349.835	1401.17	183.548	435.569	1191.51	228.545	135.768	1284.97	5.93397	299.128	1451.91	-88.5512	337.845	1238.32	-116.452	364.355	1142.37	-120.575	515.32	1044.67	-72.1979	584.126	1004.11	-134.459	557.339	978.507	-118.048	636.281	963.518
581	0	144.218	410.448	1643.93	241.303	410.96	1643.5	121.049	254.429	1653.37	266.853	260.647	1649.89	184.663	213.694	1485.89	166.055	159.687	1225.03	191.71	364.563	1399.19	184.216	450.154	1189.47	230.567	150.817	1282.67	7.69638	313.521	1450.14	-86.8183	354.427	1237.21	-115.191	382.263	1142.16	-119.279	535.48	1047.74	-70.7351	604.822	1008.36	-132.942	579.289	983.128	-116.506	658.326	969.645
582	0	145.559	424.392	1642.02	243.24	425.101	1641.63	123.285	268.252	1651.32	268.066	274.365	1646.97	186.827	228.736	1483.55	167.947	175.219	1222.61	193.529	379.481	1397.28	185.564	465.284	1188.08	232.489	166.059	1280.32	9.6088	328.147	1448.71	-85.061	370.513	1236.05	-113.664	399.598	1141.53	-117.771	554.744	1050.47	-69.4409	624.833	1012.51	-131.79	600.017	986.818	-115.167	679.289	975.406
583	0	147.755	438.248	1640.68	245.399	439.163	1639.99	125.686	281.942	1649.5	271.044	288.577	1645.24	188.843	242.843	1481.14	169.652	190.889	1220.25	195.536	394.562	1395.95	187.208	480.942	1187.12	234.235	181.368	1277.7	11.5129	342.833	1447.29	-83.2592	386.14	1234.97	-112.219	416.18	1140.9	-116.365	573.179	1052.82	-68.0192	644.057	1016.3	-130.581	619.486	990.228	-114.108	699.205	980.804
584	0	150.054	451.999	1639.42	247.791	453.114	1638.64	128.178	295.547	1647.75	273.488	302.455	1643.29	191.008	257.584	1479.22	171.016	206.581	1217.88	197.605	409.589	1394.7	189.165	496.8	1186.54	235.85	196.728	1275.37	13.6605	357.563	1446.14	-81.3982	401.202	1233.85	-110.192	432.421	1140.05	-115.024	590.789	1054.61	-67.1544	662.375	1019.58	-129.255	638.17	992.77	-113.433	718.181	985.467
585	0	152.987	465.965	1638.48	250.209	467.118	1637.36	130.92	309.423	1646.15	275.575	316.355	1641.03	193.001	271.819	1477.31	172.282	222.435	1215.69	199.792	424.708	1393.54	191.247	512.744	1186.03	237.425	212.207	1273.2	15.7327	372.493	1445.25	-79.5807	416.25	1232.96	-108.329	448.231	1139.44	-113.723	607.637	1055.8	-66.0984	680.014	1022.2	-127.986	655.579	994.713	-112.955	735.892	989.776
586	0	155.188	479.692	1637.83	252.934	480.987	1636.51	133.779	323.057	1645.02	278.772	330.262	1639.67	195.591	286.714	1475.61	173.757	238.55	1213.59	202.109	439.973	1392.83	193.574	528.563	1185.85	239.128	228.009	1270.88	18.2557	387.388	1444.52	-77.4598	430.898	1232.26	-106.199	463.521	1138.82	-112.299	623.677	1056.47	-65.169	696.76	1024.11	-126.34	672.102	995.785	-112.619	752.622	992.996
587	0	158.222	493.524	1637.72	255.87	494.979	1636.29	137.212	336.855	1644.11	282.251	344.368	1638.82	198.1	301.168	1474.04	175.366	254.795	1211.75	204.594	455.358	1392.5	196.123	544.537	1185.96	240.9	243.973	1268.91	20.6002	402.285	1444.44	-75.5553	445.38	1232.04	-103.936	478.645	1138.31	-110.872	638.9	1056.67	-64.5429	712.577	1025.4	-124.92	687.399	996.066	-112.535	768.184	995.682
588	0	161.425	507.255	1638.14	259.007	508.967	1636.55	140.564	350.49	1643.6	285.732	358.266	1638.21	200.252	315.548	1473.24	176.883	271.179	1210.39	207.127	470.681	1392.7	198.638	560.722	1186.45	242.847	260.117	1267.36	23.2244	417.048	1444.52	-73.416	459.732	1231.94	-101.5	493.32	1138.05	-109.663	653.403	1056.29	-63.8149	727.394	1025.65	-123.364	701.873	995.526	-112.819	782.455	997.286
589	0	164.361	520.931	1638.63	262.23	522.996	1636.92	143.976	363.965	1643.19	288.993	372.153	1637.36	203.185	330.45	1472.44	178.485	287.542	1209.58	209.673	486.094	1392.8	201.153	577.241	1186.82	244.848	276.324	1266.19	25.7965	432.14	1444.83	-71.2195	474.307	1232.19	-98.9664	507.761	1138.13	-108.032	667.328	1055.06	-62.8773	741.606	1025	-122.022	715.284	994.297	-113.13	795.695	997.56
590	0	167.933	534.916	1639.69	265.554	537.063	1637.57	147.871	377.807	1643.31	292.499	386.465	1636.91	205.498	344.97	1472.62	180.202	303.835	1209.09	212.015	501.461	1393.32	203.595	593.856	1187.82	247.161	292.646	1265.46	28.4032	447.113	1445.77	-68.8756	488.648	1232.66	-96.1793	521.745	1138.19	-106.563	680.484	1053.74	-61.9504	754.825	1023.44	-120.572	727.87	992.394	-113.135	807.957	996.829
591	0	171.605	548.944	1641.38	269.37	551.285	1638.77	151.962	391.808	1644.06	296.697	400.732	1636.96	208.206	360.849	1473.19	181.865	319.729	1209.65	214.392	516.872	1394.23	205.653	610.586	1189.03	249.317	309.04	1265.43	30.8336	462.377	1447.11	-66.3602	503.115	1233.35	-93.1222	535.383	1138.65	-104.652	693.036	1052.22	-60.8815	767.241	1021.2	-118.93	739.595	990.089	-113.002	819.509	995.054
592	0	175.382	563.025	1643.4	273.245	565.475	1640.18	155.805	405.795	1645.21	300.643	415.043	1637.14	211.518	378.001	1473.58	183.227	334.842	1211	216.721	532.164	1395.53	207.443	627.289	1190.38	251.202	325.389	1266.12	33.0691	477.876	1449.2	-63.8409	517.81	1234.38	-90.2974	548.788	1139.27	-102.715	704.981	1050.59	-59.5095	778.997	1018.37	-117.357	750.506	987.888	-112.514	830.164	992.125
593	0	179.398	577.385	1645.48	277.139	579.739	1641.19	159.874	419.978	1646.56	304.434	429.311	1637.21	214.562	393.934	1474.92	184.453	349.34	1212.75	218.767	547.335	1396.76	208.997	643.423	1191.67	252.905	341.249	1267.17	35.3914	493.311	1451.14	-61.2267	532.209	1235.9	-87.3497	561.732	1140.31	-100.704	716.432	1048.97	-58.0265	790.07	1015	-115.616	760.497	985.5	-111.865	840.074	987.789
594	0	183.343	591.858	1647.53	280.88	594.086	1642.01	163.743	434.421	1648.22	308.296	443.809	1637.33	217.813	409.765	1476.32	185.581	363.549	1214.69	220.473	562.131	1398.29	210.365	659.062	1192.9	254.361	356.388	1268.59	37.5817	508.69	1453.5	-58.6682	546.728	1237.56	-84.4124	574.554	1141.42	-98.6077	727.329	1047.15	-56.397	800.56	1011.32	-114.174	769.683	982.695	-110.8	849.24	982.806
595	0	186.893	606.433	1649.57	284.703	608.49	1643.03	167.131	449.092	1650.41	311.364	458.213	1637.73	220.28	424.43	1478.11	186.692	377.766	1216.89	221.98	576.818	1399.85	211.641	673.989	1194.48	255.301	370.825	1270.6	39.5542	523.656	1455.92	-55.9424	561.137	1239.21	-81.9093	587.246	1143.17	-96.5263	737.676	1045.39	-54.8001	810.316	1007.09	-112.447	778.315	979.593	-109.565	857.62	976.868
596	0	190.124	621.128	1651.46	287.659	623.012	1643.78	169.991	463.593	1652.75	314.021	472.511	1638.37	222.38	438.715	1478.74	187.977	391.807	1218.95	223.131	591.112	1401.47	212.508	688.321	1196.01	256.079	384.676	1272.22	41.3659	537.927	1458.41	-53.3735	575.342	1241.25	-79.4467	599.862	1145.03	-94.6413	747.621	1043.42	-53.1064	818.968	1002.5	-110.688	786.283	976.209	-107.944	865.261	969.957
597	0	192.873	635.958	1653.15	290.503	637.781	1644.75	172.681	478.307	1655.4	316.767	487.303	1640.02	222.79	450.261	1482.75	189.21	405.796	1221.17	224.341	605.15	1403.36	213.358	702.123	1197.89	257.05	398.259	1274.14	43.2401	551.814	1460.68	-50.8416	589.346	1243.33	-76.9493	612.311	1146.87	-92.4387	757.055	1041.16	-51.1819	827.097	997.116	-109.308	793.56	972.839	-105.878	872.236	962.432
598	0	195.01	650.692	1654.76	292.594	652.524	1645.91	175.166	493.175	1658.4	318.959	502.139	1642.15	223.965	463.331	1484.29	190.739	419.141	1223.38	225.342	618.862	1405.45	213.967	715.579	1199.93	258.294	411.857	1275.92	44.7019	565.03	1463.2	-48.4597	603.159	1245.54	-74.6406	624.674	1148.7	-90.2447	766.06	1038.87	-48.9903	834.254	991.666	-107.682	800.104	969.174	-103.382	878.322	954.514
599	0	196.254	665.209	1656.35	293.788	667.071	1647.3	176.858	507.718	1661.37	320.888	516.941	1644.85	226.639	478.492	1486.38	192.414	432.658	1225.84	226.101	632.291	1407.88	214.437	728.898	1202.47	260.098	425.36	1278.06	45.9475	577.755	1465.87	-46.3688	616.326	1247.72	-72.5938	636.627	1150.84	-88.2254	774.265	1036.58	-46.9397	840.602	986.121	-105.993	806.088	965.734	-100.897	883.214	946.516
600	0	197.412	679.591	1657.81	294.99	681.776	1648.96	178.201	522.015	1664.03	322.089	531.427	1647.59	228.024	491.341	1489	194.417	445.841	1228.14	227.177	645.624	1410.41	214.65	742.008	1205.04	262.418	438.92	1280.35	46.9556	590.167	1468.29	-44.556	629.107	1249.65	-70.4386	647.991	1152.71	-86.1396	781.95	1034.08	-44.5702	846.183	980.468	-104.785	811.38	962.382	-97.9315	887.5	938.26
601	0	197.926	693.704	1659.61	295.583	696.178	1651.03	179.292	536.236	1667.14	323.225	545.866	1650.95	229.691	504.879	1491.34	196.601	458.933	1230.5	228.175	658.887	1413.29	214.862	755.144	1208.01	264.825	452.544	1282.71	47.6814	602.419	1470.78	-42.8179	641.282	1251.77	-68.0417	658.742	1154.14	-84.3243	788.914	1031.79	-42.354	850.936	975.272	-103.094	816.298	959.207	-94.7128	890.856	930.071
602	0	198.544	707.753	1661.96	296.096	710.468	1653.65	180.216	550.229	1670.47	324.105	560.297	1654.48	231.217	518.281	1494.28	198.761	471.962	1233.31	229.367	672.052	1416.46	214.792	768.161	1211.14	266.834	465.765	1285.41	48.2964	614.722	1473.45	-41.3123	652.729	1253.38	-66.0278	668.566	1155.43	-82.4237	795.052	1029.62	-40.085	854.727	970.298	-101.927	820.301	956.096	-91.4075	893.324	922.121
603	0	198.926	721.559	1664.49	296.39	724.55	1656.58	181.019	564.079	1673.91	324.873	574.456	1658.4	232.452	531.134	1497.66	200.997	484.882	1236.43	230.276	685.112	1419.74	214.67	781.412	1214.6	268.796	478.574	1288.62	48.9965	627.054	1476.03	-40.0602	663.712	1255.22	-63.8738	677.679	1156.48	-80.6505	800.547	1027.34	-37.9439	857.878	965.446	-100.377	823.736	953.252	-87.9371	894.882	914.506
604	0	199.102	735.003	1667.25	296.737	738.287	1659.77	181.644	577.681	1677.22	325.684	588.19	1662.32	234.013	544.778	1501.12	203.318	497.827	1239.68	231.289	698.126	1423.19	214.624	794.496	1217.78	270.749	491.418	1292.26	49.6007	639.627	1478.67	-38.6642	673.678	1256.6	-61.603	686.3	1157.44	-78.7497	805.33	1025.2	-35.8554	860.185	960.937	-98.6954	826.539	950.555	-84.668	895.57	907.35
605	0	199.242	748.247	1670.23	296.815	751.736	1663.01	182.322	590.997	1680.5	326.488	601.751	1666.35	235.337	557.857	1504.53	205.805	510.737	1243	232.172	711.089	1426.67	214.714	807.502	1221.31	272.834	504.399	1295.95	50.2658	652.433	1481.16	-37.4284	682.999	1257.95	-59.2249	694.18	1158.08	-77.0342	809.333	1023.02	-33.9331	861.715	956.677	-96.7414	828.798	947.889	-81.3648	895.469	901.032
606	0	199.595	761.284	1673.13	297.134	765.017	1666.46	182.675	604.03	1683.63	326.875	615.109	1670.18	236.49	571.292	1508.09	207.84	523.774	1246.48	233.085	724.183	1430.15	214.825	820.543	1224.79	274.835	517.497	1299.76	50.8764	665.233	1483.67	-36.1645	691.984	1259.1	-56.873	701.516	1159.06	-75.3535	812.749	1020.97	-31.6233	862.919	952.987	-94.797	830.29	945.084	-78.4833	894.525	894.87
607	0	199.985	774.133	1675.92	297.533	777.988	1669.66	183.135	616.83	1686.49	327.299	628.074	1673.22	237.254	584.14	1511.27	209.778	537.005	1249.66	234.163	737.372	1433.28	214.993	833.58	1227.83	276.981	530.666	1303.2	51.5954	678.19	1485.85	-34.6046	700.382	1260.25	-54.541	708.239	1159.81	-73.501	815.713	1019.02	-29.8876	863.49	949.228	-92.6062	831.068	942.64	-75.8107	893.177	889.295
608	0	200.432	786.831	1678.82	297.925	790.771	1672.81	183.818	629.411	1688.99	327.819	640.816	1676.28	238.613	597.427	1514.18	211.68	550.369	1252.67	235.051	750.601	1436.24	215.503	846.548	1231.15	279.152	544.128	1306.47	52.3946	691.107	1488.18	-33.1303	708.532	1261.17	-52.0625	714.545	1160.67	-71.3309	818.131	1017.18	-27.888	864.054	945.914	-90.4206	831.212	940.182	-73.3674	891.328	884.476
609	0	200.917	799.363	1681.59	298.105	803.388	1675.84	184.485	642.042	1691.35	328.742	653.62	1679.25	239.751	610.916	1516.89	213.489	563.586	1255.23	235.823	763.728	1439.04	216.286	859.547	1234.4	281.237	557.744	1309.36	53.2687	704.099	1490.27	-31.4637	716.574	1262.17	-49.9519	720.492	1161.32	-69.1642	820.156	1015.37	-25.81	864.391	943.289	-88.2795	830.735	937.964	-71.2494	889.105	880.1
610	0	201.419	811.793	1683.97	298.884	815.958	1678.67	185.07	654.393	1693.18	329.225	665.986	1681.54	240.702	624.015	1519.33	215.038	576.962	1257.64	236.708	776.875	1441.67	217.119	872.375	1236.99	283.133	571.063	1312.01	54.0285	716.971	1492.1	-29.9702	724.58	1263.15	-47.577	726.36	1162.11	-66.8973	822.065	1013.64	-23.484	864.473	940.679	-85.9514	830.047	935.89	-69.2676	886.602	876.193
611	0	202.301	824.129	1686.06	299.473	828.39	1680.93	185.684	666.668	1694.48	329.992	678.454	1683.4	241.522	636.719	1521.04	216.568	590.179	1259.62	237.604	790.061	1443.63	218.05	885.152	1239.2	285.188	584.598	1314.23	54.7529	729.78	1493.27	-28.1858	732.483	1263.69	-45.1251	731.901	1162.82	-64.5258	823.202	1011.55	-21.7673	863.959	937.269	-83.4534	829.105	933.823	-67.2703	883.968	872.411
612	0	202.577	836.446	1687.55	299.98	840.942	1682.8	186.585	678.909	1695.51	330.594	690.922	1684.63	242.616	649.824	1522.25	218.269	603.432	1260.96	238.669	803.194	1445.31	218.841	898.013	1241.06	287.168	598.13	1315.92	55.3573	742.58	1494.36	-26.3359	740.318	1264.16	-42.8894	737.394	1163.11	-62.2607	824.236	1009.46	-19.2073	864.213	934.894	-80.6243	827.661	931.206	-65.1563	881.294	868.957
613	0	203.19	848.75	1688.88	300.561	853.344	1684.28	187.411	691.128	1696.13	331.399	703.44	1685.64	243.666	663.003	1523.29	219.741	616.361	1262.01	239.817	816.279	1446.63	219.965	910.703	1242.49	289.04	611.785	1316.99	55.9875	755.24	1495.12	-24.5416	748.215	1264.36	-40.6255	742.734	1163.34	-59.7775	825.261	1007.57	-17.2245	863.833	932.153	-77.9958	826.176	929.133	-63.2529	878.575	865.478
614	0	203.711	861.127	1689.63	301.233	865.889	1685.25	188.16	703.405	1696.34	332.202	715.996	1686.22	244.289	675.408	1523.8	221.291	629.434	1262.8	240.722	829.317	1447.33	221.121	923.422	1243.26	290.706	624.804	1317.92	56.7303	768.232	1495.41	-22.8203	756.309	1264.36	-38.1636	748.176	1163.63	-57.612	826.145	1005.56	-15.2159	863.145	929.016	-75.2908	824.605	927.052	-61.1678	875.747	862.244
615	0	204.251	873.542	1689.84	301.759	878.494	1685.54	189.134	715.843	1696.09	333.11	728.682	1686.1	245.463	688.84	1523.82	222.72	642.483	1262.9	241.951	842.472	1447.58	222.568	935.987	1243.52	292.487	638.039	1318.32	57.5547	781.275	1495.25	-21.0692	764.468	1263.97	-35.7429	753.843	1163.58	-55.1591	827.134	1003.38	-13.0428	862.313	925.986	-72.636	822.739	924.64	-59.0652	872.958	859.006
616	0	205.018	886.123	1689.68	302.355	891.187	1685.53	190.157	728.412	1695.52	333.886	741.518	1685.46	245.599	702.262	1522.98	224.069	655.661	1262.59	243.067	855.514	1447.35	223.908	948.374	1243.44	294.046	651.249	1317.97	58.2878	794.16	1494.82	-19.6431	772.684	1263.7	-33.4659	759.296	1163.15	-52.4959	827.63	1001.1	-11.1889	862.067	923.225	-69.7536	821.138	922.419	-57.0007	870.243	855.72
617	0	205.653	898.834	1688.89	303.277	904.076	1684.88	190.962	741.004	1694.42	334.891	754.294	1684.82	246.781	715.297	1522.21	225.133	668.665	1262.09	244.039	868.465	1446.64	225.323	960.862	1242.6	295.156	663.989	1317.51	58.8799	807.283	1493.85	-18.0876	780.754	1262.91	-31.2048	764.982	1162.8	-50.3848	828.61	999.047	-8.66843	861.36	920.642	-67.0469	819.612	920.305	-55.0379	867.289	852.732
618	0	206.308	911.69	1687.69	303.939	917.21	1683.75	191.773	753.838	1693.12	335.747	767.333	1683.62	247.007	727.717	1520.51	225.848	681.558	1261.01	245.131	881.572	1445.72	226.915	973.588	1241.32	296.062	676.788	1316.34	59.6901	820.67	1492.37	-16.3716	789.125	1261.62	-28.9142	770.867	1162.13	-48.2083	829.734	996.499	-6.78553	860.904	917.48	-64.5588	818.44	918.029	-52.9877	864.601	849.261
619	0	206.909	924.524	1686.01	304.369	930.224	1682.16	192.932	766.741	1691.59	336.744	780.585	1682.29	248.211	741.174	1518.97	226.445	694.775	1259.39	246.084	894.632	1444.1	228.329	986.337	1239.51	297.344	690.051	1314.68	60.26	833.707	1490.71	-15.2268	797.467	1260.73	-26.2887	776.826	1161.19	-45.9142	831.077	994.21	-4.66012	860.911	914.807	-61.8171	817.453	915.829	-50.6574	862.183	845.918
620	0	207.73	937.809	1684.12	305.585	943.656	1680.35	194.061	779.799	1689.92	337.941	793.855	1680.62	249.524	754.764	1517.2	226.823	708.037	1257.68	247.172	907.731	1442.42	230.243	999.755	1237.69	297.894	702.592	1312.79	61.1844	847.227	1488.89	-13.9872	806.084	1259.36	-23.8053	783.164	1160.11	-44.0036	832.659	992.171	-2.76601	860.973	911.951	-59.3741	816.483	913.677	-48.5873	859.61	842.757
621	0	208.35	950.985	1681.71	305.822	956.93	1677.85	195.088	793.045	1688.01	338.895	807.366	1678.83	250.424	768.082	1515.4	226.688	720.866	1255.75	248.008	920.824	1440.2	231.728	1013.32	1235.16	298.295	715.4	1310.68	61.7143	860.707	1486.54	-13.0117	814.751	1257.66	-21.5329	789.799	1158.93	-42.1293	834.57	989.914	-1.63189	860.719	908.378	-57.4213	816.007	911.724	-46.5371	857.165	839.203
622	0	209.097	964.485	1678.79	306.636	970.569	1675.08	196.086	806.329	1685.85	339.644	821.013	1676.38	250.429	780.283	1512.74	226.652	733.879	1253.4	248.924	933.883	1437.55	233.322	1027.24	1232.24	298.494	728.18	1308.21	62.4874	874.528	1483.81	-12.0233	823.989	1256.08	-19.1549	796.823	1157.55	-40.4901	836.848	987.292	-0.123796	861.132	904.845	-55.0362	815.877	909.666	-44.4557	855.018	835.617
623	0	209.603	977.932	1675.69	307.695	984.315	1672.1	197.079	819.885	1683.6	340.718	834.677	1674.3	252.084	794.942	1510.23	226.431	747.07	1250.81	249.902	946.918	1434.96	235.001	1041.5	1229.45	298.564	741.049	1305.59	62.9598	888.139	1481.15	-11.0196	833.432	1254.18	-16.7123	804.389	1156.02	-38.7529	839.552	985.026	1.38033	862.479	901.861	-52.7984	816.07	907.579	-42.4744	853.028	832.494
624	0	210.373	991.61	1672.4	308.226	998.036	1668.73	197.775	833.423	1681.06	341.48	848.444	1671.83	252.881	808.301	1507.6	226.076	760.275	1248.06	250.75	960.01	1432.23	236.784	1055.73	1226.83	298.534	754.038	1302.63	63.6069	902.069	1478.33	-10.0215	843.346	1252.62	-14.5598	812.509	1154.47	-37.3455	842.698	982.829	1.302	863.977	899.394	-51.1321	816.954	906.122	-40.7351	851.429	829.344
625	0	210.846	1005.24	1668.96	308.892	1011.81	1665.3	198.487	847.148	1678.5	342.243	862.272	1669.3	253.397	821.45	1504.85	225.437	773.534	1245.11	251.514	973.312	1429.46	238.578	1069.85	1224.14	298.14	766.577	1299.87	64.0226	915.83	1475.55	-9.04108	853.606	1250.54	-12.6171	821.37	1152.89	-35.9664	846.418	981	4.56985	864.977	896.588	-49.9195	818.323	904.78	-39.0608	850.12	826.762
626	0	211.332	1019.08	1665.38	308.54	1025.2	1661.27	199.289	860.864	1676.02	342.913	876.099	1666.6	253.808	834.972	1501.9	224.928	787.178	1242	252.257	986.615	1426.54	240.27	1083.71	1221.4	297.875	779.694	1296.8	64.3045	929.774	1472.79	-7.74207	864.691	1248.69	-10.4759	830.822	1151.23	-35.0456	851.021	979.382	5.71991	867.797	894.213	-48.4707	820.572	903.79	-37.6463	849.448	824.241
627	0	211.768	1032.95	1662.08	310.033	1039.4	1658.25	199.908	874.731	1673.57	343.514	889.884	1664.1	253.835	848.227	1498.93	224.487	800.947	1238.91	252.798	1000.06	1423.85	241.8	1097.54	1218.81	297.538	793.066	1293.59	64.6381	943.875	1469.96	-6.6664	876.006	1246.71	-8.70035	841.09	1149.36	-34.4837	856.091	977.954	6.82022	871.138	891.972	-47.5128	823.743	903.05	-36.2273	849.342	822.091
628	0	211.976	1046.7	1658.73	309.455	1052.66	1654.49	199.905	888.679	1671.19	343.589	903.646	1661.53	253.049	860.023	1495.94	223.89	814.816	1235.93	253.334	1013.65	1421.06	243.23	1111.46	1216.08	296.874	806.533	1290.58	64.5267	957.887	1467.12	-5.80318	887.981	1244.1	-7.19192	851.855	1147.55	-33.8333	862.322	976.394	6.48178	875.093	889.788	-47.1192	827.708	902.4	-35.2226	849.873	819.905
629	0	212.173	1060.67	1655.51	309.42	1066.41	1651.27	199.77	902.489	1668.56	343.477	917.348	1658.82	252.967	874.49	1493.15	223.538	828.996	1232.79	253.604	1027.43	1418.39	244.559	1125.41	1213.68	296.474	820.391	1287.54	64.5794	972.112	1464.14	-4.94829	900.862	1241.58	-5.93794	863.493	1145.72	-33.6585	869.403	974.674	6.33659	880.296	887.885	-47.2314	832.678	901.904	-34.6259	851.24	817.917
630	0	212.568	1074.58	1652.75	309.039	1079.87	1648.2	199.722	916.378	1666.4	343.253	930.988	1656.51	252.434	888.085	1490.36	223.379	843.213	1229.8	253.874	1041.28	1415.94	245.75	1139.51	1211.58	296.17	834.362	1284.7	64.5958	986.422	1461.09	-4.41612	913.84	1239.12	-4.81674	875.763	1143.72	-33.5827	877.498	973.293	6.50522	886.639	886.359	-47.536	838.827	901.594	-34.3852	853.549	816.4
631	0	211.936	1088.06	1650.01	309.109	1093.72	1645.95	199.111	930.417	1664.14	342.764	944.691	1654.7	251.906	902.085	1487.88	223.517	857.779	1227.11	254.05	1055.28	1413.9	246.574	1153.6	1209.72	296.054	848.565	1282.14	64.3578	1000.69	1458.38	-3.9984	927.411	1236.18	-4.1033	888.503	1141.47	-33.9485	886.605	971.942	5.72767	892.891	884.192	-48.5686	846.22	901.223	-34.3374	856.99	815.414
632	0	211.449	1102.15	1647.83	308.429	1107.22	1643.93	198.176	944.068	1662.02	341.949	958.307	1653.06	251.276	915.614	1485.81	223.773	872.374	1224.8	253.859	1069.33	1411.92	247.063	1167.82	1208.06	295.866	862.757	1279.98	64.1166	1015.11	1455.68	-3.62669	941.502	1233.67	-3.40136	901.926	1139.31	-34.535	896.506	970.407	3.95269	901.188	882.465	-49.6654	854.586	900.982	-34.4934	861.387	814.286
633	0	210.691	1115.93	1645.68	307.288	1120.84	1642.11	196.852	958	1659.9	340.83	971.964	1651.42	247.354	924.963	1483.85	224.255	887.085	1222.54	253.713	1083.55	1410.09	247.19	1181.94	1206.3	296.08	877.286	1277.91	63.8203	1029.56	1453.04	-3.25736	955.768	1231	-3.07021	915.639	1137.16	-35.341	907.55	968.943	3.09303	910.058	880.758	-51.2874	864.197	900.662	-34.9687	867.101	814.124
634	0	209.918	1129.45	1643.88	306.259	1134.62	1640.95	195.811	971.784	1657.97	339.484	985.624	1650.42	246.912	939.068	1481.9	225.024	901.995	1220.53	253.512	1097.8	1408.94	247.04	1196.12	1204.94	296.383	892.016	1276.16	63.3055	1043.92	1450.76	-3.01731	970.371	1228.49	-2.9369	929.913	1134.8	-36.4223	919.373	967.778	1.55449	920.046	879.014	-52.762	875.096	900.473	-36.1565	874.53	813.204
635	0	208.077	1143.16	1642.4	304.696	1148.19	1640.03	193.861	985.525	1656.4	337.79	999.274	1649.4	246.491	953.834	1480.19	225.407	917.011	1218.67	253.141	1112.12	1407.95	246.962	1210.77	1204.25	296.592	906.804	1274.7	62.6514	1058.27	1448.8	-2.94555	985.345	1226.16	-3.04854	944.47	1132.95	-37.7535	932.009	966.677	-0.409267	931.536	877.721	-54.9802	887.05	900.205	-37.7394	883.214	813.487
636	0	206.291	1156.68	1641.11	303.161	1161.86	1639.59	192.184	999.091	1655	336.205	1012.81	1649.31	245.478	967.742	1478.84	225.903	932.21	1217.01	252.63	1126.72	1407.61	246.681	1225.75	1203.65	296.724	921.791	1273.37	61.8863	1072.71	1447.25	-2.93109	1000.3	1224.07	-3.22075	959.37	1131.31	-39.3804	945.464	965.677	-1.55474	944.576	876.997	-57.1064	900.138	899.947	-39.9525	893.638	813.091
637	0	204.516	1170.53	1640.65	302.102	1175.92	1639.78	190.207	1012.97	1654.15	335.168	1026.42	1649.63	244.227	981.647	1477.86	226.466	947.674	1215.45	252.115	1141.16	1407.2	246.432	1241.18	1203.79	296.78	936.804	1272.14	61.0038	1086.96	1445.96	-3.2138	1015.56	1222.58	-3.56889	974.46	1129.92	-40.9047	959.988	964.941	-4.60568	957.488	875.235	-59.2404	914.23	899.889	-42.3982	905.524	813.314
638	0	202.62	1184.36	1640.47	300.025	1189.57	1640.27	188.237	1026.81	1653.64	332.73	1040.12	1650.11	242.799	995.534	1477.34	226.73	963.194	1214.37	251.39	1155.81	1407.5	246.091	1256.73	1204.05	296.566	951.929	1271.33	60.2729	1101.68	1445.07	-3.6051	1030.77	1221.3	-4.19901	990.093	1128.94	-42.5693	975.208	964.295	-6.10562	972.769	874.434	-61.3018	929.442	899.783	-45.4449	918.973	813.453
639	0	200.522	1198.06	1640.6	297.769	1203.15	1641.12	185.835	1040.53	1653.47	330.32	1053.8	1650.74	242.15	1010.6	1476.76	226.507	978.722	1213.69	251.022	1170.51	1408.13	245.645	1272.31	1204.42	295.941	966.968	1270.95	59.4204	1116.37	1444.3	-4.31671	1046.47	1220.44	-5.03714	1005.99	1127.97	-44.4831	991.099	963.792	-8.22337	988.699	873.884	-63.6482	945.495	899.644	-48.344	934.458	813.187
640	0	198.485	1212.09	1641.18	295.702	1217.02	1642.19	183.478	1054.52	1653.23	328.133	1067.51	1651.57	240.362	1024.46	1477.17	226.064	994.032	1213.53	250.306	1185.15	1408.66	245.761	1287.98	1205.22	295.289	982.083	1271.01	58.7129	1131.18	1443.93	-5.10187	1062.3	1219.93	-6.13274	1022.3	1127.38	-46.2364	1007.91	963.382	-10.7229	1005.63	873.217	-65.4684	962.5	899.135	-51.7697	951.461	813.341
641	0	196.581	1226.1	1642.16	293.915	1231.05	1644.03	181.562	1068.45	1653.22	325.961	1081.29	1652.72	240.428	1040.12	1477.24	225.802	1009.46	1213.6	249.788	1200.07	1409.65	245.996	1303.68	1206.08	294.639	997.094	1271.47	58.1176	1146.11	1443.94	-5.9782	1078.29	1219.47	-7.34855	1038.94	1127.1	-47.9174	1025.55	962.979	-12.5007	1023.59	872.757	-67.3216	980.516	898.901	-54.919	970.017	812.707
642	0	194.978	1240.05	1643.67	291.842	1244.95	1646.02	179.416	1082.56	1653.52	324.016	1095.3	1654.44	241.016	1056.25	1478.31	225.418	1024.68	1214.37	249.262	1214.94	1410.88	246.511	1319.06	1207.23	294.271	1011.93	1272.33	57.6749	1160.99	1444.33	-6.68202	1094.68	1219.72	-8.66868	1056.05	1126.84	-49.6706	1044.01	962.663	-15.0927	1042.51	872.091	-69.5164	999.915	898.569	-57.9207	990.241	812.186
643	0	193.048	1254.29	1644.99	290.478	1259.44	1648.27	177.422	1096.82	1654.12	322.061	1109.46	1656.01	239.357	1068.99	1480.09	225.074	1039.39	1215.82	249.009	1229.39	1412.16	247.251	1334.2	1208.14	293.853	1026.51	1273.78	57.6333	1175.7	1444.79	-7.50709	1111.17	1219.79	-9.98147	1073.48	1126.93	-51.4025	1063.22	962.451	-17.021	1062.74	872.043	-71.5787	1019.82	898.07	-61.1652	1012.01	811.484
644	0	191.443	1268.38	1645.98	288.528	1273.48	1649.99	175.966	1110.9	1654.55	320.472	1123.6	1657.65	239.424	1083.97	1481.67	225.053	1053.82	1217.36	248.81	1243.83	1413.3	248.188	1348.81	1208.93	293.823	1040.89	1275.61	57.8435	1190.34	1445.53	-8.19624	1127.95	1220.26	-11.4635	1091	1126.94	-53.2468	1083.17	962.439	-18.999	1083.87	871.857	-73.8666	1040.76	897.36	-64.4656	1035.07	810.769
645	0	190.08	1282.55	1646.97	287.184	1287.78	1651.68	174.733	1125.22	1655.15	319.149	1137.87	1659.3	239.449	1098.22	1483.35	225.201	1067.62	1219.04	248.852	1258.11	1414.57	248.962	1362.94	1209.83	294.142	1055.14	1277.45	58.0271	1204.54	1446.71	-8.87605	1144.7	1220.83	-12.8282	1108.78	1126.9	-54.9446	1103.86	962.666	-22.2626	1105.89	871.76	-75.8513	1062.7	896.562	-67.6102	1059.52	810.133
646	0	188.934	1296.66	1647.94	286.063	1302.08	1653.27	173.973	1139.25	1655.85	318.376	1152.23	1661.16	241.238	1114.4	1484.65	225.261	1081.31	1220.82	249.043	1272.16	1415.92	249.525	1376.58	1210.63	294.592	1069.01	1279.49	58.3899	1218.42	1448.07	-9.46064	1161.52	1221.32	-14.2115	1126.68	1127.22	-56.7611	1124.96	962.919	-24.0054	1128.72	872.026	-78.1864	1085.09	895.861	-70.7141	1085.14	809.536
647	0	188.407	1310.78	1648.95	285.498	1316.67	1654.44	173.499	1153.54	1657.19	317.928	1166.82	1663.05	241.499	1128.49	1485.92	225.484	1094.87	1222.26	249.42	1285.94	1417.25	250.114	1389.91	1211.31	295.195	1082.46	1281.21	58.6762	1232.22	1449.48	-9.90045	1178.46	1222.32	-15.6022	1144.57	1127.36	-57.824	1146.77	962.714	-25.6903	1152.25	872.315	-79.8237	1108.25	895.093	-73.8641	1111.83	809.29
648	0	188.003	1325.07	1649.72	285.687	1331.26	1655.55	173.862	1167.77	1659.13	318.089	1181.45	1664.84	242.229	1142.62	1487.61	225.982	1108.52	1223.78	249.961	1299.49	1418.72	251.019	1403.3	1212.42	295.642	1095.71	1282.71	59.1531	1246.01	1450.85	-10.1594	1195.48	1223.02	-16.5965	1162.75	1127.88	-59.3293	1168.72	963.168	-27.1565	1176.45	872.567	-81.2591	1132.1	894.421	-76.6566	1139.77	809.356
649	0	188.166	1339.37	1650.68	285.475	1345.6	1656.3	174.269	1182.12	1661.26	318.623	1196	1666.86	242.641	1156.24	1489.2	226.255	1122.12	1225.2	250.159	1312.81	1420.24	251.606	1416.31	1213.69	295.751	1108.84	1284.29	59.5052	1259.6	1452.62	-10.2358	1212.62	1223.75	-17.8795	1180.99	1128.46	-60.2755	1191.28	963.508	-29.1553	1200.71	872.738	-82.4091	1156.37	893.879	-79.1013	1168.61	809.627
650	0	188.83	1353.62	1651.66	285.087	1359.57	1656.78	174.684	1196.4	1663.79	319.009	1210.44	1668.78	242.897	1170.11	1490.08	226.428	1135.52	1226.88	250.592	1326.06	1421.8	252.293	1429.51	1215.07	295.692	1121.93	1285.95	59.9418	1273.25	1454.29	-10.5096	1229.7	1225.04	-19.1548	1199.31	1129.32	-60.9877	1214.02	964.057	-30.6275	1225.89	873.404	-83.4708	1180.94	893.582	-81.5387	1197.98	810.377
651	0	189.802	1367.81	1652.98	285.897	1373.68	1657.74	175.584	1210.64	1666.23	319.868	1224.81	1670.7	243.34	1183.84	1492.04	226.334	1148.78	1228.63	251.343	1339.31	1423.73	252.895	1442.51	1216.67	295.345	1134.92	1287.58	60.536	1287.04	1456.09	-10.8703	1246.6	1226.41	-20.2404	1217.72	1130.15	-61.5851	1237.1	964.929	-31.4343	1252.06	875.037	-84.0993	1206.01	893.469	-83.4499	1228.19	811.949
652	0	191.032	1381.89	1654.75	287.095	1387.76	1659.03	176.747	1224.81	1668.99	321.094	1238.92	1673.02	243.711	1196.89	1494.24	226.314	1161.96	1230.69	252.115	1352.46	1425.92	253.839	1455.7	1218.99	294.931	1147.85	1289.3	61.0893	1300.71	1458.42	-10.9366	1263.48	1228.25	-21.2247	1236.09	1131.33	-62.1646	1260.35	966.271	-33.0488	1276.61	876.096	-84.5568	1231.55	893.758	-85.2226	1258.76	814.357
653	0	192.135	1395.92	1656.61	288.492	1401.72	1660.68	178.046	1238.96	1672.04	322.384	1253.02	1675.35	243.844	1209.79	1496.83	225.859	1174.92	1233.02	252.866	1365.42	1428.25	254.709	1468.91	1221.47	294.21	1160.67	1291.43	61.5824	1314.25	1460.94	-11.135	1280.19	1230.5	-22.151	1254.61	1132.79	-62.5452	1283.81	968.253	-32.9155	1304.54	879.914	-84.6302	1257.42	894.444	-86.6153	1289.65	817.97
654	0	193.924	1409.85	1658.89	290.075	1415.6	1662.34	179.351	1253.06	1675.11	323.825	1266.92	1677.7	244.104	1223.18	1499.39	225.37	1187.98	1235.6	253.754	1378.48	1430.72	255.633	1482.26	1224.31	293.532	1173.48	1293.94	62.232	1327.95	1463.89	-11.1483	1296.94	1233.15	-22.9233	1273.18	1134.75	-62.6384	1307.58	970.804	-33.2054	1331.28	883.133	-84.3698	1283.75	895.56	-87.5403	1320.76	822.187
655	0	195.431	1423.7	1661.19	291.683	1429.3	1664.09	180.658	1267	1678.12	325.17	1280.65	1679.89	244.719	1236.85	1502.04	224.704	1200.88	1238.27	254.486	1391.57	1433.16	256.611	1495.69	1227.22	292.836	1186.48	1296.34	63.0379	1341.95	1466.96	-11.3294	1313.51	1236.06	-23.4627	1291.84	1136.78	-62.282	1331.61	973.656	-32.8727	1358.99	887.266	-83.5391	1310.29	897.491	-87.996	1352.04	827.333
656	0	196.893	1437.3	1663.52	293.398	1442.85	1665.98	182.118	1280.87	1681.06	326.67	1294.18	1682.09	245.283	1250.44	1504.44	224.211	1214.09	1240.83	255.432	1404.68	1435.59	257.513	1509.15	1230.25	292.128	1199.33	1298.74	63.9017	1355.86	1470.15	-11.0642	1330.33	1239.07	-23.9079	1310.66	1139.22	-62.0895	1355.9	977.208	-32.1334	1387.01	892.186	-82.387	1337.35	899.755	-88.0894	1383.18	832.935
657	0	198.549	1451.06	1665.66	294.779	1456.22	1667.4	183.184	1294.48	1683.63	327.785	1307.58	1683.59	245.726	1263.81	1506.85	223.692	1227.1	1243.13	256.026	1417.98	1437.31	258.124	1522.35	1232.5	291.487	1212.45	1301.11	64.6448	1369.69	1473.19	-11.165	1346.97	1241.9	-24.4075	1329.48	1141.96	-61.5774	1380.52	980.714	-31.516	1414.6	897.065	-81.426	1364.72	902.836	-87.7191	1414.73	838.886
658	0	200.058	1464.56	1667.44	296.174	1469.57	1668.82	184.407	1308.05	1685.99	328.898	1320.99	1685.02	246.366	1277.32	1508.65	223.423	1240.34	1245.52	256.852	1431.37	1439.03	258.87	1535.26	1234.49	291.064	1225.6	1303.22	65.6027	1383.55	1476.01	-11.1338	1363.76	1245.01	-24.9148	1348.23	1144.49	-60.8975	1405.51	984.197	-30.7555	1443.22	902.44	-80.3459	1392.63	906.23	-86.7943	1445.94	844.948
659	0	201.395	1478.09	1669.41	297.42	1482.81	1670.24	185.586	1321.55	1688	330.049	1334.22	1686.41	246.991	1290.89	1510.6	223.222	1253.7	1247.37	257.609	1444.78	1440.59	259.442	1547.73	1236.35	290.77	1238.85	1304.97	66.644	1397.34	1478.86	-10.911	1380.59	1247.77	-25.1964	1367.18	1147.02	-60.2146	1430.85	988.22	-29.6594	1471.31	908.059	-79.4548	1420.8	909.859	-85.7919	1477.15	851.479
660	0	202.5	1491.55	1671.12	298.598	1496.08	1671.53	186.643	1335	1689.61	331.075	1347.41	1687.55	247.676	1304.46	1512.4	223.12	1266.94	1249.19	258.23	1458.2	1441.89	259.966	1560.15	1237.81	290.838	1252.27	1306.46	67.5547	1411.13	1481.3	-10.8722	1397.44	1250.45	-25.6507	1386.05	1149.46	-59.4777	1456.19	992.586	-28.4258	1499.82	914.178	-78.4633	1449.28	913.724	-84.3844	1508.26	857.813
661	0	203.359	1504.99	1672.22	299.701	1509.34	1672.62	187.28	1348.34	1690.81	331.847	1360.61	1688.24	248.113	1317.92	1513.36	222.966	1280.16	1250.63	258.835	1471.71	1442.86	260.382	1572.31	1238.73	290.641	1265.57	1307.81	68.1897	1424.72	1483.36	-10.9052	1414.06	1252.6	-26.1856	1405.08	1151.51	-59.0533	1481.64	996.799	-27.5913	1528.34	920.606	-77.4618	1478.08	917.599	-82.7995	1539.25	864.024
662	0	204.242	1518.32	1673.34	300.559	1522.58	1673.51	187.988	1361.7	1691.49	332.383	1373.76	1688.65	248.838	1331.5	1514.23	223.049	1293.59	1251.67	259.488	1485.21	1443.52	260.744	1584.39	1239.56	290.572	1278.97	1308.67	69.1077	1438.53	1485	-10.9677	1431.03	1254.66	-26.7095	1424.27	1153.44	-58.8501	1507.29	1001.31	-26.3839	1557.02	927.417	-76.6112	1507.11	921.936	-81.1386	1570.24	870.289
663	0	204.676	1531.67	1674.36	301.33	1535.87	1674.31	188.677	1375.15	1691.82	332.947	1387.02	1689.01	249.407	1345.04	1514.7	223.093	1306.81	1252.4	260.132	1498.77	1444.15	261.187	1596.5	1239.86	290.847	1292.5	1309.3	69.9715	1452.33	1486.32	-11.1095	1447.73	1256.61	-27.5949	1443.34	1154.62	-58.3877	1532.8	1005.5	-25.2638	1585.36	934.329	-75.737	1536.05	926.309	-79.2883	1600.95	876.667
664	0	205.297	1545.12	1674.72	301.965	1549.46	1674.72	189.172	1388.73	1691.85	333.555	1400.31	1688.96	249.876	1358.58	1515.85	223.422	1320.3	1252.86	260.765	1512.47	1444.33	261.291	1608.55	1239.53	291.064	1305.9	1309.55	70.8822	1466.12	1487.13	-11.1448	1464.61	1257.8	-28.4061	1462.79	1155.65	-58.1601	1558.47	1009.91	-24.2188	1613.59	940.938	-75.0036	1564.93	930.406	-77.3028	1631.56	882.852
665	0	205.831	1558.85	1674.44	302.411	1563.06	1674.44	189.463	1402.36	1691.29	333.902	1413.87	1688.5	250.441	1372.23	1515.64	223.845	1333.68	1252.9	261.193	1526.04	1443.61	261.602	1620.94	1238.77	291.392	1319.31	1309.58	71.8336	1479.88	1487.15	-11.5392	1481.38	1258.31	-29.2566	1482.51	1156.29	-57.9721	1584.27	1013.98	-22.9737	1641.58	947.261	-74.5359	1593.98	934.718	-75.0076	1662.19	888.972
666	0	206.415	1572.65	1673.9	302.859	1576.64	1673.94	189.896	1416.06	1690.55	334.195	1427.66	1687.81	251.482	1386.15	1515.08	224.73	1346.97	1252.75	261.777	1539.75	1442.67	261.678	1633.63	1237.47	292.127	1332.82	1309.17	72.689	1493.62	1486.76	-11.7687	1498.25	1258.57	-30.2129	1502.35	1156.68	-57.4716	1609.91	1017.61	-21.686	1669.66	953.584	-73.8578	1622.89	939.225	-72.6568	1692.66	895.26
667	0	206.771	1586.54	1672.93	303.147	1590.67	1672.96	190.284	1429.99	1689.63	334.58	1441.57	1686.94	252.124	1399.94	1514.33	225.814	1359.95	1252.26	262.193	1553.4	1441.43	261.387	1646.47	1235.68	292.949	1346.34	1308.54	73.5641	1507.26	1485.9	-11.8457	1515.49	1258.31	-31.1042	1522.42	1156.71	-56.9657	1635.51	1021.14	-20.1137	1696.76	959.49	-73.2123	1651.41	943.538	-70.1529	1722.68	901.387
668	0	206.897	1600.65	1671.42	303.315	1604.75	1671.64	190.446	1443.98	1688.34	334.888	1455.67	1685.8	252.743	1413.54	1513.33	226.864	1372.45	1251.66	262.744	1567.14	1440.08	261.415	1659.88	1233.88	293.744	1359.7	1307.74	74.3869	1520.92	1484.48	-12.2821	1532.57	1257.65	-32.2822	1542.41	1156.61	-56.363	1660.85	1024.64	-18.6187	1723.79	965.462	-72.502	1680.05	948.266	-67.7997	1752.15	907.643
669	0	207.43	1614.66	1669.63	303.592	1618.92	1669.9	190.785	1458.1	1686.89	335.237	1469.9	1684.58	253.502	1427.18	1511.98	228.287	1385.08	1250.53	263.211	1581.15	1438.33	261.578	1673.57	1231.72	294.983	1373.21	1306.72	75.1915	1534.37	1483.13	-12.2465	1550.04	1256.98	-33.0182	1562.59	1156.27	-55.8987	1685.95	1028.36	-16.9793	1750.08	971.035	-71.6364	1708.08	953.011	-65.4301	1781.23	914.212
670	0	207.302	1628.97	1667.39	304.019	1633.28	1668.07	191.295	1472.44	1685.43	335.551	1484.22	1683.22	254.938	1441.61	1510.75	230.064	1397.99	1249.22	263.563	1594.42	1436.35	261.758	1687.62	1229.57	296.388	1386.69	1305.5	75.9971	1547.73	1481.64	-12.4606	1567.3	1256.5	-33.6016	1582.73	1156.03	-54.8183	1710.74	1031.95	-15.0803	1776.08	977.025	-70.6998	1735.6	957.519	-63.2036	1809.51	921.008
671	0	207.75	1643.23	1665.27	304.473	1647.53	1666.1	191.823	1486.84	1683.78	336.097	1498.63	1682.02	255.84	1455.19	1509.31	231.942	1411.02	1247.72	264.021	1608.08	1434.48	261.933	1701.67	1227.64	297.695	1400.03	1304.14	76.7705	1561.02	1479.94	-12.5592	1584.58	1255.82	-33.9924	1602.81	1155.84	-53.9715	1734.73	1035.9	-13.5455	1801.08	982.969	-69.8135	1762.41	962.552	-61.0161	1837.18	928.122
672	0	208.136	1657.44	1662.7	304.887	1662.03	1663.66	192.204	1501.24	1681.99	336.675	1513.25	1680.4	256.842	1468.96	1507.53	234.031	1424.18	1246	264.812	1621.68	1432.49	262.022	1715.96	1225.6	299.03	1413.37	1302.58	77.6455	1574.18	1478.16	-12.1471	1602.04	1255.39	-34.406	1622.62	1155.88	-53.0734	1758.3	1039.69	-11.9481	1825.79	988.894	-68.7219	1788.39	967.558	-59.1518	1864.11	935.491
673	0	208.716	1671.93	1660.05	305.535	1676.43	1661.07	192.79	1515.68	1680.07	337.226	1527.74	1678.83	258.119	1482.71	1505.74	236.048	1437.59	1244.13	265.562	1635.34	1430.38	262.103	1730.48	1223.54	300.885	1427.02	1300.82	78.472	1587.18	1476.41	-11.6832	1619.38	1254.87	-34.4313	1642.07	1155.9	-52.1244	1781.23	1043.74	-10.2148	1849.78	994.849	-67.9764	1813.5	972.444	-57.4328	1890.08	942.937
674	0	209.322	1686.18	1657.17	306.075	1690.94	1658.38	193.596	1530.19	1678.25	337.903	1542.33	1677.23	259.439	1496.33	1503.26	238.411	1451.28	1242.1	266.261	1649.02	1428.15	262.189	1745.08	1221.76	302.748	1440.49	1298.94	79.4873	1600.53	1474.48	-11.0105	1636.62	1254.23	-34.214	1661.19	1155.81	-51.0653	1803.48	1047.57	-8.6089	1872.84	1000.51	-66.6382	1837.99	977.487	-56.1989	1915.04	950.424
675	0	210.061	1700.39	1654.07	306.688	1705.22	1655.51	194.366	1544.64	1676.36	338.711	1556.91	1675.28	260.581	1510.14	1501.3	240.626	1465.16	1240.06	267.132	1662.79	1425.79	262.329	1759.58	1219.85	304.388	1454.02	1297.03	80.681	1613.8	1472.43	-10.1178	1653.72	1253.59	-33.8474	1679.87	1155.96	-49.8361	1825.03	1051.01	-7.2398	1894.98	1005.4	-65.5478	1861.38	982.308	-54.8492	1939.33	957.862
676	0	210.914	1714.72	1651.17	307.428	1719.81	1652.58	195.203	1558.97	1674.63	339.761	1571.46	1673.52	261.766	1523.95	1499.34	242.735	1479.21	1237.94	268.116	1676.57	1423.46	262.574	1773.81	1217.83	306.176	1467.78	1295.13	82.0345	1627.18	1470.56	-9.00942	1670.6	1252.7	-33.4494	1697.76	1155.93	-48.4688	1845.85	1054.41	-5.80587	1916.66	1010.52	-65.1675	1883.62	986.743	-53.6388	1962.48	964.791
677	0	212.045	1728.85	1648.42	308.59	1734.08	1649.86	196.567	1573.33	1672.81	340.905	1585.86	1671.62	263.245	1537.8	1497.16	244.62	1493.38	1235.78	269.297	1690.29	1421.43	263.02	1787.57	1215.84	307.953	1481.62	1293.09	83.2671	1640.86	1468.92	-7.55854	1687.38	1252.04	-32.5578	1715.39	1155.9	-47.2303	1865.78	1057.63	-4.54631	1937.24	1015.5	-64.113	1905.25	991.06	-52.6649	1984.58	972.057
678	0	213.404	1743.03	1646.05	309.764	1748.26	1647.36	197.591	1587.21	1671.12	342.135	1600.19	1669.81	264.608	1551.52	1495.26	246.164	1507.82	1233.64	270.497	1704.14	1419.37	263.829	1801.27	1213.98	309.397	1495.44	1291.03	84.6344	1654.63	1467.13	-6.40173	1703.61	1251.54	-31.5809	1732.41	1155.7	-46.0655	1884.86	1060.76	-3.4356	1956.97	1020.03	-63.1396	1925.91	995.269	-51.9099	2005.73	979.006
679	0	214.837	1757.08	1643.73	311.095	1762.33	1645.1	199.138	1601.46	1669.25	343.512	1614.29	1667.82	265.961	1565.29	1493.08	247.392	1522.28	1231.73	271.88	1718.1	1417.49	264.887	1815.02	1212.36	310.583	1509.41	1289.18	86.2302	1668.63	1465.71	-5.26145	1719.17	1250.72	-30.9065	1748.66	1155.49	-44.8857	1903	1063.45	-2.40031	1975.97	1024.28	-62.0265	1945.56	998.927	-51.4647	2025.83	985.397
680	0	216.302	1770.75	1641.93	312.683	1776.12	1643.12	200.515	1615.16	1667.54	345.189	1628.29	1666.03	267.447	1579.21	1491.08	248.401	1536.59	1229.79	273.408	1732	1415.91	266.249	1828.84	1210.91	311.825	1523.48	1287.25	87.6858	1682.57	1464.79	-3.85525	1734.58	1250.09	-29.9164	1764.58	1155.1	-43.9837	1920.69	1065.82	-1.27126	1994.24	1028.25	-61.0534	1964.27	1002.21	-50.8634	2045.04	991.624
681	0	217.982	1784.54	1640.58	314.504	1789.82	1641.65	202.881	1629.35	1666.02	347.015	1641.95	1664.55	269.216	1593.12	1489.53	249.537	1551.04	1227.9	275.116	1745.97	1414.66	267.936	1842.66	1210	313.062	1537.76	1285.25	89.2858	1696.59	1463.68	-2.75491	1749.21	1249.41	-28.5347	1780.36	1154.64	-42.986	1937.55	1067.72	-0.53106	2011.58	1031.48	-59.9209	1981.92	1004.8	-50.636	2063.05	997.133
682	0	219.863	1798.25	1639.3	316.471	1803.57	1640.41	204.493	1642.7	1664.86	348.752	1655.68	1663.25	270.886	1606.85	1488.07	250.423	1565.61	1226.1	276.901	1760.06	1413.49	269.694	1856.57	1209.12	314.086	1551.98	1283.62	91.2378	1710.73	1462.82	-1.34236	1763.89	1248.94	-27.4201	1795.5	1154.25	-41.6173	1953.76	1068.91	0.480816	2028.47	1034.32	-59.0075	1998.63	1006.64	-50.6102	2079.9	1001.86
683	0	222.175	1812.07	1638.36	318.709	1817.4	1639.27	206.448	1656.19	1663.72	351.136	1669.28	1661.77	272.494	1620.75	1486.45	251.273	1580.33	1224.64	278.748	1774.25	1412.54	271.739	1871.05	1208.32	315.198	1566.35	1282.17	93.0605	1724.9	1461.85	-0.093409	1778.4	1248.59	-26.248	1810.57	1153.87	-40.9319	1969.36	1069.8	1.18662	2044.32	1035.73	-57.8839	2014.66	1007.74	-50.6926	2095.86	1005.67
684	0	224.315	1825.59	1637.74	320.934	1831.01	1638.4	208.962	1669.84	1662.65	353.666	1683.29	1660.78	274.47	1634.78	1485.19	252.287	1595.27	1223.18	280.508	1788.51	1411.52	273.873	1885.86	1207.55	316.462	1580.98	1280.63	94.9569	1738.91	1461.12	1.18819	1792.81	1248.23	-24.7785	1825.46	1153.69	-39.748	1984.24	1069.58	1.9599	2059.47	1036.46	-56.9934	2029.99	1008.13	-50.853	2110.79	1008.27
685	0	226.627	1839.16	1637.54	323.226	1844.65	1638.16	211.525	1683.17	1662.21	356.016	1696.71	1659.85	276.553	1648.67	1484.07	253.168	1610.44	1221.86	282.412	1802.75	1411.04	276.238	1900.82	1207.43	317.944	1595.7	1279.51	97.0959	1753.07	1460.44	2.50678	1806.81	1247.88	-23.4602	1839.82	1153.52	-38.3472	1998.33	1069.04	2.61011	2073.94	1036.28	-56.1831	2044.35	1008.08	-50.9007	2124.89	1010.05
686	0	229.229	1852.68	1637.76	325.667	1858.43	1638.15	214.658	1696.86	1661.89	358.716	1710.4	1659.23	278.682	1662.73	1483.45	254.253	1625.7	1221.11	284.47	1817.23	1410.93	278.39	1916.26	1207.47	319.447	1610.47	1278.55	99.1641	1767.26	1460.32	3.75821	1820.86	1247.88	-22.0773	1853.92	1153.59	-37.6629	2012.29	1068.52	3.47169	2087.61	1035.61	-55.3819	2057.92	1007.42	-50.9393	2138.19	1010.75
687	0	231.781	1866.23	1638.56	328.16	1872.04	1638.62	217.63	1710.14	1661.98	361.854	1724.31	1658.96	280.811	1677.16	1483.2	255.45	1640.87	1220.94	286.524	1831.65	1411.06	280.468	1931.45	1207.8	321.349	1625.53	1277.99	101.039	1781.46	1460.77	5.43863	1835.05	1248.29	-20.3115	1867.58	1153.74	-36.3902	2025.4	1067.91	4.02911	2100.47	1034.09	-54.5951	2070.62	1006.67	-50.9044	2150.49	1010.38
688	0	234.568	1879.73	1639.82	331.032	1885.85	1639.45	220.846	1723.63	1662.57	364.943	1738.01	1658.9	283.136	1691.63	1483.44	256.91	1655.85	1221.2	288.469	1846.04	1411.64	282.364	1946.84	1208.47	323.049	1640.56	1277.73	103.013	1795.85	1461.46	7.15808	1848.73	1248.79	-18.5782	1880.94	1154.05	-35.4695	2037.87	1066.97	4.86869	2112.49	1032.36	-54.0392	2082.3	1005.32	-50.6763	2162.1	1008.93
689	0	237.338	1893.44	1641.71	334.016	1899.75	1640.87	224.089	1737.21	1663.5	368.078	1751.74	1659.23	285.248	1706.07	1484.23	258.168	1670.3	1221.87	290.41	1860.73	1412.75	284.018	1962.37	1209.74	324.452	1655.68	1278.01	104.771	1810.01	1462.72	8.7938	1862.1	1249.72	-16.6984	1893.69	1154.74	-34.4839	2049.22	1065.78	5.35596	2123.66	1029.96	-53.1004	2093.04	1003.72	-50.4613	2172.59	1006.44
690	0	240.086	1907.5	1643.74	336.945	1913.72	1642.22	227.282	1750.92	1664.85	371.302	1765.69	1659.44	287.197	1720.56	1485.57	259.314	1684.36	1223.35	292.1	1875.1	1413.76	285.25	1977.53	1210.79	325.589	1670.87	1278.83	106.459	1824.6	1464.41	10.5784	1875.34	1250.59	-15.2687	1905.89	1155.6	-33.2987	2060.13	1064.42	5.97753	2134.06	1027.2	-52.5735	2102.78	1001.71	-50.1497	2182.3	1002.38
691	0	243.266	1921.5	1645.96	339.886	1927.66	1643.37	230.488	1764.75	1666.39	374.389	1779.67	1659.7	288.782	1735.07	1486.44	260.3	1697.76	1225.09	293.456	1889.35	1415.02	286.089	1992.38	1212.1	326.82	1686.13	1279.98	107.926	1838.96	1466.35	12.6301	1888.44	1251.88	-13.6166	1917.72	1156.66	-32.4949	2070.28	1062.81	6.48652	2143.57	1023.74	-52.021	2111.47	999.014	-49.7535	2191.01	997.467
692	0	246.09	1935.67	1647.93	342.968	1941.76	1644.33	233.818	1779.09	1668.35	378.411	1794.22	1660.08	290.579	1749.66	1488.5	261.562	1711.25	1227	294.688	1903.42	1416.17	287.175	2007.08	1213.63	327.796	1700.47	1281.57	109.539	1853.07	1468.4	14.3612	1901.04	1252.94	-11.6333	1929.48	1157.94	-31.554	2079.73	1060.94	7.41819	2152.27	1019.78	-51.1454	2119.29	995.952	-49.109	2198.74	991.643
693	0	249.172	1949.97	1649.69	345.523	1955.81	1644.83	236.604	1793.15	1670.44	380.413	1808	1660.14	291.842	1763.64	1491.03	262.385	1724.45	1229.18	295.539	1917.35	1417.25	287.941	2021.17	1214.93	328.714	1714.07	1283.2	111.265	1867.1	1470.49	16.2092	1913.52	1254.56	-10.0358	1940.77	1159.41	-30.2028	2088.3	1058.38	7.86435	2160	1015.04	-50.2418	2126.32	992.423	-48.1444	2205.56	984.883
694	0	251.736	1964.28	1651.12	348.104	1970.14	1645.2	238.948	1807.36	1672.74	382.883	1822.19	1660.62	293.288	1777.26	1492.61	263.447	1737.6	1231.4	296.396	1931.06	1418.37	288.535	2034.76	1216.27	329.258	1727.06	1285	112.56	1880.76	1472.31	17.7379	1925.8	1255.71	-8.5521	1951.54	1160.73	-29.0873	2096.64	1056.08	8.6998	2167.05	1009.81	-48.9857	2132.57	988.702	-46.9876	2211.55	977.566
695	0	254.022	1978.74	1652.3	350.162	1984.47	1645.58	241.142	1821.65	1674.99	384.895	1836.41	1661.5	294.841	1790.73	1494.59	264.569	1750.77	1233.43	297.122	1944.54	1419.71	289.035	2047.89	1217.85	329.926	1740.04	1286.61	113.76	1893.75	1474.21	19.6016	1938.26	1257.35	-7.2759	1962	1161.83	-28.2036	2104.36	1053.16	9.86495	2173.35	1004.57	-48.151	2138.21	984.703	-45.6096	2216.61	969.527
696	0	255.505	1992.85	1653.66	351.664	1998.5	1646.24	243.026	1836.06	1677.44	386.691	1850.89	1662.96	295.955	1804.15	1496.16	266.034	1763.74	1235.57	297.832	1957.69	1421.36	289.378	2060.46	1219.52	330.953	1752.85	1288.48	114.71	1906.16	1475.9	20.5938	1949.81	1258.69	-5.56901	1972.14	1162.81	-26.6943	2111.3	1050.33	10.9451	2178.79	999.044	-47.0515	2143.15	980.895	-43.9842	2220.72	961.499
697	0	256.794	2007.05	1654.77	352.897	2012.9	1647.08	244.254	1850.13	1679.93	388.19	1865.44	1664.84	294.556	1813.61	1498.07	267.343	1776.33	1237.51	298.309	1970.66	1423.22	289.563	2072.95	1221.29	332.34	1765.78	1290.38	115.256	1918.25	1477.87	21.7271	1961.29	1260.08	-4.23011	1981.69	1163.65	-25.4366	2117.72	1047.57	12.3806	2183.62	993.805	-46.3747	2147.11	976.984	-42.1414	2224.04	952.944
698	0	257.831	2021.08	1655.87	353.852	2027.08	1648.17	245.725	1864.79	1682.42	389.601	1879.89	1667.3	296.781	1827.37	1499.94	268.794	1788.76	1239.46	298.531	1983.35	1425.03	289.599	2085.39	1223.28	333.936	1778.72	1292.13	115.906	1930.14	1479.71	22.6438	1972.11	1261.35	-2.85541	1990.67	1164.04	-24.2076	2123.35	1044.47	14.1492	2187.7	988.563	-44.9145	2151.03	973.265	-39.6832	2226.55	944.724
699	0	258.064	2034.84	1657.09	354.405	2041.2	1649.45	246.358	1878.49	1685.13	391.452	1894.84	1670.11	298.173	1840.74	1501.92	270.593	1801.29	1241.17	299.293	1996.01	1427.47	289.552	2097.78	1225.67	335.737	1791.37	1294.03	116.034	1941.75	1481.54	23.7008	1982.4	1262.38	-1.27083	1999.3	1164.3	-22.9976	2128.52	1041.72	15.9053	2190.99	983.39	-43.6143	2154.16	969.587	-37.1069	2228.26	936.576
700	0	258.131	2048.5	1658.59	354.463	2055.08	1651.1	246.786	1892.28	1687.81	391.738	1908.88	1672.96	299.267	1853.65	1504.39	272.02	1813.43	1243.27	299.803	2008.61	1429.92	289.352	2110.49	1228.2	337.2	1803.95	1296.13	116.267	1953.58	1483.22	24.4327	1992.11	1263.04	0.230543	2007.18	1164.39	-21.7211	2132.96	1038.7	17.4719	2193.55	978.297	-42.4236	2156.77	965.735	-34.5312	2229.18	928.655
701	0	258.211	2062.03	1660.04	354.436	2068.84	1652.78	247.152	1906.12	1690.59	392.086	1923.03	1675.81	300.053	1866.39	1506.69	273.272	1825.64	1245.46	300.273	2021.15	1432.18	288.771	2123.18	1230.31	338.267	1816.19	1298.64	116.298	1965.29	1484.81	25.1566	2001.15	1263.39	1.56669	2014.47	1164.32	-20.2549	2136.88	1035.5	19.1012	2195.46	972.956	-41.0839	2158.65	961.843	-31.7399	2229.28	920.882
702	0	258.158	2075.61	1661.87	354.389	2082.64	1654.82	247.139	1919.71	1693.15	391.656	1936.74	1678.72	301.015	1879.47	1509.59	274.829	1837.66	1247.76	300.566	2033.58	1434.6	288.364	2135.95	1232.67	339.624	1828.39	1301.18	116.381	1977.44	1486.16	25.8537	2009.56	1263.7	3.10873	2021.13	1164.22	-18.5828	2140.04	1032.14	21.1856	2196.72	967.611	-39.0144	2159.98	958.009	-28.7947	2228.75	913.374
703	0	258.255	2088.71	1663.75	354.073	2095.78	1657.14	247.305	1933.1	1695.7	392.17	1950.34	1681.96	301.727	1892.55	1512.07	276.603	1849.83	1250.7	301.048	2046.16	1437.03	288.07	2148.52	1235.14	340.807	1840.81	1304.03	116.576	1989.51	1487.61	26.9651	2017.86	1263.99	4.85107	2027.7	1164.15	-16.7221	2142.74	1028.96	23.2204	2197.23	962.62	-37.4994	2160.66	954.058	-25.9386	2227.23	906.311
704	0	257.968	2101.75	1665.65	353.931	2109.01	1659.64	247.206	1946.3	1698.13	391.723	1963.45	1684.96	302.645	1905.41	1515.06	278.301	1862	1253.41	301.35	2058.7	1439.42	287.66	2160.88	1237.35	342.036	1853.05	1307.15	116.764	2001.85	1489.27	27.8383	2025.25	1264.29	6.57085	2033.79	1164.26	-14.9275	2144.87	1025.95	25.4021	2196.85	957.923	-35.1809	2160.51	950.46	-23.01	2225.41	900.059
705	0	257.674	2114.75	1667.73	353.635	2121.87	1662.04	246.684	1958.96	1700.23	391.748	1976.61	1687.82	303.219	1918.31	1517.57	279.568	1874.24	1255.96	301.654	2071.28	1441.57	287.357	2172.74	1239.26	343.195	1865.5	1309.91	116.969	2014.31	1490.54	29.0508	2032.75	1264.72	8.25471	2039.44	1164.29	-12.6206	2146.49	1022.95	27.888	2196.26	953.312	-32.925	2160.02	946.864	-20.3143	2222.92	894.034
706	0	257.624	2127.36	1669.68	353.73	2134.69	1664.45	246.463	1971.74	1702.1	391.295	1989.19	1690.12	303.634	1931.18	1520.04	280.955	1886.48	1258.21	302.162	2083.93	1443.67	287.393	2184.79	1241.43	344.362	1878.03	1312.36	117.262	2026.62	1491.9	30.1208	2040.07	1264.96	10.2995	2044.85	1164.23	-10.5622	2147.77	1019.96	30.4824	2195.36	948.977	-30.288	2158.97	943.434	-17.2219	2220.18	888.64
707	0	257.696	2139.83	1671.6	353.627	2147.1	1666.88	247.328	1985.06	1703.74	391.319	2001.67	1692.61	304.146	1943.92	1521.96	281.959	1898.82	1260.42	302.434	2096.51	1445.61	287.463	2196.6	1243.52	345.614	1890.68	1314.73	117.247	2038.72	1493.15	31.3415	2047.06	1265.22	12.2873	2050.34	1164.32	-7.844	2148.54	1017.33	33.3741	2193.87	944.938	-27.5279	2157.51	940.114	-14.4469	2216.99	883.621
708	0	257.599	2152.25	1673.65	353.57	2159.46	1669.1	246.816	1997.16	1704.99	391.094	2013.95	1694.55	304.429	1956.35	1523.74	283.11	1911.34	1262.14	302.476	2108.96	1447.21	287.732	2208.62	1245.31	346.967	1903.07	1316.94	117.401	2050.99	1494.19	32.6664	2054.13	1265.31	14.4003	2055.48	1164.2	-5.37542	2149.17	1014.69	36.1905	2192.52	941.248	-25.0527	2155.79	937.329	-11.5881	2213.53	878.984
709	0	257.546	2164.53	1675.14	353.785	2171.98	1671.01	246.858	2009.43	1706	390.943	2026.17	1696	304.902	1968.95	1525.36	283.936	1923.63	1263.5	302.939	2121.6	1448.54	288.196	2220.22	1246.52	348.692	1915.84	1318.82	117.641	2063.22	1494.99	34.3512	2061.74	1265.34	16.7317	2060.53	1164.12	-2.82611	2149.34	1011.9	38.9973	2190.71	937.167	-21.7714	2153.71	933.964	-8.70696	2209.79	874.261
710	0	257.756	2176.93	1676.37	353.76	2184.14	1672.6	247.214	2021.88	1706.7	391.067	2038.4	1697.21	305.287	1981.72	1526.2	284.967	1936.14	1264.68	303.392	2134.29	1449.53	288.661	2232.02	1247.57	350.11	1928.49	1320.08	117.888	2075.45	1495.43	35.6769	2069.05	1265.19	18.9841	2065.47	1164.04	0.019663	2149.62	1009.31	42.4903	2188.76	933.544	-18.3538	2151.59	931.141	-5.6156	2206.06	870.002
711	0	257.725	2189.4	1677.32	353.832	2196.44	1673.77	247.312	2033.91	1707.16	391.082	2050.66	1697.77	305.691	1994.23	1526.87	285.924	1948.52	1265.37	303.607	2146.73	1450.07	289.422	2244.02	1248.12	352.335	1941.86	1321.16	118.053	2087.62	1495.36	37.5062	2076.97	1264.56	21.1461	2070.37	1163.75	3.02135	2149.89	1006.8	45.4979	2186.72	929.915	-15.4173	2149.22	928.136	-2.46648	2202.05	865.567
712	0	257.981	2201.59	1677.79	353.853	2209	1674.42	246.911	2045.95	1707.13	391.089	2062.88	1697.96	305.814	2006.7	1527.19	287.131	1961.48	1265.72	304.154	2159.34	1450.25	290.23	2256.09	1248.3	353.655	1954.42	1322.02	117.976	2099.88	1494.93	38.8748	2084.65	1263.83	23.3821	2075.43	1163.15	5.92379	2150.12	1003.97	48.1904	2184.5	926.165	-12.1208	2146.8	925.325	0.8542	2198.18	861.41
713	0	257.69	2213.99	1678.08	353.874	2221.48	1674.78	247.449	2058.39	1706.78	391.09	2075.31	1697.95	306.197	2019.2	1527.06	287.675	1973.55	1265.55	304.336	2171.88	1449.96	291.021	2268.2	1247.98	354.897	1966.94	1322.28	118.296	2112.28	1494.27	40.5995	2092.68	1262.92	26.0323	2080.87	1162.64	9.10754	2150.27	1001.05	51.3935	2182.36	922.341	-8.81585	2144.52	922.483	4.01923	2193.6	857.084
714	0	257.989	2226.38	1677.97	353.998	2233.94	1674.81	247.358	2070.45	1706.31	391.063	2087.94	1697.77	306.542	2031.82	1526.86	288.266	1985.88	1265.42	304.645	2184.29	1449.52	291.952	2280.29	1247.49	355.787	1979.26	1322.07	118.244	2124.57	1493.24	42.207	2100.85	1261.78	28.3867	2086.07	1161.72	12.1645	2150.43	998.267	54.6479	2180.11	918.783	-5.14184	2142.18	919.526	7.77237	2189.36	852.888
715	0	257.871	2238.92	1677.44	353.937	2246.55	1674.38	247.71	2082.95	1705.67	391.623	2100.47	1697.14	306.617	2044.57	1526.48	288.814	1997.83	1264.86	305.13	2196.67	1448.94	292.795	2292.21	1246.35	356.551	1991.55	1321.79	118.507	2137.03	1492.07	43.6892	2108.75	1260.69	30.7699	2091.61	1161	14.9769	2150.69	995.417	57.704	2178.23	915.43	-1.86353	2139.87	916.906	11.3467	2185.18	848.993
716	0	257.993	2251.37	1676.58	354.098	2259.44	1673.54	248.079	2095.56	1704.53	391.717	2113.34	1696.09	306.943	2057.04	1525.42	289.276	2009.84	1264.09	305.496	2209.06	1447.83	293.813	2304.1	1244.84	357.209	2003.78	1321.03	118.334	2149.53	1490.72	45.2189	2116.79	1259.27	33.9656	2097.96	1160.15	17.773	2151.27	993.107	60.8242	2176.69	912.014	1.57488	2137.7	914.417	14.7458	2180.88	845.077
717	0	257.829	2264.01	1675.36	354.015	2272.25	1672.27	248.677	2108.68	1703.22	391.961	2126.11	1694.96	307.188	2069.6	1524.07	289.668	2022	1262.99	305.665	2221.45	1446.41	294.795	2316.18	1243.12	357.67	2015.7	1319.9	118.498	2162.16	1488.94	46.1247	2124.65	1257.73	35.9693	2103.22	1158.53	20.4628	2151.87	990.527	63.7645	2175.09	908.982	4.30537	2135.56	911.919	18.14	2176.68	841.168
718	0	257.761	2277.03	1673.72	354.113	2285.19	1670.69	248.577	2121.18	1701.92	392.028	2139.06	1693.77	307.162	2082.16	1522.57	289.533	2034.07	1261.74	306.069	2233.76	1445.07	295.652	2328.4	1241.05	357.77	2027.65	1318.58	118.364	2174.77	1486.89	47.3048	2132.97	1256.06	38.6447	2109.32	1157.12	23.1273	2152.66	987.764	66.5269	2173.82	905.83	8.14211	2134.07	909.351	21.6192	2172.85	837.57
719	0	257.836	2289.82	1671.38	354.025	2298.44	1668.38	248.204	2134.1	1700.22	392.192	2152.39	1691.91	307.177	2094.7	1521.12	289.261	2046.11	1260.35	306.109	2246.09	1442.96	296.419	2340.97	1238.58	357.796	2039.63	1317.32	118.355	2187.62	1484.45	48.06	2141.21	1254.31	41.0561	2115.43	1155.6	25.5834	2153.94	985.366	67.5192	2173.81	903.05	10.9773	2132.98	907.419	25.0756	2169	833.741
720	0	257.787	2303.03	1668.98	354.114	2311.56	1665.77	248.708	2147.52	1698.63	392.606	2165.9	1689.93	307.155	2107.41	1519.23	289.079	2058.26	1258.56	306.482	2258.52	1440.72	297.214	2353.68	1235.98	357.582	2051.57	1315.28	118.134	2200.22	1482.15	48.9556	2149.72	1252.34	43.8921	2122.27	1153.91	28.0898	2155.65	982.793	74.0142	2172.2	899.051	14.1169	2131.91	905.538	28.41	2165.76	830.428
721	0	258.102	2316.5	1666.12	353.984	2324.83	1662.91	249.304	2161.16	1696.95	392.432	2179.55	1688.04	307.257	2119.89	1517.61	288.169	2070.37	1256.4	306.509	2270.88	1438.51	298.025	2366.78	1233.49	357.177	2063.5	1313.38	117.997	2213.05	1479.61	50.1448	2158.78	1250.42	46.8471	2129.61	1152.28	30.2275	2157.77	980.565	76.5341	2172.25	896.178	16.429	2131.74	904.143	31.4871	2162.54	827.173
722	0	257.949	2329.87	1663.24	353.984	2338.14	1659.9	248.936	2174.85	1695.15	392.499	2192.94	1685.97	307.123	2132.58	1515.46	287.437	2082.64	1254.57	306.162	2283.06	1436.08	298.705	2379.74	1231.08	356.53	2075.67	1311.38	117.831	2225.82	1477.31	51.6159	2168.28	1248.66	49.112	2137.26	1150.9	32.3707	2160.49	978.561	78.611	2172.76	894.182	19.233	2131.91	902.657	34.3113	2159.98	824.388
723	0	258.071	2343.33	1660.07	353.905	2351.54	1656.69	248.317	2188.16	1693.11	392.421	2206.36	1683.78	306.733	2145.2	1513.44	286.516	2095.09	1252.57	306.246	2295.67	1433.58	299.227	2392.38	1228.46	355.915	2087.76	1309.33	117.245	2238.74	1474.81	52.2461	2177.53	1246.81	51.202	2145.18	1149.39	34.0736	2163.77	977.117	79.8578	2174.31	891.706	21.2564	2133.08	901.674	37.289	2157.79	822.275
724	0	257.507	2356.58	1656.99	353.663	2364.89	1653.42	248.072	2201.83	1690.94	391.75	2219.83	1681.42	306.547	2157.97	1511.29	285.696	2107.74	1250.34	305.765	2308.16	1431.11	299.617	2404.71	1226.11	355.245	2100.13	1306.95	116.869	2251.36	1472.46	53.0516	2187.24	1245.03	53.3466	2153.77	1147.8	35.4808	2167.82	975.836	81.5024	2176.49	890.327	23.3275	2134.94	900.906	39.8909	2156.43	820.455
725	0	257.024	2369.85	1653.96	353.345	2378.01	1650.43	247.659	2215.5	1688.88	391.185	2233.25	1679.3	305.66	2170.7	1508.9	284.914	2120.54	1247.94	305.29	2320.67	1428.77	299.846	2417	1223.96	354.397	2112.7	1304.51	116.295	2264.23	1470.29	53.5238	2197.19	1243.11	55.5639	2163.17	1146.4	36.7779	2172.51	974.661	83.1197	2179.69	888.626	24.6016	2137.97	900.578	42.0733	2156	818.588
726	0	256.609	2383.51	1651.04	352.766	2391.42	1647.5	246.736	2229	1686.74	390.719	2246.68	1677.21	304.895	2183.34	1506.65	284.136	2133.37	1245.52	304.918	2333.41	1426.73	299.767	2429.54	1221.9	353.446	2125.67	1302.02	115.449	2276.9	1467.97	54.3164	2207.75	1241.39	56.8814	2172.37	1144.96	37.3337	2178.25	973.788	83.09	2183.3	887.883	25.5859	2141.82	900.349	43.9351	2156.47	817.059
727	0	255.587	2396.33	1648.34	352.144	2404.42	1644.72	246.17	2242.6	1684.8	389.92	2260.06	1675.14	303.973	2196.02	1504.26	283.596	2146.45	1242.97	304.525	2346.35	1424.64	299.592	2442.24	1220	352.884	2138.3	1299.51	114.857	2289.77	1465.68	54.6963	2218.46	1239.58	58.0132	2182.07	1143.38	37.9372	2184.58	972.484	83.0648	2188.97	886.453	26.2144	2146.81	900.094	45.4746	2157.96	816.131
728	0	254.805	2409.66	1645.92	351.087	2417.61	1642.4	245.042	2255.88	1682.68	388.634	2273.13	1673.43	303.223	2208.7	1501.8	283.06	2159.69	1240.47	303.736	2359.27	1422.54	299.14	2455.14	1218.48	352.075	2151.4	1297.1	113.83	2302.53	1463.34	54.7516	2229.39	1237.54	59.0541	2192.46	1141.91	37.8932	2191.95	971.3	83.8876	2194.6	885.35	26.2188	2152.68	900.08	46.6353	2160.51	815.207
729	0	253.571	2422.65	1643.52	349.848	2430.6	1640.29	243.663	2269	1680.61	387.331	2286.38	1671.34	302.083	2221.85	1499.95	282.503	2173.07	1238.09	302.807	2372.36	1420.53	298.383	2468.49	1216.86	351.271	2164.61	1294.88	112.983	2315.4	1460.68	54.753	2240.94	1235.4	59.3455	2203.04	1140.26	37.8189	2200.18	970.156	83.5951	2201.36	883.989	25.7282	2159.78	899.372	47.6572	2164.2	814.273
730	0	252.168	2435.72	1641.48	348.463	2443.8	1638.52	241.424	2281.86	1678.48	385.113	2298.86	1669.73	300.99	2234.72	1497.7	282.193	2186.6	1235.94	301.838	2385.65	1418.49	297.382	2481.74	1214.95	350.673	2178.06	1292.89	112.034	2328.37	1458.27	54.4261	2252.44	1233.22	59.4827	2214.43	1138.66	37.2815	2209.25	968.593	82.5086	2209.41	882.301	25.2996	2167.9	898.994	47.9403	2169.18	813.41
731	0	250.588	2448.71	1639.76	346.754	2456.87	1637.23	240.427	2294.84	1676.35	383.808	2312.04	1668.26	300.065	2247.82	1495.89	282.075	2200.18	1234.11	300.678	2398.94	1416.59	296.169	2494.9	1213.12	350.362	2191.57	1291.02	110.928	2341.18	1455.9	54.1599	2264.68	1231.06	59.1987	2225.84	1136.72	36.0914	2219.02	966.728	81.6935	2217.99	880.716	24.1573	2176.87	897.968	47.9931	2175.42	812.921
732	0	248.639	2461.47	1638.3	344.785	2469.6	1636.47	238.38	2307.54	1674.53	381.571	2324.86	1666.95	298.988	2261.32	1494.39	282.12	2213.87	1232.04	299.316	2412.28	1415.07	294.661	2508.25	1211.51	350.075	2205.17	1289.38	110.166	2354.17	1453.93	54.0013	2277.24	1228.89	58.7068	2237.93	1134.85	36.4721	2229.48	965.115	80.7907	2227.7	879.168	23.2017	2187.13	896.861	47.3711	2182.93	812.038
733	0	246.371	2474.2	1637.1	342.56	2482.39	1635.75	235.781	2320.03	1672.81	379.149	2337.5	1666.34	297.877	2274.43	1493.24	282.222	2227.54	1230.69	298.01	2425.59	1413.91	292.982	2521.42	1210.12	349.795	2218.84	1288.07	108.608	2366.84	1451.86	52.8718	2289.69	1226.9	58.0216	2250.24	1133.23	35.602	2240.91	963.859	79.1323	2238.25	877.566	21.2235	2197.75	896.095	45.9851	2191.76	810.8
734	0	243.96	2486.91	1636.32	340.505	2495.14	1635.44	233.445	2332.71	1671.41	377.058	2350.28	1665.68	296.615	2287.23	1491.89	282.434	2241.37	1229.33	296.619	2439.03	1413.04	291.308	2534.93	1209.06	349.69	2232.63	1286.9	107.255	2379.4	1450.29	51.8802	2302.52	1224.92	56.663	2262.85	1131.36	33.8892	2252.85	961.965	77.125	2249.55	876.087	19.3423	2209.51	894.802	44.6508	2202.16	809.734
735	0	241.714	2499.63	1636.05	338.124	2507.89	1635.58	231.071	2345.34	1670.4	374.397	2362.71	1665.45	295.32	2300.33	1490.99	282.673	2255.29	1228.05	295.243	2452.37	1413.03	289.492	2548.87	1208.6	349.757	2246.46	1286	105.806	2391.87	1449.1	51.2605	2316.02	1223.58	55.2711	2275.78	1129.67	32.1132	2265.53	960.523	75.847	2261.85	874.824	17.3472	2222.03	893.739	42.4023	2213.75	808.833
736	0	239.095	2512.27	1636.16	335.78	2520.39	1636.32	228.184	2357.92	1669.85	372.038	2375.28	1666.04	293.91	2313.44	1490.48	282.705	2269.26	1227.16	293.437	2465.67	1413.06	287.532	2563.11	1208.75	349.404	2260.39	1285.54	104.324	2404.44	1448.1	49.6763	2329.26	1222.25	54.0129	2289.27	1128.46	29.8977	2278.87	959.299	74.3742	2275.18	873.82	15.1756	2235.49	892.685	40.2149	2227.08	807.992
737	0	236.85	2524.84	1636.31	333.286	2533.16	1637.06	225.553	2370.58	1669.66	369.447	2387.93	1666.53	292.345	2326.57	1490.25	282.343	2283.25	1226.65	291.909	2479.06	1413.58	285.856	2577.58	1209.17	349.056	2274.21	1285.39	102.672	2417.03	1447.41	48.3375	2342.88	1221.13	52.5083	2302.98	1127.31	28.3864	2293.07	958.333	70.9674	2289.52	872.333	13.1675	2249.98	891.935	37.1917	2241.71	807.042
738	0	234.391	2537.58	1636.75	331.081	2545.97	1637.78	222.988	2383.15	1669.63	366.68	2400.63	1667.17	290.997	2339.77	1490.34	281.928	2297.32	1226.51	290.164	2492.54	1413.76	284.385	2592.34	1209.73	348.458	2288.29	1285.19	101.431	2429.76	1446.87	47.2006	2356.82	1220.26	51.0582	2317.28	1126.48	24.8818	2307.6	958.002	69.3036	2304.7	871.692	10.6269	2264.8	890.896	33.7977	2257.69	806.083
739	0	231.985	2550.29	1637.48	328.401	2558.59	1639.25	220.691	2395.77	1669.84	364.559	2413.25	1668.17	289.705	2352.94	1490.81	281.271	2311.35	1226.63	288.659	2505.84	1414.46	283.289	2607.07	1210.75	347.776	2302.03	1285.62	100.054	2442.59	1446.67	46.1728	2370.93	1219.78	49.4213	2331.68	1125.9	23.0344	2323.09	957.528	66.3708	2320.66	870.714	8.28495	2280.68	890.143	29.9028	2274.94	805.067
740	0	229.519	2563.11	1638.59	325.795	2571.26	1641.09	217.851	2408.19	1670.41	361.756	2425.78	1669.59	288.477	2366.01	1491.79	280.435	2325.07	1227.46	287.093	2519.1	1415.62	282.345	2621.34	1212.1	346.947	2315.72	1286.66	98.7491	2455.19	1446.87	44.5964	2384.75	1219.45	47.4548	2346.14	1125.6	20.1662	2338.87	957.085	63.485	2337.58	870.343	5.63883	2297.08	889.528	26.1172	2293.64	804.186
741	0	226.861	2575.6	1639.85	323.162	2583.99	1643.09	214.742	2420.48	1670.89	359.062	2438.36	1671.12	287.433	2379.06	1493.03	279.679	2338.43	1228.64	285.944	2532.31	1417.06	281.68	2634.91	1213.42	346.435	2329.32	1287.96	97.8501	2467.58	1447.14	43.2799	2399.07	1219.65	45.6035	2360.97	1125.5	18.0405	2355.5	956.95	60.1705	2355.31	870.033	2.85159	2314.23	888.9	22.1183	2313.52	803.549
742	0	224.294	2587.99	1641.03	320.687	2596.73	1644.97	212.985	2433.18	1671.43	356.241	2450.9	1673.01	286.856	2392.12	1494.35	279.196	2351.66	1229.81	284.859	2545.33	1418.52	281.111	2648.02	1214.61	345.985	2342.94	1289.09	97.0383	2480.06	1448.1	42.0831	2413.42	1220.13	43.99	2376.14	1125.52	15.6923	2372.59	957.199	57.5357	2373.78	869.77	0.416622	2332.29	888.572	17.8419	2334.53	803.109
743	0	222.267	2600.38	1642.24	318.233	2609.15	1646.83	210.971	2445.55	1671.9	354.398	2463.6	1674.9	286.337	2405.01	1495.65	278.499	2364.64	1231.09	283.784	2558.25	1419.99	280.562	2660.82	1215.9	345.805	2356.38	1290.58	96.493	2492.09	1449.24	40.9949	2427.47	1220.94	42.4187	2391.33	1125.84	13.4041	2390.39	957.626	54.714	2393.23	869.767	-1.84677	2351.28	888.126	13.1228	2356.33	803.111
744	0	219.997	2612.56	1643.33	316.031	2621.83	1648.44	208.986	2457.75	1672.62	352.392	2476.18	1676.47	285.786	2417.95	1496.64	278.109	2377.57	1232.38	282.898	2571.03	1421.34	280.019	2673.38	1217.18	345.863	2369.63	1292.02	95.6513	2504.04	1450.39	39.9472	2441.78	1221.66	40.4286	2406.56	1126.27	10.8016	2408.57	957.952	50.7104	2413.49	869.711	-4.19766	2371.01	887.924	8.43726	2379.11	802.929
745	0	218.077	2624.83	1644.33	314.237	2634.31	1649.91	207.603	2470.02	1673.27	351.054	2488.62	1678.11	285.198	2430.33	1497.57	277.831	2390.37	1233.33	281.954	2583.6	1422.5	279.506	2685.66	1218.39	345.977	2382.51	1293.18	95.0768	2515.9	1451.58	38.4304	2455.73	1222.36	38.7808	2421.9	1126.55	8.10381	2427.09	958.468	47.3453	2434.37	869.815	-7.47334	2390.58	887.429	3.96077	2402.69	803.181
746	0	216.73	2637.07	1645.27	312.746	2646.87	1651.2	206.091	2482.18	1674.3	349.568	2501.21	1679.34	284.636	2442.51	1498.71	277.643	2403.02	1234.26	281.44	2596.03	1423.92	279.156	2698.04	1219.64	346.047	2395.13	1294.35	94.6398	2527.88	1452.75	37.9044	2470.14	1223.16	36.8744	2436.95	1126.81	5.21994	2445.91	958.757	45.2911	2455.66	870.403	-9.87389	2411.03	887.079	-1.57592	2427.01	803.822
747	0	215.721	2649.52	1646.3	311.495	2659.16	1652.37	204.862	2494.37	1675.75	348.424	2513.85	1680.84	283.981	2454.45	1499.98	277.676	2415.18	1235.56	280.602	2608.12	1425.07	278.794	2710.4	1220.94	345.905	2407.48	1295.59	94.1305	2539.6	1453.82	36.7324	2484.27	1223.6	35.2103	2452.49	1127.21	2.83385	2465.16	958.856	41.9232	2477.6	870.859	-12.4121	2431.95	886.569	-5.61447	2451.88	804.46
748	0	214.953	2661.8	1647.31	310.74	2671.58	1653.47	204.038	2506.68	1677.12	347.412	2525.84	1682.23	283.452	2466.5	1501.25	277.459	2427.54	1236.85	280.141	2620.15	1426.34	278.257	2722.47	1222.1	345.416	2419.67	1296.76	93.3998	2551.46	1454.96	35.5353	2498.38	1224.41	33.0542	2467.58	1127.55	0.4768	2484.8	959.175	37.8194	2500.14	871.276	-14.6723	2453.47	886.211	-9.85708	2477.38	805.482
749	0	214.301	2674.08	1648.61	310.119	2683.96	1654.67	203.468	2519.19	1678.8	345.883	2538.4	1683.4	282.925	2478.39	1502.96	276.908	2440.01	1237.65	279.44	2632.17	1427.67	277.645	2734.45	1223.4	344.897	2431.71	1297.98	93.3479	2563.47	1456.12	34.5599	2512.47	1225.26	31.5426	2483.2	1128.09	-1.70358	2504.77	959.789	37.1265	2522.9	871.855	-16.225	2475.51	885.83	-14.041	2503.26	807.154
750	0	213.828	2686.21	1649.97	309.656	2696.11	1656.22	203.204	2531.47	1680.41	346.042	2550.56	1685.56	282.515	2490.36	1504.48	276.731	2452.46	1239.11	279.018	2644.03	1429.32	277.23	2746.58	1224.93	344.154	2443.71	1299.34	92.7048	2575.34	1457.41	33.6027	2526.52	1226.29	29.4123	2498.5	1128.67	-3.73981	2524.96	960.628	32.4735	2551.5	874.604	-18.3961	2497.47	885.984	-17.7517	2529.4	809.227
751	0	213.494	2698.43	1651.66	308.989	2708.02	1657.99	202.747	2543.81	1682.35	346.107	2562.95	1687.38	282.226	2502.51	1506.13	275.952	2464.81	1240.89	278.724	2655.91	1431.16	276.687	2758.44	1226.54	343.32	2455.56	1301.07	92.3736	2587.39	1459.14	32.1622	2540.4	1227.79	27.3425	2513.72	1129.55	-6.03335	2545.15	961.862	32.5067	2569.9	875.249	-20.0829	2520.4	886.18	-21.6028	2555.95	812.434
752	0	213.372	2710.63	1653.64	309.201	2720.23	1659.71	201.972	2555.71	1684.22	345.721	2574.97	1689.21	281.993	2514.65	1507.9	275.186	2476.5	1243.12	278.66	2667.8	1433.15	276.427	2770.62	1228.33	342.508	2467.34	1302.77	91.9806	2599.36	1460.98	30.9319	2554.21	1229.69	25.2365	2529.07	1130.51	-8.09474	2565.72	964.132	27.8859	2599	880.039	-21.7191	2543.2	886.858	-24.9405	2582.48	815.676
753	0	213.217	2722.86	1655.86	309.208	2732.34	1661.67	202.044	2568.07	1686.46	345.317	2586.9	1691.27	281.923	2526.78	1509.94	274.675	2488.49	1244.99	278.453	2679.52	1435.3	276.232	2782.93	1230.59	341.685	2479.07	1304.74	91.9196	2611.44	1463.18	29.8651	2568.31	1231.71	23.1903	2544.27	1131.64	-9.89349	2586.22	966.017	25.891	2622.89	883.512	-22.9391	2566.38	888.107	-27.8056	2609.28	819.926
754	0	213.516	2735.03	1657.91	309.296	2744.35	1663.86	202.402	2580.29	1688.48	345.956	2599	1693.27	281.885	2538.93	1512.11	273.783	2500.06	1247.06	278.119	2691.36	1437.3	275.951	2795.05	1232.91	340.694	2490.77	1306.8	91.6057	2623.38	1465.45	28.4942	2582.05	1233.97	21.5095	2559.87	1133.56	-11.5085	2607.08	968.993	24.1661	2647.05	887.815	-24.0542	2589.9	890.02	-30.315	2636.06	824.8
755	0	213.552	2747.17	1660.04	309.182	2756.31	1665.69	202.186	2592.55	1690.55	345.693	2611.22	1695.09	281.699	2551.08	1514.14	272.991	2511.8	1249.1	277.757	2703.3	1438.99	275.644	2807.16	1234.98	339.898	2502.59	1308.89	91.3848	2635.3	1467.78	27.0797	2596.01	1236.4	19.3455	2575.39	1135.61	-13.0195	2628.01	972.082	22.4739	2671.76	893.506	-25.3251	2613.38	892.528	-32.5065	2662.85	830
756	0	213.846	2759.4	1661.81	309.701	2768.53	1667.08	202.474	2604.73	1692.49	345.928	2622.99	1696.51	281.621	2563.2	1515.86	272.302	2523.39	1251.18	277.479	2715.34	1440.38	275.413	2819.18	1236.7	339.238	2514.58	1310.65	91.3014	2647.55	1470.16	26.2612	2610.4	1238.76	17.2659	2591.04	1137.53	-14.3149	2649.11	975.25	21.1185	2695.82	898.43	-26.2064	2637.25	895.305	-34.3458	2689.6	835.503
757	0	214.331	2771.66	1663.43	310.155	2780.68	1668.44	202.575	2617.11	1694.45	345.982	2635.14	1697.63	281.538	2575.36	1517.46	271.868	2535.32	1252.79	277.211	2727.26	1441.71	274.991	2830.79	1238.33	338.603	2526.6	1312.3	91.5704	2659.82	1472.46	24.9134	2624.21	1241.1	15.3338	2606.62	1139.74	-15.6527	2670.42	978.751	20.0776	2720.05	903.969	-27.2428	2661.12	898.418	-35.6221	2716.37	841.246
758	0	214.805	2783.96	1665.03	310.579	2792.71	1669.76	202.777	2629.2	1695.94	345.972	2647.2	1698.85	281.326	2587.44	1519.04	271.244	2546.97	1254.53	276.911	2739.45	1443	274.542	2842.23	1239.85	337.95	2538.56	1313.94	91.3375	2671.59	1474.41	23.9564	2638.57	1243.32	13.0938	2622.19	1142.05	-16.9525	2691.66	982.535	19.116	2745.17	910.366	-28.4211	2685.29	902.086	-36.6036	2743.15	847.18
759	0	215.26	2796.44	1666.45	311.035	2804.88	1670.67	202.973	2641.48	1697.56	346.609	2659.2	1699.56	281.204	2599.45	1520.36	270.825	2558.77	1255.92	276.53	2751.52	1444.02	274.102	2853.47	1240.88	337.538	2550.55	1315.29	91.1514	2683.63	1476.29	22.3499	2652.53	1245.47	10.9789	2637.64	1143.93	-17.9875	2713.15	986.33	18.2445	2768.07	915.907	-29.6923	2709.32	905.867	-37.4644	2769.58	853.381
760	0	215.707	2808.59	1667.77	311.529	2816.8	1671.61	203.208	2653.91	1699	346.604	2671.32	1700.35	281.053	2611.58	1521.33	270.574	2570.64	1256.84	276.213	2763.46	1444.81	273.789	2864.9	1241.83	337.249	2562.51	1316.19	91.1132	2695.87	1478.32	21.4434	2666.93	1247.35	9.08446	2653	1145.46	-19.2263	2734.36	990.413	17.4161	2791.86	922.029	-30.448	2733.71	909.756	-37.8808	2795.9	859.61
761	0	216.065	2820.9	1668.74	311.688	2828.76	1672.45	203.959	2666.46	1699.89	347.006	2683.06	1701.26	280.69	2623.46	1522.68	270.286	2582.45	1257.67	275.935	2775.62	1445.6	273.163	2875.96	1242.74	336.689	2574.58	1317.05	91.0296	2707.88	1479.46	19.8873	2681.04	1248.73	6.94811	2668.34	1146.95	-20.4719	2755.56	994.601	16.5355	2815.03	928.23	-31.4031	2758.2	913.893	-38.1001	2822.15	865.991
762	0	216.2	2833.24	1669.47	312.027	2840.94	1672.97	203.394	2678.69	1700.59	347.019	2695.07	1701.35	280.623	2636.07	1522.81	269.862	2594.26	1258.44	275.514	2787.81	1446.3	272.57	2887.32	1243.11	336.169	2586.54	1317.81	90.8099	2719.92	1480.29	18.6249	2695.07	1249.93	4.74185	2683.5	1148.23	-21.831	2776.46	998.365	12.046	2833.34	932.61	-32.9064	2782.04	917.861	-38.1802	2848.15	872.235
763	0	216.655	2845.66	1669.94	312.681	2853.13	1672.97	203.159	2690.95	1700.75	346.918	2707.15	1701.19	280.498	2648.47	1522.86	269.638	2606.14	1258.78	275.128	2800.05	1446.22	271.922	2898.45	1243.13	335.735	2598.69	1318.12	90.4461	2731.86	1480.78	17.2564	2709.03	1250.76	2.563	2698.67	1148.75	-22.8772	2797.24	1001.96	11.4411	2856.2	938.646	-33.7558	2806.09	922.242	-38.2996	2873.71	878.46
764	0	216.843	2858.11	1670.09	312.985	2865.33	1672.95	203.669	2703.6	1700.56	346.815	2719.18	1700.93	280.23	2660.96	1522.61	269.195	2617.93	1258.63	274.877	2812.25	1446.06	271.542	2909.81	1242.72	335.261	2610.86	1317.84	90.1211	2744.07	1480.92	15.7586	2722.9	1251.02	0.722711	2714.17	1148.9	-23.5893	2817.91	1005.57	11.1973	2878.75	944.518	-34.4902	2829.87	926.037	-37.7523	2899.06	884.619
765	0	216.897	2870.7	1669.73	313.121	2877.67	1672.44	203.111	2716.22	1700.29	347.118	2731.5	1700.38	280.034	2673.25	1522.6	268.942	2629.69	1258.23	274.373	2824.49	1445.37	271.004	2920.96	1241.87	334.651	2623	1317.62	90.233	2756.46	1480.54	14.7988	2737.01	1251.09	-1.18596	2729.68	1148.91	-24.6579	2838.38	1008.58	14.728	2905.58	951.73	-35.0189	2853.4	929.721	-37.2343	2924.06	890.525
766	0	217.082	2883.42	1668.98	313.147	2890.32	1671.55	204.717	2730.63	1699.59	346.561	2743.9	1699.46	279.789	2685.63	1522.26	268.651	2641.28	1257.98	274.022	2836.97	1444.27	270.255	2932.12	1240.35	334.194	2635.18	1317.09	89.81	2768.47	1479.63	13.3427	2750.85	1250.46	-3.23118	2745.06	1148.47	-25.3962	2858.66	1011.21	11.2261	2923.54	955.033	-35.5543	2876.51	933.151	-36.7699	2948.57	896.233
767	0	216.93	2896.21	1667.86	313.114	2902.95	1670.43	202.553	2741.69	1698.61	346.18	2756.46	1698.27	279.945	2698.28	1521.23	268.554	2652.88	1257.33	273.677	2849.32	1442.98	269.707	2943.36	1238.44	334.09	2647.35	1316.12	89.3938	2780.6	1478.67	12.4426	2764.97	1249.76	-4.897	2760.7	1147.58	-26.0691	2878.77	1013.78	11.2898	2945.03	959.824	-37.0081	2898.98	936.601	-36.0799	2972.59	901.695
768	0	216.91	2909.11	1666.45	312.717	2915.52	1669.06	201.801	2754.44	1697.8	345.812	2769.32	1697.12	279.872	2710.78	1520.01	268.634	2664.26	1256.45	273.456	2861.54	1441.49	269.132	2954.8	1236.41	334.021	2659.41	1315.17	89.6857	2793.04	1477.28	11.2981	2778.96	1248.69	-6.78067	2776.16	1146.52	-26.4817	2898.52	1015.93	11.4918	2966.12	964.469	-36.6777	2921.44	939.715	-35.3244	2996.12	907.125
769	0	216.829	2921.98	1664.77	312.676	2928.52	1667.44	201.868	2767.77	1696.44	345.285	2781.86	1695.83	279.968	2723.33	1518.96	268.855	2675.73	1255.61	273.1	2873.82	1439.98	268.406	2966.87	1234.41	334.083	2671.49	1314.39	89.5322	2805.15	1475.77	10.4678	2792.8	1247.76	-8.47629	2791.87	1145.6	-27.1172	2918.03	1018.2	11.6981	2986.71	968.994	-37.6944	2942.97	943.121	-34.7125	3018.79	912.463
770	0	216.462	2934.87	1662.82	312.385	2941.44	1665.58	201.332	2780.62	1695.02	344.788	2794.95	1694.4	279.67	2735.68	1517.66	269.74	2687.04	1254.48	272.916	2886.03	1438.33	267.773	2979.65	1232.46	334.407	2683.56	1313.11	89.524	2817.1	1474.17	9.44202	2806.88	1246.48	-9.69252	2807.45	1144.4	-27.3369	2937	1020.28	11.8467	3006.6	973.172	-37.4288	2964.37	945.81	-34.0787	3041.26	917.969
771	0	216.026	2947.84	1660.73	312.177	2954.17	1663.49	201.325	2793.8	1693.2	344.605	2807.88	1693.22	280.107	2748.25	1516.22	270.708	2698.96	1252.82	272.744	2898.19	1436.61	267.097	2992.95	1230.69	334.747	2695.85	1311.54	89.6815	2829.21	1472.66	9.19554	2820.87	1245.31	-10.7859	2823.12	1143.18	-27.5793	2955.65	1022.34	12.5473	3026.29	977.376	-37.276	2985.14	948.263	-33.5816	3062.69	923.031
772	0	215.863	2960.7	1658.38	311.869	2967.18	1661.63	200.829	2806.76	1691.52	344.562	2820.78	1691.83	280.284	2760.75	1514.55	271.559	2710.93	1251.41	272.693	2910.37	1434.87	266.446	3006.24	1229.2	335.19	2707.73	1310.2	89.8416	2841.31	1470.89	8.51323	2835.05	1244	-11.8327	2838.67	1141.76	-27.7185	2973.86	1024.2	13.039	3045.47	981.315	-37.4377	3005.64	951.21	-33.1176	3083.27	927.715
773	0	215.611	2973.51	1655.73	311.794	2980.21	1658.91	200.292	2819.63	1689.46	343.663	2834.04	1690.1	279.955	2772.64	1513.35	272.495	2723.28	1249.84	272.585	2922.63	1432.78	265.787	3019.12	1227.4	335.679	2719.74	1308.82	89.8838	2853.3	1468.67	8.00556	2848.77	1242.18	-12.9729	2853.9	1140.16	-27.8056	2991.78	1025.61	13.3174	3063.88	984.279	-37.2927	3025.12	953.226	-32.6538	3103.54	931.962
[truncated: 69 more columns]

## Sheet: Sheet2
Devices
		025370 - Force			025370 - Moment			025370 - CoP			027571 - Force			027571 - Moment			027571 - CoP			037720 - Force			037720 - Moment			037720 - CoP
Frame	Sub Frame	Fx	Fy	Fz	Mx	My	Mz	Cx	Cy	Cz	Fx	Fy	Fz	Mx	My	Mz	Cx	Cy	Cz	Fx	Fy	Fz	Mx	My	Mz	Cx	Cy	Cz
		N	N	N	N.mm	N.mm	N.mm	mm	mm	mm	N	N	N	N.mm	N.mm	N.mm	mm	mm	mm	N	N	N	N.mm	N.mm	N.mm	mm	mm	mm
407	0	0	0	0	0	0	0	200	300	0	0	0	0	0	0	0	200	903	0	0	0	0	0	0	0	603	903	0
407	1	0	0	0	0	0	0	200	300	0	0	0	0	0	0	0	200	903	0	0	0	0	0	0	0	603	903	0
407	2	0	0	0	0	0	0	200	300	0	0	0	0	0	0	0	200	903	0	0	0	0	0	0	0	603	903	0
407	3	0	0	0	0	0	0	200	300	0	0	0	0	0	0	0	200	903	0	0	0	0	0	0	0	603	903	0
407	4	0	0	0	0	0	0	200	300	0	0	0	0	0	0	0	200	903	0	0	0	0	0	0	0	603	903	0
407	5	0	0	0	0	0	0	200	300	0	0	0	0	0	0	0	200	903	0	0	0	0	0	0	0	603	903	0
407	6	0	0	0	0	0	0	200	300	0	0	0	0	0	0	0	200	903	0	0	0	0	0	0	0	603	903	0
407	7	0	0	0	0	0	0	200	300	0	0	0	0	0	0	0	200	903	0	0	0	0	0	0	0	603	903	0
407	8	0	0	0	0	0	0	200	300	0	0	0	0	0	0	0	200	903	0	0	0	0	0	0	0	603	903	0
407	9	0	0	0	0	0	0	200	300	0	0	0	0	0	0	0	200	903	0	0	0	0	0	0	0	603	903	0
408	0	0	0	0	0	0	0	200	300	0	0	0	0	0	0	0	200	903	0	0	0	0	0	0	0	603	903	0
408	1	0	0	0	0	0	0	200	300	0	0	0	0	0	0	0	200	903	0	0	0	0	0	0	0	603	903	0
408	2	0	0	0	0	0	0	200	300	0	0	0	0	0	0	0	200	903	0	0	0	0	0	0	0	603	903	0
408	3	0	0	0	0	0	0	200	300	0	0	0	0	0	0	0	200	903	0	0	0	0	0	0	0	603	903	0
408	4	0	0	0	0	0	0	200	300	0	0	0	0	0	0	0	200	903	0	0	0	0	0	0	0	603	903	0
408	5	0	0	0	0	0	0	200	300	0	0	0	0	0	0	0	200	903	0	0	0	0	0	0	0	603	903	0
408	6	0	0	0	0	0	0	200	300	0	0	0	0	0	0	0	200	903	0	0	0	0	0	0	0	603	903	0
408	7	0	0	0	0	0	0	200	300	0	0	0	0	0	0	0	200	903	0	0	0	0	0	0	0	603	903	0
408	8	0	0	0	0	0	0	200	300	0	0	0	0	0	0	0	200	903	0	0	0	0	0	0	0	603	903	0
408	9	0	0	0	0	0	0	200	300	0	0	0	0	0	0	0	200	903	0	0	0	0	0	0	0	603	903	0
409	0	0	0	0	0	0	0	200	300	0	0	0	0	0	0	0	200	903	0	0	0	0	0	0	0	603	903	0
409	1	0	0	0	0	0	0	200	300	0	0	0	0	0	0	0	200	903	0	0	0	0	0	0	0	603	903	0
409	2	0	0	0	0	0	0	200	300	0	0	0	0	0	0	0	200	903	0	0	0	0	0	0	0	603	903	0
409	3	0	0	0	0	0	0	200	300	0	0	0	0	0	0	0	200	903	0	0	0	0	0	0	0	603	903	0
409	4	0	0	0	0	0	0	200	300	0	0	0	0	0	0	0	200	903	0	0	0	0	0	0	0	603	903	0
409	5	0	0	0	0	0	0	200	300	0	0	0	0	0	0	0	200	903	0	0	0	0	0	0	0	603	903	0
409	6	0	0	0	0	0	0	200	300	0	0	0	0	0	0	0	200	903	0	0	0	0	0	0	0	603	903	0
409	7	0	0	0	0	0	0	200	300	0	0	0	0	0	0	0	200	903	0	0	0	0	0	0	0	603	903	0
409	8	0	0	0	0	0	0	200	300	0	0	0	0	0	0	0	200	903	0	0	0	0	0	0	0	603	903	0
409	9	0	0	0	0	0	0	200	300	0	0	0	0	0	0	0	200	903	0	0	0	0	0	0	0	603	903	0
410	0	0	0	0	0	0	0	200	300	0	0	0	0	0	0	0	200	903	0	0	0	0	0	0	0	603	903	0
410	1	0	0	0	0	0	0	200	300	0	0	0	0	0	0	0	200	903	0	0	0	0	0	0	0	603	903	0
410	2	0	0	0	0	0	0	200	300	0	0	0	0	0	0	0	200	903	0	0	0	0	0	0	0	603	903	0
410	3	0	0	0	0	0	0	200	300	0	0	0	0	0	0	0	200	903	0	0	0	0	0	0	0	603	903	0
410	4	0	0	0	0	0	0	200	300	0	0	0	0	0	0	0	200	903	0	0	0	0	0	0	0	603	903	0
410	5	0	0	0	0	0	0	200	300	0	0	0	0	0	0	0	200	903	0	0	0	0	0	0	0	603	903	0
410	6	0	0	0	0	0	0	200	300	0	0	0	0	0	0	0	200	903	0	0	0	0	0	0	0	603	903	0
410	7	0	0	0	0	0	0	200	300	0	0	0	0	0	0	0	200	903	0	0	0	0	0	0	0	603	903	0
410	8	0	0	0	0	0	0	200	300	0	0	0	0	0	0	0	200	903	0	0	0	0	0	0	0	603	903	0
410	9	0	0	0	0	0	0	200	300	0	0	0	0	0	0	0	200	903	0	0	0	0	0	0	0	603	903	0
411	0	0	0	0	0	0	0	200	300	0	0	0	0	0	0	0	200	903	0	0	0	0	0	0	0	603	903	0
411	1	0	0	0	0	0	0	200	300	0	0	0	0	0	0	0	200	903	0	0	0	0	0	0	0	603	903	0
411	2	0	0	0	0	0	0	200	300	0	0	0	0	0	0	0	200	903	0	0	0	0	0	0	0	603	903	0
411	3	0	0	0	0	0	0	200	300	0	0	0	0	0	0	0	200	903	0	0	0	0	0	0	0	603	903	0
411	4	0	0	0	0	0	0	200	300	0	0	0	0	0	0	0	200	903	0	0	0	0	0	0	0	603	903	0
411	5	0	0	0	0	0	0	200	300	0	0	0	0	0	0	0	200	903	0	0	0	0	0	0	0	603	903	0
411	6	0	0	0	0	0	0	200	300	0	0	0	0	0	0	0	200	903	0	0	0	0	0	0	0	603	903	0
411	7	0	0	0	0	0	0	200	300	0	0	0	0	0	0	0	200	903	0	0	0	0	0	0	0	603	903	0
411	8	0	0	0	0	0	0	200	300	0	0	0	0	0	0	0	200	903	0	0	0	0	0	0	0	603	903	0
411	9	0	0	0	0	0	0	200	300	0	0	0	0	0	0	0	200	903	0	0	0	0	0	0	0	603	903	0
412	0	0	0	0	0	0	0	200	300	0	0	0	0	0	0	0	200	903	0	0	0	0	0	0	0	603	903	0
412	1	0	0	0	0	0	0	200	300	0	0	0	0	0	0	0	200	903	0	0	0	0	0	0	0	603	903	0
412	2	0	0	0	0	0	0	200	300	0	0	0	0	0	0	0	200	903	0	0	0	0	0	0	0	603	903	0
412	3	0	0	0	0	0	0	200	300	0	0	0	0	0	0	0	200	903	0	0	0	0	0	0	0	603	903	0
412	4	0	0	0	0	0	0	200	300	0	0	0	0	0	0	0	200	903	0	0	0	0	0	0	0	603	903	0
412	5	0	0	0	0	0	0	200	300	0	0	0	0	0	0	0	200	903	0	0	0	0	0	0	0	603	903	0
412	6	0	0	0	0	0	0	200	300	0	0	0	0	0	0	0	200	903	0	0	0	0	0	0	0	603	903	0
412	7	0	0	0	0	0	0	200	300	0	0	0	0	0	0	0	200	903	0	0	0	0	0	0	0	603	903	0
412	8	0	0	0	0	0	0	200	300	0	0	0	0	0	0	0	200	903	0	0	0	0	0	0	0	603	903	0
412	9	0	0	0	0	0	0	200	300	0	0	0	0	0	0	0	200	903	0	0	0	0	0	0	0	603	903	0
413	0	0	0	0	0	0	0	200	300	0	0	0	0	0	0	0	200	903	0	0	0	0	0	0	0	603	903	0
413	1	0	0	0	0	0	0	200	300	0	0	0	0	0	0	0	200	903	0	0	0	0	0	0	0	603	903	0
413	2	0	0	0	0	0	0	200	300	0	0	0	0	0	0	0	200	903	0	0	0	0	0	0	0	603	903	0
413	3	0	0	0	0	0	0	200	300	0	0	0	0	0	0	0	200	903	0	0	0	0	0	0	0	603	903	0
413	4	0	0	0	0	0	0	200	300	0	0	0	0	0	0	0	200	903	0	0	0	0	0	0	0	603	903	0
413	5	0	0	0	0	0	0	200	300	0	0	0	0	0	0	0	200	903	0	0	0	0	0	0	0	603	903	0
413	6	0	0	0	0	0	0	200	300	0	0	0	0	0	0	0	200	903	0	0	0	0	0	0	0	603	903	0
413	7	0	0	0	0	0	0	200	300	0	0	0	0	0	0	0	200	903	0	0	0	0	0	0	0	603	903	0
413	8	0	0	0	0	0	0	200	300	0	0	0	0	0	0	0	200	903	0	0	0	0	0	0	0	603	903	0
413	9	0	0	0	0	0	0	200	300	0	0	0	0	0	0	0	200	903	0	0	0	0	0	0	0	603	903	0
414	0	0	0	0	0	0	0	200	300	0	0	0	0	0	0	0	200	903	0	0	0	0	0	0	0	603	903	0
414	1	0	0	0	0	0	0	200	300	0	0	0	0	0	0	0	200	903	0	0	0	0	0	0	0	603	903	0
414	2	0	0	0	0	0	0	200	300	0	0	0	0	0	0	0	200	903	0	0	0	0	0	0	0	603	903	0
414	3	0	0	0	0	0	0	200	300	0	0	0	0	0	0	0	200	903	0	0	0	0	0	0	0	603	903	0
414	4	0	0	0	0	0	0	200	300	0	0	0	0	0	0	0	200	903	0	0	0	0	0	0	0	603	903	0
414	5	0	0	0	0	0	0	200	300	0	0	0	0	0	0	0	200	903	0	0	0	0	0	0	0	603	903	0
414	6	0	0	0	0	0	0	200	300	0	0	0	0	0	0	0	200	903	0	0	0	0	0	0	0	603	903	0
414	7	0	0	0	0	0	0	200	300	0	0	0	0	0	0	0	200	903	0	0	0	0	0	0	0	603	903	0
414	8	0	0	0	0	0	0	200	300	0	0	0	0	0	0	0	200	903	0	0	0	0	0	0	0	603	903	0
414	9	0	0	0	0	0	0	200	300	0	0	0	0	0	0	0	200	903	0	0	0	0	0	0	0	603	903	0
415	0	0	0	0	0	0	0	200	300	0	0	0	0	0	0	0	200	903	0	0	0	0	0	0	0	603	903	0
415	1	0	0	0	0	0	0	200	300	0	0	0	0	0	0	0	200	903	0	0	0	0	0	0	0	603	903	0
415	2	0	0	0	0	0	0	200	300	0	0	0	0	0	0	0	200	903	0	0	0	0	0	0	0	603	903	0
415	3	0	0	0	0	0	0	200	300	0	0	0	0	0	0	0	200	903	0	0	0	0	0	0	0	603	903	0
415	4	0	0	0	0	0	0	200	300	0	0	0	0	0	0	0	200	903	0	0	0	0	0	0	0	603	903	0
415	5	0	0	0	0	0	0	200	300	0	0	0	0	0	0	0	200	903	0	0	0	0	0	0	0	603	903	0
415	6	0	0	0	0	0	0	200	300	0	0	0	0	0	0	0	200	903	0	0	0	0	0	0	0	603	903	0
415	7	0	0	0	0	0	0	200	300	0	0	0	0	0	0	0	200	903	0	0	0	0	0	0	0	603	903	0
415	8	0	0	0	0	0	0	200	300	0	0	0	0	0	0	0	200	903	0	0	0	0	0	0	0	603	903	0
415	9	0	0	0	0	0	0	200	300	0	0	0	0	0	0	0	200	903	0	0	0	0	0	0	0	603	903	0
416	0	0	0	0	0	0	0	200	300	0	0	0	0	0	0	0	200	903	0	0	0	0	0	0	0	603	903	0
416	1	0	0	0	0	0	0	200	300	0	0	0	0	0	0	0	200	903	0	0	0	0	0	0	0	603	903	0
416	2	0	0	0	0	0	0	200	300	0	0	0	0	0	0	0	200	903	0	0	0	0	0	0	0	603	903	0
416	3	0	0	0	0	0	0	200	300	0	0	0	0	0	0	0	200	903	0	0	0	0	0	0	0	603	903	0
416	4	0	0	0	0	0	0	200	300	0	0	0	0	0	0	0	200	903	0	0	0	0	0	0	0	603	903	0
416	5	0	0	0	0	0	0	200	300	0	0	0	0	0	0	0	200	903	0	0	0	0	0	0	0	603	903	0
416	6	0	0	0	0	0	0	200	300	0	0	0	0	0	0	0	200	903	0	0	0	0	0	0	0	603	903	0
416	7	0	0	0	0	0	0	200	300	0	0	0	0	0	0	0	200	903	0	0	0	0	0	0	0	603	903	0
416	8	0	0	0	0	0	0	200	300	0	0	0	0	0	0	0	200	903	0	0	0	0	0	0	0	603	903	0
416	9	0	0	0	0	0	0	200	300	0	0	0	0	0	0	0	200	903	0	0	0	0	0	0	0	603	903	0
417	0	0	0	0	0	0	0	200	300	0	0	0	0	0	0	0	200	903	0	0	0	0	0	0	0	603	903	0
417	1	0	0	0	0	0	0	200	300	0	0	0	0	0	0	0	200	903	0	0	0	0	0	0	0	603	903	0
417	2	0	0	0	0	0	0	200	300	0	0	0	0	0	0	0	200	903	0	0	0	0	0	0	0	603	903	0
417	3	0	0	0	0	0	0	200	300	0	0	0	0	0	0	0	200	903	0	0	0	0	0	0	0	603	903	0
417	4	0	0	0	0	0	0	200	300	0	0	0	0	0	0	0	200	903	0	0	0	0	0	0	0	603	903	0
417	5	0	0	0	0	0	0	200	300	0	0	0	0	0	0	0	200	903	0	0	0	0	0	0	0	603	903	0
417	6	0	0	0	0	0	0	200	300	0	0	0	0	0	0	0	200	903	0	0	0	0	0	0	0	603	903	0
417	7	0	0	0	0	0	0	200	300	0	0	0	0	0	0	0	200	903	0	0	0	0	0	0	0	603	903	0
417	8	0	0	0	0	0	0	200	300	0	0	0	0	0	0	0	200	903	0	0	0	0	0	0	0	603	903	0
417	9	0	0	0	0	0	0	200	300	0	0	0	0	0	0	0	200	903	0	0	0	0	0	0	0	603	903	0
418	0	0	0	0	0	0	0	200	300	0	0	0	0	0	0	0	200	903	0	0	0	0	0	0	0	603	903	0
418	1	0	0	0	0	0	0	200	300	0	0	0	0	0	0	0	200	903	0	0	0	0	0	0	0	603	903	0
418	2	0	0	0	0	0	0	200	300	0	0	0	0	0	0	0	200	903	0	0	0	0	0	0	0	603	903	0
418	3	0	0	0	0	0	0	200	300	0	0	0	0	0	0	0	200	903	0	0	0	0	0	0	0	603	903	0
418	4	0	0	0	0	0	0	200	300	0	0	0	0	0	0	0	200	903	0	0	0	0	0	0	0	603	903	0
418	5	0	0	0	0	0	0	200	300	0	0	0	0	0	0	0	200	903	0	0	0	0	0	0	0	603	903	0
418	6	0	0	0	0	0	0	200	300	0	0	0	0	0	0	0	200	903	0	0	0	0	0	0	0	603	903	0
418	7	0	0	0	0	0	0	200	300	0	0	0	0	0	0	0	200	903	0	0	0	0	0	0	0	603	903	0
418	8	0	0	0	0	0	0	200	300	0	0	0	0	0	0	0	200	903	0	0	0	0	0	0	0	603	903	0
418	9	0	0	0	0	0	0	200	300	0	0	0	0	0	0	0	200	903	0	0	0	0	0	0	0	603	903	0
419	0	0	0	0	0	0	0	200	300	0	0	0	0	0	0	0	200	903	0	0	0	0	0	0	0	603	903	0
419	1	0	0	0	0	0	0	200	300	0	0	0	0	0	0	0	200	903	0	0	0	0	0	0	0	603	903	0
419	2	0	0	0	0	0	0	200	300	0	0	0	0	0	0	0	200	903	0	0	0	0	0	0	0	603	903	0
419	3	0	0	0	0	0	0	200	300	0	0	0	0	0	0	0	200	903	0	0	0	0	0	0	0	603	903	0
419	4	0	0	0	0	0	0	200	300	0	0	0	0	0	0	0	200	903	0	0	0	0	0	0	0	603	903	0
419	5	0	0	0	0	0	0	200	300	0	0	0	0	0	0	0	200	903	0	0	0	0	0	0	0	603	903	0
419	6	0	0	0	0	0	0	200	300	0	0	0	0	0	0	0	200	903	0	0	0	0	0	0	0	603	903	0
419	7	0	0	0	0	0	0	200	300	0	0	0	0	0	0	0	200	903	0	0	0	0	0	0	0	603	903	0
419	8	0	0	0	0	0	0	200	300	0	0	0	0	0	0	0	200	903	0	0	0	0	0	0	0	603	903	0
419	9	0	0	0	0	0	0	200	300	0	0	0	0	0	0	0	200	903	0	0	0	0	0	0	0	603	903	0
420	0	0	0	0	0	0	0	200	300	0	0	0	0	0	0	0	200	903	0	0	0	0	0	0	0	603	903	0
420	1	0	0	0	0	0	0	200	300	0	0	0	0	0	0	0	200	903	0	0	0	0	0	0	0	603	903	0
420	2	0	0	0	0	0	0	200	300	0	0	0	0	0	0	0	200	903	0	0	0	0	0	0	0	603	903	0
420	3	0	0	0	0	0	0	200	300	0	0	0	0	0	0	0	200	903	0	0	0	0	0	0	0	603	903	0
420	4	0	0	0	0	0	0	200	300	0	0	0	0	0	0	0	200	903	0	0	0	0	0	0	0	603	903	0
420	5	0	0	0	0	0	0	200	300	0	0	0	0	0	0	0	200	903	0	0	0	0	0	0	0	603	903	0
420	6	0	0	0	0	0	0	200	300	0	0	0	0	0	0	0	200	903	0	0	0	0	0	0	0	603	903	0
420	7	0	0	0	0	0	0	200	300	0	0	0	0	0	0	0	200	903	0	0	0	0	0	0	0	603	903	0
420	8	0	0	0	0	0	0	200	300	0	0	0	0	0	0	0	200	903	0	0	0	0	0	0	0	603	903	0
420	9	0	0	0	0	0	0	200	300	0	0	0	0	0	0	0	200	903	0	0	0	0	0	0	0	603	903	0
421	0	0	0	0	0	0	0	200	300	0	0	0	0	0	0	0	200	903	0	0	0	0	0	0	0	603	903	0
421	1	0	0	0	0	0	0	200	300	0	0	0	0	0	0	0	200	903	0	0	0	0	0	0	0	603	903	0
421	2	0	0	0	0	0	0	200	300	0	0	0	0	0	0	0	200	903	0	0	0	0	0	0	0	603	903	0
421	3	0	0	0	0	0	0	200	300	0	0	0	0	0	0	0	200	903	0	0	0	0	0	0	0	603	903	0
421	4	0	0	0	0	0	0	200	300	0	0	0	0	0	0	0	200	903	0	0	0	0	0	0	0	603	903	0
421	5	0	0	0	0	0	0	200	300	0	0	0	0	0	0	0	200	903	0	0	0	0	0	0	0	603	903	0
421	6	0	0	0	0	0	0	200	300	0	0	0	0	0	0	0	200	903	0	0	0	0	0	0	0	603	903	0
421	7	0	0	0	0	0	0	200	300	0	0	0	0	0	0	0	200	903	0	0	0	0	0	0	0	603	903	0
421	8	0	0	0	0	0	0	200	300	0	0	0	0	0	0	0	200	903	0	0	0	0	0	0	0	603	903	0
421	9	0	0	0	0	0	0	200	300	0	0	0	0	0	0	0	200	903	0	0	0	0	0	0	0	603	903	0
422	0	0	0	0	0	0	0	200	300	0	0	0	0	0	0	0	200	903	0	0	0	0	0	0	0	603	903	0
422	1	0	0	0	0	0	0	200	300	0	0	0	0	0	0	0	200	903	0	0	0	0	0	0	0	603	903	0
422	2	0	0	0	0	0	0	200	300	0	0	0	0	0	0	0	200	903	0	0	0	0	0	0	0	603	903	0
422	3	0	0	0	0	0	0	200	300	0	0	0	0	0	0	0	200	903	0	0	0	0	0	0	0	603	903	0
422	4	0	0	0	0	0	0	200	300	0	0	0	0	0	0	0	200	903	0	0	0	0	0	0	0	603	903	0
422	5	0	0	0	0	0	0	200	300	0	0	0	0	0	0	0	200	903	0	0	0	0	0	0	0	603	903	0
422	6	0	0	0	0	0	0	200	300	0	0	0	0	0	0	0	200	903	0	0	0	0	0	0	0	603	903	0
422	7	0	0	0	0	0	0	200	300	0	0	0	0	0	0	0	200	903	0	0	0	0	0	0	0	603	903	0
422	8	0	0	0	0	0	0	200	300	0	0	0	0	0	0	0	200	903	0	0	0	0	0	0	0	603	903	0
422	9	0	0	0	0	0	0	200	300	0	0	0	0	0	0	0	200	903	0	0	0	0	0	0	0	603	903	0
423	0	0	0	0	0	0	0	200	300	0	0	0	0	0	0	0	200	903	0	0	0	0	0	0	0	603	903	0
423	1	0	0	0	0	0	0	200	300	0	0	0	0	0	0	0	200	903	0	0	0	0	0	0	0	603	903	0
423	2	0	0	0	0	0	0	200	300	0	0	0	0	0	0	0	200	903	0	0	0	0	0	0	0	603	903	0
423	3	0	0	0	0	0	0	200	300	0	0	0	0	0	0	0	200	903	0	0	0	0	0	0	0	603	903	0
423	4	0	0	0	0	0	0	200	300	0	0	0	0	0	0	0	200	903	0	0	0	0	0	0	0	603	903	0
423	5	0	0	0	0	0	0	200	300	0	0	0	0	0	0	0	200	903	0	0	0	0	0	0	0	603	903	0
423	6	0	0	0	0	0	0	200	300	0	0	0	0	0	0	0	200	903	0	0	0	0	0	0	0	603	903	0
423	7	0	0	0	0	0	0	200	300	0	0	0	0	0	0	0	200	903	0	0	0	0	0	0	0	603	903	0
423	8	0	0	0	0	0	0	200	300	0	0	0	0	0	0	0	200	903	0	0	0	0	0	0	0	603	903	0
423	9	0	0	0	0	0	0	200	300	0	0	0	0	0	0	0	200	903	0	0	0	0	0	0	0	603	903	0
424	0	0	0	0	0	0	0	200	300	0	0	0	0	0	0	0	200	903	0	0	0	0	0	0	0	603	903	0
424	1	0	0	0	0	0	0	200	300	0	0	0	0	0	0	0	200	903	0	0	0	0	0	0	0	603	903	0
424	2	0	0	0	0	0	0	200	300	0	0	0	0	0	0	0	200	903	0	0	0	0	0	0	0	603	903	0
424	3	0	0	0	0	0	0	200	300	0	0	0	0	0	0	0	200	903	0	0	0	0	0	0	0	603	903	0
424	4	0	0	0	0	0	0	200	300	0	0	0	0	0	0	0	200	903	0	0	0	0	0	0	0	603	903	0
424	5	0	0	0	0	0	0	200	300	0	0	0	0	0	0	0	200	903	0	0	0	0	0	0	0	603	903	0
424	6	0	0	0	0	0	0	200	300	0	0	0	0	0	0	0	200	903	0	0	0	0	0	0	0	603	903	0
424	7	0	0	0	0	0	0	200	300	0	0	0	0	0	0	0	200	903	0	0	0	0	0	0	0	603	903	0
424	8	0	0	0	0	0	0	200	300	0	0	0	0	0	0	0	200	903	0	0	0	0	0	0	0	603	903	0
424	9	0	0	0	0	0	0	200	300	0	0	0	0	0	0	0	200	903	0	0	0	0	0	0	0	603	903	0
425	0	0	0	0	0	0	0	200	300	0	0	0	0	0	0	0	200	903	0	0	0	0	0	0	0	603	903	0
425	1	0	0	0	0	0	0	200	300	0	0	0	0	0	0	0	200	903	0	0	0	0	0	0	0	603	903	0
425	2	0	0	0	0	0	0	200	300	0	0	0	0	0	0	0	200	903	0	0	0	0	0	0	0	603	903	0
425	3	0	0	0	0	0	0	200	300	0	0	0	0	0	0	0	200	903	0	0	0	0	0	0	0	603	903	0
425	4	0	0	0	0	0	0	200	300	0	0	0	0	0	0	0	200	903	0	0	0	0	0	0	0	603	903	0
425	5	0	0	0	0	0	0	200	300	0	0	0	0	0	0	0	200	903	0	0	0	0	0	0	0	603	903	0
425	6	0	0	0	0	0	0	200	300	0	0	0	0	0	0	0	200	903	0	0	0	0	0	0	0	603	903	0
425	7	0	0	0	0	0	0	200	300	0	0	0	0	0	0	0	200	903	0	0	0	0	0	0	0	603	903	0
425	8	0	0	0	0	0	0	200	300	0	0	0	0	0	0	0	200	903	0	0	0	0	0	0	0	603	903	0
425	9	0	0	0	0	0	0	200	300	0	0	0	0	0	0	0	200	903	0	0	0	0	0	0	0	603	903	0
426	0	0	0	0	0	0	0	200	300	0	0	0	0	0	0	0	200	903	0	0	0	0	0	0	0	603	903	0
426	1	0	0	0	0	0	0	200	300	0	0	0	0	0	0	0	200	903	0	0	0	0	0	0	0	603	903	0
426	2	0	0	0	0	0	0	200	300	0	0	0	0	0	0	0	200	903	0	0	0	0	0	0	0	603	903	0
426	3	0	0	0	0	0	0	200	300	0	0	0	0	0	0	0	200	903	0	0	0	0	0	0	0	603	903	0
426	4	0	0	0	0	0	0	200	300	0	0	0	0	0	0	0	200	903	0	0	0	0	0	0	0	603	903	0
426	5	0	0	0	0	0	0	200	300	0	0	0	0	0	0	0	200	903	0	0	0	0	0	0	0	603	903	0
426	6	0	0	0	0	0	0	200	300	0	0	0	0	0	0	0	200	903	0	0	0	0	0	0	0	603	903	0
426	7	0	0	0	0	0	0	200	300	0	0	0	0	0	0	0	200	903	0	0	0	0	0	0	0	603	903	0
426	8	0	0	0	0	0	0	200	300	0	0	0	0	0	0	0	200	903	0	0	0	0	0	0	0	603	903	0
426	9	0	0	0	0	0	0	200	300	0	0	0	0	0	0	0	200	903	0	0	0	0	0	0	0	603	903	0
427	0	0	0	0	0	0	0	200	300	0	0	0	0	0	0	0	200	903	0	0	0	0	0	0	0	603	903	0
427	1	0	0	0	0	0	0	200	300	0	0	0	0	0	0	0	200	903	0	0	0	0	0	0	0	603	903	0
427	2	0	0	0	0	0	0	200	300	0	0	0	0	0	0	0	200	903	0	0	0	0	0	0	0	603	903	0
427	3	0	0	0	0	0	0	200	300	0	0	0	0	0	0	0	200	903	0	0	0	0	0	0	0	603	903	0
427	4	0	0	0	0	0	0	200	300	0	0	0	0	0	0	0	200	903	0	0	0	0	0	0	0	603	903	0
427	5	0	0	0	0	0	0	200	300	0	0	0	0	0	0	0	200	903	0	0	0	0	0	0	0	603	903	0
427	6	0	0	0	0	0	0	200	300	0	0	0	0	0	0	0	200	903	0	0	0	0	0	0	0	603	903	0
427	7	0	0	0	0	0	0	200	300	0	0	0	0	0	0	0	200	903	0	0	0	0	0	0	0	603	903	0
427	8	0	0	0	0	0	0	200	300	0	0	0	0	0	0	0	200	903	0	0	0	0	0	0	0	603	903	0
427	9	0	0	0	0	0	0	200	300	0	0	0	0	0	0	0	200	903	0	0	0	0	0	0	0	603	903	0
428	0	0	0	0	0	0	0	200	300	0	0	0	0	0	0	0	200	903	0	0	0	0	0	0	0	603	903	0
428	1	0	0	0	0	0	0	200	300	0	0	0	0	0	0	0	200	903	0	0	0	0	0	0	0	603	903	0
428	2	0	0	0	0	0	0	200	300	0	0	0	0	0	0	0	200	903	0	0	0	0	0	0	0	603	903	0
428	3	0	0	0	0	0	0	200	300	0	0	0	0	0	0	0	200	903	0	0	0	0	0	0	0	603	903	0
428	4	0	0	0	0	0	0	200	300	0	0	0	0	0	0	0	200	903	0	0	0	0	0	0	0	603	903	0
428	5	0	0	0	0	0	0	200	300	0	0	0	0	0	0	0	200	903	0	0	0	0	0	0	0	603	903	0
428	6	0	0	0	0	0	0	200	300	0	0	0	0	0	0	0	200	903	0	0	0	0	0	0	0	603	903	0
428	7	0	0	0	0	0	0	200	300	0	0	0	0	0	0	0	200	903	0	0	0	0	0	0	0	603	903	0
428	8	0	0	0	0	0	0	200	300	0	0	0	0	0	0	0	200	903	0	0	0	0	0	0	0	603	903	0
428	9	0	0	0	0	0	0	200	300	0	0	0	0	0	0	0	200	903	0	0	0	0	0	0	0	603	903	0
429	0	0	0	0	0	0	0	200	300	0	0	0	0	0	0	0	200	903	0	0	0	0	0	0	0	603	903	0
429	1	0	0	0	0	0	0	200	300	0	0	0	0	0	0	0	200	903	0	0	0	0	0	0	0	603	903	0
429	2	0	0	0	0	0	0	200	300	0	0	0	0	0	0	0	200	903	0	0	0	0	0	0	0	603	903	0
429	3	0	0	0	0	0	0	200	300	0	0	0	0	0	0	0	200	903	0	0	0	0	0	0	0	603	903	0
429	4	0	0	0	0	0	0	200	300	0	0	0	0	0	0	0	200	903	0	0	0	0	0	0	0	603	903	0
429	5	0	0	0	0	0	0	200	300	0	0	0	0	0	0	0	200	903	0	0	0	0	0	0	0	603	903	0
429	6	0	0	0	0	0	0	200	300	0	0	0	0	0	0	0	200	903	0	0	0	0	0	0	0	603	903	0
429	7	0	0	0	0	0	0	200	300	0	0	0	0	0	0	0	200	903	0	0	0	0	0	0	0	603	903	0
429	8	0	0	0	0	0	0	200	300	0	0	0	0	0	0	0	200	903	0	0	0	0	0	0	0	603	903	0
429	9	0	0	0	0	0	0	200	300	0	0	0	0	0	0	0	200	903	0	0	0	0	0	0	0	603	903	0
430	0	0	0	0	0	0	0	200	300	0	0	0	0	0	0	0	200	903	0	0	0	0	0	0	0	603	903	0
430	1	0	0	0	0	0	0	200	300	0	0	0	0	0	0	0	200	903	0	0	0	0	0	0	0	603	903	0
430	2	0	0	0	0	0	0	200	300	0	0	0	0	0	0	0	200	903	0	0	0	0	0	0	0	603	903	0
430	3	0	0	0	0	0	0	200	300	0	0	0	0	0	0	0	200	903	0	0	0	0	0	0	0	603	903	0
430	4	0	0	0	0	0	0	200	300	0	0	0	0	0	0	0	200	903	0	0	0	0	0	0	0	603	903	0
430	5	0	0	0	0	0	0	200	300	0	0	0	0	0	0	0	200	903	0	0	0	0	0	0	0	603	903	0
430	6	0	0	0	0	0	0	200	300	0	0	0	0	0	0	0	200	903	0	0	0	0	0	0	0	603	903	0
430	7	0	0	0	0	0	0	200	300	0	0	0	0	0	0	0	200	903	0	0	0	0	0	0	0	603	903	0
430	8	0	0	0	0	0	0	200	300	0	0	0	0	0	0	0	200	903	0	0	0	0	0	0	0	603	903	0
430	9	0	0	0	0	0	0	200	300	0	0	0	0	0	0	0	200	903	0	0	0	0	0	0	0	603	903	0
431	0	0	0	0	0	0	0	200	300	0	0	0	0	0	0	0	200	903	0	0	0	0	0	0	0	603	903	0
431	1	0	0	0	0	0	0	200	300	0	0	0	0	0	0	0	200	903	0	0	0	0	0	0	0	603	903	0
431	2	0	0	0	0	0	0	200	300	0	0	0	0	0	0	0	200	903	0	0	0	0	0	0	0	603	903	0
431	3	0	0	0	0	0	0	200	300	0	0	0	0	0	0	0	200	903	0	0	0	0	0	0	0	603	903	0
431	4	0	0	0	0	0	0	200	300	0	0	0	0	0	0	0	200	903	0	0	0	0	0	0	0	603	903	0
431	5	0	0	0	0	0	0	200	300	0	0	0	0	0	0	0	200	903	0	0	0	0	0	0	0	603	903	0
431	6	0	0	0	0	0	0	200	300	0	0	0	0	0	0	0	200	903	0	0	0	0	0	0	0	603	903	0
431	7	0	0	0	0	0	0	200	300	0	0	0	0	0	0	0	200	903	0	0	0	0	0	0	0	603	903	0
431	8	0	0	0	0	0	0	200	300	0	0	0	0	0	0	0	200	903	0	0	0	0	0	0	0	603	903	0
431	9	0	0	0	0	0	0	200	300	0	0	0	0	0	0	0	200	903	0	0	0	0	0	0	0	603	903	0
432	0	0	0	0	0	0	0	200	300	0	0	0	0	0	0	0	200	903	0	0	0	0	0	0	0	603	903	0
432	1	0	0	0	0	0	0	200	300	0	0	0	0	0	0	0	200	903	0	0	0	0	0	0	0	603	903	0
432	2	0	0	0	0	0	0	200	300	0	0	0	0	0	0	0	200	903	0	0	0	0	0	0	0	603	903	0
432	3	0	0	0	0	0	0	200	300	0	0	0	0	0	0	0	200	903	0	0	0	0	0	0	0	603	903	0
432	4	0	0	0	0	0	0	200	300	0	0	0	0	0	0	0	200	903	0	0	0	0	0	0	0	603	903	0
432	5	0	0	0	0	0	0	200	300	0	0	0	0	0	0	0	200	903	0	0	0	0	0	0	0	603	903	0
432	6	0	0	0	0	0	0	200	300	0	0	0	0	0	0	0	200	903	0	0	0	0	0	0	0	603	903	0
432	7	0	0	0	0	0	0	200	300	0	0	0	0	0	0	0	200	903	0	0	0	0	0	0	0	603	903	0
432	8	0	0	0	0	0	0	200	300	0	0	0	0	0	0	0	200	903	0	0	0	0	0	0	0	603	903	0
432	9	0	0	0	0	0	0	200	300	0	0	0	0	0	0	0	200	903	0	0	0	0	0	0	0	603	903	0
433	0	0	0	0	0	0	0	200	300	0	0	0	0	0	0	0	200	903	0	0	0	0	0	0	0	603	903	0
433	1	0	0	0	0	0	0	200	300	0	0	0	0	0	0	0	200	903	0	0	0	0	0	0	0	603	903	0
433	2	0	0	0	0	0	0	200	300	0	0	0	0	0	0	0	200	903	0	0	0	0	0	0	0	603	903	0
433	3	0	0	0	0	0	0	200	300	0	0	0	0	0	0	0	200	903	0	0	0	0	0	0	0	603	903	0
433	4	0	0	0	0	0	0	200	300	0	0	0	0	0	0	0	200	903	0	0	0	0	0	0	0	603	903	0
433	5	0	0	0	0	0	0	200	300	0	0	0	0	0	0	0	200	903	0	0	0	0	0	0	0	603	903	0
433	6	0	0	0	0	0	0	200	300	0	0	0	0	0	0	0	200	903	0	0	0	0	0	0	0	603	903	0
433	7	0	0	0	0	0	0	200	300	0	0	0	0	0	0	0	200	903	0	0	0	0	0	0	0	603	903	0
433	8	0	0	0	0	0	0	200	300	0	0	0	0	0	0	0	200	903	0	0	0	0	0	0	0	603	903	0
433	9	0	0	0	0	0	0	200	300	0	0	0	0	0	0	0	200	903	0	0	0	0	0	0	0	603	903	0
434	0	0	0	0	0	0	0	200	300	0	0	0	0	0	0	0	200	903	0	0	0	0	0	0	0	603	903	0
434	1	0	0	0	0	0	0	200	300	0	0	0	0	0	0	0	200	903	0	0	0	0	0	0	0	603	903	0
434	2	0	0	0	0	0	0	200	300	0	0	0	0	0	0	0	200	903	0	0	0	0	0	0	0	603	903	0
434	3	0	0	0	0	0	0	200	300	0	0	0	0	0	0	0	200	903	0	0	0	0	0	0	0	603	903	0
434	4	0	0	0	0	0	0	200	300	0	0	0	0	0	0	0	200	903	0	0	0	0	0	0	0	603	903	0
434	5	0	0	0	0	0	0	200	300	0	0	0	0	0	0	0	200	903	0	0	0	0	0	0	0	603	903	0
434	6	0	0	0	0	0	0	200	300	0	0	0	0	0	0	0	200	903	0	0	0	0	0	0	0	603	903	0
434	7	0	0	0	0	0	0	200	300	0	0	0	0	0	0	0	200	903	0	0	0	0	0	0	0	603	903	0
434	8	0	0	0	0	0	0	200	300	0	0	0	0	0	0	0	200	903	0	0	0	0	0	0	0	603	903	0
434	9	0	0	0	0	0	0	200	300	0	0	0	0	0	0	0	200	903	0	0	0	0	0	0	0	603	903	0
435	0	0	0	0	0	0	0	200	300	0	0	0	0	0	0	0	200	903	0	0	0	0	0	0	0	603	903	0
435	1	0	0	0	0	0	0	200	300	0	0	0	0	0	0	0	200	903	0	0	0	0	0	0	0	603	903	0
435	2	0	0	0	0	0	0	200	300	0	0	0	0	0	0	0	200	903	0	0	0	0	0	0	0	603	903	0
435	3	0	0	0	0	0	0	200	300	0	0	0	0	0	0	0	200	903	0	0	0	0	0	0	0	603	903	0
435	4	0	0	0	0	0	0	200	300	0	0	0	0	0	0	0	200	903	0	0	0	0	0	0	0	603	903	0
435	5	0	0	0	0	0	0	200	300	0	0	0	0	0	0	0	200	903	0	0	0	0	0	0	0	603	903	0
435	6	0	0	0	0	0	0	200	300	0	0	0	0	0	0	0	200	903	0	0	0	0	0	0	0	603	903	0
435	7	0	0	0	0	0	0	200	300	0	0	0	0	0	0	0	200	903	0	0	0	0	0	0	0	603	903	0
435	8	0	0	0	0	0	0	200	300	0	0	0	0	0	0	0	200	903	0	0	0	0	0	0	0	603	903	0
435	9	0	0	0	0	0	0	200	300	0	0	0	0	0	0	0	200	903	0	0	0	0	0	0	0	603	903	0
436	0	0	0	0	0	0	0	200	300	0	0	0	0	0	0	0	200	903	0	0	0	0	0	0	0	603	903	0
436	1	0	0	0	0	0	0	200	300	0	0	0	0	0	0	0	200	903	0	0	0	0	0	0	0	603	903	0
436	2	0	0	0	0	0	0	200	300	0	0	0	0	0	0	0	200	903	0	0	0	0	0	0	0	603	903	0
436	3	0	0	0	0	0	0	200	300	0	0	0	0	0	0	0	200	903	0	0	0	0	0	0	0	603	903	0
436	4	0	0	0	0	0	0	200	300	0	0	0	0	0	0	0	200	903	0	0	0	0	0	0	0	603	903	0
436	5	0	0	0	0	0	0	200	300	0	0	0	0	0	0	0	200	903	0	0	0	0	0	0	0	603	903	0
436	6	0	0	0	0	0	0	200	300	0	0	0	0	0	0	0	200	903	0	0	0	0	0	0	0	603	903	0
436	7	0	0	0	0	0	0	200	300	0	0	0	0	0	0	0	200	903	0	0	0	0	0	0	0	603	903	0
436	8	0	0	0	0	0	0	200	300	0	0	0	0	0	0	0	200	903	0	0	0	0	0	0	0	603	903	0
436	9	0	0	0	0	0	0	200	300	0	0	0	0	0	0	0	200	903	0	0	0	0	0	0	0	603	903	0
437	0	0	0	0	0	0	0	200	300	0	0	0	0	0	0	0	200	903	0	0	0	0	0	0	0	603	903	0
437	1	0	0	0	0	0	0	200	300	0	0	0	0	0	0	0	200	903	0	0	0	0	0	0	0	603	903	0
437	2	0	0	0	0	0	0	200	300	0	0	0	0	0	0	0	200	903	0	0	0	0	0	0	0	603	903	0
437	3	0	0	0	0	0	0	200	300	0	0	0	0	0	0	0	200	903	0	0	0	0	0	0	0	603	903	0
437	4	0	0	0	0	0	0	200	300	0	0	0	0	0	0	0	200	903	0	0	0	0	0	0	0	603	903	0
437	5	0	0	0	0	0	0	200	300	0	0	0	0	0	0	0	200	903	0	0	0	0	0	0	0	603	903	0
437	6	0	0	0	0	0	0	200	300	0	0	0	0	0	0	0	200	903	0	0	0	0	0	0	0	603	903	0
437	7	0	0	0	0	0	0	200	300	0	0	0	0	0	0	0	200	903	0	0	0	0	0	0	0	603	903	0
437	8	0	0	0	0	0	0	200	300	0	0	0	0	0	0	0	200	903	0	0	0	0	0	0	0	603	903	0
437	9	0	0	0	0	0	0	200	300	0	0	0	0	0	0	0	200	903	0	0	0	0	0	0	0	603	903	0
438	0	0	0	0	0	0	0	200	300	0	0	0	0	0	0	0	200	903	0	0	0	0	0	0	0	603	903	0
438	1	0	0	0	0	0	0	200	300	0	0	0	0	0	0	0	200	903	0	0	0	0	0	0	0	603	903	0
438	2	0	0	0	0	0	0	200	300	0	0	0	0	0	0	0	200	903	0	0	0	0	0	0	0	603	903	0
438	3	0	0	0	0	0	0	200	300	0	0	0	0	0	0	0	200	903	0	0	0	0	0	0	0	603	903	0
438	4	0	0	0	0	0	0	200	300	0	0	0	0	0	0	0	200	903	0	0	0	0	0	0	0	603	903	0
438	5	0	0	0	0	0	0	200	300	0	0	0	0	0	0	0	200	903	0	0	0	0	0	0	0	603	903	0
438	6	0	0	0	0	0	0	200	300	0	0	0	0	0	0	0	200	903	0	0	0	0	0	0	0	603	903	0
438	7	0	0	0	0	0	0	200	300	0	0	0	0	0	0	0	200	903	0	0	0	0	0	0	0	603	903	0
438	8	0	0	0	0	0	0	200	300	0	0	0	0	0	0	0	200	903	0	0	0	0	0	0	0	603	903	0
438	9	0	0	0	0	0	0	200	300	0	0	0	0	0	0	0	200	903	0	0	0	0	0	0	0	603	903	0
439	0	0	0	0	0	0	0	200	300	0	0	0	0	0	0	0	200	903	0	0	0	0	0	0	0	603	903	0
439	1	0	0	0	0	0	0	200	300	0	0	0	0	0	0	0	200	903	0	0	0	0	0	0	0	603	903	0
439	2	0	0	0	0	0	0	200	300	0	0	0	0	0	0	0	200	903	0	0	0	0	0	0	0	603	903	0
439	3	0	0	0	0	0	0	200	300	0	0	0	0	0	0	0	200	903	0	0	0	0	0	0	0	603	903	0
439	4	0	0	0	0	0	0	200	300	0	0	0	0	0	0	0	200	903	0	0	0	0	0	0	0	603	903	0
439	5	0	0	0	0	0	0	200	300	0	0	0	0	0	0	0	200	903	0	0	0	0	0	0	0	603	903	0
439	6	0	0	0	0	0	0	200	300	0	0	0	0	0	0	0	200	903	0	0	0	0	0	0	0	603	903	0
439	7	0	0	0	0	0	0	200	300	0	0	0	0	0	0	0	200	903	0	0	0	0	0	0	0	603	903	0
439	8	0	0	0	0	0	0	200	300	0	0	0	0	0	0	0	200	903	0	0	0	0	0	0	0	603	903	0
439	9	0	0	0	0	0	0	200	300	0	0	0	0	0	0	0	200	903	0	0	0	0	0	0	0	603	903	0
440	0	0	0	0	0	0	0	200	300	0	0	0	0	0	0	0	200	903	0	0	0	0	0	0	0	603	903	0
440	1	0	0	0	0	0	0	200	300	0	0	0	0	0	0	0	200	903	0	0	0	0	0	0	0	603	903	0
440	2	0	0	0	0	0	0	200	300	0	0	0	0	0	0	0	200	903	0	0	0	0	0	0	0	603	903	0
440	3	0	0	0	0	0	0	200	300	0	0	0	0	0	0	0	200	903	0	0	0	0	0	0	0	603	903	0
440	4	0	0	0	0	0	0	200	300	0	0	0	0	0	0	0	200	903	0	0	0	0	0	0	0	603	903	0
440	5	0	0	0	0	0	0	200	300	0	0	0	0	0	0	0	200	903	0	0	0	0	0	0	0	603	903	0
440	6	0	0	0	0	0	0	200	300	0	0	0	0	0	0	0	200	903	0	0	0	0	0	0	0	603	903	0
440	7	0	0	0	0	0	0	200	300	0	0	0	0	0	0	0	200	903	0	0	0	0	0	0	0	603	903	0
440	8	0	0	0	0	0	0	200	300	0	0	0	0	0	0	0	200	903	0	0	0	0	0	0	0	603	903	0
440	9	0	0	0	0	0	0	200	300	0	0	0	0	0	0	0	200	903	0	0	0	0	0	0	0	603	903	0
441	0	0	0	0	0	0	0	200	300	0	0	0	0	0	0	0	200	903	0	0	0	0	0	0	0	603	903	0
441	1	0	0	0	0	0	0	200	300	0	0	0	0	0	0	0	200	903	0	0	0	0	0	0	0	603	903	0
441	2	0	0	0	0	0	0	200	300	0	0	0	0	0	0	0	200	903	0	0	0	0	0	0	0	603	903	0
441	3	0	0	0	0	0	0	200	300	0	0	0	0	0	0	0	200	903	0	0	0	0	0	0	0	603	903	0
441	4	0	0	0	0	0	0	200	300	0	0	0	0	0	0	0	200	903	0	0	0	0	0	0	0	603	903	0
441	5	0	0	0	0	0	0	200	300	0	0	0	0	0	0	0	200	903	0	0	0	0	0	0	0	603	903	0
441	6	0	0	0	0	0	0	200	300	0	0	0	0	0	0	0	200	903	0	0	0	0	0	0	0	603	903	0
441	7	0	0	0	0	0	0	200	300	0	0	0	0	0	0	0	200	903	0	0	0	0	0	0	0	603	903	0
441	8	0	0	0	0	0	0	200	300	0	0	0	0	0	0	0	200	903	0	0	0	0	0	0	0	603	903	0
441	9	0	0	0	0	0	0	200	300	0	0	0	0	0	0	0	200	903	0	0	0	0	0	0	0	603	903	0
442	0	0	0	0	0	0	0	200	300	0	0	0	0	0	0	0	200	903	0	0	0	0	0	0	0	603	903	0
442	1	0	0	0	0	0	0	200	300	0	0	0	0	0	0	0	200	903	0	0	0	0	0	0	0	603	903	0
442	2	0	0	0	0	0	0	200	300	0	0	0	0	0	0	0	200	903	0	0	0	0	0	0	0	603	903	0
442	3	0	0	0	0	0	0	200	300	0	0	0	0	0	0	0	200	903	0	0	0	0	0	0	0	603	903	0
442	4	0	0	0	0	0	0	200	300	0	0	0	0	0	0	0	200	903	0	0	0	0	0	0	0	603	903	0
442	5	0	0	0	0	0	0	200	300	0	0	0	0	0	0	0	200	903	0	0	0	0	0	0	0	603	903	0
442	6	0	0	0	0	0	0	200	300	0	0	0	0	0	0	0	200	903	0	0	0	0	0	0	0	603	903	0
442	7	0	0	0	0	0	0	200	300	0	0	0	0	0	0	0	200	903	0	0	0	0	0	0	0	603	903	0
442	8	0	0	0	0	0	0	200	300	0	0	0	0	0	0	0	200	903	0	0	0	0	0	0	0	603	903	0
442	9	0	0	0	0	0	0	200	300	0	0	0	0	0	0	0	200	903	0	0	0	0	0	0	0	603	903	0
443	0	0	0	0	0	0	0	200	300	0	0	0	0	0	0	0	200	903	0	0	0	0	0	0	0	603	903	0
443	1	0	0	0	0	0	0	200	300	0	0	0	0	0	0	0	200	903	0	0	0	0	0	0	0	603	903	0
443	2	0	0	0	0	0	0	200	300	0	0	0	0	0	0	0	200	903	0	0	0	0	0	0	0	603	903	0
443	3	0	0	0	0	0	0	200	300	0	0	0	0	0	0	0	200	903	0	0	0	0	0	0	0	603	903	0
443	4	0	0	0	0	0	0	200	300	0	0	0	0	0	0	0	200	903	0	0	0	0	0	0	0	603	903	0
443	5	0	0	0	0	0	0	200	300	0	0	0	0	0	0	0	200	903	0	0	0	0	0	0	0	603	903	0
443	6	0	0	0	0	0	0	200	300	0	0	0	0	0	0	0	200	903	0	0	0	0	0	0	0	603	903	0
443	7	0	0	0	0	0	0	200	300	0	0	0	0	0	0	0	200	903	0	0	0	0	0	0	0	603	903	0
443	8	0	0	0	0	0	0	200	300	0	0	0	0	0	0	0	200	903	0	0	0	0	0	0	0	603	903	0
443	9	0	0	0	0	0	0	200	300	0	0	0	0	0	0	0	200	903	0	0	0	0	0	0	0	603	903	0
444	0	0	0	0	0	0	0	200	300	0	0	0	0	0	0	0	200	903	0	0	0	0	0	0	0	603	903	0
444	1	0	0	0	0	0	0	200	300	0	0	0	0	0	0	0	200	903	0	0	0	0	0	0	0	603	903	0
444	2	0	0	0	0	0	0	200	300	0	0	0	0	0	0	0	200	903	0	0	0	0	0	0	0	603	903	0
444	3	0	0	0	0	0	0	200	300	0	0	0	0	0	0	0	200	903	0	0	0	0	0	0	0	603	903	0
444	4	0	0	0	0	0	0	200	300	0	0	0	0	0	0	0	200	903	0	0	0	0	0	0	0	603	903	0
444	5	0	0	0	0	0	0	200	300	0	0	0	0	0	0	0	200	903	0	0	0	0	0	0	0	603	903	0
444	6	0	0	0	0	0	0	200	300	0	0	0	0	0	0	0	200	903	0	0	0	0	0	0	0	603	903	0
444	7	0	0	0	0	0	0	200	300	0	0	0	0	0	0	0	200	903	0	0	0	0	0	0	0	603	903	0
444	8	0	0	0	0	0	0	200	300	0	0	0	0	0	0	0	200	903	0	0	0	0	0	0	0	603	903	0
444	9	0	0	0	0	0	0	200	300	0	0	0	0	0	0	0	200	903	0	0	0	0	0	0	0	603	903	0
445	0	0	0	0	0	0	0	200	300	0	0	0	0	0	0	0	200	903	0	0	0	0	0	0	0	603	903	0
445	1	0	0	0	0	0	0	200	300	0	0	0	0	0	0	0	200	903	0	0	0	0	0	0	0	603	903	0
445	2	0	0	0	0	0	0	200	300	0	0	0	0	0	0	0	200	903	0	0	0	0	0	0	0	603	903	0
445	3	0	0	0	0	0	0	200	300	0	0	0	0	0	0	0	200	903	0	0	0	0	0	0	0	603	903	0
445	4	0	0	0	0	0	0	200	300	0	0	0	0	0	0	0	200	903	0	0	0	0	0	0	0	603	903	0
445	5	0	0	0	0	0	0	200	300	0	0	0	0	0	0	0	200	903	0	0	0	0	0	0	0	603	903	0
445	6	0	0	0	0	0	0	200	300	0	0	0	0	0	0	0	200	903	0	0	0	0	0	0	0	603	903	0
445	7	0	0	0	0	0	0	200	300	0	0	0	0	0	0	0	200	903	0	0	0	0	0	0	0	603	903	0
445	8	0	0	0	0	0	0	200	300	0	0	0	0	0	0	0	200	903	0	0	0	0	0	0	0	603	903	0
445	9	0	0	0	0	0	0	200	300	0	0	0	0	0	0	0	200	903	0	0	0	0	0	0	0	603	903	0
446	0	0	0	0	0	0	0	200	300	0	0	0	0	0	0	0	200	903	0	0	0	0	0	0	0	603	903	0
446	1	0	0	0	0	0	0	200	300	0	0	0	0	0	0	0	200	903	0	0	0	0	0	0	0	603	903	0
446	2	0	0	0	0	0	0	200	300	0	0	0	0	0	0	0	200	903	0	0	0	0	0	0	0	603	903	0
446	3	0	0	0	0	0	0	200	300	0	0	0	0	0	0	0	200	903	0	0	0	0	0	0	0	603	903	0
446	4	0	0	0	0	0	0	200	300	0	0	0	0	0	0	0	200	903	0	0	0	0	0	0	0	603	903	0
446	5	0	0	0	0	0	0	200	300	0	0	0	0	0	0	0	200	903	0	0	0	0	0	0	0	603	903	0
446	6	0	0	0	0	0	0	200	300	0	0	0	0	0	0	0	200	903	0	0	0	0	0	0	0	603	903	0
446	7	0	0	0	0	0	0	200	300	0	0	0	0	0	0	0	200	903	0	0	0	0	0	0	0	603	903	0
446	8	0	0	0	0	0	0	200	300	0	0	0	0	0	0	0	200	903	0	0	0	0	0	0	0	603	903	0
446	9	0	0	0	0	0	0	200	300	0	0	0	0	0	0	0	200	903	0	0	0	0	0	0	0	603	903	0
447	0	0	0	0	0	0	0	200	300	0	0	0	0	0	0	0	200	903	0	0	0	0	0	0	0	603	903	0
447	1	0	0	0	0	0	0	200	300	0	0	0	0	0	0	0	200	903	0	0	0	0	0	0	0	603	903	0
447	2	0	0	0	0	0	0	200	300	0	0	0	0	0	0	0	200	903	0	0	0	0	0	0	0	603	903	0
447	3	0	0	0	0	0	0	200	300	0	0	0	0	0	0	0	200	903	0	0	0	0	0	0	0	603	903	0
447	4	0	0	0	0	0	0	200	300	0	0	0	0	0	0	0	200	903	0	0	0	0	0	0	0	603	903	0
447	5	0	0	0	0	0	0	200	300	0	0	0	0	0	0	0	200	903	0	0	0	0	0	0	0	603	903	0
447	6	0	0	0	0	0	0	200	300	0	0	0	0	0	0	0	200	903	0	0	0	0	0	0	0	603	903	0
447	7	0	0	0	0	0	0	200	300	0	0	0	0	0	0	0	200	903	0	0	0	0	0	0	0	603	903	0
447	8	0	0	0	0	0	0	200	300	0	0	0	0	0	0	0	200	903	0	0	0	0	0	0	0	603	903	0
447	9	0	0	0	0	0	0	200	300	0	0	0	0	0	0	0	200	903	0	0	0	0	0	0	0	603	903	0
448	0	0	0	0	0	0	0	200	300	0	0	0	0	0	0	0	200	903	0	0	0	0	0	0	0	603	903	0
448	1	0	0	0	0	0	0	200	300	0	0	0	0	0	0	0	200	903	0	0	0	0	0	0	0	603	903	0
448	2	0	0	0	0	0	0	200	300	0	0	0	0	0	0	0	200	903	0	0	0	0	0	0	0	603	903	0
448	3	0	0	0	0	0	0	200	300	0	0	0	0	0	0	0	200	903	0	0	0	0	0	0	0	603	903	0
448	4	0	0	0	0	0	0	200	300	0	0	0	0	0	0	0	200	903	0	0	0	0	0	0	0	603	903	0
448	5	0	0	0	0	0	0	200	300	0	0	0	0	0	0	0	200	903	0	0	0	0	0	0	0	603	903	0
448	6	0	0	0	0	0	0	200	300	0	0	0	0	0	0	0	200	903	0	0	0	0	0	0	0	603	903	0
448	7	0	0	0	0	0	0	200	300	0	0	0	0	0	0	0	200	903	0	0	0	0	0	0	0	603	903	0
448	8	0	0	0	0	0	0	200	300	0	0	0	0	0	0	0	200	903	0	0	0	0	0	0	0	603	903	0
448	9	0	0	0	0	0	0	200	300	0	0	0	0	0	0	0	200	903	0	0	0	0	0	0	0	603	903	0
449	0	0	0	0	0	0	0	200	300	0	0	0	0	0	0	0	200	903	0	0	0	0	0	0	0	603	903	0
449	1	0	0	0	0	0	0	200	300	0	0	0	0	0	0	0	200	903	0	0	0	0	0	0	0	603	903	0
449	2	0	0	0	0	0	0	200	300	0	0	0	0	0	0	0	200	903	0	0	0	0	0	0	0	603	903	0
449	3	0	0	0	0	0	0	200	300	0	0	0	0	0	0	0	200	903	0	0	0	0	0	0	0	603	903	0
449	4	0	0	0	0	0	0	200	300	0	0	0	0	0	0	0	200	903	0	0	0	0	0	0	0	603	903	0
449	5	0	0	0	0	0	0	200	300	0	0	0	0	0	0	0	200	903	0	0	0	0	0	0	0	603	903	0
449	6	0	0	0	0	0	0	200	300	0	0	0	0	0	0	0	200	903	0	0	0	0	0	0	0	603	903	0
449	7	0	0	0	0	0	0	200	300	0	0	0	0	0	0	0	200	903	0	0	0	0	0	0	0	603	903	0
449	8	0	0	0	0	0	0	200	300	0	0	0	0	0	0	0	200	903	0	0	0	0	0	0	0	603	903	0
449	9	0	0	0	0	0	0	200	300	0	0	0	0	0	0	0	200	903	0	0	0	0	0	0	0	603	903	0
450	0	0	0	0	0	0	0	200	300	0	0	0	0	0	0	0	200	903	0	0	0	0	0	0	0	603	903	0
450	1	0	0	0	0	0	0	200	300	0	0	0	0	0	0	0	200	903	0	0	0	0	0	0	0	603	903	0
450	2	0	0	0	0	0	0	200	300	0	0	0	0	0	0	0	200	903	0	0	0	0	0	0	0	603	903	0
450	3	0	0	0	0	0	0	200	300	0	0	0	0	0	0	0	200	903	0	0	0	0	0	0	0	603	903	0
450	4	0	0	0	0	0	0	200	300	0	0	0	0	0	0	0	200	903	0	0	0	0	0	0	0	603	903	0
450	5	0	0	0	0	0	0	200	300	0	0	0	0	0	0	0	200	903	0	0	0	0	0	0	0	603	903	0
450	6	0	0	0	0	0	0	200	300	0	0	0	0	0	0	0	200	903	0	0	0	0	0	0	0	603	903	0
450	7	0	0	0	0	0	0	200	300	0	0	0	0	0	0	0	200	903	0	0	0	0	0	0	0	603	903	0
450	8	0	0	0	0	0	0	200	300	0	0	0	0	0	0	0	200	903	0	0	0	0	0	0	0	603	903	0
450	9	0	0	0	0	0	0	200	300	0	0	0	0	0	0	0	200	903	0	0	0	0	0	0	0	603	903	0
451	0	0	0	0	0	0	0	200	300	0	0	0	0	0	0	0	200	903	0	0	0	0	0	0	0	603	903	0
451	1	0	0	0	0	0	0	200	300	0	0	0	0	0	0	0	200	903	0	0	0	0	0	0	0	603	903	0
451	2	0	0	0	0	0	0	200	300	0	0	0	0	0	0	0	200	903	0	0	0	0	0	0	0	603	903	0
451	3	0	0	0	0	0	0	200	300	0	0	0	0	0	0	0	200	903	0	0	0	0	0	0	0	603	903	0
451	4	0	0	0	0	0	0	200	300	0	0	0	0	0	0	0	200	903	0	0	0	0	0	0	0	603	903	0
451	5	0	0	0	0	0	0	200	300	0	0	0	0	0	0	0	200	903	0	0	0	0	0	0	0	603	903	0
451	6	0	0	0	0	0	0	200	300	0	0	0	0	0	0	0	200	903	0	0	0	0	0	0	0	603	903	0
451	7	0	0	0	0	0	0	200	300	0	0	0	0	0	0	0	200	903	0	0	0	0	0	0	0	603	903	0
451	8	0	0	0	0	0	0	200	300	0	0	0	0	0	0	0	200	903	0	0	0	0	0	0	0	603	903	0
451	9	0	0	0	0	0	0	200	300	0	0	0	0	0	0	0	200	903	0	0	0	0	0	0	0	603	903	0
452	0	0	0	0	0	0	0	200	300	0	0	0	0	0	0	0	200	903	0	0	0	0	0	0	0	603	903	0
452	1	0	0	0	0	0	0	200	300	0	0	0	0	0	0	0	200	903	0	0	0	0	0	0	0	603	903	0
452	2	0	0	0	0	0	0	200	300	0	0	0	0	0	0	0	200	903	0	0	0	0	0	0	0	603	903	0
452	3	0	0	0	0	0	0	200	300	0	0	0	0	0	0	0	200	903	0	0	0	0	0	0	0	603	903	0
452	4	0	0	0	0	0	0	200	300	0	0	0	0	0	0	0	200	903	0	0	0	0	0	0	0	603	903	0
452	5	0	0	0	0	0	0	200	300	0	0	0	0	0	0	0	200	903	0	0	0	0	0	0	0	603	903	0
452	6	0	0	0	0	0	0	200	300	0	0	0	0	0	0	0	200	903	0	0	0	0	0	0	0	603	903	0
452	7	0	0	0	0	0	0	200	300	0	0	0	0	0	0	0	200	903	0	0	0	0	0	0	0	603	903	0
452	8	0	0	0	0	0	0	200	300	0	0	0	0	0	0	0	200	903	0	0	0	0	0	0	0	603	903	0
452	9	0	0	0	0	0	0	200	300	0	0	0	0	0	0	0	200	903	0	0	0	0	0	0	0	603	903	0
453	0	0	0	0	0	0	0	200	300	0	0	0	0	0	0	0	200	903	0	0	0	0	0	0	0	603	903	0
453	1	0	0	0	0	0	0	200	300	0	0	0	0	0	0	0	200	903	0	0	0	0	0	0	0	603	903	0
453	2	0	0	0	0	0	0	200	300	0	0	0	0	0	0	0	200	903	0	0	0	0	0	0	0	603	903	0
453	3	0	0	0	0	0	0	200	300	0	0	0	0	0	0	0	200	903	0	0	0	0	0	0	0	603	903	0
453	4	0	0	0	0	0	0	200	300	0	0	0	0	0	0	0	200	903	0	0	0	0	0	0	0	603	903	0
453	5	0	0	0	0	0	0	200	300	0	0	0	0	0	0	0	200	903	0	0	0	0	0	0	0	603	903	0
453	6	0	0	0	0	0	0	200	300	0	0	0	0	0	0	0	200	903	0	0	0	0	0	0	0	603	903	0
453	7	0	0	0	0	0	0	200	300	0	0	0	0	0	0	0	200	903	0	0	0	0	0	0	0	603	903	0
453	8	0	0	0	0	0	0	200	300	0	0	0	0	0	0	0	200	903	0	0	0	0	0	0	0	603	903	0
453	9	0	0	0	0	0	0	200	300	0	0	0	0	0	0	0	200	903	0	0	0	0	0	0	0	603	903	0
454	0	0	0	0	0	0	0	200	300	0	0	0	0	0	0	0	200	903	0	0	0	0	0	0	0	603	903	0
454	1	0	0	0	0	0	0	200	300	0	0	0	0	0	0	0	200	903	0	0	0	0	0	0	0	603	903	0
454	2	0	0	0	0	0	0	200	300	0	0	0	0	0	0	0	200	903	0	0	0	0	0	0	0	603	903	0
454	3	0	0	0	0	0	0	200	300	0	0	0	0	0	0	0	200	903	0	0	0	0	0	0	0	603	903	0
454	4	0	0	0	0	0	0	200	300	0	0	0	0	0	0	0	200	903	0	0	0	0	0	0	0	603	903	0
454	5	0	0	0	0	0	0	200	300	0	0	0	0	0	0	0	200	903	0	0	0	0	0	0	0	603	903	0
454	6	0	0	0	0	0	0	200	300	0	0	0	0	0	0	0	200	903	0	0	0	0	0	0	0	603	903	0
454	7	0	0	0	0	0	0	200	300	0	0	0	0	0	0	0	200	903	0	0	0	0	0	0	0	603	903	0
454	8	0	0	0	0	0	0	200	300	0	0	0	0	0	0	0	200	903	0	0	0	0	0	0	0	603	903	0
454	9	0	0	0	0	0	0	200	300	0	0	0	0	0	0	0	200	903	0	0	0	0	0	0	0	603	903	0
455	0	0	0	0	0	0	0	200	300	0	0	0	0	0	0	0	200	903	0	0	0	0	0	0	0	603	903	0
455	1	0	0	0	0	0	0	200	300	0	0	0	0	0	0	0	200	903	0	0	0	0	0	0	0	603	903	0
455	2	0	0	0	0	0	0	200	300	0	0	0	0	0	0	0	200	903	0	0	0	0	0	0	0	603	903	0
455	3	0	0	0	0	0	0	200	300	0	0	0	0	0	0	0	200	903	0	0	0	0	0	0	0	603	903	0
455	4	0	0	0	0	0	0	200	300	0	0	0	0	0	0	0	200	903	0	0	0	0	0	0	0	603	903	0
455	5	0	0	0	0	0	0	200	300	0	0	0	0	0	0	0	200	903	0	0	0	0	0	0	0	603	903	0
455	6	0	0	0	0	0	0	200	300	0	0	0	0	0	0	0	200	903	0	0	0	0	0	0	0	603	903	0
455	7	0	0	0	0	0	0	200	300	0	0	0	0	0	0	0	200	903	0	0	0	0	0	0	0	603	903	0
455	8	0	0	0	0	0	0	200	300	0	0	0	0	0	0	0	200	903	0	0	0	0	0	0	0	603	903	0
455	9	0	0	0	0	0	0	200	300	0	0	0	0	0	0	0	200	903	0	0	0	0	0	0	0	603	903	0
456	0	0	0	0	0	0	0	200	300	0	0	0	0	0	0	0	200	903	0	0	0	0	0	0	0	603	903	0
456	1	0	0	0	0	0	0	200	300	0	0	0	0	0	0	0	200	903	0	0	0	0	0	0	0	603	903	0
456	2	0	0	0	0	0	0	200	300	0	0	0	0	0	0	0	200	903	0	0	0	0	0	0	0	603	903	0
456	3	0	0	0	0	0	0	200	300	0	0	0	0	0	0	0	200	903	0	0	0	0	0	0	0	603	903	0
456	4	0	0	0	0	0	0	200	300	0	0	0	0	0	0	0	200	903	0	0	0	0	0	0	0	603	903	0
456	5	0	0	0	0	0	0	200	300	0	0	0	0	0	0	0	200	903	0	0	0	0	0	0	0	603	903	0
456	6	0	0	0	0	0	0	200	300	0	0	0	0	0	0	0	200	903	0	0	0	0	0	0	0	603	903	0
456	7	0	0	0	0	0	0	200	300	0	0	0	0	0	0	0	200	903	0	0	0	0	0	0	0	603	903	0
456	8	0	0	0	0	0	0	200	300	0	0	0	0	0	0	0	200	903	0	0	0	0	0	0	0	603	903	0
456	9	0	0	0	0	0	0	200	300	0	0	0	0	0	0	0	200	903	0	0	0	0	0	0	0	603	903	0
457	0	0	0	0	0	0	0	200	300	0	0	0	0	0	0	0	200	903	0	0	0	0	0	0	0	603	903	0
457	1	0	0	0	0	0	0	200	300	0	0	0	0	0	0	0	200	903	0	0	0	0	0	0	0	603	903	0
457	2	0	0	0	0	0	0	200	300	0	0	0	0	0	0	0	200	903	0	0	0	0	0	0	0	603	903	0
457	3	0	0	0	0	0	0	200	300	0	0	0	0	0	0	0	200	903	0	0	0	0	0	0	0	603	903	0
457	4	0	0	0	0	0	0	200	300	0	0	0	0	0	0	0	200	903	0	0	0	0	0	0	0	603	903	0
457	5	0	0	0	0	0	0	200	300	0	0	0	0	0	0	0	200	903	0	0	0	0	0	0	0	603	903	0
457	6	0	0	0	0	0	0	200	300	0	0	0	0	0	0	0	200	903	0	0	0	0	0	0	0	603	903	0
457	7	0	0	0	0	0	0	200	300	0	0	0	0	0	0	0	200	903	0	0	0	0	0	0	0	603	903	0
457	8	0	0	0	0	0	0	200	300	0	0	0	0	0	0	0	200	903	0	0	0	0	0	0	0	603	903	0
457	9	0	0	0	0	0	0	200	300	0	0	0	0	0	0	0	200	903	0	0	0	0	0	0	0	603	903	0
458	0	0	0	0	0	0	0	200	300	0	0	0	0	0	0	0	200	903	0	0	0	0	0	0	0	603	903	0
458	1	0	0	0	0	0	0	200	300	0	0	0	0	0	0	0	200	903	0	0	0	0	0	0	0	603	903	0
458	2	0	0	0	0	0	0	200	300	0	0	0	0	0	0	0	200	903	0	0	0	0	0	0	0	603	903	0
458	3	0	0	0	0	0	0	200	300	0	0	0	0	0	0	0	200	903	0	0	0	0	0	0	0	603	903	0
458	4	0	0	0	0	0	0	200	300	0	0	0	0	0	0	0	200	903	0	0	0	0	0	0	0	603	903	0
458	5	0	0	0	0	0	0	200	300	0	0	0	0	0	0	0	200	903	0	0	0	0	0	0	0	603	903	0
458	6	0	0	0	0	0	0	200	300	0	0	0	0	0	0	0	200	903	0	0	0	0	0	0	0	603	903	0
458	7	0	0	0	0	0	0	200	300	0	0	0	0	0	0	0	200	903	0	0	0	0	0	0	0	603	903	0
458	8	0	0	0	0	0	0	200	300	0	0	0	0	0	0	0	200	903	0	0	0	0	0	0	0	603	903	0
458	9	0	0	0	0	0	0	200	300	0	0	0	0	0	0	0	200	903	0	0	0	0	0	0	0	603	903	0
459	0	0	0	0	0	0	0	200	300	0	0	0	0	0	0	0	200	903	0	0	0	0	0	0	0	603	903	0
459	1	0	0	0	0	0	0	200	300	0	0	0	0	0	0	0	200	903	0	0	0	0	0	0	0	603	903	0
459	2	0	0	0	0	0	0	200	300	0	0	0	0	0	0	0	200	903	0	0	0	0	0	0	0	603	903	0
459	3	0	0	0	0	0	0	200	300	0	0	0	0	0	0	0	200	903	0	0	0	0	0	0	0	603	903	0
459	4	0	0	0	0	0	0	200	300	0	0	0	0	0	0	0	200	903	0	0	0	0	0	0	0	603	903	0
459	5	0	0	0	0	0	0	200	300	0	0	0	0	0	0	0	200	903	0	0	0	0	0	0	0	603	903	0
459	6	0	0	0	0	0	0	200	300	0	0	0	0	0	0	0	200	903	0	0	0	0	0	0	0	603	903	0
459	7	0	0	0	0	0	0	200	300	0	0	0	0	0	0	0	200	903	0	0	0	0	0	0	0	603	903	0
459	8	0	0	0	0	0	0	200	300	0	0	0	0	0	0	0	200	903	0	0	0	0	0	0	0	603	903	0
459	9	0	0	0	0	0	0	200	300	0	0	0	0	0	0	0	200	903	0	0	0	0	0	0	0	603	903	0
460	0	0	0	0	0	0	0	200	300	0	0	0	0	0	0	0	200	903	0	0	0	0	0	0	0	603	903	0
460	1	0	0	0	0	0	0	200	300	0	0	0	0	0	0	0	200	903	0	0	0	0	0	0	0	603	903	0
460	2	0	0	0	0	0	0	200	300	0	0	0	0	0	0	0	200	903	0	0	0	0	0	0	0	603	903	0
460	3	0	0	0	0	0	0	200	300	0	0	0	0	0	0	0	200	903	0	0	0	0	0	0	0	603	903	0
460	4	0	0	0	0	0	0	200	300	0	0	0	0	0	0	0	200	903	0	0	0	0	0	0	0	603	903	0
460	5	0	0	0	0	0	0	200	300	0	0	0	0	0	0	0	200	903	0	0	0	0	0	0	0	603	903	0
460	6	0	0	0	0	0	0	200	300	0	0	0	0	0	0	0	200	903	0	0	0	0	0	0	0	603	903	0
460	7	0	0	0	0	0	0	200	300	0	0	0	0	0	0	0	200	903	0	0	0	0	0	0	0	603	903	0
460	8	0	0	0	0	0	0	200	300	0	0	0	0	0	0	0	200	903	0	0	0	0	0	0	0	603	903	0
460	9	0	0	0	0	0	0	200	300	0	0	0	0	0	0	0	200	903	0	0	0	0	0	0	0	603	903	0
461	0	0	0	0	0	0	0	200	300	0	0	0	0	0	0	0	200	903	0	0	0	0	0	0	0	603	903	0
461	1	0	0	0	0	0	0	200	300	0	0	0	0	0	0	0	200	903	0	0	0	0	0	0	0	603	903	0
461	2	0	0	0	0	0	0	200	300	0	0	0	0	0	0	0	200	903	0	0	0	0	0	0	0	603	903	0
461	3	0	0	0	0	0	0	200	300	0	0	0	0	0	0	0	200	903	0	0	0	0	0	0	0	603	903	0
461	4	0	0	0	0	0	0	200	300	0	0	0	0	0	0	0	200	903	0	0	0	0	0	0	0	603	903	0
461	5	0	0	0	0	0	0	200	300	0	0	0	0	0	0	0	200	903	0	0	0	0	0	0	0	603	903	0
461	6	0	0	0	0	0	0	200	300	0	0	0	0	0	0	0	200	903	0	0	0	0	0	0	0	603	903	0
461	7	0	0	0	0	0	0	200	300	0	0	0	0	0	0	0	200	903	0	0	0	0	0	0	0	603	903	0
461	8	0	0	0	0	0	0	200	300	0	0	0	0	0	0	0	200	903	0	0	0	0	0	0	0	603	903	0
461	9	0	0	0	0	0	0	200	300	0	0	0	0	0	0	0	200	903	0	0	0	0	0	0	0	603	903	0
462	0	0	0	0	0	0	0	200	300	0	0	0	0	0	0	0	200	903	0	0	0	0	0	0	0	603	903	0
462	1	0	0	0	0	0	0	200	300	0	0	0	0	0	0	0	200	903	0	0	0	0	0	0	0	603	903	0
462	2	0	0	0	0	0	0	200	300	0	0	0	0	0	0	0	200	903	0	0	0	0	0	0	0	603	903	0
462	3	0	0	0	0	0	0	200	300	0	0	0	0	0	0	0	200	903	0	0	0	0	0	0	0	603	903	0
462	4	0	0	0	0	0	0	200	300	0	0	0	0	0	0	0	200	903	0	0	0	0	0	0	0	603	903	0
462	5	0	0	0	0	0	0	200	300	0	0	0	0	0	0	0	200	903	0	0	0	0	0	0	0	603	903	0
462	6	0	0	0	0	0	0	200	300	0	0	0	0	0	0	0	200	903	0	0	0	0	0	0	0	603	903	0
462	7	0	0	0	0	0	0	200	300	0	0	0	0	0	0	0	200	903	0	0	0	0	0	0	0	603	903	0
462	8	0	0	0	0	0	0	200	300	0	0	0	0	0	0	0	200	903	0	0	0	0	0	0	0	603	903	0
462	9	0	0	0	0	0	0	200	300	0	0	0	0	0	0	0	200	903	0	0	0	0	0	0	0	603	903	0
463	0	0	0	0	0	0	0	200	300	0	0	0	0	0	0	0	200	903	0	0	0	0	0	0	0	603	903	0
463	1	0	0	0	0	0	0	200	300	0	0	0	0	0	0	0	200	903	0	0	0	0	0	0	0	603	903	0
463	2	0	0	0	0	0	0	200	300	0	0	0	0	0	0	0	200	903	0	0	0	0	0	0	0	603	903	0
463	3	0	0	0	0	0	0	200	300	0	0	0	0	0	0	0	200	903	0	0	0	0	0	0	0	603	903	0
463	4	0	0	0	0	0	0	200	300	0	0	0	0	0	0	0	200	903	0	0	0	0	0	0	0	603	903	0
463	5	0	0	0	0	0	0	200	300	0	0	0	0	0	0	0	200	903	0	0	0	0	0	0	0	603	903	0
463	6	0	0	0	0	0	0	200	300	0	0	0	0	0	0	0	200	903	0	0	0	0	0	0	0	603	903	0
463	7	0	0	0	0	0	0	200	300	0	0	0	0	0	0	0	200	903	0	0	0	0	0	0	0	603	903	0
463	8	0	0	0	0	0	0	200	300	0	0	0	0	0	0	0	200	903	0	0	0	0	0	0	0	603	903	0
463	9	0	0	0	0	0	0	200	300	0	0	0	0	0	0	0	200	903	0	0	0	0	0	0	0	603	903	0
464	0	0	0	0	0	0	0	200	300	0	0	0	0	0	0	0	200	903	0	0	0	0	0	0	0	603	903	0
464	1	0	0	0	0	0	0	200	300	0	0	0	0	0	0	0	200	903	0	0	0	0	0	0	0	603	903	0
464	2	0	0	0	0	0	0	200	300	0	0	0	0	0	0	0	200	903	0	0	0	0	0	0	0	603	903	0
464	3	0	0	0	0	0	0	200	300	0	0	0	0	0	0	0	200	903	0	0	0	0	0	0	0	603	903	0
464	4	0	0	0	0	0	0	200	300	0	0	0	0	0	0	0	200	903	0	0	0	0	0	0	0	603	903	0
464	5	0	0	0	0	0	0	200	300	0	0	0	0	0	0	0	200	903	0	0	0	0	0	0	0	603	903	0
464	6	0	0	0	0	0	0	200	300	0	0	0	0	0	0	0	200	903	0	0	0	0	0	0	0	603	903	0
464	7	0	0	0	0	0	0	200	300	0	0	0	0	0	0	0	200	903	0	0	0	0	0	0	0	603	903	0
464	8	0	0	0	0	0	0	200	300	0	0	0	0	0	0	0	200	903	0	0	0	0	0	0	0	603	903	0
464	9	0	0	0	0	0	0	200	300	0	0	0	0	0	0	0	200	903	0	0	0	0	0	0	0	603	903	0
465	0	0	0	0	0	0	0	200	300	0	0	0	0	0	0	0	200	903	0	0	0	0	0	0	0	603	903	0
465	1	0	0	0	0	0	0	200	300	0	0	0	0	0	0	0	200	903	0	0	0	0	0	0	0	603	903	0
465	2	0	0	0	0	0	0	200	300	0	0	0	0	0	0	0	200	903	0	0	0	0	0	0	0	603	903	0
465	3	0	0	0	0	0	0	200	300	0	0	0	0	0	0	0	200	903	0	0	0	0	0	0	0	603	903	0
465	4	0	0	0	0	0	0	200	300	0	0	0	0	0	0	0	200	903	0	0	0	0	0	0	0	603	903	0
465	5	0	0	0	0	0	0	200	300	0	0	0	0	0	0	0	200	903	0	0	0	0	0	0	0	603	903	0
465	6	0	0	0	0	0	0	200	300	0	0	0	0	0	0	0	200	903	0	0	0	0	0	0	0	603	903	0
465	7	0	0	0	0	0	0	200	300	0	0	0	0	0	0	0	200	903	0	0	0	0	0	0	0	603	903	0
465	8	0	0	0	0	0	0	200	300	0	0	0	0	0	0	0	200	903	0	0	0	0	0	0	0	603	903	0
465	9	0	0	0	0	0	0	200	300	0	0	0	0	0	0	0	200	903	0	0	0	0	0	0	0	603	903	0
466	0	0	0	0	0	0	0	200	300	0	0	0	0	0	0	0	200	903	0	0	0	0	0	0	0	603	903	0
466	1	0	0	0	0	0	0	200	300	0	0	0	0	0	0	0	200	903	0	0	0	0	0	0	0	603	903	0
466	2	0	0	0	0	0	0	200	300	0	0	0	0	0	0	0	200	903	0	0	0	0	0	0	0	603	903	0
466	3	0	0	0	0	0	0	200	300	0	0	0	0	0	0	0	200	903	0	0	0	0	0	0	0	603	903	0
466	4	0	0	0	0	0	0	200	300	0	0	0	0	0	0	0	200	903	0	0	0	0	0	0	0	603	903	0
466	5	0	0	0	0	0	0	200	300	0	0	0	0	0	0	0	200	903	0	0	0	0	0	0	0	603	903	0
466	6	0	0	0	0	0	0	200	300	0	0	0	0	0	0	0	200	903	0	0	0	0	0	0	0	603	903	0
466	7	0	0	0	0	0	0	200	300	0	0	0	0	0	0	0	200	903	0	0	0	0	0	0	0	603	903	0
466	8	0	0	0	0	0	0	200	300	0	0	0	0	0	0	0	200	903	0	0	0	0	0	0	0	603	903	0
466	9	0	0	0	0	0	0	200	300	0	0	0	0	0	0	0	200	903	0	0	0	0	0	0	0	603	903	0
467	0	0	0	0	0	0	0	200	300	0	0	0	0	0	0	0	200	903	0	0	0	0	0	0	0	603	903	0
467	1	0	0	0	0	0	0	200	300	0	0	0	0	0	0	0	200	903	0	0	0	0	0	0	0	603	903	0
467	2	0	0	0	0	0	0	200	300	0	0	0	0	0	0	0	200	903	0	0	0	0	0	0	0	603	903	0
467	3	0	0	0	0	0	0	200	300	0	0	0	0	0	0	0	200	903	0	0	0	0	0	0	0	603	903	0
467	4	0	0	0	0	0	0	200	300	0	0	0	0	0	0	0	200	903	0	0	0	0	0	0	0	603	903	0
467	5	0	0	0	0	0	0	200	300	0	0	0	0	0	0	0	200	903	0	0	0	0	0	0	0	603	903	0
467	6	0	0	0	0	0	0	200	300	0	0	0	0	0	0	0	200	903	0	0	0	0	0	0	0	603	903	0
467	7	0	0	0	0	0	0	200	300	0	0	0	0	0	0	0	200	903	0	0	0	0	0	0	0	603	903	0
467	8	0	0	0	0	0	0	200	300	0	0	0	0	0	0	0	200	903	0	0	0	0	0	0	0	603	903	0
467	9	0	0	0	0	0	0	200	300	0	0	0	0	0	0	0	200	903	0	0	0	0	0	0	0	603	903	0
468	0	0	0	0	0	0	0	200	300	0	0	0	0	0	0	0	200	903	0	0	0	0	0	0	0	603	903	0
468	1	0	0	0	0	0	0	200	300	0	0	0	0	0	0	0	200	903	0	0	0	0	0	0	0	603	903	0
468	2	0	0	0	0	0	0	200	300	0	0	0	0	0	0	0	200	903	0	0	0	0	0	0	0	603	903	0
468	3	0	0	0	0	0	0	200	300	0	0	0	0	0	0	0	200	903	0	0	0	0	0	0	0	603	903	0
468	4	0	0	0	0	0	0	200	300	0	0	0	0	0	0	0	200	903	0	0	0	0	0	0	0	603	903	0
468	5	0	0	0	0	0	0	200	300	0	0	0	0	0	0	0	200	903	0	0	0	0	0	0	0	603	903	0
468	6	0	0	0	0	0	0	200	300	0	0	0	0	0	0	0	200	903	0	0	0	0	0	0	0	603	903	0
468	7	0	0	0	0	0	0	200	300	0	0	0	0	0	0	0	200	903	0	0	0	0	0	0	0	603	903	0
468	8	0	0	0	0	0	0	200	300	0	0	0	0	0	0	0	200	903	0	0	0	0	0	0	0	603	903	0
468	9	0	0	0	0	0	0	200	300	0	0	0	0	0	0	0	200	903	0	0	0	0	0	0	0	603	903	0
469	0	0	0	0	0	0	0	200	300	0	0	0	0	0	0	0	200	903	0	0	0	0	0	0	0	603	903	0
469	1	0	0	0	0	0	0	200	300	0	0	0	0	0	0	0	200	903	0	0	0	0	0	0	0	603	903	0
469	2	0	0	0	0	0	0	200	300	0	0	0	0	0	0	0	200	903	0	0	0	0	0	0	0	603	903	0
469	3	0	0	0	0	0	0	200	300	0	0	0	0	0	0	0	200	903	0	0	0	0	0	0	0	603	903	0
469	4	0	0	0	0	0	0	200	300	0	0	0	0	0	0	0	200	903	0	0	0	0	0	0	0	603	903	0
469	5	0	0	0	0	0	0	200	300	0	0	0	0	0	0	0	200	903	0	0	0	0	0	0	0	603	903	0
469	6	0	0	0	0	0	0	200	300	0	0	0	0	0	0	0	200	903	0	0	0	0	0	0	0	603	903	0
469	7	0	0	0	0	0	0	200	300	0	0	0	0	0	0	0	200	903	0	0	0	0	0	0	0	603	903	0
469	8	0	0	0	0	0	0	200	300	0	0	0	0	0	0	0	200	903	0	0	0	0	0	0	0	603	903	0
469	9	0	0	0	0	0	0	200	300	0	0	0	0	0	0	0	200	903	0	0	0	0	0	0	0	603	903	0
470	0	0	0	0	0	0	0	200	300	0	0	0	0	0	0	0	200	903	0	0	0	0	0	0	0	603	903	0
470	1	0	0	0	0	0	0	200	300	0	0	0	0	0	0	0	200	903	0	0	0	0	0	0	0	603	903	0
470	2	0	0	0	0	0	0	200	300	0	0	0	0	0	0	0	200	903	0	0	0	0	0	0	0	603	903	0
470	3	0	0	0	0	0	0	200	300	0	0	0	0	0	0	0	200	903	0	0	0	0	0	0	0	603	903	0
470	4	0	0	0	0	0	0	200	300	0	0	0	0	0	0	0	200	903	0	0	0	0	0	0	0	603	903	0
470	5	0	0	0	0	0	0	200	300	0	0	0	0	0	0	0	200	903	0	0	0	0	0	0	0	603	903	0
470	6	0	0	0	0	0	0	200	300	0	0	0	0	0	0	0	200	903	0	0	0	0	0	0	0	603	903	0
470	7	0	0	0	0	0	0	200	300	0	0	0	0	0	0	0	200	903	0	0	0	0	0	0	0	603	903	0
470	8	0	0	0	0	0	0	200	300	0	0	0	0	0	0	0	200	903	0	0	0	0	0	0	0	603	903	0
470	9	0	0	0	0	0	0	200	300	0	0	0	0	0	0	0	200	903	0	0	0	0	0	0	0	603	903	0
471	0	0	0	0	0	0	0	200	300	0	0	0	0	0	0	0	200	903	0	0	0	0	0	0	0	603	903	0
471	1	0	0	0	0	0	0	200	300	0	0	0	0	0	0	0	200	903	0	0	0	0	0	0	0	603	903	0
471	2	0	0	0	0	0	0	200	300	0	0	0	0	0	0	0	200	903	0	0	0	0	0	0	0	603	903	0
471	3	0	0	0	0	0	0	200	300	0	0	0	0	0	0	0	200	903	0	0	0	0	0	0	0	603	903	0
471	4	0	0	0	0	0	0	200	300	0	0	0	0	0	0	0	200	903	0	0	0	0	0	0	0	603	903	0
471	5	0	0	0	0	0	0	200	300	0	0	0	0	0	0	0	200	903	0	0	0	0	0	0	0	603	903	0
471	6	0	0	0	0	0	0	200	300	0	0	0	0	0	0	0	200	903	0	0	0	0	0	0	0	603	903	0
471	7	0	0	0	0	0	0	200	300	0	0	0	0	0	0	0	200	903	0	0	0	0	0	0	0	603	903	0
471	8	0	0	0	0	0	0	200	300	0	0	0	0	0	0	0	200	903	0	0	0	0	0	0	0	603	903	0
471	9	0	0	0	0	0	0	200	300	0	0	0	0	0	0	0	200	903	0	0	0	0	0	0	0	603	903	0
472	0	0	0	0	0	0	0	200	300	0	0	0	0	0	0	0	200	903	0	0	0	0	0	0	0	603	903	0
472	1	0	0	0	0	0	0	200	300	0	0	0	0	0	0	0	200	903	0	0	0	0	0	0	0	603	903	0
472	2	0	0	0	0	0	0	200	300	0	0	0	0	0	0	0	200	903	0	0	0	0	0	0	0	603	903	0
472	3	0	0	0	0	0	0	200	300	0	0	0	0	0	0	0	200	903	0	0	0	0	0	0	0	603	903	0
472	4	0	0	0	0	0	0	200	300	0	0	0	0	0	0	0	200	903	0	0	0	0	0	0	0	603	903	0
472	5	0	0	0	0	0	0	200	300	0	0	0	0	0	0	0	200	903	0	0	0	0	0	0	0	603	903	0
472	6	0	0	0	0	0	0	200	300	0	0	0	0	0	0	0	200	903	0	0	0	0	0	0	0	603	903	0
472	7	0	0	0	0	0	0	200	300	0	0	0	0	0	0	0	200	903	0	0	0	0	0	0	0	603	903	0
472	8	0	0	0	0	0	0	200	300	0	0	0	0	0	0	0	200	903	0	0	0	0	0	0	0	603	903	0
472	9	0	0	0	0	0	0	200	300	0	0	0	0	0	0	0	200	903	0	0	0	0	0	0	0	603	903	0
473	0	0	0	0	0	0	0	200	300	0	0	0	0	0	0	0	200	903	0	0	0	0	0	0	0	603	903	0
473	1	0	0	0	0	0	0	200	300	0	0	0	0	0	0	0	200	903	0	0	0	0	0	0	0	603	903	0
473	2	0	0	0	0	0	0	200	300	0	0	0	0	0	0	0	200	903	0	0	0	0	0	0	0	603	903	0
473	3	0	0	0	0	0	0	200	300	0	0	0	0	0	0	0	200	903	0	0	0	0	0	0	0	603	903	0
473	4	0	0	0	0	0	0	200	300	0	0	0	0	0	0	0	200	903	0	0	0	0	0	0	0	603	903	0
473	5	0	0	0	0	0	0	200	300	0	0	0	0	0	0	0	200	903	0	0	0	0	0	0	0	603	903	0
473	6	0	0	0	0	0	0	200	300	0	0	0	0	0	0	0	200	903	0	0	0	0	0	0	0	603	903	0
473	7	0	0	0	0	0	0	200	300	0	0	0	0	0	0	0	200	903	0	0	0	0	0	0	0	603	903	0
473	8	0	0	0	0	0	0	200	300	0	0	0	0	0	0	0	200	903	0	0	0	0	0	0	0	603	903	0
473	9	0	0	0	0	0	0	200	300	0	0	0	0	0	0	0	200	903	0	0	0	0	0	0	0	603	903	0
474	0	0	0	0	0	0	0	200	300	0	0	0	0	0	0	0	200	903	0	0	0	0	0	0	0	603	903	0
474	1	0	0	0	0	0	0	200	300	0	0	0	0	0	0	0	200	903	0	0	0	0	0	0	0	603	903	0
474	2	0	0	0	0	0	0	200	300	0	0	0	0	0	0	0	200	903	0	0	0	0	0	0	0	603	903	0
474	3	0	0	0	0	0	0	200	300	0	0	0	0	0	0	0	200	903	0	0	0	0	0	0	0	603	903	0
474	4	0	0	0	0	0	0	200	300	0	0	0	0	0	0	0	200	903	0	0	0	0	0	0	0	603	903	0
474	5	0	0	0	0	0	0	200	300	0	0	0	0	0	0	0	200	903	0	0	0	0	0	0	0	603	903	0
474	6	0	0	0	0	0	0	200	300	0	0	0	0	0	0	0	200	903	0	0	0	0	0	0	0	603	903	0
474	7	0	0	0	0	0	0	200	300	0	0	0	0	0	0	0	200	903	0	0	0	0	0	0	0	603	903	0
474	8	0	0	0	0	0	0	200	300	0	0	0	0	0	0	0	200	903	0	0	0	0	0	0	0	603	903	0
474	9	0	0	0	0	0	0	200	300	0	0	0	0	0	0	0	200	903	0	0	0	0	0	0	0	603	903	0
475	0	0	0	0	0	0	0	200	300	0	0	0	0	0	0	0	200	903	0	0	0	0	0	0	0	603	903	0
475	1	0	0	0	0	0	0	200	300	0	0	0	0	0	0	0	200	903	0	0	0	0	0	0	0	603	903	0
475	2	0	0	0	0	0	0	200	300	0	0	0	0	0	0	0	200	903	0	0	0	0	0	0	0	603	903	0
475	3	0	0	0	0	0	0	200	300	0	0	0	0	0	0	0	200	903	0	0	0	0	0	0	0	603	903	0
475	4	0	0	0	0	0	0	200	300	0	0	0	0	0	0	0	200	903	0	0	0	0	0	0	0	603	903	0
475	5	0	0	0	0	0	0	200	300	0	0	0	0	0	0	0	200	903	0	0	0	0	0	0	0	603	903	0
475	6	0	0	0	0	0	0	200	300	0	0	0	0	0	0	0	200	903	0	0	0	0	0	0	0	603	903	0
475	7	0	0	0	0	0	0	200	300	0	0	0	0	0	0	0	200	903	0	0	0	0	0	0	0	603	903	0
475	8	0	0	0	0	0	0	200	300	0	0	0	0	0	0	0	200	903	0	0	0	0	0	0	0	603	903	0
475	9	0	0	0	0	0	0	200	300	0	0	0	0	0	0	0	200	903	0	0	0	0	0	0	0	603	903	0
476	0	0	0	0	0	0	0	200	300	0	0	0	0	0	0	0	200	903	0	0	0	0	0	0	0	603	903	0
476	1	0	0	0	0	0	0	200	300	0	0	0	0	0	0	0	200	903	0	0	0	0	0	0	0	603	903	0
476	2	0	0	0	0	0	0	200	300	0	0	0	0	0	0	0	200	903	0	0	0	0	0	0	0	603	903	0
476	3	0	0	0	0	0	0	200	300	0	0	0	0	0	0	0	200	903	0	0	0	0	0	0	0	603	903	0
476	4	0	0	0	0	0	0	200	300	0	0	0	0	0	0	0	200	903	0	0	0	0	0	0	0	603	903	0
476	5	0	0	0	0	0	0	200	300	0	0	0	0	0	0	0	200	903	0	0	0	0	0	0	0	603	903	0
476	6	0	0	0	0	0	0	200	300	0	0	0	0	0	0	0	200	903	0	0	0	0	0	0	0	603	903	0
476	7	0	0	0	0	0	0	200	300	0	0	0	0	0	0	0	200	903	0	0	0	0	0	0	0	603	903	0
476	8	0	0	0	0	0	0	200	300	0	0	0	0	0	0	0	200	903	0	0	0	0	0	0	0	603	903	0
476	9	0	0	0	0	0	0	200	300	0	0	0	0	0	0	0	200	903	0	0	0	0	0	0	0	603	903	0
477	0	0	0	0	0	0	0	200	300	0	0	0	0	0	0	0	200	903	0	0	0	0	0	0	0	603	903	0
477	1	0	0	0	0	0	0	200	300	0	0	0	0	0	0	0	200	903	0	0	0	0	0	0	0	603	903	0
477	2	0	0	0	0	0	0	200	300	0	0	0	0	0	0	0	200	903	0	0	0	0	0	0	0	603	903	0
477	3	0	0	0	0	0	0	200	300	0	0	0	0	0	0	0	200	903	0	0	0	0	0	0	0	603	903	0
477	4	0	0	0	0	0	0	200	300	0	0	0	0	0	0	0	200	903	0	0	0	0	0	0	0	603	903	0
477	5	0	0	0	0	0	0	200	300	0	0	0	0	0	0	0	200	903	0	0	0	0	0	0	0	603	903	0
477	6	0	0	0	0	0	0	200	300	0	0	0	0	0	0	0	200	903	0	0	0	0	0	0	0	603	903	0
477	7	0	0	0	0	0	0	200	300	0	0	0	0	0	0	0	200	903	0	0	0	0	0	0	0	603	903	0
477	8	0	0	0	0	0	0	200	300	0	0	0	0	0	0	0	200	903	0	0	0	0	0	0	0	603	903	0
477	9	0	0	0	0	0	0	200	300	0	0	0	0	0	0	0	200	903	0	0	0	0	0	0	0	603	903	0
478	0	0	0	0	0	0	0	200	300	0	0	0	0	0	0	0	200	903	0	0	0	0	0	0	0	603	903	0
478	1	0	0	0	0	0	0	200	300	0	0	0	0	0	0	0	200	903	0	0	0	0	0	0	0	603	903	0
478	2	0	0	0	0	0	0	200	300	0	0	0	0	0	0	0	200	903	0	0	0	0	0	0	0	603	903	0
478	3	0	0	0	0	0	0	200	300	0	0	0	0	0	0	0	200	903	0	0	0	0	0	0	0	603	903	0
478	4	0	0	0	0	0	0	200	300	0	0	0	0	0	0	0	200	903	0	0	0	0	0	0	0	603	903	0
478	5	0	0	0	0	0	0	200	300	0	0	0	0	0	0	0	200	903	0	0	0	0	0	0	0	603	903	0
478	6	0	0	0	0	0	0	200	300	0	0	0	0	0	0	0	200	903	0	0	0	0	0	0	0	603	903	0
478	7	0	0	0	0	0	0	200	300	0	0	0	0	0	0	0	200	903	0	0	0	0	0	0	0	603	903	0
478	8	0	0	0	0	0	0	200	300	0	0	0	0	0	0	0	200	903	0	0	0	0	0	0	0	603	903	0
478	9	0	0	0	0	0	0	200	300	0	0	0	0	0	0	0	200	903	0	0	0	0	0	0	0	603	903	0
479	0	0	0	0	0	0	0	200	300	0	0	0	0	0	0	0	200	903	0	0	0	0	0	0	0	603	903	0
479	1	0	0	0	0	0	0	200	300	0	0	0	0	0	0	0	200	903	0	0	0	0	0	0	0	603	903	0
479	2	0	0	0	0	0	0	200	300	0	0	0	0	0	0	0	200	903	0	0	0	0	0	0	0	603	903	0
479	3	0	0	0	0	0	0	200	300	0	0	0	0	0	0	0	200	903	0	0	0	0	0	0	0	603	903	0
479	4	0	0	0	0	0	0	200	300	0	0	0	0	0	0	0	200	903	0	0	0	0	0	0	0	603	903	0
479	5	0	0	0	0	0	0	200	300	0	0	0	0	0	0	0	200	903	0	0	0	0	0	0	0	603	903	0
479	6	0	0	0	0	0	0	200	300	0	0	0	0	0	0	0	200	903	0	0	0	0	0	0	0	603	903	0
479	7	0	0	0	0	0	0	200	300	0	0	0	0	0	0	0	200	903	0	0	0	0	0	0	0	603	903	0
479	8	0	0	0	0	0	0	200	300	0	0	0	0	0	0	0	200	903	0	0	0	0	0	0	0	603	903	0
479	9	0	0	0	0	0	0	200	300	0	0	0	0	0	0	0	200	903	0	0	0	0	0	0	0	603	903	0
480	0	0	0	0	0	0	0	200	300	0	0	0	0	0	0	0	200	903	0	0	0	0	0	0	0	603	903	0
480	1	0	0	0	0	0	0	200	300	0	0	0	0	0	0	0	200	903	0	0	0	0	0	0	0	603	903	0
480	2	0	0	0	0	0	0	200	300	0	0	0	0	0	0	0	200	903	0	0	0	0	0	0	0	603	903	0
480	3	0	0	0	0	0	0	200	300	0	0	0	0	0	0	0	200	903	0	0	0	0	0	0	0	603	903	0
480	4	0	0	0	0	0	0	200	300	0	0	0	0	0	0	0	200	903	0	0	0	0	0	0	0	603	903	0
480	5	0	0	0	0	0	0	200	300	0	0	0	0	0	0	0	200	903	0	0	0	0	0	0	0	603	903	0
480	6	0	0	0	0	0	0	200	300	0	0	0	0	0	0	0	200	903	0	0	0	0	0	0	0	603	903	0
480	7	0	0	0	0	0	0	200	300	0	0	0	0	0	0	0	200	903	0	0	0	0	0	0	0	603	903	0
480	8	0	0	0	0	0	0	200	300	0	0	0	0	0	0	0	200	903	0	0	0	0	0	0	0	603	903	0
480	9	0	0	0	0	0	0	200	300	0	0	0	0	0	0	0	200	903	0	0	0	0	0	0	0	603	903	0
481	0	0	0	0	0	0	0	200	300	0	0	0	0	0	0	0	200	903	0	0	0	0	0	0	0	603	903	0
481	1	0	0	0	0	0	0	200	300	0	0	0	0	0	0	0	200	903	0	0	0	0	0	0	0	603	903	0
481	2	0	0	0	0	0	0	200	300	0	0	0	0	0	0	0	200	903	0	0	0	0	0	0	0	603	903	0
481	3	0	0	0	0	0	0	200	300	0	0	0	0	0	0	0	200	903	0	0	0	0	0	0	0	603	903	0
481	4	0	0	0	0	0	0	200	300	0	0	0	0	0	0	0	200	903	0	0	0	0	0	0	0	603	903	0
481	5	0	0	0	0	0	0	200	300	0	0	0	0	0	0	0	200	903	0	0	0	0	0	0	0	603	903	0
481	6	0	0	0	0	0	0	200	300	0	0	0	0	0	0	0	200	903	0	0	0	0	0	0	0	603	903	0
481	7	0	0	0	0	0	0	200	300	0	0	0	0	0	0	0	200	903	0	0	0	0	0	0	0	603	903	0
481	8	0	0	0	0	0	0	200	300	0	0	0	0	0	0	0	200	903	0	0	0	0	0	0	0	603	903	0
481	9	0	0	0	0	0	0	200	300	0	0	0	0	0	0	0	200	903	0	0	0	0	0	0	0	603	903	0
482	0	0	0	0	0	0	0	200	300	0	0	0	0	0	0	0	200	903	0	0	0	0	0	0	0	603	903	0
482	1	0	0	0	0	0	0	200	300	0	0	0	0	0	0	0	200	903	0	0	0	0	0	0	0	603	903	0
482	2	0	0	0	0	0	0	200	300	0	0	0	0	0	0	0	200	903	0	0	0	0	0	0	0	603	903	0
482	3	0	0	0	0	0	0	200	300	0	0	0	0	0	0	0	200	903	0	0	0	0	0	0	0	603	903	0
482	4	0	0	0	0	0	0	200	300	0	0	0	0	0	0	0	200	903	0	0	0	0	0	0	0	603	903	0
482	5	0	0	0	0	0	0	200	300	0	0	0	0	0	0	0	200	903	0	0	0	0	0	0	0	603	903	0
482	6	0	0	0	0	0	0	200	300	0	0	0	0	0	0	0	200	903	0	0	0	0	0	0	0	603	903	0
482	7	0	0	0	0	0	0	200	300	0	0	0	0	0	0	0	200	903	0	0	0	0	0	0	0	603	903	0
482	8	0	0	0	0	0	0	200	300	0	0	0	0	0	0	0	200	903	0	0	0	0	0	0	0	603	903	0
482	9	0	0	0	0	0	0	200	300	0	0	0	0	0	0	0	200	903	0	0	0	0	0	0	0	603	903	0
483	0	0	0	0	0	0	0	200	300	0	0	0	0	0	0	0	200	903	0	0	0	0	0	0	0	603	903	0
483	1	0	0	0	0	0	0	200	300	0	0	0	0	0	0	0	200	903	0	0	0	0	0	0	0	603	903	0
483	2	0	0	0	0	0	0	200	300	0	0	0	0	0	0	0	200	903	0	0	0	0	0	0	0	603	903	0
483	3	0	0	0	0	0	0	200	300	0	0	0	0	0	0	0	200	903	0	0	0	0	0	0	0	603	903	0
483	4	0	0	0	0	0	0	200	300	0	0	0	0	0	0	0	200	903	0	0	0	0	0	0	0	603	903	0
483	5	0	0	0	0	0	0	200	300	0	0	0	0	0	0	0	200	903	0	0	0	0	0	0	0	603	903	0
483	6	0	0	0	0	0	0	200	300	0	0	0	0	0	0	0	200	903	0	0	0	0	0	0	0	603	903	0
483	7	0	0	0	0	0	0	200	300	0	0	0	0	0	0	0	200	903	0	0	0	0	0	0	0	603	903	0
483	8	0	0	0	0	0	0	200	300	0	0	0	0	0	0	0	200	903	0	0	0	0	0	0	0	603	903	0
483	9	0	0	0	0	0	0	200	300	0	0	0	0	0	0	0	200	903	0	0	0	0	0	0	0	603	903	0
484	0	0	0	0	0	0	0	200	300	0	0	0	0	0	0	0	200	903	0	0	0	0	0	0	0	603	903	0
484	1	0	0	0	0	0	0	200	300	0	0	0	0	0	0	0	200	903	0	0	0	0	0	0	0	603	903	0
484	2	0	0	0	0	0	0	200	300	0	0	0	0	0	0	0	200	903	0	0	0	0	0	0	0	603	903	0
484	3	0	0	0	0	0	0	200	300	0	0	0	0	0	0	0	200	903	0	0	0	0	0	0	0	603	903	0
484	4	0	0	0	0	0	0	200	300	0	0	0	0	0	0	0	200	903	0	0	0	0	0	0	0	603	903	0
484	5	0	0	0	0	0	0	200	300	0	0	0	0	0	0	0	200	903	0	0	0	0	0	0	0	603	903	0
484	6	0	0	0	0	0	0	200	300	0	0	0	0	0	0	0	200	903	0	0	0	0	0	0	0	603	903	0
484	7	0	0	0	0	0	0	200	300	0	0	0	0	0	0	0	200	903	0	0	0	0	0	0	0	603	903	0
484	8	0	0	0	0	0	0	200	300	0	0	0	0	0	0	0	200	903	0	0	0	0	0	0	0	603	903	0
484	9	0	0	0	0	0	0	200	300	0	0	0	0	0	0	0	200	903	0	0	0	0	0	0	0	603	903	0
485	0	0	0	0	0	0	0	200	300	0	0	0	0	0	0	0	200	903	0	0	0	0	0	0	0	603	903	0
485	1	0	0	0	0	0	0	200	300	0	0	0	0	0	0	0	200	903	0	0	0	0	0	0	0	603	903	0
485	2	0	0	0	0	0	0	200	300	0	0	0	0	0	0	0	200	903	0	0	0	0	0	0	0	603	903	0
485	3	0	0	0	0	0	0	200	300	0	0	0	0	0	0	0	200	903	0	0	0	0	0	0	0	603	903	0
485	4	0	0	0	0	0	0	200	300	0	0	0	0	0	0	0	200	903	0	0	0	0	0	0	0	603	903	0
485	5	0	0	0	0	0	0	200	300	0	0	0	0	0	0	0	200	903	0	0	0	0	0	0	0	603	903	0
485	6	0	0	0	0	0	0	200	300	0	0	0	0	0	0	0	200	903	0	0	0	0	0	0	0	603	903	0
485	7	0	0	0	0	0	0	200	300	0	0	0	0	0	0	0	200	903	0	0	0	0	0	0	0	603	903	0
485	8	0	0	0	0	0	0	200	300	0	0	0	0	0	0	0	200	903	0	0	0	0	0	0	0	603	903	0
485	9	0	0	0	0	0	0	200	300	0	0	0	0	0	0	0	200	903	0	0	0	0	0	0	0	603	903	0
486	0	0	0	0	0	0	0	200	300	0	0	0	0	0	0	0	200	903	0	0	0	0	0	0	0	603	903	0
486	1	0	0	0	0	0	0	200	300	0	0	0	0	0	0	0	200	903	0	0	0	0	0	0	0	603	903	0
486	2	0	0	0	0	0	0	200	300	0	0	0	0	0	0	0	200	903	0	0	0	0	0	0	0	603	903	0
486	3	0	0	0	0	0	0	200	300	0	0	0	0	0	0	0	200	903	0	0	0	0	0	0	0	603	903	0
486	4	0	0	0	0	0	0	200	300	0	0	0	0	0	0	0	200	903	0	0	0	0	0	0	0	603	903	0
486	5	0	0	0	0	0	0	200	300	0	0	0	0	0	0	0	200	903	0	0	0	0	0	0	0	603	903	0
486	6	0	0	0	0	0	0	200	300	0	0	0	0	0	0	0	200	903	0	0	0	0	0	0	0	603	903	0
486	7	0	0	0	0	0	0	200	300	0	0	0	0	0	0	0	200	903	0	0	0	0	0	0	0	603	903	0
486	8	0	0	0	0	0	0	200	300	0	0	0	0	0	0	0	200	903	0	0	0	0	0	0	0	603	903	0
486	9	0	0	0	0	0	0	200	300	0	0	0	0	0	0	0	200	903	0	0	0	0	0	0	0	603	903	0
487	0	0	0	0	0	0	0	200	300	0	0	0	0	0	0	0	200	903	0	0	0	0	0	0	0	603	903	0
487	1	0	0	0	0	0	0	200	300	0	0	0	0	0	0	0	200	903	0	0	0	0	0	0	0	603	903	0
487	2	0	0	0	0	0	0	200	300	0	0	0	0	0	0	0	200	903	0	0	0	0	0	0	0	603	903	0
487	3	0	0	0	0	0	0	200	300	0	0	0	0	0	0	0	200	903	0	0	0	0	0	0	0	603	903	0
487	4	0	0	0	0	0	0	200	300	0	0	0	0	0	0	0	200	903	0	0	0	0	0	0	0	603	903	0
487	5	0	0	0	0	0	0	200	300	0	0	0	0	0	0	0	200	903	0	0	0	0	0	0	0	603	903	0
487	6	0	0	0	0	0	0	200	300	0	0	0	0	0	0	0	200	903	0	0	0	0	0	0	0	603	903	0
487	7	0	0	0	0	0	0	200	300	0	0	0	0	0	0	0	200	903	0	0	0	0	0	0	0	603	903	0
487	8	0	0	0	0	0	0	200	300	0	0	0	0	0	0	0	200	903	0	0	0	0	0	0	0	603	903	0
487	9	0	0	0	0	0	0	200	300	0	0	0	0	0	0	0	200	903	0	0	0	0	0	0	0	603	903	0
488	0	0	0	0	0	0	0	200	300	0	0	0	0	0	0	0	200	903	0	0	0	0	0	0	0	603	903	0
488	1	0	0	0	0	0	0	200	300	0	0	0	0	0	0	0	200	903	0	0	0	0	0	0	0	603	903	0
488	2	0	0	0	0	0	0	200	300	0	0	0	0	0	0	0	200	903	0	0	0	0	0	0	0	603	903	0
488	3	0	0	0	0	0	0	200	300	0	0	0	0	0	0	0	200	903	0	0	0	0	0	0	0	603	903	0
488	4	0	0	0	0	0	0	200	300	0	0	0	0	0	0	0	200	903	0	0	0	0	0	0	0	603	903	0
488	5	0	0	0	0	0	0	200	300	0	0	0	0	0	0	0	200	903	0	0	0	0	0	0	0	603	903	0
488	6	0	0	0	0	0	0	200	300	0	0	0	0	0	0	0	200	903	0	0	0	0	0	0	0	603	903	0
488	7	0	0	0	0	0	0	200	300	0	0	0	0	0	0	0	200	903	0	0	0	0	0	0	0	603	903	0
488	8	0	0	0	0	0	0	200	300	0	0	0	0	0	0	0	200	903	0	0	0	0	0	0	0	603	903	0
488	9	0	0	0	0	0	0	200	300	0	0	0	0	0	0	0	200	903	0	0	0	0	0	0	0	603	903	0
489	0	0	0	0	0	0	0	200	300	0	0	0	0	0	0	0	200	903	0	0	0	0	0	0	0	603	903	0
489	1	0	0	0	0	0	0	200	300	0	0	0	0	0	0	0	200	903	0	0	0	0	0	0	0	603	903	0
489	2	0	0	0	0	0	0	200	300	0	0	0	0	0	0	0	200	903	0	0	0	0	0	0	0	603	903	0
489	3	0	0	0	0	0	0	200	300	0	0	0	0	0	0	0	200	903	0	0	0	0	0	0	0	603	903	0
489	4	0	0	0	0	0	0	200	300	0	0	0	0	0	0	0	200	903	0	0	0	0	0	0	0	603	903	0
489	5	0	0	0	0	0	0	200	300	0	0	0	0	0	0	0	200	903	0	0	0	0	0	0	0	603	903	0
489	6	0	0	0	0	0	0	200	300	0	0	0	0	0	0	0	200	903	0	0	0	0	0	0	0	603	903	0
489	7	0	0	0	0	0	0	200	300	0	0	0	0	0	0	0	200	903	0	0	0	0	0	0	0	603	903	0
489	8	0	0	0	0	0	0	200	300	0	0	0	0	0	0	0	200	903	0	0	0	0	0	0	0	603	903	0
489	9	0	0	0	0	0	0	200	300	0	0	0	0	0	0	0	200	903	0	0	0	0	0	0	0	603	903	0
490	0	0	0	0	0	0	0	200	300	0	0	0	0	0	0	0	200	903	0	0	0	0	0	0	0	603	903	0
490	1	0	0	0	0	0	0	200	300	0	0	0	0	0	0	0	200	903	0	0	0	0	0	0	0	603	903	0
490	2	0	0	0	0	0	0	200	300	0	0	0	0	0	0	0	200	903	0	0	0	0	0	0	0	603	903	0
490	3	0	0	0	0	0	0	200	300	0	0	0	0	0	0	0	200	903	0	0	0	0	0	0	0	603	903	0
490	4	0	0	0	0	0	0	200	300	0	0	0	0	0	0	0	200	903	0	0	0	0	0	0	0	603	903	0
490	5	0	0	0	0	0	0	200	300	0	0	0	0	0	0	0	200	903	0	0	0	0	0	0	0	603	903	0
490	6	0	0	0	0	0	0	200	300	0	0	0	0	0	0	0	200	903	0	0	0	0	0	0	0	603	903	0
490	7	0	0	0	0	0	0	200	300	0	0	0	0	0	0	0	200	903	0	0	0	0	0	0	0	603	903	0
490	8	0	0	0	0	0	0	200	300	0	0	0	0	0	0	0	200	903	0	0	0	0	0	0	0	603	903	0
490	9	0	0	0	0	0	0	200	300	0	0	0	0	0	0	0	200	903	0	0	0	0	0	0	0	603	903	0
491	0	0	0	0	0	0	0	200	300	0	0	0	0	0	0	0	200	903	0	0	0	0	0	0	0	603	903	0
491	1	0	0	0	0	0	0	200	300	0	0	0	0	0	0	0	200	903	0	0	0	0	0	0	0	603	903	0
491	2	0	0	0	0	0	0	200	300	0	0	0	0	0	0	0	200	903	0	0	0	0	0	0	0	603	903	0
491	3	0	0	0	0	0	0	200	300	0	0	0	0	0	0	0	200	903	0	0	0	0	0	0	0	603	903	0
491	4	0	0	0	0	0	0	200	300	0	0	0	0	0	0	0	200	903	0	0	0	0	0	0	0	603	903	0
491	5	0	0	0	0	0	0	200	300	0	0	0	0	0	0	0	200	903	0	0	0	0	0	0	0	603	903	0
491	6	0	0	0	0	0	0	200	300	0	0	0	0	0	0	0	200	903	0	0	0	0	0	0	0	603	903	0
491	7	0	0	0	0	0	0	200	300	0	0	0	0	0	0	0	200	903	0	0	0	0	0	0	0	603	903	0
491	8	0	0	0	0	0	0	200	300	0	0	0	0	0	0	0	200	903	0	0	0	0	0	0	0	603	903	0
491	9	0	0	0	0	0	0	200	300	0	0	0	0	0	0	0	200	903	0	0	0	0	0	0	0	603	903	0
492	0	0	0	0	0	0	0	200	300	0	0	0	0	0	0	0	200	903	0	0	0	0	0	0	0	603	903	0
492	1	0	0	0	0	0	0	200	300	0	0	0	0	0	0	0	200	903	0	0	0	0	0	0	0	603	903	0
492	2	0	0	0	0	0	0	200	300	0	0	0	0	0	0	0	200	903	0	0	0	0	0	0	0	603	903	0
492	3	0	0	0	0	0	0	200	300	0	0	0	0	0	0	0	200	903	0	0	0	0	0	0	0	603	903	0
492	4	0	0	0	0	0	0	200	300	0	0	0	0	0	0	0	200	903	0	0	0	0	0	0	0	603	903	0
492	5	0	0	0	0	0	0	200	300	0	0	0	0	0	0	0	200	903	0	0	0	0	0	0	0	603	903	0
492	6	0	0	0	0	0	0	200	300	0	0	0	0	0	0	0	200	903	0	0	0	0	0	0	0	603	903	0
492	7	0	0	0	0	0	0	200	300	0	0	0	0	0	0	0	200	903	0	0	0	0	0	0	0	603	903	0
492	8	0	0	0	0	0	0	200	300	0	0	0	0	0	0	0	200	903	0	0	0	0	0	0	0	603	903	0
492	9	0	0	0	0	0	0	200	300	0	0	0	0	0	0	0	200	903	0	0	0	0	0	0	0	603	903	0
493	0	0	0	0	0	0	0	200	300	0	0	0	0	0	0	0	200	903	0	0	0	0	0	0	0	603	903	0
493	1	0	0	0	0	0	0	200	300	0	0	0	0	0	0	0	200	903	0	0	0	0	0	0	0	603	903	0
493	2	0	0	0	0	0	0	200	300	0	0	0	0	0	0	0	200	903	0	0	0	0	0	0	0	603	903	0
493	3	0	0	0	0	0	0	200	300	0	0	0	0	0	0	0	200	903	0	0	0	0	0	0	0	603	903	0
493	4	0	0	0	0	0	0	200	300	0	0	0	0	0	0	0	200	903	0	0	0	0	0	0	0	603	903	0
493	5	0	0	0	0	0	0	200	300	0	0	0	0	0	0	0	200	903	0	0	0	0	0	0	0	603	903	0
493	6	0	0	0	0	0	0	200	300	0	0	0	0	0	0	0	200	903	0	0	0	0	0	0	0	603	903	0
493	7	0	0	0	0	0	0	200	300	0	0	0	0	0	0	0	200	903	0	0	0	0	0	0	0	603	903	0
493	8	0	0	0	0	0	0	200	300	0	0	0	0	0	0	0	200	903	0	0	0	0	0	0	0	603	903	0
493	9	0	0	0	0	0	0	200	300	0	0	0	0	0	0	0	200	903	0	0	0	0	0	0	0	603	903	0
494	0	0	0	0	0	0	0	200	300	0	0	0	0	0	0	0	200	903	0	0	0	0	0	0	0	603	903	0
494	1	0	0	0	0	0	0	200	300	0	0	0	0	0	0	0	200	903	0	0	0	0	0	0	0	603	903	0
494	2	0	0	0	0	0	0	200	300	0	0	0	0	0	0	0	200	903	0	0	0	0	0	0	0	603	903	0
494	3	0	0	0	0	0	0	200	300	0	0	0	0	0	0	0	200	903	0	0	0	0	0	0	0	603	903	0
494	4	0	0	0	0	0	0	200	300	0	0	0	0	0	0	0	200	903	0	0	0	0	0	0	0	603	903	0
494	5	0	0	0	0	0	0	200	300	0	0	0	0	0	0	0	200	903	0	0	0	0	0	0	0	603	903	0
494	6	0	0	0	0	0	0	200	300	0	0	0	0	0	0	0	200	903	0	0	0	0	0	0	0	603	903	0
494	7	0	0	0	0	0	0	200	300	0	0	0	0	0	0	0	200	903	0	0	0	0	0	0	0	603	903	0
494	8	0	0	0	0	0	0	200	300	0	0	0	0	0	0	0	200	903	0	0	0	0	0	0	0	603	903	0
494	9	0	0	0	0	0	0	200	300	0	0	0	0	0	0	0	200	903	0	0	0	0	0	0	0	603	903	0
495	0	0	0	0	0	0	0	200	300	0	0	0	0	0	0	0	200	903	0	0	0	0	0	0	0	603	903	0
495	1	0	0	0	0	0	0	200	300	0	0	0	0	0	0	0	200	903	0	0	0	0	0	0	0	603	903	0
495	2	0	0	0	0	0	0	200	300	0	0	0	0	0	0	0	200	903	0	0	0	0	0	0	0	603	903	0
495	3	0	0	0	0	0	0	200	300	0	0	0	0	0	0	0	200	903	0	0	0	0	0	0	0	603	903	0
495	4	0	0	0	0	0	0	200	300	0	0	0	0	0	0	0	200	903	0	0	0	0	0	0	0	603	903	0
495	5	0	0	0	0	0	0	200	300	0	0	0	0	0	0	0	200	903	0	0	0	0	0	0	0	603	903	0
495	6	0	0	0	0	0	0	200	300	0	0	0	0	0	0	0	200	903	0	0	0	0	0	0	0	603	903	0
495	7	0	0	0	0	0	0	200	300	0	0	0	0	0	0	0	200	903	0	0	0	0	0	0	0	603	903	0
495	8	0	0	0	0	0	0	200	300	0	0	0	0	0	0	0	200	903	0	0	0	0	0	0	0	603	903	0
495	9	0	0	0	0	0	0	200	300	0	0	0	0	0	0	0	200	903	0	0	0	0	0	0	0	603	903	0
496	0	0	0	0	0	0	0	200	300	0	0	0	0	0	0	0	200	903	0	0	0	0	0	0	0	603	903	0
496	1	0	0	0	0	0	0	200	300	0	0	0	0	0	0	0	200	903	0	0	0	0	0	0	0	603	903	0
496	2	0	0	0	0	0	0	200	300	0	0	0	0	0	0	0	200	903	0	0	0	0	0	0	0	603	903	0
496	3	0	0	0	0	0	0	200	300	0	0	0	0	0	0	0	200	903	0	0	0	0	0	0	0	603	903	0
496	4	0	0	0	0	0	0	200	300	0	0	0	0	0	0	0	200	903	0	0	0	0	0	0	0	603	903	0
496	5	0	0	0	0	0	0	200	300	0	0	0	0	0	0	0	200	903	0	0	0	0	0	0	0	603	903	0
496	6	0	0	0	0	0	0	200	300	0	0	0	0	0	0	0	200	903	0	0	0	0	0	0	0	603	903	0
496	7	0	0	0	0	0	0	200	300	0	0	0	0	0	0	0	200	903	0	0	0	0	0	0	0	603	903	0
496	8	0	0	0	0	0	0	200	300	0	0	0	0	0	0	0	200	903	0	0	0	0	0	0	0	603	903	0
496	9	0	0	0	0	0	0	200	300	0	0	0	0	0	0	0	200	903	0	0	0	0	0	0	0	603	903	0
497	0	0	0	0	0	0	0	200	300	0	0	0	0	0	0	0	200	903	0	0	0	0	0	0	0	603	903	0
497	1	0	0	0	0	0	0	200	300	0	0	0	0	0	0	0	200	903	0	0	0	0	0	0	0	603	903	0
497	2	0	0	0	0	0	0	200	300	0	0	0	0	0	0	0	200	903	0	0	0	0	0	0	0	603	903	0
497	3	0	0	0	0	0	0	200	300	0	0	0	0	0	0	0	200	903	0	0	0	0	0	0	0	603	903	0
497	4	0	0	0	0	0	0	200	300	0	0	0	0	0	0	0	200	903	0	0	0	0	0	0	0	603	903	0
497	5	0	0	0	0	0	0	200	300	0	0	0	0	0	0	0	200	903	0	0	0	0	0	0	0	603	903	0
497	6	0	0	0	0	0	0	200	300	0	0	0	0	0	0	0	200	903	0	0	0	0	0	0	0	603	903	0
497	7	0	0	0	0	0	0	200	300	0	0	0	0	0	0	0	200	903	0	0	0	0	0	0	0	603	903	0
497	8	0	0	0	0	0	0	200	300	0	0	0	0	0	0	0	200	903	0	0	0	0	0	0	0	603	903	0
497	9	0	0	0	0	0	0	200	300	0	0	0	0	0	0	0	200	903	0	0	0	0	0	0	0	603	903	0
498	0	0	0	0	0	0	0	200	300	0	0	0	0	0	0	0	200	903	0	0	0	0	0	0	0	603	903	0
498	1	0	0	0	0	0	0	200	300	0	0	0	0	0	0	0	200	903	0	0	0	0	0	0	0	603	903	0
498	2	0	0	0	0	0	0	200	300	0	0	0	0	0	0	0	200	903	0	0	0	0	0	0	0	603	903	0
498	3	0	0	0	0	0	0	200	300	0	0	0	0	0	0	0	200	903	0	0	0	0	0	0	0	603	903	0
498	4	0	0	0	0	0	0	200	300	0	0	0	0	0	0	0	200	903	0	0	0	0	0	0	0	603	903	0
498	5	0	0	0	0	0	0	200	300	0	0	0	0	0	0	0	200	903	0	0	0	0	0	0	0	603	903	0
498	6	0	0	0	0	0	0	200	300	0	0	0	0	0	0	0	200	903	0	0	0	0	0	0	0	603	903	0
498	7	0	0	0	0	0	0	200	300	0	0	0	0	0	0	0	200	903	0	0	0	0	0	0	0	603	903	0
498	8	0	0	0	0	0	0	200	300	0	0	0	0	0	0	0	200	903	0	0	0	0	0	0	0	603	903	0
498	9	0	0	0	0	0	0	200	300	0	0	0	0	0	0	0	200	903	0	0	0	0	0	0	0	603	903	0
499	0	0	0	0	0	0	0	200	300	0	0	0	0	0	0	0	200	903	0	0	0	0	0	0	0	603	903	0
499	1	0	0	0	0	0	0	200	300	0	0	0	0	0	0	0	200	903	0	0	0	0	0	0	0	603	903	0
499	2	0	0	0	0	0	0	200	300	0	0	0	0	0	0	0	200	903	0	0	0	0	0	0	0	603	903	0
499	3	0	0	0	0	0	0	200	300	0	0	0	0	0	0	0	200	903	0	0	0	0	0	0	0	603	903	0
499	4	0	0	0	0	0	0	200	300	0	0	0	0	0	0	0	200	903	0	0	0	0	0	0	0	603	903	0
499	5	0	0	0	0	0	0	200	300	0	0	0	0	0	0	0	200	903	0	0	0	0	0	0	0	603	903	0
499	6	0	0	0	0	0	0	200	300	0	0	0	0	0	0	0	200	903	0	0	0	0	0	0	0	603	903	0
499	7	0	0	0	0	0	0	200	300	0	0	0	0	0	0	0	200	903	0	0	0	0	0	0	0	603	903	0
499	8	0	0	0	0	0	0	200	300	0	0	0	0	0	0	0	200	903	0	0	0	0	0	0	0	603	903	0
499	9	0	0	0	0	0	0	200	300	0	0	0	0	0	0	0	200	903	0	0	0	0	0	0	0	603	903	0
500	0	0	0	0	0	0	0	200	300	0	0	0	0	0	0	0	200	903	0	0	0	0	0	0	0	603	903	0
500	1	0	0	0	0	0	0	200	300	0	0	0	0	0	0	0	200	903	0	0	0	0	0	0	0	603	903	0
500	2	0	0	0	0	0	0	200	300	0	0	0	0	0	0	0	200	903	0	0	0	0	0	0	0	603	903	0
500	3	0	0	0	0	0	0	200	300	0	0	0	0	0	0	0	200	903	0	0	0	0	0	0	0	603	903	0
500	4	0	0	0	0	0	0	200	300	0	0	0	0	0	0	0	200	903	0	0	0	0	0	0	0	603	903	0
500	5	0	0	0	0	0	0	200	300	0	0	0	0	0	0	0	200	903	0	0	0	0	0	0	0	603	903	0
500	6	0	0	0	0	0	0	200	300	0	0	0	0	0	0	0	200	903	0	0	0	0	0	0	0	603	903	0
500	7	0	0	0	0	0	0	200	300	0	0	0	0	0	0	0	200	903	0	0	0	0	0	0	0	603	903	0
500	8	0	0	0	0	0	0	200	300	0	0	0	0	0	0	0	200	903	0	0	0	0	0	0	0	603	903	0
500	9	0	0	0	0	0	0	200	300	0	0	0	0	0	0	0	200	903	0	0	0	0	0	0	0	603	903	0
501	0	0	0	0	0	0	0	200	300	0	0	0	0	0	0	0	200	903	0	0	0	0	0	0	0	603	903	0
501	1	0	0	0	0	0	0	200	300	0	0	0	0	0	0	0	200	903	0	0	0	0	0	0	0	603	903	0
501	2	0	0	0	0	0	0	200	300	0	0	0	0	0	0	0	200	903	0	0	0	0	0	0	0	603	903	0
501	3	0	0	0	0	0	0	200	300	0	0	0	0	0	0	0	200	903	0	0	0	0	0	0	0	603	903	0
501	4	0	0	0	0	0	0	200	300	0	0	0	0	0	0	0	200	903	0	0	0	0	0	0	0	603	903	0
501	5	0	0	0	0	0	0	200	300	0	0	0	0	0	0	0	200	903	0	0	0	0	0	0	0	603	903	0
501	6	0	0	0	0	0	0	200	300	0	0	0	0	0	0	0	200	903	0	0	0	0	0	0	0	603	903	0
501	7	0	0	0	0	0	0	200	300	0	0	0	0	0	0	0	200	903	0	0	0	0	0	0	0	603	903	0
501	8	0	0	0	0	0	0	200	300	0	0	0	0	0	0	0	200	903	0	0	0	0	0	0	0	603	903	0
501	9	0	0	0	0	0	0	200	300	0	0	0	0	0	0	0	200	903	0	0	0	0	0	0	0	603	903	0
502	0	0	0	0	0	0	0	200	300	0	0	0	0	0	0	0	200	903	0	0	0	0	0	0	0	603	903	0
502	1	0	0	0	0	0	0	200	300	0	0	0	0	0	0	0	200	903	0	0	0	0	0	0	0	603	903	0
502	2	0	0	0	0	0	0	200	300	0	0	0	0	0	0	0	200	903	0	0	0	0	0	0	0	603	903	0
502	3	0	0	0	0	0	0	200	300	0	0	0	0	0	0	0	200	903	0	0	0	0	0	0	0	603	903	0
502	4	0	0	0	0	0	0	200	300	0	0	0	0	0	0	0	200	903	0	0	0	0	0	0	0	603	903	0
502	5	0	0	0	0	0	0	200	300	0	0	0	0	0	0	0	200	903	0	0	0	0	0	0	0	603	903	0
502	6	0	0	0	0	0	0	200	300	0	0	0	0	0	0	0	200	903	0	0	0	0	0	0	0	603	903	0
502	7	0	0	0	0	0	0	200	300	0	0	0	0	0	0	0	200	903	0	0	0	0	0	0	0	603	903	0
502	8	0	0	0	0	0	0	200	300	0	0	0	0	0	0	0	200	903	0	0	0	0	0	0	0	603	903	0
502	9	0	0	0	0	0	0	200	300	0	0	0	0	0	0	0	200	903	0	0	0	0	0	0	0	603	903	0
503	0	0	0	0	0	0	0	200	300	0	0	0	0	0	0	0	200	903	0	0	0	0	0	0	0	603	903	0
503	1	0	0	0	0	0	0	200	300	0	0	0	0	0	0	0	200	903	0	0	0	0	0	0	0	603	903	0
503	2	0	0	0	0	0	0	200	300	0	0	0	0	0	0	0	200	903	0	0	0	0	0	0	0	603	903	0
503	3	0	0	0	0	0	0	200	300	0	0	0	0	0	0	0	200	903	0	0	0	0	0	0	0	603	903	0
503	4	0	0	0	0	0	0	200	300	0	0	0	0	0	0	0	200	903	0	0	0	0	0	0	0	603	903	0
503	5	0	0	0	0	0	0	200	300	0	0	0	0	0	0	0	200	903	0	0	0	0	0	0	0	603	903	0
503	6	0	0	0	0	0	0	200	300	0	0	0	0	0	0	0	200	903	0	0	0	0	0	0	0	603	903	0
503	7	0	0	0	0	0	0	200	300	0	0	0	0	0	0	0	200	903	0	0	0	0	0	0	0	603	903	0
503	8	0	0	0	0	0	0	200	300	0	0	0	0	0	0	0	200	903	0	0	0	0	0	0	0	603	903	0
503	9	0	0	0	0	0	0	200	300	0	0	0	0	0	0	0	200	903	0	0	0	0	0	0	0	603	903	0
504	0	0	0	0	0	0	0	200	300	0	0	0	0	0	0	0	200	903	0	0	0	0	0	0	0	603	903	0
504	1	0	0	0	0	0	0	200	300	0	0	0	0	0	0	0	200	903	0	0	0	0	0	0	0	603	903	0
504	2	0	0	0	0	0	0	200	300	0	0	0	0	0	0	0	200	903	0	0	0	0	0	0	0	603	903	0
504	3	0	0	0	0	0	0	200	300	0	0	0	0	0	0	0	200	903	0	0	0	0	0	0	0	603	903	0
504	4	0	0	0	0	0	0	200	300	0	0	0	0	0	0	0	200	903	0	0	0	0	0	0	0	603	903	0
504	5	0	0	0	0	0	0	200	300	0	0	0	0	0	0	0	200	903	0	0	0	0	0	0	0	603	903	0
504	6	0	0	0	0	0	0	200	300	0	0	0	0	0	0	0	200	903	0	0	0	0	0	0	0	603	903	0
504	7	0	0	0	0	0	0	200	300	0	0	0	0	0	0	0	200	903	0	0	0	0	0	0	0	603	903	0
504	8	0	0	0	0	0	0	200	300	0	0	0	0	0	0	0	200	903	0	0	0	0	0	0	0	603	903	0
504	9	0	0	0	0	0	0	200	300	0	0	0	0	0	0	0	200	903	0	0	0	0	0	0	0	603	903	0
505	0	0	0	0	0	0	0	200	300	0	0	0	0	0	0	0	200	903	0	0	0	0	0	0	0	603	903	0
505	1	0	0	0	0	0	0	200	300	0	0	0	0	0	0	0	200	903	0	0	0	0	0	0	0	603	903	0
505	2	0	0	0	0	0	0	200	300	0	0	0	0	0	0	0	200	903	0	0	0	0	0	0	0	603	903	0
505	3	0	0	0	0	0	0	200	300	0	0	0	0	0	0	0	200	903	0	0	0	0	0	0	0	603	903	0
505	4	0	0	0	0	0	0	200	300	0	0	0	0	0	0	0	200	903	0	0	0	0	0	0	0	603	903	0
505	5	0	0	0	0	0	0	200	300	0	0	0	0	0	0	0	200	903	0	0	0	0	0	0	0	603	903	0
505	6	0	0	0	0	0	0	200	300	0	0	0	0	0	0	0	200	903	0	0	0	0	0	0	0	603	903	0
505	7	0	0	0	0	0	0	200	300	0	0	0	0	0	0	0	200	903	0	0	0	0	0	0	0	603	903	0
505	8	0	0	0	0	0	0	200	300	0	0	0	0	0	0	0	200	903	0	0	0	0	0	0	0	603	903	0
505	9	0	0	0	0	0	0	200	300	0	0	0	0	0	0	0	200	903	0	0	0	0	0	0	0	603	903	0
506	0	0	0	0	0	0	0	200	300	0	0	0	0	0	0	0	200	903	0	0	0	0	0	0	0	603	903	0
506	1	0	0	0	0	0	0	200	300	0	0	0	0	0	0	0	200	903	0	0	0	0	0	0	0	603	903	0
506	2	0	0	0	0	0	0	200	300	0	0	0	0	0	0	0	200	903	0	0	0	0	0	0	0	603	903	0
506	3	0	0	0	0	0	0	200	300	0	0	0	0	0	0	0	200	903	0	0	0	0	0	0	0	603	903	0
506	4	0	0	0	0	0	0	200	300	0	0	0	0	0	0	0	200	903	0	0	0	0	0	0	0	603	903	0
506	5	0	0	0	0	0	0	200	300	0	0	0	0	0	0	0	200	903	0	0	0	0	0	0	0	603	903	0
506	6	0	0	0	0	0	0	200	300	0	0	0	0	0	0	0	200	903	0	0	0	0	0	0	0	603	903	0
506	7	0	0	0	0	0	0	200	300	0	0	0	0	0	0	0	200	903	0	0	0	0	0	0	0	603	903	0
506	8	0	0	0	0	0	0	200	300	0	0	0	0	0	0	0	200	903	0	0	0	0	0	0	0	603	903	0
506	9	0	0	0	0	0	0	200	300	0	0	0	0	0	0	0	200	903	0	0	0	0	0	0	0	603	903	0
507	0	0	0	0	0	0	0	200	300	0	0	0	0	0	0	0	200	903	0	0	0	0	0	0	0	603	903	0
507	1	0	0	0	0	0	0	200	300	0	0	0	0	0	0	0	200	903	0	0	0	0	0	0	0	603	903	0
507	2	0	0	0	0	0	0	200	300	0	0	0	0	0	0	0	200	903	0	0	0	0	0	0	0	603	903	0
507	3	0	0	0	0	0	0	200	300	0	0	0	0	0	0	0	200	903	0	0	0	0	0	0	0	603	903	0
507	4	0	0	0	0	0	0	200	300	0	0	0	0	0	0	0	200	903	0	0	0	0	0	0	0	603	903	0
507	5	0	0	0	0	0	0	200	300	0	0	0	0	0	0	0	200	903	0	0	0	0	0	0	0	603	903	0
507	6	0	0	0	0	0	0	200	300	0	0	0	0	0	0	0	200	903	0	0	0	0	0	0	0	603	903	0
507	7	0	0	0	0	0	0	200	300	0	0	0	0	0	0	0	200	903	0	0	0	0	0	0	0	603	903	0
507	8	0	0	0	0	0	0	200	300	0	0	0	0	0	0	0	200	903	0	0	0	0	0	0	0	603	903	0
507	9	0	0	0	0	0	0	200	300	0	0	0	0	0	0	0	200	903	0	0	0	0	0	0	0	603	903	0
508	0	0	0	0	0	0	0	200	300	0	0	0	0	0	0	0	200	903	0	0	0	0	0	0	0	603	903	0
508	1	0	0	0	0	0	0	200	300	0	0	0	0	0	0	0	200	903	0	0	0	0	0	0	0	603	903	0
508	2	0	0	0	0	0	0	200	300	0	0	0	0	0	0	0	200	903	0	0	0	0	0	0	0	603	903	0
508	3	0	0	0	0	0	0	200	300	0	0	0	0	0	0	0	200	903	0	0	0	0	0	0	0	603	903	0
508	4	0	0	0	0	0	0	200	300	0	0	0	0	0	0	0	200	903	0	0	0	0	0	0	0	603	903	0
508	5	0	0	0	0	0	0	200	300	0	0	0	0	0	0	0	200	903	0	0	0	0	0	0	0	603	903	0
508	6	0	0	0	0	0	0	200	300	0	0	0	0	0	0	0	200	903	0	0	0	0	0	0	0	603	903	0
508	7	0	0	0	0	0	0	200	300	0	0	0	0	0	0	0	200	903	0	0	0	0	0	0	0	603	903	0
508	8	0	0	0	0	0	0	200	300	0	0	0	0	0	0	0	200	903	0	0	0	0	0	0	0	603	903	0
508	9	0	0	0	0	0	0	200	300	0	0	0	0	0	0	0	200	903	0	0	0	0	0	0	0	603	903	0
509	0	0	0	0	0	0	0	200	300	0	0	0	0	0	0	0	200	903	0	0	0	0	0	0	0	603	903	0
509	1	0	0	0	0	0	0	200	300	0	0	0	0	0	0	0	200	903	0	0	0	0	0	0	0	603	903	0
509	2	0	0	0	0	0	0	200	300	0	0	0	0	0	0	0	200	903	0	0	0	0	0	0	0	603	903	0
509	3	0	0	0	0	0	0	200	300	0	0	0	0	0	0	0	200	903	0	0	0	0	0	0	0	603	903	0
509	4	0	0	0	0	0	0	200	300	0	0	0	0	0	0	0	200	903	0	0	0	0	0	0	0	603	903	0
509	5	0	0	0	0	0	0	200	300	0	0	0	0	0	0	0	200	903	0	0	0	0	0	0	0	603	903	0
509	6	0	0	0	0	0	0	200	300	0	0	0	0	0	0	0	200	903	0	0	0	0	0	0	0	603	903	0
509	7	0	0	0	0	0	0	200	300	0	0	0	0	0	0	0	200	903	0	0	0	0	0	0	0	603	903	0
509	8	0	0	0	0	0	0	200	300	0	0	0	0	0	0	0	200	903	0	0	0	0	0	0	0	603	903	0
509	9	0	0	0	0	0	0	200	300	0	0	0	0	0	0	0	200	903	0	0	0	0	0	0	0	603	903	0
510	0	0	0	0	0	0	0	200	300	0	0	0	0	0	0	0	200	903	0	0	0	0	0	0	0	603	903	0
510	1	0	0	0	0	0	0	200	300	0	0	0	0	0	0	0	200	903	0	0	0	0	0	0	0	603	903	0
510	2	0	0	0	0	0	0	200	300	0	0	0	0	0	0	0	200	903	0	0	0	0	0	0	0	603	903	0
510	3	0	0	0	0	0	0	200	300	0	0	0	0	0	0	0	200	903	0	0	0	0	0	0	0	603	903	0
510	4	0	0	0	0	0	0	200	300	0	0	0	0	0	0	0	200	903	0	0	0	0	0	0	0	603	903	0
510	5	0	0	0	0	0	0	200	300	0	0	0	0	0	0	0	200	903	0	0	0	0	0	0	0	603	903	0
510	6	0	0	0	0	0	0	200	300	0	0	0	0	0	0	0	200	903	0	0	0	0	0	0	0	603	903	0
510	7	0	0	0	0	0	0	200	300	0	0	0	0	0	0	0	200	903	0	0	0	0	0	0	0	603	903	0
510	8	0	0	0	0	0	0	200	300	0	0	0	0	0	0	0	200	903	0	0	0	0	0	0	0	603	903	0
510	9	0	0	0	0	0	0	200	300	0	0	0	0	0	0	0	200	903	0	0	0	0	0	0	0	603	903	0
511	0	0	0	0	0	0	0	200	300	0	0	0	0	0	0	0	200	903	0	0	0	0	0	0	0	603	903	0
511	1	0	0	0	0	0	0	200	300	0	0	0	0	0	0	0	200	903	0	0	0	0	0	0	0	603	903	0
511	2	0	0	0	0	0	0	200	300	0	0	0	0	0	0	0	200	903	0	0	0	0	0	0	0	603	903	0
511	3	0	0	0	0	0	0	200	300	0	0	0	0	0	0	0	200	903	0	0	0	0	0	0	0	603	903	0
511	4	0	0	0	0	0	0	200	300	0	0	0	0	0	0	0	200	903	0	0	0	0	0	0	0	603	903	0
511	5	0	0	0	0	0	0	200	300	0	0	0	0	0	0	0	200	903	0	0	0	0	0	0	0	603	903	0
511	6	0	0	0	0	0	0	200	300	0	0	0	0	0	0	0	200	903	0	0	0	0	0	0	0	603	903	0
511	7	0	0	0	0	0	0	200	300	0	0	0	0	0	0	0	200	903	0	0	0	0	0	0	0	603	903	0
511	8	0	0	0	0	0	0	200	300	0	0	0	0	0	0	0	200	903	0	0	0	0	0	0	0	603	903	0
511	9	0	0	0	0	0	0	200	300	0	0	0	0	0	0	0	200	903	0	0	0	0	0	0	0	603	903	0
512	0	0	0	0	0	0	0	200	300	0	0	0	0	0	0	0	200	903	0	0	0	0	0	0	0	603	903	0
512	1	0	0	0	0	0	0	200	300	0	0	0	0	0	0	0	200	903	0	0	0	0	0	0	0	603	903	0
512	2	0	0	0	0	0	0	200	300	0	0	0	0	0	0	0	200	903	0	0	0	0	0	0	0	603	903	0
512	3	0	0	0	0	0	0	200	300	0	0	0	0	0	0	0	200	903	0	0	0	0	0	0	0	603	903	0
512	4	0	0	0	0	0	0	200	300	0	0	0	0	0	0	0	200	903	0	0	0	0	0	0	0	603	903	0
512	5	0	0	0	0	0	0	200	300	0	0	0	0	0	0	0	200	903	0	0	0	0	0	0	0	603	903	0
512	6	0	0	0	0	0	0	200	300	0	0	0	0	0	0	0	200	903	0	0	0	0	0	0	0	603	903	0
512	7	0	0	0	0	0	0	200	300	0	0	0	0	0	0	0	200	903	0	0	0	0	0	0	0	603	903	0
512	8	0	0	0	0	0	0	200	300	0	0	0	0	0	0	0	200	903	0	0	0	0	0	0	0	603	903	0
512	9	0	0	0	0	0	0	200	300	0	0	0	0	0	0	0	200	903	0	0	0	0	0	0	0	603	903	0
513	0	0	0	0	0	0	0	200	300	0	0	0	0	0	0	0	200	903	0	0	0	0	0	0	0	603	903	0
513	1	0	0	0	0	0	0	200	300	0	0	0	0	0	0	0	200	903	0	0	0	0	0	0	0	603	903	0
513	2	0	0	0	0	0	0	200	300	0	0	0	0	0	0	0	200	903	0	0	0	0	0	0	0	603	903	0
513	3	0	0	0	0	0	0	200	300	0	0	0	0	0	0	0	200	903	0	0	0	0	0	0	0	603	903	0
513	4	0	0	0	0	0	0	200	300	0	0	0	0	0	0	0	200	903	0	0	0	0	0	0	0	603	903	0
513	5	0	0	0	0	0	0	200	300	0	0	0	0	0	0	0	200	903	0	0	0	0	0	0	0	603	903	0
513	6	0	0	0	0	0	0	200	300	0	0	0	0	0	0	0	200	903	0	0	0	0	0	0	0	603	903	0
513	7	0	0	0	0	0	0	200	300	0	0	0	0	0	0	0	200	903	0	0	0	0	0	0	0	603	903	0
513	8	0	0	0	0	0	0	200	300	0	0	0	0	0	0	0	200	903	0	0	0	0	0	0	0	603	903	0
513	9	0	0	0	0	0	0	200	300	0	0	0	0	0	0	0	200	903	0	0	0	0	0	0	0	603	903	0
514	0	0	0	0	0	0	0	200	300	0	0	0	0	0	0	0	200	903	0	0	0	0	0	0	0	603	903	0
514	1	0	0	0	0	0	0	200	300	0	0	0	0	0	0	0	200	903	0	0	0	0	0	0	0	603	903	0
514	2	0	0	0	0	0	0	200	300	0	0	0	0	0	0	0	200	903	0	0	0	0	0	0	0	603	903	0
514	3	0	0	0	0	0	0	200	300	0	0	0	0	0	0	0	200	903	0	0	0	0	0	0	0	603	903	0
514	4	0	0	0	0	0	0	200	300	0	0	0	0	0	0	0	200	903	0	0	0	0	0	0	0	603	903	0
514	5	0	0	0	0	0	0	200	300	0	0	0	0	0	0	0	200	903	0	0	0	0	0	0	0	603	903	0
514	6	0	0	0	0	0	0	200	300	0	0	0	0	0	0	0	200	903	0	0	0	0	0	0	0	603	903	0
514	7	0	0	0	0	0	0	200	300	0	0	0	0	0	0	0	200	903	0	0	0	0	0	0	0	603	903	0
514	8	0	0	0	0	0	0	200	300	0	0	0	0	0	0	0	200	903	0	0	0	0	0	0	0	603	903	0
514	9	0	0	0	0	0	0	200	300	0	0	0	0	0	0	0	200	903	0	0	0	0	0	0	0	603	903	0
515	0	0	0	0	0	0	0	200	300	0	0	0	0	0	0	0	200	903	0	0	0	0	0	0	0	603	903	0
515	1	0	0	0	0	0	0	200	300	0	0	0	0	0	0	0	200	903	0	0	0	0	0	0	0	603	903	0
515	2	0	0	0	0	0	0	200	300	0	0	0	0	0	0	0	200	903	0	0	0	0	0	0	0	603	903	0
515	3	0	0	0	0	0	0	200	300	0	0	0	0	0	0	0	200	903	0	0	0	0	0	0	0	603	903	0
515	4	0	0	0	0	0	0	200	300	0	0	0	0	0	0	0	200	903	0	0	0	0	0	0	0	603	903	0
515	5	0	0	0	0	0	0	200	300	0	0	0	0	0	0	0	200	903	0	0	0	0	0	0	0	603	903	0
515	6	0	0	0	0	0	0	200	300	0	0	0	0	0	0	0	200	903	0	0	0	0	0	0	0	603	903	0
515	7	0	0	0	0	0	0	200	300	0	0	0	0	0	0	0	200	903	0	0	0	0	0	0	0	603	903	0
515	8	0	0	0	0	0	0	200	300	0	0	0	0	0	0	0	200	903	0	0	0	0	0	0	0	603	903	0
515	9	0	0	0	0	0	0	200	300	0	0	0	0	0	0	0	200	903	0	0	0	0	0	0	0	603	903	0
516	0	0	0	0	0	0	0	200	300	0	0	0	0	0	0	0	200	903	0	0	0	0	0	0	0	603	903	0
516	1	0	0	0	0	0	0	200	300	0	0	0	0	0	0	0	200	903	0	0	0	0	0	0	0	603	903	0
516	2	0	0	0	0	0	0	200	300	0	0	0	0	0	0	0	200	903	0	0	0	0	0	0	0	603	903	0
516	3	0	0	0	0	0	0	200	300	0	0	0	0	0	0	0	200	903	0	0	0	0	0	0	0	603	903	0
516	4	0	0	0	0	0	0	200	300	0	0	0	0	0	0	0	200	903	0	0	0	0	0	0	0	603	903	0
516	5	0	0	0	0	0	0	200	300	0	0	0	0	0	0	0	200	903	0	0	0	0	0	0	0	603	903	0
516	6	0	0	0	0	0	0	200	300	0	0	0	0	0	0	0	200	903	0	0	0	0	0	0	0	603	903	0
516	7	0	0	0	0	0	0	200	300	0	0	0	0	0	0	0	200	903	0	0	0	0	0	0	0	603	903	0
516	8	0	0	0	0	0	0	200	300	0	0	0	0	0	0	0	200	903	0	0	0	0	0	0	0	603	903	0
516	9	0	0	0	0	0	0	200	300	0	0	0	0	0	0	0	200	903	0	0	0	0	0	0	0	603	903	0
517	0	0	0	0	0	0	0	200	300	0	0	0	0	0	0	0	200	903	0	0	0	0	0	0	0	603	903	0
517	1	0	0	0	0	0	0	200	300	0	0	0	0	0	0	0	200	903	0	0	0	0	0	0	0	603	903	0
517	2	0	0	0	0	0	0	200	300	0	0	0	0	0	0	0	200	903	0	0	0	0	0	0	0	603	903	0
517	3	0	0	0	0	0	0	200	300	0	0	0	0	0	0	0	200	903	0	0	0	0	0	0	0	603	903	0
517	4	0	0	0	0	0	0	200	300	0	0	0	0	0	0	0	200	903	0	0	0	0	0	0	0	603	903	0
517	5	0	0	0	0	0	0	200	300	0	0	0	0	0	0	0	200	903	0	0	0	0	0	0	0	603	903	0
517	6	0	0	0	0	0	0	200	300	0	0	0	0	0	0	0	200	903	0	0	0	0	0	0	0	603	903	0
517	7	0	0	0	0	0	0	200	300	0	0	0	0	0	0	0	200	903	0	0	0	0	0	0	0	603	903	0
517	8	0	0	0	0	0	0	200	300	0	0	0	0	0	0	0	200	903	0	0	0	0	0	0	0	603	903	0
517	9	0	0	0	0	0	0	200	300	0	0	0	0	0	0	0	200	903	0	0	0	0	0	0	0	603	903	0
518	0	0	0	0	0	0	0	200	300	0	0	0	0	0	0	0	200	903	0	0	0	0	0	0	0	603	903	0
518	1	0	0	0	0	0	0	200	300	0	0	0	0	0	0	0	200	903	0	0	0	0	0	0	0	603	903	0
518	2	0	0	0	0	0	0	200	300	0	0	0	0	0	0	0	200	903	0	0	0	0	0	0	0	603	903	0
518	3	0	0	0	0	0	0	200	300	0	0	0	0	0	0	0	200	903	0	0	0	0	0	0	0	603	903	0
518	4	0	0	0	0	0	0	200	300	0	0	0	0	0	0	0	200	903	0	0	0	0	0	0	0	603	903	0
518	5	0	0	0	0	0	0	200	300	0	0	0	0	0	0	0	200	903	0	0	0	0	0	0	0	603	903	0
518	6	0	0	0	0	0	0	200	300	0	0	0	0	0	0	0	200	903	0	0	0	0	0	0	0	603	903	0
518	7	0	0	0	0	0	0	200	300	0	0	0	0	0	0	0	200	903	0	0	0	0	0	0	0	603	903	0
518	8	0	0	0	0	0	0	200	300	0	0	0	0	0	0	0	200	903	0	0	0	0	0	0	0	603	903	0
518	9	0	0	0	0	0	0	200	300	0	0	0	0	0	0	0	200	903	0	0	0	0	0	0	0	603	903	0
519	0	0	0	0	0	0	0	200	300	0	0	0	0	0	0	0	200	903	0	0	0	0	0	0	0	603	903	0
519	1	0	0	0	0	0	0	200	300	0	0	0	0	0	0	0	200	903	0	0	0	0	0	0	0	603	903	0
519	2	0	0	0	0	0	0	200	300	0	0	0	0	0	0	0	200	903	0	0	0	0	0	0	0	603	903	0
519	3	0	0	0	0	0	0	200	300	0	0	0	0	0	0	0	200	903	0	0	0	0	0	0	0	603	903	0
519	4	0	0	0	0	0	0	200	300	0	0	0	0	0	0	0	200	903	0	0	0	0	0	0	0	603	903	0
519	5	0	0	0	0	0	0	200	300	0	0	0	0	0	0	0	200	903	0	0	0	0	0	0	0	603	903	0
519	6	0	0	0	0	0	0	200	300	0	0	0	0	0	0	0	200	903	0	0	0	0	0	0	0	603	903	0
519	7	0	0	0	0	0	0	200	300	0	0	0	0	0	0	0	200	903	0	0	0	0	0	0	0	603	903	0
519	8	0	0	0	0	0	0	200	300	0	0	0	0	0	0	0	200	903	0	0	0	0	0	0	0	603	903	0
519	9	0	0	0	0	0	0	200	300	0	0	0	0	0	0	0	200	903	0	0	0	0	0	0	0	603	903	0
520	0	0	0	0	0	0	0	200	300	0	0	0	0	0	0	0	200	903	0	0	0	0	0	0	0	603	903	0
520	1	0	0	0	0	0	0	200	300	0	0	0	0	0	0	0	200	903	0	0	0	0	0	0	0	603	903	0
520	2	0	0	0	0	0	0	200	300	0	0	0	0	0	0	0	200	903	0	0	0	0	0	0	0	603	903	0
520	3	0	0	0	0	0	0	200	300	0	0	0	0	0	0	0	200	903	0	0	0	0	0	0	0	603	903	0
520	4	0	0	0	0	0	0	200	300	0	0	0	0	0	0	0	200	903	0	0	0	0	0	0	0	603	903	0
520	5	0	0	0	0	0	0	200	300	0	0	0	0	0	0	0	200	903	0	0	0	0	0	0	0	603	903	0
520	6	0	0	0	0	0	0	200	300	0	0	0	0	0	0	0	200	903	0	0	0	0	0	0	0	603	903	0
520	7	0	0	0	0	0	0	200	300	0	0	0	0	0	0	0	200	903	0	0	0	0	0	0	0	603	903	0
520	8	0	0	0	0	0	0	200	300	0	0	0	0	0	0	0	200	903	0	0	0	0	0	0	0	603	903	0
520	9	0	0	0	0	0	0	200	300	0	0	0	0	0	0	0	200	903	0	0	0	0	0	0	0	603	903	0
521	0	0	0	0	0	0	0	200	300	0	0	0	0	0	0	0	200	903	0	0	0	0	0	0	0	603	903	0
521	1	0	0	0	0	0	0	200	300	0	0	0	0	0	0	0	200	903	0	0	0	0	0	0	0	603	903	0
521	2	0	0	0	0	0	0	200	300	0	0	0	0	0	0	0	200	903	0	0	0	0	0	0	0	603	903	0
521	3	0	0	0	0	0	0	200	300	0	0	0	0	0	0	0	200	903	0	0	0	0	0	0	0	603	903	0
521	4	0	0	0	0	0	0	200	300	0	0	0	0	0	0	0	200	903	0	0	0	0	0	0	0	603	903	0
521	5	0	0	0	0	0	0	200	300	0	0	0	0	0	0	0	200	903	0	0	0	0	0	0	0	603	903	0
521	6	0	0	0	0	0	0	200	300	0	0	0	0	0	0	0	200	903	0	0	0	0	0	0	0	603	903	0
521	7	0	0	0	0	0	0	200	300	0	0	0	0	0	0	0	200	903	0	0	0	0	0	0	0	603	903	0
521	8	0	0	0	0	0	0	200	300	0	0	0	0	0	0	0	200	903	0	0	0	0	0	0	0	603	903	0
521	9	0	0	0	0	0	0	200	300	0	0	0	0	0	0	0	200	903	0	0	0	0	0	0	0	603	903	0
522	0	0	0	0	0	0	0	200	300	0	0	0	0	0	0	0	200	903	0	0	0	0	0	0	0	603	903	0
522	1	0	0	0	0	0	0	200	300	0	0	0	0	0	0	0	200	903	0	0	0	0	0	0	0	603	903	0
522	2	0	0	0	0	0	0	200	300	0	0	0	0	0	0	0	200	903	0	0	0	0	0	0	0	603	903	0
522	3	0	0	0	0	0	0	200	300	0	0	0	0	0	0	0	200	903	0	0	0	0	0	0	0	603	903	0
522	4	0	0	0	0	0	0	200	300	0	0	0	0	0	0	0	200	903	0	0	0	0	0	0	0	603	903	0
522	5	0	0	0	0	0	0	200	300	0	0	0	0	0	0	0	200	903	0	0	0	0	0	0	0	603	903	0
522	6	0	0	0	0	0	0	200	300	0	0	0	0	0	0	0	200	903	0	0	0	0	0	0	0	603	903	0
522	7	0	0	0	0	0	0	200	300	0	0	0	0	0	0	0	200	903	0	0	0	0	0	0	0	603	903	0
522	8	0	0	0	0	0	0	200	300	0	0	0	0	0	0	0	200	903	0	0	0	0	0	0	0	603	903	0
522	9	0	0	0	0	0	0	200	300	0	0	0	0	0	0	0	200	903	0	0	0	0	0	0	0	603	903	0
523	0	0	0	0	0	0	0	200	300	0	0	0	0	0	0	0	200	903	0	0	0	0	0	0	0	603	903	0
523	1	0	0	0	0	0	0	200	300	0	0	0	0	0	0	0	200	903	0	0	0	0	0	0	0	603	903	0
523	2	0	0	0	0	0	0	200	300	0	0	0	0	0	0	0	200	903	0	0	0	0	0	0	0	603	903	0
523	3	0	0	0	0	0	0	200	300	0	0	0	0	0	0	0	200	903	0	0	0	0	0	0	0	603	903	0
523	4	0	0	0	0	0	0	200	300	0	0	0	0	0	0	0	200	903	0	0	0	0	0	0	0	603	903	0
523	5	0	0	0	0	0	0	200	300	0	0	0	0	0	0	0	200	903	0	0	0	0	0	0	0	603	903	0
523	6	0	0	0	0	0	0	200	300	0	0	0	0	0	0	0	200	903	0	0	0	0	0	0	0	603	903	0
523	7	0	0	0	0	0	0	200	300	0	0	0	0	0	0	0	200	903	0	0	0	0	0	0	0	603	903	0
523	8	0	0	0	0	0	0	200	300	0	0	0	0	0	0	0	200	903	0	0	0	0	0	0	0	603	903	0
523	9	0	0	0	0	0	0	200	300	0	0	0	0	0	0	0	200	903	0	0	0	0	0	0	0	603	903	0
524	0	0	0	0	0	0	0	200	300	0	0	0	0	0	0	0	200	903	0	0	0	0	0	0	0	603	903	0
524	1	0	0	0	0	0	0	200	300	0	0	0	0	0	0	0	200	903	0	0	0	0	0	0	0	603	903	0
524	2	0	0	0	0	0	0	200	300	0	0	0	0	0	0	0	200	903	0	0	0	0	0	0	0	603	903	0
524	3	0	0	0	0	0	0	200	300	0	0	0	0	0	0	0	200	903	0	0	0	0	0	0	0	603	903	0
524	4	0	0	0	0	0	0	200	300	0	0	0	0	0	0	0	200	903	0	0	0	0	0	0	0	603	903	0
524	5	0	0	0	0	0	0	200	300	0	0	0	0	0	0	0	200	903	0	0	0	0	0	0	0	603	903	0
524	6	0	0	0	0	0	0	200	300	0	0	0	0	0	0	0	200	903	0	0	0	0	0	0	0	603	903	0
524	7	0	0	0	0	0	0	200	300	0	0	0	0	0	0	0	200	903	0	0	0	0	0	0	0	603	903	0
524	8	0	0	0	0	0	0	200	300	0	0	0	0	0	0	0	200	903	0	0	0	0	0	0	0	603	903	0
524	9	0	0	0	0	0	0	200	300	0	0	0	0	0	0	0	200	903	0	0	0	0	0	0	0	603	903	0
525	0	0	0	0	0	0	0	200	300	0	0	0	0	0	0	0	200	903	0	0	0	0	0	0	0	603	903	0
525	1	0	0	0	0	0	0	200	300	0	0	0	0	0	0	0	200	903	0	0	0	0	0	0	0	603	903	0
525	2	0	0	0	0	0	0	200	300	0	0	0	0	0	0	0	200	903	0	0	0	0	0	0	0	603	903	0
525	3	0	0	0	0	0	0	200	300	0	0	0	0	0	0	0	200	903	0	0	0	0	0	0	0	603	903	0
525	4	0	0	0	0	0	0	200	300	0	0	0	0	0	0	0	200	903	0	0	0	0	0	0	0	603	903	0
525	5	0	0	0	0	0	0	200	300	0	0	0	0	0	0	0	200	903	0	0	0	0	0	0	0	603	903	0
525	6	0	0	0	0	0	0	200	300	0	0	0	0	0	0	0	200	903	0	0	0	0	0	0	0	603	903	0
525	7	0	0	0	0	0	0	200	300	0	0	0	0	0	0	0	200	903	0	0	0	0	0	0	0	603	903	0
525	8	0	0	0	0	0	0	200	300	0	0	0	0	0	0	0	200	903	0	0	0	0	0	0	0	603	903	0
525	9	0	0	0	0	0	0	200	300	0	0	0	0	0	0	0	200	903	0	0	0	0	0	0	0	603	903	0
526	0	0	0	0	0	0	0	200	300	0	0	0	0	0	0	0	200	903	0	0	0	0	0	0	0	603	903	0
526	1	0	0	0	0	0	0	200	300	0	0	0	0	0	0	0	200	903	0	0	0	0	0	0	0	603	903	0
526	2	0	0	0	0	0	0	200	300	0	0	0	0	0	0	0	200	903	0	0	0	0	0	0	0	603	903	0
526	3	0	0	0	0	0	0	200	300	0	0	0	0	0	0	0	200	903	0	0	0	0	0	0	0	603	903	0
526	4	0	0	0	0	0	0	200	300	0	0	0	0	0	0	0	200	903	0	0	0	0	0	0	0	603	903	0
526	5	0	0	0	0	0	0	200	300	0	0	0	0	0	0	0	200	903	0	0	0	0	0	0	0	603	903	0
526	6	0	0	0	0	0	0	200	300	0	0	0	0	0	0	0	200	903	0	0	0	0	0	0	0	603	903	0
526	7	0	0	0	0	0	0	200	300	0	0	0	0	0	0	0	200	903	0	0	0	0	0	0	0	603	903	0
526	8	0	0	0	0	0	0	200	300	0	0	0	0	0	0	0	200	903	0	0	0	0	0	0	0	603	903	0
526	9	0	0	0	0	0	0	200	300	0	0	0	0	0	0	0	200	903	0	0	0	0	0	0	0	603	903	0
527	0	0	0	0	0	0	0	200	300	0	0	0	0	0	0	0	200	903	0	0	0	0	0	0	0	603	903	0
527	1	0	0	0	0	0	0	200	300	0	0	0	0	0	0	0	200	903	0	0	0	0	0	0	0	603	903	0
527	2	0	0	0	0	0	0	200	300	0	0	0	0	0	0	0	200	903	0	0	0	0	0	0	0	603	903	0
527	3	0	0	0	0	0	0	200	300	0	0	0	0	0	0	0	200	903	0	0	0	0	0	0	0	603	903	0
527	4	0	0	0	0	0	0	200	300	0	0	0	0	0	0	0	200	903	0	0	0	0	0	0	0	603	903	0
527	5	0	0	0	0	0	0	200	300	0	0	0	0	0	0	0	200	903	0	0	0	0	0	0	0	603	903	0
527	6	0	0	0	0	0	0	200	300	0	0	0	0	0	0	0	200	903	0	0	0	0	0	0	0	603	903	0
527	7	0	0	0	0	0	0	200	300	0	0	0	0	0	0	0	200	903	0	0	0	0	0	0	0	603	903	0
527	8	0	0	0	0	0	0	200	300	0	0	0	0	0	0	0	200	903	0	0	0	0	0	0	0	603	903	0
527	9	0	0	0	0	0	0	200	300	0	0	0	0	0	0	0	200	903	0	0	0	0	0	0	0	603	903	0
528	0	0	0	0	0	0	0	200	300	0	0	0	0	0	0	0	200	903	0	0	0	0	0	0	0	603	903	0
528	1	0	0	0	0	0	0	200	300	0	0	0	0	0	0	0	200	903	0	0	0	0	0	0	0	603	903	0
528	2	0	0	0	0	0	0	200	300	0	0	0	0	0	0	0	200	903	0	0	0	0	0	0	0	603	903	0
528	3	0	0	0	0	0	0	200	300	0	0	0	0	0	0	0	200	903	0	0	0	0	0	0	0	603	903	0
528	4	0	0	0	0	0	0	200	300	0	0	0	0	0	0	0	200	903	0	0	0	0	0	0	0	603	903	0
528	5	0	0	0	0	0	0	200	300	0	0	0	0	0	0	0	200	903	0	0	0	0	0	0	0	603	903	0
528	6	0	0	0	0	0	0	200	300	0	0	0	0	0	0	0	200	903	0	0	0	0	0	0	0	603	903	0
528	7	0	0	0	0	0	0	200	300	0	0	0	0	0	0	0	200	903	0	0	0	0	0	0	0	603	903	0
528	8	0	0	0	0	0	0	200	300	0	0	0	0	0	0	0	200	903	0	0	0	0	0	0	0	603	903	0
528	9	0	0	0	0	0	0	200	300	0	0	0	0	0	0	0	200	903	0	0	0	0	0	0	0	603	903	0
529	0	0	0	0	0	0	0	200	300	0	0	0	0	0	0	0	200	903	0	0	0	0	0	0	0	603	903	0
529	1	0	0	0	0	0	0	200	300	0	0	0	0	0	0	0	200	903	0	0	0	0	0	0	0	603	903	0
529	2	0	0	0	0	0	0	200	300	0	0	0	0	0	0	0	200	903	0	0	0	0	0	0	0	603	903	0
529	3	0	0	0	0	0	0	200	300	0	0	0	0	0	0	0	200	903	0	0	0	0	0	0	0	603	903	0
529	4	0	0	0	0	0	0	200	300	0	0	0	0	0	0	0	200	903	0	0	0	0	0	0	0	603	903	0
529	5	0	0	0	0	0	0	200	300	0	0	0	0	0	0	0	200	903	0	0	0	0	0	0	0	603	903	0
529	6	0	0	0	0	0	0	200	300	0	0	0	0	0	0	0	200	903	0	0	0	0	0	0	0	603	903	0
529	7	0	0	0	0	0	0	200	300	0	0	0	0	0	0	0	200	903	0	0	0	0	0	0	0	603	903	0
529	8	0	0	0	0	0	0	200	300	0	0	0	0	0	0	0	200	903	0	0	0	0	0	0	0	603	903	0
529	9	0	0	0	0	0	0	200	300	0	0	0	0	0	0	0	200	903	0	0	0	0	0	0	0	603	903	0
530	0	0	0	0	0	0	0	200	300	0	0	0	0	0	0	0	200	903	0	0	0	0	0	0	0	603	903	0
530	1	0	0	0	0	0	0	200	300	0	0	0	0	0	0	0	200	903	0	0	0	0	0	0	0	603	903	0
530	2	0	0	0	0	0	0	200	300	0	0	0	0	0	0	0	200	903	0	0	0	0	0	0	0	603	903	0
530	3	0	0	0	0	0	0	200	300	0	0	0	0	0	0	0	200	903	0	0	0	0	0	0	0	603	903	0
530	4	0	0	0	0	0	0	200	300	0	0	0	0	0	0	0	200	903	0	0	0	0	0	0	0	603	903	0
530	5	0	0	0	0	0	0	200	300	0	0	0	0	0	0	0	200	903	0	0	0	0	0	0	0	603	903	0
530	6	0	0	0	0	0	0	200	300	0	0	0	0	0	0	0	200	903	0	0	0	0	0	0	0	603	903	0
530	7	0	0	0	0	0	0	200	300	0	0	0	0	0	0	0	200	903	0	0	0	0	0	0	0	603	903	0
530	8	0	0	0	0	0	0	200	300	0	0	0	0	0	0	0	200	903	0	0	0	0	0	0	0	603	903	0
530	9	0	0	0	0	0	0	200	300	0	0	0	0	0	0	0	200	903	0	0	0	0	0	0	0	603	903	0
531	0	0	0	0	0	0	0	200	300	0	0	0	0	0	0	0	200	903	0	0	0	0	0	0	0	603	903	0
531	1	0	0	0	0	0	0	200	300	0	0	0	0	0	0	0	200	903	0	0	0	0	0	0	0	603	903	0
531	2	0	0	0	0	0	0	200	300	0	0	0	0	0	0	0	200	903	0	0	0	0	0	0	0	603	903	0
531	3	0	0	0	0	0	0	200	300	0	0	0	0	0	0	0	200	903	0	0	0	0	0	0	0	603	903	0
531	4	0	0	0	0	0	0	200	300	0	0	0	0	0	0	0	200	903	0	0	0	0	0	0	0	603	903	0
531	5	0	0	0	0	0	0	200	300	0	0	0	0	0	0	0	200	903	0	0	0	0	0	0	0	603	903	0
531	6	0	0	0	0	0	0	200	300	0	0	0	0	0	0	0	200	903	0	0	0	0	0	0	0	603	903	0
531	7	0	0	0	0	0	0	200	300	0	0	0	0	0	0	0	200	903	0	0	0	0	0	0	0	603	903	0
531	8	0	0	0	0	0	0	200	300	0	0	0	0	0	0	0	200	903	0	0	0	0	0	0	0	603	903	0
531	9	0	0	0	0	0	0	200	300	0	0	0	0	0	0	0	200	903	0	0	0	0	0	0	0	603	903	0
532	0	0	0	0	0	0	0	200	300	0	0	0	0	0	0	0	200	903	0	0	0	0	0	0	0	603	903	0
532	1	0	0	0	0	0	0	200	300	0	0	0	0	0	0	0	200	903	0	0	0	0	0	0	0	603	903	0
532	2	0	0	0	0	0	0	200	300	0	0	0	0	0	0	0	200	903	0	0	0	0	0	0	0	603	903	0
532	3	0	0	0	0	0	0	200	300	0	0	0	0	0	0	0	200	903	0	0	0	0	0	0	0	603	903	0
532	4	0	0	0	0	0	0	200	300	0	0	0	0	0	0	0	200	903	0	0	0	0	0	0	0	603	903	0
532	5	0	0	0	0	0	0	200	300	0	0	0	0	0	0	0	200	903	0	0	0	0	0	0	0	603	903	0
532	6	0	0	0	0	0	0	200	300	0	0	0	0	0	0	0	200	903	0	0	0	0	0	0	0	603	903	0
532	7	0	0	0	0	0	0	200	300	0	0	0	0	0	0	0	200	903	0	0	0	0	0	0	0	603	903	0
532	8	0	0	0	0	0	0	200	300	0	0	0	0	0	0	0	200	903	0	0	0	0	0	0	0	603	903	0
532	9	0	0	0	0	0	0	200	300	0	0	0	0	0	0	0	200	903	0	0	0	0	0	0	0	603	903	0
533	0	0	0	0	0	0	0	200	300	0	0	0	0	0	0	0	200	903	0	0	0	0	0	0	0	603	903	0
533	1	0	0	0	0	0	0	200	300	0	0	0	0	0	0	0	200	903	0	0	0	0	0	0	0	603	903	0
533	2	0	0	0	0	0	0	200	300	0	0	0	0	0	0	0	200	903	0	0	0	0	0	0	0	603	903	0
533	3	0	0	0	0	0	0	200	300	0	0	0	0	0	0	0	200	903	0	0	0	0	0	0	0	603	903	0
533	4	0	0	0	0	0	0	200	300	0	0	0	0	0	0	0	200	903	0	0	0	0	0	0	0	603	903	0
533	5	0	0	0	0	0	0	200	300	0	0	0	0	0	0	0	200	903	0	0	0	0	0	0	0	603	903	0
533	6	0	0	0	0	0	0	200	300	0	0	0	0	0	0	0	200	903	0	0	0	0	0	0	0	603	903	0
533	7	0	0	0	0	0	0	200	300	0	0	0	0	0	0	0	200	903	0	0	0	0	0	0	0	603	903	0
533	8	0	0	0	0	0	0	200	300	0	0	0	0	0	0	0	200	903	0	0	0	0	0	0	0	603	903	0
533	9	0	0	0	0	0	0	200	300	0	0	0	0	0	0	0	200	903	0	0	0	0	0	0	0	603	903	0
534	0	0	0	0	0	0	0	200	300	0	0	0	0	0	0	0	200	903	0	0	0	0	0	0	0	603	903	0
534	1	0	0	0	0	0	0	200	300	0	0	0	0	0	0	0	200	903	0	0	0	0	0	0	0	603	903	0
534	2	0	0	0	0	0	0	200	300	0	0	0	0	0	0	0	200	903	0	0	0	0	0	0	0	603	903	0
534	3	0	0	0	0	0	0	200	300	0	0	0	0	0	0	0	200	903	0	0	0	0	0	0	0	603	903	0
534	4	0	0	0	0	0	0	200	300	0	0	0	0	0	0	0	200	903	0	0	0	0	0	0	0	603	903	0
534	5	0	0	0	0	0	0	200	300	0	0	0	0	0	0	0	200	903	0	0	0	0	0	0	0	603	903	0
534	6	0	0	0	0	0	0	200	300	0	0	0	0	0	0	0	200	903	0	0	0	0	0	0	0	603	903	0
534	7	0	0	0	0	0	0	200	300	0	0	0	0	0	0	0	200	903	0	0	0	0	0	0	0	603	903	0
534	8	0	0	0	0	0	0	200	300	0	0	0	0	0	0	0	200	903	0	0	0	0	0	0	0	603	903	0
534	9	0	0	0	0	0	0	200	300	0	0	0	0	0	0	0	200	903	0	0	0	0	0	0	0	603	903	0
535	0	0	0	0	0	0	0	200	300	0	0	0	0	0	0	0	200	903	0	0	0	0	0	0	0	603	903	0
535	1	0	0	0	0	0	0	200	300	0	0	0	0	0	0	0	200	903	0	0	0	0	0	0	0	603	903	0
535	2	0	0	0	0	0	0	200	300	0	0	0	0	0	0	0	200	903	0	0	0	0	0	0	0	603	903	0
535	3	0	0	0	0	0	0	200	300	0	0	0	0	0	0	0	200	903	0	0	0	0	0	0	0	603	903	0
535	4	0	0	0	0	0	0	200	300	0	0	0	0	0	0	0	200	903	0	0	0	0	0	0	0	603	903	0
535	5	0	0	0	0	0	0	200	300	0	0	0	0	0	0	0	200	903	0	0	0	0	0	0	0	603	903	0
535	6	0	0	0	0	0	0	200	300	0	0	0	0	0	0	0	200	903	0	0	0	0	0	0	0	603	903	0
535	7	0	0	0	0	0	0	200	300	0	0	0	0	0	0	0	200	903	0	0	0	0	0	0	0	603	903	0
535	8	0	0	0	0	0	0	200	300	0	0	0	0	0	0	0	200	903	0	0	0	0	0	0	0	603	903	0
535	9	0	0	0	0	0	0	200	300	0	0	0	0	0	0	0	200	903	0	0	0	0	0	0	0	603	903	0
536	0	0	0	0	0	0	0	200	300	0	0	0	0	0	0	0	200	903	0	0	0	0	0	0	0	603	903	0
536	1	0	0	0	0	0	0	200	300	0	0	0	0	0	0	0	200	903	0	0	0	0	0	0	0	603	903	0
536	2	0	0	0	0	0	0	200	300	0	0	0	0	0	0	0	200	903	0	0	0	0	0	0	0	603	903	0
536	3	0	0	0	0	0	0	200	300	0	0	0	0	0	0	0	200	903	0	0	0	0	0	0	0	603	903	0
536	4	0	0	0	0	0	0	200	300	0	0	0	0	0	0	0	200	903	0	0	0	0	0	0	0	603	903	0
536	5	0	0	0	0	0	0	200	300	0	0	0	0	0	0	0	200	903	0	0	0	0	0	0	0	603	903	0
536	6	0	0	0	0	0	0	200	300	0	0	0	0	0	0	0	200	903	0	0	0	0	0	0	0	603	903	0
536	7	0	0	0	0	0	0	200	300	0	0	0	0	0	0	0	200	903	0	0	0	0	0	0	0	603	903	0
536	8	0	0	0	0	0	0	200	300	0	0	0	0	0	0	0	200	903	0	0	0	0	0	0	0	603	903	0
536	9	0	0	0	0	0	0	200	300	0	0	0	0	0	0	0	200	903	0	0	0	0	0	0	0	603	903	0
537	0	0	0	0	0	0	0	200	300	0	0	0	0	0	0	0	200	903	0	0	0	0	0	0	0	603	903	0
537	1	0	0	0	0	0	0	200	300	0	0	0	0	0	0	0	200	903	0	0	0	0	0	0	0	603	903	0
537	2	0	0	0	0	0	0	200	300	0	0	0	0	0	0	0	200	903	0	0	0	0	0	0	0	603	903	0
537	3	0	0	0	0	0	0	200	300	0	0	0	0	0	0	0	200	903	0	0	0	0	0	0	0	603	903	0
537	4	0	0	0	0	0	0	200	300	0	0	0	0	0	0	0	200	903	0	0	0	0	0	0	0	603	903	0
537	5	0	0	0	0	0	0	200	300	0	0	0	0	0	0	0	200	903	0	0	0	0	0	0	0	603	903	0
537	6	0	0	0	0	0	0	200	300	0	0	0	0	0	0	0	200	903	0	0	0	0	0	0	0	603	903	0
537	7	0	0	0	0	0	0	200	300	0	0	0	0	0	0	0	200	903	0	0	0	0	0	0	0	603	903	0
537	8	0	0	0	0	0	0	200	300	0	0	0	0	0	0	0	200	903	0	0	0	0	0	0	0	603	903	0
537	9	0	0	0	0	0	0	200	300	0	0	0	0	0	0	0	200	903	0	0	0	0	0	0	0	603	903	0
538	0	0	0	0	0	0	0	200	300	0	0	0	0	0	0	0	200	903	0	0	0	0	0	0	0	603	903	0
538	1	0	0	0	0	0	0	200	300	0	0	0	0	0	0	0	200	903	0	0	0	0	0	0	0	603	903	0
538	2	0	0	0	0	0	0	200	300	0	0	0	0	0	0	0	200	903	0	0	0	0	0	0	0	603	903	0
538	3	0	0	0	0	0	0	200	300	0	0	0	0	0	0	0	200	903	0	0	0	0	0	0	0	603	903	0
538	4	0	0	0	0	0	0	200	300	0	0	0	0	0	0	0	200	903	0	0	0	0	0	0	0	603	903	0
538	5	0	0	0	0	0	0	200	300	0	0	0	0	0	0	0	200	903	0	0	0	0	0	0	0	603	903	0
538	6	0	0	0	0	0	0	200	300	0	0	0	0	0	0	0	200	903	0	0	0	0	0	0	0	603	903	0
538	7	0	0	0	0	0	0	200	300	0	0	0	0	0	0	0	200	903	0	0	0	0	0	0	0	603	903	0
538	8	0	0	0	0	0	0	200	300	0	0	0	0	0	0	0	200	903	0	0	0	0	0	0	0	603	903	0
538	9	0	0	0	0	0	0	200	300	0	0	0	0	0	0	0	200	903	0	0	0	0	0	0	0	603	903	0
539	0	0	0	0	0	0	0	200	300	0	0	0	0	0	0	0	200	903	0	0	0	0	0	0	0	603	903	0
539	1	0	0	0	0	0	0	200	300	0	0	0	0	0	0	0	200	903	0	0	0	0	0	0	0	603	903	0
539	2	0	0	0	0	0	0	200	300	0	0	0	0	0	0	0	200	903	0	0	0	0	0	0	0	603	903	0
539	3	0	0	0	0	0	0	200	300	0	0	0	0	0	0	0	200	903	0	0	0	0	0	0	0	603	903	0
539	4	0	0	0	0	0	0	200	300	0	0	0	0	0	0	0	200	903	0	0	0	0	0	0	0	603	903	0
539	5	0	0	0	0	0	0	200	300	0	0	0	0	0	0	0	200	903	0	0	0	0	0	0	0	603	903	0
539	6	0	0	0	0	0	0	200	300	0	0	0	0	0	0	0	200	903	0	0	0	0	0	0	0	603	903	0
539	7	0	0	0	0	0	0	200	300	0	0	0	0	0	0	0	200	903	0	0	0	0	0	0	0	603	903	0
539	8	0	0	0	0	0	0	200	300	0	0	0	0	0	0	0	200	903	0	0	0	0	0	0	0	603	903	0
539	9	0	0	0	0	0	0	200	300	0	0	0	0	0	0	0	200	903	0	0	0	0	0	0	0	603	903	0
540	0	0	0	0	0	0	0	200	300	0	0	0	0	0	0	0	200	903	0	0	0	0	0	0	0	603	903	0
540	1	0	0	0	0	0	0	200	300	0	0	0	0	0	0	0	200	903	0	0	0	0	0	0	0	603	903	0
540	2	0	0	0	0	0	0	200	300	0	0	0	0	0	0	0	200	903	0	0	0	0	0	0	0	603	903	0
540	3	0	0	0	0	0	0	200	300	0	0	0	0	0	0	0	200	903	0	0	0	0	0	0	0	603	903	0
540	4	0	0	0	0	0	0	200	300	0	0	0	0	0	0	0	200	903	0	0	0	0	0	0	0	603	903	0
540	5	0	0	0	0	0	0	200	300	0	0	0	0	0	0	0	200	903	0	0	0	0	0	0	0	603	903	0
540	6	0	0	0	0	0	0	200	300	0	0	0	0	0	0	0	200	903	0	0	0	0	0	0	0	603	903	0
540	7	-0.490159	-2.88162	-16.4371	4608.49	-1532.54	-34.3784	106.763	19.6282	0	0	0	0	0	0	0	200	903	0	0	0	0	0	0	0	603	903	0
540	8	-0.947922	-4.10232	-28.0337	8087.49	-1959.79	286.056	130.092	11.5086	0	0	0	0	0	0	0	200	903	0	0	0	0	0	0	0	603	903	0
540	9	0.730544	-5.32303	-37.7994	10834.1	-2692.21	698.044	128.776	13.3795	0	0	0	0	0	0	0	200	903	0	0	0	0	0	0	0	603	903	0
541	0	2.25642	-5.17044	-49.7012	13855.3	-3363.59	835.373	132.324	21.2278	0	0	0	0	0	0	0	200	903	0	0	0	0	0	0	0	603	903	0
541	1	2.25642	-7.45926	-58.8565	16968.1	-4340.16	1064.25	126.259	11.7036	0	0	0	0	0	0	0	200	903	0	0	0	0	0	0	0	603	903	0
541	2	1.79866	-7.30667	-68.9273	20172.5	-5560.86	1247.36	119.323	7.33716	0	0	0	0	0	0	0	200	903	0	0	0	0	0	0	0	603	903	0
541	3	2.71419	-7.00149	-80.524	23010.6	-6537.42	1430.47	118.814	14.2392	0	0	0	0	0	0	0	200	903	0	0	0	0	0	0	0	603	903	0
541	4	4.39265	-5.78079	-87.8482	26214.9	-7330.88	1659.35	116.551	1.5882	0	0	0	0	0	0	0	200	903	0	0	0	0	0	0	0	603	903	0
541	5	5.30818	-5.01785	-101.886	29968.6	-7758.13	1567.79	123.855	5.86224	0	0	0	0	0	0	0	200	903	0	0	0	0	0	0	0	603	903	0
541	6	6.3763	-4.25491	-114.704	32715.2	-8795.72	2208.66	123.318	14.7852	0	0	0	0	0	0	0	200	903	0	0	0	0	0	0	0	603	903	0
541	7	7.13924	-2.42386	-124.774	36011.1	-10016.4	2117.11	119.724	11.3906	0	0	0	0	0	0	0	200	903	0	0	0	0	0	0	0	603	903	0
541	8	6.68147	-1.66092	-139.118	39398.5	-11542.3	2345.99	117.032	16.7972	0	0	0	0	0	0	0	200	903	0	0	0	0	0	0	0	603	903	0
541	9	7.597	-0.13504	-149.494	43243.7	-12457.8	2300.22	116.667	10.732	0	0	0	0	0	0	0	200	903	0	0	0	0	0	0	0	603	903	0
542	0	9.42805	1.08566	-161.701	46722.7	-13068.2	2025.56	119.183	11.0542	0	0	0	0	0	0	0	200	903	0	0	0	0	0	0	0	603	903	0
542	1	8.66511	1.8486	-173.908	49103.1	-14411	1888.23	117.134	17.6485	0	0	0	0	0	0	0	200	903	0	0	0	0	0	0	0	603	903	0
542	2	9.27547	2.76413	-187.641	52490.6	-15814.8	2025.56	115.718	20.2601	0	0	0	0	0	0	0	200	903	0	0	0	0	0	0	0	603	903	0
542	3	6.98665	3.67966	-197.711	55603.4	-16791.3	1476.24	115.072	18.7651	0	0	0	0	0	0	0	200	903	0	0	0	0	0	0	0	603	903	0
542	4	6.98665	4.59518	-210.529	58716.2	-17828.9	1613.57	115.314	21.1016	0	0	0	0	0	0	0	200	903	0	0	0	0	0	0	0	603	903	0
542	5	7.44441	5.6633	-219.379	61645.9	-18439.3	1613.57	115.948	18.9984	0	0	0	0	0	0	0	200	903	0	0	0	0	0	0	0	603	903	0
542	6	8.8177	5.51071	-232.502	64850.2	-19415.8	1430.47	116.492	21.0763	0	0	0	0	0	0	0	200	903	0	0	0	0	0	0	0	603	903	0
542	7	7.13924	8.25729	-241.046	68237.6	-21246.9	1201.58	111.856	16.9108	0	0	0	0	0	0	0	200	903	0	0	0	0	0	0	0	603	903	0
542	8	7.29182	8.86765	-252.338	70068.7	-21552.1	1201.58	114.59	22.322	0	0	0	0	0	0	0	200	903	0	0	0	0	0	0	0	603	903	0
542	9	5.15559	9.32541	-263.019	73547.7	-22772.8	743.82	113.418	20.3713	0	0	0	0	0	0	0	200	903	0	0	0	0	0	0	0	603	903	0
543	0	4.39265	10.0883	-276.142	76843.6	-23749.3	514.938	113.996	21.724	0	0	0	0	0	0	0	200	903	0	0	0	0	0	0	0	603	903	0
543	1	3.32454	10.2409	-288.044	80048	-24909	194.503	113.523	22.0977	0	0	0	0	0	0	0	200	903	0	0	0	0	0	0	0	603	903	0
543	2	-0.0323951	8.71506	-299.03	83893.2	-26434.9	-766.8	111.598	19.4489	0	0	0	0	0	0	0	200	903	0	0	0	0	0	0	0	603	903	0
543	3	-1.55827	11.6142	-314.289	86914.4	-28021.8	-1407.67	110.841	23.4567	0	0	0	0	0	0	0	200	903	0	0	0	0	0	0	0	603	903	0
543	4	-4.15227	13.5979	-327.106	89844.1	-29059.4	-2231.64	111.162	25.3364	0	0	0	0	0	0	0	200	903	0	0	0	0	0	0	0	603	903	0
543	5	-7.05144	16.497	-331.989	92682.2	-29852.9	-2826.74	110.079	20.8273	0	0	0	0	0	0	0	200	903	0	0	0	0	0	0	0	603	903	0
543	6	-11.4765	17.5652	-346.332	95062.6	-30768.4	-3971.15	111.159	25.516	0	0	0	0	0	0	0	200	903	0	0	0	0	0	0	0	603	903	0
543	7	-12.5446	20.6169	-355.487	97168.3	-31806	-4657.79	110.529	26.6617	0	0	0	0	0	0	0	200	903	0	0	0	0	0	0	0	603	903	0
543	8	-14.5282	24.4316	-361.591	98816.2	-33026.7	-5298.66	108.663	26.7181	0	0	0	0	0	0	0	200	903	0	0	0	0	0	0	0	603	903	0
543	9	-16.0541	27.0256	-370.746	101197	-33637	-6305.74	109.272	27.046	0	0	0	0	0	0	0	200	903	0	0	0	0	0	0	0	603	903	0
544	0	-17.1222	29.0092	-381.427	102661	-34369.5	-6946.61	109.893	30.8491	0	0	0	0	0	0	0	200	903	0	0	0	0	0	0	0	603	903	0
544	1	-16.9697	32.2136	-386.005	104767	-35162.9	-7358.6	108.906	28.5859	0	0	0	0	0	0	0	200	903	0	0	0	0	0	0	0	603	903	0
544	2	-18.8007	36.0283	-395.465	106232	-35773.3	-7587.48	109.541	31.3747	0	0	0	0	0	0	0	200	903	0	0	0	0	0	0	0	603	903	0
544	3	-18.8007	37.4016	-400.348	107331	-36688.8	-7862.14	108.358	31.9067	0	0	0	0	0	0	0	200	903	0	0	0	0	0	0	0	603	903	0
544	4	-19.8688	36.3335	-404.926	109345	-36749.8	-8136.79	109.243	29.9633	0	0	0	0	0	0	0	200	903	0	0	0	0	0	0	0	603	903	0
544	5	-18.9533	39.6904	-410.724	110169	-37482.2	-8319.9	108.741	31.7694	0	0	0	0	0	0	0	200	903	0	0	0	0	0	0	0	603	903	0
544	6	-16.5119	42.1318	-417.438	111634	-37787.4	-8228.35	109.478	32.5744	0	0	0	0	0	0	0	200	903	0	0	0	0	0	0	0	603	903	0
544	7	-18.0378	41.674	-420.795	112091	-38153.6	-8136.79	109.33	33.6199	0	0	0	0	0	0	0	200	903	0	0	0	0	0	0	0	603	903	0
544	8	-18.3429	41.9792	-425.067	112366	-39069.2	-8319.9	108.087	35.6512	0	0	0	0	0	0	0	200	903	0	0	0	0	0	0	0	603	903	0
544	9	-16.8171	42.5896	-426.288	113098	-39252.3	-8365.68	107.921	34.6901	0	0	0	0	0	0	0	200	903	0	0	0	0	0	0	0	603	903	0
545	0	-17.4274	43.3525	-429.035	113190	-39496.4	-8091.02	107.941	36.1751	0	0	0	0	0	0	0	200	903	0	0	0	0	0	0	0	603	903	0
545	1	-15.7489	42.8947	-433.307	114106	-39252.3	-7953.69	109.412	36.6635	0	0	0	0	0	0	0	200	903	0	0	0	0	0	0	0	603	903	0
545	2	-13.9179	43.3525	-436.969	114655	-39374.3	-7907.92	109.892	37.6134	0	0	0	0	0	0	0	200	903	0	0	0	0	0	0	0	603	903	0
545	3	-12.6972	43.9629	-438.8	115296	-39618.5	-7724.81	109.712	37.2478	0	0	0	0	0	0	0	200	903	0	0	0	0	0	0	0	603	903	0
545	4	-13.3075	43.8103	-441.242	115387	-40411.9	-7495.93	108.413	38.4942	0	0	0	0	0	0	0	200	903	0	0	0	0	0	0	0	603	903	0
545	5	-10.4084	45.6413	-442.462	116211	-40473	-7450.15	108.528	37.3533	0	0	0	0	0	0	0	200	903	0	0	0	0	0	0	0	603	903	0
545	6	-11.6291	46.2517	-442.462	116120	-40289.9	-7587.48	108.942	37.5603	0	0	0	0	0	0	0	200	903	0	0	0	0	0	0	0	603	903	0
545	7	-9.79802	48.5405	-444.599	116852	-40534	-7495.93	108.83	37.1739	0	0	0	0	0	0	0	200	903	0	0	0	0	0	0	0	603	903	0
545	8	-7.96697	48.6931	-447.345	116944	-40656.1	-7267.04	109.117	38.5829	0	0	0	0	0	0	0	200	903	0	0	0	0	0	0	0	603	903	0
545	9	-9.34026	50.219	-450.092	117310	-41205.4	-7541.7	108.451	39.3645	0	0	0	0	0	0	0	200	903	0	0	0	0	0	0	0	603	903	0
546	0	-10.561	51.8974	-451.007	117676	-41510.6	-7724.81	107.96	39.0816	0	0	0	0	0	0	0	200	903	0	0	0	0	0	0	0	603	903	0
546	1	-9.03508	52.813	-452.533	118409	-41388.5	-7999.47	108.54	38.3429	0	0	0	0	0	0	0	200	903	0	0	0	0	0	0	0	603	903	0
546	2	-11.0187	54.9492	-454.364	118042	-41266.4	-8228.35	109.178	40.2033	0	0	0	0	0	0	0	200	903	0	0	0	0	0	0	0	603	903	0
546	3	-10.2558	56.7802	-456.195	118866	-41693.7	-8503.01	108.606	39.4399	0	0	0	0	0	0	0	200	903	0	0	0	0	0	0	0	603	903	0
546	4	-10.7135	58.9165	-458.026	120056	-42304	-8869.22	107.638	37.8831	0	0	0	0	0	0	0	200	903	0	0	0	0	0	0	0	603	903	0
546	5	-11.9343	61.0527	-462.604	120148	-42120.9	-9464.31	108.948	40.2788	0	0	0	0	0	0	0	200	903	0	0	0	0	0	0	0	603	903	0
546	6	-14.0705	62.8838	-466.877	121247	-42670.2	-9876.3	108.605	40.3024	0	0	0	0	0	0	0	200	903	0	0	0	0	0	0	0	603	903	0
546	7	-16.5119	64.4096	-467.487	121613	-42853.3	-10334.1	108.333	39.8582	0	0	0	0	0	0	0	200	903	0	0	0	0	0	0	0	603	903	0
546	8	-17.58	66.0881	-471.149	122254	-43341.6	-10883.4	108.009	40.52	0	0	0	0	0	0	0	200	903	0	0	0	0	0	0	0	603	903	0
546	9	-18.0378	68.0717	-474.811	122986	-43585.8	-11570	108.204	40.9787	0	0	0	0	0	0	0	200	903	0	0	0	0	0	0	0	603	903	0
547	0	-18.6481	69.2924	-481.525	123444	-44440.3	-11890.5	107.709	43.6395	0	0	0	0	0	0	0	200	903	0	0	0	0	0	0	0	603	903	0
547	1	-22.0051	70.6657	-484.272	124085	-44806.5	-12394	107.477	43.7702	0	0	0	0	0	0	0	200	903	0	0	0	0	0	0	0	603	903	0
547	2	-24.1413	72.039	-487.628	125092	-44928.5	-13309.5	107.863	43.4688	0	0	0	0	0	0	0	200	903	0	0	0	0	0	0	0	603	903	0
547	3	-24.4465	74.4804	-490.68	125092	-45294.7	-13675.7	107.69	45.0643	0	0	0	0	0	0	0	200	903	0	0	0	0	0	0	0	603	903	0
547	4	-27.6508	75.5486	-493.732	126740	-46271.3	-13996.2	106.283	43.3023	0	0	0	0	0	0	0	200	903	0	0	0	0	0	0	0	603	903	0
547	5	-27.3456	77.0744	-499.225	128022	-46576.5	-14637	106.702	43.5594	0	0	0	0	0	0	0	200	903	0	0	0	0	0	0	0	603	903	0
547	6	-27.8034	79.5158	-502.582	128662	-47370	-15232.1	105.747	43.9972	0	0	0	0	0	0	0	200	903	0	0	0	0	0	0	0	603	903	0
547	7	-29.9396	80.4314	-509.296	129853	-47186.8	-14911.7	107.349	45.0349	0	0	0	0	0	0	0	200	903	0	0	0	0	0	0	0	603	903	0
547	8	-31.7707	81.1943	-512.653	130127	-47736.2	-16056.1	106.884	46.1688	0	0	0	0	0	0	0	200	903	0	0	0	0	0	0	0	603	903	0
547	9	-30.55	82.2624	-516.01	131775	-48041.3	-16010.3	106.898	44.6265	0	0	0	0	0	0	0	200	903	0	0	0	0	0	0	0	603	903	0
548	0	-33.2966	84.8564	-519.672	132233	-49017.9	-16239.2	105.675	45.5452	0	0	0	0	0	0	0	200	903	0	0	0	0	0	0	0	603	903	0
548	1	-31.9233	85.9245	-523.029	133789	-49262	-16834.3	105.814	44.2026	0	0	0	0	0	0	0	200	903	0	0	0	0	0	0	0	603	903	0
548	2	-30.2448	86.0771	-527.607	133332	-49689.3	-16834.3	105.821	47.2895	0	0	0	0	0	0	0	200	903	0	0	0	0	0	0	0	603	903	0
548	3	-32.9914	87.9082	-532.184	133789	-49750.3	-16742.8	106.517	48.6032	0	0	0	0	0	0	0	200	903	0	0	0	0	0	0	0	603	903	0
548	4	-34.5173	88.2133	-537.372	134705	-49628.3	-16971.6	107.646	49.3266	0	0	0	0	0	0	0	200	903	0	0	0	0	0	0	0	603	903	0
548	5	-31.7707	88.3659	-538.593	135529	-50299.6	-17337.8	106.609	48.3647	0	0	0	0	0	0	0	200	903	0	0	0	0	0	0	0	603	903	0
548	6	-34.2121	90.0444	-543.17	136353	-50910	-16880.1	106.273	48.9685	0	0	0	0	0	0	0	200	903	0	0	0	0	0	0	0	603	903	0
548	7	-33.4491	89.7392	-546.527	137085	-51276.2	-17063.2	106.178	49.1703	0	0	0	0	0	0	0	200	903	0	0	0	0	0	0	0	603	903	0
548	8	-32.8388	90.8073	-552.326	138550	-51093.1	-16880.1	107.495	49.1514	0	0	0	0	0	0	0	200	903	0	0	0	0	0	0	0	603	903	0
548	9	-32.8388	91.1125	-553.241	138825	-51703.4	-16971.6	106.544	49.0701	0	0	0	0	0	0	0	200	903	0	0	0	0	0	0	0	603	903	0
549	0	-33.6017	90.9599	-560.26	139099	-52130.7	-16605.4	106.953	51.7235	0	0	0	0	0	0	0	200	903	0	0	0	0	0	0	0	603	903	0
549	1	-34.6698	91.2651	-562.091	140564	-52557.9	-17429.4	106.496	49.9262	0	0	0	0	0	0	0	200	903	0	0	0	0	0	0	0	603	903	0
549	2	-34.975	91.4177	-563.312	141205	-53168.3	-17109	105.615	49.3304	0	0	0	0	0	0	0	200	903	0	0	0	0	0	0	0	603	903	0
549	3	-33.6017	91.1125	-570.026	142212	-52741	-17246.3	107.476	50.5162	0	0	0	0	0	0	0	200	903	0	0	0	0	0	0	0	603	903	0
549	4	-33.6017	92.028	-574.298	142853	-53351.4	-17612.5	107.102	51.2562	0	0	0	0	0	0	0	200	903	0	0	0	0	0	0	0	603	903	0
549	5	-31.6181	92.791	-577.961	143311	-53595.5	-17521	107.268	52.0404	0	0	0	0	0	0	0	200	903	0	0	0	0	0	0	0	603	903	0
549	6	-35.1276	91.1125	-581.928	144410	-54511.1	-17383.6	106.327	51.8429	0	0	0	0	0	0	0	200	903	0	0	0	0	0	0	0	603	903	0
549	7	-34.6698	92.791	-585.59	145142	-54511.1	-17658.3	106.913	52.1441	0	0	0	0	0	0	0	200	903	0	0	0	0	0	0	0	603	903	0
549	8	-35.2802	93.4013	-588.336	146332	-55121.4	-17749.8	106.31	51.2781	0	0	0	0	0	0	0	200	903	0	0	0	0	0	0	0	603	903	0
549	9	-34.2121	93.5539	-592.609	147522	-54877.3	-17704.1	107.397	51.0629	0	0	0	0	0	0	0	200	903	0	0	0	0	0	0	0	603	903	0
550	0	-34.6698	93.5539	-597.187	148072	-55243.5	-17521	107.494	52.0513	0	0	0	0	0	0	0	200	903	0	0	0	0	0	0	0	603	903	0
550	1	-36.0431	94.3169	-600.849	149262	-56159	-17612.5	106.534	51.5816	0	0	0	0	0	0	0	200	903	0	0	0	0	0	0	0	603	903	0
550	2	-34.8224	94.0117	-602.68	149994	-56342.1	-17795.6	106.514	51.1211	0	0	0	0	0	0	0	200	903	0	0	0	0	0	0	0	603	903	0
550	3	-36.0431	94.1643	-606.952	150269	-56586.3	-16925.9	106.77	52.4206	0	0	0	0	0	0	0	200	903	0	0	0	0	0	0	0	603	903	0
550	4	-34.5173	94.0117	-609.088	151368	-56281.1	-17704.1	107.598	51.4852	0	0	0	0	0	0	0	200	903	0	0	0	0	0	0	0	603	903	0
550	5	-33.6017	91.8755	-614.887	152375	-56281.1	-17475.2	108.469	52.1907	0	0	0	0	0	0	0	200	903	0	0	0	0	0	0	0	603	903	0
550	6	-34.2121	92.9436	-617.939	152924	-56891.4	-17292.1	107.934	52.5256	0	0	0	0	0	0	0	200	903	0	0	0	0	0	0	0	603	903	0
550	7	-35.2802	92.028	-621.601	153015	-57623.9	-17521	107.298	53.8364	0	0	0	0	0	0	0	200	903	0	0	0	0	0	0	0	603	903	0
550	8	-31.7707	91.7229	-625.263	154114	-57684.9	-17292.1	107.743	53.521	0	0	0	0	0	0	0	200	903	0	0	0	0	0	0	0	603	903	0
550	9	-34.6698	91.8755	-627.399	154572	-57562.8	-17017.4	108.252	53.6306	0	0	0	0	0	0	0	200	903	0	0	0	0	0	0	0	603	903	0
551	0	-32.8388	92.028	-630.756	155670	-57562.8	-16971.6	108.74	53.2001	0	0	0	0	0	0	0	200	903	0	0	0	0	0	0	0	603	903	0
551	1	-31.0077	90.9599	-636.554	155945	-58173.2	-17063.2	108.612	55.0167	0	0	0	0	0	0	0	200	903	0	0	0	0	0	0	0	603	903	0
551	2	-31.3129	90.6548	-638.385	156586	-58905.6	-16880.1	107.727	54.7154	0	0	0	0	0	0	0	200	903	0	0	0	0	0	0	0	603	903	0
551	3	-31.9233	90.197	-640.522	157135	-58844.6	-16422.3	108.13	54.6759	0	0	0	0	0	0	0	200	903	0	0	0	0	0	0	0	603	903	0
551	4	-30.55	90.0444	-641.742	157593	-58539.4	-16559.6	108.781	54.4292	0	0	0	0	0	0	0	200	903	0	0	0	0	0	0	0	603	903	0
551	5	-31.3129	87.1452	-644.794	158142	-58417.3	-16376.5	109.402	54.7396	0	0	0	0	0	0	0	200	903	0	0	0	0	0	0	0	603	903	0
551	6	-30.2448	86.6875	-646.015	158417	-58661.5	-15644.1	109.195	54.7779	0	0	0	0	0	0	0	200	903	0	0	0	0	0	0	0	603	903	0
551	7	-29.1767	87.2978	-652.423	159333	-59271.8	-15735.7	109.151	55.7834	0	0	0	0	0	0	0	200	903	0	0	0	0	0	0	0	603	903	0
551	8	-29.6344	86.5349	-653.644	159974	-59638	-15598.3	108.761	55.259	0	0	0	0	0	0	0	200	903	0	0	0	0	0	0	0	603	903	0
551	9	-30.55	85.7719	-655.475	160523	-59149.7	-15461	109.761	55.1046	0	0	0	0	0	0	0	200	903	0	0	0	0	0	0	0	603	903	0
552	0	-30.7026	85.4668	-658.527	159607	-59699.1	-15323.7	109.345	57.6298	0	0	0	0	0	0	0	200	903	0	0	0	0	0	0	0	603	903	0
552	1	-30.2448	84.7038	-658.527	160065	-60004.2	-15277.9	108.881	56.9347	0	0	0	0	0	0	0	200	903	0	0	0	0	0	0	0	603	903	0
552	2	-29.4819	84.2461	-661.579	160889	-60431.5	-14820.1	108.656	56.8105	0	0	0	0	0	0	0	200	903	0	0	0	0	0	0	0	603	903	0
552	3	-28.8715	82.8728	-662.799	161347	-60004.2	-14911.7	109.468	56.5677	0	0	0	0	0	0	0	200	903	0	0	0	0	0	0	0	603	903	0
552	4	-28.7189	83.1779	-667.072	161621	-60309.4	-14774.4	109.591	57.7151	0	0	0	0	0	0	0	200	903	0	0	0	0	0	0	0	603	903	0
552	5	-29.3293	82.7202	-668.293	162262	-60370.4	-14911.7	109.665	57.1987	0	0	0	0	0	0	0	200	903	0	0	0	0	0	0	0	603	903	0
552	6	-29.1767	81.9572	-671.344	162445	-60309.4	-14453.9	110.166	58.0296	0	0	0	0	0	0	0	200	903	0	0	0	0	0	0	0	603	903	0
552	7	-29.0241	80.584	-670.429	162812	-60614.6	-14316.6	109.588	57.153	0	0	0	0	0	0	0	200	903	0	0	0	0	0	0	0	603	903	0
552	8	-27.3456	80.7365	-673.786	163269	-60919.8	-14362.4	109.586	57.6835	0	0	0	0	0	0	0	200	903	0	0	0	0	0	0	0	603	903	0
552	9	-27.193	80.584	-673.786	163544	-61163.9	-13584.2	109.224	57.2759	0	0	0	0	0	0	0	200	903	0	0	0	0	0	0	0	603	903	0
553	0	-26.7353	79.821	-677.448	163910	-60675.6	-13858.8	110.435	58.0474	0	0	0	0	0	0	0	200	903	0	0	0	0	0	0	0	603	903	0
553	1	-27.6508	78.6003	-677.448	163361	-61163.9	-13401.1	109.714	58.8582	0	0	0	0	0	0	0	200	903	0	0	0	0	0	0	0	603	903	0
553	2	-27.6508	78.1425	-678.974	163727	-60858.7	-13492.6	110.367	58.8608	0	0	0	0	0	0	0	200	903	0	0	0	0	0	0	0	603	903	0
553	3	-27.0405	77.3796	-678.974	164460	-61224.9	-13355.3	109.827	57.7821	0	0	0	0	0	0	0	200	903	0	0	0	0	0	0	0	603	903	0
553	4	-25.362	76.3115	-679.889	164551	-61286	-13263.8	109.859	57.9736	0	0	0	0	0	0	0	200	903	0	0	0	0	0	0	0	603	903	0
553	5	-25.362	75.5486	-680.5	164734	-61102.9	-12943.3	110.209	57.9216	0	0	0	0	0	0	0	200	903	0	0	0	0	0	0	0	603	903	0
553	6	-24.9042	73.7175	-682.636	164460	-60858.7	-12622.9	110.847	59.0815	0	0	0	0	0	0	0	200	903	0	0	0	0	0	0	0	603	903	0
553	7	-25.2094	71.8864	-683.857	164917	-60980.8	-12714.4	110.828	58.8422	0	0	0	0	0	0	0	200	903	0	0	0	0	0	0	0	603	903	0
553	8	-25.5146	70.6657	-684.467	164917	-61408	-12439.8	110.283	59.0572	0	0	0	0	0	0	0	200	903	0	0	0	0	0	0	0	603	903	0
553	9	-24.599	71.4287	-682.331	164826	-61286	-11982	110.181	58.437	0	0	0	0	0	0	0	200	903	0	0	0	0	0	0	0	603	903	0
554	0	-23.6835	70.208	-682.941	165467	-61530.1	-11890.5	109.904	57.7146	0	0	0	0	0	0	0	200	903	0	0	0	0	0	0	0	603	903	0
554	1	-23.5309	68.8347	-683.857	165192	-60980.8	-11936.2	110.828	58.4406	0	0	0	0	0	0	0	200	903	0	0	0	0	0	0	0	603	903	0
554	2	-22.9206	67.7666	-684.467	165558	-60797.7	-11570	111.175	58.1209	0	0	0	0	0	0	0	200	903	0	0	0	0	0	0	0	603	903	0
554	3	-24.2939	66.6985	-683.857	165284	-61224.9	-11386.9	110.471	58.3067	0	0	0	0	0	0	0	200	903	0	0	0	0	0	0	0	603	903	0
554	4	-24.2939	65.6303	-685.688	164734	-61347	-11203.8	110.532	59.7532	0	0	0	0	0	0	0	200	903	0	0	0	0	0	0	0	603	903	0
554	5	-24.2939	63.9519	-682.025	164368	-61041.8	-11249.6	110.499	59.0001	0	0	0	0	0	0	0	200	903	0	0	0	0	0	0	0	603	903	0
554	6	-23.2258	63.4941	-680.805	164460	-60614.6	-11112.3	110.966	58.4336	0	0	0	0	0	0	0	200	903	0	0	0	0	0	0	0	603	903	0
554	7	-23.3783	61.8156	-679.889	164276	-60736.7	-10929.2	110.667	58.3776	0	0	0	0	0	0	0	200	903	0	0	0	0	0	0	0	603	903	0
554	8	-23.6835	59.6794	-680.805	163819	-60431.5	-10608.7	111.235	59.3749	0	0	0	0	0	0	0	200	903	0	0	0	0	0	0	0	603	903	0
554	9	-24.7516	59.9846	-678.974	162537	-60614.6	-10105.2	110.726	60.6138	0	0	0	0	0	0	0	200	903	0	0	0	0	0	0	0	603	903	0
555	0	-25.5146	58.7639	-674.091	162903	-60553.5	-10517.2	110.17	58.3364	0	0	0	0	0	0	0	200	903	0	0	0	0	0	0	0	603	903	0
555	1	-25.2094	57.0854	-675.006	162171	-59882.2	-10105.2	111.287	59.7493	0	0	0	0	0	0	0	200	903	0	0	0	0	0	0	0	603	903	0
555	2	-23.8361	56.4751	-673.175	161530	-59882.2	-10151	111.045	60.0478	0	0	0	0	0	0	0	200	903	0	0	0	0	0	0	0	603	903	0
555	3	-23.8361	55.7121	-667.682	162171	-59577	-10196.7	110.77	57.1138	0	0	0	0	0	0	0	200	903	0	0	0	0	0	0	0	603	903	0
555	4	-23.8361	54.644	-670.734	161255	-59882.2	-10242.5	110.721	59.5839	0	0	0	0	0	0	0	200	903	0	0	0	0	0	0	0	603	903	0
555	5	-24.9042	53.1181	-667.987	160614	-59149.7	-9922.07	111.451	59.5548	0	0	0	0	0	0	0	200	903	0	0	0	0	0	0	0	603	903	0
555	6	-24.7516	52.9655	-664.936	159974	-59210.8	-9876.3	110.953	59.415	0	0	0	0	0	0	0	200	903	0	0	0	0	0	0	0	603	903	0
555	7	-24.9042	49.6086	-660.968	159241	-58661.5	-9876.3	111.249	59.0791	0	0	0	0	0	0	0	200	903	0	0	0	0	0	0	0	603	903	0
555	8	-24.2939	48.9983	-657.611	158234	-58661.5	-9876.3	110.796	59.3807	0	0	0	0	0	0	0	200	903	0	0	0	0	0	0	0	603	903	0
555	9	-23.9887	49.456	-655.475	157410	-58722.5	-9693.19	110.412	59.8536	0	0	0	0	0	0	0	200	903	0	0	0	0	0	0	0	603	903	0
556	0	-24.2939	48.2353	-655.78	156220	-58295.2	-9510.09	111.106	61.7803	0	0	0	0	0	0	0	200	903	0	0	0	0	0	0	0	603	903	0
556	1	-24.4465	47.4724	-653.034	155670	-57990.1	-9601.64	111.199	61.6195	0	0	0	0	0	0	0	200	903	0	0	0	0	0	0	0	603	903	0
556	2	-25.6672	46.5569	-648.761	155030	-57257.6	-9510.09	111.743	61.0375	0	0	0	0	0	0	0	200	903	0	0	0	0	0	0	0	603	903	0
556	3	-26.2775	46.0991	-644.184	153840	-56891.4	-9281.2	111.684	61.1869	0	0	0	0	0	0	0	200	903	0	0	0	0	0	0	0	603	903	0
556	4	-25.0568	44.4206	-636.249	153199	-56830.4	-9052.32	110.679	59.216	0	0	0	0	0	0	0	200	903	0	0	0	0	0	0	0	603	903	0
556	5	-25.362	43.3525	-635.944	152192	-56891.4	-9189.65	110.54	60.684	0	0	0	0	0	0	0	200	903	0	0	0	0	0	0	0	603	903	0
556	6	-25.0568	42.5896	-635.944	151184	-56403.2	-8640.33	111.308	62.2676	0	0	0	0	0	0	0	200	903	0	0	0	0	0	0	0	603	903	0
556	7	-25.2094	41.5215	-628.009	149994	-55853.8	-8777.66	111.062	61.1592	0	0	0	0	0	0	0	200	903	0	0	0	0	0	0	0	603	903	0
556	8	-26.2775	41.3689	-627.399	149628	-55487.6	-8457.23	111.559	61.5106	0	0	0	0	0	0	0	200	903	0	0	0	0	0	0	0	603	903	0
556	9	-26.5827	40.4533	-622.211	147705	-55365.6	-8869.22	111.018	62.612	0	0	0	0	0	0	0	200	903	0	0	0	0	0	0	0	603	903	0
557	0	-27.4982	39.3852	-617.633	146607	-55304.5	-8914.99	110.457	62.6314	0	0	0	0	0	0	0	200	903	0	0	0	0	0	0	0	603	903	0
557	1	-26.5827	38.4697	-614.887	146332	-54694.2	-8869.22	111.05	62.0177	0	0	0	0	0	0	0	200	903	0	0	0	0	0	0	0	603	903	0
557	2	-25.9723	37.249	-613.056	145325	-54328	-8594.56	111.382	62.9496	0	0	0	0	0	0	0	200	903	0	0	0	0	0	0	0	603	903	0
557	3	-26.8879	36.1809	-609.088	144593	-53595.5	-8594.56	112.007	62.6081	0	0	0	0	0	0	0	200	903	0	0	0	0	0	0	0	603	903	0
557	4	-28.1086	36.1809	-604.511	143402	-53900.7	-8869.22	110.836	62.7793	0	0	0	0	0	0	0	200	903	0	0	0	0	0	0	0	603	903	0
557	5	-27.193	35.2654	-596.576	142578	-53534.5	-8548.78	110.264	61.0055	0	0	0	0	0	0	0	200	903	0	0	0	0	0	0	0	603	903	0
557	6	-28.4137	33.4343	-594.44	141205	-53107.3	-8365.68	110.66	62.4567	0	0	0	0	0	0	0	200	903	0	0	0	0	0	0	0	603	903	0
557	7	-27.956	32.8239	-590.473	140564	-52252.8	-8457.23	111.507	61.9462	0	0	0	0	0	0	0	200	903	0	0	0	0	0	0	0	603	903	0
557	8	-25.9723	32.9765	-590.168	139374	-52130.7	-8548.78	111.668	63.8398	0	0	0	0	0	0	0	200	903	0	0	0	0	0	0	0	603	903	0
557	9	-27.8034	32.3662	-583.759	138459	-52008.6	-8503.01	110.907	62.8154	0	0	0	0	0	0	0	200	903	0	0	0	0	0	0	0	603	903	0
558	0	-28.7189	31.9084	-579.486	137726	-51459.3	-8182.57	111.198	62.3306	0	0	0	0	0	0	0	200	903	0	0	0	0	0	0	0	603	903	0
558	1	-29.0241	30.9929	-577.045	136994	-51398.3	-8457.23	110.928	62.5943	0	0	0	0	0	0	0	200	903	0	0	0	0	0	0	0	603	903	0
558	2	-29.6344	30.5351	-570.026	135712	-50604.8	-8503.01	111.224	61.9196	0	0	0	0	0	0	0	200	903	0	0	0	0	0	0	0	603	903	0
558	3	-28.7189	29.6196	-565.753	134797	-50482.7	-8548.78	110.769	61.7398	0	0	0	0	0	0	0	200	903	0	0	0	0	0	0	0	603	903	0
558	4	-28.7189	29.3144	-563.617	133789	-50360.7	-8274.12	110.647	62.6237	0	0	0	0	0	0	0	200	903	0	0	0	0	0	0	0	603	903	0
558	5	-29.787	27.1782	-559.955	132325	-49445.1	-8365.68	111.698	63.6872	0	0	0	0	0	0	0	200	903	0	0	0	0	0	0	0	603	903	0
558	6	-29.0241	27.7885	-556.293	131684	-49628.3	-8594.56	110.788	63.2835	0	0	0	0	0	0	0	200	903	0	0	0	0	0	0	0	603	903	0
558	7	-30.55	27.1782	-551.105	129853	-49078.9	-8548.78	110.945	64.3776	0	0	0	0	0	0	0	200	903	0	0	0	0	0	0	0	603	903	0
558	8	-29.3293	26.7204	-548.053	129120	-48773.8	-8274.12	111.005	64.402	0	0	0	0	0	0	0	200	903	0	0	0	0	0	0	0	603	903	0
558	9	-32.2284	26.1101	-543.17	128205	-48651.7	-8411.45	110.43	63.9697	0	0	0	0	0	0	0	200	903	0	0	0	0	0	0	0	603	903	0
559	0	-31.1603	25.9575	-539.814	127472	-48041.3	-8823.44	111.004	63.8587	0	0	0	0	0	0	0	200	903	0	0	0	0	0	0	0	603	903	0
559	1	-30.2448	25.3471	-539.508	126831	-48346.5	-8594.56	110.388	64.913	0	0	0	0	0	0	0	200	903	0	0	0	0	0	0	0	603	903	0
559	2	-31.7707	24.7368	-534.015	125000	-47553.1	-8503.01	110.952	65.9236	0	0	0	0	0	0	0	200	903	0	0	0	0	0	0	0	603	903	0
559	3	-33.7543	24.279	-529.438	124451	-47308.9	-8594.56	110.643	64.9373	0	0	0	0	0	0	0	200	903	0	0	0	0	0	0	0	603	903	0
559	4	-33.6017	23.5161	-525.165	123444	-47553.1	-8823.44	109.451	64.9426	0	0	0	0	0	0	0	200	903	0	0	0	0	0	0	0	603	903	0
559	5	-33.6017	22.1428	-520.587	122712	-46942.7	-8823.44	109.827	64.2826	0	0	0	0	0	0	0	200	903	0	0	0	0	0	0	0	603	903	0
559	6	-33.6017	21.8376	-516.925	121796	-46759.6	-8823.44	109.543	64.3837	0	0	0	0	0	0	0	200	903	0	0	0	0	0	0	0	603	903	0
559	7	-33.2966	22.6006	-513.874	120880	-45966.1	-8594.56	110.55	64.7661	0	0	0	0	0	0	0	200	903	0	0	0	0	0	0	0	603	903	0
559	8	-34.0595	22.2954	-512.653	119416	-45783	-8869.22	110.694	67.0634	0	0	0	0	0	0	0	200	903	0	0	0	0	0	0	0	603	903	0
559	9	-33.7543	22.1428	-505.634	118317	-45538.9	-8823.44	109.937	66.0026	0	0	0	0	0	0	0	200	903	0	0	0	0	0	0	0	603	903	0
560	0	-35.1276	20.9221	-505.023	117585	-45233.7	-8548.78	110.432	67.1701	0	0	0	0	0	0	0	200	903	0	0	0	0	0	0	0	603	903	0
560	1	-34.6698	21.3799	-499.836	116303	-44989.6	-8319.9	109.991	67.3178	0	0	0	0	0	0	0	200	903	0	0	0	0	0	0	0	603	903	0
560	2	-35.5854	20.3117	-495.563	115937	-44501.3	-8548.78	110.201	66.0507	0	0	0	0	0	0	0	200	903	0	0	0	0	0	0	0	603	903	0
560	3	-34.2121	20.3117	-493.732	114838	-44318.2	-8365.68	110.238	67.4082	0	0	0	0	0	0	0	200	903	0	0	0	0	0	0	0	603	903	0
560	4	-32.8388	19.5488	-492.816	114014	-44257.1	-8914.99	110.195	68.6481	0	0	0	0	0	0	0	200	903	0	0	0	0	0	0	0	603	903	0
560	5	-34.6698	19.3962	-488.544	113282	-43829.9	-8594.56	110.285	68.124	0	0	0	0	0	0	0	200	903	0	0	0	0	0	0	0	603	903	0
560	6	-36.3483	18.9384	-486.713	112549	-43707.8	-8731.89	110.198	68.7566	0	0	0	0	0	0	0	200	903	0	0	0	0	0	0	0	603	903	0
560	7	-36.0431	18.4807	-478.778	111359	-43524.7	-8823.44	109.092	67.4102	0	0	0	0	0	0	0	200	903	0	0	0	0	0	0	0	603	903	0
560	8	-35.5854	18.1755	-479.084	111176	-43097.5	-8686.11	110.042	67.9405	0	0	0	0	0	0	0	200	903	0	0	0	0	0	0	0	603	903	0
560	9	-35.2802	18.0229	-476.337	110352	-43280.6	-8548.78	109.139	68.3322	0	0	0	0	0	0	0	200	903	0	0	0	0	0	0	0	603	903	0
561	0	-34.5173	16.6496	-473.59	109253	-42548.2	-8411.45	110.158	69.3085	0	0	0	0	0	0	0	200	903	0	0	0	0	0	0	0	603	903	0
561	1	-34.6698	16.9548	-473.285	108612	-42548.2	-8640.33	110.1	70.5138	0	0	0	0	0	0	0	200	903	0	0	0	0	0	0	0	603	903	0
561	2	-36.6535	16.6496	-470.844	108155	-41998.8	-8548.78	110.801	70.2961	0	0	0	0	0	0	0	200	903	0	0	0	0	0	0	0	603	903	0
561	3	-36.1957	15.8867	-468.708	107422	-41815.7	-8319.9	110.785	70.8118	0	0	0	0	0	0	0	200	903	0	0	0	0	0	0	0	603	903	0
561	4	-36.3483	15.1237	-463.52	106781	-42120.9	-8457.23	109.128	69.6292	0	0	0	0	0	0	0	200	903	0	0	0	0	0	0	0	603	903	0
561	5	-36.6535	15.1237	-462.909	106324	-42182	-8411.45	108.876	70.3144	0	0	0	0	0	0	0	200	903	0	0	0	0	0	0	0	603	903	0
561	6	-35.5854	14.5134	-459.552	105500	-41876.8	-8091.02	108.875	70.4296	0	0	0	0	0	0	0	200	903	0	0	0	0	0	0	0	603	903	0
561	7	-35.1276	14.5134	-459.552	105317	-41266.4	-8457.23	110.203	70.828	0	0	0	0	0	0	0	200	903	0	0	0	0	0	0	0	603	903	0
561	8	-36.3483	13.903	-457.721	104676	-41327.5	-8228.35	109.71	71.3114	0	0	0	0	0	0	0	200	903	0	0	0	0	0	0	0	603	903	0
561	9	-37.1113	13.7505	-455.89	103119	-41266.4	-8136.79	109.482	73.8068	0	0	0	0	0	0	0	200	903	0	0	0	0	0	0	0	603	903	0
562	0	-36.5009	13.4453	-453.144	102845	-40595	-8365.68	110.415	73.042	0	0	0	0	0	0	0	200	903	0	0	0	0	0	0	0	603	903	0
562	1	-37.4164	12.6823	-450.092	101746	-41144.4	-8182.57	108.587	73.944	0	0	0	0	0	0	0	200	903	0	0	0	0	0	0	0	603	903	0
562	2	-35.2802	12.2246	-448.871	102204	-40534	-7999.47	109.698	72.3095	0	0	0	0	0	0	0	200	903	0	0	0	0	0	0	0	603	903	0
562	3	-36.0431	11.4616	-446.125	101288	-40228.8	-8091.02	109.826	72.9598	0	0	0	0	0	0	0	200	903	0	0	0	0	0	0	0	603	903	0
562	4	-35.8905	11.3091	-446.43	101197	-40473	-8091.02	109.341	73.3201	0	0	0	0	0	0	0	200	903	0	0	0	0	0	0	0	603	903	0
562	5	-36.3483	10.8513	-445.209	100739	-40167.8	-8091.02	109.778	73.7268	0	0	0	0	0	0	0	200	903	0	0	0	0	0	0	0	603	903	0
562	6	-37.2638	11.0039	-443.988	99914.9	-39557.4	-7862.14	110.904	74.9606	0	0	0	0	0	0	0	200	903	0	0	0	0	0	0	0	603	903	0
562	7	-37.4164	10.2409	-440.021	99365.6	-39557.4	-7999.47	110.101	74.1799	0	0	0	0	0	0	0	200	903	0	0	0	0	0	0	0	603	903	0
562	8	-36.3483	10.0883	-437.885	99274	-39618.5	-7953.69	109.523	73.2874	0	0	0	0	0	0	0	200	903	0	0	0	0	0	0	0	603	903	0
562	9	-36.0431	9.478	-436.359	98450	-39801.6	-7953.69	108.787	74.3829	0	0	0	0	0	0	0	200	903	0	0	0	0	0	0	0	603	903	0
563	0	-36.5009	9.02023	-437.274	98358.5	-39496.4	-7770.59	109.676	75.0646	0	0	0	0	0	0	0	200	903	0	0	0	0	0	0	0	603	903	0
563	1	-34.6698	7.64694	-434.833	97900.8	-39008.1	-7587.48	110.292	74.8544	0	0	0	0	0	0	0	200	903	0	0	0	0	0	0	0	603	903	0
563	2	-36.8061	6.73142	-435.138	97351.4	-39496.4	-7633.26	109.233	76.2747	0	0	0	0	0	0	0	200	903	0	0	0	0	0	0	0	603	903	0
563	3	-37.2638	7.64694	-431.781	97259.9	-38764	-7633.26	110.223	74.7474	0	0	0	0	0	0	0	200	903	0	0	0	0	0	0	0	603	903	0
563	4	-36.1957	7.49435	-432.086	96252.8	-39191.2	-7312.82	109.298	77.2373	0	0	0	0	0	0	0	200	903	0	0	0	0	0	0	0	603	903	0
563	5	-35.4328	6.73142	-430.561	96985.2	-39069.2	-7267.04	109.26	74.7467	0	0	0	0	0	0	0	200	903	0	0	0	0	0	0	0	603	903	0
563	6	-36.1957	6.884	-430.866	96435.9	-38702.9	-7495.93	110.174	76.1811	0	0	0	0	0	0	0	200	903	0	0	0	0	0	0	0	603	903	0
563	7	-36.0431	6.73142	-426.593	95611.9	-38458.8	-7221.27	109.847	75.8711	0	0	0	0	0	0	0	200	903	0	0	0	0	0	0	0	603	903	0
563	8	-37.2638	5.51071	-429.035	95703.5	-38702.9	-7083.94	109.791	76.933	0	0	0	0	0	0	0	200	903	0	0	0	0	0	0	0	603	903	0
563	9	-36.9587	5.81589	-427.509	95428.8	-38886.1	-7038.16	109.04	76.7793	0	0	0	0	0	0	0	200	903	0	0	0	0	0	0	0	603	903	0
564	0	-37.8742	4.74777	-425.067	95062.6	-38886.1	-7267.04	108.518	76.3587	0	0	0	0	0	0	0	200	903	0	0	0	0	0	0	0	603	903	0
564	1	-35.8905	3.83225	-425.067	93964	-38458.8	-6992.39	109.523	78.9434	0	0	0	0	0	0	0	200	903	0	0	0	0	0	0	0	603	903	0
564	2	-36.5009	3.22189	-425.373	94238.6	-37543.3	-6763.5	111.74	78.4563	0	0	0	0	0	0	0	200	903	0	0	0	0	0	0	0	603	903	0
564	3	-35.8905	3.52707	-424.762	94238.6	-38092.6	-6809.28	110.32	78.1379	0	0	0	0	0	0	0	200	903	0	0	0	0	0	0	0	603	903	0
564	4	-37.2638	3.37448	-425.067	93872.4	-38397.8	-6809.28	109.667	79.1587	0	0	0	0	0	0	0	200	903	0	0	0	0	0	0	0	603	903	0
564	5	-36.8061	0.6279	-422.321	93323.1	-38275.7	-6900.83	109.368	79.0233	0	0	0	0	0	0	0	200	903	0	0	0	0	0	0	0	603	903	0
564	6	-36.8061	2.30637	-420.795	93689.3	-37970.5	-6443.07	109.765	77.3517	0	0	0	0	0	0	0	200	903	0	0	0	0	0	0	0	603	903	0
564	7	-35.738	1.8486	-421.1	92590.7	-37909.5	-6443.07	109.975	80.122	0	0	0	0	0	0	0	200	903	0	0	0	0	0	0	0	603	903	0
564	8	-35.8905	1.54343	-420.49	92041.4	-37848.5	-6534.62	109.99	81.1092	0	0	0	0	0	0	0	200	903	0	0	0	0	0	0	0	603	903	0
564	9	-35.4328	1.23825	-420.795	92041.4	-38397.8	-6443.07	108.749	81.2679	0	0	0	0	0	0	0	200	903	0	0	0	0	0	0	0	603	903	0
565	0	-34.0595	0.322724	-419.879	91766.7	-38275.7	-6076.86	108.841	81.4451	0	0	0	0	0	0	0	200	903	0	0	0	0	0	0	0	603	903	0
565	1	-36.5009	0.322724	-420.795	91217.4	-37787.4	-5985.31	110.2	83.2261	0	0	0	0	0	0	0	200	903	0	0	0	0	0	0	0	603	903	0
565	2	-36.1957	1.23825	-418.964	91125.8	-37604.3	-6259.96	110.245	82.4972	0	0	0	0	0	0	0	200	903	0	0	0	0	0	0	0	603	903	0
565	3	-36.1957	0.322724	-417.133	90942.7	-37726.4	-5985.31	109.558	81.9814	0	0	0	0	0	0	0	200	903	0	0	0	0	0	0	0	603	903	0
565	4	-34.2121	-0.13504	-418.964	90668.1	-38092.6	-5664.87	109.079	83.5898	0	0	0	0	0	0	0	200	903	0	0	0	0	0	0	0	603	903	0
565	5	-34.975	-0.440216	-419.574	90759.6	-37970.5	-5481.77	109.502	83.6864	0	0	0	0	0	0	0	200	903	0	0	0	0	0	0	0	603	903	0
565	6	-34.8224	-1.05057	-418.964	90301.9	-37665.4	-5710.65	110.099	84.4639	0	0	0	0	0	0	0	200	903	0	0	0	0	0	0	0	603	903	0
565	7	-35.2802	-1.20316	-419.574	90576.5	-37848.5	-5481.77	109.793	84.1228	0	0	0	0	0	0	0	200	903	0	0	0	0	0	0	0	603	903	0
565	8	-34.3647	-1.81351	-419.574	90118.7	-37787.4	-5252.88	109.939	85.2139	0	0	0	0	0	0	0	200	903	0	0	0	0	0	0	0	603	903	0
565	9	-35.2802	-2.72903	-419.879	89844.1	-37970.5	-4932.45	109.568	86.0241	0	0	0	0	0	0	0	200	903	0	0	0	0	0	0	0	603	903	0
566	0	-33.6017	-2.11868	-418.964	89569.5	-38214.7	-5024	108.788	86.212	0	0	0	0	0	0	0	200	903	0	0	0	0	0	0	0	603	903	0
566	1	-31.3129	-2.57645	-421.711	90393.4	-37665.4	-5115.56	110.684	85.6506	0	0	0	0	0	0	0	200	903	0	0	0	0	0	0	0	603	903	0
566	2	-34.0595	-2.72903	-422.626	90118.7	-37543.3	-4795.12	111.167	86.7648	0	0	0	0	0	0	0	200	903	0	0	0	0	0	0	0	603	903	0
566	3	-34.6698	-2.88162	-421.711	90118.7	-37726.4	-4932.45	110.54	86.3019	0	0	0	0	0	0	0	200	903	0	0	0	0	0	0	0	603	903	0
566	4	-34.975	-3.64456	-421.1	89935.7	-37848.5	-4795.12	110.12	86.4269	0	0	0	0	0	0	0	200	903	0	0	0	0	0	0	0	603	903	0
566	5	-34.3647	-4.10232	-422.931	90301.9	-38336.7	-4703.57	109.355	86.4857	0	0	0	0	0	0	0	200	903	0	0	0	0	0	0	0	603	903	0
566	6	-34.0595	-4.56009	-423.542	90027.2	-37970.5	-4337.36	110.35	87.4419	0	0	0	0	0	0	0	200	903	0	0	0	0	0	0	0	603	903	0
566	7	-33.4491	-4.86526	-423.236	89203.2	-38214.7	-4062.7	109.708	89.2354	0	0	0	0	0	0	0	200	903	0	0	0	0	0	0	0	603	903	0
566	8	-32.8388	-5.01785	-424.762	89294.8	-38031.6	-3971.15	110.464	89.7771	0	0	0	0	0	0	0	200	903	0	0	0	0	0	0	0	603	903	0
566	9	-33.9069	-5.47562	-424.457	89752.5	-38336.7	-4200.03	109.681	88.5475	0	0	0	0	0	0	0	200	903	0	0	0	0	0	0	0	603	903	0
567	0	-33.9069	-5.6282	-425.373	89752.5	-38336.7	-4154.25	109.875	89.0026	0	0	0	0	0	0	0	200	903	0	0	0	0	0	0	0	603	903	0
567	1	-33.7543	-5.78079	-424.457	89569.5	-38397.8	-3833.82	109.537	88.9788	0	0	0	0	0	0	0	200	903	0	0	0	0	0	0	0	603	903	0
567	2	-32.8388	-7.30667	-425.983	89477.9	-37970.5	-3696.49	110.864	89.9496	0	0	0	0	0	0	0	200	903	0	0	0	0	0	0	0	603	903	0
567	3	-32.381	-6.54373	-425.373	89844.1	-38153.6	-3696.49	110.305	88.7873	0	0	0	0	0	0	0	200	903	0	0	0	0	0	0	0	603	903	0
567	4	-31.7707	-6.84891	-428.73	89661	-38702.9	-3742.26	109.726	90.8682	0	0	0	0	0	0	0	200	903	0	0	0	0	0	0	0	603	903	0
567	5	-33.4491	-7.45926	-426.593	89111.7	-38825	-3421.83	108.988	91.1086	0	0	0	0	0	0	0	200	903	0	0	0	0	0	0	0	603	903	0
567	6	-32.2284	-7.15408	-430.255	88837	-38764	-3421.83	109.905	93.5249	0	0	0	0	0	0	0	200	903	0	0	0	0	0	0	0	603	903	0
567	7	-32.5336	-7.61185	-430.255	89020.1	-38397.8	-3330.28	110.756	93.0994	0	0	0	0	0	0	0	200	903	0	0	0	0	0	0	0	603	903	0
567	8	-30.7026	-8.06961	-432.392	88928.6	-38519.8	-3055.62	110.914	94.3333	0	0	0	0	0	0	0	200	903	0	0	0	0	0	0	0	603	903	0
567	9	-30.3974	-7.91702	-433.918	89477.9	-38825	-3009.84	110.524	93.7905	0	0	0	0	0	0	0	200	903	0	0	0	0	0	0	0	603	903	0
568	0	-30.8551	-8.06961	-436.359	89386.3	-39252.3	-2826.74	110.046	95.1542	0	0	0	0	0	0	0	200	903	0	0	0	0	0	0	0	603	903	0
568	1	-29.9396	-8.06961	-438.19	89386.3	-39313.3	-2689.41	110.283	96.0101	0	0	0	0	0	0	0	200	903	0	0	0	0	0	0	0	603	903	0
568	2	-31.0077	-8.37479	-438.495	89569.5	-38764	-2780.96	111.598	95.7345	0	0	0	0	0	0	0	200	903	0	0	0	0	0	0	0	603	903	0
568	3	-31.0077	-7.91702	-439.716	89569.5	-39252.3	-2643.63	110.733	96.3015	0	0	0	0	0	0	0	200	903	0	0	0	0	0	0	0	603	903	0
568	4	-31.1603	-8.83255	-440.021	89844.1	-39496.4	-2277.42	110.24	95.8186	0	0	0	0	0	0	0	200	903	0	0	0	0	0	0	0	603	903	0
568	5	-30.0922	-9.29031	-442.157	89935.7	-39740.5	-2414.75	110.121	96.598	0	0	0	0	0	0	0	200	903	0	0	0	0	0	0	0	603	903	0
568	6	-30.2448	-11.274	-446.125	90210.3	-39923.7	-2368.97	110.51	97.7912	0	0	0	0	0	0	0	200	903	0	0	0	0	0	0	0	603	903	0
568	7	-29.3293	-10.511	-442.462	90668.1	-40045.7	-2140.09	109.494	95.083	0	0	0	0	0	0	0	200	903	0	0	0	0	0	0	0	603	903	0
568	8	-30.3974	-9.74808	-451.007	90942.7	-40167.8	-2002.76	110.938	98.3564	0	0	0	0	0	0	0	200	903	0	0	0	0	0	0	0	603	903	0
568	9	-30.55	-9.74808	-451.007	90942.7	-40289.9	-2002.76	110.667	98.3564	0	0	0	0	0	0	0	200	903	0	0	0	0	0	0	0	603	903	0
569	0	-30.3974	-10.0533	-449.787	91217.4	-40839.2	-1956.99	109.203	97.1986	0	0	0	0	0	0	0	200	903	0	0	0	0	0	0	0	603	903	0
569	1	-29.4819	-10.3584	-454.975	92041.4	-40717.1	-1682.33	110.507	97.7	0	0	0	0	0	0	0	200	903	0	0	0	0	0	0	0	603	903	0
569	2	-29.6344	-10.2058	-458.332	92773.8	-41205.4	-1178.79	110.097	97.5837	0	0	0	0	0	0	0	200	903	0	0	0	0	0	0	0	603	903	0
569	3	-29.3293	-10.8162	-459.857	92773.8	-40778.1	-1316.12	111.324	98.2553	0	0	0	0	0	0	0	200	903	0	0	0	0	0	0	0	603	903	0
569	4	-29.787	-11.1214	-463.825	92590.7	-41022.3	-1545	111.557	100.376	0	0	0	0	0	0	0	200	903	0	0	0	0	0	0	0	603	903	0
569	5	-30.3974	-11.7317	-463.52	93231.6	-41693.7	-1087.24	110.05	98.8617	0	0	0	0	0	0	0	200	903	0	0	0	0	0	0	0	603	903	0
569	6	-29.787	-11.8843	-465.045	93597.8	-41815.7	-1453.45	110.082	98.7342	0	0	0	0	0	0	0	200	903	0	0	0	0	0	0	0	603	903	0
569	7	-28.7189	-12.1895	-469.318	93872.4	-41815.7	-1041.46	110.901	99.9812	0	0	0	0	0	0	0	200	903	0	0	0	0	0	0	0	603	903	0
569	8	-28.4137	-13.2576	-472.98	94604.9	-41937.8	-1087.24	111.333	99.9813	0	0	0	0	0	0	0	200	903	0	0	0	0	0	0	0	603	903	0
569	9	-28.8715	-12.6472	-472.37	93689.3	-41815.7	-1041.46	111.477	101.661	0	0	0	0	0	0	0	200	903	0	0	0	0	0	0	0	603	903	0
570	0	-29.787	-13.4102	-478.778	93414.6	-42365.1	-1133.01	111.514	104.89	0	0	0	0	0	0	0	200	903	0	0	0	0	0	0	0	603	903	0
570	1	-29.4819	-14.0205	-480.304	94787.9	-42975.4	-858.353	110.525	102.65	0	0	0	0	0	0	0	200	903	0	0	0	0	0	0	0	603	903	0
570	2	-29.787	-14.1731	-481.525	95428.8	-43219.6	-858.353	110.244	101.82	0	0	0	0	0	0	0	200	903	0	0	0	0	0	0	0	603	903	0
570	3	-29.0241	-14.4783	-486.103	96161.2	-43341.6	-721.024	110.839	102.179	0	0	0	0	0	0	0	200	903	0	0	0	0	0	0	0	603	903	0
570	4	-28.5663	-14.9361	-490.07	96252.8	-43341.6	-766.8	111.56	103.594	0	0	0	0	0	0	0	200	903	0	0	0	0	0	0	0	603	903	0
570	5	-28.2612	-15.2412	-494.037	96619	-44257.1	-629.471	110.417	104.43	0	0	0	0	0	0	0	200	903	0	0	0	0	0	0	0	603	903	0
570	6	-29.9396	-14.7835	-497.394	97076.8	-44623.4	-583.695	110.286	104.829	0	0	0	0	0	0	0	200	903	0	0	0	0	0	0	0	603	903	0
570	7	-28.7189	-15.699	-496.784	97351.4	-44562.3	-537.919	110.298	104.037	0	0	0	0	0	0	0	200	903	0	0	0	0	0	0	0	603	903	0
570	8	-30.2448	-16.1568	-501.056	98175.4	-44440.3	-492.142	111.307	104.063	0	0	0	0	0	0	0	200	903	0	0	0	0	0	0	0	603	903	0
570	9	-29.0241	-15.5464	-504.718	98450	-45416.8	-354.813	110.016	104.941	0	0	0	0	0	0	0	200	903	0	0	0	0	0	0	0	603	903	0
571	0	-28.8715	-16.0042	-509.601	100006	-45599.9	-354.813	110.518	103.755	0	0	0	0	0	0	0	200	903	0	0	0	0	0	0	0	603	903	0
571	1	-29.787	-15.8516	-512.958	98633.2	-45783	-537.919	110.747	107.717	0	0	0	0	0	0	0	200	903	0	0	0	0	0	0	0	603	903	0
571	2	-29.787	-16.3094	-516.01	99182.5	-46027.2	-354.813	110.802	107.79	0	0	0	0	0	0	0	200	903	0	0	0	0	0	0	0	603	903	0
571	3	-29.1767	-16.0042	-516.315	99274	-45966.1	-263.26	110.973	107.726	0	0	0	0	0	0	0	200	903	0	0	0	0	0	0	0	603	903	0
571	4	-29.9396	-15.8516	-520.282	100281	-46210.3	-171.707	111.182	107.256	0	0	0	0	0	0	0	200	903	0	0	0	0	0	0	0	603	903	0
571	5	-29.3293	-16.6145	-523.029	100739	-46881.7	-354.813	110.365	107.393	0	0	0	0	0	0	0	200	903	0	0	0	0	0	0	0	603	903	0
571	6	-27.4982	-15.8516	-527.301	101105	-46820.6	-217.484	111.207	108.259	0	0	0	0	0	0	0	200	903	0	0	0	0	0	0	0	603	903	0
571	7	-29.3293	-15.8516	-530.963	101654	-47492	-34.3784	110.555	108.547	0	0	0	0	0	0	0	200	903	0	0	0	0	0	0	0	603	903	0
571	8	-30.3974	-16.0042	-534.626	101380	-47370	148.727	111.396	110.372	0	0	0	0	0	0	0	200	903	0	0	0	0	0	0	0	603	903	0
571	9	-29.6344	-16.4619	-536.457	102295	-47553.1	-80.1548	111.357	109.313	0	0	0	0	0	0	0	200	903	0	0	0	0	0	0	0	603	903	0
572	0	-30.8551	-16.3094	-539.814	102845	-48590.7	-34.3784	109.986	109.481	0	0	0	0	0	0	0	200	903	0	0	0	0	0	0	0	603	903	0
572	1	-29.9396	-17.0723	-544.086	103119	-48468.6	-80.1548	110.917	110.473	0	0	0	0	0	0	0	200	903	0	0	0	0	0	0	0	603	903	0
572	2	-30.55	-16.1568	-548.969	103394	-49078.9	-217.484	110.598	111.658	0	0	0	0	0	0	0	200	903	0	0	0	0	0	0	0	603	903	0
572	3	-29.0241	-16.3094	-551.41	104676	-49017.9	-80.1548	111.104	110.167	0	0	0	0	0	0	0	200	903	0	0	0	0	0	0	0	603	903	0
572	4	-31.9233	-16.7671	-555.378	104676	-49445.1	-125.931	110.97	111.523	0	0	0	0	0	0	0	200	903	0	0	0	0	0	0	0	603	903	0
572	5	-31.9233	-16.0042	-558.124	104950	-50116.5	11.398	110.205	111.959	0	0	0	0	0	0	0	200	903	0	0	0	0	0	0	0	603	903	0
572	6	-31.1603	-16.9197	-560.26	105591	-49750.3	-34.3784	111.201	111.532	0	0	0	0	0	0	0	200	903	0	0	0	0	0	0	0	603	903	0
572	7	-31.1603	-17.8352	-564.228	105957	-50726.9	-80.1548	110.095	112.208	0	0	0	0	0	0	0	200	903	0	0	0	0	0	0	0	603	903	0
572	8	-32.0759	-18.1404	-570.026	106049	-50910	-34.3784	110.688	113.958	0	0	0	0	0	0	0	200	903	0	0	0	0	0	0	0	603	903	0
572	9	-32.8388	-18.1404	-571.552	106964	-51215.2	-80.1548	110.393	112.853	0	0	0	0	0	0	0	200	903	0	0	0	0	0	0	0	603	903	0
573	0	-33.144	-18.293	-575.519	107239	-51825.5	57.1744	109.95	113.665	0	0	0	0	0	0	0	200	903	0	0	0	0	0	0	0	603	903	0
573	1	-33.2966	-17.5301	-577.961	107422	-52191.7	11.398	109.697	114.136	0	0	0	0	0	0	0	200	903	0	0	0	0	0	0	0	603	903	0
573	2	-33.2966	-19.8189	-579.792	107788	-52680	-125.931	109.14	114.091	0	0	0	0	0	0	0	200	903	0	0	0	0	0	0	0	603	903	0
573	3	-32.381	-18.293	-584.064	108246	-52557.9	-80.1548	110.013	114.667	0	0	0	0	0	0	0	200	903	0	0	0	0	0	0	0	603	903	0
573	4	-32.6862	-18.7508	-590.168	108155	-52802.1	57.1744	110.53	116.739	0	0	0	0	0	0	0	200	903	0	0	0	0	0	0	0	603	903	0
573	5	-32.9914	-18.7508	-591.693	108521	-53534.5	102.951	109.523	116.593	0	0	0	0	0	0	0	200	903	0	0	0	0	0	0	0	603	903	0
573	6	-33.7543	-19.0559	-595.661	109436	-53412.4	-80.1548	110.331	116.277	0	0	0	0	0	0	0	200	903	0	0	0	0	0	0	0	603	903	0
573	7	-33.4491	-19.5137	-598.102	109345	-54083.8	-80.1548	109.574	117.18	0	0	0	0	0	0	0	200	903	0	0	0	0	0	0	0	603	903	0
573	8	-34.3647	-19.8189	-602.069	109711	-53961.8	-34.3784	110.373	117.777	0	0	0	0	0	0	0	200	903	0	0	0	0	0	0	0	603	903	0
573	9	-33.6017	-19.9715	-604.511	110260	-54328	57.1744	110.129	117.604	0	0	0	0	0	0	0	200	903	0	0	0	0	0	0	0	603	903	0
574	0	-31.0077	-19.9715	-608.173	110352	-54938.3	-34.3784	109.667	118.552	0	0	0	0	0	0	0	200	903	0	0	0	0	0	0	0	603	903	0
574	1	-33.9069	-21.0396	-612.445	110993	-55121.4	-171.707	109.998	118.771	0	0	0	0	0	0	0	200	903	0	0	0	0	0	0	0	603	903	0
574	2	-34.8224	-21.0396	-615.192	110627	-55914.9	102.951	109.11	120.176	0	0	0	0	0	0	0	200	903	0	0	0	0	0	0	0	603	903	0
574	3	-32.5336	-21.3448	-617.633	111634	-55487.6	286.056	110.161	119.256	0	0	0	0	0	0	0	200	903	0	0	0	0	0	0	0	603	903	0
574	4	-35.4328	-21.9551	-620.685	111451	-55975.9	240.28	109.816	120.439	0	0	0	0	0	0	0	200	903	0	0	0	0	0	0	0	603	903	0
574	5	-34.6698	-22.1077	-624.347	112000	-56647.3	194.503	109.27	120.613	0	0	0	0	0	0	0	200	903	0	0	0	0	0	0	0	603	903	0
574	6	-33.2966	-24.2439	-628.62	112183	-56647.3	194.503	109.886	121.541	0	0	0	0	0	0	0	200	903	0	0	0	0	0	0	0	603	903	0
574	7	-34.8224	-23.481	-632.282	112275	-56952.5	469.162	109.925	122.43	0	0	0	0	0	0	0	200	903	0	0	0	0	0	0	0	603	903	0
574	8	-36.6535	-23.6336	-634.723	113556	-56891.4	194.503	110.368	121.093	0	0	0	0	0	0	0	200	903	0	0	0	0	0	0	0	603	903	0
574	9	-36.0431	-23.7862	-636.859	113648	-57440.8	514.938	109.806	121.55	0	0	0	0	0	0	0	200	903	0	0	0	0	0	0	0	603	903	0
575	0	-36.6535	-25.1595	-639.301	114014	-58112.1	194.503	109.1	121.658	0	0	0	0	0	0	0	200	903	0	0	0	0	0	0	0	603	903	0
575	1	-36.5009	-25.312	-642.047	114106	-58295.2	606.491	109.204	122.279	0	0	0	0	0	0	0	200	903	0	0	0	0	0	0	0	603	903	0
575	2	-36.6535	-25.9224	-642.963	114472	-58722.5	286.056	108.669	121.962	0	0	0	0	0	0	0	200	903	0	0	0	0	0	0	0	603	903	0
575	3	-36.5009	-27.1431	-649.066	113922	-58783.5	377.609	109.434	124.483	0	0	0	0	0	0	0	200	903	0	0	0	0	0	0	0	603	903	0
575	4	-38.0268	-27.6009	-652.729	114930	-59149.7	331.833	109.381	123.924	0	0	0	0	0	0	0	200	903	0	0	0	0	0	0	0	603	903	0
575	5	-38.4845	-28.3638	-653.949	115296	-59882.2	240.28	108.43	123.693	0	0	0	0	0	0	0	200	903	0	0	0	0	0	0	0	603	903	0
575	6	-39.0949	-28.2112	-656.696	115387	-59821.1	286.056	108.906	124.291	0	0	0	0	0	0	0	200	903	0	0	0	0	0	0	0	603	903	0
575	7	-37.8742	-29.7371	-660.358	115387	-60309.4	331.833	108.672	125.266	0	0	0	0	0	0	0	200	903	0	0	0	0	0	0	0	603	903	0
575	8	-38.1794	-30.5	-661.273	115662	-60309.4	286.056	108.798	125.092	0	0	0	0	0	0	0	200	903	0	0	0	0	0	0	0	603	903	0
575	9	-38.1794	-30.5	-667.072	116486	-60553.5	514.938	109.225	125.377	0	0	0	0	0	0	0	200	903	0	0	0	0	0	0	0	603	903	0
576	0	-39.2475	-30.8052	-668.598	115204	-61163.9	469.162	108.519	127.693	0	0	0	0	0	0	0	200	903	0	0	0	0	0	0	0	603	903	0
576	1	-39.0949	-31.7207	-670.429	115845	-61347	514.938	108.496	127.207	0	0	0	0	0	0	0	200	903	0	0	0	0	0	0	0	603	903	0
576	2	-39.5527	-32.0259	-671.039	115937	-61835.3	423.385	107.851	127.228	0	0	0	0	0	0	0	200	903	0	0	0	0	0	0	0	603	903	0
576	3	-38.9423	-33.2466	-674.396	115845	-61408	835.373	108.944	128.224	0	0	0	0	0	0	0	200	903	0	0	0	0	0	0	0	603	903	0
576	4	-38.7897	-32.9414	-676.532	116578	-61957.4	789.596	108.419	127.684	0	0	0	0	0	0	0	200	903	0	0	0	0	0	0	0	603	903	0
576	5	-39.2475	-32.4837	-681.11	116211	-62445.6	743.82	108.318	129.38	0	0	0	0	0	0	0	200	903	0	0	0	0	0	0	0	603	903	0
576	6	-40.0104	-34.0096	-683.246	116303	-61896.3	1064.25	109.408	129.779	0	0	0	0	0	0	0	200	903	0	0	0	0	0	0	0	603	903	0
576	7	-40.0104	-34.3147	-685.077	116394	-62567.7	1201.58	108.671	130.1	0	0	0	0	0	0	0	200	903	0	0	0	0	0	0	0	603	903	0
576	8	-40.163	-38.282	-686.298	116669	-62628.7	1293.14	108.744	130.002	0	0	0	0	0	0	0	200	903	0	0	0	0	0	0	0	603	903	0
576	9	-38.6371	-36.1458	-688.129	116303	-62995	1110.03	108.455	130.987	0	0	0	0	0	0	0	200	903	0	0	0	0	0	0	0	603	903	0
577	0	-38.6371	-36.451	-690.876	117401	-63544.3	1155.81	108.024	130.069	0	0	0	0	0	0	0	200	903	0	0	0	0	0	0	0	603	903	0
577	1	-38.9423	-38.4346	-695.148	116944	-63178.1	1293.14	109.116	131.771	0	0	0	0	0	0	0	200	903	0	0	0	0	0	0	0	603	903	0
577	2	-39.8578	-39.045	-698.2	117768	-63910.5	1384.69	108.464	131.327	0	0	0	0	0	0	0	200	903	0	0	0	0	0	0	0	603	903	0
577	3	-38.0268	-40.876	-698.81	117585	-63849.4	1476.24	108.631	131.736	0	0	0	0	0	0	0	200	903	0	0	0	0	0	0	0	603	903	0
577	4	-39.4001	-40.876	-701.557	116944	-64459.8	1750.9	108.119	133.308	0	0	0	0	0	0	0	200	903	0	0	0	0	0	0	0	603	903	0
577	5	-38.6371	-41.4864	-703.693	117401	-64581.9	1659.35	108.224	133.164	0	0	0	0	0	0	0	200	903	0	0	0	0	0	0	0	603	903	0
577	6	-39.0949	-42.8596	-705.219	118134	-65131.2	2071.33	107.644	132.486	0	0	0	0	0	0	0	200	903	0	0	0	0	0	0	0	603	903	0
577	7	-39.0949	-43.3174	-709.491	118409	-65253.2	2025.56	108.028	133.108	0	0	0	0	0	0	0	200	903	0	0	0	0	0	0	0	603	903	0
577	8	-39.7052	-44.0804	-711.933	118317	-65253.2	1934.01	108.344	133.809	0	0	0	0	0	0	0	200	903	0	0	0	0	0	0	0	603	903	0
577	9	-40.4682	-44.9959	-709.186	118683	-65436.3	2162.89	107.73	132.649	0	0	0	0	0	0	0	200	903	0	0	0	0	0	0	0	603	903	0
578	0	-39.8578	-45.1485	-714.679	118775	-65741.5	2345.99	108.013	133.807	0	0	0	0	0	0	0	200	903	0	0	0	0	0	0	0	603	903	0
578	1	-38.1794	-47.7425	-716.815	118866	-66412.9	2757.98	107.35	134.174	0	0	0	0	0	0	0	200	903	0	0	0	0	0	0	0	603	903	0
578	2	-37.2638	-46.8269	-721.393	118866	-66473.9	2529.1	107.853	135.227	0	0	0	0	0	0	0	200	903	0	0	0	0	0	0	0	603	903	0
578	3	-38.4845	-47.8951	-722.919	118866	-66229.8	2483.32	108.386	135.575	0	0	0	0	0	0	0	200	903	0	0	0	0	0	0	0	603	903	0
578	4	-39.7052	-48.8106	-725.666	118409	-66535	2574.88	108.312	136.828	0	0	0	0	0	0	0	200	903	0	0	0	0	0	0	0	603	903	0
578	5	-38.332	-49.4209	-724.75	118958	-66535	2803.76	108.196	135.864	0	0	0	0	0	0	0	200	903	0	0	0	0	0	0	0	603	903	0
578	6	-40.3156	-51.252	-727.497	118500	-67206.4	2620.65	107.62	137.113	0	0	0	0	0	0	0	200	903	0	0	0	0	0	0	0	603	903	0
578	7	-38.4845	-51.5572	-729.633	118592	-67389.5	2849.53	107.639	137.464	0	0	0	0	0	0	0	200	903	0	0	0	0	0	0	0	603	903	0
578	8	-38.7897	-51.5572	-732.074	119049	-67206.4	2986.86	108.197	137.381	0	0	0	0	0	0	0	200	903	0	0	0	0	0	0	0	603	903	0
578	9	-38.332	-52.4727	-734.516	118683	-67328.4	2803.76	108.336	138.42	0	0	0	0	0	0	0	200	903	0	0	0	0	0	0	0	603	903	0
579	0	-39.2475	-53.2356	-736.347	118775	-67328.4	2986.86	108.564	138.697	0	0	0	0	0	0	0	200	903	0	0	0	0	0	0	0	603	903	0
579	1	-39.2475	-53.6934	-736.347	119141	-67999.8	3261.52	107.652	138.2	0	0	0	0	0	0	0	200	903	0	0	0	0	0	0	0	603	903	0
579	2	-38.4845	-54.7615	-736.652	119141	-68182.9	3490.4	107.442	138.267	0	0	0	0	0	0	0	200	903	0	0	0	0	0	0	0	603	903	0
579	3	-37.569	-55.3719	-739.704	118683	-68182.9	3581.96	107.824	139.553	0	0	0	0	0	0	0	200	903	0	0	0	0	0	0	0	603	903	0
579	4	-37.1113	-56.44	-743.366	119324	-68244	3536.18	108.196	139.481	0	0	0	0	0	0	0	200	903	0	0	0	0	0	0	0	603	903	0
579	5	-37.1113	-57.6607	-740.619	119141	-68427.1	3856.61	107.608	139.133	0	0	0	0	0	0	0	200	903	0	0	0	0	0	0	0	603	903	0
579	6	-37.7216	-58.1184	-747.943	119690	-68976.4	3627.73	107.779	139.974	0	0	0	0	0	0	0	200	903	0	0	0	0	0	0	0	603	903	0
579	7	-38.0268	-61.0176	-747.943	119782	-69037.4	3856.61	107.697	139.852	0	0	0	0	0	0	0	200	903	0	0	0	0	0	0	0	603	903	0
579	8	-37.1113	-61.3228	-750.08	119416	-68793.3	4451.71	108.285	140.796	0	0	0	0	0	0	0	200	903	0	0	0	0	0	0	0	603	903	0
579	9	-36.9587	-61.3228	-749.164	119873	-69220.5	4543.26	107.603	139.99	0	0	0	0	0	0	0	200	903	0	0	0	0	0	0	0	603	903	0
580	0	-36.5009	-61.9331	-754.047	120056	-69342.6	4680.59	108.039	140.784	0	0	0	0	0	0	0	200	903	0	0	0	0	0	0	0	603	903	0
580	1	-38.6371	-63.3064	-752.826	120331	-69769.8	4543.26	107.323	140.161	0	0	0	0	0	0	0	200	903	0	0	0	0	0	0	0	603	903	0
580	2	-37.4164	-64.6797	-756.794	120148	-69708.8	4497.48	107.889	141.241	0	0	0	0	0	0	0	200	903	0	0	0	0	0	0	0	603	903	0
580	3	-37.7216	-65.2901	-757.099	120606	-69830.9	4817.92	107.765	140.7	0	0	0	0	0	0	0	200	903	0	0	0	0	0	0	0	603	903	0
580	4	-35.738	-66.2056	-759.54	120423	-70319.2	4863.69	107.419	141.453	0	0	0	0	0	0	0	200	903	0	0	0	0	0	0	0	603	903	0
580	5	-36.5009	-67.4263	-760.15	120423	-69953	4863.69	107.975	141.58	0	0	0	0	0	0	0	200	903	0	0	0	0	0	0	0	603	903	0
580	6	-36.5009	-68.0367	-761.982	120423	-70441.2	4863.69	107.555	141.961	0	0	0	0	0	0	0	200	903	0	0	0	0	0	0	0	603	903	0
580	7	-36.6535	-68.7996	-763.813	120697	-70624.3	5138.35	107.537	141.98	0	0	0	0	0	0	0	200	903	0	0	0	0	0	0	0	603	903	0
580	8	-37.7216	-70.3255	-765.033	120331	-70380.2	5275.68	108.004	142.711	0	0	0	0	0	0	0	200	903	0	0	0	0	0	0	0	603	903	0
580	9	-37.569	-71.3936	-764.423	120148	-70624.3	5413.01	107.611	142.825	0	0	0	0	0	0	0	200	903	0	0	0	0	0	0	0	603	903	0
581	0	-37.4164	-72.3091	-764.728	120697	-70624.3	5184.13	107.648	142.17	0	0	0	0	0	0	0	200	903	0	0	0	0	0	0	0	603	903	0
581	1	-36.9587	-73.835	-766.559	120423	-71295.7	5229.91	106.993	142.905	0	0	0	0	0	0	0	200	903	0	0	0	0	0	0	0	603	903	0
581	2	-36.6535	-74.2928	-769.916	119873	-70990.5	5367.23	107.794	144.303	0	0	0	0	0	0	0	200	903	0	0	0	0	0	0	0	603	903	0
581	3	-38.1794	-76.1238	-770.221	119690	-70929.5	5275.68	107.91	144.603	0	0	0	0	0	0	0	200	903	0	0	0	0	0	0	0	603	903	0
581	4	-38.4845	-76.7342	-772.052	120056	-70990.5	5458.79	108.05	144.497	0	0	0	0	0	0	0	200	903	0	0	0	0	0	0	0	603	903	0
581	5	-38.7897	-77.4971	-770.526	119965	-71234.7	5321.46	107.551	144.308	0	0	0	0	0	0	0	200	903	0	0	0	0	0	0	0	603	903	0
581	6	-37.569	-78.5652	-771.442	120148	-71234.7	5367.23	107.66	144.255	0	0	0	0	0	0	0	200	903	0	0	0	0	0	0	0	603	903	0
581	7	-36.3483	-80.2437	-775.104	119782	-71539.9	5550.34	107.703	145.464	0	0	0	0	0	0	0	200	903	0	0	0	0	0	0	0	603	903	0
581	8	-37.569	-80.5489	-773.578	119873	-71478.8	5413.01	107.6	145.04	0	0	0	0	0	0	0	200	903	0	0	0	0	0	0	0	603	903	0
581	9	-40.163	-82.0747	-775.409	119599	-71356.8	5504.56	107.975	145.76	0	0	0	0	0	0	0	200	903	0	0	0	0	0	0	0	603	903	0
582	0	-38.0268	-83.7532	-774.799	119324	-71356.8	5367.23	107.903	145.993	0	0	0	0	0	0	0	200	903	0	0	0	0	0	0	0	603	903	0
582	1	-41.0785	-84.6687	-773.578	119416	-71967.1	5504.56	106.969	145.632	0	0	0	0	0	0	0	200	903	0	0	0	0	0	0	0	603	903	0
582	2	-40.0104	-84.3636	-774.189	119233	-71661.9	5321.46	107.436	145.99	0	0	0	0	0	0	0	200	903	0	0	0	0	0	0	0	603	903	0
582	3	-40.7734	-85.4317	-777.24	119873	-71967.1	5458.79	107.407	145.77	0	0	0	0	0	0	0	200	903	0	0	0	0	0	0	0	603	903	0
582	4	-40.7734	-86.4998	-776.63	118225	-71661.9	5275.68	107.727	147.771	0	0	0	0	0	0	0	200	903	0	0	0	0	0	0	0	603	903	0
582	5	-41.8415	-87.2627	-777.24	118225	-71723	5321.46	107.721	147.891	0	0	0	0	0	0	0	200	903	0	0	0	0	0	0	0	603	903	0
582	6	-39.5527	-88.636	-776.63	117951	-72333.3	5092.58	106.863	148.125	0	0	0	0	0	0	0	200	903	0	0	0	0	0	0	0	603	903	0
582	7	-42.757	-90.1619	-774.494	117859	-72028.2	5229.91	107	147.824	0	0	0	0	0	0	0	200	903	0	0	0	0	0	0	0	603	903	0
582	8	-41.8415	-91.5352	-774.189	117676	-72150.2	5321.46	106.805	148.001	0	0	0	0	0	0	0	200	903	0	0	0	0	0	0	0	603	903	0
582	9	-40.163	-91.5352	-776.02	117859	-71784	5641.89	107.497	148.123	0	0	0	0	0	0	0	200	903	0	0	0	0	0	0	0	603	903	0
583	0	-41.8415	-91.993	-777.545	117585	-71784	5138.35	107.679	148.775	0	0	0	0	0	0	0	200	903	0	0	0	0	0	0	0	603	903	0
583	1	-42.6044	-93.2137	-775.409	117310	-71967.1	5138.35	107.188	148.712	0	0	0	0	0	0	0	200	903	0	0	0	0	0	0	0	603	903	0
583	2	-40.4682	-94.7395	-772.663	116761	-72028.2	5550.34	106.779	148.885	0	0	0	0	0	0	0	200	903	0	0	0	0	0	0	0	603	903	0
583	3	-44.1303	-96.5706	-773.273	116578	-71967.1	5458.79	106.932	149.241	0	0	0	0	0	0	0	200	903	0	0	0	0	0	0	0	603	903	0
583	4	-43.0622	-97.3335	-772.052	116669	-71356.8	5458.79	107.575	148.885	0	0	0	0	0	0	0	200	903	0	0	0	0	0	0	0	603	903	0
583	5	-41.2311	-99.3172	-772.052	116120	-71112.6	5596.12	107.891	149.596	0	0	0	0	0	0	0	200	903	0	0	0	0	0	0	0	603	903	0
583	6	-42.2992	-100.69	-771.747	116211	-71539.9	5779.22	107.301	149.418	0	0	0	0	0	0	0	200	903	0	0	0	0	0	0	0	603	903	0
583	7	-44.1303	-102.216	-770.221	115479	-71478.8	5687.67	107.197	150.071	0	0	0	0	0	0	0	200	903	0	0	0	0	0	0	0	603	903	0
583	8	-43.0622	-103.437	-767.169	115387	-71539.9	5870.77	106.748	149.593	0	0	0	0	0	0	0	200	903	0	0	0	0	0	0	0	603	903	0
583	9	-44.1303	-105.878	-765.644	114838	-70990.5	5962.33	107.28	150.011	0	0	0	0	0	0	0	200	903	0	0	0	0	0	0	0	603	903	0
584	0	-42.9096	-106.641	-764.728	114930	-70685.4	5962.33	107.568	149.712	0	0	0	0	0	0	0	200	903	0	0	0	0	0	0	0	603	903	0
584	1	-43.2148	-106.794	-765.033	114380	-71112.6	5916.55	107.046	150.49	0	0	0	0	0	0	0	200	903	0	0	0	0	0	0	0	603	903	0
584	2	-44.4355	-108.472	-764.728	113739	-70685.4	6099.66	107.568	151.268	0	0	0	0	0	0	0	200	903	0	0	0	0	0	0	0	603	903	0
584	3	-45.0458	-110.761	-762.592	113831	-69953	6099.66	108.269	150.732	0	0	0	0	0	0	0	200	903	0	0	0	0	0	0	0	603	903	0
584	4	-44.4355	-111.066	-758.93	113648	-70319.2	6145.43	107.344	150.253	0	0	0	0	0	0	0	200	903	0	0	0	0	0	0	0	603	903	0
584	5	-45.8088	-112.287	-759.235	113190	-69830.9	6420.09	108.025	150.916	0	0	0	0	0	0	0	200	903	0	0	0	0	0	0	0	603	903	0
584	6	-44.7406	-113.508	-756.183	112824	-70319.2	6374.31	107.008	150.798	0	-0.461273	13.9749	-15.9707	4044.16	1577.19	1278.67	298.756	649.776	0	0	0	0	0	0	0	603	903	0
584	7	-44.5881	-114.423	-755.878	112458	-70014	6145.43	107.374	151.223	0	1.06461	17.4844	-23.2949	3586.4	1272.02	1599.1	254.605	749.044	0	0	0	0	0	0	0	603	903	0
584	8	-45.6562	-115.034	-753.131	111908	-69647.8	6191.21	107.522	151.409	0	0	0	0	0	0	0	200	903	0	0	0	0	0	0	0	603	903	0
584	9	-46.7243	-115.339	-751.911	111176	-68854.3	6328.54	108.428	152.142	0	0	0	0	0	0	0	200	903	0	0	0	0	0	0	0	603	903	0
585	0	-45.6562	-116.56	-746.723	110993	-69098.5	6236.99	107.464	151.36	0	1.36978	17.4844	-17.1914	4318.82	1638.23	1919.54	295.294	651.78	0	0	0	0	0	0	0	603	903	0
585	1	-46.4191	-117.628	-743.976	110443	-69342.6	6236.99	106.795	151.55	0	1.82755	14.7379	-23.9053	4318.82	1760.3	1599.1	273.637	722.336	0	0	0	0	0	0	0	603	903	0
585	2	-45.6562	-118.238	-741.535	109986	-68976.4	6557.42	106.982	151.678	0	3.96378	11.0757	-23.2949	5051.24	1516.16	1644.88	265.085	686.161	0	0	0	0	0	0	0	603	903	0
585	3	-45.5036	-119.611	-740.314	109528	-68732.3	6145.43	107.158	152.052	0	3.20084	15.6534	-19.938	5417.45	1638.23	2377.3	282.166	631.285	0	0	0	0	0	0	0	603	903	0
585	4	-45.8088	-121.29	-737.873	108704	-67999.8	6191.21	107.843	152.679	0	3.6586	18.0948	-25.126	6058.32	2187.55	1873.76	287.063	661.882	0	0	0	0	0	0	0	603	903	0
585	5	-46.8769	-121.748	-734.821	107422	-67755.7	6099.66	107.793	153.812	0	10.2199	12.6016	-35.8071	7248.51	1882.37	2423.08	252.57	700.568	0	0	0	0	0	0	0	603	903	0
585	6	-45.0458	-122.053	-729.023	107605	-67694.6	6511.64	107.143	152.398	0	8.08365	8.93951	-41.9106	9354.22	2187.55	2697.74	252.196	679.806	0	0	0	0	0	0	0	603	903	0
585	7	-46.7243	-123.426	-725.971	106873	-67694.6	6603.2	106.753	152.786	0	2.74307	11.8387	-48.0141	11643	3713.42	1965.32	277.34	660.508	0	0	0	0	0	0	0	603	903	0
585	8	-46.4191	-124.494	-723.529	106140	-67206.4	6511.64	107.113	153.302	0	7.4733	11.6861	-58.6953	14115	3469.28	1965.32	259.107	662.521	0	0	0	0	0	0	0	603	903	0
585	9	-46.2665	-125.41	-721.393	105500	-66535	6557.42	107.769	153.756	0	8.08365	6.04034	-69.9868	15946	3957.57	1644.88	256.547	675.157	0	0	0	0	0	0	0	603	903	0
586	0	-45.1984	-125.257	-714.069	104950	-66168.8	6511.64	107.336	153.025	0	-0.308685	8.02399	-77.9214	17502.4	4262.74	683.577	254.706	678.384	0	0	0	0	0	0	0	603	903	0
586	1	-46.5717	-126.63	-714.984	104401	-65924.6	6832.08	107.796	153.981	0	-1.68198	12.1439	-82.8042	20157.4	4384.81	1049.79	252.954	659.565	0	0	0	0	0	0	0	603	903	0
586	2	-46.5717	-127.851	-709.186	103211	-65619.5	6923.63	107.472	154.466	0	3.50601	11.0757	-95.0112	22629.4	5361.38	1187.12	256.429	664.824	0	0	0	0	0	0	0	603	903	0
586	3	-46.1139	-128.309	-703.083	101837	-64765	6832.08	107.884	155.156	0	2.4379	8.93951	-105.387	24552	6093.8	-48.8449	257.823	670.031	0	0	0	0	0	0	0	603	903	0
586	4	-44.7406	-129.224	-699.42	101105	-64642.9	7015.18	107.576	155.445	0	-1.52939	10.4654	-116.984	27207	6154.83	-140.398	252.613	670.429	0	0	0	0	0	0	0	603	903	0
586	5	-44.1303	-130.14	-698.505	100647	-63971.5	7289.84	108.417	155.91	0	-3.20785	9.24469	-128.886	29678.9	6643.11	42.7079	251.543	672.727	0	0	0	0	0	0	0	603	903	0
586	6	-44.1303	-130.75	-690.57	99640.2	-64520.8	7198.29	106.569	155.713	0	0.301666	4.0567	-140.482	32608.6	7497.61	-1055.93	253.37	670.881	0	0	0	0	0	0	0	603	903	0
586	7	-44.7406	-131.055	-690.57	98999.4	-63788.4	7381.39	107.629	156.641	0	-0.461273	4.66705	-151.774	35538.3	7497.61	-1239.03	249.4	668.847	0	0	0	0	0	0	0	603	903	0
586	8	-42.9096	-133.497	-682.941	97900.8	-63605.3	7427.17	106.866	156.648	0	-5.1915	3.75153	-164.896	37644	8474.17	-1376.36	251.391	674.711	0	0	0	0	0	0	0	603	903	0
586	9	-44.2829	-133.649	-679.584	97351.4	-62506.7	7518.72	108.022	156.749	0	-5.80185	-1.28388	-175.883	39841.3	9328.66	-1925.68	253.039	676.478	0	0	0	0	0	0	0	603	903	0
587	0	-43.3674	-133.192	-674.396	96710.5	-62140.5	7656.05	107.858	156.597	0	-3.97079	-2.65717	-191.142	42862.5	9389.7	-2932.76	249.124	678.755	0	0	0	0	0	0	0	603	903	0
587	1	-41.8415	-133.039	-670.734	95337.3	-62018.4	7747.61	107.537	157.861	0	-10.2269	-1.43646	-206.095	46066.9	9877.98	-3253.19	247.929	679.478	0	0	0	0	0	0	0	603	903	0
587	2	-42.757	-134.412	-665.241	94055.5	-61286	7701.83	107.874	158.614	0	-13.2787	-3.42011	-216.166	48538.8	10793.5	-3344.74	249.932	678.456	0	0	0	0	0	0	0	603	903	0
587	3	-42.9096	-134.412	-661.579	93872.4	-61102.9	7884.93	107.641	158.108	0	-7.17514	-2.65717	-225.932	51468.5	11525.9	-2886.98	251.015	675.194	0	0	0	0	0	0	0	603	903	0
587	4	-41.0785	-134.87	-656.086	92865.4	-59943.2	8068.04	108.635	158.455	0	-5.34409	1.00494	-240.275	52841.8	11770.1	-2978.53	248.986	683.078	0	0	0	0	0	0	0	603	903	0
587	5	-42.757	-136.243	-648.456	91949.8	-59699.1	7884.93	107.937	158.202	0	-10.5321	2.68341	-251.566	55222.1	12563.5	-3024.31	249.941	683.487	0	0	0	0	0	0	0	603	903	0
587	6	-40.7734	-136.396	-643.268	91125.8	-59271.8	8251.15	107.858	158.339	0	-10.9898	2.22565	-259.806	58060.3	12685.6	-2703.87	248.827	679.525	0	0	0	0	0	0	0	603	903	0
587	7	-39.0949	-135.023	-638.996	89569.5	-58661.5	8296.92	108.197	159.828	0	-7.32773	4.66705	-268.961	59708.2	13784.2	-2429.22	251.25	681.004	0	0	0	0	0	0	0	603	903	0
587	8	-39.0949	-135.175	-635.639	89569.5	-57807	8434.25	109.057	159.087	0	-6.10703	10.7706	-279.643	61630.8	13967.3	-2612.32	249.947	682.609	0	0	0	0	0	0	0	603	903	0
587	9	-40.9259	-136.091	-628.315	88653.9	-57440.8	8296.92	108.58	158.902	0	-9.0062	14.8904	-292.46	63553.4	14272.5	-2291.89	248.802	685.693	0	0	0	0	0	0	0	603	903	0
588	0	-38.4845	-136.243	-621.295	87646.8	-56464.2	8434.25	109.119	158.929	0	-9.15878	13.5171	-303.751	65659.1	15127	-1834.12	249.801	686.839	0	0	0	0	0	0	0	603	903	0
588	1	-38.4845	-136.243	-614.887	86456.6	-56464.2	8571.58	108.171	159.394	0	-6.10703	20.0784	-315.653	68131.1	15859.4	-1467.91	250.243	687.159	0	0	0	0	0	0	0	603	903	0
588	2	-37.4164	-137.312	-609.088	85907.3	-55853.8	8754.69	108.299	158.958	0	-3.05527	29.6915	-322.672	69687.5	16347.7	-918.596	250.663	687.03	0	0	0	0	0	0	0	603	903	0
588	3	-36.6535	-137.617	-601.459	84167.8	-54572.1	8754.69	109.267	160.061	0	-7.17514	29.2337	-334.879	71427	16836	-964.372	250.275	689.708	0	0	0	0	0	0	0	603	903	0
588	4	-34.975	-137.006	-597.492	83343.9	-54328	8983.57	109.073	160.51	0	-8.85361	35.6424	-345.561	72891.8	17629.4	-781.267	251.017	692.062	0	0	0	0	0	0	0	603	903	0
588	5	-36.1957	-137.312	-590.778	82336.8	-53534.5	9075.12	109.383	160.63	0	-6.71738	44.1873	-356.242	74997.6	18117.7	-598.161	250.858	692.476	0	0	0	0	0	0	0	603	903	0
588	6	-35.738	-138.227	-583.148	80871.9	-53168.3	9304	108.825	161.318	0	-5.03891	49.5279	-365.702	76828.6	18789.1	-140.398	251.378	692.915	0	0	0	0	0	0	0	603	903	0
588	7	-33.9069	-137.159	-575.824	80322.6	-52313.8	9075.12	109.15	160.508	0	-5.03891	53.19	-375.468	78293.5	18850.1	180.037	250.204	694.478	0	0	0	0	0	0	0	603	903	0
588	8	-32.5336	-137.006	-567.279	79040.9	-51459.3	9395.56	109.288	160.667	0	-7.17514	58.8358	-386.149	80033	19460.5	729.354	250.396	695.741	0	0	0	0	0	0	0	603	903	0
588	9	-31.9233	-137.312	-561.481	76935.1	-50543.8	9715.99	109.981	162.978	0	-7.6329	66.4651	-399.882	81955.6	20315	637.801	250.802	698.051	0	0	0	0	0	0	0	603	903	0
589	0	-31.3129	-137.464	-554.767	76019.6	-50116.5	9761.77	109.662	162.97	0	-5.64926	70.585	-413.615	84061.3	21047.4	1095.56	250.887	699.764	0	0	0	0	0	0	0	603	903	0
589	1	-31.3129	-136.243	-548.969	74829.4	-49628.3	9624.44	109.597	163.691	0	-6.10703	74.8575	-422.77	84702.1	21901.9	1370.22	251.806	702.65	0	0	0	0	0	0	0	603	903	0
589	2	-31.1603	-135.633	-541.339	73456.2	-49017.9	9944.87	109.451	164.307	0	-9.46396	80.0455	-434.672	87906.5	22451.2	1324.45	251.651	700.764	0	0	0	0	0	0	0	603	903	0
589	3	-30.0922	-135.175	-532.184	72266	-47919.3	9990.65	109.957	164.209	0	-7.32773	83.555	-448.1	89279.8	22878.5	1644.88	251.057	703.759	0	0	0	0	0	0	0	603	903	0
589	4	-29.4819	-135.48	-525.775	71075.8	-47431	10082.2	109.789	164.817	0	-6.56479	85.0809	-456.95	90744.6	23488.8	1919.54	251.404	704.412	0	0	0	0	0	0	0	603	903	0
589	5	-27.193	-134.26	-517.231	70892.7	-46698.6	10173.8	109.714	162.938	0	-9.76913	88.5904	-470.683	92575.7	24709.5	1965.32	252.497	706.316	0	0	0	0	0	0	0	603	903	0
589	6	-25.8197	-134.107	-510.211	68146.1	-45966.1	10448.4	109.908	166.436	0	-10.2269	91.4896	-481.669	94498.3	24770.6	2056.87	251.427	706.811	0	0	0	0	0	0	0	603	903	0
589	7	-27.0405	-133.802	-500.751	67596.8	-45233.7	10311.1	109.668	165.009	0	-7.32773	92.4051	-493.571	96329.3	25136.8	2331.53	250.928	707.832	0	0	0	0	0	0	0	603	903	0
589	8	-25.8197	-133.802	-492.816	66681.2	-44135.1	10768.8	110.443	164.694	0	-9.92172	94.0836	-503.947	97794.2	25808.2	2331.53	251.212	708.943	0	0	0	0	0	0	0	603	903	0
589	9	-24.7516	-133.039	-483.661	64667.1	-43341.6	11043.5	110.388	166.297	0	-10.3795	96.8301	-514.933	99625.2	26784.7	2377.3	252.016	709.528	0	0	0	0	0	0	0	603	903	0
590	0	-23.9887	-132.276	-470.233	63751.6	-42182	10814.6	110.296	164.426	0	-11.1424	96.2198	-527.445	101639	27517.1	2377.3	252.171	710.299	0	0	0	0	0	0	0	603	903	0
590	1	-21.8525	-132.581	-465.961	61737.4	-41815.7	10723.1	110.259	167.505	0	-10.3795	97.7457	-536.906	103470	27944.4	2468.86	252.047	710.284	0	0	0	0	0	0	0	603	903	0
590	2	-20.6318	-131.666	-457.721	61279.6	-40900.2	11318.2	110.644	166.12	0	-10.2269	100.034	-553.08	105118	28798.9	2789.29	252.07	712.94	0	0	0	0	0	0	0	603	903	0
590	3	-19.8688	-130.75	-446.125	59997.9	-39557.4	10997.7	111.331	165.513	0	-11.295	100.95	-568.949	107224	29897.5	2880.84	252.549	714.54	0	0	0	0	0	0	0	603	903	0
590	4	-20.174	-131.361	-438.19	58533.1	-39008.1	10997.7	110.979	166.421	0	-7.17514	99.4241	-583.598	108506	31179.2	3109.73	253.426	717.074	0	0	0	0	0	0	0	603	903	0
590	5	-20.174	-131.361	-427.204	57068.2	-37543.3	11043.5	112.119	166.415	0	-5.80185	103.697	-594.279	110795	31118.2	3887.92	252.363	716.565	0	0	0	0	0	0	0	603	903	0
590	6	-17.7326	-130.598	-415.912	55420.3	-37116	11318.2	110.76	166.75	0	-3.51303	108.579	-605.265	111802	33132.4	4345.69	254.74	718.285	0	0	0	0	0	0	0	603	903	0
590	7	-17.2748	-130.14	-408.283	54138.5	-36200.5	11318.2	111.335	167.399	0	-1.07162	108.732	-617.167	113175	33925.8	4940.78	254.97	719.622	0	0	0	0	0	0	0	603	903	0
590	8	-15.9015	-129.682	-399.738	52490.6	-35468.1	11409.7	111.272	168.688	0	2.4379	111.631	-627.238	114548	34047.9	5627.43	254.282	720.377	0	0	0	0	0	0	0	603	903	0
590	9	-14.5282	-128.461	-386.31	51666.6	-33942.2	11318.2	112.137	166.256	0	3.96378	118.955	-634.257	114823	34597.2	6222.52	254.548	721.965	0	0	0	0	0	0	0	603	903	0
591	0	-15.2912	-127.241	-378.681	49469.3	-33148.8	11180.8	112.463	169.364	0	6.55777	123.228	-636.698	115922	36184.1	6863.39	256.831	720.933	0	0	0	0	0	0	0	603	903	0
591	1	-14.3757	-125.867	-368	48096.1	-32294.3	11684.4	112.244	169.304	0	9.60953	123.075	-647.074	115830	36367.2	6954.94	256.203	723.994	0	0	0	0	0	0	0	603	903	0
591	2	-13.7653	-124.494	-357.929	46265	-31683.9	11089.3	111.48	170.742	0	12.0509	128.568	-655.924	117020	36367.2	7641.59	255.444	724.595	0	0	0	0	0	0	0	603	903	0
591	3	-13.3075	-122.205	-347.553	45166.4	-30524.2	10631.5	112.174	170.045	0	10.9828	133.146	-659.586	116746	36672.4	7778.92	255.599	726.002	0	0	0	0	0	0	0	603	903	0
591	4	-13.4601	-119.611	-339.008	43793.1	-30158	11043.5	111.04	170.82	0	10.5251	133.909	-661.112	117478	37404.8	7916.24	256.579	725.302	0	0	0	0	0	0	0	603	903	0
591	5	-12.0868	-117.017	-325.58	41595.8	-28632.2	10631.5	112.058	172.241	0	10.8302	135.282	-665.385	117295	37343.8	8099.35	256.124	726.719	0	0	0	0	0	0	0	603	903	0
591	6	-13.6127	-114.729	-317.34	40405.6	-27411.5	10311.1	113.621	172.674	0	11.288	137.266	-669.657	117478	37465.9	7870.47	255.948	727.57	0	0	0	0	0	0	0	603	903	0
591	7	-13.3075	-112.287	-305.744	39032.3	-27106.3	10128	111.343	172.336	0	13.2716	138.029	-667.826	117112	37404.8	8007.8	256.01	727.637	0	0	0	0	0	0	0	603	903	0
591	8	-11.6291	-109.693	-295.978	37842.1	-26129.7	9853.32	111.717	172.145	0	12.6613	135.893	-671.793	116196	37710	8236.68	256.133	730.036	0	0	0	0	0	0	0	603	903	0
591	9	-11.7817	-107.404	-284.687	35644.9	-25031.1	9487.11	112.075	174.793	0	11.8983	136.35	-669.962	115738	37832.1	8419.78	256.469	730.246	0	0	0	0	0	0	0	603	903	0
592	0	-10.8661	-105.268	-276.142	33996.9	-23810.4	9441.33	113.775	176.886	0	11.8983	139.25	-668.742	115738	37465.9	8328.23	256.024	729.931	0	0	0	0	0	0	0	603	903	0
592	1	-11.3239	-101.759	-264.85	32165.9	-22650.7	9120.9	114.477	178.551	0	12.3561	137.876	-668.742	115372	37710	8740.22	256.39	730.479	0	0	0	0	0	0	0	603	903	0
592	2	-11.3239	-99.012	-251.422	30975.7	-21918.3	8983.57	112.823	176.798	0	12.9665	136.961	-667.521	114640	36916.6	8694.44	255.304	731.26	0	0	0	0	0	0	0	603	903	0
592	3	-11.0187	-96.2654	-241.962	29510.8	-21002.8	8937.79	113.198	178.035	0	12.2035	137.724	-666.3	114182	37343.8	8877.55	256.047	731.633	0	0	0	0	0	0	0	603	903	0
592	4	-9.18767	-91.6878	-233.112	27771.3	-20148.3	8296.92	113.568	180.867	0	11.288	138.334	-665.69	113541	37282.8	9014.88	256.006	732.438	0	0	0	0	0	0	0	603	903	0
592	5	-7.20403	-87.8731	-222.126	26581.2	-19293.8	7884.93	113.14	180.333	0	11.1354	134.825	-663.554	112626	38076.2	9243.76	257.382	733.269	0	0	0	0	0	0	0	603	903	0
592	6	-8.27214	-84.0584	-214.191	25299.4	-18195.1	7610.28	115.052	181.884	0	11.5932	139.555	-662.028	112534	38076.2	9014.88	257.515	733.016	0	0	0	0	0	0	0	603	903	0
592	7	-9.49284	-80.5489	-205.646	24383.9	-17279.6	7289.84	115.974	181.428	0	10.2199	139.707	-661.112	111893	37465.9	9335.31	256.671	733.75	0	0	0	0	0	0	0	603	903	0
592	8	-6.89885	-77.6497	-194.049	22278.2	-16669.3	6832.08	114.098	185.193	0	11.288	139.25	-659.892	110795	37649	9381.09	257.053	735.102	0	0	0	0	0	0	0	603	903	0
592	9	-8.27214	-73.9876	-185.81	21362.6	-16364.1	6557.42	111.931	185.029	0	10.5251	141.691	-658.061	110154	37832.1	9518.42	257.49	735.608	0	0	0	0	0	0	0	603	903	0
593	0	-7.66179	-70.4781	-175.434	19714.7	-15387.5	6328.54	112.289	187.623	0	10.3725	140.928	-654.704	110154	38015.2	9884.63	258.065	734.75	0	0	0	0	0	0	0	603	903	0
593	1	-7.20403	-67.8841	-170.246	18799.2	-14288.9	5916.55	116.069	189.576	0	11.4406	144.895	-655.619	109055	37587.9	10022	257.332	736.661	0	0	0	0	0	0	0	603	903	0
593	2	-7.05144	-64.3745	-161.09	17792.1	-13983.7	5779.22	113.193	189.552	0	11.8983	144.895	-655.314	108597	37710	10571.3	257.545	737.282	0	0	0	0	0	0	0	603	903	0
593	3	-7.35661	-60.1021	-154.071	16876.6	-13007.1	5596.12	115.577	190.463	0	12.9665	147.337	-653.788	107682	38137.3	10525.5	258.333	738.295	0	0	0	0	0	0	0	603	903	0
593	4	-6.13591	-55.9822	-141.864	15869.5	-12213.7	4955.25	113.906	188.136	0	13.2716	150.541	-652.873	107316	38259.3	10708.6	258.602	738.625	0	0	0	0	0	0	0	603	903	0
593	5	-6.89885	-50.9468	-134.54	14770.8	-11847.5	4451.71	111.941	190.212	0	14.4923	151.151	-653.178	107133	37893.1	11074.8	258.013	738.983	0	0	0	0	0	0	0	603	903	0
593	6	-6.13591	-48.3528	-127.521	13855.3	-11298.2	4497.48	111.402	191.349	0	16.3234	152.22	-653.178	106766	38137.3	11257.9	258.387	739.543	0	0	0	0	0	0	0	603	903	0
593	7	-4.76262	-44.5381	-120.807	12756.7	-10260.6	3810.84	115.067	194.405	0	19.07	153.898	-656.84	106400	38808.7	11486.8	259.084	741.012	0	0	0	0	0	0	0	603	903	0
593	8	-6.13591	-41.6389	-114.704	12207.4	-9650.21	3444.63	115.868	193.575	0	20.1381	155.424	-655.619	105759	39113.8	11990.3	259.659	741.688	0	0	0	0	0	0	0	603	903	0
593	9	-6.74626	-38.5872	-107.99	11474.9	-9039.86	3261.52	116.29	193.74	0	20.7484	157.56	-658.061	105851	38747.6	12310.8	258.882	742.147	0	0	0	0	0	0	0	603	903	0
594	0	-5.52556	-35.8406	-100.055	10376.3	-8551.58	2895.31	114.531	196.294	0	21.9691	159.849	-660.197	105393	39113.8	12493.9	259.246	743.361	0	0	0	0	0	0	0	603	903	0
594	1	-7.05144	-33.3992	-92.4258	9552.34	-8124.34	2666.43	112.099	196.649	0	26.089	160.307	-660.502	105668	39968.3	12951.6	260.512	743.019	0	0	0	0	0	0	0	603	903	0
594	2	-5.67815	-31.263	-87.2378	8911.47	-7575.02	2345.99	113.168	197.849	0	27.3097	160.917	-665.69	105759	40212.5	13363.6	260.407	744.128	0	0	0	0	0	0	0	603	903	0
594	3	-4.61003	-31.7207	-82.0499	8270.6	-6781.56	2254.44	117.348	199.2	0	28.8356	162.901	-668.437	105576	40273.5	13775.6	260.25	745.055	0	0	0	0	0	0	0	603	903	0
594	4	-5.52556	-27.906	-77.4722	7995.94	-6293.28	2117.11	118.767	196.79	0	30.0563	166.105	-671.183	105576	40578.7	14233.4	260.458	745.701	0	0	0	0	0	0	0	603	903	0
594	5	-5.98332	-25.1595	-70.7584	7171.97	-6049.14	2254.44	114.51	198.641	0	31.7348	167.021	-675.761	105668	40761.8	14508	260.32	746.632	0	0	0	0	0	0	0	603	903	0
594	6	-4.61003	-22.4129	-64.0445	5890.23	-5255.69	1522.02	117.937	208.029	0	34.1762	167.478	-680.644	106858	40822.8	14920	259.977	746.005	0	0	0	0	0	0	0	603	903	0
594	7	-6.44109	-19.8189	-56.4151	5615.57	-5072.58	1476.24	110.085	200.46	0	35.8546	168.089	-684	106583	41372.1	15286.2	260.486	747.177	0	0	0	0	0	0	0	603	903	0
594	8	-5.98332	-17.8352	-53.6685	5066.25	-4340.16	1201.58	119.13	205.601	0	36.0072	169.92	-687.968	106400	42165.6	15423.6	261.29	748.341	0	0	0	0	0	0	0	603	903	0
594	9	-4.45744	-14.7835	-50.9219	4608.49	-4034.98	1064.25	120.761	209.499	0	36.7702	171.293	-691.02	106675	42287.7	15744	261.196	748.627	0	0	0	0	0	0	0	603	903	0
595	0	-3.99968	-12.9524	-43.9029	3967.62	-3607.73	789.596	117.825	209.627	0	39.5168	171.751	-695.597	107224	42409.7	15972.9	260.969	748.853	0	0	0	0	0	0	0	603	903	0
595	1	-4.76262	-10.511	-44.2081	4333.83	-3363.59	743.82	123.914	201.967	0	37.6857	172.056	-697.428	108048	42898	16018.7	261.509	748.076	0	0	0	0	0	0	0	603	903	0
595	2	-4.76262	-9.13773	-38.4097	2594.33	-3119.45	606.491	118.785	232.456	0	39.6693	171.598	-704.447	108964	43447.3	16201.8	261.676	748.32	0	0	0	0	0	0	0	603	903	0
595	3	-3.23674	-6.69632	-34.4424	2502.78	-2387.03	331.833	130.695	227.335	0	40.4323	172.666	-706.889	108506	43813.5	16476.4	261.981	749.502	0	0	0	0	0	0	0	603	903	0
595	4	-3.99968	-5.32303	-32.3062	2228.12	-2570.14	148.727	120.444	231.031	0	39.3642	174.345	-710.856	109330	43874.6	16613.8	261.721	749.2	0	0	0	0	0	0	0	603	903	0
595	5	-3.23674	-5.47562	-31.6959	2136.56	-2203.93	240.28	130.466	232.592	0	42.7211	174.803	-714.823	109147	44118.7	16430.6	261.72	750.31	0	0	0	0	0	0	0	603	903	0
595	6	-2.62639	-4.56009	-26.5079	2136.56	-1410.47	11.398	146.791	219.399	0	40.7375	173.124	-718.485	109971	45095.3	16659.5	262.764	749.941	0	0	0	0	0	0	0	603	903	0
595	7	-5.22038	-2.27127	-28.6441	1495.7	-1959.79	-354.813	131.582	247.783	0	41.9582	174.497	-723.063	110062	45095.3	16888.4	262.367	750.783	0	0	0	0	0	0	0	603	903	0
595	8	-5.0678	-1.35574	-24.0665	1953.46	-1959.79	-171.707	118.568	218.831	0	42.2633	174.65	-727.946	110062	45034.2	17071.5	261.865	751.804	0	0	0	0	0	0	0	603	903	0
595	9	-5.37297	-0.897979	-19.4888	1495.7	-1654.61	-217.484	115.1	223.254	0	41.9582	175.413	-731.608	110703	45461.5	16705.3	262.139	751.685	0	0	0	0	0	0	0	603	903	0
596	0	-4.30486	-0.13504	-20.4044	1495.7	-1532.54	-492.142	124.892	226.697	0	42.2633	174.803	-737.101	111252	45949.8	17208.9	262.339	752.068	0	0	0	0	0	0	0	603	903	0
596	1	-3.6945	-0.592804	-19.794	1037.93	-1349.43	-446.366	131.826	247.563	0	43.3315	174.803	-737.711	111985	46377	17071.5	262.866	751.2	0	0	0	0	0	0	0	603	903	0
596	2	-3.54192	-1.20316	-19.794	1404.14	-1410.47	-354.813	128.743	229.062	0	44.8573	175.26	-745.341	112168	46132.9	17392	261.895	752.508	0	0	0	0	0	0	0	603	903	0
596	3	-5.37297	-0.13504	-16.4371	1221.04	-1471.5	-446.366	110.476	225.714	0	44.247	174.192	-748.393	112168	46804.3	17575.1	262.54	753.122	0	0	0	0	0	0	0	603	903	0
596	4	-5.37297	0.6279	-13.6905	1495.7	-983.223	-537.919	128.182	190.749	0	43.7892	175.871	-753.275	112534	46987.4	17620.8	262.377	753.607	0	0	0	0	0	0	0	603	903	0
596	5	-5.67815	0.933075	-11.2491	946.379	-678.047	-858.353	139.724	215.871	0	44.0944	176.176	-758.158	112717	47231.5	17803.9	262.298	754.328	0	0	0	0	0	0	0	603	903	0
596	6	-4.76262	2.30637	-12.775	946.379	-617.012	-812.577	151.701	225.919	0	45.9254	174.803	-760.6	113999	47414.6	17803.9	262.339	753.12	0	0	0	0	0	0	0	603	903	0
596	7	-4.45744	2.15378	-12.1646	854.827	-922.188	-858.353	124.191	229.728	0	46.6884	173.734	-767.313	114457	48147	17758.2	262.748	753.834	0	0	0	0	0	0	0	603	903	0
596	8	0	0	0	0	0	0	200	300	0	45.7729	175.413	-767.924	114091	48269.1	17941.3	262.857	754.43	0	0	0	0	0	0	0	603	903	0
596	9	0	0	0	0	0	0	200	300	0	45.7729	175.871	-773.417	114457	48208.1	17575.1	262.331	755.012	0	0	0	0	0	0	0	603	903	0
597	0	0	0	0	0	0	0	200	300	0	45.4677	175.565	-778.3	115281	48574.3	17895.5	262.411	754.881	0	0	0	0	0	0	0	603	903	0
597	1	0	0	0	0	0	0	200	300	0	46.3832	174.497	-782.572	116196	49062.6	18124.4	262.694	754.52	0	0	0	0	0	0	0	603	903	0
597	2	0	0	0	0	0	0	200	300	0	48.2143	174.65	-785.929	116837	49550.8	18124.4	263.047	754.339	0	0	0	0	0	0	0	603	903	0
597	3	0	0	0	0	0	0	200	300	0	45.7729	174.65	-787.15	116379	49306.7	17987	262.64	755.151	0	0	0	0	0	0	0	603	903	0
597	4	0	0	0	0	0	0	200	300	0	45.6203	172.514	-791.117	116929	49795	17849.7	262.943	755.198	0	0	0	0	0	0	0	603	903	0
597	5	0	0	0	0	0	0	200	300	0	45.0099	172.819	-797.221	117570	50039.1	17803.9	262.767	755.526	0	0	0	0	0	0	0	603	903	0
597	6	0	0	0	0	0	0	200	300	0	45.6203	172.056	-800.578	118485	50710.5	17620.8	263.342	755.001	0	0	0	0	0	0	0	603	903	0
597	7	0	0	0	0	0	0	200	300	0	47.4513	170.835	-801.798	118302	50344.3	17575.1	262.789	755.454	0	0	0	0	0	0	0	603	903	0
597	8	0	0	0	0	0	0	200	300	0	45.6203	170.225	-805.46	118119	50649.5	17620.8	262.883	756.352	0	0	0	0	0	0	0	603	903	0
597	9	0	0	0	0	0	0	200	300	0	44.3996	170.072	-809.123	118668	50893.6	17575.1	262.9	756.337	0	0	0	0	0	0	0	603	903	0
598	0	0	0	0	0	0	0	200	300	0	43.9418	167.326	-812.479	119218	51015.7	17392	262.79	756.267	0	0	0	0	0	0	0	603	903	0
598	1	0	0	0	0	0	0	200	300	0	45.0099	165.342	-816.752	119126	50893.6	17392	262.312	757.147	0	0	0	0	0	0	0	603	903	0
598	2	0	0	0	0	0	0	200	300	0	45.1625	165.647	-817.362	119675	51137.8	17254.6	262.564	756.584	0	0	0	0	0	0	0	603	903	0
598	3	0	0	0	0	0	0	200	300	0	44.0944	165.647	-821.024	119767	50771.5	17117.3	261.839	757.125	0	0	0	0	0	0	0	603	903	0
598	4	0	0	0	0	0	0	200	300	0	43.3315	164.732	-824.992	119858	51381.9	17254.6	262.282	757.716	0	0	0	0	0	0	0	603	903	0
598	5	0	0	0	0	0	0	200	300	0	43.1789	162.901	-827.738	120408	51626	17208.9	262.37	757.534	0	0	0	0	0	0	0	603	903	0
598	6	0	0	0	0	0	0	200	300	0	43.1789	162.29	-829.264	119767	51992.2	17071.5	262.697	758.575	0	0	0	0	0	0	0	603	903	0
598	7	0	0	0	0	0	0	200	300	0	45.0099	162.138	-829.569	121415	51992.2	17025.7	262.674	756.641	0	0	0	0	0	0	0	603	903	0
598	8	0	0	0	0	0	0	200	300	0	43.1789	160.307	-833.842	120774	51687.1	16705.3	261.987	758.16	0	0	0	0	0	0	0	603	903	0
598	9	0	0	0	0	0	0	200	300	0	41.5004	160.612	-836.894	121415	52175.4	16751.1	262.344	757.922	0	0	0	0	0	0	0	603	903	0
599	0	0	0	0	0	0	0	200	300	0	41.653	159.086	-839.335	122056	52480.5	16659.5	262.526	757.581	0	0	0	0	0	0	0	603	903	0
599	1	0	0	0	0	0	0	200	300	0	41.0426	157.865	-839.335	121598	52663.6	16522.2	262.744	758.126	0	0	0	0	0	0	0	603	903	0
599	2	0	0	0	0	0	0	200	300	0	40.5849	158.018	-841.471	122513	52480.5	16430.6	262.368	757.406	0	0	0	0	0	0	0	603	903	0
599	3	0	0	0	0	0	0	200	300	0	39.5168	155.271	-841.776	122056	52480.5	16201.8	262.345	758.002	0	0	0	0	0	0	0	603	903	0
599	4	0	0	0	0	0	0	200	300	0	41.1952	155.729	-846.659	122330	52480.5	16110.2	261.985	758.514	0	0	0	0	0	0	0	603	903	0
599	5	0	0	0	0	0	0	200	300	0	38.4486	153.898	-848.185	122880	53090.9	15744	262.594	758.126	0	0	0	0	0	0	0	603	903	0
599	6	0	0	0	0	0	0	200	300	0	38.2961	153.288	-848.49	123337	52297.4	15927.1	261.636	757.639	0	0	0	0	0	0	0	603	903	0
599	7	0	0	0	0	0	0	200	300	0	38.7538	152.525	-848.795	122696	53274	15469.3	262.764	758.446	0	0	0	0	0	0	0	603	903	0
599	8	0	0	0	0	0	0	200	300	0	37.2279	151.609	-849.406	122696	53701.2	15469.3	263.222	758.55	0	0	0	0	0	0	0	603	903	0
599	9	0	0	0	0	0	0	200	300	0	37.2279	149.168	-851.237	122880	52785.7	15286.2	262.011	758.646	0	0	0	0	0	0	0	603	903	0
600	0	0	0	0	0	0	0	200	300	0	37.0753	148.252	-852.763	123337	53335	15103.1	262.544	758.367	0	0	0	0	0	0	0	603	903	0
600	1	0	0	0	0	0	0	200	300	0	38.6012	147.642	-851.847	123154	53457.1	15103.1	262.754	758.427	0	0	0	0	0	0	0	603	903	0
600	2	0	0	0	0	0	0	200	300	0	35.8546	146.116	-852.763	123063	53396.1	14920	262.615	758.689	0	0	0	0	0	0	0	603	903	0
600	3	0	0	0	0	0	0	200	300	0	35.0917	143.827	-853.373	122788	53212.9	14782.7	262.356	759.114	0	0	0	0	0	0	0	603	903	0
600	4	0	0	0	0	0	0	200	300	0	34.9391	143.827	-853.983	122971	53212.9	14645.4	262.311	759.003	0	0	0	0	0	0	0	603	903	0
600	5	0	0	0	0	0	0	200	300	0	36.0072	141.386	-854.289	122971	53640.2	14599.6	262.789	759.054	0	0	0	0	0	0	0	603	903	0
600	6	0	0	0	0	0	0	200	300	0	34.9391	140.928	-854.289	122788	53884.3	14645.4	263.075	759.269	0	0	0	0	0	0	0	603	903	0
600	7	0	0	0	0	0	0	200	300	0	35.0917	140.165	-852.458	122605	53396.1	14508	262.638	759.175	0	0	0	0	0	0	0	603	903	0
600	8	0	0	0	0	0	0	200	300	0	34.1762	139.25	-853.373	122147	53579.2	14462.3	262.785	759.865	0	0	0	0	0	0	0	603	903	0
600	9	0	0	0	0	0	0	200	300	0	33.7184	137.266	-850.932	122056	53151.9	14187.6	262.463	759.562	0	0	0	0	0	0	0	603	903	0
601	0	0	0	0	0	0	0	200	300	0	34.4814	134.214	-852.763	121873	53212.9	14050.3	262.401	760.085	0	0	0	0	0	0	0	603	903	0
601	1	0	0	0	0	0	0	200	300	0	33.871	135.282	-850.932	122056	53029.8	14004.5	262.32	759.562	0	0	0	0	0	0	0	603	903	0
601	2	0	0	0	0	0	0	200	300	0	34.1762	134.519	-849.406	121323	53335	13958.7	262.791	760.167	0	0	0	0	0	0	0	603	903	0
601	3	0	0	0	0	0	0	200	300	0	32.3451	132.841	-847.88	120225	53457.1	13729.8	263.048	761.206	0	0	0	0	0	0	0	603	903	0
601	4	0	0	0	0	0	0	200	300	0	31.8874	131.773	-845.744	120591	53029.8	13638.3	262.702	760.415	0	0	0	0	0	0	0	603	903	0
601	5	0	0	0	0	0	0	200	300	0	33.4132	130.705	-842.387	120774	52541.6	13455.2	262.372	759.629	0	0	0	0	0	0	0	603	903	0
601	6	0	0	0	0	0	0	200	300	0	33.4132	129.637	-841.166	120499	53274	13226.3	263.333	759.747	0	0	0	0	0	0	0	603	903	0
601	7	0	0	0	0	0	0	200	300	0	32.4977	126.737	-841.471	119858	52968.8	13043.2	262.948	760.561	0	0	0	0	0	0	0	603	903	0
601	8	0	0	0	0	0	0	200	300	0	32.1925	126.127	-839.64	119675	52358.5	13134.7	262.358	760.468	0	0	0	0	0	0	0	603	903	0
601	9	0	0	0	0	0	0	200	300	0	32.1925	125.211	-837.504	119401	52541.6	13043.2	262.736	760.433	0	0	0	0	0	0	0	603	903	0
602	0	0	0	0	0	0	0	200	300	0	32.4977	123.38	-833.231	119675	52907.8	12768.5	263.497	759.372	0	0	0	0	0	0	0	603	903	0
602	1	0	0	0	0	0	0	200	300	0	34.6339	123.228	-830.485	118485	52602.6	12585.4	263.34	760.33	0	0	0	0	0	0	0	603	903	0
602	2	0	0	0	0	0	0	200	300	0	32.4977	121.549	-829.569	117570	52236.4	12722.8	262.968	761.276	0	0	0	0	0	0	0	603	903	0
602	3	0	0	0	0	0	0	200	300	0	31.5822	118.955	-825.907	117112	52053.3	12539.7	263.026	761.202	0	0	0	0	0	0	0	603	903	0
602	4	0	0	0	0	0	0	200	300	0	30.3615	117.735	-821.635	117203	52297.4	12448.1	263.65	760.354	0	0	0	0	0	0	0	603	903	0
602	5	0	0	0	0	0	0	200	300	0	31.7348	117.124	-820.109	116562	52358.5	12402.3	263.843	760.87	0	0	0	0	0	0	0	603	903	0
602	6	0	0	0	0	0	0	200	300	0	31.5822	114.378	-814.616	117020	51442.9	12310.8	263.15	759.349	0	0	0	0	0	0	0	603	903	0
602	7	0	0	0	0	0	0	200	300	0	30.5141	113.767	-813.09	115738	50771.5	12265	262.443	760.656	0	0	0	0	0	0	0	603	903	0
602	8	0	0	0	0	0	0	200	300	0	31.4296	111.784	-811.259	114640	51870.2	12127.7	263.938	761.689	0	0	0	0	0	0	0	603	903	0
602	9	0	0	0	0	0	0	200	300	0	31.277	109.953	-805.46	114365	51259.8	11990.3	263.64	761.013	0	0	0	0	0	0	0	603	903	0
603	0	0	0	0	0	0	0	200	300	0	31.4296	109.648	-801.798	114091	51015.7	11944.6	263.627	760.707	0	0	0	0	0	0	0	603	903	0
603	1	0	0	0	0	0	0	200	300	0	31.1244	108.122	-799.967	112900	51259.8	11669.9	264.077	761.869	0	0	0	0	0	0	0	603	903	0
603	2	0	0	0	0	0	0	200	300	0	30.0563	105.985	-795.39	112351	51076.7	11761.5	264.216	761.747	0	0	0	0	0	0	0	603	903	0
603	3	0	0	0	0	0	0	200	300	0	29.2934	104.307	-791.422	112168	50222.2	11441	263.458	761.27	0	0	0	0	0	0	0	603	903	0
603	4	0	0	0	0	0	0	200	300	0	30.3615	102.628	-786.234	111619	49978.1	11395.2	263.566	761.034	0	0	0	0	0	0	0	603	903	0
603	5	0	0	0	0	0	0	200	300	0	29.5985	101.866	-783.183	110612	50344.3	11303.7	264.282	761.767	0	0	0	0	0	0	0	603	903	0
603	6	0	0	0	0	0	0	200	300	0	28.3778	100.492	-779.215	110612	50222.2	11166.4	264.452	761.048	0	0	0	0	0	0	0	603	903	0
603	7	0	0	0	0	0	0	200	300	0	30.3615	97.8983	-775.553	109421	49306.7	10891.7	263.576	761.912	0	0	0	0	0	0	0	603	903	0
603	8	0	0	0	0	0	0	200	300	0	28.0727	96.8301	-770.365	109330	49550.8	11212.1	264.321	761.081	0	0	0	0	0	0	0	603	903	0
603	9	0	0	0	0	0	0	200	300	0	28.2253	96.2198	-765.482	108048	49184.6	10937.5	264.253	761.85	0	0	0	0	0	0	0	603	903	0
604	0	0	0	0	0	0	0	200	300	0	28.5304	93.7784	-759.989	107773	48452.2	10662.8	263.754	761.191	0	0	0	0	0	0	0	603	903	0
604	1	0	0	0	0	0	0	200	300	0	27.7675	93.4732	-756.938	106949	48452.2	10296.6	264.011	761.708	0	0	0	0	0	0	0	603	903	0
604	2	0	0	0	0	0	0	200	300	0	26.852	91.4896	-752.36	105668	49306.7	10113.5	265.536	762.552	0	0	0	0	0	0	0	603	903	0
604	3	0	0	0	0	0	0	200	300	0	27.9201	90.2689	-746.256	106400	48818.4	10067.7	265.418	760.421	0	0	0	0	0	0	0	603	903	0
604	4	0	0	0	0	0	0	200	300	0	29.1408	88.8956	-741.679	104935	47963.9	10022	264.669	761.517	0	0	0	0	0	0	0	603	903	0
604	5	0	0	0	0	0	0	200	300	0	27.6149	87.3697	-736.186	103837	47780.8	10113.5	264.903	761.953	0	0	0	0	0	0	0	603	903	0
604	6	0	0	0	0	0	0	200	300	0	26.5468	85.9964	-733.439	103196	48025	9838.85	265.479	762.299	0	0	0	0	0	0	0	603	903	0
604	7	0	0	0	0	0	0	200	300	0	26.6994	84.6231	-728.251	102646	47719.8	9747.3	265.527	762.051	0	0	0	0	0	0	0	603	903	0
604	8	0	0	0	0	0	0	200	300	0	27.1571	82.4869	-722.147	101273	46926.3	9335.31	264.982	762.761	0	0	0	0	0	0	0	603	903	0
604	9	0	0	0	0	0	0	200	300	0	27.3097	82.4869	-716.349	101365	46682.2	9426.86	265.167	761.498	0	0	0	0	0	0	0	603	903	0
605	0	0	0	0	0	0	0	200	300	0	26.089	81.2662	-711.771	99808.3	47048.4	9289.53	266.1	762.775	0	0	0	0	0	0	0	603	903	0
605	1	0	0	0	0	0	0	200	300	0	28.683	78.8248	-707.804	98892.8	46926.3	9060.65	266.298	763.282	0	0	0	0	0	0	0	603	903	0
605	2	0	0	0	0	0	0	200	300	0	27.1571	78.367	-701.701	98709.7	46132.9	9381.09	265.744	762.328	0	0	0	0	0	0	0	603	903	0
605	3	0	0	0	0	0	0	200	300	0	26.6994	77.6041	-696.208	97885.7	45888.7	9243.76	265.912	762.402	0	0	0	0	0	0	0	603	903	0
605	4	0	0	0	0	0	0	200	300	0	27.0045	76.5359	-691.63	96604	45522.5	9014.88	265.819	763.324	0	0	0	0	0	0	0	603	903	0
605	5	0	0	0	0	0	0	200	300	0	25.7838	75.3152	-687.357	96146.2	45217.3	8831.77	265.784	763.122	0	0	0	0	0	0	0	603	903	0
605	6	0	0	0	0	0	0	200	300	0	25.6313	73.3316	-682.475	95871.6	44851.1	8877.55	265.718	762.524	0	0	0	0	0	0	0	603	903	0
605	7	0	0	0	0	0	0	200	300	0	26.089	72.5687	-676.371	94956	45217.3	8740.22	266.853	762.61	0	0	0	0	0	0	0	603	903	0
605	8	0	0	0	0	0	0	200	300	0	27.1571	70.585	-669.962	94040.5	44973.2	8785.99	267.128	762.633	0	0	0	0	0	0	0	603	903	0
605	9	0	0	0	0	0	0	200	300	0	26.089	70.2798	-666.605	92941.9	44057.7	8511.33	266.093	763.574	0	0	0	0	0	0	0	603	903	0
606	0	0	0	0	0	0	0	200	300	0	24.8683	69.2117	-662.943	92117.9	43996.6	8511.33	266.366	764.047	0	0	0	0	0	0	0	603	903	0
606	1	0	0	0	0	0	0	200	300	0	24.4106	67.5333	-656.535	91660.1	44179.7	7962.02	267.292	763.388	0	0	0	0	0	0	0	603	903	0
606	2	0	0	0	0	0	0	200	300	0	25.0209	66.3126	-650.126	91477	43752.5	8328.23	267.299	762.293	0	0	0	0	0	0	0	603	903	0
606	3	0	0	0	0	0	0	200	300	0	25.6313	65.7022	-645.548	90653.1	43386.3	7824.69	267.208	762.572	0	0	0	0	0	0	0	603	903	0
606	4	0	0	0	0	0	0	200	300	0	24.5631	62.9556	-640.36	90653.1	43203.2	7916.24	267.467	761.434	0	0	0	0	0	0	0	603	903	0
606	5	0	0	0	0	0	0	200	300	0	23.8002	63.7186	-636.088	88638.9	43142.1	7595.81	267.824	763.65	0	0	0	0	0	0	0	603	903	0
[truncated: 1,674 more rows]
