# Supplementary material for: The Effects of an Extemporaneous Speech Dual-task on Older Adult Gait Control
Source: Research Square preprint supplement (doi:10.21203/rs.3.rs-7674245/v1), 2025-11-18
Supplement: Supplementary file 207 [file Over9ground05.xlsx]

## Sheet: Sheet1
Trajectories
		09:LFHD			09:RFHD			09:LBHD			09:RBHD			09:C7			09:T10			09:CLAV			09:STRN			09:RBAK			09:LSHO			09:LUPA			09:LELB			09:LFRM			09:LWRA			09:LWRB			09:LFIN
Frame	Sub Frame	X	Y	Z	X	Y	Z	X	Y	Z	X	Y	Z	X	Y	Z	X	Y	Z	X	Y	Z	X	Y	Z	X	Y	Z	X	Y	Z	X	Y	Z	X	Y	Z	X	Y	Z	X	Y	Z	X	Y	Z	X	Y	Z
		mm	mm	mm	mm	mm	mm	mm	mm	mm	mm	mm	mm	mm	mm	mm	mm	mm	mm	mm	mm	mm	mm	mm	mm	mm	mm	mm	mm	mm	mm	mm	mm	mm	mm	mm	mm	mm	mm	mm	mm	mm	mm	mm	mm	mm	mm	mm	mm
435	0	152.704	-1957.7	1645.73	250.538	-1958.92	1647.45	125.05	-2112.81	1663.46	271.119	-2109.8	1659.7	190.905	-2154.51	1489.51	170.833	-2203.94	1230.32	199.247	-2000.05	1413.49	194.651	-1905.55	1204.51	234.565	-2213.43	1286.77	10.8816	-2051.6	1454.88	-69.7009	-2022.62	1230.97	-89.8707	-2012.31	1130.91	-95.996	-1898.71	992.873	-49.1184	-1849.91	928.189	-112.853	-1879.87	916.741	-94.2115	-1812.45	873.546
436	0	152.094	-1943.17	1648.07	249.758	-1944.77	1650.51	123.992	-2098.33	1666.26	270.11	-2095.51	1663.38	191.128	-2141.17	1492.16	172.661	-2190.26	1233.4	198.854	-1986.22	1417.01	193.646	-1892.32	1207.67	236.492	-2199.44	1290.41	10.6894	-2039.32	1456.8	-69.3753	-2014.74	1231.63	-89.1722	-2006.03	1131.38	-95.3809	-1896.58	990.455	-48.4287	-1849.67	924.073	-112.231	-1879.72	913.818	-92.9757	-1814.02	867.843
437	0	151.353	-1928.94	1650.31	249.226	-1930.53	1653.08	123.049	-2083.91	1668.95	269.259	-2081.37	1666.93	191.554	-2127.1	1495.55	174.475	-2176.57	1236.47	198.539	-1972.41	1419.77	193.034	-1879.1	1211.11	238.458	-2185.27	1293.76	10.3166	-2026.83	1458.76	-68.8759	-2007.12	1232.55	-87.9797	-2000.15	1132.1	-94.4847	-1894.77	988.233	-47.4488	-1850	920.147	-111.668	-1880.15	911.182	-91.9595	-1816.23	862.396
438	0	150.594	-1914.79	1652.53	248.263	-1916.39	1655.64	122.152	-2069.72	1671.27	268.369	-2067.11	1669.92	191.988	-2112.95	1498.76	176.151	-2162.88	1239.01	198.299	-1958.44	1422.27	192.18	-1865.93	1213.8	240.292	-2170.91	1296.86	10.1669	-2014.21	1460.51	-68.4828	-1999.86	1233.1	-86.4914	-1994.82	1132.45	-93.6697	-1893.53	985.984	-46.7607	-1850.67	916.628	-110.832	-1881.35	908.314	-91.2852	-1818.99	857.537
439	0	149.548	-1900.85	1654.31	247.07	-1902.35	1658.06	121.402	-2055.7	1673.16	267.488	-2052.92	1672.68	192.167	-2099.16	1501.24	177.767	-2148.96	1241.5	197.932	-1944.51	1424.71	191.628	-1852.61	1216.77	242.209	-2156.65	1299.73	9.89708	-2001.78	1461.88	-67.9664	-1992.65	1233.74	-85.52	-1989.45	1132.94	-92.8253	-1892.74	983.716	-46.0468	-1851.6	912.97	-109.891	-1882.93	905.651	-91.0323	-1821.97	853.045
440	0	148.481	-1887.06	1655.88	245.99	-1888.15	1660.31	120.644	-2041.97	1674.61	266.728	-2038.83	1674.82	192.611	-2085.28	1503.4	179.449	-2135.08	1243.6	197.534	-1930.56	1426.76	191.138	-1839.17	1219.38	244.178	-2142.31	1301.95	9.74796	-1989.31	1462.96	-67.4903	-1985.45	1234	-84.128	-1984.41	1133.12	-91.8214	-1892	981.157	-45.3811	-1852.87	909.373	-108.92	-1884.97	902.756	-90.6309	-1825.48	848.515
441	0	147.415	-1873.25	1657.2	244.9	-1874.19	1662.27	119.985	-2028.34	1675.55	266.066	-2024.74	1676.63	193.008	-2071.04	1505.59	181.041	-2121.21	1245.14	197.188	-1916.62	1428.06	190.655	-1825.82	1221.08	246.163	-2128.06	1303.8	9.75898	-1976.69	1463.7	-66.7573	-1978.33	1233.96	-82.6209	-1979.52	1133.04	-90.6825	-1891.78	978.963	-44.4794	-1854.31	905.776	-107.796	-1887.31	900.44	-90.1818	-1829.26	844.098
442	0	146.162	-1859.54	1657.99	243.805	-1859.83	1663.51	119.352	-2014.65	1676.11	265.47	-2010.5	1677.93	193.583	-2056.9	1507.11	182.622	-2107.49	1246.4	197.236	-1902.61	1429.08	190.25	-1812.28	1222.41	248.083	-2113.66	1305.48	9.63425	-1964.06	1464.05	-65.8719	-1971.05	1233.89	-81.4072	-1974.56	1133.07	-89.8364	-1891.68	976.362	-43.7317	-1856.02	902.092	-107.417	-1889.32	897.852	-89.6789	-1833.25	839.686
443	0	145.048	-1845.67	1658.44	242.513	-1845.61	1664.37	118.794	-2001.13	1676.12	264.88	-1996.12	1678.67	194.159	-2042.99	1507.49	184.332	-2093.78	1247.2	196.99	-1888.7	1429.66	189.999	-1799.35	1223.15	249.954	-2099.32	1306.51	9.58968	-1951.46	1463.76	-64.8761	-1963.69	1233.34	-79.9273	-1969.77	1132.72	-88.6576	-1891.79	973.599	-42.852	-1857.56	898.347	-106.207	-1892.04	895.12	-89.2595	-1837.25	835.23
444	0	143.715	-1831.94	1658.48	241.247	-1831.41	1664.73	118.553	-1987.43	1675.82	264.352	-1981.7	1679.06	194.557	-2028.8	1508.12	186.055	-2080.16	1247.42	196.701	-1874.59	1429.63	189.741	-1786.21	1223.16	251.793	-2085.06	1307.03	9.65741	-1938.73	1463.23	-63.9721	-1956.31	1232.66	-78.3145	-1964.75	1132.08	-87.5629	-1891.81	970.903	-41.9369	-1859.36	894.693	-104.685	-1894.83	891.998	-88.3754	-1841.51	830.882
445	0	142.509	-1818.01	1658.02	239.902	-1817.01	1664.55	118.07	-1973.77	1675.16	263.739	-1967.2	1678.72	195.202	-2014.65	1507.88	187.69	-2066.36	1247.34	196.636	-1860.62	1429.19	189.594	-1773.17	1222.69	253.442	-2070.93	1307.09	9.49145	-1925.93	1462.34	-62.9709	-1948.58	1231.52	-76.7651	-1959.73	1131.2	-86.4236	-1891.93	968.006	-41.2602	-1861.36	891.163	-103.566	-1897.6	889.268	-87.8646	-1845.85	826.607
446	0	141.322	-1804.06	1657.16	238.708	-1802.46	1664.17	117.638	-1960.02	1674.02	263.369	-1952.37	1678.24	195.5	-2000.55	1507.17	189.1	-2052.77	1246.72	196.495	-1846.48	1428.36	189.546	-1759.95	1221.86	254.994	-2056.86	1306.82	9.41254	-1912.97	1460.76	-61.9246	-1940.84	1230.11	-75.1742	-1954.63	1130.02	-85.1037	-1891.77	965.211	-40.1934	-1863.28	887.379	-101.963	-1900.23	886.544	-87.1516	-1850.23	822.592
447	0	140.2	-1790.03	1655.98	237.618	-1787.74	1663.23	117.447	-1946.05	1672.68	262.783	-1937.72	1677.06	195.816	-1986.57	1505.69	190.363	-2039.18	1245.66	196.203	-1832.47	1427.06	189.53	-1746.4	1220.17	256.384	-2042.79	1305.97	9.24606	-1899.95	1458.88	-60.9588	-1933.07	1228.41	-73.4928	-1949.25	1128.74	-84.0384	-1891.7	962.055	-39.5681	-1864.79	883.594	-100.773	-1902.71	883.82	-86.7661	-1854.42	818.462
448	0	139.17	-1775.76	1654.29	236.521	-1773.14	1661.71	117.361	-1931.84	1671.01	262.503	-1922.7	1675.98	196.357	-1972.17	1504.33	191.345	-2025.58	1244.35	195.982	-1818.25	1425.27	189.664	-1732.74	1218.33	257.605	-2028.78	1304.84	9.36865	-1886.75	1456.79	-59.795	-1925.17	1226.6	-71.5925	-1943.76	1127.34	-82.7808	-1891.35	959.294	-38.4037	-1866.59	879.948	-98.9768	-1905.35	880.882	-85.5849	-1858.88	814.307
449	0	138.284	-1761.43	1652.31	235.597	-1758.27	1659.74	117.094	-1917.53	1669.28	262.355	-1907.76	1674.32	196.784	-1957.89	1502.36	191.963	-2011.77	1242.92	195.764	-1804.21	1423.31	189.716	-1718.83	1215.52	258.449	-2014.85	1303.42	9.21555	-1873.39	1454.46	-58.6758	-1916.98	1224.54	-69.7872	-1937.91	1125.93	-81.5631	-1890.98	956.424	-38.093	-1868.08	876.653	-97.4653	-1907.64	878.392	-84.3523	-1863.36	810.026
450	0	137.5	-1746.96	1649.93	234.619	-1743.47	1657.54	116.976	-1903.21	1667.33	262.113	-1892.47	1672.67	196.861	-1943.55	1500.19	192.231	-1998.13	1241.07	195.33	-1790.07	1420.75	189.784	-1704.64	1212.57	259.111	-2000.94	1301.79	9.08246	-1859.79	1451.68	-57.5544	-1908.75	1222.47	-67.6996	-1931.97	1124.24	-80.0853	-1890.38	953.587	-37.1759	-1868.32	873.523	-95.8706	-1909.9	876.128	-83.4541	-1867.54	806.194
451	0	136.708	-1732.43	1647.09	233.934	-1728.57	1654.92	116.839	-1888.81	1665.08	261.915	-1877.48	1670.37	197.108	-1929.6	1497.23	191.998	-1984.44	1239	195.176	-1775.94	1418.53	189.72	-1690.28	1209.38	259.521	-1987.15	1299.85	8.81746	-1846.25	1448.92	-56.4614	-1900.35	1220.44	-65.7028	-1925.58	1122.63	-78.7627	-1889.75	951.005	-35.5065	-1870.52	870.009	-94.2779	-1911.63	873.961	-82.2696	-1871.59	802.748
452	0	136.065	-1717.68	1644.06	233.313	-1713.42	1651.95	116.739	-1874.07	1662.7	261.846	-1862.34	1668.09	197.042	-1915.16	1494.59	191.428	-1970.59	1236.85	194.859	-1761.78	1415.59	189.731	-1675.6	1205.97	259.59	-1973.39	1297.63	8.50849	-1832.23	1445.92	-55.5091	-1891.34	1218.29	-63.6136	-1918.76	1120.99	-77.2653	-1888.41	948.561	-34.5062	-1871.46	866.799	-92.4691	-1913.39	872.275	-81.2806	-1875.67	799.537
453	0	135.662	-1702.84	1640.78	232.668	-1698.37	1648.42	116.636	-1859.15	1660.41	261.732	-1846.94	1665.73	197.045	-1900.91	1491.88	190.662	-1956.64	1234.48	194.653	-1747.6	1412.93	189.849	-1660.94	1202.44	259.602	-1959.73	1295.24	8.33329	-1818.25	1443.26	-54.4504	-1881.94	1216.19	-61.1063	-1911.46	1119.37	-75.9357	-1886.85	946.831	-34.1767	-1870.71	864.307	-90.9156	-1914.45	871.239	-80.5029	-1879.33	797.285
454	0	135.21	-1688.01	1637.32	232.1	-1683.56	1644.71	116.71	-1844.26	1657.82	261.595	-1831.48	1663.03	196.869	-1886.34	1489.28	189.734	-1942.56	1231.99	194.281	-1733.43	1409.81	190.007	-1646.28	1199.15	259.148	-1945.8	1292.85	7.90877	-1804.08	1440.32	-53.5739	-1872.1	1214.42	-59.0337	-1903.66	1118.22	-74.5685	-1884.87	945.109	-33.5947	-1870.28	862.036	-89.1784	-1915.34	870.357	-79.4075	-1882.71	795.085
455	0	134.952	-1673.06	1633.94	232.036	-1668.22	1641.46	116.654	-1829.27	1655.39	261.583	-1816.08	1660.62	196.577	-1871.74	1486.9	188.7	-1928.48	1229.41	194.075	-1719.11	1406.84	190.272	-1631.78	1195.71	258.416	-1931.57	1290.2	7.56625	-1789.73	1437.7	-52.5989	-1861.92	1212.71	-56.7243	-1895.43	1117.06	-73.4105	-1882.23	943.94	-31.3928	-1871.34	860.074	-87.6166	-1915.38	870.177	-78.3698	-1886.02	793.012
456	0	134.542	-1658.1	1630.4	231.852	-1653.1	1637.91	116.458	-1814.16	1652.86	261.499	-1800.95	1657.66	195.972	-1857.16	1484.52	187.4	-1914.44	1226.47	193.579	-1704.83	1403.75	190.278	-1617.4	1192.35	257.651	-1917.71	1287.23	6.89488	-1775.34	1434.99	-51.754	-1851.28	1211.09	-54.4487	-1886.56	1115.87	-72.4176	-1878.88	943.051	-30.7563	-1869.63	858.741	-86.1649	-1914.69	870.388	-77.5736	-1888.54	791.828
457	0	134.315	-1643.1	1627.01	231.625	-1638.28	1634.39	116.208	-1799.09	1650.31	261.143	-1785.92	1654.95	195.196	-1842.86	1481.6	186.198	-1900.18	1223.78	193.282	-1690.32	1400.96	190.194	-1603.17	1189.13	256.612	-1903.47	1284.27	6.2973	-1760.67	1432.3	-50.9935	-1840.24	1209.42	-52.4183	-1877.3	1114.83	-71.3734	-1874.87	942.397	-30.5098	-1867.1	857.553	-84.9119	-1913.05	870.995	-76.6591	-1890.47	791.037
458	0	133.931	-1627.99	1623.8	231.058	-1623.48	1630.76	115.929	-1783.88	1648.12	260.671	-1771.09	1652.09	194.314	-1828.36	1479.08	185.063	-1885.88	1220.82	192.768	-1675.84	1398.22	190.17	-1588.77	1186.48	255.536	-1889.04	1281.48	5.51141	-1745.89	1429.74	-50.446	-1828.83	1207.87	-50.4198	-1867.22	1113.96	-70.7389	-1870.05	942.105	-30.7095	-1863.49	856.882	-83.7299	-1910.62	871.933	-75.6888	-1891.5	790.61
459	0	133.639	-1613.03	1620.98	231.054	-1608.41	1628.28	115.365	-1768.67	1645.82	260.516	-1755.73	1649.83	193.454	-1813.53	1477.2	184.01	-1871.26	1218.34	192.04	-1661.18	1395.63	189.996	-1574.16	1184.38	254.344	-1874.53	1278.88	4.70028	-1731.1	1427.41	-50.0768	-1817.07	1206.53	-48.6274	-1856.64	1113.52	-70.262	-1864.15	942.192	-30.6821	-1858.99	856.077	-82.0601	-1906.97	873.053	-74.9437	-1891.73	790.49
460	0	133.245	-1598.04	1618.25	230.545	-1593.46	1625.18	114.82	-1753.66	1643.76	259.596	-1740.61	1647.71	192.323	-1798.72	1475.29	183.036	-1856.49	1216.03	191.2	-1646.43	1393.3	189.534	-1559.53	1182.33	253.212	-1859.88	1276.47	3.78901	-1716.09	1425.17	-49.7608	-1804.78	1205.28	-47.3572	-1845.54	1112.61	-70.1499	-1857.21	942.229	-32.4239	-1852.15	855.717	-81.4461	-1902.01	874.197	-74.1948	-1890.78	790.651
461	0	132.467	-1583.08	1615.87	229.714	-1578.57	1622.89	113.872	-1738.62	1641.7	258.84	-1725.79	1645.72	191.326	-1784.11	1473.13	182.277	-1841.48	1213.75	190.432	-1631.63	1391.43	188.784	-1544.83	1180.61	252.313	-1845.05	1274.33	2.8136	-1701.13	1423.06	-49.5129	-1792.09	1203.9	-46.1826	-1833.91	1111.87	-70.0865	-1849.31	942.276	-33.1643	-1845.12	855.241	-80.8283	-1895.96	875.575	-73.2955	-1888.56	791.117
462	0	131.478	-1568.17	1613.63	228.839	-1563.84	1620.78	112.871	-1723.67	1639.77	257.832	-1711.08	1643.87	190.186	-1769.47	1471.31	181.746	-1826.17	1211.55	189.51	-1616.84	1389.77	187.669	-1530.12	1179.07	251.419	-1830.11	1272.3	1.8732	-1686.27	1421.03	-49.4974	-1778.95	1202.66	-45.5987	-1821.61	1111.26	-70.0734	-1840.15	942.266	-34.4342	-1837.24	854.928	-80.6239	-1888.38	876.703	-72.6711	-1884.82	791.936
463	0	130.355	-1553.56	1611.87	227.658	-1549.18	1619.18	111.578	-1708.93	1638.13	256.532	-1696.42	1642.57	189.071	-1754.82	1469.85	181.297	-1810.65	1209.73	188.652	-1601.97	1388.45	186.308	-1515.11	1177.92	250.685	-1814.95	1270.52	0.655475	-1671.5	1419.61	-49.8988	-1765.38	1201.46	-45.3352	-1808.84	1110.6	-70.671	-1830.09	942.319	-34.1468	-1829.39	854.38	-80.9788	-1879.41	877.804	-71.462	-1879.5	792.635
464	0	129.079	-1538.89	1610.35	226.523	-1534.57	1618.05	110.033	-1694.16	1636.85	254.907	-1681.73	1641.61	187.88	-1740.12	1468.59	180.91	-1795.16	1208.11	187.475	-1587.03	1387.35	184.864	-1499.71	1177.27	249.94	-1799.64	1268.91	-0.413369	-1656.77	1418.36	-50.418	-1751.26	1200.41	-45.6169	-1795.48	1109.98	-71.2046	-1818.99	942.312	-35.8793	-1817.97	854.597	-81.7185	-1869.15	878.796	-70.9596	-1872.31	793.529
465	0	127.79	-1524.28	1609.36	225.354	-1520.06	1617.43	108.335	-1679.54	1635.85	253.326	-1667.41	1641.12	186.442	-1725.54	1467.3	180.5	-1779.32	1206.57	186.316	-1571.91	1386.76	183.038	-1483.88	1177.06	249.196	-1784.23	1267.54	-1.82002	-1641.86	1417.23	-51.0492	-1736.72	1199.54	-46.1308	-1781.53	1109.62	-72.3291	-1806.62	942.381	-37.3695	-1806.62	854.399	-82.6714	-1857.45	879.417	-70.4043	-1863.36	794.144
466	0	126.352	-1509.71	1609.03	223.732	-1505.87	1617.08	106.565	-1665	1635.25	251.621	-1653.08	1641.03	184.989	-1710.87	1466.62	179.889	-1763.34	1205.16	185.024	-1556.74	1386.65	181.455	-1467.64	1177.53	248.248	-1768.71	1266.34	-3.21549	-1626.92	1416.66	-52.0646	-1721.87	1199.16	-47.0302	-1767.11	1109.54	-73.5731	-1793.22	942.573	-38.3415	-1794	854.348	-84.0198	-1844.49	879.89	-70.1578	-1852.48	794.704
467	0	124.877	-1495.2	1609.2	222.118	-1491.65	1617.46	104.502	-1650.34	1635	249.554	-1639	1641.26	183.283	-1695.82	1466.03	179.014	-1747.22	1204.22	183.73	-1541.69	1386.75	179.856	-1451.56	1178.2	247.027	-1753.05	1265.62	-4.6407	-1611.96	1416.17	-53.3289	-1706.85	1199.08	-48.482	-1752.03	1109.26	-75.0275	-1778.71	942.618	-39.1587	-1780.17	854.528	-85.6369	-1830.15	880.197	-70.3625	-1839.81	795.11
468	0	123.047	-1480.79	1609.67	220.378	-1477.59	1618.39	102.259	-1635.87	1634.88	247.427	-1625.11	1641.56	181.515	-1681.06	1465.83	177.903	-1731.05	1203.97	182.305	-1526.31	1387.42	178.449	-1435.36	1178.83	245.56	-1737.34	1265.24	-6.1307	-1596.52	1415.89	-54.9549	-1691.36	1198.89	-49.95	-1736.72	1109.17	-76.4963	-1763.29	942.462	-40.9431	-1764.98	854.768	-87.5542	-1814.58	880.106	-70.6584	-1825.44	795.288
469	0	121.418	-1466.34	1610.86	218.709	-1463.42	1619.54	100.153	-1621.61	1634.79	245.246	-1611.27	1642.08	180.019	-1665.79	1465.84	176.489	-1714.96	1203.8	180.994	-1510.92	1388.1	177.204	-1419.24	1179.62	243.93	-1721.68	1264.99	-7.41633	-1581.13	1415.97	-56.3274	-1675.58	1199.1	-51.6968	-1720.66	1109.22	-78.3316	-1746.88	942.329	-42.0336	-1748.41	854.947	-89.7143	-1797.79	880.03	-71.4863	-1809.34	795.193
470	0	119.604	-1451.83	1611.98	217	-1449.19	1621.24	98.1341	-1607.29	1635.19	242.953	-1597.08	1642.67	178.567	-1650.69	1466.3	174.956	-1699.15	1203.99	180.024	-1495.56	1389.15	176.348	-1403.29	1180.48	242.408	-1705.97	1265.33	-8.57746	-1565.31	1416.26	-57.8944	-1659.37	1199.31	-53.678	-1704.12	1109.31	-80.2839	-1729.4	942.315	-42.6712	-1732.02	854.944	-91.9223	-1779.91	879.601	-72.7694	-1791.6	794.757
471	0	117.705	-1437.4	1613.73	215.177	-1434.84	1623.38	96.0329	-1592.69	1635.79	241.11	-1582.97	1644.15	177.35	-1635.68	1467.34	173.271	-1683.4	1204.99	179.016	-1480.25	1390.21	175.755	-1387.53	1181.28	240.867	-1690.4	1266.23	-9.67876	-1549.56	1416.81	-59.5458	-1642.75	1199.87	-55.7874	-1687.1	1109.63	-82.5258	-1710.99	942.173	-45.2756	-1712.39	854.974	-94.5427	-1760.97	879.204	-74.629	-1772.38	794.299
472	0	115.892	-1423.01	1615.44	213.103	-1420.41	1625.42	94.124	-1578.43	1636.22	239.189	-1568.7	1645.59	176.417	-1618.74	1468.88	171.702	-1668.15	1206.43	178.001	-1465.13	1391.48	175.432	-1372.01	1182.37	239.561	-1675.16	1267.56	-10.4825	-1533.96	1417.67	-61.0971	-1625.62	1200.15	-57.9481	-1669.71	1109.55	-84.5966	-1691.85	941.928	-46.7199	-1693.39	854.82	-96.9481	-1740.83	878.493	-76.8641	-1751.51	793.365
473	0	113.979	-1408.63	1616.92	211.106	-1405.84	1627.53	92.5039	-1564.18	1637.04	237.351	-1554.2	1646.92	175.598	-1605.26	1469.77	170.337	-1653.48	1207.92	177.31	-1450.04	1393.03	175.325	-1356.93	1183.43	238.592	-1660.12	1269.37	-11.1195	-1518.39	1418.64	-62.6934	-1608.33	1200.48	-60.2764	-1651.79	1109.68	-86.9357	-1671.84	941.556	-48.9381	-1672.58	854.626	-99.6419	-1720.02	877.336	-79.5924	-1729.31	792.21
474	0	112.303	-1394.17	1618.39	209.592	-1390.97	1629.49	91.0737	-1549.88	1637.8	235.826	-1539.49	1648.54	174.87	-1589.29	1471.99	169.284	-1638.97	1209.78	176.702	-1435.22	1394.4	175.183	-1342.23	1184.37	237.831	-1645.4	1271.26	-11.4886	-1503.23	1419.93	-64.1731	-1590.71	1200.83	-62.5174	-1633.5	1109.68	-89.3357	-1651.09	941.31	-51.0544	-1650.9	854.345	-102.418	-1698.26	876.236	-82.9699	-1705.82	790.983
475	0	110.816	-1379.73	1619.68	207.894	-1376.14	1631.12	90.1663	-1535.38	1638.94	234.857	-1524.48	1650.52	174.143	-1573.9	1473.87	168.67	-1624.64	1211.7	176.272	-1420.67	1395.7	175.076	-1327.89	1185.24	237.333	-1630.99	1273.25	-11.7714	-1488.42	1421.56	-65.5399	-1572.79	1201.3	-64.9235	-1615.03	1109.55	-91.7506	-1629.27	940.936	-54.465	-1627.37	853.965	-105.334	-1675.33	875.174	-86.8031	-1680.79	789.664
476	0	109.801	-1365.09	1621.07	207.036	-1361.25	1632.79	89.499	-1520.74	1640.52	234.079	-1509.65	1652.46	173.584	-1558.78	1475.74	168.24	-1610.51	1213.54	176.102	-1406.29	1397.27	174.863	-1313.72	1186.42	237.016	-1616.91	1275.31	-12.1006	-1473.81	1423.3	-66.7753	-1554.83	1201.55	-67.1844	-1596.03	1109.68	-93.9739	-1607.06	940.479	-56.7311	-1603.78	853.603	-108.055	-1651.62	873.851	-90.6615	-1654.51	788.388
477	0	109.225	-1350.38	1622.51	206.365	-1346.21	1634.12	89.1692	-1505.92	1642.7	234.288	-1494.29	1654.75	171.161	-1548.78	1477.14	167.65	-1596.51	1215.32	175.913	-1392.22	1399.03	174.932	-1299.69	1187.82	236.583	-1603.13	1277.23	-12.3592	-1459.4	1425.12	-68.0111	-1536.75	1202.15	-69.6312	-1576.89	1109.58	-96.1112	-1584.04	940.144	-57.6981	-1580.69	853.305	-110.736	-1627.17	872.497	-94.684	-1626.99	787.187
478	0	108.949	-1335.58	1623.73	205.896	-1331.4	1634.96	89.1105	-1491.06	1645.26	233.9	-1479.28	1656.57	171.298	-1533.97	1479.21	166.897	-1582.43	1217.31	175.728	-1378.39	1400.89	174.925	-1285.78	1189.42	235.803	-1589.39	1279.11	-12.4731	-1445.24	1427.24	-69.3593	-1518.39	1202.65	-71.8216	-1557.58	1109.88	-98.0498	-1560.61	939.759	-59.9017	-1555.89	853.199	-113.318	-1601.93	871.377	-98.8634	-1598.24	786.611
479	0	109.192	-1320.73	1625.21	205.874	-1316.66	1635.88	89.1925	-1476.09	1647.94	233.932	-1464.44	1658.74	171.259	-1519.42	1481.06	166.125	-1568.38	1219.36	175.544	-1364.72	1402.63	174.989	-1271.87	1191.48	234.792	-1575.81	1281.07	-12.8275	-1431.06	1429.3	-70.4359	-1499.95	1203.48	-74.1512	-1537.96	1110.08	-100.092	-1536.63	939.634	-63.3088	-1528.76	853.432	-115.91	-1575.98	870.406	-102.971	-1568.54	785.901
480	0	109.628	-1305.72	1626.76	206.572	-1301.66	1637.31	89.4986	-1460.93	1650.91	234.344	-1449.4	1660.99	171.038	-1505.29	1482.65	165.308	-1554.48	1221.5	175.541	-1350.85	1404.96	174.947	-1258.22	1193.75	233.668	-1562.32	1282.96	-13.1205	-1416.73	1431.69	-71.5802	-1481.62	1204.78	-76.5403	-1518.02	1110.7	-101.908	-1512.12	939.92	-64.5733	-1503.21	853.775	-118.332	-1549.43	869.587	-106.913	-1537.73	786.098
481	0	110.314	-1290.81	1628.7	207.63	-1286.65	1638.91	90.2734	-1445.6	1654.36	235.2	-1434.19	1663.5	171.317	-1490.57	1485.61	164.314	-1540.74	1223.99	175.502	-1337.05	1407.37	174.882	-1244.54	1196	232.376	-1548.74	1285.19	-13.1684	-1402.49	1434.32	-72.8575	-1462.99	1206.38	-78.6997	-1497.94	1111.37	-103.606	-1487.22	940.829	-65.4611	-1477.34	854.797	-120.416	-1522.5	869.378	-110.88	-1506.21	787.191
482	0	111.326	-1275.75	1630.76	208.458	-1271.98	1640.25	91.0436	-1430.48	1657.76	236.112	-1419.2	1666.19	171.185	-1475.94	1488.69	163.068	-1527.11	1226.72	175.523	-1323.24	1409.84	175.063	-1230.76	1198.81	230.923	-1535.36	1287.67	-13.4373	-1388.1	1437.18	-74.1197	-1444.58	1208.41	-81.0514	-1477.73	1112.55	-105.385	-1462.02	942.081	-67.9455	-1449.11	856.223	-122.568	-1494.86	869.511	-114.61	-1473.99	789.213
483	0	112.31	-1260.77	1632.88	209.672	-1257.32	1641.94	91.8888	-1415.28	1660.99	237.043	-1404.2	1668.8	170.871	-1461.68	1491.59	161.743	-1513.52	1229.53	175.452	-1309.62	1412.46	175.043	-1216.94	1201.53	229.343	-1522.02	1290.28	-13.6701	-1373.6	1440.05	-75.483	-1426.24	1210.63	-83.178	-1457.27	1114.04	-106.945	-1436.58	943.921	-69.2148	-1421.72	858.705	-124.452	-1466.77	870.281	-117.936	-1441.32	791.843
484	0	113.44	-1245.94	1635.15	211.15	-1242.52	1643.5	92.7192	-1400.07	1664.37	238	-1389.38	1671.1	170.52	-1447.44	1494.51	160.215	-1499.89	1232.29	175.565	-1296.17	1414.7	175.565	-1202.62	1204.79	227.687	-1508.47	1292.81	-13.8615	-1359.17	1443.13	-76.6989	-1407.69	1213.15	-85.3563	-1436.86	1115.93	-108.579	-1410.76	946.211	-70.499	-1393.89	861.276	-126.243	-1438.44	871.679	-121.187	-1408.29	795.421
485	0	114.591	-1230.99	1637.21	212.234	-1227.98	1644.8	93.3278	-1385.02	1667.7	238.729	-1374.85	1672.87	169.966	-1433.19	1497.14	158.712	-1486.03	1234.99	175.602	-1282.33	1416.7	175.268	-1189.28	1206.92	226	-1494.97	1295.28	-14.1636	-1344.48	1446.19	-77.9768	-1389.33	1215.75	-87.4176	-1416.48	1117.88	-110.32	-1384.57	948.79	-72.7395	-1364.05	864.695	-128.033	-1409.63	873.458	-124.249	-1375.09	799.588
486	0	115.596	-1216.17	1639.1	213.232	-1213.5	1645.93	94.2745	-1369.96	1670.56	238.75	-1360.91	1673.53	169.542	-1418.96	1499.52	157.341	-1472.24	1237.36	175.484	-1268.36	1418.6	175.519	-1175.72	1209.24	224.357	-1481.43	1297.58	-14.0768	-1329.72	1448.96	-79.2917	-1371.07	1218.31	-89.4673	-1396.11	1119.86	-112.271	-1358.27	951.893	-74.8134	-1334.29	868.322	-129.816	-1380.48	875.532	-126.997	-1341.72	804.14
487	0	116.589	-1201.45	1640.75	214.257	-1198.97	1646.91	95.1517	-1354.96	1673.08	240.214	-1346.03	1675.77	169.19	-1404.72	1501.67	156.063	-1458.42	1239.49	175.563	-1254.3	1420.16	175.533	-1162.43	1211.16	222.948	-1467.83	1299.72	-14.0842	-1314.8	1451.59	-80.4846	-1352.73	1220.83	-91.497	-1375.86	1122.05	-113.813	-1331.64	954.892	-76.5011	-1304.71	872.402	-131.624	-1350.79	878.184	-129.652	-1308.38	809.228
488	0	117.523	-1186.63	1642.25	215.015	-1184.51	1647.61	95.6796	-1340.13	1675.26	240.568	-1331.71	1676.89	168.885	-1390.48	1503.52	154.911	-1444.64	1241.27	175.554	-1240.32	1421.38	175.491	-1149.31	1212.62	221.544	-1454	1301.47	-14.1598	-1299.76	1454	-81.6481	-1334.37	1223.18	-93.586	-1355.6	1123.96	-115.711	-1304.94	958.211	-78.4338	-1275.58	876.096	-133.247	-1321.37	880.739	-132.195	-1275.15	814.361
489	0	118.189	-1171.86	1643.29	215.886	-1170.04	1648.44	96.0409	-1325.31	1676.76	240.54	-1317.46	1677.45	168.326	-1376.14	1504.76	153.78	-1430.81	1242.85	175.402	-1226.33	1422.33	175.69	-1136.18	1213.9	220.147	-1440.42	1302.86	-14.1459	-1284.88	1455.92	-83.0068	-1316.21	1225.24	-95.6127	-1335.35	1125.67	-117.743	-1278.07	961.461	-80.586	-1245.13	881.068	-134.989	-1291.41	883.31	-134.575	-1242.06	819.562
490	0	118.57	-1157.2	1644.04	216.538	-1155.54	1648.92	96.2828	-1310.41	1678.04	240.721	-1303.06	1677.94	167.849	-1361.73	1505.74	152.883	-1416.96	1244.07	175.533	-1212.09	1423.1	175.904	-1122.84	1214.86	218.923	-1426.32	1303.96	-14.1436	-1269.89	1457.4	-84.312	-1298.14	1226.94	-97.8928	-1315.16	1127.09	-119.972	-1251.45	964.993	-83.1269	-1213.72	886.484	-136.586	-1261.34	886.102	-136.654	-1209.11	824.678
491	0	118.982	-1142.37	1644.46	216.791	-1140.97	1648.88	96.4502	-1295.6	1678.69	240.925	-1288.54	1678.31	167.356	-1347.28	1506.27	151.896	-1403.01	1244.77	175.655	-1197.82	1423.46	176.317	-1109.59	1215.5	217.76	-1412.32	1304.66	-14.0855	-1254.9	1458.5	-85.6969	-1280.06	1228.2	-99.9473	-1294.92	1127.96	-122.127	-1224.35	968.236	-85.4857	-1183.16	891.591	-138.01	-1231.46	888.786	-138.692	-1176.31	830.037
492	0	119.19	-1127.51	1644.46	217.13	-1126.24	1648.82	96.3106	-1280.61	1679.07	241.208	-1273.58	1678.53	166.964	-1332.66	1506.77	150.877	-1389.19	1245.24	175.797	-1183.56	1423.39	176.536	-1096.27	1215.53	216.705	-1398.58	1305.02	-14.1001	-1239.73	1458.97	-87.2763	-1262.13	1229.42	-102.3	-1274.68	1128.51	-124.288	-1197.85	971.375	-87.928	-1152.03	897.447	-139.16	-1201.47	891.535	-140.394	-1143.56	835.308
493	0	118.987	-1112.62	1643.92	217.035	-1111.53	1648.06	96.0053	-1265.49	1678.85	240.714	-1258.98	1678.04	166.52	-1318.05	1506.7	149.915	-1375.34	1245.45	175.824	-1169.21	1422.75	176.858	-1083.13	1214.84	215.733	-1384.5	1305.11	-14.1053	-1224.74	1459.02	-88.7298	-1244.11	1229.89	-104.51	-1254.49	1128.68	-126.254	-1170.99	974.4	-90.1209	-1121.27	902.912	-140.661	-1171.33	894.315	-141.713	-1111.08	840.566
494	0	118.832	-1097.55	1642.9	217.03	-1096.66	1647.11	95.5164	-1250.35	1678.2	240.212	-1244.34	1677.01	166.229	-1303.5	1506.21	148.962	-1361.59	1245.13	175.674	-1155.01	1421.78	177.098	-1070.16	1213.77	214.955	-1370.57	1304.83	-14.0591	-1209.7	1458.46	-90.3117	-1226.08	1229.97	-106.732	-1233.95	1128.58	-128.283	-1144.41	977.204	-91.8632	-1091.22	908.565	-142.18	-1141.54	896.977	-142.861	-1078.76	845.966
495	0	118.499	-1082.51	1641.34	216.712	-1081.74	1645.57	95.1283	-1235.14	1677.06	239.939	-1229.04	1676.23	165.986	-1288.98	1505.41	148.197	-1347.91	1244.54	175.659	-1140.72	1420.35	177.236	-1057.18	1212.09	214.296	-1356.58	1304.15	-14.0388	-1194.85	1457.48	-91.8555	-1208.11	1229.67	-109.04	-1213.5	1127.91	-130.363	-1117.75	979.914	-93.5636	-1061.24	914.13	-143.351	-1111.58	899.657	-143.606	-1046.66	851.136
496	0	118.184	-1067.4	1639.45	216.262	-1066.53	1643.86	94.3821	-1219.93	1675.6	239.016	-1214.03	1674.89	165.685	-1274.54	1504.4	147.813	-1334.28	1243.79	175.61	-1126.5	1418.66	177.344	-1043.93	1209.94	213.891	-1342.75	1303.33	-13.9142	-1180.25	1456.1	-93.1891	-1190.15	1228.84	-111.114	-1192.7	1127.11	-131.972	-1091.17	982.423	-94.8312	-1031.76	919.572	-144.42	-1081.67	902.529	-144.099	-1014.65	856.705
497	0	117.503	-1052.06	1636.96	215.601	-1051.31	1641.63	93.6191	-1204.44	1673.81	238.132	-1198.56	1673.35	165.533	-1260.06	1503.15	148.037	-1320.72	1242.68	175.627	-1112.22	1416.62	177.749	-1030.26	1207.74	213.784	-1328.94	1302.27	-13.8126	-1165.8	1454.17	-94.6049	-1172.16	1227.77	-113.222	-1171.75	1126.16	-133.48	-1064.71	984.975	-95.8468	-1002.94	924.792	-145.31	-1052.14	905.393	-144.27	-982.959	862.359
498	0	116.715	-1036.77	1634.15	215.316	-1035.68	1639.39	92.7657	-1188.8	1672.03	237.511	-1183.13	1671.86	165.581	-1245.41	1501.72	148.665	-1307.06	1241.37	175.427	-1098.08	1414.62	177.811	-1016.07	1205.22	213.969	-1314.99	1301.07	-13.6979	-1151.6	1452.3	-95.7705	-1154.05	1226.73	-115.149	-1150.84	1125.08	-134.782	-1038.43	987.524	-96.4161	-974.525	930.292	-146.371	-1022.43	908.789	-144.33	-951.695	868.354
499	0	116.155	-1021.43	1631.12	214.829	-1020.38	1636.69	92.1734	-1173.14	1669.99	236.648	-1167.34	1670.35	165.673	-1230.84	1500.2	149.744	-1293.46	1239.81	175.191	-1084	1412.22	177.903	-1001.62	1202.59	214.393	-1301.18	1299.64	-13.4975	-1137.42	1450.1	-96.8776	-1135.88	1225.68	-116.9	-1129.74	1124.12	-135.765	-1012.29	990.484	-96.7154	-946.704	935.699	-147.252	-993.166	912.382	-144.336	-920.774	874.673
500	0	115.385	-1006.11	1627.75	213.748	-1004.78	1633.53	91.4771	-1157.59	1667.79	236.157	-1151.52	1668.97	165.798	-1216.41	1498.37	151.004	-1279.51	1238.05	175.28	-1069.74	1410.18	177.924	-986.982	1200.23	214.977	-1287.31	1298.19	-13.2363	-1123.47	1447.77	-97.8318	-1117.76	1224.67	-118.495	-1108.69	1123.32	-136.621	-986.446	993.39	-96.9792	-919.521	941.039	-148.306	-964.465	916.47	-144.013	-890.598	881.362
501	0	114.526	-990.738	1624.06	213.107	-989.26	1630.42	90.8994	-1142.06	1665.3	235.47	-1135.8	1667.18	165.987	-1202.05	1496.41	152.49	-1265.64	1236.07	175.554	-1055.65	1407.76	177.945	-972.461	1197.7	215.742	-1273.43	1296.51	-13.2992	-1109.85	1445.26	-98.5023	-1099.77	1223.3	-119.864	-1087.73	1122.34	-137.14	-960.892	996.584	-96.7503	-892.761	946.565	-149.409	-935.982	920.939	-143.928	-861.079	888.085
502	0	113.844	-975.596	1620.47	212.426	-973.743	1627.16	90.4281	-1126.47	1662.89	234.934	-1119.96	1665.16	166.368	-1187.52	1494.28	154.005	-1251.49	1233.92	175.354	-1041.4	1405.31	177.841	-958.357	1194.87	216.613	-1259.55	1294.57	-12.9782	-1096	1442.63	-98.7772	-1081.86	1222.15	-121.075	-1066.89	1121.7	-137.642	-935.7	1000.29	-96.5355	-866.884	951.872	-150.028	-908.496	925.439	-143.661	-832.505	895.158
503	0	113.249	-960.421	1617.03	211.978	-958.197	1623.84	90.1594	-1110.99	1660.27	234.741	-1104.05	1663.09	166.776	-1173.1	1491.87	155.394	-1237.17	1231.51	175.606	-1026.99	1402.89	178.033	-944.35	1191.98	217.375	-1246.05	1292.57	-12.6638	-1082.24	1440.19	-98.916	-1064.21	1221.01	-122.068	-1046.3	1121.4	-137.845	-911.227	1003.97	-96.1828	-841.71	957.013	-150.64	-881.468	930.274	-143.453	-804.821	902.303
504	0	112.914	-945.477	1613.61	211.67	-942.886	1620.79	90.0517	-1095.67	1657.97	234.799	-1088.46	1661.15	167.195	-1158.73	1489.58	156.716	-1222.75	1229	175.866	-1012.6	1400.25	177.801	-930.261	1189.13	218.189	-1232.53	1290.44	-12.3454	-1068.31	1437.59	-98.7193	-1046.5	1219.74	-122.684	-1026.24	1120.84	-137.543	-887.468	1007.5	-95.7342	-817.349	962.134	-150.944	-855.306	934.995	-143.217	-777.97	909.55
505	0	112.885	-930.571	1610.33	211.456	-927.696	1617.54	90.2543	-1080.44	1655.37	234.995	-1073.05	1658.71	167.735	-1144.22	1487.33	157.893	-1208.06	1226.32	176.269	-998.119	1397.98	177.858	-915.656	1186.89	219.218	-1218.04	1288.16	-11.8656	-1054.24	1435.27	-98.3888	-1029.2	1218.33	-122.956	-1006.69	1120.54	-137.445	-864.292	1011.13	-95.3589	-793.679	967.215	-151.764	-830.077	940.097	-143.027	-752.154	916.7
506	0	113.536	-915.555	1607.58	211.596	-912.581	1614.72	90.6635	-1065.33	1653.24	235.105	-1057.71	1656.46	168.305	-1129.66	1484.77	158.897	-1193.28	1223.85	176.803	-983.475	1395.63	178.097	-900.675	1184.98	220.116	-1203.49	1285.78	-11.324	-1040.06	1433.33	-97.769	-1012.04	1217.22	-122.766	-987.476	1119.87	-137.383	-842.235	1014.68	-94.8997	-770.933	971.968	-151.916	-806.042	944.764	-143.047	-727.433	923.838
507	0	113.632	-900.75	1605.03	212.156	-897.555	1612.03	91.3222	-1050.5	1650.85	235.79	-1042.45	1654.06	168.858	-1115.08	1482.53	159.694	-1178.35	1221.5	177.401	-968.738	1393.37	178.601	-885.53	1183.36	220.721	-1188.79	1283.36	-10.7654	-1025.64	1431.51	-97.0223	-995.411	1215.83	-122.824	-968.955	1119.76	-137.094	-820.972	1017.97	-94.7417	-749.118	976.601	-152.438	-782.77	949.404	-143.368	-703.814	930.69
508	0	114.315	-885.93	1602.4	212.77	-882.729	1609.46	92.1812	-1035.72	1648.87	236.661	-1027.71	1651.94	169.614	-1100.51	1480.09	160.258	-1163.23	1219.12	178.165	-953.892	1391.44	179.051	-870.633	1181.67	221.283	-1173.5	1280.93	-9.92878	-1010.85	1429.77	-96.2362	-978.847	1214.67	-122.584	-950.869	1119.36	-136.903	-800.673	1020.93	-94.7268	-727.985	980.917	-152.623	-761.031	953.42	-143.688	-681.425	937.263
509	0	115.54	-871.093	1600.7	213.99	-867.894	1607.52	93.4473	-1020.75	1647.22	237.783	-1012.72	1649.86	170.523	-1085.71	1478.05	160.671	-1147.9	1216.7	179.086	-938.877	1389.51	179.862	-855.819	1180.18	221.853	-1158.34	1278.68	-9.01773	-995.913	1428.49	-95.4387	-962.67	1213.62	-122.03	-933.551	1118.84	-136.829	-781.311	1023.38	-94.8774	-707.888	984.762	-152.589	-740.111	957.007	-144.304	-660.226	943.392
510	0	116.721	-856.374	1599.09	215.292	-853.095	1605.81	94.8676	-1006.01	1645.56	239.129	-998.038	1648.17	171.515	-1070.81	1476.13	160.813	-1132.28	1214.73	179.999	-923.882	1388.03	180.64	-841.08	1178.64	222.28	-1142.88	1276.39	-7.82629	-980.641	1427.35	-94.7063	-946.788	1212.8	-121.504	-916.487	1118.62	-136.691	-762.734	1025.47	-94.9599	-688.417	988.638	-152.593	-720.607	959.895	-145.057	-640.308	948.96
511	0	118.183	-841.745	1597.83	216.676	-838.466	1604.17	96.3597	-991.572	1644.13	240.854	-983.283	1646.4	172.607	-1055.99	1474.39	160.749	-1116.55	1212.86	181.153	-908.666	1386.57	181.715	-825.993	1177.5	222.605	-1127.24	1274.24	-6.72262	-965.365	1426.52	-93.8599	-930.981	1212.38	-121.024	-899.789	1118.3	-136.433	-745.188	1026.88	-95.4528	-670.14	991.484	-152.48	-702.231	962.055	-146.091	-621.564	953.807
512	0	119.999	-827.043	1597.03	218.476	-823.73	1603.24	97.9988	-976.861	1643.07	242.729	-968.91	1645.18	173.868	-1041.04	1472.74	160.628	-1100.63	1211.06	182.38	-893.448	1385.48	182.728	-810.215	1176.58	222.97	-1111.5	1272.22	-5.52721	-950.036	1425.86	-93.2192	-915.334	1211.96	-120.282	-883.606	1117.9	-136.533	-728.183	1027.95	-95.8809	-652.56	993.998	-152.159	-684.829	963.518	-147.288	-604.039	957.78
513	0	121.893	-812.482	1596.62	220.494	-809.064	1602.56	100.338	-962.414	1642.3	244.853	-954.489	1644.15	175.322	-1025.98	1471.33	160.754	-1084.39	1209.53	183.834	-878.067	1384.76	184.147	-793.838	1176.22	223.425	-1095.6	1270.36	-3.93443	-934.558	1425.39	-92.4329	-899.746	1211.75	-119.506	-867.842	1117.91	-136.232	-712.174	1028.45	-96.1262	-635.926	995.604	-151.85	-668.456	964.194	-148.483	-587.671	960.906
514	0	123.808	-797.853	1596.58	222.384	-794.47	1602.14	102.438	-947.883	1642	247.172	-939.846	1643.08	176.851	-1010.89	1470.32	161.024	-1067.98	1208.31	185.287	-862.646	1384.29	185.57	-777.161	1176.23	223.866	-1079.69	1268.82	-2.33419	-919.07	1425.25	-91.6313	-884.013	1211.97	-118.697	-852.456	1117.76	-135.978	-696.788	1028.5	-96.4055	-620.111	996.681	-151.441	-653.005	964.194	-149.623	-572.343	962.953
515	0	125.852	-783.235	1597.1	224.622	-779.718	1602.42	104.853	-933.6	1641.96	249.574	-925.274	1642.85	178.565	-995.723	1469.75	161.522	-1051.66	1207.38	186.692	-847.14	1384.1	186.83	-760.394	1176.52	224.563	-1063.6	1267.51	-0.909258	-903.468	1425.53	-90.7728	-868.438	1212.39	-117.525	-837.521	1117.92	-135.75	-682.01	1028.12	-96.6969	-605.355	996.76	-151.152	-638.385	963.858	-150.542	-558.008	963.911
516	0	128.291	-768.558	1598.19	226.816	-764.962	1603.01	107.555	-919.007	1642.34	252.174	-910.56	1642.64	180.351	-980.27	1469.43	162.164	-1035.41	1206.88	188.183	-831.495	1384.23	188.074	-743.755	1176.91	225.367	-1047.61	1266.67	0.609706	-887.976	1426.11	-89.7659	-852.967	1213.09	-116.546	-822.784	1118.21	-135.379	-667.906	1027.83	-96.5319	-591.197	996.26	-150.69	-624.57	963.214	-151.165	-544.507	964.056
517	0	130.631	-753.774	1599.87	229.322	-750.029	1604.32	110.598	-904.555	1643.48	254.83	-895.728	1642.84	182.034	-964.734	1469.74	162.859	-1019.62	1207.26	189.605	-815.793	1384.78	189.043	-727.02	1177.8	226.345	-1031.32	1266.36	2.0116	-872.341	1427.23	-88.6219	-837.659	1214.04	-115.454	-808.437	1118.91	-134.793	-654.454	1027.18	-96.385	-578.036	995.15	-150.065	-611.724	962.229	-151.452	-531.77	963.243
518	0	133.295	-738.818	1602.09	232.232	-735.024	1606.07	113.397	-890.009	1644.75	257.823	-881.001	1643.38	183.579	-949.159	1470.72	163.459	-1003.98	1208.1	190.896	-800.115	1385.87	189.686	-710.238	1178.88	227.133	-1015.04	1266.78	3.38976	-856.605	1428.84	-87.5954	-822.598	1215.18	-114.712	-794.673	1119.82	-134.415	-641.819	1026.26	-96.0447	-565.658	993.293	-149.796	-599.832	960.975	-151.508	-520.098	961.266
519	0	136.102	-723.8	1604.59	234.942	-720.079	1607.72	116.373	-875.144	1646.34	260.916	-866.484	1643.72	185.036	-933.362	1472.24	163.959	-989.111	1209.66	191.822	-784.623	1386.93	189.999	-693.474	1180.2	227.705	-999.072	1267.67	4.50391	-840.823	1430.79	-86.4775	-807.921	1216.4	-113.865	-781.284	1121.04	-133.557	-629.786	1025.3	-95.6346	-554.427	990.287	-149.631	-588.871	959.38	-150.983	-509.245	958.486
520	0	139.002	-708.452	1607.14	237.888	-705.107	1609.23	119.278	-860.077	1648.59	263.723	-851.694	1644.31	186.189	-917.56	1473.87	164.491	-974.362	1211.84	192.705	-768.985	1388.37	190.161	-676.871	1181.79	228.314	-982.992	1269.05	5.44211	-825.005	1433.02	-85.454	-793.643	1218.13	-113.324	-768.226	1122.63	-132.632	-618.453	1024.07	-94.3848	-543.745	987.768	-148.969	-578.777	957.429	-150.289	-499.19	954.723
521	0	141.845	-693.135	1609.65	240.703	-690.32	1610.39	122.02	-844.931	1651.02	267.563	-836.549	1645.57	187.11	-901.941	1475.71	164.765	-959.968	1214.23	193.186	-753.665	1389.74	190.253	-661.052	1183.4	228.31	-968.183	1271.12	6.27653	-809.259	1435.52	-84.5595	-779.43	1220.04	-112.473	-755.297	1124.43	-131.619	-607.802	1022.72	-93.4481	-534.149	984.206	-148.174	-569.718	955.23	-149.123	-490.234	950.159
522	0	144.446	-677.793	1611.95	243.172	-675.481	1611.34	124.463	-829.347	1653.44	268.958	-822.306	1645.55	187.941	-886.596	1477.75	164.75	-945.72	1216.56	193.262	-738.561	1391.11	190.166	-646.077	1184.75	228.332	-953.637	1273.02	6.97526	-793.793	1437.96	-83.6992	-765.708	1221.96	-111.664	-742.763	1126.37	-130.575	-597.898	1021.1	-92.1975	-525.409	980.256	-147.301	-561.462	952.679	-147.711	-482.233	944.882
523	0	146.662	-662.43	1613.84	244.885	-661.095	1611.77	126.194	-814.113	1655.97	270.954	-807.547	1646.3	188.56	-871.551	1479.62	164.83	-931.625	1218.86	193.575	-723.748	1392.52	189.856	-631.818	1186.02	228.477	-939.199	1275.06	7.56564	-778.876	1440.27	-82.9378	-752.112	1223.77	-111.153	-730.703	1128.29	-129.309	-588.589	1019.2	-90.546	-517.525	975.916	-146.314	-553.999	949.658	-145.892	-475.152	938.987
524	0	148.426	-647.176	1615.72	246.898	-646.146	1612.93	127.805	-798.671	1658.62	272.671	-792.417	1647.69	189.193	-857.269	1481.76	165.114	-917.495	1221.17	193.259	-709.29	1394.18	189.609	-617.827	1187.49	228.798	-924.892	1277.18	8.32487	-764.327	1442.47	-82.3161	-738.712	1225.74	-110.537	-719.263	1129.89	-127.924	-579.984	1017.08	-88.6722	-510.52	971.073	-144.998	-547.286	946.559	-143.686	-468.911	932.498
525	0	149.618	-632.107	1617.33	247.484	-631.526	1613.58	129.078	-783.139	1661.38	273.618	-777.411	1649.19	189.716	-843.027	1483.74	165.523	-903.581	1223.5	192.968	-695.008	1395.9	189.154	-604.153	1189.12	229.336	-910.65	1279.4	8.62263	-750.504	1444.67	-81.7198	-725.744	1227.47	-109.935	-708.272	1131.24	-126.472	-572.005	1014.56	-86.7084	-504.357	966.253	-143.329	-541.355	942.82	-141.181	-463.535	925.731
526	0	150.623	-617.242	1618.83	248.16	-616.557	1614.87	129.695	-767.943	1663.9	274.297	-762.262	1651.46	190.296	-828.924	1486.03	166.121	-889.882	1225.75	192.827	-681.048	1397.82	188.489	-590.498	1190.96	230.143	-896.485	1281.6	8.77323	-737.075	1446.82	-81.1772	-713.2	1229.21	-109.313	-697.615	1132.66	-124.937	-564.753	1012.16	-84.7397	-499.036	961.207	-141.83	-536.089	939.553	-138.555	-459.196	918.689
527	0	150.33	-602.582	1620.24	248.479	-601.635	1616.45	130.04	-753.061	1666.3	274.527	-747.06	1654.03	190.895	-814.998	1488.2	167.114	-876.011	1227.95	192.883	-667.12	1400.49	187.956	-576.887	1193.3	231.393	-882.436	1283.72	8.76656	-723.993	1448.96	-80.7802	-701.237	1230.85	-108.617	-687.826	1133.6	-123.345	-558.458	1009.25	-82.2608	-494.376	956.329	-140.413	-531.416	936.172	-135.499	-455.478	911.487
528	0	150.459	-588.078	1621.89	248.058	-587.039	1618.17	130.27	-738.25	1668.98	274.828	-731.812	1656.81	191.353	-801.027	1490.67	168.242	-862.431	1230.28	192.829	-653.383	1402.86	187.088	-563.505	1195.81	232.59	-868.374	1285.95	8.58719	-711.112	1450.97	-80.7018	-689.747	1232.29	-107.856	-678.493	1134.44	-121.714	-552.484	1006.64	-79.9991	-490.555	951.074	-138.704	-527.381	932.757	-132.295	-452.605	904.245
529	0	149.977	-573.632	1624.01	247.599	-572.285	1620.48	129.868	-723.657	1671.57	274.895	-716.922	1660.15	191.667	-787.148	1493.27	169.24	-848.983	1232.66	192.74	-639.62	1405.59	186.291	-550.118	1197.92	233.653	-854.567	1288.42	8.22051	-698.387	1452.87	-80.4126	-678.886	1233.32	-106.892	-669.708	1134.87	-120.298	-547.062	1003.89	-77.6241	-487.387	946.249	-137.079	-524.015	929.242	-128.999	-450.631	896.948
530	0	149.186	-559.346	1626.09	246.808	-557.903	1622.8	129.328	-709.093	1674.27	273.813	-702.306	1662.79	191.991	-773.593	1495.89	170.304	-835.725	1235.31	192.538	-625.985	1408.34	185.56	-536.763	1200.42	234.682	-840.883	1291.25	7.85106	-685.561	1454.75	-80.1016	-668.83	1234.41	-105.862	-661.354	1135.47	-118.75	-542.565	1001.01	-75.2174	-484.829	941.635	-135.307	-521.232	925.915	-125.534	-449.371	890.003
531	0	148.27	-545.167	1628.25	246.453	-543.339	1625.84	128.914	-694.764	1676.89	273.576	-687.867	1666.42	192.339	-759.408	1498.83	171.709	-822.175	1238.07	192.584	-612.171	1411.34	184.617	-523.469	1202.82	235.827	-827.099	1294.32	7.55011	-672.569	1456.53	-79.6647	-659.154	1235.32	-104.402	-653.579	1135.64	-116.909	-538.531	998.477	-72.6338	-482.923	937.117	-133.339	-518.938	922.69	-121.913	-448.873	883.257
532	0	148.042	-531.125	1630.78	245.987	-529.03	1628.54	128.21	-680.698	1679.3	272.892	-673.46	1669.47	192.54	-745.256	1501.76	173.128	-808.928	1240.99	192.561	-598.33	1414.01	183.923	-510.272	1204.99	236.897	-813.305	1297.56	7.20127	-659.453	1458.35	-79.1567	-650.072	1236.23	-102.949	-646.084	1136.16	-115.026	-535.003	995.777	-70.1471	-481.678	932.578	-131.136	-517.633	919.146	-118.414	-449.09	876.708
533	0	147.021	-517.093	1633	244.714	-515.275	1630.81	127.522	-666.553	1681.62	272.424	-659.366	1672.47	192.697	-731.172	1504.54	174.384	-795.398	1243.78	192.342	-584.521	1416.42	183.221	-496.966	1207.2	238.055	-799.578	1300.6	6.9395	-646.261	1460.09	-78.4452	-641.46	1236.87	-101.506	-638.933	1136.78	-112.918	-531.92	993.284	-67.5019	-480.952	928.313	-128.767	-516.585	916.089	-114.909	-449.988	870.731
534	0	147.019	-503.31	1635.18	244.863	-501.05	1633.93	127.021	-652.841	1683.68	271.632	-645.431	1674.99	192.913	-716.969	1507.07	175.773	-781.646	1246.29	192.275	-570.592	1418.68	182.692	-483.861	1209.55	239.343	-785.636	1303.52	6.90864	-632.894	1461.7	-77.6195	-633.102	1237.55	-99.8381	-631.949	1137.13	-110.802	-529.29	990.869	-65.0159	-480.381	924.416	-126.538	-516.243	913.15	-111.562	-451.518	865.014
535	0	146.461	-489.495	1637.57	244.119	-487.418	1636.09	126.633	-638.914	1685.48	271.177	-631.69	1677.38	192.987	-703.043	1509.32	176.764	-768.151	1248.77	192.2	-556.596	1420.78	182.235	-470.736	1211.7	240.486	-771.662	1306.14	6.69945	-619.596	1463.19	-76.6	-624.897	1238.2	-97.9123	-625.309	1137.72	-108.396	-527.028	988.49	-62.2247	-480.854	920.676	-123.769	-516.378	910.21	-108.331	-453.624	859.725
536	0	146.038	-475.708	1639.47	243.936	-473.609	1638.58	126.169	-625.513	1687.14	270.866	-618.072	1679.39	192.994	-689.259	1511.39	177.851	-753.906	1250.85	192.061	-542.707	1422.54	181.85	-457.634	1213.58	241.721	-757.643	1308.52	6.62444	-606.291	1464.5	-75.465	-616.742	1238.63	-95.9508	-618.556	1138.16	-105.907	-525.07	986.311	-59.4413	-481.237	917.18	-121.176	-517.054	907.502	-105.313	-456.336	854.73
537	0	146.113	-462.235	1641.06	243.874	-459.904	1640.56	125.839	-612.005	1688.31	270.625	-604.606	1681.1	193.018	-675.396	1513.1	178.3	-740.433	1252.65	191.893	-528.702	1423.94	181.698	-444.538	1215.07	242.885	-743.563	1310.6	6.47543	-592.828	1465.59	-74.138	-608.352	1239.01	-93.8	-612.178	1138.74	-103.156	-523.317	984.042	-56.8472	-481.904	913.393	-118.303	-517.902	904.912	-102.454	-459.256	849.839
538	0	145.942	-448.682	1642.42	243.381	-446.275	1641.84	125.853	-598.375	1689.52	270.395	-590.963	1682.46	193.246	-661.283	1514.57	179.023	-726.502	1254.04	191.971	-514.809	1425.19	181.691	-431.305	1216.39	244.022	-729.484	1312.29	6.51604	-579.316	1466.49	-72.6052	-599.797	1239.35	-91.4688	-605.937	1139	-100.387	-521.887	981.783	-54.0235	-482.782	909.86	-115.418	-519.348	902.263	-99.5348	-462.458	845.381
539	0	145.743	-435.157	1643.75	243.538	-432.51	1643.41	125.841	-585.013	1690.3	270.349	-577.3	1683.57	193.404	-647.025	1515.63	179.63	-712.602	1255.25	191.975	-500.974	1426.13	181.638	-418.064	1217.41	245.121	-715.522	1313.55	6.48531	-565.854	1467.08	-71.1642	-591.063	1239.41	-89.1884	-599.597	1139.29	-97.8228	-520.631	979.833	-51.2081	-483.701	906.79	-112.422	-520.836	900.11	-96.7539	-465.845	841.409
540	0	145.977	-421.562	1644.52	243.331	-418.883	1644.28	125.845	-571.617	1690.61	270.487	-563.626	1684.13	193.414	-633.105	1516.36	180.037	-698.871	1255.78	192.126	-487.118	1426.73	181.764	-404.678	1218.15	245.929	-701.672	1314.49	6.3879	-552.329	1467.41	-69.6546	-582.155	1239.4	-86.8676	-593.253	1139.45	-95.0354	-519.579	977.597	-48.541	-484.875	903.467	-109.402	-522.522	897.701	-94.0666	-469.532	837.468
541	0	145.939	-407.938	1644.86	243.196	-405.289	1644.66	125.957	-558.088	1690.62	270.939	-550.025	1684.25	193.535	-619.12	1516.45	180.502	-685.134	1256.14	192.242	-473.346	1426.77	181.936	-391.248	1218.15	246.718	-687.827	1314.93	6.44249	-538.66	1467.19	-68.0122	-572.945	1239.01	-84.5658	-586.76	1139.31	-92.3702	-518.387	975.142	-45.7241	-485.907	900.256	-106.293	-524.458	895.346	-91.1849	-473.244	833.319
542	0	145.513	-394.391	1644.62	243.296	-391.424	1644.58	126.117	-544.538	1690.31	270.86	-536.413	1683.72	193.695	-605.139	1516.21	180.82	-671.514	1255.96	192.33	-459.549	1426.35	182.297	-377.652	1217.69	247.403	-674.005	1315.03	6.3604	-524.966	1466.66	-66.4196	-563.643	1238.48	-81.9664	-580.288	1139.03	-89.4324	-517.303	972.78	-43.0505	-486.854	896.754	-103.34	-526.241	893.318	-88.2827	-477.025	829.369
543	0	145.522	-380.775	1644.23	243.037	-377.773	1643.91	126.528	-531.016	1689.73	271.161	-522.51	1682.98	193.778	-591.347	1515.62	181.004	-657.754	1255.57	192.5	-445.859	1425.57	182.686	-363.993	1216.98	247.877	-660.319	1314.74	6.46058	-511.036	1465.65	-64.8695	-554.35	1237.66	-79.341	-573.59	1138.68	-86.8791	-516.206	970.534	-40.407	-487.777	893.818	-100.291	-527.87	891.164	-85.4151	-480.725	825.558
544	0	145.561	-366.985	1643.48	243.169	-363.856	1643.11	126.721	-517.487	1688.72	271.401	-508.594	1682.23	193.823	-577.477	1514.78	180.967	-644.082	1254.81	192.889	-432.054	1424.59	183.273	-350.286	1215.84	248.145	-646.679	1314.01	6.37429	-497.138	1464.45	-63.3031	-545.002	1236.58	-76.825	-566.632	1138.14	-84.4607	-514.94	968.362	-37.9713	-488.336	890.98	-97.2118	-529.362	889.24	-82.6219	-484.518	821.742
545	0	145.561	-353.13	1642.44	242.929	-350.009	1641.68	127.075	-503.622	1687.47	271.549	-494.525	1680.87	193.831	-563.496	1513.59	180.785	-630.408	1253.64	193.018	-418.321	1423.25	183.848	-336.605	1214.32	248.165	-633.234	1312.75	6.41713	-483.038	1462.8	-62.0873	-535.477	1235.3	-74.0059	-559.671	1137.19	-81.9002	-513.397	966.307	-35.6071	-488.728	888.19	-94.6321	-530.757	887.436	-79.8709	-488.319	818.323
546	0	145.542	-339.228	1640.83	243.577	-335.736	1640.67	127.316	-489.668	1685.93	271.88	-480.586	1679.14	193.77	-549.538	1511.86	180.356	-616.821	1252.3	193.399	-404.564	1421.52	184.601	-322.928	1212.33	248.114	-619.776	1311.23	6.2486	-468.915	1460.9	-60.9497	-525.871	1233.94	-71.148	-552.586	1136.13	-79.7042	-511.668	964.123	-33.7455	-489.026	885.274	-91.7418	-531.749	885.838	-77.3714	-491.828	815.049
547	0	145.678	-325.198	1639	243.125	-321.891	1638.26	127.458	-475.748	1684.1	271.955	-466.376	1677.09	193.582	-535.671	1509.95	179.512	-603.198	1250.55	193.483	-390.827	1419.48	185.279	-309.383	1209.74	247.656	-606.381	1309.56	6.13892	-454.592	1458.7	-60.0695	-516.117	1232.37	-68.4229	-545.108	1135.12	-77.7723	-509.599	962.203	-31.7837	-488.824	882.741	-89.572	-532.27	884.466	-74.943	-495.271	811.791
548	0	145.508	-311.175	1636.74	243.101	-307.714	1636.15	127.672	-461.661	1681.96	272.145	-452.292	1675	193.477	-521.563	1508.14	178.412	-589.659	1248.51	193.706	-377.055	1417.36	185.921	-295.785	1207.04	247.095	-592.958	1307.67	6.10431	-440.183	1456.37	-59.1935	-506.078	1230.92	-65.5039	-537.391	1133.93	-75.9516	-507.026	960.299	-30.8379	-488.053	880.161	-87.5438	-532.338	883.358	-72.5879	-498.36	808.807
549	0	146.125	-296.94	1634.44	243.273	-293.534	1633.62	127.858	-447.364	1679.66	272.32	-438.176	1672.7	193.301	-507.396	1505.64	177.283	-575.888	1246.58	193.783	-363.324	1414.78	186.623	-282.156	1204.18	246.395	-579.479	1305.37	5.78257	-425.659	1454.07	-58.3232	-495.857	1229.36	-62.7446	-528.98	1132.86	-74.2055	-504.287	958.885	-28.4496	-487.373	877.999	-85.4382	-532.096	882.434	-70.6005	-501.159	806.392
550	0	146.002	-282.778	1631.61	243.22	-279.324	1630.76	127.769	-433.006	1677.12	272.205	-423.759	1670.14	192.92	-493.522	1503.33	175.908	-562.009	1244.03	193.991	-349.469	1412.1	187.382	-268.401	1201.06	245.531	-565.897	1302.99	5.55329	-411.15	1451.52	-57.4696	-485.274	1228	-60.2089	-520.214	1131.84	-72.7385	-500.808	957.598	-27.4192	-485.877	875.839	-83.7052	-531.223	881.956	-68.8172	-503.579	804.247
551	0	145.955	-268.42	1628.51	243.188	-265.1	1627.82	127.546	-418.827	1674.39	272.025	-409.486	1667.22	192.348	-479.534	1500.67	174.659	-548.165	1241.65	193.921	-335.59	1409.31	188.123	-254.395	1197.91	244.403	-552.173	1300.1	5.16922	-396.493	1448.94	-56.8614	-474.572	1226.5	-58.0303	-510.908	1130.62	-71.3668	-496.797	956.376	-26.6616	-483.454	874.256	-82.2397	-529.697	881.823	-67.1118	-505.311	802.508
552	0	145.513	-254.126	1625.41	242.831	-250.918	1624.58	127.172	-404.41	1671.52	271.395	-395.213	1664.12	191.624	-465.63	1497.75	173.38	-534.274	1238.66	193.804	-321.676	1406.35	188.665	-240.263	1194.82	243.367	-538.422	1297.3	4.848	-381.863	1446.24	-56.0415	-463.502	1224.69	-56.0509	-500.845	1129.56	-70.4785	-492.06	955.173	-26.1972	-480.434	872.52	-81.0008	-527.37	881.947	-65.7295	-506.399	801.087
553	0	145.223	-239.785	1622.31	242.558	-236.64	1621.52	126.744	-389.826	1668.73	271.177	-381.01	1661.72	190.895	-451.907	1495.02	172.279	-520.241	1235.96	193.666	-307.71	1403.43	189.33	-225.971	1192.08	242.458	-524.559	1294.29	4.21842	-367.198	1443.64	-55.6584	-452.143	1223.11	-54.5625	-490.434	1128.27	-69.9922	-486.553	954.344	-25.9371	-476.495	871.123	-80.1555	-524.07	881.992	-64.728	-506.631	800.034
554	0	144.721	-225.457	1619.04	242.014	-222.363	1618.35	126.187	-375.464	1665.94	270.425	-366.538	1658.95	189.854	-438.044	1492.16	171.169	-506.179	1232.91	193.284	-293.748	1400.61	189.761	-211.598	1189.44	241.474	-510.536	1291.43	3.54754	-352.526	1440.97	-55.1006	-440.149	1221.07	-53.3889	-479.723	1127	-69.7592	-479.988	953.576	-26.3826	-471.695	869.774	-79.7483	-519.626	882.316	-63.8156	-505.945	799.153
555	0	143.523	-211.081	1615.91	241.122	-208.262	1615.24	125.159	-360.81	1663.47	269.313	-352.268	1656.51	188.711	-424.06	1489.61	170.089	-491.731	1230.15	192.945	-279.651	1397.96	189.99	-197.442	1186.82	240.381	-496.405	1288.67	2.73278	-338.033	1438.32	-55.3418	-427.851	1219.42	-52.6094	-468.348	1125.65	-70.1065	-472.582	952.828	-27.2572	-465.721	868.552	-79.8228	-514.275	882.546	-63.0108	-504.233	798.503
556	0	143.075	-196.655	1613.23	240.697	-193.937	1612.94	124.01	-346.333	1661	268.529	-338.003	1654.65	187.149	-411.336	1486.68	169.268	-477.083	1227.24	192.355	-265.419	1395.65	189.94	-183.174	1184.43	239.502	-482.117	1285.86	1.73952	-323.365	1435.64	-55.156	-414.967	1217.19	-52.3303	-456.686	1124.22	-70.8846	-464.257	952.021	-28.257	-458.854	867.079	-80.51	-507.204	882.769	-62.6804	-500.964	797.998
557	0	142.044	-182.353	1610.61	239.572	-179.83	1610.68	122.493	-331.81	1658.66	266.908	-323.786	1652.46	185.752	-397.574	1484.06	168.651	-461.976	1224.51	191.774	-251.165	1393.62	189.947	-168.641	1182.76	238.474	-467.565	1283.38	0.820931	-308.826	1433.02	-55.9597	-401.82	1215.45	-52.2743	-444.295	1122.66	-71.8967	-454.887	951.014	-29.5485	-450.725	865.917	-81.7222	-499.276	882.665	-62.719	-496.379	797.588
558	0	140.808	-168.092	1608.47	238.174	-165.794	1608.73	120.609	-317.612	1656.27	265.329	-309.846	1650.94	184.364	-383.22	1481.83	168.029	-446.921	1221.95	190.844	-236.658	1391.79	189.396	-154.035	1180.99	237.51	-452.984	1280.87	-0.263093	-294.186	1430.58	-56.2814	-388.081	1213.12	-52.8211	-431.505	1121.07	-73.1525	-444.62	949.864	-31.273	-442.338	864.332	-83.6519	-490.052	882.642	-63.3003	-490.42	797.164
559	0	139.258	-153.803	1606.7	236.836	-151.733	1607.59	118.563	-303.384	1654.01	263.945	-295.845	1649.89	183.021	-369.006	1479.54	167.558	-431.641	1219.72	189.925	-222.004	1389.93	188.739	-139.29	1179.49	236.705	-438.111	1278.82	-1.30404	-279.635	1428.17	-57.0023	-374.01	1211.02	-53.6471	-417.987	1119.49	-74.8251	-433.304	948.62	-33.1759	-431.974	863.07	-85.3566	-479.632	882.143	-64.2864	-482.747	796.887
560	0	137.631	-139.586	1605.32	235.307	-137.553	1606.82	116.634	-289.243	1652.03	262.048	-281.863	1648.7	181.985	-354.202	1477.89	167.154	-416.448	1217.48	188.981	-207.255	1388.55	187.97	-124.178	1178.33	236.057	-423.054	1276.85	-2.3205	-264.941	1426.01	-57.7491	-359.451	1208.97	-54.5821	-403.9	1117.85	-76.6462	-420.964	947.628	-35.0784	-420.918	861.818	-87.7328	-467.976	881.789	-65.8446	-473.544	796.672
561	0	135.335	-125.468	1604.41	233.22	-123.539	1606.44	114.186	-275.281	1650.26	259.284	-268.152	1647.83	180.708	-339.796	1476.46	166.763	-401.032	1215.63	188.004	-192.406	1387.21	186.83	-108.767	1177.46	235.345	-407.763	1275.11	-3.47978	-250.431	1424.31	-59.0538	-344.866	1207.47	-55.8944	-389.493	1116.15	-78.8904	-407.715	946.666	-37.6625	-408.79	860.496	-90.6202	-455.237	881.055	-67.8155	-462.695	796.232
562	0	133.653	-111.17	1604.07	231.2	-109.422	1606.83	111.74	-261.392	1648.78	256.689	-254.371	1647.43	179.238	-325.344	1475.19	166.5	-385.542	1214.19	186.939	-177.425	1386.69	185.477	-93.1136	1176.96	234.684	-392.386	1273.78	-4.58717	-235.936	1422.81	-59.7848	-329.555	1205.53	-57.3529	-374.354	1114.59	-81.113	-393.61	945.51	-40.4988	-395.629	859.254	-93.5686	-441.4	880.383	-70.539	-450.306	795.572
563	0	131.448	-97.0553	1604.35	229.207	-95.1589	1608.06	109.345	-247.41	1647.78	254.228	-240.536	1647.62	178.019	-310.716	1474.38	166.368	-369.841	1213.13	185.836	-162.384	1386.54	184.26	-77.2189	1177.05	234.02	-376.882	1272.73	-5.80898	-221.293	1421.88	-60.9284	-314.013	1204.06	-58.6309	-358.631	1113.14	-83.3005	-378.533	944.395	-43.1287	-381.028	858.185	-96.5712	-426.483	879.75	-73.6817	-436.2	794.913
564	0	129.048	-82.6791	1605.24	226.998	-80.795	1609.64	106.893	-233.484	1647.44	251.962	-226.383	1648.36	177.04	-295.677	1474.39	166.263	-353.995	1212.53	184.693	-147.255	1386.9	182.897	-61.1157	1177.59	233.548	-361.333	1272.35	-6.91507	-206.835	1421.21	-62.2834	-298.194	1203.34	-60.1674	-342.429	1112.14	-85.7884	-362.485	943.823	-46.0077	-365.519	857.208	-99.8353	-410.53	879.221	-77.3816	-420.498	794.471
565	0	126.866	-68.5302	1606.71	224.302	-66.5801	1611.52	104.285	-219.594	1647.47	249.657	-212.399	1649.71	176.159	-280.654	1474.87	166.166	-338.089	1212.78	183.583	-132.074	1387.8	181.59	-44.8716	1178.52	232.999	-345.635	1272.6	-7.94512	-192.247	1421.21	-63.0882	-281.686	1202.32	-61.6506	-325.667	1111.33	-88.2037	-345.556	943.43	-49.1289	-348.801	856.532	-102.82	-393.467	878.816	-81.8497	-403.214	794.01
566	0	124.491	-54.2248	1608.62	222.014	-52.1478	1614.32	101.933	-205.761	1647.81	247.008	-198.367	1651.08	175.357	-265.507	1475.9	166.021	-322.225	1213.61	182.496	-116.73	1389.18	180.23	-28.631	1179.87	232.555	-329.928	1273.28	-8.931	-177.736	1421.71	-64.3225	-265.052	1202.31	-63.0268	-308.405	1110.88	-90.6756	-327.545	943.172	-52.4312	-331.05	856.015	-105.996	-375.265	878.665	-86.3179	-384.134	793.714
567	0	122.051	-39.9674	1611.23	219.718	-37.615	1617.52	99.8041	-191.951	1648.48	244.889	-184.218	1652.96	174.964	-249.979	1477.26	165.883	-306.781	1214.87	181.624	-101.414	1390.97	179.149	-12.4616	1181.53	232.392	-314.217	1274.58	-9.6192	-163.155	1422.77	-64.6887	-247.905	1202.2	-64.1879	-290.712	1110.86	-92.9609	-308.728	943.437	-55.4098	-311.786	855.8	-109.024	-355.856	878.775	-91.4728	-363.476	793.554
568	0	119.669	-25.8673	1613.97	217.553	-23.0295	1621.21	97.6506	-178.225	1649.51	242.801	-170.051	1655.19	174.808	-234.006	1479.35	165.666	-291.57	1216.76	180.735	-86.1189	1393.08	178.169	3.55582	1183.61	232.319	-298.645	1276.45	-10.3494	-148.667	1424.45	-65.6347	-230.634	1202.77	-65.9308	-272.474	1111.63	-95.356	-289.073	943.999	-58.0658	-291.572	856.112	-112.075	-335.484	878.972	-96.592	-341.262	793.609
569	0	117.481	-11.7874	1616.78	215.064	-8.65597	1624.63	95.9011	-164.657	1650.52	240.433	-155.772	1656.88	174.583	-218.957	1481.28	165.579	-276.78	1219	179.737	-71.0326	1395.23	177.338	19.2836	1185.84	232.466	-283.307	1278.7	-10.749	-134.376	1426.54	-66.3432	-213.151	1203.75	-67.2277	-254.096	1112.57	-97.6025	-268.46	944.723	-60.9711	-270.224	856.7	-115.228	-313.888	879.369	-101.456	-317.356	794.242
570	0	115.274	1.97356	1619.48	212.846	5.4969	1627.74	94.6774	-151.122	1651.58	239.293	-141.832	1659.19	174.538	-203.883	1483.26	165.67	-262	1221.03	179.021	-56.0023	1397.49	176.353	34.7101	1188.02	232.894	-267.985	1281.17	-11.1478	-120.069	1428.73	-66.9469	-195.492	1205.16	-68.6642	-235.67	1113.61	-99.7372	-247.162	945.703	-63.8893	-247.815	857.429	-117.655	-291.341	879.911	-106.523	-292.219	794.717
571	0	113.739	15.7134	1622.32	211.24	19.6161	1630.89	93.7478	-137.861	1652.81	238.533	-127.787	1661.21	174.572	-189.009	1485.57	165.786	-247.22	1222.91	178.569	-41.2235	1399.61	175.431	49.7124	1190.18	233.38	-252.852	1283.3	-11.4015	-105.739	1431.46	-67.5743	-177.815	1206.62	-70.1785	-217.173	1114.9	-101.954	-225.197	946.806	-66.4697	-224.564	858.389	-120.422	-267.984	880.304	-111.38	-265.835	795.278
572	0	112.913	29.389	1625.33	210.315	33.7058	1634.18	93.2069	-124.55	1654.33	237.821	-113.91	1663.11	174.321	-174.675	1487.27	165.782	-232.735	1224.88	177.929	-26.7852	1401.61	174.518	64.3857	1192.45	233.702	-238.203	1285.41	-11.5988	-91.4187	1434.16	-68.3058	-160.217	1208.37	-71.7046	-198.599	1116.23	-104.172	-202.756	947.858	-69.3037	-199.847	859.5	-122.948	-243.958	880.64	-116.146	-238.352	796.158
573	0	112.22	43.0051	1628.37	209.409	47.4995	1637.02	92.9541	-111.403	1656.2	237.551	-100.34	1664.74	174.178	-160.596	1489.27	165.575	-218.223	1226.83	177.73	-12.3459	1403.75	173.748	78.6676	1194.67	233.739	-223.804	1287.56	-11.6844	-77.0437	1436.74	-69.4409	-142.823	1210.37	-73.7292	-180.026	1117.39	-106.354	-179.943	949.128	-72.3458	-174.212	860.612	-125.199	-219.223	881.095	-120.466	-209.928	797.392
574	0	111.536	56.3946	1631.48	209.066	61.1558	1639.81	93.2646	-98.0067	1658.28	237.771	-86.7291	1666.42	173.807	-146.436	1491	165.157	-203.57	1228.56	177.401	1.86581	1405.89	173.452	92.5912	1196.97	233.406	-209.469	1289.54	-11.6615	-62.4587	1439.05	-70.6776	-125.559	1212.42	-75.7779	-161.348	1118.77	-108.443	-156.566	950.275	-74.2316	-148.768	861.835	-127.445	-194.054	881.248	-124.596	-180.778	798.538
575	0	111.705	69.9396	1634.66	209.346	74.796	1642.85	93.8442	-84.6807	1660.63	238.314	-73.1972	1668.38	173.35	-132.289	1492.78	164.532	-189.102	1230.62	177.347	15.9717	1408.16	172.983	106.269	1198.92	232.512	-195.293	1291.3	-11.9577	-47.7924	1441.7	-71.9937	-108.264	1214.54	-78.1001	-142.438	1120.16	-110.598	-132.818	951.385	-76.6944	-122.135	863.228	-129.648	-168.147	881.395	-128.193	-150.909	799.921
576	0	112.376	83.5138	1637.99	209.912	88.272	1645.62	94.5713	-71.4745	1663.06	238.844	-59.6745	1669.8	173.158	-117.987	1495.22	163.791	-174.632	1232.8	177.316	30.0429	1410.4	172.598	119.426	1200.62	231.424	-181.256	1293.32	-11.9002	-32.9903	1444.05	-73.2776	-91.0235	1216.59	-80.3682	-123.36	1121.57	-112.583	-108.698	952.598	-78.6046	-95.1749	864.967	-131.611	-141.787	881.7	-131.561	-120.485	801.578
577	0	113.103	96.8843	1641.26	210.717	101.809	1648.35	95.5335	-58.1026	1665.5	240.018	-46.4923	1671.65	172.867	-103.862	1496.96	162.57	-160.067	1234.86	177.577	44.148	1412.67	172.849	133.405	1202.39	230.182	-167.299	1295.14	-11.7364	-18.0473	1446.31	-74.757	-73.6525	1218.68	-82.8036	-104.195	1122.88	-114.81	-84.2242	953.977	-80.5713	-67.9923	866.917	-133.933	-114.897	882.034	-134.379	-89.4777	803.767
578	0	114.176	110.497	1644.68	211.749	115.224	1651.18	96.7354	-44.6519	1667.9	241.329	-33.0707	1673.45	172.805	-89.6821	1499.21	161.248	-145.953	1237.09	177.694	58.1546	1414.9	173.364	147.249	1204.33	228.776	-153.306	1297.13	-11.7543	-2.9209	1448.59	-76.38	-56.2481	1221.26	-85.4149	-84.9388	1124.39	-116.917	-59.3608	955.76	-82.5924	-40.275	869.203	-135.894	-87.644	882.659	-136.882	-58.0564	806.382
579	0	115.281	124.171	1648.17	213.194	128.749	1654.2	97.9058	-31.1734	1670.41	242.499	-19.7232	1675.08	172.646	-75.506	1501.34	159.808	-131.961	1239.62	177.877	72.0813	1417.13	173.779	161.143	1206.16	227.342	-139.483	1299.31	-11.6398	12.1269	1451.13	-77.7912	-38.716	1223.42	-87.9233	-65.4421	1125.88	-118.958	-34.3173	957.929	-84.6096	-12.2685	872.211	-137.977	-60.1703	883.61	-139.118	-26.4777	809.398
580	0	116.836	137.927	1651.54	214.45	142.342	1656.86	99.1856	-17.6154	1672.8	243.469	-6.22301	1676.37	172.227	-60.687	1504.07	158.185	-118.095	1241.99	178.036	85.9783	1419.29	174.41	174.963	1207.99	225.833	-125.867	1301.4	-11.3461	27.308	1453.57	-79.5145	-21.0015	1226.01	-90.5322	-45.7298	1127.63	-121.001	-9.08268	960.308	-86.2829	16.0672	875.697	-139.655	-31.9459	884.881	-140.798	5.40112	812.872
581	0	117.98	151.646	1654.34	215.762	155.834	1659.1	100.571	-3.82383	1675.28	244.937	7.07008	1677.91	172.115	-46.2914	1506.28	156.74	-104.263	1244.34	178.257	99.9149	1421.22	175.197	189.377	1209.95	224.498	-112.138	1303.68	-11.2183	42.4295	1455.96	-80.9729	-3.07925	1228.37	-93.1281	-25.8374	1129.5	-122.875	16.4047	962.936	-88.0801	44.4352	879.421	-141.303	-3.76962	886.588	-142.254	37.3943	816.499
582	0	119.509	165.487	1657.18	217.401	169.566	1661.36	101.872	9.89785	1677.39	246.236	20.5949	1679.12	172.143	-31.7917	1508.14	155.448	-90.4805	1246.66	178.64	113.832	1423.02	176.065	203.518	1211.74	223.127	-98.4417	1305.67	-10.8204	57.6033	1458.33	-82.0634	15.3165	1230.43	-95.5046	-5.70281	1131.38	-124.579	42.1273	965.936	-89.3302	73.2268	883.638	-142.748	24.6439	888.586	-143.285	69.5253	820.807
583	0	121.246	179.564	1659.81	218.748	183.208	1663.06	103.158	23.86	1679.44	247.747	34.2376	1680.16	172.105	-17.5595	1510.1	154.1	-76.6467	1248.71	178.796	127.843	1424.56	176.584	217.475	1213.21	221.857	-84.6791	1307.63	-10.4882	72.6708	1460.93	-83.6577	33.5106	1232.96	-97.7146	14.7974	1133.43	-126.073	67.9351	969.133	-90.5817	101.567	888.183	-144.201	53.2258	891.156	-144.189	101.493	825.628
584	0	122.49	193.52	1662.03	220.284	197.006	1664.72	104.203	37.7894	1681.15	248.865	47.8385	1680.86	172.119	-3.26889	1511.64	152.87	-62.6871	1250.61	179.115	141.819	1426	177.208	231.102	1214.49	220.552	-71.0122	1309.32	-10.163	87.6431	1463.15	-84.8669	52.0472	1235.39	-100.092	35.1109	1135.49	-127.621	93.763	972.531	-91.6159	130.394	893.427	-145.376	81.9532	893.934	-144.952	133.253	830.967
585	0	123.52	207.466	1663.91	221.517	210.791	1665.9	105.486	51.9541	1682.65	249.733	61.5588	1681.26	171.072	9.54872	1513.14	151.7	-48.8218	1251.94	179.393	155.898	1427.22	177.809	244.596	1215.69	219.542	-57.3187	1310.68	-9.75712	102.605	1465.12	-86.3923	70.4735	1237.63	-102.278	55.384	1137.29	-128.992	120.06	976.362	-92.6275	158.96	898.791	-146.304	110.959	897.158	-145.5	165.081	836.162
586	0	125.149	221.667	1665.6	222.791	224.632	1666.83	106.376	65.963	1683.82	251.12	75.4199	1681.67	171.107	23.8138	1513.92	150.841	-34.9741	1253.18	179.716	169.932	1428.13	178.36	257.794	1216.56	218.566	-43.6615	1311.57	-9.51603	117.523	1466.88	-87.4835	89.0565	1239.37	-104.282	75.848	1138.86	-130.206	146.144	979.888	-93.8255	187.395	903.905	-147.31	140.072	900.369	-145.753	196.552	841.642
587	0	125.906	235.862	1666.68	223.876	238.584	1667.39	107.168	80.0436	1684.62	251.743	89.1487	1681.54	171.328	38.1413	1514.45	150.073	-21.1698	1253.86	179.671	183.926	1428.67	178.725	270.993	1217.16	217.548	-29.9802	1312.28	-9.23944	132.375	1468.12	-88.7896	107.51	1241.04	-106.304	96.1224	1140.31	-131.167	172.218	983.364	-94.238	216.26	909.173	-147.929	169.369	903.67	-145.962	228.065	847.167
588	0	126.941	250.044	1667.34	224.889	252.567	1667.67	107.797	94.1119	1685.25	252.672	103.085	1681.28	172.46	53.833	1514.39	149.3	-7.35165	1254.31	179.944	198.007	1428.81	179.229	284.328	1217.41	216.638	-16.2029	1312.73	-8.96956	147.245	1469.04	-89.8064	125.956	1242.22	-108.131	116.474	1141.43	-132.177	198.482	987.092	-94.5792	245.095	914.575	-148.269	198.613	907.135	-145.77	259.261	852.627
589	0	127.8	264.19	1667.8	225.894	266.578	1667.73	108.524	108.33	1685.24	253.219	116.999	1680.72	171.213	66.6628	1514.82	148.722	6.59588	1254.46	180.191	212.102	1428.72	179.649	297.858	1217.46	215.886	-2.31973	1312.7	-8.81375	161.862	1469.66	-90.8663	144.321	1243.24	-109.79	136.816	1142.18	-132.61	224.594	990.261	-94.7538	273.739	920.082	-149.022	227.747	910.584	-145.664	290.283	858.299
590	0	128.436	278.293	1667.97	226.512	280.534	1667.39	108.914	122.415	1684.96	253.955	131.027	1680.15	171.037	80.9093	1514.41	148.061	20.4943	1254.27	180.459	226.257	1428.41	180.198	311.485	1217.27	214.932	11.4927	1312.31	-8.58101	176.631	1469.79	-91.9652	162.525	1243.75	-111.339	157.144	1142.44	-133.474	250.577	993.811	-94.8587	302.101	925.504	-148.993	256.752	914.111	-145.338	320.967	864.044
591	0	129.293	292.624	1667.63	227.129	294.503	1666.76	109.255	136.692	1684.22	254.013	144.852	1678.82	171.527	95.9695	1513.58	147.4	34.4993	1253.69	180.612	240.39	1427.54	180.967	325.497	1216.76	214.14	25.4113	1311.66	-8.32352	191.422	1469.38	-92.7618	180.75	1243.66	-112.864	177.535	1142.45	-133.753	276.355	996.68	-94.5556	330.123	930.451	-149.406	285.615	917.426	-144.721	351.539	869.52
592	0	129.689	306.943	1666.9	227.618	308.578	1665.9	109.534	150.945	1683.22	254.124	158.78	1677.48	170.913	109.481	1512.5	146.759	48.4367	1252.7	180.826	254.466	1426.41	181.558	339.243	1215.6	213.34	39.4124	1310.61	-7.99459	206.271	1468.62	-93.523	198.933	1243.55	-114.207	198.088	1142.08	-133.986	302.156	999.523	-94.1488	357.843	935.371	-149.096	314.242	920.738	-144.044	381.531	875.233
593	0	130.179	321.148	1665.97	228.133	322.668	1664.85	109.742	165.19	1682.06	254.717	173.037	1676.24	172.031	125.215	1510.96	146.22	62.4558	1251.51	181.067	268.691	1425.16	182.081	352.878	1214.12	212.828	53.4859	1309.3	-7.7786	220.979	1467.56	-94.3484	216.887	1243.01	-115.34	218.662	1141.5	-134.26	327.563	1002.24	-93.6286	385.047	940.132	-149.002	342.495	923.996	-143.016	411.332	880.713
594	0	130.698	335.348	1664.84	228.461	336.792	1663.62	109.809	179.4	1680.66	254.366	187.071	1674.43	170.921	138.174	1510.17	145.832	76.4043	1250.25	181.222	282.84	1423.78	182.624	366.387	1212.53	212.428	67.4976	1307.89	-7.59775	235.66	1466.23	-95.0623	234.867	1242.46	-116.499	239.188	1140.92	-134.151	352.786	1004.9	-92.9172	411.841	944.985	-148.996	370.056	927.229	-142.21	440.358	886.411
595	0	130.869	349.723	1663.53	228.825	351.079	1662.26	109.909	193.774	1678.86	254.724	200.997	1672.97	170.98	152.773	1508.6	145.661	90.3594	1248.88	181.397	297.018	1421.99	182.94	379.952	1210.43	212.118	81.5361	1306.41	-7.24355	250.324	1464.48	-95.5782	252.916	1241.57	-117.441	259.969	1140.09	-134.181	377.638	1007.38	-92.2718	438.079	949.297	-148.441	397.477	930.553	-141.055	469.274	892.144
596	0	131.25	363.98	1661.71	229.061	365.227	1660.59	110.07	208.07	1677.03	254.937	215.31	1671.19	171.218	167.304	1506.49	146.096	104.27	1247.21	181.869	311.33	1420.21	183.361	393.483	1208.12	212.011	95.5807	1304.76	-6.67693	264.939	1462.72	-95.7626	271.089	1240.64	-118.101	280.812	1139.3	-133.6	402.272	1009.76	-90.8935	464.002	953.571	-147.908	424.514	933.484	-139.83	497.253	897.735
597	0	131.13	378.136	1659.78	229.233	379.451	1658.7	110.309	222.355	1674.64	255.016	229.517	1668.89	171.381	181.567	1504.82	146.755	118.065	1245.3	181.984	325.597	1418.02	183.733	407.35	1205.67	212.062	109.668	1302.72	-6.3003	279.345	1460.64	-95.8696	289.153	1239.67	-118.84	301.421	1138.66	-133.12	426.496	1012.11	-89.8337	489.226	957.566	-147.291	451.067	936.707	-138.341	524.949	903.193
598	0	131.115	392.188	1657.67	229.122	393.571	1656.54	110.4	236.288	1672.33	255.071	243.613	1666.65	173.048	197.548	1501.95	147.662	132.174	1243.24	182.233	339.854	1415.73	183.997	421.882	1203.06	212.436	123.739	1300.79	-5.76414	293.763	1458.38	-95.791	307.32	1238.31	-119.457	322.003	1138.1	-132.511	450.581	1014.53	-88.5359	514.094	961.469	-146.115	477.073	939.684	-136.905	551.849	908.49
599	0	131.034	406.17	1655.29	229.255	407.802	1654.35	110.796	250.14	1669.78	255.696	257.85	1664.43	171.672	209.384	1500.36	148.746	146.35	1240.98	182.535	354.058	1413.28	184.052	436.424	1200.34	213.011	137.901	1298.58	-5.08049	308.073	1455.97	-95.519	325.576	1237.1	-119.837	342.224	1137.49	-131.672	474.016	1016.79	-87.2128	538.164	965.306	-145.619	502.631	942.794	-135.399	578.09	913.889
600	0	131.715	420.137	1653.11	229.508	422.042	1652.19	111.302	263.998	1667.35	256.027	272.215	1662.05	172.127	223.717	1497.73	150.007	160.552	1238.35	182.957	368.444	1410.81	184.253	451.391	1198.06	213.704	152.252	1295.91	-4.35899	322.134	1453.65	-95.1601	343.498	1235.99	-120.067	362.238	1136.89	-130.757	496.951	1019.24	-85.7852	561.788	969.203	-144.715	527.488	946.06	-133.916	603.709	919.209
601	0	131.706	434.059	1650.83	229.448	436.139	1649.84	111.815	277.779	1665.02	256.922	286.495	1659.95	172.53	237.95	1495.28	151.079	175.068	1235.52	183.363	382.935	1408.39	184.122	466.358	1195.74	214.499	166.675	1293.35	-3.90407	336.192	1451.62	-94.5849	361.317	1234.63	-120.284	381.77	1136.21	-129.817	519.402	1021.73	-84.3184	584.781	972.992	-143.926	551.867	949.515	-132.299	628.326	924.258
602	0	131.843	447.838	1648.52	229.803	450.254	1647.71	112.58	291.504	1662.74	257.184	300.54	1657.34	171.713	249.372	1493.47	152.135	189.787	1232.79	183.602	397.193	1406.07	183.898	481.157	1193.57	215.327	181.16	1290.44	-3.27906	350.25	1449.24	-93.9602	378.855	1233.23	-120.312	400.795	1135.52	-128.758	541.116	1024.02	-82.8576	607.146	976.591	-143.011	575.385	952.885	-130.507	652.458	929.408
603	0	132.126	461.573	1646.47	230.386	464.349	1645.62	113.534	305.344	1660.62	258.253	314.614	1655.41	172.38	263.593	1491.06	153.246	204.682	1229.93	184.172	411.65	1403.99	183.854	496.275	1191.82	216.462	195.783	1287.96	-2.66004	364.522	1447.16	-93.1752	395.854	1232	-120.184	419.283	1134.94	-127.792	562.175	1026.36	-81.3802	628.763	980.36	-141.854	598.205	956.009	-128.803	675.613	934.54
604	0	133.18	475.303	1644.6	231.079	478.237	1643.58	114.759	319.013	1658.57	259.073	328.648	1653.02	173.137	277.924	1488.69	154.506	219.75	1227.37	185.014	426.197	1402.04	183.689	511.175	1189.99	217.251	210.564	1285.08	-2.12804	378.725	1445.24	-92.2506	412.507	1230.58	-119.718	437.139	1134.17	-126.738	582.438	1028.5	-79.9161	649.632	983.767	-140.655	620.244	959.158	-126.914	697.994	939.322
605	0	134.223	489.185	1643.01	231.961	492.157	1641.75	115.747	332.681	1656.8	260.623	342.604	1651.12	173.964	292.141	1486.44	155.62	235.116	1224.81	185.627	440.753	1400.26	183.851	526.457	1188.78	217.96	225.694	1282.73	-1.54632	393.014	1443.44	-91.4863	428.57	1229.36	-119.049	454.319	1133.36	-125.716	601.892	1030.58	-78.3964	669.785	987.243	-139.635	641.312	962.486	-125.274	719.312	944.09
606	0	134.924	502.779	1641.53	233.176	506.085	1640.22	117.217	346.269	1655.02	261.656	356.489	1648.86	174.883	306.746	1484.14	156.606	250.657	1222.32	186.605	455.535	1398.64	183.868	541.306	1187.15	218.595	240.902	1280.26	-0.615571	407.655	1441.86	-90.7716	444.152	1228.07	-118.22	471.095	1132.62	-124.496	620.657	1032.52	-77.1233	689.092	990.417	-138.621	661.524	965.436	-123.793	739.847	948.592
607	0	136.283	516.544	1640.47	234.486	519.834	1638.91	118.68	359.984	1653.17	263.358	370.181	1647.2	176.184	321.761	1482.05	157.452	266.363	1220.17	187.474	470.29	1397.36	184.545	556.889	1186.4	219.302	256.2	1277.74	0.127564	422.238	1440.75	-89.8527	459.194	1226.85	-117.158	487.232	1131.62	-123.426	638.572	1034.26	-75.9691	707.59	993.595	-137.602	680.522	968.126	-122.287	759.368	952.846
608	0	137.828	530.309	1639.38	235.857	533.63	1637.68	120.197	373.493	1651.68	264.932	384.048	1645.3	177.598	336.877	1479.69	158.038	282.194	1217.9	188.71	485.295	1395.99	185.06	572.617	1185.42	220.018	271.554	1275.54	1.27436	437.085	1439.57	-88.8247	473.909	1225.65	-116.156	502.697	1130.67	-122.513	655.646	1035.65	-74.9364	725.352	996.115	-136.379	698.834	970.156	-121.215	777.882	956.609
609	0	139.592	543.892	1638.72	237.517	547.479	1636.77	122.017	387.121	1650.31	266.512	397.73	1643.59	179.199	352.073	1477.69	158.435	298.108	1215.73	189.823	500.33	1394.94	186.121	588.513	1184.74	220.613	287.165	1273.29	2.47982	451.912	1438.63	-88.1115	488.211	1224.55	-114.869	517.967	1129.67	-121.495	671.92	1036.54	-74.1521	742.356	998.185	-135.268	715.933	971.536	-120.356	795.508	959.703
610	0	141.196	557.743	1638.19	239.233	561.183	1636.12	124.049	400.885	1649.21	268.478	411.613	1642.25	179.69	364.411	1477	159.017	314.239	1214.08	191.001	515.436	1394.04	187.356	604.692	1184.36	221.378	302.925	1271.1	3.7809	466.909	1438.14	-86.9299	502.416	1223.98	-113.535	532.554	1129.04	-120.497	687.567	1037.01	-73.4307	758.424	999.75	-134.048	731.998	972.158	-119.758	811.897	962.215
611	0	142.96	571.431	1638.28	241.209	575.203	1636	126.108	414.43	1648.53	270.694	425.509	1641.51	182.473	381.656	1475.2	159.643	330.461	1212.58	192.535	530.697	1393.67	188.675	621.135	1184.54	222.223	318.921	1269.46	5.30645	481.846	1437.99	-85.7971	516.342	1223.35	-112.199	547.029	1128.23	-119.416	702.352	1037.04	-72.9728	773.466	1000.69	-133.095	746.979	972.514	-119.503	827.093	964.263
612	0	145.151	585.307	1638.68	243.19	589.131	1636.37	128.312	428.264	1648.24	272.691	439.474	1641.16	184.134	396.725	1474.44	160.232	346.723	1211.62	193.683	545.913	1393.76	190.019	637.754	1185.38	222.913	334.951	1268.29	6.55991	496.746	1438.24	-84.5887	530.192	1223.1	-110.75	560.947	1127.88	-118.772	716.194	1036.62	-72.4025	787.805	1000.95	-132.21	760.897	971.948	-119.592	841.299	965.5
613	0	147.168	599.284	1639.51	245.432	603.204	1636.85	130.532	442.166	1648.48	275.052	453.343	1640.82	185.84	411.799	1474.09	160.73	362.916	1211.19	195.015	561.211	1394.18	191.236	654.517	1186.34	223.623	351.118	1267.45	7.76274	511.769	1438.8	-83.2387	544.342	1223.12	-109.193	574.584	1127.75	-117.789	729.419	1035.69	-72.1258	801.021	1000.28	-130.94	773.822	970.684	-119.731	854.265	966.09
614	0	149.575	613.404	1640.72	247.774	617.427	1637.57	133.188	456.27	1649.12	277.419	467.641	1640.91	187.474	426.709	1474.32	161.287	379.056	1211.4	196.349	576.457	1394.98	192.339	671.355	1187.57	224.415	367.371	1267.18	8.95562	526.931	1439.85	-81.7037	558.14	1223.57	-107.621	587.883	1128.02	-116.809	741.883	1034.38	-71.4572	813.362	999.144	-130.176	785.791	969.208	-119.79	866.267	965.796
615	0	152.099	627.756	1642.17	250.268	631.65	1638.54	135.732	470.549	1650.4	280.089	482.08	1641.36	187.894	440.771	1476.16	161.655	394.73	1212.46	197.198	591.588	1396.09	193.027	687.965	1188.99	225.075	383.403	1267.77	9.9477	542.027	1441.3	-80.6713	572.298	1224.36	-106.056	600.754	1128.3	-115.762	753.465	1032.78	-70.7186	824.83	997.371	-128.757	796.721	967.12	-119.789	877.108	965.043
616	0	154.486	642.26	1644.09	252.671	646.068	1639.48	138.073	484.935	1652.03	282.346	496.328	1641.71	188.728	455.078	1477.76	161.414	409.677	1213.97	197.907	606.507	1397.49	193.523	704.303	1190.57	225.432	399.019	1268.93	10.8052	557.19	1443.33	-79.1666	586.589	1225.49	-104.629	613.204	1129.01	-114.649	764.383	1031.31	-69.6398	835.499	995.181	-127.805	806.727	965.097	-119.884	886.933	963.389
617	0	156.856	656.858	1645.97	255.083	660.674	1640.43	140.478	499.599	1653.87	284.627	511.002	1642.18	189.497	469.236	1478.68	161.121	424.132	1215.84	198.278	621.19	1398.96	193.902	719.965	1192.26	225.583	414.089	1270.3	11.4557	572.213	1445.41	-77.8754	601.003	1226.84	-103.23	625.327	1130.1	-113.179	774.786	1029.95	-68.6091	845.115	992.585	-126.172	816.073	963.04	-119.529	895.919	961.186
618	0	159.295	671.658	1647.96	257.1	675.139	1641.13	142.503	514.327	1656.13	286.406	525.486	1642.56	190.832	486.021	1480.03	160.874	437.983	1217.77	198.588	635.795	1400.38	193.8	734.627	1193.68	225.69	428.693	1272.03	12.0859	586.827	1447.58	-76.5943	615.167	1228.7	-101.872	637.129	1131.5	-111.9	784.647	1028.14	-67.2534	854.156	989.455	-124.873	824.383	960.734	-118.808	903.988	958.145
619	0	160.748	686.556	1649.68	258.76	689.889	1641.98	143.971	529.109	1658.5	287.694	540.214	1643.35	191.473	499.907	1482.09	160.758	452.289	1219.58	198.486	650.065	1401.92	193.718	748.894	1195.29	225.508	442.997	1273.63	12.4887	600.817	1449.75	-75.2613	629.043	1230.4	-100.985	648.651	1132.95	-110.192	793.905	1026.69	-65.6536	862.561	986.116	-123.42	832.095	957.979	-118.007	911.388	954.302
620	0	161.866	701.346	1651.49	259.813	704.731	1643.09	145.106	543.839	1661.11	288.551	554.998	1644.59	191.976	514.382	1483.99	161.071	466.073	1221.66	198.462	664.31	1403.9	193.332	762.797	1197.18	225.555	457.178	1275.57	12.7771	614.562	1452.01	-74.2983	642.509	1232.08	-100.148	659.917	1134.79	-108.829	802.755	1025.16	-64.1525	870.371	982.452	-122.158	839.317	955.534	-117.099	918.102	950.039
621	0	162.561	716.026	1653.09	260.281	719.404	1644.4	145.931	558.723	1663.91	289.313	569.763	1646.86	192.364	527.455	1486.15	161.769	479.475	1223.69	198.053	678.122	1405.88	192.676	776.535	1199.27	225.82	471.002	1277.43	12.8919	627.554	1454.26	-73.2197	655.257	1234.1	-99.4066	670.837	1136.57	-107.553	811.175	1023.68	-62.6408	877.366	978.901	-121.024	845.849	953.253	-115.996	924.045	944.967
622	0	162.585	730.78	1654.87	260.172	734.204	1645.96	146.099	573.465	1666.73	289.524	584.727	1649.67	192.964	541.605	1488.39	162.824	492.915	1225.96	197.693	691.906	1408.19	192.11	790.159	1201.97	226.466	484.627	1279.6	12.7264	640.148	1456.45	-72.5638	667.199	1236.02	-98.7811	681.361	1138.32	-106.342	818.883	1022.23	-61.4472	883.757	975.021	-120.018	851.967	950.863	-114.542	929.501	939.408
623	0	161.707	745.233	1656.43	259.505	748.89	1647.92	145.694	588.027	1669.56	289.352	599.471	1652.88	191.247	552.311	1491.6	164.12	506.23	1228.37	197.444	705.573	1410.99	191.126	803.566	1204.8	227.388	498.32	1282.28	12.3948	652.315	1458.87	-72.2316	678.642	1237.67	-98.1628	691.315	1139.69	-105.365	826.158	1020.74	-60.4132	889.535	971.334	-119.666	857.265	948.637	-112.887	934.471	933.376
624	0	160.954	759.516	1658.27	258.831	763.466	1650.22	145.141	602.521	1672.63	288.659	613.983	1656.28	191.926	566.349	1494.06	165.738	519.459	1230.91	197.019	719.026	1413.56	189.945	816.951	1207.65	228.795	511.842	1284.8	11.9696	664.405	1460.67	-72.0745	689.367	1239.3	-97.5128	700.688	1141.02	-104.641	832.891	1019.04	-59.2495	894.775	967.348	-119.071	862.365	946.079	-111.135	938.623	926.815
625	0	159.607	773.75	1660.44	257.622	777.822	1652.69	144.27	616.818	1675.68	287.853	628.599	1660.03	192.369	579.923	1497.01	167.518	532.737	1233.49	196.723	732.461	1416.61	188.671	830.2	1210.7	230.366	525.542	1287.49	11.3369	676.138	1462.98	-72.0651	699.527	1240.73	-96.9255	709.658	1142.09	-103.885	839.079	1017.19	-58.2576	899.327	963.5	-118.552	866.687	943.474	-109.116	942.299	920.17
626	0	158.258	787.89	1662.74	256.353	792.079	1655.61	143.141	630.945	1678.89	286.827	642.912	1663.87	192.445	593.068	1500.34	169.372	546.091	1236.48	196.267	745.878	1419.77	187.146	843.385	1213.61	231.782	539.087	1290.72	10.8518	687.856	1465.05	-72.1624	709.148	1241.95	-96.1722	717.913	1143.12	-103.353	844.516	1015.24	-57.5563	903.197	959.575	-118.202	870.638	940.919	-107.14	944.954	913.243
627	0	156.879	801.792	1665.22	254.999	806.169	1658.68	141.87	644.912	1682.03	285.506	656.924	1667.48	192.463	606.397	1503.62	171.32	559.367	1239.51	195.789	759.208	1422.82	185.769	856.503	1216.78	233.054	552.344	1294.17	10.4487	699.712	1466.74	-72.3615	718.178	1243.22	-95.6426	725.923	1143.94	-102.939	849.439	1013.32	-56.6528	906.496	955.792	-117.834	873.913	938.63	-104.942	946.787	906.385
628	0	155.478	815.521	1667.64	253.446	819.979	1661.7	140.419	658.718	1684.75	284.402	670.846	1671.4	192.871	620.163	1506.63	173.286	572.729	1242.56	195.298	772.594	1425.93	184.388	869.385	1219.51	234.336	565.751	1297.48	9.84359	711.63	1468.54	-72.4944	726.627	1244.29	-95.2462	733.317	1144.45	-102.626	853.898	1011.08	-55.9036	909.217	951.956	-116.977	876.682	935.725	-102.895	947.77	899.798
629	0	153.849	829.084	1670.27	252.064	833.698	1664.91	139.042	672.336	1687.52	282.962	684.464	1675.11	194.267	635.121	1509.12	175.036	586.025	1245.46	194.744	786.104	1428.99	183.246	882.207	1222.73	235.956	579.166	1300.64	9.3084	723.535	1470.28	-72.7223	734.839	1245.38	-94.2458	740.473	1145.64	-102.286	857.694	1009.03	-54.9916	911.381	948.369	-116.525	878.58	933.098	-101.01	948.103	893.349
630	0	152.391	842.438	1672.73	250.545	847.297	1668.2	137.733	685.736	1689.78	281.678	698.056	1678.5	193.765	647.734	1512.12	176.806	599.437	1248.06	194.217	799.671	1431.93	182.046	895.015	1225.54	237.595	592.764	1303.63	8.78164	735.36	1471.7	-72.5555	742.559	1246.3	-93.4246	747.416	1146.08	-101.989	861.131	1006.95	-54.3136	913.112	944.816	-115.918	880.118	930.408	-99.2459	947.62	887.305
631	0	150.845	855.627	1675.05	249.115	860.663	1671	136.479	698.816	1691.88	280.407	711.468	1681.47	193.536	661.203	1514.52	178.458	612.86	1250.54	193.636	813.231	1434.63	181.082	907.69	1228.22	239.362	606.626	1306.68	8.38328	747.44	1472.9	-72.6043	750.317	1247.08	-92.4996	753.995	1146.4	-101.379	864.232	1004.64	-53.6815	914.09	940.972	-115.419	880.911	927.795	-97.65	946.755	881.344
632	0	149.436	868.754	1677.19	247.628	873.919	1673.6	135.377	711.948	1693.65	279.409	724.796	1683.99	193.381	674.402	1516.96	180.039	626.52	1252.47	192.973	826.77	1436.8	180.273	920.333	1230.55	241.219	620.329	1309.32	8.05353	759.479	1473.88	-72.3687	757.883	1247.57	-91.3316	760.474	1146.86	-100.418	866.644	1002.12	-53.022	914.996	937.071	-114.389	881.51	924.889	-96.1185	945.416	875.657
633	0	148.41	881.776	1679.16	245.948	887.185	1675.96	134.44	724.789	1694.93	278.357	738.109	1686.09	194.881	689.561	1518.33	181.584	640.166	1254.17	192.31	840.455	1438.59	179.462	933.079	1232.54	242.914	634.325	1311.35	7.58289	771.466	1474.71	-72.0547	765.223	1247.9	-90.3098	766.531	1146.91	-99.6624	868.965	999.712	-52.0812	915.771	933.431	-113.44	881.581	921.746	-94.9329	943.547	870.049
634	0	146.607	894.717	1680.61	244.806	900.478	1677.93	133.326	737.673	1695.89	277.411	751.434	1687.73	193.446	701.266	1520.14	182.784	653.7	1255.55	191.821	853.91	1440.11	178.782	945.861	1234.06	244.464	648.115	1313.29	7.19058	783.522	1475.21	-71.3807	772.913	1247.85	-89.123	772.65	1146.79	-98.7433	871.133	997.077	-51.3713	916.146	929.419	-112.631	881.329	918.617	-93.8807	941.43	864.808
635	0	145.394	907.686	1681.74	243.431	913.753	1679.48	132.52	750.388	1696.33	276.624	764.821	1688.88	194.888	716.661	1520.89	183.933	667.481	1256.55	191.312	867.391	1441.33	178.273	958.757	1235.15	246.233	662.333	1314.61	6.81702	795.625	1475.2	-70.6202	780.755	1247.54	-87.8226	778.652	1146.43	-97.5755	872.997	994.287	-50.4035	916.275	925.312	-111.516	880.786	915.546	-92.9086	939.289	859.592
636	0	144.053	920.745	1682.59	242.189	927.082	1680.62	131.825	763.349	1696.6	275.606	778.251	1689.23	195.124	729.917	1521.5	185.187	681.272	1257.19	190.789	880.911	1442.03	177.623	972.049	1235.84	247.89	676.443	1315.71	6.42512	807.902	1475.14	-69.6707	788.668	1246.98	-86.0902	784.742	1145.85	-96.4347	874.506	991.296	-49.3696	916.235	921.022	-110.045	879.842	912.316	-92.0271	936.889	854.398
637	0	142.872	933.746	1682.98	241.035	940.438	1681.5	131.192	776.207	1696.4	275.033	791.699	1689.87	195.281	743.661	1521.79	186.222	694.917	1257.58	190.158	894.391	1442.26	177.314	985.428	1236.48	249.193	690.167	1316.31	6.04877	820.26	1474.63	-68.3632	796.64	1245.79	-84.4926	790.49	1144.9	-95.1022	875.929	988.166	-48.5297	915.855	916.655	-108.876	878.627	908.889	-91.1775	934.251	849.456
638	0	141.65	946.877	1683.07	239.868	953.961	1681.85	130.416	789.237	1695.89	274.112	805.295	1689.59	193.91	755.613	1522.1	187.075	708.566	1257.63	189.72	907.952	1442.21	177.003	999.074	1236.4	250.625	703.814	1316.77	5.749	832.806	1473.81	-67.5173	805.005	1245.18	-82.7086	796.602	1144.18	-93.8855	877.277	985.286	-47.8395	915.247	912.211	-107.515	877.197	905.714	-90.7548	931.405	844.974
639	0	140.498	960.137	1682.74	238.656	967.565	1681.73	129.81	802.408	1695.03	273.467	818.884	1689.4	195.821	771.643	1521.03	188.032	722.104	1257.4	189.163	921.429	1441.81	176.557	1012.62	1235.72	251.888	717.54	1316.72	5.40194	845.431	1472.82	-66.2981	813.573	1243.87	-80.8383	802.853	1143.14	-92.2596	877.909	981.836	-46.3537	914.907	908.731	-105.676	875.679	902.385	-90.3557	928.598	840.691
640	0	139.316	973.508	1681.9	237.398	981.184	1681.18	129.233	815.778	1693.75	272.739	832.605	1688.73	193.897	782.649	1520.87	188.588	735.543	1256.71	188.612	934.936	1440.83	176.541	1025.97	1234.6	252.81	731.217	1315.98	5.0859	858.298	1471.45	-65.0978	822.247	1242.63	-78.8637	809.149	1141.91	-90.5906	879.004	978.725	-45.2932	914.578	904.482	-104.39	873.921	899.235	-89.6997	925.186	836.322
641	0	138.202	987	1680.59	236.288	995.043	1680.21	128.346	829.247	1692.38	272.023	846.521	1687.75	193.892	796.354	1519.69	188.611	748.902	1255.76	188.137	948.517	1439.65	176.456	1038.93	1232.74	253.534	744.717	1315.04	4.60679	871.266	1469.75	-63.8527	830.946	1240.66	-76.7162	815.505	1140.56	-89.2313	879.996	975.566	-44.383	913.151	899.812	-102.511	871.994	895.875	-89.1482	922.185	831.907
642	0	137.344	1000.78	1678.83	235.372	1009.01	1678.76	127.774	842.841	1690.6	271.379	860.561	1686.31	195.971	813.213	1517.51	188.559	762.061	1254.48	187.699	961.995	1437.98	176.373	1051.7	1230.26	253.858	758.119	1313.77	4.20578	884.323	1467.79	-62.625	840.035	1239.01	-74.5213	822.152	1139.05	-87.5091	881.26	972.34	-43.3712	912.268	895.466	-100.778	870.28	893.054	-88.902	918.83	827.821
643	0	136.285	1014.63	1676.76	234.421	1023.05	1677.01	127.105	856.819	1688.87	270.531	874.71	1685.02	193.692	823.752	1516.74	188.22	774.983	1252.79	187.055	975.458	1435.92	176.257	1064.63	1227.48	253.806	771.448	1312.3	3.82882	897.664	1465.78	-61.6025	848.945	1237.14	-72.2863	829.218	1137.54	-85.9305	882.462	969.363	-42.4884	911.254	891.13	-99.019	868.641	890.269	-88.3884	915.625	823.94
644	0	135.411	1028.41	1674.35	233.332	1037.11	1674.93	126.38	870.732	1686.7	269.808	888.914	1683.33	193.685	838.504	1514.72	187.333	787.829	1250.87	186.803	988.993	1433.85	176.215	1077.98	1224.55	253.617	784.702	1310.67	3.31333	911.162	1463.55	-60.4972	858.084	1235.35	-70.1193	836.416	1136.07	-84.356	883.848	966.47	-41.0611	910.906	887.279	-97.025	867.094	887.933	-87.592	912.411	820.105
645	0	134.438	1042.62	1671.64	232.556	1051.6	1672.46	125.572	885.014	1684.64	269.06	903.329	1681.51	194.164	853.314	1512.27	186.295	800.723	1249.04	186.273	1002.5	1431.48	175.953	1091.61	1221.39	253.104	797.865	1308.75	2.71295	924.617	1461.2	-59.6029	867.768	1233.2	-67.9628	843.874	1134.49	-82.7793	885.684	963.97	-41.0189	910.564	883.474	-95.3997	865.729	885.674	-87.1064	909.024	816.74
646	0	133.713	1056.65	1668.31	231.896	1066.01	1669.62	124.947	899.24	1682.3	268.369	917.738	1679.54	194.542	868.238	1510.03	185.038	813.701	1246.98	185.899	1016.09	1428.99	175.857	1105.53	1218.21	252.487	811.193	1306.68	2.21861	938.432	1458.74	-58.5289	877.311	1231.32	-65.6452	851.618	1133.08	-81.0998	887.763	961.676	-37.8688	910.358	880.271	-93.419	864.749	883.912	-86.2784	906.033	813.622
647	0	132.831	1070.96	1665.04	230.622	1080.13	1666.38	124.206	913.741	1679.95	267.622	932.331	1677.39	194.174	881.655	1508.05	183.501	826.769	1244.86	185.098	1029.76	1426.19	175.678	1119.69	1215.13	251.649	824.426	1304.29	1.42571	952.156	1456.37	-57.9802	887.189	1229.57	-63.4099	859.756	1131.47	-79.818	890.18	959.476	-37.107	910.74	877.116	-91.9042	864.377	882.485	-85.4348	903.043	810.77
648	0	132.315	1085.39	1661.71	229.834	1094.65	1663.05	123.437	928.15	1677.53	266.89	946.734	1675.03	193.302	895.123	1505.56	181.844	839.884	1242.42	184.689	1043.46	1423.45	175.692	1133.65	1212.21	250.401	837.754	1301.7	0.780602	966.218	1453.79	-57.3614	897.268	1227.64	-61.4495	868.083	1130.25	-78.6184	892.965	957.764	-36.6186	911.221	874.278	-90.3274	864.161	881.34	-84.3065	900.434	807.913
649	0	131.434	1099.85	1658.21	229.413	1109.03	1659.78	122.649	942.72	1675	266.18	961.206	1672.54	189.928	906.499	1503.16	180.256	853.602	1239.9	184.058	1057.15	1420.63	176.043	1147.61	1209.48	248.968	851.184	1298.83	-0.279187	980.242	1451.3	-56.8164	907.723	1225.9	-59.4234	876.905	1128.89	-77.5947	896.399	956.252	-35.6717	913.382	872.062	-88.83	865.167	880.756	-83.5019	898.032	805.589
650	0	130.741	1114.35	1654.84	228.882	1123.42	1656.36	121.757	957.249	1672.58	265.18	975.716	1670.08	190.741	922.393	1500.14	178.608	867.429	1237.08	183.44	1070.76	1417.88	175.996	1161.15	1206.79	247.577	864.639	1296.15	-1.33593	994.516	1448.78	-56.6686	918.6	1224.13	-57.5979	886.033	1127.63	-76.9951	900.347	954.958	-35.2434	915.72	870.153	-87.7694	866.542	880.349	-82.473	896.266	803.596
651	0	130.047	1128.82	1651.72	227.865	1137.71	1653.08	120.618	971.761	1670.32	264.125	990.014	1667.71	189.082	936.147	1497.44	177.02	881.532	1234.29	182.753	1084.54	1415.51	176.036	1175.03	1204.6	245.842	878.168	1293.29	-2.63735	1008.8	1446.28	-56.5557	929.657	1222.6	-56.2749	895.989	1126.41	-76.6367	904.968	954.016	-35.4279	918.618	868.451	-86.8404	869	880.267	-81.5009	895.121	801.849
652	0	128.758	1143.13	1648.63	226.501	1151.84	1650.03	119.101	986.339	1668.15	262.696	1004.24	1665.7	186.979	949.181	1494.78	175.429	895.894	1231.51	181.823	1098.36	1413.31	175.898	1189.15	1202.68	243.962	891.886	1290.6	-4.0104	1023.33	1443.7	-56.5545	941.289	1220.71	-54.9969	906.233	1125.26	-76.742	910.21	953.196	-35.5892	922.669	867.096	-86.1765	872.009	880.415	-79.9284	894.439	800.322
653	0	127.433	1157.5	1645.81	225.569	1166.03	1647.46	117.629	1000.68	1665.99	261.174	1018.44	1663.72	186.221	964.226	1491.49	173.993	910.144	1228.8	180.909	1112.37	1411.3	175.65	1203.5	1201.04	242.114	905.767	1288.12	-5.46676	1037.91	1441.05	-56.9368	953.556	1218.88	-54.2619	917.331	1124.01	-76.77	916.51	952.422	-36.7803	926.624	865.771	-86.0023	876.165	880.803	-78.9248	894.809	799.264
654	0	125.871	1171.67	1643.26	222.336	1179.53	1644.5	115.659	1014.95	1663.97	259.517	1032.36	1661.76	184.475	978.266	1489.41	172.823	925.051	1226.3	179.799	1126.35	1409.22	175.289	1218.1	1199.35	240.392	919.984	1285.62	-6.85466	1052.72	1438.54	-57.2334	966.553	1217.23	-53.9028	929.131	1122.96	-77.2391	923.725	951.953	-37.0163	932.635	864.871	-86.23	881.223	881.348	-77.9914	896.272	798.486
655	0	124.026	1185.78	1640.9	221.629	1194.01	1642.93	113.464	1028.96	1661.8	257.216	1046.33	1660.24	182.434	992.286	1487.49	171.781	940.076	1223.95	178.624	1140.53	1407.47	174.453	1232.53	1197.72	238.755	933.977	1283.72	-8.39363	1067.54	1436.08	-57.4694	979.832	1215.48	-53.8029	941.474	1121.6	-77.9358	931.846	951.403	-38.1136	939.078	864.093	-86.7839	887.734	882.093	-77.311	898.764	798.081
656	0	121.688	1199.67	1639.11	218.804	1207.45	1641.32	111.133	1042.9	1659.81	254.877	1060.07	1658.85	180.389	1006.13	1485.6	170.721	954.881	1222	177.235	1154.88	1405.95	173.48	1246.96	1196.52	237.1	948.359	1281.8	-10.041	1082.35	1434.01	-58.5752	993.984	1213.38	-54.0359	954.418	1120.27	-78.9612	941.226	950.923	-38.9734	946.219	863.168	-88.0798	895.393	882.74	-76.7797	902.529	797.903
657	0	119.319	1213.52	1637.56	215.819	1221.06	1640.13	108.295	1056.72	1657.79	252.2	1073.67	1657.79	175.071	1016.46	1484.94	169.521	969.513	1220.11	175.69	1169.14	1404.49	172.274	1261.67	1195.59	235.597	962.979	1280.03	-11.7034	1097.16	1431.83	-59.5381	1008.3	1211.6	-54.8122	967.93	1118.94	-80.35	951.597	950.479	-39.6658	954.875	862.758	-89.8004	904.435	883.136	-76.5485	907.834	797.814
658	0	116.728	1227.41	1636.29	214.056	1234.98	1639.71	105.462	1070.58	1656.19	249.331	1087.34	1657.21	175.93	1034.23	1482.52	168.668	984.503	1218.53	174.312	1183.45	1403.77	170.983	1276.39	1194.97	234.299	977.644	1278.73	-13.5827	1111.91	1430.26	-60.5498	1023.2	1209.71	-55.5987	981.971	1117.79	-81.6711	963.062	949.758	-41.6319	964.346	861.833	-91.6465	914.842	883.542	-76.6833	914.473	798.475
659	0	114.105	1241.16	1635.6	211.258	1248.55	1639.47	102.463	1084.4	1655.07	246.205	1100.73	1656.92	170.6	1044.78	1482.53	167.645	999.769	1217.15	172.669	1197.94	1403.32	169.311	1291.49	1194.7	232.788	992.437	1277.61	-15.5608	1126.56	1428.75	-61.8426	1038.15	1207.95	-56.8245	996.529	1116.52	-83.3089	975.623	949.152	-43.831	975.077	861.384	-94.0439	926.673	883.822	-77.0505	922.748	798.523
660	0	111.38	1254.9	1635.37	208.582	1262.18	1639.84	99.158	1098.15	1654.5	243.097	1114.13	1657.22	168.207	1058.95	1481.97	166.065	1013.75	1216.57	171.135	1212.38	1403.55	167.761	1306.74	1195.03	231.074	1007.2	1276.93	-17.5351	1141.32	1427.63	-63.4007	1053.44	1206.67	-58.2221	1011.36	1115.35	-85.0719	989.239	948.705	-45.5395	986.649	861.049	-96.5024	939.908	884.031	-77.8202	932.761	798.684
661	0	108.872	1268.77	1635.65	205.735	1275.46	1640.57	95.7526	1111.99	1654.24	239.706	1127.54	1657.82	168.776	1076.61	1480.71	165.274	1029.85	1215.84	169.344	1226.76	1403.91	166.245	1322.37	1195.7	229.352	1022.02	1276.68	-19.5144	1155.98	1426.94	-64.9062	1069.19	1205.67	-59.7268	1026.83	1114.45	-87.0801	1003.83	948.172	-47.2863	999.933	860.697	-99.2225	954.158	884.173	-79.3627	944.213	799.404
662	0	106.102	1282.51	1636.37	203.109	1289.08	1642.02	92.4102	1125.81	1654.21	236.394	1140.71	1658.74	163.805	1087.75	1481.92	164.03	1045.22	1215.76	167.647	1241.29	1404.87	165.028	1338.01	1196.92	227.586	1036.89	1276.88	-21.299	1170.77	1426.57	-66.6353	1084.87	1205.12	-61.6398	1042.61	1113.86	-88.8543	1019.4	947.628	-49.6442	1014.22	860.173	-102.022	969.855	884.351	-80.9344	957.667	799.804
663	0	103.253	1296.28	1637.33	200.135	1302.56	1643.54	88.9323	1139.5	1654.39	233.148	1154.24	1660.06	161.792	1102.25	1482.34	162.371	1059.67	1216.39	165.93	1255.69	1405.94	163.886	1353.64	1198.08	225.746	1051.63	1277.48	-23.1066	1185.66	1426.55	-68.4333	1100.88	1204.82	-63.5716	1058.78	1113.65	-91.4616	1035.79	947.547	-51.5629	1029.95	860.282	-105.276	986.427	884.399	-83.1057	972.779	799.944
664	0	100.343	1310.07	1638.51	197.085	1316.25	1645.45	85.6325	1153.24	1654.96	229.666	1167.67	1661.62	161.194	1118.28	1482.84	161.032	1075.47	1217.16	164.419	1270.2	1407.43	163.218	1368.92	1199.48	224.059	1066.28	1278.68	-24.8208	1200.51	1426.81	-70.16	1117.06	1204.87	-65.6791	1075.19	1113.52	-93.6382	1053.05	947.368	-54.1036	1046.81	860.307	-108.41	1004.04	884.191	-86.0466	989.472	800.091
665	0	97.5612	1323.9	1639.95	193.513	1329.69	1647.5	82.4659	1167.09	1655.76	226.334	1181.24	1663.57	160.557	1133.69	1484.14	159.106	1089.06	1218.94	163.196	1284.38	1409.23	162.764	1383.72	1201.02	222.869	1080.81	1280.4	-26.1092	1215.25	1427.65	-71.7839	1133.4	1205.23	-67.6966	1092	1113.66	-96.4045	1071.15	947.387	-56.4835	1064.79	860.311	-111.436	1022.98	884.154	-89.209	1007.91	799.911
666	0	94.7074	1337.5	1641.15	191.015	1343.47	1649.68	79.4688	1180.9	1656.5	223.394	1194.85	1665.66	159.114	1147.78	1485.86	157.35	1102.61	1220.94	161.879	1298.47	1410.99	162.612	1398.19	1202.58	221.695	1094.98	1282.48	-27.1701	1229.7	1428.78	-73.5756	1149.73	1205.79	-70.0326	1108.96	1114.03	-99.1992	1089.98	947.632	-59.5361	1083.52	860.401	-114.598	1042.66	883.985	-93.186	1027.95	800.187
667	0	91.9713	1351.21	1642.09	188.253	1357.24	1651.4	76.7993	1194.54	1657.03	220.576	1208.53	1667.5	157.875	1162	1487.53	155.753	1116.06	1222.72	160.814	1312.46	1412.64	162.31	1412.36	1204.01	220.974	1109.16	1284.59	-28.2659	1244.15	1430.25	-75.2364	1166.25	1206.49	-72.4363	1126.18	1114.55	-102.062	1109.63	947.885	-62.5891	1104.14	860.563	-117.987	1063.35	883.671	-97.1199	1049.74	799.294
668	0	89.803	1364.93	1643.04	186.105	1371.1	1653.1	74.4748	1208.2	1657.85	218.219	1222.32	1669.55	156.623	1176.02	1488.91	155.076	1129.88	1224.1	159.934	1326.08	1414.17	162.273	1426.31	1205.56	220.38	1122.81	1286.57	-29.2028	1258.2	1431.72	-77.1901	1182.6	1207.14	-74.9405	1143.61	1115.15	-104.884	1129.65	948.09	-65.2111	1125.5	860.231	-121.375	1084.39	883.167	-101.847	1072.54	798.596
669	0	87.76	1378.56	1644.08	184.1	1384.85	1654.75	72.5408	1222.01	1659.11	216.193	1236.05	1671.6	155.431	1189.58	1490.5	154.543	1143.8	1225.35	159.145	1339.52	1415.75	162.378	1440	1207.35	219.976	1136.16	1288.43	-29.9929	1272.26	1433.5	-78.9613	1199.27	1208.21	-77.5295	1161.14	1115.5	-107.951	1150.29	948.375	-68.295	1147.83	860.172	-124.627	1106.45	882.566	-106.176	1097.07	797.322
670	0	86.3049	1392.38	1645.17	182.184	1398.52	1655.97	70.9001	1235.89	1660.77	214.366	1249.93	1673.69	153.995	1202.7	1492.1	153.417	1156.76	1226.98	158.552	1352.85	1417.6	162.226	1453.24	1209.06	219.077	1149.12	1290.15	-31.0162	1286.17	1435.16	-80.7313	1216.05	1209.02	-80.2942	1178.66	1115.91	-110.832	1171.49	948.364	-71.0882	1171.28	860.323	-127.758	1129.2	881.823	-110.525	1122.82	796.558
671	0	85.2083	1406.14	1646.33	181.344	1412.15	1657.16	69.4957	1249.73	1662.75	213.175	1263.67	1675.66	152.617	1215.94	1493.61	152.05	1169.83	1228.53	157.959	1365.88	1419.4	162.22	1466.3	1210.78	217.729	1161.91	1291.92	-31.8925	1300.04	1436.8	-82.6794	1232.89	1209.93	-83.1704	1196.64	1116.24	-113.638	1193.24	948.326	-74.3295	1194.74	860.235	-130.887	1152.4	880.98	-115.338	1149.66	795.6
672	0	84.6203	1419.89	1647.43	180.623	1425.74	1658.13	68.5219	1263.72	1665.02	212.083	1277.42	1677.64	151.372	1228.98	1495.49	150.821	1183.35	1230.23	157.372	1378.86	1421.13	162.08	1478.99	1212.25	216.286	1174.69	1293.64	-32.6056	1313.88	1438.6	-84.5714	1249.75	1210.97	-86.0534	1214.82	1116.78	-116.584	1215.2	948.431	-77.2664	1218.56	860.204	-133.959	1176.04	880.063	-120.763	1177.55	795.282
673	0	84.2475	1433.59	1648.84	180.151	1439.34	1659.27	67.7642	1277.59	1667.35	211.318	1290.91	1679.7	150.352	1241.66	1497.64	149.308	1196.63	1232.22	156.65	1391.8	1422.99	162.019	1491.73	1213.96	214.328	1187.48	1295.24	-33.5211	1327.63	1440.35	-86.6101	1266.77	1212.17	-88.9889	1232.99	1117.34	-119.221	1237.79	948.797	-80.4859	1242.94	860.46	-136.753	1200.36	879.279	-125.271	1206.66	794.92
674	0	84.042	1447.29	1650.31	179.977	1452.71	1660.59	66.978	1291.34	1669.88	210.755	1304.3	1681.82	149.284	1254.25	1499.79	147.774	1210.37	1234.05	156.209	1404.59	1425.03	162.04	1504.53	1215.81	212.34	1200.35	1297.04	-34.1969	1341.58	1442.24	-88.5228	1284	1213.45	-92.0784	1251.49	1118.07	-121.896	1260.57	949.247	-83.3271	1268.31	861.421	-140.018	1225.15	878.525	-129.75	1236.57	795.427
675	0	83.9917	1460.89	1652.05	180.104	1466.15	1662.2	66.5148	1305.11	1672.34	210.397	1317.81	1684.04	148.316	1267.22	1502	145.883	1223.34	1236.27	155.828	1417.45	1427.09	162.081	1517.46	1217.88	210.234	1212.96	1298.99	-34.7539	1355.24	1444.24	-90.5446	1301.13	1214.99	-95.1342	1269.97	1118.96	-124.525	1283.84	949.98	-86.7144	1294.28	862.353	-142.578	1250.46	878.354	-134.093	1267.35	796.06
676	0	84.267	1474.47	1654.21	180.33	1479.37	1663.94	66.3345	1318.85	1674.92	210.03	1331.08	1686.23	147.503	1280.3	1504.29	144.225	1236.76	1238.53	155.234	1430.23	1429.12	162.138	1530.6	1220.19	208.163	1225.61	1301.05	-35.2651	1368.92	1446.59	-92.6702	1318.19	1216.91	-98.0035	1288.75	1119.99	-126.988	1307.3	951.323	-88.4954	1320.9	864.136	-144.955	1276.26	878.298	-138.179	1298.52	798.064
677	0	84.4766	1487.98	1656.2	180.665	1492.58	1665.77	66.0839	1332.51	1677.62	209.957	1344.31	1688.38	146.615	1293.34	1506.62	142.297	1249.98	1240.85	155.211	1443.19	1431.52	162.33	1543.76	1222.77	205.947	1238.03	1303.26	-35.9315	1382.65	1449.07	-94.5039	1335.52	1218.74	-100.995	1307.68	1121.4	-129.468	1331.16	952.903	-92.281	1346.38	865.936	-147.482	1302.53	878.768	-142.092	1330.32	801.069
678	0	84.7242	1501.53	1658.47	181.186	1505.78	1667.7	65.9292	1346.12	1680.14	209.936	1357.55	1690.42	145.76	1306.55	1508.77	140.073	1262.22	1243.35	154.609	1455.87	1433.58	162.509	1556.76	1225.48	203.925	1250.68	1305.44	-36.4506	1396.39	1451.73	-96.5448	1352.58	1221.35	-104.058	1326.47	1123.04	-131.767	1355.5	955.337	-95.5781	1373.3	868.652	-149.702	1329.22	879.741	-145.753	1362.23	804.734
679	0	85.0754	1514.91	1660.72	181.689	1518.96	1669.38	65.9728	1359.67	1682.59	210.095	1370.56	1692.21	145.037	1319.87	1510.99	138.326	1274.96	1245.49	154.276	1468.8	1435.56	162.389	1569.47	1227.52	202.084	1263.37	1307.46	-36.9222	1409.88	1454.57	-98.3655	1369.89	1223.9	-106.99	1345.59	1124.88	-134.021	1380.02	957.718	-97.9148	1400.77	872.311	-152	1356.33	881.178	-149.076	1394.43	809.093
680	0	85.2305	1528.37	1662.6	182.112	1532.12	1671.01	65.9718	1373.2	1684.77	210.185	1383.72	1693.86	144.216	1333.23	1512.7	136.924	1288.03	1247.42	154.02	1481.82	1437.3	162.138	1581.79	1229.19	200.556	1276.05	1309.26	-37.3447	1423.47	1457.08	-100.236	1387.03	1226.34	-109.764	1364.55	1126.7	-136.302	1404.77	960.476	-99.5135	1429.62	876.518	-153.883	1384.11	882.901	-152.051	1426.72	813.942
681	0	85.6825	1541.87	1664.25	182.549	1545.37	1672.2	66.1091	1386.74	1686.71	210.292	1396.84	1694.95	143.429	1346.43	1514.46	135.38	1300.7	1249.18	153.738	1495.01	1438.71	161.791	1594	1230.53	199.036	1288.88	1310.96	-37.8131	1437.21	1459.4	-102.135	1404.05	1228.64	-112.788	1383.55	1128.76	-138.388	1430.1	963.38	-102.205	1457.56	880.171	-155.973	1412.23	885.203	-154.847	1458.88	819.013
682	0	85.971	1555.37	1665.55	182.383	1558.53	1673.03	66.1649	1400.24	1688.39	210.422	1410.05	1695.9	142.939	1359.45	1516.15	134.09	1313.15	1251.02	153.119	1508.09	1439.69	161.272	1606.15	1231.49	197.921	1301.96	1312.46	-38.2131	1450.9	1461.4	-103.61	1421.32	1230.43	-115.546	1402.43	1130.54	-140.457	1455.49	966.392	-104.18	1486.45	884.638	-158.32	1440.62	888.025	-157.251	1491.18	824.418
683	0	86.5728	1568.86	1666.87	182.579	1571.68	1673.77	66.3451	1413.68	1689.99	210.675	1423.27	1696.62	142.418	1372.67	1517.43	133.058	1326.08	1252.43	152.807	1521.46	1440.59	160.867	1618.44	1232.37	196.4	1314.58	1313.72	-38.6534	1464.46	1463.25	-105.623	1438.08	1232.42	-118.102	1421.4	1132.25	-142.637	1481	969.639	-106.378	1514.89	889.204	-160.259	1469.52	890.867	-159.438	1523.18	829.822
684	0	86.7267	1582.33	1667.93	182.914	1584.89	1674.38	66.2296	1427.18	1691.22	210.633	1436.4	1697.11	141.63	1386.06	1518.31	132.361	1339.59	1253.15	152.153	1534.54	1441.24	160.262	1630.92	1233.14	195.398	1327.69	1314.63	-39.0357	1478.12	1464.81	-107.63	1454.92	1234.37	-120.906	1440.41	1133.7	-144.846	1506.67	973.067	-108.768	1544.12	894.308	-162.143	1498.43	893.985	-161.621	1554.98	835.578
685	0	87.0266	1595.9	1668.82	183.302	1598.1	1674.78	66.2393	1440.76	1692.07	210.554	1449.65	1697.24	140.939	1399.46	1519.06	131.453	1352.38	1253.96	151.613	1547.86	1441.56	159.868	1643.56	1233.84	194.195	1340.76	1315.31	-39.4306	1491.69	1466.09	-109.758	1471.51	1235.97	-123.694	1459.38	1134.86	-147.286	1532.32	976.59	-110.951	1573.25	899.758	-164.38	1527.46	897.294	-163.464	1586.53	841.378
686	0	86.9386	1609.31	1669.31	183.475	1611.42	1674.99	66.041	1454.29	1692.5	210.524	1462.91	1697.15	140.348	1413	1519.35	130.914	1365.59	1254.38	151.08	1561.09	1441.68	159.37	1656.13	1234.25	192.943	1353.69	1315.61	-40.0003	1505.21	1466.96	-111.654	1488.04	1237.33	-126.265	1478.45	1135.72	-149.47	1557.99	980.334	-113.054	1602.54	905.972	-166.092	1556.44	900.561	-165.175	1617.85	847.429
687	0	86.8287	1622.82	1669.46	183.411	1624.84	1674.75	65.7156	1467.87	1692.56	210.155	1476.12	1696.74	139.806	1426.53	1519.24	130.216	1378.5	1254.58	150.617	1574.33	1441.57	158.359	1668.7	1233.87	192.03	1366.9	1315.66	-40.5074	1518.89	1467.45	-113.607	1504.57	1238.37	-129.015	1497.6	1136.25	-151.921	1583.59	983.964	-114.266	1631.93	912.457	-167.873	1585.56	904.102	-166.744	1648.77	853.324
688	0	86.4928	1636.42	1669.12	182.935	1638.3	1674.3	65.3564	1481.55	1692.13	209.819	1489.56	1696.02	139.211	1439.93	1518.9	129.706	1391.77	1254.39	150.004	1587.74	1441.02	157.757	1681.34	1233.47	191.069	1380.09	1315.34	-40.9931	1532.34	1467.28	-115.644	1520.96	1238.85	-131.654	1516.89	1136.56	-154.039	1609.04	987.406	-116.138	1660.84	918.63	-169.459	1614.33	907.542	-168.066	1679.54	859.3
689	0	86.0971	1650.09	1668.45	182.638	1651.97	1673.32	64.8536	1495.22	1691.33	209.281	1503.24	1695.04	138.696	1453.58	1518.17	128.785	1404.11	1254.15	149.474	1601.14	1439.92	157.146	1693.97	1232.26	190.211	1393.23	1314.82	-41.4149	1545.88	1466.75	-117.413	1537.53	1239.07	-134.437	1536.07	1136.53	-156.149	1634.41	990.733	-118.323	1688.8	924.229	-170.944	1643.09	911.13	-169.016	1710.03	865.289
690	0	85.1958	1663.88	1667.18	181.972	1665.68	1672.09	64.3403	1509.04	1690.2	208.6	1517.1	1693.78	138.3	1467.25	1517.25	128.303	1416.82	1253.46	148.869	1614.59	1438.58	156.249	1706.51	1230.45	189.694	1406.56	1313.93	-41.8059	1559.41	1465.86	-119.18	1554	1238.77	-136.941	1555.46	1136.41	-158.011	1659.71	994.004	-119.972	1716.61	929.882	-172.858	1671.53	915.023	-169.915	1740.17	871.216
691	0	84.5455	1677.8	1665.36	180.985	1679.91	1670.44	63.6545	1522.97	1688.86	207.895	1531.11	1692.27	137.915	1480.88	1516.01	127.749	1429.35	1252.46	148.142	1628.02	1436.8	155.406	1719.1	1228.3	189.143	1419.69	1312.88	-42.0637	1572.91	1464.41	-120.781	1570.7	1238.15	-139.519	1575.06	1136.16	-159.846	1684.78	997.118	-121.26	1744.23	935.628	-174.806	1699.51	918.78	-170.517	1770.23	877.667
692	0	83.6939	1691.82	1663.29	180.116	1693.92	1668.52	62.7664	1536.85	1687.24	207.165	1545.43	1690.9	137.593	1494.59	1514.73	127.466	1441.79	1251.41	147.501	1641.5	1434.79	154.459	1731.72	1225.87	188.916	1432.94	1311.68	-42.3189	1586.26	1462.82	-122.241	1587.44	1237.37	-141.913	1594.72	1135.78	-161.562	1709.6	1000.28	-122.438	1771.38	941.469	-175.47	1727.66	922.571	-171.339	1799.47	883.823
693	0	82.8576	1705.85	1661.16	179.109	1708.28	1666.47	62.0082	1550.93	1685.44	206.241	1559.64	1689.27	137.337	1508.22	1513.17	127.686	1454.34	1249.93	146.993	1654.88	1432.77	153.506	1744.72	1223.23	189.012	1445.96	1310.43	-42.5184	1599.5	1461.06	-123.805	1604.2	1236.43	-144.196	1614.16	1135.48	-163.054	1734.01	1003.58	-123.496	1797.61	947.339	-176.258	1755.03	926.573	-171.597	1828.21	890.638
694	0	81.8157	1719.86	1658.71	178.203	1722.35	1664.3	61.2352	1565.11	1683.45	205.434	1573.85	1687.7	137.308	1521.94	1511.56	128.701	1467.19	1248.48	146.442	1668.26	1430.68	152.425	1757.86	1220.74	189.319	1459.13	1308.98	-42.7547	1612.72	1459.4	-125.125	1620.9	1235.93	-146.261	1633.62	1135.14	-164.44	1758.12	1007.11	-124.372	1823.18	953.334	-177.417	1782.03	931.07	-171.913	1856.28	897.412
695	0	80.7957	1733.94	1656.13	177.035	1736.75	1661.98	60.3652	1579.29	1681.31	204.69	1588.23	1686.04	137.245	1535.66	1510.04	129.9	1479.95	1246.77	146.017	1681.75	1428.57	151.388	1771.28	1218.31	189.614	1472.13	1307.69	-43.1091	1625.75	1457.41	-126.258	1637.65	1235.39	-148.07	1653.02	1134.77	-165.557	1781.71	1010.82	-124.879	1848.61	959.569	-179.14	1808.37	935.889	-172.352	1883.65	904.672
696	0	79.7905	1748.01	1653.35	176.055	1750.84	1659.46	59.4355	1593.43	1679.02	203.882	1602.74	1684.3	137.141	1549.24	1508.12	131.616	1493.18	1244.88	145.584	1695.39	1426.27	150.342	1784.99	1216.08	190.17	1485.28	1306.15	-43.3485	1638.72	1455.47	-127.345	1654.38	1234.56	-149.8	1672.07	1134.53	-166.859	1804.85	1014.56	-125.644	1872.81	965.458	-180.322	1833.96	940.634	-172.771	1910.22	911.948
697	0	78.8937	1762.13	1650.52	175.04	1765.29	1656.83	58.8151	1607.58	1676.74	203.003	1617.34	1682.56	137.266	1562.89	1506.13	133.23	1506.51	1243.01	145.317	1708.95	1423.76	149.249	1798.69	1213.61	190.896	1498.4	1304.48	-43.4385	1651.76	1453.38	-127.946	1671.22	1233.83	-151.228	1690.83	1134.23	-167.558	1827.38	1018.33	-125.907	1896.32	971.219	-181.407	1858.84	945.368	-173.106	1936.01	919.285
698	0	77.9763	1776.19	1647.55	174.162	1779.56	1654.15	58.2708	1621.83	1674.38	202.515	1631.88	1680.5	137.402	1576.45	1503.89	134.56	1520.13	1240.81	144.953	1722.57	1421.27	148.189	1812.2	1210.9	191.698	1511.63	1302.58	-43.4139	1664.83	1451.14	-128.451	1687.72	1232.79	-152.323	1709.5	1134.09	-168.289	1849.6	1022.08	-126.369	1919.06	976.515	-181.517	1883.21	950.001	-173.692	1960.81	926.518
699	0	77.2839	1790.18	1644.61	173.388	1794	1651.53	57.9404	1635.8	1672.11	202.025	1646.28	1678.59	137.603	1590.05	1502.06	135.621	1533.99	1238.78	144.654	1736.28	1418.77	147.213	1825.69	1208.34	193.001	1525.36	1300.8	-43.3244	1677.95	1449.11	-128.657	1703.87	1231.7	-153.155	1727.6	1133.87	-168.689	1870.85	1025.48	-126.886	1941.11	981.691	-183.253	1906.49	955.274	-174.049	1984.83	933.726
700	0	76.7682	1804.05	1641.81	172.754	1808.12	1648.97	57.7956	1649.64	1669.89	201.819	1660.76	1676.6	137.82	1603.81	1500.04	136.276	1547.89	1236.86	144.666	1750.04	1416.4	146.552	1839.45	1206.13	193.426	1538.81	1298.76	-43.2122	1691.32	1447.13	-128.715	1719.96	1230.67	-153.972	1745.13	1133.53	-169.104	1891.33	1028.85	-127.222	1962.45	986.85	-184.248	1928.94	960.026	-174.727	2007.87	940.641
701	0	76.3509	1817.88	1639.38	172.473	1822.38	1646.54	57.9066	1663.59	1667.8	202.054	1675.35	1674.65	138.109	1617.69	1497.9	136.747	1561.96	1234.71	144.772	1763.96	1414.17	146.124	1853.3	1204.12	194.13	1552.63	1296.72	-43.1906	1704.71	1445.41	-128.619	1735.85	1229.68	-154.239	1762.35	1133.33	-169.427	1911.42	1032.22	-127.602	1982.94	991.61	-185.019	1950.46	964.469	-175.201	2030.08	947.487
702	0	76.2201	1831.61	1637.23	172.394	1836.38	1644.5	58.1145	1677.31	1665.85	202.206	1689.39	1672.81	138.431	1631.46	1495.99	137.022	1576.15	1232.6	145.173	1778.22	1412.4	145.768	1867.52	1202.64	194.49	1566.72	1294.62	-43.0486	1718.34	1443.93	-128.688	1750.96	1228.44	-154.488	1778.87	1132.79	-169.906	1930.02	1035.45	-128.059	2002.42	996.129	-185.787	1970.89	968.612	-176.188	2050.92	954.063
703	0	76.4736	1845.37	1635.55	172.444	1850.31	1642.69	58.6411	1690.98	1664.16	202.533	1703.43	1671.03	138.652	1645.27	1493.99	137.039	1590.24	1230.8	145.045	1792.02	1410.63	145.752	1881.69	1201.17	194.748	1580.93	1292.72	-42.6774	1732.12	1442.67	-128.302	1766.33	1227.54	-154.641	1795.06	1132.33	-170.392	1948.11	1038.13	-128.675	2021.4	1000.37	-186.321	1990.34	972.277	-177.376	2070.74	960.21
704	0	76.7634	1858.89	1634.13	172.987	1864.2	1641.18	59.2335	1704.55	1662.46	203.372	1717.1	1669.27	138.961	1659.13	1492.09	137.066	1604.56	1228.91	145.271	1806.04	1409	145.873	1896.17	1199.83	194.756	1595.17	1290.62	-42.3447	1746.1	1441.44	-128.21	1780.94	1226.62	-154.819	1810.56	1131.79	-170.882	1965.39	1040.29	-129.27	2039.42	1003.97	-187.138	2008.84	975.434	-178.598	2089.46	965.629
705	0	77.4222	1872.55	1633.06	173.704	1877.69	1640.01	60.2444	1718.23	1661.24	204.15	1730.8	1667.69	139.334	1672.38	1490.64	136.788	1619.04	1227.01	145.734	1820.04	1407.78	146.544	1910.53	1198.85	194.831	1609.63	1288.84	-41.9455	1760.28	1440.59	-127.703	1795.61	1225.82	-154.428	1826.08	1131.09	-170.988	1981.95	1042.13	-129.808	2056.58	1007	-187.133	2026.42	977.636	-179.916	2107.11	970.522
706	0	78.3749	1886.36	1632.3	174.678	1891.51	1638.86	61.2931	1731.72	1660.17	205.474	1744.55	1666.35	140.033	1687.03	1489.01	136.1	1633.54	1225.56	146.107	1834.21	1406.72	147.079	1925.05	1198.04	194.706	1624.1	1287.12	-41.503	1774.69	1440.1	-127.508	1809.91	1225.2	-154.141	1840.96	1130.46	-171.305	1997.65	1043.12	-130.498	2072.93	1009.22	-187.662	2042.83	979.553	-181.396	2123.71	974.573
707	0	79.5252	1899.89	1631.82	175.809	1905.18	1638.16	62.4119	1745.25	1659.45	206.493	1758.11	1665.18	140.239	1700.25	1487.92	135.538	1648.49	1224.24	146.769	1848.61	1405.84	147.771	1939.86	1197.32	194.726	1638.94	1285.57	-40.9565	1789.21	1439.43	-127.186	1824.24	1224.65	-153.785	1855.49	1129.99	-171.433	2012.67	1043.52	-131.371	2088.48	1010.61	-188.317	2058.17	980.601	-182.905	2139.21	977.861
708	0	80.7672	1913.6	1631.77	177.103	1918.77	1637.72	63.8913	1758.89	1659.05	208.023	1771.65	1664.31	141.409	1715.03	1487.04	134.938	1663.71	1223.1	147.588	1862.93	1405.34	148.383	1954.17	1196.95	194.539	1653.57	1284.12	-40.2556	1803.72	1439.2	-126.696	1838.48	1224.35	-153.26	1869.49	1129.55	-171.792	2026.9	1043.38	-132.231	2102.96	1011.17	-188.322	2072.57	980.671	-184.457	2153.54	979.944
709	0	82.1008	1927.12	1631.99	178.56	1932.47	1637.52	65.5223	1772.51	1658.98	209.537	1785.24	1663.76	142.194	1729.17	1486.44	134.576	1678.83	1222.32	148.159	1877.35	1405.07	149.143	1969.41	1196.73	194.096	1668.17	1283.11	-39.5186	1818.33	1439.32	-126.289	1852.43	1224.24	-152.371	1883.37	1129.31	-171.941	2040.42	1042.6	-133.012	2116.67	1010.82	-189.016	2085.76	979.89	-185.973	2166.81	981.086
710	0	83.8563	1940.84	1632.5	180.002	1946.07	1637.85	66.9608	1785.89	1659.24	211.468	1799.13	1663.55	142.544	1742.69	1486.23	134.262	1694.24	1221.97	148.954	1891.67	1405.15	149.938	1984.82	1197.24	193.877	1683.02	1282.35	-38.7497	1832.95	1439.68	-125.929	1866.34	1224.27	-151.482	1896.85	1129.34	-171.979	2053.09	1041.44	-133.787	2129.39	1009.95	-188.136	2098.31	978.179	-187.555	2178.91	981.018
711	0	85.2538	1954.63	1633.57	181.657	1959.78	1638.43	68.6696	1799.25	1660	213.061	1812.47	1663.43	143.379	1757.05	1486.36	134.08	1709.41	1222.03	149.933	1906.34	1405.8	150.654	2000.24	1198.1	193.851	1698.15	1282.04	-37.909	1847.64	1440.55	-124.928	1880.32	1224.92	-150.505	1909.84	1129.64	-171.895	2065.07	1040.09	-134.187	2141.5	1008.37	-188.195	2109.71	976.745	-188.858	2190.17	979.859
712	0	86.9786	1968.3	1635.09	183.626	1973.46	1639.53	70.9006	1813.09	1661.1	214.908	1826.07	1663.8	144.125	1771.33	1486.75	133.73	1724.34	1222.38	150.677	1920.84	1406.57	151.178	2015.91	1199.35	193.547	1713.31	1281.86	-37.2819	1862.3	1441.74	-124.123	1894.11	1225.76	-149.502	1922.61	1129.88	-171.773	2076.43	1038.5	-134.613	2152.57	1006.02	-188.366	2119.91	974.475	-189.72	2200.33	977.746
713	0	89.0002	1982.02	1637.1	185.652	1987.12	1640.99	72.8324	1826.78	1662.36	216.98	1839.63	1664.51	144.775	1785.68	1487.54	133.524	1738.88	1223.19	151.27	1935.21	1407.82	151.575	2031.7	1200.93	193.235	1728.34	1282.2	-36.7172	1877.16	1443.42	-123.591	1907.56	1226.59	-148.763	1934.67	1130.28	-171.812	2087.11	1036.75	-134.643	2163.05	1003.22	-188.035	2129.61	971.947	-190.471	2209.77	974.612
714	0	90.9701	1995.99	1639.28	187.429	2000.8	1642.3	74.5557	1840.45	1664.04	218.903	1853.31	1665.11	145.537	1800.79	1488.75	133.096	1752.95	1224.5	151.775	1949.59	1409.29	151.606	2047.11	1202.7	192.856	1743.24	1283	-36.2546	1891.86	1445.18	-122.844	1920.89	1227.73	-148.123	1946.39	1131.22	-171.501	2097.15	1034.76	-134.623	2172.64	999.694	-187.778	2138.42	969.21	-190.909	2218.23	970.314
715	0	92.9239	2009.99	1641.51	189.584	2014.85	1643.71	76.5782	1854.57	1666.04	220.785	1866.97	1665.76	145.915	1815.16	1490.23	132.495	1766.77	1226.28	151.973	1963.81	1410.78	151.432	2062.34	1204.52	192.403	1757.69	1284.39	-36.0154	1906.5	1447.2	-122.081	1934.12	1229.18	-147.228	1958.25	1132.27	-171.016	2106.58	1032.77	-134.339	2181.48	995.876	-187.63	2146.25	966.083	-190.882	2226.01	964.912
716	0	94.7595	2024.11	1643.54	191.508	2028.61	1644.82	78.4973	1868.69	1667.98	222.742	1880.81	1666.28	146.222	1829.46	1491.69	131.907	1780.32	1228	152.221	1978.03	1412.29	151.066	2076.99	1206.1	191.719	1771.58	1285.87	-35.7409	1920.95	1449.28	-121.538	1947.27	1230.41	-146.628	1969.62	1133.41	-170.291	2115.54	1030.44	-133.965	2189.47	991.258	-186.992	2153.51	962.768	-190.452	2232.88	958.739
717	0	96.5388	2038.28	1645.31	193.156	2042.45	1645.51	79.9611	1882.72	1670.21	224.174	1894.73	1666.66	146.363	1843.5	1493.29	131.157	1793.51	1229.84	152.04	1991.78	1413.62	150.85	2090.93	1207.53	191.087	1785.34	1287.42	-35.6731	1935.11	1451.21	-121.001	1959.85	1231.86	-146.148	1980.82	1134.65	-169.582	2123.97	1027.84	-133.537	2196.68	985.962	-186.243	2159.71	958.636	-189.642	2238.96	951.58
718	0	98.0582	2052.57	1646.92	194.526	2056.44	1646.09	81.0492	1897.01	1672.48	225.91	1909.12	1667.44	146.344	1857.1	1495.11	130.5	1806.82	1231.7	151.697	2005.43	1414.96	150.425	2104.66	1208.97	190.013	1798.59	1288.95	-35.6975	1948.87	1453.1	-120.843	1972.2	1233.29	-146.034	1991.48	1136.03	-168.828	2131.87	1025.21	-132.368	2203.24	980.74	-185.959	2165.64	955.169	-188.441	2244.28	943.838
719	0	98.8424	2066.67	1648.31	195.54	2070.41	1646.59	82.0528	1911.3	1674.97	226.116	1922.82	1668.3	146.274	1870.27	1496.67	130.022	1819.84	1233.29	151.23	2018.86	1416.39	149.888	2118.05	1210.49	189.866	1811.89	1290.67	-35.8088	1962.25	1454.65	-120.706	1984.64	1234.66	-145.39	2002.5	1137.15	-167.982	2139.24	1022.25	-131.397	2209.11	974.914	-184.47	2170.78	951.062	-186.881	2248.86	935.755
720	0	99.1454	2080.71	1649.34	195.701	2084.44	1647.25	82.4818	1925.54	1677.22	226.608	1936.95	1669.74	145.671	1882.09	1498.4	129.987	1832.8	1234.98	150.807	2032.11	1417.96	149.264	2131.19	1212.12	189.785	1824.86	1292.2	-36.0093	1974.95	1456.3	-120.379	1996.79	1236.02	-145.258	2012.86	1138.08	-167.17	2146.4	1019.29	-129.962	2214.51	968.9	-184.36	2175.38	946.822	-184.914	2252.72	927.152
721	0	99.2917	2094.76	1650.28	195.584	2098.29	1647.86	82.5125	1939.75	1679.24	226.562	1951.13	1671.55	145.576	1895.07	1500.17	130.03	1845.61	1236.83	150.346	2045.09	1419.61	148.556	2144.06	1213.8	189.66	1837.54	1293.87	-36.3195	1987.27	1457.65	-120.928	2008.26	1237.25	-145.078	2022.74	1138.88	-166.318	2152.9	1015.94	-129.069	2218.28	962.581	-183.717	2179.48	942.768	-182.657	2255.83	918.489
722	0	98.669	2108.4	1650.89	195.083	2112.34	1648.51	82.2078	1953.72	1681.43	226.255	1965.28	1673.37	145.606	1908.14	1502.2	130.201	1858.33	1238.46	149.646	2057.78	1421.15	147.712	2156.69	1215.46	189.984	1850.37	1295.72	-36.664	1999.46	1459.06	-121.073	2019.41	1237.95	-144.73	2032.33	1139.38	-165.493	2158.72	1012.68	-127.339	2222.21	956.667	-183.067	2182.99	938.722	-180.107	2258.13	909.714
723	0	97.8025	2121.92	1651.56	194.228	2126.02	1649.49	81.7015	1967.56	1683.35	225.56	1979.3	1675.58	145.592	1920.9	1503.79	130.718	1871.01	1240.15	148.993	2070.46	1422.8	146.883	2169.29	1217.35	190.596	1862.98	1297.47	-37.4583	2011.24	1460.36	-121.001	2030.39	1238.91	-144.397	2041.4	1139.77	-164.615	2164.03	1009.6	-125.996	2224.94	950.697	-182.454	2186.09	934.911	-177.134	2259.86	901.125
724	0	96.7792	2135.29	1652.62	193.206	2139.81	1650.86	80.4521	1980.86	1685.39	225.033	1993.27	1678.09	145.231	1933.52	1505.75	131.26	1883.54	1241.77	148.557	2083.17	1424.84	145.881	2181.68	1219.29	190.966	1875.5	1299.32	-38.1037	2022.86	1461.54	-121.415	2040.37	1239.53	-143.862	2049.94	1140.01	-163.818	2168.57	1006.44	-124.184	2227.5	945.274	-181.614	2188.57	930.803	-174.224	2260.28	892.633
725	0	95.485	2148.75	1653.78	191.997	2153.28	1652.37	80.4094	1995.01	1687.47	223.951	2006.94	1680.45	144.683	1946.12	1507.86	131.938	1896.14	1243.84	148.07	2095.76	1426.88	144.472	2193.31	1220.76	191.157	1888	1301.34	-38.9645	2034.71	1462.77	-121.728	2050.05	1239.91	-143.518	2057.93	1139.83	-162.986	2172.68	1003.16	-122.643	2229.03	939.841	-180.765	2190.82	927.092	-171.361	2260.28	884.603
726	0	94.1605	2161.92	1655.08	190.541	2166.67	1653.98	79.5319	2008.64	1689.46	223.188	2020.99	1683.07	144.109	1958.92	1509.86	132.518	1908.74	1245.81	147.107	2108.1	1428.63	143.506	2205.84	1222.52	191.811	1900.82	1303.49	-39.9235	2046.61	1463.81	-121.735	2059.48	1240.01	-142.634	2065.59	1139.82	-161.96	2176.34	1000.07	-120.877	2230.06	934.375	-179.8	2192.4	923.452	-168.091	2259.64	877.133
727	0	92.9104	2174.99	1656.54	189.226	2179.67	1655.72	78.2904	2021.74	1691.26	222.218	2034.36	1685.44	143.651	1971.61	1512.05	133.582	1921.58	1247.78	146.304	2120.71	1430.5	142.377	2217.7	1224.1	192.124	1913.15	1305.6	-40.9356	2058.62	1464.7	-121.536	2068.3	1240.51	-141.872	2072.83	1139.64	-160.545	2179.37	996.94	-118.84	2230.64	929.453	-178.237	2193.52	919.826	-165.074	2258.3	870.123
728	0	91.5875	2187.93	1657.98	187.869	2192.83	1657.52	77.1185	2034.6	1692.9	220.834	2047.28	1687.55	142.9	1984.36	1514.15	133.821	1933.9	1249.79	145.819	2133.38	1432.44	141.307	2229.75	1225.84	192.51	1925.58	1308.09	-41.6763	2070.82	1465.79	-121.619	2076.43	1240.62	-141.082	2079.45	1139.61	-159.163	2181.78	994.005	-117.02	2230.42	924.89	-176.86	2193.83	916.558	-162.26	2256.43	863.716
729	0	90.4095	2200.51	1659.52	186.674	2205.72	1659.49	75.8535	2047.24	1694.39	219.651	2060.26	1689.53	142.221	1997.02	1515.92	134.302	1946.6	1251.7	144.716	2146	1434.07	140.16	2241.88	1227.68	192.439	1938.07	1310.03	-42.6241	2083	1466.82	-121.202	2084.78	1240.64	-139.825	2086.04	1139.61	-157.605	2184.07	991.435	-114.776	2229.93	920.636	-175.133	2193.63	913.333	-159.721	2253.96	857.966
730	0	89.2212	2213.06	1661.09	185.564	2218.2	1661.37	74.7741	2059.8	1695.69	218.436	2072.84	1691.55	141.495	2009.67	1517.58	134.463	1959.14	1253.33	143.765	2158.63	1435.71	139.264	2254.13	1229.54	193.074	1950.83	1311.95	-43.442	2095.34	1467.83	-120.917	2092.38	1240.63	-138.472	2092.28	1139.61	-155.869	2185.69	988.86	-112.455	2229.39	916.795	-173.308	2193.18	910.599	-157.166	2251.2	852.875
731	0	88.1386	2225.32	1662.64	184.371	2230.69	1663.15	73.8064	2072.21	1696.95	217.588	2085.37	1693.07	140.967	2022.42	1519.29	134.587	1971.83	1254.7	143.051	2171.47	1437.16	138.409	2266.3	1231.21	193.535	1963.64	1313.91	-44.4861	2107.44	1468.61	-119.938	2100.54	1240.9	-137.149	2098.21	1139.47	-153.953	2187.2	986.447	-110.279	2228.31	912.95	-171.119	2192.03	907.755	-154.96	2248.09	848.096
732	0	86.9791	2237.79	1664.01	183.101	2243.25	1664.63	72.2642	2084.25	1697.91	216.273	2097.64	1694.44	139.856	2034.92	1520.51	134.568	1984.64	1256.09	142.316	2184.29	1438.37	137.496	2278.3	1232.44	193.404	1976.46	1315.33	-45.4183	2119.64	1469.36	-119.567	2108.09	1240.88	-135.734	2103.9	1139.38	-151.869	2188.37	984.075	-108.274	2227.12	909.245	-169.139	2190.78	905.126	-152.577	2244.92	843.893
733	0	85.9029	2250.15	1665.22	182.202	2255.7	1666.06	71.4132	2096.77	1698.67	215.329	2109.99	1695.5	139.14	2047.55	1521.46	134.225	1997.37	1257.16	141.622	2196.97	1439.62	136.877	2290.47	1233.53	193.875	1989.52	1316.59	-46.2059	2132.02	1470.21	-118.367	2116.36	1240.69	-133.929	2109.67	1139.36	-149.629	2189.22	981.654	-106.132	2226.21	905.939	-166.815	2189.16	902.673	-150.695	2241.51	839.942
734	0	85.015	2262.51	1666.34	181.126	2267.89	1667.37	70.7524	2109	1699.27	214.155	2122.11	1696.45	138.804	2060.22	1522.25	134.057	2010.16	1257.83	140.676	2209.58	1440.52	136.105	2302.57	1234.36	194.136	2002.36	1317.54	-47.0312	2144.28	1470.57	-117.613	2124.31	1240.3	-132.207	2115.19	1139.26	-147.708	2189.91	979.61	-104.191	2224.12	902.914	-164.58	2187.09	900.239	-148.746	2237.82	836.688
735	0	83.6893	2274.8	1667.05	180.101	2280.17	1668.29	69.3282	2120.75	1699.61	213.43	2134.55	1697.05	137.84	2072.78	1522.79	133.685	2023.08	1258.29	140.02	2222.39	1441.1	135.725	2314.76	1234.88	194.318	2015.33	1318.28	-48.0287	2156.59	1470.57	-116.569	2132.53	1240.11	-130.266	2120.7	1139.14	-145.697	2190.47	977.461	-102.216	2222.73	899.807	-161.753	2185.02	898.07	-147.02	2234.21	833.056
736	0	82.7174	2286.96	1667.65	179.008	2292.68	1668.95	68.3456	2133.01	1699.76	212.364	2146.88	1697.35	136.96	2085.42	1523.11	133.062	2036.09	1258.65	139.397	2235.26	1441.44	135.348	2327.3	1235.2	194.174	2028.25	1318.87	-49.0308	2168.95	1470.38	-115.859	2140.67	1239.42	-128.37	2126.23	1139.05	-143.555	2190.82	975.272	-100.571	2221.44	896.724	-159.589	2182.95	896.08	-145.227	2230.53	829.949
737	0	81.8009	2299.21	1668	177.818	2305.12	1669.52	67.7922	2145.51	1699.39	211.261	2159.31	1697.34	136.107	2098.29	1523.1	132.351	2048.99	1258.67	138.268	2247.84	1441.37	134.876	2339.85	1235.03	194.353	2040.93	1319.07	-49.8746	2181.6	1470.05	-114.748	2149.37	1238.7	-126.102	2131.73	1138.86	-141.742	2191.29	973.429	-98.7635	2220.45	894.323	-156.937	2180.54	894.233	-143.501	2227.01	827.002
738	0	80.5324	2311.62	1668.08	176.826	2317.68	1669.76	66.7425	2157.81	1699.09	210.158	2171.69	1697.15	135.457	2110.87	1522.92	132.208	2062.14	1258.56	137.522	2260.56	1441.35	134.518	2352.64	1235.07	194.174	2053.86	1319.04	-50.7027	2194.11	1469.52	-113.974	2157.15	1238.16	-123.679	2137.39	1138.53	-139.973	2191.74	971.894	-97.3451	2219.37	891.634	-154.323	2178.35	892.415	-142.195	2223.31	824.446
739	0	79.0505	2324.18	1667.69	175.529	2330.19	1669.7	65.8399	2170.37	1698.59	209.372	2184.31	1696.81	134.522	2123.51	1522.43	131.465	2075.11	1258.12	136.697	2273.32	1440.97	133.998	2365.5	1234.42	193.753	2066.75	1318.81	-51.4347	2207.07	1468.92	-112.902	2165.49	1237.48	-121.488	2143.3	1138.36	-138.079	2192.2	970.352	-96.0373	2218.51	889.595	-151.802	2176.26	891.299	-140.885	2219.8	822.215
740	0	78.202	2336.86	1667.18	174.493	2342.94	1669.34	64.2365	2182.39	1697.66	208.018	2196.95	1696.22	133.696	2136.37	1521.68	130.397	2087.98	1257.4	135.996	2286.17	1440.45	133.736	2378.39	1233.49	193.263	2079.43	1318.15	-52.543	2219.76	1468.01	-112.044	2173.89	1236.71	-118.997	2149.41	1138.08	-136.411	2193.08	968.926	-94.6647	2218	887.196	-149.884	2173.94	890.127	-139.424	2216.16	819.943
741	0	76.9339	2349.57	1666.36	173.153	2355.95	1668.64	63.6245	2195.28	1696.5	207.135	2209.85	1695.59	132.763	2150.13	1520.54	129.723	2101	1256.63	135.138	2299.05	1439.4	133.339	2391.41	1232.46	192.919	2092.3	1317.33	-53.3591	2232.6	1466.91	-110.892	2182.63	1236.24	-116.368	2156.09	1137.8	-134.683	2194.14	967.76	-93.5067	2217.97	885.475	-147.06	2172.55	889.51	-138.463	2212.78	818.265
742	0	75.5686	2362.07	1665.14	172.07	2368.97	1667.77	62.6569	2208.26	1695.37	206.176	2223.09	1694.68	132.142	2162.39	1519.72	128.703	2113.78	1255.53	134.41	2311.94	1438.31	132.873	2404.37	1231.21	192.243	2105.06	1316.38	-53.9614	2245.67	1465.98	-110.747	2191.03	1235.44	-114.196	2162.68	1137.54	-133.214	2195.64	966.961	-90.7172	2217.5	883.006	-144.889	2171.2	889.077	-137.166	2209.45	816.357
743	0	74.4224	2375.01	1663.64	170.773	2382.04	1666.63	61.2285	2220.85	1694.03	205.025	2236.22	1693.42	131.35	2175.33	1518.64	127.347	2126.57	1254.47	133.522	2324.82	1437.04	132.412	2417.35	1229.71	191.065	2117.87	1315.28	-55.1847	2258.64	1464.68	-110.464	2199.9	1235	-112.064	2170.12	1137.33	-131.787	2197.57	966.25	-89.6006	2217.92	881.666	-142.898	2170.45	888.966	-135.896	2206.45	814.977
744	0	73.2853	2388.32	1662.19	169.519	2395.34	1665.06	60.4502	2234.09	1692.51	204.244	2249.71	1692.51	130.649	2189.01	1517.27	126.189	2139.38	1253.26	132.814	2337.85	1435.62	131.977	2430.22	1227.87	190.214	2130.67	1314.06	-56.079	2271.84	1463.26	-110.065	2209.22	1234.37	-109.95	2177.75	1137.21	-130.55	2200.03	965.756	-88.6576	2218.91	880.381	-140.786	2170.28	889.249	-134.834	2203.95	813.866
745	0	72.0251	2401.47	1660.31	168.278	2408.58	1663.25	59.5667	2247.48	1690.97	202.872	2263.13	1690.89	129.749	2202.46	1515.87	124.82	2152.32	1251.99	132.03	2350.98	1434	131.474	2443.06	1225.9	189.737	2143.83	1312.72	-57.0176	2285.04	1461.88	-109.766	2218.86	1233.64	-108.013	2186.08	1136.94	-129.46	2203.14	965.337	-87.5428	2220.34	879.205	-138.796	2171.12	890.032	-133.806	2201.9	812.982
746	0	70.7487	2414.72	1658.11	167.009	2422	1661.33	57.4123	2260.3	1689.32	201.301	2276.53	1689.38	128.407	2214.82	1514.35	123.412	2165.29	1250.41	131.125	2364.03	1432.23	130.885	2456.05	1224.03	188.506	2156.76	1311.12	-58.0295	2298.46	1460.38	-109.558	2228.85	1232.88	-106.526	2194.88	1136.68	-128.907	2206.85	965.095	-87.2309	2222.37	878.354	-138.002	2172.32	890.537	-131.777	2200.57	811.892
747	0	69.6667	2428.16	1655.84	165.79	2435.49	1659.1	56.0415	2273.66	1687.65	200.265	2290.03	1687.73	127.427	2228.36	1512.46	121.931	2178.29	1248.58	130.189	2377.1	1430.35	130.249	2469.12	1222.12	187.106	2170.08	1309.51	-59.1965	2311.79	1458.65	-109.296	2239.2	1231.54	-105.297	2204.12	1136.2	-128.582	2211.12	964.941	-88.0659	2225.65	878.233	-136.835	2174.94	891.066	-130.694	2199.82	810.942
748	0	68.314	2441.67	1653.49	164.603	2448.99	1656.71	55.3553	2287.67	1685.69	198.967	2303.65	1685.87	125.986	2241.13	1510.72	120.607	2191.4	1246.58	129.231	2390.18	1428.33	129.607	2482.54	1220.28	186.052	2182.96	1307.52	-60.4086	2324.98	1456.66	-109.125	2249.68	1230.63	-104.29	2213.63	1135.55	-128.376	2216.44	964.712	-88.6048	2229.31	877.294	-136.554	2178.16	892.073	-129.639	2199.92	810.408
749	0	67.097	2455.11	1650.75	163.394	2462.66	1654.08	54.0928	2301.38	1683.64	198.378	2317.31	1683.92	124.499	2254.35	1508.54	118.976	2204.58	1244.45	128.29	2403.44	1426.23	128.952	2496.03	1218.46	184.54	2195.92	1305.34	-61.6446	2338.65	1454.88	-109.158	2260.97	1229.3	-103.483	2223.85	1134.79	-129.019	2222.32	964.779	-88.8401	2233.62	876.891	-136.562	2182.25	892.886	-128.773	2200.94	809.9
750	0	65.9504	2468.72	1648.04	162.149	2475.95	1651.55	52.2784	2314.96	1681.73	195.988	2330.74	1681.78	123.03	2267.35	1506.6	117.505	2218.06	1242.53	127.156	2416.62	1424.11	128.304	2509.38	1216.63	183.144	2209.28	1303.28	-63.123	2352.2	1452.54	-109.809	2272.09	1228.08	-103.103	2234.53	1134.01	-128.509	2229.06	963.776	-89.6914	2238.88	876.025	-136.721	2187.78	893.699	-128.243	2202.67	809.373
751	0	64.4462	2482.33	1645.72	160.687	2489.39	1649.23	50.4536	2328.51	1679.8	194.254	2344.22	1680.07	121.479	2280.51	1504.35	115.695	2231.61	1240.06	125.87	2429.78	1422.14	127.459	2522.72	1215.05	181.554	2222.49	1300.96	-64.474	2365.79	1450.38	-109.355	2284.36	1226.44	-103.29	2245.4	1132.85	-129.393	2236.73	963.665	-90.0508	2244.66	875.273	-137.897	2193.76	893.972	-127.888	2205.62	809.138
752	0	62.9692	2495.83	1643.35	159.243	2502.6	1647.09	48.7427	2342.24	1677.89	192.751	2357.64	1678.44	119.922	2293.68	1502.32	114.327	2245.31	1237.83	124.725	2443.13	1420.46	126.479	2536.28	1213.46	179.924	2235.86	1298.78	-65.8693	2379.14	1448.21	-110.647	2296.63	1224.6	-103.611	2257.12	1131.41	-130.417	2245.27	962.881	-91.3068	2251.55	874.308	-138.942	2200.92	894.39	-127.748	2209.48	808.59
753	0	61.3806	2509.25	1640.93	157.761	2515.91	1644.95	46.6003	2355.85	1675.79	190.783	2370.95	1676.49	117.941	2306.95	1500.17	112.75	2259.25	1235.55	123.208	2456.49	1418.51	125.474	2549.82	1211.68	178.051	2249.7	1296.31	-67.5248	2392.62	1445.92	-111.816	2309.31	1222.62	-104.468	2268.99	1130.02	-132.067	2254.53	962.128	-92.964	2259.33	873.239	-140.503	2209.41	894.173	-128.321	2214.39	808.114
754	0	59.9467	2522.72	1638.87	156.023	2529.27	1643.02	44.7216	2369.55	1673.82	188.703	2384.11	1674.82	116.261	2320.25	1498.32	110.943	2272.96	1233.58	121.578	2469.84	1416.52	124.294	2563.26	1209.88	176.444	2263.21	1294.34	-68.8001	2406.54	1443.69	-113.229	2322.15	1220.57	-105.761	2281.2	1128.61	-133.532	2264.65	960.599	-95.1078	2268.16	872.2	-142.995	2218.46	894.327	-128.997	2220.64	807.618
755	0	57.9386	2536.24	1637.02	154.299	2542.31	1641.47	42.7192	2383.11	1671.7	186.468	2397.26	1673.15	114.584	2333.65	1496.33	109.479	2286.77	1231.41	120.101	2483.41	1414.76	122.97	2577.02	1208.32	174.674	2277.14	1292.19	-70.3416	2420.16	1441.59	-114.457	2335.55	1218.83	-106.99	2294.1	1126.84	-135.867	2275.71	960.115	-97.0378	2277.55	870.779	-145.255	2228.76	893.954	-130.177	2228.14	807.481
756	0	56.0365	2549.62	1635.47	152.319	2555.57	1640.21	40.1424	2396.25	1669.82	184.014	2410.18	1671.76	112.794	2347.15	1494.7	108.041	2300.59	1229.68	118.428	2497.11	1413.27	121.332	2591.08	1206.88	173.195	2290.71	1290.43	-71.9113	2433.54	1439.62	-116.197	2348.88	1216.69	-108.733	2307.22	1124.99	-138.353	2287.41	958.703	-99.2888	2288.18	869.553	-148.091	2239.95	893.182	-131.615	2236.76	806.542
757	0	53.9319	2562.91	1634.04	150.245	2568.69	1639.23	37.5383	2409.54	1668.05	181.719	2423.25	1670.81	111.036	2360.59	1493.23	106.788	2314.64	1227.96	116.849	2510.74	1412.02	119.576	2604.97	1205.71	171.527	2304.4	1288.79	-73.8596	2446.89	1437.93	-118.181	2362.23	1214.72	-110.808	2320.47	1123.35	-140.94	2299.93	957.1	-102.177	2299.87	868.187	-151.384	2252.07	892.178	-133.883	2247.02	805.998
758	0	51.8821	2576.08	1632.9	148.139	2581.67	1638.39	35.2175	2422.79	1666.43	179.159	2436.27	1669.75	109.073	2373.95	1492	105.093	2328.71	1226.33	115.012	2524.37	1410.92	117.652	2619.22	1204.82	169.953	2318.29	1287.14	-75.7157	2460.25	1436.23	-119.97	2375.87	1213.24	-112.786	2334.13	1121.77	-143.698	2313.2	955.892	-105.513	2312.49	866.757	-154.66	2265.24	891.054	-136.182	2258.55	804.93
759	0	49.5695	2589.36	1632.32	145.952	2594.89	1638	32.7138	2436.16	1665.49	176.541	2449.16	1669.46	107.042	2387.28	1490.89	103.994	2343.26	1225.16	113.163	2537.99	1410.44	115.496	2633.6	1204.36	168.299	2332.13	1286.02	-77.6899	2473.63	1435.21	-121.441	2389.92	1211.67	-115.184	2348.25	1120.23	-146.63	2327.15	954.41	-108.022	2326	865.456	-157.871	2279.34	890.075	-139.302	2271.54	804.422
760	0	47.1815	2602.83	1632.09	143.679	2607.88	1638.06	30.3518	2449.46	1665.18	174.01	2462.2	1669.44	104.863	2400.7	1490.15	102.431	2357.48	1224.17	111.069	2551.52	1410.19	113.359	2648.04	1204.29	166.559	2346.09	1285.17	-79.6319	2486.96	1433.97	-123.636	2404.03	1210.46	-117.73	2362.56	1119.12	-149.699	2341.85	953.269	-111.203	2340.48	864.231	-161.462	2294.19	888.848	-142.932	2286.07	802.997
761	0	45.0525	2615.84	1631.93	141.449	2620.76	1638.25	27.0636	2462.17	1664.94	171.059	2475	1669.58	102.892	2414.29	1489.64	100.887	2371.97	1223.61	109.034	2565.04	1410.52	111.214	2662.52	1204.81	164.514	2360.01	1284.58	-81.6294	2500.19	1433.47	-126.443	2417.97	1209.79	-120.87	2377.02	1118.14	-152.728	2357.31	952.507	-114.725	2356.22	863.4	-164.966	2309.86	887.629	-146.816	2302.09	802.229
762	0	42.7285	2628.9	1632.41	139.118	2633.77	1638.85	24.6558	2475.3	1664.89	168.693	2487.68	1669.87	100.725	2427.64	1489.77	99.2609	2386.31	1223.43	107.152	2578.45	1410.91	109.372	2676.96	1205.43	162.343	2373.9	1284.19	-83.6725	2513.63	1433.34	-128.432	2432.91	1209.65	-124.059	2391.8	1117.59	-156.038	2373.27	952.142	-117.867	2372.59	862.816	-168.496	2326.56	886.876	-151.285	2319.66	801.481
763	0	40.5304	2641.98	1633.37	136.961	2646.66	1640.11	23.0364	2488.96	1665.23	166.728	2500.73	1670.71	98.8964	2441.16	1490.05	97.2697	2400.25	1223.81	105.262	2591.98	1411.83	107.597	2691.48	1206.66	160.141	2387.61	1284.36	-85.6183	2527.25	1433.79	-131.191	2447.5	1209.72	-126.915	2407.2	1117.37	-159.62	2390.08	951.815	-120.591	2390.08	862.421	-171.796	2344.26	885.966	-156.048	2338.48	800.451
764	0	38.2176	2655.01	1634.54	134.509	2659.75	1641.7	21.4987	2503.01	1666.26	163.696	2513.5	1672.08	96.8715	2454.16	1491.28	94.8362	2414.01	1224.64	103.511	2605.27	1413.09	106.233	2705.73	1208.23	157.981	2401.6	1285.18	-87.4353	2540.72	1434.34	-133.811	2462.75	1210.06	-129.972	2422.87	1117.42	-162.679	2407.48	950.885	-125.403	2408.39	862.162	-175.94	2362.37	885.44	-161.152	2358.7	799.718
765	0	36.0915	2668.02	1636.1	132.136	2672.77	1643.59	18.2065	2514.74	1667.17	161.334	2526.39	1673.73	95.5656	2467.72	1492.48	92.3513	2427.34	1226.24	101.887	2618.61	1414.71	105.003	2719.9	1209.92	156.027	2414.73	1286.9	-88.7875	2554.09	1435.44	-136.59	2477.94	1210.95	-133.081	2438.9	1117.79	-166.405	2425.69	951.46	-129.198	2427.73	862.295	-179.848	2381.47	885.063	-166.327	2380.2	799.25
766	0	33.8585	2681.04	1637.57	129.972	2685.74	1645.3	17.0822	2528.81	1668.28	159.111	2539.34	1675.45	94.2161	2480.9	1493.95	90.4216	2440.66	1227.75	100.523	2631.82	1416.28	104.095	2733.39	1211.52	154.391	2428.12	1288.54	-90.0355	2567.27	1436.82	-138.967	2493.34	1211.8	-136.222	2455.26	1118.51	-170.321	2444.56	952.053	-132.726	2447.81	862.355	-184.127	2401.16	884.569	-171.86	2403.13	798.948
767	0	31.6941	2693.66	1638.67	127.996	2698.7	1647	15.2297	2541.48	1669.38	157.205	2552.31	1677.25	92.9826	2494.02	1495.66	88.5784	2453.58	1229.32	99.2297	2644.77	1417.76	103.345	2746.87	1213.25	153.403	2441.6	1290.28	-91.1751	2580.49	1438.73	-141.465	2508.6	1212.9	-139.32	2471.64	1119.15	-173.575	2464.11	952.105	-136.749	2468.81	862.787	-187.954	2422.09	884.35	-177.378	2426.87	798.793
768	0	30.007	2706.3	1640.02	126.095	2711.42	1648.76	13.4956	2554.24	1670.49	155.338	2565.24	1678.89	91.644	2506.74	1497.4	87.1346	2466.27	1231.13	98.0462	2657.53	1419.3	102.494	2759.86	1214.92	152.382	2453.96	1292.14	-92.235	2593.44	1440.42	-143.613	2524.4	1214.14	-142.783	2488.2	1120.08	-177.873	2484.19	953.438	-140.805	2490.55	863.538	-192.351	2443.47	884.309	-183.381	2451.62	799.024
769	0	28.5032	2718.93	1641.39	124.633	2724.18	1650.3	11.9683	2566.88	1671.89	153.949	2577.76	1680.52	90.4287	2519.16	1498.9	86.0888	2478.69	1232.62	96.9897	2670.1	1420.8	101.718	2772.26	1216.6	151.571	2466.3	1294.02	-93.3101	2606.35	1442.23	-145.801	2540.03	1215.67	-145.951	2504.99	1120.83	-181.076	2504.98	953.949	-144.823	2513	864.096	-196.396	2465.83	884.108	-189.052	2477.54	799.566
770	0	27.2598	2731.52	1642.7	123.479	2736.84	1651.74	10.8707	2579.84	1673.35	152.555	2590.63	1682.31	89.0388	2531.48	1500.43	85.2906	2490.68	1233.95	96.1334	2682.45	1422.4	100.989	2784.31	1218.24	150.901	2478.34	1295.61	-94.2314	2619.31	1444.22	-147.894	2555.89	1217.01	-149.437	2521.86	1121.79	-184.486	2526.08	954.414	-148.743	2536.16	864.965	-200.518	2488.56	883.885	-194.857	2503.96	800.398
771	0	26.5158	2744.28	1643.99	122.584	2749.69	1652.93	9.79143	2592.6	1675.32	151.144	2603.57	1684.16	87.9076	2543.59	1502.07	84.3905	2502.85	1235.37	95.2379	2694.51	1423.89	100.449	2796.15	1219.86	149.392	2490.34	1297.18	-94.9852	2632.45	1446.12	-150.596	2571.69	1218.12	-152.926	2538.65	1122.8	-188.462	2547.42	955.388	-152.316	2559.69	865.881	-204.275	2511.96	883.782	-200.835	2531.21	801.805
772	0	26.086	2757.07	1645.32	122.038	2762.05	1654.12	8.86486	2605.5	1677.38	150.291	2615.72	1685.84	86.4926	2555.66	1503.94	83.3435	2514.95	1237.07	94.6291	2706.5	1425.65	100.021	2807.89	1221.52	148.028	2502.1	1298.98	-95.7023	2645.52	1447.83	-152.761	2587.56	1219.8	-156.405	2556.05	1123.78	-191.589	2569.43	956.167	-156.647	2584.01	867.056	-207.828	2536.06	883.694	-206.519	2558.98	803.111
773	0	25.7897	2769.75	1646.84	121.905	2774.41	1655.38	8.15877	2618.37	1679.5	149.067	2628.08	1687.83	85.1484	2567.75	1505.75	81.8752	2527.11	1238.77	94.2582	2718.5	1427.52	99.6901	2819.37	1223.25	146.227	2513.81	1300.69	-96.6441	2658.48	1449.78	-154.397	2604.06	1221.47	-160.05	2573.36	1124.67	-194.833	2591.53	957.114	-163.912	2609.32	869.165	-211.944	2560.14	883.758	-211.478	2587.24	805.02
774	0	25.8985	2782.34	1648.45	121.814	2786.61	1656.77	7.42565	2631.26	1681.94	149.024	2640.36	1689.65	84.1317	2579.7	1507.74	80.0409	2539.48	1240.68	93.7793	2730.28	1429.4	99.4372	2831.1	1224.98	143.99	2525.56	1302.32	-97.3443	2671.38	1451.72	-156.983	2619.89	1223.07	-163.785	2590.51	1125.68	-198.142	2614.06	958.404	-161.343	2633.16	869.648	-215.46	2584.78	884.203	-216.159	2615.94	807.553
775	0	25.7411	2794.92	1650.14	122.024	2798.93	1658.17	7.02639	2644.14	1684.09	148.503	2652.63	1691.62	82.9691	2591.87	1509.77	77.9148	2551.68	1243.01	93.2332	2742.05	1431.41	99.4028	2843.01	1226.79	141.816	2537.2	1304.13	-98.1022	2684.34	1453.6	-159.281	2635.99	1224.94	-167.23	2608.28	1127.11	-201.512	2636.93	960.39	-165.539	2658.44	871.918	-218.872	2609.87	884.673	-220.531	2644.97	810.425
776	0	25.9485	2807.37	1651.83	122.206	2811.2	1659.7	6.55773	2656.77	1686.76	148.525	2665.09	1693.4	82.0287	2603.85	1511.98	75.7685	2563.66	1245.33	92.7414	2753.74	1433.34	99.6491	2855.04	1228.79	139.904	2548.61	1306.37	-98.986	2697.35	1455.68	-161.498	2652.47	1227.02	-170.728	2625.8	1128.33	-204.509	2659.9	962.174	-171.658	2684.84	875.731	-221.928	2635.57	885.588	-224.751	2674.25	814.1
777	0	26.3494	2820.07	1653.96	122.163	2823.34	1661.4	6.54717	2669.69	1689.18	148.141	2676.86	1695.56	81.1707	2616.13	1513.98	73.7143	2575.31	1247.6	92.32	2765.48	1435.34	99.7563	2866.98	1230.9	137.59	2560.39	1308.5	-99.3548	2710.01	1458.18	-164.013	2668.49	1229.28	-174.145	2643.84	1130.24	-207.767	2683.06	964.778	-174.764	2710.62	879.04	-225.406	2661.23	887.536	-228.487	2703.76	818.459
778	0	26.5652	2832.51	1655.91	122.89	2835.55	1663.01	6.10762	2682.46	1691.4	148.309	2689.12	1697.14	80.5045	2628.2	1516.23	71.6171	2586.96	1249.93	91.8931	2777.28	1437.26	99.8406	2878.61	1232.94	135.499	2572.13	1310.45	-99.8243	2722.85	1460.59	-166.639	2684.49	1231.53	-177.69	2661.52	1132.05	-210.581	2706.48	967.615	-175.548	2742.14	884.768	-228.004	2687.64	889.551	-231.886	2733.19	823.205
779	0	27.1504	2845.06	1657.84	123.38	2847.62	1664.56	6.22187	2695.04	1693.73	148.389	2700.86	1698.98	79.654	2640.51	1518.18	69.6578	2598.63	1252	91.5325	2789.09	1439.06	99.8813	2890.11	1234.66	133.262	2583.47	1312.6	-100.189	2735.62	1463.06	-168.363	2701.03	1234.16	-180.885	2679.44	1134.14	-213.509	2729.97	970.788	-180.519	2762.71	887.623	-231.571	2713.66	892.499	-235.123	2762.52	828.348
780	0	27.6012	2857.48	1659.81	123.882	2859.74	1665.89	6.06542	2707.62	1695.97	148.254	2713.1	1700.58	78.843	2652.69	1519.9	67.9835	2610.23	1253.96	91.0767	2800.87	1440.59	99.8449	2901.17	1235.97	131.429	2594.99	1314.54	-100.735	2748.14	1465.53	-170.518	2717.19	1236.78	-184.041	2697.65	1136.24	-216.179	2753.68	974.494	-183.576	2788.84	892.771	-233.97	2740.41	895.463	-237.883	2792.05	833.903
781	0	27.8298	2869.9	1661.55	124.399	2871.92	1667.19	6.08928	2720.07	1697.81	148.323	2725	1701.73	78.4127	2664.99	1521.46	66.2589	2621.95	1255.83	90.5303	2812.74	1441.88	99.8066	2912.09	1237.15	129.712	2606.49	1316.37	-101.23	2760.6	1467.58	-172.855	2732.81	1238.91	-186.962	2715.66	1138.53	-218.969	2777.43	978.134	-185.918	2815.24	898.019	-236.546	2767.05	898.807	-240.304	2821.26	839.604
782	0	28.4221	2882.14	1663.03	124.89	2883.9	1668.38	6.231	2732.66	1699.65	148.28	2736.72	1702.65	77.4618	2676.91	1523.25	64.9638	2633.51	1257.61	90.0641	2824.73	1443.01	99.5666	2922.95	1238.12	128.24	2618.05	1317.8	-101.639	2773.14	1469.68	-174.494	2749.03	1241.51	-189.977	2733.73	1140.56	-221.272	2801.35	981.988	-188.202	2841.63	903.411	-239.493	2793.81	902.705	-242.543	2850.41	845.466
783	0	28.9748	2894.6	1664.49	125.342	2896	1669.38	6.20155	2744.99	1701.26	148.239	2748.72	1703.47	76.7086	2689.1	1524.48	63.7241	2645.31	1259.06	89.3893	2836.8	1444.05	99.2369	2934.2	1239.17	126.644	2629.98	1319.15	-101.979	2785.6	1471.59	-176.574	2764.72	1243.43	-193.003	2751.5	1142.49	-223.556	2825.04	986.019	-190.239	2868.03	909.17	-241.742	2820.71	906.697	-244.565	2879.38	851.56
784	0	29.2214	2907	1665.87	125.533	2908.07	1670.19	6.35488	2757.34	1702.47	148.525	2760.74	1704.07	76.1167	2701.15	1525.73	63.0329	2657.01	1260.08	88.9586	2848.79	1444.77	98.8294	2945.24	1239.94	125.73	2641.64	1320.39	-102.406	2798.04	1473.11	-178.228	2780.57	1245.59	-195.617	2769.46	1144.51	-225.859	2848.85	990.276	-188.947	2899.67	917.135	-244.116	2847.35	910.771	-246.33	2907.99	857.838
[truncated: 69 more columns]

## Sheet: Sheet2
Devices
		025370 - Force			025370 - Moment			025370 - CoP			027571 - Force			027571 - Moment			027571 - CoP			037720 - Force			037720 - Moment			037720 - CoP
Frame	Sub Frame	Fx	Fy	Fz	Mx	My	Mz	Cx	Cy	Cz	Fx	Fy	Fz	Mx	My	Mz	Cx	Cy	Cz	Fx	Fy	Fz	Mx	My	Mz	Cx	Cy	Cz
		N	N	N	N.mm	N.mm	N.mm	mm	mm	mm	N	N	N	N.mm	N.mm	N.mm	mm	mm	mm	N	N	N	N.mm	N.mm	N.mm	mm	mm	mm
435	0	0	0	0	0	0	0	200	300	0	0	0	0	0	0	0	200	903	0	0	0	0	0	0	0	603	903	0
435	1	0	0	0	0	0	0	200	300	0	0	0	0	0	0	0	200	903	0	0	0	0	0	0	0	603	903	0
435	2	0	0	0	0	0	0	200	300	0	0	0	0	0	0	0	200	903	0	0	0	0	0	0	0	603	903	0
435	3	0	0	0	0	0	0	200	300	0	0	0	0	0	0	0	200	903	0	0	0	0	0	0	0	603	903	0
435	4	0	0	0	0	0	0	200	300	0	0	0	0	0	0	0	200	903	0	0	0	0	0	0	0	603	903	0
435	5	0	0	0	0	0	0	200	300	0	0	0	0	0	0	0	200	903	0	0	0	0	0	0	0	603	903	0
435	6	0	0	0	0	0	0	200	300	0	0	0	0	0	0	0	200	903	0	0	0	0	0	0	0	603	903	0
435	7	0	0	0	0	0	0	200	300	0	0	0	0	0	0	0	200	903	0	0	0	0	0	0	0	603	903	0
435	8	0	0	0	0	0	0	200	300	0	0	0	0	0	0	0	200	903	0	0	0	0	0	0	0	603	903	0
435	9	0	0	0	0	0	0	200	300	0	0	0	0	0	0	0	200	903	0	0	0	0	0	0	0	603	903	0
436	0	0	0	0	0	0	0	200	300	0	0	0	0	0	0	0	200	903	0	0	0	0	0	0	0	603	903	0
436	1	0	0	0	0	0	0	200	300	0	0	0	0	0	0	0	200	903	0	0	0	0	0	0	0	603	903	0
436	2	0	0	0	0	0	0	200	300	0	0	0	0	0	0	0	200	903	0	0	0	0	0	0	0	603	903	0
436	3	0	0	0	0	0	0	200	300	0	0	0	0	0	0	0	200	903	0	0	0	0	0	0	0	603	903	0
436	4	0	0	0	0	0	0	200	300	0	0	0	0	0	0	0	200	903	0	0	0	0	0	0	0	603	903	0
436	5	0	0	0	0	0	0	200	300	0	0	0	0	0	0	0	200	903	0	0	0	0	0	0	0	603	903	0
436	6	0	0	0	0	0	0	200	300	0	0	0	0	0	0	0	200	903	0	0	0	0	0	0	0	603	903	0
436	7	0	0	0	0	0	0	200	300	0	0	0	0	0	0	0	200	903	0	0	0	0	0	0	0	603	903	0
436	8	0	0	0	0	0	0	200	300	0	0	0	0	0	0	0	200	903	0	0	0	0	0	0	0	603	903	0
436	9	0	0	0	0	0	0	200	300	0	0	0	0	0	0	0	200	903	0	0	0	0	0	0	0	603	903	0
437	0	0	0	0	0	0	0	200	300	0	0	0	0	0	0	0	200	903	0	0	0	0	0	0	0	603	903	0
437	1	0	0	0	0	0	0	200	300	0	0	0	0	0	0	0	200	903	0	0	0	0	0	0	0	603	903	0
437	2	0	0	0	0	0	0	200	300	0	0	0	0	0	0	0	200	903	0	0	0	0	0	0	0	603	903	0
437	3	0	0	0	0	0	0	200	300	0	0	0	0	0	0	0	200	903	0	0	0	0	0	0	0	603	903	0
437	4	0	0	0	0	0	0	200	300	0	0	0	0	0	0	0	200	903	0	0	0	0	0	0	0	603	903	0
437	5	0	0	0	0	0	0	200	300	0	0	0	0	0	0	0	200	903	0	0	0	0	0	0	0	603	903	0
437	6	0	0	0	0	0	0	200	300	0	0	0	0	0	0	0	200	903	0	0	0	0	0	0	0	603	903	0
437	7	0	0	0	0	0	0	200	300	0	0	0	0	0	0	0	200	903	0	0	0	0	0	0	0	603	903	0
437	8	0	0	0	0	0	0	200	300	0	0	0	0	0	0	0	200	903	0	0	0	0	0	0	0	603	903	0
437	9	0	0	0	0	0	0	200	300	0	0	0	0	0	0	0	200	903	0	0	0	0	0	0	0	603	903	0
438	0	0	0	0	0	0	0	200	300	0	0	0	0	0	0	0	200	903	0	0	0	0	0	0	0	603	903	0
438	1	0	0	0	0	0	0	200	300	0	0	0	0	0	0	0	200	903	0	0	0	0	0	0	0	603	903	0
438	2	0	0	0	0	0	0	200	300	0	0	0	0	0	0	0	200	903	0	0	0	0	0	0	0	603	903	0
438	3	0	0	0	0	0	0	200	300	0	0	0	0	0	0	0	200	903	0	0	0	0	0	0	0	603	903	0
438	4	0	0	0	0	0	0	200	300	0	0	0	0	0	0	0	200	903	0	0	0	0	0	0	0	603	903	0
438	5	0	0	0	0	0	0	200	300	0	0	0	0	0	0	0	200	903	0	0	0	0	0	0	0	603	903	0
438	6	0	0	0	0	0	0	200	300	0	0	0	0	0	0	0	200	903	0	0	0	0	0	0	0	603	903	0
438	7	0	0	0	0	0	0	200	300	0	0	0	0	0	0	0	200	903	0	0	0	0	0	0	0	603	903	0
438	8	0	0	0	0	0	0	200	300	0	0	0	0	0	0	0	200	903	0	0	0	0	0	0	0	603	903	0
438	9	0	0	0	0	0	0	200	300	0	0	0	0	0	0	0	200	903	0	0	0	0	0	0	0	603	903	0
439	0	0	0	0	0	0	0	200	300	0	0	0	0	0	0	0	200	903	0	0	0	0	0	0	0	603	903	0
439	1	0	0	0	0	0	0	200	300	0	0	0	0	0	0	0	200	903	0	0	0	0	0	0	0	603	903	0
439	2	0	0	0	0	0	0	200	300	0	0	0	0	0	0	0	200	903	0	0	0	0	0	0	0	603	903	0
439	3	0	0	0	0	0	0	200	300	0	0	0	0	0	0	0	200	903	0	0	0	0	0	0	0	603	903	0
439	4	0	0	0	0	0	0	200	300	0	0	0	0	0	0	0	200	903	0	0	0	0	0	0	0	603	903	0
439	5	0	0	0	0	0	0	200	300	0	0	0	0	0	0	0	200	903	0	0	0	0	0	0	0	603	903	0
439	6	0	0	0	0	0	0	200	300	0	0	0	0	0	0	0	200	903	0	0	0	0	0	0	0	603	903	0
439	7	0	0	0	0	0	0	200	300	0	0	0	0	0	0	0	200	903	0	0	0	0	0	0	0	603	903	0
439	8	0	0	0	0	0	0	200	300	0	0	0	0	0	0	0	200	903	0	0	0	0	0	0	0	603	903	0
439	9	0	0	0	0	0	0	200	300	0	0	0	0	0	0	0	200	903	0	0	0	0	0	0	0	603	903	0
440	0	0	0	0	0	0	0	200	300	0	0	0	0	0	0	0	200	903	0	0	0	0	0	0	0	603	903	0
440	1	0	0	0	0	0	0	200	300	0	0	0	0	0	0	0	200	903	0	0	0	0	0	0	0	603	903	0
440	2	0	0	0	0	0	0	200	300	0	0	0	0	0	0	0	200	903	0	0	0	0	0	0	0	603	903	0
440	3	0	0	0	0	0	0	200	300	0	0	0	0	0	0	0	200	903	0	0	0	0	0	0	0	603	903	0
440	4	0	0	0	0	0	0	200	300	0	0	0	0	0	0	0	200	903	0	0	0	0	0	0	0	603	903	0
440	5	0	0	0	0	0	0	200	300	0	0	0	0	0	0	0	200	903	0	0	0	0	0	0	0	603	903	0
440	6	0	0	0	0	0	0	200	300	0	0	0	0	0	0	0	200	903	0	0	0	0	0	0	0	603	903	0
440	7	0	0	0	0	0	0	200	300	0	0	0	0	0	0	0	200	903	0	0	0	0	0	0	0	603	903	0
440	8	0	0	0	0	0	0	200	300	0	0	0	0	0	0	0	200	903	0	0	0	0	0	0	0	603	903	0
440	9	0	0	0	0	0	0	200	300	0	0	0	0	0	0	0	200	903	0	0	0	0	0	0	0	603	903	0
441	0	0	0	0	0	0	0	200	300	0	0	0	0	0	0	0	200	903	0	0	0	0	0	0	0	603	903	0
441	1	0	0	0	0	0	0	200	300	0	0	0	0	0	0	0	200	903	0	0	0	0	0	0	0	603	903	0
441	2	0	0	0	0	0	0	200	300	0	0	0	0	0	0	0	200	903	0	0	0	0	0	0	0	603	903	0
441	3	0	0	0	0	0	0	200	300	0	0	0	0	0	0	0	200	903	0	0	0	0	0	0	0	603	903	0
441	4	0	0	0	0	0	0	200	300	0	0	0	0	0	0	0	200	903	0	0	0	0	0	0	0	603	903	0
441	5	0	0	0	0	0	0	200	300	0	0	0	0	0	0	0	200	903	0	0	0	0	0	0	0	603	903	0
441	6	0	0	0	0	0	0	200	300	0	0	0	0	0	0	0	200	903	0	0	0	0	0	0	0	603	903	0
441	7	0	0	0	0	0	0	200	300	0	0	0	0	0	0	0	200	903	0	0	0	0	0	0	0	603	903	0
441	8	0	0	0	0	0	0	200	300	0	0	0	0	0	0	0	200	903	0	0	0	0	0	0	0	603	903	0
441	9	0	0	0	0	0	0	200	300	0	0	0	0	0	0	0	200	903	0	0	0	0	0	0	0	603	903	0
442	0	0	0	0	0	0	0	200	300	0	0	0	0	0	0	0	200	903	0	0	0	0	0	0	0	603	903	0
442	1	0	0	0	0	0	0	200	300	0	0	0	0	0	0	0	200	903	0	0	0	0	0	0	0	603	903	0
442	2	0	0	0	0	0	0	200	300	0	0	0	0	0	0	0	200	903	0	0	0	0	0	0	0	603	903	0
442	3	0	0	0	0	0	0	200	300	0	0	0	0	0	0	0	200	903	0	0	0	0	0	0	0	603	903	0
442	4	0	0	0	0	0	0	200	300	0	0	0	0	0	0	0	200	903	0	0	0	0	0	0	0	603	903	0
442	5	0	0	0	0	0	0	200	300	0	0	0	0	0	0	0	200	903	0	0	0	0	0	0	0	603	903	0
442	6	0	0	0	0	0	0	200	300	0	0	0	0	0	0	0	200	903	0	0	0	0	0	0	0	603	903	0
442	7	0	0	0	0	0	0	200	300	0	0	0	0	0	0	0	200	903	0	0	0	0	0	0	0	603	903	0
442	8	0	0	0	0	0	0	200	300	0	0	0	0	0	0	0	200	903	0	0	0	0	0	0	0	603	903	0
442	9	0	0	0	0	0	0	200	300	0	0	0	0	0	0	0	200	903	0	0	0	0	0	0	0	603	903	0
443	0	0	0	0	0	0	0	200	300	0	0	0	0	0	0	0	200	903	0	0	0	0	0	0	0	603	903	0
443	1	0	0	0	0	0	0	200	300	0	0	0	0	0	0	0	200	903	0	0	0	0	0	0	0	603	903	0
443	2	0	0	0	0	0	0	200	300	0	0	0	0	0	0	0	200	903	0	0	0	0	0	0	0	603	903	0
443	3	0	0	0	0	0	0	200	300	0	0	0	0	0	0	0	200	903	0	0	0	0	0	0	0	603	903	0
443	4	0	0	0	0	0	0	200	300	0	0	0	0	0	0	0	200	903	0	0	0	0	0	0	0	603	903	0
443	5	0	0	0	0	0	0	200	300	0	0	0	0	0	0	0	200	903	0	0	0	0	0	0	0	603	903	0
443	6	0	0	0	0	0	0	200	300	0	0	0	0	0	0	0	200	903	0	0	0	0	0	0	0	603	903	0
443	7	0	0	0	0	0	0	200	300	0	0	0	0	0	0	0	200	903	0	0	0	0	0	0	0	603	903	0
443	8	0	0	0	0	0	0	200	300	0	0	0	0	0	0	0	200	903	0	0	0	0	0	0	0	603	903	0
443	9	0	0	0	0	0	0	200	300	0	0	0	0	0	0	0	200	903	0	0	0	0	0	0	0	603	903	0
444	0	0	0	0	0	0	0	200	300	0	0	0	0	0	0	0	200	903	0	0	0	0	0	0	0	603	903	0
444	1	0	0	0	0	0	0	200	300	0	0	0	0	0	0	0	200	903	0	0	0	0	0	0	0	603	903	0
444	2	0	0	0	0	0	0	200	300	0	0	0	0	0	0	0	200	903	0	0	0	0	0	0	0	603	903	0
444	3	0	0	0	0	0	0	200	300	0	0	0	0	0	0	0	200	903	0	0	0	0	0	0	0	603	903	0
444	4	0	0	0	0	0	0	200	300	0	0	0	0	0	0	0	200	903	0	0	0	0	0	0	0	603	903	0
444	5	0	0	0	0	0	0	200	300	0	0	0	0	0	0	0	200	903	0	0	0	0	0	0	0	603	903	0
444	6	0	0	0	0	0	0	200	300	0	0	0	0	0	0	0	200	903	0	0	0	0	0	0	0	603	903	0
444	7	0	0	0	0	0	0	200	300	0	0	0	0	0	0	0	200	903	0	0	0	0	0	0	0	603	903	0
444	8	0	0	0	0	0	0	200	300	0	0	0	0	0	0	0	200	903	0	0	0	0	0	0	0	603	903	0
444	9	0	0	0	0	0	0	200	300	0	0	0	0	0	0	0	200	903	0	0	0	0	0	0	0	603	903	0
445	0	0	0	0	0	0	0	200	300	0	0	0	0	0	0	0	200	903	0	0	0	0	0	0	0	603	903	0
445	1	0	0	0	0	0	0	200	300	0	0	0	0	0	0	0	200	903	0	0	0	0	0	0	0	603	903	0
445	2	0	0	0	0	0	0	200	300	0	0	0	0	0	0	0	200	903	0	0	0	0	0	0	0	603	903	0
445	3	0	0	0	0	0	0	200	300	0	0	0	0	0	0	0	200	903	0	0	0	0	0	0	0	603	903	0
445	4	0	0	0	0	0	0	200	300	0	0	0	0	0	0	0	200	903	0	0	0	0	0	0	0	603	903	0
445	5	0	0	0	0	0	0	200	300	0	0	0	0	0	0	0	200	903	0	0	0	0	0	0	0	603	903	0
445	6	0	0	0	0	0	0	200	300	0	0	0	0	0	0	0	200	903	0	0	0	0	0	0	0	603	903	0
445	7	0	0	0	0	0	0	200	300	0	0	0	0	0	0	0	200	903	0	0	0	0	0	0	0	603	903	0
445	8	0	0	0	0	0	0	200	300	0	0	0	0	0	0	0	200	903	0	0	0	0	0	0	0	603	903	0
445	9	0	0	0	0	0	0	200	300	0	0	0	0	0	0	0	200	903	0	0	0	0	0	0	0	603	903	0
446	0	0	0	0	0	0	0	200	300	0	0	0	0	0	0	0	200	903	0	0	0	0	0	0	0	603	903	0
446	1	0	0	0	0	0	0	200	300	0	0	0	0	0	0	0	200	903	0	0	0	0	0	0	0	603	903	0
446	2	0	0	0	0	0	0	200	300	0	0	0	0	0	0	0	200	903	0	0	0	0	0	0	0	603	903	0
446	3	0	0	0	0	0	0	200	300	0	0	0	0	0	0	0	200	903	0	0	0	0	0	0	0	603	903	0
446	4	0	0	0	0	0	0	200	300	0	0	0	0	0	0	0	200	903	0	0	0	0	0	0	0	603	903	0
446	5	0	0	0	0	0	0	200	300	0	0	0	0	0	0	0	200	903	0	0	0	0	0	0	0	603	903	0
446	6	0	0	0	0	0	0	200	300	0	0	0	0	0	0	0	200	903	0	0	0	0	0	0	0	603	903	0
446	7	0	0	0	0	0	0	200	300	0	0	0	0	0	0	0	200	903	0	0	0	0	0	0	0	603	903	0
446	8	0	0	0	0	0	0	200	300	0	0	0	0	0	0	0	200	903	0	0	0	0	0	0	0	603	903	0
446	9	0	0	0	0	0	0	200	300	0	0	0	0	0	0	0	200	903	0	0	0	0	0	0	0	603	903	0
447	0	0	0	0	0	0	0	200	300	0	0	0	0	0	0	0	200	903	0	0	0	0	0	0	0	603	903	0
447	1	0	0	0	0	0	0	200	300	0	0	0	0	0	0	0	200	903	0	0	0	0	0	0	0	603	903	0
447	2	0	0	0	0	0	0	200	300	0	0	0	0	0	0	0	200	903	0	0	0	0	0	0	0	603	903	0
447	3	0	0	0	0	0	0	200	300	0	0	0	0	0	0	0	200	903	0	0	0	0	0	0	0	603	903	0
447	4	0	0	0	0	0	0	200	300	0	0	0	0	0	0	0	200	903	0	0	0	0	0	0	0	603	903	0
447	5	0	0	0	0	0	0	200	300	0	0	0	0	0	0	0	200	903	0	0	0	0	0	0	0	603	903	0
447	6	0	0	0	0	0	0	200	300	0	0	0	0	0	0	0	200	903	0	0	0	0	0	0	0	603	903	0
447	7	0	0	0	0	0	0	200	300	0	0	0	0	0	0	0	200	903	0	0	0	0	0	0	0	603	903	0
447	8	0	0	0	0	0	0	200	300	0	0	0	0	0	0	0	200	903	0	0	0	0	0	0	0	603	903	0
447	9	0	0	0	0	0	0	200	300	0	0	0	0	0	0	0	200	903	0	0	0	0	0	0	0	603	903	0
448	0	0	0	0	0	0	0	200	300	0	0	0	0	0	0	0	200	903	0	0	0	0	0	0	0	603	903	0
448	1	0	0	0	0	0	0	200	300	0	0	0	0	0	0	0	200	903	0	0	0	0	0	0	0	603	903	0
448	2	0	0	0	0	0	0	200	300	0	0	0	0	0	0	0	200	903	0	0	0	0	0	0	0	603	903	0
448	3	0	0	0	0	0	0	200	300	0	0	0	0	0	0	0	200	903	0	0	0	0	0	0	0	603	903	0
448	4	0	0	0	0	0	0	200	300	0	0	0	0	0	0	0	200	903	0	0	0	0	0	0	0	603	903	0
448	5	0	0	0	0	0	0	200	300	0	0	0	0	0	0	0	200	903	0	0	0	0	0	0	0	603	903	0
448	6	0	0	0	0	0	0	200	300	0	0	0	0	0	0	0	200	903	0	0	0	0	0	0	0	603	903	0
448	7	0	0	0	0	0	0	200	300	0	0	0	0	0	0	0	200	903	0	0	0	0	0	0	0	603	903	0
448	8	0	0	0	0	0	0	200	300	0	0	0	0	0	0	0	200	903	0	0	0	0	0	0	0	603	903	0
448	9	0	0	0	0	0	0	200	300	0	0	0	0	0	0	0	200	903	0	0	0	0	0	0	0	603	903	0
449	0	0	0	0	0	0	0	200	300	0	0	0	0	0	0	0	200	903	0	0	0	0	0	0	0	603	903	0
449	1	0	0	0	0	0	0	200	300	0	0	0	0	0	0	0	200	903	0	0	0	0	0	0	0	603	903	0
449	2	0	0	0	0	0	0	200	300	0	0	0	0	0	0	0	200	903	0	0	0	0	0	0	0	603	903	0
449	3	0	0	0	0	0	0	200	300	0	0	0	0	0	0	0	200	903	0	0	0	0	0	0	0	603	903	0
449	4	0	0	0	0	0	0	200	300	0	0	0	0	0	0	0	200	903	0	0	0	0	0	0	0	603	903	0
449	5	0	0	0	0	0	0	200	300	0	0	0	0	0	0	0	200	903	0	0	0	0	0	0	0	603	903	0
449	6	0	0	0	0	0	0	200	300	0	0	0	0	0	0	0	200	903	0	0	0	0	0	0	0	603	903	0
449	7	0	0	0	0	0	0	200	300	0	0	0	0	0	0	0	200	903	0	0	0	0	0	0	0	603	903	0
449	8	0	0	0	0	0	0	200	300	0	0	0	0	0	0	0	200	903	0	0	0	0	0	0	0	603	903	0
449	9	0	0	0	0	0	0	200	300	0	0	0	0	0	0	0	200	903	0	0	0	0	0	0	0	603	903	0
450	0	0	0	0	0	0	0	200	300	0	0	0	0	0	0	0	200	903	0	0	0	0	0	0	0	603	903	0
450	1	0	0	0	0	0	0	200	300	0	0	0	0	0	0	0	200	903	0	0	0	0	0	0	0	603	903	0
450	2	0	0	0	0	0	0	200	300	0	0	0	0	0	0	0	200	903	0	0	0	0	0	0	0	603	903	0
450	3	0	0	0	0	0	0	200	300	0	0	0	0	0	0	0	200	903	0	0	0	0	0	0	0	603	903	0
450	4	0	0	0	0	0	0	200	300	0	0	0	0	0	0	0	200	903	0	0	0	0	0	0	0	603	903	0
450	5	0	0	0	0	0	0	200	300	0	0	0	0	0	0	0	200	903	0	0	0	0	0	0	0	603	903	0
450	6	0	0	0	0	0	0	200	300	0	0	0	0	0	0	0	200	903	0	0	0	0	0	0	0	603	903	0
450	7	0	0	0	0	0	0	200	300	0	0	0	0	0	0	0	200	903	0	0	0	0	0	0	0	603	903	0
450	8	0	0	0	0	0	0	200	300	0	0	0	0	0	0	0	200	903	0	0	0	0	0	0	0	603	903	0
450	9	0	0	0	0	0	0	200	300	0	0	0	0	0	0	0	200	903	0	0	0	0	0	0	0	603	903	0
451	0	0	0	0	0	0	0	200	300	0	0	0	0	0	0	0	200	903	0	0	0	0	0	0	0	603	903	0
451	1	0	0	0	0	0	0	200	300	0	0	0	0	0	0	0	200	903	0	0	0	0	0	0	0	603	903	0
451	2	0	0	0	0	0	0	200	300	0	0	0	0	0	0	0	200	903	0	0	0	0	0	0	0	603	903	0
451	3	0	0	0	0	0	0	200	300	0	0	0	0	0	0	0	200	903	0	0	0	0	0	0	0	603	903	0
451	4	0	0	0	0	0	0	200	300	0	0	0	0	0	0	0	200	903	0	0	0	0	0	0	0	603	903	0
451	5	0	0	0	0	0	0	200	300	0	0	0	0	0	0	0	200	903	0	0	0	0	0	0	0	603	903	0
451	6	0	0	0	0	0	0	200	300	0	0	0	0	0	0	0	200	903	0	0	0	0	0	0	0	603	903	0
451	7	0	0	0	0	0	0	200	300	0	0	0	0	0	0	0	200	903	0	0	0	0	0	0	0	603	903	0
451	8	0	0	0	0	0	0	200	300	0	0	0	0	0	0	0	200	903	0	0	0	0	0	0	0	603	903	0
451	9	0	0	0	0	0	0	200	300	0	0	0	0	0	0	0	200	903	0	0	0	0	0	0	0	603	903	0
452	0	0	0	0	0	0	0	200	300	0	0	0	0	0	0	0	200	903	0	0	0	0	0	0	0	603	903	0
452	1	0	0	0	0	0	0	200	300	0	0	0	0	0	0	0	200	903	0	0	0	0	0	0	0	603	903	0
452	2	0	0	0	0	0	0	200	300	0	0	0	0	0	0	0	200	903	0	0	0	0	0	0	0	603	903	0
452	3	0	0	0	0	0	0	200	300	0	0	0	0	0	0	0	200	903	0	0	0	0	0	0	0	603	903	0
452	4	0	0	0	0	0	0	200	300	0	0	0	0	0	0	0	200	903	0	0	0	0	0	0	0	603	903	0
452	5	0	0	0	0	0	0	200	300	0	0	0	0	0	0	0	200	903	0	0	0	0	0	0	0	603	903	0
452	6	0	0	0	0	0	0	200	300	0	0	0	0	0	0	0	200	903	0	0	0	0	0	0	0	603	903	0
452	7	0	0	0	0	0	0	200	300	0	0	0	0	0	0	0	200	903	0	0	0	0	0	0	0	603	903	0
452	8	0	0	0	0	0	0	200	300	0	0	0	0	0	0	0	200	903	0	0	0	0	0	0	0	603	903	0
452	9	0	0	0	0	0	0	200	300	0	0	0	0	0	0	0	200	903	0	0	0	0	0	0	0	603	903	0
453	0	0	0	0	0	0	0	200	300	0	0	0	0	0	0	0	200	903	0	0	0	0	0	0	0	603	903	0
453	1	0	0	0	0	0	0	200	300	0	0	0	0	0	0	0	200	903	0	0	0	0	0	0	0	603	903	0
453	2	0	0	0	0	0	0	200	300	0	0	0	0	0	0	0	200	903	0	0	0	0	0	0	0	603	903	0
453	3	0	0	0	0	0	0	200	300	0	0	0	0	0	0	0	200	903	0	0	0	0	0	0	0	603	903	0
453	4	0	0	0	0	0	0	200	300	0	0	0	0	0	0	0	200	903	0	0	0	0	0	0	0	603	903	0
453	5	0	0	0	0	0	0	200	300	0	0	0	0	0	0	0	200	903	0	0	0	0	0	0	0	603	903	0
453	6	0	0	0	0	0	0	200	300	0	0	0	0	0	0	0	200	903	0	0	0	0	0	0	0	603	903	0
453	7	0	0	0	0	0	0	200	300	0	0	0	0	0	0	0	200	903	0	0	0	0	0	0	0	603	903	0
453	8	0	0	0	0	0	0	200	300	0	0	0	0	0	0	0	200	903	0	0	0	0	0	0	0	603	903	0
453	9	0	0	0	0	0	0	200	300	0	0	0	0	0	0	0	200	903	0	0	0	0	0	0	0	603	903	0
454	0	0	0	0	0	0	0	200	300	0	0	0	0	0	0	0	200	903	0	0	0	0	0	0	0	603	903	0
454	1	0	0	0	0	0	0	200	300	0	0	0	0	0	0	0	200	903	0	0	0	0	0	0	0	603	903	0
454	2	0	0	0	0	0	0	200	300	0	0	0	0	0	0	0	200	903	0	0	0	0	0	0	0	603	903	0
454	3	0	0	0	0	0	0	200	300	0	0	0	0	0	0	0	200	903	0	0	0	0	0	0	0	603	903	0
454	4	0	0	0	0	0	0	200	300	0	0	0	0	0	0	0	200	903	0	0	0	0	0	0	0	603	903	0
454	5	0	0	0	0	0	0	200	300	0	0	0	0	0	0	0	200	903	0	0	0	0	0	0	0	603	903	0
454	6	0	0	0	0	0	0	200	300	0	0	0	0	0	0	0	200	903	0	0	0	0	0	0	0	603	903	0
454	7	0	0	0	0	0	0	200	300	0	0	0	0	0	0	0	200	903	0	0	0	0	0	0	0	603	903	0
454	8	0	0	0	0	0	0	200	300	0	0	0	0	0	0	0	200	903	0	0	0	0	0	0	0	603	903	0
454	9	0	0	0	0	0	0	200	300	0	0	0	0	0	0	0	200	903	0	0	0	0	0	0	0	603	903	0
455	0	0	0	0	0	0	0	200	300	0	0	0	0	0	0	0	200	903	0	0	0	0	0	0	0	603	903	0
455	1	0	0	0	0	0	0	200	300	0	0	0	0	0	0	0	200	903	0	0	0	0	0	0	0	603	903	0
455	2	0	0	0	0	0	0	200	300	0	0	0	0	0	0	0	200	903	0	0	0	0	0	0	0	603	903	0
455	3	0	0	0	0	0	0	200	300	0	0	0	0	0	0	0	200	903	0	0	0	0	0	0	0	603	903	0
455	4	0	0	0	0	0	0	200	300	0	0	0	0	0	0	0	200	903	0	0	0	0	0	0	0	603	903	0
455	5	0	0	0	0	0	0	200	300	0	0	0	0	0	0	0	200	903	0	0	0	0	0	0	0	603	903	0
455	6	0	0	0	0	0	0	200	300	0	0	0	0	0	0	0	200	903	0	0	0	0	0	0	0	603	903	0
455	7	0	0	0	0	0	0	200	300	0	0	0	0	0	0	0	200	903	0	0	0	0	0	0	0	603	903	0
455	8	0	0	0	0	0	0	200	300	0	0	0	0	0	0	0	200	903	0	0	0	0	0	0	0	603	903	0
455	9	0	0	0	0	0	0	200	300	0	0	0	0	0	0	0	200	903	0	0	0	0	0	0	0	603	903	0
456	0	0	0	0	0	0	0	200	300	0	0	0	0	0	0	0	200	903	0	0	0	0	0	0	0	603	903	0
456	1	0	0	0	0	0	0	200	300	0	0	0	0	0	0	0	200	903	0	0	0	0	0	0	0	603	903	0
456	2	0	0	0	0	0	0	200	300	0	0	0	0	0	0	0	200	903	0	0	0	0	0	0	0	603	903	0
456	3	0	0	0	0	0	0	200	300	0	0	0	0	0	0	0	200	903	0	0	0	0	0	0	0	603	903	0
456	4	0	0	0	0	0	0	200	300	0	0	0	0	0	0	0	200	903	0	0	0	0	0	0	0	603	903	0
456	5	0	0	0	0	0	0	200	300	0	0	0	0	0	0	0	200	903	0	0	0	0	0	0	0	603	903	0
456	6	0	0	0	0	0	0	200	300	0	0	0	0	0	0	0	200	903	0	0	0	0	0	0	0	603	903	0
456	7	0	0	0	0	0	0	200	300	0	0	0	0	0	0	0	200	903	0	0	0	0	0	0	0	603	903	0
456	8	0	0	0	0	0	0	200	300	0	0	0	0	0	0	0	200	903	0	0	0	0	0	0	0	603	903	0
456	9	0	0	0	0	0	0	200	300	0	0	0	0	0	0	0	200	903	0	0	0	0	0	0	0	603	903	0
457	0	0	0	0	0	0	0	200	300	0	0	0	0	0	0	0	200	903	0	0	0	0	0	0	0	603	903	0
457	1	0	0	0	0	0	0	200	300	0	0	0	0	0	0	0	200	903	0	0	0	0	0	0	0	603	903	0
457	2	0	0	0	0	0	0	200	300	0	0	0	0	0	0	0	200	903	0	0	0	0	0	0	0	603	903	0
457	3	0	0	0	0	0	0	200	300	0	0	0	0	0	0	0	200	903	0	0	0	0	0	0	0	603	903	0
457	4	0	0	0	0	0	0	200	300	0	0	0	0	0	0	0	200	903	0	0	0	0	0	0	0	603	903	0
457	5	0	0	0	0	0	0	200	300	0	0	0	0	0	0	0	200	903	0	0	0	0	0	0	0	603	903	0
457	6	0	0	0	0	0	0	200	300	0	0	0	0	0	0	0	200	903	0	0	0	0	0	0	0	603	903	0
457	7	0	0	0	0	0	0	200	300	0	0	0	0	0	0	0	200	903	0	0	0	0	0	0	0	603	903	0
457	8	0	0	0	0	0	0	200	300	0	0	0	0	0	0	0	200	903	0	0	0	0	0	0	0	603	903	0
457	9	0	0	0	0	0	0	200	300	0	0	0	0	0	0	0	200	903	0	0	0	0	0	0	0	603	903	0
458	0	0	0	0	0	0	0	200	300	0	0	0	0	0	0	0	200	903	0	0	0	0	0	0	0	603	903	0
458	1	0	0	0	0	0	0	200	300	0	0	0	0	0	0	0	200	903	0	0	0	0	0	0	0	603	903	0
458	2	0	0	0	0	0	0	200	300	0	0	0	0	0	0	0	200	903	0	0	0	0	0	0	0	603	903	0
458	3	0	0	0	0	0	0	200	300	0	0	0	0	0	0	0	200	903	0	0	0	0	0	0	0	603	903	0
458	4	0	0	0	0	0	0	200	300	0	0	0	0	0	0	0	200	903	0	0	0	0	0	0	0	603	903	0
458	5	0	0	0	0	0	0	200	300	0	0	0	0	0	0	0	200	903	0	0	0	0	0	0	0	603	903	0
458	6	0	0	0	0	0	0	200	300	0	0	0	0	0	0	0	200	903	0	0	0	0	0	0	0	603	903	0
458	7	0	0	0	0	0	0	200	300	0	0	0	0	0	0	0	200	903	0	0	0	0	0	0	0	603	903	0
458	8	0	0	0	0	0	0	200	300	0	0	0	0	0	0	0	200	903	0	0	0	0	0	0	0	603	903	0
458	9	0	0	0	0	0	0	200	300	0	0	0	0	0	0	0	200	903	0	0	0	0	0	0	0	603	903	0
459	0	0	0	0	0	0	0	200	300	0	0	0	0	0	0	0	200	903	0	0	0	0	0	0	0	603	903	0
459	1	0	0	0	0	0	0	200	300	0	0	0	0	0	0	0	200	903	0	0	0	0	0	0	0	603	903	0
459	2	0	0	0	0	0	0	200	300	0	0	0	0	0	0	0	200	903	0	0	0	0	0	0	0	603	903	0
459	3	0	0	0	0	0	0	200	300	0	0	0	0	0	0	0	200	903	0	0	0	0	0	0	0	603	903	0
459	4	0	0	0	0	0	0	200	300	0	0	0	0	0	0	0	200	903	0	0	0	0	0	0	0	603	903	0
459	5	0	0	0	0	0	0	200	300	0	0	0	0	0	0	0	200	903	0	0	0	0	0	0	0	603	903	0
459	6	0	0	0	0	0	0	200	300	0	0	0	0	0	0	0	200	903	0	0	0	0	0	0	0	603	903	0
459	7	0	0	0	0	0	0	200	300	0	0	0	0	0	0	0	200	903	0	0	0	0	0	0	0	603	903	0
459	8	0	0	0	0	0	0	200	300	0	0	0	0	0	0	0	200	903	0	0	0	0	0	0	0	603	903	0
459	9	0	0	0	0	0	0	200	300	0	0	0	0	0	0	0	200	903	0	0	0	0	0	0	0	603	903	0
460	0	0	0	0	0	0	0	200	300	0	0	0	0	0	0	0	200	903	0	0	0	0	0	0	0	603	903	0
460	1	0	0	0	0	0	0	200	300	0	0	0	0	0	0	0	200	903	0	0	0	0	0	0	0	603	903	0
460	2	0	0	0	0	0	0	200	300	0	0	0	0	0	0	0	200	903	0	0	0	0	0	0	0	603	903	0
460	3	0	0	0	0	0	0	200	300	0	0	0	0	0	0	0	200	903	0	0	0	0	0	0	0	603	903	0
460	4	0	0	0	0	0	0	200	300	0	0	0	0	0	0	0	200	903	0	0	0	0	0	0	0	603	903	0
460	5	0	0	0	0	0	0	200	300	0	0	0	0	0	0	0	200	903	0	0	0	0	0	0	0	603	903	0
460	6	0	0	0	0	0	0	200	300	0	0	0	0	0	0	0	200	903	0	0	0	0	0	0	0	603	903	0
460	7	0	0	0	0	0	0	200	300	0	0	0	0	0	0	0	200	903	0	0	0	0	0	0	0	603	903	0
460	8	0	0	0	0	0	0	200	300	0	0	0	0	0	0	0	200	903	0	0	0	0	0	0	0	603	903	0
460	9	0	0	0	0	0	0	200	300	0	0	0	0	0	0	0	200	903	0	0	0	0	0	0	0	603	903	0
461	0	0	0	0	0	0	0	200	300	0	0	0	0	0	0	0	200	903	0	0	0	0	0	0	0	603	903	0
461	1	0	0	0	0	0	0	200	300	0	0	0	0	0	0	0	200	903	0	0	0	0	0	0	0	603	903	0
461	2	0	0	0	0	0	0	200	300	0	0	0	0	0	0	0	200	903	0	0	0	0	0	0	0	603	903	0
461	3	0	0	0	0	0	0	200	300	0	0	0	0	0	0	0	200	903	0	0	0	0	0	0	0	603	903	0
461	4	0	0	0	0	0	0	200	300	0	0	0	0	0	0	0	200	903	0	0	0	0	0	0	0	603	903	0
461	5	0	0	0	0	0	0	200	300	0	0	0	0	0	0	0	200	903	0	0	0	0	0	0	0	603	903	0
461	6	0	0	0	0	0	0	200	300	0	0	0	0	0	0	0	200	903	0	0	0	0	0	0	0	603	903	0
461	7	0	0	0	0	0	0	200	300	0	0	0	0	0	0	0	200	903	0	0	0	0	0	0	0	603	903	0
461	8	0	0	0	0	0	0	200	300	0	0	0	0	0	0	0	200	903	0	0	0	0	0	0	0	603	903	0
461	9	0	0	0	0	0	0	200	300	0	0	0	0	0	0	0	200	903	0	0	0	0	0	0	0	603	903	0
462	0	0	0	0	0	0	0	200	300	0	0	0	0	0	0	0	200	903	0	0	0	0	0	0	0	603	903	0
462	1	0	0	0	0	0	0	200	300	0	0	0	0	0	0	0	200	903	0	0	0	0	0	0	0	603	903	0
462	2	0	0	0	0	0	0	200	300	0	0	0	0	0	0	0	200	903	0	0	0	0	0	0	0	603	903	0
462	3	0	0	0	0	0	0	200	300	0	0	0	0	0	0	0	200	903	0	0	0	0	0	0	0	603	903	0
462	4	0	0	0	0	0	0	200	300	0	0	0	0	0	0	0	200	903	0	0	0	0	0	0	0	603	903	0
462	5	0	0	0	0	0	0	200	300	0	0	0	0	0	0	0	200	903	0	0	0	0	0	0	0	603	903	0
462	6	0	0	0	0	0	0	200	300	0	0	0	0	0	0	0	200	903	0	0	0	0	0	0	0	603	903	0
462	7	0	0	0	0	0	0	200	300	0	0	0	0	0	0	0	200	903	0	0	0	0	0	0	0	603	903	0
462	8	0	0	0	0	0	0	200	300	0	0	0	0	0	0	0	200	903	0	0	0	0	0	0	0	603	903	0
462	9	0	0	0	0	0	0	200	300	0	0	0	0	0	0	0	200	903	0	0	0	0	0	0	0	603	903	0
463	0	0	0	0	0	0	0	200	300	0	0	0	0	0	0	0	200	903	0	0	0	0	0	0	0	603	903	0
463	1	0	0	0	0	0	0	200	300	0	0	0	0	0	0	0	200	903	0	0	0	0	0	0	0	603	903	0
463	2	0	0	0	0	0	0	200	300	0	0	0	0	0	0	0	200	903	0	0	0	0	0	0	0	603	903	0
463	3	0	0	0	0	0	0	200	300	0	0	0	0	0	0	0	200	903	0	0	0	0	0	0	0	603	903	0
463	4	0	0	0	0	0	0	200	300	0	0	0	0	0	0	0	200	903	0	0	0	0	0	0	0	603	903	0
463	5	0	0	0	0	0	0	200	300	0	0	0	0	0	0	0	200	903	0	0	0	0	0	0	0	603	903	0
463	6	0	0	0	0	0	0	200	300	0	0	0	0	0	0	0	200	903	0	0	0	0	0	0	0	603	903	0
463	7	0	0	0	0	0	0	200	300	0	0	0	0	0	0	0	200	903	0	0	0	0	0	0	0	603	903	0
463	8	0	0	0	0	0	0	200	300	0	0	0	0	0	0	0	200	903	0	0	0	0	0	0	0	603	903	0
463	9	0	0	0	0	0	0	200	300	0	0	0	0	0	0	0	200	903	0	0	0	0	0	0	0	603	903	0
464	0	0	0	0	0	0	0	200	300	0	0	0	0	0	0	0	200	903	0	0	0	0	0	0	0	603	903	0
464	1	0	0	0	0	0	0	200	300	0	0	0	0	0	0	0	200	903	0	0	0	0	0	0	0	603	903	0
464	2	0	0	0	0	0	0	200	300	0	0	0	0	0	0	0	200	903	0	0	0	0	0	0	0	603	903	0
464	3	0	0	0	0	0	0	200	300	0	0	0	0	0	0	0	200	903	0	0	0	0	0	0	0	603	903	0
464	4	0	0	0	0	0	0	200	300	0	0	0	0	0	0	0	200	903	0	0	0	0	0	0	0	603	903	0
464	5	0	0	0	0	0	0	200	300	0	0	0	0	0	0	0	200	903	0	0	0	0	0	0	0	603	903	0
464	6	0	0	0	0	0	0	200	300	0	0	0	0	0	0	0	200	903	0	0	0	0	0	0	0	603	903	0
464	7	0	0	0	0	0	0	200	300	0	0	0	0	0	0	0	200	903	0	0	0	0	0	0	0	603	903	0
464	8	0	0	0	0	0	0	200	300	0	0	0	0	0	0	0	200	903	0	0	0	0	0	0	0	603	903	0
464	9	0	0	0	0	0	0	200	300	0	0	0	0	0	0	0	200	903	0	0	0	0	0	0	0	603	903	0
465	0	0	0	0	0	0	0	200	300	0	0	0	0	0	0	0	200	903	0	0	0	0	0	0	0	603	903	0
465	1	0	0	0	0	0	0	200	300	0	0	0	0	0	0	0	200	903	0	0	0	0	0	0	0	603	903	0
465	2	0	0	0	0	0	0	200	300	0	0	0	0	0	0	0	200	903	0	0	0	0	0	0	0	603	903	0
465	3	0	0	0	0	0	0	200	300	0	0	0	0	0	0	0	200	903	0	0	0	0	0	0	0	603	903	0
465	4	0	0	0	0	0	0	200	300	0	0	0	0	0	0	0	200	903	0	0	0	0	0	0	0	603	903	0
465	5	0	0	0	0	0	0	200	300	0	0	0	0	0	0	0	200	903	0	0	0	0	0	0	0	603	903	0
465	6	0	0	0	0	0	0	200	300	0	0	0	0	0	0	0	200	903	0	0	0	0	0	0	0	603	903	0
465	7	0	0	0	0	0	0	200	300	0	0	0	0	0	0	0	200	903	0	0	0	0	0	0	0	603	903	0
465	8	0	0	0	0	0	0	200	300	0	0	0	0	0	0	0	200	903	0	0	0	0	0	0	0	603	903	0
465	9	0	0	0	0	0	0	200	300	0	0	0	0	0	0	0	200	903	0	0	0	0	0	0	0	603	903	0
466	0	0	0	0	0	0	0	200	300	0	0	0	0	0	0	0	200	903	0	0	0	0	0	0	0	603	903	0
466	1	0	0	0	0	0	0	200	300	0	0	0	0	0	0	0	200	903	0	0	0	0	0	0	0	603	903	0
466	2	0	0	0	0	0	0	200	300	0	0	0	0	0	0	0	200	903	0	0	0	0	0	0	0	603	903	0
466	3	0	0	0	0	0	0	200	300	0	0	0	0	0	0	0	200	903	0	0	0	0	0	0	0	603	903	0
466	4	0	0	0	0	0	0	200	300	0	0	0	0	0	0	0	200	903	0	0	0	0	0	0	0	603	903	0
466	5	0	0	0	0	0	0	200	300	0	0	0	0	0	0	0	200	903	0	0	0	0	0	0	0	603	903	0
466	6	0	0	0	0	0	0	200	300	0	0	0	0	0	0	0	200	903	0	0	0	0	0	0	0	603	903	0
466	7	0	0	0	0	0	0	200	300	0	0	0	0	0	0	0	200	903	0	0	0	0	0	0	0	603	903	0
466	8	0	0	0	0	0	0	200	300	0	0	0	0	0	0	0	200	903	0	0	0	0	0	0	0	603	903	0
466	9	0	0	0	0	0	0	200	300	0	0	0	0	0	0	0	200	903	0	0	0	0	0	0	0	603	903	0
467	0	0	0	0	0	0	0	200	300	0	0	0	0	0	0	0	200	903	0	0	0	0	0	0	0	603	903	0
467	1	0	0	0	0	0	0	200	300	0	0	0	0	0	0	0	200	903	0	0	0	0	0	0	0	603	903	0
467	2	0	0	0	0	0	0	200	300	0	0	0	0	0	0	0	200	903	0	0	0	0	0	0	0	603	903	0
467	3	0	0	0	0	0	0	200	300	0	0	0	0	0	0	0	200	903	0	0	0	0	0	0	0	603	903	0
467	4	0	0	0	0	0	0	200	300	0	0	0	0	0	0	0	200	903	0	0	0	0	0	0	0	603	903	0
467	5	0	0	0	0	0	0	200	300	0	0	0	0	0	0	0	200	903	0	0	0	0	0	0	0	603	903	0
467	6	0	0	0	0	0	0	200	300	0	0	0	0	0	0	0	200	903	0	0	0	0	0	0	0	603	903	0
467	7	0	0	0	0	0	0	200	300	0	0	0	0	0	0	0	200	903	0	0	0	0	0	0	0	603	903	0
467	8	0	0	0	0	0	0	200	300	0	0	0	0	0	0	0	200	903	0	0	0	0	0	0	0	603	903	0
467	9	0	0	0	0	0	0	200	300	0	0	0	0	0	0	0	200	903	0	0	0	0	0	0	0	603	903	0
468	0	0	0	0	0	0	0	200	300	0	0	0	0	0	0	0	200	903	0	0	0	0	0	0	0	603	903	0
468	1	0	0	0	0	0	0	200	300	0	0	0	0	0	0	0	200	903	0	0	0	0	0	0	0	603	903	0
468	2	0	0	0	0	0	0	200	300	0	0	0	0	0	0	0	200	903	0	0	0	0	0	0	0	603	903	0
468	3	0	0	0	0	0	0	200	300	0	0	0	0	0	0	0	200	903	0	0	0	0	0	0	0	603	903	0
468	4	0	0	0	0	0	0	200	300	0	0	0	0	0	0	0	200	903	0	0	0	0	0	0	0	603	903	0
468	5	0	0	0	0	0	0	200	300	0	0	0	0	0	0	0	200	903	0	0	0	0	0	0	0	603	903	0
468	6	0	0	0	0	0	0	200	300	0	0	0	0	0	0	0	200	903	0	0	0	0	0	0	0	603	903	0
468	7	0	0	0	0	0	0	200	300	0	0	0	0	0	0	0	200	903	0	0	0	0	0	0	0	603	903	0
468	8	0	0	0	0	0	0	200	300	0	0	0	0	0	0	0	200	903	0	0	0	0	0	0	0	603	903	0
468	9	0	0	0	0	0	0	200	300	0	0	0	0	0	0	0	200	903	0	0	0	0	0	0	0	603	903	0
469	0	0	0	0	0	0	0	200	300	0	0	0	0	0	0	0	200	903	0	0	0	0	0	0	0	603	903	0
469	1	0	0	0	0	0	0	200	300	0	0	0	0	0	0	0	200	903	0	0	0	0	0	0	0	603	903	0
469	2	0	0	0	0	0	0	200	300	0	0	0	0	0	0	0	200	903	0	0	0	0	0	0	0	603	903	0
469	3	0	0	0	0	0	0	200	300	0	0	0	0	0	0	0	200	903	0	0	0	0	0	0	0	603	903	0
469	4	0	0	0	0	0	0	200	300	0	0	0	0	0	0	0	200	903	0	0	0	0	0	0	0	603	903	0
469	5	0	0	0	0	0	0	200	300	0	0	0	0	0	0	0	200	903	0	0	0	0	0	0	0	603	903	0
469	6	0	0	0	0	0	0	200	300	0	0	0	0	0	0	0	200	903	0	0	0	0	0	0	0	603	903	0
469	7	0	0	0	0	0	0	200	300	0	0	0	0	0	0	0	200	903	0	0	0	0	0	0	0	603	903	0
469	8	0	0	0	0	0	0	200	300	0	0	0	0	0	0	0	200	903	0	0	0	0	0	0	0	603	903	0
469	9	0	0	0	0	0	0	200	300	0	0	0	0	0	0	0	200	903	0	0	0	0	0	0	0	603	903	0
470	0	0	0	0	0	0	0	200	300	0	0	0	0	0	0	0	200	903	0	0	0	0	0	0	0	603	903	0
470	1	0	0	0	0	0	0	200	300	0	0	0	0	0	0	0	200	903	0	0	0	0	0	0	0	603	903	0
470	2	0	0	0	0	0	0	200	300	0	0	0	0	0	0	0	200	903	0	0	0	0	0	0	0	603	903	0
470	3	0	0	0	0	0	0	200	300	0	0	0	0	0	0	0	200	903	0	0	0	0	0	0	0	603	903	0
470	4	0	0	0	0	0	0	200	300	0	0	0	0	0	0	0	200	903	0	0	0	0	0	0	0	603	903	0
470	5	0	0	0	0	0	0	200	300	0	0	0	0	0	0	0	200	903	0	0	0	0	0	0	0	603	903	0
470	6	0	0	0	0	0	0	200	300	0	0	0	0	0	0	0	200	903	0	0	0	0	0	0	0	603	903	0
470	7	0	0	0	0	0	0	200	300	0	0	0	0	0	0	0	200	903	0	0	0	0	0	0	0	603	903	0
470	8	0	0	0	0	0	0	200	300	0	0	0	0	0	0	0	200	903	0	0	0	0	0	0	0	603	903	0
470	9	0	0	0	0	0	0	200	300	0	0	0	0	0	0	0	200	903	0	0	0	0	0	0	0	603	903	0
471	0	0	0	0	0	0	0	200	300	0	0	0	0	0	0	0	200	903	0	0	0	0	0	0	0	603	903	0
471	1	0	0	0	0	0	0	200	300	0	0	0	0	0	0	0	200	903	0	0	0	0	0	0	0	603	903	0
471	2	0	0	0	0	0	0	200	300	0	0	0	0	0	0	0	200	903	0	0	0	0	0	0	0	603	903	0
471	3	0	0	0	0	0	0	200	300	0	0	0	0	0	0	0	200	903	0	0	0	0	0	0	0	603	903	0
471	4	0	0	0	0	0	0	200	300	0	0	0	0	0	0	0	200	903	0	0	0	0	0	0	0	603	903	0
471	5	0	0	0	0	0	0	200	300	0	0	0	0	0	0	0	200	903	0	0	0	0	0	0	0	603	903	0
471	6	0	0	0	0	0	0	200	300	0	0	0	0	0	0	0	200	903	0	0	0	0	0	0	0	603	903	0
471	7	0	0	0	0	0	0	200	300	0	0	0	0	0	0	0	200	903	0	0	0	0	0	0	0	603	903	0
471	8	0	0	0	0	0	0	200	300	0	0	0	0	0	0	0	200	903	0	0	0	0	0	0	0	603	903	0
471	9	0	0	0	0	0	0	200	300	0	0	0	0	0	0	0	200	903	0	0	0	0	0	0	0	603	903	0
472	0	0	0	0	0	0	0	200	300	0	0	0	0	0	0	0	200	903	0	0	0	0	0	0	0	603	903	0
472	1	0	0	0	0	0	0	200	300	0	0	0	0	0	0	0	200	903	0	0	0	0	0	0	0	603	903	0
472	2	0	0	0	0	0	0	200	300	0	0	0	0	0	0	0	200	903	0	0	0	0	0	0	0	603	903	0
472	3	0	0	0	0	0	0	200	300	0	0	0	0	0	0	0	200	903	0	0	0	0	0	0	0	603	903	0
472	4	0	0	0	0	0	0	200	300	0	0	0	0	0	0	0	200	903	0	0	0	0	0	0	0	603	903	0
472	5	0	0	0	0	0	0	200	300	0	0	0	0	0	0	0	200	903	0	0	0	0	0	0	0	603	903	0
472	6	0	0	0	0	0	0	200	300	0	0	0	0	0	0	0	200	903	0	0	0	0	0	0	0	603	903	0
472	7	0	0	0	0	0	0	200	300	0	0	0	0	0	0	0	200	903	0	0	0	0	0	0	0	603	903	0
472	8	0	0	0	0	0	0	200	300	0	0	0	0	0	0	0	200	903	0	0	0	0	0	0	0	603	903	0
472	9	0	0	0	0	0	0	200	300	0	0	0	0	0	0	0	200	903	0	0	0	0	0	0	0	603	903	0
473	0	0	0	0	0	0	0	200	300	0	0	0	0	0	0	0	200	903	0	0	0	0	0	0	0	603	903	0
473	1	0	0	0	0	0	0	200	300	0	0	0	0	0	0	0	200	903	0	0	0	0	0	0	0	603	903	0
473	2	0	0	0	0	0	0	200	300	0	0	0	0	0	0	0	200	903	0	0	0	0	0	0	0	603	903	0
473	3	0	0	0	0	0	0	200	300	0	0	0	0	0	0	0	200	903	0	0	0	0	0	0	0	603	903	0
473	4	0	0	0	0	0	0	200	300	0	0	0	0	0	0	0	200	903	0	0	0	0	0	0	0	603	903	0
473	5	0	0	0	0	0	0	200	300	0	0	0	0	0	0	0	200	903	0	0	0	0	0	0	0	603	903	0
473	6	0	0	0	0	0	0	200	300	0	0	0	0	0	0	0	200	903	0	0	0	0	0	0	0	603	903	0
473	7	0	0	0	0	0	0	200	300	0	0	0	0	0	0	0	200	903	0	0	0	0	0	0	0	603	903	0
473	8	0	0	0	0	0	0	200	300	0	0	0	0	0	0	0	200	903	0	0	0	0	0	0	0	603	903	0
473	9	0	0	0	0	0	0	200	300	0	0	0	0	0	0	0	200	903	0	0	0	0	0	0	0	603	903	0
474	0	0	0	0	0	0	0	200	300	0	0	0	0	0	0	0	200	903	0	0	0	0	0	0	0	603	903	0
474	1	0	0	0	0	0	0	200	300	0	0	0	0	0	0	0	200	903	0	0	0	0	0	0	0	603	903	0
474	2	0	0	0	0	0	0	200	300	0	0	0	0	0	0	0	200	903	0	0	0	0	0	0	0	603	903	0
474	3	0	0	0	0	0	0	200	300	0	0	0	0	0	0	0	200	903	0	0	0	0	0	0	0	603	903	0
474	4	0	0	0	0	0	0	200	300	0	0	0	0	0	0	0	200	903	0	0	0	0	0	0	0	603	903	0
474	5	0	0	0	0	0	0	200	300	0	0	0	0	0	0	0	200	903	0	0	0	0	0	0	0	603	903	0
474	6	0	0	0	0	0	0	200	300	0	0	0	0	0	0	0	200	903	0	0	0	0	0	0	0	603	903	0
474	7	0	0	0	0	0	0	200	300	0	0	0	0	0	0	0	200	903	0	0	0	0	0	0	0	603	903	0
474	8	0	0	0	0	0	0	200	300	0	0	0	0	0	0	0	200	903	0	0	0	0	0	0	0	603	903	0
474	9	0	0	0	0	0	0	200	300	0	0	0	0	0	0	0	200	903	0	0	0	0	0	0	0	603	903	0
475	0	0	0	0	0	0	0	200	300	0	0	0	0	0	0	0	200	903	0	0	0	0	0	0	0	603	903	0
475	1	0	0	0	0	0	0	200	300	0	0	0	0	0	0	0	200	903	0	0	0	0	0	0	0	603	903	0
475	2	0	0	0	0	0	0	200	300	0	0	0	0	0	0	0	200	903	0	0	0	0	0	0	0	603	903	0
475	3	0	0	0	0	0	0	200	300	0	0	0	0	0	0	0	200	903	0	0	0	0	0	0	0	603	903	0
475	4	0	0	0	0	0	0	200	300	0	0	0	0	0	0	0	200	903	0	0	0	0	0	0	0	603	903	0
475	5	0	0	0	0	0	0	200	300	0	0	0	0	0	0	0	200	903	0	0	0	0	0	0	0	603	903	0
475	6	0	0	0	0	0	0	200	300	0	0	0	0	0	0	0	200	903	0	0	0	0	0	0	0	603	903	0
475	7	0	0	0	0	0	0	200	300	0	0	0	0	0	0	0	200	903	0	0	0	0	0	0	0	603	903	0
475	8	0	0	0	0	0	0	200	300	0	0	0	0	0	0	0	200	903	0	0	0	0	0	0	0	603	903	0
475	9	0	0	0	0	0	0	200	300	0	0	0	0	0	0	0	200	903	0	0	0	0	0	0	0	603	903	0
476	0	0	0	0	0	0	0	200	300	0	0	0	0	0	0	0	200	903	0	0	0	0	0	0	0	603	903	0
476	1	0	0	0	0	0	0	200	300	0	0	0	0	0	0	0	200	903	0	0	0	0	0	0	0	603	903	0
476	2	0	0	0	0	0	0	200	300	0	0	0	0	0	0	0	200	903	0	0	0	0	0	0	0	603	903	0
476	3	0	0	0	0	0	0	200	300	0	0	0	0	0	0	0	200	903	0	0	0	0	0	0	0	603	903	0
476	4	0	0	0	0	0	0	200	300	0	0	0	0	0	0	0	200	903	0	0	0	0	0	0	0	603	903	0
476	5	0	0	0	0	0	0	200	300	0	0	0	0	0	0	0	200	903	0	0	0	0	0	0	0	603	903	0
476	6	0	0	0	0	0	0	200	300	0	0	0	0	0	0	0	200	903	0	0	0	0	0	0	0	603	903	0
476	7	0	0	0	0	0	0	200	300	0	0	0	0	0	0	0	200	903	0	0	0	0	0	0	0	603	903	0
476	8	0	0	0	0	0	0	200	300	0	0	0	0	0	0	0	200	903	0	0	0	0	0	0	0	603	903	0
476	9	0	0	0	0	0	0	200	300	0	0	0	0	0	0	0	200	903	0	0	0	0	0	0	0	603	903	0
477	0	0	0	0	0	0	0	200	300	0	0	0	0	0	0	0	200	903	0	0	0	0	0	0	0	603	903	0
477	1	0	0	0	0	0	0	200	300	0	0	0	0	0	0	0	200	903	0	0	0	0	0	0	0	603	903	0
477	2	0	0	0	0	0	0	200	300	0	0	0	0	0	0	0	200	903	0	0	0	0	0	0	0	603	903	0
477	3	0	0	0	0	0	0	200	300	0	0	0	0	0	0	0	200	903	0	0	0	0	0	0	0	603	903	0
477	4	0	0	0	0	0	0	200	300	0	0	0	0	0	0	0	200	903	0	0	0	0	0	0	0	603	903	0
477	5	0	0	0	0	0	0	200	300	0	0	0	0	0	0	0	200	903	0	0	0	0	0	0	0	603	903	0
477	6	0	0	0	0	0	0	200	300	0	0	0	0	0	0	0	200	903	0	0	0	0	0	0	0	603	903	0
477	7	0	0	0	0	0	0	200	300	0	0	0	0	0	0	0	200	903	0	0	0	0	0	0	0	603	903	0
477	8	0	0	0	0	0	0	200	300	0	0	0	0	0	0	0	200	903	0	0	0	0	0	0	0	603	903	0
477	9	0	0	0	0	0	0	200	300	0	0	0	0	0	0	0	200	903	0	0	0	0	0	0	0	603	903	0
478	0	0	0	0	0	0	0	200	300	0	0	0	0	0	0	0	200	903	0	0	0	0	0	0	0	603	903	0
478	1	0	0	0	0	0	0	200	300	0	0	0	0	0	0	0	200	903	0	0	0	0	0	0	0	603	903	0
478	2	0	0	0	0	0	0	200	300	0	0	0	0	0	0	0	200	903	0	0	0	0	0	0	0	603	903	0
478	3	0	0	0	0	0	0	200	300	0	0	0	0	0	0	0	200	903	0	0	0	0	0	0	0	603	903	0
478	4	0	0	0	0	0	0	200	300	0	0	0	0	0	0	0	200	903	0	0	0	0	0	0	0	603	903	0
478	5	0	0	0	0	0	0	200	300	0	0	0	0	0	0	0	200	903	0	0	0	0	0	0	0	603	903	0
478	6	0	0	0	0	0	0	200	300	0	0	0	0	0	0	0	200	903	0	0	0	0	0	0	0	603	903	0
478	7	0	0	0	0	0	0	200	300	0	0	0	0	0	0	0	200	903	0	0	0	0	0	0	0	603	903	0
478	8	0	0	0	0	0	0	200	300	0	0	0	0	0	0	0	200	903	0	0	0	0	0	0	0	603	903	0
478	9	0	0	0	0	0	0	200	300	0	0	0	0	0	0	0	200	903	0	0	0	0	0	0	0	603	903	0
479	0	0	0	0	0	0	0	200	300	0	0	0	0	0	0	0	200	903	0	0	0	0	0	0	0	603	903	0
479	1	0	0	0	0	0	0	200	300	0	0	0	0	0	0	0	200	903	0	0	0	0	0	0	0	603	903	0
479	2	0	0	0	0	0	0	200	300	0	0	0	0	0	0	0	200	903	0	0	0	0	0	0	0	603	903	0
479	3	0	0	0	0	0	0	200	300	0	0	0	0	0	0	0	200	903	0	0	0	0	0	0	0	603	903	0
479	4	0	0	0	0	0	0	200	300	0	0	0	0	0	0	0	200	903	0	0	0	0	0	0	0	603	903	0
479	5	0	0	0	0	0	0	200	300	0	0	0	0	0	0	0	200	903	0	0	0	0	0	0	0	603	903	0
479	6	0	0	0	0	0	0	200	300	0	0	0	0	0	0	0	200	903	0	0	0	0	0	0	0	603	903	0
479	7	0	0	0	0	0	0	200	300	0	0	0	0	0	0	0	200	903	0	0	0	0	0	0	0	603	903	0
479	8	0	0	0	0	0	0	200	300	0	0	0	0	0	0	0	200	903	0	0	0	0	0	0	0	603	903	0
479	9	0	0	0	0	0	0	200	300	0	0	0	0	0	0	0	200	903	0	0	0	0	0	0	0	603	903	0
480	0	0	0	0	0	0	0	200	300	0	0	0	0	0	0	0	200	903	0	0	0	0	0	0	0	603	903	0
480	1	0	0	0	0	0	0	200	300	0	0	0	0	0	0	0	200	903	0	0	0	0	0	0	0	603	903	0
480	2	0	0	0	0	0	0	200	300	0	0	0	0	0	0	0	200	903	0	0	0	0	0	0	0	603	903	0
480	3	0	0	0	0	0	0	200	300	0	0	0	0	0	0	0	200	903	0	0	0	0	0	0	0	603	903	0
480	4	0	0	0	0	0	0	200	300	0	0	0	0	0	0	0	200	903	0	0	0	0	0	0	0	603	903	0
480	5	0	0	0	0	0	0	200	300	0	0	0	0	0	0	0	200	903	0	0	0	0	0	0	0	603	903	0
480	6	0	0	0	0	0	0	200	300	0	0	0	0	0	0	0	200	903	0	0	0	0	0	0	0	603	903	0
480	7	0	0	0	0	0	0	200	300	0	0	0	0	0	0	0	200	903	0	0	0	0	0	0	0	603	903	0
480	8	0	0	0	0	0	0	200	300	0	0	0	0	0	0	0	200	903	0	0	0	0	0	0	0	603	903	0
480	9	0	0	0	0	0	0	200	300	0	0	0	0	0	0	0	200	903	0	0	0	0	0	0	0	603	903	0
481	0	0	0	0	0	0	0	200	300	0	0	0	0	0	0	0	200	903	0	0	0	0	0	0	0	603	903	0
481	1	0	0	0	0	0	0	200	300	0	0	0	0	0	0	0	200	903	0	0	0	0	0	0	0	603	903	0
481	2	0	0	0	0	0	0	200	300	0	0	0	0	0	0	0	200	903	0	0	0	0	0	0	0	603	903	0
481	3	0	0	0	0	0	0	200	300	0	0	0	0	0	0	0	200	903	0	0	0	0	0	0	0	603	903	0
481	4	0	0	0	0	0	0	200	300	0	0	0	0	0	0	0	200	903	0	0	0	0	0	0	0	603	903	0
481	5	0	0	0	0	0	0	200	300	0	0	0	0	0	0	0	200	903	0	0	0	0	0	0	0	603	903	0
481	6	0	0	0	0	0	0	200	300	0	0	0	0	0	0	0	200	903	0	0	0	0	0	0	0	603	903	0
481	7	0	0	0	0	0	0	200	300	0	0	0	0	0	0	0	200	903	0	0	0	0	0	0	0	603	903	0
481	8	0	0	0	0	0	0	200	300	0	0	0	0	0	0	0	200	903	0	0	0	0	0	0	0	603	903	0
481	9	0	0	0	0	0	0	200	300	0	0	0	0	0	0	0	200	903	0	0	0	0	0	0	0	603	903	0
482	0	0	0	0	0	0	0	200	300	0	0	0	0	0	0	0	200	903	0	0	0	0	0	0	0	603	903	0
482	1	0	0	0	0	0	0	200	300	0	0	0	0	0	0	0	200	903	0	0	0	0	0	0	0	603	903	0
482	2	0	0	0	0	0	0	200	300	0	0	0	0	0	0	0	200	903	0	0	0	0	0	0	0	603	903	0
482	3	0	0	0	0	0	0	200	300	0	0	0	0	0	0	0	200	903	0	0	0	0	0	0	0	603	903	0
482	4	0	0	0	0	0	0	200	300	0	0	0	0	0	0	0	200	903	0	0	0	0	0	0	0	603	903	0
482	5	0	0	0	0	0	0	200	300	0	0	0	0	0	0	0	200	903	0	0	0	0	0	0	0	603	903	0
482	6	0	0	0	0	0	0	200	300	0	0	0	0	0	0	0	200	903	0	0	0	0	0	0	0	603	903	0
482	7	0	0	0	0	0	0	200	300	0	0	0	0	0	0	0	200	903	0	0	0	0	0	0	0	603	903	0
482	8	0	0	0	0	0	0	200	300	0	0	0	0	0	0	0	200	903	0	0	0	0	0	0	0	603	903	0
482	9	0	0	0	0	0	0	200	300	0	0	0	0	0	0	0	200	903	0	0	0	0	0	0	0	603	903	0
483	0	0	0	0	0	0	0	200	300	0	0	0	0	0	0	0	200	903	0	0	0	0	0	0	0	603	903	0
483	1	0	0	0	0	0	0	200	300	0	0	0	0	0	0	0	200	903	0	0	0	0	0	0	0	603	903	0
483	2	0	0	0	0	0	0	200	300	0	0	0	0	0	0	0	200	903	0	0	0	0	0	0	0	603	903	0
483	3	0	0	0	0	0	0	200	300	0	0	0	0	0	0	0	200	903	0	0	0	0	0	0	0	603	903	0
483	4	0	0	0	0	0	0	200	300	0	0	0	0	0	0	0	200	903	0	0	0	0	0	0	0	603	903	0
483	5	0	0	0	0	0	0	200	300	0	0	0	0	0	0	0	200	903	0	0	0	0	0	0	0	603	903	0
483	6	0	0	0	0	0	0	200	300	0	0	0	0	0	0	0	200	903	0	0	0	0	0	0	0	603	903	0
483	7	0	0	0	0	0	0	200	300	0	0	0	0	0	0	0	200	903	0	0	0	0	0	0	0	603	903	0
483	8	0	0	0	0	0	0	200	300	0	0	0	0	0	0	0	200	903	0	0	0	0	0	0	0	603	903	0
483	9	0	0	0	0	0	0	200	300	0	0	0	0	0	0	0	200	903	0	0	0	0	0	0	0	603	903	0
484	0	0	0	0	0	0	0	200	300	0	0	0	0	0	0	0	200	903	0	0	0	0	0	0	0	603	903	0
484	1	0	0	0	0	0	0	200	300	0	0	0	0	0	0	0	200	903	0	0	0	0	0	0	0	603	903	0
484	2	0	0	0	0	0	0	200	300	0	0	0	0	0	0	0	200	903	0	0	0	0	0	0	0	603	903	0
484	3	0	0	0	0	0	0	200	300	0	0	0	0	0	0	0	200	903	0	0	0	0	0	0	0	603	903	0
484	4	0	0	0	0	0	0	200	300	0	0	0	0	0	0	0	200	903	0	0	0	0	0	0	0	603	903	0
484	5	0	0	0	0	0	0	200	300	0	0	0	0	0	0	0	200	903	0	0	0	0	0	0	0	603	903	0
484	6	0	0	0	0	0	0	200	300	0	0	0	0	0	0	0	200	903	0	0	0	0	0	0	0	603	903	0
484	7	0	0	0	0	0	0	200	300	0	0	0	0	0	0	0	200	903	0	0	0	0	0	0	0	603	903	0
484	8	0	0	0	0	0	0	200	300	0	0	0	0	0	0	0	200	903	0	0	0	0	0	0	0	603	903	0
484	9	0	0	0	0	0	0	200	300	0	0	0	0	0	0	0	200	903	0	0	0	0	0	0	0	603	903	0
485	0	0	0	0	0	0	0	200	300	0	0	0	0	0	0	0	200	903	0	0	0	0	0	0	0	603	903	0
485	1	0	0	0	0	0	0	200	300	0	0	0	0	0	0	0	200	903	0	0	0	0	0	0	0	603	903	0
485	2	0	0	0	0	0	0	200	300	0	0	0	0	0	0	0	200	903	0	0	0	0	0	0	0	603	903	0
485	3	0	0	0	0	0	0	200	300	0	0	0	0	0	0	0	200	903	0	0	0	0	0	0	0	603	903	0
485	4	0	0	0	0	0	0	200	300	0	0	0	0	0	0	0	200	903	0	0	0	0	0	0	0	603	903	0
485	5	0	0	0	0	0	0	200	300	0	0	0	0	0	0	0	200	903	0	0	0	0	0	0	0	603	903	0
485	6	0	0	0	0	0	0	200	300	0	0	0	0	0	0	0	200	903	0	0	0	0	0	0	0	603	903	0
485	7	0	0	0	0	0	0	200	300	0	0	0	0	0	0	0	200	903	0	0	0	0	0	0	0	603	903	0
485	8	0	0	0	0	0	0	200	300	0	0	0	0	0	0	0	200	903	0	0	0	0	0	0	0	603	903	0
485	9	0	0	0	0	0	0	200	300	0	0	0	0	0	0	0	200	903	0	0	0	0	0	0	0	603	903	0
486	0	0	0	0	0	0	0	200	300	0	0	0	0	0	0	0	200	903	0	0	0	0	0	0	0	603	903	0
486	1	0	0	0	0	0	0	200	300	0	0	0	0	0	0	0	200	903	0	0	0	0	0	0	0	603	903	0
486	2	0	0	0	0	0	0	200	300	0	0	0	0	0	0	0	200	903	0	0	0	0	0	0	0	603	903	0
486	3	0	0	0	0	0	0	200	300	0	0	0	0	0	0	0	200	903	0	0	0	0	0	0	0	603	903	0
486	4	0	0	0	0	0	0	200	300	0	0	0	0	0	0	0	200	903	0	0	0	0	0	0	0	603	903	0
486	5	0	0	0	0	0	0	200	300	0	0	0	0	0	0	0	200	903	0	0	0	0	0	0	0	603	903	0
486	6	0	0	0	0	0	0	200	300	0	0	0	0	0	0	0	200	903	0	0	0	0	0	0	0	603	903	0
486	7	0	0	0	0	0	0	200	300	0	0	0	0	0	0	0	200	903	0	0	0	0	0	0	0	603	903	0
486	8	0	0	0	0	0	0	200	300	0	0	0	0	0	0	0	200	903	0	0	0	0	0	0	0	603	903	0
486	9	0	0	0	0	0	0	200	300	0	0	0	0	0	0	0	200	903	0	0	0	0	0	0	0	603	903	0
487	0	0	0	0	0	0	0	200	300	0	0	0	0	0	0	0	200	903	0	0	0	0	0	0	0	603	903	0
487	1	0	0	0	0	0	0	200	300	0	0	0	0	0	0	0	200	903	0	0	0	0	0	0	0	603	903	0
487	2	0	0	0	0	0	0	200	300	0	0	0	0	0	0	0	200	903	0	0	0	0	0	0	0	603	903	0
487	3	0	0	0	0	0	0	200	300	0	0	0	0	0	0	0	200	903	0	0	0	0	0	0	0	603	903	0
487	4	0	0	0	0	0	0	200	300	0	0	0	0	0	0	0	200	903	0	0	0	0	0	0	0	603	903	0
487	5	0	0	0	0	0	0	200	300	0	0	0	0	0	0	0	200	903	0	0	0	0	0	0	0	603	903	0
487	6	0	0	0	0	0	0	200	300	0	0	0	0	0	0	0	200	903	0	0	0	0	0	0	0	603	903	0
487	7	0	0	0	0	0	0	200	300	0	0	0	0	0	0	0	200	903	0	0	0	0	0	0	0	603	903	0
487	8	0	0	0	0	0	0	200	300	0	0	0	0	0	0	0	200	903	0	0	0	0	0	0	0	603	903	0
487	9	0	0	0	0	0	0	200	300	0	0	0	0	0	0	0	200	903	0	0	0	0	0	0	0	603	903	0
488	0	0	0	0	0	0	0	200	300	0	0	0	0	0	0	0	200	903	0	0	0	0	0	0	0	603	903	0
488	1	0	0	0	0	0	0	200	300	0	0	0	0	0	0	0	200	903	0	0	0	0	0	0	0	603	903	0
488	2	0	0	0	0	0	0	200	300	0	0	0	0	0	0	0	200	903	0	0	0	0	0	0	0	603	903	0
488	3	0	0	0	0	0	0	200	300	0	0	0	0	0	0	0	200	903	0	0	0	0	0	0	0	603	903	0
488	4	0	0	0	0	0	0	200	300	0	0	0	0	0	0	0	200	903	0	0	0	0	0	0	0	603	903	0
488	5	0	0	0	0	0	0	200	300	0	0	0	0	0	0	0	200	903	0	0	0	0	0	0	0	603	903	0
488	6	0	0	0	0	0	0	200	300	0	0	0	0	0	0	0	200	903	0	0	0	0	0	0	0	603	903	0
488	7	0	0	0	0	0	0	200	300	0	0	0	0	0	0	0	200	903	0	0	0	0	0	0	0	603	903	0
488	8	0	0	0	0	0	0	200	300	0	0	0	0	0	0	0	200	903	0	0	0	0	0	0	0	603	903	0
488	9	0	0	0	0	0	0	200	300	0	0	0	0	0	0	0	200	903	0	0	0	0	0	0	0	603	903	0
489	0	0	0	0	0	0	0	200	300	0	0	0	0	0	0	0	200	903	0	0	0	0	0	0	0	603	903	0
489	1	0	0	0	0	0	0	200	300	0	0	0	0	0	0	0	200	903	0	0	0	0	0	0	0	603	903	0
489	2	0	0	0	0	0	0	200	300	0	0	0	0	0	0	0	200	903	0	0	0	0	0	0	0	603	903	0
489	3	0	0	0	0	0	0	200	300	0	0	0	0	0	0	0	200	903	0	0	0	0	0	0	0	603	903	0
489	4	0	0	0	0	0	0	200	300	0	0	0	0	0	0	0	200	903	0	0	0	0	0	0	0	603	903	0
489	5	0	0	0	0	0	0	200	300	0	0	0	0	0	0	0	200	903	0	0	0	0	0	0	0	603	903	0
489	6	0	0	0	0	0	0	200	300	0	0	0	0	0	0	0	200	903	0	0	0	0	0	0	0	603	903	0
489	7	0	0	0	0	0	0	200	300	0	0	0	0	0	0	0	200	903	0	0	0	0	0	0	0	603	903	0
489	8	0	0	0	0	0	0	200	300	0	0	0	0	0	0	0	200	903	0	0	0	0	0	0	0	603	903	0
489	9	0	0	0	0	0	0	200	300	0	0	0	0	0	0	0	200	903	0	0	0	0	0	0	0	603	903	0
490	0	0	0	0	0	0	0	200	300	0	0	0	0	0	0	0	200	903	0	0	0	0	0	0	0	603	903	0
490	1	0	0	0	0	0	0	200	300	0	0	0	0	0	0	0	200	903	0	0	0	0	0	0	0	603	903	0
490	2	0	0	0	0	0	0	200	300	0	0	0	0	0	0	0	200	903	0	0	0	0	0	0	0	603	903	0
490	3	0	0	0	0	0	0	200	300	0	0	0	0	0	0	0	200	903	0	0	0	0	0	0	0	603	903	0
490	4	0	0	0	0	0	0	200	300	0	0	0	0	0	0	0	200	903	0	0	0	0	0	0	0	603	903	0
490	5	0	0	0	0	0	0	200	300	0	0	0	0	0	0	0	200	903	0	0	0	0	0	0	0	603	903	0
490	6	0	0	0	0	0	0	200	300	0	0	0	0	0	0	0	200	903	0	0	0	0	0	0	0	603	903	0
490	7	0	0	0	0	0	0	200	300	0	0	0	0	0	0	0	200	903	0	0	0	0	0	0	0	603	903	0
490	8	0	0	0	0	0	0	200	300	0	0	0	0	0	0	0	200	903	0	0	0	0	0	0	0	603	903	0
490	9	0	0	0	0	0	0	200	300	0	0	0	0	0	0	0	200	903	0	0	0	0	0	0	0	603	903	0
491	0	0	0	0	0	0	0	200	300	0	0	0	0	0	0	0	200	903	0	0	0	0	0	0	0	603	903	0
491	1	0	0	0	0	0	0	200	300	0	0	0	0	0	0	0	200	903	0	0	0	0	0	0	0	603	903	0
491	2	0	0	0	0	0	0	200	300	0	0	0	0	0	0	0	200	903	0	0	0	0	0	0	0	603	903	0
491	3	0	0	0	0	0	0	200	300	0	0	0	0	0	0	0	200	903	0	0	0	0	0	0	0	603	903	0
491	4	0	0	0	0	0	0	200	300	0	0	0	0	0	0	0	200	903	0	0	0	0	0	0	0	603	903	0
491	5	0	0	0	0	0	0	200	300	0	0	0	0	0	0	0	200	903	0	0	0	0	0	0	0	603	903	0
491	6	0	0	0	0	0	0	200	300	0	0	0	0	0	0	0	200	903	0	0	0	0	0	0	0	603	903	0
491	7	0	0	0	0	0	0	200	300	0	0	0	0	0	0	0	200	903	0	0	0	0	0	0	0	603	903	0
491	8	0	0	0	0	0	0	200	300	0	0	0	0	0	0	0	200	903	0	0	0	0	0	0	0	603	903	0
491	9	0	0	0	0	0	0	200	300	0	0	0	0	0	0	0	200	903	0	0	0	0	0	0	0	603	903	0
492	0	0	0	0	0	0	0	200	300	0	0	0	0	0	0	0	200	903	0	0	0	0	0	0	0	603	903	0
492	1	0	0	0	0	0	0	200	300	0	0	0	0	0	0	0	200	903	0	0	0	0	0	0	0	603	903	0
492	2	0	0	0	0	0	0	200	300	0	0	0	0	0	0	0	200	903	0	0	0	0	0	0	0	603	903	0
492	3	0	0	0	0	0	0	200	300	0	0	0	0	0	0	0	200	903	0	0	0	0	0	0	0	603	903	0
492	4	0	0	0	0	0	0	200	300	0	0	0	0	0	0	0	200	903	0	0	0	0	0	0	0	603	903	0
492	5	0	0	0	0	0	0	200	300	0	0	0	0	0	0	0	200	903	0	0	0	0	0	0	0	603	903	0
492	6	0	0	0	0	0	0	200	300	0	0	0	0	0	0	0	200	903	0	0	0	0	0	0	0	603	903	0
492	7	0	0	0	0	0	0	200	300	0	0	0	0	0	0	0	200	903	0	0	0	0	0	0	0	603	903	0
492	8	0	0	0	0	0	0	200	300	0	0	0	0	0	0	0	200	903	0	0	0	0	0	0	0	603	903	0
492	9	0	0	0	0	0	0	200	300	0	0	0	0	0	0	0	200	903	0	0	0	0	0	0	0	603	903	0
493	0	0	0	0	0	0	0	200	300	0	0	0	0	0	0	0	200	903	0	0	0	0	0	0	0	603	903	0
493	1	0	0	0	0	0	0	200	300	0	0	0	0	0	0	0	200	903	0	0	0	0	0	0	0	603	903	0
493	2	0	0	0	0	0	0	200	300	0	0	0	0	0	0	0	200	903	0	0	0	0	0	0	0	603	903	0
493	3	0	0	0	0	0	0	200	300	0	0	0	0	0	0	0	200	903	0	0	0	0	0	0	0	603	903	0
493	4	0	0	0	0	0	0	200	300	0	0	0	0	0	0	0	200	903	0	0	0	0	0	0	0	603	903	0
493	5	0	0	0	0	0	0	200	300	0	0	0	0	0	0	0	200	903	0	0	0	0	0	0	0	603	903	0
493	6	0	0	0	0	0	0	200	300	0	0	0	0	0	0	0	200	903	0	0	0	0	0	0	0	603	903	0
493	7	0	0	0	0	0	0	200	300	0	0	0	0	0	0	0	200	903	0	0	0	0	0	0	0	603	903	0
493	8	0	0	0	0	0	0	200	300	0	0	0	0	0	0	0	200	903	0	0	0	0	0	0	0	603	903	0
493	9	0	0	0	0	0	0	200	300	0	0	0	0	0	0	0	200	903	0	0	0	0	0	0	0	603	903	0
494	0	0	0	0	0	0	0	200	300	0	0	0	0	0	0	0	200	903	0	0	0	0	0	0	0	603	903	0
494	1	0	0	0	0	0	0	200	300	0	0	0	0	0	0	0	200	903	0	0	0	0	0	0	0	603	903	0
494	2	0	0	0	0	0	0	200	300	0	0	0	0	0	0	0	200	903	0	0	0	0	0	0	0	603	903	0
494	3	0	0	0	0	0	0	200	300	0	0	0	0	0	0	0	200	903	0	0	0	0	0	0	0	603	903	0
494	4	0	0	0	0	0	0	200	300	0	0	0	0	0	0	0	200	903	0	0	0	0	0	0	0	603	903	0
494	5	0	0	0	0	0	0	200	300	0	0	0	0	0	0	0	200	903	0	0	0	0	0	0	0	603	903	0
494	6	0	0	0	0	0	0	200	300	0	0	0	0	0	0	0	200	903	0	0	0	0	0	0	0	603	903	0
494	7	0	0	0	0	0	0	200	300	0	0	0	0	0	0	0	200	903	0	0	0	0	0	0	0	603	903	0
494	8	0	0	0	0	0	0	200	300	0	0	0	0	0	0	0	200	903	0	0	0	0	0	0	0	603	903	0
494	9	0	0	0	0	0	0	200	300	0	0	0	0	0	0	0	200	903	0	0	0	0	0	0	0	603	903	0
495	0	0	0	0	0	0	0	200	300	0	0	0	0	0	0	0	200	903	0	0	0	0	0	0	0	603	903	0
495	1	0	0	0	0	0	0	200	300	0	0	0	0	0	0	0	200	903	0	0	0	0	0	0	0	603	903	0
495	2	0	0	0	0	0	0	200	300	0	0	0	0	0	0	0	200	903	0	0	0	0	0	0	0	603	903	0
495	3	0	0	0	0	0	0	200	300	0	0	0	0	0	0	0	200	903	0	0	0	0	0	0	0	603	903	0
495	4	0	0	0	0	0	0	200	300	0	0	0	0	0	0	0	200	903	0	0	0	0	0	0	0	603	903	0
495	5	0	0	0	0	0	0	200	300	0	0	0	0	0	0	0	200	903	0	0	0	0	0	0	0	603	903	0
495	6	0	0	0	0	0	0	200	300	0	0	0	0	0	0	0	200	903	0	0	0	0	0	0	0	603	903	0
495	7	0	0	0	0	0	0	200	300	0	0	0	0	0	0	0	200	903	0	0	0	0	0	0	0	603	903	0
495	8	0	0	0	0	0	0	200	300	0	0	0	0	0	0	0	200	903	0	0	0	0	0	0	0	603	903	0
495	9	0	0	0	0	0	0	200	300	0	0	0	0	0	0	0	200	903	0	0	0	0	0	0	0	603	903	0
496	0	0	0	0	0	0	0	200	300	0	0	0	0	0	0	0	200	903	0	0	0	0	0	0	0	603	903	0
496	1	0	0	0	0	0	0	200	300	0	0	0	0	0	0	0	200	903	0	0	0	0	0	0	0	603	903	0
496	2	0	0	0	0	0	0	200	300	0	0	0	0	0	0	0	200	903	0	0	0	0	0	0	0	603	903	0
496	3	0	0	0	0	0	0	200	300	0	0	0	0	0	0	0	200	903	0	0	0	0	0	0	0	603	903	0
496	4	0	0	0	0	0	0	200	300	0	0	0	0	0	0	0	200	903	0	0	0	0	0	0	0	603	903	0
496	5	0	0	0	0	0	0	200	300	0	0	0	0	0	0	0	200	903	0	0	0	0	0	0	0	603	903	0
496	6	0	0	0	0	0	0	200	300	0	0	0	0	0	0	0	200	903	0	0	0	0	0	0	0	603	903	0
496	7	0	0	0	0	0	0	200	300	0	0	0	0	0	0	0	200	903	0	0	0	0	0	0	0	603	903	0
496	8	0	0	0	0	0	0	200	300	0	0	0	0	0	0	0	200	903	0	0	0	0	0	0	0	603	903	0
496	9	0	0	0	0	0	0	200	300	0	0	0	0	0	0	0	200	903	0	0	0	0	0	0	0	603	903	0
497	0	0	0	0	0	0	0	200	300	0	0	0	0	0	0	0	200	903	0	0	0	0	0	0	0	603	903	0
497	1	0	0	0	0	0	0	200	300	0	0	0	0	0	0	0	200	903	0	0	0	0	0	0	0	603	903	0
497	2	0	0	0	0	0	0	200	300	0	0	0	0	0	0	0	200	903	0	0	0	0	0	0	0	603	903	0
497	3	0	0	0	0	0	0	200	300	0	0	0	0	0	0	0	200	903	0	0	0	0	0	0	0	603	903	0
497	4	0	0	0	0	0	0	200	300	0	0	0	0	0	0	0	200	903	0	0	0	0	0	0	0	603	903	0
497	5	0	0	0	0	0	0	200	300	0	0	0	0	0	0	0	200	903	0	0	0	0	0	0	0	603	903	0
497	6	0	0	0	0	0	0	200	300	0	0	0	0	0	0	0	200	903	0	0	0	0	0	0	0	603	903	0
497	7	0	0	0	0	0	0	200	300	0	0	0	0	0	0	0	200	903	0	0	0	0	0	0	0	603	903	0
497	8	0	0	0	0	0	0	200	300	0	0	0	0	0	0	0	200	903	0	0	0	0	0	0	0	603	903	0
497	9	0	0	0	0	0	0	200	300	0	0	0	0	0	0	0	200	903	0	0	0	0	0	0	0	603	903	0
498	0	0	0	0	0	0	0	200	300	0	0	0	0	0	0	0	200	903	0	0	0	0	0	0	0	603	903	0
498	1	0	0	0	0	0	0	200	300	0	0	0	0	0	0	0	200	903	0	0	0	0	0	0	0	603	903	0
498	2	0	0	0	0	0	0	200	300	0	0	0	0	0	0	0	200	903	0	0	0	0	0	0	0	603	903	0
498	3	0	0	0	0	0	0	200	300	0	0	0	0	0	0	0	200	903	0	0	0	0	0	0	0	603	903	0
498	4	0	0	0	0	0	0	200	300	0	0	0	0	0	0	0	200	903	0	0	0	0	0	0	0	603	903	0
498	5	0	0	0	0	0	0	200	300	0	0	0	0	0	0	0	200	903	0	0	0	0	0	0	0	603	903	0
498	6	0	0	0	0	0	0	200	300	0	0	0	0	0	0	0	200	903	0	0	0	0	0	0	0	603	903	0
498	7	0	0	0	0	0	0	200	300	0	0	0	0	0	0	0	200	903	0	0	0	0	0	0	0	603	903	0
498	8	0	0	0	0	0	0	200	300	0	0	0	0	0	0	0	200	903	0	0	0	0	0	0	0	603	903	0
498	9	0	0	0	0	0	0	200	300	0	0	0	0	0	0	0	200	903	0	0	0	0	0	0	0	603	903	0
499	0	0	0	0	0	0	0	200	300	0	0	0	0	0	0	0	200	903	0	0	0	0	0	0	0	603	903	0
499	1	0	0	0	0	0	0	200	300	0	0	0	0	0	0	0	200	903	0	0	0	0	0	0	0	603	903	0
499	2	0	0	0	0	0	0	200	300	0	0	0	0	0	0	0	200	903	0	0	0	0	0	0	0	603	903	0
499	3	0	0	0	0	0	0	200	300	0	0	0	0	0	0	0	200	903	0	0	0	0	0	0	0	603	903	0
499	4	0	0	0	0	0	0	200	300	0	0	0	0	0	0	0	200	903	0	0	0	0	0	0	0	603	903	0
499	5	0	0	0	0	0	0	200	300	0	0	0	0	0	0	0	200	903	0	0	0	0	0	0	0	603	903	0
499	6	0	0	0	0	0	0	200	300	0	0	0	0	0	0	0	200	903	0	0	0	0	0	0	0	603	903	0
499	7	0	0	0	0	0	0	200	300	0	0	0	0	0	0	0	200	903	0	0	0	0	0	0	0	603	903	0
499	8	0	0	0	0	0	0	200	300	0	0	0	0	0	0	0	200	903	0	0	0	0	0	0	0	603	903	0
499	9	0	0	0	0	0	0	200	300	0	0	0	0	0	0	0	200	903	0	0	0	0	0	0	0	603	903	0
500	0	0	0	0	0	0	0	200	300	0	0	0	0	0	0	0	200	903	0	0	0	0	0	0	0	603	903	0
500	1	0	0	0	0	0	0	200	300	0	0	0	0	0	0	0	200	903	0	0	0	0	0	0	0	603	903	0
500	2	0	0	0	0	0	0	200	300	0	0	0	0	0	0	0	200	903	0	0	0	0	0	0	0	603	903	0
500	3	0	0	0	0	0	0	200	300	0	0	0	0	0	0	0	200	903	0	0	0	0	0	0	0	603	903	0
500	4	0	0	0	0	0	0	200	300	0	0	0	0	0	0	0	200	903	0	0	0	0	0	0	0	603	903	0
500	5	0	0	0	0	0	0	200	300	0	0	0	0	0	0	0	200	903	0	0	0	0	0	0	0	603	903	0
500	6	0	0	0	0	0	0	200	300	0	0	0	0	0	0	0	200	903	0	0	0	0	0	0	0	603	903	0
500	7	0	0	0	0	0	0	200	300	0	0	0	0	0	0	0	200	903	0	0	0	0	0	0	0	603	903	0
500	8	0	0	0	0	0	0	200	300	0	0	0	0	0	0	0	200	903	0	0	0	0	0	0	0	603	903	0
500	9	0	0	0	0	0	0	200	300	0	0	0	0	0	0	0	200	903	0	0	0	0	0	0	0	603	903	0
501	0	0	0	0	0	0	0	200	300	0	0	0	0	0	0	0	200	903	0	0	0	0	0	0	0	603	903	0
501	1	0	0	0	0	0	0	200	300	0	0	0	0	0	0	0	200	903	0	0	0	0	0	0	0	603	903	0
501	2	0	0	0	0	0	0	200	300	0	0	0	0	0	0	0	200	903	0	0	0	0	0	0	0	603	903	0
501	3	0	0	0	0	0	0	200	300	0	0	0	0	0	0	0	200	903	0	0	0	0	0	0	0	603	903	0
501	4	0	0	0	0	0	0	200	300	0	0	0	0	0	0	0	200	903	0	0	0	0	0	0	0	603	903	0
501	5	0	0	0	0	0	0	200	300	0	0	0	0	0	0	0	200	903	0	0	0	0	0	0	0	603	903	0
501	6	0	0	0	0	0	0	200	300	0	0	0	0	0	0	0	200	903	0	0	0	0	0	0	0	603	903	0
501	7	0	0	0	0	0	0	200	300	0	0	0	0	0	0	0	200	903	0	0	0	0	0	0	0	603	903	0
501	8	0	0	0	0	0	0	200	300	0	0	0	0	0	0	0	200	903	0	0	0	0	0	0	0	603	903	0
501	9	0	0	0	0	0	0	200	300	0	0	0	0	0	0	0	200	903	0	0	0	0	0	0	0	603	903	0
502	0	0	0	0	0	0	0	200	300	0	0	0	0	0	0	0	200	903	0	0	0	0	0	0	0	603	903	0
502	1	0	0	0	0	0	0	200	300	0	0	0	0	0	0	0	200	903	0	0	0	0	0	0	0	603	903	0
502	2	0	0	0	0	0	0	200	300	0	0	0	0	0	0	0	200	903	0	0	0	0	0	0	0	603	903	0
502	3	0	0	0	0	0	0	200	300	0	0	0	0	0	0	0	200	903	0	0	0	0	0	0	0	603	903	0
502	4	0	0	0	0	0	0	200	300	0	0	0	0	0	0	0	200	903	0	0	0	0	0	0	0	603	903	0
502	5	0	0	0	0	0	0	200	300	0	0	0	0	0	0	0	200	903	0	0	0	0	0	0	0	603	903	0
502	6	0	0	0	0	0	0	200	300	0	0	0	0	0	0	0	200	903	0	0	0	0	0	0	0	603	903	0
502	7	0	0	0	0	0	0	200	300	0	0	0	0	0	0	0	200	903	0	0	0	0	0	0	0	603	903	0
502	8	0	0	0	0	0	0	200	300	0	0	0	0	0	0	0	200	903	0	0	0	0	0	0	0	603	903	0
502	9	0	0	0	0	0	0	200	300	0	0	0	0	0	0	0	200	903	0	0	0	0	0	0	0	603	903	0
503	0	0	0	0	0	0	0	200	300	0	0	0	0	0	0	0	200	903	0	0	0	0	0	0	0	603	903	0
503	1	0	0	0	0	0	0	200	300	0	0	0	0	0	0	0	200	903	0	0	0	0	0	0	0	603	903	0
503	2	0	0	0	0	0	0	200	300	0	0	0	0	0	0	0	200	903	0	0	0	0	0	0	0	603	903	0
503	3	0	0	0	0	0	0	200	300	0	0	0	0	0	0	0	200	903	0	0	0	0	0	0	0	603	903	0
503	4	0	0	0	0	0	0	200	300	0	0	0	0	0	0	0	200	903	0	0	0	0	0	0	0	603	903	0
503	5	0	0	0	0	0	0	200	300	0	0	0	0	0	0	0	200	903	0	0	0	0	0	0	0	603	903	0
503	6	0	0	0	0	0	0	200	300	0	0	0	0	0	0	0	200	903	0	0	0	0	0	0	0	603	903	0
503	7	0	0	0	0	0	0	200	300	0	0	0	0	0	0	0	200	903	0	0	0	0	0	0	0	603	903	0
503	8	0	0	0	0	0	0	200	300	0	0	0	0	0	0	0	200	903	0	0	0	0	0	0	0	603	903	0
503	9	0	0	0	0	0	0	200	300	0	0	0	0	0	0	0	200	903	0	0	0	0	0	0	0	603	903	0
504	0	0	0	0	0	0	0	200	300	0	0	0	0	0	0	0	200	903	0	0	0	0	0	0	0	603	903	0
504	1	0	0	0	0	0	0	200	300	0	0	0	0	0	0	0	200	903	0	0	0	0	0	0	0	603	903	0
504	2	0	0	0	0	0	0	200	300	0	0	0	0	0	0	0	200	903	0	0	0	0	0	0	0	603	903	0
504	3	0	0	0	0	0	0	200	300	0	0	0	0	0	0	0	200	903	0	0	0	0	0	0	0	603	903	0
504	4	0	0	0	0	0	0	200	300	0	0	0	0	0	0	0	200	903	0	0	0	0	0	0	0	603	903	0
504	5	0	0	0	0	0	0	200	300	0	0	0	0	0	0	0	200	903	0	0	0	0	0	0	0	603	903	0
504	6	0	0	0	0	0	0	200	300	0	0	0	0	0	0	0	200	903	0	0	0	0	0	0	0	603	903	0
504	7	0	0	0	0	0	0	200	300	0	0	0	0	0	0	0	200	903	0	0	0	0	0	0	0	603	903	0
504	8	0	0	0	0	0	0	200	300	0	0	0	0	0	0	0	200	903	0	0	0	0	0	0	0	603	903	0
504	9	0	0	0	0	0	0	200	300	0	0	0	0	0	0	0	200	903	0	0	0	0	0	0	0	603	903	0
505	0	0	0	0	0	0	0	200	300	0	0	0	0	0	0	0	200	903	0	0	0	0	0	0	0	603	903	0
505	1	0	0	0	0	0	0	200	300	0	0	0	0	0	0	0	200	903	0	0	0	0	0	0	0	603	903	0
505	2	0	0	0	0	0	0	200	300	0	0	0	0	0	0	0	200	903	0	0	0	0	0	0	0	603	903	0
505	3	0	0	0	0	0	0	200	300	0	0	0	0	0	0	0	200	903	0	0	0	0	0	0	0	603	903	0
505	4	0	0	0	0	0	0	200	300	0	0	0	0	0	0	0	200	903	0	0	0	0	0	0	0	603	903	0
505	5	0	0	0	0	0	0	200	300	0	0	0	0	0	0	0	200	903	0	0	0	0	0	0	0	603	903	0
505	6	0	0	0	0	0	0	200	300	0	0	0	0	0	0	0	200	903	0	0	0	0	0	0	0	603	903	0
505	7	0	0	0	0	0	0	200	300	0	0	0	0	0	0	0	200	903	0	0	0	0	0	0	0	603	903	0
505	8	0	0	0	0	0	0	200	300	0	0	0	0	0	0	0	200	903	0	0	0	0	0	0	0	603	903	0
505	9	0	0	0	0	0	0	200	300	0	0	0	0	0	0	0	200	903	0	0	0	0	0	0	0	603	903	0
506	0	0	0	0	0	0	0	200	300	0	0	0	0	0	0	0	200	903	0	0	0	0	0	0	0	603	903	0
506	1	0	0	0	0	0	0	200	300	0	0	0	0	0	0	0	200	903	0	0	0	0	0	0	0	603	903	0
506	2	0	0	0	0	0	0	200	300	0	0	0	0	0	0	0	200	903	0	0	0	0	0	0	0	603	903	0
506	3	0	0	0	0	0	0	200	300	0	0	0	0	0	0	0	200	903	0	0	0	0	0	0	0	603	903	0
506	4	0	0	0	0	0	0	200	300	0	0	0	0	0	0	0	200	903	0	0	0	0	0	0	0	603	903	0
506	5	0	0	0	0	0	0	200	300	0	0	0	0	0	0	0	200	903	0	0	0	0	0	0	0	603	903	0
506	6	0	0	0	0	0	0	200	300	0	0	0	0	0	0	0	200	903	0	0	0	0	0	0	0	603	903	0
506	7	0	0	0	0	0	0	200	300	0	0	0	0	0	0	0	200	903	0	0	0	0	0	0	0	603	903	0
506	8	0	0	0	0	0	0	200	300	0	0	0	0	0	0	0	200	903	0	0	0	0	0	0	0	603	903	0
506	9	0	0	0	0	0	0	200	300	0	0	0	0	0	0	0	200	903	0	0	0	0	0	0	0	603	903	0
507	0	0	0	0	0	0	0	200	300	0	0	0	0	0	0	0	200	903	0	0	0	0	0	0	0	603	903	0
507	1	0	0	0	0	0	0	200	300	0	0	0	0	0	0	0	200	903	0	0	0	0	0	0	0	603	903	0
507	2	0	0	0	0	0	0	200	300	0	0	0	0	0	0	0	200	903	0	0	0	0	0	0	0	603	903	0
507	3	0	0	0	0	0	0	200	300	0	0	0	0	0	0	0	200	903	0	0	0	0	0	0	0	603	903	0
507	4	0	0	0	0	0	0	200	300	0	0	0	0	0	0	0	200	903	0	0	0	0	0	0	0	603	903	0
507	5	0	0	0	0	0	0	200	300	0	0	0	0	0	0	0	200	903	0	0	0	0	0	0	0	603	903	0
507	6	0	0	0	0	0	0	200	300	0	0	0	0	0	0	0	200	903	0	0	0	0	0	0	0	603	903	0
507	7	0	0	0	0	0	0	200	300	0	0	0	0	0	0	0	200	903	0	0	0	0	0	0	0	603	903	0
507	8	0	0	0	0	0	0	200	300	0	0	0	0	0	0	0	200	903	0	0	0	0	0	0	0	603	903	0
507	9	0	0	0	0	0	0	200	300	0	0	0	0	0	0	0	200	903	0	0	0	0	0	0	0	603	903	0
508	0	0	0	0	0	0	0	200	300	0	0	0	0	0	0	0	200	903	0	0	0	0	0	0	0	603	903	0
508	1	0	0	0	0	0	0	200	300	0	0	0	0	0	0	0	200	903	0	0	0	0	0	0	0	603	903	0
508	2	0	0	0	0	0	0	200	300	0	0	0	0	0	0	0	200	903	0	0	0	0	0	0	0	603	903	0
508	3	0	0	0	0	0	0	200	300	0	0	0	0	0	0	0	200	903	0	0	0	0	0	0	0	603	903	0
508	4	0	0	0	0	0	0	200	300	0	0	0	0	0	0	0	200	903	0	0	0	0	0	0	0	603	903	0
508	5	0	0	0	0	0	0	200	300	0	0	0	0	0	0	0	200	903	0	0	0	0	0	0	0	603	903	0
508	6	0	0	0	0	0	0	200	300	0	0	0	0	0	0	0	200	903	0	0	0	0	0	0	0	603	903	0
508	7	0	0	0	0	0	0	200	300	0	0	0	0	0	0	0	200	903	0	0	0	0	0	0	0	603	903	0
508	8	0	0	0	0	0	0	200	300	0	0	0	0	0	0	0	200	903	0	0	0	0	0	0	0	603	903	0
508	9	0	0	0	0	0	0	200	300	0	0	0	0	0	0	0	200	903	0	0	0	0	0	0	0	603	903	0
509	0	0	0	0	0	0	0	200	300	0	0	0	0	0	0	0	200	903	0	0	0	0	0	0	0	603	903	0
509	1	0	0	0	0	0	0	200	300	0	0	0	0	0	0	0	200	903	0	0	0	0	0	0	0	603	903	0
509	2	0	0	0	0	0	0	200	300	0	0	0	0	0	0	0	200	903	0	0	0	0	0	0	0	603	903	0
509	3	0	0	0	0	0	0	200	300	0	0	0	0	0	0	0	200	903	0	0	0	0	0	0	0	603	903	0
509	4	0	0	0	0	0	0	200	300	0	0	0	0	0	0	0	200	903	0	0	0	0	0	0	0	603	903	0
509	5	0	0	0	0	0	0	200	300	0	0	0	0	0	0	0	200	903	0	0	0	0	0	0	0	603	903	0
509	6	0	0	0	0	0	0	200	300	0	0	0	0	0	0	0	200	903	0	0	0	0	0	0	0	603	903	0
509	7	0	0	0	0	0	0	200	300	0	0	0	0	0	0	0	200	903	0	0	0	0	0	0	0	603	903	0
509	8	0	0	0	0	0	0	200	300	0	0	0	0	0	0	0	200	903	0	0	0	0	0	0	0	603	903	0
509	9	0	0	0	0	0	0	200	300	0	0	0	0	0	0	0	200	903	0	0	0	0	0	0	0	603	903	0
510	0	0	0	0	0	0	0	200	300	0	0	0	0	0	0	0	200	903	0	0	0	0	0	0	0	603	903	0
510	1	0	0	0	0	0	0	200	300	0	0	0	0	0	0	0	200	903	0	0	0	0	0	0	0	603	903	0
510	2	0	0	0	0	0	0	200	300	0	0	0	0	0	0	0	200	903	0	0	0	0	0	0	0	603	903	0
510	3	0	0	0	0	0	0	200	300	0	0	0	0	0	0	0	200	903	0	0	0	0	0	0	0	603	903	0
510	4	0	0	0	0	0	0	200	300	0	0	0	0	0	0	0	200	903	0	0	0	0	0	0	0	603	903	0
510	5	0	0	0	0	0	0	200	300	0	0	0	0	0	0	0	200	903	0	0	0	0	0	0	0	603	903	0
510	6	0	0	0	0	0	0	200	300	0	0	0	0	0	0	0	200	903	0	0	0	0	0	0	0	603	903	0
510	7	0	0	0	0	0	0	200	300	0	0	0	0	0	0	0	200	903	0	0	0	0	0	0	0	603	903	0
510	8	0	0	0	0	0	0	200	300	0	0	0	0	0	0	0	200	903	0	0	0	0	0	0	0	603	903	0
510	9	0	0	0	0	0	0	200	300	0	0	0	0	0	0	0	200	903	0	0	0	0	0	0	0	603	903	0
511	0	0	0	0	0	0	0	200	300	0	0	0	0	0	0	0	200	903	0	0	0	0	0	0	0	603	903	0
511	1	0	0	0	0	0	0	200	300	0	0	0	0	0	0	0	200	903	0	0	0	0	0	0	0	603	903	0
511	2	0	0	0	0	0	0	200	300	0	0	0	0	0	0	0	200	903	0	0	0	0	0	0	0	603	903	0
511	3	0	0	0	0	0	0	200	300	0	0	0	0	0	0	0	200	903	0	0	0	0	0	0	0	603	903	0
511	4	0	0	0	0	0	0	200	300	0	0	0	0	0	0	0	200	903	0	0	0	0	0	0	0	603	903	0
511	5	0	0	0	0	0	0	200	300	0	0	0	0	0	0	0	200	903	0	0	0	0	0	0	0	603	903	0
511	6	0	0	0	0	0	0	200	300	0	0	0	0	0	0	0	200	903	0	0	0	0	0	0	0	603	903	0
511	7	0	0	0	0	0	0	200	300	0	0	0	0	0	0	0	200	903	0	0	0	0	0	0	0	603	903	0
511	8	0	0	0	0	0	0	200	300	0	0	0	0	0	0	0	200	903	0	0	0	0	0	0	0	603	903	0
511	9	0	0	0	0	0	0	200	300	0	0	0	0	0	0	0	200	903	0	0	0	0	0	0	0	603	903	0
512	0	0	0	0	0	0	0	200	300	0	0	0	0	0	0	0	200	903	0	0	0	0	0	0	0	603	903	0
512	1	0	0	0	0	0	0	200	300	0	0	0	0	0	0	0	200	903	0	0	0	0	0	0	0	603	903	0
512	2	0	0	0	0	0	0	200	300	0	0	0	0	0	0	0	200	903	0	0	0	0	0	0	0	603	903	0
512	3	0	0	0	0	0	0	200	300	0	0	0	0	0	0	0	200	903	0	0	0	0	0	0	0	603	903	0
512	4	0	0	0	0	0	0	200	300	0	0	0	0	0	0	0	200	903	0	0	0	0	0	0	0	603	903	0
512	5	0	0	0	0	0	0	200	300	0	0	0	0	0	0	0	200	903	0	0	0	0	0	0	0	603	903	0
512	6	0	0	0	0	0	0	200	300	0	0	0	0	0	0	0	200	903	0	0	0	0	0	0	0	603	903	0
512	7	0	0	0	0	0	0	200	300	0	0	0	0	0	0	0	200	903	0	0	0	0	0	0	0	603	903	0
512	8	0	0	0	0	0	0	200	300	0	0	0	0	0	0	0	200	903	0	0	0	0	0	0	0	603	903	0
512	9	0	0	0	0	0	0	200	300	0	0	0	0	0	0	0	200	903	0	0	0	0	0	0	0	603	903	0
513	0	0	0	0	0	0	0	200	300	0	0	0	0	0	0	0	200	903	0	0	0	0	0	0	0	603	903	0
513	1	0	0	0	0	0	0	200	300	0	0	0	0	0	0	0	200	903	0	0	0	0	0	0	0	603	903	0
513	2	0	0	0	0	0	0	200	300	0	0	0	0	0	0	0	200	903	0	0	0	0	0	0	0	603	903	0
513	3	0	0	0	0	0	0	200	300	0	0	0	0	0	0	0	200	903	0	0	0	0	0	0	0	603	903	0
513	4	0	0	0	0	0	0	200	300	0	0	0	0	0	0	0	200	903	0	0	0	0	0	0	0	603	903	0
513	5	0	0	0	0	0	0	200	300	0	0	0	0	0	0	0	200	903	0	0	0	0	0	0	0	603	903	0
513	6	0	0	0	0	0	0	200	300	0	0	0	0	0	0	0	200	903	0	0	0	0	0	0	0	603	903	0
513	7	0	0	0	0	0	0	200	300	0	0	0	0	0	0	0	200	903	0	0	0	0	0	0	0	603	903	0
513	8	0	0	0	0	0	0	200	300	0	0	0	0	0	0	0	200	903	0	0	0	0	0	0	0	603	903	0
513	9	0	0	0	0	0	0	200	300	0	0	0	0	0	0	0	200	903	0	0	0	0	0	0	0	603	903	0
514	0	0	0	0	0	0	0	200	300	0	0	0	0	0	0	0	200	903	0	0	0	0	0	0	0	603	903	0
514	1	0	0	0	0	0	0	200	300	0	0	0	0	0	0	0	200	903	0	0	0	0	0	0	0	603	903	0
514	2	0	0	0	0	0	0	200	300	0	0	0	0	0	0	0	200	903	0	0	0	0	0	0	0	603	903	0
514	3	0	0	0	0	0	0	200	300	0	0	0	0	0	0	0	200	903	0	0	0	0	0	0	0	603	903	0
514	4	0	0	0	0	0	0	200	300	0	0	0	0	0	0	0	200	903	0	0	0	0	0	0	0	603	903	0
514	5	0	0	0	0	0	0	200	300	0	0	0	0	0	0	0	200	903	0	0	0	0	0	0	0	603	903	0
514	6	0	0	0	0	0	0	200	300	0	0	0	0	0	0	0	200	903	0	0	0	0	0	0	0	603	903	0
514	7	0	0	0	0	0	0	200	300	0	0	0	0	0	0	0	200	903	0	0	0	0	0	0	0	603	903	0
514	8	0	0	0	0	0	0	200	300	0	0	0	0	0	0	0	200	903	0	0	0	0	0	0	0	603	903	0
514	9	0	0	0	0	0	0	200	300	0	0	0	0	0	0	0	200	903	0	0	0	0	0	0	0	603	903	0
515	0	0	0	0	0	0	0	200	300	0	0	0	0	0	0	0	200	903	0	0	0	0	0	0	0	603	903	0
515	1	0	0	0	0	0	0	200	300	0	0	0	0	0	0	0	200	903	0	0	0	0	0	0	0	603	903	0
515	2	0	0	0	0	0	0	200	300	0	0	0	0	0	0	0	200	903	0	0	0	0	0	0	0	603	903	0
515	3	0	0	0	0	0	0	200	300	0	0	0	0	0	0	0	200	903	0	0	0	0	0	0	0	603	903	0
515	4	0	0	0	0	0	0	200	300	0	0	0	0	0	0	0	200	903	0	0	0	0	0	0	0	603	903	0
515	5	0	0	0	0	0	0	200	300	0	0	0	0	0	0	0	200	903	0	0	0	0	0	0	0	603	903	0
515	6	0	0	0	0	0	0	200	300	0	0	0	0	0	0	0	200	903	0	0	0	0	0	0	0	603	903	0
515	7	0	0	0	0	0	0	200	300	0	0	0	0	0	0	0	200	903	0	0	0	0	0	0	0	603	903	0
515	8	0	0	0	0	0	0	200	300	0	0	0	0	0	0	0	200	903	0	0	0	0	0	0	0	603	903	0
515	9	0	0	0	0	0	0	200	300	0	0	0	0	0	0	0	200	903	0	0	0	0	0	0	0	603	903	0
516	0	0	0	0	0	0	0	200	300	0	0	0	0	0	0	0	200	903	0	0	0	0	0	0	0	603	903	0
516	1	0	0	0	0	0	0	200	300	0	0	0	0	0	0	0	200	903	0	0	0	0	0	0	0	603	903	0
516	2	0	0	0	0	0	0	200	300	0	0	0	0	0	0	0	200	903	0	0	0	0	0	0	0	603	903	0
516	3	0	0	0	0	0	0	200	300	0	0	0	0	0	0	0	200	903	0	0	0	0	0	0	0	603	903	0
516	4	0	0	0	0	0	0	200	300	0	0	0	0	0	0	0	200	903	0	0	0	0	0	0	0	603	903	0
516	5	0	0	0	0	0	0	200	300	0	0	0	0	0	0	0	200	903	0	0	0	0	0	0	0	603	903	0
516	6	0	0	0	0	0	0	200	300	0	0	0	0	0	0	0	200	903	0	0	0	0	0	0	0	603	903	0
516	7	0	0	0	0	0	0	200	300	0	0	0	0	0	0	0	200	903	0	0	0	0	0	0	0	603	903	0
516	8	0	0	0	0	0	0	200	300	0	0	0	0	0	0	0	200	903	0	0	0	0	0	0	0	603	903	0
516	9	0	0	0	0	0	0	200	300	0	0	0	0	0	0	0	200	903	0	0	0	0	0	0	0	603	903	0
517	0	0	0	0	0	0	0	200	300	0	0	0	0	0	0	0	200	903	0	0	0	0	0	0	0	603	903	0
517	1	0	0	0	0	0	0	200	300	0	0	0	0	0	0	0	200	903	0	0	0	0	0	0	0	603	903	0
517	2	0	0	0	0	0	0	200	300	0	0	0	0	0	0	0	200	903	0	0	0	0	0	0	0	603	903	0
517	3	0	0	0	0	0	0	200	300	0	0	0	0	0	0	0	200	903	0	0	0	0	0	0	0	603	903	0
517	4	0	0	0	0	0	0	200	300	0	0	0	0	0	0	0	200	903	0	0	0	0	0	0	0	603	903	0
517	5	0	0	0	0	0	0	200	300	0	0	0	0	0	0	0	200	903	0	0	0	0	0	0	0	603	903	0
517	6	0	0	0	0	0	0	200	300	0	0	0	0	0	0	0	200	903	0	0	0	0	0	0	0	603	903	0
517	7	0	0	0	0	0	0	200	300	0	0	0	0	0	0	0	200	903	0	0	0	0	0	0	0	603	903	0
517	8	0	0	0	0	0	0	200	300	0	0	0	0	0	0	0	200	903	0	0	0	0	0	0	0	603	903	0
517	9	0	0	0	0	0	0	200	300	0	0	0	0	0	0	0	200	903	0	0	0	0	0	0	0	603	903	0
518	0	0	0	0	0	0	0	200	300	0	0	0	0	0	0	0	200	903	0	0	0	0	0	0	0	603	903	0
518	1	0	0	0	0	0	0	200	300	0	0	0	0	0	0	0	200	903	0	0	0	0	0	0	0	603	903	0
518	2	0	0	0	0	0	0	200	300	0	0	0	0	0	0	0	200	903	0	0	0	0	0	0	0	603	903	0
518	3	0	0	0	0	0	0	200	300	0	0	0	0	0	0	0	200	903	0	0	0	0	0	0	0	603	903	0
518	4	0	0	0	0	0	0	200	300	0	0	0	0	0	0	0	200	903	0	0	0	0	0	0	0	603	903	0
518	5	0	0	0	0	0	0	200	300	0	0	0	0	0	0	0	200	903	0	0	0	0	0	0	0	603	903	0
518	6	0	0	0	0	0	0	200	300	0	0	0	0	0	0	0	200	903	0	0	0	0	0	0	0	603	903	0
518	7	0	0	0	0	0	0	200	300	0	0	0	0	0	0	0	200	903	0	0	0	0	0	0	0	603	903	0
518	8	0	0	0	0	0	0	200	300	0	0	0	0	0	0	0	200	903	0	0	0	0	0	0	0	603	903	0
518	9	0	0	0	0	0	0	200	300	0	0	0	0	0	0	0	200	903	0	0	0	0	0	0	0	603	903	0
519	0	0	0	0	0	0	0	200	300	0	0	0	0	0	0	0	200	903	0	0	0	0	0	0	0	603	903	0
519	1	0	0	0	0	0	0	200	300	0	0	0	0	0	0	0	200	903	0	0	0	0	0	0	0	603	903	0
519	2	0	0	0	0	0	0	200	300	0	0	0	0	0	0	0	200	903	0	0	0	0	0	0	0	603	903	0
519	3	0	0	0	0	0	0	200	300	0	0	0	0	0	0	0	200	903	0	0	0	0	0	0	0	603	903	0
519	4	0	0	0	0	0	0	200	300	0	0	0	0	0	0	0	200	903	0	0	0	0	0	0	0	603	903	0
519	5	0	0	0	0	0	0	200	300	0	0	0	0	0	0	0	200	903	0	0	0	0	0	0	0	603	903	0
519	6	0	0	0	0	0	0	200	300	0	0	0	0	0	0	0	200	903	0	0	0	0	0	0	0	603	903	0
519	7	0	0	0	0	0	0	200	300	0	0	0	0	0	0	0	200	903	0	0	0	0	0	0	0	603	903	0
519	8	0	0	0	0	0	0	200	300	0	0	0	0	0	0	0	200	903	0	0	0	0	0	0	0	603	903	0
519	9	0	0	0	0	0	0	200	300	0	0	0	0	0	0	0	200	903	0	0	0	0	0	0	0	603	903	0
520	0	0	0	0	0	0	0	200	300	0	0	0	0	0	0	0	200	903	0	0	0	0	0	0	0	603	903	0
520	1	0	0	0	0	0	0	200	300	0	0	0	0	0	0	0	200	903	0	0	0	0	0	0	0	603	903	0
520	2	0	0	0	0	0	0	200	300	0	0	0	0	0	0	0	200	903	0	0	0	0	0	0	0	603	903	0
520	3	0	0	0	0	0	0	200	300	0	0	0	0	0	0	0	200	903	0	0	0	0	0	0	0	603	903	0
520	4	0	0	0	0	0	0	200	300	0	0	0	0	0	0	0	200	903	0	0	0	0	0	0	0	603	903	0
520	5	0	0	0	0	0	0	200	300	0	0	0	0	0	0	0	200	903	0	0	0	0	0	0	0	603	903	0
520	6	0	0	0	0	0	0	200	300	0	0	0	0	0	0	0	200	903	0	0	0	0	0	0	0	603	903	0
520	7	0	0	0	0	0	0	200	300	0	0	0	0	0	0	0	200	903	0	0	0	0	0	0	0	603	903	0
520	8	0	0	0	0	0	0	200	300	0	0	0	0	0	0	0	200	903	0	0	0	0	0	0	0	603	903	0
520	9	0	0	0	0	0	0	200	300	0	0	0	0	0	0	0	200	903	0	0	0	0	0	0	0	603	903	0
521	0	0	0	0	0	0	0	200	300	0	0	0	0	0	0	0	200	903	0	0	0	0	0	0	0	603	903	0
521	1	0	0	0	0	0	0	200	300	0	0	0	0	0	0	0	200	903	0	0	0	0	0	0	0	603	903	0
521	2	0	0	0	0	0	0	200	300	0	0	0	0	0	0	0	200	903	0	0	0	0	0	0	0	603	903	0
521	3	0	0	0	0	0	0	200	300	0	0	0	0	0	0	0	200	903	0	0	0	0	0	0	0	603	903	0
521	4	0	0	0	0	0	0	200	300	0	0	0	0	0	0	0	200	903	0	0	0	0	0	0	0	603	903	0
521	5	0	0	0	0	0	0	200	300	0	0	0	0	0	0	0	200	903	0	0	0	0	0	0	0	603	903	0
521	6	0	0	0	0	0	0	200	300	0	0	0	0	0	0	0	200	903	0	0	0	0	0	0	0	603	903	0
521	7	0	0	0	0	0	0	200	300	0	0	0	0	0	0	0	200	903	0	0	0	0	0	0	0	603	903	0
521	8	0	0	0	0	0	0	200	300	0	0	0	0	0	0	0	200	903	0	0	0	0	0	0	0	603	903	0
521	9	0	0	0	0	0	0	200	300	0	0	0	0	0	0	0	200	903	0	0	0	0	0	0	0	603	903	0
522	0	0	0	0	0	0	0	200	300	0	0	0	0	0	0	0	200	903	0	0	0	0	0	0	0	603	903	0
522	1	0	0	0	0	0	0	200	300	0	0	0	0	0	0	0	200	903	0	0	0	0	0	0	0	603	903	0
522	2	0	0	0	0	0	0	200	300	0	0	0	0	0	0	0	200	903	0	0	0	0	0	0	0	603	903	0
522	3	0	0	0	0	0	0	200	300	0	0	0	0	0	0	0	200	903	0	0	0	0	0	0	0	603	903	0
522	4	0	0	0	0	0	0	200	300	0	0	0	0	0	0	0	200	903	0	0	0	0	0	0	0	603	903	0
522	5	0	0	0	0	0	0	200	300	0	0	0	0	0	0	0	200	903	0	0	0	0	0	0	0	603	903	0
522	6	0	0	0	0	0	0	200	300	0	0	0	0	0	0	0	200	903	0	0	0	0	0	0	0	603	903	0
522	7	0	0	0	0	0	0	200	300	0	0	0	0	0	0	0	200	903	0	0	0	0	0	0	0	603	903	0
522	8	0	0	0	0	0	0	200	300	0	0	0	0	0	0	0	200	903	0	0	0	0	0	0	0	603	903	0
522	9	0	0	0	0	0	0	200	300	0	0	0	0	0	0	0	200	903	0	0	0	0	0	0	0	603	903	0
523	0	0	0	0	0	0	0	200	300	0	0	0	0	0	0	0	200	903	0	0	0	0	0	0	0	603	903	0
523	1	0	0	0	0	0	0	200	300	0	0	0	0	0	0	0	200	903	0	0	0	0	0	0	0	603	903	0
523	2	0	0	0	0	0	0	200	300	0	0	0	0	0	0	0	200	903	0	0	0	0	0	0	0	603	903	0
523	3	0	0	0	0	0	0	200	300	0	0	0	0	0	0	0	200	903	0	0	0	0	0	0	0	603	903	0
523	4	0	0	0	0	0	0	200	300	0	0	0	0	0	0	0	200	903	0	0	0	0	0	0	0	603	903	0
523	5	0	0	0	0	0	0	200	300	0	0	0	0	0	0	0	200	903	0	0	0	0	0	0	0	603	903	0
523	6	0	0	0	0	0	0	200	300	0	0	0	0	0	0	0	200	903	0	0	0	0	0	0	0	603	903	0
523	7	0	0	0	0	0	0	200	300	0	0	0	0	0	0	0	200	903	0	0	0	0	0	0	0	603	903	0
523	8	0	0	0	0	0	0	200	300	0	0	0	0	0	0	0	200	903	0	0	0	0	0	0	0	603	903	0
523	9	0	0	0	0	0	0	200	300	0	0	0	0	0	0	0	200	903	0	0	0	0	0	0	0	603	903	0
524	0	0	0	0	0	0	0	200	300	0	0	0	0	0	0	0	200	903	0	0	0	0	0	0	0	603	903	0
524	1	0	0	0	0	0	0	200	300	0	0	0	0	0	0	0	200	903	0	0	0	0	0	0	0	603	903	0
524	2	0	0	0	0	0	0	200	300	0	0	0	0	0	0	0	200	903	0	0	0	0	0	0	0	603	903	0
524	3	0	0	0	0	0	0	200	300	0	0	0	0	0	0	0	200	903	0	0	0	0	0	0	0	603	903	0
524	4	0	0	0	0	0	0	200	300	0	0	0	0	0	0	0	200	903	0	0	0	0	0	0	0	603	903	0
524	5	0	0	0	0	0	0	200	300	0	0	0	0	0	0	0	200	903	0	0	0	0	0	0	0	603	903	0
524	6	0	0	0	0	0	0	200	300	0	0	0	0	0	0	0	200	903	0	0	0	0	0	0	0	603	903	0
524	7	0	0	0	0	0	0	200	300	0	0	0	0	0	0	0	200	903	0	0	0	0	0	0	0	603	903	0
524	8	0	0	0	0	0	0	200	300	0	0	0	0	0	0	0	200	903	0	0	0	0	0	0	0	603	903	0
524	9	0	0	0	0	0	0	200	300	0	0	0	0	0	0	0	200	903	0	0	0	0	0	0	0	603	903	0
525	0	0	0	0	0	0	0	200	300	0	0	0	0	0	0	0	200	903	0	0	0	0	0	0	0	603	903	0
525	1	0	0	0	0	0	0	200	300	0	0	0	0	0	0	0	200	903	0	0	0	0	0	0	0	603	903	0
525	2	0	0	0	0	0	0	200	300	0	0	0	0	0	0	0	200	903	0	0	0	0	0	0	0	603	903	0
525	3	0	0	0	0	0	0	200	300	0	0	0	0	0	0	0	200	903	0	0	0	0	0	0	0	603	903	0
525	4	0	0	0	0	0	0	200	300	0	0	0	0	0	0	0	200	903	0	0	0	0	0	0	0	603	903	0
525	5	0	0	0	0	0	0	200	300	0	0	0	0	0	0	0	200	903	0	0	0	0	0	0	0	603	903	0
525	6	0	0	0	0	0	0	200	300	0	0	0	0	0	0	0	200	903	0	0	0	0	0	0	0	603	903	0
525	7	0	0	0	0	0	0	200	300	0	0	0	0	0	0	0	200	903	0	0	0	0	0	0	0	603	903	0
525	8	0	0	0	0	0	0	200	300	0	0	0	0	0	0	0	200	903	0	0	0	0	0	0	0	603	903	0
525	9	0	0	0	0	0	0	200	300	0	0	0	0	0	0	0	200	903	0	0	0	0	0	0	0	603	903	0
526	0	0	0	0	0	0	0	200	300	0	0	0	0	0	0	0	200	903	0	0	0	0	0	0	0	603	903	0
526	1	0	0	0	0	0	0	200	300	0	0	0	0	0	0	0	200	903	0	0	0	0	0	0	0	603	903	0
526	2	0	0	0	0	0	0	200	300	0	0	0	0	0	0	0	200	903	0	0	0	0	0	0	0	603	903	0
526	3	0	0	0	0	0	0	200	300	0	0	0	0	0	0	0	200	903	0	0	0	0	0	0	0	603	903	0
526	4	0	0	0	0	0	0	200	300	0	0	0	0	0	0	0	200	903	0	0	0	0	0	0	0	603	903	0
526	5	0	0	0	0	0	0	200	300	0	0	0	0	0	0	0	200	903	0	0	0	0	0	0	0	603	903	0
526	6	0	0	0	0	0	0	200	300	0	0	0	0	0	0	0	200	903	0	0	0	0	0	0	0	603	903	0
526	7	0	0	0	0	0	0	200	300	0	0	0	0	0	0	0	200	903	0	0	0	0	0	0	0	603	903	0
526	8	0	0	0	0	0	0	200	300	0	0	0	0	0	0	0	200	903	0	0	0	0	0	0	0	603	903	0
526	9	0	0	0	0	0	0	200	300	0	0	0	0	0	0	0	200	903	0	0	0	0	0	0	0	603	903	0
527	0	0	0	0	0	0	0	200	300	0	0	0	0	0	0	0	200	903	0	0	0	0	0	0	0	603	903	0
527	1	0	0	0	0	0	0	200	300	0	0	0	0	0	0	0	200	903	0	0	0	0	0	0	0	603	903	0
527	2	0	0	0	0	0	0	200	300	0	0	0	0	0	0	0	200	903	0	0	0	0	0	0	0	603	903	0
527	3	0	0	0	0	0	0	200	300	0	0	0	0	0	0	0	200	903	0	0	0	0	0	0	0	603	903	0
527	4	0	0	0	0	0	0	200	300	0	0	0	0	0	0	0	200	903	0	0	0	0	0	0	0	603	903	0
527	5	0	0	0	0	0	0	200	300	0	0	0	0	0	0	0	200	903	0	0	0	0	0	0	0	603	903	0
527	6	0	0	0	0	0	0	200	300	0	0	0	0	0	0	0	200	903	0	0	0	0	0	0	0	603	903	0
527	7	0	0	0	0	0	0	200	300	0	0	0	0	0	0	0	200	903	0	0	0	0	0	0	0	603	903	0
527	8	0	0	0	0	0	0	200	300	0	0	0	0	0	0	0	200	903	0	0	0	0	0	0	0	603	903	0
527	9	0	0	0	0	0	0	200	300	0	0	0	0	0	0	0	200	903	0	0	0	0	0	0	0	603	903	0
528	0	0	0	0	0	0	0	200	300	0	0	0	0	0	0	0	200	903	0	0	0	0	0	0	0	603	903	0
528	1	0	0	0	0	0	0	200	300	0	0	0	0	0	0	0	200	903	0	0	0	0	0	0	0	603	903	0
528	2	0	0	0	0	0	0	200	300	0	0	0	0	0	0	0	200	903	0	0	0	0	0	0	0	603	903	0
528	3	0	0	0	0	0	0	200	300	0	0	0	0	0	0	0	200	903	0	0	0	0	0	0	0	603	903	0
528	4	0	0	0	0	0	0	200	300	0	0	0	0	0	0	0	200	903	0	0	0	0	0	0	0	603	903	0
528	5	0	0	0	0	0	0	200	300	0	0	0	0	0	0	0	200	903	0	0	0	0	0	0	0	603	903	0
528	6	0	0	0	0	0	0	200	300	0	0	0	0	0	0	0	200	903	0	0	0	0	0	0	0	603	903	0
528	7	0	0	0	0	0	0	200	300	0	0	0	0	0	0	0	200	903	0	0	0	0	0	0	0	603	903	0
528	8	0	0	0	0	0	0	200	300	0	0	0	0	0	0	0	200	903	0	0	0	0	0	0	0	603	903	0
528	9	0	0	0	0	0	0	200	300	0	0	0	0	0	0	0	200	903	0	0	0	0	0	0	0	603	903	0
529	0	0	0	0	0	0	0	200	300	0	0	0	0	0	0	0	200	903	0	0	0	0	0	0	0	603	903	0
529	1	0	0	0	0	0	0	200	300	0	0	0	0	0	0	0	200	903	0	0	0	0	0	0	0	603	903	0
529	2	0	0	0	0	0	0	200	300	0	0	0	0	0	0	0	200	903	0	0	0	0	0	0	0	603	903	0
529	3	0	0	0	0	0	0	200	300	0	0	0	0	0	0	0	200	903	0	0	0	0	0	0	0	603	903	0
529	4	0	0	0	0	0	0	200	300	0	0	0	0	0	0	0	200	903	0	0	0	0	0	0	0	603	903	0
529	5	0	0	0	0	0	0	200	300	0	0	0	0	0	0	0	200	903	0	0	0	0	0	0	0	603	903	0
529	6	0	0	0	0	0	0	200	300	0	0	0	0	0	0	0	200	903	0	0	0	0	0	0	0	603	903	0
529	7	0	0	0	0	0	0	200	300	0	0	0	0	0	0	0	200	903	0	0	0	0	0	0	0	603	903	0
529	8	0	0	0	0	0	0	200	300	0	0	0	0	0	0	0	200	903	0	0	0	0	0	0	0	603	903	0
529	9	0	0	0	0	0	0	200	300	0	0	0	0	0	0	0	200	903	0	0	0	0	0	0	0	603	903	0
530	0	0	0	0	0	0	0	200	300	0	0	0	0	0	0	0	200	903	0	0	0	0	0	0	0	603	903	0
530	1	0	0	0	0	0	0	200	300	0	0	0	0	0	0	0	200	903	0	0	0	0	0	0	0	603	903	0
530	2	0	0	0	0	0	0	200	300	0	0	0	0	0	0	0	200	903	0	0	0	0	0	0	0	603	903	0
530	3	0	0	0	0	0	0	200	300	0	0	0	0	0	0	0	200	903	0	0	0	0	0	0	0	603	903	0
530	4	0	0	0	0	0	0	200	300	0	0	0	0	0	0	0	200	903	0	0	0	0	0	0	0	603	903	0
530	5	0	0	0	0	0	0	200	300	0	0	0	0	0	0	0	200	903	0	0	0	0	0	0	0	603	903	0
530	6	0	0	0	0	0	0	200	300	0	0	0	0	0	0	0	200	903	0	0	0	0	0	0	0	603	903	0
530	7	0	0	0	0	0	0	200	300	0	0	0	0	0	0	0	200	903	0	0	0	0	0	0	0	603	903	0
530	8	0	0	0	0	0	0	200	300	0	0	0	0	0	0	0	200	903	0	0	0	0	0	0	0	603	903	0
530	9	0	0	0	0	0	0	200	300	0	0	0	0	0	0	0	200	903	0	0	0	0	0	0	0	603	903	0
531	0	0	0	0	0	0	0	200	300	0	0	0	0	0	0	0	200	903	0	0	0	0	0	0	0	603	903	0
531	1	0	0	0	0	0	0	200	300	0	0	0	0	0	0	0	200	903	0	0	0	0	0	0	0	603	903	0
531	2	0	0	0	0	0	0	200	300	0	0	0	0	0	0	0	200	903	0	0	0	0	0	0	0	603	903	0
531	3	0	0	0	0	0	0	200	300	0	0	0	0	0	0	0	200	903	0	0	0	0	0	0	0	603	903	0
531	4	0	0	0	0	0	0	200	300	0	0	0	0	0	0	0	200	903	0	0	0	0	0	0	0	603	903	0
531	5	0	0	0	0	0	0	200	300	0	0	0	0	0	0	0	200	903	0	0	0	0	0	0	0	603	903	0
531	6	0	0	0	0	0	0	200	300	0	0	0	0	0	0	0	200	903	0	0	0	0	0	0	0	603	903	0
531	7	0	0	0	0	0	0	200	300	0	0	0	0	0	0	0	200	903	0	0	0	0	0	0	0	603	903	0
531	8	0	0	0	0	0	0	200	300	0	0	0	0	0	0	0	200	903	0	0	0	0	0	0	0	603	903	0
531	9	0	0	0	0	0	0	200	300	0	0	0	0	0	0	0	200	903	0	0	0	0	0	0	0	603	903	0
532	0	0	0	0	0	0	0	200	300	0	0	0	0	0	0	0	200	903	0	0	0	0	0	0	0	603	903	0
532	1	0	0	0	0	0	0	200	300	0	0	0	0	0	0	0	200	903	0	0	0	0	0	0	0	603	903	0
532	2	0	0	0	0	0	0	200	300	0	0	0	0	0	0	0	200	903	0	0	0	0	0	0	0	603	903	0
532	3	0	0	0	0	0	0	200	300	0	0	0	0	0	0	0	200	903	0	0	0	0	0	0	0	603	903	0
532	4	0	0	0	0	0	0	200	300	0	0	0	0	0	0	0	200	903	0	0	0	0	0	0	0	603	903	0
532	5	0	0	0	0	0	0	200	300	0	0	0	0	0	0	0	200	903	0	0	0	0	0	0	0	603	903	0
532	6	0	0	0	0	0	0	200	300	0	0	0	0	0	0	0	200	903	0	0	0	0	0	0	0	603	903	0
532	7	0	0	0	0	0	0	200	300	0	0	0	0	0	0	0	200	903	0	0	0	0	0	0	0	603	903	0
532	8	0	0	0	0	0	0	200	300	0	0	0	0	0	0	0	200	903	0	0	0	0	0	0	0	603	903	0
532	9	0	0	0	0	0	0	200	300	0	0	0	0	0	0	0	200	903	0	0	0	0	0	0	0	603	903	0
533	0	0	0	0	0	0	0	200	300	0	0	0	0	0	0	0	200	903	0	0	0	0	0	0	0	603	903	0
533	1	0	0	0	0	0	0	200	300	0	0	0	0	0	0	0	200	903	0	0	0	0	0	0	0	603	903	0
533	2	0	0	0	0	0	0	200	300	0	0	0	0	0	0	0	200	903	0	0	0	0	0	0	0	603	903	0
533	3	0	0	0	0	0	0	200	300	0	0	0	0	0	0	0	200	903	0	0	0	0	0	0	0	603	903	0
533	4	0	0	0	0	0	0	200	300	0	0	0	0	0	0	0	200	903	0	0	0	0	0	0	0	603	903	0
533	5	0	0	0	0	0	0	200	300	0	0	0	0	0	0	0	200	903	0	0	0	0	0	0	0	603	903	0
533	6	0	0	0	0	0	0	200	300	0	0	0	0	0	0	0	200	903	0	0	0	0	0	0	0	603	903	0
533	7	0	0	0	0	0	0	200	300	0	0	0	0	0	0	0	200	903	0	0	0	0	0	0	0	603	903	0
533	8	0	0	0	0	0	0	200	300	0	0	0	0	0	0	0	200	903	0	0	0	0	0	0	0	603	903	0
533	9	0	0	0	0	0	0	200	300	0	0	0	0	0	0	0	200	903	0	0	0	0	0	0	0	603	903	0
534	0	0	0	0	0	0	0	200	300	0	0	0	0	0	0	0	200	903	0	0	0	0	0	0	0	603	903	0
534	1	0	0	0	0	0	0	200	300	0	0	0	0	0	0	0	200	903	0	0	0	0	0	0	0	603	903	0
534	2	0	0	0	0	0	0	200	300	0	0	0	0	0	0	0	200	903	0	0	0	0	0	0	0	603	903	0
534	3	0	0	0	0	0	0	200	300	0	0	0	0	0	0	0	200	903	0	0	0	0	0	0	0	603	903	0
534	4	0	0	0	0	0	0	200	300	0	0	0	0	0	0	0	200	903	0	0	0	0	0	0	0	603	903	0
534	5	0	0	0	0	0	0	200	300	0	0	0	0	0	0	0	200	903	0	0	0	0	0	0	0	603	903	0
534	6	0	0	0	0	0	0	200	300	0	0	0	0	0	0	0	200	903	0	0	0	0	0	0	0	603	903	0
534	7	0	0	0	0	0	0	200	300	0	0	0	0	0	0	0	200	903	0	0	0	0	0	0	0	603	903	0
534	8	0	0	0	0	0	0	200	300	0	0	0	0	0	0	0	200	903	0	0	0	0	0	0	0	603	903	0
534	9	0	0	0	0	0	0	200	300	0	0	0	0	0	0	0	200	903	0	0	0	0	0	0	0	603	903	0
535	0	0	0	0	0	0	0	200	300	0	0	0	0	0	0	0	200	903	0	0	0	0	0	0	0	603	903	0
535	1	0	0	0	0	0	0	200	300	0	0	0	0	0	0	0	200	903	0	0	0	0	0	0	0	603	903	0
535	2	0	0	0	0	0	0	200	300	0	0	0	0	0	0	0	200	903	0	0	0	0	0	0	0	603	903	0
535	3	0	0	0	0	0	0	200	300	0	0	0	0	0	0	0	200	903	0	0	0	0	0	0	0	603	903	0
535	4	0	0	0	0	0	0	200	300	0	0	0	0	0	0	0	200	903	0	0	0	0	0	0	0	603	903	0
535	5	0	0	0	0	0	0	200	300	0	0	0	0	0	0	0	200	903	0	0	0	0	0	0	0	603	903	0
535	6	0	0	0	0	0	0	200	300	0	0	0	0	0	0	0	200	903	0	0	0	0	0	0	0	603	903	0
535	7	0	0	0	0	0	0	200	300	0	0	0	0	0	0	0	200	903	0	0	0	0	0	0	0	603	903	0
535	8	0	0	0	0	0	0	200	300	0	0	0	0	0	0	0	200	903	0	0	0	0	0	0	0	603	903	0
535	9	0	0	0	0	0	0	200	300	0	0	0	0	0	0	0	200	903	0	0	0	0	0	0	0	603	903	0
536	0	0	0	0	0	0	0	200	300	0	0	0	0	0	0	0	200	903	0	0	0	0	0	0	0	603	903	0
536	1	0	0	0	0	0	0	200	300	0	0	0	0	0	0	0	200	903	0	0	0	0	0	0	0	603	903	0
536	2	0	0	0	0	0	0	200	300	0	0	0	0	0	0	0	200	903	0	0	0	0	0	0	0	603	903	0
536	3	0	0	0	0	0	0	200	300	0	0	0	0	0	0	0	200	903	0	0	0	0	0	0	0	603	903	0
536	4	0	0	0	0	0	0	200	300	0	0	0	0	0	0	0	200	903	0	0	0	0	0	0	0	603	903	0
536	5	0	0	0	0	0	0	200	300	0	0	0	0	0	0	0	200	903	0	0	0	0	0	0	0	603	903	0
536	6	0	0	0	0	0	0	200	300	0	0	0	0	0	0	0	200	903	0	0	0	0	0	0	0	603	903	0
536	7	0	0	0	0	0	0	200	300	0	0	0	0	0	0	0	200	903	0	0	0	0	0	0	0	603	903	0
536	8	0	0	0	0	0	0	200	300	0	0	0	0	0	0	0	200	903	0	0	0	0	0	0	0	603	903	0
536	9	0	0	0	0	0	0	200	300	0	0	0	0	0	0	0	200	903	0	0	0	0	0	0	0	603	903	0
537	0	0	0	0	0	0	0	200	300	0	0	0	0	0	0	0	200	903	0	0	0	0	0	0	0	603	903	0
537	1	0	0	0	0	0	0	200	300	0	0	0	0	0	0	0	200	903	0	0	0	0	0	0	0	603	903	0
537	2	0	0	0	0	0	0	200	300	0	0	0	0	0	0	0	200	903	0	0	0	0	0	0	0	603	903	0
537	3	0	0	0	0	0	0	200	300	0	0	0	0	0	0	0	200	903	0	0	0	0	0	0	0	603	903	0
537	4	0	0	0	0	0	0	200	300	0	0	0	0	0	0	0	200	903	0	0	0	0	0	0	0	603	903	0
537	5	0	0	0	0	0	0	200	300	0	0	0	0	0	0	0	200	903	0	0	0	0	0	0	0	603	903	0
537	6	0	0	0	0	0	0	200	300	0	0	0	0	0	0	0	200	903	0	0	0	0	0	0	0	603	903	0
537	7	0	0	0	0	0	0	200	300	0	0	0	0	0	0	0	200	903	0	0	0	0	0	0	0	603	903	0
537	8	0	0	0	0	0	0	200	300	0	0	0	0	0	0	0	200	903	0	0	0	0	0	0	0	603	903	0
537	9	0	0	0	0	0	0	200	300	0	0	0	0	0	0	0	200	903	0	0	0	0	0	0	0	603	903	0
538	0	0	0	0	0	0	0	200	300	0	0	0	0	0	0	0	200	903	0	0	0	0	0	0	0	603	903	0
538	1	0	0	0	0	0	0	200	300	0	0	0	0	0	0	0	200	903	0	0	0	0	0	0	0	603	903	0
538	2	0	0	0	0	0	0	200	300	0	0	0	0	0	0	0	200	903	0	0	0	0	0	0	0	603	903	0
538	3	0	0	0	0	0	0	200	300	0	0	0	0	0	0	0	200	903	0	0	0	0	0	0	0	603	903	0
538	4	0	0	0	0	0	0	200	300	0	0	0	0	0	0	0	200	903	0	0	0	0	0	0	0	603	903	0
538	5	0	0	0	0	0	0	200	300	0	0	0	0	0	0	0	200	903	0	0	0	0	0	0	0	603	903	0
538	6	0	0	0	0	0	0	200	300	0	0	0	0	0	0	0	200	903	0	0	0	0	0	0	0	603	903	0
538	7	0	0	0	0	0	0	200	300	0	0	0	0	0	0	0	200	903	0	0	0	0	0	0	0	603	903	0
538	8	0	0	0	0	0	0	200	300	0	0	0	0	0	0	0	200	903	0	0	0	0	0	0	0	603	903	0
538	9	0	0	0	0	0	0	200	300	0	0	0	0	0	0	0	200	903	0	0	0	0	0	0	0	603	903	0
539	0	0	0	0	0	0	0	200	300	0	0	0	0	0	0	0	200	903	0	0	0	0	0	0	0	603	903	0
539	1	0	0	0	0	0	0	200	300	0	0	0	0	0	0	0	200	903	0	0	0	0	0	0	0	603	903	0
539	2	0	0	0	0	0	0	200	300	0	0	0	0	0	0	0	200	903	0	0	0	0	0	0	0	603	903	0
539	3	0	0	0	0	0	0	200	300	0	0	0	0	0	0	0	200	903	0	0	0	0	0	0	0	603	903	0
539	4	0	0	0	0	0	0	200	300	0	0	0	0	0	0	0	200	903	0	0	0	0	0	0	0	603	903	0
539	5	0	0	0	0	0	0	200	300	0	0	0	0	0	0	0	200	903	0	0	0	0	0	0	0	603	903	0
539	6	0	0	0	0	0	0	200	300	0	0	0	0	0	0	0	200	903	0	0	0	0	0	0	0	603	903	0
539	7	0	0	0	0	0	0	200	300	0	0	0	0	0	0	0	200	903	0	0	0	0	0	0	0	603	903	0
539	8	0	0	0	0	0	0	200	300	0	0	0	0	0	0	0	200	903	0	0	0	0	0	0	0	603	903	0
539	9	0	0	0	0	0	0	200	300	0	0	0	0	0	0	0	200	903	0	0	0	0	0	0	0	603	903	0
540	0	0	0	0	0	0	0	200	300	0	0	0	0	0	0	0	200	903	0	0	0	0	0	0	0	603	903	0
540	1	0	0	0	0	0	0	200	300	0	0	0	0	0	0	0	200	903	0	0	0	0	0	0	0	603	903	0
540	2	0	0	0	0	0	0	200	300	0	0	0	0	0	0	0	200	903	0	0	0	0	0	0	0	603	903	0
540	3	0	0	0	0	0	0	200	300	0	0	0	0	0	0	0	200	903	0	0	0	0	0	0	0	603	903	0
540	4	0	0	0	0	0	0	200	300	0	0	0	0	0	0	0	200	903	0	0	0	0	0	0	0	603	903	0
540	5	0	0	0	0	0	0	200	300	0	0	0	0	0	0	0	200	903	0	0	0	0	0	0	0	603	903	0
540	6	0	0	0	0	0	0	200	300	0	0	0	0	0	0	0	200	903	0	0	0	0	0	0	0	603	903	0
540	7	0	0	0	0	0	0	200	300	0	0	0	0	0	0	0	200	903	0	0	0	0	0	0	0	603	903	0
540	8	0	0	0	0	0	0	200	300	0	0	0	0	0	0	0	200	903	0	0	0	0	0	0	0	603	903	0
540	9	0	0	0	0	0	0	200	300	0	0	0	0	0	0	0	200	903	0	0	0	0	0	0	0	603	903	0
541	0	0	0	0	0	0	0	200	300	0	0	0	0	0	0	0	200	903	0	0	0	0	0	0	0	603	903	0
541	1	0	0	0	0	0	0	200	300	0	0	0	0	0	0	0	200	903	0	0	0	0	0	0	0	603	903	0
541	2	0	0	0	0	0	0	200	300	0	0	0	0	0	0	0	200	903	0	0	0	0	0	0	0	603	903	0
541	3	0	0	0	0	0	0	200	300	0	0	0	0	0	0	0	200	903	0	0	0	0	0	0	0	603	903	0
541	4	0	0	0	0	0	0	200	300	0	0	0	0	0	0	0	200	903	0	0	0	0	0	0	0	603	903	0
541	5	0	0	0	0	0	0	200	300	0	0	0	0	0	0	0	200	903	0	0	0	0	0	0	0	603	903	0
541	6	0	0	0	0	0	0	200	300	0	0	0	0	0	0	0	200	903	0	0	0	0	0	0	0	603	903	0
541	7	0	0	0	0	0	0	200	300	0	0	0	0	0	0	0	200	903	0	0	0	0	0	0	0	603	903	0
541	8	0	0	0	0	0	0	200	300	0	0	0	0	0	0	0	200	903	0	0	0	0	0	0	0	603	903	0
541	9	0	0	0	0	0	0	200	300	0	0	0	0	0	0	0	200	903	0	0	0	0	0	0	0	603	903	0
542	0	0	0	0	0	0	0	200	300	0	0	0	0	0	0	0	200	903	0	0	0	0	0	0	0	603	903	0
542	1	0	0	0	0	0	0	200	300	0	0	0	0	0	0	0	200	903	0	0	0	0	0	0	0	603	903	0
542	2	0	0	0	0	0	0	200	300	0	0	0	0	0	0	0	200	903	0	0	0	0	0	0	0	603	903	0
542	3	0	0	0	0	0	0	200	300	0	0	0	0	0	0	0	200	903	0	0	0	0	0	0	0	603	903	0
542	4	0	0	0	0	0	0	200	300	0	0	0	0	0	0	0	200	903	0	0	0	0	0	0	0	603	903	0
542	5	0	0	0	0	0	0	200	300	0	0	0	0	0	0	0	200	903	0	0	0	0	0	0	0	603	903	0
542	6	0	0	0	0	0	0	200	300	0	0	0	0	0	0	0	200	903	0	0	0	0	0	0	0	603	903	0
542	7	0	0	0	0	0	0	200	300	0	0	0	0	0	0	0	200	903	0	0	0	0	0	0	0	603	903	0
542	8	0	0	0	0	0	0	200	300	0	0	0	0	0	0	0	200	903	0	0	0	0	0	0	0	603	903	0
542	9	0	0	0	0	0	0	200	300	0	0	0	0	0	0	0	200	903	0	0	0	0	0	0	0	603	903	0
543	0	0	0	0	0	0	0	200	300	0	0	0	0	0	0	0	200	903	0	0	0	0	0	0	0	603	903	0
543	1	0	0	0	0	0	0	200	300	0	0	0	0	0	0	0	200	903	0	0	0	0	0	0	0	603	903	0
543	2	0	0	0	0	0	0	200	300	0	0	0	0	0	0	0	200	903	0	0	0	0	0	0	0	603	903	0
543	3	0	0	0	0	0	0	200	300	0	0	0	0	0	0	0	200	903	0	0	0	0	0	0	0	603	903	0
543	4	0	0	0	0	0	0	200	300	0	0	0	0	0	0	0	200	903	0	0	0	0	0	0	0	603	903	0
543	5	0	0	0	0	0	0	200	300	0	0	0	0	0	0	0	200	903	0	0	0	0	0	0	0	603	903	0
543	6	0	0	0	0	0	0	200	300	0	0	0	0	0	0	0	200	903	0	0	0	0	0	0	0	603	903	0
543	7	0	0	0	0	0	0	200	300	0	0	0	0	0	0	0	200	903	0	0	0	0	0	0	0	603	903	0
543	8	0	0	0	0	0	0	200	300	0	0	0	0	0	0	0	200	903	0	0	0	0	0	0	0	603	903	0
543	9	0	0	0	0	0	0	200	300	0	0	0	0	0	0	0	200	903	0	0	0	0	0	0	0	603	903	0
544	0	0	0	0	0	0	0	200	300	0	0	0	0	0	0	0	200	903	0	0	0	0	0	0	0	603	903	0
544	1	0	0	0	0	0	0	200	300	0	0	0	0	0	0	0	200	903	0	0	0	0	0	0	0	603	903	0
544	2	0	0	0	0	0	0	200	300	0	0	0	0	0	0	0	200	903	0	0	0	0	0	0	0	603	903	0
544	3	0	0	0	0	0	0	200	300	0	0	0	0	0	0	0	200	903	0	0	0	0	0	0	0	603	903	0
544	4	0	0	0	0	0	0	200	300	0	0	0	0	0	0	0	200	903	0	0	0	0	0	0	0	603	903	0
544	5	0	0	0	0	0	0	200	300	0	0	0	0	0	0	0	200	903	0	0	0	0	0	0	0	603	903	0
544	6	0	0	0	0	0	0	200	300	0	0	0	0	0	0	0	200	903	0	0	0	0	0	0	0	603	903	0
544	7	0	0	0	0	0	0	200	300	0	0	0	0	0	0	0	200	903	0	0	0	0	0	0	0	603	903	0
544	8	0	0	0	0	0	0	200	300	0	0	0	0	0	0	0	200	903	0	0	0	0	0	0	0	603	903	0
544	9	0	0	0	0	0	0	200	300	0	0	0	0	0	0	0	200	903	0	0	0	0	0	0	0	603	903	0
545	0	0	0	0	0	0	0	200	300	0	0	0	0	0	0	0	200	903	0	0	0	0	0	0	0	603	903	0
545	1	0	0	0	0	0	0	200	300	0	0	0	0	0	0	0	200	903	0	0	0	0	0	0	0	603	903	0
545	2	0	0	0	0	0	0	200	300	0	0	0	0	0	0	0	200	903	0	0	0	0	0	0	0	603	903	0
545	3	0	0	0	0	0	0	200	300	0	0	0	0	0	0	0	200	903	0	0	0	0	0	0	0	603	903	0
545	4	0	0	0	0	0	0	200	300	0	0	0	0	0	0	0	200	903	0	0	0	0	0	0	0	603	903	0
545	5	0	0	0	0	0	0	200	300	0	0	0	0	0	0	0	200	903	0	0	0	0	0	0	0	603	903	0
545	6	0	0	0	0	0	0	200	300	0	0	0	0	0	0	0	200	903	0	0	0	0	0	0	0	603	903	0
545	7	0	0	0	0	0	0	200	300	0	0	0	0	0	0	0	200	903	0	0	0	0	0	0	0	603	903	0
545	8	0	0	0	0	0	0	200	300	0	0	0	0	0	0	0	200	903	0	0	0	0	0	0	0	603	903	0
545	9	0	0	0	0	0	0	200	300	0	0	0	0	0	0	0	200	903	0	0	0	0	0	0	0	603	903	0
546	0	0	0	0	0	0	0	200	300	0	0	0	0	0	0	0	200	903	0	0	0	0	0	0	0	603	903	0
546	1	0	0	0	0	0	0	200	300	0	0	0	0	0	0	0	200	903	0	0	0	0	0	0	0	603	903	0
546	2	0	0	0	0	0	0	200	300	0	0	0	0	0	0	0	200	903	0	0	0	0	0	0	0	603	903	0
546	3	0	0	0	0	0	0	200	300	0	0	0	0	0	0	0	200	903	0	0	0	0	0	0	0	603	903	0
546	4	0	0	0	0	0	0	200	300	0	0	0	0	0	0	0	200	903	0	0	0	0	0	0	0	603	903	0
546	5	0	0	0	0	0	0	200	300	0	0	0	0	0	0	0	200	903	0	0	0	0	0	0	0	603	903	0
546	6	0	0	0	0	0	0	200	300	0	0	0	0	0	0	0	200	903	0	0	0	0	0	0	0	603	903	0
546	7	0	0	0	0	0	0	200	300	0	0	0	0	0	0	0	200	903	0	0	0	0	0	0	0	603	903	0
546	8	0	0	0	0	0	0	200	300	0	0	0	0	0	0	0	200	903	0	0	0	0	0	0	0	603	903	0
546	9	0	0	0	0	0	0	200	300	0	0	0	0	0	0	0	200	903	0	0	0	0	0	0	0	603	903	0
547	0	0	0	0	0	0	0	200	300	0	0	0	0	0	0	0	200	903	0	0	0	0	0	0	0	603	903	0
547	1	0	0	0	0	0	0	200	300	0	0	0	0	0	0	0	200	903	0	0	0	0	0	0	0	603	903	0
547	2	0	0	0	0	0	0	200	300	0	0	0	0	0	0	0	200	903	0	0	0	0	0	0	0	603	903	0
547	3	0	0	0	0	0	0	200	300	0	0	0	0	0	0	0	200	903	0	0	0	0	0	0	0	603	903	0
547	4	0	0	0	0	0	0	200	300	0	0	0	0	0	0	0	200	903	0	0	0	0	0	0	0	603	903	0
547	5	0	0	0	0	0	0	200	300	0	0	0	0	0	0	0	200	903	0	0	0	0	0	0	0	603	903	0
547	6	0	0	0	0	0	0	200	300	0	0	0	0	0	0	0	200	903	0	0	0	0	0	0	0	603	903	0
547	7	0	0	0	0	0	0	200	300	0	0	0	0	0	0	0	200	903	0	0	0	0	0	0	0	603	903	0
547	8	0	0	0	0	0	0	200	300	0	0	0	0	0	0	0	200	903	0	0	0	0	0	0	0	603	903	0
547	9	0	0	0	0	0	0	200	300	0	0	0	0	0	0	0	200	903	0	0	0	0	0	0	0	603	903	0
548	0	0	0	0	0	0	0	200	300	0	0	0	0	0	0	0	200	903	0	0	0	0	0	0	0	603	903	0
548	1	0	0	0	0	0	0	200	300	0	0	0	0	0	0	0	200	903	0	0	0	0	0	0	0	603	903	0
548	2	0	0	0	0	0	0	200	300	0	0	0	0	0	0	0	200	903	0	0	0	0	0	0	0	603	903	0
548	3	0	0	0	0	0	0	200	300	0	0	0	0	0	0	0	200	903	0	0	0	0	0	0	0	603	903	0
548	4	0	0	0	0	0	0	200	300	0	0	0	0	0	0	0	200	903	0	0	0	0	0	0	0	603	903	0
548	5	0	0	0	0	0	0	200	300	0	0	0	0	0	0	0	200	903	0	0	0	0	0	0	0	603	903	0
548	6	0	0	0	0	0	0	200	300	0	0	0	0	0	0	0	200	903	0	0	0	0	0	0	0	603	903	0
548	7	0	0	0	0	0	0	200	300	0	0	0	0	0	0	0	200	903	0	0	0	0	0	0	0	603	903	0
548	8	0	0	0	0	0	0	200	300	0	0	0	0	0	0	0	200	903	0	0	0	0	0	0	0	603	903	0
548	9	0	0	0	0	0	0	200	300	0	0	0	0	0	0	0	200	903	0	0	0	0	0	0	0	603	903	0
549	0	0	0	0	0	0	0	200	300	0	0	0	0	0	0	0	200	903	0	0	0	0	0	0	0	603	903	0
549	1	0	0	0	0	0	0	200	300	0	0	0	0	0	0	0	200	903	0	0	0	0	0	0	0	603	903	0
549	2	0	0	0	0	0	0	200	300	0	0	0	0	0	0	0	200	903	0	0	0	0	0	0	0	603	903	0
549	3	0	0	0	0	0	0	200	300	0	0	0	0	0	0	0	200	903	0	0	0	0	0	0	0	603	903	0
549	4	0	0	0	0	0	0	200	300	0	0	0	0	0	0	0	200	903	0	0	0	0	0	0	0	603	903	0
549	5	0	0	0	0	0	0	200	300	0	0	0	0	0	0	0	200	903	0	0	0	0	0	0	0	603	903	0
549	6	0	0	0	0	0	0	200	300	0	0	0	0	0	0	0	200	903	0	0	0	0	0	0	0	603	903	0
549	7	0	0	0	0	0	0	200	300	0	0	0	0	0	0	0	200	903	0	0	0	0	0	0	0	603	903	0
549	8	0	0	0	0	0	0	200	300	0	0	0	0	0	0	0	200	903	0	0	0	0	0	0	0	603	903	0
549	9	0	0	0	0	0	0	200	300	0	0	0	0	0	0	0	200	903	0	0	0	0	0	0	0	603	903	0
550	0	0	0	0	0	0	0	200	300	0	0	0	0	0	0	0	200	903	0	0	0	0	0	0	0	603	903	0
550	1	0	0	0	0	0	0	200	300	0	0	0	0	0	0	0	200	903	0	0	0	0	0	0	0	603	903	0
550	2	0	0	0	0	0	0	200	300	0	0	0	0	0	0	0	200	903	0	0	0	0	0	0	0	603	903	0
550	3	0	0	0	0	0	0	200	300	0	0	0	0	0	0	0	200	903	0	0	0	0	0	0	0	603	903	0
550	4	0	0	0	0	0	0	200	300	0	0	0	0	0	0	0	200	903	0	0	0	0	0	0	0	603	903	0
550	5	0	0	0	0	0	0	200	300	0	0	0	0	0	0	0	200	903	0	0	0	0	0	0	0	603	903	0
550	6	0	0	0	0	0	0	200	300	0	0	0	0	0	0	0	200	903	0	0	0	0	0	0	0	603	903	0
550	7	0	0	0	0	0	0	200	300	0	0	0	0	0	0	0	200	903	0	0	0	0	0	0	0	603	903	0
550	8	0	0	0	0	0	0	200	300	0	0	0	0	0	0	0	200	903	0	0	0	0	0	0	0	603	903	0
550	9	0	0	0	0	0	0	200	300	0	0	0	0	0	0	0	200	903	0	0	0	0	0	0	0	603	903	0
551	0	0	0	0	0	0	0	200	300	0	0	0	0	0	0	0	200	903	0	0	0	0	0	0	0	603	903	0
551	1	0	0	0	0	0	0	200	300	0	0	0	0	0	0	0	200	903	0	0	0	0	0	0	0	603	903	0
551	2	0	0	0	0	0	0	200	300	0	0	0	0	0	0	0	200	903	0	0	0	0	0	0	0	603	903	0
551	3	0	0	0	0	0	0	200	300	0	0	0	0	0	0	0	200	903	0	0	0	0	0	0	0	603	903	0
551	4	0	0	0	0	0	0	200	300	0	0	0	0	0	0	0	200	903	0	0	0	0	0	0	0	603	903	0
551	5	0	0	0	0	0	0	200	300	0	0	0	0	0	0	0	200	903	0	0	0	0	0	0	0	603	903	0
551	6	0	0	0	0	0	0	200	300	0	0	0	0	0	0	0	200	903	0	0	0	0	0	0	0	603	903	0
551	7	0	0	0	0	0	0	200	300	0	0	0	0	0	0	0	200	903	0	0	0	0	0	0	0	603	903	0
551	8	0	0	0	0	0	0	200	300	0	0	0	0	0	0	0	200	903	0	0	0	0	0	0	0	603	903	0
551	9	0	0	0	0	0	0	200	300	0	0	0	0	0	0	0	200	903	0	0	0	0	0	0	0	603	903	0
552	0	0	0	0	0	0	0	200	300	0	0	0	0	0	0	0	200	903	0	0	0	0	0	0	0	603	903	0
552	1	0	0	0	0	0	0	200	300	0	0	0	0	0	0	0	200	903	0	0	0	0	0	0	0	603	903	0
552	2	0	0	0	0	0	0	200	300	0	0	0	0	0	0	0	200	903	0	0	0	0	0	0	0	603	903	0
552	3	0	0	0	0	0	0	200	300	0	0	0	0	0	0	0	200	903	0	0	0	0	0	0	0	603	903	0
552	4	0	0	0	0	0	0	200	300	0	0	0	0	0	0	0	200	903	0	0	0	0	0	0	0	603	903	0
552	5	0	0	0	0	0	0	200	300	0	0	0	0	0	0	0	200	903	0	0	0	0	0	0	0	603	903	0
552	6	0	0	0	0	0	0	200	300	0	0	0	0	0	0	0	200	903	0	0	0	0	0	0	0	603	903	0
552	7	0	0	0	0	0	0	200	300	0	0	0	0	0	0	0	200	903	0	0	0	0	0	0	0	603	903	0
552	8	0	0	0	0	0	0	200	300	0	0	0	0	0	0	0	200	903	0	0	0	0	0	0	0	603	903	0
552	9	0	0	0	0	0	0	200	300	0	0	0	0	0	0	0	200	903	0	0	0	0	0	0	0	603	903	0
553	0	0	0	0	0	0	0	200	300	0	0	0	0	0	0	0	200	903	0	0	0	0	0	0	0	603	903	0
553	1	0	0	0	0	0	0	200	300	0	0	0	0	0	0	0	200	903	0	0	0	0	0	0	0	603	903	0
553	2	0	0	0	0	0	0	200	300	0	0	0	0	0	0	0	200	903	0	0	0	0	0	0	0	603	903	0
553	3	0	0	0	0	0	0	200	300	0	0	0	0	0	0	0	200	903	0	0	0	0	0	0	0	603	903	0
553	4	0	0	0	0	0	0	200	300	0	0	0	0	0	0	0	200	903	0	0	0	0	0	0	0	603	903	0
553	5	0	0	0	0	0	0	200	300	0	0	0	0	0	0	0	200	903	0	0	0	0	0	0	0	603	903	0
553	6	0	0	0	0	0	0	200	300	0	0	0	0	0	0	0	200	903	0	0	0	0	0	0	0	603	903	0
553	7	0	0	0	0	0	0	200	300	0	0	0	0	0	0	0	200	903	0	0	0	0	0	0	0	603	903	0
553	8	0	0	0	0	0	0	200	300	0	0	0	0	0	0	0	200	903	0	0	0	0	0	0	0	603	903	0
553	9	0	0	0	0	0	0	200	300	0	0	0	0	0	0	0	200	903	0	0	0	0	0	0	0	603	903	0
554	0	0	0	0	0	0	0	200	300	0	0	0	0	0	0	0	200	903	0	0	0	0	0	0	0	603	903	0
554	1	0	0	0	0	0	0	200	300	0	0	0	0	0	0	0	200	903	0	0	0	0	0	0	0	603	903	0
554	2	0	0	0	0	0	0	200	300	0	0	0	0	0	0	0	200	903	0	0	0	0	0	0	0	603	903	0
554	3	0	0	0	0	0	0	200	300	0	0	0	0	0	0	0	200	903	0	0	0	0	0	0	0	603	903	0
554	4	0	0	0	0	0	0	200	300	0	0	0	0	0	0	0	200	903	0	0	0	0	0	0	0	603	903	0
554	5	0	0	0	0	0	0	200	300	0	0	0	0	0	0	0	200	903	0	0	0	0	0	0	0	603	903	0
554	6	0	0	0	0	0	0	200	300	0	0	0	0	0	0	0	200	903	0	0	0	0	0	0	0	603	903	0
554	7	0	0	0	0	0	0	200	300	0	0	0	0	0	0	0	200	903	0	0	0	0	0	0	0	603	903	0
554	8	0	0	0	0	0	0	200	300	0	0	0	0	0	0	0	200	903	0	0	0	0	0	0	0	603	903	0
554	9	0	0	0	0	0	0	200	300	0	0	0	0	0	0	0	200	903	0	0	0	0	0	0	0	603	903	0
555	0	0	0	0	0	0	0	200	300	0	0	0	0	0	0	0	200	903	0	0	0	0	0	0	0	603	903	0
555	1	0	0	0	0	0	0	200	300	0	0	0	0	0	0	0	200	903	0	0	0	0	0	0	0	603	903	0
555	2	0	0	0	0	0	0	200	300	0	0	0	0	0	0	0	200	903	0	0	0	0	0	0	0	603	903	0
555	3	0	0	0	0	0	0	200	300	0	0	0	0	0	0	0	200	903	0	0	0	0	0	0	0	603	903	0
555	4	0	0	0	0	0	0	200	300	0	0	0	0	0	0	0	200	903	0	0	0	0	0	0	0	603	903	0
555	5	0	0	0	0	0	0	200	300	0	0	0	0	0	0	0	200	903	0	0	0	0	0	0	0	603	903	0
555	6	0	0	0	0	0	0	200	300	0	0	0	0	0	0	0	200	903	0	0	0	0	0	0	0	603	903	0
555	7	0	0	0	0	0	0	200	300	0	0	0	0	0	0	0	200	903	0	0	0	0	0	0	0	603	903	0
555	8	0	0	0	0	0	0	200	300	0	0	0	0	0	0	0	200	903	0	0	0	0	0	0	0	603	903	0
555	9	0	0	0	0	0	0	200	300	0	0	0	0	0	0	0	200	903	0	0	0	0	0	0	0	603	903	0
556	0	0	0	0	0	0	0	200	300	0	0	0	0	0	0	0	200	903	0	0	0	0	0	0	0	603	903	0
556	1	0	0	0	0	0	0	200	300	0	0	0	0	0	0	0	200	903	0	0	0	0	0	0	0	603	903	0
556	2	0	0	0	0	0	0	200	300	0	0	0	0	0	0	0	200	903	0	0	0	0	0	0	0	603	903	0
556	3	0	0	0	0	0	0	200	300	0	0	0	0	0	0	0	200	903	0	0	0	0	0	0	0	603	903	0
556	4	0	0	0	0	0	0	200	300	0	0	0	0	0	0	0	200	903	0	0	0	0	0	0	0	603	903	0
556	5	0	0	0	0	0	0	200	300	0	0	0	0	0	0	0	200	903	0	0	0	0	0	0	0	603	903	0
556	6	0	0	0	0	0	0	200	300	0	0	0	0	0	0	0	200	903	0	0	0	0	0	0	0	603	903	0
556	7	0	0	0	0	0	0	200	300	0	0	0	0	0	0	0	200	903	0	0	0	0	0	0	0	603	903	0
556	8	0	0	0	0	0	0	200	300	0	0	0	0	0	0	0	200	903	0	0	0	0	0	0	0	603	903	0
556	9	0	0	0	0	0	0	200	300	0	0	0	0	0	0	0	200	903	0	0	0	0	0	0	0	603	903	0
557	0	0	0	0	0	0	0	200	300	0	0	0	0	0	0	0	200	903	0	0	0	0	0	0	0	603	903	0
557	1	0	0	0	0	0	0	200	300	0	0	0	0	0	0	0	200	903	0	0	0	0	0	0	0	603	903	0
557	2	0	0	0	0	0	0	200	300	0	0	0	0	0	0	0	200	903	0	0	0	0	0	0	0	603	903	0
557	3	0	0	0	0	0	0	200	300	0	0	0	0	0	0	0	200	903	0	0	0	0	0	0	0	603	903	0
557	4	0	0	0	0	0	0	200	300	0	0	0	0	0	0	0	200	903	0	0	0	0	0	0	0	603	903	0
557	5	0	0	0	0	0	0	200	300	0	0	0	0	0	0	0	200	903	0	0	0	0	0	0	0	603	903	0
557	6	0	0	0	0	0	0	200	300	0	0	0	0	0	0	0	200	903	0	0	0	0	0	0	0	603	903	0
557	7	0	0	0	0	0	0	200	300	0	0	0	0	0	0	0	200	903	0	0	0	0	0	0	0	603	903	0
557	8	0	0	0	0	0	0	200	300	0	0	0	0	0	0	0	200	903	0	0	0	0	0	0	0	603	903	0
557	9	0	0	0	0	0	0	200	300	0	0	0	0	0	0	0	200	903	0	0	0	0	0	0	0	603	903	0
558	0	0	0	0	0	0	0	200	300	0	0	0	0	0	0	0	200	903	0	0	0	0	0	0	0	603	903	0
558	1	0	0	0	0	0	0	200	300	0	0	0	0	0	0	0	200	903	0	0	0	0	0	0	0	603	903	0
558	2	0	0	0	0	0	0	200	300	0	0	0	0	0	0	0	200	903	0	0	0	0	0	0	0	603	903	0
558	3	0	0	0	0	0	0	200	300	0	0	0	0	0	0	0	200	903	0	0	0	0	0	0	0	603	903	0
558	4	0	0	0	0	0	0	200	300	0	0	0	0	0	0	0	200	903	0	0	0	0	0	0	0	603	903	0
558	5	0	0	0	0	0	0	200	300	0	0	0	0	0	0	0	200	903	0	0	0	0	0	0	0	603	903	0
558	6	0	0	0	0	0	0	200	300	0	0	0	0	0	0	0	200	903	0	0	0	0	0	0	0	603	903	0
558	7	0	0	0	0	0	0	200	300	0	0	0	0	0	0	0	200	903	0	0	0	0	0	0	0	603	903	0
558	8	0	0	0	0	0	0	200	300	0	0	0	0	0	0	0	200	903	0	0	0	0	0	0	0	603	903	0
558	9	0	0	0	0	0	0	200	300	0	0	0	0	0	0	0	200	903	0	0	0	0	0	0	0	603	903	0
559	0	0	0	0	0	0	0	200	300	0	0	0	0	0	0	0	200	903	0	0	0	0	0	0	0	603	903	0
559	1	0	0	0	0	0	0	200	300	0	0	0	0	0	0	0	200	903	0	0	0	0	0	0	0	603	903	0
559	2	0	0	0	0	0	0	200	300	0	0	0	0	0	0	0	200	903	0	0	0	0	0	0	0	603	903	0
559	3	0	0	0	0	0	0	200	300	0	0	0	0	0	0	0	200	903	0	0	0	0	0	0	0	603	903	0
559	4	2.86677	4.90036	-12.1646	3326.75	-678.047	606.491	144.261	26.5221	0	0	0	0	0	0	0	200	903	0	0	0	0	0	0	0	603	903	0
559	5	2.5616	5.6633	-16.4371	3143.64	-555.977	377.609	166.175	108.747	0	0	0	0	0	0	0	200	903	0	0	0	0	0	0	0	603	903	0
559	6	3.93489	4.13742	-15.2164	2960.54	-678.047	377.609	155.44	105.437	0	0	0	0	0	0	0	200	903	0	0	0	0	0	0	0	603	903	0
559	7	1.03572	6.42624	-13.3853	3601.41	-861.152	11.398	135.664	30.9431	0	0	0	0	0	0	0	200	903	0	0	0	0	0	0	0	603	903	0
559	8	1.18831	8.25729	-17.3526	4242.28	-800.117	698.044	153.891	55.5248	0	0	0	0	0	0	0	200	903	0	0	0	0	0	0	0	603	903	0
559	9	4.39265	7.34177	-19.1836	4333.83	-1349.43	148.727	129.657	74.0872	0	0	0	0	0	0	0	200	903	0	0	0	0	0	0	0	603	903	0
560	0	2.25642	6.57883	-21.6251	4791.6	-1044.26	286.056	151.711	78.4239	0	0	0	0	0	0	0	200	903	0	0	0	0	0	0	0	603	903	0
560	1	1.95125	9.17282	-20.0992	5340.91	-1044.26	-171.707	148.045	34.2721	0	0	0	0	0	0	0	200	903	0	0	0	0	0	0	0	603	903	0
560	2	2.71419	12.2246	-23.4561	5524.02	-1654.61	-125.931	129.459	64.4956	0	0	0	0	0	0	0	200	903	0	0	0	0	0	0	0	603	903	0
560	3	1.3409	11.3091	-26.5079	6256.44	-1410.47	-354.813	146.791	63.978	0	0	0	0	0	0	0	200	903	0	0	0	0	0	0	0	603	903	0
560	4	1.18831	13.903	-29.8648	8453.71	-1715.64	-354.813	142.553	16.9341	0	0	0	0	0	0	0	200	903	0	0	0	0	0	0	0	603	903	0
560	5	1.95125	15.8867	-31.6959	7904.39	-1837.72	-675.248	142.02	50.6176	0	0	0	0	0	0	0	200	903	0	0	0	0	0	0	0	603	903	0
560	6	2.5616	18.3281	-34.4424	8819.92	-1715.64	-1178.79	150.188	43.923	0	0	0	0	0	0	0	200	903	0	0	0	0	0	0	0	603	903	0
560	7	-0.0323951	18.3281	-38.7149	10467.9	-2264.96	-995.682	141.496	29.6166	0	0	0	0	0	0	0	200	903	0	0	0	0	0	0	0	603	903	0
560	8	0.272781	15.7341	-43.2925	11383.4	-2570.14	-949.906	140.633	37.0587	0	0	0	0	0	0	0	200	903	0	0	0	0	0	0	0	603	903	0
560	9	1.18831	13.7505	-48.4805	13489.1	-3302.56	-629.471	131.879	21.7624	0	0	0	0	0	0	0	200	903	0	0	0	0	0	0	0	603	903	0
561	0	1.49348	13.2927	-54.8892	15594.8	-3363.59	-171.707	138.72	15.8856	0	0	0	0	0	0	0	200	903	0	0	0	0	0	0	0	603	903	0
561	1	2.5616	9.63058	-62.8238	17517.4	-3546.7	-171.707	143.545	21.1656	0	0	0	0	0	0	0	200	903	0	0	0	0	0	0	0	603	903	0
561	2	3.32454	7.03659	-67.7066	19623.1	-4034.98	11.398	140.405	10.1739	0	0	0	0	0	0	0	200	903	0	0	0	0	0	0	0	603	903	0
561	3	1.64607	7.03659	-78.3877	21637.3	-4706.37	331.833	139.96	23.9709	0	0	0	0	0	0	0	200	903	0	0	0	0	0	0	0	603	903	0
561	4	2.25642	6.27365	-84.4913	24200.8	-5377.76	560.714	136.351	13.5706	0	0	0	0	0	0	0	200	903	0	0	0	0	0	0	0	603	903	0
561	5	6.83406	3.52707	-92.4258	26306.5	-5438.79	698.044	141.155	15.3773	0	0	0	0	0	0	0	200	903	0	0	0	0	0	0	0	603	903	0
561	6	4.69783	0.6279	-100.666	28870	-5988.11	1567.79	140.515	13.2092	0	0	0	0	0	0	0	200	903	0	0	0	0	0	0	0	603	903	0
561	7	7.13924	-1.81351	-113.483	31433.4	-6476.39	2483.32	142.931	23.0117	0	0	0	0	0	0	0	200	903	0	0	0	0	0	0	0	603	903	0
561	8	10.0384	-4.86526	-121.418	33905.4	-7452.95	2803.76	138.617	20.754	0	0	0	0	0	0	0	200	903	0	0	0	0	0	0	0	603	903	0
561	9	7.74959	-7.45926	-131.183	36468.8	-7880.2	2895.31	139.93	22.0006	0	0	0	0	0	0	0	200	903	0	0	0	0	0	0	0	603	903	0
562	0	7.13924	-9.13773	-139.423	39581.6	-8490.55	3902.39	139.102	16.1038	0	0	0	0	0	0	0	200	903	0	0	0	0	0	0	0	603	903	0
562	1	10.0384	-12.4947	-148.883	41321.1	-9345.04	3765.06	137.232	22.4596	0	0	0	0	0	0	0	200	903	0	0	0	0	0	0	0	603	903	0
562	2	10.4962	-14.9361	-159.259	44159.3	-9589.18	3765.06	139.789	22.721	0	0	0	0	0	0	0	200	903	0	0	0	0	0	0	0	603	903	0
562	3	9.73323	-16.7671	-169.025	46539.6	-10565.7	3948.17	137.49	24.6582	0	0	0	0	0	0	0	200	903	0	0	0	0	0	0	0	603	903	0
562	4	10.9539	-19.2085	-178.18	48736.9	-11237.1	4268.6	136.934	26.4741	0	0	0	0	0	0	0	200	903	0	0	0	0	0	0	0	603	903	0
562	5	9.73323	-19.2085	-184.894	51483.5	-11481.3	4131.27	137.904	21.5515	0	0	0	0	0	0	0	200	903	0	0	0	0	0	0	0	603	903	0
562	6	9.12288	-19.6663	-193.439	53497.6	-12335.8	4360.15	136.229	23.4392	0	0	0	0	0	0	0	200	903	0	0	0	0	0	0	0	603	903	0
562	7	11.7169	-21.6499	-199.848	55237.2	-12579.9	4543.26	137.053	23.6037	0	0	0	0	0	0	0	200	903	0	0	0	0	0	0	0	603	903	0
562	8	12.785	-20.887	-205.951	57251.3	-13068.2	4085.5	136.547	22.0151	0	0	0	0	0	0	0	200	903	0	0	0	0	0	0	0	603	903	0
562	9	11.4117	-21.6499	-215.107	58807.7	-13617.5	4222.83	136.694	26.6112	0	0	0	0	0	0	0	200	903	0	0	0	0	0	0	0	603	903	0
563	0	10.8013	-19.2085	-221.515	60364.1	-13739.6	4497.48	137.975	27.4945	0	0	0	0	0	0	0	200	903	0	0	0	0	0	0	0	603	903	0
563	1	10.6488	-17.6826	-226.703	62744.5	-14288.9	4268.6	136.971	23.2307	0	0	0	0	0	0	0	200	903	0	0	0	0	0	0	0	603	903	0
563	2	9.42805	-15.3938	-230.06	64484	-14716.1	3719.28	136.034	19.7081	0	0	0	0	0	0	0	200	903	0	0	0	0	0	0	0	603	903	0
563	3	12.4798	-11.5791	-239.215	65857.3	-15082.3	4177.05	136.951	24.6947	0	0	0	0	0	0	0	200	903	0	0	0	0	0	0	0	603	903	0
563	4	14.4635	-8.83255	-247.15	66772.8	-15753.7	4360.15	136.258	29.8288	0	0	0	0	0	0	0	200	903	0	0	0	0	0	0	0	603	903	0
563	5	13.8531	-6.54373	-252.338	68603.9	-15631.7	3993.94	138.053	28.1271	0	0	0	0	0	0	0	200	903	0	0	0	0	0	0	0	603	903	0
563	6	14.0057	-3.33939	-258.747	69977.1	-15936.8	3856.61	138.408	29.5534	0	0	0	0	0	0	0	200	903	0	0	0	0	0	0	0	603	903	0
563	7	15.8367	0.6279	-263.019	71167.3	-16486.2	4085.5	137.32	29.4214	0	0	0	0	0	0	0	200	903	0	0	0	0	0	0	0	603	903	0
563	8	16.5997	4.74777	-269.733	72357.5	-17035.5	3948.17	136.843	31.7438	0	0	0	0	0	0	0	200	903	0	0	0	0	0	0	0	603	903	0
563	9	18.8885	8.40988	-277.973	74097	-17401.7	3719.28	137.398	33.4378	0	0	0	0	0	0	0	200	903	0	0	0	0	0	0	0	603	903	0
564	0	19.3463	12.2246	-284.992	75378.8	-17706.9	3902.39	137.869	35.5055	0	0	0	0	0	0	0	200	903	0	0	0	0	0	0	0	603	903	0
564	1	19.1937	15.7341	-292.926	77118.3	-18134.1	3581.96	138.093	36.7315	0	0	0	0	0	0	0	200	903	0	0	0	0	0	0	0	603	903	0
564	2	21.0247	21.8376	-298.725	78400	-18866.5	3353.07	136.843	37.551	0	0	0	0	0	0	0	200	903	0	0	0	0	0	0	0	603	903	0
564	3	20.4144	24.7368	-304.523	79590.2	-19415.8	3215.74	136.242	38.6398	0	0	0	0	0	0	0	200	903	0	0	0	0	0	0	0	603	903	0
564	4	21.4825	29.6196	-312.152	81879	-19721	2986.86	136.822	37.6954	0	0	0	0	0	0	0	200	903	0	0	0	0	0	0	0	603	903	0
564	5	21.3299	34.0446	-321.918	82428.3	-20087.2	2712.2	137.601	43.9463	0	0	0	0	0	0	0	200	903	0	0	0	0	0	0	0	603	903	0
564	6	22.5506	38.4697	-325.58	83435.4	-20514.5	2391.77	136.991	43.7332	0	0	0	0	0	0	0	200	903	0	0	0	0	0	0	0	603	903	0
564	7	21.7877	42.7422	-337.787	85998.9	-21246.9	2391.77	137.1	45.4052	0	0	0	0	0	0	0	200	903	0	0	0	0	0	0	0	603	903	0
564	8	21.6351	46.862	-344.501	87646.8	-22101.4	1705.12	135.845	45.5832	0	0	0	0	0	0	0	200	903	0	0	0	0	0	0	0	603	903	0
564	9	23.3136	50.8293	-355.182	89203.2	-22101.4	1338.91	137.775	48.8522	0	0	0	0	0	0	0	200	903	0	0	0	0	0	0	0	603	903	0
565	0	23.0084	54.0337	-361.896	91400.5	-23139	1293.14	136.062	47.4399	0	0	0	0	0	0	0	200	903	0	0	0	0	0	0	0	603	903	0
565	1	22.8558	56.7802	-372.272	92773.8	-23444.2	1338.91	137.024	50.7903	0	0	0	0	0	0	0	200	903	0	0	0	0	0	0	0	603	903	0
565	2	22.398	60.1372	-381.427	94879.5	-24298.7	881.149	136.295	51.2515	0	0	0	0	0	0	0	200	903	0	0	0	0	0	0	0	603	903	0
565	3	23.161	62.1208	-389.667	96802.1	-24848	972.702	136.233	51.5774	0	0	0	0	0	0	0	200	903	0	0	0	0	0	0	0	603	903	0
565	4	22.398	63.4941	-396.076	98267	-25214.2	102.951	136.34	51.8986	0	0	0	0	0	0	0	200	903	0	0	0	0	0	0	0	603	903	0
565	5	23.161	62.5786	-406.147	100373	-25458.3	652.267	137.317	52.8659	0	0	0	0	0	0	0	200	903	0	0	0	0	0	0	0	603	903	0
565	6	24.8394	65.6303	-415.912	102295	-26495.9	743.82	136.294	54.0459	0	0	0	0	0	0	0	200	903	0	0	0	0	0	0	0	603	903	0
565	7	23.3136	65.7829	-429.035	105133	-27716.6	377.609	135.398	54.9537	0	0	0	0	0	0	0	200	903	0	0	0	0	0	0	0	603	903	0
565	8	22.398	66.6985	-444.599	108155	-28632.2	-217.484	135.6	56.7365	0	0	0	0	0	0	0	200	903	0	0	0	0	0	0	0	603	903	0
565	9	22.2454	67.1562	-455.89	110535	-29486.6	-537.919	135.321	57.5403	0	0	0	0	0	0	0	200	903	0	0	0	0	0	0	0	603	903	0
566	0	18.1256	69.7502	-469.013	112458	-30463.2	-766.8	135.048	60.2248	0	0	0	0	0	0	0	200	903	0	0	0	0	0	0	0	603	903	0
566	1	16.5997	69.9028	-476.947	114746	-31683.9	-1636.55	133.569	59.4148	0	0	0	0	0	0	0	200	903	0	0	0	0	0	0	0	603	903	0
566	2	14.4635	69.445	-489.765	117035	-32233.2	-2002.76	134.186	61.0378	0	0	0	0	0	0	0	200	903	0	0	0	0	0	0	0	603	903	0
566	3	12.4798	71.1235	-501.056	118317	-33270.8	-2414.75	133.599	63.8648	0	0	0	0	0	0	0	200	903	0	0	0	0	0	0	0	603	903	0
566	4	9.88582	75.8537	-510.822	120697	-33698.1	-3055.62	134.032	63.7192	0	0	0	0	0	0	0	200	903	0	0	0	0	0	0	0	603	903	0
566	5	9.27547	79.5158	-519.672	122162	-34308.4	-4016.92	133.981	64.9243	0	0	0	0	0	0	0	200	903	0	0	0	0	0	0	0	603	903	0
566	6	4.69783	81.0417	-526.386	123078	-35162.9	-4474.69	133.199	66.1834	0	0	0	0	0	0	0	200	903	0	0	0	0	0	0	0	603	903	0
566	7	5.30818	83.6357	-534.32	124909	-35651.2	-4383.13	133.278	66.2286	0	0	0	0	0	0	0	200	903	0	0	0	0	0	0	0	603	903	0
566	8	6.68147	86.8401	-543.781	125916	-36322.6	-4886.67	133.204	68.4437	0	0	0	0	0	0	0	200	903	0	0	0	0	0	0	0	603	903	0
566	9	5.76594	90.0444	-549.884	127198	-36383.6	-5069.78	133.834	68.6829	0	0	0	0	0	0	0	200	903	0	0	0	0	0	0	0	603	903	0
567	0	3.47713	90.3496	-553.852	126923	-36932.9	-5207.11	133.316	70.8358	0	0	0	0	0	0	0	200	903	0	0	0	0	0	0	0	603	903	0
567	1	3.7823	93.4013	-558.124	128205	-37360.2	-5252.88	133.061	70.2936	0	0	0	0	0	0	0	200	903	0	0	0	0	0	0	0	603	903	0
567	2	2.86677	96.1479	-557.209	128662	-37909.5	-5390.21	131.965	69.0946	0	0	0	0	0	0	0	200	903	0	0	0	0	0	0	0	603	903	0
567	3	3.62971	95.385	-565.753	129212	-37787.4	-5527.54	133.209	71.6112	0	0	0	0	0	0	0	200	903	0	0	0	0	0	0	0	603	903	0
567	4	2.71419	96.6057	-568.5	129578	-37238.1	-5847.98	134.498	72.0704	0	0	0	0	0	0	0	200	903	0	0	0	0	0	0	0	603	903	0
567	5	2.40901	98.2841	-571.247	130219	-38031.6	-5847.98	133.424	72.0444	0	0	0	0	0	0	0	200	903	0	0	0	0	0	0	0	603	903	0
567	6	0.883132	98.5893	-573.078	129395	-38519.8	-5893.75	132.784	74.2106	0	0	0	0	0	0	0	200	903	0	0	0	0	0	0	0	603	903	0
567	7	-0.337571	97.3686	-571.857	130036	-38458.8	-6259.96	132.747	72.608	0	0	0	0	0	0	0	200	903	0	0	0	0	0	0	0	603	903	0
567	8	0.577956	96.1479	-572.162	130219	-38214.7	-6351.52	133.21	72.4091	0	0	0	0	0	0	0	200	903	0	0	0	0	0	0	0	603	903	0
567	9	1.3409	96.6057	-573.078	129761	-38275.7	-6122.64	133.21	73.5716	0	0	0	0	0	0	0	200	903	0	0	0	0	0	0	0	603	903	0
568	0	0.730544	94.4695	-576.74	129761	-38519.8	-6351.52	133.211	75.0093	0	0	0	0	0	0	0	200	903	0	0	0	0	0	0	0	603	903	0
568	1	-1.10051	94.9272	-576.74	129486	-38947.1	-6580.4	132.47	75.4855	0	0	0	0	0	0	0	200	903	0	0	0	0	0	0	0	603	903	0
568	2	-0.490159	94.9272	-573.383	129853	-38641.9	-6351.52	132.607	73.5323	0	0	0	0	0	0	0	200	903	0	0	0	0	0	0	0	603	903	0
568	3	0.272781	95.5376	-574.604	129395	-38397.8	-6259.96	133.175	74.8102	0	0	0	0	0	0	0	200	903	0	0	0	0	0	0	0	603	903	0
568	4	1.03572	95.385	-575.519	129395	-38092.6	-6855.06	133.812	75.1684	0	0	0	0	0	0	0	200	903	0	0	0	0	0	0	0	603	903	0
568	5	1.3409	94.0117	-577.655	128937	-38092.6	-6671.95	134.057	76.7923	0	0	0	0	0	0	0	200	903	0	0	0	0	0	0	0	603	903	0
568	6	0.730544	95.6902	-575.824	128754	-38214.7	-6763.5	133.635	76.4005	0	0	0	0	0	0	0	200	903	0	0	0	0	0	0	0	603	903	0
568	7	-0.490159	97.6738	-576.129	127930	-38580.9	-6763.5	133.034	77.9491	0	0	0	0	0	0	0	200	903	0	0	0	0	0	0	0	603	903	0
568	8	0.730544	97.6738	-575.214	127472	-38336.7	-7083.94	133.352	78.3915	0	0	0	0	0	0	0	200	903	0	0	0	0	0	0	0	603	903	0
568	9	-0.947922	98.4367	-573.078	127564	-38153.6	-6809.28	133.423	77.4057	0	0	0	0	0	0	0	200	903	0	0	0	0	0	0	0	603	903	0
569	0	-0.795335	100.878	-574.298	127106	-38764	-7450.15	132.502	78.6759	0	0	0	0	0	0	0	200	903	0	0	0	0	0	0	0	603	903	0
569	1	-1.10051	101.794	-577.35	127014	-38397.8	-7404.38	133.493	80.0044	0	0	0	0	0	0	0	200	903	0	0	0	0	0	0	0	603	903	0
569	2	-2.77898	102.099	-576.74	126282	-38458.8	-7633.26	133.317	81.0415	0	0	0	0	0	0	0	200	903	0	0	0	0	0	0	0	603	903	0
569	3	-3.08415	103.625	-576.74	125824	-38641.9	-7770.59	132.999	81.8352	0	0	0	0	0	0	0	200	903	0	0	0	0	0	0	0	603	903	0
569	4	-4.91521	104.998	-575.824	125916	-38641.9	-8365.68	132.893	81.3294	0	0	0	0	0	0	0	200	903	0	0	0	0	0	0	0	603	903	0
569	5	-4.91521	105.761	-576.74	125367	-39069.2	-8548.78	132.259	82.6289	0	0	0	0	0	0	0	200	903	0	0	0	0	0	0	0	603	903	0
569	6	-6.2885	107.134	-579.486	125458	-39069.2	-9098.1	132.58	83.5012	0	0	0	0	0	0	0	200	903	0	0	0	0	0	0	0	603	903	0
569	7	-7.35661	108.355	-577.961	125367	-38947.1	-9464.31	132.613	83.088	0	0	0	0	0	0	0	200	903	0	0	0	0	0	0	0	603	903	0
569	8	-9.18767	108.66	-582.843	125641	-39130.2	-9464.31	132.863	84.434	0	0	0	0	0	0	0	200	903	0	0	0	0	0	0	0	603	903	0
569	9	-10.8661	109.576	-581.012	125458	-39740.5	-9967.85	131.601	84.0697	0	0	0	0	0	0	0	200	903	0	0	0	0	0	0	0	603	903	0
570	0	-10.7135	108.965	-582.233	126007	-39801.6	-10242.5	131.64	83.579	0	0	0	0	0	0	0	200	903	0	0	0	0	0	0	0	603	903	0
570	1	-12.392	110.033	-584.064	125367	-39984.7	-10517.2	131.541	85.3548	0	0	0	0	0	0	0	200	903	0	0	0	0	0	0	0	603	903	0
570	2	-14.0705	109.27	-587.726	125916	-39557.4	-10562.9	132.694	85.7576	0	0	0	0	0	0	0	200	903	0	0	0	0	0	0	0	603	903	0
570	3	-15.9015	110.644	-589.557	125916	-39862.6	-10974.9	132.386	86.423	0	0	0	0	0	0	0	200	903	0	0	0	0	0	0	0	603	903	0
570	4	-16.9697	111.254	-593.219	126831	-40473	-11295.4	131.774	86.1981	0	0	0	0	0	0	0	200	903	0	0	0	0	0	0	0	603	903	0
570	5	-18.6481	112.17	-592.304	127289	-40839.2	-11615.8	131.05	85.0948	0	0	0	0	0	0	0	200	903	0	0	0	0	0	0	0	603	903	0
570	6	-19.1059	112.627	-595.661	127747	-40534	-11844.7	131.951	85.5374	0	0	0	0	0	0	0	200	903	0	0	0	0	0	0	0	603	903	0
570	7	-19.4111	112.017	-600.238	127564	-40473	-12027.8	132.572	87.478	0	0	0	0	0	0	0	200	903	0	0	0	0	0	0	0	603	903	0
570	8	-20.7843	110.949	-603.29	128754	-41205.4	-12165.1	131.699	86.5802	0	0	0	0	0	0	0	200	903	0	0	0	0	0	0	0	603	903	0
570	9	-22.768	112.322	-605.426	128571	-41632.6	-12851.8	131.234	87.6358	0	0	0	0	0	0	0	200	903	0	0	0	0	0	0	0	603	903	0
571	0	-23.9887	112.322	-607.563	129303	-41876.8	-12485.5	131.074	87.177	0	0	0	0	0	0	0	200	903	0	0	0	0	0	0	0	603	903	0
571	1	-24.9042	111.712	-608.783	129944	-41632.6	-12668.7	131.613	86.551	0	0	0	0	0	0	0	200	903	0	0	0	0	0	0	0	603	903	0
571	2	-23.8361	112.475	-614.582	130127	-42120.9	-13034.9	131.464	88.2669	0	0	0	0	0	0	0	200	903	0	0	0	0	0	0	0	603	903	0
571	3	-24.7516	113.085	-619.464	131501	-42548.2	-12989.1	131.315	87.7189	0	0	0	0	0	0	0	200	903	0	0	0	0	0	0	0	603	903	0
571	4	-24.7516	112.322	-621.295	130585	-43097.5	-13172.2	130.633	89.8181	0	0	0	0	0	0	0	200	903	0	0	0	0	0	0	0	603	903	0
571	5	-27.193	112.933	-626.178	131501	-43036.4	-13218	131.271	89.995	0	0	0	0	0	0	0	200	903	0	0	0	0	0	0	0	603	903	0
571	6	-28.2612	112.933	-627.704	131958	-43280.6	-13584.2	131.049	89.7762	0	0	0	0	0	0	0	200	903	0	0	0	0	0	0	0	603	903	0
571	7	-27.8034	112.933	-631.061	132599	-43280.6	-13538.4	131.416	89.8789	0	0	0	0	0	0	0	200	903	0	0	0	0	0	0	0	603	903	0
571	8	-27.956	113.39	-635.639	133515	-43585.8	-13218	131.43	89.9519	0	0	0	0	0	0	0	200	903	0	0	0	0	0	0	0	603	903	0
571	9	-27.956	112.627	-640.827	133332	-44318.2	-13538.4	130.842	91.938	0	0	0	0	0	0	0	200	903	0	0	0	0	0	0	0	603	903	0
572	0	-28.8715	112.78	-645.099	134522	-44257.1	-13401.1	131.395	91.4711	0	0	0	0	0	0	0	200	903	0	0	0	0	0	0	0	603	903	0
572	1	-30.55	112.78	-642.353	135163	-44074	-13263.8	131.387	89.5818	0	0	0	0	0	0	0	200	903	0	0	0	0	0	0	0	603	903	0
572	2	-30.2448	112.475	-649.372	135987	-44257.1	-13080.6	131.846	90.5873	0	0	0	0	0	0	0	200	903	0	0	0	0	0	0	0	603	903	0
572	3	-29.4819	110.491	-651.203	136628	-44623.4	-13813.1	131.475	90.192	0	0	0	0	0	0	0	200	903	0	0	0	0	0	0	0	603	903	0
572	4	-27.956	111.712	-656.696	137177	-44928.5	-13767.3	131.584	91.1105	0	0	0	0	0	0	0	200	903	0	0	0	0	0	0	0	603	903	0
572	5	-30.0922	110.796	-660.968	138916	-45294.7	-13538.4	131.472	89.829	0	0	0	0	0	0	0	200	903	0	0	0	0	0	0	0	603	903	0
572	6	-31.1603	110.491	-664.325	139099	-44867.5	-13675.7	132.462	90.6154	0	0	0	0	0	0	0	200	903	0	0	0	0	0	0	0	603	903	0
572	7	-31.0077	110.186	-665.546	139740	-45111.6	-13767.3	132.219	90.0365	0	0	0	0	0	0	0	200	903	0	0	0	0	0	0	0	603	903	0
572	8	-31.9233	108.66	-667.682	140564	-45844.1	-13630	131.339	89.4742	0	0	0	0	0	0	0	200	903	0	0	0	0	0	0	0	603	903	0
572	9	-31.4655	107.745	-674.091	140290	-45355.8	-13492.6	132.716	91.8832	0	0	0	0	0	0	0	200	903	0	0	0	0	0	0	0	603	903	0
573	0	-31.1603	107.134	-678.363	141754	-46027.2	-13584.2	132.15	91.0346	0	0	0	0	0	0	0	200	903	0	0	0	0	0	0	0	603	903	0
573	1	-32.5336	106.829	-681.11	142304	-45966.1	-13538.4	132.513	91.0707	0	0	0	0	0	0	0	200	903	0	0	0	0	0	0	0	603	903	0
573	2	-32.8388	105.608	-685.688	142487	-46271.3	-13538.4	132.518	92.1985	0	0	0	0	0	0	0	200	903	0	0	0	0	0	0	0	603	903	0
573	3	-32.5336	105.456	-687.824	143677	-46637.5	-13309.5	132.196	91.1135	0	0	0	0	0	0	0	200	903	0	0	0	0	0	0	0	603	903	0
573	4	-31.9233	104.235	-691.486	143128	-47247.9	-13218	131.672	93.0141	0	0	0	0	0	0	0	200	903	0	0	0	0	0	0	0	603	903	0
573	5	-30.2448	103.93	-696.979	143677	-46759.6	-13263.8	132.911	93.8574	0	0	0	0	0	0	0	200	903	0	0	0	0	0	0	0	603	903	0
573	6	-31.4655	103.625	-699.726	144501	-46881.7	-13218	133	93.489	0	0	0	0	0	0	0	200	903	0	0	0	0	0	0	0	603	903	0
573	7	-33.144	103.014	-703.998	145233	-47003.7	-12897.5	133.233	93.7019	0	0	0	0	0	0	0	200	903	0	0	0	0	0	0	0	603	903	0
573	8	-32.8388	101.641	-705.219	145508	-47614.1	-12622.9	132.483	93.6695	0	0	0	0	0	0	0	200	903	0	0	0	0	0	0	0	603	903	0
573	9	-32.2284	101.336	-708.271	146515	-47797.2	-12806	132.516	93.1366	0	0	0	0	0	0	0	200	903	0	0	0	0	0	0	0	603	903	0
574	0	-31.0077	101.183	-713.153	147339	-47614.1	-12531.3	133.234	93.3976	0	0	0	0	0	0	0	200	903	0	0	0	0	0	0	0	603	903	0
574	1	-31.3129	99.81	-718.036	147889	-47736.2	-12302.4	133.518	94.0375	0	0	0	0	0	0	0	200	903	0	0	0	0	0	0	0	603	903	0
574	2	-32.0759	99.1997	-720.478	149170	-48346.5	-12256.7	132.897	92.9564	0	0	0	0	0	0	0	200	903	0	0	0	0	0	0	0	603	903	0
574	3	-31.1603	98.4367	-721.698	149353	-48163.4	-12302.4	133.264	93.0529	0	0	0	0	0	0	0	200	903	0	0	0	0	0	0	0	603	903	0
574	4	-31.1603	97.8264	-721.698	150269	-48773.8	-12073.6	132.418	91.7843	0	0	0	0	0	0	0	200	903	0	0	0	0	0	0	0	603	903	0
574	5	-30.0922	96.4531	-727.191	150360	-48224.4	-11890.5	133.684	93.2313	0	0	0	0	0	0	0	200	903	0	0	0	0	0	0	0	603	903	0
574	6	-29.787	96.1479	-731.464	151276	-48285.5	-11524.2	133.988	93.1874	0	0	0	0	0	0	0	200	903	0	0	0	0	0	0	0	603	903	0
574	7	-30.2448	94.622	-734.211	150818	-48712.7	-11570	133.653	94.5845	0	0	0	0	0	0	0	200	903	0	0	0	0	0	0	0	603	903	0
574	8	-29.6344	94.4695	-735.126	151917	-48346.5	-11753.1	134.234	93.3458	0	0	0	0	0	0	0	200	903	0	0	0	0	0	0	0	603	903	0
574	9	-29.6344	92.791	-736.347	153107	-48895.8	-11158	133.597	92.072	0	0	0	0	0	0	0	200	903	0	0	0	0	0	0	0	603	903	0
575	0	-29.0241	92.1806	-739.398	152466	-48651.7	-11158	134.201	93.7971	0	0	0	0	0	0	0	200	903	0	0	0	0	0	0	0	603	903	0
575	1	-28.2612	91.4177	-743.671	153473	-48529.6	-11112.3	134.743	93.6275	0	0	0	0	0	0	0	200	903	0	0	0	0	0	0	0	603	903	0
575	2	-28.7189	89.8918	-744.586	152100	-49323.1	-10974.9	133.758	95.7256	0	0	0	0	0	0	0	200	903	0	0	0	0	0	0	0	603	903	0
575	3	-28.1086	88.8237	-746.418	153015	-49017.9	-10562.9	134.329	95.0002	0	0	0	0	0	0	0	200	903	0	0	0	0	0	0	0	603	903	0
575	4	-28.2612	88.2133	-745.502	153107	-49201	-10471.4	134.003	94.6256	0	0	0	0	0	0	0	200	903	0	0	0	0	0	0	0	603	903	0
575	5	-27.3456	86.9926	-748.554	153840	-49017.9	-10288.3	134.517	94.4844	0	0	0	0	0	0	0	200	903	0	0	0	0	0	0	0	603	903	0
575	6	-27.193	85.7719	-753.131	153656	-49262	-10288.3	134.59	95.9767	0	0	0	0	0	0	0	200	903	0	0	0	0	0	0	0	603	903	0
575	7	-27.193	86.2297	-755.573	154206	-49323.1	-9647.42	134.721	95.9089	0	0	0	0	0	0	0	200	903	0	0	0	0	0	0	0	603	903	0
575	8	-25.2094	84.8564	-754.962	153840	-48956.9	-9784.74	135.153	96.229	0	0	0	0	0	0	0	200	903	0	0	0	0	0	0	0	603	903	0
575	9	-27.3456	84.2461	-755.268	154297	-49506.2	-9784.74	134.452	95.7053	0	0	0	0	0	0	0	200	903	0	0	0	0	0	0	0	603	903	0
576	0	-25.5146	82.5676	-756.183	154663	-49201	-9418.53	134.935	95.4683	0	0	0	0	0	0	0	200	903	0	0	0	0	0	0	0	603	903	0
576	1	-25.2094	80.584	-759.54	154755	-49201	-9372.76	135.223	96.2517	0	0	0	0	0	0	0	200	903	0	0	0	0	0	0	0	603	903	0
576	2	-26.1249	81.0417	-759.235	154938	-49750.3	-9143.88	134.473	95.9287	0	0	0	0	0	0	0	200	903	0	0	0	0	0	0	0	603	903	0
576	3	-25.362	80.2788	-760.761	155579	-49262	-9098.1	135.246	95.4955	0	0	0	0	0	0	0	200	903	0	0	0	0	0	0	0	603	903	0
576	4	-25.362	78.9055	-760.456	155762	-49689.3	-8823.44	134.659	95.1727	0	0	0	0	0	0	0	200	903	0	0	0	0	0	0	0	603	903	0
576	5	-23.8361	78.2951	-759.845	155579	-49445.1	-8686.11	134.927	95.2491	0	0	0	0	0	0	0	200	903	0	0	0	0	0	0	0	603	903	0
576	6	-23.2258	77.8374	-760.456	155670	-49201	-8365.68	135.301	95.2931	0	0	0	0	0	0	0	200	903	0	0	0	0	0	0	0	603	903	0
576	7	-23.0732	75.2434	-764.423	154755	-49628.3	-8091.02	135.077	97.5532	0	0	0	0	0	0	0	200	903	0	0	0	0	0	0	0	603	903	0
576	8	-23.2258	75.2434	-764.423	155396	-49689.3	-7862.14	134.998	96.7148	0	0	0	0	0	0	0	200	903	0	0	0	0	0	0	0	603	903	0
576	9	-21.6999	73.4123	-763.507	155762	-49323.1	-7450.15	135.399	95.9914	0	0	0	0	0	0	0	200	903	0	0	0	0	0	0	0	603	903	0
577	0	-22.9206	72.6494	-760.761	155945	-48773.8	-7999.47	135.888	95.0142	0	0	0	0	0	0	0	200	903	0	0	0	0	0	0	0	603	903	0
577	1	-21.3947	71.1235	-762.592	155945	-48895.8	-7541.7	135.882	95.5064	0	0	0	0	0	0	0	200	903	0	0	0	0	0	0	0	603	903	0
577	2	-21.3947	70.9709	-766.254	155854	-49323.1	-7358.6	135.631	96.6032	0	0	0	0	0	0	0	200	903	0	0	0	0	0	0	0	603	903	0
577	3	-20.7843	69.5976	-764.118	154755	-48956.9	-6717.73	135.93	97.4723	0	0	0	0	0	0	0	200	903	0	0	0	0	0	0	0	603	903	0
577	4	-21.2421	68.5295	-764.423	154480	-48468.6	-6855.06	136.595	97.9125	0	0	0	0	0	0	0	200	903	0	0	0	0	0	0	0	603	903	0
577	5	-21.2421	68.3769	-762.287	154297	-48529.6	-6351.52	136.337	97.5864	0	0	0	0	0	0	0	200	903	0	0	0	0	0	0	0	603	903	0
577	6	-20.3266	66.6985	-760.761	153748	-48712.7	-6626.18	135.968	97.9025	0	0	0	0	0	0	0	200	903	0	0	0	0	0	0	0	603	903	0
577	7	-19.2585	66.5459	-760.15	153015	-49017.9	-6214.19	135.516	98.7037	0	0	0	0	0	0	0	200	903	0	0	0	0	0	0	0	603	903	0
577	8	-19.5636	65.1726	-761.371	153199	-48712.7	-6763.5	136.02	98.7859	0	0	0	0	0	0	0	200	903	0	0	0	0	0	0	0	603	903	0
577	9	-20.3266	65.02	-761.066	153107	-48407.6	-6168.41	136.395	98.8255	0	0	0	0	0	0	0	200	903	0	0	0	0	0	0	0	603	903	0
578	0	-20.7843	62.1208	-758.014	152832	-47858.2	-6168.41	136.864	98.378	0	0	0	0	0	0	0	200	903	0	0	0	0	0	0	0	603	903	0
578	1	-20.0214	61.8156	-755.878	151825	-48102.4	-6031.08	136.362	99.1405	0	0	0	0	0	0	0	200	903	0	0	0	0	0	0	0	603	903	0
578	2	-19.5636	61.0527	-753.437	152008	-48468.6	-6031.08	135.67	98.2466	0	0	0	0	0	0	0	200	903	0	0	0	0	0	0	0	603	903	0
578	3	-17.7326	60.9001	-752.521	151642	-48346.5	-6168.41	135.754	98.4877	0	0	0	0	0	0	0	200	903	0	0	0	0	0	0	0	603	903	0
578	4	-19.5636	58.9165	-751.3	151001	-47736.2	-5847.98	136.462	99.0134	0	0	0	0	0	0	0	200	903	0	0	0	0	0	0	0	603	903	0
578	5	-21.2421	58.1535	-747.943	150269	-47614.1	-5481.77	136.34	99.0906	0	0	0	0	0	0	0	200	903	0	0	0	0	0	0	0	603	903	0
578	6	-20.9369	56.9328	-745.197	149262	-47431	-5664.87	136.351	99.7014	0	0	0	0	0	0	0	200	903	0	0	0	0	0	0	0	603	903	0
578	7	-21.3947	56.0173	-739.398	149170	-47736.2	-5298.66	135.439	98.2546	0	0	0	0	0	0	0	200	903	0	0	0	0	0	0	0	603	903	0
578	8	-19.5636	55.8647	-739.093	148529	-47492	-5802.2	135.743	99.0383	0	0	0	0	0	0	0	200	903	0	0	0	0	0	0	0	603	903	0
578	9	-20.0214	54.1862	-736.957	147522	-46881.7	-5527.54	136.385	99.8223	0	0	0	0	0	0	0	200	903	0	0	0	0	0	0	0	603	903	0
579	0	-19.5636	53.4233	-729.023	146332	-46515.4	-5619.1	136.195	99.2762	0	0	0	0	0	0	0	200	903	0	0	0	0	0	0	0	603	903	0
579	1	-21.8525	52.6604	-730.854	145417	-46637.5	-5481.77	136.188	101.032	0	0	0	0	0	0	0	200	903	0	0	0	0	0	0	0	603	903	0
579	2	-21.6999	51.7448	-726.276	144501	-46332.3	-5298.66	136.206	101.038	0	0	0	0	0	0	0	200	903	0	0	0	0	0	0	0	603	903	0
579	3	-22.0051	50.8293	-719.257	143860	-46393.4	-5252.88	135.498	99.9877	0	0	0	0	0	0	0	200	903	0	0	0	0	0	0	0	603	903	0
579	4	-21.0895	51.2871	-718.952	143128	-45783	-5115.56	136.32	100.922	0	0	0	0	0	0	0	200	903	0	0	0	0	0	0	0	603	903	0
579	5	-21.0895	50.0664	-717.731	141388	-45783	-5069.78	136.211	103.007	0	0	0	0	0	0	0	200	903	0	0	0	0	0	0	0	603	903	0
579	6	-21.0895	49.7612	-713.153	140839	-45050.6	-5207.11	136.829	102.512	0	0	0	0	0	0	0	200	903	0	0	0	0	0	0	0	603	903	0
579	7	-22.3102	49.3034	-710.712	140107	-45111.6	-5024	136.526	102.865	0	0	0	0	0	0	0	200	903	0	0	0	0	0	0	0	603	903	0
579	8	-22.4628	47.9301	-704.303	138825	-45111.6	-4886.67	135.949	102.891	0	0	0	0	0	0	0	200	903	0	0	0	0	0	0	0	603	903	0
579	9	-20.9369	47.625	-700.031	137452	-44135.1	-5161.33	136.953	103.649	0	0	0	0	0	0	0	200	903	0	0	0	0	0	0	0	603	903	0
580	0	-20.3266	46.0991	-696.979	136811	-44318.2	-4978.23	136.414	103.709	0	0	0	0	0	0	0	200	903	0	0	0	0	0	0	0	603	903	0
580	1	-21.0895	43.8103	-694.232	136078	-44013	-4703.57	136.602	103.987	0	0	0	0	0	0	0	200	903	0	0	0	0	0	0	0	603	903	0
580	2	-22.4628	43.8103	-689.35	134797	-44196.1	-4657.79	135.887	104.458	0	0	0	0	0	0	0	200	903	0	0	0	0	0	0	0	603	903	0
580	3	-21.0895	45.031	-684.162	133789	-43768.9	-4795.12	136.026	104.448	0	0	0	0	0	0	0	200	903	0	0	0	0	0	0	0	603	903	0
580	4	-22.9206	43.5051	-678.058	133423	-43707.8	-4428.91	135.54	103.228	0	0	0	0	0	0	0	200	903	0	0	0	0	0	0	0	603	903	0
580	5	-22.1576	43.1999	-675.617	132233	-42914.4	-4566.24	136.481	104.278	0	0	0	0	0	0	0	200	903	0	0	0	0	0	0	0	603	903	0
580	6	-21.6999	42.5896	-673.786	131501	-42975.4	-4337.36	136.218	104.833	0	0	0	0	0	0	0	200	903	0	0	0	0	0	0	0	603	903	0
580	7	-22.768	42.1318	-668.598	130402	-43036.4	-4383.13	135.632	104.962	0	0	0	0	0	0	0	200	903	0	0	0	0	0	0	0	603	903	0
580	8	-22.9206	40.6059	-664.936	128937	-42182	-4612.02	136.562	106.091	0	0	0	0	0	0	0	200	903	0	0	0	0	0	0	0	603	903	0
580	9	-23.3783	39.843	-658.832	128205	-42365.1	-4749.34	135.697	105.406	0	0	0	0	0	0	0	200	903	0	0	0	0	0	0	0	603	903	0
581	0	-22.1576	39.6904	-654.865	127655	-41754.7	-4291.58	136.239	105.066	0	0	0	0	0	0	0	200	903	0	0	0	0	0	0	0	603	903	0
581	1	-21.6999	38.6223	-651.813	126007	-41510.6	-4383.13	136.315	106.682	0	0	0	0	0	0	0	200	903	0	0	0	0	0	0	0	603	903	0
581	2	-21.8525	38.9275	-649.066	125550	-41510.6	-4520.46	136.046	106.569	0	0	0	0	0	0	0	200	903	0	0	0	0	0	0	0	603	903	0
581	3	-23.5309	38.1645	-643.878	123719	-41327.5	-4428.91	135.815	107.854	0	0	0	0	0	0	0	200	903	0	0	0	0	0	0	0	603	903	0
581	4	-22.6154	37.4016	-638.08	122437	-41327.5	-4154.25	135.232	108.117	0	0	0	0	0	0	0	200	903	0	0	0	0	0	0	0	603	903	0
581	5	-22.3102	36.0283	-634.418	121521	-40534	-4062.7	136.108	108.452	0	0	0	0	0	0	0	200	903	0	0	0	0	0	0	0	603	903	0
581	6	-22.9206	36.3335	-629.23	120697	-40228.8	-4245.8	136.067	108.182	0	0	0	0	0	0	0	200	903	0	0	0	0	0	0	0	603	903	0
581	7	-22.3102	35.8757	-627.399	118592	-40167.8	-4154.25	135.977	110.979	0	0	0	0	0	0	0	200	903	0	0	0	0	0	0	0	603	903	0
581	8	-22.768	34.9602	-622.821	118409	-39984.7	-3925.37	135.801	109.884	0	0	0	0	0	0	0	200	903	0	0	0	0	0	0	0	603	903	0
581	9	-22.4628	34.9602	-617.633	117401	-39313.3	-4016.92	136.348	109.917	0	0	0	0	0	0	0	200	903	0	0	0	0	0	0	0	603	903	0
582	0	-23.6835	33.5869	-613.056	116120	-39435.4	-3971.15	135.674	110.589	0	0	0	0	0	0	0	200	903	0	0	0	0	0	0	0	603	903	0
582	1	-22.0051	32.6714	-610.919	115662	-39008.1	-3971.15	136.149	110.676	0	0	0	0	0	0	0	200	903	0	0	0	0	0	0	0	603	903	0
582	2	-22.3102	33.1291	-606.952	115296	-39069.2	-3833.82	135.631	110.041	0	0	0	0	0	0	0	200	903	0	0	0	0	0	0	0	603	903	0
582	3	-23.2258	32.3662	-605.426	114289	-38947.1	-3696.49	135.67	111.226	0	0	0	0	0	0	0	200	903	0	0	0	0	0	0	0	603	903	0
582	4	-23.5309	31.6032	-601.154	113282	-38214.7	-3879.59	136.431	111.56	0	0	0	0	0	0	0	200	903	0	0	0	0	0	0	0	603	903	0
582	5	-23.5309	30.9929	-595.661	112549	-37970.5	-3925.37	136.255	111.052	0	0	0	0	0	0	0	200	903	0	0	0	0	0	0	0	603	903	0
582	6	-23.3783	30.5351	-591.999	111908	-38214.7	-3604.93	135.448	110.965	0	0	0	0	0	0	0	200	903	0	0	0	0	0	0	0	603	903	0
582	7	-22.768	29.467	-590.168	109803	-38336.7	-3742.26	135.041	113.947	0	0	0	0	0	0	0	200	903	0	0	0	0	0	0	0	603	903	0
582	8	-22.9206	29.6196	-587.421	109345	-37726.4	-3879.59	135.776	113.856	0	0	0	0	0	0	0	200	903	0	0	0	0	0	0	0	603	903	0
582	9	-23.9887	28.5515	-583.759	109253	-37421.2	-3742.26	135.896	112.845	0	0	0	0	0	0	0	200	903	0	0	0	0	0	0	0	603	903	0
583	0	-23.9887	28.0937	-579.486	108155	-36810.9	-3421.83	136.477	113.361	0	0	0	0	0	0	0	200	903	0	0	0	0	0	0	0	603	903	0
583	1	-23.6835	27.7885	-576.74	107514	-37177.1	-3696.49	135.539	113.584	0	0	0	0	0	0	0	200	903	0	0	0	0	0	0	0	603	903	0
583	2	-22.768	27.7885	-572.773	106507	-36994	-3696.49	135.412	114.051	0	0	0	0	0	0	0	200	903	0	0	0	0	0	0	0	603	903	0
583	3	-23.0732	25.042	-572.467	105957	-36871.9	-3604.93	135.591	114.911	0	0	0	0	0	0	0	200	903	0	0	0	0	0	0	0	603	903	0
583	4	-24.1413	25.9575	-570.026	105866	-36139.5	-3467.61	136.6	114.279	0	0	0	0	0	0	0	200	903	0	0	0	0	0	0	0	603	903	0
583	5	-22.4628	25.3471	-564.533	103577	-35956.4	-3604.93	136.308	116.526	0	0	0	0	0	0	0	200	903	0	0	0	0	0	0	0	603	903	0
583	6	-23.8361	25.3471	-562.091	102753	-36017.4	-3650.71	135.923	117.195	0	0	0	0	0	0	0	200	903	0	0	0	0	0	0	0	603	903	0
583	7	-22.9206	24.8894	-558.734	101654	-36261.5	-3696.49	135.101	118.063	0	0	0	0	0	0	0	200	903	0	0	0	0	0	0	0	603	903	0
583	8	-23.0732	24.4316	-557.209	101288	-36078.4	-3604.93	135.251	118.222	0	0	0	0	0	0	0	200	903	0	0	0	0	0	0	0	603	903	0
583	9	-23.3783	23.8213	-556.903	100190	-35529.1	-3559.16	136.202	120.095	0	0	0	0	0	0	0	200	903	0	0	0	0	0	0	0	603	903	0
584	0	-24.1413	24.279	-553.852	100281	-35834.3	-3513.38	135.3	118.939	0	0	0	0	0	0	0	200	903	0	0	0	0	0	0	0	603	903	0
584	1	-24.1413	23.9738	-548.358	98724.7	-35285	-3421.83	135.653	119.963	0	0	0	0	0	0	0	200	903	0	0	0	0	0	0	0	603	903	0
584	2	-24.7516	23.3635	-545.002	97992.3	-35407.1	-3147.17	135.033	120.198	0	0	0	0	0	0	0	200	903	0	0	0	0	0	0	0	603	903	0
584	3	-23.0732	22.448	-543.476	97443	-35407.1	-3467.61	134.851	120.704	0	0	0	0	0	0	0	200	903	0	0	0	0	0	0	0	603	903	0
584	4	-23.0732	22.2954	-544.086	96985.2	-34979.8	-3604.93	135.709	121.747	0	0	0	0	0	0	0	200	903	0	0	0	0	0	0	0	603	903	0
584	5	-25.0568	20.4643	-541.645	96161.2	-34552.6	-3421.83	136.208	122.464	0	0	0	0	0	0	0	200	903	0	0	0	0	0	0	0	603	903	0
584	6	-24.599	21.2273	-538.593	95795	-34918.8	-3467.61	135.167	122.138	0	0	0	0	0	0	0	200	903	0	0	0	0	0	0	0	603	903	0
584	7	-24.4465	21.0747	-535.846	95703.5	-34857.7	-3604.93	134.948	121.397	0	0	0	0	0	0	0	200	903	0	0	0	0	0	0	0	603	903	0
584	8	-24.2939	20.7695	-534.015	95245.7	-35040.8	-3559.16	134.382	121.642	0	0	0	0	0	0	0	200	903	0	0	0	0	0	0	0	603	903	0
584	9	-22.0051	20.4643	-533.405	94421.7	-34247.4	-3284.5	135.795	122.983	0	0	0	0	0	0	0	200	903	0	0	0	0	0	0	0	603	903	0
585	0	-24.2939	20.0066	-530.353	93780.9	-33881.2	-3330.28	136.116	123.173	0	0	0	0	0	0	0	200	903	0	0	0	0	0	0	0	603	903	0
585	1	-25.2094	19.7014	-527.912	93414.6	-34369.5	-3467.61	134.895	123.049	0	0	0	0	0	0	0	200	903	0	0	0	0	0	0	0	603	903	0
585	2	-25.362	18.4807	-525.165	93140	-34491.5	-3559.16	134.323	122.646	0	0	0	0	0	0	0	200	903	0	0	0	0	0	0	0	603	903	0
585	3	-24.9042	18.9384	-521.808	91492	-34125.3	-3421.83	134.602	124.663	0	0	0	0	0	0	0	200	903	0	0	0	0	0	0	0	603	903	0
585	4	-23.8361	18.1755	-520.587	91400.5	-33698.1	-3330.28	135.269	124.428	0	0	0	0	0	0	0	200	903	0	0	0	0	0	0	0	603	903	0
585	5	-24.1413	17.5652	-521.808	90759.6	-33637	-3467.61	135.538	126.067	0	0	0	0	0	0	0	200	903	0	0	0	0	0	0	0	603	903	0
585	6	-24.599	17.4126	-519.062	89844.1	-33331.9	-3513.38	135.784	126.91	0	0	0	0	0	0	0	200	903	0	0	0	0	0	0	0	603	903	0
585	7	-25.0568	14.9712	-516.62	89386.3	-33820.1	-3376.05	134.536	126.979	0	0	0	0	0	0	0	200	903	0	0	0	0	0	0	0	603	903	0
585	8	-25.2094	17.8703	-513.263	89111.7	-33698.1	-3009.84	134.345	126.382	0	0	0	0	0	0	0	200	903	0	0	0	0	0	0	0	603	903	0
585	9	-23.9887	16.497	-511.737	87372.2	-33148.8	-3238.72	135.223	129.264	0	0	0	0	0	0	0	200	903	0	0	0	0	0	0	0	603	903	0
586	0	-22.3102	16.1919	-511.432	87097.5	-33148.8	-3604.93	135.184	129.699	0	0	0	0	0	0	0	200	903	0	0	0	0	0	0	0	603	903	0
586	1	-23.3783	15.4289	-510.517	86273.6	-33148.8	-3101.39	135.068	131.007	0	0	0	0	0	0	0	200	903	0	0	0	0	0	0	0	603	903	0
586	2	-23.9887	15.4289	-510.517	85724.2	-33637	-2964.07	134.112	132.083	0	0	0	0	0	0	0	200	903	0	0	0	0	0	0	0	603	903	0
586	3	-24.1413	15.2763	-506.244	84808.7	-33026.7	-3147.17	134.761	132.475	0	0	0	0	0	0	0	200	903	0	0	0	0	0	0	0	603	903	0
586	4	-24.4465	15.4289	-503.192	84534	-32843.6	-3101.39	134.73	132.005	0	0	0	0	0	0	0	200	903	0	0	0	0	0	0	0	603	903	0
586	5	-23.5309	15.4289	-503.498	84167.8	-32904.6	-2918.29	134.648	132.834	0	0	0	0	0	0	0	200	903	0	0	0	0	0	0	0	603	903	0
586	6	-23.2258	13.4453	-503.803	83710.1	-33087.7	-2964.07	134.324	133.844	0	0	0	0	0	0	0	200	903	0	0	0	0	0	0	0	603	903	0
586	7	-24.4465	15.2763	-503.192	83435.4	-32782.5	-2964.07	134.851	134.188	0	0	0	0	0	0	0	200	903	0	0	0	0	0	0	0	603	903	0
586	8	-23.9887	14.666	-501.056	83252.3	-32843.6	-2872.51	134.451	133.846	0	0	0	0	0	0	0	200	903	0	0	0	0	0	0	0	603	903	0
586	9	-23.5309	14.8186	-499.836	82794.5	-32599.4	-2826.74	134.78	134.356	0	0	0	0	0	0	0	200	903	0	0	0	0	0	0	0	603	903	0
587	0	-22.768	14.5134	-497.394	82336.8	-32416.3	-2872.51	134.828	134.464	0	0	0	0	0	0	0	200	903	0	0	0	0	0	0	0	603	903	0
587	1	-22.6154	14.2082	-495.258	81970.5	-32599.4	-2780.96	134.177	134.489	0	0	0	0	0	0	0	200	903	0	0	0	0	0	0	0	603	903	0
587	2	-22.9206	13.2927	-497.699	81146.6	-32660.5	-2826.74	134.377	136.957	0	0	0	0	0	0	0	200	903	0	0	0	0	0	0	0	603	903	0
587	3	-22.768	13.4453	-496.479	81238.1	-32355.3	-2643.63	134.83	136.371	0	0	0	0	0	0	0	200	903	0	0	0	0	0	0	0	603	903	0
587	4	-20.7843	12.9875	-494.953	80597.3	-32294.3	-2689.41	134.753	137.162	0	0	0	0	0	0	0	200	903	0	0	0	0	0	0	0	603	903	0
587	5	-23.0732	12.6823	-492.511	80139.5	-32050.1	-2689.41	134.925	137.284	0	0	0	0	0	0	0	200	903	0	0	0	0	0	0	0	603	903	0
587	6	-21.6999	12.5298	-490.985	79864.8	-32599.4	-2460.53	133.604	137.338	0	0	0	0	0	0	0	200	903	0	0	0	0	0	0	0	603	903	0
587	7	-21.2421	12.6823	-493.122	78766.2	-32111.2	-2277.42	134.882	140.27	0	0	0	0	0	0	0	200	903	0	0	0	0	0	0	0	603	903	0
587	8	-20.3266	12.3772	-490.68	78033.8	-32172.2	-2185.87	134.434	140.968	0	0	0	0	0	0	0	200	903	0	0	0	0	0	0	0	603	903	0
587	9	-21.6999	12.8349	-491.291	77667.6	-31989.1	-2323.2	134.888	141.911	0	0	0	0	0	0	0	200	903	0	0	0	0	0	0	0	603	903	0
588	0	-21.3947	12.6823	-488.544	77301.4	-31867	-2323.2	134.771	141.772	0	0	0	0	0	0	0	200	903	0	0	0	0	0	0	0	603	903	0
588	1	-20.9369	12.6823	-489.154	76019.6	-31806	-2140.09	134.978	144.59	0	0	0	0	0	0	0	200	903	0	0	0	0	0	0	0	603	903	0
588	2	-20.174	12.5298	-486.713	76477.4	-32050.1	-1911.21	134.15	142.87	0	0	0	0	0	0	0	200	903	0	0	0	0	0	0	0	603	903	0
588	3	-20.174	12.072	-488.544	76019.6	-32050.1	-2048.54	134.397	144.396	0	0	0	0	0	0	0	200	903	0	0	0	0	0	0	0	603	903	0
588	4	-20.4792	11.0039	-489.46	75745	-31744.9	-1819.66	135.143	145.248	0	0	0	0	0	0	0	200	903	0	0	0	0	0	0	0	603	903	0
588	5	-19.2585	11.4616	-487.018	75195.7	-31744.9	-1728.1	134.818	145.6	0	0	0	0	0	0	0	200	903	0	0	0	0	0	0	0	603	903	0
588	6	-20.3266	11.6142	-486.408	75195.7	-31622.9	-1636.55	134.987	145.406	0	0	0	0	0	0	0	200	903	0	0	0	0	0	0	0	603	903	0
588	7	-19.5636	11.4616	-487.018	75104.1	-32172.2	-1590.78	133.94	145.788	0	0	0	0	0	0	0	200	903	0	0	0	0	0	0	0	603	903	0
588	8	-16.6645	11.0039	-487.018	74829.4	-32111.2	-1545	134.066	146.352	0	0	0	0	0	0	0	200	903	0	0	0	0	0	0	0	603	903	0
588	9	-18.9533	10.8513	-487.628	74463.2	-31561.8	-1316.12	135.275	147.295	0	0	0	0	0	0	0	200	903	0	0	0	0	0	0	0	603	903	0
589	0	-19.7162	11.1565	-487.628	74280.1	-31439.8	-1133.01	135.525	147.671	0	0	0	0	0	0	0	200	903	0	0	0	0	0	0	0	603	903	0
589	1	-17.2748	10.3935	-487.934	73822.4	-31317.7	-1224.56	135.816	148.704	0	0	0	0	0	0	0	200	903	0	0	0	0	0	0	0	603	903	0
589	2	-18.8007	9.93576	-483.356	73913.9	-31867	-1361.89	134.071	147.082	0	0	0	0	0	0	0	200	903	0	0	0	0	0	0	0	603	903	0
589	3	-17.2748	9.32541	-486.713	73639.2	-31989.1	-1041.46	134.275	148.701	0	0	0	0	0	0	0	200	903	0	0	0	0	0	0	0	603	903	0
589	4	-16.9697	9.478	-488.849	72815.3	-31622.9	-858.353	135.312	151.048	0	0	0	0	0	0	0	200	903	0	0	0	0	0	0	0	603	903	0
589	5	-17.1222	9.17282	-483.051	73273	-31378.7	-583.695	135.041	148.312	0	0	0	0	0	0	0	200	903	0	0	0	0	0	0	0	603	903	0
589	6	-17.7326	8.40988	-489.765	72815.3	-32172.2	-1041.46	134.311	151.326	0	0	0	0	0	0	0	200	903	0	0	0	0	0	0	0	603	903	0
589	7	-16.5119	8.56247	-487.628	72632.2	-31867	-537.919	134.649	151.05	0	0	0	0	0	0	0	200	903	0	0	0	0	0	0	0	603	903	0
589	8	-15.2912	8.71506	-487.934	72632.2	-31744.9	-675.248	134.94	151.143	0	0	0	0	0	0	0	200	903	0	0	0	0	0	0	0	603	903	0
589	9	-15.5964	7.18918	-487.934	72266	-31561.8	-721.024	135.315	151.894	0	0	0	0	0	0	0	200	903	0	0	0	0	0	0	0	603	903	0
590	0	-15.5964	7.34177	-490.375	71899.8	-31561.8	-354.813	135.637	153.378	0	0	0	0	0	0	0	200	903	0	0	0	0	0	0	0	603	903	0
590	1	-16.0541	7.64694	-491.901	70984.2	-31867	-217.484	135.217	155.694	0	0	0	0	0	0	0	200	903	0	0	0	0	0	0	0	603	903	0
590	2	-15.7489	7.34177	-491.901	71167.3	-31928.1	-217.484	135.093	155.322	0	0	0	0	0	0	0	200	903	0	0	0	0	0	0	0	603	903	0
590	3	-15.7489	6.884	-491.901	70618	-31989.1	-171.707	134.968	156.439	0	0	0	0	0	0	0	200	903	0	0	0	0	0	0	0	603	903	0
590	4	-14.2231	5.96848	-490.375	70984.2	-31989.1	11.398	134.766	155.245	0	0	0	0	0	0	0	200	903	0	0	0	0	0	0	0	603	903	0
590	5	-14.6808	5.96848	-491.291	70434.9	-31928.1	194.503	135.012	156.633	0	0	0	0	0	0	0	200	903	0	0	0	0	0	0	0	603	903	0
590	6	-14.3757	6.73142	-494.648	70984.2	-31989.1	240.28	135.33	156.495	0	0	0	0	0	0	0	200	903	0	0	0	0	0	0	0	603	903	0
590	7	-14.8334	5.6633	-495.563	70068.7	-32233.2	194.503	134.956	158.608	0	0	0	0	0	0	0	200	903	0	0	0	0	0	0	0	603	903	0
590	8	-13.155	5.96848	-494.342	70343.4	-32172.2	194.503	134.919	157.703	0	0	0	0	0	0	0	200	903	0	0	0	0	0	0	0	603	903	0
590	9	-15.7489	3.37448	-497.394	70434.9	-32233.2	698.044	135.196	158.392	0	0	0	0	0	0	0	200	903	0	0	0	0	0	0	0	603	903	0
591	0	-14.0705	3.37448	-497.394	70160.3	-32172.2	377.609	135.319	158.944	0	0	0	0	0	0	0	200	903	0	0	0	0	0	0	0	603	903	0
591	1	-12.6972	4.59518	-501.056	70892.7	-32233.2	514.938	135.669	158.514	0	0	0	0	0	0	0	200	903	0	0	0	0	0	0	0	603	903	0
591	2	-13.7653	4.29001	-500.446	71075.8	-32599.4	743.82	134.859	157.975	0	0	0	0	0	0	0	200	903	0	0	0	0	0	0	0	603	903	0
591	3	-14.0705	4.29001	-501.667	70526.5	-32660.5	881.149	134.896	159.416	0	0	0	0	0	0	0	200	903	0	0	0	0	0	0	0	603	903	0
591	4	-12.5446	3.52707	-502.277	70068.7	-32294.3	926.926	135.704	160.498	0	0	0	0	0	0	0	200	903	0	0	0	0	0	0	0	603	903	0
591	5	-14.2231	2.45895	-502.582	70984.2	-32660.5	743.82	135.015	158.761	0	0	0	0	0	0	0	200	903	0	0	0	0	0	0	0	603	903	0
591	6	-13.9179	2.30637	-504.108	69794.1	-32599.4	789.596	135.332	161.549	0	0	0	0	0	0	0	200	903	0	0	0	0	0	0	0	603	903	0
591	7	-13.3075	2.30637	-507.16	70709.6	-32843.6	698.044	135.24	160.577	0	0	0	0	0	0	0	200	903	0	0	0	0	0	0	0	603	903	0
591	8	-13.7653	2.61154	-508.075	70160.3	-33270.8	514.938	134.516	161.91	0	0	0	0	0	0	0	200	903	0	0	0	0	0	0	0	603	903	0
591	9	-14.6808	0.170136	-509.906	69885.6	-32904.6	698.044	135.469	162.944	0	0	0	0	0	0	0	200	903	0	0	0	0	0	0	0	603	903	0
592	0	-15.1386	1.54343	-509.296	68970.1	-33026.7	743.82	135.152	164.578	0	0	0	0	0	0	0	200	903	0	0	0	0	0	0	0	603	903	0
592	1	-14.6808	1.39084	-507.465	69702.5	-33087.7	560.714	134.798	162.646	0	0	0	0	0	0	0	200	903	0	0	0	0	0	0	0	603	903	0
592	2	-14.2231	0.322724	-512.043	69336.3	-33698.1	789.596	134.189	164.589	0	0	0	0	0	0	0	200	903	0	0	0	0	0	0	0	603	903	0
592	3	-13.4601	0.933075	-514.789	69702.5	-33698.1	743.82	134.54	164.6	0	0	0	0	0	0	0	200	903	0	0	0	0	0	0	0	603	903	0
592	4	-15.5964	0.6279	-515.399	69794.1	-33270.8	972.702	135.447	164.583	0	0	0	0	0	0	0	200	903	0	0	0	0	0	0	0	603	903	0
592	5	-15.2912	0.780487	-518.756	68695.4	-33515	835.373	135.394	167.577	0	0	0	0	0	0	0	200	903	0	0	0	0	0	0	0	603	903	0
592	6	-14.8334	0.017548	-518.146	69153.2	-33759.1	743.82	134.846	166.537	0	0	0	0	0	0	0	200	903	0	0	0	0	0	0	0	603	903	0
592	7	-14.3757	0.017548	-519.672	69244.7	-34186.3	789.596	134.216	166.753	0	0	0	0	0	0	0	200	903	0	0	0	0	0	0	0	603	903	0
592	8	-13.3075	-0.13504	-521.503	69153.2	-34186.3	926.926	134.447	167.396	0	0	0	0	0	0	0	200	903	0	0	0	0	0	0	0	603	903	0
592	9	-14.986	-2.11868	-524.555	69153.2	-34064.3	789.596	135.061	168.168	0	0	0	0	0	0	0	200	903	0	0	0	0	0	0	0	603	903	0
593	0	-15.9015	-0.897979	-526.386	69061.6	-34064.3	835.373	135.286	168.8	0	0	0	0	0	0	0	200	903	0	0	0	0	0	0	0	603	903	0
593	1	-16.0541	-1.50833	-524.86	69519.4	-34735.7	835.373	133.819	167.547	0	0	0	0	0	0	0	200	903	0	0	0	0	0	0	0	603	903	0
593	2	-16.5119	-2.11868	-527.607	69702.5	-34857.7	606.491	133.932	167.889	0	0	0	0	0	0	0	200	903	0	0	0	0	0	0	0	603	903	0
593	3	-15.7489	-1.81351	-529.132	69610.9	-34796.7	1155.81	134.238	168.443	0	0	0	0	0	0	0	200	903	0	0	0	0	0	0	0	603	903	0
593	4	-14.986	-1.05057	-531.269	70068.7	-34735.7	881.149	134.618	168.111	0	0	0	0	0	0	0	200	903	0	0	0	0	0	0	0	603	903	0
593	5	-16.3593	-2.88162	-533.405	69244.7	-34796.7	789.596	134.765	170.184	0	0	0	0	0	0	0	200	903	0	0	0	0	0	0	0	603	903	0
593	6	-17.1222	-3.03421	-535.541	69610.9	-35101.9	606.491	134.455	170.018	0	0	0	0	0	0	0	200	903	0	0	0	0	0	0	0	603	903	0
593	7	-16.8171	-3.49197	-534.931	70068.7	-35468.1	835.373	133.696	169.014	0	0	0	0	0	0	0	200	903	0	0	0	0	0	0	0	603	903	0
593	8	-18.0378	-4.10232	-534.32	69610.9	-35529.1	698.044	133.506	169.721	0	0	0	0	0	0	0	200	903	0	0	0	0	0	0	0	603	903	0
593	9	-16.9697	-4.25491	-539.508	69610.9	-35285	606.491	134.598	170.973	0	0	0	0	0	0	0	200	903	0	0	0	0	0	0	0	603	903	0
594	0	-16.9697	-6.08597	-542.255	69336.3	-35651.2	606.491	134.254	172.133	0	0	0	0	0	0	0	200	903	0	0	0	0	0	0	0	603	903	0
594	1	-17.2748	-5.32303	-542.865	69885.6	-35529.1	698.044	134.553	171.265	0	0	0	0	0	0	0	200	903	0	0	0	0	0	0	0	603	903	0
594	2	-18.3429	-5.6282	-547.138	68512.3	-36017.4	698.044	134.171	174.781	0	0	0	0	0	0	0	200	903	0	0	0	0	0	0	0	603	903	0
594	3	-18.8007	-6.08597	-547.138	68970.1	-36322.6	652.267	133.613	173.944	0	0	0	0	0	0	0	200	903	0	0	0	0	0	0	0	603	903	0
594	4	-19.2585	-6.23856	-546.833	69336.3	-36200.5	652.267	133.8	173.204	0	0	0	0	0	0	0	200	903	0	0	0	0	0	0	0	603	903	0
594	5	-17.4274	-6.69632	-550.8	68970.1	-36261.5	926.926	134.166	174.782	0	0	0	0	0	0	0	200	903	0	0	0	0	0	0	0	603	903	0
594	6	-18.1904	-6.54373	-554.767	69610.9	-36444.6	789.596	134.306	174.522	0	0	0	0	0	0	0	200	903	0	0	0	0	0	0	0	603	903	0
594	7	-19.8688	-6.23856	-552.631	69153.2	-36932.9	881.149	133.169	174.866	0	0	0	0	0	0	0	200	903	0	0	0	0	0	0	0	603	903	0
594	8	-19.5636	-7.30667	-558.734	69336.3	-37177.1	835.373	133.462	175.905	0	0	0	0	0	0	0	200	903	0	0	0	0	0	0	0	603	903	0
594	9	-20.4792	-7.76443	-558.124	69519.4	-37177.1	926.926	133.389	175.441	0	0	0	0	0	0	0	200	903	0	0	0	0	0	0	0	603	903	0
595	0	-18.3429	-8.67996	-561.481	69336.3	-37116	972.702	133.896	176.512	0	0	0	0	0	0	0	200	903	0	0	0	0	0	0	0	603	903	0
595	1	-19.8688	-8.37479	-559.955	69336.3	-37299.1	560.714	133.389	176.175	0	0	0	0	0	0	0	200	903	0	0	0	0	0	0	0	603	903	0
595	2	-19.5636	-8.67996	-566.669	69885.6	-37665.4	789.596	133.532	176.673	0	0	0	0	0	0	0	200	903	0	0	0	0	0	0	0	603	903	0
595	3	-21.2421	-8.37479	-570.026	69885.6	-37848.5	560.714	133.602	177.399	0	0	0	0	0	0	0	200	903	0	0	0	0	0	0	0	603	903	0
595	4	-19.2585	-9.29031	-568.195	70343.4	-37726.4	743.82	133.603	176.199	0	0	0	0	0	0	0	200	903	0	0	0	0	0	0	0	603	903	0
595	5	-21.3947	-11.1214	-570.636	70343.4	-37543.3	606.491	134.208	176.728	0	0	0	0	0	0	0	200	903	0	0	0	0	0	0	0	603	903	0
595	6	-20.4792	-10.2058	-573.688	69244.7	-37970.5	881.149	133.813	179.299	0	0	0	0	0	0	0	200	903	0	0	0	0	0	0	0	603	903	0
595	7	-18.9533	-11.274	-574.604	69977.1	-38580.9	972.702	132.857	178.217	0	0	0	0	0	0	0	200	903	0	0	0	0	0	0	0	603	903	0
595	8	-20.9369	-11.1214	-577.961	70068.7	-38336.7	652.267	133.669	178.766	0	0	0	0	0	0	0	200	903	0	0	0	0	0	0	0	603	903	0
595	9	-22.1576	-11.5791	-580.097	70343.4	-38275.7	698.044	134.018	178.739	0	0	0	0	0	0	0	200	903	0	0	0	0	0	0	0	603	903	0
596	0	-22.3102	-12.1895	-580.097	70526.5	-38336.7	835.373	133.913	178.423	0	0	0	0	0	0	0	200	903	0	0	0	0	0	0	0	603	903	0
596	1	-22.3102	-12.4947	-580.097	69977.1	-38886.1	789.596	132.966	179.37	0	0	0	0	0	0	0	200	903	0	0	0	0	0	0	0	603	903	0
596	2	-21.3947	-12.3421	-583.759	69702.5	-39130.2	835.373	132.969	180.597	0	0	0	0	0	0	0	200	903	0	0	0	0	0	0	0	603	903	0
596	3	-21.0895	-12.4947	-588.031	69977.1	-39252.3	789.596	133.248	180.998	0	0	0	0	0	0	0	200	903	0	0	0	0	0	0	0	603	903	0
596	4	-22.1576	-13.2576	-588.947	69519.4	-39130.2	881.149	133.559	181.96	0	0	0	0	0	0	0	200	903	0	0	0	0	0	0	0	603	903	0
596	5	-22.1576	-14.3257	-592.609	70160.3	-39252.3	698.044	133.764	181.608	0	0	0	0	0	0	0	200	903	0	0	0	0	0	0	0	603	903	0
596	6	-22.9206	-12.7998	-593.219	70526.5	-39435.4	1110.03	133.523	181.112	0	0	0	0	0	0	0	200	903	0	0	0	0	0	0	0	603	903	0
596	7	-21.3947	-13.105	-595.966	69794.1	-39618.5	1476.24	133.522	182.889	0	0	0	0	0	0	0	200	903	0	0	0	0	0	0	0	603	903	0
596	8	-20.3266	-14.1731	-599.323	69702.5	-39923.7	1567.79	133.385	183.698	0	0	0	0	0	0	0	200	903	0	0	0	0	0	0	0	603	903	0
596	9	-21.5473	-14.7835	-600.849	69977.1	-39801.6	1293.14	133.758	183.536	0	0	0	0	0	0	0	200	903	0	0	0	0	0	0	0	603	903	0
597	0	-22.4628	-16.6145	-603.595	70068.7	-39984.7	1430.47	133.756	183.914	0	0	0	0	0	0	0	200	903	0	0	0	0	0	0	0	603	903	0
597	1	-21.6999	-14.9361	-604.816	70709.6	-40289.9	1247.36	133.385	183.089	0	0	0	0	0	0	0	200	903	0	0	0	0	0	0	0	603	903	0
597	2	-23.2258	-16.1568	-605.121	70709.6	-40778.1	1567.79	132.612	183.148	0	0	0	0	0	0	0	200	903	0	0	0	0	0	0	0	603	903	0
597	3	-22.0051	-16.7671	-608.173	70984.2	-40595	1613.57	133.251	183.283	0	0	0	0	0	0	0	200	903	0	0	0	0	0	0	0	603	903	0
597	4	-22.9206	-16.7671	-612.751	71075.8	-40595	1155.81	133.749	184.005	0	0	0	0	0	0	0	200	903	0	0	0	0	0	0	0	603	903	0
597	5	-22.1576	-17.8352	-612.751	70251.8	-40350.9	1384.69	134.148	185.35	0	0	0	0	0	0	0	200	903	0	0	0	0	0	0	0	603	903	0
597	6	-22.6154	-18.1404	-616.718	71167.3	-40961.2	1613.57	133.582	184.603	0	0	0	0	0	0	0	200	903	0	0	0	0	0	0	0	603	903	0
597	7	-23.2258	-18.4456	-617.633	70801.1	-41205.4	1522.02	133.285	185.367	0	0	0	0	0	0	0	200	903	0	0	0	0	0	0	0	603	903	0
597	8	-22.9206	-18.7508	-617.023	71442	-41266.4	1522.02	133.12	184.215	0	0	0	0	0	0	0	200	903	0	0	0	0	0	0	0	603	903	0
597	9	-22.1576	-20.7344	-622.821	71167.3	-41388.5	1842.45	133.547	185.734	0	0	0	0	0	0	0	200	903	0	0	0	0	0	0	0	603	903	0
598	0	-21.3947	-19.9715	-625.873	69977.1	-41632.6	1842.45	133.481	188.193	0	0	0	0	0	0	0	200	903	0	0	0	0	0	0	0	603	903	0
598	1	-20.6318	-20.887	-625.263	70526.5	-41571.6	2025.56	133.513	187.205	0	0	0	0	0	0	0	200	903	0	0	0	0	0	0	0	603	903	0
598	2	-22.3102	-21.0396	-631.061	70892.7	-42120.9	2071.33	133.254	187.661	0	0	0	0	0	0	0	200	903	0	0	0	0	0	0	0	603	903	0
598	3	-22.3102	-21.6499	-632.282	70801.1	-41937.8	1979.78	133.672	188.023	0	0	0	0	0	0	0	200	903	0	0	0	0	0	0	0	603	903	0
598	4	-21.2421	-21.4973	-635.334	70434.9	-41876.8	2162.89	134.087	189.137	0	0	0	0	0	0	0	200	903	0	0	0	0	0	0	0	603	903	0
598	5	-20.9369	-21.6499	-637.775	70892.7	-42059.9	2300.22	134.052	188.844	0	0	0	0	0	0	0	200	903	0	0	0	0	0	0	0	603	903	0
598	6	-20.6318	-22.718	-641.742	70709.6	-42120.9	2345.99	134.365	189.816	0	0	0	0	0	0	0	200	903	0	0	0	0	0	0	0	603	903	0
598	7	-21.0895	-24.7017	-643.878	71350.4	-42487.1	2666.43	134.014	189.186	0	0	0	0	0	0	0	200	903	0	0	0	0	0	0	0	603	903	0
598	8	-20.0214	-23.481	-644.184	71075.8	-42670.2	2803.76	133.761	189.665	0	0	0	0	0	0	0	200	903	0	0	0	0	0	0	0	603	903	0
598	9	-21.6999	-24.2439	-646.32	72082.9	-42548.2	3124.19	134.169	188.472	0	0	0	0	0	0	0	200	903	0	0	0	0	0	0	0	603	903	0
599	0	-20.174	-25.9224	-649.982	71808.2	-42609.2	3078.42	134.446	189.523	0	0	0	0	0	0	0	200	903	0	0	0	0	0	0	0	603	903	0
599	1	-20.174	-26.2276	-654.865	72174.4	-42670.2	2757.98	134.841	189.787	0	0	0	0	0	0	0	200	903	0	0	0	0	0	0	0	603	903	0
599	2	-21.6999	-27.906	-656.391	72357.5	-43524.7	3078.42	133.691	189.765	0	0	0	0	0	0	0	200	903	0	0	0	0	0	0	0	603	903	0
599	3	-21.0895	-28.2112	-654.56	72632.2	-43463.7	2941.09	133.599	189.037	0	0	0	0	0	0	0	200	903	0	0	0	0	0	0	0	603	903	0
599	4	-21.5473	-28.9742	-658.832	71716.6	-43341.6	3078.42	134.214	191.146	0	0	0	0	0	0	0	200	903	0	0	0	0	0	0	0	603	903	0
599	5	-20.0214	-29.2793	-662.189	72357.5	-43890.9	3169.97	133.718	190.73	0	0	0	0	0	0	0	200	903	0	0	0	0	0	0	0	603	903	0
599	6	-19.5636	-30.3474	-667.072	72815.3	-43890.9	3581.96	134.204	190.843	0	0	0	0	0	0	0	200	903	0	0	0	0	0	0	0	603	903	0
599	7	-19.7162	-30.6526	-667.682	72449.1	-43952	3215.74	134.172	191.492	0	0	0	0	0	0	0	200	903	0	0	0	0	0	0	0	603	903	0
599	8	-20.3266	-31.8733	-670.734	73090	-44257.1	3353.07	134.017	191.03	0	0	0	0	0	0	0	200	903	0	0	0	0	0	0	0	603	903	0
599	9	-20.6318	-32.6363	-671.344	72540.6	-44135.1	3490.4	134.259	191.947	0	0	0	0	0	0	0	200	903	0	0	0	0	0	0	0	603	903	0
600	0	-19.4111	-33.3992	-673.786	73547.7	-44135.1	3581.96	134.497	190.844	0	0	0	0	0	0	0	200	903	0	0	0	0	0	0	0	603	903	0
600	1	-18.9533	-33.857	-676.227	73730.8	-44257.1	3627.73	134.553	190.967	0	0	0	0	0	0	0	200	903	0	0	0	0	0	0	0	603	903	0
600	2	-18.6481	-34.4673	-681.415	72632.2	-44806.5	3810.84	134.245	193.41	0	0	0	0	0	0	0	200	903	0	0	0	0	0	0	0	603	903	0
600	3	-20.174	-35.5354	-682.636	72266	-44989.6	4039.72	134.094	194.137	0	0	0	0	0	0	0	200	903	0	0	0	0	0	0	0	603	903	0
600	4	-17.2748	-36.2984	-683.551	72815.3	-44806.5	3856.61	134.45	193.475	0	0	0	0	0	0	0	200	903	0	0	0	0	0	0	0	603	903	0
600	5	-19.5636	-37.0613	-686.908	72540.6	-45050.6	4131.27	134.415	194.395	0	0	0	0	0	0	0	200	903	0	0	0	0	0	0	0	603	903	0
600	6	-17.8852	-38.4346	-689.655	72998.4	-45355.8	4360.15	134.234	194.152	0	0	0	0	0	0	0	200	903	0	0	0	0	0	0	0	603	903	0
600	7	-15.7489	-38.5872	-691.791	72449.1	-45416.8	4451.71	134.349	195.273	0	0	0	0	0	0	0	200	903	0	0	0	0	0	0	0	603	903	0
600	8	-18.1904	-39.9605	-695.758	72632.2	-45233.7	4451.71	134.986	195.607	0	0	0	0	0	0	0	200	903	0	0	0	0	0	0	0	603	903	0
600	9	-18.8007	-41.0286	-697.895	73090	-45416.8	4772.14	134.923	195.271	0	0	0	0	0	0	0	200	903	0	0	0	0	0	0	0	603	903	0
601	0	-17.2748	-43.3174	-698.81	73181.5	-45355.8	4589.04	135.096	195.277	0	0	0	0	0	0	0	200	903	0	0	0	0	0	0	0	603	903	0
601	1	-18.6481	-43.6226	-702.472	73273	-45416.8	4955.25	135.347	195.693	0	0	0	0	0	0	0	200	903	0	0	0	0	0	0	0	603	903	0
601	2	-17.58	-44.0804	-703.083	73181.5	-46515.4	4955.25	133.841	195.913	0	0	0	0	0	0	0	200	903	0	0	0	0	0	0	0	603	903	0
601	3	-17.8852	-44.8433	-707.05	74097	-46271.3	5138.35	134.557	195.203	0	0	0	0	0	0	0	200	903	0	0	0	0	0	0	0	603	903	0
601	4	-18.8007	-45.7588	-706.745	74371.7	-46332.3	5046.8	134.443	194.769	0	0	0	0	0	0	0	200	903	0	0	0	0	0	0	0	603	903	0
601	5	-17.58	-46.9795	-712.848	74280.1	-46210.3	5367.23	135.175	195.798	0	0	0	0	0	0	0	200	903	0	0	0	0	0	0	0	603	903	0
601	6	-18.1904	-47.5899	-712.238	74371.7	-46393.4	5229.91	134.863	195.58	0	0	0	0	0	0	0	200	903	0	0	0	0	0	0	0	603	903	0
601	7	-17.7326	-49.4209	-714.069	74554.8	-47003.7	5367.23	134.175	195.592	0	0	0	0	0	0	0	200	903	0	0	0	0	0	0	0	603	903	0
601	8	-17.1222	-50.9468	-715.595	74737.9	-47186.8	5413.01	134.059	195.558	0	0	0	0	0	0	0	200	903	0	0	0	0	0	0	0	603	903	0
601	9	-16.8171	-51.7097	-719.867	74737.9	-46881.7	5184.13	134.875	196.178	0	0	0	0	0	0	0	200	903	0	0	0	0	0	0	0	603	903	0
602	0	-17.8852	-52.7779	-720.172	74829.4	-46942.7	5596.12	134.817	196.095	0	0	0	0	0	0	0	200	903	0	0	0	0	0	0	0	603	903	0
602	1	-15.2912	-53.6934	-722.003	74737.9	-47125.8	5504.56	134.729	196.485	0	0	0	0	0	0	0	200	903	0	0	0	0	0	0	0	603	903	0
602	2	-17.8852	-54.4563	-724.14	74646.3	-47614.1	5641.89	134.247	196.917	0	0	0	0	0	0	0	200	903	0	0	0	0	0	0	0	603	903	0
602	3	-16.2067	-57.5081	-724.75	74737.9	-47675.1	5825	134.219	196.878	0	0	0	0	0	0	0	200	903	0	0	0	0	0	0	0	603	903	0
602	4	-16.3593	-57.3555	-729.023	74554.8	-47186.8	6008.1	135.274	197.733	0	0	0	0	0	0	0	200	903	0	0	0	0	0	0	0	603	903	0
602	5	-14.986	-57.5081	-729.023	73822.4	-47675.1	5962.33	134.604	198.738	0	0	0	0	0	0	0	200	903	0	0	0	0	0	0	0	603	903	0
602	6	-17.1222	-59.1866	-732.685	74280.1	-47553.1	6053.88	135.098	198.619	0	0	0	0	0	0	0	200	903	0	0	0	0	0	0	0	603	903	0
602	7	-17.7326	-60.1021	-732.685	74188.6	-48285.5	6145.43	134.098	198.744	0	0	0	0	0	0	0	200	903	0	0	0	0	0	0	0	603	903	0
602	8	-16.3593	-61.0176	-735.736	74280.1	-48346.5	6328.54	134.288	199.04	0	0	0	0	0	0	0	200	903	0	0	0	0	0	0	0	603	903	0
602	9	-16.9697	-63.1538	-735.431	74280.1	-48102.4	6191.21	134.593	198.998	0	0	0	0	0	0	0	200	903	0	0	0	0	0	0	0	603	903	0
603	0	-16.6645	-63.6116	-739.093	74005.5	-48285.5	6328.54	134.669	199.87	0	0	0	0	0	0	0	200	903	0	0	0	0	0	0	0	603	903	0
603	1	-18.8007	-64.0694	-740.924	74737.9	-48407.6	6282.76	134.666	199.129	0	0	0	0	0	0	0	200	903	0	0	0	0	0	0	0	603	903	0
603	2	-18.1904	-65.1375	-740.924	74005.5	-48834.8	6465.87	134.089	200.117	0	0	0	0	0	0	0	200	903	0	0	0	0	0	0	0	603	903	0
603	3	-18.0378	-65.5952	-741.535	74463.2	-49017.9	6511.64	133.897	199.582	0	0	0	0	0	0	0	200	903	0	0	0	0	0	0	0	603	903	0
603	4	-16.6645	-67.1211	-743.976	74646.3	-48834.8	6648.97	134.36	199.666	0	0	0	0	0	0	0	200	903	0	0	0	0	0	0	0	603	903	0
603	5	-17.1222	-68.1892	-747.028	74463.2	-49017.9	6603.2	134.383	200.321	0	0	0	0	0	0	0	200	903	0	0	0	0	0	0	0	603	903	0
603	6	-17.7326	-70.0203	-748.249	74371.7	-48956.9	6282.76	134.571	200.606	0	0	0	0	0	0	0	200	903	0	0	0	0	0	0	0	603	903	0
603	7	-18.4955	-70.1729	-744.281	74829.4	-49445.1	6511.64	133.567	199.461	0	0	0	0	0	0	0	200	903	0	0	0	0	0	0	0	603	903	0
603	8	-18.9533	-70.9358	-748.554	75104.1	-49689.3	6740.53	133.62	199.668	0	0	0	0	0	0	0	200	903	0	0	0	0	0	0	0	603	903	0
603	9	-17.4274	-72.0039	-750.08	75104.1	-49078.9	6786.3	134.568	199.872	0	0	0	0	0	0	0	200	903	0	0	0	0	0	0	0	603	903	0
604	0	-17.4274	-72.4617	-753.437	75195.7	-49506.2	6511.64	134.293	200.196	0	0	0	0	0	0	0	200	903	0	0	0	0	0	0	0	603	903	0
604	1	-17.58	-73.5298	-751.606	75287.2	-49628.3	6648.97	133.97	199.831	0	0	0	0	0	0	0	200	903	0	0	0	0	0	0	0	603	903	0
604	2	-18.3429	-75.2083	-755.878	74646.3	-50116.5	6694.75	133.698	201.246	0	0	0	0	0	0	0	200	903	0	0	0	0	0	0	0	603	903	0
604	3	-18.4955	-76.1238	-755.268	74921	-50055.5	6511.64	133.725	200.802	0	0	0	0	0	0	0	200	903	0	0	0	0	0	0	0	603	903	0
604	4	-18.1904	-77.4971	-756.794	74829.4	-50299.6	6648.97	133.536	201.123	0	0	0	0	0	0	0	200	903	0	0	0	0	0	0	0	603	903	0
604	5	-17.4274	-78.26	-757.404	74829.4	-49994.5	6877.85	133.992	201.203	0	0	0	0	0	0	0	200	903	0	0	0	0	0	0	0	603	903	0
604	6	-17.58	-79.3282	-758.93	75012.5	-49628.3	6832.08	134.608	201.16	0	0	0	0	0	0	0	200	903	0	0	0	0	0	0	0	603	903	0
604	7	-18.4955	-81.9221	-760.15	74737.9	-50604.8	6786.3	133.428	201.68	0	0	0	0	0	0	0	200	903	0	0	0	0	0	0	0	603	903	0
604	8	-16.5119	-82.2273	-758.625	73730.8	-49872.4	6969.41	134.259	202.81	0	0	0	0	0	0	0	200	903	0	0	0	0	0	0	0	603	903	0
604	9	-18.6481	-82.6851	-757.099	74005.5	-50726.9	6923.63	132.998	202.251	0	0	0	0	0	0	0	200	903	0	0	0	0	0	0	0	603	903	0
605	0	-18.1904	-84.0584	-760.15	74188.6	-50421.7	7015.18	133.669	202.403	0	0	0	0	0	0	0	200	903	0	0	0	0	0	0	0	603	903	0
605	1	-18.0378	-85.5843	-763.202	73822.4	-50665.9	7060.96	133.614	203.273	0	0	0	0	0	0	0	200	903	0	0	0	0	0	0	0	603	903	0
605	2	-18.6481	-86.1946	-764.118	73822.4	-50482.7	7015.18	133.933	203.389	0	0	0	0	0	0	0	200	903	0	0	0	0	0	0	0	603	903	0
605	3	-19.8688	-86.805	-762.897	74280.1	-50910	6923.63	133.268	202.634	0	0	0	0	0	0	0	200	903	0	0	0	0	0	0	0	603	903	0
605	4	-19.2585	-88.3308	-761.982	73273	-51032.1	7244.07	133.027	203.839	0	0	0	0	0	0	0	200	903	0	0	0	0	0	0	0	603	903	0
605	5	-18.9533	-89.2464	-762.287	73822.4	-50849	7060.96	133.294	203.157	0	0	0	0	0	0	0	200	903	0	0	0	0	0	0	0	603	903	0
605	6	-16.9697	-90.9248	-764.423	74097	-50482.7	7015.18	133.96	203.068	0	0	0	0	0	0	0	200	903	0	0	0	0	0	0	0	603	903	0
605	7	-19.2585	-92.9085	-764.118	73730.8	-50665.9	7289.84	133.694	203.509	0	0	0	0	0	0	0	200	903	0	0	0	0	0	0	0	603	903	0
605	8	-20.174	-94.5869	-763.813	73273	-51215.2	7152.51	132.948	204.069	0	0	0	0	0	0	0	200	903	0	0	0	0	0	0	0	603	903	0
605	9	-20.6318	-94.5869	-760.761	73547.7	-51215.2	7106.74	132.679	203.324	0	0	0	0	0	0	0	200	903	0	0	0	0	0	0	0	603	903	0
606	0	-20.9369	-95.9602	-760.761	73547.7	-51215.2	7244.07	132.679	203.324	0	0	0	0	0	0	0	200	903	0	0	0	0	0	0	0	603	903	0
606	1	-20.174	-98.4016	-761.066	73456.2	-50726.9	7198.29	133.348	203.483	0	0	0	0	0	0	0	200	903	0	0	0	0	0	0	0	603	903	0
606	2	-20.0214	-98.7068	-762.592	73547.7	-50910	7472.95	133.241	203.556	0	0	0	0	0	0	0	200	903	0	0	0	0	0	0	0	603	903	0
606	3	-22.0051	-100.233	-762.592	73273	-51459.3	7289.84	132.521	203.916	0	0	0	0	0	0	0	200	903	0	0	0	0	0	0	0	603	903	0
606	4	-22.1576	-101.606	-762.287	73090	-51215.2	7289.84	132.814	204.118	0	0	0	0	0	0	0	200	903	0	0	0	0	0	0	0	603	903	0
606	5	-22.0051	-103.284	-758.625	73547.7	-51276.2	7198.29	132.409	203.051	0	0	0	0	0	0	0	200	903	0	0	0	0	0	0	0	603	903	0
606	6	-21.5473	-104.505	-760.15	72357.5	-50726.9	7289.84	133.267	204.812	0	0	0	0	0	0	0	200	903	0	0	0	0	0	0	0	603	903	0
606	7	-21.6999	-105.726	-756.794	72815.3	-51032.1	7427.17	132.568	203.785	0	0	0	0	0	0	0	200	903	0	0	0	0	0	0	0	603	903	0
606	8	-22.6154	-107.404	-759.235	72449.1	-50971	7289.84	132.865	204.576	0	0	0	0	0	0	0	200	903	0	0	0	0	0	0	0	603	903	0
606	9	-24.1413	-108.778	-759.235	72540.6	-51459.3	7060.96	132.222	204.456	0	0	0	0	0	0	0	200	903	0	0	0	0	0	0	0	603	903	0
607	0	-23.6835	-109.388	-756.794	72357.5	-51703.4	7289.84	131.681	204.389	0	0	0	0	0	0	0	200	903	0	0	0	0	0	0	0	603	903	0
607	1	-24.9042	-110.914	-750.995	71991.3	-50910	7244.07	132.21	204.139	0	0	0	0	0	0	0	200	903	0	0	0	0	0	0	0	603	903	0
607	2	-24.2939	-111.829	-754.047	71075.8	-50726.9	7060.96	132.727	205.741	0	0	0	0	0	0	0	200	903	0	0	0	0	0	0	0	603	903	0
607	3	-24.4465	-112.745	-754.352	71167.3	-50910	7106.74	132.512	205.658	0	0	0	0	0	0	0	200	903	0	0	0	0	0	0	0	603	903	0
607	4	-27.0405	-114.118	-754.352	70892.7	-51032.1	7381.39	132.35	206.022	0	0	0	0	0	0	0	200	903	0	0	0	0	0	0	0	603	903	0
607	5	-25.362	-114.423	-749.774	70618	-51032.1	6923.63	131.937	205.814	0	-5.03891	14.1275	-16.2759	2762.42	783.737	271.59	248.153	733.275	0	0	0	0	0	0	0	603	903	0
607	6	-25.9723	-116.712	-746.418	70434.9	-50543.8	6969.41	132.285	205.636	0	-2.5975	12.1439	-16.2759	2670.87	905.807	180.037	255.653	738.9	0	0	0	0	0	0	0	603	903	0
607	7	-26.1249	-116.56	-745.807	70251.8	-50421.7	6877.85	132.393	205.804	0	0	0	0	0	0	0	200	903	0	0	0	0	0	0	0	603	903	0
607	8	-26.1249	-117.475	-748.249	69610.9	-50238.6	6969.41	132.858	206.968	0	0	0	0	0	0	0	200	903	0	0	0	0	0	0	0	603	903	0
607	9	-27.193	-119.764	-745.197	69794.1	-50543.8	6923.63	132.174	206.341	0	-2.29233	15.806	-19.3276	3037.08	905.807	729.354	246.866	745.863	0	0	0	0	0	0	0	603	903	0
608	0	-27.0405	-119.611	-740.924	69336.3	-50116.5	6877.85	132.359	206.419	0	-0.00350934	11.5335	-21.1587	3952.61	1149.95	592.024	254.349	716.192	0	0	0	0	0	0	0	603	903	0
608	1	-27.8034	-121.29	-739.093	68420.7	-50726.9	6877.85	131.366	207.426	0	1.67496	13.0594	-19.3276	3677.95	1210.98	912.459	262.656	712.705	0	0	0	0	0	0	0	603	903	0
608	2	-26.8879	-121.442	-737.262	68512.3	-49933.4	7060.96	132.272	207.072	0	-0.766449	17.1793	-20.5483	3494.84	1272.02	1141.34	261.904	732.921	0	0	0	0	0	0	0	603	903	0
608	3	-27.956	-122.358	-736.042	68237.6	-49750.3	7152.51	132.408	207.291	0	3.6586	16.7215	-24.8208	4685.03	1577.19	1232.89	263.543	714.246	0	0	0	0	0	0	0	603	903	0
608	4	-26.7353	-123.579	-731.159	68512.3	-49994.5	7427.17	131.623	206.296	0	5.03189	13.5171	-30.0088	5325.9	1394.09	1919.54	246.456	725.522	0	0	0	0	0	0	0	603	903	0
608	5	-29.0241	-124.494	-731.464	67963	-49811.4	7060.96	131.902	207.086	0	4.11636	16.7215	-33.6709	5875.21	2004.44	1782.21	259.53	728.511	0	0	0	0	0	0	0	603	903	0
608	6	-29.1767	-124.952	-728.107	67413.7	-49811.4	6832.08	131.588	207.412	0	5.03189	17.7896	-37.6382	6973.85	2004.44	1690.66	253.256	717.713	0	0	0	0	0	0	0	603	903	0
608	7	-28.2612	-126.325	-723.529	67047.5	-48895.8	7244.07	132.42	207.333	0	5.79483	11.2283	-46.7934	9079.56	2187.55	1507.55	246.749	708.965	0	0	0	0	0	0	0	603	903	0
608	8	-27.3456	-127.241	-719.867	66589.7	-48956.9	6786.3	131.992	207.497	0	5.03189	10.4654	-56.5591	10086.6	2492.72	1644.88	244.073	724.662	0	0	0	0	0	0	0	603	903	0
608	9	-28.4137	-128.156	-720.172	66315	-49140	7106.74	131.766	207.918	0	4.57413	13.212	-62.9678	11551.5	3164.11	1370.22	250.25	719.549	0	0	0	0	0	0	0	603	903	0
609	0	-29.3293	-129.377	-716.815	65399.5	-48956.9	7015.18	131.702	208.764	0	5.18448	11.3809	-68.1557	13016.3	3225.14	1278.67	247.32	712.021	0	0	0	0	0	0	0	603	903	0
609	1	-27.3456	-129.987	-709.186	65582.6	-48712.7	6923.63	131.312	207.524	0	5.64224	9.85504	-77.9214	14115	3530.32	1232.89	245.306	721.856	0	0	0	0	0	0	0	603	903	0
609	2	-30.2448	-131.055	-708.881	63751.6	-48224.4	7015.18	131.971	210.067	0	1.98013	12.9068	-90.4336	15762.9	3713.42	1049.79	241.062	728.696	0	0	0	0	0	0	0	603	903	0
609	3	-28.1086	-131.513	-706.44	64300.9	-47614.1	7060.96	132.6	208.979	0	0.912018	12.1439	-96.5371	17410.9	3957.57	729.354	240.995	722.646	0	0	0	0	0	0	0	603	903	0
609	4	-28.2612	-131.666	-703.998	63843.1	-47797.2	6877.85	132.106	209.314	0	3.20084	8.02399	-110.27	20249	4201.71	546.248	238.104	719.369	0	0	0	0	0	0	0	603	903	0
609	5	-28.2612	-132.734	-698.81	63568.4	-47736.2	7152.51	131.689	209.033	0	3.04825	7.26105	-118.51	21622.3	4506.88	225.813	238.03	720.549	0	0	0	0	0	0	0	603	903	0
609	6	-29.4819	-133.802	-696.064	63202.2	-47247.9	7335.62	132.121	209.2	0	-1.3768	8.48175	-130.106	23636.4	4934.13	-277.727	237.924	721.33	0	0	0	0	0	0	0	603	903	0
609	7	-28.7189	-133.955	-689.044	61737.4	-46759.6	6969.41	132.138	210.401	0	-0.308685	4.0567	-142.008	25650.6	5117.23	-323.503	236.035	722.373	0	0	0	0	0	0	0	603	903	0
609	8	-27.3456	-134.718	-685.993	61371.2	-46332.3	7106.74	132.459	210.537	0	-0.766449	0.0894158	-152.384	27664.8	5544.48	-689.714	236.385	721.454	0	0	0	0	0	0	0	603	903	0
609	9	-28.1086	-135.938	-682.941	60821.9	-46149.2	7289.84	132.426	210.941	0	-3.05527	0.852355	-160.624	30045.1	5788.62	-1101.7	236.038	715.947	0	0	0	0	0	0	0	603	903	0
610	0	-27.6508	-136.854	-680.5	59906.3	-45844.1	7289.84	132.632	211.967	0	-5.64926	-1.58905	-174.052	32791.7	5483.45	-1651.02	231.505	714.598	0	0	0	0	0	0	0	603	903	0
610	1	-28.5663	-135.938	-674.091	59997.9	-45966.1	7060.96	131.81	210.994	0	-6.25961	-5.09857	-184.123	33890.4	6032.76	-1193.25	232.765	718.936	0	0	0	0	0	0	0	603	903	0
610	2	-28.2612	-136.091	-668.293	58716.2	-45172.7	7381.39	132.406	212.14	0	-3.05527	-3.72528	-196.33	35172.1	6643.11	-1513.69	233.837	723.852	0	0	0	0	0	0	0	603	903	0
610	3	-28.1086	-137.006	-661.884	57892.2	-44745.4	7472.95	132.397	212.534	0	-8.09067	-3.87787	-211.588	38559.5	7070.36	-1925.68	233.416	720.762	0	0	0	0	0	0	0	603	903	0
610	4	-25.9723	-137.312	-658.832	57800.6	-44806.5	7564.5	131.991	212.268	0	-10.0743	-7.84515	-224.101	40299.1	6887.25	-2337.66	230.733	723.174	0	0	0	0	0	0	0	603	903	0
610	5	-25.6672	-138.074	-656.086	56885.1	-43829.9	7518.72	133.195	213.296	0	-12.9735	-7.08221	-233.866	42404.8	7497.61	-2520.77	232.059	721.679	0	0	0	0	0	0	0	603	903	0
610	6	-26.7353	-138.38	-652.118	56335.8	-44196.1	7289.84	132.227	213.611	0	-13.2787	-0.673524	-247.294	43411.8	7436.57	-2886.98	230.072	727.453	0	0	0	0	0	0	0	603	903	0
610	7	-27.193	-138.532	-641.742	56702	-43158.5	7656.05	132.748	211.644	0	-12.9735	0.852355	-260.722	46250	7863.82	-2658.1	230.162	725.608	0	0	0	0	0	0	0	603	903	0
610	8	-26.5827	-138.38	-638.996	55694.9	-42731.3	7656.05	133.127	212.84	0	-13.1261	-1.58905	-272.929	48172.6	8046.92	-2566.54	229.484	726.498	0	0	0	0	0	0	0	603	903	0
610	9	-24.9042	-138.837	-634.113	55145.6	-42975.4	8113.82	132.228	213.035	0	-13.4312	3.44635	-282.084	49362.8	8413.13	-2886.98	229.825	728.007	0	0	0	0	0	0	0	603	903	0
611	0	-23.9887	-138.685	-630.756	54047	-42731.3	7839.16	132.254	214.314	0	-14.8045	9.70245	-290.934	50369.9	8779.34	-2566.54	230.176	729.869	0	0	0	0	0	0	0	603	903	0
611	1	-23.9887	-139.143	-623.127	53863.9	-42182	7747.61	132.306	213.559	0	-13.889	11.0757	-303.141	52017.8	8901.42	-2291.89	229.364	731.404	0	0	0	0	0	0	0	603	903	0
611	2	-24.7516	-138.685	-618.549	53131.4	-41571.6	8159.59	132.792	214.103	0	-15.1097	16.1111	-313.822	53665.8	9084.52	-2337.66	228.948	731.993	0	0	0	0	0	0	0	603	903	0
611	3	-23.9887	-139.143	-611.835	52582.1	-41205.4	8205.37	132.653	214.058	0	-16.0252	22.0621	-326.029	54947.5	9511.77	-2291.89	229.175	734.465	0	0	0	0	0	0	0	603	903	0
611	4	-22.9206	-138.685	-606.342	51758.2	-40839.2	7564.5	132.647	214.639	0	-14.1942	27.2501	-334.574	56778.5	9939.01	-1925.68	229.706	733.296	0	0	0	0	0	0	0	603	903	0
611	5	-21.5473	-139.295	-600.544	51025.7	-40534	8022.27	132.504	215.034	0	-14.6519	32.2855	-341.288	56870.1	10000	-2154.56	229.301	736.366	0	0	0	0	0	0	0	603	903	0
611	6	-21.0895	-138.38	-595.356	50384.9	-39984.7	8113.82	132.839	215.37	0	-16.6356	38.0838	-355.326	58243.4	10061.1	-1605.24	228.315	739.085	0	0	0	0	0	0	0	603	903	0
611	7	-21.6999	-138.532	-588.642	48920	-39557.4	8205.37	132.799	216.893	0	-18.7718	44.0347	-362.65	59616.7	10183.2	-1742.57	228.08	738.608	0	0	0	0	0	0	0	603	903	0
611	8	-19.2585	-138.685	-582.538	48187.6	-38764	8113.82	133.457	217.28	0	-16.7882	48.4598	-373.332	61081.5	10427.3	-1559.47	227.93	739.388	0	0	0	0	0	0	0	603	903	0
611	9	-20.0214	-138.38	-573.993	47638.3	-38214.7	8480.03	133.423	217.006	0	-17.7037	55.0211	-380.961	61447.7	10549.4	-1605.24	227.691	741.703	0	0	0	0	0	0	0	603	903	0
612	0	-18.9533	-138.227	-566.974	46905.9	-38092.6	8388.48	132.814	217.27	0	-22.1288	61.4297	-391.337	62729.5	11342.8	-1696.79	228.985	742.705	0	0	0	0	0	0	0	603	903	0
612	1	-18.9533	-138.38	-562.091	45990.3	-37787.4	8251.15	132.774	218.18	0	-21.671	65.5496	-403.239	63919.7	11770.1	-1513.69	229.189	744.484	0	0	0	0	0	0	0	603	903	0
612	2	-17.2748	-138.074	-550.495	45349.5	-37177.1	8251.15	132.466	217.621	0	-19.3822	68.1436	-414.225	65659.1	11648	-1055.93	228.12	744.489	0	0	0	0	0	0	0	603	903	0
612	3	-17.2748	-138.227	-547.748	44525.5	-36505.7	8571.58	133.353	218.712	0	-19.5348	73.6368	-422.77	66574.7	11953.2	-1376.36	228.273	745.527	0	0	0	0	0	0	0	603	903	0
612	4	-16.9697	-138.227	-538.593	44067.7	-35834.3	8892.02	133.467	218.18	0	-21.8236	76.6885	-435.282	67398.6	12624.6	-1376.36	229.003	748.161	0	0	0	0	0	0	0	603	903	0
612	5	-16.2067	-138.074	-526.996	42877.5	-35162.9	8480.03	133.277	218.638	0	-23.502	78.9774	-443.217	68314.2	12685.6	-1193.25	228.622	748.867	0	0	0	0	0	0	0	603	903	0
612	6	-14.3757	-139.143	-522.419	41962	-34796.7	8892.02	133.393	219.677	0	-21.671	81.8765	-456.339	69229.7	12807.7	-1055.93	228.066	751.293	0	0	0	0	0	0	0	603	903	0
612	7	-14.0705	-137.769	-516.315	41412.7	-34308.4	9029.35	133.551	219.792	0	-20.2977	84.7757	-467.326	71610.1	13295.9	-781.267	228.451	749.766	0	0	0	0	0	0	0	603	903	0
612	8	-13.0024	-137.769	-502.887	41138	-33392.9	9120.9	133.598	218.196	0	-20.1451	85.0809	-476.786	72067.9	13479.1	-506.608	228.271	751.847	0	0	0	0	0	0	0	603	903	0
612	9	-13.4601	-138.837	-500.141	40130.9	-33026.7	9075.12	133.965	219.761	0	-22.5865	85.2335	-488.078	72983.4	13418	-781.267	227.492	753.468	0	0	0	0	0	0	0	603	903	0
613	0	-13.0024	-138.532	-489.46	39581.6	-32355.3	9075.12	133.896	219.132	0	-21.8236	89.8111	-498.759	73624.2	14211.5	-827.043	228.494	755.385	0	0	0	0	0	0	0	603	903	0
613	1	-12.0868	-136.701	-483.356	38299.9	-32172.2	9441.33	133.44	220.763	0	-22.4339	90.8792	-510.05	75638.4	15066	-643.938	229.538	754.704	0	0	0	0	0	0	0	603	903	0
613	2	-10.4084	-137.159	-473.896	38025.2	-31378.7	9349.78	133.786	219.76	0	-21.3658	90.1163	-519.206	76279.3	15066	-689.714	229.017	756.085	0	0	0	0	0	0	0	603	903	0
613	3	-10.1032	-136.396	-464.74	36560.4	-30524.2	9120.9	134.32	221.332	0	-20.9081	90.7266	-530.802	78110.3	15188	-323.503	228.613	755.845	0	0	0	0	0	0	0	603	903	0
613	4	-10.7135	-135.328	-456.195	36194.2	-29791.8	9304	134.695	220.661	0	-21.5184	93.3206	-542.399	78201.9	15493.2	-186.174	228.564	758.822	0	0	0	0	0	0	0	603	903	0
613	5	-10.1032	-134.26	-447.04	35095.6	-29059.4	9441.33	134.996	221.493	0	-18.3141	94.0836	-553.69	79666.7	16530.8	-186.174	229.856	759.117	0	0	0	0	0	0	0	603	903	0
613	6	-9.34026	-133.955	-436.664	33996.9	-28754.2	9258.23	134.15	222.144	0	-18.7718	94.8465	-564.677	80856.9	16774.9	-3.06848	229.707	759.808	0	0	0	0	0	0	0	603	903	0
613	7	-7.66179	-133.497	-426.898	32989.8	-28265.9	9349.78	133.788	222.722	0	-16.6356	95.1517	-578.715	82047.1	17141.2	88.4843	229.619	761.225	0	0	0	0	0	0	0	603	903	0
613	8	-7.05144	-133.192	-419.269	32165.9	-27533.5	9304	134.33	223.281	0	-13.1261	98.6612	-588.786	82413.3	17751.5	180.037	230.149	763.028	0	0	0	0	0	0	0	603	903	0
613	9	-6.2885	-131.513	-411.945	31158.8	-26373.8	9304	135.977	224.362	0	-10.8372	100.797	-594.584	82504.9	18239.8	729.354	230.677	764.239	0	0	0	0	0	0	0	603	903	0
614	0	-6.74626	-130.445	-400.653	30151.7	-25946.6	9120.9	135.239	224.744	0	-8.39584	101.103	-607.707	84061.3	18972.2	1278.67	231.219	764.675	0	0	0	0	0	0	0	603	903	0
614	1	-5.67815	-128.767	-389.057	29785.5	-25275.2	9304	135.035	223.442	0	-3.36044	105.375	-617.167	85159.9	18850.1	1278.67	230.543	765.015	0	0	0	0	0	0	0	603	903	0
614	2	-5.83074	-127.393	-375.324	27771.3	-24848	9349.78	133.796	226.007	0	-0.308685	109.495	-624.186	85709.2	19826.7	1736.43	231.764	765.687	0	0	0	0	0	0	0	603	903	0
614	3	-4.76262	-125.867	-368.915	27313.6	-24115.5	9258.23	134.631	225.962	0	1.82755	112.242	-629.069	85159.9	20192.9	2194.2	232.1	767.625	0	0	0	0	0	0	0	603	903	0
614	4	-4.76262	-124.036	-359.149	26123.4	-23322.1	9075.12	135.063	227.263	0	2.89566	114.683	-632.426	85343	20192.9	2651.96	231.929	768.055	0	0	0	0	0	0	0	603	903	0
614	5	-5.0678	-122.663	-350.299	25299.4	-22528.6	8983.57	135.688	227.778	0	4.57413	119.566	-641.886	85892.3	20254	2743.51	231.554	769.188	0	0	0	0	0	0	0	603	903	0
614	6	-5.0678	-119.611	-335.346	24383.9	-22284.5	8708.91	133.548	227.287	0	6.10001	122.77	-649.21	86533.2	20925.3	2697.74	232.232	769.71	0	0	0	0	0	0	0	603	903	0
614	7	-5.67815	-117.017	-327.411	23010.6	-21185.9	8708.91	135.293	229.72	0	9.60953	124.296	-650.736	86075.4	21169.5	2926.62	232.532	770.726	0	0	0	0	0	0	0	603	903	0
614	8	-4.45744	-115.034	-315.815	23285.3	-20880.7	8754.69	133.883	226.269	0	8.23624	126.432	-654.093	85526.1	20925.3	2743.51	231.991	772.245	0	0	0	0	0	0	0	603	903	0
614	9	-3.6945	-112.135	-308.49	21728.9	-20026.2	8388.48	135.083	229.564	0	8.54141	129.179	-654.704	85617.7	20742.2	3063.95	231.682	772.227	0	0	0	0	0	0	0	603	903	0
615	0	-4.76262	-108.625	-297.809	20996.4	-19415.8	8113.82	134.804	229.497	0	9.30435	130.247	-660.502	85251.5	21352.6	3201.28	232.328	773.929	0	0	0	0	0	0	0	603	903	0
615	1	-4.30486	-106.336	-287.433	19806.2	-18439.3	8113.82	135.848	231.093	0	11.7458	131.162	-663.249	85800.8	21779.8	3292.83	232.838	773.636	0	0	0	0	0	0	0	603	903	0
615	2	-4.61003	-104.353	-275.836	19165.4	-17767.9	7518.72	135.585	230.519	0	10.2199	131.925	-664.774	85617.7	21291.5	3292.83	232.028	774.208	0	0	0	0	0	0	0	603	903	0
615	3	-3.6945	-100.843	-264.545	18707.6	-17035.5	7244.07	135.605	229.284	0	11.288	133.146	-665.995	85068.3	21535.7	3567.49	232.336	775.269	0	0	0	0	0	0	0	603	903	0
615	4	-1.2531	-97.3335	-256.305	17609	-16791.3	7198.29	134.487	231.297	0	10.6776	130.857	-665.69	84152.8	21352.6	3521.71	232.076	776.586	0	0	0	0	0	0	0	603	903	0
615	5	-3.23674	-94.1292	-245.929	16235.7	-15875.8	6557.42	135.446	233.982	0	10.8302	133.451	-667.521	84061.3	21535.7	3887.92	232.262	777.07	0	0	0	0	0	0	0	603	903	0
615	6	-4.61003	-91.0774	-237.384	15869.5	-14960.3	6694.75	136.979	233.149	0	11.7458	133.909	-668.131	84152.8	21291.5	3842.15	231.867	777.047	0	0	0	0	0	0	0	603	903	0
615	7	-4.91521	-87.5679	-225.177	14404.6	-14349.9	6328.54	136.273	236.03	0	10.9828	133.299	-669.352	84335.9	21718.8	4162.58	232.448	777.004	0	0	0	0	0	0	0	603	903	0
615	8	-4.30486	-83.9058	-212.97	13580.7	-13617.5	6282.76	136.059	236.232	0	10.5251	133.604	-668.742	83328.9	21901.9	4208.36	232.751	778.395	0	0	0	0	0	0	0	603	903	0
615	9	-3.54192	-79.6333	-204.731	13122.9	-13312.3	5550.34	134.976	235.902	0	10.5251	135.893	-669.047	82962.6	21474.7	4483.02	232.097	778.999	0	0	0	0	0	0	0	603	903	0
616	0	-3.84709	-76.429	-199.237	11749.6	-12946.1	5641.89	135.022	241.027	0	8.99918	136.961	-670.573	83328.9	21718.8	4437.24	232.388	778.735	0	0	0	0	0	0	0	603	903	0
616	1	-4.61003	-73.3772	-189.777	10834.1	-12213.7	5184.13	135.642	242.912	0	8.84659	135.893	-670.878	83328.9	21840.9	4757.68	232.556	778.791	0	0	0	0	0	0	0	603	903	0
616	2	-4.30486	-69.2574	-181.232	10376.3	-11786.4	4817.92	134.965	242.746	0	9.60953	138.334	-669.657	81955.6	21901.9	4940.78	232.706	780.616	0	0	0	0	0	0	0	603	903	0
616	3	-4.61003	-63.7642	-170.551	9460.79	-11176.1	4589.04	134.471	244.528	0	8.08365	138.029	-666.605	81772.4	21169.5	5215.44	231.757	780.33	0	0	0	0	0	0	0	603	903	0
616	4	-3.99968	-59.4917	-164.142	8636.81	-10932	4222.83	133.399	247.382	0	8.54141	139.555	-669.962	81497.8	22024	5215.44	232.873	781.355	0	0	0	0	0	0	0	603	903	0
616	5	-2.93157	-56.8977	-157.733	8911.47	-10443.7	4131.27	133.789	243.503	0	9.60953	142.454	-672.099	80673.8	22146	5444.32	232.951	782.967	0	0	0	0	0	0	0	603	903	0
616	6	-5.0678	-52.3201	-149.799	7538.18	-9955.39	3719.28	133.542	249.678	0	10.5251	143.827	-673.014	81131.6	21840.9	5444.32	232.452	782.45	0	0	0	0	0	0	0	603	903	0
616	7	-4.91521	-49.2683	-142.475	7171.97	-9345.04	3765.06	134.409	249.661	0	10.6776	145.048	-673.625	80216	21901.9	5673.2	232.514	783.919	0	0	0	0	0	0	0	603	903	0
616	8	-5.0678	-48.3528	-132.404	6622.65	-8856.76	3627.73	133.108	249.981	0	13.7294	147.337	-675.15	79941.4	22390.2	5947.86	233.163	784.595	0	0	0	0	0	0	0	603	903	0
616	9	-2.62639	-48.5054	-126.911	6714.2	-8490.55	3536.18	133.098	247.095	0	13.5768	149.168	-678.202	79941.4	22451.2	5902.08	233.104	785.128	0	0	0	0	0	0	0	603	903	0
617	0	-3.99968	-45.6062	-118.061	5798.68	-8185.37	3307.3	130.668	250.884	0	16.0182	150.694	-677.592	80582.2	22329.1	6222.52	232.954	784.076	0	0	0	0	0	0	0	603	903	0
617	1	-2.4738	-44.3855	-112.873	5981.78	-7575.02	3078.42	132.889	247.004	0	17.3915	151.914	-682.169	79575.2	22695.4	6314.07	233.269	786.35	0	0	0	0	0	0	0	603	903	0
617	2	-4.76262	-42.4019	-104.938	5249.36	-6842.6	3353.07	134.794	249.977	0	17.8493	152.372	-684	79392.1	23000.5	6817.61	233.626	786.93	0	0	0	0	0	0	0	603	903	0
617	3	-4.45744	-39.3501	-96.0879	5340.91	-6598.46	3169.97	131.329	244.416	0	19.2226	154.203	-686.747	79483.6	22451.2	6451.4	232.692	787.261	0	0	0	0	0	0	0	603	903	0
617	4	-5.37297	-36.6035	-88.1534	4333.83	-6293.28	3078.42	128.61	250.838	0	21.8166	155.424	-690.714	80216	23061.6	6954.94	233.388	786.865	0	0	0	0	0	0	0	603	903	0
617	5	-4.15227	-32.6363	-84.4913	3876.07	-5866.04	2391.77	130.572	254.125	0	24.1054	156.034	-693.766	80124.5	23305.7	7000.72	233.593	787.508	0	0	0	0	0	0	0	603	903	0
617	6	-4.91521	-31.4156	-79.3033	4333.83	-5560.86	2071.33	129.879	245.351	0	23.9528	155.119	-698.649	79483.6	23488.8	7138.05	233.62	789.232	0	0	0	0	0	0	0	603	903	0
617	7	-6.2885	-28.8216	-74.1153	4059.17	-4828.44	2025.56	134.852	245.232	0	26.089	157.865	-698.954	79575.2	23183.6	7321.15	233.169	789.151	0	0	0	0	0	0	0	603	903	0
617	8	-5.98332	-25.6172	-69.2325	3143.64	-4706.37	1750.9	132.021	254.593	0	28.0727	159.391	-702.921	80216	23977.1	7550.03	234.111	788.882	0	0	0	0	0	0	0	603	903	0
617	9	-5.52556	-23.1758	-62.5186	2777.43	-4462.23	1293.14	128.626	255.574	0	29.5985	160.612	-708.109	80033	24404.3	7824.69	234.464	789.977	0	0	0	0	0	0	0	603	903	0
618	0	-4.61003	-21.9551	-58.8565	2594.33	-4157.05	1430.47	129.37	255.921	0	30.3615	160.002	-711.466	79300.5	24160.2	7778.92	233.958	791.539	0	0	0	0	0	0	0	603	903	0
618	1	-3.84709	-18.4456	-55.4996	2045.01	-3668.77	1247.36	133.896	263.153	0	31.1244	160.307	-715.128	80307.6	24465.4	7916.24	234.211	790.702	0	0	0	0	0	0	0	603	903	0
618	2	-4.91521	-16.4619	-52.4478	1587.25	-3302.56	1064.25	137.032	269.737	0	32.6503	159.849	-718.485	80033	25014.7	8282.45	234.816	791.609	0	0	0	0	0	0	0	603	903	0
618	3	-5.98332	-14.4783	-50.0064	1404.14	-3302.56	926.926	133.957	271.921	0	34.4814	161.833	-722.758	80399.2	25686.1	8099.35	235.539	791.761	0	0	0	0	0	0	0	603	903	0
618	4	-6.2885	-12.1895	-45.1236	1037.93	-2814.28	789.596	137.632	276.998	0	34.3288	161.833	-726.115	80856.9	24953.7	8236.68	234.366	791.644	0	0	0	0	0	0	0	603	903	0
618	5	-6.13591	-11.4265	-40.8511	1037.93	-2753.24	698.044	132.603	274.592	0	34.9391	160.612	-730.998	80490.7	25319.9	8374.01	234.637	792.889	0	0	0	0	0	0	0	603	903	0
618	6	-5.22038	-10.3584	-37.4942	1587.25	-2509.1	606.491	133.08	257.667	0	35.0917	160.917	-734.049	80765.4	25869.2	8557.11	235.242	792.973	0	0	0	0	0	0	0	603	903	0
618	7	-5.37297	-9.59549	-36.2735	854.827	-2570.14	698.044	129.146	276.434	0	34.7865	160.459	-738.627	80582.2	25503	8602.89	234.528	793.903	0	0	0	0	0	0	0	603	903	0
618	8	-5.98332	-8.06961	-32.9166	122.405	-2081.86	148.727	136.754	296.281	0	36.3124	161.527	-741.374	81406.2	25625	8602.89	234.564	793.195	0	0	0	0	0	0	0	603	903	0
618	9	-5.52556	-7.15408	-28.9493	488.616	-1837.72	423.385	136.519	283.122	0	35.0917	161.68	-747.172	81406.2	26174.4	9106.43	235.031	794.048	0	0	0	0	0	0	0	603	903	0
619	0	-4.91521	-7.61185	-26.813	488.616	-1959.79	240.28	126.909	281.777	0	36.465	161.527	-750.224	81131.6	26357.5	8877.55	235.133	794.857	0	0	0	0	0	0	0	603	903	0
619	1	-4.91521	-5.17044	-24.6768	122.405	-1593.57	194.503	135.422	295.04	0	35.8546	161.68	-752.665	80948.5	26113.3	8877.55	234.694	795.451	0	0	0	0	0	0	0	603	903	0
619	2	-5.0678	-3.94974	-24.6768	1404.14	-1532.54	-354.813	137.896	243.099	0	35.0917	162.443	-756.632	81864	26174.4	9152.2	234.593	794.805	0	0	0	0	0	0	0	603	903	0
619	3	-4.30486	-2.88162	-21.0147	854.827	-1105.29	-125.931	147.404	259.322	0	36.6176	160.764	-758.158	82230.2	26357.5	9060.65	234.765	794.539	0	0	0	0	0	0	0	603	903	0
619	4	-5.67815	-2.57645	-20.4044	488.616	-800.117	240.28	160.787	276.053	0	37.8383	163.816	-763.957	82321.8	26296.4	9106.43	234.421	795.243	0	0	0	0	0	0	0	603	903	0
619	5	-5.67815	-1.96609	-17.9629	580.168	-1044.26	102.951	141.866	267.702	0	36.7702	161.833	-768.229	82230.2	25991.3	9060.65	233.833	795.961	0	0	0	0	0	0	0	603	903	0
619	6	-4.61003	-1.35574	-16.4371	397.063	-983.223	-217.484	140.183	275.843	0	35.8546	161.833	-772.196	82230.2	26967.8	9014.88	234.924	796.511	0	0	0	0	0	0	0	603	903	0
619	7	-4.15227	-0.897979	-14.9112	854.827	-555.977	11.398	162.714	242.672	0	36.1598	163.358	-774.638	83145.7	26845.7	9014.88	234.656	795.665	0	0	0	0	0	0	0	603	903	0
619	8	-5.0678	-0.592804	-10.3336	122.405	-678.047	-125.931	134.384	288.155	0	37.3805	162.29	-779.826	82596.4	26418.5	9152.2	233.877	797.084	0	0	0	0	0	0	0	603	903	0
619	9	-4.76262	-1.05057	-11.5543	-60.7009	-372.871	-34.3784	167.729	305.254	0	37.2279	161.985	-782.267	83054.2	26967.8	9014.88	234.474	796.829	0	0	0	0	0	0	0	603	903	0
620	0	0	0	0	0	0	0	200	300	0	36.1598	162.29	-783.793	83237.3	27150.9	8969.1	234.64	796.802	0	0	0	0	0	0	0	603	903	0
620	1	0	0	0	0	0	0	200	300	0	39.059	162.748	-788.371	83145.7	27089.9	9289.53	234.362	797.535	0	0	0	0	0	0	0	603	903	0
620	2	0	0	0	0	0	0	200	300	0	36.7702	161.07	-790.812	83695.1	27089.9	9335.31	234.256	797.166	0	0	0	0	0	0	0	603	903	0
620	3	0	0	0	0	0	0	200	300	0	37.9909	161.527	-794.169	83603.5	27456.1	9335.31	234.572	797.728	0	0	0	0	0	0	0	603	903	0
620	4	0	0	0	0	0	0	200	300	0	38.4486	159.696	-797.831	83511.9	27761.3	9335.31	234.796	798.326	0	0	0	0	0	0	0	603	903	0
620	5	0	0	0	0	0	0	200	300	0	37.8383	159.086	-799.967	83878.1	27395.1	9381.09	234.245	798.148	0	0	0	0	0	0	0	603	903	0
620	6	0	0	0	0	0	0	200	300	0	38.7538	158.323	-801.798	83695.1	28188.5	9243.76	235.157	798.616	0	0	0	0	0	0	0	603	903	0
620	7	0	0	0	0	0	0	200	300	0	37.8383	157.255	-806.681	84335.9	28249.6	9472.64	235.019	798.453	0	0	0	0	0	0	0	603	903	0
620	8	0	0	0	0	0	0	200	300	0	38.2961	155.424	-806.071	84152.8	27761.3	9426.86	234.44	798.601	0	0	0	0	0	0	0	603	903	0
620	9	0	0	0	0	0	0	200	300	0	38.7538	153.593	-810.954	84244.4	27761.3	9106.43	234.233	799.117	0	0	0	0	0	0	0	603	903	0
621	0	0	0	0	0	0	0	200	300	0	37.6857	153.135	-812.174	83878.1	27944.4	8969.1	234.407	799.724	0	0	0	0	0	0	0	603	903	0
621	1	0	0	0	0	0	0	200	300	0	38.1435	152.525	-813.7	84519	28127.5	9426.86	234.567	799.13	0	0	0	0	0	0	0	603	903	0
621	2	0	0	0	0	0	0	200	300	0	37.6857	151.609	-817.057	84702.1	27761.3	8969.1	233.977	799.333	0	0	0	0	0	0	0	603	903	0
621	3	0	0	0	0	0	0	200	300	0	38.6012	149.168	-819.499	85159.9	28249.6	9197.98	234.472	799.083	0	0	0	0	0	0	0	603	903	0
621	4	0	0	0	0	0	0	200	300	0	38.1435	149.32	-819.193	84885.2	28005.4	9060.65	234.187	799.379	0	0	0	0	0	0	0	603	903	0
621	5	0	0	0	0	0	0	200	300	0	37.2279	147.489	-818.278	84976.8	27822.3	9152.2	234.001	799.152	0	0	0	0	0	0	0	603	903	0
621	6	0	0	0	0	0	0	200	300	0	37.2279	148.1	-822.855	84702.1	27883.3	8877.55	233.886	800.063	0	0	0	0	0	0	0	603	903	0
621	7	0	0	0	0	0	0	200	300	0	36.9228	147.032	-824.381	85617.7	28249.6	9106.43	234.268	799.143	0	0	0	0	0	0	0	603	903	0
621	8	0	0	0	0	0	0	200	300	0	37.3805	145.201	-826.212	85343	28432.7	9106.43	234.413	799.706	0	0	0	0	0	0	0	603	903	0
621	9	0	0	0	0	0	0	200	300	0	36.3124	143.827	-826.823	84885.2	28005.4	8557.11	233.871	800.336	0	0	0	0	0	0	0	603	903	0
622	0	0	0	0	0	0	0	200	300	0	36.6176	143.98	-826.823	85251.5	28554.7	8694.44	234.536	799.893	0	0	0	0	0	0	0	603	903	0
622	1	0	0	0	0	0	0	200	300	0	35.8546	143.217	-828.349	85526.1	28310.6	8511.33	234.177	799.751	0	0	0	0	0	0	0	603	903	0
622	2	0	0	0	0	0	0	200	300	0	35.7021	139.097	-826.212	85159.9	28310.6	8557.11	234.266	799.927	0	0	0	0	0	0	0	603	903	0
622	3	0	0	0	0	0	0	200	300	0	36.3124	138.334	-831.4	84702.1	27883.3	8648.66	233.538	801.121	0	0	0	0	0	0	0	603	903	0
622	4	0	0	0	0	0	0	200	300	0	34.7865	138.181	-830.485	84793.7	28432.7	8419.78	234.236	800.899	0	0	0	0	0	0	0	603	903	0
622	5	0	0	0	0	0	0	200	300	0	35.8546	137.724	-832.011	84610.6	28188.5	8328.23	233.88	801.306	0	0	0	0	0	0	0	603	903	0
622	6	0	0	0	0	0	0	200	300	0	34.6339	136.045	-833.842	85159.9	27578.2	8282.45	233.074	800.87	0	0	0	0	0	0	0	603	903	0
622	7	0	0	0	0	0	0	200	300	0	35.7021	134.214	-833.231	84885.2	28493.7	8328.23	234.197	801.125	0	0	0	0	0	0	0	603	903	0
622	8	0	0	0	0	0	0	200	300	0	34.9391	133.604	-834.452	84519	28310.6	8602.89	233.927	801.713	0	0	0	0	0	0	0	603	903	0
622	9	0	0	0	0	0	0	200	300	0	34.4814	132.078	-834.452	84061.3	28249.6	8282.45	233.854	802.262	0	0	0	0	0	0	0	603	903	0
623	0	0	0	0	0	0	0	200	300	0	34.6339	131.01	-834.452	84061.3	28005.4	7962.02	233.561	802.262	0	0	0	0	0	0	0	603	903	0
623	1	0	0	0	0	0	0	200	300	0	35.2443	129.942	-835.368	84610.6	28249.6	8190.9	233.817	801.715	0	0	0	0	0	0	0	603	903	0
623	2	0	0	0	0	0	0	200	300	0	35.2443	128.416	-835.978	84519	28371.6	7962.02	233.938	801.898	0	0	0	0	0	0	0	603	903	0
623	3	0	0	0	0	0	0	200	300	0	34.3288	127.348	-834.147	83786.6	28249.6	7916.24	233.866	802.554	0	0	0	0	0	0	0	603	903	0
623	4	0	0	0	0	0	0	200	300	0	33.5658	126.432	-834.757	83878.1	28188.5	7778.92	233.769	802.518	0	0	0	0	0	0	0	603	903	0
623	5	0	0	0	0	0	0	200	300	0	32.8029	122.923	-833.842	84061.3	28432.7	7550.03	234.098	802.188	0	0	0	0	0	0	0	603	903	0
623	6	0	0	0	0	0	0	200	300	0	33.4132	124.143	-833.231	83420.4	27761.3	7275.38	233.318	802.883	0	0	0	0	0	0	0	603	903	0
623	7	0	0	0	0	0	0	200	300	0	33.5658	122.007	-832.316	84061.3	27822.3	7733.14	233.428	802.003	0	0	0	0	0	0	0	603	903	0
623	8	0	0	0	0	0	0	200	300	0	32.1925	120.786	-830.18	83695.1	28249.6	7550.03	234.028	802.184	0	0	0	0	0	0	0	603	903	0
623	9	0	0	0	0	0	0	200	300	0	33.2607	120.329	-829.875	82688	28554.7	7641.59	234.408	803.361	0	0	0	0	0	0	0	603	903	0
624	0	0	0	0	0	0	0	200	300	0	31.7348	116.819	-827.128	82779.5	27944.4	7504.26	233.785	802.919	0	0	0	0	0	0	0	603	903	0
624	1	0	0	0	0	0	0	200	300	0	32.1925	117.887	-826.823	82688	28554.7	7733.14	234.536	802.993	0	0	0	0	0	0	0	603	903	0
624	2	0	0	0	0	0	0	200	300	0	32.3451	116.361	-824.992	81772.4	28188.5	7321.15	234.168	803.881	0	0	0	0	0	0	0	603	903	0
624	3	0	0	0	0	0	0	200	300	0	30.6667	114.836	-821.94	81406.2	27639.2	7092.27	233.627	803.958	0	0	0	0	0	0	0	603	903	0
624	4	0	0	0	0	0	0	200	300	0	31.1244	114.683	-820.719	80856.9	27700.2	7046.49	233.751	804.48	0	0	0	0	0	0	0	603	903	0
624	5	0	0	0	0	0	0	200	300	0	31.7348	113.004	-817.973	81497.8	27822.3	7138.05	234.014	803.366	0	0	0	0	0	0	0	603	903	0
624	6	0	0	0	0	0	0	200	300	0	33.5658	111.326	-813.395	80673.8	27883.3	6863.39	234.28	803.818	0	0	0	0	0	0	0	603	903	0
624	7	0	0	0	0	0	0	200	300	0	31.5822	108.427	-814.005	79666.7	27334	6909.16	233.58	805.13	0	0	0	0	0	0	0	603	903	0
624	8	0	0	0	0	0	0	200	300	0	30.9718	108.427	-809.123	79117.4	27700.2	6817.61	234.235	805.218	0	0	0	0	0	0	0	603	903	0
624	9	0	0	0	0	0	0	200	300	0	30.0563	108.579	-806.376	79117.4	27334	6726.06	233.897	804.885	0	0	0	0	0	0	0	603	903	0
625	0	0	0	0	0	0	0	200	300	0	30.6667	106.596	-804.24	79117.4	27150.9	6771.84	233.76	804.625	0	0	0	0	0	0	0	603	903	0
625	1	0	0	0	0	0	0	200	300	0	32.1925	104.917	-801.188	78018.8	27028.9	6588.73	233.736	805.621	0	0	0	0	0	0	0	603	903	0
625	2	0	0	0	0	0	0	200	300	0	30.0563	104.002	-796.61	77377.9	27456.1	6542.95	234.466	805.866	0	0	0	0	0	0	0	603	903	0
625	3	0	0	0	0	0	0	200	300	0	29.5985	103.697	-788.981	76737.1	26967.8	6359.85	234.181	805.739	0	0	0	0	0	0	0	603	903	0
625	4	0	0	0	0	0	0	200	300	0	28.9882	102.018	-789.591	76920.1	26174.4	6268.3	233.149	805.582	0	0	0	0	0	0	0	603	903	0
625	5	0	0	0	0	0	0	200	300	0	29.9037	100.797	-786.845	76553.9	27150.9	6085.19	234.506	805.708	0	0	0	0	0	0	0	603	903	0
625	6	0	0	0	0	0	0	200	300	0	30.8192	98.9664	-783.183	75913.1	26662.6	6176.74	234.044	806.071	0	0	0	0	0	0	0	603	903	0
625	7	0	0	0	0	0	0	200	300	0	28.8356	97.1353	-777.689	74906	26357.5	6039.41	233.892	806.681	0	0	0	0	0	0	0	603	903	0
625	8	0	0	0	0	0	0	200	300	0	28.3778	97.1353	-773.722	74448.2	26418.5	5856.31	234.145	806.779	0	0	0	0	0	0	0	603	903	0
625	9	0	0	0	0	0	0	200	300	0	28.2253	95.3043	-770.06	74265.1	26296.4	6130.97	234.149	806.559	0	0	0	0	0	0	0	603	903	0
626	0	0	0	0	0	0	0	200	300	0	29.2934	93.6258	-763.957	73807.4	26052.3	5993.64	234.102	806.388	0	0	0	0	0	0	0	603	903	0
626	1	0	0	0	0	0	0	200	300	0	31.5822	90.2689	-762.125	72891.8	26357.5	5718.98	234.584	807.357	0	0	0	0	0	0	0	603	903	0
626	2	0	0	0	0	0	0	200	300	0	28.9882	90.7266	-756.632	72525.6	26296.4	5718.98	234.755	807.147	0	0	0	0	0	0	0	603	903	0
626	3	0	0	0	0	0	0	200	300	0	27.3097	89.9637	-752.97	71610.1	26052.3	5673.2	234.599	807.896	0	0	0	0	0	0	0	603	903	0
626	4	0	0	0	0	0	0	200	300	0	27.4623	88.4378	-749.003	71060.8	25808.2	5490.1	234.457	808.126	0	0	0	0	0	0	0	603	903	0
626	5	0	0	0	0	0	0	200	300	0	28.9882	85.9964	-744.425	69779	25686.1	5581.65	234.505	809.265	0	0	0	0	0	0	0	603	903	0
626	6	0	0	0	0	0	0	200	300	0	28.683	84.9283	-739.848	70053.7	25930.2	5581.65	235.048	808.313	0	0	0	0	0	0	0	603	903	0
626	7	0	0	0	0	0	0	200	300	0	27.3097	84.3179	-735.27	68955	25380.9	5490.1	234.519	809.218	0	0	0	0	0	0	0	603	903	0
626	8	0	0	0	0	0	0	200	300	0	29.7511	82.9446	-730.998	68772	25380.9	5490.1	234.721	808.92	0	0	0	0	0	0	0	603	903	0
626	9	0	0	0	0	0	0	200	300	0	27.3097	82.4869	-724.589	68314.2	25503	5398.54	235.196	808.72	0	0	0	0	0	0	0	603	903	0
627	0	0	0	0	0	0	0	200	300	0	28.683	80.5032	-720.927	67948	25014.7	5535.87	234.698	808.749	0	0	0	0	0	0	0	603	903	0
627	1	0	0	0	0	0	0	200	300	0	28.0727	78.8248	-715.739	66391.6	24160.2	5306.99	233.756	810.24	0	0	0	0	0	0	0	603	903	0
627	2	0	0	0	0	0	0	200	300	0	26.852	78.367	-709.94	66208.5	25197.8	5215.44	235.493	809.741	0	0	0	0	0	0	0	603	903	0
627	3	0	0	0	0	0	0	200	300	0	27.1571	77.4515	-707.194	66483.1	24770.6	4849.23	235.027	808.99	0	0	0	0	0	0	0	603	903	0
627	4	0	0	0	0	0	0	200	300	0	27.1571	75.6204	-701.701	64926.7	24526.4	4986.56	234.953	810.472	0	0	0	0	0	0	0	603	903	0
627	5	0	0	0	0	0	0	200	300	0	27.4623	73.942	-694.682	64743.6	24160.2	4803.45	234.779	809.801	0	0	0	0	0	0	0	603	903	0
627	6	0	0	0	0	0	0	200	300	0	26.852	71.9583	-690.714	64011.2	24709.5	4940.78	235.774	810.326	0	0	0	0	0	0	0	603	903	0
627	7	0	0	0	0	0	0	200	300	0	28.5304	72.8738	-686.137	63278.8	24221.2	4757.68	235.301	810.775	0	0	0	0	0	0	0	603	903	0
627	8	0	0	0	0	0	0	200	300	0	25.1735	71.6531	-682.169	63095.7	23977.1	4666.12	235.148	810.507	0	0	0	0	0	0	0	603	903	0
627	9	0	0	0	0	0	0	200	300	0	27.0045	70.2798	-676.371	62454.8	24038.1	4528.79	235.54	810.662	0	0	0	0	0	0	0	603	903	0
628	0	0	0	0	0	0	0	200	300	0	26.089	68.754	-670.268	61630.8	23855	4391.46	235.59	811.05	0	0	0	0	0	0	0	603	903	0
628	1	0	0	0	0	0	0	200	300	0	25.9364	68.9066	-665.385	60440.7	23794	4620.35	235.76	812.164	0	0	0	0	0	0	0	603	903	0
628	2	0	0	0	0	0	0	200	300	0	26.6994	66.3126	-661.112	60166	23000.5	4299.91	234.791	811.993	0	0	0	0	0	0	0	603	903	0
628	3	0	0	0	0	0	0	200	300	0	25.7838	66.6177	-656.229	59250.5	23733	4299.91	236.166	812.711	0	0	0	0	0	0	0	603	903	0
628	4	0	0	0	0	0	0	200	300	0	25.9364	64.9393	-651.347	58975.8	23427.8	4483.02	235.968	812.456	0	0	0	0	0	0	0	603	903	0
628	5	0	0	0	0	0	0	200	300	0	25.9364	64.3289	-646.159	58060.3	23061.6	4391.46	235.69	813.146	0	0	0	0	0	0	0	603	903	0
628	6	0	0	0	0	0	0	200	300	0	24.5631	64.4815	-640.055	56595.4	22573.3	4116.81	235.268	814.577	0	0	0	0	0	0	0	603	903	0
628	7	0	0	0	0	0	0	200	300	0	25.4787	63.2608	-637.003	56961.7	23244.7	4437.24	236.491	813.579	0	0	0	0	0	0	0	603	903	0
628	8	0	0	0	0	0	0	200	300	0	25.7838	61.7349	-632.731	56320.8	22817.4	4116.81	236.062	813.988	0	0	0	0	0	0	0	603	903	0
628	9	0	0	0	0	0	0	200	300	0	26.852	58.6832	-629.069	55863	22512.3	3979.48	235.787	814.197	0	0	0	0	0	0	0	603	903	0
629	0	0	0	0	0	0	0	200	300	0	25.4787	60.0565	-622.66	54672.8	22634.3	3933.7	236.351	815.195	0	0	0	0	0	0	0	603	903	0
629	1	0	0	0	0	0	0	200	300	0	24.5631	59.5987	-616.862	54398.2	22756.4	3796.37	236.891	814.815	0	0	0	0	0	0	0	603	903	0
629	2	0	0	0	0	0	0	200	300	0	24.7157	59.2935	-612.895	53757.3	22085	3659.04	236.034	815.29	0	0	0	0	0	0	0	603	903	0
629	3	0	0	0	0	0	0	200	300	0	25.0209	57.0047	-609.538	53208	22756.4	3613.27	237.334	815.708	0	0	0	0	0	0	0	603	903	0
629	4	0	0	0	0	0	0	200	300	0	27.3097	56.5469	-602.824	52750.2	22390.2	3475.94	237.142	815.495	0	0	0	0	0	0	0	603	903	0
629	5	0	0	0	0	0	0	200	300	0	24.4106	56.6995	-597.331	52109.3	21840.9	3567.49	236.564	815.763	0	0	0	0	0	0	0	603	903	0
629	6	0	0	0	0	0	0	200	300	0	24.4106	55.6314	-594.584	51102.3	22085	3475.94	237.144	817.054	0	0	0	0	0	0	0	603	903	0
629	7	0	0	0	0	0	0	200	300	0	23.3424	54.1055	-586.955	50736.1	21962.9	3475.94	237.418	816.56	0	0	0	0	0	0	0	603	903	0
629	8	0	0	0	0	0	0	200	300	0	23.8002	53.4952	-585.124	50736.1	21962.9	3567.49	237.536	816.29	0	0	0	0	0	0	0	603	903	0
629	9	0	0	0	0	0	0	200	300	0	24.5631	51.8167	-580.241	49729	21108.4	3475.94	236.379	817.296	0	0	0	0	0	0	0	603	903	0
630	0	0	0	0	0	0	0	200	300	0	25.0209	52.1219	-576.273	48721.9	21901.9	3338.61	238.006	818.454	0	0	0	0	0	0	0	603	903	0
630	1	0	0	0	0	0	0	200	300	0	22.7321	51.6641	-572.306	48172.6	21535.7	3292.83	237.63	818.827	0	0	0	0	0	0	0	603	903	0
630	2	0	0	0	0	0	0	200	300	0	25.6313	49.9857	-564.372	47806.4	21291.5	3201.28	237.726	818.293	0	0	0	0	0	0	0	603	903	0
630	3	0	0	0	0	0	0	200	300	0	23.495	49.0701	-565.592	47165.5	20986.4	3201.28	237.105	819.609	0	0	0	0	0	0	0	603	903	0
630	4	0	0	0	0	0	0	200	300	0	24.7157	47.8494	-558.878	47165.5	21230.5	3292.83	237.988	818.607	0	0	0	0	0	0	0	603	903	0
630	5	0	0	0	0	0	0	200	300	0	24.8683	48.6124	-554.606	46616.2	20986.4	3338.61	237.84	818.947	0	0	0	0	0	0	0	603	903	0
630	6	0	0	0	0	0	0	200	300	0	23.1898	47.2391	-551.859	45426	20437.1	3201.28	237.033	820.686	0	0	0	0	0	0	0	603	903	0
630	7	0	0	0	0	0	0	200	300	0	25.6313	46.6287	-548.197	44785.1	21047.4	3063.95	238.394	821.305	0	0	0	0	0	0	0	603	903	0
630	8	0	0	0	0	0	0	200	300	0	23.8002	45.2554	-544.84	44785.1	20803.3	2972.4	238.182	820.801	0	0	0	0	0	0	0	603	903	0
630	9	0	0	0	0	0	0	200	300	0	24.1054	44.7977	-540.873	44235.8	20498.1	3384.38	237.898	821.214	0	0	0	0	0	0	0	603	903	0
631	0	0	0	0	0	0	0	200	300	0	23.9528	44.3399	-537.516	42954.1	20315	2972.4	237.794	823.088	0	0	0	0	0	0	0	603	903	0
631	1	0	0	0	0	0	0	200	300	0	23.0373	42.3563	-533.244	43595	20681.2	2972.4	238.784	821.246	0	0	0	0	0	0	0	603	903	0
631	2	0	0	0	0	0	0	200	300	0	23.1898	43.1192	-531.107	42587.9	20315	2972.4	238.25	822.813	0	0	0	0	0	0	0	603	903	0
631	3	0	0	0	0	0	0	200	300	0	21.9691	41.8985	-527.75	42130.1	19887.7	3018.17	237.684	823.17	0	0	0	0	0	0	0	603	903	0
631	4	0	0	0	0	0	0	200	300	0	23.0373	41.2881	-522.868	41580.8	20192.9	2697.74	238.62	823.475	0	0	0	0	0	0	0	603	903	0
631	5	0	0	0	0	0	0	200	300	0	22.5795	41.1356	-519.206	41031.5	20254	3018.17	239.01	823.973	0	0	0	0	0	0	0	603	903	0
631	6	0	0	0	0	0	0	200	300	0	22.1217	39.3045	-514.628	40482.2	20009.8	2560.41	238.882	824.337	0	0	0	0	0	0	0	603	903	0
631	7	0	0	0	0	0	0	200	300	0	21.9691	39.4571	-514.628	40024.4	19826.7	2926.62	238.526	825.227	0	0	0	0	0	0	0	603	903	0
631	8	0	0	0	0	0	0	200	300	0	22.4269	38.6942	-511.881	39749.7	19948.8	2514.63	238.971	825.346	0	0	0	0	0	0	0	603	903	0
631	9	0	0	0	0	0	0	200	300	0	22.5795	38.2364	-507.914	39292	20131.9	2560.41	239.636	825.641	0	0	0	0	0	0	0	603	903	0
632	0	0	0	0	0	0	0	200	300	0	22.4269	38.0838	-503.947	38376.4	19460.5	2606.19	238.616	826.848	0	0	0	0	0	0	0	603	903	0
632	1	0	0	0	0	0	0	200	300	0	21.8166	37.0157	-502.421	37644	19948.8	2239.97	239.705	828.075	0	0	0	0	0	0	0	603	903	0
632	2	0	0	0	0	0	0	200	300	0	22.4269	37.0157	-499.674	37552.5	19826.7	2423.08	239.679	827.846	0	0	0	0	0	0	0	603	903	0
632	3	0	0	0	0	0	0	200	300	0	22.5795	35.3372	-498.454	37644	19704.6	2789.29	239.532	827.478	0	0	0	0	0	0	0	603	903	0
632	4	0	0	0	0	0	0	200	300	0	25.0209	34.2691	-495.402	37186.3	19399.5	2331.53	239.159	827.937	0	0	0	0	0	0	0	603	903	0
632	5	0	0	0	0	0	0	200	300	0	22.1217	34.7269	-492.96	36179.2	19399.5	2331.53	239.353	829.608	0	0	0	0	0	0	0	603	903	0
632	6	0	0	0	0	0	0	200	300	0	22.5795	33.9639	-490.519	35904.5	19460.5	2560.41	239.673	829.803	0	0	0	0	0	0	0	603	903	0
632	7	0	0	0	0	0	0	200	300	0	21.9691	32.5906	-486.552	35538.3	19399.5	2377.3	239.871	829.959	0	0	0	0	0	0	0	603	903	0
632	8	0	0	0	0	0	0	200	300	0	22.8847	31.0648	-487.162	35538.3	18789.1	2560.41	238.569	830.05	0	0	0	0	0	0	0	603	903	0
632	9	0	0	0	0	0	0	200	300	0	23.3424	31.8277	-483.195	34714.3	19399.5	2514.63	240.148	831.157	0	0	0	0	0	0	0	603	903	0
633	0	0	0	0	0	0	0	200	300	0	21.664	31.8277	-480.143	34439.7	19155.3	2331.53	239.895	831.272	0	0	0	0	0	0	0	603	903	0
633	1	0	0	0	0	0	0	200	300	0	23.8002	31.8277	-479.838	33890.4	18728.1	2285.75	239.03	832.371	0	0	0	0	0	0	0	603	903	0
633	2	0	0	0	0	0	0	200	300	0	22.8847	29.5389	-476.786	33890.4	18972.2	2148.42	239.792	831.919	0	0	0	0	0	0	0	603	903	0
633	3	0	0	0	0	0	0	200	300	0	23.6476	29.5389	-473.734	33066.4	19521.5	2239.97	241.208	833.201	0	0	0	0	0	0	0	603	903	0
633	4	0	0	0	0	0	0	200	300	0	23.1898	29.8441	-469.157	33249.5	19094.3	2377.3	240.699	832.129	0	0	0	0	0	0	0	603	903	0
633	5	0	0	0	0	0	0	200	300	0	22.1217	28.013	-469.767	32608.6	18239.8	2194.2	238.827	833.586	0	0	0	0	0	0	0	603	903	0
633	6	0	0	0	0	0	0	200	300	0	22.4269	28.3182	-469.157	32425.5	19399.5	2239.97	241.35	833.886	0	0	0	0	0	0	0	603	903	0
633	7	0	0	0	0	0	0	200	300	0	23.1898	27.2501	-466.715	32150.8	19155.3	2468.86	241.043	834.113	0	0	0	0	0	0	0	603	903	0
633	8	0	0	0	0	0	0	200	300	0	23.8002	27.5552	-464.579	31693.1	18728.1	2239.97	240.312	834.781	0	0	0	0	0	0	0	603	903	0
633	9	0	0	0	0	0	0	200	300	0	22.4269	27.2501	-462.748	30869.1	18972.2	2148.42	240.999	836.292	0	0	0	0	0	0	0	603	903	0
634	0	0	0	0	0	0	0	200	300	0	25.0209	26.3345	-461.527	30686	19094.3	2331.53	241.372	836.512	0	0	0	0	0	0	0	603	903	0
634	1	0	0	0	0	0	0	200	300	0	24.1054	25.8768	-458.17	30228.2	19033.2	2651.96	241.542	837.024	0	0	0	0	0	0	0	603	903	0
634	2	0	0	0	0	0	0	200	300	0	24.258	25.7242	-458.17	29953.6	18850.1	2194.2	241.142	837.624	0	0	0	0	0	0	0	603	903	0
634	3	0	0	0	0	0	0	200	300	0	23.8002	25.2664	-457.255	29404.3	19277.4	2194.2	242.159	838.694	0	0	0	0	0	0	0	603	903	0
634	4	0	0	0	0	0	0	200	300	0	23.495	25.419	-455.119	28855	19094.3	2148.42	241.955	839.599	0	0	0	0	0	0	0	603	903	0
634	5	0	0	0	0	0	0	200	300	0	23.6476	25.1138	-455.119	28763.4	18667	2194.2	241.016	839.8	0	0	0	0	0	0	0	603	903	0
[truncated: 1,504 more rows]
