# Supplementary material for: The Effects of an Extemporaneous Speech Dual-task on Older Adult Gait Control
Source: Research Square preprint supplement (doi:10.21203/rs.3.rs-7674245/v1), 2025-11-18
Supplement: Supplementary file 209 [file Over9ground07.xlsx]

## Sheet: Sheet1
Trajectories
		09:LFHD			09:RFHD			09:LBHD			09:RBHD			09:C7			09:T10			09:CLAV			09:STRN			09:RBAK			09:LSHO			09:LUPA			09:LELB			09:LFRM			09:LWRA			09:LWRB			09:LFIN
Frame	Sub Frame	X	Y	Z	X	Y	Z	X	Y	Z	X	Y	Z	X	Y	Z	X	Y	Z	X	Y	Z	X	Y	Z	X	Y	Z	X	Y	Z	X	Y	Z	X	Y	Z	X	Y	Z	X	Y	Z	X	Y	Z	X	Y	Z
		mm	mm	mm	mm	mm	mm	mm	mm	mm	mm	mm	mm	mm	mm	mm	mm	mm	mm	mm	mm	mm	mm	mm	mm	mm	mm	mm	mm	mm	mm	mm	mm	mm	mm	mm	mm	mm	mm	mm	mm	mm	mm	mm	mm	mm	mm	mm	mm
477	0	57.3863	-1804.65	1606.29	154.621	-1799.46	1614.18	36.9157	-1957.57	1641.56	182.377	-1946.11	1647.3	112.945	-2009.64	1471.38	103.068	-2065.47	1207.76	123.946	-1859.83	1385.48	125.809	-1771.12	1175.97	171.414	-2073.92	1269.33	-66.3811	-1916.69	1421.54	-126.986	-1990.2	1198.09	-130.977	-2030.87	1106.21	-160.003	-2038.05	937.684	-123.261	-2039.64	850.488	-179.716	-2080.23	870.91	-170.37	-2073.67	786.26
478	0	57.207	-1789.42	1608.01	154.456	-1784.1	1616.04	36.8969	-1942.32	1643.76	182.543	-1930.58	1649.63	113.07	-1994.85	1473.39	102.956	-2050.6	1209.7	124.182	-1845.06	1387.49	126.099	-1756.37	1177.9	171.63	-2059.36	1271.41	-66.0859	-1901.59	1423.89	-127.813	-1971.56	1199.43	-132.804	-2010.97	1106.84	-161.834	-2013.77	937.889	-125.309	-2012.88	850.834	-181.82	-2054.07	870.334	-173.386	-2044.65	785.97
479	0	57.3272	-1774.44	1609.96	154.96	-1768.75	1618.21	37.2044	-1927.02	1646.23	182.162	-1915.87	1651.21	113.11	-1980.31	1475.37	102.696	-2035.74	1211.62	124.247	-1830.61	1389.41	126.491	-1741.71	1180.09	171.408	-2045.07	1273.22	-65.7503	-1886.86	1426.31	-128.546	-1953.05	1200.88	-134.502	-1990.74	1107.62	-163.545	-1989.08	938.533	-128.442	-1984.23	851.055	-183.609	-2027.35	869.803	-176.31	-2014.39	786.395
480	0	57.9069	-1759.25	1611.95	155.448	-1754.1	1619.64	37.8511	-1911.66	1649	182.709	-1900.86	1653.57	113.259	-1965.91	1477.63	102.393	-2021.07	1213.58	124.465	-1816.11	1392.22	126.957	-1727.32	1182.36	170.721	-2030.8	1275	-65.5446	-1872.12	1428.98	-129.39	-1934.26	1202.63	-135.862	-1970.27	1108.17	-164.733	-1963.74	939.174	-129.859	-1956.82	851.876	-185.433	-1999.81	869.336	-178.904	-1983.38	787.208
481	0	58.9946	-1744.23	1614.11	156.649	-1738.91	1621.6	38.5798	-1896.32	1651.97	183.655	-1885.67	1656.23	113.373	-1951.63	1480.25	101.919	-2006.24	1215.97	125.051	-1801.7	1394.55	127.477	-1713.28	1184.79	169.759	-2016.5	1277.08	-65.1489	-1857.31	1431.69	-130.126	-1915.36	1204.73	-137.877	-1949.46	1109.52	-166.231	-1937.9	940.456	-129.927	-1930.22	853.412	-186.833	-1971.63	869.379	-181.118	-1951.56	788.544
482	0	60.3131	-1729.18	1616.57	157.736	-1724.26	1623.64	39.6556	-1881.14	1655.15	184.705	-1870.58	1658.7	113.624	-1937.03	1482.92	101.23	-1991.68	1218.61	125.514	-1787.71	1397.15	128.07	-1699.43	1186.96	168.6	-2002.35	1279.47	-64.7077	-1842.32	1434.42	-130.852	-1896.44	1206.76	-139.653	-1928.52	1110.94	-167.509	-1911.6	941.949	-131.45	-1901.1	854.976	-188.072	-1943.05	869.82	-182.866	-1918.97	790.297
483	0	62.0422	-1714.03	1619.17	159.219	-1709.7	1625.83	40.7889	-1865.96	1658.39	186.38	-1855.27	1661.98	113.986	-1922.35	1485.75	100.419	-1977.3	1221.49	125.976	-1774.06	1399.05	128.594	-1685.43	1189.21	167.516	-1988.3	1282.11	-64.13	-1827.59	1437.47	-131.62	-1877.38	1209.23	-141.457	-1907.45	1112.45	-168.744	-1884.85	943.698	-133.091	-1870.58	857.24	-189.46	-1913.71	870.588	-184.259	-1885.92	792.746
484	0	63.5484	-1699.06	1621.85	160.859	-1694.94	1628.05	42.1191	-1850.74	1661.78	187.719	-1840.45	1664.62	114.354	-1907.51	1489.02	99.5009	-1963.13	1224.48	126.584	-1759.8	1401.8	129.589	-1671.26	1191.81	166.373	-1974.28	1284.99	-63.6077	-1812.46	1440.64	-132.425	-1858.27	1211.93	-143.202	-1886.15	1114.43	-169.548	-1857.71	946.033	-133.802	-1840.66	860.006	-190.417	-1883.99	871.835	-185.444	-1852.27	795.945
485	0	65.2729	-1684.07	1624.73	162.618	-1680.41	1630.31	43.5796	-1835.68	1665.28	189.27	-1825.79	1667.25	114.655	-1892.83	1492.15	98.5119	-1948.79	1227.94	127.162	-1745.61	1404.54	130.623	-1656.75	1194.88	165.31	-1960.21	1288.03	-62.9492	-1797.29	1443.99	-133.108	-1839.14	1214.79	-144.821	-1864.84	1116.78	-169.975	-1830.52	948.859	-133.568	-1811.76	863.611	-190.979	-1854.08	873.778	-186.257	-1818.48	799.878
486	0	66.9358	-1669.24	1627.59	164.279	-1665.91	1632.49	44.9938	-1820.65	1668.49	190.685	-1811.63	1668.91	114.893	-1878.34	1495.08	97.5063	-1934.57	1231.08	127.791	-1731.45	1407.31	131.774	-1642.38	1197.93	164.291	-1946.11	1291.03	-62.4876	-1782.02	1447.3	-133.762	-1819.84	1217.92	-146.312	-1843.25	1119.1	-170.773	-1802.93	952.242	-133.915	-1782.46	866.837	-191.664	-1823.5	876.316	-186.802	-1784.46	804.492
487	0	68.5621	-1654.35	1630.31	166.136	-1651.3	1634.77	46.6496	-1805.48	1671.83	191.756	-1797.15	1671.05	115.271	-1863.66	1497.78	96.6349	-1920.4	1233.8	128.37	-1717.08	1409.87	132.724	-1627.97	1200.81	163.357	-1931.98	1293.72	-61.7898	-1766.73	1450.68	-134.361	-1800.62	1221.13	-147.72	-1821.92	1121.73	-171.371	-1775.34	955.991	-134.147	-1751.59	872.1	-192.054	-1792.9	879.223	-187.164	-1750.28	809.532
488	0	70.3056	-1639.43	1632.77	167.836	-1636.79	1636.42	48.1543	-1790.46	1674.77	193.468	-1782.54	1673.1	115.491	-1848.91	1500.32	95.9029	-1905.94	1236.49	128.954	-1702.83	1412.12	133.626	-1613.95	1203.48	162.471	-1917.81	1296.24	-61.0054	-1751.34	1454	-135.083	-1781.33	1224.37	-148.941	-1800.43	1124.51	-172.641	-1747.33	960.657	-134.536	-1720.44	877.411	-192.933	-1761.73	883.036	-187.49	-1715.84	815.819
489	0	71.7923	-1624.56	1635.01	169.367	-1622.24	1637.97	49.5309	-1775.42	1677.35	194.811	-1768.04	1674.61	115.641	-1834.16	1502.62	95.3043	-1891.52	1238.95	129.346	-1688.58	1413.98	134.413	-1600.35	1205.72	161.653	-1903.57	1298.57	-60.5377	-1736.1	1456.88	-135.792	-1762.15	1227.32	-150.246	-1779.09	1126.97	-173.309	-1719.48	965.038	-134.886	-1689.07	883.256	-193.057	-1730.75	886.85	-187.584	-1681.58	821.749
490	0	73.1401	-1609.67	1636.81	171.011	-1607.88	1639.27	50.7159	-1760.36	1679.38	195.737	-1753.72	1675.95	115.793	-1819.61	1504.37	94.8715	-1877.1	1240.93	129.905	-1674.05	1415.7	135.119	-1586.98	1207.63	160.882	-1889.29	1300.45	-59.8422	-1720.72	1459.37	-136.273	-1743.05	1230.1	-151.311	-1757.85	1129.33	-173.767	-1691.63	969.326	-135.056	-1657.38	889.266	-192.886	-1699.73	890.713	-187.324	-1647.42	827.909
491	0	74.4834	-1594.86	1638.2	172.287	-1593.45	1640.22	51.8427	-1745.46	1681.05	196.822	-1739.12	1676.57	116.005	-1804.99	1505.69	94.5803	-1862.65	1242.43	130.574	-1659.62	1417.07	135.985	-1573.64	1209.05	160.26	-1874.95	1301.84	-59.1309	-1705.58	1461.47	-136.783	-1724.01	1232.33	-152.77	-1736.59	1131.53	-174.145	-1663.78	973.621	-135.135	-1626.02	895.441	-192.78	-1668.62	894.503	-186.951	-1613.61	834.328
492	0	75.7109	-1579.95	1639.14	173.421	-1578.79	1640.67	52.7409	-1730.53	1682.35	197.932	-1724.5	1677.29	116.081	-1790.2	1506.68	94.1819	-1848.19	1243.64	131.093	-1645.13	1417.68	136.726	-1560.11	1210.16	159.645	-1860.56	1302.83	-58.4116	-1690.26	1463.05	-137.108	-1705.19	1234.25	-153.52	-1715.35	1133.1	-174.492	-1636.04	977.821	-135.087	-1594.51	901.78	-192.906	-1637.55	898.775	-186.381	-1579.82	840.701
493	0	76.7088	-1564.99	1639.6	174.41	-1564.38	1640.87	53.3515	-1715.4	1682.97	198.712	-1709.92	1677.68	116.187	-1775.27	1507.25	93.7322	-1833.76	1244.51	131.48	-1630.51	1417.9	137.51	-1546.43	1210.78	159.124	-1845.98	1303.54	-57.7311	-1675.05	1464.08	-137.558	-1686.21	1235.74	-154.748	-1694.08	1134.52	-174.701	-1608.12	981.708	-135.059	-1563.18	908.003	-192.136	-1606.7	902.483	-185.896	-1546.47	846.976
494	0	77.488	-1550.02	1639.65	175.247	-1549.76	1640.66	53.8744	-1700.35	1683.09	199.032	-1695.3	1677.3	116.412	-1760.3	1507.33	93.1958	-1819.33	1244.57	131.897	-1615.87	1417.68	138.465	-1532.48	1211.02	158.728	-1831.32	1303.55	-56.9696	-1659.76	1464.66	-137.973	-1667.5	1236.75	-155.54	-1672.79	1135.29	-174.88	-1580.49	985.68	-134.872	-1531.97	914.549	-191.27	-1575.81	906.133	-185.009	-1513.15	853.537
495	0	78.1672	-1534.96	1639.28	175.892	-1535.03	1640.21	54.1538	-1685.3	1682.67	199.512	-1680.46	1677.08	116.598	-1745.49	1506.98	92.5813	-1804.95	1244.18	132.394	-1601.26	1417.16	139.184	-1518.44	1210.69	158.387	-1816.77	1303.27	-56.3818	-1644.5	1464.49	-138.231	-1648.79	1237.35	-156.465	-1651.39	1135.71	-174.869	-1553.05	989.417	-134.561	-1500.71	921.466	-190.594	-1544.86	910.262	-184.208	-1480.12	860.201
496	0	78.7231	-1519.81	1638.55	176.665	-1519.99	1639.72	54.1654	-1670.11	1681.71	199.563	-1665.83	1676.07	116.773	-1730.44	1506.18	92.2299	-1790.41	1243.61	132.891	-1586.5	1416.3	139.903	-1504.43	1210.07	158.101	-1802.13	1302.58	-55.8101	-1629.48	1464.03	-138.634	-1630.31	1237.26	-157.295	-1629.95	1135.55	-174.72	-1525.64	993.002	-134.162	-1470.09	927.869	-189.805	-1514.33	913.928	-183.098	-1447.35	867.195
497	0	79.0057	-1504.63	1637.28	176.908	-1505.13	1638.56	54.3319	-1654.86	1680.31	199.681	-1650.89	1674.9	117.051	-1715.26	1504.97	92.2048	-1776.07	1242.77	133.212	-1571.74	1414.93	140.7	-1490.64	1208.91	158.068	-1787.54	1301.39	-55.3999	-1614.43	1462.91	-138.983	-1611.5	1236.98	-158.053	-1608.49	1135.19	-174.786	-1498.22	996.355	-133.443	-1440.27	933.857	-188.767	-1483.79	917.856	-181.789	-1415.05	874.045
498	0	79.2792	-1489.35	1635.67	177.32	-1489.81	1637.24	54.354	-1639.46	1678.6	199.531	-1635.88	1673.47	117.557	-1700.21	1503.57	92.6365	-1761.99	1241.32	133.99	-1556.87	1413.32	141.245	-1477.19	1206.92	158.311	-1772.95	1299.88	-54.8038	-1599.31	1461.53	-139.291	-1592.97	1236.15	-158.657	-1586.82	1134.22	-174.318	-1471.25	999.571	-132.486	-1410.42	940.442	-187.632	-1453.57	921.884	-180.232	-1383.02	880.913
499	0	79.568	-1473.89	1633.87	177.653	-1474.71	1635.67	54.3045	-1623.94	1676.56	199.863	-1620.42	1671.93	118.063	-1685.26	1501.94	93.3609	-1748	1239.89	134.398	-1541.85	1411.22	141.53	-1463.72	1204.59	158.718	-1758.3	1298.36	-54.251	-1584.49	1459.8	-139.334	-1574.14	1235.23	-158.88	-1565.04	1133.63	-173.691	-1444.34	1002.92	-131.429	-1381.39	946.891	-186.671	-1423.69	925.975	-178.784	-1351.43	888.239
500	0	79.7968	-1458.31	1631.63	177.921	-1459.16	1633.64	54.1828	-1608.42	1674.33	199.642	-1605.17	1670.31	118.759	-1670.1	1500.18	94.4444	-1733.99	1238.29	134.777	-1526.92	1408.68	142.04	-1450.03	1201.64	159.424	-1743.65	1296.7	-53.4933	-1569.54	1457.6	-139.401	-1555.59	1234.2	-159.223	-1543.33	1132.66	-173.127	-1417.9	1006.12	-129.966	-1353.17	952.859	-185.312	-1394.04	930.012	-177.085	-1320.54	895.592
501	0	79.9443	-1442.84	1628.96	177.812	-1443.82	1630.86	54.0951	-1592.86	1671.7	199.663	-1589.65	1667.97	119.504	-1654.87	1498.1	95.8273	-1719.88	1236.41	135.129	-1512.06	1406.1	142.433	-1435.89	1198.32	160.388	-1728.97	1294.89	-52.7695	-1554.83	1455.3	-139.046	-1536.77	1232.87	-159.574	-1521.91	1131.77	-171.939	-1391.65	1009.48	-128.366	-1325.42	958.74	-183.757	-1364.99	934.304	-175.075	-1290.22	903.016
502	0	80.1755	-1427.28	1625.94	178.093	-1428.24	1628.27	54.1557	-1577.32	1669.09	199.527	-1574.08	1665.62	120.517	-1639.61	1495.82	97.4805	-1705.76	1234.36	135.674	-1497.02	1403.12	142.896	-1420.93	1194.88	161.675	-1714.28	1292.93	-51.9568	-1540.09	1452.52	-138.642	-1518.05	1231.45	-159.566	-1500.25	1131.15	-170.863	-1365.82	1012.65	-126.535	-1298.49	964.445	-182.266	-1336.62	938.647	-172.707	-1260.59	910.461
503	0	80.4018	-1411.66	1622.64	178.265	-1412.61	1625.28	54.4524	-1561.5	1666.14	199.777	-1558.13	1663.1	121.628	-1624.43	1493.52	99.3229	-1691.35	1232.31	136.243	-1482.03	1400.11	143.123	-1405.3	1191.6	163.156	-1699.58	1290.91	-51.1719	-1525.5	1449.91	-138.031	-1499.48	1230.1	-159.572	-1479.01	1130.39	-169.404	-1340.59	1016.16	-124.473	-1272.37	970.241	-180.624	-1308.88	943.277	-170.808	-1231.76	918.199
504	0	80.568	-1396.22	1619.13	178.351	-1396.92	1622.13	54.7112	-1546.06	1663.26	200.581	-1541.73	1661.65	122.876	-1609.35	1491.03	101.387	-1676.73	1229.91	136.738	-1467.07	1397.1	143.445	-1389	1188.38	164.873	-1684.8	1288.6	-50.0854	-1510.86	1447.27	-137.289	-1480.95	1228.71	-159.642	-1457.98	1130.1	-167.918	-1315.94	1020.04	-122.352	-1246.92	976.141	-179.446	-1281.54	948.254	-168.519	-1203.93	926.052
505	0	80.7612	-1380.86	1615.79	178.773	-1381.15	1619.1	55.261	-1530.39	1660.31	201.127	-1525.76	1658.99	124.249	-1594.34	1488.43	103.624	-1661.74	1227.14	137.325	-1452.11	1394.1	143.663	-1373.01	1185.4	166.801	-1669.97	1286.1	-49.0598	-1496.41	1444.61	-136.249	-1462.74	1227.62	-159.037	-1437.6	1129.53	-166.569	-1291.93	1023.64	-120.287	-1222.39	981.679	-178.161	-1255.18	953.437	-166.225	-1176.95	933.937
506	0	81.2473	-1365.36	1612.34	179.131	-1365.48	1616.03	55.9523	-1514.78	1657.68	201.797	-1509.8	1656.85	125.487	-1579.39	1485.81	105.881	-1646.56	1224.27	138.365	-1436.98	1391.4	143.887	-1357.43	1182.29	168.72	-1655.14	1283.5	-47.8901	-1481.86	1442.22	-135.158	-1444.89	1226.25	-158.719	-1417.49	1129.16	-164.874	-1268.74	1027.52	-118.09	-1198.63	987.585	-176.526	-1229.86	958.936	-163.983	-1151.09	941.871
507	0	81.5479	-1350.08	1609.01	179.556	-1349.82	1612.95	56.7468	-1499.38	1654.81	202.599	-1493.9	1654.22	126.703	-1564.34	1483.22	108.022	-1631.05	1221.59	139.143	-1421.9	1388.65	144.085	-1342.35	1179.01	170.573	-1640.16	1281	-46.5934	-1467.09	1439.91	-134.079	-1427.4	1224.78	-158.098	-1398.11	1128.74	-163.186	-1246.5	1031.13	-116.155	-1175.88	992.868	-175.296	-1205.27	964.162	-162.032	-1126.27	949.619
508	0	82.5177	-1334.73	1606	180.438	-1334.18	1610.1	58.0226	-1483.95	1652.39	203.825	-1478.19	1652	128.072	-1549.11	1480.74	109.963	-1615.3	1218.98	140.2	-1406.66	1386.03	144.187	-1327.51	1175.72	172.393	-1625	1278.62	-45.3171	-1452.25	1437.74	-132.699	-1410.12	1223.32	-157.38	-1379.2	1128.03	-161.611	-1224.91	1034.72	-114.14	-1153.86	997.999	-173.862	-1181.92	968.862	-160.043	-1102.47	956.98
509	0	83.7215	-1319.41	1603.16	181.868	-1318.55	1607.35	59.6784	-1468.45	1649.93	205.167	-1462.56	1649.34	129.47	-1533.8	1478.29	111.635	-1599.58	1216.43	141.573	-1391.46	1383.6	144.826	-1312.39	1173	173.948	-1609.72	1276.26	-43.9581	-1437.02	1435.6	-131.264	-1393.39	1221.71	-156.432	-1361.07	1127.33	-159.946	-1204.38	1037.81	-112.185	-1132.91	1002.62	-172.313	-1159.48	973.402	-157.917	-1079.79	964.034
510	0	85.4005	-1303.99	1600.89	183.389	-1303.19	1604.75	61.2608	-1452.96	1647.9	207.532	-1446.79	1647.58	130.88	-1518.42	1476.02	112.878	-1583.8	1214.13	143.197	-1376.06	1381.38	145.64	-1296.79	1171.04	175.135	-1594.42	1273.81	-42.3985	-1421.63	1433.74	-129.887	-1376.98	1220.3	-155.533	-1343.29	1126.68	-158.317	-1184.64	1040.56	-110.459	-1112.66	1006.98	-170.938	-1138.13	977.36	-156.262	-1058.32	970.404
511	0	87.1345	-1288.62	1598.8	185.369	-1287.86	1602.43	63.2503	-1437.62	1646.1	209.423	-1431.45	1645.54	132.298	-1503.15	1473.79	113.818	-1567.85	1211.86	144.7	-1360.65	1379.38	147.063	-1280.8	1169.44	176.114	-1578.94	1271.55	-40.9672	-1406.1	1431.97	-128.584	-1360.94	1218.68	-154.496	-1326.15	1125.55	-156.922	-1165.74	1042.57	-108.771	-1093.3	1010.63	-169.242	-1117.97	980.714	-154.789	-1037.88	976.262
512	0	89.3067	-1273.32	1597.11	187.516	-1272.6	1600.38	65.5073	-1422.23	1644.55	211.374	-1416.52	1642.94	133.799	-1487.77	1471.75	114.551	-1551.84	1209.55	146.406	-1345.1	1377.52	148.884	-1264.56	1168.4	177.036	-1563.31	1269.22	-39.3005	-1390.43	1430.41	-127.323	-1345.09	1217.37	-153.418	-1309.45	1124.52	-155.191	-1147.67	1044.11	-107.384	-1074.7	1013.76	-167.621	-1098.69	983.41	-153.623	-1018.54	981.348
513	0	91.9738	-1258.05	1595.79	190.101	-1257.38	1598.86	67.8891	-1406.97	1643.29	213.793	-1401.35	1641	135.34	-1472.38	1469.9	115.24	-1535.86	1207.5	148.23	-1329.5	1376.18	150.89	-1248.37	1167.61	177.797	-1547.56	1266.99	-37.4901	-1374.62	1428.98	-126.114	-1329.59	1216.04	-152.272	-1293.2	1123.55	-153.671	-1130.47	1045.01	-105.902	-1056.97	1016.21	-166.013	-1080.52	985.171	-152.468	-1000.43	985.586
514	0	94.71	-1242.76	1595.11	192.719	-1242.29	1597.59	70.4241	-1391.79	1642.24	216.387	-1386.35	1639.75	137.037	-1456.99	1468.28	116.008	-1519.45	1205.69	150.275	-1313.8	1375.21	153.147	-1232.22	1167.05	178.618	-1531.59	1265.12	-35.6854	-1358.8	1427.92	-124.899	-1314.15	1215.25	-151.086	-1277.43	1122.54	-152.317	-1113.92	1045.57	-104.669	-1040.17	1018.03	-164.388	-1063.5	986.218	-151.692	-983.333	989.023
515	0	97.4485	-1227.51	1594.64	195.511	-1227.2	1596.81	73.2923	-1376.59	1641.62	219.223	-1371.4	1638.78	138.962	-1441.57	1467.05	116.987	-1502.77	1204.27	152.514	-1298	1374.49	155.605	-1215.95	1166.77	179.526	-1515.47	1263.37	-33.6768	-1342.93	1427.16	-123.498	-1298.72	1214.78	-149.746	-1261.99	1121.84	-151.093	-1098.23	1045.5	-103.225	-1024.01	1019.14	-162.735	-1047.29	986.58	-150.971	-967.285	991.526
516	0	100.116	-1212.47	1594.59	198.425	-1212.12	1596.44	76.3169	-1361.66	1641.43	222.274	-1356.38	1638.14	141.112	-1426.1	1466.04	118.131	-1485.89	1202.91	154.739	-1282.21	1374.17	158.226	-1199.33	1167.07	180.668	-1499.07	1261.84	-31.3927	-1326.97	1426.69	-122.025	-1283.42	1214.41	-148.156	-1246.9	1121.31	-149.696	-1083.13	1045.05	-102.153	-1009.06	1019.2	-161.276	-1032.08	986.217	-150.344	-952.409	992.966
517	0	103.307	-1197.44	1595.29	201.463	-1197.01	1596.82	79.5152	-1346.75	1641.6	225.241	-1341.38	1637.53	143.423	-1410.46	1465.48	119.379	-1468.8	1202.04	157.164	-1266.36	1374.27	160.896	-1182.38	1167.95	181.956	-1482.49	1260.74	-29.2971	-1311.2	1426.75	-120.416	-1268.21	1214.59	-146.679	-1232.46	1120.85	-148.43	-1068.99	1044.06	-101.13	-994.88	1018.45	-159.997	-1018.09	985.195	-149.9	-938.707	993.462
518	0	106.487	-1182.38	1596.27	204.579	-1182.02	1597.43	82.8419	-1332.07	1641.97	228.557	-1326.76	1637.43	145.712	-1394.8	1465.42	120.617	-1451.92	1201.73	159.314	-1250.43	1374.62	163.245	-1164.98	1169.05	183.531	-1465.92	1260.15	-27.2502	-1295.41	1427.21	-118.79	-1253.18	1214.76	-145.086	-1218.4	1120.88	-147.098	-1055.43	1042.96	-99.774	-981.404	1017.36	-158.442	-1004.8	984.085	-149.233	-925.781	992.887
519	0	109.467	-1167.28	1597.59	207.886	-1166.85	1598.33	86.2566	-1317.22	1642.55	230.943	-1312.65	1636.57	147.984	-1379.04	1465.63	121.839	-1435.31	1201.99	161.534	-1234.46	1375.08	165.494	-1147.55	1170.31	185.193	-1449.07	1259.72	-25.1265	-1279.5	1427.97	-116.862	-1238.26	1215.26	-143.106	-1204.97	1120.59	-145.721	-1042.76	1041.24	-98.9127	-968.905	1014.89	-157.173	-992.876	981.667	-148.622	-913.703	990.953
520	0	112.848	-1152.23	1599.55	211.291	-1151.74	1599.6	89.8555	-1302.27	1643.77	235.767	-1296.96	1637.77	150.241	-1363.25	1466.42	123.034	-1419.41	1202.89	163.581	-1218.5	1375.93	167.32	-1130.23	1171.65	186.923	-1432.43	1259.92	-23.07	-1263.59	1429.25	-114.867	-1223.43	1215.95	-141.449	-1191.78	1120.86	-144.354	-1030.84	1039.36	-97.6707	-956.997	1012.55	-156.005	-981.712	979.144	-148.103	-902.62	987.899
521	0	116.25	-1136.94	1601.75	214.734	-1136.67	1600.87	93.3	-1287.49	1645.23	238.847	-1282.34	1637.5	152.207	-1347.4	1467.57	124.044	-1403.99	1204.27	165.298	-1202.79	1377.08	168.665	-1113.35	1172.88	188.453	-1416.15	1260.79	-21.4932	-1247.72	1430.9	-112.872	-1208.93	1216.72	-139.696	-1179.28	1121.52	-143.076	-1019.58	1037.29	-96.8115	-946.083	1008.9	-154.957	-971.502	976.338	-147.229	-892.322	983.881
522	0	119.496	-1121.53	1603.8	217.927	-1121.57	1601.87	96.6985	-1272.26	1646.95	241.823	-1267.63	1637.31	153.849	-1331.58	1469.11	124.994	-1389.01	1206.1	166.605	-1187.21	1378.25	169.562	-1097.41	1173.87	189.582	-1400.53	1262.18	-19.9171	-1231.81	1432.58	-110.707	-1194.62	1217.53	-137.682	-1166.98	1121.83	-141.622	-1008.93	1034.83	-95.884	-935.747	1004.98	-153.876	-962.315	972.77	-146.986	-883.044	978.58
523	0	122.836	-1106.03	1605.81	221.252	-1106.44	1602.82	99.9489	-1256.89	1648.89	244.793	-1252.9	1637.4	155.324	-1316.01	1470.76	125.928	-1374.43	1207.91	167.439	-1172.06	1379.32	170.365	-1082.05	1174.63	190.228	-1385.58	1263.87	-18.7251	-1216.23	1434.32	-108.814	-1180.58	1218.36	-135.661	-1155.25	1122.14	-140.144	-999.117	1032.07	-94.9727	-926.405	1000.02	-152.745	-953.767	968.669	-146.348	-874.464	972.285
524	0	125.814	-1090.5	1607.65	223.938	-1091.43	1603.42	102.697	-1241.35	1651.32	247.684	-1237.62	1638.07	156.42	-1300.81	1472.63	126.715	-1360.12	1209.97	168.272	-1156.86	1380.58	171.075	-1067.01	1175.6	190.647	-1370.92	1265.65	-17.3678	-1200.87	1436	-106.721	-1166.96	1219.4	-133.754	-1143.61	1122.98	-138.978	-989.843	1028.89	-93.968	-917.665	995.014	-151.758	-946.235	964.382	-145.519	-866.9	965.277
525	0	128.283	-1075.1	1609.46	226.328	-1076.32	1604.16	105.088	-1225.65	1653.99	250.088	-1222.25	1639.25	157.412	-1286	1474.68	127.513	-1346.02	1212.21	168.784	-1142.09	1382.29	171.441	-1052.26	1177.06	190.961	-1356.4	1267.73	-16.5659	-1186.14	1437.98	-105.003	-1153.86	1220.57	-132.589	-1132.33	1124.26	-137.713	-981.265	1025.75	-93.0041	-909.82	989.145	-150.607	-939.544	959.504	-144.688	-860.291	957.719
526	0	130.019	-1059.65	1610.91	228.052	-1061.03	1605.05	107.074	-1209.9	1656.59	251.78	-1207.05	1640.58	158.362	-1271.46	1476.79	128.347	-1331.92	1214.54	169.102	-1127.56	1384.32	171.581	-1037.7	1178.88	191.449	-1342	1269.84	-15.9278	-1171.98	1439.94	-103.476	-1141.3	1221.57	-130.795	-1121.36	1125.23	-136.558	-973.151	1022.01	-92.0123	-902.667	983.289	-149.511	-933.66	954.632	-143.74	-854.581	949.449
527	0	131.283	-1044.49	1612.32	229.294	-1045.81	1606.15	108.497	-1194.34	1659.27	253.321	-1191.37	1642.81	159.404	-1257.05	1478.98	129.4	-1317.78	1216.73	169.414	-1113.29	1386.45	171.694	-1023.37	1181.05	192.433	-1327.71	1272.03	-15.4437	-1158.39	1441.89	-102.164	-1129.2	1222.93	-129.372	-1110.71	1126.32	-135.195	-965.696	1018.47	-90.7517	-896.346	977.218	-148.281	-928.599	949.519	-142.46	-849.962	940.868
528	0	131.692	-1029.28	1613.65	230.109	-1030.56	1607.49	109.461	-1178.83	1662.05	254.696	-1175.75	1645.86	160.357	-1242.99	1481.42	130.671	-1303.86	1219.11	169.81	-1099.16	1388.93	171.888	-1009.26	1183.78	193.63	-1313.58	1274.3	-15.1194	-1145.17	1444.11	-101.072	-1117.49	1224.36	-127.778	-1100.3	1127.18	-133.628	-959.087	1014.86	-89.6321	-891.176	970.719	-147.15	-924.22	944.461	-141.024	-846.095	931.998
529	0	131.937	-1014.4	1615.21	230.126	-1015.56	1609.27	109.779	-1163.55	1664.87	254.937	-1160.26	1648.74	161.168	-1229.16	1484.1	132.126	-1289.9	1221.82	170.133	-1085.18	1391.49	171.742	-995.553	1186.52	195.094	-1299.48	1276.8	-14.9906	-1132.32	1446.12	-100.25	-1106.39	1225.79	-126.135	-1090.38	1127.99	-132.565	-952.935	1011.12	-88.1831	-886.716	964.237	-145.836	-920.905	939.254	-139.388	-843.286	922.882
530	0	132.344	-999.842	1617.3	230.121	-1000.37	1611.7	109.893	-1148.34	1667.86	255.353	-1144.62	1652.73	162.107	-1215.1	1487.02	133.817	-1276.32	1224.27	170.446	-1071.32	1394.64	171.439	-982.091	1189.42	196.802	-1285.58	1279.51	-15.0101	-1119.58	1448.36	-99.7096	-1095.56	1227.22	-124.693	-1080.73	1129.23	-131.322	-947.491	1007.56	-86.821	-883.086	957.784	-144.504	-918.089	934.36	-137.492	-841.374	913.768
531	0	131.309	-985.242	1619.44	229.8	-985.378	1614.28	109.803	-1133.34	1671.01	254.777	-1129.53	1655.65	162.975	-1201.21	1490.07	135.713	-1262.66	1227.56	171.081	-1057.63	1398.05	171.175	-968.632	1192.61	198.466	-1271.76	1282.57	-15.0012	-1106.85	1450.59	-99.1745	-1085.26	1228.66	-123.092	-1071.88	1129.81	-129.97	-942.756	1004.09	-85.2116	-880.5	951.398	-143.411	-916.155	929.674	-135.345	-840.453	904.843
532	0	130.85	-970.759	1622.01	229.144	-970.727	1617.24	109.537	-1118.57	1674.25	255.254	-1114.13	1660.62	163.911	-1187.19	1493.6	137.752	-1249.06	1230.8	171.55	-1043.87	1401.59	170.776	-955.254	1195.78	200.059	-1257.86	1286.08	-14.8906	-1093.94	1453.11	-98.537	-1075.48	1230.4	-121.243	-1063.45	1130.91	-128.592	-938.694	1000.93	-83.7283	-878.593	945.384	-142.248	-914.739	925.563	-133.088	-840.459	896.394
533	0	130.358	-956.583	1624.53	228.487	-956.192	1620.39	109.044	-1104.22	1677.17	254.447	-1099.41	1664.13	164.768	-1173.08	1497.07	139.969	-1235.26	1234.16	171.95	-1030.07	1405.18	170.402	-941.764	1198.95	201.755	-1243.93	1289.71	-14.8147	-1080.99	1455.57	-97.7703	-1065.95	1231.99	-119.555	-1055.24	1132.14	-127.362	-935.249	998.068	-81.9514	-877.823	939.415	-141.139	-913.965	921.618	-130.667	-841.32	888.041
534	0	129.656	-942.63	1627.3	227.868	-941.794	1623.77	108.629	-1090.23	1680.1	254.203	-1084.83	1668.13	165.528	-1159.02	1500.37	142.314	-1221.45	1237.48	172.558	-1015.93	1408.5	169.944	-928.229	1202.34	202.064	-1232.68	1293.19	-14.3366	-1067.86	1457.79	-96.9525	-1056.79	1233.43	-117.778	-1047.22	1133.18	-126.164	-932.269	995.308	-80.285	-877.531	933.998	-139.999	-913.778	918.049	-128.186	-843.025	880.412
535	0	129.215	-928.797	1630.07	227.568	-927.531	1627.2	108.366	-1076.45	1682.82	253.616	-1070.85	1671.42	166.245	-1145.02	1503.23	144.421	-1207.43	1240.32	172.918	-1001.85	1411.58	169.575	-914.695	1205.55	205.357	-1216.92	1296.38	-14.0238	-1054.83	1460.04	-96.2953	-1047.52	1234.92	-116.058	-1039.62	1134.4	-124.559	-929.859	992.857	-78.3736	-877.852	929.115	-138.742	-913.996	914.75	-125.64	-845.455	873.119
536	0	128.534	-915.207	1632.69	226.94	-913.643	1630.42	107.832	-1062.86	1685.09	253.224	-1056.84	1674.53	167.076	-1130.75	1506.31	146.358	-1193.48	1242.84	173.145	-987.761	1414.39	169.276	-901.208	1208.8	206.515	-1203.76	1299.32	-13.6293	-1041.65	1462.2	-95.0777	-1038.38	1236.33	-114.229	-1032.34	1135.59	-123.138	-927.794	990.443	-76.7355	-878.599	924.393	-137.592	-914.656	911.941	-123.224	-848.352	866.315
537	0	128.255	-901.611	1635.3	226.669	-899.832	1633.5	107.71	-1049.56	1687.07	253.088	-1043.38	1677.42	167.6	-1116.85	1508.33	148.249	-1179.15	1245.3	173.636	-973.51	1416.89	169.051	-887.702	1211.55	208.795	-1189.16	1301.98	-13.2276	-1028.41	1463.87	-94.0015	-1029.2	1237.29	-112.089	-1025.34	1135.99	-121.474	-925.847	988.242	-75.0226	-879.771	919.921	-136.204	-915.875	908.94	-120.921	-851.824	859.8
538	0	128.125	-888.18	1637.71	226.52	-886.255	1636.24	107.639	-1036.41	1688.72	253.243	-1029.66	1679.99	168.329	-1102.59	1510.4	149.97	-1165.03	1247.08	174.089	-959.223	1419.07	168.923	-874.307	1213.96	211.096	-1174.34	1304.26	-12.7507	-1015.12	1465.21	-92.6498	-1019.73	1238.13	-110.614	-1018.23	1137.16	-119.859	-924.498	985.892	-73.0644	-880.983	915.738	-134.842	-916.922	906.395	-118.618	-855.625	853.713
539	0	127.908	-874.834	1640.04	226.261	-872.76	1638.67	107.596	-1023.36	1689.95	252.975	-1016.31	1681.49	168.917	-1088.43	1512.11	151.49	-1150.63	1248.54	174.438	-944.973	1420.84	168.936	-860.874	1215.87	213.33	-1159.55	1306.22	-12.3176	-1001.77	1466.26	-91.3121	-1010.35	1238.59	-108.8	-1011.66	1137.63	-118.017	-923.081	983.711	-71.4927	-882.346	911.833	-133.371	-918.398	903.844	-116.501	-859.743	848.025
540	0	127.837	-861.574	1641.75	226.267	-859.083	1640.96	107.629	-1010.35	1690.86	252.302	-1003.76	1682.13	169.581	-1074.36	1513.31	152.975	-1136.35	1249.76	174.903	-930.608	1422.26	168.953	-847.163	1217.39	215.307	-1144.78	1307.69	-11.9328	-988.352	1466.8	-89.946	-1000.9	1238.7	-107.345	-1004.95	1138.01	-116.544	-921.879	981.222	-69.725	-883.989	908.037	-131.586	-920.086	901.15	-114.522	-864.044	842.557
541	0	127.946	-848.226	1643.38	226.287	-845.542	1642.74	107.996	-997.581	1691.1	252.414	-990.589	1682.7	170.23	-1060.04	1513.84	154.381	-1121.86	1250.36	175.372	-916.187	1423.24	169.207	-833.177	1218.46	217.315	-1130.23	1308.57	-11.6205	-974.976	1466.91	-88.6646	-991.292	1238.41	-105.538	-998.477	1137.75	-114.583	-920.792	978.628	-68.2572	-885.53	904.037	-130.011	-921.784	898.516	-112.829	-868.571	837.563
542	0	127.997	-834.899	1644.38	226.427	-832.048	1644.01	108.348	-984.6	1691.08	252.698	-977.295	1682.93	170.808	-1045.75	1514.01	155.717	-1107.42	1250.4	175.853	-901.887	1423.66	169.533	-819.019	1219.02	219.675	-1115.22	1309.2	-11.3684	-961.43	1466.51	-87.2436	-981.898	1237.67	-103.872	-992.007	1137.39	-113.064	-919.844	976.038	-66.7802	-886.888	900.227	-128.401	-923.638	895.884	-111.225	-873.047	832.613
543	0	127.988	-821.485	1644.98	226.521	-818.336	1644.73	108.783	-971.531	1690.55	253.437	-963.671	1683.01	171.57	-1031.38	1513.9	156.901	-1093.19	1250.11	176.362	-887.468	1423.48	169.861	-804.651	1219.08	221.569	-1100.57	1309.33	-11.0918	-947.667	1465.76	-85.829	-972.537	1236.7	-102.009	-985.81	1136.75	-111.325	-918.853	973.243	-65.3096	-888.082	896.531	-126.595	-925.645	893.147	-109.461	-877.427	827.958
544	0	128.088	-808.006	1645.11	226.634	-804.56	1644.97	109.254	-958.556	1689.54	253.764	-950.308	1682.08	172.236	-1017.02	1513.25	158.233	-1078.81	1249.72	176.857	-873.149	1422.88	170.312	-790.052	1218.48	223.108	-1086.06	1308.98	-10.6451	-933.91	1464.41	-84.6972	-963.264	1235.38	-100.214	-979.319	1135.89	-109.729	-917.816	970.307	-64.1083	-888.978	892.818	-124.926	-927.537	890.592	-108.238	-881.634	823.457
545	0	128.324	-794.294	1644.87	226.883	-790.627	1644.84	109.744	-945.168	1688.15	254.238	-936.563	1680.67	172.838	-1002.57	1511.97	159.503	-1064.62	1248.69	177.502	-858.692	1421.82	170.939	-775.628	1217.29	224.673	-1071.55	1308.1	-10.4649	-919.99	1462.46	-83.4333	-954.139	1233.7	-98.0295	-973.112	1134.61	-108.12	-916.888	967.43	-63.1583	-889.783	889.199	-123.425	-929.372	887.934	-106.883	-885.578	819.083
546	0	128.487	-780.454	1644.07	226.916	-776.693	1643.94	110.359	-931.729	1686.44	254.703	-922.738	1679.37	173.415	-988.117	1510.39	160.41	-1050.57	1247.42	177.893	-844.267	1420.21	171.716	-761.771	1215.32	225.884	-1057.22	1306.81	-10.2833	-905.858	1460.48	-82.1364	-945.222	1231.82	-95.8376	-966.696	1133.1	-106.874	-915.978	964.547	-62.347	-890.446	885.592	-121.78	-931.343	885.31	-105.675	-889.497	815.047
547	0	128.693	-766.469	1642.71	227.133	-762.442	1642.73	110.849	-918	1684.41	255.184	-908.545	1677.16	173.97	-973.738	1508.64	161.056	-1036.64	1245.86	178.479	-829.868	1418.28	172.577	-748.227	1212.65	226.773	-1043.15	1305.3	-9.9441	-891.59	1457.97	-80.8508	-936.221	1229.84	-93.3189	-959.922	1131.21	-105.412	-914.795	961.702	-61.1515	-890.724	882.098	-119.951	-933.198	883.076	-104.724	-893.105	811.419
548	0	128.983	-752.194	1640.91	227.528	-747.936	1641.1	111.374	-903.929	1682.21	256.343	-893.844	1675.54	174.644	-959.206	1506.6	161.543	-1022.77	1243.78	179.038	-815.5	1416.12	173.21	-734.653	1209.36	227.727	-1028.9	1303.33	-9.63244	-877.246	1455.51	-79.6825	-927.092	1227.89	-90.8479	-953.154	1129.79	-103.962	-913.438	959.257	-60.6426	-890.747	878.997	-118.369	-934.458	881.136	-103.88	-896.501	808.166
549	0	129.204	-737.788	1638.7	227.895	-733.349	1638.85	111.986	-889.628	1679.64	256.231	-879.384	1672.45	175.227	-944.722	1504.11	161.56	-1009.11	1241.44	179.436	-801.083	1413.46	174.143	-720.621	1205.94	228.088	-1015.19	1301.15	-9.27125	-862.776	1452.91	-78.4712	-917.675	1226.11	-88.6306	-945.827	1128.62	-102.592	-911.74	956.818	-59.8545	-890.937	875.638	-116.453	-935.72	879.406	-103.209	-899.618	805.158
550	0	129.417	-723.196	1636.04	227.947	-718.456	1636.11	112.439	-875.112	1677.13	257.034	-864.19	1670.31	175.729	-930.329	1501.77	160.975	-995.784	1239.18	179.791	-786.894	1410.77	175.124	-706.193	1202.46	228.193	-1001.42	1298.65	-9.23172	-848.16	1450.3	-77.4577	-908.016	1224.34	-86.1995	-938.156	1127.16	-101.314	-909.597	955.038	-59.2675	-890.398	872.944	-114.949	-936.203	878.249	-102.675	-902.126	802.761
551	0	129.457	-708.413	1632.81	227.974	-703.557	1632.9	112.639	-860.126	1674.44	257.17	-849.45	1667.45	176.05	-915.8	1499.2	159.951	-982.22	1236.45	180.342	-772.595	1407.97	176.301	-691.183	1198.99	228.083	-987.586	1296.13	-9.09789	-833.516	1447.51	-76.1272	-898.358	1222.66	-83.5856	-930.069	1125.86	-100.129	-906.897	953.469	-58.9782	-889.341	870.48	-113.363	-936.2	877.428	-102.125	-904.265	800.728
552	0	129.475	-693.587	1628.97	228.165	-688.481	1629.34	112.995	-845.192	1671.44	257.465	-834.192	1664.36	176.323	-901.396	1496.21	158.998	-968.027	1234	180.622	-758.384	1404.84	177.474	-675.765	1195.57	227.696	-973.715	1293.21	-8.90491	-818.652	1444.59	-74.9379	-888.196	1220.7	-81.1946	-921.451	1124.67	-99.1507	-903.71	951.842	-58.4367	-887.721	868.296	-112.212	-935.59	876.84	-101.892	-905.804	798.962
553	0	129.495	-678.649	1625.12	228.157	-673.408	1625.29	113.163	-830.021	1668.78	257.578	-818.751	1661.51	176.408	-887.025	1493.22	157.924	-953.776	1231.12	180.991	-744.231	1401.72	178.696	-660.42	1192.39	227.141	-959.745	1290.25	-8.89776	-803.832	1441.88	-73.7727	-877.668	1219.12	-78.7401	-912.362	1123.4	-97.9332	-899.817	950.755	-58.6749	-885.154	866.357	-110.701	-933.924	876.651	-101.575	-906.632	797.759
554	0	129.435	-663.576	1621.21	228.139	-658.353	1621.26	113.371	-814.537	1666	257.813	-803.322	1658.92	176.255	-872.798	1490.44	156.905	-939.255	1228.33	180.819	-729.979	1398.74	179.72	-645.602	1189.05	226.283	-945.591	1287.19	-8.87905	-788.731	1439.3	-72.7639	-866.495	1217.44	-76.4802	-902.593	1122.31	-97.1539	-895.104	949.966	-58.5012	-882.232	865.012	-109.665	-931.677	876.819	-101.54	-906.484	796.635
555	0	129.487	-648.431	1617.18	228.038	-643.199	1617.11	113.271	-798.955	1663.43	257.809	-787.754	1655.98	176.017	-858.664	1487.49	155.864	-924.448	1225.21	180.814	-715.575	1395.64	180.711	-630.877	1185.81	225.389	-931.191	1284.06	-9.02757	-773.797	1436.6	-72.1218	-854.971	1215.96	-74.5393	-892.13	1121.37	-96.6962	-889.471	949.246	-57.8932	-878.53	863.489	-109.037	-928.145	877.132	-101.415	-905.672	795.839
556	0	129.271	-633.344	1613.17	227.421	-628.656	1612.72	113.013	-783.462	1660.9	257.517	-772.398	1653.29	175.59	-844.501	1484.47	155.012	-909.613	1222.12	181.065	-701.022	1392.79	181.606	-616.431	1182.89	224.484	-916.649	1280.82	-9.04751	-758.866	1433.8	-71.4572	-842.957	1214.24	-72.57	-881.268	1119.99	-96.4317	-883.04	948.398	-58.0215	-873.542	862.365	-108.65	-923.531	877.512	-101.534	-903.946	794.981
557	0	129.263	-618.079	1609.77	227.005	-613.695	1609.06	112.694	-767.807	1658.35	257.311	-757.037	1650.78	174.896	-830.094	1481.64	154.244	-894.412	1219.11	180.988	-686.306	1390.18	182.346	-601.679	1180.73	223.646	-901.827	1277.8	-9.48903	-743.933	1431.22	-70.7205	-830.294	1212.33	-71.1015	-869.731	1118.7	-96.6123	-875.556	947.96	-58.6769	-867.51	861.042	-108.42	-917.901	878.128	-101.678	-900.998	794.472
558	0	128.684	-602.943	1606.75	226.735	-598.692	1606.08	112.032	-752.394	1656.15	256.519	-741.893	1648.43	174.102	-815.502	1479.16	153.666	-879.104	1216.38	180.757	-671.419	1387.89	182.917	-586.548	1179.11	222.839	-886.823	1275.09	-10.0169	-728.861	1428.56	-70.3402	-817.18	1210.21	-70.062	-857.522	1117.31	-96.8066	-867.018	947.306	-59.8889	-860.269	860.088	-108.831	-911.018	878.525	-102.675	-896.69	794.465
559	0	128.56	-587.808	1604.44	226.297	-583.758	1603.8	111.028	-737.313	1653.7	255.671	-727.081	1646.33	173.241	-800.669	1476.75	153.515	-863.615	1213.63	180.347	-656.388	1385.96	183.166	-570.989	1177.94	222.183	-871.668	1272.45	-10.6234	-713.81	1426.04	-70.3944	-803.526	1208.22	-69.229	-844.615	1115.69	-97.6112	-857.38	946.456	-61.6348	-852.199	858.564	-109.651	-902.841	878.686	-103.118	-891.479	793.467
560	0	127.468	-572.75	1602.4	225.764	-568.784	1602.33	110.077	-722.228	1651.71	254.613	-712.09	1644.81	172.263	-785.795	1474.65	153.716	-847.891	1211.41	179.809	-641.133	1384.29	182.99	-555.401	1176.89	221.818	-856.234	1270.17	-11.4593	-698.575	1423.63	-70.3454	-789.301	1206.33	-68.8583	-830.969	1114.11	-98.3136	-846.815	945.817	-62.6216	-842.888	857.566	-110.621	-893.623	878.858	-104.18	-884.661	793.17
561	0	126.274	-557.802	1600.93	224.572	-554.104	1601.17	108.422	-707.447	1649.7	253.096	-697.702	1643.34	171.138	-770.649	1472.71	153.915	-832.07	1209.28	179.244	-625.624	1382.85	182.429	-539.853	1175.96	221.569	-840.678	1268.31	-12.1978	-683.166	1421.49	-70.1766	-774.229	1204.05	-68.8835	-816.9	1112.52	-99.5746	-835.129	945.128	-64.4883	-832.512	856.364	-112.031	-882.95	878.967	-105.532	-876.352	793.102
562	0	124.992	-542.965	1599.78	223.406	-539.384	1600.63	106.56	-692.836	1647.98	251.046	-683.265	1642.31	169.98	-755.474	1471.23	154.302	-815.91	1207.47	178.529	-610.054	1381.71	181.495	-524.321	1174.94	221.408	-824.805	1266.74	-13.2149	-667.841	1419.39	-70.3193	-758.834	1201.84	-69.23	-802.001	1111.04	-100.853	-822.397	944.243	-68.8304	-820.222	855.815	-113.886	-871.289	878.891	-107.356	-866.541	792.826
563	0	123.409	-528.359	1598.97	221.204	-525.137	1599.83	104.427	-678.432	1646.39	249.004	-668.967	1641.39	168.751	-740.251	1469.83	154.594	-799.645	1205.67	177.721	-594.422	1380.99	180.429	-508.411	1174.36	221.34	-808.773	1265.23	-14.2364	-652.256	1417.73	-70.7665	-743.106	1199.94	-69.9302	-786.719	1109.59	-102.306	-808.69	943.285	-69.0063	-807.443	854.42	-115.67	-858.045	878.645	-109.025	-855.046	792.471
564	0	121.782	-513.818	1598.79	220.019	-510.308	1600.8	102.372	-663.876	1645.43	247.157	-654.737	1641.21	167.214	-724.918	1468.63	154.88	-783.008	1204.11	176.887	-578.588	1380.58	179.267	-492.2	1174.05	221.23	-792.492	1264.03	-15.4998	-636.662	1416.34	-71.5202	-726.923	1198.3	-70.7271	-770.955	1108.24	-103.911	-793.879	942.523	-72.4812	-793.423	853.79	-117.67	-843.899	878.455	-111.042	-842.033	792.088
565	0	119.755	-499.121	1599.42	217.72	-495.922	1601.7	99.8847	-649.427	1644.95	244.518	-640.451	1641.51	165.554	-709.583	1467.97	154.845	-766.304	1203.05	175.731	-562.673	1380.71	178.176	-475.475	1174.2	220.732	-776.131	1263.34	-16.6186	-620.783	1415.37	-72.6132	-710.418	1197.39	-71.8383	-754.709	1107.43	-105.584	-778.135	941.819	-74.2179	-778.167	852.931	-119.739	-828.321	878.29	-113.417	-827.43	791.823
566	0	118.147	-484.512	1600.5	215.418	-481.552	1603.26	97.3277	-635.173	1644.64	242.274	-626.409	1642.43	163.967	-694.069	1467.75	154.549	-749.399	1202.46	174.994	-546.663	1381.42	177.508	-458.244	1175.02	220.052	-759.626	1263.13	-17.7297	-604.727	1414.75	-73.5576	-693.535	1196.47	-73.2128	-737.939	1106.63	-107.425	-761.389	941.379	-76.8633	-761.47	852.466	-121.757	-811.58	878.071	-115.927	-811.111	791.406
567	0	116.024	-469.816	1602.03	213.135	-467.108	1605.16	94.8516	-620.901	1644.44	240.375	-612.012	1643.54	162.476	-678.314	1467.74	153.845	-732.65	1202.19	174.145	-530.461	1382.43	177.102	-440.714	1176.07	219.078	-742.995	1263.06	-18.8679	-588.505	1414.33	-74.7752	-676.381	1196.04	-74.6749	-720.56	1106.17	-109.389	-743.712	941.043	-79.5748	-743.731	852.108	-124.182	-793.682	877.531	-118.712	-793.285	791.108
568	0	113.588	-455.153	1603.81	211.778	-452.128	1608.34	92.1486	-606.562	1644.45	237.901	-597.908	1645	160.821	-662.632	1468.2	152.672	-716.016	1202.19	172.96	-514.356	1383.51	176.987	-423.231	1177.28	217.794	-726.47	1263.27	-19.8906	-572.038	1414.28	-75.9645	-659.046	1195.87	-76.3815	-702.906	1105.75	-111.553	-725.068	940.618	-81.5028	-724.783	851.256	-126.7	-774.675	876.932	-121.598	-773.955	790.69
569	0	111.003	-440.325	1605.84	208.93	-437.615	1610.67	89.4911	-592.194	1644.66	234.595	-583.899	1645.89	159.386	-646.705	1468.91	151.303	-699.742	1202.85	172.181	-498.217	1385.02	176.906	-406.202	1178.37	216.66	-710.048	1264.07	-20.8329	-555.783	1414.45	-77.6773	-641.532	1196.22	-78.205	-684.936	1105.49	-113.972	-705.564	940.353	-84.7185	-704.49	851.041	-129.351	-754.467	876.351	-124.691	-753.096	790.109
570	0	108.69	-425.461	1607.94	206.825	-422.633	1613.78	86.886	-577.609	1645.12	231.663	-569.496	1647.35	158.389	-630.764	1470.27	150.221	-683.65	1204.01	171.377	-482.311	1386.59	177.198	-389.933	1179.35	215.79	-693.836	1265.33	-21.4742	-539.627	1414.83	-78.8514	-623.889	1196.23	-80.1131	-666.421	1105.29	-116.334	-685.295	939.915	-86.7353	-683.311	850.636	-132.071	-733.277	875.433	-127.972	-730.88	789.353
571	0	106.481	-410.513	1609.91	204.468	-407.794	1616.41	84.6488	-562.827	1645.65	229.706	-554.833	1649.6	157.632	-615.032	1471.65	149.223	-668.373	1205.85	170.665	-466.506	1388.22	177.413	-374.191	1180.14	215.294	-677.897	1267.18	-21.8732	-523.546	1415.5	-79.8034	-605.868	1196.3	-82.0827	-647.534	1105.22	-118.802	-664.071	939.484	-88.1458	-661.8	849.836	-134.962	-711.013	874.472	-130.964	-707.244	788.269
572	0	104.304	-395.568	1611.51	202.583	-392.502	1619.1	82.5218	-548.016	1646.18	227.516	-539.599	1651.48	157.272	-599.336	1473.54	148.699	-653.38	1207.66	170.08	-451.027	1389.79	177.782	-358.844	1180.9	215.172	-662.358	1269.48	-21.9933	-507.901	1416.44	-80.9075	-587.814	1196.63	-84.2859	-628.487	1105	-121.157	-642.07	939.07	-90.678	-638.743	849.124	-138.004	-687.883	873.222	-134.32	-682.393	787.366
573	0	102.6	-380.621	1612.77	199.856	-377.49	1620.6	80.7341	-533.217	1646.8	225.538	-524.564	1653.21	156.938	-584.381	1475.25	148.468	-638.712	1209.62	169.844	-435.772	1391.41	178.119	-343.752	1181.7	215.486	-647.152	1271.88	-21.7042	-492.715	1417.6	-82.1822	-569.719	1196.93	-86.3317	-609.206	1104.82	-123.644	-619.236	938.326	-93.2965	-614.529	848.536	-141.181	-663.713	871.952	-137.538	-656.339	786.281
574	0	100.994	-365.526	1613.93	198.597	-361.887	1622.73	79.5197	-518.246	1647.77	224.244	-509.251	1655.57	156.85	-569.485	1477.05	148.544	-624.261	1211.6	169.754	-420.789	1393.11	178.435	-328.79	1182.85	216.15	-632.414	1274.24	-21.8233	-477.964	1418.82	-83.2215	-551.431	1197.38	-88.4219	-589.681	1104.69	-125.88	-595.919	937.922	-95.5667	-589.512	848.119	-144.206	-638.788	870.611	-140.804	-629.055	785.23
575	0	100.207	-350.32	1615.13	197.417	-346.326	1624.59	78.6868	-503.028	1649.37	223.139	-493.338	1657.89	156.978	-554.654	1479.28	148.771	-609.889	1213.71	169.637	-406.224	1394.87	178.915	-313.955	1184.53	216.843	-618.003	1276.49	-21.7706	-463.336	1420.67	-83.9419	-533.116	1197.71	-90.5046	-570.023	1104.94	-128.12	-571.946	937.722	-97.4892	-563.838	848.175	-146.748	-612.989	869.252	-144.046	-600.69	784.63
576	0	99.4013	-335.193	1616.36	196.254	-330.962	1625.74	78.0963	-487.583	1651.56	222.696	-477.658	1660.54	157.033	-540.211	1481.5	148.936	-595.493	1215.74	169.629	-391.87	1397.04	179.047	-299.503	1186.36	217.171	-603.955	1278.84	-21.8798	-449.081	1422.6	-84.9925	-514.718	1198.61	-92.658	-550.166	1104.97	-130.379	-547.494	937.619	-99.6884	-537.467	848.499	-149.331	-586.483	868.346	-147.185	-571.32	784.609
577	0	98.6929	-319.951	1617.35	195.896	-315.56	1626.85	77.9596	-471.943	1654.02	222.812	-461.862	1663.33	156.89	-525.825	1483.5	149.188	-581.072	1217.88	169.745	-377.611	1399.33	179.095	-285.442	1188.43	217.268	-590.011	1281.18	-21.837	-434.834	1424.61	-85.9709	-496.349	1199.83	-94.8003	-530.12	1105.57	-132.128	-522.436	938.097	-101.599	-510.342	849.13	-151.73	-559.197	867.561	-150.206	-541.018	785.131
578	0	98.8077	-304.693	1618.69	196.35	-300.179	1628.2	78.1585	-456.248	1656.86	223.029	-446.076	1665.64	157.049	-511.469	1485.94	149.408	-566.612	1220.13	169.841	-363.521	1401.65	179.227	-271.637	1190.62	217.137	-576.169	1283.39	-21.9102	-420.726	1427.01	-86.937	-477.807	1201.44	-96.8278	-509.837	1106.24	-133.975	-497.052	938.991	-103.052	-482.814	850.374	-154.014	-531.488	867.304	-152.863	-509.898	786.209
579	0	99.8282	-289.472	1620.42	197.043	-284.889	1629.57	78.6289	-440.745	1660.03	223.509	-430.699	1668.21	156.904	-497.184	1488.59	149.24	-552.604	1222.71	169.884	-349.473	1404.16	179.157	-257.983	1192.96	216.609	-562.336	1285.83	-21.9735	-406.484	1429.51	-87.8317	-459.483	1203.25	-98.8008	-489.593	1107.36	-135.306	-471.427	940.138	-104.355	-455.009	852.054	-155.767	-503.285	867.384	-155.184	-478.035	787.842
580	0	100.672	-274.341	1622.38	197.507	-270	1630.68	79.3681	-425.265	1663.29	224.393	-415.231	1670.73	156.844	-483.055	1491.38	148.706	-538.673	1225.51	169.867	-335.527	1406.74	179.185	-244.023	1195.73	215.627	-548.503	1288.46	-22.0375	-392.236	1432.29	-88.7363	-441.095	1205.37	-100.831	-469.254	1108.73	-136.661	-445.474	941.664	-105.225	-426.551	854.425	-157.245	-474.617	868.123	-157.115	-445.524	790.332
581	0	102.252	-259.104	1624.77	198.728	-255.09	1632.26	80.2486	-409.726	1666.86	225.426	-400.141	1672.89	156.802	-468.711	1494.37	148.062	-524.754	1228.5	169.87	-321.53	1409.5	179.5	-229.853	1198.75	214.639	-534.72	1291.15	-22.0177	-377.921	1435.12	-89.5848	-422.881	1207.85	-102.661	-448.841	1110.57	-137.724	-419.274	943.844	-105.564	-397.666	857.488	-158.373	-445.796	869.351	-158.805	-412.719	793.581
582	0	103.399	-244.068	1627.31	200.194	-240.299	1634.2	81.726	-394.358	1670.46	226.464	-385.022	1675.09	156.786	-454.255	1497.15	147.201	-510.885	1231.52	169.95	-307.409	1412.27	179.781	-215.501	1202.09	213.526	-520.802	1294.01	-22.0435	-363.374	1438.37	-90.4228	-404.738	1210.73	-104.215	-428.567	1112.74	-138.468	-393.068	946.699	-106.11	-368.917	860.842	-159.226	-416.614	871.191	-160.052	-379.52	797.804
583	0	104.779	-229.193	1630.09	201.704	-225.682	1636.31	82.8728	-379.097	1674.08	228.208	-370.239	1677.87	156.703	-439.804	1500.11	146.245	-496.79	1234.68	169.961	-293.221	1414.96	179.908	-201.128	1205.49	212.365	-506.89	1296.86	-22.016	-348.769	1441.67	-91.3652	-386.609	1213.82	-105.889	-408.225	1115.34	-139.196	-366.608	950.139	-106.303	-339.676	864.988	-159.778	-387.23	873.765	-160.885	-346.169	803.079
584	0	105.882	-214.283	1633	203.02	-211.222	1638.21	84.0406	-364.241	1677.35	229.293	-355.769	1679.64	156.549	-425.364	1502.76	145.416	-482.673	1237.61	170.02	-278.863	1417.54	179.83	-187.18	1208.31	211.279	-492.714	1299.59	-21.9645	-333.939	1444.86	-92.2839	-368.455	1216.99	-107.411	-387.91	1118.03	-139.695	-340.176	953.79	-106.117	-310.229	870.139	-160.251	-357.679	876.696	-161.732	-312.939	808.72
585	0	107.609	-199.495	1635.86	204.627	-196.836	1640.41	85.2092	-349.454	1680.32	230.301	-341.559	1681.3	156.577	-410.888	1505.34	144.706	-468.378	1240.33	169.985	-264.492	1419.8	179.609	-173.535	1210.82	210.464	-478.517	1302.09	-21.7972	-319.001	1447.97	-93.1627	-350.686	1220.2	-108.883	-367.703	1120.69	-140.102	-313.682	957.846	-105.977	-280.985	875.725	-160.36	-328.127	880.157	-161.895	-279.652	815.062
586	0	108.891	-184.889	1638.59	205.998	-182.548	1642.5	86.4076	-334.706	1683	231.598	-327.478	1683.08	156.566	-396.264	1507.69	144.131	-454.08	1242.77	170.197	-249.908	1421.92	179.2	-159.996	1212.92	209.512	-464.267	1304.38	-21.6233	-304.042	1451.11	-94.0752	-332.82	1223.25	-110.309	-347.649	1123.42	-140.402	-287.251	962.112	-105.665	-251.472	881.729	-160.409	-298.41	884.014	-161.885	-246.453	821.896
587	0	110.054	-170.316	1640.99	207.289	-168.379	1644.55	87.3701	-320.218	1685.18	232.457	-313.466	1684.57	156.499	-381.808	1509.58	143.58	-439.628	1244.87	170.238	-235.351	1423.73	178.921	-146.589	1215	208.741	-450.009	1306.45	-21.4463	-288.918	1453.78	-95.1257	-315.006	1226.28	-111.753	-327.498	1126.11	-140.925	-260.784	966.828	-105.799	-222.11	887.985	-160.567	-268.551	888.21	-161.68	-213.57	828.935
588	0	111.29	-155.728	1643.23	208.249	-154.213	1646.14	88.2848	-305.724	1686.91	233.301	-299.366	1685.61	156.531	-367.005	1511.27	143.331	-425.169	1246.64	170.401	-220.74	1425.07	178.812	-132.994	1216.62	208.215	-435.657	1308.18	-21.1365	-273.856	1456.17	-95.815	-297.382	1229.01	-113.422	-307.339	1129.1	-141.134	-234.302	971.306	-105.668	-192.795	894.252	-160.264	-238.657	892.411	-160.978	-180.9	836.091
589	0	112.195	-141.201	1644.85	209.681	-139.802	1647.82	89.0166	-291.233	1688.18	233.855	-285.445	1686.45	156.739	-352.264	1512.49	143.184	-410.691	1248.12	170.463	-206.136	1426.05	178.58	-119.285	1217.83	207.833	-421.012	1309.36	-20.7966	-258.681	1458.15	-96.7866	-279.599	1231.31	-114.57	-287.628	1131.3	-141.215	-207.928	975.872	-105.21	-163.389	901.077	-159.902	-208.906	896.73	-160.136	-148.462	843.297
590	0	113.009	-126.595	1646.33	210.199	-125.683	1648.85	89.3915	-276.715	1689.01	234.987	-271.147	1687.27	156.925	-337.321	1513.56	142.929	-396.171	1249.19	170.512	-191.476	1426.76	178.323	-105.367	1218.72	207.274	-406.621	1310.44	-20.4538	-243.601	1459.78	-97.6386	-261.858	1233.27	-116.008	-268.091	1132.86	-141.433	-181.675	980.39	-104.597	-134.035	907.908	-159.124	-179.253	901.001	-159.171	-116.303	850.61
591	0	113.74	-111.904	1647.16	210.771	-111.497	1649.32	89.5526	-262.418	1689.09	234.866	-257.292	1686.97	156.728	-322.849	1513.8	142.73	-381.837	1249.98	170.688	-176.754	1426.87	178.209	-91.3537	1218.9	206.823	-391.963	1310.98	-20.0831	-228.577	1460.59	-98.3536	-243.948	1234.6	-117.572	-248.546	1134.43	-141.579	-155.515	984.605	-103.997	-104.953	914.648	-158.866	-149.595	905.38	-157.813	-84.4857	857.656
592	0	114.378	-97.1617	1647.39	211.317	-97.0212	1649.31	89.9244	-247.763	1688.81	234.975	-243.171	1686.32	155.535	-310.309	1513.17	142.626	-367.53	1250.2	170.931	-161.969	1426.52	178.111	-77.4539	1218.6	206.667	-377.393	1310.93	-19.6192	-213.524	1460.77	-99.0127	-226.203	1235.39	-119.029	-228.712	1135.38	-141.565	-129.553	988.483	-103.155	-76.2051	921.215	-158.143	-120.14	909.813	-156.207	-53.0318	864.742
593	0	114.852	-82.3411	1647.33	211.835	-82.4277	1649.18	90.1149	-232.878	1688.24	234.984	-228.779	1685.5	157.775	-291.651	1513.38	142.418	-353.306	1250	171.096	-147.18	1425.77	177.855	-63.8897	1217.69	206.523	-362.795	1310.58	-19.2167	-198.648	1460.7	-99.9582	-208.494	1236.02	-120.364	-209.105	1135.92	-141.494	-103.743	992.607	-102.323	-47.7773	927.824	-157.387	-90.9579	914.163	-154.471	-21.9675	871.652
594	0	115.134	-67.5076	1646.72	212.417	-67.7479	1648.82	90.2117	-218.007	1687.12	235.768	-214.173	1684.92	157.975	-276.995	1512.43	142.251	-339.356	1249.53	171.065	-132.385	1424.7	177.504	-50.4567	1216.38	206.361	-348.094	1309.99	-18.8274	-183.963	1460.17	-100.803	-190.718	1236.19	-121.715	-189.255	1135.95	-141.407	-78.123	996.364	-101.481	-19.847	934.38	-156.593	-61.9959	918.454	-152.558	8.83459	878.806
595	0	115.571	-52.4025	1645.57	212.954	-52.7311	1647.82	90.2198	-203.051	1685.55	235.29	-199.519	1683.2	158.3	-262.103	1511.17	142.265	-325.548	1248.64	171.212	-117.476	1423.18	177.317	-37.0133	1214.47	206.475	-333.592	1308.94	-18.6264	-169.253	1459.05	-101.495	-172.707	1235.82	-123.078	-169.037	1135.67	-141.27	-52.6692	999.881	-100.302	7.88529	940.659	-155.793	-33.6883	922.529	-150.631	38.9951	885.727
596	0	115.8	-37.1973	1644.02	212.994	-37.7404	1646.07	90.3126	-187.823	1683.71	235.58	-184.53	1681.48	158.901	-247.002	1509.9	142.504	-311.805	1247.37	171.304	-102.661	1421.28	176.986	-23.2533	1212.11	206.869	-319.013	1307.58	-18.2462	-154.74	1457.52	-102.243	-154.786	1234.96	-124.289	-148.88	1134.88	-140.889	-27.5928	1003.05	-99.1204	34.8654	946.713	-155.329	-5.5383	926.575	-148.65	68.6023	892.449
597	0	115.861	-21.9105	1641.88	213.304	-22.3826	1644.14	90.3857	-172.548	1681.65	235.669	-169.233	1679.61	159.338	-232.031	1507.8	143.21	-297.951	1245.9	171.294	-87.8491	1419.17	176.772	-9.06571	1209.64	207.287	-304.561	1305.86	-18.0092	-140.303	1455.58	-102.898	-136.915	1233.65	-125.314	-128.586	1133.82	-140.656	-2.63347	1006.17	-97.9097	61.2992	952.502	-154.467	22.2797	930.546	-146.466	97.6727	899.171
598	0	115.925	-6.55846	1639.35	213.328	-7.15777	1641.7	90.31	-157.202	1679.27	235.666	-153.932	1677.37	159.82	-217.351	1505.95	144.381	-284.034	1244.11	171.37	-72.9764	1416.85	176.549	5.89632	1207.04	208.01	-290.081	1304.15	-17.7548	-126.064	1453.23	-103.398	-119.008	1232.04	-126.374	-108.113	1132.7	-140.1	22.1005	1009.12	-96.8173	87.0735	957.791	-153.615	49.6662	934.439	-144.502	126.131	905.669
599	0	116.076	8.80623	1636.47	213.392	8.33376	1638.82	90.3952	-141.633	1676.8	235.588	-138.37	1674.91	160.604	-202.452	1503.74	145.994	-269.859	1241.99	171.263	-58.1375	1414.17	176.213	21.4218	1204.06	209.1	-275.517	1302.13	-17.3616	-111.841	1450.69	-103.494	-101.163	1230.46	-126.812	-87.9685	1131.21	-139.502	46.2824	1011.79	-95.3551	112.473	962.992	-152.9	76.4842	938.391	-142.257	153.765	912.041
600	0	116.038	24.0936	1633.11	213.296	23.7886	1635.44	90.6286	-126.098	1674.09	236.158	-122.457	1672.47	161.36	-187.428	1501.25	147.771	-255.543	1239.47	171.256	-43.3254	1411.22	175.958	37.2184	1201.07	210.428	-261.039	1299.78	-16.9799	-97.7706	1447.81	-103.561	-83.5014	1228.86	-127.275	-67.8772	1129.75	-138.833	69.9825	1014.27	-94.1422	137.13	967.607	-152.086	102.728	942.316	-140.38	180.649	918.275
601	0	116.138	39.5917	1629.51	213.661	39.4839	1632.18	90.8474	-110.436	1671.24	235.721	-106.678	1669.08	162.199	-172.456	1498.86	149.689	-240.978	1237.13	171.257	-28.5856	1408.09	175.508	52.8065	1197.93	211.832	-246.477	1297.59	-16.5402	-83.7179	1444.73	-103.072	-65.7595	1226.92	-127.341	-48.1655	1128.4	-138.123	93.1267	1016.8	-92.8089	161.136	972.072	-151.156	128.027	946.016	-138.523	206.797	924.333
602	0	116.315	55.0562	1625.94	213.576	54.8872	1628.59	91.0521	-94.8732	1668.22	236.259	-91.137	1666.48	162.954	-157.478	1496.01	151.571	-226.201	1234.42	171.332	-13.8677	1404.89	174.969	67.9813	1194.6	213.295	-231.848	1295.08	-16.0425	-69.8042	1441.72	-102.493	-48.3787	1224.91	-127.291	-28.9321	1126.87	-137.167	115.604	1019.19	-91.4111	184.454	976.408	-150.362	152.683	949.756	-136.946	231.835	930.143
603	0	116.608	70.3407	1622.5	214.028	70.3505	1625.29	91.4359	-79.5351	1665.06	236.559	-75.5056	1663.67	164.037	-142.54	1493.08	153.623	-211.23	1231.2	171.867	1.16037	1401.9	174.683	82.8501	1191.18	214.948	-217.175	1292.25	-15.1601	-55.8247	1438.57	-101.64	-31.3525	1222.61	-126.859	-10.1401	1125.18	-136.086	137.281	1021.54	-90.1952	206.89	980.561	-149.373	176.394	953.543	-135.459	256.005	935.9
604	0	117.251	85.6243	1619.28	214.891	85.8078	1622.34	92.015	-64.0597	1662.16	237.152	-60.1015	1660.92	165.097	-127.601	1490.33	155.633	-196.034	1228.23	172.559	16.1241	1398.92	174.661	97.6389	1187.98	216.692	-202.305	1289.51	-14.6886	-41.8287	1435.85	-100.495	-14.447	1220.21	-126.346	8.12353	1123.43	-134.926	157.988	1023.69	-88.9838	228.596	984.533	-148.485	199.226	956.83	-134.173	278.938	941.416
605	0	117.932	100.819	1615.98	215.507	100.945	1619.24	92.8077	-48.8094	1659.13	239.004	-44.6125	1658.85	166.047	-112.666	1487.35	157.384	-180.55	1225.12	173.151	31.144	1395.92	174.705	112.627	1185.07	218.101	-187.394	1286.61	-13.8348	-27.5147	1432.92	-99.4506	1.97768	1217.91	-125.664	25.7511	1121.6	-133.775	178.119	1025.62	-87.7223	249.493	988.069	-147.459	220.846	959.952	-133.302	301.056	946.787
606	0	118.864	115.879	1613.06	216.44	115.971	1616.13	93.8436	-33.6262	1656.35	239.336	-29.6622	1655.44	167.072	-98.3547	1484.74	159.025	-164.945	1222.26	173.991	46.2193	1393.17	174.904	128.041	1182.3	219.561	-172.325	1283.9	-13.0464	-13.0062	1430.08	-98.0898	18.0656	1215.3	-124.791	42.8519	1119.59	-132.66	197.417	1027.07	-86.6183	269.476	991.052	-146.374	241.588	962.721	-132.496	322.131	951.626
607	0	120.465	130.97	1610.5	218.061	130.987	1613.6	95.0577	-18.5969	1653.77	241.16	-14.5404	1653.05	168.127	-83.2717	1481.73	160.124	-149.326	1219.47	175.168	61.443	1390.68	175.663	143.716	1180.13	220.804	-157.143	1281.04	-12.1548	1.78658	1427.55	-96.6902	33.6452	1212.54	-123.662	59.3574	1117.25	-131.55	215.835	1028.21	-85.3523	288.913	994.081	-145.179	261.324	964.76	-131.914	342.027	955.89
608	0	121.839	145.744	1608.3	219.886	145.851	1611.48	96.6694	-3.67504	1651.38	242.3	0.126905	1650.53	169.245	-68.3525	1479.43	160.771	-133.761	1216.6	176.247	76.6209	1388.46	176.794	159.784	1178.38	221.585	-141.892	1278.23	-11.1484	16.8097	1425.18	-95.3445	48.7943	1209.88	-122.884	75.2012	1115.05	-130.449	233.428	1028.87	-84.5786	307.251	996.323	-144.002	280.095	966.157	-131.549	360.857	959.714
609	0	123.916	160.661	1606.41	221.216	160.404	1609	98.3916	11.0434	1649.2	243.939	14.5801	1647.77	168.936	-55.4439	1476.39	161.145	-118.008	1214.02	177.41	91.8932	1386.41	178.235	175.628	1176.93	222.377	-126.438	1275.69	-10.0623	32.054	1422.83	-94.2391	63.288	1207.43	-121.401	90.9163	1112.57	-129.292	250.322	1028.88	-83.7111	324.93	997.976	-142.611	297.829	967.15	-131.075	378.71	962.985
610	0	125.74	175.36	1604.89	223.599	175.107	1607.32	100.404	25.6996	1647.56	246.081	29.1322	1645.69	171.469	-39.3295	1474.52	161.53	-102.05	1211.45	179.056	107.305	1384.64	179.888	191.5	1175.33	223.129	-110.93	1272.89	-8.54008	47.6663	1420.91	-93.1492	77.6127	1205.38	-119.995	106.086	1110.36	-128.023	266.288	1028.3	-82.6511	341.724	999.127	-141.078	314.56	967.342	-130.766	395.587	965.367
611	0	127.98	189.988	1603.7	225.747	189.741	1605.94	102.886	40.2864	1646.23	248.666	43.9436	1644.1	172.884	-24.3271	1472.36	162.007	-85.9853	1209.24	180.665	122.589	1383.3	181.897	207.259	1174.24	223.842	-95.1489	1270.51	-7.07386	63.2956	1419.38	-91.6793	91.7119	1203.29	-118.303	120.852	1108.12	-126.89	281.614	1027.4	-81.8346	357.562	999.393	-139.61	330.414	966.825	-130.54	411.415	967.134
612	0	130.142	204.423	1603.28	227.895	204.266	1605.07	105.209	54.5313	1645.47	250.85	58.2428	1642.61	174.596	-8.97725	1470.7	162.15	-69.3895	1207.51	182.436	138.125	1382.53	183.754	223.07	1173.5	224.356	-79.0607	1268.4	-5.39862	79.0051	1418.27	-90.1371	105.856	1201.62	-116.779	135.209	1106.56	-125.622	296.243	1026.07	-81.1173	372.593	998.946	-138.019	345.335	965.591	-130.431	426.198	968.171
613	0	132.7	219.042	1603.53	230.189	218.854	1604.75	108.049	68.885	1645.18	253.618	72.5975	1641.76	176.319	6.29982	1469.54	162.339	-52.9882	1206.12	184.357	153.555	1382.16	185.621	239.471	1173.41	224.84	-62.8336	1266.55	-3.8143	94.592	1417.62	-88.7274	119.692	1200.63	-114.867	149.421	1105.35	-124.221	310.218	1024.16	-80.0256	386.751	997.852	-136.567	359.038	963.759	-130.302	439.739	967.991
614	0	135.125	233.301	1604.18	233.047	233.58	1605.19	111	82.9497	1645.42	256.523	87.2951	1641.19	178.327	21.6696	1468.94	162.507	-36.2275	1205.34	186.209	169.16	1382.16	187.499	256.489	1173.82	225.667	-46.4458	1265.21	-2.11687	110.338	1417.55	-87.3278	133.616	1200.36	-112.897	163.083	1104.51	-122.776	323.423	1022.2	-78.9377	399.996	995.915	-135.088	371.867	961.648	-129.901	452.228	966.853
615	0	137.895	248.012	1605.73	235.862	248.284	1606.22	114.164	97.1512	1646.07	260.565	101.9	1641.74	180.179	37.1606	1469.12	162.714	-19.8202	1205.31	187.888	184.837	1382.9	189.222	273.923	1175.11	226.339	-29.8258	1264.57	-0.531769	126.046	1418.41	-85.7271	147.822	1200.74	-110.853	176.524	1104.31	-121.299	335.945	1020.44	-77.6785	412.394	993.686	-133.566	383.656	959.229	-129.497	463.697	965.073
616	0	140.631	262.453	1607.79	238.33	262.724	1607.36	117.349	111.345	1647.38	263.374	116.436	1641.84	181.849	52.654	1469.85	162.798	-3.74615	1206.05	189.478	200.344	1384.05	190.514	291.265	1176.77	227.039	-13.4945	1264.77	0.962897	141.894	1420.05	-84.1481	162.093	1201.71	-108.878	189.688	1104.79	-119.666	347.882	1018.7	-76.4261	424.059	991.154	-131.962	394.535	956.607	-128.872	474.262	961.979
617	0	143.293	277.16	1610.13	241.155	277.454	1608.92	120.735	125.762	1649.07	266.534	130.939	1642.24	183.605	68.0521	1471.03	163.127	11.9099	1207.52	190.959	215.849	1385.49	191.503	308.144	1178.53	227.642	2.38684	1265.43	2.4299	157.836	1422.18	-82.5421	176.348	1203.17	-106.94	202.465	1105.87	-117.936	359.174	1016.94	-75.0021	434.626	987.492	-130.347	404.593	953.975	-127.846	484.328	958.098
618	0	146.443	291.972	1612.73	244.446	292.25	1610.64	123.931	140.256	1651.32	270.484	146.07	1643.24	185.051	83.4748	1472.73	163.377	26.8777	1209.46	192.172	231.209	1387.19	191.821	324.116	1180.04	228.058	17.8804	1266.81	3.71815	173.67	1424.97	-80.8226	190.853	1205.13	-105.021	214.964	1107.17	-116.141	369.655	1015.27	-73.4659	444.814	984.125	-128.691	413.586	951.075	-126.609	493.235	953.224
619	0	149.506	306.766	1615.28	247.457	306.901	1612.15	127.064	155.167	1653.86	272.617	160.053	1643.59	186.219	98.6903	1475	163.689	41.428	1211.79	193.14	246.17	1389.26	192.078	339.438	1181.71	228.082	32.7019	1268.63	4.90325	189.291	1428.03	-78.9175	205.534	1207.21	-103.198	227.398	1109.3	-114.373	379.641	1013.49	-71.8855	454.095	980.112	-127.052	421.728	947.795	-125.222	501.326	947.451
620	0	152.228	321.768	1617.67	250.016	321.361	1613.22	129.549	169.852	1656.55	274.694	174.228	1644.11	187.248	113.682	1476.87	163.822	55.69	1214.08	193.726	260.994	1391.23	192.2	354.194	1183.55	228.071	47.2892	1270.84	5.97395	204.681	1431.23	-77.7067	220.047	1210.09	-101.721	239.542	1111.83	-112.801	389.263	1011.96	-70.2304	462.548	975.625	-125.39	429.174	944.558	-123.455	508.623	940.957
621	0	154.824	336.629	1619.94	252.505	335.933	1614.44	132.145	185.019	1659.57	278.028	189.14	1645.93	188.249	128.289	1479.15	164.194	69.8441	1216.52	194.455	275.585	1393.54	192.159	368.71	1185.72	228.06	61.7008	1272.93	6.9974	219.511	1434.66	-76.1504	234.286	1213.04	-100.247	251.778	1114.7	-111.008	398.134	1009.89	-68.4947	470.206	971.037	-123.822	435.926	941.25	-121.567	515.156	933.951
622	0	156.622	351.305	1622.02	254.348	350.462	1615.61	134.099	199.932	1662.72	279.22	203.771	1647.41	189.205	142.31	1481.73	164.376	83.8761	1218.87	194.571	289.81	1395.71	191.774	382.229	1188.08	228.137	75.9698	1274.88	7.74487	233.817	1438.09	-74.5386	248.713	1215.74	-98.9835	263.802	1117.56	-109.638	406.684	1007.88	-66.6818	477.24	965.979	-122.246	442.042	937.651	-119.316	520.816	926.507
623	0	157.897	366.011	1623.99	255.589	364.991	1617.08	135.567	214.872	1665.9	280.515	218.49	1649.62	189.893	155.855	1484.09	164.488	97.7517	1221.36	194.971	303.795	1398.23	191.714	396.204	1190.87	228.59	90.1091	1277.41	8.35154	247.584	1441.47	-73.3387	262.948	1218.7	-97.9456	275.803	1120.48	-108.224	414.809	1005.8	-64.7865	483.436	960.573	-121.177	447.646	934.249	-116.863	525.912	918.569
624	0	158.835	380.521	1625.86	256.11	379.41	1618.55	136.476	229.528	1668.93	281.026	233.088	1651.7	190.557	169.392	1486.63	164.872	111.553	1223.9	194.916	317.565	1400.73	191.405	409.893	1193.82	229.399	104.113	1279.96	8.97451	260.867	1444.46	-72.5118	276.726	1221.74	-96.9573	287.74	1123.25	-106.883	422.548	1003.57	-63.0599	488.982	955.329	-119.946	452.86	930.67	-114.32	530.256	910.438
625	0	159.214	394.688	1627.75	256.827	393.892	1620.64	137.17	244.111	1671.9	281.968	247.837	1654.88	191.002	182.71	1489.39	165.61	125.236	1226.38	195.258	331.187	1403.8	191.021	423.211	1196.87	230.468	117.994	1282.3	9.28371	273.673	1447.32	-71.7678	290.129	1224.6	-95.9051	299.261	1125.98	-105.842	429.823	1001.39	-61.5232	493.796	950.005	-119.141	457.357	927.436	-111.497	533.701	902.246
626	0	159.133	408.766	1629.99	256.793	408.223	1622.93	137.368	258.417	1674.99	282.236	262.457	1658.22	191.688	196.295	1492.35	166.651	138.826	1229.07	195.26	344.671	1406.9	190.58	436.686	1200.32	231.296	131.659	1284.87	9.27975	286.315	1450.6	-71.5057	302.917	1227.54	-94.8576	310.635	1128.01	-104.923	436.567	999.385	-60.0865	498.061	945.013	-118.748	461.623	924.385	-108.833	536.408	894.246
627	0	158.792	422.812	1632.49	256.576	422.434	1625.67	137.335	272.716	1678.24	282.311	276.776	1661.77	192.018	209.653	1495.53	167.79	152.499	1232.14	195.166	358.019	1410.25	189.936	450.288	1203.78	232.133	145.456	1287.8	9.18224	298.804	1453.36	-71.2962	315.246	1230.08	-93.9504	321.48	1130.31	-104.22	442.853	997.341	-58.6988	501.881	940.193	-118.212	465.327	921.48	-106.101	538.105	886.584
628	0	158.426	436.871	1635.18	256.046	436.548	1628.4	137.19	286.94	1681.59	281.722	291.113	1665.07	192.438	223.29	1498.81	169.175	165.906	1235.23	195.267	371.434	1413.71	189.36	463.895	1207.12	233.101	159.104	1290.86	9.08961	311.436	1455.91	-71.1113	327.16	1232.52	-92.717	332.208	1132.07	-103.525	448.698	995.286	-57.6649	505.02	935.612	-117.744	468.644	918.763	-103.62	539.411	879.265
629	0	157.831	450.73	1637.81	255.641	450.61	1631.49	136.846	301.074	1684.93	282.005	305.627	1669.62	192.742	237.069	1502.17	170.679	179.133	1238.34	195.254	384.88	1417.18	188.688	477.368	1210.65	234.534	172.469	1294.43	8.86248	324.105	1458.41	-71.0697	338.224	1234.48	-91.6161	342.25	1133.74	-103.022	453.852	993.541	-56.7504	507.638	931.505	-117.042	471.367	915.98	-101.462	539.785	872.755
630	0	157.48	464.453	1640.68	255.171	464.484	1634.68	136.3	315.042	1688	281.831	319.505	1673.24	192.936	250.638	1505.51	172.16	192.591	1241.62	195.34	398.369	1420.63	187.858	490.776	1213.94	235.621	185.974	1297.95	8.75252	336.753	1460.78	-70.7518	348.591	1236.16	-90.5113	351.849	1135.38	-102.559	458.564	992.015	-55.9832	509.897	927.991	-116.912	473.625	914.018	-99.7593	539.57	866.623
631	0	157.032	478.107	1643.26	254.6	478.242	1637.78	135.597	328.834	1690.84	280.483	333.164	1676.4	193.056	264.124	1508.66	173.914	205.835	1244.73	195.323	411.919	1423.82	187.063	503.903	1217.15	236.918	199.606	1301.28	8.60493	349.715	1462.85	-70.3309	358.715	1237.91	-89.4198	360.879	1136.97	-101.913	462.949	990.748	-55.3222	511.803	924.489	-116.369	475.404	911.816	-98.3428	538.97	861.167
632	0	156.561	491.763	1645.88	254.141	491.865	1640.71	134.975	342.467	1693.51	280.058	346.859	1679.68	193.622	277.879	1511.82	175.531	219.48	1247.59	195.257	425.565	1426.74	186.349	516.734	1219.9	238.57	213.437	1304.53	8.64898	362.553	1464.98	-69.7872	368.378	1239.21	-88.1895	369.403	1138.23	-101.067	466.836	989.599	-54.7357	513.453	921.75	-116.024	476.619	910.174	-97.3846	538.106	856.549
633	0	156.029	505.38	1648.4	253.477	505.439	1643.42	134.525	356.056	1695.91	279.672	360.551	1682.64	193.849	291.783	1514.43	177.296	233.125	1250.17	195.305	439.183	1429.3	186.082	530.033	1222.73	240.163	227.316	1307.45	8.77309	375.415	1466.74	-69.1023	377.75	1240.48	-87.0982	377.476	1139.62	-100.347	470.625	988.61	-54.4237	514.824	918.831	-115.301	477.795	908.722	-96.8679	536.874	852.462
634	0	155.821	518.829	1650.52	253.092	519.062	1646.11	133.926	369.337	1697.88	279.23	373.996	1685.28	194.013	305.138	1516.99	178.591	246.81	1252.38	195.278	452.944	1431.62	185.821	543.108	1225.2	241.787	241.346	1310.17	8.7686	388.448	1468.57	-68.3979	386.969	1241.44	-86.1314	385.015	1140.88	-99.4558	473.843	987.624	-54.2983	516.158	916.275	-114.758	478.614	907.508	-96.5858	535.591	848.911
635	0	155.34	532.152	1652.54	252.676	532.499	1648.45	133.4	382.611	1699.24	278.297	387.214	1686.97	194.483	319.462	1518.78	179.82	260.871	1254.18	195.194	466.7	1433.57	185.739	556.379	1227.59	243.42	255.408	1312.5	8.90105	401.249	1469.77	-67.4957	395.822	1242.2	-85.1045	392.248	1141.95	-98.7038	477.003	986.384	-53.8065	517.836	914.21	-114.3	479.14	906.264	-96.6973	534.395	845.745
636	0	154.84	545.587	1654.26	252.381	545.905	1650.57	133.083	395.911	1700.3	278.155	400.611	1688.98	194.516	333.648	1519.88	180.66	275.26	1255.03	195.353	480.466	1435.12	185.738	569.673	1229.47	245.145	269.513	1314.08	8.89383	414.27	1470.81	-66.724	404.815	1242.87	-83.9963	399.211	1142.57	-97.6388	479.868	985.232	-53.9287	518.812	911.593	-113.613	479.739	905	-96.7988	533.267	843.009
637	0	154.418	558.885	1655.67	251.961	559.369	1652.39	132.752	408.984	1700.96	277.707	414.076	1690.12	195.233	346.717	1520.74	182.202	288.576	1256.28	195.363	494.274	1436.26	185.947	583.104	1231.01	246.752	283.627	1315.42	9.07543	427.193	1471.49	-65.9062	413.608	1243.21	-82.9794	405.943	1143.09	-97.0727	482.562	984.032	-53.454	520.577	909.802	-112.9	480.12	903.931	-96.9134	532.336	840.592
638	0	154.004	572.191	1656.78	251.49	572.976	1653.84	132.514	422.044	1701.2	277.524	427.355	1691.01	195.562	360.547	1521.37	183.204	302.453	1256.87	195.379	508.134	1436.95	186.217	596.782	1232.13	248.352	297.743	1316.39	9.08043	440.381	1471.82	-65.1526	422.322	1243.3	-82.022	412.274	1143.31	-96.4137	485.104	982.822	-53.5799	522.556	907.946	-112.15	480.507	902.891	-97.2704	531.496	838.327
639	0	153.663	585.592	1657.31	251.137	586.609	1654.66	132.328	435.174	1701	277.501	440.836	1691.38	196.099	374.418	1521.62	184.347	316.173	1257.01	195.543	522.148	1437.18	186.53	610.182	1232.46	249.832	311.841	1316.69	9.2963	453.507	1471.61	-64.5081	431.032	1243.07	-80.8132	418.875	1143.3	-95.64	487.577	981.264	-52.9707	524.072	905.825	-111.125	480.529	901.147	-97.5416	530.837	836.089
640	0	153.181	598.998	1657.38	250.89	600.319	1655.11	132.419	448.308	1700.35	277.395	454.558	1691.23	196.536	388.339	1521.31	185.449	329.842	1256.7	195.877	536.052	1436.77	187.075	623.191	1232.24	251.049	325.469	1316.76	9.28176	466.85	1470.97	-63.7798	439.549	1242.55	-79.8781	425.329	1143.19	-94.8213	489.833	979.447	-52.5293	525.267	902.99	-109.893	480.734	899.404	-97.9776	530.241	833.805
641	0	152.664	612.551	1657	250.249	614.078	1654.86	132.171	461.451	1699.37	277.133	468.17	1690.32	196.815	402.203	1520.53	186.474	343.562	1255.96	196.073	550.111	1435.81	187.604	636.071	1230.77	252.31	339.823	1316.21	9.52983	480.208	1469.95	-63.357	448.184	1241.74	-78.6247	431.962	1142.63	-93.8512	492.362	977.444	-52.7065	526.702	900.561	-108.694	480.981	897.741	-98.3206	529.623	831.441
642	0	152.254	626.052	1656.18	249.861	628.018	1654.31	132.157	474.729	1697.88	276.971	482.102	1689.26	197.122	416.02	1519.29	187.329	357.346	1254.9	196.273	564.01	1434.52	188.599	648.926	1229.23	253.204	353.571	1315.22	9.77602	493.941	1468.45	-62.6916	456.861	1240.55	-77.3801	438.89	1141.89	-93.0395	494.897	975.28	-52.4222	528.249	897.729	-107.365	481.245	895.826	-98.4823	529.14	829.05
643	0	151.628	639.749	1655.04	249.315	642.002	1653.27	132.167	488.335	1696.27	276.885	496.022	1687.75	197.641	429.953	1517.75	187.915	370.874	1253.6	196.61	578.023	1433.1	189.514	662.101	1226.99	254.109	367.288	1313.81	10.0218	507.715	1466.75	-62.5203	465.705	1239.8	-76.0371	445.955	1140.98	-92.02	497.544	973.037	-52.1006	529.756	894.775	-106.081	481.535	893.803	-98.4723	528.891	826.435
644	0	151.266	653.611	1653.41	248.889	656.206	1651.91	132.282	501.958	1694.29	277.135	510.214	1686.47	198.18	444.095	1516.27	188.164	384.358	1251.92	196.804	592.044	1431.18	190.356	675.593	1224.57	254.769	380.449	1312.45	10.1029	521.647	1464.87	-61.9282	474.911	1238.58	-74.8681	453.385	1140.04	-91.2757	500.596	970.901	-51.6025	531.565	891.919	-104.702	482.269	891.921	-98.4585	528.598	824.109
645	0	150.866	667.738	1651.53	248.568	670.528	1650.16	132.082	515.845	1692.32	276.961	524.563	1684.68	198.341	458.118	1514.26	187.698	397.794	1250.15	196.923	605.924	1428.97	191.271	689.72	1221.91	254.996	394.022	1310.67	10.1459	535.71	1462.67	-61.3214	484.341	1237.26	-73.6575	461.155	1138.87	-90.416	503.779	968.937	-51.6766	533.443	889.302	-103.292	483.048	890.306	-98.4634	528.471	821.844
646	0	150.291	681.827	1649.06	247.893	684.88	1647.82	132.055	529.946	1689.86	276.725	539.11	1682.46	198.604	472.245	1512.16	187.032	411.569	1248.07	197.227	619.804	1426.64	192.232	704.422	1219.05	254.911	407.403	1308.7	10.3026	550.01	1460.42	-60.5983	494.285	1235.44	-72.2821	469.159	1137.75	-89.7002	507.394	966.971	-51.5487	535.677	886.489	-101.946	484.492	888.561	-98.1583	528.565	819.287
647	0	149.907	696.111	1646.32	247.743	699.481	1645.31	132.026	544.261	1687.33	276.591	553.724	1680.25	198.905	486.541	1509.92	185.992	425.338	1245.84	197.518	633.845	1424.24	193.208	719.559	1216.2	254.699	420.901	1306.56	10.0929	564.374	1457.95	-60.282	504.405	1234.33	-70.775	477.614	1136.25	-89.0593	511.246	965.116	-51.5495	538.241	883.82	-100.846	486.336	887.083	-97.8788	528.937	816.937
648	0	149.299	710.616	1643.28	247.188	714.084	1642.52	131.541	558.776	1684.72	276.348	568.496	1678.08	198.662	500.794	1507.3	184.803	439.292	1243.56	197.679	647.772	1421.66	194.337	734.678	1213.51	253.978	434.448	1304.11	10.0201	579.029	1455.6	-59.5143	514.946	1232.45	-69.4144	486.417	1135.01	-88.5387	515.799	963.344	-51.8073	541.393	881.364	-99.7408	488.534	885.791	-97.6169	529.415	814.416
649	0	148.914	725.163	1639.96	246.923	728.802	1639.33	131.312	573.531	1682	276.055	583.368	1675.56	198.318	515.024	1504.66	183.638	453.379	1241.17	197.805	661.811	1418.88	195.256	749.323	1210.54	253.114	448.169	1301.61	9.86919	593.642	1453	-58.928	525.996	1230.94	-67.7184	495.808	1133.63	-87.7954	520.827	961.6	-51.8784	545.01	878.826	-98.9178	491.283	884.682	-97.3962	530.228	811.94
650	0	148.536	739.956	1636.22	246.106	743.263	1635.55	131.149	588.315	1679.28	275.681	598.414	1672.74	198.236	529.253	1502.1	182.349	467.583	1238.53	197.91	676.012	1415.73	196.278	763.723	1207.19	252.091	461.999	1298.71	9.78895	608.536	1450.33	-58.2399	537.339	1229.05	-66.2338	505.735	1132.26	-87.4451	526.43	960.018	-52.0208	549.175	876.297	-98.4256	495.051	883.558	-96.8288	531.689	809.602
651	0	147.965	754.63	1632.39	246.123	758.383	1632.08	130.64	603.254	1676.34	275.409	613.455	1670.02	197.752	543.497	1499.38	180.858	481.846	1235.46	197.814	690.156	1412.66	197.109	777.916	1203.87	250.899	475.84	1295.76	9.41588	623.426	1447.59	-57.8171	549.261	1227.05	-64.6377	516.303	1130.66	-87.0447	532.895	958.408	-52.2258	553.943	873.788	-97.367	498.888	882.698	-96.464	533.179	806.811
652	0	147.63	769.106	1628.63	245.307	773.018	1628.36	129.95	618.208	1673.44	274.86	628.412	1667.42	196.925	557.67	1496.44	179.416	496.289	1232.67	197.885	704.52	1409.79	197.585	792.064	1200.83	249.502	490.09	1292.64	9.16396	638.36	1444.74	-57.5625	561.568	1225.11	-63.311	527.37	1129.28	-86.7629	539.458	956.59	-52.5745	559.094	870.999	-97.2131	503.83	882.231	-96.1693	535.503	804.492
653	0	146.897	784.073	1625.16	244.866	787.962	1625.01	129.259	633.255	1670.68	274.081	643.459	1664.69	195.919	571.829	1493.49	178.183	510.911	1229.45	197.621	718.867	1406.94	198.405	806.803	1198.35	248.041	504.123	1289.58	8.50598	653.216	1442.04	-57.0975	574.349	1222.85	-62.0694	539.188	1127.54	-86.6013	547.195	955.101	-53.0081	565.745	868.754	-97.0382	509.619	881.656	-95.9655	538.116	802.42
654	0	146.209	798.823	1621.93	244.083	802.62	1621.75	128.705	648.298	1668.18	273.246	658.465	1662.24	195.064	586.063	1490.62	177.322	525.729	1226.58	197.341	733.391	1404.44	198.83	821.622	1196.42	246.884	518.742	1286.53	8.00551	668.24	1439.27	-56.9212	587.834	1220.5	-60.7936	551.387	1125.42	-86.8498	555.653	953.69	-53.9426	572.55	866.807	-97.199	516.244	881.092	-95.961	541.617	800.319
655	0	145.391	813.628	1618.94	243.012	817.369	1618.99	127.874	663.309	1665.75	272.445	673.528	1660.16	193.699	600.205	1488.19	176.57	540.668	1223.85	196.85	748.05	1402.08	198.932	836.673	1194.61	245.763	533.446	1283.8	7.18328	683.122	1436.67	-56.7768	601.705	1218.13	-59.8582	564.392	1123.44	-87.3536	564.984	952.455	-55.0777	580.425	864.849	-97.5678	524.059	880.648	-96.1257	546.132	798.635
656	0	144.25	828.325	1616.48	242.161	832.232	1616.78	126.762	678.171	1663.52	271.334	688.267	1657.89	192.562	614.746	1485.92	176.086	555.835	1221.46	196.175	762.729	1400	198.898	851.631	1192.96	245.019	548.495	1281.41	6.43106	698.228	1434.08	-56.7459	615.932	1215.6	-59.364	578.058	1121.32	-87.8273	575.163	950.999	-56.4863	589.085	863.034	-98.3222	532.732	880.239	-96.3165	551.809	797.256
657	0	143.159	843.215	1614.23	240.951	847.106	1614.81	125.347	692.981	1661.37	270.314	703.149	1656.39	191.473	629.516	1483.79	175.922	571.251	1219.04	195.563	777.617	1398.01	198.17	866.281	1191.12	244.038	563.127	1279.18	5.32294	713.223	1431.42	-56.5737	630.696	1212.8	-58.8353	592.275	1118.93	-88.5546	586.254	949.35	-58.2652	598.634	860.981	-99.2889	542.459	879.541	-96.8941	558.613	795.635
658	0	141.494	857.818	1612.44	239.239	861.799	1613.17	123.847	707.753	1659.18	268.605	718.052	1654.89	190.388	644.44	1481.89	175.894	586.706	1216.87	194.715	792.683	1396.41	197.372	881.317	1189.61	243.517	578.271	1277.16	4.38783	728.228	1429.05	-56.7851	645.872	1209.95	-58.7265	606.776	1116.39	-89.2489	598.172	947.52	-57.9634	608.232	858.524	-100.763	553.225	878.525	-97.2093	566.76	793.796
659	0	139.986	872.609	1610.9	237.697	876.782	1612.14	122.086	722.357	1657.52	266.923	732.73	1653.65	188.978	659.319	1480.22	176.02	602.403	1215.15	193.548	807.954	1395.04	196.131	896.241	1188.26	243.272	593.684	1275.65	3.24348	743.079	1426.87	-56.7636	661.397	1207.34	-58.7057	621.901	1114.13	-90.3373	611.067	945.923	-58.6686	619.63	856.789	-102.387	565.268	877.89	-98.1531	576.36	792.532
660	0	138.23	887.283	1609.69	235.986	891.495	1611.27	120.153	736.81	1656.13	265.052	747.532	1652.87	187.788	674.305	1478.89	176.256	618.314	1213.51	192.438	823.116	1393.88	194.825	912.005	1187.14	243.021	609.193	1274.35	2.21513	758.096	1425.01	-57.0361	676.97	1204.74	-58.917	637.31	1112.15	-91.2507	624.999	944.366	-60.023	631.917	855.185	-104.232	578.417	876.952	-99.2871	587.485	791.416
661	0	136.208	901.997	1609.27	233.513	906.068	1611.06	118.293	751.468	1655.36	263.229	762.29	1652.86	186.793	689.449	1478.14	176.523	634.537	1212.15	191.572	838.5	1393.68	193.385	928.057	1186.78	242.774	624.909	1273.17	1.02506	772.63	1423.59	-57.212	692.977	1202.92	-59.2204	653.034	1110.24	-92.0583	639.821	943.029	-59.6852	645.011	853.796	-105.878	592.813	876.231	-100.458	600.189	790.431
662	0	134.318	916.833	1609.58	232.259	920.987	1612.09	116.157	766.114	1655.2	261.174	776.828	1653.53	185.369	704.447	1477.56	176.625	650.822	1211.47	190.297	854.067	1393.84	191.748	944.435	1186.98	242.438	640.816	1272.67	-0.144216	787.532	1422.8	-57.7437	708.82	1201.56	-59.597	669.097	1108.84	-93.3812	655.482	942.209	-60.8036	659.78	852.582	-107.356	608.418	875.712	-102.148	614.527	789.799
663	0	132.305	931.422	1610.22	229.693	935.56	1613.17	113.842	780.676	1655.27	258.898	791.266	1654.36	183.924	719.828	1477.51	176.222	667.168	1211.15	189.241	869.434	1394.6	190.605	961.205	1188.13	241.824	656.501	1272.92	-1.40284	802.665	1422.41	-58.494	724.849	1200.94	-60.265	685.502	1108.19	-94.2736	671.882	941.529	-62.6019	675.697	851.636	-109.12	624.841	875.331	-103.886	630.428	789.574
664	0	130.236	946.227	1611.45	227.544	950.102	1614.8	111.407	795.089	1655.37	256.303	805.791	1655.32	182.299	735.122	1477.57	175.539	683.494	1210.98	187.924	885.314	1395.45	189.591	977.92	1189.28	240.673	672.377	1273.04	-2.58061	818.14	1422.38	-59.4363	741.119	1200.63	-61.1352	702.083	1107.68	-95.5083	689.108	941.17	-62.9929	693.062	851.575	-110.749	642.334	874.797	-106.035	647.682	789.508
665	0	128.327	960.661	1612.97	225.681	964.904	1617.22	109.117	809.584	1655.9	254.001	820.072	1656.8	181.257	750.695	1478.38	174.777	699.894	1211.57	186.918	901.028	1396.83	188.726	994.704	1190.73	239.689	688.839	1273.41	-3.78387	833.594	1423.01	-60.3418	757.486	1200.96	-62.0546	719.113	1107.6	-96.981	707.109	941.431	-64.6078	711.232	851.459	-112.203	660.806	874.622	-108.264	666.477	789.636
666	0	126.038	975.513	1615.1	223.304	979.603	1619.88	106.901	824.128	1656.87	251.923	834.566	1658.85	180.267	766.356	1479.82	173.646	715.849	1212.84	186.127	916.665	1398.77	188.212	1010.97	1192.36	238.754	704.74	1274.9	-4.64744	849.32	1423.84	-61.3407	774.269	1201.54	-63.1885	736.409	1108.17	-98.2067	725.697	941.695	-65.6453	730.643	851.778	-113.596	680.233	874.88	-110.452	686.935	789.946
667	0	124.113	990.207	1617.41	221.063	994.31	1622.62	104.729	838.624	1658.03	249.798	849.088	1660.94	179.219	781.801	1481.42	172.362	731.511	1214.53	185.282	932.285	1400.59	187.767	1026.96	1193.67	237.709	720.426	1276.78	-5.28664	865.175	1425.01	-62.3273	791.116	1202.58	-64.3884	754.096	1108.86	-99.483	745.257	942.204	-67.0557	751.083	852.114	-115.101	700.576	874.884	-112.987	708.489	790.331
668	0	122.196	1005.02	1619.42	219.131	1009.37	1625.39	102.74	853.276	1659.03	247.702	863.849	1663.05	178.728	797.491	1483.23	171.242	746.281	1216.49	184.515	947.819	1402.42	187.618	1042.59	1194.88	236.844	736.351	1278.73	-5.67895	880.848	1426.37	-63.1511	808.316	1203.73	-65.7979	771.976	1109.5	-101.081	765.356	942.658	-68.6063	772.517	852.868	-116.626	721.653	874.759	-115.292	731.356	790.611
669	0	120.381	1019.65	1621.18	217.299	1024.29	1627.84	101.015	867.764	1660.02	246.012	878.816	1665	178.393	813.078	1485.07	170.509	761.055	1218.48	183.98	963.158	1404.11	187.013	1057.63	1195.59	236.372	751.697	1281.06	-5.88936	896.218	1427.94	-63.8376	825.73	1204.79	-67.2536	790.107	1110.44	-102.489	786.278	943.174	-70.2384	794.717	853.609	-118.269	743.646	874.766	-117.472	755.4	790.865
670	0	118.894	1034.27	1622.79	215.559	1039.3	1630.11	99.6417	882.222	1661.02	244.395	893.591	1667.15	178.35	828.378	1487.16	169.815	775.542	1220.42	183.559	978.158	1405.93	186.751	1072.47	1197.07	236.196	766.759	1283.38	-5.97552	911.388	1429.78	-64.9325	843.113	1206.24	-68.8887	808.39	1111.47	-104.085	807.768	943.953	-73.3919	817.914	854.208	-119.946	766.459	874.819	-119.922	780.202	791.375
671	0	117.541	1048.83	1624.47	214.399	1054.23	1632.19	98.7817	896.757	1662.24	243.415	908.65	1669.42	177.848	842.743	1489.03	169.199	789.849	1222.43	183.513	993.079	1407.77	186.909	1087.16	1198.91	236.436	781.676	1285.56	-5.97508	926.409	1431.77	-66.1071	860.702	1207.52	-70.6619	827.002	1112.32	-105.727	829.917	944.703	-74.7886	841.805	855.397	-121.905	789.851	874.706	-122.191	806.197	791.933
672	0	116.791	1063.63	1625.85	213.556	1069.32	1633.92	98.4408	911.561	1664.18	242.929	923.812	1671.66	177.807	857.489	1490.98	169.163	804.343	1224.46	183.424	1007.55	1409.56	186.888	1101.64	1200.49	236.595	796.055	1287.65	-5.99444	941.239	1434.02	-67.0283	878.434	1208.8	-72.4046	845.75	1113.42	-107.526	852.378	945.655	-76.2414	866.183	856.58	-123.381	814.273	874.589	-124.303	833.068	792.695
673	0	116.49	1078.38	1627.32	212.95	1083.97	1635.4	98.1774	926.519	1666.4	242.886	938.909	1673.94	177.505	871.078	1493.24	168.949	818.695	1226.55	183.464	1021.81	1411.4	186.723	1115.64	1202.12	236.503	810.126	1289.72	-6.20826	955.712	1436.26	-67.9692	896.355	1210.33	-74.1319	864.738	1114.41	-108.77	875.547	946.662	-77.7131	891.337	857.76	-124.902	839.065	874.631	-126.097	860.821	793.686
674	0	116.513	1093.14	1628.97	213.089	1098.78	1636.75	98.301	941.542	1668.9	242.816	953.982	1675.97	176.757	884.749	1495.27	168.451	833.049	1228.57	183.593	1035.89	1413.61	186.726	1129.62	1204.01	235.909	824.081	1291.76	-6.31552	970.378	1438.58	-69.0291	914.412	1211.99	-76.2985	883.832	1115.45	-110.397	898.983	947.641	-79.2002	916.87	859.508	-126.44	864.483	874.813	-127.984	889.185	795.004
675	0	116.833	1107.89	1630.55	213.466	1113.57	1637.85	98.4849	956.606	1671.4	243.173	969.001	1677.98	176.488	899.013	1497.27	167.99	847.347	1230.58	183.61	1049.74	1415.55	186.699	1143.34	1206.02	235.072	837.899	1293.57	-6.45153	984.93	1440.83	-69.94	932.656	1213.42	-78.3709	903.131	1116.83	-111.617	923.015	948.866	-80.9647	942.729	861.276	-127.792	890.49	874.896	-129.566	918.263	796.609
676	0	117.689	1122.76	1632.16	214.386	1128.32	1639.16	99.3531	971.781	1674.19	243.868	983.887	1680.12	176.151	913.105	1499.4	167.517	861.587	1232.83	183.721	1063.62	1417.67	187.008	1157.27	1208.16	234.056	851.624	1295.51	-6.53806	999.514	1443.36	-70.941	950.612	1215.4	-80.314	922.493	1118.18	-112.787	947.233	950.413	-81.7663	969.372	863.875	-128.89	916.929	875.399	-130.86	947.919	798.719
677	0	118.734	1137.59	1634.19	215.421	1142.89	1640.66	100.195	986.864	1677.2	245.052	998.691	1682.4	176.071	927.185	1502.01	166.523	875.412	1235.41	183.989	1077.46	1420.05	187.138	1171.1	1210.4	232.737	865.203	1297.83	-6.45975	1014.29	1445.82	-72.206	968.683	1217.94	-82.3124	941.864	1119.86	-113.86	971.741	952.482	-82.3447	996.466	866.677	-129.881	943.841	876.357	-131.993	978.455	801.534
678	0	119.915	1152.41	1636.2	216.627	1157.45	1642.24	101.164	1002.04	1680.3	245.935	1013.58	1684.63	175.865	941.36	1504.71	165.363	889.276	1238.17	183.978	1091.16	1422.16	187.73	1185.32	1212.9	231.223	878.75	1300.3	-6.42056	1029.1	1448.68	-73.3673	986.729	1220.56	-84.3801	961.386	1121.81	-114.733	996.534	954.982	-82.8867	1023.73	870.056	-130.702	971.183	877.854	-132.591	1008.97	804.835
679	0	121.152	1167.26	1638.52	218.04	1172.12	1643.83	102.376	1017.15	1683.36	247.219	1028.32	1686.7	175.757	955.64	1507.35	164.013	902.847	1240.99	184.289	1105	1424.56	188.297	1199.57	1215.67	229.788	892.317	1302.87	-6.42292	1043.91	1451.7	-74.3833	1004.58	1223.39	-86.273	980.958	1124.23	-115.539	1021.52	957.671	-83.0526	1051.27	874.216	-131.153	998.849	879.749	-132.999	1039.95	809.051
680	0	122.481	1181.97	1640.76	219.525	1186.6	1645.44	103.712	1032.13	1686.28	248.468	1042.92	1688.7	175.705	969.841	1509.88	162.684	916.721	1243.76	184.365	1118.81	1426.66	188.792	1213.74	1218.32	228.172	905.831	1305.25	-6.33207	1058.82	1454.71	-75.5216	1022.45	1226.36	-88.2478	1000.43	1126.54	-116.164	1046.62	960.983	-83.224	1078.92	878.716	-131.632	1026.78	882.249	-133.379	1070.94	813.764
681	0	123.85	1196.74	1643.05	220.894	1201.21	1647.09	104.8	1047.08	1689.25	249.693	1057.51	1690.41	175.241	984.043	1512.13	161.142	930.58	1246.42	184.659	1132.78	1428.83	189.374	1227.55	1220.94	226.626	919.534	1307.63	-6.10425	1073.88	1457.74	-76.538	1040.36	1229.28	-90.243	1019.98	1129.21	-116.734	1071.8	964.666	-83.195	1107.03	883.909	-131.812	1054.94	885.397	-133.368	1102.16	819.074
682	0	125.269	1211.5	1645.14	222.174	1215.49	1648.51	106.156	1061.85	1691.88	251.006	1072.05	1691.93	174.284	997.059	1514.42	160.035	944.939	1248.79	184.98	1146.84	1430.71	189.814	1241.14	1222.97	225.316	933.284	1310.01	-5.92189	1088.98	1460.79	-77.9424	1058	1232.72	-92.123	1039.52	1132.12	-117.161	1097.32	968.731	-83.1935	1134.71	889.383	-132.037	1083.29	888.834	-133.347	1133.65	825.015
683	0	126.573	1226.14	1647.14	222.667	1229.56	1649.53	107.546	1076.68	1694.21	252.399	1086.31	1693.2	175.318	1012.89	1516.26	158.994	958.811	1250.91	185.232	1160.89	1432.17	190.214	1254.34	1224.86	224.247	947.09	1311.93	-5.56552	1104.11	1463.68	-78.845	1075.64	1235.82	-94.0882	1059.27	1135.09	-117.959	1122.92	973.286	-82.7599	1163.12	895.638	-131.965	1111.88	892.633	-132.943	1164.93	831.181
684	0	127.694	1240.66	1648.89	223.873	1243.89	1650.77	108.557	1091.29	1696.24	253.65	1100.73	1694.33	174.954	1027.05	1517.94	158.21	972.969	1252.83	185.276	1175.12	1433.45	190.66	1267.62	1226.66	223.154	960.919	1313.58	-5.26145	1119.26	1466.31	-79.8495	1093.3	1238.47	-95.8864	1078.63	1137.61	-118.03	1148.17	977.44	-82.33	1191.69	902.27	-131.945	1140.45	896.678	-132.344	1196.15	837.599
685	0	128.813	1255.24	1650.3	224.965	1258.21	1651.62	109.577	1105.89	1697.82	254.418	1114.97	1694.97	174.603	1041.4	1519.27	157.38	987.137	1254.44	185.681	1189.41	1434.55	190.967	1280.7	1227.91	222.102	974.874	1314.92	-4.94936	1134.31	1468.4	-81.1704	1110.81	1241.1	-97.8142	1098.03	1139.89	-118.498	1173.65	981.853	-82.1042	1219.71	908.557	-132.166	1169.14	901.056	-131.75	1227.36	844.152
686	0	129.812	1269.76	1651.41	225.954	1272.56	1652.18	110.544	1120.36	1698.97	255.272	1129.26	1695.16	175.113	1056.89	1520.1	156.761	1001.27	1255.51	185.964	1203.72	1435.11	191.265	1294.01	1228.65	221.366	988.893	1316.01	-4.64749	1149.41	1470.17	-82.1884	1128.53	1243.3	-99.4067	1117.47	1141.85	-118.897	1199.32	986.083	-81.8152	1247.6	914.758	-132.043	1197.99	905.357	-130.833	1258.25	850.738
687	0	130.814	1284.39	1652.17	226.909	1286.84	1652.6	111.288	1134.93	1699.6	256.149	1143.39	1695.3	174.905	1070.83	1520.7	156.306	1015.46	1256.26	186.225	1217.99	1435.37	191.297	1307.2	1229.02	220.584	1002.92	1316.59	-4.29108	1164.39	1471.5	-83.2188	1146.07	1244.95	-101.264	1136.8	1143.24	-119.281	1224.56	990.271	-81.4315	1275.49	921.12	-132.021	1226.33	909.453	-129.883	1289.03	857.29
688	0	131.534	1298.88	1652.7	227.772	1301.19	1652.76	111.947	1149.46	1699.84	256.755	1157.61	1695.15	174.85	1085.31	1521	155.604	1029.56	1256.75	186.565	1232.34	1435.57	191.744	1320.73	1229.24	219.921	1017.02	1317.06	-3.98352	1179.29	1472.34	-84.4095	1163.5	1246.24	-102.967	1156.15	1144.54	-119.685	1249.85	994.242	-81.1981	1303.15	927.544	-131.978	1254.75	913.312	-128.933	1319.5	863.786
689	0	132.197	1313.52	1652.67	228.646	1315.62	1652.65	112.476	1163.99	1699.53	257.291	1171.94	1694.69	174.952	1100.15	1520.88	155.002	1043.72	1256.87	186.69	1246.76	1434.91	192	1334.19	1229.1	219.402	1031.15	1316.88	-3.72196	1194.19	1472.71	-85.4174	1181.12	1247.12	-104.653	1175.89	1145.24	-119.961	1275.14	997.932	-80.5802	1330.68	933.859	-131.77	1283.49	917.505	-127.899	1349.9	870.405
690	0	132.938	1328.29	1652.26	229.312	1330.17	1651.95	112.986	1178.63	1698.85	257.791	1186.34	1693.69	175.509	1115.09	1520.35	154.6	1057.74	1256.6	186.965	1261.24	1434	192.312	1347.61	1228.13	219.041	1045.41	1316.45	-3.34241	1208.98	1472.43	-86.3736	1198.64	1247.62	-106.215	1195.73	1145.59	-120.22	1300.35	1001.58	-79.974	1357.82	939.849	-131.322	1311.79	921.154	-126.647	1379.94	876.872
691	0	133.57	1342.96	1651.25	229.792	1344.76	1650.94	113.3	1193.4	1697.69	257.988	1200.73	1692.34	175.818	1129.86	1519.45	154.404	1071.7	1255.92	187.064	1275.75	1432.57	192.554	1361	1226.86	218.743	1059.7	1315.62	-3.04895	1223.62	1471.76	-87.1713	1216.34	1247.27	-107.657	1215.61	1145.43	-120.245	1325.37	1004.63	-79.059	1384.86	945.555	-130.847	1339.84	924.984	-125.345	1409.48	883.008
692	0	133.951	1357.75	1650.12	230.361	1359.35	1649.78	113.485	1208.13	1696.26	258.437	1215.15	1690.98	175.897	1144.43	1518.21	154.202	1085.45	1255.03	187.214	1290.25	1430.93	192.624	1374.28	1225.06	218.558	1073.9	1314.53	-2.72864	1238.3	1470.49	-88.1018	1233.88	1246.6	-109.261	1235.69	1144.92	-120.376	1350.32	1007.57	-78.4119	1411.46	950.775	-130.389	1367.56	928.43	-124.05	1438.78	889.203
693	0	134.258	1372.63	1648.5	230.613	1374.21	1648.04	113.632	1222.94	1694.58	258.545	1230.04	1689.08	176.158	1159.07	1516.61	154.417	1099.17	1253.83	187.457	1304.77	1429.03	192.747	1387.65	1222.85	218.778	1088.22	1313.17	-2.40078	1252.87	1469.13	-88.8728	1251.57	1245.74	-110.47	1255.82	1144.24	-120.328	1375.09	1010.47	-77.6274	1437.33	955.913	-129.916	1395.17	932.209	-122.59	1467.71	895.372
694	0	134.679	1387.61	1646.55	231.053	1389.09	1646.11	113.947	1238.08	1692.68	258.78	1244.97	1687.19	177.783	1175.15	1515.26	155.275	1112.99	1252.28	187.658	1319.31	1426.89	192.756	1401.22	1220.25	219.035	1102.27	1311.7	-1.96637	1267.35	1467.45	-89.4909	1269.37	1244.59	-111.491	1276.11	1143.37	-120.107	1399.6	1013.16	-76.5217	1463.1	960.846	-129.634	1422.47	935.883	-121.118	1496	901.299
695	0	134.843	1402.61	1644.26	231.226	1404.14	1643.93	114.171	1253.11	1690.66	259.155	1260.02	1685.26	177.782	1188.67	1513.46	156.268	1126.82	1250.63	187.856	1333.75	1424.72	192.344	1415.12	1217.32	219.628	1116.53	1310.1	-1.5083	1281.69	1465.36	-89.737	1287.32	1243.44	-112.406	1296.48	1142.45	-119.609	1423.79	1015.57	-75.444	1488.37	965.578	-129.484	1448.94	939.433	-119.864	1523.73	907.324
696	0	135.097	1417.57	1641.75	231.399	1419.2	1641.41	114.443	1268.12	1688.32	259.361	1275.14	1683.1	178.546	1203.54	1511.61	157.505	1140.71	1248.94	187.987	1348.23	1422.25	192.287	1429.95	1214.35	220.909	1131.13	1308.35	-1.01725	1295.98	1463.19	-89.582	1305.36	1241.84	-113.074	1316.82	1141.61	-119.311	1447.69	1018.22	-74.3111	1513.17	970.106	-129.449	1475.2	943.035	-118.5	1550.88	913.28
697	0	135.145	1432.42	1638.7	231.407	1434.34	1638.58	114.737	1283.14	1685.91	259.421	1290.46	1680.64	179.497	1218.33	1509.46	159.154	1154.78	1246.77	188.251	1362.73	1419.7	192.025	1444.94	1211.39	222.039	1145.45	1306.5	-0.412462	1310.17	1460.74	-89.6647	1323.14	1240.61	-113.542	1336.91	1140.62	-118.929	1471.24	1020.65	-73.227	1537.35	974.187	-128.964	1500.87	946.337	-117.195	1577.31	919.195
698	0	135.152	1447.27	1635.77	231.578	1449.36	1635.69	115.049	1298.25	1683.32	259.807	1305.72	1678.27	179.97	1232.01	1507.04	160.96	1169.16	1244.4	188.511	1377.21	1417.13	191.674	1460.21	1208.8	223.43	1159.95	1304	0.257805	1324.33	1458.3	-89.4168	1340.95	1239.17	-113.68	1356.98	1139.63	-118.279	1494.19	1023.11	-72.0988	1560.95	978.225	-128.553	1525.91	949.787	-116.117	1602.91	924.857
699	0	135.136	1462.01	1632.72	231.577	1464.42	1632.62	115.33	1313.14	1680.89	260.252	1321.01	1675.87	180.765	1246.92	1504.58	162.574	1183.54	1241.99	188.808	1391.78	1414.47	191.324	1475.47	1205.92	224.722	1174.24	1301.73	0.976924	1338.46	1455.76	-88.854	1358.62	1237.72	-113.843	1376.49	1138.78	-117.535	1516.68	1025.57	-71.024	1583.96	981.949	-127.505	1550.32	952.888	-114.983	1627.77	930.242
700	0	135.467	1476.93	1629.56	231.804	1479.31	1629.5	115.866	1328.01	1678.45	260.758	1336.33	1673.53	180.877	1260.37	1501.99	164.422	1198.31	1239.36	189.18	1406.38	1411.74	190.817	1490.56	1202.73	226.304	1188.88	1299.37	1.76338	1352.53	1453.31	-88.0125	1376.19	1236.27	-113.522	1395.99	1137.88	-116.719	1538.52	1027.72	-69.8637	1606.42	985.497	-127.47	1574.01	956.532	-113.962	1651.98	935.425
701	0	135.959	1491.65	1626.63	232.195	1494.37	1626.61	116.577	1342.85	1675.92	261.36	1351.46	1671.11	181.415	1274.45	1499.6	166.278	1213.22	1236.59	189.723	1421.11	1409.17	190.644	1505.42	1199.93	227.946	1203.51	1296.7	2.53775	1366.61	1450.85	-87.0107	1393.58	1234.61	-113.081	1414.81	1136.83	-115.896	1559.66	1029.74	-69.0363	1628.09	988.727	-127.076	1596.84	959.768	-113.062	1675.2	940.326
702	0	136.558	1506.23	1623.93	232.885	1509.14	1623.95	117.374	1357.63	1673.47	262.186	1366.33	1668.8	182.584	1289.29	1497.13	167.845	1228.37	1233.8	190.414	1435.75	1406.78	190.557	1520.2	1197.49	229.448	1218.37	1294.14	3.30732	1380.82	1448.59	-85.8822	1410.53	1232.85	-112.223	1433.08	1135.75	-115.1	1580.17	1031.77	-68.1674	1649.16	991.828	-126.512	1618.81	962.583	-112.524	1697.54	945.03
703	0	137.216	1520.82	1621.45	233.7	1523.85	1621.54	118.138	1372.3	1671.21	262.893	1380.98	1666.38	184.033	1304.37	1494.75	169.182	1243.65	1231.2	191.14	1450.49	1404.62	190.587	1535.24	1195.29	230.6	1233.23	1291.7	4.13113	1395.26	1446.44	-84.6994	1426.99	1230.95	-111.563	1450.75	1134.55	-114.484	1599.89	1033.36	-67.6103	1669.6	994.75	-126.096	1639.83	965.166	-112.175	1718.96	949.24
704	0	138.181	1535.41	1619.4	234.783	1538.31	1619.39	119.326	1386.88	1668.95	264.02	1395.52	1664.11	184.363	1318.76	1492.18	170.155	1258.86	1228.71	192.004	1465.31	1402.49	191.198	1550.49	1193.47	231.734	1248.32	1289.23	5.02281	1409.87	1444.37	-83.4998	1443.24	1229.37	-110.499	1467.91	1133.1	-113.836	1618.86	1034.73	-67.2002	1689.31	997.216	-125.718	1660.05	967.424	-112.091	1739.49	953.06
705	0	139.571	1550.08	1617.4	236.132	1552.61	1617.54	120.477	1401.36	1666.95	265.33	1409.9	1661.96	186.143	1333.95	1490	171.028	1274.09	1226.21	193.04	1480.19	1400.45	192.051	1565.81	1191.77	232.628	1263.56	1286.61	5.91802	1424.6	1442.57	-81.9414	1459.3	1227.49	-109.291	1484.66	1131.66	-113.127	1637.11	1035.49	-66.8561	1708.33	999.249	-125.097	1679.39	968.918	-112.14	1759.08	956.366
706	0	141.066	1564.56	1616.1	237.665	1567.11	1615.89	121.955	1415.81	1665.24	266.678	1424.08	1660.04	187.238	1348.81	1487.9	171.757	1289.67	1223.78	194.225	1495.25	1398.78	193.31	1581.27	1190.47	233.389	1278.77	1284.18	7.0257	1439.67	1440.69	-80.744	1474.52	1225.64	-107.989	1501.05	1129.96	-112.525	1654.49	1036	-66.7005	1726.71	1000.95	-124.669	1697.63	970.266	-112.477	1777.75	959.173
707	0	142.764	1578.99	1615.01	239.406	1581.45	1614.67	123.406	1429.99	1663.56	268.251	1438.06	1658.03	188.217	1363.52	1485.95	172.148	1305.31	1221.69	195.519	1510.28	1397.33	194.671	1596.75	1189.22	233.975	1294.12	1281.92	8.21624	1454.95	1438.97	-79.3395	1489.85	1223.8	-106.567	1516.9	1128.35	-112.028	1671.45	1035.91	-66.7302	1744.36	1002.15	-124.049	1715.06	970.358	-113.132	1795.45	961.37
708	0	144.427	1593.45	1613.96	241.193	1595.64	1613.59	125.35	1444.16	1661.9	269.891	1452.12	1656.58	189.566	1378.45	1484.17	172.606	1321.18	1219.72	197.004	1525.38	1395.99	196.393	1612.39	1188.09	234.441	1309.61	1279.83	9.50234	1470.3	1437.54	-78.0133	1504.78	1222.27	-105.055	1532.27	1126.77	-111.364	1687.34	1035.21	-66.8849	1761.19	1002.62	-123.582	1731.49	970.201	-113.835	1812.35	962.643
709	0	146.102	1607.67	1613.64	243.09	1609.76	1613.2	127.092	1458.21	1660.86	271.666	1466.06	1655.3	190.906	1393.33	1482.61	173.058	1337.44	1217.93	198.647	1540.66	1395.19	198.372	1628.27	1187.54	235.069	1325.3	1277.89	10.9664	1485.74	1436.21	-76.7875	1519.4	1220.67	-103.217	1547.57	1125.14	-110.664	1702.66	1034.22	-67.0101	1777.28	1002.62	-122.816	1747.08	969.452	-114.753	1827.89	963.509
710	0	148.07	1621.98	1613.68	245.004	1624.06	1613.15	129.102	1472.3	1660.38	273.664	1480.25	1654.63	192.408	1408.27	1481.72	173.797	1354.2	1216.35	200.139	1555.79	1394.68	200.324	1644.4	1187.4	235.697	1341.25	1276.4	12.2812	1501.16	1435.6	-75.4023	1534.08	1219.77	-101.733	1562.14	1123.94	-110.113	1717.27	1032.82	-67.2141	1792.52	1002.05	-122.159	1761.46	967.952	-115.948	1842.41	963.469
711	0	150.143	1636.38	1614.35	247.097	1638.57	1613.56	131.187	1486.3	1660.25	275.895	1494.35	1654.23	193.763	1423.2	1481.12	174.019	1370.27	1215.74	201.929	1570.95	1394.7	202.355	1660.91	1187.92	236.401	1357.15	1275.31	13.7658	1516.66	1435.23	-74.0861	1548.47	1219.26	-99.5153	1576.48	1122.96	-109.344	1731.13	1031.03	-67.3311	1806.94	1000.84	-121.384	1774.88	966.19	-116.923	1856	962.776
712	0	152.234	1650.63	1615.39	249.275	1652.88	1614.22	133.632	1500.39	1660.59	278.194	1508.61	1654.19	195.327	1438.3	1480.95	174.658	1386.54	1215.55	203.547	1586.19	1395.07	204.002	1677.61	1188.58	237.214	1373.15	1274.57	15.2509	1532.03	1435.32	-72.6539	1563.23	1219.16	-97.6755	1590.49	1122.54	-108.379	1744.28	1029.06	-67.2654	1820.49	999.146	-120.318	1787.6	964.16	-117.977	1868.37	961.166
713	0	154.382	1664.99	1616.73	251.284	1667.33	1615.26	136.213	1514.57	1661.36	280.559	1522.83	1654.37	197.012	1453.47	1481.43	175.173	1402.25	1215.95	205.132	1601.44	1395.73	205.625	1694.32	1189.7	238.094	1389.1	1274.56	16.8885	1547.48	1436.01	-70.8197	1577.3	1218.8	-96.069	1604.09	1122.39	-107.411	1756.81	1027.28	-66.9673	1832.99	996.865	-118.466	1799.22	961.307	-118.495	1879.61	959.023
714	0	156.705	1679.68	1618.62	253.706	1682.11	1616.75	138.24	1528.65	1662.71	283.057	1537.23	1654.88	198.146	1468.48	1482.46	175.606	1417.48	1217.05	206.435	1616.63	1396.78	206.996	1710.81	1191.02	238.726	1404.62	1275.2	18.2045	1562.97	1437.3	-69.3717	1591.64	1219.74	-94.5411	1617.21	1122.91	-106.111	1768.51	1025.42	-66.4638	1844.61	994.239	-117.064	1809.88	958.509	-118.695	1889.85	956.314
715	0	158.942	1694.23	1620.72	255.944	1696.5	1618.15	140.771	1543.13	1664.4	285.448	1551.77	1655.58	199.056	1483.41	1483.65	176.159	1432.21	1218.65	207.674	1631.51	1398.22	208.054	1726.97	1192.54	239.386	1419.78	1276.44	19.2799	1578.3	1439.16	-67.823	1606.09	1220.74	-92.8831	1630.14	1123.81	-104.866	1779.63	1023.95	-65.6116	1855.34	991.312	-115.843	1819.71	956.091	-118.719	1899.22	952.797
716	0	161.39	1709.11	1622.94	258.187	1711.11	1619.42	143.346	1557.8	1666.36	287.736	1566.19	1656.39	200.315	1498.37	1485.54	176.871	1446.34	1220.39	208.599	1646.27	1399.78	208.808	1742.44	1194.11	240.069	1434.43	1278.28	20.5089	1593.69	1441.44	-66.2444	1620.41	1222.66	-91.1944	1642.61	1125.24	-103.566	1790.15	1022.63	-64.4941	1865.19	988.162	-114.63	1828.63	953.785	-118.157	1907.69	949.057
717	0	163.341	1723.85	1624.97	260.312	1725.81	1620.7	145.525	1572.64	1668.69	289.783	1580.73	1657.34	201.393	1513.15	1487.59	177.642	1459.89	1222.9	209.51	1660.9	1401.64	209.474	1757.3	1195.84	240.517	1448.79	1280.15	21.4875	1608.51	1443.83	-65.0081	1634.29	1224.54	-89.9007	1654.71	1127.07	-102.217	1800.23	1021.36	-63.3167	1874.14	984.587	-113.626	1836.6	951.25	-117.264	1915.58	944.501
718	0	165.434	1738.68	1626.82	262.113	1740.18	1621.66	147.482	1587.79	1671.14	291.604	1595.27	1658.48	201.99	1527.46	1489.54	178.283	1473.6	1225.01	210.046	1675.22	1403.39	209.986	1771.7	1197.73	240.901	1463.13	1282.06	22.3168	1622.82	1446.33	-63.3827	1648.23	1226.84	-88.7532	1666.57	1129.09	-100.711	1809.41	1019.8	-61.8501	1882.55	980.887	-113.097	1844.15	949.249	-115.848	1922.8	939.449
719	0	166.68	1753.29	1628.41	263.578	1754.77	1622.64	148.616	1602.51	1673.74	292.966	1609.89	1659.88	203.072	1541.6	1491.58	178.965	1486.98	1227.24	210.185	1689.32	1405.08	210.331	1785.58	1199.97	241.526	1477.1	1284.22	23.09	1636.54	1448.82	-62.3541	1661.49	1229.18	-87.6789	1678.15	1131.07	-99.518	1818.39	1018.49	-60.4227	1889.83	976.719	-111.491	1851.27	946.549	-114.16	1929.18	933.952
720	0	167.821	1767.93	1629.82	264.578	1769.16	1623.95	149.684	1617.43	1676.33	293.821	1624.79	1662.01	204.027	1555.34	1493.77	179.667	1500.47	1229.4	210.264	1703.03	1407.19	210.332	1799.05	1202.3	242.396	1491	1286.34	23.9054	1649.72	1451.4	-61.3338	1674.39	1231.51	-86.5765	1689.47	1133.25	-98.3568	1826.7	1017.03	-58.7356	1896.62	972.688	-110.04	1857.51	943.489	-112.053	1934.92	928.127
721	0	168.169	1782.29	1631.2	264.91	1783.66	1625.27	150.01	1632.18	1679.13	294.308	1639.47	1664.44	204.854	1568.99	1496.2	180.448	1513.95	1231.8	210.428	1716.62	1409.63	210.265	1812.27	1204.95	243.493	1504.76	1288.68	24.4026	1662.61	1453.76	-60.2084	1687.03	1233.38	-85.8965	1700.3	1135.34	-97.3116	1834.57	1015.37	-56.9075	1903.2	968.581	-110.011	1863.3	941.5	-109.718	1940.23	922.041
722	0	168.342	1796.57	1632.41	264.976	1797.94	1626.5	150.541	1646.85	1681.67	294.805	1654.25	1667.08	205.834	1582.5	1498.69	181.611	1527.36	1234.17	210.515	1730.18	1411.83	210.149	1825.23	1207.59	244.872	1518.44	1291	24.7705	1674.75	1456.17	-59.3051	1698.94	1235.65	-84.7736	1710.9	1137.27	-95.8144	1841.75	1013.58	-55.4087	1908.35	963.973	-109.189	1868.64	939.055	-107.074	1944.7	915.607
723	0	168.132	1810.65	1633.73	264.865	1812.34	1628.04	150.862	1661.55	1684.04	294.782	1668.91	1669.96	206.776	1595.83	1501.2	183.167	1540.76	1236.5	210.725	1743.49	1414.27	209.668	1838.23	1209.98	246.206	1531.75	1293.44	25.0534	1686.81	1458.42	-58.4451	1710.43	1237.52	-83.7754	1720.76	1138.91	-95.049	1848.68	1011.98	-53.721	1913.04	959.229	-108.615	1873.66	936.732	-104.068	1948.74	909.21
724	0	167.669	1824.59	1635.32	264.358	1826.4	1630.16	150.405	1675.62	1686.59	294.461	1683.31	1673.16	207.373	1608.94	1503.94	184.93	1554.12	1238.88	210.544	1756.52	1416.92	209.194	1851.15	1213.02	247.696	1545.17	1295.96	25.1649	1698.59	1460.62	-58.1169	1721.17	1239.23	-82.8315	1730.24	1140.5	-94.0173	1854.96	1010.27	-52.5083	1916.71	954.632	-107.812	1878.1	934.566	-101.274	1951.97	902.979
725	0	167.026	1838.28	1637.26	263.688	1840.38	1632.57	149.737	1689.74	1689.26	293.944	1697.9	1676.64	208.107	1622.18	1506.86	186.665	1567.33	1241.51	210.729	1769.53	1420.16	208.367	1864.08	1215.82	248.989	1558.43	1298.65	25.1115	1710.33	1462.65	-57.7503	1731.31	1240.88	-81.8641	1739.22	1141.59	-93.2158	1860.47	1008.73	-50.8759	1920.27	951.051	-107.482	1882.01	932.552	-98.4368	1954.25	896.807
726	0	166.575	1852.01	1639.35	263.205	1854.23	1635.24	148.919	1703.58	1691.84	293.256	1712.07	1680.03	208.904	1635.38	1509.72	188.53	1580.49	1244.29	210.612	1782.5	1423.08	207.743	1877.04	1218.76	250.738	1571.82	1301.61	25.0271	1722.08	1464.86	-57.3997	1740.73	1242.6	-80.6751	1747.6	1142.82	-92.5628	1865.53	1007.22	-49.0799	1923.42	947.583	-107.019	1885.39	930.595	-95.7829	1955.86	890.847
727	0	165.795	1865.43	1641.47	262.545	1868.05	1637.76	148.532	1717.47	1694.44	292.931	1726.17	1683.35	209.696	1648.72	1512.6	190.694	1593.68	1246.99	211.456	1795.56	1425.9	207.108	1889.97	1221.47	252.488	1585.05	1304.63	25.0562	1734.05	1466.84	-57.1025	1749.57	1243.94	-79.3854	1755.45	1143.72	-91.9036	1870.09	1005.83	-48.1903	1925.52	943.93	-105.788	1888.06	928.307	-93.2416	1956.7	885.336
728	0	165.019	1878.75	1643.54	261.765	1881.46	1640.67	147.974	1731.05	1696.94	292.091	1739.73	1686.92	210.001	1662.02	1515.38	192.712	1607.05	1249.78	211.544	1808.82	1428.91	206.361	1902.84	1224.31	254.199	1598.31	1307.56	25.1644	1745.93	1468.73	-56.7743	1758	1245.21	-78.1136	1762.77	1144.89	-90.917	1873.78	1004.13	-46.7707	1927.61	941.101	-105.485	1889.91	926.29	-91.0686	1956.54	879.988
729	0	164.306	1892.03	1645.81	260.952	1894.93	1643.36	147.045	1744.3	1699.03	291.41	1753.22	1689.94	210.76	1675.56	1518.05	194.637	1620.2	1252.35	211.409	1821.82	1431.42	205.742	1915.78	1227.04	255.971	1611.75	1310.35	25.3621	1758.1	1470.54	-56.2912	1766.15	1246.47	-76.8586	1769.95	1145.96	-89.9535	1877.24	1002.67	-46.0832	1929.35	938.161	-104.539	1891.34	924.291	-89.4969	1956.19	875.271
730	0	163.858	1905.24	1647.73	260.548	1908.3	1645.9	146.537	1757.46	1700.93	290.796	1766.55	1692.53	211.334	1688.87	1520.3	196.602	1633.56	1254.57	211.592	1835.2	1433.52	205.107	1928.68	1229.23	258.177	1625.4	1312.9	25.5182	1770.31	1472.08	-55.3381	1774.2	1247.25	-75.3678	1776.53	1146.57	-88.9534	1879.92	1001	-45.2869	1930.88	935.102	-103.38	1892.19	922.251	-88.0771	1955.27	870.623
731	0	163.465	1918.33	1649.6	260.027	1921.91	1648.24	146.205	1770.48	1702.42	290.231	1779.86	1694.78	212.117	1702.29	1522.38	198.351	1646.8	1256.5	211.769	1848.59	1435.5	204.665	1941.61	1231.22	260.175	1638.98	1315.14	25.8932	1782.47	1473.18	-54.6241	1781.93	1248.05	-73.8695	1782.71	1147.05	-87.9222	1882.68	999.181	-44.4226	1932.31	932.226	-102.315	1892.49	919.907	-86.9976	1953.94	866.24
732	0	162.974	1931.47	1651.14	259.475	1935.11	1650.32	145.524	1783.16	1703.66	290.188	1793.38	1696.8	212.339	1715.46	1524.06	200.232	1660.18	1258.38	211.591	1861.94	1436.9	204.09	1953.86	1232.69	262.033	1652.6	1317.18	26.1892	1794.79	1474.03	-53.4438	1789.96	1248.3	-72.4442	1788.69	1147.59	-86.7485	1884.99	997.329	-43.8325	1933.09	929.056	-100.316	1892.48	917.729	-86.0928	1952.45	862.067
733	0	162.585	1944.34	1652.71	259.017	1948.36	1652.07	145.384	1795.85	1704.65	289.973	1806.55	1698.47	213.407	1728.94	1525.66	201.76	1673.38	1259.92	211.564	1875.26	1438	203.821	1966.38	1233.91	263.983	1666.3	1318.93	26.5719	1807.15	1474.81	-52.3792	1797.54	1248.6	-70.7063	1794.58	1148.03	-85.483	1886.73	995.294	-43.2747	1933.59	925.676	-99.4415	1892.08	915.605	-85.3262	1950.68	858.27
734	0	162.194	1957.22	1653.91	258.449	1961.7	1653.67	145.67	1808.73	1705.38	289.71	1819.75	1699.57	214.213	1742.41	1526.71	203.311	1686.7	1260.93	211.729	1888.62	1439.04	203.787	1979.12	1234.98	266.199	1679.97	1320.31	27.0413	1819.38	1475.41	-50.9364	1805.66	1248.36	-68.7084	1800.36	1148.23	-84.2457	1888.25	993.172	-42.5436	1934.18	922.749	-97.8351	1891.2	913.21	-84.6332	1948.85	854.733
735	0	161.675	1970.19	1654.95	258.088	1974.84	1655.08	145.582	1821.4	1705.76	290.542	1833.68	1700.8	214.723	1755.76	1527.48	204.655	1699.86	1261.72	212.145	1901.87	1439.93	203.744	1991.52	1235.78	268.202	1693.56	1321.51	27.179	1831.62	1475.66	-49.8068	1813.35	1248.5	-66.9731	1805.89	1148.1	-82.8746	1889.7	991.233	-41.8196	1934.36	919.735	-95.7405	1890.2	910.767	-84.1853	1946.78	851.414
736	0	161.235	1983.16	1655.7	257.77	1988.3	1656.03	145.492	1834.05	1705.91	289.981	1846.52	1701.21	215.094	1769.15	1528.01	205.994	1713.18	1262.35	212.417	1915.21	1440.45	203.911	2004.03	1236.24	269.647	1706.89	1322.18	27.4106	1844.11	1475.78	-48.1751	1821.77	1248.62	-65.2433	1811.47	1148	-81.4245	1890.88	989.294	-40.9923	1934.52	916.715	-94.3847	1888.98	908.638	-83.887	1944.64	848.183
737	0	160.99	1996.1	1655.98	257.386	2001.73	1656.43	145.548	1846.59	1705.73	290.129	1859.83	1701.29	215.75	1782.56	1528.1	207.241	1726.35	1262.43	212.632	1928.47	1440.48	204.011	2017.01	1236.46	271.365	1720.35	1322.45	27.7086	1856.51	1475.5	-47.2526	1829.54	1248.08	-63.1967	1817.14	1147.57	-80.1194	1892.02	987.137	-40.1803	1934.01	913.711	-92.3296	1887.62	906.093	-83.3329	1941.99	845.095
738	0	160.642	2009.11	1655.88	256.998	2015.06	1656.51	145.776	1859.48	1705.11	290.297	1873.38	1701.06	216.749	1796.12	1527.8	208.244	1739.26	1262.18	213.023	1941.81	1440.22	204.315	2030.26	1236.09	273.129	1733.85	1322.47	27.9918	1869	1474.72	-45.7354	1837.87	1247.08	-61.0078	1823.03	1146.96	-78.4544	1893.14	984.802	-39.2245	1933.89	910.425	-90.1866	1886.32	903.541	-82.7883	1939.73	841.887
739	0	160.173	2022.13	1655.18	256.631	2028.77	1656.09	146.441	1872.65	1704.29	290.461	1886.91	1700.4	217.391	1809.42	1527.2	209.449	1752.32	1261.83	213.235	1955.11	1439.36	204.675	2043.73	1235.25	274.141	1747.11	1322.02	28.4029	1881.81	1473.69	-43.877	1846.81	1246.5	-58.8688	1829.21	1146.3	-77.0044	1894.49	982.589	-38.1225	1933.72	906.826	-88.4093	1885.07	901.221	-82.186	1937.49	838.688
740	0	159.904	2035.52	1653.97	256.368	2042.33	1654.87	146.452	1885.6	1703.18	290.788	1900.72	1699.35	217.7	1822.77	1526.34	210.324	1765.3	1261.08	213.672	1968.46	1438.15	205.331	2057.05	1233.81	275.211	1760.39	1321.29	28.6131	1894.41	1472.03	-42.3666	1855.4	1245.12	-56.539	1835.79	1145.63	-75.2409	1896.17	979.985	-37.0938	1933.67	903.127	-86.4376	1884.07	899.371	-81.3006	1935.33	835.314
741	0	159.733	2048.83	1652.49	256.029	2056.19	1653.42	146.634	1898.82	1701.83	290.961	1914.82	1697.97	218.39	1836.12	1525.14	210.975	1778.22	1259.91	213.89	1981.78	1436.53	205.928	2070.34	1232.04	276.269	1773.43	1320.19	29.0444	1907.44	1470.56	-41.1119	1863.73	1243.64	-54.1326	1842.55	1144.63	-73.5341	1898	977.585	-35.8122	1933.79	899.495	-84.6846	1883.3	897.02	-80.4478	1933.26	831.965
742	0	159.618	2062.46	1650.59	255.855	2069.9	1651.71	146.987	1912.36	1700.24	290.879	1928.64	1696.41	219.247	1849.59	1523.82	211.129	1791.16	1258.4	214.219	1994.98	1434.95	206.496	2083.46	1229.99	277.202	1786.83	1318.75	29.326	1920.45	1468.75	-39.6828	1872.63	1241.92	-51.9164	1849.53	1143.66	-72.054	1899.93	974.961	-34.7356	1934.1	895.862	-82.9202	1882.74	895.15	-79.4542	1931.06	828.521
743	0	159.549	2076.08	1648.46	255.503	2083.77	1649.57	146.532	1925.7	1698.51	291.127	1942.83	1694.59	219.559	1862.91	1522.21	210.774	1804.05	1257	214.381	2008.18	1433.04	206.976	2096.52	1227.68	277.123	1799.64	1317.25	29.5879	1933.41	1466.84	-38.4093	1881.64	1240.28	-49.6786	1856.98	1142.49	-70.4792	1902.46	972.717	-33.7992	1934.4	892.493	-81.5289	1882.7	893.608	-78.4598	1929.03	825.24
744	0	159.402	2089.55	1645.93	255.524	2097.6	1647.01	146.767	1939.53	1696.71	291.848	1957.25	1692.94	219.873	1876.33	1520.36	210.308	1817.17	1255.31	214.698	2021.39	1430.99	207.596	2109.66	1225.21	277.258	1812.72	1315.42	29.6059	1946.41	1465.09	-36.904	1891.06	1239.01	-47.0808	1865.12	1141.47	-68.9639	1905.21	970.979	-32.5239	1935.37	889.49	-80.1062	1882.9	891.99	-77.6067	1927.06	822.331
745	0	159.378	2103.37	1643.29	255.453	2111.71	1644.34	147.263	1953.67	1694.62	291.546	1971.16	1690.82	220.596	1889.78	1518.41	209.638	1830.41	1253.25	214.854	2034.61	1428.89	208.184	2122.77	1222.78	277.342	1825.93	1313.32	29.737	1959.55	1463.27	-35.6497	1900.48	1237.46	-44.4413	1872.71	1139.86	-67.9037	1908.37	969.367	-31.6494	1937.06	887.146	-78.9825	1883.32	890.908	-76.7466	1925.21	819.592
746	0	159.299	2116.93	1640.4	255.54	2125.55	1641.64	147.5	1967.92	1692.49	292.595	1986.01	1689.06	220.854	1903.18	1516.22	208.83	1843.76	1251.16	215.006	2047.84	1426.92	208.561	2136.07	1220.41	277.045	1839.41	1310.99	29.8487	1972.73	1461.49	-34.4634	1910.16	1236.03	-42.2166	1881.32	1138.64	-66.9051	1911.96	968.127	-31.5092	1938.58	884.851	-77.9128	1884.38	890.105	-75.994	1923.66	817.192
747	0	159.11	2130.99	1637.53	255.506	2139.53	1638.62	147.036	1981.87	1690.29	292.241	2000.03	1686.72	220.478	1916.38	1513.96	207.875	1857.07	1248.9	214.98	2061.09	1424.51	208.973	2149.42	1218.02	276.352	1852.38	1308.59	29.6169	1985.96	1459.43	-33.5251	1920.23	1234.49	-39.9298	1890.52	1137.29	-66.1133	1916.1	966.754	-32.2386	1940.6	882.277	-77.1369	1886.26	889.552	-75.3662	1922.32	814.999
748	0	159.241	2144.86	1634.32	255.45	2153.34	1635.29	147.959	1996.58	1688.05	292.272	2014.26	1684.15	220.622	1929.94	1511.49	207.286	1870.68	1246.42	214.802	2074.39	1421.9	209.465	2162.98	1215.6	275.952	1865.71	1305.94	29.4979	1999.46	1457.27	-32.4552	1930.91	1232.84	-37.9848	1899.65	1135.71	-65.5138	1920.63	965.438	-34.4664	1944.12	880.462	-76.0205	1888.24	888.68	-74.6172	1921.53	812.627
749	0	159.255	2158.53	1630.99	255.371	2167.27	1631.88	148.405	2011.13	1685.56	292.461	2028.51	1681.46	220.401	1943.3	1508.98	206.41	1884.27	1243.66	214.705	2087.85	1419.28	209.953	2176.63	1213.24	275.343	1878.98	1303.36	29.2277	2013	1454.86	-31.6751	1941.75	1230.72	-35.9906	1909.67	1134.31	-65.2621	1925.71	963.677	-29.651	1945.7	876.369	-75.5537	1891.09	888.441	-74.0448	1921.18	810.474
750	0	159.09	2173.08	1627.73	255.414	2181.24	1628.68	147.874	2025.1	1683.26	292.365	2042.67	1678.92	219.894	1956.7	1506.49	205.491	1898	1241.11	214.512	2101.42	1416.68	210.21	2190.73	1210.8	274.504	1892.45	1300.63	28.8531	2026.69	1452.27	-30.9198	1952.97	1228.64	-34.2885	1920.11	1132.74	-64.5758	1931.56	962.365	-30.1545	1949.98	874.645	-74.9786	1895.07	888.518	-73.5027	1921.61	808.658
751	0	159.286	2186.91	1624.99	255.287	2195.27	1625.73	147.326	2039.15	1681.25	292.156	2056.74	1676.53	219.359	1970.23	1504.03	204.941	1912.09	1238.68	214.303	2115.06	1414.12	210.406	2204.64	1208.48	273.677	1906.04	1298.1	28.3353	2040.53	1449.71	-30.3586	1964.74	1226.65	-32.9027	1930.92	1131.44	-64.6861	1938.11	961.015	-31.5836	1955.23	873.42	-75.0389	1899.45	888.383	-73.194	1922.79	807.081
752	0	159.097	2200.75	1622.37	255.097	2209.04	1623.07	147.411	2053.64	1678.91	291.585	2070.6	1674.16	218.583	1983.95	1501.53	204.256	1926.33	1235.98	213.982	2128.87	1411.81	210.52	2218.8	1206.5	272.65	1919.75	1295.35	27.7434	2054.36	1447.17	-29.9677	1977.11	1224.66	-31.6042	1942.27	1129.64	-64.7923	1945.42	960.055	-32.4657	1961.38	871.602	-74.6245	1905.17	888.522	-72.8792	1924.89	805.787
753	0	158.28	2214.63	1620.03	254.533	2222.79	1620.95	146.429	2067.5	1676.79	290.654	2084.38	1672.18	217.712	1997.64	1499.42	203.966	1940.81	1233.62	213.414	2142.7	1409.81	210.198	2232.77	1204.76	272.619	1934.26	1293.12	27.1511	2068.32	1444.89	-30.3227	1989.71	1222.6	-30.6758	1953.95	1127.88	-65.1667	1953.51	959.136	-33.3246	1968.13	869.931	-75.0523	1911.71	888.384	-71.9836	1927.9	804.734
754	0	157.458	2228.54	1618.22	253.916	2236.38	1619.28	145.281	2081.28	1674.66	289.136	2097.85	1670.35	216.725	2011.53	1497.15	203.993	1955.65	1231.55	212.746	2156.58	1407.99	209.734	2246.71	1203.16	271.775	1948.43	1290.88	26.3323	2082.35	1442.7	-30.6894	2002.45	1220.43	-30.2325	1966.38	1126.31	-65.5754	1962.64	958.51	-34.6608	1975.76	868.322	-75.7983	1919.29	888.336	-72.9347	1932.4	804.205
755	0	156.66	2242.11	1616.78	252.855	2250.04	1617.9	144.12	2094.83	1672.77	288.914	2111.67	1668.95	216.035	2025.42	1495.5	203.883	1969.96	1229.49	212.037	2170.64	1406.35	209.056	2261.27	1201.95	271.135	1962.67	1288.86	25.4313	2096.27	1440.63	-31.1553	2015.7	1218.52	-30.1565	1978.94	1124.52	-66.7627	1972.22	957.534	-36.9192	1984.5	867.175	-76.5981	1927.97	888.32	-71.8227	1937.79	802.954
756	0	155.563	2255.66	1615.36	251.77	2263.63	1616.74	143.358	2108.68	1670.86	287.185	2124.95	1667.6	215.445	2039.45	1493.42	203.771	1984.42	1227.44	211.208	2184.64	1405.02	208.564	2275.62	1200.85	270.986	1977.09	1287.01	24.428	2110.07	1438.72	-30.6295	2029.46	1216.81	-30.0925	1991.98	1123.02	-67.6177	1983	956.847	-38.2182	1994.12	865.814	-77.9232	1937.63	887.993	-72.4199	1945.01	802.647
757	0	154.344	2269.25	1614.12	250.251	2277.23	1615.75	141.593	2122.02	1669.5	286.021	2138.7	1666.52	214.126	2053.17	1492.15	203.945	1999.15	1225.59	210.2	2198.78	1403.94	208.094	2291.45	1200.48	270.306	1991.57	1285.32	23.5813	2124.26	1437.05	-31.7952	2043.55	1215.01	-30.6016	2005.39	1121.63	-68.7031	1994.7	955.974	-39.5904	2004.56	864.738	-79.3091	1948.57	887.755	-73.2544	1953.4	802.296
758	0	152.841	2282.91	1613.09	249.061	2290.76	1615.29	139.963	2135.6	1668.29	284.027	2151.91	1665.98	213.021	2067.15	1490.54	203.745	2013.98	1224.08	209.197	2212.96	1402.97	206.027	2305.11	1199.12	269.967	2006.14	1283.9	22.3522	2138.22	1435.51	-32.6841	2057.6	1213.43	-31.3647	2019.22	1120.36	-69.5387	2007.47	955.194	-40.0069	2015.98	863.566	-80.8177	1960.57	887.64	-74.074	1963.6	801.683
759	0	151.362	2296.32	1612.77	247.38	2304.37	1614.97	138.192	2149.08	1667.48	282.655	2165.54	1665.53	211.673	2081.05	1489.49	203.976	2029.29	1222.84	208.37	2227.29	1402.57	204.18	2319.34	1198.34	269.513	2020.76	1282.69	21.1702	2152.24	1434.26	-33.4726	2071.84	1211.84	-32.2678	2033.26	1119.11	-70.8234	2020.62	954.154	-41.2006	2028.42	862.7	-82.2677	1973.42	887.209	-75.1219	1975.13	801.261
760	0	149.302	2310.1	1612.44	245.823	2317.81	1615.47	136.372	2162.65	1667.29	280.874	2178.72	1665.84	210.182	2094.93	1488.98	203.654	2044.6	1221.82	207.1	2241.61	1402.63	202.787	2334.57	1198.8	268.677	2035.33	1281.91	19.9599	2166.64	1433.37	-34.3314	2086.88	1211.06	-33.3286	2047.65	1118.36	-72.2845	2034.68	953.276	-42.5934	2041.61	862.042	-83.9475	1987.44	886.79	-76.3233	1988.38	800.818
761	0	147.762	2323.78	1612.89	244.182	2331.39	1616.29	134.353	2176.07	1667.2	278.231	2191.86	1666.09	208.526	2109.1	1488.68	202.991	2059.87	1221.25	206.144	2255.94	1403.14	201.66	2350.08	1199.26	267.618	2050.04	1281.72	18.6913	2181.04	1432.59	-35.5503	2101.41	1210.37	-34.7209	2062.47	1117.96	-73.3966	2049.58	952.593	-43.3634	2056.05	861.598	-85.6478	2002.47	886.452	-78.088	2003.01	800.659
762	0	146.103	2337.32	1613.8	242.689	2344.84	1617.4	132.038	2189.37	1667.19	276.22	2204.94	1666.83	206.878	2123.28	1488.7	202.227	2075.12	1221.19	204.755	2270.24	1403.54	200.903	2365.66	1200.1	266.139	2064.54	1281.47	17.5338	2195.78	1432.31	-36.7027	2116.83	1210.08	-36.1429	2077.69	1117.71	-74.93	2065.22	952.209	-44.7051	2071.97	861.384	-87.4874	2018.3	886.027	-79.6209	2019.15	800.231
763	0	144.466	2351	1615.03	240.932	2358.37	1619.09	130.564	2203.16	1667.39	274.607	2218.3	1667.84	205.523	2137.51	1489.01	201.125	2089.87	1221.44	203.949	2284.73	1404.33	200.698	2381.2	1201.01	265.267	2079.49	1281.92	16.5703	2210.72	1432.32	-38.2922	2132.01	1210.15	-37.684	2093.1	1117.47	-76.4632	2081.46	951.862	-45.9912	2087.95	860.962	-89.248	2034.98	885.486	-81.7554	2036.55	799.701
764	0	142.677	2364.6	1616.68	239.196	2371.83	1621.37	128.731	2216.85	1667.88	272.539	2231.45	1669.47	204.252	2151.72	1489.95	199.585	2104.08	1222.43	203.358	2299.08	1405.7	200.66	2396.23	1202.27	264.047	2093.78	1283.02	15.7286	2225.64	1432.56	-39.2329	2147.65	1210.51	-39.1567	2109.07	1117.47	-78.1392	2098.5	951.941	-47.364	2105.41	860.924	-91.0293	2052.57	885.073	-84.006	2055.17	799.378
765	0	140.979	2378.27	1618.54	237.478	2385.37	1623.82	125.727	2229.56	1668.55	269.953	2244.47	1671.01	203.271	2166.02	1491.23	197.987	2117.84	1223.74	202.764	2313.17	1407.25	200.938	2410.98	1203.53	262.799	2108.15	1284.55	14.8771	2240.28	1433.06	-40.9568	2163.49	1211.1	-40.8984	2125.42	1117.73	-79.9653	2116.18	952.143	-48.6101	2124.01	860.989	-93.1995	2071.14	884.56	-86.317	2075.03	798.938
766	0	139.38	2391.84	1620.09	235.808	2399.12	1625.86	124.589	2243.47	1669.07	268.397	2258.06	1672.63	202.826	2180.19	1492.6	197.101	2131.64	1225.19	202.168	2327.1	1408.55	201.416	2425.41	1204.51	262.174	2122.29	1286.31	14.7505	2254.91	1434.1	-41.6138	2179.42	1211.71	-42.6023	2142.12	1117.85	-81.767	2134.59	951.888	-50.2266	2142.99	860.973	-95.0684	2090.83	883.775	-88.9286	2095.89	798.493
767	0	137.782	2405.36	1621.07	234.171	2412.81	1627.39	123.11	2256.96	1669.41	267.006	2271.66	1674.1	202.534	2194.25	1493.86	196.524	2144.97	1226.63	201.978	2341.1	1409.53	202.165	2439.33	1205.19	262.006	2136.5	1288.19	14.3927	2268.88	1434.8	-42.4672	2195.57	1212.31	-44.2844	2158.92	1117.97	-83.5996	2153.86	951.897	-51.873	2162.87	861.024	-97.2774	2111.07	883.356	-91.6319	2118.1	798.239
768	0	136.413	2418.98	1621.79	232.781	2426.76	1628.74	121.974	2270.49	1670.12	265.566	2285.72	1675.54	202.135	2207.73	1495.43	195.923	2157.96	1228.15	201.908	2354.78	1410.46	202.857	2452.72	1206.01	261.91	2150.01	1289.89	14.4709	2282.85	1435.92	-43.6961	2211.96	1212.67	-45.9947	2176.08	1118.39	-85.4049	2173.91	952.148	-53.2523	2183.87	861.332	-99.4627	2132.31	883.028	-95.7818	2141.59	798.619
769	0	135.369	2432.52	1622.52	231.638	2440.58	1629.88	120.494	2283.71	1671.18	264.471	2299.55	1677.01	201.794	2221.17	1497.08	195.411	2170.64	1229.72	201.912	2368.12	1411.53	203.498	2465.72	1206.83	262.3	2162.58	1291.67	14.6562	2296.79	1437.29	-44.1029	2228.36	1213.29	-47.7893	2193.14	1118.67	-87.2773	2194.45	952.026	-55.5076	2205.73	861.646	-101.796	2154.21	882.307	-98.1025	2165.62	798.071
770	0	134.86	2446.24	1623.2	230.902	2454.36	1630.83	120.378	2297.46	1672.44	263.426	2313.62	1678.57	201.513	2234.2	1498.61	195.172	2183.38	1231.28	202.122	2381.12	1412.79	204.124	2478.44	1207.84	262.557	2175.17	1293.63	14.6792	2310.19	1438.64	-45.1868	2244.81	1213.5	-49.8042	2210.33	1118.74	-88.8209	2215.31	951.658	-56.75	2228.09	862.058	-103.784	2176.71	881.741	-100.865	2190.7	797.938
771	0	134.507	2459.82	1623.82	230.577	2468.12	1631.58	120.995	2312.71	1674.37	263.354	2327.85	1680.48	201.268	2246.94	1500.33	194.748	2196.06	1232.67	202.159	2393.85	1414.26	204.583	2490.97	1209.29	262.261	2187.68	1295.31	14.4286	2323.3	1440.21	-45.7734	2261.46	1214.63	-51.4639	2228.1	1119.31	-90.3586	2236.9	951.972	-58.4702	2251.12	862.688	-105.689	2199.81	881.324	-103.863	2216.88	798.838
772	0	134.425	2473.4	1624.61	230.504	2481.57	1632.27	119.712	2325.56	1676.36	263.188	2341.51	1682.35	201.047	2259.77	1502.17	194.814	2208.94	1234.86	202.228	2406.42	1415.96	204.994	2503.37	1210.95	261.886	2199.97	1297.13	14.3054	2336.25	1441.92	-46.5869	2278.2	1215.6	-53.0641	2245.97	1120.16	-92.0113	2258.69	952.721	-60.9371	2274.82	863.624	-107.62	2223.51	880.799	-106.642	2243.54	799.252
773	0	134.58	2486.92	1625.61	230.852	2495.16	1633.01	120.878	2340.87	1678.62	263.562	2355.62	1684.03	200.861	2272.37	1504.26	194.681	2221.92	1236.65	202.334	2418.77	1417.94	205.323	2515.65	1212.85	261.181	2212.2	1299.03	14.2215	2349.44	1444.15	-47.476	2294.6	1216.98	-55.1278	2263.52	1120.62	-93.6649	2280.6	953.312	-58.6362	2298.1	863.769	-109.172	2247.72	880.824	-109.043	2271.11	800.675
774	0	135.02	2500.55	1627.03	231.494	2508.74	1634.03	121.051	2354.84	1681.09	263.847	2369.44	1686.23	200.738	2284.99	1506.37	194.264	2234.61	1238.97	202.565	2431.18	1420.25	205.792	2528.07	1215.23	260.07	2224.55	1300.9	14.3884	2362.5	1446.6	-48.3016	2311.12	1218.92	-56.6304	2281.42	1121.76	-94.9112	2303.17	954.758	-61.0068	2327.07	867.188	-109.947	2272.67	881.07	-111.485	2299.26	802.639
775	0	135.954	2514.05	1628.52	232.088	2521.85	1635.27	121.479	2368.85	1683.65	263.906	2382.8	1688.64	200.331	2297.38	1509.02	193.248	2246.9	1241.39	202.608	2443.47	1422.54	206.187	2540.33	1217.77	258.932	2236.55	1303.32	14.4506	2375.43	1449.07	-49.1175	2327.45	1220.99	-58.6075	2299.26	1123	-94.924	2326.43	956.749	-60.1153	2347.47	867.85	-111.351	2297.52	881.749	-113.371	2328.03	805.273
776	0	136.796	2527.49	1630.2	232.914	2535.01	1636.48	121.951	2382.86	1686.43	263.922	2395.8	1690.58	200.312	2309.93	1511.52	192.197	2259.15	1243.97	202.874	2455.7	1425.01	206.431	2552.46	1219.97	257.804	2248.46	1305.79	14.4661	2388.12	1451.59	-50.1685	2343.65	1223.24	-60.3601	2317.12	1124.91	-95.8574	2349.34	958.987	-62.2831	2376.81	872.501	-112.188	2323.14	882.791	-115.127	2357.05	808.489
777	0	137.639	2540.81	1631.78	233.888	2548.03	1637.67	122.665	2396.6	1689.17	264.8	2409.63	1692.4	200.425	2322.56	1513.93	191.315	2271.47	1246.73	202.745	2467.83	1427.05	206.961	2564.49	1222.25	256.751	2260.49	1308.09	14.8156	2401.14	1454.43	-51.1926	2359.61	1225.54	-61.7856	2335.13	1126.89	-96.5631	2372.43	961.414	-62.5374	2402.32	875.864	-113.366	2348.97	884.588	-116.463	2386.77	812.794
778	0	138.51	2554.08	1633.42	234.666	2560.93	1639.08	123.348	2410.28	1691.73	266.015	2422.78	1694.55	200.247	2335.12	1516.33	190.321	2283.91	1248.95	202.832	2480.12	1429.26	207.252	2576.33	1224.55	255.58	2272.62	1310.52	14.9452	2414.34	1457.5	-52.1568	2375.64	1228.52	-63.4047	2352.7	1129.23	-97.2632	2395.56	964.153	-62.6746	2428.3	879.878	-113.931	2374.52	886.364	-117.187	2416.19	817.056
779	0	139.237	2567.1	1635.33	235.375	2573.86	1640.58	123.915	2423.63	1694.46	266.643	2435.83	1696.6	200.185	2347.65	1518.76	189.481	2296.17	1251.46	202.953	2492.58	1431.42	207.26	2588.07	1226.84	254.378	2284.97	1312.65	15.0871	2427.3	1460.39	-53.0096	2391.58	1231.38	-65.1348	2370.46	1131.84	-97.9479	2419.03	967.579	-62.5712	2455.05	885.091	-114.294	2401.04	889.537	-117.89	2445.8	822.15
780	0	140.006	2580.11	1637.17	236.295	2586.75	1641.97	124.581	2436.73	1696.72	267.34	2448.43	1698	200.195	2360.27	1520.89	188.789	2308.47	1253.8	202.921	2504.99	1433.2	207.407	2599.86	1229	253.493	2297.45	1314.71	15.0465	2440.29	1463.39	-54.0155	2407.32	1234.17	-66.9489	2388.03	1134.45	-98.4957	2442.48	971.259	-65.5086	2476.44	888.792	-114.854	2427.16	892.509	-118.419	2475.56	827.798
781	0	140.749	2592.85	1638.95	237.137	2599.24	1643.47	125.466	2449.63	1698.77	267.384	2461.37	1699.57	200.473	2372.93	1522.43	188.499	2320.91	1255.7	202.951	2517.49	1434.78	207.629	2611.77	1230.99	252.792	2309.84	1316.46	15.0784	2453.02	1465.94	-54.9324	2422.97	1237.13	-68.6059	2405.07	1136.58	-99.1822	2465.66	975.207	-62.7633	2507.51	896.122	-115.214	2453.74	895.94	-118.855	2505.2	833.875
782	0	141.263	2605.63	1640.89	237.677	2611.74	1644.98	125.793	2462.31	1700.54	268.579	2473.65	1700.98	200.316	2385.49	1524.03	188.236	2333.43	1257.36	202.873	2530	1436.3	207.512	2623.44	1232.86	252.259	2322.31	1317.9	15.3437	2466.09	1468.54	-55.9531	2438.35	1239.85	-70.2396	2422.6	1138.99	-100.002	2489.27	979.375	-65.7598	2529.13	900.457	-115.748	2480.2	899.533	-119.058	2534.63	840.224
783	0	141.823	2618.18	1642.46	238.169	2624.24	1646.29	126.364	2474.94	1702.13	269.065	2486.2	1702.16	200.347	2398.11	1525.47	188.03	2345.89	1258.67	202.873	2542.49	1437.48	207.307	2635.13	1234.45	251.819	2334.75	1319.07	15.504	2478.96	1470.51	-57.0751	2453.6	1242.32	-72.0059	2439.51	1141.16	-100.694	2512.6	983.29	-66.0663	2555.45	906.505	-116.114	2507.19	903.208	-119.03	2563.97	846.465
784	0	142.494	2630.85	1643.85	238.749	2636.84	1647.24	126.955	2487.36	1703.17	269.607	2498.51	1702.81	200.297	2410.96	1526.38	187.976	2358.47	1259.71	202.725	2555.04	1438.19	207.337	2646.89	1235.47	251.562	2347.16	1320.09	15.5716	2491.71	1471.99	-58.308	2468.53	1244.03	-73.9468	2456.21	1142.77	-101.458	2535.84	987.217	-66.3491	2581.93	912.708	-116.398	2533.41	906.849	-118.833	2593.49	852.93
785	0	142.727	2643.46	1644.89	239.16	2649.23	1648.02	127.466	2500	1703.8	269.663	2510.43	1703.08	200.423	2423.77	1526.79	188.141	2371	1260.51	202.728	2567.66	1438.58	207.292	2658.79	1235.97	251.556	2360.31	1320.52	15.5773	2504.58	1473.01	-59.2085	2483.88	1245.56	-75.5347	2473.12	1144.33	-102.201	2559.17	991.285	-66.8533	2608.01	918.972	-116.997	2560.16	911.01	-118.436	2622.34	859.086
786	0	143.166	2656.08	1645.62	239.728	2661.77	1648.53	127.803	2512.48	1704.1	269.841	2523.01	1703.15	200.516	2436.64	1527.13	187.696	2383.42	1260.72	202.687	2580.45	1438.75	207.096	2670.59	1236.11	251.471	2373.21	1320.71	15.6276	2517.27	1473.54	-60.3853	2499.13	1246.53	-77.2358	2490.18	1145.5	-103.034	2582.12	995.007	-63.7049	2638.56	927.138	-117.406	2586.56	914.81	-117.884	2650.79	865.49
787	0	143.411	2668.79	1646.12	239.824	2674.23	1648.87	128.011	2524.78	1704.13	270.321	2535.05	1702.64	200.377	2449.67	1526.95	187.602	2395.86	1260.82	202.408	2593.27	1438.4	206.926	2682.52	1236	251.21	2385.78	1320.83	15.7075	2529.9	1473.51	-61.5452	2513.96	1247.37	-79.5128	2506.72	1145.98	-103.972	2605.08	998.586	-67.3699	2660.2	931.81	-120.379	2613.13	919.883	-117.535	2679.33	871.944
788	0	143.607	2681.41	1646.14	240.087	2686.9	1648.73	128.147	2537.37	1703.67	270.248	2547.51	1701.71	200.516	2462.53	1526.41	187.408	2408.12	1260.58	202.292	2606.03	1437.79	206.65	2694.48	1235.28	251.395	2398.51	1320.49	15.7594	2542.67	1473.29	-62.9903	2528.63	1247.08	-81.2803	2523.29	1146.07	-104.755	2627.83	1002.2	-67.6184	2685.63	938.231	-118.118	2639.05	922.593	-116.7	2707.43	878.637
789	0	143.858	2694.19	1645.68	240.401	2699.62	1648.36	128.456	2550.09	1702.71	270.066	2559.72	1700.93	200.813	2475.64	1525.62	187.751	2420.41	1259.94	202.221	2618.84	1436.77	206.471	2706.62	1234.08	251.317	2411.03	1320.02	15.9465	2555.1	1472.44	-63.8351	2543.76	1247.09	-83.0196	2539.9	1145.77	-105.344	2650.24	1005.47	-67.7766	2710.54	944.425	-117.881	2664.85	926.448	-115.884	2734.98	885.114
790	0	143.812	2707.05	1644.8	240.424	2712.35	1647.42	128.141	2562.66	1701.63	269.925	2572.71	1699.78	201.142	2488.4	1524.81	187.998	2432.51	1258.98	201.986	2631.58	1435.41	206.199	2718.91	1232.47	251.548	2423.71	1319.05	15.9201	2567.47	1471.11	-64.6584	2558.93	1246.68	-84.6212	2557.21	1145.39	-106.122	2672.46	1008.61	-67.9679	2734.87	950.35	-117.863	2690.26	930.327	-115.154	2761.97	891.504
791	0	144.132	2720.09	1643.62	240.531	2725.32	1646.12	128.21	2575.74	1700.26	270	2585.57	1698.27	201.223	2501.34	1523.48	188.533	2444.79	1257.97	201.75	2644.35	1433.78	205.665	2731.08	1230.45	251.892	2436.36	1318.17	16.0067	2579.81	1469.76	-66.051	2573.44	1245.69	-86.2766	2574.45	1144.52	-106.692	2694.4	1011.58	-68.0986	2758.66	956.114	-118.35	2715.07	934.086	-114.226	2788.72	898.144
792	0	143.973	2733.02	1641.89	240.346	2738.45	1644.54	128.402	2588.68	1698.6	270.173	2598.54	1696.84	201.867	2514.25	1521.98	189.671	2456.93	1256.65	201.604	2657.12	1432.13	205.141	2743.61	1228.36	252.711	2449.17	1316.85	16.3256	2591.98	1468.11	-67.3421	2587.91	1244.48	-87.7969	2591.91	1143.72	-107.299	2716.05	1014.51	-68.1771	2781.98	961.756	-118.47	2739.52	937.669	-113.645	2814.48	904.647
793	0	143.714	2746.07	1639.71	240.206	2751.36	1642.48	128.08	2601.81	1696.77	269.622	2611.64	1695.33	202.347	2527.01	1520.46	191.034	2469.35	1254.91	201.469	2669.79	1430.29	204.618	2756.43	1226.18	253.771	2461.75	1315.43	16.5582	2604.09	1466.18	-67.381	2603.26	1243.68	-89.059	2609.16	1142.6	-107.764	2737.32	1017.29	-68.3093	2804.64	967.081	-118.672	2763.5	941.392	-112.974	2839.63	910.864
794	0	143.705	2759.08	1637.11	240.107	2764.53	1639.91	127.883	2615.04	1694.77	269.337	2624.95	1693.16	202.858	2539.62	1518.81	192.497	2481.73	1253.3	201.439	2682.41	1428.11	203.939	2769.45	1223.58	254.982	2474.08	1314.04	16.9286	2616.18	1464.32	-67.8528	2617.95	1242.17	-90.152	2626.47	1141.78	-108.09	2758.26	1019.87	-68.4207	2826.69	972.012	-119.086	2786.78	945.039	-112.542	2863.95	916.993
795	0	143.164	2772.02	1634.32	239.761	2777.7	1637.24	127.773	2628.36	1692.47	269.292	2638.41	1691.17	203.573	2552.29	1516.75	194.297	2494.23	1251.43	201.607	2695.06	1425.83	203.336	2782.54	1221.05	256.11	2486.56	1312.09	17.5385	2628.2	1462.21	-67.8951	2632.92	1241.13	-90.5141	2643.8	1140.84	-108.352	2778.77	1022.44	-68.624	2848.01	976.66	-120.733	2809.47	948.909	-112.316	2887.59	923.047
796	0	142.886	2784.9	1631.27	239.514	2790.87	1634.51	127.757	2641.61	1690.05	269.023	2652.2	1689.25	204.311	2564.75	1514.73	196.209	2506.99	1249.16	201.585	2707.57	1423.61	202.776	2795.76	1218.88	257.651	2499.22	1310.11	18.0944	2640.11	1460.05	-67.9024	2647.64	1239.71	-90.8545	2660.48	1139.81	-108.69	2798.55	1024.99	-68.7656	2868.89	981.288	-121.106	2831.19	952.189	-112.233	2910.34	928.973
797	0	142.754	2797.78	1628.19	239.313	2804.02	1631.67	127.421	2654.85	1687.77	269.458	2665.79	1687.53	204.847	2577.11	1512.72	197.928	2519.81	1246.87	201.838	2720.11	1421.45	202.18	2808.91	1216.55	259.087	2511.76	1308.15	18.7491	2652.05	1457.97	-67.6245	2662.49	1238.34	-91.6108	2676.93	1138.76	-109.027	2817.81	1027.36	-69.027	2889.14	985.724	-120.744	2852.45	955.257	-112.412	2932.27	934.878
798	0	142.562	2810.75	1625.1	239.148	2817.28	1628.89	126.646	2666.93	1685.67	269.343	2679	1685.37	205.542	2589.85	1510.42	199.386	2532.49	1244.57	202.149	2732.71	1419.2	201.783	2822	1214.09	260.533	2524.37	1306.02	19.3343	2664.14	1455.89	-67.178	2677.19	1236.67	-91.9207	2693.05	1137.79	-109.085	2836.39	1029.53	-69.1306	2908.53	989.746	-122.869	2872.64	959.386	-112.894	2952.97	940.147
799	0	142.743	2823.67	1622.06	239.199	2830.29	1626	127.792	2681.15	1683.02	269.668	2692.59	1683.28	206.497	2602.54	1508	200.901	2545.24	1242.17	202.743	2745.29	1416.78	201.581	2834.9	1211.81	261.819	2537.06	1303.74	19.9257	2676.41	1453.82	-66.3139	2691.81	1234.63	-91.497	2708.62	1136.52	-109.292	2854.27	1031.54	-69.4074	2927.4	993.107	-120.559	2892.44	961.12	-113.398	2972.98	945.042
800	0	143.109	2836.53	1619.19	239.4	2843.2	1623.37	127.875	2694.04	1680.51	269.659	2705.52	1681.12	207.225	2615.12	1505.73	202.211	2558.27	1239.7	203.415	2758.08	1414.61	201.634	2847.77	1209.72	262.838	2549.74	1301.48	20.6371	2688.79	1451.64	-65.237	2706.27	1232.93	-91.1616	2723.74	1135.13	-109.217	2871.5	1032.98	-69.7531	2945.35	996.286	-120.666	2910.93	963.58	-114.069	2992.01	949.681
801	0	143.547	2849.26	1616.65	239.959	2856.11	1621.07	128.325	2706.98	1678.2	270.399	2718.34	1679.14	207.513	2627.73	1503.73	202.894	2571.31	1237.49	204.214	2770.9	1412.55	201.949	2860.58	1207.79	263.416	2562.33	1299.16	21.3988	2701.4	1449.73	-64.6554	2720.06	1230.87	-90.6289	2738.55	1133.91	-108.963	2887.99	1034.36	-69.4967	2962.93	999.514	-121.076	2928.78	966.091	-114.89	3010.13	953.867
802	0	144.334	2861.93	1614.54	240.205	2868.66	1619.07	129.158	2719.67	1676.02	270.837	2731.19	1677.26	208.39	2640.53	1501.48	203.666	2584.41	1235.26	205.107	2783.76	1410.67	202.737	2873.43	1206.08	263.889	2575.2	1296.94	22.2609	2714.3	1448.07	-63.355	2733.99	1229.19	-90.4243	2752.38	1132.19	-109.071	2903.58	1035.22	-69.7809	2979.68	1001.89	-123.138	2945.45	968.644	-115.922	3027.19	957.607
803	0	145.274	2874.56	1612.88	241.618	2881.31	1617.21	129.983	2732.44	1673.99	271.45	2743.81	1675.01	209.258	2653.27	1499.26	204.12	2597.53	1233.09	206.021	2796.56	1408.97	203.805	2886.45	1204.63	264.372	2587.92	1294.78	22.7963	2727.15	1446.34	-62.5178	2747.18	1227.54	-89.531	2766.36	1130.29	-108.948	2918.84	1036.15	-70.1843	2995.61	1003.88	-121.35	2961.37	968.549	-117.061	3043.27	960.706
804	0	146.678	2887.08	1611.35	242.968	2893.74	1615.7	130.984	2744.95	1672.36	272.692	2755.92	1673.39	209.834	2665.77	1497.42	204.073	2610.89	1230.9	207.021	2809.41	1407.45	204.983	2899.61	1203.26	264.614	2600.86	1292.63	23.6847	2740.46	1444.62	-61.6711	2760.41	1226.06	-88.9525	2779.62	1128.68	-108.987	2933.31	1036.21	-70.5858	3010.66	1005.26	-121.187	2976.64	969.205	-118.474	3058.37	962.989
805	0	148.094	2899.55	1610.05	244.226	2905.94	1614.49	132.177	2757.34	1670.84	273.75	2767.98	1672.01	210.519	2678.2	1495.76	204.069	2624.45	1229.16	208.151	2822.19	1406.12	206.534	2913.02	1202.23	264.432	2613.89	1290.74	24.5786	2753.69	1443.13	-60.4146	2773.45	1224.61	-87.7492	2793.45	1127.48	-108.923	2947.04	1035.65	-71.2245	3025.29	1006.05	-119.564	2993	969.568	-119.965	3072.62	964.593
806	0	149.844	2911.99	1609.23	246.376	2918.21	1613.28	134.098	2769.72	1669.96	275.53	2780.2	1670.58	211.418	2690.62	1494.01	204.184	2638.41	1227.13	209.465	2835.17	1405.07	208.252	2926.41	1201.36	264.723	2626.84	1288.63	25.8183	2767.12	1441.77	-59.7685	2786.02	1223.04	-86.9562	2805.99	1125.66	-108.738	2960.34	1034.61	-71.8013	3039.03	1005.7	-120.524	3004.54	968.195	-121.177	3085.89	965.107
807	0	151.635	2924.35	1608.63	247.957	2930.38	1612.67	135.77	2782.01	1669.1	277.268	2792.25	1669.62	212.528	2703.2	1492.68	203.934	2652.36	1225.69	210.72	2848.18	1404.3	210.113	2939.94	1200.81	264.943	2640.63	1286.76	26.9672	2780.36	1440.78	-58.7448	2798.57	1222.05	-85.2979	2819	1124.68	-108.378	2972.9	1033.03	-72.1961	3052.1	1004.91	-118.388	3019.37	966.418	-122.404	3098.49	965.095
808	0	153.544	2936.61	1608.73	249.96	2942.67	1612.52	137.765	2794.08	1669.16	278.909	2804.39	1668.87	213.529	2715.75	1491.91	203.756	2666.44	1224.55	212.255	2861.18	1404.13	211.817	2953.71	1200.96	265.167	2653.98	1285.59	28.068	2793.57	1440.15	-57.6906	2810.95	1221.33	-84.2622	2831.15	1123.27	-107.923	2985	1031.47	-72.811	3064.28	1003.54	-119.996	3029.06	965.106	-123.649	3109.77	963.769
809	0	155.504	2948.82	1609.41	251.462	2954.9	1612.82	138.62	2804.55	1669.4	281.07	2816.35	1668.74	214.461	2728.33	1491.51	203.825	2680.6	1223.88	213.837	2874.37	1404.2	213.617	2967.97	1201.56	265.43	2667.51	1284.68	29.2782	2806.89	1440.06	-56.9035	2823.37	1220.81	-82.7956	2844.02	1123.45	-107.544	2996.19	1029.41	-73.0879	3075.89	1001.81	-118.007	3041.22	963.076	-124.76	3120.21	961.941
810	0	157.425	2960.92	1610.59	253.703	2967.12	1613.79	142.2	2817.76	1669.74	283.62	2828.25	1668.87	215.879	2741.3	1491.42	204.036	2694.44	1223.78	215.229	2887.25	1404.87	215.147	2982.19	1202.52	265.891	2681.93	1283.99	30.4233	2820.13	1440.33	-55.4557	2835.84	1221.28	-81.4187	2855.08	1122.35	-107.03	3006.83	1027.7	-73.3276	3086.48	999.757	-117.031	3051.16	960.59	-125.628	3129.64	959.472
811	0	159.436	2973.11	1612.42	255.798	2979.41	1615.19	142.095	2827.31	1671.33	285.816	2840.42	1669.45	217.076	2754.04	1491.79	204.098	2708.12	1224.14	216.614	2900.37	1405.9	216.364	2996.41	1204.04	266.289	2695.05	1283.83	31.6397	2833.6	1441.55	-54.3773	2848.04	1221.93	-79.7696	2867.23	1123.57	-106.54	3016.66	1026.02	-73.1986	3096.49	997.253	-116.226	3060.25	957.186	-126.254	3138.19	956.426
812	0	161.446	2985.34	1614.68	258.223	2992.17	1616.99	146.663	2841.2	1672.6	288.593	2852.13	1670.3	218.122	2766.76	1492.74	204.486	2721.31	1225.08	217.839	2913.32	1407.34	217.275	3010.61	1205.68	266.491	2709.26	1284.26	32.5666	2846.82	1442.98	-53.0213	2860.23	1222.97	-78.2403	2878.08	1124.1	-105.76	3026.02	1024.44	-73.4646	3105.42	994.277	-116.719	3066.4	954.909	-126.538	3145.76	952.68
813	0	163.68	2997.82	1617.1	260.467	3004.52	1618.78	147.946	2851.99	1674.46	291.33	2864.51	1671.32	219.226	2779.9	1494.07	204.841	2734.15	1226.58	219.136	2926.25	1408.82	218.016	3024.9	1207.68	266.818	2722.11	1285.35	33.6781	2860.24	1445.05	-51.5802	2872.39	1224.4	-76.645	2889.15	1125.19	-104.508	3034.74	1022.75	-72.7121	3113.88	991.13	-116.815	3073.02	952.346	-126.662	3152.58	948.344
814	0	166.05	3010.23	1619.7	262.854	3016.82	1620.44	150.721	2864.24	1676.4	293.827	2876.5	1672.21	220.284	2792.87	1495.75	205.435	2746.7	1228.23	220.038	2939.1	1410.52	218.362	3038.77	1209.75	267.03	2734.96	1286.55	34.5319	2873.52	1447.39	-50.1024	2884.53	1225.96	-75.0572	2899.93	1126.89	-103.363	3042.83	1021.06	-72.1301	3121.16	987.243	-113.17	3081.41	949.129	-125.863	3158.48	943.351
815	0	168.28	3022.86	1621.75	265.055	3029.06	1621.8	151.762	2876	1678.7	295.906	2888.67	1672.71	220.844	2805.37	1497.34	205.85	2758.61	1230.09	220.69	2951.86	1412.12	219.003	3052.67	1211.95	267.263	2747.51	1288.43	35.3802	2886.71	1449.63	-48.94	2896.5	1227.94	-74.0046	2910.35	1129.43	-102.098	3050.48	1019.25	-70.6207	3128.18	983.445	-113.386	3085.11	946.631	-124.748	3163.59	937.826
816	0	170.508	3035.53	1623.85	267.32	3041.36	1622.81	153.823	2888.4	1680.67	297.962	2900.34	1673.26	221.289	2817.79	1498.99	205.957	2770.65	1231.7	221.226	2964.48	1413.54	219.47	3065.8	1213.99	267.181	2760.27	1289.98	36.2138	2899.61	1452.09	-47.9788	2908.32	1230.05	-72.819	2920.04	1130.91	-100.74	3057.56	1017.4	-69.2779	3134.23	979.017	-110.493	3092.04	943.433	-123.465	3168	931.927
817	0	172.372	3047.97	1625.52	269.139	3053.64	1623.89	156.644	2901.4	1682.82	299.95	2912.71	1674.1	222.039	2830.01	1500.41	206.123	2782.49	1233.28	221.564	2976.99	1414.89	219.854	3078.27	1215.89	267.373	2772.48	1291.09	36.8955	2911.98	1454.64	-46.8954	2920.08	1231.85	-71.5571	2930.29	1133.34	-99.3288	3064.19	1015.63	-67.5402	3139.82	974.465	-110.705	3094.47	940.955	-121.592	3171.89	926.007
818	0	174.134	3060.49	1627.28	270.759	3065.81	1624.79	158.569	2913.93	1684.61	301.647	2924.96	1675.19	222.9	2842.13	1502.09	206.199	2794.22	1234.61	221.792	2989.1	1416.5	219.973	3089.75	1217.83	268.059	2784.65	1292.73	37.5365	2923.94	1456.96	-45.5891	2931.79	1234.16	-70.2999	2939.73	1135	-97.9144	3070.66	1014.02	-63.4487	3145.96	970.636	-109.237	3098.55	938.456	-119.526	3175.23	919.835
819	0	175.296	3072.85	1628.72	271.946	3078.25	1625.98	159.67	2926.38	1686.56	302.814	2937.23	1676.6	223.211	2853.88	1503.8	205.979	2805.97	1236.2	221.819	3000.97	1418.31	220.074	3101.1	1219.89	268.105	2796.66	1294.44	37.8537	2935.49	1459.16	-45.2094	2942.9	1236.33	-69.3959	2949.29	1136.8	-96.409	3076.78	1012.45	-63.9561	3148.71	964.965	-108.215	3102.02	935.586	-116.972	3177.96	913.581
820	0	176.065	3085.06	1629.95	272.828	3090.44	1626.74	159.294	2938.79	1688.75	303.847	2949.79	1678.09	223.57	2865.59	1505.43	206.113	2817.6	1238.22	221.992	3012.62	1420.06	220.203	3112.15	1221.83	268.776	2808.47	1296.02	38.2241	2946.66	1461.29	-44.8576	2953.51	1238.2	-68.6289	2958.8	1138.35	-95.2071	3082.28	1010.26	-59.4593	3154.22	961.055	-107.127	3105.56	933.155	-114.456	3180.45	907.156
821	0	176.611	3097.25	1630.78	273.339	3102.72	1627.63	160.149	2951.22	1690.24	305.051	2962.79	1679.65	224.308	2877.4	1507.08	206.926	2829.66	1239.65	222.158	3024.2	1421.75	220.171	3123.21	1223.67	269.554	2820.08	1297.58	38.3089	2957.34	1462.93	-44.2361	2964.28	1239.73	-67.5674	2967.72	1139.55	-93.7659	3087.77	1008.37	-57.1575	3157.37	955.872	-105.954	3108.41	930.249	-111.444	3182.51	900.554
822	0	176.956	3109.34	1631.59	273.563	3114.89	1628.52	161.339	2963.78	1691.65	305.592	2975.7	1681.3	224.672	2888.87	1508.78	207.353	2841.11	1241.4	222.173	3035.7	1423.41	219.86	3134.26	1225.4	269.99	2831.55	1299.2	38.4999	2968.14	1464.47	-43.9143	2974.24	1240.89	-66.2906	2976.05	1140.26	-92.431	3092.62	1005.8	-54.3159	3160.11	950.86	-105.141	3111.2	927.713	-108.357	3183.99	893.715
823	0	176.978	3121.49	1632.34	273.614	3127.11	1629.29	161.313	2976.31	1693.61	305.704	2988.38	1683.12	225.273	2900.4	1510.68	208.122	2852.8	1243.25	222.276	3047.15	1425.05	219.52	3145.68	1227.04	270.604	2843.01	1300.92	38.4403	2978.74	1465.92	-44.0204	2983.53	1241.63	-65.6582	2984.59	1141.31	-90.7615	3097.19	1003.34	-51.7843	3162.31	945.888	-104.171	3113.71	925.004	-104.86	3184.97	887.122
824	0	176.813	3133.6	1633.33	273.566	3139.4	1630.34	160.744	2988.51	1695.77	305.922	3001.04	1685.15	225.583	2911.95	1512.55	209.1	2864.2	1244.99	222.452	3058.6	1426.94	218.917	3157	1228.61	271.331	2854.32	1302.63	38.4723	2989.48	1467.21	-43.5814	2992.72	1242.6	-64.3409	2992.87	1142.05	-89.2244	3101.38	1001.31	-49.1084	3164.82	941.054	-103.084	3115.92	922.52	-101.302	3185.41	880.62
825	0	176.53	3145.57	1634.17	273.573	3151.92	1631.53	161.334	3001.01	1697.33	306.152	3013.68	1687.17	225.273	2923.2	1514.63	209.675	2875.27	1247.3	222.617	3069.99	1428.92	218.287	3168.48	1230.28	272.108	2865.52	1304.67	38.4998	3000.13	1468.45	-42.8921	3001.48	1243.39	-63.0885	3000.76	1142.61	-87.8406	3105.4	999.055	-49.6302	3162.36	935.016	-101.964	3117.57	919.903	-97.7677	3185.3	874.616
826	0	176.402	3157.43	1635.3	273.59	3164.32	1632.9	160.705	3013.33	1699.12	305.679	3025.78	1689.1	225.907	2934.91	1516.68	210.731	2886.42	1249.01	222.534	3081.02	1430.85	217.375	3179.87	1232.03	272.634	2876.54	1306.81	38.3582	3011.03	1469.69	-42.3824	3009.77	1244.18	-61.7619	3007.95	1143.06	-86.3155	3108.58	997.11	-47.3974	3163.12	931.044	-100.884	3119.07	917.957	-94.4146	3184.51	868.938
827	0	175.876	3169.26	1636.54	273.126	3175.75	1634.4	160.258	3025.52	1700.61	305.304	3037.92	1691.25	225.794	2946.4	1518.58	211.665	2897.41	1251.17	222.53	3092.31	1432.69	216.654	3191.26	1233.83	273.314	2887.52	1309.19	38.0753	3021.62	1470.64	-41.8058	3017.48	1245.01	-58.721	3017.35	1144.89	-84.8251	3111.62	995.476	-45.4501	3163.55	927.623	-99.3674	3119.8	915.965	-91.4909	3183.02	864.1
828	0	176.047	3181	1637.84	272.596	3187.36	1635.83	160.128	3037.68	1702.14	304.852	3049.65	1693.16	226.003	2957.89	1520.55	212.568	2908.65	1252.93	222.502	3103.61	1434.52	215.847	3202.46	1235.51	274.212	2898.75	1311.11	38.0466	3032.64	1472.32	-40.9087	3025.06	1245.94	-58.3352	3021.75	1144.17	-83.2533	3114.25	994.383	-43.3566	3163.99	924.701	-97.8224	3120.17	913.998	-89.0252	3181.25	859.612
829	0	175.738	3192.77	1638.91	272.448	3199.14	1637.31	159.756	3049.62	1703.55	304.499	3061.4	1695.1	225.981	2969.42	1522.33	213.385	2919.8	1254.52	222.539	3115.1	1436.21	215.151	3213.25	1237.13	274.806	2909.82	1312.98	37.9982	3043.51	1473.45	-39.6805	3032.69	1246.59	-55.1573	3030.61	1145.38	-81.4205	3116.18	992.961	-41.9912	3163.84	921.701	-96.1168	3120.01	912.102	-86.8134	3178.76	855.424
830	0	175.379	3204.47	1639.96	272.643	3211.21	1638.68	159.705	3061.63	1704.71	304.048	3073.27	1696.58	226.346	2981.05	1523.88	213.841	2931.03	1256.24	222.493	3126.62	1437.51	214.642	3224	1238.34	275.443	2921.12	1315.27	37.6691	3054.42	1474.54	-38.5742	3040.15	1246.97	-54.6535	3034.79	1145.72	-79.3349	3118.11	991.419	-40.2162	3164.08	919.082	-94.3281	3119.31	910.433	-84.9635	3176.02	851.433
831	0	175.063	3216	1640.92	272.76	3223.21	1639.86	159.448	3073.36	1705.67	303.742	3085.04	1697.69	226.385	2992.51	1525.09	214.107	2942.16	1257.59	222.457	3138.11	1438.52	214.439	3234.99	1239.42	276.27	2932.68	1316.22	37.5802	3065.45	1475.33	-37.259	3047.9	1247.17	-52.8362	3040.76	1146.4	-77.712	3119.73	989.835	-38.595	3164.15	916.298	-92.4474	3118.54	909.201	-83.2016	3173.23	847.758
[truncated: 69 more columns]

## Sheet: Sheet2
Devices
		025370 - Force			025370 - Moment			025370 - CoP			027571 - Force			027571 - Moment			027571 - CoP			037720 - Force			037720 - Moment			037720 - CoP
Frame	Sub Frame	Fx	Fy	Fz	Mx	My	Mz	Cx	Cy	Cz	Fx	Fy	Fz	Mx	My	Mz	Cx	Cy	Cz	Fx	Fy	Fz	Mx	My	Mz	Cx	Cy	Cz
		N	N	N	N.mm	N.mm	N.mm	mm	mm	mm	N	N	N	N.mm	N.mm	N.mm	mm	mm	mm	N	N	N	N.mm	N.mm	N.mm	mm	mm	mm
477	0	0	0	0	0	0	0	200	300	0	0	0	0	0	0	0	200	903	0	0	0	0	0	0	0	603	903	0
477	1	0	0	0	0	0	0	200	300	0	0	0	0	0	0	0	200	903	0	0	0	0	0	0	0	603	903	0
477	2	0	0	0	0	0	0	200	300	0	0	0	0	0	0	0	200	903	0	0	0	0	0	0	0	603	903	0
477	3	0	0	0	0	0	0	200	300	0	0	0	0	0	0	0	200	903	0	0	0	0	0	0	0	603	903	0
477	4	0	0	0	0	0	0	200	300	0	0	0	0	0	0	0	200	903	0	0	0	0	0	0	0	603	903	0
477	5	0	0	0	0	0	0	200	300	0	0	0	0	0	0	0	200	903	0	0	0	0	0	0	0	603	903	0
477	6	0	0	0	0	0	0	200	300	0	0	0	0	0	0	0	200	903	0	0	0	0	0	0	0	603	903	0
477	7	0	0	0	0	0	0	200	300	0	0	0	0	0	0	0	200	903	0	0	0	0	0	0	0	603	903	0
477	8	0	0	0	0	0	0	200	300	0	0	0	0	0	0	0	200	903	0	0	0	0	0	0	0	603	903	0
477	9	0	0	0	0	0	0	200	300	0	0	0	0	0	0	0	200	903	0	0	0	0	0	0	0	603	903	0
478	0	0	0	0	0	0	0	200	300	0	0	0	0	0	0	0	200	903	0	0	0	0	0	0	0	603	903	0
478	1	0	0	0	0	0	0	200	300	0	0	0	0	0	0	0	200	903	0	0	0	0	0	0	0	603	903	0
478	2	0	0	0	0	0	0	200	300	0	0	0	0	0	0	0	200	903	0	0	0	0	0	0	0	603	903	0
478	3	0	0	0	0	0	0	200	300	0	0	0	0	0	0	0	200	903	0	0	0	0	0	0	0	603	903	0
478	4	0	0	0	0	0	0	200	300	0	0	0	0	0	0	0	200	903	0	0	0	0	0	0	0	603	903	0
478	5	0	0	0	0	0	0	200	300	0	0	0	0	0	0	0	200	903	0	0	0	0	0	0	0	603	903	0
478	6	0	0	0	0	0	0	200	300	0	0	0	0	0	0	0	200	903	0	0	0	0	0	0	0	603	903	0
478	7	0	0	0	0	0	0	200	300	0	0	0	0	0	0	0	200	903	0	0	0	0	0	0	0	603	903	0
478	8	0	0	0	0	0	0	200	300	0	0	0	0	0	0	0	200	903	0	0	0	0	0	0	0	603	903	0
478	9	0	0	0	0	0	0	200	300	0	0	0	0	0	0	0	200	903	0	0	0	0	0	0	0	603	903	0
479	0	0	0	0	0	0	0	200	300	0	0	0	0	0	0	0	200	903	0	0	0	0	0	0	0	603	903	0
479	1	0	0	0	0	0	0	200	300	0	0	0	0	0	0	0	200	903	0	0	0	0	0	0	0	603	903	0
479	2	0	0	0	0	0	0	200	300	0	0	0	0	0	0	0	200	903	0	0	0	0	0	0	0	603	903	0
479	3	0	0	0	0	0	0	200	300	0	0	0	0	0	0	0	200	903	0	0	0	0	0	0	0	603	903	0
479	4	0	0	0	0	0	0	200	300	0	0	0	0	0	0	0	200	903	0	0	0	0	0	0	0	603	903	0
479	5	0	0	0	0	0	0	200	300	0	0	0	0	0	0	0	200	903	0	0	0	0	0	0	0	603	903	0
479	6	0	0	0	0	0	0	200	300	0	0	0	0	0	0	0	200	903	0	0	0	0	0	0	0	603	903	0
479	7	0	0	0	0	0	0	200	300	0	0	0	0	0	0	0	200	903	0	0	0	0	0	0	0	603	903	0
479	8	0	0	0	0	0	0	200	300	0	0	0	0	0	0	0	200	903	0	0	0	0	0	0	0	603	903	0
479	9	0	0	0	0	0	0	200	300	0	0	0	0	0	0	0	200	903	0	0	0	0	0	0	0	603	903	0
480	0	0	0	0	0	0	0	200	300	0	0	0	0	0	0	0	200	903	0	0	0	0	0	0	0	603	903	0
480	1	0	0	0	0	0	0	200	300	0	0	0	0	0	0	0	200	903	0	0	0	0	0	0	0	603	903	0
480	2	0	0	0	0	0	0	200	300	0	0	0	0	0	0	0	200	903	0	0	0	0	0	0	0	603	903	0
480	3	0	0	0	0	0	0	200	300	0	0	0	0	0	0	0	200	903	0	0	0	0	0	0	0	603	903	0
480	4	0	0	0	0	0	0	200	300	0	0	0	0	0	0	0	200	903	0	0	0	0	0	0	0	603	903	0
480	5	0	0	0	0	0	0	200	300	0	0	0	0	0	0	0	200	903	0	0	0	0	0	0	0	603	903	0
480	6	0	0	0	0	0	0	200	300	0	0	0	0	0	0	0	200	903	0	0	0	0	0	0	0	603	903	0
480	7	0	0	0	0	0	0	200	300	0	0	0	0	0	0	0	200	903	0	0	0	0	0	0	0	603	903	0
480	8	0	0	0	0	0	0	200	300	0	0	0	0	0	0	0	200	903	0	0	0	0	0	0	0	603	903	0
480	9	0	0	0	0	0	0	200	300	0	0	0	0	0	0	0	200	903	0	0	0	0	0	0	0	603	903	0
481	0	0	0	0	0	0	0	200	300	0	0	0	0	0	0	0	200	903	0	0	0	0	0	0	0	603	903	0
481	1	0	0	0	0	0	0	200	300	0	0	0	0	0	0	0	200	903	0	0	0	0	0	0	0	603	903	0
481	2	0	0	0	0	0	0	200	300	0	0	0	0	0	0	0	200	903	0	0	0	0	0	0	0	603	903	0
481	3	0	0	0	0	0	0	200	300	0	0	0	0	0	0	0	200	903	0	0	0	0	0	0	0	603	903	0
481	4	0	0	0	0	0	0	200	300	0	0	0	0	0	0	0	200	903	0	0	0	0	0	0	0	603	903	0
481	5	0	0	0	0	0	0	200	300	0	0	0	0	0	0	0	200	903	0	0	0	0	0	0	0	603	903	0
481	6	0	0	0	0	0	0	200	300	0	0	0	0	0	0	0	200	903	0	0	0	0	0	0	0	603	903	0
481	7	0	0	0	0	0	0	200	300	0	0	0	0	0	0	0	200	903	0	0	0	0	0	0	0	603	903	0
481	8	0	0	0	0	0	0	200	300	0	0	0	0	0	0	0	200	903	0	0	0	0	0	0	0	603	903	0
481	9	0	0	0	0	0	0	200	300	0	0	0	0	0	0	0	200	903	0	0	0	0	0	0	0	603	903	0
482	0	0	0	0	0	0	0	200	300	0	0	0	0	0	0	0	200	903	0	0	0	0	0	0	0	603	903	0
482	1	0	0	0	0	0	0	200	300	0	0	0	0	0	0	0	200	903	0	0	0	0	0	0	0	603	903	0
482	2	0	0	0	0	0	0	200	300	0	0	0	0	0	0	0	200	903	0	0	0	0	0	0	0	603	903	0
482	3	0	0	0	0	0	0	200	300	0	0	0	0	0	0	0	200	903	0	0	0	0	0	0	0	603	903	0
482	4	0	0	0	0	0	0	200	300	0	0	0	0	0	0	0	200	903	0	0	0	0	0	0	0	603	903	0
482	5	0	0	0	0	0	0	200	300	0	0	0	0	0	0	0	200	903	0	0	0	0	0	0	0	603	903	0
482	6	0	0	0	0	0	0	200	300	0	0	0	0	0	0	0	200	903	0	0	0	0	0	0	0	603	903	0
482	7	0	0	0	0	0	0	200	300	0	0	0	0	0	0	0	200	903	0	0	0	0	0	0	0	603	903	0
482	8	0	0	0	0	0	0	200	300	0	0	0	0	0	0	0	200	903	0	0	0	0	0	0	0	603	903	0
482	9	0	0	0	0	0	0	200	300	0	0	0	0	0	0	0	200	903	0	0	0	0	0	0	0	603	903	0
483	0	0	0	0	0	0	0	200	300	0	0	0	0	0	0	0	200	903	0	0	0	0	0	0	0	603	903	0
483	1	0	0	0	0	0	0	200	300	0	0	0	0	0	0	0	200	903	0	0	0	0	0	0	0	603	903	0
483	2	0	0	0	0	0	0	200	300	0	0	0	0	0	0	0	200	903	0	0	0	0	0	0	0	603	903	0
483	3	0	0	0	0	0	0	200	300	0	0	0	0	0	0	0	200	903	0	0	0	0	0	0	0	603	903	0
483	4	0	0	0	0	0	0	200	300	0	0	0	0	0	0	0	200	903	0	0	0	0	0	0	0	603	903	0
483	5	0	0	0	0	0	0	200	300	0	0	0	0	0	0	0	200	903	0	0	0	0	0	0	0	603	903	0
483	6	0	0	0	0	0	0	200	300	0	0	0	0	0	0	0	200	903	0	0	0	0	0	0	0	603	903	0
483	7	0	0	0	0	0	0	200	300	0	0	0	0	0	0	0	200	903	0	0	0	0	0	0	0	603	903	0
483	8	0	0	0	0	0	0	200	300	0	0	0	0	0	0	0	200	903	0	0	0	0	0	0	0	603	903	0
483	9	0	0	0	0	0	0	200	300	0	0	0	0	0	0	0	200	903	0	0	0	0	0	0	0	603	903	0
484	0	0	0	0	0	0	0	200	300	0	0	0	0	0	0	0	200	903	0	0	0	0	0	0	0	603	903	0
484	1	0	0	0	0	0	0	200	300	0	0	0	0	0	0	0	200	903	0	0	0	0	0	0	0	603	903	0
484	2	0	0	0	0	0	0	200	300	0	0	0	0	0	0	0	200	903	0	0	0	0	0	0	0	603	903	0
484	3	0	0	0	0	0	0	200	300	0	0	0	0	0	0	0	200	903	0	0	0	0	0	0	0	603	903	0
484	4	0	0	0	0	0	0	200	300	0	0	0	0	0	0	0	200	903	0	0	0	0	0	0	0	603	903	0
484	5	0	0	0	0	0	0	200	300	0	0	0	0	0	0	0	200	903	0	0	0	0	0	0	0	603	903	0
484	6	0	0	0	0	0	0	200	300	0	0	0	0	0	0	0	200	903	0	0	0	0	0	0	0	603	903	0
484	7	0	0	0	0	0	0	200	300	0	0	0	0	0	0	0	200	903	0	0	0	0	0	0	0	603	903	0
484	8	0	0	0	0	0	0	200	300	0	0	0	0	0	0	0	200	903	0	0	0	0	0	0	0	603	903	0
484	9	0	0	0	0	0	0	200	300	0	0	0	0	0	0	0	200	903	0	0	0	0	0	0	0	603	903	0
485	0	0	0	0	0	0	0	200	300	0	0	0	0	0	0	0	200	903	0	0	0	0	0	0	0	603	903	0
485	1	0	0	0	0	0	0	200	300	0	0	0	0	0	0	0	200	903	0	0	0	0	0	0	0	603	903	0
485	2	0	0	0	0	0	0	200	300	0	0	0	0	0	0	0	200	903	0	0	0	0	0	0	0	603	903	0
485	3	0	0	0	0	0	0	200	300	0	0	0	0	0	0	0	200	903	0	0	0	0	0	0	0	603	903	0
485	4	0	0	0	0	0	0	200	300	0	0	0	0	0	0	0	200	903	0	0	0	0	0	0	0	603	903	0
485	5	0	0	0	0	0	0	200	300	0	0	0	0	0	0	0	200	903	0	0	0	0	0	0	0	603	903	0
485	6	0	0	0	0	0	0	200	300	0	0	0	0	0	0	0	200	903	0	0	0	0	0	0	0	603	903	0
485	7	0	0	0	0	0	0	200	300	0	0	0	0	0	0	0	200	903	0	0	0	0	0	0	0	603	903	0
485	8	0	0	0	0	0	0	200	300	0	0	0	0	0	0	0	200	903	0	0	0	0	0	0	0	603	903	0
485	9	0	0	0	0	0	0	200	300	0	0	0	0	0	0	0	200	903	0	0	0	0	0	0	0	603	903	0
486	0	0	0	0	0	0	0	200	300	0	0	0	0	0	0	0	200	903	0	0	0	0	0	0	0	603	903	0
486	1	0	0	0	0	0	0	200	300	0	0	0	0	0	0	0	200	903	0	0	0	0	0	0	0	603	903	0
486	2	0	0	0	0	0	0	200	300	0	0	0	0	0	0	0	200	903	0	0	0	0	0	0	0	603	903	0
486	3	0	0	0	0	0	0	200	300	0	0	0	0	0	0	0	200	903	0	0	0	0	0	0	0	603	903	0
486	4	0	0	0	0	0	0	200	300	0	0	0	0	0	0	0	200	903	0	0	0	0	0	0	0	603	903	0
486	5	0	0	0	0	0	0	200	300	0	0	0	0	0	0	0	200	903	0	0	0	0	0	0	0	603	903	0
486	6	0	0	0	0	0	0	200	300	0	0	0	0	0	0	0	200	903	0	0	0	0	0	0	0	603	903	0
486	7	0	0	0	0	0	0	200	300	0	0	0	0	0	0	0	200	903	0	0	0	0	0	0	0	603	903	0
486	8	0	0	0	0	0	0	200	300	0	0	0	0	0	0	0	200	903	0	0	0	0	0	0	0	603	903	0
486	9	0	0	0	0	0	0	200	300	0	0	0	0	0	0	0	200	903	0	0	0	0	0	0	0	603	903	0
487	0	0	0	0	0	0	0	200	300	0	0	0	0	0	0	0	200	903	0	0	0	0	0	0	0	603	903	0
487	1	0	0	0	0	0	0	200	300	0	0	0	0	0	0	0	200	903	0	0	0	0	0	0	0	603	903	0
487	2	0	0	0	0	0	0	200	300	0	0	0	0	0	0	0	200	903	0	0	0	0	0	0	0	603	903	0
487	3	0	0	0	0	0	0	200	300	0	0	0	0	0	0	0	200	903	0	0	0	0	0	0	0	603	903	0
487	4	0	0	0	0	0	0	200	300	0	0	0	0	0	0	0	200	903	0	0	0	0	0	0	0	603	903	0
487	5	0	0	0	0	0	0	200	300	0	0	0	0	0	0	0	200	903	0	0	0	0	0	0	0	603	903	0
487	6	0	0	0	0	0	0	200	300	0	0	0	0	0	0	0	200	903	0	0	0	0	0	0	0	603	903	0
487	7	0	0	0	0	0	0	200	300	0	0	0	0	0	0	0	200	903	0	0	0	0	0	0	0	603	903	0
487	8	0	0	0	0	0	0	200	300	0	0	0	0	0	0	0	200	903	0	0	0	0	0	0	0	603	903	0
487	9	0	0	0	0	0	0	200	300	0	0	0	0	0	0	0	200	903	0	0	0	0	0	0	0	603	903	0
488	0	0	0	0	0	0	0	200	300	0	0	0	0	0	0	0	200	903	0	0	0	0	0	0	0	603	903	0
488	1	0	0	0	0	0	0	200	300	0	0	0	0	0	0	0	200	903	0	0	0	0	0	0	0	603	903	0
488	2	0	0	0	0	0	0	200	300	0	0	0	0	0	0	0	200	903	0	0	0	0	0	0	0	603	903	0
488	3	0	0	0	0	0	0	200	300	0	0	0	0	0	0	0	200	903	0	0	0	0	0	0	0	603	903	0
488	4	0	0	0	0	0	0	200	300	0	0	0	0	0	0	0	200	903	0	0	0	0	0	0	0	603	903	0
488	5	0	0	0	0	0	0	200	300	0	0	0	0	0	0	0	200	903	0	0	0	0	0	0	0	603	903	0
488	6	0	0	0	0	0	0	200	300	0	0	0	0	0	0	0	200	903	0	0	0	0	0	0	0	603	903	0
488	7	0	0	0	0	0	0	200	300	0	0	0	0	0	0	0	200	903	0	0	0	0	0	0	0	603	903	0
488	8	0	0	0	0	0	0	200	300	0	0	0	0	0	0	0	200	903	0	0	0	0	0	0	0	603	903	0
488	9	0	0	0	0	0	0	200	300	0	0	0	0	0	0	0	200	903	0	0	0	0	0	0	0	603	903	0
489	0	0	0	0	0	0	0	200	300	0	0	0	0	0	0	0	200	903	0	0	0	0	0	0	0	603	903	0
489	1	0	0	0	0	0	0	200	300	0	0	0	0	0	0	0	200	903	0	0	0	0	0	0	0	603	903	0
489	2	0	0	0	0	0	0	200	300	0	0	0	0	0	0	0	200	903	0	0	0	0	0	0	0	603	903	0
489	3	0	0	0	0	0	0	200	300	0	0	0	0	0	0	0	200	903	0	0	0	0	0	0	0	603	903	0
489	4	0	0	0	0	0	0	200	300	0	0	0	0	0	0	0	200	903	0	0	0	0	0	0	0	603	903	0
489	5	0	0	0	0	0	0	200	300	0	0	0	0	0	0	0	200	903	0	0	0	0	0	0	0	603	903	0
489	6	0	0	0	0	0	0	200	300	0	0	0	0	0	0	0	200	903	0	0	0	0	0	0	0	603	903	0
489	7	0	0	0	0	0	0	200	300	0	0	0	0	0	0	0	200	903	0	0	0	0	0	0	0	603	903	0
489	8	0	0	0	0	0	0	200	300	0	0	0	0	0	0	0	200	903	0	0	0	0	0	0	0	603	903	0
489	9	0	0	0	0	0	0	200	300	0	0	0	0	0	0	0	200	903	0	0	0	0	0	0	0	603	903	0
490	0	0	0	0	0	0	0	200	300	0	0	0	0	0	0	0	200	903	0	0	0	0	0	0	0	603	903	0
490	1	0	0	0	0	0	0	200	300	0	0	0	0	0	0	0	200	903	0	0	0	0	0	0	0	603	903	0
490	2	0	0	0	0	0	0	200	300	0	0	0	0	0	0	0	200	903	0	0	0	0	0	0	0	603	903	0
490	3	0	0	0	0	0	0	200	300	0	0	0	0	0	0	0	200	903	0	0	0	0	0	0	0	603	903	0
490	4	0	0	0	0	0	0	200	300	0	0	0	0	0	0	0	200	903	0	0	0	0	0	0	0	603	903	0
490	5	0	0	0	0	0	0	200	300	0	0	0	0	0	0	0	200	903	0	0	0	0	0	0	0	603	903	0
490	6	0	0	0	0	0	0	200	300	0	0	0	0	0	0	0	200	903	0	0	0	0	0	0	0	603	903	0
490	7	0	0	0	0	0	0	200	300	0	0	0	0	0	0	0	200	903	0	0	0	0	0	0	0	603	903	0
490	8	0	0	0	0	0	0	200	300	0	0	0	0	0	0	0	200	903	0	0	0	0	0	0	0	603	903	0
490	9	0	0	0	0	0	0	200	300	0	0	0	0	0	0	0	200	903	0	0	0	0	0	0	0	603	903	0
491	0	0	0	0	0	0	0	200	300	0	0	0	0	0	0	0	200	903	0	0	0	0	0	0	0	603	903	0
491	1	0	0	0	0	0	0	200	300	0	0	0	0	0	0	0	200	903	0	0	0	0	0	0	0	603	903	0
491	2	0	0	0	0	0	0	200	300	0	0	0	0	0	0	0	200	903	0	0	0	0	0	0	0	603	903	0
491	3	0	0	0	0	0	0	200	300	0	0	0	0	0	0	0	200	903	0	0	0	0	0	0	0	603	903	0
491	4	0	0	0	0	0	0	200	300	0	0	0	0	0	0	0	200	903	0	0	0	0	0	0	0	603	903	0
491	5	0	0	0	0	0	0	200	300	0	0	0	0	0	0	0	200	903	0	0	0	0	0	0	0	603	903	0
491	6	0	0	0	0	0	0	200	300	0	0	0	0	0	0	0	200	903	0	0	0	0	0	0	0	603	903	0
491	7	0	0	0	0	0	0	200	300	0	0	0	0	0	0	0	200	903	0	0	0	0	0	0	0	603	903	0
491	8	0	0	0	0	0	0	200	300	0	0	0	0	0	0	0	200	903	0	0	0	0	0	0	0	603	903	0
491	9	0	0	0	0	0	0	200	300	0	0	0	0	0	0	0	200	903	0	0	0	0	0	0	0	603	903	0
492	0	0	0	0	0	0	0	200	300	0	0	0	0	0	0	0	200	903	0	0	0	0	0	0	0	603	903	0
492	1	0	0	0	0	0	0	200	300	0	0	0	0	0	0	0	200	903	0	0	0	0	0	0	0	603	903	0
492	2	0	0	0	0	0	0	200	300	0	0	0	0	0	0	0	200	903	0	0	0	0	0	0	0	603	903	0
492	3	0	0	0	0	0	0	200	300	0	0	0	0	0	0	0	200	903	0	0	0	0	0	0	0	603	903	0
492	4	0	0	0	0	0	0	200	300	0	0	0	0	0	0	0	200	903	0	0	0	0	0	0	0	603	903	0
492	5	0	0	0	0	0	0	200	300	0	0	0	0	0	0	0	200	903	0	0	0	0	0	0	0	603	903	0
492	6	0	0	0	0	0	0	200	300	0	0	0	0	0	0	0	200	903	0	0	0	0	0	0	0	603	903	0
492	7	0	0	0	0	0	0	200	300	0	0	0	0	0	0	0	200	903	0	0	0	0	0	0	0	603	903	0
492	8	0	0	0	0	0	0	200	300	0	0	0	0	0	0	0	200	903	0	0	0	0	0	0	0	603	903	0
492	9	0	0	0	0	0	0	200	300	0	0	0	0	0	0	0	200	903	0	0	0	0	0	0	0	603	903	0
493	0	0	0	0	0	0	0	200	300	0	0	0	0	0	0	0	200	903	0	0	0	0	0	0	0	603	903	0
493	1	0	0	0	0	0	0	200	300	0	0	0	0	0	0	0	200	903	0	0	0	0	0	0	0	603	903	0
493	2	0	0	0	0	0	0	200	300	0	0	0	0	0	0	0	200	903	0	0	0	0	0	0	0	603	903	0
493	3	0	0	0	0	0	0	200	300	0	0	0	0	0	0	0	200	903	0	0	0	0	0	0	0	603	903	0
493	4	0	0	0	0	0	0	200	300	0	0	0	0	0	0	0	200	903	0	0	0	0	0	0	0	603	903	0
493	5	0	0	0	0	0	0	200	300	0	0	0	0	0	0	0	200	903	0	0	0	0	0	0	0	603	903	0
493	6	0	0	0	0	0	0	200	300	0	0	0	0	0	0	0	200	903	0	0	0	0	0	0	0	603	903	0
493	7	0	0	0	0	0	0	200	300	0	0	0	0	0	0	0	200	903	0	0	0	0	0	0	0	603	903	0
493	8	0	0	0	0	0	0	200	300	0	0	0	0	0	0	0	200	903	0	0	0	0	0	0	0	603	903	0
493	9	0	0	0	0	0	0	200	300	0	0	0	0	0	0	0	200	903	0	0	0	0	0	0	0	603	903	0
494	0	0	0	0	0	0	0	200	300	0	0	0	0	0	0	0	200	903	0	0	0	0	0	0	0	603	903	0
494	1	0	0	0	0	0	0	200	300	0	0	0	0	0	0	0	200	903	0	0	0	0	0	0	0	603	903	0
494	2	0	0	0	0	0	0	200	300	0	0	0	0	0	0	0	200	903	0	0	0	0	0	0	0	603	903	0
494	3	0	0	0	0	0	0	200	300	0	0	0	0	0	0	0	200	903	0	0	0	0	0	0	0	603	903	0
494	4	0	0	0	0	0	0	200	300	0	0	0	0	0	0	0	200	903	0	0	0	0	0	0	0	603	903	0
494	5	0	0	0	0	0	0	200	300	0	0	0	0	0	0	0	200	903	0	0	0	0	0	0	0	603	903	0
494	6	0	0	0	0	0	0	200	300	0	0	0	0	0	0	0	200	903	0	0	0	0	0	0	0	603	903	0
494	7	0	0	0	0	0	0	200	300	0	0	0	0	0	0	0	200	903	0	0	0	0	0	0	0	603	903	0
494	8	0	0	0	0	0	0	200	300	0	0	0	0	0	0	0	200	903	0	0	0	0	0	0	0	603	903	0
494	9	0	0	0	0	0	0	200	300	0	0	0	0	0	0	0	200	903	0	0	0	0	0	0	0	603	903	0
495	0	0	0	0	0	0	0	200	300	0	0	0	0	0	0	0	200	903	0	0	0	0	0	0	0	603	903	0
495	1	0	0	0	0	0	0	200	300	0	0	0	0	0	0	0	200	903	0	0	0	0	0	0	0	603	903	0
495	2	0	0	0	0	0	0	200	300	0	0	0	0	0	0	0	200	903	0	0	0	0	0	0	0	603	903	0
495	3	0	0	0	0	0	0	200	300	0	0	0	0	0	0	0	200	903	0	0	0	0	0	0	0	603	903	0
495	4	0	0	0	0	0	0	200	300	0	0	0	0	0	0	0	200	903	0	0	0	0	0	0	0	603	903	0
495	5	0	0	0	0	0	0	200	300	0	0	0	0	0	0	0	200	903	0	0	0	0	0	0	0	603	903	0
495	6	0	0	0	0	0	0	200	300	0	0	0	0	0	0	0	200	903	0	0	0	0	0	0	0	603	903	0
495	7	0	0	0	0	0	0	200	300	0	0	0	0	0	0	0	200	903	0	0	0	0	0	0	0	603	903	0
495	8	0	0	0	0	0	0	200	300	0	0	0	0	0	0	0	200	903	0	0	0	0	0	0	0	603	903	0
495	9	0	0	0	0	0	0	200	300	0	0	0	0	0	0	0	200	903	0	0	0	0	0	0	0	603	903	0
496	0	0	0	0	0	0	0	200	300	0	0	0	0	0	0	0	200	903	0	0	0	0	0	0	0	603	903	0
496	1	0	0	0	0	0	0	200	300	0	0	0	0	0	0	0	200	903	0	0	0	0	0	0	0	603	903	0
496	2	0	0	0	0	0	0	200	300	0	0	0	0	0	0	0	200	903	0	0	0	0	0	0	0	603	903	0
496	3	0	0	0	0	0	0	200	300	0	0	0	0	0	0	0	200	903	0	0	0	0	0	0	0	603	903	0
496	4	0	0	0	0	0	0	200	300	0	0	0	0	0	0	0	200	903	0	0	0	0	0	0	0	603	903	0
496	5	0	0	0	0	0	0	200	300	0	0	0	0	0	0	0	200	903	0	0	0	0	0	0	0	603	903	0
496	6	0	0	0	0	0	0	200	300	0	0	0	0	0	0	0	200	903	0	0	0	0	0	0	0	603	903	0
496	7	0	0	0	0	0	0	200	300	0	0	0	0	0	0	0	200	903	0	0	0	0	0	0	0	603	903	0
496	8	0	0	0	0	0	0	200	300	0	0	0	0	0	0	0	200	903	0	0	0	0	0	0	0	603	903	0
496	9	0	0	0	0	0	0	200	300	0	0	0	0	0	0	0	200	903	0	0	0	0	0	0	0	603	903	0
497	0	0	0	0	0	0	0	200	300	0	0	0	0	0	0	0	200	903	0	0	0	0	0	0	0	603	903	0
497	1	0	0	0	0	0	0	200	300	0	0	0	0	0	0	0	200	903	0	0	0	0	0	0	0	603	903	0
497	2	0	0	0	0	0	0	200	300	0	0	0	0	0	0	0	200	903	0	0	0	0	0	0	0	603	903	0
497	3	0	0	0	0	0	0	200	300	0	0	0	0	0	0	0	200	903	0	0	0	0	0	0	0	603	903	0
497	4	0	0	0	0	0	0	200	300	0	0	0	0	0	0	0	200	903	0	0	0	0	0	0	0	603	903	0
497	5	0	0	0	0	0	0	200	300	0	0	0	0	0	0	0	200	903	0	0	0	0	0	0	0	603	903	0
497	6	0	0	0	0	0	0	200	300	0	0	0	0	0	0	0	200	903	0	0	0	0	0	0	0	603	903	0
497	7	0	0	0	0	0	0	200	300	0	0	0	0	0	0	0	200	903	0	0	0	0	0	0	0	603	903	0
497	8	0	0	0	0	0	0	200	300	0	0	0	0	0	0	0	200	903	0	0	0	0	0	0	0	603	903	0
497	9	0	0	0	0	0	0	200	300	0	0	0	0	0	0	0	200	903	0	0	0	0	0	0	0	603	903	0
498	0	0	0	0	0	0	0	200	300	0	0	0	0	0	0	0	200	903	0	0	0	0	0	0	0	603	903	0
498	1	0	0	0	0	0	0	200	300	0	0	0	0	0	0	0	200	903	0	0	0	0	0	0	0	603	903	0
498	2	0	0	0	0	0	0	200	300	0	0	0	0	0	0	0	200	903	0	0	0	0	0	0	0	603	903	0
498	3	0	0	0	0	0	0	200	300	0	0	0	0	0	0	0	200	903	0	0	0	0	0	0	0	603	903	0
498	4	0	0	0	0	0	0	200	300	0	0	0	0	0	0	0	200	903	0	0	0	0	0	0	0	603	903	0
498	5	0	0	0	0	0	0	200	300	0	0	0	0	0	0	0	200	903	0	0	0	0	0	0	0	603	903	0
498	6	0	0	0	0	0	0	200	300	0	0	0	0	0	0	0	200	903	0	0	0	0	0	0	0	603	903	0
498	7	0	0	0	0	0	0	200	300	0	0	0	0	0	0	0	200	903	0	0	0	0	0	0	0	603	903	0
498	8	0	0	0	0	0	0	200	300	0	0	0	0	0	0	0	200	903	0	0	0	0	0	0	0	603	903	0
498	9	0	0	0	0	0	0	200	300	0	0	0	0	0	0	0	200	903	0	0	0	0	0	0	0	603	903	0
499	0	0	0	0	0	0	0	200	300	0	0	0	0	0	0	0	200	903	0	0	0	0	0	0	0	603	903	0
499	1	0	0	0	0	0	0	200	300	0	0	0	0	0	0	0	200	903	0	0	0	0	0	0	0	603	903	0
499	2	0	0	0	0	0	0	200	300	0	0	0	0	0	0	0	200	903	0	0	0	0	0	0	0	603	903	0
499	3	0	0	0	0	0	0	200	300	0	0	0	0	0	0	0	200	903	0	0	0	0	0	0	0	603	903	0
499	4	0	0	0	0	0	0	200	300	0	0	0	0	0	0	0	200	903	0	0	0	0	0	0	0	603	903	0
499	5	0	0	0	0	0	0	200	300	0	0	0	0	0	0	0	200	903	0	0	0	0	0	0	0	603	903	0
499	6	0	0	0	0	0	0	200	300	0	0	0	0	0	0	0	200	903	0	0	0	0	0	0	0	603	903	0
499	7	0	0	0	0	0	0	200	300	0	0	0	0	0	0	0	200	903	0	0	0	0	0	0	0	603	903	0
499	8	0	0	0	0	0	0	200	300	0	0	0	0	0	0	0	200	903	0	0	0	0	0	0	0	603	903	0
499	9	0	0	0	0	0	0	200	300	0	0	0	0	0	0	0	200	903	0	0	0	0	0	0	0	603	903	0
500	0	0	0	0	0	0	0	200	300	0	0	0	0	0	0	0	200	903	0	0	0	0	0	0	0	603	903	0
500	1	0	0	0	0	0	0	200	300	0	0	0	0	0	0	0	200	903	0	0	0	0	0	0	0	603	903	0
500	2	0	0	0	0	0	0	200	300	0	0	0	0	0	0	0	200	903	0	0	0	0	0	0	0	603	903	0
500	3	0	0	0	0	0	0	200	300	0	0	0	0	0	0	0	200	903	0	0	0	0	0	0	0	603	903	0
500	4	0	0	0	0	0	0	200	300	0	0	0	0	0	0	0	200	903	0	0	0	0	0	0	0	603	903	0
500	5	0	0	0	0	0	0	200	300	0	0	0	0	0	0	0	200	903	0	0	0	0	0	0	0	603	903	0
500	6	0	0	0	0	0	0	200	300	0	0	0	0	0	0	0	200	903	0	0	0	0	0	0	0	603	903	0
500	7	0	0	0	0	0	0	200	300	0	0	0	0	0	0	0	200	903	0	0	0	0	0	0	0	603	903	0
500	8	0	0	0	0	0	0	200	300	0	0	0	0	0	0	0	200	903	0	0	0	0	0	0	0	603	903	0
500	9	0	0	0	0	0	0	200	300	0	0	0	0	0	0	0	200	903	0	0	0	0	0	0	0	603	903	0
501	0	0	0	0	0	0	0	200	300	0	0	0	0	0	0	0	200	903	0	0	0	0	0	0	0	603	903	0
501	1	0	0	0	0	0	0	200	300	0	0	0	0	0	0	0	200	903	0	0	0	0	0	0	0	603	903	0
501	2	0	0	0	0	0	0	200	300	0	0	0	0	0	0	0	200	903	0	0	0	0	0	0	0	603	903	0
501	3	0	0	0	0	0	0	200	300	0	0	0	0	0	0	0	200	903	0	0	0	0	0	0	0	603	903	0
501	4	0	0	0	0	0	0	200	300	0	0	0	0	0	0	0	200	903	0	0	0	0	0	0	0	603	903	0
501	5	0	0	0	0	0	0	200	300	0	0	0	0	0	0	0	200	903	0	0	0	0	0	0	0	603	903	0
501	6	0	0	0	0	0	0	200	300	0	0	0	0	0	0	0	200	903	0	0	0	0	0	0	0	603	903	0
501	7	0	0	0	0	0	0	200	300	0	0	0	0	0	0	0	200	903	0	0	0	0	0	0	0	603	903	0
501	8	0	0	0	0	0	0	200	300	0	0	0	0	0	0	0	200	903	0	0	0	0	0	0	0	603	903	0
501	9	0	0	0	0	0	0	200	300	0	0	0	0	0	0	0	200	903	0	0	0	0	0	0	0	603	903	0
502	0	0	0	0	0	0	0	200	300	0	0	0	0	0	0	0	200	903	0	0	0	0	0	0	0	603	903	0
502	1	0	0	0	0	0	0	200	300	0	0	0	0	0	0	0	200	903	0	0	0	0	0	0	0	603	903	0
502	2	0	0	0	0	0	0	200	300	0	0	0	0	0	0	0	200	903	0	0	0	0	0	0	0	603	903	0
502	3	0	0	0	0	0	0	200	300	0	0	0	0	0	0	0	200	903	0	0	0	0	0	0	0	603	903	0
502	4	0	0	0	0	0	0	200	300	0	0	0	0	0	0	0	200	903	0	0	0	0	0	0	0	603	903	0
502	5	0	0	0	0	0	0	200	300	0	0	0	0	0	0	0	200	903	0	0	0	0	0	0	0	603	903	0
502	6	0	0	0	0	0	0	200	300	0	0	0	0	0	0	0	200	903	0	0	0	0	0	0	0	603	903	0
502	7	0	0	0	0	0	0	200	300	0	0	0	0	0	0	0	200	903	0	0	0	0	0	0	0	603	903	0
502	8	0	0	0	0	0	0	200	300	0	0	0	0	0	0	0	200	903	0	0	0	0	0	0	0	603	903	0
502	9	0	0	0	0	0	0	200	300	0	0	0	0	0	0	0	200	903	0	0	0	0	0	0	0	603	903	0
503	0	0	0	0	0	0	0	200	300	0	0	0	0	0	0	0	200	903	0	0	0	0	0	0	0	603	903	0
503	1	0	0	0	0	0	0	200	300	0	0	0	0	0	0	0	200	903	0	0	0	0	0	0	0	603	903	0
503	2	0	0	0	0	0	0	200	300	0	0	0	0	0	0	0	200	903	0	0	0	0	0	0	0	603	903	0
503	3	0	0	0	0	0	0	200	300	0	0	0	0	0	0	0	200	903	0	0	0	0	0	0	0	603	903	0
503	4	0	0	0	0	0	0	200	300	0	0	0	0	0	0	0	200	903	0	0	0	0	0	0	0	603	903	0
503	5	0	0	0	0	0	0	200	300	0	0	0	0	0	0	0	200	903	0	0	0	0	0	0	0	603	903	0
503	6	0	0	0	0	0	0	200	300	0	0	0	0	0	0	0	200	903	0	0	0	0	0	0	0	603	903	0
503	7	0	0	0	0	0	0	200	300	0	0	0	0	0	0	0	200	903	0	0	0	0	0	0	0	603	903	0
503	8	0	0	0	0	0	0	200	300	0	0	0	0	0	0	0	200	903	0	0	0	0	0	0	0	603	903	0
503	9	0	0	0	0	0	0	200	300	0	0	0	0	0	0	0	200	903	0	0	0	0	0	0	0	603	903	0
504	0	0	0	0	0	0	0	200	300	0	0	0	0	0	0	0	200	903	0	0	0	0	0	0	0	603	903	0
504	1	0	0	0	0	0	0	200	300	0	0	0	0	0	0	0	200	903	0	0	0	0	0	0	0	603	903	0
504	2	0	0	0	0	0	0	200	300	0	0	0	0	0	0	0	200	903	0	0	0	0	0	0	0	603	903	0
504	3	0	0	0	0	0	0	200	300	0	0	0	0	0	0	0	200	903	0	0	0	0	0	0	0	603	903	0
504	4	0	0	0	0	0	0	200	300	0	0	0	0	0	0	0	200	903	0	0	0	0	0	0	0	603	903	0
504	5	0	0	0	0	0	0	200	300	0	0	0	0	0	0	0	200	903	0	0	0	0	0	0	0	603	903	0
504	6	0	0	0	0	0	0	200	300	0	0	0	0	0	0	0	200	903	0	0	0	0	0	0	0	603	903	0
504	7	0	0	0	0	0	0	200	300	0	0	0	0	0	0	0	200	903	0	0	0	0	0	0	0	603	903	0
504	8	0	0	0	0	0	0	200	300	0	0	0	0	0	0	0	200	903	0	0	0	0	0	0	0	603	903	0
504	9	0	0	0	0	0	0	200	300	0	0	0	0	0	0	0	200	903	0	0	0	0	0	0	0	603	903	0
505	0	0	0	0	0	0	0	200	300	0	0	0	0	0	0	0	200	903	0	0	0	0	0	0	0	603	903	0
505	1	0	0	0	0	0	0	200	300	0	0	0	0	0	0	0	200	903	0	0	0	0	0	0	0	603	903	0
505	2	0	0	0	0	0	0	200	300	0	0	0	0	0	0	0	200	903	0	0	0	0	0	0	0	603	903	0
505	3	0	0	0	0	0	0	200	300	0	0	0	0	0	0	0	200	903	0	0	0	0	0	0	0	603	903	0
505	4	0	0	0	0	0	0	200	300	0	0	0	0	0	0	0	200	903	0	0	0	0	0	0	0	603	903	0
505	5	0	0	0	0	0	0	200	300	0	0	0	0	0	0	0	200	903	0	0	0	0	0	0	0	603	903	0
505	6	0	0	0	0	0	0	200	300	0	0	0	0	0	0	0	200	903	0	0	0	0	0	0	0	603	903	0
505	7	0	0	0	0	0	0	200	300	0	0	0	0	0	0	0	200	903	0	0	0	0	0	0	0	603	903	0
505	8	0	0	0	0	0	0	200	300	0	0	0	0	0	0	0	200	903	0	0	0	0	0	0	0	603	903	0
505	9	0	0	0	0	0	0	200	300	0	0	0	0	0	0	0	200	903	0	0	0	0	0	0	0	603	903	0
506	0	0	0	0	0	0	0	200	300	0	0	0	0	0	0	0	200	903	0	0	0	0	0	0	0	603	903	0
506	1	0	0	0	0	0	0	200	300	0	0	0	0	0	0	0	200	903	0	0	0	0	0	0	0	603	903	0
506	2	0	0	0	0	0	0	200	300	0	0	0	0	0	0	0	200	903	0	0	0	0	0	0	0	603	903	0
506	3	0	0	0	0	0	0	200	300	0	0	0	0	0	0	0	200	903	0	0	0	0	0	0	0	603	903	0
506	4	0	0	0	0	0	0	200	300	0	0	0	0	0	0	0	200	903	0	0	0	0	0	0	0	603	903	0
506	5	0	0	0	0	0	0	200	300	0	0	0	0	0	0	0	200	903	0	0	0	0	0	0	0	603	903	0
506	6	0	0	0	0	0	0	200	300	0	0	0	0	0	0	0	200	903	0	0	0	0	0	0	0	603	903	0
506	7	0	0	0	0	0	0	200	300	0	0	0	0	0	0	0	200	903	0	0	0	0	0	0	0	603	903	0
506	8	0	0	0	0	0	0	200	300	0	0	0	0	0	0	0	200	903	0	0	0	0	0	0	0	603	903	0
506	9	0	0	0	0	0	0	200	300	0	0	0	0	0	0	0	200	903	0	0	0	0	0	0	0	603	903	0
507	0	0	0	0	0	0	0	200	300	0	0	0	0	0	0	0	200	903	0	0	0	0	0	0	0	603	903	0
507	1	0	0	0	0	0	0	200	300	0	0	0	0	0	0	0	200	903	0	0	0	0	0	0	0	603	903	0
507	2	0	0	0	0	0	0	200	300	0	0	0	0	0	0	0	200	903	0	0	0	0	0	0	0	603	903	0
507	3	0	0	0	0	0	0	200	300	0	0	0	0	0	0	0	200	903	0	0	0	0	0	0	0	603	903	0
507	4	0	0	0	0	0	0	200	300	0	0	0	0	0	0	0	200	903	0	0	0	0	0	0	0	603	903	0
507	5	0	0	0	0	0	0	200	300	0	0	0	0	0	0	0	200	903	0	0	0	0	0	0	0	603	903	0
507	6	0	0	0	0	0	0	200	300	0	0	0	0	0	0	0	200	903	0	0	0	0	0	0	0	603	903	0
507	7	0	0	0	0	0	0	200	300	0	0	0	0	0	0	0	200	903	0	0	0	0	0	0	0	603	903	0
507	8	0	0	0	0	0	0	200	300	0	0	0	0	0	0	0	200	903	0	0	0	0	0	0	0	603	903	0
507	9	0	0	0	0	0	0	200	300	0	0	0	0	0	0	0	200	903	0	0	0	0	0	0	0	603	903	0
508	0	0	0	0	0	0	0	200	300	0	0	0	0	0	0	0	200	903	0	0	0	0	0	0	0	603	903	0
508	1	0	0	0	0	0	0	200	300	0	0	0	0	0	0	0	200	903	0	0	0	0	0	0	0	603	903	0
508	2	0	0	0	0	0	0	200	300	0	0	0	0	0	0	0	200	903	0	0	0	0	0	0	0	603	903	0
508	3	0	0	0	0	0	0	200	300	0	0	0	0	0	0	0	200	903	0	0	0	0	0	0	0	603	903	0
508	4	0	0	0	0	0	0	200	300	0	0	0	0	0	0	0	200	903	0	0	0	0	0	0	0	603	903	0
508	5	0	0	0	0	0	0	200	300	0	0	0	0	0	0	0	200	903	0	0	0	0	0	0	0	603	903	0
508	6	0	0	0	0	0	0	200	300	0	0	0	0	0	0	0	200	903	0	0	0	0	0	0	0	603	903	0
508	7	0	0	0	0	0	0	200	300	0	0	0	0	0	0	0	200	903	0	0	0	0	0	0	0	603	903	0
508	8	0	0	0	0	0	0	200	300	0	0	0	0	0	0	0	200	903	0	0	0	0	0	0	0	603	903	0
508	9	0	0	0	0	0	0	200	300	0	0	0	0	0	0	0	200	903	0	0	0	0	0	0	0	603	903	0
509	0	0	0	0	0	0	0	200	300	0	0	0	0	0	0	0	200	903	0	0	0	0	0	0	0	603	903	0
509	1	0	0	0	0	0	0	200	300	0	0	0	0	0	0	0	200	903	0	0	0	0	0	0	0	603	903	0
509	2	0	0	0	0	0	0	200	300	0	0	0	0	0	0	0	200	903	0	0	0	0	0	0	0	603	903	0
509	3	0	0	0	0	0	0	200	300	0	0	0	0	0	0	0	200	903	0	0	0	0	0	0	0	603	903	0
509	4	0	0	0	0	0	0	200	300	0	0	0	0	0	0	0	200	903	0	0	0	0	0	0	0	603	903	0
509	5	0	0	0	0	0	0	200	300	0	0	0	0	0	0	0	200	903	0	0	0	0	0	0	0	603	903	0
509	6	0	0	0	0	0	0	200	300	0	0	0	0	0	0	0	200	903	0	0	0	0	0	0	0	603	903	0
509	7	0	0	0	0	0	0	200	300	0	0	0	0	0	0	0	200	903	0	0	0	0	0	0	0	603	903	0
509	8	0	0	0	0	0	0	200	300	0	0	0	0	0	0	0	200	903	0	0	0	0	0	0	0	603	903	0
509	9	0	0	0	0	0	0	200	300	0	0	0	0	0	0	0	200	903	0	0	0	0	0	0	0	603	903	0
510	0	0	0	0	0	0	0	200	300	0	0	0	0	0	0	0	200	903	0	0	0	0	0	0	0	603	903	0
510	1	0	0	0	0	0	0	200	300	0	0	0	0	0	0	0	200	903	0	0	0	0	0	0	0	603	903	0
510	2	0	0	0	0	0	0	200	300	0	0	0	0	0	0	0	200	903	0	0	0	0	0	0	0	603	903	0
510	3	0	0	0	0	0	0	200	300	0	0	0	0	0	0	0	200	903	0	0	0	0	0	0	0	603	903	0
510	4	0	0	0	0	0	0	200	300	0	0	0	0	0	0	0	200	903	0	0	0	0	0	0	0	603	903	0
510	5	0	0	0	0	0	0	200	300	0	0	0	0	0	0	0	200	903	0	0	0	0	0	0	0	603	903	0
510	6	0	0	0	0	0	0	200	300	0	0	0	0	0	0	0	200	903	0	0	0	0	0	0	0	603	903	0
510	7	0	0	0	0	0	0	200	300	0	0	0	0	0	0	0	200	903	0	0	0	0	0	0	0	603	903	0
510	8	0	0	0	0	0	0	200	300	0	0	0	0	0	0	0	200	903	0	0	0	0	0	0	0	603	903	0
510	9	0	0	0	0	0	0	200	300	0	0	0	0	0	0	0	200	903	0	0	0	0	0	0	0	603	903	0
511	0	0	0	0	0	0	0	200	300	0	0	0	0	0	0	0	200	903	0	0	0	0	0	0	0	603	903	0
511	1	0	0	0	0	0	0	200	300	0	0	0	0	0	0	0	200	903	0	0	0	0	0	0	0	603	903	0
511	2	0	0	0	0	0	0	200	300	0	0	0	0	0	0	0	200	903	0	0	0	0	0	0	0	603	903	0
511	3	0	0	0	0	0	0	200	300	0	0	0	0	0	0	0	200	903	0	0	0	0	0	0	0	603	903	0
511	4	0	0	0	0	0	0	200	300	0	0	0	0	0	0	0	200	903	0	0	0	0	0	0	0	603	903	0
511	5	0	0	0	0	0	0	200	300	0	0	0	0	0	0	0	200	903	0	0	0	0	0	0	0	603	903	0
511	6	0	0	0	0	0	0	200	300	0	0	0	0	0	0	0	200	903	0	0	0	0	0	0	0	603	903	0
511	7	0	0	0	0	0	0	200	300	0	0	0	0	0	0	0	200	903	0	0	0	0	0	0	0	603	903	0
511	8	0	0	0	0	0	0	200	300	0	0	0	0	0	0	0	200	903	0	0	0	0	0	0	0	603	903	0
511	9	0	0	0	0	0	0	200	300	0	0	0	0	0	0	0	200	903	0	0	0	0	0	0	0	603	903	0
512	0	0	0	0	0	0	0	200	300	0	0	0	0	0	0	0	200	903	0	0	0	0	0	0	0	603	903	0
512	1	0	0	0	0	0	0	200	300	0	0	0	0	0	0	0	200	903	0	0	0	0	0	0	0	603	903	0
512	2	0	0	0	0	0	0	200	300	0	0	0	0	0	0	0	200	903	0	0	0	0	0	0	0	603	903	0
512	3	0	0	0	0	0	0	200	300	0	0	0	0	0	0	0	200	903	0	0	0	0	0	0	0	603	903	0
512	4	0	0	0	0	0	0	200	300	0	0	0	0	0	0	0	200	903	0	0	0	0	0	0	0	603	903	0
512	5	0	0	0	0	0	0	200	300	0	0	0	0	0	0	0	200	903	0	0	0	0	0	0	0	603	903	0
512	6	0	0	0	0	0	0	200	300	0	0	0	0	0	0	0	200	903	0	0	0	0	0	0	0	603	903	0
512	7	0	0	0	0	0	0	200	300	0	0	0	0	0	0	0	200	903	0	0	0	0	0	0	0	603	903	0
512	8	0	0	0	0	0	0	200	300	0	0	0	0	0	0	0	200	903	0	0	0	0	0	0	0	603	903	0
512	9	0	0	0	0	0	0	200	300	0	0	0	0	0	0	0	200	903	0	0	0	0	0	0	0	603	903	0
513	0	0	0	0	0	0	0	200	300	0	0	0	0	0	0	0	200	903	0	0	0	0	0	0	0	603	903	0
513	1	0	0	0	0	0	0	200	300	0	0	0	0	0	0	0	200	903	0	0	0	0	0	0	0	603	903	0
513	2	0	0	0	0	0	0	200	300	0	0	0	0	0	0	0	200	903	0	0	0	0	0	0	0	603	903	0
513	3	0	0	0	0	0	0	200	300	0	0	0	0	0	0	0	200	903	0	0	0	0	0	0	0	603	903	0
513	4	0	0	0	0	0	0	200	300	0	0	0	0	0	0	0	200	903	0	0	0	0	0	0	0	603	903	0
513	5	0	0	0	0	0	0	200	300	0	0	0	0	0	0	0	200	903	0	0	0	0	0	0	0	603	903	0
513	6	0	0	0	0	0	0	200	300	0	0	0	0	0	0	0	200	903	0	0	0	0	0	0	0	603	903	0
513	7	0	0	0	0	0	0	200	300	0	0	0	0	0	0	0	200	903	0	0	0	0	0	0	0	603	903	0
513	8	0	0	0	0	0	0	200	300	0	0	0	0	0	0	0	200	903	0	0	0	0	0	0	0	603	903	0
513	9	0	0	0	0	0	0	200	300	0	0	0	0	0	0	0	200	903	0	0	0	0	0	0	0	603	903	0
514	0	0	0	0	0	0	0	200	300	0	0	0	0	0	0	0	200	903	0	0	0	0	0	0	0	603	903	0
514	1	0	0	0	0	0	0	200	300	0	0	0	0	0	0	0	200	903	0	0	0	0	0	0	0	603	903	0
514	2	0	0	0	0	0	0	200	300	0	0	0	0	0	0	0	200	903	0	0	0	0	0	0	0	603	903	0
514	3	0	0	0	0	0	0	200	300	0	0	0	0	0	0	0	200	903	0	0	0	0	0	0	0	603	903	0
514	4	0	0	0	0	0	0	200	300	0	0	0	0	0	0	0	200	903	0	0	0	0	0	0	0	603	903	0
514	5	0	0	0	0	0	0	200	300	0	0	0	0	0	0	0	200	903	0	0	0	0	0	0	0	603	903	0
514	6	0	0	0	0	0	0	200	300	0	0	0	0	0	0	0	200	903	0	0	0	0	0	0	0	603	903	0
514	7	0	0	0	0	0	0	200	300	0	0	0	0	0	0	0	200	903	0	0	0	0	0	0	0	603	903	0
514	8	0	0	0	0	0	0	200	300	0	0	0	0	0	0	0	200	903	0	0	0	0	0	0	0	603	903	0
514	9	0	0	0	0	0	0	200	300	0	0	0	0	0	0	0	200	903	0	0	0	0	0	0	0	603	903	0
515	0	0	0	0	0	0	0	200	300	0	0	0	0	0	0	0	200	903	0	0	0	0	0	0	0	603	903	0
515	1	0	0	0	0	0	0	200	300	0	0	0	0	0	0	0	200	903	0	0	0	0	0	0	0	603	903	0
515	2	0	0	0	0	0	0	200	300	0	0	0	0	0	0	0	200	903	0	0	0	0	0	0	0	603	903	0
515	3	0	0	0	0	0	0	200	300	0	0	0	0	0	0	0	200	903	0	0	0	0	0	0	0	603	903	0
515	4	0	0	0	0	0	0	200	300	0	0	0	0	0	0	0	200	903	0	0	0	0	0	0	0	603	903	0
515	5	0	0	0	0	0	0	200	300	0	0	0	0	0	0	0	200	903	0	0	0	0	0	0	0	603	903	0
515	6	0	0	0	0	0	0	200	300	0	0	0	0	0	0	0	200	903	0	0	0	0	0	0	0	603	903	0
515	7	0	0	0	0	0	0	200	300	0	0	0	0	0	0	0	200	903	0	0	0	0	0	0	0	603	903	0
515	8	0	0	0	0	0	0	200	300	0	0	0	0	0	0	0	200	903	0	0	0	0	0	0	0	603	903	0
515	9	0	0	0	0	0	0	200	300	0	0	0	0	0	0	0	200	903	0	0	0	0	0	0	0	603	903	0
516	0	0	0	0	0	0	0	200	300	0	0	0	0	0	0	0	200	903	0	0	0	0	0	0	0	603	903	0
516	1	0	0	0	0	0	0	200	300	0	0	0	0	0	0	0	200	903	0	0	0	0	0	0	0	603	903	0
516	2	0	0	0	0	0	0	200	300	0	0	0	0	0	0	0	200	903	0	0	0	0	0	0	0	603	903	0
516	3	0	0	0	0	0	0	200	300	0	0	0	0	0	0	0	200	903	0	0	0	0	0	0	0	603	903	0
516	4	0	0	0	0	0	0	200	300	0	0	0	0	0	0	0	200	903	0	0	0	0	0	0	0	603	903	0
516	5	0	0	0	0	0	0	200	300	0	0	0	0	0	0	0	200	903	0	0	0	0	0	0	0	603	903	0
516	6	0	0	0	0	0	0	200	300	0	0	0	0	0	0	0	200	903	0	0	0	0	0	0	0	603	903	0
516	7	0	0	0	0	0	0	200	300	0	0	0	0	0	0	0	200	903	0	0	0	0	0	0	0	603	903	0
516	8	0	0	0	0	0	0	200	300	0	0	0	0	0	0	0	200	903	0	0	0	0	0	0	0	603	903	0
516	9	0	0	0	0	0	0	200	300	0	0	0	0	0	0	0	200	903	0	0	0	0	0	0	0	603	903	0
517	0	0	0	0	0	0	0	200	300	0	0	0	0	0	0	0	200	903	0	0	0	0	0	0	0	603	903	0
517	1	0	0	0	0	0	0	200	300	0	0	0	0	0	0	0	200	903	0	0	0	0	0	0	0	603	903	0
517	2	0	0	0	0	0	0	200	300	0	0	0	0	0	0	0	200	903	0	0	0	0	0	0	0	603	903	0
517	3	0	0	0	0	0	0	200	300	0	0	0	0	0	0	0	200	903	0	0	0	0	0	0	0	603	903	0
517	4	0	0	0	0	0	0	200	300	0	0	0	0	0	0	0	200	903	0	0	0	0	0	0	0	603	903	0
517	5	0	0	0	0	0	0	200	300	0	0	0	0	0	0	0	200	903	0	0	0	0	0	0	0	603	903	0
517	6	0	0	0	0	0	0	200	300	0	0	0	0	0	0	0	200	903	0	0	0	0	0	0	0	603	903	0
517	7	0	0	0	0	0	0	200	300	0	0	0	0	0	0	0	200	903	0	0	0	0	0	0	0	603	903	0
517	8	0	0	0	0	0	0	200	300	0	0	0	0	0	0	0	200	903	0	0	0	0	0	0	0	603	903	0
517	9	0	0	0	0	0	0	200	300	0	0	0	0	0	0	0	200	903	0	0	0	0	0	0	0	603	903	0
518	0	0	0	0	0	0	0	200	300	0	0	0	0	0	0	0	200	903	0	0	0	0	0	0	0	603	903	0
518	1	0	0	0	0	0	0	200	300	0	0	0	0	0	0	0	200	903	0	0	0	0	0	0	0	603	903	0
518	2	0	0	0	0	0	0	200	300	0	0	0	0	0	0	0	200	903	0	0	0	0	0	0	0	603	903	0
518	3	0	0	0	0	0	0	200	300	0	0	0	0	0	0	0	200	903	0	0	0	0	0	0	0	603	903	0
518	4	0	0	0	0	0	0	200	300	0	0	0	0	0	0	0	200	903	0	0	0	0	0	0	0	603	903	0
518	5	0	0	0	0	0	0	200	300	0	0	0	0	0	0	0	200	903	0	0	0	0	0	0	0	603	903	0
518	6	0	0	0	0	0	0	200	300	0	0	0	0	0	0	0	200	903	0	0	0	0	0	0	0	603	903	0
518	7	0	0	0	0	0	0	200	300	0	0	0	0	0	0	0	200	903	0	0	0	0	0	0	0	603	903	0
518	8	0	0	0	0	0	0	200	300	0	0	0	0	0	0	0	200	903	0	0	0	0	0	0	0	603	903	0
518	9	0	0	0	0	0	0	200	300	0	0	0	0	0	0	0	200	903	0	0	0	0	0	0	0	603	903	0
519	0	0	0	0	0	0	0	200	300	0	0	0	0	0	0	0	200	903	0	0	0	0	0	0	0	603	903	0
519	1	0	0	0	0	0	0	200	300	0	0	0	0	0	0	0	200	903	0	0	0	0	0	0	0	603	903	0
519	2	0	0	0	0	0	0	200	300	0	0	0	0	0	0	0	200	903	0	0	0	0	0	0	0	603	903	0
519	3	0	0	0	0	0	0	200	300	0	0	0	0	0	0	0	200	903	0	0	0	0	0	0	0	603	903	0
519	4	0	0	0	0	0	0	200	300	0	0	0	0	0	0	0	200	903	0	0	0	0	0	0	0	603	903	0
519	5	0	0	0	0	0	0	200	300	0	0	0	0	0	0	0	200	903	0	0	0	0	0	0	0	603	903	0
519	6	0	0	0	0	0	0	200	300	0	0	0	0	0	0	0	200	903	0	0	0	0	0	0	0	603	903	0
519	7	0	0	0	0	0	0	200	300	0	0	0	0	0	0	0	200	903	0	0	0	0	0	0	0	603	903	0
519	8	0	0	0	0	0	0	200	300	0	0	0	0	0	0	0	200	903	0	0	0	0	0	0	0	603	903	0
519	9	0	0	0	0	0	0	200	300	0	0	0	0	0	0	0	200	903	0	0	0	0	0	0	0	603	903	0
520	0	0	0	0	0	0	0	200	300	0	0	0	0	0	0	0	200	903	0	0	0	0	0	0	0	603	903	0
520	1	0	0	0	0	0	0	200	300	0	0	0	0	0	0	0	200	903	0	0	0	0	0	0	0	603	903	0
520	2	0	0	0	0	0	0	200	300	0	0	0	0	0	0	0	200	903	0	0	0	0	0	0	0	603	903	0
520	3	0	0	0	0	0	0	200	300	0	0	0	0	0	0	0	200	903	0	0	0	0	0	0	0	603	903	0
520	4	0	0	0	0	0	0	200	300	0	0	0	0	0	0	0	200	903	0	0	0	0	0	0	0	603	903	0
520	5	0	0	0	0	0	0	200	300	0	0	0	0	0	0	0	200	903	0	0	0	0	0	0	0	603	903	0
520	6	0	0	0	0	0	0	200	300	0	0	0	0	0	0	0	200	903	0	0	0	0	0	0	0	603	903	0
520	7	0	0	0	0	0	0	200	300	0	0	0	0	0	0	0	200	903	0	0	0	0	0	0	0	603	903	0
520	8	0	0	0	0	0	0	200	300	0	0	0	0	0	0	0	200	903	0	0	0	0	0	0	0	603	903	0
520	9	0	0	0	0	0	0	200	300	0	0	0	0	0	0	0	200	903	0	0	0	0	0	0	0	603	903	0
521	0	0	0	0	0	0	0	200	300	0	0	0	0	0	0	0	200	903	0	0	0	0	0	0	0	603	903	0
521	1	0	0	0	0	0	0	200	300	0	0	0	0	0	0	0	200	903	0	0	0	0	0	0	0	603	903	0
521	2	0	0	0	0	0	0	200	300	0	0	0	0	0	0	0	200	903	0	0	0	0	0	0	0	603	903	0
521	3	0	0	0	0	0	0	200	300	0	0	0	0	0	0	0	200	903	0	0	0	0	0	0	0	603	903	0
521	4	0	0	0	0	0	0	200	300	0	0	0	0	0	0	0	200	903	0	0	0	0	0	0	0	603	903	0
521	5	0	0	0	0	0	0	200	300	0	0	0	0	0	0	0	200	903	0	0	0	0	0	0	0	603	903	0
521	6	0	0	0	0	0	0	200	300	0	0	0	0	0	0	0	200	903	0	0	0	0	0	0	0	603	903	0
521	7	0	0	0	0	0	0	200	300	0	0	0	0	0	0	0	200	903	0	0	0	0	0	0	0	603	903	0
521	8	0	0	0	0	0	0	200	300	0	0	0	0	0	0	0	200	903	0	0	0	0	0	0	0	603	903	0
521	9	0	0	0	0	0	0	200	300	0	0	0	0	0	0	0	200	903	0	0	0	0	0	0	0	603	903	0
522	0	0	0	0	0	0	0	200	300	0	0	0	0	0	0	0	200	903	0	0	0	0	0	0	0	603	903	0
522	1	0	0	0	0	0	0	200	300	0	0	0	0	0	0	0	200	903	0	0	0	0	0	0	0	603	903	0
522	2	0	0	0	0	0	0	200	300	0	0	0	0	0	0	0	200	903	0	0	0	0	0	0	0	603	903	0
522	3	0	0	0	0	0	0	200	300	0	0	0	0	0	0	0	200	903	0	0	0	0	0	0	0	603	903	0
522	4	0	0	0	0	0	0	200	300	0	0	0	0	0	0	0	200	903	0	0	0	0	0	0	0	603	903	0
522	5	0	0	0	0	0	0	200	300	0	0	0	0	0	0	0	200	903	0	0	0	0	0	0	0	603	903	0
522	6	0	0	0	0	0	0	200	300	0	0	0	0	0	0	0	200	903	0	0	0	0	0	0	0	603	903	0
522	7	0	0	0	0	0	0	200	300	0	0	0	0	0	0	0	200	903	0	0	0	0	0	0	0	603	903	0
522	8	0	0	0	0	0	0	200	300	0	0	0	0	0	0	0	200	903	0	0	0	0	0	0	0	603	903	0
522	9	0	0	0	0	0	0	200	300	0	0	0	0	0	0	0	200	903	0	0	0	0	0	0	0	603	903	0
523	0	0	0	0	0	0	0	200	300	0	0	0	0	0	0	0	200	903	0	0	0	0	0	0	0	603	903	0
523	1	0	0	0	0	0	0	200	300	0	0	0	0	0	0	0	200	903	0	0	0	0	0	0	0	603	903	0
523	2	0	0	0	0	0	0	200	300	0	0	0	0	0	0	0	200	903	0	0	0	0	0	0	0	603	903	0
523	3	0	0	0	0	0	0	200	300	0	0	0	0	0	0	0	200	903	0	0	0	0	0	0	0	603	903	0
523	4	0	0	0	0	0	0	200	300	0	0	0	0	0	0	0	200	903	0	0	0	0	0	0	0	603	903	0
523	5	0	0	0	0	0	0	200	300	0	0	0	0	0	0	0	200	903	0	0	0	0	0	0	0	603	903	0
523	6	0	0	0	0	0	0	200	300	0	0	0	0	0	0	0	200	903	0	0	0	0	0	0	0	603	903	0
523	7	0	0	0	0	0	0	200	300	0	0	0	0	0	0	0	200	903	0	0	0	0	0	0	0	603	903	0
523	8	0	0	0	0	0	0	200	300	0	0	0	0	0	0	0	200	903	0	0	0	0	0	0	0	603	903	0
523	9	0	0	0	0	0	0	200	300	0	0	0	0	0	0	0	200	903	0	0	0	0	0	0	0	603	903	0
524	0	0	0	0	0	0	0	200	300	0	0	0	0	0	0	0	200	903	0	0	0	0	0	0	0	603	903	0
524	1	0	0	0	0	0	0	200	300	0	0	0	0	0	0	0	200	903	0	0	0	0	0	0	0	603	903	0
524	2	0	0	0	0	0	0	200	300	0	0	0	0	0	0	0	200	903	0	0	0	0	0	0	0	603	903	0
524	3	0	0	0	0	0	0	200	300	0	0	0	0	0	0	0	200	903	0	0	0	0	0	0	0	603	903	0
524	4	0	0	0	0	0	0	200	300	0	0	0	0	0	0	0	200	903	0	0	0	0	0	0	0	603	903	0
524	5	0	0	0	0	0	0	200	300	0	0	0	0	0	0	0	200	903	0	0	0	0	0	0	0	603	903	0
524	6	0	0	0	0	0	0	200	300	0	0	0	0	0	0	0	200	903	0	0	0	0	0	0	0	603	903	0
524	7	0	0	0	0	0	0	200	300	0	0	0	0	0	0	0	200	903	0	0	0	0	0	0	0	603	903	0
524	8	0	0	0	0	0	0	200	300	0	0	0	0	0	0	0	200	903	0	0	0	0	0	0	0	603	903	0
524	9	0	0	0	0	0	0	200	300	0	0	0	0	0	0	0	200	903	0	0	0	0	0	0	0	603	903	0
525	0	0	0	0	0	0	0	200	300	0	0	0	0	0	0	0	200	903	0	0	0	0	0	0	0	603	903	0
525	1	0	0	0	0	0	0	200	300	0	0	0	0	0	0	0	200	903	0	0	0	0	0	0	0	603	903	0
525	2	0	0	0	0	0	0	200	300	0	0	0	0	0	0	0	200	903	0	0	0	0	0	0	0	603	903	0
525	3	0	0	0	0	0	0	200	300	0	0	0	0	0	0	0	200	903	0	0	0	0	0	0	0	603	903	0
525	4	0	0	0	0	0	0	200	300	0	0	0	0	0	0	0	200	903	0	0	0	0	0	0	0	603	903	0
525	5	0	0	0	0	0	0	200	300	0	0	0	0	0	0	0	200	903	0	0	0	0	0	0	0	603	903	0
525	6	0	0	0	0	0	0	200	300	0	0	0	0	0	0	0	200	903	0	0	0	0	0	0	0	603	903	0
525	7	0	0	0	0	0	0	200	300	0	0	0	0	0	0	0	200	903	0	0	0	0	0	0	0	603	903	0
525	8	0	0	0	0	0	0	200	300	0	0	0	0	0	0	0	200	903	0	0	0	0	0	0	0	603	903	0
525	9	0	0	0	0	0	0	200	300	0	0	0	0	0	0	0	200	903	0	0	0	0	0	0	0	603	903	0
526	0	0	0	0	0	0	0	200	300	0	0	0	0	0	0	0	200	903	0	0	0	0	0	0	0	603	903	0
526	1	0	0	0	0	0	0	200	300	0	0	0	0	0	0	0	200	903	0	0	0	0	0	0	0	603	903	0
526	2	0	0	0	0	0	0	200	300	0	0	0	0	0	0	0	200	903	0	0	0	0	0	0	0	603	903	0
526	3	0	0	0	0	0	0	200	300	0	0	0	0	0	0	0	200	903	0	0	0	0	0	0	0	603	903	0
526	4	0	0	0	0	0	0	200	300	0	0	0	0	0	0	0	200	903	0	0	0	0	0	0	0	603	903	0
526	5	0	0	0	0	0	0	200	300	0	0	0	0	0	0	0	200	903	0	0	0	0	0	0	0	603	903	0
526	6	0	0	0	0	0	0	200	300	0	0	0	0	0	0	0	200	903	0	0	0	0	0	0	0	603	903	0
526	7	0	0	0	0	0	0	200	300	0	0	0	0	0	0	0	200	903	0	0	0	0	0	0	0	603	903	0
526	8	0	0	0	0	0	0	200	300	0	0	0	0	0	0	0	200	903	0	0	0	0	0	0	0	603	903	0
526	9	0	0	0	0	0	0	200	300	0	0	0	0	0	0	0	200	903	0	0	0	0	0	0	0	603	903	0
527	0	0	0	0	0	0	0	200	300	0	0	0	0	0	0	0	200	903	0	0	0	0	0	0	0	603	903	0
527	1	0	0	0	0	0	0	200	300	0	0	0	0	0	0	0	200	903	0	0	0	0	0	0	0	603	903	0
527	2	0	0	0	0	0	0	200	300	0	0	0	0	0	0	0	200	903	0	0	0	0	0	0	0	603	903	0
527	3	0	0	0	0	0	0	200	300	0	0	0	0	0	0	0	200	903	0	0	0	0	0	0	0	603	903	0
527	4	0	0	0	0	0	0	200	300	0	0	0	0	0	0	0	200	903	0	0	0	0	0	0	0	603	903	0
527	5	0	0	0	0	0	0	200	300	0	0	0	0	0	0	0	200	903	0	0	0	0	0	0	0	603	903	0
527	6	0	0	0	0	0	0	200	300	0	0	0	0	0	0	0	200	903	0	0	0	0	0	0	0	603	903	0
527	7	0	0	0	0	0	0	200	300	0	0	0	0	0	0	0	200	903	0	0	0	0	0	0	0	603	903	0
527	8	0	0	0	0	0	0	200	300	0	0	0	0	0	0	0	200	903	0	0	0	0	0	0	0	603	903	0
527	9	0	0	0	0	0	0	200	300	0	0	0	0	0	0	0	200	903	0	0	0	0	0	0	0	603	903	0
528	0	0	0	0	0	0	0	200	300	0	0	0	0	0	0	0	200	903	0	0	0	0	0	0	0	603	903	0
528	1	0	0	0	0	0	0	200	300	0	0	0	0	0	0	0	200	903	0	0	0	0	0	0	0	603	903	0
528	2	0	0	0	0	0	0	200	300	0	0	0	0	0	0	0	200	903	0	0	0	0	0	0	0	603	903	0
528	3	0	0	0	0	0	0	200	300	0	0	0	0	0	0	0	200	903	0	0	0	0	0	0	0	603	903	0
528	4	0	0	0	0	0	0	200	300	0	0	0	0	0	0	0	200	903	0	0	0	0	0	0	0	603	903	0
528	5	0	0	0	0	0	0	200	300	0	0	0	0	0	0	0	200	903	0	0	0	0	0	0	0	603	903	0
528	6	0	0	0	0	0	0	200	300	0	0	0	0	0	0	0	200	903	0	0	0	0	0	0	0	603	903	0
528	7	0	0	0	0	0	0	200	300	0	0	0	0	0	0	0	200	903	0	0	0	0	0	0	0	603	903	0
528	8	0	0	0	0	0	0	200	300	0	0	0	0	0	0	0	200	903	0	0	0	0	0	0	0	603	903	0
528	9	0	0	0	0	0	0	200	300	0	0	0	0	0	0	0	200	903	0	0	0	0	0	0	0	603	903	0
529	0	0	0	0	0	0	0	200	300	0	0	0	0	0	0	0	200	903	0	0	0	0	0	0	0	603	903	0
529	1	0	0	0	0	0	0	200	300	0	0	0	0	0	0	0	200	903	0	0	0	0	0	0	0	603	903	0
529	2	0	0	0	0	0	0	200	300	0	0	0	0	0	0	0	200	903	0	0	0	0	0	0	0	603	903	0
529	3	0	0	0	0	0	0	200	300	0	0	0	0	0	0	0	200	903	0	0	0	0	0	0	0	603	903	0
529	4	0	0	0	0	0	0	200	300	0	0	0	0	0	0	0	200	903	0	0	0	0	0	0	0	603	903	0
529	5	0	0	0	0	0	0	200	300	0	0	0	0	0	0	0	200	903	0	0	0	0	0	0	0	603	903	0
529	6	0	0	0	0	0	0	200	300	0	0	0	0	0	0	0	200	903	0	0	0	0	0	0	0	603	903	0
529	7	0	0	0	0	0	0	200	300	0	0	0	0	0	0	0	200	903	0	0	0	0	0	0	0	603	903	0
529	8	0	0	0	0	0	0	200	300	0	0	0	0	0	0	0	200	903	0	0	0	0	0	0	0	603	903	0
529	9	0	0	0	0	0	0	200	300	0	0	0	0	0	0	0	200	903	0	0	0	0	0	0	0	603	903	0
530	0	0	0	0	0	0	0	200	300	0	0	0	0	0	0	0	200	903	0	0	0	0	0	0	0	603	903	0
530	1	0	0	0	0	0	0	200	300	0	0	0	0	0	0	0	200	903	0	0	0	0	0	0	0	603	903	0
530	2	0	0	0	0	0	0	200	300	0	0	0	0	0	0	0	200	903	0	0	0	0	0	0	0	603	903	0
530	3	0	0	0	0	0	0	200	300	0	0	0	0	0	0	0	200	903	0	0	0	0	0	0	0	603	903	0
530	4	0	0	0	0	0	0	200	300	0	0	0	0	0	0	0	200	903	0	0	0	0	0	0	0	603	903	0
530	5	0	0	0	0	0	0	200	300	0	0	0	0	0	0	0	200	903	0	0	0	0	0	0	0	603	903	0
530	6	0	0	0	0	0	0	200	300	0	0	0	0	0	0	0	200	903	0	0	0	0	0	0	0	603	903	0
530	7	0	0	0	0	0	0	200	300	0	0	0	0	0	0	0	200	903	0	0	0	0	0	0	0	603	903	0
530	8	0	0	0	0	0	0	200	300	0	0	0	0	0	0	0	200	903	0	0	0	0	0	0	0	603	903	0
530	9	0	0	0	0	0	0	200	300	0	0	0	0	0	0	0	200	903	0	0	0	0	0	0	0	603	903	0
531	0	0	0	0	0	0	0	200	300	0	0	0	0	0	0	0	200	903	0	0	0	0	0	0	0	603	903	0
531	1	0	0	0	0	0	0	200	300	0	0	0	0	0	0	0	200	903	0	0	0	0	0	0	0	603	903	0
531	2	0	0	0	0	0	0	200	300	0	0	0	0	0	0	0	200	903	0	0	0	0	0	0	0	603	903	0
531	3	0	0	0	0	0	0	200	300	0	0	0	0	0	0	0	200	903	0	0	0	0	0	0	0	603	903	0
531	4	0	0	0	0	0	0	200	300	0	0	0	0	0	0	0	200	903	0	0	0	0	0	0	0	603	903	0
531	5	0	0	0	0	0	0	200	300	0	0	0	0	0	0	0	200	903	0	0	0	0	0	0	0	603	903	0
531	6	0	0	0	0	0	0	200	300	0	0	0	0	0	0	0	200	903	0	0	0	0	0	0	0	603	903	0
531	7	0	0	0	0	0	0	200	300	0	0	0	0	0	0	0	200	903	0	0	0	0	0	0	0	603	903	0
531	8	0	0	0	0	0	0	200	300	0	0	0	0	0	0	0	200	903	0	0	0	0	0	0	0	603	903	0
531	9	0	0	0	0	0	0	200	300	0	0	0	0	0	0	0	200	903	0	0	0	0	0	0	0	603	903	0
532	0	0	0	0	0	0	0	200	300	0	0	0	0	0	0	0	200	903	0	0	0	0	0	0	0	603	903	0
532	1	0	0	0	0	0	0	200	300	0	0	0	0	0	0	0	200	903	0	0	0	0	0	0	0	603	903	0
532	2	0	0	0	0	0	0	200	300	0	0	0	0	0	0	0	200	903	0	0	0	0	0	0	0	603	903	0
532	3	0	0	0	0	0	0	200	300	0	0	0	0	0	0	0	200	903	0	0	0	0	0	0	0	603	903	0
532	4	0	0	0	0	0	0	200	300	0	0	0	0	0	0	0	200	903	0	0	0	0	0	0	0	603	903	0
532	5	0	0	0	0	0	0	200	300	0	0	0	0	0	0	0	200	903	0	0	0	0	0	0	0	603	903	0
532	6	0	0	0	0	0	0	200	300	0	0	0	0	0	0	0	200	903	0	0	0	0	0	0	0	603	903	0
532	7	0	0	0	0	0	0	200	300	0	0	0	0	0	0	0	200	903	0	0	0	0	0	0	0	603	903	0
532	8	0	0	0	0	0	0	200	300	0	0	0	0	0	0	0	200	903	0	0	0	0	0	0	0	603	903	0
532	9	0	0	0	0	0	0	200	300	0	0	0	0	0	0	0	200	903	0	0	0	0	0	0	0	603	903	0
533	0	0	0	0	0	0	0	200	300	0	0	0	0	0	0	0	200	903	0	0	0	0	0	0	0	603	903	0
533	1	0	0	0	0	0	0	200	300	0	0	0	0	0	0	0	200	903	0	0	0	0	0	0	0	603	903	0
533	2	0	0	0	0	0	0	200	300	0	0	0	0	0	0	0	200	903	0	0	0	0	0	0	0	603	903	0
533	3	0	0	0	0	0	0	200	300	0	0	0	0	0	0	0	200	903	0	0	0	0	0	0	0	603	903	0
533	4	0	0	0	0	0	0	200	300	0	0	0	0	0	0	0	200	903	0	0	0	0	0	0	0	603	903	0
533	5	0	0	0	0	0	0	200	300	0	0	0	0	0	0	0	200	903	0	0	0	0	0	0	0	603	903	0
533	6	0	0	0	0	0	0	200	300	0	0	0	0	0	0	0	200	903	0	0	0	0	0	0	0	603	903	0
533	7	0	0	0	0	0	0	200	300	0	0	0	0	0	0	0	200	903	0	0	0	0	0	0	0	603	903	0
533	8	0	0	0	0	0	0	200	300	0	0	0	0	0	0	0	200	903	0	0	0	0	0	0	0	603	903	0
533	9	0	0	0	0	0	0	200	300	0	0	0	0	0	0	0	200	903	0	0	0	0	0	0	0	603	903	0
534	0	0	0	0	0	0	0	200	300	0	0	0	0	0	0	0	200	903	0	0	0	0	0	0	0	603	903	0
534	1	0	0	0	0	0	0	200	300	0	0	0	0	0	0	0	200	903	0	0	0	0	0	0	0	603	903	0
534	2	0	0	0	0	0	0	200	300	0	0	0	0	0	0	0	200	903	0	0	0	0	0	0	0	603	903	0
534	3	0	0	0	0	0	0	200	300	0	0	0	0	0	0	0	200	903	0	0	0	0	0	0	0	603	903	0
534	4	0	0	0	0	0	0	200	300	0	0	0	0	0	0	0	200	903	0	0	0	0	0	0	0	603	903	0
534	5	0	0	0	0	0	0	200	300	0	0	0	0	0	0	0	200	903	0	0	0	0	0	0	0	603	903	0
534	6	0	0	0	0	0	0	200	300	0	0	0	0	0	0	0	200	903	0	0	0	0	0	0	0	603	903	0
534	7	0	0	0	0	0	0	200	300	0	0	0	0	0	0	0	200	903	0	0	0	0	0	0	0	603	903	0
534	8	0	0	0	0	0	0	200	300	0	0	0	0	0	0	0	200	903	0	0	0	0	0	0	0	603	903	0
534	9	0	0	0	0	0	0	200	300	0	0	0	0	0	0	0	200	903	0	0	0	0	0	0	0	603	903	0
535	0	0	0	0	0	0	0	200	300	0	0	0	0	0	0	0	200	903	0	0	0	0	0	0	0	603	903	0
535	1	0	0	0	0	0	0	200	300	0	0	0	0	0	0	0	200	903	0	0	0	0	0	0	0	603	903	0
535	2	0	0	0	0	0	0	200	300	0	0	0	0	0	0	0	200	903	0	0	0	0	0	0	0	603	903	0
535	3	0	0	0	0	0	0	200	300	0	0	0	0	0	0	0	200	903	0	0	0	0	0	0	0	603	903	0
535	4	0	0	0	0	0	0	200	300	0	0	0	0	0	0	0	200	903	0	0	0	0	0	0	0	603	903	0
535	5	0	0	0	0	0	0	200	300	0	0	0	0	0	0	0	200	903	0	0	0	0	0	0	0	603	903	0
535	6	0	0	0	0	0	0	200	300	0	0	0	0	0	0	0	200	903	0	0	0	0	0	0	0	603	903	0
535	7	0	0	0	0	0	0	200	300	0	0	0	0	0	0	0	200	903	0	0	0	0	0	0	0	603	903	0
535	8	0	0	0	0	0	0	200	300	0	0	0	0	0	0	0	200	903	0	0	0	0	0	0	0	603	903	0
535	9	0	0	0	0	0	0	200	300	0	0	0	0	0	0	0	200	903	0	0	0	0	0	0	0	603	903	0
536	0	0	0	0	0	0	0	200	300	0	0	0	0	0	0	0	200	903	0	0	0	0	0	0	0	603	903	0
536	1	0	0	0	0	0	0	200	300	0	0	0	0	0	0	0	200	903	0	0	0	0	0	0	0	603	903	0
536	2	0	0	0	0	0	0	200	300	0	0	0	0	0	0	0	200	903	0	0	0	0	0	0	0	603	903	0
536	3	0	0	0	0	0	0	200	300	0	0	0	0	0	0	0	200	903	0	0	0	0	0	0	0	603	903	0
536	4	0	0	0	0	0	0	200	300	0	0	0	0	0	0	0	200	903	0	0	0	0	0	0	0	603	903	0
536	5	0	0	0	0	0	0	200	300	0	0	0	0	0	0	0	200	903	0	0	0	0	0	0	0	603	903	0
536	6	0	0	0	0	0	0	200	300	0	0	0	0	0	0	0	200	903	0	0	0	0	0	0	0	603	903	0
536	7	0	0	0	0	0	0	200	300	0	0	0	0	0	0	0	200	903	0	0	0	0	0	0	0	603	903	0
536	8	0	0	0	0	0	0	200	300	0	0	0	0	0	0	0	200	903	0	0	0	0	0	0	0	603	903	0
536	9	0	0	0	0	0	0	200	300	0	0	0	0	0	0	0	200	903	0	0	0	0	0	0	0	603	903	0
537	0	0	0	0	0	0	0	200	300	0	0	0	0	0	0	0	200	903	0	0	0	0	0	0	0	603	903	0
537	1	0	0	0	0	0	0	200	300	0	0	0	0	0	0	0	200	903	0	0	0	0	0	0	0	603	903	0
537	2	0	0	0	0	0	0	200	300	0	0	0	0	0	0	0	200	903	0	0	0	0	0	0	0	603	903	0
537	3	0	0	0	0	0	0	200	300	0	0	0	0	0	0	0	200	903	0	0	0	0	0	0	0	603	903	0
537	4	0	0	0	0	0	0	200	300	0	0	0	0	0	0	0	200	903	0	0	0	0	0	0	0	603	903	0
537	5	0	0	0	0	0	0	200	300	0	0	0	0	0	0	0	200	903	0	0	0	0	0	0	0	603	903	0
537	6	0	0	0	0	0	0	200	300	0	0	0	0	0	0	0	200	903	0	0	0	0	0	0	0	603	903	0
537	7	0	0	0	0	0	0	200	300	0	0	0	0	0	0	0	200	903	0	0	0	0	0	0	0	603	903	0
537	8	0	0	0	0	0	0	200	300	0	0	0	0	0	0	0	200	903	0	0	0	0	0	0	0	603	903	0
537	9	0	0	0	0	0	0	200	300	0	0	0	0	0	0	0	200	903	0	0	0	0	0	0	0	603	903	0
538	0	0	0	0	0	0	0	200	300	0	0	0	0	0	0	0	200	903	0	0	0	0	0	0	0	603	903	0
538	1	0	0	0	0	0	0	200	300	0	0	0	0	0	0	0	200	903	0	0	0	0	0	0	0	603	903	0
538	2	0	0	0	0	0	0	200	300	0	0	0	0	0	0	0	200	903	0	0	0	0	0	0	0	603	903	0
538	3	0	0	0	0	0	0	200	300	0	0	0	0	0	0	0	200	903	0	0	0	0	0	0	0	603	903	0
538	4	0	0	0	0	0	0	200	300	0	0	0	0	0	0	0	200	903	0	0	0	0	0	0	0	603	903	0
538	5	0	0	0	0	0	0	200	300	0	0	0	0	0	0	0	200	903	0	0	0	0	0	0	0	603	903	0
538	6	0	0	0	0	0	0	200	300	0	0	0	0	0	0	0	200	903	0	0	0	0	0	0	0	603	903	0
538	7	0	0	0	0	0	0	200	300	0	0	0	0	0	0	0	200	903	0	0	0	0	0	0	0	603	903	0
538	8	0	0	0	0	0	0	200	300	0	0	0	0	0	0	0	200	903	0	0	0	0	0	0	0	603	903	0
538	9	0	0	0	0	0	0	200	300	0	0	0	0	0	0	0	200	903	0	0	0	0	0	0	0	603	903	0
539	0	0	0	0	0	0	0	200	300	0	0	0	0	0	0	0	200	903	0	0	0	0	0	0	0	603	903	0
539	1	0	0	0	0	0	0	200	300	0	0	0	0	0	0	0	200	903	0	0	0	0	0	0	0	603	903	0
539	2	0	0	0	0	0	0	200	300	0	0	0	0	0	0	0	200	903	0	0	0	0	0	0	0	603	903	0
539	3	0	0	0	0	0	0	200	300	0	0	0	0	0	0	0	200	903	0	0	0	0	0	0	0	603	903	0
539	4	0	0	0	0	0	0	200	300	0	0	0	0	0	0	0	200	903	0	0	0	0	0	0	0	603	903	0
539	5	0	0	0	0	0	0	200	300	0	0	0	0	0	0	0	200	903	0	0	0	0	0	0	0	603	903	0
539	6	0	0	0	0	0	0	200	300	0	0	0	0	0	0	0	200	903	0	0	0	0	0	0	0	603	903	0
539	7	0	0	0	0	0	0	200	300	0	0	0	0	0	0	0	200	903	0	0	0	0	0	0	0	603	903	0
539	8	0	0	0	0	0	0	200	300	0	0	0	0	0	0	0	200	903	0	0	0	0	0	0	0	603	903	0
539	9	0	0	0	0	0	0	200	300	0	0	0	0	0	0	0	200	903	0	0	0	0	0	0	0	603	903	0
540	0	0	0	0	0	0	0	200	300	0	0	0	0	0	0	0	200	903	0	0	0	0	0	0	0	603	903	0
540	1	0	0	0	0	0	0	200	300	0	0	0	0	0	0	0	200	903	0	0	0	0	0	0	0	603	903	0
540	2	0	0	0	0	0	0	200	300	0	0	0	0	0	0	0	200	903	0	0	0	0	0	0	0	603	903	0
540	3	0	0	0	0	0	0	200	300	0	0	0	0	0	0	0	200	903	0	0	0	0	0	0	0	603	903	0
540	4	0	0	0	0	0	0	200	300	0	0	0	0	0	0	0	200	903	0	0	0	0	0	0	0	603	903	0
540	5	0	0	0	0	0	0	200	300	0	0	0	0	0	0	0	200	903	0	0	0	0	0	0	0	603	903	0
540	6	0	0	0	0	0	0	200	300	0	0	0	0	0	0	0	200	903	0	0	0	0	0	0	0	603	903	0
540	7	0	0	0	0	0	0	200	300	0	0	0	0	0	0	0	200	903	0	0	0	0	0	0	0	603	903	0
540	8	0	0	0	0	0	0	200	300	0	0	0	0	0	0	0	200	903	0	0	0	0	0	0	0	603	903	0
540	9	0	0	0	0	0	0	200	300	0	0	0	0	0	0	0	200	903	0	0	0	0	0	0	0	603	903	0
541	0	0	0	0	0	0	0	200	300	0	0	0	0	0	0	0	200	903	0	0	0	0	0	0	0	603	903	0
541	1	0	0	0	0	0	0	200	300	0	0	0	0	0	0	0	200	903	0	0	0	0	0	0	0	603	903	0
541	2	0	0	0	0	0	0	200	300	0	0	0	0	0	0	0	200	903	0	0	0	0	0	0	0	603	903	0
541	3	0	0	0	0	0	0	200	300	0	0	0	0	0	0	0	200	903	0	0	0	0	0	0	0	603	903	0
541	4	0	0	0	0	0	0	200	300	0	0	0	0	0	0	0	200	903	0	0	0	0	0	0	0	603	903	0
541	5	0	0	0	0	0	0	200	300	0	0	0	0	0	0	0	200	903	0	0	0	0	0	0	0	603	903	0
541	6	0	0	0	0	0	0	200	300	0	0	0	0	0	0	0	200	903	0	0	0	0	0	0	0	603	903	0
541	7	0	0	0	0	0	0	200	300	0	0	0	0	0	0	0	200	903	0	0	0	0	0	0	0	603	903	0
541	8	0	0	0	0	0	0	200	300	0	0	0	0	0	0	0	200	903	0	0	0	0	0	0	0	603	903	0
541	9	0	0	0	0	0	0	200	300	0	0	0	0	0	0	0	200	903	0	0	0	0	0	0	0	603	903	0
542	0	0	0	0	0	0	0	200	300	0	0	0	0	0	0	0	200	903	0	0	0	0	0	0	0	603	903	0
542	1	0	0	0	0	0	0	200	300	0	0	0	0	0	0	0	200	903	0	0	0	0	0	0	0	603	903	0
542	2	0	0	0	0	0	0	200	300	0	0	0	0	0	0	0	200	903	0	0	0	0	0	0	0	603	903	0
542	3	0	0	0	0	0	0	200	300	0	0	0	0	0	0	0	200	903	0	0	0	0	0	0	0	603	903	0
542	4	0	0	0	0	0	0	200	300	0	0	0	0	0	0	0	200	903	0	0	0	0	0	0	0	603	903	0
542	5	0	0	0	0	0	0	200	300	0	0	0	0	0	0	0	200	903	0	0	0	0	0	0	0	603	903	0
542	6	0	0	0	0	0	0	200	300	0	0	0	0	0	0	0	200	903	0	0	0	0	0	0	0	603	903	0
542	7	0	0	0	0	0	0	200	300	0	0	0	0	0	0	0	200	903	0	0	0	0	0	0	0	603	903	0
542	8	0	0	0	0	0	0	200	300	0	0	0	0	0	0	0	200	903	0	0	0	0	0	0	0	603	903	0
542	9	0	0	0	0	0	0	200	300	0	0	0	0	0	0	0	200	903	0	0	0	0	0	0	0	603	903	0
543	0	0	0	0	0	0	0	200	300	0	0	0	0	0	0	0	200	903	0	0	0	0	0	0	0	603	903	0
543	1	0	0	0	0	0	0	200	300	0	0	0	0	0	0	0	200	903	0	0	0	0	0	0	0	603	903	0
543	2	0	0	0	0	0	0	200	300	0	0	0	0	0	0	0	200	903	0	0	0	0	0	0	0	603	903	0
543	3	0	0	0	0	0	0	200	300	0	0	0	0	0	0	0	200	903	0	0	0	0	0	0	0	603	903	0
543	4	0	0	0	0	0	0	200	300	0	0	0	0	0	0	0	200	903	0	0	0	0	0	0	0	603	903	0
543	5	0	0	0	0	0	0	200	300	0	0	0	0	0	0	0	200	903	0	0	0	0	0	0	0	603	903	0
543	6	0	0	0	0	0	0	200	300	0	0	0	0	0	0	0	200	903	0	0	0	0	0	0	0	603	903	0
543	7	0	0	0	0	0	0	200	300	0	0	0	0	0	0	0	200	903	0	0	0	0	0	0	0	603	903	0
543	8	0	0	0	0	0	0	200	300	0	0	0	0	0	0	0	200	903	0	0	0	0	0	0	0	603	903	0
543	9	0	0	0	0	0	0	200	300	0	0	0	0	0	0	0	200	903	0	0	0	0	0	0	0	603	903	0
544	0	0	0	0	0	0	0	200	300	0	0	0	0	0	0	0	200	903	0	0	0	0	0	0	0	603	903	0
544	1	0	0	0	0	0	0	200	300	0	0	0	0	0	0	0	200	903	0	0	0	0	0	0	0	603	903	0
544	2	0	0	0	0	0	0	200	300	0	0	0	0	0	0	0	200	903	0	0	0	0	0	0	0	603	903	0
544	3	0	0	0	0	0	0	200	300	0	0	0	0	0	0	0	200	903	0	0	0	0	0	0	0	603	903	0
544	4	0	0	0	0	0	0	200	300	0	0	0	0	0	0	0	200	903	0	0	0	0	0	0	0	603	903	0
544	5	0	0	0	0	0	0	200	300	0	0	0	0	0	0	0	200	903	0	0	0	0	0	0	0	603	903	0
544	6	0	0	0	0	0	0	200	300	0	0	0	0	0	0	0	200	903	0	0	0	0	0	0	0	603	903	0
544	7	0	0	0	0	0	0	200	300	0	0	0	0	0	0	0	200	903	0	0	0	0	0	0	0	603	903	0
544	8	0	0	0	0	0	0	200	300	0	0	0	0	0	0	0	200	903	0	0	0	0	0	0	0	603	903	0
544	9	0	0	0	0	0	0	200	300	0	0	0	0	0	0	0	200	903	0	0	0	0	0	0	0	603	903	0
545	0	0	0	0	0	0	0	200	300	0	0	0	0	0	0	0	200	903	0	0	0	0	0	0	0	603	903	0
545	1	0	0	0	0	0	0	200	300	0	0	0	0	0	0	0	200	903	0	0	0	0	0	0	0	603	903	0
545	2	0	0	0	0	0	0	200	300	0	0	0	0	0	0	0	200	903	0	0	0	0	0	0	0	603	903	0
545	3	0	0	0	0	0	0	200	300	0	0	0	0	0	0	0	200	903	0	0	0	0	0	0	0	603	903	0
545	4	0	0	0	0	0	0	200	300	0	0	0	0	0	0	0	200	903	0	0	0	0	0	0	0	603	903	0
545	5	0	0	0	0	0	0	200	300	0	0	0	0	0	0	0	200	903	0	0	0	0	0	0	0	603	903	0
545	6	0	0	0	0	0	0	200	300	0	0	0	0	0	0	0	200	903	0	0	0	0	0	0	0	603	903	0
545	7	0	0	0	0	0	0	200	300	0	0	0	0	0	0	0	200	903	0	0	0	0	0	0	0	603	903	0
545	8	0	0	0	0	0	0	200	300	0	0	0	0	0	0	0	200	903	0	0	0	0	0	0	0	603	903	0
545	9	0	0	0	0	0	0	200	300	0	0	0	0	0	0	0	200	903	0	0	0	0	0	0	0	603	903	0
546	0	0	0	0	0	0	0	200	300	0	0	0	0	0	0	0	200	903	0	0	0	0	0	0	0	603	903	0
546	1	0	0	0	0	0	0	200	300	0	0	0	0	0	0	0	200	903	0	0	0	0	0	0	0	603	903	0
546	2	0	0	0	0	0	0	200	300	0	0	0	0	0	0	0	200	903	0	0	0	0	0	0	0	603	903	0
546	3	0	0	0	0	0	0	200	300	0	0	0	0	0	0	0	200	903	0	0	0	0	0	0	0	603	903	0
546	4	0	0	0	0	0	0	200	300	0	0	0	0	0	0	0	200	903	0	0	0	0	0	0	0	603	903	0
546	5	0	0	0	0	0	0	200	300	0	0	0	0	0	0	0	200	903	0	0	0	0	0	0	0	603	903	0
546	6	0	0	0	0	0	0	200	300	0	0	0	0	0	0	0	200	903	0	0	0	0	0	0	0	603	903	0
546	7	0	0	0	0	0	0	200	300	0	0	0	0	0	0	0	200	903	0	0	0	0	0	0	0	603	903	0
546	8	0	0	0	0	0	0	200	300	0	0	0	0	0	0	0	200	903	0	0	0	0	0	0	0	603	903	0
546	9	0	0	0	0	0	0	200	300	0	0	0	0	0	0	0	200	903	0	0	0	0	0	0	0	603	903	0
547	0	0	0	0	0	0	0	200	300	0	0	0	0	0	0	0	200	903	0	0	0	0	0	0	0	603	903	0
547	1	0	0	0	0	0	0	200	300	0	0	0	0	0	0	0	200	903	0	0	0	0	0	0	0	603	903	0
547	2	0	0	0	0	0	0	200	300	0	0	0	0	0	0	0	200	903	0	0	0	0	0	0	0	603	903	0
547	3	0	0	0	0	0	0	200	300	0	0	0	0	0	0	0	200	903	0	0	0	0	0	0	0	603	903	0
547	4	0	0	0	0	0	0	200	300	0	0	0	0	0	0	0	200	903	0	0	0	0	0	0	0	603	903	0
547	5	0	0	0	0	0	0	200	300	0	0	0	0	0	0	0	200	903	0	0	0	0	0	0	0	603	903	0
547	6	0	0	0	0	0	0	200	300	0	0	0	0	0	0	0	200	903	0	0	0	0	0	0	0	603	903	0
547	7	0	0	0	0	0	0	200	300	0	0	0	0	0	0	0	200	903	0	0	0	0	0	0	0	603	903	0
547	8	0	0	0	0	0	0	200	300	0	0	0	0	0	0	0	200	903	0	0	0	0	0	0	0	603	903	0
547	9	0	0	0	0	0	0	200	300	0	0	0	0	0	0	0	200	903	0	0	0	0	0	0	0	603	903	0
548	0	0	0	0	0	0	0	200	300	0	0	0	0	0	0	0	200	903	0	0	0	0	0	0	0	603	903	0
548	1	0	0	0	0	0	0	200	300	0	0	0	0	0	0	0	200	903	0	0	0	0	0	0	0	603	903	0
548	2	0	0	0	0	0	0	200	300	0	0	0	0	0	0	0	200	903	0	0	0	0	0	0	0	603	903	0
548	3	0	0	0	0	0	0	200	300	0	0	0	0	0	0	0	200	903	0	0	0	0	0	0	0	603	903	0
548	4	0	0	0	0	0	0	200	300	0	0	0	0	0	0	0	200	903	0	0	0	0	0	0	0	603	903	0
548	5	0	0	0	0	0	0	200	300	0	0	0	0	0	0	0	200	903	0	0	0	0	0	0	0	603	903	0
548	6	0	0	0	0	0	0	200	300	0	0	0	0	0	0	0	200	903	0	0	0	0	0	0	0	603	903	0
548	7	0	0	0	0	0	0	200	300	0	0	0	0	0	0	0	200	903	0	0	0	0	0	0	0	603	903	0
548	8	0	0	0	0	0	0	200	300	0	0	0	0	0	0	0	200	903	0	0	0	0	0	0	0	603	903	0
548	9	0	0	0	0	0	0	200	300	0	0	0	0	0	0	0	200	903	0	0	0	0	0	0	0	603	903	0
549	0	0	0	0	0	0	0	200	300	0	0	0	0	0	0	0	200	903	0	0	0	0	0	0	0	603	903	0
549	1	0	0	0	0	0	0	200	300	0	0	0	0	0	0	0	200	903	0	0	0	0	0	0	0	603	903	0
549	2	0	0	0	0	0	0	200	300	0	0	0	0	0	0	0	200	903	0	0	0	0	0	0	0	603	903	0
549	3	0	0	0	0	0	0	200	300	0	0	0	0	0	0	0	200	903	0	0	0	0	0	0	0	603	903	0
549	4	0	0	0	0	0	0	200	300	0	0	0	0	0	0	0	200	903	0	0	0	0	0	0	0	603	903	0
549	5	0	0	0	0	0	0	200	300	0	0	0	0	0	0	0	200	903	0	0	0	0	0	0	0	603	903	0
549	6	0	0	0	0	0	0	200	300	0	0	0	0	0	0	0	200	903	0	0	0	0	0	0	0	603	903	0
549	7	0	0	0	0	0	0	200	300	0	0	0	0	0	0	0	200	903	0	0	0	0	0	0	0	603	903	0
549	8	0	0	0	0	0	0	200	300	0	0	0	0	0	0	0	200	903	0	0	0	0	0	0	0	603	903	0
549	9	0	0	0	0	0	0	200	300	0	0	0	0	0	0	0	200	903	0	0	0	0	0	0	0	603	903	0
550	0	0	0	0	0	0	0	200	300	0	0	0	0	0	0	0	200	903	0	0	0	0	0	0	0	603	903	0
550	1	0	0	0	0	0	0	200	300	0	0	0	0	0	0	0	200	903	0	0	0	0	0	0	0	603	903	0
550	2	0	0	0	0	0	0	200	300	0	0	0	0	0	0	0	200	903	0	0	0	0	0	0	0	603	903	0
550	3	0	0	0	0	0	0	200	300	0	0	0	0	0	0	0	200	903	0	0	0	0	0	0	0	603	903	0
550	4	0	0	0	0	0	0	200	300	0	0	0	0	0	0	0	200	903	0	0	0	0	0	0	0	603	903	0
550	5	0	0	0	0	0	0	200	300	0	0	0	0	0	0	0	200	903	0	0	0	0	0	0	0	603	903	0
550	6	0	0	0	0	0	0	200	300	0	0	0	0	0	0	0	200	903	0	0	0	0	0	0	0	603	903	0
550	7	0	0	0	0	0	0	200	300	0	0	0	0	0	0	0	200	903	0	0	0	0	0	0	0	603	903	0
550	8	0	0	0	0	0	0	200	300	0	0	0	0	0	0	0	200	903	0	0	0	0	0	0	0	603	903	0
550	9	0	0	0	0	0	0	200	300	0	0	0	0	0	0	0	200	903	0	0	0	0	0	0	0	603	903	0
551	0	0	0	0	0	0	0	200	300	0	0	0	0	0	0	0	200	903	0	0	0	0	0	0	0	603	903	0
551	1	0	0	0	0	0	0	200	300	0	0	0	0	0	0	0	200	903	0	0	0	0	0	0	0	603	903	0
551	2	0	0	0	0	0	0	200	300	0	0	0	0	0	0	0	200	903	0	0	0	0	0	0	0	603	903	0
551	3	0	0	0	0	0	0	200	300	0	0	0	0	0	0	0	200	903	0	0	0	0	0	0	0	603	903	0
551	4	0	0	0	0	0	0	200	300	0	0	0	0	0	0	0	200	903	0	0	0	0	0	0	0	603	903	0
551	5	0	0	0	0	0	0	200	300	0	0	0	0	0	0	0	200	903	0	0	0	0	0	0	0	603	903	0
551	6	0	0	0	0	0	0	200	300	0	0	0	0	0	0	0	200	903	0	0	0	0	0	0	0	603	903	0
551	7	0	0	0	0	0	0	200	300	0	0	0	0	0	0	0	200	903	0	0	0	0	0	0	0	603	903	0
551	8	0	0	0	0	0	0	200	300	0	0	0	0	0	0	0	200	903	0	0	0	0	0	0	0	603	903	0
551	9	0	0	0	0	0	0	200	300	0	0	0	0	0	0	0	200	903	0	0	0	0	0	0	0	603	903	0
552	0	0	0	0	0	0	0	200	300	0	0	0	0	0	0	0	200	903	0	0	0	0	0	0	0	603	903	0
552	1	0	0	0	0	0	0	200	300	0	0	0	0	0	0	0	200	903	0	0	0	0	0	0	0	603	903	0
552	2	0	0	0	0	0	0	200	300	0	0	0	0	0	0	0	200	903	0	0	0	0	0	0	0	603	903	0
552	3	0	0	0	0	0	0	200	300	0	0	0	0	0	0	0	200	903	0	0	0	0	0	0	0	603	903	0
552	4	0	0	0	0	0	0	200	300	0	0	0	0	0	0	0	200	903	0	0	0	0	0	0	0	603	903	0
552	5	0	0	0	0	0	0	200	300	0	0	0	0	0	0	0	200	903	0	0	0	0	0	0	0	603	903	0
552	6	0	0	0	0	0	0	200	300	0	0	0	0	0	0	0	200	903	0	0	0	0	0	0	0	603	903	0
552	7	0	0	0	0	0	0	200	300	0	0	0	0	0	0	0	200	903	0	0	0	0	0	0	0	603	903	0
552	8	0	0	0	0	0	0	200	300	0	0	0	0	0	0	0	200	903	0	0	0	0	0	0	0	603	903	0
552	9	0	0	0	0	0	0	200	300	0	0	0	0	0	0	0	200	903	0	0	0	0	0	0	0	603	903	0
553	0	0	0	0	0	0	0	200	300	0	0	0	0	0	0	0	200	903	0	0	0	0	0	0	0	603	903	0
553	1	0	0	0	0	0	0	200	300	0	0	0	0	0	0	0	200	903	0	0	0	0	0	0	0	603	903	0
553	2	0	0	0	0	0	0	200	300	0	0	0	0	0	0	0	200	903	0	0	0	0	0	0	0	603	903	0
553	3	0	0	0	0	0	0	200	300	0	0	0	0	0	0	0	200	903	0	0	0	0	0	0	0	603	903	0
553	4	0	0	0	0	0	0	200	300	0	0	0	0	0	0	0	200	903	0	0	0	0	0	0	0	603	903	0
553	5	0	0	0	0	0	0	200	300	0	0	0	0	0	0	0	200	903	0	0	0	0	0	0	0	603	903	0
553	6	0	0	0	0	0	0	200	300	0	0	0	0	0	0	0	200	903	0	0	0	0	0	0	0	603	903	0
553	7	0	0	0	0	0	0	200	300	0	0	0	0	0	0	0	200	903	0	0	0	0	0	0	0	603	903	0
553	8	0	0	0	0	0	0	200	300	0	0	0	0	0	0	0	200	903	0	0	0	0	0	0	0	603	903	0
553	9	0	0	0	0	0	0	200	300	0	0	0	0	0	0	0	200	903	0	0	0	0	0	0	0	603	903	0
554	0	0	0	0	0	0	0	200	300	0	0	0	0	0	0	0	200	903	0	0	0	0	0	0	0	603	903	0
554	1	0	0	0	0	0	0	200	300	0	0	0	0	0	0	0	200	903	0	0	0	0	0	0	0	603	903	0
554	2	0	0	0	0	0	0	200	300	0	0	0	0	0	0	0	200	903	0	0	0	0	0	0	0	603	903	0
554	3	0	0	0	0	0	0	200	300	0	0	0	0	0	0	0	200	903	0	0	0	0	0	0	0	603	903	0
554	4	0	0	0	0	0	0	200	300	0	0	0	0	0	0	0	200	903	0	0	0	0	0	0	0	603	903	0
554	5	0	0	0	0	0	0	200	300	0	0	0	0	0	0	0	200	903	0	0	0	0	0	0	0	603	903	0
554	6	0	0	0	0	0	0	200	300	0	0	0	0	0	0	0	200	903	0	0	0	0	0	0	0	603	903	0
554	7	0	0	0	0	0	0	200	300	0	0	0	0	0	0	0	200	903	0	0	0	0	0	0	0	603	903	0
554	8	0	0	0	0	0	0	200	300	0	0	0	0	0	0	0	200	903	0	0	0	0	0	0	0	603	903	0
554	9	0	0	0	0	0	0	200	300	0	0	0	0	0	0	0	200	903	0	0	0	0	0	0	0	603	903	0
555	0	0	0	0	0	0	0	200	300	0	0	0	0	0	0	0	200	903	0	0	0	0	0	0	0	603	903	0
555	1	0	0	0	0	0	0	200	300	0	0	0	0	0	0	0	200	903	0	0	0	0	0	0	0	603	903	0
555	2	0	0	0	0	0	0	200	300	0	0	0	0	0	0	0	200	903	0	0	0	0	0	0	0	603	903	0
555	3	0	0	0	0	0	0	200	300	0	0	0	0	0	0	0	200	903	0	0	0	0	0	0	0	603	903	0
555	4	0	0	0	0	0	0	200	300	0	0	0	0	0	0	0	200	903	0	0	0	0	0	0	0	603	903	0
555	5	0	0	0	0	0	0	200	300	0	0	0	0	0	0	0	200	903	0	0	0	0	0	0	0	603	903	0
555	6	0	0	0	0	0	0	200	300	0	0	0	0	0	0	0	200	903	0	0	0	0	0	0	0	603	903	0
555	7	0	0	0	0	0	0	200	300	0	0	0	0	0	0	0	200	903	0	0	0	0	0	0	0	603	903	0
555	8	0	0	0	0	0	0	200	300	0	0	0	0	0	0	0	200	903	0	0	0	0	0	0	0	603	903	0
555	9	0	0	0	0	0	0	200	300	0	0	0	0	0	0	0	200	903	0	0	0	0	0	0	0	603	903	0
556	0	0	0	0	0	0	0	200	300	0	0	0	0	0	0	0	200	903	0	0	0	0	0	0	0	603	903	0
556	1	0	0	0	0	0	0	200	300	0	0	0	0	0	0	0	200	903	0	0	0	0	0	0	0	603	903	0
556	2	0	0	0	0	0	0	200	300	0	0	0	0	0	0	0	200	903	0	0	0	0	0	0	0	603	903	0
556	3	0	0	0	0	0	0	200	300	0	0	0	0	0	0	0	200	903	0	0	0	0	0	0	0	603	903	0
556	4	0	0	0	0	0	0	200	300	0	0	0	0	0	0	0	200	903	0	0	0	0	0	0	0	603	903	0
556	5	0	0	0	0	0	0	200	300	0	0	0	0	0	0	0	200	903	0	0	0	0	0	0	0	603	903	0
556	6	0	0	0	0	0	0	200	300	0	0	0	0	0	0	0	200	903	0	0	0	0	0	0	0	603	903	0
556	7	0	0	0	0	0	0	200	300	0	0	0	0	0	0	0	200	903	0	0	0	0	0	0	0	603	903	0
556	8	0	0	0	0	0	0	200	300	0	0	0	0	0	0	0	200	903	0	0	0	0	0	0	0	603	903	0
556	9	0	0	0	0	0	0	200	300	0	0	0	0	0	0	0	200	903	0	0	0	0	0	0	0	603	903	0
557	0	0	0	0	0	0	0	200	300	0	0	0	0	0	0	0	200	903	0	0	0	0	0	0	0	603	903	0
557	1	0	0	0	0	0	0	200	300	0	0	0	0	0	0	0	200	903	0	0	0	0	0	0	0	603	903	0
557	2	0	0	0	0	0	0	200	300	0	0	0	0	0	0	0	200	903	0	0	0	0	0	0	0	603	903	0
557	3	0	0	0	0	0	0	200	300	0	0	0	0	0	0	0	200	903	0	0	0	0	0	0	0	603	903	0
557	4	0	0	0	0	0	0	200	300	0	0	0	0	0	0	0	200	903	0	0	0	0	0	0	0	603	903	0
557	5	0	0	0	0	0	0	200	300	0	0	0	0	0	0	0	200	903	0	0	0	0	0	0	0	603	903	0
557	6	0	0	0	0	0	0	200	300	0	0	0	0	0	0	0	200	903	0	0	0	0	0	0	0	603	903	0
557	7	0	0	0	0	0	0	200	300	0	0	0	0	0	0	0	200	903	0	0	0	0	0	0	0	603	903	0
557	8	0	0	0	0	0	0	200	300	0	0	0	0	0	0	0	200	903	0	0	0	0	0	0	0	603	903	0
557	9	0	0	0	0	0	0	200	300	0	0	0	0	0	0	0	200	903	0	0	0	0	0	0	0	603	903	0
558	0	0	0	0	0	0	0	200	300	0	0	0	0	0	0	0	200	903	0	0	0	0	0	0	0	603	903	0
558	1	0	0	0	0	0	0	200	300	0	0	0	0	0	0	0	200	903	0	0	0	0	0	0	0	603	903	0
558	2	0	0	0	0	0	0	200	300	0	0	0	0	0	0	0	200	903	0	0	0	0	0	0	0	603	903	0
558	3	0	0	0	0	0	0	200	300	0	0	0	0	0	0	0	200	903	0	0	0	0	0	0	0	603	903	0
558	4	0	0	0	0	0	0	200	300	0	0	0	0	0	0	0	200	903	0	0	0	0	0	0	0	603	903	0
558	5	0	0	0	0	0	0	200	300	0	0	0	0	0	0	0	200	903	0	0	0	0	0	0	0	603	903	0
558	6	0	0	0	0	0	0	200	300	0	0	0	0	0	0	0	200	903	0	0	0	0	0	0	0	603	903	0
558	7	0	0	0	0	0	0	200	300	0	0	0	0	0	0	0	200	903	0	0	0	0	0	0	0	603	903	0
558	8	0	0	0	0	0	0	200	300	0	0	0	0	0	0	0	200	903	0	0	0	0	0	0	0	603	903	0
558	9	0	0	0	0	0	0	200	300	0	0	0	0	0	0	0	200	903	0	0	0	0	0	0	0	603	903	0
559	0	0	0	0	0	0	0	200	300	0	0	0	0	0	0	0	200	903	0	0	0	0	0	0	0	603	903	0
559	1	0	0	0	0	0	0	200	300	0	0	0	0	0	0	0	200	903	0	0	0	0	0	0	0	603	903	0
559	2	0	0	0	0	0	0	200	300	0	0	0	0	0	0	0	200	903	0	0	0	0	0	0	0	603	903	0
559	3	0	0	0	0	0	0	200	300	0	0	0	0	0	0	0	200	903	0	0	0	0	0	0	0	603	903	0
559	4	0	0	0	0	0	0	200	300	0	0	0	0	0	0	0	200	903	0	0	0	0	0	0	0	603	903	0
559	5	0	0	0	0	0	0	200	300	0	0	0	0	0	0	0	200	903	0	0	0	0	0	0	0	603	903	0
559	6	0	0	0	0	0	0	200	300	0	0	0	0	0	0	0	200	903	0	0	0	0	0	0	0	603	903	0
559	7	0	0	0	0	0	0	200	300	0	0	0	0	0	0	0	200	903	0	0	0	0	0	0	0	603	903	0
559	8	0	0	0	0	0	0	200	300	0	0	0	0	0	0	0	200	903	0	0	0	0	0	0	0	603	903	0
559	9	0	0	0	0	0	0	200	300	0	0	0	0	0	0	0	200	903	0	0	0	0	0	0	0	603	903	0
560	0	0	0	0	0	0	0	200	300	0	0	0	0	0	0	0	200	903	0	0	0	0	0	0	0	603	903	0
560	1	0	0	0	0	0	0	200	300	0	0	0	0	0	0	0	200	903	0	0	0	0	0	0	0	603	903	0
560	2	0	0	0	0	0	0	200	300	0	0	0	0	0	0	0	200	903	0	0	0	0	0	0	0	603	903	0
560	3	0	0	0	0	0	0	200	300	0	0	0	0	0	0	0	200	903	0	0	0	0	0	0	0	603	903	0
560	4	0	0	0	0	0	0	200	300	0	0	0	0	0	0	0	200	903	0	0	0	0	0	0	0	603	903	0
560	5	0	0	0	0	0	0	200	300	0	0	0	0	0	0	0	200	903	0	0	0	0	0	0	0	603	903	0
560	6	0	0	0	0	0	0	200	300	0	0	0	0	0	0	0	200	903	0	0	0	0	0	0	0	603	903	0
560	7	0	0	0	0	0	0	200	300	0	0	0	0	0	0	0	200	903	0	0	0	0	0	0	0	603	903	0
560	8	0	0	0	0	0	0	200	300	0	0	0	0	0	0	0	200	903	0	0	0	0	0	0	0	603	903	0
560	9	0	0	0	0	0	0	200	300	0	0	0	0	0	0	0	200	903	0	0	0	0	0	0	0	603	903	0
561	0	0	0	0	0	0	0	200	300	0	0	0	0	0	0	0	200	903	0	0	0	0	0	0	0	603	903	0
561	1	0	0	0	0	0	0	200	300	0	0	0	0	0	0	0	200	903	0	0	0	0	0	0	0	603	903	0
561	2	0	0	0	0	0	0	200	300	0	0	0	0	0	0	0	200	903	0	0	0	0	0	0	0	603	903	0
561	3	0	0	0	0	0	0	200	300	0	0	0	0	0	0	0	200	903	0	0	0	0	0	0	0	603	903	0
561	4	0	0	0	0	0	0	200	300	0	0	0	0	0	0	0	200	903	0	0	0	0	0	0	0	603	903	0
561	5	0	0	0	0	0	0	200	300	0	0	0	0	0	0	0	200	903	0	0	0	0	0	0	0	603	903	0
561	6	0	0	0	0	0	0	200	300	0	0	0	0	0	0	0	200	903	0	0	0	0	0	0	0	603	903	0
561	7	0	0	0	0	0	0	200	300	0	0	0	0	0	0	0	200	903	0	0	0	0	0	0	0	603	903	0
561	8	0	0	0	0	0	0	200	300	0	0	0	0	0	0	0	200	903	0	0	0	0	0	0	0	603	903	0
561	9	0	0	0	0	0	0	200	300	0	0	0	0	0	0	0	200	903	0	0	0	0	0	0	0	603	903	0
562	0	0	0	0	0	0	0	200	300	0	0	0	0	0	0	0	200	903	0	0	0	0	0	0	0	603	903	0
562	1	0	0	0	0	0	0	200	300	0	0	0	0	0	0	0	200	903	0	0	0	0	0	0	0	603	903	0
562	2	0	0	0	0	0	0	200	300	0	0	0	0	0	0	0	200	903	0	0	0	0	0	0	0	603	903	0
562	3	0	0	0	0	0	0	200	300	0	0	0	0	0	0	0	200	903	0	0	0	0	0	0	0	603	903	0
562	4	0	0	0	0	0	0	200	300	0	0	0	0	0	0	0	200	903	0	0	0	0	0	0	0	603	903	0
562	5	0	0	0	0	0	0	200	300	0	0	0	0	0	0	0	200	903	0	0	0	0	0	0	0	603	903	0
562	6	0	0	0	0	0	0	200	300	0	0	0	0	0	0	0	200	903	0	0	0	0	0	0	0	603	903	0
562	7	0	0	0	0	0	0	200	300	0	0	0	0	0	0	0	200	903	0	0	0	0	0	0	0	603	903	0
562	8	0	0	0	0	0	0	200	300	0	0	0	0	0	0	0	200	903	0	0	0	0	0	0	0	603	903	0
562	9	0	0	0	0	0	0	200	300	0	0	0	0	0	0	0	200	903	0	0	0	0	0	0	0	603	903	0
563	0	0	0	0	0	0	0	200	300	0	0	0	0	0	0	0	200	903	0	0	0	0	0	0	0	603	903	0
563	1	0	0	0	0	0	0	200	300	0	0	0	0	0	0	0	200	903	0	0	0	0	0	0	0	603	903	0
563	2	0	0	0	0	0	0	200	300	0	0	0	0	0	0	0	200	903	0	0	0	0	0	0	0	603	903	0
563	3	0	0	0	0	0	0	200	300	0	0	0	0	0	0	0	200	903	0	0	0	0	0	0	0	603	903	0
563	4	0	0	0	0	0	0	200	300	0	0	0	0	0	0	0	200	903	0	0	0	0	0	0	0	603	903	0
563	5	0	0	0	0	0	0	200	300	0	0	0	0	0	0	0	200	903	0	0	0	0	0	0	0	603	903	0
563	6	0	0	0	0	0	0	200	300	0	0	0	0	0	0	0	200	903	0	0	0	0	0	0	0	603	903	0
563	7	0	0	0	0	0	0	200	300	0	0	0	0	0	0	0	200	903	0	0	0	0	0	0	0	603	903	0
563	8	0	0	0	0	0	0	200	300	0	0	0	0	0	0	0	200	903	0	0	0	0	0	0	0	603	903	0
563	9	0	0	0	0	0	0	200	300	0	0	0	0	0	0	0	200	903	0	0	0	0	0	0	0	603	903	0
564	0	0	0	0	0	0	0	200	300	0	0	0	0	0	0	0	200	903	0	0	0	0	0	0	0	603	903	0
564	1	0	0	0	0	0	0	200	300	0	0	0	0	0	0	0	200	903	0	0	0	0	0	0	0	603	903	0
564	2	0	0	0	0	0	0	200	300	0	0	0	0	0	0	0	200	903	0	0	0	0	0	0	0	603	903	0
564	3	0	0	0	0	0	0	200	300	0	0	0	0	0	0	0	200	903	0	0	0	0	0	0	0	603	903	0
564	4	0	0	0	0	0	0	200	300	0	0	0	0	0	0	0	200	903	0	0	0	0	0	0	0	603	903	0
564	5	0	0	0	0	0	0	200	300	0	0	0	0	0	0	0	200	903	0	0	0	0	0	0	0	603	903	0
564	6	0	0	0	0	0	0	200	300	0	0	0	0	0	0	0	200	903	0	0	0	0	0	0	0	603	903	0
564	7	0	0	0	0	0	0	200	300	0	0	0	0	0	0	0	200	903	0	0	0	0	0	0	0	603	903	0
564	8	0	0	0	0	0	0	200	300	0	0	0	0	0	0	0	200	903	0	0	0	0	0	0	0	603	903	0
564	9	0	0	0	0	0	0	200	300	0	0	0	0	0	0	0	200	903	0	0	0	0	0	0	0	603	903	0
565	0	0	0	0	0	0	0	200	300	0	0	0	0	0	0	0	200	903	0	0	0	0	0	0	0	603	903	0
565	1	0	0	0	0	0	0	200	300	0	0	0	0	0	0	0	200	903	0	0	0	0	0	0	0	603	903	0
565	2	0	0	0	0	0	0	200	300	0	0	0	0	0	0	0	200	903	0	0	0	0	0	0	0	603	903	0
565	3	0	0	0	0	0	0	200	300	0	0	0	0	0	0	0	200	903	0	0	0	0	0	0	0	603	903	0
565	4	0	0	0	0	0	0	200	300	0	0	0	0	0	0	0	200	903	0	0	0	0	0	0	0	603	903	0
565	5	0	0	0	0	0	0	200	300	0	0	0	0	0	0	0	200	903	0	0	0	0	0	0	0	603	903	0
565	6	0	0	0	0	0	0	200	300	0	0	0	0	0	0	0	200	903	0	0	0	0	0	0	0	603	903	0
565	7	0	0	0	0	0	0	200	300	0	0	0	0	0	0	0	200	903	0	0	0	0	0	0	0	603	903	0
565	8	0	0	0	0	0	0	200	300	0	0	0	0	0	0	0	200	903	0	0	0	0	0	0	0	603	903	0
565	9	0	0	0	0	0	0	200	300	0	0	0	0	0	0	0	200	903	0	0	0	0	0	0	0	603	903	0
566	0	0	0	0	0	0	0	200	300	0	0	0	0	0	0	0	200	903	0	0	0	0	0	0	0	603	903	0
566	1	0	0	0	0	0	0	200	300	0	0	0	0	0	0	0	200	903	0	0	0	0	0	0	0	603	903	0
566	2	0	0	0	0	0	0	200	300	0	0	0	0	0	0	0	200	903	0	0	0	0	0	0	0	603	903	0
566	3	0	0	0	0	0	0	200	300	0	0	0	0	0	0	0	200	903	0	0	0	0	0	0	0	603	903	0
566	4	0	0	0	0	0	0	200	300	0	0	0	0	0	0	0	200	903	0	0	0	0	0	0	0	603	903	0
566	5	0	0	0	0	0	0	200	300	0	0	0	0	0	0	0	200	903	0	0	0	0	0	0	0	603	903	0
566	6	0	0	0	0	0	0	200	300	0	0	0	0	0	0	0	200	903	0	0	0	0	0	0	0	603	903	0
566	7	0	0	0	0	0	0	200	300	0	0	0	0	0	0	0	200	903	0	0	0	0	0	0	0	603	903	0
566	8	0	0	0	0	0	0	200	300	0	0	0	0	0	0	0	200	903	0	0	0	0	0	0	0	603	903	0
566	9	0	0	0	0	0	0	200	300	0	0	0	0	0	0	0	200	903	0	0	0	0	0	0	0	603	903	0
567	0	0	0	0	0	0	0	200	300	0	0	0	0	0	0	0	200	903	0	0	0	0	0	0	0	603	903	0
567	1	0	0	0	0	0	0	200	300	0	0	0	0	0	0	0	200	903	0	0	0	0	0	0	0	603	903	0
567	2	0	0	0	0	0	0	200	300	0	0	0	0	0	0	0	200	903	0	0	0	0	0	0	0	603	903	0
567	3	0	0	0	0	0	0	200	300	0	0	0	0	0	0	0	200	903	0	0	0	0	0	0	0	603	903	0
567	4	0	0	0	0	0	0	200	300	0	0	0	0	0	0	0	200	903	0	0	0	0	0	0	0	603	903	0
567	5	0	0	0	0	0	0	200	300	0	0	0	0	0	0	0	200	903	0	0	0	0	0	0	0	603	903	0
567	6	0	0	0	0	0	0	200	300	0	0	0	0	0	0	0	200	903	0	0	0	0	0	0	0	603	903	0
567	7	0	0	0	0	0	0	200	300	0	0	0	0	0	0	0	200	903	0	0	0	0	0	0	0	603	903	0
567	8	0	0	0	0	0	0	200	300	0	0	0	0	0	0	0	200	903	0	0	0	0	0	0	0	603	903	0
567	9	0	0	0	0	0	0	200	300	0	0	0	0	0	0	0	200	903	0	0	0	0	0	0	0	603	903	0
568	0	0	0	0	0	0	0	200	300	0	0	0	0	0	0	0	200	903	0	0	0	0	0	0	0	603	903	0
568	1	0	0	0	0	0	0	200	300	0	0	0	0	0	0	0	200	903	0	0	0	0	0	0	0	603	903	0
568	2	0	0	0	0	0	0	200	300	0	0	0	0	0	0	0	200	903	0	0	0	0	0	0	0	603	903	0
568	3	0	0	0	0	0	0	200	300	0	0	0	0	0	0	0	200	903	0	0	0	0	0	0	0	603	903	0
568	4	0	0	0	0	0	0	200	300	0	0	0	0	0	0	0	200	903	0	0	0	0	0	0	0	603	903	0
568	5	0	0	0	0	0	0	200	300	0	0	0	0	0	0	0	200	903	0	0	0	0	0	0	0	603	903	0
568	6	0	0	0	0	0	0	200	300	0	0	0	0	0	0	0	200	903	0	0	0	0	0	0	0	603	903	0
568	7	0	0	0	0	0	0	200	300	0	0	0	0	0	0	0	200	903	0	0	0	0	0	0	0	603	903	0
568	8	0	0	0	0	0	0	200	300	0	0	0	0	0	0	0	200	903	0	0	0	0	0	0	0	603	903	0
568	9	0	0	0	0	0	0	200	300	0	0	0	0	0	0	0	200	903	0	0	0	0	0	0	0	603	903	0
569	0	0	0	0	0	0	0	200	300	0	0	0	0	0	0	0	200	903	0	0	0	0	0	0	0	603	903	0
569	1	0	0	0	0	0	0	200	300	0	0	0	0	0	0	0	200	903	0	0	0	0	0	0	0	603	903	0
569	2	0	0	0	0	0	0	200	300	0	0	0	0	0	0	0	200	903	0	0	0	0	0	0	0	603	903	0
569	3	0	0	0	0	0	0	200	300	0	0	0	0	0	0	0	200	903	0	0	0	0	0	0	0	603	903	0
569	4	0	0	0	0	0	0	200	300	0	0	0	0	0	0	0	200	903	0	0	0	0	0	0	0	603	903	0
569	5	0	0	0	0	0	0	200	300	0	0	0	0	0	0	0	200	903	0	0	0	0	0	0	0	603	903	0
569	6	0	0	0	0	0	0	200	300	0	0	0	0	0	0	0	200	903	0	0	0	0	0	0	0	603	903	0
569	7	0	0	0	0	0	0	200	300	0	0	0	0	0	0	0	200	903	0	0	0	0	0	0	0	603	903	0
569	8	0	0	0	0	0	0	200	300	0	0	0	0	0	0	0	200	903	0	0	0	0	0	0	0	603	903	0
569	9	0	0	0	0	0	0	200	300	0	0	0	0	0	0	0	200	903	0	0	0	0	0	0	0	603	903	0
570	0	0	0	0	0	0	0	200	300	0	0	0	0	0	0	0	200	903	0	0	0	0	0	0	0	603	903	0
570	1	0	0	0	0	0	0	200	300	0	0	0	0	0	0	0	200	903	0	0	0	0	0	0	0	603	903	0
570	2	0	0	0	0	0	0	200	300	0	0	0	0	0	0	0	200	903	0	0	0	0	0	0	0	603	903	0
570	3	0	0	0	0	0	0	200	300	0	0	0	0	0	0	0	200	903	0	0	0	0	0	0	0	603	903	0
570	4	0	0	0	0	0	0	200	300	0	0	0	0	0	0	0	200	903	0	0	0	0	0	0	0	603	903	0
570	5	0	0	0	0	0	0	200	300	0	0	0	0	0	0	0	200	903	0	0	0	0	0	0	0	603	903	0
570	6	0	0	0	0	0	0	200	300	0	0	0	0	0	0	0	200	903	0	0	0	0	0	0	0	603	903	0
570	7	0	0	0	0	0	0	200	300	0	0	0	0	0	0	0	200	903	0	0	0	0	0	0	0	603	903	0
570	8	0	0	0	0	0	0	200	300	0	0	0	0	0	0	0	200	903	0	0	0	0	0	0	0	603	903	0
570	9	0	0	0	0	0	0	200	300	0	0	0	0	0	0	0	200	903	0	0	0	0	0	0	0	603	903	0
571	0	0	0	0	0	0	0	200	300	0	0	0	0	0	0	0	200	903	0	0	0	0	0	0	0	603	903	0
571	1	0	0	0	0	0	0	200	300	0	0	0	0	0	0	0	200	903	0	0	0	0	0	0	0	603	903	0
571	2	0	0	0	0	0	0	200	300	0	0	0	0	0	0	0	200	903	0	0	0	0	0	0	0	603	903	0
571	3	0	0	0	0	0	0	200	300	0	0	0	0	0	0	0	200	903	0	0	0	0	0	0	0	603	903	0
571	4	0	0	0	0	0	0	200	300	0	0	0	0	0	0	0	200	903	0	0	0	0	0	0	0	603	903	0
571	5	2.10384	9.478	-5.14556	580.168	-311.836	-1041.46	139.397	187.249	0	0	0	0	0	0	0	200	903	0	0	0	0	0	0	0	603	903	0
571	6	1.18831	10.2409	-4.53521	580.168	-250.801	-1224.56	144.699	172.075	0	0	0	0	0	0	0	200	903	0	0	0	0	0	0	0	603	903	0
571	7	1.3409	10.2409	-3.00933	305.51	115.41	-1590.78	238.351	198.479	0	0	0	0	0	0	0	200	903	0	0	0	0	0	0	0	603	903	0
571	8	2.40901	10.5461	-3.61968	854.827	-189.766	-1499.22	147.574	63.8394	0	0	0	0	0	0	0	200	903	0	0	0	0	0	0	0	603	903	0
571	9	3.01936	11.6142	-3.61968	671.721	-67.6952	-1270.34	181.298	114.425	0	0	0	0	0	0	0	200	903	0	0	0	0	0	0	0	603	903	0
572	0	2.10384	12.2246	-5.14556	671.721	-494.941	-1865.43	103.812	169.456	0	0	0	0	0	0	0	200	903	0	0	0	0	0	0	0	603	903	0
572	1	1.18831	12.5298	-6.06109	763.274	-189.766	-1865.43	168.691	174.07	0	0	0	0	0	0	0	200	903	0	0	0	0	0	0	0	603	903	0
572	2	1.18831	13.5979	-3.61968	946.379	54.3751	-2323.2	215.022	38.5464	0	0	0	0	0	0	0	200	903	0	0	0	0	0	0	0	603	903	0
572	3	0.577956	14.666	-2.39898	580.168	-433.906	-2323.2	19.1289	58.1604	0	0	0	0	0	0	0	200	903	0	0	0	0	0	0	0	603	903	0
572	4	1.49348	14.9712	-4.53521	305.51	-6.66007	-2597.85	198.531	232.636	0	0	0	0	0	0	0	200	903	0	0	0	0	0	0	0	603	903	0
572	5	0.883132	15.4289	-4.84039	580.168	-311.836	-3009.84	135.576	180.14	0	0	0	0	0	0	0	200	903	0	0	0	0	0	0	0	603	903	0
572	6	0.577956	17.26	-6.67144	763.274	-494.941	-3101.39	125.812	185.591	0	0	0	0	0	0	0	200	903	0	0	0	0	0	0	0	603	903	0
572	7	1.95125	17.7177	-5.14556	580.168	-372.871	-3330.28	127.535	187.249	0	0	0	0	0	0	0	200	903	0	0	0	0	0	0	0	603	903	0
572	8	0.120193	18.7859	-5.75591	854.827	-250.801	-3421.83	156.427	151.487	0	0	0	0	0	0	0	200	903	0	0	0	0	0	0	0	603	903	0
572	9	-0.184983	17.8703	-6.67144	763.274	-372.871	-3559.16	144.109	185.591	0	0	0	0	0	0	0	200	903	0	0	0	0	0	0	0	603	903	0
573	0	-0.0323951	20.6169	-6.36626	1221.04	-678.047	-4016.92	93.4938	108.202	0	0	0	0	0	0	0	200	903	0	0	0	0	0	0	0	603	903	0
573	1	-0.947922	21.2273	-6.67144	1129.48	-739.082	-4016.92	89.217	130.699	0	0	0	0	0	0	0	200	903	0	0	0	0	0	0	0	603	903	0
573	2	-0.0323951	21.2273	-3.61968	1221.04	-311.836	-4337.36	113.85	-37.3327	0	0	0	0	0	0	0	200	903	0	0	0	0	0	0	0	603	903	0
573	3	-1.10051	21.8376	-5.75591	1770.35	-739.082	-4474.69	71.5961	-7.57132	0	0	0	0	0	0	0	200	903	0	0	0	0	0	0	0	603	903	0
573	4	-0.337571	21.8376	-6.36626	1953.46	-311.836	-4749.34	151.017	-6.84543	0	0	0	0	0	0	0	200	903	0	0	0	0	0	0	0	603	903	0
573	5	-0.337571	22.6006	-6.97662	1312.59	-678.047	-4749.34	102.812	111.859	0	0	0	0	0	0	0	200	903	0	0	0	0	0	0	0	603	903	0
573	6	-0.947922	23.0583	-7.89214	1587.25	-617.012	-4657.79	121.82	98.8825	0	0	0	0	0	0	0	200	903	0	0	0	0	0	0	0	603	903	0
573	7	-1.10051	21.9902	-6.97662	1495.7	-311.836	-4657.79	155.303	85.6131	0	0	0	0	0	0	0	200	903	0	0	0	0	0	0	0	603	903	0
573	8	-0.642747	23.3635	-6.36626	1221.04	-555.977	-4749.34	112.668	108.202	0	0	0	0	0	0	0	200	903	0	0	0	0	0	0	0	603	903	0
573	9	0.730544	23.2109	-6.97662	1129.48	-555.977	-4383.13	120.309	138.104	0	0	0	0	0	0	0	200	903	0	0	0	0	0	0	0	603	903	0
574	0	0.272781	23.6687	-8.19732	1221.04	-800.117	-4291.58	102.393	151.044	0	0	0	0	0	0	0	200	903	0	0	0	0	0	0	0	603	903	0
574	1	0.883132	24.279	-5.45074	2319.67	-800.117	-4474.69	53.2094	-125.57	0	0	0	0	0	0	0	200	903	0	0	0	0	0	0	0	603	903	0
574	2	0.120193	24.1264	-7.28179	1037.93	-555.977	-4154.25	123.648	157.462	0	0	0	0	0	0	0	200	903	0	0	0	0	0	0	0	603	903	0
574	3	0.272781	24.5842	-6.67144	1587.25	-861.152	-4520.46	70.9196	62.0831	0	0	0	0	0	0	0	200	903	0	0	0	0	0	0	0	603	903	0
574	4	1.49348	23.3635	-6.97662	1495.7	-678.047	-4200.03	102.812	85.6131	0	0	0	0	0	0	0	200	903	0	0	0	0	0	0	0	603	903	0
574	5	2.10384	24.5842	-9.11285	1678.8	-800.117	-4291.58	112.199	115.776	0	0	0	0	0	0	0	200	903	0	0	0	0	0	0	0	603	903	0
574	6	1.49348	24.4316	-6.36626	1953.46	-739.082	-4337.36	83.9065	-6.84543	0	0	0	0	0	0	0	200	903	0	0	0	0	0	0	0	603	903	0
574	7	0.425369	24.8894	-7.89214	1312.59	-800.117	-4474.69	98.6185	133.684	0	0	0	0	0	0	0	200	903	0	0	0	0	0	0	0	603	903	0
574	8	1.3409	24.1264	-7.28179	2319.67	-800.117	-4245.8	90.1208	-18.5576	0	0	0	0	0	0	0	200	903	0	0	0	0	0	0	0	603	903	0
574	9	1.95125	23.9738	-6.67144	1770.35	-861.152	-4291.58	70.9196	34.637	0	0	0	0	0	0	0	200	903	0	0	0	0	0	0	0	603	903	0
575	0	4.08748	24.7368	-8.19732	1953.46	-922.188	-4566.24	87.5013	61.6954	0	0	0	0	0	0	0	200	903	0	0	0	0	0	0	0	603	903	0
575	1	2.25642	24.7368	-8.5025	2319.67	-861.152	-4337.36	98.7177	27.1777	0	0	0	0	0	0	0	200	903	0	0	0	0	0	0	0	603	903	0
575	2	1.3409	24.7368	-9.11285	1587.25	-922.188	-4383.13	98.8036	125.823	0	0	0	0	0	0	0	200	903	0	0	0	0	0	0	0	603	903	0
575	3	1.3409	24.5842	-7.89214	1678.8	-800.117	-4337.36	98.6185	87.282	0	0	0	0	0	0	0	200	903	0	0	0	0	0	0	0	603	903	0
575	4	0.272781	25.042	-4.84039	1678.8	-617.012	-4291.58	72.5284	-46.8321	0	0	0	0	0	0	0	200	903	0	0	0	0	0	0	0	603	903	0
575	5	2.40901	25.4997	-7.89214	2136.56	-739.082	-4474.69	106.352	29.2795	0	0	0	0	0	0	0	200	903	0	0	0	0	0	0	0	603	903	0
575	6	2.71419	25.042	-8.5025	1678.8	-1105.29	-4154.25	70.0037	102.552	0	0	0	0	0	0	0	200	903	0	0	0	0	0	0	0	603	903	0
575	7	2.10384	25.4997	-9.11285	1495.7	-1349.43	-4200.03	51.9196	135.87	0	0	0	0	0	0	0	200	903	0	0	0	0	0	0	0	603	903	0
575	8	3.7823	25.3471	-8.5025	1953.46	-372.871	-4154.25	156.146	70.2487	0	0	0	0	0	0	0	200	903	0	0	0	0	0	0	0	603	903	0
575	9	1.95125	24.1264	-7.58697	1953.46	-861.152	-4200.03	86.4958	42.5244	0	0	0	0	0	0	0	200	903	0	0	0	0	0	0	0	603	903	0
576	0	3.01936	24.8894	-8.19732	2136.56	-922.188	-3971.15	87.5013	39.3581	0	0	0	0	0	0	0	200	903	0	0	0	0	0	0	0	603	903	0
576	1	3.01936	23.9738	-7.58697	1953.46	-1227.36	-3833.82	38.2274	42.5244	0	0	0	0	0	0	0	200	903	0	0	0	0	0	0	0	603	903	0
576	2	2.40901	22.9057	-9.11285	2136.56	-1166.33	-3925.37	72.0127	65.5437	0	0	0	0	0	0	0	200	903	0	0	0	0	0	0	0	603	903	0
576	3	2.10384	23.0583	-10.3336	1861.91	-983.223	-3971.15	104.851	119.819	0	0	0	0	0	0	0	200	903	0	0	0	0	0	0	0	603	903	0
576	4	2.10384	22.7531	-8.80767	2136.56	-922.188	-3467.61	95.2972	57.42	0	0	0	0	0	0	0	200	903	0	0	0	0	0	0	0	603	903	0
576	5	3.7823	22.1428	-9.7232	2045.01	-861.152	-3238.72	111.433	89.677	0	0	0	0	0	0	0	200	903	0	0	0	0	0	0	0	603	903	0
576	6	3.62971	19.7014	-9.41802	2045.01	-1166.33	-3284.5	76.16	82.8619	0	0	0	0	0	0	0	200	903	0	0	0	0	0	0	0	603	903	0
576	7	3.47713	20.7695	-6.97662	2045.01	-1227.36	-3284.5	24.0747	6.87625	0	0	0	0	0	0	0	200	903	0	0	0	0	0	0	0	603	903	0
576	8	3.01936	20.0066	-8.80767	1678.8	-1105.29	-3055.62	74.5079	109.393	0	0	0	0	0	0	0	200	903	0	0	0	0	0	0	0	603	903	0
576	9	3.17195	19.7014	-8.5025	1861.91	-861.152	-2872.51	98.7177	81.0165	0	0	0	0	0	0	0	200	903	0	0	0	0	0	0	0	603	903	0
577	0	3.93489	18.6333	-9.11285	1861.91	-861.152	-2735.18	105.501	95.6833	0	0	0	0	0	0	0	200	903	0	0	0	0	0	0	0	603	903	0
577	1	6.3763	19.5488	-7.89214	1678.8	-922.188	-2735.18	83.1512	87.282	0	0	0	0	0	0	0	200	903	0	0	0	0	0	0	0	603	903	0
577	2	4.39265	19.3962	-9.41802	1953.46	-1166.33	-2552.08	76.16	92.5829	0	0	0	0	0	0	0	200	903	0	0	0	0	0	0	0	603	903	0
577	3	3.7823	17.1074	-9.41802	1861.91	-1105.29	-2277.42	82.6406	102.304	0	0	0	0	0	0	0	200	903	0	0	0	0	0	0	0	603	903	0
577	4	3.93489	18.0229	-7.58697	1312.59	-1349.43	-2368.97	22.1379	126.994	0	0	0	0	0	0	0	200	903	0	0	0	0	0	0	0	603	903	0
577	5	3.47713	17.4126	-6.67144	2319.67	-1044.26	-2231.64	43.4734	-47.7015	0	0	0	0	0	0	0	200	903	0	0	0	0	0	0	0	603	903	0
577	6	4.08748	16.6496	-7.58697	2045.01	-861.152	-2048.54	86.4958	30.4573	0	0	0	0	0	0	0	200	903	0	0	0	0	0	0	0	603	903	0
577	7	4.24007	16.1919	-10.6387	2502.78	-1288.4	-1956.99	78.8954	64.7486	0	0	0	0	0	0	0	200	903	0	0	0	0	0	0	0	603	903	0
577	8	3.17195	15.2763	-8.80767	1861.91	-1471.5	-2048.54	32.9293	88.604	0	0	0	0	0	0	0	200	903	0	0	0	0	0	0	0	603	903	0
577	9	4.85042	15.4289	-8.5025	1770.35	-1288.4	-2048.54	48.4682	91.7842	0	0	0	0	0	0	0	200	903	0	0	0	0	0	0	0	603	903	0
578	0	3.47713	14.3608	-8.5025	2228.12	-861.152	-1956.99	98.7177	37.9455	0	0	0	0	0	0	0	200	903	0	0	0	0	0	0	0	603	903	0
578	1	4.08748	14.2082	-7.58697	1861.91	-1044.26	-1224.56	62.3616	54.5915	0	0	0	0	0	0	0	200	903	0	0	0	0	0	0	0	603	903	0
578	2	3.93489	13.903	-9.41802	1587.25	-1044.26	-1773.88	89.1213	131.467	0	0	0	0	0	0	0	200	903	0	0	0	0	0	0	0	603	903	0
578	3	3.32454	13.2927	-8.5025	1495.7	-1105.29	-1178.79	70.0037	124.087	0	0	0	0	0	0	0	200	903	0	0	0	0	0	0	0	603	903	0
578	4	3.47713	13.7505	-5.75591	1861.91	-1227.36	-1819.66	-13.2352	-23.4772	0	0	0	0	0	0	0	200	903	0	0	0	0	0	0	0	603	903	0
578	5	3.47713	12.8349	-6.67144	1953.46	-922.188	-1178.79	61.7708	7.1908	0	0	0	0	0	0	0	200	903	0	0	0	0	0	0	0	603	903	0
578	6	3.32454	13.2927	-7.58697	1221.04	-922.188	-1590.78	78.4511	139.061	0	0	0	0	0	0	0	200	903	0	0	0	0	0	0	0	603	903	0
578	7	4.39265	11.1565	-8.19732	1587.25	-983.223	-1499.22	80.0556	106.37	0	0	0	0	0	0	0	200	903	0	0	0	0	0	0	0	603	903	0
578	8	3.62971	11.4616	-6.06109	2136.56	-800.117	-1636.55	67.9912	-52.5051	0	0	0	0	0	0	0	200	903	0	0	0	0	0	0	0	603	903	0
578	9	2.5616	11.6142	-6.97662	1953.46	-861.152	-1041.46	76.5659	19.9991	0	0	0	0	0	0	0	200	903	0	0	0	0	0	0	0	603	903	0
579	0	1.95125	11.4616	-7.58697	1678.8	-861.152	-1270.34	86.4958	78.7257	0	0	0	0	0	0	0	200	903	0	0	0	0	0	0	0	603	903	0
579	1	2.5616	9.93576	-5.75591	1495.7	-617.012	-1133.01	92.8039	40.1462	0	0	0	0	0	0	0	200	903	0	0	0	0	0	0	0	603	903	0
579	2	2.71419	9.63058	-5.45074	1587.25	-617.012	-1636.55	86.8022	8.80118	0	0	0	0	0	0	0	200	903	0	0	0	0	0	0	0	603	903	0
579	3	1.95125	9.17282	-7.89214	1221.04	-983.223	-904.13	75.4175	145.284	0	0	0	0	0	0	0	200	903	0	0	0	0	0	0	0	603	903	0
579	4	0	0	0	0	0	0	200	300	0	0	0	0	0	0	0	200	903	0	0	0	0	0	0	0	603	903	0
579	5	0.730544	8.71506	-5.45074	2136.56	-678.047	-1270.34	75.6046	-91.9772	0	0	0	0	0	0	0	200	903	0	0	0	0	0	0	0	603	903	0
579	6	0	0	0	0	0	0	200	300	0	0	0	0	0	0	0	200	903	0	0	0	0	0	0	0	603	903	0
579	7	1.95125	8.56247	-4.84039	1221.04	-494.941	-1407.67	97.7476	47.7397	0	0	0	0	0	0	0	200	903	0	0	0	0	0	0	0	603	903	0
579	8	1.79866	8.86765	-8.19732	763.274	-1105.29	-1224.56	65.1641	206.887	0	0	0	0	0	0	0	200	903	0	0	0	0	0	0	0	603	903	0
579	9	1.18831	7.95212	-7.58697	1129.48	-739.082	-1224.56	102.585	151.128	0	0	0	0	0	0	0	200	903	0	0	0	0	0	0	0	603	903	0
580	0	1.95125	8.10471	-6.97662	580.168	-555.977	-949.906	120.309	216.841	0	0	0	0	0	0	0	200	903	0	0	0	0	0	0	0	603	903	0
580	1	0	0	0	0	0	0	200	300	0	0	0	0	0	0	0	200	903	0	0	0	0	0	0	0	603	903	0
580	2	0	0	0	0	0	0	200	300	0	0	0	0	0	0	0	200	903	0	0	0	0	0	0	0	603	903	0
580	3	0.425369	7.03659	-7.28179	580.168	-617.012	-1133.01	115.267	220.326	0	0	0	0	0	0	0	200	903	0	0	0	0	0	0	0	603	903	0
580	4	0	0	0	0	0	0	200	300	0	0	0	0	0	0	0	200	903	0	0	0	0	0	0	0	603	903	0
580	5	0	0	0	0	0	0	200	300	0	0	0	0	0	0	0	200	903	0	0	0	0	0	0	0	603	903	0
580	6	0	0	0	0	0	0	200	300	0	0	0	0	0	0	0	200	903	0	0	0	0	0	0	0	603	903	0
580	7	0	0	0	0	0	0	200	300	0	0	0	0	0	0	0	200	903	0	0	0	0	0	0	0	603	903	0
580	8	0	0	0	0	0	0	200	300	0	0	0	0	0	0	0	200	903	0	0	0	0	0	0	0	603	903	0
580	9	0	0	0	0	0	0	200	300	0	0	0	0	0	0	0	200	903	0	0	0	0	0	0	0	603	903	0
581	0	0	0	0	0	0	0	200	300	0	0	0	0	0	0	0	200	903	0	0	0	0	0	0	0	603	903	0
581	1	0	0	0	0	0	0	200	300	0	0	0	0	0	0	0	200	903	0	0	0	0	0	0	0	603	903	0
581	2	0	0	0	0	0	0	200	300	0	0	0	0	0	0	0	200	903	0	0	0	0	0	0	0	603	903	0
581	3	0	0	0	0	0	0	200	300	0	0	0	0	0	0	0	200	903	0	0	0	0	0	0	0	603	903	0
581	4	0	0	0	0	0	0	200	300	0	0	0	0	0	0	0	200	903	0	0	0	0	0	0	0	603	903	0
581	5	0	0	0	0	0	0	200	300	0	0	0	0	0	0	0	200	903	0	0	0	0	0	0	0	603	903	0
581	6	0	0	0	0	0	0	200	300	0	0	0	0	0	0	0	200	903	0	0	0	0	0	0	0	603	903	0
581	7	0	0	0	0	0	0	200	300	0	0	0	0	0	0	0	200	903	0	0	0	0	0	0	0	603	903	0
581	8	0	0	0	0	0	0	200	300	0	0	0	0	0	0	0	200	903	0	0	0	0	0	0	0	603	903	0
581	9	0	0	0	0	0	0	200	300	0	0	0	0	0	0	0	200	903	0	0	0	0	0	0	0	603	903	0
582	0	0	0	0	0	0	0	200	300	0	0	0	0	0	0	0	200	903	0	0	0	0	0	0	0	603	903	0
582	1	0	0	0	0	0	0	200	300	0	0	0	0	0	0	0	200	903	0	0	0	0	0	0	0	603	903	0
582	2	0	0	0	0	0	0	200	300	0	0	0	0	0	0	0	200	903	0	0	0	0	0	0	0	603	903	0
582	3	0	0	0	0	0	0	200	300	0	0	0	0	0	0	0	200	903	0	0	0	0	0	0	0	603	903	0
582	4	0	0	0	0	0	0	200	300	0	0	0	0	0	0	0	200	903	0	0	0	0	0	0	0	603	903	0
582	5	0	0	0	0	0	0	200	300	0	0	0	0	0	0	0	200	903	0	0	0	0	0	0	0	603	903	0
582	6	0	0	0	0	0	0	200	300	0	0	0	0	0	0	0	200	903	0	0	0	0	0	0	0	603	903	0
582	7	0	0	0	0	0	0	200	300	0	0	0	0	0	0	0	200	903	0	0	0	0	0	0	0	603	903	0
582	8	0	0	0	0	0	0	200	300	0	0	0	0	0	0	0	200	903	0	0	0	0	0	0	0	603	903	0
582	9	0	0	0	0	0	0	200	300	0	0	0	0	0	0	0	200	903	0	0	0	0	0	0	0	603	903	0
583	0	0	0	0	0	0	0	200	300	0	0	0	0	0	0	0	200	903	0	0	0	0	0	0	0	603	903	0
583	1	0	0	0	0	0	0	200	300	0	0	0	0	0	0	0	200	903	0	0	0	0	0	0	0	603	903	0
583	2	0	0	0	0	0	0	200	300	0	0	0	0	0	0	0	200	903	0	0	0	0	0	0	0	603	903	0
583	3	0	0	0	0	0	0	200	300	0	0	0	0	0	0	0	200	903	0	0	0	0	0	0	0	603	903	0
583	4	0	0	0	0	0	0	200	300	0	0	0	0	0	0	0	200	903	0	0	0	0	0	0	0	603	903	0
583	5	0	0	0	0	0	0	200	300	0	0	0	0	0	0	0	200	903	0	0	0	0	0	0	0	603	903	0
583	6	0	0	0	0	0	0	200	300	0	0	0	0	0	0	0	200	903	0	0	0	0	0	0	0	603	903	0
583	7	0	0	0	0	0	0	200	300	0	0	0	0	0	0	0	200	903	0	0	0	0	0	0	0	603	903	0
583	8	0	0	0	0	0	0	200	300	0	0	0	0	0	0	0	200	903	0	0	0	0	0	0	0	603	903	0
583	9	0	0	0	0	0	0	200	300	0	0	0	0	0	0	0	200	903	0	0	0	0	0	0	0	603	903	0
584	0	0	0	0	0	0	0	200	300	0	0	0	0	0	0	0	200	903	0	0	0	0	0	0	0	603	903	0
584	1	0	0	0	0	0	0	200	300	0	0	0	0	0	0	0	200	903	0	0	0	0	0	0	0	603	903	0
584	2	0	0	0	0	0	0	200	300	0	0	0	0	0	0	0	200	903	0	0	0	0	0	0	0	603	903	0
584	3	0	0	0	0	0	0	200	300	0	0	0	0	0	0	0	200	903	0	0	0	0	0	0	0	603	903	0
584	4	0	0	0	0	0	0	200	300	0	0	0	0	0	0	0	200	903	0	0	0	0	0	0	0	603	903	0
584	5	0	0	0	0	0	0	200	300	0	0	0	0	0	0	0	200	903	0	0	0	0	0	0	0	603	903	0
584	6	0	0	0	0	0	0	200	300	0	0	0	0	0	0	0	200	903	0	0	0	0	0	0	0	603	903	0
584	7	0	0	0	0	0	0	200	300	0	0	0	0	0	0	0	200	903	0	0	0	0	0	0	0	603	903	0
584	8	0	0	0	0	0	0	200	300	0	0	0	0	0	0	0	200	903	0	0	0	0	0	0	0	603	903	0
584	9	0	0	0	0	0	0	200	300	0	0	0	0	0	0	0	200	903	0	0	0	0	0	0	0	603	903	0
585	0	0	0	0	0	0	0	200	300	0	0	0	0	0	0	0	200	903	0	0	0	0	0	0	0	603	903	0
585	1	0	0	0	0	0	0	200	300	0	0	0	0	0	0	0	200	903	0	0	0	0	0	0	0	603	903	0
585	2	0	0	0	0	0	0	200	300	0	0	0	0	0	0	0	200	903	0	0	0	0	0	0	0	603	903	0
585	3	0	0	0	0	0	0	200	300	0	0	0	0	0	0	0	200	903	0	0	0	0	0	0	0	603	903	0
585	4	0	0	0	0	0	0	200	300	0	0	0	0	0	0	0	200	903	0	0	0	0	0	0	0	603	903	0
585	5	0	0	0	0	0	0	200	300	0	0	0	0	0	0	0	200	903	0	0	0	0	0	0	0	603	903	0
585	6	0	0	0	0	0	0	200	300	0	0	0	0	0	0	0	200	903	0	0	0	0	0	0	0	603	903	0
585	7	0	0	0	0	0	0	200	300	0	0	0	0	0	0	0	200	903	0	0	0	0	0	0	0	603	903	0
585	8	0	0	0	0	0	0	200	300	0	0	0	0	0	0	0	200	903	0	0	0	0	0	0	0	603	903	0
585	9	0	0	0	0	0	0	200	300	0	0	0	0	0	0	0	200	903	0	0	0	0	0	0	0	603	903	0
586	0	0	0	0	0	0	0	200	300	0	0	0	0	0	0	0	200	903	0	0	0	0	0	0	0	603	903	0
586	1	0	0	0	0	0	0	200	300	0	0	0	0	0	0	0	200	903	0	0	0	0	0	0	0	603	903	0
586	2	0	0	0	0	0	0	200	300	0	0	0	0	0	0	0	200	903	0	0	0	0	0	0	0	603	903	0
586	3	0	0	0	0	0	0	200	300	0	0	0	0	0	0	0	200	903	0	0	0	0	0	0	0	603	903	0
586	4	0	0	0	0	0	0	200	300	0	0	0	0	0	0	0	200	903	0	0	0	0	0	0	0	603	903	0
586	5	0	0	0	0	0	0	200	300	0	0	0	0	0	0	0	200	903	0	0	0	0	0	0	0	603	903	0
586	6	0	0	0	0	0	0	200	300	0	0	0	0	0	0	0	200	903	0	0	0	0	0	0	0	603	903	0
586	7	0	0	0	0	0	0	200	300	0	0	0	0	0	0	0	200	903	0	0	0	0	0	0	0	603	903	0
586	8	0	0	0	0	0	0	200	300	0	0	0	0	0	0	0	200	903	0	0	0	0	0	0	0	603	903	0
586	9	0	0	0	0	0	0	200	300	0	0	0	0	0	0	0	200	903	0	0	0	0	0	0	0	603	903	0
587	0	0	0	0	0	0	0	200	300	0	0	0	0	0	0	0	200	903	0	0	0	0	0	0	0	603	903	0
587	1	0	0	0	0	0	0	200	300	0	0	0	0	0	0	0	200	903	0	0	0	0	0	0	0	603	903	0
587	2	0	0	0	0	0	0	200	300	0	0	0	0	0	0	0	200	903	0	0	0	0	0	0	0	603	903	0
587	3	0	0	0	0	0	0	200	300	0	0	0	0	0	0	0	200	903	0	0	0	0	0	0	0	603	903	0
587	4	0	0	0	0	0	0	200	300	0	0	0	0	0	0	0	200	903	0	0	0	0	0	0	0	603	903	0
587	5	0	0	0	0	0	0	200	300	0	0	0	0	0	0	0	200	903	0	0	0	0	0	0	0	603	903	0
587	6	0	0	0	0	0	0	200	300	0	0	0	0	0	0	0	200	903	0	0	0	0	0	0	0	603	903	0
587	7	0	0	0	0	0	0	200	300	0	0	0	0	0	0	0	200	903	0	0	0	0	0	0	0	603	903	0
587	8	0	0	0	0	0	0	200	300	0	0	0	0	0	0	0	200	903	0	0	0	0	0	0	0	603	903	0
587	9	0	0	0	0	0	0	200	300	0	0	0	0	0	0	0	200	903	0	0	0	0	0	0	0	603	903	0
588	0	0	0	0	0	0	0	200	300	0	0	0	0	0	0	0	200	903	0	0	0	0	0	0	0	603	903	0
588	1	0	0	0	0	0	0	200	300	0	0	0	0	0	0	0	200	903	0	0	0	0	0	0	0	603	903	0
588	2	0	0	0	0	0	0	200	300	0	0	0	0	0	0	0	200	903	0	0	0	0	0	0	0	603	903	0
588	3	0	0	0	0	0	0	200	300	0	0	0	0	0	0	0	200	903	0	0	0	0	0	0	0	603	903	0
588	4	0	0	0	0	0	0	200	300	0	0	0	0	0	0	0	200	903	0	0	0	0	0	0	0	603	903	0
588	5	0	0	0	0	0	0	200	300	0	0	0	0	0	0	0	200	903	0	0	0	0	0	0	0	603	903	0
588	6	0	0	0	0	0	0	200	300	0	0	0	0	0	0	0	200	903	0	0	0	0	0	0	0	603	903	0
588	7	0	0	0	0	0	0	200	300	0	0	0	0	0	0	0	200	903	0	0	0	0	0	0	0	603	903	0
588	8	0	0	0	0	0	0	200	300	0	0	0	0	0	0	0	200	903	0	0	0	0	0	0	0	603	903	0
588	9	0	0	0	0	0	0	200	300	0	0	0	0	0	0	0	200	903	0	0	0	0	0	0	0	603	903	0
589	0	0	0	0	0	0	0	200	300	0	0	0	0	0	0	0	200	903	0	0	0	0	0	0	0	603	903	0
589	1	0	0	0	0	0	0	200	300	0	0	0	0	0	0	0	200	903	0	0	0	0	0	0	0	603	903	0
589	2	0	0	0	0	0	0	200	300	0	0	0	0	0	0	0	200	903	0	0	0	0	0	0	0	603	903	0
589	3	0	0	0	0	0	0	200	300	0	0	0	0	0	0	0	200	903	0	0	0	0	0	0	0	603	903	0
589	4	0	0	0	0	0	0	200	300	0	0	0	0	0	0	0	200	903	0	0	0	0	0	0	0	603	903	0
589	5	0	0	0	0	0	0	200	300	0	0	0	0	0	0	0	200	903	0	0	0	0	0	0	0	603	903	0
589	6	0	0	0	0	0	0	200	300	0	0	0	0	0	0	0	200	903	0	0	0	0	0	0	0	603	903	0
589	7	0	0	0	0	0	0	200	300	0	0	0	0	0	0	0	200	903	0	0	0	0	0	0	0	603	903	0
589	8	0	0	0	0	0	0	200	300	0	0	0	0	0	0	0	200	903	0	0	0	0	0	0	0	603	903	0
589	9	0	0	0	0	0	0	200	300	0	0	0	0	0	0	0	200	903	0	0	0	0	0	0	0	603	903	0
590	0	0	0	0	0	0	0	200	300	0	0	0	0	0	0	0	200	903	0	0	0	0	0	0	0	603	903	0
590	1	0	0	0	0	0	0	200	300	0	0	0	0	0	0	0	200	903	0	0	0	0	0	0	0	603	903	0
590	2	0	0	0	0	0	0	200	300	0	0	0	0	0	0	0	200	903	0	0	0	0	0	0	0	603	903	0
590	3	0	0	0	0	0	0	200	300	0	0	0	0	0	0	0	200	903	0	0	0	0	0	0	0	603	903	0
590	4	0	0	0	0	0	0	200	300	0	0	0	0	0	0	0	200	903	0	0	0	0	0	0	0	603	903	0
590	5	0	0	0	0	0	0	200	300	0	0	0	0	0	0	0	200	903	0	0	0	0	0	0	0	603	903	0
590	6	0	0	0	0	0	0	200	300	0	0	0	0	0	0	0	200	903	0	0	0	0	0	0	0	603	903	0
590	7	0	0	0	0	0	0	200	300	0	0	0	0	0	0	0	200	903	0	0	0	0	0	0	0	603	903	0
590	8	0	0	0	0	0	0	200	300	0	0	0	0	0	0	0	200	903	0	0	0	0	0	0	0	603	903	0
590	9	0	0	0	0	0	0	200	300	0	0	0	0	0	0	0	200	903	0	0	0	0	0	0	0	603	903	0
591	0	0	0	0	0	0	0	200	300	0	0	0	0	0	0	0	200	903	0	0	0	0	0	0	0	603	903	0
591	1	0	0	0	0	0	0	200	300	0	0	0	0	0	0	0	200	903	0	0	0	0	0	0	0	603	903	0
591	2	0	0	0	0	0	0	200	300	0	0	0	0	0	0	0	200	903	0	0	0	0	0	0	0	603	903	0
591	3	0	0	0	0	0	0	200	300	0	0	0	0	0	0	0	200	903	0	0	0	0	0	0	0	603	903	0
591	4	0	0	0	0	0	0	200	300	0	0	0	0	0	0	0	200	903	0	0	0	0	0	0	0	603	903	0
591	5	0	0	0	0	0	0	200	300	0	0	0	0	0	0	0	200	903	0	0	0	0	0	0	0	603	903	0
591	6	0	0	0	0	0	0	200	300	0	0	0	0	0	0	0	200	903	0	0	0	0	0	0	0	603	903	0
591	7	0	0	0	0	0	0	200	300	0	0	0	0	0	0	0	200	903	0	0	0	0	0	0	0	603	903	0
591	8	0	0	0	0	0	0	200	300	0	0	0	0	0	0	0	200	903	0	0	0	0	0	0	0	603	903	0
591	9	0	0	0	0	0	0	200	300	0	0	0	0	0	0	0	200	903	0	0	0	0	0	0	0	603	903	0
592	0	0	0	0	0	0	0	200	300	0	0	0	0	0	0	0	200	903	0	0	0	0	0	0	0	603	903	0
592	1	0	0	0	0	0	0	200	300	0	0	0	0	0	0	0	200	903	0	0	0	0	0	0	0	603	903	0
592	2	0	0	0	0	0	0	200	300	0	0	0	0	0	0	0	200	903	0	0	0	0	0	0	0	603	903	0
592	3	0	0	0	0	0	0	200	300	0	0	0	0	0	0	0	200	903	0	0	0	0	0	0	0	603	903	0
592	4	0	0	0	0	0	0	200	300	0	0	0	0	0	0	0	200	903	0	0	0	0	0	0	0	603	903	0
592	5	0	0	0	0	0	0	200	300	0	0	0	0	0	0	0	200	903	0	0	0	0	0	0	0	603	903	0
592	6	0	0	0	0	0	0	200	300	0	0	0	0	0	0	0	200	903	0	0	0	0	0	0	0	603	903	0
592	7	0	0	0	0	0	0	200	300	0	0	0	0	0	0	0	200	903	0	0	0	0	0	0	0	603	903	0
592	8	0	0	0	0	0	0	200	300	0	0	0	0	0	0	0	200	903	0	0	0	0	0	0	0	603	903	0
592	9	0	0	0	0	0	0	200	300	0	0	0	0	0	0	0	200	903	0	0	0	0	0	0	0	603	903	0
593	0	0	0	0	0	0	0	200	300	0	0	0	0	0	0	0	200	903	0	0	0	0	0	0	0	603	903	0
593	1	0	0	0	0	0	0	200	300	0	0	0	0	0	0	0	200	903	0	0	0	0	0	0	0	603	903	0
593	2	0	0	0	0	0	0	200	300	0	0	0	0	0	0	0	200	903	0	0	0	0	0	0	0	603	903	0
593	3	0	0	0	0	0	0	200	300	0	0	0	0	0	0	0	200	903	0	0	0	0	0	0	0	603	903	0
593	4	0	0	0	0	0	0	200	300	0	0	0	0	0	0	0	200	903	0	0	0	0	0	0	0	603	903	0
593	5	0	0	0	0	0	0	200	300	0	0	0	0	0	0	0	200	903	0	0	0	0	0	0	0	603	903	0
593	6	0	0	0	0	0	0	200	300	0	0	0	0	0	0	0	200	903	0	0	0	0	0	0	0	603	903	0
593	7	0	0	0	0	0	0	200	300	0	0	0	0	0	0	0	200	903	0	0	0	0	0	0	0	603	903	0
593	8	0	0	0	0	0	0	200	300	0	0	0	0	0	0	0	200	903	0	0	0	0	0	0	0	603	903	0
593	9	0	0	0	0	0	0	200	300	0	0	0	0	0	0	0	200	903	0	0	0	0	0	0	0	603	903	0
594	0	0	0	0	0	0	0	200	300	0	0	0	0	0	0	0	200	903	0	0	0	0	0	0	0	603	903	0
594	1	0	0	0	0	0	0	200	300	0	0	0	0	0	0	0	200	903	0	0	0	0	0	0	0	603	903	0
594	2	0	0	0	0	0	0	200	300	0	0	0	0	0	0	0	200	903	0	0	0	0	0	0	0	603	903	0
594	3	0	0	0	0	0	0	200	300	0	0	0	0	0	0	0	200	903	0	0	0	0	0	0	0	603	903	0
594	4	0	0	0	0	0	0	200	300	0	0	0	0	0	0	0	200	903	0	0	0	0	0	0	0	603	903	0
594	5	0	0	0	0	0	0	200	300	0	0	0	0	0	0	0	200	903	0	0	0	0	0	0	0	603	903	0
594	6	0	0	0	0	0	0	200	300	0	0	0	0	0	0	0	200	903	0	0	0	0	0	0	0	603	903	0
594	7	0	0	0	0	0	0	200	300	0	0	0	0	0	0	0	200	903	0	0	0	0	0	0	0	603	903	0
594	8	0	0	0	0	0	0	200	300	0	0	0	0	0	0	0	200	903	0	0	0	0	0	0	0	603	903	0
594	9	0	0	0	0	0	0	200	300	0	0	0	0	0	0	0	200	903	0	0	0	0	0	0	0	603	903	0
595	0	0	0	0	0	0	0	200	300	0	0	0	0	0	0	0	200	903	0	0	0	0	0	0	0	603	903	0
595	1	0	0	0	0	0	0	200	300	0	0	0	0	0	0	0	200	903	0	0	0	0	0	0	0	603	903	0
595	2	0	0	0	0	0	0	200	300	0	0	0	0	0	0	0	200	903	0	0	0	0	0	0	0	603	903	0
595	3	0	0	0	0	0	0	200	300	0	0	0	0	0	0	0	200	903	0	0	0	0	0	0	0	603	903	0
595	4	0	0	0	0	0	0	200	300	0	0	0	0	0	0	0	200	903	0	0	0	0	0	0	0	603	903	0
595	5	0	0	0	0	0	0	200	300	0	0	0	0	0	0	0	200	903	0	0	0	0	0	0	0	603	903	0
595	6	0	0	0	0	0	0	200	300	0	0	0	0	0	0	0	200	903	0	0	0	0	0	0	0	603	903	0
595	7	0	0	0	0	0	0	200	300	0	0	0	0	0	0	0	200	903	0	0	0	0	0	0	0	603	903	0
595	8	0	0	0	0	0	0	200	300	0	0	0	0	0	0	0	200	903	0	0	0	0	0	0	0	603	903	0
595	9	0	0	0	0	0	0	200	300	0	0	0	0	0	0	0	200	903	0	0	0	0	0	0	0	603	903	0
596	0	0	0	0	0	0	0	200	300	0	0	0	0	0	0	0	200	903	0	0	0	0	0	0	0	603	903	0
596	1	0	0	0	0	0	0	200	300	0	0	0	0	0	0	0	200	903	0	0	0	0	0	0	0	603	903	0
596	2	0	0	0	0	0	0	200	300	0	0	0	0	0	0	0	200	903	0	0	0	0	0	0	0	603	903	0
596	3	0	0	0	0	0	0	200	300	0	0	0	0	0	0	0	200	903	0	0	0	0	0	0	0	603	903	0
596	4	0	0	0	0	0	0	200	300	0	0	0	0	0	0	0	200	903	0	0	0	0	0	0	0	603	903	0
596	5	0	0	0	0	0	0	200	300	0	0	0	0	0	0	0	200	903	0	0	0	0	0	0	0	603	903	0
596	6	0	0	0	0	0	0	200	300	0	0	0	0	0	0	0	200	903	0	0	0	0	0	0	0	603	903	0
596	7	0	0	0	0	0	0	200	300	0	0	0	0	0	0	0	200	903	0	0	0	0	0	0	0	603	903	0
596	8	0	0	0	0	0	0	200	300	0	0	0	0	0	0	0	200	903	0	0	0	0	0	0	0	603	903	0
596	9	0	0	0	0	0	0	200	300	0	0	0	0	0	0	0	200	903	0	0	0	0	0	0	0	603	903	0
597	0	0	0	0	0	0	0	200	300	0	0	0	0	0	0	0	200	903	0	0	0	0	0	0	0	603	903	0
597	1	0	0	0	0	0	0	200	300	0	0	0	0	0	0	0	200	903	0	0	0	0	0	0	0	603	903	0
597	2	0	0	0	0	0	0	200	300	0	0	0	0	0	0	0	200	903	0	0	0	0	0	0	0	603	903	0
597	3	0	0	0	0	0	0	200	300	0	0	0	0	0	0	0	200	903	0	0	0	0	0	0	0	603	903	0
597	4	0	0	0	0	0	0	200	300	0	0	0	0	0	0	0	200	903	0	0	0	0	0	0	0	603	903	0
597	5	0	0	0	0	0	0	200	300	0	0	0	0	0	0	0	200	903	0	0	0	0	0	0	0	603	903	0
597	6	0	0	0	0	0	0	200	300	0	0	0	0	0	0	0	200	903	0	0	0	0	0	0	0	603	903	0
597	7	0	0	0	0	0	0	200	300	0	0	0	0	0	0	0	200	903	0	0	0	0	0	0	0	603	903	0
597	8	0	0	0	0	0	0	200	300	0	0	0	0	0	0	0	200	903	0	0	0	0	0	0	0	603	903	0
597	9	0	0	0	0	0	0	200	300	0	0	0	0	0	0	0	200	903	0	0	0	0	0	0	0	603	903	0
598	0	0	0	0	0	0	0	200	300	0	0	0	0	0	0	0	200	903	0	0	0	0	0	0	0	603	903	0
598	1	0	0	0	0	0	0	200	300	0	0	0	0	0	0	0	200	903	0	0	0	0	0	0	0	603	903	0
598	2	0	0	0	0	0	0	200	300	0	0	0	0	0	0	0	200	903	0	0	0	0	0	0	0	603	903	0
598	3	0	0	0	0	0	0	200	300	0	0	0	0	0	0	0	200	903	0	0	0	0	0	0	0	603	903	0
598	4	0	0	0	0	0	0	200	300	0	0	0	0	0	0	0	200	903	0	0	0	0	0	0	0	603	903	0
598	5	0	0	0	0	0	0	200	300	0	0	0	0	0	0	0	200	903	0	0	0	0	0	0	0	603	903	0
598	6	0	0	0	0	0	0	200	300	0	0	0	0	0	0	0	200	903	0	0	0	0	0	0	0	603	903	0
598	7	0	0	0	0	0	0	200	300	0	0	0	0	0	0	0	200	903	0	0	0	0	0	0	0	603	903	0
598	8	0	0	0	0	0	0	200	300	0	0	0	0	0	0	0	200	903	0	0	0	0	0	0	0	603	903	0
598	9	0	0	0	0	0	0	200	300	0	0	0	0	0	0	0	200	903	0	0	0	0	0	0	0	603	903	0
599	0	0	0	0	0	0	0	200	300	0	0	0	0	0	0	0	200	903	0	0	0	0	0	0	0	603	903	0
599	1	0	0	0	0	0	0	200	300	0	0	0	0	0	0	0	200	903	0	0	0	0	0	0	0	603	903	0
599	2	0	0	0	0	0	0	200	300	0	0	0	0	0	0	0	200	903	0	0	0	0	0	0	0	603	903	0
599	3	0	0	0	0	0	0	200	300	0	0	0	0	0	0	0	200	903	0	0	0	0	0	0	0	603	903	0
599	4	0	0	0	0	0	0	200	300	0	0	0	0	0	0	0	200	903	0	0	0	0	0	0	0	603	903	0
599	5	0	0	0	0	0	0	200	300	0	0	0	0	0	0	0	200	903	0	0	0	0	0	0	0	603	903	0
599	6	0	0	0	0	0	0	200	300	0	0	0	0	0	0	0	200	903	0	0	0	0	0	0	0	603	903	0
599	7	0	0	0	0	0	0	200	300	0	0	0	0	0	0	0	200	903	0	0	0	0	0	0	0	603	903	0
599	8	0	0	0	0	0	0	200	300	0	0	0	0	0	0	0	200	903	0	0	0	0	0	0	0	603	903	0
599	9	0	0	0	0	0	0	200	300	0	0	0	0	0	0	0	200	903	0	0	0	0	0	0	0	603	903	0
600	0	0	0	0	0	0	0	200	300	0	0	0	0	0	0	0	200	903	0	0	0	0	0	0	0	603	903	0
600	1	0	0	0	0	0	0	200	300	0	0	0	0	0	0	0	200	903	0	0	0	0	0	0	0	603	903	0
600	2	0	0	0	0	0	0	200	300	0	0	0	0	0	0	0	200	903	0	0	0	0	0	0	0	603	903	0
600	3	0	0	0	0	0	0	200	300	0	0	0	0	0	0	0	200	903	0	0	0	0	0	0	0	603	903	0
600	4	0	0	0	0	0	0	200	300	0	0	0	0	0	0	0	200	903	0	0	0	0	0	0	0	603	903	0
600	5	0	0	0	0	0	0	200	300	0	0	0	0	0	0	0	200	903	0	0	0	0	0	0	0	603	903	0
600	6	0	0	0	0	0	0	200	300	0	0	0	0	0	0	0	200	903	0	0	0	0	0	0	0	603	903	0
600	7	0	0	0	0	0	0	200	300	0	0	0	0	0	0	0	200	903	0	0	0	0	0	0	0	603	903	0
600	8	0	0	0	0	0	0	200	300	0	0	0	0	0	0	0	200	903	0	0	0	0	0	0	0	603	903	0
600	9	0	0	0	0	0	0	200	300	0	0	0	0	0	0	0	200	903	0	0	0	0	0	0	0	603	903	0
601	0	0	0	0	0	0	0	200	300	0	0	0	0	0	0	0	200	903	0	0	0	0	0	0	0	603	903	0
601	1	0	0	0	0	0	0	200	300	0	0	0	0	0	0	0	200	903	0	0	0	0	0	0	0	603	903	0
601	2	0	0	0	0	0	0	200	300	0	0	0	0	0	0	0	200	903	0	0	0	0	0	0	0	603	903	0
601	3	0	0	0	0	0	0	200	300	0	0	0	0	0	0	0	200	903	0	0	0	0	0	0	0	603	903	0
601	4	0	0	0	0	0	0	200	300	0	0	0	0	0	0	0	200	903	0	0	0	0	0	0	0	603	903	0
601	5	0	0	0	0	0	0	200	300	0	0	0	0	0	0	0	200	903	0	0	0	0	0	0	0	603	903	0
601	6	0	0	0	0	0	0	200	300	0	0	0	0	0	0	0	200	903	0	0	0	0	0	0	0	603	903	0
601	7	0	0	0	0	0	0	200	300	0	0	0	0	0	0	0	200	903	0	0	0	0	0	0	0	603	903	0
601	8	0	0	0	0	0	0	200	300	0	0	0	0	0	0	0	200	903	0	0	0	0	0	0	0	603	903	0
601	9	0	0	0	0	0	0	200	300	0	0	0	0	0	0	0	200	903	0	0	0	0	0	0	0	603	903	0
602	0	0	0	0	0	0	0	200	300	0	0	0	0	0	0	0	200	903	0	0	0	0	0	0	0	603	903	0
602	1	0	0	0	0	0	0	200	300	0	0	0	0	0	0	0	200	903	0	0	0	0	0	0	0	603	903	0
602	2	0	0	0	0	0	0	200	300	0	0	0	0	0	0	0	200	903	0	0	0	0	0	0	0	603	903	0
602	3	0	0	0	0	0	0	200	300	0	0	0	0	0	0	0	200	903	0	0	0	0	0	0	0	603	903	0
602	4	0	0	0	0	0	0	200	300	0	0	0	0	0	0	0	200	903	0	0	0	0	0	0	0	603	903	0
602	5	0	0	0	0	0	0	200	300	0	0	0	0	0	0	0	200	903	0	0	0	0	0	0	0	603	903	0
602	6	0	0	0	0	0	0	200	300	0	0	0	0	0	0	0	200	903	0	0	0	0	0	0	0	603	903	0
602	7	0	0	0	0	0	0	200	300	0	0	0	0	0	0	0	200	903	0	0	0	0	0	0	0	603	903	0
602	8	0	0	0	0	0	0	200	300	0	0	0	0	0	0	0	200	903	0	0	0	0	0	0	0	603	903	0
602	9	0	0	0	0	0	0	200	300	0	0	0	0	0	0	0	200	903	0	0	0	0	0	0	0	603	903	0
603	0	0	0	0	0	0	0	200	300	0	0	0	0	0	0	0	200	903	0	0	0	0	0	0	0	603	903	0
603	1	0	0	0	0	0	0	200	300	0	0	0	0	0	0	0	200	903	0	0	0	0	0	0	0	603	903	0
603	2	0	0	0	0	0	0	200	300	0	0	0	0	0	0	0	200	903	0	0	0	0	0	0	0	603	903	0
603	3	0	0	0	0	0	0	200	300	0	0	0	0	0	0	0	200	903	0	0	0	0	0	0	0	603	903	0
603	4	0	0	0	0	0	0	200	300	0	0	0	0	0	0	0	200	903	0	0	0	0	0	0	0	603	903	0
603	5	0	0	0	0	0	0	200	300	0	0	0	0	0	0	0	200	903	0	0	0	0	0	0	0	603	903	0
603	6	0	0	0	0	0	0	200	300	0	0	0	0	0	0	0	200	903	0	0	0	0	0	0	0	603	903	0
603	7	0	0	0	0	0	0	200	300	0	0	0	0	0	0	0	200	903	0	0	0	0	0	0	0	603	903	0
603	8	0	0	0	0	0	0	200	300	0	0	0	0	0	0	0	200	903	0	0	0	0	0	0	0	603	903	0
603	9	0	0	0	0	0	0	200	300	0	0	0	0	0	0	0	200	903	0	0	0	0	0	0	0	603	903	0
604	0	0	0	0	0	0	0	200	300	0	0	0	0	0	0	0	200	903	0	0	0	0	0	0	0	603	903	0
604	1	0	0	0	0	0	0	200	300	0	0	0	0	0	0	0	200	903	0	0	0	0	0	0	0	603	903	0
604	2	0	0	0	0	0	0	200	300	0	0	0	0	0	0	0	200	903	0	0	0	0	0	0	0	603	903	0
604	3	0	0	0	0	0	0	200	300	0	0	0	0	0	0	0	200	903	0	0	0	0	0	0	0	603	903	0
604	4	0	0	0	0	0	0	200	300	0	0	0	0	0	0	0	200	903	0	0	0	0	0	0	0	603	903	0
604	5	0	0	0	0	0	0	200	300	0	0	0	0	0	0	0	200	903	0	0	0	0	0	0	0	603	903	0
604	6	0	0	0	0	0	0	200	300	0	0	0	0	0	0	0	200	903	0	0	0	0	0	0	0	603	903	0
604	7	0	0	0	0	0	0	200	300	0	0	0	0	0	0	0	200	903	0	0	0	0	0	0	0	603	903	0
604	8	0	0	0	0	0	0	200	300	0	0	0	0	0	0	0	200	903	0	0	0	0	0	0	0	603	903	0
604	9	0	0	0	0	0	0	200	300	0	0	0	0	0	0	0	200	903	0	0	0	0	0	0	0	603	903	0
605	0	0	0	0	0	0	0	200	300	0	0	0	0	0	0	0	200	903	0	0	0	0	0	0	0	603	903	0
605	1	0	0	0	0	0	0	200	300	0	0	0	0	0	0	0	200	903	0	0	0	0	0	0	0	603	903	0
605	2	0	0	0	0	0	0	200	300	0	0	0	0	0	0	0	200	903	0	0	0	0	0	0	0	603	903	0
605	3	0	0	0	0	0	0	200	300	0	0	0	0	0	0	0	200	903	0	0	0	0	0	0	0	603	903	0
605	4	0	0	0	0	0	0	200	300	0	0	0	0	0	0	0	200	903	0	0	0	0	0	0	0	603	903	0
605	5	0	0	0	0	0	0	200	300	0	0	0	0	0	0	0	200	903	0	0	0	0	0	0	0	603	903	0
605	6	0	0	0	0	0	0	200	300	0	0	0	0	0	0	0	200	903	0	0	0	0	0	0	0	603	903	0
605	7	0	0	0	0	0	0	200	300	0	0	0	0	0	0	0	200	903	0	0	0	0	0	0	0	603	903	0
605	8	0	0	0	0	0	0	200	300	0	0	0	0	0	0	0	200	903	0	0	0	0	0	0	0	603	903	0
605	9	0	0	0	0	0	0	200	300	0	0	0	0	0	0	0	200	903	0	0	0	0	0	0	0	603	903	0
606	0	0	0	0	0	0	0	200	300	0	0	0	0	0	0	0	200	903	0	0	0	0	0	0	0	603	903	0
606	1	0	0	0	0	0	0	200	300	0	0	0	0	0	0	0	200	903	0	0	0	0	0	0	0	603	903	0
606	2	0	0	0	0	0	0	200	300	0	0	0	0	0	0	0	200	903	0	0	0	0	0	0	0	603	903	0
606	3	0	0	0	0	0	0	200	300	0	0	0	0	0	0	0	200	903	0	0	0	0	0	0	0	603	903	0
606	4	0	0	0	0	0	0	200	300	0	0	0	0	0	0	0	200	903	0	0	0	0	0	0	0	603	903	0
606	5	0	0	0	0	0	0	200	300	0	0	0	0	0	0	0	200	903	0	0	0	0	0	0	0	603	903	0
606	6	0	0	0	0	0	0	200	300	0	0	0	0	0	0	0	200	903	0	0	0	0	0	0	0	603	903	0
606	7	0	0	0	0	0	0	200	300	0	0	0	0	0	0	0	200	903	0	0	0	0	0	0	0	603	903	0
606	8	0	0	0	0	0	0	200	300	0	0	0	0	0	0	0	200	903	0	0	0	0	0	0	0	603	903	0
606	9	0	0	0	0	0	0	200	300	0	0	0	0	0	0	0	200	903	0	0	0	0	0	0	0	603	903	0
607	0	0	0	0	0	0	0	200	300	0	0	0	0	0	0	0	200	903	0	0	0	0	0	0	0	603	903	0
607	1	0	0	0	0	0	0	200	300	0	0	0	0	0	0	0	200	903	0	0	0	0	0	0	0	603	903	0
607	2	0	0	0	0	0	0	200	300	0	0	0	0	0	0	0	200	903	0	0	0	0	0	0	0	603	903	0
607	3	0	0	0	0	0	0	200	300	0	0	0	0	0	0	0	200	903	0	0	0	0	0	0	0	603	903	0
607	4	0	0	0	0	0	0	200	300	0	0	0	0	0	0	0	200	903	0	0	0	0	0	0	0	603	903	0
607	5	0	0	0	0	0	0	200	300	0	0	0	0	0	0	0	200	903	0	0	0	0	0	0	0	603	903	0
607	6	0	0	0	0	0	0	200	300	0	0	0	0	0	0	0	200	903	0	0	0	0	0	0	0	603	903	0
607	7	0	0	0	0	0	0	200	300	0	0	0	0	0	0	0	200	903	0	0	0	0	0	0	0	603	903	0
607	8	0	0	0	0	0	0	200	300	0	0	0	0	0	0	0	200	903	0	0	0	0	0	0	0	603	903	0
607	9	0	0	0	0	0	0	200	300	0	0	0	0	0	0	0	200	903	0	0	0	0	0	0	0	603	903	0
608	0	0	0	0	0	0	0	200	300	0	0	0	0	0	0	0	200	903	0	0	0	0	0	0	0	603	903	0
608	1	0	0	0	0	0	0	200	300	0	0	0	0	0	0	0	200	903	0	0	0	0	0	0	0	603	903	0
608	2	0	0	0	0	0	0	200	300	0	0	0	0	0	0	0	200	903	0	0	0	0	0	0	0	603	903	0
608	3	0	0	0	0	0	0	200	300	0	0	0	0	0	0	0	200	903	0	0	0	0	0	0	0	603	903	0
608	4	0	0	0	0	0	0	200	300	0	0	0	0	0	0	0	200	903	0	0	0	0	0	0	0	603	903	0
608	5	0	0	0	0	0	0	200	300	0	0	0	0	0	0	0	200	903	0	0	0	0	0	0	0	603	903	0
608	6	0	0	0	0	0	0	200	300	0	0	0	0	0	0	0	200	903	0	0	0	0	0	0	0	603	903	0
608	7	0	0	0	0	0	0	200	300	0	0	0	0	0	0	0	200	903	0	0	0	0	0	0	0	603	903	0
608	8	0	0	0	0	0	0	200	300	0	0	0	0	0	0	0	200	903	0	0	0	0	0	0	0	603	903	0
608	9	0	0	0	0	0	0	200	300	0	0	0	0	0	0	0	200	903	0	0	0	0	0	0	0	603	903	0
609	0	0	0	0	0	0	0	200	300	0	0	0	0	0	0	0	200	903	0	0	0	0	0	0	0	603	903	0
609	1	0	0	0	0	0	0	200	300	0	0	0	0	0	0	0	200	903	0	0	0	0	0	0	0	603	903	0
609	2	0	0	0	0	0	0	200	300	0	0	0	0	0	0	0	200	903	0	0	0	0	0	0	0	603	903	0
609	3	0	0	0	0	0	0	200	300	0	0	0	0	0	0	0	200	903	0	0	0	0	0	0	0	603	903	0
609	4	-1.71086	3.37448	-11.2491	-610.017	542.656	57.1744	248.24	354.228	0	0	0	0	0	0	0	200	903	0	0	0	0	0	0	0	603	903	0
609	5	-0.490159	9.02023	-18.8785	-426.912	847.832	377.609	244.91	322.614	0	0	0	0	0	0	0	200	903	0	0	0	0	0	0	0	603	903	0
609	6	0.272781	8.40988	-19.4888	-610.017	969.903	331.833	249.767	331.301	0	0	0	0	0	0	0	200	903	0	0	0	0	0	0	0	603	903	0
609	7	0.425369	7.79953	-19.4888	-335.359	54.3751	194.503	202.79	317.208	0	0	0	0	0	0	0	200	903	0	0	0	0	0	0	0	603	903	0
609	8	2.25642	7.79953	-19.4888	-610.017	786.797	240.28	240.372	331.301	0	0	0	0	0	0	0	200	903	0	0	0	0	0	0	0	603	903	0
609	9	3.7823	10.5461	-23.1509	-1067.78	1030.94	331.833	244.531	346.123	0	0	0	0	0	0	0	200	903	0	0	0	0	0	0	0	603	903	0
610	0	3.32454	9.63058	-22.5406	-793.123	725.762	789.596	232.198	335.186	0	0	0	0	0	0	0	200	903	0	0	0	0	0	0	0	603	903	0
610	1	1.64607	8.10471	-26.2027	-1159.33	1153.01	423.385	244.003	344.245	0	0	0	0	0	0	0	200	903	0	0	0	0	0	0	0	603	903	0
610	2	3.17195	9.63058	-26.5079	-1342.44	786.797	377.609	229.682	350.643	0	0	0	0	0	0	0	200	903	0	0	0	0	0	0	0	603	903	0
610	3	6.07112	9.17282	-31.6959	-2074.86	908.867	11.398	228.675	365.462	0	0	0	0	0	0	0	200	903	0	0	0	0	0	0	0	603	903	0
610	4	6.07112	4.74777	-40.8511	-2166.41	1214.04	-263.26	229.719	353.032	0	0	0	0	0	0	0	200	903	0	0	0	0	0	0	0	603	903	0
610	5	5.61336	0.017548	-50.9219	-2441.07	1824.39	102.951	235.827	347.938	0	0	0	0	0	0	0	200	903	0	0	0	0	0	0	0	603	903	0
610	6	6.07112	0.475312	-59.4669	-2624.18	2190.61	-309.037	236.837	344.128	0	0	0	0	0	0	0	200	903	0	0	0	0	0	0	0	603	903	0
610	7	5.61336	3.67966	-65.8755	-3173.49	1702.32	-309.037	225.842	348.174	0	0	0	0	0	0	0	200	903	0	0	0	0	0	0	0	603	903	0
610	8	6.3763	2.76413	-72.2842	-3814.36	2129.57	-400.589	229.461	352.769	0	0	0	0	0	0	0	200	903	0	0	0	0	0	0	0	603	903	0
610	9	5.00301	0.475312	-76.8619	-3905.92	2373.71	-354.813	230.883	350.817	0	0	0	0	0	0	0	200	903	0	0	0	0	0	0	0	603	903	0
611	0	5.91853	6.57883	-88.1534	-4729.89	2861.99	-263.26	232.466	353.655	0	0	0	0	0	0	0	200	903	0	0	0	0	0	0	0	603	903	0
611	1	5.15559	9.17282	-97.0035	-4180.57	3045.1	-309.037	231.392	343.097	0	0	0	0	0	0	0	200	903	0	0	0	0	0	0	0	603	903	0
611	2	5.00301	7.95212	-103.412	-4821.44	3045.1	-309.037	229.446	346.624	0	0	0	0	0	0	0	200	903	0	0	0	0	0	0	0	603	903	0
611	3	4.39265	3.67966	-116.84	-5279.21	3350.27	-125.931	228.674	345.183	0	0	0	0	0	0	0	200	903	0	0	0	0	0	0	0	603	903	0
611	4	2.71419	3.52707	-129.962	-6469.39	3655.45	-400.589	228.127	349.779	0	0	0	0	0	0	0	200	903	0	0	0	0	0	0	0	603	903	0
611	5	1.64607	0.475312	-143.695	-6927.16	3899.59	-125.931	227.138	348.207	0	0	0	0	0	0	0	200	903	0	0	0	0	0	0	0	603	903	0
611	6	-3.23674	-5.93338	-155.902	-7842.68	3899.59	-354.813	225.013	350.305	0	0	0	0	0	0	0	200	903	0	0	0	0	0	0	0	603	903	0
611	7	-5.22038	-4.4075	-168.72	-7751.13	4204.77	11.398	224.922	345.941	0	0	0	0	0	0	0	200	903	0	0	0	0	0	0	0	603	903	0
611	8	-8.72991	-3.64456	-180.316	-9399.08	3960.63	-263.26	221.965	352.125	0	0	0	0	0	0	0	200	903	0	0	0	0	0	0	0	603	903	0
611	9	-9.34026	-4.4075	-190.692	-10497.7	4021.66	-125.931	221.09	355.051	0	0	0	0	0	0	0	200	903	0	0	0	0	0	0	0	603	903	0
612	0	-10.7135	-5.32303	-203.815	-10680.8	4509.94	-309.037	222.128	352.405	0	0	0	0	0	0	0	200	903	0	0	0	0	0	0	0	603	903	0
612	1	-11.7817	-4.10232	-214.496	-11138.6	4448.91	11.398	220.741	351.929	0	0	0	0	0	0	0	200	903	0	0	0	0	0	0	0	603	903	0
612	2	-12.392	-1.66092	-225.177	-11504.8	4693.05	-80.1548	220.842	351.092	0	0	0	0	0	0	0	200	903	0	0	0	0	0	0	0	603	903	0
612	3	-15.5964	-2.72903	-235.858	-12969.6	4387.87	194.503	218.604	354.989	0	0	0	0	0	0	0	200	903	0	0	0	0	0	0	0	603	903	0
612	4	-17.7326	-3.1868	-248.371	-13976.7	4082.7	240.28	216.438	356.274	0	0	0	0	0	0	0	200	903	0	0	0	0	0	0	0	603	903	0
612	5	-21.3947	-0.592804	-259.052	-14892.2	4509.94	789.596	217.409	357.488	0	0	0	0	0	0	0	200	903	0	0	0	0	0	0	0	603	903	0
612	6	-21.2421	4.74777	-272.174	-16082.4	4693.05	560.714	217.243	359.089	0	0	0	0	0	0	0	200	903	0	0	0	0	0	0	0	603	903	0
612	7	-21.8525	8.10471	-282.856	-15899.3	4998.22	698.044	217.671	356.21	0	0	0	0	0	0	0	200	903	0	0	0	0	0	0	0	603	903	0
612	8	-20.4792	7.95212	-290.18	-16723.3	4998.22	789.596	217.225	357.631	0	0	0	0	0	0	0	200	903	0	0	0	0	0	0	0	603	903	0
612	9	-21.8525	13.1401	-299.64	-17547.3	4876.15	1293.14	216.273	358.561	0	0	0	0	0	0	0	200	903	0	0	0	0	0	0	0	603	903	0
613	0	-21.8525	19.7014	-307.575	-18371.2	5120.29	1247.36	216.647	359.729	0	0	0	0	0	0	0	200	903	0	0	0	0	0	0	0	603	903	0
613	1	-24.1413	22.448	-318.561	-19561.4	5364.43	1522.02	216.84	361.406	0	0	0	0	0	0	0	200	903	0	0	0	0	0	0	0	603	903	0
613	2	-25.362	25.8049	-326.496	-19927.6	5486.5	1430.47	216.804	361.035	0	0	0	0	0	0	0	200	903	0	0	0	0	0	0	0	603	903	0
613	3	-22.6154	31.7558	-334.125	-20568.5	5791.68	1750.9	217.334	361.559	0	0	0	0	0	0	0	200	903	0	0	0	0	0	0	0	603	903	0
613	4	-23.6835	38.0119	-340.839	-22033.4	5730.64	1705.12	216.813	364.645	0	0	0	0	0	0	0	200	903	0	0	0	0	0	0	0	603	903	0
613	5	-23.0732	41.5215	-351.215	-23040.4	5791.68	1934.01	216.49	365.602	0	0	0	0	0	0	0	200	903	0	0	0	0	0	0	0	603	903	0
613	6	-24.7516	46.7094	-362.812	-24963.1	5913.75	2117.11	216.3	368.804	0	0	0	0	0	0	0	200	903	0	0	0	0	0	0	0	603	903	0
613	7	-25.0568	54.3388	-374.408	-25787	6524.1	2345.99	217.425	368.874	0	0	0	0	0	0	0	200	903	0	0	0	0	0	0	0	603	903	0
613	8	-24.1413	59.3742	-382.038	-27435	6707.21	2437.55	217.556	371.812	0	0	0	0	0	0	0	200	903	0	0	0	0	0	0	0	603	903	0
613	9	-26.4301	63.1889	-393.329	-28533.6	6585.14	2483.32	216.742	372.544	0	0	0	0	0	0	0	200	903	0	0	0	0	0	0	0	603	903	0
614	0	-26.2775	67.7666	-403.4	-28533.6	6096.86	2895.31	215.114	370.733	0	0	0	0	0	0	0	200	903	0	0	0	0	0	0	0	603	903	0
614	1	-26.4301	72.1916	-417.133	-31188.6	7012.38	2712.2	216.811	374.769	0	0	0	0	0	0	0	200	903	0	0	0	0	0	0	0	603	903	0
614	2	-27.0405	76.1589	-428.119	-32195.7	7683.77	2895.31	217.948	375.203	0	0	0	0	0	0	0	200	903	0	0	0	0	0	0	0	603	903	0
614	3	-28.5663	77.5322	-438.8	-33660.6	7683.77	3169.97	217.511	376.71	0	0	0	0	0	0	0	200	903	0	0	0	0	0	0	0	603	903	0
614	4	-29.4819	78.7529	-453.144	-35583.2	7927.91	3261.52	217.495	378.525	0	0	0	0	0	0	0	200	903	0	0	0	0	0	0	0	603	903	0
614	5	-28.4137	84.2461	-466.571	-36407.1	7988.95	3444.63	217.123	378.031	0	0	0	0	0	0	0	200	903	0	0	0	0	0	0	0	603	903	0
614	6	-29.3293	86.0771	-480.915	-38055.1	8416.19	3444.63	217.5	379.131	0	0	0	0	0	0	0	200	903	0	0	0	0	0	0	0	603	903	0
614	7	-30.3974	86.2297	-493.122	-39336.8	9148.62	3810.84	218.552	379.771	0	0	0	0	0	0	0	200	903	0	0	0	0	0	0	0	603	903	0
614	8	-30.8551	87.2978	-507.465	-41351	9209.65	3856.61	218.148	381.485	0	0	0	0	0	0	0	200	903	0	0	0	0	0	0	0	603	903	0
614	9	-29.787	89.5866	-519.062	-42632.7	9758.97	3856.61	218.801	382.134	0	0	0	0	0	0	0	200	903	0	0	0	0	0	0	0	603	903	0
615	0	-29.9396	90.9599	-529.438	-44189.1	9636.9	4039.72	218.202	383.464	0	0	0	0	0	0	0	200	903	0	0	0	0	0	0	0	603	903	0
615	1	-29.6344	91.5703	-543.17	-45654	9636.9	4085.5	217.742	384.051	0	0	0	0	0	0	0	200	903	0	0	0	0	0	0	0	603	903	0
615	2	-28.7189	94.1643	-552.326	-47118.8	10613.5	3993.94	219.216	385.31	0	0	0	0	0	0	0	200	903	0	0	0	0	0	0	0	603	903	0
615	3	-29.9396	96.3005	-566.364	-48766.8	11040.7	4314.38	219.494	386.105	0	0	0	0	0	0	0	200	903	0	0	0	0	0	0	0	603	903	0
615	4	-29.1767	98.1316	-575.824	-50872.5	11345.9	4268.6	219.704	388.347	0	0	0	0	0	0	0	200	903	0	0	0	0	0	0	0	603	903	0
615	5	-27.193	99.5049	-584.674	-52337.3	11284.8	4222.83	219.301	389.515	0	0	0	0	0	0	0	200	903	0	0	0	0	0	0	0	603	903	0
615	6	-26.5827	102.557	-597.492	-53710.6	11834.2	4131.27	219.806	389.893	0	0	0	0	0	0	0	200	903	0	0	0	0	0	0	0	603	903	0
615	7	-25.2094	105.456	-604.206	-55358.6	12505.5	3993.94	220.698	391.622	0	0	0	0	0	0	0	200	903	0	0	0	0	0	0	0	603	903	0
615	8	-25.2094	105.914	-617.633	-57098.1	12383.5	4039.72	220.05	392.447	0	0	0	0	0	0	0	200	903	0	0	0	0	0	0	0	603	903	0
615	9	-22.3102	108.05	-629.23	-58929.1	13543.1	3627.73	221.523	393.653	0	0	0	0	0	0	0	200	903	0	0	0	0	0	0	0	603	903	0
616	0	-18.4955	111.864	-641.437	-60394	13787.3	3353.07	221.494	394.154	0	0	0	0	0	0	0	200	903	0	0	0	0	0	0	0	603	903	0
616	1	-15.4438	115.984	-653.949	-62957.4	14275.6	3124.19	221.83	396.273	0	0	0	0	0	0	0	200	903	0	0	0	0	0	0	0	603	903	0
616	2	-12.6972	117.205	-659.748	-64330.7	15313.2	2391.77	223.211	397.508	0	0	0	0	0	0	0	200	903	0	0	0	0	0	0	0	603	903	0
616	3	-10.2558	118.121	-669.513	-65795.6	15191.1	1934.01	222.69	398.274	0	0	0	0	0	0	0	200	903	0	0	0	0	0	0	0	603	903	0
616	4	-5.67815	124.682	-675.922	-67535.1	15740.4	1842.45	223.287	399.915	0	0	0	0	0	0	0	200	903	0	0	0	0	0	0	0	603	903	0
616	5	-1.86345	127.886	-682.025	-67992.8	15862.5	1430.47	223.258	399.693	0	0	0	0	0	0	0	200	903	0	0	0	0	0	0	0	603	903	0
616	6	1.64607	130.48	-692.707	-69274.6	15984.6	972.702	223.076	400.006	0	0	0	0	0	0	0	200	903	0	0	0	0	0	0	0	603	903	0
616	7	3.17195	134.142	-696.674	-70556.3	17022.2	789.596	224.433	401.276	0	0	0	0	0	0	0	200	903	0	0	0	0	0	0	0	603	903	0
616	8	4.08748	138.72	-701.252	-71563.4	17205.3	606.491	224.535	402.051	0	0	0	0	0	0	0	200	903	0	0	0	0	0	0	0	603	903	0
616	9	6.22371	141.009	-703.388	-72845.1	17327.3	652.267	224.634	403.563	0	0	0	0	0	0	0	200	903	0	0	0	0	0	0	0	603	903	0
617	0	7.74959	141.314	-706.134	-72570.5	16961.1	606.491	224.02	402.772	0	0	0	0	0	0	0	200	903	0	0	0	0	0	0	0	603	903	0
617	1	7.74959	143.298	-708.576	-74493.1	17510.4	698.044	224.712	405.131	0	0	0	0	0	0	0	200	903	0	0	0	0	0	0	0	603	903	0
617	2	9.73323	146.044	-713.459	-74950.8	17754.6	331.833	224.885	405.053	0	0	0	0	0	0	0	200	903	0	0	0	0	0	0	0	603	903	0
617	3	8.8177	145.892	-714.374	-75591.7	17937.7	423.385	225.11	405.815	0	0	0	0	0	0	0	200	903	0	0	0	0	0	0	0	603	903	0
617	4	9.12288	143.755	-713.153	-75957.9	17876.6	560.714	225.067	406.51	0	0	0	0	0	0	0	200	903	0	0	0	0	0	0	0	603	903	0
617	5	9.88582	145.586	-713.764	-76049.5	18242.9	560.714	225.559	406.547	0	0	0	0	0	0	0	200	903	0	0	0	0	0	0	0	603	903	0
617	6	9.27547	145.892	-713.153	-77056.5	17876.6	652.267	225.067	408.051	0	0	0	0	0	0	0	200	903	0	0	0	0	0	0	0	603	903	0
617	7	8.51253	143.755	-714.069	-77331.2	18059.8	881.149	225.291	408.297	0	0	0	0	0	0	0	200	903	0	0	0	0	0	0	0	603	903	0
617	8	7.90217	142.229	-712.543	-77422.8	18120.8	1018.48	225.431	408.657	0	0	0	0	0	0	0	200	903	0	0	0	0	0	0	0	603	903	0
617	9	8.66511	143.298	-712.543	-77880.5	18120.8	1384.69	225.431	409.299	0	0	0	0	0	0	0	200	903	0	0	0	0	0	0	0	603	903	0
618	0	6.3763	143.45	-708.271	-77697.4	18181.8	1750.9	225.671	409.7	0	0	0	0	0	0	0	200	903	0	0	0	0	0	0	0	603	903	0
618	1	6.07112	141.467	-707.355	-77331.2	17693.5	1934.01	225.014	409.324	0	0	0	0	0	0	0	200	903	0	0	0	0	0	0	0	603	903	0
618	2	5.30818	141.467	-707.05	-78338.3	17876.6	2117.11	225.283	410.796	0	0	0	0	0	0	0	200	903	0	0	0	0	0	0	0	603	903	0
618	3	4.39265	143.145	-704.608	-78429.9	18120.8	2437.55	225.718	411.31	0	0	0	0	0	0	0	200	903	0	0	0	0	0	0	0	603	903	0
618	4	5.61336	142.535	-701.252	-77789	18059.8	2529.1	225.754	410.929	0	0	0	0	0	0	0	200	903	0	0	0	0	0	0	0	603	903	0
618	5	3.47713	140.856	-699.42	-77972.1	18120.8	2620.65	225.908	411.481	0	0	0	0	0	0	0	200	903	0	0	0	0	0	0	0	603	903	0
618	6	5.00301	142.535	-697.589	-77789	17571.5	2437.55	225.189	411.511	0	0	0	0	0	0	0	200	903	0	0	0	0	0	0	0	603	903	0
618	7	5.00301	143.298	-697.895	-78155.2	17266.3	2895.31	224.741	411.987	0	0	0	0	0	0	0	200	903	0	0	0	0	0	0	0	603	903	0
618	8	5.00301	143.908	-695.758	-78887.6	17693.5	2666.43	225.431	413.384	0	0	0	0	0	0	0	200	903	0	0	0	0	0	0	0	603	903	0
618	9	5.00301	144.671	-694.843	-79345.4	18120.8	2529.1	226.079	414.192	0	0	0	0	0	0	0	200	903	0	0	0	0	0	0	0	603	903	0
619	0	6.22371	145.586	-691.181	-79436.9	17937.7	2574.88	225.952	414.929	0	0	0	0	0	0	0	200	903	0	0	0	0	0	0	0	603	903	0
619	1	8.97029	145.739	-691.486	-79620	17754.6	2620.65	225.676	415.143	0	0	0	0	0	0	0	200	903	0	0	0	0	0	0	0	603	903	0
619	2	11.8695	147.112	-692.096	-79803.2	18181.8	2254.44	226.271	415.306	0	0	0	0	0	0	0	200	903	0	0	0	0	0	0	0	603	903	0
619	3	11.5643	147.875	-691.486	-79528.5	18059.8	1979.78	226.117	415.011	0	0	0	0	0	0	0	200	903	0	0	0	0	0	0	0	603	903	0
619	4	12.785	149.401	-693.622	-80627.1	18426	1705.12	226.565	416.241	0	0	0	0	0	0	0	200	903	0	0	0	0	0	0	0	603	903	0
619	5	14.7686	149.554	-691.181	-81268	18792.2	1613.57	227.189	417.579	0	0	0	0	0	0	0	200	903	0	0	0	0	0	0	0	603	903	0
619	6	16.1419	150.164	-692.707	-81634.2	18609.1	926.926	226.864	417.848	0	0	0	0	0	0	0	200	903	0	0	0	0	0	0	0	603	903	0
619	7	18.8885	148.943	-693.927	-82183.5	18853.2	881.149	227.169	418.432	0	0	0	0	0	0	0	200	903	0	0	0	0	0	0	0	603	903	0
619	8	21.0247	151.69	-697.895	-83099.1	18914.2	560.714	227.102	419.071	0	0	0	0	0	0	0	200	903	0	0	0	0	0	0	0	603	903	0
619	9	21.7877	152.453	-700.031	-82641.3	19280.5	240.28	227.542	418.054	0	0	0	0	0	0	0	200	903	0	0	0	0	0	0	0	603	903	0
620	0	24.992	152.453	-699.726	-83007.5	18853.2	148.727	226.944	418.629	0	0	0	0	0	0	0	200	903	0	0	0	0	0	0	0	603	903	0
620	1	25.2972	153.368	-700.336	-83739.9	19768.7	11.398	228.228	419.571	0	0	0	0	0	0	0	200	903	0	0	0	0	0	0	0	603	903	0
620	2	27.2808	154.436	-703.998	-84197.7	19707.7	-34.3784	227.994	419.599	0	0	0	0	0	0	0	200	903	0	0	0	0	0	0	0	603	903	0
620	3	28.5015	153.674	-708.271	-84747	19890.8	-125.931	228.084	419.653	0	0	0	0	0	0	0	200	903	0	0	0	0	0	0	0	603	903	0
620	4	28.1964	153.826	-711.017	-85662.5	19768.7	-125.931	227.803	420.479	0	0	0	0	0	0	0	200	903	0	0	0	0	0	0	0	603	903	0
620	5	28.5015	154.589	-710.407	-86211.8	20073.9	-263.26	228.257	421.356	0	0	0	0	0	0	0	200	903	0	0	0	0	0	0	0	603	903	0
620	6	29.1119	155.199	-715.595	-86395	20379.1	-217.484	228.479	420.732	0	0	0	0	0	0	0	200	903	0	0	0	0	0	0	0	603	903	0
620	7	29.7222	154.131	-717.426	-87493.6	20623.2	-125.931	228.746	421.955	0	0	0	0	0	0	0	200	903	0	0	0	0	0	0	0	603	903	0
620	8	30.6378	154.894	-720.783	-87859.8	20379.1	-217.484	228.274	421.895	0	0	0	0	0	0	0	200	903	0	0	0	0	0	0	0	603	903	0
620	9	30.7904	155.505	-725.666	-87859.8	20684.3	11.398	228.504	421.075	0	0	0	0	0	0	0	200	903	0	0	0	0	0	0	0	603	903	0
621	0	29.5697	155.505	-728.412	-90240.1	20928.4	102.951	228.732	423.886	0	0	0	0	0	0	0	200	903	0	0	0	0	0	0	0	603	903	0
621	1	29.8748	154.894	-728.717	-90331.7	21050.5	11.398	228.887	423.96	0	0	0	0	0	0	0	200	903	0	0	0	0	0	0	0	603	903	0
621	2	30.4852	155.047	-732.379	-91064.1	20684.3	102.951	228.243	424.34	0	0	0	0	0	0	0	200	903	0	0	0	0	0	0	0	603	903	0
621	3	32.0111	155.352	-735.736	-91338.8	20806.3	11.398	228.28	424.146	0	0	0	0	0	0	0	200	903	0	0	0	0	0	0	0	603	903	0
621	4	30.18	155.81	-738.483	-90972.6	21294.6	286.056	228.836	423.188	0	0	0	0	0	0	0	200	903	0	0	0	0	0	0	0	603	903	0
621	5	28.9593	155.047	-742.145	-90881	21416.7	148.727	228.858	422.457	0	0	0	0	0	0	0	200	903	0	0	0	0	0	0	0	603	903	0
621	6	30.0274	155.047	-743.976	-93078.3	21477.7	286.056	228.869	425.109	0	0	0	0	0	0	0	200	903	0	0	0	0	0	0	0	603	903	0
621	7	30.3326	155.657	-748.249	-93536	21294.6	148.727	228.459	425.007	0	0	0	0	0	0	0	200	903	0	0	0	0	0	0	0	603	903	0
621	8	30.6378	154.894	-748.859	-93993.8	21050.5	286.056	228.11	425.516	0	0	0	0	0	0	0	200	903	0	0	0	0	0	0	0	603	903	0
621	9	31.2481	154.589	-752.826	-94451.6	21355.7	240.28	228.367	425.463	0	0	0	0	0	0	0	200	903	0	0	0	0	0	0	0	603	903	0
622	0	29.8748	154.894	-756.488	-95367.1	21660.8	286.056	228.633	426.066	0	0	0	0	0	0	0	200	903	0	0	0	0	0	0	0	603	903	0
622	1	30.6378	152.911	-757.404	-95550.2	21599.8	57.1744	228.518	426.155	0	0	0	0	0	0	0	200	903	0	0	0	0	0	0	0	603	903	0
622	2	29.8748	153.979	-758.319	-96282.6	21355.7	240.28	228.162	426.968	0	0	0	0	0	0	0	200	903	0	0	0	0	0	0	0	603	903	0
622	3	31.0955	153.521	-764.118	-96923.5	21416.7	194.503	228.028	426.844	0	0	0	0	0	0	0	200	903	0	0	0	0	0	0	0	603	903	0
622	4	30.6378	153.826	-769.611	-96465.7	21599.8	11.398	228.066	425.344	0	0	0	0	0	0	0	200	903	0	0	0	0	0	0	0	603	903	0
622	5	29.5697	153.063	-772.052	-97106.6	21905	57.1744	228.372	425.777	0	0	0	0	0	0	0	200	903	0	0	0	0	0	0	0	603	903	0
622	6	30.3326	151.995	-776.02	-97106.6	21416.7	57.1744	227.598	425.134	0	0	0	0	0	0	0	200	903	0	0	0	0	0	0	0	603	903	0
622	7	29.8748	151.842	-776.63	-97564.4	22027	57.1744	228.362	425.625	0	0	0	0	0	0	0	200	903	0	0	0	0	0	0	0	603	903	0
622	8	31.2481	150.622	-780.292	-98113.7	21905	-34.3784	228.073	425.74	0	0	0	0	0	0	0	200	903	0	0	0	0	0	0	0	603	903	0
622	9	31.2481	149.401	-784.259	-98479.9	21843.9	102.951	227.853	425.571	0	0	0	0	0	0	0	200	903	0	0	0	0	0	0	0	603	903	0
623	0	29.7222	148.638	-785.175	-99395.4	21905	57.1744	227.898	426.59	0	0	0	0	0	0	0	200	903	0	0	0	0	0	0	0	603	903	0
623	1	30.0274	147.57	-790.363	-99578.5	22454.3	194.503	228.41	425.991	0	0	0	0	0	0	0	200	903	0	0	0	0	0	0	0	603	903	0
623	2	30.0274	147.112	-791.278	-99944.8	22149.1	11.398	227.992	426.308	0	0	0	0	0	0	0	200	903	0	0	0	0	0	0	0	603	903	0
623	3	29.8748	145.892	-794.025	-100311	22332.2	240.28	228.125	426.332	0	0	0	0	0	0	0	200	903	0	0	0	0	0	0	0	603	903	0
623	4	29.8748	143.298	-796.772	-100677	21966	240.28	227.569	426.356	0	0	0	0	0	0	0	200	903	0	0	0	0	0	0	0	603	903	0
623	5	29.1119	144.366	-800.128	-101043	22210.1	148.727	227.758	426.284	0	0	0	0	0	0	0	200	903	0	0	0	0	0	0	0	603	903	0
623	6	28.349	142.687	-801.349	-101959	22515.3	514.938	228.097	427.234	0	0	0	0	0	0	0	200	903	0	0	0	0	0	0	0	603	903	0
623	7	27.2808	141.467	-801.96	-102417	22088.1	240.28	227.543	427.708	0	0	0	0	0	0	0	200	903	0	0	0	0	0	0	0	603	903	0
623	8	28.349	140.704	-804.096	-102600	22393.2	606.491	227.849	427.596	0	0	0	0	0	0	0	200	903	0	0	0	0	0	0	0	603	903	0
623	9	27.4334	139.635	-806.232	-102874	22393.2	377.609	227.775	427.599	0	0	0	0	0	0	0	200	903	0	0	0	0	0	0	0	603	903	0
624	0	27.1283	139.178	-809.284	-102966	22027	377.609	227.218	427.231	0	0	0	0	0	0	0	200	903	0	0	0	0	0	0	0	603	903	0
624	1	26.0601	137.194	-810.81	-102417	22027	11.398	227.167	426.314	0	0	0	0	0	0	0	200	903	0	0	0	0	0	0	0	603	903	0
624	2	27.4334	135.821	-810.199	-103424	22332.2	606.491	227.564	427.652	0	0	0	0	0	0	0	200	903	0	0	0	0	0	0	0	603	903	0
624	3	25.2972	135.21	-812.641	-103424	22332.2	789.596	227.481	427.269	0	0	0	0	0	0	0	200	903	0	0	0	0	0	0	0	603	903	0
624	4	25.755	133.685	-813.251	-103241	21966	377.609	227.01	426.948	0	0	0	0	0	0	0	200	903	0	0	0	0	0	0	0	603	903	0
624	5	25.4498	132.159	-816.608	-103515	21843.9	286.056	226.75	426.763	0	0	0	0	0	0	0	200	903	0	0	0	0	0	0	0	603	903	0
624	6	24.992	129.87	-817.218	-103790	22149.1	743.82	227.103	427.004	0	0	0	0	0	0	0	200	903	0	0	0	0	0	0	0	603	903	0
624	7	24.992	129.87	-815.998	-103882	22332.2	240.28	227.368	427.306	0	0	0	0	0	0	0	200	903	0	0	0	0	0	0	0	603	903	0
624	8	23.6187	128.802	-815.387	-103058	22393.2	698.044	227.463	426.391	0	0	0	0	0	0	0	200	903	0	0	0	0	0	0	0	603	903	0
624	9	24.0765	126.971	-817.523	-103332	22088.1	331.833	227.018	426.397	0	0	0	0	0	0	0	200	903	0	0	0	0	0	0	0	603	903	0
625	0	23.6187	125.903	-820.88	-103515	21905	331.833	226.685	426.103	0	0	0	0	0	0	0	200	903	0	0	0	0	0	0	0	603	903	0
625	1	23.0084	124.529	-822.711	-103424	22027	423.385	226.774	425.711	0	0	0	0	0	0	0	200	903	0	0	0	0	0	0	0	603	903	0
625	2	23.6187	123.309	-822.101	-103241	22027	423.385	226.794	425.581	0	0	0	0	0	0	0	200	903	0	0	0	0	0	0	0	603	903	0
625	3	22.0928	121.783	-820.88	-103515	22332.2	560.714	227.205	426.103	0	0	0	0	0	0	0	200	903	0	0	0	0	0	0	0	603	903	0
625	4	23.0084	119.952	-821.796	-103973	21966	286.056	226.729	426.519	0	0	0	0	0	0	0	200	903	0	0	0	0	0	0	0	603	903	0
625	5	22.0928	118.578	-824.848	-103058	21538.8	240.28	226.112	424.941	0	0	0	0	0	0	0	200	903	0	0	0	0	0	0	0	603	903	0
625	6	21.1773	116.442	-823.932	-103241	21843.9	743.82	226.512	425.302	0	0	0	0	0	0	0	200	903	0	0	0	0	0	0	0	603	903	0
625	7	20.2618	115.221	-825.458	-103607	22088.1	240.28	226.759	425.514	0	0	0	0	0	0	0	200	903	0	0	0	0	0	0	0	603	903	0
625	8	19.804	114.153	-823.932	-103332	22088.1	469.162	226.808	425.413	0	0	0	0	0	0	0	200	903	0	0	0	0	0	0	0	603	903	0
625	9	20.4144	112.17	-823.322	-103424	21843.9	286.056	226.531	425.618	0	0	0	0	0	0	0	200	903	0	0	0	0	0	0	0	603	903	0
626	0	20.4144	109.576	-825.458	-102966	21416.7	194.503	225.945	424.738	0	0	0	0	0	0	0	200	903	0	0	0	0	0	0	0	603	903	0
626	1	20.1092	109.118	-822.101	-102966	21843.9	514.938	226.571	425.247	0	0	0	0	0	0	0	200	903	0	0	0	0	0	0	0	603	903	0
626	2	19.0411	107.897	-825.458	-103882	21905	240.28	226.537	425.847	0	0	0	0	0	0	0	200	903	0	0	0	0	0	0	0	603	903	0
626	3	19.0411	106.219	-823.627	-103790	21905	286.056	226.596	426.016	0	0	0	0	0	0	0	200	903	0	0	0	0	0	0	0	603	903	0
626	4	19.6514	104.388	-821.491	-103515	21843.9	148.727	226.591	426.009	0	0	0	0	0	0	0	200	903	0	0	0	0	0	0	0	603	903	0
626	5	20.1092	103.014	-823.322	-103058	21294.6	148.727	225.864	425.173	0	0	0	0	0	0	0	200	903	0	0	0	0	0	0	0	603	903	0
626	6	18.5833	100.878	-816.913	-102508	21416.7	240.28	226.217	425.482	0	0	0	0	0	0	0	200	903	0	0	0	0	0	0	0	603	903	0
626	7	17.973	100.573	-819.965	-102600	21721.9	57.1744	226.491	425.127	0	0	0	0	0	0	0	200	903	0	0	0	0	0	0	0	603	903	0
626	8	17.5152	98.7419	-815.998	-100494	21721.9	102.951	226.62	423.155	0	0	0	0	0	0	0	200	903	0	0	0	0	0	0	0	603	903	0
626	9	18.4307	97.216	-813.861	-102050	21294.6	57.1744	226.165	425.391	0	0	0	0	0	0	0	200	903	0	0	0	0	0	0	0	603	903	0
627	0	18.7359	96.3005	-815.692	-101318	21355.7	57.1744	226.181	424.211	0	0	0	0	0	0	0	200	903	0	0	0	0	0	0	0	603	903	0
627	1	18.5833	93.8591	-810.199	-101226	21172.5	102.951	226.133	424.94	0	0	0	0	0	0	0	200	903	0	0	0	0	0	0	0	603	903	0
627	2	17.5152	92.791	-807.453	-100586	21599.8	-171.707	226.751	424.572	0	0	0	0	0	0	0	200	903	0	0	0	0	0	0	0	603	903	0
627	3	17.0574	90.9599	-804.096	-100494	21477.7	-34.3784	226.71	424.978	0	0	0	0	0	0	0	200	903	0	0	0	0	0	0	0	603	903	0
627	4	18.2782	89.2815	-801.044	-99944.8	21050.5	-34.3784	226.279	424.768	0	0	0	0	0	0	0	200	903	0	0	0	0	0	0	0	603	903	0
627	5	18.1256	88.3659	-796.772	-99853.2	20867.4	57.1744	226.19	425.322	0	0	0	0	0	0	0	200	903	0	0	0	0	0	0	0	603	903	0
627	6	17.973	86.3823	-795.551	-98296.8	21111.5	-125.931	226.537	423.558	0	0	0	0	0	0	0	200	903	0	0	0	0	0	0	0	603	903	0
627	7	16.9049	85.6194	-791.278	-97839	21233.6	-125.931	226.835	423.647	0	0	0	0	0	0	0	200	903	0	0	0	0	0	0	0	603	903	0
627	8	19.1937	83.9409	-786.701	-97381.3	21111.5	-80.1548	226.836	423.784	0	0	0	0	0	0	0	200	903	0	0	0	0	0	0	0	603	903	0
627	9	17.6678	81.8047	-780.597	-96648.9	20623.2	-171.707	226.42	423.814	0	0	0	0	0	0	0	200	903	0	0	0	0	0	0	0	603	903	0
628	0	18.2782	81.0417	-776.63	-96099.5	20562.2	-354.813	226.476	423.739	0	0	0	0	0	0	0	200	903	0	0	0	0	0	0	0	603	903	0
628	1	17.3626	79.2107	-774.189	-95458.7	20562.2	148.727	226.56	423.302	0	0	0	0	0	0	0	200	903	0	0	0	0	0	0	0	603	903	0
628	2	17.6678	78.1425	-768.085	-95184	20684.3	-537.919	226.93	423.924	0	0	0	0	0	0	0	200	903	0	0	0	0	0	0	0	603	903	0
628	3	16.4471	76.7693	-766.559	-93902.2	20684.3	-171.707	226.983	422.498	0	0	0	0	0	0	0	200	903	0	0	0	0	0	0	0	603	903	0
628	4	16.7523	74.9382	-760.761	-94451.6	20257	-995.682	226.627	424.154	0	0	0	0	0	0	0	200	903	0	0	0	0	0	0	0	603	903	0
628	5	17.21	73.8701	-755.268	-93719.2	19646.7	-400.589	226.013	424.087	0	0	0	0	0	0	0	200	903	0	0	0	0	0	0	0	603	903	0
628	6	17.21	72.3442	-753.742	-92986.8	20073.9	-537.919	226.632	423.367	0	0	0	0	0	0	0	200	903	0	0	0	0	0	0	0	603	903	0
628	7	17.21	70.8183	-748.554	-92712.1	20196	-263.26	226.98	423.855	0	0	0	0	0	0	0	200	903	0	0	0	0	0	0	0	603	903	0
628	8	16.2945	70.0554	-743.976	-91064.1	19890.8	-492.142	226.736	422.402	0	0	0	0	0	0	0	200	903	0	0	0	0	0	0	0	603	903	0
628	9	17.8204	68.3769	-736.347	-91247.2	19829.8	-400.589	226.93	423.919	0	0	0	0	0	0	0	200	903	0	0	0	0	0	0	0	603	903	0
629	0	16.5997	67.614	-732.685	-90423.3	19280.5	-675.248	226.315	423.414	0	0	0	0	0	0	0	200	903	0	0	0	0	0	0	0	603	903	0
629	1	16.2945	66.2407	-726.886	-89965.5	19402.5	-492.142	226.693	423.768	0	0	0	0	0	0	0	200	903	0	0	0	0	0	0	0	603	903	0
629	2	16.9049	63.0363	-724.14	-89324.6	19463.6	-858.353	226.878	423.353	0	0	0	0	0	0	0	200	903	0	0	0	0	0	0	0	603	903	0
629	3	16.7523	63.4941	-714.984	-88866.9	19646.7	-400.589	227.478	424.292	0	0	0	0	0	0	0	200	903	0	0	0	0	0	0	0	603	903	0
629	4	16.4471	61.8156	-713.764	-87493.6	18548	-858.353	225.986	422.581	0	0	0	0	0	0	0	200	903	0	0	0	0	0	0	0	603	903	0
629	5	15.9893	60.9001	-708.271	-86578	19036.3	-904.13	226.877	422.239	0	0	0	0	0	0	0	200	903	0	0	0	0	0	0	0	603	903	0
629	6	17.6678	59.832	-704.303	-86120.3	19097.3	-904.13	227.115	422.277	0	0	0	0	0	0	0	200	903	0	0	0	0	0	0	0	603	903	0
629	7	17.21	57.238	-698.2	-84563.9	19219.4	-1270.34	227.527	421.117	0	0	0	0	0	0	0	200	903	0	0	0	0	0	0	0	603	903	0
629	8	17.0574	56.0173	-694.232	-85113.2	18975.3	-1087.24	227.333	422.6	0	0	0	0	0	0	0	200	903	0	0	0	0	0	0	0	603	903	0
629	9	16.2945	54.4914	-689.655	-84563.9	18975.3	-1178.79	227.514	422.618	0	0	0	0	0	0	0	200	903	0	0	0	0	0	0	0	603	903	0
630	0	17.8204	52.5078	-683.857	-83648.3	18731.1	-1087.24	227.39	422.319	0	0	0	0	0	0	0	200	903	0	0	0	0	0	0	0	603	903	0
630	1	16.2945	52.2026	-678.058	-83465.3	18364.9	-1133.01	227.085	423.095	0	0	0	0	0	0	0	200	903	0	0	0	0	0	0	0	603	903	0
630	2	17.21	50.9819	-672.565	-83465.3	18731.1	-1499.22	227.85	424.1	0	0	0	0	0	0	0	200	903	0	0	0	0	0	0	0	603	903	0
630	3	17.8204	49.456	-670.429	-82366.6	18548	-1453.45	227.666	422.857	0	0	0	0	0	0	0	200	903	0	0	0	0	0	0	0	603	903	0
630	4	17.6678	47.0146	-664.325	-81817.3	18426	-1270.34	227.736	423.159	0	0	0	0	0	0	0	200	903	0	0	0	0	0	0	0	603	903	0
630	5	16.9049	47.9301	-659.442	-80810.2	18242.9	-1407.67	227.664	422.543	0	0	0	0	0	0	0	200	903	0	0	0	0	0	0	0	603	903	0
630	6	16.5997	46.2517	-653.644	-80077.8	17937.7	-1545	227.443	422.51	0	0	0	0	0	0	0	200	903	0	0	0	0	0	0	0	603	903	0
630	7	16.9049	45.3362	-647.846	-80260.9	18120.8	-1453.45	227.971	423.889	0	0	0	0	0	0	0	200	903	0	0	0	0	0	0	0	603	903	0
630	8	17.5152	44.268	-642.353	-79436.9	18059.8	-1270.34	228.115	423.666	0	0	0	0	0	0	0	200	903	0	0	0	0	0	0	0	603	903	0
630	9	17.3626	40.6059	-639.301	-78796.1	17998.7	-1636.55	228.154	423.254	0	0	0	0	0	0	0	200	903	0	0	0	0	0	0	0	603	903	0
631	0	17.21	42.1318	-634.418	-77880.5	17754.6	-1636.55	227.986	422.759	0	0	0	0	0	0	0	200	903	0	0	0	0	0	0	0	603	903	0
631	1	18.4307	40.9111	-627.704	-76965	17632.5	-1773.88	228.09	422.614	0	0	0	0	0	0	0	200	903	0	0	0	0	0	0	0	603	903	0
631	2	17.0574	39.6904	-622.516	-76232.6	17815.6	-1819.66	228.619	422.459	0	0	0	0	0	0	0	200	903	0	0	0	0	0	0	0	603	903	0
631	3	17.8204	38.6223	-616.107	-75408.6	17876.6	-1819.66	229.015	422.395	0	0	0	0	0	0	0	200	903	0	0	0	0	0	0	0	603	903	0
631	4	17.8204	36.3335	-613.361	-74950.8	17327.3	-2002.76	228.25	422.197	0	0	0	0	0	0	0	200	903	0	0	0	0	0	0	0	603	903	0
631	5	17.3626	36.3335	-608.173	-73577.6	17144.2	-1911.21	228.19	420.981	0	0	0	0	0	0	0	200	903	0	0	0	0	0	0	0	603	903	0
631	6	18.2782	35.5705	-600.849	-73760.6	17144.2	-1819.66	228.533	422.761	0	0	0	0	0	0	0	200	903	0	0	0	0	0	0	0	603	903	0
631	7	17.973	34.5024	-596.881	-73577.6	17327.3	-2185.87	229.03	423.27	0	0	0	0	0	0	0	200	903	0	0	0	0	0	0	0	603	903	0
631	8	18.1256	33.7395	-591.999	-72845.1	17388.4	-2002.76	229.372	423.05	0	0	0	0	0	0	0	200	903	0	0	0	0	0	0	0	603	903	0
631	9	18.7359	32.3662	-588.031	-73028.2	16839	-1682.33	228.636	424.191	0	0	0	0	0	0	0	200	903	0	0	0	0	0	0	0	603	903	0
632	0	18.1256	31.4507	-583.454	-72021.1	17205.3	-1956.99	229.489	423.439	0	0	0	0	0	0	0	200	903	0	0	0	0	0	0	0	603	903	0
632	1	17.5152	31.1455	-578.876	-71563.4	16594.9	-2094.31	228.667	423.625	0	0	0	0	0	0	0	200	903	0	0	0	0	0	0	0	603	903	0
632	2	18.1256	30.8403	-573.078	-70922.5	17266.3	-2185.87	230.129	423.757	0	0	0	0	0	0	0	200	903	0	0	0	0	0	0	0	603	903	0
632	3	18.5833	30.0774	-568.5	-70831	17083.2	-2140.09	230.05	424.593	0	0	0	0	0	0	0	200	903	0	0	0	0	0	0	0	603	903	0
632	4	18.7359	28.8567	-565.143	-70373.2	16594.9	-2231.64	229.364	424.523	0	0	0	0	0	0	0	200	903	0	0	0	0	0	0	0	603	903	0
632	5	19.0411	26.5678	-560.871	-69366.1	16594.9	-2140.09	229.588	423.676	0	0	0	0	0	0	0	200	903	0	0	0	0	0	0	0	603	903	0
632	6	18.1256	26.7204	-555.683	-68542.2	16472.8	-2277.42	229.644	423.348	0	0	0	0	0	0	0	200	903	0	0	0	0	0	0	0	603	903	0
632	7	19.1937	26.7204	-550.8	-68267.5	16594.9	-2277.42	230.129	423.942	0	0	0	0	0	0	0	200	903	0	0	0	0	0	0	0	603	903	0
632	8	20.1092	26.7204	-546.222	-67443.5	16594.9	-2277.42	230.381	423.473	0	0	0	0	0	0	0	200	903	0	0	0	0	0	0	0	603	903	0
632	9	19.9566	22.7531	-543.17	-67077.3	16472.8	-2277.42	230.327	423.492	0	0	0	0	0	0	0	200	903	0	0	0	0	0	0	0	603	903	0
633	0	19.1937	23.6687	-539.508	-65795.6	16472.8	-2597.85	230.533	421.955	0	0	0	0	0	0	0	200	903	0	0	0	0	0	0	0	603	903	0
633	1	18.7359	22.9057	-535.846	-66253.4	15923.5	-2735.18	229.717	423.642	0	0	0	0	0	0	0	200	903	0	0	0	0	0	0	0	603	903	0
633	2	19.6514	21.9902	-530.048	-65795.6	16594.9	-2826.74	231.308	424.131	0	0	0	0	0	0	0	200	903	0	0	0	0	0	0	0	603	903	0
633	3	20.1092	20.1591	-526.386	-65246.2	16106.6	-2689.41	230.599	423.951	0	0	0	0	0	0	0	200	903	0	0	0	0	0	0	0	603	903	0
633	4	20.7196	21.2273	-523.334	-65429.4	16411.8	-2780.96	231.36	425.024	0	0	0	0	0	0	0	200	903	0	0	0	0	0	0	0	603	903	0
633	5	20.567	20.3117	-518.146	-64971.6	16045.6	-2460.53	230.967	425.392	0	0	0	0	0	0	0	200	903	0	0	0	0	0	0	0	603	903	0
633	6	19.6514	19.854	-514.484	-64788.5	15923.5	-2964.07	230.95	425.929	0	0	0	0	0	0	0	200	903	0	0	0	0	0	0	0	603	903	0
633	7	20.2618	19.3962	-511.127	-63873	15984.6	-2780.96	231.273	424.965	0	0	0	0	0	0	0	200	903	0	0	0	0	0	0	0	603	903	0
633	8	21.0247	19.2436	-507.16	-63873	16228.7	-3238.72	231.999	425.943	0	0	0	0	0	0	0	200	903	0	0	0	0	0	0	0	603	903	0
633	9	22.8558	18.1755	-505.634	-63140.5	16106.6	-2735.18	231.854	424.874	0	0	0	0	0	0	0	200	903	0	0	0	0	0	0	0	603	903	0
634	0	21.9403	16.9548	-501.972	-63140.5	15679.4	-3009.84	231.236	425.785	0	0	0	0	0	0	0	200	903	0	0	0	0	0	0	0	603	903	0
634	1	20.2618	14.9712	-499.225	-62774.3	15862.5	-2918.29	231.774	425.744	0	0	0	0	0	0	0	200	903	0	0	0	0	0	0	0	603	903	0
634	2	22.7032	14.666	-495.258	-62499.7	15679.4	-3009.84	231.659	426.196	0	0	0	0	0	0	0	200	903	0	0	0	0	0	0	0	603	903	0
634	3	20.8721	14.9712	-490.07	-62865.9	16106.6	-2918.29	232.866	428.279	0	0	0	0	0	0	0	200	903	0	0	0	0	0	0	0	603	903	0
634	4	21.7877	14.666	-487.018	-61126.4	15557.3	-3192.95	231.944	425.512	0	0	0	0	0	0	0	200	903	0	0	0	0	0	0	0	603	903	0
634	5	23.6187	13.7505	-484.577	-60760.2	15801.4	-3192.95	232.609	425.388	0	0	0	0	0	0	0	200	903	0	0	0	0	0	0	0	603	903	0
634	6	21.6351	13.1401	-483.051	-60760.2	15435.2	-3421.83	231.954	425.784	0	0	0	0	0	0	0	200	903	0	0	0	0	0	0	0	603	903	0
634	7	21.4825	11.6142	-480.609	-60119.3	15374.2	-3238.72	231.989	425.09	0	0	0	0	0	0	0	200	903	0	0	0	0	0	0	0	603	903	0
634	8	21.1773	10.6987	-476.337	-59844.6	15679.4	-3238.72	232.917	425.635	0	0	0	0	0	0	0	200	903	0	0	0	0	0	0	0	603	903	0
634	9	22.0928	10.2409	-472.675	-59844.6	15740.4	-3147.17	233.301	426.608	0	0	0	0	0	0	0	200	903	0	0	0	0	0	0	0	603	903	0
635	0	21.7877	9.78317	-469.928	-59570	15740.4	-3513.38	233.495	426.764	0	0	0	0	0	0	0	200	903	0	0	0	0	0	0	0	603	903	0
635	1	22.0928	7.34177	-470.233	-59844.6	15435.2	-3467.61	232.825	427.266	0	0	0	0	0	0	0	200	903	0	0	0	0	0	0	0	603	903	0
635	2	21.6351	7.95212	-468.708	-59295.3	15008	-3147.17	232.02	426.508	0	0	0	0	0	0	0	200	903	0	0	0	0	0	0	0	603	903	0
635	3	22.398	6.73142	-464.13	-59844.6	15374.2	-3376.05	233.125	428.939	0	0	0	0	0	0	0	200	903	0	0	0	0	0	0	0	603	903	0
635	4	21.4825	7.03659	-462.299	-59753.1	15679.4	-3696.49	233.916	429.252	0	0	0	0	0	0	0	200	903	0	0	0	0	0	0	0	603	903	0
635	5	22.7032	6.12106	-459.857	-59386.9	15618.3	-3238.72	233.963	429.142	0	0	0	0	0	0	0	200	903	0	0	0	0	0	0	0	603	903	0
635	6	22.7032	6.73142	-458.942	-58105.1	15435.2	-3742.26	233.632	426.607	0	0	0	0	0	0	0	200	903	0	0	0	0	0	0	0	603	903	0
635	7	22.398	5.35812	-454.669	-58929.1	15374.2	-3421.83	233.814	429.609	0	0	0	0	0	0	0	200	903	0	0	0	0	0	0	0	603	903	0
635	8	21.4825	5.05295	-454.975	-59020.7	15374.2	-3833.82	233.791	429.723	0	0	0	0	0	0	0	200	903	0	0	0	0	0	0	0	603	903	0
635	9	21.4825	4.90036	-451.313	-58746	15496.3	-3604.93	234.336	430.167	0	0	0	0	0	0	0	200	903	0	0	0	0	0	0	0	603	903	0
636	0	21.7877	2.45895	-449.787	-58562.9	15435.2	-3559.16	234.317	430.202	0	0	0	0	0	0	0	200	903	0	0	0	0	0	0	0	603	903	0
636	1	22.7032	3.83225	-451.313	-58837.6	15679.4	-4016.92	234.742	430.37	0	0	0	0	0	0	0	200	903	0	0	0	0	0	0	0	603	903	0
636	2	22.8558	3.06931	-448.871	-58105.1	15313.2	-3833.82	234.115	429.447	0	0	0	0	0	0	0	200	903	0	0	0	0	0	0	0	603	903	0
636	3	21.1773	2.45895	-446.43	-58105.1	15374.2	-3833.82	234.438	430.155	0	0	0	0	0	0	0	200	903	0	0	0	0	0	0	0	603	903	0
636	4	21.9403	2.45895	-443.988	-58105.1	15130.1	-3925.37	234.078	430.871	0	0	0	0	0	0	0	200	903	0	0	0	0	0	0	0	603	903	0
636	5	21.3299	1.54343	-438.495	-57830.5	15740.4	-3788.04	235.896	431.884	0	0	0	0	0	0	0	200	903	0	0	0	0	0	0	0	603	903	0
636	6	22.7032	1.08566	-440.937	-58379.8	15679.4	-4108.48	235.559	432.4	0	0	0	0	0	0	0	200	903	0	0	0	0	0	0	0	603	903	0
636	7	23.3136	0.475312	-441.852	-57372.7	15313.2	-3925.37	234.657	429.846	0	0	0	0	0	0	0	200	903	0	0	0	0	0	0	0	603	903	0
636	8	22.2454	-0.287628	-439.106	-57922	14947	-3971.15	234.04	431.909	0	0	0	0	0	0	0	200	903	0	0	0	0	0	0	0	603	903	0
636	9	23.6187	-0.440216	-436.969	-57738.9	15313.2	-4154.25	235.044	432.135	0	0	0	0	0	0	0	200	903	0	0	0	0	0	0	0	603	903	0
637	0	22.0928	-0.592804	-436.969	-58105.1	15679.4	-4062.7	235.882	432.973	0	0	0	0	0	0	0	200	903	0	0	0	0	0	0	0	603	903	0
637	1	23.161	-2.57645	-434.528	-58013.6	15679.4	-4200.03	236.084	433.509	0	0	0	0	0	0	0	200	903	0	0	0	0	0	0	0	603	903	0
637	2	23.7713	-1.35574	-436.054	-58288.2	15679.4	-4016.92	235.957	433.672	0	0	0	0	0	0	0	200	903	0	0	0	0	0	0	0	603	903	0
637	3	22.2454	-1.81351	-433.918	-58837.6	15191.1	-4200.03	235.009	435.596	0	0	0	0	0	0	0	200	903	0	0	0	0	0	0	0	603	903	0
637	4	22.398	-1.81351	-433.612	-58379.8	15252.1	-4154.25	235.175	434.636	0	0	0	0	0	0	0	200	903	0	0	0	0	0	0	0	603	903	0
637	5	22.5506	-3.1868	-432.697	-58929.1	15679.4	-4108.48	236.236	436.19	0	0	0	0	0	0	0	200	903	0	0	0	0	0	0	0	603	903	0
637	6	23.161	-1.50833	-430.561	-58746	15740.4	-4200.03	236.558	436.441	0	0	0	0	0	0	0	200	903	0	0	0	0	0	0	0	603	903	0
637	7	23.3136	-2.11868	-430.866	-58379.8	15618.3	-4291.58	236.249	435.494	0	0	0	0	0	0	0	200	903	0	0	0	0	0	0	0	603	903	0
637	8	22.8558	-2.88162	-425.678	-59386.9	15435.2	-4428.91	236.26	439.511	0	0	0	0	0	0	0	200	903	0	0	0	0	0	0	0	603	903	0
637	9	22.2454	-1.81351	-430.255	-59203.8	15252.1	-4200.03	235.449	437.601	0	0	0	0	0	0	0	200	903	0	0	0	0	0	0	0	603	903	0
638	0	21.7877	-5.01785	-427.509	-59478.4	15557.3	-4245.8	236.391	439.128	0	0	0	0	0	0	0	200	903	0	0	0	0	0	0	0	603	903	0
638	1	22.8558	-4.71268	-427.204	-59844.6	15801.4	-4520.46	236.988	440.085	0	0	0	0	0	0	0	200	903	0	0	0	0	0	0	0	603	903	0
638	2	24.2291	-3.64456	-428.73	-58196.7	15801.4	-4520.46	236.856	435.742	0	0	0	0	0	0	0	200	903	0	0	0	0	0	0	0	603	903	0
638	3	22.8558	-3.64456	-427.814	-59203.8	15740.4	-4383.13	236.793	438.387	0	0	0	0	0	0	0	200	903	0	0	0	0	0	0	0	603	903	0
638	4	22.0928	-3.94974	-427.814	-58929.1	15496.3	-4337.36	236.222	437.745	0	0	0	0	0	0	0	200	903	0	0	0	0	0	0	0	603	903	0
638	5	23.4661	-4.56009	-426.288	-59203.8	15740.4	-4154.25	236.924	438.882	0	0	0	0	0	0	0	200	903	0	0	0	0	0	0	0	603	903	0
638	6	21.7877	-4.71268	-422.626	-59570	15862.5	-4291.58	237.533	440.952	0	0	0	0	0	0	0	200	903	0	0	0	0	0	0	0	603	903	0
638	7	22.2454	-5.93338	-425.067	-59844.6	15801.4	-4383.13	237.174	440.789	0	0	0	0	0	0	0	200	903	0	0	0	0	0	0	0	603	903	0
638	8	22.7032	-5.78079	-426.898	-59020.7	16045.6	-4703.57	237.586	438.255	0	0	0	0	0	0	0	200	903	0	0	0	0	0	0	0	603	903	0
638	9	21.6351	-5.32303	-425.983	-60027.8	15740.4	-4566.24	236.951	440.916	0	0	0	0	0	0	0	200	903	0	0	0	0	0	0	0	603	903	0
639	0	21.4825	-6.54373	-427.509	-60577.1	15862.5	-4428.91	237.104	441.698	0	0	0	0	0	0	0	200	903	0	0	0	0	0	0	0	603	903	0
639	1	21.4825	-6.54373	-425.678	-60943.3	15862.5	-4566.24	237.264	443.168	0	0	0	0	0	0	0	200	903	0	0	0	0	0	0	0	603	903	0
639	2	21.9403	-6.84891	-425.678	-61126.4	15984.6	-4612.02	237.551	443.598	0	0	0	0	0	0	0	200	903	0	0	0	0	0	0	0	603	903	0
639	3	21.7877	-6.39114	-427.509	-61492.6	15984.6	-4703.57	237.39	443.839	0	0	0	0	0	0	0	200	903	0	0	0	0	0	0	0	603	903	0
639	4	21.4825	-8.2222	-425.067	-61492.6	15740.4	-4383.13	237.03	444.666	0	0	0	0	0	0	0	200	903	0	0	0	0	0	0	0	603	903	0
639	5	20.7196	-7.15408	-430.561	-62225	15984.6	-4474.69	237.125	444.521	0	0	0	0	0	0	0	200	903	0	0	0	0	0	0	0	603	903	0
639	6	20.7196	-6.84891	-428.424	-63140.5	15862.5	-4428.91	237.025	447.379	0	0	0	0	0	0	0	200	903	0	0	0	0	0	0	0	603	903	0
639	7	21.0247	-7.30667	-428.119	-63140.5	16106.6	-4428.91	237.622	447.484	0	0	0	0	0	0	0	200	903	0	0	0	0	0	0	0	603	903	0
639	8	21.9403	-6.84891	-431.476	-63781.4	16289.7	-4428.91	237.754	447.821	0	0	0	0	0	0	0	200	903	0	0	0	0	0	0	0	603	903	0
639	9	19.9566	-6.39114	-432.697	-63415.2	16167.7	-4612.02	237.365	446.558	0	0	0	0	0	0	0	200	903	0	0	0	0	0	0	0	603	903	0
640	0	19.3463	-7.61185	-433.307	-64147.6	16167.7	-4703.57	237.312	448.042	0	0	0	0	0	0	0	200	903	0	0	0	0	0	0	0	603	903	0
640	1	18.7359	-7.61185	-432.697	-64880	16228.7	-4657.79	237.506	449.943	0	0	0	0	0	0	0	200	903	0	0	0	0	0	0	0	603	903	0
640	2	18.8885	-7.91702	-434.223	-65063.1	16411.8	-4612.02	237.796	449.838	0	0	0	0	0	0	0	200	903	0	0	0	0	0	0	0	603	903	0
640	3	19.0411	-10.0533	-434.528	-65520.9	16350.8	-4703.57	237.629	450.786	0	0	0	0	0	0	0	200	903	0	0	0	0	0	0	0	603	903	0
640	4	18.8885	-8.06961	-438.19	-65795.6	16533.9	-4795.12	237.732	450.153	0	0	0	0	0	0	0	200	903	0	0	0	0	0	0	0	603	903	0
640	5	17.3626	-9.29031	-438.495	-65887.1	16472.8	-4428.91	237.567	450.257	0	0	0	0	0	0	0	200	903	0	0	0	0	0	0	0	603	903	0
640	6	17.6678	-8.67996	-439.106	-66070.2	16533.9	-4566.24	237.654	450.465	0	0	0	0	0	0	0	200	903	0	0	0	0	0	0	0	603	903	0
640	7	18.5833	-9.4429	-439.716	-66528	16655.9	-4612.02	237.879	451.298	0	0	0	0	0	0	0	200	903	0	0	0	0	0	0	0	603	903	0
640	8	17.5152	-10.6636	-441.242	-67168.9	16778	-4291.58	238.025	452.227	0	0	0	0	0	0	0	200	903	0	0	0	0	0	0	0	603	903	0
640	9	16.9049	-10.9688	-444.294	-67535.1	16778	-4108.48	237.763	452.005	0	0	0	0	0	0	0	200	903	0	0	0	0	0	0	0	603	903	0
641	0	15.2264	-11.274	-445.209	-67260.4	16533.9	-4062.7	237.137	451.076	0	0	0	0	0	0	0	200	903	0	0	0	0	0	0	0	603	903	0
641	1	16.1419	-11.1214	-446.43	-68633.7	16167.7	-4428.91	236.215	453.739	0	0	0	0	0	0	0	200	903	0	0	0	0	0	0	0	603	903	0
641	2	14.616	-11.274	-446.735	-68816.8	16778	-4154.25	237.557	454.044	0	0	0	0	0	0	0	200	903	0	0	0	0	0	0	0	603	903	0
641	3	14.9212	-14.1731	-448.871	-69366.1	17144.2	-4520.46	238.194	454.535	0	0	0	0	0	0	0	200	903	0	0	0	0	0	0	0	603	903	0
641	4	14.1583	-11.8843	-452.228	-70098.5	17144.2	-4383.13	237.911	455.007	0	0	0	0	0	0	0	200	903	0	0	0	0	0	0	0	603	903	0
641	5	13.5479	-12.3421	-448.261	-71105.6	16778	-4383.13	237.429	458.626	0	0	0	0	0	0	0	200	903	0	0	0	0	0	0	0	603	903	0
641	6	12.9376	-12.1895	-456.195	-72021.1	17144.2	-4383.13	237.581	457.874	0	0	0	0	0	0	0	200	903	0	0	0	0	0	0	0	603	903	0
641	7	12.1746	-12.3421	-456.806	-72204.3	16961.1	-4291.58	237.13	458.063	0	0	0	0	0	0	0	200	903	0	0	0	0	0	0	0	603	903	0
641	8	12.785	-13.5628	-458.332	-72753.6	17510.4	-3925.37	238.205	458.736	0	0	0	0	0	0	0	200	903	0	0	0	0	0	0	0	603	903	0
641	9	12.4798	-13.7154	-458.637	-73302.9	17022.2	-4383.13	237.115	459.828	0	0	0	0	0	0	0	200	903	0	0	0	0	0	0	0	603	903	0
642	0	11.7169	-12.9524	-464.435	-72478.9	17266.3	-4383.13	237.177	456.058	0	0	0	0	0	0	0	200	903	0	0	0	0	0	0	0	603	903	0
642	1	10.3436	-13.105	-466.571	-74859.3	17388.4	-4428.91	237.268	460.446	0	0	0	0	0	0	0	200	903	0	0	0	0	0	0	0	603	903	0
642	2	10.191	-12.9524	-465.961	-74950.8	17571.5	-4200.03	237.71	460.852	0	0	0	0	0	0	0	200	903	0	0	0	0	0	0	0	603	903	0
642	3	9.42805	-13.2576	-464.74	-75866.4	17510.4	-4428.91	237.678	463.245	0	0	0	0	0	0	0	200	903	0	0	0	0	0	0	0	603	903	0
642	4	9.58064	-15.5464	-470.539	-76507.3	18059.8	-3833.82	238.381	462.595	0	0	0	0	0	0	0	200	903	0	0	0	0	0	0	0	603	903	0
642	5	9.73323	-14.3257	-474.811	-77056.5	18059.8	-4062.7	238.036	462.289	0	0	0	0	0	0	0	200	903	0	0	0	0	0	0	0	603	903	0
642	6	9.27547	-13.5628	-476.947	-77148.1	17876.6	-4062.7	237.481	461.754	0	0	0	0	0	0	0	200	903	0	0	0	0	0	0	0	603	903	0
642	7	9.73323	-13.5628	-477.863	-77880.5	17327.3	-4062.7	236.26	462.977	0	0	0	0	0	0	0	200	903	0	0	0	0	0	0	0	603	903	0
642	8	7.44441	-14.0205	-479.389	-78338.3	17815.6	-3879.59	237.163	463.413	0	0	0	0	0	0	0	200	903	0	0	0	0	0	0	0	603	903	0
642	9	8.05476	-16.1568	-479.694	-78704.5	18426	-4291.58	238.412	464.072	0	0	0	0	0	0	0	200	903	0	0	0	0	0	0	0	603	903	0
643	0	7.44441	-15.2412	-485.797	-79162.3	18364.9	-3696.49	237.804	462.953	0	0	0	0	0	0	0	200	903	0	0	0	0	0	0	0	603	903	0
643	1	6.52888	-15.699	-486.408	-80352.4	18487	-4062.7	238.007	465.196	0	0	0	0	0	0	0	200	903	0	0	0	0	0	0	0	603	903	0
643	2	6.22371	-16.4619	-490.375	-80718.7	18426	-3788.04	237.575	464.606	0	0	0	0	0	0	0	200	903	0	0	0	0	0	0	0	603	903	0
643	3	6.07112	-16.4619	-490.375	-81817.3	18364.9	-4016.92	237.451	466.846	0	0	0	0	0	0	0	200	903	0	0	0	0	0	0	0	603	903	0
643	4	6.52888	-17.3775	-493.122	-82000.4	18853.2	-4016.92	238.232	466.288	0	0	0	0	0	0	0	200	903	0	0	0	0	0	0	0	603	903	0
643	5	6.52888	-16.7671	-496.173	-83190.6	18975.3	-4337.36	238.243	467.664	0	0	0	0	0	0	0	200	903	0	0	0	0	0	0	0	603	903	0
643	6	6.98665	-17.0723	-495.868	-84472.3	19158.4	-3788.04	238.636	470.352	0	0	0	0	0	0	0	200	903	0	0	0	0	0	0	0	603	903	0
643	7	5.30818	-17.8352	-501.056	-84838.5	18975.3	-3971.15	237.871	469.319	0	0	0	0	0	0	0	200	903	0	0	0	0	0	0	0	603	903	0
643	8	5.15559	-17.8352	-501.972	-85754.1	18548	-4108.48	236.95	470.835	0	0	0	0	0	0	0	200	903	0	0	0	0	0	0	0	603	903	0
643	9	5.91853	-16.7671	-505.329	-85479.4	19402.5	-4383.13	238.396	469.156	0	0	0	0	0	0	0	200	903	0	0	0	0	0	0	0	603	903	0
644	0	6.98665	-17.0723	-506.549	-86761.2	19524.6	-4428.91	238.544	471.279	0	0	0	0	0	0	0	200	903	0	0	0	0	0	0	0	603	903	0
644	1	6.07112	-17.6826	-511.432	-87859.8	19951.8	-4245.8	239.012	471.792	0	0	0	0	0	0	0	200	903	0	0	0	0	0	0	0	603	903	0
644	2	5.15559	-17.9878	-512.653	-88317.5	19707.7	-4291.58	238.443	472.276	0	0	0	0	0	0	0	200	903	0	0	0	0	0	0	0	603	903	0
644	3	3.93489	-19.0559	-514.484	-89141.5	19585.6	-4337.36	238.069	473.264	0	0	0	0	0	0	0	200	903	0	0	0	0	0	0	0	603	903	0
644	4	6.07112	-17.6826	-516.62	-89050	20012.9	-4657.79	238.738	472.37	0	0	0	0	0	0	0	200	903	0	0	0	0	0	0	0	603	903	0
644	5	7.29182	-18.5982	-519.367	-89965.5	19890.8	-4520.46	238.298	473.222	0	0	0	0	0	0	0	200	903	0	0	0	0	0	0	0	603	903	0
644	6	6.3763	-17.8352	-523.029	-90697.9	20379.1	-4108.48	238.964	473.409	0	0	0	0	0	0	0	200	903	0	0	0	0	0	0	0	603	903	0
644	7	5.30818	-18.7508	-525.165	-91155.7	20562.2	-4703.57	239.154	473.575	0	0	0	0	0	0	0	200	903	0	0	0	0	0	0	0	603	903	0
644	8	4.69783	-18.7508	-526.691	-91979.7	20501.2	-4520.46	238.924	474.637	0	0	0	0	0	0	0	200	903	0	0	0	0	0	0	0	603	903	0
644	9	7.13924	-19.9715	-530.048	-93078.3	20562.2	-4612.02	238.793	475.604	0	0	0	0	0	0	0	200	903	0	0	0	0	0	0	0	603	903	0
645	0	6.3763	-19.6663	-531.574	-93078.3	20684.3	-4245.8	238.911	475.1	0	0	0	0	0	0	0	200	903	0	0	0	0	0	0	0	603	903	0
645	1	6.68147	-19.9715	-536.457	-94176.9	21172.5	-4840.9	239.467	475.554	0	0	0	0	0	0	0	200	903	0	0	0	0	0	0	0	603	903	0
645	2	6.07112	-19.8189	-538.288	-94909.3	21355.7	-4840.9	239.673	476.317	0	0	0	0	0	0	0	200	903	0	0	0	0	0	0	0	603	903	0
645	3	8.51253	-20.7344	-539.508	-95733.3	21355.7	-4932.45	239.584	477.445	0	0	0	0	0	0	0	200	903	0	0	0	0	0	0	0	603	903	0
645	4	6.68147	-19.6663	-538.898	-96648.9	21355.7	-4932.45	239.628	479.345	0	0	0	0	0	0	0	200	903	0	0	0	0	0	0	0	603	903	0
645	5	7.90217	-20.7344	-543.781	-97839	21477.7	-5161.33	239.497	479.924	0	0	0	0	0	0	0	200	903	0	0	0	0	0	0	0	603	903	0
645	6	8.20735	-19.9715	-548.969	-99120.8	22088.1	-5115.56	240.236	480.558	0	0	0	0	0	0	0	200	903	0	0	0	0	0	0	0	603	903	0
645	7	7.29182	-20.4292	-548.969	-99487	21599.8	-5069.78	239.346	481.225	0	0	0	0	0	0	0	200	903	0	0	0	0	0	0	0	603	903	0
645	8	8.8177	-20.1241	-551.41	-100128	22271.2	-5207.11	240.39	481.585	0	0	0	0	0	0	0	200	903	0	0	0	0	0	0	0	603	903	0
645	9	8.51253	-21.9551	-552.631	-101135	22271.2	-5390.21	240.3	483.006	0	0	0	0	0	0	0	200	903	0	0	0	0	0	0	0	603	903	0
646	0	9.58064	-19.9715	-556.598	-100219	22271.2	-5710.65	240.013	480.057	0	0	0	0	0	0	0	200	903	0	0	0	0	0	0	0	603	903	0
646	1	10.6488	-20.2766	-560.871	-102600	22576.4	-5756.42	240.252	482.93	0	0	0	0	0	0	0	200	903	0	0	0	0	0	0	0	603	903	0
646	2	9.27547	-20.1241	-562.091	-103149	23125.7	-5619.1	241.142	483.51	0	0	0	0	0	0	0	200	903	0	0	0	0	0	0	0	603	903	0
646	3	11.1065	-21.0396	-563.312	-103790	23064.6	-5756.42	240.945	484.249	0	0	0	0	0	0	0	200	903	0	0	0	0	0	0	0	603	903	0
646	4	9.27547	-21.4973	-562.702	-104797	23064.6	-6031.08	240.989	486.239	0	0	0	0	0	0	0	200	903	0	0	0	0	0	0	0	603	903	0
646	5	12.022	-21.0396	-569.11	-105713	23247.7	-6122.64	240.849	485.751	0	0	0	0	0	0	0	200	903	0	0	0	0	0	0	0	603	903	0
646	6	12.3272	-21.1922	-573.993	-105529	23247.7	-6168.41	240.502	483.851	0	0	0	0	0	0	0	200	903	0	0	0	0	0	0	0	603	903	0
646	7	12.1746	-21.3448	-574.298	-106445	23858.1	-6580.4	241.543	485.348	0	0	0	0	0	0	0	200	903	0	0	0	0	0	0	0	603	903	0
646	8	11.4117	-21.4973	-578.266	-107269	23736	-6534.62	241.047	485.501	0	0	0	0	0	0	0	200	903	0	0	0	0	0	0	0	603	903	0
646	9	11.8695	-22.8706	-578.876	-108093	24224.3	-6397.29	241.847	486.729	0	0	0	0	0	0	0	200	903	0	0	0	0	0	0	0	603	903	0
647	0	14.0057	-23.3284	-581.623	-108459	23858.1	-6626.18	241.02	486.477	0	0	0	0	0	0	0	200	903	0	0	0	0	0	0	0	603	903	0
647	1	15.0738	-23.1758	-585.895	-109375	24041.2	-6763.5	241.033	486.68	0	0	0	0	0	0	0	200	903	0	0	0	0	0	0	0	603	903	0
647	2	14.0057	-23.7862	-587.116	-110382	24285.3	-6946.61	241.364	488.007	0	0	0	0	0	0	0	200	903	0	0	0	0	0	0	0	603	903	0
647	3	13.8531	-23.7862	-590.778	-110748	24712.6	-6809.28	241.831	487.461	0	0	0	0	0	0	0	200	903	0	0	0	0	0	0	0	603	903	0
647	4	14.3109	-24.8543	-591.693	-111755	25261.9	-7083.94	242.694	488.873	0	0	0	0	0	0	0	200	903	0	0	0	0	0	0	0	603	903	0
647	5	14.4635	-25.312	-591.999	-112762	24834.7	-7267.04	241.951	490.477	0	0	0	0	0	0	0	200	903	0	0	0	0	0	0	0	603	903	0
647	6	15.9893	-25.1595	-596.881	-113769	25017.8	-7312.82	241.914	490.606	0	0	0	0	0	0	0	200	903	0	0	0	0	0	0	0	603	903	0
647	7	15.9893	-25.0069	-600.544	-115417	25322.9	-7358.6	242.167	492.188	0	0	0	0	0	0	0	200	903	0	0	0	0	0	0	0	603	903	0
647	8	16.2945	-25.9224	-602.68	-115966	25689.1	-7495.93	242.625	492.418	0	0	0	0	0	0	0	200	903	0	0	0	0	0	0	0	603	903	0
647	9	15.9893	-26.2276	-601.459	-116699	25322.9	-7724.81	242.103	494.026	0	0	0	0	0	0	0	200	903	0	0	0	0	0	0	0	603	903	0
648	0	16.7523	-26.2276	-606.647	-117248	25994.3	-7862.14	242.849	493.273	0	0	0	0	0	0	0	200	903	0	0	0	0	0	0	0	603	903	0
648	1	17.973	-26.2276	-609.088	-118164	25994.3	-7404.38	242.677	494.001	0	0	0	0	0	0	0	200	903	0	0	0	0	0	0	0	603	903	0
648	2	18.4307	-26.9905	-613.361	-119354	25933.3	-7862.14	242.281	494.59	0	0	0	0	0	0	0	200	903	0	0	0	0	0	0	0	603	903	0
648	3	17.3626	-26.8379	-616.107	-119995	26360.5	-8548.78	242.786	494.763	0	0	0	0	0	0	0	200	903	0	0	0	0	0	0	0	603	903	0
648	4	18.5833	-28.5164	-620.075	-120727	26787.8	-8091.02	243.201	494.698	0	0	0	0	0	0	0	200	903	0	0	0	0	0	0	0	603	903	0
648	5	19.3463	-27.906	-619.464	-122192	27031.9	-8228.35	243.638	497.254	0	0	0	0	0	0	0	200	903	0	0	0	0	0	0	0	603	903	0
648	6	19.9566	-27.7534	-622.821	-121826	27215	-8457.23	243.696	495.603	0	0	0	0	0	0	0	200	903	0	0	0	0	0	0	0	603	903	0
648	7	19.4989	-28.669	-627.399	-122741	26909.8	-8640.33	242.891	495.635	0	0	0	0	0	0	0	200	903	0	0	0	0	0	0	0	603	903	0
648	8	20.567	-30.1949	-629.23	-123291	27459.2	-8594.56	243.639	495.939	0	0	0	0	0	0	0	200	903	0	0	0	0	0	0	0	603	903	0
648	9	19.9566	-30.8052	-631.366	-124756	27337.1	-8686.11	243.298	497.596	0	0	0	0	0	0	0	200	903	0	0	0	0	0	0	0	603	903	0
649	0	21.0247	-31.8733	-632.892	-125213	27825.4	-9098.1	243.965	497.843	0	0	0	0	0	0	0	200	903	0	0	0	0	0	0	0	603	903	0
649	1	21.3299	-31.5681	-636.859	-125946	28191.6	-9098.1	244.267	497.761	0	0	0	0	0	0	0	200	903	0	0	0	0	0	0	0	603	903	0
649	2	21.3299	-32.3311	-640.827	-127044	27886.4	-9006.55	243.516	498.251	0	0	0	0	0	0	0	200	903	0	0	0	0	0	0	0	603	903	0
649	3	21.7877	-32.7888	-641.742	-127777	28191.6	-9235.43	243.93	499.109	0	0	0	0	0	0	0	200	903	0	0	0	0	0	0	0	603	903	0
649	4	22.0928	-33.3992	-643.268	-129425	28435.7	-9418.53	244.205	501.199	0	0	0	0	0	0	0	200	903	0	0	0	0	0	0	0	603	903	0
649	5	21.7877	-34.1621	-642.658	-129882	28801.9	-9235.43	244.817	502.102	0	0	0	0	0	0	0	200	903	0	0	0	0	0	0	0	603	903	0
649	6	22.8558	-34.3147	-647.235	-131164	28863	-9189.65	244.594	502.653	0	0	0	0	0	0	0	200	903	0	0	0	0	0	0	0	603	903	0
649	7	23.0084	-34.3147	-652.118	-130890	28924	-8960.77	244.354	500.714	0	0	0	0	0	0	0	200	903	0	0	0	0	0	0	0	603	903	0
649	8	22.7032	-35.2303	-656.086	-132721	29107.1	-9601.64	244.365	502.292	0	0	0	0	0	0	0	200	903	0	0	0	0	0	0	0	603	903	0
649	9	24.0765	-35.8406	-654.865	-133636	29107.1	-9235.43	244.448	504.067	0	0	0	0	0	0	0	200	903	0	0	0	0	0	0	0	603	903	0
650	0	23.4661	-36.1458	-656.696	-134094	29412.3	-9922.07	244.788	504.195	0	0	0	0	0	0	0	200	903	0	0	0	0	0	0	0	603	903	0
650	1	23.6187	-37.8242	-660.663	-134918	29961.6	-9601.64	245.351	504.216	0	0	0	0	0	0	0	200	903	0	0	0	0	0	0	0	603	903	0
650	2	23.9239	-37.5191	-666.461	-136474	29900.6	-9830.52	244.865	504.775	0	0	0	0	0	0	0	200	903	0	0	0	0	0	0	0	603	903	0
650	3	24.0765	-38.4346	-668.903	-136200	30266.8	-9922.07	245.248	503.616	0	0	0	0	0	0	0	200	903	0	0	0	0	0	0	0	603	903	0
650	4	25.1446	-39.1975	-669.818	-137115	30083.7	-10105.2	244.913	504.705	0	0	0	0	0	0	0	200	903	0	0	0	0	0	0	0	603	903	0
650	5	24.2291	-40.1131	-670.429	-137939	30388.9	-9967.85	245.327	505.748	0	0	0	0	0	0	0	200	903	0	0	0	0	0	0	0	603	903	0
650	6	25.2972	-41.0286	-675.006	-138214	30449.9	-10425.6	245.111	504.759	0	0	0	0	0	0	0	200	903	0	0	0	0	0	0	0	603	903	0
650	7	25.6024	-41.6389	-679.889	-140045	31121.3	-10700.3	245.774	505.982	0	0	0	0	0	0	0	200	903	0	0	0	0	0	0	0	603	903	0
650	8	26.3653	-42.2493	-682.941	-140869	31121.3	-10746	245.57	506.268	0	0	0	0	0	0	0	200	903	0	0	0	0	0	0	0	603	903	0
650	9	24.6868	-44.9959	-682.331	-141967	31365.4	-10791.8	245.968	508.063	0	0	0	0	0	0	0	200	903	0	0	0	0	0	0	0	603	903	0
651	0	26.0601	-43.7752	-686.298	-143341	31304.4	-10746	245.613	508.861	0	0	0	0	0	0	0	200	903	0	0	0	0	0	0	0	603	903	0
651	1	26.9757	-44.6907	-689.35	-144073	31426.5	-11158	245.589	508.999	0	0	0	0	0	0	0	200	903	0	0	0	0	0	0	0	603	903	0
651	2	26.9757	-45.6062	-694.538	-145446	31609.6	-11203.8	245.512	509.415	0	0	0	0	0	0	0	200	903	0	0	0	0	0	0	0	603	903	0
651	3	27.586	-46.2166	-696.369	-145904	31914.7	-11112.3	245.83	509.521	0	0	0	0	0	0	0	200	903	0	0	0	0	0	0	0	603	903	0
651	4	26.8231	-46.8269	-698.2	-147094	31548.5	-11295.4	245.186	510.677	0	0	0	0	0	0	0	200	903	0	0	0	0	0	0	0	603	903	0
651	5	27.8912	-46.8269	-700.031	-147827	32403	-11341.1	246.288	511.172	0	0	0	0	0	0	0	200	903	0	0	0	0	0	0	0	603	903	0
651	6	28.1964	-47.2847	-703.693	-148376	32403	-11295.4	246.047	510.854	0	0	0	0	0	0	0	200	903	0	0	0	0	0	0	0	603	903	0
651	7	28.349	-47.8951	-708.271	-149749	32464	-11570	245.836	511.43	0	0	0	0	0	0	0	200	903	0	0	0	0	0	0	0	603	903	0
651	8	28.1964	-48.8106	-710.407	-150665	33074.4	-11295.4	246.557	512.083	0	0	0	0	0	0	0	200	903	0	0	0	0	0	0	0	603	903	0
651	9	29.4171	-49.8787	-711.933	-151580	32952.3	-11753.1	246.286	512.914	0	0	0	0	0	0	0	200	903	0	0	0	0	0	0	0	603	903	0
652	0	28.8067	-51.4046	-715.29	-152588	33196.5	-11615.8	246.41	513.323	0	0	0	0	0	0	0	200	903	0	0	0	0	0	0	0	603	903	0
652	1	29.4171	-50.489	-717.426	-153228	33379.6	-11936.2	246.527	513.581	0	0	0	0	0	0	0	200	903	0	0	0	0	0	0	0	603	903	0
652	2	29.1119	-51.252	-722.003	-153595	33196.5	-11707.4	245.978	512.734	0	0	0	0	0	0	0	200	903	0	0	0	0	0	0	0	603	903	0
652	3	28.6541	-52.1675	-725.055	-154602	33684.7	-11890.5	246.458	513.228	0	0	0	0	0	0	0	200	903	0	0	0	0	0	0	0	603	903	0
652	4	29.8748	-52.7779	-725.971	-155700	33989.9	-11936.2	246.82	514.472	0	0	0	0	0	0	0	200	903	0	0	0	0	0	0	0	603	903	0
652	5	28.8067	-53.083	-729.023	-156524	34112	-11936.2	246.791	514.704	0	0	0	0	0	0	0	200	903	0	0	0	0	0	0	0	603	903	0
652	6	29.4171	-55.2193	-730.854	-156616	34295.1	-12256.7	246.925	514.292	0	0	0	0	0	0	0	200	903	0	0	0	0	0	0	0	603	903	0
652	7	29.5697	-55.677	-736.957	-158264	34234.1	-12439.8	246.453	514.753	0	0	0	0	0	0	0	200	903	0	0	0	0	0	0	0	603	903	0
652	8	29.1119	-56.44	-739.093	-158996	34478.2	-12302.4	246.649	515.123	0	0	0	0	0	0	0	200	903	0	0	0	0	0	0	0	603	903	0
652	9	30.6378	-57.9659	-740.314	-160186	34783.4	-12210.9	246.985	516.376	0	0	0	0	0	0	0	200	903	0	0	0	0	0	0	0	603	903	0
653	0	28.9593	-57.6607	-743.366	-160827	34600.3	-12348.2	246.545	516.35	0	0	0	0	0	0	0	200	903	0	0	0	0	0	0	0	603	903	0
653	1	29.5697	-58.1184	-746.112	-162750	35210.6	-12439.8	247.192	518.131	0	0	0	0	0	0	0	200	903	0	0	0	0	0	0	0	603	903	0
653	2	28.8067	-59.1866	-750.08	-163665	34966.5	-12302.4	246.617	518.197	0	0	0	0	0	0	0	200	903	0	0	0	0	0	0	0	603	903	0
653	3	29.2645	-61.1702	-753.131	-164489	35027.5	-12439.8	246.509	518.407	0	0	0	0	0	0	0	200	903	0	0	0	0	0	0	0	603	903	0
653	4	28.5015	-60.2547	-754.047	-164764	35332.7	-12210.9	246.857	518.506	0	0	0	0	0	0	0	200	903	0	0	0	0	0	0	0	603	903	0
653	5	28.8067	-61.0176	-757.099	-166046	35943.1	-12439.8	247.475	519.319	0	0	0	0	0	0	0	200	903	0	0	0	0	0	0	0	603	903	0
653	6	29.5697	-62.5435	-758.625	-167144	36004.1	-12806	247.46	520.326	0	0	0	0	0	0	0	200	903	0	0	0	0	0	0	0	603	903	0
653	7	29.7222	-64.3745	-763.202	-167877	35821	-12897.5	246.935	519.964	0	0	0	0	0	0	0	200	903	0	0	0	0	0	0	0	603	903	0
653	8	29.1119	-63.7642	-766.254	-168518	35454.8	-12485.5	246.27	519.924	0	0	0	0	0	0	0	200	903	0	0	0	0	0	0	0	603	903	0
653	9	29.5697	-64.8323	-768.39	-169067	36187.2	-12760.2	247.095	520.028	0	0	0	0	0	0	0	200	903	0	0	0	0	0	0	0	603	903	0
654	0	29.2645	-65.7478	-768.695	-169891	36492.4	-12806	247.473	521.012	0	0	0	0	0	0	0	200	903	0	0	0	0	0	0	0	603	903	0
654	1	30.0274	-66.9685	-771.442	-170807	36675.5	-12897.5	247.541	521.412	0	0	0	0	0	0	0	200	903	0	0	0	0	0	0	0	603	903	0
654	2	30.18	-67.7315	-776.325	-171356	36858.6	-12806	247.478	520.727	0	0	0	0	0	0	0	200	903	0	0	0	0	0	0	0	603	903	0
654	3	30.18	-69.4099	-777.545	-172271	36553.4	-12760.2	247.011	521.558	0	0	0	0	0	0	0	200	903	0	0	0	0	0	0	0	603	903	0
654	4	30.6378	-69.5625	-776.63	-172180	36919.6	-13126.4	247.538	521.701	0	0	0	0	0	0	0	200	903	0	0	0	0	0	0	0	603	903	0
654	5	29.5697	-70.6306	-781.513	-173736	37163.8	-13034.9	247.554	522.308	0	0	0	0	0	0	0	200	903	0	0	0	0	0	0	0	603	903	0
654	6	30.18	-71.5462	-782.123	-174194	36919.6	-12851.8	247.204	522.719	0	0	0	0	0	0	0	200	903	0	0	0	0	0	0	0	603	903	0
654	7	30.0274	-72.0039	-786.396	-175201	37285.8	-13034.9	247.414	522.79	0	0	0	0	0	0	0	200	903	0	0	0	0	0	0	0	603	903	0
654	8	30.3326	-73.5298	-788.227	-175934	37041.7	-13034.9	246.994	523.202	0	0	0	0	0	0	0	200	903	0	0	0	0	0	0	0	603	903	0
654	9	31.0955	-74.2928	-789.753	-176849	36980.7	-13218	246.826	523.93	0	0	0	0	0	0	0	200	903	0	0	0	0	0	0	0	603	903	0
655	0	30.0274	-74.4453	-787.311	-177948	37530	-12851.8	247.669	526.02	0	0	0	0	0	0	0	200	903	0	0	0	0	0	0	0	603	903	0
655	1	30.3326	-75.9712	-791.889	-178955	37713.1	-12989.1	247.624	525.985	0	0	0	0	0	0	0	200	903	0	0	0	0	0	0	0	603	903	0
655	2	30.9429	-75.9712	-797.077	-179412	38079.3	-13492.6	247.774	525.088	0	0	0	0	0	0	0	200	903	0	0	0	0	0	0	0	603	903	0
655	3	29.8748	-77.6497	-797.992	-180328	37957.2	-13172.2	247.566	525.977	0	0	0	0	0	0	0	200	903	0	0	0	0	0	0	0	603	903	0
655	4	30.6378	-78.8704	-797.992	-180969	37835.1	-13034.9	247.413	526.78	0	0	0	0	0	0	0	200	903	0	0	0	0	0	0	0	603	903	0
655	5	30.18	-77.4971	-801.349	-181793	38018.3	-13080.6	247.443	526.859	0	0	0	0	0	0	0	200	903	0	0	0	0	0	0	0	603	903	0
655	6	30.6378	-78.1075	-801.349	-181701	38079.3	-13263.8	247.519	526.744	0	0	0	0	0	0	0	200	903	0	0	0	0	0	0	0	603	903	0
655	7	30.6378	-78.8704	-805.316	-181884	38628.6	-13401.1	247.967	525.855	0	0	0	0	0	0	0	200	903	0	0	0	0	0	0	0	603	903	0
655	8	29.5697	-79.4807	-807.148	-183624	38628.6	-13034.9	247.858	527.497	0	0	0	0	0	0	0	200	903	0	0	0	0	0	0	0	603	903	0
655	9	30.4852	-80.7014	-806.232	-184723	38323.4	-12577.1	247.534	529.118	0	0	0	0	0	0	0	200	903	0	0	0	0	0	0	0	603	903	0
656	0	31.5533	-81.3118	-808.368	-185089	38140.3	-13172.2	247.182	528.966	0	0	0	0	0	0	0	200	903	0	0	0	0	0	0	0	603	903	0
656	1	32.1637	-82.5325	-812.641	-185730	38506.5	-13492.6	247.384	528.551	0	0	0	0	0	0	0	200	903	0	0	0	0	0	0	0	603	903	0
656	2	32.0111	-83.2954	-812.03	-186187	39361	-13172.2	248.472	529.286	0	0	0	0	0	0	0	200	903	0	0	0	0	0	0	0	603	903	0
656	3	30.4852	-84.9739	-812.946	-186828	38872.7	-13492.6	247.817	529.816	0	0	0	0	0	0	0	200	903	0	0	0	0	0	0	0	603	903	0
656	4	31.8585	-85.2791	-812.03	-187286	39177.9	-13172.2	248.247	530.639	0	0	0	0	0	0	0	200	903	0	0	0	0	0	0	0	603	903	0
656	5	32.1637	-85.5843	-813.251	-187194	38872.7	-12943.3	247.799	530.18	0	0	0	0	0	0	0	200	903	0	0	0	0	0	0	0	603	903	0
656	6	32.6214	-86.6524	-816.303	-187652	38872.7	-13309.5	247.621	529.881	0	0	0	0	0	0	0	200	903	0	0	0	0	0	0	0	603	903	0
656	7	32.9266	-87.8731	-812.946	-188019	39300	-13675.7	248.343	531.28	0	0	0	0	0	0	0	200	903	0	0	0	0	0	0	0	603	903	0
656	8	31.4007	-88.3308	-817.829	-188568	39239	-13630	247.979	530.571	0	0	0	0	0	0	0	200	903	0	0	0	0	0	0	0	603	903	0
656	9	32.4688	-90.6197	-816.913	-189026	39483.1	-13492.6	248.332	531.39	0	0	0	0	0	0	0	200	903	0	0	0	0	0	0	0	603	903	0
657	0	33.0792	-90.6197	-817.218	-189209	39666.2	-13675.7	248.538	531.528	0	0	0	0	0	0	0	200	903	0	0	0	0	0	0	0	603	903	0
657	1	33.3844	-92.7559	-819.66	-189941	39544.1	-13813.1	248.245	531.732	0	0	0	0	0	0	0	200	903	0	0	0	0	0	0	0	603	903	0
657	2	33.2318	-93.824	-820.27	-190216	39483.1	-13813.1	248.134	531.894	0	0	0	0	0	0	0	200	903	0	0	0	0	0	0	0	603	903	0
657	3	32.4688	-94.5869	-815.082	-190674	39544.1	-13675.7	248.516	533.932	0	0	0	0	0	0	0	200	903	0	0	0	0	0	0	0	603	903	0
657	4	33.5369	-96.7232	-819.049	-191040	39605.2	-13858.8	248.355	533.246	0	0	0	0	0	0	0	200	903	0	0	0	0	0	0	0	603	903	0
657	5	33.8421	-97.0284	-818.439	-191314	40032.4	-14041.9	248.913	533.755	0	0	0	0	0	0	0	200	903	0	0	0	0	0	0	0	603	903	0
657	6	34.7576	-97.6387	-821.491	-192138	38872.7	-14087.7	247.32	533.89	0	0	0	0	0	0	0	200	903	0	0	0	0	0	0	0	603	903	0
657	7	34.1473	-99.012	-821.491	-192321	39727.2	-13950.4	248.36	534.113	0	0	0	0	0	0	0	200	903	0	0	0	0	0	0	0	603	903	0
657	8	34.7576	-100.538	-818.744	-192871	39666.2	-13950.4	248.448	535.569	0	0	0	0	0	0	0	200	903	0	0	0	0	0	0	0	603	903	0
657	9	34.7576	-101.148	-814.777	-192962	39971.4	-14270.8	249.058	536.828	0	0	0	0	0	0	0	200	903	0	0	0	0	0	0	0	603	903	0
658	0	35.0628	-101.453	-817.523	-192230	39910.3	-14270.8	248.819	535.137	0	0	0	0	0	0	0	200	903	0	0	0	0	0	0	0	603	903	0
658	1	35.2154	-102.522	-819.355	-192779	40032.4	-13996.2	248.858	535.282	0	0	0	0	0	0	0	200	903	0	0	0	0	0	0	0	603	903	0
658	2	35.2154	-104.2	-819.049	-193145	39910.3	-14041.9	248.728	535.817	0	0	0	0	0	0	0	200	903	0	0	0	0	0	0	0	603	903	0
658	3	35.2154	-104.963	-815.387	-193695	39910.3	-14453.9	248.947	537.549	0	0	0	0	0	0	0	200	903	0	0	0	0	0	0	0	603	903	0
658	4	35.368	-107.099	-813.861	-193603	39788.3	-14270.8	248.888	537.882	0	0	0	0	0	0	0	200	903	0	0	0	0	0	0	0	603	903	0
658	5	35.9783	-108.015	-815.082	-194153	40337.6	-14270.8	249.489	538.2	0	0	0	0	0	0	0	200	903	0	0	0	0	0	0	0	603	903	0
658	6	36.4361	-107.557	-815.387	-194336	40032.4	-14133.5	249.096	538.335	0	0	0	0	0	0	0	200	903	0	0	0	0	0	0	0	603	903	0
658	7	35.9783	-108.472	-815.082	-193237	40154.5	-14362.4	249.264	537.077	0	0	0	0	0	0	0	200	903	0	0	0	0	0	0	0	603	903	0
658	8	36.5887	-109.388	-813.251	-193512	39971.4	-14545.5	249.15	537.948	0	0	0	0	0	0	0	200	903	0	0	0	0	0	0	0	603	903	0
658	9	35.9783	-110.609	-810.81	-193512	39849.3	-14225.1	249.148	538.665	0	5.18448	9.24469	-17.4966	-3737.82	-1047.32	-1147.48	140.141	1116.63	0	0	0	0	0	0	0	603	903	0
659	0	36.4361	-112.44	-809.284	-193786	40154.5	-14179.3	249.617	539.454	0	7.62589	12.9068	-19.0224	-3280.06	-1169.39	-1101.7	138.526	1075.43	0	0	0	0	0	0	0	603	903	0
659	1	36.4361	-113.508	-810.199	-192596	40154.5	-14499.7	249.561	537.714	0	0	0	0	0	0	0	200	903	0	0	0	0	0	0	0	603	903	0
659	2	36.1309	-115.491	-810.504	-192871	39422.1	-14499.7	248.639	537.964	0	0	0	0	0	0	0	200	903	0	0	0	0	0	0	0	603	903	0
659	3	35.0628	-117.323	-806.842	-192779	39849.3	-14225.1	249.389	538.93	0	0	0	0	0	0	0	200	903	0	0	0	0	0	0	0	603	903	0
659	4	35.2154	-118.696	-803.791	-192596	39605.2	-14133.5	249.273	539.61	0	0.75943	-1.89423	-27.2622	-4287.14	-1596.63	1187.12	141.434	1060.26	0	0	0	0	0	0	0	603	903	0
659	5	35.6732	-120.222	-801.349	-192688	40093.4	-14408.2	250.032	540.454	0	0.149079	-9.37103	-28.1777	-5202.67	-2206.99	1324.45	121.676	1087.64	0	0	0	0	0	0	0	603	903	0
659	6	35.5206	-121.9	-801.349	-191955	39361	-14270.8	249.118	539.54	0	-0.766449	-12.8806	-30.3139	-5019.56	-2206.99	820.906	127.196	1068.59	0	0	0	0	0	0	0	603	903	0
659	7	34.2999	-124.799	-797.382	-192230	39788.3	-14087.7	249.899	541.076	0	0.75943	-11.3547	-36.4175	-6301.3	-2145.95	1690.66	141.074	1076.03	0	0	0	0	0	0	0	603	903	0
659	8	33.8421	-125.562	-797.687	-191955	39361	-14453.9	249.344	540.64	0	1.98013	-15.7797	-42.8262	-6942.17	-3183.55	2239.97	125.663	1065.1	0	0	0	0	0	0	0	603	903	0
659	9	34.4525	-126.783	-793.109	-191681	39361	-14362.4	249.629	541.682	0	-1.3768	-18.9841	-51.6763	-8040.8	-3183.55	1232.89	138.394	1058.6	0	0	0	0	0	0	0	603	903	0
660	0	33.3844	-129.53	-792.499	-191314	39300	-14408.2	249.59	541.406	0	-4.42856	-17.4582	-55.9487	-9139.43	-3732.86	2194.2	133.281	1066.35	0	0	0	0	0	0	0	603	903	0
660	1	33.9947	-131.666	-790.363	-191131	39422.1	-14225.1	249.878	541.827	0	2.13272	-17.0004	-66.6299	-10329.6	-4099.08	1827.99	138.48	1058.03	0	0	0	0	0	0	0	603	903	0
660	2	33.6895	-131.361	-789.142	-190307	39300	-14270.8	249.801	541.157	0	6.10001	-18.5263	-73.0386	-11336.7	-4465.29	1095.56	138.864	1058.22	0	0	0	0	0	0	0	603	903	0
660	3	33.5369	-131.818	-787.006	-189209	38811.7	-14499.7	249.316	540.416	0	1.52237	-18.5263	-78.5317	-12435.3	-4709.43	1782.21	140.032	1061.35	0	0	0	0	0	0	0	603	903	0
660	4	33.0792	-134.26	-782.428	-189758	38750.7	-14545.5	249.526	542.525	0	-0.00350934	-17.153	-85.5508	-13350.9	-5075.64	1461.78	140.671	1059.06	0	0	0	0	0	0	0	603	903	0
660	5	31.4007	-135.633	-779.377	-189758	38811.7	-14362.4	249.798	543.474	0	7.16812	-17.916	-96.5371	-14449.5	-5563.92	866.683	142.365	1052.68	0	0	0	0	0	0	0	603	903	0
660	6	32.9266	-135.023	-776.63	-188659	38811.7	-14179.3	249.975	542.921	0	8.694	-19.8996	-104.777	-16829.9	-5930.13	1278.67	143.402	1063.63	0	0	0	0	0	0	0	603	903	0
660	7	32.1637	-136.701	-774.799	-188293	38689.6	-14408.2	249.935	543.022	0	2.59048	-19.1367	-110.575	-17470.7	-6174.27	1049.79	144.162	1061	0	0	0	0	0	0	0	603	903	0
660	8	31.2481	-139.143	-771.747	-188110	38506.5	-13996.2	249.895	543.746	0	5.03189	-20.0522	-116.374	-17379.2	-6723.59	408.919	142.224	1052.34	0	0	0	0	0	0	0	603	903	0
660	9	31.7059	-138.685	-767.169	-186737	38201.4	-14453.9	249.795	543.41	0	10.5251	-22.9514	-126.444	-19668	-6906.69	775.13	145.378	1058.55	0	0	0	0	0	0	0	603	903	0
661	0	30.6378	-138.227	-762.287	-187011	38079.3	-13538.4	249.954	545.33	0	10.2199	-21.2729	-136.82	-20949.7	-7517.05	866.683	145.059	1056.12	0	0	0	0	0	0	0	603	903	0
661	1	30.9429	-139.295	-759.54	-185089	38140.3	-14270.8	250.215	543.685	0	9.45694	-22.0358	-145.06	-22231.5	-7822.22	-369.28	146.076	1056.26	0	0	0	0	0	0	0	603	903	0
661	2	30.0274	-142.042	-757.404	-184631	37835.1	-14133.5	249.954	543.768	0	15.713	-24.4772	-151.469	-23238.6	-8005.33	-506.608	147.149	1056.42	0	0	0	0	0	0	0	603	903	0
661	3	29.7222	-142.194	-754.657	-183990	37896.2	-14133.5	250.216	543.806	0	17.6967	-21.4255	-155.741	-24428.7	-8737.75	-369.28	143.896	1059.85	0	0	0	0	0	0	0	603	903	0
661	4	30.0274	-142.5	-749.774	-183166	37285.8	-14041.9	249.729	544.295	0	19.5277	-18.3737	-165.202	-25710.5	-8554.64	-1788.35	148.217	1058.63	0	0	0	0	0	0	0	603	903	0
661	5	27.8912	-142.957	-743.671	-182617	37041.7	-14133.5	249.809	545.561	0	17.5441	-17.3056	-172.831	-27083.8	-8920.85	-1834.12	148.384	1059.71	0	0	0	0	0	0	0	603	903	0
661	6	28.5015	-145.551	-739.093	-181518	37041.7	-14087.7	250.118	545.596	0	20.4433	-18.0685	-179.85	-27999.3	-9470.17	-1879.9	147.344	1058.68	0	0	0	0	0	0	0	603	903	0
661	7	27.2808	-145.704	-737.567	-180969	36858.6	-13721.5	249.973	545.359	0	21.9691	-13.0331	-184.428	-28457.1	-9531.21	-2978.53	148.32	1057.3	0	0	0	0	0	0	0	603	903	0
661	8	26.2127	-145.399	-733.905	-179870	36736.5	-13584.2	250.056	545.086	0	23.495	-9.52362	-189.311	-29464.1	-9592.24	-3115.86	149.331	1058.64	0	0	0	0	0	0	0	603	903	0
661	9	26.6705	-146.467	-724.75	-178772	36126.2	-13767.3	249.846	546.667	0	23.0373	-12.1176	-195.109	-30837.4	-9714.31	-3070.08	150.211	1061.05	0	0	0	0	0	0	0	603	903	0
662	0	24.992	-147.84	-721.698	-177948	35515.8	-13721.5	249.211	546.568	0	24.1054	-7.84515	-200.907	-30929	-10324.7	-4031.39	148.61	1056.95	0	0	0	0	0	0	0	603	903	0
662	1	24.2291	-147.535	-717.426	-176666	35515.8	-13172.2	249.505	546.25	0	27.6149	-2.65717	-205.485	-32302.3	-10507.8	-4260.27	148.864	1060.2	0	0	0	0	0	0	0	603	903	0
662	2	23.4661	-149.061	-713.459	-175659	35515.8	-13126.4	249.78	546.208	0	26.6994	-2.04681	-207.926	-32943.1	-10202.6	-4306.05	150.932	1061.44	0	0	0	0	0	0	0	603	903	0
662	3	22.7032	-149.519	-708.271	-174560	34966.5	-13355.3	249.369	546.46	0	27.9201	-0.368348	-211.894	-33767.1	-10751.9	-5084.25	149.258	1062.36	0	0	0	0	0	0	0	603	903	0
662	4	24.2291	-149.976	-700.031	-173095	34966.5	-12943.3	249.95	547.268	0	28.683	4.20929	-217.997	-34774.2	-11118.1	-5496.23	148.999	1062.52	0	0	0	0	0	0	0	603	903	0
662	5	20.8721	-150.434	-692.096	-172271	34356.1	-12989.1	249.641	548.913	0	28.0727	9.85504	-222.27	-35689.7	-11179.2	-5542.01	149.705	1063.57	0	0	0	0	0	0	0	603	903	0
662	6	21.4825	-150.282	-690.265	-171814	34417.2	-12668.7	249.861	548.91	0	30.3615	10.1602	-226.542	-36330.6	-11118.1	-6503.31	150.922	1063.37	0	0	0	0	0	0	0	603	903	0
662	7	19.9566	-152.418	-685.382	-170623	33684.7	-12668.7	249.147	548.946	0	31.7348	13.5171	-230.814	-36513.7	-11728.5	-6869.52	149.187	1061.2	0	0	0	0	0	0	0	603	903	0
662	8	18.4307	-152.723	-678.058	-168701	33928.9	-12577.1	250.038	548.8	0	31.1244	20.0784	-239.054	-38711	-12033.6	-7006.85	149.661	1064.93	0	0	0	0	0	0	0	603	903	0
662	9	19.4989	-153.333	-668.293	-167602	33501.6	-12302.4	250.13	550.792	0	32.6503	20.231	-242.716	-40084.3	-11972.6	-7601.95	150.672	1068.15	0	0	0	0	0	0	0	603	903	0
663	0	16.7523	-153.181	-663.715	-166229	32586.1	-12165.1	249.097	550.452	0	35.7021	24.1983	-250.041	-41732.2	-12399.9	-8380.15	150.409	1069.9	0	0	0	0	0	0	0	603	903	0
663	1	16.1419	-154.096	-657.306	-164581	32647.1	-12073.6	249.668	550.387	0	32.9555	27.7078	-257.06	-42464.6	-13010.2	-8242.82	149.388	1068.19	0	0	0	0	0	0	0	603	903	0
663	2	15.6842	-154.249	-650.287	-163665	32036.8	-12027.8	249.266	551.682	0	34.3288	31.6751	-263.773	-43837.9	-13376.4	-9158.35	149.288	1069.2	0	0	0	0	0	0	0	603	903	0
663	3	15.0738	-153.638	-644.489	-162017	32036.8	-11570	249.709	551.389	0	36.1598	34.2691	-270.792	-45943.6	-13681.6	-9478.78	149.476	1072.66	0	0	0	0	0	0	0	603	903	0
663	4	13.2428	-154.554	-637.47	-160553	31548.5	-11341.1	249.49	551.859	0	34.9391	36.8631	-280.253	-47133.8	-13986.8	-9249.9	150.092	1071.18	0	0	0	0	0	0	0	603	903	0
663	5	12.022	-154.859	-629.23	-158905	30999.2	-11432.7	249.265	552.538	0	34.6339	41.2881	-285.746	-49239.5	-14658.2	-9982.32	148.702	1075.32	0	0	0	0	0	0	0	603	903	0
663	6	12.3272	-153.333	-622.516	-157348	30877.1	-11295.4	249.601	552.762	0	36.9228	42.9666	-298.258	-50246.6	-15329.5	-10623.2	148.603	1071.47	0	0	0	0	0	0	0	603	903	0
663	7	12.022	-153.791	-615.802	-156158	30083.7	-11020.7	248.853	553.585	0	37.3805	44.1873	-307.414	-53176.3	-15878.9	-10348.5	148.347	1075.98	0	0	0	0	0	0	0	603	903	0
663	8	9.27547	-154.096	-608.173	-153595	30083.7	-10746	249.466	552.551	0	35.5495	48.9175	-317.484	-55648.2	-16245.1	-11081	148.832	1078.28	0	0	0	0	0	0	0	603	903	0
663	9	8.8177	-154.859	-601.764	-151764	29534.4	-10883.4	249.08	552.198	0	35.7021	50.7486	-330.912	-57753.9	-17099.6	-11218.3	148.326	1077.53	0	0	0	0	0	0	0	603	903	0
664	0	8.20735	-154.249	-592.304	-150299	29229.2	-10700.3	249.348	553.753	0	35.7021	49.8331	-338.236	-59218.8	-17648.9	-10989.4	147.821	1078.08	0	0	0	0	0	0	0	603	903	0
664	1	8.66511	-154.401	-584.98	-148193	28740.9	-10288.3	249.131	553.33	0	35.3969	50.9012	-349.223	-60958.3	-18381.3	-11309.8	147.365	1077.55	0	0	0	0	0	0	0	603	903	0
664	2	8.20735	-155.164	-576.74	-146728	27642.3	-10196.7	247.929	554.41	0	35.2443	55.1736	-360.514	-64345.7	-19296.8	-11218.3	146.474	1081.48	0	0	0	0	0	0	0	603	903	0
664	3	5.91853	-155.317	-566.364	-143341	27825.4	-10151	249.13	553.09	0	33.871	55.9366	-372.416	-66726.1	-19968.2	-11126.7	146.382	1082.17	0	0	0	0	0	0	0	603	903	0
664	4	4.69783	-155.012	-560.26	-142608	27581.2	-9738.97	249.229	554.539	0	32.9555	56.5469	-385.844	-69198.1	-20639.6	-10852.1	146.508	1082.34	0	0	0	0	0	0	0	603	903	0
664	5	4.08748	-154.554	-548.969	-140319	27398.1	-9555.86	249.908	555.606	0	31.5822	60.0565	-396.83	-71578.4	-21127.9	-11035.2	146.758	1083.38	0	0	0	0	0	0	0	603	903	0
664	6	3.62971	-155.012	-541.339	-138122	26421.6	-9418.53	248.808	555.149	0	29.1408	59.9039	-406.901	-73684.1	-22104.5	-9982.32	145.676	1084.09	0	0	0	0	0	0	0	603	903	0
664	7	3.32454	-154.707	-532.794	-136017	25750.2	-9510.09	248.33	555.289	0	29.7511	60.209	-416.666	-75972.9	-22836.9	-10073.9	145.191	1085.34	0	0	0	0	0	0	0	603	903	0
664	8	1.64607	-153.028	-521.198	-133270	25445	-9052.32	248.82	555.699	0	27.1571	63.7186	-428.874	-79177.3	-23264.1	-10165.4	145.755	1087.62	0	0	0	0	0	0	0	603	903	0
664	9	-0.642747	-154.554	-513.568	-131897	25139.8	-8640.33	248.951	556.824	0	25.9364	66.0074	-438.639	-81008.3	-23996.5	-9295.67	145.293	1087.68	0	0	0	0	0	0	0	603	903	0
665	0	-1.10051	-153.638	-502.277	-129516	24773.6	-8503.01	249.323	557.858	0	24.1054	65.2444	-448.1	-82930.9	-24912.1	-9249.9	144.405	1088.07	0	0	0	0	0	0	0	603	903	0
665	1	-2.16863	-153.486	-492.816	-127227	24102.2	-8457.23	248.907	558.164	0	23.1898	67.0755	-459.391	-84945.1	-25217.2	-8975.24	145.107	1087.91	0	0	0	0	0	0	0	603	903	0
665	2	-2.16863	-153.791	-483.356	-124756	23430.8	-7907.92	248.475	558.103	0	21.0536	70.1273	-467.326	-87966.3	-25949.7	-8197.04	144.472	1091.23	0	0	0	0	0	0	0	603	903	0
665	3	-3.23674	-152.265	-468.097	-122650	22942.6	-7679.03	249.012	562.018	0	18.1544	72.4161	-477.396	-90072.1	-26804.2	-8105.49	143.853	1091.67	0	0	0	0	0	0	0	603	903	0
665	4	-5.37297	-150.434	-462.604	-120086	22637.4	-7587.48	248.935	559.588	0	16.7812	71.1954	-489.298	-92910.2	-27902.8	-7556.17	142.974	1092.88	0	0	0	0	0	0	0	603	903	0
665	5	-6.13591	-150.739	-450.092	-115875	22271.2	-7450.15	249.481	557.447	0	14.6449	74.5523	-502.726	-95656.8	-28574.2	-6411.76	143.162	1093.28	0	0	0	0	0	0	0	603	903	0
665	6	-5.98332	-149.519	-439.716	-114959	21477.7	-7221.27	248.845	561.44	0	9.60953	77.9092	-515.238	-98952.7	-29428.7	-5908.22	142.883	1095.05	0	0	0	0	0	0	0	603	903	0
665	7	-5.52556	-147.688	-431.781	-112304	20867.4	-6809.28	248.329	560.096	0	7.77847	80.5032	-526.835	-101882	-30832.5	-5496.23	141.476	1096.39	0	0	0	0	0	0	0	603	903	0
665	8	-7.20403	-146.467	-418.354	-109924	20318.1	-6626.18	248.567	562.754	0	2.89566	83.8602	-536.295	-104171	-31259.7	-4443.38	141.712	1097.24	0	0	0	0	0	0	0	603	903	0
665	9	-9.49284	-146.925	-410.419	-107177	19890.8	-6397.29	248.465	561.141	0	-0.461273	87.2171	-548.197	-107742	-32053.2	-3573.62	141.53	1099.54	0	0	0	0	0	0	0	603	903	0
666	0	-9.64543	-144.788	-397.907	-104614	19890.8	-6351.52	249.989	562.911	0	-1.98715	89.5059	-552.775	-109207	-32602.5	-3482.07	141.02	1100.56	0	0	0	0	0	0	0	603	903	0
666	1	-9.18767	-142.652	-386.92	-102325	18670.1	-5847.98	248.253	564.46	0	-4.73373	92.5577	-566.813	-111587	-33212.8	-2291.89	141.404	1099.87	0	0	0	0	0	0	0	603	903	0
666	2	-8.27214	-140.058	-376.85	-98571.5	18426	-5161.33	248.895	561.567	0	-9.0062	98.356	-573.222	-114059	-33884.2	-1971.45	140.888	1101.98	0	0	0	0	0	0	0	603	903	0
666	3	-10.1032	-137.464	-366.779	-95916.4	17815.6	-5390.21	248.573	561.51	0	-10.6847	103.391	-580.851	-116256	-34372.5	-2658.1	140.824	1103.15	0	0	0	0	0	0	0	603	903	0
666	4	-11.0187	-134.718	-354.267	-93353	17388.4	-5344.44	249.083	563.51	0	-12.6683	105.985	-588.175	-117172	-35227	-2017.23	140.108	1102.21	0	0	0	0	0	0	0	603	903	0
666	5	-10.2558	-131.361	-341.449	-90423.3	17144.2	-4795.12	250.21	564.822	0	-12.3631	109.495	-596.11	-118637	-35715.3	-2017.23	140.086	1102.02	0	0	0	0	0	0	0	603	903	0
666	6	-10.2558	-129.072	-329.242	-86852.7	16228.7	-4703.57	249.291	563.796	0	-12.058	110.41	-600.688	-121292	-35532.2	-2612.32	140.847	1104.92	0	0	0	0	0	0	0	603	903	0
666	7	-7.66179	-126.478	-320.087	-84472.3	15740.4	-4795.12	249.175	563.904	0	-13.2787	113.462	-605.265	-123123	-35959.4	-2474.99	140.589	1106.42	0	0	0	0	0	0	0	603	903	0
666	8	-9.34026	-122.968	-308.49	-81908.8	15069	-4566.24	248.848	565.515	0	-12.2105	115.598	-610.453	-124313	-36691.8	-2429.22	139.894	1106.64	0	0	0	0	0	0	0	603	903	0
666	9	-10.561	-119.306	-298.725	-78887.6	14031.4	-4520.46	246.971	564.081	0	-11.7528	117.735	-615.031	-124862	-36997	-2520.77	139.845	1106.02	0	0	0	0	0	0	0	603	903	0
667	0	-9.95061	-115.797	-284.076	-76049.5	14031.4	-3696.49	249.393	567.708	0	-12.2105	116.361	-614.42	-126144	-37058.1	-2703.87	139.686	1108.31	0	0	0	0	0	0	0	603	903	0
667	1	-9.64543	-112.135	-272.785	-73486	13604.2	-3971.15	249.872	569.392	0	-11.1424	117.124	-621.745	-127426	-36691.8	-3024.31	140.986	1107.95	0	0	0	0	0	0	0	603	903	0
667	2	-8.72991	-108.778	-263.935	-71471.8	13176.9	-3742.26	249.925	570.794	0	-10.9898	116.667	-623.881	-128250	-37119.1	-3802.51	140.503	1108.57	0	0	0	0	0	0	0	603	903	0
667	3	-8.72991	-104.047	-254.474	-69274.6	12627.6	-3925.37	249.622	572.226	0	-10.5321	116.819	-625.712	-128524	-36875	-3985.61	141.067	1108.4	0	0	0	0	0	0	0	603	903	0
667	4	-9.95061	-100.385	-244.403	-66619.6	11956.2	-3421.83	248.92	572.58	0	-7.93808	115.598	-626.933	-129074	-37058.1	-4214.49	140.89	1108.88	0	0	0	0	0	0	0	603	903	0
667	5	-9.79802	-97.3335	-231.891	-63964.5	11590	-3055.62	249.98	575.839	0	-6.71738	114.073	-629.069	-129989	-37485.3	-4809.59	140.411	1109.64	0	0	0	0	0	0	0	603	903	0
667	6	-10.4084	-92.9085	-218.769	-61126.4	11040.7	-3055.62	250.468	579.411	0	-7.02255	114.073	-629.374	-130905	-37180.1	-4992.69	140.925	1110.99	0	0	0	0	0	0	0	603	903	0
667	7	-9.03508	-87.7205	-212.055	-58837.6	10979.7	-2689.41	251.778	577.464	0	-2.5975	114.073	-628.764	-131271	-37180.1	-5450.46	140.868	1111.78	0	0	0	0	0	0	0	603	903	0
667	8	-8.27214	-83.1429	-204.425	-56182.5	10552.4	-2414.75	251.62	574.832	0	-4.42856	111.173	-631.815	-131362	-36997	-5770.89	141.443	1110.91	0	0	0	0	0	0	0	603	903	0
667	9	-9.64543	-78.4126	-196.186	-54259.9	9881.04	-2185.87	250.366	576.575	0	-3.20785	113.92	-632.121	-131637	-37058.1	-5908.22	141.375	1111.25	0	0	0	0	0	0	0	603	903	0
668	0	-7.81438	-74.9031	-185.504	-51696.5	9331.72	-1956.99	250.305	578.68	0	-3.20785	113.767	-633.341	-132186	-37180.1	-5908.22	141.295	1111.71	0	0	0	0	0	0	0	603	903	0
668	1	-9.03508	-69.8677	-176.044	-49956.9	9087.58	-2002.76	251.621	583.775	0	-2.5975	113.004	-632.731	-132553	-36630.8	-5862.44	142.107	1112.49	0	0	0	0	0	0	0	603	903	0
668	2	-7.20403	-66.3582	-169.635	-47668.1	8904.48	-1728.1	252.492	581.004	0	-0.461273	114.53	-632.426	-132827	-37668.4	-6228.65	140.438	1113.03	0	0	0	0	0	0	0	603	903	0
668	3	-6.44109	-60.2547	-161.09	-45470.9	8782.41	-1728.1	254.519	582.269	0	-2.75009	115.293	-634.867	-132736	-37546.3	-5999.77	140.86	1112.08	0	0	0	0	0	0	0	603	903	0
668	4	-7.05144	-56.2874	-151.935	-42815.8	8355.16	-1728.1	254.992	581.804	0	-2.13974	115.141	-634.562	-133285	-37119.1	-6137.1	141.504	1113.04	0	0	0	0	0	0	0	603	903	0
668	5	-6.44109	-52.3201	-146.747	-40435.5	7683.77	-1499.22	252.361	575.545	0	-3.05527	113.462	-634.257	-134017	-37302.2	-6137.1	141.188	1114.3	0	0	0	0	0	0	0	603	903	0
668	6	-6.59367	-48.3528	-137.287	-38696	7256.52	-1361.89	252.857	581.862	0	-4.27597	116.667	-633.646	-134933	-37729.4	-5679.34	140.457	1115.95	0	0	0	0	0	0	0	603	903	0
668	7	-4.91521	-45.7588	-129.962	-36681.8	7073.42	-1133.01	254.427	582.249	0	-5.95444	118.192	-634.867	-134475	-37790.5	-5450.46	140.475	1114.82	0	0	0	0	0	0	0	603	903	0
668	8	-5.37297	-43.9278	-124.164	-35400.1	6951.35	-1087.24	255.985	585.107	0	-5.95444	118.955	-635.783	-134567	-37668.4	-5175.8	140.753	1114.66	0	0	0	0	0	0	0	603	903	0
668	9	-5.83074	-40.4182	-115.619	-32104.2	6341	-949.906	254.844	577.672	0	-7.32773	119.108	-637.614	-136123	-37058.1	-4718.03	141.88	1116.49	0	0	0	0	0	0	0	603	903	0
669	0	-6.89885	-39.1975	-111.347	-31188.6	5791.68	-537.919	252.015	580.104	0	-10.5321	118.498	-638.529	-136581	-37424.3	-4809.59	141.39	1116.9	0	0	0	0	0	0	0	603	903	0
669	1	-7.20403	-37.2139	-102.497	-29266	5547.54	-537.919	254.124	585.532	0	-10.3795	120.023	-639.14	-137313	-38339.8	-4122.94	140.013	1117.84	0	0	0	0	0	0	0	603	903	0
669	2	-6.44109	-35.0777	-96.0879	-27251.9	5425.47	-492.142	256.464	583.614	0	-14.3468	121.092	-641.581	-137405	-37790.5	-3573.62	141.098	1117.17	0	0	0	0	0	0	0	603	903	0
669	3	-5.22038	-33.7044	-88.4585	-25787	5425.47	-446.366	261.333	591.515	0	-15.7201	122.465	-644.328	-137863	-38522.9	-3207.41	140.212	1116.96	0	0	0	0	0	0	0	603	903	0
669	4	-4.76262	-28.8216	-84.1861	-23406.6	4937.19	-263.26	258.646	578.035	0	-17.2459	122.007	-648.295	-138229	-38889.1	-3024.31	140.013	1116.22	0	0	0	0	0	0	0	603	903	0
669	5	-5.52556	-26.5327	-75.9463	-22124.9	4448.91	-171.707	258.58	591.323	0	-20.1451	120.634	-652.873	-138961	-38156.7	-2520.77	141.556	1115.85	0	0	0	0	0	0	0	603	903	0
669	6	-3.23674	-23.481	-65.8755	-20110.8	3838.56	-446.366	258.27	605.284	0	-19.8399	123.533	-656.84	-139602	-38522.9	-2337.66	141.351	1115.54	0	0	0	0	0	0	0	603	903	0
669	7	-4.15227	-19.5137	-58.8565	-17821.9	3594.42	-171.707	261.071	602.803	0	-23.6546	124.906	-659.892	-138870	-39255.3	-1971.45	140.512	1113.44	0	0	0	0	0	0	0	603	903	0
669	8	-2.4738	-16.9197	-51.8375	-16082.4	3167.17	-492.142	261.098	610.247	0	-23.502	125.822	-666.605	-139144	-39011.2	-1284.81	141.478	1111.74	0	0	0	0	0	0	0	603	903	0
669	9	-1.71086	-14.3257	-47.2598	-13519	2984.06	11.398	263.142	586.056	0	-24.4176	125.517	-670.268	-139877	-38828.1	-1239.03	142.071	1111.69	0	0	0	0	0	0	0	603	903	0
670	0	-3.23674	-12.7998	-37.4942	-10955.5	2556.82	-34.3784	268.192	592.191	0	-27.3167	124.601	-677.287	-139419	-38950.1	-1010.15	142.491	1108.85	0	0	0	0	0	0	0	603	903	0
670	1	-2.93157	-10.0533	-32.9166	-9215.97	1824.39	148.727	255.425	579.98	0	-27.1642	126.28	-682.78	-139053	-39194.3	-506.608	142.596	1106.66	0	0	0	0	0	0	0	603	903	0
670	2	-3.23674	-8.37479	-26.5079	-7842.68	1580.25	-34.3784	259.615	595.862	0	-27.0116	127.043	-688.883	-138870	-39560.5	-277.727	142.573	1104.59	0	0	0	0	0	0	0	603	903	0
670	3	-1.55827	-8.67996	-21.3199	-6469.39	1336.11	-171.707	262.67	603.444	0	-27.9271	127.5	-694.682	-139877	-39377.4	134.261	143.316	1104.35	0	0	0	0	0	0	0	603	903	0
670	4	-0.795335	-7.76443	-16.1319	-4638.34	1458.18	-80.1548	290.391	587.526	0	-28.9952	127.805	-697.733	-140060	-39316.4	-3.06848	143.651	1103.74	0	0	0	0	0	0	0	603	903	0
670	5	-2.32121	-6.54373	-11.8594	-3448.15	969.903	194.503	281.783	590.752	0	-29.453	125.822	-702.921	-139877	-39499.5	-140.398	143.807	1101.99	0	0	0	0	0	0	0	603	903	0
670	6	-2.77898	-7.00149	-9.41802	-2807.28	969.903	-34.3784	302.984	598.076	0	-27.4693	126.89	-705.668	-139419	-39133.3	-140.398	144.544	1100.57	0	0	0	0	0	0	0	603	903	0
670	7	0	0	0	0	0	0	200	300	0	-28.0797	127.195	-707.499	-141616	-39621.5	-94.6212	143.998	1103.16	0	0	0	0	0	0	0	603	903	0
670	8	0	0	0	0	0	0	200	300	0	-29.6056	126.737	-710.856	-142623	-40109.8	-369.28	143.575	1103.64	0	0	0	0	0	0	0	603	903	0
670	9	0	0	0	0	0	0	200	300	0	-28.0797	124.906	-711.771	-143814	-40170.9	-506.608	143.562	1105.05	0	0	0	0	0	0	0	603	903	0
671	0	0	0	0	0	0	0	200	300	0	-30.9789	122.923	-713.908	-144454	-39743.6	-323.503	144.329	1105.34	0	0	0	0	0	0	0	603	903	0
671	1	0	0	0	0	0	0	200	300	0	-28.8426	124.296	-712.992	-146285	-39987.7	-598.161	143.916	1108.17	0	0	0	0	0	0	0	603	903	0
671	2	0	0	0	0	0	0	200	300	0	-29.6056	124.754	-710.551	-148116	-41025.3	-186.174	142.263	1111.45	0	0	0	0	0	0	0	603	903	0
671	3	0	0	0	0	0	0	200	300	0	-30.2159	125.364	-711.466	-149398	-40964.3	-415.056	142.423	1112.99	0	0	0	0	0	0	0	603	903	0
671	4	0	0	0	0	0	0	200	300	0	-30.9789	125.364	-713.908	-150955	-41086.4	-506.608	142.449	1114.45	0	0	0	0	0	0	0	603	903	0
671	5	0	0	0	0	0	0	200	300	0	-29.9107	125.364	-712.077	-151138	-41147.4	-689.714	142.215	1115.25	0	0	0	0	0	0	0	603	903	0
671	6	0	0	0	0	0	0	200	300	0	-28.9952	126.585	-711.466	-153060	-41208.4	-369.28	142.08	1118.13	0	0	0	0	0	0	0	603	903	0
671	7	0	0	0	0	0	0	200	300	0	-30.8263	126.89	-712.077	-154251	-41208.4	-323.503	142.129	1119.62	0	0	0	0	0	0	0	603	903	0
671	8	0	0	0	0	0	0	200	300	0	-31.7418	127.958	-714.823	-155441	-41452.6	-323.503	142.01	1120.45	0	0	0	0	0	0	0	603	903	0
671	9	0	0	0	0	0	0	200	300	0	-31.8944	127.805	-717.265	-156082	-42307.1	-3.06848	141.016	1120.61	0	0	0	0	0	0	0	603	903	0
672	0	0	0	0	0	0	0	200	300	0	-30.9789	127.805	-715.128	-156906	-42307.1	225.813	140.84	1122.41	0	0	0	0	0	0	0	603	903	0
672	1	0	0	0	0	0	0	200	300	0	-31.284	130.247	-715.434	-158645	-42062.9	363.142	141.206	1124.75	0	0	0	0	0	0	0	603	903	0
672	2	0	0	0	0	0	0	200	300	0	-32.1996	126.737	-720.316	-158828	-42368.1	866.683	141.181	1123.5	0	0	0	0	0	0	0	603	903	0
672	3	0	0	0	0	0	0	200	300	0	-31.284	130.552	-723.063	-159927	-42978.5	958.235	140.561	1124.18	0	0	0	0	0	0	0	603	903	0
672	4	0	0	0	0	0	0	200	300	0	-31.8944	130.399	-725.199	-161117	-42978.5	592.024	140.736	1125.17	0	0	0	0	0	0	0	603	903	0
672	5	0	0	0	0	0	0	200	300	0	-32.5047	127.958	-723.673	-162032	-42734.3	592.024	140.948	1126.9	0	0	0	0	0	0	0	603	903	0
672	6	0	0	0	0	0	0	200	300	0	-33.878	127.195	-725.81	-163864	-43222.6	454.695	140.449	1128.77	0	0	0	0	0	0	0	603	903	0
672	7	0	0	0	0	0	0	200	300	0	-35.0987	126.89	-728.556	-164138	-42856.4	592.024	141.176	1128.29	0	0	0	0	0	0	0	603	903	0
672	8	0	0	0	0	0	0	200	300	0	-34.3358	126.737	-730.082	-164871	-43283.6	866.683	140.714	1128.82	0	0	0	0	0	0	0	603	903	0
672	9	0	0	0	0	0	0	200	300	0	-34.0306	124.754	-733.744	-165420	-43283.6	637.801	141.01	1128.45	0	0	0	0	0	0	0	603	903	0
673	0	0	0	0	0	0	0	200	300	0	-33.4203	123.838	-736.186	-165969	-43710.9	729.354	140.625	1128.44	0	0	0	0	0	0	0	603	903	0
673	1	0	0	0	0	0	0	200	300	0	-32.6573	124.754	-737.711	-167251	-44016.1	592.024	140.334	1129.72	0	0	0	0	0	0	0	603	903	0
673	2	0	0	0	0	0	0	200	300	0	-33.7254	123.991	-742.899	-168075	-43833	729.354	140.997	1129.24	0	0	0	0	0	0	0	603	903	0
673	3	0	0	0	0	0	0	200	300	0	-33.1151	122.465	-744.425	-169265	-43833	592.024	141.118	1130.38	0	0	0	0	0	0	0	603	903	0
673	4	0	0	0	0	0	0	200	300	0	-32.8099	122.007	-746.562	-168899	-44138.1	1095.56	140.878	1129.24	0	0	0	0	0	0	0	603	903	0
673	5	0	0	0	0	0	0	200	300	0	-29.7581	120.634	-747.172	-169265	-43710.9	729.354	141.498	1129.54	0	0	0	0	0	0	0	603	903	0
673	6	0	0	0	0	0	0	200	300	0	-30.2159	120.786	-749.308	-170455	-44016.1	637.801	141.258	1130.48	0	0	0	0	0	0	0	603	903	0
673	7	0	0	0	0	0	0	200	300	0	-31.5892	119.413	-752.36	-170730	-44443.3	958.235	140.928	1129.93	0	0	0	0	0	0	0	603	903	0
673	8	0	0	0	0	0	0	200	300	0	-31.7418	118.04	-754.801	-171188	-44199.2	637.801	141.443	1129.8	0	0	0	0	0	0	0	603	903	0
673	9	0	0	0	0	0	0	200	300	0	-29.6056	115.141	-756.938	-171646	-44321.2	363.142	141.447	1129.76	0	0	0	0	0	0	0	603	903	0
674	0	0	0	0	0	0	0	200	300	0	-28.5374	115.446	-757.853	-172561	-44016.1	729.354	141.92	1130.7	0	0	0	0	0	0	0	603	903	0
674	1	0	0	0	0	0	0	200	300	0	-30.0633	115.751	-760.294	-171462	-44382.3	363.142	141.625	1128.52	0	0	0	0	0	0	0	603	903	0
674	2	0	0	0	0	0	0	200	300	0	-29.453	114.988	-763.957	-173202	-44199.2	729.354	142.144	1129.72	0	0	0	0	0	0	0	603	903	0
674	3	0	0	0	0	0	0	200	300	0	-28.2323	112.699	-761.82	-173477	-44138.1	729.354	142.062	1130.71	0	0	0	0	0	0	0	603	903	0
674	4	0	0	0	0	0	0	200	300	0	-27.7745	112.394	-767.924	-173934	-44504.3	408.919	142.046	1129.5	0	0	0	0	0	0	0	603	903	0
674	5	0	0	0	0	0	0	200	300	0	-27.0116	111.173	-768.534	-173660	-44504.3	683.577	142.092	1128.96	0	0	0	0	0	0	0	603	903	0
674	6	0	0	0	0	0	0	200	300	0	-27.4693	111.326	-769.145	-175491	-44321.2	500.472	142.376	1131.16	0	0	0	0	0	0	0	603	903	0
674	7	0	0	0	0	0	0	200	300	0	-24.5702	109.495	-773.722	-175949	-44321.2	683.577	142.717	1130.41	0	0	0	0	0	0	0	603	903	0
674	8	0	0	0	0	0	0	200	300	0	-27.0116	108.579	-770.67	-175857	-44626.4	546.248	142.094	1131.19	0	0	0	0	0	0	0	603	903	0
674	9	0	0	0	0	0	0	200	300	0	-25.7909	108.122	-775.248	-176315	-44870.6	546.248	142.121	1130.43	0	0	0	0	0	0	0	603	903	0
675	0	0	0	0	0	0	0	200	300	0	-25.0279	105.833	-775.858	-177139	-44138.1	592.024	143.111	1131.31	0	0	0	0	0	0	0	603	903	0
675	1	0	0	0	0	0	0	200	300	0	-25.0279	105.985	-777.079	-176681	-44931.6	546.248	142.179	1130.37	0	0	0	0	0	0	0	603	903	0
675	2	0	0	0	0	0	0	200	300	0	-25.1805	105.07	-780.741	-178329	-44870.6	912.459	142.528	1131.41	0	0	0	0	0	0	0	603	903	0
675	3	0	0	0	0	0	0	200	300	0	-24.4176	103.086	-780.131	-177871	-43955	592.024	143.657	1131	0	0	0	0	0	0	0	603	903	0
675	4	0	0	0	0	0	0	200	300	0	-23.502	102.476	-780.741	-178237	-44443.3	500.472	143.076	1131.29	0	0	0	0	0	0	0	603	903	0
675	5	0	0	0	0	0	0	200	300	0	-23.6546	102.628	-781.962	-178695	-44687.5	546.248	142.852	1131.52	0	0	0	0	0	0	0	603	903	0
675	6	0	0	0	0	0	0	200	300	0	-22.1288	102.323	-781.657	-178878	-44931.6	317.366	142.517	1131.84	0	0	0	0	0	0	0	603	903	0
675	7	0	0	0	0	0	0	200	300	0	-21.671	101.866	-784.098	-178512	-44443.3	500.472	143.319	1130.67	0	0	0	0	0	0	0	603	903	0
675	8	0	0	0	0	0	0	200	300	0	-21.671	101.103	-783.183	-178787	-44199.2	500.472	143.565	1131.28	0	0	0	0	0	0	0	603	903	0
675	9	0	0	0	0	0	0	200	300	0	-21.0606	100.34	-784.098	-178787	-44565.4	225.813	143.164	1131.02	0	0	0	0	0	0	0	603	903	0
676	0	0	0	0	0	0	0	200	300	0	-21.671	98.8138	-783.183	-179336	-44504.3	408.919	143.175	1131.98	0	0	0	0	0	0	0	603	903	0
676	1	0	0	0	0	0	0	200	300	0	-21.671	98.5086	-782.877	-178787	-44138.1	225.813	143.621	1131.37	0	0	0	0	0	0	0	603	903	0
676	2	0	0	0	0	0	0	200	300	0	-19.8399	95.4568	-783.793	-178146	-44077.1	546.248	143.764	1130.29	0	0	0	0	0	0	0	603	903	0
676	3	0	0	0	0	0	0	200	300	0	-19.5348	96.2198	-781.962	-178695	-44626.4	225.813	142.93	1131.52	0	0	0	0	0	0	0	603	903	0
676	4	0	0	0	0	0	0	200	300	0	-17.7037	94.3887	-781.962	-178787	-44016.1	363.142	143.711	1131.64	0	0	0	0	0	0	0	603	903	0
676	5	0	0	0	0	0	0	200	300	0	-20.1451	92.4051	-779.521	-178787	-43710.9	592.024	143.926	1132.35	0	0	0	0	0	0	0	603	903	0
[truncated: 1,554 more rows]
