# Supplementary material for: The Effects of an Extemporaneous Speech Dual-task on Older Adult Gait Control
Source: Research Square preprint supplement (doi:10.21203/rs.3.rs-7674245/v1), 2025-11-18
Supplement: Supplementary file 211 [file Over9ground08.xlsx]

## Sheet: Sheet1
Trajectories
		09:LFHD			09:RFHD			09:LBHD			09:RBHD			09:C7			09:T10			09:CLAV			09:STRN			09:RBAK			09:LSHO			09:LUPA			09:LELB			09:LFRM			09:LWRA			09:LWRB			09:LFIN
Frame	Sub Frame	X	Y	Z	X	Y	Z	X	Y	Z	X	Y	Z	X	Y	Z	X	Y	Z	X	Y	Z	X	Y	Z	X	Y	Z	X	Y	Z	X	Y	Z	X	Y	Z	X	Y	Z	X	Y	Z	X	Y	Z	X	Y	Z
		mm	mm	mm	mm	mm	mm	mm	mm	mm	mm	mm	mm	mm	mm	mm	mm	mm	mm	mm	mm	mm	mm	mm	mm	mm	mm	mm	mm	mm	mm	mm	mm	mm	mm	mm	mm	mm	mm	mm	mm	mm	mm	mm	mm	mm	mm	mm	mm
352	0	246.828	2570.46	1614.12	150.164	2562.46	1612.56	257.607	2715.96	1673.5	113.164	2700.44	1664.94	196.924	2792.81	1500.52	220.744	2873.58	1241.6	194.326	2655.1	1401.27	198.536	2584.44	1188.06	155.64	2879.27	1301.88	378.87	2709.16	1448.84	473.584	2678.29	1237.23	506.177	2645.49	1144.37	501.188	2482.17	1068.35	449.021	2410.12	1035.72	513.993	2431.54	1010.86	498.3	2353.37	1007.89
353	0	246.666	2555.61	1612.04	149.929	2547.73	1610.31	257.166	2701.03	1671.44	112.354	2685.49	1663.14	196.46	2778.16	1498.47	220.153	2858.66	1239.46	194.019	2640.4	1399.13	198.427	2569.57	1186.04	155.053	2864.23	1299.78	378.301	2694.38	1447.01	473.104	2660.64	1236.35	505.715	2627.14	1143.2	500.407	2462.87	1069.89	447.986	2390.71	1037.63	513.494	2411.42	1013.18	497.286	2333.37	1011.69
354	0	246.127	2540.65	1610.25	149.268	2532.67	1608.17	256.797	2686.21	1669.78	111.791	2670.42	1661.14	195.792	2762.94	1496.53	219.533	2843.23	1237.42	193.547	2625.29	1397.14	198.325	2554.57	1184.15	154.556	2849.16	1297.8	377.94	2679.67	1445.4	472.533	2643.61	1235.32	505.32	2609.43	1142.33	499.74	2444.27	1070.77	447.285	2372.05	1039.38	512.592	2392.1	1014.96	496.575	2314.04	1014.72
355	0	244.987	2525.74	1608.8	148.31	2517.91	1606.65	255.825	2671.5	1668.17	110.506	2655.72	1659.53	194.825	2747.85	1494.73	218.721	2827.66	1235.57	192.961	2610.21	1395.35	197.956	2539.11	1182.78	153.833	2833.82	1295.89	377.322	2664.47	1444.36	471.947	2626.68	1234.51	504.756	2591.91	1141.99	499.072	2426.23	1071.77	446.446	2353.86	1040.88	511.591	2373.48	1016.18	495.782	2295.59	1017.45
356	0	243.928	2510.98	1607.53	147.392	2503.08	1605.41	254.271	2656.93	1666.52	109.241	2640.86	1657.58	193.765	2732.93	1492.92	218.276	2812.23	1233.51	191.758	2594.93	1393.94	197.189	2523.63	1181.34	153.256	2818.61	1293.81	376.134	2649.09	1442.94	470.939	2610.18	1233.62	504.033	2575.01	1141.54	498.136	2408.69	1072.37	445.293	2336.2	1041.69	511.282	2355.59	1017.67	494.982	2277.71	1019.27
357	0	242.777	2496.32	1606.64	146.361	2488.23	1604.21	252.799	2642.43	1665.01	107.875	2626.45	1656.01	192.868	2717.94	1491.13	217.918	2796.41	1231.57	191	2579.64	1392.62	196.411	2508.02	1180.2	152.977	2803.09	1291.67	375.095	2633.64	1441.65	470.309	2594.28	1232.66	503.564	2558.31	1141.22	497.512	2391.93	1072.18	445.152	2319.4	1042.19	510.785	2338.81	1017.83	494.527	2260.77	1020.13
358	0	241.256	2481.71	1605.98	144.648	2473.38	1603.48	251.235	2628.17	1663.81	106.428	2611.83	1654.28	191.779	2702.88	1489.56	217.76	2780.45	1229.8	189.631	2564.07	1391.56	195.651	2492.16	1179.36	152.642	2787.31	1289.63	373.891	2618.03	1440.7	469.664	2578.75	1231.82	502.408	2542.3	1140.05	497	2375.98	1071.77	444.728	2303.25	1041.69	510.21	2322.66	1017.44	494.29	2244.74	1020.36
359	0	239.796	2466.98	1605.97	143.061	2458.6	1603.36	249.132	2613.78	1663.07	104.558	2597.23	1653.2	190.469	2687.64	1488.25	217.353	2764.3	1228.35	188.383	2548.45	1390.96	194.47	2475.85	1178.86	152.027	2771.4	1287.98	372.557	2602.32	1440.19	468.56	2563.42	1231.52	501.314	2526.82	1139.93	496.388	2360.58	1070.74	444.398	2287.8	1040.67	509.525	2307.49	1016.4	494.236	2229.56	1019.93
360	0	237.787	2452.3	1606.53	140.968	2443.64	1603.67	246.874	2599.21	1662.9	102.141	2582.55	1652.73	188.923	2672.21	1487.6	216.875	2747.99	1227.48	187.111	2532.76	1390.79	193.321	2459.24	1179.04	151.419	2755.34	1286.6	371.022	2586.63	1440.18	467.549	2548.13	1231.48	500.111	2511.64	1139.82	495.9	2345.92	1069.09	444.167	2273.17	1038.98	508.766	2293.27	1014.38	494.019	2215.21	1018.28
361	0	235.82	2437.31	1607.61	139.26	2428.65	1604.51	244.828	2584.82	1663.39	99.9979	2568.01	1652.82	187.344	2656.69	1487.51	216.277	2731.71	1227.25	185.755	2517.02	1391.03	192.183	2442.27	1179.64	150.618	2739.08	1285.96	369.853	2570.76	1440.73	466.13	2533.01	1231.56	498.856	2497	1139.46	495.519	2332.04	1066.97	443.892	2259.37	1036.14	509.299	2279.97	1012.36	493.975	2202.03	1015.68
362	0	233.621	2422.21	1609.67	137.046	2413.85	1605.92	242.452	2570.19	1664.57	97.3174	2553.19	1653.14	185.867	2641.16	1488.27	215.758	2715.63	1227.99	184.512	2501.26	1391.83	191.217	2425.33	1180.42	149.745	2722.53	1286.14	368.488	2554.87	1441.93	465.394	2517.91	1232.62	497.586	2482.53	1139.8	494.658	2318.82	1064.49	443.517	2246.6	1032.75	508.034	2267.59	1008.55	494.432	2189.89	1012.45
363	0	230.845	2407.11	1611.94	134.441	2398.95	1607.32	239.964	2555.39	1666.03	94.8647	2538.46	1653.51	184.19	2625.34	1489.32	215.305	2699.93	1229.16	183.068	2485.46	1392.83	190.168	2408.17	1181.67	148.949	2706.15	1286.82	367.396	2538.75	1443.57	464.282	2502.96	1233.7	496.147	2468.7	1140.62	494.16	2306.23	1061.88	443.16	2234.56	1028.73	508.116	2256.35	1005.44	494.446	2178.52	1008.09
364	0	228.606	2391.98	1614.28	131.873	2383.89	1608.97	238.313	2541.35	1667.86	92.243	2523.94	1654.29	182.856	2609.7	1490.59	215.057	2684.76	1230.61	182.057	2469.79	1394.04	189.601	2391.3	1183.08	148.244	2690.11	1287.84	366.169	2522.72	1445.22	463.043	2488.17	1234.68	494.713	2455.24	1141.1	493.267	2294.67	1058.83	442.785	2223.42	1024.06	507.543	2246.08	1001.3	494.396	2168.14	1002.53
365	0	225.981	2376.68	1616.77	129.312	2369.14	1610.65	235.589	2526.37	1669.65	89.7928	2509.42	1654.6	181.777	2594.1	1492.1	214.902	2669.51	1232.5	181.337	2454.36	1395.5	189.226	2374.75	1184.46	147.863	2674.75	1289.3	365.157	2506.9	1447.13	461.674	2473.36	1235.81	492.829	2442.4	1141.76	492.751	2283.44	1056.04	442.32	2213.04	1019.01	507.279	2236.41	997.256	494.211	2158.51	996.252
366	0	223.438	2361.78	1618.9	126.902	2354.64	1612.18	233.015	2511.27	1671.5	87.5998	2495.32	1655.28	180.959	2578.69	1493.65	214.649	2654.74	1234.28	180.641	2439.06	1397.3	188.924	2358.99	1185.77	147.595	2659.66	1290.79	363.93	2491.28	1449.14	460.054	2458.63	1237.32	491.296	2429.7	1142.71	491.705	2273.12	1053.09	441.567	2203.55	1013.57	506.847	2227.68	993.117	494.047	2149.96	989.337
367	0	221.244	2346.71	1621.01	124.475	2339.96	1613.38	230.693	2496.17	1673.4	85.7509	2480.93	1655.21	180.045	2563.66	1495.23	214.381	2640.39	1236.03	180.264	2424.02	1398.88	188.627	2343.56	1187.55	147.22	2644.48	1292.18	363.126	2476.18	1451	458.296	2444.28	1238.65	489.932	2417.34	1143.99	490.769	2263.19	1050.11	440.993	2194.91	1007.7	506.581	2219.74	988.714	493.001	2141.96	981.117
368	0	219.295	2331.85	1622.82	122.525	2325.55	1614.47	229.022	2481.25	1675.57	84.2517	2466.57	1656.33	179.423	2549.18	1496.92	213.847	2625.74	1237.74	180.172	2409.28	1400.48	188.716	2328.94	1189.37	146.761	2629.55	1293.85	362.406	2461.88	1452.88	456.972	2430.09	1240.04	488.595	2405.23	1145.13	490.151	2254.07	1046.75	440.49	2187.15	1001.5	506.099	2212.67	983.642	493.076	2135.39	972.801
369	0	218.038	2317.18	1624.89	121.775	2311.22	1615.85	228.036	2466.33	1678.35	82.9609	2452.18	1658.23	178.875	2534.84	1499.05	213.181	2611.48	1239.92	180.382	2394.84	1402.52	188.966	2314.77	1191.39	145.862	2614.78	1295.8	362.076	2447.65	1455.27	455.855	2416.5	1241.75	485.619	2393.71	1146.1	489.23	2245.5	1043.38	439.581	2180.05	995.14	505.69	2206.23	978.788	492.066	2129.51	963.822
370	0	216.929	2302.41	1626.94	120.516	2296.66	1617.45	227.272	2451.56	1681.43	82.0886	2437.34	1660.28	178.29	2520.91	1501.51	212.273	2596.96	1242.43	180.469	2380.68	1405.06	189.517	2300.71	1193.91	144.877	2600.07	1298.05	361.676	2434.16	1457.83	454.325	2403.08	1243.79	485.082	2381.97	1147.84	488.225	2237.4	1039.95	438.723	2173.92	988.794	505.401	2200.55	973.99	491.141	2124.57	954.806
371	0	216.504	2287.96	1629.02	120.038	2282.29	1619.2	226.305	2436.69	1684.27	81.7082	2422.55	1663.16	177.883	2506.8	1504.22	211.416	2582.45	1245.01	180.709	2366.51	1407.45	190.188	2286.7	1196.78	143.956	2585.66	1300.45	361.879	2420.92	1460.58	453.551	2390.21	1245.87	483.892	2370.63	1149.33	487.747	2230.14	1036.51	438.322	2168.83	982.383	504.871	2195.77	968.991	489.563	2120.63	945.224
372	0	216.641	2273.68	1631.18	120.019	2267.92	1621.32	225.694	2421.71	1687.13	80.9993	2407.88	1666.29	177.423	2492.92	1507.04	210.487	2568.25	1247.47	180.829	2352.68	1410.21	190.878	2272.92	1199.77	142.94	2571.35	1303.13	361.909	2408.03	1463.28	453.102	2378.1	1247.87	483.185	2359.71	1150.97	487.113	2223.56	1033.06	437.32	2164.44	975.88	504.728	2191.68	964.447	488.243	2117.82	935.8
373	0	216.633	2259.35	1633.69	120.343	2253.81	1623.81	226.471	2407.72	1690.56	81.1093	2393.26	1669.33	176.857	2478.99	1509.86	209.182	2553.94	1250.02	180.89	2338.66	1413.29	191.645	2259.24	1202.55	141.778	2557.05	1305.68	362.314	2395.26	1466.27	452.568	2366.38	1249.8	481.932	2349.57	1152.72	486.385	2217.64	1029.75	436.4	2161.13	969.68	504.552	2188.19	959.763	487.175	2116.13	927.024
374	0	216.933	2245.52	1636.32	120.839	2239.59	1626.77	226.644	2393.65	1693.44	81.4298	2379.01	1672.99	176.462	2464.98	1512.45	207.867	2540.2	1252.6	180.848	2324.72	1416.39	192.705	2245.51	1206	140.815	2543.12	1308.34	362.483	2382.52	1468.85	452.261	2355.29	1251.51	481.017	2339.9	1154.09	485.66	2212.49	1026.7	436.257	2158.63	964.303	502.507	2185.35	954.57	485.644	2115.27	918.393
375	0	217.976	2231.58	1639.02	121.22	2225.33	1629.76	227.188	2379.5	1696.28	81.6981	2364.83	1676.48	176.319	2451.31	1515.45	206.866	2526.47	1255.02	180.871	2310.79	1419.62	193.69	2231.82	1208.92	139.991	2529.15	1311.07	363.004	2369.71	1471.36	452.125	2344.93	1253.02	479.719	2330.72	1154.82	485.191	2208.12	1023.57	435.536	2156.85	958.68	503.941	2183.71	951.552	484.496	2115.38	910.076
376	0	218.648	2217.76	1641.76	122.253	2211.48	1633.24	227.86	2365.63	1699.14	82.7744	2350.83	1679.34	176.148	2437.12	1518.19	205.654	2512.56	1257.9	181.203	2296.82	1422.87	194.741	2218.23	1211.92	139.277	2515.26	1313.89	363.308	2356.77	1473.85	451.904	2334.91	1254.4	478.271	2322.45	1155.83	484.584	2204.21	1020.77	435.057	2155.42	954.132	503.164	2182.52	947.247	483.262	2116.35	902.616
377	0	219.142	2203.92	1644.75	122.467	2197.4	1636.53	228.566	2351.82	1701.87	83.4195	2336.94	1683.03	175.919	2423.17	1521.23	204.489	2498.83	1260.67	181.35	2282.98	1426.27	195.693	2204.22	1215.08	138.377	2501.3	1317.13	363.49	2343.39	1476.41	451.585	2325.17	1255.92	477.214	2314.34	1156.81	483.969	2200.99	1018.29	434.225	2154.75	949.615	503.065	2181.8	944.116	482.084	2117.76	895.668
378	0	219.756	2190.26	1647.7	123.389	2183.52	1640.1	229.197	2338.1	1704.34	83.93	2322.99	1686.36	175.82	2408.89	1524.04	203.393	2484.76	1263.38	181.309	2268.79	1429.1	196.357	2190.44	1218	137.582	2487.04	1320	363.725	2329.91	1478.8	451.115	2315.75	1257.19	475.338	2306.88	1157.45	483.276	2198.48	1015.73	433.838	2154.74	945.383	502.387	2182.01	940.541	481.974	2120.76	889.467
379	0	220.474	2176.51	1650.57	124.025	2169.62	1643.27	230.067	2324.57	1706.91	84.9594	2309.15	1689.21	175.817	2394.79	1526.8	202.501	2470.67	1266.18	181.552	2254.8	1431.6	197.062	2176.67	1220.78	136.635	2472.73	1322.99	364.056	2316.57	1481.16	450.891	2306.71	1258.59	474.588	2299.83	1158.61	482.923	2196.24	1013.51	433.245	2154.74	941.6	502.355	2182.35	937.663	481.789	2123.69	883.764
380	0	221.356	2162.71	1653.49	124.677	2155.98	1646.24	230.839	2311.03	1709.31	85.6045	2295.69	1692.06	175.614	2380.52	1529.53	201.716	2456.44	1268.92	181.988	2240.52	1434.19	197.752	2163.13	1223.26	135.622	2458.32	1325.88	364.13	2302.73	1483.42	450.474	2297.35	1259.99	473.242	2293.14	1159.8	482.194	2194.41	1011.36	433.357	2155.89	937.973	501.616	2183.23	935.057	481.3	2126.73	878.618
381	0	221.771	2149.06	1656.06	125.259	2142.26	1649.17	231.674	2297.71	1711.2	85.9224	2281.85	1694.52	175.437	2366.39	1531.81	200.909	2442	1271.08	182.008	2226.37	1436.29	197.943	2149.5	1225.48	134.602	2443.51	1328.27	364.417	2289.06	1485.36	449.632	2288.13	1260.94	471.819	2286.71	1160.72	481.582	2192.77	1009.51	432.664	2156.23	934.592	501.618	2184.07	932.728	480.913	2130	873.925
382	0	222.179	2135.52	1658.09	125.938	2128.58	1651.51	232.259	2284.42	1712.47	86.3227	2268.49	1696.58	175.523	2352.13	1533.45	200.288	2427.67	1272.7	182.202	2212.13	1437.68	198.391	2136.07	1227.42	133.595	2428.89	1330.16	364.451	2275.44	1486.54	449.321	2279.19	1261.33	471.155	2280.5	1161.32	481.033	2191.61	1007.12	432.225	2156.94	931.437	501.076	2185.62	930.059	480.879	2133.39	869.281
383	0	222.837	2122	1659.72	126.313	2114.85	1653.28	232.778	2271.11	1713.4	87.0973	2254.86	1697.67	175.542	2338	1534.65	199.724	2413.33	1273.86	182.48	2197.96	1438.94	198.424	2122.5	1228.64	132.672	2414.33	1331.4	364.805	2261.94	1487.4	448.804	2270.35	1261.65	470.166	2274.42	1161.48	480.397	2190.45	1004.83	432.357	2158.5	927.941	499.942	2187.25	927.169	480.618	2136.71	864.832
384	0	223.166	2108.33	1660.95	126.53	2100.99	1654.64	232.919	2257.92	1713.63	87.3574	2241.57	1698.41	175.423	2323.7	1535.2	198.882	2399.16	1274.46	182.539	2183.64	1439.89	198.468	2108.82	1229.64	131.482	2399.95	1332.16	364.882	2248.18	1487.77	447.971	2261.38	1261.48	468.325	2268.69	1161.55	479.82	2189.19	1002.83	432.127	2159.29	924.806	499.588	2188.54	925.26	480.21	2139.85	860.932
385	0	223.558	2094.99	1661.53	126.861	2087.24	1655.68	232.853	2244.68	1713.21	87.5547	2227.98	1698.15	175.355	2309.71	1535.1	198.211	2384.92	1274.29	182.43	2169.4	1440.19	198.397	2094.87	1229.97	130.589	2385.43	1332.2	364.895	2234.64	1487.49	447.431	2252.66	1260.89	466.904	2262.71	1160.85	478.93	2188.35	1000.04	431.726	2159.8	921.705	499.398	2190.07	923.056	480.327	2143.26	857.126
386	0	224.082	2081.46	1661.5	127.375	2073.51	1656.1	231.891	2230.8	1711.76	88.1613	2214.41	1697.78	175.467	2295.22	1534.22	197.49	2370.92	1273.7	182.807	2155.15	1439.73	198.595	2080.82	1230.07	129.743	2371.2	1331.66	365.388	2221.14	1486.58	447.291	2244.12	1259.93	465.918	2256.94	1159.84	478.678	2187.38	997.371	431.227	2159.6	918.486	498.506	2191.94	919.987	480.488	2146.68	853.162
387	0	224.44	2067.88	1661.3	127.791	2059.49	1656.02	233.043	2217.89	1711.22	88.0655	2200.56	1696.9	175.373	2281.07	1533.41	196.933	2356.72	1272.86	182.805	2140.93	1439.18	198.481	2066.66	1229.55	129.07	2356.69	1330.93	366.008	2207.46	1485.56	446.93	2235.54	1258.85	464.931	2250.63	1159.17	478.217	2186.23	994.766	430.909	2160.7	914.721	497.753	2193.64	917.333	480.709	2149.83	849.472
388	0	224.5	2053.66	1660.77	128.199	2045.49	1655.43	232.73	2204.07	1710.04	88.0573	2186.71	1695.67	175.311	2266.62	1532.45	196.26	2342.8	1272.1	182.709	2126.34	1437.97	198.246	2052.32	1228.69	128.252	2342.35	1330.15	366.113	2193.42	1484.37	446.154	2226.89	1257.74	463.945	2244.16	1158.73	477.76	2184.83	992.533	430.644	2161.19	911.314	497.362	2194.85	915.252	480.055	2152.59	845.716
389	0	224.562	2039.54	1659.73	128.313	2031.19	1654.25	232.666	2190.24	1708.49	87.727	2172.36	1694.09	175.347	2252.07	1530.99	195.898	2328.81	1270.69	182.557	2112	1436.16	198.113	2038	1226.99	127.779	2327.85	1328.77	366.368	2179.22	1482.65	446.187	2217.93	1256.57	463.526	2237.16	1157.96	477.277	2183.4	989.95	430.4	2160.93	907.992	496.441	2195.89	912.541	480.366	2155.64	842.163
390	0	225.177	2025.44	1658.15	128.76	2016.87	1652.46	232.936	2176.33	1706.58	87.8129	2157.99	1692.21	175.467	2237.97	1529.16	195.69	2314.96	1268.87	182.959	2097.64	1434.04	197.989	2023.65	1224.88	127.576	2313.71	1327.02	366.819	2165.07	1480.44	445.554	2208.95	1254.69	462.883	2230.16	1156.84	477.362	2181.41	987.08	431.252	2160.8	905.159	496.545	2196.74	910.092	479.973	2158.12	838.012
391	0	225.412	2011.05	1656.27	128.786	2002.13	1650.27	232.768	2162.01	1704.39	87.6869	2143.28	1689.88	175.43	2223.38	1527	195.593	2301.06	1266.96	183.203	2083.33	1431.71	197.914	2009.47	1222.08	127.485	2299.4	1324.88	367.266	2150.86	1478.16	445.616	2199.69	1253.18	461.584	2222.89	1155.6	477.35	2179.06	984.729	431.234	2160.13	901.549	496.702	2196.93	908.303	480.607	2160.98	835.007
392	0	225.678	1996.62	1653.66	129.176	1987.51	1647.86	232.606	2147.54	1701.95	87.979	2128.46	1687.1	175.413	2209	1524.59	195.928	2286.98	1264.44	183.285	2069.04	1429.16	197.724	1995.36	1219.16	127.463	2285.43	1322.29	367.275	2136.45	1475.48	445.474	2190.1	1251.38	460.576	2215.16	1154.04	477.43	2176.31	982.591	431.058	2160.05	897.734	496.871	2196.58	906.335	481.143	2162.95	831.811
393	0	225.855	1981.99	1650.76	129.459	1972.74	1644.73	232.45	2133	1699.06	88.6305	2113.69	1684.05	175.539	2194.65	1521.71	196.863	2272.95	1261.86	183.564	2054.7	1426.24	197.506	1981.13	1215.65	127.987	2271.29	1319.55	367.746	2122.13	1472.6	445.126	2180.13	1249.26	459.751	2206.98	1152.3	477.902	2173.34	980.095	431.802	2158.85	894.952	497.456	2195.76	904.874	481.423	2164.87	828.523
394	0	226.157	1967.59	1647.17	129.877	1957.91	1641.3	232.382	2118.25	1696.12	88.3479	2098.67	1681.09	175.762	2180.21	1518.76	197.922	2258.62	1259.03	183.812	2040.51	1423.29	197.651	1967.15	1211.84	128.398	2257.39	1316.51	368.112	2107.99	1469.71	445.024	2170.04	1247.13	458.901	2198.29	1150.46	478.432	2169.12	978.343	432.717	2156.83	892.045	498.043	2194.4	903.408	482.041	2166.45	825.63
395	0	226.697	1952.77	1643.51	130.009	1942.96	1637.41	232.365	2103.36	1693.05	88.4034	2083.38	1677.83	175.901	2166.05	1515.58	198.901	2244.08	1255.88	183.763	2025.9	1420.03	197.249	1952.4	1208.23	129.011	2243.11	1313.27	368.369	2093.61	1466.75	444.714	2159.24	1244.9	457.985	2189.29	1148.58	478.858	2164.76	976.632	433.944	2154.26	890.069	498.648	2192.22	902.335	482.606	2167.28	823.184
396	0	226.62	1937.72	1639.48	130.349	1928.04	1633.47	232.23	2088.22	1689.8	88.6112	2068.29	1674.54	176.236	2151.74	1512.44	199.944	2229.64	1252.86	184.281	2011.7	1416.81	197.352	1937.87	1204.66	129.736	2228.99	1309.84	368.751	2079.23	1463.89	444.547	2148.19	1242.69	455.948	2179.01	1146.12	479.727	2159.58	974.874	435.511	2150.34	888.063	499.669	2189.41	901.606	482.976	2167.43	820.73
397	0	227.31	1922.99	1635.57	131.077	1913.27	1629.58	232.927	2073.03	1687.01	89.2208	2053.34	1671.42	176.585	2137.37	1509.36	201.142	2215.3	1249.9	185.027	1997.39	1413.64	197.829	1923.18	1201.26	130.624	2214.64	1306.77	369.538	2064.82	1461.27	444.858	2136.96	1240.89	456.498	2169.46	1145.4	480.733	2153.85	973.484	437.001	2146.44	886.432	500.8	2185.78	901.004	484.06	2167.11	818.823
398	0	228.486	1908.9	1632.12	131.736	1898.58	1625.72	233.815	2057.74	1684.49	89.8502	2038.34	1668.47	177.191	2123.13	1506.6	202.35	2200.6	1246.98	185.911	1982.97	1410.71	198.063	1908.23	1197.92	131.486	2200.07	1303.73	370.336	2050.34	1458.91	445.396	2125.24	1239.36	456.106	2158.62	1144.29	481.973	2147.16	972.473	439.419	2140.36	885.251	501.967	2181.12	900.825	486.065	2165.92	817.999
399	0	229.083	1893.88	1628.66	132.264	1883.87	1622.14	234.702	2042.48	1681.76	90.4198	2023.32	1665.84	178.092	2108.63	1503.67	203.622	2185.85	1244.03	186.144	1968.34	1407.67	198.417	1893.03	1195.27	132.55	2185.67	1300.94	371.036	2035.65	1456.31	445.764	2112.96	1237.74	456.056	2147.66	1143.15	483.238	2139.82	971.409	441.035	2134.39	883.185	503.342	2175.58	900.529	487.171	2163.85	816.682
400	0	229.82	1878.73	1625.28	132.717	1869.05	1618.97	236.046	2027.44	1679.09	91.3776	2008.48	1663.45	179.05	2094.39	1500.74	204.689	2170.79	1240.77	186.834	1953.5	1404.79	198.753	1877.62	1192.88	133.692	2170.83	1297.69	372.102	2021.07	1453.88	446.285	2100.54	1235.84	456.093	2136.28	1141.68	483.869	2131.42	969.58	443.441	2128.12	881.511	504.818	2169.09	900.051	486.605	2159.96	813.982
401	0	230.932	1864.11	1622.52	133.678	1854.38	1616.13	237.333	2012.61	1676.43	92.6893	1993.82	1660.69	181.121	2080.9	1498.36	205.872	2155.68	1237.89	188.114	1938.79	1402.43	199.42	1862.22	1191	134.99	2156.01	1294.87	373.604	2006.78	1451.37	447.137	2087.83	1233.94	456.218	2124.44	1140.09	486.308	2122.81	968.913	445.752	2119.96	880.178	506.537	2161.53	899.918	490.85	2156.15	815.002
402	0	232.011	1849.4	1620.24	134.809	1839.88	1614.02	238.609	1997.89	1673.94	94.969	1979.56	1658.36	182.152	2065.8	1495.65	206.731	2140.19	1234.95	189.264	1923.76	1400.45	200.3	1846.78	1189.37	136.104	2140.73	1292	374.737	1991.89	1449.04	447.555	2074.46	1232.18	456.444	2112.02	1138.67	488.076	2112.96	968.444	448.14	2110.98	879.096	508.563	2152.74	900.209	492.705	2150.36	814.941
403	0	233.272	1834.79	1618.22	136.129	1825.46	1612.62	240.338	1983.5	1671.43	96.2739	1965.25	1656.5	183.43	2051.06	1492.76	207.678	2124.6	1231.96	190.229	1908.42	1398.47	201.319	1831.26	1188.02	137.346	2125.28	1288.93	376.191	1977.04	1446.77	448.383	2060.87	1230.2	456.41	2098.93	1136.76	489.961	2102.34	967.575	450.751	2101.35	877.961	510.487	2143.26	900.061	493.58	2142.78	813.851
404	0	234.56	1819.85	1616.46	137.624	1811	1611.46	242.137	1969.24	1668.97	97.6329	1951.24	1654.91	185.113	2036.51	1490.07	208.576	2108.65	1229.14	191.923	1893.06	1396.59	202.947	1815.87	1186.89	138.622	2109.67	1286.14	377.491	1962.14	1444.51	449.161	2046.78	1228.03	455.874	2084.41	1134.26	491.838	2091	966.284	453.398	2090.9	876.64	512.756	2132.75	899.46	495.912	2134.61	813.139
405	0	236.434	1805.61	1615.54	139.375	1796.68	1610.76	244.38	1955.17	1667.28	99.8171	1937.14	1653.42	186.754	2021.62	1488.21	209.294	2092.72	1226.82	193.736	1877.68	1395.41	204.962	1800.2	1185.57	139.758	2093.79	1284.06	379.117	1947.13	1442.64	449.207	2031.15	1225.84	458.399	2071.55	1133.82	493.494	2078.63	965.353	456.11	2079.46	875.643	514.992	2121.29	899.331	499.224	2125.02	813.573
406	0	238.19	1790.92	1615.26	141.247	1782.28	1610.5	246.238	1941.05	1666.01	102.149	1923.01	1652.33	188.336	2006.34	1487.02	209.903	2076.36	1224.99	195.143	1862.04	1394.56	206.896	1784.23	1184.94	140.868	2077.8	1282.56	380.747	1931.76	1441.42	450.206	2015.97	1224.38	457.886	2055.61	1131.89	495.606	2065.52	965.184	458.06	2066.54	874.981	517.017	2108.75	899.497	500.803	2113.33	813.236
407	0	240.019	1776.31	1615.4	143.168	1767.88	1610.93	248.463	1926.9	1665.11	104.066	1909	1652.29	190.161	1991.08	1486.05	210.482	2059.63	1223.35	196.863	1846.25	1394.24	209.089	1767.82	1184.64	142.077	2061.64	1281.07	382.566	1916.5	1440.39	451.552	2000.49	1223.24	459.223	2040.3	1131.02	497.496	2051.43	964.456	460.615	2053.29	873.918	519.201	2095.06	899.495	501.455	2100.09	811.703
408	0	242.723	1762.36	1616.06	145.622	1753.61	1612.04	251.417	1912.93	1664.83	106.482	1894.99	1652.64	192.501	1975.94	1485.35	211.403	2042.8	1222.11	198.601	1830.57	1394.25	211.5	1750.82	1184.97	143.601	2045.46	1280.15	384.547	1901.14	1439.6	453.354	1984.64	1222.34	460.749	2024.47	1130.09	498.806	2036.28	963.064	464.177	2038.81	873.663	521.239	2080.55	898.606	504.393	2085.88	811.357
409	0	245.109	1747.72	1617.49	147.889	1739.16	1613.46	254.07	1898.73	1665.18	109.072	1880.9	1653.05	194.73	1960.39	1485.25	212.718	2025.89	1221.57	200.465	1814.73	1394.77	213.653	1733.53	1185.88	145.256	2029.31	1279.93	386.819	1885.31	1439.32	455.075	1968.26	1222.02	462.63	2008.18	1129.87	500.576	2020.42	962.818	465.711	2023.09	872.946	523.17	2064.93	898.33	506.836	2070.31	811.248
410	0	247.3	1733.32	1619.36	150.11	1724.64	1615.47	256.498	1884.6	1665.34	111.625	1866.7	1653.71	196.8	1944.78	1485.73	214.133	2009.12	1221.58	202.08	1798.6	1395.79	215.505	1715.99	1187.12	146.973	2012.9	1280.05	388.214	1869.18	1439.37	456.368	1951.06	1221.63	463.886	1991.07	1129.48	502.48	2003.45	963.018	467.269	2006.55	872.617	525.458	2048.08	898.882	509.639	2052.95	811.631
411	0	249.625	1718.4	1621.14	152.358	1710.11	1617.85	258.588	1870.33	1665.48	114.646	1852.66	1654.79	198.841	1929.07	1485.92	215.974	1992.42	1221.54	204.106	1782.72	1397.11	217.095	1698.2	1188.39	148.871	1996.5	1280.11	389.676	1852.5	1439.24	457.866	1933.96	1221.22	465.432	1973.81	1129.12	503.764	1985.62	962.63	469.568	1988.32	872.728	527.11	2030.12	898.69	511.945	2034.43	811.041
412	0	251.367	1703.15	1623.17	154.718	1695.21	1620.64	261.395	1856.33	1665.78	116.835	1838.61	1655.99	200.988	1913.5	1486.33	218.106	1976.47	1222.1	205.676	1766.74	1398.4	218.34	1680.78	1189.77	150.79	1980.28	1280.6	391.229	1836.25	1439.57	459.505	1916.46	1221.11	467.095	1956	1128.76	506.393	1967.34	962.816	471.55	1969.64	872.419	528.819	2011.25	898.007	514.469	2014.51	810.619
413	0	254.294	1688.65	1625.74	157.231	1680.4	1623.72	264.029	1842	1666.52	119.657	1824.11	1657.63	202.604	1897.69	1487.54	220.014	1960.56	1223.41	206.915	1750.87	1399.98	219.189	1663.9	1191.04	152.447	1964.39	1282.02	392.943	1820.01	1440.32	461.174	1898.63	1221.32	468.996	1938.19	1128.88	507.753	1947.57	962.783	472.964	1950.15	872.719	530.379	1990.94	897.577	517.403	1993.12	810.753
414	0	256.61	1674.15	1627.95	159.83	1665.47	1626.67	265.897	1827.4	1666.96	122.022	1809.58	1659.56	204.009	1881.97	1489.21	221.78	1945.09	1225.37	208.235	1735.24	1401.74	219.768	1648.01	1192.1	153.788	1948.62	1284.09	393.782	1803.7	1441.35	462.613	1880.56	1221.79	470.787	1919.67	1129.24	509.392	1927.14	962.949	475.189	1928.65	872.839	533.597	1969.97	898.23	519.606	1970.47	810.501
415	0	258.907	1659.22	1630.2	162.43	1650.43	1629.35	268.186	1812.86	1667.97	124.353	1794.65	1661.38	204.795	1865.77	1491.42	223.024	1930.25	1227.66	209.112	1719.69	1403.32	220.394	1632.89	1192.92	154.818	1933.15	1286.75	394.339	1787.59	1442.36	464.066	1862.58	1222.82	472.878	1900.88	1129.87	511.722	1906.14	963.336	477.015	1906.82	873.207	534.741	1947.44	897.14	522.519	1946.85	810.385
416	0	261.277	1644.37	1631.89	164.477	1635.23	1631.64	270.283	1798.3	1669.08	126.336	1779.55	1663.46	205.878	1850.54	1493.67	224.061	1915.23	1230.05	209.873	1704.45	1404.79	220.719	1618.27	1193.85	155.39	1918.35	1289.34	395.225	1771.99	1444.13	465.621	1844.51	1223.93	475.065	1881.95	1130.69	513.685	1884.32	963.584	479.321	1883.86	873.592	536.897	1924.36	896.799	525.228	1922.05	810.405
417	0	262.975	1629.54	1633.59	166.487	1620.04	1633.79	271.811	1783.38	1670.48	127.937	1764.28	1665.66	206.87	1835.42	1495.89	225.001	1900.5	1232.27	210.337	1689.51	1406.45	220.83	1603.66	1195.2	155.918	1903.79	1291.88	395.725	1756.46	1446	467.035	1826.18	1225.04	477.25	1862.83	1131.43	516.561	1862.2	964.557	481.08	1859.91	874.048	538.481	1900.39	895.875	527.284	1896.19	809.956
418	0	264.782	1614.41	1635.12	168.072	1604.83	1635.66	273.312	1768.35	1672.37	129.196	1748.88	1668.1	207.865	1820.69	1498.04	225.929	1886.08	1234.49	210.929	1674.95	1408.37	221.107	1589.25	1196.84	156.599	1890	1294.36	396.236	1741.29	1447.85	468.219	1807.81	1226.03	479.459	1843.76	1132.27	516.597	1838.82	963.743	482.884	1835.34	874.488	539.982	1875.8	895.157	529.551	1869.36	809.841
419	0	266.045	1599.59	1636.51	169.643	1589.8	1637.21	274.501	1753.08	1674.62	130.598	1733.57	1670.22	208.85	1806.38	1500.13	226.959	1871.55	1236.58	211.533	1660.36	1410.58	221.441	1575.05	1198.76	157.604	1875.94	1296.74	397.401	1726.44	1450.27	469.615	1789.56	1227.44	481.681	1824.37	1133.21	519.195	1815.55	964.942	484.947	1810.02	875.435	543.534	1851.08	896.11	532.21	1841.39	810.476
420	0	267.228	1584.5	1638.22	170.698	1574.75	1638.69	275.519	1737.76	1677.14	131.551	1718.4	1672.69	209.989	1791.97	1502.31	227.8	1856.99	1238.85	211.932	1646.21	1412.87	221.29	1560.85	1201.22	158.731	1862.14	1299.12	397.804	1711.42	1452.28	470.903	1771.23	1228.93	483.782	1804.97	1134.19	521.116	1791.85	966.216	487.623	1784.95	877.147	544.912	1825.18	896.084	534.735	1812.69	811.51
421	0	267.986	1569.62	1639.79	171.383	1559.73	1640.41	276.187	1722.44	1679.52	132.37	1703.16	1675.14	210.983	1777.99	1504.36	228.918	1842.49	1240.81	212.496	1631.78	1415.4	221.023	1546.75	1203.87	160.07	1848.2	1301.09	398.492	1696.79	1454.37	472.173	1753.17	1230.28	485.894	1786.03	1135	523.043	1767.82	967.566	488.977	1758.39	878.546	545.883	1799.11	895.807	536.336	1783.09	812.216
422	0	268.252	1554.52	1641.31	171.789	1544.88	1642.13	277.161	1707.35	1682.17	133.08	1688.22	1677.4	212.221	1763.56	1506.5	230.457	1828.58	1242.9	212.949	1617.66	1417.8	220.948	1532.86	1206.29	161.728	1834.09	1302.89	399.182	1681.96	1456.41	473.552	1735.31	1231.75	487.856	1766.73	1135.9	524.544	1743.66	968.655	489.714	1730.2	879.695	547.09	1772.58	895.779	538.802	1752.85	813.823
423	0	268.75	1539.57	1643.55	172.046	1530.06	1643.9	277.61	1692.13	1684.96	133.823	1673.55	1679.98	213.22	1749.35	1508.97	232.103	1814.54	1245.45	213.654	1603.46	1420.67	220.755	1518.8	1209.17	163.712	1820.49	1305.62	400.07	1666.96	1458.97	474.841	1717.29	1233.6	489.7	1747.51	1137.23	526.274	1719.44	970.416	491.445	1702.43	882.156	548.444	1746.14	896.47	540.895	1722.48	816.168
424	0	268.994	1524.57	1646.1	172.328	1515.52	1646.02	278.15	1676.81	1688.1	134.236	1658.86	1682.36	214.387	1734.64	1511.79	233.84	1800.47	1248.56	214.035	1589.14	1423.4	220.403	1504.69	1211.96	165.731	1806.39	1308.7	400.716	1652.1	1461.56	476.127	1699.27	1236.08	491.628	1728.24	1139.02	528.588	1695	973.195	492.989	1674.81	885.527	549.978	1719.34	898.289	543.384	1691.43	819.646
425	0	268.867	1509.77	1648.64	172.39	1500.89	1648.17	278.838	1661.88	1691	134.667	1644.3	1684.56	215.563	1720.21	1514.64	235.623	1786.01	1251.29	214.631	1574.97	1426.01	219.922	1490.4	1215.03	167.804	1792.61	1311.52	401.485	1636.85	1464.22	477.691	1681.66	1238.63	493.451	1708.81	1140.79	529.806	1670.66	975.374	495.243	1647.34	889.359	551.455	1692.51	899.771	545.171	1660.25	822.916
426	0	269.586	1495.27	1651.31	172.702	1486.6	1650.64	279.392	1647.11	1693.59	135.093	1630.14	1687.24	216.812	1705.53	1517.13	237.663	1772.01	1254.03	215.313	1560.42	1428.33	219.566	1476.13	1217.64	169.698	1777.9	1313.87	402.63	1621.77	1466.88	479.153	1664.05	1241.02	495.35	1689.53	1142.66	531.703	1646.33	977.97	496.503	1619.28	892.548	552.199	1665.45	901.247	547.152	1628.68	826.763
427	0	269.999	1480.65	1653.98	172.952	1472.32	1653	280.27	1632.63	1696.16	135.792	1616.1	1689.13	218.002	1690.82	1519.68	239.522	1757.66	1256.67	215.907	1546.02	1430.5	219.551	1462.06	1220.28	172.57	1765.04	1317.24	403.375	1606.4	1469.27	480.708	1646.79	1243.41	497.233	1670.13	1144.74	532.922	1621.31	980.567	498.372	1590.84	896.751	552.47	1637.83	903.031	549.03	1597.07	831.237
428	0	270.154	1466.06	1656.55	172.996	1458.12	1655.3	280.747	1618.19	1697.99	136.436	1602.2	1690.97	219.076	1676.22	1521.73	241.083	1743.37	1258.76	216.408	1531.35	1432.56	219.26	1448.09	1222.35	173.96	1749.99	1319.1	403.869	1591	1471.33	481.804	1629.05	1245.44	498.83	1650.64	1146.36	534.183	1596.23	983.667	499.456	1562.04	901.008	553.603	1610.15	905.475	550.558	1565.42	836.098
429	0	270.604	1451.67	1658.63	173.541	1444.08	1657.61	281.631	1604.07	1699.27	137.412	1588.62	1692.04	220.233	1661.35	1523	242.544	1728.73	1260.26	216.941	1516.87	1433.98	219.292	1434.45	1223.89	175.047	1734.89	1320.38	404.668	1575.81	1472.96	483.033	1611.74	1246.92	500.445	1631.43	1147.38	535.313	1570.94	986.253	501.061	1533.28	905.654	553.944	1582.14	907.582	552.212	1533.79	840.918
430	0	271.498	1437.59	1660.62	174.303	1430.09	1659.59	282.649	1590.1	1700.15	138.735	1574.85	1693.02	221.355	1646.59	1524.06	243.873	1714.28	1261.45	217.751	1502.09	1435.3	219.349	1420.65	1225.24	176.762	1720.49	1321.61	405.381	1560.47	1474.14	484.351	1594.51	1248.11	502.175	1612.17	1148.06	536.865	1545.52	989.149	502.663	1504.21	910.512	554.493	1553.72	909.765	554.063	1502.09	846.053
431	0	272.099	1423.15	1662.28	175.032	1415.94	1661.31	283.69	1576.04	1700.66	139.636	1561	1693.53	222.685	1631.9	1524.97	245.081	1699.68	1262.41	218.256	1487.33	1436.08	219.55	1406.92	1226.09	178.004	1705.83	1322.61	406.187	1545.08	1475.21	485.814	1577.09	1249.29	504.057	1592.79	1148.73	538.481	1519.64	992.325	504.4	1475.2	915.586	556.972	1525.45	913.438	555.715	1470.57	851.503
432	0	272.439	1408.68	1663.74	175.623	1401.78	1662.57	284.742	1561.84	1700.89	141.004	1547.35	1694	223.663	1616.67	1525.33	246.024	1685.02	1263.19	218.915	1472.58	1436.72	219.502	1392.94	1226.53	179.133	1691.08	1323.15	406.668	1529.54	1475.71	487.303	1559.81	1250.15	506.055	1573.2	1149.32	540.375	1494.3	995.204	505.716	1446.04	920.622	557.015	1496.23	915.715	556.901	1438.89	856.858
433	0	273.675	1394.33	1664.31	176.408	1387.49	1663.42	286.06	1547.55	1700.75	141.949	1533.46	1693.92	225.028	1601.88	1525.82	247.265	1670.45	1263.73	219.758	1457.69	1436.8	219.802	1378.99	1226.44	180.572	1676.27	1323.78	407.381	1514.05	1475.85	488.712	1541.99	1250.47	508.393	1553.33	1149.7	541.677	1467.88	997.949	506.962	1416.94	925.429	558.549	1467.22	918.271	558.387	1407.36	862.088
434	0	274.274	1379.8	1664.61	177.333	1373.14	1663.8	287.507	1533.23	1700.32	142.94	1519.25	1693.66	226.049	1586.94	1525.97	248.198	1655.72	1264.09	220.334	1442.86	1436.24	220.024	1365	1225.81	181.704	1661.46	1323.94	408.253	1498.82	1475.8	490.348	1524.27	1250.71	510.88	1533.26	1149.89	543.241	1441.7	1000.52	508.7	1388.35	930.527	559.283	1437.84	920.792	559.723	1376.07	867.527
435	0	275.76	1365.12	1664.63	178.483	1358.81	1663.63	288.868	1518.71	1699.5	144.279	1504.86	1692.9	227.119	1571.74	1525.44	248.96	1641.18	1263.97	220.903	1427.94	1435.36	220.621	1351.36	1224.83	182.808	1646.59	1323.97	408.973	1483.34	1475.16	492.027	1506.56	1250.62	513.511	1513.03	1149.91	544.726	1415.39	1003.13	509.673	1359.67	935.43	561.803	1408.56	924.432	560.948	1344.73	873.075
436	0	276.444	1350.15	1663.75	179.55	1344.23	1663.11	290.268	1504.01	1698.07	145.804	1490.43	1691.87	228.126	1556.82	1524.48	249.923	1626.62	1263.31	221.917	1413.17	1434.22	221.037	1337.33	1223.39	183.834	1632	1323.12	409.676	1468.14	1473.99	493.746	1488.52	1249.75	515.807	1492.33	1148.83	546.577	1389.29	1005.82	510.759	1331.26	940.115	563.099	1379.23	927.148	561.836	1313.63	878.339
437	0	278.064	1335.52	1662.55	180.854	1329.48	1662.02	291.563	1489.35	1696.29	147.116	1475.69	1690.77	229.181	1542.06	1523.14	250.524	1612.31	1261.99	222.636	1398.15	1432.86	221.968	1323.44	1221.35	184.757	1617.23	1321.87	410.47	1453	1472.3	495.556	1470.61	1248.41	518.326	1471.8	1147.65	548.294	1363.17	1008.2	512.282	1303.44	944.71	564.856	1350.28	930.011	562.813	1283	883.468
438	0	279.473	1320.59	1660.99	182.177	1314.56	1660.53	292.979	1474.42	1694.48	148.486	1460.94	1688.99	230.27	1527.13	1521.54	251.209	1598.03	1260.46	223.963	1383.53	1431.17	222.712	1309.03	1219.09	185.45	1602.65	1320.29	411.512	1438.31	1470.47	497.327	1452.42	1247.03	520.643	1451.13	1146.13	549.835	1337.21	1010.52	513.294	1275.74	949.217	566.438	1321.27	933.209	563.904	1252.68	889.135
439	0	280.671	1305.56	1658.82	183.251	1299.49	1658.6	294.204	1459.37	1692.17	150.003	1445.95	1686.75	231.084	1512.29	1519.37	251.621	1583.74	1258.49	224.699	1368.72	1429.23	223.425	1294.3	1216.57	185.99	1587.98	1318.41	411.853	1423.45	1467.98	498.845	1434.07	1245.08	522.931	1430.03	1144.3	551.421	1311.45	1012.9	514.012	1248.49	953.48	568.175	1292.75	936.332	564.747	1222.66	894.644
440	0	281.953	1290.47	1656.13	184.858	1284.59	1656.13	295.613	1444.39	1689.55	151.448	1430.96	1684.63	231.74	1497.31	1516.74	251.655	1569.46	1256.24	225.678	1354.03	1426.77	224.606	1279.03	1214.13	186.23	1573.5	1316.17	412.583	1408.75	1465.26	500.292	1415.62	1242.97	525.193	1408.97	1142.54	552.78	1286.16	1014.75	515.164	1221.92	957.574	569.674	1264.8	939.063	565.957	1193.44	900.173
441	0	283.211	1275.41	1653.57	186.343	1269.5	1653.56	297.08	1429.24	1687.18	152.908	1415.77	1682.26	232.489	1482.6	1514.61	251.412	1554.94	1253.97	227	1339.39	1424.36	225.532	1263.27	1211.37	186.412	1558.93	1313.87	413.259	1394.37	1462.62	501.703	1396.95	1241.21	527.3	1387.86	1141.18	554.527	1261.26	1016.98	516.23	1195.7	961.479	572.52	1237.66	942.992	567.078	1164.74	905.679
442	0	284.903	1260.5	1650.57	187.738	1254.66	1650.73	298.461	1414.17	1684.66	154.217	1400.64	1680.05	232.962	1467.69	1512.27	250.908	1540.44	1251.76	227.736	1324.45	1421.78	227.154	1248.12	1208.72	186.572	1544.21	1311.95	413.895	1379.82	1460.16	503.116	1378.15	1239.73	529.484	1367.02	1140.09	555.889	1236.66	1019.45	517.174	1170.02	965.596	572.883	1210.5	945.784	568.411	1136.96	911.493
443	0	286.257	1245.36	1647.48	188.911	1239.53	1647.81	299.809	1398.92	1682.11	155.85	1385.43	1677.63	233.412	1452.84	1509.95	250.304	1525.75	1249.27	228.881	1309.78	1419.04	228.489	1232.65	1205.95	186.478	1529.43	1309.73	414.333	1365.41	1457.62	504.444	1359.38	1238.38	531.372	1346.12	1139.25	557.25	1212.69	1021.72	518.159	1145.03	969.557	575.012	1184.39	949.259	569.602	1109.77	917.176
444	0	287.324	1230.69	1644.21	190.288	1224.74	1644.87	301.037	1383.88	1679.37	156.44	1370.29	1675.47	233.822	1438.24	1507.42	249.783	1511.07	1246.59	230.258	1295.3	1416.13	229.842	1217.15	1202.94	186.404	1514.78	1307.12	414.703	1351.09	1454.93	505.354	1340.65	1236.8	533.3	1325.78	1138.36	558.478	1189.33	1023.84	519.19	1120.69	973.231	576.507	1158.85	952.447	571.041	1083.62	922.795
445	0	288.545	1215.78	1641.21	191.323	1209.83	1641.75	301.951	1368.99	1676.46	157.399	1355.31	1672.75	234.278	1423.67	1504.81	248.947	1495.88	1243.5	230.635	1280.08	1413.28	231.316	1201.88	1200.11	186.136	1499.98	1304.59	415.244	1336.71	1452.36	506.181	1322.21	1235.33	535.27	1305.9	1137.79	559.499	1166.6	1026.18	520.287	1097.04	977.089	578.052	1134.27	955.994	572.338	1058.23	928.492
446	0	289.421	1201.27	1638.23	192.196	1195.03	1639.13	302.84	1354.36	1673.78	158.622	1340.5	1670.13	234.452	1409.09	1501.57	248.371	1480.43	1240.36	231.23	1265.17	1410.62	232.429	1186.4	1197.54	185.783	1485.08	1301.54	415.504	1322.25	1449.75	506.812	1304.28	1233.73	536.429	1286.49	1136.68	560.598	1144.56	1028.79	521.116	1074.13	981.052	579.222	1110.33	959.549	573.717	1033.75	934.383
447	0	290.033	1186.89	1635.39	192.866	1180.21	1636.56	303.398	1339.91	1670.74	158.79	1325.72	1667.56	234.77	1394.55	1498.43	247.673	1464.8	1236.61	231.659	1250.16	1408.09	233.622	1170.71	1195.29	184.977	1469.8	1298.01	415.85	1307.77	1447.09	507.34	1286.51	1231.82	537.448	1267.87	1135.09	561.797	1123.33	1031.06	522.521	1052.12	984.806	580.746	1087.51	962.856	575.115	1010.18	939.969
448	0	290.934	1172.46	1632.91	193.607	1165.77	1634.19	303.698	1325.48	1667.84	159.236	1311.22	1665.16	234.923	1379.74	1495.3	247.335	1448.91	1233.1	231.876	1234.97	1405.72	234.727	1155.09	1193.27	185.171	1454.69	1295.03	416.266	1293.1	1444.66	507.984	1269.42	1229.99	538.573	1249.82	1133.69	563.118	1103.05	1033.15	523.771	1030.83	988.434	582.096	1065.41	966.164	576.895	987.73	945.479
449	0	291.205	1158.02	1630.81	193.872	1151.21	1632.16	303.809	1311.1	1665.46	159.643	1296.7	1662.6	234.856	1364.88	1492.41	247.394	1433.26	1230.06	231.813	1219.58	1403.54	235.186	1139.23	1191.38	184.681	1439.09	1291.71	416.368	1278.21	1442.48	508.241	1252.74	1228.37	539.263	1232.22	1132.34	563.906	1083.21	1035.19	524.708	1010.24	991.825	582.923	1044.33	969.239	578.359	966.034	950.849
450	0	291.028	1143.44	1628.89	193.733	1136.67	1630.43	303.724	1296.93	1662.97	159.481	1282.38	1660.29	234.946	1349.89	1489.81	247.494	1417.19	1227.16	231.367	1203.95	1401.61	235.387	1123.43	1189.8	184.816	1423.24	1288.9	416.243	1263.03	1440.45	508.527	1236.62	1226.69	540.063	1215.32	1131.04	564.831	1064.29	1036.85	525.87	990.557	995.168	584.453	1024.03	972.142	579.735	945.315	955.888
451	0	290.74	1129.18	1627.39	193.535	1122.39	1628.69	303.621	1282.69	1660.91	159.202	1268.18	1658.15	234.635	1334.94	1487.28	247.56	1400.78	1224.46	231.268	1188.46	1399.89	235.61	1107.45	1188.25	185.611	1407.81	1286.38	416.155	1247.73	1438.71	509.067	1220.91	1225.26	540.807	1198.77	1129.93	566.074	1046.22	1038.51	526.986	971.566	997.939	585.549	1004.73	974.305	581.446	925.663	960.409
452	0	290.794	1115.1	1626.34	193.258	1108.2	1627.45	303.091	1268.51	1659.04	158.739	1254.01	1656.27	234.497	1319.76	1485.22	248.118	1384.25	1222.07	231.845	1173.35	1398.28	235.474	1091.14	1187	185.46	1391.54	1283.56	415.915	1232.27	1437.25	509.426	1205.48	1224.16	541.493	1182.61	1129.18	567.121	1028.82	1039.56	528.184	953.39	1000.23	586.185	986.36	976.148	583.134	906.935	964.483
453	0	289.567	1100.68	1625.46	192.686	1093.94	1626.54	302.536	1254.34	1657.62	158.056	1239.81	1654.5	234.025	1304.77	1483.52	248.725	1367.49	1219.83	230.926	1157.29	1397.09	235.137	1074.5	1186.25	186.131	1375.3	1281.52	415.641	1216.87	1436.14	510.042	1190.48	1223.5	542.037	1166.69	1128.44	567.971	1011.94	1040.51	529.229	935.938	1002.13	587.633	968.846	978.058	584.679	889.243	967.952
454	0	289.154	1086.36	1625.01	191.886	1079.71	1625.87	301.8	1240.29	1656.32	157.136	1225.83	1653.36	233.375	1289.49	1481.44	249.023	1350.35	1217.5	230.576	1141.46	1396.17	234.613	1057.44	1185.87	185.911	1358.51	1278.78	415.27	1201.41	1435.08	510.239	1175.32	1222.59	542.623	1151.05	1127.79	568.826	995.776	1040.85	530.321	919.31	1003.29	588.499	952.146	978.726	586.724	872.812	970.754
455	0	288.41	1072.07	1624.86	191.102	1065.51	1625.62	300.709	1226.33	1655.06	156.143	1211.65	1652.14	232.971	1274.47	1479.83	249.429	1333.35	1215.24	230.49	1126.02	1395.5	234.193	1040.37	1185.68	185.859	1341.81	1276.37	414.993	1186.12	1434.17	510.549	1160.7	1221.73	542.785	1135.83	1126.89	569.415	980.035	1040.63	531.521	903.51	1003.69	589.294	936.335	978.725	588.234	856.69	972.816
456	0	287.505	1057.89	1625.26	190.137	1051.02	1625.89	299.425	1212.22	1654.36	154.964	1197.37	1651.17	232.254	1259.34	1478.63	249.564	1316.15	1213.34	230.221	1110.08	1395.28	233.963	1023.54	1185.7	185.856	1325.07	1274.49	414.481	1170.89	1433.71	510.589	1146.12	1221.1	542.85	1120.86	1126.24	570.079	965.215	1040.15	532.435	888.348	1003.59	590.001	921.432	978.469	589.803	841.891	973.958
457	0	286.045	1043.33	1626.03	188.888	1036.48	1626.5	297.85	1198.08	1653.89	153.851	1183.08	1650.37	231.439	1243.76	1477.62	249.642	1299.27	1212.04	229.395	1093.85	1395.46	233.737	1006.61	1185.97	185.629	1307.97	1272.77	414.101	1155.26	1433.72	510.634	1131.49	1220.85	542.525	1106.26	1125.73	570.692	950.897	1039.74	533.479	874.076	1002.86	590.455	907.353	977.569	591.17	827.956	974.257
458	0	284.916	1028.81	1627.14	187.593	1021.83	1627.35	296.201	1183.69	1653.77	152.419	1168.56	1649.85	230.698	1228.08	1476.88	249.998	1282.83	1211.41	229.098	1077.84	1395.84	233.983	989.519	1186.5	185.392	1290.64	1271.51	413.822	1139.75	1434.04	510.593	1117	1220.72	542.246	1091.95	1125.23	571.154	937.305	1038.52	534.468	860.6	1001.32	591.396	894.248	976.295	593.067	815.168	973.435
459	0	283.146	1013.76	1628.78	186.307	1007.17	1628.49	294.68	1169.06	1654.32	150.92	1153.85	1649.69	230.05	1211.95	1476.97	250.474	1266.72	1211.59	228.838	1061.83	1396.52	234.471	972.12	1187.14	184.945	1273.09	1270.46	413.973	1123.87	1435.36	510.519	1102.26	1221.19	541.789	1077.81	1125.45	571.587	924.333	1037.06	535.34	847.781	999.157	592.251	882.261	974.572	594.627	803.291	971.512
460	0	281.978	998.79	1630.77	184.674	992.202	1629.58	293.254	1154.12	1655.52	149.438	1139	1649.68	229.822	1195.96	1478.1	251.209	1251.11	1212.93	228.86	1046.07	1397.44	234.972	954.603	1188.1	185.862	1256.36	1271.6	413.8	1107.78	1437.07	510.431	1087.3	1222.48	541.455	1063.96	1126.53	571.872	911.968	1035.8	536.086	835.711	996.594	592.851	871.108	972.686	595.8	792.307	968.72
461	0	279.93	983.351	1632.51	182.988	977.123	1630.37	292.055	1138.78	1657.08	147.856	1124.11	1649.93	229.874	1180.3	1479.61	252.309	1236.05	1214.7	229.038	1030.41	1398.43	235.625	937.564	1189.19	187.261	1240.89	1273.21	413.725	1091.14	1439.08	510.209	1072.39	1223.9	541.163	1050.32	1127.88	571.679	900.122	1033.86	536.672	824.522	993.389	592.707	860.624	969.621	596.919	782.241	964.804
462	0	278.682	967.521	1634.11	181.632	962.117	1631	291.125	1123.14	1658.65	147.012	1109.07	1650.19	229.998	1164.65	1480.98	253.327	1220.86	1216.53	229.678	1015.29	1399.57	236.463	921.467	1190.2	188.301	1225.7	1274.51	413.923	1075.17	1441.02	509.858	1057.18	1225.11	540.824	1037.02	1129.27	571.888	889.01	1031.89	537.353	814.077	989.636	593.036	851.15	966.462	597.872	772.99	959.79
463	0	277.428	951.755	1635.57	180.548	946.948	1631.54	290.703	1107.21	1660.85	146.456	1093.87	1650.76	230.379	1149.45	1482.61	254.579	1206.18	1218.51	230.396	1000.23	1400.67	237.382	906.251	1191.18	189.689	1211.34	1276.21	414.169	1059.73	1442.97	509.634	1042.12	1226.66	540.459	1023.92	1130.73	572.047	878.576	1029.49	537.834	804.36	985.478	593.022	842.333	962.91	598.581	764.596	954.042
464	0	277.094	936.3	1637.12	179.93	931.609	1632.14	290.586	1091.19	1663.42	146.146	1078.6	1652	231.213	1134.74	1484.96	255.808	1191.82	1220.76	231.007	985.407	1402.16	238.017	891.54	1192.53	190.501	1196.53	1278.05	414.708	1044.48	1445.2	509.424	1027.37	1228.51	539.999	1011.05	1132.22	572.09	868.517	1027.45	538.003	795.367	981.035	593.829	834.367	960.222	598.806	757.092	947.79
465	0	276.991	920.411	1638.2	179.859	916.115	1632.78	290.624	1075.27	1665.59	146.623	1063.03	1653.43	232.074	1120.43	1486.27	256.316	1176.96	1222.41	231.881	970.902	1403.91	238.862	877.198	1194.29	191.381	1181.99	1279.62	415.103	1029.85	1446.87	509.022	1012.74	1229.72	539.443	998.448	1133.17	571.781	859.293	1024.47	537.982	787.161	976.168	593.113	827.033	955.962	598.781	750.368	940.889
466	0	277.206	905.249	1638.85	180.422	900.69	1633.71	290.802	1059.52	1667.62	146.922	1047.47	1655.52	232.656	1106.06	1487.79	257.302	1162.83	1224.34	232.743	956.587	1405.93	239.912	863.135	1196.48	191.967	1167.65	1281.3	415.857	1015.88	1448.6	508.668	998.68	1231	538.854	986.471	1134.04	571.62	850.706	1021.47	537.998	779.918	971.172	593.182	820.639	952.109	598.436	744.547	933.547
467	0	278.19	889.96	1639.97	181.453	885.402	1635.02	291.621	1044.07	1669.94	147.889	1031.76	1658.04	233.625	1092.82	1490.1	257.508	1148.4	1226.26	233.749	942.45	1408.15	240.915	849.104	1199.08	191.891	1153.27	1283.19	416.657	1002.29	1450.57	508.464	985.056	1232.52	538.277	974.998	1135.15	571.554	842.786	1018.83	537.927	773.49	966.243	592.783	814.803	948.197	597.716	739.596	926.018
468	0	279.677	874.85	1641.44	182.686	870.122	1636.69	292.949	1028.97	1672.71	148.991	1016.23	1660.9	234.099	1078.51	1492.66	257.538	1134.25	1228.59	234.048	928.135	1410.65	241.803	835.087	1201.97	192.584	1139.52	1285.9	417.7	988.936	1452.78	508.406	972.117	1234.15	537.45	963.942	1136.28	571.101	835.688	1016.12	537.488	767.836	961.385	592.216	809.74	944.36	596.502	735.45	918.616
469	0	280.871	859.822	1643.36	184.392	854.761	1639	294.126	1013.89	1675.64	150.077	1000.87	1664.4	234.906	1064.37	1495.54	257.151	1120.21	1231.2	235.116	914.11	1413.58	242.942	821.326	1205.13	192.581	1125.55	1288.62	418.832	975.721	1454.96	508.459	959.97	1235.69	536.786	953.599	1137.33	570.71	829.259	1013.27	537.12	762.876	956.659	591.638	805.444	940.808	595.148	732.1	911.063
470	0	283.232	845.273	1645.8	186.271	839.803	1641.67	295.388	998.809	1678.71	151.242	985.531	1667.79	235.654	1049.91	1498.82	256.548	1106.13	1234.4	236.227	900.168	1416.67	244.221	807.633	1208.41	192.505	1111.54	1291.87	420.432	962.611	1457.57	508.694	948.521	1237.41	535.885	943.833	1138.55	570.377	823.484	1010.85	536.651	758.731	951.906	590.961	801.96	937.288	593.941	730.013	903.848
471	0	284.79	830.8	1648.43	187.894	824.903	1644.58	297.017	984.118	1682	152.742	970.33	1671.61	236.336	1035.52	1502.53	255.81	1092.16	1237.98	236.697	885.503	1419.89	245.409	793.942	1211.7	192.711	1097.68	1295.78	421.545	949.168	1460.11	509.05	937.935	1239.38	534.992	934.585	1140.04	569.429	818.3	1008.33	535.442	755.221	947.385	590.878	799.215	934.802	592.243	728.484	897.072
472	0	286.445	816.229	1651.08	189.262	810.172	1647.49	298.422	969.474	1684.9	153.824	955.62	1675.16	237.235	1021.22	1505.87	255.033	1077.97	1241.26	237.767	871.56	1423.02	246.487	780.267	1215.11	192.588	1083.39	1299.33	422.649	935.691	1462.49	508.882	927.866	1240.52	533.755	925.905	1140.88	568.434	813.769	1006.01	534.205	752.201	943.161	588.952	796.939	931.101	590.36	727.732	890.526
473	0	287.477	801.878	1653.42	191.082	795.725	1650.45	299.915	955.264	1687.69	155.3	941.005	1678.42	237.845	1006.44	1508.86	254.072	1063.7	1244.29	238.709	856.952	1426.16	247.707	766.452	1218.34	192.203	1068.91	1302.7	423.513	922.052	1464.56	508.863	918.491	1241.59	532.254	917.527	1141.64	567.588	809.773	1003.87	533.033	749.824	938.964	587.044	795.089	927.725	588.512	727.679	884.467
474	0	289.476	787.841	1656.33	192.649	781.597	1653.65	301.207	941.027	1690.2	156.813	926.808	1681.24	238.715	992.21	1511.68	253.501	1049.2	1247.11	240.243	843.128	1428.9	248.625	752.681	1221.19	191.622	1054.26	1305.59	424.551	908.591	1466.8	508.49	909.397	1242.71	530.675	909.56	1142.37	566.003	805.943	1001.75	531.392	747.646	935.107	586.079	794.175	925.474	586.343	728.367	878.428
475	0	290.711	773.693	1658.89	193.756	767.292	1656.56	302.492	926.985	1692.39	158.201	912.596	1683.77	239.244	977.825	1514.01	253.201	1034.78	1249.54	241.134	828.55	1431.49	249.553	738.814	1224.07	191.082	1039.45	1308.26	425.342	894.906	1468.56	508.115	900.69	1243.54	528.827	901.806	1142.87	564.539	802.603	1000.01	530.094	746.089	931.477	584.316	793.363	923.182	584.243	729.23	873.101
476	0	291.984	759.757	1661.27	195.219	753.208	1659.22	303.862	913.19	1694.07	159.564	898.622	1686.17	239.952	963.537	1515.96	252.945	1020.15	1251.4	242.177	814.035	1433.94	250.423	724.961	1226.56	190.351	1024.4	1310.54	425.998	881.369	1469.9	507.398	891.905	1244.07	526.99	894.312	1143.29	562.881	799.429	997.893	528.437	744.778	927.712	582.312	792.878	920.435	582.525	730.737	868.004
477	0	293.234	745.783	1663.37	196.597	739.212	1661.56	305.006	899.423	1695.52	160.779	884.717	1688.15	240.472	948.272	1517.76	252.685	1005.46	1253.15	243.19	799.519	1435.75	251.245	711.059	1228.72	189.755	1009.34	1312.78	427.084	867.827	1471.38	506.477	882.968	1244.58	525.078	886.802	1143.74	561.293	796.428	995.954	527.064	743.575	924.287	580.58	792.531	918.217	580.668	732.346	863.103
478	0	294.673	731.945	1665.24	197.778	725.134	1663.65	306.139	885.544	1696.8	161.709	870.529	1689.55	240.913	933.561	1519.57	252.484	990.843	1254.79	244.196	784.889	1437.43	251.967	696.994	1230.4	189.12	994.191	1314.75	427.888	854.21	1472.33	505.5	873.821	1245.06	523.047	879.39	1144.28	559.541	793.466	993.942	525.703	742.606	920.647	578.653	792.556	916.029	578.918	734.035	858.583
479	0	295.936	717.959	1666.74	198.952	710.825	1665.26	307.118	871.822	1697.57	162.899	856.637	1690.71	241.584	919.267	1520.6	252.252	976.315	1256.02	245.044	770.246	1438.62	252.451	683.008	1231.58	188.301	979.014	1316.01	428.427	840.394	1472.86	504.449	864.598	1245.2	521.081	872.089	1144.49	558.024	790.867	991.825	524.479	741.988	917.023	576.331	792.264	913.462	577.1	735.951	854.122
480	0	297.49	704.058	1667.63	200.481	696.636	1666.57	308.142	858.128	1697.5	164.411	842.41	1691.29	241.907	904.222	1521.24	251.82	961.707	1256.62	245.888	755.606	1439.25	253.18	668.922	1232.37	187.636	963.895	1316.88	429.312	826.875	1472.82	503.252	855.065	1244.81	518.964	864.517	1144.21	556.708	788.654	989.372	523.333	740.999	913.517	574.872	792.318	911.086	575.654	737.923	849.604
481	0	298.874	690.112	1668.12	201.841	682.414	1667.26	309.133	844.307	1697.13	164.783	827.919	1691.38	242.588	889.72	1521.36	251.239	947.341	1256.89	246.946	740.848	1439.45	253.738	655.145	1232.31	186.883	948.822	1317.35	430.222	813.225	1472.65	502.241	845.278	1244.37	517.213	857.313	1143.97	554.959	785.625	986.95	522.338	740.02	909.676	573.087	792.594	908.713	574.296	740.036	845.198
482	0	299.643	675.948	1668.17	203.091	668.029	1667.61	309.888	830.394	1696.55	165.808	813.569	1691.07	242.652	874.663	1521.04	250.658	932.858	1256.81	247.646	726.056	1439.15	254.77	642.157	1231.48	186.187	933.885	1317.36	430.974	799.425	1472.09	501.245	835.193	1243.74	515.05	849.389	1143.39	552.946	783.23	984.303	521.363	739.192	905.935	570.698	792.565	906.04	572.942	742.021	841.177
483	0	301.221	661.655	1667.72	204.378	653.315	1667.35	310.674	816.233	1695.37	166.392	798.871	1690.51	243.055	860.264	1520.32	250.001	918.406	1256.1	248.272	711.27	1438.37	255.138	627.449	1230.71	185.711	919.023	1316.88	431.308	785.472	1470.76	499.928	824.755	1242.26	512.885	841.186	1142.4	551.395	780.382	981.629	520.61	738.195	902.193	569.122	792.535	903.495	571.69	743.94	837.056
484	0	302.779	647.247	1666.62	205.641	638.354	1666.44	311.393	801.951	1693.71	167.361	784.034	1689.34	243.24	845.471	1518.99	249.595	904.065	1254.84	249.015	696.438	1436.93	256.104	614.148	1228.6	185.062	904.192	1315.69	431.932	771.662	1469.1	498.905	814.225	1240.46	511.115	833.191	1141.15	550.22	777.641	978.797	520.262	737.088	898.449	567.431	792.314	900.96	570.799	745.946	833.031
485	0	304.05	632.615	1665.06	207.144	623.574	1665.29	312.15	787.524	1691.89	168.409	768.952	1687.8	243.557	830.796	1517.36	249.389	889.611	1253.34	249.691	681.714	1435.32	256.918	600.153	1226.55	184.401	889.374	1314.1	432.838	757.875	1467.39	498.204	803.373	1238.64	509.148	824.537	1139.62	549.068	774.586	976.279	519.832	735.902	894.655	566.319	792.091	899.23	569.928	747.934	829.396
486	0	305.233	617.873	1663.14	208.466	608.505	1663.67	312.892	772.677	1690.08	169.272	753.751	1686.09	243.466	815.764	1515.38	249.374	875.285	1251.74	250.363	666.906	1433.43	257.205	584.931	1224.08	184.256	874.821	1312.52	433.264	743.638	1465.43	497.418	792.261	1236.71	507.212	815.604	1138.16	548.041	771.229	973.913	519.797	734.078	891.404	563.463	791.342	896.709	569.107	749.5	825.966
487	0	306.67	602.98	1660.88	209.713	593.264	1661.57	313.76	757.814	1687.74	170.14	738.235	1684.4	243.855	801.181	1513.49	249.507	860.964	1249.95	251.192	652.121	1431.27	258.237	570.524	1221.26	184.116	860.108	1310.78	433.801	729.204	1463.2	496.974	780.819	1234.78	505.614	806.225	1136.7	546.018	767.471	970.786	519.479	732.415	887.885	560.78	790.431	894.032	568.439	750.945	822.91
488	0	307.638	587.925	1658.08	210.98	577.982	1659.04	314.724	742.695	1685.52	171.322	722.787	1682.13	244.124	786.136	1511.58	249.912	846.613	1247.89	251.862	637.456	1428.66	258.833	555.207	1218.21	184.385	845.791	1308.83	434.41	714.729	1461.05	497.027	769.377	1233.05	504.387	796.702	1135.41	545.554	763.66	968.974	519.167	730.7	884.187	559.934	789.25	892.867	567.945	752.205	819.882
489	0	308.762	572.772	1655.02	212.17	562.687	1656.11	315.594	727.339	1683	171.677	707.261	1680.33	244.364	771.33	1509.32	250.76	832.135	1245.9	252.31	622.639	1426.05	259.717	540.244	1215.07	184.589	831.192	1306.74	434.961	699.991	1458.74	496.943	757.612	1231.2	502.765	786.296	1133.96	544.667	759.049	967.133	518.8	727.782	881.043	558.54	787.082	891.636	567.499	752.973	817.582
490	0	309.496	557.448	1651.61	213.19	547.185	1653	316.676	712.083	1680.33	172.866	691.778	1677.71	244.673	756.173	1506.97	251.79	817.351	1243.5	252.713	607.694	1423.14	260	523.966	1212.3	184.74	816.568	1303.78	435.342	685.113	1456.14	496.365	745.6	1229.05	501.941	776.407	1132.53	543.886	753.899	965.223	518.097	724.807	877.757	557.837	784.72	890.827	565.821	752.812	814.449
491	0	310.808	542.196	1648.08	214.114	531.762	1649.62	317.577	696.523	1677.47	173.776	676.246	1675.31	245.322	741.323	1504.21	253.189	802.448	1240.93	253.449	592.803	1420.25	260.508	508.074	1209.26	185.405	801.973	1300.92	436.091	670.242	1453.63	496.276	733.547	1227.07	500.652	765.092	1130.89	543.637	748.419	963.744	518.698	721.309	875.303	557.711	781.958	890.649	566.131	752.817	812.941
492	0	311.968	526.902	1644.5	215.186	516.508	1646.18	318.65	681.049	1674.46	174.883	660.809	1672.31	246.079	726.1	1501.44	254.873	787.365	1238.16	254.129	577.872	1417.08	261.095	492.657	1206.02	186.914	787.508	1298.76	437.318	655.456	1451.37	496.655	721.447	1225.29	499.716	754.05	1129.23	544.102	742.681	962.826	519.594	717.361	873.574	557.699	778.493	890.55	566.431	752.256	811.69
493	0	312.717	511.424	1640.87	215.911	501.209	1642.72	319.624	665.515	1671.48	175.831	645.453	1669.73	246.96	711.392	1498.39	256.497	772.309	1235.2	254.861	562.836	1413.98	261.565	477.341	1202.98	188.042	772.69	1295.43	437.847	640.007	1448.5	496.929	709.013	1223.29	498.988	742.456	1127.54	544.296	736.197	961.722	520.347	712.804	871.685	557.437	773.923	890.279	566.557	750.91	810.451
494	0	313.523	495.96	1637.25	216.462	485.778	1639.33	320.615	649.935	1668.56	176.66	629.911	1666.78	248.182	696.871	1495.04	257.96	757.352	1232	255.463	547.701	1410.95	261.866	462.073	1199.95	189.453	757.762	1292.2	438.713	624.632	1445.59	496.926	696.186	1220.97	498.613	730.423	1125.75	544.469	728.745	960.344	521.522	707.532	869.596	557.398	768.581	890.049	566.409	748.488	808.926
495	0	314.561	480.521	1634.08	217.488	470.486	1636.16	321.66	634.424	1665.68	177.858	614.565	1664.11	249.265	681.789	1492.31	259.606	742.221	1229.04	256.426	532.584	1408.17	262.447	447.008	1197.19	190.894	742.537	1289.18	439.791	609.335	1442.9	497.493	683.181	1218.95	498.543	717.932	1124.06	545.448	720.925	959.379	523.208	700.954	868.064	558.159	762.652	890.393	567.005	745.587	808.167
496	0	315.541	465.001	1631.17	218.445	455.091	1633.14	322.728	618.811	1663.28	178.641	599.141	1661.63	250.186	666.308	1489.33	261.135	727.008	1226.32	257.192	517.271	1405.43	262.608	431.664	1194.66	192.341	727.359	1286.49	440.901	593.841	1440.38	498.378	669.589	1217.07	498.756	704.986	1122.51	546.55	712.214	958.774	525.208	694.601	866.831	559.256	755.834	890.905	567.959	741.852	807.934
497	0	316.557	449.578	1628.5	219.532	439.608	1630.41	323.894	603.343	1660.93	179.933	583.657	1659.12	251.783	651.415	1487.1	262.409	711.612	1223.83	258.228	501.826	1403.09	263.139	416.334	1192.56	193.877	712.105	1284.04	442.018	578.276	1437.88	499.126	655.399	1215.11	499.232	691.665	1121.09	548.091	702.61	958.27	527.517	686.483	865.82	560.249	747.633	891.209	568.721	736.64	807.546
498	0	317.795	434.207	1626.12	220.948	424.266	1628.31	325.236	588.045	1658.68	181.144	568.3	1657.2	253.187	636.27	1484.71	263.735	695.842	1221.32	259.47	486.309	1401.1	264.03	400.866	1190.68	195.044	696.489	1281.49	443.327	562.797	1435.55	500.578	640.873	1213.21	500.06	677.953	1119.62	549.692	692.122	957.706	530.519	678.064	864.944	562.062	738.668	891.772	570.271	730.527	807.58
499	0	319.427	419.01	1624.26	222.336	408.951	1626.49	326.568	572.655	1656.65	182.647	552.846	1655.41	254.329	620.348	1482.66	264.726	679.958	1219.21	260.726	470.752	1399.24	265.395	385.781	1188.67	196.299	681.023	1279.6	444.74	547.215	1433.58	501.951	626.021	1211.64	501.214	663.773	1118.32	552.298	681.271	957.767	532.924	668	864.037	563.881	728.593	892.211	572.05	722.947	807.919
500	0	321.008	403.599	1622.69	223.777	393.537	1624.94	328.109	557.325	1655.07	184.09	537.577	1653.83	256.048	605.948	1481.34	265.77	663.784	1217.56	261.909	455.021	1397.77	266.621	369.88	1187.43	197.363	665.138	1277.85	446.139	531.574	1431.95	503.302	610.713	1210.19	502.66	649.255	1117.28	553.697	668.786	957.177	535.821	657.154	863.748	566.062	717.42	892.784	573.747	713.729	808.196
501	0	322.638	388.23	1621.39	225.307	378.192	1623.82	329.913	542.2	1653.68	185.729	522.388	1652.63	257.813	590.588	1479.8	266.574	647.274	1215.52	263.299	439.089	1396.82	268.25	353.421	1186.81	198.564	649.072	1276.1	447.487	515.79	1430.36	504.448	595.114	1208.64	504.224	634.344	1116.2	555.82	655.727	956.784	537.79	644.548	862.714	568.144	705.077	893.094	575.34	702.619	807.962
502	0	324.236	373.081	1620.81	227.074	362.995	1623.57	331.826	527.018	1652.68	187.895	507.204	1652.05	259.379	575.054	1478.49	267.63	630.525	1213.82	264.836	423.174	1396.34	270.08	336.549	1186.63	199.763	632.908	1274.66	449.101	499.861	1429.06	505.947	579.369	1207.47	505.993	619.068	1115.43	558.166	641.811	956.553	540.305	631.439	862.079	570.561	691.688	893.297	577.911	690.552	808.307
503	0	325.971	357.719	1621.05	228.799	347.99	1624.11	333.887	511.753	1652.2	189.668	492.452	1652.09	261.206	559.424	1477.67	268.883	613.65	1212.87	266.176	407.267	1396.26	271.876	319.674	1186.9	201.465	616.548	1273.58	450.973	483.943	1428.64	507.833	563.877	1207.34	508.001	603.465	1115.08	560.591	627.098	956.701	543.176	617.273	862.386	573.244	677.239	893.745	580.577	676.55	808.761
504	0	327.259	342.248	1621.89	230.4	332.986	1625.26	336.013	496.543	1652.05	191.811	477.711	1652.49	263.194	543.604	1477.37	270.055	596.599	1212.18	267.618	391.129	1396.74	273.242	302.727	1187.61	203.231	600.089	1273.19	452.615	467.626	1428.28	509.827	547.36	1207.3	510.007	587.417	1115.07	562.477	611.089	956.799	545.795	602.27	863.091	575.553	661.444	894.052	583.237	661.146	809.266
505	0	329.159	326.934	1622.99	232.052	317.965	1626.59	338.369	481.416	1652.03	194.037	463.054	1652.92	265.105	527.439	1477.43	271.765	579.777	1212.14	268.914	374.752	1397.38	274.874	286.031	1188.36	205.348	583.574	1273.12	454.078	450.958	1428.22	510.876	530.591	1207.25	512.012	570.684	1115.38	564.501	594.172	956.921	548.739	585.747	863.778	578.001	644.515	894.313	586.121	643.886	809.554
506	0	330.752	311.683	1624.8	233.753	302.968	1628.82	340.712	466.277	1652.47	196.461	448.318	1653.69	266.633	511.055	1478.17	273.659	562.84	1212.62	270.259	358.508	1398.4	276.065	269.145	1189.22	207.592	567.081	1273.52	455.736	434.27	1428.79	513.752	513.985	1208.41	514.286	553.717	1116	567.275	576.731	957.713	550.627	567.773	863.86	580.916	626.763	894.853	589.331	625.344	810.05
507	0	332.266	296.311	1627.03	235.43	287.845	1631.35	342.858	451.105	1653.28	198.324	433.726	1655.27	268.423	494.89	1479.33	275.668	546.174	1213.67	271.422	342.188	1399.84	276.853	252.309	1190.37	209.589	550.761	1274.74	456.956	417.238	1429.61	515.527	496.544	1209.47	516.388	536.088	1116.96	569.833	558.386	958.616	552.807	548.941	864.774	583.443	607.765	895.214	592.721	605.518	810.925
508	0	333.92	280.87	1629.35	237.096	272.659	1634.19	344.876	435.828	1653.91	200.572	418.76	1656.75	269.642	478.124	1480.71	277.758	529.947	1215.26	272.404	325.914	1401.52	277.458	235.682	1191.51	211.469	534.608	1276.41	458.101	400.302	1430.78	516.978	478.675	1210.33	518.716	518.222	1117.81	571.8	538.624	959.064	554.799	528.753	865.261	586.167	587.728	895.468	595.882	584.194	811.211
509	0	335.701	265.556	1631.62	238.843	257.487	1637.09	346.817	420.552	1654.67	202.453	403.817	1658.59	270.964	462.018	1482.34	279.564	514.328	1217.22	273.278	309.9	1403.13	277.855	219.407	1192.75	212.864	518.542	1278.25	458.905	383.465	1432.04	518.653	460.759	1211.49	520.967	499.698	1118.76	574.175	518.313	959.735	557.656	508.51	866.55	589.269	566.77	895.797	599.253	561.765	811.555
510	0	337.284	250.203	1633.63	240.478	242.037	1639.76	348.353	405.318	1655.49	204.318	388.495	1660.2	271.785	445.818	1484.3	281.182	498.961	1219.48	273.849	294.017	1404.88	278.245	203.922	1193.79	214.019	503.026	1280.69	459.527	366.898	1433.76	520.346	442.607	1213.02	523.181	480.897	1119.91	576.897	497.423	960.669	559.837	486.166	867.552	592.389	544.802	896.1	603.081	538.425	812.321
511	0	338.51	234.87	1635.49	241.764	226.408	1642.05	349.562	390.12	1656.38	205.248	373.197	1662.33	272.694	429.945	1486.34	282.211	483.834	1221.54	274.242	278.394	1406.64	278.388	188.454	1195.11	214.594	487.69	1283.11	459.891	350.554	1435.83	521.686	424.025	1214.43	525.47	461.798	1121.13	579.351	475.504	961.74	562.242	463.375	868.738	595.005	521.698	896.109	606.438	513.635	812.857
512	0	339.432	219.348	1637.31	242.694	210.75	1644.21	350.415	374.743	1657.9	206.297	357.51	1664.36	273.215	413.899	1488.04	283.158	468.821	1223.59	274.291	262.939	1408.22	278.538	173.248	1196.51	215.151	472.762	1285.29	459.974	334.173	1437.77	522.823	405.184	1215.52	527.719	442.492	1122.28	581.636	452.906	962.323	564.772	439.676	869.735	597.978	497.9	895.981	609.434	487.561	812.852
513	0	340.135	203.768	1639.07	243.5	195.201	1646.34	350.878	359.073	1659.74	206.764	341.724	1666.64	273.757	399.094	1490.5	284.232	453.827	1225.95	274.437	247.786	1410.16	278.654	158.46	1198.09	215.982	458.325	1287.55	460.538	318.405	1440.17	524.447	386.557	1217.25	529.945	422.847	1123.5	583.563	429.572	962.866	566.744	415.14	870.436	601.133	473.471	896.292	612.992	461.203	813.605
514	0	340.398	188.057	1641.15	243.673	179.464	1648.17	351.02	343.375	1662.34	206.635	325.871	1668.93	274.138	384.086	1492.92	285.356	438.823	1228.48	274.39	232.854	1412.24	278.487	143.807	1199.77	216.919	444.121	1289.9	460.802	302.459	1442.67	525.849	367.704	1219.19	532.276	403.111	1125.04	586.384	406.287	964.43	569.128	390.134	872.288	604.203	448.388	896.704	616.236	433.605	814.637
515	0	340.105	172.4	1643.11	243.378	163.722	1649.73	350.74	327.502	1665.12	206.488	310.045	1671.13	274.676	369.046	1495.2	286.425	423.809	1230.82	274.224	218.001	1414.39	278.163	129.406	1201.74	218.271	429.95	1292.32	461.107	286.589	1445.32	527.042	348.687	1221.11	534.478	383.191	1126.49	588.567	382.163	965.636	569.637	363.829	872.923	606.661	422.383	896.82	619.049	404.977	815.588
516	0	339.484	156.64	1644.9	242.77	148.086	1651.16	350.239	311.738	1668.05	205.974	294.427	1673.4	275.293	353.958	1497.51	287.762	408.929	1233.14	274.263	203.26	1416.74	277.988	114.973	1203.95	219.938	415.74	1294.58	461.187	270.579	1447.67	528.241	329.632	1222.9	536.804	363.275	1128.03	590.376	357.467	966.586	571.262	336.662	874.405	609.328	395.99	896.974	621.845	375.685	816.59
517	0	338.646	141.023	1646.91	241.81	132.435	1652.64	349.259	295.748	1671.1	205.082	278.543	1675.59	276.082	338.886	1499.96	289.327	394.279	1235.63	274.097	188.512	1418.82	277.522	100.443	1206.05	221.908	401.54	1296.91	461.454	254.73	1450.36	529.564	310.829	1224.94	539.075	343.346	1129.67	592.419	332.638	967.959	572.627	309.858	876.124	611.705	368.835	897.378	624.717	346.017	818.18
518	0	337.275	125.148	1649.13	240.477	116.836	1654.03	348.225	279.825	1674.4	204.018	262.736	1677.68	276.662	323.885	1502.56	291.089	379.848	1238.34	273.921	173.874	1421.39	276.627	85.7556	1208.32	223.787	387.281	1299.2	461.642	238.631	1453.09	530.282	291.141	1227.21	541.281	323.379	1131.47	594.455	307.778	969.648	574.002	282.06	878.627	613.703	341.188	897.799	626.555	314.989	820.077
519	0	335.781	109.413	1651.46	238.87	101.306	1655.56	347.033	264.039	1677.68	202.649	247.189	1679.73	276.988	308.646	1505.18	292.94	365.434	1241.15	273.551	159.216	1423.68	275.852	71.0678	1211.01	225.809	372.967	1301.69	461.715	222.448	1455.97	532.018	273.077	1229.79	543.383	303.362	1133.38	595.308	281.662	971.176	575.272	253.931	881.572	615.241	312.686	898.514	628.118	283.519	822.128
520	0	334.362	93.882	1653.74	237.457	86.0132	1657.21	345.691	248.204	1680.73	201.265	231.795	1681.7	277.543	293.666	1507.81	295.01	350.991	1243.82	273.383	144.46	1425.94	275.044	56.4502	1213.36	228.07	358.719	1304.15	461.798	206.203	1458.71	533.431	254.516	1232.55	545.594	283.319	1135.4	597.091	255.835	973.479	576.211	225.34	884.589	616.72	283.94	899.192	629.948	251.842	825.21
521	0	332.856	78.267	1656.14	235.803	70.7815	1658.64	344.362	232.463	1683.72	200.122	216.571	1683.26	278.027	278.672	1510.29	297.206	336.386	1246.44	273.022	129.879	1427.88	274.303	41.9693	1215.71	229.669	344.047	1305.95	461.969	189.925	1461.62	535.021	236.185	1235.51	548.012	263.171	1137.84	598.894	229.945	976.413	578.053	196.887	889.461	618.237	254.87	900.803	631.439	219.693	828.8
522	0	331.182	62.7302	1658.39	234.207	55.6718	1660.13	343.132	216.912	1686.52	198.603	201.383	1684.6	278.545	263.394	1512.41	299.159	321.731	1248.95	272.699	115.018	1429.78	273.535	27.5285	1217.94	231.665	329.646	1308.3	461.736	173.414	1464.44	536.363	217.662	1238.49	550.636	243.598	1140.61	599.861	203.323	979.229	578.353	167.453	893.909	619.401	225.141	902.985	632.221	186.805	832.678
523	0	329.622	47.2934	1660.48	232.616	40.573	1661.41	341.81	201.453	1688.76	197.521	186.232	1685.27	279.231	248.025	1514.2	301.124	307.058	1251.15	272.352	100.024	1431.27	272.841	13.2998	1219.74	234.082	315.479	1310.9	461.353	156.885	1466.77	537.482	198.946	1241.07	552.353	223.235	1142.51	600.547	176.21	981.989	579.264	137.924	898.757	620.736	195.214	905.471	632.641	153.48	836.9
524	0	328.159	32.1398	1662.01	231.33	25.5248	1662.5	340.729	186.314	1690.4	196.088	171.418	1686.12	279.414	232.474	1515.69	302.822	292.353	1253.1	272.164	85.0374	1432.38	272.27	-0.887841	1221.03	235.689	300.75	1312.45	461.239	140.605	1469.03	539.174	180.645	1243.71	554.4	203.009	1144.5	602.535	149.689	985.796	579.007	108.376	903.083	621.922	165.083	907.858	633.907	120.293	841.68
525	0	327.176	16.8468	1663.72	230.085	10.5713	1663.34	339.699	171.208	1691.66	195.34	156.563	1686.36	279.759	217.359	1516.88	304.178	277.575	1254.3	271.862	69.9973	1433.09	271.683	-15.0171	1222.13	237.294	286.088	1313.75	461.241	124.459	1470.98	541.151	162.759	1246.16	557.058	183.288	1146.49	603.446	122.505	988.861	579.726	78.4778	908.587	622.895	134.66	910.497	634.186	86.8389	846.443
526	0	326.149	1.73763	1664.96	228.976	-4.41015	1664.1	338.781	156.132	1692.17	194.396	141.787	1686.26	279.75	202.035	1517.39	305.358	262.702	1255.15	271.524	54.8056	1433.48	271.146	-29.1412	1222.85	238.455	271.17	1314.28	460.812	108.083	1472.2	542.573	144.374	1248.05	559.447	163.223	1147.83	604.287	95.5387	991.825	579.838	48.4062	914.021	623.709	103.999	912.991	634.221	52.9094	851.534
527	0	325.219	-13.4997	1665.75	228.075	-19.4081	1664.55	338.049	141.05	1692.12	194.462	126.998	1685.72	279.671	186.601	1517.27	306.542	247.883	1255.54	271.271	39.6447	1433.34	270.736	-43.158	1222.77	239.659	256.351	1314.62	460.442	91.8097	1472.85	543.91	125.919	1249.2	561.961	143.104	1148.88	605.59	68.2032	995.103	579.927	17.9958	919.601	624.669	73.0931	916.066	633.99	19.1517	856.551
528	0	324.713	-28.5775	1666.23	227.404	-34.4196	1664.61	337.449	126.057	1691.7	193.356	112.071	1684.86	279.643	170.901	1517.23	307.521	233.094	1255.76	270.937	24.4005	1432.61	270.585	-56.7352	1221.77	240.446	241.534	1314.58	460.268	75.807	1473.15	545.119	107.366	1249.87	564.562	122.919	1149.36	606.875	41.2905	998.121	580.286	-11.8507	924.948	625.614	42.2913	918.88	633.708	-14.5247	861.835
529	0	323.99	-43.9278	1666.23	226.828	-49.6092	1664.47	337.012	111.001	1690.84	193.067	97.1243	1683.65	279.781	155.119	1516.26	308.289	218.257	1255.45	270.606	9.15279	1431.84	270.33	-70.4416	1220.71	241.249	226.546	1313.98	459.959	59.6273	1472.94	546.362	88.947	1250.14	567.145	102.633	1149.54	607.946	14.0814	1001.06	580.193	-41.753	930.7	626.324	11.5276	921.751	633.209	-48.1052	867.543
530	0	323.246	-59.206	1665.69	226.28	-64.9399	1663.86	336.472	95.846	1689.34	192.612	81.8654	1681.84	279.757	139.635	1515.17	308.974	203.428	1254.6	270.276	-6.15918	1430.48	270.149	-83.9519	1218.97	241.962	211.601	1313.14	459.588	43.384	1472.03	547.754	70.3245	1249.88	569.622	82.1501	1148.87	609.506	-12.7967	1004.33	580.192	-71.4259	936.192	626.88	-19.2582	924.455	632.462	-81.6089	873.22
531	0	323.099	-74.5311	1664.82	225.976	-80.2221	1662.91	336.425	80.632	1687.7	192.311	66.8122	1680.23	279.839	124.072	1513.91	309.6	188.749	1253.71	270.13	-21.5315	1428.61	270.155	-98.3355	1216.82	242.539	196.601	1312.03	459.3	27.4067	1470.76	549.497	52.1184	1249.34	572.445	61.5085	1148.3	609.859	-39.9297	1006.5	579.829	-100.793	941.467	627.547	-49.8268	927.588	631.73	-114.776	879.108
532	0	322.97	-89.9727	1663.74	225.734	-95.596	1661.71	336.155	65.2174	1685.71	192.297	51.3412	1677.92	279.552	108.424	1512.32	309.919	173.969	1252.58	270.023	-36.9247	1426.47	270.077	-112.353	1214.27	242.813	181.577	1310.74	459.107	11.6535	1469.32	551.192	33.7187	1248.59	575.386	40.8331	1147.61	610.705	-66.9288	1009.38	579.357	-129.423	946.798	629.146	-79.8663	931.735	630.841	-147.594	885.431
533	0	322.64	-105.559	1662.18	225.586	-111.198	1660.12	336.127	49.9395	1683.67	192.293	36.0354	1675.72	279.432	93.035	1510.81	309.997	159.421	1251.11	269.815	-52.2019	1424.16	269.951	-126.98	1211.31	242.972	166.593	1309.23	458.553	-4.29085	1467.25	552.4	15.0018	1247.19	577.658	19.3612	1146.68	611.232	-93.951	1012.02	578.312	-158.111	951.908	628.122	-110.739	934.446	629.713	-180.055	891.978
534	0	322.213	-121.267	1659.96	225.294	-126.775	1657.96	335.946	34.5117	1681.01	191.692	20.5823	1673.22	279.101	77.4116	1508.75	310.017	144.858	1249.28	269.711	-67.4677	1421.52	269.993	-142.104	1207.97	242.752	151.487	1307.03	458.148	-20.013	1464.8	553.363	-3.9026	1245.3	579.838	-1.89888	1145.04	611.617	-120.588	1014.5	577.436	-186.596	957.195	628.225	-140.754	937.633	628.515	-211.919	898.38
535	0	322.437	-136.784	1657.75	225.359	-142.434	1655.68	335.841	19.0101	1678.23	191.77	4.78613	1670.25	277.992	61.3599	1505.15	309.384	130.363	1246.95	269.787	-82.7451	1418.53	270.177	-157.29	1204.28	242.369	136.609	1304.8	457.821	-35.3525	1462.22	554.652	-22.5376	1243.54	582.192	-22.9001	1143.54	611.887	-147.002	1016.89	576.391	-214.368	962.158	629.02	-170.194	941.653	627.28	-243.236	905.129
536	0	322.335	-152.217	1655.2	225.182	-158.034	1653.11	335.816	3.52128	1675.54	191.438	-10.7189	1667.62	277.979	45.9525	1503.2	308.671	115.878	1244.74	269.644	-97.8778	1415.53	270.341	-172.826	1200.78	241.79	121.554	1302.34	457.369	-50.5407	1459.45	555.466	-41.2017	1241.86	584.038	-43.9813	1141.97	611.859	-172.989	1019.54	574.983	-241.372	966.889	628.815	-199.054	945.254	625.874	-273.786	912.19
537	0	322.116	-167.885	1652.28	224.976	-173.794	1649.96	335.281	-12.246	1672.36	191.119	-26.3122	1664.71	277.477	30.6085	1500.14	307.35	101.356	1241.94	269.583	-113.021	1412.43	270.516	-188.741	1197.28	241.026	106.553	1299.73	456.62	-65.83	1456.42	555.406	-60.4783	1239.45	585.422	-65.1679	1140.24	611.704	-198.569	1022.26	573.672	-268.113	972.166	627.868	-227.969	948.64	624.292	-303.514	919.303
538	0	321.814	-183.308	1648.88	224.816	-189.303	1646.75	334.805	-27.7595	1669.35	190.799	-42.0586	1661.7	276.327	14.6256	1496.53	305.91	86.5413	1238.94	269.627	-128.369	1409.27	270.926	-204.957	1193.85	240.149	91.8024	1296.89	456.137	-80.7357	1453.46	555.685	-79.1773	1237.38	586.728	-86.2241	1138.68	611.118	-223.732	1024.79	572.327	-294.155	976.833	627.484	-255.734	952.504	622.853	-332.305	926.196
539	0	321.81	-198.701	1645.76	224.648	-204.898	1643.52	334.417	-43.114	1666.58	190.401	-57.612	1658.97	276.502	0.260304	1494.35	304.267	71.629	1235.97	269.527	-143.531	1406.18	271.309	-221.187	1190.78	238.98	76.6554	1293.91	455.666	-95.4908	1450.72	555.73	-97.6901	1235.43	587.297	-107.071	1137.08	610.193	-248.12	1027.32	570.77	-319.338	981.411	626.908	-282.662	956.58	621.161	-360.219	933.061
540	0	321.251	-214.088	1642.49	224.163	-220.269	1640.41	334.071	-58.4399	1664.3	189.765	-73.0393	1656.48	275.357	-14.8495	1491.68	302.524	56.3414	1233.06	269.117	-158.682	1403.31	271.753	-237.322	1188.01	237.605	61.5515	1291.22	455.071	-110.252	1448.33	555.262	-116.197	1233.7	587.812	-127.324	1136	609.232	-272.039	1030.29	569.024	-343.993	986.041	626.455	-308.617	961.19	619.564	-387.084	940.134
541	0	320.645	-229.265	1639.39	224.045	-235.519	1637.33	333.385	-73.7278	1661.86	189.055	-88.4627	1653.95	274.695	-30.0019	1488.88	300.996	40.822	1230.21	268.66	-173.976	1400.62	272.274	-253.158	1185.44	236.43	46.3379	1288.4	454.203	-125.075	1445.73	554.297	-134.842	1231.62	587.916	-147.471	1134.89	608.202	-295.065	1033.24	567.619	-367.862	990.835	625.144	-334.214	965.21	618.283	-412.834	947.128
542	0	320.448	-244.173	1636.39	223.406	-250.662	1634.46	332.968	-88.5692	1659.62	188.537	-103.638	1651.57	274.875	-44.075	1487.32	299.463	24.7701	1227.09	268.09	-189.056	1398.07	272.652	-268.771	1183.15	235.11	30.8932	1285.4	453.786	-139.697	1443.51	553.983	-152.337	1230.15	587.667	-167.068	1133.69	607.132	-317.489	1035.79	566.107	-390.877	995.049	624.749	-358.159	969.656	616.74	-437.604	953.585
543	0	319.756	-258.95	1633.87	222.642	-265.671	1631.87	332.307	-103.496	1657.45	187.463	-118.654	1649.42	274.179	-58.6669	1485.06	298.458	8.77741	1224.34	267.257	-204.278	1395.75	272.701	-284.523	1181.27	234.01	15.373	1282.55	453.29	-154.293	1441.74	553.213	-169.686	1228.69	587.365	-186.139	1132.74	605.86	-338.939	1038.38	564.56	-413.051	999.335	623.858	-381.366	973.843	615.432	-461.253	960.064
544	0	318.604	-273.754	1631.61	221.519	-280.642	1629.66	330.939	-118.347	1654.98	186.419	-133.467	1647.15	273.163	-73.6214	1482.5	297.098	-7.55203	1221.29	266.206	-219.549	1393.83	272.229	-300.262	1180	233.036	-0.345425	1279.72	452.193	-169.239	1439.9	551.948	-186.772	1227.09	586.549	-204.794	1131.72	604.602	-359.939	1040.86	562.918	-434.531	1003.25	622.401	-403.757	977.16	614.036	-483.92	966.282
545	0	317.411	-288.501	1629.69	220.448	-295.353	1627.79	329.737	-133.078	1652.72	185.033	-148.22	1645.01	272.08	-88.7966	1479.62	295.919	-23.9983	1218.24	265.282	-235.019	1392.05	271.61	-316.065	1178.61	232.101	-16.2189	1276.76	451.034	-184.462	1438.14	550.379	-203.665	1225.07	585.569	-222.845	1130.64	603.172	-380.025	1042.9	561.449	-455.146	1006.85	620.659	-425.439	980.004	612.852	-505.462	971.725
546	0	316.035	-303.067	1628.1	219.205	-309.813	1626.14	328.486	-147.45	1650.77	183.794	-162.682	1642.84	270.64	-104.064	1477.12	295.098	-40.2003	1215.61	263.942	-250.463	1390.29	270.852	-331.81	1177.42	231.155	-32.2647	1274	449.847	-199.774	1436.6	549.296	-219.88	1223.79	584.466	-240.52	1129.57	601.804	-399.274	1044.68	560.055	-475.071	1010.19	619.237	-445.815	982.742	611.548	-526.085	976.648
547	0	314.771	-317.336	1627.3	217.539	-324.266	1625.32	326.972	-161.737	1649.09	183.133	-177.382	1640.94	269.179	-119.066	1474.86	294.299	-56.7156	1213.18	262.689	-266.156	1389.19	269.692	-347.856	1176.74	230.254	-48.4618	1271.35	448.581	-215.257	1435.52	548.049	-235.861	1222.74	583.068	-257.756	1128.62	600.572	-417.791	1046.34	558.629	-494.201	1013.09	617.931	-465.115	985.217	610.388	-545.655	981.059
548	0	313.073	-331.803	1626.52	215.798	-338.797	1624.61	325.155	-176.135	1647.47	181.088	-191.478	1639.8	267.667	-134.407	1472.8	293.436	-73.3738	1210.83	261.149	-281.842	1388.13	268.439	-364.357	1176.35	229.566	-64.7694	1269.07	447.042	-230.894	1434.42	546.505	-251.966	1221.68	581.597	-274.512	1127.72	599.136	-435.644	1047.55	557.296	-512.479	1015.64	616.414	-483.72	986.997	609.324	-564.311	984.88
549	0	311.45	-346.022	1626.36	214.14	-353.182	1624.44	323.386	-190.196	1646.56	179.189	-206.054	1638.7	266.058	-149.484	1471.56	292.822	-90.0906	1209.16	259.701	-297.552	1387.64	266.95	-381.316	1176.32	228.509	-81.3178	1266.93	445.511	-246.298	1433.81	545.01	-267.589	1221.02	579.937	-291.04	1126.97	597.659	-452.808	1048.16	555.957	-529.952	1017.38	614.987	-501.293	988.413	608.315	-581.992	987.911
550	0	309.625	-360.22	1626.79	212.564	-367.499	1624.91	321.311	-204.228	1646.06	176.799	-220.073	1638.48	264.567	-164.798	1470.82	291.956	-107.15	1208.01	257.97	-313.45	1387.37	265.323	-398.542	1176.84	227.335	-98.0306	1265.43	444.024	-261.758	1433.74	543.814	-283.071	1221.04	578.294	-307.086	1126.66	596.213	-469.291	1048.59	554.637	-546.803	1018.54	613.458	-518.022	989.209	607.394	-598.75	990.204
551	0	307.494	-374.469	1627.77	210.142	-382.191	1625.7	319.397	-218.053	1646.3	174.834	-234.831	1638.03	263.016	-180.111	1470.72	291.016	-124.082	1207.22	256.391	-329.381	1387.67	263.612	-415.922	1177.57	226.225	-114.787	1264.68	442.41	-277.417	1434.02	542.3	-298.463	1221.27	576.525	-322.802	1126.84	594.619	-485.061	1048.8	553.375	-562.579	1019.27	611.841	-533.768	989.583	606.416	-614.466	991.754
552	0	305.155	-389.01	1629	207.811	-396.885	1626.79	316.772	-232.404	1646.51	172.003	-249.385	1638.04	261.209	-195.92	1470.75	290.25	-140.857	1207.18	254.868	-345.227	1388.42	262.29	-433.217	1178.44	224.781	-131.773	1264.16	440.75	-293.348	1434.57	540.448	-314.088	1221.42	574.767	-338.076	1127.05	593.042	-499.953	1048.4	552.121	-577.749	1019.33	610.119	-548.622	989.026	605.479	-629.23	992.356
553	0	302.942	-403.425	1630.9	205.703	-411.495	1628.23	313.737	-247.049	1646.99	169.449	-264.087	1638.25	259.506	-211.695	1471.12	289.26	-157.412	1207.37	253.776	-361.129	1389.38	261.21	-450.26	1179.52	223.701	-148.555	1264.24	439.562	-309.034	1435.93	539.02	-329.288	1222.12	572.781	-352.878	1127.29	591.466	-514.322	1047.56	550.754	-591.973	1018.31	608.518	-562.414	987.988	604.97	-642.889	992.151
554	0	300.269	-418.245	1632.93	202.949	-426.512	1629.72	310.979	-261.817	1648.27	167.17	-278.987	1638.51	257.966	-227.44	1472.35	288.917	-173.033	1208.81	252.637	-376.817	1390.62	260.32	-467.29	1180.82	222.623	-165.141	1265.03	438.348	-324.832	1437.58	537.641	-344.581	1223.41	570.788	-367.498	1128.11	589.391	-527.763	1046.25	549.143	-605.374	1016.93	606.744	-575.201	986.707	603.663	-655.708	991.083
555	0	297.565	-433.403	1635.23	200.549	-441.425	1631.02	307.95	-276.951	1649.57	164.378	-294.165	1638.51	256.742	-243.124	1473.81	288.632	-188.325	1210.64	251.805	-392.251	1392.16	259.72	-484.08	1182.19	221.853	-181.052	1266.3	437.217	-340.766	1439.64	535.882	-360.033	1224.87	568.998	-381.719	1129.58	587.768	-540.834	1045.5	547.418	-617.899	1015	604.745	-587.347	984.827	602.516	-667.385	989.081
556	0	295.194	-448.644	1637.24	198.17	-456.464	1631.94	305.774	-291.868	1651.64	162.265	-309.151	1638.6	255.867	-258.354	1475.48	288.393	-203.372	1212.54	251.435	-407.623	1393.65	259.262	-500.485	1183.57	221.943	-196.425	1268.15	436.092	-356.493	1441.53	534.402	-375.481	1226.45	567.008	-395.66	1130.8	585.858	-553.091	1044.01	545.707	-629.692	1012.36	602.732	-598.468	982.346	601.252	-678.315	986.234
557	0	292.96	-463.936	1638.8	196.129	-471.528	1632.58	303.88	-307.082	1653.89	160.046	-323.92	1639.16	255.116	-273.426	1477.24	288.133	-218.239	1214.62	251.148	-422.649	1394.98	258.915	-516.029	1185.11	221.545	-211.562	1269.73	435.355	-371.52	1443.81	532.989	-390.815	1228.24	565.589	-409.128	1132.56	583.957	-564.741	1042.45	543.804	-640.623	1008.81	600.827	-608.887	979.634	599.803	-688.426	982.591
558	0	291.204	-479.262	1640.55	194.445	-486.761	1633.22	302.073	-322.614	1656.19	158.691	-339.321	1640.2	254.336	-288.105	1479.03	287.631	-232.855	1216.51	250.91	-437.339	1396.58	258.706	-530.929	1186.81	221.159	-226.446	1271.52	434.592	-386.112	1446.01	531.567	-405.824	1230.2	564.002	-422.445	1134.26	582.045	-575.954	1040.88	541.868	-650.899	1005.38	599.156	-618.345	976.998	598.172	-697.918	978.202
559	0	290.262	-494.689	1641.96	193.419	-502.16	1633.91	300.635	-338.251	1658.49	157.442	-354.565	1641.73	253.984	-302.107	1480.85	286.908	-247.452	1218.34	251.183	-451.89	1398.16	258.769	-545.255	1188.58	220.648	-241.078	1273.36	433.896	-400.236	1448	530.118	-420.6	1231.94	562.736	-435.283	1136.31	580.219	-586.562	1038.82	540.129	-660.426	1001.27	597.305	-627.521	973.618	596.335	-706.857	972.958
560	0	289.908	-509.706	1643.13	193.181	-517.366	1634.84	300.598	-353.209	1661.4	157.039	-370.127	1643.86	252.869	-316.674	1482.41	286.439	-261.684	1220.59	251.361	-466.234	1400.08	258.885	-559.244	1190.42	219.714	-255.751	1275.05	433.74	-413.704	1450.1	528.854	-434.668	1233.82	561.646	-447.562	1137.87	578.792	-596.616	1036.78	538.567	-669.439	996.952	595.988	-635.804	970.338	594.433	-715.191	966.941
561	0	290.102	-524.839	1644.16	193.464	-532.57	1636.2	300.198	-368.543	1663.68	156.859	-385.393	1646.46	252.276	-330.638	1484.36	285.155	-276.251	1222.12	251.319	-480.419	1402.07	259.242	-572.999	1192.79	218.561	-270.144	1276.78	433.459	-426.93	1452.03	527.896	-448.107	1235.67	560.277	-459.609	1139.36	577.267	-605.949	1034.31	537.09	-677.495	992.065	594.847	-643.443	967.078	592.541	-722.642	960.468
562	0	290.531	-539.615	1645.29	193.892	-547.76	1637.73	300.28	-383.512	1666.13	157.273	-400.89	1649.08	251.229	-344.981	1486.24	284.012	-290.198	1223.95	251.283	-494.56	1404.25	259.582	-586.934	1195.42	217.218	-284.533	1278.49	433.345	-439.781	1453.79	526.654	-461.115	1237.1	559.124	-471.232	1140.89	576.196	-614.579	1031.94	535.646	-684.969	987.415	593.858	-650.391	963.638	590.375	-729.658	953.268
563	0	291.419	-554.464	1646.83	194.723	-562.807	1639.55	300.549	-398.43	1668.44	157.101	-416.033	1652.29	250.547	-359.012	1488.13	282.488	-304.762	1225.46	251.258	-508.64	1406.82	260	-601.108	1197.88	215.808	-298.723	1280.27	433.384	-452.575	1455.64	525.698	-473.499	1238.08	557.436	-482.12	1141.41	575.222	-622.619	1029.31	534.397	-691.859	982.348	593.048	-656.655	960.018	588.209	-735.83	945.499
564	0	292.468	-568.794	1648.56	195.823	-577.71	1641.99	301.216	-412.989	1671.13	157.842	-431.13	1655.58	250.028	-373.191	1490.56	280.998	-318.486	1227.51	251.211	-522.62	1409.37	260.775	-615.275	1200.94	214.273	-312.637	1282.32	433.886	-464.838	1457.28	525.153	-484.784	1239.14	555.839	-492.308	1141.89	574.451	-630.062	1026.47	533.54	-697.794	977.555	592.369	-661.853	956.676	586.405	-740.926	937.62
565	0	293.791	-583.125	1650.89	196.875	-592.331	1644.64	302.183	-427.341	1674.09	158.348	-445.909	1659.17	249.973	-386.855	1493.64	279.333	-332.538	1229.84	250.871	-536.605	1412.4	261.501	-629.594	1203.91	212.869	-326.845	1285.01	434.372	-477.235	1459.23	524.715	-495.545	1240.23	554.447	-501.976	1142.39	573.747	-636.606	1023.73	532.586	-703.201	972.681	591.994	-666.985	953.11	584.659	-744.999	929.825
566	0	294.706	-597.232	1653.07	197.882	-606.861	1647.42	302.781	-441.633	1676.61	158.787	-460.48	1662.61	249.414	-401.34	1496.21	277.515	-346.494	1232.39	250.83	-550.729	1415.24	262.241	-643.4	1207.02	211.575	-341.048	1287.8	434.568	-490.333	1460.61	524.17	-505.832	1240.85	552.953	-511.08	1142.68	572.912	-642.429	1020.66	531.668	-708.054	967.653	590.977	-671.205	948.968	582.925	-748.027	921.748
567	0	295.664	-611.407	1655.38	199.048	-620.948	1650.16	303.16	-455.968	1678.67	159.675	-474.931	1665.9	249.032	-415.852	1498.66	275.493	-360.566	1234.77	250.881	-564.983	1418.03	262.573	-657.799	1209.65	210.303	-355.382	1290.66	434.62	-503.704	1461.96	523.504	-515.632	1241.18	551.478	-519.685	1142.88	572.222	-647.822	1017.43	531.185	-712.01	962.794	590.33	-674.339	945.133	581.414	-750.115	913.638
568	0	296.388	-625.307	1657.72	199.762	-635.194	1653.19	304.252	-469.656	1681.25	160.359	-489.135	1668.76	248.828	-430.396	1501.3	273.841	-374.713	1237.38	250.957	-579.216	1420.55	263.053	-671.942	1212.3	209.046	-369.846	1293.4	435.009	-517.085	1463.51	523.18	-524.693	1241.94	549.776	-527.951	1142.9	571.331	-652.625	1014.21	530.492	-715.468	957.621	589.885	-676.989	941.512	579.978	-751.268	905.679
569	0	296.944	-639.078	1660.31	200.328	-648.95	1656.07	304.614	-483.654	1682.99	160.897	-503.012	1671.47	248.5	-444.839	1503.56	272.195	-388.896	1239.81	250.975	-593.643	1423.06	263.359	-685.927	1214.86	207.801	-384.364	1296.04	435.161	-530.715	1464.89	522.575	-533.625	1242.49	547.99	-536.139	1143.08	570.491	-656.796	1011.1	529.692	-718.408	952.497	588.541	-678.724	937.214	578.87	-751.516	898.179
570	0	297.421	-652.981	1662.64	200.91	-662.764	1658.89	304.989	-497.44	1684.38	161.349	-516.593	1673.66	248.713	-458.85	1505.61	270.934	-403.37	1241.68	251.085	-608.094	1425.08	263.655	-699.733	1217.29	206.557	-398.998	1298.27	435.197	-544.515	1465.9	522.186	-542.289	1243.06	546.133	-544.092	1143	569.517	-660.472	1007.76	529.235	-720.286	947.392	587.384	-679.88	932.839	577.833	-751.078	890.669
571	0	298.043	-666.474	1664.94	201.346	-676.474	1661.42	305.953	-510.655	1685.84	161.931	-530.144	1675.26	248.718	-473.245	1507.08	269.79	-417.792	1242.83	251.364	-622.601	1427.01	263.851	-713.592	1219.29	205.154	-413.89	1300.01	435.549	-558.032	1466.83	521.627	-550.835	1243.05	544.416	-551.629	1142.96	568.668	-663.701	1004.35	528.563	-722.044	941.999	586.187	-680.314	928.551	577.056	-749.956	883.492
572	0	298.404	-680.057	1666.93	201.803	-690.029	1663.79	305.977	-524.392	1686.32	162.19	-543.798	1676.68	248.798	-487.517	1508.53	268.953	-432.408	1244.32	251.476	-637.153	1428.47	263.858	-727.621	1220.9	204.051	-428.777	1301.9	435.777	-571.94	1467.45	520.486	-559.893	1243.35	542.813	-559.121	1143.04	567.72	-666.59	1001.13	527.783	-723.259	936.71	584.866	-680.343	924.345	576.276	-748.269	876.818
573	0	298.763	-693.719	1668.73	202.05	-703.699	1665.73	306.463	-537.716	1686.69	162.703	-557.211	1677.53	248.559	-502.02	1509.63	268.066	-447.258	1245.19	251.457	-651.734	1429.7	263.758	-741.699	1222.09	202.624	-443.893	1303.06	435.552	-586.123	1467.72	519.619	-568.973	1243.36	540.758	-566.625	1142.91	566.094	-669.219	997.606	526.971	-723.58	931.443	583.307	-679.912	920.257	575.344	-746.288	870.352
574	0	299.037	-707.272	1669.83	202.354	-717.365	1667.43	306.813	-551.042	1686.64	162.901	-570.877	1677.92	248.414	-516.445	1509.78	267.091	-462.103	1245.63	251.759	-666.327	1430.21	263.705	-755.864	1222.85	201.388	-458.842	1303.89	435.867	-599.646	1468.03	518.472	-578.317	1243.03	538.935	-574.109	1142.53	564.534	-671.542	993.852	525.83	-723.937	925.673	581.643	-679.169	916.056	574.564	-743.418	863.892
575	0	299.655	-720.728	1670.76	202.932	-731.076	1668.67	307.301	-564.342	1686.15	163.362	-584.586	1677.81	247.493	-531.844	1509.5	266.242	-476.813	1245.73	251.845	-681.044	1430.5	263.668	-769.963	1223.15	200.332	-473.757	1304.34	435.962	-613.815	1467.43	517.525	-588.071	1242.4	536.933	-581.624	1141.8	563.095	-673.685	990.027	524.898	-724.023	920.222	579.827	-678.124	911.599	573.602	-740.929	857.6
576	0	300.238	-734.414	1671.37	203.469	-744.794	1669.51	307.794	-577.69	1685.27	163.687	-598.264	1677.52	248.245	-545.921	1510.17	265.21	-491.592	1245.55	251.817	-695.61	1430.44	263.391	-784.043	1223	198.981	-488.737	1304.17	436.367	-627.812	1466.97	516.39	-598.081	1241.7	534.855	-589.278	1141.04	561.552	-675.602	986.493	523.633	-723.755	914.698	578.115	-676.936	907.612	572.701	-737.811	851.653
577	0	300.778	-748.163	1671.44	203.963	-758.725	1669.93	308.033	-591.271	1683.81	163.53	-612.092	1676.73	247.348	-561.798	1508.92	264.174	-506.358	1244.7	251.674	-710.404	1429.87	263.029	-798.095	1222.1	197.959	-503.478	1303.7	436.177	-642.227	1465.97	515.32	-608.625	1240.55	532.732	-597.246	1139.88	559.675	-677.288	982.611	522.23	-723.36	909.161	576.099	-675.661	903.485	571.552	-734.728	845.778
578	0	301.475	-761.932	1671.03	204.507	-772.868	1669.78	307.906	-605.235	1681.61	164.436	-626.222	1675.37	247.8	-575.351	1507.58	263.303	-520.98	1243.64	251.519	-725.257	1428.94	262.701	-812.308	1220.63	197.078	-518.371	1302.7	436.201	-656.667	1464.35	514.063	-619.402	1238.89	530.789	-605.218	1138.63	557.832	-679.246	978.404	521.008	-722.71	903.693	574.36	-674.259	899.566	570.46	-731.567	839.892
579	0	302.141	-775.896	1670.07	205.381	-786.967	1669.25	308.723	-618.682	1679.84	164.604	-640.435	1673.94	247.44	-590.467	1505.4	262.816	-535.316	1242.29	251.689	-739.859	1427.29	262.364	-826.662	1218.83	196.333	-533.228	1301.28	436.396	-671.109	1462.62	513.033	-630.477	1237.1	528.729	-613.417	1137.14	556.174	-680.791	974.795	519.949	-722.522	898.42	572.578	-673.167	895.746	569.121	-728.339	834.03
580	0	302.862	-790.015	1668.71	205.985	-801.379	1668.34	308.639	-632.979	1677.16	165.164	-655.012	1672.09	247.313	-605.4	1503.39	262.548	-549.841	1240.72	251.593	-754.718	1425.62	261.8	-841.313	1216.63	195.971	-547.865	1299.76	436.564	-685.777	1460.64	511.68	-641.779	1234.81	526.373	-621.992	1135.38	554.513	-682.866	971.083	518.303	-721.393	892.963	570.003	-671.775	891.771	567.76	-724.918	828.477
581	0	303.628	-804.28	1667.04	206.722	-816	1666.85	308.58	-647.4	1674.37	165.512	-669.658	1670.17	247.553	-619.737	1501.42	262.092	-564.55	1238.59	251.556	-769.488	1423.48	261.313	-856.212	1213.9	195.61	-562.601	1297.68	436.678	-700.705	1458.22	510.515	-653.307	1232.54	524.103	-630.586	1133.78	552.99	-685.029	967.794	516.992	-721.029	887.435	568.817	-670.562	889.116	566.412	-721.601	823.092
582	0	304.366	-818.93	1664.7	207.547	-830.739	1665	309.875	-661.351	1672.51	165.796	-684.709	1668.11	247.805	-634.752	1499.61	262.163	-579.131	1236.18	251.634	-784.358	1420.99	261.045	-871.247	1210.88	195.284	-576.997	1295.19	436.843	-715.643	1455.64	509.592	-664.608	1230.2	521.894	-639.324	1132.07	551.474	-687.434	964.441	515.69	-721.034	882.416	567.089	-669.926	886.039	565.43	-718.15	818.36
583	0	305.133	-833.535	1662.22	208.345	-845.662	1662.89	309.712	-676.314	1669.48	166.389	-699.605	1665.93	248.391	-649.004	1497.96	262.883	-593.7	1234.11	251.602	-799.309	1418.32	260.614	-886.494	1207.59	195.475	-591.541	1292.91	437.244	-730.767	1453.11	508.543	-676.096	1227.99	519.731	-648.34	1130.56	549.998	-690.106	961.64	514.92	-720.969	878.092	565.648	-669.341	883.867	564.377	-714.769	814.074
584	0	305.875	-848.482	1659.48	208.963	-860.839	1660.29	310.283	-691.227	1666.62	166.569	-714.902	1663.5	248.984	-663.524	1495.61	263.775	-608.68	1231.4	251.648	-814.265	1415.46	260.111	-901.876	1204.2	195.964	-606.108	1290.51	437.472	-745.867	1450.11	507.685	-687.593	1225.72	517.109	-657.964	1128.42	548.541	-693.093	958.943	513.65	-721.829	873.431	563.891	-669.263	881.618	563.386	-711.421	809.991
585	0	306.716	-863.608	1656.29	209.608	-876.137	1657.2	310.931	-706.284	1663.78	167.32	-730.073	1660.83	249.279	-679.182	1492.77	265.057	-623.665	1228.75	251.774	-829.262	1412.32	259.648	-917.387	1200.7	196.54	-620.835	1287.62	437.659	-761.452	1446.93	506.68	-699.426	1223.11	514.802	-667.998	1126.46	547.055	-696.692	956.305	513.005	-723.114	869.478	562.757	-669.262	880.31	562.478	-708.243	806.211
586	0	307.282	-878.931	1652.72	210.571	-891.396	1654.18	311.493	-721.615	1660.51	168.016	-745.506	1657.92	250.003	-693.979	1489.62	266.254	-638.805	1225.83	251.996	-844.368	1408.99	259.132	-933.012	1197.24	197.382	-635.545	1284.46	438.26	-777.105	1443.92	505.955	-711.423	1220.66	512.455	-678.551	1124.22	545.995	-700.595	954.206	513.872	-724.257	867.189	561.65	-670.115	879.16	561.605	-705.338	802.96
587	0	308.062	-894.372	1649.3	211.148	-906.896	1650.9	312.369	-736.995	1657.36	168.752	-760.932	1655.06	250.4	-710.163	1486.09	267.475	-654.081	1222.65	252.018	-859.651	1405.78	258.496	-948.656	1193.8	198.608	-650.336	1281.59	438.859	-792.904	1440.86	505.265	-723.689	1218.36	510.242	-689.767	1122.06	545.177	-705.111	952.563	515.066	-726.86	865.124	559.977	-671.479	878.446	560.908	-702.736	800.432
588	0	308.67	-909.981	1645.71	211.64	-922.515	1647.43	312.962	-752.793	1653.97	169.566	-776.414	1652.21	251.243	-725.055	1482.21	269.002	-669.315	1219.6	252.46	-874.814	1402.39	257.767	-964.29	1190.63	199.616	-665.547	1277.92	439.601	-809.035	1437.66	504.747	-736.197	1216.02	508.96	-701.044	1120.41	544.633	-710.395	951.045	513.204	-730.142	861.372	558.908	-673.871	878.18	560.065	-701.043	798.076
589	0	309.457	-925.802	1642.21	212.61	-937.951	1644.08	314.201	-768.452	1651.04	170.382	-791.853	1649.27	252.25	-740.365	1478.86	270.061	-684.819	1216.09	252.801	-890.183	1399.19	257.401	-979.902	1187.48	200.939	-680.748	1274.75	440.303	-825.077	1434.26	504.205	-749.332	1213.37	507.461	-713.197	1118.11	544.591	-716.633	949.713	513.255	-733.704	859.31	558.318	-677.44	878.163	559.478	-700.31	796.309
590	0	310.331	-941.651	1638.82	213.284	-953.597	1640.87	315.398	-784.264	1648.37	171.742	-807.42	1646.66	253.89	-754.909	1475.95	271.552	-700.403	1213.2	252.928	-905.711	1396.17	256.827	-995.643	1184.72	202.364	-696.091	1271.79	441.359	-841.313	1431.37	504.197	-762.895	1211.21	506.843	-725.707	1116.87	544.786	-723.836	948.845	513.659	-738.708	857.156	558.1	-682.225	878.698	559.479	-700.698	795.764
591	0	311.272	-957.535	1635.91	213.999	-969.38	1637.74	316.843	-800.23	1645.99	172.872	-822.887	1644.01	255.258	-770.438	1473.57	272.946	-716.158	1210.55	253.357	-921.173	1393.4	256.135	-1011.56	1182.28	203.634	-711.526	1269.25	442.204	-857.641	1428.38	504.466	-776.892	1209.39	506.367	-738.778	1115.5	545.197	-732.113	948.117	514.334	-744.784	855.537	558.343	-688.496	879.28	559.123	-701.988	795.855
592	0	312.534	-973.38	1632.91	215.265	-985.003	1634.98	318.746	-815.834	1643.71	174.449	-838.636	1641.86	256.938	-785.884	1471.01	273.934	-732.268	1207.9	254.11	-936.75	1390.97	256.066	-1027.09	1179.96	205.172	-726.957	1266.94	443.466	-874.354	1425.53	504.815	-791.545	1206.98	506.019	-752.55	1113.59	546.115	-741.671	947.456	515.664	-752.224	854.325	559.575	-696.036	880.017	558.874	-705.542	795.199
593	0	314.008	-989.044	1630.4	216.862	-1000.53	1632.79	320.747	-831.533	1641.38	176.038	-854.118	1640.11	258.382	-801.854	1468.92	275.03	-748.139	1205.51	255.016	-952.476	1388.77	256.396	-1042.65	1177.93	206.425	-742.701	1264.69	444.747	-890.766	1422.93	505.377	-806.923	1204.65	506.319	-766.827	1112	547.71	-752.324	946.948	517.674	-760.75	853.421	561.351	-705.318	880.754	559.279	-710.999	795.07
594	0	315.587	-1004.94	1628.07	218.325	-1016.07	1631.12	322.692	-847.378	1639.03	178.339	-869.319	1638.58	260.166	-817.35	1467.35	275.777	-764.238	1203.14	255.792	-968.394	1386.78	256.756	-1058.63	1176.2	207.308	-758.688	1262.46	445.864	-907.451	1420.48	506.279	-822.728	1202.64	506.956	-781.633	1110.55	549.1	-764.196	946.265	521.493	-769.809	854.385	563.375	-715.918	881.28	559.739	-718.191	794.785
595	0	317.306	-1020.72	1626.34	219.996	-1031.76	1629.86	324.632	-863.267	1636.84	180.094	-884.865	1637.18	261.775	-833.348	1465.16	276.608	-780.282	1201.15	256.536	-984.325	1385.29	257.171	-1074.93	1174.8	208.516	-774.626	1260.83	446.92	-924.138	1418.11	507.037	-838.937	1200.56	507.829	-797.074	1108.86	550.75	-777.239	945.543	521.918	-781.457	852.117	565.814	-727.996	881.574	560.888	-727.024	794.951
596	0	319.318	-1036.59	1624.96	221.865	-1047.46	1629.03	327.273	-878.894	1635.32	182.484	-900.316	1636.36	263.348	-849.325	1463.22	277.352	-796.682	1199.39	257.545	-1000.34	1384.19	258.162	-1091.37	1173.85	209.716	-790.672	1259.21	448.157	-940.737	1416.17	508.219	-855.563	1198.68	509.219	-813.163	1107.45	552.618	-791.455	944.595	524.261	-793.955	851.604	568.616	-741.394	881.682	562.36	-737.938	794.671
597	0	321.373	-1052.2	1624.39	223.94	-1063.03	1629.05	329.568	-894.715	1634.1	185.172	-915.908	1635.99	265.023	-865.602	1461.88	278.158	-813.119	1198.08	258.389	-1016.45	1383.64	259.13	-1108.09	1173.46	210.979	-806.855	1257.93	449.48	-957.397	1414.88	509.365	-872.688	1196.97	510.786	-829.823	1106	554.674	-806.745	943.855	527.773	-807.433	852.274	571.129	-756.242	881.491	564.403	-750.953	794.687
598	0	323.426	-1068.03	1624.62	226.045	-1078.6	1629.76	332.12	-910.502	1633.76	187.349	-931.244	1636.35	266.697	-881.647	1461.57	279.067	-829.599	1197.57	259.343	-1032.58	1383.87	259.835	-1124.98	1173.6	212.26	-823.132	1257.47	450.742	-973.935	1414.25	510.781	-890.163	1196.14	512.362	-847.058	1105.16	557.16	-823.118	943.79	529.322	-822.972	851.457	573.97	-772.487	881.741	566.905	-765.819	795.026
599	0	325.594	-1083.84	1625.32	228.133	-1094.18	1630.95	334.273	-926.412	1633.57	189.708	-946.857	1637.26	268.364	-897.527	1462.15	279.761	-846.27	1197.54	260.3	-1048.69	1384.54	260.692	-1141.71	1174.12	213.744	-839.291	1257.56	451.893	-990.567	1414.15	512.229	-907.829	1195.65	514.525	-864.392	1105.16	559.259	-840.669	943.6	531.752	-840.053	851.55	576.68	-790.14	881.754	569.825	-782.761	795.234
600	0	327.668	-1099.59	1626.19	230.338	-1109.87	1632.41	336.394	-942.165	1633.74	191.607	-962.106	1638.79	268.855	-915.223	1462.8	281.058	-862.607	1198.81	261.257	-1064.85	1385.54	261.656	-1158.46	1174.82	215.236	-855.527	1259	452.736	-1007.13	1414.44	513.651	-925.671	1195.65	516.254	-882.352	1105.15	561.599	-859.307	943.817	533.798	-858.933	850.792	579.595	-809.223	881.89	573.056	-801.797	795.308
601	0	329.829	-1115.02	1627.34	232.545	-1125.53	1634.24	338.609	-957.722	1634.6	193.485	-977.914	1640.47	271.11	-929.326	1465.9	282.074	-878.725	1200.45	262.147	-1080.75	1386.94	262.375	-1175.05	1175.77	216.085	-871.28	1260.69	453.508	-1023.52	1415.61	515.132	-943.566	1196.51	518.345	-900.453	1105.99	563.867	-878.982	944.591	536.975	-878.471	852.185	582.472	-829.446	882.313	576.746	-822.79	795.757
602	0	331.727	-1130.55	1628.57	234.505	-1141.29	1636.33	340.538	-973.222	1635.95	195.138	-993.703	1642.31	272.691	-945.493	1466.97	283.105	-894.065	1202.6	262.674	-1096.52	1388.55	262.712	-1191.31	1177.14	216.624	-886.892	1263.08	454.035	-1039.6	1417.27	516.532	-961.354	1197.87	520.165	-918.914	1106.95	566.228	-899.491	945.15	539.143	-900.251	851.851	585.322	-850.86	882.674	580.823	-845.545	796.273
603	0	333.368	-1146.14	1629.75	236.188	-1157.02	1637.77	341.756	-988.76	1636.83	196.338	-1009.43	1644.35	273.111	-960.612	1469.35	283.917	-909.398	1204.63	263.469	-1112.06	1390.23	263.653	-1206.43	1178.39	217.081	-902.189	1265.24	454.63	-1055.51	1419.16	517.933	-979.338	1199.06	522.251	-937.582	1107.72	568.562	-920.973	945.748	541.763	-922.876	852.378	588.102	-873.37	882.538	584.853	-870.051	796.265
604	0	334.829	-1161.53	1630.99	237.796	-1172.6	1639.29	342.692	-1004.22	1638.13	198.054	-1025.14	1646.1	273.102	-977.051	1471.34	284.318	-924.446	1206.23	263.967	-1127.25	1391.82	264.018	-1221.69	1179.94	216.89	-917.138	1267.25	454.991	-1071.14	1421.1	519.143	-997.381	1200.21	524.292	-956.533	1108.76	571.081	-943.021	946.211	543.994	-946.965	852.403	590.865	-896.822	882.361	589.505	-896.061	796.586
605	0	335.721	-1176.81	1632.34	238.804	-1188.11	1640.98	343.387	-1019.47	1640.08	198.435	-1040.8	1648.22	272.47	-993.634	1472.36	285.119	-939.782	1208.21	264.276	-1142.27	1393.78	264.142	-1236.62	1181.73	217.5	-931.866	1269.49	455.32	-1086.43	1423.37	520.456	-1015.42	1201.61	526.46	-975.515	1109.82	573.497	-965.769	946.938	547.22	-971.517	853.763	593.515	-921.079	881.907	593.51	-923.509	796.22
606	0	336.171	-1192.08	1633.93	239.357	-1203.61	1642.55	343.515	-1034.97	1642.26	199.07	-1056.3	1650.67	272.969	-1008.38	1473.77	285.959	-954.651	1210.04	264.413	-1157.09	1395.82	263.233	-1252.04	1183.69	218.091	-946.417	1271.3	455.585	-1101.73	1425.77	521.998	-1033.49	1203.43	528.635	-994.753	1110.99	575.877	-989.125	947.614	549.054	-997.361	853.894	596.136	-946.117	881.536	597.386	-951.975	796.385
607	0	336.518	-1207.33	1635.97	239.579	-1218.89	1644.16	343.987	-1050.09	1645.24	199.173	-1071.81	1652.87	273.825	-1022.58	1475.86	286.737	-969.491	1211.78	264.56	-1171.62	1397.9	262.873	-1266.51	1185.83	219.086	-960.77	1273.12	455.804	-1116.82	1427.98	523.288	-1051.85	1204.87	530.8	-1014.33	1111.83	578.114	-1013.07	948.186	551.976	-1023.74	855.248	598.67	-972.052	881.138	601.366	-981.696	796.598
608	0	336.269	-1222.4	1638.06	239.405	-1234.09	1646.08	343.428	-1065.31	1647.54	199.056	-1086.81	1655.37	274.253	-1037.21	1478.29	287.863	-984.278	1214.41	264.489	-1186.1	1400.36	262.389	-1280.88	1188.27	220.461	-974.971	1275.3	456.072	-1131.94	1430.66	524.663	-1070.14	1206.89	532.899	-1034.14	1112.95	580.32	-1037.56	949.028	554.162	-1050.64	856.591	600.836	-998.558	880.653	604.989	-1012.34	797.507
609	0	335.787	-1237.33	1640.52	238.768	-1249.04	1648.14	343.433	-1080.2	1651.21	198.37	-1101.89	1657.88	276.445	-1049.05	1481.84	288.96	-999.123	1216.85	264.382	-1200.56	1402.84	261.859	-1294.36	1190.53	222.245	-989.18	1277.79	455.966	-1147.17	1433.32	525.888	-1088.55	1209.06	535.214	-1054.09	1114.6	582.214	-1062.67	950.36	556.074	-1078.57	858.098	603.156	-1025.63	880.825	608.617	-1043.81	799.45
610	0	335.046	-1252.35	1643.06	238.14	-1263.82	1650.3	342.619	-1095.19	1654.08	198.292	-1116.53	1660.16	276.656	-1063.62	1484.75	290.281	-1013.7	1219.56	264.169	-1215.02	1405.35	261.004	-1308.66	1192.99	223.578	-1003.6	1279.96	456.016	-1162.31	1436.3	527.028	-1107.12	1211.13	537.526	-1074.07	1116.36	584.079	-1088.04	951.659	557.994	-1107.15	860.085	604.875	-1053.81	880.685	611.475	-1076.23	800.888
611	0	334.073	-1267.2	1645.8	237.135	-1278.63	1652.76	341.833	-1110.15	1657.29	197.11	-1131.34	1662.82	276.925	-1077.82	1488.12	291.54	-1028.19	1222.48	263.942	-1229.35	1408	260.317	-1322.35	1195.28	225.11	-1017.76	1282.91	455.754	-1177.69	1439.1	528.179	-1125.72	1213.82	539.448	-1094.39	1117.88	585.722	-1114.09	953.416	559.991	-1136.09	862.555	606.644	-1082.36	881.331	614.168	-1109.36	803.502
612	0	332.879	-1282.01	1648.9	235.851	-1293.29	1655.35	340.935	-1124.85	1660.56	196.242	-1145.9	1665.5	276.882	-1092.68	1491.17	292.987	-1042.48	1225.74	263.521	-1243.72	1410.63	259.389	-1336.67	1198.06	226.698	-1031.93	1285.98	455.491	-1192.98	1442.24	529.18	-1144.44	1216.54	541.394	-1114.73	1120.06	587.143	-1140.43	955.769	561.378	-1165.46	865.755	608.111	-1111.52	882.336	616.403	-1143	806.91
613	0	331.431	-1296.76	1651.82	234.451	-1307.66	1657.41	339.855	-1139.73	1663.74	194.821	-1160.52	1667.78	275.681	-1110.18	1493.1	294.271	-1056.79	1228.59	263.091	-1258.16	1413.25	258.468	-1350.74	1200.56	228.032	-1046.1	1288.79	455.031	-1208.6	1445.23	530.074	-1163.02	1219.44	543.316	-1135.17	1122.23	588.013	-1167.23	958.251	561.262	-1196.11	868.717	609.265	-1141.08	883.979	618.017	-1177.15	810.767
614	0	329.936	-1311.75	1654.5	233.12	-1322.1	1659.76	338.735	-1154.52	1666.41	193.814	-1174.96	1669.7	274.965	-1125.72	1495.29	295.435	-1070.97	1231.49	262.664	-1272.54	1415.56	257.856	-1364.93	1202.93	229.216	-1060.21	1291.4	454.669	-1224.15	1448.14	530.644	-1181.86	1221.86	545.255	-1155.76	1124.43	588.717	-1194.48	960.979	561.911	-1226.64	873.044	609.984	-1171.46	885.645	619.107	-1211.81	815.023
615	0	328.632	-1326.32	1657.36	231.684	-1336.54	1661.96	337.456	-1169.43	1668.95	192.723	-1189.42	1671.37	274.581	-1140.82	1497.44	296.654	-1085.28	1234.17	262.286	-1286.88	1417.85	257.523	-1378.77	1205.55	230.134	-1074.54	1293.71	454.13	-1239.7	1450.92	531.537	-1200.58	1224.88	546.899	-1176.46	1126.61	589.476	-1221.67	964.285	562.141	-1257.4	877.944	610.45	-1202.22	887.802	619.965	-1246.37	820.309
616	0	327.162	-1341.05	1659.91	230.129	-1350.9	1663.92	336.754	-1183.96	1671.8	191.727	-1203.7	1672.96	276.429	-1153.15	1500.29	297.515	-1099.65	1236.55	261.86	-1301.33	1419.96	256.913	-1392.44	1207.82	230.944	-1088.91	1296.07	453.587	-1255.08	1454.04	532.283	-1219.19	1227.89	548.79	-1196.92	1129.35	590.009	-1249.2	968.23	563.167	-1287.4	884.811	610.95	-1232.94	891.234	620.144	-1281.32	826.26
617	0	325.729	-1355.77	1662.11	228.719	-1365.27	1665.4	335.788	-1198.68	1674.01	190.697	-1217.83	1674.44	276.471	-1167.44	1502.22	298.24	-1114.08	1238.5	261.424	-1315.72	1421.72	256.371	-1406.34	1209.61	232.094	-1103.22	1298.44	452.859	-1270.63	1456.63	532.999	-1237.74	1230.67	550.6	-1217.5	1131.88	590.225	-1276.97	972.299	562.363	-1318.24	890.474	610.995	-1264.3	894.447	619.942	-1316.23	832.531
618	0	324.423	-1370.42	1663.89	227.406	-1379.6	1666.8	334.715	-1213.4	1675.6	189.53	-1232.27	1675.33	276.328	-1181.92	1503.92	299.092	-1128.55	1240.4	260.976	-1330.21	1422.98	255.948	-1420.13	1211.14	232.678	-1117.61	1299.85	452.231	-1286.04	1458.6	533.765	-1256.27	1233.09	552.408	-1237.8	1133.99	590.367	-1304.86	976.058	561.601	-1348.96	896.564	610.435	-1296.12	897.174	619.29	-1350.98	838.92
619	0	323.217	-1384.98	1665.29	226.163	-1393.9	1667.81	333.846	-1228.12	1676.86	189.029	-1246.38	1675.87	276.249	-1196.36	1505.18	299.557	-1143.02	1241.94	260.57	-1344.64	1424.05	255.454	-1434.02	1212.39	233.27	-1131.98	1301.24	451.544	-1301.44	1460.46	534.566	-1274.73	1235.34	553.751	-1258.37	1135.53	590.406	-1332.54	980.23	560.721	-1379.77	903.195	609.376	-1328.45	900.317	618.099	-1385.41	845.796
620	0	322.216	-1399.5	1666.47	225.096	-1408.24	1668.36	333.008	-1242.77	1677.4	188.472	-1260.56	1675.99	275.881	-1211.04	1505.93	299.867	-1157.43	1243	260.148	-1359.24	1424.67	254.89	-1447.93	1213.28	233.759	-1146.58	1302.13	450.76	-1316.85	1461.66	535.366	-1292.98	1237.33	555.786	-1278.64	1137.49	590.302	-1360.07	984.622	559.537	-1410.35	909.84	610.323	-1358.69	906.351	616.444	-1420	852.625
621	0	321.359	-1414.21	1666.86	224.223	-1422.65	1668.65	332.958	-1257.05	1678.09	188.132	-1274.95	1675.8	275.577	-1225.8	1506.25	300.332	-1171.91	1243.55	259.787	-1373.83	1424.77	254.399	-1461.87	1213.55	234.115	-1161.09	1302.54	450.292	-1331.96	1462.68	536.316	-1311.23	1238.82	557.407	-1299.14	1138.44	590.173	-1387.7	988.646	558.169	-1440.92	916.485	609.353	-1390.49	910.003	614.702	-1453.91	859.869
622	0	320.731	-1428.93	1666.98	223.542	-1436.94	1668.72	332.836	-1271.71	1677.92	187.765	-1289.17	1675.48	275.348	-1240.97	1505.97	300.719	-1186.29	1243.93	259.572	-1388.4	1424.48	254.017	-1475.75	1213.53	234.684	-1175.68	1302.52	449.818	-1346.75	1462.98	537.192	-1329.29	1239.82	559.391	-1319.32	1139.41	590.003	-1415.2	992.623	556.94	-1471	923.423	608.74	-1421.77	914.381	612.642	-1487.7	867.071
623	0	320.089	-1443.69	1666.66	222.922	-1451.43	1668.32	332.742	-1286.13	1677.23	187.358	-1303.7	1674.46	274.882	-1255.92	1505.21	300.827	-1200.9	1243.39	259.211	-1403.09	1423.72	253.623	-1489.51	1212.77	234.846	-1190.16	1301.83	449.229	-1361.59	1462.78	538.081	-1347.34	1240.23	560.965	-1339.99	1139.53	589.666	-1442.36	996.465	555.38	-1500.8	930.341	607.854	-1452.81	918.669	610.114	-1521.04	874.267
624	0	319.571	-1458.47	1665.86	222.3	-1466.15	1667.37	332.5	-1300.9	1675.75	187.423	-1317.98	1673.24	273.78	-1272.12	1503.17	300.955	-1215.48	1242.37	258.789	-1417.84	1422.54	253.252	-1502.92	1211.46	234.98	-1204.67	1300.77	448.379	-1376.81	1461.69	538.786	-1365.38	1239.9	562.538	-1360.52	1139.43	589.168	-1469.62	1000.05	553.471	-1530.31	937.064	606.53	-1483.8	922.671	607.469	-1554.01	881.58
625	0	319.265	-1473.4	1664.49	222.246	-1480.68	1666.31	332.19	-1316.19	1673.54	187.271	-1332.59	1671.67	273.165	-1286.9	1501.6	301.031	-1229.82	1241.03	258.591	-1432.58	1420.92	253.187	-1516.11	1209.52	235.115	-1219.07	1299.5	447.995	-1391.38	1460.43	539.678	-1383.4	1239.09	563.965	-1381.41	1138.52	588.543	-1496.6	1003.36	551.694	-1559.25	943.632	604.363	-1515.75	925.658	604.7	-1586.51	888.886
626	0	319.197	-1488.27	1662.87	222.02	-1495.45	1664.88	332.584	-1330.59	1671.8	187.562	-1347.43	1669.89	272.644	-1301.7	1500.01	300.687	-1244.29	1239.37	258.361	-1447.34	1418.96	253.372	-1529.07	1207.24	234.667	-1233.83	1297.64	447.757	-1405.56	1459.11	540.552	-1401.12	1238.23	565.543	-1401.96	1137.91	587.994	-1523.11	1007.01	549.698	-1587.72	950.241	604.472	-1544.58	931.716	601.713	-1618.44	896.316
627	0	319.05	-1503.21	1660.85	221.83	-1510.49	1662.98	332.073	-1346.15	1669.31	187.558	-1362.27	1667.9	271.873	-1316.82	1498.08	300.182	-1258.54	1237.47	258.014	-1462.06	1416.78	253.755	-1541.78	1204.46	234.016	-1248.47	1295.55	447.147	-1420.02	1457.02	541.237	-1418.99	1237.08	566.715	-1422.79	1136.85	587.187	-1549.61	1010.51	547.502	-1615.64	956.784	602.798	-1574.55	936.148	598.495	-1649.53	903.956
628	0	318.924	-1518.17	1658.47	221.652	-1525.64	1660.59	332.27	-1360.64	1667.18	187.098	-1377.24	1665.65	271.683	-1329.22	1496.3	299.286	-1272.84	1235.28	257.641	-1476.84	1414.17	253.762	-1555.94	1201.3	233.206	-1262.87	1293.34	446.081	-1435.1	1454.22	541.464	-1437.01	1235.23	567.475	-1443.84	1135.33	586.028	-1575.74	1013.73	545.111	-1643.14	962.845	601.538	-1603.91	940.969	595.333	-1680.29	911.411
629	0	318.783	-1533.31	1655.63	221.69	-1540.86	1657.97	332.007	-1375.75	1664.48	186.976	-1392.6	1663.1	271.235	-1343.96	1494.12	297.902	-1286.89	1232.95	257.356	-1491.61	1411.37	253.823	-1570.89	1197.92	232.336	-1277.32	1291.39	445.424	-1449.68	1451.42	541.617	-1454.89	1233.46	568.133	-1464.82	1133.83	584.802	-1601.32	1016.96	542.856	-1669.81	968.91	599.761	-1632.48	945.533	592.188	-1709.96	918.934
630	0	318.744	-1548.36	1652.56	221.485	-1556.13	1655.02	331.622	-1390.8	1661.76	186.471	-1407.83	1660.65	270.764	-1358.7	1492.2	296.417	-1300.9	1230.62	256.977	-1506.46	1408.49	253.881	-1586.34	1194.74	230.92	-1291.73	1288.89	444.802	-1464.03	1448.63	541.622	-1472.81	1231.81	568.844	-1485.5	1132.93	583.383	-1626.3	1020.5	540.302	-1696.02	974.577	598.471	-1660.46	950.461	588.938	-1738.59	926.351
631	0	318.541	-1563.49	1649.5	221.307	-1571.42	1652.03	331.047	-1405.88	1658.99	185.645	-1423.13	1658.14	269.973	-1373.79	1489.33	294.688	-1314.94	1228.09	256.611	-1521.19	1405.45	253.734	-1602.58	1191.39	229.567	-1306.29	1286.4	444.63	-1477.42	1446.48	541.268	-1490.57	1230.05	569.034	-1506.29	1131.62	581.819	-1650.85	1023.85	537.87	-1721.26	980.205	596.889	-1687.59	955.283	585.847	-1766.42	933.704
632	0	318.186	-1578.63	1646.11	221.069	-1586.77	1648.87	330.452	-1420.97	1656.33	185.415	-1438.6	1655.31	269.025	-1389.01	1486.15	292.751	-1329.04	1225.19	256.264	-1536	1402.25	253.876	-1618.69	1188.05	228.034	-1320.92	1283.7	443.397	-1492.24	1442.94	540.662	-1508.42	1227.89	568.962	-1526.65	1130.27	580.186	-1674.84	1026.88	535.428	-1745.82	985.313	595.646	-1713.85	960.155	583.264	-1793.11	940.988
633	0	317.865	-1593.7	1642.95	220.699	-1602.03	1645.79	329.692	-1436.15	1653.39	184.558	-1454.06	1652.95	267.804	-1403.89	1483.61	290.72	-1343.61	1222.24	255.858	-1550.86	1399.11	254.42	-1634.36	1184.99	226.209	-1335.7	1280.82	443.112	-1505.6	1440.62	539.768	-1525.95	1225.69	568.576	-1546.84	1128.7	578.464	-1697.75	1029.87	533.173	-1769.54	990.567	593.788	-1739.13	964.4	580.769	-1818.8	947.949
634	0	317.177	-1608.65	1639.69	220.074	-1617.38	1642.56	328.678	-1451.22	1650.88	183.578	-1469.46	1650.38	266.561	-1419.13	1480.33	288.49	-1358.36	1219.33	255.136	-1565.8	1396.16	255.179	-1648.98	1181.78	224.439	-1350.37	1278.07	442.134	-1519.78	1437.83	538.678	-1543.5	1223.92	567.892	-1566.35	1127.55	576.569	-1719.97	1032.8	530.879	-1792.39	995.141	591.703	-1763.39	968.563	578.276	-1843.3	954.778
635	0	316.415	-1623.58	1636.63	219.222	-1632.57	1639.36	327.658	-1466.05	1648.62	182.36	-1484.69	1647.93	265.198	-1434.16	1477.48	286.172	-1373.42	1216.31	254.286	-1580.79	1393.3	255.285	-1664.36	1178.56	222.752	-1365.27	1275.22	440.915	-1534.41	1434.93	537.138	-1560.74	1221.98	567.244	-1585.25	1126.57	574.758	-1741.5	1035.28	528.611	-1814.26	999.654	590.043	-1786.36	972.873	575.979	-1866.79	961.336
636	0	315.256	-1638.48	1633.81	218.175	-1647.63	1636.68	326.2	-1481.05	1646	181.26	-1499.87	1645.39	261.841	-1451.37	1474.46	284.235	-1388.85	1213.37	253.363	-1595.76	1390.63	255.808	-1678.85	1175.78	220.975	-1380.26	1272.36	439.872	-1548.74	1432.55	535.58	-1578.03	1219.93	566.18	-1603.82	1125.35	572.984	-1762.01	1037.94	526.582	-1835.33	1003.81	588.11	-1808.55	976.688	573.784	-1889.22	967.308
637	0	313.873	-1653.32	1631.36	216.829	-1662.5	1634.29	324.692	-1495.91	1643.7	179.218	-1514.65	1643.17	260.228	-1466.82	1472.36	282.626	-1404.56	1210.88	252.172	-1610.83	1388.37	255.714	-1694.14	1173.81	219.542	-1395.38	1269.78	438.972	-1563.1	1430.72	533.988	-1594.67	1218.31	564.805	-1621.51	1123.96	571.201	-1781.48	1040.3	524.668	-1855.5	1007.52	586.361	-1829.62	979.991	571.988	-1910.21	972.987
638	0	312.268	-1667.99	1629.36	215.202	-1677.19	1632.13	322.868	-1510.57	1641.73	177.843	-1529.53	1640.68	259.06	-1481.23	1469.95	281.117	-1420.17	1208.27	250.918	-1625.77	1386.2	255.059	-1709.92	1172.47	218.316	-1410.76	1267.45	437.776	-1577.77	1428.99	532.199	-1610.98	1216.69	563.456	-1638.66	1122.96	569.355	-1800.13	1042.32	522.807	-1874.7	1010.87	584.705	-1849.54	983.325	570.55	-1930.32	978.428
639	0	310.13	-1682.38	1627.51	213.133	-1691.89	1630.18	320.943	-1525.17	1639.94	175.815	-1544.09	1638.52	258.089	-1495.67	1468.21	279.901	-1436.01	1205.93	249.253	-1641.13	1384.5	253.932	-1725.92	1171.4	217.05	-1426.33	1264.79	436.149	-1592.96	1427.51	530.342	-1626.93	1215.22	562	-1655.12	1121.79	567.786	-1818.21	1043.69	521.112	-1893.1	1013.66	582.995	-1868.37	985.696	569.169	-1949.39	982.719
640	0	308.096	-1697.14	1626.29	210.875	-1706.33	1628.8	319.137	-1539.84	1638.13	173.629	-1558.46	1636.7	256.735	-1510.3	1466.4	278.992	-1451.94	1203.77	247.652	-1656.54	1382.93	252.594	-1741.92	1170.53	216.162	-1442.03	1262.58	434.772	-1608.1	1426.29	528.721	-1642.55	1213.87	560.352	-1671.3	1120.52	566.219	-1835.19	1044.66	519.666	-1910.67	1015.7	581.339	-1886.31	987.37	568.155	-1967.2	986.698
641	0	305.54	-1711.59	1625.5	208.309	-1720.74	1627.7	316.675	-1554.19	1636.54	171.465	-1572.82	1634.77	255.909	-1520.36	1465.97	277.969	-1468.12	1201.6	245.756	-1671.99	1381.77	250.923	-1757.83	1169.76	215.039	-1457.98	1260.3	433.002	-1623.48	1425.28	527.064	-1657.86	1212.69	558.576	-1686.86	1119.41	564.59	-1851.44	1044.96	518.353	-1927.48	1017.17	579.562	-1903.06	988.177	567.462	-1984.02	989.729
642	0	302.891	-1725.99	1625.19	205.633	-1735	1627.14	314.167	-1568.54	1635.41	168.724	-1586.83	1633.25	252.654	-1540.94	1462.35	276.909	-1484.43	1199.48	243.659	-1687.52	1380.88	248.862	-1773.62	1169.28	213.879	-1473.98	1258.08	431.007	-1639.12	1424.22	525.374	-1673.02	1211.59	556.689	-1702.02	1118.32	563.053	-1867.02	1044.46	517.134	-1943.42	1017.8	578.248	-1919	987.954	566.642	-2000.03	991.731
643	0	300.015	-1740.34	1625.28	202.781	-1749.24	1627.06	311.369	-1582.8	1634.34	166.293	-1601.02	1632.2	250.327	-1556.71	1460.71	275.984	-1501.03	1197.94	241.675	-1703.03	1380.3	246.607	-1789.88	1169.15	212.526	-1490.29	1256.33	429.055	-1654.69	1423.62	523.831	-1688.04	1210.73	554.727	-1717.09	1117.25	561.66	-1882.02	1043.59	516.321	-1958.86	1017.5	576.798	-1934.14	987.204	566.27	-2014.76	992.828
644	0	297.003	-1754.65	1625.97	199.767	-1763.34	1627.56	308.582	-1597.05	1633.95	163.535	-1615.12	1631.32	248.226	-1572.03	1460.08	274.992	-1517.73	1196.92	239.493	-1718.8	1380.36	244.182	-1806.75	1169.58	211.514	-1506.62	1255.15	427.184	-1670.36	1423.53	522.117	-1702.88	1210.48	552.592	-1731.82	1116.34	560.265	-1896.33	1042.12	515.266	-1973.18	1016.21	575.357	-1948.32	985.692	566.082	-2028.62	992.726
645	0	293.839	-1768.9	1626.85	196.445	-1777.66	1628.29	305.348	-1611.35	1633.79	160.36	-1629.36	1630.95	246.327	-1586.84	1459.79	274.028	-1534.31	1196.67	237.258	-1734.34	1380.5	241.55	-1823.9	1170.36	210.07	-1523.08	1254.44	424.883	-1686.13	1423.75	520.31	-1717.79	1210.57	550.395	-1746.11	1116.08	558.72	-1910.01	1040.12	514.164	-1986.88	1014.25	573.847	-1961.29	983.359	565.787	-2041.48	991.971
646	0	290.376	-1783.34	1628.34	193.166	-1791.8	1629.42	301.904	-1625.56	1634.17	156.974	-1643.59	1630.59	243.871	-1602.93	1460.21	272.873	-1550.83	1196.84	234.984	-1750.01	1381.29	239.237	-1841.33	1171.58	208.58	-1539.61	1254.05	422.832	-1702.15	1424.43	518.367	-1732.55	1210.82	548.295	-1760.12	1116.22	557.397	-1923.09	1038.22	512.886	-1999.78	1011.65	572.395	-1973.68	980.861	565.566	-2053.57	989.605
647	0	286.896	-1797.77	1630.18	189.632	-1806.17	1630.43	298.494	-1639.95	1634.83	153.491	-1657.8	1630.59	243.702	-1615.93	1461.43	271.931	-1566.98	1197.19	233.05	-1765.53	1382.22	237.119	-1858.29	1172.7	207.339	-1555.81	1254.3	420.92	-1717.97	1425.59	516.543	-1747.5	1211.6	546.046	-1773.9	1116.4	555.859	-1935.6	1035.81	511.809	-2011.88	1007.86	570.896	-1984.97	977.524	565.314	-2064.63	986.535
648	0	283.388	-1812.21	1632.34	186.154	-1820.43	1631.95	295.17	-1654.4	1635.99	150.09	-1672.06	1630.6	242.064	-1631.02	1462.88	271.239	-1582.76	1198.66	231.18	-1780.99	1383.32	235.36	-1874.87	1173.9	206.284	-1571.79	1255.11	419.086	-1733.55	1427.46	514.574	-1762.12	1212.84	543.899	-1787.37	1117.2	554.185	-1947.25	1033.35	510.645	-2023.23	1004	569.525	-1995.4	974.101	564.925	-2074.88	982.696
649	0	279.887	-1826.89	1634.51	182.635	-1834.83	1632.95	291.772	-1668.84	1637.52	147.15	-1686.62	1630.74	240.399	-1646.02	1463.71	270.652	-1597.87	1200.25	229.587	-1796.23	1384.65	233.868	-1890.78	1175.14	205.366	-1587.17	1256.25	417.141	-1749.23	1429.51	512.457	-1776.99	1214.28	541.873	-1800.39	1118.46	552.533	-1958.42	1031.02	509.162	-2033.81	999.587	568.264	-2005.11	970.57	564.141	-2084.25	977.691
650	0	276.733	-1841.67	1636.43	179.524	-1849.38	1634	288.639	-1683.6	1639.03	144.057	-1701.16	1630.83	238.785	-1660.94	1465.16	269.958	-1612.63	1202.14	228.317	-1811.19	1385.98	232.643	-1906.36	1176.33	204.419	-1602.39	1257.58	415.339	-1764.57	1431.38	510.381	-1791.78	1215.88	539.74	-1813.2	1119.72	550.995	-1968.94	1028.6	508.057	-2043.4	994.644	567.142	-2013.93	966.674	563.434	-2092.88	971.774
651	0	273.909	-1856.5	1638.16	176.859	-1864.11	1634.83	285.869	-1698.29	1641.08	141.594	-1716.19	1631.39	236.887	-1675.68	1466.43	268.921	-1627.32	1203.68	227.239	-1825.99	1387.29	231.611	-1921.72	1177.62	203.612	-1617.34	1258.95	413.671	-1779.45	1433.44	508.185	-1806.47	1217.3	537.815	-1825.86	1121.31	549.394	-1978.94	1025.83	506.968	-2052.23	989.567	565.672	-2021.89	962.45	562.541	-2100.89	964.904
652	0	271.578	-1871.29	1639.84	174.578	-1878.99	1635.89	283.371	-1713.24	1643.2	139.241	-1730.93	1632.59	234.918	-1690.49	1467.41	267.644	-1641.98	1205.16	226.372	-1840.37	1388.87	230.839	-1936.5	1179.4	202.215	-1632.04	1260.26	411.999	-1793.66	1435.53	505.993	-1820.68	1219.31	536.059	-1838.07	1123.16	547.937	-1988.33	1023.05	505.634	-2060.42	983.93	564.505	-2028.99	958.25	561.405	-2108.16	957.367
653	0	269.96	-1886.16	1641.42	172.734	-1894.11	1636.98	281.388	-1727.89	1645.76	137.481	-1745.91	1634.2	232.881	-1704.67	1469.15	266.589	-1656.24	1207.07	225.505	-1854.62	1390.72	230.465	-1950.82	1181.41	200.906	-1646.7	1262.05	410.69	-1807.21	1437.85	503.967	-1834.73	1221.01	534.642	-1850.23	1125.42	546.363	-1997.11	1020.45	504.349	-2067.97	978.288	562.863	-2034.94	954.144	560.124	-2114.3	948.885
654	0	268.899	-1900.84	1643.17	171.866	-1908.9	1638.51	279.868	-1742.6	1648.33	135.896	-1760.91	1636.62	231.257	-1718.82	1471.49	265.045	-1670.4	1209.05	224.867	-1868.57	1392.81	230.319	-1964.69	1183.57	199.321	-1661.13	1263.83	409.771	-1820.04	1440.38	502.243	-1847.7	1223.23	532.881	-1861.95	1127.08	545.078	-2005.44	1017.68	503.086	-2074.72	972.483	562.382	-2041.4	950.121	558.575	-2119.98	940.594
655	0	268.207	-1915.33	1644.63	171.345	-1923.64	1640.31	278.641	-1757.27	1651.06	134.662	-1776.12	1639.44	229.975	-1732.09	1474.43	263.212	-1684.51	1211.1	224.07	-1882.6	1395.36	230.276	-1978.38	1186.16	197.256	-1675.39	1265.82	408.869	-1832.75	1442.98	500.921	-1860.28	1225.43	531.268	-1873.31	1129.06	543.893	-2013.15	1015.05	501.892	-2080.61	966.793	561.84	-2046.88	946.403	556.763	-2124.88	931.959
656	0	267.823	-1929.73	1646.51	170.754	-1938.48	1642.06	277.548	-1771.75	1654.18	133.298	-1790.88	1642.71	228.616	-1745.52	1476.72	261.185	-1698.35	1213.66	223.274	-1896.43	1397.98	230.263	-1992.12	1189.12	195.421	-1689.52	1268.07	408.342	-1845.07	1445.68	499.801	-1872.1	1227.46	529.677	-1883.86	1130.98	542.855	-2020.14	1012.48	500.668	-2085.78	961.378	560.807	-2051.35	942.56	554.77	-2128.79	923.108
657	0	267.633	-1944.1	1648.57	170.629	-1953.14	1644.3	276.799	-1786.23	1657.22	132.78	-1805.83	1645.86	227.238	-1759.45	1479.51	259.09	-1712.34	1215.69	222.564	-1910.23	1400.66	230.529	-2005.93	1192.2	193.583	-1703.25	1270.4	407.847	-1857.4	1447.96	499.054	-1883.4	1229.25	528.187	-1894.08	1132.28	541.912	-2026.66	1009.86	499.473	-2090.27	955.959	559.776	-2055.1	938.634	552.464	-2131.83	913.931
658	0	267.567	-1958.52	1650.69	170.602	-1967.65	1646.86	276.464	-1800.59	1660.45	132.106	-1820.37	1649.46	226.278	-1772.8	1482.81	256.823	-1725.95	1218.16	222.034	-1923.85	1403.68	230.963	-2019.88	1195.4	191.883	-1716.99	1272.82	407.54	-1869.82	1450.34	498.314	-1893.82	1230.61	526.719	-1903.94	1133.27	540.838	-2032.45	1007.1	498.203	-2094.08	950.412	558.941	-2058.68	934.945	550.119	-2133.93	904.698
659	0	267.44	-1972.63	1653.25	170.53	-1981.91	1649.61	276.005	-1814.87	1663.77	131.748	-1834.87	1653.06	224.883	-1786.76	1485.52	254.74	-1739.65	1220.95	221.521	-1937.45	1406.87	231.216	-2033.75	1198.79	190.163	-1730.74	1275.76	407.583	-1882.34	1452.61	497.758	-1903.81	1232.46	525.151	-1912.91	1134.28	539.89	-2037.62	1004.51	497.034	-2097.2	945.504	558.07	-2061.5	931.53	547.786	-2134.89	896.306
660	0	267.225	-1986.68	1655.67	170.262	-1996.19	1652.35	275.584	-1829.04	1666.89	131.499	-1849.09	1656.55	223.558	-1801.14	1487.71	252.612	-1753.11	1223.81	221.044	-1951.09	1409.99	231.444	-2047.49	1202.24	188.458	-1744.49	1278.68	407.377	-1895.13	1454.84	497.194	-1913.35	1233.69	523.579	-1921.56	1135.19	538.867	-2042.18	1001.77	495.616	-2099.55	940.53	557.243	-2063.66	928.352	545.659	-2134.94	888.273
661	0	266.985	-2000.8	1658.13	169.979	-2010.3	1655.15	275.547	-1843.19	1670.16	131.373	-1863.19	1660.25	222.57	-1815.37	1490.45	250.598	-1766.77	1227	220.514	-1964.99	1413.11	231.602	-2061.2	1205.36	187.208	-1758.08	1282.1	407.044	-1908.13	1456.93	496.541	-1922.49	1235	521.465	-1929.48	1135.9	537.801	-2046.01	999.226	494.445	-2101.36	936.137	556.038	-2065.03	924.591	543.208	-2134.14	880.374
662	0	266.741	-2014.63	1660.52	169.794	-2024.18	1657.9	275.43	-1857.26	1673.1	131.2	-1877.16	1663.44	222.202	-1828.41	1493.87	248.588	-1780.57	1229.72	220.134	-1978.74	1416.06	231.808	-2074.8	1208.48	185.529	-1772.08	1285.23	406.583	-1921.18	1459.04	495.615	-1931.42	1236.27	519.176	-1937.35	1136.28	536.569	-2049.41	996.946	493.092	-2102.45	931.584	554.838	-2066.09	921.575	541.154	-2132.54	873.251
663	0	266.402	-2028.36	1662.8	169.485	-2037.96	1660.5	275.092	-1871.18	1675.64	131.076	-1890.91	1666.7	222.074	-1841.58	1497.61	246.778	-1794.36	1232.49	219.682	-1992.44	1418.81	231.546	-2088.58	1211.02	183.696	-1785.89	1288.1	406.011	-1934.42	1461.2	494.434	-1940.13	1237.74	517.4	-1945.14	1137.69	535.063	-2052.19	994.814	491.599	-2103.06	927.361	553.418	-2066.15	918.812	538.932	-2130.5	867.12
664	0	266.066	-2042.27	1664.78	169.261	-2051.65	1662.91	275.008	-1885.03	1678.06	130.653	-1904.59	1669.52	220.791	-1855.66	1499.61	245.167	-1808.36	1235.1	219.172	-2006.32	1421.25	231.531	-2101.43	1214.16	181.821	-1799.94	1291.06	405.381	-1947.8	1463.09	493.164	-1948.93	1238.99	515.395	-1951.8	1138.74	533.611	-2054.65	992.868	490.172	-2103.25	923.487	552.17	-2066.1	916.341	537.027	-2127.88	861.225
665	0	265.866	-2055.83	1666.59	168.989	-2065.35	1665.07	274.991	-1898.76	1680.04	130.584	-1918.37	1671.81	221.165	-1868.01	1502.95	244.088	-1821.99	1237.36	218.691	-2020.14	1423.35	231.321	-2114.71	1216.53	179.985	-1814.1	1293.3	404.915	-1961.14	1464.65	491.866	-1958.05	1239.95	513.579	-1959.1	1139.74	532.018	-2056.86	990.65	488.868	-2102.89	919.659	550.462	-2065.52	913.398	535.283	-2124.92	855.489
666	0	265.56	-2069.43	1667.98	168.7	-2078.9	1666.93	274.722	-1912.54	1681.3	130.402	-1931.77	1673.81	219.518	-1883.29	1503.41	242.731	-1836.19	1238.83	218.06	-2034.07	1425.04	230.972	-2127.87	1218.62	178.258	-1828.25	1295.43	404.281	-1974.5	1465.89	490.452	-1967.31	1240.58	511.049	-1966	1140.17	530.143	-2058.61	988.509	487.321	-2102.27	915.884	548.746	-2064.59	910.838	533.503	-2121.75	850.695
667	0	265.247	-2082.67	1668.91	168.329	-2092.67	1668.24	274.533	-1926.3	1682.17	130.198	-1945.51	1675.27	218.102	-1898.2	1504.2	241.419	-1850.02	1239.87	217.371	-2047.93	1426.39	230.445	-2141.13	1220.27	176.429	-1842.48	1296.79	403.745	-1987.87	1466.83	488.768	-1976.6	1240.97	509.028	-1972.46	1140.77	528.234	-2060.12	986.322	485.618	-2101.2	912.135	546.819	-2063.12	908.227	531.892	-2118.49	846.227
668	0	265.081	-2096.42	1669.48	168.223	-2106.37	1669.17	274.267	-1939.9	1682.63	129.905	-1959.27	1676.11	217.172	-1912.18	1504.57	240.333	-1863.82	1240.82	216.741	-2061.85	1427.25	229.886	-2154.64	1221.27	174.682	-1856.6	1297.49	403.199	-2001.33	1467.11	487.051	-1985.98	1240.91	506.876	-1979.19	1140.99	526.139	-2061.47	983.847	483.877	-2100.45	908.156	544.841	-2061.75	905.599	530.285	-2115.06	841.886
669	0	264.944	-2110.3	1669.6	167.933	-2120.36	1669.68	274.048	-1953.62	1682.34	129.613	-1973.15	1676.44	216.296	-1926.49	1504.52	238.94	-1877.57	1240.73	216.006	-2075.76	1427.58	229.221	-2168.27	1221.84	172.97	-1870.69	1298.03	402.736	-2014.84	1466.99	485.426	-1995.8	1240.48	504.702	-1985.99	1140.53	524.371	-2062.78	981.271	482.135	-2099.44	904.257	542.973	-2060.29	902.964	528.72	-2112.17	837.608
670	0	264.648	-2123.99	1669.6	167.671	-2134.21	1669.86	273.578	-1967.54	1681.94	129.419	-1987.14	1676.4	215.577	-1940.53	1504.24	237.685	-1891.11	1240.82	215.163	-2089.69	1427.57	228.473	-2181.75	1222.09	171.337	-1884.7	1298.02	402.202	-2028.28	1466.61	483.76	-2005.26	1239.46	501.963	-1992.29	1139.87	522.062	-2063.94	978.734	480.3	-2098.21	900.717	540.705	-2058.47	900.446	527.324	-2108.11	833.373
671	0	264.489	-2137.82	1668.9	167.614	-2148.17	1669.47	273.094	-1981.29	1681.07	129.112	-2001.2	1675.68	214.891	-1954.55	1503.71	236.368	-1904.72	1240.53	214.439	-2103.5	1427.03	227.661	-2195.05	1221.41	169.601	-1898.6	1297.44	401.789	-2042.07	1465.65	482.116	-2014.94	1238.58	500.115	-1999.38	1139.86	520.006	-2065.15	976.075	478.511	-2097.16	896.948	538.646	-2056.85	898.026	525.627	-2104.76	829.619
672	0	264.337	-2151.91	1667.88	167.523	-2162.33	1668.58	272.56	-1995.13	1679.86	128.32	-2015.45	1674.89	214.463	-1968.02	1502.96	234.875	-1918.48	1239.5	213.658	-2117.57	1425.91	226.781	-2208.09	1220.16	168.499	-1912.35	1296.92	401.264	-2055.89	1464.38	480.574	-2024.31	1237.1	497.141	-2006.25	1138.45	517.907	-2066.46	973.262	476.789	-2096.28	892.937	535.994	-2055.21	895.076	524.321	-2101.43	825.418
673	0	264.136	-2166.14	1666.39	167.193	-2176.7	1667.14	271.985	-2009.17	1678.39	127.947	-2029.81	1673.62	214.156	-1981.44	1502.77	233.878	-1932.07	1238.4	212.923	-2131.58	1424.46	225.82	-2220.96	1218.31	167.152	-1925.87	1296.04	400.786	-2069.87	1462.72	478.811	-2033.66	1235.78	494.886	-2013.24	1137.62	515.76	-2068	970.526	474.872	-2095.63	888.87	533.984	-2053.97	892.668	522.704	-2098.43	822.214
674	0	263.786	-2180.25	1664.25	166.95	-2191.18	1665.3	271.459	-2023.46	1676.79	127.003	-2044.37	1671.98	213.437	-1996.12	1500.2	233.068	-1945.45	1236.97	212.225	-2145.58	1422.61	224.825	-2233.99	1215.82	166.21	-1939.76	1294.66	400.405	-2083.93	1460.72	477.238	-2042.88	1234.16	492.276	-2020.34	1136.2	513.734	-2069.48	967.819	473.274	-2094.9	885.393	531.737	-2052.47	890.328	521.362	-2095.29	818.189
675	0	263.43	-2194.76	1662	166.435	-2206	1662.96	270.667	-2037.84	1674.59	126.859	-2059.27	1669.77	212.599	-2010.39	1498.09	232.28	-1959.09	1235.13	211.529	-2159.74	1420.25	223.869	-2247.36	1212.76	165.391	-1953.36	1292.61	399.806	-2098.17	1458.13	475.248	-2051.53	1232.3	489.251	-2027.55	1134.38	511.66	-2071.18	964.974	472.019	-2093.42	883.315	529.915	-2051.57	888.226	519.943	-2092.48	814.867
676	0	263.065	-2209.44	1659.33	166.369	-2220.78	1660.38	270.189	-2052.55	1672.18	126.276	-2074.48	1667.49	212.189	-2024.55	1495.84	232.183	-1972.53	1232.85	210.971	-2173.8	1417.64	222.83	-2261.27	1209.45	165.01	-1966.91	1291.24	399.441	-2112.47	1455.5	473.865	-2061.51	1229.96	486.789	-2035.5	1132.25	509.786	-2073.56	962.296	470.873	-2094.24	879.914	527.57	-2050.92	885.765	518.432	-2089.75	811.349
677	0	262.802	-2224.34	1656.38	165.979	-2235.7	1657.36	269.463	-2067.31	1669.57	125.604	-2089.49	1665.08	211.561	-2039.28	1493.25	232.12	-1986.09	1230.47	210.504	-2187.91	1414.82	221.747	-2275.69	1205.86	164.46	-1980.3	1288.27	399.147	-2126.86	1452.47	472.436	-2071.43	1227.65	484.187	-2043.66	1130.25	508.087	-2076.12	959.769	469.927	-2095.11	876.716	525.488	-2050.62	883.597	517.173	-2087.2	808.337
678	0	262.38	-2239.3	1653.11	165.626	-2250.9	1653.95	268.782	-2082.56	1666.83	125.108	-2104.79	1662.46	210.729	-2054.13	1490.02	232.23	-1999.6	1227.89	209.941	-2202.1	1411.72	220.701	-2290.54	1202.32	164.33	-1994.09	1285.4	398.82	-2141.34	1449.53	471.293	-2081.71	1225.56	481.26	-2052.25	1128.18	506.459	-2079.17	957.562	467.357	-2095.08	873.11	523.962	-2051.11	882.348	516.027	-2084.25	806.32
679	0	261.9	-2254.58	1649.54	165.213	-2266.16	1650.12	268.345	-2097.52	1664.74	124.434	-2120.3	1659.33	210.103	-2069.3	1487.15	232.704	-2013.11	1225.14	209.509	-2216.31	1408.52	219.604	-2305.7	1198.53	164.467	-2007.74	1283.06	398.535	-2155.92	1446.69	469.798	-2092.14	1223.05	477.354	-2063.35	1124.05	505.096	-2083	955.387	467.048	-2097.33	870.875	522.198	-2052.3	881.037	514.561	-2082.37	803.436
680	0	261.43	-2269.88	1645.72	164.767	-2281.51	1646.18	267.608	-2112.86	1661.68	123.838	-2135.78	1656.47	209.43	-2084.04	1484.96	233.461	-2026.84	1222.63	209.16	-2230.75	1405.04	218.38	-2320.34	1194.78	164.731	-2020.71	1280.45	398.079	-2170.55	1443.53	468.583	-2103.3	1221	476.861	-2070.59	1125	503.747	-2087.33	953.718	466.03	-2099.56	868.296	520.729	-2054.24	880.236	513.253	-2081.37	801.204
681	0	260.927	-2285.13	1641.88	164.327	-2296.93	1642.07	267.07	-2128.58	1659.19	123.308	-2151.21	1653.55	210.03	-2097.71	1482.25	234.628	-2040.68	1220.33	208.903	-2245.04	1401.76	217.208	-2334.49	1191.24	165.084	-2034.5	1277.79	398.061	-2185.23	1441.01	467.455	-2114.57	1219.12	472.899	-2082.44	1121.15	502.463	-2091.53	952.876	465.612	-2103.82	866.35	519.406	-2056.86	879.808	512.182	-2080.9	799.464
682	0	260.599	-2300.75	1637.93	163.888	-2312.37	1637.85	266.756	-2143.95	1656.84	122.91	-2166.82	1650.46	210.799	-2111.06	1479.7	235.437	-2054.9	1217.46	208.684	-2259.47	1398.35	216.224	-2348.44	1187.42	165.433	-2048.6	1274.96	398.009	-2200.08	1438.27	466.509	-2126.16	1217.14	472.34	-2091.32	1121.14	501.631	-2097.22	951.689	465.774	-2108.04	865.059	518.348	-2060.54	879.613	510.943	-2081.03	797.871
683	0	260.19	-2316.31	1634.19	163.646	-2327.71	1633.81	266.509	-2159.83	1654.47	122.776	-2182.48	1647.59	210.567	-2126.58	1476.97	236.481	-2069.05	1214.91	208.586	-2273.99	1395.09	215.478	-2362.54	1183.93	166.095	-2062.48	1272.35	398.14	-2215.06	1435.47	465.597	-2138.1	1214.84	470.651	-2102.41	1119.81	501.286	-2104.09	950.424	465.52	-2113.27	863.004	517.699	-2065.52	879.583	510.063	-2082.3	796.402
684	0	260.101	-2331.86	1630.72	163.489	-2343.11	1630.15	266.472	-2175.65	1652.16	122.489	-2197.73	1645.12	211.255	-2140.72	1474.68	236.7	-2083.72	1212.39	208.488	-2288.48	1392.17	214.702	-2376.9	1181	166.751	-2076.73	1269.63	398.371	-2230.08	1432.83	465.254	-2150.84	1213.02	469.183	-2113.79	1118.24	501.072	-2111.72	949.531	466.298	-2119.65	861.73	517.274	-2071.41	879.643	509.177	-2084.43	795.385
685	0	260.024	-2347.3	1627.47	163.493	-2358.46	1626.71	266.783	-2191.13	1650.1	122.881	-2213.22	1642.57	212.063	-2154.86	1471.87	237.06	-2098.5	1209.72	208.294	-2303.14	1389.53	213.942	-2391.77	1178.89	167.15	-2090.93	1267.42	398.608	-2245.08	1430.16	464.871	-2163.63	1210.93	467.885	-2125.79	1116.52	500.99	-2120.12	948.589	466.756	-2126.7	860.571	517.165	-2078.41	879.803	508.444	-2087.54	794.573
686	0	260.212	-2362.72	1624.52	163.709	-2373.7	1623.71	267.404	-2206.73	1647.97	123.084	-2228.69	1640.42	213.058	-2169.08	1470.16	237.278	-2113.35	1207.29	208.338	-2317.85	1387.21	213.575	-2406.95	1177.1	167.727	-2105.58	1265.16	398.814	-2260.13	1427.3	464.513	-2177.11	1208.98	466.333	-2139.74	1113.51	501.397	-2129.73	947.565	467.46	-2134.66	859.231	517.359	-2086.67	879.623	508.348	-2092.31	794.09
687	0	260.991	-2378.25	1621.65	164.311	-2388.88	1621.27	268.193	-2222.02	1645.65	124.124	-2243.79	1638.42	213.908	-2182.46	1467.55	236.931	-2128.47	1204.4	208.662	-2332.72	1385.06	213.647	-2422.17	1175.62	167.911	-2120.67	1262.76	399.214	-2275.11	1424.75	464.276	-2191.32	1206.45	465.922	-2153.32	1111.77	501.922	-2140.51	946.441	468.555	-2144.36	857.863	517.977	-2096.08	879.139	507.515	-2098.18	793.177
688	0	261.793	-2393.37	1619.35	165.091	-2403.81	1619.32	267.073	-2239.24	1640.87	125.29	-2258.6	1636.82	214.459	-2197.5	1465.41	237.433	-2143.59	1202.97	209.068	-2347.76	1383.32	214.09	-2437.05	1174.21	168.211	-2135.72	1260.71	399.791	-2290.15	1422.55	464.382	-2205.86	1204.48	465.209	-2167.25	1109.38	502.389	-2152	945.188	469.56	-2154.62	856.66	518.892	-2106.88	879.061	507.211	-2105.5	792.615
689	0	262.619	-2408.37	1617.47	166.046	-2418.87	1617.63	270.452	-2252.6	1641.8	124.454	-2272.97	1636.44	214.868	-2212.87	1463.74	237.088	-2158.78	1200.64	209.596	-2362.96	1381.73	214.909	-2451.8	1172.88	168.145	-2151.07	1259.18	400.207	-2305.04	1420.4	464.54	-2220.85	1202.59	465.469	-2182.14	1108.11	503.384	-2164.66	944.352	470.396	-2165.72	855.68	520.239	-2118.88	878.74	507.397	-2114.44	792.629
690	0	264.053	-2423.55	1615.67	167.265	-2433.71	1616.24	271.134	-2268.01	1639.34	127.636	-2288.54	1634.57	215.384	-2227.77	1462.16	236.32	-2174.29	1198.63	210.182	-2378.14	1380.6	216.055	-2466.79	1171.6	168.451	-2166.53	1257.5	400.753	-2319.85	1419.06	464.568	-2236.08	1200.51	465.79	-2196.95	1106.55	504.28	-2178.41	943.286	471.276	-2178.34	854.41	521.672	-2132.1	878.497	508.204	-2125.59	792.868
691	0	265.188	-2438.16	1614.07	168.726	-2448.23	1615.25	272.26	-2283.42	1637.32	128.753	-2302.89	1634.12	216.442	-2242.49	1461.21	236.17	-2189.95	1197.52	210.846	-2393.45	1379.72	217.269	-2482.13	1170.93	168.383	-2182.17	1256.15	401.707	-2334.92	1417.81	465.098	-2251.85	1199.18	466.557	-2212.03	1105.45	505.223	-2193.07	942.051	472.871	-2192.27	853.501	523.261	-2146.67	877.941	508.908	-2137.96	792.204
692	0	266.663	-2452.96	1613.44	169.955	-2463.13	1614.92	273.835	-2298.15	1636.62	130.348	-2317.69	1633.72	217.295	-2257.53	1460.38	235.641	-2205.83	1196.16	211.697	-2408.75	1379.15	218.455	-2498.1	1170.81	168.058	-2198.02	1254.77	402.532	-2349.69	1417.08	465.551	-2267.59	1198.03	468.174	-2226.72	1105.82	506.348	-2208.74	941.498	473.825	-2206.88	852.698	524.835	-2162.06	877.435	509.724	-2151.64	791.644
693	0	268.176	-2467.58	1613.19	171.541	-2477.58	1614.94	276.344	-2312.02	1637.13	130.19	-2331.61	1634.48	218.363	-2272.57	1459.48	235.974	-2222.02	1194.77	212.464	-2424.19	1379.21	219.638	-2514.62	1171.23	168.441	-2213.83	1254.3	403.478	-2364.75	1416.59	466.482	-2283.68	1197.19	469.063	-2242.76	1104.88	506.152	-2226.92	939.189	474.847	-2222.62	851.954	526.374	-2178.58	876.916	511.006	-2167.13	791.273
694	0	269.63	-2482.22	1613.24	173.167	-2491.87	1615.23	277.996	-2326.57	1636.59	134.511	-2345.81	1633.75	219.106	-2287.91	1459.03	236.052	-2238.39	1193.97	213.469	-2439.66	1379.3	220.714	-2531.43	1171.95	168.634	-2229.73	1253.54	404.298	-2380.1	1416.1	467.372	-2300.12	1196.51	470.421	-2259.38	1104.2	508.765	-2242.47	940.027	476.264	-2239.81	851.141	528.097	-2196.19	876.08	512.833	-2184.46	790.516
695	0	271.177	-2496.59	1613.55	174.554	-2506.42	1616.04	279.904	-2340.92	1636.25	137.369	-2359.95	1633.52	220.31	-2302.91	1458.54	236.36	-2254.68	1193.7	214.107	-2455.06	1379.86	221.408	-2548.52	1172.86	169.732	-2245.31	1252.86	405.159	-2395.7	1415.79	468.283	-2316.71	1195.98	471.507	-2276.38	1103.68	509.923	-2260.67	938.968	477.457	-2258.08	850.434	529.675	-2214.57	875.366	514.655	-2203.3	789.795
696	0	272.801	-2511.31	1614.49	176.022	-2520.85	1617.26	281.65	-2355.43	1635.76	138.42	-2374.4	1634.27	221.071	-2318	1457.96	237.27	-2270.86	1193.33	214.838	-2470.55	1380.39	221.791	-2565.27	1173.64	170.663	-2261.16	1252.91	405.666	-2411.57	1415.2	469.377	-2333.44	1195.76	471.73	-2295.2	1101.22	511.657	-2279.17	938.447	478.733	-2276.85	849.935	531.501	-2233.86	874.613	516.798	-2223.18	788.826
697	0	274.221	-2525.65	1615.14	177.509	-2535.39	1618.7	282.607	-2370.58	1634.68	140.269	-2388.79	1634.81	221.664	-2333.57	1458.21	238.088	-2286.96	1193.44	215.383	-2486.16	1380.84	221.848	-2581.45	1173.93	171.369	-2276.79	1252.79	406.182	-2427.59	1414.99	470.315	-2350.58	1195.49	473.253	-2312.8	1100.94	511.02	-2300.52	935.57	480.108	-2296.82	849.011	533.379	-2253.89	873.267	519.55	-2244.85	787.848
698	0	275.628	-2540.38	1616.35	178.923	-2549.93	1620.45	285.069	-2384.16	1635.79	142.11	-2402.87	1635.47	221.997	-2348.28	1458.18	239.348	-2302.65	1193.8	215.699	-2501.43	1381.74	221.694	-2596.73	1174.1	172.059	-2291.73	1253.73	406.308	-2443.13	1415.21	471.286	-2368.06	1195.22	475.112	-2330.31	1100.35	514.512	-2318.44	936.826	482.29	-2318.2	848.366	535.014	-2274.8	872.097	521.638	-2267.37	785.835
699	0	276.849	-2554.93	1617.45	180.24	-2564.58	1622.23	285.903	-2399.01	1635.5	142.855	-2417.76	1636.89	222.797	-2363.21	1459.86	240.058	-2317.82	1195.33	215.799	-2516.41	1382.76	221.204	-2611.51	1174.1	172.559	-2306.65	1254.7	406.41	-2458.68	1415.95	471.924	-2385.51	1195.06	477.275	-2347.68	1101.34	516.421	-2339.17	936.2	484.097	-2340.06	847.596	536.959	-2296.56	870.775	524.453	-2291.23	784.511
700	0	277.965	-2569.62	1618.32	181.311	-2579.47	1623.56	287.189	-2413.41	1636.14	144.105	-2432.38	1637.96	222.757	-2377.16	1462.2	240.509	-2332.01	1197.71	215.75	-2531.16	1383.57	220.47	-2626.02	1174.07	172.065	-2321.55	1256.49	405.93	-2473.73	1416.32	472.597	-2403.18	1195.14	478.612	-2366.29	1101.02	516.653	-2362.12	934.254	485.88	-2362.59	847.007	538.898	-2318.96	869.366	527.404	-2316.33	782.94
701	0	278.72	-2584.27	1619	182.25	-2594.22	1624.82	287.662	-2427.83	1636.74	144.323	-2447.45	1639.48	221.36	-2395.02	1462.11	240.452	-2346.17	1199.28	215.472	-2545.84	1384.34	219.601	-2640.34	1174.42	171.617	-2335.7	1258.57	405.408	-2488.32	1417.36	473.062	-2421.04	1195.21	479.876	-2385.1	1100.66	519.646	-2382.49	935.198	487.862	-2386.26	846.266	541.125	-2342.51	868.243	530.638	-2342.91	781.668
702	0	279.161	-2598.91	1619.55	182.673	-2609.37	1625.87	287.99	-2442.81	1637.83	144.357	-2462.56	1641.14	220.396	-2410.04	1464.71	240.026	-2359.87	1200.96	215.101	-2560	1385.46	218.68	-2654.61	1174.89	170.594	-2349.84	1260.42	404.924	-2502.5	1418.66	473.319	-2438.94	1195.04	481.149	-2403.97	1100.43	521.177	-2405.16	934.588	489.905	-2410.82	845.88	542.837	-2366.69	866.815	533.917	-2370.84	781.155
703	0	278.966	-2614.01	1620.91	182.621	-2624.37	1626.77	287.685	-2457.58	1639.54	145.047	-2477.35	1642.46	219.468	-2425.39	1465.87	239.212	-2373.53	1201.92	214.477	-2574.02	1386.99	217.719	-2668.75	1175.91	169.919	-2363.35	1262.26	404.435	-2516.58	1419.9	473.517	-2456.82	1195.64	482.443	-2423.02	1100.36	522.67	-2428.27	934.606	491.213	-2435.64	845.842	544.559	-2391.33	865.617	537.039	-2399.41	780.757
704	0	278.653	-2628.97	1621.65	182.306	-2639.27	1627.38	287.188	-2472.56	1641.83	144.035	-2492.86	1644.65	220.692	-2435.64	1468.03	238.935	-2386.84	1203.95	214.119	-2587.61	1388.48	216.869	-2682.59	1177.39	169.404	-2376.72	1264.07	403.951	-2530.27	1421.6	473.639	-2474.78	1196.16	482.052	-2444.45	1098.41	523.301	-2451.73	934.685	492.443	-2461.26	846.097	545.876	-2416.92	864.582	539.52	-2428.8	780.64
705	0	277.978	-2643.62	1622.45	181.585	-2654.24	1627.86	286.313	-2487.83	1644.43	142.516	-2508.88	1646.56	220.003	-2450.03	1469.38	238.949	-2400.47	1205.71	213.525	-2601.18	1390.26	216.082	-2696.01	1179.29	169.099	-2389.97	1265.82	403.501	-2543.85	1423.38	473.705	-2492.83	1196.99	484.793	-2461.7	1101.32	524.562	-2476.55	934.94	493.712	-2488.06	846.858	547.138	-2443.12	864.198	542.574	-2459.77	781.792
706	0	276.907	-2658.39	1623.66	180.434	-2669.05	1628.71	285.181	-2502.58	1647.15	141.843	-2523.26	1648.86	219.619	-2463.42	1471.44	239.225	-2414.2	1208.08	213.073	-2614.52	1392.52	215.226	-2709.29	1181.55	169.544	-2403.01	1267.55	402.957	-2557.56	1425.51	473.612	-2510.47	1198.37	484.235	-2483.14	1099.81	525.035	-2500.55	936.168	494.483	-2514.91	848.364	547.916	-2469.96	864.222	544.32	-2490.73	783.188
707	0	275.525	-2672.83	1624.83	179.177	-2683.64	1629.68	283.965	-2517.26	1650.51	140.477	-2538.08	1651.01	218.975	-2477.29	1473.97	239.198	-2427.51	1210.28	212.354	-2627.85	1394.82	214.431	-2722.73	1183.98	169.567	-2416.33	1269.87	402.341	-2571.05	1428.52	473.947	-2528.05	1200.76	484.655	-2503.18	1101.21	525.056	-2524.77	938.2	495.27	-2541.99	851.037	548.481	-2497	865.177	546.785	-2523.07	786.073
708	0	273.977	-2688.05	1627.22	177.496	-2698.17	1630.79	282.608	-2532.12	1653.77	138.709	-2552.9	1653.29	218.4	-2491.08	1476.77	239.019	-2440.93	1212.88	211.72	-2641.04	1397.42	213.652	-2736.21	1186.85	170.326	-2429.34	1272.13	401.637	-2584.73	1431.3	474.002	-2545.27	1203.39	485.574	-2522.43	1103.06	525.467	-2549.75	940.631	495.446	-2569.83	854.04	548.531	-2524.22	866.247	547.903	-2554.94	789.855
709	0	272.181	-2702.42	1628.81	175.922	-2712.44	1632.01	280.745	-2546.93	1656.88	137.056	-2567.45	1655.67	217.247	-2504.58	1479.33	239.458	-2454.1	1215.56	211.214	-2654.18	1399.85	212.724	-2749.67	1190.34	170.734	-2442.33	1274.85	400.957	-2598.46	1434.61	474.332	-2562.61	1206.51	489.273	-2538.75	1108.05	525.271	-2574.96	943.522	495.338	-2598.56	857.706	548.292	-2552.22	868.282	549.247	-2587.98	794.697
710	0	270.386	-2716.61	1631.07	174.038	-2726.58	1633.47	279.147	-2561.17	1660.51	135.709	-2581.64	1657.92	217.706	-2517.2	1483.03	239.975	-2467.47	1218.53	210.315	-2667.46	1402.49	211.801	-2763.12	1193.61	171.575	-2455.55	1277.33	400.088	-2612.16	1438.3	474.555	-2579.58	1209.9	487.968	-2560.35	1108.79	525.738	-2600.68	947.173	494.542	-2627.89	861.386	547.918	-2580.5	871.309	549.672	-2620.68	800.848
711	0	268.878	-2730.78	1632.83	172.222	-2740.56	1635.11	277.75	-2575.42	1663.93	133.775	-2595.76	1660.01	217.255	-2530.82	1485.55	240.641	-2480.97	1220.97	209.585	-2680.89	1404.94	211.102	-2776.57	1196.85	172.067	-2468.82	1279.97	399.598	-2626.19	1442.06	474.976	-2596.47	1213.66	489.123	-2579.18	1112.04	524.916	-2625.5	951.4	494.193	-2656.8	866.356	547.406	-2609.11	874.73	549.632	-2653.16	807.113
712	0	267.065	-2744.81	1635.2	170.584	-2754.25	1636.63	276.251	-2589.58	1666.92	132.511	-2609.47	1661.84	216.049	-2544.68	1488.36	241.237	-2494.52	1223.78	208.699	-2694.69	1407.56	210.483	-2789.72	1199.83	172.908	-2482.09	1282.26	398.856	-2640.2	1445.67	475.346	-2613.23	1217.09	489.98	-2598.31	1114.91	525.414	-2651.84	956.139	494.823	-2688.05	873.578	546.496	-2637.95	878.426	549.682	-2686.36	814.393
713	0	265.236	-2758.71	1637.33	168.862	-2767.88	1638.16	274.624	-2603.55	1669.27	131	-2623.04	1663.44	216.036	-2557.97	1490.39	241.653	-2508.16	1225.76	207.985	-2708.21	1409.73	209.815	-2802.59	1202.37	173.579	-2495.59	1284.32	397.818	-2654.23	1448.52	475.465	-2629.84	1220.37	492.828	-2614.88	1120.01	524.067	-2676.73	960.325	493.138	-2715.84	879.456	545.773	-2667.04	882.456	548.837	-2718.68	821.159
714	0	263.556	-2772.57	1639.54	167.145	-2781.44	1639.57	273.298	-2617.29	1671.66	129.71	-2636.59	1664.72	215.12	-2571.98	1491.8	242.33	-2521.65	1227.69	207.349	-2721.76	1411.56	209.134	-2815.72	1204.09	174.359	-2508.84	1285.9	397.163	-2668.32	1451.5	475.955	-2646.41	1223.62	492.142	-2635.75	1120.38	524.199	-2702.74	965.556	493.192	-2746.36	887.187	544.905	-2696.21	887.025	547.797	-2750.91	828.569
[truncated: 69 more columns]

## Sheet: Sheet2
Devices
		025370 - Force			025370 - Moment			025370 - CoP			027571 - Force			027571 - Moment			027571 - CoP			037720 - Force			037720 - Moment			037720 - CoP
Frame	Sub Frame	Fx	Fy	Fz	Mx	My	Mz	Cx	Cy	Cz	Fx	Fy	Fz	Mx	My	Mz	Cx	Cy	Cz	Fx	Fy	Fz	Mx	My	Mz	Cx	Cy	Cz
		N	N	N	N.mm	N.mm	N.mm	mm	mm	mm	N	N	N	N.mm	N.mm	N.mm	mm	mm	mm	N	N	N	N.mm	N.mm	N.mm	mm	mm	mm
352	0	0	0	0	0	0	0	200	300	0	0	0	0	0	0	0	200	903	0	0	0	0	0	0	0	603	903	0
352	1	0	0	0	0	0	0	200	300	0	0	0	0	0	0	0	200	903	0	0	0	0	0	0	0	603	903	0
352	2	0	0	0	0	0	0	200	300	0	0	0	0	0	0	0	200	903	0	0	0	0	0	0	0	603	903	0
352	3	0	0	0	0	0	0	200	300	0	0	0	0	0	0	0	200	903	0	0	0	0	0	0	0	603	903	0
352	4	0	0	0	0	0	0	200	300	0	0	0	0	0	0	0	200	903	0	0	0	0	0	0	0	603	903	0
352	5	0	0	0	0	0	0	200	300	0	0	0	0	0	0	0	200	903	0	0	0	0	0	0	0	603	903	0
352	6	0	0	0	0	0	0	200	300	0	0	0	0	0	0	0	200	903	0	0	0	0	0	0	0	603	903	0
352	7	0	0	0	0	0	0	200	300	0	0	0	0	0	0	0	200	903	0	0	0	0	0	0	0	603	903	0
352	8	0	0	0	0	0	0	200	300	0	0	0	0	0	0	0	200	903	0	0	0	0	0	0	0	603	903	0
352	9	0	0	0	0	0	0	200	300	0	0	0	0	0	0	0	200	903	0	0	0	0	0	0	0	603	903	0
353	0	0	0	0	0	0	0	200	300	0	0	0	0	0	0	0	200	903	0	0	0	0	0	0	0	603	903	0
353	1	0	0	0	0	0	0	200	300	0	0	0	0	0	0	0	200	903	0	0	0	0	0	0	0	603	903	0
353	2	0	0	0	0	0	0	200	300	0	0	0	0	0	0	0	200	903	0	0	0	0	0	0	0	603	903	0
353	3	0	0	0	0	0	0	200	300	0	0	0	0	0	0	0	200	903	0	0	0	0	0	0	0	603	903	0
353	4	0	0	0	0	0	0	200	300	0	0	0	0	0	0	0	200	903	0	0	0	0	0	0	0	603	903	0
353	5	0	0	0	0	0	0	200	300	0	0	0	0	0	0	0	200	903	0	0	0	0	0	0	0	603	903	0
353	6	0	0	0	0	0	0	200	300	0	0	0	0	0	0	0	200	903	0	0	0	0	0	0	0	603	903	0
353	7	0	0	0	0	0	0	200	300	0	0	0	0	0	0	0	200	903	0	0	0	0	0	0	0	603	903	0
353	8	0	0	0	0	0	0	200	300	0	0	0	0	0	0	0	200	903	0	0	0	0	0	0	0	603	903	0
353	9	0	0	0	0	0	0	200	300	0	0	0	0	0	0	0	200	903	0	0	0	0	0	0	0	603	903	0
354	0	0	0	0	0	0	0	200	300	0	0	0	0	0	0	0	200	903	0	0	0	0	0	0	0	603	903	0
354	1	0	0	0	0	0	0	200	300	0	0	0	0	0	0	0	200	903	0	0	0	0	0	0	0	603	903	0
354	2	0	0	0	0	0	0	200	300	0	0	0	0	0	0	0	200	903	0	0	0	0	0	0	0	603	903	0
354	3	0	0	0	0	0	0	200	300	0	0	0	0	0	0	0	200	903	0	0	0	0	0	0	0	603	903	0
354	4	0	0	0	0	0	0	200	300	0	0	0	0	0	0	0	200	903	0	0	0	0	0	0	0	603	903	0
354	5	0	0	0	0	0	0	200	300	0	0	0	0	0	0	0	200	903	0	0	0	0	0	0	0	603	903	0
354	6	0	0	0	0	0	0	200	300	0	0	0	0	0	0	0	200	903	0	0	0	0	0	0	0	603	903	0
354	7	0	0	0	0	0	0	200	300	0	0	0	0	0	0	0	200	903	0	0	0	0	0	0	0	603	903	0
354	8	0	0	0	0	0	0	200	300	0	0	0	0	0	0	0	200	903	0	0	0	0	0	0	0	603	903	0
354	9	0	0	0	0	0	0	200	300	0	0	0	0	0	0	0	200	903	0	0	0	0	0	0	0	603	903	0
355	0	0	0	0	0	0	0	200	300	0	0	0	0	0	0	0	200	903	0	0	0	0	0	0	0	603	903	0
355	1	0	0	0	0	0	0	200	300	0	0	0	0	0	0	0	200	903	0	0	0	0	0	0	0	603	903	0
355	2	0	0	0	0	0	0	200	300	0	0	0	0	0	0	0	200	903	0	0	0	0	0	0	0	603	903	0
355	3	0	0	0	0	0	0	200	300	0	0	0	0	0	0	0	200	903	0	0	0	0	0	0	0	603	903	0
355	4	0	0	0	0	0	0	200	300	0	0	0	0	0	0	0	200	903	0	0	0	0	0	0	0	603	903	0
355	5	0	0	0	0	0	0	200	300	0	0	0	0	0	0	0	200	903	0	0	0	0	0	0	0	603	903	0
355	6	0	0	0	0	0	0	200	300	0	0	0	0	0	0	0	200	903	0	0	0	0	0	0	0	603	903	0
355	7	0	0	0	0	0	0	200	300	0	0	0	0	0	0	0	200	903	0	0	0	0	0	0	0	603	903	0
355	8	0	0	0	0	0	0	200	300	0	0	0	0	0	0	0	200	903	0	0	0	0	0	0	0	603	903	0
355	9	0	0	0	0	0	0	200	300	0	0	0	0	0	0	0	200	903	0	0	0	0	0	0	0	603	903	0
356	0	0	0	0	0	0	0	200	300	0	0	0	0	0	0	0	200	903	0	0	0	0	0	0	0	603	903	0
356	1	0	0	0	0	0	0	200	300	0	0	0	0	0	0	0	200	903	0	0	0	0	0	0	0	603	903	0
356	2	0	0	0	0	0	0	200	300	0	0	0	0	0	0	0	200	903	0	0	0	0	0	0	0	603	903	0
356	3	0	0	0	0	0	0	200	300	0	0	0	0	0	0	0	200	903	0	0	0	0	0	0	0	603	903	0
356	4	0	0	0	0	0	0	200	300	0	0	0	0	0	0	0	200	903	0	0	0	0	0	0	0	603	903	0
356	5	0	0	0	0	0	0	200	300	0	0	0	0	0	0	0	200	903	0	0	0	0	0	0	0	603	903	0
356	6	0	0	0	0	0	0	200	300	0	0	0	0	0	0	0	200	903	0	0	0	0	0	0	0	603	903	0
356	7	0	0	0	0	0	0	200	300	0	0	0	0	0	0	0	200	903	0	0	0	0	0	0	0	603	903	0
356	8	0	0	0	0	0	0	200	300	0	0	0	0	0	0	0	200	903	0	0	0	0	0	0	0	603	903	0
356	9	0	0	0	0	0	0	200	300	0	0	0	0	0	0	0	200	903	0	0	0	0	0	0	0	603	903	0
357	0	0	0	0	0	0	0	200	300	0	0	0	0	0	0	0	200	903	0	0	0	0	0	0	0	603	903	0
357	1	0	0	0	0	0	0	200	300	0	0	0	0	0	0	0	200	903	0	0	0	0	0	0	0	603	903	0
357	2	0	0	0	0	0	0	200	300	0	0	0	0	0	0	0	200	903	0	0	0	0	0	0	0	603	903	0
357	3	0	0	0	0	0	0	200	300	0	0	0	0	0	0	0	200	903	0	0	0	0	0	0	0	603	903	0
357	4	0	0	0	0	0	0	200	300	0	0	0	0	0	0	0	200	903	0	0	0	0	0	0	0	603	903	0
357	5	0	0	0	0	0	0	200	300	0	0	0	0	0	0	0	200	903	0	0	0	0	0	0	0	603	903	0
357	6	0	0	0	0	0	0	200	300	0	0	0	0	0	0	0	200	903	0	0	0	0	0	0	0	603	903	0
357	7	0	0	0	0	0	0	200	300	0	0	0	0	0	0	0	200	903	0	0	0	0	0	0	0	603	903	0
357	8	0	0	0	0	0	0	200	300	0	0	0	0	0	0	0	200	903	0	0	0	0	0	0	0	603	903	0
357	9	0	0	0	0	0	0	200	300	0	0	0	0	0	0	0	200	903	0	0	0	0	0	0	0	603	903	0
358	0	0	0	0	0	0	0	200	300	0	0	0	0	0	0	0	200	903	0	0	0	0	0	0	0	603	903	0
358	1	0	0	0	0	0	0	200	300	0	0	0	0	0	0	0	200	903	0	0	0	0	0	0	0	603	903	0
358	2	0	0	0	0	0	0	200	300	0	0	0	0	0	0	0	200	903	0	0	0	0	0	0	0	603	903	0
358	3	0	0	0	0	0	0	200	300	0	0	0	0	0	0	0	200	903	0	0	0	0	0	0	0	603	903	0
358	4	0	0	0	0	0	0	200	300	0	0	0	0	0	0	0	200	903	0	0	0	0	0	0	0	603	903	0
358	5	0	0	0	0	0	0	200	300	0	0	0	0	0	0	0	200	903	0	0	0	0	0	0	0	603	903	0
358	6	0	0	0	0	0	0	200	300	0	0	0	0	0	0	0	200	903	0	0	0	0	0	0	0	603	903	0
358	7	0	0	0	0	0	0	200	300	0	0	0	0	0	0	0	200	903	0	0	0	0	0	0	0	603	903	0
358	8	0	0	0	0	0	0	200	300	0	0	0	0	0	0	0	200	903	0	0	0	0	0	0	0	603	903	0
358	9	0	0	0	0	0	0	200	300	0	0	0	0	0	0	0	200	903	0	0	0	0	0	0	0	603	903	0
359	0	0	0	0	0	0	0	200	300	0	0	0	0	0	0	0	200	903	0	0	0	0	0	0	0	603	903	0
359	1	0	0	0	0	0	0	200	300	0	0	0	0	0	0	0	200	903	0	0	0	0	0	0	0	603	903	0
359	2	0	0	0	0	0	0	200	300	0	0	0	0	0	0	0	200	903	0	0	0	0	0	0	0	603	903	0
359	3	0	0	0	0	0	0	200	300	0	0	0	0	0	0	0	200	903	0	0	0	0	0	0	0	603	903	0
359	4	0	0	0	0	0	0	200	300	0	0	0	0	0	0	0	200	903	0	0	0	0	0	0	0	603	903	0
359	5	0	0	0	0	0	0	200	300	0	0	0	0	0	0	0	200	903	0	0	0	0	0	0	0	603	903	0
359	6	0	0	0	0	0	0	200	300	0	0	0	0	0	0	0	200	903	0	0	0	0	0	0	0	603	903	0
359	7	0	0	0	0	0	0	200	300	0	0	0	0	0	0	0	200	903	0	0	0	0	0	0	0	603	903	0
359	8	0	0	0	0	0	0	200	300	0	0	0	0	0	0	0	200	903	0	0	0	0	0	0	0	603	903	0
359	9	0	0	0	0	0	0	200	300	0	0	0	0	0	0	0	200	903	0	0	0	0	0	0	0	603	903	0
360	0	0	0	0	0	0	0	200	300	0	0	0	0	0	0	0	200	903	0	0	0	0	0	0	0	603	903	0
360	1	0	0	0	0	0	0	200	300	0	0	0	0	0	0	0	200	903	0	0	0	0	0	0	0	603	903	0
360	2	0	0	0	0	0	0	200	300	0	0	0	0	0	0	0	200	903	0	0	0	0	0	0	0	603	903	0
360	3	0	0	0	0	0	0	200	300	0	0	0	0	0	0	0	200	903	0	0	0	0	0	0	0	603	903	0
360	4	0	0	0	0	0	0	200	300	0	0	0	0	0	0	0	200	903	0	0	0	0	0	0	0	603	903	0
360	5	0	0	0	0	0	0	200	300	0	0	0	0	0	0	0	200	903	0	0	0	0	0	0	0	603	903	0
360	6	0	0	0	0	0	0	200	300	0	0	0	0	0	0	0	200	903	0	0	0	0	0	0	0	603	903	0
360	7	0	0	0	0	0	0	200	300	0	0	0	0	0	0	0	200	903	0	0	0	0	0	0	0	603	903	0
360	8	0	0	0	0	0	0	200	300	0	0	0	0	0	0	0	200	903	0	0	0	0	0	0	0	603	903	0
360	9	0	0	0	0	0	0	200	300	0	0	0	0	0	0	0	200	903	0	0	0	0	0	0	0	603	903	0
361	0	0	0	0	0	0	0	200	300	0	0	0	0	0	0	0	200	903	0	0	0	0	0	0	0	603	903	0
361	1	0	0	0	0	0	0	200	300	0	0	0	0	0	0	0	200	903	0	0	0	0	0	0	0	603	903	0
361	2	0	0	0	0	0	0	200	300	0	0	0	0	0	0	0	200	903	0	0	0	0	0	0	0	603	903	0
361	3	0	0	0	0	0	0	200	300	0	0	0	0	0	0	0	200	903	0	0	0	0	0	0	0	603	903	0
361	4	0	0	0	0	0	0	200	300	0	0	0	0	0	0	0	200	903	0	0	0	0	0	0	0	603	903	0
361	5	0	0	0	0	0	0	200	300	0	0	0	0	0	0	0	200	903	0	0	0	0	0	0	0	603	903	0
361	6	0	0	0	0	0	0	200	300	0	0	0	0	0	0	0	200	903	0	0	0	0	0	0	0	603	903	0
361	7	0	0	0	0	0	0	200	300	0	0	0	0	0	0	0	200	903	0	0	0	0	0	0	0	603	903	0
361	8	0	0	0	0	0	0	200	300	0	0	0	0	0	0	0	200	903	0	0	0	0	0	0	0	603	903	0
361	9	0	0	0	0	0	0	200	300	0	0	0	0	0	0	0	200	903	0	0	0	0	0	0	0	603	903	0
362	0	0	0	0	0	0	0	200	300	0	0	0	0	0	0	0	200	903	0	0	0	0	0	0	0	603	903	0
362	1	0	0	0	0	0	0	200	300	0	0	0	0	0	0	0	200	903	0	0	0	0	0	0	0	603	903	0
362	2	0	0	0	0	0	0	200	300	0	0	0	0	0	0	0	200	903	0	0	0	0	0	0	0	603	903	0
362	3	0	0	0	0	0	0	200	300	0	0	0	0	0	0	0	200	903	0	0	0	0	0	0	0	603	903	0
362	4	0	0	0	0	0	0	200	300	0	0	0	0	0	0	0	200	903	0	0	0	0	0	0	0	603	903	0
362	5	0	0	0	0	0	0	200	300	0	0	0	0	0	0	0	200	903	0	0	0	0	0	0	0	603	903	0
362	6	0	0	0	0	0	0	200	300	0	0	0	0	0	0	0	200	903	0	0	0	0	0	0	0	603	903	0
362	7	0	0	0	0	0	0	200	300	0	0	0	0	0	0	0	200	903	0	0	0	0	0	0	0	603	903	0
362	8	0	0	0	0	0	0	200	300	0	0	0	0	0	0	0	200	903	0	0	0	0	0	0	0	603	903	0
362	9	0	0	0	0	0	0	200	300	0	0	0	0	0	0	0	200	903	0	0	0	0	0	0	0	603	903	0
363	0	0	0	0	0	0	0	200	300	0	0	0	0	0	0	0	200	903	0	0	0	0	0	0	0	603	903	0
363	1	0	0	0	0	0	0	200	300	0	0	0	0	0	0	0	200	903	0	0	0	0	0	0	0	603	903	0
363	2	0	0	0	0	0	0	200	300	0	0	0	0	0	0	0	200	903	0	0	0	0	0	0	0	603	903	0
363	3	0	0	0	0	0	0	200	300	0	0	0	0	0	0	0	200	903	0	0	0	0	0	0	0	603	903	0
363	4	0	0	0	0	0	0	200	300	0	0	0	0	0	0	0	200	903	0	0	0	0	0	0	0	603	903	0
363	5	0	0	0	0	0	0	200	300	0	0	0	0	0	0	0	200	903	0	0	0	0	0	0	0	603	903	0
363	6	0	0	0	0	0	0	200	300	0	0	0	0	0	0	0	200	903	0	0	0	0	0	0	0	603	903	0
363	7	0	0	0	0	0	0	200	300	0	0	0	0	0	0	0	200	903	0	0	0	0	0	0	0	603	903	0
363	8	0	0	0	0	0	0	200	300	0	0	0	0	0	0	0	200	903	0	0	0	0	0	0	0	603	903	0
363	9	0	0	0	0	0	0	200	300	0	0	0	0	0	0	0	200	903	0	0	0	0	0	0	0	603	903	0
364	0	0	0	0	0	0	0	200	300	0	0	0	0	0	0	0	200	903	0	0	0	0	0	0	0	603	903	0
364	1	0	0	0	0	0	0	200	300	0	0	0	0	0	0	0	200	903	0	0	0	0	0	0	0	603	903	0
364	2	0	0	0	0	0	0	200	300	0	0	0	0	0	0	0	200	903	0	0	0	0	0	0	0	603	903	0
364	3	0	0	0	0	0	0	200	300	0	0	0	0	0	0	0	200	903	0	0	0	0	0	0	0	603	903	0
364	4	0	0	0	0	0	0	200	300	0	0	0	0	0	0	0	200	903	0	0	0	0	0	0	0	603	903	0
364	5	0	0	0	0	0	0	200	300	0	0	0	0	0	0	0	200	903	0	0	0	0	0	0	0	603	903	0
364	6	0	0	0	0	0	0	200	300	0	0	0	0	0	0	0	200	903	0	0	0	0	0	0	0	603	903	0
364	7	0	0	0	0	0	0	200	300	0	0	0	0	0	0	0	200	903	0	0	0	0	0	0	0	603	903	0
364	8	0	0	0	0	0	0	200	300	0	0	0	0	0	0	0	200	903	0	0	0	0	0	0	0	603	903	0
364	9	0	0	0	0	0	0	200	300	0	0	0	0	0	0	0	200	903	0	0	0	0	0	0	0	603	903	0
365	0	0	0	0	0	0	0	200	300	0	0	0	0	0	0	0	200	903	0	0	0	0	0	0	0	603	903	0
365	1	0	0	0	0	0	0	200	300	0	0	0	0	0	0	0	200	903	0	0	0	0	0	0	0	603	903	0
365	2	0	0	0	0	0	0	200	300	0	0	0	0	0	0	0	200	903	0	0	0	0	0	0	0	603	903	0
365	3	0	0	0	0	0	0	200	300	0	0	0	0	0	0	0	200	903	0	0	0	0	0	0	0	603	903	0
365	4	0	0	0	0	0	0	200	300	0	0	0	0	0	0	0	200	903	0	0	0	0	0	0	0	603	903	0
365	5	0	0	0	0	0	0	200	300	0	0	0	0	0	0	0	200	903	0	0	0	0	0	0	0	603	903	0
365	6	0	0	0	0	0	0	200	300	0	0	0	0	0	0	0	200	903	0	0	0	0	0	0	0	603	903	0
365	7	0	0	0	0	0	0	200	300	0	0	0	0	0	0	0	200	903	0	0	0	0	0	0	0	603	903	0
365	8	0	0	0	0	0	0	200	300	0	0	0	0	0	0	0	200	903	0	0	0	0	0	0	0	603	903	0
365	9	0	0	0	0	0	0	200	300	0	0	0	0	0	0	0	200	903	0	0	0	0	0	0	0	603	903	0
366	0	0	0	0	0	0	0	200	300	0	0	0	0	0	0	0	200	903	0	0	0	0	0	0	0	603	903	0
366	1	0	0	0	0	0	0	200	300	0	0	0	0	0	0	0	200	903	0	0	0	0	0	0	0	603	903	0
366	2	0	0	0	0	0	0	200	300	0	0	0	0	0	0	0	200	903	0	0	0	0	0	0	0	603	903	0
366	3	0	0	0	0	0	0	200	300	0	0	0	0	0	0	0	200	903	0	0	0	0	0	0	0	603	903	0
366	4	0	0	0	0	0	0	200	300	0	0	0	0	0	0	0	200	903	0	0	0	0	0	0	0	603	903	0
366	5	0	0	0	0	0	0	200	300	0	0	0	0	0	0	0	200	903	0	0	0	0	0	0	0	603	903	0
366	6	0	0	0	0	0	0	200	300	0	0	0	0	0	0	0	200	903	0	0	0	0	0	0	0	603	903	0
366	7	0	0	0	0	0	0	200	300	0	0	0	0	0	0	0	200	903	0	0	0	0	0	0	0	603	903	0
366	8	0	0	0	0	0	0	200	300	0	0	0	0	0	0	0	200	903	0	0	0	0	0	0	0	603	903	0
366	9	0	0	0	0	0	0	200	300	0	0	0	0	0	0	0	200	903	0	0	0	0	0	0	0	603	903	0
367	0	0	0	0	0	0	0	200	300	0	0	0	0	0	0	0	200	903	0	0	0	0	0	0	0	603	903	0
367	1	0	0	0	0	0	0	200	300	0	0	0	0	0	0	0	200	903	0	0	0	0	0	0	0	603	903	0
367	2	0	0	0	0	0	0	200	300	0	0	0	0	0	0	0	200	903	0	0	0	0	0	0	0	603	903	0
367	3	0	0	0	0	0	0	200	300	0	0	0	0	0	0	0	200	903	0	0	0	0	0	0	0	603	903	0
367	4	0	0	0	0	0	0	200	300	0	0	0	0	0	0	0	200	903	0	0	0	0	0	0	0	603	903	0
367	5	0	0	0	0	0	0	200	300	0	0	0	0	0	0	0	200	903	0	0	0	0	0	0	0	603	903	0
367	6	0	0	0	0	0	0	200	300	0	0	0	0	0	0	0	200	903	0	0	0	0	0	0	0	603	903	0
367	7	0	0	0	0	0	0	200	300	0	0	0	0	0	0	0	200	903	0	0	0	0	0	0	0	603	903	0
367	8	0	0	0	0	0	0	200	300	0	0	0	0	0	0	0	200	903	0	0	0	0	0	0	0	603	903	0
367	9	0	0	0	0	0	0	200	300	0	0	0	0	0	0	0	200	903	0	0	0	0	0	0	0	603	903	0
368	0	0	0	0	0	0	0	200	300	0	0	0	0	0	0	0	200	903	0	0	0	0	0	0	0	603	903	0
368	1	0	0	0	0	0	0	200	300	0	0	0	0	0	0	0	200	903	0	0	0	0	0	0	0	603	903	0
368	2	0	0	0	0	0	0	200	300	0	0	0	0	0	0	0	200	903	0	0	0	0	0	0	0	603	903	0
368	3	0	0	0	0	0	0	200	300	0	0	0	0	0	0	0	200	903	0	0	0	0	0	0	0	603	903	0
368	4	0	0	0	0	0	0	200	300	0	0	0	0	0	0	0	200	903	0	0	0	0	0	0	0	603	903	0
368	5	0	0	0	0	0	0	200	300	0	0	0	0	0	0	0	200	903	0	0	0	0	0	0	0	603	903	0
368	6	0	0	0	0	0	0	200	300	0	0	0	0	0	0	0	200	903	0	0	0	0	0	0	0	603	903	0
368	7	0	0	0	0	0	0	200	300	0	0	0	0	0	0	0	200	903	0	0	0	0	0	0	0	603	903	0
368	8	0	0	0	0	0	0	200	300	0	0	0	0	0	0	0	200	903	0	0	0	0	0	0	0	603	903	0
368	9	0	0	0	0	0	0	200	300	0	0	0	0	0	0	0	200	903	0	0	0	0	0	0	0	603	903	0
369	0	0	0	0	0	0	0	200	300	0	0	0	0	0	0	0	200	903	0	0	0	0	0	0	0	603	903	0
369	1	0	0	0	0	0	0	200	300	0	0	0	0	0	0	0	200	903	0	0	0	0	0	0	0	603	903	0
369	2	0	0	0	0	0	0	200	300	0	0	0	0	0	0	0	200	903	0	0	0	0	0	0	0	603	903	0
369	3	0	0	0	0	0	0	200	300	0	0	0	0	0	0	0	200	903	0	0	0	0	0	0	0	603	903	0
369	4	0	0	0	0	0	0	200	300	0	0	0	0	0	0	0	200	903	0	0	0	0	0	0	0	603	903	0
369	5	0	0	0	0	0	0	200	300	0	0	0	0	0	0	0	200	903	0	0	0	0	0	0	0	603	903	0
369	6	0	0	0	0	0	0	200	300	0	0	0	0	0	0	0	200	903	0	0	0	0	0	0	0	603	903	0
369	7	0	0	0	0	0	0	200	300	0	0	0	0	0	0	0	200	903	0	0	0	0	0	0	0	603	903	0
369	8	0	0	0	0	0	0	200	300	0	0	0	0	0	0	0	200	903	0	0	0	0	0	0	0	603	903	0
369	9	0	0	0	0	0	0	200	300	0	0	0	0	0	0	0	200	903	0	0	0	0	0	0	0	603	903	0
370	0	0	0	0	0	0	0	200	300	0	0	0	0	0	0	0	200	903	0	0	0	0	0	0	0	603	903	0
370	1	0	0	0	0	0	0	200	300	0	0	0	0	0	0	0	200	903	0	0	0	0	0	0	0	603	903	0
370	2	0	0	0	0	0	0	200	300	0	0	0	0	0	0	0	200	903	0	0	0	0	0	0	0	603	903	0
370	3	0	0	0	0	0	0	200	300	0	0	0	0	0	0	0	200	903	0	0	0	0	0	0	0	603	903	0
370	4	0	0	0	0	0	0	200	300	0	0	0	0	0	0	0	200	903	0	0	0	0	0	0	0	603	903	0
370	5	0	0	0	0	0	0	200	300	0	0	0	0	0	0	0	200	903	0	0	0	0	0	0	0	603	903	0
370	6	0	0	0	0	0	0	200	300	0	0	0	0	0	0	0	200	903	0	0	0	0	0	0	0	603	903	0
370	7	0	0	0	0	0	0	200	300	0	0	0	0	0	0	0	200	903	0	0	0	0	0	0	0	603	903	0
370	8	0	0	0	0	0	0	200	300	0	0	0	0	0	0	0	200	903	0	0	0	0	0	0	0	603	903	0
370	9	0	0	0	0	0	0	200	300	0	0	0	0	0	0	0	200	903	0	0	0	0	0	0	0	603	903	0
371	0	0	0	0	0	0	0	200	300	0	0	0	0	0	0	0	200	903	0	0	0	0	0	0	0	603	903	0
371	1	0	0	0	0	0	0	200	300	0	0	0	0	0	0	0	200	903	0	0	0	0	0	0	0	603	903	0
371	2	0	0	0	0	0	0	200	300	0	0	0	0	0	0	0	200	903	0	0	0	0	0	0	0	603	903	0
371	3	0	0	0	0	0	0	200	300	0	0	0	0	0	0	0	200	903	0	0	0	0	0	0	0	603	903	0
371	4	0	0	0	0	0	0	200	300	0	0	0	0	0	0	0	200	903	0	0	0	0	0	0	0	603	903	0
371	5	0	0	0	0	0	0	200	300	0	0	0	0	0	0	0	200	903	0	0	0	0	0	0	0	603	903	0
371	6	0	0	0	0	0	0	200	300	0	0	0	0	0	0	0	200	903	0	0	0	0	0	0	0	603	903	0
371	7	0	0	0	0	0	0	200	300	0	0	0	0	0	0	0	200	903	0	0	0	0	0	0	0	603	903	0
371	8	0	0	0	0	0	0	200	300	0	0	0	0	0	0	0	200	903	0	0	0	0	0	0	0	603	903	0
371	9	0	0	0	0	0	0	200	300	0	0	0	0	0	0	0	200	903	0	0	0	0	0	0	0	603	903	0
372	0	0	0	0	0	0	0	200	300	0	0	0	0	0	0	0	200	903	0	0	0	0	0	0	0	603	903	0
372	1	0	0	0	0	0	0	200	300	0	0	0	0	0	0	0	200	903	0	0	0	0	0	0	0	603	903	0
372	2	0	0	0	0	0	0	200	300	0	0	0	0	0	0	0	200	903	0	0	0	0	0	0	0	603	903	0
372	3	0	0	0	0	0	0	200	300	0	0	0	0	0	0	0	200	903	0	0	0	0	0	0	0	603	903	0
372	4	0	0	0	0	0	0	200	300	0	0	0	0	0	0	0	200	903	0	0	0	0	0	0	0	603	903	0
372	5	0	0	0	0	0	0	200	300	0	0	0	0	0	0	0	200	903	0	0	0	0	0	0	0	603	903	0
372	6	0	0	0	0	0	0	200	300	0	0	0	0	0	0	0	200	903	0	0	0	0	0	0	0	603	903	0
372	7	0	0	0	0	0	0	200	300	0	0	0	0	0	0	0	200	903	0	0	0	0	0	0	0	603	903	0
372	8	0	0	0	0	0	0	200	300	0	0	0	0	0	0	0	200	903	0	0	0	0	0	0	0	603	903	0
372	9	0	0	0	0	0	0	200	300	0	0	0	0	0	0	0	200	903	0	0	0	0	0	0	0	603	903	0
373	0	0	0	0	0	0	0	200	300	0	0	0	0	0	0	0	200	903	0	0	0	0	0	0	0	603	903	0
373	1	0	0	0	0	0	0	200	300	0	0	0	0	0	0	0	200	903	0	0	0	0	0	0	0	603	903	0
373	2	0	0	0	0	0	0	200	300	0	0	0	0	0	0	0	200	903	0	0	0	0	0	0	0	603	903	0
373	3	0	0	0	0	0	0	200	300	0	0	0	0	0	0	0	200	903	0	0	0	0	0	0	0	603	903	0
373	4	0	0	0	0	0	0	200	300	0	0	0	0	0	0	0	200	903	0	0	0	0	0	0	0	603	903	0
373	5	0	0	0	0	0	0	200	300	0	0	0	0	0	0	0	200	903	0	0	0	0	0	0	0	603	903	0
373	6	0	0	0	0	0	0	200	300	0	0	0	0	0	0	0	200	903	0	0	0	0	0	0	0	603	903	0
373	7	0	0	0	0	0	0	200	300	0	0	0	0	0	0	0	200	903	0	0	0	0	0	0	0	603	903	0
373	8	0	0	0	0	0	0	200	300	0	0	0	0	0	0	0	200	903	0	0	0	0	0	0	0	603	903	0
373	9	0	0	0	0	0	0	200	300	0	0	0	0	0	0	0	200	903	0	0	0	0	0	0	0	603	903	0
374	0	0	0	0	0	0	0	200	300	0	0	0	0	0	0	0	200	903	0	0	0	0	0	0	0	603	903	0
374	1	0	0	0	0	0	0	200	300	0	0	0	0	0	0	0	200	903	0	0	0	0	0	0	0	603	903	0
374	2	0	0	0	0	0	0	200	300	0	0	0	0	0	0	0	200	903	0	0	0	0	0	0	0	603	903	0
374	3	0	0	0	0	0	0	200	300	0	0	0	0	0	0	0	200	903	0	0	0	0	0	0	0	603	903	0
374	4	0	0	0	0	0	0	200	300	0	0	0	0	0	0	0	200	903	0	0	0	0	0	0	0	603	903	0
374	5	0	0	0	0	0	0	200	300	0	0	0	0	0	0	0	200	903	0	0	0	0	0	0	0	603	903	0
374	6	0	0	0	0	0	0	200	300	0	0	0	0	0	0	0	200	903	0	0	0	0	0	0	0	603	903	0
374	7	0	0	0	0	0	0	200	300	0	0	0	0	0	0	0	200	903	0	0	0	0	0	0	0	603	903	0
374	8	0	0	0	0	0	0	200	300	0	0	0	0	0	0	0	200	903	0	0	0	0	0	0	0	603	903	0
374	9	0	0	0	0	0	0	200	300	0	0	0	0	0	0	0	200	903	0	0	0	0	0	0	0	603	903	0
375	0	0	0	0	0	0	0	200	300	0	0	0	0	0	0	0	200	903	0	0	0	0	0	0	0	603	903	0
375	1	0	0	0	0	0	0	200	300	0	0	0	0	0	0	0	200	903	0	0	0	0	0	0	0	603	903	0
375	2	0	0	0	0	0	0	200	300	0	0	0	0	0	0	0	200	903	0	0	0	0	0	0	0	603	903	0
375	3	0	0	0	0	0	0	200	300	0	0	0	0	0	0	0	200	903	0	0	0	0	0	0	0	603	903	0
375	4	0	0	0	0	0	0	200	300	0	0	0	0	0	0	0	200	903	0	0	0	0	0	0	0	603	903	0
375	5	0	0	0	0	0	0	200	300	0	0	0	0	0	0	0	200	903	0	0	0	0	0	0	0	603	903	0
375	6	0	0	0	0	0	0	200	300	0	0	0	0	0	0	0	200	903	0	0	0	0	0	0	0	603	903	0
375	7	0	0	0	0	0	0	200	300	0	0	0	0	0	0	0	200	903	0	0	0	0	0	0	0	603	903	0
375	8	0	0	0	0	0	0	200	300	0	0	0	0	0	0	0	200	903	0	0	0	0	0	0	0	603	903	0
375	9	0	0	0	0	0	0	200	300	0	0	0	0	0	0	0	200	903	0	0	0	0	0	0	0	603	903	0
376	0	0	0	0	0	0	0	200	300	0	0	0	0	0	0	0	200	903	0	0	0	0	0	0	0	603	903	0
376	1	0	0	0	0	0	0	200	300	0	0	0	0	0	0	0	200	903	0	0	0	0	0	0	0	603	903	0
376	2	0	0	0	0	0	0	200	300	0	0	0	0	0	0	0	200	903	0	0	0	0	0	0	0	603	903	0
376	3	0	0	0	0	0	0	200	300	0	0	0	0	0	0	0	200	903	0	0	0	0	0	0	0	603	903	0
376	4	0	0	0	0	0	0	200	300	0	0	0	0	0	0	0	200	903	0	0	0	0	0	0	0	603	903	0
376	5	0	0	0	0	0	0	200	300	0	0	0	0	0	0	0	200	903	0	0	0	0	0	0	0	603	903	0
376	6	0	0	0	0	0	0	200	300	0	0	0	0	0	0	0	200	903	0	0	0	0	0	0	0	603	903	0
376	7	0	0	0	0	0	0	200	300	0	0	0	0	0	0	0	200	903	0	0	0	0	0	0	0	603	903	0
376	8	0	0	0	0	0	0	200	300	0	0	0	0	0	0	0	200	903	0	0	0	0	0	0	0	603	903	0
376	9	0	0	0	0	0	0	200	300	0	0	0	0	0	0	0	200	903	0	0	0	0	0	0	0	603	903	0
377	0	0	0	0	0	0	0	200	300	0	0	0	0	0	0	0	200	903	0	0	0	0	0	0	0	603	903	0
377	1	0	0	0	0	0	0	200	300	0	0	0	0	0	0	0	200	903	0	0	0	0	0	0	0	603	903	0
377	2	0	0	0	0	0	0	200	300	0	0	0	0	0	0	0	200	903	0	0	0	0	0	0	0	603	903	0
377	3	0	0	0	0	0	0	200	300	0	0	0	0	0	0	0	200	903	0	0	0	0	0	0	0	603	903	0
377	4	0	0	0	0	0	0	200	300	0	0	0	0	0	0	0	200	903	0	0	0	0	0	0	0	603	903	0
377	5	0	0	0	0	0	0	200	300	0	0	0	0	0	0	0	200	903	0	0	0	0	0	0	0	603	903	0
377	6	0	0	0	0	0	0	200	300	0	0	0	0	0	0	0	200	903	0	0	0	0	0	0	0	603	903	0
377	7	0	0	0	0	0	0	200	300	0	0	0	0	0	0	0	200	903	0	0	0	0	0	0	0	603	903	0
377	8	0	0	0	0	0	0	200	300	0	0	0	0	0	0	0	200	903	0	0	0	0	0	0	0	603	903	0
377	9	0	0	0	0	0	0	200	300	0	0	0	0	0	0	0	200	903	0	0	0	0	0	0	0	603	903	0
378	0	0	0	0	0	0	0	200	300	0	0	0	0	0	0	0	200	903	0	0	0	0	0	0	0	603	903	0
378	1	0	0	0	0	0	0	200	300	0	0	0	0	0	0	0	200	903	0	0	0	0	0	0	0	603	903	0
378	2	0	0	0	0	0	0	200	300	0	0	0	0	0	0	0	200	903	0	0	0	0	0	0	0	603	903	0
378	3	0	0	0	0	0	0	200	300	0	0	0	0	0	0	0	200	903	0	0	0	0	0	0	0	603	903	0
378	4	0	0	0	0	0	0	200	300	0	0	0	0	0	0	0	200	903	0	0	0	0	0	0	0	603	903	0
378	5	0	0	0	0	0	0	200	300	0	0	0	0	0	0	0	200	903	0	0	0	0	0	0	0	603	903	0
378	6	0	0	0	0	0	0	200	300	0	0	0	0	0	0	0	200	903	0	0	0	0	0	0	0	603	903	0
378	7	0	0	0	0	0	0	200	300	0	0	0	0	0	0	0	200	903	0	0	0	0	0	0	0	603	903	0
378	8	0	0	0	0	0	0	200	300	0	0	0	0	0	0	0	200	903	0	0	0	0	0	0	0	603	903	0
378	9	0	0	0	0	0	0	200	300	0	0	0	0	0	0	0	200	903	0	0	0	0	0	0	0	603	903	0
379	0	0	0	0	0	0	0	200	300	0	0	0	0	0	0	0	200	903	0	0	0	0	0	0	0	603	903	0
379	1	0	0	0	0	0	0	200	300	0	0	0	0	0	0	0	200	903	0	0	0	0	0	0	0	603	903	0
379	2	0	0	0	0	0	0	200	300	0	0	0	0	0	0	0	200	903	0	0	0	0	0	0	0	603	903	0
379	3	0	0	0	0	0	0	200	300	0	0	0	0	0	0	0	200	903	0	0	0	0	0	0	0	603	903	0
379	4	0	0	0	0	0	0	200	300	0	0	0	0	0	0	0	200	903	0	0	0	0	0	0	0	603	903	0
379	5	0	0	0	0	0	0	200	300	0	0	0	0	0	0	0	200	903	0	0	0	0	0	0	0	603	903	0
379	6	0	0	0	0	0	0	200	300	0	0	0	0	0	0	0	200	903	0	0	0	0	0	0	0	603	903	0
379	7	0	0	0	0	0	0	200	300	0	0	0	0	0	0	0	200	903	0	0	0	0	0	0	0	603	903	0
379	8	0	0	0	0	0	0	200	300	0	0	0	0	0	0	0	200	903	0	0	0	0	0	0	0	603	903	0
379	9	0	0	0	0	0	0	200	300	0	0	0	0	0	0	0	200	903	0	0	0	0	0	0	0	603	903	0
380	0	0	0	0	0	0	0	200	300	0	0	0	0	0	0	0	200	903	0	0	0	0	0	0	0	603	903	0
380	1	0	0	0	0	0	0	200	300	0	0	0	0	0	0	0	200	903	0	0	0	0	0	0	0	603	903	0
380	2	0	0	0	0	0	0	200	300	0	0	0	0	0	0	0	200	903	0	0	0	0	0	0	0	603	903	0
380	3	0	0	0	0	0	0	200	300	0	0	0	0	0	0	0	200	903	0	0	0	0	0	0	0	603	903	0
380	4	0	0	0	0	0	0	200	300	0	0	0	0	0	0	0	200	903	0	0	0	0	0	0	0	603	903	0
380	5	0	0	0	0	0	0	200	300	0	0	0	0	0	0	0	200	903	0	0	0	0	0	0	0	603	903	0
380	6	0	0	0	0	0	0	200	300	0	0	0	0	0	0	0	200	903	0	0	0	0	0	0	0	603	903	0
380	7	0	0	0	0	0	0	200	300	0	0	0	0	0	0	0	200	903	0	0	0	0	0	0	0	603	903	0
380	8	0	0	0	0	0	0	200	300	0	0	0	0	0	0	0	200	903	0	0	0	0	0	0	0	603	903	0
380	9	0	0	0	0	0	0	200	300	0	0	0	0	0	0	0	200	903	0	0	0	0	0	0	0	603	903	0
381	0	0	0	0	0	0	0	200	300	0	0	0	0	0	0	0	200	903	0	0	0	0	0	0	0	603	903	0
381	1	0	0	0	0	0	0	200	300	0	0	0	0	0	0	0	200	903	0	0	0	0	0	0	0	603	903	0
381	2	0	0	0	0	0	0	200	300	0	0	0	0	0	0	0	200	903	0	0	0	0	0	0	0	603	903	0
381	3	0	0	0	0	0	0	200	300	0	0	0	0	0	0	0	200	903	0	0	0	0	0	0	0	603	903	0
381	4	0	0	0	0	0	0	200	300	0	0	0	0	0	0	0	200	903	0	0	0	0	0	0	0	603	903	0
381	5	0	0	0	0	0	0	200	300	0	0	0	0	0	0	0	200	903	0	0	0	0	0	0	0	603	903	0
381	6	0	0	0	0	0	0	200	300	0	0	0	0	0	0	0	200	903	0	0	0	0	0	0	0	603	903	0
381	7	0	0	0	0	0	0	200	300	0	0	0	0	0	0	0	200	903	0	0	0	0	0	0	0	603	903	0
381	8	0	0	0	0	0	0	200	300	0	0	0	0	0	0	0	200	903	0	0	0	0	0	0	0	603	903	0
381	9	0	0	0	0	0	0	200	300	0	0	0	0	0	0	0	200	903	0	0	0	0	0	0	0	603	903	0
382	0	0	0	0	0	0	0	200	300	0	0	0	0	0	0	0	200	903	0	0	0	0	0	0	0	603	903	0
382	1	0	0	0	0	0	0	200	300	0	0	0	0	0	0	0	200	903	0	0	0	0	0	0	0	603	903	0
382	2	0	0	0	0	0	0	200	300	0	0	0	0	0	0	0	200	903	0	0	0	0	0	0	0	603	903	0
382	3	0	0	0	0	0	0	200	300	0	0	0	0	0	0	0	200	903	0	0	0	0	0	0	0	603	903	0
382	4	0	0	0	0	0	0	200	300	0	0	0	0	0	0	0	200	903	0	0	0	0	0	0	0	603	903	0
382	5	0	0	0	0	0	0	200	300	0	0	0	0	0	0	0	200	903	0	0	0	0	0	0	0	603	903	0
382	6	0	0	0	0	0	0	200	300	0	0	0	0	0	0	0	200	903	0	0	0	0	0	0	0	603	903	0
382	7	0	0	0	0	0	0	200	300	0	0	0	0	0	0	0	200	903	0	0	0	0	0	0	0	603	903	0
382	8	0	0	0	0	0	0	200	300	0	0	0	0	0	0	0	200	903	0	0	0	0	0	0	0	603	903	0
382	9	0	0	0	0	0	0	200	300	0	0	0	0	0	0	0	200	903	0	0	0	0	0	0	0	603	903	0
383	0	0	0	0	0	0	0	200	300	0	0	0	0	0	0	0	200	903	0	0	0	0	0	0	0	603	903	0
383	1	0	0	0	0	0	0	200	300	0	0	0	0	0	0	0	200	903	0	0	0	0	0	0	0	603	903	0
383	2	0	0	0	0	0	0	200	300	0	0	0	0	0	0	0	200	903	0	0	0	0	0	0	0	603	903	0
383	3	0	0	0	0	0	0	200	300	0	0	0	0	0	0	0	200	903	0	0	0	0	0	0	0	603	903	0
383	4	0	0	0	0	0	0	200	300	0	0	0	0	0	0	0	200	903	0	0	0	0	0	0	0	603	903	0
383	5	0	0	0	0	0	0	200	300	0	0	0	0	0	0	0	200	903	0	0	0	0	0	0	0	603	903	0
383	6	0	0	0	0	0	0	200	300	0	0	0	0	0	0	0	200	903	0	0	0	0	0	0	0	603	903	0
383	7	0	0	0	0	0	0	200	300	0	0	0	0	0	0	0	200	903	0	0	0	0	0	0	0	603	903	0
383	8	0	0	0	0	0	0	200	300	0	0	0	0	0	0	0	200	903	0	0	0	0	0	0	0	603	903	0
383	9	0	0	0	0	0	0	200	300	0	0	0	0	0	0	0	200	903	0	0	0	0	0	0	0	603	903	0
384	0	0	0	0	0	0	0	200	300	0	0	0	0	0	0	0	200	903	0	0	0	0	0	0	0	603	903	0
384	1	0	0	0	0	0	0	200	300	0	0	0	0	0	0	0	200	903	0	0	0	0	0	0	0	603	903	0
384	2	0	0	0	0	0	0	200	300	0	0	0	0	0	0	0	200	903	0	0	0	0	0	0	0	603	903	0
384	3	0	0	0	0	0	0	200	300	0	0	0	0	0	0	0	200	903	0	0	0	0	0	0	0	603	903	0
384	4	0	0	0	0	0	0	200	300	0	0	0	0	0	0	0	200	903	0	0	0	0	0	0	0	603	903	0
384	5	0	0	0	0	0	0	200	300	0	0	0	0	0	0	0	200	903	0	0	0	0	0	0	0	603	903	0
384	6	0	0	0	0	0	0	200	300	0	0	0	0	0	0	0	200	903	0	0	0	0	0	0	0	603	903	0
384	7	0	0	0	0	0	0	200	300	0	0	0	0	0	0	0	200	903	0	0	0	0	0	0	0	603	903	0
384	8	0	0	0	0	0	0	200	300	0	0	0	0	0	0	0	200	903	0	0	0	0	0	0	0	603	903	0
384	9	0	0	0	0	0	0	200	300	0	0	0	0	0	0	0	200	903	0	0	0	0	0	0	0	603	903	0
385	0	0	0	0	0	0	0	200	300	0	0	0	0	0	0	0	200	903	0	0	0	0	0	0	0	603	903	0
385	1	0	0	0	0	0	0	200	300	0	0	0	0	0	0	0	200	903	0	0	0	0	0	0	0	603	903	0
385	2	0	0	0	0	0	0	200	300	0	0	0	0	0	0	0	200	903	0	0	0	0	0	0	0	603	903	0
385	3	0	0	0	0	0	0	200	300	0	0	0	0	0	0	0	200	903	0	0	0	0	0	0	0	603	903	0
385	4	0	0	0	0	0	0	200	300	0	0	0	0	0	0	0	200	903	0	0	0	0	0	0	0	603	903	0
385	5	0	0	0	0	0	0	200	300	0	0	0	0	0	0	0	200	903	0	0	0	0	0	0	0	603	903	0
385	6	0	0	0	0	0	0	200	300	0	0	0	0	0	0	0	200	903	0	0	0	0	0	0	0	603	903	0
385	7	0	0	0	0	0	0	200	300	0	0	0	0	0	0	0	200	903	0	0	0	0	0	0	0	603	903	0
385	8	0	0	0	0	0	0	200	300	0	0	0	0	0	0	0	200	903	0	0	0	0	0	0	0	603	903	0
385	9	0	0	0	0	0	0	200	300	0	0	0	0	0	0	0	200	903	0	0	0	0	0	0	0	603	903	0
386	0	0	0	0	0	0	0	200	300	0	0	0	0	0	0	0	200	903	0	0	0	0	0	0	0	603	903	0
386	1	0	0	0	0	0	0	200	300	0	0	0	0	0	0	0	200	903	0	0	0	0	0	0	0	603	903	0
386	2	0	0	0	0	0	0	200	300	0	0	0	0	0	0	0	200	903	0	0	0	0	0	0	0	603	903	0
386	3	0	0	0	0	0	0	200	300	0	0	0	0	0	0	0	200	903	0	0	0	0	0	0	0	603	903	0
386	4	0	0	0	0	0	0	200	300	0	0	0	0	0	0	0	200	903	0	0	0	0	0	0	0	603	903	0
386	5	0	0	0	0	0	0	200	300	0	0	0	0	0	0	0	200	903	0	0	0	0	0	0	0	603	903	0
386	6	0	0	0	0	0	0	200	300	0	0	0	0	0	0	0	200	903	0	0	0	0	0	0	0	603	903	0
386	7	0	0	0	0	0	0	200	300	0	0	0	0	0	0	0	200	903	0	0	0	0	0	0	0	603	903	0
386	8	0	0	0	0	0	0	200	300	0	0	0	0	0	0	0	200	903	0	0	0	0	0	0	0	603	903	0
386	9	0	0	0	0	0	0	200	300	0	0	0	0	0	0	0	200	903	0	0	0	0	0	0	0	603	903	0
387	0	0	0	0	0	0	0	200	300	0	0	0	0	0	0	0	200	903	0	0	0	0	0	0	0	603	903	0
387	1	0	0	0	0	0	0	200	300	0	0	0	0	0	0	0	200	903	0	0	0	0	0	0	0	603	903	0
387	2	0	0	0	0	0	0	200	300	0	0	0	0	0	0	0	200	903	0	0	0	0	0	0	0	603	903	0
387	3	0	0	0	0	0	0	200	300	0	0	0	0	0	0	0	200	903	0	0	0	0	0	0	0	603	903	0
387	4	0	0	0	0	0	0	200	300	0	0	0	0	0	0	0	200	903	0	0	0	0	0	0	0	603	903	0
387	5	0	0	0	0	0	0	200	300	0	0	0	0	0	0	0	200	903	0	0	0	0	0	0	0	603	903	0
387	6	0	0	0	0	0	0	200	300	0	0	0	0	0	0	0	200	903	0	0	0	0	0	0	0	603	903	0
387	7	0	0	0	0	0	0	200	300	0	0	0	0	0	0	0	200	903	0	0	0	0	0	0	0	603	903	0
387	8	0	0	0	0	0	0	200	300	0	0	0	0	0	0	0	200	903	0	0	0	0	0	0	0	603	903	0
387	9	0	0	0	0	0	0	200	300	0	0	0	0	0	0	0	200	903	0	0	0	0	0	0	0	603	903	0
388	0	0	0	0	0	0	0	200	300	0	0	0	0	0	0	0	200	903	0	0	0	0	0	0	0	603	903	0
388	1	0	0	0	0	0	0	200	300	0	0	0	0	0	0	0	200	903	0	0	0	0	0	0	0	603	903	0
388	2	0	0	0	0	0	0	200	300	0	0	0	0	0	0	0	200	903	0	0	0	0	0	0	0	603	903	0
388	3	0	0	0	0	0	0	200	300	0	0	0	0	0	0	0	200	903	0	0	0	0	0	0	0	603	903	0
388	4	0	0	0	0	0	0	200	300	0	0	0	0	0	0	0	200	903	0	0	0	0	0	0	0	603	903	0
388	5	0	0	0	0	0	0	200	300	0	0	0	0	0	0	0	200	903	0	0	0	0	0	0	0	603	903	0
388	6	0	0	0	0	0	0	200	300	0	0	0	0	0	0	0	200	903	0	0	0	0	0	0	0	603	903	0
388	7	0	0	0	0	0	0	200	300	0	0	0	0	0	0	0	200	903	0	0	0	0	0	0	0	603	903	0
388	8	0	0	0	0	0	0	200	300	0	0	0	0	0	0	0	200	903	0	0	0	0	0	0	0	603	903	0
388	9	0	0	0	0	0	0	200	300	0	0	0	0	0	0	0	200	903	0	0	0	0	0	0	0	603	903	0
389	0	0	0	0	0	0	0	200	300	0	0	0	0	0	0	0	200	903	0	0	0	0	0	0	0	603	903	0
389	1	0	0	0	0	0	0	200	300	0	0	0	0	0	0	0	200	903	0	0	0	0	0	0	0	603	903	0
389	2	0	0	0	0	0	0	200	300	0	0	0	0	0	0	0	200	903	0	0	0	0	0	0	0	603	903	0
389	3	0	0	0	0	0	0	200	300	0	0	0	0	0	0	0	200	903	0	0	0	0	0	0	0	603	903	0
389	4	0	0	0	0	0	0	200	300	0	0	0	0	0	0	0	200	903	0	0	0	0	0	0	0	603	903	0
389	5	0	0	0	0	0	0	200	300	0	0	0	0	0	0	0	200	903	0	0	0	0	0	0	0	603	903	0
389	6	0	0	0	0	0	0	200	300	0	0	0	0	0	0	0	200	903	0	0	0	0	0	0	0	603	903	0
389	7	0	0	0	0	0	0	200	300	0	0	0	0	0	0	0	200	903	0	0	0	0	0	0	0	603	903	0
389	8	0	0	0	0	0	0	200	300	0	0	0	0	0	0	0	200	903	0	0	0	0	0	0	0	603	903	0
389	9	0	0	0	0	0	0	200	300	0	0	0	0	0	0	0	200	903	0	0	0	0	0	0	0	603	903	0
390	0	0	0	0	0	0	0	200	300	0	0	0	0	0	0	0	200	903	0	0	0	0	0	0	0	603	903	0
390	1	0	0	0	0	0	0	200	300	0	0	0	0	0	0	0	200	903	0	0	0	0	0	0	0	603	903	0
390	2	0	0	0	0	0	0	200	300	0	0	0	0	0	0	0	200	903	0	0	0	0	0	0	0	603	903	0
390	3	0	0	0	0	0	0	200	300	0	0	0	0	0	0	0	200	903	0	0	0	0	0	0	0	603	903	0
390	4	0	0	0	0	0	0	200	300	0	0	0	0	0	0	0	200	903	0	0	0	0	0	0	0	603	903	0
390	5	0	0	0	0	0	0	200	300	0	0	0	0	0	0	0	200	903	0	0	0	0	0	0	0	603	903	0
390	6	0	0	0	0	0	0	200	300	0	0	0	0	0	0	0	200	903	0	0	0	0	0	0	0	603	903	0
390	7	0	0	0	0	0	0	200	300	0	0	0	0	0	0	0	200	903	0	0	0	0	0	0	0	603	903	0
390	8	0	0	0	0	0	0	200	300	0	0	0	0	0	0	0	200	903	0	0	0	0	0	0	0	603	903	0
390	9	0	0	0	0	0	0	200	300	0	0	0	0	0	0	0	200	903	0	0	0	0	0	0	0	603	903	0
391	0	0	0	0	0	0	0	200	300	0	0	0	0	0	0	0	200	903	0	0	0	0	0	0	0	603	903	0
391	1	0	0	0	0	0	0	200	300	0	0	0	0	0	0	0	200	903	0	0	0	0	0	0	0	603	903	0
391	2	0	0	0	0	0	0	200	300	0	0	0	0	0	0	0	200	903	0	0	0	0	0	0	0	603	903	0
391	3	0	0	0	0	0	0	200	300	0	0	0	0	0	0	0	200	903	0	0	0	0	0	0	0	603	903	0
391	4	0	0	0	0	0	0	200	300	0	0	0	0	0	0	0	200	903	0	0	0	0	0	0	0	603	903	0
391	5	0	0	0	0	0	0	200	300	0	0	0	0	0	0	0	200	903	0	0	0	0	0	0	0	603	903	0
391	6	0	0	0	0	0	0	200	300	0	0	0	0	0	0	0	200	903	0	0	0	0	0	0	0	603	903	0
391	7	0	0	0	0	0	0	200	300	0	0	0	0	0	0	0	200	903	0	0	0	0	0	0	0	603	903	0
391	8	0	0	0	0	0	0	200	300	0	0	0	0	0	0	0	200	903	0	0	0	0	0	0	0	603	903	0
391	9	0	0	0	0	0	0	200	300	0	0	0	0	0	0	0	200	903	0	0	0	0	0	0	0	603	903	0
392	0	0	0	0	0	0	0	200	300	0	0	0	0	0	0	0	200	903	0	0	0	0	0	0	0	603	903	0
392	1	0	0	0	0	0	0	200	300	0	0	0	0	0	0	0	200	903	0	0	0	0	0	0	0	603	903	0
392	2	0	0	0	0	0	0	200	300	0	0	0	0	0	0	0	200	903	0	0	0	0	0	0	0	603	903	0
392	3	0	0	0	0	0	0	200	300	0	0	0	0	0	0	0	200	903	0	0	0	0	0	0	0	603	903	0
392	4	0	0	0	0	0	0	200	300	0	0	0	0	0	0	0	200	903	0	0	0	0	0	0	0	603	903	0
392	5	0	0	0	0	0	0	200	300	0	0	0	0	0	0	0	200	903	0	0	0	0	0	0	0	603	903	0
392	6	0	0	0	0	0	0	200	300	0	0	0	0	0	0	0	200	903	0	0	0	0	0	0	0	603	903	0
392	7	0	0	0	0	0	0	200	300	0	0	0	0	0	0	0	200	903	0	0	0	0	0	0	0	603	903	0
392	8	0	0	0	0	0	0	200	300	0	0	0	0	0	0	0	200	903	0	0	0	0	0	0	0	603	903	0
392	9	0	0	0	0	0	0	200	300	0	0	0	0	0	0	0	200	903	0	0	0	0	0	0	0	603	903	0
393	0	0	0	0	0	0	0	200	300	0	0	0	0	0	0	0	200	903	0	0	0	0	0	0	0	603	903	0
393	1	0	0	0	0	0	0	200	300	0	0	0	0	0	0	0	200	903	0	0	0	0	0	0	0	603	903	0
393	2	0	0	0	0	0	0	200	300	0	0	0	0	0	0	0	200	903	0	0	0	0	0	0	0	603	903	0
393	3	0	0	0	0	0	0	200	300	0	0	0	0	0	0	0	200	903	0	0	0	0	0	0	0	603	903	0
393	4	0	0	0	0	0	0	200	300	0	0	0	0	0	0	0	200	903	0	0	0	0	0	0	0	603	903	0
393	5	0	0	0	0	0	0	200	300	0	0	0	0	0	0	0	200	903	0	0	0	0	0	0	0	603	903	0
393	6	0	0	0	0	0	0	200	300	0	0	0	0	0	0	0	200	903	0	0	0	0	0	0	0	603	903	0
393	7	0	0	0	0	0	0	200	300	0	0	0	0	0	0	0	200	903	0	0	0	0	0	0	0	603	903	0
393	8	0	0	0	0	0	0	200	300	0	0	0	0	0	0	0	200	903	0	0	0	0	0	0	0	603	903	0
393	9	0	0	0	0	0	0	200	300	0	0	0	0	0	0	0	200	903	0	0	0	0	0	0	0	603	903	0
394	0	0	0	0	0	0	0	200	300	0	0	0	0	0	0	0	200	903	0	0	0	0	0	0	0	603	903	0
394	1	0	0	0	0	0	0	200	300	0	0	0	0	0	0	0	200	903	0	0	0	0	0	0	0	603	903	0
394	2	0	0	0	0	0	0	200	300	0	0	0	0	0	0	0	200	903	0	0	0	0	0	0	0	603	903	0
394	3	0	0	0	0	0	0	200	300	0	0	0	0	0	0	0	200	903	0	0	0	0	0	0	0	603	903	0
394	4	0	0	0	0	0	0	200	300	0	0	0	0	0	0	0	200	903	0	0	0	0	0	0	0	603	903	0
394	5	0	0	0	0	0	0	200	300	0	0	0	0	0	0	0	200	903	0	0	0	0	0	0	0	603	903	0
394	6	0	0	0	0	0	0	200	300	0	0	0	0	0	0	0	200	903	0	0	0	0	0	0	0	603	903	0
394	7	0	0	0	0	0	0	200	300	0	0	0	0	0	0	0	200	903	0	0	0	0	0	0	0	603	903	0
394	8	0	0	0	0	0	0	200	300	0	0	0	0	0	0	0	200	903	0	0	0	0	0	0	0	603	903	0
394	9	0	0	0	0	0	0	200	300	0	0	0	0	0	0	0	200	903	0	0	0	0	0	0	0	603	903	0
395	0	0	0	0	0	0	0	200	300	0	0	0	0	0	0	0	200	903	0	0	0	0	0	0	0	603	903	0
395	1	0	0	0	0	0	0	200	300	0	0	0	0	0	0	0	200	903	0	0	0	0	0	0	0	603	903	0
395	2	0	0	0	0	0	0	200	300	0	0	0	0	0	0	0	200	903	0	0	0	0	0	0	0	603	903	0
395	3	0	0	0	0	0	0	200	300	0	0	0	0	0	0	0	200	903	0	0	0	0	0	0	0	603	903	0
395	4	0	0	0	0	0	0	200	300	0	0	0	0	0	0	0	200	903	0	0	0	0	0	0	0	603	903	0
395	5	0	0	0	0	0	0	200	300	0	0	0	0	0	0	0	200	903	0	0	0	0	0	0	0	603	903	0
395	6	0	0	0	0	0	0	200	300	0	0	0	0	0	0	0	200	903	0	0	0	0	0	0	0	603	903	0
395	7	0	0	0	0	0	0	200	300	0	0	0	0	0	0	0	200	903	0	0	0	0	0	0	0	603	903	0
395	8	0	0	0	0	0	0	200	300	0	0	0	0	0	0	0	200	903	0	0	0	0	0	0	0	603	903	0
395	9	0	0	0	0	0	0	200	300	0	0	0	0	0	0	0	200	903	0	0	0	0	0	0	0	603	903	0
396	0	0	0	0	0	0	0	200	300	0	0	0	0	0	0	0	200	903	0	0	0	0	0	0	0	603	903	0
396	1	0	0	0	0	0	0	200	300	0	0	0	0	0	0	0	200	903	0	0	0	0	0	0	0	603	903	0
396	2	0	0	0	0	0	0	200	300	0	0	0	0	0	0	0	200	903	0	0	0	0	0	0	0	603	903	0
396	3	0	0	0	0	0	0	200	300	0	0	0	0	0	0	0	200	903	0	0	0	0	0	0	0	603	903	0
396	4	0	0	0	0	0	0	200	300	0	0	0	0	0	0	0	200	903	0	0	0	0	0	0	0	603	903	0
396	5	0	0	0	0	0	0	200	300	0	0	0	0	0	0	0	200	903	0	0	0	0	0	0	0	603	903	0
396	6	0	0	0	0	0	0	200	300	0	0	0	0	0	0	0	200	903	0	0	0	0	0	0	0	603	903	0
396	7	0	0	0	0	0	0	200	300	0	0	0	0	0	0	0	200	903	0	0	0	0	0	0	0	603	903	0
396	8	0	0	0	0	0	0	200	300	0	0	0	0	0	0	0	200	903	0	0	0	0	0	0	0	603	903	0
396	9	0	0	0	0	0	0	200	300	0	0	0	0	0	0	0	200	903	0	0	0	0	0	0	0	603	903	0
397	0	0	0	0	0	0	0	200	300	0	0	0	0	0	0	0	200	903	0	0	0	0	0	0	0	603	903	0
397	1	0	0	0	0	0	0	200	300	0	0	0	0	0	0	0	200	903	0	0	0	0	0	0	0	603	903	0
397	2	0	0	0	0	0	0	200	300	0	0	0	0	0	0	0	200	903	0	0	0	0	0	0	0	603	903	0
397	3	0	0	0	0	0	0	200	300	0	0	0	0	0	0	0	200	903	0	0	0	0	0	0	0	603	903	0
397	4	0	0	0	0	0	0	200	300	0	0	0	0	0	0	0	200	903	0	0	0	0	0	0	0	603	903	0
397	5	0	0	0	0	0	0	200	300	0	0	0	0	0	0	0	200	903	0	0	0	0	0	0	0	603	903	0
397	6	0	0	0	0	0	0	200	300	0	0	0	0	0	0	0	200	903	0	0	0	0	0	0	0	603	903	0
397	7	0	0	0	0	0	0	200	300	0	0	0	0	0	0	0	200	903	0	0	0	0	0	0	0	603	903	0
397	8	0	0	0	0	0	0	200	300	0	0	0	0	0	0	0	200	903	0	0	0	0	0	0	0	603	903	0
397	9	0	0	0	0	0	0	200	300	0	0	0	0	0	0	0	200	903	0	0	0	0	0	0	0	603	903	0
398	0	0	0	0	0	0	0	200	300	0	0	0	0	0	0	0	200	903	0	0	0	0	0	0	0	603	903	0
398	1	0	0	0	0	0	0	200	300	0	0	0	0	0	0	0	200	903	0	0	0	0	0	0	0	603	903	0
398	2	0	0	0	0	0	0	200	300	0	0	0	0	0	0	0	200	903	0	0	0	0	0	0	0	603	903	0
398	3	0	0	0	0	0	0	200	300	0	0	0	0	0	0	0	200	903	0	0	0	0	0	0	0	603	903	0
398	4	0	0	0	0	0	0	200	300	0	0	0	0	0	0	0	200	903	0	0	0	0	0	0	0	603	903	0
398	5	0	0	0	0	0	0	200	300	0	0	0	0	0	0	0	200	903	0	0	0	0	0	0	0	603	903	0
398	6	0	0	0	0	0	0	200	300	0	0	0	0	0	0	0	200	903	0	0	0	0	0	0	0	603	903	0
398	7	0	0	0	0	0	0	200	300	0	0	0	0	0	0	0	200	903	0	0	0	0	0	0	0	603	903	0
398	8	0	0	0	0	0	0	200	300	0	0	0	0	0	0	0	200	903	0	0	0	0	0	0	0	603	903	0
398	9	0	0	0	0	0	0	200	300	0	0	0	0	0	0	0	200	903	0	0	0	0	0	0	0	603	903	0
399	0	0	0	0	0	0	0	200	300	0	0	0	0	0	0	0	200	903	0	0	0	0	0	0	0	603	903	0
399	1	0	0	0	0	0	0	200	300	0	0	0	0	0	0	0	200	903	0	0	0	0	0	0	0	603	903	0
399	2	0	0	0	0	0	0	200	300	0	0	0	0	0	0	0	200	903	0	0	0	0	0	0	0	603	903	0
399	3	0	0	0	0	0	0	200	300	0	0	0	0	0	0	0	200	903	0	0	0	0	0	0	0	603	903	0
399	4	0	0	0	0	0	0	200	300	0	0	0	0	0	0	0	200	903	0	0	0	0	0	0	0	603	903	0
399	5	0	0	0	0	0	0	200	300	0	0	0	0	0	0	0	200	903	0	0	0	0	0	0	0	603	903	0
399	6	0	0	0	0	0	0	200	300	0	0	0	0	0	0	0	200	903	0	0	0	0	0	0	0	603	903	0
399	7	0	0	0	0	0	0	200	300	0	0	0	0	0	0	0	200	903	0	0	0	0	0	0	0	603	903	0
399	8	0	0	0	0	0	0	200	300	0	0	0	0	0	0	0	200	903	0	0	0	0	0	0	0	603	903	0
399	9	0	0	0	0	0	0	200	300	0	0	0	0	0	0	0	200	903	0	0	0	0	0	0	0	603	903	0
400	0	0	0	0	0	0	0	200	300	0	0	0	0	0	0	0	200	903	0	0	0	0	0	0	0	603	903	0
400	1	0	0	0	0	0	0	200	300	0	0	0	0	0	0	0	200	903	0	0	0	0	0	0	0	603	903	0
400	2	0	0	0	0	0	0	200	300	0	0	0	0	0	0	0	200	903	0	0	0	0	0	0	0	603	903	0
400	3	0	0	0	0	0	0	200	300	0	0	0	0	0	0	0	200	903	0	0	0	0	0	0	0	603	903	0
400	4	0	0	0	0	0	0	200	300	0	0	0	0	0	0	0	200	903	0	0	0	0	0	0	0	603	903	0
400	5	0	0	0	0	0	0	200	300	0	0	0	0	0	0	0	200	903	0	0	0	0	0	0	0	603	903	0
400	6	0	0	0	0	0	0	200	300	0	0	0	0	0	0	0	200	903	0	0	0	0	0	0	0	603	903	0
400	7	0	0	0	0	0	0	200	300	0	0	0	0	0	0	0	200	903	0	0	0	0	0	0	0	603	903	0
400	8	0	0	0	0	0	0	200	300	0	0	0	0	0	0	0	200	903	0	0	0	0	0	0	0	603	903	0
400	9	0	0	0	0	0	0	200	300	0	0	0	0	0	0	0	200	903	0	0	0	0	0	0	0	603	903	0
401	0	0	0	0	0	0	0	200	300	0	0	0	0	0	0	0	200	903	0	0	0	0	0	0	0	603	903	0
401	1	0	0	0	0	0	0	200	300	0	0	0	0	0	0	0	200	903	0	0	0	0	0	0	0	603	903	0
401	2	0	0	0	0	0	0	200	300	0	0	0	0	0	0	0	200	903	0	0	0	0	0	0	0	603	903	0
401	3	0	0	0	0	0	0	200	300	0	0	0	0	0	0	0	200	903	0	0	0	0	0	0	0	603	903	0
401	4	0	0	0	0	0	0	200	300	0	0	0	0	0	0	0	200	903	0	0	0	0	0	0	0	603	903	0
401	5	0	0	0	0	0	0	200	300	0	0	0	0	0	0	0	200	903	0	0	0	0	0	0	0	603	903	0
401	6	0	0	0	0	0	0	200	300	0	0	0	0	0	0	0	200	903	0	0	0	0	0	0	0	603	903	0
401	7	0	0	0	0	0	0	200	300	0	0	0	0	0	0	0	200	903	0	0	0	0	0	0	0	603	903	0
401	8	0	0	0	0	0	0	200	300	0	0	0	0	0	0	0	200	903	0	0	0	0	0	0	0	603	903	0
401	9	0	0	0	0	0	0	200	300	0	0	0	0	0	0	0	200	903	0	0	0	0	0	0	0	603	903	0
402	0	0	0	0	0	0	0	200	300	0	0	0	0	0	0	0	200	903	0	0	0	0	0	0	0	603	903	0
402	1	0	0	0	0	0	0	200	300	0	0	0	0	0	0	0	200	903	0	0	0	0	0	0	0	603	903	0
402	2	0	0	0	0	0	0	200	300	0	0	0	0	0	0	0	200	903	0	0	0	0	0	0	0	603	903	0
402	3	0	0	0	0	0	0	200	300	0	0	0	0	0	0	0	200	903	0	0	0	0	0	0	0	603	903	0
402	4	0	0	0	0	0	0	200	300	0	0	0	0	0	0	0	200	903	0	0	0	0	0	0	0	603	903	0
402	5	0	0	0	0	0	0	200	300	0	0	0	0	0	0	0	200	903	0	0	0	0	0	0	0	603	903	0
402	6	0	0	0	0	0	0	200	300	0	0	0	0	0	0	0	200	903	0	0	0	0	0	0	0	603	903	0
402	7	0	0	0	0	0	0	200	300	0	0	0	0	0	0	0	200	903	0	0	0	0	0	0	0	603	903	0
402	8	0	0	0	0	0	0	200	300	0	0	0	0	0	0	0	200	903	0	0	0	0	0	0	0	603	903	0
402	9	0	0	0	0	0	0	200	300	0	0	0	0	0	0	0	200	903	0	0	0	0	0	0	0	603	903	0
403	0	0	0	0	0	0	0	200	300	0	0	0	0	0	0	0	200	903	0	0	0	0	0	0	0	603	903	0
403	1	0	0	0	0	0	0	200	300	0	0	0	0	0	0	0	200	903	0	0	0	0	0	0	0	603	903	0
403	2	0	0	0	0	0	0	200	300	0	0	0	0	0	0	0	200	903	0	0	0	0	0	0	0	603	903	0
403	3	0	0	0	0	0	0	200	300	0	0	0	0	0	0	0	200	903	0	0	0	0	0	0	0	603	903	0
403	4	0	0	0	0	0	0	200	300	0	0	0	0	0	0	0	200	903	0	0	0	0	0	0	0	603	903	0
403	5	0	0	0	0	0	0	200	300	0	0	0	0	0	0	0	200	903	0	0	0	0	0	0	0	603	903	0
403	6	0	0	0	0	0	0	200	300	0	0	0	0	0	0	0	200	903	0	0	0	0	0	0	0	603	903	0
403	7	0	0	0	0	0	0	200	300	0	0	0	0	0	0	0	200	903	0	0	0	0	0	0	0	603	903	0
403	8	0	0	0	0	0	0	200	300	0	0	0	0	0	0	0	200	903	0	0	0	0	0	0	0	603	903	0
403	9	0	0	0	0	0	0	200	300	0	0	0	0	0	0	0	200	903	0	0	0	0	0	0	0	603	903	0
404	0	0	0	0	0	0	0	200	300	0	0	0	0	0	0	0	200	903	0	0	0	0	0	0	0	603	903	0
404	1	0	0	0	0	0	0	200	300	0	0	0	0	0	0	0	200	903	0	0	0	0	0	0	0	603	903	0
404	2	0	0	0	0	0	0	200	300	0	0	0	0	0	0	0	200	903	0	0	0	0	0	0	0	603	903	0
404	3	0	0	0	0	0	0	200	300	0	0	0	0	0	0	0	200	903	0	0	0	0	0	0	0	603	903	0
404	4	0	0	0	0	0	0	200	300	0	0	0	0	0	0	0	200	903	0	0	0	0	0	0	0	603	903	0
404	5	0	0	0	0	0	0	200	300	0	0	0	0	0	0	0	200	903	0	0	0	0	0	0	0	603	903	0
404	6	0	0	0	0	0	0	200	300	0	0	0	0	0	0	0	200	903	0	0	0	0	0	0	0	603	903	0
404	7	0	0	0	0	0	0	200	300	0	0	0	0	0	0	0	200	903	0	0	0	0	0	0	0	603	903	0
404	8	0	0	0	0	0	0	200	300	0	0	0	0	0	0	0	200	903	0	0	0	0	0	0	0	603	903	0
404	9	0	0	0	0	0	0	200	300	0	0	0	0	0	0	0	200	903	0	0	0	0	0	0	0	603	903	0
405	0	0	0	0	0	0	0	200	300	0	0	0	0	0	0	0	200	903	0	0	0	0	0	0	0	603	903	0
405	1	0	0	0	0	0	0	200	300	0	0	0	0	0	0	0	200	903	0	0	0	0	0	0	0	603	903	0
405	2	0	0	0	0	0	0	200	300	0	0	0	0	0	0	0	200	903	0	0	0	0	0	0	0	603	903	0
405	3	0	0	0	0	0	0	200	300	0	0	0	0	0	0	0	200	903	0	0	0	0	0	0	0	603	903	0
405	4	0	0	0	0	0	0	200	300	0	0	0	0	0	0	0	200	903	0	0	0	0	0	0	0	603	903	0
405	5	0	0	0	0	0	0	200	300	0	0	0	0	0	0	0	200	903	0	0	0	0	0	0	0	603	903	0
405	6	0	0	0	0	0	0	200	300	0	0	0	0	0	0	0	200	903	0	0	0	0	0	0	0	603	903	0
405	7	0	0	0	0	0	0	200	300	0	0	0	0	0	0	0	200	903	0	0	0	0	0	0	0	603	903	0
405	8	0	0	0	0	0	0	200	300	0	0	0	0	0	0	0	200	903	0	0	0	0	0	0	0	603	903	0
405	9	0	0	0	0	0	0	200	300	0	0	0	0	0	0	0	200	903	0	0	0	0	0	0	0	603	903	0
406	0	0	0	0	0	0	0	200	300	0	0	0	0	0	0	0	200	903	0	0	0	0	0	0	0	603	903	0
406	1	0	0	0	0	0	0	200	300	0	0	0	0	0	0	0	200	903	0	0	0	0	0	0	0	603	903	0
406	2	0	0	0	0	0	0	200	300	0	0	0	0	0	0	0	200	903	0	0	0	0	0	0	0	603	903	0
406	3	0	0	0	0	0	0	200	300	0	0	0	0	0	0	0	200	903	0	0	0	0	0	0	0	603	903	0
406	4	0	0	0	0	0	0	200	300	0	0	0	0	0	0	0	200	903	0	0	0	0	0	0	0	603	903	0
406	5	0	0	0	0	0	0	200	300	0	0	0	0	0	0	0	200	903	0	0	0	0	0	0	0	603	903	0
406	6	0	0	0	0	0	0	200	300	0	0	0	0	0	0	0	200	903	0	0	0	0	0	0	0	603	903	0
406	7	0	0	0	0	0	0	200	300	0	0	0	0	0	0	0	200	903	0	0	0	0	0	0	0	603	903	0
406	8	0	0	0	0	0	0	200	300	0	0	0	0	0	0	0	200	903	0	0	0	0	0	0	0	603	903	0
406	9	0	0	0	0	0	0	200	300	0	0	0	0	0	0	0	200	903	0	0	0	0	0	0	0	603	903	0
407	0	0	0	0	0	0	0	200	300	0	0	0	0	0	0	0	200	903	0	0	0	0	0	0	0	603	903	0
407	1	0	0	0	0	0	0	200	300	0	0	0	0	0	0	0	200	903	0	0	0	0	0	0	0	603	903	0
407	2	0	0	0	0	0	0	200	300	0	0	0	0	0	0	0	200	903	0	0	0	0	0	0	0	603	903	0
407	3	0	0	0	0	0	0	200	300	0	0	0	0	0	0	0	200	903	0	0	0	0	0	0	0	603	903	0
407	4	0	0	0	0	0	0	200	300	0	0	0	0	0	0	0	200	903	0	0	0	0	0	0	0	603	903	0
407	5	0	0	0	0	0	0	200	300	0	0	0	0	0	0	0	200	903	0	0	0	0	0	0	0	603	903	0
407	6	0	0	0	0	0	0	200	300	0	0	0	0	0	0	0	200	903	0	0	0	0	0	0	0	603	903	0
407	7	0	0	0	0	0	0	200	300	0	0	0	0	0	0	0	200	903	0	0	0	0	0	0	0	603	903	0
407	8	0	0	0	0	0	0	200	300	0	0	0	0	0	0	0	200	903	0	0	0	0	0	0	0	603	903	0
407	9	0	0	0	0	0	0	200	300	0	0	0	0	0	0	0	200	903	0	0	0	0	0	0	0	603	903	0
408	0	0	0	0	0	0	0	200	300	0	0	0	0	0	0	0	200	903	0	0	0	0	0	0	0	603	903	0
408	1	0	0	0	0	0	0	200	300	0	0	0	0	0	0	0	200	903	0	0	0	0	0	0	0	603	903	0
408	2	0	0	0	0	0	0	200	300	0	0	0	0	0	0	0	200	903	0	0	0	0	0	0	0	603	903	0
408	3	0	0	0	0	0	0	200	300	0	0	0	0	0	0	0	200	903	0	0	0	0	0	0	0	603	903	0
408	4	0	0	0	0	0	0	200	300	0	0	0	0	0	0	0	200	903	0	0	0	0	0	0	0	603	903	0
408	5	0	0	0	0	0	0	200	300	0	0	0	0	0	0	0	200	903	0	0	0	0	0	0	0	603	903	0
408	6	0	0	0	0	0	0	200	300	0	0	0	0	0	0	0	200	903	0	0	0	0	0	0	0	603	903	0
408	7	0	0	0	0	0	0	200	300	0	0	0	0	0	0	0	200	903	0	0	0	0	0	0	0	603	903	0
408	8	0	0	0	0	0	0	200	300	0	0	0	0	0	0	0	200	903	0	0	0	0	0	0	0	603	903	0
408	9	0	0	0	0	0	0	200	300	0	0	0	0	0	0	0	200	903	0	0	0	0	0	0	0	603	903	0
409	0	0	0	0	0	0	0	200	300	0	0	0	0	0	0	0	200	903	0	0	0	0	0	0	0	603	903	0
409	1	0	0	0	0	0	0	200	300	0	0	0	0	0	0	0	200	903	0	0	0	0	0	0	0	603	903	0
409	2	0	0	0	0	0	0	200	300	0	0	0	0	0	0	0	200	903	0	0	0	0	0	0	0	603	903	0
409	3	0	0	0	0	0	0	200	300	0	0	0	0	0	0	0	200	903	0	0	0	0	0	0	0	603	903	0
409	4	0	0	0	0	0	0	200	300	0	0	0	0	0	0	0	200	903	0	0	0	0	0	0	0	603	903	0
409	5	0	0	0	0	0	0	200	300	0	0	0	0	0	0	0	200	903	0	0	0	0	0	0	0	603	903	0
409	6	0	0	0	0	0	0	200	300	0	0	0	0	0	0	0	200	903	0	0	0	0	0	0	0	603	903	0
409	7	0	0	0	0	0	0	200	300	0	0	0	0	0	0	0	200	903	0	0	0	0	0	0	0	603	903	0
409	8	0	0	0	0	0	0	200	300	0	0	0	0	0	0	0	200	903	0	0	0	0	0	0	0	603	903	0
409	9	0	0	0	0	0	0	200	300	0	0	0	0	0	0	0	200	903	0	0	0	0	0	0	0	603	903	0
410	0	0	0	0	0	0	0	200	300	0	0	0	0	0	0	0	200	903	0	0	0	0	0	0	0	603	903	0
410	1	0	0	0	0	0	0	200	300	0	0	0	0	0	0	0	200	903	0	0	0	0	0	0	0	603	903	0
410	2	0	0	0	0	0	0	200	300	0	0	0	0	0	0	0	200	903	0	0	0	0	0	0	0	603	903	0
410	3	0	0	0	0	0	0	200	300	0	0	0	0	0	0	0	200	903	0	0	0	0	0	0	0	603	903	0
410	4	0	0	0	0	0	0	200	300	0	0	0	0	0	0	0	200	903	0	0	0	0	0	0	0	603	903	0
410	5	0	0	0	0	0	0	200	300	0	0	0	0	0	0	0	200	903	0	0	0	0	0	0	0	603	903	0
410	6	0	0	0	0	0	0	200	300	0	0	0	0	0	0	0	200	903	0	0	0	0	0	0	0	603	903	0
410	7	0	0	0	0	0	0	200	300	0	0	0	0	0	0	0	200	903	0	0	0	0	0	0	0	603	903	0
410	8	0	0	0	0	0	0	200	300	0	0	0	0	0	0	0	200	903	0	0	0	0	0	0	0	603	903	0
410	9	0	0	0	0	0	0	200	300	0	0	0	0	0	0	0	200	903	0	0	0	0	0	0	0	603	903	0
411	0	0	0	0	0	0	0	200	300	0	0	0	0	0	0	0	200	903	0	0	0	0	0	0	0	603	903	0
411	1	0	0	0	0	0	0	200	300	0	0	0	0	0	0	0	200	903	0	0	0	0	0	0	0	603	903	0
411	2	0	0	0	0	0	0	200	300	0	0	0	0	0	0	0	200	903	0	0	0	0	0	0	0	603	903	0
411	3	0	0	0	0	0	0	200	300	0	0	0	0	0	0	0	200	903	0	0	0	0	0	0	0	603	903	0
411	4	0	0	0	0	0	0	200	300	0	0	0	0	0	0	0	200	903	0	0	0	0	0	0	0	603	903	0
411	5	0	0	0	0	0	0	200	300	0	0	0	0	0	0	0	200	903	0	0	0	0	0	0	0	603	903	0
411	6	0	0	0	0	0	0	200	300	0	0	0	0	0	0	0	200	903	0	0	0	0	0	0	0	603	903	0
411	7	0	0	0	0	0	0	200	300	0	0	0	0	0	0	0	200	903	0	0	0	0	0	0	0	603	903	0
411	8	0	0	0	0	0	0	200	300	0	0	0	0	0	0	0	200	903	0	0	0	0	0	0	0	603	903	0
411	9	0	0	0	0	0	0	200	300	0	0	0	0	0	0	0	200	903	0	0	0	0	0	0	0	603	903	0
412	0	0	0	0	0	0	0	200	300	0	0	0	0	0	0	0	200	903	0	0	0	0	0	0	0	603	903	0
412	1	0	0	0	0	0	0	200	300	0	0	0	0	0	0	0	200	903	0	0	0	0	0	0	0	603	903	0
412	2	0	0	0	0	0	0	200	300	0	0	0	0	0	0	0	200	903	0	0	0	0	0	0	0	603	903	0
412	3	0	0	0	0	0	0	200	300	0	0	0	0	0	0	0	200	903	0	0	0	0	0	0	0	603	903	0
412	4	0	0	0	0	0	0	200	300	0	0	0	0	0	0	0	200	903	0	0	0	0	0	0	0	603	903	0
412	5	0	0	0	0	0	0	200	300	0	0	0	0	0	0	0	200	903	0	0	0	0	0	0	0	603	903	0
412	6	0	0	0	0	0	0	200	300	0	0	0	0	0	0	0	200	903	0	0	0	0	0	0	0	603	903	0
412	7	0	0	0	0	0	0	200	300	0	0	0	0	0	0	0	200	903	0	0	0	0	0	0	0	603	903	0
412	8	0	0	0	0	0	0	200	300	0	0	0	0	0	0	0	200	903	0	0	0	0	0	0	0	603	903	0
412	9	0	0	0	0	0	0	200	300	0	0	0	0	0	0	0	200	903	0	0	0	0	0	0	0	603	903	0
413	0	0	0	0	0	0	0	200	300	0	0	0	0	0	0	0	200	903	0	0	0	0	0	0	0	603	903	0
413	1	0	0	0	0	0	0	200	300	0	0	0	0	0	0	0	200	903	0	0	0	0	0	0	0	603	903	0
413	2	0	0	0	0	0	0	200	300	0	0	0	0	0	0	0	200	903	0	0	0	0	0	0	0	603	903	0
413	3	0	0	0	0	0	0	200	300	0	0	0	0	0	0	0	200	903	0	0	0	0	0	0	0	603	903	0
413	4	0	0	0	0	0	0	200	300	0	0	0	0	0	0	0	200	903	0	0	0	0	0	0	0	603	903	0
413	5	0	0	0	0	0	0	200	300	0	0	0	0	0	0	0	200	903	0	0	0	0	0	0	0	603	903	0
413	6	0	0	0	0	0	0	200	300	0	0	0	0	0	0	0	200	903	0	0	0	0	0	0	0	603	903	0
413	7	0	0	0	0	0	0	200	300	0	0	0	0	0	0	0	200	903	0	0	0	0	0	0	0	603	903	0
413	8	0	0	0	0	0	0	200	300	0	0	0	0	0	0	0	200	903	0	0	0	0	0	0	0	603	903	0
413	9	0	0	0	0	0	0	200	300	0	0	0	0	0	0	0	200	903	0	0	0	0	0	0	0	603	903	0
414	0	0	0	0	0	0	0	200	300	0	0	0	0	0	0	0	200	903	0	0	0	0	0	0	0	603	903	0
414	1	0	0	0	0	0	0	200	300	0	0	0	0	0	0	0	200	903	0	0	0	0	0	0	0	603	903	0
414	2	0	0	0	0	0	0	200	300	0	0	0	0	0	0	0	200	903	0	0	0	0	0	0	0	603	903	0
414	3	0	0	0	0	0	0	200	300	0	0	0	0	0	0	0	200	903	0	0	0	0	0	0	0	603	903	0
414	4	0	0	0	0	0	0	200	300	0	0	0	0	0	0	0	200	903	0	0	0	0	0	0	0	603	903	0
414	5	0	0	0	0	0	0	200	300	0	0	0	0	0	0	0	200	903	0	0	0	0	0	0	0	603	903	0
414	6	0	0	0	0	0	0	200	300	0	0	0	0	0	0	0	200	903	0	0	0	0	0	0	0	603	903	0
414	7	0	0	0	0	0	0	200	300	0	0	0	0	0	0	0	200	903	0	0	0	0	0	0	0	603	903	0
414	8	0	0	0	0	0	0	200	300	0	0	0	0	0	0	0	200	903	0	0	0	0	0	0	0	603	903	0
414	9	0	0	0	0	0	0	200	300	0	0	0	0	0	0	0	200	903	0	0	0	0	0	0	0	603	903	0
415	0	0	0	0	0	0	0	200	300	0	0	0	0	0	0	0	200	903	0	0	0	0	0	0	0	603	903	0
415	1	0	0	0	0	0	0	200	300	0	0	0	0	0	0	0	200	903	0	0	0	0	0	0	0	603	903	0
415	2	0	0	0	0	0	0	200	300	0	0	0	0	0	0	0	200	903	0	0	0	0	0	0	0	603	903	0
415	3	0	0	0	0	0	0	200	300	0	0	0	0	0	0	0	200	903	0	0	0	0	0	0	0	603	903	0
415	4	0	0	0	0	0	0	200	300	0	0	0	0	0	0	0	200	903	0	0	0	0	0	0	0	603	903	0
415	5	0	0	0	0	0	0	200	300	0	0	0	0	0	0	0	200	903	0	0	0	0	0	0	0	603	903	0
415	6	0	0	0	0	0	0	200	300	0	0	0	0	0	0	0	200	903	0	0	0	0	0	0	0	603	903	0
415	7	0	0	0	0	0	0	200	300	0	0	0	0	0	0	0	200	903	0	0	0	0	0	0	0	603	903	0
415	8	0	0	0	0	0	0	200	300	0	0	0	0	0	0	0	200	903	0	0	0	0	0	0	0	603	903	0
415	9	0	0	0	0	0	0	200	300	0	0	0	0	0	0	0	200	903	0	0	0	0	0	0	0	603	903	0
416	0	0	0	0	0	0	0	200	300	0	0	0	0	0	0	0	200	903	0	0	0	0	0	0	0	603	903	0
416	1	0	0	0	0	0	0	200	300	0	0	0	0	0	0	0	200	903	0	0	0	0	0	0	0	603	903	0
416	2	0	0	0	0	0	0	200	300	0	0	0	0	0	0	0	200	903	0	0	0	0	0	0	0	603	903	0
416	3	0	0	0	0	0	0	200	300	0	0	0	0	0	0	0	200	903	0	0	0	0	0	0	0	603	903	0
416	4	0	0	0	0	0	0	200	300	0	0	0	0	0	0	0	200	903	0	0	0	0	0	0	0	603	903	0
416	5	0	0	0	0	0	0	200	300	0	0	0	0	0	0	0	200	903	0	0	0	0	0	0	0	603	903	0
416	6	0	0	0	0	0	0	200	300	0	0	0	0	0	0	0	200	903	0	0	0	0	0	0	0	603	903	0
416	7	0	0	0	0	0	0	200	300	0	0	0	0	0	0	0	200	903	0	0	0	0	0	0	0	603	903	0
416	8	0	0	0	0	0	0	200	300	0	0	0	0	0	0	0	200	903	0	0	0	0	0	0	0	603	903	0
416	9	0	0	0	0	0	0	200	300	0	0	0	0	0	0	0	200	903	0	0	0	0	0	0	0	603	903	0
417	0	0	0	0	0	0	0	200	300	0	0	0	0	0	0	0	200	903	0	0	0	0	0	0	0	603	903	0
417	1	0	0	0	0	0	0	200	300	0	0	0	0	0	0	0	200	903	0	0	0	0	0	0	0	603	903	0
417	2	0	0	0	0	0	0	200	300	0	0	0	0	0	0	0	200	903	0	0	0	0	0	0	0	603	903	0
417	3	0	0	0	0	0	0	200	300	0	0	0	0	0	0	0	200	903	0	0	0	0	0	0	0	603	903	0
417	4	0	0	0	0	0	0	200	300	0	0	0	0	0	0	0	200	903	0	0	0	0	0	0	0	603	903	0
417	5	0	0	0	0	0	0	200	300	0	0	0	0	0	0	0	200	903	0	0	0	0	0	0	0	603	903	0
417	6	0	0	0	0	0	0	200	300	0	0	0	0	0	0	0	200	903	0	0	0	0	0	0	0	603	903	0
417	7	0	0	0	0	0	0	200	300	0	0	0	0	0	0	0	200	903	0	0	0	0	0	0	0	603	903	0
417	8	0	0	0	0	0	0	200	300	0	0	0	0	0	0	0	200	903	0	0	0	0	0	0	0	603	903	0
417	9	0	0	0	0	0	0	200	300	0	0	0	0	0	0	0	200	903	0	0	0	0	0	0	0	603	903	0
418	0	0	0	0	0	0	0	200	300	0	0	0	0	0	0	0	200	903	0	0	0	0	0	0	0	603	903	0
418	1	0	0	0	0	0	0	200	300	0	0	0	0	0	0	0	200	903	0	0	0	0	0	0	0	603	903	0
418	2	0	0	0	0	0	0	200	300	0	0	0	0	0	0	0	200	903	0	0	0	0	0	0	0	603	903	0
418	3	0	0	0	0	0	0	200	300	0	0	0	0	0	0	0	200	903	0	0	0	0	0	0	0	603	903	0
418	4	0	0	0	0	0	0	200	300	0	0	0	0	0	0	0	200	903	0	0	0	0	0	0	0	603	903	0
418	5	0	0	0	0	0	0	200	300	0	0	0	0	0	0	0	200	903	0	0	0	0	0	0	0	603	903	0
418	6	0	0	0	0	0	0	200	300	0	0	0	0	0	0	0	200	903	0	0	0	0	0	0	0	603	903	0
418	7	0	0	0	0	0	0	200	300	0	0	0	0	0	0	0	200	903	0	0	0	0	0	0	0	603	903	0
418	8	0	0	0	0	0	0	200	300	0	0	0	0	0	0	0	200	903	0	0	0	0	0	0	0	603	903	0
418	9	0	0	0	0	0	0	200	300	0	0	0	0	0	0	0	200	903	0	0	0	0	0	0	0	603	903	0
419	0	0	0	0	0	0	0	200	300	0	0	0	0	0	0	0	200	903	0	0	0	0	0	0	0	603	903	0
419	1	0	0	0	0	0	0	200	300	0	0	0	0	0	0	0	200	903	0	0	0	0	0	0	0	603	903	0
419	2	0	0	0	0	0	0	200	300	0	0	0	0	0	0	0	200	903	0	0	0	0	0	0	0	603	903	0
419	3	0	0	0	0	0	0	200	300	0	0	0	0	0	0	0	200	903	0	0	0	0	0	0	0	603	903	0
419	4	0	0	0	0	0	0	200	300	0	0	0	0	0	0	0	200	903	0	0	0	0	0	0	0	603	903	0
419	5	0	0	0	0	0	0	200	300	0	0	0	0	0	0	0	200	903	0	0	0	0	0	0	0	603	903	0
419	6	0	0	0	0	0	0	200	300	0	0	0	0	0	0	0	200	903	0	0	0	0	0	0	0	603	903	0
419	7	0	0	0	0	0	0	200	300	0	0	0	0	0	0	0	200	903	0	0	0	0	0	0	0	603	903	0
419	8	0	0	0	0	0	0	200	300	0	0	0	0	0	0	0	200	903	0	0	0	0	0	0	0	603	903	0
419	9	0	0	0	0	0	0	200	300	0	0	0	0	0	0	0	200	903	0	0	0	0	0	0	0	603	903	0
420	0	0	0	0	0	0	0	200	300	0	0	0	0	0	0	0	200	903	0	0	0	0	0	0	0	603	903	0
420	1	0	0	0	0	0	0	200	300	0	0	0	0	0	0	0	200	903	0	0	0	0	0	0	0	603	903	0
420	2	0	0	0	0	0	0	200	300	0	0	0	0	0	0	0	200	903	0	0	0	0	0	0	0	603	903	0
420	3	0	0	0	0	0	0	200	300	0	0	0	0	0	0	0	200	903	0	0	0	0	0	0	0	603	903	0
420	4	0	0	0	0	0	0	200	300	0	0	0	0	0	0	0	200	903	0	0	0	0	0	0	0	603	903	0
420	5	0	0	0	0	0	0	200	300	0	0	0	0	0	0	0	200	903	0	0	0	0	0	0	0	603	903	0
420	6	0	0	0	0	0	0	200	300	0	0	0	0	0	0	0	200	903	0	0	0	0	0	0	0	603	903	0
420	7	0	0	0	0	0	0	200	300	0	0	0	0	0	0	0	200	903	0	0	0	0	0	0	0	603	903	0
420	8	0	0	0	0	0	0	200	300	0	0	0	0	0	0	0	200	903	0	0	0	0	0	0	0	603	903	0
420	9	0	0	0	0	0	0	200	300	0	0	0	0	0	0	0	200	903	0	0	0	0	0	0	0	603	903	0
421	0	0	0	0	0	0	0	200	300	0	0	0	0	0	0	0	200	903	0	0	0	0	0	0	0	603	903	0
421	1	0	0	0	0	0	0	200	300	0	0	0	0	0	0	0	200	903	0	0	0	0	0	0	0	603	903	0
421	2	0	0	0	0	0	0	200	300	0	0	0	0	0	0	0	200	903	0	0	0	0	0	0	0	603	903	0
421	3	0	0	0	0	0	0	200	300	0	0	0	0	0	0	0	200	903	0	0	0	0	0	0	0	603	903	0
421	4	0	0	0	0	0	0	200	300	0	0	0	0	0	0	0	200	903	0	0	0	0	0	0	0	603	903	0
421	5	0	0	0	0	0	0	200	300	0	0	0	0	0	0	0	200	903	0	0	0	0	0	0	0	603	903	0
421	6	0	0	0	0	0	0	200	300	0	0	0	0	0	0	0	200	903	0	0	0	0	0	0	0	603	903	0
421	7	0	0	0	0	0	0	200	300	0	0	0	0	0	0	0	200	903	0	0	0	0	0	0	0	603	903	0
421	8	0	0	0	0	0	0	200	300	0	0	0	0	0	0	0	200	903	0	0	0	0	0	0	0	603	903	0
421	9	0	0	0	0	0	0	200	300	0	0	0	0	0	0	0	200	903	0	0	0	0	0	0	0	603	903	0
422	0	0	0	0	0	0	0	200	300	0	0	0	0	0	0	0	200	903	0	0	0	0	0	0	0	603	903	0
422	1	0	0	0	0	0	0	200	300	0	0	0	0	0	0	0	200	903	0	0	0	0	0	0	0	603	903	0
422	2	0	0	0	0	0	0	200	300	0	0	0	0	0	0	0	200	903	0	0	0	0	0	0	0	603	903	0
422	3	0	0	0	0	0	0	200	300	0	0	0	0	0	0	0	200	903	0	0	0	0	0	0	0	603	903	0
422	4	0	0	0	0	0	0	200	300	0	0	0	0	0	0	0	200	903	0	0	0	0	0	0	0	603	903	0
422	5	0	0	0	0	0	0	200	300	0	0	0	0	0	0	0	200	903	0	0	0	0	0	0	0	603	903	0
422	6	0	0	0	0	0	0	200	300	0	0	0	0	0	0	0	200	903	0	0	0	0	0	0	0	603	903	0
422	7	0	0	0	0	0	0	200	300	0	0	0	0	0	0	0	200	903	0	0	0	0	0	0	0	603	903	0
422	8	0	0	0	0	0	0	200	300	0	0	0	0	0	0	0	200	903	0	0	0	0	0	0	0	603	903	0
422	9	0	0	0	0	0	0	200	300	0	0	0	0	0	0	0	200	903	0	0	0	0	0	0	0	603	903	0
423	0	0	0	0	0	0	0	200	300	0	0	0	0	0	0	0	200	903	0	0	0	0	0	0	0	603	903	0
423	1	0	0	0	0	0	0	200	300	0	0	0	0	0	0	0	200	903	0	0	0	0	0	0	0	603	903	0
423	2	0	0	0	0	0	0	200	300	0	0	0	0	0	0	0	200	903	0	0	0	0	0	0	0	603	903	0
423	3	0	0	0	0	0	0	200	300	0	0	0	0	0	0	0	200	903	0	0	0	0	0	0	0	603	903	0
423	4	0	0	0	0	0	0	200	300	0	0	0	0	0	0	0	200	903	0	0	0	0	0	0	0	603	903	0
423	5	0	0	0	0	0	0	200	300	0	0	0	0	0	0	0	200	903	0	0	0	0	0	0	0	603	903	0
423	6	0	0	0	0	0	0	200	300	0	0	0	0	0	0	0	200	903	0	0	0	0	0	0	0	603	903	0
423	7	0	0	0	0	0	0	200	300	0	0	0	0	0	0	0	200	903	0	0	0	0	0	0	0	603	903	0
423	8	0	0	0	0	0	0	200	300	0	0	0	0	0	0	0	200	903	0	0	0	0	0	0	0	603	903	0
423	9	0	0	0	0	0	0	200	300	0	0	0	0	0	0	0	200	903	0	0	0	0	0	0	0	603	903	0
424	0	0	0	0	0	0	0	200	300	0	0	0	0	0	0	0	200	903	0	0	0	0	0	0	0	603	903	0
424	1	0	0	0	0	0	0	200	300	0	0	0	0	0	0	0	200	903	0	0	0	0	0	0	0	603	903	0
424	2	0	0	0	0	0	0	200	300	0	0	0	0	0	0	0	200	903	0	0	0	0	0	0	0	603	903	0
424	3	0	0	0	0	0	0	200	300	0	0	0	0	0	0	0	200	903	0	0	0	0	0	0	0	603	903	0
424	4	0	0	0	0	0	0	200	300	0	0	0	0	0	0	0	200	903	0	0	0	0	0	0	0	603	903	0
424	5	0	0	0	0	0	0	200	300	0	0	0	0	0	0	0	200	903	0	0	0	0	0	0	0	603	903	0
424	6	0	0	0	0	0	0	200	300	0	0	0	0	0	0	0	200	903	0	0	0	0	0	0	0	603	903	0
424	7	0	0	0	0	0	0	200	300	0	0	0	0	0	0	0	200	903	0	0	0	0	0	0	0	603	903	0
424	8	0	0	0	0	0	0	200	300	0	0	0	0	0	0	0	200	903	0	0	0	0	0	0	0	603	903	0
424	9	0	0	0	0	0	0	200	300	0	0	0	0	0	0	0	200	903	0	0	0	0	0	0	0	603	903	0
425	0	0	0	0	0	0	0	200	300	0	0	0	0	0	0	0	200	903	0	0	0	0	0	0	0	603	903	0
425	1	0	0	0	0	0	0	200	300	0	0	0	0	0	0	0	200	903	0	0	0	0	0	0	0	603	903	0
425	2	0	0	0	0	0	0	200	300	0	0	0	0	0	0	0	200	903	0	0	0	0	0	0	0	603	903	0
425	3	0	0	0	0	0	0	200	300	0	0	0	0	0	0	0	200	903	0	0	0	0	0	0	0	603	903	0
425	4	0	0	0	0	0	0	200	300	0	0	0	0	0	0	0	200	903	0	0	0	0	0	0	0	603	903	0
425	5	0	0	0	0	0	0	200	300	0	0	0	0	0	0	0	200	903	0	0	0	0	0	0	0	603	903	0
425	6	0	0	0	0	0	0	200	300	0	0	0	0	0	0	0	200	903	0	0	0	0	0	0	0	603	903	0
425	7	0	0	0	0	0	0	200	300	0	0	0	0	0	0	0	200	903	0	0	0	0	0	0	0	603	903	0
425	8	0	0	0	0	0	0	200	300	0	0	0	0	0	0	0	200	903	0	0	0	0	0	0	0	603	903	0
425	9	0	0	0	0	0	0	200	300	0	0	0	0	0	0	0	200	903	0	0	0	0	0	0	0	603	903	0
426	0	0	0	0	0	0	0	200	300	0	0	0	0	0	0	0	200	903	0	0	0	0	0	0	0	603	903	0
426	1	0	0	0	0	0	0	200	300	0	0	0	0	0	0	0	200	903	0	0	0	0	0	0	0	603	903	0
426	2	0	0	0	0	0	0	200	300	0	0	0	0	0	0	0	200	903	0	0	0	0	0	0	0	603	903	0
426	3	0	0	0	0	0	0	200	300	0	0	0	0	0	0	0	200	903	0	0	0	0	0	0	0	603	903	0
426	4	0	0	0	0	0	0	200	300	0	0	0	0	0	0	0	200	903	0	0	0	0	0	0	0	603	903	0
426	5	0	0	0	0	0	0	200	300	0	0	0	0	0	0	0	200	903	0	0	0	0	0	0	0	603	903	0
426	6	0	0	0	0	0	0	200	300	0	0	0	0	0	0	0	200	903	0	0	0	0	0	0	0	603	903	0
426	7	0	0	0	0	0	0	200	300	0	0	0	0	0	0	0	200	903	0	0	0	0	0	0	0	603	903	0
426	8	0	0	0	0	0	0	200	300	0	0	0	0	0	0	0	200	903	0	0	0	0	0	0	0	603	903	0
426	9	0	0	0	0	0	0	200	300	0	0	0	0	0	0	0	200	903	0	0	0	0	0	0	0	603	903	0
427	0	0	0	0	0	0	0	200	300	0	0	0	0	0	0	0	200	903	0	0	0	0	0	0	0	603	903	0
427	1	0	0	0	0	0	0	200	300	0	0	0	0	0	0	0	200	903	0	0	0	0	0	0	0	603	903	0
427	2	0	0	0	0	0	0	200	300	0	0	0	0	0	0	0	200	903	0	0	0	0	0	0	0	603	903	0
427	3	0	0	0	0	0	0	200	300	0	0	0	0	0	0	0	200	903	0	0	0	0	0	0	0	603	903	0
427	4	0	0	0	0	0	0	200	300	0	0	0	0	0	0	0	200	903	0	0	0	0	0	0	0	603	903	0
427	5	0	0	0	0	0	0	200	300	0	0	0	0	0	0	0	200	903	0	0	0	0	0	0	0	603	903	0
427	6	0	0	0	0	0	0	200	300	0	0	0	0	0	0	0	200	903	0	0	0	0	0	0	0	603	903	0
427	7	0	0	0	0	0	0	200	300	0	0	0	0	0	0	0	200	903	0	0	0	0	0	0	0	603	903	0
427	8	0	0	0	0	0	0	200	300	0	0	0	0	0	0	0	200	903	0	0	0	0	0	0	0	603	903	0
427	9	0	0	0	0	0	0	200	300	0	0	0	0	0	0	0	200	903	0	0	0	0	0	0	0	603	903	0
428	0	0	0	0	0	0	0	200	300	0	0	0	0	0	0	0	200	903	0	0	0	0	0	0	0	603	903	0
428	1	0	0	0	0	0	0	200	300	0	0	0	0	0	0	0	200	903	0	0	0	0	0	0	0	603	903	0
428	2	0	0	0	0	0	0	200	300	0	0	0	0	0	0	0	200	903	0	0	0	0	0	0	0	603	903	0
428	3	0	0	0	0	0	0	200	300	0	0	0	0	0	0	0	200	903	0	0	0	0	0	0	0	603	903	0
428	4	0	0	0	0	0	0	200	300	0	0	0	0	0	0	0	200	903	0	0	0	0	0	0	0	603	903	0
428	5	0	0	0	0	0	0	200	300	0	0	0	0	0	0	0	200	903	0	0	0	0	0	0	0	603	903	0
428	6	0	0	0	0	0	0	200	300	0	0	0	0	0	0	0	200	903	0	0	0	0	0	0	0	603	903	0
428	7	0	0	0	0	0	0	200	300	0	0	0	0	0	0	0	200	903	0	0	0	0	0	0	0	603	903	0
428	8	0	0	0	0	0	0	200	300	0	0	0	0	0	0	0	200	903	0	0	0	0	0	0	0	603	903	0
428	9	0	0	0	0	0	0	200	300	0	0	0	0	0	0	0	200	903	0	0	0	0	0	0	0	603	903	0
429	0	0	0	0	0	0	0	200	300	0	0	0	0	0	0	0	200	903	0	0	0	0	0	0	0	603	903	0
429	1	0	0	0	0	0	0	200	300	0	0	0	0	0	0	0	200	903	0	0	0	0	0	0	0	603	903	0
429	2	0	0	0	0	0	0	200	300	0	0	0	0	0	0	0	200	903	0	0	0	0	0	0	0	603	903	0
429	3	0	0	0	0	0	0	200	300	0	0	0	0	0	0	0	200	903	0	0	0	0	0	0	0	603	903	0
429	4	0	0	0	0	0	0	200	300	0	0	0	0	0	0	0	200	903	0	0	0	0	0	0	0	603	903	0
429	5	0	0	0	0	0	0	200	300	0	0	0	0	0	0	0	200	903	0	0	0	0	0	0	0	603	903	0
429	6	0	0	0	0	0	0	200	300	0	0	0	0	0	0	0	200	903	0	0	0	0	0	0	0	603	903	0
429	7	0	0	0	0	0	0	200	300	0	0	0	0	0	0	0	200	903	0	0	0	0	0	0	0	603	903	0
429	8	0	0	0	0	0	0	200	300	0	0	0	0	0	0	0	200	903	0	0	0	0	0	0	0	603	903	0
429	9	0	0	0	0	0	0	200	300	0	0	0	0	0	0	0	200	903	0	0	0	0	0	0	0	603	903	0
430	0	0	0	0	0	0	0	200	300	0	0	0	0	0	0	0	200	903	0	0	0	0	0	0	0	603	903	0
430	1	0	0	0	0	0	0	200	300	0	0	0	0	0	0	0	200	903	0	0	0	0	0	0	0	603	903	0
430	2	0	0	0	0	0	0	200	300	0	0	0	0	0	0	0	200	903	0	0	0	0	0	0	0	603	903	0
430	3	0	0	0	0	0	0	200	300	0	0	0	0	0	0	0	200	903	0	0	0	0	0	0	0	603	903	0
430	4	0	0	0	0	0	0	200	300	0	0	0	0	0	0	0	200	903	0	0	0	0	0	0	0	603	903	0
430	5	0	0	0	0	0	0	200	300	0	0	0	0	0	0	0	200	903	0	0	0	0	0	0	0	603	903	0
430	6	0	0	0	0	0	0	200	300	0	0	0	0	0	0	0	200	903	0	0	0	0	0	0	0	603	903	0
430	7	0	0	0	0	0	0	200	300	0	0	0	0	0	0	0	200	903	0	0	0	0	0	0	0	603	903	0
430	8	0	0	0	0	0	0	200	300	0	0	0	0	0	0	0	200	903	0	0	0	0	0	0	0	603	903	0
430	9	0	0	0	0	0	0	200	300	0	0	0	0	0	0	0	200	903	0	0	0	0	0	0	0	603	903	0
431	0	0	0	0	0	0	0	200	300	0	0	0	0	0	0	0	200	903	0	0	0	0	0	0	0	603	903	0
431	1	0	0	0	0	0	0	200	300	0	0	0	0	0	0	0	200	903	0	0	0	0	0	0	0	603	903	0
431	2	0	0	0	0	0	0	200	300	0	0	0	0	0	0	0	200	903	0	0	0	0	0	0	0	603	903	0
431	3	0	0	0	0	0	0	200	300	0	0	0	0	0	0	0	200	903	0	0	0	0	0	0	0	603	903	0
431	4	0	0	0	0	0	0	200	300	0	0	0	0	0	0	0	200	903	0	0	0	0	0	0	0	603	903	0
431	5	0	0	0	0	0	0	200	300	0	0	0	0	0	0	0	200	903	0	0	0	0	0	0	0	603	903	0
431	6	0	0	0	0	0	0	200	300	0	0	0	0	0	0	0	200	903	0	0	0	0	0	0	0	603	903	0
431	7	0	0	0	0	0	0	200	300	0	0	0	0	0	0	0	200	903	0	0	0	0	0	0	0	603	903	0
431	8	0	0	0	0	0	0	200	300	0	0	0	0	0	0	0	200	903	0	0	0	0	0	0	0	603	903	0
431	9	0	0	0	0	0	0	200	300	0	0	0	0	0	0	0	200	903	0	0	0	0	0	0	0	603	903	0
432	0	0	0	0	0	0	0	200	300	0	0	0	0	0	0	0	200	903	0	0	0	0	0	0	0	603	903	0
432	1	0	0	0	0	0	0	200	300	0	0	0	0	0	0	0	200	903	0	0	0	0	0	0	0	603	903	0
432	2	0	0	0	0	0	0	200	300	0	0	0	0	0	0	0	200	903	0	0	0	0	0	0	0	603	903	0
432	3	0	0	0	0	0	0	200	300	0	0	0	0	0	0	0	200	903	0	0	0	0	0	0	0	603	903	0
432	4	0	0	0	0	0	0	200	300	0	0	0	0	0	0	0	200	903	0	0	0	0	0	0	0	603	903	0
432	5	0	0	0	0	0	0	200	300	0	0	0	0	0	0	0	200	903	0	0	0	0	0	0	0	603	903	0
432	6	0	0	0	0	0	0	200	300	0	0	0	0	0	0	0	200	903	0	0	0	0	0	0	0	603	903	0
432	7	0	0	0	0	0	0	200	300	0	0	0	0	0	0	0	200	903	0	0	0	0	0	0	0	603	903	0
432	8	0	0	0	0	0	0	200	300	0	0	0	0	0	0	0	200	903	0	0	0	0	0	0	0	603	903	0
432	9	0	0	0	0	0	0	200	300	0	0	0	0	0	0	0	200	903	0	0	0	0	0	0	0	603	903	0
433	0	0	0	0	0	0	0	200	300	0	0	0	0	0	0	0	200	903	0	0	0	0	0	0	0	603	903	0
433	1	0	0	0	0	0	0	200	300	0	0	0	0	0	0	0	200	903	0	0	0	0	0	0	0	603	903	0
433	2	0	0	0	0	0	0	200	300	0	0	0	0	0	0	0	200	903	0	0	0	0	0	0	0	603	903	0
433	3	0	0	0	0	0	0	200	300	0	0	0	0	0	0	0	200	903	0	0	0	0	0	0	0	603	903	0
433	4	0	0	0	0	0	0	200	300	0	0	0	0	0	0	0	200	903	0	0	0	0	0	0	0	603	903	0
433	5	0	0	0	0	0	0	200	300	0	0	0	0	0	0	0	200	903	0	0	0	0	0	0	0	603	903	0
433	6	0	0	0	0	0	0	200	300	0	0	0	0	0	0	0	200	903	0	0	0	0	0	0	0	603	903	0
433	7	0	0	0	0	0	0	200	300	0	0	0	0	0	0	0	200	903	0	0	0	0	0	0	0	603	903	0
433	8	0	0	0	0	0	0	200	300	0	0	0	0	0	0	0	200	903	0	0	0	0	0	0	0	603	903	0
433	9	0	0	0	0	0	0	200	300	0	0	0	0	0	0	0	200	903	0	0	0	0	0	0	0	603	903	0
434	0	0	0	0	0	0	0	200	300	0	0	0	0	0	0	0	200	903	0	0	0	0	0	0	0	603	903	0
434	1	0	0	0	0	0	0	200	300	0	0	0	0	0	0	0	200	903	0	0	0	0	0	0	0	603	903	0
434	2	0	0	0	0	0	0	200	300	0	0	0	0	0	0	0	200	903	0	0	0	0	0	0	0	603	903	0
434	3	0	0	0	0	0	0	200	300	0	0	0	0	0	0	0	200	903	0	0	0	0	0	0	0	603	903	0
434	4	0	0	0	0	0	0	200	300	0	0	0	0	0	0	0	200	903	0	0	0	0	0	0	0	603	903	0
434	5	0	0	0	0	0	0	200	300	0	0	0	0	0	0	0	200	903	0	0	0	0	0	0	0	603	903	0
434	6	0	0	0	0	0	0	200	300	0	0	0	0	0	0	0	200	903	0	0	0	0	0	0	0	603	903	0
434	7	0	0	0	0	0	0	200	300	0	0	0	0	0	0	0	200	903	0	0	0	0	0	0	0	603	903	0
434	8	0	0	0	0	0	0	200	300	0	0	0	0	0	0	0	200	903	0	0	0	0	0	0	0	603	903	0
434	9	0	0	0	0	0	0	200	300	0	0	0	0	0	0	0	200	903	0	0	0	0	0	0	0	603	903	0
435	0	0	0	0	0	0	0	200	300	0	0	0	0	0	0	0	200	903	0	0	0	0	0	0	0	603	903	0
435	1	0	0	0	0	0	0	200	300	0	0	0	0	0	0	0	200	903	0	0	0	0	0	0	0	603	903	0
435	2	0	0	0	0	0	0	200	300	0	0	0	0	0	0	0	200	903	0	0	0	0	0	0	0	603	903	0
435	3	0	0	0	0	0	0	200	300	0	0	0	0	0	0	0	200	903	0	0	0	0	0	0	0	603	903	0
435	4	0	0	0	0	0	0	200	300	0	0	0	0	0	0	0	200	903	0	0	0	0	0	0	0	603	903	0
435	5	0	0	0	0	0	0	200	300	0	0	0	0	0	0	0	200	903	0	0	0	0	0	0	0	603	903	0
435	6	0	0	0	0	0	0	200	300	0	0	0	0	0	0	0	200	903	0	0	0	0	0	0	0	603	903	0
435	7	0	0	0	0	0	0	200	300	0	0	0	0	0	0	0	200	903	0	0	0	0	0	0	0	603	903	0
435	8	0	0	0	0	0	0	200	300	0	0	0	0	0	0	0	200	903	0	0	0	0	0	0	0	603	903	0
435	9	0	0	0	0	0	0	200	300	0	0	0	0	0	0	0	200	903	0	0	0	0	0	0	0	603	903	0
436	0	0	0	0	0	0	0	200	300	0	0	0	0	0	0	0	200	903	0	0	0	0	0	0	0	603	903	0
436	1	0	0	0	0	0	0	200	300	0	0	0	0	0	0	0	200	903	0	0	0	0	0	0	0	603	903	0
436	2	0	0	0	0	0	0	200	300	0	0	0	0	0	0	0	200	903	0	0	0	0	0	0	0	603	903	0
436	3	0	0	0	0	0	0	200	300	0	0	0	0	0	0	0	200	903	0	0	0	0	0	0	0	603	903	0
436	4	0	0	0	0	0	0	200	300	0	0	0	0	0	0	0	200	903	0	0	0	0	0	0	0	603	903	0
436	5	0	0	0	0	0	0	200	300	0	0	0	0	0	0	0	200	903	0	0	0	0	0	0	0	603	903	0
436	6	0	0	0	0	0	0	200	300	0	0	0	0	0	0	0	200	903	0	0	0	0	0	0	0	603	903	0
436	7	0	0	0	0	0	0	200	300	0	0	0	0	0	0	0	200	903	0	0	0	0	0	0	0	603	903	0
436	8	0	0	0	0	0	0	200	300	0	0	0	0	0	0	0	200	903	0	0	0	0	0	0	0	603	903	0
436	9	0	0	0	0	0	0	200	300	0	0	0	0	0	0	0	200	903	0	0	0	0	0	0	0	603	903	0
437	0	0	0	0	0	0	0	200	300	0	0	0	0	0	0	0	200	903	0	0	0	0	0	0	0	603	903	0
437	1	0	0	0	0	0	0	200	300	0	0	0	0	0	0	0	200	903	0	0	0	0	0	0	0	603	903	0
437	2	0	0	0	0	0	0	200	300	0	0	0	0	0	0	0	200	903	0	0	0	0	0	0	0	603	903	0
437	3	0	0	0	0	0	0	200	300	0	0	0	0	0	0	0	200	903	0	0	0	0	0	0	0	603	903	0
437	4	0	0	0	0	0	0	200	300	0	0	0	0	0	0	0	200	903	0	0	0	0	0	0	0	603	903	0
437	5	0	0	0	0	0	0	200	300	0	0	0	0	0	0	0	200	903	0	0	0	0	0	0	0	603	903	0
437	6	0	0	0	0	0	0	200	300	0	0	0	0	0	0	0	200	903	0	0	0	0	0	0	0	603	903	0
437	7	0	0	0	0	0	0	200	300	0	0	0	0	0	0	0	200	903	0	0	0	0	0	0	0	603	903	0
437	8	0	0	0	0	0	0	200	300	0	0	0	0	0	0	0	200	903	0	0	0	0	0	0	0	603	903	0
437	9	0	0	0	0	0	0	200	300	0	0	0	0	0	0	0	200	903	0	0	0	0	0	0	0	603	903	0
438	0	0	0	0	0	0	0	200	300	0	0	0	0	0	0	0	200	903	0	0	0	0	0	0	0	603	903	0
438	1	0	0	0	0	0	0	200	300	0	0	0	0	0	0	0	200	903	0	0	0	0	0	0	0	603	903	0
438	2	0	0	0	0	0	0	200	300	0	0	0	0	0	0	0	200	903	0	0	0	0	0	0	0	603	903	0
438	3	0	0	0	0	0	0	200	300	0	0	0	0	0	0	0	200	903	0	0	0	0	0	0	0	603	903	0
438	4	0	0	0	0	0	0	200	300	0	0	0	0	0	0	0	200	903	0	0	0	0	0	0	0	603	903	0
438	5	0	0	0	0	0	0	200	300	0	0	0	0	0	0	0	200	903	0	0	0	0	0	0	0	603	903	0
438	6	0	0	0	0	0	0	200	300	0	0	0	0	0	0	0	200	903	0	0	0	0	0	0	0	603	903	0
438	7	0	0	0	0	0	0	200	300	0	0	0	0	0	0	0	200	903	0	0	0	0	0	0	0	603	903	0
438	8	0	0	0	0	0	0	200	300	0	0	0	0	0	0	0	200	903	0	0	0	0	0	0	0	603	903	0
438	9	0	0	0	0	0	0	200	300	0	0	0	0	0	0	0	200	903	0	0	0	0	0	0	0	603	903	0
439	0	0	0	0	0	0	0	200	300	0	0	0	0	0	0	0	200	903	0	0	0	0	0	0	0	603	903	0
439	1	0	0	0	0	0	0	200	300	0	0	0	0	0	0	0	200	903	0	0	0	0	0	0	0	603	903	0
439	2	0	0	0	0	0	0	200	300	0	0	0	0	0	0	0	200	903	0	0	0	0	0	0	0	603	903	0
439	3	0	0	0	0	0	0	200	300	0	0	0	0	0	0	0	200	903	0	0	0	0	0	0	0	603	903	0
439	4	0	0	0	0	0	0	200	300	0	0	0	0	0	0	0	200	903	0	0	0	0	0	0	0	603	903	0
439	5	0	0	0	0	0	0	200	300	0	0	0	0	0	0	0	200	903	0	0	0	0	0	0	0	603	903	0
439	6	0	0	0	0	0	0	200	300	0	0	0	0	0	0	0	200	903	0	0	0	0	0	0	0	603	903	0
439	7	0	0	0	0	0	0	200	300	0	0	0	0	0	0	0	200	903	0	0	0	0	0	0	0	603	903	0
439	8	0	0	0	0	0	0	200	300	0	0	0	0	0	0	0	200	903	0	0	0	0	0	0	0	603	903	0
439	9	0	0	0	0	0	0	200	300	0	0	0	0	0	0	0	200	903	0	0	0	0	0	0	0	603	903	0
440	0	0	0	0	0	0	0	200	300	0	0	0	0	0	0	0	200	903	0	0	0	0	0	0	0	603	903	0
440	1	0	0	0	0	0	0	200	300	0	0	0	0	0	0	0	200	903	0	0	0	0	0	0	0	603	903	0
440	2	0	0	0	0	0	0	200	300	0	0	0	0	0	0	0	200	903	0	0	0	0	0	0	0	603	903	0
440	3	0	0	0	0	0	0	200	300	0	0	0	0	0	0	0	200	903	0	0	0	0	0	0	0	603	903	0
440	4	0	0	0	0	0	0	200	300	0	0	0	0	0	0	0	200	903	0	0	0	0	0	0	0	603	903	0
440	5	0	0	0	0	0	0	200	300	0	0	0	0	0	0	0	200	903	0	0	0	0	0	0	0	603	903	0
440	6	0	0	0	0	0	0	200	300	0	0	0	0	0	0	0	200	903	0	0	0	0	0	0	0	603	903	0
440	7	0	0	0	0	0	0	200	300	0	0	0	0	0	0	0	200	903	0	0	0	0	0	0	0	603	903	0
440	8	0	0	0	0	0	0	200	300	0	0	0	0	0	0	0	200	903	0	0	0	0	0	0	0	603	903	0
440	9	0	0	0	0	0	0	200	300	0	0	0	0	0	0	0	200	903	0	0	0	0	0	0	0	603	903	0
441	0	0	0	0	0	0	0	200	300	0	0	0	0	0	0	0	200	903	0	0	0	0	0	0	0	603	903	0
441	1	0	0	0	0	0	0	200	300	0	0	0	0	0	0	0	200	903	0	0	0	0	0	0	0	603	903	0
441	2	0	0	0	0	0	0	200	300	0	0	0	0	0	0	0	200	903	0	0	0	0	0	0	0	603	903	0
441	3	0	0	0	0	0	0	200	300	0	0	0	0	0	0	0	200	903	0	0	0	0	0	0	0	603	903	0
441	4	0	0	0	0	0	0	200	300	0	0	0	0	0	0	0	200	903	0	0	0	0	0	0	0	603	903	0
441	5	0	0	0	0	0	0	200	300	0	0	0	0	0	0	0	200	903	0	0	0	0	0	0	0	603	903	0
441	6	0	0	0	0	0	0	200	300	0	0	0	0	0	0	0	200	903	0	0	0	0	0	0	0	603	903	0
441	7	0	0	0	0	0	0	200	300	0	0	0	0	0	0	0	200	903	0	0	0	0	0	0	0	603	903	0
441	8	0	0	0	0	0	0	200	300	0	0	0	0	0	0	0	200	903	0	0	0	0	0	0	0	603	903	0
441	9	0	0	0	0	0	0	200	300	0	0	0	0	0	0	0	200	903	0	0	0	0	0	0	0	603	903	0
442	0	0	0	0	0	0	0	200	300	0	0	0	0	0	0	0	200	903	0	0	0	0	0	0	0	603	903	0
442	1	0	0	0	0	0	0	200	300	0	0	0	0	0	0	0	200	903	0	0	0	0	0	0	0	603	903	0
442	2	0	0	0	0	0	0	200	300	0	0	0	0	0	0	0	200	903	0	0	0	0	0	0	0	603	903	0
442	3	0	0	0	0	0	0	200	300	0	0	0	0	0	0	0	200	903	0	0	0	0	0	0	0	603	903	0
442	4	0	0	0	0	0	0	200	300	0	0	0	0	0	0	0	200	903	0	0	0	0	0	0	0	603	903	0
442	5	0	0	0	0	0	0	200	300	0	0	0	0	0	0	0	200	903	0	0	0	0	0	0	0	603	903	0
442	6	0	0	0	0	0	0	200	300	0	0	0	0	0	0	0	200	903	0	0	0	0	0	0	0	603	903	0
442	7	0	0	0	0	0	0	200	300	0	0	0	0	0	0	0	200	903	0	0	0	0	0	0	0	603	903	0
442	8	0	0	0	0	0	0	200	300	0	0	0	0	0	0	0	200	903	0	0	0	0	0	0	0	603	903	0
442	9	0	0	0	0	0	0	200	300	0	0	0	0	0	0	0	200	903	0	0	0	0	0	0	0	603	903	0
443	0	0	0	0	0	0	0	200	300	0	0	0	0	0	0	0	200	903	0	0	0	0	0	0	0	603	903	0
443	1	0	0	0	0	0	0	200	300	0	0	0	0	0	0	0	200	903	0	0	0	0	0	0	0	603	903	0
443	2	0	0	0	0	0	0	200	300	0	0	0	0	0	0	0	200	903	0	0	0	0	0	0	0	603	903	0
443	3	0	0	0	0	0	0	200	300	0	0	0	0	0	0	0	200	903	0	0	0	0	0	0	0	603	903	0
443	4	0	0	0	0	0	0	200	300	0	0	0	0	0	0	0	200	903	0	0	0	0	0	0	0	603	903	0
443	5	0	0	0	0	0	0	200	300	0	0	0	0	0	0	0	200	903	0	0	0	0	0	0	0	603	903	0
443	6	0	0	0	0	0	0	200	300	0	0	0	0	0	0	0	200	903	0	0	0	0	0	0	0	603	903	0
443	7	0	0	0	0	0	0	200	300	0	0	0	0	0	0	0	200	903	0	0	0	0	0	0	0	603	903	0
443	8	0	0	0	0	0	0	200	300	0	0	0	0	0	0	0	200	903	0	0	0	0	0	0	0	603	903	0
443	9	0	0	0	0	0	0	200	300	0	0	0	0	0	0	0	200	903	0	0	0	0	0	0	0	603	903	0
444	0	0	0	0	0	0	0	200	300	0	0	0	0	0	0	0	200	903	0	0	0	0	0	0	0	603	903	0
444	1	0	0	0	0	0	0	200	300	0	0	0	0	0	0	0	200	903	0	0	0	0	0	0	0	603	903	0
444	2	0	0	0	0	0	0	200	300	0	0	0	0	0	0	0	200	903	0	0	0	0	0	0	0	603	903	0
444	3	0	0	0	0	0	0	200	300	0	0	0	0	0	0	0	200	903	0	0	0	0	0	0	0	603	903	0
444	4	0	0	0	0	0	0	200	300	0	0	0	0	0	0	0	200	903	0	0	0	0	0	0	0	603	903	0
444	5	0	0	0	0	0	0	200	300	0	0	0	0	0	0	0	200	903	0	0	0	0	0	0	0	603	903	0
444	6	0	0	0	0	0	0	200	300	0	0	0	0	0	0	0	200	903	0	0	0	0	0	0	0	603	903	0
444	7	0	0	0	0	0	0	200	300	0	0	0	0	0	0	0	200	903	0	0	0	0	0	0	0	603	903	0
444	8	0	0	0	0	0	0	200	300	0	0	0	0	0	0	0	200	903	0	0	0	0	0	0	0	603	903	0
444	9	0	0	0	0	0	0	200	300	0	0	0	0	0	0	0	200	903	0	0	0	0	0	0	0	603	903	0
445	0	0	0	0	0	0	0	200	300	0	0	0	0	0	0	0	200	903	0	0	0	0	0	0	0	603	903	0
445	1	0	0	0	0	0	0	200	300	0	0	0	0	0	0	0	200	903	0	0	0	0	0	0	0	603	903	0
445	2	0	0	0	0	0	0	200	300	0	0	0	0	0	0	0	200	903	0	0	0	0	0	0	0	603	903	0
445	3	0	0	0	0	0	0	200	300	0	0	0	0	0	0	0	200	903	0	0	0	0	0	0	0	603	903	0
445	4	0	0	0	0	0	0	200	300	0	0	0	0	0	0	0	200	903	0	0	0	0	0	0	0	603	903	0
445	5	0	0	0	0	0	0	200	300	0	0	0	0	0	0	0	200	903	0	0	0	0	0	0	0	603	903	0
445	6	0	0	0	0	0	0	200	300	0	0	0	0	0	0	0	200	903	0	0	0	0	0	0	0	603	903	0
445	7	0	0	0	0	0	0	200	300	0	0	0	0	0	0	0	200	903	0	0	0	0	0	0	0	603	903	0
445	8	0	0	0	0	0	0	200	300	0	0	0	0	0	0	0	200	903	0	0	0	0	0	0	0	603	903	0
445	9	0	0	0	0	0	0	200	300	0	0	0	0	0	0	0	200	903	0	0	0	0	0	0	0	603	903	0
446	0	0	0	0	0	0	0	200	300	0	0	0	0	0	0	0	200	903	0	0	0	0	0	0	0	603	903	0
446	1	0	0	0	0	0	0	200	300	0	0	0	0	0	0	0	200	903	0	0	0	0	0	0	0	603	903	0
446	2	0	0	0	0	0	0	200	300	0	0	0	0	0	0	0	200	903	0	0	0	0	0	0	0	603	903	0
446	3	0	0	0	0	0	0	200	300	0	0	0	0	0	0	0	200	903	0	0	0	0	0	0	0	603	903	0
446	4	0	0	0	0	0	0	200	300	0	0	0	0	0	0	0	200	903	0	0	0	0	0	0	0	603	903	0
446	5	0	0	0	0	0	0	200	300	0	0	0	0	0	0	0	200	903	0	0	0	0	0	0	0	603	903	0
446	6	0	0	0	0	0	0	200	300	0	0	0	0	0	0	0	200	903	0	0	0	0	0	0	0	603	903	0
446	7	0	0	0	0	0	0	200	300	0	0	0	0	0	0	0	200	903	0	0	0	0	0	0	0	603	903	0
446	8	0	0	0	0	0	0	200	300	0	0	0	0	0	0	0	200	903	0	0	0	0	0	0	0	603	903	0
446	9	0	0	0	0	0	0	200	300	0	0	0	0	0	0	0	200	903	0	0	0	0	0	0	0	603	903	0
447	0	0	0	0	0	0	0	200	300	0	0	0	0	0	0	0	200	903	0	0	0	0	0	0	0	603	903	0
447	1	0	0	0	0	0	0	200	300	0	0	0	0	0	0	0	200	903	0	0	0	0	0	0	0	603	903	0
447	2	0	0	0	0	0	0	200	300	0	0	0	0	0	0	0	200	903	0	0	0	0	0	0	0	603	903	0
447	3	0	0	0	0	0	0	200	300	0	0	0	0	0	0	0	200	903	0	0	0	0	0	0	0	603	903	0
447	4	0	0	0	0	0	0	200	300	0	0	0	0	0	0	0	200	903	0	0	0	0	0	0	0	603	903	0
447	5	0	0	0	0	0	0	200	300	0	0	0	0	0	0	0	200	903	0	0	0	0	0	0	0	603	903	0
447	6	0	0	0	0	0	0	200	300	0	0	0	0	0	0	0	200	903	0	0	0	0	0	0	0	603	903	0
447	7	0	0	0	0	0	0	200	300	0	0	0	0	0	0	0	200	903	0	0	0	0	0	0	0	603	903	0
447	8	0	0	0	0	0	0	200	300	0	0	0	0	0	0	0	200	903	0	0	0	0	0	0	0	603	903	0
447	9	0	0	0	0	0	0	200	300	0	0	0	0	0	0	0	200	903	0	0	0	0	0	0	0	603	903	0
448	0	0	0	0	0	0	0	200	300	0	0	0	0	0	0	0	200	903	0	0	0	0	0	0	0	603	903	0
448	1	0	0	0	0	0	0	200	300	0	0	0	0	0	0	0	200	903	0	0	0	0	0	0	0	603	903	0
448	2	0	0	0	0	0	0	200	300	0	0	0	0	0	0	0	200	903	0	0	0	0	0	0	0	603	903	0
448	3	0	0	0	0	0	0	200	300	0	0	0	0	0	0	0	200	903	0	0	0	0	0	0	0	603	903	0
448	4	0	0	0	0	0	0	200	300	0	0	0	0	0	0	0	200	903	0	0	0	0	0	0	0	603	903	0
448	5	0	0	0	0	0	0	200	300	0	0	0	0	0	0	0	200	903	0	0	0	0	0	0	0	603	903	0
448	6	0	0	0	0	0	0	200	300	0	0	0	0	0	0	0	200	903	0	0	0	0	0	0	0	603	903	0
448	7	0	0	0	0	0	0	200	300	0	0	0	0	0	0	0	200	903	0	0	0	0	0	0	0	603	903	0
448	8	0	0	0	0	0	0	200	300	0	0	0	0	0	0	0	200	903	0	0	0	0	0	0	0	603	903	0
448	9	0	0	0	0	0	0	200	300	0	0	0	0	0	0	0	200	903	0	0	0	0	0	0	0	603	903	0
449	0	0	0	0	0	0	0	200	300	0	0	0	0	0	0	0	200	903	0	0	0	0	0	0	0	603	903	0
449	1	0	0	0	0	0	0	200	300	0	0	0	0	0	0	0	200	903	0	0	0	0	0	0	0	603	903	0
449	2	0	0	0	0	0	0	200	300	0	0	0	0	0	0	0	200	903	0	0	0	0	0	0	0	603	903	0
449	3	0	0	0	0	0	0	200	300	0	0	0	0	0	0	0	200	903	0	0	0	0	0	0	0	603	903	0
449	4	0	0	0	0	0	0	200	300	0	0	0	0	0	0	0	200	903	0	0	0	0	0	0	0	603	903	0
449	5	0	0	0	0	0	0	200	300	0	0	0	0	0	0	0	200	903	0	0	0	0	0	0	0	603	903	0
449	6	0	0	0	0	0	0	200	300	0	0	0	0	0	0	0	200	903	0	0	0	0	0	0	0	603	903	0
449	7	0	0	0	0	0	0	200	300	0	0	0	0	0	0	0	200	903	0	0	0	0	0	0	0	603	903	0
449	8	0	0	0	0	0	0	200	300	0	0	0	0	0	0	0	200	903	0	0	0	0	0	0	0	603	903	0
449	9	0	0	0	0	0	0	200	300	0	0	0	0	0	0	0	200	903	0	0	0	0	0	0	0	603	903	0
450	0	0	0	0	0	0	0	200	300	0	0	0	0	0	0	0	200	903	0	0	0	0	0	0	0	603	903	0
450	1	0	0	0	0	0	0	200	300	0	0	0	0	0	0	0	200	903	0	0	0	0	0	0	0	603	903	0
450	2	0	0	0	0	0	0	200	300	0	0	0	0	0	0	0	200	903	0	0	0	0	0	0	0	603	903	0
450	3	0	0	0	0	0	0	200	300	0	0	0	0	0	0	0	200	903	0	0	0	0	0	0	0	603	903	0
450	4	0	0	0	0	0	0	200	300	0	0	0	0	0	0	0	200	903	0	0	0	0	0	0	0	603	903	0
450	5	0	0	0	0	0	0	200	300	0	0	0	0	0	0	0	200	903	0	0	0	0	0	0	0	603	903	0
450	6	0	0	0	0	0	0	200	300	0	0	0	0	0	0	0	200	903	0	0	0	0	0	0	0	603	903	0
450	7	0	0	0	0	0	0	200	300	0	0	0	0	0	0	0	200	903	0	0	0	0	0	0	0	603	903	0
450	8	0	0	0	0	0	0	200	300	0	0	0	0	0	0	0	200	903	0	0	0	0	0	0	0	603	903	0
450	9	0	0	0	0	0	0	200	300	0	0	0	0	0	0	0	200	903	0	0	0	0	0	0	0	603	903	0
451	0	0	0	0	0	0	0	200	300	0	0	0	0	0	0	0	200	903	0	0	0	0	0	0	0	603	903	0
451	1	0	0	0	0	0	0	200	300	0	0	0	0	0	0	0	200	903	0	0	0	0	0	0	0	603	903	0
451	2	0	0	0	0	0	0	200	300	0	0	0	0	0	0	0	200	903	0	0	0	0	0	0	0	603	903	0
451	3	0	0	0	0	0	0	200	300	0	0	0	0	0	0	0	200	903	0	0	0	0	0	0	0	603	903	0
451	4	0	0	0	0	0	0	200	300	0	0	0	0	0	0	0	200	903	0	0	0	0	0	0	0	603	903	0
451	5	0	0	0	0	0	0	200	300	0	0	0	0	0	0	0	200	903	0	0	0	0	0	0	0	603	903	0
451	6	0	0	0	0	0	0	200	300	0	0	0	0	0	0	0	200	903	0	0	0	0	0	0	0	603	903	0
451	7	0	0	0	0	0	0	200	300	0	0	0	0	0	0	0	200	903	0	0	0	0	0	0	0	603	903	0
451	8	0	0	0	0	0	0	200	300	0	0	0	0	0	0	0	200	903	0	0	0	0	0	0	0	603	903	0
451	9	0	0	0	0	0	0	200	300	0	0	0	0	0	0	0	200	903	0	0	0	0	0	0	0	603	903	0
452	0	0	0	0	0	0	0	200	300	0	0	0	0	0	0	0	200	903	0	0	0	0	0	0	0	603	903	0
452	1	0	0	0	0	0	0	200	300	0	0	0	0	0	0	0	200	903	0	0	0	0	0	0	0	603	903	0
452	2	0	0	0	0	0	0	200	300	0	0	0	0	0	0	0	200	903	0	0	0	0	0	0	0	603	903	0
452	3	0	0	0	0	0	0	200	300	0	0	0	0	0	0	0	200	903	0	0	0	0	0	0	0	603	903	0
452	4	0	0	0	0	0	0	200	300	0	0	0	0	0	0	0	200	903	0	0	0	0	0	0	0	603	903	0
452	5	0	0	0	0	0	0	200	300	0	0	0	0	0	0	0	200	903	0	0	0	0	0	0	0	603	903	0
452	6	0	0	0	0	0	0	200	300	0	0	0	0	0	0	0	200	903	0	0	0	0	0	0	0	603	903	0
452	7	0	0	0	0	0	0	200	300	0	6.10001	-17.7634	-23.6001	-1540.56	905.807	-415.056	238.382	968.278	0	0	0	0	0	0	0	603	903	0
452	8	0	0	0	0	0	0	200	300	0	1.52237	-11.0495	-22.9897	-2181.43	722.701	134.261	231.436	997.887	0	0	0	0	0	0	0	603	903	0
452	9	0	0	0	0	0	0	200	300	0	-5.1915	-7.08221	-17.8017	-2089.87	1149.95	-140.398	264.597	1020.4	0	0	0	0	0	0	0	603	903	0
453	0	0	0	0	0	0	0	200	300	0	-0.919037	-11.5073	-22.0742	-2547.64	1088.91	-48.8449	249.33	1018.41	0	0	0	0	0	0	0	603	903	0
453	1	0	0	0	0	0	0	200	300	0	2.13272	-7.84515	-35.1968	-1540.56	1027.88	729.354	229.204	946.77	0	0	0	0	0	0	0	603	903	0
453	2	0	0	0	0	0	0	200	300	0	-3.05527	1.61529	-38.2485	-2639.19	1577.19	225.813	241.235	972.001	0	0	0	0	0	0	0	603	903	0
453	3	0	0	0	0	0	0	200	300	0	-3.66562	5.73517	-41.9106	-3005.4	1943.4	42.7079	246.37	974.71	0	0	0	0	0	0	0	603	903	0
453	4	0	0	0	0	0	0	200	300	0	4.11636	6.04034	-49.8452	-3554.72	2065.48	958.235	241.438	974.315	0	0	0	0	0	0	0	603	903	0
453	5	0	0	0	0	0	0	200	300	0	-1.07162	12.1439	-65.4092	-3463.16	2614.79	729.354	239.976	955.946	0	0	0	0	0	0	0	603	903	0
453	6	0	0	0	0	0	0	200	300	0	-5.34409	13.5171	-76.7007	-4012.48	3103.07	500.472	240.457	955.313	0	0	0	0	0	0	0	603	903	0
453	7	0	0	0	0	0	0	200	300	0	-1.68198	7.56622	-87.0766	-4928.01	3713.42	592.024	242.645	959.594	0	0	0	0	0	0	0	603	903	0
453	8	0	0	0	0	0	0	200	300	0	1.06461	8.32916	-98.6733	-5202.67	4384.81	317.366	244.438	955.726	0	0	0	0	0	0	0	603	903	0
453	9	0	0	0	0	0	0	200	300	0	1.98013	13.6697	-113.017	-5477.33	4689.99	363.142	241.498	951.465	0	0	0	0	0	0	0	603	903	0
454	0	0	0	0	0	0	0	200	300	0	4.72672	8.48175	-125.224	-5843.54	5605.52	88.4843	244.764	949.665	0	0	0	0	0	0	0	603	903	0
454	1	0	0	0	0	0	0	200	300	0	8.38882	5.12482	-137.736	-6942.17	6582.08	-186.174	247.788	953.402	0	0	0	0	0	0	0	603	903	0
454	2	0	0	0	0	0	0	200	300	0	11.8983	13.212	-155.741	-7399.93	7131.39	-323.503	245.79	950.514	0	0	0	0	0	0	0	603	903	0
454	3	0	0	0	0	0	0	200	300	0	14.7975	17.9422	-172.831	-7583.04	8107.96	-140.398	246.913	946.875	0	0	0	0	0	0	0	603	903	0
454	4	0	0	0	0	0	0	200	300	0	17.0863	12.449	-184.733	-7583.04	8718.31	-231.95	247.194	944.049	0	0	0	0	0	0	0	603	903	0
454	5	0	0	0	0	0	0	200	300	0	19.8329	16.1111	-199.992	-8864.77	9572.8	-277.727	247.866	947.326	0	0	0	0	0	0	0	603	903	0
454	6	0	0	0	0	0	0	200	300	0	21.0536	21.7569	-211.283	-9139.43	10122.1	-231.95	247.908	946.257	0	0	0	0	0	0	0	603	903	0
454	7	0	0	0	0	0	0	200	300	0	21.8166	17.0267	-225.932	-9871.85	10854.5	-186.174	248.043	946.694	0	0	0	0	0	0	0	603	903	0
454	8	0	0	0	0	0	0	200	300	0	27.3097	13.5171	-240.275	-9597.2	12014.2	-415.056	250.002	942.943	0	0	0	0	0	0	0	603	903	0
454	9	0	0	0	0	0	0	200	300	0	33.4132	17.3318	-253.092	-10238.1	12746.6	-689.714	250.364	943.452	0	0	0	0	0	0	0	603	903	0
455	0	0	0	0	0	0	0	200	300	0	36.3124	14.2801	-266.215	-10604.3	13723.2	-506.608	251.549	942.834	0	0	0	0	0	0	0	603	903	0
455	1	0	0	0	0	0	0	200	300	0	39.3642	4.66705	-275.98	-10970.5	14699.8	-735.49	253.264	942.751	0	0	0	0	0	0	0	603	903	0
455	2	0	0	0	0	0	0	200	300	0	36.6176	2.98859	-282.084	-10329.6	15249.1	-735.49	254.059	939.619	0	0	0	0	0	0	0	603	903	0
455	3	0	0	0	0	0	0	200	300	0	38.6012	2.22565	-297.038	-10421.2	15615.3	-781.267	252.57	938.084	0	0	0	0	0	0	0	603	903	0
455	4	0	0	0	0	0	0	200	300	0	43.0263	-4.18304	-305.277	-11245.1	16286.7	-781.267	253.35	939.836	0	0	0	0	0	0	0	603	903	0
455	5	0	0	0	0	0	0	200	300	0	41.8056	-10.4391	-312.907	-11153.6	16713.9	-827.043	253.415	938.645	0	0	0	0	0	0	0	603	903	0
455	6	0	0	0	0	0	0	200	300	0	38.1435	-12.5754	-324.809	-9963.41	17080.1	-1239.03	252.585	933.675	0	0	0	0	0	0	0	603	903	0
455	7	0	0	0	0	0	0	200	300	0	41.653	-18.3737	-334.269	-10329.6	17873.6	-1147.48	253.471	933.902	0	0	0	0	0	0	0	603	903	0
455	8	0	0	0	0	0	0	200	300	0	46.841	-26.6135	-340.678	-11062	18056.7	-1101.7	253.002	935.471	0	0	0	0	0	0	0	603	903	0
455	9	0	0	0	0	0	0	200	300	0	43.0263	-30.5807	-349.833	-10878.9	19094.3	-1605.24	254.581	934.098	0	0	0	0	0	0	0	603	903	0
456	0	0	0	0	0	0	0	200	300	0	42.5685	-34.0903	-358.683	-10512.7	19399.5	-1696.79	254.085	932.309	0	0	0	0	0	0	0	603	903	0
456	1	0	0	0	0	0	0	200	300	0	50.8083	-42.33	-370.89	-10329.6	19460.5	-2017.23	252.47	930.851	0	0	0	0	0	0	0	603	903	0
456	2	0	0	0	0	0	0	200	300	0	52.9445	-49.0439	-379.13	-10604.3	20559.1	-2200.33	254.227	930.97	0	0	0	0	0	0	0	603	903	0
456	3	0	0	0	0	0	0	200	300	0	50.0453	-52.0956	-389.201	-10238.1	21291.5	-2383.44	254.706	929.305	0	0	0	0	0	0	0	603	903	0
456	4	0	0	0	0	0	0	200	300	0	51.1134	-58.9621	-402.628	-9871.85	21718.8	-2291.89	253.943	927.519	0	0	0	0	0	0	0	603	903	0
456	5	0	0	0	0	0	0	200	300	0	54.1652	-65.9811	-412.394	-9505.64	21962.9	-2474.99	253.257	926.05	0	0	0	0	0	0	0	603	903	0
456	6	0	0	0	0	0	0	200	300	0	55.3859	-69.3381	-423.075	-8956.33	22512.3	-2932.76	253.211	924.17	0	0	0	0	0	0	0	603	903	0
456	7	0	0	0	0	0	0	200	300	0	55.9962	-69.4907	-437.724	-8956.33	23488.8	-2749.65	253.661	923.461	0	0	0	0	0	0	0	603	903	0
456	8	0	0	0	0	0	0	200	300	0	57.0644	-79.4089	-450.236	-8864.77	24160.2	-2932.76	253.661	922.689	0	0	0	0	0	0	0	603	903	0
456	9	0	0	0	0	0	0	200	300	0	59.8109	-81.2399	-463.969	-8223.91	24221.2	-3024.31	252.204	920.725	0	0	0	0	0	0	0	603	903	0
457	0	0	0	0	0	0	0	200	300	0	58.5902	-80.9348	-477.396	-7949.25	25075.7	-3161.64	252.526	919.651	0	0	0	0	0	0	0	603	903	0
457	1	0	0	0	0	0	0	200	300	0	59.048	-85.665	-490.824	-7491.49	26235.4	-3298.97	253.452	918.263	0	0	0	0	0	0	0	603	903	0
457	2	0	0	0	0	0	0	200	300	0	61.4894	-89.0219	-504.252	-7583.04	26784.7	-3207.41	253.118	918.038	0	0	0	0	0	0	0	603	903	0
457	3	0	0	0	0	0	0	200	300	0	61.3368	-88.259	-518.9	-7125.27	27028.9	-3070.08	252.089	916.732	0	0	0	0	0	0	0	603	903	0
457	4	0	0	0	0	0	0	200	300	0	58.7428	-88.4116	-532.938	-6392.85	27578.2	-3344.74	251.747	914.996	0	0	0	0	0	0	0	603	903	0
457	5	0	0	0	0	0	0	200	300	0	58.7428	-92.9892	-546.061	-5751.98	28493.7	-3253.19	252.18	913.534	0	0	0	0	0	0	0	603	903	0
457	6	0	0	0	0	0	0	200	300	0	59.2006	-95.1254	-561.015	-5294.22	28798.9	-3298.97	251.334	912.437	0	0	0	0	0	0	0	603	903	0
457	7	0	0	0	0	0	0	200	300	0	57.3695	-93.7521	-572.306	-4928.01	29104	-3527.85	250.854	911.611	0	0	0	0	0	0	0	603	903	0
457	8	0	0	0	0	0	0	200	300	0	56.1488	-94.8203	-584.818	-4836.46	28920.9	-3527.85	249.453	911.27	0	0	0	0	0	0	0	603	903	0
457	9	0	0	0	0	0	0	200	300	0	55.2333	-98.6349	-596.415	-3920.93	29470.3	-3619.4	249.412	909.574	0	0	0	0	0	0	0	603	903	0
458	0	0	0	0	0	0	0	200	300	0	56.6066	-99.3979	-607.707	-3646.27	30385.8	-3985.61	250.001	909	0	0	0	0	0	0	0	603	903	0
458	1	0	0	0	0	0	0	200	300	0	54.7755	-100.313	-615.336	-3463.16	30507.9	-3619.4	249.579	908.628	0	0	0	0	0	0	0	603	903	0
458	2	0	0	0	0	0	0	200	300	0	52.1815	-103.67	-623.576	-3280.06	30874.1	-4168.72	249.511	908.26	0	0	0	0	0	0	0	603	903	0
458	3	0	0	0	0	0	0	200	300	0	49.7401	-106.417	-632.731	-2364.53	31728.6	-4077.17	250.145	906.737	0	0	0	0	0	0	0	603	903	0
458	4	0	0	0	0	0	0	200	300	0	49.435	-105.807	-641.886	-2181.43	31728.6	-4397.6	249.43	906.398	0	0	0	0	0	0	0	603	903	0
458	5	0	0	0	0	0	0	200	300	0	47.1461	-109.316	-650.126	-1449	31362.3	-4763.81	248.24	905.229	0	0	0	0	0	0	0	603	903	0
458	6	0	0	0	0	0	0	200	300	0	45.6203	-112.978	-655.009	-350.371	31423.4	-4763.81	247.974	903.535	0	0	0	0	0	0	0	603	903	0
458	7	0	0	0	0	0	0	200	300	0	42.5685	-112.673	-661.723	-716.582	32461	-5175.8	249.055	904.083	0	0	0	0	0	0	0	603	903	0
458	8	0	0	0	0	0	0	200	300	0	40.1271	-112.826	-669.352	656.709	32583.1	-5221.57	248.679	902.019	0	0	0	0	0	0	0	603	903	0
458	9	0	0	0	0	0	0	200	300	0	41.1952	-115.725	-673.625	656.709	32277.9	-5404.68	247.917	902.025	0	0	0	0	0	0	0	603	903	0
459	0	0	0	0	0	0	0	200	300	0	34.9391	-118.166	-682.169	1663.79	32399.9	-5450.46	247.495	900.561	0	0	0	0	0	0	0	603	903	0
459	1	0	0	0	0	0	0	200	300	0	30.3615	-118.319	-690.104	2579.32	32644.1	-6137.1	247.303	899.263	0	0	0	0	0	0	0	603	903	0
459	2	0	0	0	0	0	0	200	300	0	28.5304	-122.439	-695.292	3403.29	32277.9	-6457.54	246.423	898.105	0	0	0	0	0	0	0	603	903	0
459	3	0	0	0	0	0	0	200	300	0	26.6994	-126.101	-700.48	3861.06	32033.7	-6594.87	245.731	897.488	0	0	0	0	0	0	0	603	903	0
459	4	0	0	0	0	0	0	200	300	0	21.5114	-123.812	-704.447	5600.56	31667.5	-6961.08	244.954	895.05	0	0	0	0	0	0	0	603	903	0
459	5	0	0	0	0	0	0	200	300	0	19.5277	-127.016	-708.415	5234.35	32644.1	-7052.63	246.081	895.611	0	0	0	0	0	0	0	603	903	0
459	6	0	0	0	0	0	0	200	300	0	16.3234	-132.662	-711.161	5966.77	32461	-7189.96	245.645	894.61	0	0	0	0	0	0	0	603	903	0
459	7	0	0	0	0	0	0	200	300	0	13.5768	-135.714	-713.603	6882.29	32094.8	-7281.51	244.976	893.356	0	0	0	0	0	0	0	603	903	0
459	8	0	0	0	0	0	0	200	300	0	12.0509	-135.409	-716.044	6882.29	31911.7	-7418.84	244.567	893.388	0	0	0	0	0	0	0	603	903	0
459	9	0	0	0	0	0	0	200	300	0	11.5932	-141.054	-714.823	7431.61	32094.8	-7510.39	244.899	892.604	0	0	0	0	0	0	0	603	903	0
460	0	0	0	0	0	0	0	200	300	0	10.0673	-145.022	-719.096	8164.03	32155.8	-7418.84	244.717	891.647	0	0	0	0	0	0	0	603	903	0
460	1	0	0	0	0	0	0	200	300	0	9.76212	-144.411	-718.485	8621.8	31911.7	-7647.72	244.415	891	0	0	0	0	0	0	0	603	903	0
460	2	0	0	0	0	0	0	200	300	0	7.93106	-143.801	-716.959	9445.78	31728.6	-7144.18	244.254	889.825	0	0	0	0	0	0	0	603	903	0
460	3	0	0	0	0	0	0	200	300	0	9.76212	-147.158	-718.18	9811.99	31850.6	-7006.85	244.349	889.338	0	0	0	0	0	0	0	603	903	0
460	4	0	0	0	0	0	0	200	300	0	8.694	-148.073	-718.18	9995.09	31911.7	-7418.84	244.434	889.083	0	0	0	0	0	0	0	603	903	0
460	5	0	0	0	0	0	0	200	300	0	6.86295	-143.954	-716.959	10910.6	31362.3	-7006.85	243.744	887.782	0	0	0	0	0	0	0	603	903	0
460	6	0	0	0	0	0	0	200	300	0	7.62589	-147.921	-713.603	10361.3	31423.4	-7144.18	244.035	888.48	0	0	0	0	0	0	0	603	903	0
460	7	0	0	0	0	0	0	200	300	0	9.45694	-148.073	-711.771	11917.7	31484.4	-6640.64	244.234	886.256	0	0	0	0	0	0	0	603	903	0
460	8	0	0	0	0	0	0	200	300	0	9.76212	-146.242	-711.466	11643	31484.4	-6686.42	244.253	886.635	0	0	0	0	0	0	0	603	903	0
460	9	0	0	0	0	0	0	200	300	0	7.01553	-147.616	-710.246	12100.8	31362.3	-6549.09	244.157	885.963	0	0	0	0	0	0	0	603	903	0
461	0	0	0	0	0	0	0	200	300	0	9.76212	-147.921	-707.804	12283.9	30874.1	-6411.76	243.62	885.645	0	0	0	0	0	0	0	603	903	0
461	1	0	0	0	0	0	0	200	300	0	7.16812	-148.684	-707.499	12924.8	31301.3	-6320.21	244.242	884.732	0	0	0	0	0	0	0	603	903	0
461	2	0	0	0	0	0	0	200	300	0	6.86295	-147.31	-705.363	13382.5	31179.2	-6320.21	244.203	884.027	0	0	0	0	0	0	0	603	903	0
461	3	0	0	0	0	0	0	200	300	0	6.55777	-149.904	-705.058	13657.2	30935.1	-6365.98	243.876	883.63	0	0	0	0	0	0	0	603	903	0
461	4	0	0	0	0	0	0	200	300	0	5.33707	-152.956	-704.142	14023.4	31057.2	-6274.43	244.106	883.084	0	0	0	0	0	0	0	603	903	0
461	5	0	0	0	0	0	0	200	300	0	4.42154	-151.43	-706.278	14572.7	30385.8	-6411.76	243.022	882.367	0	0	0	0	0	0	0	603	903	0
461	6	0	0	0	0	0	0	200	300	0	3.50601	-155.245	-703.837	14755.8	30568.9	-6503.31	243.432	882.035	0	0	0	0	0	0	0	603	903	0
461	7	0	0	0	0	0	0	200	300	0	3.50601	-156.161	-703.837	15030.5	30324.8	-6549.09	243.085	881.645	0	0	0	0	0	0	0	603	903	0
461	8	0	0	0	0	0	0	200	300	0	0.149079	-156.924	-705.668	16037.6	30752	-6686.42	243.579	880.273	0	0	0	0	0	0	0	603	903	0
461	9	0	0	0	0	0	0	200	300	0	-0.919037	-157.686	-706.889	15946	30874.1	-6823.75	243.676	880.442	0	0	0	0	0	0	0	603	903	0
462	0	0	0	0	0	0	0	200	300	0	-1.52939	-160.891	-705.973	17044.6	30263.7	-7144.18	242.868	878.857	0	0	0	0	0	0	0	603	903	0
462	1	0	0	0	0	0	0	200	300	0	-3.36044	-161.196	-705.058	17227.8	30263.7	-6823.75	242.924	878.566	0	0	0	0	0	0	0	603	903	0
462	2	0	0	0	0	0	0	200	300	0	-7.02255	-161.349	-710.246	17136.2	30507.9	-7098.41	242.954	878.873	0	0	0	0	0	0	0	603	903	0
462	3	0	0	0	0	0	0	200	300	0	-8.54843	-162.569	-713.908	17777.1	30507.9	-7327.29	242.734	878.099	0	0	0	0	0	0	0	603	903	0
462	4	0	0	0	0	0	0	200	300	0	-8.85361	-165.468	-717.265	18326.4	30568.9	-7464.62	242.619	877.45	0	0	0	0	0	0	0	603	903	0
462	5	0	0	0	0	0	0	200	300	0	-9.31137	-165.621	-719.401	19058.8	30385.8	-7876.6	242.238	876.507	0	0	0	0	0	0	0	603	903	0
462	6	0	0	0	0	0	0	200	300	0	-14.4994	-165.163	-722.453	19425	29714.4	-7876.6	241.13	876.112	0	0	0	0	0	0	0	603	903	0
462	7	0	0	0	0	0	0	200	300	0	-14.6519	-167.91	-727.946	20065.9	29775.4	-7922.38	240.903	875.435	0	0	0	0	0	0	0	603	903	0
462	8	0	0	0	0	0	0	200	300	0	-18.1615	-168.52	-728.556	20432.1	30385.8	-7968.16	241.707	874.955	0	0	0	0	0	0	0	603	903	0
462	9	0	0	0	0	0	0	200	300	0	-18.4666	-169.131	-735.27	21073	30752	-8059.71	241.824	874.34	0	0	0	0	0	0	0	603	903	0
463	0	0	0	0	0	0	0	200	300	0	-21.0606	-170.809	-740.763	21622.3	30568.9	-7876.6	241.267	873.811	0	0	0	0	0	0	0	603	903	0
463	1	0	0	0	0	0	0	200	300	0	-23.1969	-171.572	-743.205	21805.4	30568.9	-8242.82	241.131	873.66	0	0	0	0	0	0	0	603	903	0
463	2	0	0	0	0	0	0	200	300	0	-24.4176	-171.572	-748.698	22446.3	30568.9	-8380.15	240.829	873.02	0	0	0	0	0	0	0	603	903	0
463	3	0	0	0	0	0	0	200	300	0	-23.9598	-172.487	-752.97	22720.9	30935.1	-8288.59	241.084	872.825	0	0	0	0	0	0	0	603	903	0
463	4	0	0	0	0	0	0	200	300	0	-24.265	-173.403	-754.496	22354.7	30874.1	-8425.92	240.92	873.371	0	0	0	0	0	0	0	603	903	0
463	5	0	0	0	0	0	0	200	300	0	-26.096	-174.624	-759.379	23087.1	30935.1	-8288.59	240.737	872.597	0	0	0	0	0	0	0	603	903	0
463	6	0	0	0	0	0	0	200	300	0	-25.6383	-172.03	-763.041	23178.7	30874.1	-8288.59	240.462	872.623	0	0	0	0	0	0	0	603	903	0
463	7	0	0	0	0	0	0	200	300	0	-24.7227	-171.725	-767.924	24460.4	31545.5	-8197.04	241.079	871.147	0	0	0	0	0	0	0	603	903	0
463	8	0	0	0	0	0	0	200	300	0	-22.2813	-172.182	-770.365	24368.9	31789.6	-8105.49	241.266	871.367	0	0	0	0	0	0	0	603	903	0
463	9	0	0	0	0	0	0	200	300	0	-23.8072	-171.572	-772.807	24002.7	31240.3	-8059.71	240.424	871.941	0	0	0	0	0	0	0	603	903	0
464	0	0	0	0	0	0	0	200	300	0	-24.7227	-169.741	-775.553	24826.6	31728.6	-7876.6	240.911	870.988	0	0	0	0	0	0	0	603	903	0
464	1	0	0	0	0	0	0	200	300	0	-22.8917	-170.504	-778.605	25009.7	31301.3	-7785.05	240.202	870.879	0	0	0	0	0	0	0	603	903	0
464	2	0	0	0	0	0	0	200	300	0	-21.8236	-169.893	-780.436	25284.4	32033.7	-7693.5	241.046	870.602	0	0	0	0	0	0	0	603	903	0
464	3	0	0	0	0	0	0	200	300	0	-21.2132	-167.91	-784.403	25559.1	31423.4	-7601.95	240.06	870.416	0	0	0	0	0	0	0	603	903	0
464	4	0	0	0	0	0	0	200	300	0	-21.5184	-168.215	-788.371	25833.7	32705.1	-7052.63	241.484	870.232	0	0	0	0	0	0	0	603	903	0
464	5	0	0	0	0	0	0	200	300	0	-20.9081	-166.842	-791.422	26566.1	32949.3	-7052.63	241.633	869.432	0	0	0	0	0	0	0	603	903	0
464	6	0	0	0	0	0	0	200	300	0	-19.077	-166.231	-795.084	27115.4	32522	-7052.63	240.904	868.896	0	0	0	0	0	0	0	603	903	0
464	7	0	0	0	0	0	0	200	300	0	-17.5511	-166.231	-798.747	26749.2	32705.1	-7418.84	240.946	869.511	0	0	0	0	0	0	0	603	903	0
464	8	0	0	0	0	0	0	200	300	0	-18.1615	-166.384	-801.493	26749.2	33559.6	-7464.62	241.871	869.626	0	0	0	0	0	0	0	603	903	0
464	9	0	0	0	0	0	0	200	300	0	-18.3141	-165.316	-805.155	27207	33742.7	-7327.29	241.908	869.209	0	0	0	0	0	0	0	603	903	0
465	0	0	0	0	0	0	0	200	300	0	-18.4666	-163.943	-807.597	27573.2	33681.7	-7373.06	241.706	868.858	0	0	0	0	0	0	0	603	903	0
465	1	0	0	0	0	0	0	200	300	0	-17.2459	-164.4	-811.869	28305.6	33742.7	-7327.29	241.562	868.135	0	0	0	0	0	0	0	603	903	0
465	2	0	0	0	0	0	0	200	300	0	-16.0252	-164.553	-814.616	28305.6	34536.2	-7189.96	242.396	868.253	0	0	0	0	0	0	0	603	903	0
465	3	0	0	0	0	0	0	200	300	0	-17.8563	-163.637	-817.362	28122.5	34536.2	-7464.62	242.253	868.594	0	0	0	0	0	0	0	603	903	0
465	4	0	0	0	0	0	0	200	300	0	-15.5675	-162.722	-820.719	28580.3	34597.2	-7464.62	242.155	868.177	0	0	0	0	0	0	0	603	903	0
465	5	0	0	0	0	0	0	200	300	0	-16.3304	-160.891	-821.635	28580.3	34658.3	-7327.29	242.182	868.215	0	0	0	0	0	0	0	603	903	0
465	6	0	0	0	0	0	0	200	300	0	-15.8727	-160.586	-828.349	29312.7	35268.6	-7189.96	242.577	867.613	0	0	0	0	0	0	0	603	903	0
465	7	0	0	0	0	0	0	200	300	0	-16.3304	-160.128	-830.79	28671.8	35146.5	-7327.29	242.305	868.488	0	0	0	0	0	0	0	603	903	0
465	8	0	0	0	0	0	0	200	300	0	-17.0934	-159.823	-832.621	28671.8	35085.5	-7373.06	242.139	868.564	0	0	0	0	0	0	0	603	903	0
465	9	0	0	0	0	0	0	200	300	0	-16.7882	-157.839	-832.621	29129.6	35207.6	-7327.29	242.285	868.015	0	0	0	0	0	0	0	603	903	0
466	0	0	0	0	0	0	0	200	300	0	-14.0416	-155.398	-837.199	29312.7	35756.9	-7281.51	242.71	867.987	0	0	0	0	0	0	0	603	903	0
466	1	0	0	0	0	0	0	200	300	0	-15.5675	-154.635	-840.25	30045.1	36306.2	-7189.96	243.209	867.243	0	0	0	0	0	0	0	603	903	0
466	2	0	0	0	0	0	0	200	300	0	-14.9571	-154.33	-842.082	29312.7	35573.8	-7144.18	242.245	868.19	0	0	0	0	0	0	0	603	903	0
466	3	0	0	0	0	0	0	200	300	0	-16.6356	-152.498	-843.302	29495.8	35817.9	-6823.75	242.473	868.023	0	0	0	0	0	0	0	603	903	0
466	4	0	0	0	0	0	0	200	300	0	-16.6356	-149.752	-844.828	29770.5	36184.1	-6777.97	242.83	867.761	0	0	0	0	0	0	0	603	903	0
466	5	0	0	0	0	0	0	200	300	0	-14.8045	-147.768	-848.49	29953.6	36611.4	-7098.41	243.149	867.698	0	0	0	0	0	0	0	603	903	0
466	6	0	0	0	0	0	0	200	300	0	-14.3468	-147.158	-849.711	28946.5	36550.4	-6961.08	243.015	868.934	0	0	0	0	0	0	0	603	903	0
466	7	0	0	0	0	0	0	200	300	0	-14.6519	-146.242	-851.237	29221.2	36367.2	-6823.75	242.723	868.672	0	0	0	0	0	0	0	603	903	0
466	8	0	0	0	0	0	0	200	300	0	-14.1942	-144.564	-851.542	29312.7	36916.6	-6777.97	243.353	868.577	0	0	0	0	0	0	0	603	903	0
466	9	0	0	0	0	0	0	200	300	0	-12.9735	-142.275	-852.763	29587.4	36916.6	-6549.09	243.291	868.304	0	0	0	0	0	0	0	603	903	0
467	0	0	0	0	0	0	0	200	300	0	-12.5157	-140.597	-855.814	30319.8	36550.4	-6594.87	242.708	867.572	0	0	0	0	0	0	0	603	903	0
467	1	0	0	0	0	0	0	200	300	0	-12.2105	-139.376	-854.899	29312.7	37099.7	-6457.54	243.397	868.712	0	0	0	0	0	0	0	603	903	0
467	2	0	0	0	0	0	0	200	300	0	-12.9735	-137.697	-857.951	29678.9	36489.3	-6320.21	242.531	868.407	0	0	0	0	0	0	0	603	903	0
467	3	0	0	0	0	0	0	200	300	0	-11.1424	-136.629	-858.256	29770.5	37649	-6274.43	243.867	868.313	0	0	0	0	0	0	0	603	903	0
467	4	0	0	0	0	0	0	200	300	0	-7.93808	-134.035	-858.866	29495.8	36733.5	-6091.33	242.77	868.657	0	0	0	0	0	0	0	603	903	0
467	5	0	0	0	0	0	0	200	300	0	-10.2269	-133.12	-860.087	29495.8	37649	-6045.55	243.773	868.706	0	0	0	0	0	0	0	603	903	0
467	6	0	0	0	0	0	0	200	300	0	-8.54843	-132.052	-861.002	29495.8	37649	-5908.22	243.727	868.743	0	0	0	0	0	0	0	603	903	0
467	7	0	0	0	0	0	0	200	300	0	-9.61655	-127.932	-860.392	29678.9	37343.8	-5862.44	243.403	868.505	0	0	0	0	0	0	0	603	903	0
467	8	0	0	0	0	0	0	200	300	0	-8.09067	-128.237	-858.561	29587.4	37526.9	-5770.89	243.709	868.538	0	0	0	0	0	0	0	603	903	0
467	9	0	0	0	0	0	0	200	300	0	-7.17514	-126.101	-860.697	29129.6	37832.1	-5725.11	243.955	869.156	0	0	0	0	0	0	0	603	903	0
468	0	0	0	0	0	0	0	200	300	0	-7.78549	-124.422	-860.697	29221.2	38076.2	-5908.22	244.239	869.049	0	0	0	0	0	0	0	603	903	0
468	1	0	0	0	0	0	0	200	300	0	-7.93808	-123.202	-860.392	29404.3	37404.8	-5816.67	243.474	868.825	0	0	0	0	0	0	0	603	903	0
468	2	0	0	0	0	0	0	200	300	0	-6.25961	-120.913	-861.308	29312.7	37465.9	-5358.9	243.499	868.967	0	0	0	0	0	0	0	603	903	0
468	3	0	0	0	0	0	0	200	300	0	-5.80185	-119.539	-857.951	28946.5	37893.1	-5633.56	244.167	869.261	0	0	0	0	0	0	0	603	903	0
468	4	0	0	0	0	0	0	200	300	0	-6.86996	-116.488	-856.425	28855	37832.1	-5542.01	244.174	869.308	0	0	0	0	0	0	0	603	903	0
468	5	0	0	0	0	0	0	200	300	0	-6.4122	-114.962	-855.814	28763.4	37587.9	-5450.46	243.921	869.391	0	0	0	0	0	0	0	603	903	0
468	6	0	0	0	0	0	0	200	300	0	-5.03891	-114.046	-854.899	28214.1	37404.8	-5404.68	243.754	869.997	0	0	0	0	0	0	0	603	903	0
468	7	0	0	0	0	0	0	200	300	0	-5.34409	-109.469	-853.068	28580.3	37893.1	-5358.9	244.42	869.497	0	0	0	0	0	0	0	603	903	0
468	8	0	0	0	0	0	0	200	300	0	-6.25961	-110.232	-850.016	27664.8	37587.9	-5267.35	244.22	870.454	0	0	0	0	0	0	0	603	903	0
468	9	0	0	0	0	0	0	200	300	0	-5.80185	-108.095	-846.964	27847.9	37771.1	-5313.13	244.596	870.12	0	0	0	0	0	0	0	603	903	0
469	0	0	0	0	0	0	0	200	300	0	-4.27597	-105.959	-846.354	28488.7	36977.6	-4992.69	243.69	869.34	0	0	0	0	0	0	0	603	903	0
469	1	0	0	0	0	0	0	200	300	0	-4.58115	-104.281	-841.776	28305.6	37649	-5084.25	244.726	869.374	0	0	0	0	0	0	0	603	903	0
469	2	0	0	0	0	0	0	200	300	0	-5.34409	-102.755	-840.556	27390.1	37649	-4946.92	244.791	870.414	0	0	0	0	0	0	0	603	903	0
469	3	0	0	0	0	0	0	200	300	0	-5.03891	-101.382	-836.588	27115.4	36916.6	-4901.14	244.128	870.588	0	0	0	0	0	0	0	603	903	0
469	4	0	0	0	0	0	0	200	300	0	-2.75009	-98.4824	-833.231	27023.9	37099.7	-4946.92	244.525	870.567	0	0	0	0	0	0	0	603	903	0
469	5	0	0	0	0	0	0	200	300	0	-2.44492	-96.4987	-831.095	26840.8	36855.5	-5084.25	244.346	870.704	0	0	0	0	0	0	0	603	903	0
469	6	0	0	0	0	0	0	200	300	0	-3.81821	-94.5151	-828.654	26199.9	36916.6	-4763.81	244.55	871.383	0	0	0	0	0	0	0	603	903	0
469	7	0	0	0	0	0	0	200	300	0	-4.27597	-94.0573	-823.466	26291.5	36611.4	-4901.14	244.46	871.072	0	0	0	0	0	0	0	603	903	0
469	8	0	0	0	0	0	0	200	300	0	-4.58115	-92.5314	-818.888	26383	36550.4	-4901.14	244.634	870.782	0	0	0	0	0	0	0	603	903	0
469	9	0	0	0	0	0	0	200	300	0	-3.36044	-89.7849	-812.785	26383	36123.1	-4626.48	244.444	870.54	0	0	0	0	0	0	0	603	903	0
470	0	0	0	0	0	0	0	200	300	0	-3.20785	-88.7167	-809.428	26016.8	36184.1	-4718.03	244.703	870.858	0	0	0	0	0	0	0	603	903	0
470	1	0	0	0	0	0	0	200	300	0	-4.27597	-86.5805	-807.597	25833.7	36062.1	-4306.05	244.654	871.012	0	0	0	0	0	0	0	603	903	0
470	2	0	0	0	0	0	0	200	300	0	-4.12338	-85.8176	-801.493	24918.2	36367.2	-4306.05	245.374	871.91	0	0	0	0	0	0	0	603	903	0
470	3	0	0	0	0	0	0	200	300	0	-2.90268	-83.9865	-795.695	25101.3	36245.2	-4351.82	245.552	871.454	0	0	0	0	0	0	0	603	903	0
470	4	0	0	0	0	0	0	200	300	0	-0.461273	-82.7658	-790.507	24735.1	35634.8	-4397.6	245.078	871.71	0	0	0	0	0	0	0	603	903	0
470	5	0	0	0	0	0	0	200	300	0	-3.05527	-80.0192	-785.929	24368.9	35390.7	-4351.82	245.03	871.994	0	0	0	0	0	0	0	603	903	0
470	6	0	0	0	0	0	0	200	300	0	-3.51303	-78.7985	-782.267	24002.7	35573.8	-4534.93	245.475	872.317	0	0	0	0	0	0	0	603	903	0
470	7	0	0	0	0	0	0	200	300	0	-3.20785	-77.2726	-778.605	24094.2	35207.6	-4351.82	245.219	872.055	0	0	0	0	0	0	0	603	903	0
470	8	0	0	0	0	0	0	200	300	0	-2.44492	-74.5261	-772.501	23636.4	34475.2	-4260.27	244.628	872.403	0	0	0	0	0	0	0	603	903	0
470	9	0	0	0	0	0	0	200	300	0	-1.98715	-74.5261	-766.093	23453.3	34963.4	-4306.05	245.639	872.386	0	0	0	0	0	0	0	603	903	0
471	0	0	0	0	0	0	0	200	300	0	-3.51303	-72.2372	-762.125	22995.6	35085.5	-4260.27	246.036	872.827	0	0	0	0	0	0	0	603	903	0
471	1	0	0	0	0	0	0	200	300	0	-3.05527	-70.4062	-756.632	22812.5	34292.1	-4168.72	245.322	872.85	0	0	0	0	0	0	0	603	903	0
471	2	0	0	0	0	0	0	200	300	0	-0.766449	-69.4907	-752.36	22446.3	34170	-4168.72	245.417	873.166	0	0	0	0	0	0	0	603	903	0
471	3	0	0	0	0	0	0	200	300	0	-1.07162	-67.2018	-745.036	22080	34292.1	-4214.49	246.027	873.364	0	0	0	0	0	0	0	603	903	0
471	4	0	0	0	0	0	0	200	300	0	-1.52939	-65.9811	-738.627	21713.8	33925.8	-4214.49	245.931	873.602	0	0	0	0	0	0	0	603	903	0
471	5	0	0	0	0	0	0	200	300	0	-3.66562	-63.9975	-734.354	21713.8	33803.8	-4031.39	246.032	873.431	0	0	0	0	0	0	0	603	903	0
471	6	0	0	0	0	0	0	200	300	0	-3.20785	-62.4716	-729.777	21164.5	33376.5	-4031.39	245.735	873.999	0	0	0	0	0	0	0	603	903	0
471	7	0	0	0	0	0	0	200	300	0	-2.44492	-61.8613	-723.979	21439.2	33376.5	-3848.28	246.102	873.387	0	0	0	0	0	0	0	603	903	0
471	8	0	0	0	0	0	0	200	300	0	-2.13974	-60.1828	-717.57	20706.8	33071.3	-3985.61	246.088	874.143	0	0	0	0	0	0	0	603	903	0
471	9	0	0	0	0	0	0	200	300	0	-3.51303	-58.9621	-710.551	20615.2	32583.1	-3939.84	245.856	873.987	0	0	0	0	0	0	0	603	903	0
472	0	0	0	0	0	0	0	200	300	0	-3.20785	-56.9785	-706.278	20249	32461	-3894.06	245.961	874.33	0	0	0	0	0	0	0	603	903	0
472	1	0	0	0	0	0	0	200	300	0	-1.98715	-55.3	-701.701	20065.9	32399.9	-4031.39	246.173	874.404	0	0	0	0	0	0	0	603	903	0
472	2	0	0	0	0	0	0	200	300	0	-1.68198	-54.3845	-695.902	19791.2	31911.7	-3848.28	245.857	874.56	0	0	0	0	0	0	0	603	903	0
472	3	0	0	0	0	0	0	200	300	0	-2.5975	-51.7905	-688.273	19241.9	31118.2	-3939.84	245.212	875.043	0	0	0	0	0	0	0	603	903	0
472	4	0	0	0	0	0	0	200	300	0	-3.66562	-52.2482	-684.611	19333.5	31789.6	-3802.51	246.435	874.76	0	0	0	0	0	0	0	603	903	0
472	5	0	0	0	0	0	0	200	300	0	-3.51303	-49.8068	-676.676	18692.6	31789.6	-3848.28	246.979	875.376	0	0	0	0	0	0	0	603	903	0
472	6	0	0	0	0	0	0	200	300	0	-2.75009	-48.7387	-672.709	18417.9	30813	-3802.51	245.804	875.621	0	0	0	0	0	0	0	603	903	0
472	7	0	0	0	0	0	0	200	300	0	-2.5975	-47.3654	-667.826	18784.2	30629.9	-3573.62	245.865	874.873	0	0	0	0	0	0	0	603	903	0
472	8	0	0	0	0	0	0	200	300	0	-4.42856	-45.687	-660.502	18051.7	30813	-3710.95	246.651	875.67	0	0	0	0	0	0	0	603	903	0
472	9	0	0	0	0	0	0	200	300	0	-3.36044	-44.6188	-652.873	17960.2	30446.8	-3710.95	246.635	875.491	0	0	0	0	0	0	0	603	903	0
473	0	0	0	0	0	0	0	200	300	0	-4.42856	-43.3981	-647.074	17594	29836.5	-3619.4	246.11	875.81	0	0	0	0	0	0	0	603	903	0
473	1	0	0	0	0	0	0	200	300	0	-3.81821	-42.0248	-643.717	17777.1	29470.3	-3802.51	245.781	875.384	0	0	0	0	0	0	0	603	903	0
473	2	0	0	0	0	0	0	200	300	0	-3.36044	-40.9567	-638.529	17227.8	29592.3	-3482.07	246.345	876.02	0	0	0	0	0	0	0	603	903	0
473	3	0	0	0	0	0	0	200	300	0	-5.1915	-39.5834	-631.815	17044.6	29348.2	-3253.19	246.451	876.023	0	0	0	0	0	0	0	603	903	0
473	4	0	0	0	0	0	0	200	300	0	-5.1915	-38.5153	-626.017	16861.5	28859.9	-3298.97	246.101	876.065	0	0	0	0	0	0	0	603	903	0
473	5	0	0	0	0	0	0	200	300	0	-3.66562	-37.5998	-620.829	16678.4	28554.7	-3344.74	245.995	876.135	0	0	0	0	0	0	0	603	903	0
473	6	0	0	0	0	0	0	200	300	0	-4.12338	-36.9894	-614.115	16678.4	28554.7	-3298.97	246.497	875.842	0	0	0	0	0	0	0	603	903	0
473	7	0	0	0	0	0	0	200	300	0	-4.88632	-35.0058	-609.843	16403.8	28188.5	-3527.85	246.223	876.102	0	0	0	0	0	0	0	603	903	0
473	8	0	0	0	0	0	0	200	300	0	-5.95444	-34.7006	-603.739	15671.4	27334	-3527.85	245.275	877.043	0	0	0	0	0	0	0	603	903	0
473	9	0	0	0	0	0	0	200	300	0	-6.10703	-33.3273	-597.941	16037.6	27883.3	-3573.62	246.632	876.179	0	0	0	0	0	0	0	603	903	0
474	0	0	0	0	0	0	0	200	300	0	-6.71738	-32.2592	-593.058	16770	27822.3	-3436.3	246.913	874.723	0	0	0	0	0	0	0	603	903	0
474	1	0	0	0	0	0	0	200	300	0	-5.34409	-31.6489	-588.48	16037.6	26845.7	-3344.74	245.619	875.748	0	0	0	0	0	0	0	603	903	0
474	2	0	0	0	0	0	0	200	300	0	-6.25961	-30.123	-582.072	15762.9	26662.6	-3344.74	245.806	875.919	0	0	0	0	0	0	0	603	903	0
474	3	0	0	0	0	0	0	200	300	0	-7.02255	-30.8859	-576.884	15762.9	26906.8	-3207.41	246.642	875.676	0	0	0	0	0	0	0	603	903	0
474	4	0	0	0	0	0	0	200	300	0	-7.6329	-28.4445	-572.306	15396.7	26723.7	-3298.97	246.695	876.097	0	0	0	0	0	0	0	603	903	0
474	5	0	0	0	0	0	0	200	300	0	-8.24326	-27.529	-567.729	15671.4	26113.3	-3436.3	245.996	875.396	0	0	0	0	0	0	0	603	903	0
474	6	0	0	0	0	0	0	200	300	0	-7.17514	-26.4609	-562.541	15396.7	25808.2	-3390.52	245.878	875.63	0	0	0	0	0	0	0	603	903	0
474	7	0	0	0	0	0	0	200	300	0	-6.86996	-25.8505	-557.047	15030.5	26113.3	-3482.07	246.878	876.018	0	0	0	0	0	0	0	603	903	0
474	8	0	0	0	0	0	0	200	300	0	-7.48032	-24.0195	-547.892	15030.5	25686.1	-3436.3	246.882	875.567	0	0	0	0	0	0	0	603	903	0
474	9	0	0	0	0	0	0	200	300	0	-8.85361	-24.0195	-547.282	14847.4	24892.6	-3344.74	245.484	875.871	0	0	0	0	0	0	0	603	903	0
475	0	0	0	0	0	0	0	200	300	0	-7.32773	-23.2565	-543.62	15030.5	25136.8	-3298.97	246.24	875.351	0	0	0	0	0	0	0	603	903	0
475	1	0	0	0	0	0	0	200	300	0	-9.0062	-22.1884	-538.126	14847.4	24953.7	-3161.64	246.371	875.409	0	0	0	0	0	0	0	603	903	0
475	2	0	0	0	0	0	0	200	300	0	-8.24326	-21.5781	-533.549	15213.6	24953.7	-3070.08	246.769	874.486	0	0	0	0	0	0	0	603	903	0
475	3	0	0	0	0	0	0	200	300	0	-8.39584	-20.5099	-528.666	14664.3	24282.3	-3253.19	245.931	875.262	0	0	0	0	0	0	0	603	903	0
475	4	0	0	0	0	0	0	200	300	0	-8.85361	-20.3574	-525.309	14572.7	24099.2	-3436.3	245.876	875.259	0	0	0	0	0	0	0	603	903	0
475	5	0	0	0	0	0	0	200	300	0	-10.0743	-19.2892	-521.647	14298.1	24282.3	-3115.86	246.549	875.591	0	0	0	0	0	0	0	603	903	0
475	6	0	0	0	0	0	0	200	300	0	-10.3795	-18.9841	-516.459	14847.4	23855	-3207.41	246.19	874.252	0	0	0	0	0	0	0	603	903	0
475	7	0	0	0	0	0	0	200	300	0	-8.85361	-18.0685	-512.187	14389.6	23427.8	-3161.64	245.741	874.906	0	0	0	0	0	0	0	603	903	0
475	8	0	0	0	0	0	0	200	300	0	-9.46396	-17.153	-506.999	14115	23366.7	-3024.31	246.088	875.16	0	0	0	0	0	0	0	603	903	0
475	9	0	0	0	0	0	0	200	300	0	-10.8372	-16.8478	-504.252	14481.2	23427.8	-3161.64	246.46	874.282	0	0	0	0	0	0	0	603	903	0
476	0	0	0	0	0	0	0	200	300	0	-9.92172	-15.6271	-500.895	14206.5	23122.6	-3253.19	246.163	874.638	0	0	0	0	0	0	0	603	903	0
476	1	0	0	0	0	0	0	200	300	0	-11.295	-15.1694	-496.623	14206.5	22634.3	-3115.86	245.577	874.394	0	0	0	0	0	0	0	603	903	0
476	2	0	0	0	0	0	0	200	300	0	-9.76913	-14.2538	-492.045	14389.6	22329.1	-2978.53	245.38	873.755	0	0	0	0	0	0	0	603	903	0
476	3	0	0	0	0	0	0	200	300	0	-10.3795	-13.9487	-488.688	13565.6	22695.4	-3070.08	246.441	875.241	0	0	0	0	0	0	0	603	903	0
476	4	0	0	0	0	0	0	200	300	0	-11.295	-12.8806	-485.636	14664.3	22634.3	-3070.08	246.608	872.804	0	0	0	0	0	0	0	603	903	0
476	5	0	0	0	0	0	0	200	300	0	-11.295	-11.8124	-481.974	13748.8	21901.9	-2978.53	245.442	874.474	0	0	0	0	0	0	0	603	903	0
476	6	0	0	0	0	0	0	200	300	0	-10.3795	-11.6599	-479.533	14389.6	21779.8	-2795.43	245.419	872.992	0	0	0	0	0	0	0	603	903	0
476	7	0	0	0	0	0	0	200	300	0	-8.85361	-10.8969	-473.734	14298.1	21352.6	-2841.2	245.073	872.818	0	0	0	0	0	0	0	603	903	0
476	8	0	0	0	0	0	0	200	300	0	-10.5321	-10.134	-471.598	13931.9	21413.6	-2886.98	245.407	873.458	0	0	0	0	0	0	0	603	903	0
476	9	0	0	0	0	0	0	200	300	0	-11.295	-9.98139	-468.546	14298.1	21291.5	-2932.76	245.442	872.484	0	0	0	0	0	0	0	603	903	0
477	0	0	0	0	0	0	0	200	300	0	-12.058	-8.91327	-465.189	14481.2	21291.5	-2978.53	245.77	871.87	0	0	0	0	0	0	0	603	903	0
477	1	0	0	0	0	0	0	200	300	0	-11.1424	-9.06586	-462.443	14847.4	21047.4	-2749.65	245.514	870.894	0	0	0	0	0	0	0	603	903	0
477	2	0	0	0	0	0	0	200	300	0	-10.9898	-8.60809	-457.255	14572.7	20742.2	-2932.76	245.363	871.13	0	0	0	0	0	0	0	603	903	0
477	3	0	0	0	0	0	0	200	300	0	-11.7528	-7.2348	-456.645	14481.2	20437.1	-2932.76	244.755	871.288	0	0	0	0	0	0	0	603	903	0
477	4	0	0	0	0	0	0	200	300	0	-10.0743	-6.77704	-455.119	14755.8	20620.2	-2612.32	245.307	870.578	0	0	0	0	0	0	0	603	903	0
477	5	0	0	0	0	0	0	200	300	0	-12.058	-6.77704	-448.405	15122	20498.1	-2658.1	245.713	869.276	0	0	0	0	0	0	0	603	903	0
477	6	0	0	0	0	0	0	200	300	0	-11.6002	-6.47186	-449.625	15305.2	20192.9	-2612.32	244.911	868.96	0	0	0	0	0	0	0	603	903	0
477	7	0	0	0	0	0	0	200	300	0	-10.9898	-5.70892	-446.574	15488.3	19765.7	-2749.65	244.261	868.318	0	0	0	0	0	0	0	603	903	0
477	8	0	0	0	0	0	0	200	300	0	-12.6683	-5.55634	-445.048	15488.3	20009.8	-2841.2	244.961	868.199	0	0	0	0	0	0	0	603	903	0
477	9	0	0	0	0	0	0	200	300	0	-10.5321	-4.33563	-441.996	15213.6	19704.6	-2658.1	244.581	868.58	0	0	0	0	0	0	0	603	903	0
478	0	0	0	0	0	0	0	200	300	0	-12.5157	-5.09857	-441.691	15579.8	18972.2	-2429.22	242.954	867.727	0	0	0	0	0	0	0	603	903	0
478	1	0	0	0	0	0	0	200	300	0	-11.7528	-4.94598	-439.249	15671.4	19643.6	-2795.43	244.721	867.322	0	0	0	0	0	0	0	603	903	0
478	2	0	0	0	0	0	0	200	300	0	-11.6002	-3.72528	-434.977	15854.5	19338.4	-2429.22	244.459	866.551	0	0	0	0	0	0	0	603	903	0
478	3	0	0	0	0	0	0	200	300	0	-13.4312	-3.57269	-434.061	15946	19033.2	-2337.66	243.849	866.263	0	0	0	0	0	0	0	603	903	0
478	4	0	0	0	0	0	0	200	300	0	-13.1261	-2.80975	-433.756	16770	18789.1	-2429.22	243.317	864.338	0	0	0	0	0	0	0	603	903	0
478	5	0	0	0	0	0	0	200	300	0	-12.3631	-3.11493	-432.536	16953.1	19094.3	-2108.78	244.145	863.805	0	0	0	0	0	0	0	603	903	0
478	6	0	0	0	0	0	0	200	300	0	-10.5321	-3.72528	-428.568	17044.6	19094.3	-2429.22	244.554	863.229	0	0	0	0	0	0	0	603	903	0
478	7	0	0	0	0	0	0	200	300	0	-12.8209	-2.35199	-427.958	17594	18667	-2520.77	243.619	861.889	0	0	0	0	0	0	0	603	903	0
478	8	0	0	0	0	0	0	200	300	0	-13.5838	-1.74164	-425.517	17136.2	18422.9	-2520.77	243.295	862.728	0	0	0	0	0	0	0	603	903	0
478	9	0	0	0	0	0	0	200	300	0	-13.7364	-1.58905	-425.517	17685.5	18728.1	-2566.54	244.013	861.438	0	0	0	0	0	0	0	603	903	0
479	0	0	0	0	0	0	0	200	300	0	-12.8209	-1.74164	-424.601	18051.7	18728.1	-2520.77	244.107	860.485	0	0	0	0	0	0	0	603	903	0
479	1	0	0	0	0	0	0	200	300	0	-12.8209	-2.1994	-423.38	18143.3	18300.8	-2612.32	243.225	860.147	0	0	0	0	0	0	0	603	903	0
479	2	0	0	0	0	0	0	200	300	0	-14.6519	-1.28388	-421.549	18326.4	18422.9	-2566.54	243.703	859.526	0	0	0	0	0	0	0	603	903	0
479	3	0	0	0	0	0	0	200	300	0	-12.2105	-0.520936	-419.718	18143.3	18239.8	-2383.44	243.457	859.773	0	0	0	0	0	0	0	603	903	0
479	4	0	0	0	0	0	0	200	300	0	-13.7364	-0.978699	-420.023	18601	17995.7	-2429.22	242.844	858.714	0	0	0	0	0	0	0	603	903	0
479	5	0	0	0	0	0	0	200	300	0	-13.889	-0.978699	-418.498	19241.9	17629.4	-2337.66	242.126	857.021	0	0	0	0	0	0	0	603	903	0
479	6	0	0	0	0	0	0	200	300	0	-13.4312	-1.13129	-417.887	18967.3	18361.9	-2612.32	243.94	857.612	0	0	0	0	0	0	0	603	903	0
479	7	0	0	0	0	0	0	200	300	0	-14.4994	-0.21576	-415.446	19608.1	18361.9	-2474.99	244.198	855.802	0	0	0	0	0	0	0	603	903	0
479	8	0	0	0	0	0	0	200	300	0	-14.3468	0.242004	-415.446	19974.3	17690.5	-2566.54	242.582	854.921	0	0	0	0	0	0	0	603	903	0
479	9	0	0	0	0	0	0	200	300	0	-13.889	0.0894158	-416.056	20523.7	18239.8	-2337.66	243.84	853.671	0	0	0	0	0	0	0	603	903	0
480	0	0	0	0	0	0	0	200	300	0	-13.5838	-0.0631721	-415.446	20432.1	17934.6	-2291.89	243.17	853.819	0	0	0	0	0	0	0	603	903	0
480	1	0	0	0	0	0	0	200	300	0	-14.6519	-0.21576	-415.141	20523.7	17873.6	-2383.44	243.054	853.562	0	0	0	0	0	0	0	603	903	0
480	2	0	0	0	0	0	0	200	300	0	-12.5157	-0.21576	-415.141	20889.9	17629.4	-2566.54	242.466	852.68	0	0	0	0	0	0	0	603	903	0
480	3	0	0	0	0	0	0	200	300	0	-14.3468	-0.0631721	-412.699	21439.2	17568.4	-2520.77	242.57	851.051	0	0	0	0	0	0	0	603	903	0
480	4	0	0	0	0	0	0	200	300	0	-12.9735	-0.21576	-414.225	21988.5	17507.4	-2200.33	242.265	849.917	0	0	0	0	0	0	0	603	903	0
480	5	0	0	0	0	0	0	200	300	0	-13.1261	-0.368348	-413.615	21896.9	17812.5	-2383.44	243.066	850.06	0	0	0	0	0	0	0	603	903	0
480	6	0	0	0	0	0	0	200	300	0	-14.4994	-1.74164	-413.92	22446.3	17324.3	-2566.54	241.854	848.771	0	0	0	0	0	0	0	603	903	0
480	7	0	0	0	0	0	0	200	300	0	-13.889	-0.673524	-413.92	22446.3	17629.4	-2337.66	242.591	848.771	0	0	0	0	0	0	0	603	903	0
480	8	0	0	0	0	0	0	200	300	0	-11.6002	-0.368348	-413.92	23087.1	17507.4	-2383.44	242.297	847.223	0	0	0	0	0	0	0	603	903	0
480	9	0	0	0	0	0	0	200	300	0	-12.6683	-0.21576	-415.751	23636.4	17324.3	-2383.44	241.67	846.148	0	0	0	0	0	0	0	603	903	0
481	0	0	0	0	0	0	0	200	300	0	-12.3631	-0.0631721	-416.361	23636.4	17080.1	-2291.89	241.022	846.231	0	0	0	0	0	0	0	603	903	0
481	1	0	0	0	0	0	0	200	300	0	-13.5838	-0.826112	-415.446	24552	17629.4	-2337.66	242.435	843.902	0	0	0	0	0	0	0	603	903	0
481	2	0	0	0	0	0	0	200	300	0	-13.4312	-0.368348	-414.225	25009.7	17324.3	-2383.44	241.823	842.623	0	0	0	0	0	0	0	603	903	0
481	3	0	0	0	0	0	0	200	300	0	-12.058	-0.978699	-415.751	25101.3	17080.1	-2063	241.083	842.624	0	0	0	0	0	0	0	603	903	0
481	4	0	0	0	0	0	0	200	300	0	-11.7528	-0.0631721	-416.972	26016.8	17507.4	-2246.11	241.987	840.605	0	0	0	0	0	0	0	603	903	0
481	5	0	0	0	0	0	0	200	300	0	-12.2105	-0.21576	-418.498	25650.6	17385.3	-2337.66	241.542	841.708	0	0	0	0	0	0	0	603	903	0
481	6	0	0	0	0	0	0	200	300	0	-9.76913	-0.520936	-416.972	26291.5	17507.4	-2108.78	241.987	839.947	0	0	0	0	0	0	0	603	903	0
481	7	0	0	0	0	0	0	200	300	0	-11.4476	0.394592	-418.803	26749.2	17019.1	-2246.11	240.637	839.129	0	0	0	0	0	0	0	603	903	0
481	8	0	0	0	0	0	0	200	300	0	-11.1424	-0.978699	-420.329	27481.7	17263.2	-2108.78	241.071	837.619	0	0	0	0	0	0	0	603	903	0
481	9	0	0	0	0	0	0	200	300	0	-10.0743	-0.520936	-422.16	27298.6	17568.4	-2383.44	241.616	838.336	0	0	0	0	0	0	0	603	903	0
482	0	0	0	0	0	0	0	200	300	0	-10.9898	-0.0631721	-422.465	28397.2	17568.4	-2246.11	241.585	835.782	0	0	0	0	0	0	0	603	903	0
482	1	0	0	0	0	0	0	200	300	0	-10.3795	-0.0631721	-422.16	28946.5	17019.1	-2108.78	240.314	834.432	0	0	0	0	0	0	0	603	903	0
482	2	0	0	0	0	0	0	200	300	0	-9.61655	0.242004	-423.686	29038.1	17141.2	-2017.23	240.457	834.463	0	0	0	0	0	0	0	603	903	0
482	3	0	0	0	0	0	0	200	300	0	-9.0062	0.394592	-426.432	30411.3	17507.4	-2154.56	241.055	831.684	0	0	0	0	0	0	0	603	903	0
482	4	0	0	0	0	0	0	200	300	0	-9.15878	0.0894158	-427.042	30136.7	17446.3	-2246.11	240.854	832.429	0	0	0	0	0	0	0	603	903	0
482	5	0	0	0	0	0	0	200	300	0	-7.17514	-1.13129	-430.399	30502.9	17324.3	-2246.11	240.252	832.129	0	0	0	0	0	0	0	603	903	0
482	6	0	0	0	0	0	0	200	300	0	-8.39584	0.852355	-428.263	31143.8	17385.3	-2383.44	240.595	830.279	0	0	0	0	0	0	0	603	903	0
482	7	0	0	0	0	0	0	200	300	0	-5.80185	0.0894158	-431.315	31784.6	17446.3	-2337.66	240.449	829.308	0	0	0	0	0	0	0	603	903	0
482	8	0	0	0	0	0	0	200	300	0	-8.85361	0.699767	-433.451	31967.7	17324.3	-2337.66	239.968	829.248	0	0	0	0	0	0	0	603	903	0
482	9	0	0	0	0	0	0	200	300	0	-6.71738	0.0894158	-435.282	32242.4	17141.2	-2383.44	239.379	828.928	0	0	0	0	0	0	0	603	903	0
483	0	0	0	0	0	0	0	200	300	0	-7.17514	0.699767	-435.893	33341	17812.5	-2383.44	240.865	826.511	0	0	0	0	0	0	0	603	903	0
483	1	0	0	0	0	0	0	200	300	0	-7.17514	1.31012	-436.503	33798.8	17995.7	-2429.22	241.227	825.569	0	0	0	0	0	0	0	603	903	0
483	2	0	0	0	0	0	0	200	300	0	-6.4122	1.31012	-440.47	33890.4	17690.5	-1971.45	240.163	826.059	0	0	0	0	0	0	0	603	903	0
483	3	0	0	0	0	0	0	200	300	0	-6.71738	1.61529	-440.47	33890.4	17751.5	-2200.33	240.301	826.059	0	0	0	0	0	0	0	603	903	0
483	4	0	0	0	0	0	0	200	300	0	-7.17514	0.699767	-444.132	34805.9	18056.7	-2154.56	240.656	824.632	0	0	0	0	0	0	0	603	903	0
483	5	0	0	0	0	0	0	200	300	0	-4.73373	1.31012	-445.353	35721.4	17995.7	-1971.45	240.408	822.791	0	0	0	0	0	0	0	603	903	0
483	6	0	0	0	0	0	0	200	300	0	-5.03891	1.46271	-446.574	36179.2	17873.6	-2063	240.024	821.985	0	0	0	0	0	0	0	603	903	0
483	7	0	0	0	0	0	0	200	300	0	-4.88632	1.92047	-449.625	36911.6	17934.6	-1879.9	239.888	820.906	0	0	0	0	0	0	0	603	903	0
483	8	0	0	0	0	0	0	200	300	0	-5.49667	1.92047	-452.677	37369.4	17873.6	-2246.11	239.484	820.448	0	0	0	0	0	0	0	603	903	0
483	9	0	0	0	0	0	0	200	300	0	-5.64926	1.92047	-451.762	38284.9	18606	-2383.44	241.185	818.254	0	0	0	0	0	0	0	603	903	0
484	0	0	0	0	0	0	0	200	300	0	-3.20785	3.14117	-453.593	38834.2	17507.4	-2200.33	238.597	817.385	0	0	0	0	0	0	0	603	903	0
484	1	0	0	0	0	0	0	200	300	0	-3.97079	2.68341	-457.56	39292	18422.9	-2200.33	240.263	817.127	0	0	0	0	0	0	0	603	903	0
484	2	0	0	0	0	0	0	200	300	0	-4.58115	2.53082	-455.729	39200.4	18483.9	-2291.89	240.559	816.983	0	0	0	0	0	0	0	603	903	0
484	3	0	0	0	0	0	0	200	300	0	-2.90268	2.22565	-460.917	39932.8	18117.7	-2291.89	239.308	816.362	0	0	0	0	0	0	0	603	903	0
484	4	0	0	0	0	0	0	200	300	0	-2.13974	2.68341	-462.443	40665.3	18545	-2200.33	240.102	815.064	0	0	0	0	0	0	0	603	903	0
484	5	0	0	0	0	0	0	200	300	0	-2.44492	3.90411	-463.664	41214.6	18667	-2291.89	240.26	814.111	0	0	0	0	0	0	0	603	903	0
484	6	0	0	0	0	0	0	200	300	0	-2.29233	3.59894	-468.241	41214.6	18545	-2108.78	239.606	814.98	0	0	0	0	0	0	0	603	903	0
484	7	0	0	0	0	0	0	200	300	0	-3.66562	3.29376	-468.852	41947	18606	-2246.11	239.684	813.533	0	0	0	0	0	0	0	603	903	0
484	8	0	0	0	0	0	0	200	300	0	-3.81821	4.0567	-470.988	42771	18545	-2429.22	239.375	812.189	0	0	0	0	0	0	0	603	903	0
484	9	0	0	0	0	0	0	200	300	0	-1.3768	4.81964	-473.124	43411.8	18850.1	-2291.89	239.842	811.244	0	0	0	0	0	0	0	603	903	0
485	0	0	0	0	0	0	0	200	300	0	-2.5975	2.98859	-475.26	44235.8	18545	-2612.32	239.021	809.923	0	0	0	0	0	0	0	603	903	0
485	1	0	0	0	0	0	0	200	300	0	-3.20785	5.2774	-478.617	44144.3	18483.9	-2429.22	238.619	810.767	0	0	0	0	0	0	0	603	903	0
485	2	0	0	0	0	0	0	200	300	0	-3.51303	4.81964	-480.448	44327.4	18667	-2017.23	238.853	810.737	0	0	0	0	0	0	0	603	903	0
485	3	0	0	0	0	0	0	200	300	0	-2.90268	4.66705	-482.279	45334.4	19094.3	-2017.23	239.592	809	0	0	0	0	0	0	0	603	903	0
485	4	0	0	0	0	0	0	200	300	0	-2.13974	5.58258	-483.805	46066.9	18667	-2383.44	238.584	807.782	0	0	0	0	0	0	0	603	903	0
485	5	0	0	0	0	0	0	200	300	0	-2.75009	5.88776	-484.11	46890.9	17995.7	-1925.68	237.173	806.14	0	0	0	0	0	0	0	603	903	0
485	6	0	0	0	0	0	0	200	300	0	-2.13974	5.58258	-487.467	46890.9	19155.3	-2017.23	239.296	806.807	0	0	0	0	0	0	0	603	903	0
485	7	0	0	0	0	0	0	200	300	0	-3.05527	6.19293	-491.435	47074	19277.4	-2154.56	239.227	807.211	0	0	0	0	0	0	0	603	903	0
485	8	0	0	0	0	0	0	200	300	0	-2.75009	6.04034	-491.435	48447.2	18789.1	-2017.23	238.233	804.417	0	0	0	0	0	0	0	603	903	0
485	9	0	0	0	0	0	0	200	300	0	-2.44492	7.10846	-494.791	49179.7	18728.1	-2246.11	237.85	803.605	0	0	0	0	0	0	0	603	903	0
486	0	0	0	0	0	0	0	200	300	0	-2.13974	7.71881	-498.454	49454.3	19155.3	-2108.78	238.43	803.785	0	0	0	0	0	0	0	603	903	0
486	1	0	0	0	0	0	0	200	300	0	-1.52939	7.71881	-500.59	49637.4	19216.4	-2154.56	238.387	803.842	0	0	0	0	0	0	0	603	903	0
486	2	0	0	0	0	0	0	200	300	0	-4.42856	6.49811	-501.811	50369.9	18850.1	-2520.77	237.564	802.624	0	0	0	0	0	0	0	603	903	0
486	3	0	0	0	0	0	0	200	300	0	-3.36044	7.71881	-502.726	51102.3	19033.2	-2612.32	237.86	801.35	0	0	0	0	0	0	0	603	903	0
486	4	0	0	0	0	0	0	200	300	0	-3.20785	8.63434	-504.557	51651.6	19033.2	-2703.87	237.723	800.63	0	0	0	0	0	0	0	603	903	0
486	5	0	0	0	0	0	0	200	300	0	-3.51303	9.0921	-508.83	52200.9	19155.3	-2658.1	237.646	800.41	0	0	0	0	0	0	0	603	903	0
486	6	0	0	0	0	0	0	200	300	0	-4.27597	8.93951	-510.966	51926.2	18850.1	-2658.1	236.891	801.376	0	0	0	0	0	0	0	603	903	0
486	7	0	0	0	0	0	0	200	300	0	-5.34409	8.63434	-510.355	53757.3	18911.2	-2429.22	237.055	797.667	0	0	0	0	0	0	0	603	903	0
486	8	0	0	0	0	0	0	200	300	0	-3.81821	8.63434	-514.933	53574.2	18789.1	-2658.1	236.488	798.959	0	0	0	0	0	0	0	603	903	0
486	9	0	0	0	0	0	0	200	300	0	-4.27597	9.85504	-515.849	54398.2	19216.4	-2703.87	237.252	797.546	0	0	0	0	0	0	0	603	903	0
487	0	0	0	0	0	0	0	200	300	0	-6.25961	10.1602	-519.816	55130.6	18789.1	-2749.65	236.146	796.942	0	0	0	0	0	0	0	603	903	0
487	1	0	0	0	0	0	0	200	300	0	-4.12338	10.0076	-520.731	55588.4	18850.1	-2474.99	236.199	796.25	0	0	0	0	0	0	0	603	903	0
487	2	0	0	0	0	0	0	200	300	0	-6.25961	10.4654	-521.342	56412.3	18850.1	-2795.43	236.157	794.794	0	0	0	0	0	0	0	603	903	0
487	3	0	0	0	0	0	0	200	300	0	-5.03891	11.3809	-523.783	57053.2	18911.2	-2978.53	236.105	794.075	0	0	0	0	0	0	0	603	903	0
487	4	0	0	0	0	0	0	200	300	0	-5.64926	11.9913	-528.361	57144.8	18361.9	-2886.98	234.753	794.845	0	0	0	0	0	0	0	603	903	0
487	5	0	0	0	0	0	0	200	300	0	-7.17514	12.1439	-528.971	57694.1	18972.2	-3070.08	235.866	793.932	0	0	0	0	0	0	0	603	903	0
487	6	0	0	0	0	0	0	200	300	0	-8.70102	11.8387	-531.413	58975.8	18850.1	-3115.86	235.472	792.021	0	0	0	0	0	0	0	603	903	0
487	7	0	0	0	0	0	0	200	300	0	-7.48032	11.8387	-534.159	59616.7	18911.2	-2841.2	235.404	791.392	0	0	0	0	0	0	0	603	903	0
487	8	0	0	0	0	0	0	200	300	0	-7.93808	13.212	-535.075	59891.3	18850.1	-3436.3	235.229	791.069	0	0	0	0	0	0	0	603	903	0
487	9	0	0	0	0	0	0	200	300	0	-8.85361	12.9068	-538.432	60532.2	19033.2	-3115.86	235.349	790.577	0	0	0	0	0	0	0	603	903	0
488	0	0	0	0	0	0	0	200	300	0	-9.15878	13.6697	-540.263	60990	19155.3	-3115.86	235.456	790.111	0	0	0	0	0	0	0	603	903	0
488	1	0	0	0	0	0	0	200	300	0	-9.15878	13.8223	-541.483	61813.9	18911.2	-3161.64	234.925	788.843	0	0	0	0	0	0	0	603	903	0
488	2	0	0	0	0	0	0	200	300	0	-9.15878	14.5853	-540.873	62363.3	18972.2	-3115.86	235.077	787.699	0	0	0	0	0	0	0	603	903	0
488	3	0	0	0	0	0	0	200	300	0	-11.1424	14.1275	-546.366	62821	19277.4	-3390.52	235.283	788.02	0	0	0	0	0	0	0	603	903	0
488	4	0	0	0	0	0	0	200	300	0	-11.7528	15.5008	-548.808	63461.9	19338.4	-3344.74	235.237	787.364	0	0	0	0	0	0	0	603	903	0
488	5	0	0	0	0	0	0	200	300	0	-9.31137	15.6534	-551.249	64102.8	18789.1	-3436.3	234.085	786.714	0	0	0	0	0	0	0	603	903	0
488	6	0	0	0	0	0	0	200	300	0	-9.76913	16.1111	-553.69	64469	19155.3	-3527.85	234.596	786.565	0	0	0	0	0	0	0	603	903	0
488	7	0	0	0	0	0	0	200	300	0	-11.7528	17.0267	-554.911	65018.3	19155.3	-3436.3	234.52	785.831	0	0	0	0	0	0	0	603	903	0
488	8	0	0	0	0	0	0	200	300	0	-13.5838	17.1793	-558.573	65384.5	19582.6	-3344.74	235.058	785.944	0	0	0	0	0	0	0	603	903	0
488	9	0	0	0	0	0	0	200	300	0	-14.0416	17.0267	-558.878	66483.1	18361.9	-3527.85	232.855	784.042	0	0	0	0	0	0	0	603	903	0
489	0	0	0	0	0	0	0	200	300	0	-12.8209	16.2637	-564.066	67215.6	19277.4	-3756.73	234.176	783.838	0	0	0	0	0	0	0	603	903	0
489	1	0	0	0	0	0	0	200	300	0	-13.4312	18.8577	-565.897	67307.1	19582.6	-3710.95	234.604	784.061	0	0	0	0	0	0	0	603	903	0
489	2	0	0	0	0	0	0	200	300	0	-14.8045	19.3155	-567.118	68131.1	19033.2	-3894.06	233.561	782.864	0	0	0	0	0	0	0	603	903	0
489	3	0	0	0	0	0	0	200	300	0	-15.1097	19.4681	-572.306	69138.2	19033.2	-3665.18	233.257	782.194	0	0	0	0	0	0	0	603	903	0
489	4	0	0	0	0	0	0	200	300	0	-14.3468	19.9258	-574.442	68680.4	19338.4	-3710.95	233.665	783.44	0	0	0	0	0	0	0	603	903	0
489	5	0	0	0	0	0	0	200	300	0	-15.5675	19.7733	-576.579	70145.3	19338.4	-3985.61	233.54	781.342	0	0	0	0	0	0	0	603	903	0
489	6	0	0	0	0	0	0	200	300	0	-15.2623	20.994	-578.104	70511.5	18911.2	-3939.84	232.712	781.03	0	0	0	0	0	0	0	603	903	0
489	7	0	0	0	0	0	0	200	300	0	-16.3304	20.3836	-583.903	70969.2	18911.2	-3939.84	232.388	781.457	0	0	0	0	0	0	0	603	903	0
489	8	0	0	0	0	0	0	200	300	0	-17.7037	22.3672	-585.734	72342.5	19460.5	-3894.06	233.224	779.493	0	0	0	0	0	0	0	603	903	0
489	9	0	0	0	0	0	0	200	300	0	-16.7882	22.3672	-588.175	72525.6	19399.5	-3939.84	232.982	779.694	0	0	0	0	0	0	0	603	903	0
490	0	0	0	0	0	0	0	200	300	0	-17.0934	22.6724	-589.701	73349.6	19521.5	-4031.39	233.104	778.616	0	0	0	0	0	0	0	603	903	0
490	1	0	0	0	0	0	0	200	300	0	-18.1615	23.8931	-592.143	73807.4	19094.3	-3985.61	232.246	778.355	0	0	0	0	0	0	0	603	903	0
490	2	0	0	0	0	0	0	200	300	0	-17.0934	22.9776	-593.974	74722.9	19460.5	-3756.73	232.763	777.198	0	0	0	0	0	0	0	603	903	0
490	3	0	0	0	0	0	0	200	300	0	-18.9244	24.6561	-598.551	75730	19216.4	-3802.51	232.105	776.478	0	0	0	0	0	0	0	603	903	0
490	4	0	0	0	0	0	0	200	300	0	-18.6192	25.1138	-601.603	75821.5	19216.4	-3894.06	231.942	776.968	0	0	0	0	0	0	0	603	903	0
490	5	0	0	0	0	0	0	200	300	0	-18.4666	25.2664	-602.824	76737.1	19643.6	-3710.95	232.586	775.704	0	0	0	0	0	0	0	603	903	0
490	6	0	0	0	0	0	0	200	300	0	-18.6192	26.9449	-605.57	77103.3	19460.5	-3985.61	232.136	775.677	0	0	0	0	0	0	0	603	903	0
490	7	0	0	0	0	0	0	200	300	0	-20.6029	27.4026	-608.622	77744.1	19399.5	-3848.28	231.874	775.262	0	0	0	0	0	0	0	603	903	0
490	8	0	0	0	0	0	0	200	300	0	-20.6029	27.5552	-612.284	78934.3	19338.4	-4168.72	231.584	774.082	0	0	0	0	0	0	0	603	903	0
490	9	0	0	0	0	0	0	200	300	0	-19.8399	28.9285	-616.251	79117.4	19948.8	-4214.49	232.371	774.615	0	0	0	0	0	0	0	603	903	0
491	0	0	0	0	0	0	0	200	300	0	-19.8399	29.0811	-618.083	80490.7	19704.6	-3894.06	231.88	772.774	0	0	0	0	0	0	0	603	903	0
491	1	0	0	0	0	0	0	200	300	0	-21.0606	30.3018	-620.829	80307.6	19521.5	-4214.49	231.444	773.645	0	0	0	0	0	0	0	603	903	0
491	2	0	0	0	0	0	0	200	300	0	-21.5184	31.0648	-625.712	81314.7	19460.5	-4260.27	231.101	773.045	0	0	0	0	0	0	0	603	903	0
491	3	0	0	0	0	0	0	200	300	0	-20.9081	31.0648	-626.322	82230.2	19765.7	-4351.82	231.558	771.709	0	0	0	0	0	0	0	603	903	0
491	4	0	0	0	0	0	0	200	300	0	-20.1451	29.8441	-630.9	82962.6	19704.6	-4306.05	231.233	771.501	0	0	0	0	0	0	0	603	903	0
491	5	0	0	0	0	0	0	200	300	0	-20.4503	33.6588	-634.257	83969.7	18911.2	-4306.05	229.816	770.609	0	0	0	0	0	0	0	603	903	0
491	6	0	0	0	0	0	0	200	300	0	-21.671	34.7269	-637.614	84061.3	19521.5	-4489.15	230.617	771.163	0	0	0	0	0	0	0	603	903	0
491	7	0	0	0	0	0	0	200	300	0	-20.4503	35.4898	-641.276	84885.2	20070.8	-4397.6	231.298	770.631	0	0	0	0	0	0	0	603	903	0
491	8	0	0	0	0	0	0	200	300	0	-21.671	35.4898	-645.854	85800.8	19704.6	-4306.05	230.509	770.151	0	0	0	0	0	0	0	603	903	0
491	9	0	0	0	0	0	0	200	300	0	-21.3658	36.5579	-648.295	86899.4	19826.7	-4351.82	230.583	768.957	0	0	0	0	0	0	0	603	903	0
492	0	0	0	0	0	0	0	200	300	0	-21.5184	38.8467	-651.957	86899.4	20131.9	-4306.05	230.879	769.71	0	0	0	0	0	0	0	603	903	0
492	1	0	0	0	0	0	0	200	300	0	-22.5865	36.8631	-656.84	87631.8	20131.9	-4260.27	230.65	769.586	0	0	0	0	0	0	0	603	903	0
492	2	0	0	0	0	0	0	200	300	0	-22.7391	39.4571	-660.197	88730.4	20009.8	-4489.15	230.309	768.6	0	0	0	0	0	0	0	603	903	0
492	3	0	0	0	0	0	0	200	300	0	-22.1288	40.5252	-663.249	89920.6	20070.8	-4214.49	230.261	767.424	0	0	0	0	0	0	0	603	903	0
492	4	0	0	0	0	0	0	200	300	0	-19.8399	40.6778	-667.826	90561.5	20620.2	-4443.38	230.877	767.394	0	0	0	0	0	0	0	603	903	0
492	5	0	0	0	0	0	0	200	300	0	-22.8917	42.5089	-669.047	90561.5	20620.2	-4397.6	230.82	767.641	0	0	0	0	0	0	0	603	903	0
492	6	0	0	0	0	0	0	200	300	0	-23.0443	42.9666	-673.93	91751.7	20437.1	-4260.27	230.325	766.856	0	0	0	0	0	0	0	603	903	0
492	7	0	0	0	0	0	0	200	300	0	-22.7391	42.6614	-678.812	92575.7	20376	-4260.27	230.017	766.621	0	0	0	0	0	0	0	603	903	0
492	8	0	0	0	0	0	0	200	300	0	-22.2813	42.3563	-683.39	92117.9	21108.4	-4306.05	230.888	768.205	0	0	0	0	0	0	0	603	903	0
492	9	0	0	0	0	0	0	200	300	0	-21.9762	45.1028	-684.611	94132	21108.4	-4306.05	230.833	765.503	0	0	0	0	0	0	0	603	903	0
493	0	0	0	0	0	0	0	200	300	0	-22.4339	46.6287	-688.273	94589.8	20681.2	-4351.82	230.048	765.569	0	0	0	0	0	0	0	603	903	0
493	1	0	0	0	0	0	0	200	300	0	-23.3495	46.6287	-691.325	95230.7	20803.3	-4122.94	230.092	765.249	0	0	0	0	0	0	0	603	903	0
493	2	0	0	0	0	0	0	200	300	0	-22.4339	47.0865	-695.597	95505.4	20803.3	-4443.38	229.907	765.7	0	0	0	0	0	0	0	603	903	0
493	3	0	0	0	0	0	0	200	300	0	-21.9762	48.3072	-698.649	97336.4	21352.6	-4351.82	230.563	763.679	0	0	0	0	0	0	0	603	903	0
493	4	0	0	0	0	0	0	200	300	0	-21.0606	50.1382	-701.09	97519.5	21291.5	-4260.27	230.369	763.903	0	0	0	0	0	0	0	603	903	0
493	5	0	0	0	0	0	0	200	300	0	-21.5184	48.3072	-702.921	97885.7	21230.5	-4306.05	230.203	763.744	0	0	0	0	0	0	0	603	903	0
493	6	0	0	0	0	0	0	200	300	0	-22.5865	51.0538	-707.804	98435.1	21230.5	-4122.94	229.995	763.929	0	0	0	0	0	0	0	603	903	0
493	7	0	0	0	0	0	0	200	300	0	-22.7391	51.9693	-712.077	98801.3	21352.6	-4214.49	229.986	764.249	0	0	0	0	0	0	0	603	903	0
493	8	0	0	0	0	0	0	200	300	0	-21.3658	52.8848	-713.908	100083	21779.8	-4214.49	230.508	762.81	0	0	0	0	0	0	0	603	903	0
493	9	0	0	0	0	0	0	200	300	0	-20.9081	54.2581	-716.959	100999	21352.6	-4260.27	229.782	762.129	0	0	0	0	0	0	0	603	903	0
494	0	0	0	0	0	0	0	200	300	0	-20.9081	55.0211	-722.453	101182	21413.6	-4260.27	229.64	762.947	0	0	0	0	0	0	0	603	903	0
494	1	0	0	0	0	0	0	200	300	0	-22.1288	55.6314	-722.147	101639	21657.8	-3985.61	229.991	762.254	0	0	0	0	0	0	0	603	903	0
494	2	0	0	0	0	0	0	200	300	0	-22.1288	54.5633	-728.556	102830	21962.9	-4031.39	230.146	761.858	0	0	0	0	0	0	0	603	903	0
494	3	0	0	0	0	0	0	200	300	0	-19.6873	56.6995	-731.303	103562	22207.1	-4031.39	230.366	761.387	0	0	0	0	0	0	0	603	903	0
494	4	0	0	0	0	0	0	200	300	0	-20.2977	58.2254	-733.134	104294	21718.8	-4077.17	229.625	760.742	0	0	0	0	0	0	0	603	903	0
494	5	0	0	0	0	0	0	200	300	0	-20.9081	58.8358	-737.101	105118	21840.9	-3939.84	229.631	760.39	0	0	0	0	0	0	0	603	903	0
494	6	0	0	0	0	0	0	200	300	0	-21.3658	59.2935	-740.153	105027	22390.2	-3527.85	230.251	761.101	0	0	0	0	0	0	0	603	903	0
494	7	0	0	0	0	0	0	200	300	0	-21.8236	57.6151	-742.594	106309	22390.2	-4031.39	230.151	759.842	0	0	0	0	0	0	0	603	903	0
494	8	0	0	0	0	0	0	200	300	0	-18.1615	60.972	-745.951	107316	22268.1	-3848.28	229.852	759.136	0	0	0	0	0	0	0	603	903	0
494	9	0	0	0	0	0	0	200	300	0	-19.8399	62.1927	-748.087	107865	21718.8	-3665.18	229.032	758.812	0	0	0	0	0	0	0	603	903	0
495	0	0	0	0	0	0	0	200	300	0	-19.8399	63.2608	-752.055	108323	22268.1	-3710.95	229.61	758.964	0	0	0	0	0	0	0	603	903	0
495	1	0	0	0	0	0	0	200	300	0	-20.4503	63.7186	-756.327	108414	22573.3	-3710.95	229.846	759.657	0	0	0	0	0	0	0	603	903	0
495	2	0	0	0	0	0	0	200	300	0	-20.4503	62.9556	-758.769	109238	22878.5	-3619.4	230.152	759.032	0	0	0	0	0	0	0	603	903	0
495	3	0	0	0	0	0	0	200	300	0	-18.7718	66.0074	-760.6	110337	22390.2	-3665.18	229.438	757.934	0	0	0	0	0	0	0	603	903	0
495	4	0	0	0	0	0	0	200	300	0	-19.3822	67.2281	-764.262	110978	22634.3	-3390.52	229.616	757.791	0	0	0	0	0	0	0	603	903	0
495	5	0	0	0	0	0	0	200	300	0	-19.2296	67.8384	-765.788	111527	22817.4	-3436.3	229.796	757.363	0	0	0	0	0	0	0	603	903	0
495	6	0	0	0	0	0	0	200	300	0	-19.5348	68.1436	-769.145	112168	22573.3	-3390.52	229.349	757.165	0	0	0	0	0	0	0	603	903	0
495	7	0	0	0	0	0	0	200	300	0	-19.077	68.9066	-770.365	112992	22878.5	-3253.19	229.698	756.327	0	0	0	0	0	0	0	603	903	0
495	8	0	0	0	0	0	0	200	300	0	-18.4666	71.6531	-773.417	114091	22695.4	-3482.07	229.344	755.485	0	0	0	0	0	0	0	603	903	0
495	9	0	0	0	0	0	0	200	300	0	-17.5511	71.9583	-777.079	113816	22878.5	-3161.64	229.442	756.534	0	0	0	0	0	0	0	603	903	0
496	0	0	0	0	0	0	0	200	300	0	-17.8563	71.1954	-772.807	114365	23244.7	-3070.08	230.078	755.013	0	0	0	0	0	0	0	603	903	0
496	1	0	0	0	0	0	0	200	300	0	-19.5348	72.7213	-781.657	115189	23183.6	-2978.53	229.66	755.635	0	0	0	0	0	0	0	603	903	0
496	2	0	0	0	0	0	0	200	300	0	-19.6873	74.5523	-782.572	116288	22695.4	-3115.86	229.001	754.403	0	0	0	0	0	0	0	603	903	0
496	3	0	0	0	0	0	0	200	300	0	-17.8563	75.773	-784.708	116379	23122.6	-3161.64	229.466	754.691	0	0	0	0	0	0	0	603	903	0
496	4	0	0	0	0	0	0	200	300	0	-16.3304	77.1463	-788.065	117112	23183.6	-3115.86	229.418	754.393	0	0	0	0	0	0	0	603	903	0
496	5	0	0	0	0	0	0	200	300	0	-17.3985	77.2989	-789.286	117112	23061.6	-3070.08	229.218	754.623	0	0	0	0	0	0	0	603	903	0
496	6	0	0	0	0	0	0	200	300	0	-19.3822	78.367	-790.202	117661	23366.7	-2978.53	229.571	754.1	0	0	0	0	0	0	0	603	903	0
496	7	0	0	0	0	0	0	200	300	0	-19.5348	81.2662	-789.286	118577	22939.5	-2978.53	229.064	752.767	0	0	0	0	0	0	0	603	903	0
496	8	0	0	0	0	0	0	200	300	0	-18.0089	80.3506	-794.474	119675	23061.6	-2749.65	229.027	752.365	0	0	0	0	0	0	0	603	903	0
496	9	0	0	0	0	0	0	200	300	0	-18.1615	82.7921	-796.61	119675	23549.8	-2566.54	229.563	752.769	0	0	0	0	0	0	0	603	903	0
497	0	0	0	0	0	0	0	200	300	0	-18.9244	82.3343	-798.747	120133	23183.6	-2658.1	229.025	752.598	0	0	0	0	0	0	0	603	903	0
497	1	0	0	0	0	0	0	200	300	0	-19.3822	83.555	-800.272	120316	23366.7	-2749.65	229.199	752.656	0	0	0	0	0	0	0	603	903	0
497	2	0	0	0	0	0	0	200	300	0	-20.1451	85.8438	-800.883	120408	23366.7	-2841.2	229.176	752.656	0	0	0	0	0	0	0	603	903	0
497	3	0	0	0	0	0	0	200	300	0	-17.0934	86.9119	-803.629	122147	23366.7	-2703.87	229.077	751.006	0	0	0	0	0	0	0	603	903	0
497	4	0	0	0	0	0	0	200	300	0	-19.2296	87.5223	-801.798	122147	23549.8	-2612.32	229.371	750.659	0	0	0	0	0	0	0	603	903	0
497	5	0	0	0	0	0	0	200	300	0	-19.3822	87.6749	-805.766	122605	23610.9	-2520.77	229.302	750.84	0	0	0	0	0	0	0	603	903	0
497	6	0	0	0	0	0	0	200	300	0	-20.6029	89.3533	-806.986	122513	23366.7	-2429.22	228.956	751.184	0	0	0	0	0	0	0	603	903	0
497	7	0	0	0	0	0	0	200	300	0	-20.7555	90.7266	-808.512	123063	23061.6	-2337.66	228.523	750.791	0	0	0	0	0	0	0	603	903	0
497	8	0	0	0	0	0	0	200	300	0	-18.9244	92.4051	-809.428	123887	23183.6	-1742.57	228.642	749.945	0	0	0	0	0	0	0	603	903	0
497	9	0	0	0	0	0	0	200	300	0	-20.1451	92.5577	-806.986	124070	23366.7	-2337.66	228.956	749.255	0	0	0	0	0	0	0	603	903	0
498	0	0	0	0	0	0	0	200	300	0	-19.9925	92.7103	-810.343	124344	23549.8	-2154.56	229.062	749.553	0	0	0	0	0	0	0	603	903	0
498	1	0	0	0	0	0	0	200	300	0	-21.2132	94.6939	-810.954	124344	23122.6	-2246.11	228.513	749.669	0	0	0	0	0	0	0	603	903	0
498	2	0	0	0	0	0	0	200	300	0	-21.8236	96.9827	-811.869	125168	22756.4	-2063	228.03	748.827	0	0	0	0	0	0	0	603	903	0
498	3	0	0	0	0	0	0	200	300	0	-20.7555	97.7457	-813.7	124802	23061.6	-1971.45	228.342	749.624	0	0	0	0	0	0	0	603	903	0
498	4	0	0	0	0	0	0	200	300	0	-21.8236	97.5931	-814.311	125901	23427.8	-1834.12	228.77	748.39	0	0	0	0	0	0	0	603	903	0
498	5	0	0	0	0	0	0	200	300	0	-22.5865	99.2715	-814.616	125626	23671.9	-1696.79	229.059	748.785	0	0	0	0	0	0	0	603	903	0
498	6	0	0	0	0	0	0	200	300	0	-21.5184	100.95	-813.7	125901	23183.6	-1696.79	228.492	748.274	0	0	0	0	0	0	0	603	903	0
498	7	0	0	0	0	0	0	200	300	0	-22.7391	101.56	-811.564	126542	23183.6	-1742.57	228.567	747.077	0	0	0	0	0	0	0	603	903	0
498	8	0	0	0	0	0	0	200	300	0	-21.671	102.934	-812.479	125718	23061.6	-1467.91	228.384	748.267	0	0	0	0	0	0	0	603	903	0
498	9	0	0	0	0	0	0	200	300	0	-21.0606	104.154	-816.142	126908	23061.6	-1651.02	228.257	747.503	0	0	0	0	0	0	0	603	903	0
499	0	0	0	0	0	0	0	200	300	0	-21.9762	106.291	-815.226	126450	23061.6	-1559.47	228.289	747.889	0	0	0	0	0	0	0	603	903	0
499	1	0	0	0	0	0	0	200	300	0	-23.8072	107.816	-814.005	126633	22695.4	-1559.47	227.881	747.432	0	0	0	0	0	0	0	603	903	0
499	2	0	0	0	0	0	0	200	300	0	-23.1969	109.648	-814.311	126725	22695.4	-1376.36	227.871	747.378	0	0	0	0	0	0	0	603	903	0
499	3	0	0	0	0	0	0	200	300	0	-22.5865	111.479	-814.616	127000	23000.5	-1239.03	228.235	747.099	0	0	0	0	0	0	0	603	903	0
499	4	0	0	0	0	0	0	200	300	0	-21.9762	112.547	-811.869	127274	22939.5	-1284.81	228.255	746.233	0	0	0	0	0	0	0	603	903	0
499	5	0	0	0	0	0	0	200	300	0	-22.4339	114.988	-812.174	127183	22390.2	-1101.7	227.568	746.405	0	0	0	0	0	0	0	603	903	0
499	6	0	0	0	0	0	0	200	300	0	-23.502	114.53	-810.343	126908	22329.1	-918.596	227.555	746.39	0	0	0	0	0	0	0	603	903	0
499	7	0	0	0	0	0	0	200	300	0	-24.1124	117.887	-810.038	127549	22268.1	-1101.7	227.49	745.54	0	0	0	0	0	0	0	603	903	0
499	8	0	0	0	0	0	0	200	300	0	-23.0443	119.871	-808.512	126542	22268.1	-964.372	227.542	746.488	0	0	0	0	0	0	0	603	903	0
499	9	0	0	0	0	0	0	200	300	0	-21.3658	119.871	-807.597	127549	22512.3	-552.385	227.876	745.064	0	0	0	0	0	0	0	603	903	0
500	0	0	0	0	0	0	0	200	300	0	-23.0443	122.923	-805.155	126816	22207.1	-643.938	227.581	745.495	0	0	0	0	0	0	0	603	903	0
500	1	-6.13591	-5.47562	-9.41802	213.957	2190.61	-812.577	432.597	277.282	0	-24.7227	124.296	-806.376	126908	21718.8	-827.043	226.934	745.619	0	0	0	0	0	0	0	603	903	0
500	2	-11.9343	-12.0369	-25.8975	213.957	4265.8	-2231.64	364.719	291.738	0	-24.265	123.991	-803.019	127000	21962.9	-872.819	227.35	744.847	0	0	0	0	0	0	0	603	903	0
500	3	-0.947922	-14.9361	-30.4752	1495.7	4509.94	-1911.21	347.987	250.921	0	-23.502	125.364	-798.747	126633	22085	-735.49	227.65	744.46	0	0	0	0	0	0	0	603	903	0
500	4	10.191	-7.45926	-24.6768	488.616	3960.63	743.82	360.5	280.199	0	-22.7391	126.89	-798.441	127091	21840.9	-598.161	227.354	743.826	0	0	0	0	0	0	0	603	903	0
500	5	-0.490159	4.29001	-19.4888	305.51	4570.98	789.596	434.544	284.324	0	-24.265	128.568	-797.526	126633	21474.7	-598.161	226.927	744.217	0	0	0	0	0	0	0	603	903	0
500	6	-10.561	6.73142	-26.5079	1037.93	4815.12	-263.26	381.649	260.844	0	-24.1124	130.705	-796.916	126267	21474.7	-506.608	226.947	744.555	0	0	0	0	0	0	0	603	903	0
500	7	-6.2885	1.69601	-41.4615	946.379	5913.75	2025.56	342.632	277.174	0	-24.7227	131.162	-794.169	126450	21169.5	-598.161	226.656	743.777	0	0	0	0	0	0	0	603	903	0
500	8	2.71419	6.42624	-50.6168	1861.91	7195.49	3490.4	342.156	263.216	0	-23.9598	131.162	-790.812	126450	21535.7	-598.161	227.232	743.101	0	0	0	0	0	0	0	603	903	0
500	9	3.7823	18.1755	-48.7857	2777.43	8965.51	2254.44	383.773	243.069	0	-23.502	133.756	-786.54	126542	21047.4	-369.28	226.76	742.116	0	0	0	0	0	0	0	603	903	0
501	0	1.3409	17.5652	-49.396	2594.33	9087.58	3215.74	383.974	247.479	0	-24.4176	134.519	-786.54	125443	21108.4	-369.28	226.837	743.513	0	0	0	0	0	0	0	603	903	0
501	1	-2.93157	17.7177	-62.2134	3418.3	10125.2	4680.59	362.749	245.055	0	-22.4339	136.503	-783.793	125168	20864.3	-552.385	226.62	743.304	0	0	0	0	0	0	0	603	903	0
501	2	-8.42473	21.3799	-78.0826	3967.62	11590	3856.61	348.433	249.187	0	-25.7909	135.893	-780.131	125168	20803.3	-277.727	226.666	742.555	0	0	0	0	0	0	0	603	903	0
501	3	-5.37297	21.5324	-84.7964	3784.51	13543.1	3124.19	359.714	255.369	0	-24.5702	137.266	-777.689	124711	20803.3	-552.385	226.75	742.639	0	0	0	0	0	0	0	603	903	0
501	4	2.86677	19.091	-85.4068	4608.49	14397.6	4772.14	368.577	246.041	0	-23.9598	139.555	-772.196	124894	20254	-277.727	226.229	741.262	0	0	0	0	0	0	0	603	903	0
501	5	-1.40569	18.7859	-94.2569	4883.15	16167.7	4131.27	371.528	248.193	0	-24.4176	138.944	-771.281	124070	19887.7	-415.056	225.785	742.138	0	0	0	0	0	0	0	603	903	0
501	6	-5.22038	20.9221	-102.802	5340.91	16350.8	2574.88	359.051	248.047	0	-24.8753	141.538	-767.008	124253	20254	-186.174	226.406	741.003	0	0	0	0	0	0	0	603	903	0
501	7	-5.52556	20.9221	-118.671	5524.02	17815.6	3856.61	350.126	253.451	0	-25.7909	141.996	-763.957	123887	20437.1	-186.174	226.752	740.835	0	0	0	0	0	0	0	603	903	0
501	8	-9.79802	20.6169	-122.943	5981.78	19341.5	4497.48	357.32	251.345	0	-22.4339	141.996	-761.21	123795	20254	-323.503	226.608	740.371	0	0	0	0	0	0	0	603	903	0
501	9	-9.03508	22.1428	-129.657	7171.97	20867.4	2986.86	360.943	244.685	0	-23.502	142.912	-754.191	123246	19948.8	-277.727	226.451	739.585	0	0	0	0	0	0	0	603	903	0
502	0	-1.86345	21.0747	-138.202	6805.76	22088.1	3536.18	359.824	250.755	0	-22.8917	144.895	-752.665	122605	19887.7	-48.8449	226.423	740.106	0	0	0	0	0	0	0	603	903	0
502	1	-3.08415	20.0066	-149.799	7629.73	23675	4772.14	358.045	249.067	0	-23.502	146.269	-749.918	121964	20009.8	-94.6212	226.683	740.364	0	0	0	0	0	0	0	603	903	0
502	2	-10.8661	22.7531	-158.954	8087.49	24773.6	3490.4	355.854	249.121	0	-23.6546	145.506	-747.172	121873	19948.8	-3.06848	226.699	739.888	0	0	0	0	0	0	0	603	903	0
502	3	-14.0705	23.2109	-166.889	9369.23	25750.2	2757.98	354.296	243.859	0	-22.2813	146.726	-741.374	121598	19643.6	546.248	226.496	738.983	0	0	0	0	0	0	0	603	903	0
502	4	-14.5282	23.2109	-174.518	9827	26665.7	3444.63	352.796	243.691	0	-21.2132	148.557	-736.491	120865	19399.5	88.4843	226.34	738.89	0	0	0	0	0	0	0	603	903	0
502	5	-16.2067	20.3117	-183.673	10559.4	28252.6	2895.31	353.82	242.51	0	-20.4503	148.1	-729.167	120316	19155.3	225.813	226.27	737.995	0	0	0	0	0	0	0	603	903	0
502	6	-15.2912	16.1919	-188.861	11017.2	29961.6	1155.81	358.643	241.665	0	-21.8236	149.168	-728.861	119401	18911.2	454.695	225.946	739.182	0	0	0	0	0	0	0	603	903	0
502	7	-13.4601	14.0556	-198.017	11749.6	30388.9	1705.12	353.466	240.664	0	-22.8917	150.083	-722.758	118577	19277.4	546.248	226.672	738.939	0	0	0	0	0	0	0	603	903	0
502	8	-16.8171	15.7341	-204.731	11841.2	31365.4	1750.9	353.203	242.162	0	-22.1288	150.541	-716.654	118668	18911.2	363.142	226.388	737.414	0	0	0	0	0	0	0	603	903	0
502	9	-20.0214	10.2409	-210.224	12939.8	32586.1	-354.813	355.007	238.448	0	-19.2296	151.609	-710.551	118027	18606	500.472	226.185	736.893	0	0	0	0	0	0	0	603	903	0
503	0	-20.6318	6.73142	-213.581	13306	32769.2	-492.142	353.428	237.7	0	-19.8399	152.525	-706.889	117112	18361.9	592.024	225.976	737.328	0	0	0	0	0	0	0	603	903	0
503	1	-19.8688	5.20554	-221.515	13580.7	33989.9	286.056	353.443	238.692	0	-20.9081	152.525	-698.039	116562	18545	546.248	226.567	736.014	0	0	0	0	0	0	0	603	903	0
503	2	-20.7843	2.91672	-227.008	14404.6	34783.4	-1682.33	353.225	236.546	0	-17.0934	152.982	-695.902	115830	18056.7	958.235	225.947	736.554	0	0	0	0	0	0	0	603	903	0
503	3	-21.3947	-1.50833	-230.06	14770.8	35332.7	-2552.08	353.58	235.796	0	-19.5348	153.745	-688.578	114915	18361.9	912.459	226.666	736.113	0	0	0	0	0	0	0	603	903	0
503	4	-22.6154	-3.94974	-237.384	15137.1	35882	-1819.66	351.156	236.234	0	-18.1615	154.966	-683.39	113999	17934.6	1095.56	226.244	736.186	0	0	0	0	0	0	0	603	903	0
503	5	-24.599	-6.69632	-241.352	15869.5	36797.6	-3284.5	352.465	234.247	0	-18.4666	155.119	-677.897	113450	17568.4	1187.12	225.916	735.645	0	0	0	0	0	0	0	603	903	0
503	6	-23.6835	-11.8843	-246.845	16052.6	37163.8	-4428.91	350.555	234.969	0	-17.8563	155.576	-672.709	112717	17690.5	912.459	226.297	735.443	0	0	0	0	0	0	0	603	903	0
503	7	-23.3783	-15.3938	-254.779	16785	38750.7	-4245.8	352.095	234.119	0	-17.8563	156.034	-663.859	111619	17690.5	1095.56	226.648	734.864	0	0	0	0	0	0	0	603	903	0
503	8	-25.362	-17.9878	-261.188	17334.3	39544.1	-4520.46	351.401	233.633	0	-17.7037	155.576	-656.229	110154	17263.2	1232.89	226.307	735.141	0	0	0	0	0	0	0	603	903	0
503	9	-25.2094	-21.9551	-267.597	17975.2	40398.6	-6946.61	350.968	232.827	0	-17.2459	156.645	-651.957	110154	17080.1	1507.55	226.198	734.041	0	0	0	0	0	0	0	603	903	0
504	0	-25.0568	-25.1595	-272.785	19073.8	42046.6	-7038.16	354.138	230.077	0	-15.4149	157.102	-644.328	108780	16774.9	1324.45	226.035	734.172	0	0	0	0	0	0	0	603	903	0
504	1	-28.4137	-29.1267	-277.362	19897.8	42595.9	-6946.61	353.575	228.261	0	-14.9571	156.492	-638.529	107499	17019.1	1416	226.654	734.646	0	0	0	0	0	0	0	603	903	0
504	2	-27.8034	-32.4837	-289.264	20721.8	43511.4	-8914.99	350.421	228.364	0	-15.5675	156.645	-629.679	106583	16713.9	1553.33	226.544	733.734	0	0	0	0	0	0	0	603	903	0
504	3	-27.8034	-35.3828	-299.64	21545.8	44976.3	-9601.64	350.101	228.095	0	-15.2623	157.255	-623.576	106125	15920.5	1690.66	225.531	732.811	0	0	0	0	0	0	0	603	903	0
504	4	-26.8879	-37.9768	-306.354	22827.5	46441.1	-9189.65	351.593	225.487	0	-13.1261	157.255	-616.862	104752	15859.4	1782.21	225.71	733.185	0	0	0	0	0	0	0	603	903	0
504	5	-29.6344	-42.4019	-317.646	24383.9	48455.3	-10379.8	352.545	223.236	0	-12.058	157.56	-605.875	103562	15920.5	1507.55	226.277	732.07	0	0	0	0	0	0	0	603	903	0
504	6	-30.2448	-45.4536	-326.496	25482.5	49920.1	-11615.8	352.897	221.951	0	-12.2105	156.187	-601.603	102189	16103.6	1827.99	226.768	733.139	0	0	0	0	0	0	0	603	903	0
504	7	-28.4137	-48.2002	-338.398	27405.1	51629.1	-11386.9	352.569	219.015	0	-12.6683	156.339	-590.922	100724	15920.5	1736.43	226.942	732.548	0	0	0	0	0	0	0	603	903	0
504	8	-27.956	-50.9468	-348.468	28229.1	53582.2	-11707.4	353.765	218.991	0	-11.6002	158.323	-584.513	100175	15371.1	1873.76	226.297	731.619	0	0	0	0	0	0	0	603	903	0
504	9	-28.4137	-53.3882	-360.981	29693.9	55352.2	-12897.5	353.339	217.741	0	-9.31137	159.086	-575.968	98709.7	14882.9	2148.42	225.84	731.62	0	0	0	0	0	0	0	603	903	0
505	0	-28.8715	-55.2193	-373.188	30701	56756	-12806	352.085	217.733	0	-9.61655	157.865	-566.508	97794.2	14943.9	2011.09	226.379	730.374	0	0	0	0	0	0	0	603	903	0
505	1	-26.4301	-57.3555	-385.089	32257.4	59136.4	-12989.1	353.565	216.234	0	-8.09067	157.255	-556.742	95871.6	14638.7	2194.2	226.294	730.799	0	0	0	0	0	0	0	603	903	0
505	2	-26.4301	-58.8814	-396.076	33813.8	61028.5	-13401.1	354.083	214.628	0	-8.24326	159.086	-547.282	94315.2	14699.8	2239.97	226.86	730.666	0	0	0	0	0	0	0	603	903	0
505	3	-25.362	-61.4754	-407.367	35370.2	63347.8	-13355.3	355.505	213.174	0	-7.48032	156.797	-536.601	93216.5	14089.4	2423.08	226.257	729.283	0	0	0	0	0	0	0	603	903	0
505	4	-21.6999	-62.2383	-423.542	37292.8	65606.1	-12622.9	354.899	211.95	0	-5.1915	158.933	-529.276	91293.9	14028.4	2651.96	226.505	730.512	0	0	0	0	0	0	0	603	903	0
505	5	-20.9369	-65.5952	-436.969	38574.6	67620.3	-13126.4	354.748	211.722	0	-5.64926	158.933	-519.206	90469.9	13967.3	2560.41	226.901	728.753	0	0	0	0	0	0	0	603	903	0
505	6	-21.2421	-66.8159	-448.261	40497.2	69573.4	-13950.4	355.207	209.657	0	-3.51303	158.476	-507.914	88547.4	13295.9	2835.07	226.178	728.665	0	0	0	0	0	0	0	603	903	0
505	7	-18.1904	-66.3582	-458.942	41595.8	71038.3	-13126.4	354.787	209.366	0	-2.90268	158.17	-497.538	86807.8	13357	2789.29	226.846	728.525	0	0	0	0	0	0	0	603	903	0
505	8	-17.2748	-68.0367	-469.013	43152.2	73418.6	-13355.3	356.539	207.994	0	-4.27597	158.018	-488.993	85709.2	12990.8	2926.62	226.566	727.723	0	0	0	0	0	0	0	603	903	0
505	9	-14.6808	-69.1048	-480.915	44891.7	75615.9	-13675.7	357.234	206.654	0	-2.13974	156.339	-478.922	83969.7	12441.5	2606.19	225.978	727.67	0	0	0	0	0	0	0	603	903	0
506	0	-11.9343	-71.241	-494.953	46081.9	77263.8	-13309.5	356.104	206.896	0	-1.52939	154.051	-468.546	81955.6	12685.6	2835.07	227.074	728.086	0	0	0	0	0	0	0	603	903	0
506	1	-10.7135	-72.7669	-503.192	47272.1	78606.6	-12806	356.216	206.056	0	-1.83456	155.424	-456.339	80765.4	12258.3	3018.17	226.862	726.015	0	0	0	0	0	0	0	603	903	0
506	2	-10.4084	-73.5298	-513.568	48553.8	80559.7	-13172.2	356.863	205.458	0	-1.98715	155.576	-447.489	78659.7	11342.8	3063.95	225.348	727.22	0	0	0	0	0	0	0	603	903	0
506	3	-10.1032	-74.4453	-521.503	51208.8	82879.1	-12622.9	358.924	201.805	0	1.52237	155.119	-437.418	77286.3	11464.9	3018.17	226.21	726.313	0	0	0	0	0	0	0	603	903	0
506	4	-6.44109	-77.4971	-535.846	52856.8	84099.8	-12577.1	356.948	201.358	0	1.06461	152.22	-426.432	76004.6	11037.6	3109.73	225.884	724.766	0	0	0	0	0	0	0	603	903	0
506	5	-3.54192	-79.1756	-547.748	55145.6	86663.3	-12668.7	358.217	199.323	0	1.21719	151.151	-414.835	74082	11220.8	3109.73	227.049	724.418	0	0	0	0	0	0	0	603	903	0
506	6	-0.490159	-79.7859	-561.481	57342.9	88799.5	-12256.7	358.152	197.872	0	-0.156097	149.931	-402.018	72067.9	10671.4	3063.95	226.545	723.735	0	0	0	0	0	0	0	603	903	0
506	7	5.15559	-83.7532	-575.519	58899.3	90935.7	-11890.5	358.006	197.659	0	0.454254	146.269	-393.473	70511.5	10305.2	3018.17	226.19	723.797	0	0	0	0	0	0	0	603	903	0
506	8	8.35994	-88.9412	-585.895	61096.5	93255.1	-12210.9	359.167	195.721	0	2.28531	145.506	-381.266	68955	10122.1	3018.17	226.549	722.142	0	0	0	0	0	0	0	603	903	0
506	9	10.3436	-90.6197	-596.576	62836	95147.2	-11844.7	359.489	194.672	0	1.06461	142.301	-370.89	67581.8	9816.94	3109.73	226.469	720.785	0	0	0	0	0	0	0	603	903	0
507	0	15.2264	-93.3662	-603.9	64484	96795.1	-11753.1	360.283	193.221	0	2.89566	139.707	-357.462	64835.2	9572.8	3018.17	226.78	721.624	0	0	0	0	0	0	0	603	903	0
507	1	20.567	-97.6387	-614.887	66040.4	98259.9	-11936.2	359.802	192.598	0	0.454254	137.876	-346.476	63370.3	9633.84	2743.51	227.805	720.1	0	0	0	0	0	0	0	603	903	0
507	2	20.4144	-103.59	-622.516	67413.7	99541.7	-12668.7	359.902	191.708	0	3.96378	134.519	-336.1	61447.7	8352.1	2926.62	224.85	720.174	0	0	0	0	0	0	0	603	903	0
507	3	22.5506	-107.099	-632.587	69244.7	100701	-12668.7	359.19	190.537	0	1.98013	130.857	-324.809	59799.8	7985.89	2789.29	224.586	718.892	0	0	0	0	0	0	0	603	903	0
507	4	23.3136	-110.303	-639.911	70343.4	102532	-12989.1	360.229	190.073	0	3.20084	127.653	-311.991	58060.3	8230.03	2835.07	226.379	716.904	0	0	0	0	0	0	0	603	903	0
507	5	25.4498	-114.729	-647.541	71808.2	103631	-13721.5	360.038	189.106	0	3.20084	125.364	-301.005	55496.8	8046.92	2880.84	226.734	718.628	0	0	0	0	0	0	0	603	903	0
507	6	25.755	-119.001	-650.592	73456.2	104608	-14270.8	360.788	187.093	0	2.74307	121.244	-291.239	53940.4	7802.78	2789.29	226.792	717.79	0	0	0	0	0	0	0	603	903	0
507	7	27.1283	-121.137	-655.78	74188.6	105828	-14270.8	361.378	186.87	0	2.59048	116.514	-279.337	52567.1	7192.43	2789.29	225.748	714.815	0	0	0	0	0	0	0	603	903	0
507	8	26.9757	-122.358	-662.189	75561.9	106622	-14087.7	361.014	185.891	0	2.4379	113.767	-266.825	50553	6948.29	2743.51	226.041	713.539	0	0	0	0	0	0	0	603	903	0
507	9	26.3653	-122.968	-668.293	76202.7	107049	-15049	360.183	185.974	0	4.42154	109.8	-256.754	48538.8	6582.08	2743.51	225.636	713.952	0	0	0	0	0	0	0	603	903	0
508	0	25.755	-125.562	-673.481	76202.7	107537	-15415.2	359.674	186.852	0	4.57413	105.222	-244.547	46616.2	6398.97	2423.08	226.167	712.378	0	0	0	0	0	0	0	603	903	0
508	1	25.1446	-124.036	-675.312	78125.4	108209	-15323.7	360.235	184.312	0	2.89566	100.797	-234.477	45242.9	6215.87	2514.63	226.51	710.047	0	0	0	0	0	0	0	603	903	0
508	2	24.6868	-123.579	-676.837	77667.6	108758	-15644.1	360.686	185.249	0	3.96378	96.9827	-225.932	43228.7	5666.55	2651.96	225.081	711.664	0	0	0	0	0	0	0	603	903	0
508	3	25.2972	-124.189	-675.312	78400	109124	-15506.8	361.591	183.905	0	2.28531	91.9473	-215.861	41947	5361.38	2423.08	224.837	708.676	0	0	0	0	0	0	0	603	903	0
508	4	24.5343	-124.494	-681.415	79681.8	109551	-15644.1	360.771	183.064	0	4.57413	89.0482	-206.4	40207.5	5361.38	2423.08	225.976	708.197	0	0	0	0	0	0	0	603	903	0
508	5	24.5343	-123.273	-685.077	80505.7	109796	-15918.8	360.268	182.487	0	3.35342	85.0809	-197.855	38193.3	5056.2	2285.75	225.555	709.964	0	0	0	0	0	0	0	603	903	0
508	6	23.6187	-123.121	-686.908	80780.4	110040	-15964.6	360.196	182.4	0	2.13272	80.0455	-189.005	37277.8	4812.06	2285.75	225.46	705.769	0	0	0	0	0	0	0	603	903	0
508	7	21.9403	-122.511	-688.129	81695.9	110467	-15415.2	360.532	181.278	0	5.03189	74.7049	-177.104	34897.4	4384.81	2239.97	224.758	705.955	0	0	0	0	0	0	0	603	903	0
508	8	22.7032	-123.121	-687.213	82153.7	110528	-16056.1	360.835	180.454	0	1.98013	67.5333	-167.948	33524.2	4079.64	1873.76	224.291	703.39	0	0	0	0	0	0	0	603	903	0
508	9	20.4144	-122.663	-687.519	82428.3	110040	-16330.8	360.053	180.108	0	2.74307	65.0919	-162.15	31967.7	3652.39	1965.32	222.525	705.851	0	0	0	0	0	0	0	603	903	0
509	0	20.8721	-122.358	-689.96	82794.5	110528	-16468.1	360.195	180.001	0	3.50601	60.3616	-153.91	30502.9	4018.6	2011.09	226.11	704.814	0	0	0	0	0	0	0	603	903	0
509	1	21.4825	-123.731	-692.096	83252.3	110711	-16697	359.965	179.71	0	2.4379	56.3943	-145.365	29129.6	3896.53	1919.54	226.805	702.611	0	0	0	0	0	0	0	603	903	0
509	2	21.4825	-124.647	-691.791	83984.7	110955	-16925.9	360.388	178.598	0	2.59048	53.3426	-136.515	27115.4	3225.14	1690.66	223.625	704.374	0	0	0	0	0	0	0	603	903	0
509	3	19.804	-124.647	-692.401	84534	110345	-17109	359.366	177.912	0	3.20084	50.2908	-128.275	26383	3225.14	1827.99	225.142	697.325	0	0	0	0	0	0	0	603	903	0
509	4	21.0247	-124.799	-693.012	84625.6	110467	-17017.4	359.401	177.887	0	4.57413	48.002	-122.172	24735.1	2919.97	1873.76	223.901	700.539	0	0	0	0	0	0	0	603	903	0
509	5	21.4825	-126.783	-688.739	84900.2	110955	-17200.5	361.099	176.731	0	3.04825	45.5606	-113.017	22995.6	2919.97	1965.32	225.837	699.529	0	0	0	0	0	0	0	603	903	0
509	6	22.8558	-128.004	-693.012	85541.1	111138	-17246.3	360.37	176.566	0	3.20084	43.577	-104.777	21256.1	2858.93	1965.32	227.286	700.13	0	0	0	0	0	0	0	603	903	0
509	7	23.4661	-128.614	-696.674	85907.3	111505	-17017.4	360.053	176.689	0	2.4379	42.3563	-96.5371	20249	2309.62	1873.76	223.925	693.246	0	0	0	0	0	0	0	603	903	0
509	8	25.755	-129.377	-695.148	86273.6	111444	-16971.6	360.316	175.892	0	3.6586	37.626	-89.8232	18234.8	2004.44	1736.43	222.315	699.992	0	0	0	0	0	0	0	603	903	0
509	9	26.2127	-130.903	-699.42	87006	111321	-17063.2	359.162	175.603	0	3.35342	37.7786	-85.8559	17502.4	2126.51	1507.55	224.768	699.142	0	0	0	0	0	0	0	603	903	0
510	0	27.2808	-132.887	-697.284	87555.3	112054	-16880.1	360.7	174.434	0	1.36978	34.2691	-80.0576	16220.7	1821.33	1461.78	222.75	700.387	0	0	0	0	0	0	0	603	903	0
510	1	29.4171	-132.581	-700.031	88013.1	112481	-16697	360.68	174.273	0	3.50601	30.3018	-72.4282	14847.4	1882.37	1278.67	225.989	698.005	0	0	0	0	0	0	0	603	903	0
510	2	30.9429	-133.955	-701.252	88196.1	113092	-16971.6	361.271	174.23	0	1.98013	27.2501	-66.935	14206.5	1577.19	1416	223.563	690.757	0	0	0	0	0	0	0	603	903	0
510	3	33.0792	-134.87	-705.829	89111.7	113336	-16880.1	360.571	173.749	0	2.28531	24.9612	-62.6626	13291	1272.02	1278.67	220.299	690.896	0	0	0	0	0	0	0	603	903	0
510	4	33.8421	-135.633	-707.965	89935.7	113885	-16376.5	360.862	172.966	0	1.98013	22.5198	-58.6953	12100.8	1577.19	1095.56	226.871	696.837	0	0	0	0	0	0	0	603	903	0
510	5	36.4361	-136.701	-709.491	90668.1	114312	-16605.4	361.119	172.207	0	0.454254	19.9258	-54.1177	10727.5	1210.98	1187.12	222.377	704.774	0	0	0	0	0	0	0	603	903	0
510	6	36.2835	-137.006	-711.933	91217.4	114678	-16605.4	361.08	171.874	0	1.06461	16.8741	-46.1831	9720.43	1088.91	1095.56	223.578	692.524	0	0	0	0	0	0	0	603	903	0
510	7	39.0301	-138.685	-714.679	91583.6	115289	-16193.4	361.315	171.854	0	1.67496	14.7379	-44.352	9628.88	1149.95	958.235	225.928	685.899	0	0	0	0	0	0	0	603	903	0
510	8	41.6241	-137.464	-720.478	92132.9	115655	-16056.1	360.525	172.122	0	3.50601	14.5853	-41.3003	8896.46	783.737	729.354	218.977	687.591	0	0	0	0	0	0	0	603	903	0
510	9	41.1663	-138.532	-721.698	93323.1	116326	-15506.8	361.184	170.69	0	0.301666	11.3809	-37.9433	7523.16	966.842	775.13	225.481	704.726	0	0	0	0	0	0	0	603	903	0
511	0	41.7767	-139.143	-724.14	93597.8	116937	-15735.7	361.484	170.746	0	-0.308685	10.4654	-32.7554	6882.29	1149.95	546.248	235.107	692.888	0	0	0	0	0	0	0	603	903	0
511	1	43.7603	-138.074	-726.276	94330.2	117669	-16056.1	362.017	170.118	0	0.454254	10.1602	-30.0088	6516.08	478.561	683.577	215.947	685.861	0	0	0	0	0	0	0	603	903	0
511	2	42.9974	-138.38	-725.666	95337.3	117547	-16147.7	361.985	168.621	0	0.912018	8.17657	-28.1777	6149.87	234.42	592.024	208.319	684.747	0	0	0	0	0	0	0	603	903	0
511	3	44.0655	-137.922	-730.548	94421.7	117974	-15644.1	361.487	170.752	0	2.59048	6.49811	-26.3467	5234.35	539.596	225.813	220.481	704.328	0	0	0	0	0	0	0	603	903	0
511	4	44.5233	-137.617	-734.516	95245.7	118524	-15461	361.363	170.329	0	1.21719	6.19293	-22.6846	4685.03	783.737	454.695	234.549	696.471	0	0	0	0	0	0	0	603	903	0
511	5	44.6759	-136.854	-735.736	95978.1	119134	-15873	361.925	169.548	0	0	0	0	0	0	0	200	903	0	0	0	0	0	0	0	603	903	0
511	6	45.1336	-137.006	-739.704	96252.8	119561	-15735.7	361.634	169.877	0	0	0	0	0	0	0	200	903	0	0	0	0	0	0	0	603	903	0
511	7	44.981	-136.701	-739.093	96527.5	119500	-15506.8	361.685	169.397	0	0	0	0	0	0	0	200	903	0	0	0	0	0	0	0	603	903	0
511	8	45.2862	-135.48	-741.84	97443	119866	-15323.7	361.58	168.647	0	0	0	0	0	0	0	200	903	0	0	0	0	0	0	0	603	903	0
511	9	45.8966	-135.328	-742.145	97443	120599	-15506.8	362.5	168.701	0	0	0	0	0	0	0	200	903	0	0	0	0	0	0	0	603	903	0
512	0	46.0491	-134.87	-747.638	98267	120721	-15049	361.47	168.564	0	0	0	0	0	0	0	200	903	0	0	0	0	0	0	0	603	903	0
512	1	44.8284	-135.023	-748.249	98633.2	120660	-14957.5	361.256	168.181	0	0	0	0	0	0	0	200	903	0	0	0	0	0	0	0	603	903	0
512	2	46.3543	-134.87	-751.3	99090.9	120660	-14911.7	360.601	168.107	0	0	0	0	0	0	0	200	903	0	0	0	0	0	0	0	603	903	0
512	3	46.3543	-133.955	-749.774	99548.7	121270	-14911.7	361.742	167.229	0	0	0	0	0	0	0	200	903	0	0	0	0	0	0	0	603	903	0
512	4	46.6595	-133.649	-751.911	99274	121636	-14774.4	361.77	167.971	0	0	0	0	0	0	0	200	903	0	0	0	0	0	0	0	603	903	0
512	5	47.2699	-134.26	-757.404	100464	121881	-15186.4	360.919	167.357	0	0	0	0	0	0	0	200	903	0	0	0	0	0	0	0	603	903	0
512	6	47.4224	-133.802	-756.183	100922	122003	-14911.7	361.34	166.538	0	0	0	0	0	0	0	200	903	0	0	0	0	0	0	0	603	903	0
512	7	47.575	-133.955	-759.845	101105	122186	-14591.3	360.803	166.94	0	0	0	0	0	0	0	200	903	0	0	0	0	0	0	0	603	903	0
512	8	48.1854	-133.192	-757.404	101105	122552	-14820.1	361.805	166.511	0	0	0	0	0	0	0	200	903	0	0	0	0	0	0	0	603	903	0
512	9	47.4224	-133.039	-756.488	101837	122735	-14865.9	362.243	165.381	0	0	0	0	0	0	0	200	903	0	0	0	0	0	0	0	603	903	0
513	0	48.4906	-133.649	-760.456	102295	122857	-14225.1	361.557	165.482	0	0	0	0	0	0	0	200	903	0	0	0	0	0	0	0	603	903	0
513	1	48.4906	-133.039	-763.202	102387	123223	-14270.8	361.456	165.846	0	0	0	0	0	0	0	200	903	0	0	0	0	0	0	0	603	903	0
513	2	47.8802	-131.818	-764.728	102936	123467	-14453.9	361.453	165.395	0	0	0	0	0	0	0	200	903	0	0	0	0	0	0	0	603	903	0
513	3	48.7957	-132.124	-765.338	102936	123773	-13996.2	361.723	165.502	0	0	0	0	0	0	0	200	903	0	0	0	0	0	0	0	603	903	0
513	4	48.7957	-131.208	-765.033	103852	123834	-13721.5	361.867	164.252	0	0	0	0	0	0	0	200	903	0	0	0	0	0	0	0	603	903	0
513	5	48.9483	-130.598	-765.949	104309	123528	-13767.3	361.275	163.817	0	0	0	0	0	0	0	200	903	0	0	0	0	0	0	0	603	903	0
513	6	49.8638	-129.682	-765.949	104493	123834	-13721.5	361.674	163.578	0	0	0	0	0	0	0	200	903	0	0	0	0	0	0	0	603	903	0
513	7	49.8638	-128.614	-769.306	104859	124383	-13675.7	361.682	163.697	0	0	0	0	0	0	0	200	903	0	0	0	0	0	0	0	603	903	0
513	8	49.2535	-128.004	-770.526	105133	124261	-13446.9	361.268	163.556	0	0	0	0	0	0	0	200	903	0	0	0	0	0	0	0	603	903	0
513	9	49.5587	-126.936	-770.832	105408	124749	-13126.4	361.837	163.254	0	0	0	0	0	0	0	200	903	0	0	0	0	0	0	0	603	903	0
514	0	48.338	-125.562	-770.526	105500	124261	-13034.9	361.268	163.081	0	0	0	0	0	0	0	200	903	0	0	0	0	0	0	0	603	903	0
514	1	49.4061	-123.884	-769.916	105866	124322	-13126.4	361.475	162.497	0	0	0	0	0	0	0	200	903	0	0	0	0	0	0	0	603	903	0
514	2	49.1009	-123.273	-771.442	106049	124993	-13034.9	362.026	162.532	0	0	0	0	0	0	0	200	903	0	0	0	0	0	0	0	603	903	0
514	3	49.1009	-123.121	-773.883	106140	124871	-12531.3	361.357	162.847	0	0	0	0	0	0	0	200	903	0	0	0	0	0	0	0	603	903	0
514	4	48.338	-120.985	-772.663	106690	124871	-12027.8	361.612	161.919	0	0	0	0	0	0	0	200	903	0	0	0	0	0	0	0	603	903	0
514	5	48.0328	-119.459	-774.799	106232	124139	-12165.1	360.221	162.891	0	0	0	0	0	0	0	200	903	0	0	0	0	0	0	0	603	903	0
514	6	47.4224	-118.696	-774.189	106507	124932	-11707.4	361.372	162.428	0	0	0	0	0	0	0	200	903	0	0	0	0	0	0	0	603	903	0
514	7	48.1854	-117.17	-773.578	106598	125299	-12165.1	361.973	162.201	0	0	0	0	0	0	0	200	903	0	0	0	0	0	0	0	603	903	0
514	8	46.9647	-115.797	-772.968	107239	125176	-11844.7	361.943	161.263	0	0	0	0	0	0	0	200	903	0	0	0	0	0	0	0	603	903	0
514	9	47.4224	-114.881	-776.325	107239	124993	-11570	361.007	161.863	0	0	0	0	0	0	0	200	903	0	0	0	0	0	0	0	603	903	0
515	0	47.2699	-113.66	-776.02	107331	124993	-11570	361.07	161.691	0	0	0	0	0	0	0	200	903	0	0	0	0	0	0	0	603	903	0
515	1	46.2017	-112.44	-775.714	107605	125054	-11341.1	361.212	161.282	0	0	0	0	0	0	0	200	903	0	0	0	0	0	0	0	603	903	0
515	2	45.8966	-111.066	-774.189	107697	125115	-11066.5	361.608	160.891	0	0	0	0	0	0	0	200	903	0	0	0	0	0	0	0	603	903	0
515	3	46.3543	-110.151	-774.799	107605	125360	-10791.8	361.796	161.118	0	0	0	0	0	0	0	200	903	0	0	0	0	0	0	0	603	903	0
515	4	46.6595	-109.998	-776.935	107788	124932	-10929.2	360.802	161.265	0	0	0	0	0	0	0	200	903	0	0	0	0	0	0	0	603	903	0
515	5	45.8966	-108.015	-776.63	107331	125115	-10746	361.1	161.799	0	0	0	0	0	0	0	200	903	0	0	0	0	0	0	0	603	903	0
515	6	45.1336	-107.099	-776.02	107697	125360	-10379.8	361.542	161.219	0	0	0	0	0	0	0	200	903	0	0	0	0	0	0	0	603	903	0
515	7	45.744	-106.031	-773.578	108063	124566	-10059.4	361.026	160.307	0	0	0	0	0	0	0	200	903	0	0	0	0	0	0	0	603	903	0
515	8	44.5233	-104.2	-774.799	107697	125237	-10013.6	361.639	161	0	0	0	0	0	0	0	200	903	0	0	0	0	0	0	0	603	903	0
515	9	44.8284	-103.59	-773.578	108155	124688	-9784.74	361.184	160.189	0	0	0	0	0	0	0	200	903	0	0	0	0	0	0	0	603	903	0
516	0	44.981	-102.674	-775.409	108704	124810	-9464.31	360.961	159.811	0	0	0	0	0	0	0	200	903	0	0	0	0	0	0	0	603	903	0
516	1	44.6759	-100.996	-775.409	108063	124932	-9510.09	361.118	160.637	0	0	0	0	0	0	0	200	903	0	0	0	0	0	0	0	603	903	0
516	2	44.3707	-100.08	-774.189	107697	124749	-9464.31	361.135	160.891	0	0	0	0	0	0	0	200	903	0	0	0	0	0	0	0	603	903	0
516	3	42.9974	-98.8594	-772.052	107514	124932	-9326.98	361.818	160.743	0	0	0	0	0	0	0	200	903	0	0	0	0	0	0	0	603	903	0
516	4	44.6759	-96.8758	-770.221	107697	124139	-9189.65	361.173	160.174	0	0	0	0	0	0	0	200	903	0	0	0	0	0	0	0	603	903	0
516	5	43.9129	-95.9602	-768.695	107331	124322	-8777.66	361.731	160.373	0	0	0	0	0	0	0	200	903	0	0	0	0	0	0	0	603	903	0
516	6	42.9974	-95.1973	-769.916	107331	124261	-8457.23	361.395	160.594	0	0	0	0	0	0	0	200	903	0	0	0	0	0	0	0	603	903	0
516	7	43.3026	-93.6714	-768.39	107331	124017	-8411.45	361.398	160.318	0	0	0	0	0	0	0	200	903	0	0	0	0	0	0	0	603	903	0
516	8	43.15	-91.6878	-765.338	107514	123406	-8274.12	361.244	159.521	0	0	0	0	0	0	0	200	903	0	0	0	0	0	0	0	603	903	0
516	9	42.9974	-90.3145	-764.118	106598	123284	-7770.59	361.342	160.495	0	0	0	0	0	0	0	200	903	0	0	0	0	0	0	0	603	903	0
517	0	42.5396	-89.0938	-761.982	106690	122918	-7724.81	361.314	159.984	0	0	0	0	0	0	0	200	903	0	0	0	0	0	0	0	603	903	0
517	1	42.2345	-87.2627	-761.066	106415	122674	-7724.81	361.187	160.176	0	0	0	0	0	0	0	200	903	0	0	0	0	0	0	0	603	903	0
517	2	41.7767	-86.805	-754.657	106324	122552	-7358.6	362.394	159.11	0	0	0	0	0	0	0	200	903	0	0	0	0	0	0	0	603	903	0
517	3	41.0137	-86.4998	-758.014	106232	122003	-7175.49	360.95	159.855	0	0	0	0	0	0	0	200	903	0	0	0	0	0	0	0	603	903	0
517	4	40.556	-83.2954	-753.131	106140	121697	-6717.73	361.589	159.068	0	0	0	0	0	0	0	200	903	0	0	0	0	0	0	0	603	903	0
517	5	41.6241	-82.3799	-751.606	105225	121392	-6809.28	361.511	160	0	0	0	0	0	0	0	200	903	0	0	0	0	0	0	0	603	903	0
517	6	40.556	-80.854	-748.554	106232	121026	-6763.5	361.68	158.084	0	0	0	0	0	0	0	200	903	0	0	0	0	0	0	0	603	903	0
517	7	40.556	-79.9385	-747.028	105866	120416	-6076.86	361.193	158.284	0	0	0	0	0	0	0	200	903	0	0	0	0	0	0	0	603	903	0
517	8	40.4034	-78.8704	-743.976	105133	119866	-6168.41	361.116	158.687	0	0	0	0	0	0	0	200	903	0	0	0	0	0	0	0	603	903	0
517	9	40.0982	-77.3445	-738.788	104950	119317	-6214.19	361.504	157.943	0	0	0	0	0	0	0	200	903	0	0	0	0	0	0	0	603	903	0
518	0	38.8775	-75.9712	-735.736	104309	118768	-6031.08	361.427	158.224	0	0	0	0	0	0	0	200	903	0	0	0	0	0	0	0	603	903	0
518	1	39.6405	-75.2083	-731.464	104401	118279	-5802.2	361.702	157.271	0	0	0	0	0	0	0	200	903	0	0	0	0	0	0	0	603	903	0
518	2	39.1827	-74.4453	-731.159	104126	117730	-5435.99	361.019	157.587	0	0	0	0	0	0	0	200	903	0	0	0	0	0	0	0	603	903	0
518	3	38.5723	-73.6824	-726.276	102295	116998	-5390.21	361.093	159.151	0	0	0	0	0	0	0	200	903	0	0	0	0	0	0	0	603	903	0
518	4	37.962	-72.6143	-722.003	103028	116570	-5344.44	361.454	157.303	0	0	0	0	0	0	0	200	903	0	0	0	0	0	0	0	603	903	0
518	5	38.2672	-71.5462	-715.9	102478	115960	-4566.24	361.978	156.854	0	0	0	0	0	0	0	200	903	0	0	0	0	0	0	0	603	903	0
518	6	38.2672	-70.6306	-711.628	102387	115289	-4566.24	362.007	156.123	0	0	0	0	0	0	0	200	903	0	0	0	0	0	0	0	603	903	0
518	7	38.2672	-69.8677	-711.322	101929	114800	-4886.67	361.39	156.705	0	0	0	0	0	0	0	200	903	0	0	0	0	0	0	0	603	903	0
518	8	38.4198	-69.1048	-704.608	101563	113763	-4566.24	361.455	155.859	0	0	0	0	0	0	0	200	903	0	0	0	0	0	0	0	603	903	0
518	9	36.8939	-67.2737	-699.115	100922	113153	-4520.46	361.851	155.643	0	0	0	0	0	0	0	200	903	0	0	0	0	0	0	0	603	903	0
519	0	37.8094	-65.5952	-693.317	99731.8	112542	-4200.03	362.324	156.153	0	0	0	0	0	0	0	200	903	0	0	0	0	0	0	0	603	903	0
519	1	36.1309	-65.1375	-690.265	99365.6	111566	-4154.25	361.627	156.047	0	0	0	0	0	0	0	200	903	0	0	0	0	0	0	0	603	903	0
519	2	36.5887	-64.222	-685.993	98450	111077	-4154.25	361.922	156.485	0	0	0	0	0	0	0	200	903	0	0	0	0	0	0	0	603	903	0
519	3	37.5042	-62.8487	-681.72	98358.5	110223	-3833.82	361.683	155.72	0	0	0	0	0	0	0	200	903	0	0	0	0	0	0	0	603	903	0
519	4	36.8939	-61.7805	-675.006	97626.1	109490	-3879.59	362.206	155.37	0	0	0	0	0	0	0	200	903	0	0	0	0	0	0	0	603	903	0
519	5	35.9783	-59.3391	-672.565	97351.4	108880	-3559.16	361.888	155.254	0	0	0	0	0	0	0	200	903	0	0	0	0	0	0	0	603	903	0
519	6	35.0628	-58.8814	-666.461	96435.9	108026	-3513.38	362.088	155.302	0	0	0	0	0	0	0	200	903	0	0	0	0	0	0	0	603	903	0
519	7	34.6051	-57.3555	-657.611	95703.5	107293	-3513.38	363.156	154.468	0	0	0	0	0	0	0	200	903	0	0	0	0	0	0	0	603	903	0
519	8	35.8258	-56.44	-655.78	95245.7	106378	-3147.17	362.215	154.76	0	0	0	0	0	0	0	200	903	0	0	0	0	0	0	0	603	903	0
519	9	35.5206	-55.5244	-652.423	94696.4	105523	-2964.07	361.74	154.854	0	0	0	0	0	0	0	200	903	0	0	0	0	0	0	0	603	903	0
520	0	35.0628	-54.4563	-645.099	94696.4	105218	-2460.53	363.104	153.206	0	0	0	0	0	0	0	200	903	0	0	0	0	0	0	0	603	903	0
520	1	34.1473	-53.5408	-642.047	93597.8	104180	-2689.41	362.263	154.22	0	0	0	0	0	0	0	200	903	0	0	0	0	0	0	0	603	903	0
520	2	34.2999	-53.083	-635.944	92956.9	103509	-2368.97	362.764	153.829	0	0	0	0	0	0	0	200	903	0	0	0	0	0	0	0	603	903	0
520	3	34.6051	-52.3201	-630.146	92499.1	102532	-2277.42	362.712	153.21	0	0	0	0	0	0	0	200	903	0	0	0	0	0	0	0	603	903	0
520	4	35.368	-50.7942	-628.62	91766.7	101251	-2048.54	361.068	154.019	0	0	0	0	0	0	0	200	903	0	0	0	0	0	0	0	603	903	0
520	5	33.9947	-50.0313	-622.211	92132.9	101373	-1682.33	362.923	151.927	0	0	0	0	0	0	0	200	903	0	0	0	0	0	0	0	603	903	0
520	6	32.774	-48.9632	-616.718	91400.5	100396	-1636.55	362.791	151.795	0	0	0	0	0	0	0	200	903	0	0	0	0	0	0	0	603	903	0
520	7	34.1473	-48.0476	-608.173	90301.9	99297.6	-1682.33	363.272	151.519	0	0	0	0	0	0	0	200	903	0	0	0	0	0	0	0	603	903	0
520	8	33.2318	-47.5899	-604.206	89752.5	98198.9	-1316.12	362.526	151.454	0	0	0	0	0	0	0	200	903	0	0	0	0	0	0	0	603	903	0
520	9	33.2318	-46.5218	-599.628	89203.2	97832.7	-1224.56	363.156	151.236	0	0	0	0	0	0	0	200	903	0	0	0	0	0	0	0	603	903	0
521	0	33.6895	-46.3692	-596.576	88653.9	97344.4	-1224.56	363.172	151.396	0	0	0	0	0	0	0	200	903	0	0	0	0	0	0	0	603	903	0
521	1	33.9947	-45.7588	-588.336	88287.7	96306.8	-1407.67	363.693	149.937	0	0	0	0	0	0	0	200	903	0	0	0	0	0	0	0	603	903	0
521	2	33.0792	-44.6907	-586.505	86548.2	95452.3	-858.353	362.748	152.434	0	0	0	0	0	0	0	200	903	0	0	0	0	0	0	0	603	903	0
521	3	32.4688	-44.0804	-579.181	86639.8	94658.9	-721.024	363.436	150.41	0	0	0	0	0	0	0	200	903	0	0	0	0	0	0	0	603	903	0
521	4	33.6895	-42.8596	-574.909	86639.8	94170.6	-949.906	363.801	149.298	0	0	0	0	0	0	0	200	903	0	0	0	0	0	0	0	603	903	0
521	5	33.3844	-42.5545	-570.941	86090.4	93499.2	-629.471	363.763	149.213	0	0	0	0	0	0	0	200	903	0	0	0	0	0	0	0	603	903	0
521	6	33.2318	-41.9441	-567.585	85632.7	92522.6	-171.707	363.011	149.128	0	0	0	0	0	0	0	200	903	0	0	0	0	0	0	0	603	903	0
521	7	32.1637	-41.3338	-563.922	84991.8	91546.1	102.951	362.338	149.285	0	0	0	0	0	0	0	200	903	0	0	0	0	0	0	0	603	903	0
521	8	33.2318	-42.0967	-558.429	84259.4	91118.9	-171.707	363.17	149.114	0	0	0	0	0	0	0	200	903	0	0	0	0	0	0	0	603	903	0
521	9	32.9266	-40.4182	-552.326	84625.6	90691.6	-80.1548	364.199	146.783	0	0	0	0	0	0	0	200	903	0	0	0	0	0	0	0	603	903	0
522	0	32.3162	-39.3501	-548.358	83069.2	89654	102.951	363.495	148.513	0	0	0	0	0	0	0	200	903	0	0	0	0	0	0	0	603	903	0
522	1	33.0792	-38.7398	-545.002	82703	89043.7	331.833	363.382	148.252	0	0	0	0	0	0	0	200	903	0	0	0	0	0	0	0	603	903	0
522	2	32.9266	-38.282	-536.151	81879	88494.3	377.609	365.055	147.284	0	0	0	0	0	0	0	200	903	0	0	0	0	0	0	0	603	903	0
522	3	32.0111	-37.3665	-537.372	81329.7	88128.1	377.609	363.998	148.653	0	0	0	0	0	0	0	200	903	0	0	0	0	0	0	0	603	903	0
522	4	32.6214	-35.9932	-532.184	81421.3	87456.7	560.714	364.336	147.005	0	0	0	0	0	0	0	200	903	0	0	0	0	0	0	0	603	903	0
522	5	33.0792	-35.5354	-526.691	80688.8	86541.2	652.267	364.311	146.8	0	0	0	0	0	0	0	200	903	0	0	0	0	0	0	0	603	903	0
522	6	32.6214	-35.0777	-523.639	80414.2	85930.8	972.702	364.103	146.432	0	0	0	0	0	0	0	200	903	0	0	0	0	0	0	0	603	903	0
522	7	32.774	-35.0777	-521.198	80048	85320.5	881.149	363.701	146.415	0	0	0	0	0	0	0	200	903	0	0	0	0	0	0	0	603	903	0
522	8	32.0111	-34.3147	-518.451	79681.8	84893.3	972.702	363.744	146.308	0	0	0	0	0	0	0	200	903	0	0	0	0	0	0	0	603	903	0
522	9	33.0792	-34.3147	-512.653	79315.5	84099.8	1293.14	364.048	145.284	0	0	0	0	0	0	0	200	903	0	0	0	0	0	0	0	603	903	0
523	0	31.4007	-35.2303	-508.686	78857.8	83367.4	1155.81	363.888	144.977	0	0	0	0	0	0	0	200	903	0	0	0	0	0	0	0	603	903	0
523	1	32.1637	-34.0096	-506.244	78216.9	83001.1	1384.69	363.955	145.496	0	0	0	0	0	0	0	200	903	0	0	0	0	0	0	0	603	903	0
523	2	31.7059	-32.6363	-503.192	78308.4	82329.8	1247.36	363.615	144.377	0	0	0	0	0	0	0	200	903	0	0	0	0	0	0	0	603	903	0
523	3	32.9266	-32.0259	-498.004	78674.6	82085.6	1384.69	364.829	142.02	0	0	0	0	0	0	0	200	903	0	0	0	0	0	0	0	603	903	0
523	4	31.2481	-31.4156	-497.394	78216.9	81170.1	1567.79	363.191	142.747	0	0	0	0	0	0	0	200	903	0	0	0	0	0	0	0	603	903	0
523	5	31.5533	-30.3474	-493.427	77942.2	80620.8	1659.35	363.39	142.039	0	0	0	0	0	0	0	200	903	0	0	0	0	0	0	0	603	903	0
523	6	30.7904	-29.7371	-488.849	77850.7	80193.5	1567.79	364.046	140.747	0	0	0	0	0	0	0	200	903	0	0	0	0	0	0	0	603	903	0
523	7	31.8585	-29.7371	-487.018	77484.5	79644.2	1750.9	363.534	140.9	0	0	0	0	0	0	0	200	903	0	0	0	0	0	0	0	603	903	0
523	8	32.1637	-29.8897	-485.797	77026.7	79156	1934.01	362.94	141.443	0	0	0	0	0	0	0	200	903	0	0	0	0	0	0	0	603	903	0
523	9	31.0955	-29.2793	-482.135	76019.6	78789.8	1979.78	363.418	142.327	0	0	0	0	0	0	0	200	903	0	0	0	0	0	0	0	603	903	0
524	0	31.2481	-28.5164	-480.304	76568.9	78606.6	2117.11	363.66	140.582	0	0	0	0	0	0	0	200	903	0	0	0	0	0	0	0	603	903	0
524	1	30.9429	-27.6009	-474.201	76660.5	77935.3	2300.22	364.351	138.337	0	0	0	0	0	0	0	200	903	0	0	0	0	0	0	0	603	903	0
524	2	31.5533	-27.2957	-472.675	76843.6	77630.1	2391.77	364.236	137.428	0	0	0	0	0	0	0	200	903	0	0	0	0	0	0	0	603	903	0
524	3	31.2481	-27.2957	-469.928	76019.6	77447	2529.1	364.806	138.231	0	0	0	0	0	0	0	200	903	0	0	0	0	0	0	0	603	903	0
524	4	31.0955	-26.5327	-469.013	76111.2	77019.7	2345.99	364.217	137.72	0	0	0	0	0	0	0	200	903	0	0	0	0	0	0	0	603	903	0
524	5	30.9429	-27.7534	-466.877	75745	76470.4	2574.88	363.792	137.762	0	0	0	0	0	0	0	200	903	0	0	0	0	0	0	0	603	903	0
524	6	32.0111	-25.1595	-462.909	75287.2	75982.1	2574.88	364.14	137.361	0	0	0	0	0	0	0	200	903	0	0	0	0	0	0	0	603	903	0
524	7	30.7904	-24.7017	-461.078	75287.2	75982.1	2757.98	364.792	136.715	0	0	0	0	0	0	0	200	903	0	0	0	0	0	0	0	603	903	0
524	8	31.0955	-24.0913	-457.416	74371.7	75005.6	2757.98	363.977	137.409	0	0	0	0	0	0	0	200	903	0	0	0	0	0	0	0	603	903	0
524	9	33.0792	-23.6336	-458.332	74371.7	75249.7	2941.09	364.182	137.734	0	0	0	0	0	0	0	200	903	0	0	0	0	0	0	0	603	903	0
525	0	31.8585	-23.3284	-455.28	74646.3	74700.4	2986.86	364.076	136.043	0	0	0	0	0	0	0	200	903	0	0	0	0	0	0	0	603	903	0
525	1	29.5697	-22.8706	-454.669	74280.1	74578.3	3078.42	364.027	136.628	0	0	0	0	0	0	0	200	903	0	0	0	0	0	0	0	603	903	0
525	2	31.4007	-21.8025	-450.702	75104.1	74395.2	3169.97	365.065	133.362	0	0	0	0	0	0	0	200	903	0	0	0	0	0	0	0	603	903	0
525	3	30.7904	-21.6499	-446.43	73547.7	73967.9	3169.97	365.688	135.254	0	0	0	0	0	0	0	200	903	0	0	0	0	0	0	0	603	903	0
525	4	31.7059	-21.0396	-447.65	74097	73906.9	3581.96	365.1	134.476	0	0	0	0	0	0	0	200	903	0	0	0	0	0	0	0	603	903	0
525	5	31.5533	-20.5818	-445.514	73913.9	73174.5	3444.63	364.247	134.093	0	0	0	0	0	0	0	200	903	0	0	0	0	0	0	0	603	903	0
525	6	32.3162	-19.8189	-443.988	73822.4	73052.4	3902.39	364.537	133.729	0	0	0	0	0	0	0	200	903	0	0	0	0	0	0	0	603	903	0
525	7	30.4852	-20.5818	-443.988	73913.9	73113.5	3673.51	364.674	133.523	0	0	0	0	0	0	0	200	903	0	0	0	0	0	0	0	603	903	0
525	8	30.9429	-19.2085	-440.326	73639.2	72808.3	3536.18	365.351	132.762	0	0	0	0	0	0	0	200	903	0	0	0	0	0	0	0	603	903	0
525	9	32.0111	-18.5982	-438.495	73913.9	72381	3856.61	365.067	131.437	0	0	0	0	0	0	0	200	903	0	0	0	0	0	0	0	603	903	0
526	0	31.4007	-18.5982	-437.274	74005.5	71892.8	4039.72	364.411	130.757	0	0	0	0	0	0	0	200	903	0	0	0	0	0	0	0	603	903	0
526	1	31.4007	-17.6826	-438.19	74280.1	72136.9	3627.73	364.625	130.484	0	0	0	0	0	0	0	200	903	0	0	0	0	0	0	0	603	903	0
526	2	30.4852	-18.1404	-437.58	74463.2	72136.9	4680.59	364.854	129.829	0	0	0	0	0	0	0	200	903	0	0	0	0	0	0	0	603	903	0
526	3	32.1637	-16.9197	-434.223	74005.5	71709.6	4360.15	365.145	129.568	0	0	0	0	0	0	0	200	903	0	0	0	0	0	0	0	603	903	0
526	4	30.3326	-17.5301	-433.307	73364.6	71343.4	4360.15	364.649	130.687	0	0	0	0	0	0	0	200	903	0	0	0	0	0	0	0	603	903	0
526	5	31.2481	-17.0723	-432.392	73364.6	71160.3	4726.37	364.574	130.328	0	0	0	0	0	0	0	200	903	0	0	0	0	0	0	0	603	903	0
526	6	31.2481	-16.6145	-433.002	74188.6	71099.3	4543.26	364.201	128.665	0	0	0	0	0	0	0	200	903	0	0	0	0	0	0	0	603	903	0
526	7	32.0111	-16.4619	-430.561	74371.7	71160.3	4589.04	365.274	127.268	0	0	0	0	0	0	0	200	903	0	0	0	0	0	0	0	603	903	0
526	8	30.7904	-15.2412	-432.392	74646.3	70977.2	4772.14	364.15	127.364	0	0	0	0	0	0	0	200	903	0	0	0	0	0	0	0	603	903	0
526	9	30.0274	-15.2412	-428.424	74737.9	70855.2	4909.47	365.385	125.552	0	0	0	0	0	0	0	200	903	0	0	0	0	0	0	0	603	903	0
527	0	30.4852	-14.7835	-428.119	74005.5	70550	5001.02	364.791	127.138	0	0	0	0	0	0	0	200	903	0	0	0	0	0	0	0	603	903	0
527	1	31.2481	-15.0887	-427.509	74097	70794.1	5046.8	365.597	126.677	0	0	0	0	0	0	0	200	903	0	0	0	0	0	0	0	603	903	0
527	2	30.3326	-14.0205	-428.73	74280.1	70366.9	5138.35	364.129	126.744	0	0	0	0	0	0	0	200	903	0	0	0	0	0	0	0	603	903	0
527	3	29.5697	-13.5628	-428.73	74371.7	70427.9	5413.01	364.271	126.53	0	0	0	0	0	0	0	200	903	0	0	0	0	0	0	0	603	903	0
527	4	31.2481	-12.6472	-427.204	74554.8	70305.8	5413.01	364.572	125.482	0	0	0	0	0	0	0	200	903	0	0	0	0	0	0	0	603	903	0
527	5	29.4171	-12.3421	-422.931	75195.7	70061.7	5413.01	365.657	122.204	0	0	0	0	0	0	0	200	903	0	0	0	0	0	0	0	603	903	0
527	6	30.4852	-11.7317	-425.678	75287.2	70427.9	5733.45	365.449	123.136	0	0	0	0	0	0	0	200	903	0	0	0	0	0	0	0	603	903	0
527	7	30.0274	-11.7317	-426.898	74829.4	70305.8	5641.89	364.69	124.714	0	0	0	0	0	0	0	200	903	0	0	0	0	0	0	0	603	903	0
527	8	29.8748	-10.8162	-422.626	74829.4	70183.8	5779.22	366.066	122.942	0	0	0	0	0	0	0	200	903	0	0	0	0	0	0	0	603	903	0
527	9	29.2645	-10.9688	-427.509	75287.2	70000.7	5825	363.741	123.893	0	0	0	0	0	0	0	200	903	0	0	0	0	0	0	0	603	903	0
528	0	28.9593	-10.2058	-425.067	75470.3	70366.9	5687.67	365.543	122.451	0	0	0	0	0	0	0	200	903	0	0	0	0	0	0	0	603	903	0
528	1	30.18	-10.3584	-425.983	75561.9	69939.6	6053.88	364.184	122.618	0	0	0	0	0	0	0	200	903	0	0	0	0	0	0	0	603	903	0
528	2	30.0274	-10.6636	-425.067	75561.9	70061.7	5962.33	364.825	122.236	0	0	0	0	0	0	0	200	903	0	0	0	0	0	0	0	603	903	0
528	3	29.5697	-10.8162	-427.204	76111.2	70000.7	6465.87	363.858	121.839	0	0	0	0	0	0	0	200	903	0	0	0	0	0	0	0	603	903	0
528	4	28.6541	-8.98514	-427.509	76752.1	70000.7	6648.97	363.741	120.467	0	0	0	0	0	0	0	200	903	0	0	0	0	0	0	0	603	903	0
528	5	28.0438	-8.98514	-424.152	77484.5	70366.9	6282.76	365.9	117.319	0	0	0	0	0	0	0	200	903	0	0	0	0	0	0	0	603	903	0
528	6	27.8912	-8.37479	-425.678	77667.6	70122.7	6374.31	364.732	117.544	0	0	0	0	0	0	0	200	903	0	0	0	0	0	0	0	603	903	0
528	7	29.2645	-7.45926	-426.593	78216.9	70183.8	6465.87	364.522	116.648	0	0	0	0	0	0	0	200	903	0	0	0	0	0	0	0	603	903	0
528	8	29.5697	-7.91702	-429.035	78491.6	70244.8	6465.87	363.728	117.051	0	0	0	0	0	0	0	200	903	0	0	0	0	0	0	0	603	903	0
528	9	29.1119	-7.30667	-428.424	78400	70244.8	6511.64	363.961	117.004	0	0	0	0	0	0	0	200	903	0	0	0	0	0	0	0	603	903	0
529	0	27.8912	-6.69632	-429.34	78766.2	70366.9	6923.63	363.896	116.541	0	0	0	0	0	0	0	200	903	0	0	0	0	0	0	0	603	903	0
529	1	27.7386	-6.84891	-429.035	79407.1	70611	6603.2	364.581	114.917	0	0	0	0	0	0	0	200	903	0	0	0	0	0	0	0	603	903	0
529	2	27.586	-6.54373	-425.373	79315.5	70366.9	6832.08	365.424	113.539	0	0	0	0	0	0	0	200	903	0	0	0	0	0	0	0	603	903	0
529	3	27.7386	-6.08597	-429.34	79864.8	70550	6832.08	364.322	113.982	0	0	0	0	0	0	0	200	903	0	0	0	0	0	0	0	603	903	0
529	4	28.349	-5.32303	-432.392	80505.7	70916.2	6923.63	364.009	113.813	0	0	0	0	0	0	0	200	903	0	0	0	0	0	0	0	603	903	0
529	5	27.1283	-5.93338	-433.307	80780.4	70916.2	7060.96	363.663	113.572	0	0	0	0	0	0	0	200	903	0	0	0	0	0	0	0	603	903	0
529	6	26.9757	-4.86526	-433.307	81146.6	70244.8	7106.74	362.113	112.727	0	0	0	0	0	0	0	200	903	0	0	0	0	0	0	0	603	903	0
529	7	26.8231	-5.01785	-432.392	81604.3	70855.2	7518.72	363.868	111.272	0	0	0	0	0	0	0	200	903	0	0	0	0	0	0	0	603	903	0
529	8	27.7386	-6.08597	-434.528	81879	71038.3	7244.07	363.484	111.568	0	0	0	0	0	0	0	200	903	0	0	0	0	0	0	0	603	903	0
529	9	28.349	-3.64456	-435.443	82886.1	71648.6	7381.39	364.542	109.651	0	0	0	0	0	0	0	200	903	0	0	0	0	0	0	0	603	903	0
530	0	26.6705	-3.94974	-438.495	82245.2	71587.6	7244.07	363.257	112.438	0	0	0	0	0	0	0	200	903	0	0	0	0	0	0	0	603	903	0
530	1	26.0601	-3.03421	-438.495	82519.9	71282.4	7472.95	362.561	111.811	0	0	0	0	0	0	0	200	903	0	0	0	0	0	0	0	603	903	0
530	2	26.3653	-3.03421	-437.58	83069.2	71465.5	7610.28	363.32	110.162	0	0	0	0	0	0	0	200	903	0	0	0	0	0	0	0	603	903	0
530	3	26.0601	-2.57645	-438.8	83343.9	71953.8	7610.28	363.978	110.064	0	0	0	0	0	0	0	200	903	0	0	0	0	0	0	0	603	903	0
530	4	26.5179	-2.11868	-441.547	83893.2	72014.8	7564.5	363.097	110.002	0	0	0	0	0	0	0	200	903	0	0	0	0	0	0	0	603	903	0
530	5	26.5179	-2.27127	-443.988	84442.5	72503.1	7518.72	363.3	109.809	0	0	0	0	0	0	0	200	903	0	0	0	0	0	0	0	603	903	0
530	6	25.4498	-0.745391	-445.209	84808.7	72442.1	7793.38	362.715	109.508	0	0	0	0	0	0	0	200	903	0	0	0	0	0	0	0	603	903	0
530	7	26.0601	-1.35574	-446.125	84900.2	72747.2	7793.38	363.065	109.694	0	0	0	0	0	0	0	200	903	0	0	0	0	0	0	0	603	903	0
530	8	25.1446	-1.35574	-446.735	85998.9	73479.7	7610.28	364.482	107.495	0	0	0	0	0	0	0	200	903	0	0	0	0	0	0	0	603	903	0
530	9	24.6868	-1.50833	-448.261	86273.6	73296.6	7884.93	363.513	107.537	0	0	0	0	0	0	0	200	903	0	0	0	0	0	0	0	603	903	0
531	0	26.6705	-1.66092	-450.397	87097.5	73601.7	7976.49	363.415	106.621	0	0	0	0	0	0	0	200	903	0	0	0	0	0	0	0	603	903	0
531	1	24.5343	0.170136	-454.059	87372.2	73418.6	7839.16	361.694	107.575	0	0	0	0	0	0	0	200	903	0	0	0	0	0	0	0	603	903	0
531	2	23.6187	0.933075	-454.975	88470.8	74090	7518.72	362.844	105.548	0	0	0	0	0	0	0	200	903	0	0	0	0	0	0	0	603	903	0
531	3	23.7713	1.08566	-456.501	89111.7	74700.4	7930.71	363.637	104.794	0	0	0	0	0	0	0	200	903	0	0	0	0	0	0	0	603	903	0
531	4	22.5506	1.23825	-457.111	88928.6	74761.4	8113.82	363.552	105.455	0	0	0	0	0	0	0	200	903	0	0	0	0	0	0	0	603	903	0
531	5	24.2291	1.8486	-461.689	90393.4	74883.5	8663.13	362.195	104.211	0	0	0	0	0	0	0	200	903	0	0	0	0	0	0	0	603	903	0
531	6	23.4661	1.8486	-464.74	90759.6	75493.9	8388.48	362.443	104.709	0	0	0	0	0	0	0	200	903	0	0	0	0	0	0	0	603	903	0
531	7	24.6868	2.45895	-466.266	91217.4	75860.1	8068.04	362.697	104.366	0	0	0	0	0	0	0	200	903	0	0	0	0	0	0	0	603	903	0
531	8	22.7032	2.30637	-470.539	92407.6	76226.3	8342.7	361.998	103.613	0	0	0	0	0	0	0	200	903	0	0	0	0	0	0	0	603	903	0
531	9	22.2454	2.45895	-469.928	93048.4	76287.3	8205.37	362.338	101.994	0	0	0	0	0	0	0	200	903	0	0	0	0	0	0	0	603	903	0
532	0	22.5506	2.15378	-474.201	93780.9	76775.6	8296.92	361.905	102.234	0	0	0	0	0	0	0	200	903	0	0	0	0	0	0	0	603	903	0
532	1	22.0928	1.8486	-475.116	94238.6	77202.8	8205.37	362.492	101.651	0	0	0	0	0	0	0	200	903	0	0	0	0	0	0	0	603	903	0
532	2	22.0928	1.39084	-479.694	95245.7	77691.1	8251.15	361.96	101.445	0	0	0	0	0	0	0	200	903	0	0	0	0	0	0	0	603	903	0
532	3	21.0247	3.37448	-482.746	95703.5	77996.3	8754.69	361.568	101.752	0	0	0	0	0	0	0	200	903	0	0	0	0	0	0	0	603	903	0
532	4	21.0247	4.4426	-484.577	96527.5	78240.4	8525.81	361.461	100.8	0	0	0	0	0	0	0	200	903	0	0	0	0	0	0	0	603	903	0
532	5	20.2618	4.59518	-487.018	97992.3	78240.4	8388.48	360.652	98.7913	0	0	0	0	0	0	0	200	903	0	0	0	0	0	0	0	603	903	0
532	6	21.1773	4.74777	-490.07	98358.5	79094.9	8525.81	361.395	99.297	0	0	0	0	0	0	0	200	903	0	0	0	0	0	0	0	603	903	0
532	7	22.8558	5.35812	-495.563	99640.2	80071.5	8663.13	361.577	98.9353	0	0	0	0	0	0	0	200	903	0	0	0	0	0	0	0	603	903	0
532	8	21.0247	5.51071	-496.479	100006	80193.5	8708.91	361.525	98.5685	0	0	0	0	0	0	0	200	903	0	0	0	0	0	0	0	603	903	0
532	9	20.4144	3.67966	-498.92	100922	80315.6	8708.91	360.979	97.7191	0	0	0	0	0	0	0	200	903	0	0	0	0	0	0	0	603	903	0
533	0	19.6514	5.35812	-499.53	101929	81170.1	8663.13	362.493	95.9502	0	0	0	0	0	0	0	200	903	0	0	0	0	0	0	0	603	903	0
533	1	19.9566	5.05295	-503.192	102570	81231.2	9075.12	361.432	96.1617	0	0	0	0	0	0	0	200	903	0	0	0	0	0	0	0	603	903	0
533	2	21.0247	5.51071	-505.634	103577	82329.8	8800.46	362.825	95.1542	0	0	0	0	0	0	0	200	903	0	0	0	0	0	0	0	603	903	0
533	3	21.1773	5.6633	-512.653	104493	82757	8617.36	361.429	96.1729	0	0	0	0	0	0	0	200	903	0	0	0	0	0	0	0	603	903	0
533	4	21.1773	5.81589	-514.179	105317	83001.1	9029.35	361.425	95.1753	0	0	0	0	0	0	0	200	903	0	0	0	0	0	0	0	603	903	0
533	5	19.9566	5.35812	-516.62	106140	83489.4	9120.9	361.607	94.5484	0	0	0	0	0	0	0	200	903	0	0	0	0	0	0	0	603	903	0
533	6	21.1773	5.6633	-519.672	107239	84038.8	9075.12	361.715	93.6408	0	0	0	0	0	0	0	200	903	0	0	0	0	0	0	0	603	903	0
533	7	20.2618	6.57883	-522.113	108155	84466	9075.12	361.777	92.8521	0	0	0	0	0	0	0	200	903	0	0	0	0	0	0	0	603	903	0
533	8	21.0247	7.34177	-524.86	108155	85259.5	9120.9	362.442	93.9361	0	0	0	0	0	0	0	200	903	0	0	0	0	0	0	0	603	903	0
533	9	23.161	6.42624	-527.301	109070	85137.4	9304	361.459	93.154	0	0	0	0	0	0	0	200	903	0	0	0	0	0	0	0	603	903	0
534	0	21.1773	6.884	-530.963	109711	85686.7	9258.23	361.38	93.3736	0	0	0	0	0	0	0	200	903	0	0	0	0	0	0	0	603	903	0
534	1	20.8721	8.25729	-534.626	110901	86480.2	9395.56	361.758	92.5628	0	0	0	0	0	0	0	200	903	0	0	0	0	0	0	0	603	903	0
534	2	21.7877	8.25729	-536.457	111359	87029.5	9441.33	362.23	92.4175	0	0	0	0	0	0	0	200	903	0	0	0	0	0	0	0	603	903	0
534	3	21.0247	8.10471	-538.593	112458	87334.7	9578.66	362.153	91.2011	0	0	0	0	0	0	0	200	903	0	0	0	0	0	0	0	603	903	0
534	4	21.9403	9.63058	-541.034	113648	87700.9	9899.1	362.099	89.9434	0	0	0	0	0	0	0	200	903	0	0	0	0	0	0	0	603	903	0
534	5	22.5506	10.2409	-546.527	113739	87823	10128	360.693	91.8872	0	0	0	0	0	0	0	200	903	0	0	0	0	0	0	0	603	903	0
534	6	21.9403	9.78317	-545.307	115113	88982.6	9761.77	363.179	88.9029	0	0	0	0	0	0	0	200	903	0	0	0	0	0	0	0	603	903	0
534	7	21.3299	10.2409	-552.326	115754	89226.7	9853.32	361.547	90.4253	0	0	0	0	0	0	0	200	903	0	0	0	0	0	0	0	603	903	0
534	8	21.1773	11.0039	-553.852	116669	89592.9	10082.2	361.763	89.3496	0	0	0	0	0	0	0	200	903	0	0	0	0	0	0	0	603	903	0
534	9	21.7877	10.8513	-555.378	117401	90020.2	10265.3	362.088	88.6096	0	0	0	0	0	0	0	200	903	0	0	0	0	0	0	0	603	903	0
535	0	22.5506	9.478	-559.04	118592	90447.4	10219.5	361.791	87.8654	0	0	0	0	0	0	0	200	903	0	0	0	0	0	0	0	603	903	0
535	1	22.8558	11.3091	-563.312	119324	91301.9	10402.6	362.081	88.1741	0	0	0	0	0	0	0	200	903	0	0	0	0	0	0	0	603	903	0
535	2	21.4825	11.0039	-565.753	120148	91729.2	10356.9	362.136	87.6318	0	0	0	0	0	0	0	200	903	0	0	0	0	0	0	0	603	903	0
535	3	24.5343	12.2246	-567.279	120606	92095.4	10906.2	362.346	87.3961	0	0	0	0	0	0	0	200	903	0	0	0	0	0	0	0	603	903	0
535	4	22.8558	12.6823	-568.805	122162	92339.6	10814.6	362.34	85.2301	0	0	0	0	0	0	0	200	903	0	0	0	0	0	0	0	603	903	0
535	5	23.7713	13.4453	-572.467	123078	92827.8	10677.3	362.154	85.0048	0	0	0	0	0	0	0	200	903	0	0	0	0	0	0	0	603	903	0
535	6	23.0084	13.2927	-577.045	123993	93377.1	10768.8	361.82	85.1237	0	0	0	0	0	0	0	200	903	0	0	0	0	0	0	0	603	903	0
535	7	24.6868	13.7505	-577.655	125092	93560.3	10997.7	361.966	83.4489	0	0	0	0	0	0	0	200	903	0	0	0	0	0	0	0	603	903	0
535	8	23.4661	14.9712	-582.843	126007	94475.8	11135.1	362.095	83.8056	0	0	0	0	0	0	0	200	903	0	0	0	0	0	0	0	603	903	0
535	9	23.6187	14.5134	-584.369	126557	94597.8	11501.3	361.88	83.4301	0	0	0	0	0	0	0	200	903	0	0	0	0	0	0	0	603	903	0
536	0	25.2972	12.8349	-585.285	127655	95147.2	11272.4	362.566	81.8918	0	0	0	0	0	0	0	200	903	0	0	0	0	0	0	0	603	903	0
536	1	24.6868	15.1237	-588.642	129029	95635.5	11455.5	362.468	80.8027	0	0	0	0	0	0	0	200	903	0	0	0	0	0	0	0	603	903	0
536	2	25.4498	15.5815	-595.05	128296	95635.5	11867.5	360.718	84.3943	0	0	0	0	0	0	0	200	903	0	0	0	0	0	0	0	603	903	0
536	3	24.5343	16.3445	-597.492	129761	96612	11730.2	361.696	82.8237	0	0	0	0	0	0	0	200	903	0	0	0	0	0	0	0	603	903	0
536	4	23.9239	16.497	-598.102	130860	96795.1	11821.7	361.837	81.2084	0	0	0	0	0	0	0	200	903	0	0	0	0	0	0	0	603	903	0
536	5	24.6868	16.8022	-600.544	132325	97222.4	12050.6	361.891	79.6587	0	0	0	0	0	0	0	200	903	0	0	0	0	0	0	0	603	903	0
536	6	25.2972	16.9548	-603.29	133149	97771.7	12187.9	362.064	79.2959	0	0	0	0	0	0	0	200	903	0	0	0	0	0	0	0	603	903	0
536	7	26.3653	18.3281	-608.478	133606	98137.9	12371	361.284	80.4254	0	0	0	0	0	0	0	200	903	0	0	0	0	0	0	0	603	903	0
536	8	25.9075	18.6333	-608.783	134797	98809.3	12508.3	362.306	78.5804	0	0	0	0	0	0	0	200	903	0	0	0	0	0	0	0	603	903	0
536	9	25.1446	19.091	-614.276	135529	98992.4	12416.8	361.153	79.3681	0	0	0	0	0	0	0	200	903	0	0	0	0	0	0	0	603	903	0
537	0	25.2972	18.9384	-614.887	136353	99358.6	12691.5	361.588	78.2472	0	0	0	0	0	0	0	200	903	0	0	0	0	0	0	0	603	903	0
537	1	25.6024	18.4807	-617.023	137452	99907.9	12874.6	361.919	77.2344	0	0	0	0	0	0	0	200	903	0	0	0	0	0	0	0	603	903	0
537	2	25.9075	19.854	-620.99	138184	100396	13195	361.671	77.4781	0	0	0	0	0	0	0	200	903	0	0	0	0	0	0	0	603	903	0
537	3	26.0601	21.8376	-625.873	139374	101129	13149.2	361.58	77.3125	0	0	0	0	0	0	0	200	903	0	0	0	0	0	0	0	603	903	0
537	4	26.3653	22.7531	-628.62	139740	101434	13195	361.359	77.7028	0	0	0	0	0	0	0	200	903	0	0	0	0	0	0	0	603	903	0
537	5	27.1283	22.9057	-629.23	140473	101739	13195	361.688	76.7545	0	0	0	0	0	0	0	200	903	0	0	0	0	0	0	0	603	903	0
537	6	25.4498	23.6687	-633.503	141388	102532	13835.9	361.85	76.8149	0	0	0	0	0	0	0	200	903	0	0	0	0	0	0	0	603	903	0
537	7	26.3653	24.8894	-635.639	142487	102532	13652.8	361.306	75.8366	0	0	0	0	0	0	0	200	903	0	0	0	0	0	0	0	603	903	0
537	8	27.2808	25.4997	-639.911	143128	103265	13698.5	361.374	76.3317	0	0	0	0	0	0	0	200	903	0	0	0	0	0	0	0	603	903	0
537	9	26.3653	26.1101	-643.878	143860	103753	13835.9	361.138	76.5724	0	0	0	0	0	0	0	200	903	0	0	0	0	0	0	0	603	903	0
538	0	25.6024	27.3308	-646.625	144867	104119	13790.1	361.02	75.9639	0	0	0	0	0	0	0	200	903	0	0	0	0	0	0	0	603	903	0
538	1	26.5179	27.7885	-646.93	145600	105096	14385.2	362.453	74.9375	0	0	0	0	0	0	0	200	903	0	0	0	0	0	0	0	603	903	0
538	2	25.6024	27.7885	-646.32	146881	105462	14110.5	363.173	72.7419	0	0	0	0	0	0	0	200	903	0	0	0	0	0	0	0	603	903	0
538	3	26.5179	28.5515	-653.644	148346	105706	14476.7	361.718	73.0473	0	0	0	0	0	0	0	200	903	0	0	0	0	0	0	0	603	903	0
538	4	26.3653	30.5351	-658.832	148987	106195	14614.1	361.186	73.8617	0	0	0	0	0	0	0	200	903	0	0	0	0	0	0	0	603	903	0
538	5	26.5179	31.1455	-660.053	149628	106683	14751.4	361.628	73.309	0	0	0	0	0	0	0	200	903	0	0	0	0	0	0	0	603	903	0
538	6	26.2127	32.2136	-663.41	150269	107232	15254.9	361.638	73.4901	0	0	0	0	0	0	0	200	903	0	0	0	0	0	0	0	603	903	0
538	7	25.6024	33.4343	-664.936	151642	107598	14980.3	361.818	71.9445	0	0	0	0	0	0	0	200	903	0	0	0	0	0	0	0	603	903	0
538	8	26.9757	34.1972	-666.461	152375	107598	15163.4	361.447	71.3677	0	0	0	0	0	0	0	200	903	0	0	0	0	0	0	0	603	903	0
538	9	26.5179	34.5024	-667.377	153382	108148	15300.7	362.049	70.1723	0	0	0	0	0	0	0	200	903	0	0	0	0	0	0	0	603	903	0
539	0	27.586	35.5705	-675.922	154206	108880	15621.1	361.084	71.8588	0	0	0	0	0	0	0	200	903	0	0	0	0	0	0	0	603	903	0
539	1	26.5179	36.4861	-677.753	155213	109551	15666.9	361.639	70.9892	0	0	0	0	0	0	0	200	903	0	0	0	0	0	0	0	603	903	0
539	2	27.1283	36.7912	-680.5	156037	109735	15804.2	361.256	70.7026	0	0	0	0	0	0	0	200	903	0	0	0	0	0	0	0	603	903	0
539	3	25.1446	37.8593	-681.72	157044	110162	15895.8	361.594	69.636	0	0	0	0	0	0	0	200	903	0	0	0	0	0	0	0	603	903	0
539	4	26.2127	38.0119	-683.551	157685	110467	15804.2	361.607	69.3156	0	0	0	0	0	0	0	200	903	0	0	0	0	0	0	0	603	903	0
539	5	26.0601	38.1645	-689.044	158600	111199	16445.1	361.382	69.8259	0	0	0	0	0	0	0	200	903	0	0	0	0	0	0	0	603	903	0
539	6	24.3817	39.5378	-690.57	159516	111566	16445.1	361.556	69.0087	0	0	0	0	0	0	0	200	903	0	0	0	0	0	0	0	603	903	0
539	7	25.1446	41.5215	-693.622	160157	112054	16445.1	361.549	69.1011	0	0	0	0	0	0	0	200	903	0	0	0	0	0	0	0	603	903	0
539	8	24.3817	42.2844	-695.453	160706	112420	16719.8	361.65	68.9191	0	0	0	0	0	0	0	200	903	0	0	0	0	0	0	0	603	903	0
539	9	25.755	43.3525	-699.115	161805	112542	17040.2	360.978	68.5582	0	0	0	0	0	0	0	200	903	0	0	0	0	0	0	0	603	903	0
540	0	27.2808	44.4206	-700.641	163178	113214	16948.7	361.586	67.1021	0	0	0	0	0	0	0	200	903	0	0	0	0	0	0	0	603	903	0
540	1	25.2972	45.1836	-702.777	163727	113030	17040.2	360.834	67.0285	0	0	0	0	0	0	0	200	903	0	0	0	0	0	0	0	603	903	0
540	2	24.6868	46.2517	-705.829	164643	114129	17177.5	361.695	66.7386	0	0	0	0	0	0	0	200	903	0	0	0	0	0	0	0	603	903	0
540	3	25.4498	46.7094	-707.05	165375	114129	17223.3	361.416	66.1054	0	0	0	0	0	0	0	200	903	0	0	0	0	0	0	0	603	903	0
540	4	23.9239	48.8457	-708.271	166657	114373	17589.5	361.482	64.6989	0	0	0	0	0	0	0	200	903	0	0	0	0	0	0	0	603	903	0
540	5	24.3817	48.3879	-711.322	166291	114923	17681.1	361.562	66.2232	0	0	0	0	0	0	0	200	903	0	0	0	0	0	0	0	603	903	0
540	6	23.9239	48.6931	-715.9	167023	114373	17635.3	359.762	66.6949	0	0	0	0	0	0	0	200	903	0	0	0	0	0	0	0	603	903	0
540	7	23.7713	48.9983	-711.933	168763	115655	17955.7	362.452	62.9515	0	0	0	0	0	0	0	200	903	0	0	0	0	0	0	0	603	903	0
540	8	22.7032	50.5241	-719.257	169495	115472	18093.1	360.543	64.3471	0	0	0	0	0	0	0	200	903	0	0	0	0	0	0	0	603	903	0
540	9	22.8558	51.7448	-719.562	169953	116021	18184.6	361.239	63.8108	0	0	0	0	0	0	0	200	903	0	0	0	0	0	0	0	603	903	0
541	0	23.7713	50.9819	-721.698	170868	116509	17864.2	361.438	63.2414	0	0	0	0	0	0	0	200	903	0	0	0	0	0	0	0	603	903	0
541	1	22.8558	53.1181	-723.835	171601	116815	17910	361.383	62.9283	0	0	0	0	0	0	0	200	903	0	0	0	0	0	0	0	603	903	0
541	2	23.161	53.5759	-727.191	171143	116265	18733.9	359.883	64.6522	0	0	0	0	0	0	0	200	903	0	0	0	0	0	0	0	603	903	0
541	3	21.7877	54.644	-729.023	172242	116937	18596.6	360.402	63.7363	0	0	0	0	0	0	0	200	903	0	0	0	0	0	0	0	603	903	0
541	4	21.9403	56.6277	-728.412	173157	117547	18733.9	361.374	62.2814	0	0	0	0	0	0	0	200	903	0	0	0	0	0	0	0	603	903	0
541	5	21.0247	57.238	-731.769	173706	117852	18642.4	361.051	62.6213	0	0	0	0	0	0	0	200	903	0	0	0	0	0	0	0	603	903	0
541	6	21.0247	57.0854	-732.074	174256	117913	18871.3	361.067	61.9699	0	0	0	0	0	0	0	200	903	0	0	0	0	0	0	0	603	903	0
541	7	21.9403	59.3742	-736.042	174988	118035	19100.1	360.365	62.2578	0	0	0	0	0	0	0	200	903	0	0	0	0	0	0	0	603	903	0
541	8	21.0247	60.4424	-735.431	175263	118035	19008.6	360.498	61.687	0	0	0	0	0	0	0	200	903	0	0	0	0	0	0	0	603	903	0
541	9	20.2618	61.3579	-739.704	176361	118463	19100.1	360.149	61.5782	0	0	0	0	0	0	0	200	903	0	0	0	0	0	0	0	603	903	0
542	0	20.1092	61.8156	-738.788	177185	118096	19237.5	359.852	60.1675	0	0	0	0	0	0	0	200	903	0	0	0	0	0	0	0	603	903	0
542	1	20.1092	63.1889	-742.145	177460	118829	19512.1	360.115	60.8823	0	0	0	0	0	0	0	200	903	0	0	0	0	0	0	0	603	903	0
542	2	20.2618	61.9682	-741.23	178101	118035	19786.8	359.243	59.7222	0	0	0	0	0	0	0	200	903	0	0	0	0	0	0	0	603	903	0
542	3	20.2618	64.7148	-744.281	178467	118890	19649.5	359.738	60.2155	0	0	0	0	0	0	0	200	903	0	0	0	0	0	0	0	603	903	0
542	4	20.1092	64.8674	-746.723	179200	119561	19649.5	360.115	60.0186	0	0	0	0	0	0	0	200	903	0	0	0	0	0	0	0	603	903	0
542	5	18.5833	65.7829	-742.45	180207	119073	19878.3	360.378	57.2811	0	0	0	0	0	0	0	200	903	0	0	0	0	0	0	0	603	903	0
542	6	19.3463	66.5459	-746.723	180756	119561	19924.1	360.115	57.9343	0	0	0	0	0	0	0	200	903	0	0	0	0	0	0	0	603	903	0
542	7	19.1937	67.1562	-747.028	181305	119378	19832.6	359.804	57.2979	0	0	0	0	0	0	0	200	903	0	0	0	0	0	0	0	603	903	0
542	8	19.9566	67.9192	-750.385	181763	119561	19832.6	359.333	57.7735	0	0	0	0	0	0	0	200	903	0	0	0	0	0	0	0	603	903	0
542	9	19.0411	69.2924	-748.554	182129	119988	20015.7	360.294	56.6919	0	0	0	0	0	0	0	200	903	0	0	0	0	0	0	0	603	903	0
543	0	18.4307	70.0554	-751.606	182496	119866	20427.7	359.48	57.1924	0	0	0	0	0	0	0	200	903	0	0	0	0	0	0	0	603	903	0
543	1	18.5833	70.3606	-751.3	183228	120233	20336.1	360.033	56.119	0	0	0	0	0	0	0	200	903	0	0	0	0	0	0	0	603	903	0
543	2	18.7359	70.6657	-751.606	182862	119927	20198.8	359.562	56.7053	0	0	0	0	0	0	0	200	903	0	0	0	0	0	0	0	603	903	0
543	3	19.4989	71.8864	-753.131	183319	119927	20381.9	359.238	56.5904	0	0	0	0	0	0	0	200	903	0	0	0	0	0	0	0	603	903	0
543	4	19.0411	72.6494	-755.573	184326	119500	20381.9	358.158	56.044	0	0	0	0	0	0	0	200	903	0	0	0	0	0	0	0	603	903	0
543	5	18.5833	73.7175	-755.573	184876	120355	20885.4	359.289	55.3169	0	0	0	0	0	0	0	200	903	0	0	0	0	0	0	0	603	903	0
543	6	18.7359	74.1753	-754.962	184876	120294	20885.4	359.337	55.1191	0	0	0	0	0	0	0	200	903	0	0	0	0	0	0	0	603	903	0
543	7	18.1256	75.0908	-754.962	185334	120233	20610.8	359.256	54.5128	0	0	0	0	0	0	0	200	903	0	0	0	0	0	0	0	603	903	0
543	8	19.6514	75.7011	-755.878	186249	120294	21022.8	359.144	53.599	0	0	0	0	0	0	0	200	903	0	0	0	0	0	0	0	603	903	0
543	9	19.804	75.8537	-756.488	186158	120721	21434.7	359.581	53.9187	0	0	0	0	0	0	0	200	903	0	0	0	0	0	0	0	603	903	0
544	0	19.804	78.1425	-758.319	186890	120050	21434.7	358.31	53.5471	0	0	0	0	0	0	0	200	903	0	0	0	0	0	0	0	603	903	0
544	1	19.0411	77.6848	-758.93	186432	120599	21846.7	358.906	54.3485	0	0	0	0	0	0	0	200	903	0	0	0	0	0	0	0	603	903	0
544	2	19.4989	78.7529	-757.404	186524	120538	21343.2	359.146	53.7327	0	0	0	0	0	0	0	200	903	0	0	0	0	0	0	0	603	903	0
544	3	21.0247	79.3633	-756.488	186798	120538	21617.8	359.339	53.0716	0	0	0	0	0	0	0	200	903	0	0	0	0	0	0	0	603	903	0
544	4	21.1773	80.4314	-757.404	186890	120599	21755.2	359.227	53.2492	0	0	0	0	0	0	0	200	903	0	0	0	0	0	0	0	603	903	0
544	5	21.6351	79.821	-758.93	187256	120843	21755.2	359.228	53.2628	0	0	0	0	0	0	0	200	903	0	0	0	0	0	0	0	603	903	0
544	6	21.6351	82.1098	-758.319	187348	120660	22121.4	359.115	52.9434	0	0	0	0	0	0	0	200	903	0	0	0	0	0	0	0	603	903	0
544	7	21.3299	82.8728	-758.93	187348	120416	21984.1	358.665	53.1421	0	0	0	0	0	0	0	200	903	0	0	0	0	0	0	0	603	903	0
544	8	21.1773	83.4831	-757.099	187897	120477	22258.7	359.13	51.8196	0	0	0	0	0	0	0	200	903	0	0	0	0	0	0	0	603	903	0
544	9	22.398	84.3987	-756.488	187622	120599	22579.1	359.419	51.9824	0	0	0	0	0	0	0	200	903	0	0	0	0	0	0	0	603	903	0
545	0	23.4661	86.2297	-757.709	187714	120477	22716.5	359.001	52.2612	0	0	0	0	0	0	0	200	903	0	0	0	0	0	0	0	603	903	0
545	1	22.7032	86.6875	-758.014	187714	120233	22624.9	358.615	52.3609	0	0	0	0	0	0	0	200	903	0	0	0	0	0	0	0	603	903	0
545	2	22.8558	85.7719	-758.014	187714	120172	22899.6	358.535	52.3609	0	0	0	0	0	0	0	200	903	0	0	0	0	0	0	0	603	903	0
545	3	23.0084	89.2815	-754.657	187531	120050	23265.8	359.078	51.5019	0	0	0	0	0	0	0	200	903	0	0	0	0	0	0	0	603	903	0
545	4	23.3136	89.8918	-751.911	188172	120050	23265.8	359.659	49.7419	0	0	0	0	0	0	0	200	903	0	0	0	0	0	0	0	603	903	0
545	5	23.4661	90.8073	-752.216	188080	119866	23403.1	359.351	49.9651	0	0	0	0	0	0	0	200	903	0	0	0	0	0	0	0	603	903	0
545	6	24.992	92.1806	-751.911	188172	119012	23540.5	358.279	49.7419	0	0	0	0	0	0	0	200	903	0	0	0	0	0	0	0	603	903	0
545	7	24.3817	93.7065	-752.521	187989	119134	24089.8	358.313	50.1882	0	0	0	0	0	0	0	200	903	0	0	0	0	0	0	0	603	903	0
545	8	23.9239	95.0798	-750.69	187439	119012	23952.4	358.537	50.3106	0	0	0	0	0	0	0	200	903	0	0	0	0	0	0	0	603	903	0
545	9	24.8394	96.1479	-747.943	187531	119012	24684.9	359.119	49.2713	0	0	0	0	0	0	0	200	903	0	0	0	0	0	0	0	603	903	0
546	0	25.6024	96.4531	-748.249	187897	118707	24593.3	358.646	48.8842	0	0	0	0	0	0	0	200	903	0	0	0	0	0	0	0	603	903	0
546	1	27.586	97.0634	-747.638	186524	118157	24684.9	358.041	50.516	0	0	0	0	0	0	0	200	903	0	0	0	0	0	0	0	603	903	0
546	2	25.2972	98.1316	-746.112	186615	118279	25051.1	358.528	49.883	0	0	0	0	0	0	0	200	903	0	0	0	0	0	0	0	603	903	0
546	3	25.2972	99.6574	-744.586	186707	118035	25234.2	358.525	49.2476	0	0	0	0	0	0	0	200	903	0	0	0	0	0	0	0	603	903	0
546	4	26.3653	100.878	-741.23	186707	117852	25234.2	358.996	48.1119	0	0	0	0	0	0	0	200	903	0	0	0	0	0	0	0	603	903	0
546	5	26.3653	102.251	-736.957	186066	117425	25463.1	359.338	47.5212	0	0	0	0	0	0	0	200	903	0	0	0	0	0	0	0	603	903	0
546	6	26.6705	102.862	-735.126	186249	116570	25737.7	358.572	46.6433	0	0	0	0	0	0	0	200	903	0	0	0	0	0	0	0	603	903	0
546	7	27.1283	103.014	-738.178	185517	116937	26149.7	358.413	48.6829	0	0	0	0	0	0	0	200	903	0	0	0	0	0	0	0	603	903	0
546	8	27.1283	105.761	-736.042	184784	116693	26378.6	358.541	48.9486	0	0	0	0	0	0	0	200	903	0	0	0	0	0	0	0	603	903	0
546	9	27.7386	106.676	-730.548	184143	116387	26470.1	359.315	47.9381	0	0	0	0	0	0	0	200	903	0	0	0	0	0	0	0	603	903	0
547	0	27.2808	108.05	-730.854	183869	115838	26424.4	358.497	48.4191	0	0	0	0	0	0	0	200	903	0	0	0	0	0	0	0	603	903	0
547	1	28.0438	109.881	-729.938	183503	115411	27431.4	358.11	48.6054	0	0	0	0	0	0	0	200	903	0	0	0	0	0	0	0	603	903	0
547	2	28.349	111.102	-728.412	183045	115411	27294.1	358.442	48.7071	0	0	0	0	0	0	0	200	903	0	0	0	0	0	0	0	603	903	0
547	3	29.2645	112.475	-722.003	182679	115167	27339.9	359.51	46.9838	0	0	0	0	0	0	0	200	903	0	0	0	0	0	0	0	603	903	0
547	4	27.7386	113.696	-722.309	182587	114434	27568.8	358.429	47.2175	0	0	0	0	0	0	0	200	903	0	0	0	0	0	0	0	603	903	0
547	5	27.7386	115.221	-716.815	181122	113824	27614.5	358.791	47.3239	0	0	0	0	0	0	0	200	903	0	0	0	0	0	0	0	603	903	0
547	6	28.9593	116.747	-714.984	180390	113397	27980.8	358.6	47.7012	0	0	0	0	0	0	0	200	903	0	0	0	0	0	0	0	603	903	0
547	7	29.5697	117.663	-712.238	180207	112969	27935	358.612	46.9853	0	0	0	0	0	0	0	200	903	0	0	0	0	0	0	0	603	903	0
547	8	29.2645	118.884	-710.712	179840	112725	27980.8	358.609	46.9574	0	0	0	0	0	0	0	200	903	0	0	0	0	0	0	0	603	903	0
547	9	26.8231	119.799	-706.44	179383	111810	28209.6	358.272	46.075	0	0	0	0	0	0	0	200	903	0	0	0	0	0	0	0	603	903	0
548	0	27.7386	119.341	-701.557	178284	110894	28621.6	358.069	45.8736	0	0	0	0	0	0	0	200	903	0	0	0	0	0	0	0	603	903	0
548	1	26.9757	120.257	-699.42	178009	110833	28759	358.464	45.4901	0	0	0	0	0	0	0	200	903	0	0	0	0	0	0	0	603	903	0
548	2	28.1964	122.698	-693.622	176728	110101	28667.4	358.733	45.2105	0	0	0	0	0	0	0	200	903	0	0	0	0	0	0	0	603	903	0
548	3	28.1964	123.614	-691.791	176178	109979	28713.2	358.977	45.3302	0	0	0	0	0	0	0	200	903	0	0	0	0	0	0	0	603	903	0
548	4	26.8231	124.834	-687.519	175812	108758	28942.1	358.189	44.2802	0	0	0	0	0	0	0	200	903	0	0	0	0	0	0	0	603	903	0
548	5	27.7386	125.445	-682.636	175080	108209	28942.1	358.516	43.524	0	0	0	0	0	0	0	200	903	0	0	0	0	0	0	0	603	903	0
548	6	27.2808	126.665	-675.006	174256	107781	29399.8	359.675	41.8459	0	0	0	0	0	0	0	200	903	0	0	0	0	0	0	0	603	903	0
548	7	28.0438	127.276	-673.786	173432	106561	29262.5	358.152	42.601	0	0	0	0	0	0	0	200	903	0	0	0	0	0	0	0	603	903	0
548	8	27.586	127.428	-672.87	172425	106011	29170.9	357.551	43.7474	0	0	0	0	0	0	0	200	903	0	0	0	0	0	0	0	603	903	0
548	9	26.8231	128.497	-665.241	170685	105279	29033.6	358.257	43.4234	0	0	0	0	0	0	0	200	903	0	0	0	0	0	0	0	603	903	0
549	0	28.349	129.565	-659.748	170410	104547	29857.6	358.465	41.7035	0	0	0	0	0	0	0	200	903	0	0	0	0	0	0	0	603	903	0
549	1	26.3653	130.022	-655.78	168946	104058	29399.8	358.679	42.3746	0	0	0	0	0	0	0	200	903	0	0	0	0	0	0	0	603	903	0
549	2	27.1283	130.938	-649.677	168396	102960	29399.8	358.478	40.7998	0	0	0	0	0	0	0	200	903	0	0	0	0	0	0	0	603	903	0
549	3	26.3653	129.412	-645.71	167023	101739	29720.3	357.562	41.334	0	0	0	0	0	0	0	200	903	0	0	0	0	0	0	0	603	903	0
549	4	26.3653	131.701	-641.437	165467	100762	29674.5	357.089	42.0376	0	0	0	0	0	0	0	200	903	0	0	0	0	0	0	0	603	903	0
549	5	26.3653	132.464	-636.249	164093	99907.9	29628.7	357.026	42.0925	0	0	0	0	0	0	0	200	903	0	0	0	0	0	0	0	603	903	0
549	6	25.755	132.311	-626.789	162812	99480.6	29674.5	358.715	40.2448	0	0	0	0	0	0	0	200	903	0	0	0	0	0	0	0	603	903	0
549	7	26.3653	132.922	-623.127	161164	98565.1	29994.9	358.178	41.3628	0	0	0	0	0	0	0	200	903	0	0	0	0	0	0	0	603	903	0
549	8	26.5179	132.769	-618.854	159882	97283.4	29766	357.199	41.6484	0	0	0	0	0	0	0	200	903	0	0	0	0	0	0	0	603	903	0
549	9	25.2972	133.532	-609.088	158600	96428.9	29674.5	358.317	39.6106	0	0	0	0	0	0	0	200	903	0	0	0	0	0	0	0	603	903	0
550	0	24.6868	134.295	-606.037	157410	95574.4	29445.6	357.704	40.2632	0	0	0	0	0	0	0	200	903	0	0	0	0	0	0	0	603	903	0
550	1	23.7713	134.905	-599.323	155579	94231.6	29582.9	357.23	40.4087	0	0	0	0	0	0	0	200	903	0	0	0	0	0	0	0	603	903	0
550	2	23.7713	135.21	-592.304	154297	93682.3	29766	358.166	39.4965	0	0	0	0	0	0	0	200	903	0	0	0	0	0	0	0	603	903	0
550	3	23.9239	135.363	-585.59	152924	92156.4	29308.3	357.374	38.8549	0	0	0	0	0	0	0	200	903	0	0	0	0	0	0	0	603	903	0
550	4	23.0084	135.516	-581.317	151001	91424	29216.7	357.27	40.2429	0	0	0	0	0	0	0	200	903	0	0	0	0	0	0	0	603	903	0
550	5	21.9403	133.074	-574.298	149536	90569.5	29216.7	357.705	39.6189	0	0	0	0	0	0	0	200	903	0	0	0	0	0	0	0	603	903	0
550	6	20.8721	134.905	-564.838	148163	89226.7	29125.2	357.969	37.6891	0	0	0	0	0	0	0	200	903	0	0	0	0	0	0	0	603	903	0
550	7	20.7196	134.753	-558.734	147339	88128.1	28347	357.728	36.2983	0	0	0	0	0	0	0	200	903	0	0	0	0	0	0	0	603	903	0
550	8	21.0247	134.447	-551.41	145508	86907.4	28026.5	357.609	36.1164	0	0	0	0	0	0	0	200	903	0	0	0	0	0	0	0	603	903	0
550	9	20.1092	133.532	-546.222	144043	86052.9	28209.6	357.542	36.2918	0	0	0	0	0	0	0	200	903	0	0	0	0	0	0	0	603	903	0
551	0	18.7359	133.379	-536.151	141938	84893.3	28072.3	358.338	35.2657	0	0	0	0	0	0	0	200	903	0	0	0	0	0	0	0	603	903	0
551	1	17.6678	132.311	-533.71	140656	83489.4	27477.2	356.432	36.4563	0	0	0	0	0	0	0	200	903	0	0	0	0	0	0	0	603	903	0
551	2	16.5997	131.091	-523.944	137635	82573.9	27111	357.601	37.3106	0	0	0	0	0	0	0	200	903	0	0	0	0	0	0	0	603	903	0
551	3	17.0574	131.091	-516.315	136536	81170.1	27339.9	357.21	35.5567	0	0	0	0	0	0	0	200	903	0	0	0	0	0	0	0	603	903	0
551	4	15.6842	130.785	-506.549	134797	79766.3	27156.8	357.47	33.8926	0	0	0	0	0	0	0	200	903	0	0	0	0	0	0	0	603	903	0
551	5	15.379	130.48	-500.751	132599	78545.6	26515.9	356.856	35.1992	0	0	0	0	0	0	0	200	903	0	0	0	0	0	0	0	603	903	0
[truncated: 1,634 more rows]
