# Supplementary material for: The Effects of an Extemporaneous Speech Dual-task on Older Adult Gait Control
Source: Research Square preprint supplement (doi:10.21203/rs.3.rs-7674245/v1), 2025-11-18
Supplement: Supplementary file 213 [file Over9ground09.xlsx]

## Sheet: Sheet1
Trajectories
		09:LFHD			09:RFHD			09:LBHD			09:RBHD			09:C7			09:T10			09:CLAV			09:STRN			09:RBAK			09:LSHO			09:LUPA			09:LELB			09:LFRM			09:LWRA			09:LWRB			09:LFIN
Frame	Sub Frame	X	Y	Z	X	Y	Z	X	Y	Z	X	Y	Z	X	Y	Z	X	Y	Z	X	Y	Z	X	Y	Z	X	Y	Z	X	Y	Z	X	Y	Z	X	Y	Z	X	Y	Z	X	Y	Z	X	Y	Z	X	Y	Z
		mm	mm	mm	mm	mm	mm	mm	mm	mm	mm	mm	mm	mm	mm	mm	mm	mm	mm	mm	mm	mm	mm	mm	mm	mm	mm	mm	mm	mm	mm	mm	mm	mm	mm	mm	mm	mm	mm	mm	mm	mm	mm	mm	mm	mm	mm	mm	mm
436	0	69.8505	-2024.76	1634.99	167.652	-2024.81	1632.32	45.1541	-2180.4	1651.95	190.777	-2175.13	1642.45	99.7873	-2222.24	1478.46	75.0391	-2270.01	1217.29	113.329	-2064.09	1399.82	106.104	-1971.28	1189.8	140.576	-2279.04	1272.31	-73.626	-2114.12	1446.83	-165.697	-2084.42	1229.19	-194.71	-2069.55	1132.37	-210.774	-1935.71	1011.86	-170.283	-1870.8	958.719	-229.325	-1907.03	940.043	-223.294	-1831.11	914.545
437	0	69.1081	-2008.87	1637.5	166.763	-2008.76	1634.97	44.8736	-2164.47	1655.9	190.519	-2158.77	1646.53	99.995	-2208.23	1480.85	76.3978	-2255.16	1220.52	113.206	-2049.13	1404.26	105.157	-1956.11	1193.93	141.701	-2264.23	1275.73	-74.2576	-2100.55	1449.77	-165.539	-2072.94	1231.19	-193.529	-2060.11	1133.68	-209.455	-1930.52	1008.6	-168.548	-1867.62	952.886	-227.802	-1904.18	935.809	-220.558	-1829.67	905.451
438	0	68.2678	-1993.39	1640.22	166.208	-1992.65	1638.2	44.3368	-2148.8	1659.59	190.155	-2142.7	1650.63	100.081	-2193.68	1483.86	77.9934	-2240.41	1224	112.853	-2034.39	1407.77	104.379	-1941.12	1197.96	142.829	-2249.44	1279.36	-74.9278	-2086.75	1452.59	-165.356	-2062.11	1232.86	-192.015	-2051.24	1134.52	-208.208	-1926	1005.43	-166.822	-1865.57	946.832	-226.384	-1902.02	931.515	-217.581	-1829.32	896.746
439	0	67.2467	-1978.04	1642.83	165.188	-1977.01	1641.05	43.79	-2133.3	1663.26	189.407	-2126.9	1654.49	100.205	-2179.29	1486.68	79.6554	-2225.57	1227.55	112.502	-2019.51	1411.72	103.7	-1926.49	1201.97	144.111	-2234.69	1283.21	-75.4062	-2073.11	1455.12	-165.051	-2051.94	1234.41	-190.438	-2043.14	1135.25	-207.01	-1922.29	1002.31	-165.135	-1864.42	940.847	-224.903	-1900.87	927.339	-214.693	-1830.05	888.294
440	0	66.1693	-1962.84	1645.67	164.117	-1961.64	1643.68	43.2724	-2118.23	1666.76	189.01	-2111.31	1658.28	100.352	-2164.57	1489.86	81.267	-2210.79	1231.05	111.909	-2004.72	1415.42	102.87	-1912.14	1205.5	145.551	-2219.73	1287.11	-75.8671	-2059.33	1457.66	-164.511	-2042.24	1235.82	-188.884	-2035.36	1136.2	-205.739	-1919.22	999.411	-163.388	-1863.43	936.079	-223.303	-1900.33	923.553	-211.714	-1831.46	880.552
441	0	65.258	-1947.91	1648.49	162.833	-1946.41	1646.82	42.4711	-2103.25	1670.07	188.279	-2096.01	1662	100.564	-2149.59	1492.99	82.8108	-2195.78	1234.49	111.527	-1989.68	1418.73	102.482	-1897.54	1209.3	147.092	-2204.46	1290.91	-76.3576	-2045.39	1460	-163.983	-2032.8	1237.17	-187.273	-2028.04	1137.23	-204.229	-1916.65	996.69	-161.672	-1863.2	931.366	-221.818	-1900.34	919.92	-209.054	-1833.56	873.297
442	0	64.2007	-1933.17	1651.21	162.062	-1931.17	1650.09	41.9788	-2088.52	1672.84	187.622	-2080.85	1665.04	100.684	-2134.33	1496.46	84.3896	-2180.75	1237.53	110.979	-1974.68	1421.63	101.992	-1883.27	1212.88	148.798	-2189.06	1294.39	-76.8342	-2031.39	1462.16	-163.043	-2023.9	1238.02	-184.862	-2020.93	1137.6	-202.649	-1914.4	994.262	-160.142	-1863.28	926.91	-220.112	-1900.87	916.693	-206.519	-1836.35	866.627
443	0	63.0745	-1918.54	1653.54	160.755	-1916.32	1652.49	41.4038	-2073.81	1675.3	187.072	-2065.79	1668.15	101.119	-2119.09	1499.57	85.8625	-2165.57	1240.01	110.582	-1959.5	1424.85	101.638	-1868.86	1216.12	150.556	-2173.6	1297.44	-77.0207	-2017.48	1464.19	-161.93	-2015.12	1239.01	-183.38	-2014.36	1138.56	-201.167	-1912.74	991.76	-158.577	-1863.85	922.802	-218.146	-1901.94	913.767	-204.265	-1839.58	860.392
444	0	62.0362	-1904.01	1656	159.667	-1901.58	1655.07	40.8758	-2059.43	1677.35	186.458	-2050.72	1670.73	101.543	-2103.65	1502.59	87.2384	-2150.22	1242.27	110.154	-1944.36	1427.27	101.365	-1854.4	1219.07	152.201	-2157.88	1300.2	-77.4225	-2003.69	1465.93	-160.819	-2006.27	1239.86	-181.093	-2008.03	1139.26	-199.333	-1911.33	989.4	-156.86	-1864.36	919.07	-216.404	-1903.48	910.775	-202.184	-1843.26	854.872
445	0	60.7699	-1889.53	1657.83	158.513	-1886.51	1657.69	40.3129	-2045.09	1678.73	186.063	-2035.95	1672.81	101.676	-2088.87	1504.01	88.6194	-2135	1244.2	109.657	-1929.2	1429.68	101.06	-1840.04	1221.64	153.938	-2142.14	1302.45	-77.6863	-1989.81	1467.06	-159.752	-1997.65	1240.17	-178.977	-2001.76	1139.49	-197.593	-1910.24	986.914	-155.303	-1865.11	915.358	-214.341	-1905.33	907.81	-200.2	-1847.34	849.493
446	0	59.8288	-1875.13	1659.28	157.57	-1871.45	1659.77	39.7796	-2030.91	1679.48	185.157	-2020.81	1674.14	102.092	-2073.63	1505.6	90.1066	-2119.7	1245.44	109.201	-1913.81	1431.32	101.033	-1825.93	1223.6	155.802	-2126.47	1304.07	-78.0013	-1976.04	1467.9	-158.551	-1988.92	1240.35	-176.758	-1995.59	1139.62	-195.796	-1909.34	984.383	-153.767	-1866.11	911.367	-212.164	-1907.57	905.154	-198.523	-1851.46	844.435
447	0	58.7278	-1860.59	1660.36	156.406	-1856.67	1660.95	39.5267	-2016.55	1679.89	184.759	-2005.69	1675.18	102.434	-2058.37	1506.5	91.5545	-2104.39	1246.3	108.978	-1898.5	1432.56	100.864	-1811.71	1224.73	157.577	-2110.64	1305.36	-78.2204	-1961.96	1468.18	-157.16	-1980.19	1240.24	-174.564	-1989.54	1139.6	-193.725	-1908.86	981.858	-152.363	-1867.16	907.712	-209.854	-1909.78	902.296	-196.702	-1855.77	839.566
448	0	57.6499	-1845.91	1661.04	155.35	-1841.56	1661.91	39.2477	-2002.08	1679.81	184.385	-1990.5	1675.74	103.071	-2042.61	1507.46	93.1224	-2089.22	1246.83	108.569	-1883.13	1433.1	100.874	-1797.31	1225.23	159.321	-2094.95	1306.22	-78.3538	-1947.78	1468.13	-155.87	-1971.28	1239.81	-172.429	-1983.29	1139.64	-191.866	-1908.11	979.359	-150.846	-1868.31	903.929	-207.572	-1912.07	899.61	-195.272	-1860.18	835.163
449	0	56.8407	-1831.2	1660.96	154.431	-1826.2	1662.4	38.9012	-1987.41	1679.17	184.331	-1975.27	1675.9	103.661	-2027.14	1507.34	94.6252	-2073.96	1247.02	108.379	-1867.77	1433.06	101.192	-1782.57	1225.25	161.028	-2079.13	1306.61	-78.5026	-1933.59	1467.52	-154.341	-1962.46	1239.14	-170.126	-1976.9	1139.25	-189.943	-1907.43	976.654	-149.331	-1869.61	899.99	-206.682	-1913.93	897.579	-193.896	-1864.32	830.891
450	0	55.9457	-1816.19	1660.31	153.433	-1810.98	1661.81	38.6607	-1972.74	1678.06	183.825	-1959.76	1675.08	104.215	-2011.46	1506.62	96.0145	-2058.77	1246.52	108.054	-1852.24	1432.25	101.446	-1767.65	1224.09	162.649	-2063.46	1306.41	-78.6081	-1919.2	1466.1	-152.876	-1953.51	1237.86	-167.424	-1970.64	1138.33	-188.508	-1906.57	974.069	-147.943	-1870.91	895.695	-203.905	-1916.5	894.767	-192.702	-1868.57	827.109
451	0	55.08	-1801.1	1659.28	152.557	-1795.42	1661.07	38.4387	-1957.64	1676.63	183.44	-1944.2	1674.03	104.839	-1995.82	1505.35	97.2012	-2043.59	1245.74	107.883	-1836.72	1431.08	101.77	-1752.55	1222.7	164.046	-2047.93	1305.71	-78.6842	-1904.68	1464.68	-151.552	-1944.67	1236.46	-164.831	-1964.23	1137.28	-186.61	-1906	971.629	-147.093	-1871.69	892.169	-201.038	-1919.15	892.207	-191.456	-1872.83	823.077
452	0	54.1383	-1785.71	1657.67	151.795	-1779.6	1660.19	38.1471	-1942.48	1674.74	183.039	-1928.37	1672.55	105.203	-1980.24	1503.69	98.1442	-2028.42	1244.71	107.637	-1821.24	1429.44	101.924	-1737.53	1220.51	165.27	-2032.34	1304.66	-78.8646	-1890.13	1462.47	-150.046	-1935.65	1234.77	-162.18	-1957.51	1136.2	-184.923	-1905.34	968.652	-146.416	-1872.24	888.631	-198.727	-1921.41	889.861	-190.3	-1876.84	819.346
453	0	53.3965	-1770.2	1655.57	151.022	-1763.61	1658.25	37.9114	-1926.88	1672.64	182.887	-1912.18	1671.12	105.839	-1964.45	1501.51	98.8776	-2013.39	1242.94	107.437	-1805.74	1427.43	102.364	-1722.3	1218.04	166.394	-2016.92	1303.15	-78.8938	-1875.19	1460.16	-148.608	-1926.3	1233	-158.927	-1950.65	1134.81	-183.658	-1904.57	966.064	-145.77	-1872.16	885.785	-196.385	-1923.61	887.608	-189.495	-1880.83	815.818
454	0	52.733	-1754.25	1653.05	150.499	-1747.28	1656.33	37.9958	-1911.15	1670.27	182.62	-1895.68	1669.24	106.327	-1948.4	1499.56	99.3402	-1998.22	1240.94	107.152	-1789.95	1424.75	102.588	-1707.11	1214.69	167.323	-2001.76	1301.19	-78.9106	-1860.27	1457.74	-147.069	-1916.57	1231.18	-155.751	-1943.49	1133.27	-181.831	-1903.65	963.948	-144.878	-1872.71	881.99	-194.153	-1925.5	885.703	-188.747	-1884.82	812.703
455	0	52.0716	-1738.2	1650.18	149.46	-1730.83	1653.4	37.7114	-1895.04	1667.8	182.429	-1879.19	1667.17	106.824	-1932.25	1497.28	99.3092	-1983.23	1238.75	107.027	-1774.38	1421.88	102.793	-1691.59	1211.19	167.955	-1986.49	1298.94	-79.0223	-1844.93	1454.94	-145.549	-1906.6	1229.23	-152.567	-1935.74	1131.93	-180.002	-1902.17	961.619	-144.578	-1872.88	878.821	-192.067	-1927.14	884.282	-188.095	-1888.73	809.869
456	0	51.459	-1721.97	1646.6	148.958	-1714.37	1650.38	37.4676	-1878.62	1664.9	182.115	-1862.45	1664.77	107.251	-1916.35	1494.28	98.8576	-1967.98	1236.1	106.867	-1758.71	1418.55	102.906	-1675.81	1207.23	168.302	-1971.36	1296.41	-79.0271	-1829.68	1452.06	-143.931	-1896.26	1227.15	-149.535	-1927.48	1130.34	-178.387	-1900.36	959.636	-143.291	-1874.86	874.516	-190.164	-1928.47	883.228	-187.599	-1892.38	807.625
457	0	50.9814	-1705.56	1642.62	148.406	-1697.75	1646.61	37.2047	-1862.19	1661.75	181.923	-1845.75	1661.9	107.508	-1900.7	1490.45	98.1073	-1952.75	1233.16	106.936	-1743	1415.15	103.178	-1659.82	1202.9	168.411	-1956.2	1293.4	-79.1276	-1814.18	1448.73	-142.548	-1885.67	1225.11	-146.369	-1918.66	1128.75	-176.423	-1898.13	958.055	-143.908	-1872.93	872.844	-187.748	-1929.18	882.454	-186.865	-1895.91	805.526
458	0	50.6324	-1688.84	1638.48	148.225	-1680.92	1642.64	37.1031	-1845.34	1658.51	181.758	-1828.72	1658.89	107.718	-1884.47	1487.7	97.2501	-1937.63	1230.18	106.835	-1727.27	1411.38	103.426	-1643.53	1198.84	168.364	-1941.16	1290.13	-79.2263	-1798.56	1445.81	-141.147	-1874.39	1223.16	-143.5	-1909.09	1127.39	-174.994	-1895.33	956.682	-143.788	-1872.01	870.457	-185.435	-1929.23	882.389	-186.561	-1898.92	804.067
459	0	50.5593	-1671.95	1634.18	147.972	-1664.06	1638.23	36.9071	-1828.36	1655.58	181.609	-1811.65	1656.08	108.017	-1868.14	1484.81	96.2155	-1922.18	1227.11	106.81	-1711.51	1407.74	103.598	-1626.99	1194.87	167.909	-1925.72	1287.1	-79.334	-1782.75	1442.82	-139.736	-1862.7	1221.46	-140.892	-1898.85	1126.26	-173.619	-1891.64	956.056	-144.18	-1870.41	868.355	-183.738	-1928.54	882.682	-186.311	-1901.29	803.12
460	0	50.4724	-1655.07	1629.74	148.006	-1647.3	1634.07	36.8047	-1811.26	1652.36	181.633	-1794.65	1653.13	107.912	-1851.78	1482.24	95.2258	-1906.85	1223.85	106.605	-1695.6	1404.1	103.918	-1610.22	1191.01	167.27	-1910.19	1283.63	-79.5327	-1766.75	1439.93	-138.605	-1850.39	1219.58	-138.508	-1887.97	1125	-172.724	-1887	955.535	-144.238	-1867.74	866.364	-181.597	-1926.74	883.505	-185.75	-1903.17	802.675
461	0	50.5015	-1638.12	1625.5	148.044	-1630.5	1629.68	36.731	-1794.1	1649.42	181.327	-1777.56	1649.87	107.493	-1835.55	1479.4	94.0581	-1891.17	1220.43	106.207	-1679.85	1400.39	104.202	-1593.69	1187.57	166.406	-1894.54	1280.1	-79.9999	-1750.7	1436.88	-137.906	-1837.74	1217.68	-136.447	-1876.62	1123.67	-172.167	-1881.58	955.245	-145.296	-1864.04	865.66	-180.212	-1923.82	884.413	-185.784	-1903.82	802.734
462	0	50.5445	-1621.19	1621.42	148.212	-1613.59	1625.63	36.4099	-1776.85	1646.64	181.144	-1760.51	1646.92	106.981	-1819.36	1476.86	92.8773	-1875.39	1217.15	106.016	-1663.87	1397.23	104.475	-1577.21	1184.56	165.319	-1878.8	1276.85	-80.5255	-1734.58	1433.92	-137.505	-1824.39	1215.88	-134.85	-1864.57	1122.35	-172.087	-1874.97	955.029	-146.607	-1859.16	864.469	-179.258	-1919.61	885.708	-185.529	-1903.61	802.864
463	0	50.4646	-1604.09	1617.71	148.082	-1597.02	1621.69	35.9268	-1759.61	1644.25	180.679	-1743.67	1643.98	106.081	-1803.43	1473.62	91.7911	-1859.04	1214.15	105.741	-1647.77	1394.13	104.443	-1560.93	1181.83	164.197	-1863.01	1273.93	-81.2386	-1718.18	1430.75	-137.587	-1810.45	1213.91	-133.778	-1851.67	1121.1	-171.928	-1867.27	954.824	-147.872	-1853.38	863.765	-179.023	-1913.7	887.111	-185.321	-1902.11	802.667
464	0	50.4037	-1587.15	1614.1	147.931	-1580.49	1617.9	35.5002	-1742.38	1641.68	180.214	-1726.96	1641.39	105.262	-1787.34	1470.74	90.951	-1842.62	1211.33	105.283	-1631.6	1391.43	104.462	-1544.81	1179.51	163.077	-1847.08	1271.07	-81.844	-1701.67	1427.9	-137.706	-1795.81	1211.94	-133.2	-1838.19	1119.83	-172.51	-1858.08	954.734	-149.216	-1846.22	862.918	-179.312	-1906.56	888.115	-185.023	-1898.94	803.656
465	0	50.0017	-1570.26	1611.15	147.628	-1563.93	1614.79	34.9525	-1725.38	1639.44	179.75	-1710.05	1639.07	104.451	-1770.92	1468.6	90.3255	-1826.2	1208.53	104.783	-1615.28	1388.94	104.555	-1528.63	1177.39	162.108	-1830.79	1268.52	-82.645	-1685.12	1425.27	-137.487	-1780.63	1209.68	-133.035	-1824.13	1118.48	-173.234	-1847.93	954.504	-150.449	-1838.17	861.922	-179.936	-1898.12	889.272	-185.098	-1893.95	804.398
466	0	49.275	-1553.59	1608.6	146.849	-1547.32	1612.26	33.9367	-1708.58	1637.27	178.986	-1693.4	1637.22	103.524	-1754.3	1466.82	89.8069	-1809.36	1206.3	104.251	-1599	1386.78	103.878	-1512.31	1175.57	161.283	-1814.31	1266.37	-83.4989	-1668.35	1422.75	-138.216	-1764.81	1207.86	-133.543	-1809.29	1117.13	-174.388	-1836.52	953.933	-152.146	-1828.59	861.349	-181.425	-1887.94	890.261	-184.431	-1887.5	804.505
467	0	48.3059	-1537.08	1606.15	145.78	-1530.98	1610.13	32.6224	-1692.08	1635.13	177.669	-1677.01	1635.45	102.415	-1738.32	1464.13	89.4254	-1792.31	1204.09	103.764	-1582.37	1385.22	103.203	-1495.78	1174.29	160.597	-1797.6	1264.35	-84.1971	-1651.61	1420.34	-138.628	-1748.59	1205.76	-134.433	-1793.92	1115.74	-175.51	-1823.85	953.518	-153.74	-1818.02	860.81	-183.52	-1876.35	891.199	-185.869	-1878.46	805.27
468	0	46.9918	-1520.79	1604.31	144.472	-1514.89	1608.66	31.328	-1675.61	1633.44	176.111	-1660.89	1634.05	100.916	-1722.18	1461.8	89.1842	-1775.04	1201.91	102.813	-1565.67	1383.7	102.473	-1478.73	1173.26	159.934	-1780.57	1262.39	-85.1532	-1634.81	1418.13	-139.629	-1731.98	1203.89	-135.584	-1778.01	1114.44	-177.662	-1809.97	953.452	-155.518	-1805.75	860.586	-185.615	-1863.69	891.347	-187.146	-1867.8	805.641
469	0	45.4327	-1504.47	1603.19	143.129	-1498.47	1607.95	29.6149	-1659.42	1632.25	174.523	-1644.41	1633.66	99.9459	-1705.55	1460.7	88.9335	-1757.54	1200.12	102.087	-1548.99	1382.98	101.392	-1461.41	1172.64	159.202	-1763.49	1260.67	-86.0849	-1617.89	1416.68	-140.519	-1714.93	1202.44	-137.031	-1761.55	1113.35	-179.492	-1794.94	952.816	-156.61	-1792.46	860.393	-188.231	-1849.4	891.637	-188.39	-1855.17	805.715
470	0	43.7624	-1488.02	1602.82	141.451	-1482.27	1607.9	27.7397	-1643.06	1631.66	172.63	-1628.43	1633.56	98.6535	-1688.59	1459.84	88.5464	-1739.82	1198.77	101.24	-1532.28	1382.79	100.462	-1444.02	1172.65	158.387	-1746.21	1259.53	-87.2512	-1600.96	1415.69	-141.905	-1697.53	1201.39	-138.625	-1744.59	1112.63	-181.714	-1778.73	952.67	-158.597	-1777.68	860.039	-191.196	-1833.51	891.946	-190.598	-1840.6	806.098
471	0	42.0752	-1471.75	1602.99	139.586	-1466.38	1608.41	25.7096	-1626.75	1631.35	170.58	-1612.36	1634.14	97.39	-1670.59	1460.5	88.114	-1722.17	1197.88	100.443	-1515.31	1383.07	99.8965	-1426.22	1173.08	157.501	-1728.91	1258.85	-88.3324	-1583.68	1414.98	-143.361	-1679.8	1200.81	-140.253	-1727.09	1112.01	-184.009	-1761.49	952.551	-160.448	-1761.41	859.851	-194.304	-1816.28	891.89	-193.098	-1824.17	806.014
472	0	40.1736	-1455.55	1603.67	138.119	-1449.99	1609.89	23.5114	-1610.52	1631.13	168.374	-1596.32	1634.84	95.8863	-1655.28	1459.68	87.4245	-1704.66	1197.56	99.699	-1498.05	1383.82	99.2248	-1408.6	1173.56	156.523	-1711.74	1258.64	-89.3557	-1566.23	1414.67	-145.019	-1661.6	1200.54	-142.349	-1708.88	1111.71	-186.564	-1743.1	952.373	-162.587	-1743.53	859.909	-197.427	-1797.95	891.814	-195.933	-1806.04	806.005
473	0	38.3273	-1439.13	1604.61	135.937	-1433.6	1611.32	21.1566	-1594.24	1631.33	166.126	-1580.32	1635.99	94.5296	-1637.27	1460.32	86.5726	-1687.4	1198.06	98.8314	-1481.18	1384.58	98.9395	-1390.78	1174.27	155.451	-1694.56	1259.31	-90.3398	-1548.64	1414.7	-146.516	-1643.34	1200.39	-144.422	-1690.37	1111.46	-188.697	-1723.82	952.107	-164.364	-1724.64	859.607	-200.428	-1778.22	891.37	-199.157	-1786.17	805.564
474	0	36.4394	-1422.7	1605.84	134.207	-1417.56	1613.26	18.8268	-1577.91	1631.77	163.675	-1564.36	1637.24	91.4604	-1624.22	1461.92	85.8199	-1670.38	1199.42	98.2554	-1464.41	1385.63	98.7807	-1373.03	1175.11	154.596	-1677.71	1260.52	-90.8726	-1531.22	1415.01	-147.909	-1624.53	1200.46	-146.519	-1671.18	1111.47	-191.257	-1703.41	951.856	-166.916	-1703.86	859.352	-203.502	-1757.35	891.078	-202.997	-1764.5	805.126
475	0	34.4618	-1406.2	1607.2	132.263	-1400.96	1615.45	16.8714	-1561.41	1632.35	161.447	-1548.31	1638.74	91.9089	-1605.47	1463	85.2835	-1653.9	1200.94	97.7368	-1447.53	1387.18	99.1192	-1355.96	1175.83	154.113	-1661.17	1262.4	-91.3254	-1514.03	1415.56	-149.152	-1605.7	1200.39	-148.377	-1651.59	1111.32	-193.683	-1682.14	951.428	-169.543	-1682.09	858.811	-206.544	-1735.3	890.352	-206.986	-1741.35	804.363
476	0	33.0092	-1389.7	1608.5	130.285	-1384.45	1616.98	15.1177	-1544.77	1633.45	159.97	-1531.36	1640.83	92.4634	-1586.67	1465.05	84.8752	-1637.61	1203.16	97.4869	-1430.98	1388.65	99.5475	-1339.56	1176.56	153.963	-1644.82	1264.95	-91.2961	-1496.98	1416.79	-150.239	-1586.58	1200.76	-150.141	-1631.73	1111.25	-195.759	-1659.88	950.74	-171.997	-1658.92	858.246	-209.735	-1712.3	889.075	-210.97	-1716.8	803.36
477	0	31.4953	-1373.12	1609.67	128.923	-1367.71	1619.05	13.6556	-1528.08	1634.73	158.349	-1514.49	1643.2	92.7427	-1569.56	1467.27	84.7674	-1621.94	1205.86	97.1598	-1415.04	1390.2	100.062	-1323.89	1177.46	154.073	-1628.56	1267.94	-91.1135	-1480.57	1418.28	-151.205	-1567.21	1201.2	-151.953	-1611.58	1111.38	-198.232	-1636.82	950.29	-174.568	-1634.7	857.666	-212.908	-1688.13	887.942	-215.286	-1690.53	802.417
478	0	30.2596	-1356.56	1610.66	127.61	-1350.84	1620.73	12.5071	-1511.55	1636.23	157.271	-1497.71	1645.97	92.9306	-1552.52	1469.6	84.9106	-1606.52	1208.3	97.1361	-1398.98	1392.02	100.617	-1308.39	1178.48	154.338	-1612.85	1270.8	-90.8442	-1464.53	1419.99	-152.22	-1547.85	1201.48	-153.963	-1591.03	1111.38	-200.762	-1612.79	949.782	-177.427	-1609.3	857.247	-215.855	-1662.73	886.574	-219.741	-1662.88	801.463
479	0	29.4663	-1339.98	1611.75	126.826	-1334.02	1622.14	12.1176	-1494.68	1638.35	156.344	-1480.81	1648.06	92.9427	-1536.52	1471.98	84.9732	-1591.1	1210.72	97.4367	-1383.15	1393.98	101.058	-1293.3	1179.85	154.742	-1597.62	1273.5	-90.7789	-1448.89	1421.94	-152.861	-1528.45	1202.04	-155.865	-1570.39	1111.47	-202.939	-1588.12	949.251	-179.593	-1583.07	856.518	-218.863	-1636.35	885.301	-224.03	-1633.96	800.55
480	0	29.1595	-1323.31	1613.1	126.462	-1317.11	1623.61	11.8741	-1477.86	1640.92	156.39	-1463.49	1651.2	92.9712	-1521.26	1474.86	84.9164	-1575.82	1213.29	97.8221	-1367.86	1396.04	101.864	-1278.3	1181.89	154.984	-1582.6	1276.16	-90.6256	-1433.45	1424.39	-153.764	-1508.78	1202.87	-158.02	-1549.45	1111.84	-204.771	-1562.84	948.865	-182.046	-1555.77	856.404	-221.906	-1609.12	883.985	-227.993	-1603.59	800.013
481	0	29.2705	-1306.68	1614.57	126.394	-1300.39	1624.7	11.9235	-1460.99	1643.86	156.234	-1446.78	1653.42	93.0869	-1506.61	1477.15	84.8129	-1560.8	1215.92	98.206	-1352.84	1398.4	102.564	-1263.68	1183.94	154.813	-1567.76	1278.67	-90.3954	-1418	1426.77	-154.339	-1489.05	1203.78	-160.121	-1528.17	1112.4	-206.67	-1536.85	948.747	-183.646	-1527.68	856.471	-224.176	-1581.12	882.756	-231.808	-1572.01	799.592
482	0	29.807	-1289.89	1616.19	127.03	-1283.89	1626.06	12.5682	-1444	1646.98	157.126	-1429.52	1656.68	93.1674	-1492.13	1479.56	84.5083	-1545.76	1218.44	98.5453	-1337.85	1400.77	103.364	-1249.14	1186.24	154.498	-1553.16	1281.12	-90.1046	-1402.51	1429.51	-154.964	-1469.31	1205.18	-161.929	-1506.84	1113.05	-208.235	-1510.24	948.804	-185.343	-1498.71	857.03	-226.303	-1552.32	881.363	-235.1	-1539.37	799.766
483	0	30.7762	-1273.3	1618.08	128.357	-1267.1	1627.75	13.3225	-1426.9	1650.42	157.994	-1412.53	1659.09	93.2476	-1476.82	1482.39	83.9196	-1531.1	1221.06	99.4385	-1322.69	1403.69	104.333	-1234.62	1189.1	153.752	-1538.74	1283.66	-89.6721	-1386.88	1432.23	-155.6	-1449.63	1207.05	-163.396	-1485.47	1113.9	-209.516	-1483.22	949.464	-185.022	-1470.1	857.634	-227.738	-1522.89	880.386	-237.899	-1505.59	800.635
484	0	32.1405	-1256.6	1620.15	129.847	-1250.74	1629.52	14.3002	-1409.76	1654.07	159.082	-1395.89	1662.22	93.3242	-1461.37	1485.89	82.8933	-1516.38	1224.24	100.241	-1308.17	1406.3	105.323	-1219.69	1192.01	152.633	-1524.37	1286.58	-89.4896	-1371.15	1435.4	-156.096	-1429.78	1209.45	-165.08	-1464.02	1115.5	-210.386	-1455.81	950.301	-186.673	-1438.95	859.533	-229.234	-1492.8	880.236	-240.188	-1471.18	801.935
485	0	33.7627	-1239.96	1622.13	131.299	-1234.44	1630.94	15.421	-1392.9	1657.67	159.56	-1380.06	1664.19	93.3388	-1446.03	1488.98	81.6556	-1501.67	1227.61	101.132	-1293.6	1408.92	106.28	-1204.33	1194.87	151.191	-1510.12	1289.67	-89.0157	-1355.14	1438.65	-156.69	-1410.22	1212.07	-166.918	-1441.91	1117.37	-211.132	-1427.88	951.755	-187.029	-1408.02	861.744	-230.405	-1461.92	880.434	-241.891	-1435.88	804.199
486	0	35.5111	-1223.43	1624.39	133.252	-1218.2	1632.49	16.8627	-1375.96	1661.38	160.759	-1363.98	1666.75	93.5166	-1430.39	1492.46	80.366	-1486.89	1231.12	101.88	-1279.01	1411.5	107.355	-1189.57	1198.06	149.732	-1495.82	1292.75	-88.3998	-1338.91	1442.01	-157.111	-1390.74	1214.9	-168.36	-1420.06	1119.36	-211.819	-1399.52	954.015	-187.159	-1376.61	864.494	-230.905	-1430.74	881.333	-243.107	-1400.13	807.112
487	0	37.419	-1206.99	1626.79	135.242	-1202.18	1634.13	18.3122	-1359.05	1665.16	162.941	-1347.34	1669.87	93.6372	-1415	1495.9	78.9995	-1472.11	1234.39	102.82	-1264.14	1414.59	108.465	-1174.6	1201.55	148.232	-1481.22	1295.89	-87.7135	-1322.62	1445.83	-157.667	-1371.1	1218.41	-169.667	-1397.98	1121.74	-212.165	-1370.8	956.783	-186.708	-1344.69	868.447	-231.113	-1399.04	882.639	-243.682	-1364.01	811.179
488	0	39.3267	-1190.7	1628.97	136.974	-1186.26	1635.42	19.8366	-1342.36	1668.81	164.787	-1331.05	1672.38	93.7046	-1399.73	1499.07	77.5806	-1457.14	1237.7	103.713	-1249.2	1417.26	109.333	-1159.83	1204.85	146.625	-1466.77	1299.03	-87.1065	-1306.15	1449.57	-158.378	-1351.64	1221.79	-171.258	-1375.84	1124.58	-212.639	-1341.82	960.142	-186.514	-1312.52	872.98	-231.514	-1366.76	884.762	-243.89	-1327.63	815.793
489	0	41.0944	-1174.36	1630.84	138.989	-1170.39	1636.76	21.2507	-1325.74	1671.84	165.86	-1315.43	1674.35	93.7745	-1384.37	1501.74	76.2878	-1442.06	1240.59	104.377	-1234.35	1419.41	110.006	-1145.28	1207.69	145.089	-1452.22	1301.68	-86.4542	-1289.74	1453	-159.003	-1331.99	1225.11	-172.789	-1353.46	1127.2	-212.716	-1312.47	963.58	-185.486	-1280.7	877.297	-231.707	-1333.91	887.176	-243.901	-1290.85	820.778
490	0	42.7517	-1158.35	1632.61	140.79	-1154.56	1637.95	22.8241	-1309.54	1674.39	167.302	-1299.48	1675.8	93.8489	-1368.97	1503.99	75.1843	-1427.17	1243.03	105.4	-1219.4	1421.53	111.087	-1130.75	1210.59	143.711	-1437.73	1303.85	-85.6521	-1273.3	1456.08	-159.893	-1312.4	1228.14	-174.353	-1331.23	1129.69	-212.359	-1283.07	967.273	-184.625	-1247.08	883.429	-231.134	-1301.1	889.867	-243	-1254.04	826.121
491	0	44.3397	-1142.34	1634	142.506	-1138.87	1638.85	24.0299	-1293.17	1676.76	168.61	-1283.94	1677.09	93.7906	-1353.61	1505.94	74.1485	-1412.36	1245.14	106.267	-1204.4	1423.15	112.034	-1116.26	1213.06	142.342	-1423.29	1305.8	-84.9153	-1256.72	1458.88	-160.423	-1292.64	1230.89	-175.395	-1309.3	1131.97	-212.333	-1253.33	970.858	-183.766	-1214.7	888.955	-230.539	-1267.94	892.681	-242.066	-1217.45	831.696
492	0	45.9062	-1126.44	1635.1	143.898	-1123.21	1639.3	25.45	-1277.04	1678.51	169.959	-1268.15	1678.13	93.8538	-1338.39	1507.49	73.2904	-1397.34	1246.94	107.063	-1189.54	1424.2	112.925	-1101.91	1215.05	141.098	-1408.5	1307.33	-84.0587	-1240.34	1461.21	-161.152	-1272.5	1233.49	-177.276	-1286.71	1133.99	-212.253	-1223.53	974.62	-182.786	-1181.32	894.984	-230.355	-1234.41	895.723	-240.248	-1180.78	837.228
493	0	47.3382	-1110.55	1635.76	145.542	-1107.56	1639.51	26.6634	-1261.05	1679.76	171.199	-1252.54	1678.59	94.0213	-1322.75	1508.43	72.5129	-1382.25	1248.18	108.073	-1174.39	1424.84	113.996	-1087.67	1216.41	139.998	-1393.73	1308.32	-83.3026	-1223.79	1462.89	-161.99	-1252.39	1235.61	-178.86	-1264.38	1135.49	-211.786	-1193.66	978.214	-181.39	-1148.23	900.862	-229.551	-1200.93	898.626	-238.465	-1144.19	842.863
494	0	48.5906	-1094.77	1635.95	146.842	-1092.06	1639.18	27.7336	-1244.99	1680.31	172.823	-1236.49	1678.81	94.1345	-1307.13	1508.95	71.5751	-1367.25	1248.73	108.918	-1159.26	1424.85	114.988	-1073.46	1217.15	138.934	-1378.59	1308.71	-82.4217	-1207.55	1464.04	-162.684	-1232.15	1237.08	-180.442	-1241.86	1136.52	-211.471	-1163.99	981.639	-179.768	-1115.23	906.786	-228.07	-1167.62	901.562	-236.018	-1107.85	848.518
495	0	49.8624	-1078.86	1635.6	148.22	-1076.4	1638.65	28.7217	-1229.11	1680.36	173.772	-1220.96	1678.31	94.159	-1291.59	1508.96	70.7669	-1352.16	1249.04	109.844	-1144.14	1424.5	115.724	-1059.56	1217.24	137.719	-1364.13	1308.99	-81.7511	-1191.32	1464.34	-163.431	-1211.88	1237.89	-181.834	-1219.3	1137.13	-211.01	-1134.28	984.957	-178.162	-1082.59	912.645	-227.407	-1133.96	904.755	-233.455	-1071.65	854.089
496	0	50.7032	-1062.84	1634.53	149.051	-1060.93	1637.45	29.3232	-1213.34	1679.67	174	-1205.82	1676.7	94.2364	-1276.24	1508.35	69.9748	-1337.23	1248.57	110.532	-1128.97	1423.56	116.564	-1045.51	1216.56	136.789	-1349.44	1308.41	-80.9039	-1175.14	1464.15	-164.097	-1191.44	1238.05	-183.375	-1196.57	1137.3	-210.452	-1104.6	987.984	-176.489	-1049.87	918.628	-227.023	-1100.62	908.252	-230.512	-1035.92	859.714
497	0	51.6871	-1047.09	1633.15	150.313	-1045.2	1636.12	30.1607	-1197.29	1678.62	174.663	-1190.21	1675.28	94.4927	-1260.83	1507.21	69.4093	-1322.5	1247.6	111.255	-1113.82	1421.97	117.646	-1031.29	1215.51	136.294	-1334.5	1307.32	-80.2884	-1159.47	1463.2	-164.841	-1171.01	1237.55	-184.62	-1173.84	1136.64	-209.807	-1075.09	991.116	-174.468	-1017.58	924.44	-224.963	-1067.22	911.268	-227.47	-1000.24	865.423
498	0	52.5429	-1031.2	1631.3	151.22	-1029.51	1634.2	30.8589	-1181.21	1677.28	175.326	-1174.51	1673.77	94.8551	-1245.4	1505.76	69.3968	-1307.43	1246.27	112.017	-1098.6	1420.41	118.537	-1016.83	1214.01	136.082	-1319.53	1305.86	-79.4282	-1143.45	1461.94	-165.469	-1150.55	1236.91	-185.681	-1150.86	1135.57	-209.052	-1045.78	993.779	-172.539	-985.656	930.546	-223.478	-1034.17	914.344	-224.153	-965.153	871.363
499	0	53.3453	-1015.33	1629.5	151.899	-1013.73	1632.11	31.2846	-1165.24	1675.58	176.281	-1158.53	1672.7	95.2043	-1230.06	1504.25	69.4795	-1292.86	1244.81	112.736	-1083.39	1418.28	119.403	-1002.18	1211.9	135.992	-1304.59	1304.27	-79.0038	-1127.62	1460.3	-166.117	-1129.89	1235.71	-186.745	-1127.53	1134.64	-208.008	-1016.42	996.511	-170.357	-954.054	936.726	-222.1	-1001.2	917.723	-220.97	-930.449	877.527
500	0	53.9223	-999.329	1627	152.601	-997.951	1629.59	31.7848	-1149.23	1673.5	176.431	-1142.91	1670.35	95.6273	-1214.79	1502.14	70.189	-1278.2	1242.83	113.509	-1068.22	1415.99	120.197	-987.222	1209.33	136.354	-1289.68	1302.2	-78.3556	-1111.8	1458.1	-166.592	-1109.21	1234.09	-187.443	-1104.19	1133.22	-206.799	-987.281	999.196	-167.651	-923.099	942.498	-219.648	-968.82	921.066	-217.235	-896.433	883.759
501	0	54.5173	-983.483	1624.05	153.387	-982.192	1626.79	32.0658	-1133.08	1671.01	177.346	-1126.83	1668.44	96.0987	-1199.64	1499.85	71.306	-1263.58	1240.36	114.247	-1053.14	1413.28	120.912	-972.186	1206.26	136.971	-1274.87	1299.83	-77.4903	-1096.14	1455.62	-166.599	-1088.78	1232.4	-188.082	-1080.68	1131.74	-205.247	-958.532	1001.91	-164.812	-892.671	948.353	-217.839	-936.678	924.952	-213.484	-862.876	890.213
502	0	55.6183	-968.067	1620.86	153.854	-966.349	1623.65	32.5908	-1116.98	1668.58	177.241	-1111.22	1665.32	96.6534	-1184.43	1497.6	72.8176	-1248.88	1237.97	115.055	-1038.03	1410.6	121.638	-956.802	1202.95	137.754	-1260.04	1297.68	-76.8371	-1080.57	1452.81	-166.386	-1068.1	1230.84	-188.471	-1057.21	1130.56	-203.454	-930.006	1004.69	-161.667	-863	953.792	-215.714	-905.04	929.033	-209.664	-830.142	897.079
503	0	55.7336	-952.094	1617.35	154.333	-950.573	1620.26	32.9508	-1101.04	1665.83	177.493	-1095.1	1662.64	97.2972	-1169.16	1495.19	74.6065	-1234.04	1235.66	115.886	-1022.92	1407.67	122.217	-941.26	1199.32	138.728	-1245.13	1295.4	-75.7444	-1064.89	1449.9	-165.813	-1047.57	1229.41	-189.066	-1033.73	1129.69	-201.463	-901.841	1007.89	-158.381	-834.15	959.211	-213.069	-874.05	933.127	-205.659	-798.315	903.91
504	0	56.509	-936.372	1613.65	154.88	-934.832	1616.72	33.5122	-1085.08	1662.9	178.235	-1079.22	1660.23	98.0249	-1153.93	1492.65	76.8765	-1218.61	1233.08	116.691	-1007.74	1404.58	122.762	-925.331	1195.68	140.068	-1230.05	1292.94	-74.7991	-1049.39	1447.07	-164.912	-1026.91	1227.99	-189.228	-1010.11	1129.17	-198.943	-874.42	1011.07	-155.011	-806.075	964.428	-210.594	-843.941	937.591	-201.768	-767.389	911.024
505	0	56.8866	-920.766	1610.16	155.787	-919.085	1613.44	34.0879	-1069	1660.2	179.335	-1062.84	1657.85	98.8695	-1138.68	1489.95	79.1705	-1202.86	1230.27	117.418	-992.621	1401.57	123.374	-909.218	1192.4	141.416	-1214.98	1290.39	-73.7212	-1034.05	1444.44	-163.649	-1006.55	1226.84	-188.451	-987.242	1128.21	-196.524	-847.768	1014.42	-151.546	-778.748	969.815	-207.881	-814.691	942.193	-198.122	-737.548	918.101
506	0	58.1403	-905.16	1606.89	156.258	-903.323	1610.02	34.6016	-1053.08	1657.34	179.641	-1047.18	1654.96	99.6147	-1123.45	1487.31	81.232	-1186.93	1227.34	118.332	-977.308	1398.79	124.097	-893.091	1189.46	142.776	-1199.86	1287.87	-72.5774	-1018.62	1441.9	-162.401	-986.18	1225.69	-187.591	-964.334	1127.53	-193.884	-821.657	1018.14	-148.018	-752.364	975.107	-205.379	-786.37	946.953	-194.406	-708.649	925.577
507	0	58.2371	-889.58	1603.46	157.019	-887.6	1606.82	35.3432	-1037.36	1654.47	180.042	-1031.51	1652.01	100.476	-1108.33	1484.28	82.7923	-1171.7	1224.25	119.244	-961.927	1395.91	124.844	-876.885	1186.39	144.161	-1184.58	1285.04	-71.3433	-1003.3	1439.23	-160.791	-966.217	1224.34	-186.678	-942.16	1127.51	-191.324	-796.405	1021.64	-144.563	-726.802	980.343	-202.753	-758.908	951.84	-190.695	-680.814	932.896
508	0	59.4267	-874.073	1600.37	157.883	-872.111	1603.85	36.1695	-1021.74	1651.44	180.845	-1015.92	1649.47	101.477	-1092.96	1481.32	84.3742	-1156.3	1221.09	120.162	-946.454	1393.05	125.739	-860.881	1183.66	145.67	-1169.04	1281.96	-70.078	-987.78	1436.79	-159.026	-946.542	1223.11	-186.883	-920.38	1127.79	-188.322	-771.944	1025.25	-141.166	-702.213	985.273	-200.305	-732.438	956.915	-187.15	-654.102	940.076
509	0	60.493	-858.707	1597.28	158.884	-856.622	1600.92	37.3717	-1006.18	1648.76	182.331	-1000.2	1647.32	102.663	-1077.5	1478.47	85.939	-1140.17	1217.98	121.365	-930.898	1390.42	126.842	-844.664	1181.61	147.125	-1153.28	1279.05	-68.8277	-972.201	1434.64	-157.323	-927.28	1222.1	-185.414	-899.558	1127.1	-185.734	-748.483	1028.52	-137.702	-678.424	990.425	-197.685	-707.049	961.621	-183.732	-628.386	947.101
510	0	61.7214	-843.228	1594.92	160.145	-840.965	1598.34	38.4906	-990.663	1646.27	183.881	-984.471	1644.92	104.015	-1062.05	1475.89	87.1263	-1123.87	1215.14	122.732	-915.221	1387.98	128.117	-828.565	1179.71	148.412	-1137.16	1276.21	-67.4832	-956.595	1432.53	-155.388	-908.389	1220.94	-183.411	-879.1	1126.54	-183.089	-725.811	1031.74	-134.639	-655.661	994.74	-195.055	-682.655	965.892	-180.468	-603.808	953.716
511	0	63.1915	-827.825	1592.36	161.523	-825.567	1595.94	39.8876	-975.36	1643.79	184.887	-969.242	1642.45	105.368	-1046.52	1473.18	88.3983	-1107.3	1212.26	124.152	-899.48	1385.62	129.86	-812.417	1178.04	149.671	-1120.97	1273.23	-65.8587	-940.654	1430.51	-153.31	-890.425	1219.36	-181.392	-859.603	1125.7	-180.555	-704.183	1034.31	-131.716	-633.604	998.749	-192.514	-659.43	969.665	-177.501	-580.475	959.757
512	0	64.2876	-812.329	1590.29	163.213	-810.166	1593.78	41.4316	-959.929	1641.49	186.219	-954.085	1639.75	106.802	-1030.93	1470.53	89.3958	-1090.64	1209.28	125.91	-883.558	1383.57	131.548	-796.325	1176.44	150.769	-1104.75	1270.35	-64.1203	-924.659	1428.53	-151.558	-872.703	1217.87	-180.16	-840.523	1125.04	-178.05	-683.493	1036.39	-129.318	-612.765	1001.92	-189.904	-637.531	972.602	-174.813	-558.272	965.171
513	0	66.0975	-796.738	1588.69	164.899	-794.729	1592.06	43.1364	-944.475	1639.74	187.812	-938.75	1637.89	108.342	-1015.32	1468.26	90.2575	-1073.67	1206.81	127.769	-867.591	1381.8	133.595	-780.167	1175.28	151.849	-1088.3	1267.75	-62.4177	-908.561	1427.02	-149.974	-855.682	1216.43	-178.055	-822.264	1124.22	-175.72	-663.888	1038	-126.888	-592.451	1005.36	-187.436	-616.797	975.139	-172.64	-537.339	969.994
514	0	68.428	-781.373	1587.28	166.814	-779.3	1590.81	44.9438	-929.102	1638.08	189.859	-923.34	1636.13	110.071	-999.572	1466.27	91.3214	-1056.35	1204.56	129.598	-851.534	1380.33	135.565	-763.71	1174.09	152.789	-1071.69	1265.31	-60.4389	-892.314	1425.66	-148.229	-839.033	1215.34	-175.912	-804.426	1123.32	-173.76	-645.167	1038.88	-125.006	-573.347	1007.6	-185.165	-597.357	976.792	-170.977	-517.674	973.947
515	0	70.4128	-765.959	1586.21	168.649	-764.023	1589.6	47.1565	-913.826	1636.82	191.711	-907.886	1635	112.134	-983.691	1464.36	92.6778	-1039.02	1202.36	131.623	-835.277	1379.25	137.717	-746.8	1173.35	153.981	-1055.02	1263.04	-58.5353	-876.105	1424.55	-146.549	-822.744	1214.48	-174.401	-787.011	1122.39	-171.832	-627.339	1039.06	-123.388	-555.08	1009.1	-182.898	-579.156	977.481	-169.693	-499.234	976.95
516	0	72.4157	-750.504	1585.87	170.838	-748.144	1589.23	49.5961	-898.419	1636.15	194.46	-891.981	1634.62	114.295	-967.703	1462.99	94.1716	-1021.28	1200.71	133.804	-818.953	1378.76	140.259	-729.238	1173.47	155.449	-1037.91	1261.14	-56.4643	-860.055	1423.95	-144.942	-806.569	1214	-172.181	-770.572	1121.96	-170.157	-610.431	1038.78	-121.982	-537.767	1010.1	-180.69	-561.977	977.427	-168.772	-482.162	978.959
517	0	74.6609	-734.973	1585.86	172.94	-732.646	1589.12	51.9796	-882.859	1635.93	197.153	-876.271	1634.41	116.441	-951.776	1462.1	95.528	-1003.91	1199.49	135.892	-802.554	1378.76	142.643	-711.45	1173.98	156.927	-1020.88	1259.62	-54.4903	-843.904	1423.68	-143.247	-790.607	1213.65	-170.329	-754.686	1121.31	-168.386	-594.282	1038.27	-120.523	-521.33	1010.46	-178.694	-545.887	976.766	-168.184	-466.151	979.835
518	0	76.5777	-719.361	1586.3	175.398	-716.722	1589.7	54.5294	-867.68	1635.75	199.345	-861.013	1634.12	118.717	-935.717	1461.56	96.9495	-986.669	1198.81	138.116	-786.165	1378.85	144.941	-693.475	1174.65	158.821	-1003.62	1258.54	-52.3998	-827.776	1423.61	-141.394	-774.859	1213.36	-167.772	-739.17	1120.62	-166.739	-579.002	1037.2	-119.239	-505.705	1010	-176.774	-530.816	975.837	-167.403	-451.193	979.496
519	0	79.109	-703.762	1587.29	177.651	-701.352	1590.07	57.3441	-852.219	1636.39	202.031	-845.439	1634.34	121.11	-919.45	1461.45	98.5245	-969.797	1198.69	140.296	-769.616	1379.41	146.911	-675.517	1175.43	160.836	-986.421	1257.99	-50.4272	-811.459	1424.01	-139.48	-759.267	1213.26	-164.682	-724.224	1119.7	-165.003	-564.492	1035.99	-118.035	-491.047	1008.76	-174.811	-516.739	973.945	-167.035	-437.246	978.17
520	0	81.6756	-688.024	1588.69	180.386	-685.482	1591.17	60.2361	-836.539	1637.29	205.463	-829.423	1635.1	123.397	-903.152	1462.1	100.131	-953.109	1199.27	142.354	-753.194	1380.25	148.649	-657.926	1176.41	162.952	-969.211	1258.09	-48.2896	-795.058	1424.94	-137.388	-743.842	1213.55	-162.2	-709.841	1119.6	-163.297	-550.826	1034.29	-116.7	-477.227	1006.69	-173.356	-503.722	972.026	-166.294	-424.277	975.643
521	0	84.4699	-672.149	1590.3	183.084	-669.803	1592.42	63.2586	-821.113	1638.61	208.159	-814.069	1635.63	125.524	-886.71	1463.2	101.662	-937.037	1200.35	144.1	-736.726	1381.08	150.203	-640.611	1177.48	164.997	-952.122	1258.76	-46.3802	-778.705	1426.19	-134.842	-728.992	1213.75	-160.438	-696.102	1119.71	-161.595	-537.928	1032.55	-115.398	-464.299	1004.13	-171.623	-491.625	969.35	-165.527	-412.306	972.033
522	0	87.0743	-656.239	1592.01	185.456	-654.227	1593.28	65.9884	-805.294	1640.25	210.639	-798.458	1635.71	127.517	-870.578	1464.58	103.322	-921.295	1201.91	145.675	-720.592	1382.12	151.465	-623.741	1178.59	166.621	-935.915	1260.04	-44.4728	-762.634	1427.68	-132.681	-714.021	1214.46	-158.231	-682.636	1120.26	-160.046	-525.722	1030.49	-114.086	-452.337	1000.57	-170.158	-480.651	966.574	-164.557	-401.264	967.548
523	0	90.2458	-640.313	1594.01	188.254	-638.496	1594.62	68.5312	-789.373	1642.14	213.13	-782.69	1636.35	129.294	-854.503	1466.22	104.901	-905.988	1203.74	146.892	-704.658	1383.44	152.343	-607.343	1179.93	168.178	-920.24	1261.59	-42.8752	-746.611	1429.5	-130.44	-699.509	1215.31	-155.923	-669.523	1120.68	-158.286	-514.391	1028.37	-112.677	-441.304	996.943	-168.674	-470.614	963.388	-163.162	-391.297	962.287
524	0	92.5795	-624.47	1595.93	190.719	-622.863	1596.06	70.5928	-773.515	1644.44	215.118	-767.031	1637.83	130.748	-838.781	1468.25	106.116	-890.911	1205.92	147.739	-688.902	1385.09	152.971	-591.585	1181.42	169.278	-904.912	1263.47	-41.556	-731.144	1431.44	-128.287	-685.296	1216.34	-154.903	-656.966	1121.79	-156.789	-503.796	1025.97	-111.201	-431.363	992.615	-167.282	-461.599	960.043	-161.752	-382.221	956.447
525	0	94.3189	-608.678	1597.82	192.352	-607.316	1597.16	72.879	-757.406	1646.8	217.098	-751.425	1639.5	132.166	-823.484	1470.28	107.298	-875.79	1208.25	148.352	-673.449	1386.72	153.252	-576.234	1182.98	170.337	-889.791	1265.53	-40.4789	-715.992	1433.5	-126.331	-671.445	1217.61	-152.299	-644.699	1122.72	-155.181	-493.939	1023.54	-109.503	-422.352	988.002	-166.139	-453.381	956.187	-160.199	-374.37	949.988
526	0	96.1179	-592.799	1599.77	194.157	-591.56	1598.88	74.3541	-741.479	1649.56	219.077	-735.658	1641.71	133.618	-808.508	1472.55	108.811	-860.91	1210.66	149.103	-658.217	1388.99	153.488	-561.257	1184.99	171.934	-874.549	1267.85	-39.5989	-701.523	1435.85	-124.632	-658.033	1219.29	-150.4	-633.113	1123.99	-153.662	-484.824	1020.96	-108.016	-414.342	982.929	-164.845	-446.09	952.446	-158.362	-367.487	942.997
527	0	97.1841	-577.19	1601.75	195.441	-575.813	1600.7	75.7349	-725.541	1652.48	220.909	-719.299	1644.55	134.994	-793.607	1474.99	110.395	-846.18	1213.23	149.537	-643.432	1391.53	153.445	-546.615	1187.43	173.798	-859.471	1270.41	-38.7452	-687.401	1438.47	-123.052	-645.123	1221.1	-149.187	-621.928	1125.41	-152.09	-476.611	1018.29	-106.425	-407.442	977.679	-163.787	-439.884	948.598	-156.277	-361.615	935.988
528	0	97.7914	-561.789	1603.81	195.897	-560.23	1602.64	76.6265	-709.839	1655.44	221.434	-703.251	1647.6	136.106	-779.328	1477.93	111.991	-831.55	1216.26	150.033	-628.628	1394.38	153.277	-532.085	1190.11	175.659	-844.67	1273.19	-38.2747	-673.623	1441.1	-121.719	-632.616	1223.05	-147.145	-611.493	1126.46	-150.735	-469.215	1015.52	-104.858	-401.533	972.158	-162.58	-434.466	944.628	-154.255	-356.825	928.602
529	0	98.1016	-546.432	1606.01	195.277	-545.062	1604.27	77.2158	-694.203	1658.41	222.582	-687.623	1650.8	136.972	-765.196	1480.7	113.762	-817.201	1219.17	150.347	-614.008	1397.12	153.012	-517.604	1192.94	177.449	-830.017	1276.05	-37.676	-660.123	1443.71	-120.588	-620.866	1224.77	-145.353	-601.457	1127.65	-149.223	-462.473	1012.81	-103.016	-396.413	966.727	-161.415	-429.818	940.786	-151.983	-352.989	920.93
530	0	98.3475	-531.235	1608.26	195.808	-529.134	1607.4	77.6134	-678.672	1661.65	222.396	-671.91	1653.94	138.296	-750.371	1484.02	115.713	-802.971	1222.33	150.924	-599.478	1400.52	152.683	-503.227	1196.07	179.381	-815.558	1279.28	-37.2914	-646.765	1446.27	-119.587	-609.682	1226.42	-144.031	-591.979	1128.92	-147.815	-456.674	1009.87	-101.433	-392.339	961.084	-160.42	-426.142	937.047	-149.759	-350.154	913.489
531	0	97.6286	-516.12	1611.06	195.399	-513.707	1610.24	77.7398	-663.314	1665.13	222.566	-655.76	1657.77	139.672	-735.508	1487.78	117.679	-788.915	1225.9	151.31	-585.181	1404.28	152.448	-488.855	1199.49	181.253	-801.059	1283.14	-36.9489	-633.419	1449.04	-118.405	-599.055	1228.29	-142.333	-583.312	1130.1	-146.419	-451.564	1007.28	-99.8383	-389.314	955.584	-159.343	-423.227	933.416	-147.473	-348.342	906.016
532	0	97.3128	-501.127	1613.79	194.888	-498.468	1613.3	77.9168	-648.082	1668.75	222.901	-640.059	1662.18	140.992	-720.703	1491.74	119.772	-774.702	1229.87	151.812	-570.814	1408.16	152.001	-474.637	1203.04	183.127	-786.666	1287.26	-36.7446	-620.119	1452.02	-117.717	-588.871	1230.37	-140.565	-575.065	1131.54	-145.403	-447.239	1004.68	-98.375	-386.801	950.633	-158.016	-421.47	929.378	-145.51	-347.583	898.827
533	0	97.592	-486.348	1616.71	194.777	-483.263	1616.54	78.0785	-633.053	1672.26	222.905	-624.435	1666.42	142.31	-705.963	1495.7	122.041	-760.467	1233.62	152.331	-556.388	1411.85	151.992	-460.385	1206.6	185.362	-772.136	1291.36	-36.1276	-606.787	1454.83	-116.713	-579.303	1232.28	-138.638	-567.315	1132.87	-144.289	-443.817	1002.32	-97.1303	-385.143	945.894	-157.029	-420.051	926.272	-143.531	-347.83	891.73
534	0	97.3818	-471.626	1619.73	194.924	-468.052	1620.3	78.2731	-618.081	1675.68	223.117	-609.123	1670.43	143.585	-691.267	1499.38	124.338	-746.147	1237.49	152.735	-541.998	1415.61	151.867	-446.34	1210.4	187.626	-757.626	1295.24	-35.6508	-593.469	1457.69	-115.943	-570.226	1234.18	-136.738	-560.004	1134.09	-142.883	-441.215	999.605	-96.0867	-384.106	941.422	-156.039	-419.84	922.969	-142.033	-349.095	885.155
535	0	97.4414	-457.08	1622.66	194.867	-453.138	1623.63	78.2618	-603.314	1678.88	223.027	-594.185	1674.16	144.578	-676.772	1502.86	126.433	-731.806	1240.91	153.204	-527.475	1419.18	151.858	-432.305	1214.01	189.82	-742.947	1299.11	-35.2254	-580.293	1460.62	-114.954	-561.448	1235.96	-135.024	-553.155	1135.71	-141.595	-438.947	997.609	-95.2387	-383.602	937.266	-155.177	-420.338	919.965	-140.789	-351.203	878.963
536	0	97.1043	-442.625	1625.4	194.65	-438.728	1626.45	78.3079	-588.971	1681.62	222.991	-579.321	1677.42	145.429	-662.398	1505.95	128.494	-717.317	1244.05	153.667	-512.883	1422.5	151.825	-418.471	1217.48	192.107	-728.104	1302.65	-34.6637	-566.855	1463.16	-113.9	-552.76	1237.54	-133.269	-546.547	1137.08	-140.646	-437.157	995.501	-94.4592	-383.546	933.267	-154.166	-421.293	917.081	-139.869	-353.976	873.037
537	0	97.4245	-428.207	1627.99	194.787	-424.271	1629.34	78.6436	-574.412	1684.35	223.55	-565.016	1680.59	146.822	-647.607	1508.77	130.575	-702.907	1246.8	154.119	-498.291	1425.25	152.184	-404.479	1220.85	194.602	-713.106	1305.76	-34.1163	-553.552	1465.6	-112.775	-544.273	1238.94	-131.569	-540.211	1138.34	-139.576	-435.808	993.46	-93.7	-383.841	929.459	-152.881	-422.883	914.427	-138.916	-357.287	867.458
538	0	98.231	-413.789	1630.61	195.511	-409.614	1632.25	79.2915	-560.119	1686.67	224.192	-550.418	1683.25	148.232	-632.392	1511.4	132.471	-688.671	1249.25	154.679	-483.671	1427.76	152.254	-390.627	1223.71	197.027	-698.092	1308.37	-33.5113	-540.237	1467.85	-111.508	-535.82	1240.23	-129.56	-534.328	1139.51	-138.376	-434.839	991.515	-93.327	-384.881	925.717	-151.549	-424.908	911.668	-138.192	-361.007	862.184
539	0	98.6607	-399.602	1632.64	195.671	-395.441	1634.25	79.5077	-546	1688.36	224.571	-536.329	1685.25	149.316	-617.797	1513.54	134.18	-674.097	1251.17	155.09	-469.038	1429.59	152.587	-376.565	1226.26	199.278	-683.073	1310.7	-32.8749	-526.736	1469.48	-110.18	-527.334	1241.21	-127.664	-528.432	1140.47	-137.239	-434.05	989.431	-92.6113	-385.921	921.927	-150.251	-427.105	909.163	-137.611	-365.363	857.172
540	0	98.8271	-385.324	1634.3	196.241	-381.134	1636.29	80.1309	-532.086	1689.4	225.334	-522.142	1686.76	150.37	-603.21	1514.8	135.695	-659.784	1252.57	155.778	-454.294	1431.24	152.782	-362.484	1228.27	201.482	-667.986	1312.44	-32.2108	-513.19	1470.64	-108.97	-518.893	1241.83	-125.832	-522.766	1141.24	-135.913	-433.613	987.276	-91.9109	-387.092	918.141	-148.874	-429.668	906.663	-136.95	-369.832	852.168
541	0	99.6438	-371.118	1635.75	196.521	-366.793	1637.6	80.8208	-518.231	1690.08	225.428	-508.061	1687.26	151.543	-588.468	1515.67	137.511	-645.149	1253.59	156.371	-439.601	1432.27	153.066	-348.308	1229.79	203.728	-652.973	1313.57	-31.6002	-499.544	1471.37	-107.672	-510.488	1242.19	-124.037	-517.06	1141.57	-134.994	-433.186	985.045	-91.314	-388.496	914.584	-147.646	-432.416	904.038	-136.222	-374.414	847.683
542	0	99.7944	-356.984	1636.71	197.398	-352.358	1639.11	81.5619	-504.399	1690.17	226.327	-494.018	1687.83	152.574	-573.73	1516.05	139.306	-630.537	1253.99	156.961	-424.874	1432.75	153.5	-334.236	1230.75	205.692	-638	1314.21	-31.0102	-485.767	1471.81	-106.516	-501.898	1242.25	-122.299	-511.335	1141.97	-133.999	-432.925	982.911	-90.7558	-390.02	910.942	-146.233	-435.213	901.815	-136.002	-379.053	843.241
543	0	100.514	-342.926	1637.2	197.584	-338.021	1639.55	82.354	-490.483	1689.9	227.274	-479.8	1687.76	153.701	-559.032	1515.97	141.007	-615.91	1254.21	157.594	-410.048	1432.61	153.857	-320.561	1230.74	207.613	-623.044	1314.51	-30.4209	-471.886	1471.52	-105.205	-493.272	1242.12	-120.457	-505.465	1142.08	-132.955	-432.63	980.506	-90.3136	-391.613	907.119	-145.008	-437.877	899.377	-135.499	-383.735	838.917
544	0	100.761	-328.692	1637.17	198.25	-323.5	1639.66	83.3572	-476.71	1689.1	228.068	-465.432	1686.97	154.812	-544.212	1515.42	142.647	-601.277	1253.71	158.218	-395.246	1431.89	154.664	-307.047	1230.19	209.473	-608.234	1314.11	-29.7768	-457.609	1470.68	-103.967	-484.698	1241.41	-118.501	-499.48	1141.71	-131.869	-432.22	977.88	-90.011	-393.206	903.099	-143.946	-440.577	897.154	-134.853	-388.443	834.515
545	0	101.55	-314.485	1636.72	198.756	-308.981	1639.24	84.4861	-462.844	1687.81	229.133	-450.976	1685.98	155.834	-529.352	1514.28	144.015	-586.907	1252.63	158.897	-380.471	1430.64	155.338	-293.664	1228.81	210.938	-593.518	1313.15	-29.0998	-443.314	1469.54	-102.738	-476.112	1240.55	-116.388	-493.493	1140.93	-130.986	-431.818	975.346	-89.9607	-394.617	899.321	-142.939	-443.143	894.782	-134.445	-393.117	830.078
546	0	101.739	-300.093	1635.77	199.109	-294.395	1638.26	85.4703	-448.826	1686.17	230.017	-436.488	1684.29	156.726	-514.757	1512.81	144.862	-572.45	1251.4	159.637	-365.606	1429.1	155.707	-280.527	1226.59	212.003	-578.921	1311.89	-28.5926	-428.724	1467.76	-101.336	-467.449	1239.13	-114.244	-487.234	1140.15	-130.214	-431.497	972.74	-89.7896	-395.795	895.911	-142.097	-445.721	892.625	-134.383	-397.596	826.125
547	0	102.712	-285.579	1634.4	199.704	-279.665	1636.73	86.3312	-434.741	1684.07	230.814	-421.916	1682.11	157.333	-500.149	1510.83	145.217	-557.936	1249.74	160.387	-350.93	1426.85	156.39	-266.374	1223.99	212.911	-564.435	1310.08	-28.0803	-413.898	1465.56	-99.9729	-458.445	1237.54	-112.053	-480.707	1139.07	-129.475	-430.741	970.232	-90.0368	-396.926	892.238	-141.456	-447.873	890.735	-134.077	-402.39	822.151
548	0	103.103	-271.058	1632.3	200.332	-264.9	1634.64	87.4926	-420.199	1681.93	231.745	-407.084	1679.56	158.17	-485.477	1508.53	145.171	-543.356	1247.5	161.152	-336.177	1424.19	157.525	-251.302	1221.03	213.571	-550.009	1307.86	-27.3818	-399	1463.03	-98.545	-449.066	1235.87	-109.542	-473.629	1137.88	-128.688	-429.901	967.759	-90.0949	-398.012	888.385	-140.648	-449.873	889.076	-134.035	-407.019	818.546
549	0	104.084	-256.295	1630.11	200.988	-250.037	1632.24	88.5117	-405.443	1679.54	232.816	-392.273	1677.21	159.247	-470.311	1506.47	144.742	-528.599	1245.21	161.749	-321.511	1421.41	158.487	-235.827	1217.58	213.958	-535.604	1305.47	-26.8285	-383.786	1460.51	-97.1992	-439.351	1234.19	-107.042	-466.316	1136.59	-127.888	-428.691	965.655	-90.855	-398.419	885.114	-139.613	-451.899	887.633	-134.325	-411.561	815.303
550	0	104.436	-241.525	1627.24	201.599	-235.18	1629.36	89.3409	-390.77	1676.78	233.611	-377.262	1674.56	159.882	-455.386	1503.73	144.227	-513.847	1242.79	162.477	-306.922	1418.52	159.292	-220.019	1213.95	213.895	-521.209	1302.74	-26.3656	-368.601	1457.83	-96.0297	-429.141	1232.45	-104.463	-458.518	1135.3	-127.153	-427.141	964.031	-91.2898	-399.26	881.702	-139.183	-453.369	886.898	-134.731	-415.875	812.615
551	0	105.057	-226.596	1624.04	202.296	-220.289	1626.19	90.0444	-375.807	1673.85	234.297	-362.356	1671.38	160.461	-440.769	1500.81	143.299	-499.028	1239.77	163.184	-292.305	1415.48	160.095	-204.087	1210.22	213.73	-506.799	1299.67	-25.9443	-353.354	1455	-95.1285	-418.403	1230.81	-102.168	-449.75	1134.14	-126.48	-425.07	962.285	-92.4004	-399.376	878.664	-138.306	-454.518	886.372	-135.396	-419.95	810.572
552	0	105.782	-211.681	1620.73	203.116	-205.359	1622.88	90.6978	-360.684	1670.77	234.888	-347.348	1668.01	160.858	-426.063	1497.39	142.417	-484.35	1236.65	163.779	-277.731	1412.23	161.145	-188.412	1206.6	213.282	-492.385	1296.22	-25.5949	-337.996	1452.16	-93.8796	-407.176	1228.89	-99.8781	-440.464	1132.92	-126.151	-422.36	961.1	-93.095	-398.69	876.316	-137.787	-454.943	886.271	-135.947	-423.643	808.917
553	0	106.516	-196.765	1617.15	203.886	-190.478	1619.37	91.4317	-345.735	1667.48	235.659	-332.362	1665.13	161.033	-411.319	1494.24	141.233	-469.562	1233.44	164.264	-263.015	1408.86	162.257	-173.072	1202.95	212.619	-477.806	1292.69	-25.3814	-322.648	1449.41	-92.906	-395.349	1227.16	-97.7308	-430.428	1131.74	-125.697	-418.918	960.189	-94.4131	-397.6	874.265	-136.72	-454.814	886.434	-136.75	-426.822	807.743
554	0	107.163	-181.784	1613.59	204.615	-175.599	1615.89	91.916	-330.615	1664.3	236.002	-317.496	1661.73	161	-396.739	1491.03	140.286	-454.585	1229.98	164.563	-248.17	1405.47	162.989	-158.038	1199.1	211.917	-463.088	1289.18	-25.17	-307.19	1446.51	-92.0571	-382.926	1225.19	-95.6947	-419.972	1130.36	-125.735	-414.523	959.658	-95.847	-395.484	872.447	-136.646	-453.289	887.325	-137.616	-429.03	806.92
555	0	107.739	-166.767	1610.33	205.379	-160.832	1612.46	92.3308	-315.375	1661.28	236.635	-302.639	1658.53	160.528	-382.676	1487.38	139.453	-439.405	1226.49	164.758	-233.164	1402.12	163.689	-143.136	1195.25	211.168	-448.181	1285.3	-25.1233	-291.607	1443.61	-91.3906	-370.193	1223.16	-94.0497	-408.41	1129.17	-126.029	-409.131	959.17	-97.4533	-392.449	871.045	-136.841	-450.783	888.269	-138.664	-430.395	806.57
556	0	108.626	-151.564	1607.44	206.112	-145.956	1609.45	92.6258	-300.248	1658.4	236.811	-287.848	1655.49	160.206	-367.751	1484.11	138.763	-424.137	1223.13	165.008	-218.12	1398.99	164.363	-128.066	1191.8	210.43	-433.145	1281.74	-25.2871	-275.9	1440.75	-91.0555	-356.989	1221.23	-92.5812	-396.638	1127.73	-126.625	-402.729	958.898	-99.5335	-388.424	869.668	-137.485	-446.68	889.529	-139.778	-430.683	806.443
557	0	108.895	-136.466	1604.56	206.195	-131.231	1606.37	92.3028	-285.168	1655.54	236.738	-273.127	1652.46	159.422	-352.998	1481.07	138.051	-408.622	1219.85	165.2	-202.953	1396.13	164.963	-112.423	1189.02	209.478	-417.839	1278.62	-25.4756	-260.203	1437.65	-90.686	-343.106	1219.02	-91.4185	-383.867	1126.15	-127.558	-395.126	958.555	-102.092	-382.809	868.786	-138.767	-441.167	891.018	-140.814	-429.73	806.62
558	0	108.895	-121.378	1601.93	206.148	-116.475	1603.85	91.8244	-270.282	1652.64	235.957	-258.45	1649.28	158.222	-338.386	1477.89	137.692	-392.809	1216.89	165.37	-187.651	1393.57	165.555	-96.5799	1186.73	208.881	-402.379	1275.57	-25.857	-244.372	1434.64	-90.2319	-328.874	1216.28	-90.6572	-370.58	1124.47	-128.318	-386.52	958.022	-104.512	-376.503	867.314	-140.111	-434.27	892.441	-142.332	-427.292	807.156
559	0	108.828	-106.375	1600.06	206.076	-101.728	1601.99	91.3751	-255.307	1650.19	235.873	-244.217	1647.31	157.79	-322.72	1475.28	137.681	-376.931	1213.85	165.17	-172.193	1391.33	165.991	-80.8648	1184.97	208.438	-386.739	1272.66	-26.3522	-228.479	1431.62	-90.011	-314.111	1213.84	-90.2664	-356.766	1122.53	-130.258	-376.647	957.793	-107.128	-368.625	865.964	-141.962	-426.109	893.435	-143.615	-423.224	807.702
560	0	108.244	-91.3693	1598.35	205.666	-86.9702	1600.61	90.4621	-240.404	1647.82	234.903	-229.473	1645.51	157.004	-307.277	1473.27	137.849	-360.696	1211.32	164.807	-156.691	1389.38	165.998	-65.342	1183.37	207.846	-371.131	1270.32	-26.8965	-212.585	1429.17	-90.1197	-298.773	1211.45	-90.001	-342.205	1120.83	-131.967	-365.509	957.623	-108.91	-360.227	865.324	-144.384	-416.613	894.399	-145.455	-417.423	808.376
561	0	107.424	-76.4788	1597.03	204.737	-72.2725	1599.59	89.1488	-225.665	1645.87	233.891	-215.141	1644.14	155.979	-291.898	1471.08	137.969	-344.471	1208.91	164.322	-140.945	1387.87	165.612	-49.8707	1182.04	207.64	-354.928	1268.14	-27.6483	-196.617	1426.89	-90.3238	-282.933	1209.16	-90.5332	-327.055	1119.34	-134.074	-353.329	957.203	-112.514	-349.334	864.516	-147.013	-405.489	895.325	-147.668	-409.577	809.402
562	0	106.137	-61.6085	1595.88	203.72	-57.6452	1598.96	87.4766	-210.994	1643.94	232.274	-200.83	1642.93	154.733	-276.513	1469.15	138.207	-327.874	1206.57	163.778	-125.162	1386.58	164.889	-34.0237	1180.96	207.203	-338.796	1266.13	-28.4174	-180.901	1424.8	-91.0665	-266.783	1207.33	-91.2546	-311.627	1117.59	-136.025	-339.915	956.753	-114.589	-337.865	863.748	-149.862	-392.775	895.815	-150.189	-399.542	810.205
563	0	105.227	-46.6634	1595.56	202.896	-42.9602	1599.14	85.8899	-196.321	1642.5	230.553	-186.732	1642.17	153.587	-261.134	1467.45	138.371	-311.07	1204.7	163.072	-109.189	1385.92	164.277	-17.6259	1180.43	206.976	-322.521	1264.25	-29.4618	-164.999	1423.01	-91.554	-250.399	1205.15	-92.4801	-295.511	1116.69	-138.238	-325.369	956.173	-117.056	-324.676	863.037	-152.61	-378.774	895.903	-152.897	-387.631	810.652
564	0	104.152	-31.688	1595.89	201.659	-28.3062	1599.89	83.6006	-181.666	1641.68	228.458	-172.387	1642.11	152.045	-245.549	1466.3	138.315	-294.272	1203.21	162.283	-93.2391	1385.68	163.538	-0.64573	1180.42	206.346	-306.122	1263.01	-30.5195	-148.953	1421.83	-92.5013	-233.688	1203.69	-93.9504	-279.101	1115.57	-140.411	-309.637	955.464	-119.775	-309.607	862.357	-155.619	-363.222	895.905	-155.713	-373.537	810.68
565	0	102.34	-16.6599	1596.66	199.951	-13.7884	1601.03	81.4472	-166.82	1641.45	226.548	-158.163	1642.43	150.444	-229.861	1465.7	138.08	-277.372	1202.35	161.614	-77.2023	1386.06	162.792	16.6395	1180.85	205.418	-289.55	1262.33	-31.4753	-132.855	1420.88	-93.4577	-216.731	1202.64	-95.6767	-262.246	1114.82	-142.561	-292.717	954.898	-121.541	-293.796	861.4	-158.574	-346.2	895.634	-158.741	-357.229	810.442
566	0	101.33	-1.6125	1598.06	198.642	0.935441	1602.83	79.3086	-152.049	1641.45	224.301	-143.958	1642.99	149.238	-213.955	1465.74	137.558	-260.386	1201.8	160.867	-61.0087	1386.6	162.499	34.2905	1181.83	204.435	-272.835	1261.99	-32.3999	-116.491	1420.36	-95.0067	-199.722	1202.52	-97.321	-244.965	1114.17	-144.753	-274.747	954.422	-123.817	-275.676	861.046	-161.355	-327.931	894.945	-161.674	-338.982	809.989
567	0	99.3577	13.437	1600.08	197.181	15.6842	1605.36	77.0894	-137.262	1641.71	221.887	-129.663	1644.15	148.052	-197.905	1466.31	136.859	-243.404	1201.94	160.036	-44.7434	1387.69	162.1	51.7688	1183.04	203.392	-256.236	1262.39	-33.2623	-99.9685	1420.47	-96.0909	-182.355	1202.2	-99.0544	-227.327	1113.6	-147.021	-255.716	953.926	-125.765	-256.626	860.635	-164.086	-308.355	894.275	-164.962	-318.864	809.478
568	0	97.6942	28.5165	1602.45	195.209	30.4758	1608.38	74.6606	-122.554	1642.39	219.615	-115.368	1646.03	146.696	-181.907	1467.43	135.843	-226.661	1203.05	159.208	-28.57	1389.06	162.069	68.9417	1184.52	202.32	-239.866	1263.42	-34.1387	-83.5338	1420.83	-97.5479	-164.92	1202.64	-101.044	-209.198	1113.69	-149.247	-235.79	953.529	-127.514	-236.45	860.208	-166.868	-287.585	893.601	-168.444	-296.74	808.686
569	0	96.0389	43.7879	1605.07	193.327	45.4144	1611.52	72.3229	-107.87	1643.07	217.257	-100.942	1647.65	145.423	-166.27	1468.46	134.613	-210.348	1204.46	158.626	-12.4045	1390.64	162.183	85.5789	1185.52	201.333	-223.669	1264.85	-34.5673	-67.2886	1421.47	-98.9175	-147.292	1203.16	-102.954	-190.612	1113.63	-151.415	-214.954	953.256	-129.58	-215.393	859.632	-169.67	-265.805	892.446	-171.93	-273.197	807.51
570	0	94.424	58.7778	1607.72	191.699	60.6603	1614.91	70.4539	-92.9358	1644.16	215.288	-86.0685	1649.74	145.438	-149.891	1470.69	134.011	-194.634	1206.59	158.132	3.61036	1392.44	162.137	101.449	1186.59	200.841	-207.59	1266.87	-34.9965	-51.2395	1422.75	-100.002	-129.291	1203.89	-104.768	-171.76	1113.86	-153.412	-193.339	952.858	-132.11	-191.873	859.634	-172.096	-243.062	891.268	-175.426	-247.97	806.436
571	0	92.1163	73.8152	1609.94	189.815	75.7243	1617.84	68.7882	-78.0958	1645.23	213.801	-71.1562	1652.19	145.436	-133.269	1472.85	133.437	-179.38	1208.87	157.733	19.3115	1394.28	162.406	117.039	1188	200.788	-191.925	1269.42	-34.8297	-35.4897	1424.22	-100.917	-111.039	1204.58	-106.462	-152.648	1114.21	-155.508	-170.888	952.875	-133.832	-167.398	859.711	-174.474	-219.285	890.156	-178.768	-221.477	805.433
572	0	91.0533	88.8273	1612.06	187.996	90.8125	1620.47	67.4968	-63.2792	1646.43	212.195	-56.1358	1654.31	145.43	-117.47	1475.14	133.429	-164.486	1211.19	157.384	34.8452	1396.06	162.691	132.393	1189.33	200.934	-176.598	1272.41	-34.8128	-19.9862	1426.06	-102.099	-92.8612	1205.76	-108.07	-133.208	1114.32	-157.245	-147.791	952.648	-135.904	-142.5	859.652	-176.652	-194.716	889.034	-182.058	-193.508	804.604
573	0	89.7457	103.914	1614.09	186.912	106.233	1623.07	66.3811	-48.5352	1647.79	211.015	-40.9627	1656.5	145.487	-102.127	1477.44	133.667	-149.918	1213.36	157.317	50.1435	1397.86	162.766	147.305	1190.69	201.457	-161.742	1274.92	-34.7417	-4.9597	1427.93	-102.786	-74.3218	1206.57	-109.672	-113.788	1114.85	-158.983	-124.113	952.635	-138.179	-116.294	860.303	-178.574	-169.514	887.586	-185.403	-164.49	803.961
574	0	88.892	118.965	1616.16	185.86	121.438	1625.35	65.665	-33.5116	1649.61	210.492	-25.5418	1658.91	145.585	-86.8563	1479.57	133.738	-135.423	1215.52	157.3	64.9617	1399.76	162.827	161.899	1192.2	201.912	-147.185	1277.35	-34.7339	9.72636	1430.01	-103.568	-55.97	1207.51	-111.327	-94.3555	1115.2	-160.515	-99.986	952.522	-139.827	-89.6258	860.315	-180.131	-143.545	886.233	-187.997	-134.363	803.419
575	0	88.5224	133.975	1618.06	185.487	136.711	1627.6	65.0927	-18.4062	1651.89	209.855	-10.3541	1661.25	145.382	-72.5597	1481.93	133.694	-121.011	1218.1	157.348	79.5956	1401.94	162.868	176.154	1194.03	202.056	-132.613	1279.65	-34.794	24.2399	1432.39	-103.859	-37.3306	1208.53	-112.774	-74.3055	1115.85	-161.893	-75.4014	952.631	-141.744	-62.1422	860.728	-181.62	-116.929	885.024	-191.441	-103.265	803.568
576	0	88.3577	149.085	1620.05	185.131	151.679	1629.35	64.8879	-3.23573	1654.44	209.811	4.93219	1663.82	145.109	-58.3324	1484.45	133.531	-106.613	1220.53	157.39	93.916	1404.17	163.202	190.273	1196.3	201.757	-118.395	1282.19	-34.7559	38.8323	1434.79	-104.323	-18.7697	1209.89	-114.093	-54.3927	1116.7	-163.204	-50.2621	952.955	-143.381	-33.565	862.026	-182.841	-89.7092	883.92	-193.884	-71.4511	804.015
577	0	88.5284	164.15	1622.17	185.418	166.779	1631.31	65.1912	12.118	1657.34	209.929	20.1376	1666.23	145.209	-43.7032	1487.02	133.512	-92.0643	1222.74	157.542	108.202	1406.62	163.207	203.849	1198.32	201.423	-104.204	1284.63	-34.7147	53.3557	1437.13	-104.806	-0.407978	1211.52	-115.281	-34.3734	1117.34	-163.971	-24.7925	953.751	-144.195	-4.87104	863.189	-183.496	-61.7722	883.172	-196.052	-38.8009	805.069
578	0	88.8121	179.199	1624.69	186.323	181.799	1633.75	65.7494	27.4345	1660.54	210.849	35.3499	1669.36	145.058	-29.609	1489.69	133.051	-77.7466	1225.45	157.653	122.36	1409.29	163.465	217.49	1201.02	200.693	-90.1648	1287.14	-34.8887	67.7946	1440.04	-105.037	17.9671	1213.46	-116.184	-14.3393	1118.34	-164.774	1.03291	954.816	-144.991	24.5833	865.134	-184.027	-33.0299	882.67	-197.601	-5.74367	806.733
579	0	89.9106	194.231	1627.23	186.975	196.523	1635.86	66.3592	42.6995	1663.9	210.864	50.1338	1671.66	144.661	-15.084	1492.58	132.206	-63.557	1228.54	157.87	136.391	1412.01	163.7	231.343	1203.69	199.498	-76.3032	1289.83	-34.8552	82.4968	1442.74	-105.635	35.872	1215.68	-117.281	5.78691	1119.58	-165.34	27.1608	956.218	-145.457	54.4599	867.605	-184.183	-3.98197	882.652	-198.808	27.8516	808.937
580	0	91.0389	209.193	1629.81	188.061	211.047	1638.1	66.9991	57.8089	1667.13	211.561	64.8582	1674.11	144.288	-0.610131	1495.39	131.198	-49.6317	1231.66	158.143	150.494	1414.91	164.289	245.507	1206.53	198.201	-62.4237	1292.72	-35.0141	97.2805	1445.65	-106.116	53.8144	1218.17	-118.134	25.9399	1120.95	-165.589	53.5827	957.886	-145.742	84.9576	870.925	-184.052	25.6408	883.007	-199.48	62.085	812.101
581	0	92.2021	224.003	1632.87	189.471	225.657	1640.46	67.9495	72.8717	1670.5	212.706	79.3528	1676.96	144.264	14.3551	1498.59	130.097	-35.7107	1234.65	157.899	164.518	1417.71	164.822	259.876	1209.67	196.853	-48.4288	1295.63	-34.9598	112.226	1448.75	-106.607	71.4152	1220.82	-118.773	46.3304	1122.67	-165.651	80.49	960.221	-145.454	115.447	874.775	-183.562	55.6939	883.825	-199.575	96.2746	815.848
582	0	93.5032	238.737	1635.87	190.759	239.953	1642.89	68.8269	87.754	1674.03	213.586	93.708	1679.4	144.007	28.9331	1501.58	128.95	-21.7065	1237.85	158.101	178.675	1420.6	165.327	274.329	1212.99	195.506	-34.3714	1298.65	-34.8702	127.212	1451.98	-106.636	89.2743	1223.36	-119.542	66.7499	1124.62	-165.557	107.669	963.086	-144.478	146.446	879.347	-182.827	86.1984	885.497	-199.236	130.778	820.446
583	0	94.808	253.451	1638.74	191.96	254.136	1645.24	69.6171	102.524	1677.37	214.675	107.931	1681.91	143.743	43.3677	1504.35	127.741	-7.44357	1240.81	158.392	192.961	1423.06	165.583	288.411	1215.78	194.126	-20.3738	1301.41	-34.7896	142.174	1455.16	-107.287	106.864	1226.71	-120.265	87.3172	1126.92	-165.107	135.219	966.3	-143.934	177.841	884.525	-181.892	117.155	887.793	-198.702	165.336	825.287
584	0	95.9373	267.88	1641.49	193.115	268.328	1647.31	70.3702	117.063	1680.25	215.547	122.049	1683.73	143.63	57.7651	1506.99	126.745	6.74834	1243.5	158.547	207.278	1425.33	165.839	302.259	1218.15	192.914	-6.28739	1303.82	-34.6676	157.263	1458.07	-107.389	124.785	1229.16	-120.942	108.007	1129	-164.546	163.093	969.776	-142.665	209.295	890.24	-180.71	148.724	890.575	-197.708	200.091	830.849
585	0	96.8518	282.308	1644.14	194.151	282.368	1649.46	71.0004	131.513	1682.75	215.914	136.056	1685.16	143.424	72.2488	1509.25	125.905	20.932	1245.84	158.53	221.661	1427.31	165.899	315.781	1220.23	191.8	7.88724	1306.15	-34.561	172.397	1460.76	-107.671	142.633	1231.95	-121.534	128.869	1131.15	-164.184	191.215	973.771	-141.245	240.519	896.263	-179.805	180.324	893.797	-196.149	234.7	836.765
586	0	97.6691	296.808	1646.81	194.932	296.465	1651.63	71.4922	145.81	1684.83	216.518	149.901	1686.95	142.9	86.7529	1511.01	125.145	35.0371	1248.11	158.658	236.152	1429.17	166.006	329.105	1222.15	190.547	22.0998	1308.15	-34.4158	187.428	1463.5	-108.24	160.548	1234.5	-122.229	149.862	1133.2	-163.872	219.388	977.854	-140.211	271.872	903.207	-178.977	212.031	897.474	-194.541	269.178	842.626
587	0	98.2164	311.155	1648.73	195.394	310.502	1653.2	71.8453	160.064	1686.46	216.768	163.847	1687.97	142.528	101.362	1512.61	124.546	49.3382	1249.74	158.846	250.655	1430.66	166.066	342.341	1223.55	189.626	36.4122	1309.94	-34.2481	202.519	1465.61	-108.647	178.889	1236.81	-123.034	171.042	1135.02	-163.653	247.889	982.23	-138.92	303.41	910.016	-178.196	244.179	901.531	-192.599	303.83	848.986
588	0	98.7275	325.514	1650.41	196.097	324.727	1654.72	72.1702	174.4	1687.73	217.233	177.812	1688.92	142.548	116.229	1513.81	124.099	63.6436	1251.24	158.769	265.233	1431.66	166.218	355.681	1224.61	189.115	50.8343	1311.08	-33.7982	217.629	1467.36	-108.951	197.243	1238.55	-123.843	192.328	1136.53	-163.508	276.281	986.719	-137.817	334.944	917.307	-177.46	276.203	905.81	-190.592	338.307	855.261
589	0	98.9473	339.786	1651.74	196.369	338.871	1655.92	72.2687	188.715	1688.47	217.635	191.968	1689.62	142.447	130.855	1514.75	123.623	77.7995	1252.18	158.757	279.838	1432.37	166.238	369.27	1225.43	188.655	65.2786	1312.2	-33.6271	232.5	1468.81	-109.426	215.667	1240.25	-124.84	213.822	1137.84	-163.054	304.7	991.12	-136.512	366.067	924.634	-176.908	308.497	910.449	-188.603	372.761	862.066
590	0	98.9753	354.149	1652.44	196.576	353.09	1656.63	72.0215	202.997	1688.62	217.055	205.821	1689.51	142.107	145.324	1515.12	123.181	91.9068	1252.91	158.542	294.259	1432.52	166.294	382.864	1225.81	188.141	79.7512	1312.75	-33.4703	247.324	1469.47	-110.044	234.351	1241.21	-125.954	235.719	1138.8	-163.062	333.237	995.631	-135.063	396.704	931.489	-176.432	340.604	915.134	-186.277	407.056	868.723
591	0	99.1791	368.763	1652.68	196.529	367.407	1656.79	71.7921	217.458	1688.25	216.867	219.949	1689.05	141.506	159.414	1514.75	122.688	106.08	1253.02	158.328	308.878	1432.14	166.409	396.828	1225.6	187.614	94.2043	1312.68	-33.236	262.17	1469.5	-110.643	253.108	1241.81	-127.399	257.703	1139.35	-162.937	361.842	999.918	-133.893	427.657	938.896	-176.164	372.785	919.953	-183.858	441.2	875.765
592	0	99.1105	383.417	1652.41	196.372	381.825	1656.4	71.6894	232.073	1687.6	216.454	234.272	1688.44	141.959	174.544	1514.38	122.457	120.075	1252.72	158.153	323.45	1431.33	166.368	410.472	1224.79	187.563	108.688	1312.33	-32.9975	276.859	1469.13	-111.25	272.083	1241.59	-128.631	279.908	1139.65	-162.792	390.227	1004.29	-132.31	458.007	946.081	-175.774	404.797	924.888	-181.499	474.88	882.784
593	0	98.8937	398.108	1651.65	196.317	396.426	1655.63	71.2353	246.734	1686.65	216.296	248.885	1687.64	142.111	189.604	1513.73	122.344	133.963	1252.29	158.009	338.126	1430.1	166.26	424.072	1223.4	187.52	123.122	1311.67	-32.8388	291.344	1468.27	-112.017	291.358	1241.28	-130.109	302.23	1139.97	-162.363	418.544	1008.48	-130.653	487.821	952.901	-175.638	436.314	929.999	-179.153	508.111	890.111
594	0	98.7377	412.958	1650.36	195.96	411.161	1654.25	70.7486	261.502	1685.58	216.02	263.562	1686.38	142.023	204.066	1512.75	122.585	147.812	1251.39	157.701	352.776	1428.57	165.764	437.482	1221.44	187.664	137.535	1310.97	-32.6886	305.72	1467.12	-112.674	310.902	1240.98	-131.608	324.785	1140.22	-161.791	446.87	1012.96	-128.527	517.327	959.532	-175.271	467.497	935.284	-176.72	541.088	897.859
595	0	98.4867	427.921	1648.77	195.646	425.889	1652.62	70.405	276.385	1684.09	215.663	278.439	1684.94	142.39	218.867	1511.55	123.47	161.721	1250.24	157.436	367.379	1426.69	165.447	451.147	1219.39	188.185	151.963	1309.8	-32.5032	319.823	1465.53	-113.617	330.639	1240.75	-132.895	347.319	1140.42	-161.259	474.62	1017.42	-126.398	546.331	966.702	-174.699	498.462	940.854	-174.374	573.25	906.411
596	0	98.1097	442.698	1646.79	195.558	440.945	1650.88	69.9973	291.379	1682.32	215.281	293.464	1683.28	142.83	233.785	1509.92	124.84	175.416	1248.63	157.182	381.872	1424.73	164.929	465.189	1217.09	188.899	166.451	1308.43	-32.4015	333.793	1463.81	-114.221	350.278	1240.2	-134.121	369.697	1140.55	-160.714	501.71	1022.09	-124.529	574.32	973.718	-174.065	528.761	946.772	-172.401	604.715	915.019
597	0	97.4061	457.518	1644.37	194.863	455.923	1648.59	69.5649	306.354	1680.17	214.531	308.507	1681.39	142.6	247.886	1507.81	126.305	189.448	1246.84	156.778	396.263	1422.69	164.295	479.676	1214.66	189.684	180.662	1306.81	-32.3105	347.84	1462.14	-115.118	369.98	1240.38	-135.415	391.795	1141.07	-159.885	528.321	1026.79	-122.472	601.703	980.818	-173.733	558.294	953.006	-170.616	634.95	923.969
598	0	96.9275	472.433	1641.7	193.978	470.837	1646.01	69.0557	321.104	1678.05	214.22	323.745	1679.48	142.87	262.046	1505.79	128.023	203.5	1244.69	156.502	410.704	1420.4	163.699	494.887	1212.15	190.798	195.052	1304.96	-32.0948	361.775	1460	-115.456	389.659	1240.33	-136.351	413.713	1141.58	-159.013	554.267	1031.75	-120.658	628.166	987.945	-172.998	586.886	959.514	-168.771	664.629	933.424
599	0	96.0729	487.079	1638.94	193.514	486.031	1643.42	68.9348	335.939	1675.75	214.31	339.084	1677.42	143.882	276.988	1503.71	130.093	217.975	1242.66	156.46	425.213	1417.92	163.058	510.473	1209.79	192.162	209.533	1302.92	-31.7038	375.597	1458.13	-115.678	408.944	1240.14	-137.047	435.249	1142.13	-158.331	579.593	1037.25	-118.685	653.688	994.868	-172.409	614.692	966.136	-167.01	693.325	943.005
600	0	95.3432	501.765	1636.13	192.782	501.228	1640.82	68.9875	350.801	1673.45	214.362	354.45	1675.63	144.67	291.823	1501.88	131.985	232.707	1240.39	156.418	439.683	1415.45	162.237	525.651	1207.45	193.541	224.048	1300.96	-31.4373	389.436	1456.34	-115.535	428.13	1240.07	-137.63	455.968	1142.85	-157.321	603.951	1042.22	-117.062	678.575	1002.16	-171.948	641.421	972.864	-165.781	720.646	952.674
601	0	94.7277	516.51	1633.17	191.905	516.256	1638.07	68.7293	365.364	1670.89	214.09	369.673	1673.42	145.097	306.153	1499.38	133.974	247.623	1237.84	156.451	454.2	1412.82	161.647	540.596	1204.66	194.91	238.404	1298.78	-30.988	403.308	1454.21	-115.231	446.842	1239.57	-138.079	476.4	1143.54	-156.508	627.351	1047.14	-115.761	702.499	1008.74	-171.508	667.174	979.282	-164.492	747.018	962.059
602	0	94.2465	531.034	1630.21	191.451	531.358	1635.33	68.6817	379.731	1668.4	214.036	384.851	1670.82	145.882	320.608	1496.99	135.705	262.811	1235.14	156.885	468.84	1410.09	160.944	554.992	1201.66	196.112	253.027	1296.26	-30.1767	417.496	1452.1	-114.859	465.004	1239.19	-138.472	495.963	1143.91	-155.775	649.898	1051.83	-114.57	725.429	1015.16	-171.227	691.83	985.505	-163.581	772.125	971.062
603	0	94.0481	545.429	1627.55	191.079	546.183	1632.75	69.1635	394.173	1665.89	214.244	400.016	1668.58	146.585	335.207	1494.42	137.169	277.972	1232.56	157.151	483.472	1407.54	160.483	569.648	1199.11	197.236	267.555	1293.92	-29.5146	431.688	1450.17	-114.233	482.61	1238.5	-138.501	515.019	1144.21	-155.154	671.586	1056.4	-113.574	747.581	1021.32	-171.162	715.327	991.524	-162.99	795.936	979.962
604	0	94.1036	559.987	1625.32	191.24	561.022	1630.69	69.5457	408.538	1663.49	214.827	414.749	1666.62	147.118	350.108	1492.06	138.404	293.117	1229.97	157.659	498.215	1405.39	160.16	584.479	1196.96	198.11	282.217	1291.49	-28.7177	446.064	1448.31	-113.892	499.746	1237.87	-138.701	533.533	1144.39	-154.741	692.196	1060.51	-113.064	768.908	1027.4	-170.918	737.898	997.143	-162.659	818.77	988.401
605	0	94.2736	574.394	1623.31	191.741	575.633	1628.87	70.1207	422.915	1661.52	215.486	429.325	1664.47	147.795	364.786	1489.63	139.379	308.351	1227.58	158.201	513.076	1403.19	160.379	599.772	1195.44	198.796	297.08	1289.2	-28.0067	460.741	1446.7	-113.439	516.356	1237.02	-138.85	551.34	1144.28	-154.546	712.005	1064.35	-112.967	789.321	1032.82	-170.651	759.405	1002.16	-162.78	840.442	996.165
606	0	95.283	588.959	1621.55	192.591	590.132	1627.04	71.1248	437.322	1659.35	216.272	443.713	1662.43	148.741	379.664	1487.47	140.074	323.786	1225.04	159.028	528.062	1401.26	160.98	615.159	1194.03	199.43	312.245	1286.83	-27.2739	475.503	1445.13	-113.212	532.341	1236.24	-139.064	568.932	1143.93	-154.294	731.13	1067.11	-112.914	808.962	1037.83	-170.598	779.644	1006.13	-163.119	860.891	1003.36
607	0	96.3148	603.462	1620.39	193.872	604.408	1625.83	72.0811	451.772	1657.63	217.505	457.801	1660.73	149.548	394.642	1485.45	140.388	339.407	1222.63	159.836	542.942	1399.71	161.891	630.644	1192.92	199.809	327.564	1284.37	-26.4792	490.375	1443.68	-113.208	547.942	1235.42	-139.1	585.97	1143.57	-154.59	749.297	1069.67	-113.123	827.856	1042.1	-170.691	798.836	1009.53	-164.018	880.112	1009.76
608	0	97.6955	617.859	1619.32	195.279	618.692	1624.55	73.1957	466.05	1655.91	218.386	471.834	1658.96	150.168	409.507	1483.37	140.457	355.135	1220.59	160.748	558.086	1398.18	162.925	645.878	1192.06	200.186	342.927	1282.44	-25.5733	505.732	1442.54	-113.36	563.31	1234.59	-139.138	602.663	1143.19	-154.767	766.816	1071.14	-113.875	845.809	1045.42	-170.068	817.149	1011.4	-165.431	898.14	1014.78
609	0	99.5844	632.42	1618.43	196.894	633.018	1623.49	74.5222	480.454	1654.51	219.808	485.818	1657.13	151.163	424.304	1481.62	140.369	371.092	1218.64	161.906	573.348	1397	164.196	661.343	1190.83	200.535	358.514	1280.42	-24.6052	521.173	1441.37	-113.585	578.528	1233.84	-139.182	618.942	1142.82	-155.145	783.641	1072.02	-114.565	862.88	1047.58	-170.028	834.457	1012.34	-166.866	915.105	1018.76
610	0	101.362	646.926	1618.01	198.818	647.188	1622.71	76.3092	494.764	1653.39	221.562	499.898	1655.68	152.382	439.403	1480.06	140.391	387.458	1216.68	162.983	588.546	1395.76	165.744	677.189	1190.08	201.043	374.399	1278.5	-23.4515	536.592	1440.52	-113.585	593.737	1233.4	-138.865	634.95	1142.44	-155.407	799.727	1072.09	-115.37	879.293	1048.88	-170.212	850.746	1012.88	-168.438	930.99	1021.33
611	0	103.234	661.244	1617.82	200.769	661.428	1622.26	77.9987	509.152	1652.71	223.619	514.024	1654.81	153.391	454.598	1478.66	140.365	404.084	1215.13	164.224	603.937	1395.02	167.555	693.675	1189.92	201.27	390.137	1276.87	-22.2189	552.156	1440.08	-113.571	608.928	1233.12	-138.581	650.468	1142.26	-155.614	815.056	1071.54	-116.304	894.859	1048.96	-170.333	866.161	1012.35	-170.208	945.871	1022.86
612	0	105.164	675.678	1618.02	202.608	675.695	1622.14	79.9012	523.237	1652.4	225.6	527.899	1653.98	154.576	469.609	1477.66	140.273	420.789	1214.04	165.527	619.427	1394.66	169.29	710.395	1189.92	201.662	406.347	1275.48	-20.919	567.786	1439.67	-113.495	623.977	1233.39	-138.168	665.431	1141.92	-156.085	829.935	1070.72	-117.284	909.557	1048.16	-170.968	880.507	1011.37	-171.865	959.909	1022.7
613	0	107.197	690.123	1618.78	204.627	690.104	1622.66	81.9816	537.53	1652.25	227.353	542.181	1653.44	155.953	484.714	1476.92	140.213	437.106	1213.19	166.838	634.942	1394.59	170.891	727.307	1190.43	202.184	422.644	1274.22	-19.6279	583.463	1439.76	-112.8	639.078	1233.46	-137.889	679.913	1141.85	-156.671	843.815	1069.64	-118.061	923.635	1046.8	-171.881	893.924	1010.11	-173.701	973.216	1021.32
614	0	109.238	704.435	1619.94	206.718	704.496	1623.43	84.2317	551.643	1652.46	229.747	556.374	1653.28	157.325	500.156	1476.66	140.517	453.76	1212.6	168.232	650.467	1394.98	172.303	744.049	1191.24	202.834	438.942	1273.42	-18.2492	599.014	1440.19	-112.14	654.095	1233.59	-136.987	693.842	1141.66	-157.314	857.02	1068.24	-119.275	936.75	1044.39	-172.893	906.395	1008.2	-175.371	985.529	1018.79
615	0	111.319	718.891	1621.72	209.18	719.053	1624.93	86.7178	565.751	1653.16	232.132	570.362	1653.27	158.703	515.425	1476.81	140.847	470.2	1212.75	169.481	666.154	1395.9	173.49	760.564	1192.25	203.411	455.399	1272.89	-17.0856	614.601	1441.21	-111.003	668.904	1234.1	-136.504	707.309	1141.77	-157.865	869.352	1066.6	-120.616	949.136	1041.42	-173.846	917.873	1005.54	-177.118	997.13	1014.84
616	0	113.573	733.534	1623.77	211.529	733.63	1626.51	89.2336	580.211	1654.27	234.615	584.897	1653.76	160.155	530.874	1477.66	141.186	485.914	1213.44	170.574	681.805	1396.8	174.379	777.124	1193.28	203.996	471.996	1272.79	-15.9603	630.299	1442.43	-109.782	683.429	1234.62	-135.726	720.238	1141.94	-158.54	880.984	1064.55	-121.995	960.748	1037.77	-175.059	928.379	1002.64	-178.568	1007.81	1009.66
617	0	116.2	748.302	1626.16	213.93	748.229	1628.16	91.8875	594.764	1655.6	237.275	599.338	1654.15	161.378	546.42	1478.56	141.372	501.217	1214.4	171.421	697.361	1397.87	174.968	793.613	1194.33	204.506	488.333	1273.32	-14.9724	645.91	1443.9	-108.252	697.582	1235.03	-134.812	732.757	1142.08	-159.078	891.832	1061.89	-123.241	971.216	1032.83	-176.065	937.753	999.05	-180.096	1017.37	1003.46
618	0	118.595	763.247	1628.57	216.465	763.037	1629.81	94.4663	609.457	1657.36	239.901	613.935	1654.71	162.394	561.961	1480.14	141.579	515.86	1215.99	172.159	712.816	1399.19	175.325	809.908	1195.57	204.868	504.439	1274.54	-14.2374	661.484	1445.51	-107.199	711.478	1235.86	-133.925	744.739	1142.47	-159.625	901.652	1058.61	-124.365	980.94	1027.9	-177.182	946.121	994.749	-181.373	1025.96	996.26
619	0	121.208	778.318	1630.86	218.724	777.666	1630.85	96.4678	624.41	1659.16	241.846	628.314	1654.78	162.997	577.509	1481.76	141.718	530.126	1217.9	172.331	727.964	1400.19	175.373	825.969	1196.74	204.739	519.933	1275.94	-13.6202	677.072	1447.29	-106.073	724.872	1236.46	-133.317	756.29	1143.07	-159.955	910.845	1054.93	-125.374	989.766	1022.03	-178.184	953.464	990.164	-182.402	1033.32	988.345
620	0	123.542	793.493	1632.84	220.982	792.522	1631.67	98.4394	639.417	1661.34	243.557	643.154	1655.05	163.497	592.634	1483.1	141.933	544.261	1219.93	172.505	743.038	1401.14	175.457	841.382	1197.77	204.608	534.768	1277.66	-13.0645	692.439	1448.88	-104.893	737.637	1236.78	-132.545	767.537	1143.37	-160.267	919.501	1050.9	-125.953	997.685	1015.57	-178.994	959.744	985.061	-183.256	1039.62	979.631
621	0	125.358	808.809	1634.76	222.361	807.119	1632.36	100.284	654.84	1663.6	245.204	658.155	1655.93	164.062	607.637	1485.18	141.956	558.588	1222.03	172.371	757.771	1402.4	175.149	856.054	1198.87	204.672	548.957	1279.29	-12.8695	707.218	1450.58	-104.222	750.164	1237.68	-131.606	778.432	1143.74	-160.06	927.115	1046.59	-126.61	1004.27	1008.56	-178.966	965.509	979.334	-183.745	1044.67	970.566
622	0	126.757	823.995	1636.62	223.835	822.169	1633.5	101.564	670.325	1666.32	246.729	673.195	1657.65	164.348	622.206	1487.44	142.097	572.798	1224.15	172.152	772.199	1404.11	174.653	870.284	1200.37	204.651	562.987	1281.37	-12.5633	721.565	1452.51	-103.764	762.404	1238.72	-130.888	788.706	1144.29	-159.901	934.275	1042.56	-126.715	1010.14	1001.59	-178.668	969.987	973.423	-183.894	1048.65	961.481
623	0	127.564	839.194	1638.06	224.481	837.104	1634.56	102.323	685.591	1668.92	247.523	688.331	1659.74	164.531	636.604	1489.46	142.342	586.739	1226.48	171.759	786.285	1405.98	174.38	884.152	1202.27	204.767	577.328	1283.29	-12.6182	735.286	1454.4	-103.717	774.127	1240.06	-130.407	798.633	1144.83	-159.623	940.561	1038.32	-126.475	1015.17	994.332	-178.907	973.854	967.878	-183.587	1051.77	952.022
624	0	127.909	854.282	1639.48	224.704	852.14	1635.68	102.824	700.848	1671.3	247.714	703.575	1661.79	164.934	650.627	1491.51	142.92	600.912	1228.51	171.588	800.258	1407.98	173.896	897.777	1204.45	205.404	591.405	1285.28	-12.8946	748.456	1456.08	-103.799	785.302	1241.41	-129.861	808.065	1144.97	-159.163	946.165	1033.9	-125.992	1019.23	986.893	-178.165	977.059	962.384	-182.873	1054	942.493
625	0	127.487	869.073	1640.87	224.672	867.222	1637.34	102.944	715.974	1673.89	247.857	718.967	1664.54	164.867	664.412	1493.74	143.761	614.503	1230.58	171.496	814.183	1410.49	173.16	911.484	1206.97	205.948	604.931	1287.66	-13.213	761.297	1457.99	-103.541	796.049	1242.1	-129.031	816.909	1145.25	-158.535	951.105	1029.76	-125.154	1022.2	979.686	-177.644	979.316	956.837	-181.82	1055.31	933.194
626	0	126.835	883.938	1642.58	223.877	882.118	1639.24	102.507	730.907	1676.53	247.508	734.167	1667.47	164.91	677.961	1496.39	144.679	628.035	1232.95	171.21	827.916	1412.98	172.28	925.146	1209.57	206.936	618.792	1289.87	-13.62	773.797	1459.93	-103.616	806.123	1243.26	-128.38	825.285	1145.71	-157.873	955.344	1025.76	-124.113	1024.38	972.627	-176.904	981.049	951.822	-180.288	1055.86	924.226
627	0	125.849	898.592	1644.36	223.217	897.324	1641.53	102.035	745.707	1679.26	247.084	749.49	1670.75	165.006	691.721	1498.93	145.839	641.423	1235.45	171.143	841.682	1415.79	171.55	938.632	1212.3	207.688	632.197	1292.44	-14.1811	786.313	1461.62	-103.567	815.859	1244.28	-127.314	833.353	1146.28	-156.925	958.918	1021.6	-122.888	1025.76	965.488	-176.442	982.077	946.973	-178.522	1055.6	915.351
628	0	124.895	912.948	1646.39	221.89	911.856	1643.69	101.574	760.162	1681.94	246.922	764.477	1674.07	165.387	705.799	1501.98	147.408	654.816	1238.07	170.865	855.209	1418.23	170.631	951.872	1214.66	208.836	645.864	1295.32	-14.6474	798.926	1463.44	-103.194	825.23	1244.87	-126.674	840.188	1146	-155.896	961.847	1017.92	-121.351	1026.38	958.791	-175.587	982.564	942.411	-176.316	1054.63	906.792
629	0	123.778	927.04	1648.41	220.773	926.653	1646.45	100.876	774.456	1684.72	246.152	779.336	1677.59	165.701	719.722	1505.07	148.95	668.516	1241	170.781	868.981	1421.43	169.845	965.159	1217.41	209.659	659.557	1298.47	-15.1304	811.461	1465.26	-102.634	833.918	1245.33	-125.343	846.967	1146.03	-154.54	963.977	1014.14	-119.756	1026.18	952.451	-174.296	982.369	937.981	-174.073	1052.81	898.797
630	0	122.333	941.164	1650.66	219.465	941.179	1649.18	99.7724	788.547	1687.01	244.982	793.929	1680.67	165.495	733.7	1507.83	150.272	681.86	1243.9	170.396	882.685	1424.11	168.938	978.431	1219.87	210.386	672.928	1301.58	-15.6942	824.174	1466.99	-102.21	842.295	1245.83	-124.058	853.227	1146.12	-153.554	965.508	1010.64	-118.148	1025.21	946.475	-173.128	981.568	933.87	-171.616	1050.27	891.175
631	0	121.185	954.811	1652.79	218.284	955.357	1651.8	98.9356	802.37	1689.36	243.977	808.344	1683.67	165.59	747.506	1510.38	151.763	695.416	1246.59	170.223	896.539	1426.76	167.921	991.684	1222.14	211.489	686.731	1304.45	-16.0301	836.951	1468.58	-101.537	850.396	1246.41	-122.416	858.953	1146.15	-152.03	966.756	1007.24	-116.252	1023.88	940.8	-171.713	980.201	930.075	-169.152	1047.02	883.942
632	0	120.185	968.598	1655.18	217.382	969.515	1654.72	98.3195	815.985	1691.19	243.44	822.369	1686.47	166.027	761.8	1513.09	153.487	710.026	1248.92	169.892	910.32	1428.97	167.017	1004.97	1224.82	212.878	700.782	1307.23	-16.4421	849.814	1470.27	-100.22	858.136	1246.36	-120.46	864.504	1146.25	-150.262	967.516	1004.09	-114.365	1021.83	935.611	-170.005	978.308	926.286	-166.607	1043.28	877.284
633	0	119.166	982.127	1657.22	216.204	983.289	1657.28	97.5496	829.587	1693.17	242.739	836.304	1689.27	166.005	775.645	1515.34	154.692	723.657	1251.3	169.707	924.481	1431.65	166.157	1018.19	1227.45	214.186	714.526	1309.92	-16.6906	862.571	1471.93	-99.1776	865.746	1246.64	-118.709	869.759	1146.27	-148.275	967.693	1001.04	-112.506	1019.51	930.536	-168.131	975.823	922.871	-164.212	1038.89	871.457
634	0	118.209	995.735	1659.18	215.195	996.977	1659.46	96.9778	842.812	1694.74	241.949	850.105	1691.16	166.187	789.748	1517.57	155.651	737.457	1253.29	169.355	938.211	1433.42	165.41	1031.46	1229.48	215.364	728.29	1312.43	-16.946	875.368	1473.2	-97.9461	873.316	1246.71	-116.607	874.805	1146.26	-146.367	967.548	997.977	-110.372	1016.78	925.499	-166.032	973.025	919.654	-161.792	1034.17	865.622
635	0	117.417	1009.06	1660.89	214.548	1010.77	1661.49	96.3284	856.194	1695.78	241.334	863.735	1692.59	166.435	803.888	1519.02	156.597	751.448	1254.84	169.087	952.186	1434.8	164.79	1044.67	1231.05	215.81	741.152	1314.51	-17.2495	888.374	1474.09	-96.681	880.883	1246.59	-114.638	879.929	1146	-143.82	967.384	994.879	-107.596	1014.59	921.199	-163.358	969.861	916.234	-159.216	1029.13	860.038
636	0	116.54	1022.51	1662.4	213.95	1024.47	1663.34	96.0307	869.422	1696.52	240.946	877.133	1693.82	166.457	817.78	1520.23	157.283	765.122	1255.94	168.638	966.047	1436.07	164.248	1058.01	1232.52	217.771	756.299	1315.78	-17.6474	901.413	1474.74	-95.4	888.453	1246.39	-112.548	884.578	1145.86	-141.476	966.754	991.901	-105.222	1011.79	916.969	-160.488	966.05	912.951	-156.872	1023.74	854.792
637	0	115.958	1035.86	1663.44	213.133	1038	1664.69	95.5346	882.554	1696.88	240.411	890.738	1694.82	166.292	831.663	1520.96	157.733	778.902	1256.84	168.252	980.158	1437.03	163.709	1071.29	1233.5	218.732	770.435	1316.94	-18.1172	914.389	1475.13	-94.2501	896.209	1246.49	-110.506	889.626	1145.93	-138.929	965.933	989.139	-103.171	1008.28	912.383	-157.463	962.16	909.808	-154.338	1017.88	850.043
638	0	115.335	1049.06	1663.94	212.277	1051.6	1665.39	95.1326	895.727	1697.04	240.109	904.335	1695.11	166.312	845.698	1521.46	158.329	792.871	1257.36	168.085	993.922	1437.44	163.308	1084.72	1234.01	219.982	784.627	1317.75	-18.4875	927.463	1475.08	-92.8045	904.216	1246.16	-108.204	894.605	1145.67	-136.179	965.17	986.52	-100.538	1005.26	908.139	-154.123	958.268	907.143	-151.697	1011.99	845.406
639	0	114.642	1062.61	1664.24	211.768	1065.36	1665.81	95.1292	909.018	1696.9	240.001	918.109	1695.23	166.488	859.661	1521.56	159.159	806.86	1257.57	167.877	1007.83	1437.61	163.102	1098.43	1234.24	221.289	798.951	1318.17	-18.7513	940.754	1474.75	-91.4203	912.291	1245.55	-105.978	899.988	1145.32	-133.294	964.24	983.545	-97.4575	1002.61	904.731	-150.635	954.276	904.326	-148.865	1005.94	841.089
640	0	114.009	1076.04	1664.18	211.041	1078.98	1666.02	95.014	922.424	1696.41	239.895	931.913	1694.92	166.412	873.679	1521.23	159.514	820.804	1257.32	167.766	1021.75	1437.44	162.629	1112.07	1233.75	222.312	813.167	1318.19	-19.1303	954.091	1474.08	-90.0283	920.568	1244.71	-103.671	905.43	1144.92	-130.595	963.384	981.051	-95.0745	998.618	900.688	-147.029	950.331	901.821	-145.916	999.757	837.092
641	0	113.243	1089.57	1663.74	210.277	1093	1665.6	94.44	935.85	1695.37	239.368	945.715	1694.4	166.271	887.504	1520.51	159.744	834.62	1256.64	167.322	1035.63	1436.54	162.681	1126.03	1233.22	223.06	827.148	1317.88	-19.592	967.385	1472.91	-88.6697	929.001	1243.72	-101.598	911.108	1144.4	-127.934	962.857	978.432	-92.5345	995.491	896.796	-143.884	946.406	899.85	-143.019	993.78	833.3
642	0	112.643	1103.37	1662.7	209.718	1107.12	1664.8	94.2635	949.366	1694.21	238.983	959.806	1693.09	166.287	901.482	1519.26	159.851	848.449	1255.71	167.188	1049.6	1435.39	162.45	1139.86	1231.73	223.685	841.235	1317.1	-19.8531	981.012	1471.47	-87.4997	937.504	1242.16	-99.3612	917.143	1143.52	-125.386	962.7	976.281	-89.7987	992.774	893.815	-140.214	942.849	897.657	-139.706	987.845	829.415
643	0	111.95	1117.18	1661.47	209.155	1121.36	1663.68	94.254	963.159	1692.78	238.668	973.933	1691.87	166.409	915.567	1518.08	159.749	862.19	1254.36	166.932	1063.46	1434.02	162.515	1153.8	1230.04	224.179	855.39	1315.8	-20.2468	994.572	1469.84	-86.3592	946.463	1241.2	-96.8376	923.397	1142.65	-122.789	962.65	974.246	-87.1884	990.231	890.596	-137.223	939.984	896.165	-136.392	982.214	826.059
644	0	111.162	1131.07	1659.99	208.456	1135.5	1662.39	93.9028	977.185	1691.29	238.461	988.405	1690.71	166.29	929.528	1516.71	159.762	876.519	1252.85	166.575	1077.32	1432.39	162.594	1167.49	1228.07	224.157	869.267	1314.3	-20.5402	1008.44	1468.07	-85.1463	955.337	1239.67	-94.4553	930.053	1142.01	-120.415	963.106	972.406	-84.6478	988.072	888.213	-134.3	937.644	895.092	-132.961	976.889	822.936
645	0	110.48	1145.27	1657.82	206.885	1149.68	1660.16	93.5954	991.174	1689.52	238.296	1002.93	1689.1	166.101	943.663	1515.04	159.222	890.296	1251.35	166.455	1091.31	1430.53	162.542	1181.12	1225.43	224.099	883.295	1312.59	-21.1002	1022.33	1466.19	-84.3742	964.785	1238.52	-92.1529	937.138	1141.33	-118.163	964.166	971.069	-82.2733	986.205	885.697	-131.726	935.847	894.44	-129.585	971.906	820.208
646	0	109.756	1159.57	1655.56	206.584	1164.38	1657.92	93.2291	1005.58	1687.31	237.776	1017.63	1687.06	165.991	957.86	1513.03	158.489	903.964	1249.48	166.132	1105.23	1428.24	162.621	1194.83	1222.65	223.575	897.225	1310.53	-21.4593	1036.54	1464.01	-83.6158	974.521	1237.19	-89.8035	944.645	1140.43	-115.891	965.5	969.738	-79.687	984.921	883.565	-129.215	934.594	894.081	-126.204	967.083	818.041
647	0	109.186	1173.94	1652.83	206.097	1178.91	1655.35	92.8721	1020.01	1685.1	237.369	1032.29	1684.98	165.604	972.051	1510.79	157.029	916.885	1247.55	165.988	1119.18	1425.96	162.124	1208.54	1219.32	223.339	910.844	1308.65	-21.961	1050.76	1461.73	-82.928	984.6	1235.94	-87.5149	952.645	1139.57	-113.951	967.541	968.69	-77.8229	984.569	882.33	-126.671	933.796	893.751	-122.872	963.034	816.097
648	0	108.635	1188.51	1649.8	205.344	1193.47	1652.47	92.3967	1034.61	1682.79	236.661	1047.19	1682.69	165.107	986.102	1508.62	155.51	930.686	1245.47	165.592	1133.13	1423.38	162.551	1222.88	1216.85	222.373	924.724	1306.39	-22.5894	1065.21	1459.57	-82.4008	994.996	1234.52	-85.4661	961.203	1139.03	-111.946	970.349	967.924	-73.8419	984.479	881.302	-124.608	934.126	894.455	-119.88	959.487	814.827
649	0	107.958	1203.16	1646.72	204.781	1208.19	1649.34	91.7825	1049.37	1680.3	236.231	1062	1680.23	164.478	1000.34	1506.18	154.215	945.089	1243.09	165.19	1147.16	1420.69	162.845	1237.36	1214.11	221.491	938.697	1303.87	-23.1641	1079.83	1457.25	-82.0344	1005.89	1233.27	-83.421	970.131	1138.35	-110.325	973.872	967.516	-72.223	985.331	880.259	-122.894	935.136	895.1	-116.854	956.601	813.982
650	0	107.431	1217.81	1643.56	204.281	1222.86	1646.15	91.4159	1064.21	1677.86	235.48	1076.97	1678.05	163.84	1014.48	1503.73	152.74	958.985	1240.56	164.658	1161.3	1417.83	162.969	1251.95	1211.39	220.653	952.856	1301.07	-23.8169	1094.58	1454.98	-81.3021	1017.01	1231.91	-81.4961	979.818	1137.51	-108.81	978.255	967.132	-70.4576	987.208	879.56	-121.148	937.283	895.828	-114.087	954.547	813.514
651	0	106.692	1232.5	1640.28	203.255	1237.57	1642.91	90.6147	1079.23	1675.52	235.077	1091.81	1675.52	162.706	1028.36	1501.32	151.159	973.18	1238.04	164.122	1175.51	1415.18	162.993	1266.62	1208.87	219.418	966.937	1298.46	-24.6345	1109.43	1452.54	-80.8073	1028.45	1230.48	-80.0502	989.933	1136.81	-107.838	983.224	967.001	-68.5666	989.485	879.032	-119.941	940.313	897.113	-111.484	953.51	813.539
652	0	106.018	1247.33	1637	202.567	1252.25	1639.67	89.62	1094.22	1673.22	234.054	1106.75	1673.21	161.246	1042.46	1498.74	149.913	987.899	1235.41	163.353	1189.71	1412.4	163.01	1281.21	1206.33	217.837	981.082	1295.79	-25.5903	1124.32	1450.04	-80.5153	1040.3	1228.82	-78.7613	1000.34	1135.81	-106.98	989.288	966.864	-69.1293	992.8	878.393	-119.305	944.206	898.217	-109.015	953.355	813.535
653	0	105.2	1262.24	1633.95	201.602	1267	1636.58	88.5824	1109.26	1671.08	233.051	1121.65	1670.91	159.945	1056.62	1496.28	148.525	1002.19	1232.93	162.701	1204.01	1410	163.064	1295.69	1204.13	216.462	995.361	1293.33	-26.7671	1139.3	1447.52	-80.3743	1052.53	1227.16	-77.713	1011.43	1134.79	-106.599	996.043	966.669	-68.2437	997.672	878.235	-118.922	949.146	899.26	-107.588	954.219	813.927
654	0	103.994	1276.95	1631.3	200.549	1281.58	1634.04	87.3277	1124.37	1668.98	231.529	1136.48	1668.96	158.567	1070.89	1493.99	147.481	1017.1	1230.39	162.042	1218.35	1407.97	162.917	1310.23	1202.47	215.071	1009.63	1290.92	-27.8056	1154.26	1444.93	-80.3538	1065.34	1225.39	-77.1442	1022.86	1133.7	-106.627	1003.66	966.439	-67.9956	1003.57	878.161	-118.481	955.39	900.475	-105.848	956.474	813.796
655	0	102.668	1291.7	1628.86	199.195	1296.25	1631.81	85.8628	1139.07	1667.02	230.165	1151.23	1667.25	156.617	1085.34	1491.78	146.358	1031.97	1228.27	161.045	1232.85	1406.17	162.526	1324.83	1200.9	213.72	1024.14	1288.88	-29.0227	1169.43	1442.52	-80.5389	1078.65	1223.86	-76.5691	1035.02	1132.83	-107.163	1012.15	966.435	-68.3235	1010.71	877.921	-118.912	962.437	901.78	-105.318	960.064	815.014
656	0	101.253	1306.49	1626.75	197.736	1310.92	1629.95	83.9305	1153.85	1664.95	228.423	1165.89	1665.58	155.017	1099.88	1489.87	145.423	1047.14	1226.29	160.25	1247.46	1404.48	161.957	1339.55	1199.28	212.322	1038.85	1286.88	-30.2991	1184.62	1440.32	-80.9738	1092.33	1222.26	-76.5219	1047.78	1131.65	-107.84	1021.81	966.614	-70.4842	1018.22	877.768	-119.641	970.926	903.029	-104.95	965.102	816.575
657	0	99.4439	1321.05	1624.83	195.819	1325.52	1628.35	82.1215	1168.46	1662.96	226.475	1180.56	1664.26	153.102	1114.95	1487.64	144.575	1062.2	1224.33	159.088	1262.17	1402.85	161.163	1354.42	1197.89	211.309	1053.83	1285.02	-31.5385	1199.83	1438.27	-81.5015	1106.41	1220.52	-76.6935	1060.93	1130.52	-109.084	1032.06	966.474	-71.5235	1027.47	877.375	-120.586	980.413	903.679	-105.042	971.84	817.025
658	0	97.4743	1335.52	1623.4	193.916	1339.98	1627.37	80.0295	1183.02	1661.22	224.39	1195	1663.05	151.813	1128.91	1486.31	143.778	1077.67	1222.43	157.84	1277.1	1401.54	159.919	1369.47	1196.79	210.023	1068.88	1283.31	-33.0329	1214.97	1436.36	-82.373	1120.81	1218.8	-77.1398	1074.55	1129.51	-109.946	1043.76	965.987	-73.2211	1037.64	876.962	-121.721	990.767	904.162	-105.832	980.09	817.804
659	0	95.3341	1350.01	1622.17	191.902	1354.61	1626.64	77.4985	1197.51	1659.78	221.891	1209.43	1662.43	149.591	1143.44	1484.83	142.708	1093	1220.82	156.781	1292.09	1400.88	158.607	1384.74	1196.28	208.533	1084.07	1282.03	-34.646	1230.18	1434.86	-83.3044	1135.78	1217.55	-78.2308	1088.79	1128.61	-111.792	1056.02	965.865	-75.1618	1049.65	876.546	-123.41	1002.72	904.35	-107.48	990.002	818.424
660	0	93.3259	1364.66	1621.5	190.263	1369.04	1626.53	75.1221	1211.95	1658.79	219.483	1223.73	1662.02	147.413	1158.06	1483.65	142.052	1108.93	1219.55	155.35	1307.1	1400.23	157.276	1400.27	1195.89	207.078	1099.34	1280.64	-36.2995	1245.47	1433.51	-84.6746	1151.07	1216.18	-79.3761	1103.5	1127.69	-113.223	1069.81	965.469	-77.4961	1062.21	876.044	-125.153	1015.8	904.721	-109.126	1001.85	818.94
661	0	91.3419	1379.24	1621.41	188.022	1383.53	1626.75	72.7343	1226.55	1658.36	217.164	1237.99	1662.08	145.208	1172.38	1483.15	141.366	1124.87	1218.38	154.056	1322.22	1400.27	155.82	1416.1	1195.89	205.581	1114.74	1279.75	-37.9609	1260.91	1432.53	-86.0085	1166.6	1215.22	-80.833	1118.82	1126.99	-115.382	1084.39	965.196	-79.329	1076.39	875.569	-127.181	1029.9	904.744	-111.527	1015.32	819.155
662	0	88.9992	1393.88	1621.89	186.006	1397.85	1627.74	69.9388	1241.12	1658.3	214.398	1252.08	1662.76	142.901	1187.19	1483.14	140.267	1141.01	1218	152.525	1337.35	1400.72	154.712	1432.16	1196.6	203.732	1130.22	1279.41	-39.5794	1276.6	1431.89	-87.6862	1182.7	1214.54	-82.8341	1134.61	1126.58	-117.62	1099.95	965.027	-81.2112	1092.04	875.361	-129.415	1045.49	904.759	-114.377	1030.53	818.989
663	0	87.038	1408.41	1622.89	183.677	1412.06	1629.04	67.0489	1255.61	1658.29	211.58	1266.12	1663.38	140.325	1202.09	1483.1	138.763	1157.02	1217.95	151.095	1352.76	1401.43	153.747	1448.31	1197.45	201.524	1145.7	1279.44	-41.3582	1292.5	1431.52	-89.6129	1199.1	1214.33	-85.0034	1150.96	1126.21	-119.908	1116.57	964.472	-84.1906	1108.69	874.936	-132.172	1062.21	904.204	-117.415	1047.7	818.434
664	0	84.8166	1423.14	1624.12	181.688	1426.44	1630.86	64.2753	1270.04	1658.27	208.803	1280.02	1664.24	137.95	1217.19	1483.26	136.947	1172.92	1218.25	149.699	1368.06	1402.39	153.22	1464.58	1198.54	199.418	1161.24	1279.74	-42.9174	1308.62	1431.32	-91.7434	1215.73	1214.02	-87.3254	1167.76	1125.76	-122.789	1134.31	964.334	-87.732	1126.49	874.12	-134.898	1080.13	903.445	-120.855	1066.29	817.709
665	0	82.5626	1437.78	1625.84	179.418	1440.85	1633.03	61.7187	1284.59	1658.68	205.925	1294.3	1665.53	136.157	1232.72	1484.03	135.006	1188.67	1218.91	148.492	1383.42	1403.58	152.895	1480.68	1199.56	197.593	1176.69	1280.55	-44.3204	1324.62	1431.61	-93.7203	1232.88	1214.24	-89.5197	1185.26	1125.46	-125.656	1152.87	963.923	-90.226	1145.8	873.575	-138.004	1099.12	902.634	-124.433	1086.84	816.231
666	0	80.2809	1452.51	1627.57	176.907	1455.48	1635.29	59.0014	1299.27	1659.46	203.212	1308.62	1667.11	134.753	1248.96	1485.49	132.908	1203.88	1220.32	147.4	1398.7	1404.94	152.987	1496.29	1200.61	195.863	1191.7	1282.1	-45.3213	1340.66	1432.16	-95.6595	1250.27	1214.48	-92.0498	1203.06	1125.36	-128.642	1172.49	963.553	-93.878	1166.35	872.83	-141.178	1119.71	901.575	-128.746	1108.69	815.149
667	0	78.0028	1467.31	1629.23	174.886	1470.29	1637.68	56.5086	1313.85	1660.22	200.956	1323.2	1668.91	133.667	1264.48	1487.32	130.507	1218.75	1222.57	146.432	1413.78	1406.32	153.01	1511.4	1201.47	194.467	1206.51	1283.97	-46.2109	1356.44	1433.06	-97.472	1267.94	1214.68	-94.7914	1221.48	1125.27	-131.54	1193.25	962.715	-97.478	1187.82	872.252	-144.898	1141.11	900.283	-133.306	1131.94	813.904
668	0	75.9141	1482.07	1630.41	172.38	1485.08	1639.48	54.5536	1328.51	1660.88	198.596	1338.08	1670.54	133.201	1280.06	1489.2	129.419	1233.26	1224.1	145.601	1428.59	1407.64	153.275	1526.07	1202.21	193.573	1221.14	1286.08	-46.7741	1371.99	1434.06	-99.184	1285.82	1214.76	-97.3964	1240.37	1125	-134.627	1214.85	962.034	-100.468	1210.59	871.398	-148.46	1163.74	898.824	-137.749	1156.77	812.022
669	0	73.7782	1496.73	1631.35	170.227	1500.21	1641.08	52.5493	1343.21	1661.53	196.6	1353.06	1672.39	132.395	1294.98	1490.87	128.364	1247.54	1226	145	1443.23	1408.84	153.57	1540.32	1203.04	193.259	1235.65	1288.38	-47.0857	1387.14	1435.25	-100.748	1304.05	1215.05	-99.9547	1259.48	1124.71	-137.428	1237.31	961.001	-103.433	1234.5	870.33	-152.224	1187.41	897.221	-142.475	1182.76	810.284
670	0	72.0501	1511.53	1632.14	168.272	1515.26	1642.45	50.9685	1357.87	1662.56	195.039	1368.26	1674.27	131.341	1308.77	1492.79	127.53	1260.93	1227.94	144.611	1457.46	1410.13	153.677	1554.22	1203.95	192.893	1249.58	1290.67	-47.3698	1401.9	1436.84	-102.529	1322.17	1215.18	-102.927	1278.95	1124.59	-140.945	1260.37	960.618	-106.965	1259.55	869.795	-156.255	1212.09	895.468	-147.637	1210.06	808.768
671	0	70.7289	1526.28	1632.89	166.878	1530.38	1643.55	49.7441	1372.79	1663.98	193.776	1383.64	1676.28	130.606	1322.6	1494.53	127.383	1274.1	1229.84	144.473	1471.57	1411.62	153.903	1567.94	1204.96	192.743	1263.22	1292.89	-47.4121	1416.39	1438.53	-103.91	1340.7	1215.67	-105.301	1298.7	1124.31	-143.577	1284.23	959.613	-110.625	1284.8	868.74	-159.943	1237.67	893.594	-152.949	1238.81	807.475
672	0	69.6354	1541.19	1633.61	165.992	1545.52	1644.55	49.2864	1387.84	1665.85	193.042	1399	1678.24	130.433	1336.42	1496.58	127.002	1287.32	1231.56	144.33	1485.29	1413.23	154.036	1581.34	1206.24	192.571	1276.56	1294.75	-47.6276	1430.56	1440.49	-105.359	1359.19	1216.2	-108.066	1318.54	1124.46	-146.222	1308.7	958.965	-111.386	1312.99	868.383	-163.357	1264.19	891.972	-157.887	1268.58	806.41
673	0	68.9149	1555.81	1634.52	164.908	1560.27	1645.37	48.7383	1402.93	1668.07	192.631	1414.24	1680.55	130.088	1350.3	1498.71	126.443	1300.64	1233.51	144.275	1498.93	1415.18	154.162	1594.56	1207.87	191.794	1289.88	1296.68	-47.9921	1444.5	1442.73	-106.691	1377.74	1217.13	-110.372	1338.79	1124.62	-148.889	1333.87	958.761	-115.86	1338.73	867.723	-166.789	1291.34	890.604	-162.512	1299.65	805.683
674	0	68.8246	1570.56	1635.46	165.26	1575.08	1646.11	48.5809	1417.95	1670.49	192.571	1429.32	1682.46	129.507	1363.91	1500.75	125.434	1314.27	1235.61	143.993	1512.33	1416.82	154.303	1607.54	1209.43	190.791	1302.95	1298.61	-48.2989	1458.36	1444.94	-108.051	1396.38	1218.39	-113.302	1358.95	1124.94	-151.379	1359.4	958.759	-118.268	1367.93	868.639	-170.242	1319.36	889.562	-167.046	1331.4	805.57
675	0	69.402	1585.14	1636.77	165.615	1589.76	1646.86	48.7963	1433.04	1672.89	192.877	1444.39	1684.36	128.964	1376.96	1502.83	124.453	1327.93	1237.68	143.962	1525.7	1418.78	154.391	1620.47	1211.17	189.731	1315.96	1300.52	-48.3975	1472.2	1447.31	-109.512	1414.83	1219.87	-115.78	1379.24	1125.46	-153.816	1385.21	958.865	-120.583	1396.49	869.307	-172.943	1348.09	888.485	-171.385	1363.96	805.911
676	0	69.7348	1599.7	1638.14	166.217	1604.32	1647.95	49.3864	1447.99	1675.64	193.325	1459.06	1686.4	128.829	1390.66	1505.11	123.767	1341.52	1240.08	143.916	1539.03	1420.92	154.451	1633.46	1213.11	188.708	1329.11	1302.76	-48.5567	1486.02	1449.61	-110.902	1433.18	1221.48	-118.392	1399.45	1126.18	-156.02	1411.49	959.606	-122.605	1425.52	870.177	-175.51	1376.92	887.88	-175.583	1397.36	807.273
677	0	70.4258	1614.34	1639.82	167.031	1618.54	1649.15	50.0058	1462.67	1678.46	194.244	1473.69	1688.35	128.789	1404.34	1507.77	122.656	1355.05	1242.51	143.587	1552.31	1422.99	154.637	1646.49	1215.14	187.312	1341.99	1305.34	-48.6088	1499.93	1452.19	-112.085	1451.51	1223.35	-120.789	1419.85	1127.2	-158.051	1438.02	960.593	-124.791	1455.07	871.857	-177.942	1406.39	887.717	-179.002	1431.32	809.05
678	0	71.5811	1628.63	1641.62	167.939	1632.83	1650.23	50.8892	1477.37	1681.44	195.184	1488.12	1690.08	128.644	1417.95	1510.27	121.201	1367.85	1245.42	143.459	1565.74	1424.89	154.814	1659.67	1216.95	186.011	1355.05	1307.75	-48.6307	1513.95	1454.86	-113.551	1469.5	1225.44	-123.072	1440.39	1128.53	-159.859	1464.82	962.235	-129.15	1482.38	873.194	-180.043	1436.02	888.326	-182.144	1465.74	811.825
679	0	72.731	1642.92	1643.45	169.026	1647	1651.32	52.0705	1491.7	1684.21	196.264	1502.33	1691.67	129.035	1432.53	1512.56	119.917	1381.09	1247.81	143.567	1579.16	1426.91	154.781	1672.7	1218.84	184.938	1368.06	1310.07	-48.6644	1527.95	1457.57	-114.7	1487.56	1228.01	-125.359	1460.78	1130.2	-161.656	1491.87	964.347	-128.193	1515.66	877.389	-181.755	1466.08	889.439	-184.817	1500.56	815.524
680	0	73.5314	1656.88	1645.6	170.218	1660.85	1652.75	53.1217	1505.91	1686.82	197.481	1516.4	1693.29	128.934	1446.22	1514.81	118.344	1393.82	1250.17	143.214	1592.5	1428.83	154.889	1685.7	1221.06	183.564	1381.29	1312.33	-48.633	1542.04	1460.45	-116.57	1505.02	1230.71	-127.744	1481.24	1132.06	-163.27	1518.92	967.085	-129.985	1546.08	881.233	-183.543	1496.48	891.101	-187.15	1535.4	819.862
681	0	74.4227	1670.88	1647.6	171.333	1674.61	1654.11	53.9661	1519.95	1689.08	198.46	1530.24	1694.62	128.612	1459.76	1516.68	117.043	1407.21	1252.41	143.028	1605.95	1430.55	154.743	1698.52	1223.02	182.259	1394.44	1314.37	-48.6266	1556.07	1463.27	-117.912	1522.55	1233.42	-130.097	1501.61	1134.02	-164.886	1546.16	970.239	-131.701	1577.15	885.972	-185.077	1527.08	893.312	-189.33	1570.32	825.279
682	0	75.3648	1684.82	1649.27	172.186	1688.56	1655.17	54.9999	1533.8	1691.19	199.477	1543.99	1695.57	127.733	1472.13	1518.16	116.266	1420.55	1254.38	143.094	1619.55	1431.9	154.64	1711.33	1224.51	181.306	1407.68	1316.04	-48.3917	1570.22	1465.79	-119.437	1540.05	1236.23	-132.462	1521.72	1136.13	-166.288	1573.59	973.716	-134.445	1606.52	890.342	-186.445	1557.88	896.264	-190.902	1605.45	830.984
683	0	76.2412	1698.57	1650.82	172.506	1702.17	1656.07	56.2396	1547.61	1692.87	200.69	1557.69	1696.26	128.608	1486.47	1519.77	115.902	1433.95	1255.71	142.934	1633.11	1433.02	154.34	1724.14	1225.76	180.868	1421.4	1317.1	-48.2287	1584.22	1468.2	-120.667	1557.62	1238.6	-134.369	1541.97	1138.01	-167.595	1601.09	977.572	-135.273	1637.55	895.628	-187.621	1588.86	899.389	-192.096	1640	837.152
684	0	76.8395	1712.16	1652.14	173.275	1715.72	1656.89	57.1703	1561.19	1694.33	201.49	1571.2	1696.82	128.41	1499.71	1520.93	115.227	1446.99	1257.1	142.894	1646.74	1433.97	154.111	1737.04	1226.96	179.975	1434.69	1318.28	-47.9251	1598.35	1470.18	-121.756	1575.22	1240.79	-136.483	1561.95	1139.97	-168.974	1628.49	981.642	-136.639	1668.34	901.485	-188.667	1619.92	903.024	-193.102	1674.55	843.829
685	0	77.464	1725.8	1653.12	173.858	1729.26	1657.38	57.5998	1574.73	1695.3	202.08	1584.86	1697.16	127.972	1513.5	1521.46	115.056	1460.63	1257.98	142.672	1660.27	1434.52	153.796	1750	1227.78	179.335	1448.2	1319	-47.7285	1612.48	1471.69	-123.301	1592.36	1242.98	-138.822	1581.72	1141.76	-170.236	1655.83	985.698	-137.795	1699.24	907.813	-189.69	1651.01	906.932	-193.784	1708.83	850.704
686	0	77.9132	1739.35	1653.77	174.25	1742.89	1657.83	58.1818	1588.35	1695.8	202.485	1598.46	1697.16	128.094	1527.9	1521.57	114.703	1473.97	1258.49	142.626	1673.92	1434.94	153.441	1762.98	1228.2	179.029	1461.82	1319.43	-47.5704	1626.37	1472.88	-124.707	1609.55	1244.71	-140.724	1601.81	1143.09	-171.531	1682.94	990.027	-137.472	1731.19	915.648	-190.441	1681.93	910.764	-194.086	1742.72	857.856
687	0	78.4204	1753.14	1654.12	174.59	1756.64	1657.91	58.4991	1601.94	1695.92	202.772	1611.95	1697.05	128.062	1541.13	1521.76	114.301	1487.42	1258.86	142.519	1687.57	1434.96	153.144	1776.18	1228.36	178.393	1475.16	1319.59	-47.3563	1640.26	1473.76	-125.95	1626.79	1245.61	-142.962	1621.42	1144.29	-172.677	1709.98	994.293	-138.602	1761.54	922.67	-190.879	1712.81	914.997	-194.12	1776.31	865.367
688	0	78.4268	1766.91	1654.09	174.803	1770.3	1657.71	58.3724	1615.49	1695.59	202.937	1625.58	1696.57	128.001	1554.83	1521.49	113.808	1500.75	1258.85	142.419	1701.29	1434.66	152.93	1789.42	1228.31	178.11	1488.81	1319.38	-47.1379	1654.16	1474.13	-127.085	1644.12	1246.74	-144.935	1641.29	1145.21	-173.689	1736.83	998.513	-139.698	1791.48	929.845	-191.324	1743.51	919.73	-194.083	1809.33	872.917
689	0	78.3522	1780.82	1653.48	174.859	1783.98	1657.04	58.2987	1629.11	1694.99	202.929	1639.29	1695.94	128.176	1568.54	1521.18	113.319	1514.04	1258.54	142.467	1715.05	1433.94	152.496	1802.68	1227.52	177.614	1502.15	1319.21	-46.8838	1667.99	1474.31	-128.174	1661.43	1247.54	-146.973	1661.09	1145.92	-174.413	1763.51	1002.94	-140.095	1821.49	937.206	-191.233	1773.91	924.187	-193.471	1842.05	880.732
690	0	78.2795	1794.72	1652.56	174.92	1797.92	1656.31	58.704	1643.56	1694.16	202.845	1653.04	1695.06	129.038	1583.15	1520.39	113.127	1527.53	1257.93	142.221	1728.8	1432.87	152.225	1815.98	1226.53	177.831	1515.85	1318.39	-46.5968	1681.73	1474	-129.321	1678.71	1247.81	-148.66	1681.11	1146.35	-175.132	1789.89	1007.38	-139.958	1850.8	945.091	-191.406	1804.04	929.213	-192.725	1874.33	888.943
691	0	78.2511	1808.58	1651.29	174.845	1811.7	1655.23	58.6664	1657.63	1692.91	202.94	1667.17	1694.07	129.342	1596.5	1519.54	113.092	1540.96	1257.14	142.251	1742.5	1431.8	151.964	1829.25	1225.32	177.865	1529.38	1317.55	-46.3741	1695.38	1473.27	-130.526	1695.92	1248.01	-150.438	1701.01	1146.71	-175.8	1816.1	1011.75	-139.887	1879.84	953.024	-191.312	1833.88	934.364	-191.875	1905.83	897.317
692	0	78.2467	1822.59	1649.66	174.737	1825.79	1653.56	57.9796	1671.48	1691.32	202.841	1681.47	1692.93	129.441	1610.87	1518.01	113.204	1554.48	1256.04	142.252	1756.34	1430.32	151.609	1842.58	1223.57	177.981	1542.85	1316.62	-46.1325	1708.85	1472.17	-131.477	1713.15	1247.96	-152.061	1721.09	1146.77	-176.196	1842.04	1016.28	-139.725	1907.97	960.612	-190.755	1863.25	939.743	-190.574	1937.05	905.796
693	0	78.4245	1836.75	1647.61	174.781	1839.93	1651.7	57.7484	1685.74	1689.61	202.425	1695.46	1691.27	129.616	1624.43	1516.27	114.102	1567.81	1254.83	142.25	1770.13	1428.55	151.105	1856.13	1221.45	178.519	1556.47	1315.26	-45.8865	1722.23	1470.91	-132.392	1730.59	1247.59	-153.439	1741.25	1146.8	-176.141	1867.45	1020.85	-138.895	1935.49	968.249	-190.502	1892.2	945.506	-189.197	1967.32	914.342
694	0	78.19	1850.77	1645.5	174.686	1853.92	1649.75	57.8133	1699.97	1687.82	202.449	1709.69	1689.74	130.74	1638.05	1515.27	115.516	1581.35	1253.22	142.093	1783.8	1426.68	150.58	1869.83	1219.34	179.315	1570.04	1313.87	-45.5445	1735.48	1469.53	-132.963	1747.91	1247.29	-154.505	1761.5	1146.86	-176.084	1892.71	1025.39	-138.123	1962.09	975.632	-190.053	1920.53	951.157	-187.896	1996.67	923.015
695	0	78.2001	1864.99	1643.29	174.479	1868.11	1647.64	57.7028	1714.18	1686.07	202.844	1724.27	1688.31	131.111	1652.36	1513.48	116.598	1594.54	1251.63	142.054	1797.56	1424.84	149.839	1883.69	1217.21	180.092	1583.74	1312.35	-45.2524	1748.84	1467.94	-133.425	1765.27	1246.92	-155.481	1781.53	1146.98	-175.869	1917.29	1030.16	-137.065	1988.12	983.486	-189.87	1948.05	957.172	-186.26	2025.37	932.038
696	0	77.9846	1878.91	1640.67	174.58	1882.24	1645.19	57.7295	1728.48	1684.08	202.761	1738.56	1686.48	131.553	1665.58	1511.81	117.724	1607.74	1249.77	142.058	1811.59	1422.84	149.282	1897.72	1214.91	180.78	1597.31	1310.63	-45.0003	1762.13	1466.27	-133.424	1782.68	1246.4	-156.405	1801.36	1147.06	-175.449	1941.47	1034.92	-135.766	2013.39	990.682	-188.856	1974.98	963.057	-184.719	2053.28	940.873
697	0	77.9053	1892.89	1637.93	174.474	1896.59	1642.53	57.8047	1742.61	1681.85	202.357	1752.67	1684.21	131.91	1679.18	1509.65	119.14	1621.34	1247.72	142.241	1825.44	1420.65	148.774	1912.04	1212.83	181.773	1611.1	1308.61	-44.5815	1775.36	1464.48	-133.41	1799.75	1245.69	-157.211	1820.99	1146.72	-175.044	1965.03	1039.65	-134.748	2037.64	997.582	-189.053	2001.03	969.086	-183.128	2079.98	949.504
698	0	77.7895	1906.94	1635.31	174.388	1910.49	1640.09	58.0992	1756.66	1679.68	202.527	1766.91	1682.25	132.583	1693.67	1507.29	120.31	1635.24	1245.37	142.168	1839.15	1418.44	148.354	1926.5	1210.81	182.718	1624.91	1306.5	-44.0773	1788.75	1462.5	-133.216	1816.85	1245.05	-157.23	1840.65	1146.88	-174.221	1987.87	1043.97	-133.353	2061.38	1004.45	-188.248	2026.22	975.074	-181.689	2105.83	958.176
699	0	77.9498	1920.66	1632.83	174.264	1924.63	1637.59	58.203	1770.4	1677.59	203.127	1781.47	1680.4	133.262	1706.8	1505.48	121.641	1649.32	1243.09	142.417	1852.96	1416.29	147.996	1941.01	1208.85	183.997	1638.98	1304.49	-43.571	1802.23	1460.69	-132.777	1833.63	1244.12	-157.808	1859.29	1146.98	-173.306	2009.95	1048.32	-132.04	2084.16	1010.82	-187.489	2050.67	980.951	-180.237	2130.6	966.616
700	0	78.1129	1934.41	1630.34	174.525	1938.63	1635.24	58.7245	1784.11	1675.5	203.224	1795.42	1678.14	133.924	1720.69	1503.27	123.013	1663.67	1240.72	142.798	1867.01	1414.1	147.628	1955.36	1206.87	185.185	1653.22	1302.2	-42.8608	1815.78	1458.89	-132.084	1850.4	1243.17	-157.745	1877.86	1147.01	-172.538	2031.23	1052.61	-130.718	2106.08	1017.05	-187.458	2073.71	986.521	-178.688	2154.43	974.719
701	0	78.3233	1948.22	1628.22	174.865	1952.63	1633.19	59.4506	1797.84	1673.45	203.954	1809.41	1676.11	134.952	1734.72	1501.19	124.485	1678.26	1238.52	143.477	1881.01	1412.04	147.626	1969.69	1205.08	186.047	1667.3	1299.77	-42.1102	1829.51	1457.1	-131.428	1866.82	1242.1	-157.577	1895.89	1146.73	-171.686	2051.88	1056.61	-129.593	2127.14	1022.69	-185.973	2096.12	991.738	-177.426	2177.03	982.473
702	0	78.7435	1961.83	1626.33	175.294	1966.52	1631.41	60.3427	1811.56	1671.39	204.65	1823.22	1674.1	135.668	1748.7	1499.04	125.264	1692.75	1236.18	144.15	1895.22	1410.21	147.791	1984.13	1203.51	186.811	1681.51	1297.7	-41.4195	1843.55	1455.4	-130.588	1883.12	1241.24	-157.419	1913.4	1146.57	-170.655	2071.56	1060.27	-128.448	2147.28	1028.15	-185.453	2117.55	996.804	-176.289	2198.65	989.853
703	0	79.6408	1975.48	1624.8	176.134	1980.15	1629.85	60.7366	1824.85	1669.3	205.418	1836.8	1672.15	136.046	1762.2	1496.74	125.965	1707.35	1234.11	144.931	1909.49	1408.52	148.279	1998.46	1201.9	187.228	1695.76	1295.56	-40.8324	1857.54	1453.8	-130.013	1898.88	1240.38	-157.5	1930.13	1146.11	-169.917	2090.59	1063.63	-127.205	2166.82	1033.21	-184.866	2138.03	1001.2	-175.181	2219.16	996.78
704	0	80.4832	1989.13	1623.69	177	1993.73	1628.45	61.9711	1838.57	1667.63	206.412	1850.32	1670.27	137.041	1776.7	1494.95	126.472	1721.91	1232.04	145.807	1923.68	1407.02	149.027	2012.84	1200.48	187.815	1710.14	1293.31	-39.879	1871.68	1452.49	-129.353	1914.45	1239.44	-157.071	1946.68	1145.63	-169.058	2108.6	1066.4	-126.189	2185.36	1037.75	-183.956	2157.39	1005.12	-174.62	2238.72	1002.92
705	0	81.4051	2002.95	1622.41	178.332	2007.4	1627.39	63.2893	1852.19	1665.99	207.439	1863.62	1668.64	138.103	1790.82	1493.12	126.944	1736.65	1229.98	147.083	1938.14	1405.74	150.02	2027.5	1199.33	188.552	1724.67	1291.23	-38.8825	1886	1451.18	-128.609	1929.76	1238.4	-156.536	1962.78	1144.94	-168.075	2125.77	1068.34	-125.53	2202.99	1041.47	-183.101	2175.87	1008.23	-173.857	2257.2	1008.36
706	0	83.1391	2016.67	1621.62	179.677	2021	1626.24	64.4857	1865.69	1664.61	208.749	1877.01	1667.1	139.058	1804.84	1491.62	127.325	1751.64	1228.2	147.926	1952.46	1404.47	151.292	2042.15	1198.35	189.107	1739.38	1289.36	-37.8483	1900.55	1449.94	-127.675	1945.03	1237.71	-155.83	1978.52	1144.46	-167.264	2142.55	1070.05	-124.905	2220.01	1044.44	-182.247	2193.4	1010.59	-173.601	2274.54	1012.97
707	0	84.9037	2030.43	1620.6	181.514	2034.57	1625.19	65.7282	1879.38	1663.38	210.789	1890.86	1665.85	140.047	1818.82	1490.16	127.486	1766.74	1226.53	149.39	1967.03	1403.47	152.625	2057.43	1197.41	189.598	1754.2	1287.7	-36.5069	1915.07	1448.97	-127.332	1959.46	1237	-155.072	1993.78	1143.99	-166.694	2158.4	1070.79	-124.425	2236.22	1046.45	-180.753	2209.96	1011.52	-173.411	2291.1	1016.43
708	0	86.4555	2044.01	1619.95	183.07	2048.05	1624.36	67.3319	1893	1662.38	211.653	1903.88	1664.56	141.567	1832.96	1488.77	128.054	1782.11	1224.92	150.687	1981.47	1402.61	154.38	2072.82	1197.08	190.055	1769.06	1285.83	-35.0659	1929.53	1448.03	-126.263	1974.14	1236.54	-154.359	2008.63	1143.45	-166.116	2173.68	1071.14	-123.928	2251.66	1047.71	-179.712	2225.48	1011.92	-173.233	2306.46	1018.91
709	0	88.2982	2057.71	1619.75	184.752	2061.64	1624.15	68.9553	1906.33	1661.83	213.42	1917.18	1663.9	142.916	1846.94	1487.69	128.498	1797.59	1223.66	152.154	1995.9	1402.37	156.021	2088.57	1197.22	190.897	1784.15	1284.4	-33.6533	1944.02	1447.59	-125.352	1988.52	1236.29	-153.584	2023.05	1143.14	-165.421	2188.23	1070.91	-123.624	2266.29	1048.41	-179.218	2240.18	1012.37	-173.303	2321.04	1020.39
710	0	90.0105	2071.35	1619.85	186.641	2075.32	1624.19	70.6667	1919.77	1661.4	215.404	1930.73	1663.62	144.411	1860.99	1486.89	129.102	1813.22	1222.52	153.642	2010.48	1402.37	157.588	2104.39	1197.77	191.838	1799.43	1283.19	-32.2665	1958.27	1447.33	-124.521	2002.72	1236.41	-152.727	2037.02	1143	-164.853	2202.11	1070.68	-123.246	2280.3	1048.33	-178.866	2253.99	1012.11	-173.421	2334.73	1021.03
711	0	92.0977	2084.66	1620.41	188.741	2088.92	1624.53	73.1356	1933.19	1661.51	217.713	1944.34	1663.3	146.202	1875.17	1486.37	129.956	1828.77	1221.85	155.24	2025.1	1402.63	159.24	2119.99	1198.66	193.083	1814.79	1282.27	-30.6745	1972.43	1447.74	-123.229	2016.72	1236.65	-150.945	2050.48	1142.82	-164.317	2215.33	1070.37	-122.716	2293.48	1047.57	-178.127	2266.83	1011.41	-173.254	2347.57	1020.29
712	0	93.831	2098.19	1621.31	190.56	2102.47	1625.32	75.6786	1946.38	1661.76	220.136	1957.96	1663.46	148.214	1889.48	1486.17	131.11	1844.26	1221.39	156.906	2039.83	1403.34	160.637	2135.78	1199.95	194.5	1830.19	1281.46	-29.3062	1986.67	1448.49	-122.09	2030.31	1237.07	-149.433	2063.47	1143.02	-163.536	2227.77	1069.71	-122.351	2305.86	1046.37	-177.593	2278.86	1010.34	-173.352	2359.52	1018.64
713	0	95.7426	2111.6	1622.84	192.429	2116.23	1626.54	78.2293	1959.65	1662.64	222.289	1971.24	1663.75	149.835	1903.86	1486.36	132.134	1859.49	1221.53	158.234	2054.58	1404.3	161.654	2151.6	1201.33	195.758	1845.64	1281.14	-28.1369	2000.95	1449.66	-120.558	2043.86	1237.67	-148.304	2075.92	1143.35	-162.932	2239.37	1068.4	-122.262	2317.43	1044.44	-177.453	2289.94	1008.81	-173.258	2370.81	1016.12
714	0	97.9033	2125.28	1624.53	194.716	2130.01	1627.59	80.5532	1972.88	1663.51	224.954	1985.07	1663.98	151.192	1918.02	1486.93	132.915	1874.19	1222.07	159.674	2069.24	1405.35	162.392	2167.34	1202.65	196.776	1860.97	1281.34	-26.5604	2014.96	1450.67	-119.103	2057.17	1238.47	-147.196	2087.92	1143.79	-162.423	2250.62	1067	-121.813	2328.37	1041.72	-177.218	2300.07	1006.65	-173.212	2381.04	1012.37
715	0	100.334	2139.14	1626.53	197.026	2143.81	1629.02	83.0233	1986.16	1664.62	227.349	1998.7	1664.03	153.075	1932.5	1487.93	133.774	1888.55	1223.08	160.814	2083.96	1406.43	162.98	2182.84	1204.12	197.817	1876.05	1281.98	-25.2975	2029.28	1452.54	-117.683	2070.09	1239.28	-145.908	2099.55	1144.43	-161.799	2260.88	1065.15	-121.421	2338.57	1038.4	-176.262	2309.65	1004.05	-172.818	2390.53	1007.58
716	0	102.421	2152.87	1628.7	199.252	2157.79	1630.5	86.2015	2000.09	1666.4	230.311	2012.62	1664.77	154.628	1946.86	1489.24	134.489	1902.48	1224.34	161.785	2098.42	1407.92	163.007	2197.74	1205.5	198.507	1890.78	1282.88	-24.2982	2043.53	1454.43	-116.237	2082.82	1240.17	-144.763	2110.62	1145.19	-160.856	2270.57	1062.83	-120.931	2347.91	1034.51	-175.459	2317.91	1000.31	-172.472	2398.92	1002.19
717	0	104.859	2166.75	1630.68	201.409	2171.38	1631.57	88.3776	2013.7	1668.18	232.424	2026.08	1665.12	155.787	1961.28	1490.73	134.865	1916.18	1225.93	162.134	2112.58	1409.37	162.866	2212.46	1206.93	199.082	1905.02	1284.29	-23.3824	2057.79	1456.38	-114.928	2095.14	1241.3	-143.429	2121.71	1146.14	-160.256	2279.54	1060.06	-120.399	2356.38	1029.85	-175.126	2325.42	997.11	-171.9	2406.26	995.919
718	0	106.854	2180.9	1632.58	203.532	2185.38	1632.5	91.6961	2028.52	1670.5	235.35	2040.25	1665.84	156.488	1975.41	1492.16	135.696	1930.21	1227.76	162.82	2126.92	1410.59	162.644	2226.19	1207.97	199.638	1919.14	1285.95	-22.6096	2071.84	1458.51	-113.946	2107.2	1242.65	-142.441	2132.17	1147.28	-159.091	2287.92	1057.04	-119.713	2364.11	1024.53	-174.861	2332.18	992.871	-171.261	2412.85	988.761
719	0	108.913	2194.94	1634.5	205.47	2199.36	1633.38	93.5822	2042.47	1672.64	237.134	2054.5	1666.82	157.465	1989.41	1493.82	135.901	1943.71	1229.63	163.027	2140.87	1412.08	162.504	2240.54	1209.55	200.227	1933.01	1287.4	-22.1513	2085.52	1460.44	-113.111	2118.94	1243.78	-141.342	2142.6	1148.09	-158.41	2295.82	1053.85	-118.693	2371.19	1018.9	-173.778	2337.98	988.128	-170.43	2418.45	981.222
720	0	110.238	2209.14	1636.13	206.966	2213.31	1634.38	95.0238	2056.62	1674.78	239.031	2068.6	1667.89	158.154	2003.18	1495.57	135.909	1957.08	1231.64	163.08	2154.57	1413.78	162.092	2253.77	1211.13	200.273	1946.37	1289.05	-21.6639	2099.01	1462.39	-112.589	2130.29	1245.07	-140.492	2152.59	1148.95	-157.494	2302.96	1050.27	-117.747	2377.28	1012.83	-173.003	2343.1	983.212	-169.356	2423.19	973.203
721	0	111.314	2223.1	1637.54	208.034	2227.42	1635.51	95.9372	2070.56	1677.19	239.837	2082.57	1669.3	158.43	2016.49	1497.37	136.335	1970.43	1233.87	162.914	2167.89	1415.52	161.85	2267.06	1212.98	200.53	1959.62	1291.11	-21.2914	2112.15	1464.43	-111.956	2141.73	1246.66	-139.713	2162.29	1149.96	-156.572	2309.49	1046.45	-116.8	2382.52	1006.52	-172.23	2347.47	978.296	-168.208	2427.05	964.72
722	0	112.495	2237.11	1638.77	208.774	2241.22	1636.33	97.2451	2085.27	1679.29	240.631	2096.83	1671.03	159.298	2029.85	1499.47	136.803	1983.29	1235.93	162.976	2181.21	1417.38	161.625	2280.66	1214.97	201.095	1972.79	1292.89	-20.993	2124.85	1466.35	-111.633	2152.46	1247.86	-138.845	2171.66	1150.79	-155.584	2315.61	1042.71	-115.709	2386.87	999.412	-170.938	2351.41	973.039	-166.441	2430.13	955.937
723	0	112.733	2251.3	1639.91	209.38	2255.6	1637.48	98.2673	2099.58	1681.33	241.858	2111.32	1673.19	159.98	2043.05	1501.51	137.708	1996.31	1237.76	162.879	2194.24	1419.17	161.35	2293.92	1217.01	201.951	1985.79	1294.76	-20.8044	2137.18	1467.9	-110.939	2163.39	1249.06	-137.837	2180.79	1151.45	-154.547	2321.19	1038.77	-114.548	2390.42	992.347	-169.437	2354.34	967.415	-164.565	2432.42	947.045
724	0	112.802	2265	1641.21	209.482	2269.49	1638.89	98.5424	2113.62	1683.84	241.985	2125.64	1675.31	160.547	2056.21	1503.85	138.428	2008.97	1239.88	163.133	2207.29	1421.51	160.885	2306.51	1219.27	202.631	1998.61	1296.87	-20.9931	2149.07	1469.42	-110.728	2173.73	1250.31	-136.745	2189.71	1152.15	-153.357	2326.07	1034.74	-113.044	2393.52	985.481	-169.092	2356.88	962.695	-162.703	2434.01	938.444
725	0	112.886	2279.03	1642.64	209.429	2283.48	1640.43	97.9428	2127.28	1686.21	242.266	2139.84	1678.02	161.033	2069.07	1506.44	139.314	2021.61	1242.23	163.245	2220.18	1423.9	160.51	2319.52	1221.83	203.299	2011.18	1299.46	-21.0738	2161.17	1471.25	-110.523	2183.51	1251.26	-135.985	2197.88	1152.67	-152.405	2330.33	1030.79	-111.774	2395.6	978.425	-168.228	2358.39	957.498	-160.399	2434.56	929.349
726	0	112.81	2292.52	1644.26	209.256	2297.37	1642.02	98.0083	2141.23	1688.67	241.963	2154.04	1680.59	161.551	2082.02	1509.01	140.483	2034.14	1244.55	163.281	2232.97	1426.51	159.904	2331.85	1224.02	204.777	2024.03	1301.94	-21.3855	2172.99	1472.8	-110.36	2192.95	1251.93	-134.966	2205.71	1153.09	-151.342	2333.98	1026.82	-110.185	2396.99	971.708	-167.172	2359.93	952.923	-158.296	2434.26	920.503
727	0	112.268	2306.28	1645.71	208.986	2311.29	1643.83	97.8372	2155.28	1691.19	241.629	2168.04	1683.39	161.962	2095.07	1511.62	142.278	2046.98	1247.13	163.564	2245.8	1429.2	159.401	2344.5	1226.64	205.833	2036.74	1304.71	-21.4987	2185.01	1474.47	-109.668	2202.27	1252.98	-133.37	2213.56	1153.45	-150.147	2336.96	1023.07	-108.623	2397.67	965.305	-165.839	2360.54	948.214	-156.176	2433.14	912.193
728	0	111.996	2319.46	1647.29	208.726	2325.05	1645.73	98.0647	2169.26	1693.47	241.739	2182.11	1686.12	162.143	2108.07	1514.22	143.652	2059.68	1249.65	163.51	2258.47	1431.73	158.943	2357.05	1229.27	207.165	2049.5	1307.3	-21.5413	2197.23	1476.13	-109.057	2211.29	1253.84	-132.157	2220.48	1153.92	-148.848	2339.45	1019.48	-106.964	2397.54	959.081	-165.061	2360.23	943.691	-153.924	2431.24	904.04
729	0	112.138	2333.03	1648.98	208.511	2338.49	1647.54	97.5574	2182.68	1695.79	241.506	2195.8	1688.48	162.521	2121.11	1516.78	145.237	2072.5	1252.06	163.801	2271.43	1433.99	158.601	2369.59	1231.61	208.457	2062.44	1310.02	-21.6517	2209.53	1477.69	-107.759	2220.34	1254.74	-130.506	2227.48	1154.28	-147.318	2341.44	1016.22	-105.098	2396.87	953.108	-163.84	2359.6	939.606	-151.575	2428.65	896.413
730	0	111.683	2346.02	1650.85	208.307	2351.85	1649.43	97.6465	2196.28	1697.68	241.127	2209.3	1690.86	162.791	2134.21	1518.94	146.661	2085.3	1254.19	163.807	2284.33	1436.38	158.295	2382.05	1234.33	210.073	2075.47	1312.39	-21.7114	2221.78	1479.22	-107.224	2228.53	1255.24	-128.477	2234.3	1154.6	-145.761	2343.04	1013.1	-103.602	2395.73	947.47	-162.471	2358.32	935.76	-149.65	2425.27	889.244
731	0	111.485	2359.34	1652.52	208.043	2365.07	1651.4	96.88	2209.27	1699.44	241.648	2222.76	1693.25	163.14	2147.32	1521.08	147.823	2098.14	1256.17	164.078	2297.53	1438.58	158.052	2394.32	1236.84	211.047	2088.37	1314.56	-21.5341	2234.28	1480.68	-106.124	2236.81	1255.8	-126.827	2240.36	1154.85	-144.191	2344.02	1009.88	-101.791	2393.97	942.297	-161.269	2356.52	931.987	-147.912	2421.42	882.557
732	0	111.583	2372.56	1654.05	207.941	2378.09	1653.25	96.5776	2222.22	1700.89	240.803	2235.75	1694.7	163.284	2160.28	1523.08	148.947	2111.04	1258.09	164.006	2310.6	1440.24	157.824	2406.66	1238.72	212.622	2101.6	1317.05	-21.6272	2246.71	1481.73	-105.04	2245.06	1255.9	-124.977	2246.32	1155.02	-142.47	2344.98	1007.01	-99.971	2392.33	937.309	-159.772	2354.57	928.665	-146.264	2417.13	876.133
733	0	111.375	2385.57	1655.57	207.938	2391.33	1654.83	96.624	2235.22	1702.05	240.701	2248.81	1696.11	163.532	2173.52	1524.44	150.02	2124.06	1259.62	164.421	2323.87	1441.71	158.038	2419.14	1240.28	214.021	2114.89	1318.61	-21.6078	2259.31	1482.63	-103.509	2253.56	1255.97	-122.643	2252.38	1155.19	-140.804	2345.51	1004.05	-98.4342	2390.18	932.086	-158.214	2352.22	925.345	-144.59	2412.51	869.943
734	0	111.067	2398.47	1656.55	207.734	2404.32	1656.21	96.9922	2248.33	1702.95	240.917	2261.71	1697.34	163.711	2186.82	1525.53	150.963	2137.03	1260.55	164.397	2337.15	1442.72	158.144	2431.58	1241.63	215.296	2128.3	1319.89	-21.5236	2271.98	1483.03	-101.729	2262.12	1255.81	-120.157	2258.12	1154.87	-138.84	2345.91	1001.02	-96.785	2387.89	927.331	-156.569	2349.53	922.007	-143.16	2407.54	864.124
735	0	110.889	2411.4	1657.53	207.684	2417.3	1657.53	96.691	2261.02	1703.6	240.891	2274.7	1698.43	163.863	2200.09	1526.53	151.899	2150.15	1261.51	164.458	2350.42	1443.65	158.258	2444.13	1242.74	216.496	2141.27	1321.28	-21.4875	2284.74	1483.3	-100.365	2270.42	1255.39	-117.737	2263.89	1154.71	-136.982	2346.02	998.109	-95.401	2385.41	922.912	-154.464	2346.62	918.753	-141.854	2402.35	858.731
736	0	110.904	2424.32	1658.42	207.525	2430.41	1658.45	96.5589	2273.64	1703.9	240.611	2287.62	1698.72	163.966	2213.41	1527.21	152.577	2163.08	1262.37	164.826	2363.73	1444.28	158.861	2456.87	1243.33	217.325	2154.89	1322.2	-21.4831	2297.69	1483.18	-98.7756	2278.99	1254.76	-115.614	2269.42	1154.36	-135.341	2346.01	995.121	-94.2116	2383.1	918.6	-152.786	2343.56	916.06	-140.733	2396.66	853.691
737	0	110.661	2437.2	1658.86	207.38	2443.47	1659.1	96.2458	2286.24	1703.78	240.826	2300.58	1698.85	164.225	2226.8	1527.37	153.394	2176.12	1262.62	164.936	2377	1444.37	159.384	2469.8	1243.41	218.521	2167.95	1322.67	-21.6542	2310.53	1482.57	-97.2449	2287.48	1253.99	-112.745	2275.44	1153.55	-133.725	2345.8	992.361	-92.97	2380.58	914.352	-149.972	2340.26	912.605	-139.813	2390.99	848.78
738	0	110.538	2450.2	1659.15	207.348	2456.62	1659.51	98.5278	2300.82	1703.26	240.648	2313.66	1698.64	164.316	2240.28	1527.18	154.284	2189.27	1263.13	165.019	2390.39	1444.14	159.924	2482.61	1243.02	219.525	2181.49	1322.62	-21.7276	2323.63	1481.62	-95.6001	2296.01	1252.83	-110.004	2281.37	1152.62	-132.034	2345.59	989.607	-91.9406	2378.3	910.238	-148.024	2336.99	910.128	-138.745	2385.36	844.2
739	0	110.349	2463.3	1658.91	207.091	2470.16	1659.53	96.3147	2311.98	1702.86	240.762	2326.72	1698.35	164.347	2253.72	1526.86	154.955	2202.09	1262.84	165.259	2403.75	1443.84	160.531	2495.08	1241.9	219.922	2194.45	1322.67	-21.6841	2336.82	1480.68	-94.3962	2304.41	1251.57	-107.703	2287.28	1151.8	-130.367	2345.45	986.827	-88.1432	2381.19	908.159	-146.558	2333.43	907.72	-137.844	2379.67	840.182
740	0	110.09	2476.46	1658.45	206.913	2483.23	1659.01	98.6101	2326.64	1701.87	240.886	2339.97	1697.73	164.491	2267.18	1526.15	155.128	2215.09	1262.12	165.493	2417.22	1442.91	161.28	2507.4	1240.33	220.584	2207.63	1322.12	-21.5574	2350.05	1479.53	-92.6985	2313.29	1250.07	-105.084	2293.53	1150.88	-128.84	2345.45	984.646	-89.9884	2373.85	902.714	-144.738	2330.21	905.632	-137.005	2374.03	836.162
741	0	109.978	2489.75	1657.48	206.68	2496.7	1658.1	98.9578	2339.89	1700.29	240.862	2353.73	1696.63	164.746	2280.67	1525.09	155.248	2228.06	1261.11	165.681	2430.72	1441.62	162.031	2519.94	1238.35	221.067	2220.81	1321.35	-21.3292	2363.56	1478.03	-91.0533	2322.14	1248.61	-101.891	2300.53	1149.84	-127.206	2345.75	982.304	-89.0399	2371.96	899.286	-142.647	2327.41	903.799	-136.047	2368.5	832.571
742	0	109.771	2503.11	1656.1	206.508	2510.23	1656.94	98.7572	2353.17	1699.06	240.907	2366.99	1695.24	164.697	2294.02	1523.96	154.949	2240.95	1260.09	165.675	2444.03	1440.04	162.796	2532.97	1236.2	221.455	2233.72	1320.41	-21.3167	2376.89	1476.06	-89.6725	2331.07	1247	-99.3178	2307.11	1148.59	-125.524	2346.36	980.147	-85.732	2375.15	897.335	-140.863	2324.83	902.385	-134.96	2363.32	829.31
743	0	109.608	2516.7	1654.43	206.303	2523.89	1655.32	98.653	2366.7	1697.65	240.436	2380.99	1694.15	164.772	2307.4	1522.85	154.78	2253.81	1259.15	165.78	2457.28	1438.32	163.629	2546.48	1233.86	221.447	2246.73	1319.48	-21.5606	2390.14	1474.09	-88.5231	2340.45	1245.28	-96.6554	2314.56	1147.71	-124.122	2347.28	978.372	-87.0938	2369.4	893.171	-139.454	2322.5	901.554	-134.206	2358.19	826.773
744	0	109.461	2530.42	1652.41	206.063	2537.79	1653.26	98.7276	2380.48	1696.05	240.428	2394.83	1692.3	164.783	2320.79	1521.3	154.351	2266.74	1257.67	165.89	2470.55	1436.6	164.53	2560.38	1231.66	221.85	2259.63	1318.22	-21.4482	2403.83	1472.3	-87.3984	2350.04	1243.87	-94.103	2322.01	1146.62	-122.68	2348.72	977.22	-86.3224	2368.56	890.852	-137.648	2320.9	900.892	-133.233	2353.66	824.966
745	0	109.144	2544.07	1649.93	205.779	2551.51	1651.01	98.626	2394.54	1694.23	240.466	2408.82	1690.81	164.797	2334.25	1519.59	153.925	2279.81	1256.01	166.041	2483.83	1434.77	165.221	2574.44	1229.7	221.681	2272.57	1316.53	-21.5278	2417.36	1470.36	-85.94	2359.86	1242.61	-91.2868	2329.95	1145.47	-121.304	2350.63	975.883	-86.5736	2368.64	889.016	-135.654	2320.14	900.884	-132.234	2349.5	823.205
746	0	108.877	2557.92	1647.29	205.472	2565.43	1648.58	98.2495	2408.67	1692.45	240.345	2423.08	1689.26	164.62	2347.56	1517.97	153.239	2292.87	1254.37	166.216	2497.16	1432.91	166.013	2588.18	1227.55	221.264	2285.47	1314.92	-21.6465	2431.04	1468.54	-84.9214	2369.75	1241.38	-88.5964	2338.41	1144.9	-119.983	2353.1	975.338	-77.8553	2365.65	889.633	-134.745	2319.65	901.265	-131.269	2345.93	822.12
747	0	108.627	2571.77	1644.79	205.384	2579.26	1645.86	97.816	2422.76	1690.63	239.774	2437	1687.21	164.13	2360.92	1516.06	152.642	2306.09	1252.75	166.054	2510.4	1430.6	166.63	2601.46	1225.01	220.851	2298.62	1313.09	-22.0511	2444.33	1466.38	-84.3386	2379.63	1239.87	-86.5056	2347.16	1143.92	-118.924	2356.36	975.174	-83.418	2368.74	886.126	-133.509	2320.13	902.262	-130.287	2343.22	821.51
748	0	108.349	2585.83	1641.97	205.076	2593.13	1643.11	97.6406	2437.06	1688.55	239.868	2451.18	1685.28	163.856	2374.39	1514.12	152.155	2319.37	1250.69	166.038	2523.87	1428.47	167.068	2614.68	1222.52	220.554	2311.79	1311.06	-22.1421	2458.19	1464.48	-83.3497	2389.95	1238.63	-84.5172	2356.14	1143.06	-118.124	2360.02	974.744	-83.1837	2370.86	885.264	-132.318	2321.81	903.019	-129.375	2341.26	821.157
749	0	108.149	2599.74	1639.06	204.889	2607.09	1640.39	96.4521	2450.58	1686.5	238.562	2464.96	1683.09	163.439	2387.79	1511.89	151.536	2332.81	1248.43	165.874	2537.2	1426.39	167.354	2627.99	1220.45	219.717	2325.03	1308.99	-22.4015	2471.79	1462.39	-82.5	2400.27	1237.29	-82.4269	2365.7	1142.22	-117.643	2364.47	974.562	-82.1918	2373.33	884.765	-131.287	2324.36	904.013	-129.07	2340.26	821.09
750	0	107.789	2613.71	1636.23	204.413	2620.86	1637.59	96.3506	2465.43	1684.23	238.429	2479.15	1681.25	162.795	2401.14	1509.77	150.729	2346.4	1246.3	165.521	2550.53	1424.08	167.494	2641.75	1218.5	219.134	2338.5	1306.93	-22.8479	2485.32	1460.21	-81.8824	2411.01	1235.91	-80.9886	2375.54	1141.32	-117.286	2369.73	974.441	-81.6853	2376.93	884.099	-130.901	2327.7	905.278	-126.703	2339.96	820.608
751	0	107.334	2627.61	1633.57	204.158	2634.5	1634.9	95.0926	2479.11	1682.16	237.698	2492.94	1678.87	162.145	2414.6	1507.4	150.283	2360.23	1243.92	165.205	2564.09	1421.85	167.841	2655.52	1216.54	218.598	2352.09	1304.49	-23.3489	2498.76	1457.99	-81.54	2421.99	1234.34	-78.9781	2385.33	1140.24	-117.006	2375.96	974.34	-81.2916	2381.25	883.554	-130.466	2332.34	906.456	-125.919	2341	820.835
752	0	106.824	2641.51	1631.01	203.695	2648.39	1632.62	94.9261	2493.67	1679.92	237.018	2506.78	1676.96	161.601	2428.01	1505.21	149.909	2374.24	1241.38	164.783	2577.85	1419.83	167.819	2669.51	1215.05	218.086	2365.8	1302.17	-23.7613	2512.43	1455.7	-81.3326	2433.66	1232.61	-77.796	2395.49	1139.2	-116.924	2382.84	974.06	-81.5965	2386.73	882.917	-130.298	2337.76	907.203	-125.258	2343.08	821.02
753	0	106.366	2655.33	1628.83	203.132	2662	1630.65	93.8967	2507.46	1677.72	236.18	2520.22	1675.09	160.993	2441.66	1502.93	149.61	2388.25	1239.3	164.204	2591.46	1417.99	167.471	2683.35	1213.66	217.523	2379.66	1299.96	-24.6036	2525.78	1453.28	-81.4509	2445.1	1230.56	-77.1692	2406.39	1138.05	-117.21	2390.52	973.463	-82.9449	2393.22	882.276	-130.423	2344.02	907.753	-124.783	2346.4	821.239
754	0	105.446	2668.86	1626.91	202.32	2675.53	1629.04	91.8572	2520.18	1675.85	234.208	2533.24	1673.68	160.412	2455.24	1501.06	149.499	2402.31	1237.42	163.452	2605.27	1416.17	166.961	2696.61	1212.02	217.178	2393.68	1297.89	-25.1037	2539.21	1451.15	-81.523	2457.29	1229.26	-77.175	2417.37	1136.66	-117.684	2399.02	973.171	-85.0295	2401.02	881.806	-130.872	2351.63	908.062	-124.328	2351.13	821.397
755	0	104.518	2682.47	1625.3	201.384	2688.88	1627.6	91.8488	2534.68	1673.71	233.155	2546.77	1671.75	160.235	2469.11	1498.83	149.504	2416.5	1235.19	162.782	2619.06	1414.4	166.263	2710.2	1210.51	217.069	2407.9	1295.51	-25.9104	2552.42	1449.2	-82.0049	2469.46	1227.57	-77.1424	2428.99	1135.39	-118.313	2408.27	972.483	-85.7181	2409.06	880.699	-131.295	2360.01	907.964	-124.225	2356.9	821.161
756	0	103.427	2696.03	1623.92	200.264	2702.54	1626.4	90.7903	2548.13	1671.83	232.258	2560.36	1670.47	159.549	2482.84	1497.13	149.733	2430.77	1233.02	162.034	2633.18	1413.02	165.152	2724.21	1209.2	216.925	2422.15	1293.52	-26.6874	2565.6	1447.16	-82.2935	2481.86	1225.87	-77.0326	2441.03	1134.1	-119.01	2418.47	971.538	-87.0159	2418.35	879.702	-131.565	2369.7	907.916	-124.216	2364.37	821.064
757	0	102.114	2709.32	1622.51	199.071	2716.07	1625.34	89.3901	2561.33	1670.08	231.286	2573.79	1669.28	159.386	2496.73	1495.27	149.927	2445.02	1231.4	161.068	2647.08	1411.77	163.876	2738.49	1208.15	216.947	2436.36	1292.04	-27.3715	2578.84	1445.4	-81.8178	2494.47	1224.42	-77.8854	2453.22	1132.97	-119.985	2429.3	970.335	-85.5314	2428.37	878.54	-132.464	2380.21	907.209	-124.645	2373.09	820.68
758	0	100.731	2722.58	1621.31	197.653	2729.45	1624.54	87.3265	2573.68	1668.83	229.04	2587.28	1668.07	158.531	2510.21	1494.14	150.16	2459.46	1229.75	160.148	2660.91	1410.67	162.463	2753.32	1207.18	216.933	2450.88	1290.31	-28.1476	2592.04	1443.8	-83.2226	2507.32	1223.09	-78.9566	2465.33	1131.52	-121.1	2441	969.457	-87.8428	2439.77	877.427	-133.828	2391.65	906.74	-125.203	2383.59	820.065
759	0	99.5396	2735.98	1620.54	196.41	2742.87	1623.96	86.9706	2587.8	1667.73	228.484	2600.84	1667.45	158.108	2524.2	1492.63	150.441	2474.04	1228.21	159.318	2674.96	1409.85	160.912	2768.41	1206.5	217.135	2465.26	1288.96	-29.0937	2605.09	1442.42	-83.7773	2520.36	1221.74	-79.5518	2478.12	1130.43	-122.168	2453.74	968.497	-89.4654	2452.08	876.436	-135.082	2403.99	905.594	-125.97	2395.21	819.16
760	0	98.3584	2749.37	1620.11	194.927	2756.23	1623.61	85.7952	2601.04	1667.14	227.252	2614.19	1667.22	157.258	2537.57	1492.04	150.489	2488.92	1227.11	158.046	2688.92	1409.5	159.184	2783.22	1206.26	216.783	2479.69	1287.86	-30.1134	2618.17	1441.32	-84.9388	2533.59	1220.56	-80.7042	2491.14	1129.47	-123.504	2467.01	967.454	-90.9106	2465.44	875.671	-136.102	2417.2	904.612	-127.043	2408.62	818.396
761	0	97.0939	2762.69	1619.97	193.684	2769.67	1623.79	84.4472	2614.29	1667.11	226.05	2627.38	1667.07	156.33	2551.29	1491.41	150.312	2503.8	1226.38	156.827	2702.65	1409.48	157.627	2798.28	1206.37	216.303	2494.02	1287.09	-31.0736	2631.39	1440.7	-86.7764	2547.22	1219.67	-81.8915	2504.68	1129.04	-124.889	2481	966.68	-92.3918	2479.93	875.214	-137.358	2431.37	903.799	-128.44	2423.41	817.155
762	0	95.8105	2775.97	1620.4	192.627	2783.02	1624.06	83.156	2627.52	1667.01	224.336	2640.54	1667.29	155.655	2565.2	1490.79	150.16	2518.85	1225.69	155.685	2716.73	1409.7	156.04	2813.22	1206.74	215.633	2508.56	1286.44	-32.0212	2644.75	1440.61	-85.0913	2560.13	1219.93	-82.7226	2518.53	1128.68	-126.257	2495.47	966.332	-92.4531	2494.9	874.308	-138.081	2446.6	902.824	-129.306	2439.75	816.323
763	0	94.7718	2789.2	1621.03	191.376	2796.26	1624.99	82.0076	2640.76	1667.31	223.373	2653.49	1667.61	155.133	2579.07	1490.69	149.553	2533.67	1225.3	154.914	2730.78	1410.53	154.745	2828.13	1207.58	214.916	2522.96	1286.22	-32.8719	2658.12	1441.01	-89.5241	2575.11	1220.56	-83.9226	2532.54	1128.35	-127.794	2510.73	966.106	-95.0305	2511.49	874.275	-139.435	2462.05	902.006	-132.148	2457.15	815.907
764	0	93.5932	2802.61	1622.42	189.98	2809.32	1626.49	80.5685	2654.02	1667.88	222.066	2666.7	1668.89	154.272	2592.73	1491.2	148.719	2548.05	1225.83	153.763	2744.51	1411.58	153.645	2842.84	1208.74	213.997	2537.2	1286.38	-33.6794	2671.54	1441.38	-86.7856	2587.95	1220.12	-85.1791	2547.26	1128.75	-128.779	2526.68	966.284	-96.5352	2528.67	874.065	-140.558	2478.82	901.19	-134.422	2475.83	814.934
765	0	92.505	2815.87	1623.87	189.173	2822.6	1628.17	79.4407	2667.32	1668.89	220.636	2679.87	1670.29	153.737	2606.43	1492.15	147.824	2562.18	1226.71	153.152	2758.34	1412.68	152.952	2857.29	1209.8	213.274	2551.27	1287.37	-34.559	2685.04	1442.21	-87.8799	2602.53	1220.51	-86.5157	2562.04	1128.99	-130.898	2543.19	966.181	-98.5316	2546.85	874.065	-142.351	2495.98	900.436	-136.915	2495.76	814.138
766	0	91.1544	2829.39	1625.58	187.843	2835.93	1629.97	78.3512	2680.61	1670.06	219.731	2693.1	1671.76	153.739	2620.31	1493.45	147.054	2575.88	1228.05	152.611	2772.09	1414.13	152.515	2871.21	1211.06	212.792	2565.38	1288.4	-34.627	2698.44	1443.23	-88.4453	2617.02	1221.53	-87.7818	2577.24	1129.22	-132.451	2560.64	966.388	-100.665	2565.93	874.177	-143.658	2514.14	899.724	-139.514	2516.65	813.516
767	0	90.4953	2842.64	1626.71	186.827	2849.41	1631.79	77.2334	2693.94	1670.62	219.032	2706.4	1673.44	153.737	2634.05	1494.91	146.507	2589.4	1229.05	152.094	2785.61	1415.56	152.198	2884.87	1212.23	212.479	2579.19	1289.86	-34.5755	2711.69	1444.61	-88.9039	2631.67	1222.55	-88.5557	2592.67	1130.05	-133.486	2578.45	966.183	-102.325	2585.71	874.346	-144.88	2533.32	899.354	-142.309	2538.75	813.364
768	0	89.6411	2855.8	1627.7	186.255	2862.99	1633.23	76.4136	2707.07	1671.55	218.14	2719.95	1674.8	154.101	2647.72	1496.4	146.082	2602.66	1230.85	151.904	2799.16	1416.76	152.105	2898.28	1213.22	212.7	2592.95	1291.71	-34.4894	2724.73	1446	-89.4088	2646.57	1223.75	-90.0173	2608.19	1130.8	-133.939	2597.61	966.861	-104.904	2606.59	874.838	-146.584	2553.23	898.744	-145.344	2561.74	813.416
769	0	88.9211	2868.92	1628.72	185.405	2876.35	1634.59	75.9707	2720.04	1672.71	217.613	2733.5	1676.35	154.437	2661.17	1497.76	145.979	2615.76	1232.29	151.885	2812.64	1417.78	151.946	2911.31	1214.22	213.286	2606.37	1293.3	-34.088	2737.75	1447.7	-89.9263	2661.65	1225.22	-91.2982	2623.6	1131.72	-135.82	2616.65	966.969	-106.891	2628.18	875.266	-147.978	2574.02	898.023	-148.498	2585.57	813.484
770	0	88.6136	2882.33	1629.87	185.001	2889.88	1635.88	75.7787	2733.28	1674.04	217.197	2747.19	1677.81	154.808	2674.18	1499.36	146.248	2628.78	1233.77	152.016	2825.63	1419.12	152.05	2924.31	1215.4	213.89	2619.42	1294.67	-33.7909	2750.62	1449.56	-89.7795	2676.8	1226.72	-92.344	2639.38	1132.38	-137.443	2636.32	967.209	-108.411	2650.3	875.812	-149.381	2595.53	897.448	-151.518	2610.24	813.538
771	0	88.4632	2895.3	1631	184.796	2903.2	1637.26	75.918	2746.56	1675.62	217.009	2760.57	1679.71	154.852	2687	1501.21	146.432	2641.57	1235.27	152.196	2838.42	1420.76	152.046	2936.98	1216.97	214.305	2632.09	1296.53	-33.5976	2763.45	1451.48	-90.2823	2691.59	1227.88	-93.8084	2654.99	1133.45	-138.979	2656.46	967.742	-111.543	2673.54	877.219	-151.23	2617.37	896.993	-154.667	2635.63	814.263
772	0	88.4407	2908.43	1632.33	184.754	2916.44	1638.52	75.8033	2759.71	1677.37	217.227	2774.1	1681.54	155.213	2699.7	1502.83	146.525	2654.17	1237.18	152.394	2851.05	1422.49	151.973	2949.38	1218.71	214.422	2644.53	1298.42	-33.5965	2775.97	1453.27	-91.2359	2706.27	1229.21	-94.9306	2670.98	1134.43	-140.576	2676.86	968.463	-113.502	2696.99	878.37	-152.927	2639.85	896.465	-158.182	2661.94	815.447
773	0	88.9038	2921.53	1633.8	185.201	2929.51	1639.62	76.2726	2773.03	1679.54	217.843	2787.48	1683.2	155.623	2712.56	1504.35	146.542	2666.94	1238.65	152.942	2863.58	1424.22	152.238	2961.52	1220.37	214.408	2657.11	1299.83	-33.0978	2788.91	1455.67	-90.7969	2721.44	1230.99	-95.5225	2687.29	1135.66	-142.007	2697.78	969.505	-115.321	2721.05	879.842	-153.856	2663.31	895.908	-161.117	2688.63	816.876
774	0	89.3864	2934.63	1635.32	186.276	2943.04	1640.9	75.2702	2784.75	1682.1	218.594	2800.84	1685.14	155.939	2724.96	1506.27	146.545	2679.56	1240.58	153.27	2875.92	1426.16	152.463	2973.93	1222.3	214.344	2669.48	1301.46	-32.6203	2801.72	1457.98	-91.4033	2736.04	1232.55	-96.8411	2703	1136.47	-142.884	2719.18	970.857	-116.542	2745.37	881.669	-154.895	2687.15	895.78	-163.773	2715.93	818.904
775	0	90.1923	2947.57	1636.73	186.659	2955.8	1642.23	76.3441	2798.47	1684.03	219.365	2813.65	1687.26	156.154	2737.51	1508.21	146.216	2691.73	1242.63	153.616	2888.33	1428.12	152.835	2986.43	1224.27	213.902	2681.53	1303.77	-32.3323	2814.5	1460.03	-91.6181	2751.1	1234.79	-98.2301	2718.83	1137.97	-144.184	2740.66	972.167	-119.32	2770.11	884.488	-156.201	2711.07	895.933	-166.084	2743.73	821.171
776	0	91.2376	2960.77	1638.28	187.672	2968.7	1643.5	78.5216	2813.2	1686.35	219.899	2826.91	1689.22	156.518	2749.91	1510.43	145.73	2703.92	1244.7	154.089	2900.44	1430.09	153.351	2998.98	1226.2	213.388	2693.43	1305.73	-32.0962	2827.33	1462.27	-92.6859	2765.81	1236.56	-100.195	2734.45	1139.45	-145.437	2762.51	973.75	-118.287	2799.15	888.391	-157.245	2735.64	896.52	-168.388	2771.89	824.056
777	0	92.453	2973.96	1639.78	188.46	2981.54	1644.66	77.5444	2824.81	1688.75	220.732	2839.99	1690.71	157.105	2762.41	1512.52	145.192	2715.98	1247.11	154.747	2912.83	1431.87	154.019	3011.58	1228.13	212.884	2705.58	1307.57	-31.4997	2840.09	1464.41	-93.2727	2780.76	1238.63	-101.372	2750.68	1141.07	-146.2	2784.43	975.418	-121.05	2820.16	890.331	-158.254	2760.42	897.512	-170.172	2800.55	827.701
778	0	93.5794	2986.81	1641.22	189.646	2994.41	1645.97	78.59	2838	1690.87	221.733	2852.91	1692.29	157.624	2775.06	1514.58	144.627	2728.02	1249.19	155.359	2924.94	1433.56	154.794	3024.12	1230.24	212.467	2717.62	1309.53	-30.8241	2852.93	1466.51	-93.3594	2795.99	1241.31	-102.866	2766.36	1142.51	-146.831	2806.6	977.489	-119.306	2849.79	895.279	-158.865	2785.55	898.874	-171.429	2829.31	831.731
779	0	94.747	2999.78	1642.73	190.751	3007.11	1647.23	79.6484	2850.99	1693.12	223.54	2866.4	1693.99	158.017	2787.47	1516.86	144.031	2740.17	1251.39	155.818	2937.26	1435.23	155.463	3036.49	1232.27	211.605	2729.58	1311.58	-30.1434	2865.84	1469.16	-94.411	2810.68	1243.82	-104.652	2782.22	1144.6	-147.604	2828.85	979.945	-119.45	2875.13	899.512	-159.032	2811.21	901.025	-172.487	2858.11	836.514
780	0	96.0012	3012.71	1644.45	192.226	3019.82	1648.64	80.3045	2863.8	1695.23	223.866	2878.74	1695.67	158.736	2799.94	1518.71	143.659	2752.32	1253.42	156.394	2949.49	1436.98	156.222	3048.66	1234.04	211.463	2741.73	1313.33	-29.6962	2878.47	1471.47	-95.384	2825.42	1246.2	-105.98	2798.85	1146.79	-147.9	2851.45	983.108	-119.296	2899.97	904.347	-159.942	2836.39	903.539	-173.565	2886.81	841.696
781	0	96.9099	3025.31	1645.92	193.456	3032.47	1650	80.2604	2876.19	1696.91	224.729	2890.86	1696.99	159.043	2812.26	1520.26	143.445	2764.29	1255.22	157	2961.7	1438.53	156.708	3060.43	1235.76	211.119	2753.85	1314.99	-28.9023	2891.28	1474.1	-96.8882	2840.28	1248.39	-106.374	2816.74	1148.48	-148.849	2873.58	986.123	-119.368	2925.37	910.297	-160.295	2862.13	906.477	-173.921	2915.71	847.583
782	0	97.9405	3037.86	1647.46	194.612	3044.99	1651.06	82.0085	2889.2	1698.32	225.546	2903.25	1698.23	159.688	2824.8	1521.56	143.351	2776.39	1256.8	157.587	2973.93	1439.84	157.199	3072.07	1237.38	210.892	2765.95	1316.48	-28.4142	2903.83	1476.23	-98.0085	2855.08	1250.63	-108.985	2831.26	1150.19	-148.892	2896.49	990.143	-122.01	2946.13	914.736	-160.511	2888.29	909.728	-174.234	2944.43	853.803
783	0	99.1749	3050.47	1649.12	195.673	3057.45	1652.26	82.808	2901.85	1699.99	226.734	2915.6	1699.47	159.93	2836.98	1523.04	143.236	2788.2	1258.35	158.097	2986.15	1441.12	157.638	3083.57	1238.71	210.86	2778.07	1317.68	-27.865	2916.34	1478.24	-99.2766	2869.79	1252.74	-109.737	2849.08	1152.78	-149.315	2919.09	994.326	-120.96	2972.96	921.491	-161.135	2914	912.858	-174.283	2972.9	860.306
784	0	99.812	3062.85	1649.95	196.861	3070.04	1653.17	83.9078	2914.4	1700.87	227.842	2927.94	1700.32	160.723	2849.52	1524.02	143.462	2800.24	1259.25	158.644	2998.41	1442.03	158.172	3095.16	1239.77	210.758	2790.19	1318.6	-27.2897	2928.87	1479.94	-99.9202	2884.56	1254.26	-112.342	2863.76	1153.51	-149.726	2941.58	997.944	-119.555	2999.33	928.18	-161.677	2939.65	916.298	-174.02	3001.2	866.731
785	0	100.975	3075.59	1650.96	198.071	3082.77	1653.99	84.5771	2927.08	1701.91	229.042	2941.1	1701.1	161.216	2862.28	1524.72	143.871	2812.32	1259.91	159.161	3010.77	1442.62	158.481	3106.62	1240.5	210.915	2802.24	1319.62	-26.34	2941.52	1481.21	-100.263	2899.47	1255.42	-112.901	2881.61	1154.57	-150.059	2963.93	1001.74	-117.396	3024.78	934.864	-162.627	2965.71	920.771	-173.435	3029.3	873.188
[truncated: 69 more columns]

## Sheet: Sheet2
Devices
		025370 - Force			025370 - Moment			025370 - CoP			027571 - Force			027571 - Moment			027571 - CoP			037720 - Force			037720 - Moment			037720 - CoP
Frame	Sub Frame	Fx	Fy	Fz	Mx	My	Mz	Cx	Cy	Cz	Fx	Fy	Fz	Mx	My	Mz	Cx	Cy	Cz	Fx	Fy	Fz	Mx	My	Mz	Cx	Cy	Cz
		N	N	N	N.mm	N.mm	N.mm	mm	mm	mm	N	N	N	N.mm	N.mm	N.mm	mm	mm	mm	N	N	N	N.mm	N.mm	N.mm	mm	mm	mm
436	0	0	0	0	0	0	0	200	300	0	0	0	0	0	0	0	200	903	0	0	0	0	0	0	0	603	903	0
436	1	0	0	0	0	0	0	200	300	0	0	0	0	0	0	0	200	903	0	0	0	0	0	0	0	603	903	0
436	2	0	0	0	0	0	0	200	300	0	0	0	0	0	0	0	200	903	0	0	0	0	0	0	0	603	903	0
436	3	0	0	0	0	0	0	200	300	0	0	0	0	0	0	0	200	903	0	0	0	0	0	0	0	603	903	0
436	4	0	0	0	0	0	0	200	300	0	0	0	0	0	0	0	200	903	0	0	0	0	0	0	0	603	903	0
436	5	0	0	0	0	0	0	200	300	0	0	0	0	0	0	0	200	903	0	0	0	0	0	0	0	603	903	0
436	6	0	0	0	0	0	0	200	300	0	0	0	0	0	0	0	200	903	0	0	0	0	0	0	0	603	903	0
436	7	0	0	0	0	0	0	200	300	0	0	0	0	0	0	0	200	903	0	0	0	0	0	0	0	603	903	0
436	8	0	0	0	0	0	0	200	300	0	0	0	0	0	0	0	200	903	0	0	0	0	0	0	0	603	903	0
436	9	0	0	0	0	0	0	200	300	0	0	0	0	0	0	0	200	903	0	0	0	0	0	0	0	603	903	0
437	0	0	0	0	0	0	0	200	300	0	0	0	0	0	0	0	200	903	0	0	0	0	0	0	0	603	903	0
437	1	0	0	0	0	0	0	200	300	0	0	0	0	0	0	0	200	903	0	0	0	0	0	0	0	603	903	0
437	2	0	0	0	0	0	0	200	300	0	0	0	0	0	0	0	200	903	0	0	0	0	0	0	0	603	903	0
437	3	0	0	0	0	0	0	200	300	0	0	0	0	0	0	0	200	903	0	0	0	0	0	0	0	603	903	0
437	4	0	0	0	0	0	0	200	300	0	0	0	0	0	0	0	200	903	0	0	0	0	0	0	0	603	903	0
437	5	0	0	0	0	0	0	200	300	0	0	0	0	0	0	0	200	903	0	0	0	0	0	0	0	603	903	0
437	6	0	0	0	0	0	0	200	300	0	0	0	0	0	0	0	200	903	0	0	0	0	0	0	0	603	903	0
437	7	0	0	0	0	0	0	200	300	0	0	0	0	0	0	0	200	903	0	0	0	0	0	0	0	603	903	0
437	8	0	0	0	0	0	0	200	300	0	0	0	0	0	0	0	200	903	0	0	0	0	0	0	0	603	903	0
437	9	0	0	0	0	0	0	200	300	0	0	0	0	0	0	0	200	903	0	0	0	0	0	0	0	603	903	0
438	0	0	0	0	0	0	0	200	300	0	0	0	0	0	0	0	200	903	0	0	0	0	0	0	0	603	903	0
438	1	0	0	0	0	0	0	200	300	0	0	0	0	0	0	0	200	903	0	0	0	0	0	0	0	603	903	0
438	2	0	0	0	0	0	0	200	300	0	0	0	0	0	0	0	200	903	0	0	0	0	0	0	0	603	903	0
438	3	0	0	0	0	0	0	200	300	0	0	0	0	0	0	0	200	903	0	0	0	0	0	0	0	603	903	0
438	4	0	0	0	0	0	0	200	300	0	0	0	0	0	0	0	200	903	0	0	0	0	0	0	0	603	903	0
438	5	0	0	0	0	0	0	200	300	0	0	0	0	0	0	0	200	903	0	0	0	0	0	0	0	603	903	0
438	6	0	0	0	0	0	0	200	300	0	0	0	0	0	0	0	200	903	0	0	0	0	0	0	0	603	903	0
438	7	0	0	0	0	0	0	200	300	0	0	0	0	0	0	0	200	903	0	0	0	0	0	0	0	603	903	0
438	8	0	0	0	0	0	0	200	300	0	0	0	0	0	0	0	200	903	0	0	0	0	0	0	0	603	903	0
438	9	0	0	0	0	0	0	200	300	0	0	0	0	0	0	0	200	903	0	0	0	0	0	0	0	603	903	0
439	0	0	0	0	0	0	0	200	300	0	0	0	0	0	0	0	200	903	0	0	0	0	0	0	0	603	903	0
439	1	0	0	0	0	0	0	200	300	0	0	0	0	0	0	0	200	903	0	0	0	0	0	0	0	603	903	0
439	2	0	0	0	0	0	0	200	300	0	0	0	0	0	0	0	200	903	0	0	0	0	0	0	0	603	903	0
439	3	0	0	0	0	0	0	200	300	0	0	0	0	0	0	0	200	903	0	0	0	0	0	0	0	603	903	0
439	4	0	0	0	0	0	0	200	300	0	0	0	0	0	0	0	200	903	0	0	0	0	0	0	0	603	903	0
439	5	0	0	0	0	0	0	200	300	0	0	0	0	0	0	0	200	903	0	0	0	0	0	0	0	603	903	0
439	6	0	0	0	0	0	0	200	300	0	0	0	0	0	0	0	200	903	0	0	0	0	0	0	0	603	903	0
439	7	0	0	0	0	0	0	200	300	0	0	0	0	0	0	0	200	903	0	0	0	0	0	0	0	603	903	0
439	8	0	0	0	0	0	0	200	300	0	0	0	0	0	0	0	200	903	0	0	0	0	0	0	0	603	903	0
439	9	0	0	0	0	0	0	200	300	0	0	0	0	0	0	0	200	903	0	0	0	0	0	0	0	603	903	0
440	0	0	0	0	0	0	0	200	300	0	0	0	0	0	0	0	200	903	0	0	0	0	0	0	0	603	903	0
440	1	0	0	0	0	0	0	200	300	0	0	0	0	0	0	0	200	903	0	0	0	0	0	0	0	603	903	0
440	2	0	0	0	0	0	0	200	300	0	0	0	0	0	0	0	200	903	0	0	0	0	0	0	0	603	903	0
440	3	0	0	0	0	0	0	200	300	0	0	0	0	0	0	0	200	903	0	0	0	0	0	0	0	603	903	0
440	4	0	0	0	0	0	0	200	300	0	0	0	0	0	0	0	200	903	0	0	0	0	0	0	0	603	903	0
440	5	0	0	0	0	0	0	200	300	0	0	0	0	0	0	0	200	903	0	0	0	0	0	0	0	603	903	0
440	6	0	0	0	0	0	0	200	300	0	0	0	0	0	0	0	200	903	0	0	0	0	0	0	0	603	903	0
440	7	0	0	0	0	0	0	200	300	0	0	0	0	0	0	0	200	903	0	0	0	0	0	0	0	603	903	0
440	8	0	0	0	0	0	0	200	300	0	0	0	0	0	0	0	200	903	0	0	0	0	0	0	0	603	903	0
440	9	0	0	0	0	0	0	200	300	0	0	0	0	0	0	0	200	903	0	0	0	0	0	0	0	603	903	0
441	0	0	0	0	0	0	0	200	300	0	0	0	0	0	0	0	200	903	0	0	0	0	0	0	0	603	903	0
441	1	0	0	0	0	0	0	200	300	0	0	0	0	0	0	0	200	903	0	0	0	0	0	0	0	603	903	0
441	2	0	0	0	0	0	0	200	300	0	0	0	0	0	0	0	200	903	0	0	0	0	0	0	0	603	903	0
441	3	0	0	0	0	0	0	200	300	0	0	0	0	0	0	0	200	903	0	0	0	0	0	0	0	603	903	0
441	4	0	0	0	0	0	0	200	300	0	0	0	0	0	0	0	200	903	0	0	0	0	0	0	0	603	903	0
441	5	0	0	0	0	0	0	200	300	0	0	0	0	0	0	0	200	903	0	0	0	0	0	0	0	603	903	0
441	6	0	0	0	0	0	0	200	300	0	0	0	0	0	0	0	200	903	0	0	0	0	0	0	0	603	903	0
441	7	0	0	0	0	0	0	200	300	0	0	0	0	0	0	0	200	903	0	0	0	0	0	0	0	603	903	0
441	8	0	0	0	0	0	0	200	300	0	0	0	0	0	0	0	200	903	0	0	0	0	0	0	0	603	903	0
441	9	0	0	0	0	0	0	200	300	0	0	0	0	0	0	0	200	903	0	0	0	0	0	0	0	603	903	0
442	0	0	0	0	0	0	0	200	300	0	0	0	0	0	0	0	200	903	0	0	0	0	0	0	0	603	903	0
442	1	0	0	0	0	0	0	200	300	0	0	0	0	0	0	0	200	903	0	0	0	0	0	0	0	603	903	0
442	2	0	0	0	0	0	0	200	300	0	0	0	0	0	0	0	200	903	0	0	0	0	0	0	0	603	903	0
442	3	0	0	0	0	0	0	200	300	0	0	0	0	0	0	0	200	903	0	0	0	0	0	0	0	603	903	0
442	4	0	0	0	0	0	0	200	300	0	0	0	0	0	0	0	200	903	0	0	0	0	0	0	0	603	903	0
442	5	0	0	0	0	0	0	200	300	0	0	0	0	0	0	0	200	903	0	0	0	0	0	0	0	603	903	0
442	6	0	0	0	0	0	0	200	300	0	0	0	0	0	0	0	200	903	0	0	0	0	0	0	0	603	903	0
442	7	0	0	0	0	0	0	200	300	0	0	0	0	0	0	0	200	903	0	0	0	0	0	0	0	603	903	0
442	8	0	0	0	0	0	0	200	300	0	0	0	0	0	0	0	200	903	0	0	0	0	0	0	0	603	903	0
442	9	0	0	0	0	0	0	200	300	0	0	0	0	0	0	0	200	903	0	0	0	0	0	0	0	603	903	0
443	0	0	0	0	0	0	0	200	300	0	0	0	0	0	0	0	200	903	0	0	0	0	0	0	0	603	903	0
443	1	0	0	0	0	0	0	200	300	0	0	0	0	0	0	0	200	903	0	0	0	0	0	0	0	603	903	0
443	2	0	0	0	0	0	0	200	300	0	0	0	0	0	0	0	200	903	0	0	0	0	0	0	0	603	903	0
443	3	0	0	0	0	0	0	200	300	0	0	0	0	0	0	0	200	903	0	0	0	0	0	0	0	603	903	0
443	4	0	0	0	0	0	0	200	300	0	0	0	0	0	0	0	200	903	0	0	0	0	0	0	0	603	903	0
443	5	0	0	0	0	0	0	200	300	0	0	0	0	0	0	0	200	903	0	0	0	0	0	0	0	603	903	0
443	6	0	0	0	0	0	0	200	300	0	0	0	0	0	0	0	200	903	0	0	0	0	0	0	0	603	903	0
443	7	0	0	0	0	0	0	200	300	0	0	0	0	0	0	0	200	903	0	0	0	0	0	0	0	603	903	0
443	8	0	0	0	0	0	0	200	300	0	0	0	0	0	0	0	200	903	0	0	0	0	0	0	0	603	903	0
443	9	0	0	0	0	0	0	200	300	0	0	0	0	0	0	0	200	903	0	0	0	0	0	0	0	603	903	0
444	0	0	0	0	0	0	0	200	300	0	0	0	0	0	0	0	200	903	0	0	0	0	0	0	0	603	903	0
444	1	0	0	0	0	0	0	200	300	0	0	0	0	0	0	0	200	903	0	0	0	0	0	0	0	603	903	0
444	2	0	0	0	0	0	0	200	300	0	0	0	0	0	0	0	200	903	0	0	0	0	0	0	0	603	903	0
444	3	0	0	0	0	0	0	200	300	0	0	0	0	0	0	0	200	903	0	0	0	0	0	0	0	603	903	0
444	4	0	0	0	0	0	0	200	300	0	0	0	0	0	0	0	200	903	0	0	0	0	0	0	0	603	903	0
444	5	0	0	0	0	0	0	200	300	0	0	0	0	0	0	0	200	903	0	0	0	0	0	0	0	603	903	0
444	6	0	0	0	0	0	0	200	300	0	0	0	0	0	0	0	200	903	0	0	0	0	0	0	0	603	903	0
444	7	0	0	0	0	0	0	200	300	0	0	0	0	0	0	0	200	903	0	0	0	0	0	0	0	603	903	0
444	8	0	0	0	0	0	0	200	300	0	0	0	0	0	0	0	200	903	0	0	0	0	0	0	0	603	903	0
444	9	0	0	0	0	0	0	200	300	0	0	0	0	0	0	0	200	903	0	0	0	0	0	0	0	603	903	0
445	0	0	0	0	0	0	0	200	300	0	0	0	0	0	0	0	200	903	0	0	0	0	0	0	0	603	903	0
445	1	0	0	0	0	0	0	200	300	0	0	0	0	0	0	0	200	903	0	0	0	0	0	0	0	603	903	0
445	2	0	0	0	0	0	0	200	300	0	0	0	0	0	0	0	200	903	0	0	0	0	0	0	0	603	903	0
445	3	0	0	0	0	0	0	200	300	0	0	0	0	0	0	0	200	903	0	0	0	0	0	0	0	603	903	0
445	4	0	0	0	0	0	0	200	300	0	0	0	0	0	0	0	200	903	0	0	0	0	0	0	0	603	903	0
445	5	0	0	0	0	0	0	200	300	0	0	0	0	0	0	0	200	903	0	0	0	0	0	0	0	603	903	0
445	6	0	0	0	0	0	0	200	300	0	0	0	0	0	0	0	200	903	0	0	0	0	0	0	0	603	903	0
445	7	0	0	0	0	0	0	200	300	0	0	0	0	0	0	0	200	903	0	0	0	0	0	0	0	603	903	0
445	8	0	0	0	0	0	0	200	300	0	0	0	0	0	0	0	200	903	0	0	0	0	0	0	0	603	903	0
445	9	0	0	0	0	0	0	200	300	0	0	0	0	0	0	0	200	903	0	0	0	0	0	0	0	603	903	0
446	0	0	0	0	0	0	0	200	300	0	0	0	0	0	0	0	200	903	0	0	0	0	0	0	0	603	903	0
446	1	0	0	0	0	0	0	200	300	0	0	0	0	0	0	0	200	903	0	0	0	0	0	0	0	603	903	0
446	2	0	0	0	0	0	0	200	300	0	0	0	0	0	0	0	200	903	0	0	0	0	0	0	0	603	903	0
446	3	0	0	0	0	0	0	200	300	0	0	0	0	0	0	0	200	903	0	0	0	0	0	0	0	603	903	0
446	4	0	0	0	0	0	0	200	300	0	0	0	0	0	0	0	200	903	0	0	0	0	0	0	0	603	903	0
446	5	0	0	0	0	0	0	200	300	0	0	0	0	0	0	0	200	903	0	0	0	0	0	0	0	603	903	0
446	6	0	0	0	0	0	0	200	300	0	0	0	0	0	0	0	200	903	0	0	0	0	0	0	0	603	903	0
446	7	0	0	0	0	0	0	200	300	0	0	0	0	0	0	0	200	903	0	0	0	0	0	0	0	603	903	0
446	8	0	0	0	0	0	0	200	300	0	0	0	0	0	0	0	200	903	0	0	0	0	0	0	0	603	903	0
446	9	0	0	0	0	0	0	200	300	0	0	0	0	0	0	0	200	903	0	0	0	0	0	0	0	603	903	0
447	0	0	0	0	0	0	0	200	300	0	0	0	0	0	0	0	200	903	0	0	0	0	0	0	0	603	903	0
447	1	0	0	0	0	0	0	200	300	0	0	0	0	0	0	0	200	903	0	0	0	0	0	0	0	603	903	0
447	2	0	0	0	0	0	0	200	300	0	0	0	0	0	0	0	200	903	0	0	0	0	0	0	0	603	903	0
447	3	0	0	0	0	0	0	200	300	0	0	0	0	0	0	0	200	903	0	0	0	0	0	0	0	603	903	0
447	4	0	0	0	0	0	0	200	300	0	0	0	0	0	0	0	200	903	0	0	0	0	0	0	0	603	903	0
447	5	0	0	0	0	0	0	200	300	0	0	0	0	0	0	0	200	903	0	0	0	0	0	0	0	603	903	0
447	6	0	0	0	0	0	0	200	300	0	0	0	0	0	0	0	200	903	0	0	0	0	0	0	0	603	903	0
447	7	0	0	0	0	0	0	200	300	0	0	0	0	0	0	0	200	903	0	0	0	0	0	0	0	603	903	0
447	8	0	0	0	0	0	0	200	300	0	0	0	0	0	0	0	200	903	0	0	0	0	0	0	0	603	903	0
447	9	0	0	0	0	0	0	200	300	0	0	0	0	0	0	0	200	903	0	0	0	0	0	0	0	603	903	0
448	0	0	0	0	0	0	0	200	300	0	0	0	0	0	0	0	200	903	0	0	0	0	0	0	0	603	903	0
448	1	0	0	0	0	0	0	200	300	0	0	0	0	0	0	0	200	903	0	0	0	0	0	0	0	603	903	0
448	2	0	0	0	0	0	0	200	300	0	0	0	0	0	0	0	200	903	0	0	0	0	0	0	0	603	903	0
448	3	0	0	0	0	0	0	200	300	0	0	0	0	0	0	0	200	903	0	0	0	0	0	0	0	603	903	0
448	4	0	0	0	0	0	0	200	300	0	0	0	0	0	0	0	200	903	0	0	0	0	0	0	0	603	903	0
448	5	0	0	0	0	0	0	200	300	0	0	0	0	0	0	0	200	903	0	0	0	0	0	0	0	603	903	0
448	6	0	0	0	0	0	0	200	300	0	0	0	0	0	0	0	200	903	0	0	0	0	0	0	0	603	903	0
448	7	0	0	0	0	0	0	200	300	0	0	0	0	0	0	0	200	903	0	0	0	0	0	0	0	603	903	0
448	8	0	0	0	0	0	0	200	300	0	0	0	0	0	0	0	200	903	0	0	0	0	0	0	0	603	903	0
448	9	0	0	0	0	0	0	200	300	0	0	0	0	0	0	0	200	903	0	0	0	0	0	0	0	603	903	0
449	0	0	0	0	0	0	0	200	300	0	0	0	0	0	0	0	200	903	0	0	0	0	0	0	0	603	903	0
449	1	0	0	0	0	0	0	200	300	0	0	0	0	0	0	0	200	903	0	0	0	0	0	0	0	603	903	0
449	2	0	0	0	0	0	0	200	300	0	0	0	0	0	0	0	200	903	0	0	0	0	0	0	0	603	903	0
449	3	0	0	0	0	0	0	200	300	0	0	0	0	0	0	0	200	903	0	0	0	0	0	0	0	603	903	0
449	4	0	0	0	0	0	0	200	300	0	0	0	0	0	0	0	200	903	0	0	0	0	0	0	0	603	903	0
449	5	0	0	0	0	0	0	200	300	0	0	0	0	0	0	0	200	903	0	0	0	0	0	0	0	603	903	0
449	6	0	0	0	0	0	0	200	300	0	0	0	0	0	0	0	200	903	0	0	0	0	0	0	0	603	903	0
449	7	0	0	0	0	0	0	200	300	0	0	0	0	0	0	0	200	903	0	0	0	0	0	0	0	603	903	0
449	8	0	0	0	0	0	0	200	300	0	0	0	0	0	0	0	200	903	0	0	0	0	0	0	0	603	903	0
449	9	0	0	0	0	0	0	200	300	0	0	0	0	0	0	0	200	903	0	0	0	0	0	0	0	603	903	0
450	0	0	0	0	0	0	0	200	300	0	0	0	0	0	0	0	200	903	0	0	0	0	0	0	0	603	903	0
450	1	0	0	0	0	0	0	200	300	0	0	0	0	0	0	0	200	903	0	0	0	0	0	0	0	603	903	0
450	2	0	0	0	0	0	0	200	300	0	0	0	0	0	0	0	200	903	0	0	0	0	0	0	0	603	903	0
450	3	0	0	0	0	0	0	200	300	0	0	0	0	0	0	0	200	903	0	0	0	0	0	0	0	603	903	0
450	4	0	0	0	0	0	0	200	300	0	0	0	0	0	0	0	200	903	0	0	0	0	0	0	0	603	903	0
450	5	0	0	0	0	0	0	200	300	0	0	0	0	0	0	0	200	903	0	0	0	0	0	0	0	603	903	0
450	6	0	0	0	0	0	0	200	300	0	0	0	0	0	0	0	200	903	0	0	0	0	0	0	0	603	903	0
450	7	0	0	0	0	0	0	200	300	0	0	0	0	0	0	0	200	903	0	0	0	0	0	0	0	603	903	0
450	8	0	0	0	0	0	0	200	300	0	0	0	0	0	0	0	200	903	0	0	0	0	0	0	0	603	903	0
450	9	0	0	0	0	0	0	200	300	0	0	0	0	0	0	0	200	903	0	0	0	0	0	0	0	603	903	0
451	0	0	0	0	0	0	0	200	300	0	0	0	0	0	0	0	200	903	0	0	0	0	0	0	0	603	903	0
451	1	0	0	0	0	0	0	200	300	0	0	0	0	0	0	0	200	903	0	0	0	0	0	0	0	603	903	0
451	2	0	0	0	0	0	0	200	300	0	0	0	0	0	0	0	200	903	0	0	0	0	0	0	0	603	903	0
451	3	0	0	0	0	0	0	200	300	0	0	0	0	0	0	0	200	903	0	0	0	0	0	0	0	603	903	0
451	4	0	0	0	0	0	0	200	300	0	0	0	0	0	0	0	200	903	0	0	0	0	0	0	0	603	903	0
451	5	0	0	0	0	0	0	200	300	0	0	0	0	0	0	0	200	903	0	0	0	0	0	0	0	603	903	0
451	6	0	0	0	0	0	0	200	300	0	0	0	0	0	0	0	200	903	0	0	0	0	0	0	0	603	903	0
451	7	0	0	0	0	0	0	200	300	0	0	0	0	0	0	0	200	903	0	0	0	0	0	0	0	603	903	0
451	8	0	0	0	0	0	0	200	300	0	0	0	0	0	0	0	200	903	0	0	0	0	0	0	0	603	903	0
451	9	0	0	0	0	0	0	200	300	0	0	0	0	0	0	0	200	903	0	0	0	0	0	0	0	603	903	0
452	0	0	0	0	0	0	0	200	300	0	0	0	0	0	0	0	200	903	0	0	0	0	0	0	0	603	903	0
452	1	0	0	0	0	0	0	200	300	0	0	0	0	0	0	0	200	903	0	0	0	0	0	0	0	603	903	0
452	2	0	0	0	0	0	0	200	300	0	0	0	0	0	0	0	200	903	0	0	0	0	0	0	0	603	903	0
452	3	0	0	0	0	0	0	200	300	0	0	0	0	0	0	0	200	903	0	0	0	0	0	0	0	603	903	0
452	4	0	0	0	0	0	0	200	300	0	0	0	0	0	0	0	200	903	0	0	0	0	0	0	0	603	903	0
452	5	0	0	0	0	0	0	200	300	0	0	0	0	0	0	0	200	903	0	0	0	0	0	0	0	603	903	0
452	6	0	0	0	0	0	0	200	300	0	0	0	0	0	0	0	200	903	0	0	0	0	0	0	0	603	903	0
452	7	0	0	0	0	0	0	200	300	0	0	0	0	0	0	0	200	903	0	0	0	0	0	0	0	603	903	0
452	8	0	0	0	0	0	0	200	300	0	0	0	0	0	0	0	200	903	0	0	0	0	0	0	0	603	903	0
452	9	0	0	0	0	0	0	200	300	0	0	0	0	0	0	0	200	903	0	0	0	0	0	0	0	603	903	0
453	0	0	0	0	0	0	0	200	300	0	0	0	0	0	0	0	200	903	0	0	0	0	0	0	0	603	903	0
453	1	0	0	0	0	0	0	200	300	0	0	0	0	0	0	0	200	903	0	0	0	0	0	0	0	603	903	0
453	2	0	0	0	0	0	0	200	300	0	0	0	0	0	0	0	200	903	0	0	0	0	0	0	0	603	903	0
453	3	0	0	0	0	0	0	200	300	0	0	0	0	0	0	0	200	903	0	0	0	0	0	0	0	603	903	0
453	4	0	0	0	0	0	0	200	300	0	0	0	0	0	0	0	200	903	0	0	0	0	0	0	0	603	903	0
453	5	0	0	0	0	0	0	200	300	0	0	0	0	0	0	0	200	903	0	0	0	0	0	0	0	603	903	0
453	6	0	0	0	0	0	0	200	300	0	0	0	0	0	0	0	200	903	0	0	0	0	0	0	0	603	903	0
453	7	0	0	0	0	0	0	200	300	0	0	0	0	0	0	0	200	903	0	0	0	0	0	0	0	603	903	0
453	8	0	0	0	0	0	0	200	300	0	0	0	0	0	0	0	200	903	0	0	0	0	0	0	0	603	903	0
453	9	0	0	0	0	0	0	200	300	0	0	0	0	0	0	0	200	903	0	0	0	0	0	0	0	603	903	0
454	0	0	0	0	0	0	0	200	300	0	0	0	0	0	0	0	200	903	0	0	0	0	0	0	0	603	903	0
454	1	0	0	0	0	0	0	200	300	0	0	0	0	0	0	0	200	903	0	0	0	0	0	0	0	603	903	0
454	2	0	0	0	0	0	0	200	300	0	0	0	0	0	0	0	200	903	0	0	0	0	0	0	0	603	903	0
454	3	0	0	0	0	0	0	200	300	0	0	0	0	0	0	0	200	903	0	0	0	0	0	0	0	603	903	0
454	4	0	0	0	0	0	0	200	300	0	0	0	0	0	0	0	200	903	0	0	0	0	0	0	0	603	903	0
454	5	0	0	0	0	0	0	200	300	0	0	0	0	0	0	0	200	903	0	0	0	0	0	0	0	603	903	0
454	6	0	0	0	0	0	0	200	300	0	0	0	0	0	0	0	200	903	0	0	0	0	0	0	0	603	903	0
454	7	0	0	0	0	0	0	200	300	0	0	0	0	0	0	0	200	903	0	0	0	0	0	0	0	603	903	0
454	8	0	0	0	0	0	0	200	300	0	0	0	0	0	0	0	200	903	0	0	0	0	0	0	0	603	903	0
454	9	0	0	0	0	0	0	200	300	0	0	0	0	0	0	0	200	903	0	0	0	0	0	0	0	603	903	0
455	0	0	0	0	0	0	0	200	300	0	0	0	0	0	0	0	200	903	0	0	0	0	0	0	0	603	903	0
455	1	0	0	0	0	0	0	200	300	0	0	0	0	0	0	0	200	903	0	0	0	0	0	0	0	603	903	0
455	2	0	0	0	0	0	0	200	300	0	0	0	0	0	0	0	200	903	0	0	0	0	0	0	0	603	903	0
455	3	0	0	0	0	0	0	200	300	0	0	0	0	0	0	0	200	903	0	0	0	0	0	0	0	603	903	0
455	4	0	0	0	0	0	0	200	300	0	0	0	0	0	0	0	200	903	0	0	0	0	0	0	0	603	903	0
455	5	0	0	0	0	0	0	200	300	0	0	0	0	0	0	0	200	903	0	0	0	0	0	0	0	603	903	0
455	6	0	0	0	0	0	0	200	300	0	0	0	0	0	0	0	200	903	0	0	0	0	0	0	0	603	903	0
455	7	0	0	0	0	0	0	200	300	0	0	0	0	0	0	0	200	903	0	0	0	0	0	0	0	603	903	0
455	8	0	0	0	0	0	0	200	300	0	0	0	0	0	0	0	200	903	0	0	0	0	0	0	0	603	903	0
455	9	0	0	0	0	0	0	200	300	0	0	0	0	0	0	0	200	903	0	0	0	0	0	0	0	603	903	0
456	0	0	0	0	0	0	0	200	300	0	0	0	0	0	0	0	200	903	0	0	0	0	0	0	0	603	903	0
456	1	0	0	0	0	0	0	200	300	0	0	0	0	0	0	0	200	903	0	0	0	0	0	0	0	603	903	0
456	2	0	0	0	0	0	0	200	300	0	0	0	0	0	0	0	200	903	0	0	0	0	0	0	0	603	903	0
456	3	0	0	0	0	0	0	200	300	0	0	0	0	0	0	0	200	903	0	0	0	0	0	0	0	603	903	0
456	4	0	0	0	0	0	0	200	300	0	0	0	0	0	0	0	200	903	0	0	0	0	0	0	0	603	903	0
456	5	0	0	0	0	0	0	200	300	0	0	0	0	0	0	0	200	903	0	0	0	0	0	0	0	603	903	0
456	6	0	0	0	0	0	0	200	300	0	0	0	0	0	0	0	200	903	0	0	0	0	0	0	0	603	903	0
456	7	0	0	0	0	0	0	200	300	0	0	0	0	0	0	0	200	903	0	0	0	0	0	0	0	603	903	0
456	8	0	0	0	0	0	0	200	300	0	0	0	0	0	0	0	200	903	0	0	0	0	0	0	0	603	903	0
456	9	0	0	0	0	0	0	200	300	0	0	0	0	0	0	0	200	903	0	0	0	0	0	0	0	603	903	0
457	0	0	0	0	0	0	0	200	300	0	0	0	0	0	0	0	200	903	0	0	0	0	0	0	0	603	903	0
457	1	0	0	0	0	0	0	200	300	0	0	0	0	0	0	0	200	903	0	0	0	0	0	0	0	603	903	0
457	2	0	0	0	0	0	0	200	300	0	0	0	0	0	0	0	200	903	0	0	0	0	0	0	0	603	903	0
457	3	0	0	0	0	0	0	200	300	0	0	0	0	0	0	0	200	903	0	0	0	0	0	0	0	603	903	0
457	4	0	0	0	0	0	0	200	300	0	0	0	0	0	0	0	200	903	0	0	0	0	0	0	0	603	903	0
457	5	0	0	0	0	0	0	200	300	0	0	0	0	0	0	0	200	903	0	0	0	0	0	0	0	603	903	0
457	6	0	0	0	0	0	0	200	300	0	0	0	0	0	0	0	200	903	0	0	0	0	0	0	0	603	903	0
457	7	0	0	0	0	0	0	200	300	0	0	0	0	0	0	0	200	903	0	0	0	0	0	0	0	603	903	0
457	8	0	0	0	0	0	0	200	300	0	0	0	0	0	0	0	200	903	0	0	0	0	0	0	0	603	903	0
457	9	0	0	0	0	0	0	200	300	0	0	0	0	0	0	0	200	903	0	0	0	0	0	0	0	603	903	0
458	0	0	0	0	0	0	0	200	300	0	0	0	0	0	0	0	200	903	0	0	0	0	0	0	0	603	903	0
458	1	0	0	0	0	0	0	200	300	0	0	0	0	0	0	0	200	903	0	0	0	0	0	0	0	603	903	0
458	2	0	0	0	0	0	0	200	300	0	0	0	0	0	0	0	200	903	0	0	0	0	0	0	0	603	903	0
458	3	0	0	0	0	0	0	200	300	0	0	0	0	0	0	0	200	903	0	0	0	0	0	0	0	603	903	0
458	4	0	0	0	0	0	0	200	300	0	0	0	0	0	0	0	200	903	0	0	0	0	0	0	0	603	903	0
458	5	0	0	0	0	0	0	200	300	0	0	0	0	0	0	0	200	903	0	0	0	0	0	0	0	603	903	0
458	6	0	0	0	0	0	0	200	300	0	0	0	0	0	0	0	200	903	0	0	0	0	0	0	0	603	903	0
458	7	0	0	0	0	0	0	200	300	0	0	0	0	0	0	0	200	903	0	0	0	0	0	0	0	603	903	0
458	8	0	0	0	0	0	0	200	300	0	0	0	0	0	0	0	200	903	0	0	0	0	0	0	0	603	903	0
458	9	0	0	0	0	0	0	200	300	0	0	0	0	0	0	0	200	903	0	0	0	0	0	0	0	603	903	0
459	0	0	0	0	0	0	0	200	300	0	0	0	0	0	0	0	200	903	0	0	0	0	0	0	0	603	903	0
459	1	0	0	0	0	0	0	200	300	0	0	0	0	0	0	0	200	903	0	0	0	0	0	0	0	603	903	0
459	2	0	0	0	0	0	0	200	300	0	0	0	0	0	0	0	200	903	0	0	0	0	0	0	0	603	903	0
459	3	0	0	0	0	0	0	200	300	0	0	0	0	0	0	0	200	903	0	0	0	0	0	0	0	603	903	0
459	4	0	0	0	0	0	0	200	300	0	0	0	0	0	0	0	200	903	0	0	0	0	0	0	0	603	903	0
459	5	0	0	0	0	0	0	200	300	0	0	0	0	0	0	0	200	903	0	0	0	0	0	0	0	603	903	0
459	6	0	0	0	0	0	0	200	300	0	0	0	0	0	0	0	200	903	0	0	0	0	0	0	0	603	903	0
459	7	0	0	0	0	0	0	200	300	0	0	0	0	0	0	0	200	903	0	0	0	0	0	0	0	603	903	0
459	8	0	0	0	0	0	0	200	300	0	0	0	0	0	0	0	200	903	0	0	0	0	0	0	0	603	903	0
459	9	0	0	0	0	0	0	200	300	0	0	0	0	0	0	0	200	903	0	0	0	0	0	0	0	603	903	0
460	0	0	0	0	0	0	0	200	300	0	0	0	0	0	0	0	200	903	0	0	0	0	0	0	0	603	903	0
460	1	0	0	0	0	0	0	200	300	0	0	0	0	0	0	0	200	903	0	0	0	0	0	0	0	603	903	0
460	2	0	0	0	0	0	0	200	300	0	0	0	0	0	0	0	200	903	0	0	0	0	0	0	0	603	903	0
460	3	0	0	0	0	0	0	200	300	0	0	0	0	0	0	0	200	903	0	0	0	0	0	0	0	603	903	0
460	4	0	0	0	0	0	0	200	300	0	0	0	0	0	0	0	200	903	0	0	0	0	0	0	0	603	903	0
460	5	0	0	0	0	0	0	200	300	0	0	0	0	0	0	0	200	903	0	0	0	0	0	0	0	603	903	0
460	6	0	0	0	0	0	0	200	300	0	0	0	0	0	0	0	200	903	0	0	0	0	0	0	0	603	903	0
460	7	0	0	0	0	0	0	200	300	0	0	0	0	0	0	0	200	903	0	0	0	0	0	0	0	603	903	0
460	8	0	0	0	0	0	0	200	300	0	0	0	0	0	0	0	200	903	0	0	0	0	0	0	0	603	903	0
460	9	0	0	0	0	0	0	200	300	0	0	0	0	0	0	0	200	903	0	0	0	0	0	0	0	603	903	0
461	0	0	0	0	0	0	0	200	300	0	0	0	0	0	0	0	200	903	0	0	0	0	0	0	0	603	903	0
461	1	0	0	0	0	0	0	200	300	0	0	0	0	0	0	0	200	903	0	0	0	0	0	0	0	603	903	0
461	2	0	0	0	0	0	0	200	300	0	0	0	0	0	0	0	200	903	0	0	0	0	0	0	0	603	903	0
461	3	0	0	0	0	0	0	200	300	0	0	0	0	0	0	0	200	903	0	0	0	0	0	0	0	603	903	0
461	4	0	0	0	0	0	0	200	300	0	0	0	0	0	0	0	200	903	0	0	0	0	0	0	0	603	903	0
461	5	0	0	0	0	0	0	200	300	0	0	0	0	0	0	0	200	903	0	0	0	0	0	0	0	603	903	0
461	6	0	0	0	0	0	0	200	300	0	0	0	0	0	0	0	200	903	0	0	0	0	0	0	0	603	903	0
461	7	0	0	0	0	0	0	200	300	0	0	0	0	0	0	0	200	903	0	0	0	0	0	0	0	603	903	0
461	8	0	0	0	0	0	0	200	300	0	0	0	0	0	0	0	200	903	0	0	0	0	0	0	0	603	903	0
461	9	0	0	0	0	0	0	200	300	0	0	0	0	0	0	0	200	903	0	0	0	0	0	0	0	603	903	0
462	0	0	0	0	0	0	0	200	300	0	0	0	0	0	0	0	200	903	0	0	0	0	0	0	0	603	903	0
462	1	0	0	0	0	0	0	200	300	0	0	0	0	0	0	0	200	903	0	0	0	0	0	0	0	603	903	0
462	2	0	0	0	0	0	0	200	300	0	0	0	0	0	0	0	200	903	0	0	0	0	0	0	0	603	903	0
462	3	0	0	0	0	0	0	200	300	0	0	0	0	0	0	0	200	903	0	0	0	0	0	0	0	603	903	0
462	4	0	0	0	0	0	0	200	300	0	0	0	0	0	0	0	200	903	0	0	0	0	0	0	0	603	903	0
462	5	0	0	0	0	0	0	200	300	0	0	0	0	0	0	0	200	903	0	0	0	0	0	0	0	603	903	0
462	6	0	0	0	0	0	0	200	300	0	0	0	0	0	0	0	200	903	0	0	0	0	0	0	0	603	903	0
462	7	0	0	0	0	0	0	200	300	0	0	0	0	0	0	0	200	903	0	0	0	0	0	0	0	603	903	0
462	8	0	0	0	0	0	0	200	300	0	0	0	0	0	0	0	200	903	0	0	0	0	0	0	0	603	903	0
462	9	0	0	0	0	0	0	200	300	0	0	0	0	0	0	0	200	903	0	0	0	0	0	0	0	603	903	0
463	0	0	0	0	0	0	0	200	300	0	0	0	0	0	0	0	200	903	0	0	0	0	0	0	0	603	903	0
463	1	0	0	0	0	0	0	200	300	0	0	0	0	0	0	0	200	903	0	0	0	0	0	0	0	603	903	0
463	2	0	0	0	0	0	0	200	300	0	0	0	0	0	0	0	200	903	0	0	0	0	0	0	0	603	903	0
463	3	0	0	0	0	0	0	200	300	0	0	0	0	0	0	0	200	903	0	0	0	0	0	0	0	603	903	0
463	4	0	0	0	0	0	0	200	300	0	0	0	0	0	0	0	200	903	0	0	0	0	0	0	0	603	903	0
463	5	0	0	0	0	0	0	200	300	0	0	0	0	0	0	0	200	903	0	0	0	0	0	0	0	603	903	0
463	6	0	0	0	0	0	0	200	300	0	0	0	0	0	0	0	200	903	0	0	0	0	0	0	0	603	903	0
463	7	0	0	0	0	0	0	200	300	0	0	0	0	0	0	0	200	903	0	0	0	0	0	0	0	603	903	0
463	8	0	0	0	0	0	0	200	300	0	0	0	0	0	0	0	200	903	0	0	0	0	0	0	0	603	903	0
463	9	0	0	0	0	0	0	200	300	0	0	0	0	0	0	0	200	903	0	0	0	0	0	0	0	603	903	0
464	0	0	0	0	0	0	0	200	300	0	0	0	0	0	0	0	200	903	0	0	0	0	0	0	0	603	903	0
464	1	0	0	0	0	0	0	200	300	0	0	0	0	0	0	0	200	903	0	0	0	0	0	0	0	603	903	0
464	2	0	0	0	0	0	0	200	300	0	0	0	0	0	0	0	200	903	0	0	0	0	0	0	0	603	903	0
464	3	0	0	0	0	0	0	200	300	0	0	0	0	0	0	0	200	903	0	0	0	0	0	0	0	603	903	0
464	4	0	0	0	0	0	0	200	300	0	0	0	0	0	0	0	200	903	0	0	0	0	0	0	0	603	903	0
464	5	0	0	0	0	0	0	200	300	0	0	0	0	0	0	0	200	903	0	0	0	0	0	0	0	603	903	0
464	6	0	0	0	0	0	0	200	300	0	0	0	0	0	0	0	200	903	0	0	0	0	0	0	0	603	903	0
464	7	0	0	0	0	0	0	200	300	0	0	0	0	0	0	0	200	903	0	0	0	0	0	0	0	603	903	0
464	8	0	0	0	0	0	0	200	300	0	0	0	0	0	0	0	200	903	0	0	0	0	0	0	0	603	903	0
464	9	0	0	0	0	0	0	200	300	0	0	0	0	0	0	0	200	903	0	0	0	0	0	0	0	603	903	0
465	0	0	0	0	0	0	0	200	300	0	0	0	0	0	0	0	200	903	0	0	0	0	0	0	0	603	903	0
465	1	0	0	0	0	0	0	200	300	0	0	0	0	0	0	0	200	903	0	0	0	0	0	0	0	603	903	0
465	2	0	0	0	0	0	0	200	300	0	0	0	0	0	0	0	200	903	0	0	0	0	0	0	0	603	903	0
465	3	0	0	0	0	0	0	200	300	0	0	0	0	0	0	0	200	903	0	0	0	0	0	0	0	603	903	0
465	4	0	0	0	0	0	0	200	300	0	0	0	0	0	0	0	200	903	0	0	0	0	0	0	0	603	903	0
465	5	0	0	0	0	0	0	200	300	0	0	0	0	0	0	0	200	903	0	0	0	0	0	0	0	603	903	0
465	6	0	0	0	0	0	0	200	300	0	0	0	0	0	0	0	200	903	0	0	0	0	0	0	0	603	903	0
465	7	0	0	0	0	0	0	200	300	0	0	0	0	0	0	0	200	903	0	0	0	0	0	0	0	603	903	0
465	8	0	0	0	0	0	0	200	300	0	0	0	0	0	0	0	200	903	0	0	0	0	0	0	0	603	903	0
465	9	0	0	0	0	0	0	200	300	0	0	0	0	0	0	0	200	903	0	0	0	0	0	0	0	603	903	0
466	0	0	0	0	0	0	0	200	300	0	0	0	0	0	0	0	200	903	0	0	0	0	0	0	0	603	903	0
466	1	0	0	0	0	0	0	200	300	0	0	0	0	0	0	0	200	903	0	0	0	0	0	0	0	603	903	0
466	2	0	0	0	0	0	0	200	300	0	0	0	0	0	0	0	200	903	0	0	0	0	0	0	0	603	903	0
466	3	0	0	0	0	0	0	200	300	0	0	0	0	0	0	0	200	903	0	0	0	0	0	0	0	603	903	0
466	4	0	0	0	0	0	0	200	300	0	0	0	0	0	0	0	200	903	0	0	0	0	0	0	0	603	903	0
466	5	0	0	0	0	0	0	200	300	0	0	0	0	0	0	0	200	903	0	0	0	0	0	0	0	603	903	0
466	6	0	0	0	0	0	0	200	300	0	0	0	0	0	0	0	200	903	0	0	0	0	0	0	0	603	903	0
466	7	0	0	0	0	0	0	200	300	0	0	0	0	0	0	0	200	903	0	0	0	0	0	0	0	603	903	0
466	8	0	0	0	0	0	0	200	300	0	0	0	0	0	0	0	200	903	0	0	0	0	0	0	0	603	903	0
466	9	0	0	0	0	0	0	200	300	0	0	0	0	0	0	0	200	903	0	0	0	0	0	0	0	603	903	0
467	0	0	0	0	0	0	0	200	300	0	0	0	0	0	0	0	200	903	0	0	0	0	0	0	0	603	903	0
467	1	0	0	0	0	0	0	200	300	0	0	0	0	0	0	0	200	903	0	0	0	0	0	0	0	603	903	0
467	2	0	0	0	0	0	0	200	300	0	0	0	0	0	0	0	200	903	0	0	0	0	0	0	0	603	903	0
467	3	0	0	0	0	0	0	200	300	0	0	0	0	0	0	0	200	903	0	0	0	0	0	0	0	603	903	0
467	4	0	0	0	0	0	0	200	300	0	0	0	0	0	0	0	200	903	0	0	0	0	0	0	0	603	903	0
467	5	0	0	0	0	0	0	200	300	0	0	0	0	0	0	0	200	903	0	0	0	0	0	0	0	603	903	0
467	6	0	0	0	0	0	0	200	300	0	0	0	0	0	0	0	200	903	0	0	0	0	0	0	0	603	903	0
467	7	0	0	0	0	0	0	200	300	0	0	0	0	0	0	0	200	903	0	0	0	0	0	0	0	603	903	0
467	8	0	0	0	0	0	0	200	300	0	0	0	0	0	0	0	200	903	0	0	0	0	0	0	0	603	903	0
467	9	0	0	0	0	0	0	200	300	0	0	0	0	0	0	0	200	903	0	0	0	0	0	0	0	603	903	0
468	0	0	0	0	0	0	0	200	300	0	0	0	0	0	0	0	200	903	0	0	0	0	0	0	0	603	903	0
468	1	0	0	0	0	0	0	200	300	0	0	0	0	0	0	0	200	903	0	0	0	0	0	0	0	603	903	0
468	2	0	0	0	0	0	0	200	300	0	0	0	0	0	0	0	200	903	0	0	0	0	0	0	0	603	903	0
468	3	0	0	0	0	0	0	200	300	0	0	0	0	0	0	0	200	903	0	0	0	0	0	0	0	603	903	0
468	4	0	0	0	0	0	0	200	300	0	0	0	0	0	0	0	200	903	0	0	0	0	0	0	0	603	903	0
468	5	0	0	0	0	0	0	200	300	0	0	0	0	0	0	0	200	903	0	0	0	0	0	0	0	603	903	0
468	6	0	0	0	0	0	0	200	300	0	0	0	0	0	0	0	200	903	0	0	0	0	0	0	0	603	903	0
468	7	0	0	0	0	0	0	200	300	0	0	0	0	0	0	0	200	903	0	0	0	0	0	0	0	603	903	0
468	8	0	0	0	0	0	0	200	300	0	0	0	0	0	0	0	200	903	0	0	0	0	0	0	0	603	903	0
468	9	0	0	0	0	0	0	200	300	0	0	0	0	0	0	0	200	903	0	0	0	0	0	0	0	603	903	0
469	0	0	0	0	0	0	0	200	300	0	0	0	0	0	0	0	200	903	0	0	0	0	0	0	0	603	903	0
469	1	0	0	0	0	0	0	200	300	0	0	0	0	0	0	0	200	903	0	0	0	0	0	0	0	603	903	0
469	2	0	0	0	0	0	0	200	300	0	0	0	0	0	0	0	200	903	0	0	0	0	0	0	0	603	903	0
469	3	0	0	0	0	0	0	200	300	0	0	0	0	0	0	0	200	903	0	0	0	0	0	0	0	603	903	0
469	4	0	0	0	0	0	0	200	300	0	0	0	0	0	0	0	200	903	0	0	0	0	0	0	0	603	903	0
469	5	0	0	0	0	0	0	200	300	0	0	0	0	0	0	0	200	903	0	0	0	0	0	0	0	603	903	0
469	6	0	0	0	0	0	0	200	300	0	0	0	0	0	0	0	200	903	0	0	0	0	0	0	0	603	903	0
469	7	0	0	0	0	0	0	200	300	0	0	0	0	0	0	0	200	903	0	0	0	0	0	0	0	603	903	0
469	8	0	0	0	0	0	0	200	300	0	0	0	0	0	0	0	200	903	0	0	0	0	0	0	0	603	903	0
469	9	0	0	0	0	0	0	200	300	0	0	0	0	0	0	0	200	903	0	0	0	0	0	0	0	603	903	0
470	0	0	0	0	0	0	0	200	300	0	0	0	0	0	0	0	200	903	0	0	0	0	0	0	0	603	903	0
470	1	0	0	0	0	0	0	200	300	0	0	0	0	0	0	0	200	903	0	0	0	0	0	0	0	603	903	0
470	2	0	0	0	0	0	0	200	300	0	0	0	0	0	0	0	200	903	0	0	0	0	0	0	0	603	903	0
470	3	0	0	0	0	0	0	200	300	0	0	0	0	0	0	0	200	903	0	0	0	0	0	0	0	603	903	0
470	4	0	0	0	0	0	0	200	300	0	0	0	0	0	0	0	200	903	0	0	0	0	0	0	0	603	903	0
470	5	0	0	0	0	0	0	200	300	0	0	0	0	0	0	0	200	903	0	0	0	0	0	0	0	603	903	0
470	6	0	0	0	0	0	0	200	300	0	0	0	0	0	0	0	200	903	0	0	0	0	0	0	0	603	903	0
470	7	0	0	0	0	0	0	200	300	0	0	0	0	0	0	0	200	903	0	0	0	0	0	0	0	603	903	0
470	8	0	0	0	0	0	0	200	300	0	0	0	0	0	0	0	200	903	0	0	0	0	0	0	0	603	903	0
470	9	0	0	0	0	0	0	200	300	0	0	0	0	0	0	0	200	903	0	0	0	0	0	0	0	603	903	0
471	0	0	0	0	0	0	0	200	300	0	0	0	0	0	0	0	200	903	0	0	0	0	0	0	0	603	903	0
471	1	0	0	0	0	0	0	200	300	0	0	0	0	0	0	0	200	903	0	0	0	0	0	0	0	603	903	0
471	2	0	0	0	0	0	0	200	300	0	0	0	0	0	0	0	200	903	0	0	0	0	0	0	0	603	903	0
471	3	0	0	0	0	0	0	200	300	0	0	0	0	0	0	0	200	903	0	0	0	0	0	0	0	603	903	0
471	4	0	0	0	0	0	0	200	300	0	0	0	0	0	0	0	200	903	0	0	0	0	0	0	0	603	903	0
471	5	0	0	0	0	0	0	200	300	0	0	0	0	0	0	0	200	903	0	0	0	0	0	0	0	603	903	0
471	6	0	0	0	0	0	0	200	300	0	0	0	0	0	0	0	200	903	0	0	0	0	0	0	0	603	903	0
471	7	0	0	0	0	0	0	200	300	0	0	0	0	0	0	0	200	903	0	0	0	0	0	0	0	603	903	0
471	8	0	0	0	0	0	0	200	300	0	0	0	0	0	0	0	200	903	0	0	0	0	0	0	0	603	903	0
471	9	0	0	0	0	0	0	200	300	0	0	0	0	0	0	0	200	903	0	0	0	0	0	0	0	603	903	0
472	0	0	0	0	0	0	0	200	300	0	0	0	0	0	0	0	200	903	0	0	0	0	0	0	0	603	903	0
472	1	0	0	0	0	0	0	200	300	0	0	0	0	0	0	0	200	903	0	0	0	0	0	0	0	603	903	0
472	2	0	0	0	0	0	0	200	300	0	0	0	0	0	0	0	200	903	0	0	0	0	0	0	0	603	903	0
472	3	0	0	0	0	0	0	200	300	0	0	0	0	0	0	0	200	903	0	0	0	0	0	0	0	603	903	0
472	4	0	0	0	0	0	0	200	300	0	0	0	0	0	0	0	200	903	0	0	0	0	0	0	0	603	903	0
472	5	0	0	0	0	0	0	200	300	0	0	0	0	0	0	0	200	903	0	0	0	0	0	0	0	603	903	0
472	6	0	0	0	0	0	0	200	300	0	0	0	0	0	0	0	200	903	0	0	0	0	0	0	0	603	903	0
472	7	0	0	0	0	0	0	200	300	0	0	0	0	0	0	0	200	903	0	0	0	0	0	0	0	603	903	0
472	8	0	0	0	0	0	0	200	300	0	0	0	0	0	0	0	200	903	0	0	0	0	0	0	0	603	903	0
472	9	0	0	0	0	0	0	200	300	0	0	0	0	0	0	0	200	903	0	0	0	0	0	0	0	603	903	0
473	0	0	0	0	0	0	0	200	300	0	0	0	0	0	0	0	200	903	0	0	0	0	0	0	0	603	903	0
473	1	0	0	0	0	0	0	200	300	0	0	0	0	0	0	0	200	903	0	0	0	0	0	0	0	603	903	0
473	2	0	0	0	0	0	0	200	300	0	0	0	0	0	0	0	200	903	0	0	0	0	0	0	0	603	903	0
473	3	0	0	0	0	0	0	200	300	0	0	0	0	0	0	0	200	903	0	0	0	0	0	0	0	603	903	0
473	4	0	0	0	0	0	0	200	300	0	0	0	0	0	0	0	200	903	0	0	0	0	0	0	0	603	903	0
473	5	0	0	0	0	0	0	200	300	0	0	0	0	0	0	0	200	903	0	0	0	0	0	0	0	603	903	0
473	6	0	0	0	0	0	0	200	300	0	0	0	0	0	0	0	200	903	0	0	0	0	0	0	0	603	903	0
473	7	0	0	0	0	0	0	200	300	0	0	0	0	0	0	0	200	903	0	0	0	0	0	0	0	603	903	0
473	8	0	0	0	0	0	0	200	300	0	0	0	0	0	0	0	200	903	0	0	0	0	0	0	0	603	903	0
473	9	0	0	0	0	0	0	200	300	0	0	0	0	0	0	0	200	903	0	0	0	0	0	0	0	603	903	0
474	0	0	0	0	0	0	0	200	300	0	0	0	0	0	0	0	200	903	0	0	0	0	0	0	0	603	903	0
474	1	0	0	0	0	0	0	200	300	0	0	0	0	0	0	0	200	903	0	0	0	0	0	0	0	603	903	0
474	2	0	0	0	0	0	0	200	300	0	0	0	0	0	0	0	200	903	0	0	0	0	0	0	0	603	903	0
474	3	0	0	0	0	0	0	200	300	0	0	0	0	0	0	0	200	903	0	0	0	0	0	0	0	603	903	0
474	4	0	0	0	0	0	0	200	300	0	0	0	0	0	0	0	200	903	0	0	0	0	0	0	0	603	903	0
474	5	0	0	0	0	0	0	200	300	0	0	0	0	0	0	0	200	903	0	0	0	0	0	0	0	603	903	0
474	6	0	0	0	0	0	0	200	300	0	0	0	0	0	0	0	200	903	0	0	0	0	0	0	0	603	903	0
474	7	0	0	0	0	0	0	200	300	0	0	0	0	0	0	0	200	903	0	0	0	0	0	0	0	603	903	0
474	8	0	0	0	0	0	0	200	300	0	0	0	0	0	0	0	200	903	0	0	0	0	0	0	0	603	903	0
474	9	0	0	0	0	0	0	200	300	0	0	0	0	0	0	0	200	903	0	0	0	0	0	0	0	603	903	0
475	0	0	0	0	0	0	0	200	300	0	0	0	0	0	0	0	200	903	0	0	0	0	0	0	0	603	903	0
475	1	0	0	0	0	0	0	200	300	0	0	0	0	0	0	0	200	903	0	0	0	0	0	0	0	603	903	0
475	2	0	0	0	0	0	0	200	300	0	0	0	0	0	0	0	200	903	0	0	0	0	0	0	0	603	903	0
475	3	0	0	0	0	0	0	200	300	0	0	0	0	0	0	0	200	903	0	0	0	0	0	0	0	603	903	0
475	4	0	0	0	0	0	0	200	300	0	0	0	0	0	0	0	200	903	0	0	0	0	0	0	0	603	903	0
475	5	0	0	0	0	0	0	200	300	0	0	0	0	0	0	0	200	903	0	0	0	0	0	0	0	603	903	0
475	6	0	0	0	0	0	0	200	300	0	0	0	0	0	0	0	200	903	0	0	0	0	0	0	0	603	903	0
475	7	0	0	0	0	0	0	200	300	0	0	0	0	0	0	0	200	903	0	0	0	0	0	0	0	603	903	0
475	8	0	0	0	0	0	0	200	300	0	0	0	0	0	0	0	200	903	0	0	0	0	0	0	0	603	903	0
475	9	0	0	0	0	0	0	200	300	0	0	0	0	0	0	0	200	903	0	0	0	0	0	0	0	603	903	0
476	0	0	0	0	0	0	0	200	300	0	0	0	0	0	0	0	200	903	0	0	0	0	0	0	0	603	903	0
476	1	0	0	0	0	0	0	200	300	0	0	0	0	0	0	0	200	903	0	0	0	0	0	0	0	603	903	0
476	2	0	0	0	0	0	0	200	300	0	0	0	0	0	0	0	200	903	0	0	0	0	0	0	0	603	903	0
476	3	0	0	0	0	0	0	200	300	0	0	0	0	0	0	0	200	903	0	0	0	0	0	0	0	603	903	0
476	4	0	0	0	0	0	0	200	300	0	0	0	0	0	0	0	200	903	0	0	0	0	0	0	0	603	903	0
476	5	0	0	0	0	0	0	200	300	0	0	0	0	0	0	0	200	903	0	0	0	0	0	0	0	603	903	0
476	6	0	0	0	0	0	0	200	300	0	0	0	0	0	0	0	200	903	0	0	0	0	0	0	0	603	903	0
476	7	0	0	0	0	0	0	200	300	0	0	0	0	0	0	0	200	903	0	0	0	0	0	0	0	603	903	0
476	8	0	0	0	0	0	0	200	300	0	0	0	0	0	0	0	200	903	0	0	0	0	0	0	0	603	903	0
476	9	0	0	0	0	0	0	200	300	0	0	0	0	0	0	0	200	903	0	0	0	0	0	0	0	603	903	0
477	0	0	0	0	0	0	0	200	300	0	0	0	0	0	0	0	200	903	0	0	0	0	0	0	0	603	903	0
477	1	0	0	0	0	0	0	200	300	0	0	0	0	0	0	0	200	903	0	0	0	0	0	0	0	603	903	0
477	2	0	0	0	0	0	0	200	300	0	0	0	0	0	0	0	200	903	0	0	0	0	0	0	0	603	903	0
477	3	0	0	0	0	0	0	200	300	0	0	0	0	0	0	0	200	903	0	0	0	0	0	0	0	603	903	0
477	4	0	0	0	0	0	0	200	300	0	0	0	0	0	0	0	200	903	0	0	0	0	0	0	0	603	903	0
477	5	0	0	0	0	0	0	200	300	0	0	0	0	0	0	0	200	903	0	0	0	0	0	0	0	603	903	0
477	6	0	0	0	0	0	0	200	300	0	0	0	0	0	0	0	200	903	0	0	0	0	0	0	0	603	903	0
477	7	0	0	0	0	0	0	200	300	0	0	0	0	0	0	0	200	903	0	0	0	0	0	0	0	603	903	0
477	8	0	0	0	0	0	0	200	300	0	0	0	0	0	0	0	200	903	0	0	0	0	0	0	0	603	903	0
477	9	0	0	0	0	0	0	200	300	0	0	0	0	0	0	0	200	903	0	0	0	0	0	0	0	603	903	0
478	0	0	0	0	0	0	0	200	300	0	0	0	0	0	0	0	200	903	0	0	0	0	0	0	0	603	903	0
478	1	0	0	0	0	0	0	200	300	0	0	0	0	0	0	0	200	903	0	0	0	0	0	0	0	603	903	0
478	2	0	0	0	0	0	0	200	300	0	0	0	0	0	0	0	200	903	0	0	0	0	0	0	0	603	903	0
478	3	0	0	0	0	0	0	200	300	0	0	0	0	0	0	0	200	903	0	0	0	0	0	0	0	603	903	0
478	4	0	0	0	0	0	0	200	300	0	0	0	0	0	0	0	200	903	0	0	0	0	0	0	0	603	903	0
478	5	0	0	0	0	0	0	200	300	0	0	0	0	0	0	0	200	903	0	0	0	0	0	0	0	603	903	0
478	6	0	0	0	0	0	0	200	300	0	0	0	0	0	0	0	200	903	0	0	0	0	0	0	0	603	903	0
478	7	0	0	0	0	0	0	200	300	0	0	0	0	0	0	0	200	903	0	0	0	0	0	0	0	603	903	0
478	8	0	0	0	0	0	0	200	300	0	0	0	0	0	0	0	200	903	0	0	0	0	0	0	0	603	903	0
478	9	0	0	0	0	0	0	200	300	0	0	0	0	0	0	0	200	903	0	0	0	0	0	0	0	603	903	0
479	0	0	0	0	0	0	0	200	300	0	0	0	0	0	0	0	200	903	0	0	0	0	0	0	0	603	903	0
479	1	0	0	0	0	0	0	200	300	0	0	0	0	0	0	0	200	903	0	0	0	0	0	0	0	603	903	0
479	2	0	0	0	0	0	0	200	300	0	0	0	0	0	0	0	200	903	0	0	0	0	0	0	0	603	903	0
479	3	0	0	0	0	0	0	200	300	0	0	0	0	0	0	0	200	903	0	0	0	0	0	0	0	603	903	0
479	4	0	0	0	0	0	0	200	300	0	0	0	0	0	0	0	200	903	0	0	0	0	0	0	0	603	903	0
479	5	0	0	0	0	0	0	200	300	0	0	0	0	0	0	0	200	903	0	0	0	0	0	0	0	603	903	0
479	6	0	0	0	0	0	0	200	300	0	0	0	0	0	0	0	200	903	0	0	0	0	0	0	0	603	903	0
479	7	0	0	0	0	0	0	200	300	0	0	0	0	0	0	0	200	903	0	0	0	0	0	0	0	603	903	0
479	8	0	0	0	0	0	0	200	300	0	0	0	0	0	0	0	200	903	0	0	0	0	0	0	0	603	903	0
479	9	0	0	0	0	0	0	200	300	0	0	0	0	0	0	0	200	903	0	0	0	0	0	0	0	603	903	0
480	0	0	0	0	0	0	0	200	300	0	0	0	0	0	0	0	200	903	0	0	0	0	0	0	0	603	903	0
480	1	0	0	0	0	0	0	200	300	0	0	0	0	0	0	0	200	903	0	0	0	0	0	0	0	603	903	0
480	2	0	0	0	0	0	0	200	300	0	0	0	0	0	0	0	200	903	0	0	0	0	0	0	0	603	903	0
480	3	0	0	0	0	0	0	200	300	0	0	0	0	0	0	0	200	903	0	0	0	0	0	0	0	603	903	0
480	4	0	0	0	0	0	0	200	300	0	0	0	0	0	0	0	200	903	0	0	0	0	0	0	0	603	903	0
480	5	0	0	0	0	0	0	200	300	0	0	0	0	0	0	0	200	903	0	0	0	0	0	0	0	603	903	0
480	6	0	0	0	0	0	0	200	300	0	0	0	0	0	0	0	200	903	0	0	0	0	0	0	0	603	903	0
480	7	0	0	0	0	0	0	200	300	0	0	0	0	0	0	0	200	903	0	0	0	0	0	0	0	603	903	0
480	8	0	0	0	0	0	0	200	300	0	0	0	0	0	0	0	200	903	0	0	0	0	0	0	0	603	903	0
480	9	0	0	0	0	0	0	200	300	0	0	0	0	0	0	0	200	903	0	0	0	0	0	0	0	603	903	0
481	0	0	0	0	0	0	0	200	300	0	0	0	0	0	0	0	200	903	0	0	0	0	0	0	0	603	903	0
481	1	0	0	0	0	0	0	200	300	0	0	0	0	0	0	0	200	903	0	0	0	0	0	0	0	603	903	0
481	2	0	0	0	0	0	0	200	300	0	0	0	0	0	0	0	200	903	0	0	0	0	0	0	0	603	903	0
481	3	0	0	0	0	0	0	200	300	0	0	0	0	0	0	0	200	903	0	0	0	0	0	0	0	603	903	0
481	4	0	0	0	0	0	0	200	300	0	0	0	0	0	0	0	200	903	0	0	0	0	0	0	0	603	903	0
481	5	0	0	0	0	0	0	200	300	0	0	0	0	0	0	0	200	903	0	0	0	0	0	0	0	603	903	0
481	6	0	0	0	0	0	0	200	300	0	0	0	0	0	0	0	200	903	0	0	0	0	0	0	0	603	903	0
481	7	0	0	0	0	0	0	200	300	0	0	0	0	0	0	0	200	903	0	0	0	0	0	0	0	603	903	0
481	8	0	0	0	0	0	0	200	300	0	0	0	0	0	0	0	200	903	0	0	0	0	0	0	0	603	903	0
481	9	0	0	0	0	0	0	200	300	0	0	0	0	0	0	0	200	903	0	0	0	0	0	0	0	603	903	0
482	0	0	0	0	0	0	0	200	300	0	0	0	0	0	0	0	200	903	0	0	0	0	0	0	0	603	903	0
482	1	0	0	0	0	0	0	200	300	0	0	0	0	0	0	0	200	903	0	0	0	0	0	0	0	603	903	0
482	2	0	0	0	0	0	0	200	300	0	0	0	0	0	0	0	200	903	0	0	0	0	0	0	0	603	903	0
482	3	0	0	0	0	0	0	200	300	0	0	0	0	0	0	0	200	903	0	0	0	0	0	0	0	603	903	0
482	4	0	0	0	0	0	0	200	300	0	0	0	0	0	0	0	200	903	0	0	0	0	0	0	0	603	903	0
482	5	0	0	0	0	0	0	200	300	0	0	0	0	0	0	0	200	903	0	0	0	0	0	0	0	603	903	0
482	6	0	0	0	0	0	0	200	300	0	0	0	0	0	0	0	200	903	0	0	0	0	0	0	0	603	903	0
482	7	0	0	0	0	0	0	200	300	0	0	0	0	0	0	0	200	903	0	0	0	0	0	0	0	603	903	0
482	8	0	0	0	0	0	0	200	300	0	0	0	0	0	0	0	200	903	0	0	0	0	0	0	0	603	903	0
482	9	0	0	0	0	0	0	200	300	0	0	0	0	0	0	0	200	903	0	0	0	0	0	0	0	603	903	0
483	0	0	0	0	0	0	0	200	300	0	0	0	0	0	0	0	200	903	0	0	0	0	0	0	0	603	903	0
483	1	0	0	0	0	0	0	200	300	0	0	0	0	0	0	0	200	903	0	0	0	0	0	0	0	603	903	0
483	2	0	0	0	0	0	0	200	300	0	0	0	0	0	0	0	200	903	0	0	0	0	0	0	0	603	903	0
483	3	0	0	0	0	0	0	200	300	0	0	0	0	0	0	0	200	903	0	0	0	0	0	0	0	603	903	0
483	4	0	0	0	0	0	0	200	300	0	0	0	0	0	0	0	200	903	0	0	0	0	0	0	0	603	903	0
483	5	0	0	0	0	0	0	200	300	0	0	0	0	0	0	0	200	903	0	0	0	0	0	0	0	603	903	0
483	6	0	0	0	0	0	0	200	300	0	0	0	0	0	0	0	200	903	0	0	0	0	0	0	0	603	903	0
483	7	0	0	0	0	0	0	200	300	0	0	0	0	0	0	0	200	903	0	0	0	0	0	0	0	603	903	0
483	8	0	0	0	0	0	0	200	300	0	0	0	0	0	0	0	200	903	0	0	0	0	0	0	0	603	903	0
483	9	0	0	0	0	0	0	200	300	0	0	0	0	0	0	0	200	903	0	0	0	0	0	0	0	603	903	0
484	0	0	0	0	0	0	0	200	300	0	0	0	0	0	0	0	200	903	0	0	0	0	0	0	0	603	903	0
484	1	0	0	0	0	0	0	200	300	0	0	0	0	0	0	0	200	903	0	0	0	0	0	0	0	603	903	0
484	2	0	0	0	0	0	0	200	300	0	0	0	0	0	0	0	200	903	0	0	0	0	0	0	0	603	903	0
484	3	0	0	0	0	0	0	200	300	0	0	0	0	0	0	0	200	903	0	0	0	0	0	0	0	603	903	0
484	4	0	0	0	0	0	0	200	300	0	0	0	0	0	0	0	200	903	0	0	0	0	0	0	0	603	903	0
484	5	0	0	0	0	0	0	200	300	0	0	0	0	0	0	0	200	903	0	0	0	0	0	0	0	603	903	0
484	6	0	0	0	0	0	0	200	300	0	0	0	0	0	0	0	200	903	0	0	0	0	0	0	0	603	903	0
484	7	0	0	0	0	0	0	200	300	0	0	0	0	0	0	0	200	903	0	0	0	0	0	0	0	603	903	0
484	8	0	0	0	0	0	0	200	300	0	0	0	0	0	0	0	200	903	0	0	0	0	0	0	0	603	903	0
484	9	0	0	0	0	0	0	200	300	0	0	0	0	0	0	0	200	903	0	0	0	0	0	0	0	603	903	0
485	0	0	0	0	0	0	0	200	300	0	0	0	0	0	0	0	200	903	0	0	0	0	0	0	0	603	903	0
485	1	0	0	0	0	0	0	200	300	0	0	0	0	0	0	0	200	903	0	0	0	0	0	0	0	603	903	0
485	2	0	0	0	0	0	0	200	300	0	0	0	0	0	0	0	200	903	0	0	0	0	0	0	0	603	903	0
485	3	0	0	0	0	0	0	200	300	0	0	0	0	0	0	0	200	903	0	0	0	0	0	0	0	603	903	0
485	4	0	0	0	0	0	0	200	300	0	0	0	0	0	0	0	200	903	0	0	0	0	0	0	0	603	903	0
485	5	0	0	0	0	0	0	200	300	0	0	0	0	0	0	0	200	903	0	0	0	0	0	0	0	603	903	0
485	6	0	0	0	0	0	0	200	300	0	0	0	0	0	0	0	200	903	0	0	0	0	0	0	0	603	903	0
485	7	0	0	0	0	0	0	200	300	0	0	0	0	0	0	0	200	903	0	0	0	0	0	0	0	603	903	0
485	8	0	0	0	0	0	0	200	300	0	0	0	0	0	0	0	200	903	0	0	0	0	0	0	0	603	903	0
485	9	0	0	0	0	0	0	200	300	0	0	0	0	0	0	0	200	903	0	0	0	0	0	0	0	603	903	0
486	0	0	0	0	0	0	0	200	300	0	0	0	0	0	0	0	200	903	0	0	0	0	0	0	0	603	903	0
486	1	0	0	0	0	0	0	200	300	0	0	0	0	0	0	0	200	903	0	0	0	0	0	0	0	603	903	0
486	2	0	0	0	0	0	0	200	300	0	0	0	0	0	0	0	200	903	0	0	0	0	0	0	0	603	903	0
486	3	0	0	0	0	0	0	200	300	0	0	0	0	0	0	0	200	903	0	0	0	0	0	0	0	603	903	0
486	4	0	0	0	0	0	0	200	300	0	0	0	0	0	0	0	200	903	0	0	0	0	0	0	0	603	903	0
486	5	0	0	0	0	0	0	200	300	0	0	0	0	0	0	0	200	903	0	0	0	0	0	0	0	603	903	0
486	6	0	0	0	0	0	0	200	300	0	0	0	0	0	0	0	200	903	0	0	0	0	0	0	0	603	903	0
486	7	0	0	0	0	0	0	200	300	0	0	0	0	0	0	0	200	903	0	0	0	0	0	0	0	603	903	0
486	8	0	0	0	0	0	0	200	300	0	0	0	0	0	0	0	200	903	0	0	0	0	0	0	0	603	903	0
486	9	0	0	0	0	0	0	200	300	0	0	0	0	0	0	0	200	903	0	0	0	0	0	0	0	603	903	0
487	0	0	0	0	0	0	0	200	300	0	0	0	0	0	0	0	200	903	0	0	0	0	0	0	0	603	903	0
487	1	0	0	0	0	0	0	200	300	0	0	0	0	0	0	0	200	903	0	0	0	0	0	0	0	603	903	0
487	2	0	0	0	0	0	0	200	300	0	0	0	0	0	0	0	200	903	0	0	0	0	0	0	0	603	903	0
487	3	0	0	0	0	0	0	200	300	0	0	0	0	0	0	0	200	903	0	0	0	0	0	0	0	603	903	0
487	4	0	0	0	0	0	0	200	300	0	0	0	0	0	0	0	200	903	0	0	0	0	0	0	0	603	903	0
487	5	0	0	0	0	0	0	200	300	0	0	0	0	0	0	0	200	903	0	0	0	0	0	0	0	603	903	0
487	6	0	0	0	0	0	0	200	300	0	0	0	0	0	0	0	200	903	0	0	0	0	0	0	0	603	903	0
487	7	0	0	0	0	0	0	200	300	0	0	0	0	0	0	0	200	903	0	0	0	0	0	0	0	603	903	0
487	8	0	0	0	0	0	0	200	300	0	0	0	0	0	0	0	200	903	0	0	0	0	0	0	0	603	903	0
487	9	0	0	0	0	0	0	200	300	0	0	0	0	0	0	0	200	903	0	0	0	0	0	0	0	603	903	0
488	0	0	0	0	0	0	0	200	300	0	0	0	0	0	0	0	200	903	0	0	0	0	0	0	0	603	903	0
488	1	0	0	0	0	0	0	200	300	0	0	0	0	0	0	0	200	903	0	0	0	0	0	0	0	603	903	0
488	2	0	0	0	0	0	0	200	300	0	0	0	0	0	0	0	200	903	0	0	0	0	0	0	0	603	903	0
488	3	0	0	0	0	0	0	200	300	0	0	0	0	0	0	0	200	903	0	0	0	0	0	0	0	603	903	0
488	4	0	0	0	0	0	0	200	300	0	0	0	0	0	0	0	200	903	0	0	0	0	0	0	0	603	903	0
488	5	0	0	0	0	0	0	200	300	0	0	0	0	0	0	0	200	903	0	0	0	0	0	0	0	603	903	0
488	6	0	0	0	0	0	0	200	300	0	0	0	0	0	0	0	200	903	0	0	0	0	0	0	0	603	903	0
488	7	0	0	0	0	0	0	200	300	0	0	0	0	0	0	0	200	903	0	0	0	0	0	0	0	603	903	0
488	8	0	0	0	0	0	0	200	300	0	0	0	0	0	0	0	200	903	0	0	0	0	0	0	0	603	903	0
488	9	0	0	0	0	0	0	200	300	0	0	0	0	0	0	0	200	903	0	0	0	0	0	0	0	603	903	0
489	0	0	0	0	0	0	0	200	300	0	0	0	0	0	0	0	200	903	0	0	0	0	0	0	0	603	903	0
489	1	0	0	0	0	0	0	200	300	0	0	0	0	0	0	0	200	903	0	0	0	0	0	0	0	603	903	0
489	2	0	0	0	0	0	0	200	300	0	0	0	0	0	0	0	200	903	0	0	0	0	0	0	0	603	903	0
489	3	0	0	0	0	0	0	200	300	0	0	0	0	0	0	0	200	903	0	0	0	0	0	0	0	603	903	0
489	4	0	0	0	0	0	0	200	300	0	0	0	0	0	0	0	200	903	0	0	0	0	0	0	0	603	903	0
489	5	0	0	0	0	0	0	200	300	0	0	0	0	0	0	0	200	903	0	0	0	0	0	0	0	603	903	0
489	6	0	0	0	0	0	0	200	300	0	0	0	0	0	0	0	200	903	0	0	0	0	0	0	0	603	903	0
489	7	0	0	0	0	0	0	200	300	0	0	0	0	0	0	0	200	903	0	0	0	0	0	0	0	603	903	0
489	8	0	0	0	0	0	0	200	300	0	0	0	0	0	0	0	200	903	0	0	0	0	0	0	0	603	903	0
489	9	0	0	0	0	0	0	200	300	0	0	0	0	0	0	0	200	903	0	0	0	0	0	0	0	603	903	0
490	0	0	0	0	0	0	0	200	300	0	0	0	0	0	0	0	200	903	0	0	0	0	0	0	0	603	903	0
490	1	0	0	0	0	0	0	200	300	0	0	0	0	0	0	0	200	903	0	0	0	0	0	0	0	603	903	0
490	2	0	0	0	0	0	0	200	300	0	0	0	0	0	0	0	200	903	0	0	0	0	0	0	0	603	903	0
490	3	0	0	0	0	0	0	200	300	0	0	0	0	0	0	0	200	903	0	0	0	0	0	0	0	603	903	0
490	4	0	0	0	0	0	0	200	300	0	0	0	0	0	0	0	200	903	0	0	0	0	0	0	0	603	903	0
490	5	0	0	0	0	0	0	200	300	0	0	0	0	0	0	0	200	903	0	0	0	0	0	0	0	603	903	0
490	6	0	0	0	0	0	0	200	300	0	0	0	0	0	0	0	200	903	0	0	0	0	0	0	0	603	903	0
490	7	0	0	0	0	0	0	200	300	0	0	0	0	0	0	0	200	903	0	0	0	0	0	0	0	603	903	0
490	8	0	0	0	0	0	0	200	300	0	0	0	0	0	0	0	200	903	0	0	0	0	0	0	0	603	903	0
490	9	0	0	0	0	0	0	200	300	0	0	0	0	0	0	0	200	903	0	0	0	0	0	0	0	603	903	0
491	0	0	0	0	0	0	0	200	300	0	0	0	0	0	0	0	200	903	0	0	0	0	0	0	0	603	903	0
491	1	0	0	0	0	0	0	200	300	0	0	0	0	0	0	0	200	903	0	0	0	0	0	0	0	603	903	0
491	2	0	0	0	0	0	0	200	300	0	0	0	0	0	0	0	200	903	0	0	0	0	0	0	0	603	903	0
491	3	0	0	0	0	0	0	200	300	0	0	0	0	0	0	0	200	903	0	0	0	0	0	0	0	603	903	0
491	4	0	0	0	0	0	0	200	300	0	0	0	0	0	0	0	200	903	0	0	0	0	0	0	0	603	903	0
491	5	0	0	0	0	0	0	200	300	0	0	0	0	0	0	0	200	903	0	0	0	0	0	0	0	603	903	0
491	6	0	0	0	0	0	0	200	300	0	0	0	0	0	0	0	200	903	0	0	0	0	0	0	0	603	903	0
491	7	0	0	0	0	0	0	200	300	0	0	0	0	0	0	0	200	903	0	0	0	0	0	0	0	603	903	0
491	8	0	0	0	0	0	0	200	300	0	0	0	0	0	0	0	200	903	0	0	0	0	0	0	0	603	903	0
491	9	0	0	0	0	0	0	200	300	0	0	0	0	0	0	0	200	903	0	0	0	0	0	0	0	603	903	0
492	0	0	0	0	0	0	0	200	300	0	0	0	0	0	0	0	200	903	0	0	0	0	0	0	0	603	903	0
492	1	0	0	0	0	0	0	200	300	0	0	0	0	0	0	0	200	903	0	0	0	0	0	0	0	603	903	0
492	2	0	0	0	0	0	0	200	300	0	0	0	0	0	0	0	200	903	0	0	0	0	0	0	0	603	903	0
492	3	0	0	0	0	0	0	200	300	0	0	0	0	0	0	0	200	903	0	0	0	0	0	0	0	603	903	0
492	4	0	0	0	0	0	0	200	300	0	0	0	0	0	0	0	200	903	0	0	0	0	0	0	0	603	903	0
492	5	0	0	0	0	0	0	200	300	0	0	0	0	0	0	0	200	903	0	0	0	0	0	0	0	603	903	0
492	6	0	0	0	0	0	0	200	300	0	0	0	0	0	0	0	200	903	0	0	0	0	0	0	0	603	903	0
492	7	0	0	0	0	0	0	200	300	0	0	0	0	0	0	0	200	903	0	0	0	0	0	0	0	603	903	0
492	8	0	0	0	0	0	0	200	300	0	0	0	0	0	0	0	200	903	0	0	0	0	0	0	0	603	903	0
492	9	0	0	0	0	0	0	200	300	0	0	0	0	0	0	0	200	903	0	0	0	0	0	0	0	603	903	0
493	0	0	0	0	0	0	0	200	300	0	0	0	0	0	0	0	200	903	0	0	0	0	0	0	0	603	903	0
493	1	0	0	0	0	0	0	200	300	0	0	0	0	0	0	0	200	903	0	0	0	0	0	0	0	603	903	0
493	2	0	0	0	0	0	0	200	300	0	0	0	0	0	0	0	200	903	0	0	0	0	0	0	0	603	903	0
493	3	0	0	0	0	0	0	200	300	0	0	0	0	0	0	0	200	903	0	0	0	0	0	0	0	603	903	0
493	4	0	0	0	0	0	0	200	300	0	0	0	0	0	0	0	200	903	0	0	0	0	0	0	0	603	903	0
493	5	0	0	0	0	0	0	200	300	0	0	0	0	0	0	0	200	903	0	0	0	0	0	0	0	603	903	0
493	6	0	0	0	0	0	0	200	300	0	0	0	0	0	0	0	200	903	0	0	0	0	0	0	0	603	903	0
493	7	0	0	0	0	0	0	200	300	0	0	0	0	0	0	0	200	903	0	0	0	0	0	0	0	603	903	0
493	8	0	0	0	0	0	0	200	300	0	0	0	0	0	0	0	200	903	0	0	0	0	0	0	0	603	903	0
493	9	0	0	0	0	0	0	200	300	0	0	0	0	0	0	0	200	903	0	0	0	0	0	0	0	603	903	0
494	0	0	0	0	0	0	0	200	300	0	0	0	0	0	0	0	200	903	0	0	0	0	0	0	0	603	903	0
494	1	0	0	0	0	0	0	200	300	0	0	0	0	0	0	0	200	903	0	0	0	0	0	0	0	603	903	0
494	2	0	0	0	0	0	0	200	300	0	0	0	0	0	0	0	200	903	0	0	0	0	0	0	0	603	903	0
494	3	0	0	0	0	0	0	200	300	0	0	0	0	0	0	0	200	903	0	0	0	0	0	0	0	603	903	0
494	4	0	0	0	0	0	0	200	300	0	0	0	0	0	0	0	200	903	0	0	0	0	0	0	0	603	903	0
494	5	0	0	0	0	0	0	200	300	0	0	0	0	0	0	0	200	903	0	0	0	0	0	0	0	603	903	0
494	6	0	0	0	0	0	0	200	300	0	0	0	0	0	0	0	200	903	0	0	0	0	0	0	0	603	903	0
494	7	0	0	0	0	0	0	200	300	0	0	0	0	0	0	0	200	903	0	0	0	0	0	0	0	603	903	0
494	8	0	0	0	0	0	0	200	300	0	0	0	0	0	0	0	200	903	0	0	0	0	0	0	0	603	903	0
494	9	0	0	0	0	0	0	200	300	0	0	0	0	0	0	0	200	903	0	0	0	0	0	0	0	603	903	0
495	0	0	0	0	0	0	0	200	300	0	0	0	0	0	0	0	200	903	0	0	0	0	0	0	0	603	903	0
495	1	0	0	0	0	0	0	200	300	0	0	0	0	0	0	0	200	903	0	0	0	0	0	0	0	603	903	0
495	2	0	0	0	0	0	0	200	300	0	0	0	0	0	0	0	200	903	0	0	0	0	0	0	0	603	903	0
495	3	0	0	0	0	0	0	200	300	0	0	0	0	0	0	0	200	903	0	0	0	0	0	0	0	603	903	0
495	4	0	0	0	0	0	0	200	300	0	0	0	0	0	0	0	200	903	0	0	0	0	0	0	0	603	903	0
495	5	0	0	0	0	0	0	200	300	0	0	0	0	0	0	0	200	903	0	0	0	0	0	0	0	603	903	0
495	6	0	0	0	0	0	0	200	300	0	0	0	0	0	0	0	200	903	0	0	0	0	0	0	0	603	903	0
495	7	0	0	0	0	0	0	200	300	0	0	0	0	0	0	0	200	903	0	0	0	0	0	0	0	603	903	0
495	8	0	0	0	0	0	0	200	300	0	0	0	0	0	0	0	200	903	0	0	0	0	0	0	0	603	903	0
495	9	0	0	0	0	0	0	200	300	0	0	0	0	0	0	0	200	903	0	0	0	0	0	0	0	603	903	0
496	0	0	0	0	0	0	0	200	300	0	0	0	0	0	0	0	200	903	0	0	0	0	0	0	0	603	903	0
496	1	0	0	0	0	0	0	200	300	0	0	0	0	0	0	0	200	903	0	0	0	0	0	0	0	603	903	0
496	2	0	0	0	0	0	0	200	300	0	0	0	0	0	0	0	200	903	0	0	0	0	0	0	0	603	903	0
496	3	0	0	0	0	0	0	200	300	0	0	0	0	0	0	0	200	903	0	0	0	0	0	0	0	603	903	0
496	4	0	0	0	0	0	0	200	300	0	0	0	0	0	0	0	200	903	0	0	0	0	0	0	0	603	903	0
496	5	0	0	0	0	0	0	200	300	0	0	0	0	0	0	0	200	903	0	0	0	0	0	0	0	603	903	0
496	6	0	0	0	0	0	0	200	300	0	0	0	0	0	0	0	200	903	0	0	0	0	0	0	0	603	903	0
496	7	0	0	0	0	0	0	200	300	0	0	0	0	0	0	0	200	903	0	0	0	0	0	0	0	603	903	0
496	8	0	0	0	0	0	0	200	300	0	0	0	0	0	0	0	200	903	0	0	0	0	0	0	0	603	903	0
496	9	0	0	0	0	0	0	200	300	0	0	0	0	0	0	0	200	903	0	0	0	0	0	0	0	603	903	0
497	0	0	0	0	0	0	0	200	300	0	0	0	0	0	0	0	200	903	0	0	0	0	0	0	0	603	903	0
497	1	0	0	0	0	0	0	200	300	0	0	0	0	0	0	0	200	903	0	0	0	0	0	0	0	603	903	0
497	2	0	0	0	0	0	0	200	300	0	0	0	0	0	0	0	200	903	0	0	0	0	0	0	0	603	903	0
497	3	0	0	0	0	0	0	200	300	0	0	0	0	0	0	0	200	903	0	0	0	0	0	0	0	603	903	0
497	4	0	0	0	0	0	0	200	300	0	0	0	0	0	0	0	200	903	0	0	0	0	0	0	0	603	903	0
497	5	0	0	0	0	0	0	200	300	0	0	0	0	0	0	0	200	903	0	0	0	0	0	0	0	603	903	0
497	6	0	0	0	0	0	0	200	300	0	0	0	0	0	0	0	200	903	0	0	0	0	0	0	0	603	903	0
497	7	0	0	0	0	0	0	200	300	0	0	0	0	0	0	0	200	903	0	0	0	0	0	0	0	603	903	0
497	8	0	0	0	0	0	0	200	300	0	0	0	0	0	0	0	200	903	0	0	0	0	0	0	0	603	903	0
497	9	0	0	0	0	0	0	200	300	0	0	0	0	0	0	0	200	903	0	0	0	0	0	0	0	603	903	0
498	0	0	0	0	0	0	0	200	300	0	0	0	0	0	0	0	200	903	0	0	0	0	0	0	0	603	903	0
498	1	0	0	0	0	0	0	200	300	0	0	0	0	0	0	0	200	903	0	0	0	0	0	0	0	603	903	0
498	2	0	0	0	0	0	0	200	300	0	0	0	0	0	0	0	200	903	0	0	0	0	0	0	0	603	903	0
498	3	0	0	0	0	0	0	200	300	0	0	0	0	0	0	0	200	903	0	0	0	0	0	0	0	603	903	0
498	4	0	0	0	0	0	0	200	300	0	0	0	0	0	0	0	200	903	0	0	0	0	0	0	0	603	903	0
498	5	0	0	0	0	0	0	200	300	0	0	0	0	0	0	0	200	903	0	0	0	0	0	0	0	603	903	0
498	6	0	0	0	0	0	0	200	300	0	0	0	0	0	0	0	200	903	0	0	0	0	0	0	0	603	903	0
498	7	0	0	0	0	0	0	200	300	0	0	0	0	0	0	0	200	903	0	0	0	0	0	0	0	603	903	0
498	8	0	0	0	0	0	0	200	300	0	0	0	0	0	0	0	200	903	0	0	0	0	0	0	0	603	903	0
498	9	0	0	0	0	0	0	200	300	0	0	0	0	0	0	0	200	903	0	0	0	0	0	0	0	603	903	0
499	0	0	0	0	0	0	0	200	300	0	0	0	0	0	0	0	200	903	0	0	0	0	0	0	0	603	903	0
499	1	0	0	0	0	0	0	200	300	0	0	0	0	0	0	0	200	903	0	0	0	0	0	0	0	603	903	0
499	2	0	0	0	0	0	0	200	300	0	0	0	0	0	0	0	200	903	0	0	0	0	0	0	0	603	903	0
499	3	0	0	0	0	0	0	200	300	0	0	0	0	0	0	0	200	903	0	0	0	0	0	0	0	603	903	0
499	4	0	0	0	0	0	0	200	300	0	0	0	0	0	0	0	200	903	0	0	0	0	0	0	0	603	903	0
499	5	0	0	0	0	0	0	200	300	0	0	0	0	0	0	0	200	903	0	0	0	0	0	0	0	603	903	0
499	6	0	0	0	0	0	0	200	300	0	0	0	0	0	0	0	200	903	0	0	0	0	0	0	0	603	903	0
499	7	0	0	0	0	0	0	200	300	0	0	0	0	0	0	0	200	903	0	0	0	0	0	0	0	603	903	0
499	8	0	0	0	0	0	0	200	300	0	0	0	0	0	0	0	200	903	0	0	0	0	0	0	0	603	903	0
499	9	0	0	0	0	0	0	200	300	0	0	0	0	0	0	0	200	903	0	0	0	0	0	0	0	603	903	0
500	0	0	0	0	0	0	0	200	300	0	0	0	0	0	0	0	200	903	0	0	0	0	0	0	0	603	903	0
500	1	0	0	0	0	0	0	200	300	0	0	0	0	0	0	0	200	903	0	0	0	0	0	0	0	603	903	0
500	2	0	0	0	0	0	0	200	300	0	0	0	0	0	0	0	200	903	0	0	0	0	0	0	0	603	903	0
500	3	0	0	0	0	0	0	200	300	0	0	0	0	0	0	0	200	903	0	0	0	0	0	0	0	603	903	0
500	4	0	0	0	0	0	0	200	300	0	0	0	0	0	0	0	200	903	0	0	0	0	0	0	0	603	903	0
500	5	0	0	0	0	0	0	200	300	0	0	0	0	0	0	0	200	903	0	0	0	0	0	0	0	603	903	0
500	6	0	0	0	0	0	0	200	300	0	0	0	0	0	0	0	200	903	0	0	0	0	0	0	0	603	903	0
500	7	0	0	0	0	0	0	200	300	0	0	0	0	0	0	0	200	903	0	0	0	0	0	0	0	603	903	0
500	8	0	0	0	0	0	0	200	300	0	0	0	0	0	0	0	200	903	0	0	0	0	0	0	0	603	903	0
500	9	0	0	0	0	0	0	200	300	0	0	0	0	0	0	0	200	903	0	0	0	0	0	0	0	603	903	0
501	0	0	0	0	0	0	0	200	300	0	0	0	0	0	0	0	200	903	0	0	0	0	0	0	0	603	903	0
501	1	0	0	0	0	0	0	200	300	0	0	0	0	0	0	0	200	903	0	0	0	0	0	0	0	603	903	0
501	2	0	0	0	0	0	0	200	300	0	0	0	0	0	0	0	200	903	0	0	0	0	0	0	0	603	903	0
501	3	0	0	0	0	0	0	200	300	0	0	0	0	0	0	0	200	903	0	0	0	0	0	0	0	603	903	0
501	4	0	0	0	0	0	0	200	300	0	0	0	0	0	0	0	200	903	0	0	0	0	0	0	0	603	903	0
501	5	0	0	0	0	0	0	200	300	0	0	0	0	0	0	0	200	903	0	0	0	0	0	0	0	603	903	0
501	6	0	0	0	0	0	0	200	300	0	0	0	0	0	0	0	200	903	0	0	0	0	0	0	0	603	903	0
501	7	0	0	0	0	0	0	200	300	0	0	0	0	0	0	0	200	903	0	0	0	0	0	0	0	603	903	0
501	8	0	0	0	0	0	0	200	300	0	0	0	0	0	0	0	200	903	0	0	0	0	0	0	0	603	903	0
501	9	0	0	0	0	0	0	200	300	0	0	0	0	0	0	0	200	903	0	0	0	0	0	0	0	603	903	0
502	0	0	0	0	0	0	0	200	300	0	0	0	0	0	0	0	200	903	0	0	0	0	0	0	0	603	903	0
502	1	0	0	0	0	0	0	200	300	0	0	0	0	0	0	0	200	903	0	0	0	0	0	0	0	603	903	0
502	2	0	0	0	0	0	0	200	300	0	0	0	0	0	0	0	200	903	0	0	0	0	0	0	0	603	903	0
502	3	0	0	0	0	0	0	200	300	0	0	0	0	0	0	0	200	903	0	0	0	0	0	0	0	603	903	0
502	4	0	0	0	0	0	0	200	300	0	0	0	0	0	0	0	200	903	0	0	0	0	0	0	0	603	903	0
502	5	0	0	0	0	0	0	200	300	0	0	0	0	0	0	0	200	903	0	0	0	0	0	0	0	603	903	0
502	6	0	0	0	0	0	0	200	300	0	0	0	0	0	0	0	200	903	0	0	0	0	0	0	0	603	903	0
502	7	0	0	0	0	0	0	200	300	0	0	0	0	0	0	0	200	903	0	0	0	0	0	0	0	603	903	0
502	8	0	0	0	0	0	0	200	300	0	0	0	0	0	0	0	200	903	0	0	0	0	0	0	0	603	903	0
502	9	0	0	0	0	0	0	200	300	0	0	0	0	0	0	0	200	903	0	0	0	0	0	0	0	603	903	0
503	0	0	0	0	0	0	0	200	300	0	0	0	0	0	0	0	200	903	0	0	0	0	0	0	0	603	903	0
503	1	0	0	0	0	0	0	200	300	0	0	0	0	0	0	0	200	903	0	0	0	0	0	0	0	603	903	0
503	2	0	0	0	0	0	0	200	300	0	0	0	0	0	0	0	200	903	0	0	0	0	0	0	0	603	903	0
503	3	0	0	0	0	0	0	200	300	0	0	0	0	0	0	0	200	903	0	0	0	0	0	0	0	603	903	0
503	4	0	0	0	0	0	0	200	300	0	0	0	0	0	0	0	200	903	0	0	0	0	0	0	0	603	903	0
503	5	0	0	0	0	0	0	200	300	0	0	0	0	0	0	0	200	903	0	0	0	0	0	0	0	603	903	0
503	6	0	0	0	0	0	0	200	300	0	0	0	0	0	0	0	200	903	0	0	0	0	0	0	0	603	903	0
503	7	0	0	0	0	0	0	200	300	0	0	0	0	0	0	0	200	903	0	0	0	0	0	0	0	603	903	0
503	8	0	0	0	0	0	0	200	300	0	0	0	0	0	0	0	200	903	0	0	0	0	0	0	0	603	903	0
503	9	0	0	0	0	0	0	200	300	0	0	0	0	0	0	0	200	903	0	0	0	0	0	0	0	603	903	0
504	0	0	0	0	0	0	0	200	300	0	0	0	0	0	0	0	200	903	0	0	0	0	0	0	0	603	903	0
504	1	0	0	0	0	0	0	200	300	0	0	0	0	0	0	0	200	903	0	0	0	0	0	0	0	603	903	0
504	2	0	0	0	0	0	0	200	300	0	0	0	0	0	0	0	200	903	0	0	0	0	0	0	0	603	903	0
504	3	0	0	0	0	0	0	200	300	0	0	0	0	0	0	0	200	903	0	0	0	0	0	0	0	603	903	0
504	4	0	0	0	0	0	0	200	300	0	0	0	0	0	0	0	200	903	0	0	0	0	0	0	0	603	903	0
504	5	0	0	0	0	0	0	200	300	0	0	0	0	0	0	0	200	903	0	0	0	0	0	0	0	603	903	0
504	6	0	0	0	0	0	0	200	300	0	0	0	0	0	0	0	200	903	0	0	0	0	0	0	0	603	903	0
504	7	0	0	0	0	0	0	200	300	0	0	0	0	0	0	0	200	903	0	0	0	0	0	0	0	603	903	0
504	8	0	0	0	0	0	0	200	300	0	0	0	0	0	0	0	200	903	0	0	0	0	0	0	0	603	903	0
504	9	0	0	0	0	0	0	200	300	0	0	0	0	0	0	0	200	903	0	0	0	0	0	0	0	603	903	0
505	0	0	0	0	0	0	0	200	300	0	0	0	0	0	0	0	200	903	0	0	0	0	0	0	0	603	903	0
505	1	0	0	0	0	0	0	200	300	0	0	0	0	0	0	0	200	903	0	0	0	0	0	0	0	603	903	0
505	2	0	0	0	0	0	0	200	300	0	0	0	0	0	0	0	200	903	0	0	0	0	0	0	0	603	903	0
505	3	0	0	0	0	0	0	200	300	0	0	0	0	0	0	0	200	903	0	0	0	0	0	0	0	603	903	0
505	4	0	0	0	0	0	0	200	300	0	0	0	0	0	0	0	200	903	0	0	0	0	0	0	0	603	903	0
505	5	0	0	0	0	0	0	200	300	0	0	0	0	0	0	0	200	903	0	0	0	0	0	0	0	603	903	0
505	6	0	0	0	0	0	0	200	300	0	0	0	0	0	0	0	200	903	0	0	0	0	0	0	0	603	903	0
505	7	0	0	0	0	0	0	200	300	0	0	0	0	0	0	0	200	903	0	0	0	0	0	0	0	603	903	0
505	8	0	0	0	0	0	0	200	300	0	0	0	0	0	0	0	200	903	0	0	0	0	0	0	0	603	903	0
505	9	0	0	0	0	0	0	200	300	0	0	0	0	0	0	0	200	903	0	0	0	0	0	0	0	603	903	0
506	0	0	0	0	0	0	0	200	300	0	0	0	0	0	0	0	200	903	0	0	0	0	0	0	0	603	903	0
506	1	0	0	0	0	0	0	200	300	0	0	0	0	0	0	0	200	903	0	0	0	0	0	0	0	603	903	0
506	2	0	0	0	0	0	0	200	300	0	0	0	0	0	0	0	200	903	0	0	0	0	0	0	0	603	903	0
506	3	0	0	0	0	0	0	200	300	0	0	0	0	0	0	0	200	903	0	0	0	0	0	0	0	603	903	0
506	4	0	0	0	0	0	0	200	300	0	0	0	0	0	0	0	200	903	0	0	0	0	0	0	0	603	903	0
506	5	0	0	0	0	0	0	200	300	0	0	0	0	0	0	0	200	903	0	0	0	0	0	0	0	603	903	0
506	6	0	0	0	0	0	0	200	300	0	0	0	0	0	0	0	200	903	0	0	0	0	0	0	0	603	903	0
506	7	0	0	0	0	0	0	200	300	0	0	0	0	0	0	0	200	903	0	0	0	0	0	0	0	603	903	0
506	8	0	0	0	0	0	0	200	300	0	0	0	0	0	0	0	200	903	0	0	0	0	0	0	0	603	903	0
506	9	0	0	0	0	0	0	200	300	0	0	0	0	0	0	0	200	903	0	0	0	0	0	0	0	603	903	0
507	0	0	0	0	0	0	0	200	300	0	0	0	0	0	0	0	200	903	0	0	0	0	0	0	0	603	903	0
507	1	0	0	0	0	0	0	200	300	0	0	0	0	0	0	0	200	903	0	0	0	0	0	0	0	603	903	0
507	2	0	0	0	0	0	0	200	300	0	0	0	0	0	0	0	200	903	0	0	0	0	0	0	0	603	903	0
507	3	0	0	0	0	0	0	200	300	0	0	0	0	0	0	0	200	903	0	0	0	0	0	0	0	603	903	0
507	4	0	0	0	0	0	0	200	300	0	0	0	0	0	0	0	200	903	0	0	0	0	0	0	0	603	903	0
507	5	0	0	0	0	0	0	200	300	0	0	0	0	0	0	0	200	903	0	0	0	0	0	0	0	603	903	0
507	6	0	0	0	0	0	0	200	300	0	0	0	0	0	0	0	200	903	0	0	0	0	0	0	0	603	903	0
507	7	0	0	0	0	0	0	200	300	0	0	0	0	0	0	0	200	903	0	0	0	0	0	0	0	603	903	0
507	8	0	0	0	0	0	0	200	300	0	0	0	0	0	0	0	200	903	0	0	0	0	0	0	0	603	903	0
507	9	0	0	0	0	0	0	200	300	0	0	0	0	0	0	0	200	903	0	0	0	0	0	0	0	603	903	0
508	0	0	0	0	0	0	0	200	300	0	0	0	0	0	0	0	200	903	0	0	0	0	0	0	0	603	903	0
508	1	0	0	0	0	0	0	200	300	0	0	0	0	0	0	0	200	903	0	0	0	0	0	0	0	603	903	0
508	2	0	0	0	0	0	0	200	300	0	0	0	0	0	0	0	200	903	0	0	0	0	0	0	0	603	903	0
508	3	0	0	0	0	0	0	200	300	0	0	0	0	0	0	0	200	903	0	0	0	0	0	0	0	603	903	0
508	4	0	0	0	0	0	0	200	300	0	0	0	0	0	0	0	200	903	0	0	0	0	0	0	0	603	903	0
508	5	0	0	0	0	0	0	200	300	0	0	0	0	0	0	0	200	903	0	0	0	0	0	0	0	603	903	0
508	6	0	0	0	0	0	0	200	300	0	0	0	0	0	0	0	200	903	0	0	0	0	0	0	0	603	903	0
508	7	0	0	0	0	0	0	200	300	0	0	0	0	0	0	0	200	903	0	0	0	0	0	0	0	603	903	0
508	8	0	0	0	0	0	0	200	300	0	0	0	0	0	0	0	200	903	0	0	0	0	0	0	0	603	903	0
508	9	0	0	0	0	0	0	200	300	0	0	0	0	0	0	0	200	903	0	0	0	0	0	0	0	603	903	0
509	0	0	0	0	0	0	0	200	300	0	0	0	0	0	0	0	200	903	0	0	0	0	0	0	0	603	903	0
509	1	0	0	0	0	0	0	200	300	0	0	0	0	0	0	0	200	903	0	0	0	0	0	0	0	603	903	0
509	2	0	0	0	0	0	0	200	300	0	0	0	0	0	0	0	200	903	0	0	0	0	0	0	0	603	903	0
509	3	0	0	0	0	0	0	200	300	0	0	0	0	0	0	0	200	903	0	0	0	0	0	0	0	603	903	0
509	4	0	0	0	0	0	0	200	300	0	0	0	0	0	0	0	200	903	0	0	0	0	0	0	0	603	903	0
509	5	0	0	0	0	0	0	200	300	0	0	0	0	0	0	0	200	903	0	0	0	0	0	0	0	603	903	0
509	6	0	0	0	0	0	0	200	300	0	0	0	0	0	0	0	200	903	0	0	0	0	0	0	0	603	903	0
509	7	0	0	0	0	0	0	200	300	0	0	0	0	0	0	0	200	903	0	0	0	0	0	0	0	603	903	0
509	8	0	0	0	0	0	0	200	300	0	0	0	0	0	0	0	200	903	0	0	0	0	0	0	0	603	903	0
509	9	0	0	0	0	0	0	200	300	0	0	0	0	0	0	0	200	903	0	0	0	0	0	0	0	603	903	0
510	0	0	0	0	0	0	0	200	300	0	0	0	0	0	0	0	200	903	0	0	0	0	0	0	0	603	903	0
510	1	0	0	0	0	0	0	200	300	0	0	0	0	0	0	0	200	903	0	0	0	0	0	0	0	603	903	0
510	2	0	0	0	0	0	0	200	300	0	0	0	0	0	0	0	200	903	0	0	0	0	0	0	0	603	903	0
510	3	0	0	0	0	0	0	200	300	0	0	0	0	0	0	0	200	903	0	0	0	0	0	0	0	603	903	0
510	4	0	0	0	0	0	0	200	300	0	0	0	0	0	0	0	200	903	0	0	0	0	0	0	0	603	903	0
510	5	0	0	0	0	0	0	200	300	0	0	0	0	0	0	0	200	903	0	0	0	0	0	0	0	603	903	0
510	6	0	0	0	0	0	0	200	300	0	0	0	0	0	0	0	200	903	0	0	0	0	0	0	0	603	903	0
510	7	0	0	0	0	0	0	200	300	0	0	0	0	0	0	0	200	903	0	0	0	0	0	0	0	603	903	0
510	8	0	0	0	0	0	0	200	300	0	0	0	0	0	0	0	200	903	0	0	0	0	0	0	0	603	903	0
510	9	0	0	0	0	0	0	200	300	0	0	0	0	0	0	0	200	903	0	0	0	0	0	0	0	603	903	0
511	0	0	0	0	0	0	0	200	300	0	0	0	0	0	0	0	200	903	0	0	0	0	0	0	0	603	903	0
511	1	0	0	0	0	0	0	200	300	0	0	0	0	0	0	0	200	903	0	0	0	0	0	0	0	603	903	0
511	2	0	0	0	0	0	0	200	300	0	0	0	0	0	0	0	200	903	0	0	0	0	0	0	0	603	903	0
511	3	0	0	0	0	0	0	200	300	0	0	0	0	0	0	0	200	903	0	0	0	0	0	0	0	603	903	0
511	4	0	0	0	0	0	0	200	300	0	0	0	0	0	0	0	200	903	0	0	0	0	0	0	0	603	903	0
511	5	0	0	0	0	0	0	200	300	0	0	0	0	0	0	0	200	903	0	0	0	0	0	0	0	603	903	0
511	6	0	0	0	0	0	0	200	300	0	0	0	0	0	0	0	200	903	0	0	0	0	0	0	0	603	903	0
511	7	0	0	0	0	0	0	200	300	0	0	0	0	0	0	0	200	903	0	0	0	0	0	0	0	603	903	0
511	8	0	0	0	0	0	0	200	300	0	0	0	0	0	0	0	200	903	0	0	0	0	0	0	0	603	903	0
511	9	0	0	0	0	0	0	200	300	0	0	0	0	0	0	0	200	903	0	0	0	0	0	0	0	603	903	0
512	0	0	0	0	0	0	0	200	300	0	0	0	0	0	0	0	200	903	0	0	0	0	0	0	0	603	903	0
512	1	0	0	0	0	0	0	200	300	0	0	0	0	0	0	0	200	903	0	0	0	0	0	0	0	603	903	0
512	2	0	0	0	0	0	0	200	300	0	0	0	0	0	0	0	200	903	0	0	0	0	0	0	0	603	903	0
512	3	0	0	0	0	0	0	200	300	0	0	0	0	0	0	0	200	903	0	0	0	0	0	0	0	603	903	0
512	4	0	0	0	0	0	0	200	300	0	0	0	0	0	0	0	200	903	0	0	0	0	0	0	0	603	903	0
512	5	0	0	0	0	0	0	200	300	0	0	0	0	0	0	0	200	903	0	0	0	0	0	0	0	603	903	0
512	6	0	0	0	0	0	0	200	300	0	0	0	0	0	0	0	200	903	0	0	0	0	0	0	0	603	903	0
512	7	0	0	0	0	0	0	200	300	0	0	0	0	0	0	0	200	903	0	0	0	0	0	0	0	603	903	0
512	8	0	0	0	0	0	0	200	300	0	0	0	0	0	0	0	200	903	0	0	0	0	0	0	0	603	903	0
512	9	0	0	0	0	0	0	200	300	0	0	0	0	0	0	0	200	903	0	0	0	0	0	0	0	603	903	0
513	0	0	0	0	0	0	0	200	300	0	0	0	0	0	0	0	200	903	0	0	0	0	0	0	0	603	903	0
513	1	0	0	0	0	0	0	200	300	0	0	0	0	0	0	0	200	903	0	0	0	0	0	0	0	603	903	0
513	2	0	0	0	0	0	0	200	300	0	0	0	0	0	0	0	200	903	0	0	0	0	0	0	0	603	903	0
513	3	0	0	0	0	0	0	200	300	0	0	0	0	0	0	0	200	903	0	0	0	0	0	0	0	603	903	0
513	4	0	0	0	0	0	0	200	300	0	0	0	0	0	0	0	200	903	0	0	0	0	0	0	0	603	903	0
513	5	0	0	0	0	0	0	200	300	0	0	0	0	0	0	0	200	903	0	0	0	0	0	0	0	603	903	0
513	6	0	0	0	0	0	0	200	300	0	0	0	0	0	0	0	200	903	0	0	0	0	0	0	0	603	903	0
513	7	0	0	0	0	0	0	200	300	0	0	0	0	0	0	0	200	903	0	0	0	0	0	0	0	603	903	0
513	8	0	0	0	0	0	0	200	300	0	0	0	0	0	0	0	200	903	0	0	0	0	0	0	0	603	903	0
513	9	0	0	0	0	0	0	200	300	0	0	0	0	0	0	0	200	903	0	0	0	0	0	0	0	603	903	0
514	0	0	0	0	0	0	0	200	300	0	0	0	0	0	0	0	200	903	0	0	0	0	0	0	0	603	903	0
514	1	0	0	0	0	0	0	200	300	0	0	0	0	0	0	0	200	903	0	0	0	0	0	0	0	603	903	0
514	2	0	0	0	0	0	0	200	300	0	0	0	0	0	0	0	200	903	0	0	0	0	0	0	0	603	903	0
514	3	0	0	0	0	0	0	200	300	0	0	0	0	0	0	0	200	903	0	0	0	0	0	0	0	603	903	0
514	4	0	0	0	0	0	0	200	300	0	0	0	0	0	0	0	200	903	0	0	0	0	0	0	0	603	903	0
514	5	0	0	0	0	0	0	200	300	0	0	0	0	0	0	0	200	903	0	0	0	0	0	0	0	603	903	0
514	6	0	0	0	0	0	0	200	300	0	0	0	0	0	0	0	200	903	0	0	0	0	0	0	0	603	903	0
514	7	0	0	0	0	0	0	200	300	0	0	0	0	0	0	0	200	903	0	0	0	0	0	0	0	603	903	0
514	8	0	0	0	0	0	0	200	300	0	0	0	0	0	0	0	200	903	0	0	0	0	0	0	0	603	903	0
514	9	0	0	0	0	0	0	200	300	0	0	0	0	0	0	0	200	903	0	0	0	0	0	0	0	603	903	0
515	0	0	0	0	0	0	0	200	300	0	0	0	0	0	0	0	200	903	0	0	0	0	0	0	0	603	903	0
515	1	0	0	0	0	0	0	200	300	0	0	0	0	0	0	0	200	903	0	0	0	0	0	0	0	603	903	0
515	2	0	0	0	0	0	0	200	300	0	0	0	0	0	0	0	200	903	0	0	0	0	0	0	0	603	903	0
515	3	0	0	0	0	0	0	200	300	0	0	0	0	0	0	0	200	903	0	0	0	0	0	0	0	603	903	0
515	4	0	0	0	0	0	0	200	300	0	0	0	0	0	0	0	200	903	0	0	0	0	0	0	0	603	903	0
515	5	0	0	0	0	0	0	200	300	0	0	0	0	0	0	0	200	903	0	0	0	0	0	0	0	603	903	0
515	6	0	0	0	0	0	0	200	300	0	0	0	0	0	0	0	200	903	0	0	0	0	0	0	0	603	903	0
515	7	0	0	0	0	0	0	200	300	0	0	0	0	0	0	0	200	903	0	0	0	0	0	0	0	603	903	0
515	8	0	0	0	0	0	0	200	300	0	0	0	0	0	0	0	200	903	0	0	0	0	0	0	0	603	903	0
515	9	0	0	0	0	0	0	200	300	0	0	0	0	0	0	0	200	903	0	0	0	0	0	0	0	603	903	0
516	0	0	0	0	0	0	0	200	300	0	0	0	0	0	0	0	200	903	0	0	0	0	0	0	0	603	903	0
516	1	0	0	0	0	0	0	200	300	0	0	0	0	0	0	0	200	903	0	0	0	0	0	0	0	603	903	0
516	2	0	0	0	0	0	0	200	300	0	0	0	0	0	0	0	200	903	0	0	0	0	0	0	0	603	903	0
516	3	0	0	0	0	0	0	200	300	0	0	0	0	0	0	0	200	903	0	0	0	0	0	0	0	603	903	0
516	4	0	0	0	0	0	0	200	300	0	0	0	0	0	0	0	200	903	0	0	0	0	0	0	0	603	903	0
516	5	0	0	0	0	0	0	200	300	0	0	0	0	0	0	0	200	903	0	0	0	0	0	0	0	603	903	0
516	6	0	0	0	0	0	0	200	300	0	0	0	0	0	0	0	200	903	0	0	0	0	0	0	0	603	903	0
516	7	0	0	0	0	0	0	200	300	0	0	0	0	0	0	0	200	903	0	0	0	0	0	0	0	603	903	0
516	8	0	0	0	0	0	0	200	300	0	0	0	0	0	0	0	200	903	0	0	0	0	0	0	0	603	903	0
516	9	0	0	0	0	0	0	200	300	0	0	0	0	0	0	0	200	903	0	0	0	0	0	0	0	603	903	0
517	0	0	0	0	0	0	0	200	300	0	0	0	0	0	0	0	200	903	0	0	0	0	0	0	0	603	903	0
517	1	0	0	0	0	0	0	200	300	0	0	0	0	0	0	0	200	903	0	0	0	0	0	0	0	603	903	0
517	2	0	0	0	0	0	0	200	300	0	0	0	0	0	0	0	200	903	0	0	0	0	0	0	0	603	903	0
517	3	0	0	0	0	0	0	200	300	0	0	0	0	0	0	0	200	903	0	0	0	0	0	0	0	603	903	0
517	4	0	0	0	0	0	0	200	300	0	0	0	0	0	0	0	200	903	0	0	0	0	0	0	0	603	903	0
517	5	0	0	0	0	0	0	200	300	0	0	0	0	0	0	0	200	903	0	0	0	0	0	0	0	603	903	0
517	6	0	0	0	0	0	0	200	300	0	0	0	0	0	0	0	200	903	0	0	0	0	0	0	0	603	903	0
517	7	0	0	0	0	0	0	200	300	0	0	0	0	0	0	0	200	903	0	0	0	0	0	0	0	603	903	0
517	8	0	0	0	0	0	0	200	300	0	0	0	0	0	0	0	200	903	0	0	0	0	0	0	0	603	903	0
517	9	0	0	0	0	0	0	200	300	0	0	0	0	0	0	0	200	903	0	0	0	0	0	0	0	603	903	0
518	0	0	0	0	0	0	0	200	300	0	0	0	0	0	0	0	200	903	0	0	0	0	0	0	0	603	903	0
518	1	0	0	0	0	0	0	200	300	0	0	0	0	0	0	0	200	903	0	0	0	0	0	0	0	603	903	0
518	2	0	0	0	0	0	0	200	300	0	0	0	0	0	0	0	200	903	0	0	0	0	0	0	0	603	903	0
518	3	0	0	0	0	0	0	200	300	0	0	0	0	0	0	0	200	903	0	0	0	0	0	0	0	603	903	0
518	4	0	0	0	0	0	0	200	300	0	0	0	0	0	0	0	200	903	0	0	0	0	0	0	0	603	903	0
518	5	0	0	0	0	0	0	200	300	0	0	0	0	0	0	0	200	903	0	0	0	0	0	0	0	603	903	0
518	6	0	0	0	0	0	0	200	300	0	0	0	0	0	0	0	200	903	0	0	0	0	0	0	0	603	903	0
518	7	0	0	0	0	0	0	200	300	0	0	0	0	0	0	0	200	903	0	0	0	0	0	0	0	603	903	0
518	8	0	0	0	0	0	0	200	300	0	0	0	0	0	0	0	200	903	0	0	0	0	0	0	0	603	903	0
518	9	0	0	0	0	0	0	200	300	0	0	0	0	0	0	0	200	903	0	0	0	0	0	0	0	603	903	0
519	0	0	0	0	0	0	0	200	300	0	0	0	0	0	0	0	200	903	0	0	0	0	0	0	0	603	903	0
519	1	0	0	0	0	0	0	200	300	0	0	0	0	0	0	0	200	903	0	0	0	0	0	0	0	603	903	0
519	2	0	0	0	0	0	0	200	300	0	0	0	0	0	0	0	200	903	0	0	0	0	0	0	0	603	903	0
519	3	0	0	0	0	0	0	200	300	0	0	0	0	0	0	0	200	903	0	0	0	0	0	0	0	603	903	0
519	4	0	0	0	0	0	0	200	300	0	0	0	0	0	0	0	200	903	0	0	0	0	0	0	0	603	903	0
519	5	0	0	0	0	0	0	200	300	0	0	0	0	0	0	0	200	903	0	0	0	0	0	0	0	603	903	0
519	6	0	0	0	0	0	0	200	300	0	0	0	0	0	0	0	200	903	0	0	0	0	0	0	0	603	903	0
519	7	0	0	0	0	0	0	200	300	0	0	0	0	0	0	0	200	903	0	0	0	0	0	0	0	603	903	0
519	8	0	0	0	0	0	0	200	300	0	0	0	0	0	0	0	200	903	0	0	0	0	0	0	0	603	903	0
519	9	0	0	0	0	0	0	200	300	0	0	0	0	0	0	0	200	903	0	0	0	0	0	0	0	603	903	0
520	0	0	0	0	0	0	0	200	300	0	0	0	0	0	0	0	200	903	0	0	0	0	0	0	0	603	903	0
520	1	0	0	0	0	0	0	200	300	0	0	0	0	0	0	0	200	903	0	0	0	0	0	0	0	603	903	0
520	2	0	0	0	0	0	0	200	300	0	0	0	0	0	0	0	200	903	0	0	0	0	0	0	0	603	903	0
520	3	0	0	0	0	0	0	200	300	0	0	0	0	0	0	0	200	903	0	0	0	0	0	0	0	603	903	0
520	4	0	0	0	0	0	0	200	300	0	0	0	0	0	0	0	200	903	0	0	0	0	0	0	0	603	903	0
520	5	0	0	0	0	0	0	200	300	0	0	0	0	0	0	0	200	903	0	0	0	0	0	0	0	603	903	0
520	6	0	0	0	0	0	0	200	300	0	0	0	0	0	0	0	200	903	0	0	0	0	0	0	0	603	903	0
520	7	0	0	0	0	0	0	200	300	0	0	0	0	0	0	0	200	903	0	0	0	0	0	0	0	603	903	0
520	8	0	0	0	0	0	0	200	300	0	0	0	0	0	0	0	200	903	0	0	0	0	0	0	0	603	903	0
520	9	0	0	0	0	0	0	200	300	0	0	0	0	0	0	0	200	903	0	0	0	0	0	0	0	603	903	0
521	0	0	0	0	0	0	0	200	300	0	0	0	0	0	0	0	200	903	0	0	0	0	0	0	0	603	903	0
521	1	0	0	0	0	0	0	200	300	0	0	0	0	0	0	0	200	903	0	0	0	0	0	0	0	603	903	0
521	2	0	0	0	0	0	0	200	300	0	0	0	0	0	0	0	200	903	0	0	0	0	0	0	0	603	903	0
521	3	0	0	0	0	0	0	200	300	0	0	0	0	0	0	0	200	903	0	0	0	0	0	0	0	603	903	0
521	4	0	0	0	0	0	0	200	300	0	0	0	0	0	0	0	200	903	0	0	0	0	0	0	0	603	903	0
521	5	0	0	0	0	0	0	200	300	0	0	0	0	0	0	0	200	903	0	0	0	0	0	0	0	603	903	0
521	6	0	0	0	0	0	0	200	300	0	0	0	0	0	0	0	200	903	0	0	0	0	0	0	0	603	903	0
521	7	0	0	0	0	0	0	200	300	0	0	0	0	0	0	0	200	903	0	0	0	0	0	0	0	603	903	0
521	8	0	0	0	0	0	0	200	300	0	0	0	0	0	0	0	200	903	0	0	0	0	0	0	0	603	903	0
521	9	0	0	0	0	0	0	200	300	0	0	0	0	0	0	0	200	903	0	0	0	0	0	0	0	603	903	0
522	0	0	0	0	0	0	0	200	300	0	0	0	0	0	0	0	200	903	0	0	0	0	0	0	0	603	903	0
522	1	0	0	0	0	0	0	200	300	0	0	0	0	0	0	0	200	903	0	0	0	0	0	0	0	603	903	0
522	2	0	0	0	0	0	0	200	300	0	0	0	0	0	0	0	200	903	0	0	0	0	0	0	0	603	903	0
522	3	0	0	0	0	0	0	200	300	0	0	0	0	0	0	0	200	903	0	0	0	0	0	0	0	603	903	0
522	4	0	0	0	0	0	0	200	300	0	0	0	0	0	0	0	200	903	0	0	0	0	0	0	0	603	903	0
522	5	0	0	0	0	0	0	200	300	0	0	0	0	0	0	0	200	903	0	0	0	0	0	0	0	603	903	0
522	6	0	0	0	0	0	0	200	300	0	0	0	0	0	0	0	200	903	0	0	0	0	0	0	0	603	903	0
522	7	0	0	0	0	0	0	200	300	0	0	0	0	0	0	0	200	903	0	0	0	0	0	0	0	603	903	0
522	8	0	0	0	0	0	0	200	300	0	0	0	0	0	0	0	200	903	0	0	0	0	0	0	0	603	903	0
522	9	0	0	0	0	0	0	200	300	0	0	0	0	0	0	0	200	903	0	0	0	0	0	0	0	603	903	0
523	0	0	0	0	0	0	0	200	300	0	0	0	0	0	0	0	200	903	0	0	0	0	0	0	0	603	903	0
523	1	0	0	0	0	0	0	200	300	0	0	0	0	0	0	0	200	903	0	0	0	0	0	0	0	603	903	0
523	2	0	0	0	0	0	0	200	300	0	0	0	0	0	0	0	200	903	0	0	0	0	0	0	0	603	903	0
523	3	0	0	0	0	0	0	200	300	0	0	0	0	0	0	0	200	903	0	0	0	0	0	0	0	603	903	0
523	4	0	0	0	0	0	0	200	300	0	0	0	0	0	0	0	200	903	0	0	0	0	0	0	0	603	903	0
523	5	0	0	0	0	0	0	200	300	0	0	0	0	0	0	0	200	903	0	0	0	0	0	0	0	603	903	0
523	6	-1.2531	9.17282	-4.84039	397.063	115.41	-1728.1	223.843	217.969	0	0	0	0	0	0	0	200	903	0	0	0	0	0	0	0	603	903	0
523	7	-1.10051	9.93576	-3.92486	580.168	-128.73	-1865.43	167.201	152.181	0	0	0	0	0	0	0	200	903	0	0	0	0	0	0	0	603	903	0
523	8	-0.642747	10.3935	-3.61968	305.51	-555.977	-2185.87	46.4019	215.598	0	0	0	0	0	0	0	200	903	0	0	0	0	0	0	0	603	903	0
523	9	-0.184983	10.8513	-3.31451	488.616	-189.766	-2277.42	142.747	152.583	0	0	0	0	0	0	0	200	903	0	0	0	0	0	0	0	603	903	0
524	0	-0.337571	12.3772	-3.61968	397.063	-189.766	-2277.42	147.574	190.305	0	0	0	0	0	0	0	200	903	0	0	0	0	0	0	0	603	903	0
524	1	0.425369	12.9875	-5.75591	763.274	-494.941	-2323.2	114.012	167.393	0	0	0	0	0	0	0	200	903	0	0	0	0	0	0	0	603	903	0
524	2	-0.490159	13.7505	-4.84039	1221.04	-311.836	-2460.53	135.576	47.7397	0	0	0	0	0	0	0	200	903	0	0	0	0	0	0	0	603	903	0
524	3	-0.337571	13.903	-6.36626	671.721	-555.977	-2506.3	112.668	194.487	0	0	0	0	0	0	0	200	903	0	0	0	0	0	0	0	603	903	0
524	4	-0.795335	14.5134	-5.14556	946.379	-189.766	-2460.53	163.121	116.079	0	0	0	0	0	0	0	200	903	0	0	0	0	0	0	0	603	903	0
524	5	-0.0323951	13.4453	-6.06109	946.379	-494.941	-2506.3	118.341	143.86	0	0	0	0	0	0	0	200	903	0	0	0	0	0	0	0	603	903	0
524	6	0.577956	15.8867	-5.75591	305.51	-800.117	-2552.08	60.9921	246.922	0	0	0	0	0	0	0	200	903	0	0	0	0	0	0	0	603	903	0
524	7	0.425369	16.497	-5.45074	1404.14	-494.941	-3101.39	109.197	42.394	0	0	0	0	0	0	0	200	903	0	0	0	0	0	0	0	603	903	0
524	8	-0.642747	16.9548	-6.36626	1312.59	-433.906	-3009.84	131.843	93.821	0	0	0	0	0	0	0	200	903	0	0	0	0	0	0	0	603	903	0
524	9	0.577956	17.4126	-5.75591	1129.48	-250.801	-2918.29	156.427	103.77	0	0	0	0	0	0	0	200	903	0	0	0	0	0	0	0	603	903	0
525	0	-0.795335	17.7177	-6.06109	1587.25	-617.012	-3192.95	98.2012	38.1249	0	0	0	0	0	0	0	200	903	0	0	0	0	0	0	0	603	903	0
525	1	0.272781	18.3281	-6.67144	1587.25	-861.152	-3604.93	70.9196	62.0831	0	0	0	0	0	0	0	200	903	0	0	0	0	0	0	0	603	903	0
525	2	1.3409	19.091	-7.28179	1495.7	-922.188	-3513.38	73.3571	94.5979	0	0	0	0	0	0	0	200	903	0	0	0	0	0	0	0	603	903	0
525	3	0.577956	19.5488	-7.58697	1587.25	-678.047	-3788.04	110.63	90.7928	0	0	0	0	0	0	0	200	903	0	0	0	0	0	0	0	603	903	0
525	4	-0.642747	19.3962	-7.89214	2136.56	-1288.4	-3788.04	36.7492	29.2795	0	0	0	0	0	0	0	200	903	0	0	0	0	0	0	0	603	903	0
525	5	0.120193	20.1591	-6.97662	1770.35	-617.012	-3971.15	111.56	46.2446	0	0	0	0	0	0	0	200	903	0	0	0	0	0	0	0	603	903	0
525	6	-0.642747	20.4643	-7.58697	1861.91	-983.223	-3788.04	70.4064	54.5915	0	0	0	0	0	0	0	200	903	0	0	0	0	0	0	0	603	903	0
525	7	0.272781	20.6169	-7.28179	1037.93	-983.223	-4200.03	64.9752	157.462	0	0	0	0	0	0	0	200	903	0	0	0	0	0	0	0	603	903	0
525	8	0.883132	20.7695	-8.5025	1770.35	-678.047	-3971.15	120.253	91.7842	0	0	0	0	0	0	0	200	903	0	0	0	0	0	0	0	603	903	0
525	9	0.120193	20.4643	-7.28179	1861.91	-922.188	-3467.61	73.3571	44.3066	0	0	0	0	0	0	0	200	903	0	0	0	0	0	0	0	603	903	0
526	0	0.120193	18.9384	-8.5025	1678.8	-861.152	-3971.15	98.7177	102.552	0	0	0	0	0	0	0	200	903	0	0	0	0	0	0	0	603	903	0
526	1	-0.337571	20.6169	-8.5025	2502.78	-922.188	-3742.26	91.5392	5.64221	0	0	0	0	0	0	0	200	903	0	0	0	0	0	0	0	603	903	0
526	2	-0.337571	20.3117	-5.45074	2228.12	-983.223	-3788.04	19.6166	-108.774	0	0	0	0	0	0	0	200	903	0	0	0	0	0	0	0	603	903	0
526	3	0.883132	20.3117	-7.89214	1678.8	-800.117	-3650.71	98.6185	87.282	0	0	0	0	0	0	0	200	903	0	0	0	0	0	0	0	603	903	0
526	4	-0.184983	19.5488	-9.11285	1587.25	-861.152	-3650.71	105.501	125.823	0	0	0	0	0	0	0	200	903	0	0	0	0	0	0	0	603	903	0
526	5	1.03572	19.3962	-8.5025	1587.25	-1105.29	-3559.16	70.0037	113.32	0	0	0	0	0	0	0	200	903	0	0	0	0	0	0	0	603	903	0
526	6	-0.0323951	19.3962	-8.5025	1770.35	-922.188	-3421.83	91.5392	91.7842	0	0	0	0	0	0	0	200	903	0	0	0	0	0	0	0	603	903	0
526	7	-0.0323951	18.9384	-8.80767	1495.7	-800.117	-3376.05	109.157	130.183	0	0	0	0	0	0	0	200	903	0	0	0	0	0	0	0	603	903	0
526	8	0.272781	18.7859	-8.19732	1678.8	-861.152	-3009.84	94.9471	95.2012	0	0	0	0	0	0	0	200	903	0	0	0	0	0	0	0	603	903	0
526	9	0.883132	18.3281	-8.80767	1312.59	-1593.57	-3284.5	19.0697	150.972	0	0	0	0	0	0	0	200	903	0	0	0	0	0	0	0	603	903	0
527	0	1.18831	17.5652	-10.0284	1678.8	-1349.43	-3055.62	65.4384	132.595	0	0	0	0	0	0	0	200	903	0	0	0	0	0	0	0	603	903	0
527	1	1.18831	18.3281	-10.3336	1861.91	-1044.26	-3238.72	98.9449	119.819	0	0	0	0	0	0	0	200	903	0	0	0	0	0	0	0	603	903	0
527	2	-0.795335	18.3281	-10.6387	2045.01	-922.188	-3376.05	113.318	107.777	0	0	0	0	0	0	0	200	903	0	0	0	0	0	0	0	603	903	0
527	3	1.95125	17.5652	-9.41802	2228.12	-861.152	-2964.07	108.563	63.4198	0	0	0	0	0	0	0	200	903	0	0	0	0	0	0	0	603	903	0
527	4	-0.0323951	16.8022	-9.7232	1861.91	-1105.29	-3055.62	86.3241	108.509	0	0	0	0	0	0	0	200	903	0	0	0	0	0	0	0	603	903	0
527	5	1.3409	16.497	-8.5025	1953.46	-1044.26	-2643.63	77.1822	70.2487	0	0	0	0	0	0	0	200	903	0	0	0	0	0	0	0	603	903	0
527	6	1.64607	16.3445	-9.7232	1861.91	-739.082	-2872.51	123.988	108.509	0	0	0	0	0	0	0	200	903	0	0	0	0	0	0	0	603	903	0
527	7	0.730544	15.5815	-10.9439	1770.35	-1227.36	-2460.53	87.8495	138.234	0	0	0	0	0	0	0	200	903	0	0	0	0	0	0	0	603	903	0
527	8	0.120193	15.2763	-9.7232	1678.8	-800.117	-2368.97	117.711	127.341	0	0	0	0	0	0	0	200	903	0	0	0	0	0	0	0	603	903	0
527	9	0.272781	14.9712	-8.80767	1861.91	-1166.33	-2368.97	67.5781	88.604	0	0	0	0	0	0	0	200	903	0	0	0	0	0	0	0	603	903	0
528	0	-0.184983	12.3772	-6.97662	1770.35	-1166.33	-2368.97	32.8232	46.2446	0	0	0	0	0	0	0	200	903	0	0	0	0	0	0	0	603	903	0
528	1	0.883132	14.5134	-8.5025	1678.8	-861.152	-2048.54	98.7177	102.552	0	0	0	0	0	0	0	200	903	0	0	0	0	0	0	0	603	903	0
528	2	1.18831	13.5979	-10.6387	1953.46	-800.117	-2368.97	124.792	116.382	0	0	0	0	0	0	0	200	903	0	0	0	0	0	0	0	603	903	0
528	3	0.272781	12.9875	-7.89214	2228.12	-800.117	-2185.87	98.6185	17.679	0	0	0	0	0	0	0	200	903	0	0	0	0	0	0	0	603	903	0
528	4	0.120193	12.6823	-10.0284	1861.91	-922.188	-2002.76	108.042	114.336	0	0	0	0	0	0	0	200	903	0	0	0	0	0	0	0	603	903	0
528	5	-0.184983	12.3772	-9.11285	2136.56	-1166.33	-1956.99	72.0127	65.5437	0	0	0	0	0	0	0	200	903	0	0	0	0	0	0	0	603	903	0
528	6	1.3409	12.2246	-8.5025	2228.12	-861.152	-1636.55	98.7177	37.9455	0	0	0	0	0	0	0	200	903	0	0	0	0	0	0	0	603	903	0
528	7	0.730544	11.6142	-8.5025	1861.91	-922.188	-1728.1	91.5392	81.0165	0	0	0	0	0	0	0	200	903	0	0	0	0	0	0	0	603	903	0
528	8	0.883132	11.0039	-9.7232	2228.12	-1349.43	-1728.1	61.215	70.8452	0	0	0	0	0	0	0	200	903	0	0	0	0	0	0	0	603	903	0
528	9	0.120193	10.5461	-9.11285	2045.01	-983.223	-1728.1	92.1059	75.5902	0	0	0	0	0	0	0	200	903	0	0	0	0	0	0	0	603	903	0
529	0	-0.642747	9.78317	-7.58697	1953.46	-678.047	-1590.78	110.63	42.5244	0	0	0	0	0	0	0	200	903	0	0	0	0	0	0	0	603	903	0
529	1	-0.0323951	8.86765	-6.97662	1861.91	-1349.43	-1499.22	6.57759	33.1219	0	0	0	0	0	0	0	200	903	0	0	0	0	0	0	0	603	903	0
529	2	0.883132	9.32541	-8.5025	2228.12	-739.082	-1590.78	113.075	37.9455	0	0	0	0	0	0	0	200	903	0	0	0	0	0	0	0	603	903	0
529	3	1.79866	7.95212	-8.5025	1770.35	-1288.4	-1453.45	48.4682	91.7842	0	0	0	0	0	0	0	200	903	0	0	0	0	0	0	0	603	903	0
529	4	0.577956	7.95212	-7.89214	1312.59	-983.223	-1590.78	75.4175	133.684	0	0	0	0	0	0	0	200	903	0	0	0	0	0	0	0	603	903	0
529	5	-0.795335	7.79953	-8.19732	1861.91	-555.977	-1224.56	132.176	72.864	0	0	0	0	0	0	0	200	903	0	0	0	0	0	0	0	603	903	0
529	6	1.18831	7.95212	-6.06109	1312.59	-739.082	-1270.34	78.0612	83.4399	0	0	0	0	0	0	0	200	903	0	0	0	0	0	0	0	603	903	0
529	7	0	0	0	0	0	0	200	300	0	0	0	0	0	0	0	200	903	0	0	0	0	0	0	0	603	903	0
529	8	0	0	0	0	0	0	200	300	0	0	0	0	0	0	0	200	903	0	0	0	0	0	0	0	603	903	0
529	9	0	0	0	0	0	0	200	300	0	0	0	0	0	0	0	200	903	0	0	0	0	0	0	0	603	903	0
530	0	0	0	0	0	0	0	200	300	0	0	0	0	0	0	0	200	903	0	0	0	0	0	0	0	603	903	0
530	1	0	0	0	0	0	0	200	300	0	0	0	0	0	0	0	200	903	0	0	0	0	0	0	0	603	903	0
530	2	0	0	0	0	0	0	200	300	0	0	0	0	0	0	0	200	903	0	0	0	0	0	0	0	603	903	0
530	3	0	0	0	0	0	0	200	300	0	0	0	0	0	0	0	200	903	0	0	0	0	0	0	0	603	903	0
530	4	0	0	0	0	0	0	200	300	0	0	0	0	0	0	0	200	903	0	0	0	0	0	0	0	603	903	0
530	5	0	0	0	0	0	0	200	300	0	0	0	0	0	0	0	200	903	0	0	0	0	0	0	0	603	903	0
530	6	0	0	0	0	0	0	200	300	0	0	0	0	0	0	0	200	903	0	0	0	0	0	0	0	603	903	0
530	7	0	0	0	0	0	0	200	300	0	0	0	0	0	0	0	200	903	0	0	0	0	0	0	0	603	903	0
530	8	0	0	0	0	0	0	200	300	0	0	0	0	0	0	0	200	903	0	0	0	0	0	0	0	603	903	0
530	9	0	0	0	0	0	0	200	300	0	0	0	0	0	0	0	200	903	0	0	0	0	0	0	0	603	903	0
531	0	0	0	0	0	0	0	200	300	0	0	0	0	0	0	0	200	903	0	0	0	0	0	0	0	603	903	0
531	1	0	0	0	0	0	0	200	300	0	0	0	0	0	0	0	200	903	0	0	0	0	0	0	0	603	903	0
531	2	0	0	0	0	0	0	200	300	0	0	0	0	0	0	0	200	903	0	0	0	0	0	0	0	603	903	0
531	3	0	0	0	0	0	0	200	300	0	0	0	0	0	0	0	200	903	0	0	0	0	0	0	0	603	903	0
531	4	0	0	0	0	0	0	200	300	0	0	0	0	0	0	0	200	903	0	0	0	0	0	0	0	603	903	0
531	5	0	0	0	0	0	0	200	300	0	0	0	0	0	0	0	200	903	0	0	0	0	0	0	0	603	903	0
531	6	0	0	0	0	0	0	200	300	0	0	0	0	0	0	0	200	903	0	0	0	0	0	0	0	603	903	0
531	7	0	0	0	0	0	0	200	300	0	0	0	0	0	0	0	200	903	0	0	0	0	0	0	0	603	903	0
531	8	0	0	0	0	0	0	200	300	0	0	0	0	0	0	0	200	903	0	0	0	0	0	0	0	603	903	0
531	9	0	0	0	0	0	0	200	300	0	0	0	0	0	0	0	200	903	0	0	0	0	0	0	0	603	903	0
532	0	0	0	0	0	0	0	200	300	0	0	0	0	0	0	0	200	903	0	0	0	0	0	0	0	603	903	0
532	1	0	0	0	0	0	0	200	300	0	0	0	0	0	0	0	200	903	0	0	0	0	0	0	0	603	903	0
532	2	0	0	0	0	0	0	200	300	0	0	0	0	0	0	0	200	903	0	0	0	0	0	0	0	603	903	0
532	3	0	0	0	0	0	0	200	300	0	0	0	0	0	0	0	200	903	0	0	0	0	0	0	0	603	903	0
532	4	0	0	0	0	0	0	200	300	0	0	0	0	0	0	0	200	903	0	0	0	0	0	0	0	603	903	0
532	5	0	0	0	0	0	0	200	300	0	0	0	0	0	0	0	200	903	0	0	0	0	0	0	0	603	903	0
532	6	0	0	0	0	0	0	200	300	0	0	0	0	0	0	0	200	903	0	0	0	0	0	0	0	603	903	0
532	7	0	0	0	0	0	0	200	300	0	0	0	0	0	0	0	200	903	0	0	0	0	0	0	0	603	903	0
532	8	0	0	0	0	0	0	200	300	0	0	0	0	0	0	0	200	903	0	0	0	0	0	0	0	603	903	0
532	9	0	0	0	0	0	0	200	300	0	0	0	0	0	0	0	200	903	0	0	0	0	0	0	0	603	903	0
533	0	0	0	0	0	0	0	200	300	0	0	0	0	0	0	0	200	903	0	0	0	0	0	0	0	603	903	0
533	1	0	0	0	0	0	0	200	300	0	0	0	0	0	0	0	200	903	0	0	0	0	0	0	0	603	903	0
533	2	0	0	0	0	0	0	200	300	0	0	0	0	0	0	0	200	903	0	0	0	0	0	0	0	603	903	0
533	3	0	0	0	0	0	0	200	300	0	0	0	0	0	0	0	200	903	0	0	0	0	0	0	0	603	903	0
533	4	0	0	0	0	0	0	200	300	0	0	0	0	0	0	0	200	903	0	0	0	0	0	0	0	603	903	0
533	5	0	0	0	0	0	0	200	300	0	0	0	0	0	0	0	200	903	0	0	0	0	0	0	0	603	903	0
533	6	0	0	0	0	0	0	200	300	0	0	0	0	0	0	0	200	903	0	0	0	0	0	0	0	603	903	0
533	7	0	0	0	0	0	0	200	300	0	0	0	0	0	0	0	200	903	0	0	0	0	0	0	0	603	903	0
533	8	0	0	0	0	0	0	200	300	0	0	0	0	0	0	0	200	903	0	0	0	0	0	0	0	603	903	0
533	9	0	0	0	0	0	0	200	300	0	0	0	0	0	0	0	200	903	0	0	0	0	0	0	0	603	903	0
534	0	0	0	0	0	0	0	200	300	0	0	0	0	0	0	0	200	903	0	0	0	0	0	0	0	603	903	0
534	1	0	0	0	0	0	0	200	300	0	0	0	0	0	0	0	200	903	0	0	0	0	0	0	0	603	903	0
534	2	0	0	0	0	0	0	200	300	0	0	0	0	0	0	0	200	903	0	0	0	0	0	0	0	603	903	0
534	3	0	0	0	0	0	0	200	300	0	0	0	0	0	0	0	200	903	0	0	0	0	0	0	0	603	903	0
534	4	0	0	0	0	0	0	200	300	0	0	0	0	0	0	0	200	903	0	0	0	0	0	0	0	603	903	0
534	5	0	0	0	0	0	0	200	300	0	0	0	0	0	0	0	200	903	0	0	0	0	0	0	0	603	903	0
534	6	0	0	0	0	0	0	200	300	0	0	0	0	0	0	0	200	903	0	0	0	0	0	0	0	603	903	0
534	7	0	0	0	0	0	0	200	300	0	0	0	0	0	0	0	200	903	0	0	0	0	0	0	0	603	903	0
534	8	0	0	0	0	0	0	200	300	0	0	0	0	0	0	0	200	903	0	0	0	0	0	0	0	603	903	0
534	9	0	0	0	0	0	0	200	300	0	0	0	0	0	0	0	200	903	0	0	0	0	0	0	0	603	903	0
535	0	0	0	0	0	0	0	200	300	0	0	0	0	0	0	0	200	903	0	0	0	0	0	0	0	603	903	0
535	1	0	0	0	0	0	0	200	300	0	0	0	0	0	0	0	200	903	0	0	0	0	0	0	0	603	903	0
535	2	0	0	0	0	0	0	200	300	0	0	0	0	0	0	0	200	903	0	0	0	0	0	0	0	603	903	0
535	3	0	0	0	0	0	0	200	300	0	0	0	0	0	0	0	200	903	0	0	0	0	0	0	0	603	903	0
535	4	0	0	0	0	0	0	200	300	0	0	0	0	0	0	0	200	903	0	0	0	0	0	0	0	603	903	0
535	5	0	0	0	0	0	0	200	300	0	0	0	0	0	0	0	200	903	0	0	0	0	0	0	0	603	903	0
535	6	0	0	0	0	0	0	200	300	0	0	0	0	0	0	0	200	903	0	0	0	0	0	0	0	603	903	0
535	7	0	0	0	0	0	0	200	300	0	0	0	0	0	0	0	200	903	0	0	0	0	0	0	0	603	903	0
535	8	0	0	0	0	0	0	200	300	0	0	0	0	0	0	0	200	903	0	0	0	0	0	0	0	603	903	0
535	9	0	0	0	0	0	0	200	300	0	0	0	0	0	0	0	200	903	0	0	0	0	0	0	0	603	903	0
536	0	0	0	0	0	0	0	200	300	0	0	0	0	0	0	0	200	903	0	0	0	0	0	0	0	603	903	0
536	1	0	0	0	0	0	0	200	300	0	0	0	0	0	0	0	200	903	0	0	0	0	0	0	0	603	903	0
536	2	0	0	0	0	0	0	200	300	0	0	0	0	0	0	0	200	903	0	0	0	0	0	0	0	603	903	0
536	3	0	0	0	0	0	0	200	300	0	0	0	0	0	0	0	200	903	0	0	0	0	0	0	0	603	903	0
536	4	0	0	0	0	0	0	200	300	0	0	0	0	0	0	0	200	903	0	0	0	0	0	0	0	603	903	0
536	5	0	0	0	0	0	0	200	300	0	0	0	0	0	0	0	200	903	0	0	0	0	0	0	0	603	903	0
536	6	0	0	0	0	0	0	200	300	0	0	0	0	0	0	0	200	903	0	0	0	0	0	0	0	603	903	0
536	7	0	0	0	0	0	0	200	300	0	0	0	0	0	0	0	200	903	0	0	0	0	0	0	0	603	903	0
536	8	0	0	0	0	0	0	200	300	0	0	0	0	0	0	0	200	903	0	0	0	0	0	0	0	603	903	0
536	9	0	0	0	0	0	0	200	300	0	0	0	0	0	0	0	200	903	0	0	0	0	0	0	0	603	903	0
537	0	0	0	0	0	0	0	200	300	0	0	0	0	0	0	0	200	903	0	0	0	0	0	0	0	603	903	0
537	1	0	0	0	0	0	0	200	300	0	0	0	0	0	0	0	200	903	0	0	0	0	0	0	0	603	903	0
537	2	0	0	0	0	0	0	200	300	0	0	0	0	0	0	0	200	903	0	0	0	0	0	0	0	603	903	0
537	3	0	0	0	0	0	0	200	300	0	0	0	0	0	0	0	200	903	0	0	0	0	0	0	0	603	903	0
537	4	0	0	0	0	0	0	200	300	0	0	0	0	0	0	0	200	903	0	0	0	0	0	0	0	603	903	0
537	5	0	0	0	0	0	0	200	300	0	0	0	0	0	0	0	200	903	0	0	0	0	0	0	0	603	903	0
537	6	0	0	0	0	0	0	200	300	0	0	0	0	0	0	0	200	903	0	0	0	0	0	0	0	603	903	0
537	7	0	0	0	0	0	0	200	300	0	0	0	0	0	0	0	200	903	0	0	0	0	0	0	0	603	903	0
537	8	0	0	0	0	0	0	200	300	0	0	0	0	0	0	0	200	903	0	0	0	0	0	0	0	603	903	0
537	9	0	0	0	0	0	0	200	300	0	0	0	0	0	0	0	200	903	0	0	0	0	0	0	0	603	903	0
538	0	0	0	0	0	0	0	200	300	0	0	0	0	0	0	0	200	903	0	0	0	0	0	0	0	603	903	0
538	1	0	0	0	0	0	0	200	300	0	0	0	0	0	0	0	200	903	0	0	0	0	0	0	0	603	903	0
538	2	0	0	0	0	0	0	200	300	0	0	0	0	0	0	0	200	903	0	0	0	0	0	0	0	603	903	0
538	3	0	0	0	0	0	0	200	300	0	0	0	0	0	0	0	200	903	0	0	0	0	0	0	0	603	903	0
538	4	0	0	0	0	0	0	200	300	0	0	0	0	0	0	0	200	903	0	0	0	0	0	0	0	603	903	0
538	5	0	0	0	0	0	0	200	300	0	0	0	0	0	0	0	200	903	0	0	0	0	0	0	0	603	903	0
538	6	0	0	0	0	0	0	200	300	0	0	0	0	0	0	0	200	903	0	0	0	0	0	0	0	603	903	0
538	7	0	0	0	0	0	0	200	300	0	0	0	0	0	0	0	200	903	0	0	0	0	0	0	0	603	903	0
538	8	0	0	0	0	0	0	200	300	0	0	0	0	0	0	0	200	903	0	0	0	0	0	0	0	603	903	0
538	9	0	0	0	0	0	0	200	300	0	0	0	0	0	0	0	200	903	0	0	0	0	0	0	0	603	903	0
539	0	0	0	0	0	0	0	200	300	0	0	0	0	0	0	0	200	903	0	0	0	0	0	0	0	603	903	0
539	1	0	0	0	0	0	0	200	300	0	0	0	0	0	0	0	200	903	0	0	0	0	0	0	0	603	903	0
539	2	0	0	0	0	0	0	200	300	0	0	0	0	0	0	0	200	903	0	0	0	0	0	0	0	603	903	0
539	3	0	0	0	0	0	0	200	300	0	0	0	0	0	0	0	200	903	0	0	0	0	0	0	0	603	903	0
539	4	0	0	0	0	0	0	200	300	0	0	0	0	0	0	0	200	903	0	0	0	0	0	0	0	603	903	0
539	5	0	0	0	0	0	0	200	300	0	0	0	0	0	0	0	200	903	0	0	0	0	0	0	0	603	903	0
539	6	0	0	0	0	0	0	200	300	0	0	0	0	0	0	0	200	903	0	0	0	0	0	0	0	603	903	0
539	7	0	0	0	0	0	0	200	300	0	0	0	0	0	0	0	200	903	0	0	0	0	0	0	0	603	903	0
539	8	0	0	0	0	0	0	200	300	0	0	0	0	0	0	0	200	903	0	0	0	0	0	0	0	603	903	0
539	9	0	0	0	0	0	0	200	300	0	0	0	0	0	0	0	200	903	0	0	0	0	0	0	0	603	903	0
540	0	0	0	0	0	0	0	200	300	0	0	0	0	0	0	0	200	903	0	0	0	0	0	0	0	603	903	0
540	1	0	0	0	0	0	0	200	300	0	0	0	0	0	0	0	200	903	0	0	0	0	0	0	0	603	903	0
540	2	0	0	0	0	0	0	200	300	0	0	0	0	0	0	0	200	903	0	0	0	0	0	0	0	603	903	0
540	3	0	0	0	0	0	0	200	300	0	0	0	0	0	0	0	200	903	0	0	0	0	0	0	0	603	903	0
540	4	0	0	0	0	0	0	200	300	0	0	0	0	0	0	0	200	903	0	0	0	0	0	0	0	603	903	0
540	5	0	0	0	0	0	0	200	300	0	0	0	0	0	0	0	200	903	0	0	0	0	0	0	0	603	903	0
540	6	0	0	0	0	0	0	200	300	0	0	0	0	0	0	0	200	903	0	0	0	0	0	0	0	603	903	0
540	7	0	0	0	0	0	0	200	300	0	0	0	0	0	0	0	200	903	0	0	0	0	0	0	0	603	903	0
540	8	0	0	0	0	0	0	200	300	0	0	0	0	0	0	0	200	903	0	0	0	0	0	0	0	603	903	0
540	9	0	0	0	0	0	0	200	300	0	0	0	0	0	0	0	200	903	0	0	0	0	0	0	0	603	903	0
541	0	0	0	0	0	0	0	200	300	0	0	0	0	0	0	0	200	903	0	0	0	0	0	0	0	603	903	0
541	1	0	0	0	0	0	0	200	300	0	0	0	0	0	0	0	200	903	0	0	0	0	0	0	0	603	903	0
541	2	0	0	0	0	0	0	200	300	0	0	0	0	0	0	0	200	903	0	0	0	0	0	0	0	603	903	0
541	3	0	0	0	0	0	0	200	300	0	0	0	0	0	0	0	200	903	0	0	0	0	0	0	0	603	903	0
541	4	0	0	0	0	0	0	200	300	0	0	0	0	0	0	0	200	903	0	0	0	0	0	0	0	603	903	0
541	5	0	0	0	0	0	0	200	300	0	0	0	0	0	0	0	200	903	0	0	0	0	0	0	0	603	903	0
541	6	0	0	0	0	0	0	200	300	0	0	0	0	0	0	0	200	903	0	0	0	0	0	0	0	603	903	0
541	7	0	0	0	0	0	0	200	300	0	0	0	0	0	0	0	200	903	0	0	0	0	0	0	0	603	903	0
541	8	0	0	0	0	0	0	200	300	0	0	0	0	0	0	0	200	903	0	0	0	0	0	0	0	603	903	0
541	9	0	0	0	0	0	0	200	300	0	0	0	0	0	0	0	200	903	0	0	0	0	0	0	0	603	903	0
542	0	0	0	0	0	0	0	200	300	0	0	0	0	0	0	0	200	903	0	0	0	0	0	0	0	603	903	0
542	1	0	0	0	0	0	0	200	300	0	0	0	0	0	0	0	200	903	0	0	0	0	0	0	0	603	903	0
542	2	0	0	0	0	0	0	200	300	0	0	0	0	0	0	0	200	903	0	0	0	0	0	0	0	603	903	0
542	3	0	0	0	0	0	0	200	300	0	0	0	0	0	0	0	200	903	0	0	0	0	0	0	0	603	903	0
542	4	0	0	0	0	0	0	200	300	0	0	0	0	0	0	0	200	903	0	0	0	0	0	0	0	603	903	0
542	5	0	0	0	0	0	0	200	300	0	0	0	0	0	0	0	200	903	0	0	0	0	0	0	0	603	903	0
542	6	0	0	0	0	0	0	200	300	0	0	0	0	0	0	0	200	903	0	0	0	0	0	0	0	603	903	0
542	7	0	0	0	0	0	0	200	300	0	0	0	0	0	0	0	200	903	0	0	0	0	0	0	0	603	903	0
542	8	0	0	0	0	0	0	200	300	0	0	0	0	0	0	0	200	903	0	0	0	0	0	0	0	603	903	0
542	9	0	0	0	0	0	0	200	300	0	0	0	0	0	0	0	200	903	0	0	0	0	0	0	0	603	903	0
543	0	0	0	0	0	0	0	200	300	0	0	0	0	0	0	0	200	903	0	0	0	0	0	0	0	603	903	0
543	1	0	0	0	0	0	0	200	300	0	0	0	0	0	0	0	200	903	0	0	0	0	0	0	0	603	903	0
543	2	0	0	0	0	0	0	200	300	0	0	0	0	0	0	0	200	903	0	0	0	0	0	0	0	603	903	0
543	3	0	0	0	0	0	0	200	300	0	0	0	0	0	0	0	200	903	0	0	0	0	0	0	0	603	903	0
543	4	0	0	0	0	0	0	200	300	0	0	0	0	0	0	0	200	903	0	0	0	0	0	0	0	603	903	0
543	5	0	0	0	0	0	0	200	300	0	0	0	0	0	0	0	200	903	0	0	0	0	0	0	0	603	903	0
543	6	0	0	0	0	0	0	200	300	0	0	0	0	0	0	0	200	903	0	0	0	0	0	0	0	603	903	0
543	7	0	0	0	0	0	0	200	300	0	0	0	0	0	0	0	200	903	0	0	0	0	0	0	0	603	903	0
543	8	0	0	0	0	0	0	200	300	0	0	0	0	0	0	0	200	903	0	0	0	0	0	0	0	603	903	0
543	9	0	0	0	0	0	0	200	300	0	0	0	0	0	0	0	200	903	0	0	0	0	0	0	0	603	903	0
544	0	0	0	0	0	0	0	200	300	0	0	0	0	0	0	0	200	903	0	0	0	0	0	0	0	603	903	0
544	1	0	0	0	0	0	0	200	300	0	0	0	0	0	0	0	200	903	0	0	0	0	0	0	0	603	903	0
544	2	0	0	0	0	0	0	200	300	0	0	0	0	0	0	0	200	903	0	0	0	0	0	0	0	603	903	0
544	3	0	0	0	0	0	0	200	300	0	0	0	0	0	0	0	200	903	0	0	0	0	0	0	0	603	903	0
544	4	0	0	0	0	0	0	200	300	0	0	0	0	0	0	0	200	903	0	0	0	0	0	0	0	603	903	0
544	5	0	0	0	0	0	0	200	300	0	0	0	0	0	0	0	200	903	0	0	0	0	0	0	0	603	903	0
544	6	0	0	0	0	0	0	200	300	0	0	0	0	0	0	0	200	903	0	0	0	0	0	0	0	603	903	0
544	7	0	0	0	0	0	0	200	300	0	0	0	0	0	0	0	200	903	0	0	0	0	0	0	0	603	903	0
544	8	0	0	0	0	0	0	200	300	0	0	0	0	0	0	0	200	903	0	0	0	0	0	0	0	603	903	0
544	9	0	0	0	0	0	0	200	300	0	0	0	0	0	0	0	200	903	0	0	0	0	0	0	0	603	903	0
545	0	0	0	0	0	0	0	200	300	0	0	0	0	0	0	0	200	903	0	0	0	0	0	0	0	603	903	0
545	1	0	0	0	0	0	0	200	300	0	0	0	0	0	0	0	200	903	0	0	0	0	0	0	0	603	903	0
545	2	0	0	0	0	0	0	200	300	0	0	0	0	0	0	0	200	903	0	0	0	0	0	0	0	603	903	0
545	3	0	0	0	0	0	0	200	300	0	0	0	0	0	0	0	200	903	0	0	0	0	0	0	0	603	903	0
545	4	0	0	0	0	0	0	200	300	0	0	0	0	0	0	0	200	903	0	0	0	0	0	0	0	603	903	0
545	5	0	0	0	0	0	0	200	300	0	0	0	0	0	0	0	200	903	0	0	0	0	0	0	0	603	903	0
545	6	0	0	0	0	0	0	200	300	0	0	0	0	0	0	0	200	903	0	0	0	0	0	0	0	603	903	0
545	7	0	0	0	0	0	0	200	300	0	0	0	0	0	0	0	200	903	0	0	0	0	0	0	0	603	903	0
545	8	0	0	0	0	0	0	200	300	0	0	0	0	0	0	0	200	903	0	0	0	0	0	0	0	603	903	0
545	9	0	0	0	0	0	0	200	300	0	0	0	0	0	0	0	200	903	0	0	0	0	0	0	0	603	903	0
546	0	0	0	0	0	0	0	200	300	0	0	0	0	0	0	0	200	903	0	0	0	0	0	0	0	603	903	0
546	1	0	0	0	0	0	0	200	300	0	0	0	0	0	0	0	200	903	0	0	0	0	0	0	0	603	903	0
546	2	0	0	0	0	0	0	200	300	0	0	0	0	0	0	0	200	903	0	0	0	0	0	0	0	603	903	0
546	3	0	0	0	0	0	0	200	300	0	0	0	0	0	0	0	200	903	0	0	0	0	0	0	0	603	903	0
546	4	0	0	0	0	0	0	200	300	0	0	0	0	0	0	0	200	903	0	0	0	0	0	0	0	603	903	0
546	5	0	0	0	0	0	0	200	300	0	0	0	0	0	0	0	200	903	0	0	0	0	0	0	0	603	903	0
546	6	0	0	0	0	0	0	200	300	0	0	0	0	0	0	0	200	903	0	0	0	0	0	0	0	603	903	0
546	7	0	0	0	0	0	0	200	300	0	0	0	0	0	0	0	200	903	0	0	0	0	0	0	0	603	903	0
546	8	0	0	0	0	0	0	200	300	0	0	0	0	0	0	0	200	903	0	0	0	0	0	0	0	603	903	0
546	9	0	0	0	0	0	0	200	300	0	0	0	0	0	0	0	200	903	0	0	0	0	0	0	0	603	903	0
547	0	0	0	0	0	0	0	200	300	0	0	0	0	0	0	0	200	903	0	0	0	0	0	0	0	603	903	0
547	1	0	0	0	0	0	0	200	300	0	0	0	0	0	0	0	200	903	0	0	0	0	0	0	0	603	903	0
547	2	0	0	0	0	0	0	200	300	0	0	0	0	0	0	0	200	903	0	0	0	0	0	0	0	603	903	0
547	3	0	0	0	0	0	0	200	300	0	0	0	0	0	0	0	200	903	0	0	0	0	0	0	0	603	903	0
547	4	0	0	0	0	0	0	200	300	0	0	0	0	0	0	0	200	903	0	0	0	0	0	0	0	603	903	0
547	5	0	0	0	0	0	0	200	300	0	0	0	0	0	0	0	200	903	0	0	0	0	0	0	0	603	903	0
547	6	0	0	0	0	0	0	200	300	0	0	0	0	0	0	0	200	903	0	0	0	0	0	0	0	603	903	0
547	7	0	0	0	0	0	0	200	300	0	0	0	0	0	0	0	200	903	0	0	0	0	0	0	0	603	903	0
547	8	0	0	0	0	0	0	200	300	0	0	0	0	0	0	0	200	903	0	0	0	0	0	0	0	603	903	0
547	9	0	0	0	0	0	0	200	300	0	0	0	0	0	0	0	200	903	0	0	0	0	0	0	0	603	903	0
548	0	0	0	0	0	0	0	200	300	0	0	0	0	0	0	0	200	903	0	0	0	0	0	0	0	603	903	0
548	1	0	0	0	0	0	0	200	300	0	0	0	0	0	0	0	200	903	0	0	0	0	0	0	0	603	903	0
548	2	0	0	0	0	0	0	200	300	0	0	0	0	0	0	0	200	903	0	0	0	0	0	0	0	603	903	0
548	3	0	0	0	0	0	0	200	300	0	0	0	0	0	0	0	200	903	0	0	0	0	0	0	0	603	903	0
548	4	0	0	0	0	0	0	200	300	0	0	0	0	0	0	0	200	903	0	0	0	0	0	0	0	603	903	0
548	5	0	0	0	0	0	0	200	300	0	0	0	0	0	0	0	200	903	0	0	0	0	0	0	0	603	903	0
548	6	0	0	0	0	0	0	200	300	0	0	0	0	0	0	0	200	903	0	0	0	0	0	0	0	603	903	0
548	7	0	0	0	0	0	0	200	300	0	0	0	0	0	0	0	200	903	0	0	0	0	0	0	0	603	903	0
548	8	0	0	0	0	0	0	200	300	0	0	0	0	0	0	0	200	903	0	0	0	0	0	0	0	603	903	0
548	9	0	0	0	0	0	0	200	300	0	0	0	0	0	0	0	200	903	0	0	0	0	0	0	0	603	903	0
549	0	0	0	0	0	0	0	200	300	0	0	0	0	0	0	0	200	903	0	0	0	0	0	0	0	603	903	0
549	1	0	0	0	0	0	0	200	300	0	0	0	0	0	0	0	200	903	0	0	0	0	0	0	0	603	903	0
549	2	0	0	0	0	0	0	200	300	0	0	0	0	0	0	0	200	903	0	0	0	0	0	0	0	603	903	0
549	3	0	0	0	0	0	0	200	300	0	0	0	0	0	0	0	200	903	0	0	0	0	0	0	0	603	903	0
549	4	0	0	0	0	0	0	200	300	0	0	0	0	0	0	0	200	903	0	0	0	0	0	0	0	603	903	0
549	5	0	0	0	0	0	0	200	300	0	0	0	0	0	0	0	200	903	0	0	0	0	0	0	0	603	903	0
549	6	0	0	0	0	0	0	200	300	0	0	0	0	0	0	0	200	903	0	0	0	0	0	0	0	603	903	0
549	7	0	0	0	0	0	0	200	300	0	0	0	0	0	0	0	200	903	0	0	0	0	0	0	0	603	903	0
549	8	0	0	0	0	0	0	200	300	0	0	0	0	0	0	0	200	903	0	0	0	0	0	0	0	603	903	0
549	9	0	0	0	0	0	0	200	300	0	0	0	0	0	0	0	200	903	0	0	0	0	0	0	0	603	903	0
550	0	0	0	0	0	0	0	200	300	0	0	0	0	0	0	0	200	903	0	0	0	0	0	0	0	603	903	0
550	1	0	0	0	0	0	0	200	300	0	0	0	0	0	0	0	200	903	0	0	0	0	0	0	0	603	903	0
550	2	0	0	0	0	0	0	200	300	0	0	0	0	0	0	0	200	903	0	0	0	0	0	0	0	603	903	0
550	3	0	0	0	0	0	0	200	300	0	0	0	0	0	0	0	200	903	0	0	0	0	0	0	0	603	903	0
550	4	0	0	0	0	0	0	200	300	0	0	0	0	0	0	0	200	903	0	0	0	0	0	0	0	603	903	0
550	5	0	0	0	0	0	0	200	300	0	0	0	0	0	0	0	200	903	0	0	0	0	0	0	0	603	903	0
550	6	0	0	0	0	0	0	200	300	0	0	0	0	0	0	0	200	903	0	0	0	0	0	0	0	603	903	0
550	7	0	0	0	0	0	0	200	300	0	0	0	0	0	0	0	200	903	0	0	0	0	0	0	0	603	903	0
550	8	0	0	0	0	0	0	200	300	0	0	0	0	0	0	0	200	903	0	0	0	0	0	0	0	603	903	0
550	9	0	0	0	0	0	0	200	300	0	0	0	0	0	0	0	200	903	0	0	0	0	0	0	0	603	903	0
551	0	0	0	0	0	0	0	200	300	0	0	0	0	0	0	0	200	903	0	0	0	0	0	0	0	603	903	0
551	1	0	0	0	0	0	0	200	300	0	0	0	0	0	0	0	200	903	0	0	0	0	0	0	0	603	903	0
551	2	0	0	0	0	0	0	200	300	0	0	0	0	0	0	0	200	903	0	0	0	0	0	0	0	603	903	0
551	3	0	0	0	0	0	0	200	300	0	0	0	0	0	0	0	200	903	0	0	0	0	0	0	0	603	903	0
551	4	0	0	0	0	0	0	200	300	0	0	0	0	0	0	0	200	903	0	0	0	0	0	0	0	603	903	0
551	5	0	0	0	0	0	0	200	300	0	0	0	0	0	0	0	200	903	0	0	0	0	0	0	0	603	903	0
551	6	0	0	0	0	0	0	200	300	0	0	0	0	0	0	0	200	903	0	0	0	0	0	0	0	603	903	0
551	7	0	0	0	0	0	0	200	300	0	0	0	0	0	0	0	200	903	0	0	0	0	0	0	0	603	903	0
551	8	0	0	0	0	0	0	200	300	0	0	0	0	0	0	0	200	903	0	0	0	0	0	0	0	603	903	0
551	9	0	0	0	0	0	0	200	300	0	0	0	0	0	0	0	200	903	0	0	0	0	0	0	0	603	903	0
552	0	0	0	0	0	0	0	200	300	0	0	0	0	0	0	0	200	903	0	0	0	0	0	0	0	603	903	0
552	1	0	0	0	0	0	0	200	300	0	0	0	0	0	0	0	200	903	0	0	0	0	0	0	0	603	903	0
552	2	0	0	0	0	0	0	200	300	0	0	0	0	0	0	0	200	903	0	0	0	0	0	0	0	603	903	0
552	3	0	0	0	0	0	0	200	300	0	0	0	0	0	0	0	200	903	0	0	0	0	0	0	0	603	903	0
552	4	0	0	0	0	0	0	200	300	0	0	0	0	0	0	0	200	903	0	0	0	0	0	0	0	603	903	0
552	5	0	0	0	0	0	0	200	300	0	0	0	0	0	0	0	200	903	0	0	0	0	0	0	0	603	903	0
552	6	0	0	0	0	0	0	200	300	0	0	0	0	0	0	0	200	903	0	0	0	0	0	0	0	603	903	0
552	7	0	0	0	0	0	0	200	300	0	0	0	0	0	0	0	200	903	0	0	0	0	0	0	0	603	903	0
552	8	0	0	0	0	0	0	200	300	0	0	0	0	0	0	0	200	903	0	0	0	0	0	0	0	603	903	0
552	9	0	0	0	0	0	0	200	300	0	0	0	0	0	0	0	200	903	0	0	0	0	0	0	0	603	903	0
553	0	0	0	0	0	0	0	200	300	0	0	0	0	0	0	0	200	903	0	0	0	0	0	0	0	603	903	0
553	1	0	0	0	0	0	0	200	300	0	0	0	0	0	0	0	200	903	0	0	0	0	0	0	0	603	903	0
553	2	0	0	0	0	0	0	200	300	0	0	0	0	0	0	0	200	903	0	0	0	0	0	0	0	603	903	0
553	3	0	0	0	0	0	0	200	300	0	0	0	0	0	0	0	200	903	0	0	0	0	0	0	0	603	903	0
553	4	0	0	0	0	0	0	200	300	0	0	0	0	0	0	0	200	903	0	0	0	0	0	0	0	603	903	0
553	5	0	0	0	0	0	0	200	300	0	0	0	0	0	0	0	200	903	0	0	0	0	0	0	0	603	903	0
553	6	0	0	0	0	0	0	200	300	0	0	0	0	0	0	0	200	903	0	0	0	0	0	0	0	603	903	0
553	7	0	0	0	0	0	0	200	300	0	0	0	0	0	0	0	200	903	0	0	0	0	0	0	0	603	903	0
553	8	0	0	0	0	0	0	200	300	0	0	0	0	0	0	0	200	903	0	0	0	0	0	0	0	603	903	0
553	9	0	0	0	0	0	0	200	300	0	0	0	0	0	0	0	200	903	0	0	0	0	0	0	0	603	903	0
554	0	0	0	0	0	0	0	200	300	0	0	0	0	0	0	0	200	903	0	0	0	0	0	0	0	603	903	0
554	1	0	0	0	0	0	0	200	300	0	0	0	0	0	0	0	200	903	0	0	0	0	0	0	0	603	903	0
554	2	0	0	0	0	0	0	200	300	0	0	0	0	0	0	0	200	903	0	0	0	0	0	0	0	603	903	0
554	3	0	0	0	0	0	0	200	300	0	0	0	0	0	0	0	200	903	0	0	0	0	0	0	0	603	903	0
554	4	0	0	0	0	0	0	200	300	0	0	0	0	0	0	0	200	903	0	0	0	0	0	0	0	603	903	0
554	5	0	0	0	0	0	0	200	300	0	0	0	0	0	0	0	200	903	0	0	0	0	0	0	0	603	903	0
554	6	0	0	0	0	0	0	200	300	0	0	0	0	0	0	0	200	903	0	0	0	0	0	0	0	603	903	0
554	7	0	0	0	0	0	0	200	300	0	0	0	0	0	0	0	200	903	0	0	0	0	0	0	0	603	903	0
554	8	0	0	0	0	0	0	200	300	0	0	0	0	0	0	0	200	903	0	0	0	0	0	0	0	603	903	0
554	9	0	0	0	0	0	0	200	300	0	0	0	0	0	0	0	200	903	0	0	0	0	0	0	0	603	903	0
555	0	0	0	0	0	0	0	200	300	0	0	0	0	0	0	0	200	903	0	0	0	0	0	0	0	603	903	0
555	1	0	0	0	0	0	0	200	300	0	0	0	0	0	0	0	200	903	0	0	0	0	0	0	0	603	903	0
555	2	0	0	0	0	0	0	200	300	0	0	0	0	0	0	0	200	903	0	0	0	0	0	0	0	603	903	0
555	3	0	0	0	0	0	0	200	300	0	0	0	0	0	0	0	200	903	0	0	0	0	0	0	0	603	903	0
555	4	0	0	0	0	0	0	200	300	0	0	0	0	0	0	0	200	903	0	0	0	0	0	0	0	603	903	0
555	5	0	0	0	0	0	0	200	300	0	0	0	0	0	0	0	200	903	0	0	0	0	0	0	0	603	903	0
555	6	0	0	0	0	0	0	200	300	0	0	0	0	0	0	0	200	903	0	0	0	0	0	0	0	603	903	0
555	7	0	0	0	0	0	0	200	300	0	0	0	0	0	0	0	200	903	0	0	0	0	0	0	0	603	903	0
555	8	0	0	0	0	0	0	200	300	0	0	0	0	0	0	0	200	903	0	0	0	0	0	0	0	603	903	0
555	9	0	0	0	0	0	0	200	300	0	0	0	0	0	0	0	200	903	0	0	0	0	0	0	0	603	903	0
556	0	0	0	0	0	0	0	200	300	0	0	0	0	0	0	0	200	903	0	0	0	0	0	0	0	603	903	0
556	1	0	0	0	0	0	0	200	300	0	0	0	0	0	0	0	200	903	0	0	0	0	0	0	0	603	903	0
556	2	0	0	0	0	0	0	200	300	0	0	0	0	0	0	0	200	903	0	0	0	0	0	0	0	603	903	0
556	3	0	0	0	0	0	0	200	300	0	0	0	0	0	0	0	200	903	0	0	0	0	0	0	0	603	903	0
556	4	0	0	0	0	0	0	200	300	0	0	0	0	0	0	0	200	903	0	0	0	0	0	0	0	603	903	0
556	5	0	0	0	0	0	0	200	300	0	0	0	0	0	0	0	200	903	0	0	0	0	0	0	0	603	903	0
556	6	0	0	0	0	0	0	200	300	0	0	0	0	0	0	0	200	903	0	0	0	0	0	0	0	603	903	0
556	7	0	0	0	0	0	0	200	300	0	0	0	0	0	0	0	200	903	0	0	0	0	0	0	0	603	903	0
556	8	0	0	0	0	0	0	200	300	0	0	0	0	0	0	0	200	903	0	0	0	0	0	0	0	603	903	0
556	9	0	0	0	0	0	0	200	300	0	0	0	0	0	0	0	200	903	0	0	0	0	0	0	0	603	903	0
557	0	0	0	0	0	0	0	200	300	0	0	0	0	0	0	0	200	903	0	0	0	0	0	0	0	603	903	0
557	1	0	0	0	0	0	0	200	300	0	0	0	0	0	0	0	200	903	0	0	0	0	0	0	0	603	903	0
557	2	0	0	0	0	0	0	200	300	0	0	0	0	0	0	0	200	903	0	0	0	0	0	0	0	603	903	0
557	3	0	0	0	0	0	0	200	300	0	0	0	0	0	0	0	200	903	0	0	0	0	0	0	0	603	903	0
557	4	0	0	0	0	0	0	200	300	0	0	0	0	0	0	0	200	903	0	0	0	0	0	0	0	603	903	0
557	5	0	0	0	0	0	0	200	300	0	0	0	0	0	0	0	200	903	0	0	0	0	0	0	0	603	903	0
557	6	0	0	0	0	0	0	200	300	0	0	0	0	0	0	0	200	903	0	0	0	0	0	0	0	603	903	0
557	7	0	0	0	0	0	0	200	300	0	0	0	0	0	0	0	200	903	0	0	0	0	0	0	0	603	903	0
557	8	0	0	0	0	0	0	200	300	0	0	0	0	0	0	0	200	903	0	0	0	0	0	0	0	603	903	0
557	9	0	0	0	0	0	0	200	300	0	0	0	0	0	0	0	200	903	0	0	0	0	0	0	0	603	903	0
558	0	0	0	0	0	0	0	200	300	0	0	0	0	0	0	0	200	903	0	0	0	0	0	0	0	603	903	0
558	1	0	0	0	0	0	0	200	300	0	0	0	0	0	0	0	200	903	0	0	0	0	0	0	0	603	903	0
558	2	0	0	0	0	0	0	200	300	0	0	0	0	0	0	0	200	903	0	0	0	0	0	0	0	603	903	0
558	3	0	0	0	0	0	0	200	300	0	0	0	0	0	0	0	200	903	0	0	0	0	0	0	0	603	903	0
558	4	0	0	0	0	0	0	200	300	0	0	0	0	0	0	0	200	903	0	0	0	0	0	0	0	603	903	0
558	5	0	0	0	0	0	0	200	300	0	0	0	0	0	0	0	200	903	0	0	0	0	0	0	0	603	903	0
558	6	0	0	0	0	0	0	200	300	0	0	0	0	0	0	0	200	903	0	0	0	0	0	0	0	603	903	0
558	7	0	0	0	0	0	0	200	300	0	0	0	0	0	0	0	200	903	0	0	0	0	0	0	0	603	903	0
558	8	0	0	0	0	0	0	200	300	0	0	0	0	0	0	0	200	903	0	0	0	0	0	0	0	603	903	0
558	9	0	0	0	0	0	0	200	300	0	0	0	0	0	0	0	200	903	0	0	0	0	0	0	0	603	903	0
559	0	0	0	0	0	0	0	200	300	0	0	0	0	0	0	0	200	903	0	0	0	0	0	0	0	603	903	0
559	1	0	0	0	0	0	0	200	300	0	0	0	0	0	0	0	200	903	0	0	0	0	0	0	0	603	903	0
559	2	0	0	0	0	0	0	200	300	0	0	0	0	0	0	0	200	903	0	0	0	0	0	0	0	603	903	0
559	3	0	0	0	0	0	0	200	300	0	0	0	0	0	0	0	200	903	0	0	0	0	0	0	0	603	903	0
559	4	0	0	0	0	0	0	200	300	0	0	0	0	0	0	0	200	903	0	0	0	0	0	0	0	603	903	0
559	5	0	0	0	0	0	0	200	300	0	0	0	0	0	0	0	200	903	0	0	0	0	0	0	0	603	903	0
559	6	0	0	0	0	0	0	200	300	0	0	0	0	0	0	0	200	903	0	0	0	0	0	0	0	603	903	0
559	7	0	0	0	0	0	0	200	300	0	0	0	0	0	0	0	200	903	0	0	0	0	0	0	0	603	903	0
559	8	0	0	0	0	0	0	200	300	0	0	0	0	0	0	0	200	903	0	0	0	0	0	0	0	603	903	0
559	9	0	0	0	0	0	0	200	300	0	0	0	0	0	0	0	200	903	0	0	0	0	0	0	0	603	903	0
560	0	0	0	0	0	0	0	200	300	0	0	0	0	0	0	0	200	903	0	0	0	0	0	0	0	603	903	0
560	1	0	0	0	0	0	0	200	300	0	0	0	0	0	0	0	200	903	0	0	0	0	0	0	0	603	903	0
560	2	0	0	0	0	0	0	200	300	0	0	0	0	0	0	0	200	903	0	0	0	0	0	0	0	603	903	0
560	3	0	0	0	0	0	0	200	300	0	0	0	0	0	0	0	200	903	0	0	0	0	0	0	0	603	903	0
560	4	0	0	0	0	0	0	200	300	0	0	0	0	0	0	0	200	903	0	0	0	0	0	0	0	603	903	0
560	5	0	0	0	0	0	0	200	300	0	0	0	0	0	0	0	200	903	0	0	0	0	0	0	0	603	903	0
560	6	0	0	0	0	0	0	200	300	0	0	0	0	0	0	0	200	903	0	0	0	0	0	0	0	603	903	0
560	7	0	0	0	0	0	0	200	300	0	0	0	0	0	0	0	200	903	0	0	0	0	0	0	0	603	903	0
560	8	0	0	0	0	0	0	200	300	0	0	0	0	0	0	0	200	903	0	0	0	0	0	0	0	603	903	0
560	9	0	0	0	0	0	0	200	300	0	0	0	0	0	0	0	200	903	0	0	0	0	0	0	0	603	903	0
561	0	0	0	0	0	0	0	200	300	0	0	0	0	0	0	0	200	903	0	0	0	0	0	0	0	603	903	0
561	1	0	0	0	0	0	0	200	300	0	0	0	0	0	0	0	200	903	0	0	0	0	0	0	0	603	903	0
561	2	0	0	0	0	0	0	200	300	0	0	0	0	0	0	0	200	903	0	0	0	0	0	0	0	603	903	0
561	3	0	0	0	0	0	0	200	300	0	0	0	0	0	0	0	200	903	0	0	0	0	0	0	0	603	903	0
561	4	0	0	0	0	0	0	200	300	0	0	0	0	0	0	0	200	903	0	0	0	0	0	0	0	603	903	0
561	5	4.08748	5.81589	-16.7422	3143.64	-1227.36	-354.813	126.691	112.233	0	0	0	0	0	0	0	200	903	0	0	0	0	0	0	0	603	903	0
561	6	1.03572	14.9712	-28.0337	3967.62	-1593.57	-1361.89	143.155	158.47	0	0	0	0	0	0	0	200	903	0	0	0	0	0	0	0	603	903	0
561	7	-2.77898	10.2409	-25.5923	2136.56	-1105.29	-1133.01	156.812	216.515	0	0	0	0	0	0	0	200	903	0	0	0	0	0	0	0	603	903	0
561	8	-2.77898	3.52707	-17.3526	3509.86	-1593.57	-812.577	108.165	97.733	0	0	0	0	0	0	0	200	903	0	0	0	0	0	0	0	603	903	0
561	9	-2.93157	4.59518	-13.9957	3876.07	-1227.36	-766.8	112.304	23.0522	0	0	0	0	0	0	0	200	903	0	0	0	0	0	0	0	603	903	0
562	0	-1.71086	6.73142	-28.9493	4150.73	-1410.47	-721.024	151.278	156.621	0	0	0	0	0	0	0	200	903	0	0	0	0	0	0	0	603	903	0
562	1	1.3409	0.017548	-37.4942	5890.23	-2326	11.398	137.964	142.903	0	0	0	0	0	0	0	200	903	0	0	0	0	0	0	0	603	903	0
562	2	-5.22038	-11.4265	-39.9356	6164.89	-2936.35	606.491	126.473	145.629	0	0	0	0	0	0	0	200	903	0	0	0	0	0	0	0	603	903	0
562	3	-4.76262	-12.4947	-43.5977	7721.28	-3424.63	11.398	121.449	122.897	0	0	0	0	0	0	0	200	903	0	0	0	0	0	0	0	603	903	0
562	4	-1.55827	-9.59549	-55.4996	9918.55	-4279.12	240.28	122.898	121.286	0	0	0	0	0	0	0	200	903	0	0	0	0	0	0	0	603	903	0
562	5	-3.99968	-15.3938	-68.0118	10651	-4462.23	926.926	134.39	143.395	0	0	0	0	0	0	0	200	903	0	0	0	0	0	0	0	603	903	0
562	6	-5.37297	-18.7508	-75.6412	13672.2	-5133.61	606.491	132.132	119.249	0	0	0	0	0	0	0	200	903	0	0	0	0	0	0	0	603	903	0
562	7	-1.86345	-14.6309	-83.5757	14679.3	-5988.11	1018.48	128.351	124.359	0	0	0	0	0	0	0	200	903	0	0	0	0	0	0	0	603	903	0
562	8	0.120193	-9.74808	-89.0689	16052.6	-6964.67	1247.36	121.806	119.773	0	0	0	0	0	0	0	200	903	0	0	0	0	0	0	0	603	903	0
562	9	-0.795335	-13.2576	-104.938	17700.5	-7391.92	1522.02	129.559	131.324	0	0	0	0	0	0	0	200	903	0	0	0	0	0	0	0	603	903	0
563	0	-1.40569	-17.8352	-112.873	18982.3	-7636.06	1293.14	132.348	131.826	0	0	0	0	0	0	0	200	903	0	0	0	0	0	0	0	603	903	0
563	1	5.00301	-12.9524	-121.112	21271.1	-8246.41	1476.24	131.911	124.369	0	0	0	0	0	0	0	200	903	0	0	0	0	0	0	0	603	903	0
563	2	2.86677	-10.6636	-132.099	22644.4	-8734.69	1796.68	133.878	128.58	0	0	0	0	0	0	0	200	903	0	0	0	0	0	0	0	603	903	0
563	3	1.3409	-18.5982	-140.644	24475.4	-9955.39	1888.23	129.215	125.975	0	0	0	0	0	0	0	200	903	0	0	0	0	0	0	0	603	903	0
563	4	1.79866	-20.1241	-154.071	26398	-10565.7	2391.77	131.423	128.664	0	0	0	0	0	0	0	200	903	0	0	0	0	0	0	0	603	903	0
563	5	5.00301	-17.8352	-163.837	27313.6	-10565.7	2757.98	135.511	133.288	0	0	0	0	0	0	0	200	903	0	0	0	0	0	0	0	603	903	0
563	6	9.12288	-18.7508	-174.823	29693.9	-11237.1	2666.43	135.723	130.149	0	0	0	0	0	0	0	200	903	0	0	0	0	0	0	0	603	903	0
563	7	10.4962	-24.5491	-185.199	31158.8	-12335.8	3627.73	133.392	131.755	0	0	0	0	0	0	0	200	903	0	0	0	0	0	0	0	603	903	0
563	8	12.785	-21.9551	-195.575	33081.4	-12824	3765.06	134.429	130.851	0	0	0	0	0	0	0	200	903	0	0	0	0	0	0	0	603	903	0
563	9	14.1583	-15.2412	-205.036	35004	-13068.2	3398.85	136.264	129.279	0	0	0	0	0	0	0	200	903	0	0	0	0	0	0	0	603	903	0
564	0	15.379	-14.6309	-211.75	35553.3	-13861.6	3261.52	134.538	132.097	0	0	0	0	0	0	0	200	903	0	0	0	0	0	0	0	603	903	0
564	1	14.7686	-16.0042	-222.736	36835.1	-14044.7	3810.84	136.944	134.625	0	0	0	0	0	0	0	200	903	0	0	0	0	0	0	0	603	903	0
564	2	14.7686	-12.0369	-229.45	37842.1	-14777.2	3353.07	135.597	135.074	0	0	0	0	0	0	0	200	903	0	0	0	0	0	0	0	603	903	0
564	3	19.4989	-7.00149	-237.384	39032.3	-15082.3	3078.42	136.464	135.573	0	0	0	0	0	0	0	200	903	0	0	0	0	0	0	0	603	903	0
564	4	20.8721	-6.69632	-245.319	40130.9	-15448.6	3765.06	137.027	136.413	0	0	0	0	0	0	0	200	903	0	0	0	0	0	0	0	603	903	0
564	5	18.8885	-5.01785	-248.981	41504.3	-15448.6	3307.3	137.953	133.304	0	0	0	0	0	0	0	200	903	0	0	0	0	0	0	0	603	903	0
564	6	20.7196	0.170136	-258.136	42328.2	-16119.9	2757.98	137.553	136.024	0	0	0	0	0	0	0	200	903	0	0	0	0	0	0	0	603	903	0
564	7	23.0084	5.35812	-260.273	42602.9	-16608.2	2986.86	136.189	136.314	0	0	0	0	0	0	0	200	903	0	0	0	0	0	0	0	603	903	0
564	8	23.3136	5.51071	-266.376	43976.2	-16852.4	2895.31	136.735	134.909	0	0	0	0	0	0	0	200	903	0	0	0	0	0	0	0	603	903	0
564	9	24.8394	9.02023	-274.616	44708.6	-17035.5	2208.66	137.966	137.196	0	0	0	0	0	0	0	200	903	0	0	0	0	0	0	0	603	903	0
565	0	26.5179	15.4289	-281.635	45257.9	-17645.8	2300.22	137.345	139.303	0	0	0	0	0	0	0	200	903	0	0	0	0	0	0	0	603	903	0
565	1	26.3653	20.3117	-292.011	46173.4	-18195.1	2025.56	137.69	141.878	0	0	0	0	0	0	0	200	903	0	0	0	0	0	0	0	603	903	0
565	2	25.1446	22.1428	-297.199	47272.1	-18622.4	1430.47	137.34	140.941	0	0	0	0	0	0	0	200	903	0	0	0	0	0	0	0	603	903	0
565	3	28.0438	26.873	-305.133	48004.5	-19476.9	1567.79	136.169	142.677	0	0	0	0	0	0	0	200	903	0	0	0	0	0	0	0	603	903	0
565	4	30.7904	33.1291	-313.373	48462.3	-19354.8	1567.79	138.237	145.353	0	0	0	0	0	0	0	200	903	0	0	0	0	0	0	0	603	903	0
565	5	30.18	38.1645	-325.275	49652.4	-19843.1	698.044	138.996	147.352	0	0	0	0	0	0	0	200	903	0	0	0	0	0	0	0	603	903	0
565	6	29.5697	39.5378	-332.599	50476.4	-20514.5	469.162	138.321	148.236	0	0	0	0	0	0	0	200	903	0	0	0	0	0	0	0	603	903	0
565	7	30.3326	45.031	-340.839	51391.9	-21613.1	469.162	136.589	149.219	0	0	0	0	0	0	0	200	903	0	0	0	0	0	0	0	603	903	0
565	8	32.0111	52.9655	-353.351	52582.1	-22284.5	11.398	136.934	151.19	0	0	0	0	0	0	0	200	903	0	0	0	0	0	0	0	603	903	0
565	9	32.1637	55.8647	-364.643	53863.9	-22955.9	-766.8	137.046	152.283	0	0	0	0	0	0	0	200	903	0	0	0	0	0	0	0	603	903	0
566	0	32.6214	58.7639	-377.155	55328.7	-23566.2	-721.024	137.516	153.3	0	0	0	0	0	0	0	200	903	0	0	0	0	0	0	0	603	903	0
566	1	32.0111	62.8838	-388.446	56518.9	-24359.7	-858.353	137.289	154.5	0	0	0	0	0	0	0	200	903	0	0	0	0	0	0	0	603	903	0
566	2	35.8258	65.7829	-400.043	57342.9	-25641.4	-1361.89	135.903	156.658	0	0	0	0	0	0	0	200	903	0	0	0	0	0	0	0	603	903	0
566	3	33.6895	68.2243	-412.86	59082.4	-26434.9	-1453.45	135.971	156.895	0	0	0	0	0	0	0	200	903	0	0	0	0	0	0	0	603	903	0
566	4	33.5369	70.8183	-424.152	61188.1	-27106.3	-1453.45	136.093	155.74	0	0	0	0	0	0	0	200	903	0	0	0	0	0	0	0	603	903	0
566	5	34.4525	74.1753	-440.937	62652.9	-27899.7	-1956.99	136.726	157.909	0	0	0	0	0	0	0	200	903	0	0	0	0	0	0	0	603	903	0
566	6	32.3162	76.3115	-453.449	64026.2	-29242.5	-2368.97	135.511	158.802	0	0	0	0	0	0	0	200	903	0	0	0	0	0	0	0	603	903	0
566	7	32.0111	77.3796	-468.097	65216.4	-30402.2	-2323.2	135.052	160.678	0	0	0	0	0	0	0	200	903	0	0	0	0	0	0	0	603	903	0
566	8	30.9429	78.4477	-478.778	65948.8	-31073.6	-2826.74	135.098	162.256	0	0	0	0	0	0	0	200	903	0	0	0	0	0	0	0	603	903	0
566	9	31.8585	80.7365	-491.596	67596.8	-32050.1	-2964.07	134.804	162.495	0	0	0	0	0	0	0	200	903	0	0	0	0	0	0	0	603	903	0
567	0	32.6214	82.1098	-506.549	69153.2	-32294.3	-3009.84	136.247	163.482	0	0	0	0	0	0	0	200	903	0	0	0	0	0	0	0	603	903	0
567	1	29.2645	82.5676	-517.536	70160.3	-34186.3	-3330.28	133.944	164.434	0	0	0	0	0	0	0	200	903	0	0	0	0	0	0	0	603	903	0
567	2	27.8912	84.3987	-529.132	71258.9	-34796.7	-3513.38	134.238	165.329	0	0	0	0	0	0	0	200	903	0	0	0	0	0	0	0	603	903	0
567	3	27.4334	87.2978	-538.593	71808.2	-35468.1	-3421.83	134.147	166.674	0	0	0	0	0	0	0	200	903	0	0	0	0	0	0	0	603	903	0
567	4	25.755	88.0608	-547.138	72815.3	-36078.4	-3467.61	134.06	166.916	0	0	0	0	0	0	0	200	903	0	0	0	0	0	0	0	603	903	0
567	5	25.4498	88.5185	-563.617	73456.2	-36932.9	-3925.37	134.472	169.67	0	0	0	0	0	0	0	200	903	0	0	0	0	0	0	0	603	903	0
567	6	23.9239	91.7229	-575.214	74280.1	-38092.6	-4108.48	133.777	170.865	0	0	0	0	0	0	0	200	903	0	0	0	0	0	0	0	603	903	0
567	7	21.9403	94.3169	-586.811	75378.8	-38764	-4108.48	133.941	171.545	0	0	0	0	0	0	0	200	903	0	0	0	0	0	0	0	603	903	0
567	8	21.0247	94.3169	-599.018	76019.6	-40228.8	-4749.34	132.842	173.093	0	0	0	0	0	0	0	200	903	0	0	0	0	0	0	0	603	903	0
567	9	15.5316	98.5893	-609.699	76385.9	-41022.3	-4337.36	132.717	174.715	0	0	0	0	0	0	0	200	903	0	0	0	0	0	0	0	603	903	0
568	0	13.7005	103.472	-623.737	77392.9	-42243	-5024	132.274	175.921	0	0	0	0	0	0	0	200	903	0	0	0	0	0	0	0	603	903	0
568	1	11.1065	107.134	-634.418	77942.2	-42914.4	-5893.75	132.356	177.144	0	0	0	0	0	0	0	200	903	0	0	0	0	0	0	0	603	903	0
568	2	6.22371	107.287	-644.794	78766.2	-43829.9	-5756.42	132.025	177.843	0	0	0	0	0	0	0	200	903	0	0	0	0	0	0	0	603	903	0
568	3	5.00301	113.085	-651.813	79407.1	-44440.3	-6580.4	131.821	178.175	0	0	0	0	0	0	0	200	903	0	0	0	0	0	0	0	603	903	0
568	4	1.64607	120.104	-660.053	80139.5	-44989.6	-7450.15	131.839	178.586	0	0	0	0	0	0	0	200	903	0	0	0	0	0	0	0	603	903	0
568	5	0.425369	123.309	-666.156	80231	-45416.8	-7907.92	131.823	179.561	0	0	0	0	0	0	0	200	903	0	0	0	0	0	0	0	603	903	0
568	6	-1.55827	126.513	-674.396	80414.2	-45966.1	-7999.47	131.841	180.761	0	0	0	0	0	0	0	200	903	0	0	0	0	0	0	0	603	903	0
568	7	-2.77898	130.175	-680.5	81146.6	-46942.7	-8319.9	131.017	180.754	0	0	0	0	0	0	0	200	903	0	0	0	0	0	0	0	603	903	0
568	8	-0.642747	134.447	-685.688	79681.8	-47186.8	-8960.77	131.183	183.793	0	0	0	0	0	0	0	200	903	0	0	0	0	0	0	0	603	903	0
568	9	-3.38933	136.279	-689.35	80780.4	-46942.7	-9098.1	131.903	182.817	0	0	0	0	0	0	0	200	903	0	0	0	0	0	0	0	603	903	0
569	0	-2.32121	136.584	-693.317	80597.3	-47553.1	-9052.32	131.412	183.751	0	0	0	0	0	0	0	200	903	0	0	0	0	0	0	0	603	903	0
569	1	-0.947922	139.33	-699.42	80505.7	-47919.3	-9098.1	131.487	184.897	0	0	0	0	0	0	0	200	903	0	0	0	0	0	0	0	603	903	0
569	2	-0.0323951	140.398	-700.336	80597.3	-47675.1	-9372.76	131.925	184.916	0	0	0	0	0	0	0	200	903	0	0	0	0	0	0	0	603	903	0
569	3	-0.947922	139.178	-698.2	80322.6	-48102.4	-9326.98	131.105	184.958	0	0	0	0	0	0	0	200	903	0	0	0	0	0	0	0	603	903	0
569	4	-0.184983	138.72	-702.472	80505.7	-47919.3	-9281.2	131.785	185.397	0	0	0	0	0	0	0	200	903	0	0	0	0	0	0	0	603	903	0
569	5	2.10384	139.941	-702.472	79315.5	-48224.4	-9418.53	131.35	187.091	0	0	0	0	0	0	0	200	903	0	0	0	0	0	0	0	603	903	0
569	6	3.17195	139.178	-706.745	78857.8	-48285.5	-9418.53	131.679	188.421	0	0	0	0	0	0	0	200	903	0	0	0	0	0	0	0	603	903	0
569	7	2.86677	137.194	-705.524	78766.2	-47919.3	-9464.31	132.08	188.358	0	0	0	0	0	0	0	200	903	0	0	0	0	0	0	0	603	903	0
569	8	5.46077	136.889	-705.219	78857.8	-48285.5	-9326.98	131.531	188.18	0	0	0	0	0	0	0	200	903	0	0	0	0	0	0	0	603	903	0
569	9	5.61336	137.347	-705.524	78583.1	-47675.1	-9418.53	132.426	188.617	0	0	0	0	0	0	0	200	903	0	0	0	0	0	0	0	603	903	0
570	0	7.44441	135.973	-705.219	78125.4	-47797.2	-9693.19	132.224	189.218	0	0	0	0	0	0	0	200	903	0	0	0	0	0	0	0	603	903	0
570	1	7.74959	136.584	-705.829	77484.5	-47919.3	-9510.09	132.109	190.222	0	0	0	0	0	0	0	200	903	0	0	0	0	0	0	0	603	903	0
570	2	7.74959	137.347	-705.524	77301.4	-47797.2	-9464.31	132.253	190.434	0	0	0	0	0	0	0	200	903	0	0	0	0	0	0	0	603	903	0
570	3	8.20735	138.567	-705.219	77026.7	-48102.4	-9235.43	131.791	190.776	0	0	0	0	0	0	0	200	903	0	0	0	0	0	0	0	603	903	0
570	4	8.20735	137.957	-703.388	76477.4	-47553.1	-9876.3	132.394	191.273	0	0	0	0	0	0	0	200	903	0	0	0	0	0	0	0	603	903	0
570	5	8.97029	138.72	-702.777	76202.7	-47492	-9830.52	132.422	191.569	0	0	0	0	0	0	0	200	903	0	0	0	0	0	0	0	603	903	0
570	6	8.66511	140.704	-704.914	75928.1	-47980.3	-10059.4	131.934	192.287	0	0	0	0	0	0	0	200	903	0	0	0	0	0	0	0	603	903	0
570	7	7.74959	141.772	-704.608	75104.1	-47858.2	-10059.4	132.078	193.41	0	0	0	0	0	0	0	200	903	0	0	0	0	0	0	0	603	903	0
570	8	7.74959	141.619	-703.693	75470.3	-47247.9	-10196.7	132.857	192.751	0	0	0	0	0	0	0	200	903	0	0	0	0	0	0	0	603	903	0
570	9	4.69783	142.687	-703.083	74646.3	-47186.8	-10379.8	132.886	193.83	0	0	0	0	0	0	0	200	903	0	0	0	0	0	0	0	603	903	0
571	0	5.61336	144.671	-703.693	74646.3	-47858.2	-10700.3	131.99	193.922	0	0	0	0	0	0	0	200	903	0	0	0	0	0	0	0	603	903	0
571	1	3.17195	144.518	-707.66	74554.8	-48407.6	-10654.5	131.595	194.646	0	0	0	0	0	0	0	200	903	0	0	0	0	0	0	0	603	903	0
571	2	1.3409	144.518	-707.66	74005.5	-48468.6	-11020.7	131.509	195.422	0	0	0	0	0	0	0	200	903	0	0	0	0	0	0	0	603	903	0
571	3	-0.795335	147.112	-708.881	73730.8	-48041.3	-11112.3	132.229	195.99	0	0	0	0	0	0	0	200	903	0	0	0	0	0	0	0	603	903	0
571	4	-2.77898	148.333	-710.102	74280.1	-48468.6	-11341.1	131.744	195.395	0	0	0	0	0	0	0	200	903	0	0	0	0	0	0	0	603	903	0
571	5	-3.84709	149.249	-713.764	74097	-49262	-11020.7	130.983	196.188	0	0	0	0	0	0	0	200	903	0	0	0	0	0	0	0	603	903	0
571	6	-3.99968	150.011	-716.815	74188.6	-49445.1	-11386.9	131.021	196.503	0	0	0	0	0	0	0	200	903	0	0	0	0	0	0	0	603	903	0
571	7	-8.11955	152.148	-720.783	73822.4	-49933.4	-11844.7	130.723	197.58	0	0	0	0	0	0	0	200	903	0	0	0	0	0	0	0	603	903	0
571	8	-10.561	152.148	-724.445	72998.4	-49689.3	-11936.2	131.411	199.235	0	0	0	0	0	0	0	200	903	0	0	0	0	0	0	0	603	903	0
571	9	-12.8498	152.605	-726.276	73913.9	-50116.5	-12119.3	130.995	198.229	0	0	0	0	0	0	0	200	903	0	0	0	0	0	0	0	603	903	0
572	0	-13.7653	154.284	-729.328	73730.8	-50726.9	-12256.7	130.447	198.906	0	0	0	0	0	0	0	200	903	0	0	0	0	0	0	0	603	903	0
572	1	-14.5282	156.115	-730.854	73822.4	-50482.7	-12714.4	130.926	198.992	0	0	0	0	0	0	0	200	903	0	0	0	0	0	0	0	603	903	0
572	2	-15.7489	154.742	-736.042	73730.8	-51398.3	-13034.9	130.169	199.828	0	0	0	0	0	0	0	200	903	0	0	0	0	0	0	0	603	903	0
572	3	-17.8852	156.268	-740.619	74554.8	-51337.2	-12897.5	130.683	199.335	0	0	0	0	0	0	0	200	903	0	0	0	0	0	0	0	603	903	0
572	4	-18.6481	157.03	-741.84	73639.2	-51520.3	-13172.2	130.551	200.734	0	0	0	0	0	0	0	200	903	0	0	0	0	0	0	0	603	903	0
572	5	-17.58	157.946	-746.418	73913.9	-52313.8	-12714.4	129.913	200.975	0	0	0	0	0	0	0	200	903	0	0	0	0	0	0	0	603	903	0
572	6	-18.1904	157.336	-747.943	73730.8	-52374.8	-13538.4	129.975	201.422	0	0	0	0	0	0	0	200	903	0	0	0	0	0	0	0	603	903	0
572	7	-18.8007	156.42	-752.521	73639.2	-52741	-12760.2	129.914	202.143	0	0	0	0	0	0	0	200	903	0	0	0	0	0	0	0	603	903	0
572	8	-18.8007	157.336	-754.352	74188.6	-52619	-13355.3	130.246	201.653	0	0	0	0	0	0	0	200	903	0	0	0	0	0	0	0	603	903	0
572	9	-18.8007	157.336	-755.268	73273	-52619	-13080.6	130.331	202.984	0	0	0	0	0	0	0	200	903	0	0	0	0	0	0	0	603	903	0
573	0	-18.3429	156.573	-756.488	73639.2	-53107.3	-13034.9	129.798	202.656	0	0	0	0	0	0	0	200	903	0	0	0	0	0	0	0	603	903	0
573	1	-17.4274	155.505	-758.625	73730.8	-53168.3	-12806	129.915	202.81	0	0	0	0	0	0	0	200	903	0	0	0	0	0	0	0	603	903	0
573	2	-16.9697	154.894	-762.592	73730.8	-52924.2	-13401.1	130.6	203.316	0	0	0	0	0	0	0	200	903	0	0	0	0	0	0	0	603	903	0
573	3	-18.1904	155.047	-764.728	74005.5	-53473.5	-13309.5	130.075	203.226	0	0	0	0	0	0	0	200	903	0	0	0	0	0	0	0	603	903	0
573	4	-17.58	154.436	-763.813	74463.2	-53168.3	-13034.9	130.391	202.511	0	0	0	0	0	0	0	200	903	0	0	0	0	0	0	0	603	903	0
573	5	-17.4274	153.979	-767.169	74646.3	-53839.7	-13172.2	129.82	202.699	0	0	0	0	0	0	0	200	903	0	0	0	0	0	0	0	603	903	0
573	6	-16.0541	153.674	-766.864	74188.6	-53839.7	-13355.3	129.792	203.257	0	0	0	0	0	0	0	200	903	0	0	0	0	0	0	0	603	903	0
573	7	-16.5119	153.216	-771.137	74737.9	-53412.4	-13172.2	130.735	203.081	0	0	0	0	0	0	0	200	903	0	0	0	0	0	0	0	603	903	0
573	8	-18.0378	153.521	-771.747	74280.1	-53412.4	-13080.6	130.79	203.751	0	0	0	0	0	0	0	200	903	0	0	0	0	0	0	0	603	903	0
573	9	-16.3593	152.453	-771.442	74188.6	-53961.8	-12989.1	130.051	203.831	0	0	0	0	0	0	0	200	903	0	0	0	0	0	0	0	603	903	0
574	0	-17.4274	152.605	-770.221	74280.1	-53961.8	-13218	129.94	203.56	0	0	0	0	0	0	0	200	903	0	0	0	0	0	0	0	603	903	0
574	1	-17.1222	151.232	-774.189	74188.6	-54389	-13034.9	129.747	204.172	0	0	0	0	0	0	0	200	903	0	0	0	0	0	0	0	603	903	0
574	2	-16.6645	151.69	-778.766	74463.2	-53900.7	-12897.5	130.787	204.383	0	0	0	0	0	0	0	200	903	0	0	0	0	0	0	0	603	903	0
574	3	-17.58	149.401	-776.02	74463.2	-54083.8	-12943.3	130.306	204.045	0	0	0	0	0	0	0	200	903	0	0	0	0	0	0	0	603	903	0
574	4	-18.4955	151.08	-782.733	74737.9	-54511.1	-12989.1	130.358	204.517	0	0	0	0	0	0	0	200	903	0	0	0	0	0	0	0	603	903	0
574	5	-18.8007	150.622	-782.428	74097	-54450	-13034.9	130.409	205.299	0	0	0	0	0	0	0	200	903	0	0	0	0	0	0	0	603	903	0
574	6	-18.6481	150.164	-783.344	74097	-55243.5	-12851.8	129.477	205.409	0	0	0	0	0	0	0	200	903	0	0	0	0	0	0	0	603	903	0
574	7	-18.8007	149.401	-786.396	74280.1	-54572.1	-12851.8	130.605	205.544	0	0	0	0	0	0	0	200	903	0	0	0	0	0	0	0	603	903	0
574	8	-18.9533	148.028	-789.753	74463.2	-54877.3	-12622.9	130.513	205.713	0	0	0	0	0	0	0	200	903	0	0	0	0	0	0	0	603	903	0
574	9	-19.8688	147.112	-793.415	74737.9	-55121.4	-12485.5	130.526	205.802	0	0	0	0	0	0	0	200	903	0	0	0	0	0	0	0	603	903	0
575	0	-18.9533	146.655	-793.109	74554.8	-55365.6	-12806	130.192	205.997	0	0	0	0	0	0	0	200	903	0	0	0	0	0	0	0	603	903	0
575	1	-20.174	144.976	-790.668	74737.9	-55609.7	-12577.1	129.667	205.475	0	0	0	0	0	0	0	200	903	0	0	0	0	0	0	0	603	903	0
575	2	-19.1059	144.213	-796.466	74646.3	-55060.4	-12394	130.869	206.278	0	0	0	0	0	0	0	200	903	0	0	0	0	0	0	0	603	903	0
575	3	-18.8007	143.145	-799.823	74921	-55670.7	-12760.2	130.396	206.328	0	0	0	0	0	0	0	200	903	0	0	0	0	0	0	0	603	903	0
575	4	-19.2585	142.077	-801.96	75195.7	-55792.8	-12485.5	130.429	206.235	0	0	0	0	0	0	0	200	903	0	0	0	0	0	0	0	603	903	0
575	5	-19.5636	140.856	-800.739	75287.2	-55792.8	-11936.2	130.323	205.978	0	0	0	0	0	0	0	200	903	0	0	0	0	0	0	0	603	903	0
575	6	-18.9533	137.652	-803.18	75653.4	-55304.5	-11982	131.143	205.808	0	0	0	0	0	0	0	200	903	0	0	0	0	0	0	0	603	903	0
575	7	-18.0378	138.11	-804.401	75653.4	-55365.6	-11432.7	131.172	205.951	0	0	0	0	0	0	0	200	903	0	0	0	0	0	0	0	603	903	0
575	8	-16.3593	137.041	-808.063	76294.3	-55609.7	-11707.4	131.181	205.584	0	0	0	0	0	0	0	200	903	0	0	0	0	0	0	0	603	903	0
575	9	-16.8171	135.058	-805.622	76752.1	-55853.8	-11478.5	130.67	204.729	0	0	0	0	0	0	0	200	903	0	0	0	0	0	0	0	603	903	0
576	0	-17.7326	133.837	-810.199	76568.9	-55914.9	-11798.9	130.986	205.494	0	0	0	0	0	0	0	200	903	0	0	0	0	0	0	0	603	903	0
576	1	-17.58	133.227	-809.284	77118.3	-55853.8	-11570	130.984	204.708	0	0	0	0	0	0	0	200	903	0	0	0	0	0	0	0	603	903	0
576	2	-16.0541	130.785	-810.81	77484.5	-55792.8	-11203.8	131.189	204.436	0	0	0	0	0	0	0	200	903	0	0	0	0	0	0	0	603	903	0
576	3	-14.986	129.717	-817.218	76660.5	-56036.9	-10929.2	131.43	206.193	0	0	0	0	0	0	0	200	903	0	0	0	0	0	0	0	603	903	0
576	4	-14.986	127.734	-815.692	77392.9	-56281.1	-11066.5	131.002	205.12	0	0	0	0	0	0	0	200	903	0	0	0	0	0	0	0	603	903	0
576	5	-16.0541	127.123	-816.608	77209.8	-55975.9	-10654.5	131.453	205.451	0	0	0	0	0	0	0	200	903	0	0	0	0	0	0	0	603	903	0
576	6	-15.4438	126.055	-816.303	77576	-55670.7	-10425.6	131.801	204.967	0	0	0	0	0	0	0	200	903	0	0	0	0	0	0	0	603	903	0
576	7	-15.7489	124.224	-813.861	77484.5	-56281.1	-10288.3	130.847	204.794	0	0	0	0	0	0	0	200	903	0	0	0	0	0	0	0	603	903	0
576	8	-14.0705	123.309	-816.608	77484.5	-56220.1	-10471.4	131.154	205.114	0	0	0	0	0	0	0	200	903	0	0	0	0	0	0	0	603	903	0
576	9	-12.8498	120.562	-819.355	77667.6	-56525.2	-10196.7	131.012	205.209	0	0	0	0	0	0	0	200	903	0	0	0	0	0	0	0	603	903	0
577	0	-14.5282	120.562	-819.355	77484.5	-56159	-9876.3	131.459	205.432	0	0	0	0	0	0	0	200	903	0	0	0	0	0	0	0	603	903	0
577	1	-14.2231	118.884	-819.965	76111.2	-55914.9	-9830.52	131.808	207.178	0	0	0	0	0	0	0	200	903	0	0	0	0	0	0	0	603	903	0
577	2	-14.986	117.663	-819.66	76935.1	-56220.1	-9784.74	131.41	206.138	0	0	0	0	0	0	0	200	903	0	0	0	0	0	0	0	603	903	0
577	3	-13.4601	117.358	-820.27	77026.7	-56525.2	-9510.09	131.089	206.096	0	0	0	0	0	0	0	200	903	0	0	0	0	0	0	0	603	903	0
577	4	-11.4765	114.916	-822.101	76843.6	-56647.3	-9235.43	131.094	206.528	0	0	0	0	0	0	0	200	903	0	0	0	0	0	0	0	603	903	0
577	5	-12.6972	114.153	-820.27	76752.1	-55914.9	-9189.65	131.834	206.431	0	0	0	0	0	0	0	200	903	0	0	0	0	0	0	0	603	903	0
577	6	-13.6127	113.238	-820.88	76935.1	-55731.8	-9235.43	132.107	206.277	0	0	0	0	0	0	0	200	903	0	0	0	0	0	0	0	603	903	0
577	7	-12.392	111.559	-817.829	76019.6	-56220.1	-9098.1	131.257	207.047	0	0	0	0	0	0	0	200	903	0	0	0	0	0	0	0	603	903	0
577	8	-13.3075	110.491	-813.556	76385.9	-55975.9	-8869.22	131.196	206.109	0	0	0	0	0	0	0	200	903	0	0	0	0	0	0	0	603	903	0
577	9	-12.5446	109.576	-814.777	76385.9	-56281.1	-8777.66	130.925	206.249	0	0	0	0	0	0	0	200	903	0	0	0	0	0	0	0	603	903	0
578	0	-12.392	107.439	-815.692	76019.6	-55670.7	-8823.44	131.75	206.804	0	0	0	0	0	0	0	200	903	0	0	0	0	0	0	0	603	903	0
578	1	-12.6972	104.845	-813.861	75836.5	-55365.6	-8777.66	131.972	206.819	0	0	0	0	0	0	0	200	903	0	0	0	0	0	0	0	603	903	0
578	2	-13.155	104.388	-811.42	75836.5	-55792.8	-8228.35	131.241	206.539	0	0	0	0	0	0	0	200	903	0	0	0	0	0	0	0	603	903	0
578	3	-12.8498	104.082	-808.673	76294.3	-55914.9	-7816.36	130.856	205.655	0	0	0	0	0	0	0	200	903	0	0	0	0	0	0	0	603	903	0
578	4	-12.0868	102.557	-805.927	75653.4	-55548.7	-8228.35	131.075	206.129	0	0	0	0	0	0	0	200	903	0	0	0	0	0	0	0	603	903	0
578	5	-11.4765	100.878	-801.96	75928.1	-55243.5	-7999.47	131.114	205.322	0	0	0	0	0	0	0	200	903	0	0	0	0	0	0	0	603	903	0
578	6	-11.0187	98.1316	-803.485	75653.4	-54877.3	-7862.14	131.701	205.843	0	0	0	0	0	0	0	200	903	0	0	0	0	0	0	0	603	903	0
578	7	-11.6291	97.6738	-800.739	75012.5	-55121.4	-7450.15	131.162	206.321	0	0	0	0	0	0	0	200	903	0	0	0	0	0	0	0	603	903	0
578	8	-11.7817	96.7583	-797.382	75104.1	-54816.2	-7221.27	131.255	205.812	0	0	0	0	0	0	0	200	903	0	0	0	0	0	0	0	603	903	0
578	9	-12.0868	94.4695	-790.973	74463.2	-54328	-7450.15	131.315	205.859	0	0	0	0	0	0	0	200	903	0	0	0	0	0	0	0	603	903	0
579	0	-10.8661	92.6384	-789.753	74097	-54328	-7083.94	131.209	206.177	0	0	0	0	0	0	0	200	903	0	0	0	0	0	0	0	603	903	0
579	1	-10.7135	91.1125	-788.532	73913.9	-53839.7	-6855.06	131.722	206.264	0	0	0	0	0	0	0	200	903	0	0	0	0	0	0	0	603	903	0
579	2	-10.2558	90.3496	-785.48	72540.6	-54328	-6626.18	130.835	207.648	0	0	0	0	0	0	0	200	903	0	0	0	0	0	0	0	603	903	0
579	3	-11.4765	89.1289	-781.818	72723.8	-53778.6	-6351.52	131.213	206.981	0	0	0	0	0	0	0	200	903	0	0	0	0	0	0	0	603	903	0
579	4	-11.6291	87.7556	-776.63	71899.8	-53351.4	-6626.18	131.304	207.421	0	0	0	0	0	0	0	200	903	0	0	0	0	0	0	0	603	903	0
579	5	-9.79802	86.8401	-772.357	71808.2	-53107.3	-6214.19	131.24	207.027	0	0	0	0	0	0	0	200	903	0	0	0	0	0	0	0	603	903	0
579	6	-9.03508	85.3142	-769.916	71442	-53351.4	-6351.52	130.705	207.208	0	0	0	0	0	0	0	200	903	0	0	0	0	0	0	0	603	903	0
579	7	-9.64543	84.3987	-766.864	70709.6	-52985.2	-5710.65	130.907	207.794	0	0	0	0	0	0	0	200	903	0	0	0	0	0	0	0	603	903	0
579	8	-11.0187	83.3305	-763.202	71167.3	-52130.7	-5847.98	131.695	206.752	0	0	0	0	0	0	0	200	903	0	0	0	0	0	0	0	603	903	0
579	9	-9.79802	81.6521	-758.625	69977.1	-52374.8	-5573.32	130.961	207.758	0	0	0	0	0	0	0	200	903	0	0	0	0	0	0	0	603	903	0
580	0	-9.79802	79.821	-751.3	69977.1	-51703.4	-5985.31	131.181	206.859	0	0	0	0	0	0	0	200	903	0	0	0	0	0	0	0	603	903	0
580	1	-9.79802	78.9055	-747.943	69610.9	-51703.4	-5985.31	130.873	206.93	0	0	0	0	0	0	0	200	903	0	0	0	0	0	0	0	603	903	0
580	2	-9.79802	77.8374	-747.028	68878.5	-51642.4	-5664.87	130.87	207.797	0	0	0	0	0	0	0	200	903	0	0	0	0	0	0	0	603	903	0
580	3	-9.03508	76.1589	-739.398	68695.4	-50849	-5527.54	131.229	207.093	0	0	0	0	0	0	0	200	903	0	0	0	0	0	0	0	603	903	0
580	4	-10.2558	74.0227	-738.483	68237.6	-50665.9	-5344.44	131.392	207.598	0	0	0	0	0	0	0	200	903	0	0	0	0	0	0	0	603	903	0
580	5	-10.2558	74.0227	-731.464	67871.4	-50910	-5435.99	130.4	207.212	0	0	0	0	0	0	0	200	903	0	0	0	0	0	0	0	603	903	0
580	6	-9.49284	73.2597	-727.191	67779.9	-50604.8	-5161.33	130.411	206.792	0	0	0	0	0	0	0	200	903	0	0	0	0	0	0	0	603	903	0
580	7	-8.88249	72.1916	-723.529	67322.1	-50665.9	-4978.23	129.974	206.953	0	0	0	0	0	0	0	200	903	0	0	0	0	0	0	0	603	903	0
580	8	-9.03508	70.0554	-719.867	66681.2	-49689.3	-4978.23	130.974	207.37	0	0	0	0	0	0	0	200	903	0	0	0	0	0	0	0	603	903	0
580	9	-10.2558	68.5295	-714.984	66589.7	-49384.1	-4978.23	130.93	206.866	0	0	0	0	0	0	0	200	903	0	0	0	0	0	0	0	603	903	0
581	0	-10.1032	67.614	-710.407	65857.3	-49506.2	-4612.02	130.313	207.296	0	0	0	0	0	0	0	200	903	0	0	0	0	0	0	0	603	903	0
581	1	-9.79802	65.7829	-703.998	64484	-49078.9	-4474.69	130.285	208.403	0	0	0	0	0	0	0	200	903	0	0	0	0	0	0	0	603	903	0
581	2	-9.79802	64.4096	-699.42	64758.6	-48468.6	-4474.69	130.702	207.411	0	0	0	0	0	0	0	200	903	0	0	0	0	0	0	0	603	903	0
581	3	-9.34026	63.0363	-693.622	64667.1	-48102.4	-4291.58	130.65	206.769	0	0	0	0	0	0	0	200	903	0	0	0	0	0	0	0	603	903	0
581	4	-9.03508	61.8156	-691.181	64026.2	-48590.7	-4337.36	129.699	207.367	0	0	0	0	0	0	0	200	903	0	0	0	0	0	0	0	603	903	0
581	5	-10.4084	60.2898	-686.908	63385.3	-48285.5	-4108.48	129.706	207.724	0	0	0	0	0	0	0	200	903	0	0	0	0	0	0	0	603	903	0
581	6	-8.72991	59.832	-681.11	62652.9	-47553.1	-4154.25	130.183	208.014	0	0	0	0	0	0	0	200	903	0	0	0	0	0	0	0	603	903	0
581	7	-10.2558	58.6113	-675.617	62652.9	-47125.8	-4154.25	130.248	207.266	0	0	0	0	0	0	0	200	903	0	0	0	0	0	0	0	603	903	0
581	8	-9.79802	57.238	-669.513	61829	-47370	-4016.92	129.247	207.651	0	0	0	0	0	0	0	200	903	0	0	0	0	0	0	0	603	903	0
581	9	-9.64543	55.5595	-667.072	61279.6	-47003.7	-3833.82	129.537	208.136	0	0	0	0	0	0	0	200	903	0	0	0	0	0	0	0	603	903	0
582	0	-10.7135	54.7966	-661.273	61188.1	-46332.3	-3833.82	129.935	207.469	0	0	0	0	0	0	0	200	903	0	0	0	0	0	0	0	603	903	0
582	1	-10.7135	54.1862	-657.306	60181	-45966.1	-3879.59	130.069	208.443	0	0	0	0	0	0	0	200	903	0	0	0	0	0	0	0	603	903	0
582	2	-11.9343	53.5759	-651.508	59540.1	-46027.2	-3650.71	129.353	208.612	0	0	0	0	0	0	0	200	903	0	0	0	0	0	0	0	603	903	0
582	3	-10.2558	51.8974	-645.71	59265.5	-45905.1	-3513.38	128.908	208.217	0	0	0	0	0	0	0	200	903	0	0	0	0	0	0	0	603	903	0
582	4	-9.03508	51.1345	-640.522	58350	-44989.6	-3467.61	129.761	208.902	0	0	0	0	0	0	0	200	903	0	0	0	0	0	0	0	603	903	0
582	5	-10.8661	50.0664	-637.47	57434.4	-45050.6	-3513.38	129.329	209.903	0	0	0	0	0	0	0	200	903	0	0	0	0	0	0	0	603	903	0
582	6	-12.8498	48.8457	-632.282	56976.7	-44806.5	-3238.72	129.135	209.887	0	0	0	0	0	0	0	200	903	0	0	0	0	0	0	0	603	903	0
582	7	-12.6972	48.3879	-626.789	56244.2	-44074	-3330.28	129.683	210.266	0	0	0	0	0	0	0	200	903	0	0	0	0	0	0	0	603	903	0
582	8	-12.0868	47.4724	-618.549	56152.7	-44379.2	-3147.17	128.253	209.219	0	0	0	0	0	0	0	200	903	0	0	0	0	0	0	0	603	903	0
582	9	-11.6291	46.7094	-617.328	55603.4	-43585.8	-3147.17	129.396	209.929	0	0	0	0	0	0	0	200	903	0	0	0	0	0	0	0	603	903	0
583	0	-11.6291	46.0991	-612.751	55145.6	-43402.7	-3238.72	129.167	210.003	0	0	0	0	0	0	0	200	903	0	0	0	0	0	0	0	603	903	0
583	1	-12.5446	45.6413	-608.478	54687.8	-43707.8	-2964.07	128.169	210.124	0	0	0	0	0	0	0	200	903	0	0	0	0	0	0	0	603	903	0
583	2	-12.0868	44.5732	-602.069	53497.6	-43219.6	-3147.17	128.215	211.144	0	0	0	0	0	0	0	200	903	0	0	0	0	0	0	0	603	903	0
583	3	-13.4601	43.9629	-597.187	53314.5	-42853.3	-3101.39	128.241	210.724	0	0	0	0	0	0	0	200	903	0	0	0	0	0	0	0	603	903	0
583	4	-12.6972	42.8947	-593.219	52582.1	-42426.1	-2597.85	128.482	211.361	0	0	0	0	0	0	0	200	903	0	0	0	0	0	0	0	603	903	0
583	5	-12.5446	42.5896	-590.473	51849.7	-41998.8	-3147.17	128.872	212.19	0	0	0	0	0	0	0	200	903	0	0	0	0	0	0	0	603	903	0
583	6	-13.6127	41.9792	-585.285	51666.6	-42182	-2964.07	127.929	211.724	0	0	0	0	0	0	0	200	903	0	0	0	0	0	0	0	603	903	0
583	7	-14.0705	41.3689	-580.097	51025.7	-41815.7	-2689.41	127.916	212.039	0	0	0	0	0	0	0	200	903	0	0	0	0	0	0	0	603	903	0
583	8	-14.3757	41.0637	-574.909	50842.6	-41388.5	-2689.41	128.009	211.564	0	0	0	0	0	0	0	200	903	0	0	0	0	0	0	0	603	903	0
583	9	-13.3075	40.1482	-571.552	50384.9	-40778.1	-2826.74	128.654	211.846	0	0	0	0	0	0	0	200	903	0	0	0	0	0	0	0	603	903	0
584	0	-12.2394	39.6904	-567.89	49652.4	-41083.3	-3055.62	127.656	212.567	0	0	0	0	0	0	0	200	903	0	0	0	0	0	0	0	603	903	0
584	1	-13.6127	38.6223	-561.176	49286.2	-41083.3	-2597.85	126.791	212.173	0	0	0	0	0	0	0	200	903	0	0	0	0	0	0	0	603	903	0
584	2	-15.1386	36.3335	-559.65	48279.2	-40961.2	-2460.53	126.809	213.733	0	0	0	0	0	0	0	200	903	0	0	0	0	0	0	0	603	903	0
584	3	-15.5964	37.4016	-553.546	48096.1	-40106.8	-2414.75	127.546	213.113	0	0	0	0	0	0	0	200	903	0	0	0	0	0	0	0	603	903	0
584	4	-14.8334	36.4861	-550.495	47180.5	-39618.5	-2414.75	128.031	214.294	0	0	0	0	0	0	0	200	903	0	0	0	0	0	0	0	603	903	0
584	5	-13.6127	36.4861	-547.748	47729.8	-40045.7	-2597.85	126.89	212.862	0	0	0	0	0	0	0	200	903	0	0	0	0	0	0	0	603	903	0
584	6	-14.5282	35.4179	-544.696	47089	-39801.6	-2277.42	126.929	213.55	0	0	0	0	0	0	0	200	903	0	0	0	0	0	0	0	603	903	0
584	7	-16.0541	35.4179	-541.034	46631.2	-39557.4	-2368.97	126.886	213.811	0	0	0	0	0	0	0	200	903	0	0	0	0	0	0	0	603	903	0
584	8	-16.2067	34.655	-534.626	46173.4	-39252.3	-2506.3	126.58	213.634	0	0	0	0	0	0	0	200	903	0	0	0	0	0	0	0	603	903	0
584	9	-15.2912	33.8921	-531.269	45715.7	-39069.2	-2506.3	126.461	213.95	0	0	0	0	0	0	0	200	903	0	0	0	0	0	0	0	603	903	0
585	0	-13.6127	33.1291	-530.048	44800.2	-38886.1	-2231.64	126.637	215.479	0	0	0	0	0	0	0	200	903	0	0	0	0	0	0	0	603	903	0
585	1	-15.4438	32.5188	-526.996	44891.7	-38825	-2231.64	126.328	214.816	0	0	0	0	0	0	0	200	903	0	0	0	0	0	0	0	603	903	0
585	2	-17.2748	30.9929	-523.639	44525.5	-39191.2	-2323.2	125.156	214.969	0	0	0	0	0	0	0	200	903	0	0	0	0	0	0	0	603	903	0
585	3	-16.6645	30.6877	-518.146	43426.8	-38031.6	-2323.2	126.601	216.188	0	0	0	0	0	0	0	200	903	0	0	0	0	0	0	0	603	903	0
585	4	-16.2067	29.7722	-514.789	42969.1	-38153.6	-2277.42	125.885	216.531	0	0	0	0	0	0	0	200	903	0	0	0	0	0	0	0	603	903	0
585	5	-14.3757	29.3144	-512.653	42328.2	-38275.7	-1773.88	125.338	217.433	0	0	0	0	0	0	0	200	903	0	0	0	0	0	0	0	603	903	0
585	6	-16.3593	28.5515	-509.296	42511.3	-38092.6	-1911.21	125.205	216.529	0	0	0	0	0	0	0	200	903	0	0	0	0	0	0	0	603	903	0
585	7	-17.8852	28.2463	-507.465	41962	-37482.2	-1819.66	126.138	217.311	0	0	0	0	0	0	0	200	903	0	0	0	0	0	0	0	603	903	0
585	8	-18.0378	27.7885	-502.887	41778.9	-37299.1	-2048.54	125.83	216.922	0	0	0	0	0	0	0	200	903	0	0	0	0	0	0	0	603	903	0
585	9	-16.3593	26.873	-499.836	41412.7	-37787.4	-2094.31	124.4	217.147	0	0	0	0	0	0	0	200	903	0	0	0	0	0	0	0	603	903	0
586	0	-17.1222	26.2627	-497.699	40863.4	-37482.2	-1819.66	124.689	217.895	0	0	0	0	0	0	0	200	903	0	0	0	0	0	0	0	603	903	0
586	1	-17.4274	25.3471	-494.953	40405.6	-37238.1	-1911.21	124.764	218.365	0	0	0	0	0	0	0	200	903	0	0	0	0	0	0	0	603	903	0
586	2	-18.9533	25.042	-494.648	40039.4	-36810.9	-2002.76	125.582	219.055	0	0	0	0	0	0	0	200	903	0	0	0	0	0	0	0	603	903	0
586	3	-18.1904	23.9738	-490.07	39673.2	-36505.7	-1682.33	125.509	219.046	0	0	0	0	0	0	0	200	903	0	0	0	0	0	0	0	603	903	0
586	4	-19.1059	23.0583	-485.187	39398.5	-36994	-1682.33	123.753	218.797	0	0	0	0	0	0	0	200	903	0	0	0	0	0	0	0	603	903	0
586	5	-17.4274	23.2109	-485.187	39947.8	-36688.8	-1728.1	124.382	217.665	0	0	0	0	0	0	0	200	903	0	0	0	0	0	0	0	603	903	0
586	6	-17.8852	23.0583	-483.661	37933.7	-36383.6	-1682.33	124.775	221.57	0	0	0	0	0	0	0	200	903	0	0	0	0	0	0	0	603	903	0
586	7	-18.6481	22.6006	-482.44	38025.2	-36200.5	-1728.1	124.964	221.181	0	0	0	0	0	0	0	200	903	0	0	0	0	0	0	0	603	903	0
586	8	-17.8852	21.3799	-479.694	37292.8	-36200.5	-1545	124.534	222.257	0	0	0	0	0	0	0	200	903	0	0	0	0	0	0	0	603	903	0
586	9	-18.6481	21.2273	-476.947	36926.6	-36444.6	-1545	123.588	222.577	0	0	0	0	0	0	0	200	903	0	0	0	0	0	0	0	603	903	0
587	0	-18.1904	21.8376	-475.421	37292.8	-36322.6	-1545	123.599	221.558	0	0	0	0	0	0	0	200	903	0	0	0	0	0	0	0	603	903	0
587	1	-18.8007	20.9221	-473.59	36468.8	-35834.3	-1453.45	124.335	222.995	0	0	0	0	0	0	0	200	903	0	0	0	0	0	0	0	603	903	0
587	2	-18.6481	20.4643	-470.539	35644.9	-35773.3	-1361.89	123.974	224.247	0	0	0	0	0	0	0	200	903	0	0	0	0	0	0	0	603	903	0
587	3	-19.2585	19.7014	-472.065	35644.9	-36017.4	-1407.67	123.702	224.492	0	0	0	0	0	0	0	200	903	0	0	0	0	0	0	0	603	903	0
587	4	-19.2585	19.091	-468.402	35187.1	-36017.4	-1270.34	123.106	224.878	0	0	0	0	0	0	0	200	903	0	0	0	0	0	0	0	603	903	0
587	5	-17.8852	18.6333	-466.877	35004	-35407.1	-1133.01	124.162	225.025	0	0	0	0	0	0	0	200	903	0	0	0	0	0	0	0	603	903	0
587	6	-18.6481	16.497	-464.435	34454.7	-35346	-1087.24	123.895	225.814	0	0	0	0	0	0	0	200	903	0	0	0	0	0	0	0	603	903	0
587	7	-18.0378	17.1074	-465.045	34546.2	-34979.8	-1178.79	124.782	225.714	0	0	0	0	0	0	0	200	903	0	0	0	0	0	0	0	603	903	0
587	8	-20.3266	17.5652	-462.604	33722.3	-35834.3	-1270.34	122.538	227.103	0	0	0	0	0	0	0	200	903	0	0	0	0	0	0	0	603	903	0
587	9	-16.9697	16.8022	-462.604	34180	-35529.1	-766.8	123.198	226.114	0	0	0	0	0	0	0	200	903	0	0	0	0	0	0	0	603	903	0
588	0	-19.5636	16.8022	-459.552	33813.8	-34918.8	-446.366	124.016	226.42	0	0	0	0	0	0	0	200	903	0	0	0	0	0	0	0	603	903	0
588	1	-18.4955	16.497	-458.332	33356	-35040.8	-583.695	123.547	227.223	0	0	0	0	0	0	0	200	903	0	0	0	0	0	0	0	603	903	0
588	2	-18.0378	16.3445	-458.332	33081.4	-35407.1	-263.26	122.748	227.822	0	0	0	0	0	0	0	200	903	0	0	0	0	0	0	0	603	903	0
588	3	-18.9533	15.4289	-455.89	32989.8	-35407.1	-904.13	122.334	227.636	0	0	0	0	0	0	0	200	903	0	0	0	0	0	0	0	603	903	0
588	4	-19.5636	14.666	-457.416	32623.6	-34857.7	-583.695	123.794	228.678	0	0	0	0	0	0	0	200	903	0	0	0	0	0	0	0	603	903	0
588	5	-20.0214	13.5979	-452.838	32898.3	-34735.7	-812.577	123.293	227.351	0	0	0	0	0	0	0	200	903	0	0	0	0	0	0	0	603	903	0
588	6	-18.9533	14.9712	-453.449	32074.3	-34857.7	-904.13	123.128	229.266	0	0	0	0	0	0	0	200	903	0	0	0	0	0	0	0	603	903	0
588	7	-18.8007	12.5298	-454.059	32074.3	-35223.9	-675.248	122.424	229.361	0	0	0	0	0	0	0	200	903	0	0	0	0	0	0	0	603	903	0
588	8	-17.1222	12.8349	-451.923	31708.1	-35223.9	-583.695	122.058	229.837	0	0	0	0	0	0	0	200	903	0	0	0	0	0	0	0	603	903	0
588	9	-19.1059	12.3772	-452.838	31525	-34613.6	-309.037	123.563	230.384	0	0	0	0	0	0	0	200	903	0	0	0	0	0	0	0	603	903	0
589	0	-19.7162	11.7668	-449.176	30884.1	-34857.7	-537.919	122.396	231.243	0	0	0	0	0	0	0	200	903	0	0	0	0	0	0	0	603	903	0
589	1	-17.8852	11.6142	-450.092	30792.6	-34857.7	-400.589	122.554	231.586	0	0	0	0	0	0	0	200	903	0	0	0	0	0	0	0	603	903	0
589	2	-17.4274	10.2409	-451.618	30334.8	-35101.9	-217.484	122.275	232.831	0	0	0	0	0	0	0	200	903	0	0	0	0	0	0	0	603	903	0
589	3	-17.7326	9.63058	-447.65	30151.7	-35101.9	-309.037	121.586	232.645	0	0	0	0	0	0	0	200	903	0	0	0	0	0	0	0	603	903	0
589	4	-18.9533	10.8513	-451.007	29968.6	-34979.8	-263.26	122.441	233.552	0	0	0	0	0	0	0	200	903	0	0	0	0	0	0	0	603	903	0
589	5	-18.4955	10.0883	-447.65	28961.5	-34796.7	-263.26	122.268	235.303	0	0	0	0	0	0	0	200	903	0	0	0	0	0	0	0	603	903	0
589	6	-17.2748	10.2409	-447.65	28778.4	-35040.8	-400.589	121.723	235.712	0	0	0	0	0	0	0	200	903	0	0	0	0	0	0	0	603	903	0
589	7	-16.5119	9.478	-449.787	28870	-35407.1	-80.1548	121.28	235.814	0	0	0	0	0	0	0	200	903	0	0	0	0	0	0	0	603	903	0
589	8	-16.8171	9.478	-448.261	28412.2	-34796.7	-217.484	122.374	236.617	0	0	0	0	0	0	0	200	903	0	0	0	0	0	0	0	603	903	0
589	9	-18.0378	9.32541	-447.956	28229.1	-34674.6	-80.1548	122.594	236.982	0	0	0	0	0	0	0	200	903	0	0	0	0	0	0	0	603	903	0
590	0	-17.2748	9.32541	-447.04	28046	-34979.8	-34.3784	121.752	237.263	0	0	0	0	0	0	0	200	903	0	0	0	0	0	0	0	603	903	0
590	1	-15.7489	9.63058	-447.956	27588.2	-34979.8	194.503	121.912	238.413	0	0	0	0	0	0	0	200	903	0	0	0	0	0	0	0	603	903	0
590	2	-16.0541	9.63058	-446.43	27679.8	-34979.8	11.398	121.645	237.997	0	0	0	0	0	0	0	200	903	0	0	0	0	0	0	0	603	903	0
590	3	-15.2912	8.56247	-449.176	27038.9	-34552.6	377.609	123.076	239.803	0	0	0	0	0	0	0	200	903	0	0	0	0	0	0	0	603	903	0
590	4	-16.3593	8.86765	-448.566	26947.4	-34674.6	652.267	122.699	239.926	0	0	0	0	0	0	0	200	903	0	0	0	0	0	0	0	603	903	0
590	5	-16.0541	7.49435	-447.04	26947.4	-35285	514.938	121.07	239.72	0	0	0	0	0	0	0	200	903	0	0	0	0	0	0	0	603	903	0
590	6	-15.7489	6.42624	-444.599	26581.2	-34918.8	469.162	121.46	240.213	0	0	0	0	0	0	0	200	903	0	0	0	0	0	0	0	603	903	0
590	7	-14.5282	7.18918	-447.345	26214.9	-34979.8	560.714	121.806	241.399	0	0	0	0	0	0	0	200	903	0	0	0	0	0	0	0	603	903	0
590	8	-13.4601	6.884	-449.787	26489.6	-34979.8	514.938	122.23	241.106	0	0	0	0	0	0	0	200	903	0	0	0	0	0	0	0	603	903	0
590	9	-14.3757	6.42624	-449.787	26214.9	-35468.1	560.714	121.145	241.717	0	0	0	0	0	0	0	200	903	0	0	0	0	0	0	0	603	903	0
591	0	-14.6808	6.42624	-451.007	26214.9	-35346	698.044	121.629	241.875	0	0	0	0	0	0	0	200	903	0	0	0	0	0	0	0	603	903	0
591	1	-14.3757	6.27365	-450.397	26214.9	-34735.7	789.596	122.878	241.796	0	0	0	0	0	0	0	200	903	0	0	0	0	0	0	0	603	903	0
591	2	-13.0024	5.35812	-450.702	25757.2	-35101.9	1018.48	122.117	242.851	0	0	0	0	0	0	0	200	903	0	0	0	0	0	0	0	603	903	0
591	3	-12.5446	3.52707	-452.228	25940.3	-35162.9	1110.03	122.245	242.639	0	0	0	0	0	0	0	200	903	0	0	0	0	0	0	0	603	903	0
591	4	-13.3075	4.13742	-450.092	25299.4	-35468.1	1018.48	121.198	243.791	0	0	0	0	0	0	0	200	903	0	0	0	0	0	0	0	603	903	0
591	5	-12.6972	3.98483	-454.364	25299.4	-35223.9	1247.36	122.476	244.319	0	0	0	0	0	0	0	200	903	0	0	0	0	0	0	0	603	903	0
591	6	-13.3075	3.22189	-452.838	24750.1	-35468.1	1522.02	121.676	245.345	0	0	0	0	0	0	0	200	903	0	0	0	0	0	0	0	603	903	0
591	7	-11.3239	3.98483	-454.059	24567	-35223.9	1201.58	122.424	245.895	0	0	0	0	0	0	0	200	903	0	0	0	0	0	0	0	603	903	0
591	8	-11.4765	1.54343	-455.585	24658.5	-35651.2	1201.58	121.746	245.875	0	0	0	0	0	0	0	200	903	0	0	0	0	0	0	0	603	903	0
591	9	-11.1713	2.76413	-453.144	24109.2	-35712.2	1338.91	121.19	246.796	0	0	0	0	0	0	0	200	903	0	0	0	0	0	0	0	603	903	0
592	0	-12.2394	2.45895	-460.163	23651.5	-35407.1	1476.24	123.055	248.602	0	0	0	0	0	0	0	200	903	0	0	0	0	0	0	0	603	903	0
592	1	-12.0868	2.15378	-458.332	23559.9	-35651.2	1430.47	122.215	248.596	0	0	0	0	0	0	0	200	903	0	0	0	0	0	0	0	603	903	0
592	2	-10.1032	2.00119	-460.163	23193.7	-35529.1	1476.24	122.79	249.597	0	0	0	0	0	0	0	200	903	0	0	0	0	0	0	0	603	903	0
592	3	-8.42473	2.45895	-462.604	23559.9	-35956.4	1476.24	122.274	249.071	0	0	0	0	0	0	0	200	903	0	0	0	0	0	0	0	603	903	0
592	4	-10.4084	1.69601	-464.74	22644.4	-35956.4	1842.45	122.631	251.275	0	0	0	0	0	0	0	200	903	0	0	0	0	0	0	0	603	903	0
592	5	-10.4084	2.15378	-464.74	22827.5	-35590.2	1796.68	123.419	250.881	0	0	0	0	0	0	0	200	903	0	0	0	0	0	0	0	603	903	0
592	6	-10.2558	1.39084	-465.656	22644.4	-36017.4	1750.9	122.652	251.371	0	0	0	0	0	0	0	200	903	0	0	0	0	0	0	0	603	903	0
592	7	-9.03508	0.017548	-467.182	22552.8	-36078.4	1934.01	122.774	251.726	0	0	0	0	0	0	0	200	903	0	0	0	0	0	0	0	603	903	0
592	8	-8.57732	0.6279	-467.182	22095.1	-36383.6	2071.33	122.121	252.706	0	0	0	0	0	0	0	200	903	0	0	0	0	0	0	0	603	903	0
592	9	-8.57732	0.475312	-470.844	22735.9	-36200.5	1979.78	123.116	251.712	0	0	0	0	0	0	0	200	903	0	0	0	0	0	0	0	603	903	0
593	0	-9.34026	-0.13504	-472.98	22827.5	-36261.5	2254.44	123.334	251.737	0	0	0	0	0	0	0	200	903	0	0	0	0	0	0	0	603	903	0
593	1	-6.74626	-0.287628	-472.37	22369.7	-36749.8	2208.66	122.201	252.644	0	0	0	0	0	0	0	200	903	0	0	0	0	0	0	0	603	903	0
593	2	-8.57732	-0.13504	-474.506	22186.6	-36871.9	2437.55	122.294	253.243	0	0	0	0	0	0	0	200	903	0	0	0	0	0	0	0	603	903	0
593	3	-7.5092	-0.745391	-476.032	21728.9	-36810.9	2437.55	122.671	254.354	0	0	0	0	0	0	0	200	903	0	0	0	0	0	0	0	603	903	0
593	4	-7.5092	-1.35574	-481.22	22095.1	-36627.8	2208.66	123.886	254.085	0	0	0	0	0	0	0	200	903	0	0	0	0	0	0	0	603	903	0
593	5	-8.11955	-3.03421	-482.746	21728.9	-37177.1	2574.88	122.988	254.989	0	0	0	0	0	0	0	200	903	0	0	0	0	0	0	0	603	903	0
593	6	-8.11955	-2.72903	-481.83	21454.2	-37482.2	2483.32	122.209	255.474	0	0	0	0	0	0	0	200	903	0	0	0	0	0	0	0	603	903	0
593	7	-7.81438	-2.88162	-484.882	22278.2	-36810.9	3078.42	124.083	254.054	0	0	0	0	0	0	0	200	903	0	0	0	0	0	0	0	603	903	0
593	8	-7.5092	-3.79715	-486.713	20996.4	-37299.1	2941.09	123.365	256.861	0	0	0	0	0	0	0	200	903	0	0	0	0	0	0	0	603	903	0
593	9	-6.59367	-3.64456	-490.985	21179.5	-37299.1	2666.43	124.032	256.863	0	0	0	0	0	0	0	200	903	0	0	0	0	0	0	0	603	903	0
594	0	-5.67815	-3.64456	-490.985	20813.3	-37970.5	2757.98	122.665	257.609	0	0	0	0	0	0	0	200	903	0	0	0	0	0	0	0	603	903	0
594	1	-6.74626	-6.08597	-494.648	20721.8	-37848.5	3032.64	123.484	258.108	0	0	0	0	0	0	0	200	903	0	0	0	0	0	0	0	603	903	0
594	2	-7.05144	-4.86526	-495.868	20904.9	-37848.5	2895.31	123.672	257.842	0	0	0	0	0	0	0	200	903	0	0	0	0	0	0	0	603	903	0
594	3	-5.83074	-4.86526	-498.31	19440	-37909.5	2941.09	123.924	260.988	0	0	0	0	0	0	0	200	903	0	0	0	0	0	0	0	603	903	0
594	4	-5.22038	-5.6282	-500.141	19806.2	-38275.7	3124.19	123.47	260.399	0	0	0	0	0	0	0	200	903	0	0	0	0	0	0	0	603	903	0
594	5	-5.52556	-5.93338	-504.413	19897.8	-38214.7	3078.42	124.239	260.553	0	0	0	0	0	0	0	200	903	0	0	0	0	0	0	0	603	903	0
594	6	-6.13591	-6.23856	-509.296	19348.5	-38702.9	3307.3	124.007	262.009	0	0	0	0	0	0	0	200	903	0	0	0	0	0	0	0	603	903	0
594	7	-4.91521	-5.6282	-507.77	20264	-38641.9	3215.74	123.899	260.092	0	0	0	0	0	0	0	200	903	0	0	0	0	0	0	0	603	903	0
594	8	-6.89885	-6.23856	-511.432	19073.8	-38886.1	3215.74	123.966	262.705	0	0	0	0	0	0	0	200	903	0	0	0	0	0	0	0	603	903	0
594	9	-4.76262	-6.69632	-513.568	19348.5	-39069.2	3444.63	123.926	262.325	0	0	0	0	0	0	0	200	903	0	0	0	0	0	0	0	603	903	0
595	0	-5.37297	-6.54373	-517.536	18799.2	-39313.3	3444.63	124.038	263.676	0	0	0	0	0	0	0	200	903	0	0	0	0	0	0	0	603	903	0
595	1	-5.37297	-8.37479	-517.841	18524.5	-40106.8	3673.51	122.55	264.227	0	0	0	0	0	0	0	200	903	0	0	0	0	0	0	0	603	903	0
595	2	-5.98332	-8.37479	-521.503	18616.1	-39191.2	3536.18	124.849	264.303	0	0	0	0	0	0	0	200	903	0	0	0	0	0	0	0	603	903	0
595	3	-6.59367	-6.84891	-523.334	19165.4	-39618.5	3719.28	124.296	263.378	0	0	0	0	0	0	0	200	903	0	0	0	0	0	0	0	603	903	0
595	4	-4.76262	-7.91702	-526.996	18341.4	-40106.8	3627.73	123.896	265.196	0	0	0	0	0	0	0	200	903	0	0	0	0	0	0	0	603	903	0
595	5	-5.52556	-7.45926	-529.743	18249.9	-40289.9	3627.73	123.944	265.55	0	0	0	0	0	0	0	200	903	0	0	0	0	0	0	0	603	903	0
595	6	-5.0678	-7.61185	-534.015	18341.4	-40289.9	3765.06	124.553	265.654	0	0	0	0	0	0	0	200	903	0	0	0	0	0	0	0	603	903	0
595	7	-5.67815	-9.29031	-535.846	18066.7	-40411.9	4039.72	124.583	266.284	0	0	0	0	0	0	0	200	903	0	0	0	0	0	0	0	603	903	0
595	8	-4.30486	-8.98514	-538.898	17883.6	-41083.3	3719.28	123.764	266.814	0	0	0	0	0	0	0	200	903	0	0	0	0	0	0	0	603	903	0
595	9	-6.13591	-9.29031	-540.119	17609	-40778.1	3856.61	124.502	267.398	0	0	0	0	0	0	0	200	903	0	0	0	0	0	0	0	603	903	0
596	0	-5.37297	-8.67996	-542.56	17151.2	-41205.4	3948.17	124.054	268.388	0	0	0	0	0	0	0	200	903	0	0	0	0	0	0	0	603	903	0
596	1	-5.52556	-9.13773	-547.138	17151.2	-41327.5	3902.39	124.466	268.653	0	0	0	0	0	0	0	200	903	0	0	0	0	0	0	0	603	903	0
596	2	-5.0678	-10.6636	-545.002	16968.1	-41266.4	3856.61	124.282	268.866	0	0	0	0	0	0	0	200	903	0	0	0	0	0	0	0	603	903	0
596	3	-5.98332	-9.59549	-553.241	16876.6	-41876.8	3902.39	124.306	269.495	0	0	0	0	0	0	0	200	903	0	0	0	0	0	0	0	603	903	0
596	4	-5.83074	-9.4429	-555.378	16693.5	-42059.9	3993.94	124.268	269.942	0	0	0	0	0	0	0	200	903	0	0	0	0	0	0	0	603	903	0
596	5	-4.45744	-9.4429	-558.124	15777.9	-42243	3856.61	124.313	271.73	0	0	0	0	0	0	0	200	903	0	0	0	0	0	0	0	603	903	0
596	6	-5.22038	-9.90067	-559.955	15503.3	-41937.8	4039.72	125.105	272.313	0	0	0	0	0	0	0	200	903	0	0	0	0	0	0	0	603	903	0
596	7	-4.91521	-10.3584	-564.533	15228.6	-42426.1	3993.94	124.847	273.024	0	0	0	0	0	0	0	200	903	0	0	0	0	0	0	0	603	903	0
596	8	-5.67815	-10.8162	-568.195	15228.6	-42853.3	4268.6	124.58	273.198	0	0	0	0	0	0	0	200	903	0	0	0	0	0	0	0	603	903	0
596	9	-5.0678	-9.74808	-568.5	15411.7	-43158.5	3993.94	124.084	272.891	0	0	0	0	0	0	0	200	903	0	0	0	0	0	0	0	603	903	0
597	0	-6.2885	-9.74808	-568.5	15045.5	-42792.3	4268.6	124.728	273.535	0	0	0	0	0	0	0	200	903	0	0	0	0	0	0	0	603	903	0
597	1	-5.22038	-10.3584	-574.298	14679.3	-43463.7	3993.94	124.319	274.44	0	0	0	0	0	0	0	200	903	0	0	0	0	0	0	0	603	903	0
597	2	-5.37297	-10.3584	-578.266	14404.6	-43402.7	4360.15	124.943	275.09	0	0	0	0	0	0	0	200	903	0	0	0	0	0	0	0	603	903	0
597	3	-6.2885	-10.511	-581.012	14587.7	-43890.9	4360.15	124.458	274.893	0	0	0	0	0	0	0	200	903	0	0	0	0	0	0	0	603	903	0
597	4	-7.5092	-12.9524	-581.012	14130	-44013	4314.38	124.248	275.68	0	0	0	0	0	0	0	200	903	0	0	0	0	0	0	0	603	903	0
597	5	-6.59367	-11.4265	-585.285	13763.8	-44318.2	4085.5	124.279	276.484	0	0	0	0	0	0	0	200	903	0	0	0	0	0	0	0	603	903	0
597	6	-5.83074	-11.5791	-588.031	14404.6	-44074	4589.04	125.048	275.504	0	0	0	0	0	0	0	200	903	0	0	0	0	0	0	0	603	903	0
597	7	-6.13591	-11.8843	-591.999	13855.3	-44684.4	4543.26	124.519	276.596	0	0	0	0	0	0	0	200	903	0	0	0	0	0	0	0	603	903	0
597	8	-5.0678	-12.4947	-593.83	13306	-44684.4	4314.38	124.752	277.593	0	0	0	0	0	0	0	200	903	0	0	0	0	0	0	0	603	903	0
597	9	-7.81438	-12.1895	-598.407	13397.6	-45111.6	4177.05	124.614	277.611	0	0	0	0	0	0	0	200	903	0	0	0	0	0	0	0	603	903	0
598	0	-7.96697	-12.4947	-599.018	12848.2	-44806.5	4543.26	125.2	278.551	0	0	0	0	0	0	0	200	903	0	0	0	0	0	0	0	603	903	0
598	1	-6.59367	-13.5628	-600.849	12939.8	-44562.3	4360.15	125.834	278.464	0	0	0	0	0	0	0	200	903	0	0	0	0	0	0	0	603	903	0
598	2	-7.35661	-13.7154	-602.985	12482	-45172.7	4497.48	125.085	279.3	0	0	0	0	0	0	0	200	903	0	0	0	0	0	0	0	603	903	0
598	3	-7.5092	-14.6309	-610.004	12207.4	-45783	4497.48	124.946	279.988	0	0	0	0	0	0	0	200	903	0	0	0	0	0	0	0	603	903	0
598	4	-8.42473	-14.6309	-611.53	11566.5	-46149.2	4451.71	124.535	281.086	0	0	0	0	0	0	0	200	903	0	0	0	0	0	0	0	603	903	0
598	5	-7.20403	-15.8516	-612.445	11749.6	-45783	4772.14	125.246	280.815	0	0	0	0	0	0	0	200	903	0	0	0	0	0	0	0	603	903	0
598	6	-8.88249	-17.3775	-613.971	11566.5	-46271.3	4589.04	124.636	281.161	0	0	0	0	0	0	0	200	903	0	0	0	0	0	0	0	603	903	0
598	7	-8.42473	-15.5464	-617.023	11749.6	-45966.1	4634.81	125.503	280.958	0	0	0	0	0	0	0	200	903	0	0	0	0	0	0	0	603	903	0
598	8	-8.88249	-16.3094	-621.906	10467.9	-46881.7	4772.14	124.616	283.168	0	0	0	0	0	0	0	200	903	0	0	0	0	0	0	0	603	903	0
598	9	-9.18767	-16.9197	-624.042	10101.7	-47003.7	4405.93	124.679	283.813	0	0	0	0	0	0	0	200	903	0	0	0	0	0	0	0	603	903	0
599	0	-9.95061	-17.2249	-626.178	10101.7	-46820.6	4634.81	125.228	283.868	0	0	0	0	0	0	0	200	903	0	0	0	0	0	0	0	603	903	0
599	1	-9.95061	-17.3775	-627.704	9643.89	-46942.7	4589.04	125.215	284.636	0	0	0	0	0	0	0	200	903	0	0	0	0	0	0	0	603	903	0
599	2	-9.03508	-17.0723	-630.756	9643.89	-47308.9	4817.92	124.996	284.711	0	0	0	0	0	0	0	200	903	0	0	0	0	0	0	0	603	903	0
599	3	-9.34026	-18.293	-634.723	9552.34	-48102.4	5321.46	124.215	284.95	0	0	0	0	0	0	0	200	903	0	0	0	0	0	0	0	603	903	0
599	4	-9.34026	-18.5982	-635.028	8636.81	-48041.3	4589.04	124.348	286.399	0	0	0	0	0	0	0	200	903	0	0	0	0	0	0	0	603	903	0
599	5	-11.4765	-18.293	-639.301	8636.81	-47858.2	4863.69	125.14	286.49	0	0	0	0	0	0	0	200	903	0	0	0	0	0	0	0	603	903	0
599	6	-11.3239	-18.7508	-640.216	7995.94	-48041.3	4543.26	124.961	287.511	0	0	0	0	0	0	0	200	903	0	0	0	0	0	0	0	603	903	0
599	7	-10.561	-20.887	-641.742	7995.94	-48285.5	5046.8	124.759	287.54	0	0	0	0	0	0	0	200	903	0	0	0	0	0	0	0	603	903	0
599	8	-10.7135	-21.6499	-645.099	7721.28	-48956.9	4955.25	124.11	288.031	0	0	0	0	0	0	0	200	903	0	0	0	0	0	0	0	603	903	0
599	9	-10.2558	-20.2766	-649.677	7171.97	-48773.8	5001.02	124.926	288.961	0	0	0	0	0	0	0	200	903	0	0	0	0	0	0	0	603	903	0
600	0	-11.6291	-20.7344	-651.508	7355.07	-48773.8	4955.25	125.137	288.711	0	0	0	0	0	0	0	200	903	0	0	0	0	0	0	0	603	903	0
600	1	-11.0187	-21.4973	-653.949	6988.86	-49078.9	5138.35	124.95	289.313	0	0	0	0	0	0	0	200	903	0	0	0	0	0	0	0	603	903	0
600	2	-12.5446	-22.2603	-655.475	6897.31	-49078.9	5092.58	125.125	289.477	0	0	0	0	0	0	0	200	903	0	0	0	0	0	0	0	603	903	0
600	3	-11.3239	-22.8706	-658.222	6347.99	-49750.3	5001.02	124.417	290.356	0	0	0	0	0	0	0	200	903	0	0	0	0	0	0	0	603	903	0
600	4	-11.3239	-24.7017	-663.105	6256.44	-49811.4	5229.91	124.882	290.565	0	0	0	0	0	0	0	200	903	0	0	0	0	0	0	0	603	903	0
600	5	-11.4765	-25.0069	-665.241	5615.57	-49689.3	5321.46	125.306	291.559	0	0	0	0	0	0	0	200	903	0	0	0	0	0	0	0	603	903	0
600	6	-13.155	-25.0069	-668.598	5981.78	-50055.5	5138.35	125.134	291.053	0	0	0	0	0	0	0	200	903	0	0	0	0	0	0	0	603	903	0
600	7	-13.0024	-25.9224	-669.818	5249.36	-50055.5	5138.35	125.27	292.163	0	0	0	0	0	0	0	200	903	0	0	0	0	0	0	0	603	903	0
600	8	-13.3075	-26.8379	-670.734	4883.15	-50787.9	5321.46	124.28	292.72	0	0	0	0	0	0	0	200	903	0	0	0	0	0	0	0	603	903	0
600	9	-12.5446	-26.8379	-675.006	4425.38	-50849	5550.34	124.669	293.444	0	0	0	0	0	0	0	200	903	0	0	0	0	0	0	0	603	903	0
601	0	-12.6972	-28.9742	-678.363	4150.73	-50910	5321.46	124.952	293.881	0	0	0	0	0	0	0	200	903	0	0	0	0	0	0	0	603	903	0
601	1	-15.1386	-28.8216	-677.448	4608.49	-51459.3	5367.23	124.039	293.197	0	0	0	0	0	0	0	200	903	0	0	0	0	0	0	0	603	903	0
601	2	-14.2231	-28.8216	-683.246	3235.2	-51154.1	5550.34	125.131	295.265	0	0	0	0	0	0	0	200	903	0	0	0	0	0	0	0	603	903	0
601	3	-14.8334	-29.7371	-683.246	2868.99	-52008.6	5458.79	123.88	295.801	0	0	0	0	0	0	0	200	903	0	0	0	0	0	0	0	603	903	0
601	4	-13.9179	-31.1104	-686.603	2868.99	-52008.6	5687.67	124.252	295.822	0	0	0	0	0	0	0	200	903	0	0	0	0	0	0	0	603	903	0
601	5	-13.9179	-30.0423	-689.35	2319.67	-52008.6	5733.45	124.554	296.635	0	0	0	0	0	0	0	200	903	0	0	0	0	0	0	0	603	903	0
601	6	-13.9179	-31.4156	-694.232	3052.09	-51764.5	5413.01	125.436	295.604	0	0	0	0	0	0	0	200	903	0	0	0	0	0	0	0	603	903	0
601	7	-14.986	-31.8733	-695.758	1495.7	-52130.7	6053.88	125.074	297.85	0	0	0	0	0	0	0	200	903	0	0	0	0	0	0	0	603	903	0
601	8	-14.0705	-32.3311	-699.726	1770.35	-52802.1	5687.67	124.539	297.47	0	0	0	0	0	0	0	200	903	0	0	0	0	0	0	0	603	903	0
601	9	-15.1386	-32.7888	-699.42	1037.93	-52802.1	6053.88	124.506	298.516	0	0	0	0	0	0	0	200	903	0	0	0	0	0	0	0	603	903	0
602	0	-14.0705	-34.7725	-701.862	763.274	-52741	5733.45	124.856	298.913	0	0	0	0	0	0	0	200	903	0	0	0	0	0	0	0	603	903	0
602	1	-13.9179	-35.0777	-704.303	1312.59	-53107.3	6053.88	124.596	298.136	0	0	0	0	0	0	0	200	903	0	0	0	0	0	0	0	603	903	0
602	2	-13.6127	-35.2303	-708.576	763.274	-52985.2	5916.55	125.223	298.923	0	0	0	0	0	0	0	200	903	0	0	0	0	0	0	0	603	903	0
602	3	-13.9179	-36.451	-711.322	305.51	-53656.6	5916.55	124.568	299.57	0	0	0	0	0	0	0	200	903	0	0	0	0	0	0	0	603	903	0
602	4	-15.2912	-37.6717	-713.459	305.51	-53656.6	5870.77	124.794	299.572	0	0	0	0	0	0	0	200	903	0	0	0	0	0	0	0	603	903	0
602	5	-15.1386	-38.8924	-714.374	-518.465	-53473.5	6099.66	125.146	300.726	0	0	0	0	0	0	0	200	903	0	0	0	0	0	0	0	603	903	0
602	6	-14.3757	-39.6553	-715.595	-518.465	-53656.6	6236.99	125.018	300.725	0	0	0	0	0	0	0	200	903	0	0	0	0	0	0	0	603	903	0
602	7	-13.9179	-41.3338	-718.341	-1067.78	-53900.7	6099.66	124.965	301.486	0	0	0	0	0	0	0	200	903	0	0	0	0	0	0	0	603	903	0
602	8	-13.7653	-41.4864	-723.835	-1250.89	-54450	6557.42	124.776	301.728	0	0	0	0	0	0	0	200	903	0	0	0	0	0	0	0	603	903	0
602	9	-14.0705	-42.4019	-722.614	-2532.63	-54511.1	6465.87	124.564	303.505	0	0	0	0	0	0	0	200	903	0	0	0	0	0	0	0	603	903	0
603	0	-14.6808	-43.3174	-729.328	-2257.97	-54328	6374.31	125.51	303.096	0	0	0	0	0	0	0	200	903	0	0	0	0	0	0	0	603	903	0
603	1	-11.9343	-44.6907	-729.023	-2441.07	-54633.1	6557.42	125.06	303.348	0	0	0	0	0	0	0	200	903	0	0	0	0	0	0	0	603	903	0
603	2	-14.6808	-45.7588	-730.548	-2898.84	-54511.1	6420.09	125.383	303.968	0	0	0	0	0	0	0	200	903	0	0	0	0	0	0	0	603	903	0
603	3	-12.6972	-46.5218	-733.295	-3081.94	-55426.6	6877.85	124.414	304.203	0	0	0	0	0	0	0	200	903	0	0	0	0	0	0	0	603	903	0
603	4	-11.9343	-46.064	-736.347	-2807.28	-55121.4	6694.75	125.142	303.812	0	0	0	0	0	0	0	200	903	0	0	0	0	0	0	0	603	903	0
603	5	-13.3075	-47.2847	-739.398	-3081.94	-54999.3	6511.64	125.616	304.168	0	0	0	0	0	0	0	200	903	0	0	0	0	0	0	0	603	903	0
603	6	-13.6127	-47.7425	-740.924	-3631.26	-55121.4	6877.85	125.605	304.901	0	0	0	0	0	0	0	200	903	0	0	0	0	0	0	0	603	903	0
603	7	-12.8498	-48.3528	-740.924	-4089.02	-55487.6	6786.3	125.11	305.519	0	0	0	0	0	0	0	200	903	0	0	0	0	0	0	0	603	903	0
603	8	-14.2231	-49.1158	-745.502	-4272.13	-56036.9	7106.74	124.833	305.731	0	0	0	0	0	0	0	200	903	0	0	0	0	0	0	0	603	903	0
603	9	-12.6972	-50.1839	-745.807	-4638.34	-56098	6832.08	124.782	306.219	0	0	0	0	0	0	0	200	903	0	0	0	0	0	0	0	603	903	0
604	0	-12.8498	-52.4727	-749.774	-4729.89	-55792.8	6923.63	125.587	306.308	0	0	0	0	0	0	0	200	903	0	0	0	0	0	0	0	603	903	0
604	1	-12.2394	-51.7097	-751.3	-5096.1	-55914.9	7381.39	125.576	306.783	0	0	0	0	0	0	0	200	903	0	0	0	0	0	0	0	603	903	0
604	2	-13.4601	-52.4727	-753.742	-5187.65	-56036.9	7106.74	125.655	306.883	0	0	0	0	0	0	0	200	903	0	0	0	0	0	0	0	603	903	0
604	3	-12.392	-53.2356	-755.268	-5370.76	-56708.3	7289.84	124.916	307.111	0	0	0	0	0	0	0	200	903	0	0	0	0	0	0	0	603	903	0
604	4	-13.0024	-54.4563	-754.047	-5553.86	-56586.3	7335.62	124.957	307.365	0	0	0	0	0	0	0	200	903	0	0	0	0	0	0	0	603	903	0
604	5	-12.0868	-55.0667	-757.404	-5736.97	-56281.1	7335.62	125.692	307.575	0	0	0	0	0	0	0	200	903	0	0	0	0	0	0	0	603	903	0
604	6	-12.2394	-56.44	-761.982	-6194.73	-56525.2	7472.95	125.818	308.13	0	0	0	0	0	0	0	200	903	0	0	0	0	0	0	0	603	903	0
604	7	-12.2394	-57.0503	-758.625	-6560.94	-56586.3	7518.72	125.409	308.648	0	0	0	0	0	0	0	200	903	0	0	0	0	0	0	0	603	903	0
604	8	-13.4601	-56.7451	-765.033	-6652.5	-56830.4	7656.05	125.715	308.696	0	0	0	0	0	0	0	200	903	0	0	0	0	0	0	0	603	903	0
604	9	-13.0024	-58.8814	-763.202	-7110.26	-57074.5	7518.72	125.217	309.316	0	0	0	0	0	0	0	200	903	0	0	0	0	0	0	0	603	903	0
605	0	-12.6972	-60.2547	-762.897	-6652.5	-56647.3	7610.28	125.747	308.72	0	0	0	0	0	0	0	200	903	0	0	0	0	0	0	0	603	903	0
605	1	-11.7817	-61.0176	-765.644	-7110.26	-56952.5	7839.16	125.615	309.287	0	0	0	0	0	0	0	200	903	0	0	0	0	0	0	0	603	903	0
605	2	-11.7817	-62.0857	-768.695	-7842.68	-56891.4	7564.5	125.99	310.203	0	0	0	0	0	0	0	200	903	0	0	0	0	0	0	0	603	903	0
605	3	-12.0868	-62.6961	-770.221	-8300.45	-57562.8	7564.5	125.265	310.777	0	0	0	0	0	0	0	200	903	0	0	0	0	0	0	0	603	903	0
605	4	-13.3075	-63.459	-770.221	-8575.11	-57623.9	7747.61	125.185	311.133	0	0	0	0	0	0	0	200	903	0	0	0	0	0	0	0	603	903	0
605	5	-12.0868	-64.222	-770.832	-8758.21	-57135.6	7839.16	125.878	311.362	0	0	0	0	0	0	0	200	903	0	0	0	0	0	0	0	603	903	0
605	6	-14.3757	-66.2056	-770.221	-9307.53	-57379.7	7564.5	125.502	312.084	0	0	0	0	0	0	0	200	903	0	0	0	0	0	0	0	603	903	0
605	7	-12.392	-68.0367	-772.052	-9399.08	-57501.8	8068.04	125.521	312.174	0	0	0	0	0	0	0	200	903	0	0	0	0	0	0	0	603	903	0
605	8	-11.6291	-67.1211	-772.968	-9673.74	-57745.9	7701.83	125.293	312.515	0	0	0	0	0	0	0	200	903	0	0	0	0	0	0	0	603	903	0
605	9	-12.8498	-68.0367	-774.494	-10406.2	-57257.6	7701.83	126.071	313.436	0	0	0	0	0	0	0	200	903	0	0	0	0	0	0	0	603	903	0
606	0	-14.0705	-69.2574	-776.02	-10589.3	-57501.8	7701.83	125.902	313.646	0	0	0	0	0	0	0	200	903	0	0	0	0	0	0	0	603	903	0
606	1	-12.5446	-70.0203	-776.63	-11047	-57318.7	7701.83	126.196	314.224	0	0	0	0	0	0	0	200	903	0	0	0	0	0	0	0	603	903	0
606	2	-13.9179	-71.0884	-775.104	-11138.6	-57807	7884.93	125.42	314.37	0	0	0	0	0	0	0	200	903	0	0	0	0	0	0	0	603	903	0
606	3	-13.0024	-71.0884	-776.02	-11138.6	-57807	7747.61	125.508	314.353	0	0	0	0	0	0	0	200	903	0	0	0	0	0	0	0	603	903	0
606	4	-13.3075	-72.0039	-778.156	-11321.7	-57623.9	7839.16	125.948	314.549	0	0	0	0	0	0	0	200	903	0	0	0	0	0	0	0	603	903	0
606	5	-13.3075	-73.3772	-775.409	-11962.6	-57440.8	8022.27	125.922	315.427	0	0	0	0	0	0	0	200	903	0	0	0	0	0	0	0	603	903	0
606	6	-14.8334	-73.3772	-779.071	-12145.7	-57501.8	7701.83	126.192	315.59	0	0	0	0	0	0	0	200	903	0	0	0	0	0	0	0	603	903	0
606	7	-14.6808	-75.0557	-776.63	-12695	-57929	7701.83	125.41	316.346	0	0	0	0	0	0	0	200	903	0	0	0	0	0	0	0	603	903	0
606	8	-14.8334	-76.7342	-773.273	-12878.1	-57684.9	7884.93	125.402	316.654	0	0	0	0	0	0	0	200	903	0	0	0	0	0	0	0	603	903	0
606	9	-14.0705	-76.8867	-776.325	-12969.6	-57807	7976.49	125.538	316.706	0	0	0	0	0	0	0	200	903	0	0	0	0	0	0	0	603	903	0
607	0	-14.0705	-77.6497	-778.461	-12786.5	-57318.7	7976.49	126.369	316.425	0	0	0	0	0	0	0	200	903	0	0	0	0	0	0	0	603	903	0
607	1	-14.6808	-77.9549	-773.578	-13519	-57807	7793.38	125.273	317.476	0	0	0	0	0	0	0	200	903	0	0	0	0	0	0	0	603	903	0
607	2	-15.4438	-79.7859	-778.766	-13244.3	-57807	7930.71	125.771	317.007	0	0	0	0	0	0	0	200	903	0	0	0	0	0	0	0	603	903	0
607	3	-16.6645	-81.3118	-776.325	-13702.1	-57745.9	8022.27	125.616	317.65	0	0	0	0	0	0	0	200	903	0	0	0	0	0	0	0	603	903	0
607	4	-16.6645	-81.9221	-772.357	-13793.6	-57318.7	8159.59	125.787	317.859	0	0	0	0	0	0	0	200	903	0	0	0	0	0	0	0	603	903	0
607	5	-15.4438	-82.9903	-775.104	-13152.7	-57196.6	7930.71	126.208	316.969	0	0	0	0	0	0	0	200	903	0	0	0	0	0	0	0	603	903	0
607	6	-15.5964	-83.2954	-778.156	-14068.3	-57562.8	7839.16	126.027	318.079	0	0	0	0	0	0	0	200	903	0	0	0	0	0	0	0	603	903	0
607	7	-16.5119	-83.9058	-773.578	-14068.3	-56830.4	8068.04	126.536	318.186	0	0	0	0	0	0	0	200	903	0	0	0	0	0	0	0	603	903	0
607	8	-17.1222	-84.9739	-776.935	-14709.1	-57562.8	8068.04	125.91	318.932	0	0	0	0	0	0	0	200	903	0	0	0	0	0	0	0	603	903	0
607	9	-16.8171	-85.8894	-774.799	-14800.7	-56891.4	8022.27	126.573	319.103	0	0	0	0	0	0	0	200	903	0	0	0	0	0	0	0	603	903	0
608	0	-16.9697	-88.3308	-773.273	-15075.4	-57135.6	8022.27	126.112	319.496	0	0	0	0	0	0	0	200	903	0	0	0	0	0	0	0	603	903	0
608	1	-15.9015	-89.0938	-772.968	-15166.9	-57074.5	8205.37	126.162	319.622	0	0	0	0	0	0	0	200	903	0	0	0	0	0	0	0	603	903	0
608	2	-16.0541	-90.0093	-772.968	-15075.4	-56769.4	8205.37	126.557	319.503	0	0	0	0	0	0	0	200	903	0	0	0	0	0	0	0	603	903	0
608	3	-16.8171	-91.0774	-765.949	-15807.8	-57196.6	8159.59	125.326	320.638	0	0	0	0	0	0	0	200	903	0	0	0	0	0	0	0	603	903	0
608	4	-17.8852	-92.9085	-770.832	-16082.4	-56403.2	8296.92	126.828	320.864	0	0	0	0	0	0	0	200	903	0	0	0	0	0	0	0	603	903	0
608	5	-18.0378	-94.5869	-767.169	-16448.6	-56525.2	8434.25	126.32	321.441	0	0	0	0	0	0	0	200	903	0	0	0	0	0	0	0	603	903	0
608	6	-16.2067	-95.3499	-766.254	-16906.4	-56586.3	8525.81	126.152	322.064	0	0	0	0	0	0	0	200	903	0	0	0	0	0	0	0	603	903	0
608	7	-16.3593	-97.6387	-765.949	-16540.2	-56403.2	8434.25	126.362	321.594	0	0	0	0	0	0	0	200	903	0	0	0	0	0	0	0	603	903	0
608	8	-17.4274	-98.4016	-765.338	-16998	-56647.3	8388.48	125.984	322.21	0	0	0	0	0	0	0	200	903	0	0	0	0	0	0	0	603	903	0
608	9	-16.9697	-99.9275	-761.371	-16906.4	-55853.8	8617.36	126.64	322.205	0	0	0	0	0	0	0	200	903	0	0	0	0	0	0	0	603	903	0
609	0	-18.8007	-101.301	-761.371	-17364.2	-55792.8	8800.46	126.721	322.806	0	0	0	0	0	0	0	200	903	0	0	0	0	0	0	0	603	903	0
609	1	-18.0378	-102.064	-758.93	-17272.6	-55792.8	8754.69	126.485	322.759	0	0	0	0	0	0	0	200	903	0	0	0	0	0	0	0	603	903	0
609	2	-18.1904	-103.132	-755.268	-16357.1	-55853.8	8800.46	126.048	321.657	0	0	0	0	0	0	0	200	903	0	0	0	0	0	0	0	603	903	0
609	3	-16.6645	-103.895	-754.657	-17638.8	-55426.6	9029.35	126.554	323.373	0	0	0	0	0	0	0	200	903	0	0	0	0	0	0	0	603	903	0
609	4	-17.4274	-106.184	-754.657	-17913.5	-55670.7	9029.35	126.23	323.737	0	-3.20785	17.3318	-23.9053	1572.24	417.526	42.7079	217.466	837.231	0	0	0	0	0	0	0	603	903	0
609	5	-16.9697	-106.794	-747.028	-18005	-55060.4	9212.45	126.294	324.102	0	-0.00350934	9.70245	-21.769	1114.47	722.701	225.813	233.199	851.805	0	0	0	0	0	0	0	603	903	0
609	6	-17.7326	-107.71	-751.606	-18005	-55304.5	9304	126.418	323.955	0	0	0	0	0	0	0	200	903	0	0	0	0	0	0	0	603	903	0
609	7	-17.8852	-108.778	-746.112	-18005	-54999.3	9166.67	126.285	324.132	0	0.912018	5.58258	-21.769	1572.24	417.526	180.037	219.18	830.776	0	0	0	0	0	0	0	603	903	0
609	8	-17.1222	-110.761	-742.755	-17547.3	-54633.1	9349.78	126.445	323.625	0	0.454254	2.98859	-29.3984	2030	722.701	-94.6212	224.583	833.949	0	0	0	0	0	0	0	603	903	0
609	9	-16.8171	-112.287	-742.45	-18005	-54511.1	9304	126.58	324.251	0	0.454254	-6.77704	-33.0605	2396.21	905.807	-48.8449	227.398	830.521	0	0	0	0	0	0	0	603	903	0
610	0	-16.9697	-112.897	-741.23	-17913.5	-54755.2	9395.56	126.129	324.167	0	-0.613861	-7.69257	-34.5864	2213.11	905.807	-3.06848	226.19	839.012	0	0	0	0	0	0	0	603	903	0
610	1	-17.4274	-114.423	-738.483	-17821.9	-54328	9487.11	126.433	324.133	0	-3.05527	-6.16669	-40.3847	3037.08	783.737	-186.174	219.407	827.796	0	0	0	0	0	0	0	603	903	0
610	2	-17.1222	-116.865	-735.431	-18554.4	-53839.7	9624.44	126.792	325.229	0	2.4379	-12.8806	-51.0659	3861.06	1088.91	271.59	221.324	827.391	0	0	0	0	0	0	0	603	903	0
610	3	-17.2748	-117.17	-731.769	-17730.4	-53900.7	9670.21	126.342	324.229	0	4.26895	-16.3901	-58.3901	4410.37	1149.95	-3.06848	219.694	827.467	0	0	0	0	0	0	0	603	903	0
610	4	-18.0378	-118.238	-729.328	-17364.2	-53290.4	9670.21	126.932	323.809	0	-1.3768	-10.2866	-64.7988	5142.79	783.737	-3.06848	212.095	823.635	0	0	0	0	0	0	0	603	903	0
610	5	-16.2067	-118.543	-725.055	-18371.2	-53534.5	9715.99	126.165	325.338	0	0.75943	-8.45551	-73.6489	5509	1027.88	-323.503	213.956	828.199	0	0	0	0	0	0	0	603	903	0
610	6	-15.1386	-120.222	-722.614	-18829	-53351.4	9670.21	126.169	326.057	0	2.13272	-15.0168	-83.7197	6241.43	966.842	-186.174	211.549	828.449	0	0	0	0	0	0	0	603	903	0
610	7	-15.5964	-120.985	-721.393	-18737.5	-52741	9807.54	126.89	325.974	0	0.454254	-14.1013	-93.4853	7523.16	905.807	-231.95	209.689	822.526	0	0	0	0	0	0	0	603	903	0
610	8	-16.9697	-121.29	-718.952	-18920.6	-52374.8	9715.99	127.151	326.317	0	-3.66562	-10.134	-98.6733	7706.27	600.631	-506.608	206.087	824.901	0	0	0	0	0	0	0	603	903	0
610	9	-14.986	-122.053	-714.374	-18829	-52191.7	9853.32	126.941	326.357	0	-5.34409	-14.559	-110.575	8347.14	783.737	-598.161	207.088	827.512	0	0	0	0	0	0	0	603	903	0
611	0	-15.9015	-123.426	-708.881	-19378.3	-52374.8	10082.2	126.116	327.337	0	-3.20785	-17.0004	-124.003	8804.91	478.561	-918.596	203.859	831.994	0	0	0	0	0	0	0	603	903	0
611	1	-14.8334	-123.731	-706.44	-18920.6	-52130.7	10265.3	126.206	326.783	0	-10.0743	-14.7116	-135.6	9903.54	600.631	-1101.7	204.429	829.965	0	0	0	0	0	0	0	603	903	0
611	2	-15.4438	-124.799	-703.693	-19653	-51520.3	10173.8	126.786	327.928	0	-12.6683	-15.9323	-145.06	10910.6	51.3148	-1284.81	200.354	827.786	0	0	0	0	0	0	0	603	903	0
611	3	-14.5282	-126.02	-700.641	-20019.2	-50971	10173.8	127.251	328.573	0	-12.2105	-21.1203	-154.52	11551.5	295.455	-1055.93	201.912	828.243	0	0	0	0	0	0	0	603	903	0
611	4	-15.5964	-127.088	-695.453	-20293.9	-51154.1	10356.9	126.445	329.181	0	-14.9571	-18.6789	-163.676	12009.3	356.491	-1559.47	202.178	829.628	0	0	0	0	0	0	0	603	903	0
611	5	-14.8334	-127.546	-691.181	-20202.3	-50787.9	10585.7	126.52	329.229	0	-17.7037	-15.1694	-174.662	12558.6	-375.931	-1651.02	197.848	831.098	0	0	0	0	0	0	0	603	903	0
611	6	-11.6291	-127.393	-686.298	-20110.8	-49506.2	10311.1	127.865	329.303	0	-19.3822	-17.7634	-181.376	12924.8	-436.967	-1513.69	197.591	831.74	0	0	0	0	0	0	0	603	903	0
611	7	-13.155	-128.461	-681.11	-19653	-50116.5	10128	126.419	328.854	0	-17.2459	-17.916	-188.09	13748.8	-314.896	-1559.47	198.326	829.903	0	0	0	0	0	0	0	603	903	0
611	8	-12.5446	-129.224	-677.753	-19927.6	-49384.1	10402.6	127.136	329.403	0	-19.077	-11.8124	-198.771	14023.4	-314.896	-1788.35	198.416	832.449	0	0	0	0	0	0	0	603	903	0
611	9	-13.155	-129.53	-673.175	-20568.5	-49506.2	10814.6	126.459	330.554	0	-26.5538	-11.2021	-208.842	14298.1	-925.248	-1696.79	195.57	834.536	0	0	0	0	0	0	0	603	903	0
612	0	-12.8498	-130.293	-669.513	-20477	-49201	10631.5	126.512	330.585	0	-29.1478	-12.1176	-214.335	14847.4	-925.248	-1696.79	195.683	833.728	0	0	0	0	0	0	0	603	903	0
612	1	-12.5446	-131.971	-660.968	-20477	-48285.5	10631.5	126.947	330.98	0	-28.69	-5.70892	-220.133	15122	-986.283	-1467.91	195.52	834.305	0	0	0	0	0	0	0	603	903	0
612	2	-9.79802	-131.818	-658.222	-20385.4	-47980.3	10860.4	127.106	330.97	0	-28.2323	-0.673524	-226.237	15213.6	-1352.49	-1376.36	194.022	835.754	0	0	0	0	0	0	0	603	903	0
612	3	-10.2558	-131.818	-652.118	-20477	-47736.2	10768.8	126.798	331.401	0	-29.6056	-1.58905	-232.645	15854.5	-1413.53	-1467.91	193.924	834.851	0	0	0	0	0	0	0	603	903	0
612	4	-10.561	-133.192	-648.151	-20660.1	-47247.9	10952	127.104	331.875	0	-30.3685	1.76788	-240.58	15488.3	-1291.46	-1284.81	194.632	838.621	0	0	0	0	0	0	0	603	903	0
612	5	-10.4084	-134.565	-639.301	-20019.2	-47064.8	11089.3	126.381	331.314	0	-31.4366	8.48175	-246.378	15854.5	-1474.56	-1284.81	194.015	838.65	0	0	0	0	0	0	0	603	903	0
612	6	-10.1032	-135.023	-637.47	-20293.9	-46210.3	10997.7	127.51	331.835	0	-31.4366	11.9913	-250.956	16312.2	-1474.56	-1010.15	194.124	838	0	0	0	0	0	0	0	603	903	0
612	7	-8.11955	-134.87	-628.315	-20019.2	-45783	10814.6	127.134	331.862	0	-31.5892	13.8223	-256.754	15762.9	-1535.6	-872.819	194.019	841.607	0	0	0	0	0	0	0	603	903	0
612	8	-9.79802	-135.328	-621.601	-20019.2	-45783	11135.1	126.347	332.206	0	-33.7254	17.4844	-260.416	17136.2	-1291.46	-1147.48	195.041	837.197	0	0	0	0	0	0	0	603	903	0
612	9	-8.11955	-136.549	-617.023	-19836.1	-45172.7	10997.7	126.789	332.148	0	-33.4203	25.8768	-269.877	17136.2	-1657.67	-1239.03	193.858	839.504	0	0	0	0	0	0	0	603	903	0
613	0	-5.83074	-136.549	-613.971	-19469.9	-44318.2	11272.4	127.817	331.711	0	-32.8099	26.9449	-275.98	16770	-1657.67	-1193.25	193.994	842.235	0	0	0	0	0	0	0	603	903	0
613	1	-6.59367	-137.464	-606.037	-20202.3	-44074	11226.6	127.275	333.335	0	-32.047	30.1492	-281.168	16953.1	-1718.71	-735.49	193.887	842.705	0	0	0	0	0	0	0	603	903	0
613	2	-6.74626	-138.38	-599.628	-19836.1	-43158.5	10997.7	128.025	333.081	0	-36.7772	38.0838	-289.408	16770	-1596.63	-1193.25	194.483	845.054	0	0	0	0	0	0	0	603	903	0
613	3	-5.83074	-137.922	-590.778	-20110.8	-43463.7	11135.1	126.43	334.041	0	-36.6246	42.5089	-300.395	17136.2	-1901.81	-1055.93	193.669	845.954	0	0	0	0	0	0	0	603	903	0
613	4	-5.98332	-137.464	-584.064	-20110.8	-42731.3	11089.3	126.838	334.432	0	-36.1668	45.1028	-309.855	17044.6	-2329.06	-1010.15	192.483	847.992	0	0	0	0	0	0	0	603	903	0
613	5	-5.67815	-137.006	-577.961	-19927.6	-41693.7	11180.8	127.861	334.479	0	-39.2186	50.2908	-319.621	17410.9	-1535.6	-735.49	195.196	848.527	0	0	0	0	0	0	0	603	903	0
613	6	-3.23674	-137.006	-573.688	-19836.1	-41693.7	11043.5	127.323	334.576	0	-39.3712	55.6314	-329.081	17685.5	-2084.92	-506.608	193.664	849.258	0	0	0	0	0	0	0	603	903	0
613	7	-3.99968	-137.617	-565.448	-20019.2	-40900.2	11043.5	127.668	335.404	0	-37.235	57.6151	-339.457	17136.2	-1840.78	-872.819	194.577	852.519	0	0	0	0	0	0	0	603	903	0
613	8	-4.45744	-137.922	-558.429	-20202.3	-40778.1	11363.9	126.977	336.177	0	-37.0824	60.972	-351.359	16953.1	-1596.63	-735.49	195.456	854.75	0	0	0	0	0	0	0	603	903	0
613	9	-2.77898	-139.295	-548.969	-20202.3	-40167.8	11455.5	126.83	336.8	0	-39.8289	64.9393	-363.261	17594	-1962.85	-689.714	194.597	854.567	0	0	0	0	0	0	0	603	903	0
614	0	-3.54192	-139.448	-542.56	-20202.3	-39069.2	11180.8	127.991	337.235	0	-39.8289	66.7703	-374.552	18967.3	-1962.85	-415.056	194.76	852.36	0	0	0	0	0	0	0	603	903	0
614	1	-1.71086	-139.295	-533.71	-20019.2	-39069.2	11180.8	126.797	337.51	0	-37.6927	69.3643	-385.539	18234.8	-1596.63	-323.503	195.859	855.703	0	0	0	0	0	0	0	603	903	0
614	2	0.577956	-138.38	-526.386	-19836.1	-37848.5	11409.7	128.098	337.684	0	-36.9298	72.1109	-400.492	17777.1	-1779.74	-94.6212	195.556	858.612	0	0	0	0	0	0	0	603	903	0
614	3	-0.947922	-139.753	-519.672	-19103.7	-37543.3	11226.6	127.756	336.761	0	-38.1505	73.7894	-413.004	18417.9	-1718.71	-460.832	195.839	858.405	0	0	0	0	0	0	0	603	903	0
614	4	-0.947922	-139.906	-510.822	-19012.1	-37177.1	11226.6	127.221	337.219	0	-37.5401	71.8057	-426.127	18417.9	-1840.78	-506.608	195.68	859.778	0	0	0	0	0	0	0	603	903	0
614	5	0.883132	-139.906	-501.667	-19378.3	-35895.3	11226.6	128.448	338.628	0	-35.5565	75.4678	-437.724	18875.7	-1291.46	-323.503	197.05	859.878	0	0	0	0	0	0	0	603	903	0
614	6	-0.490159	-138.99	-491.596	-19286.8	-35346	11409.7	128.099	339.233	0	-33.878	78.5196	-448.71	18967.3	-1291.46	-598.161	197.122	860.729	0	0	0	0	0	0	0	603	903	0
614	7	0.883132	-139.6	-483.966	-19103.7	-35101.9	11409.7	127.47	339.473	0	-33.878	78.8248	-462.748	18326.4	-1413.53	-552.385	196.945	863.397	0	0	0	0	0	0	0	603	903	0
614	8	1.95125	-139.143	-477.253	-19012.1	-34003.2	11043.5	128.752	339.837	0	-30.3685	77.6041	-472.208	18234.8	-1291.46	-460.832	197.265	864.384	0	0	0	0	0	0	0	603	903	0
614	9	2.10384	-138.685	-467.182	-18462.8	-33698.1	11180.8	127.869	339.52	0	-32.3521	80.1981	-481.974	18601	-1535.6	-598.161	196.814	864.407	0	0	0	0	0	0	0	603	903	0
615	0	1.49348	-137.617	-457.416	-18371.2	-32538.4	11135.1	128.865	340.163	0	-29.7581	82.7921	-492.655	18692.6	-1169.39	-506.608	197.626	865.057	0	0	0	0	0	0	0	603	903	0
615	1	2.71419	-136.854	-448.566	-17913.5	-32111.2	11180.8	128.414	339.935	0	-28.69	82.6395	-502.726	18143.3	-986.283	-689.714	198.038	866.91	0	0	0	0	0	0	0	603	903	0
615	2	1.79866	-136.396	-438.8	-18645.9	-31744.9	10952	127.655	342.493	0	-28.3849	82.7921	-513.102	18143.3	-498.002	-689.714	199.029	867.64	0	0	0	0	0	0	0	603	903	0
615	3	4.08748	-135.633	-426.593	-17821.9	-31134.6	10860.4	127.016	341.777	0	-26.859	85.5386	-521.342	18051.7	-498.002	-918.596	199.045	868.375	0	0	0	0	0	0	0	603	903	0
615	4	3.7823	-135.023	-418.659	-17638.8	-30097	11043.5	128.111	342.132	0	-24.8753	87.5223	-528.666	17410.9	-436.967	-872.819	199.173	870.066	0	0	0	0	0	0	0	603	903	0
615	5	4.08748	-133.955	-410.724	-16998	-29486.6	10952	128.208	341.385	0	-21.9762	87.2171	-541.178	17777.1	-253.861	-964.372	199.531	870.151	0	0	0	0	0	0	0	603	903	0
615	6	3.93489	-133.192	-402.484	-16723.3	-28571.1	10585.7	129.013	341.55	0	-20.2977	90.574	-553.69	16861.5	173.385	-918.596	200.313	872.547	0	0	0	0	0	0	0	603	903	0
615	7	4.39265	-132.124	-391.498	-16540.2	-28265.9	10494.2	127.801	342.249	0	-16.7882	91.6422	-566.508	16495.3	844.772	-1010.15	201.491	873.882	0	0	0	0	0	0	0	603	903	0
615	8	5.00301	-129.987	-379.596	-16448.6	-27228.3	10631.5	128.27	343.332	0	-12.058	94.8465	-575.053	16037.6	478.561	-1284.81	200.832	875.111	0	0	0	0	0	0	0	603	903	0
615	9	5.15559	-128.156	-368.305	-16174	-26618	10494.2	127.728	343.915	0	-7.93808	99.5767	-584.208	16220.7	1210.98	-1422.14	202.073	875.235	0	0	0	0	0	0	0	603	903	0
616	0	5.91853	-126.325	-359.455	-15899.3	-25702.5	10265.3	128.496	344.232	0	-5.49667	101.408	-593.363	15854.5	1394.09	-1239.03	202.349	876.28	0	0	0	0	0	0	0	603	903	0
616	1	5.76594	-124.647	-351.52	-15990.9	-24909	9944.87	129.139	345.491	0	-1.3768	103.086	-602.519	15396.7	1333.05	-1330.58	202.212	877.446	0	0	0	0	0	0	0	603	903	0
616	2	5.00301	-121.595	-340.229	-14709.1	-24542.8	9899.1	127.864	343.233	0	2.28531	105.985	-609.232	15030.5	1882.37	-1467.91	203.09	878.329	0	0	0	0	0	0	0	603	903	0
616	3	5.00301	-119.611	-328.022	-14434.5	-23810.4	10128	127.412	344.005	0	3.04825	112.394	-614.42	14389.6	2126.51	-1467.91	203.461	879.58	0	0	0	0	0	0	0	603	903	0
616	4	4.39265	-117.017	-316.73	-15350	-22772.8	10128	128.1	348.464	0	7.16812	116.819	-621.745	15122	2065.48	-1330.58	203.322	878.678	0	0	0	0	0	0	0	603	903	0
616	5	5.00301	-114.271	-307.88	-14617.6	-22101.4	9349.78	128.214	347.478	0	9.76212	119.871	-629.069	13565.6	2370.65	-1513.69	203.769	881.435	0	0	0	0	0	0	0	603	903	0
616	6	6.68147	-112.44	-298.419	-14342.9	-21185.9	9029.35	129.006	348.063	0	8.99918	122.923	-634.867	13474.1	2736.86	-1467.91	204.311	881.776	0	0	0	0	0	0	0	603	903	0
616	7	4.69783	-110.151	-288.044	-13885.2	-20941.7	9120.9	127.297	348.205	0	10.8302	126.28	-638.224	12833.2	2797.9	-1239.03	204.384	882.892	0	0	0	0	0	0	0	603	903	0
616	8	3.01936	-107.404	-277.362	-13976.7	-19904.1	8937.79	128.238	350.392	0	10.6776	125.517	-638.529	12375.5	2736.86	-1513.69	204.286	883.619	0	0	0	0	0	0	0	603	903	0
616	9	4.39265	-103.742	-265.461	-13702.1	-18744.5	8434.25	129.389	351.616	0	12.6613	128.874	-645.243	12375.5	2797.9	-1330.58	204.336	883.821	0	0	0	0	0	0	0	603	903	0
617	0	3.17195	-99.012	-254.474	-13519	-18622.4	8113.82	126.82	353.125	0	12.0509	130.705	-649.21	11734.6	3042.04	-1147.48	204.686	884.925	0	0	0	0	0	0	0	603	903	0
617	1	2.5616	-95.1973	-243.793	-13610.5	-17584.8	7884.93	127.87	355.828	0	9.9147	129.331	-651.042	11276.8	3042.04	-1284.81	204.673	885.679	0	0	0	0	0	0	0	603	903	0
617	2	4.24007	-92.2981	-235.248	-13152.7	-17035.5	7701.83	127.585	355.91	0	11.5932	127.043	-656.535	11185.3	2981	-1010.15	204.541	885.963	0	0	0	0	0	0	0	603	903	0
617	3	2.25642	-88.636	-224.872	-12695	-16181	7244.07	128.044	356.454	0	10.5251	129.026	-655.924	11093.7	3225.14	-506.608	204.917	886.087	0	0	0	0	0	0	0	603	903	0
617	4	0.272781	-84.211	-216.327	-12969.6	-15448.6	7060.96	128.587	359.954	0	10.9828	129.637	-656.229	10544.4	3347.21	-415.056	205.101	886.932	0	0	0	0	0	0	0	603	903	0
617	5	1.64607	-80.3963	-203.815	-12054.1	-14899.2	6648.97	126.898	359.142	0	10.3725	128.568	-657.755	10819.1	3225.14	-506.608	204.903	886.552	0	0	0	0	0	0	0	603	903	0
617	6	-0.0323951	-77.1919	-195.27	-11962.6	-14227.9	6191.21	127.138	361.262	0	8.54141	127.653	-659.281	9720.43	3469.28	-94.6212	205.262	888.256	0	0	0	0	0	0	0	603	903	0
617	7	0.120193	-73.0721	-189.167	-11687.9	-13861.6	6191.21	126.723	361.786	0	10.0673	127.5	-658.976	9720.43	3469.28	-231.95	205.265	888.249	0	0	0	0	0	0	0	603	903	0
617	8	1.18831	-68.9522	-181.232	-11687.9	-13312.3	5687.67	126.545	364.491	0	7.01553	127.653	-660.502	9720.43	3225.14	134.261	204.883	888.283	0	0	0	0	0	0	0	603	903	0
617	9	0.425369	-63.6116	-175.434	-10955.5	-12640.9	5321.46	127.945	362.448	0	8.08365	128.263	-658.671	8988.01	2981	88.4843	204.526	889.354	0	0	0	0	0	0	0	603	903	0
618	0	-0.947922	-58.8814	-167.194	-10497.7	-12274.7	5046.8	126.584	362.788	0	7.32071	129.179	-661.723	8072.48	3652.39	225.813	205.52	890.801	0	0	0	0	0	0	0	603	903	0
618	1	0.120193	-54.7615	-157.428	-9582.19	-11664.4	4680.59	125.907	360.867	0	6.86295	129.484	-661.723	8255.59	3469.28	454.695	205.243	890.524	0	0	0	0	0	0	0	603	903	0
618	2	-2.01604	-52.0149	-152.545	-9399.08	-11359.2	4543.26	125.536	361.615	0	8.23624	127.805	-660.807	7523.16	3469.28	363.142	205.25	891.615	0	0	0	0	0	0	0	603	903	0
618	3	-1.10051	-49.8787	-142.78	-9856.84	-10870.9	4268.6	123.862	369.035	0	6.86295	131.315	-662.333	7248.51	3042.04	592.024	204.593	892.056	0	0	0	0	0	0	0	603	903	0
618	4	-0.947922	-47.4373	-137.897	-9307.53	-10016.4	3856.61	127.363	367.496	0	8.99918	134.367	-662.028	6607.64	3652.39	592.024	205.517	893.019	0	0	0	0	0	0	0	603	903	0
618	5	-1.40569	-45.7588	-128.437	-8666.66	-9650.21	3902.39	124.864	367.478	0	9.9147	133.909	-663.249	6607.64	3408.25	454.695	205.139	893.037	0	0	0	0	0	0	0	603	903	0
618	6	-2.01604	-44.5381	-122.943	-8666.66	-8795.72	3902.39	128.457	370.493	0	10.0673	134.367	-660.502	6241.43	3347.21	637.801	205.068	893.551	0	0	0	0	0	0	0	603	903	0
618	7	-2.16863	-44.0804	-114.093	-8117.34	-8246.41	3627.73	127.722	371.147	0	11.7458	134.977	-664.469	5692.11	3835.5	637.801	205.772	894.434	0	0	0	0	0	0	0	603	903	0
618	8	-0.947922	-41.9441	-106.769	-7659.58	-8246.41	3444.63	122.764	371.74	0	14.3398	137.266	-665.385	6149.87	4018.6	592.024	206.04	893.757	0	0	0	0	0	0	0	603	903	0
618	9	-1.71086	-38.8924	-99.7501	-6286.29	-7269.85	3215.74	127.119	363.02	0	16.3234	139.25	-666.605	5234.35	4140.67	225.813	206.212	895.148	0	0	0	0	0	0	0	603	903	0
619	0	-1.2531	-36.6035	-94.5621	-6194.73	-7147.77	3215.74	124.412	365.51	0	18.0019	139.86	-669.657	5142.79	4384.81	363.142	206.548	895.32	0	0	0	0	0	0	0	603	903	0
619	1	-2.4738	-32.9414	-89.0689	-5828.52	-6903.63	2803.76	122.491	365.438	0	19.6803	141.996	-669.657	4318.82	4567.92	180.037	206.821	896.551	0	0	0	0	0	0	0	603	903	0
619	2	-2.01604	-29.8897	-82.355	-5279.21	-6476.39	2483.32	121.36	364.103	0	22.1217	140.928	-675.761	3952.61	4262.74	363.142	206.308	897.151	0	0	0	0	0	0	0	603	903	0
619	3	-3.84709	-27.1431	-76.5567	-5279.21	-6049.14	2391.77	120.985	368.958	0	24.5631	142.301	-677.592	4410.37	4689.99	42.7079	206.922	896.491	0	0	0	0	0	0	0	603	903	0
619	4	-3.6945	-24.3965	-71.9791	-4638.34	-5560.86	2391.77	122.743	364.44	0	28.2253	144.285	-680.644	3220.19	4812.06	-48.8449	207.07	898.269	0	0	0	0	0	0	0	603	903	0
619	5	-2.93157	-21.9551	-69.5377	-4913	-5316.72	2117.11	123.542	370.652	0	29.5985	144.743	-686.137	3128.63	5117.23	-3.06848	207.458	898.44	0	0	0	0	0	0	0	603	903	0
619	6	-3.99968	-19.6663	-64.3497	-4272.13	-4889.47	2208.66	124.017	366.389	0	29.9037	145.506	-686.137	2579.32	4751.02	-140.398	206.924	899.241	0	0	0	0	0	0	0	603	903	0
619	7	-5.37297	-18.293	-59.772	-4180.57	-4340.16	1934.01	127.388	369.942	0	31.1244	145.506	-692.851	2487.76	5422.41	-3.06848	207.826	899.409	0	0	0	0	0	0	0	603	903	0
619	8	-3.54192	-15.699	-54.2789	-3722.81	-4340.16	1750.9	120.04	368.587	0	33.2607	146.726	-694.376	2396.21	5361.38	-48.8449	207.721	899.549	0	0	0	0	0	0	0	603	903	0
619	9	-5.67815	-16.7671	-50.9219	-3905.92	-3912.91	1705.12	123.159	376.704	0	35.7021	147.184	-697.733	1755.34	5117.23	-3.06848	207.334	900.484	0	0	0	0	0	0	0	603	903	0
620	0	-4.61003	-14.1731	-46.0391	-3905.92	-3363.59	1293.14	126.941	384.839	0	36.6176	147.489	-702.616	1755.34	4995.16	225.813	207.109	900.502	0	0	0	0	0	0	0	603	903	0
620	1	-3.38933	-13.2576	-45.1236	-3356.6	-3363.59	1247.36	125.458	374.387	0	35.2443	147.489	-705.668	1663.79	5483.45	180.037	207.771	900.642	0	0	0	0	0	0	0	603	903	0
620	2	-4.61003	-12.4947	-41.7667	-3356.6	-3119.45	1430.47	125.312	380.366	0	36.3124	145.658	-709.94	1755.34	5422.41	271.59	207.638	900.528	0	0	0	0	0	0	0	603	903	0
620	3	-5.22038	-11.1214	-37.7994	-2898.84	-2509.1	1293.14	133.621	376.69	0	38.4486	146.879	-709.94	931.367	5422.41	500.472	207.638	901.688	0	0	0	0	0	0	0	603	903	0
620	4	-5.22038	-11.274	-32.9166	-2624.18	-2264.96	1110.03	131.191	379.722	0	37.9909	148.252	-713.908	1297.58	5849.66	271.59	208.194	901.182	0	0	0	0	0	0	0	603	903	0
620	5	-4.76262	-9.90067	-27.1182	-2807.28	-2020.82	926.926	125.481	403.52	0	38.2961	148.557	-718.485	748.262	5544.48	683.577	207.717	901.959	0	0	0	0	0	0	0	603	903	0
620	6	-3.6945	-7.76443	-27.1182	-1342.44	-2142.89	1155.81	120.98	349.503	0	39.059	147.032	-720.927	382.051	5605.52	408.919	207.775	902.47	0	0	0	0	0	0	0	603	903	0
620	7	-3.99968	-7.00149	-25.2872	-2257.97	-1837.72	972.702	127.326	389.293	0	37.3805	147.184	-723.368	382.051	5422.41	729.354	207.496	902.472	0	0	0	0	0	0	0	603	903	0
620	8	-4.30486	-5.47562	-22.8458	-1983.31	-1593.57	1293.14	130.246	386.813	0	38.4486	148.1	-724.894	107.393	5727.59	729.354	207.901	902.852	0	0	0	0	0	0	0	603	903	0
620	9	-5.52556	-5.17044	-20.7095	-1983.31	-1044.26	1064.25	149.576	395.768	0	37.9909	147.947	-731.303	-75.7126	5605.52	820.906	207.665	903.104	0	0	0	0	0	0	0	603	903	0
621	0	-4.91521	-6.08597	-18.2681	-1983.31	-983.223	881.149	146.178	408.567	0	37.6857	146.879	-730.998	-75.7126	5422.41	729.354	207.418	903.104	0	0	0	0	0	0	0	603	903	0
621	1	-3.84709	-3.94974	-15.8267	-1433.99	-1227.36	377.609	122.45	390.606	0	37.3805	145.811	-734.965	-625.029	5788.62	637.801	207.876	903.85	0	0	0	0	0	0	0	603	903	0
621	2	-3.6945	-3.03421	-13.9957	-1433.99	-861.152	560.714	138.47	402.46	0	36.1598	147.337	-736.491	15.8401	5910.69	866.683	208.025	902.979	0	0	0	0	0	0	0	603	903	0
621	3	-4.30486	-1.66092	-13.3853	-1067.78	-555.977	560.714	158.464	379.773	0	37.6857	147.642	-740.153	-1174.35	4934.13	775.13	206.666	904.587	0	0	0	0	0	0	0	603	903	0
621	4	-5.37297	-1.96609	-11.2491	-793.123	-311.836	469.162	172.279	370.506	0	37.6857	147.642	-744.425	-899.687	5788.62	866.683	207.776	904.209	0	0	0	0	0	0	0	603	903	0
621	5	-3.54192	-0.745391	-9.41802	-793.123	54.3751	377.609	205.774	384.213	0	35.8546	147.947	-746.256	-808.135	5727.59	546.248	207.675	904.083	0	0	0	0	0	0	0	603	903	0
621	6	0	0	0	0	0	0	200	300	0	38.4486	146.879	-747.782	-1632.11	5483.45	592.024	207.333	905.183	0	0	0	0	0	0	0	603	903	0
621	7	0	0	0	0	0	0	200	300	0	36.6176	147.032	-749.918	-1540.56	5483.45	592.024	207.312	905.054	0	0	0	0	0	0	0	603	903	0
621	8	0	0	0	0	0	0	200	300	0	37.2279	147.489	-754.496	-1449	5422.41	546.248	207.187	904.921	0	0	0	0	0	0	0	603	903	0
621	9	0	0	0	0	0	0	200	300	0	37.3805	146.269	-756.327	-1449	5605.52	683.577	207.412	904.916	0	0	0	0	0	0	0	603	903	0
622	0	0	0	0	0	0	0	200	300	0	36.0072	145.658	-758.769	-1906.77	5178.27	363.142	206.825	905.513	0	0	0	0	0	0	0	603	903	0
622	1	0	0	0	0	0	0	200	300	0	37.5331	145.506	-757.548	-2364.53	5727.59	592.024	207.561	906.121	0	0	0	0	0	0	0	603	903	0
622	2	0	0	0	0	0	0	200	300	0	36.9228	144.59	-763.651	-1723.66	5666.55	408.919	207.42	905.257	0	0	0	0	0	0	0	603	903	0
622	3	0	0	0	0	0	0	200	300	0	36.6176	145.353	-767.924	-1632.11	5361.38	500.472	206.982	905.125	0	0	0	0	0	0	0	603	903	0
622	4	0	0	0	0	0	0	200	300	0	37.0753	143.675	-770.976	-2364.53	5300.34	729.354	206.875	906.067	0	0	0	0	0	0	0	603	903	0
622	5	0	0	0	0	0	0	200	300	0	35.2443	143.217	-773.417	-2456.08	5605.52	637.801	207.248	906.176	0	0	0	0	0	0	0	603	903	0
622	6	0	0	0	0	0	0	200	300	0	35.5495	143.98	-774.333	-2547.64	5544.48	683.577	207.16	906.29	0	0	0	0	0	0	0	603	903	0
622	7	0	0	0	0	0	0	200	300	0	35.5495	141.996	-778.3	-2364.53	5544.48	500.472	207.124	906.038	0	0	0	0	0	0	0	603	903	0
622	8	0	0	0	0	0	0	200	300	0	35.8546	140.928	-780.131	-2181.43	5727.59	408.919	207.342	905.796	0	0	0	0	0	0	0	603	903	0
622	9	0	0	0	0	0	0	200	300	0	36.0072	140.775	-782.572	-3371.61	5544.48	500.472	207.085	907.308	0	0	0	0	0	0	0	603	903	0
623	0	0	0	0	0	0	0	200	300	0	34.6339	140.165	-783.793	-3005.4	5239.3	546.248	206.685	906.834	0	0	0	0	0	0	0	603	903	0
623	1	0	0	0	0	0	0	200	300	0	34.1762	138.181	-785.014	-2639.19	5300.34	546.248	206.752	906.362	0	0	0	0	0	0	0	603	903	0
623	2	0	0	0	0	0	0	200	300	0	34.6339	138.639	-789.896	-3005.4	5605.52	729.354	207.097	906.805	0	0	0	0	0	0	0	603	903	0
623	3	0	0	0	0	0	0	200	300	0	34.1762	136.656	-792.643	-2913.85	5544.48	775.13	206.995	906.676	0	0	0	0	0	0	0	603	903	0
623	4	0	0	0	0	0	0	200	300	0	34.1762	135.893	-793.559	-3280.06	5056.2	363.142	206.372	907.133	0	0	0	0	0	0	0	603	903	0
623	5	0	0	0	0	0	0	200	300	0	32.9555	135.435	-795.084	-3280.06	5300.34	500.472	206.666	907.125	0	0	0	0	0	0	0	603	903	0
623	6	0	0	0	0	0	0	200	300	0	32.8029	134.367	-797.221	-2639.19	5178.27	637.801	206.495	906.311	0	0	0	0	0	0	0	603	903	0
623	7	0	0	0	0	0	0	200	300	0	33.5658	132.993	-798.747	-2822.29	5117.23	363.142	206.407	906.533	0	0	0	0	0	0	0	603	903	0
623	8	0	0	0	0	0	0	200	300	0	32.3451	131.62	-799.052	-3005.4	5422.41	592.024	206.786	906.761	0	0	0	0	0	0	0	603	903	0
623	9	0	0	0	0	0	0	200	300	0	32.1925	130.705	-796.916	-3188.51	4812.06	408.919	206.038	907.001	0	0	0	0	0	0	0	603	903	0
624	0	0	0	0	0	0	0	200	300	0	31.277	127.805	-800.272	-3554.72	5361.38	408.919	206.699	907.442	0	0	0	0	0	0	0	603	903	0
624	1	0	0	0	0	0	0	200	300	0	30.5141	128.416	-803.019	-3280.06	4934.13	363.142	206.144	907.085	0	0	0	0	0	0	0	603	903	0
624	2	0	0	0	0	0	0	200	300	0	30.6667	126.127	-805.155	-2822.29	4812.06	225.813	205.977	906.505	0	0	0	0	0	0	0	603	903	0
624	3	0	0	0	0	0	0	200	300	0	32.1925	125.669	-805.766	-3554.72	5300.34	500.472	206.578	907.412	0	0	0	0	0	0	0	603	903	0
624	4	0	0	0	0	0	0	200	300	0	30.5141	124.906	-806.376	-3554.72	4934.13	454.695	206.119	907.408	0	0	0	0	0	0	0	603	903	0
624	5	0	0	0	0	0	0	200	300	0	29.1408	123.838	-808.817	-3554.72	4384.81	317.366	205.421	907.395	0	0	0	0	0	0	0	603	903	0
624	6	0	0	0	0	0	0	200	300	0	30.0563	121.855	-808.512	-3829.38	4873.09	180.037	206.027	907.736	0	0	0	0	0	0	0	603	903	0
624	7	0	0	0	0	0	0	200	300	0	27.6149	120.634	-809.123	-3005.4	4873.09	225.813	206.023	906.714	0	0	0	0	0	0	0	603	903	0
624	8	0	0	0	0	0	0	200	300	0	28.8356	119.413	-812.174	-3554.72	4812.06	271.59	205.925	907.377	0	0	0	0	0	0	0	603	903	0
624	9	0	0	0	0	0	0	200	300	0	28.0727	118.65	-812.174	-3554.72	4567.92	180.037	205.624	907.377	0	0	0	0	0	0	0	603	903	0
625	0	0	0	0	0	0	0	200	300	0	26.089	117.582	-814.005	-3280.06	5056.2	363.142	206.212	907.03	0	0	0	0	0	0	0	603	903	0
625	1	0	0	0	0	0	0	200	300	0	27.1571	115.751	-814.921	-3554.72	4995.16	134.261	206.13	907.362	0	0	0	0	0	0	0	603	903	0
625	2	0	0	0	0	0	0	200	300	0	25.4787	113.767	-814.616	-3371.61	4689.99	592.024	205.757	907.139	0	0	0	0	0	0	0	603	903	0
625	3	0	0	0	0	0	0	200	300	0	26.2416	113.31	-815.226	-3463.16	4689.99	225.813	205.753	907.248	0	0	0	0	0	0	0	603	903	0
625	4	0	0	0	0	0	0	200	300	0	25.7838	111.326	-813.395	-3646.27	4506.88	317.366	205.541	907.483	0	0	0	0	0	0	0	603	903	0
625	5	0	0	0	0	0	0	200	300	0	24.7157	110.868	-817.362	-3280.06	4323.78	317.366	205.29	907.013	0	0	0	0	0	0	0	603	903	0
625	6	0	0	0	0	0	0	200	300	0	23.9528	108.579	-818.278	-3829.38	4201.71	225.813	205.135	907.68	0	0	0	0	0	0	0	603	903	0
625	7	0	0	0	0	0	0	200	300	0	24.258	106.901	-817.057	-3280.06	4445.85	42.7079	205.441	907.014	0	0	0	0	0	0	0	603	903	0
625	8	0	0	0	0	0	0	200	300	0	26.6994	105.833	-817.667	-3188.51	4384.81	180.037	205.363	906.9	0	0	0	0	0	0	0	603	903	0
625	9	0	0	0	0	0	0	200	300	0	23.9528	104.307	-817.973	-3280.06	4262.74	42.7079	205.211	907.01	0	0	0	0	0	0	0	603	903	0
626	0	0	0	0	0	0	0	200	300	0	22.5795	102.628	-817.362	-3371.61	4567.92	271.59	205.589	907.125	0	0	0	0	0	0	0	603	903	0
626	1	0	0	0	0	0	0	200	300	0	22.4269	99.2715	-811.869	-3463.16	4445.85	88.4843	205.476	907.266	0	0	0	0	0	0	0	603	903	0
626	2	0	0	0	0	0	0	200	300	0	23.3424	97.5931	-814.311	-2730.74	4262.74	-3.06848	205.235	906.353	0	0	0	0	0	0	0	603	903	0
626	3	0	0	0	0	0	0	200	300	0	23.1898	98.0508	-812.479	-3371.61	4384.81	42.7079	205.397	907.15	0	0	0	0	0	0	0	603	903	0
626	4	0	0	0	0	0	0	200	300	0	22.1217	97.2879	-811.259	-3371.61	4384.81	134.261	205.405	907.156	0	0	0	0	0	0	0	603	903	0
626	5	0	0	0	0	0	0	200	300	0	21.5114	95.3043	-810.038	-3554.72	4140.67	-3.06848	205.112	907.388	0	0	0	0	0	0	0	603	903	0
626	6	0	0	0	0	0	0	200	300	0	21.0536	94.0836	-807.902	-3829.38	4201.71	-94.6212	205.201	907.74	0	0	0	0	0	0	0	603	903	0
626	7	0	0	0	0	0	0	200	300	0	22.2743	93.0154	-805.46	-3280.06	4567.92	88.4843	205.671	907.072	0	0	0	0	0	0	0	603	903	0
626	8	0	0	0	0	0	0	200	300	0	23.8002	92.5577	-806.376	-3554.72	4262.74	-94.6212	205.286	907.408	0	0	0	0	0	0	0	603	903	0
626	9	0	0	0	0	0	0	200	300	0	21.5114	89.8111	-800.578	-3920.93	3896.53	-3.06848	204.867	907.898	0	0	0	0	0	0	0	603	903	0
627	0	0	0	0	0	0	0	200	300	0	19.8329	89.2007	-796.305	-3920.93	4201.71	-48.8449	205.277	907.924	0	0	0	0	0	0	0	603	903	0
627	1	0	0	0	0	0	0	200	300	0	20.2907	87.5223	-796	-2730.74	4079.64	-140.398	205.125	906.431	0	0	0	0	0	0	0	603	903	0
627	2	0	0	0	0	0	0	200	300	0	21.8166	86.9119	-792.033	-3554.72	4567.92	88.4843	205.767	907.488	0	0	0	0	0	0	0	603	903	0
627	3	0	0	0	0	0	0	200	300	0	20.1381	85.8438	-788.371	-4104.03	3713.42	-140.398	204.71	908.206	0	0	0	0	0	0	0	603	903	0
627	4	0	0	0	0	0	0	200	300	0	20.4433	84.1653	-785.624	-4104.03	4140.67	180.037	205.271	908.224	0	0	0	0	0	0	0	603	903	0
627	5	0	0	0	0	0	0	200	300	0	19.6803	83.0972	-782.572	-3829.38	4262.74	-186.174	205.447	907.893	0	0	0	0	0	0	0	603	903	0
627	6	0	0	0	0	0	0	200	300	0	19.07	82.4869	-778.3	-4104.03	4018.6	-140.398	205.163	908.273	0	0	0	0	0	0	0	603	903	0
627	7	0	0	0	0	0	0	200	300	0	20.5959	80.961	-775.248	-4012.48	4018.6	-94.6212	205.184	908.176	0	0	0	0	0	0	0	603	903	0
627	8	0	0	0	0	0	0	200	300	0	19.5277	79.7403	-771.891	-4195.59	4140.67	-231.95	205.364	908.436	0	0	0	0	0	0	0	603	903	0
627	9	0	0	0	0	0	0	200	300	0	19.5277	78.367	-767.313	-4378.69	4079.64	-140.398	205.317	908.707	0	0	0	0	0	0	0	603	903	0
628	0	0	0	0	0	0	0	200	300	0	18.307	77.4515	-762.736	-4012.48	3408.25	-369.28	204.468	908.261	0	0	0	0	0	0	0	603	903	0
628	1	0	0	0	0	0	0	200	300	0	17.6967	76.0782	-758.769	-4287.14	4262.74	-369.28	205.618	908.65	0	0	0	0	0	0	0	603	903	0
628	2	0	0	0	0	0	0	200	300	0	19.07	75.6204	-755.412	-4378.69	3896.53	88.4843	205.158	908.797	0	0	0	0	0	0	0	603	903	0
628	3	0	0	0	0	0	0	200	300	0	17.8493	73.942	-751.139	-4378.69	3652.39	-277.727	204.862	908.829	0	0	0	0	0	0	0	603	903	0
628	4	0	0	0	0	0	0	200	300	0	17.5441	73.179	-745.951	-4836.46	4079.64	-231.95	205.469	909.484	0	0	0	0	0	0	0	603	903	0
628	5	0	0	0	0	0	0	200	300	0	17.2389	72.4161	-740.763	-5111.11	3835.5	-460.832	205.178	909.9	0	0	0	0	0	0	0	603	903	0
628	6	0	0	0	0	0	0	200	300	0	16.7812	71.5005	-738.627	-4744.9	4079.64	-415.056	205.523	909.424	0	0	0	0	0	0	0	603	903	0
628	7	0	0	0	0	0	0	200	300	0	16.6286	70.1273	-734.354	-4653.35	3347.21	-48.8449	204.558	909.337	0	0	0	0	0	0	0	603	903	0
628	8	0	0	0	0	0	0	200	300	0	17.0863	68.754	-727.946	-4378.69	3835.5	-277.727	205.269	909.015	0	0	0	0	0	0	0	603	903	0
628	9	0	0	0	0	0	0	200	300	0	17.0863	67.0755	-720.927	-4653.35	3835.5	-369.28	205.32	909.455	0	0	0	0	0	0	0	603	903	0
629	0	0	0	0	0	0	0	200	300	0	15.8656	65.0919	-720.622	-5019.56	3713.42	-323.503	205.153	909.966	0	0	0	0	0	0	0	603	903	0
629	1	0	0	0	0	0	0	200	300	0	14.9501	66.3126	-716.044	-5111.11	3835.5	-186.174	205.357	910.138	0	0	0	0	0	0	0	603	903	0
629	2	0	0	0	0	0	0	200	300	0	15.5605	65.2444	-712.077	-5019.56	3835.5	-323.503	205.386	910.049	0	0	0	0	0	0	0	603	903	0
629	3	0	0	0	0	0	0	200	300	0	15.4079	63.566	-705.973	-5294.22	4018.6	-415.056	205.692	910.499	0	0	0	0	0	0	0	603	903	0
629	4	0	0	0	0	0	0	200	300	0	15.713	63.2608	-702.311	-4928.01	3652.39	-506.608	205.201	910.017	0	0	0	0	0	0	0	603	903	0
629	5	0	0	0	0	0	0	200	300	0	14.3398	61.5823	-698.039	-5202.67	3469.28	-460.832	204.97	910.453	0	0	0	0	0	0	0	603	903	0
629	6	0	0	0	0	0	0	200	300	0	15.5605	59.7513	-694.071	-5111.11	3957.57	-598.161	205.702	910.364	0	0	0	0	0	0	0	603	903	0
629	7	0	0	0	0	0	0	200	300	0	14.1872	59.2935	-688.883	-5294.22	3530.32	-369.28	205.125	910.685	0	0	0	0	0	0	0	603	903	0
629	8	0	0	0	0	0	0	200	300	0	15.4079	58.5306	-684.306	-5660.43	3713.42	-643.938	205.427	911.272	0	0	0	0	0	0	0	603	903	0
629	9	0	0	0	0	0	0	200	300	0	14.9501	58.0728	-680.033	-5935.09	4262.74	-598.161	206.268	911.728	0	0	0	0	0	0	0	603	903	0
630	0	0	0	0	0	0	0	200	300	0	13.5768	56.5469	-674.845	-5294.22	3896.53	-552.385	205.774	910.845	0	0	0	0	0	0	0	603	903	0
630	1	0	0	0	0	0	0	200	300	0	16.0182	55.1736	-671.488	-5843.54	3957.57	-460.832	205.894	911.702	0	0	0	0	0	0	0	603	903	0
630	2	0	0	0	0	0	0	200	300	0	13.882	53.4952	-663.859	-5935.09	4018.6	-506.608	206.053	911.94	0	0	0	0	0	0	0	603	903	0
630	3	0	0	0	0	0	0	200	300	0	14.6449	53.0374	-660.502	-5385.77	3957.57	-369.28	205.992	911.154	0	0	0	0	0	0	0	603	903	0
630	4	0	0	0	0	0	0	200	300	0	15.5605	52.7322	-656.229	-6209.75	3835.5	-735.49	205.845	912.463	0	0	0	0	0	0	0	603	903	0
630	5	0	0	0	0	0	0	200	300	0	13.2716	50.7486	-652.262	-6301.3	3774.46	-689.714	205.787	912.661	0	0	0	0	0	0	0	603	903	0
630	6	0	0	0	0	0	0	200	300	0	14.1872	49.9857	-647.379	-6301.3	4140.67	-643.938	206.396	912.734	0	0	0	0	0	0	0	603	903	0
630	7	0	0	0	0	0	0	200	300	0	15.4079	49.9857	-639.445	-6026.64	4140.67	-735.49	206.475	912.425	0	0	0	0	0	0	0	603	903	0
630	8	0	0	0	0	0	0	200	300	0	15.5605	47.8494	-637.003	-5935.09	3957.57	-552.385	206.213	912.317	0	0	0	0	0	0	0	603	903	0
630	9	0	0	0	0	0	0	200	300	0	14.6449	48.4598	-633.341	-6575.96	3957.57	-460.832	206.249	913.383	0	0	0	0	0	0	0	603	903	0
631	0	0	0	0	0	0	0	200	300	0	16.6286	46.6287	-628.153	-6667.51	3713.42	-506.608	205.912	913.615	0	0	0	0	0	0	0	603	903	0
631	1	0	0	0	0	0	0	200	300	0	15.1027	46.7813	-623.271	-7308.38	4079.64	-460.832	206.546	914.726	0	0	0	0	0	0	0	603	903	0
631	2	0	0	0	0	0	0	200	300	0	15.713	46.0184	-618.083	-6942.17	4018.6	-552.385	206.502	914.232	0	0	0	0	0	0	0	603	903	0
631	3	0	0	0	0	0	0	200	300	0	15.4079	45.1028	-614.42	-8040.8	4262.74	-506.608	206.938	916.087	0	0	0	0	0	0	0	603	903	0
631	4	0	0	0	0	0	0	200	300	0	14.9501	44.1873	-609.843	-7491.49	4262.74	-689.714	206.99	915.284	0	0	0	0	0	0	0	603	903	0
631	5	0	0	0	0	0	0	200	300	0	16.9337	43.577	-605.57	-7766.14	4140.67	-598.161	206.838	915.825	0	0	0	0	0	0	0	603	903	0
631	6	0	0	0	0	0	0	200	300	0	14.6449	43.577	-598.551	-7491.49	4262.74	-506.608	207.122	915.516	0	0	0	0	0	0	0	603	903	0
631	7	0	0	0	0	0	0	200	300	0	15.5605	40.8304	-597.331	-7949.25	4506.88	-689.714	207.545	916.308	0	0	0	0	0	0	0	603	903	0
631	8	0	0	0	0	0	0	200	300	0	15.8656	42.3563	-592.448	-7857.7	4506.88	-598.161	207.607	916.263	0	0	0	0	0	0	0	603	903	0
631	9	0	0	0	0	0	0	200	300	0	14.4923	40.8304	-589.396	-7857.7	3896.53	-735.49	206.611	916.332	0	0	0	0	0	0	0	603	903	0
632	0	0	0	0	0	0	0	200	300	0	14.9501	40.3726	-583.292	-8498.56	4812.06	-735.49	208.25	917.57	0	0	0	0	0	0	0	603	903	0
632	1	0	0	0	0	0	0	200	300	0	15.2553	40.5252	-579.02	-8498.56	4628.95	-689.714	207.994	917.678	0	0	0	0	0	0	0	603	903	0
632	2	0	0	0	0	0	0	200	300	0	17.2389	39.6097	-577.494	-8590.12	4567.92	-552.385	207.91	917.875	0	0	0	0	0	0	0	603	903	0
632	3	0	0	0	0	0	0	200	300	0	15.8656	38.389	-572.001	-9139.43	4445.85	-689.714	207.772	918.978	0	0	0	0	0	0	0	603	903	0
632	4	0	0	0	0	0	0	200	300	0	14.7975	38.0838	-567.729	-9047.88	4628.95	-689.714	208.153	918.937	0	0	0	0	0	0	0	603	903	0
632	5	0	0	0	0	0	0	200	300	0	14.6449	37.4734	-563.151	-8864.77	4934.13	-598.161	208.762	918.741	0	0	0	0	0	0	0	603	903	0
632	6	0	0	0	0	0	0	200	300	0	15.713	37.4734	-559.489	-8956.33	4140.67	-598.161	207.401	919.008	0	0	0	0	0	0	0	603	903	0
632	7	0	0	0	0	0	0	200	300	0	15.1027	36.4053	-558.573	-9322.54	4873.09	-689.714	208.724	919.69	0	0	0	0	0	0	0	603	903	0
632	8	0	0	0	0	0	0	200	300	0	14.7975	35.4898	-553.996	-9871.85	5056.2	-415.056	209.127	920.819	0	0	0	0	0	0	0	603	903	0
632	9	0	0	0	0	0	0	200	300	0	14.3398	34.7269	-550.028	-9505.64	4567.92	-643.938	208.305	920.282	0	0	0	0	0	0	0	603	903	0
633	0	0	0	0	0	0	0	200	300	0	16.0182	34.8795	-546.366	-9047.88	4689.99	-552.385	208.584	919.56	0	0	0	0	0	0	0	603	903	0
633	1	0	0	0	0	0	0	200	300	0	17.3915	31.3699	-543.314	-10055	4873.09	-460.832	208.969	921.507	0	0	0	0	0	0	0	603	903	0
633	2	0	0	0	0	0	0	200	300	0	15.2553	33.9639	-540.568	-10055	5056.2	-506.608	209.354	921.601	0	0	0	0	0	0	0	603	903	0
633	3	0	0	0	0	0	0	200	300	0	14.4923	33.0484	-537.211	-10695.8	4812.06	-598.161	208.957	922.91	0	0	0	0	0	0	0	603	903	0
633	4	0	0	0	0	0	0	200	300	0	14.6449	31.6751	-532.938	-10421.2	4628.95	-506.608	208.686	922.554	0	0	0	0	0	0	0	603	903	0
633	5	0	0	0	0	0	0	200	300	0	14.7975	31.6751	-529.276	-10695.8	4934.13	-231.95	209.322	923.208	0	0	0	0	0	0	0	603	903	0
633	6	0	0	0	0	0	0	200	300	0	15.2553	30.7596	-526.835	-10787.4	4812.06	-598.161	209.134	923.476	0	0	0	0	0	0	0	603	903	0
633	7	0	0	0	0	0	0	200	300	0	15.713	30.1492	-522.562	-11245.1	5117.23	-506.608	209.793	924.519	0	0	0	0	0	0	0	603	903	0
633	8	0	0	0	0	0	0	200	300	0	14.3398	28.7759	-522.257	-11428.3	5056.2	-598.161	209.681	924.882	0	0	0	0	0	0	0	603	903	0
633	9	0	0	0	0	0	0	200	300	0	17.3915	28.6234	-517.68	-11702.9	5239.3	-369.28	210.121	925.607	0	0	0	0	0	0	0	603	903	0
634	0	0	0	0	0	0	0	200	300	0	14.7975	29.0811	-514.628	-11611.4	4751.02	-598.161	209.232	925.563	0	0	0	0	0	0	0	603	903	0
634	1	0	0	0	0	0	0	200	300	0	16.0182	27.8604	-513.102	-11794.5	4995.16	-415.056	209.735	925.987	0	0	0	0	0	0	0	603	903	0
634	2	0	0	0	0	0	0	200	300	0	15.8656	27.0975	-509.745	-11977.6	5300.34	-323.503	210.398	926.497	0	0	0	0	0	0	0	603	903	0
634	3	0	0	0	0	0	0	200	300	0	14.7975	26.4871	-506.388	-11702.9	5117.23	-643.938	210.105	926.111	0	0	0	0	0	0	0	603	903	0
634	4	0	0	0	0	0	0	200	300	0	14.9501	26.3345	-504.252	-12252.2	5300.34	-460.832	210.511	927.298	0	0	0	0	0	0	0	603	903	0
634	5	0	0	0	0	0	0	200	300	0	16.476	26.1819	-503.642	-12069.1	5483.45	-552.385	210.888	926.964	0	0	0	0	0	0	0	603	903	0
634	6	0	0	0	0	0	0	200	300	0	16.476	25.8768	-499.674	-12435.3	5605.52	-369.28	211.218	927.887	0	0	0	0	0	0	0	603	903	0
634	7	0	0	0	0	0	0	200	300	0	16.3234	24.6561	-497.843	-12801.5	5300.34	-415.056	210.647	928.714	0	0	0	0	0	0	0	603	903	0
634	8	0	0	0	0	0	0	200	300	0	15.1027	23.7405	-495.402	-13076.2	4934.13	-140.398	209.96	929.395	0	0	0	0	0	0	0	603	903	0
634	9	0	0	0	0	0	0	200	300	0	16.1708	23.7405	-492.35	-12893.1	5483.45	-415.056	211.137	929.187	0	0	0	0	0	0	0	603	903	0
635	0	0	0	0	0	0	0	200	300	0	16.6286	23.588	-490.824	-12618.4	5239.3	-506.608	210.675	928.709	0	0	0	0	0	0	0	603	903	0
635	1	0	0	0	0	0	0	200	300	0	16.7812	22.3672	-489.909	-13167.8	5422.41	-460.832	211.068	929.878	0	0	0	0	0	0	0	603	903	0
635	2	0	0	0	0	0	0	200	300	0	19.07	22.0621	-485.941	-13808.6	5910.69	-323.503	212.163	931.416	0	0	0	0	0	0	0	603	903	0
635	3	0	0	0	0	0	0	200	300	0	16.0182	21.9095	-484.721	-13900.2	5971.73	-369.28	212.32	931.677	0	0	0	0	0	0	0	603	903	0
635	4	0	0	0	0	0	0	200	300	0	16.3234	21.4517	-483.195	-13167.8	5605.52	-552.385	211.601	930.252	0	0	0	0	0	0	0	603	903	0
635	5	0	0	0	0	0	0	200	300	0	17.2389	20.994	-479.838	-13534	5788.62	-643.938	212.064	931.205	0	0	0	0	0	0	0	603	903	0
[truncated: 1,504 more rows]
